# Supplementary material for: Escherichia coli ST302: Genomic Analysis of Virulence Potential and Antimicrobial Resistance Mediated by Mobile Genetic Elements
Source: Front Microbiol. 2020 Jan 21;10:3098. doi: 10.3389/fmicb.2019.03098 (PMC6985150; doi:10.3389/fmicb.2019.03098)
Supplement: DATA S2 — ST302 SNP analysis. [file Data_Sheet_2.ZIP]

Archive with 140 entries (116 files):
- SNP_Analysis/
- SNP_Analysis/ST302_SNP/
- SNP_Analysis/ST302_SNP/SNP_analysis/
- SNP_Analysis/ST302_SNP/SNP_analysis/core/
- SNP_Analysis/ST302_SNP/SNP_analysis/core/EA2454.ref.fa
- SNP_Analysis/ST302_SNP/SNP_analysis/core/ST302.aln
- SNP_Analysis/ST302_SNP/SNP_analysis/core/ST302.tab
- SNP_Analysis/ST302_SNP/SNP_analysis/core/ST302.txt
- SNP_Analysis/ST302_SNP/SNP_analysis/core/ST302.vcf
- SNP_Analysis/ST302_SNP/SNP_analysis/fasttree/
- SNP_Analysis/ST302_SNP/SNP_analysis/fasttree/ST302_SNP.tree
- SNP_Analysis/ST302_SNP/SNP_analysis/gubbins/
- SNP_Analysis/ST302_SNP/SNP_analysis/gubbins/branch_base_reconstruction.embl
- SNP_Analysis/ST302_SNP/SNP_analysis/gubbins/filtered_polymorphic_sites.fasta
- SNP_Analysis/ST302_SNP/SNP_analysis/gubbins/filtered_polymorphic_sites.phylip
- SNP_Analysis/ST302_SNP/SNP_analysis/gubbins/final_tree.tre
- SNP_Analysis/ST302_SNP/SNP_analysis/gubbins/node_labelled.final_tree.tre
- SNP_Analysis/ST302_SNP/SNP_analysis/gubbins/per_branch_statistics.csv
- SNP_Analysis/ST302_SNP/SNP_analysis/gubbins/recombination_predictions.embl
- SNP_Analysis/ST302_SNP/SNP_analysis/gubbins/recombination_predictions.gff
- SNP_Analysis/ST302_SNP/SNP_analysis/gubbins/summary_of_snp_distribution.vcf
- SNP_Analysis/ST302_SNP/SNP_analysis/snippyout/
- SNP_Analysis/ST302_SNP/SNP_analysis/snippyout/ST302/
- SNP_Analysis/ST302_SNP/SNP_analysis/snippyout/ST302/BA8907-ND-ST302.out/
- SNP_Analysis/ST302_SNP/SNP_analysis/snippyout/ST302/BA8907-ND-ST302.out/snps.consensus.fa
- SNP_Analysis/ST302_SNP/SNP_analysis/snippyout/ST302/BA8907-ND-ST302.out/snps.csv
- SNP_Analysis/ST302_SNP/SNP_analysis/snippyout/ST302/BA8907-ND-ST302.out/snps.gff
- SNP_Analysis/ST302_SNP/SNP_analysis/snippyout/ST302/BA8907-ND-ST302.out/snps.tab
- SNP_Analysis/ST302_SNP/SNP_analysis/snippyout/ST302/BA8907-ND-ST302.out/snps.txt
- SNP_Analysis/ST302_SNP/SNP_analysis/snippyout/ST302/BA8907-ND-ST302.out/snps.vcf.gz
- SNP_Analysis/ST302_SNP/SNP_analysis/snippyout/ST302/BA8907-ND-ST302.out/snps.vcf.gz.csi
- SNP_Analysis/ST302_SNP/SNP_analysis/snippyout/ST302/BA9503-ND-ST302.out/
- SNP_Analysis/ST302_SNP/SNP_analysis/snippyout/ST302/BA9503-ND-ST302.out/snps.consensus.fa
- SNP_Analysis/ST302_SNP/SNP_analysis/snippyout/ST302/BA9503-ND-ST302.out/snps.csv
- SNP_Analysis/ST302_SNP/SNP_analysis/snippyout/ST302/BA9503-ND-ST302.out/snps.gff
- SNP_Analysis/ST302_SNP/SNP_analysis/snippyout/ST302/BA9503-ND-ST302.out/snps.tab
- SNP_Analysis/ST302_SNP/SNP_analysis/snippyout/ST302/BA9503-ND-ST302.out/snps.txt
- SNP_Analysis/ST302_SNP/SNP_analysis/snippyout/ST302/BA9503-ND-ST302.out/snps.vcf.gz
- SNP_Analysis/ST302_SNP/SNP_analysis/snippyout/ST302/BA9503-ND-ST302.out/snps.vcf.gz.csi
- SNP_Analysis/ST302_SNP/SNP_analysis/snippyout/ST302/CA0191-ND-ST302.out/
- SNP_Analysis/ST302_SNP/SNP_analysis/snippyout/ST302/CA0191-ND-ST302.out/snps.consensus.fa
- SNP_Analysis/ST302_SNP/SNP_analysis/snippyout/ST302/CA0191-ND-ST302.out/snps.csv
- SNP_Analysis/ST302_SNP/SNP_analysis/snippyout/ST302/CA0191-ND-ST302.out/snps.gff
- SNP_Analysis/ST302_SNP/SNP_analysis/snippyout/ST302/CA0191-ND-ST302.out/snps.tab
- SNP_Analysis/ST302_SNP/SNP_analysis/snippyout/ST302/CA0191-ND-ST302.out/snps.txt
- SNP_Analysis/ST302_SNP/SNP_analysis/snippyout/ST302/CA0191-ND-ST302.out/snps.vcf.gz
- SNP_Analysis/ST302_SNP/SNP_analysis/snippyout/ST302/CA0191-ND-ST302.out/snps.vcf.gz.csi
- SNP_Analysis/ST302_SNP/SNP_analysis/snippyout/ST302/CA0229-ND-ST302.out/
- SNP_Analysis/ST302_SNP/SNP_analysis/snippyout/ST302/CA0229-ND-ST302.out/snps.consensus.fa
- SNP_Analysis/ST302_SNP/SNP_analysis/snippyout/ST302/CA0229-ND-ST302.out/snps.csv
- SNP_Analysis/ST302_SNP/SNP_analysis/snippyout/ST302/CA0229-ND-ST302.out/snps.gff
- SNP_Analysis/ST302_SNP/SNP_analysis/snippyout/ST302/CA0229-ND-ST302.out/snps.tab
- SNP_Analysis/ST302_SNP/SNP_analysis/snippyout/ST302/CA0229-ND-ST302.out/snps.txt
- SNP_Analysis/ST302_SNP/SNP_analysis/snippyout/ST302/CA0229-ND-ST302.out/snps.vcf.gz
- SNP_Analysis/ST302_SNP/SNP_analysis/snippyout/ST302/CA0229-ND-ST302.out/snps.vcf.gz.csi
- SNP_Analysis/ST302_SNP/SNP_analysis/snippyout/ST302/EA1682-Poultry-ST302.out/
- SNP_Analysis/ST302_SNP/SNP_analysis/snippyout/ST302/EA1682-Poultry-ST302.out/snps.consensus.fa
- SNP_Analysis/ST302_SNP/SNP_analysis/snippyout/ST302/EA1682-Poultry-ST302.out/snps.csv
- SNP_Analysis/ST302_SNP/SNP_analysis/snippyout/ST302/EA1682-Poultry-ST302.out/snps.gff
- SNP_Analysis/ST302_SNP/SNP_analysis/snippyout/ST302/EA1682-Poultry-ST302.out/snps.tab
- SNP_Analysis/ST302_SNP/SNP_analysis/snippyout/ST302/EA1682-Poultry-ST302.out/snps.txt
- SNP_Analysis/ST302_SNP/SNP_analysis/snippyout/ST302/EA1682-Poultry-ST302.out/snps.vcf.gz
- SNP_Analysis/ST302_SNP/SNP_analysis/snippyout/ST302/EA1682-Poultry-ST302.out/snps.vcf.gz.csi
- SNP_Analysis/ST302_SNP/SNP_analysis/snippyout/ST302/EA2455-Poultry-ST302.out/
- SNP_Analysis/ST302_SNP/SNP_analysis/snippyout/ST302/EA2455-Poultry-ST302.out/snps.consensus.fa
- SNP_Analysis/ST302_SNP/SNP_analysis/snippyout/ST302/EA2455-Poultry-ST302.out/snps.csv
- SNP_Analysis/ST302_SNP/SNP_analysis/snippyout/ST302/EA2455-Poultry-ST302.out/snps.gff
- SNP_Analysis/ST302_SNP/SNP_analysis/snippyout/ST302/EA2455-Poultry-ST302.out/snps.tab
- SNP_Analysis/ST302_SNP/SNP_analysis/snippyout/ST302/EA2455-Poultry-ST302.out/snps.txt
- SNP_Analysis/ST302_SNP/SNP_analysis/snippyout/ST302/EA2455-Poultry-ST302.out/snps.vcf.gz
- SNP_Analysis/ST302_SNP/SNP_analysis/snippyout/ST302/EA2455-Poultry-ST302.out/snps.vcf.gz.csi
- SNP_Analysis/ST302_SNP/SNP_analysis/snippyout/ST302/EA8393-Porcine-ST302.out/
- SNP_Analysis/ST302_SNP/SNP_analysis/snippyout/ST302/EA8393-Porcine-ST302.out/snps.consensus.fa
- SNP_Analysis/ST302_SNP/SNP_analysis/snippyout/ST302/EA8393-Porcine-ST302.out/snps.csv
- SNP_Analysis/ST302_SNP/SNP_analysis/snippyout/ST302/EA8393-Porcine-ST302.out/snps.gff
- SNP_Analysis/ST302_SNP/SNP_analysis/snippyout/ST302/EA8393-Porcine-ST302.out/snps.tab
- SNP_Analysis/ST302_SNP/SNP_analysis/snippyout/ST302/EA8393-Porcine-ST302.out/snps.txt
- SNP_Analysis/ST302_SNP/SNP_analysis/snippyout/ST302/EA8393-Porcine-ST302.out/snps.vcf.gz
- SNP_Analysis/ST302_SNP/SNP_analysis/snippyout/ST302/EA8393-Porcine-ST302.out/snps.vcf.gz.csi
- SNP_Analysis/ST302_SNP/SNP_analysis/snippyout/ST302/F2_18C-Porcine-ST302.out/
- SNP_Analysis/ST302_SNP/SNP_analysis/snippyout/ST302/F2_18C-Porcine-ST302.out/snps.consensus.fa
- SNP_Analysis/ST302_SNP/SNP_analysis/snippyout/ST302/F2_18C-Porcine-ST302.out/snps.csv
- SNP_Analysis/ST302_SNP/SNP_analysis/snippyout/ST302/F2_18C-Porcine-ST302.out/snps.gff
- SNP_Analysis/ST302_SNP/SNP_analysis/snippyout/ST302/F2_18C-Porcine-ST302.out/snps.tab
- SNP_Analysis/ST302_SNP/SNP_analysis/snippyout/ST302/F2_18C-Porcine-ST302.out/snps.txt
- SNP_Analysis/ST302_SNP/SNP_analysis/snippyout/ST302/F2_18C-Porcine-ST302.out/snps.vcf.gz
- SNP_Analysis/ST302_SNP/SNP_analysis/snippyout/ST302/F2_18C-Porcine-ST302.out/snps.vcf.gz.csi
- SNP_Analysis/ST302_SNP/SNP_analysis/snippyout/ST302/FA0416-Human-ST302.out/
- SNP_Analysis/ST302_SNP/SNP_analysis/snippyout/ST302/FA0416-Human-ST302.out/snps.consensus.fa
- SNP_Analysis/ST302_SNP/SNP_analysis/snippyout/ST302/FA0416-Human-ST302.out/snps.csv
- SNP_Analysis/ST302_SNP/SNP_analysis/snippyout/ST302/FA0416-Human-ST302.out/snps.gff
- SNP_Analysis/ST302_SNP/SNP_analysis/snippyout/ST302/FA0416-Human-ST302.out/snps.tab
- SNP_Analysis/ST302_SNP/SNP_analysis/snippyout/ST302/FA0416-Human-ST302.out/snps.txt
- SNP_Analysis/ST302_SNP/SNP_analysis/snippyout/ST302/FA0416-Human-ST302.out/snps.vcf.gz
- SNP_Analysis/ST302_SNP/SNP_analysis/snippyout/ST302/FA0416-Human-ST302.out/snps.vcf.gz.csi
- SNP_Analysis/ST302_SNP/SNP_analysis/snippyout/ST302/FA5537-ND-ST302.out/
- SNP_Analysis/ST302_SNP/SNP_analysis/snippyout/ST302/FA5537-ND-ST302.out/snps.consensus.fa
- SNP_Analysis/ST302_SNP/SNP_analysis/snippyout/ST302/FA5537-ND-ST302.out/snps.csv
- SNP_Analysis/ST302_SNP/SNP_analysis/snippyout/ST302/FA5537-ND-ST302.out/snps.gff
- SNP_Analysis/ST302_SNP/SNP_analysis/snippyout/ST302/FA5537-ND-ST302.out/snps.tab
- SNP_Analysis/ST302_SNP/SNP_analysis/snippyout/ST302/FA5537-ND-ST302.out/snps.txt
- SNP_Analysis/ST302_SNP/SNP_analysis/snippyout/ST302/FA5537-ND-ST302.out/snps.vcf.gz
- SNP_Analysis/ST302_SNP/SNP_analysis/snippyout/ST302/FA5537-ND-ST302.out/snps.vcf.gz.csi
- SNP_Analysis/ST302_SNP/SNP_analysis/snippyout/ST302/IA1186-Poultry-ST302.out/
- SNP_Analysis/ST302_SNP/SNP_analysis/snippyout/ST302/IA1186-Poultry-ST302.out/snps.aligned.fa
- SNP_Analysis/ST302_SNP/SNP_analysis/snippyout/ST302/IA1186-Poultry-ST302.out/snps.csv
- SNP_Analysis/ST302_SNP/SNP_analysis/snippyout/ST302/IA1186-Poultry-ST302.out/snps.gff
- SNP_Analysis/ST302_SNP/SNP_analysis/snippyout/ST302/IA1186-Poultry-ST302.out/snps.tab
- SNP_Analysis/ST302_SNP/SNP_analysis/snippyout/ST302/IA1186-Poultry-ST302.out/snps.txt
- SNP_Analysis/ST302_SNP/SNP_analysis/snippyout/ST302/IA1186-Poultry-ST302.out/snps.vcf.gz
- SNP_Analysis/ST302_SNP/SNP_analysis/snippyout/ST302/IA1186-Poultry-ST302.out/snps.vcf.gz.csi
- SNP_Analysis/ST302_SNP/SNP_analysis/snippyout/ST302/IA1729-Canine-ST302.out/
- SNP_Analysis/ST302_SNP/SNP_analysis/snippyout/ST302/IA1729-Canine-ST302.out/snps.consensus.fa
- SNP_Analysis/ST302_SNP/SNP_analysis/snippyout/ST302/IA1729-Canine-ST302.out/snps.csv
- SNP_Analysis/ST302_SNP/SNP_analysis/snippyout/ST302/IA1729-Canine-ST302.out/snps.gff
- SNP_Analysis/ST302_SNP/SNP_analysis/snippyout/ST302/IA1729-Canine-ST302.out/snps.tab
- SNP_Analysis/ST302_SNP/SNP_analysis/snippyout/ST302/IA1729-Canine-ST302.out/snps.txt
- SNP_Analysis/ST302_SNP/SNP_analysis/snippyout/ST302/IA1729-Canine-ST302.out/snps.vcf.gz
- SNP_Analysis/ST302_SNP/SNP_analysis/snippyout/ST302/IA1729-Canine-ST302.out/snps.vcf.gz.csi
- SNP_Analysis/ST302_SNP/SNP_analysis/snippyout/ST302/IA4731-Poultry-ST302.out/
- SNP_Analysis/ST302_SNP/SNP_analysis/snippyout/ST302/IA4731-Poultry-ST302.out/snps.consensus.fa
- SNP_Analysis/ST302_SNP/SNP_analysis/snippyout/ST302/IA4731-Poultry-ST302.out/snps.csv
- SNP_Analysis/ST302_SNP/SNP_analysis/snippyout/ST302/IA4731-Poultry-ST302.out/snps.gff
- SNP_Analysis/ST302_SNP/SNP_analysis/snippyout/ST302/IA4731-Poultry-ST302.out/snps.tab
- SNP_Analysis/ST302_SNP/SNP_analysis/snippyout/ST302/IA4731-Poultry-ST302.out/snps.txt
- SNP_Analysis/ST302_SNP/SNP_analysis/snippyout/ST302/IA4731-Poultry-ST302.out/snps.vcf.gz
- SNP_Analysis/ST302_SNP/SNP_analysis/snippyout/ST302/IA4731-Poultry-ST302.out/snps.vcf.gz.csi
- SNP_Analysis/ST302_SNP/SNP_analysis/snippyout/ST302/IA7122-Poultry-ST302.out/
- SNP_Analysis/ST302_SNP/SNP_analysis/snippyout/ST302/IA7122-Poultry-ST302.out/snps.consensus.fa
- SNP_Analysis/ST302_SNP/SNP_analysis/snippyout/ST302/IA7122-Poultry-ST302.out/snps.csv
- SNP_Analysis/ST302_SNP/SNP_analysis/snippyout/ST302/IA7122-Poultry-ST302.out/snps.gff
- SNP_Analysis/ST302_SNP/SNP_analysis/snippyout/ST302/IA7122-Poultry-ST302.out/snps.tab
- SNP_Analysis/ST302_SNP/SNP_analysis/snippyout/ST302/IA7122-Poultry-ST302.out/snps.txt
- SNP_Analysis/ST302_SNP/SNP_analysis/snippyout/ST302/IA7122-Poultry-ST302.out/snps.vcf.gz
- SNP_Analysis/ST302_SNP/SNP_analysis/snippyout/ST302/IA7122-Poultry-ST302.out/snps.vcf.gz.csi
- SNP_Analysis/ST302_SNP/SNP_analysis/snp_dists/
- SNP_Analysis/ST302_SNP/SNP_analysis/snp_dists/pairwise_snps.csv
- SNP_Analysis/ST302_SNP/SNP_analysis/snp_sites/
- SNP_Analysis/ST302_SNP/SNP_analysis/snp_sites/clean.fullcore.aln
- SNP_Analysis/ST302_SNP/Strain_names.txt
