# Supplementary material for: Escherichia coli ST302: Genomic Analysis of Virulence Potential and Antimicrobial Resistance Mediated by Mobile Genetic Elements
Source: Front Microbiol. 2020 Jan 21;10:3098. doi: 10.3389/fmicb.2019.03098 (PMC6985150; doi:10.3389/fmicb.2019.03098)
Supplement: DATA S2 — ST302 SNP analysis. [file Data_Sheet_2.ZIP › SNP_Analysis/ST302_SNP/SNP_analysis/core/EA2454.ref.fa]

>EA2454
ACTTAGGATAGCCAACCATCAGATGCTGCATTTGCATAGTGCAATCTCCCCTTACTTATCCGGAGGCAATTGCAATATCT
CTGTGAACTTACACAGGGGGAGCTTTTACCTGAAATACGCCACGGAGGCGGGTATGAAACTGGCAGTCGTCACTGGACAA
ATTGTTTGTACCGTACGCCATCACGGACTGGCGCATGACAAATTGCTGATGGTGGAAATGATTGATCCACAAGGTAATCC
TGACGGGCAATGCGCCGTCGCCATCGACAATATTGGCGCGGGAACCGGGGAGTGGGTGTTACTGGTGAGTGGCAGTTCCG
CCCGCCAGGCGCATAAAAGCGAAACGTCACCGGTCGATCTGTGCGTGATTGGCATTGTCGATGAGGTGGTGTCTGGCGGT
CAGGTAATTTTCCACAAATAAGGCAGAACATCATGAATCAACAGGATATTGAACAGGTGGTGAAAGCGGTACTGCTGAAA
ATGCAAAGCAGTGACACGCCGCCCGCCGCCGTTCATGAGATGGGCGTTTTCGCGTCCCTGGATGACGCCGTTGCGGCAGC
CAAAGTCGCCCAGCAAGGGTTAAAGAGCGTGGCAATGCGCCAGTTAGCCATTGCTGCCATTCGTGAAGCAGGCGAAAAAC
ACGCCAGAGATTTAGCGGAACTTGCCGTCAGTGAAACCGGCATGGGGCGCGTTGAAGATAAATTTGCAAAAAACGTCGCT
CAGGCGCGCGGCACACCAGGCGTTGAGTACCTCTCTCCGCAAGTGCTGACTGGCGACAACGGCCTGACCCTAATTGAAAA
CGCACCCTGGGGCGTGGTGGCTTCGGTGACGCCGTCCACTAACCCGGCGGCAACCGTAATTAACAACGCCATCAGCCTGA
TTGCCGCGGGCAACAGCGTCATTTTTGCCCCGCATCCGGCGGCGAAAAAAGTCTCCCAGCGGGCGATTACGCTGCTCAAC
CAGGCGATTGTTGCCGTAGGTGGGCCGGAAAACTTACTGGTTACTGTGGCAAATCCGGATATCGAAACCGCGCAACGCTT
GTTCAAGTTTCCGGGCATCGGCCTGCTGGTGGTGACCGGCGGCGAAGCGGTAGTAGAAGCGGCGCGTAAACACACCAATA
AACGTCTGATTGCCGCAGGCGCTGGCAACCCGCCGGTAGTGGTGGATGAAACCGCTGACCTCGCCCGTGCTGCTCAGTCC
ATCGTTAAAGGCGCGTCTTTCGATAACAACATCATTTGTGCCGACGAAAAGGTACTGATTGTTGTTGATAGCGTAGCCGA
TGAACTGATGCGTCTGATGGAAGGCCAGCACGCGGTGAAACTGACCGCAGAGCAGGCGCAGCAATTGCAACCGGTGTTGC
TGAAAAATATCGACGAGCGCGGAAAAGGTACCGTCAGCCGTGACTGGGTAGGTCGCGATGCAGGCAAAATCGCGGCGGCA
ATCGGCCTTAAAGTTCCGGAACAAACGCGATTGCTGTTTGTAGAAACCACCGCAGAACATCCGTTTGCCGTGACTGAACT
GATGATGCCGGTGTTGCCCGTCGTGCGCGTCGCCAACGTGGCGGATGCCATTGCGCTGGCGGTGAAACTGGAAGGCGGTT
GCCACCACACGGCGGCAATGCACTCGCGCAATATCGAGAACATGAACCAGATGGCGAATGCCATTGATACCAGCATTTTC
GTTAAGAACGGACCGTGCATTGCCGGGCTGGGGCTGGGCGGGGAAGGCTGGACCACCATGACCATCACCACGCCAACCGG
TGAAGGGGTAACCAGCGCGCGTACGTTTGTCCGTCTGCGTCGCTGTGTATTAGTCGATGCGTTTCGCATTGTTTAAGGAG
TAACAGATGGCGCACGACGAACAATGGCTCACCCCACGTCTGCAAACGGCGGCAACGCTGTGTAACCAGACGCCCGCCGC
GACGGAATCTCCGCTGTGGCTGGGGGTGGATCTGGGCACCTGCGATGTGGTGTCGATGGTTGTCGACCGCGACGGTCAGC
CGGTGGCGGTATGCCTCGACTGGGCCGATGTGGTCCGCGACGGCATCGTCTGGGATTTCTTCGGCGCGGTCACCATTGTT
CGTCGCCATCTCGACACGCTCGAGCAGCAATTCGGTCGTCGTTTTAGCCATGCGGCGACTTCATTTCCTCCAGGTACGGA
CCCGCGTATTTCCATCAACGTGCTGGAGTCTGCCGGGCTGGAAGTGAGCCATGTGCTGGATGAGCCAACCGCAGTCGCGG
ATCTACTGCAACTGGATAACGCAGGCGTAGTGGATATCGGCGGTGGCACTACCGGCATTGCCATCGTGAAAAAGGGCAAA
GTGACGTACTCGGCGGATGAAGCCACCGGCGGACATCACATCTCTCTGACTCTCGCCGGAAATCGCCGTATTTCGCTGGA
AGAGGCGGAGCAGTACAAGCGCGGTCACGGTGAAGAGATTTGGCCTGCGGTGAAACCGGTGTACGAAAAAATGGCGGACA
TTGTCGCCCGGCATATTGAAGGGCAGGGCATTACTGATTTATGGCTGGCGGGCGGCTCTTGTATGCAACCGGGCGTGGCG
GAACTGTTTCGCAAACAATTCCCGGCGTTACAGGTGCATTTACCGCAGCACAGTTTGTTTATGACCCCGCTGGCAATCGC
CAGTAGTGGGCGAGAGAAAGCGGAGGGGCTATATGCAAAATGAATTGCAGACCGCGCTCTTTCAGGCGTTCGATACCCTG
AATCTGCAACGGGTAAAAACATTTAGCGTTCCACCGGTGACGCTTTGCGGTCCGGGCTCGGTGAGCAGTTGCGGACAGCA
AGCGCAAACGCGTGGGCTGAAACATCTGTTCGTGATGGCAGACAGCTTTTTGCATCAGGCAGGGATGACCGCCGGGCTGA
CGCGTAGCCTGGCCGTTAAAGGTATCGCCATGACGCTCTGGCCATGTCCGGTGGGCGAACCGTGCATTACCGACGTGTGT
GCAGCCGTGGCGCAGTTGCGTGAGTCAGGTTGTGACGGGGTGATCGCATTTGGCGGCGGCTCGGTGCTGGATGCGGCGAA
AGCCGTGGCGTTGCTGGTGACGAACCCGGATAGCACGCTGGCAGAGATGTCAGAAACCAGCGTTCTGCAACCGCGCTTGC
CGCTGATTGCCATTCCAACTACCGCCGGAACCGGCTCTGAAACCACCAATGTAACGGTGATTATCGACGCGGTGAGCGGG
CGCAAGCAGGTGTTAGCCCATGCCTCGCTGATGCCGGATGTGGCGATCCTCGACGCCGCATTGACCGAAGGTGTGCCGTC
GCATGTCACGGCGATGACCGGCATTGATGCGTTAACCCATGCCATTGAAGCATACAGCGCCCTGAACGCTACACCGTTTA
CCGACAGTCTGGCGATTGGTGCCATTGCGATGATTGGCAAATCGCTGCCGAAAGCGGTGGGCTACGGTCACGACCTTGCC
GCGCGCGAGAGCATGTTGCTGGCTTCATGTATGGCGGGAATGGCGTTTTCCAGTGCGGGTCTTGGGTTGTGCCACGCGAT
GGCGCATCAGCCGGGCGCGGCGCTGCATATTCCGCACGGTCTGGCGAACGCTATGTTGCTGCCAACGGTGATGGAGTTTA
ACCGGATGGTATGTCGCGAACGCTTTAGTCAGATTGGTCGGGCACTGCGAACTAAAAAATCCGACGATCGTGACGCTATT
AACGCGGTAAGTGAGCTGATTGCGGAAGTTGGGATTGGTAAACGACTGGGCGATGTTGGCGCGACATCTGCGCATTACGG
TGCATGGGCGCAGGCCGCGCAGGAAGATATTTGTCTGCGCAGCAACCCGCGTACCGCCAGCCTGGAACAGATTGTCGGCC
TGTACGCGGCGGCGCAATAAATGCCGCGTCTTATCCGGTCTGTGGGATTGCACATGTAGTGCGGATAAGGCTTCACGCAG
CATCCGCTAATAAATAACAACTAACAGGGAGTAAAGGCGATGGGAATTAACGAAATCATCATGTACATCATGATGTTCTT
TATGCTGATAGCTGCCGTAGACAGGATCCTGTCACAGTTCGGCGGTTCTGCTCGTTTCCTCGGTAAGTTCGGTAAAAGTA
TCGAAGGATCAGGCGGTCAGTTCGAAGAAGGCTTTATGGCAATGGGCGCTCTGGGTCTGGCGATGGTCGGTATGACCGCG
CTGGCACCGGTACTGGCTCACGTACTCGGGCCGGTAATTATCCCGGTTTACGAAATGCTCGGCGCAAACCCGTCAATGTT
CGCCGGAACGCTGCTGGCGTGCGATATGGGCGGCTTCTTCCTCGCCAAAGAGCTGGCGGGCGGCGACGTAGCAGCGTGGC
TATACTCTGGGTTAATTCTCGGGTCGATGATGGGGCCAACGATTGTGTTTTCCATTCCGGTGGCGCTCGGCATTATCGAA
CCTTCTGACCGTCGTTATCTGGCGCTCGGCGTGCTGGCGGGCATTGTGACCATTCCGATTGGTTGTATCGCTGGTGGTCT
GGTAGCTATGTACTCCGGTGTTCAGATCAACGGCCAGCCGGTGGAATTCACTTTCGCCCTGATCCTGATGAACATGATCC
CGGTGATCATTGTTGCGATTCTGGTGGCGCTGGGGCTGAAATTCATCCCGGAAAAAATGATCAACGGCTTCCAGATCTTC
GCCAAATTCCTCGTTGCATTGATCACCCTCGGTCTTGCCGCTGCGGTAGTGAAATTCCTGCTTGGCTGGGAACTGATCCC
CGGTCTGGATCCTATCTTTATGGCCCCTGGCGATAAACCCGGTGAGGTGATGCGCGCCATTGAAGTTATCGGTTCTATCT
CCTGCGTTCTGTTAGGGGCGTATCCAATGGTGCTGCTGCTGACCCGCTGGTTTGAAAAACCGCTGATGAGCGTCGGTAAA
GTGCTGAATATGAACAACATTGCGGCAGCCGGCATGGTGGCAACGCTTGCCAACAACATCCCGATGTTCGGCATGATGAA
GCAGATGGATACCCGCGGCAAAGTCATCAACTGCGCCTTCGCCGTTTCCGCTGCTTTCGCCCTGGGCGACCACTTAGGCT
TCGCCGCTGCCAACATGAATGCCATGATCTTCCCGATGATTGTCGGCAAGTTGATCGGCGGCGTAACGGCGATTGGCGTG
GCGATGATGCTGGTGCCAAAAGACGACGCGACCGCGGCTAAAACCGAAGCGGAGGCACAATCGTGAACACTCGCCAGCTA
CTGAGCGTCGGTATCGATATCGGCACCACCACCACCCAGGTGATTTTCTCCCACCTGGAACTGGTTAACCGTGCGGCGGT
GTCGCAGGTGCCGCGCTACGAATTCATCAAACGCGAAATTAGCTGGCAAAGCCCGGTGTTCTTTACCCCTGTCGATAAAC
AGGGTGGTTTAAAAGAAGCGGAACTGAAATCGCTGATTTTAGAGCAATATCAGGCTGCGGGCATTGCGCCGGAAAGCGTT
GATTCTGGTGCCATCATCATCACCGGTGAAAGCGCGAAAACCCGCAATGCTCGCCCGGCGGTGATGGCGCTCTCTCAGTC
GCTGGGCGATTTTGTCGTCGCCAGCGCCGGGCCGCACCTCGAATCCGTGATCGCCGGTCACGGTGCCGGGGCGCAAACCC
TTTCTGAACAACGGCTGTGTCGGGTACTGAATATCGACATCGGCGGTGGCACCGCGAACTACGCCCTGTTCGATGCCGGA
AAAATCAGCGGCACTGCCTGCCTCAACGTCGGTGGTCGCCTGCTGGAAACCGACAGCCAGGGGCGCGTGGTTTACGCTCA
TAAACCGGGGCAGATGATTGTGGATGAGTGCTTCGGCGCAGGCACCGACGCCCGTTCGCTGACCGGCGCGCAGCTGGTGC
AGGTTACCCGGCGGATGGCAGAGCTGATTGTCGAAGTGATTGACGGAACGCTTTCGCCGCTCGCGCAGGCATTAATGCAA
ACCGGTTTGCTGCCCGCAGGTGTTACGCCCGAAATCATTACGCTTTCTGGCGGCGTGGGCGAATGTTATCGCCACCAGCC
CGCCGACCCGTTCTGTTTTGCCGATATTGGCCCGCTTCTGGCAACGGCGCTGCATGACCATCCGCGCCTGCGTGAGATGA
ACGTGCAGTTTCCGGCGCAAACCGTACGCGCCACGGTGATTGGCGCGGGTGCACATACCCTTTCGCTCTCTGGCAGCACA
ATCTGGCTGGAGGGCGTACAACTGCCGCTGCGCAATTTGCCGGTGGCGATCCCGATTGATGAAACGGATCTGGTGAGTGC
CTGGCAACAGGCGCTGATTCAGCTGGATCTTGATCCCAAAACTGACGCGTACGTGCTGGCGCTTCCCGCCTCGCTGCCTG
TGCGTTACGCCGCGGTACTGACGGTCATCAACGCGTTGGTCGATTTCGTCGCGCGTTTTCCGAATCCGCATCCCCTGCTG
GTGGTGGCCGGGCAGGACTTTGGTAAAGCTCTGGGCATGTTGTTGCGCCCACAGCTACAACAACTCCCGTTGGCAGTCAT
TGACGAAGTGATTGTCCGCGCGGGGGACTATATCGACATTGGTACGCCTCTTTTTGGCGGATCGGTTGTGCCGGTGACGG
TGAAATCACTCGCATTTCCTTCCTGAGGGAACGACTTATGAAACTAAAGACCACATTGTTCGGCAATGTATATCAGTTTA
AGGATGTAAAAGAGGTGCTGGCTAAAGCCAACGAACTGCGTTCGGGGGATGTGCTGGCGGGCGTTGCAGCGGCAAGCTCA
CAGGAGCGCGTGGCAGCAAAGCAGGTGTTGTCGGAAATGACCGTAGCGGACATCCGCAATAATCCGGTGATTGCCTATGA
AGATGACTGCGTGACGCGGCTGATTCAGGACGATGTTAACGAAACGGCCTACAACCAGATTAAAAACTGGAGCATCAGCG
AACTGCGTGAGTATGTGCTGAGCGATGAAACCAGCGTGGACGACATTGCCTTTACCCGCAAAGGGCTGACCTCGGAAGTG
GTCGCGGCGGTAGCGAAGATTTGCTCCAACGCGGACCTGATCTACGGCGCGAAGAAAATGCCGGTAATCAAAAAGGCCAA
TACCACCATCGGTATTCCGGGCACCTTTAGCGCCCGTTTGCAGCCAAATGACACCCGTGACGACGTGCAAAGTATCGCCG
CGCAAATCTACGAAGGGCTTTCCTTCGGGGTGGGCGATGCGGTGATCGGCGTCAACCCGGTAACTGACGACGTGGAAAAC
TTAAGCCGCGTGCTGGACACCATCTATGGCGTGATCGACAAATTCAACATCCCAACTCAGGGCTGCGTACTGGCGCACGT
CACCACCCAGATCGAAGCGATTCGTCGTGGCGCACCAGGCGGGCTGATTTTCCAGAGTATCTGTGGCAGTGAAAAAGGGC
TGAAAGAGTTTGGCGTGGAACTGGCGATGCTCGACGAAGCGCGCGCAGTGGGTGCAGAGTTCAACCGTATCGCCGGGGAA
AACTGCCTCTACTTCGAAACCGGGCAAGGTTCGGCGCTGTCGGCGGGTGCCAACTACGGCGCAGACCAGGTGACCATGGA
AGCGCGTAACTACGGGCTGGCGCGTCATTACGATCCGTTTATCGTCAACACCGTGGTCGGCTTTATTGGGCCGGAGTATC
TCTACAATGACCGCCAGATTATTCGTGCGGGCTTAGAAGATCACTTTATGGGCAAGCTGAGCGGCATCTCTATGGGCTGT
GACTGCTGTTACACCAACCACGCTGACGCTGACCAGAACCTCAACGAAAACCTGATGATCCTGCTCGCCACCGCAGGCTG
CAACTACATCATGGGGATGCCGCTGGGTGATGACATCATGCTCAATTACCAGACCACCGCATTCCACGATACCGCCACTG
TGCGTCAGTTACTCAACCTGCGCCCGTCACCGGAGTTTGAACGCTGGCTGGAAAGCATGGGCATTATGGCAAACGGTCGC
CTGACCAAACGGGCGGGCGATCCGTCACTGTTCTTCTGATGACGCGGAGATAACACATCATGGATCAAAAACAGATTGAA
GAAATTGTACGCAGCGTGATGGCGTCAATGGGACAAACGGCCCCCGCGCCGTCAGAAGCAAAGTGCGCCACTACCACCTG
TGCGGCACCGGTGACCTCGGAAAGCTGTGCGCTGGATTTAGGTTCCGCTGAAGCAAAAGCGTGGATTGGTGTTGAAAACC
CGCATCGCGCAGACGTATTAACAGAACTGCGCCGCAGCACCGTGGCCCGCGTTTGTACCGGTCGTGCCGGTCCGCGTCCG
CGTACCCAGGCGCTGCTGCGTTTCCTGGCCGATCACTCTCGTTCGAAAGATACCGTACTGAAAGAAGTGCCGGAAGAGTG
GGTGAAAGCGCAGGGCTTGCTGGAAGTACGCTCCGAAATTAGCGACAAAAATCTCTACCTGACTCGCCCGGATATGGGCC
GCCGCCTGTGTGCAGAAGCTGTTGAAGCGCTGAAAGCACAGTGTGTTGCTAATCCGGACGTACAGGTCGTTATTTCTGAT
GGCCTGTCAACTGATGCGATCACCGTGAACTACGAAGAGATCCTGCCACCGCTGATGGCGGGCCTGAAACAGGCCGGGCT
GAAAGTCGGTACACCATTCTTTGTTCGTTATGGTCGCGTGAAGATTGAAGATCAGATCGGTGAGATCCTCGGCGCGAAAG
TAGTGATCCTGCTGGTGGGCGAACGTCCGGGGTTGGGTCAGTCAGAAAGCCTCTCCTGCTACGCCGTTTACTCGCCGCGT
ATGGCGACCACCGTTGAGGCCGATCGCACCTGTATCTCTAACATTCACCAGGGCGGCACGCCGCCGGTTGAAGCCGCAGC
CGTCATTGTGGATTTGGCGAAACGTATGCTGGAGCAGAAAGCATCCGGCATCAACATGACCCGATAAGGAGGCATCATGC
CAGCTTTAGATTTGATTCGACCGTCGGTAACCGCCATGCGGGTGATTGCCTCCGTTAACGCCGAATTTGCGCGTGAACTG
AAATTGCCGCCGCATATTCGTAGCCTCGGGCTGATTTCTGCTGATTCCGATGACGTCACCTACATTGCCGCTGATGAAGC
AACCAAACAGGCGATGGTCGAAGTGGTGTATGGCCGCTCGCTGTATGCGGGCGCTGCACACGGCCCGTCACCGACTGCCG
GTGAAGTGCTGATTATGCTTGGTGGGCCAAACCCGGCGGAAGTGCGTGCAGGTCTGGATGCGATGGTTGCGCATATTGAA
AATGGCGCTGCTTTCCAGTGGGCTAATGATGCGCAAGATACGGCATTCCTGGCACATGTAGTTTCGCGTACCGGTTCTTA
TCTCTCATCAACCGCCGGGATCACGCTTGGCGATCCGATGGCGTATCTGGTGGCACCGCCGCTGGAAGCGACCTACGGCA
TTGATGCAGCGTTGAAATCTGCCGACGTACAGCTGGTGACCTATGTCCCGCCACCGTCTGAAACTAACTACTCGGCAGCA
TTTTTAACCGGTAGCCAGGCAGCGTGTAAAGCGGCCTGTAACGCCTTTACCGATGCAGTGCTGGAAATCGCGCGTAATCC
AATCCAGCGTGCGTAATGGAGGTTGCCGATGATCAATGCACTGGGATTGCTGGAAGTGGACGGCATGGTCGCTGCGATAG
ATGCAGCGGATGCCATGCTCAAAGCAGCTAACGTTCGTCTGCTCAGTCACGAAGTGCTTGACCCTGGTCGCTTAACGCTG
GTGGTGGAAGGCGATCTGGCGGCGTGTCGTGCTGCGCTGGACGCAGGTTGTGCTGCCGCGATGCGTACCGGGCGTGTCAT
CAGCCGTAAGGAGATCGGTCGGCCAGACGATGACACCCAGTGGCTGGTTACTGGCTTTAACCGCCAGCCGAAGCAACCCG
TACAGGAACCCGACGCGCCAGTTATCGTCGCGGAATCTGCTGACGAGTTGTTGGCGCTGTTAACATCAGTACGTCAGGGA
ATGACGGCAGGAGAAGTGGCTGCCCACTTTGGCTGGCCGCTGGAAAAAGCCAGAAATGCGCTCGAACAGCTCTTTTCTGC
CGGGACGTTACGTAAACGCAGTAGTCGTTATCGTCTCAAGCCCCATTAACCTGTCGGAGGTGCCGGGTGTCCTACAACAC
CCGGCATTAACATCATGAAAAAGACCCGTACAGCCAATTTGCACCATCTTTATCATGAACCCTTACCCGAAAACCTGAAG
CTCACGCCGAAGGTCGAAGTGGATAATGTTCATCAACGACAGACAACGGATGTCTATGAACATGCTTTAACGATTACCGC
CTGGCAGCAGATTTACGATCAGCTGCATCCGGGCAAGTTTCATGGTGAATTTACGGAAATTCTACTCGATGATATTCAGG
TTTTTCGTGAATACACCGGTCTGGCGCTGCGTCAGTCGTGTCTGGTCTGGCCGAACTCGTTCTGGTTTGGCATTCCGGCG
ACGCGCGGTGAGCAGGGATTTATCGGTTCGCAATGTCTGGGAAGCGCAGAAATAGCGACGCGCCCTGGTGGAACCGAGTT
TGAATTAAGTACGCCGGACGATTACACGATCCTGGGCGTAGTGCTTTCTGAAGATGTCATCACCCGTCAGGCTAACTTTT
TGCATAATCCGGATCGGGTATTACATATGTTGCGTAGCCAGTCGGCGCTGGAAGTGAAAGAGCAGCATAAAGCCGCGCTG
TGGGGCTTTGTCCAACAGGCGCTGGCGACGTTTTGCGAGAACCCGGAAAATCTTCATCAGCCTGCAGTGCGAAAAGTGCT
GGGGGATAATTTGCTAATGGCGATGGGGGCGATGCTGGAAGAAGCGCAACCAATGGTGACGGCGGAAAGCATCAGTCATC
AGAGTTACCGTAGATTACTTTCCCGCGCCCGTGAATATGTGCTGGAAAACATGTCCGAACCGGTGACGGTGCTGGATTTG
TGTAATCAACTGCATGTCAGCCGCCGCACGCTACAAAACGCGTTTCACGCTATTTTAGGCATTGGCCCAAACGCGTGGCT
GAAACGCATTCGCCTGAACGCCGTACGCCGCGAACTGATAAGCCCGTGGTCGCAAAGCACAACGGTAAAAGACGCCGCCA
TGCAGTGGGGATTCTGGCATCTGGGGCAATTTGCCACGGATTACCAGCAGCTGTTTGCCGAGAAGCCGTCGTTGACGTTG
CATCAGCGGATGCGGGAATGGGGGTGAGGGAGTTACACCCAATCCCTGACCTTAATAAACTCACTTAACGCCGCTTCTGG
GCTGCCATCTTTTGGCTGATAATCATACTCCCAGCGTACCAGTGGCGGCATTGACATCAGGATCGACTCGGTGCGCCCGC
CAGTTTGCAGGCCAAACAGAGTGCCGCGATCCCAGACCAGATTGAACTCGACATAACGACCGCGACGGTAGAGCTGAAAA
TTGCGCTCGCGCTCGCCGTAGACCATCGCTTTCCGTCGCTCTACAATTGGTAAATAAGCGTCGGTGTAGCCTTTGCCTAC
CGCCTGCATAAAGGCAAAACAGTGGTCGAAATCTGGCGTGTTCAGATCATCAAAGAACAGCCCGCCAATACCGCGCTGTT
CGTTGCGATGTTTGAGGTAGAAGTAATCGTCGCACCATTTTTTGTAACGGGGATAAACGTCTTCACCAAATGGCAGGCAC
AGGTCACGGGCGGTTCGGTGCCAGTGAATGGCATCTTCTTCAAAACCATAGAAAGGGGTTAAATCGAAGCCGCCGCCAAA
CCACCAGACTGGCTCTGCACCCGGTTTTTCGGCAATAAAAAAGCGCACATTCGCGTGGCTGGTGGGAACATACGGGTTAT
GCGGATGCACTACCAGTGAAACGCCCATCGCCTCGAAACTGCGCCCGGCAAGTTCCGGGCGATGAGCGGTGGCGGAAGCA
GGCATCGCCTCACCATGGACATGTGAAAAGTTGACGCCCGCCTGTTCGAAAACACCACCATTACGCAACACCCGGCTACG
TCCGCCGCCGCCAGCTTCGCGCTGCCAGCTATCTTCGACAAATTCTGTGCCATCGACGGCGGTCAGCTGCTGACAAATCG
TATCCTGAAGGTTGAGCAGAAACTGTTTAACCTGGTGTGCGTCGGGTTTCATAACTTATCGCTTTTTCGAATGTGCTTTC
TGGTTGTCGAACCAGTGGAAATAACTGATCACGCCTTCAGCAATCGCTGTGGCGATTTTCTGACGAAACGCCGCCGTGCC
TAACAGTCGCTCTTCTTCTGGGTTGGTGATAAACGAGGTTTCCACCAGCACCGAAGGAACCGACGGCGATTTCAACACCA
CAAACGCGGCTTGTTCGGTGTTGCGGCTGTGCAGTTTATGCACCGGCTTAATCTTTTTCAGAATATGCGAGCCGAGCGTC
AGGCTGTTTTTAATAGTATCGGTTTGCACCAGATCAAACAGCACTTGCTGCAATAGGTGATCCTTGTCAGTCGCCTTTTT
ACCGGCAACTTCATCGGCGCGGTTTTCGCGTTCAGACAGGTATTTCGCCATTGCGCTACTTGCCCCACGGTTAGAGAGGG
CAAATACCGAAGCACCGGCAGCTTTCGGGTTGGTAAAGCCATCGGCATGAATTGACATAAACAGATCTGCGCCATGTTTA
TGGGCGATTTCAACGCGATCGTAAAGTGGGATAAACGTATCGCCAGAACGCGTTAAACGCGCATCAATCCCATGATTACG
CAAAATGGAACGGACGTTTTTAGCAATCGCCAGCACCACATGTTTTTCTTTCGAACCGTTGCGCCCGATCGCTCCGGTAT
CAATTCCGCCGTGGCCTGGATCGAGAACAACGACACGTTTGCCGCCAGATTTTTTGGCTTTCGGCTTGCTGTGTCCGTTG
CTGGTTTTTAAAGGTTCGTCTTTGGCGATGGCTTGCGACATTCCTGACAACGTCAGGGCAGCCAAACCGGCTTTCAGCAC
CTGGCGGCGCGAAGTGAGTGTTTTTAGTGGTTTAAAAGTGCTCATACGGCCTGAGTTGTAATAATAAAGTTCCAGATGTT
ATATCGTATCGCGTAATCCGTTACGACCGTTTGCTGTTGAGAATTGTTTTACTTTTCATTTCAATAGTTGACAACTCCCC
ATTATGCCACTTTTTCAACCGATTTTCGTCAGATATTGGCTAATTCGACCGTTCACGCCATAATCAGCCTTTTAACCCGC
AAAAAGGTAACGAATACCATGGAGATACGCGTATTTCGCCAGGAAGATTTCGAAGAGGTCATCACCCTTTGGGAGCGTTG
CGACTTGCTGCGTCCGTGGAACGATCCGGAAATGGACATCGAGCGTAAGATGAACCATGACGTCAGTTTGTTTCTGGTCG
CTGAGGTGAACGGTGAAGTGGTCGGAACGGTGATGGGCGGTTATGACGGGCATCGCGGGTCTGCTTATTATCTTGGCGTG
CATCCAGAGTTTCGTGGGCGTGGAATTGCCAATGCGTTGCTTAACCGGCTGGAGAAAAAGCTGATTGCTCGCGGCTGCCC
GAAAATTCAGATCAACGTGCCGGAAGATAACGACATGGTGCTCGGAATGTATGAACGCCTGGGATATGAACACGCCGACG
TGCTGAGTCTGGGTAAGCGTTTGATTGAAGATGAAGAGTACTGAGTTTCATCCTGTCCATTATGATGCGCACGGTCGCCT
GCGTTTACCCTTGCTCTTCTGGCTTGTGCTATTGCTTCAGGCGCGAACCTGGGTGCTGTTTGTTATTGCCGGTGCGTCGC
GCGAGCAGGGTACTGCGCTGCTAAATCTGTTTTATCCCGATCACGATAATTTCTGGCTGGGGCTGATTCCTGGCATTCCG
GCGGTGCTGGCGTTTTTGCTGAGTGGTCGGCGGGCTTCGTTTCCCCGTATCTGGCATGTGCTCTATTTTCTGTTGCTGTT
GGCGCAAGTGGTTTTACTTTGCTGGCAACCGTGGCTGTGGCTGAACGGTGAATCCGTTAGCGGTTTCGGTCTGGCGCTGG
TAGTGGCGGATATTGTGGCATTAATCTGGCTGCTGACCAATCGACGTTTACGCGCTTGTTTTAATGAAGTAAAAGAATAA
CGGCACTTTTTGGTGAATTTGCACTCCAAGCAACGTTATTGAATAACCAAAGGAAGTGACATGAAATCGCTGCGTTTAAT
GTTATGCGCTATGCCATTGATGCTGACCGGCTGTTCCACGATGTCGTCAGTTAACTGGTCTGCCGCTAACCCGTGGAACT
GGTTTGGGTCGTCCACCAAAGTGAGCGAGCAGGGCGTTGGTGAATTAACGGCGTCCACACCACTGCAAGAACAAGCCATT
GCCGATGCGCTTGATGGCGATTATCGCCTGCGCAGCGGAATGAAAACCGCGAACGGCAACGTGGTGCGCTTTTTTGAAGT
GATGAAGGGCGACAACGTGGCGATGGTGATTAACGGCGATCAAGGCACGATCAGTCGCATTGACGTGCTGGATAGCGATA
TTCCTGCTGACACCGGTGTTAAAATCGGTACACCGTTTAGCGACCTTTACAGCAAAGCATTTGGCAATTGCCAAAAAGCT
GATGGTGATGATAATCGTGCCGTCGAATGTAAAGCCGAAGGCAGTCAACATATTAGCTACCAGTTCAGCGGGGAATGGAG
TGGTCCTGAAGGGTTAATGCCTTCGGACGATACCCTGAAAAACTGGAAAGTCAGTAAAATTATCTGGCGGCGTTAATTTG
CGTCTGAACAAACCGCCGCCGCGAAAAAACACGTAAAATAGCGCTCAACAATGCCACGGATTGCGTGGCATTATTATTTT
CAGGAGGAACAATGTCTCAGGTTCAGAGTGGCATTTTGCCAGAACATTGCCGCGCGGCGATTTGGATCGAAGCCAACGTG
AAAGGGGAAGTTGACGCCCTGCGTGCGGCCAGTAAAACATTTGCCGACAAACTGGCAACTTTTGAAGCGAAATTCCCGGA
CGCGCATCTTGGTGCGGTGGTTGCCTTTGGTAACAACACCTGGCGCGCTCTGAGCGGCGGCGTTGGGGCAGAAGAGCTGA
AAGATTTTCCGGGCTACGGTAAAGGCCTTGCGCCGACCACCCAGTTCGATGTGTTGATCCACATTCTTTCTCTGCGTCAC
GACGTAAACTTCTCTGTCGCCCAGGCGGCGATGGAAGCCTTTGGTGACTGCATTGAAGTGAAAGAAGAGATCCACGGCTT
CCGTTGGGTGGAAGAGCGTGACCTGAGCGGCTTTGTTGACGGTACAGAAAACCCGGCGGGTGAAGAGACGCGTCGCGAAG
TGGCGGTTATCAAAGACGGCGTGGATGCCGGCGGCAGCTATGTGTTTGTGCAGCGTTGGGAGCACAACCTGAAGCAGCTC
AACCGGATGAGCGTTCACGATCAGGAGATGATGATCGGGCGCACCAAAGAGGCCAACGAAGAGATTGACGGCGACGAACG
TCCGGAAACCTCTCACCTCACCCGCGTTGATCTGAAAGAAGATGGCAAAGGGCTGAAGATTGTTCGCCAGAGCCTGCCGT
ACGGCACCGCCAGTGGCACTCACGGTCTGTACTTCTGCGCCTACTGCGCGCGTCTGCATAACATTGAGCAGCAACTGCTG
AGCATGTTTGGCGATACCGATGGTAAGCGTGATGCGATGTTGCGTTTCACCAAACCGGTAACCGGCGGCTATTATTTCGC
ACCGTCGCTGGACAAGTTGATGGCGCTGTAAGCGTTTCTGATTCATTGATTAAAGGCCAGGCAGTAACATTACTGACTGG
CCTTTTTATTACTTTTGCTTTAACGCCGCATACACCTGATCAACTACCCAACCATACGTTGCAATCGGCAGCTGACCGCT
TTCGAACATATTGGGATTCTTTTGCGGATCGGCAACCGGCGAATGTGGCTTGTTGCTTAACATCACAATCGCCATATGAT
TCACCGGATCGATAACGGTCACCGTTCCGGTCCAGCCAGTGTGACCGTAGGTTTGCGGGCTTGCCAGCGTGCCAAACGTC
GGCGTCATGGTGGCATTACCATTCACGCGCCAGCCGAGGCCAAAAGTGGCATCTTCCTTAGAGCTGGTGGTGAACATCTT
CACCGTTTCCGCACTGAACAGCTGCACATCGCCATAGCCCCCGCCGTTCAGCATCGTTTGCATTAACACCGCAATATCGC
CGGTATTGGAAAACAAACCTGCGTGCCCGGAAACGCCGCCCATCGAATAAAAGGCTTTTTCATCGTGCACCTGACCCCAG
AGAGTGGAGGTGCGGATATTCGGGAAGTGGATCACTCCATCGCGGGTATTGCCGTTCAATTCCGTGGCGGCAATTTGTTG
CGGTTTAAAGCCTTTCAGCAGCGGGTTAAATACCGTATGTGTCAGGCCGAGCGGGCGATAAATCGACTCTTCAACATAGC
GGTCAAGCGGCTGACCGGTGACCGACTCGACGATAAATCCAAGCAGCATATAATCGACATCACTGTAAATATGCTTGCTG
CCGGGCTGATACTCTAGCGGCGTGCGCTTGATCATCTCCAGCGTCTGGCCTTTATCCTGGGAATATAACGCGCCCGCGAC
CGCTTTATTCGGATATTGTGGGTCCGCCGGGAAACCGCCGCTGTGATGCAGCAGGTCAGAAATCCGCAGCGTGTTTTTGC
CTTTGATGGTGTCATTTGGACTATCGGCAAACCCCGAAATATATTTCGCAATCCGATCGTCAGGATGCAGCTTGCCTTCG
CTCATTAGCTTTTGCAGAGCAAAGTTAGTGGCGTACATTTTGGTATTGGAAGCCAGGTCATACAGCGTCCCGGTGGTGGC
TTTGACAGGCTGTTCCATCAATACGCTGCCATCGTACTTTTTCGCCGCTCCCCAGGCTTTGCGATACACAATCTGATTAT
CTTTTATAATCAGCAGGTTTACGCCGGGATAACCGGCGTCCACTTGCTGGCTAATCCAGCGATCCATCTGGTTAAGCCGT
TCGACGTTGAACCCTGCTTTCTCTGGCGAACTTTCTGTCAGAACAGGGTATTTTGCGGCGCTGACGCTACAACTGACAGC
CAGCAGAGAAAGATAGAGCATTGTCCGTTTCATAATATCAGTCCAGATTGACGTTACGGCAGCCAAAGAGCGTGGTGAAA
ATAAACCCGCAAACCCATGCCACCAGAATCCCACCTGCATATACCGCCATGGCCGGAAGGATGCCTTGCGCGGATGTCAT
CAGCGGCAGCGCCACCAGACCAGACGGCCCAAAGGCGCTGTTTAAGCCCATCGGCAGACCCCACCAGGCTATCAGCCCGA
TAAACAAACCGCCCGCTGCGCCGCCTAAACAGGCGGTAATAAACGGTTTCATGCGGGGCAGGGTGACGCCGTAAATCAGC
GGTTCGCCAACGCCCAGCAGACCAGGAATAATCGCCCCGCGTACCTGACTGCGTAATGCACTGTGCGGTTGCGCCCGCCA
GTAGAGTGCCAGCGCCGCGCCCACCTGGCCCGCGCCTGCCATTGAAAGGATGGGAAATAAGCTGTTGAATCCCTGGCTGT
CCATTAACGCGAGGTAAACAGGAATAAAGCCCTGATGCACGCCAAATACCACGGCGATCAGGAACAGCCCGGCTAAAACC
GCACAACCGAGCGGATTACTGTTCAGGTGCATAAACAGCCACGACATACCTTCGAATAACCAGCCGCCCAGCGGCATAAT
GATCAGGTAGGCCAGCGTAGCGGTGATCAGTAGGGTGATTAACGAGGTCAGCAGCATGTCGAGATCGTCCGGCATAAAGC
GGCGCACCATGCCTTCAATGCGAGCGCAGGCCCATGCGGCAATCAACACGCCGATAATATTGCCGCGCGGATCGATGGGC
AGACCAAAGAAATCGTGAAAACCGGCGTAGTAACCGGTGGTTGCAGCGGGGTTATAACCGAGCAAAAAGAGTGCGGCAAT
AATTGCGCCATTGACGCCCGTGCCGCCAAATGCCTGGGCGGCGTTATAGCCCACCAGAATCACCAGGAAGGTGAACAAAC
CTTTGCTGAACACCTTCATAAAATTCAGCGCGTCGGGTAGCGTGCCCTGAGCATCTGCCGGAACGTGCATCACCGTGGCA
AATAACGTCGCTATCCCCAGCAGCAGACCGGCGGCAATAAAACCGGGGATAAGCGGCGTAAAGATGGTGGCGAATTTAGC
GAGAAATTGTTGCACGCCGGAGGTTTGTTTGGCTTTTAACTGACGTTTGTTCTGGGCGGCGATTTCTGCGGCATCCTGTA
CCGGTGCTTCTCCCAGCAGCTCGCTCATCGCTTTTGCGGCACGATGCGCTTTACCAGGCCCAAAAACGACCTGCACCTGG
TCGCTGGTCAAAATGACGCCCTTCACGCCTTCCAGCGTTTTGATATTGGGATCAACCAGTGAACTGTCATGTACACCCAG
ACGCAGGCGCGTCATACAGTTACCACAACTGGCGATATTTCCCGGTCCGCCGACACGGGTAAGAATGGTGTTCAGAAGTT
CACTGCTGATCTCTTTGACCATGGGTTATTCCTTGTCTAAAACCTGACGAATAAAGCCGCCGTGTTGATCCAGGCGTTTT
TTAGCTTCTGTGGCATCGAGATTTTTCAGCACCATCACAATGGCCGTTTTACAGTTGCGCTCGCAGGCAATTAACGCCGC
TTCCGCTTGTTCGGCATTACATCCGGTGGCGTTTTTAACGATATTGACCTGGCGCACATGCAGTTTTTCGTTGGTGGCGA
CCACATCGACCATCAGGTTGCCGAACACTTTGCCGGATTTAATCATCAGCCCGGTGGAGAGCATATTGAGCACCAGTTTC
TGCGCTGTACCTGCTTTCATCCGCGAAGAACCGGTAACCACTTCGGCACCTACAATCGGTGTAATGGCAAACTCTGCGGT
GGTTGAAACGGCGCTCCCCGGATTACAGGAAATTCCCACTGTGCGGCAGCCGAGCTGGCGTGCGTATTCCAGTCCGGCAA
TTACATACGGCGTGCGACCACTGGCCGCAATACCAACCACCACATCCTGTGCCGTTAAATTAATATTTTTCAGATCGTTA
ACACCACCTTCCCGGCTATCTTCAGCGCCTTCCACCGCGTGCTGAATGGCATATTCGCCTCCAGCAATCAAACCAACTAC
CAGACCCGGTTTCACGCCGTAGGTGGGCGGACATTCGCTGGCATCCAGAATCCCCAGACGACCGGATGTTCCCGCACCGA
GATAAATCAGACGACCGCCGCCGCTTACCTGGGCGTGGATAACATCGATCGCCGCGGCGATATCCGGCAGTACGCGCTCA
ACGGCAAGCGGTACGGTTTTATCTTCATCGTTGATAATCCGGCACATTTCCAGCGTTGATACGCGGTCAATTTCAGCCGA
GGCGGCGTTCGAGCCTTCGGTAATCATCTTTTCAAGTTGCATCGGTGGTGACCTTACTATTTACGATCAAATAATTGCAG
ATGTATGGAATCATATATCCCGAATTGACAGACTTAAAGGAATCATTGAGTCTACACTCGCAGAGTGTGAAGAGCGTCAT
AAGAACTTAAGCGGAATTTTTGCTGCCAGCCCAGGAGAGTGGAAGATGTTGTACCTGACGAAAATACGCAATGCGGAAAG
TGAATTTACCGAGAACGAGCAAAAAATTGCTGACTTTCTGCGGGCCAACGTGAGTGAGCTGAAATCCGTCTCTTCGCGCA
AGATGGCGAAACAGCTCGGCATCAGCCAGTCGAGTATTGTGAAATTTGCCCAGAAGCTCGGCGCGCAAGGATTTACTGAA
TTGCGTATGGCGTTAATTGGCGAATACAGTGCCAGCCGGGAGAAAACGAATGCCACGGCGCTGCACCTGCACAGTTCGAT
TACCAGTGATGATTCGCTGGAAGTGATTGCCCGCAAATTGAATCGCGAAAAAGAGCTGGCGCTGGATCAAACCTGTGCGT
TGTTCGACTACGCGCGGATGCAAAAAATCATTGAGGTCATCAGTAAAGCACCGTTTATCCAGATAACGGGCCTGGGCGGA
TCGGCGCTGGTGGGGCGCGATCTGTCGTTCAAACTGATGAAAATTGGCTATCGCGTGGCCTGCGAAGCCGACACGCACGT
ACAAGCTACCGTTTCCCAGGCGTTGAAAAAAGGCGATGTACAAATCGCTATCTCTTACAGCGGCAGTAAAAAAGAGATTG
TCTTGTGCGCAGAAGCGGCACGAAAGCAGGGGGCAACGGTGATTGCCATTACTTCTCTGGCTGACTCTCCGCTGCGGCGG
CTGGCGCATTTCACGCTCGATACCGTTTCCGGTGAAACCGAATGGCGTAGCTCGTCGATGTCTACCCGCACGGCGCAAAA
TTCTGTTACCGATTTACTGTTTGTTGGTCTTGTGCAACTCAATGATGTGGAGTCATTGAAAATGATTCAGCGCAGCAGTG
AGCTAACACAACGCCTGAAATGATGCATAAAGCAGCGACTGGATTGAGATTTTCCTGAATTAGTGAGCTGATCCGCAGCA
ATATTTTGTTTATCCTGTATTTTCAGAGGGAATGGAGTGTAACGCTCTGTATTAACAAGGAGAGCATTAAAATGGGTAAA
CTCACGGGCAAGACAGCACTGATTACGGGCGCATTGCAGGGAATTGGCGAAGGAATTGCCAGAACTTTTGCGCGTCATGG
CGCAAACCTAATCTTGCTGGATATCTCCCCTGAGATCGAAAAGCTGGCGGACGAACTGTGTGGTCGTGGTCATCGCTGTA
CGGCGGTTGTCGCCGATGTGCGTGACCCGGCGTCGGTAGCCGCAGCTATCAAACGCGCGAAGGAAAAAGAAGGGCGCATT
GATATCCTGGTGAATAACGCAGGCGTTTGTCGTCTGGGCAGTTTCCTCGATATGAGCGATGACGATCGCGATTTCCATAT
TGATATCAATATTAAAGGCGTATGGAACGTCACGAAGGCGGTGTTGCCGGAGATGATTGCCCGCAAAGATGGTCGCATTG
TGATGATGTCTTCAGTCACTGGCGATATGGTGGCCGATCCGGGTGAAACGGCGTATGCCTTAACGAAAGCGGCGATTGTT
GGCCTGACTAAATCGCTGGCGGTGGAGTACGCGCAGTCTGGTATTCGCGTTAACGCCATCTGCCCGGGATACGTTCGCAC
GCCAATGGCGGAAAGCATTGCCCGCCAGTCGAACCCGGAAGATCCAGAATCGGTGCTGACTGAAATGGCAAAAGCAATCC
CGCTGCGTCGCCTCGCCGATCCGCTGGAAGTCGGCGAACTGGCAGCCTTCCTCGCATCGGATGAATCAAGTTATTTAACC
GGTACACAGAATGTGATTGATGGCGGCAGCACACTGCCGGAGACGGTTAGCGTCGGCATCTGATTCACCTCTGTTTCCTC
CCTGCATGTGTGGGGAGGATTTCGTCTTATTCCCTTTTCAACTTCCAAATCACCAAACGGTATATAAAACCGTTACTCCT
TTCACGTCCGTTATAAATATGATGGCTATTAGAAAGTCATTAAATTTATAAGGGTGCGCAATGGCCGTTAACTTACTGAA
AAAGAACTCACTCGCGCTGGTCGCTTCTCTGCTGCTGGCGGGCCATGTACAGGCAACGGAACTGCTGAACAGTTCTTATG
ACGTCTCCCGCGAGCTGTTTGCCGCCCTGAACCCGCCGTTTGAGCAACAATGGGCCAAAGATAACGGCGGCGACAAACTG
ACGATAAAACAATCTCATGCCGGGTCATCAAAACAGGCGCTGGCAATTTTGCAGGGCTTAAAAGCCGACGTTGTCACTTA
TAACCAGGTGACCGACGTACAAATTCTGCACGATAAAGGCAAGCTTATCCCGGCGGACTGGCAGTCGCGCCTGCCGAATA
ATAGCTCGCCGTTCTACTCCACCATGGGCTTCCTGGTGCGTAAGGGCAACCCGAAGAATATCCACGACTGGAACGACCTG
GTGCGCTCCGACGTGAAGCTGATTTTCCCGAACCCGAAAACGTCGGGTAACGCGCGTTATACCTATCTGGCGGCATGGGG
CGCAGCGGATAAAGCTGACGGTGGCGACAAAGCCAAAACCGAACAGTTTATGACCCAGTTCCTGAAAAACGTTGAAGTGT
TCGATACTGGCGGTCGTGGCGCGACCACCACTTTTGCCGAGCGCGGCCTGGGCGATGTGCTGATCAGCTTCGAGTCGGAA
GTGAACAACATCCGCAAACAGTATGAAGCGCAGGGCTTTGAAGTGGTGATTCCGAAAACCAACATTCTGGCGGAATTCCC
GGTGGCGTGGGTCGATAAAAACGTGCAGGCCAACGGTACGGAAAAAGCAGCAAAAGCCTACCTGAACTGGCTCTACAGCC
CGCAGGCGCAGACCATCATCACCGACTATTACTACCGCGTAAATAACCCGGAAGTCATGGACAAACTGAAAGATAAATTC
CCGCAGACCGAACTGTTCCGCGTGGAAGACAAATTTGGCTCCTGGCCGGAAGTGATGAAAACCCACTTCACCAGCGGCGG
CGAGTTAGACAAGCTGTTAGCGGCGGGGCGTAACTGATGTTTGCAGTTTCATCAAGACGCGTGCTGCCGGGCTTTACCTT
AAGCCTCGGCACCAGTCTGCTGTTTGTTTGCCTGATTTTGCTCCTGCCACTCTCCGCGCTGGTGATGCAGCTGGCCCAGA
TGAGCTGGGCGCAGTACTGGGAGGTGATCACCAACCCGCAGGTGGTCGCAGCCTACAAAGTGACGCTGCTGTCGGCGTTT
GTGGCATCGATTTTTAACGGCGTTTTCGGCCTGCTGATGGCGTGGATCTTAACTCGTTATCGCTTCCCTGGCCGCACGCT
GCTTGATGCGCTGATGGATTTACCCTTTGCGCTGCCAACGGCAGTCGCCGGTTTAACGCTGGCCTCGCTCTTTTCCGTGA
ACGGTTTTTACGGTGAATGGCTGGCGAAGTTTGATATCAAAGTCACCTACACCTGGCTTGGGATTGCGGTGGCGATGGCC
TTTACCAGCATTCCGTTTGTGGTGCGTACCGTGCAGCCGGTGCTGGAAGAGTTAGGCCCGGAATATGAAGAAGCGGCGGA
AACGCTTGGTGCAACGCGCTGGCAGAGTTTCTGCAAAGTGGTGCTGCCGGAACTTTCTCCGGCGCTGGTGGCGGGCGTGG
CGTTGTCGTTTACCCGTAGTCTTGGTGAGTTTGGCGCGGTGATATTTATCGCCGGGAACATCGCCTGGAAGACGGAAGTG
ACGTCGCTGATGATTTTTGTGCGCTTGCAGGAGTTTGATTACCCGGCAGCGAGCGCGATTGCTTCGGTGATCCTCGCGGC
ATCTCTGCTGCTGCTGTTCTCAATTAACACTCTGCAAAGTCGCTTTGGTCGGCGTGTGGTAGGTCATTAATGGCGGAAGT
TACCCAATTGAAGCGTTATGACGCGCGCCCGATTAACTGGGGCAAATGGTTTCTGATTGGCATCGGGATGCTGGTATCGG
CGTTCATCCTGCTGGTGCCGATGATTTATATCTTCGTACAGGCGTTCAGCAAAGGGCTGATGCCGGTTTTACAGAATCTG
GCCGATCCGGATATGCTGCACGCCATCTGGCTGACGGTGATGATCGCGCTGATTGCCGTACCGGTAAACCTGGTGTTCGG
CATTCTGCTGGCCTGGCTGGTGACGCGCTTTAACTTCCCTGGACGCCAGTTACTGCTGACGCTACTGGACATTCCGTTTG
CCGTATCGCCGGTGGTTGCCGGTCTGGTGTATCTGCTGTTCTACGGCTCTAACGGCCCGCTCGGCGGCTGGCTGGATGAA
CATAATCTGCAAATTATGTTCTCCTGGCCGGGAATGGTGCTGGTCACCATCTTTGTGACATGTCCGTTTGTGGTGCGCGA
GCTGGTGCCGGTGATGTTAAGCCAGGGCAGCCAGGAAGACGAAGCGGCGATTTTGCTTGGCGCGTCTGGCTGGCAGATGT
TCCGCCGTGTCACATTGCCGAACATCCGCTGGGCGCTGCTTTATGGCGTAGTGCTGACCAACGCCCGCGCGATTGGCGAG
TTTGGCGCGGTGTCGGTGGTTTCCGGCTCGATTCGCGGCGAAACACTTTCGCTGCCGTTACAGATTGAATTGCTGGAGCA
GGACTACAACACCGTCGGCTCCTTTACCGCCGCCGCGCTGTTGACGCTGATGGCGATTATCACCCTGTTTTTAAAGAGTA
TGTTGCAGTGGCGTCTGGAGAATCAGGAAAAACGCGCGCAGCAGGAGGAGCATCATGAGCATTGAGATTGCCAATATTAA
GAAGTCTTTTGGTCGCACCCAGGTGCTGAACGATATCTCACTGGATATTCCTTCAGGTCAGATGGTCGCGTTGCTGGGGC
CGTCCGGTTCCGGGAAAACCACGCTGCTGCGCATTATCGCCGGGCTGGAGCATCAAACCAGCGGGCATATTCGCTTCCAC
GGCACCGACGTGAGCCGCCTGCACGCACGTGATCGTAAAGTCGGTTTCGTGTTCCAGCATTACGCGCTGTTCCGCCATAT
GACGGTGTTCGACAATATCTCTTTTGGCCTGACGGTGCTGCCGCGTCGCGAGCGCCCGAATGCCGCAGCCATCAAAGCGA
AAGTGACAAAATTGCTGGAAATGGTCCAGCTTGCCCATCTGGCGGATCGTTATCCGGCGCAGCTTTCCGGCGGCCAGAAA
CAGCGCGTGGCGCTGGCGCGCGCGCTGGCTGTGGAACCGCAAATTCTGCTGCTTGATGAACCGTTTGGCGCGCTGGATGC
GCAGGTGCGTAAAGAGCTGCGTCGCTGGCTGCGTCAACTCCATGAAGAACTAAAATTCACCAGCGTTTTTGTGACCCACG
ATCAGGAAGAAGCGACCGAAGTAGCTGATCGTGTAGTTGTGATGAGCCAGGGCAATATTGAACAGGCTGACGCGCCGGAT
CAGGTATGGCGCGAACCGGCGACCCGTTTTGTGCTCGAATTTATGGGCGAAGTGAACCGCCTGCAGGGAACCATTCGCGG
CGGGCAGTTCCATGTTGGCGCGCATCGCTGGCCGCTGGGCTACACACCTGCATATCAGGGGCCGGTGGATCTCTTCCTGC
GCCCTTGGGAAGTGGATATCAGCCGCCGTACCAGCCTCGATTCGCCGCTGCCGGTACAGGTACTGGAAGCCAGCCCGAAA
GGTCACTACACCCAATTAGTGGTGCAGCCGCTGGGGTGGTACAACGAACCGCTGACGGTCGTGATGCATGGCGACGATGC
CCCGCAGCGTGGCGAGCGTTTATTCGTTGGTCTGCAACATGCGCGGCTGTATAACGGCGACGAGCGTATCGAAACCCGAG
ATGAGGAACTTGCTCTCGCACAAAGCGCCTGATAGGTTGAGTGAATGTTAAACGCCCGGAGGCGCTTCCCGCGATCCGGG
CTTTTTAATGGCAAGGTTTGTAACCTGTAGGCCTGATAAGACGCGCAAGCGTCGCATCAGGCAACACCACGTATGGATAG
AGATCGTGAGTACATTAGAACAAACAATTGGCAATACACCTCTGGTGAAGTTGCAGCGAATGGGGCCGAATAACGGCAGT
GAAGTGTGGTTGAAACTGGAAGGCAATAACCCGGCAGGTTCGGTAAAAGATCGTGCGGCGCTTTCGATGATCGTCGAGGC
GGAAAAGCGCGGGGAAATTAAACCGGGTGATGTGTTAATCGAAGCCACCAGTGGTAACACCGGCATTGCGCTGGCAATGA
TTGCCGCGCTTAAAGGCTATCGCATGAAATTGCTGATGCCCGACAACATGAGCCAGGAACGCCGTGCGGCGATGCGTGCT
TATGGTGCGGAACTGATTCTTGTCACCAAAGAGCAGGGTATGGAAGGTGCGCGCGATCTGGCGCTGGAGATGGCGAATCG
TGGTGAAGGAAAGCTGCTCGATCAGTTCAATAATCCCGATAACCCTTACGCCCATTACACCACTACCGGGCCGGAAATCT
GGCAGCAAACTGGCGGGCGCATTACCCATTTTGTCTCCAGCATGGGAACAACCGGCACTATCACCGGCGTGTCACGCTTT
ATGCGCGAACAATCCAAACCGGTGACCATTGTCGGCCTGCAACCGGAAGAGGGCAGCAGCATTCCCGGCATTCGCCGCTG
GCCTGCGGAATATCTGCCGGGGATTTTCAACGCTTCGCTGATGGATGAGGTGCTGGATATTCATCAGCGCGATGCGGAAA
ACACCATGCGCGAACTGGCAGTGCGGGAAGGAATATTCTGTGGCGTCAGCTCCGGCGGCGCGGTTGCTGGAGCACTGCGG
GTGGCAAAAGCTAACCCTGGTGCGGTGGTGGTAGCGATCATCTGCGATCGTGGCGATCGCTACCTTTCCACCGGGGTGTT
TGGGGAAGAGCATTTTAGTCAGGGGGCGGGGATTTAAGATTATTGCGCAGGCACCGTTTTATCCGTCTGCGCAATTAACG
CATGTAAAAAAGGCTGTGCATTCTCATCGCTCTTACCGGGCATCTTCACGATATACGGCTTCCCGGTAATCGATGATGAC
GAAGCAACCTTATCAATAAACTGCTCGGCAGTGTTAATGCGGTTACGGGTATTGCCGAGCTTCAGACGCAGATGAGAAAC
CGCTTCATCGCAGGTATGTTCATCACCGTTGCGCACAAATATCAAATCCTTTTTCTGTGCTAATCCCTCCAGCATGGCGT
TGATGCGGGCTTCTTCATGGGCAGTTAACTTCGCGTAAGCGGGGAGTGTCATTAGTAGTGTAATGACCAGACAAATGATT
TTCTTCATTGAATTACCTTATCCTTGTTTTGTGATAGCCGATTTGACTGCCAGAATCAGGTAAAGTTTCGGTTGGAATAC
GATGAGGATCATCGGCAAGGAGAAAAAATTAAATGAGTAGTTTGTTGTTGTTTAACGATAAGAGCAGGGCACTGCAGGCG
GATATCGTCGCCGTGCAGTCGCAGGTAGTGTACGGCAGCGTAGGCAACAGCATTGCGGTGCCTGCTATCAAACAGAACGG
TCTGAATGTCTTTGCCGTGCCGACGGTATTGCTGAGCAATACGCCGCATTATGACACTTTCTACGGTGGTGCGATTCCGG
ACGAATGGTTTAGCGGCTATTTGCGTGCGCTTCAGGAGCGTGATGCGCTGCGCCAACTTCGAGCTGTAACCACGGGCTAT
ATGGGAACGGCATCGCAAATCAAAATCCTTGCCGAGTGGCTGACTGCGCTACGCAAAGACCATCCTGACCTATTGATCAT
GGTCGATCCGGTGATTGGCGATATTGATAGCGGAATTTATGTCAAACCTGACCTTCCCGAGGCGTATCGACAATATTTAC
TGCCACTAGCGCAGGGAATTACCCCCAATATCTTTGAGCTGGAAATCCTGACCGGTAAAAATTGCCGCGATCTCGACAGT
GCCATTGCTGCCGCAAAAAGTCTGCTTTCAGACACATTAAAATGGGTGGTGATTACCAGCGCCTCCGGTAATGAAGAAAA
TCAGGAGATGCAGGTGGTGGTGGTCACTGCCGACAGCGTGAATGTCATTTCCCATTCACGGGTAAAAACCGACCTGAAAG
GGACTGGCGACCTGTTTTGTGCTCAGCTTATCAGTGGTTTGCTGAAAGGGAAGGCGTTAACCGATGCAGTGCACCGAGCG
GGGTTGCGCGTACTGGAAGTGATGCGCTACACCCAGCAGCATGAGAGCGATGAATTGATTTTGCCGCCGCTGGCGGAAGC
ATAAAAAAATGGCGCCGATGGGCGCCATTTTTCACTGCGGCAAGAATTACTTCTTGATGCGGATAACCGGGGTTTCACCC
ACGGTTACGCTACCGGACAGTTTGATCAGTTCTTTGATTTCGTCCATGTTGGAGATAACAACCGGAGTCAGGGTAGACTT
GGCTTTCTCTTCCAGCAGCGGCAGATCAAATTCAATGACAGTATCGCCAACTTTCACGCGCTGACCTTCTTCAGCAATAC
GCTTGAAGCCTTCGCCTTTCAGTTCAACGGTGTCGATACCGAAGTGGACGAACAGTTCAACGCCGCTATCAGATTCGATA
GAGAATGCGTGGTTGGTTTCAAAGATTTTACCAATGGTACCGTCTACAGGCGCGACCATTTTGTTACCCGTTGGTTTGAT
AGCAATACCATCACCAACGATTTTTTCCGCAAAAACGACATCCGGCACGTCTTCGATATTGACGATCTCGCCAGAGAGCG
GAGCAATGATCTCAATAGTTCCGGTATCCTTCTTGTCGTCGGAAACCAGAGATTTCAGTTTATCGAACAAACCCATGATC
TTCTCCTAAGCAGTAAATTGGGCCGCATCTCGTGGATTAGCAGATTGTTTTTTCTTCAATGAACTTGTTAACCAGCGTCA
TTAACTCGTCCGTTGTCGGTTGAGCAAGAGCCTGCTCTGCTAACACCTTCGCATCTTCGAAGTTCGTGTTACGGATAATC
TTCTTAATGCGCGGGATAGAAATGGCGCTCATAGAGAATTCGTCCAGACCCATCCCCAGCAACAGAAGTGTAGCACGTTC
ATCGCCAGCAAGCTCACCACACATGCCAGTCCATTTGCCTTCAGCATGAGAAGCATCAATAACTTGCTTGATCAAGTTCA
GCACGGACGGTGACATTGGCTGGTAAAGGTGTGAAATCATATCATTACCACGGTCAACTGCCAGAGTGTACTGCGTTAAA
TCATTGGTGCCGATACTAAAGAAATCAACTTCTTTGGCTAAATGACGTGCAATTGTTGCGGCAGCCGGTGTTTCCACCAT
TACGCCGATTTCAATTGACTCGTCAAACGCTTTACCTTCGTCGCGCAGTTCCTGTTTGTAGATTTCGATCTCTTTGCGCA
GTGCACGCACTTCTTCAACAGAGATGATCATCGGGAACATAATGCGCAATTTACCGAAAGCCGAGGCACGCAGGATAGCG
CGGAGCTGATCGCGCAGGATCTCTTTACGATCCATTGCGATACGGATAGCGCGCCAGCCGAGGAACGGGTTCTCTTCTTT
CGGGAAGTTCATGTATGGCAGCTCTTTGTCGCCGCCGATGTCCATGGTACGAACGATAACCGCCTGCGAGCCACACGCTT
CAGCCACTGCTTTGTAAGCAGCAAACTGTTCTTCTTCAGTGGGCAGCGCGTCGCGGTCCATGAACAGGAACTCAGTACGA
TACAGACCAACGCCTTCAGCGCCGTTACGCTCTGCACCTTCAACGTCACGAACCGTACCAATGTTAGCGCATACTTCTAC
CTGGTGACCGTCCAGCGTAATAGCTGGCAGATCTTTCAGTTTAGCAAGCTCTGCTTTTTCAGAAGCCACTTGCTCCTGAA
CAGCGCGCATTTTATCAATAACTTCGTTGGTTGGATTGACGTAAACCTGATTATTTACGGCATCCAGAATCAGATAGTCG
TCATTTTTCACCTGAGAGGTGACGCTACCGGTACCCACGATAGCAGGTAGTTCCAGAGAACGCGCCATGATAGAGGTGTG
GGAAGTACGGCCACCCGCGTCGGTGATGAAACCCAGCACCTTCTTCAGGTTCAGCTGTGCGGTTTCGGACGGCGTCAGGT
CAGCGGCAACCAGAATGACTTCATCCTGAATGGCGCTCAGGTCGATAATCTTCAGGCCCAGGATGTTGCGCAGCAGGCGC
TTACCGATATCACGTACGTCAGCCGCACGTTCTTTCAGGTATTCATCATCCAGCTCTTCCAGGGCAGAAGCCTGACCTTC
GATAACTTCATGAGCAGCTGCGTCAGCTGTCATGTGCTTATCTTTAATCAGGGCTATGATTTCCTGCTCCAGCTCCTCAT
CTTCGAGCAGCATAATATGCCCTTCAAAGATGGCTTCTTTTTCTTCACCGAACGTTTCACCAGCTTTCGTTTTGATCGTT
TCCAGCTGGGCTGATGCCTTGGCACGACCGCTCAGAAAACGTTCAACTTCCTGATCAACCTGGTCGGCAGAAATTTTTTT
CCGGTCAATGACAATTTCGTCTTCTTTCAGAAGCAGAGCTTTACCGAAAGCGATACCCGGGGATGCTAAAATGCCTGAAA
TCATAACCCTACCTTACTTGTGACTGATTTTTAAAAGAACCCGGGAAATTACTCGAGTTCCGCCATCAGTTTAACCAGAT
GTTCAACCGCTTTCTGCTCGTCTTCGCCTTCTGCGGAGATAGTCACAACGGTACCTTGAGTCAGGCCCAGAGTCTGCAGT
TTAAACAGGCTTTTCGCGCTGGCGCTTTTGCCGTTGGAAGTCACAGTAATTTCAGAAGTGAAGCCCTTAGCTTCTTTTAC
AAACTGGGCAGCAGGGCGGGTGTGCAGACCGTTCGGAGCGGTAATGGTAACTTCTTGCTGGAACATTGTATTTCCCCAAC
TTATAGGTTTAGTGTTGTGGAACTAAAGTCTAGCCTGGCGGTTCGACTTTAGCCTGTATTGTTAGCGCCAGTTTTTAACA
GACGCGACGCACGAAGAGCGCAATACAGTCCATTGCTGGCGGGTGTTGACCGCTGACGTTTCGTACGTCATTAAACATTA
TGCCGCTAAAGGAAGAATTGAACCAAATCATAAAATCGATTCAGCTTTGGCTTTTCCTGTAACGATTAATTTCGCGCATC
AAAATAATTAGTCTGGTTAAATACCAGTTCCGACAGGCTGAATCAATGCCAGGAGGGGCGAAAGTTTGAAGCAGGCCACA
AAAAAGCACCTAAAAAGGTGCTTTTTTACGCATTTTTAACAAGCTGGCATTACTGTTGCAGTTCTTTCTCAGTGAAGAGA
TCGGCAAACAATGCGGTGCTTAAATAACGCTCACCCGATGACGGTAGAATAACCACAATATTCTTGTTGGTAAAGCTTTC
ATCTTCTTGTAGTTTCAACGCCGCAGCAACAGCTGCTCCAGAAGAGATACCTGCAAGAATACCTTCTTCTTCCATCAGAC
GACGCGCGGTAGAAATGGCTTCTTCATTGGTAATGCCAATGACTTTATCGATCAGCTTGAGATCGAGGTTAGCCGGGATA
AAACCAGCGCCAATACCCTGAATTTTATGCGGGCCAGGTTTAATCTCTTCACCTGCCAGCGCCTGGGCGATAACTGGAGA
ATCGGTTGGCTCAACGGCGACAGAGATAAGATCGGTCTTGCCTTTGGTGCCTTTAATGTAGCGGCTGACGCCGGTCAGCG
TACCGCCAGTCCCAACGCCAGCAATAAATACATCAACCTGACCGTCGGTATCTTCCCAGATCTCCGGACCGGTGGTTTTT
TCGTGAATTTCAGGGTTTGCCGGATTGCTGAATTGTTGCAGCAGCAGGTATTTCTCTGGATTGCTGGCGACAATTTCTTC
TGCTTTTTGGATTGCGCCTTTCATGCCTTTAGCACCTTCGGTCAGCACCAGGTTTGCACCTAACGCTTTCAGCAGCTTGC
GGCGTTCAATACTCATGGTTTCTGGCATGGTCAGGGTGAGTTTGTAACCGCGAGCGGCAGCTACATAGGCCAGTGCAATC
CCGGTATTACCGCTGGTCGGTTCAACCAGTTCAACGCCTGGTTTCAGCACGCCGCGCTTTTCGGCATCCCAAATCATGTT
GGCACCGATACGGCACTTAACGCTGAAGCTGGGGTTACGAGATTCCACCTTCGCCAGAATGCGTCCGTTACCGATGCGAT
TCAGGCGAACCAGCGGCGTGTGACCGATAGTCAGCGAGTTATCTTCAAAAATCTTACTCATGGCCTGTCCTTAACTGTAT
GAAATTGGGATACAACAGGTAGCATACCCGCTCAGAGAATATGCGGAAGTAAGGATTTAGCATATCTATATACAGAAGGG
AAATAATGACATGCAAGATGGAATAAGGGGCGGCATAAGCCACCCCTGTTTCACACAAACGGTTTACAAAATAACCGGTA
GATTGTTACCGCCACATCGCGTGTTTATCGCGATAGCAATCGACCCACATCGCCGTCGCGCCACAAACGGCAACGGGCAT
GATGAACAGATTAAGCAGCGGGATCATCGTAAACAGGCTGGTTAAAGCACCAAACTGCATATTGGTGATTTTGCGTGTGC
GCAGGGCGGTGCGCATCTCTTTAAACGGCACTTTGTGGTTATCGAAGGGGTAATCGCAATACTGGATGGCTAACATCCAG
GCGCTAAACAGGAACCACAGTACCGGCGCGACGGTTTGCCCAATACCAGGGATGAAGTAAAGAATTAGTAATACAATTGC
GCGCGGCAGATACCAGGCAAATTTTTGCCATTCGCGTTTCATGATTCGCGGCACATCTTTCATGATACCGAAAATCCCGG
TATCTGGCGGTGTAGCGCCAGTCAATCGTGCTTCCAGTTGTTCAGCCAATAAACCGTTAAACGGAGCGGCAATCCAGTTA
GCAATCGTGGAGAAGAAATAGCCAAACACTAACAGCACAGAGATGACAGCCAGAGGCCACAACAGATAGCTCAGCCATTG
TAACCAGTCCGGAACATAACTCATGAGAGTCGGGATCCAGACATCGAGTTGCGTAAAGAGCCACCAGAATGCGCCCCCCA
TCAACAAAATATTGACCAGCAGCGGTAAAATAACGAAACGCCGAATCCCAGGTTGCGAGACGAGCTTCCAGCCTTGCGCA
AAATAGTAAAAACCGCTGCGTGGGGCAGATGTGAATGATGAAACCATAATCAGGATGAGCTCCTTTTGACCAATCCCAGG
AAAATTGTGCGTATTTTACCGGGTAATTGCGCAATGGACAGTTAGGATATGTTCGAAAAAACAGCAAAAAGCACGATTTC
ATCTATCTTTGTGCTGTGAAAGTTAATAGTGCACTTGCACTTGAGGTAATCGGCAAATACTCTTAGTGAGTAAATGTTTG
CCGTGGTGGCAAGGTGTTAGAACAACAGAGAATATAATGATGCAGGATTTGCGTCTGATATTAATCATTGTTGGCGCGAT
CGCCATAATCGCTTTACTGGTACATGGTTTCTGGACCAGCCGTAAAGAACGATCTTCTATGTTCCGCGATCGGCCATTAA
AACGAATGAAGTCAAAACGTGACGACGATTCTTATGACGAGGATGTCGAAGATGATGAGGGCGTTGGTGAGGTTCGTGTT
CACCGCGTGAATCATGCCCCGGCTAACGCCCAGGAGCATGAGGCTGCTCGTCCGTCGCCGCAACACCAGTACCAACCGCC
TTATGCGTCTGCGCAGCCGCGTCAACCGGTCCAGCAGCCGCCTGAAGCGCAGGTACCGCCGCAACATGCTCCGCGTCCAG
CGCAGCCGGTGCAGCAACCCGTGCAGCAGCCTGCCTATCAGCCGCAGCCTGAACAGCCGTTGCAGCAGCCAGTTTCGCCA
CAGGTCGCGCCAGCGCCGCAGCCAGTGCATTCAGCACCGCAACCGGCACAACAGGCTTTCCAGCCTGCAGAACCCGTAGC
GGCACCACAGCCTGAGCCTGTAGCGGAACCGGCTCCAGTTATGGATAAACCGAAGCGCAAAGAAGCGGTGATTATCATGA
ACGTCGCGGCGCATCACGGTAGCGAGCTAAACGGTGAACTGCTTCTTAACAGCATTCAACAAGCGGGCTTCATTTTTGGC
GATATGAATATTTACCATCGTCATCTTAGCCCGGATGGCAGCGGCCCGGCGTTATTCAGCCTGGCGAATATGGTGAAACC
GGGAACCTTTGATCCTGAAATGAAGGATTTCACTACTCCGGGTGTCACTATCTTTATGCAGGTACCGTCTTACGGTGACG
AGCTGCAGAACTTCAAGCTGATGCTGCAATCTGCGCAGCATATTGCCGATGAAGTGGGCGGTGTCGTGCTTGACGATCAG
CGCCGTATGATGACTCCGCAGAAATTGCGCGAGTACCAGGACATCATCCGCGAAGTCAAAGACGCCAACGCCTGATACAC
TTAAGGCAAATTAACTCCTCTTCGAACCCCCGCTTGTCGGGGGTTTTTAGCATTGATGGTGCGATATGGAATCAATCGAA
CAACAACTGACAGAACTGCGAACGACGCTTCGCCATCATGAATATCTTTATCATGTGATGGATGCGCCGGAAATTCCCGA
CGCTGAATACGACAGGCTGATGCGCGAACTGCGCGAGCTGGAAACCAAACATCCAGAACTGATTACGCCTGATTCGCCTA
CCCAACGTGTAGGTGCTGCGCCGCTGGCGGCTTTCAGCCAGATTCGCCATGAAGTGCCAATGCTGTCGCTGGATAACGTT
TTTGATGAAGAAAGCTTTCTTGCTTTCAACAAACGTGTGCAGGACCGTCTGAAAAGCAACGAGAAAGTCACCTGGTGCTG
TGAGCTGAAGCTGGATGGCCTTGCCGTCAGTATTCTGTATGAAAATGGCGTTTTAGTCAGTGCCGCGACCCGTGGCGATG
GCACCACCGGGGAAGATATCACGTCTAATGTGCGTACTATTCGCGCCATTCCGCTGAAGCTGCACGGAGAGAATATCCCG
GCGCGTCTGGAAGTGCGTGGTGAAGTGTTCCTGCCGCAGGCGGGGTTCGAAAAGATTAACGAAGATGCGCGACGCACGGG
CGGGAAAGTGTTTGCTAACCCACGTAATGCGGCAGCTGGTTCACTGCGTCAGCTTGATCCGCGTATTACAGCGAAGCGAC
CGCTCACTTTTTTTTGCTATGGCGTTGGTGTTCTGGAAGGTGGCGAGCTGCCGGATACTCATCTTGGCCGTTTACTGCAA
TTTAAAAAGTGGGGGTTGCCGGTCAGCGATCGGGTAACGCTTTGTGAATCGGCGGAAGAAGTGCTGGCGTTCTATCACAA
AGTGGAAGAAGACCGCCCGACGCTGGGCTTTGATATCGACGGCGTGGTGATTAAGGTCAACTCACTGGAACAGCAGGAGC
AGCTTGGCTTTGTCGCGCGTGCCCCGCGCTGGGCGGTAGCGTTTAAATTCCCGGCGCAGGAGCAGATGACCTTTGTGCGT
GACGTCGAGTTTCAGGTTGGGCGTACTGGCGCGATTACGCCTGTTGCGCGTCTGGAACCTGTCCATGTTGCTGGCGTGCT
GGTGAGTAACGCAACCTTACACAATGCGGATGAAATCGAACGTCTTGGTTTACGCATTGGCGATAAAGTGGTGATTCGCC
GCGCTGGCGACGTGATCCCGCAGGTGGTTAACGTCGTGCTTTCTGAACGCCCGGAAGATACCCGTGAGGTTGTATTCCCG
ACGCATTGTCCGGTATGTGGTTCTGACGTTGAGCGTGTGGAAGGTGAAGCTGTTGCCCGCTGTACCGGTGGCCTGATTTG
CGGTGCGCAGCGTAAAGAGTCGCTGAAACACTTTGTTTCCCGCCGTGCGATGGATGTTGACGGAATGGGCGACAAAATCA
TCGATCAGCTGGTTGAAAAAGAATATGTCCACACTCCGGCGGATCTGTTCAAACTCACCGCAGGCAAACTTACCGGACTG
GAGCGTATGGGGCCAAAATCGGCACAAAACGTGGTTAACGCGCTGGAAAAAGCGAAAGAAACCACCTTTGCTCGCTTCCT
CTATGCACTTGGCATCCGTGAAGTCGGCGAGGCCACCGCAGCAGGTCTGGCGGCATATTTCGGCACGCTGGAAGCGCTGG
AAGCCGCTTCGATTGAAGAACTGCAAAAGGTGCCTGATGTTGGCATTGTCGTTGCATCCCACGTTCACAACTTCTTTGCC
GAAGAAAGCAACCGCAATGTCATCAGCGAGCTGTTGGCGGAAGGTGTTCACTGGCCTGCGCCGATCGTTATCAACGCGGA
AGAGATTGACAGCCCGTTTGCTGGTAAAACCGTGGTGCTTACGGGCAGCTTAAGCCAGATGTCGCGTGATGACGCTAAAG
CTCGACTGGTCGAACTGGGCGCGAAAGTCGCGGGCAGCGTGTCGAAGAAAACCGATCTGGTGATAGCGGGTGAAGCTGCA
GGATCTAAACTGGCGAAGGCGCAGGAACTGGGCATTGAAGTCATCGACGAAGCGGAAATGCTGCGTTTGCTGGGTAGCTG
AGATGGAAAAAGAGCAGCTGATTGAAATAGCCAATACGATAATGCCGTTTGGCAAATACAAAGGGCGTCGCTTAATCGAC
CTGCCGGAGGAGTATCTGCTGTGGTTTGCCCGCAAAGATGAGTTCCCGGCAGGGAAGCTCGGTGAGCTAATGCAAATCAC
GCTGCTGATTAAAACCGAGGGGCTGACGCAACTGGTCCAGCCCCTGAAGCGTCCGCTTTAAGCTTTATCGGTGCTGCTTT
CCTGCTGTGCCTGTAACTGTTCGGTCTGGCGTTTGTATCGCCGCGCCAGCACCGCACAGACCATCAATTGGATCTGATGG
AAAATCATCAGGGGCAGCACCATCATACCGATCACCGATGTGGGGAACAGAATGTTTGCCATCGGGATGCCATTTGCCAG
ACTCTTTTTCGAACCACAAAAGACGATAGTAATTTCATCTGCTTTATTGAAGCCTAGTCGGCGTGCCATAAAGACGTTAA
CTACAATCACGATAGCCAGAAGAACGCAGCTGACCACCACGATAAACAGCAATGCTCCCCAGCCAACTTTATGCCAGATA
CCATTAACGACGGCTTCGCTGAACGCTGTATAAACCACCAACAGAATGGACGTCTGGTCAGTTTTCGCAATCCATTTTTT
ATTGCGCGACACCCAGTCACCAATCCACGGCCGGGAAAGATGCCCCAACACAAACGGCAGCAACAGTTGCAGCATAATTT
TACCGACCTGCTCAAGGCTGCCCCCTGCACCGTGAACATTCATCACCAGGCCAACCAGCAATGGTGAAAGGAAAATCCCC
AGCAGGCTGGATGCCGACGCAGAACAAACCGCCGCCGCGACGTTACCGCCCGCCATTGACGTGAAGGCGATTGCAGACTG
CACGGTAGCCGGGAGAATGCACAAGTAGAGAAAACCGGAGTAGAGCATCGGGTCGACATTTACCGGTTTCCACCAGGCAA
ACAGTACACCCAGAATCGGAAACAGCACGAAGGTGCTGCACATTACCCACAAATGCAGTCGCCAGTGACCACCGCCAGCA
ATAATCGCCTCACGCGACAACTTCGCGCCGTGCATAAAGAACAGCAGGGCAATAGCTGCGGTGGTCAGATTTTCAAAGAA
GGGGACGAAATCGCCTCTGGCCGGAAAGAAAGAGGCCAGCAACACCACCGTGATCAGGGTTAAGGTGAAAGGATCGAGGA
TACGAAAAAGTTTCATAAAGACTCCAGATGATCGATGGTTCTATTGTGCTTCTTCCAGTTTGAGAAATAAAATTGATTTA
TTGCATCCATTCATGAAGAAAACAGATGAATTATTCTTTAAAACAGTTAAAGGTTTTCGTCACAGTAGCGCAGGAGAAAA
GTTTTAGTCGTGCAGGAGAGCGTATCGGCCTGAGCCAGTCGGCAGTAAGTCACAGTGTGAAGGAGCTGGAAAATCATACA
GGTGTTCGCCTGCTGGACAGAACCACGCGTGAAGTGGTACTTACAGATGCAGGGCAGCAGTTGGCTTTGCGTCTTGAGCG
ACTGCTGGATGAACTTAACAGCACGTTGCGCGATACCGGGCGTATGGGGCAACAACTGAGCGGAAAAGTTCGGGTCGCTG
CCAGCCAGACCATTTCCGCGCATCTTATTCCGCAATGCATTGCTGAAAGCCATCGCCGCTATCCAGATATTCAGTTTGTC
CTGCACGATCGTCCGCAGCAGTGGGTGATGGAAAGTATTCGCCAGGGAGATGTCGACTTTGGCATCGTCATAGATCCAGG
CCCAGTGGGCGATCTGCAATGTGAAGCGATTCTTTCCGAGCCTTTCTTTCTGCTTTGCCATCGCGATAGCGCTTTGGCCG
TGGAAGATTATGTACCCTGGCAGGCATTACAGGGAGCGAAATTGGTGTTGCAGGATTACGCGTCAGGCAGCCGACCGCTG
ATTGACGCAGCGCTGGCGCGCAATGGTATTCAGGCGAATATTGTGCAGGAGATTGGACATCCGGCGACGCTGTTCCCGAT
GGTAGCCGCAGGCATCGGCATCAGTATTCTTCCCGCACTGGCGCTACCATTGCCTGAAGGTAGCCCACTGGTGGTAAAGC
GCATTACGCCGGTGGTGGAACGCCAGTTGATGCTGGTGCGCAGGAAAAACCGTTCACTTTCCACCGTCGCTGAAGCGTTA
TGGGACGTGGTACGAGACCAGGGCAATACGCTAATGGCTGGGCGGGAAGGGGATCCGTTGTATCAGATATAGATATCGAT
ATGAGTCGTATTTTCAACAGGATTTAGAAGGGATACATTCAGAGACAAACGCTGCTCTTTCTCCTGCGCCTTTTCTGCCT
GCTGTCTCTGCAACTGCGCCAGTTGTGTTTCCAGTAGGGTGATTTGCTGTTGAATCAATTCGGCCTGTTTTTGCTTGTCT
TCAGCACTGCCGCTAGTGTCTACAATCTCTTTAATTTGTTGAGTGAGTTTGATGATTTGCTGACTTATCCGCGCGATTTG
TGAAGCAACATCGCTACCTTGTGATGCCCTGTTACTACTCTGTGTTTGTATGGAAGGAATTGAAGTTGAAGAGATAGTGG
CCATTGTTCAGTCCTCGTCACTGTACGAGGTAATATCGGTAGAAGAACAAGGAACTTGAGAAGAAAAATCAATCTTACAA
ATCGCAGATAGCAAAAAAGCGCCTTTAGGGCGCTTTTTTACATTGGTGGGTCGTGCAGGATGACTCGCTTCGCTCGCCCT
TCGGGCCGTCGCCGCGAGCGGCTCCGTTGTTTCGCTGCGCTCAACTCGAACCTGCTGCAGGTTCGAATCTTTGAGTATCG
CAGATAGCAAAAAAGCGCCTTTAGGGCGCCTTTTTAAATTGGTGGGTCGTGCAGGATTCGAACCTGCGACCAATTGATTA
AAAGTCAACTGCTCTACCAACTGAGCTAACGACCCGAAGTGGTGGGTGATGACGGGATCGAACCGCCGACCCCCTCCTTG
TAAGGGAGGTGCTCTCCCAGCTGAGCTAATCACCCACTTCTCAATTTCTTGCTACACGGCGGAGACTACATAAAGTAGTT
GGTGGGTGATGACGGGATCGAACCGCCGACCCCCTCCTTGTAAGGGAGGTGCTCTCCCAGCTGAGCTAATCACCCCCGCT
GTGTGGAGTCGCATTATAGGGAGAGTTCAAAATGAGTCAACGCATTTTCTAAAGAAATTGTTCGTTCGTCGTAAATTTAA
GCAAGATGATCGCAAAACAGACCGTGTTGCGCAATTTGTCAACGAAAACAATAATGCGTAAGGTTGCAACCCGAACTACA
TTGAGGAATCAGGCGGGAGTGATAGAATATCGCCCACTCAATTTTTCCAGGATTTGCCGGTTGTCGGCATCTTTCTAAAC
GTAAGGCCATTTCATGAAAATCAAAACTCGCTTCGCGCCAAGCCCAACAGGCTATCTGCACGTTGGCGGCGCGCGTACTG
CTCTTTACTCCTGGCTTTTTGCACGTAATCACGGCGGTGAGTTCGTGCTGCGTATTGAAGACACCGATCTTGAGCGTTCC
ACGCCGGAAGCTATCGAAGCCATTATGGATGGCATGAACTGGCTGAGCCTGGAGTGGGATGAAGGTCCGTACTTCCAGAC
CAAACGTTTTGATCGCTACAACGCGGTGATCGATCAGATGCTGGAAGAGGGCACAGCTTATAAATGCTATTGCTCTAAAG
AGCGCCTGGAAGCGCTGCGCGAAGAGCAAATGGCGAAAGGTGAGAAGCCGCGTTATGACGGTCGCTGCCGCCACAGTCAT
GAGCATCACGCTGATGATGAGCCGTGTGTCGTACGTTTTGCTAACCCGCAGGAAGGTTCTGTTGTTTTTGACGATCAGAT
CCGTGGTCCGATCGAGTTCAGCAACCAGGAACTGGACGATCTTATTATCCGCCGTACCGATGGTTCCCCAACCTATAACT
TCTGTGTGGTTGTCGATGACTGGGATATGGAAATCACCCACGTTATCCGTGGCGAAGACCATATCAACAACACGCCACGC
CAGATCAACATTCTTAAGGCCCTGAAAGCGCCGGTGCCGGTTTACGCGCACGTTTCTATGATCAACGGCGATGACGGTAA
AAAACTGTCCAAACGTCACGGGGCGGTCAGCGTAATGCAGTATCGTGACGACGGTTATTTGCCAGAAGCACTGCTGAACT
ATCTGGTGCGTCTGGGCTGGTCCCACGGCGATCAGGAAATCTTCACTCGTGAAGAGATGATCAAATACTTCACCCTGAAT
GCCGTCAGCAAATCTGCCAGTGCGTTCAACACCGACAAGCTGCTGTGGCTGAACCATCACTACATTAACGCGCTGCCGCC
GGAGTATGTTGCTACTCACTTACAGTGGCACATTGAGCAGGAAAATATCGATACCCGTAACGGCCCGCAGCTGGCTGATC
TGGTGAAACTGCTGGGCGAACGCTGCAAGACGCTGAAAGAGATGGCACAGAGCTGCCGTTATTTCTACGAAGATTTTGCA
GAGTTCGATGCCGACGCCGCGAAAAAACATCTGCGTCCGGTAGCGCGTCAGCCGCTGGAAGTGGTTCGTGACAAACTGGC
CGCGATTACTGACTGGACCGCTGAAAACGTTCATCACGCTATTCAGGCGACGGCGGATGAGCTGGAAGTGGGTATGGGTA
AAGTTGGTATGCCGCTGCGTGTCGCCGTAACCGGTGCGGGGCAGTCTCCAGCACTGGATGTTACCGTTCACGCGATCGGT
AAGACACGTAGCATTGAGCGTATCAACAAAGCGCTGGCTTTTATTGCTGAACGCGAAAATCAGCAGTAATTAGCGCATAA
AAGACAAACGGCAGGAGAGAAACCCCTGCCGTTTTTTATTTATGCTGATTCATTTATGTCGAGACGAGCCAGGAAATTAC
GAATTCCTTCGCGTGACAAAAATTGCGCAACTTTTTCCTGCTCACTGTGAGTCATGTTGTCTATTGCGCTTATGATTTGT
CGATAAGCAGGAGTGCGAATCCCCGGTGCGTATTCGGCAAGGGGTTCTTCGGCTTCCAGAAGCATCGGTGTGTTATGGAA
GGCTGGCGTGTTCTGAATAAACTCGCAAACTTGCGTATCGACCAGAATAAGTCTGGCACGACCGCCTTTCACGCCGGGAA
ATTTTTCCGTTTTCCAGCCTTTTTCTCTGATCCAACGGTTAACAGTTTGTTTAGCCACACCGAGGCATTCAGCCAGTTCT
TCGGTGGTCATTTTGTTGCGTAATCTTTTCATATTATTTGCTATCGCGAATCCCTAAGCGTTGTAACAATCCGATAATCC
CTTCCCGCAGAAGCAAGGATGTAAACTGTTTTTGTTCAACTGGCGTCATCTCTTTCGCCAGTGTCACCAGCAATACTTCA
AGCGGCGCATCACCAGAAAGGGCAGGCGCTTCTCCCTGACCTTCTGGACGTTCAGCATTACGAATATATTCACGAACCTG
TTCATTGACGTGAACCAGTCGGGCTTTGCCACCCTGGACGCCTGGTTTTGGTGACGTCGTCCAGCCTTCCTTGCGTACCC
ATTTATTAATGGTCTGGCGGCTATAGCCGGTCAGTCTGGCAAGTTCATCTGGTGTCATCCTCTCCTTGAACATAACAATT
CCCTGAATGTATGTGGGTCTATTAGTAGTTCATTTTATAGCACCACTTTACAGGAAACCGTGACATGAATAACTACTGAA
TGCGAGCGGTTTTCCAAAATTGTTCATTTGCCTGATTTTTCAGCGATTGAAACTACACGTTGCAATTTGCCGTTGACACA
TTCGGGCGGAATTCATATGATGCCGCCCGTCAACTCGACAAGCTTTACGTGACGGGGCTATAGCTCAGCTGGGAGAGCGC
TTGCATGGCATGCAAGAGGTCAGCGGTTCGATCCCGCTTAGCTCCACCAAATTTTGCACCCAGCAAATTTGGTACGTAAA
CGCATCGTGGGGCTATAGCTCAGCTGGGAGAGCGCTTGCATGGCATGCAAGAGGTCAGCGGTTCGATCCCGCTTAGCTCC
ACCAAATTTCCAACCCTCGCTGCAAAGCGGGGGTTTTTTGTCTCTGCTTTTTGCCGCTTTTGTAATACAGTCTACGTCCG
GGTTAGTGCCGCCTGGTGAAAGCATCATTGGATGAAAAATCGGCAACAGGCTGGCCCCTGTTTGCTTCGCGATGCGAATA
AACTTATTATTTGTGTGCCTGAAAACCCCGATCAGTGAGAGTAGTGTACTCATGTTTGTGGAGCATAACCTGATAAAAAA
TATCAAGATATTCACACTAGCGTTTACGCTCACCGTGGTACTTATTCAGCTATCCCGTTTTATTTCGCCACTTGCCATTA
TCCATTCCAGTTATATCTTTCTGGCGTGGATGCCACTGTGCGTAATGCTGTCAATCTTGTTTATCTTTGGCTGGCGCGGT
GTCGTTCCCGTTTTATGCGGGATGTTTTGCACCAATCTGTGGAACTTTCATCTCTCTTTTTTACAGACTGCGGTCATGCT
CGGCAGCCAGACGTTTGTCGTGTTGTGTGCCTGCGCAATATTACGCTGGCAGCTGGGGACGCGTTGGCGTTATGGATTGA
CCAGCCGATATGTCTGGCAACGTCTGTTCTGGCTTGGTTTGGTGACGCCGATCGGCATCAAATGCAGCATGTATTTTGTG
GGGAGCTTCTTTGATTTCCCGCTAAAGATATCCACCTTTTTCGGCGATGCGGATGCCATTTTCACGGTTGTTGATTTACT
AAGCCTTTTCACCGCTGTGCTGATTTACAACATGCTTTTCTACTATCTCACTCGCATGATTGTAAGTCCCCACTTTGCGC
AGATATTGTGGCGCAGGGATATCGCTCCGTCGTTGGGCAAAGAGAAACGCGCATTTACCTTAAGCTGGCTGGCAGCGTTA
AGCGTGCTGCTACTTCTGTTGTGCACACCTTATGAAAACGACTTTATTGCCGGTTACCTGGTACCCGTTTTCTTCATCAT
CTTTACCCTCGGGGTCGGTAAGCTTCGCTATCCGTTTTTAAATCTCACCTGGGCTGTTTCAACGCTTTGCCTGCTGAATT
ACAACCAGAACTTTTTGCAAGGGGTGGAAACCGAATATTCGCTGGCATTTATTCTTGCGGTGCTGATTTCCTTTAGCGTT
TGCCTGCTCTATATGGTGCGCATTTATCATCGCAGTGAATGGCTTAATCGACGCTGGCATTTGCAGGCGCTGACCGATCC
GTTAACGCTCCTACCCAATTTTCGTGCGTTGGAACAAGCGCCGGAGCAAGAGGCGGGCAAGAGTTTTTGCTGCCTGCGCA
TTGATAATCTTGAGTTTATGAGTCGTCATTACGGGTTAATGATGCGCGTTCACTGTATCCGATCAATTTACCGTACGCTG
CTGCCGTTGATGCAGGAAAACGAAAAGTTGTATCAATTGCCGGGTAGTGAACTGCTGTTAGTGCTGAGCGGGCCGGAAAC
GGAAGGGCGACTCCAGCATATGGTTAACATCCTGAATAGTCGGCAAATTCACTGGAACAATACCGGGCTGGATATGGGCT
ATGGTGCTGCCTGGGGGCGTTTTGATGGAAATCAGGAAACCCTGCAACCCTTGTTGGGGCAGTTAAGCTGGCTGGCGGAG
CAATCCTGCGCACATCATCATGTGCTGGCGCTGGATAGCAGAGAGGAGATGGTTTCCGGGCAGACCACTAAACAAGTGCT
ATTGCTGAATACCATTCGCACGGCGTTAGATCAGGGTGATTTGCTGCTCTACGCCCAGCCAATTCGCAACAAAGAGGGTG
AAGGTTATGATGAGATCCTCGCGCGACTGAAGTATGACGGCGGCATTATGACCCCGGATAAGTTTCTGCCCCTTATTGCT
CAGTTTAACCTTAGCGCGCGTTTTGATTTGCAAGTGCTGGAATCCTTGTTGAAGTGGCTGGCAACACACCCTTGCGACAA
AAAAGGCCCGCGCTTTTCAGTTAATTTAATGCCGCTCACGCTGCTACAAAAGAATATTGCCGGGCGGATTATTCGTCTGT
TTAAGCGTTATCACATCTCCCCGCAGGCGGTCATTCTTGAGATCACCGAGGAGCAGGCGTTTTCTAACGCAGAAAGCAGC
ATGTACAACATCGAGCAACTGCATAAGTTTGGCTTCCGGATTGCGATTGATGACTTTGGCACCGGCTATGCCAACTACGA
ACGGTTAAAGCGTTTGCAGGCTGATATCATCAAAATTGATGGTGTCTTTGTGAAAGATATCGTCACGAATACGCTGGATG
CGATGATTGTGAGATCAATTACCGATCTGGCGAAAGCGAAGTCATTGAGTGTGGTTGCGGAGTTTGTCGAGACGCAACAG
CAGCAGGCGTTATTGCATAAGCTCGGGGTGCAATATCTGCAAGGGTATTTGATTGGTCGCCCGCAGCCATTAGCTGATTA
ACAGGCGTAAAAAAACCGGGGAATTATCCCCGGCTTTTTTATGTATGGTCTTACAGCACCAGTGCTGCGATTGACGCAGA
CAGCACACTCACCAGGGTAGAGCCGTAAACCAGTTTCAGACCGAAGCGAGAAACCACGTTACCTTGCTCTTCATTCAGAC
CCTTAACTGCACCTGCGATAATCCCGATTGAAGAGAAGTTAGCGAAGGAAACCAGGAACACAGAGATGATGCCTTCAGCA
CGCGGAGAGAGCGTGGAAGCAATTTTCTGCAGATCCATCATCGCAACGAACTCGTTGGAAACCAGTTTGGTCGCCATGAT
ACTGCCCACTTGCAGTGCTTCGCTGGACGGAACACCCATCACCCATGCAATCGGATAGAAGATGTAGCCCAGGATGCCCT
GGAAGGAGATGCTGTAGCCAAACCAGCCAGTCACGGTGGCAAACAGTGCGTTCAACGCGGCGATCAGGGCGATAAAGCCG
ATCAGCATCGCGGCAACGATAATGGCAACTTTGAAACCTGCCAGAATGTATTCACCCAGCATTTCGAAGAAGCTCTGACC
TTCGTGCAGGTTGGACATCTGAATGTTTTCTTCACTGGCATCAACACGGTAAGGGTTGATCAGCGACAGCACGATAAAGG
TGCTGAACATGTTCAGTACCAGCGCCGCAACGACATATTTCGGCTCCAGCATGGTCATGTATGCACCAACGATGGACATA
GATACGGTGGACATCGCCGTTGCTGCCATGGTGTACATACGATTGCGGGAGATTTTGCCGAGGATATCTTTATAGGCAAT
AAAGTTTTCAGACTGACCCAGAATCAGAGAGCTGACGGCGTTAAAGGATTCCAGTTTGCCCATGCCGTTGACTTTGGAGA
GCAGGAAACCAATTGCGCGGATAATCACCGGCAACACGCGAATGTGCTGGAGAATACCGATCAGTGCAGAGATAAAGACG
ATTGGGCACAGCACTTTCAGGAAGAAGAATGCCAGGCCTTGATCATTCATGCTACCAAAGACGAAGTTAGTCCCTTCGTT
GGCAAATCCGAGCAGTTTTTCGAACATTTCGGAGAAGCCTTTCACGAAGCCTAAACCAACGTCGGAGTTCAGGAAGAACC
ACGCCAGTAACACTTCGATAACAAGCAGTTGAATAACATAACGGATACGAATTTTTTTGCGGTCGCTGCTTACCAGCAGT
GCGAGAATCGCAACAACGGCAAGTGCCAGTACAAAATGAAGGACGCGGTCCATATTTGCTCCAAATATGAGGCAGGTTAA
ATTTCCGTGCACATTCTATGTAACATGGTTAAGGAAAACGAGATCTGACACACACTATAATGACGTCCTGTGACAAGCTT
CAAAAATAGTGAGCTGTCATACATTTCTGCTATGTTGTGTATGGAAGCTGAAAGTTATGTAAATGTGCTAACATTAAACA
TAACCATAACATTCAAGTCATCAATCTTTTCGTAGTCATAATCCTGGTCTATCAGAGAAATCACCACAACCCATTTAAAT
GAATTTGATAATCATTCTCGTTTGGCATAGCATGAAACATAGCAAAGGCTATGTTTTAGAGGCACAAGATGACGAACTAT
CGCGTTGAGAGTAGCAGCGGACGGGCGGCGCGCAAGATGAGGCTCGCATTAATGGGACCTGCGTTCATTGCGGCGATTGG
TTATATCGATCCCGGTAACTTTGCGACCAATATTCAGGCGGGTGCCAGCTTCGGCTATCAGCTACTGTGGGTTGTCGTTT
GGGCCAACCTGATGGCGATGCTGATTCAGATCCTCTCTGCCAAACTAGGGATTGCCACCGGTAAAAATCTGGCGGAGCAG
ATTCGCGATCACTATCCGCGTCCCGTAGTGTGGTTCTATTGGGTTCAGGCAGAAATTATTGCGATGGCAACCGACCTGGC
GGAATTTATTGGTGCGGCGATCGGTTTTAAACTCATTCTTGGTGTTTCGTTGTTGCAGGGCGCGGTGCTGACGGGGATCG
CGACTTTCCTGATTTTAATGCTGCAACGTCGCGGGCAAAAACCGCTGGAGAAAGTGATTGGCGGGTTACTGTTGTTTGTT
GCCGCGGCTTACATCGTCGAGTTGATTTTCTCCCAGCCTAACCTGGCGCAGCTGGGTAAAGGAATGGTGATCCCGAGTTT
ACCTACTTCGGAGGCGGTCTTCCTGGCAGCAGGCGTGTTAGGGGCGACGATTATGCCGCATGTGATTTATTTGCACTCTT
CGCTCACTCAGCATTTACATGGCGGTTCGCGTCAACAACGTTATTCCGCCACCAAATGGGATGTGGCTATCGCCATGACT
ATTGCCGGTTTTGTCAATCTGGCGATGATGGCTACAGCTGCGGCGGCGTTCCACTTTTCTGGTCATACTGGTGTTGCCGA
TCTTGATGAGGCTTATCTGACGCTGCAACCGCTGTTAAGCCATGCTGCGGCAACGGTCTTTGGATTAAGCCTGGTTGCTG
CCGGACTGTCCTCAACGGTGGTGGGGACACTGGCGGGGCAGGTGGTGATGCAGGGCTTCATTCGCTTCCATATCCCGCTG
TGGGTGCGTCGTACAGTCACCATGTTGCCATCATTTATTGTCATTCTGATGGGATTAGATCCGACACGGATTCTGGTTAT
GAGTCAGGTACTGTTAAGTTTTGGCATCGCCCTGGCGCTGGTTCCACTGCTGATTTTCACCAGTGACAGCAAGTTGATGG
GCGATCTGGTGAACAGCAAACGCGTAAAACAGACAGGCTGGGTGATTGTAGTGCTGGTCGTGGCGCTGAATATCTGGTTG
TTGGTGGGGACGGCGCTGGGATTGTAGTTGAATGAGCGTCGCATCTGGCACTATTGGCGGATGCGGCGTAAACGCCTTAT
CCGCCTTACGCGTTAAAGAGCCGGTTTGTAGGCCTGATAAGACGCACTAGCGTCGCATCAGGCCTTGTGCTCCATTGGCA
AATGTGTTTAATGGCGGTGCCCATGTCCGCGGCCTTTTCCGCGATGATCGTCACGATCGCGCCAGCCTTCACGATAGCCA
CGCTCATACGCTTTACGCTTATCCCAGCCACGATGATAGCCATTATCATGACGCCACCAGCGGTTTTTGCGCCACTCATA
ATTGCGATGCCAGTAATCACGATCTCGCCAGTGACCACCGTCCCAGTAATTACCGTAATGATCGCGATCGCCAATTTGTA
ATTTGATTGATGGCAGTAGGGTGATTTCACCTGCGTTTGCTGCAAGCGGGGTAAATGCCATCAGGGCGGCCGCCAGAAAC
AGTGACCTGAACATTGTTATTCTCCTTCACGATCGAAGCCGTCAGCGGCCTGTTAACGCAATATTACGGGGAGGTAAAGC
CCCGTATCATCGCCATAACTCTTAAATCATAAAGGAGAGCATTTTTTGTTAAACGTTATCGTGGGGTGGCTGTTGCTTCG
GACGATTGACCATCATCATCGGCTTACCTGCTAATAACAGCCATGCCGGAAGCATGACGATACAGAGCAGCGGTAGCAAT
GTGGTATTGGGTACAACGACTGCCGCCATAAAAAGACTTAACCAGCCATCGCGTGTTACCACCAGCACGATGCCGAGAAT
AGCGCAGGAAACGGTTATTGCCGCTGGAACGGCGGGGACGTGCTCATGCAGCATCAACCCTAATGCCACGCCGACGAACA
CTGCCGGGAAAATTCGTCCACCGCGAAAGCCACTGGCGGCAGCAACGACCAGGGCGGTAAGTTTAATCACCGCCAGTAAA
AAGTAATCGCTGGTGCTGAAAGCCTGATTTGCCACCATCTGCTGCATCTCATCCAGTCCTTTAAACAGCGAAACTGGTCC
ACCAATAACCCCCAGAATACCGAGAATAAATCCGCCAATACCCAGCACGAGCACCGGATTTTTCATTTGATGCATCATCG
CGTGCAACCGTGGTAAGCACCATACGGCGCCCATCCCTGCTGCGATGGCAATCGCCGCGACAATTGCACCGCTGAGAATA
TCGGTCATTTCCATCTGTCCGTAATGCGCAATGGGCAGTGAAAAATGGGGATGGAAAAATAATCCGGTAGTAAGTGCACC
AGCTGCTGCCGCCATTAACGGCGCAAAAAGACGATCCCATAGCGGAACTTCACTACTGCCATTTAAGGTTTGCGAAAATA
TCAACGCCGCCGCAACAGGTGTACCAAACAGCGCGCCGATGGTTCCGGCAGAGGCTAAAATAGTCCACTCCATTCGGTTG
ACGCGCGGTAACAGACGAGCGCCAATGGCAACCGCAAGGGCGATATTGACGGTCATGATCGGATGTTCCGGCCCCAGGCT
GACGCCGCCAGCAAGACCGAGAATTAATGCTACGATAAGTCCTGGTAGCGCAGAGGGCGGAACCGGTGCGCCGATCAGCG
GTTCACAGGCGGGGTCTGGTCCGGCATGACCCTGGCTGAAACGGATAACCAACCCCACTGCAATACCCGTTAACGTTAAT
ACACCGATGATCCAGAGAGGTGAATCCTGGGCTATCCCCAGAGTTCCCGGCAGTCGTTGCCAGAGCAAATTCTGTAATGC
CGAGGCGATTTTCATCACCACAATCAGAATAAGACTGGACGCAATCCCAATTGCCACGGCGGGGAGCGATAATAACAACA
TGGTTCTGGCTCGCGGATGGAGCATGTTCTATTCCTTATGCGGGGTCAGATACTTAGTTTGCCCAGCTTGCAAAAAGGCA
TCGCTGCAATTGGTGCTGAAACGATAAAGTAATTGTGTGACCCAGATCGATATTTACAGGGAGCCTGCCTTTCCGGCGTT
GTTGTTATGCCCCCAGGTATTTACAGTGTGAGAAAGAATTATTTTGACTTTAGCGGAGCAGTTGAAGAATGACAAAGTAT
GCATTAGTCGGTGATGTGGGCGGCACCAACGCACGTCTTGCTCTGTGTGATATTGCCAGTGGTGAAATCTCTCAGGCTAA
GACCTATTCAGGGCTTGATTACCCCAGCCTCGAAGCGGTCATTCGCGTTTATCTTGAAGAACATAAGGTCGAGGTGAAAG
ACGGCTGTATTGCCATCGCTTGCCCGATTACCGGAGACTGGGTGGCAATGACCAACCATACCTGGGCGTTCTCAATTGCC
GAAATGAAAAAGAATCTCGGTTTTAGCCATCTGGAAATTATTAACGATTTTACCGCTGTATCGATGGCGATTCCGATGCT
GAAAAAAGAGCATCTGATTCAGTTTGGTGGCGCAGAACCGGTAGAAGGTAAACCTATTGCGGTTTACGGTGCCGGAACGG
GGCTTGGGGTTGCGCATCTGGTCCATGTCGATAAGCGTTGGGTAAGCTTGCCGGGCGAAGGCGGTCACGTTGATTTTGCG
CCGAATAGTGAAGAAGAGGCCATTATCCTCGAAATATTGCGTGCGGAAATTGGCCATGTTTCGGCGGAACGCGTGCTTTC
TGGCCCTGGGCTGGTGAATTTGTATCGCGCAATTGTGAAAGCTGACAACCGCCTGCCAGAAAATCTCAAGCCAAAAGATA
TTACCGAACGCGCGCTGGCTGACAGCTGCACCGATTGCCGCCGTGCGTTGTCGCTGTTTTGCGTCATTATGGGCCGTTTT
GGCGGCAATCTGGCGCTCAATCTCGGGACATTTGGGGGCGTGTTTATTGCGGGCGGTATCGTGCCGCGCTTCCTTGAGTT
CTTCAAAGCCTCTGGTTTCCGTGCCGCATTTGAAGATAAAGGGCGCTTTAAAGAATATGTCCATGATATTCCGGTGTATC
TCATCGTCCATGACAATCCGGGTCTTCTCGGTTCCGGTGCACATTTACGCCAGACCTTAGGTCACATTCTGTAAATCCTT
CCTGTTATATCGGGAGGTAACTCTCCCGATAATCTTTTAAATCATACAGTTAATTCAATTTTTCTTTGTGTCCCCTCACA
AGGCCGACCTGCGTCACACTTCCGTACAGCGGGATTAATTCTCCAGTAAATGCATTATTTGTCTGGTAACGGCGATTTGT
TTTGCACGTTCATAATTTCACTCGTCAACTATCACTGAACGAGGAATTAACGATGAGTAAGAAACTGATTGCATTATGTG
CCTGCCCAATGGGCCTGGCTCACACTTTTATGGCCGCTCAGGCGCTGGAAGAAGCGGCGGTAGAAGCCGGTTATGAAGTG
AAAATTGAAACCCAGGGCGCGGACGGTATCCAGAATCGCCTGACGGCGCAGGATATCGCCGAAGCGACCATCATCATCCA
CTCCGTGGCAGTTACCCCGGAAGATAACGAACGTTTCGAATCACGCGACGTTTATGAAATCACTTTGCAGGACGCAATTA
AAAACGCTGCGGGCATCATCAAAGAAATCGAAGAGATGATTGCCTCTGAACAACAGTAATATTCGACAGGGATAATTGTT
ATGGCCATTAAAAAACGCAGTGCAACCGTTGTGCCTGGCGCATCCGGTGCGGCAGCGGCAGTTAAGAATCCGCAGGCCTC
TAAAAGCAGCTTCTGGGGTGAACTCCCGCAGCATGTGATGTCAGGGATTTCACGCATGGTGCCGACCTTAATTATGGGCG
GTGTGATCCTCGCTTTCAGCCAGCTGATTGCTTATAGCTGGCTTAAAATTACTGCTGATATCGGCATCATGGATGCTCTT
AATAGCGGGAAATTCTCCGGTTTCGACCTCTCCTTACTGAAATTTGCCTGGTTGTCGCAGTCCTTCGGCGGCGTGTTGTT
TGGTTTTGCCATTCCGATGTTTGCTGCTTTTGTGGCGAACTCTATCGGTGGCAAACTGGCGTTTCCGGCTGGTTTTATCG
GCGGCTTGATGTCTACCCAGCCGACGCAACTGCTGAACTTCGATCCCAGCACTATGCAATGGGCGACCTCTTCGCCGGTG
CCGTCCACCTTCATTGGTGCGCTGATTATTTCTATCGTTGCCGGTTACCTTGTGAAATGGATGAACCAGAAAATCCAGTT
ACCGGATTTCCTGTTAGCGTTCAAAACCACATTTTTGCTCCCGATTCTTTCCGCCATTTTTGTCATGCTGGCGATGTACT
ACGTGATCACCCCCTTTGGCGGCTGGATCAACGGTGGTATCCGTACCGTGCTGACTGCCGCAGGTGAGAAGGGCGCGCTA
ATGTATGCGATGGGGATCGCCGCGGCGACAGCAATCGACCTTGGTGGCCCGATCAACAAAGCCGCAGGTTTCGTTGCCTT
CAGCTTTACCACTGACCACGTATTACCGGTCACCGCACGTTCTATCGCAATCGTTATTCCGCCGATTGGTCTGGGGCTGG
CGACCATTATCGACCGTCGTTTAACCGGCAAACGCCTGTTCAACGCTCAACTTTATCCGCAGGGTAAGACCGCCATGTTC
CTGGCGTTTATGGGGATTAGTGAGGGTGCGATTCCGTTTGCGCTGGAAAGCCCCATCACCGCCATTCCGTCGTATATGGT
CGGCGCGATTGTCGGCTCAACCGCCGCTGTCTGGCTGGGCGCAGTGCAATGGTTCCCGGAATCCGCTATCTGGGCATGGC
CGCTGGTCACTAACCTCGGCGTCTACATGGCGGGGATCGCGCTGGGGGCAGTCATTACTGCGCTGATGGTGGTGTTCCTG
CGTCTGATGATGTTCCGTAAAGGCAAATTGTTAATCGATAGCCTGTAAGAAGGAAAATCCAGATGACATTACTCGCTTCG
CTGCGTGACTGGCTTAAGGCGCAACAACTGGATGCGGTGCTTCTCTCCTCACGGCAGAACAAACAGCCGCATCTGGGGAT
CTCCACCGGATCAGGCTATGTGCTGATTAGCCGTGAAAGTGCGCACATTCTGGTGGACTCGCGCTATTACGCGGATGTAG
AAGCCCGCACGCAAGGTTACCAGCTGCATTTGCTTGACGCGACGCACACGCTTACAACCATCGCCAGGCAAATCATTGCC
GATGAGCAGTTGCAAACGCTCGGTTTTGAAGGCCAGCAGGTGAGTTGGGAAACCGCGCACCGCTGGCAGTCTGAACTCAA
TGCGAAACTGGTTAGCGCCACGCCGGATGTGCTGCGGCAAATCAAAACGCCAGAGGAGGTGGAGAAAATCCGCCTTGCCT
GTGGGATTGCCGATCGCGGTGCAGAGCATATTCGCCGCTTTATTCAGGCGGGGATGAGCGAGCGCGAGATAGCCGCTGAA
CTGGAGTGGTTTATGCGTCAGCAAGGCGCGGAAAAAGCCTCTTTTGACACCATTGTCGCCAGTGGCTGGCGTGGGGCGCT
GCCGCACGGCAAAGCCAGCGACAAGATTGTTGCAGCGGGCGAGTTTGTCACTCTCGATTTCGGTGCGCTGTATCAGGGCT
ACTGCTCTGATATGACGCGCACCTTGCTGGTGAATGGCGAAGGGGTGAGCGCCGAATCTCATCCGCTGTTTAACGTCTAT
CAGATTGTTTTGCAGGCACAGCTCGCAGCAATCTCTGCAATTCGCCCCGGCGTGCGCTGCCAGCAGGTTGACGACGCCGC
GCGCCGGGTCATTACAGAAGCCGGTTATGGCGACTATTTCGGTCATAACACCGGTCATGCTATCGGCATTGAAGTACACG
AAGATCCGCGCTTTTCACCGCGGGACACCACGACGCTACAGCCAGGCATGTTACTGACCGTGGAGCCGGGGATTTATTTG
CCAGGGCAAGGGGGCGTGCGCATCGAGGATGTTGTGCTGGTCACCCCGCAAGGCGCAGAAGTGCTCTACGCCATGCCGAA
AACAGTGTTGCTCACGGGAGAGGCATAATGGATTTATCGCTATTGAAAGCGTTGAGCGAGGCAGATGCGATCGCCTCCTC
GGAACAGGAAGTGCGGCAGATCCTGCTGGAAGAAGCGGATCGCCTGCAAAAAGAAGTGCGATTTGATGGGCTGGGATCGG
TGCTGATCCGCCTCAATGAATCGACAGGTCCGAAAGCGATGATCTGTGCGCATATGGACGAAGTTGGATTTATGGTGCGC
AGTATCTCCCGCGAAGGCGCAATTGATGTGCTGCCGGTTGGCAACGTGCGCATGGCTGCCCGCCAGCTGCAGCCGGTGCG
CATCACCACCCGTGAAGAGTGCAAAATTCCAGGCCTGCTTGACGGCGACCGGCAGGGGAATGACGTCAGCGCCATGCGCG
TGGATATTGGCGCGCGCTCGTATGACGAAGTGATGCAGGCGGGAATTCGTCCAGGCGATCGCGTCACGTTCGATACCACT
TTTCAGGTTCTCCCCCACCAGCGAGTGATGGGGAAAGCCTTTGATGACCGCCTTGGTTGCTATCTGCTGGTGACGTTACT
ATGTGAGCTGCACGACGCCGAACTGCCTGCGGAAGTGTGGCTGGTGGCAAGTTCCAGCGAAGAGGTGGGATTACGCGGCG
GGCAAACTGCCACCCGCGCGGTGTCGCCGGACGTCGCCATTGTGCTTGATACCGCCTGCTGGGCGAAAAACTTTGATTAT
GGCGCGGCTAACCATCGCCAGATTGGTAACGGCCCGATGCTGGTGTTAAGCGACAAGTCGCTGATTGCGCCGCCAAAACT
TACCGCCTGGGTCGAAACCGTGGCGGCAGAAATTGGCGTGCCGTTGCAGGCAGATATGTTCAGCAACGGCGGCACGGACG
GCGGGGCGGTGCACTTAACCGGCACCGGCGTGCCCACAGTGGTGATGGGGCCAGCAACCCGCCATGGACATTGCGCCGCA
TCGATTGCCGATTGCCGCGACATTTTGCAGATGCAGCAACTTTTATCTGCCCTGATTCAACGTCTTACGCGTGAGACGGT
TGTTCAACTGACGGATTTCAGATGATCTCCTGATTAACCCGGAGCGGTTATGCTAACGATTCAATTTCTCTGTCCTTTGC
CTAACGGTCTTCATGCCCGTCCGGCGTGGGAACTTAAAGAACAGTGCAGCCAGTGGCAAAGCGAAATCACCTTCATCAAC
CATCGCCAGAACGCAAAGGCCGATGCCAAAAGCTCGCTGGCGCTGATTGGCACCGGCACCTTATTTAATGACAGTTGCAG
CCTGAACATTAGCGGCAGCGATGAAGAGCAGGCGCGGCGCGTGCTGGAAGAGTACATCCAGGTGTGCTTTATTGACAGCG
ACAGCGTTCAGCCAACGCAGGCAGAACTGACGGCGCATCCGCTGCCGCGTTCATTAAGCCGCCTTAACCCGGATTTACTG
TACGGCAATGTGCTGGCAAGCGGCGTCGGCGTGGGTACGCTGACCCTGTTACAAAGCGACAGCCTCGACAGTTATCGGGC
AATCCCCGCCAGTGCGCAAGACTCCACCCGGCTGGAGCACAGCCTGGCAACGCTTGCCGAGCAACTGAACCAGCAATTGC
GTGAGCGTGACGGCGAAAGCAAAACTATCCTCAGCGCCCATTTGTCGCTGATTCAGGATGATGAGTTCGCGGGCAATATC
CGTCGCCTGATGACAGAACAGCATCAGGGGCTGGGGGCGGCGATCATCAGCAATATGGAGCAGGTTTGCGCCAAACTATC
TGCTTCTGCCAGCGATTATCTGCGCGAGCGGGTTAGCGACATTCGCGATATCAGCGAACAGTTGCTGCATATCACCTGGC
CGGAACTGAAGCCGCGCAACAATCTGGTGCTTGAAAAACCGACCATTCTGGTGGCTGAAGATTTAACCCCAAGCCAGTTT
TTGAGCCTTGATTTGAAAAATCTTGCGGGCATGATTCTGGAGAAAACCGGGCGCACCTCGCATACCCTGATTCTGGCCCG
CGCCTCGGCGATCCCGGTACTGAGCGGCCTGTCGCTGGATGCGATTGCCCGTTATGCCGGGCAACCTGCAGTGCTTGACG
CCCAGTGCGGCGTGCTGGCGATTAACCCGAATGACGCGGTGAGCGGTTATTATCAGGTCGCGCAGACGCTGGCGGATAAA
CGCCAAAAACAACAGGCGCAGGCTGCCGCGCAGCTGGCTTATTCCCGTGATAACAAGCGTATTGATATCGCGGCGAATAT
TGGCACCGCTCTGGAAGCGCCTGGCGCGTTTGCCAACGGCGCGGAAGGCGTCGGGCTGTTCCGTACCGAAATGCTCTATA
TGGATCGCGACAGCGCGCCGGACGAGCAGGAGCAATTTGAAGCCTACCAGCAGGTGCTACTGGCAGCGGGCGATAAGCCG
ATTATCTTCCGCACAATGGACATCGGAGGCGATAAAAGCATTCCTTATCTGAATATTCCCCAGGAAGAGAACCCGTTCCT
CGGCTATCGCGCGGTACGTATTTACCCGGAATTTGCTGGCCTGTTCCGCACTCAACTGCGGGCCATTTTGCGCGCCGCCA
GTTTCGGCAACGCCCAGTTGATGATCCCGATGGTCCACAGCCTCGATCAGATCTTATGGGTGAAGGGCGAGATCCAAAAA
GCGATCGTTGAGCTTAAGCGCGATGGCCTGCGTCATGCAGAGACGATTACGCTGGGTATCATGGTGGAAGTGCCGTCGGT
GTGCTACATCATCGATCACTTCTGCGATGAGGTCGATTTCTTCAGTATCGGCTCCAACGATATGACCCAGTATCTTTATG
CGGTCGATCGTAATAACCCGCGCGTATCGCCGCTATATAACCCGATTACGCCATCGTTCCTGCGCATGTTGCAGCAAATA
GTTACCACTGCGCATCAGCGGGGCAAATGGGTAGGCATTTGCGGTGAACTGGGAGGCGAAAGTCGTTACCTGCCGCTACT
GCTTGGGCTGGGCCTGGATGAGCTGAGTATGAGTAGCCCGCGCATTCCGGCGGTGAAAAGCCAGCTTCGTCAACTGGATA
GCGAGGCGTGTCGGGAACTGGCACGTCAGGCGTGTGAATGTCGCAGCGCGCAGGAAATTGAAGCGTTACTCACCGCCTTT
ACGCCGGAAGAAGACGTTCGCCCGCTGCTGGCGCTGGAGAATATCTTCGTTGATCAGGCCTTTAGCAATAAAGAGCAGGC
GATCCAGTTCCTGTGCGGTAACCTCGGCGTTAACGGGCGCACTGAACATCCGTTCGAGCTGGAAGAGGATGTCTGGCAGC
GGGAAGAGATTGTCACCACTGGCGTTGGTTTTGGCGTGGCGATCCCGCACACCAAATCGCAGTGGATCCGTCATTCCAGT
ATCAGCATTGCCCGGCTGGTGAAACCGGTTGACTGGCAGTCAGAAATGGGCGAAGTCGAACTGGTGATCATGCTGACGCT
GGGCGCTAACGAAGGGATGAATCATGTGAAAGTCTTCTCGCAGCTGGCGCGTAAACTGGTGAATAAAAACTTCCGCCAGT
CGTTGTTTGCCGCGCAAGATGCACAAAGTATCCTGACGCTGCTGGAAACAGAATTAACCTTCTGACGTTAGCCCTGAAAA
CGGGCGCTGTACTCTCCCGGCGTCAGACCAAACTGACGCCGGAAAACGCGACAAAAATAGTCGCTATACGGAAAACCGCA
ACGCTGTGCCACTTCATGAATTGACAGATGATATTTCTGCAAAATCATCCTCGCCTTCGCCATTCGCACCCAACGCACAT
ACTCGATAAAACGCATCGTTCCATGCTGAGCAAACAGTTTTGACAGATGATTGGGCGTGATATTAAAAAACTGCGCCACG
CTCTCGCGGGTGAGCGGCTGGGCATAATTATCCTGAACCCAGTTACAAATGCTGTGATAGAGAAAATCGCCGCGCGGCTG
CGAATTGCCCGGCGGCATATTCACCACGTTACGGCAAAGATGCAGCAAACTTAACACCAGCGGCTGAATGATATTTTGCT
CCAGCGGCGAACGGCTAAGATGGGTGAGGGCGGTAAGCATCGCTTCACCTTCACCGCGTTGCAGGCTGGGAAGCTGGATC
TGGCGAGCAGGATGCAACAACGACGTGGTGCGGCTATCGTAAAACGATAACCCAAGCCAGGTCGGAGCGAACACCAGGCT
TAACAGCATCACCGGTTTGTTGTTGACCGGTAAATTAGCCGCGCGCGCCGGAATAAACAGCATTTCTCCTTCCACCAAAC
GTTGCTGCTTTGCTTCCAGCAGATTGCCGTATTCGCCGCGCAGCACGATATCCAGACGGGGAAAATCAATACATAAACTG
CCCACCGGCAACGAGGCAGGCTGGCTGGCAAAACAGACGCGCCCCAGTAGTTGCGGGTTAAGCACCAGGCCGCTGAACAG
ATCGGCGAAAAATTGTTGATCGGCGGGCAAGCCTGGTGCTTTCATGAAAGTTCCCGATTAAAGATGCATTAACTGGCGAA
ATTCTTTTACTTTGCTGCGGCTGACTGGCACTTCAAAATCCAGATCTTTCAGCCGCAGAATATAGGTGTTATTAAACCAC
GGTTCGATTTCGCGGATTTTGTTCAGATTGACACAAAATGAGCGATGGCAGCGGAAAAAATGCGACGGCGGCAGTTTGCT
GCAAAATTCGGTAATGTTCATCGGCATTACGTAGGATTCACGCCGCGTATAGACAAAGGTCATTTTCTCGTGCGCTTCGG
CGTAATAGATATCGTTAATTGGCGTGACGATTATTCGCTCATCTTTCACCAGATTAATGGTGTCATTCTCACGCGTTACC
GTCGCGGCAGGCGTGCTGCTGGTCTGCTGTTGCTGCCAGGCCGCTTCCAGTTTTTGCAGCATCCCGGTAATGCGAGACTC
CTGATACGGTTTGAGAATGTAGTCAAACGCCTCAAGTTCAAACGCTTCTACCGCATGTTCTTTCCACGCGGTGATGAACA
CAATAAACGGTTTATGGGCGAACTGGCTGATGTTTTGCGCCAGCAACACACCATCCAGCGACGGAATATTGATATCCAGA
AAAATGGCGTCGACGCGGTTATGCTGCAAAAACTTCAACACGTCCAGACCGTCGTCAAAGGTGCCGACAATCTCCATCTG
GCTGTGCTCTTTAATTAGCCAGCTCAGTTCCTGTTGTGCCAGGAATTCGTCTTCAACAATGATGACTTTCATAATATCAC
TCCGGCTCAAAGCAATAACGTAGCCTGTGAGGCGACTGGGGTGCGTTGGTTAGGAATGTAAAACGCAATTTCCGTTCCTG
GTTCCAGGCGGCGGATATGCAGCCCCTCGCCATACAATAACTTCACGCGATGATGAACATTCAGCAGGCCAATTTTATTG
CCCGGCATTTCATTCGCTTCGACCCGCTCAATCACCTTTGGATCGATGCCGTGCCCGGTATCCCGCACCGCAATGCGTAC
CCGATTGCCGCACTCTGCAACGCTGATGGTGACAACGCCTTTACCTTTGCAAGGCTGGATACCGTGGACAATGGCATTCT
CCACCAACGGCTGGATCAGCAGGCTGGGAATGCAGCAATTCACCTCTTCATCAATATCATAGATAACCGTCAGCTTGTCG
CCAAAGCGGGCCTGCTCAATGGCAATATAGTCTTTAATTTGATACAGCTCTTTTTTGATATCGATTTGCTCATCGTCTTT
TAATTCAATGTTATAGCGCAGATAACGCGACAGATTAAAGATCAGCTGGCGAGCGGTATCCGGATTCAGACGGATCGACG
ATGAAATAGCGTTCAAAGCGTTAAACAGGAAATGGGGATTAATTTTGCTTTGCAGGGCGCGAAGCTCTGCCTTATTTGCC
ATTTCACGTAGCTGCTCGGCGCGTGAAACCTCCAGTTGCGTGGAGATGATTTGCGACAGACCAACCGCCATTTCCTGTAA
TGACGAGGTTATCTGATGCGCGTGGCAGTAGTAAATTTTCAGCGTTCCGGTCACAACGCCTTTCTCCCACAATGGGATCA
CCAGCATGGAATGAATCTCTGGTGTGCGGTGGGCTTCATCATTGTTTTTAATGATGATTTTTCCGTAATTCATCGCCTGA
CGGGTAGTCGGGCTAATGAAGTCATCGCCATTCTGATAGTTATGTTCACCCACGCCAACATAGGCCAGCACATGATCGGT
ATTGGTAATCGCCACCGCATCGGCGTGAATGTCATCGCGAATAATTTCACAAACTTTGCGTAATGACTCGCTATTGACAT
GGCGAAACAGAGGTAGCGTTTTGTTGGCGATATCCAGCGCCAACTTGGCCTGCCGCGCGGCGCTGGCCTCTTTTTCGCCC
TCAACGCTTTGCACCAGAAGCACAATAAAGCCGATACAGACGCTGCCGAGGATCATTGGAATCCCGATTTTAGAGACGAT
ATCGATCCCCAACGCGGTAGTTGGTGCCCAGACAATCACCAGAATCATGGTCAACGTTTCACACAACATGCCGCCGAGAA
TACCGACGCGCCAGCGCTGTGCTTTGGGGATTTTCAGGTTGATCCAGCCCGATATACAACCAGCCAGAATGCTGGTGATA
AAGCAGGGGATCGCCGTCACGCCGCCGATATCAATTAAATAACGATGAATACCCGCAATCACGCCGGTAATGATGCCCAC
CCACGGGCCAAACAGAATCCCGCCGGACATCACCGCGATAATACGTACGTTCACCAGCGAGCCTTCTACGGGAACGCCGG
ACCAGGTGCTGAACAGGGCGAACAGCGAGAAAATGGCGGTAACGGCGAGCAACTCTTTCGGTGAGTGTGCCGACTTGTGC
AACAGTTCGCGAAACAGGCGGATACGGATGAGAAAGAACAGGCAGATAAGCATTAACGCTGCCCGATCGAAGACCGCCAG
CAGCATGTTGAATATTTCGTGCACGGGTGACTCTGAATAAGGATTAAACCTCTATGATAGGTAACCTGAAGGCTGATGAC
CAGCAGGCCGTTTTTGAGGAAAAACCACAATTTTAAAAGGGGATTGATAGATAAATGGTGTATTAGCAATGCATCTCTTG
ATAATGCACTTCTGGTTAGTAAATTTATTGAAATTATTATGTTAATAAAATGAGTGGTAATTTTCTTGTTAGCGCAGATA
AATTTCCTGTTTTTAAAGCAGAGTTCCTCATTTAACGTCATTAATAAAAATGTTCTAAAACGCTGGACAGACAGAAATTA
ATCAGGCTATTTTCAAAACAGCCACCATCGTGGCAGCGTCGCTCGGACGGTCCGGGCGCTAACGTTAATCTGAGGAAATT
ATGGCTGACACTCGCCCTGAACGTCGCTTTACGCGCATTGATCGTCTCCCGCCCTATGTTTTTAACATTACCGCTGAACT
GAAAATGGCTGCGCGTCGGCGCGGCGAAGATATTATCGATTTCAGTATGGGTAACCCGGACGGTGCGACTCCGCCGCATA
TCGTCGAAAAATTATGTACTGTGGCCCAGCGCCCGGACACGCATGGTTACTCCACTTCACGCGGTATTCCGCGGCTACGT
CGCGCCATTTCCCGCTGGTATCAGGATCGCTACGACGTTGAAATCGACCCGGAATCAGAAGCCATCGTCACTATTGGTTC
GAAAGAGGGCCTGGCGCATCTGATGCTGGCGACACTGGATCACGGTGACACAGTGCTGGTGCCGAATCCAAGTTACCCCA
TTCATATTTACGGCGCGGTGATTGCCGGGGCTCAGGTACGCTCAGTGCCGCTGGTGGAAGGTGTCGATTTCTTCAACGAA
CTGGAGCGCGCCATTCGTGAAAGTTATCCGAAACCGAAGATGATGATCCTCGGCTTCCCGTCGAACCCAACCGCGCAATG
CGTGGAACTGGAGTTCTTCGAAAAGGTTGTGGCGCTGGCGAAACGCTACGATGTGCTGGTGGTCCATGACCTGGCCTATG
CCGATATCGTCTACGATGGCTGGAAAGCGCCGTCAATCATGCAGGTGCCGGGTGCACGCGATGTGGCGGTCGAGTTCTTT
ACGCTGTCGAAAAGCTACAACATGGCGGGCTGGCGTATCGGCTTTATGGTTGGCAACAAAACGCTGGTCAGCGCCCTGGC
ACGTATTAAAAGCTATCACGATTACGGCACCTTTACGCCGTTGCAGGTGGCGGCGATTGCGGCACTCGAGGGCGATCAAC
AGTGCGTGCGCGACATTGCCGAACAGTACAAACGCCGCCGTGATGTATTGGTTAAAGGGCTGCATGAAGCGGGCTGGATG
GTCGAAATGCCGAAGGCTTCGATGTATGTCTGGGCGAAAATCCCTGAACCTTACGCTGCCATGGGCTCGCTGGAGTTTGC
CAAGAAATTACTTAACGAAGCGAAGGTTTGTGTCTCGCCGGGGATCGGCTTTGGCGACTATGGTGATACGCATGTGCGCT
TTGCACTGATTGAAAACCGCGACCGTATTCGTCAGGCGATTCGTGGGATTAAAGCGATGTTCCGTGCCGACGGTTTACTA
CCCGCCAGCAGCAAACATATTCACGAAAACGCGGAATAAACACCGACCTCAGAAATGCAAACAGGAGCCTGATGGCTCCT
GTTTTTCATTGCACAGTTTGCTTTTAGATCATCAGGGCAAAAGTACCGGCCCAAACGATGACCATAAAAGAAATGCCCAT
AAAGAAATATTTCACTTTACATCTCTCCGCGTAATTGCTGTTACGCCTGAATGACTTCATTACACCTGATACAGTGAGTT
GACACCGGGCAAAACGACCTTAAAAGTCCTGTATTTTACCGTGGGCATCACCCCAGAATTCTGAGCTAAACTGCTCGAGA
CGGCGCTAATGTACGCCTAAAACTGAAACGAGACAAGAGGCATTTTCTTATTTACTTTTAGTAACTTACAGGTGTCTCAT
ATCGGCGACAGTTTAATTTCTGACGGTAATAATTAGATATTCAGCGAAGGAAAAAACCTTAAGAAAAAAGCCATAAAAAC
CATGAGGTTATTATGGCTTATGTGAGGAGGTAAAGAGTCAGAGCAGTTTGTTAAATGTATAACGACGATTCTCCCACCGG
GCGCGTTTTAAAGCGACGGTGGATCCAGAGGTACTGCTCCGGTGCGCGCATGATCTCTTTCTCGATAATCTTGTTCATAT
AGGCAGCGGCTTGATTTTCATCTGTCGGGTAGCCTTCCATCTCTGGGGTGATGAACAAACGATATCCGCTGTAATCCGCT
TTTCTTACCATCGTTACGGTCAACATGGCTGCGCCAGAGAGACGGGAGAGAACATAGGTGCCATTGGTTGTGGCGACATT
TTCTACCGCAAAGAACGGCGCGAAGGAGCTGCCTTTACGACCATAATCCTGATCGGGAGCAAACCATACCGCTTCACCTT
TCTTCAGTGCACTGACAATGCCGCGCAGATTATTTCTGCCGATCATCGCTTTGTTAGAGCGCATGCGACCACGGGTCTGC
ACCCATTCCATCAGCTGATTATTATGTGGACGATAGGTAGCCATCATTGGCTGACAAAGTCCCATCACGCGGCCGCCCAG
TTCCAGCGACATAAAATGGACGCCGACAACCATTACGCCGCGATTTTGCATTTGTGCGCGTTTAAGGTTATCCAGCCCTT
CAACATCAAACCATTTACGTACGCGACTGTCGGGCCAGAACCACGCCATGCCGGTTTCTACCAGCGCCATGCCGAGTGAA
CGAAAGTTTTCGGCAATCATCTTCTCGCGTTCTTCCGCAGAATGCTGCGGGAAGCAAAGTTCCAGGTTTTTACGGGCGAT
AGATTCACGCCGTTTCAGGAATGGTCGCGCCATTGCGCCAATACGCGTGCCGAGAAAGCAGAGAACAGGATAAGGAAGCT
GTACCCAAAGCCAGAGTACACCAAGCCCAAACCATGTGAGCCAGTAGCGAGGATGCAGAAACTCGCGGGAAAATTTGCAT
TGTGGAAACATAGTTACCTTCTGTAGATACGAATTGTTGTATCGCAGAAGATTCCATGTCGACAGCGGTACACTCAATTG
GTTGGGCCATCATGTACGACAATGGTTCCTGTAAAGAGTGTAAAGACTAGTCAGGACATAACCACGAGGAGCATGAATGC
GGTGGCTCTACTTTATCACTGGCTGACTGCTTTCAGCTACTGATTATTAATCGTGCAAAGTAAAAAATTTTCCGCATGCA
ATAGTGTTGCATTTAACATGCTGTTTTCATTGATGCTTAGCAAAAATTGCCAGAGGGTAAGGATTGTCTTACTATTAAAG
TGACTGAAGTTACAGGTTTTTTAGCGCGGCAGGAGGTTGAGCTATGATTTATTTATGGATGTTTCTCGCCCTGTGTATTG
TCTGCGTAAGCGGATACATCGGTCAGGTACTGAACGTGGTATCGGCGGTCTCTTCTTTCTTCGGCATGGTGATCCTCGCT
GCACTCATTTATTACTTCACCATGTGGTTAACTGGCGGTAATGAACTGGTGACGGGGATATTTATGTTTCTTGCCCCGGC
TTGTGGCTTGATGATTCGCTTTATGGTGGGGTATGGCAGGCGATAGTGGGTCAGGATGGCTCATTTGGGCAGGTGTTCAC
ATCAGCATCAGACATGATTGTTCACCTGCCAGGTGACAGACGCTATCGCACAGGATGAATAAGATAATTCGCCTTTGTCG
GAAAAGGGGGCGTGGTTTCTTCTGTGAGGTTTAATGGTGGCGCATCTTCTCTCATCTTAAACAAAATTGCCTGTGATGGC
TGAATTTTTGTAGAGTGAGTTGTCGTCATCGCTGATGTTTTTTCCGTCTCTTTATAGCTCCTCTCACTTCCACCACCAGA
AATGGAAAATGCAAAAACATTGCATGCCATAATAGAGACCAATAAAAATAAGCTAAAAAGTATTAAGTTTACTTTCATAG
AAAGTTATCCTGAAAATGGTTCACTGAGAATGTACGATGTTATGGCTGTATTTACATATAATTAATCAATATTTACATCG
ATATAATAAATGACATCTCTTTGTGGTACATAAGAATAGTTCTCTGTGACAGGAAGCATATTCCTACAATTGTAAGACTA
AAATACTTCTTGCGATAATAACTACAACTGTAAGATAACCCTTTCAAAATGACCGTTGCTCTCTGATTTCTCATTTCATG
CTCACCCAATATGATGGCGGCGTTTTCTAAAACTGTTAAAGAATGAGGTAAGTATGAAACGTTTAATTATGGCCACGATG
GTCACAGCAATTCTGGCATCTTCAACTGTATGGGCTGCTGATAATGCTCCGGTAGCGGCACAACAGCAAACTCAGCAAGT
TCAGCAAACCCAGAAAACGGCAGCGGCAGCAGAGCGTATCTCTGAACAAGGTTTATATGCGATGCGTGACGTGCAGGTAG
CGCGCCTGGCTCTGTTTCATGGCGATCCGGAAAAGGCAAAAGAACTGACCAATGAAGCTTCCGCTTTGTTGTCAGATGAC
AGTACCGAATGGGCAAAGTTCGCTAAGCCAGGTAAAAAGACCAATCTCAATGATGACCAATATATTGTCATTAATGCATC
TGTCGGAATTTCTGAGAGTTATGTAGCAACACCCGAAAAAGAAGCCGCGATAAAAATTGCCAATGAAAAAATGGCGAAAG
GGGATAAAAAGGGCGCAATGGAAGAGCTTCGCCTGGCCGGTGTTGGCGTAATGGAAAACCAATATCTGATGCCGCTTAAA
CAGACTCGTAATGCACTTGCTGATGCGCAGAAACTGCTTGATAAAAAGCAATACTACGAGGCAAACCTGGCGCTTAAAGG
TGCGGAAGATGGAATCATCGTCGATAGCGAAGCACTGTTTGTGAACTAATGCTGACAGGCAGTATATTGAGGTAAAGGAT
TTAACTCCCTCCAGCCGACAATTTTTTATGACCACAATACGACAGGTTGTGGTCATAAAATTATTTGGCGCTCGCGGTTC
TATAAACTCGCATTTTATATTCCTCAAAGTAAACCGCAATAATCCCGTGTCATCACAAATCATTTAATATGTTATATTTT
ATGGTACGCTTTAAAAAGCGTAATCATACCCTTACTTGTAAATCACCGGCGCTTCTTACAGTTGTAAGAATAACATCACA
AATGTCGCGACTCTCTCTGATTACCACGAACCAATATTTATCATATTCTTCTTTTCGTCCTCACTACTTACCATGCAGAA
AGGAATTGGAAGTAGCGATGAAATGATTTTCAGTACTTGATACAGGAATGTGAAAATATCGAGTGCAGCTACGACGATAT
TTTGCGGATTATTTATAGAGGCGTTATGCCTTAAATAAACGCTAAATTAACACATATTTAATTAACTAATAGGTATTGCT
ATGTCAACTCCACTTCAAGGAATTAAAGTTCTCGATTTCACCGGTGTGCAATCTGGCCCATCTTGTACTCAAATGCTGGC
CTGGTTTGGCGCTGACGTCATTAAAATTGAACGCCCCGGCGTTGGTGACGTAACGCGTCACCAGCTGCGAGATATTCCTG
ATATCGATGCGCTTTACTTCACCATGCTTAACAGTAACAAACGTTCTATTGAATTAAATACCAAAACAGCGGAAGGCAAA
GAGGTAATGGAAAAGCTGATCCGCGAAGCTGATATCTTAGTCGAGAACTTTCATCCAGGGGCCATTGATCATATGGGCTT
CACTTGGGAGCATATTCAAGAAATCAATCCACGTCTGATTTTTGGTTCGATCAAAGGGTTTGATGAGTGTTCGCCTTATG
TGAATGTAAAAGCCTATGAAAACGTTGCTCAGGCAGCGGGTGGCGCGGCATCTACTACGGGTTTTTGGGACGGTCCGCCG
CTGGTAAGCGCTGCAGCGTTGGGTGACAGCAACACCGGAATGCATTTACTGATCGGTTTACTTGCTGCTTTGCTGCATCG
AGAAAAAACGGGGCGTGGGCAACGAGTCACCATGTCAATGCAGGATGCCGTATTGAACCTTTGCCGCGTGAAATTACGCG
ACCAGCAGCGTCTCGATAAATTGGGTTATCTGGAAGAATACCCGCAGTATCCGAATGGCACATTTGGTGATGCAGTTCCC
CGCGGTGGTAATGCGGGTGGTGGCGGTCAGCCTGGCTGGATCCTGAAATGTAAAGGCTGGGAAACAGATCCTAACGCCTA
TATTTATTTCACTATTCAGGAGCAAAACTGGGAAAACACCTGTAAAGCCATCGGCAAACCAGATTGGATTACCGATCCGG
CATACAGTACAGCCCATGCCCGACAGCCACATATTTTCGATATTTTTGCTGAAATCGAAAAATACACTGTCACTATTGAT
AAACATGAAGCGGTGGCCTATTTGACTCAGTTTGATATTCCTTGTGCACCGGTTTTAAGTATGAAAGAAATTTCACTTGA
TCCCTCTTTACGCCAAAGTGGCAGTGTTGTCGAAGTGGAACAACCGTTGCGTGGAAAATATCTGACAGTTGGTTGTCCAA
TGAAATTCTCTGCCTTTACGCCAGATATTAAAGCTGCGCCGCTATTAGGTGAACATACCGCTGCTGTATTGCAGGAGCTG
GGTTATAGCGACGATGAAATTGCTGCAATGAAGCAAAACCACGCCATCTGATATTAACGGGGGCTTCTGGCTCCCAATTT
ATAAAAATTTCGAGGTTATTAATCATGTCAGATCAACTTCAAATGACAGATGGTATGCATATCATCGTTGAAGCATTAAA
ACAGAATAATATTGACACTATTTATGGTGTTGTAGGTATTCCTGTGACGGATATGGCGCGCCATGCCCAGGCGGAAGGCA
TTCGTTATATTGGTTTTCGTCATGAGCAGTCGGCAGGCTATGCCGCTGCGGCAAGCGGTTTTCTTACCCAAAAACCAGGG
ATCTGCCTGACAGTGTCTGCGCCAGGATTCCTCAATGGTTTGACCGCATTGGCCAACGCAACGGTAAATGGTTTTCCGAT
GATCATGATTAGCGGCTCCAGCGACCGCGCGATCGTCGACCTACAGCAAGGTGATTATGAAGAGCTGGACCAAATGAATG
CGGCAAAACCGTATGCCAAAGCAGCATTTCGCGTTAATCAGCCGCAGGATCTTGGCATTGCATTGGCACGCGCTATCCGG
GTCTCGATATCGGGTCGCCCTGGCGGAGTTTATCTTGATTTGCCAGCAAATGTCCTGGCCGCGACGATGGAAAAAGACGA
AGCGTTAACCACGATTGTAAAAGTTGAAAATCCGTCGCCAGCATTATTGCCATGCCCGAAGTCAGTCGCTAGCGCAATTT
CGCTTTTAGCAAAAGCTGAACGACCATTAGTTATCCTTGGCAAAGGCGCGGCGTATTCACAAGCTGATGAACAGCTTCGT
GAATTTATTGAAAGTGCCCAGATTCCATTCCTGCAAATGTCTATGGCGAAAGGGATCCTCGAAGATACGCATCCACTTTC
TGCGGCAGCTGCGCGTTCGTTTGCCCTGGCAAATGCTGACGTTGTCATGCTTGTTGGTGCACGACTGAATTGGTTACTGG
CACACGGTAAAAAAGGATGGGCGGCAGATACACAGTTTATTCAACTGGATATTGAACCGCAGGAAATTGACAGCAACCGC
CCCATTGCTGTGCCAGTCGTTGGTGATATTGCATCCAGTATGCAAGGTATGCTGGCAGAACTGAAACAAAACACATTTAC
GACTCCACTGGTATGGCGCGATATTTTAAATATCCACAAGCAGCAAAATGCACAAAAAATGCATGAAAAATTAAGTACAG
ATACCCAACCATTAAATTACTTTAATGCATTAAGTGCTGTGCGCGATGTATTGCGCGAGAACCAGGATATTTATTTAGTT
AATGAAGGGGCAAATACCCTGGATAATGCACGAAATATTATTGATATGTATAAACCACGTCGTCGTCTGGATTGTGGTAC
CTGGGGTGTCATGGGCATCGGTATGGGCTATGCCATCGGTGCTAGCGTGACTTCTGGTTCTCCGGTTGTCGCCATTGAAG
GTGATAGTGCTTTTGGTTTCAGTGGGATGGAAATTGAAACGATTTGTCGATATAACCTGCCGGTAACGATCGTTATTTTT
AATAATGGCGGCATCTACAGAGGAGACGGTGTTGATCTCAGTGGCGCTGGTGCACCATCACCAACAGATCTGTTGCACCA
TGCAAGGTATGACAAATTAATGGATGCGTTTCGTGGCGTTGGCTATAACGTCACCACGACAGATGAACTTCGTCATGCTT
TAACCACCGGTATTCAGTCGCGCAAACCGACCATTATTAATATGGTCATCGACCCTGCAGCAGGAACTGAAAGTGGCCAT
ATTACCAAACTGAACCCAAAACAAGTCGCTGGTAATTAAATACTGACATCGTCTCCTCTTGCCAACTCATTATGCGATGG
TGAGGGGACCCTTATCGGAAATACTATTATGCTAACATTTTTTATTGGCGATTTATTGCCTATTATCGTAATCATGCTGT
TGGGTTATTTTAGCGGCAGACGAGAAACATTTTCAGAAGATCAAGCTCGGGCATTTAATAAACTGGTATTAAACTACGCG
CTTCCTGCGGCTCTATTTGTATCTATTACCCGGGCAAACAGGGAAATGATTTTTGCGGACACTCGTCTGACCCTTGTATC
ACTTGTGGTTATTGTCGGATGTTTCTTTTTCTCCTGGTTCGGTTGCTACAAATTTTTTAAACGTACTCATGCAGAAGCAG
CTGTATGTGCATTAATTGCAGGTTCACCTACCATTGGATTCCTGGGGTTTGCAGTTCTCGATCCTATTTATGGTGATTCC
GTATCAACAGGTTTAGTGGTAGCAATTATTTCTATTATTGTTAACGCAATTACTATTCCTATTGGTCTGTATTTGCTGAA
TCCTTCCTCAGGAGCGGATGGTAAGAAGAATAGTAATCTGAGCGCATTAATTTCTGCGGCAAAGGAGCCAGTTGTATGGG
CACCTGTTCTGGCAACGATCCTGGTGTTGGTTGGGGTAAAAATTCCGGCAGCATGGGACCCAACCTTTAATCTGATTGCG
AAGGCTAACTCAGGGGTAGCGGTATTCGCTGCGGGGTTGACTCTGGCTGCACATAAATTCGAGTTCAGTGCCGAAATTGC
TTATAACACCTTCCTGAAGCTGATTCTGATGCCACTGGCGCTGCTTCTCGTTGGTATGGCATGTCATTTGAACAGCGAAC
ATTTGCAGATGATGGTACTGGCAGGCGCATTACCGCCGGCATTCTCCGGAATCATTATTGCCAGCCGGTTTAATGTCTAC
ACCCGCACTGGTACAGCGTCATTGGCTGTGAGCGTACTGGGCTTTGTCGTCACGGCTCCCTTGTGGATTTATGTCAGTCG
ACTGGTTTCATAATTAATCATGTTATTGATTTTACATAAATGCCGAAGTGTCTTTTCACCTTCGGCTTTTTTCAAGGCAT
AAGCAAATGACAAATAATGAAAGCAAAGGGCCGTTTGAAGGCTTATTAGTTATCGATATGACACATGTCCTTAATGGACC
TTTCGGAACTCAACTTCTTTGTAATATGGGCGCAAGGGTAATTAAAGTTGAGCCGCCGGGCCATGGTGATGATACCCGCA
CATTTGGTCCCTATGTGGATGGACAGTCACTCTATTACAGTTTTATTAATCATGGCAAAGAGAGTGTGGTTCTTAATTTA
AAGAATGATCACGATAAAAGTATATTTATAAATATGCTTAAACAAGCTGATGTATTAGCTGAGAATTTTCGCCCAGGTAC
AATGGAAAAACTAGGGTTTTCATGGGAAAGGTTACAAGAAATCAACCCGCGCCTCATATATGCTTCATCGTCAGGTTTCG
GACATACCGGTCCGCTAAAAGATGCTCCTGCCTACGATACCATCATTCAGGCAATGAGCGGGATAATGATGGAAACAGGG
TACCCTGATGCTCCGCCAGTGCGTGTTGGTACCTCTCTTGCGGATCTATGCGGCGGTGTCTATTTATTCAGCGGAATAGT
GAGTGCACTTTATGGCCGCGAAAAGAGCCAGAGAGGGGCGCATGTCGATATAGCGATGTTTGATGCTACTCTGAGTTTTC
TGGAGCACGGGCTGATGGCATATATCGCGACTGGGAAGTCACCACAACGTTTGGGAAATCGCCACCCCTACATGGCACCT
TTTGATGTTTTCGATACTCAGGATAAGCCGATTACGATTTGTTGTGGTAATGACAAGCTTTTCTCTGCGTTATGCCAGGC
ACTGGAGCTTACGGAACTGGTTAATGATCCCAGATTTAGCAGCAATATTTTACGCGTACAAAACCAGGCTATTCTTAAAC
AATATATTGAGCGGACGTTAAAAACGCAGGCAGCTGAAGTTTGGTTAGCCAAAATACATGAAGTTGGTGTGCCCGTCGCG
CCGTTATTAAGTGTGGCTGAGGCCATTAATTTGCCACAAACTCAGGCGAGAAATATGTTGATTGAAGCCGGAGGAATAAT
GATGCCAGGTAATCCGATAAAAATCAGCGGCTGCGCGGACCCGCATGTTATGCCGGGAGCGGCAATGCTCGACCAGCATG
GGGAACAAATTCGCCAGGAGTTCTCATCATAAATGTAAGATGTGCTGGTAAATAGCTCCCACATTTGAACATTGTGGGAG
CCACTATTTAGTTATTTTGTTGACAGAAAACAGCAATCTCCTGGTCCAGCTCTGCAATGTGTTCTTTTACAGAGTTCAGC
AACTGAAGAATTTCAGGCTTACTGTCATCTGAAACAGGTGTTATTTCTAACTGATGGCTAATATTAATCAACTTTTGCAA
ATTCAGGATGTTAGCCGCACCGTGGATGCGATGAATACATTGATGGAAAGTTCTGTTATCGCCAGCTTCTAGTGCATGAA
ACGCAGCGGGTAGATCTTTATGCGTTTCATGCTGGAAAGTCATGAGAATCTCCTGCATCAGTTGTAGATCGTTCGCCGTA
TTATTTTTCAGGGCTTCGATATCAAGGTGGCGATACTGAGGTGCAATATGCGCAACCTGGTGTAACTGACTTAAATGTGT
TTTCAGTACATCCAGGGTCAACGGTTTGAACAAACATAAGTTCATGCCGCAATTTAACCCTTTTTCACGTTCGTTAGCCT
GTGCGTTGGCTGTAAGCCCCCAGATGGGTAAGGAAGAATTTTGCTCACGGAGTTTGCGAGTCAACTCAAAACCATCCATA
TTCGGCATATTAACGTCAGTAATAAGCAGATCATAATGTTGCATACTGACTTTGTGTAGCGCTTGCACACCATCAGTGGC
TTCATCAACATCATATCCTAATAGATTTAGCTGGCGTTTGAGTAATAGCCTGTTGGTCGGATGATCATCCGCGATTAATA
TGCTCAACTTTTCAGGTAGTGTGATGGGTTGTTCTGCTTTTGCCTCGACAGTCGCCACTTGTTGGATAATTTCTACCGGG
ATTGTGATCGTAAATGTTGTTCCTATGCCTGGATGACTTTCTAATGACAAATCACCCTGCATGTTTTTAATTAATTCTTT
GCAGATCATTAAGCCTAAACCAGAACCTGTTTGCTGACGACCTGCACTTGTTTGGCTATAGCGTTTAAACAGTTGTTGTT
GTTCTTCCTGCGATAATCCACTTCCAGAATCCATAATCGTCATTTTGATTACAGCGTGGTTGTCATCAATGTGAACCAGG
GAGGTCGTAATTTTTACTGCCCCCTCGGTGGTAAATTTGAGAGCATTACTCAGTAAATTTGATAAGACCTGCTTAAACGC
CTGAGGGTCGATCTTAACCAGGTAATGTTCAGGAAACGTACTGCTGCAACTTAATGCGATCGATTTGCTTGCAGCAATCG
CACCGAAAGAGTGACAAGTGTTCTGGACTAAAGTAGGGATATCGACCCATTGTGGTTGAAGTTGATAGTTACCCGATTCA
ATTTTGTCGACATCAAGGATTTCACCAATTAAGCCGAGGAGTGATTGTCCGGTGGCGTAGGCAAGTGAAATCGCCTCCAC
CCGTTGCTCCTTGCTAAGACCAGAACCCGACAGAAGTTCCAGGAAGCCCATAATGGAGCTTATTGGTGTTCTTATTTCGT
GACTCATTGTTGCCAGAAACTGACTTTTTGCGACAGTTGCATTGATCGCTTTATTTCTCTCTACTTCGAGTGCATGAATT
AAATCACGCGTCTCGGTAATATCTTGCCAACCACAAATATAAACAGCATGATCGCTGGCTGGCAGATTGCATAATGTATG
CCAGTGATTAATGCATCTTTTCTCGATGCCATTATCAATTTCAAATACCTGTGTGTATATTGTTCGATTTTCTTTCGTTT
CTGCTGTGACTTCATGCGCATTAGAAAAAACATCTTTAAAGGGTGAGTCACTGTTTTCTAATGGTAACATTGCATTTTTG
TAGTAATCAGCAGTGAAATAATGTTCAAATGCACTATTGTGACTAATGACATTACCTTGCCAGTTTACAACATAAGTTGG
ATTCGGTAAGGAGTCCGAGAGCGCTTTCCGGAATGATATTTGGTTTTCTAAATCACCCTGAATGACTTTACGACGACGAA
CTGAGCGTAACAGGTAGAATCCCCATAAAAGGCTACTGCCAACTAATAAAACGGATAATGTCGTAACAATATAAAATTGC
TCGCTATAGAGGTCCCATGTGTCAATGGTCACATTGGGCATTTTAATCCATTTTTCGGTCAGGCGCAGAACTTCGCTTGG
GGGGATTGCATTCAGTGCTTTATTAATAATATCCTTAAGTTCCGGTTCTCCGCGAGGAAAAGCGAACGAAAGCGATGCAT
TCGGAACGCCGGGAATAAGAAAATGATACAGTTCATTAGGATAGTAATGGTCGATCATGTAACGCGAATTTAACTGTGTC
GCGACCAGAGCATCAAGTTCACCTTCCTTGACCTTGTGAAATGCAGCGCTGGCGTTATCGACTTTTATCCACTCTACCTC
CGGATACATCTCTTTTAATTGCGAATGCAGCTCATAATAATATGGAATGGCAACTTTCATTCCTTTTTTTAATGTTTGTT
CACTGTCAGGCGCTTTTTGCATGACAAAAACGTAAGGCGTTGTTATGAAGGCTTCAGCAAATAAAACATTATTTTCTCTA
TCTTCACTATAAATAGCACCGGGTAATATATCCCATCCGCCGGGATTCAGCTGTGTTCCAGCATGGATATTGTGTGAAAC
GGTGATCGGAGAAAAATTTAAACCTGTTTGCAAAGTAATAATATTAAGAATATCCCCCATAACGCCCCGAACCGAGCCAT
TTTCATCCGTCATAGAATAGGGAGGGGAGTAAGGATTTTCCAGCACCTTTAAATCGGGATGCTGCTTAATCCATTGTTTT
TCATGTTCAGTGAGTTCTAATGGTTTGTTCAGAAAGGCCAGGTTTCCTGTATCAAGCCAATTTTGTGATACTTCATAGCG
AACTTCATTTGTCAAAGCATCAACAAATCGATTGAGTACTTCATTAAGAACGACAGATTCTTTTCTGGTCAAGAAAAAAT
TATATTGACGCGGTGAGTTATAATATTTCACTACATTTAAGGAGTGAGTGAAATAGCGGGAAATCATACTGCTGGTAATG
ATGTTACTACCAATAAAGTAATCATTCTGTCCGGCTGAGACGGATGCTAATGCCTGATATAAATTTGTAAAAGAGATAAT
TGTTGCTTTTGGAAATGATTGATGAATTACCTCGTCAGGGGGATAATTTGCTACTCGAGCAATATTTACTGGTTTTGATG
AGGTAAGCGGTCGCATTGAATCGTGAAGGGTGGTGACGAGCGCCGGAAAGGTAATTATCAGTGGTTTGGTTGCAGCAATG
TCATCATTAAGAGGCGGCGAAGCAACTAAATGTGATAACACTATATCGACTTCACCTTCTTCCAGCGCGTCCATTGCTTT
TTGATGATCGGCGTATTCCCGGAGTGTTAGTTTGATATTTAACGCTCTTTTTAAAAGATTTAAATAATCAGCATTAATAC
CACGAACCCGTTGCTGCGAATCGGTATGCAACAACGTAGCCGTTTGGGACTTGTGTACTGCAATCACAAGATTTTTTTTG
CTCGCTAACCAACGTAATTCCTTGTTGCTCAGACGTAGTGGATCAAGTGTGACACGGTTGTTACTACTGATGCCACGATA
TTCGATGTAATCTTCGTCTGCGAAACTTATGGTCGACCAAAGACCACAACAGAGAAGAAAAATATAGGGTAAAAACTTCA
TGTGGTTAGCCGATTTTGTTACGTTGTGCGAATGTGTAAAGATCCATCAGTGATTTACATTCTAATTTTTCCATCAGGCG
ACTTTTATAAGTGCTGACAGTTTTGTTGCTGATGAACATTTTTTCAGCAATGTCATTATTATCCTTGCCATCAAGAATAT
AGCGCATGACACTAATTTCTTGTTTCGATAAGGAGTCGAGTTTTTGCTGGTCGGACGTTAAACTTCCAACAAACCGGTTG
AGAGAGAAGGGGAAATAGCAGTAGCCATTTTTTGCAGCTTCAATAGCCGCAATGATATTGTTCATGCCTTCTTTTTTACT
CACGAAACCATTAGCGCCAGCATCAGCACAATGTTTCCCGTAAAAATGGTCATTTTTAGCGGAGACGATAATAATAATTC
CGCTATATTGGCGCTTCCTCAGCGTTTCTAACACCTGGATACCGTTAACTCCGGGGATATCGACATCAATGATGACGATA
TCAGGCTTAAGTGTTTCCACCCGCTGAACGACACTTCCGCCTTCAGTCAACTCTGCTAAGATTTCAATATCGTTTTTGAT
CAATAAATTACGAATTGCTGCGATAGCAAGAGGATGGTCATCAATAATTATTGCGTTCATAGATTATTCCCTTTGCAATG
AAGCATCTCCCTTCTCCCTGTAGTAATACAGACATAAGGCATCATCTCATTTTCTCAATAAAAATAAGAAAATTTGAGCT
TCCTTTAAGATAATTCGACAAGTATACCATATAAATAGTCGGCATATATGAAATGTCAACAATAAAATCAGGGATTGTAC
CGATGATTTATAGTTTCACATTAGCACTATAAGTCTTCTCACTAATCCTACAGGCGTAAGAATTGTATTGCAAAAGCCAC
GGTTTAGTCCTCTGTTGTTTTTTTTGCACCTCATTTAAATTAGGCCTCCAACGTTCCTGGGATAATGTGCAACACATGCA
CTGTGTTTGATATGAAGAATGAATACTCTTTTCATTCAATTCATAAATTTCATCTATGCGAAATGAGAGATAAAAGTGGA
ACAGATTAATTCAAATAAAAAACATTCTAACAGAAGAAAATACTTTTCTTTATTGGCGGTAGTTTTATTTATTGCGTTTT
CAGGTGCCTATGCCTATTGGTCAATGGAATTAGAAGACATGATTAGTACAGATGACGCCTATGTCACGGGGAATGCAGAT
CCAATTTCTGCACAAGTCTCAGGTAGTGTCACTGTAGTTAATCATAAAGATACGAACTACGTTCGACAAGGTGACATTTT
AGTTTCACTGGATAAAACTGATGCCACTATCGCACTCAATAAAGCTAAAAATAATCTGGCAAATATTGTTCGGCAAACGA
ATAAACTATACTTACAGGATAAACAATACAGTGCCGAAGTCGCTTCAGCGCGTATTCAGTATCAACAATCTTTAGAAGAT
TATAACCGTCGAGTGCCGTTAGCGAAGCAGGGGGTTATTTCAAAAGAAACGCTGGAGCATACCAAAGATACGTTAATAAG
TAGCAAAGCGGCATTGAATGCCGCTATCCAGGCTTATAAAGCGAATAAAGCTTTAGTAATGAACACACCATTAAACCGTC
AGCCACAAGTCGTTGAAGCGGCGGATGCAACTAAAGAAGCCTGGTTGGCGCTTAAACGTACGGATATTAAGAGTCCGGTT
ACCGGCTATATTGCCCAGAGAAGTGTTCAGGTCGGCGAAACAGTGAGCCCCGGACAATCGTTAATGGCTGTCGTACCGGC
ACGTCAAATGTGGGTTAATGCCAACTTTAAAGAAACACAACTCACGGATGTACGGATTGGTCAATCGGTCAATATTATCA
GCGATCTTTATGGTGAAAATGTTGTGTTTCATGGTCGGGTGACAGGGATCAATATGGGAACCGGCAATGCGTTCTCCTTA
TTACCTGCACAAAATGCGACAGGGAACTGGATCAAAATCGTTCAGCGTGTACCGGTTGAAGTTTCTCTGGATCCAAAAGA
ACTCATGGAACACCCCTTGCGCATTGGTTTATCGATGACTGCAACTATTGATACCAGGAACGAAGACATTGCTGAGATGC
CTGATCTGGCTTCAACCGTGACCTCCATGCCTGCTTATACCAGTAAGGCTTTAGTTATCGATACCAGTCCGATAGAAAAA
GAAATTAGCAACATTATTTCGCATAATGGACAACTTTAATGGCAATCACTAAATCAACTCCGGCACCATTAACCGGTGGG
ACGTTATGGTGCGTCACTATTGCATTGTCATTAGCGACATTTATGCAAATGTTGGATTCCACTATTTCTAACGTCGCAAT
ACCGACAATATCTGGCTTTCTGGGAGCATCAACAGACGAAGGTACCTGGGTTATCACCTCGTTTGGCGTAGCAAATGCCA
TTGCGATCCCTGTTACCGGCAGGCTGGCACAAAGAATAGGCGAATTAAGGTTATTTTTACTTTCAGTCACTTTTTTTTCG
CTGTCTTCCTTAATGTGTAGTTTATCGACCAATCTTGATGTGCTGATATTTTTTAGAGTCGTTCAGGGGTTAATGGCAGG
GCCGTTAATTCCACTGTCACAGAGTTTATTATTAAGGAATTATCCACCAGAAAAAAGAACATTTGCTCTGGCATTATGGT
CAATGACCGTGATTATCGCTCCGATATGTGGGCCGATATTGGGCGGTTATATTTGTGATAACTTTAGCTGGGGTTGGATA
TTTTTAATCAATGTCCCTATGGGGGTTATCGTCCTGACATTATGCTTAACCTTACTTAAAGGAAGAGAAACTGAGACTTC
ACCGGTCAAAATGAATCTACCAGGACTGACCCTGTTAGTGCTTGGTGTTGGTGGCTTGCAAATTATGCTTGATAAAGGGC
GCGATCTGGATTGGTTCAACTCGAGTACAATAATAATATTAACAGTAGTATCAGTTATTTCTCTGATCTCTTTAGTCATT
TGGGAGTCAACCTCAGAGAACCCGATTCTTGATCTCAGTTTGTTTAAGTCCCGTAATTTCACCATTGGTATTGTGAGTAT
CACATGCGCGTATTTATTTTACTCTGGAGCGATAGTCCTTATGCCGCAGTTACTCCAGGAAACAATGGGGTATAATGCGA
TTTGGGCTGGGCTTGCTTATGCGCCCATCGGCATCATGCCACTATTAATTTCACCTTTGATAGGACGTTATGGCAACAAA
ATAGACATGCGGTTGTTAGTGACATTTAGTTTTTTGATGTATGCGGTTTGCTATTACTGGCGTTCTGTGACATTTATGCC
AACGATTGATTTTACAGGCATCATTTTGCCACAGTTTTTCCAGGGATTCGCCGTTGCCTGTTTCTTTTTACCCTTAACAA
CGATTTCGTTTTCAGGGTTGCCAGATAATAAATTTGCCAATGCCTCGAGTATGAGTAATTTTTTTCGTACCTTGTCAGGA
TCAGTTGGTACGTCGTTGACAATGACGCTGTGGGGACGACGCGAATCGTTACACCATAGTCAGTTGACAGCAACCATCGA
TCAATTTAACCCCGTGTTTAATTCATCGTCACAAATTATGGATAAATACTATGGTTCGCTTTCAGGAGTTCTTAATGAAA
TTAATAATGAAATAACCCAGCAGTCACTTTCTATTTCTGCAAATGAGATTTTCCGTATGGCGGCTATTGCTTTTATCTTA
CTTACGGTTTTGGTTTGGTTTGCGAAACCGCCGTTTACAGCGAAAGGCGTTGGGTGATGGTAAAAGCAGGGGGTTATAGC
GGGTAAGACCGGGGATCTTAAGTCTGCGCCATCGGCAGCATCGCTCATCCAGGGAAAGGATGGCGATGCTGAATTGAAAA
TTAATTAGCGGCCTTTTGCCAGATATTGCTCCATCTCTTCTTCCGGCACCATTCCACCTCCCGTCGCCCACACCAGATGA
GTGGCATTACGCAGTTGTTCTGCGCTGCAACCGTGCATCTGTTGGTAACTTACTGATGCGCACACGCGCTGAGGCCCGGC
CATACCCGCCAGTGCCGAAGGTTCAAGACGAATGCCTTCTTCCTGCGCCAGCCAGCCAAGCATGTTATACATGGTTTGAT
CGCTAAGGGTATAGAAGCCATCCAGTAGACGCTCCATTGCCCGCCCGACAAAGCCTGATGCGCGACCAACTGCAAGGCCA
TCCGCTGCGGTAAGGTTGTCGATACCAATATCCTGAACAGAAATCTGATCGTGTAATCCTGTATGGACGCCTAACAGCAT
ACAAGGGGAGTGCGTTGGTTCGGCAAAAAAGCAGTGAACATGATCGCCAAACGCCAGTTTAAGCCCGAATGCGACGCCAC
CAGGACCACCGCCAACACCACACGGCAGATAGACAAACAGAGGGTTATCAGCATCGACAATACGACCTTGCTCGGCAAAT
TGCGCTTTAAGACGCTGGCCAGCGACGGAATACCCAAGGAACAACGTGCGGGAATTTTCGTCATCAATAAAGAAACAGTT
CGGGTCAGACTGCGCTGCTCTACGTCCTTCCTCGACGGCAACACCATAATCTTGCTCATATTCCACGACCGTAACGCCAT
GGCTGCGCAGTTTCGCTTTTTTCCATGCCCGGGCATCAGCAGACATATGCACTGTCACCTTAAAGCCAATGCGGGCGCTC
ATAATGCCGATTGATAACCCCAGATTTCCGGTTGAGCCCACAGCAATGCTGTATTGGCTAAAGAACTGTTTAAACTCCGG
AGAAAGCAGTTTGCTGTAGTCATCATCAAGCGTCAGCAACCCCGCTTCCAGAGCCAGTTTTTCTGCGTGTGCCAGGACTT
CATAAATCCCGCCGCGTGCTTTTATGGAGCCGGAAATGGGCAAATGGCTATCTTTTTTCAGTAACAGTTGCCCGCTGATC
GGTTGTTGATATTCCTTTTCCAGCCGTTTTTGCATAGCCGGAATGGCAACCAGTTCTGATTCAATAATCCCCCCAGTGGC
AGCAGTTTCAGGAAATGCTTTTGTCAGATAGGGTGCAAAACGGGATAAGCGCGCATGGGCGTCCTGAACATCCTGTTCGG
TCAGGCCAACATAAGGTAAACCTTCAGCCAATGAGGTCGTGCCAGGATTAAACCAGGTGGTTTCTTTAAGAGCAACCAGA
TCCTTTACCAACGGATACTGGGCGATGAGCGAGTTCATTTTAGCGTTTTCCATAGTACGTCTCTTTGCGCTTAGATGATA
AATGACAGCAGGAATGTGCCCGCCAGAGCGACGACTGAAGCGATAAATGTCGCTGTCGTATAGTATTTAAATGTTTCATT
GAGCGTAGCGCCGCAATATTGCTTCACCAGCCAGAAAAGCGAGTCCGTAACGATAGTGCAGCCAATTGCACCTGAACCGA
TAGCAATCGCAATAATTTCCGGGCTGATGTCGGGATACAGCGGCAGCACAATGATCCATATTTATATTTTCTTCTCCAGG
TTGGCGATGCCAGTTGGCATGTTTTACTTACTTGCCTATATGGTTACTCGTTGGCGAGAACAGAGGCGGAATTGGGGACA
ATTGGCCGGGAATTATTGTTATTTTTTATTGTATTGCCGTGTCAGGTGATAGGGCGTTGGATCTCGCCAGTGACGTCTGT
TTCTGCTACAGTGCCCGTTTTACGACAAACGGCTTGGGTATGGCTTCATTAAAGGATGTCGCACGCCTGGCGGGAGTGTC
GATGATGACAGTCTCCCGGGTGATGCATAATGCAGAATCTGTGCGTCCTGCAACGCGTGACCGCGTATTGCAGGCAATCC
AGACCCTGAATTATGTTCCTGATCTTTCCGCCCGTAAGATGCGCGCTCAAGGACGTAAGCCGTCGACTCTCGCCGTGCTG
GCGCAGGACACTGCTACCACTCCTTTCTCTGTTGATATTCTGCTTGCCATTGAGCAAACCGCCAGCGAGTTCGGCTGGAA
TAGTTTTTTAATCAATATTTTTTCTGAAGATGACGCTGCCCGCGCGGCACGTCAGCTGCTTGCCCACCGTCCGGATGGCA
TTATCTATACTACAATGGGGCTGCGACATATCACGCTGCCTGAGTCTCTGTATGGTGAAAATATTGTATTGGCGAACTGT
GTGGCGGATGACCCAGCGTTACCCAGTTATATCCCTGATGATTACACTGCACAATATGAATCAACACAGCATTTGCTCGC
GGCGGGCTATCGTCAACCGTTATGCTTCTGGCTACCGGAAAGTGCGTTGGCAACAGGGTATCGTCGGCAGGGATTTGAGC
AGGCCTGGCGTGATGCTGGACGAGATCTGGCTGAGGTGAAACAATTTCACATGGCAACAGGTGATGATCACTACACCGAT
CTCGCAAGTTTACTCAATGACCACTTCAAATCGGGCAAACCAGATTTTGATGTTCTGATATGTGGTAACGATCGCGCAGC
CTTTGTGGCTTATCAGGTTCTCCTGGCGAAGGGGGTACGTATCCCGCAGGATGTCGCCGTAATGGGCTTTGATAATCTGG
TTGGCGTCGGGCATCTGTTTTTACCGCCGCTGACCACAATTCAGCTTCCACATGACATTATCGGGCGGGAAGCTGCATTG
CATATTATTGAAGGTCGTGAAGGGGGAAGTGTGACGCGGATCCCTTGCCCGCTGTTGATCCGTTGTTCCACCTGATATTA
TGCTAACCCAGTTGCCAGAGTGCTCCATGTTGCACCACAGCCACTCCGTGGGAGGCATAAAGCGACAGTTCCCGTTCTTC
TGGCTGCGGATAGATTCGACTACTCATCACCGCTTCCCCGTCGTTAATAAATACTTCCACGGATGATGTATCGATAAATA
TCCTTAGGGCGAGCGTCTCACCCTGCGGGAGGGGAATACTACGGTAGCCGTCTAAATTCTCGTGTGGGTAATACCGCCAC
AAAACAAGTCGCTCAGATTGGTTATCAATATACAGCCGCATTCCAGTGCCGAGCTGTAATCCGTAATGTTCGGCATCACT
GTTCTTCAGCGCCCACTGCAACTGAATCTCAACTGCTTGCGCGTTTTCCTGCAAAACATATTTATTGCTGATTGTGCGGG
GAGAGATAGATTGATGCTGCTGGCGTAACGACTCAGCTTCGTGTACCGGGCGTTGTAGGAGTTTGCCATTGCTCTCTGAT
AGCTCGCGCGCCAGCGTCATGCAGCCTGCCCAGCCTTCACGTTTTGAGGGCATTGGCGATTCCCACATATCCATCCAGCC
GATAACAATACGCCGACCATCCTTCGCTACAAAGCTTTGTGGTGCATAAAAGTCATGCCCGTTATCAAGTTCAGTAAAAT
GCCCGGATTGTGCAAAAAGTCGTCCTGGCGACCACATTCCGGGTATTACGCCACTTTGAAAGCGATTTCGGTAACTGTAT
CCCTCGGCATTCATTCCCTGCGGGGAAAACATCAGATAATGCTGATCGCCAAGGCTGAAAAAGTCCGGACATTCCCACAT
ATAGCTTTCACCCGCATCAGCGTGGGCCAGTACGCGATCGAAAGTCCATTCACGTAATGAACTGCCGCGATAAAGCAGGA
TCTGCCCCGTGTTGCCTGGGTCTTTCGCCCCGACTACCATCCACCATGAGTCGGCTTCACGCCACACTTTAGGATCGCGG
AAGTGCATGATTCCTTCTGGTGGAGTGAGGATCACACCCTGTTTCTCGAAATGAATACCATCCCGACTGGTAGCCAGACA
TTGTACTTCGCGAATTGCATCGTCATTACCTGCACCATCGAGCCAGACGTGTCCGGTGTAGATAAGTGAGAGGACACCAT
TGTCATCGACAGCACTACCTGAAAAACACCCGTCTTTGTCATTATCGTCTCCTGGCGCTAGCGCAATAGGCTCATGCTGC
CAGTGGATCATATCGTCGCTGGTGGCATGTCCCCAGTGCATTGGCCCCCAGTGTTCGCTCATCGGGTGATGTTGATAAAA
CGCGTGATAACGATCGTTAAACCAGATCAGGCCGTTTGGATCGTTCATCCACCCGGCAGGAGGCGCGAGGTGAAAATGGG
GATAGAAAGTGTTACCCCGGTGCTCATGAAGTTTTGCTAGTGCGTTTTGCGCCGCATGCAATCGAGATTGCGTCATTTTA
ATCATCCTGGTTAAGCAAATTTGGTGAATTGTTAACGTTAACTTTTATAAAAATAAAGTCCCTTACTTTCATAAATGCGA
TGAATATCACAAATGTTAACGTTAACTATGACATTTTGTGATCGAATATGCATGTTTTAGTAAATCCATGACGATTTTGC
GAAAAAGAGGTTTATCACTATGCGTAAGTCAGATGAATTTAAGGGAAAAAAATGTCAGCCAAAGTATGGGTTTTAGGGGA
TGCGGTAGTAGATCTCTTGCCAGAATCAGACGGGCGCCTACTGCCTTGTCCTGGCGGCGCGCCAGCTAACGTTGCGGTGG
GAATCGCCAGATTAGGCGGAATAAGTGGGTTTATAGGTCGGGTCGGTGATGATCCTTTTGGTGCGTTAATGCAAAGAACT
CTGCTAACTGAGGGAGTCGATATCACGTATCTGAAGCAAGATGAATGGCACCGGACATCCACGGTGCTTGTCGATCTGAA
CGATCAAGGGGAACGTTCATTTACGTTTATGGTTCGCCCCAGTGCCGATCTTTTTTTAGAGACGACAGACTTGCCCTGCT
GGCGACATGGCGAATGGTTACATCTCTGTTCAATTGCGTTGTCTGCCGAGCCTTCGCGTACCAGCGCATTTACTGCGATG
ACGGCGATCCGGCATGCCGGAGGTTTTGTCAGCTTCGATCCCAATATTCGTGAAGATCTATGGCAAGACGAGCATTTGCT
CCGCTTGTGTTTGCGGCAGGCGCTACAACTGGCGGATGTCGTCAAGCTCTCGGAAGAAGAATGGCGACTTATCAGTGGAA
AAACACAGAACGATCGGGATATATGCGCCCTGGCAAAAGAGTATGAGATCGCCATGCTGTTGGTGACTAAAGGTGCAGAA
GGGGTGGTGGTCTGTTATCGAGGACAAGTTCACCATTTTGCTGGAATGTCTGTGAATTGTGTCGATAGCACGGGGGCGGG
AGATGCGTTCGTTGCCGGGTTACTCACAGGTCTGTCCTCTACGGGATTATCTACAGATGAGAGAGAAATGCGACGAATTA
TCGATCTCGCTCAACGTTGCGGAGCGCTTGCAGTAACGGCGAAAGGGGCAATGACAGCGCTGCCATGTCGACAAGAACTG
GAATAGTGAGAAGTAAACGGCGAAGTCGCTCTTATCTCTAAATAGGACGTGAATTTTTTAACGACAGGCAGGTAATTATG
GCACTGAATATTCCATTCAGAAATGCGTACTATCGTTTTGCATCCAGTTACTCATTTCTCTTTTTTATTTCCTGGTCGCT
GTGGTGGTCGTTATACGCTATTTGGCTGAAAGGACATCTAGGGTTGACAGGGACGGAATTAGGTACACTTTATTCGGTCA
ACCAGTTTACCAGCATTCTATTTATGATGTTCTACGGCATCGTTCAGGATAAACTCGGTCTGAAGAAACCGCTCATCTGG
TGTATGAGTTTCATCCTGGTCTTGACCGGACCGTTTATGATTTACGTTTATGAACCGTTACTGCAAAGCAATTTTTCTGT
AGGTCTAATTCTGGGGGCGCTCTTTTTTGGCTTGGGGTATCTGGCGGGATGCGGTTTGCTTGACAGCTTCACCGAAAAAA
TGGCGCGAAATTTTCATTTCGAATATGGAACAGCGCGCGCCTGGGGATCTTTTGGCTATGCTATTGGCGCGTTCTTTGCC
GGCATATTTTTTAGTATCAGTCCCCATATCAACTTCTGGTTGGTCTCGCTATTTGGCGCTGTATTTATGATGATCAACAT
GTGTTTTAAAGACCAGGATCACCAGTGCGTAGCGGCGGATGCGGGAGGGGTAAAAAAAGAGGATTTTATCGCAGTTTTCA
AGGATCGAAACTTCTGGGTTTTCGTCATATTTATTGTGGGGACGTGGTCTTTCTATAACATTTTTGATCAACAACTCTTT
CCTGTCTTTTATGCAGGTTTATTCGAATCACACGATGTAGGAACGCGCCTGTATGGTTATCTCAACTCATTCCAGGTGGT
ACTCGAAGCGCTGTGCATGGCGATTATTCCTTTCTTTGTGAATCGGGTAGGGCCAAAAAATGCATTACTTATCGGTGTTG
TGATTATGGCGTTGCGTATCCTTTCCTGCGCGCTGTTCGTTAACCCCTGGATTATTTCATTAGTGAAGTTGTTACATGCC
ATTGAGGTTCCACTTTGTGTCATATCCGTCTTCAAATACAGCGTGGCAAACTTTGATAAGCGCCTGTCGTCGACGATCTT
TCTGATTGGTTTTCAAATTGCCAGTTCGCTTGGGATTGTGCTGCTTTCAACGCCGACTGGGATACTCTTTGACCACTCAG
GCTACCAGACAGTTTTCTTCGCAATTTCGGGTATTGTCTGCCTGATGTTGCTATTTGGTATTTTCTTCTTGAGTAAAAAA
CGCGAGCAAATAGTTATGGAAACGCCTGTACCTTCAGCAATATAGACATAAACTTTTTCCGGTTGTTGTCGATATCTCCA
TATCCCTCAACCGGAAAATAATAATACTAAAATGCTTAGGCCTGCTAATAATCGCCTAATCCAAACACCTCATTCATGTT
CTGGTACAGTCGCTCAAATGTACTCCGGATACACGGTTCGCTGATTTCCAGGACATTGTCGTCATTCAGCGACCTGTCCC
GTGTATTACGGGCCTGCGAATTCATCAAGGAATGCATTGCGGAGTGAAGTATCGAGTCACGCCATATTTCGCTATCAGGA
TTCTGTGTGATGGTTACATCGCCCGGCCCAGGGCTGTTTAGTCATCAGCGCTTTCTGACAGTGCTGAGATTTCAACCTGT
TGCAGTAAAAATGAGTAGATATAGGGCAAGTGTGCTGCCAAACCCATCTTTTACGGGGTGAAGGTAGATTTGGTTTGAAG
GGTATCTGGTGTCCCCTGCAGGAATCGAACCTGCAATTAGCCCTTAGGAGGGGCTCGTTATATCCATTTAACTAAGAGGA
CAATGCGGCATGAGTATACCCGCTAATGGACTGCGGGGTAAGTACGCTGCCGCTCGATTGCTTAAACCCTCGCCATTTAT
GCCGGGTTTTTATCATTTTTCTTAATGTTTTCCGCACGTTCTGCTTTTTGGCGTGCTTCTGCTTTGCGCTTGTTGCTCAT
GTCGTTACGGATCTGTGCATGACTCATTAACGCGAAGATAAAGGTGCCGCCGCAGATGTTCCCCGCTAAAGTAGGTAGTG
CGAAGGGCCAGATGAAATCGCTCCAGTGCAGCGTGCCGTTAAACACCAGATAGAGGATTTCAACAGAACCGACAACGATG
TGGGTGGTGTCACCCAGGGCAATAAGCCAGGTCATCAATATAATCACCACAATCTTTGCCGCACCCGCTGCAGGAAACAT
CCATACCATAGTGGCGATCAGCCAGCCGGAAATGATCGCGTTGGCAAACATCTCGCTGGGGGTGTTCTTCATCACATCCA
TGCCGATATTGACAAATGCATCGCGAGTTTCTTCATTGAAGATTGGCATATATTCAAATGCCCACGCCGCAATACCTGTC
CCGAGAATATTACCCAGCAGCACGACGCCCCATAACCGCATAAGTAAGCCAACGTTGCTCATTGTCGGTTTTTGCATGAC
GGGTAGTACCGCAGTCACGGTGTTTTCGGTAAATAATTGCTGGCGGGCCATAATGACGATAATAAAACCAAAGGTATAAC
CGAGATTCTCCAGCAAGAAGCTGCCCGGCACACCTTCCAGTTCGACATGAAATATCCCTTTTGCCAGTAATGAAGCGCCC
ATCGACAGACCCGCCGCAATGGCTGACCACAGTAGTGCCATTGCGTCGCGTTCCAGCTCTTTTTCACCATCCTGGCGGAT
ATGCTCATGAATTGCCATCGCCCGGGAGGGGAGTCGATCTTCATCTATTTCTATTTTTTTGCCACGCTCTTTTTCTTCGC
TCTCAACTTCAATTTCGTCGCTGTGTTGATCAATTTTGTCGTTGTCCATGGTCTCTTCTCTTGAATTAGCACGTATAGCT
AAAGCGTAGCGGCTTTTTTGCTCGCAACTGGCGGGAGTTACTCTGAAAATGTAGAAAAGGCCGCGTTTGCCTTTTTCTGT
TTCCATAGAATCAAGTAGCCTACAGGGCGGCGATTACCAGGCTATGATCAAATCAGCAAATCAGGGCGTCTGGACATCAG
TTGACGTGCTGTTACAATCGCCCACACCTAAACAGGCGGATACGGTATCGTTCCGTCATGGATGGCAAACTGCATAAGCC
ATAAAAAAACAGGGAGACATTTATGAAGCTTCGCCTGTCGGCGCTTGCTCTGGGAACTACGCTTCTGGTGGGGTGTGCGA
GTTCCGGTACAGATCAGCAAGGGCGTTCTGACCCGTTAGAAGGGTTCAACCGCACCATGTACAACTTCAACTTCAACGTA
CTAGACCCGTATATTGTTCGACCGGTCGCTGTCGCCTGGCGTGATTATGTTCCGCAACCGGCGCGTAACGGTTTGAGCAA
CTTTACCGGCAACCTTGAAGAACCTGCGGTGATGGTTAACTACTTCTTGCAGGGCGACCCTTATCAGGGGATGGTCCACT
TTACCCGCTTTTTCCTGAACACCATTTTGGGGATGGGCGGCTTTATTGATGTTGCAGGGATGGCGAACCCGAAACTGCAA
CGGACTGAACCTCACCGCTTCGGTAGTACGCTTGGTCATTATGGCGTGGGTTATGGGCCGTACGTTCAGTTACCATTCTA
CGGTAGCTTCACGCTGCGTGATGACGGTGGTGATATGGCGGATGGTCTTTACCCGGTTCTTTCCTGGTTGACCTGGCCGA
TGTCTGTGGGTAAATGGACGCTTGAAGGGATCGAAACCCGCGCTCAGCTGCTGGATTCCGACGGTCTGCTGCGTCAGTCG
TCCGATCCTTATATTATGGTGCGCGAAGCGTACTTCCAGCGTCATGATTTCATCGCTAATGGCGGCGAACTCAAACCGCA
GGAAAATCCGAACGCGCAAGCGATTCAGGATGATTTAAAAGATATCGATTCTGAATAAGAAACAAATAAAAAAGGTGAGT
CGCAAAACTCACCTTTTTTGTTGTTATCCCTCAATTACCACAAGTAAAAGGAGATAAACCGACAATGACCCGGACGTAAT
GATGTAAAAATACTGATGTTCGTCACTGACTATTTCCGATATTCAGGCGTTAAAAAATCAAAAAACTGGAAAAATAATTT
TAAATATCATCAAAATTAACACCTGGCGCATATAGTTGATTAATTTCATTTTGATATTCCGTCTGGCGATTTTGAAGCCT
TTCTTCAATTTTACCTTCGAGTTCCTTATAGTGCATATATATATTTTGAGAATGGTCAACGTTAACTTCGTTACCGAATA
AAGTAGAAACTATTTCTTTTGTATTCTTAAGTGTATATTTTCTATCATCCTCTTAATATTCATATCCTCTTGCTAGATTT
GAAGGATTAAAAGCTTCGTTAGGTTCTCTCAGTCTTTCCCCTTTGAGTTCGTTTACAACTTGATGATCGGGACCTGTTGC
AAATGATTCTGCGATGATTGCTTTACTGTGTTCAAACCACGCAGAAGCACTCCTGGCTTTTTTACTACAATATTGGGTGA
GATTATCACCATCAATACGAAATCCTTTTTGAATGTGGTAGCCATCCTGATCGTAGTAACCGAGAGATAAGTAATCATTT
CCATTTTTATTTTTTATTACAATAGCGAGAGAGTCGCCTTTTTTATCTTTACCGTACCAGGTAAATAAGCACGTTGGTTC
GCTTTTCCCGCTCTCATCGAATTCCGTTACCGTATGTCTGAGTTTGTGTGATATTTTATCGAAGATAAAACTTGGATTTT
CATCATATATTTCTTTTATTGCGCTGAAGATCATTTTCTTGTTATTGATATCATGAGTATTCTCTACTATGTTTTCATTG
ATGATGGTTTGACCGACTTTTTTGTTTTCATCGTTCGCGGGTGATTTTGTTGGTTCTTGATTTTCAATATCAATATCAAT
ATCAATATCAATATCAATATCAATATCAAAAGTAATATCGTTTGTATCATTGGAGTCAATACCAATATCACTACGATCAT
CAATACCACTAATAATAATACCATCAGTAAATTCAGCATTATTTATATCATCATGAGTCTTCTCAACTATGTTGTCATTA
ATGATAGTACGGACGAGTTCTTTGTCTTTATAACTCGCAGGTAATTTTATTGGTTCTTGGTTGTCGATACCAATAGTAAT
ATGGTCTGTATCATTGGAACCAATATTAATATAAGTAACTGAAGAATTATTGATATTTATTCTATCAGGATCGTCGTTTC
CTCGTATGGCGTTTTTTATAAGCTCAAGTAGATGTTTAATACAGGTGCTTATTCCTTCCTTACCATTAAAAAGGTTTTTG
AACTCTTGTACTAATCCATTAACTTCATCATTGTTATTTTCATTGATGGATTCTGGGTAAGCTGCGCTGGTATTGTTGAT
TGAAATAGATGGTAGCATGATTTTATTCCATGTTGATTGATTTGTTACAAATATATATTACCTAATGAAATAGACTATCA
AAAAACGCTCATTTATTTAGACCCTATCTTTAATTTGAGTGTATGAGCGCACAATAGCCAGGGTGGTTTGAGTATCCTGG
AAATTCAGAAAAGTAAACTCTTTGAGAAAGACGAGCAGAACGCCTGAAAATATGCCTTTCCCTTCAGGTTTGTCTGTGGA
TACCACTTAATGATTTGAAAGGGCAAGCTACCATCAGGCTGTTTGCAAAACTCAGGAGGCAAGCAATGAGGACACTACTT
TCGGTGAAGTGGGGAAGTTAAAGTCACCTGCATAGCAGGTGACTTTAACCAGGCGAACGCGTTATCAGAACGCGTAGTTA
AAGTTAGTACCGAACAGCCAGGCTTTACCTTCAGATTTAAAGGTATATGCTGCTGGCCCTTCACCTTCAGTAAACTTCAC
ATTCTGACCGTGCATATAAGATGCACCAACGTCAATGGATGCATCTTCATTAAATGCATAAGTCGCACCTGCACTTAACC
ACAGACGATCCTGATCTGGGATAGAGATAGAACGTTTATCTGCCGGAACCGGGCTGTCATCGAATGCAATACCCGTACGG
AAGGTCCAGTTTTTATCGTGGTAGTAGGTTGTACCTAACGCGATACGGTAAGCATCCCGGAAACCTTCGTCTTTATAGAA
CAGCGTTTGACCAGAGTCTCCTTTCGCTTTCAGTTCCTGGAATTGACTCCAACTGGTATACGCCAGACTATAGTGGATAG
CCCATTGTGGTGCGACACGGTTATAGCCAGAAATTTCCCACATCTCAGGTAAATTCAGCGTTAAGGACCCATTTTGGGTT
GCACCCATTGTGCCATATGGTAAACCCATGCTACCCAAGATGTTGTTCAGATTTGGGTTGATGGAGCTTTTGTAATCTCC
TTCAAAGTCAATTTTCACTTCTGAACGATAGGTTAGGCCCCAACGGTTATCTTTATCCAGTTCATAAAGAATACCGGCGT
TCCAGCCGAATCCCCATTCATCACCCTTGAGATGAGCAATTTGCGAATCCGGTGTATTGATGCCGTTTGTCCAACTTTGT
GGCACGCCTTGCGCTATCAGTTGTTGGGAAAGCAATGGACCGAGTGAACCGGCAGTACGCTCAATTTTTGCCTTAGCGTA
TACAGCATCAAAACCAAGACCAAAACTCCAGCTATTGTTAAGGCGGTAGGCTCCGCTAAGGTTAAGGTTGATCGTCTGCA
GATCGGTTTTACCGCCATAGATTCCAGCAGCGTAGTTATCATTAAATTCCGTGGCCAGACCATAGTTCGAGGTAATAGAA
GCCCCCCAACCAAACTGATCGTTAATAGGTGCTACGAAATGTAGGTTAGGCACCCACGCAGTTGGTGCAATATTATCTGC
ATCAGCACGCTGGCCCGTTAAATCGGAACGCCCAGAAATATCTACATCCGGGTCAATATAAACCGCACCCGCAGAAAATG
TCGGGCGGTCAAACATGGTAATCAATGCGGGGTTACGGCTGACGTTACCTGCATCATCGGCAATTGCGCCTTCCCCTGAA
TAAGCCCGGCCCAGGCCAGAGGAAGAAAATTCGTTTAACTGAAAGCCTGCCGACCAGGCCTGGGTGGAGATAAGTGCCAC
TGCGACTGCGAGAGCAGACTTTGTAAACAGGGTTTTCTGGCTCATGACCATAACCTCAATGATTTATTTTTATACAAACT
ATGTTACGTGCTGTAACAGGAGCGCGAAGTGTAGGGTCTGAGGTACATCTTAGAAATCAGACCAGTGGCGAGAGTATAGG
TCGGACCAGCTGGAATGTTGCAAGTATGTTTCTATCTTTTTTCAAATATGATCTAAGAAACGCGATCCAGCTGGCAAAAT
TTGGAGGTGGCGCACTCATGGATTCGGGTGAATTTTGTTTTAGATCATTTTTAAGTGTGATTTCGGTCACTTATCCGATT
TTGCAGAATTAACAACTGGAGCAGCACTTTCCGGAAGCGTAAAATATCCACAACGTTTATCTGGCACCTTGGGTGCACAT
ACAGAGGAAATCAACGATGAGTAAATGTAGTGCTGATGAAACCCCGGTTTGCTGCTGTATGGATGTTGGCACCATTATGG
ACAACTCCGACTGCACCGCGTCTTACAGCCGCGTGTTTGCAAACCGCGCAGAAGCAGAACAAACGCTGGCGGCACTGACT
GAGAAAGCCCGTAGCGTGGAATCCGAACCGTGCAAAATCTCCCCGACTTTCACTGAAGAGTCTGATGGTGTGCGCCTGGA
TATCGATTTCACTTTTGCCTGCGAAGCTGAAATGCTGATCTTCCAGCTGGGTCTGCGTTAATTCCTCTCGGGTACGTACG
CCCCTGTCAGTTGCTGGCAGGGGCGTTTTCTTTTCTCTTCTTCTTTTCTCTCTGTGTCATAGCTCCCACTTTCCCTTTTC
TCCGCTTGGCTAAATGTAAAAAAATGGTTAAGACTATGATCAGGTCAGACCACTTTATTTATTTTTTTACAGGGGAGTGT
TATGGGTCAGGTTTTACCGCTGGTTACCCGCCAGGGCGATCGTATCGCCATTGTTAGCGGTTTACGTACGCCTTTTGCCC
GCCAGGCGACGGCTTTTCATGGCATTCCCGCGGTTGATTTAGGGAAGATGGTGGTAGGCGAACTGCTGGCACGCAGCGAG
ATCCCCGCCGAAGTGATTGAACAACTGGTCTTTGGTCAGGTCGTACAAATGCCTGAAGCTCCCAACATTGCGCGTGAAAT
TGTTCTCGGTACTGGAATGAATGTGCATACCGATGCTTACAGCGTCAGCCGCGCTTGCGCTACCAGTTTCCAGGCGGTTG
CAAACGTCGCAGAAAGCCTGATGGCGGGGACTATCCGAGCGGGGATTGCCGGTGGGGCAGATTCCTCTTCGGTATTGCCA
ATTGGCGTCAGTAAAAAACTGGCGCGCGTGCTGGTTGATGTCAACAAAGCCCGCACAATGAGCCAGCGTCTGAAACTCTT
CTCTCGCCTGCGTTTGCGCGACTTAATGCCCGTACCACCTGCGGTAGCAGAATATTCTACCGGCTTGCGGATGGGCGACA
CTGCAGAGCAAATGGCGAAAACCTACGGCATCACCCGAGAACAGCAAGATGCATTAGCGCACCGTTCGCATCAGCGTGCC
GCTCAGGCATGGTCAGACGGAAAACTCAAAGAAGAGGTGATGACTGCCTTTATCCCTCCTTATAAACAACTGCTCGCGGA
AGACAACAATATTCGCGGTAATTCCTCGCTTGCTGATTACGCAAAGCTGCGTCCGGCGTTTGATCGTAAACACGGAACGG
TAACGGCGGCGAACAGTACGCCGCTGACCGATGGCGCAGCGGCGGTGATCCTGATGACTGAATCCCGGGCGAAAGAATTA
GGGCTGGTACCGCTGGGATATCTGCGCAGCTACGCATTTACCGCTATCGATGTCTGGCAGGACATGTTGCTCGGTCCAGC
CTGGTCAACACCGCTGGCGCTGGAGCGTGCCGGTTTGACGATGAGCGATCTGACATTGATCGATATGCACGAAGCCTTTG
CAGCTCAGACACTGGCGAATATTCAGTTGCTGGGTAGTGAACGTTTTGCTCGTGAAGCACTGGGGCGTGCACATGCCACT
GGCGAAGTGGACGATAGCAAATTTAACGTGCTTGGCGGTTCGATTGCTTACGGGCATCCCTTCGCGGCGACCGGCGCGCG
GATGATTACCCAGACATTGCATGAACTTCGCCGTCGCGGCGGTGGATTTGGTTTAGTTACCGCCTGTGCTGCTGGTGGGC
TTGGCGCGGCAATGGTTCTGGAGGCGGAATAATGGAAATGACATCAGCGTTTACCCTTAATGTTCGTCTGGACAACATTG
CCGTTATCACCATCGACGTACCGGGTGAGAAAATGAATACCCTGAAGGCGGAGTTTGCCTCGCAGGTGCGCGCCATTATT
AAGCAACTCCGTGAAAACAAAGAGTTGCGAGGCGTGGTGTTTGTCTCCGCTAAACCGGACAACTTCATTGCTGGCGCAGA
CATCAACATGATCGGCAATTGCAAAACGGCGCAAGAAGCGGAAGCTCTGGCGCGGCAGGGCCAACAGTTGATGGCGGAGA
TTCATGCTTTGCCCATTCAGGTTATCGCGGCTATTCATGGCGCTTGCCTGGGTGGTGGGCTGGAGTTGGCGCTGGCGTGC
CACGGTCGCGTTTGTACTGACGATCCTAAAACGGTGCTCGGTTTGCCTGAAGTACAACTTGGATTGTTACCCGGTTCAGG
CGGCACCCAGCGTTTACCGCGTCTGATAGGCGTCAGCACAGCATTAGAGATGATCCTCACCGGAAAACAACTTCGGGCGA
AACAGGCATTAAAGCTGGGGCTGGTGGATGATGTTGTTCCGCACTCCATTCTGCTGGAAGCCGCTGTTGAGCTGGTAAAG
AAGGATCGCCCATCTTCCCGCCCTCTACCTGTACGCGAGCGTATTCTGGCGGGGCCGTTAGGTCGTGCGCTGCTGTTCAA
AATGGTCGGCAAGAAAACAGAACACAAAACTCAAGGCAATTATCCGGCGACAGAACGCATCCTGGAGGTTGTTGAAACGG
GATTAGCGCAGGGCACCAGCAGTGGCTATGACGCTGAAGCACGGGCGTTTGGCGAACTGGCGATGACGCCACAATCGCAA
GCTTTGCGTAGTATCTTTTTTGCCAGTACGGAAGTGAAGAAAGATCCCGGCAGTGATGCGCCGCCTGCGCCATTAAACAG
CGTGGGGATTTTAGGTGGTGGCTTGATGGGCGGCGGTATTGCTTATGTCACTGCTTGTAAAGCGGGGATTCCGGTCAGAA
TTAAAGATATCAACCCGCAGGGCATAAATCATGCGCTGAAGTACAGTTGGGATCAGCTGGAGGGCAAAGTTCGCCGTCGT
CATCTCAAAGCCAGCGAACGTGACAAACAGCTGGCATTAATCTCCGGAACGACGGACTATCGCGGCTTTGCCCATCGCGA
TCTGATTATTGAAGCGGTGTTTGAAAATCTCGAATTGAAACAACAGATGGTGGCGGAAGTTGAGCAAAATTGCGCCGCTC
ATACCATCTTTGCTTCGAATACGTCATCTTTACCGATTGGTGATATCGCCGCTCACGCCACGCGACCTGAGCAAGTTATC
GGCCTGCATTTCTTCAGTCCGGTGGAAAAAATGCCGCTGGTGGAGATTATTCCTCATGCGGGTACATCAGCGCAAACCAT
CGCCACTACGGTAAAACTGGCGAAAAAACAGGGCAAAACGCCCATTGTCGTGCGTGACAAAGCCGGGTTTTACGTCAATC
GCATCTTAGCGCCTTACATTAATGAAGCTATCCGCATGCTGACCGAAGGTGAACGGGTAGAGCACATTGATGCCGCGCTA
GTGAAATTTGGTTTTCCGGTAGGTCCAATCCAACTTTTGGATGAGGTAGGAATCGACACCGGGACTAAAATTATTCCTGT
ACTGGAAGCTGCTTATGGAGAACGTTTTAGCGCGCCTGCAAATGTTGTTTCTTCAATTTTGAACGACGATCGCAAAGGCA
GAAAAAATGGTCGGGGTTTCTATCTTTATGGTCAGAAAGGGCGTAAAAGCAAAAAACAGGTCGATCCTGCCATTTACCCG
CTCATTGGCGCACAAGGGCAGGGGCGACTCTCCGCACCGCAGGTTGCTGAACGGTGTGTGATGTTGATGCTGAATGAAGC
AGTACGTTGTGTTGATGAGCAGGTTATCCGTAGCGTGCGTGACGGGGATATTGGTGCGGTATTTGGCATTGGTTTTCCGC
CATTTCTCGGTGGACCGTTCCGCTATATCGATTCTCTCGGCGCGGGCGAAGTGGTTGCAATAATGCAACGACTTGCCACG
CAGTATGGTTCCCGTTTTACCCCCTGTGAGCGTTTGGTCGAGATGGGCGAGCGTGGGGAAAGTTTTTGGAAAACAACTGC
AACTGACCTGCAATAAGAAGGTCAAAGCTATATGAATCCGCGCTGAATGGCGGATAGTTGGTCAAAATGTAAACGCATAT
TGACTATACTTACGCCATTGAGGTAAAAAACAGCGTTTCATTCGGTGAATGGATAAGGCACAATGCCGGCCACCGTTTTC
TTTCTCTGGTTTCAGATGAAAGAAAACGGGCGAATCTGGTTAACAAAAGCGGTGCAATATGCAAGTTTTTATCATGCGTC
ACGGCGACGCAGCCCTCGATGCCGCCAGTGATTCGGTTCGTCCTCTGACTACTAATGGTTGTGACGAATCTCGCCTGATG
GCGAACTGGCTGAAAGGTCAAAAAGTGGAAATCGAACGCGTTCTGGTGAGCCCGTTCCTGCGAGCCGAGCAAACACTGGA
GGAAGTAGGGGATTGTCTGAACCTGCCTTCCAGTGCAGAAGTTCTGCCGGAGTTAACGCCCTGCGGCGATGTTGGTCTGG
TCAGTGCCTATTTGCAGGCGTTGACCAATGAAGGTGTTGCTTCGGTGTTGGTTATCTCCCACTTACCGTTAGTTGGGTAT
CTGGTCGCCGAGTTATGTCCGGGCGAAACGCCGCCTATGTTTACCACCTCGGCCATTGCCAGCGTCACGCTTGATGAAAG
CGGAAACGGCACATTCAACTGGCAGATGAGCCCGTGTAATCTGAAGATGGCGAAAGCTATCTGATTTGTTTGAAAAAATG
CCCGATGTAAGCTGTACATCGGGCATTTGTCTTTTTGCAATAGTATAAATTCACTCAAAACCCTTCACGGAGTTGGTATG
CTGCGATGATGATTTCATCGCACTCTTTCCTCTGCTTCCCTATTAATTTCTGATGAAATGAGACTAAGTTGTAATATATT
TTTACAAATTATAAAACTAATGGAACAATTAACAGTAAAAAAGAAATGATATTTTTGTGTCTTGATTTAATATTATTTGT
GATGCTTTAATATTATATCTTCAAAAAATACAATTTCAAAATTAATCTAAGATCGTCTTTTTTTGTATACATTTCCCATA
AATTTTAATTATGTAAAAGATGTTTTCTAAGCATTTTATTTGTTTTTTATAAGTAAACTCTCAAAATTTCACCTTTTTGA
TTATATGTTAAGTGCTCCTTAATTTACTGTTAAGTAAATATAAATTGAAACAATAAAGACAAAACATCACCATCCACCCA
CACCAAAGAATATCTTCTTATGCGACCTATTTTCTTGTTAGTTAGATCGGATAGCTTATTCAATGGCTGAGTATAAATAA
TTGCTATTGACTGAATCAATGTATTGCAATGTTTATATTTTTAATTATTTATGGTTTAAGGACAAATAATGAGTAAGTTT
GTAAAAACAGCTATTGCTGCAACAATGGTAATGGGTGCGTTCGCTTCTACTTCAACAATCGCCGCTGGCAACAACGGTAC
AGCTCGTTTTTACGGCACCATTGAAGATTCCCCGTGCTCCATCGTTCCTGATGATCACAAACTGGAAGTGGATATGGGTG
ACATTGGTTCGGGGATCCTGAAAAATAACGGGACCTCCACGCCGAAAGCTTTCCAGATCCATCTGCAAGACTGCGTGTTT
GACACCCAGACAACCATGACAACGACCTTCACCGGTAACGCGTCCGCTACCAACAGCGGCAATTACTACACCATTTACAA
TACCGACACCGGCGCGGCATTTAACAATGTCAGCCTGGCGATTGGTGATGCTCAGGGGACCTCTTACAAAAGCGGTACGG
GCATCAACCAGACAATTGTAAAAGATACTGCCACCAACAAAGGCAAAGCGAAGCAGACGCTGGACTTTAAAGCCTGGCTG
GTGGGCGCTGCTGATGCGCCAGATTTGGGTAACTTCGAAGCCAACACGACTTTCCAGATTACTTATCTCTAAGTGATATC
CCCATAGCCTTCGGCTATGGGGTTTTTTAAATGGAATTTGCGCAAATTATAATAATTACGGATGGATACGTGCATGCCTG
ACGATTCTCTTTTCCGACTGCGGGTGCTTCCCTGCTGCATTGCGCTGGCAATGTCAGGGTGTTATGTCAATGCCTGGGCT
GAAGATGAAATTCAGTTTGATTCCCGTTTCCTGGAGTTAAAAGGCGACACAAAAATCGATCTGAAGCGATTTTCCAGCCA
GGGATATGTCGAACCTGGTAAATACAATTTACAGGTTCAACTAAATAAACAGCCGCTGGCGGAAGAATACGATATTTACT
GGTACGCCTCTGAGAACGATGCCAGTAAAACCTATGCCTGCCTGACACCTGAACTGGTCGCTCAGTTTGGTTTAAAAGAG
GATGCGGCAAAAAACCTGCAATGGATCCACGACGGCAAATGTTTGAAACCCGGCCAGCTGGAAGGCATTGATATTAAAGC
TGACCTGAGTCAGTCAGCGTTAGTCATTTCATTACCCCAGGCTTACCTTGAATATACCGACACCGACTGGGACCCACCTT
CACGCTGGGATGACGGTATTTCTGGTTTAATTGCTGACTACAGTATTACCGCCCAGACACGACATGAAGAAAATGGCGGG
GATGACAGCAATGAAATTAGCGGCAACGGAACGGTTGGGGTTAACCTCGGCGCATGGCGTCTGCGAGCCGACTGGCAGAC
CGACTACCAGCACAGCAAAAGCAATGATGAAGATGTTATCAACGGTGATGACACGCAAAAAAACTGGGAGTGGAGCCGCT
ACTACGCCTGGCGGGCTTTACCGTCGCTAAAAGCCAAACTTGGCCTTGGCGAAGACTACCTTAATTCTGATATTTTCGAC
GGCTTTAACTACGTGGGTGGCAGTATCAGCACCGACGATCAAATGTTGCCGCCGAATCTGCGCGGCTATGCGCCGGATAT
CTCCGGCGTGGCGCACACCACCGCGAAAGTGACCGTCAGCCAGATGGGCCGCGTGATTTACGAAACGCAGGTTCCGGCGG
GGCCGTTCCGCATCCAGGATCTTGGCGATTCTGTCTCCGGTACACTGCACATCCGCATTGAAGAACAGAACGGCCAGGTG
CAGGAATATGACATCAACACCGCCTCGATGCCGTTCCTGACCCGCCCCGGCCAGGTGCGCTATAAGCTGATGATGGGCCG
CCCGCAGGAGTGGGGGCATCATGTTGAAGGTGGTTTCTTCTCCGGCGGCGAAGCTTCATGGGGGATTGCCAACGGCTGGT
CGCTCTACGGCGGAGCGCTGGCAGATGAACACTATCAGTCGGCGGCGCTTGGCGTCGGTCGCGACCTGTCTGTCTTTGGC
GCAGTCGCCTTTGATATCACCCACTCGCATACCCGCCTGGATAAAGAGACCGCCTACGGTAAAGGTTCACTGGACGGTAA
CTCGTTTCGCGTGAGCTATTCCAAAGACTTCGATGAACTGAACAGCCGCGTCACTTTTGCCGGATACCGCTTCTCGGAAG
AGAACTTCATGACCATGAGCGAGTATCTCGATGCCAGCGACAGCGAAATGGTGCGCACTGGCAACGACAAAGAGATGTAC
ACCGCCACCTACAACCAGAACTTCAGGGATGCCGGTGTGTCTGTTTATCTAAACTACACCCGCCATACCTACTGGGATCG
CGACGAACAGACCAACTACAACGTCATGCTCTCGCACTACTTCAACCTGGGCAGTATCCGCAATATGAGTATTTCCATGA
CCGGATACCGCTACGAATATGACAACCGCGCCGATAAAGGTGTGTACATATCGCTCAGTATGCCGTGGGGCGACAGCAGC
ACCATCAGCTATAACGGTAACTACGGCAGCGGTGCGGACAGCAGCCAGGTGGGGTATTTCAGCCGTGTCGATGACGCAAC
CCACTACCAGTTGAACGTGGGAACCAGTGACAAACACTCCAGCGTTGACGGCTATTACAGCCACGATGGTTCGCTGGCGC
AGGTCGATCTCAGCGCCAACTACCATGAAGGGCAGTACACCTCGGCGGGCATTTCCTTACAGGGCGGCGCGACGCTCACC
GCACAAGGTGGCGCGCTTCACCGTACCCAGAATATGGGCGGCACGCGTCTGCTGATTGATGCCGACGGCGTGGCTGGTGT
TCCGGTAGAAGGAAATGGTGCGGCGGTTTACACCAATATGTTCGGTAAGGCCGTGGTGGCAGACGTCAACAACTACTACC
GCAACCAGGCGTATATCGACCTTAACAACCTGCCGGAAAACGCCGAAGCCACCCAGTCCGTGGTGCAGGCGACGCTTACC
GAAGGAGCCATTGGCTACCGTAAGTTTTCGGTTATCAGCGGGCAAAAAGCGATGGCGGTATTGCGCCTGCAAGATGGCAG
TCATCCGCCGTTTGGCGCGGAAGTGAAAAATGACAACGCGCAGAACGTCGGTCTGGTTGATGATGATGGCAACGTCTACC
TCGCGGGTGTGAAACCTGGCGAGCATATGACCGTTTCATGGGGCGGCGTGGCCCACTGTGATATTCATCTGCCGGACCCA
CTGCCTGCCGATCTGTTCAATGGCCTGTTATTGCCATGTCAGCAAACAGGGCCGATATCTCCTTCGATGCCCAATGAAAT
TAAGCCGGTGATCCAGGAGCAGACCCAGCAGGTGATGCCAACGGAAGCGCCGGTATCGGTATCCGCCAATTAACAACGTG
ATTAAGGAATGATCCATGACGAATCTATTTTGCTCTGCCAGAACGGCCGCAACGACGCTGGCGTTACTGATAACTGCCGC
CAGCCTGTCAGCACAGGCCTCTGTCACGCCGGACCGTACACGCCTGATTTTTAACGAAAGTGATAAATCAATCAGTGTCA
CGCTGCGCAATAACGACCCGAAAATGCCGTATCTGGCACAAAGCTGGATGGAAGATGAACAGGGTAACAAGATTAGCTCG
CCACTGACGGTACTGCCGCCGGTGCAGCGCATCGATTCCATGATGAACGGTCAGGTGAAGGTACAGGGCATGCCGGATAT
CAACAAGCTGCCTGCCGACCGCGAGAGCGTGTTCTATTTCAACGTGCGTGAGATCCCGCCGAAATCGAACAAACCCAACA
CGTTACAGATTGCGCTGCAAACGCGCATCAAGCTGTTCTGGCGACCAAAGGCGCTGGAAAACGTCAGCATGAAAAATCCA
TGGCAGCATAAGGTGACCTTAACCCGCAGCGGCCAGGAGTTTACTGTCAATAACCCGACGCCGTACTTCGTGGTTATCAG
TAACGCCAGCGCGCAGAAAAACGGCAATCCGGCAGCGGGATTTTCTCCCATGGTGATATCGCCAAAAACCTCCGTGCCGC
TGAATGTCAAAATGGATAGCGTCCCGGTGCTGACCTACGTCAACGACTATGGCGCGCGGATGCCGCTGTATTTTAAATGT
GGTGGCGATACCTGCCAGGTGGACGCAGAGCAGAGCCGCAAAGGCTGATGCCGGGAGAGCCATATGAAAATAATTTATCT
GGCGGTGTCGGGCATTGCGCTGCTGGCCTGGAATGTCGCCAGTGCAGAAACGAAACCCGTCAACCTGGAACTCAGAGTCC
TGGTGGATGCGCCGCCGCCCTGTACCGTGACCGGTAGTGCAGTGGAGTTTGGCGATGTGCTGATCGCCAGTATCGATGGC
AACAATTACCGCCAGAACGCGGGCTATACCCTCGATTGTTCGGGGCGTCTGGCAGACGATCTGCGGATGCAACTGAAGGG
CACCACCACAACCGTGAACGGTGAAACTGTGCTGGATGCAGGCATTGCCGGGTTTGGCATCCGCATCGAAAACGCCGCCG
ATAACTCGCTGTTTTCCATTGGTGAAAATAACTGGACGCCTTTTGCATTTAACTCTCTGCCGCAACTGAAGGCTGTGCCG
GTAAAACAGAACGGCGTGCAGCTCGCGCCAACGGAATTTAACGCCAGTATGACCATGGTGGTGGATTACCAATGAAACGA
CTCGCACTTTTCCTGATTTGGGGTGCCTGCGGGGGCGCTCTGGCCTCACCGGATATCACCTTTCACGGCACGCTGGTGTC
GCCGCCTGCCTGCACCATCAACGAAGGCCAGACCATTGAACTGGAGTTTCGCGATGTACTTATCGACAGCATTGATGGCA
ACTACGCCCGCCAGGAGGTGCCGTACACCATCAAATGTGACTCCGACGTTCGCAATGAGGCCTGGCAGATGACGCTCACC
TGGACCGGGACGCAAACCAGCTACAACGATGCGGCAATCGAAACCGATGTTCCGGGATTCGGGATTCAGCTTTTGCAAAA
CGGGCAACGTTTTCAGCTTAATACCCCACTGACCATCAATGCCACGGATTTGACACAAAAACCGAAGCTTGAGGCCGTTC
CGGTTAAAGCGAGTGACGCTGTTTTAAACGACGGCACGTTTTCAGCGTACGCAACATTACGGGTGGAATATCAATGAAGA
CAAATACCGGATGTGTGCTTCTGGCAAGCCTGATGCTCACCGCCAGCGGAACCACGTTGGCGGCGGACAACCTGCATTTT
TACGGCAACTTGTTAAGTAAATCCTGCACGCTGGTGGTGGATGGTGAAGTGCTGGCGGAAGTGCATTTCCCGACCATCAG
CAACCAGGATTTAACGGTGGCGGGCCAGTCTTCCAGGGTGCAGGTGGTCTTTAAGTTGAAAGATTGCAAAGGCCCGGCGG
ATTACCAGGTCAAAGTCACGCTGACCGGTACGGAAGATAGCGAACAGCCAGGTTTTCTGGCGCTTGACCCGGCATCCAGC
GCGCAAGGGGTAGGGATTGGTATGGAAAAGTCAGACGGTACCTGGGTGCCGCTTAACGATTCTGCCGGTGCCACCTTTAA
CCTCACTAACGGCGCGAATAACCTCAATTTTAATGCCTGGTTGCAGGCGAAAAGCGGTCGTGAAGTGACTTCTGGTGACT
TCACCGCCAGCCTGACTGCCACTTTTGAGTATATTTAAGATGAAGATAATACGAAACTTTTTGGGGCTGTTGACGCTGAT
GGTGTTGAGCCTGACGGCTCAGGCACAGACATTTCAGATGTATACCCCTATGGGTGTACCAGGCGCTTTAGCCAGGATAA
TATTTACTCTGGAAGTTGTTACCCCTGCAGGCGTTTATACAGGTACATATCAGTCGCGCGATCCCAGGATGCTTCTCGTT
GGCAATTTAACATTGTTAAGCTGGAATGGTCCATCTTCAATTCCTGCGCCAACTATTTATCTGGATCATTCGAACGAAAT
AAATATGTCAAATTGTCCCGGTCTTGCTGGCGTTCCCTCCACCAACGGCAAAGGATGGGATTGTTATGCTGCTGATTTAA
AAGTCACGGTAACAGGGGACGTGCAGGGGTGTCCATGGCTGGTTTCAACCCAGATTACCACTACGGACCTGGGAGATGTG
GGGGCTACCTATGTAGGTCCTAAATACAATAACTCCACCTGTCCATCAATCCCACTGACGACATATGATGTTTCCTGGGA
TGAGAATACGGTGATTCATAAAAAAACATTGAATCTGAAATCAACAGACGCCGTAGGGGGAATCATCGAGAAAACCCTGT
CGACCTATTTAATGGAAAGTGAGAGGCTGTGTGATGGTAGCCAGTTTGATCCTCGCGGGGCAAATTGCCGTTTTGTTTCG
CAGATGATCACTTTTACAGCATCAGGCTGCGACGATGCCAAAGTGACGGTGACGCCGGTTCCGCATCCGATTACTGACAG
GCAACTGCATGATATTGTGGTGCGCGTCGATGCCAGCGCATTGCAGCCTATTGATTCAACGTGTCGCTTCCAGTATGTGT
TGAATATGTTCTAGCACATACCAGCCTGGTGACAGGAGTTTACCAGGCTTTTTTTCTCTCATATTGGATAATTTGCCCTA
CCTGAACACATTTAGGCCGGATAAGGCGTTTACCCCGCATCCGGCATTCGATACCAGCATTCAGGGCGAAATGGCAAAAC
GCATCCGCCCCTAATATTCACGGTAACTCCGGCGGCAGCCACTCTTCCACTTCAATCAACACTAACAACGCTGCATCTCC
GCCGTACTCTTTCGGTGCCTGGTGAAATGCCATTACATGCGGATGTTGCGCCAGCCACAGCGGCGTTTGCTGTTTCAAAA
TATGCTTCCCGTGCCCGTGCATTACGCATGCGCAAAACACATGTTCACGGCGGCAGGCGGCAATCAACGCCCCCAGTTCC
TGCTTGGCCTGCATTTGCGTCAAACCATGTAAATCGAGGAAAAGCTCCGGTGAATAATCGCCGCGTCGCAACTTCTTCGC
CTCAAAATGACTCACATCCGGGCGGACATATTTCACCGGGCCTTCGGTATTCAATAACGGCTGAAACTCATCTGAGAAAT
AATGGCTGGCATCGGCCTGCTCCTGAATCAACCGTTTCACCGGCACTTCGCTGATTTTCTTACGCTGCGGTCGGTGGACA
ATCGTGTCCTGCTTAATCTTGCGAGTCCCCGCCATCAACTGGCGAAACAGAGCCTGGTCCTCCTCGCTAAGTGTTGTTTT
CTTTTTCATTTATCTGTCTCTATTTCTAATTTTCCTACAGTTTACCCGACTCGTAGCGCAATCGATCGTTTTAAACGTAT
TTTTCCTCACTCACCGCGCGTGAATGCTGATTTATCGTCATCTTCGTGGCAAACTAGCCGCCGAAATTATTGCGATCATG
CCCTGGAGGAATACGTGGATAAAATTTTCGTTGATGAAGCAGTTAATGAGCTGCAAACCATTCAGGACATGTTGCGCTGG
TCGGTTAGCCGCTTCAGCGCGGCAAATATCTGGTACGGTCACGGCACCGATAACCCGTGGGATGAAGCGGTACAATTGGT
GTTGCCGTCGCTCTACCTGCCGCTGGATATTCCGGAAGATATGCGCACCGCGCGTCTGACCTCCAGCGAAAAACATCGTA
TTGTTGAGCGCGTGATCCGCCGCGTCAACGAACGCATTCCGGTGGCTTACCTGACCAATAAAGCATGGTTCTGCGGTCAT
GAATTTTACGTCGATGAACGTGTGCTGGTGCCGCGCTCGCCGATTGGTGAACTGATCAACAATAAATTTGCCGGGCTAAT
CAGCAAGCAACCGCAGCATATTTTAGATATGTGTACCGGTAGCGGCTGCATTGCCATTGCCTGTGCTTATGCCTTCCCGG
AAGCGGAAGTCGATGCGGTAGATATCTCTCCCGACGCGCTGGCGGTTGCCGAACAGAACATCGAAGAACACGGTCTGATC
CACAATGTCATACCGATTCGTTCCGATCTGTTCCGTGATTTGCCGAAAGTGCAGTACGACTTGATCGTCACTAACCCGCC
GTATGTCGATGCGGAAGATATGTCCGACCTGCCAAACGAATACCGTCACGAGCCAGAACTGGGCCTGGCATCTGGCACTG
ACGGCCTGAAACTGACGCGTCGCATTCTCGGTAACGCGGCAGATTACCTTGCTGATGATGGTGTGCTGATTTGTGAAGTC
GGCAACAGCATGGTACATCTTATGGAACAATATCCGGATGTTCCGTTCACCTGGCTGGAGTTTGATAACGGCGGCGATGG
TGTGTTTATGCTCACCAAAGAGCAGCTGCTGGCGGCCCGTGAACATTTCGCGATTTATAAAGATTAAGTAAACACGCAAA
CACAACAATAACGGAGCCGTGATGGCTGGAAACACAATTGGACAACTCTTTCGCGTAACCACCTTCGGCGAATCGCACGG
GCTGGCGCTTGGCTGCATCGTCGATGGTGTTCCGCCAGGCATTCCGCTGACGGAAGCGGACCTGCAACATGACCTTGATC
GTCGTCGCCCTGGGACATCGCGCTATACCACCCAGCGTCGTGAGCCAGATCAGGTCAAAATTCTCTCCGGTGTTTTTGAA
GGTGTTACTACCGGCACCAGCATTGGTTTGTTGATCGAAAATACCGATCAGCGTTCTCAGGATTATAGTGCGATTAAGGA
CGTTTTCCGTCCTGGCCATGCCGATTACACCTACGAACAAAAATACGGTCTGCGCGATTATCGCGGCGGTGGACGTTCTT
CCGCCCGCGAAACCGCCATGCGCGTGGCGGCAGGGGCGATTGCCAAAAAATATCTCGCCGAGAAATTTGGTATTGAAATC
CGCGGCTGCCTGACCCAGATGGGCGACATTCCGCTGGAAATCAAAGACTGGTCGCAGGTTGAACAAAATCCGTTCTTCTG
CCCGGACCCGGACAAAATCGACGCGTTAGATGAACTGATGCGCGCGCTGAAAAAAGAGGGCGACTCCATCGGCGCGAAAG
TCACCGTTGTAGCCAGTGGTGTCCCCGCCGGACTTGGCGAGCCGGTCTTTGACCGCCTGGATGCCGACATCGCCCATGCG
CTGATGAGCATCAACGCGGTGAAAGGCGTGGAAATTGGCGACGGTTTTGACGTAGTGGCGCTGCGCGGCAGCCAGAATCG
CGACGAAATCACCAAAGACGGTTTCCAGAGCAACCATGCGGGCGGCATTCTTGGCGGTATCAGCAGCGGGCAGCAAATCA
TTGCCCATATGGCGCTGAAACCGACCTCCAGCATTACCGTGCCGGGGCGCACCATTAACCGCTTTGGCGAAGAAGTTGAG
ATGATCACCAAAGGCCGTCACGATCCTTGTGTCGGGATCCGCGCGGTGCCGATCGCTGAAGCGATGCTGGCGATCGTTTT
AATGGATCACCTGCTACGGCAGCGGGCGCAAAATGCCGATGTGAAGACTGATATTCCACGCTGGTAAAAAATGAACAAAA
CCGCGATTGCGCTGCTGGCCCTGCTTGCCAGTAGCGCCAGCCTGGCAGCGACGCCGTGGCAAAAAATAACCCAACCTGTG
CCGGGTAGCGCACAATCGATAGGCAGTTTTTCTAATGGCTGTATCGTCGGCGCTGACACGCTGCCGATACAGTCCGAACA
TTATCAGGTCATGCGTACCGATCAGCGTCGCTATTTCGGTCACCCGGACCTGGTGATGTTTATCCAGCGTCTGAGTAGCC
AGGTGAGCAATCTGGGCATGGGTACGGTGCTGATTGGCGATATGGGGATGCCCGCTGGTGGGCGTTTCAACGGCGGTCAT
GCCAGCCACCAGACCGGACTGGATGTCGATATCTTTCTGCAACTGCCGAAAACACGCTGGACCTCCGCGCAGCTCTTGCG
CCCGCAAGCACTGGACTTAGTTTCCCGCGACGGTAAACACGTTGTCCCCACGCTGTGGAAGCCAGAAATTTTCAGCTTGA
TCAAACTCGCCGCCCAGGACAAAGACGTCACACGCATTTTTGTTAATCCGGCGATTAAACAACAACTTTGCCTTGATGCG
GGCACCGATCGCGACTGGTTGCGCAAAGTGCGACCCTGGTTCCAGCATCGCGCGCATATGCATGTACGATTACGTTGTCC
TGCCGATAGTCTGGAGTGTGAAGATCAACCTTTACCGCCACCAGGCGATGGTTGCGGGGCAGAACTGCAAAGCTGGTTTG
AACCTCCAAAACCGGGAACAACAAAGCCTGAGAAGAAGACACCGCCTCCGTTGCCGCCTTCCTGCCAGGCGCTACTGGAT
GAGCACGTGATCTAATGGAAACGTTTAATAGCCTGTTTATGGTTTCCCCGCTGTTGCTGGGAGTTCTCTTTTTTGTCGCC
ATGCTGGCGGGATTTATCGACTCGATTGCCGGTGGTGGTGGGTTACTCACGATTCCGGCATTAATGGCTGCGGGGATGTC
TCCCGCTAATGCGCTGGCAACCAATAAACTGCAAGCCTGCGGCGGCTCTATTTCCGCCACTATCTACTTTATTCGCCGCA
AAGTGGTTAGTTTAAGCGATCAGAAACTCAATATCGCCATGACCTTTATCGGCTCAATGAGCGGCGCACTGCTGGTGCAA
TACGTTCAGGCTGATGTCTTACGGCAGATTTTGCCCATTCTGGTGATTTGTATCGGCCTCTATTTCTTGCTGATGCCAAA
GCTGGGTGAAGAAGATCGCCAGCGCCGGATGTACGGTTTACCCTTCGCGTTAATTGCCGGTGGCTGCGTCGGTTTTTACG
ACGGATTCTTTGGTCCGGCAGCCGGATCGTTTTACGCGCTGGCCTTTGTTACGCTGTGCGGATTCAACCTCGCCAAAGCC
ACGGCTCACGCCAAATTACTTAACGCAACGTCAAACATCGGCGGTTTGCTGCTGTTTATTCTCGGCGGCAAAGTGATTTG
GGCGACGGGCTTTGTGATGCTGGTGGGGCAGTTCCTCGGCGCGCGCATGGGTTCAAGACTGGTGTTGAGCAAAGGACAAA
AGCTGATCCGCCCGATGATTGTTATCGTCTCGGCGGTGATGAGTGCCAAATTACTTTACGATAGCCATGGACAGGAGATC
CTCCACTGGTTGGGGATGAACTAATGAACAGTACACACCACTATGAGCAGTTGATTGAAATTTTTAATAGCTGCTTTGCC
GATGATTTTAATACCCGTCTGATTAAAGGCGACGACGAACCGATCTATCTTCCCGCTGAAGCGGAAGTACCGTATAACCG
AATCGTCTTTGCTCATGGCTTTTATGCCAGCGCAATTCATGAGATTTCGCACTGGTGTATTGCCGGAAAAGCGCGCCGTA
AGCTGGTTGATTTCGGCTACTGGTATTGCCCGGACGGACGCGATGCCCAAACGCAAAGCCAGTTTGAAGATGTTGAAGTG
AAGCCGCAGGCGCTCGACTGGTTGTTCTGCGTGGCGGCGGGATATCCGTTTAACGTCAGTTGCGACAATCTGGAAGGGGA
TTTCGAACCGGACCGCGTGGTGTTTCAACGGCGGGTACATGCGCAGGTGATGGATTATCTGGCAAATGGCATTCCGGAAC
GCCCGGCACGTTTCATTAAAGCACTACAAAATTATTATCACACGCCGGAACTTACGGCGGAACAGTTCCCGTGGCCGGAA
GCGCTAAACTAAAGCCAGTGCCACGTTTTACAATGAGGAAAGAAGATGATCGCGGAGTTTGAATCACGCATTCTGGCATT
AATCGACGGTATGGTTGACCATGCCAGTGATGATGAGTTGTTTGCCAGTGGGTATTTGCGTGGCCACCTGACATTAGCCA
TCGCAGAACTGGAAAGTGGTGATGACCACTCCGCTCAGGCGGTGCATACGACCGTTAGCCAGAGTCTGGAAAAAGCCATT
GGTGCTGGTGAATTGTCGCCGCGTGACCAGGCGCTGGTGACCGATATGTGGGAAAACCTGTTTCAGCAGGCATCACAGCA
GTAAGTTGCGGCGTCTGGAGCACCATGCCTGATGCGACGCTTATCGCGTCTTATCAGGCCTACACGTCACACGTAGGTCG
GATAAGGCGTTCACGCCGCATCCGACAAACAATGCCAAAGCTGGTTACCCAGCCTTAACTGCTTTACCCTTCAACAATTT
CCGCACCCATAACCGATTCGGATTTAACGCCGCCAGCGTACTGGCATCCATCGGAATCGGTTCTTCACTCATCTGTGCCG
CCAGAATCTCTGCGCACAGTGGGGCAGAACACAAACCACGCGAACCCAAAGCAGCAAGCATAAAGAGATCGTCATAAACC
GGCGCGCTTACCGCCTTATCTTTCTGCTCCGCCAGCGACGCATATTCCACAAGTGTTGCCTCATAATCGGGAACATTACC
TACCATTGGTAGATGATCGCGGGTGGCACAACGCACACCGCAGCGCGCCTCTTTCTCACTGATATCAACCTCTTTTGCCC
ACTGTGCCTGCGGGAAACAATCAATCAACCGCTGGCGATTCTGCTGCTGATCTTCATCACTGTACGTCGTATCTTCGCTG
CCGCGATGATAACTGGCACCAATACAATGATGCTGATTCGCCGGATTTTGTGGCGTGAGATAACCGTCATAGCACAGCAC
CTGCTTCAGTTTTGCCAGTTCCGGTGTCGTCGGAATATGGCTGACCTGACCGGCAACCGAATATACTGGCAGAGATGATG
TTTGGCTGAAACGGCTGATTTGATGCCCGTTCGCCAGTACCACTACGCTGTGTGTTGCTTGCTGATCTCCTGCAAAATTC
AACAACCAACAGTCATCCTTACGGGATAAATCCTGTAACTGATATTGATAATAAATCTGCAACCCCTGCTGTTGCGCCAG
TTCCAGCACATTACGGGTCAGTTCTGCTGGGCACAGCCAACCACCTTGCGGATAAGTAATGCCGCTGCAATTTGTCGCAA
CGCCCGTAATTTGTTCAACCGCATTTGCCTCAACGGCTACAGCCAGTTCTTCGGGTAAATCCATTGACAACATCTGTGCG
ATTTTATGCTGGCTTTTCTCATCCCAGCCTAACTGCGTGACGCCGCACCAGTCATGATCAAATTTAACGGGTAATTGGTC
GTAAAACCGACGAGCAAAAGTAAACGCATTAGAGAAAAAGCGGTTTAGCGCCTCATCGTGTTTGCTTAATAACGGATACA
ACGCCCCCTGGCGATTGCCGGAAGCACCCAGCGCGGGGGCTTCATCCGCGCAATAAAGCGTTACCTGCCAGCCGCGGCGT
AATAACGCCAGCGACAACAACGCGCTGGCAATACCACCGCCGATAATCGCCGCTTCCAGTTTGCTGCTGCCCGTACGATT
AAACCACGGCGTGGAGCAGGGGAGTGGTAATGTCTGTTCCATCACCCCACAAAGCATTTCCCGTTTGCGCCCAAAGCCCT
TACGTTTTTGCATCGTGAATCCGGCTTCCTGCAAACCGCGGCGGACAAAACCGGCAGACGTAAATGTCGCCAGCGTGCCG
CCTGGACGCGCCAACCTTGCCATGGCGTTAAACAGATTTTGCGTCCACATATCCGGGTTTTTAGCTGGCGCAAAGCCGTC
CAGAAACCAGGCATCTACTTTTTGATTTAGAGAATCGTCCAGTTGGCTGGTCAGTTCATTAATATCGCCAAACCATAAAT
CCAGCGTCACGCGGCCTTCATCGAGTAATAAACGATGGCAACCGGGCAAGGGCATTGGCCACTGCGCCTGAAGTTGTTCT
GCCCACGGAGTCAGTTCCGGCCAGTGTTGATGCGCTAAGGCTAAATCCGCACGGGTGAGGGGAAATTTCTCAAAACTAAT
GAAATGTAAGCGTTGTAATTGCGCTTGCGGATGCGCTTCGCGAAACTGATCAAATGCCTGCCATAGCGTCAGGAAGTTTA
ATCCGGTGCCGAAGCCGCTCTCTGCTACCACAAACAGAGGATGTGGATGTTCAGGAAAGCGTGCCTCTAATTGGTTACCT
CCCAGAAAAACATAACGCGTCTCTTCCAGCCCGTTATCGTTGGAAAAATAGACATCGTCAAAATCTCGGGAAACAGGTGT
ACCCTCAGCATTAAATTCGAGGTTGGCAGGTTGTATGGAGTAGTGTTTCACGTAAGTTACTCGTCTTACAGGCGGTGGCT
CGATCTTAGCGATGTGTGTAAGGCTGCGCAAATTTCTCTATTAATTGGCTGATCGGACTTGTTCGGCGTACAAGTGTACG
CTATTGTGCATTCGAAACTTACTCTATGTGCGACTTACAGAGGTATTGAATGAAACGTGCAGTGATTACTGGCCTGGGCA
TTGTTTCCAGCATCGGTAATAACCAGCAGGAAGTCCTGGCATCTCTGCGTGAAGGACGTTCAGGGATCACTTTCTCTCAG
GAGCTGAAGGATTCCGGCATGCGTAGCCACGTCTGGGGCAACGTAAAACTGGATACCACTGGCCTCATTGACCGCAAAGT
TGTGCGCTTTATGAGCGACGCATCCATTTATGCATTCCTTTCTATGGAGCAGGCAATCGCTGATGCGGGCCTCTCTCCGG
AAGCTTACCAGAATAACCCGCGCGTTGGCCTGATTGCAGGTTCCGGCGGCGGCTCCCCGCGTTTCCAGGTGTTCGGCGCT
GACGCAATGCGCGGCCCGCGCGGCCTGAAAGCGGTTGGCCCGTATGTGGTCACCAAAGCGATGGCATCCGGCGTTTCTGC
CTGCCTCGCCACCCCGTTTAAAATTCATGGCGTTAACTACTCCATCAGCTCCGCGTGTGCGACTTCCGCACACTGTATCG
GTAACGCAGTAGAGCAGATCCAACTGGGCAAACAGGACATCGTGTTTGCTGGCGGCGGCGAAGAGCTGTGCTGGGAAATG
GCTTGCGAATTCGACGCGATGGGTGCGCTGTCTACTAAATACAACGACACCCCGGAAAAAGCCTCCCGTACTTACGATGC
TCACCGTGACGGTTTTGTTATCGCTGGCGGCGGCGGTATGGTTGTGGTCGAAGAACTGGAACACGCGTTGGCACGTGGTG
CTCATATCTACGCTGAAATCGTTGGCTACGGCGCAACGTCTGATGGCGCAGACATGGTTGCTCCATCTGGCGAAGGCGCA
GTGCGCTGCATGAAGATGGCGATGCACGGTGTTGATACGCCAATCGACTACCTGAACTCCCACGGTACTTCGACTCCGGT
TGGCGACGTGAAAGAGCTGGCTGCTATCCGTGAAGTGTTCGGCGATAAGAGCCCGGCGATTTCTGCAACCAAAGCCATGA
CCGGTCACTCTCTGGGCGCTGCTGGCGTACAGGAAGCTATCTACTCTCTGCTGATGCTGGAACACGGCTTTATCGCCCCG
AGCATCAACATTGAAGAGCTGGACGAGCAGGCTGCGGGTCTGAATATCGTGACCGAAACGACCGATCGCGAACTGACCAC
CGTTATGTCTAACAGCTTCGGCTTCGGCGGCACCAACGCCACGCTGGTAATGCGCAAGCTGAAAGATTAATTCGGAGTAG
GTCGGAGTAGGTCGGATAAGACGCGCCAGCGTCGCATCCGACGTTACGCGCCAATGCGGCATTCGGCACTAACGCCAAAG
GGAACCCGATGGTTCCCTTTTTCACATCATTGACAATCGCCGCCTGTTCCAGGCAAACTTCCCGCTTTGTCGATTTCCTT
CTGAAAAGACGTACGCGTTAATTCCTGCCAACGCACCGTAACCCTGAAACCAGAGAGATGAGACGGGGATACTCCTCGCC
TTGCGCTGCATTCTGGAGTAATGCATGACTGCTGTAAGCCAAACCGAAACACGATCTTCTGCCAATTTTTCGCTCTTCCG
CATCGCTTTTGCCGTTTTTCTCACCTACATGACCGTAGGGCTGCCGTTGCCGGTTATCCCGCTGTTTGTTCATCATGAAC
TGGGCTATGGCAATACCATGGTCGGCATTGCCGTCGGGATTCAGTTTCTGGCTACGGTGCTGACGCGTGGCTATGCCGGG
CGACTGGCCGATCAATATGGCGCAAAACGTTCGGCGCTTCAGGGGATGTTAGCTTGTGGTCTGGCGGGGGGCGCGTTGCT
GCTGGCGGCGATTTTGCCCGTCTCCGCACCGTTCAAATTTGCCCTGTTGGTCGTCGGGCGTTTGATTCTTGGCTTTGGTG
AAAGCCAGTTACTGACAGGCGCTCTGACCTGGGGATTAGGCATCGTAGGGCCAAAACACTCTGGCAAAGTAATGTCATGG
AACGGAATGGCGATTTACGGTGCCCTCGCTGTTGGTGCACCGCTTGGCCTGTTGATTCATAGCCATTACGGTTTTGCCGC
ACTGGCGATCACCACAATGGCATTACCCTTACTGGCGTGGGCCTGTAACGGCACAGTGCGCAAAGTACCGGCCCTGGCGG
GAGAACGTCCATCGCTGTGGAGCGTTGTCGGGCTTATCTGGAAACCAGGGTTAGGTCTGGCACTACAAGGCGTTGGTTTT
GCGGTTATCGGGACTTTCGTTTCGCTCTACTTTGCCAGCAAAGGATGGGCGATGGCGGGCTTTACTCTTACCGCGTTTGG
CGGGGCATTTGTCGTGATGCGCGTCATGTTTGGCTGGATGCCGGACCGTTTTGGCGGCGTGAAAGTGGCGATAGTCTCTC
TGCTTGTAGAAACGGTGGGCTTGTTGCTGCTCTGGCAAGCCCCGGGTGCGTGGGTCGCATTAGCGGGCGCGGCGTTAACC
GGAGCCGGATGTTCGCTTATCTTTCCTGCGCTGGGCGTGGAGGTGGTTAAACGCGTCCCCTCACAAGTTCGCGGCACCGC
ACTGGGCGGTTACGCCGCGTTTCAGGATATCGCCCTCGGCGTCTCCGGGCCGCTGGCGGGAATGCTGGCGACCACGTTTG
GTTACTCTTCGGTATTTCTTGCCGGGGCGATCTCTGCAGTGCTGGGAATTATTGTCACGATACTGTCATTTCGTCGGGGC
TAACGAACCAGCCAGACCAGCATCAGGATAATCGCGACTAACAGTATCCACAGCGCGGGACGCGTTGCCATATTTTGCAA
CGTGTCCATCATCGGTGGAAAAGGATTAAGCAGCGGTTGCATATCACGCGGATCAATCCCTTTAACCCGCCGTTGATAAA
GCTGATTAAGAATATCCTCGGCCTGGGCAGAAGAAAGCGATGATTGCGCAGAAAGGCCATATTTTTGCTGGATATATGCC
GATAACGCCGCCAGTTCACTGGCATCTAAAGGTTGTTTTAGCGCCATCTGTAGTGATTCCAGCGTCGGCGTATTTTGCTG
GCTTAGCGTCTGACGCGCCTGTAGCCAGGTCACCAGATGGTTAAACAGTTTCGCTGGAATTAACTCGCCATCTTTCACCC
CGGAAAGTTCCAGCATCGATTGCCAGATCTGTTTGCTGGGTTCCCCCGTTGCCGCCGCAAGTTTGGTCACCAGCTGTTTG
AGCGCATTGTGCTCCGCCGGTAATAAAGGACGATCGGTCGCCTCGCGCTGCTGCGGTTGCGGAATAACCATCTTCCCTTC
CTGCAACAGGGTTAGAATGGTTTTTAATTGCTCCGGTGAGAGCTGATTCAGCGGCGTCTGACCAAAGTTATGACGGATAT
AATCCGTGACCGCCTGACGATTATTCCCCAGACGTAAATACTCCCCTAATTGCGCTAAAAGCTGGCGGGCAGAATGGCTT
TTTTGCGCGGCCAGCAGACGTTGCGCCAGATTATGCTCAGCGGCAGGGAAGTGACGCGAAAGCAGCGGTGAATCTCCCGA
CAGACCAATATCGTGCCTGATACCCGCCCACAGTTCTGCTCTTTGCTGTTGCGTCAGTGAGGTCACTTTCGTCATTAAGC
TTTCCAGCGAAGTACGTTGCTGACTGGATAAAGGCTGATTGCCCGCGCCAGACGGCAGGTTATCTCCCTGACCTGGTGGT
TGCCCAGGAGGAGGGCCGGAAATAGGTTGTATCATTACGTATCCTTATACCTGAAATCTTCGCAAGTATGCCTGGCCGCG
AGATTATGGCACACTTGTCCGGTTAACTCTCGTCTCATACAGGTAACACAAACGTGAAAATCCTTGTTGATGAAAATATG
CCTTATGCCCGCGACTTATTTAGCCGTTTGGGTGAGGTGACCGCGGTTCCCGGGCGTCCAATCCCCGTCGCTCAACTGGC
AGACGCGGATGCGCTGATGGTGCGTTCGGTCACGAAAGTGAATGAATCTTTGCTGGCAGGAAAACCCATTAAATTTGTTG
GCACTGCCACTGCGGGGACCGACCATGTCGATGAAGCATGGTTGAAGCAGGCGGGAATTGGTTTTTCCGCTGCACCTGGC
TGTAATGCGATTGCGGTGGTGGAATATGTTTTCTCCTCCCTGCTGATGCTTGCCGAACGCGATGGATTTTCACTGCACGA
GCGTACCGTGGGGATCGTGGGCGTTGGTAACGTTGGACGTCGATTGCAGGCGCGACTGGAAGCGTTAGGGATTAAAACCT
TGCTTTGCGATCCGCCTCGCGCTGACCGTGGGGATGAGGGTGATTTCCGCTCGCTGGATGAGTTAGTCCAGCGCGCGGAT
ATTCTGACTTTCCATACGCCACTCTTTAAAGATGGTCCGTACAAAACGCTACATCTGGCGGATGAAAAACTGATCCGTAG
CCTGAAGCCGGGAGCGATTCTGATTAACGCCTGCCGTGGCGCAGTCGTCGATAATACCGCGCTGCTGACCTGCCTGAATG
AAGGCCAGAAGTTAAGCGTGGTGCTGGATGTCTGGGAAGGCGAGCCGGAACTTAATGTGGAATTGCTGACAAAAGTGGAT
ATCGGCACGCCGCATATTGCAGGCTATACCCTGGAAGGTAAAGCACGCGGTACTACGCAAGTGTTTGAAGCCTATAGCAA
GTTTATTGGGCATGAACAGCACGTTGCGCTGGATACATTACTGCCCGCGCCAGAGTTTGGTCGCATTACGCTGCATGGCC
CGCTCGATCAACCGACGCTGAAAAGGCTGGTGCATTTGGTGTATGATGTGCGCCGCGATGACGCACCGCTGCGTAAAGTC
GCCGGGATACCGGGTGAGTTCGATAAACTGCGCAAAAACTATCTTGAGCGCCGTGAATGGTCATCTCTGTATGTAATTTG
TGATGACGCCAGTGCGGCATCATTGCTGTGTAAACTGGGTTTTAACGCCGTTCATCATCCGGCACGTTAATCTCTTCTTC
ATGCTCTCTGCTGTAACATTGGCAGGGAGCTTTGCTATTTCTGGAGTAAACCACCATGTCTGAAGGCTGGAACATTGCCG
TCCTGGGCGCAACTGGCGCTGTGGGCGAAGCCCTGCTTGAAACGCTGGCTGAACGTCAGTTCCCGGTTGGGGAAATTTAT
GCACTGGCACGTAACGAAAGCGCAGGCGAACAACTGCGCTTTGGTGGTAAAACAATCACCGTGCAGGATGCCGCTGAATT
CGACTGGACGCAGGCGCAGCTGGCATTTTTTGTCGCAGGCAAAGAAGCTACCGCTGCCTGGGTTGAAGAAGCGACCAACT
CAGGTTGCCTGGTGATCGACAGCAGCGGACTGTTTGCTCTCGAACCAGACGTACCGCTGGTGGTGCCGGAAGTAAACCCG
TTTGTACTGACCGATTACCGCAACCGGAATGTCATCGCCGTACCGGACAGTCTGACCAGCCAGTTGCTGGCGGCACTGAA
ACCGTTAATCGATCAGGGCGGTTTATCACGTATCAGCGTTACCAGCCTGATTTCAGCCTCCGCCCAGGGCAAAAAAGCGG
TCGATGCGTTAGCGGGGCAGAGTGCGAAATTGCTCAACGGCATTCCGATTGACGAAGAAGATTTCTTCGGGCGTCAGCTG
GCGTTCAACATGCTGCCGTTACTGCCGGATAGCGAAGGTAGCGTGCGTGAAGAACGTCGTATCGTTGACGAAGTACGCAA
AATCCTGCAGGACGAAGGGCTGATGATTTCGGCAAGCGTCGTCCAGGCACCGGTATTCTACGGTCATGCCCAGATGGTCA
ACTTTGAAGCACTGCGTCCGCTGGCGGCAGAAGAAGCGCGTGATGCGTTTGCTCAGGGCGAAGATATTGTGCTCTCTGAA
GAGAACGAATTCCCGACTCAGGTAGGGGATGCTTCTGGTACGCCGCATCTTTCTGTTGGCTGCGTGCGTAATGACTACGG
TATGCCGGAGCAAGTCCAGTTCTGGTCGGTGGCCGATAACGTTCGCTTTGGCGGCGCGCTGATGGCAGTAAAAATCGCCG
AGAAACTGGTGCAGGAGTATCTGTACTAATGTCCGACCAGCAACAACCGCCAGTTTATAAAATTGCGCTGGGCATTGAGT
ACGACGGCAGTAAGTATTACGGCTGGCAACGGCAGAACGAAGTTCGCAGTGTGCAGGAGAAGCTGGAAAAGGCGCTCTCC
CAGGTGGCGAACGAACCCATCACCGTCTTCTGCGCCGGGCGTACTGACGCAGGGGTACACGGTACCGGGCAGGTTGTGCA
TTTCGAAACAACCGCGCAGCGCAAAGACGCTGCGTGGACGTTGGGCGTAAATGCGAATTTACCTGGTGACATCGCCGTGC
GTTGGGTTAAAGCTGTACCTGATGATTTTCATGCCCGATTTAGCGCCACGGCTCGCCGTTATCGCTACATCATCTACAAT
CATCGGCTGCGCCCGGCGGTACTGAGTAAAGGGGTAACCCATTTTTACGAACCGCTGGACGCTGAACGGATGCATCGGGC
TGCGCAATGCTTGCTGGGCGAGAATGATTTCACCTCGTTCCGTGCGGTGCAGTGCCAGTCCCGAACCCCGTGGCGCAACG
TTATGCATATTAATGTCACGCGTCACGGTCCTTATGTGGTGGTAGATATCAAAGCGAATGCCTTTGTACATCATATGGTC
AGGAATATTGTCGGCAGCCTGATGGAAGTCGGTGCCCACAACCAGCCGGAGAGCTGGATAGCAGAGTTGCTGGCGGCAAA
GGACAGAACGCTGGCGGCAGCAACGGCAAAAGCGGAAGGGCTGTATCTGGTCGCGGTGGATTACCCTGACCGGTATGATC
TTCCAAAACCGCCAATGGGCCCGCTATTTCTGGCGGACTAACGAGAATAACGCTCGTAACATTTCAGGCTGTAGCCAACG
TAGTTACAGCCTGAAAGATGACGAGTACAAGGCATAGGCAAATATGGACCTGATTTATTTCCTCATCGATTTTATCCTGC
ACATTGACGTGCATCTGGCAGAGCTGGTCGCGGAGTACGGCGTCTGGGTTTATGCCATTTTGTTCTTAATTTTGTTCTGT
GAAACCGGTCTGGTGGTAACGCCGTTTTTACCGGGTGATTCATTGCTGTTTGTTGCCGGTGCGTTGGCATCACTGGAAAC
CAACGATCTCAACGTCCATATGATGGTGGTGCTGATGCTGATCGCCGCGATTGTGGGTGACGCGGTCAATTACACTATCG
GGCGGTTGTTCGGTGAAAAGTTATTCAGTAATCCCAATTCGAAAATTTTCCGTCGCAGTTATCTCGACAAAACCCATCAG
TTTTATGAGAAACATGGCGGCAAAACGATTATTCTCGCCCGTTTTGTGCCGATCGTCAGAACGTTCGCCCCGTTTGTTGC
GGGAATGGGCCACATGTCGTACCGTCATTTCGCTGCTTATAACGTGATCGGCGCACTGTTGTGGGTACTGCTTTTTACCT
ACGCAGGCTATTTCTTCGGTACAATCCCGATGGTTCAGGATAACCTTAAGCTGCTGATCGTCGGGATTATTGTGGTTTCT
ATTTTGCCGGGCGTCATCGAAATAATCCGTCACAAACGCGCTGCGGCACGCGCCGCAAAATAAAAAGTAACTCAGCGGTT
CGACCACTTTTTTATCCAAAGTTTCGGGCTGTTATGTTTTAATGTGCAACATTCATGGTCTGTTGGGGGCAAAAATGGCA
TTATGCGTCCCCAAAGATAAAACTGGCATCGAACCAGGTTCAGACAGAAAGGTCCCTAATGAGCTGGATTGAACGAATTA
AAAGCAACATTACTCCCACCCGCAAGGCGAGCATTCCTGAAGGGGTGTGGACTAAGTGTGATAGCTGCGGTCAGGTTTTA
TACCGCGCTGAGCTGGAACGTAATCTTGAGGTCTGTCCGAAGTGTGACCATCACATGCGTATGACAGCGCGTAATCGCCT
GCATAGCCTGTTAGATGAAGGAAGCCTTGTGGAGCTGGGTAGCGAGCTTGAGCCGAAAGATGTGCTGAAGTTTCGTGACT
CCAAGAAGTATAAAGACCGTCTGGCATCTGCGCAGAAAGAAACCGGCGAAAAAGATGCGCTGGTGGTGATGAAAGGCACT
CTGTATGGAATGCCGGTTGTCGCTGCGGCATTCGAGTTCGCCTTTATGGGCGGTTCAATGGGGTCTGTTGTGGGTGCACG
TTTCGTGCGTGCCGTTGAGCAGGCGCTGGAAGATAACTGCCCGCTGATCTGCTTCTCCGCCTCTGGTGGCGCACGTATGC
AGGAAGCACTGATGTCGCTGATGCAGATGGCGAAAACCTCTGCGGCACTGGCAAAAATGCAGGAGCGCGGCTTGCCGTAC
ATCTCCGTGCTGACCGACCCGACGATGGGCGGTGTTTCTGCAAGTTTCGCCATGCTGGGCGATCTCAACATCGCTGAACC
GAAAGCGTTAATCGGCTTTGCCGGTCCGCGTGTTATCGAACAGACCGTTCGCGAAAAACTGCCGCCAGGATTCCAGCGCA
GTGAATTCCTGATCGAGAAAGGCGCGATCGACATGATCGTCCGTCGTCCGGAAATGCGCCTGAAACTGGCGAGCATTCTG
GCGAAGTTGATGAATCTGCCTGCGCCGAATCCTGAAGCGCCGCGTGAAGGCGTAGTGGTACCCCCGGTACCGGATCAGGA
ACCTGAGGCCTGATAACTGATAAGGGCAGGGCCACTGGCTCTGCCCTTTTGCTATTCTCACCGTAACGAATCAGCGGATA
CCATGATTATCAAACGCACTCCTCAAGCCGCGTCGCCTCTGGCTTCGTGGCTTTCTTATCTGGAAAACCTGCACAGTAAA
ACTATCGATCTCGGCCTTGAGCGCGTGAGCCAGGTCGCGGCGCGTCTTGGCGTTCTGAAACCAGCGCCATTTGTGTTTAC
CGTTGCGGGTACGAATGGCAAAGGCACCACCTGCCGTACGCTGGAGTCGATTCTGATGGCGGCAGGGTACAAAGTGGGCG
TCTACAGTTCGCCTCATCTGGTGCGTTATACCGAGCGCGTACGTGTGCAGGGTCAGGAATTGCCGGAATCGGCCCACACC
GCCTCTTTTGCGGAGATTGAATCGGCACGCGGTGATATTTCCCTGACCTATTTCGAGTACGGTACGCTGTCGGCGTTGTG
GCTGTTCAAACAGGCACAACTTGACGTGGTGATTCTGGAAGTAGGGCTGGGCGGTCGTCTGGACGCAACCAATATTGTCG
ACGCCGATGTCGCGGTAGTAACCAGTATTGCGCTGGATCATACCGACTGGCTGGGGCCAGATCGCGAAAGTATTGGTCGC
GAGAAAGCAGGCATCTTCCGCAGCGAAAAACCGGCAATTGTCGGTGAGCCGGAAATGCCTTCTACCATTGCTGATGTGGC
GCAGGAAAAAGGTGCACTGTTACAACGTCGGGGCGTTGAGTGGAACTATTCCGTCACCGATCATTACTGGGCGTTTAGCG
ATGCTCACGGCACGCTGGAAAATCTGCCGTTGCCGCTTGTCCCGCAACCGAATGCCGCAACGGCGCTGGCGGCACTGCGT
GCCAGCGGGCTGGAGGTCAGTGAAAATGCCATTCGCGACGGGATTGCCAGCGCAATTTTGCCGGGACGTTTCCAGATTGT
GAGCGAGTCGCCACGCGTTATTTTTGATGTCGCGCATAATCCACATGCGGCGGAATATCTCACCGGGCGTATGAAAGCGC
TACCGAAAAACGGGCGCGTGCTGGCGGTTATCGGTATGCTACATGATAAAGATATTGCCGGAACTCTGGCCTGGTTGAAA
AGCGTGGTTGATGACTGGTATTGTGCGCCACTGGAAGGGCCGCGCGGTGCCACGGCAGAACAACTGCTTGAGCATTTGGG
TAACGGCAAATCATTTGATAGCGTTGCGCAGGCATGGGATGCCGCAATGGCGGACGCTAAAGCGGAAGACACCGTGCTGG
TGTGTGGTTCTTTCCACACGGTCGCACATGTCATGGAAGTGATTGACGCGAGGAGAAGCGGTGGCAAGTAAGTTTCAGAA
TCGGTTAGTGGGCACGATCGTGCTGGTGGCGCTGGGGGTGATTGTACTTCCAGGGCTGCTGGACGGGCAGAAAAAACATT
ATCAGGATGAGTTTGCGGCTATCCCGCTGGTTCCAAAAGCGGGCGATCGCGATGAGCCTGATATGATGCCAGCCGCCACC
CAGGCGTTGCCGACGCAGCCGCCGGAAGGCGCAGCGGAAGAGGTGCGGGCAGGTGATGCCGCAGCACCGTCGCTCGATCC
GGCCACTATTGCAGCCAATAACACCGAGTTTGAACCGGAACCTGCACCGGTCGCGCCACCGAAGCCGAAACCGGTGGAGC
CGCCTAAACCAAAGGTTGAAGCACCACCTGCGCCGAAGCCAGAACCGAAGCCGGTCGTGGAAGAAAAAGCTGCACCGACG
GGTAAAGCCTATGTTGTGCAACTGGGTGCGCTGAAAAATGCCGATAAAGTGAATGAAATTGTCGGTAAGCTGCGCGGTGC
CGGTTATCGGGTTTATACGTCGCCATCCACGCCAGTGCAGGGTAAAATTACCCGTATTCTGGTTGGGCCGGATGCCTCGA
AAGATAAGCTGAAAGGTTCGCTGGGTGAGTTGAAGCAACTTTCTGGCTTAAGTGGCGTGGTAATGGGCTATACGCCGAAT
TAATACGGTCTTGCCTGATGCGACGCTGGCGCGTCTTATCAGGCCTACGCAGGGGTAGAACCGTAGGTTGGATAAGGCGT
TTACGCCGCATCCGACACGCATTGCACGATGCCGCAAAGGCATAAAAAGTCGATGGCGTTGAATATTTTTTCAGCGCCAT
TTTTATTGATGCGCGGGAAGGAAATCCCTACGCAAACGTTTTCTTTTTCTGTTAGAATGCGCCCCGAACAGGATGACAGG
GCGTAAAATCGTAGGACACATATGGTCTGGATTGATTACGCCATAATCGCGGTGATTGCTTTTTCCTCTCTGGTTAGCCT
GATCCGCGGCTTTGTTCGTGAAGCGTTATCGCTGGTGACATGGGGTTGTGCTTTCTTTGTTGCCAGTCATTACTACACTT
ACCTGTCAGTCTGGTTTACGGGCTTTGAAGACGAACTGGTTCGAAATGGGATTGCCATCGCGGTACTGTTTATCGCTACC
CTGATCGTTGGTGCTATCGTGAACTTCGTGATAGGCCAGTTGGTGGAGAAAACGGGGTTGTCAGGCACCGATCGGGTGCT
GGGCGTCTGTTTCGGTGCGTTGCGCGGTGTGTTGATTGTTGCCGCCATTCTCTTCTTTCTCGACTCCTTTACCGGGGTGT
CGAAAAGCGAAGACTGGAGCAAATCACAGCTGATCCCGCAGTTCAGTTTTATCATCAGATGGTTTTTTGATTATCTGCAA
AGCTCGTCAAGTTTCTTGCCCAGAGCGTAAGTGCTCTGAGATGTGGCTTAACGAGGAAAAAGACGTATGTGCGGTATTGT
CGGTATCGCCGGTGTTATGCCGGTTAACCAGTCGATTTATGATGCCTTAACGGTGCTTCAGCATCGCGGTCAGGATGCCG
CCGGCATCATCACCATAGATGCCAATAACTGCTTCCGTTTGCGTAAAGCGAACGGGCTGGTGAGCGATGTATTTGAAGCT
CGCCATATGCAGCGTTTGCAGGGCAATATGGGCATTGGTCATGTGCGTTACCCCACGGCTGGCAGCTCCAGCGCCTCTGA
AGCGCAGCCGTTTTACGTTAACTCTCCGTATGGCATTACGCTTGCCCACAACGGCAATCTGACCAACGCTCACGAGTTGC
GTAAAAAACTGTTTGAAGAAAAACGCCGCCACATCAACACCACTTCCGACTCGGAAATTCTGCTTAATATCTTCGCCAGC
GAGCTGGACAACTTCCGCCACTACCCGCTGGAAGCCGACAACATTTTCGCCGCCATCGCTGCTACAAACCGCTTAATCCG
CGGCGCGTATGCCTGTGTGGCGATGATTATCGGCCACGGTATGGTTGCTTTCCGCGATCCTAACGGTATTCGTCCGCTGG
TACTGGGAAAACGTGATATTGACGAGAACCGCACAGAATATATGGTCGCTTCCGAAAGCGTTGCGCTCGATACACTGGGC
TTTGATTTCCTGCGTGACGTCGCGCCTGGCGAAGCGATTTACATCACTGAAGAAGGGCAGTTGTTTACCCGTCAATGTGC
TGACAATCCGGTCAGCAATCCGTGCCTGTTTGAGTATGTATACTTTGCTCGCCCGGACTCGTTCATCGACAAAATTTCCG
TTTACAGCGCGCGTGTGAATATGGGCACGAAGCTGGGCGAGAAAATTGCCCGCGAATGGGAAGATCTGGATATCGACGTG
GTGATCCCGATCCCGGAAACCTCGTGTGATATCGCGCTGGAAATTGCGCGTATTCTGGGCAAACCGTACCGCCAGGGCTT
CGTTAAAAACCGCTATGTTGGCCGCACCTTCATCATGCCGGGCCAGCAGCTGCGTCGTAAGTCCGTGCGCCGTAAACTGA
ACGCCAACCGCGCCGAGTTCCGCGATAAAAACGTCCTGCTGGTCGACGACTCCATCGTCCGTGGCACCACTTCTGAGCAG
ATTATCGAGATGGCACGCGAAGCCGGAGCGAAGAAAGTGTACCTCGCTTCTGCGGCACCGGAAATTCGCTTCCCGAACGT
TTACGGTATCGATATGCCGAGCGCTACGGAACTGATCGCTCACGGTCGCGAAGTAGATGAAATTCGCCAGATCATCGGTG
CTGACGGGTTGATTTTCCAGGATCTGAACGATCTGATCGAAGCCGTTCGCGCTGAAAACCCGGATATCCAGCAGTTTGAA
TGCTCGGTGTTCAACGGCGTCTACGTCACCAAAGATGTTGATCAGGGCTACCTCGATTTCCTCGATACTTTACGTAATGA
CGACGCCAAAGCAGTGCAACGTCAGAACGAAGTGGAAAATCTCGAAATGCATAACGAAGGATGATGCCTTCGCTCAGGGT
GCCGATCTGGCACCCTGACTTGCAACTCCCGCCGAAATCCTGCAAAGTCTGCCTGCAAGTCTGACAGGGCAACTATTTAT
GAAACGACTTATTGTGGGCATCAGCGGTGCCAGCGGCGCGATTTATGGCGTGCGTTTATTACAGGTTCTGCGCGATGTCA
CAGATATCGAAACGCATCTGGTAATGAGCCAGGCGGCGCGCCAGACCTTATCCCTCGAAACGGATTTTTCCCTGCGCGAA
GTGCAGGCGTTAGCCGATGTCACGCACGATGCGCGCGATATTGCCGCCAGCATCTCTTCCGGTTCTTTCCAGACGTTGGG
GATGGTGATTTTACCCTGTTCAATCAAAACCCTGTCCGGCATTGTCCATAGCTATACTGATGGCTTACTGACCCGTGCGG
CAGATGTTGTGCTGAAAGAGCGTCGCCCGTTGGTGCTCTGCGTGCGTGAAACACCATTGCACTTAGGCCATCTGCGTTTA
ATGACGCAGGCAGCAGAAATCGGTGCGGTGATTATGCCTCCCGTTCCGGCGTTTTATCATCGCCCGCAATCCCTTGATGA
TGTGATAAATCAGACGGTTAATCGTGTTCTTGACCAGTTTGCGATAACCCTTCCTGAAGATCTCTTTGCCCGCTGGCAGG
GCGCATAACTCCGCTGTTGCCCTGTTTCAGGGCAATTTTGCAACCGCGATCAAATCCTCGACATTTTGTTTCTGCCATTC
AATCGAAACGCTGCGATTCAACCGCTATACCTGCTATCTTCAACTTTAGGACAATAATGCAACGTCTTATTAACATATTT
AACGTTGAATGTTATTGTTGTCGTCAAGATGGCATAAGACCTGCATGAAAGAGCCTGCAAACACACAACACAATACACAA
CATAAAAAGCCATTTTTACTTGAGGGTTATGTATGAAGAAGTCGATTCTCGCTCTGTCTTTGTTAGTCGGTCTCTCCGCA
GCGGCTTCCAGCTATGCGGCGCTACCGGAGACGGTACGTATCGGAACCGATACCACCTATGCGCCGTTCTCGTCGAAAGA
TGCTAAAGGTGATTTTGTTGGCTTTGATATCGATCTCGGTAACGAGATGTGCAAACGGATGCAGGTGAAATGTACCTGGG
TTGCCAGTGACTTTGACGCGCTGATCCCCTCACTGAAAGCGAAAAAAATCGACGCCATTATTTCGTCGCTCTCCATTACC
GATAAACGTCAGCAGGAGATTGCTTTCTCCGACAAGTTGTACGCCGCAGATTCTCGTTTGATTGCCGCCAAAGGTTCGCC
GATTCAGCCAACGCTGGATTCACTGAAAGGTAAACATGTTGGTGTGCTGCAGGGATCAACCCAGGAAGCTTACGCTAACG
AGACCTGGCGTAGCAAAGGTGTGGATGTGGTGGCCTATGCCAACCAGGATTTGGTCTATTCCGATCTGGCTGCAGGACGT
CTGGATGCTGCACTGCAGGATGAAGTTGCTGCCAGCGAAGGATTCCTCAAGCAACCTGCTGGTAAAGACTTCGCCTTTGC
TGGCTCATCAGTGAAAGACAAAAAATACTTCGGTGACGGCACCGGTGTAGGGCTACGTAAAGATGATGCTGAACTGACGG
CTGCCTTCAATAAGGCGCTTGGCGAGCTGCGTCAGGACGGCACCTACGACAAGATGGCGAAAAAGTATTTTGACTTTAAT
GTCTACGGTGACTGATACGTCGCAGGGAAGCTGTACCTGATGGAATGATCATCATGGTGCACGCTAGGTTTGTTGCACTA
TTGTGGTGCATTGAAATGCATACTTAAGCATTTTTAATGAAAAATAATACGTCTAACGGGGCGGGATATTTTGCCTTGAT
GGTCAATTTTATGGCACGATAAGTGTAACAAACCTGTAAATATTCCCTATAAAAAGACTGTCAGTTGAGGACATTATGAA
AAAACTGGTGCTATCGCTCTCTCTGGTTCTGGCCTTCTCCAGCGCAACTGCGGCATTTGCTGCGATTCCGCAAAACATCC
GCATCGGTACCGACCCGACCTATGCGCCATTTGAATCAAAAAATTCACAAGGCGAACTGGTTGGCTTCGATATCGATCTG
GCAAAGGAATTATGCAAACGCATCAATACGCAATGTACGTTTGTCGAAAATCCGCTGGATGCGTTAATCCCGTCCTTAAA
AGCGAAGAAGATTGACGCCATCATGTCATCGCTTTCCATTACGGAAAAACGTCAGCAAGAAATAGCCTTCACCGACAAAC
TGTACGCTGCCGATTCTCGTCTGGTGGTGGCGAAAAATTCTGACATTCAGCCGACAGTCGAGTCGCTGAAAGGCAAACGG
GTAGGCGTATTGCAGGGCACCACCCAGGAGACGTTCGGTAACGAACACTGGGCACCAAAAGGCATTGAAATCGTCTCGTA
TCAGGGGCAGGACAACATTTATTCTGACCTGACTGCCGGACGTATTGATGCCGCGTTCCAGGATGAGGTCGCTGCCAGCG
AAGGTTTCCTTAAACAACCTGTCGGTAAAGATTACAAATTCGGTGGCCCGTCTGTTAAAGATGAAAAACTGTTTGGCGTA
GGGACCGGCATGGGCCTACGTAAAGAAGATAACGAACTGCGCGAGGCACTGAACAAAGCCTTTGCCGAAATGCGCGCTGA
CGGTACTTACGAGAAATTAGCGAAAAAGTACTTCGATTTTGATGTTTATGGTGGCTAATCGCCATCGGTGAAAGAAAGCC
CGCTCCCTTCGGGTAACCGGAGGGAGACAAGAGGCGGTAATTCACCACACACGACAGGACAGGCTGCATGTTGTATGGGT
TTTCAGGTGTTATTTTACAGGGTGCGCTCGTCACGCTGGAGCTGGCTATCAGCTCTGTAGTGCTCGCTGTAATCATCGGT
TTAATTGGCGCTGGCGGTAAGCTCTCTCAAAATCGGCTTTCGGGGCTGATTTTCGAAGGGTACACCACGCTGATTCGTGG
CGTGCCGGACTTAGTGTTGATGCTGCTGATTTTCTACGGTTTGCAGATTGCGCTAAACACGGTGACGGAGGCGATGGGCG
TCGGGCAGATTGATATCGATCCGATGGTCGCTGGTATTATCACTCTCGGTTTTATCTACGGTGCTTATTTTACCGAAACG
TTCCGTGGTGCTTTTATGGCAGTGCCGAAAGGACATATAGAGGCGGCGACGGCGTTCGGTTTTACTCGTGGGCAAGTGTT
TCGGCGGATCATGTTTCCGGCGATGATGCGTTACGCCCTGCCAGGCATTGGCAACAACTGGCAGGTGATCCTCAAATCTA
CCGCACTGGTTTCGTTACTCGGCCTGGAAGATGTGGTCAAAGCCACGCAGCTGGCAGGCAAAAGTACCTGGGAACCGTTC
TATTTCGCCATCGTCTGTGGCGTAATTTACCTGGTTTTCACCACCGTTTCCAATGGTGTGCTGCTGTTCCTTGAGCGCCG
CTACTCCGTGGGTGTGAAGAGGGCTGACCTGTGATCGAAATCTTACATGAATACTGGAAACCGCTGCTGTGGACCGACGG
TTATCGCTTTACTGGTGTGGCGATCACTCTGTGGCTGCTTATTTTGTCGGTAGTGATAGGCGGAGTCCTGGCGCTGTTTC
TGGCGATTGGTCGTGTCTCCAGTAATAAATACATCCAGTTTCCAATCTGGTTATTTACCTATATTTTTCGCGGTACGCCG
CTGTATGTTCAGTTGCTGGTGTTCTATTCCGGCATGTATACGCTGGAGATTGTTAAGGGGACCGAGTTTCTTAACGCCTT
TTTCCGCAGTGGCCTGAACTGTACCGTGCTGGCGCTGACGCTTAACACCTGCGCTTACACTACCGAGATTTTTGCTGGGG
CAATCCGTTCGGTTCCGCATGGGGAAATTGAAGCCGCCAGAGCCTATGGCTTCTCGACTTTTAAAATGTATCGCTGCATT
ATTTTGCCTTCTGCGCTGCGTATTGCGTTACCGGCATACAGCAACGAAGTGATCCTGATGCTGCACTCTACTGCGTTGGC
ATTTACTGCCACGGTGCCGGATCTGCTGAAAATAGCCCGCGATATTAACGCCGCCACGTATCAACCTTTTACCGCCTTCG
GCATTGCCGCGGTGCTCTATTTAATCATCTCTTATGTCCTGATCAGCCTCTTTCGCAGAGCGGAAAAACGCTGGTTGCAG
CATGTGAAACCTTCTTCAACGCACTGAGAATACGATGTCCGAGAATAAATTAAACGTTATCGATTTGCACAAACGCTATG
GCGAACACGAAGTGCTGAAAGGGGTGTCACTGCAAGCGAATGCCGGAGATGTCATAAGCATCATCGGATCGTCGGGATCG
GGGAAAAGTACCTTTCTGCGCTGCATTAACTTCCTCGAAAAACCGAGTGAAGGGTCGATCGTGGTCAATGGCCAGACGAT
CAATCTGGTGCGCGGCAAAGACGGTCAACTCAAAGTCGCCGATAAAAATCAACTGCGCTTACTGCGCACACGCCTGACGA
TGGTATTCCAGCACTTCAATCTCTGGAGCCATATGACGGTGCTGGAAAACGTCATGGAAGCGCCGATTCAGGTGTTGGGC
CTGAGCAAGCAGGAAGCGCGCGAGCGGGCGGTGAAGTATCTGGCAAAAGTTGGGATAGACGAACGTGCACAGGGGAAATA
TCCGGTGCATCTTTCCGGCGGTCAGCAACAGCGTGTTTCTATCGCGCGGGCGCTGGCGATGGAACCGGAAGTTTTACTGT
TTGATGAACCTACCTCGGCGCTCGATCCTGAACTGGTAGGCGAAGTGTTGCGCATTATGCAGCAACTGGCAGAAGAGGGG
AAAACCATGGTGGTTGTGACTCACGAAATGGGCTTTGCTCGTCATGTTTCTACTCACGTCATTTTCCTCCATCAGGGGAA
AATAGAGGAAGAAGGCGCGCCGGAGCAGTTATTTGGCAACCCGCAAAGCCCTCGTCTGCAACAGTTCCTTAAAGGTTCGC
TGAAATAATTGCCTCTCCGGTGGCTAACGCTGCCGGAGTATTTTCAAGGGGAATTTGCGAGTCAGCTTCCGCTGAAATGT
AAAAGTTGCAGTCCGCTAAAAATACTTCTGAATTCGCTGTCCAAAGATAAAAACTGCCTGCTGCATTGGGTGTTAATCGT
GGTTATTGTCGCGTCATCTTAAATTTGAGGGGTGACGGAACGCCATGACAATATCGACAACTTCCACGCCGCATGATGCG
GTATTTAAATCTTTTTTACGCCATCCAGACACCGCGCGGGATTTTATTGATATTCATCTTCCCGCGCCGCTGCGCAAACT
GTGAGATTTAACGACGCTTAAACTGGAACCAAACAGTTTTATTGATGAAGACCTGCGGCAATATTATTCCGACCTCTTAT
GGTCTGTGAAAACGCAGGAGGGAGTGGGTTATATTTATGTAGTGATAGAGCACCAAAGTAAGCCGGAAGAATTAATGGCT
TTTCGCATGATGCGTTATTCCATTGCGGCAATGCAAAACCATCTTGATGCGGGCTATAAAGAGCTTCCATTGGTGATCCC
GATGCTGTTTTATCATGGTTGCAGAAGTCCTTATCCTTATTCACTCTGCTGGCTTGATGAATTTGCCGAGCCTGCGATTG
CCCGTAAAATATATTCATCGGCTTTTCCGTTGGTGGATATTACCGTGGTGCCGGATGACGAGATTATGCAACATCGCAAA
ATGGCGCTGTTGGAGTTAATTCAGAAACATATTCGTCAGCGCGATCTGTTGGGATTAGTCGACCAAATTGTTTCGCTGCT
AGTTACAGGGAACACTAATGACAGACAGCTAAAAGCCCTGTTTAATTATGTATTACAAACGGGAGATGCCCAGCGTTTCC
GTGCATTTATTGGTGAGATAGCAGAACGCGCACCACAGGAAAAGGAGAAACTGATGACCATTGCTGACAGATTACGTGAA
GAAGGGCGGAATGATGGATTAATTCTTGGCAAACGCGAAGAAGCCCTGCGTATTGCTCAGGAGATGCTGGATAGAGGTTT
AGACCGAGAGTTAGTTATGATGGTGACCCGACTTTCACCAGACGATCTTATCGCGCAAAGCCACTAACCCTGTAACACCG
GGAGTTAACTGGCGGATGTTTGCAGTAAACCACATCAGCGAACGACATCCGCCAGCGCCTCTTCTAAATCGTACCAACGA
AACGCAAAACCCGCTTCTTCCAGCCGTTTAGGCAGCGCGCGTTGTCCACCTAATACCAGTACTGAAGATTCGCCCATTAA
CAGCCGAATGGCGGTTGCGGGGACGCGCAAAATAGCCGGGCGATGCAGCGCATGACCGAGCGCATGGGCAAATTGTTCAT
TGCGTATCGGGTAGGGCGAAACCATATTAAATGGCCCGCGCAGCTCGTTATCCAGCAGCCAGAGAATGCCGTTGACCATA
TCATCGATATGAATCCAGGCCAGATACTGCCGACCGGAACCAATCGGCCCGCCCAGGCCAAGACGAAACGGCGGCAGCAT
TTTACCGAGAATACCGCCATCCGGTGCCAGCACTACGCCGGTACGCAGCAGGCACACTCGCGTTTTGTCACTTTGCGCCC
GGCAGGCAATTTCTTCCCAGCGGGCGCAGAGTTTATGGGTAAATTCGTTATGCGGCGGTTCCTCTTCGGTAACCACCACT
TCACCTAAGTCGCCATAATAGCCCGTTGCCGAGCCGGAAATGAGTACCGACGGTGGCGTGTCGCTGGCATTAATCAAATC
GACCAGTTTTTGCGTGATATTCCAGCGGCTTTGGCAGAGACGCTCTTTTTGCTCGTGAGTCCAGCGTTTATCAGCAATCG
GTTCTCCGGCGAGGTTGATTACCGCATCAACGCCGTTGAGGTTGCTTTGATCGGCAAGCCCTTGCCATAGCGTCACCTGC
GGCCCGAGCACGGAACTGGCTTTCTGCGGGTTACGCGTCATTACCGTGATTTGATGGCCCAGCTCCAGCAAACGTGGAAT
CAAATGGCGACCAATTAATCCCGTCCCTCCGGTGATCACTATGTTCATGCAGCCTCCCGATATGGCGGTTAACGCTGCCA
GCTTAAGGTCATGGATACCGAATCGGCGTAGCGCAGCGCGTGCAGTTTATCGATCTCCACTTCAGCATACGTCACCCAGT
GATGTTCACGTGCGATATCGAGCACATCCTGAGTTAATTTTTCCAGCAAAGAGAAACGGTTATTCTCTACATGCTGAATA
ATGTTTTTCGTTACGGTGCGATAATTCAGCGCATCGTTGATATCTTCGCTGGTGCGCGCTTTATCGGCGGGGTAGTGGAT
CGTCACATTGATAACAATATCCTGACGGTTGTTAATTTCTTCTTCCTTAATTCCGATAAATGTACGTAAACGAAGGTTCT
TTATACGAATAATAGCGGCAGGTTGTGCCATTGCAGGTTCTCCGTTGTTTTACTTAGGATGAAATAATACACGAGAACCT
GTTTCTGTTAACTATCCGAACGCTCATCACCGAGTTGTGCTTTTAGCAGTGCCTGCCCAGTGGCAGGGCGCGAACGGATC
CGCTCATGCCAGTTCTTGACTGCCGGATACATTGCGAGGTCAATTCGCTGGCGAGTCCAGGCATTAACCCACGGCCAGCA
GGCAATATCCGCAATGCTGTAGTTCTCACCTCCCAGCCAGGGCGAGTTTTCCAGCCGCTTGTTCAGTACATGGTACAGGC
GCTGAGTTTCAACCTGATAACGTTCAATAGCGTAAGGAATGGTTTGGGGGGCTGCGTGATTAAAATGATGATTTTGCCCA
AGCATCGGCCCCAGTCCGCCTACCTGCCAGAATAACCACTGTAATGTGGCGGCGCGCTCACGCGTTTCATGACTCAAAAA
GAGTCCTGTTTTCTCAGCCAGATACAACAAAATGGCACCAGATTCAAAGAGGCTTAGCGGTTCGCCGCCATCGGCTGGAG
AATGATCAACAATTGCCGGAATTTTGTTGTTAGGCGAAATGCGCAAAAATTCCGGGCGAAACTGACCGCCTTTCCCCAGG
TCTACCTTTATCAAGCGATAATCCAGCCCTGCTTCTTCGAGAAACAGCGTAATTTTGTGGCCATTGGGTGTCGGGGCGAA
ATAGAGATCGATCATTGCAGCTCCGGTTGTCTAATCATCTGAACACCACAAGTATAGAAAGCGCGGCGACTTGCGTGAGT
ATTCGTCACGTGACAGTGACAAAAAGGCTCTATAGTTTGATAGCCAGCCCCCTTTATTGCCGAGGACATAATGAGTAAAC
CCGCTATCACGCTTTGGTCAGATGCCCATTTTTTCTCCCCTTATGTGTTATCCGCCTGGGTGGCGTTGCAGGAAAAAGGC
CTGTCGTTTCATATCAAGACCATCGACCTCGACAGCGGTGAACATTTGCAACCGACGTGGCAAGGTTACGGTCAGACACG
CCGTGTGCCGTTATTACAAATCGATGATTTTGAGTTGAGTGAATCTTCTGCCATTGCGGAGTATCTGGAAGATCGATTTG
CGCCACCGACCTAGGAACGTATTTATCCGCTTGATTTAGAAAATCGTGCGCGTGCACGACAGATTCGGGCCTGGCTGCGC
AGCGATCTGATGCCCATTCGCGAAGAGCGTCCGACGGATGTTGTCTTTGCGGGGGCGAAAAAAGCGCCACTAACGGCCGA
GGGAAAAGCCAGTGCAGAGAAACTGTTCGCGATGGCAGAACATTTGTTAGTACTGGGTCAGCCGAATTTATTTGGTGAAT
GGTGCATTGCTGATACTGATCTGGCGCTAATGATTAACCGCCTGGTACTACATGGCGATGAGGTGCCAGAACGCCTGGTG
GATTATGCGACATTCCAGTGGCAGCGAGCGTCTGTCCAGCGTTTTATTGCACTTTCAGCGAAGCAATCTGGCTGATAGCA
ACGACAGAATCCAGTATCATAGCTTACGTTTTTTCGACGAGGAGTGAGTGATGAAACTGATGTTTGCATCGGACATTCAT
GGGTCGTTACCGGCGACGGAACGTGTTCTGGAGTTGTTTGCCCAAAGCGGTGCCCAGTGGCTGGTGATCCTTGGCGACGT
GTTGAATCACGGCCCGCGTAATGCTTTACCGGAGGGTTACGCGCCAGCCAAAGTCGCTGAACGGCTTAATGAAGTGGCAC
ATAAGGTTATCGCTGTGCGCGGCAACTGCGACAGCGAAGTGGATCAAATGCTGCTGCATTTCCCGATAACCGCGCCGTGG
CAACAGGTATTACTGGAAAAACAACGTCTGTTTTTGACGCATGGTCATCTTTTTGGCCCGGAAAATCTGCCTGCTTTAAA
CCAGAACGATGTGCTGGTTTACGGTCATACCCATCTGCCAGTAGCAGAACAGCGGGGGGAGATTTTCCACTTCAACCCCG
GCTCGGTGAGTATTCCGAAAGGCGGTAATCCGGCGAGTTATGGCATGCTGGATAATGACGTACTTAGTGTAATCGCACTC
AATGATCAAAGTATCATTGCGCAGGTCGCGATTAATCCGTAATTTACCCACAACTCAAAATGCGCCGTAAGAGCGCCAGA
AAAAGAAGGTTTCCTGATAATGGAACAGCGTCGTTTGGCAAGTACTGAATGGGTGGATATTGTCAATGAAGAGAACGAAG
TCATTGCACAAGCCAGCCGGGAGCAAATGCGGGCACAGTGTCTGCGTCATCGTGCAACTTACATCGTCGTGCATGATGGC
ATGGGCAAAATTCTGGTCCAGCGTCGTACCGAGACAAAAGACTTTTTACCCGGCATGTTAGATGCGACCGCAGGCGGTGT
GGTTCAGGCCGATGAGCAACTGCTGGAATCCGCGCGTCGCGAAGCGGAAGAAGAGTTGGGCATTGCCGGTGTCCCCTTTG
CCGAGCACGGGCAGTTCTATTTCGAAGATAAAAATTGCCGTGTCTGGGGCGCATTGTTCAGCTGCGTCTCTCACGGTCCC
TTCGCCCTACAGGAAGATGAAGTCAGTGAAGTTTGCTGGCTGACGCCGGAAGAAATCACCGCACGCTGCGATGAGTTCAC
TCCAGACTCGCTGAAAGCGCTAGCGTTGTGGATGAAGCGCAATGCCAAAAATGAAGCCGTAGAGACTGAAACGGCAGAAT
GAAAAAAGAGCCGCAATTGCGGCTCTTAACATTTTTAGTGGTAGCCCATCAACTGAGCGCCGATCACTACGACGCTGGAC
ATAATAAACAGCAGTCCAAGTAGGGTCGCGCCCACCTTCAGCCAGTTACGGAAGTCCACCCTGCACACACCGAGCGTTGC
CATTAACGAAGCTGAGGTTGGGTAAATGATGTGACTGAAGCCATCACCAAACTGGAACGCCAGCACGGTAACCTGACGGT
TAACACCGACCAGATCGCCAAGCGGTGCCAGTAACGGCATGGTTAACGCCGCCTGACCAGAACCGGACGTCACGAAGAAA
TTAAATACCGCCTGGAAGAGCAACATAAACCAGGCCGCGACCGCGTTGTCCAGACCGCTAATGGCATTGGCAATGCTGTT
GAGGATAGTATTTAACACGCTGGCCTCACCTGCTTCACCATTACCAACCAGCAGCAAAATCCCTTTGGCGAAACCCACCA
GCAGGGCAGGGGCGATCATCATTCGCGCCCCTTCGGTAAAGGATGAAGCCATGGTATTAACCGTCATGCCGTTAAGGCGG
AAAACAACGCCGATGATGCCAATCACCAGACCCATGGTGAAGAACTGGCTGGCAATTTCTGGAATAAACCAGGCATTAAC
GATCACGCCCCAAATCACCCAGACCATTACGGCGGTCAGGACAATCAATACCAGCCAGTCACCAAAGGTAAACGGACGTT
GTTCAACATCCGCCTGCTTTTCACGAAAGAAGCGGTCGGACTCATGCACGCGTGACAGAAGAGGATTCTTTTTCACTCGT
GAGGCGTAGACCATGGTAAAGATCAGGCCAATCAGAGTGGCGATAACCCACACCACGATGCGCAACCCGGAGCCAGAAAG
CACCGGAACGCCGGCAATCCCCTGAGCAACGACCACACAAAACGGGTTCATCCACGAACTGGCAAAACCGATTTGCGTGG
CAATATAGGTCACCAGGACGGTGGTAATACTGTCATAGCCCAGCCGGACCATTAGCGGTGCGATGATAATGGCAAAGGCG
ACGGCCTCTTCTCCCATACCAAATACCGCGCCGCCAAGTGAAAACAGAATAAACAGCGCAGGAATAAAGAGAATTTCATT
CCCGCGGGTATGGCGAATAAGCGCCAGGATACCGTTATCAATGGTTCCTGTACGCATCACAATGCCAAACGCGCCGCCAA
TCACCAGCATAAACATGATGATGCCAACGGCTGTCCCGTATTTCGATCCTGAGGTTAACCCTTCAAACGGGAAGTTCATC
AGGCCCGGGCGTTCATCGCCCGTCGTGAACAGCTGTACGCGGTGATACTCAGGTTCGCCTGCTTCGTTAGTCAGAATGCG
AAATGAGTGTGGATCTACGACTTTGCGTGTTTTTGTTTGACCATCAACCTGATACTGCACTTCCTGACTGTCAAACATCC
CCACCGGAACTACCCAGGTGGCAAGGCTGGTTAAAATAGCAACAAAAAAGATAATCACCAACGTATCGGGCATTGCCCAT
CTTCTTGTTGGTTTGGATTCAGTGATTGCGGACATAGCGCAAATATTCCCTTGCACAAAACAAAGTGGTAAGTATGCAAA
GTGAGATGGCGCAATTCATTGATGCAGAGCAGTTAAGCAAGATAATCAGAAAGGATTAATGCAAATTAAGAGAATAAAAA
ACCGGAAATAGTGACTATTTCCGGTTCAGATATCCGCAGCGCAAAGCTGCGGATGATGACGAGGTTACTGCTGCTGTGCA
GACTGAATCGCAGTCAGCGCGATAGTGTAGACGATATCGTCAACCAGTGCGCCACGGGACAGGTCGTTAACCGGCTTGCG
CATACCCTGCAGCATCGGCCCGATGGAGATCAGGTCGGCAGAACGCTGTACCGCTTTGTAGGTGGTGTTACCGGTGTTCA
GATCCGGGAAGATGAACACGGTAGCGCGACCTGCAACCGGAGAGTTCGGCGCTTTGGATTTCGCAACGTCAGCCATTACC
GCAGCGTCGTACTGCAGCGGACCGTCGATCATCAGGTCAGGACGTTTTTCCTGCGCCAGACGAGTTGCTTCGCGAACTTT
TTCTACGTCGCTACCTGCACCAGAAGTACCGGTGGAGTAGGAGAGCATAGCAACGCGCGGTTCGATACCGAAGGCTGCAG
CGGAATCAGCGGACTGAATCGCGATTTCTGCCAGCTGTTCTGCGGTCGGATCCGGGTTGATCGCACAGTCACCGTAAACG
TAAACCTGTTCCGGCAGCAGCATGAAGAACACGGAAGATACCAGGGAGCTGCCCGGTGCAGTTTTGATCAGCTGCAGCGG
CGGACGGATGGTGTTTGCGGTAGTGTGAACAGCACCGGAAACCAGACCATCAACTTCATCCTGTTCCAGCATCAGCGTAC
CGAGCACCACGTTGTCTTCCAGCTGTTCGCGGGCAACGGTTTCGGTCATGCCTTTGTTCTTACGCAGCTCGACCAGACGA
CCAACATAGCTTTCGCGAACCACTTCTGGATCAACGATTTCAATGCCTGCACCCAGTTCTACACCCTGAGACGCTGCAAC
ACGGTTGATCTCTGCCGGATTACCCAGCAGTACGCAAGTTGCGATACCACGTTCAGCACAGATAGCGGCTGCTTTAACGG
TACGCGGTTCGTCACCTTCCGGCAGTACGATACGTTTGCCCGCTTTGCGCGCAAGTTCAGTCAGCTGATAACGGAACGCT
GGCGGAGACAGACGACGGCTGCGCTCAGAAGTGGCAGTCAGAGAATCGATCCAGTCAGCGTTGATGTAGTTAGCAACGTA
TTCCTGAACTTTCTCGATACGCTCGTGATCGTCAACTGGAACTTCCAGGTTGAAGCTCTGCAGGCTCAGAGAAGTCTGCC
AGGTGTTGGTGTTCACCATAAATACCGGCAGGCCGGTAGCGAAAGCACGTTCGCACAGTTTAGAAATGCGCGCGTCCATT
TCGTAGCCGCCAGTCAGCAGCAGGGCACCGATTTCTACGCCGTTCATGGCAGCCAGGCAAGCGGCAACCAGCACGTCAGG
ACGGTCTGCGGAAGTCACCAGCAGAGAACCGGCACGGAAGTGCTCCAGCATGTGCGGAATGCTGCGTGCGCAGAAAGTGA
CGGATTTAACGCGGCGAGTATTGATGTCGCCTTCGTTGATGATGGTCGCATTCAGGTGGCGAGCCATATCGATCGCACGA
GTCGCGATCAGGTCAAAGCTCCACGGCACAGCGCCGAGAACCGGCAGCGGGCTGGATTCTTGCAGCTTCGCCGGATCAAC
ATTGTTTACTTTAGCTTTGGAAGAGTCGTCGAAAATCTCGGACAGATCCGGGCGAGTACGACCCTGTTCATCAACCGGTG
CGTTCAGTTTGTTAACGATAACGCCGGTGATGTTGGTGTTTTTGGCACCGCCGAAGCTGTTGCGGGTCAGTTCGATACGC
TCTTTCAGCTGTTCCGGGGTGTCAGTGCCCTGAGACATAACGAAGACGATTTCCGCATTCAGCGTTTTAGCGATTTCGTA
GTTCAGAGACTGGGCAAACTGGTGCTTACGTGTCGGGACCAGACCTTCAACCAGAACGACTTCAGCGTCTTTGGTGTTAG
CGTGGTAGTTTGCGACGATCTCTTCCATCAGCACATCTTTCTGATTGCTGGAAAGCAGACCTTCAACGTAGCTCATTTTC
AGCGGTTCAGCGGCCGTCGTGGTGGAAGAGTTCGCACGCACGATAGTCGTAGTCTGATCGGGCGCATCGCCACCGGTACG
CGGCTGAGCGATAGGTTTGAAAACGCTCAGACGAACGCCTTTGCGTTCCATTGCACGGATCACGCCAAGGCTGACGCTGG
TCAGACCGACGCTGGTTCCGGTAGGGATCAGCATAATAATACGGGACACGGTTTATCCTCTTTCGTTACCGCCGATTTGG
CGGGTTACAAAACAGCACCGCCAGCTGAGCTGGCGGTGTGAAATCAGGCAGTCAGGCGGCTCGCGTCTTGCGCGATAACC
AGTTCTTCGTTGGTTGGGATAACCACCGCAGGACGGGTACCTTCTTTGTTGATGAAACCAGATTTGCCGAAACGTGCAGC
CAGGTTGCGTTCATGATCAACTTCAAAGCCCAGCACGCCCAGTTTGCCCAGAGACAGTTCACGAACCATCGCGGCATTTT
CACCGATACCACCGGTGAATACAACAGCGTCCAGACGACCATCCATCAGCGCAGTGTAGGCACCGATGTATTTCGCCAGG
CGGTGGCAGTAAACGTCCATTGCGCGCTTCGCGTCTTCTTTCGTCGCGTAGTTGTCTTCAACATAGCGGCAGTCGCTGGT
CACTTCGGTCAGACCCAGCAGGCCAGACTCTTTGGTCAGCAGTTTGTTGATTGCGTCAACGCTCATGCCCAGGGTGTCGT
GCAGGTGGAAGATGATCGCCGGATCGATATCACCAGAACGGGTACCCATGACCAGACCTTCCAGCGGGGTCAGGCCCATA
GAGGTGTCAACGCATTTACCGTTGCGGATAGCAGAAACGGAACCACCGTTGCCCAGGTGGCAGGTGATGATGTTCAGTTC
TTCTACCGGTTTGTTCAGCATTTTTGCCGCTTCCTGGGTTACATAGAAGTGGCTGGTGCCGTGCGCGCCGTAACGACGGA
TGCCGTGCTCTTTGTACAGGTTGTACGGCAGGGCGTAGAGGTAAGACTCTTCCGGCATAGTCTGGTGGAACGCGGTGTCA
AATACAGCAACGTTTTTGTCTTTCAGCTGTGGGAAAGATTTCAGAGCTTCTTCGATACCGATCAGGTGAGCCGGGTTGTG
CAGCGGTGCAAAAGAAGCTGCATCTTTGATACCCTGAATAACAGACTCATCGATCACTACGGAGCTGGTATACTTTTCGC
CGCCGTGTACGATACGGTGACCGATAGCAGTCAGCTGCGCAGACAGTTCTGGTTTTTGTGCCAGAATAGTATTAACGATA
AAGTTGAGCGCTTCGCTGTGAGCGGCGCCTGCACCTAAAGCCGCTTCCTGTTTATTGCCGTCCATTTTCCATTTGATACG
TGCTTCGGGCAGGTGGAAACATTCGGCTAAACCAGAAAGGTACTCTTCACCATTTACTGCATCGATGATGGCAAATTTCA
GTGAAGAACTACCGCAGTTCAGAACCAGTACTAACTTACTCGACATGGAAGTACCTATAATTGATACGTGGCTAAAAAAA
CGTCAGGGAGCCATAGAGCGTAGCGCATGATGACACCGACATTTATGATTAACATCATGCACTGCAAATTTTTTTTGCAT
GATGGAAGAAATATCTTGAGTCTATGCCATTTTGCGTAATTTTCAGCCAATGGCATAATGTATATGAATTTGACGACTCA
ATGAATATGTACTACTTAGGCCTTCAGGCTGCTAAAGGATACCTGATAGTGGGTATGGAAGACAAAATGTTTTGAACGTT
GTCCCGCTGAGTTGTGAATTTGCACAAATTTTTGAATCTTTATATGTGAAGTTGAGGTGAAGCATGTCAACGCCGGATAA
TCGTTCTGTTAATTTTTTTAGCTTGTTTCGCCGGGGACAGCATTACTCAAAGACGTGGCCGCTGGAAAAACGCCTTGCCC
CGGTCTTTGTCGAAAATCGCGTTATCAAGATGACGCGTTATGCGATCCGTTTTATGCCGCCGATCGCCGTATTTACTCTC
TGCTGGCAGATTGCCCTGGGCGGTCAGCTTGGGCCGGCAGTTGCCACCGCCCTGTTCGCCTTAAGTTTACCCATGCAGGG
ATTGTGGTGGCTGGGCAAGCGTTCTGTCACGCCATTACCCCCTGCAATCCTCAACTGGTTTTATGAAGTTCGCGGTAAAT
TGCAGGAGTCTGGACAGGTGTTGGCACCCGTTGAAGGCAAGCCTGATTACCAGGCATTAGCTGACACGCTTAAGCGCGCC
TTCAAACAACTGGATAAAACTTTCCTTGATGATTTGTAATTGACCCCTGATTACGCATATAAAAGAAAGCATACTCAGCC
TTCTTTTTTTTCACCGTAATAGAGTGATACAGGAGTCAACAATGGAAATGACCAACGCGCAACGTCTTATTTTGTCTAAT
CAGTACAAGATGATGACTATGCTCGATCCGGCAAATGCTGAACGTTACCGTCGCCTGCAAACAATTATTGAGCGTGGTTA
TGGATTACAGATGCGTGAACTGGATCGCGAGTTTGGCGAGCTGAAAGAAGAAACCTGCCGCACTATCATCGACATTATGG
AGATGTATCATGCGTTGCATGTTTCCTGGTCTAATTTGCAGGACCAGCAATCCATCGATGAACGTCGTGTCACCTTCCTC
GGCTTTGACGCCGCCACTGAAGCACGTTACCTCGGTTATGTCCGCTTTATGGTTAATGTGGAAGGGCGCTATACCCATTT
TGACGCCGGAACTCACGGTTTTAACGCCCAGACGCCAATGTGGGAAAAATATCAGCGCATGCTTAATGTGTGGCATGCCT
GCCCGCGTCAGTACCATTTGAGCGCCAACGAAATTAATCAAATTATCAACGCCTGAGGAGGCCCGCGTGCGGTGCAAAGG
TTTTCTGTTTGATCTTGATGGAACGCTGGTGGATTCCCTGCCTGCGGTAGAACGGGCGTGGAGCAACTGGGCCAGACGTC
ATGGGTTAGCGCCGGAAGAGGTGCTGGCTTTCATTCACGGTAAACAGGCGATCACCTCTCTGCGCCATTTTATGGCGGGC
AAATCCGAGGCTGATATTGCCGCCGAGTTTACGCGTCTGGAGCAAATCGAGGCCACGGAAACCGAAGGTATTACCGCGCT
TCCGGGGGCAATCGCCTTACTCAATCATTTGAATAAAGCAGGTATTCCGTGGGCCATTGTGACTTCTGGCTCCATGCCGG
TAGCGCGAGCGCGCCATAAAATAGCTGGGCTTCCCGCACCAGAGGTGTTTGTAACCGCTGAGCGAGTGAAGCGCGGAAAA
CCAGAACCTGATGCGTATCTGTTAGGTGCGCAGCTGCTGGGGCTTGCGCCGCAGGAGTGTGTGGTGGTGGAAGATGCTCC
CGCTGGCGTGCTTTCTGGCCTGGCGGCGGGTTGCCATGTCATTGCGGTTAACGCTCCGGCAGATACCCCGCGCCTGAATG
AGGTCGATTTGGTCCTCCACAGTCTGGAGCAAATTACTGTGACTAAACAGCCAAATGGCGATGTTATTATTCAGTGAAAC
ACCTGATCATGATTTAGCCCCGTCTCGTCGGGGCTTTTTTATGGCAGAATCAAGTCATCCCCCTCAATTAACAAGGATAA
GTTGTGAACGGTGAATTGATTTGGGTTCTTTCATTACTGGCCGTTGCCATCGTCTTGTTTGCGACGGGCAGAGTGCGTAT
GGATGCGGTCGCTTTGTTTGTTATTGTCGCGTTTGCATTAAGCGGAACGCTGACAGTCCCAGAAGTATTTTCCGGCTTTT
CTGATCCTAACGTTGTCCTGATTGCCGCCTTGTTTATTATTGGCGATGGTTTGGTCCGTACCGGTGTTGCCACCGTAATG
GGAACATGGCTGGTCAAAGTTGCGGGCAACAGTGAAATCAAAATGTTGGTTTTGTTGATGCTGACCGTCGCGGGGCTTGG
CGCGTTTATGAGTTCAACCGGTGTTGTCGCTATCTTTATTCCCGTGGTGTTAAGCGTTGCCATGCGTATGCAAACGTCGC
CGTCACGTCTGATGATGCCGTTAAGTTTTGCCGGGCTGATTAGCGGCATGATGACGCTGGTGGCGACGCCTCCGAACCTG
GTAGTCAACAGTGAATTGCTGCGTGAAGGCTATCACGGCTTCAGTTTCTTTAGCGTAACACCTATTGGCCTGGTCGTGCT
GGTGCTGGGTATTTTGTATATGTTAGTGATGCGTTTCATGCTGAAAGGGGATACCCAGACCCCGCAGCGCGAAGGCTGGA
CGCGTCGAACCTTTCGCGATCTTATCCGTGAATATCGACTGACCGGGCGTGCGCGACGTCTGGCTATTCGCCCCGGATCG
CCAATGATTGGTCAACGGCTGGATGATCTCAAATTACGTGAGCGTTATGGCGCTAACGTCATCGGTGTTGAACGCTGGCG
GCGTTTTCGTCGCGTTATCGTGAACGTTAATGGGGTTTCTGAATTTCGCGCGCGTGACGTTTTGCTTATTGATATGTCTG
CGGCTGATGTCGATCTCCGGCAATTTTGTAGTGAGCAATTGCTGGAGCCGATGGTACTGCGCGGCGAGTATTTTTCTGAC
CAGGCCCTTGATGTGGGCATGGCAGAGATTTCATTAATTCCTGAGTCAGAACTGATTGGTAAATCGGTGCGCGAAATTGG
TTTTCGTACACGCTACGGACTGAATGTGGTGGGGCTAAAGCGCAATGGCGTGGCGCTGGAAGGTTCGCTGGCGGATGAGC
CTCTGCTGCTGGGCGATATCATTCTGGTTGTGGGTAACTGGAAACTGATCGGTATGCTGGCCAAACAGGGCCGCGACTTC
GTAGCGCTGAACTTACCGGAAGAGGTGAGTGAAGCATCGCCCGCGCACAGCCAGGCACCCCATGCCATTTTCTGTCTGGT
GCTAATGGTGGCGTTAATGCTGACAGATGAAATTCCTAATCCTGTTGCCGCTATCATCGCCTGCCTGCTGATGGGGAAAT
TCCGCTGTATAGATGCTGAAAGCGCCTATAAATCCATTCACTGGCCGAGCATTATTTTGATCGTTGGGATGATGCCGTTT
GCTGTGGCATTACAGAAAACGGGAGGTGTCGCGCTGGCGGTGAAAGGGCTGATGGACATTGGCGGTGGTTACGGGCCACA
TATGATGCTGGGTTGTTTGTTTGTCTTGTCGGCGGTTATTGGGCTATTTATCTCTAATACCGCGACGGCGGTGTTGATGG
CTCCGATTGCGCTGGCTGCTGCCAAAACGATGGGGGTGTCGCCTTATCCATTCGCGATGGTCGTGGCGATGGCAGCATCC
GCCGCCTTTATGACACCGGTTTCTTCACCGGTTAACACCCTGGTTTTAGGTCCGGGAAATTACAGCTTCAGTGACTTTGT
GAAGTTGGGGGTACCGTTCACCATTATCGTGATGGCGGTTTGTGTGGTGATGATCCCGATGCTGTTTCCGTTTTGACAAG
AGCCTGATGTCGCATCCGGCGCTTATTGCCTGATGCGACGCAGACTCCAGCTGCTTACAGCGGTGAATCCTGGCTAATCT
CATCGAGCGAAAGATGGAAGCTGGGAACAAATACTTCCATGAAGTAGTCCATCTCCTGGCTGCGGCGCGCTTCAAGCGTC
GCTTCCAGTCGCGTTTTTGCCAGCAAGAATTCATTATTTCCGGCCGCGAGTTCTTCCAGACATTTCAGATATGCACACAG
TGCATCTGCCTGTTTCACCAACGATTTTTCTTCATCGCTATATGCATGCTCGTCAATTAACGGCGCAAAGATATCCCGCA
GCTCTTCCGGAACCATATCGACCAGTTTTTGCTGAGCGATTTTTTCAATAGCCTTGTATTCCTGAGCGATTTGCGAATTG
AAGTATTTCACCGGAGTAGGGAGATCGCCGGTGAGCACTTCTGAGGCATCGTGGTACATCGCCAGTAAAGCGATACGTTC
GGCGTTGACATTACCGCCAAATTTCCGATTTTTGATAGCTGCCAGCGCATGGGCGACCATCGCTACCTGCAAACTGTGTT
CGGACACATTTTCCGTCCGCACGTTGCGCATGAGCGGCCAGCGGTTAATGAGTTTCAGGCGGGAGAGATGGGCAAAAAAA
TGGCTCTGTTTCATAGTGACCTTACGTATGATGACATCATCAGGTCATTGTGGCGGGATAACACTGCCGGATGCAATCTC
CGGCAGTGAAATTAAGATTACAGCTGATGATAACCAGAAAGGAAACGCGCGAACTTGCTCAAAGACAGCTCGATATCATC
GACACGCGGTAGCGTGACAATGCGGAAGTGATCCGGCCACGGCCAGTTGAATGCCGTCCCTTGCACCAACAGAACTTTTT
CCTGCAACAGGAAATCCAGCACCATTTTCTGATCGTCGTGAATGTTAAAGCGTTTGGCGTCGATTTTCGGGAACATGTAC
AGCGCACCACGAGGTTTCACGCAGGAAACGCCCGGAATATCGTTGATCAATTCCCACGCGCGGTTACGCTGCTCATAAAG
ACGACCGCCAGGGGTAATAAATTCACTGATGCTCTGATAACCACCCAGCGCGGTCTGAATGGCGTGTTGCGCAGGAACGT
TAGCACACAGGCGCATTGAAGCCAGCATTTCCAGACCTTCGATGTAGCCTTTGGCGTGTTTTTTCGGCCCGTTCAACACC
ATCCACCCCTGACGGAAGCCTGCAACGCGGTACGTTTTCGACAGTCCATTAAAGGTAATGGTCAGCAGGTCAGGTGCCAG
CGGCGCAATTGAGTGATGCTCAGCGTCGTCGTAGAGAATTTTGTCATAAATTTCATCGGCGAAGATAATGAGATTATGCT
GACGTGCAATCTCCACAATCTCCATTAAAAGCTCTTTGGAATATACCGCGCCGGTTGGGTTATTTGGGTTGATAATAACG
ATCCCACGCGTACGAGGCGTAATTTTAGCGCGAATATCATCGAGGTCCGGGAACCAGTCAGAGGATTCATCGCAAAGATA
ATGCACCGCTTTACCGCTGGAAAGCGAAACCGCCGCGGTCCATAGTGGGTAATCTGGTGCAGGAACCAACATTTCGTCCC
CGCTGTTCAGCAATGCCTGCATTGCCTGAACGATAAGCTCCGATACACCATTGCCGATGTAAATATCTTCCACGGTAACA
TCACGCATGCCACGAGCCTGGTAGTGCTGCATGATGGCTTTACGCGCAGAGTAAAGACCTTTGGAATCGCAATACCCTTG
AGCTGTAGGCAGGTTGCGTATCACGTCAACGAGAATTTCATCTGGCGCGTCAAAACCGAACGGGGCTGGGTTGCCGATGT
TCAGTTTCAGTACCTTGTTACCTTCTTCTTCCAGTCGTTTTGCTTCTTTCAGCACCGGACCACGGATGTCATAACAGACA
TTCTCTAATTTGCTGGATTTTTCAATGGGGGACATGAATCTTGACCTTTTTTGCTGTTATCGCCACTCCCTGCCGTGGAA
GTCAGCTTAGAACAATGTACTCCCCCAGGACGGTGTTTTGAAGGTCTGCAGAATAAGATTTTGCCAGAGGGGAAGGCTCG
ATTGTGCTGTTAATAACTTAATAATGACAAAATAATGAGGCGTATATGCTTTACATACAATGTTATATAGTGAATTGTTC
TGATTCTTAATTGTAAGTCTGGTTTTTTTATCTGTAAGATAATTGTGTGAAAATGCCTCATTTAAGAATTCACTAATGAA
ACGCGATGATGATATTTCCGCATTACGGAGAGTTTAACAGCGTGATGATTTCCGAGGTGTCGCAATGGGGGCAAGGTGTG
AAACTATTGTTAAGCGGAATTAATGAATGAGGATGATGCTAATTAATTATTATTTAATATTCAAAAAGGTTTTGATGTGC
TTATTAATAATAGAAGATTACTTTGCCTAACATAACATAACTTTGCATCAGATAATTCGCAATGACCCTTATAAATAAAA
GGTTTTTGGGGTAAAATGCTCGCATAAATGACGGATCCCTGCTCTTGATGCCGCCTCACCATTGCTGTTTGTACGTGTTC
GCGTATGACCAGCGATGCTGCACGAGAGTGGAACAAGGACTCACATTTACATTTATACAAACACGCGCATGTCATAAATA
GAAAAGAGTGAGTAACTTAATAGATATGCGATCCCTGAAGATATATTCTGTGATCTACTTCAGGCATTATAACGGAACAA
TGTGAGTCGCTTTTTTAGTGCAACTCATATGCATTTTTACTTTCGTCCGGGTTCCGGATGAAACTGCCAGGGAGGCACAT
TACAAATGGAATTGCTTGTTTGTGTGTGCACAGCATTAACCAGCTCAGTATGAGCCGCCAGTAAGTGATAATATATGATA
AGTGCAAATCGTCCGATAATTAACCTCGACCTCGATCTGCTGAGAACATTTGTTGCTGTTGCCGATCTGAACACTTTTGC
TGCCGCAGCTGCCGCTGTGTGTCGTACTCAGTCCGCCGTAAGTCAGCAAATGCAGCGTCTGGAACAACTCGTTGGGAAAG
AACTGTTCGCTCGTCACGGTCGCAACAAACTGTTAACTGAACATGGCATTCAACTTCTTGGTTACGCTAGGAAAATCCTG
CGTTTTAATGATGAGGCCTGCTCATCATTAATGTTCAGTAATCTTCAGGGCGTGTTAACTATCGGTGCTTCAGATGAATC
TGCCGATACGATCTTACCTTTCCTGTTAAATCGCGTGAGTTCGGTTTATCCGAAATTAGCGCTGGATGTCCGCGTTAAAC
GTAATGCCTATATGGCAGAAATGCTGGAATCCCAGGAAGTGGATTTGATGGTAACCACCCATCGTCCTTCAGCGTTTAAG
GCATTGAACCTGCGTACCTCGCCAACACACTGGTACTGCGCAGCGGAATACGTATTGCAAAAAGGTGAGCCGATCCCTCT
TGTATTGCTGGATGATCCAAGTCCGTTTCGCGATATGGTGCTGGCGACGCTTAATAAAGCAGATATTCCCTGGCGACTGG
CTTATGTCGCCTCGACGCTTCCGGCCGTTCGTGCGGCAGTGAAAGCCGGTCTTGGCGTGACGGCAAGGCCGGTCGAGATG
ATGAGTCCGGACTTGCGTGTGCTGAGTGGAGTAGATGGCTTACCGCCGCTACCTGATACCGAATATTTGCTGTGCTATGA
CCCGTCCAGTAATAATGAGCTGGCCCAGGTGATCTATCAGGCGATGGAGAGCTACCATAATCCGTGGCAATACAGCCCAA
TATCTGATCCGGAAGGGGATGATTCATTGTTGATTGAAAGGGATATCGAGTAATCGACGGACGATAGATAATTCCTGAGA
CAATAGTGTAAAAAACGAGCCGCTGGGGGTGTTTTAAACCCCAGCGGCTTTTTTTTAGTAAAGAACCTTCTTCACATCGT
GCAGAACGTACAAAACTGTTCATTTTTCAATCGCCAGAGATTCACGCCCCGTACGCACAAATAATCGCCTGAAAAAAATC
ACCTGCTACAATGATGTTAAAAAATACGTAAATTTGTTGCTGCGTTTTTGTTATGGAATGACAAAAGCGTGTCACAGATC
AAGAAAATACTCTCTTTTGGGGGGAGGAATCGACACAAATTCCTGTCAAAATAGACCCGTATTTTTTCCATTGCTTCACA
ACGGACACGATTCAACAACATCTAATTATCCTGGAGTCGTCAAGGATCTGGGGTGAAAGGGCATTAAATGCTAATGGTGT
TGATATTATGTAAACTAATGTGAAGAAACTTTTGTTAAAGTTGACAAAAGGTTATAGAAAGGAGTAAAAGACCACATCAA
TTAGCTGTATAAAAGAATTTCTACAGTGATTGTAAGGTTTTTTTTATTCCTCCCCATGAATCGATGTGGCGTCCATCTGC
CGTGAAGAGCAGTGAATCTGGCGCTACTTTTGATGAGTAAGCAATGAGTATGTCAACATCCACTGAAGTCATCGCTCATC
ACTGGGCATTCGCTATCTTTCTTATCGTTGCCATTGGCCTGTGTTGCCTGATGCTGGTAGGCGGTTGGTTTTTAGGCGGT
CGCGCACGCGCGAGGTCGAAAAACGTGCCGTTTGAATCCGGTATCGACTCGGTCGGCTCCGCCCGCTTACGCCTGTCCGC
CAAGTTTTATCTGGTGGCCATGTTCTTCGTTATCTTCGACGTTGAAGCGCTGTATCTGTTCGCATGGTCAACCTCTATCC
GCGAAAGCGGCTGGGTAGGCTTTGTGGAAGCTGCAATTTTTATTTTTGTGTTACTGGCAGGTCTGGTTTATCTGGTGCGT
ATTGGCGCGCTGGACTGGACGCCCGCGCGTTCACGCCGCGAGCGTATGAACCCGGAAACGAACAGTATCGCTAATCGTCA
ACGCTAACCGCGAGGCATTAAGATGGATTATACGCTCACCCGCATAGATCCCAACGGTGAGAACGACCGTTACCCCCTGC
AAAAGCAGGAGATCGTAACCGACCCTCTGGAGCAAGAAGTTAACAAAAACGTGTTTATGGGCAAGCTCAATGACATGGTT
AACTGGGGTCGTAAAAACTCAATTTGGCCGTATAACTTCGGTCTTTCCTGCTGTTACGTTGAGATGGTGACTTCGTTTAC
CGCGGTGCATGACGTGGCGCGTTTTGGCGCAGAAGTATTGCGTGCTTCGCCGCGTCAGGCTGACCTGATGGTGGTTGCAG
GAACCTGCTTTACCAAAATGGCACCGGTTATTCAGCGTCTGTATGACCAGATGCTGGAACCAAAATGGGTTATCTCAATG
GGTGCCTGTGCCAACTCTGGTGGTATGTACGATATTTATTCCGTTGTGCAGGGCGTCGATAAATTCATCCCGGTTGATGT
GTATATCCCGGGCTGCCCGCCGCGTCCTGAAGCGTACATGCAGGCACTGATGCTGTTGCAGGAATCTATCGGCAAAGAAC
GTCGTCCGCTCTCCTGGGTGGTTGGCGATCAGGGCGTTTATCGCGCCAATATGCAATCAGAGCGCGAACGCAAGCGCGGT
GAACGCATTGCCGTAACCAACCTGCGTACACCTGACGAGATTTAATTTGCGCCTGTCGGCAAAGGGATTTTTCTTCGCTT
ATTCCTAAATCTATTTCGCGAAGCTTACTGCGCCGACAGTCACCACGGACCATTTGCAATGGTGAACAATATGACCGACT
TAACCGCGCAAGAACCCGCCTGGCAGACCCGCGATCATCTTGATGATCCGGTAATTGGCGAACTGCGCAACCGTTTTGGG
CCGGATGCCTTTACTGTTCAGGCGACTCGCACCGGGGTTCCCGTTGTGTGGATCAAGCGTGAACAATTACTGGAAGTTGG
CGATTTCTTAAAGAAACTGCCGAAACCTTACGTCATGCTGTTTGACTTACACGGCATGGACGAACGTCTGCGCACACACC
GCGAAGGGTTACCTGCCGCGGATTTTTCCGTTTTCTACCATCTGATTTCTATCGATCGTAACCGCGACATCATGCTGAAG
GTGGCGTTGGCAGAAAACGACCTGCACGTACCGACCTTCACCAAACTGTTCCCGAACGCTAACTGGTATGAGCGTGAAAC
CTGGGATCTGTTTGGCATTACATTCGACGGTCACCCGAACCTGCGCCGCATCATGATGCCGCAAACCTGGAAAGGTCACC
CGCTGCGTAAAGATTACCCGGCGCGCGCTACCGAATTCTCGCCGTTTGAGCTGACCAAAGCCAAACAGGATCTGGAGATG
GAAGCCCTGACCTTCAAACCGGAAGAGTGGGGGATGAAGCGCGGCACCGAAAACGAGGACTTCATGTTCCTCAACCTCGG
CCCGAACCACCCGTCGGCGCACGGTGCTTTCCGTATCGTTTTGCAGCTTGATGGCGAAGAGATTGTCGACTGCGTACCAG
ACATCGGTTACCACCACCGTGGTGCGGAGAAAATGGGCGAACGCCAGTCCTGGCACAGCTACATTCCGTATACCGACCGT
ATCGAATACCTCGGCGGCTGCGTTAACGAAATGCCTTACGTGCTGGCGGTAGAGAAACTGGCCGGGATCACCGTGCCGGA
TCGCGTTAACGTCATTCGCGTAATGCTCTCCGAACTGTTCCGCATCAACAGCCACCTGCTGTATATCTCGACCTTTATTC
AGGACGTCGGCGCAATGACGCCCGTGTTCTTCGCCTTTACCGATCGTCAGAAAATTTACGATCTGGTGGAAGCGATCACG
GGTTTCCGTATGCACCCGGCGTGGTTCCGTATTGGCGGCGTAGCGCACGACCTGCCGCGCGGCTGGGATCGCCTGCTGCG
TGAGTTCCTCGACTGGATGCCGAAACGTCTGGCGTCTTACGAGAAAGCGGCGCTGCAAAATACCATTCTGAAAGGTCGTT
CCCAGGGCGTTGCCGCCTATGGCGCGAAAGAGGCGCTGGAGTGGGGCACCACTGGCGCGGGCCTGCGTGCTACCGGGATT
GACTTCGACGTGCGTAAGGCGCGTCCTTATTCTGGCTATGAAAACTTCGACTTTGAAATCCCGGTTGGTGGTGGTGTTTC
TGACTGCTACACCCGCGTAATGCTGAAAGTGGAAGAGCTGCGCCAGAGTCTGCGCATTCTTGAGCAGTGCCTCAACAACA
TGCCGGAAGGCCCGTTCAAAGCGGATCACCCGCTGACCACGCCACCGCCGAAAGAGCGCACGCTGCAACATATCGAAACC
CTGATCACCCACTTCCTGCAAGTGTCGTGGGGGCCGGTGATGCCTGCCAATGAATCTTTCCAGATGATTGAGGCGACCAA
GGGGATCAACAGTTACTACCTGACCAGCGACGGTAGCACCATGAGTTATCGCACTCGTATCCGCACGCCGAGTTATGCGC
ATTTGCAGCAAATTCCGGCGGCGATCCGCGGCAGCCTGGTGTCTGACCTGATTGTTTATCTGGGCAGTATCGATTTTGTT
ATGTCAGATGTGGACCGCTAATTATGCACGAGAATCAACAACCACAAACCGAGGCTTTTGAGCTGAGTGCGGCAGAGCGT
GAAGCGATTGAGCACGAGATGCACCACTACGAAGACCCGCGTGCGGCGTCCATTGAAGCGCTGAAAATCGTTCAGAAGCA
GCGTGGCTGGGTGCCGGATGGCGCGATCCACGCGATCGCCGATGTGCTGGGTATTCCGGCGAGCGACGTCGAAGGCGTGG
CAACGTTCTACAGCCAGATCTTCCGCCAGCCGGTTGGCCGCCATGTGATCCGTTATTGCGACAGCGTGGTCTGTCATATC
AACGGTTACCAGGGTATTCAGGCGGCGCTCGAGAAAAAGCTAAACATCAAACCAGGGCAAACGACATTTGACGGTCGCTT
TACGCTGCTGCCAACTTGCTGCCTGGGGAACTGTGATAAAGGGCCAAACATGATGATCGATGAGGACACTCACGCGCATC
TGACCCCGGAAGCGATCCCTGAACTGCTGGAGCGGTATAAATGAAAAACATTATCCGTACTCCCGAAACGCATCCGCTGA
CCTGGCGTCTGCGCGATGACAAACAGCCAGTGTGGCTGGACGAATACCGCAGCAAAAACGGTTACGAAGGCGCGCGTAAG
GCGCTGACCGGGCTGTCTCCGGACGAAATCGTTAATCAGGTAAAAGACGCTGGTCTGAAAGGGCGTGGCGGCGCGGGTTT
CTCGACTGGCCTGAAATGGAGCCTGATGCCGAAAGACGAATCCATGAACATCCGTTACCTGCTGTGTAACGCCGATGAAA
TGGAGCCAGGCACCTATAAAGACCGCCTGCTGATGGAGCAACTGCCGCACCTGCTGGTGGAAGGCATGCTCATCTCCGCG
TTTGCGCTGAAAGCTTACCGTGGCTATATCTTCCTGCGCGGCGAATATATCGAAGCGGCAGTGAATCTACGCCGTGCCAT
TGCCGAAGCGACTGAAGCGGGCTTGCTTGGCAAAAACATTATGGGAACAGGTTTCGACTTCGAACTGTTCGTCCATACCG
GGGCAGGGCGCTACATCTGCGGGGAAGAAACAGCGTTAATCAACTCCCTGGAAGGGCGTCGTGCTAACCCGCGCTCGAAG
CCTCCATTCCCGGCGACCTCCGGCGCATGGGGTAAACCGACCTGTGTCAACAACGTCGAAACCCTGTGTAACGTTCCGGC
GATCCTCGCTAACGGCGTGGAGTGGTATCAGAACATCTCGAAAAGTAAAGATGCTGGCACCAAGCTGATGGGCTTCTCCG
GTCGGGTGAAAAATCCGGGCCTGTGGGAACTGCCGTTTGGTACTACCGCGCGCGAGATCCTCGAAGATTACGCCGGTGGT
ATGCGTGACGGTCTGAAATTCAAAGCCTGGCAGCCAGGCGGCGCGGGCACCGACTTCCTGACCGAAGCGCACCTTGACCT
GCCGATGGAATTCGAAAGTATCGGTAAAGCGGGAAGCCGTCTGGGTACGGCGCTGGCGATGGCGGTTGACCATGAGATCA
ACATGGTGTCGCTGGTGCGTAACCTGGAAGAGTTTTTCGCCCGTGAGTCCTGCGGCTGGTGTACGCCGTGCCGCGACGGT
CTGCCGTGGAGCGTGAAAATTCTGCGTGCGCTGGAGCGTGGTGAAGGTCAGCCGGGCGATATCGAAACACTTGAGCAACT
GTGTCGATTCTTAGGCCCGGGTAAAACTTTCTGTGCCCACGCACCTGGTGCAGTGGAGCCGTTACAGAGCGCCATCAAAT
ATTTCCGCGAAGAATTTGAGGCGGGGATCAAACAGCCGTTCAGCAATACCCATTTGATTAATGGGATTCAGCCGAACCTG
CTGAAAGAGCGCTGGTAACCGAATTTCGATTAACGCTCAGTCTCTGACTGAGAAAACTGGAAGCATGCTAATGGCTACAA
TTCATGTAGACGGCAAAGAATACGAGGTCAACGGAGCGGACAACCTGCTGGAAGCTTGTCTGTCTCTTGGCCTTGATATT
CCTTACTTTTGCTGGCATCCGGCGCTGGGAAGCGTCGGTGCTTGCCGCCAGTGTGCGGTGAAGCAATACCAAAACGCGGA
AGACACGCGTGGTCGCCTGGTGATGTCCTGTATGACACCGGCTTCCGATGGCACCTTTATTTCCATTGACGACGAAGAAG
CGAAACAGTTCCGTGAAAGTGTGGTCGAGTGGTTAATGACCAACCACCCGCACGACTGTCCGGTATGTGAAGAAGGCGGT
AACTGCCATCTTCAGGATATGACCGTGATGACCGGACACAGCTTCCGTCGCTACCGTTTCACCAAACGTACCCACCGTAA
TCAGGATTTGGGACCGTTCATCTCTCACGAAATGAACCGCTGCATCGCCTGCTACCGCTGCGTGCGTTACTACAAAGATT
ACGCTGACGGTACAGATCTGGGCGTTTATGGCGCGCACGACAACGTCTACTTCGGTCGCCCGGAAGACGGCACGCTGGAA
AGCGAATTTTCCGGTAACCTGGTCGAAATTTGCCCGACTGGCGTATTTACCGACAAAACGCACTCCGAGCGTTACAACCG
TAAATGGGATATGCAGTTTGCGCCGAGCATCTGCCAGCAATGTTCCATCGGCTGTAACATCAGCCCCGGTGAACGTTATG
GCGAACTGCGTCGTATCGAAAACCGTTACAACGGTACGGTAAACCACTACTTCCTCTGCGACCGTGGTCGTTTCGGTTAC
GGTTACGTCAACCTGAAGGATCGTCCGCGTCAGCCAGTACAGCGTCGTGGCGATGATTTCATTACCCTCAACGCCGAACA
GGCAATGCAGGGCGCGGCAGATATTCTGCGTCAGTCGAAGAAAGTGATCGGTATTGGTTCTCCGCGTGCCAGCGTGGAAA
GCAACTTTGCGCTGCGTGAACTGGTGGGCGAAGAAAACTTCTACACCGGTATCGCTCACGGTGAGCAGGAACGTCTGCAA
CTGGCGCTGAAAGTGCTGCGTGAAGGCGGCATTTATACTCCGGCTCTGCGCGAAATCGAATCTTACGATGCGGTACTGGT
GCTGGGCGAAGACGTTACCCAGACCGGCGCGCGCGTCGCGCTGGCAGTGCGTCAGGCGGTGAAAGGTAAAGCGCGCGAAA
TGGCGGCAGCACAGAAAGTGGCTGACTGGCAGATTGCGGCAATCCTCAACATCGGTCAACGTGCGAAGCATCCGCTGTTT
GTTACCAACGTTGATGACACCCGTCTGGATGATATCGCGGCGTGGACTTACCGCGCACCGGTTGAAGATCAGGCGCGTTT
AGGTTTTGCCATCGCCCATGCGCTGGATAACTCTGCACCAGCGGTTGACGGTATCGAACCTGAGCTGCAAAGCAAAATCG
ACGTCATCGTGCAGGCACTGGCAGGTGCGAAGAAACCGTTGATTATCTCCGGGACGAACGCCGGTAGCGCTGAAGTAATT
CAGGCTGCGGCTAACGTCGCGAAAGCCCTGAAAGGTCGCGGCGCTGACGTCGGTATCACCATGATTGCCCGTTCCGTCAA
CAGCATGGGGCTGGGCATTATGGGCGGTGGATCGCTTGAAGAAGCGTTAACCGAACTGGAAACCGGACGCGCCGACGCGG
TGGTGGTGCTGGAGAACGATCTGCATCGTCACGCATCCGCTACCCGCGTGAATGCTGCGCTGGCTAAAGCGCCGCTGGTG
ATGGTGGTTGACCATCAACGCACAGCGATCATGGAAAACGCCCATCTGGTGCTTTCCGCCGCCAGCTTTGCTGAAAGCGA
CGGTACAGTGATCAACAACGAAGGCCGCGCCCAACGTTTCTTCCAGGTTTACGATCCGGCTTATTACGACAGCAAAACTG
TCATGCTGGAAAGCTGGCGCTGGTTACACTCGCTGCACAGCACTCTGCTGAGCCGTGAAGTGGACTGGACGCAGCTCGAC
CATGTGATTGACGCTGTTGTGGCGAAAATCCCGGAACTGGCAGGTATCAAAGATGCTGCGCCGGATGCGACATTCCGTAT
TCGTGGGCAGAAACTGGCCCGTGAACCGCACCGTTACAGCGGTCGTACCGCCATGCGCGCCAATATCAGCGTTCATGAGC
CGCGTCAGCCGCAGGATATTGACACCATGTTCACCTTCTCGATGGAAGGTAACAACCAGCCGACCGCGCATCGTTCGCAA
GTGCCGTTTGCCTGGGCTCCGGGCTGGAACTCCCCGCAGGCGTGGAACAAATTCCAGGACGAAGTGGGCGGCAAACTGCG
CTTTGGCGATCCGGGCGTGCGTCTGTTTGAAACCAGCGAAAATGGTCTGGATTACTTCACCAGCGTACCGGCACGCTTCC
AGCCGCAGGACGGGAAATGGCGTATCGCGCCGTATTACCACCTGTTTGGCAGTGATGAATTGTCACAGCGTGCTCCGGTC
TTCCAGAGCCGTATGCCGCAGCCGTACATCAAACTCAACCCGGCAGATGCCGCGAAGTTGGGTGTGAATGCAGGTACACG
CGTCTCCTTTAGTTACGATGGCAACACGGTCACGCTGCCGGTTGAAATCGCCGAAGGGCTGACGGCAGGGCAGGTGGGCT
TGCCGATGGGTATGTCCGGCATTGCTCCGGTGCTGGCTGGCGCGCATCTTGAGGATCTCAAGGAGGCACAACAATGAGTT
GGATATCACCGGAACTGATTGAGATCCTGCTGACCATCCTCAAAGCGGTGGTGATCCTGCTGGTGGTTGTCACCTGCGGG
GCATTCATGAGCTTTGGCGAACGTCGCCTGCTGGGTCTGTTCCAGAACCGTTACGGACCTAACCGTGTTGGCTGGGGCGG
TTCGCTCCAGCTGGTTGCGGACATGATCAAAATGTTCTTTAAAGAAGACTGGATCCCGAAATTCTCGGATCGCGTCATCT
TTACCCTGGCACCGATGATTGCCTTTACCTCGTTGCTGCTGGCCTTTGCGATTGTGCCAGTCAGCCCGGGTTGGGTGGTT
GCCGACCTGAACATCGGGATTTTGTTCTTCCTGATGATGGCTGGTCTGGCGGTTTACGCGGTGCTGTTTGCGGGCTGGTC
AAGTAACAACAAATACTCGCTGCTGGGTGCGATGCGTGCTTCTGCACAGACCCTGAGCTACGAAGTGTTCCTCGGGCTTT
CTCTGATGGGCGTGGTGGCGCAGGCCGGTTCATTCAACATGACCGACATCGTCAACAGCCAGGCGCATGTGTGGAACGTC
ATCCCGCAATTCTTTGGTTTTATTACCTTTGCCATCGCGGGTGTGGCGGTGTGTCACCGTCACCCGTTTGACCAGCCGGA
AGCCGAGCAGGAACTGGCGGATGGTTACCACATTGAATACTCCGGCATGAAGTTCGGTCTGTTCTTCGTGGGTGAGTACA
TCGGGATTGTGACCATCTCTGCATTGATGGTGACGCTGTTCTTCGGTGGCTGGCAAGGCCCGTTGTTACCGCCATTCATC
TGGTTCGCGCTGAAAACCGCGTTCTTTATGATGATGTTCATTTTGATTCGTGCGTCGTTACCGCGTCCGCGTTATGACCA
GGTAATGTCCTTCGGCTGGAAAATCTGCCTGCCGCTGACGCTGATCAACTTGCTGGTAACGGCGGCTGTCATTCTCTGGC
AGGCGCAATAAGGGGCAATAAGACCATGACCTTAAAAGAATTGTTAGTAGGTTTCGGCACCCAGGTTCGTAGTATCTGGA
TGATCGGCCTGCACGCGTTCGCCAAACGCGAAACGCGAATGTACCCGGAAGAGCCGGTCTATCTGCCGCCCCGTTATCGT
GGTCGTATCGTTCTGACCCGCGACCCGGACGGCGAAGAGCGTTGCGTAGCCTGTAACCTCTGTGCGGTAGCCTGCCCGGT
CGGCTGTATCTCGCTGCAAAAAGCAGAAACCAAAGACGGTCGCTGGTATCCGGAATTTTTCCGCATCAACTTCTCACGCT
GCATTTTCTGTGGTCTGTGCGAAGAAGCCTGTCCGACCACGGCGATTCAGTTAACCCCGGATTTCGAAATGGGGGAATAC
AAGCGCCAGGATCTGGTTTACGAGAAAGAGGATCTGCTGATCTCCGGTCCGGGCAAATACCCGGAATATAACTTCTACCG
GATGGCAGGTATGGCAATCGACGGCAAAGATAAGGGCGAAGCAGAGAACGAAGCCAAGCCTATCGACGTCAAGAGCCTGT
TACCGTAAGGAGAGGAGCAATGGAGTTCGCTTTTTATATCTGTGGCCTGATAGCCATACTTGCGACCTTGCGAGTGATCA
CCCATACCAATCCGGTACACGCACTGCTGTACCTGATTATTTCGCTGCTGGCGATTTCTGGGGTGTTCTTCTCACTGGGC
GCTTACTTCGCCGGTGCGCTGGAAATTATCGTCTACGCGGGTGCCATTATGGTGCTGTTCGTGTTCGTGGTGATGATGCT
CAACCTGGGCGGTTCAGAAATCGAACAGGAACGCCAGTGGCTGAAACCGCAGGTGTGGATTGGTCCGGCAATTTTGTCGG
CCATCATGCTGGTGGTGATTGTTTACGCCATCCTCGGTGTTAACGATCAGGGTATCGACGGTACGCCAATCAGTGCTAAA
GCAGTGGGTATTACGCTGTTCGGGCCTTACGTACTGGCGGTGGAACTGGCTTCTATGCTGCTGCTCGCGGGTCTGGTTGT
GGCCTTCCACGTCGGTCGTGAAGAGCGTGCGGGTGAAGTGCTGAGCAATCGTAAAGACGACAGCGCGAAAAGAAAAACGG
AGGAGCACGCATGATCCCCTTACAACATGGACTGATCCTCGCGGCAATCTTATTCGTTCTTGGCTTAACCGGTCTGGTTA
TCCGTCGCAATCTGCTGTTTATGCTGATTGGTCTGGAAATCATGATTAACGCCTCCGCGCTGGCCTTTGTGGTCGCCGGA
AGCTACTGGGGCCAGACCGACGGTCAGGTGATGTACATTCTCGCCATCAGCCTCGCGGCGGCAGAAGCGAGTATCGGCCT
TGCGCTGCTGCTGCAACTTCACCGTCGTCGCCAGAACCTGAACATCGATTCAGTAAGTGAGATGCGCGGATGAACATGCT
TGCCTTAACCATTATTTTGCCATTGATTGGCTTCGTCCTGCTGGCGTTCTCCCGTGGGCGCTGGTCTGAAAACGTTTCGG
CGATCGTCGGCGTTGGCTCTGTGGGCCTGGCGGCGCTGGTAACCGCCTTTATCGGCGTTGATTTCTTCGCTAACGGCGAG
CAGGCATACAGCCAGCCGCTGTGGACGTGGATGTCGGTAGGCGACTTTAACATCGGTTTTAACCTGGTGCTGGACGGCCT
GTCGCTGACCATGCTCTCGGTGGTCACTGGTGTGGGTTTCCTGATCCACATGTACGCCTCCTGGTATATGCGTGGTGAAG
AGGGCTACTCTCGCTTCTTCGCCTACACCAACCTGTTCATCGCCAGCATGGTGGTTCTGGTGCTTGCCGATAACCTGCTG
TTGATGTACCTCGGCTGGGAAGGCGTGGGCCTGTGCTCCTATCTGCTGATCGGTTTCTATTACACCGATCCGAAGAATGG
CGCAGCGGCAATGAAAGCGTTCGTCGTGACCCGTGTGGGTGACGTGTTCCTCGCTTTCGCGCTGTTCATTCTTTACAACG
AACTGGGCACCCTGAACTTCCGCGAAATGGTGGAACTGGCACCAGCGCACTTTGCTGACGGCAATAACATGCTGATGTGG
GCGACGCTGATGCTGCTGGGCGGTGCGGTCGGTAAATCTGCGCAGTTGCCGTTGCAGACATGGCTTGCCGACGCGATGGC
GGGCCCGACGCCTGTCTCCGCGCTGATCCACGCCGCAACGATGGTAACCGCGGGTGTCTACCTGATCGCCCGTACCCACG
GCCTGTTCCTGATGACCCCGGAAGTTCTGCATCTGGTGGGTATTGTCGGGGCAGTTACGCTGCTGCTGGCCGGTTTTGCC
GCGCTGGTACAGACCGACATCAAACGTGTTCTCGCTTACTCTACCATGAGCCAGATTGGCTACATGTTCCTCGCGCTTGG
CGTGCAGGCATGGGATGCGGCGATTTTCCACTTGATGACTCACGCGTTCTTTAAAGCGCTGCTGTTCCTGGCATCCGGTT
CCGTCATTCTGGCCTGCCATCACGAACAGAACATCTTCAAGATGGGCGGTCTGCGTAAATCTATTCCGCTGGTTTATCTC
TGCTTCCTGGTGGGTGGTGCAGCACTGTCGGCACTGCCGCTGGTCACTGCGGGCTTCTTCAGTAAGGATGAGATCCTCGC
GGGTGCGATGGCGAATGGTCATATCAATCTGATGGTGGCAGGTCTGGTCGGTGCGTTTATGACCTCGCTCTACACCTTCC
GTATGATTTTCATCGTCTTCCACGGAAAAGAACAAATTCACGCTCACGCCGTGAAAGGGGTAACTCACAGCCTGCCGCTG
ATTGTGCTGCTGATCCTTTCCACCTTCGTTGGCGCACTGATTGTACCGCCGCTGCAGGGCGTGCTTCCGCAAACGACGGA
GCTGGCGCACGGCAGCATGTTGACCCTGGAAATTACCTCTGGCGTGGTCGCGGTGGTCGGCATTCTGCTGGCTGCCTGGC
TGTGGCTGGGTAAACGTACTCTGGTGACCTCCATCGCCAACAGTGCGCCGGGCCGTCTGCTGGGCACCTGGTGGTACAAC
GCCTGGGGCTTTGACTGGCTGTACGACAAAGTGTTCGTCAAGCCGTTCCTGGGTATTGCCTGGTTGCTGAAACGCGATCC
GCTGAACGCAATGATGAACATTCCGGCGGTTCTTTCCCGCTTTGCAGGTAAAGGTCTGCTGTTAAGCGAGAACGGCTATC
TGCGCTGGTATGTGGCATCCATGAGCATCGGTGCGGTCGTGGTGCTGGCACTGTTGATGGTACTGCGTTGAGTTAAGGAT
TGTGGGATTGCCCCTGGGCATATAAGAACGTAGGTCGGATAAGCCTCCTTCGCGGTGCATCCGACACTACCCCCAGTCCG
AAGAGAATTTTCTGTCGTGAGAATTCGTTGAAAATCCGGTCCTGACGGGACTTTTACAAGGAATAAAGATCGCCATGTTA
CTACCCTGGCTAATATTAATTCCCTTTATCGGCGGCTTCCTGTGCTGGCAGACCGAACGCTTTGGCGTCAAGGTGCCGCG
CTGGATCGCGCTGATCACCATGGGATTGACGCTGGCGCTGTCGCTGCAACTGTGGTTGCAGGGCGGTTATTCACTGACGC
AATCCGCCGGAATTCCGCAGTGGCAGTCTGAATTCGACATGCCGTGGATCCCGCGTTTTGGTATCTCTATTCATCTCGCC
ATTGACGGGCTGTCGCTGCTGATGGTCGTGCTGACCGGTCTGCTCGGTGTGCTGGCGGTACTCTGTTCGTGGAAAGAGAT
CGAAAAATATCAGGGCTTCTTCCACCTCAACCTGATGTGGATCCTGGGCGGCGTTATCGGCGTGTTCCTTGCCATCGACA
TGTTCCTGTTCTTCTTCTTCTGGGAAATGATGCTGGTGCCGATGTACTTCCTGATCGCACTGTGGGGGCATAAAGCCTCT
GACGGTAAAACGCGTATCACGGCGGCAACCAAGTTCTTCATTTACACCCAGGCGAGTGGTCTTGTGATGTTGATCGCCAT
CCTGGCGCTGGTTTTTGTTCACTACAATGCGACCGGCGTCTGGACCTTCAACTATGAAGAGCTGCTGAATACGCCAATGT
CCAGTGGTGTGGAATATCTGTTGATGCTGGGCTTCTTCATCGCCTTCGCAGTCAAAATGCCGGTGGTTCCGCTGCATGGC
TGGCTGCCGGATGCGCACTCCCAGGCTCCGACCGCCGGTTCCGTTGACCTCGCGGGGATCTTGCTGAAAACTGCCGCTTA
CGGTTTGCTGCGTTTCTCCCTGCCGCTGTTCCCAAATGCGTCGGCAGAGTTCGCGCCAATCGCTATGTGGCTGGGTGTTA
TCGGCATCTTTTACGGTGCGTGGATGGCCTTCGCCCAGACCGATATCAAACGTCTGATCGCCTACACCTCGGTTTCCCAC
ATGGGCTTCGTGCTGATTGCTATCTACACCGGCAGCCAGTTGGCCTACCAGGGCGCGGTAATCCAGATGATTGCGCACGG
CTTGTCGGCGGCGGGTCTGTTTATTCTCTGCGGTCAGCTTTATGAACGTATCCATACCCGCGACATGCGCATGATGGGCG
GTCTGTGGAGCAAGATGAAATGGCTGCCAGCACTGTCGCTGTTCTTTGCGGTGGCAACGCTTGGGATGCCTGGCACCGGT
AACTTCGTCGGCGAATTTATGATTCTGTTCGGCAGCTTCCAGGTTGTCCCGGTGATTACCGTTATTTCTACCTTTGGGCT
GGTCTTTGCATCTGTTTATTCGCTGGCGATGTTGCATCGTGCTTACTTCGGTAAAGCGAAAAGCCAGATTGCCAGCCAGG
AACTGCCAGGGATGTCGCTGCGTGAGCTGTTTATGATCCTGTTGCTGGTGGTGCTGCTGGTACTGCTGGGCTTCTATCCG
CAGCCGATTCTGGATACCTCGCACTCCGCGATTGGCAATATCCAGCAGTGGTTTGTTAATTCCGTTACTACTACAAGGCC
GTAAATCGCCATGACAATAACTCCACAAAACCTGATCGCACTGCTACCGTTGCTGATCGTCGGCTTGACGGTGGTGGTTG
TGATGCTCTCCATTGCGTGGCGACGCAATCATTTCCTCAACGCTACGCTCTCGGTTATTGGGCTTAACGCGGCGCTGGTT
TCGCTCTGGTTTGTCGGCCAGGCGGGCGCTATGGATGTTACGCCGCTGATGCGCGTTGATGGTTTCGCCATGCTTTACAC
CGGGCTGGTCCTGCTGGCGAGCCTCGCCACCTGTACTTTCGCCTACCCGTGGCTTGAAGGCTATAACGACAACAAGGATG
AGTTCTACCTGTTGGTGTTAATTGCCGCGCTGGGCGGGATCCTGCTGGCGAATGCCAACCATCTGGCGTCTCTGTTCCTC
GGTATCGAACTGATCTCTTTGCCGCTGTTTGGCCTGGTCGGTTACGCTTTCCGCCAGAAACGTTCGCTGGAAGCCAGTAT
CAAATACACCATCCTTTCTGCCGCAGCGTCTTCTTTCCTGCTGTTTGGTATGGCGCTGGTGTATGCGCAGTCTGGCGACC
TGTCGTTTGTCGCGTTGGGTAAAAACCTTGGCGACGGTATGCTCAACGAGCCGCTGTTGCTGGCAGGTTTCGGCCTGATG
ATTGTTGGCCTCGGCTTCAAACTCTCTCTGGTGCCGTTCCACCTGTGGACGCCAGACGTATACCAGGGCGCGCCTGCGCC
GGTTTCCACTTTCCTGGCGACGGCGAGCAAAATCGCTATCTTCGGTGTGGTGATGCGTCTGTTCCTCTACGCACCGGTGG
GTGACAGCGAAGCGATTCGCGTAGTACTGGCGATTATCGCCTTTGCCTCCATCATCTTCGGTAACCTGATGGCGTTGAGC
CAGACCAACATCAAACGTCTGCTCGGTTACTCATCTATCTCTCACCTCGGCTATCTGCTGGTGGCGCTGATTGCGCTGCA
AACCGGCGAGATGTCGATGGAAGCGGTAGGGGTTTACCTGGCCGGTTATCTGTTCAGCAGCCTCGGCGCGTTCGGCGTGG
TCAGCCTGATGTCCAGCCCGTATCGTGGCCCGGATGCTGATTCCCTGTTCTCTTACCGCGGTCTGTTCTGGCATCGTCCG
ATCCTCGCGGCAGTGATGACGGTGATGATGCTGTCTCTGGCCGGTATCCCGATGACGCTGGGCTTTATCGGTAAGTTCTA
CGTGCTGGCGGTCGGTGTCCAGGCTCACTTGTGGTGGCTGGTGGGTGCCGTGGTTGTCGGTTCGGCAATCGGCCTTTACT
ACTACCTGCGCGTGGCGGTGAGTCTGTACCTGCACGCACCGGAACAACCGGGTCGCGATGCACCGTCAAACTGGCAGTAC
AGCGCGGGCGGTATCGTGGTGCTGATTTCTGCACTGTTGGTACTGGTGCTGGGTGTATGGCCACAACCGCTGATTAGCAT
TGTGCGTTTGGCAATGCCGCTGATGTAATCTGTTAGTTTGTAAGTCAGAAAGCCGCCGACATGCTCGGCGGTTTTTTTTG
GCGCTCTGACACCATCACCCAACAATAACCGTCAGCGCATGATTCCCTTGTCGCAGCATACGTCGATACGCGCTAATCAG
CTTTTCCATATCAAGCATGATCGAGGCAAAGAGTTGCCCCTCTAACTCTTCTGAAAAGGTCACTCCCGGATAAATCTCCA
TTTCATTGAGTCGCTTAATGGAAAACTGTTTACGCAGCTCACTTCGATCCAGTGATTCCAGTCGGTCGATTGTCGCGGCT
AACTCCTGATTCCAGGTCAATCCCAGGAAGCCATCTATGCCATCTTCGAGGCTGTGTTCACCAAGCACGGCACGACTCAG
CGGATCATTCTTCGCGGGATCAAAAGCAGAGGTGCCTGTCAGCCCAAAGTGTAAAAAATCCCAGCGTTTATCAATATCCA
GTCGGCGTAATCCTGAAAGCGTGTCATGTATATTATCCATCAAAGGTTTTTCAGTAGACTCAAGCAGTTGGTTAATCTTT
TCTGAGTCAATTTCTGCAAAATAACCAATCATTCCCATTTATTTTTCCTCCATTGAATTTCATGTTTCGCATCTTAAAAC
AGACGAGGGAAAATAAAATGTGCATGTCGCTTTTTCTGGACCCGCCTCGAGAAATTTTTATTATTTACTGTTGTATAACA
AATTTATAACACCATCCACCACCTGAGCCATTTTCTGATAATTCAATCTGTCTGCGGTATCACCGGGCAAGTGGTATTGT
TTATTACGATAAAAAGCGGTGTCAGTAATCATTACGGCGGGAATATCGTGTTGCCAATAATTCAGGTGGTCAGAGAAATC
AATACCGGGAATAAACCCTGGGGCATTCATAGAATAAACAGATAAATCCCGGGATGACAACAATGCCGCTTTTACCTGAC
GAACGGCGTTGATATCCTGTATTCTGCCGACCAGGCAATAAAGTCCCCCCGATCGGGATAAAGCCAGGACATTGCGGGTA
AGGGTAATCCTGGCTACCAGGCGCAGAGTCGTAATAGCCAATCGGGGACGCCCTGCGCGGTAACTCTGGCACCGCTACTG
ACAAAGACCTCTTTTATATACTCTACGGACCTATTCAGATTATCAATATTGTCGGCATTACGTGGATGCACAGCTTGTGT
AAGATAACGAACTGTTTTTTCTAATTGCTCAGGAATTACGTGTCGGGGCGTTGGCGATAATGCAGTGACCCAGGGTTGGT
AAAAATAATCAGAGGGAGTGAAAACAGAAATAATATAACAAAAGGAAAATTTTTTCATATGTAAATTATCAATAAAAGGC
GTTATTTCATTATTATTTATAATGAATTATGAGCGTTTATTTTATTACACTTGGTAGAGATATACAAAAAGTGTTTTTTA
CAGTGGGTTCGCTATTTTTAAAAAGGAATTTCTGTGAGGAATAAAAATATAATTATGTTATTTATTGGCAGATTGAATTG
ACAAGTGGGGCAGAAATCTGAGGGTAAGAAAAGTCAGCAACTACAATCCACTACATCAACAGACCAGCAATCGCGTGCCG
AGATACGCTGGAAATACCCGAAGATTGAACTGCAGGGTGGTGTGACTGACATCAGTCAGTGATGACTTTTTAGCAAACTA
TGTTCGACCAGTCAGCATATTTGCTGACTGGTCGAATTAATTAACAATGATGTTAACTTACTCTTTTGCCTGATGCTCTA
TTTTGGGGTTGTGAGTGTTTTATTTCTAAGTCTCTATAATAATCATTGATATTTGCATCGCCATATTTATCTAAATAACA
ATTTCTGTTTACCAGTCGATGTTGAAAATCAATTTCGTACTGCTCTTCTGCTGAATATTTTTTAAATCTGTCAGCATAGT
TTTTTAATAACGTATAGGGGGCGCTGTCAGAATTACTTTCCCTTTGTTCAATCACTTCCTGGGCTGCCATGCACACAAAT
GCACCGCAACTTTGGCTTAAGTATTGCTGAAGATCGGTATGTAAAAATATTATCTCGGGTTCAGTTAAATGAACTTTTAT
ATTATTATTCGACATTTCTCCCATGAGTTCAGAATTAAAACTATTAATGACACGCTTAAGTGAATTTTCTTTATCATGGC
CTAGTGCGCGCAATGAGTTGAATATGACGCATTTTATTTGTTGTGTATTATTTTTTTTCATTTACTATTTTCTGTAGCGA
AACTAATATCCAGTGTCCGCCAGTATTTATGGGGAATAACTGGACTTCATTCGGCCATGATGGATCGCTCTTAATATTTT
CATTGAGAGCGTCTTCCAGGTGAGTTCTGGTGGAGTAGGGGACGTAGAGACCAGTAGGATAATTGACTTCAGTATTTTTT
GCATTAGCGGCGATCTTCTGAAGATAGCAATCTATTTCATCTGTGGTTAATTGACGATTTTTATCCCAGAAGTTTGTACC
ATCGCTCAGTTCATTATTCTCATCATTTAAAAGCACCTTCGAAAGCGACTGTTTTTCAGATATAAGAGGAATTTCATCAC
CGATAATTGTCATTAATTTCGAAGGGGAGAATAGCTTTTTGAACAGGAGATCATCTGAATTATCCGGACCAGTTGGTTTA
AGGTGGGAGTTGGTTGCGGTATGTGCCAAATTATATAATTTTAAACAGGCATTTTTAATAAGTCGGATAATCGATAGGGT
CTCATTTGTTGGGTTTCTAACAATATGGTAAAGAATATCTTCAGCTTTTTTTCCAAATTCATCATAACCTAACGCAATAT
TATGCAGTAACTCAATACTTTCTTCATCTCCGGATAACGCTGTTTTTTTTAAAGACTGCAGTAATTCCTCGGTCACAGTA
AATTTTTCTGCAAATGTCTGACTGAGTTGGGTTTGAGATAATTGACAATAATTGCTGACAACTGTAACCATCATATGCTC
CTTTTAGTTGCAAAGGTTGTGCTGAATGAAGATAAAAAGAGGCAACTTATTGCTCTGAATATAGTGCGTAAGGAGATGAA
TAAATATCAAAAATCGCTCAATATGCCCGTGTGGGTGGATATATGTAGCGCGGGTTGCGATAACAGGGCAAGTTTCGCCC
TGTTTTTAATAATAAGCAGAGTTAAACGTTAAACACGGTGAAATCATTCGCTAGTTCAGTCGCCGGGAAAATTGACCTGC
ATTCACGTAACAGGTGCTGACAACCTTTGTCATCATAGCGCGAGCTGACGTGGGTAATGATTAGCTTACCGACTCCAGCC
TCACGGGCCAGTGTCGCAGCCTGGCGTGTAGAGCTATGACCGCGACTATTGGCTTTGGCTTCCATGGTTATATCCAGCGT
CGCTTCGTGTACCATGACATCGACACCTTTAGCCAGGTCAAGTGCGGCATCGCAGGGGCCGGTATCGCCGAAAATAGCGA
GCGCTTTACCTGGCACTGGAGCAGCTAAGTAATCTGCGCCGTTAATCTGCCTTCCATCTTCCAGCATGATTGTTTTGCCC
GCTTTTAATTCCTGAAACAGTGGGCCAGGCGGTACGCCAGCAGCTTTTAATGCCTGGGCATTTAATGCACCCGGTTTATC
ATGTTCTTCAATACGATAGCCATAACATTCCAGTGGGTGTTCCATTGGATAAGCGGTCACTTTGCGCAGGCCATCATCGA
GAATTTCGCCAGCGCCAATTTCGACAATTTCCAGCGGATAATCGGTCCATGAGCCGCTAATCCGCAGCGCGGTCTCCACA
AATTCACGGATACCTTGCGGACCATAAATCGTTAAGGGTTGGACAATACCAGACATAGAACGACTGCACAGCAAGCCGGG
TAAACCAAAGAGATGATCGCCATGAAGGTGACTAATAAAAATCTTGTCCAGTTTTCCAGGGTTAAAGGCGGTATGCAGTA
GCTGATGCTGGGTGCCTTCACCGCAGTCAAACAACCAAAGACCGCTCTGGGTCGGATGTTGCAGGTTAAGCAATATTGCC
GTGACATTGCGCGTACGGGTTGGCACACCGGCTGAAGTACCTAAAAAAATTAATTCCATGAGTTCATCACGTTTCAAAAA
ATATTCCGGCTAGTATAAGGCATACATCTAAAAGGAGAGCATTATGATTGAATGGCAAGATCTGCATCACTCTGAATTAT
CGGTTTCCCAGCTTTATGCCTTATTACAACTGCGTTGCGCGGTGTTTGTTGTCGAGCAGAATTGCCCTTATCAGGATATC
GATGGTGATGATTTGACGGGGGATAATCGCCATATTCTCGGTTGGAAAAATGATGAACTGGTGGCATATGCGAGGATTCT
GAAAAGTGATGATGATCTTGAGCCGGTCGTTATAGGTCGGGTGATTGTCAGTGAAGCGTTGCGTGGCGAAAAAGTGGGGC
AGCAACTGATGAGTAAAACCCTCGACACATGCACGCATCACTGGCCTGATAAGCCTGTTTACCTTGGGGCGCAGGCGCAT
CTGCAAAACTTCTACCAGAGTTTCGGTTTTATCCCTGTGACGGAGATCTATGAAGAAGATGGTATCCCACACATTGGGAT
GGCACGCGAGGTAATTCAGGCGTAATCAATAACCCTTGTCTATAGTTAGTGACAGGTTTTACGCAAATGGAGAACGAGAA
TGTCTAATCAGTTTGGTGATACACGTATCGATGACGACCTGACGCTGCTTAGTGAAACACTGGAAGAGGTGCTCCGCTCC
TCTGGCGATCCCGCCGATCAGAAATATGTTGAGCTGAAAGCGCGTGCAGAAAAAGCGCTGGATGATGTGAAAAAACGGGT
TAGCCAGGCTTCAGACAGTTATTACTATCGGGCGAAGCAGGCTGTTTATCGTGCTGATGACTACGTCCACGAAAAACCCT
GGCAGGGAATTGGTGTGGGTGCGGCCGTTGGGCTGGTACTAGGACTGTTGCTGGCACGCCGTTAAAACCTCCCTACACCG
GGGTACTGCATTTTTTTTGTAGTACCCCGTATAATGTGAGGCTTTTAACAGGGAGAGGTCCGCGTGCAATCACTTACTAC
GGCGCTGGAAAATCTACTGCGCCATTTGTCGCAAGAGATTCCGGTGACACCCGGCATTCGGGTTATCGATATTCCTTTCC
CTCTCAAAGACGCTTTTGATGCCTTGAGCTGGCTGGCCAGTCAGCAAACGTACCCGCAATTCTACTGGCAACAACGTAAT
GGTGATGAAGAAGCTGCCGTCCTGGGCGCGATTACCCGTTTTACGTCGTTGGACCAGGCACAACGTTTTCTTCGCCAGCA
CCCGGAACACGCCGACTTACGCATTTGGGGGCTGAATGCGTTCGACCCGTCGCAGGGCAATTTACTTTTACCACGCCTGG
AATGGCGACGCTGTGGCGGTAAAGCCACGCTGCGGCTGACGCTATTCAGCGAAAGCTCCCTTCAGCACGATGCGATTAAG
GCAAGAGAATTTATCGCCACACTGGTGAGTATCAAGCCCTTGCCTGGGTTACATTTAACCACTACGCGAGAACAACACTG
GCCGGACAAAACGGGCTGGACGCAATTAATCGAACTGGCAACGAAAACCATCGCCGAAGGGGAGCTCGACAAAGTGGTGC
TTGCTCGGGCAACTGACCTGCATTTCGCAAGTCCGGTCAATGCGGCGGCGATGATGGCTGCCAGTCGTCGACTGAATCTC
AATTGCTACCATTTTTACATGGCCTTTGATGGCGAAAATGCTTTTCTTGGCTCTTCACCGGAACGGTTATGGCGGCGGCG
TGACAAAGCGCTGCGTACTGAAGCGCTGGCGGGAACAGTAGCAAATCATCCTGATGATAAGCAGGCGCAGCAGTTAGGAG
AGTGGCTGATGGCGGATGATAAAAACCAGCGCGAGAACATGCTGGTGGTGGAAGATATCTGCCAACGATTACAGGCCGAT
ACCCAGACGCTGGATGTTTTACCGCCGCAGGTACTGCGTCTGCGTAAAGTGCAGCATCTTCGCCGCTGTATCTGGACTTC
ACTCAACAAAGCGGATGATGTGATCTGTTTACATCAGTTGCAGCCAACGGCAGCAGTTGCTGGCTTACCGCGCGATCTGG
CGCGACAGTTTATCGCCCGTCACGAACCGTTCACCCGAGAATGGTACGCCGGTTCTGCGGGCTATCTCTCATTACAACAA
AGCGAATTCTGCGTTTCCCTGCGCTCAGCAAAAATTAGCGGCAATGTCGTGCGATTATATGCTGGCGCGGGCATTGTCCG
TGGTTCCGACCCCGAGCAAGAGTGGCAGGAAATCGACAACAAAGCGGCAGGGCTGCGTACTTTATTACAGATGGAATAGT
AATGAGTCGCATCATTACCGATTCATATCAATAATCTATTTTTGTAGCTCCTTATACTTAGCCGCAATATTGATACCGGA
CAAACTCATGTCAGTAAGCGCATTTAACCGACGCTGGGCGGCGGTCATTCTGGAAGCATTAACGCGTCACGGCGTCAGAC
ACATCTGTATCGCCCCAGGCTCGCGTTCTACACCGTTAACGTTAGCGGCGGCGGAGAATTCCGCATTCATTCACCACACC
CATTTCGATGAGCGTGGACTGGGGCATCTGGCGCTGGGGCTGGCGAAAGTCAGCAAGCAGCCGGTGGCGGTGATTGTGAC
CTCCGGCACGGCGGTAGCAAATCTCTATCCTGCACTGATTGAAGCTGGGTTAACCGGAGAAAAACTGATCCTGTTAACCG
CCGATCGCCCGCCGGAGCTAATTGACTGCGGCGCGAATCAGGCGATTCGTCAGCCGGGAATGTTCGCCTCTCACCCCACG
CACAGTATTTCATTGCCGCGCCCGACCCAGGATATCCCCGCAAGTTGGCTGGTTTCTACCATCGACCATGCTCTCGGTAC
GCTTCATGCGGGCGGAGTCCATATCAACTGCCCGTTTGCTGAACCGCTGTATGGCGAGATGGACGACACTGGGCTTAGCT
GGCAACAGCGTCTGGGTGACTGGTGGCAGGATGATAAGCCGTGGCTGCGTGAAGCGCCTCGTCTGGAAAGTGAAAAACAG
CGCGACTGGTTCTTCTGGCGGCAAAAACGCGGCGTGGTGGTTGCCGGGCGCATGAGTGCGGAAGAGGGCAAAAAAGTTGC
ACTGTGGGCGCAAACTCTTGGCTGGCCGCTGATTGGCGACGTGCTGTCGCAAACCGGACAGCCGCTGCCGTGTGCCGATC
TTTGGTTAGGCAATGCCAAAGCGACCAGCGAACTGCAACAGGCACAGATTGTGGTGCAACTGGGCAGCAGCCTGACGGGC
AAACGGCTCCTGCAATGGCAGGCAAGCTGTGAACCCGAAGAGTACTGGATTGTGGATGACATCGAAGGGCGACTTGATCC
GGCACACCATCGTGGACGCCGCTTAATTGCCAATATTGCCGACTGGCTGGAGCTGCATCCGGCAGAAAAACGCCAGCCCT
GGTGCGTTGAAATCCCGCGCCTGGCAGAACAGGCAATGCAGGCGGTTATTGCCCGTCGCGATGCGTTTGGCGAAGCGCAA
CTGGCGCATCGCATCAGCGACTATCTGCCTGAACAGGGGCAATTGTTTGTTGGTAACAGCCTGGTGGTACGTCTGATTGA
TGCGCTTTCGCAACTTCCAGCAGGTTACCCGGTGTACAGCAACCGTGGGGCCAGCGGTATCGACGGACTGCTTTCTACTG
CCGCCGGCGTTCAGCGTGCCAGTGGCAAACCGACGCTGGCGATTGTGGGCGATCTCTCCGCACTTTACGATCTCAACGCG
CTGGCGTTATTGCGTCAGGTTTCCGCGCCGCTGGTATTAATTGTGGTGAATAACAACGGCGGGCAAATTTTTTCGCTGTT
GCCAACGCCGCAAAGCGAGCGCGAACGTTTCTATCTGATGCCGCAAAACGTTCATTTTGAGCACGCCGCCGCGATGTTCG
AGCTGAAATATCATCGTCCGCAAAACTGGCAGGAACTTGAAACGGCACTTGCCGATGCCTGGCGCACGCCAACCACCACG
GTAATTGAAATGGTGGTTAACGACACCGATGGTGCGCAAACGCTCCAGCAACTTCTGGCGCAGGTAAGCCATTTATGATC
CTGCACGCGCAGGCAAAACACGGCAAACCAGGTTTACCCTGGCTGGTGTTTTTGCACGGTTTTTCCGGCGATTGCCACGA
ATGGCAAGAAGTGGGCGAGGCGTTTGCCGACTACTCACGGTTGTATGTTGATCTTCCCGGGCACGGTGGTTCGGCGGCGA
TTAGCGTCGATGGATTTGATGATGTCACCGACTTACTGCGTAAAACCCTGGTTAGTTACAACATCCTTAACTTCTGGCTG
GTGGGGTACTCGCTTGGCGGACGGGTGGCGATGATGGCCGCTTGCCAGGGGCTGGCGGGGCTTTGTGGGGTTATTGTCGA
AGGCGGGCATCCGGGGCTGCAAAATGCTGAACAACGTGCGGAACGTCAGCGTTCCGATCGCCAATGGGCGCAGCGTTTTC
GCACAGAACCGTTAACGGCGGTATTTGCCGACTGGTATCAACAGTCTGTTTTTGCCTCGCTCAATGACGATCAACGCCGG
GAGCTGGTGGCGCTGCGCAGCAACAATAATGGCGCAACCCTTGCCGCCATGCTGGAGGCGACTTCTCTCGCCGTCCAGCC
TGATTTACGTGCTAACCTTAGCGCCCGCACATTTGCGTTTTATTATTTATGTGGTGAACGTGACAGCAAATTCCGCGCTC
TGGCGGCGGAACTGGCTGCCGACTGCCATGTCATTCCTCGCGCCGGACATAACGCGCATCGGGAAAATCCCGCTGGCGTT
ATCGCAAGTCTGGCGCAGATCTTGCGTTTCTGACTAAAGGACACAATATGATTTATCCTGATGAAGCAATGCTTTACGCA
CCGGTTGAATGGCACGACTGCTCCGAAGGTTTCGAGGACATTCGTTATGAAAAATCCACCGACGGTATCGCAAAAATCAC
CATTAATCGTCCGCAGGTGCGCAATGCCTTCCGTCCTCTGACGGTAAAAGAGATGATCCAGGCACTGGCAGATGCGCGTT
ATGACGACAATATCGGCGTGATCATTCTGACTGGCGCAGGCGATAAAGCGTTCTGCTCCGGTGGTGACCAGAAAGTGCGT
GGTGATTACGGCGGCTATAAAGATGATTCCGGCGTACATCACCTGAACGTGCTGGACTTCCAGCGTCAGATCCGTACCTG
TCCGAAACCGGTTGTCGCGATGGTGGCTGGCTACTCCATCGGCGGTGGTCACGTTCTGCACATGATGTGCGACCTGACTA
TCGCGGCAGATAATGCCATCTTCGGTCAGACTGGCCCGAAAGTCGGTTCCTTCGACGGCGGCTGGGGCGCTTCCTACATG
GCTCGTATCGTCGGGCAGAAAAAAGCGCGTGAAATCTGGTTCCTGTGCCGTCAGTACGACGCAAAACAGGCGCTGGATAT
GGGCCTTGTGAACACCGTGGTACCGCTGGCGGATCTGGAAAAAGAAACCGTCCGTTGGTGCCGCGAAATGCTGCAAAACA
GCCCGATGGCGCTGCGCTGCCTGAAAGCTGCACTGAACGCCGACTGTGACGGTCAGGCAGGTCTGCAGGAGCTGGCGGGC
AACGCCACCATGCTGTTCTACATGACGGAAGAAGGTCAGGAAGGTCGCAACGCCTTCAACCAGAAACGTCAGCCTGATTT
CAGCAAATTTAAACGGAATCCGTAATGCGTAGCGCGCAGGTATACCGCTGGCAGATCCCCATGGACGCGGGGGTGGTTCT
GCGCGACAGGCGGTTAAAAACCCGCGACGGGCTGTATGTTTGCCTGCGTGAAGGCGAGCGCGAAGGGTGGGGGGAGATCT
CCCCACTGCCGGGCTTCAGTCAGGAAACCTGGGAAGAGGCGCAAAGTGTGCTGCTTGCCTGGGTAAATAACTGGCTGGCA
GGCGATTGCGAATTACCGCAGCTGCCTTCCGTCGCCTTTGGCGTAAGCTGTGCATTGGCGGAGCTGGCAGATACGCTCCC
GCAGGCGGCCAATTACCGTGCGGCACCACTGTGTAATGGCGATCCTGACGATCTGATCCTCAAACTTGCTGATATGCCAG
GCGAGAAAGTGGCGAAGGTCAAAGTGGGATTGTACGAAGCCGTGCGCGACGGCATGGTGGTGAATCTGTTGCTGGAGGCA
ATTCCGGATCTGCATTTGCGTCTTGACGCGAATCGCGCCTGGACACCGCTGAAAGGCCAGCAGTTTGCCAAATATGTTAA
CCCGGATTATCGCCACCGCATCGCGTTTCTCGAAGAGCCGTGCAAAACCCGCGATGATTCGCGAGCGTTTGCCCGTGAAA
CCGGCATTGCCATTGCCTGGGATGAAAGCTTGCGCGAGCCGGATTTTGCCTTTGTGGCTGAAGAGGGCGTGCGCGCGGTA
GTTATCAAACCCACGCTCACGGGCAGTCTGGAGAAAGTACGCGAGCAGGTACAGGCGGCGCACGCGCTGGGGCTGACGGC
GGTGATCAGTTCTTCCATTGAATCGAGCTTAGGCTTAACGCAACTGGCGCGGATTGCCGCCTGGTTAACGCCGGACACCA
TTCCAGGGCTGGACACGCTGGATCTAATGCAGGCGCAGCAGGTACGTCGCTGGCCGGGTAGCACGCTGCCTGTCGTGGAA
GTTGATGCACTGGAGCGGTTGTTATGATCTTCTCTGACTGGCCGTGGCGTCACTGGCGGCAAGTGCGGGGAGAAGCCATC
GCCTTACGTCTTAATGACGAGCAACTCAACTGGCGCGAGCTTTGTGCTCGCGTCGATGAATTAGCCTCCGGCTTTGCGGC
GCAGGGCGTAGTTGAGGGCAGCGGCGTGATGTTGCGGGCGTGGAATACGCCGCAAACGCTGCTCGCCTGGCTGGCGTTAC
TGCAATGCGGGGCGCGGGTGTTGCCCGTGAACCCTCAGCTGCCGCAACCGTTGCTTGAAGAATTGCTGCCCAATCTTACG
CTGCAATTTGCGCTGGTGCCGGAAGGGGAAAACACGTTTCCGGCGTTAGCGTCGCTGCACATTCAGCGGGTTGAAGGCGC
ACATGCCGCTGCGTGGCAGCCGACGCGTCTGTGCTCAATGACGTTAACCTCTGGGTCCACTGGCTTGCCGAAAGCCGCTG
TTCATAATTACCAGGCTCATCTTGCCAGCGCCGAAGGGGTGTTATCGCTGATTCCGTTTGGCGATCACGATGATTGGTTG
CTCTCTTTACCGCTGTTTCACGTCTCCGGTCAGGGAATTATGTGGCGCTGGTTATACGCTGGTGCGCGGATGACGGTACG
TGATAAACAGCCATTGGAGCAAATGCTGGCAGGCTGTACTCACGCTTCACTGGTGCCAACACAACTCTGGCGTTTGCTGG
TTAACCGCAGTTCCGTTTCCCTGAAAGCGGTGTTACTTGGCGGCGCGGCTATCCCGGTCGAGTTGACGGAACAGGCGCGC
GAGCAGGGGATTCGTTGCTTTTGCGGCTATGGTCTGACCGAGTTTGCCTCCACGGTGTGTGCGAAAGAAGCCGACGGCCT
GGCAGACGTTGGTTCGCCGCTGCCGGGTCGGGAAGTGAAAATCGTTAATAATGAAGTGTGGCTGCGGGCTGCCAGTATGG
CAGAAGGTTACTGGCGTAACGGGCAACTGGTTTCACTGGTTAATGACGAAGGCTGGTACGCTACGCGCGATCGCGGTGAG
ATGCATAATGGCAAGCTGACCATTGTCGGACGTTTAGACAATCTATTCTTCAGTGGCGGAGAGGGTATTCAGCCGGAAGA
AGTCGAGCGCGTAATTGCTGCACATCCTGCGGTTTTGCAGGTGTTTATCGTCCCCGTTGCCGACAAGGAGTTTGGTCATC
GACCGGTGGCGGTGATGGAGTATGACCACGAGAGCGTTGATCTTAGTGAATGGGTGAAAGATAAGCTGGCCCGTTTTCAG
CAACCGGTGCGTTGGTTAACGTTGCCGCCTGAACTGAAAAACGGCGGTATTAAAATTTCACGTCAGGCGCTAAAAGAGTG
GGTGCAACGTCAGCAATAATTAACCCTCCGTTTCACTTCTCATTTCTGCCATTCCATTGCCGTTGATAAAGAGTTTATCT
GTTAATCTGTAAATTGATGTGAAAACTCTTAGCAAACAGGATAATGCAATGGAATGGCTGGTCAAAAAATCGTGCTGCAA
TAAACAAGATAACAGACATGTACTTATGCTCTGCGATGCTGGCGGCGCGATAAAAATGATCGCCGAAGTGAAGAGTGACT
TCGCCGTGAAAGTGGGGGATTTACTCTCGCCTTTGCAGAATGCGCTTTATTGTATTAATCGTGAAAAGCTGCATACGGTG
AAAGTCCTCTCGGCAAGCAGTTATAGCCCCGATGAGTGGGAACGGCAGTGTAAAGCGGCAGGGAAAACTCAGTAACGTTG
TTTTGTCGTGGGCAGGAAAATCAGCATCAACCCGCTCATAATACAGGCTACTCCCAGTAGTGCTTTCAGCGAAAAAGTCC
CTTCCCAGCCGGGAAGTACCATTGAAGCAATCCATACCAGCACATAACTCATACTGAGCAAGGCATAGGCTTTGCTTAGC
GCAAGTATATGTAGCGTTTTATACCAACAAAAAACGGAAAGCAGATAACCCAGCAGCCCGAGTAACAGTATCCGGGCATC
CAGGCCAAAAGCTAACAGCATCGCGATAAAATCCCATAAGTGCGTCATCGGCGGCAGATGACTCGCCGCAAAACCCAGGC
TTAATTGCGCAGCTGAGGCAATAATGACGCTGAATAATCCCCACATCAGGCCCATTACACCGTACTCCCGAGGATCACAA
TGCCACCAATAATGAACGCCACCCCACACCAGTGACGCGGCGATACCGGTTCGTGCCACAGTTTTACTGCAGCCAGCGTC
ACCCAGACAAAATTCAGACTTAACATCGGGTAGGCAATGCCTACCGGTACGTTCTGCAAGACCAGCAGCCAGAGCACCAT
GGCAAGACCAAGACAAGCCAGCGCCAGTCCCAGCCACAGCACGATATGTTTGCGCCGTTTGTTTATCGCCACAAAGCAGG
TTGCCTGTTTCTGACACAACTGCCCGGCAACGCTAAGCAAGCTGGCAAAGACTAATGTTAGCCAGATCATTTGGGACGAT
ACTGAATCAGCACCAGACGCTCCTGACGATCGATGGCATCTGCGGGCGGAATGGCGAGACTGTTGATATCTTCATCGCGG
TCAACCGAAAGCACGAGTGTAATAATCCCCTCCTGACGATGTTGATTAAGCCAGTTTGCGAACTCATCACCGCTGACAAA
TCTCCCTTTCGCATCCGGATAATTAAGGCCGTATTTCAACTCACCTGTCTGGCGATACATGATGATGTCATCGCGTTGCA
GGCTCCATGCCAGACCTGCGGCAACACCGACGCTATCAGTAAGAATATAGCGGCTTGGCTGAAGTGATTCTTGTGTCATC
TCGACAAAAAATTGCGGATGTTTTCCTTCCATGACTCTGTCAGGAATTGAAAATCCTACCAGCAACGCCAGCCCCAGCGG
GCAAAGCGCGGCAAAAGACCAGGTCTTTTCGACGTTTGTTAAGGTGTACCAGCCGAAAAATGCCCATAGTGAAAAAATCG
ACCAGGCACAAAAGACTTTATAGCTCTCGAAGGTTTGCCACACCGGCGTGTTCATTGGTCCCCAGGGGGAGACCACAAAT
GTGGCAATAATGCCAGTGACGCCAAAAGCGATGTTAATCCAGCCATTAATCCGCAACGCCAGAGGATTATTTTTTGCTGC
CAGCAAAGCGTAATGCGCCATCAGCATTGCCAGAGGTGCAAAGCAGGAAAGAATATAGGTGGGCAATTTACCTTTAGCGA
CGGAGAAAAACAGCAGCGGCATTATCGTCCAGCTCAACAAATAGACGGTTGCGGAATGCTTGCGGTTTTTCCAGCCTGCG
TACAGTGCACCGGGGAGTAATCCCAGCCACGGCAGGCTACCGGCAATGATGACCGGCACGTAGTACCAGAACGGAGCTCT
ATGTTGGGCATCATCCAGTGCAAAGCGTTGAATATGCTCAACCCAGAAAAAATAGTGCCAGAAGTCAGGCTCCCGCTGCG
CTATCGCCAGTCCCCAGGGGAGAACCGTCAGTACGCAACTGATAACCGCCAGCCAGCCGTAAATAAAGAGATCTTTCCAG
CGTTTTTGCGTCGCTACCCATGGCAGTACGCTTAATACCGGCACGGCAAGGGCGAGAAAACCTTTGGTCATCACCCCCAT
GCCGCAGGTGATTCCCAGCAGTAAAAATCCTGCGCTTTTGCCTTTCCACGTCTGTGCCTGCATTGCCAGCCAGAAGCTGC
ACATTCCCGCCACCAGCCAGAATGCAATAAACGGATCGAGCACGGCATAAGTGCCGATGGCATAGACAATAAACAATGAG
AGATAAATTACTGTGGCGAGTAGAGCCAGACGTTTATCGCGCCATAAGCGCAGAGTAAACCAGGTCACCAGCGCGGCAGT
TAACAGGGTCGCAAAGATAACGCCTGCCCGCACACCAAAGTTATTCGCACCAAATAGCCATTGCCCAATGCTGTTAATCC
AGTATCCAGCAATGGGTTTTTCAAAATAACGTAGCCCTAACAGATGGGGCACAATCCAGTCGCCGGATGCCAGCATTTCC
CGACTGATTTCCGCATAACGCGTTTCATCGGGTTGCCAGAGCAGACGCGTGCTGATCGGTAACAGGTAATAGCAGGCAAT
AAACGCGAAGAGGCCGATAAGGTAACGTACCGATTTCATCAGCGACTACCCGCAATTTGTTGGCAACCCAGCCAGCCTTC
ACGTCCGGCAATATTTCCGCGAACAACTTGTCCGAGCGGCAACGTCTCTGATAACAGTTCGCTTAAAGGGCAAAATGTCA
CGCCTTCCTGAGCTGCGCGTTTGAGGAGATCCACAAAATTATGCTGATAAGCGCAGCCTTCAACTTCTGCATGAATGGTA
TAAACCGGCGTGCCTTTATCTCGCAGGATGCGGTTGAGTAACCAACCGTTAAAATCTTCTGCTTTCACATCCCGACCAAT
CACTTCATCCCAGGTGGGTAAGGTCACCGGAATTTGCGCAGTGCCAGGGTTTCCTGATTCGAGCAGTGGACGGAACGGCA
TGGCCCCACGACAATCGCTGTTGTAGCGCAAATGGAACGCTTCTTTTGCTTCGATCACCTGCTGGTCGGCACGCCAGCCC
GCAGCGGCAGAACAGGTTACCGGTTGACCGATAATCTCTTCCAGGGTGCGAAGGCCGAGTGCAATATCGTCGATCATTGT
TTGCCGATCCCAGTTACCGCTATGGGCTTGCCAGGCATGGTGATCCCAGGCGTGCAGGCCGACTTCGTGATGTTTAGCCG
CTTCACGAATGATATCGGCATTGGCAGGACCAATCTCTTTACCTGGCCAGGCCGTACCTGCCAGTAAAATATCCCAGCCA
TAAAGCGATGCCGCGTTTGAGCGCAGCATCTTCCACAAAAACTGTGGCTTCACCAGTCGCCAGAGATGGCGGCCCATATT
GTCCGGGCCGACGCTGAAAAAAATGCTGGCCTGAATATTATGCTTACTCAAGATTTCCAGCAGACGCGGCACGCCTTCAC
GGGTGCCACGAAAGGTATCGACATCAATGCGTAAGCCTACTTTGGTCATGATGGTTTATCCGTAAGATCAACGGTGCGCA
GGAAGAAATCCAGCGTTTCGTCGATGGTTTCCTGCATATCAATTTTCGGCTCCCAGTCCAGGCAGCGGTGGGCATTGCGG
ATGCTCGGTTTACGATGCTCTACGTCCTGATATCCTTTGCCGTAGTAGCTGCTACTTTCGACAACGCGAAAGCCCGCAAA
CGGTGGGAAGTGATGGCGCAGCGGATGTTTTTCGAAGCTCGCCAGCAGCATCTCGCCCAGTTCCTCAATGCTCGCTTCGT
TCTCAGGATTGCCAATGTTGATAATTTCGCCGTCGCAGCGATTTCCCACATTTTCGATAATGCGGTACAACGCCTCGATA
CCATCCCGGATATCAGTAAAGCAGCGTTTTTGTTTTCCGCCATCAATCAGCTTAATCGGTGAACCTTCTACCAGATTGAG
AATGAGTTGCGTAATAGCGCGGGAGCTGCCGATTCGTGCCGCATTAAGGTTATCCAGTCGTGGTCCCATCCAGTTAAACG
GGCGGAAGAGGGTGAACTGTAAACCCTCTTTTTCGCCATAGGCCCAGATAACCCGATCAAGTAATTGTTTTGACACCGAA
TAAATCCAGCGTGGTTTATTCACCGGGCCGACGATTAAATTAGAATGGTCCTCATCGAAGTATTTATCGCTACACATCCC
ATAAACTTCTGAAGTTGACGGGAAGATGATTCGCTTACGGTACTTCACGCAGTAGCGGATAATGCGCAGATTCTCTTCAA
AATCGAGTTCAAATACGCGCAGCGGGTTGCGGGTATATTCAATCGGCGTGGCTATCGCCACCAGCGGCAAGACGACATCA
CATTTTTTGACGTGATACTCAATCCATTCGGAATGAATACTGATATCGCCTTCGACAAAGTGAAAATGCGGATGATTCAG
AAAACGGCTTATCGCATCGCTGCCAATATCCAGACCGTAAACTTCATAATGATCTTCGCGCAGCAGGCGTTCTGTCAGAT
GGTTGCCAATAAAGCCATTCACCCCGAGGATGAGTACCCGGGTACGGCGTCGGGCGGCACAGGCAGGCTGGCTATTCAAG
CGTGAACCTTGCACCAGGCCCAGCGTCTGCGCTAATTGCGAGCCCTGCATAGTAATGCCGTCGCCCGCCTGTCCGGTGAC
GATTTCCAGCGCGCCATCGCCACAGGCAATCAGCAGTGGCGCAACAGAAATCACGCTCCCCGGCTGCGCTGCGGATGTAT
GAGGATGTACGCGTGACGACCAGACGGTGAATTTCTGATTGCCAGCATAGCTGAAGGCACCCGGCCACGGATCGGCAACG
GCGCGGACCATGTTATGCAATACGGCTGCCGGTTTGTGCCACTCGAGGAAGCTATCTTCTGGTGTTCTGCGACCAAAACA
GGTGGCTTCGTTCTCGCGTTGGGCGATTTCCAGAATATTACCGTGTTTAATGGCGGGTAATGTCTGTTCCAGTAGCTGGC
GCGCGGCATGGCACAATTTATGATGCAGCGTAATAGCGATATCGTCTGGCGCAATGGCAATGCGCAGTTGCGCCACAATG
GCCCCGGCATCGGCACGTTTCACCATTCGGTGCAATGTAACGCCAGTTTCCGTTTCACCGTTGACCAGCACCCAGTTCAG
CGGCGCGCGACCACGATATTTTGGTAACAGCGAACCATGCAGATTAAATGCACCTGCGGGAGCGAGCTGCAAAATTTCGT
CGCAAATAAGATGGCGATAATAAAAAGAGAAAATCACCTCTGGTGATAGTTGGGCAATGCGTTCCACCCACAGCGGATGA
TTAACGTTATCCGGCGCATAAACCGGAATGCCTCTTTCCGCTGCCAGACGAGCCACCGAACCATAAAAGGCTTTTTCACC
GGGATTATCAGTATGGGTAAAAATGGCGCTAATTTCGTAACCGGTAGCCAGCAGGGCTTCAATACCGAGGCATCCCATAT
CGTGGTAGGCAAAAACGACGGTTTTCATTATTCATTTTCCTTGCTGGATGGACGGATAACTTGCTGAACAAAATAGCGGG
GGCGGGCGCGGACATCGGTGTAGATCCTGCCGATATATTCACCGAGTAATCCCATGCCGATAAACTGAGCGCCAATAAAA
GTAAACAGCACGGCAAATAGCATAAAGACGCCTTCTGCCGCCCATTGTGGTCCGAAGGTCAGGCGTAAAATCACCAGCAG
CACCGCAATGCTAAAACCTCCAATCGCAATAATGCTGCCGAGCAGACTCAGCATACGTAGCGGCGTTGTGGTAAGGCAGG
TCACCAGGTCGTACATCAAATTAATCAGGCGCATAAAACTGTATTTGGATTCACCAAACTCACGCTCGGCATGATGCACT
GGAATTTCAATGGCACGGCGGGCGAAGATATTCGCCAGAATCGGGATAAAGGTGCTGCGTTCATGGCAGTGCAACATCGC
ATCGACAATATGACGGCGATAGGCGCGCAGCATACAACCGTAGTCACCCATCGCTTTGCCGGTGGTGCGCTGAATAAGCC
GGTTAATCATCTTCGAAGCGGTTTTACGAAACCAGCTGTCCTGGCGGTTCTGGCGTACAGTCCCTACCACGTCGTAACCT
TCATCGGCTTTTGCCACCAGGCGGGGGATTTCTTCTGGCGGATTCTGGAGATCGGCATCAAGGGTAATAATTAAGTCGCC
AGTAACGTGACTGAATCCCGCCATAATCGCTGAATGTTGCCCGTAATTGCGGTTAAGCAAAATAGACACAATATGGCTGT
TCTCCGCTTGTGAGGCTTCGACCAGCATATGCGCGGAATTATCGCTACTGCCGTCATCAATCAGCAGGATCTCATACTCT
TTCCCCAGTGATTCACAGGCTGTGGTGGTGCGCCTGATTAATTCCGGTAAGCTTTCCTGCTCGTTATAAACGGGAATAAC
CACCGAGACTTTCTTAACAGGGTGGATTTCAAACATGGCTTATTGTCCTGCGAGTTGCTGAAGGGCTGTGATGACGCGGT
CGGCATCGGCGGTGGTCATATCCGGGAACAGCGGCAACGAACAGATGCGTTCGCTATTCCATTCGCTATTCGGTAACGAC
AGCGTGGGAAAACGCTCGCGATAATATTTTTGTGTGTGAGCGGCGCGGAAATGTAACCCGGTACCAATACCTCTTTCTTT
TAACGCTTCCATCAACGCATCGCGACTGATACCACAACGTTGTTCATCGACACGAATAATAAACAGATGCCAGGCGTGAA
CGTGCGGCCAGGCGGGAAGGCTTAATGGCTGAAAGGGGAGAGCTGCCAGTGCTTGCTGATATTGCTGGGCAATTTCGCGC
CGACGGGTGTTGAGGTGCTCTAATTTGACTAACTGTGTCAGGGCAATCGCGGCGTTAATATCGGTCAGATTGTACTTATA
GCCCGGCGTTAAGACTTCAGCCTGCGGTACACGGCCCCAGGTTTGTCTGTCATAGGCATCGACACCCAGACCGTGAAATT
TCAGCATCCGTAGCTGGCGGGCAAGGTTTTCATTATCAGTTACAATCAGGCCACCTTCAGCACAGGTAATATTTTTAATG
GCATGAAATGAAAAAATAGCGGTACCTTTTGCGCCAATATGTCGCCCTTTGTAATACGTACCTACGGCATGGGCAGCATC
TTCGATAACTGCGATGCCGTAACGTTCGCCAATGGCGCGAATGGCGTCAATATCTGCTGGCGCACCGGCATAATGCACCG
GAATGATGGCTTTAGTGCGTGGCGTAATGGCTGACTCGATAGCTTCAGGCGTGACCATCAGCGTATCGCGGTCGACATCC
ACCATTACCGGCGTTGCACCCAACAAGGAAATCATATTGAGGGTTGAAACCCAGGTCAGGGAAGGCGTAATCACTTCATC
GCCCTTGCCAATTTCCAACGCCATTAGCGTGATATGCATTCCGGCGGTGGCTGAACTGACCGCGATGGCATGCTGATTTC
CCGTCAACTGGCAAAAGGCTTGCTCAAGCGCCTGATTCTTCGGACCGGTTGTGATCCAACCGGATTCGAGAACCTCTTTA
ACTGCAGCGAGTTCCTCCACGCCCATTGCTGGTCGCGAAAAAGGCAAAAATTCTGACATTGCTTTTCCTTCCGCCATTGA
ATACCTGTCCACTTATATTTGCTATAAAGAGTGTTGTGTATATTTTGCCATTTGGAGCGAAATTTTAAGGATAGAATATT
AACTTAACCTTAAGAAACTAATATTAGACGTAAATATTGAAATTTTTATATTTTTTCTTATTTAGGCTTTGCATTTGGCA
AAATTTTGAGGCATTTTGCCGGCATCGCAGGATTTTTAATATTACACCAACTGCTAATTATCGCCAGAAATGTCGCTCAA
TTTCACGGTAATTGTCTGGTTGCGCTTGTCTATAGGTGGAGTTTACGTGTTAGCTTTTTGCCGCTCTTCGTTGAAGTCAA
AAAAATATTTCATCATTTTACTGGCGCTCGCTGCAATTGCCGGACTGGGTACTCATGCTGCCTGGAGTAGCAATGGTTTG
CCACGTATCGACAATAAAACACTGGCCAGACTGGCACAGCAGCACCCGGTTGTCGTTTTGTTTCGCCATGCTGAACGTTG
CGATCGTTCAACCAATCAATGCTTGTCAGATAAAACAGGTATTACGGTCAAAGGTACCCAGGATGCCCGAGAACTGGGCA
ACGCTTTTAGTGCTGATATCCCTGATTTCGATCTCTATTCCAGTAATACCGTCCGGACCATTCAGTCGGCGACCTGGTTT
TCAGCGGGTAAAAAATTGACGGTAGATAAACGACTTCTTCAGTGCGGTAATGAGATTTATAGTGCAATTAAGGACTTACA
AAGCAAAGCGCCTGATAAAAATATCGTTATTTTCACCCATAATCATTGCCTGACATATATTGCTAAAGATAAGCGTGATG
CGACATTTAAACCTGATTATCTGGATGGTTTAGTCATGCATGTGGAAAAAGGCAAAGTTTATCTGGATGGGGAATTCGTT
AACCACTAAATTTTCAATCTGACAGCCAGTGATGGCTGTCATCATTGTTAAAGAAGACCTTTCAAACGTAACGTTTTTCG
GGTGGCAACATTCAAATCATAATGCACCAGATCTTCAGGTTTTACCCTCGCGTAGTCCTGAAACTCTTCGTTTATTTTCA
CTTCTCGGTTGGCAGAAACGCAGTCAAAAATCAGGTAAATCATATAAATCTCTTCCTTGCGACCATCTGCATACGTCTTG
GTGCGAATATCATCGCTGAAGGTCCACGGCGTGATTTCTGTCAAAAGCAGCTGTTCTCCCAGTTCTTCGCGAATTTCGCG
GCGTAGTGCCTCTTCAATTCGTTCGCCGGGCTCCACGCCGCCACCCGAAAGCGCCCATTGACCGGGGAAAACGCCGCGAT
CGTCGGCCATTTTACACAGCAAATAAGCACCATCATTTTGAATCAAAGGGCATACAATAGTCCGTTGTCGCACAGGGGTA
TTCCTTATAAATAAAAAGAAACCATGAGAATACGGTAACTCAGAAATATGTGAAAGTGACAGTAATCTCTTTTGCGATGA
TAACTGCACTTATTATTATTTTTGTGTGTATCGGTAAACTGTGTTTATTTTTTCGGCGTTTAATTATTTAAGAAGTATTT
AGTTACAATAAGTGACTAGATCCCTTTTTTCGCTCATTGAATCCTCTGCGCCAGGCAGTACAATCCCGCAGCTTTGGGAA
TTTTGATTAATTGCTTGTGGGAAAGGGGATAATGAAAAAAATTGCGCTAGCAGGTCTGGCCGGAATGCTGTTGGTTTCTG
CATCGGTCAATGCAATGAGCATCAGCGGCCAGGCGGGTAAAGAATACACCAATATTGGTGTCGGTTTTGGGACTGAATCG
ACGGGCCTGGCTTTAAGCGGTAACTGGACACATAACGACGACGACGGTGACGTCGCGGGCGTGGGGCTGGGGTTGAATCT
GCCTCTCGGGCCGTTAATGGCGACCGTTGGCGGAAAAGGCGTTTACACCAACCCGAATTACGGCGATGAAGGTTATGCCG
CAGCGGTAGGAGGTGGTTTGCAGTGGAAAATTGGCAACAGCTTCCGTTTGTTTGGCGAGTATTACTACTCTCCGGATTCG
CTCTCCAGCGGTATTCAAAGTTATGAGGAAGCGAATGCTGGCGCGCGTTACACCATTATGCGTCCAGTCAGTATTGAGGC
GGGTTATCGCTACCTGAATCTGTCGGGTAAAGACGGCAACCGCGACAACGCCGTGGCTGACGGCCCGTATGTTGGGGTTA
ACGCCAGTTTCTGATCCCTTCCGGCGCGGCATTCTGCCGCGCCATTCAGTTTCTTACTACGCCTTATCTCCCTTTGCGTT
ATAGTGATTCGATAACAAAAGCAGGAGATAACCATGTTAAAAGTGGAAATGCTATCCACCGGGGATGAAGTGTTACACGG
GCAAATCGTTGACACTAACGCTGCCTGGCTGGCCGATTTTTTCTTTCATCAGGGGTTGCCATTATCTCGCCGCAATACGG
TGGGGGATAACCTTGATGACTTAGTCACCATTCTTCGCGAACGTAGTCAGCACGCCGATGTGCTGATCGTTAACGGCGGG
CTGGGACCGACCAGCGATGATTTAAGCGCACTCGCCGCTGCGACAGCAAAAGGTGAAGGCCTGGTGTTGCATGAAGCCTG
GCTCAAAGAGATGGAACGCTATTTCCACGAACGTGGACGAGTAATGGCACCGAGCAACCGTAAACAAGCGGAGCTTCCTG
CCAGTGCTGAATTTATCAATAACCCGGTAGGCACCGCCTGTGGTTTTGCCGTGCAGCTTAATCGTTGCCTGATGTTCTTT
ACCCCCGGCGTACCGTCAGAATTTAAGGTGATGGTCGAGCACGAAATCCTGCCGCGCCTGCGCGAGCGTTTTTCTTTACC
ACAGCCGCCGGTTTGCCTGCGTTTGACTACCTTTGGTCGTTCGGAAAGCGATCTGGCACAAAGCCTGGACACTCTACAAC
TGCCGCCGGGCGTAACAATGGGCTATCGCTCCTCAATGCCGATCATCGAACTGAAACTCACCGGACCGGCAAGCGAGCAA
CAGGCGATGGAAAAACTGTGGCTGGACGTTAAACGTGTTGCCGGACAGAGCGTGATTTTCGAAGGCACCGAAGGACTGCC
CGCGCAAATCAGTCGCGAATTGCAAAACCGCCAGTTCAGCCTGACGTTGAGCGAGCAATTCACCGGTGGTTTATTGGCTT
TGCAACTTTCTCGCGCAGGTGCTCCATTGCTGGCGTGTGAAGTGGTTCCTTCACAGGAAGAAACCCTGGCGCAAACTGCG
CACTGGATTACAGAACGGCGGGCCAACCATTTTGCCGGGCTGGCACTGGCTGTTTCGGGTTTCGAGAACGAGCATCTCAA
CTTTGCGCTAGCCACGCCAGATGGCACTTTCGCTCTGCGTGTGCGTTTCAGCACTACACGCTATAGCCTGGCTATCCGTC
AGGAAGTGTGCGCAATGATGGCACTGAATATGCTACGCCGTTGGTTAAACGGCCAGGACATTGCCAGTGAGCATGGCTGG
ATTGAGGTTGTTGAGTCGTTGATGCTGTCGCCACAGGGGGCATGAAAGAGGCGCGCCGGGGAGAAGGCTTTTACCCGGCA
CGTTGTCGCATTCATTGCAGGCTTAATGGAGCGAGATCGGCCTCGGTTAGCTGGGTTGTTGCCAGCACCAGGTCAAGATC
GATACCCTGCTCCAGCATGCGCAAGGCAATTTTAATGGCTTGTTCATGCATGCCTTGCTGCAAACCTTCTAATTTACCTT
CCTGCCAGCCAATTTGATGCCCTTCCTGCCTCAGCCGTTCAGCAATAGTCATTAATCTCTCCTTTTGTAGTGGTGAACGT
TCGGCAATCTCCTGAATAAAACGGGTGAAACGGGAGGTATCGCCGCATTGCAGCAGATAATTAAACAGTGTTTGTAGCTG
GCTGTCATTAGTGAAGCCTCTAACCAAAAGCGTGGTGATCCTGTCGACCATACCGATTAAATCGCGGTCGCGAATATGCT
TTTGAATCAGTTCAAGCAGAGCTATACGCCGATGTTGCATGATCTCATCGTCAGGTACGATGGTGATATCCACCAACGGA
AAAGCTTCGGTGTACAACTGCCGGGCAAGTTGCGGACCGTCAAACTCATCCAGCCAGTTGAGTGAGTACGGGTAGGGCGA
GGTTTCGCCATGATAAAACAGCAACGGCACCACCAGCGGGACTCTGTCATAGCCTTTGTCCAGGTGACGCTGCATGGCGG
CAGTGGCATAGCGCATTAGCCGAAAAGCCATATTCTTTTCTGCAGAGCTTTGATGTTCAATCACGCAGTAGATATAGCCG
TCACCGTCGCTGGTTTCCACGGACCACAAAACATCCGAGTAGTAAGCGCGTAAACTTTTTTCAATAAAACTAGTGGGTTC
CAGGCGTAAGGTTTGCAGGTTGCAAAGCTTGCGCAGTGGTTCTGGTAAATGTATTTCGAGAAAATCCCGTGCGGTTTCGG
GTGTGAACATAAAGGTTTTAAATACTGCATCATGCGGGGAGGAGGTTGTTGATTCGGTCATGGTTGTCCGTCACCTGATA
TTTATGATGACGCGACATTACGGTTATCCCAGGCCTTTGACATCTGCCAGTTTCAGCCTTTGCGAGACGTTTTCAGAGGA
ATTTTCACTGCGTTGCAACGCATACATTGGGCACGGAATCGTGTACGCAAAAATGCCCGGTAACCACATGCTTACCGGGC
ATCAGAAAGGAGTTTAAGCCAGCGCCTGGGCCAGTAGCGTAATCGGATGTTCGCAGCGAAGACTTGTGGACATCTCAATC
TGCCATTTACAGGTTTCGCAGTCGGTGACCACCAGATCTGCGCCGCTTTCTTCTATCTGGCGGAACAGTGGTGCGCCGAT
GGCTTGTGAGGTGGGGTAGTTCTCTTTTTTGAAACCGTAAGTACCCGCAATACCGCAGCACTGGGAATCCAGCACCGTTA
ACTCAAGCCCCGGGATGTTACGCAACAGCTCCAGGGTGTAGAGCGTCCAGCCCATTTTTTCCATATGGCACGGAGTGTGA
TAAACCACTTTCAGCGGCAGCGGTTTCAGCGGTAACGTTTTGCCTTCGTCCAGCTTGCGCCACAACCAGTGGGTCGCCAG
TTCGATATGATCGCGCAAGCCTTTGTTGTCGACATTCAGCACTTCCGGGTATTCGTCGCGCAGGGCAAATGTACAGGTTG
AGGAGGTGGCAATCACCGGAATGCCTTTTACTCCCACAGCTTCGCGGATCGACTCTACATTCGTAATTGCCTGTTTGCGT
GCTTTATCGGTAAAGCCGTTGGCGATCAGCGGTACGCCGCAGCATTTTTCTTTGCTGAGCAGTTGTACACCGGTACCCAT
TGCGTTGAGCACTTTAATTAAATCTTTACCTAACTGCGGATGGTTGTAGTTAACGAAGCAGCCGTGAAAGAAAGCGACCT
GGTCTTTATACTGCGCTTGCTGAGCCGCCACGCTGCGATACCAGCGACGAAACGTGCCGAAGGAGTATTTCGGTAGCGTG
CGGCGATGATCGATTTTTAACGCCGCATCAAGCAACTGCCGCACCGGTTTCAGCGAGGTAGCGGTGTTGACGATTGGTGC
GAACGGCGTGGAAACGCTACCCATCAGGTCGGTATGACTCAACACAAAATTACGCAGCGACGGGCGCGTGGTGTCATATT
TCGCCCGCGCGCGCTGGATGATATCGCCAATCTTCACATCGGACGGGCAGGCGACTTCACAACGTTTGCAGTTGATACAA
TATTTCAGCGCCTCGTCATACAGTGCGCCATCTTTTAAACGCAGACGCTCGCCATCCGGCCCGGCTTGTTTTGGCCCTGG
ATAACCGGGATTCACCCGGCTCACTGGGCAGGCGGTGGTGCAGACGGTGCACTTAATGCAGTTTTCGAAGCTGGTGTCAT
TCATTGTTGGCCTCCTGCGCGTTGGGCAATCTGTTGAGCGGCATGTAAAGCACTGACGGCACAAACACCGCCGCCGCATC
CCTGGGCGATGGGATCAAATCCGCCCAGCACCGAACCGATGGCAAACAGGTTCTCAATGGTTTGCCCTGCCTGTGATGGG
CGTAGCGTCTTATCAGTGGTTACACCGAACTGCTGCCACGGTTGCGGCGCAAAAAAATCTCCCTTATACCATTCACCCCG
CGTGGCGGTTTGTAGCACATCAAGGCCGAGAATCGGCTCTCGAATGCCGTTACGTTCCGCTACCAGTCCGCCACTAAAGA
AACTGCCGCTGGCGAGAACCGCGAAACGTGGACGTAGCGGGATATCGGCGTGATTGCGGGTCCAGATTTCATTCACTACG
CCATTTTTACAGGTCACTTTTTTCACTTCATCGCCCGGCATCCACACGCCACCCTGGCGCACAAACTGGCGCTGTAACTG
GTTTTGCAGACGAATGCCCAGCACGGAAGGCGGCAGCGTTGGCAAAAGCATCAGTGAACAAGGTAGTTTTTCATTCAACC
AACGCCACAGTTTGTCATCGACCAGGCCGAAGCAGGCGGGCATCAGGATCATTTCGCAGGTATTGGCGACAGGAATAAGC
GCATCAAGTAACAGCGACCAGTTTTCTTCATTATCAAGGAAACGGGCGATATTCACCGCGCGGAACTCGGTGGCGTTATT
GCGCAGGACATCCAGTTCCGGCAGCTCTATTTCTGCGGTTTCAACCGAAAGATCCAGTTCACGCAACGAAGCTGCCGCAA
GGTGCGCCTGAAAATCCATCAGCCCGCTTATCCCCACTACACATATCTTCTTCGCGGGTAGCGGCCAGACGGGGACTTCT
GGCGAACTTAACCAGGTTGCACGCAAAGTGCCGAGCGGGGTAACGCGCTGATGGGCCAGTTCCACGCTGCCCTGCAATTG
CGCACCGCTTTCAGCGATTAATGCCTGCGCCTGGCAAGCGAGATCGAGCACGCGTTGTGGCCCGAGAAGAGAGTAAGGAT
GTGCAGGTGCCTGCTGACGCAAAGATTCCAGTCCACTGTGAATGTCTGTCACCGCTTGACCATCTGGCAGATGGCTCAGC
AAATCCAGCGAACCGGATGAGAAATGCAGCGCGCTTTGACCACGCGTGACAATGGCACAGCGCAGGCCGTGTTTTTGCAG
TTGCAGGCCACAGAGTAATCCGGCGAGGCCGCCGCCCATAATGACAGTATCAAAGCGCATCTTTCTGCTCCTTCTCCAGA
CCACACAGTCCCTGATAAACCCAGCGGGTAAATTCGCTTTCGCGCAGTGCATCTCCCCAGGCGATGGGTTGCACGCCTTT
CCAGCGTTCGTTAAGGAAGGTGGAAAGTTGCTCGATAGATTGCGCGGACGTCGTGACGTTAAAACGTTGCAGCAGTCCGG
CAGCGCGGCAGGCGCAGAGTTCGCCCTGGCAGGTACCCATCCCCACACGGGTACGACGGCGTAAATCCAGCAGGCTATTA
ACGTTTAAATTTTCTACCGCGTACTGCACTTCACCCGCAGTTACCGCTTCGCACTCACATACCAGGCTACGGTGCAGACG
GCCTTCGCTCAGCCAGGCAGGCGTGCGATCGCCATGACGATAAACCGCAGAACCGCGCAGCGGGGCAGGCAGGGAGATGA
CTTTACGTAAGGTAACTTCAGCGGGTTCTTGTGAACCAGGCAGTGCCAGATCGGCAGTCGTACAGGGGCGCGTGTTGCCC
AGTTTGCGGCATACCGCGTCGGTAGCCCATTCAGCCATCAGCCGATAGGTCATCAGTTTGCCACCGGTGATGGTGATAAA
TCCGTCCAGACCATCGCGTTCAGCATGGTCGAGCAGCACGATGCCACGGCTGACGTTACGTCCGCTCGGGTCGTCATCGC
TGGCAACCAGCGGGCGCACGCCAGAATAGGCCCGCAAAATGCGCGTTTTCGCCATCACGGGGGCCAGTTTTTCCCCTTCA
CGCAGCAGAATATCAACCTCTTCTGCCGTCACTCGATTATCGTCAATCTCGTTGTAATCAATACGTAAAGAGGTGGTGCC
AATCAGCGAAATGGTATCGCCAGGCACCAGAATATCGGCGTCGGAAGGTTTACGGCAGCGGTTGATCACATGCTGGTTAA
TGCGGTGATCCATGATCAGCAGCGATCCTTTCGCCGGGAACATGCGAATGCGCAGATCGGCATATTCGGCAATGTGTTGC
CCCCAGATCCCAGCGGCATTAACCACGACAGGTGCATGAAGGGCCTGAGTTTCGCCGGTGAGATGGTTACGTACACGAAC
ACCGCACACCGTCGCGCCTTCACGAATCAGTCCCGTGACTTCATGAGCGGTAAGGATAACGGCACCGTGTTCTTTGGCAT
CCAGCATGTTTGCTGCGGTCAGACGAAATGGATCAACGGTGCCATCCGGAACTTTCACCGCGCCAATCAGTGCCGGGTTA
ACGGCAGGTTCGATAATGCGCGCTTGCTGCGGGTCTATAGCTTCTGCGCTGATCCCTGCTTCTTCGCAGGCGCGAATAAA
AGTGGCCTGGAAGGAGAGGTCATCTTCCGGCAGGGTGATAAACAGGCCGTTGGTTGGTTCAACGCAGTGACGTGCAATGC
GTTTCAGGATCTGGTTTTCACTAATGCATTCGCGGGCCGATTCCGCATCGGTTACCGCATAGCGCGCACCGCTGTGCAGC
AGGCCGTGGTTACGCCCGGTGGCACCGGTTGCGATGTCGTGGCGCTCAACCAAAATCACGCGCAGCCCGCGCAGGGCACA
GTCGCGGGCAATCCCGGCTCCCGTTGCGCCGCCGCCAATGATAATCACGTCACTTGATTGCGAGTCGCGAGTTTTCATTG
TTATCCCTCTGAAGTTCGTTTTTTACCATTTAGCCATAGTAAAAACATGAATTGTTTGATTTCGCGCATATTTGCTCATA
ATTCGAAAGTGAAACGTGATTTCATGCGTCATTTTGAACATTTTGTAAATCTTATTTAATAATGTGTGCGGCAATTCACA
TTTAATTTATGAATGTTTTCTTAACATCGCGGCAACTCAAGAAACGGCAGGTTCTCTCACTGAATCAGGCTGTTAATCAT
AAATAAGACCACGGGCCACGGAGGCTATCAATGTTGAGTATTTTTAAACCAGCGCCACACAAAGCGCGCTTACCTGCCGC
GGAGATCGATCCGACTTATCGTCGATTGCGCTGGCAAATTTTCCTGGGGATATTCTTTGGCTATGCTGCTTACTATTTGG
TTCGTAAGAACTTTGCGCTTGCTATGCCTTATCTGGTTGAGCAGGGATTCTCACGCGGTGATTTAGGTTTTGCCCTTTCG
GGGATCTCGATTGCTTATGGATTTTCGAAATTCATCATGGGTTCGGTATCGGATCGCTCGAATCCGCGCGTTTTCCTGCC
CGCAGGTTTGATTCTGGCGGCGGCAGTGATGTTGTTTATGGGCTTTGTGCCATGGGCGACGTCGAGCATTGCGGTGATGT
TTGTACTGTTGTTCCTCTGCGGTTGGTTCCAGGGGATGGGGTGGCCGCCGTGTGGTCGTACTATGGTGCACTGGTGGTCG
CAGAAAGAACGTGGCGGCATTGTGTCAGTGTGGAACTGTGCGCACAACGTCGGTGGTGGTATTCCGCCGCTGCTGTTCCT
GCTGGGGATGGCCTGGTTCAATGACTGGCACGCGGCGCTCTATATGCCCGCTTTTTGCGCCATTCTGGTGGCATTATTCG
CCTTTGCGATGATGCGCGATACCCCGCAATCCTGTGGCTTGCCGCCGATCGAAGAGTACAAAAATGATTATCCGGACGAC
TATAACGAAAAAGCGGAACAGGAGCTGACCGCGAAGCAAATCTTCATGCAGTACGTGCTGCCGAACAAACTGCTGTGGTA
CATCGCCATCGCCAACGTGTTCGTTTATCTGCTGCGTTACGGCATCCTCGACTGGTCACCGACTTATCTGAAAGAGGTTA
AGCATTTCGCGCTGGATAAATCCTCCTGGGCCTACTTCTTCTATGAGTATGCGGGTATTCCGGGCACCCTGCTGTGCGGC
TGGATGTCGGACAAAGTCTTCCGCGGTAACCGTGGGGCAACCGGCGTCTTCTTTATGACACTGGTGACCATCGCGACTAT
CGTTTACTGGATGAACCCGGCAGGTAACCCAACCGTCGATATGATTTGTATGATTGTTATCGGCTTCCTGATCTACGGCC
CTGTGATGCTGATCGGTCTGCATGCGCTGGAACTGGCACCGAAAAAAGCGGCAGGAACGGCAGCGGGCTTTACCGGTCTG
TTTGGTTACCTGGGCGGTTCGGTGGCGGCGAGCGCGATTGTTGGCTACACCGTGGACTTCTTCGGCTGGGATGGCGGCTT
TATGGTAATGATTGGCGGCAGCATTCTGGCGGTTATCTTGTTGATTGTTGTGATGATTGGCGAAAAACGTCGCCATCAGG
AATTACTGCAAAAACGCAACGGAGGCTAATGGCATGAAATTGACGCTGAAAAACCTTAGCATGGCGATCATGATGAGCAC
TATAGTCATGGGAAGCAGTGCAATGGCGGCGAACAGCAACGAAAAAATAGTCATCGCCCATCGCGGTGCCAGTGGATATT
TGCCGGAGCATACGCTGCCAGCAAAAGCGATGGCGTATGCGCAGGGAGCGGATTATCTGGAACAGGATTTGGTGATGACC
AAAGACGACCATCTGGTTGTTCTGCATGACCATTACCTCGATCGTGTTACTGATGTTGCCGATCGTTTCCCGGATCGGGC
GCGCAAAGACGGTCGTTACTACGCGATAGATTTCACGCTGGATGAAATTAAGTCGCTGAAATTTACCGAAGGTTTCGATA
TTGAAAACGGTAAAAAAGTGCAGACTTATCCGGGGCGTTTCCCAATGGGTAAGTCCGACTTCCGGGTGCACTCCTTTGAA
GAAGAGATTGAATTTGTTCAGGGGTTAAATCACTCTACCGGGAAAAATATCGGTATCTATCCAGAAATTAAAGCGCCGTG
GTTCCATCATCAGGAAGGGAAGGATATTGCGGCAAAAACGCTGGAAGTGCTGAAGAAATATGGTTACACCGGTAAGGACG
ACAAAGTTTATCTGCAATGCTTTGATGCTGATGAACTGAAGCGTATTAAGAATGAGCTGGAACCTAAAATGGGTATGGAC
CTCAACCTGGTACAGCTGATTGCCTATACCGACTGGAACGAAACTCAGCAGAAACAACCGGACGGAAGCTGGGTTAATTA
CAGCTATGACTGGATGTTTAAGCCGGGTGCCATGAAACAGGTGGCGGAATATGCTGATGGTATTGGCCCAGATTACCATA
TGTTGATTGAGGAGACATCGCAGCCGGGTAATATCAAACTCACTGGCATGGTGCAAGATGCTCAGCAGAATAAACTGGTA
GTGCATCCTTATACCGTGCGGTCAGATAAACTGCCTGAATACACTACTGATGTGAATCAGTTATATGATGTTCTGTATAA
CAAAGCGGGTGTAAATGGGCTGTTTACTGATTTCCCTGATAAGGCAGTAAAATTCCTTAATAAAGAGTAATGCTACTGCA
GGATGGCGTTCATGCGCCATCCTCAGCTAAAGCGAAATAATGCTACTACCGGTTATTCTATTCATTCACCTGAGCATCCT
GTTAAAAAAGATGCCAACATATTTGCGTAAAACTCATTTGTTAGGAAAGCTAACACTGGGTATTGTTATTCTTTAAACAG
TATGAATAGGGCTCAATAATAAATTGTAATGTAGTTTATAATATACAGTATTATTCGCATTTCGGGAAAGTAAAGAAAAT
ATTAATGTATCTTATTAATTTATCATATTGTTCTTGGGTGAATGCTGTTTGCACACCTTCAGGACAATACTCACCAGTAA
TAATCAGTTGCCCATTGCTGTGTTGTACCATTAAACCTTTTTTTTCCTTTGGATCTTCAAACTTAGAATTATCAAACGTG
AAGATGTTATTTTCCTGTTTTGAGTAAGCAAAGAAATCTCGTGTATAGCTGAAACTATCATTTATTAATGGTGCTAACTT
TTTGTCGGCGATATCGATAAGCTCACCACCTAATTTATTGATATATTTCATTTGGTTCAATTTTTTCTGCGCTTGTACAA
TTTGCTTGTAGGTGTTTTTAATTTCCTTAGAAGAATTCTTGAATTTATCATAGCGTTCCTCGGAGGATGCGTATTTGTAC
CATTCTGTATTTTTCTCAGAATGTTGTAGCAGGTCTGCATATTTTTTTTGATCGCTGTAAAGTTGACTTTTAATACTTTC
CTCACTGCTGGTTTTATAAGGCTTATCAGAGCTGTTTATTTTTGAAATGTCTTTTTCTGTCAGTGACTGGACCGTGTTGT
GGGTATTTTCTTTTGCAACATGCTCATTGATGATGTTAATTGCAGTTTCATATTCATTTAAGTTTATTGTTCTTTGTGAA
ATAGACCCTTCTTTGCTTTCGATACTCAAAACACCTTCGTTGTTTTCACCTCGGGTAAAGGTAAGGGTATAGGGTTCATA
ATCCGCTGCAAATTCATTTTTATACGTTATGACATGCTCGACAAAATGTCTTATTGGTACGAAACCATAACTGTGAACGT
CAATTTTTTGGGTCTTGATACTATCAATTTCATCTGAGGCTTTCGTGAAAAAAGCCAATAAATTAGCTATGTTGTCTGCT
GAGGTTGATAACCCGAATCTACTTTGAGATATTTTTAGAAACTCATTGCAAAAAATCTCAAGTTTCGCGGTTTGTTGTGA
TTCTTTGTAAATTTCTGCTGTTTGCAATTTATTATTTTGTAAAAGATTACAGCGAGATAATTGAATAGATGTATTTGGCA
TAAATGATTCCTTGTATTGTGAGTTAACAAGATACAATTTAATCTTTGCAGAATATATTCACTATCAAATTTAGCTCATT
TTATTACGAAGACCTTTACGCATGTTAGAAAGTATCATTATTGTTAATAAACACGGTAATAAGTAACAAACAGATATTGA
TAACTTCCCTGACAAGTTATTAGGTATCCCACTTGAAGATTGAGAGTGGCTCCAGAGTAAACTGTGTACTGTTCGCCGGA
GTGTCATTACTCTCAACAATCGGTTTTGACAGTGAGTCGGGCGCTTCATACTGGTTTCTACCTGGAGTCATTGTCACTTC
CCTAAACTGGATAAATATATATCGCTAATTCACAAAGTGGACCAAAATCAGGTGAAAACGAATTATTACGCCTGGTAAAG
ACTACAGGCCAACTAAGTGTGGCGAATCAGGCAATCTTACATTTGTCATCAATCTCATGTCTTACATCAAATTTTTCCAC
TCACCACGAGTTGTTCCGTACACATTTGTAGTAAAAACAGTGGACTGCCTTCTACCGGCTTTTCTTTAGCCAGCAACGAA
ATCTGTCGATAGAAGGTTGGTTCGAGAGGAACGGAACACAATTCATCTGCAATGGTTTTCAGCGTTAACTCTGGTAATAA
GGCGATGCCTAATCCCTGTCGAATAAAACTGATCGCTGTATCCGGGTGATTAAATTCATATTTTATCTGTGGGGTAATAT
TCTTTTCTTTAAATAGTGCCATAATGCTTAATTCATAGCGTCCTTTACTAATGATTAATGGTTCACCCATTAATTCTTCC
ACTGTAATAGTGCTGTTTTTTGCCAGAGCATGGTTGGGCGGTAACACTACGGTGAATTTATCCTGATAAATGGGCACGGA
GTACATTCCGCTCACCGGAAAATGAACAAAACCGGCATCAATGGATTCATTCTGAAGCGAATCAATAATCGCTGTGCTAT
TTTCCTCAAAAGGAATAATTTTTATATTCGGATGATGAATTTCAAAGTAGCGAATCACAACCGGTAAGATACAGGCGCAG
ACGCTGGGGAAACAACCAAGTCTCAGCGTTCTTTGAGGGTTCTGCTTTTCCTGCTCGGCTATCTCTTTTACTGCGTTAAC
TTCCCGATTAATGGCGCGCAGATGTTGCACAATGCGATGACCTGCTGTGGTCAGTTGTATAGCTTTACGGCGATCGCGTA
ACAGTATATTCACACCAAGTTCTTGTTCGAGGGCAGCAATTGCCTGACTTACCGCCGACTGCGTCATGAACAATCGCTTG
CTGGCTTCAGTAAAGCCACCGTAATCCAGCACGGCGAGTAAAGAATTTATTTGGGTAAGAGTCATTAGAGTTTGCTAATC
AATAATATTAAAACGATTAATTTCTCTAATAGCATGCCGCCATTTATACTTCTGTTCTGCAAAGTACATCACAATTTGAC
GCAACCGCAGTAACGGGAGTGTTGTCTGCGTGCGTCATCCTGACAGGCGGTAGGGTATGAAAGAGAAGTTATGGACGAAG
GATTTTTGGGCAATAACCATCATCAGCTTTATTATTTTCTTCGTCTTTTATGTTTTACTAACATTGTTGCCAATTTATAT
CTCTGACCGCTTGCATGCCTCTCCTGATAAAGCTGGTCTGCTGGTGACATTATTTTTAATTGCGGCGATTGTTATTCGAC
CCTTTGCCGGGCAATGGGTGGGTAAATATTCGAATAAAACTATTCTGGTGCTCTCTTCTCTGGCCTTTTTGGTGGTCACT
GCGCTGTATCCTTTTTGCCACTCAATAGAATCACTGCTTTTTATTAGGGTGCTTCATGGTATTACCTTCGGGGTTATCAC
AACGGTAAAGGGAACGATTTCCGCGCGGCTGATCCCGGCCTCCCGACGTGGGGAGGGCATCAGTTTTTTCTCTCTGGCAA
TGGGGCTGGCAATGGTGGTCGGGCCGTGGATTGGCCTGAATATGGCGCGCTGGGAGGCCTTTAATATGGCTTTCTGGTTA
TGTACTGGCGTTGCGGCGGTGGGGATTATCCTGTCGCTGATTATGACCGTGCCGCCGGTTATCAGCCATGCCGACGGTTC
AAAGCCAAAGATGGGCTTCGCCGCCATGTTCGATCGCGCGGCATTGCCGTTTGCCATGGTTACATTCTTTATGACCTTTT
CGTATGCCGGGGTTTCTGCCTTTCTGGCGCTTTACGCCCGCGAACTTAATCTGATGTCGGCGGCCAGTAATTTCCTGCTT
TGCTACGCCATCTTCCTGATGATCTGCCGTACCTTTACCGGCAATGTCTGCGACAAAAAAGGACCGAAATATGTGGTTTA
CCCTTGCCTTGTGTTCTTTACGGTAGGACTGGTGGTTCTCGGCTACACCCAGGGAAGCATAATGATGGTTGTTTCTGGCG
CGTTGATTGGTATCGGGTATGGTTCCGTGACGCCAGTTTTTCAGACGCAGATTATCAGTTCAGTGGAACCGCATAAAATC
GGTGTCGCAAACTCCCTCTTCTTCAATGCGATGGATGCAGGCCTGGCGCTGGGAGCCTGTGTGATGGGGATGATGGTTGC
ACATACTGGCTACCGAATGATTTATCTGCTGGGCGCACTATTAGTGGTAGTGGCTGGTGGAGTCTATGCGCTGCAAATGA
AGGGTAAAAGCGGTGTCGCGCTAGTAGTGGCAAAAGAAATTCATTAATACGACACGTTTCATTAAGATTTTTCGCAGGTA
ACCACCTATAGTCATTGTCGTTAATAAAAAATGACAGGCGATAGGGTATGGCAGTTTCAGCAAAGCACGACGAATTTAAT
CACTGGTGGGCAACAGAGGGCGACTGGGTTGAAGAGCCTAACTATCGCCGTAATGGTATGAGCGGGGTGCAATGCGTCGA
GCGCAACGGCAAAAAGCTATATGTAAAGCGCATGACGCATCATCTGTTTCATTCCGTACGTTATCCTTTCGGCCGACCAA
CGATTGTCCGTGAGGTTGCGGTAATTAAAGAACTGGAACGGGCCGGTGTCATCGTGCCGAAGATCGTTTTTGGTGAAGCG
GTGAAAATTGAGGGTGAATGGCGAGCGTTGCTGGTGACTGAAGATATGGCGGGGTTCATCAGCATTGCTGACTGGTATGC
CCAGCATGCAGTATCGCCTTATTCTGACGAAGTACGGCAAGCCATGTTGAAAGCAGTGGCGCTGGCGTTTAAGAAAATGC
ATAGCATTAATCGTCAGCATGGCTGTTGTTATGTTCGCCATATCTATGTGAAAACAGAAGGTAAGGCAGAAGCTGGTTTT
CTTGACCTGGAGAAAAGTCGTCGCCGCTTGCGTCGCGATAAAGCGATTAATCATGACTTCCGCCAGCTGGAAAAATATCT
GGAGCCAATTCCCAAAGCGGACTGGGAGCAGGTGAAAGCGTATTACTACGCCATGTAATCGTTGTAGGCCAGATAAGACG
CATAAGCGTCGTATCTGGCACTACAACCAATTCACATCTCGATTTCAATATCGCCTTTTGCCCGGCAACAACAGGGCAAA
ATTTCCCCCGGCTGAATAAAGGCTAACGGTTCGGCAATCCAGTCCACCTGACCTGCGACCAGTCGGGTGCGACAGGAGCC
GCAGTAACCTTCGCGGCACTGGTACTCAACCGCCACATTGTGGGATTCCAGCGCCGCCAGAAGGGAAGGGTGTTCATCCT
GGCACAGCAGTTGTGTGCCAGTGATGCGCAGGGTAACGCGAGCCATCAGAGCTGGAAGTTACTCAAATCGTCGGTGTCCA
CTTCCGAGTCAATCTGCCCGACCAGATAAGAACTGACTTCCACTTCCTGCGGAGCAACCTGCACGTTATCAGACACCAGC
CAGGTGTTGATCCACGGGATCGGGTTGGAGCGCGTCTGGAACGGCAGATCCAAACCGACTGCCTGCATGCGGATATTGGT
GATGTATTCAACGTACTGGCAGAGAATGTCTTTATTCAGACCAATCATCGAACCGTCACGGAACAGATAATCCGCCCAGT
CTTTCTCTTGCTGTGCCGCCTGGACAAACAGGTCATAGCACTCCTGCTTACATTCTTCGGCAATTTCCGCCATCTCCGGA
TCATCCGCACCGCTGCGCAGCAGATTCAGCATATGCTGAGTACCGGTCAGGTGCAGGGCTTCGTCGCGGGCAATCAGGCG
AATAATTTTGGCGTTACCTTCCATCAGCTCACGTTCAGCGAATGCGAAAGAGCAGGCAAAGCTGACGTAGAAACGAATCG
CTTCCAGCGCGTTAACGCTCATCAGGCAGAGATACAGTTTTTTCTTCAGCTCGCGCAGGCTAACGGTCACGGTTTTACCG
TTAACGGTGTGGGTGCCTTCGCCCAGCAGATGCCAGTAGCTGGTCATTTCGATCAGCTCATCGTAATAGCTGGAGATCCC
TTCCGCACGTTTCTGGATCTGCTCGTTGGTGACGATATCGTCAAACACAACAGACGGATCGTTAACGATATTACGAATGA
TATGAGTATAGGAACGGGAATGAATCGTTTCTGAGAACGCCCAGGTTTCGACCCAGGTTTCCAGTTCCGGAATAGAAATA
AGCGGCAATAGCGCCACGTTCGGGCTACGACCCTGAATGGAATCCAGCAGCGTCTGATATTTCAGGTTGCTGATAAAGAT
GTGTTTTTCGTGTTCAGGCAATGCCTGGTAATCAATACGGTCACGAGAAACGTCAACTTCTTCCGGACGCCAGAAGAAAG
AGAGCTGCTTTTCGATCAGCTTTTCGAAGATGTCATATTTTTGCTGATCGTAGCGAGCCACGTTGACCGGCTGACCAAAG
AACATCGGTTCTTTGAGCTGATCATTTTTCGTCTGTGAAAAGGTGGTATATGCCATGAGTGTGTCCTGTTGGGAGTTTAA
TGCCGGATAAGGCATTTTACGCCGCATCCTGTGCCTGATGCGACGCTGGCGCGTCTTATCAGGCCTACAAATCCGAGCCG
TAGGCCGGATAAGGCGTTCACGCTGCATCCGGCACCCGGAGCCTGATGCGACGCTGGCGCGTCTTATCAGGCCTACAAAC
CGAGCCGTAGGCCGGATAAGGCGTTTACGCCGCATCCGGCATCTCAATATCAGATCTTACATGCGCCGCTTTCGCAGCCA
TCGTCCTGGATTGACGGCACCAGATCGTCCTGCGCGTCTTCAGCGCCGTCACGGGTGTTCTGATAATACAGCGTTTTGAC
CCCGAATTTGTAGGCGGTGAGCAGGTCTTTCAGCAACTGCTGCATCGGCACTTTTCCTGACGGGAAACGTGACGGATCGT
AGTTGGTGTTAGCAGAGATCGACTGATCGATAAATTTCTGCATGATACCCACCAGTTGCAGGTAGCCATCGTTACCCGGC
ATTTCCCACAGCAGCTCATAGGCGTCGTGCAGATGCTCGTAGTCCGGCACCACCTGGCGCAGAATACCGTCTTTCGACGC
TTTGATGCTGACGTAACCGCGCGGCGGTTCAATACCGTTAGTGGCGTTAGAGATCTGCGAAGAAGTCTCGGACGGCATCA
GAGCAGAAAGCGTGGAGTTACGCAGGCCGTGCGTTTTGATTGACTCACGCAGAGCTTCCCAGTCGTAATGCAGCGGCTCA
TTAGCGATGGTATCCAGATCTTTCTTATAGGTATCGATCGGCAGGATCCCTTTCGCGTAAGTGGTTTCGTTAAACCACGG
GCACGCGCCTTGCTCTTTCGCCAGCTCATTAGACGCTTTCAGCAGGTAATACTGAATCGCTTCGAAGGTTTTATGCGTCA
GGTTGTTGGCGCTGCCGTCGGAGTAGCGTTTACCATGCTTCGCCAGGTAGTAAGCGAAGTTGATCACACCAATACCCAGC
GTACGACGACCCATCGCTCCACGTTTGGCGGCCGGGATCGGGTAATCCTGATAATCCAGCAGCGCGTCAAGTGCACGAAC
CGCCAGAATTGCCAGCTCTTCCAGTTCATCCAGGCTATTAATTGCGCCCAGGTTGAAAGCAGACAGCGTACACAGCGCGA
TTTCACCGTTCTCGTCGTTGACGTCGTTCAGCGGTTTGGTCGGCAGGGCTATCTCCAGGCACAGGTTAGACTGACGCACT
GGCGCGATGGCCGGATCAAACGGGCTATGGGTATTGCAGTGGTCAACGTTCTGAATATAGATACGACCGGTAGACGCACG
TTCCTGCATCATCAGCGAGAACAGCTCAACGGCTTTCACACGCTGCTTGCGGATGCTGTCGTCTTTCTCATATTTGGTAT
ACAGACGTTCAAACTCTTCCTGATCGGCGAAGAATGCGTCGTACAGCCCCGGTACGTCGGACGGGCTGAACAGGGTGATA
TCTTCACCTTTCAGCAGGCGGGTATACATCAGTTTGTTGATCTGTACCCCGTAGTCCATATGGCGCACGCGGTTGCCTTC
CACACCACGGTTGTTTTTCAACACCAGCAGGCTTTCCACTTCCAGATGCCACATCGGGTAGAACAGCGTTGCCGCACCGC
CGCGCACACCGCCCTGAGAGCAGGATTTCACCGCAGTCTGGAAATGTTTGTAGAACGGAATGCAGCCGGTATGGAACGCT
TCGCCACCGCGAATCGGGCTACCCAGCGCACGAATACGCCCGGCGTTGATGCCGATCCCGGCACGCTGGGAAACATATTT
CACAATCGCGCTGGAGGTGGCGTTGATGGAATCCAGGCTGTCGCCGCACTCGATCAGTACGCAGGAGCTGAACTGACGAG
TCGGGGTACGCACGCCGGACATGATTGGCGTCGGCAGCGAAATTTTAAATGTGGAAACCGCGTCGTAAAAACGCTTCACA
TATTGCAGGCGCGTTTCACGCGGGTAGTTCGAGAACAGGCACGCGGCAACCAGAATATAAAGGAACTGGGCGCTTTCGTA
GATTTCGCCGGTCACGCGGTTCTGTACCAGATATTTGCCTTCCAGTTGCTTAACGGCAGCATAAGAGAAGGTCATATCAC
GGTCGTGATCGATAAACGTGTCCATCTGCTTGAACTCTTCTTCCGTGTAGTCTTCCAGCAGATGATTATCGTATTTGCCC
ATCTCGACCATTTTCACCACGTGGTCGTACAGCGCAGGCGGCTCAAACTGGCCGTAGGCTTTTTTACGCAGGTGGAAGAT
CGCCAGGCGCGCGGCGAGATACTGATAATCCGGCGCATCACGGGAGATCAGGTCTGCGGCAGCCTTGATAATAGTTTCGT
GGATGTCAGAGGTCTTGATACCGTCATAAAACTGAATGTGGGAGCGCAGCTCGACCTGGGAAATCGAAACGTTATGCAGT
CCTTCTGCCGCCCAATCCAGAACGCGATGGATTTTGTCGAGATTGATGCGCTCTGTGCTACCGTCGCGCTTTGTCACCAG
CAGATTCTGATTCATGTATGTCGTACCTGTTTTTGGAATTCTTTCCGCAATAGTTTCGTGCAGACTACCTGTAGTACGGG
AAGCTGCTTAGAACACTATATATAGGGGGTATGTTTGGGATTCACTGCAAGATAGTGTGAAAATGGCCCTCTTGCAAGTG
CATAACTTTGTGGATAACTCAGGAAGGAAAAAGTGGCTTTCGCGCACCTTAGGTCAGACAAGGTGTCCGGGAAAGTCAAT
GGGAAGAGAAAAATTTGTTAAAAATAACTGTTCGGCGATTTCTTGAACGGCAGAATAGGTTGGATAAATTGATATAGATG
GTTTATTAATCTTTTTGCTAATGATTGCAAAAATTGATCTAAGCACGAGTCATCACATAATCTGATGTATCAGTTGTGGT
CAATATATAAGCGAATGTAAGCGATTGTTGATGTCGAAATGGTTGTTTTCTATTCGGTTATTGTTAAATGCGAAGCCATT
TTGTTAATTTACCTTATATTATAAGAAAATTATTCATTACTTTAATTTAGTTTAAATATAACTGGTATCCCTTAAGGTTA
TTAACTTGAATTATGACGCACTGATACTATTCATCAAATAATAACAAAATAGCTATTGCATCGGGTTGGACAATTTACAA
AAGAAAGATAACCCATATTGTATAATGCGTTTAAATATGCCGTCTTATATAAAATGATGGTCAGATTAATATGCGAATTA
TTTTTCTACGCAAGGAGTATCTATCTTTACTCCCGTCAATGATTGCGTCTCTCTTCTCTGCTAATGGCATTGCGGCAGTC
ACTGATTCATGCCAGGGATATGATATCAAAGCGAGTTGCCAGGCCAGCAGGCAAAGCCTTGCAGGCATTACGCAGGACTG
GAGCATCGCCGATGGGCAATGGCTGGTTTTTTCGGATATGACCAATAATGCCAGCGGTGGGGCCGTATTTTTGCAACAAG
GAGCGGAATTTACATTATCACCAGAAAATGAAACTGGAATGACTCTGTTTGCCAATAACACCGTTTCAGGAGAATATAAT
AACGGCGGGGCAATATTTGCTAAAGAAAACTCAACGCTGAATCTTACGGATGTTATTTTTTCTGGTAACGTCGCAGGCGG
CTATGGTGGCGCAATCTATTCTTCTGGTACTAACGATACCGGTGCCATCGATTTACGTGTCACTAACGCCGTGTTTCGCA
ATAACATCGCTAATGACGGCAAAGGTGGTGCAATTTATACCATCAATAATGATATCTATTTAAGTGATGATGTTTTTAAC
AATAACCAGGCATATACATCAACAAGTTACAGTGATGGCGATGGCGGCGCAATCGATGTCACAGATAATAATAGCGACAG
CAAGCATCCTTCAGGTTATACGATAATAAATAACACTGCCTTTACAAATAACACTGCCGAAGGTTATGGCGGGGCGATAT
ATACCAATAGCGCGACGGCTCCCTATCTTATTGATATTTCTGTTGATGACAGCTACAGCCAGAACGGAGGCGTGTTAGTC
GATGAGAACAATAGCGCAGCAGGCTATGGAGATGGTCCTTCCTCTGCGGCGGGTGGCTTTATGTATCTCGGCTTAAGTGA
AGTTACATTTGATATTGCCGACGGAAAAACGCTGGTTATTGGCAATACAGAGAATGACGGAGCTGTTGACTCTATTGCTG
GTACCGGGTTAATCACCAAAACAGGTTCCGGCGATCTGGTACTTAATGCAGATAACAATGACTTTACTGGTGAGATGCAG
ATTGAAAACGGTGAAGTTACCCTGGGCCGCAGCAACTCCCTGATGAATGTCGGCGATACGCATTGCCAGGACGATCCGCA
AGACTGCTACGGTCTGACGATAGGGAGTATTGATAAGTACCAGAATCAGGCAGAGCTAAATGTTGGCTCCACCCAACAAA
CCTTTGTGCACTCATTGACGGGCTTTCAGAATGGCACTTTAAATATCGATGCTGGTGGCAATGTTACTGTTAATGAAGGC
AGTTTTGCTGGCACCATCGAAGGTGCTGGTCAGCTCACCATTGCGCAAAACGGCAGCTATGTGCTGGCGGGAGCGTCGTC
GATGGCGCTAACCGGCGATATAGTCGTTGATGATGGTGCGGTGCTTTCGCTGGAAGGCGACGCGGCAGATCTTGCCGCTC
TCCAGGACGATCCGCAGTCGATCGTGTTAAACGGCGGTGTGCTCGATCTCTCTGATTTCTCCACCTGGCAGAGCGGTACA
TCATACAAAGATGGCCTTGAAGTCAGCGGCAGCAGCGGAACGGTTATCGGCAGTCAGGATGTGGTAGATCTTGCAGGCGG
AAACGATATGCATATCGGCGGTGACGGGAAAGATGGCGTCTACGTGGTGATCGATGCGGGTGACGGGCAGGTCCGCCTGG
CAAATGACAATCAATACCTCGGCACAACGCAAATCGCCTCCGGTACGCTGATGGTGAGCGACAACTCGCAGCTTGGAGAT
ACCCATTACAACCGCCAGGTTATCTTTACCGATAATCAACAAGAAAGCGTGATGGAGATTACTGCCAATGTCGATACTCG
CTCTACAACGACTGAGCATGGGCGTGATATTGAAATGCGCGCCGACGGTGAAGTGGCAGTTGATGCGGGGGTAGACACGC
AGTGGGGCGCACTGATGGCTGACAGCAGCGGGCAGCATCAGGATGAGGGTAGCACATTGACGAAAACGGGGGCGGGTACG
CTGGAGCTGACCGCCAGCGGTACAACGCAGTCGGCGGTACGTGTCGAAGAAGGCACCCTGAAAGGTGATGTTGCTGATAT
CCTTCCTTATGCTTCGTCACTGTGGGTTGGTGATGGGGCAACGTTCGTTACTGGCGCGGATCAGGATATTCAGTCAATTG
ATGCTATTTCCAGCGGCACTATTGACATCAGCGATGGTACGGTTTTGCGCCTGACCGGGCAGGATACTTCCGTCGCCCTT
AATGCCTCACTGTTTAACGGCGATGGGACGCTGGTGAATGCCACCGATGGTGTGACGTTGACAGGTGAGCTTAATACCAA
CCTTGAAACTGACAGCCTGACTTATCTTTCCAACGTGACGGTTAATGGCAATCTGACCAATACGTCCGGTGCGGTTAGCC
TGCAAAATGGCGTCGCTGGCGATACGCTGACGGTAAACGGTGATTATACCGGCGGCGGTACGCTACTGCTCGATAGCGAA
TTAAACGGCGATGACTCGGTAAGCGATCAATTGGTGATGAACGGTAATACTGCTGGCAACACAACTGTGGTGGTTAACTC
CATTACAGGGATTGGTGAGCCGACATCGACAGGCATTAAAGTGGTTGATTTCGCAGCTGATCCCACGCAGTTTCAAAACA
ATGCGCAGTTCAGTCTGGCAGGCAGTGGCTACGTCAACATGGGAGCGTATGACTACACGCTGGTGGAAGATAACAACGAC
TGGTATCTGCGATCGCAAGAAGTAACGCCGCCATCGCCACCTGATCCAGACCCGGACCCAACCCCCGATCCTGACCCAAC
ACCCGATCCAATCCCCGCTTACCAGCCGGTGCTGAATGCCAAAGTTGGCGGTTATCTCAATAACCTGCGGGCGGCAAATC
AGGCGTTTGTGATGGAGCGACGCGATCACGCTGGTGGCGATGGTCAGACGCTGAATTTACGTGTTATCGGCGGACGTTAT
CATTACACGGCGGCAGGGCAACTGGCTCAGCATGAAGACACTTCTACGGTGCAGCTAAGCGGCGATCTGTTTAGCGGGCG
CTGGGGCGATGATGGCGAGTGGATGCTTGGGATTGTAGGTGGCTACAGCGATAACCAGGGCGACAGCCGCTCGAATCTGA
CCGGAACTCGCGCCGATAACCAGAACCACGGTTATGCCGTTGGGCTAACCTCAAGCTGGTTTCAGCACGGTAATCAGAAG
CAGGGGGCCTGGCTGGATAACTGGCTGCAATACGCGTGGTTTAACAATGATGTTTCCGAACAAGACGATGGCGCGGATCA
TTACCATTCGTCGGGGATTATCGCCTCGCTGGAAGCCGGGTATCAATGGTTACCGGGGCGTGGTGTGGTGATTGAACCGC
AGGCGCAGGTGATTTATCAGGGCGTGCAGCAGGATGATTTTACCGCCGCTAACCGTGCGCGCGTGTCACAATCGCAGGGT
GATGATATTCAGACGCGGCTGGGTTTACACAGCGAATGGCGTACCGCTGTTCATGTCATACCAACATTAGATCTGAATTA
TTATCACGATCCCCATTCGACGGAAATTGAAGAGGATGGCAGCACTATCAGTGACGATGCGGTGAAGCAACGGGGTGAAA
TAAAAGTGGGAGTCACGGGCAATATCAGTCAGCGAGTGTCCCTGCGCGGCAGCGTGGCGTGGCAGAAAGGGAGTGATGAT
TTTGCCCAGACGGCAGGATTTTTGTCGATGACGGTGAAATGGTAATCGCTGTCTGACCATCACTATTGCCGGATGCGGCG
TAAACGCCTTATCTGGCCTACGGAGAGCATTTGTAGGCCTGATAAGACGCGGCAAGCGTCGCATCAGGCATTGGCGCGGT
TGCCGGATGAATCCAAACAACAACCTCACTTATTCTGCGTGTGCAGCATATAGTTCACATCCACGCCGGGGCCGAGTTTA
AAAGAATTAGTGATCGGGTTGTAATGTAGCCCGGTTATATGTCGCTCTTTAAGGCTTGTCTGATCTACCCAGCCAAGCAG
CTCTGCCGGTTTAATAAACTTCTTCACATCATGCGTGCCTTTGGGCACCATGCGCAAAATATATTCCGCGCCAACCACCG
CCATCAGCCATGACTTGCCGTTGCGGTTAAGCGTCGAGAAAAAGACATCGCCGCCCGGTTTCACCAGTTGCGCACAGGCT
CTGACTACTGACTGCGGATCGGGGACGTGCTCCAGCATCTCCATGCAGGTCACCACATCATACTGCCCGGCATGTTTTGC
CGCGTGCTCTTCCACGGTTTCCTGCACGTAATCCACCTGAATGCCGCTTTCCAGCGCGTGCAGCTTTGCCACCTGCAATG
GCTCAAAGCCCATATCCAGACCGGTCACCGTCGCGCCTTCGCGCGCCATACTCTCGGCCAGAATGCCGCCGCCACAACCG
ACATCGAGCACCTTTTTGCCAAATAAACCGCCAGCACGCTCGGCAATATAGCCCAGACGTAGCGGATTAATGCGGTGCAA
CGGTTTGAACTCACCTTCAAGATCCCACCAGCGGGAGGCGACGGCTTCAAATTTAGCGATCTCTTCGTGGTCTACGTTAT
GGTTTACCGGCGATTTTTCGGCATTCATTGGCACTTCTACTCCGTAATTGGCAAGACAAACGAGTATATCAGGCATTGGA
TGTGAATAAAGCGTATAGGTTTACCTCAAACTGCGCGGCTGTGTTATAATTTGCGACCTTTGAATCCGGGATACAGTAGA
GGGATAGCGGTTAGATGAGCGACCTTGCGAGAGAAATTACACCGGTCAACATTGAGGAAGAGCTGAAGAGCTCCTATCTG
GATTATGCGATGTCGGTCATTGTTGGCCGTGCGCTGCCAGATGTCCGAGATGGCCTGAAACCGGTACACCGTCGCGTACT
TTACGCCATGAACGTACTAGGCAATGACTGGAACAAAGCCTATAAAAAATCTGCCCGTGTCGTTGGTGACGTAATCGGTA
AATACCATCCCCATGGTGACTCGGCGGTTTATGACACGATCGTCCGTATGGCGCAGCCATTCTCGCTGCGTTACATGCTG
GTAGACGGTCAGGGTAACTTCGGTTCCATCGACGGCGACTCTGCGGCGGCAATGCGTTATACGGAAATCCGTCTGGCGAA
AATTGCCCATGAACTGATGGCCGATCTCGAAAAAGAGACGGTCGATTTCGTTGATAACTATGACGGCACGGAAAAAATTC
CGGACGTCATGCCAACCAAAATTCCTAACCTGCTGGTGAACGGTTCTTCCGGTATCGCCGTAGGTATGGCAACCAACATC
CCGCCGCACAACCTGACGGAAGTCATCAACGGTTGTCTGGCGTATATCGATGATGAAGACATCAGCATTGAAGGGCTGAT
GGAATACATCCCGGGGCCGGACTTCCCGACGGCGGCAATCATTAACGGTCGTCGCGGTATTGAAGAAGCTTACCGTACCG
GTCGCGGCAAGGTATATATCCGCGCCCGTGCTGAAGTGGAAGTTGACGCCAAAACCGGACGTGAAACCATTATCGTCCAC
GAAATTCCGTATCAGGTAAACAAAGCGCGCCTGATCGAGAAGATTGCGGAACTGGTAAAAGAAAAACGCGTGGAAGGCAT
CAGCGCGCTGCGTGACGAGTCTGACAAAGACGGTATGCGCATCGTGATTGAAGTGAAACGCGATGCGGTCGGTGAAGTTG
TGCTCAACAACCTCTACTCCCAGACCCAGTTGCAGGTTTCTTTCGGTATCAACATGGTGGCATTGCACCATGGTCAGCCG
AAGATCATGAACCTGAAAGACATCATCGCGGCGTTTGTTCGTCACCGCCGTGAAGTGGTGACCCGTCGTACTATTTTCGA
ACTGCGTAAAGCTCGCGATCGTGCTCATATCCTTGAAGCATTAGCCGTGGCGCTGGCGAACATCGACCCGATCATCGAAC
TGATCCGTCATGCGCCGACGCCTGCAGAAGCGAAAACTGCGCTGGTTGCTAATCCGTGGCAGCTGGGCAACGTTGCCGCG
ATGCTCGAACGTGCTGGCGACGATGCTGCGCGTCCGGAATGGCTGGAGCCAGAGTTCGGCGTGCGTGATGGTCTGTACTA
CCTGACCGAACAGCAAGCTCAGGCGATTCTGGATCTGCGTTTGCAGAAACTGACCGGCCTTGAGCACGAAAAACTGCTCG
ACGAATACAAAGAGCTGCTGGATCAGATCGCGGAACTGCTGCGTATTCTTGGTAGCGCCGATCGTCTGATGGAAGTGATC
CGTGAAGAGCTGGAGCTGGTTCGTGAACAGTTCGGTGACAAACGTCGTACTGAAATCACCGCCAACAGCGCAGACATCAA
CCTGGAAGATCTGATCACCCAGGAAGATGTGGTCGTGACGCTCTCTCACCAGGGCTACGTTAAATATCAGCCGCTTTCTG
AATACGAAGCGCAGCGTCGTGGCGGGAAAGGTAAATCTGCCGCACGTATTAAAGAAGAAGACTTTATCGACCGACTGCTG
GTGGCGAACACGCACGACCATATTCTGTGCTTCTCCAGCCGTGGTCGCGTCTATTCGATGAAAGTTTACCAGTTGCCGGA
GGCCACTCGTGGCGCGCGCGGTCGTCCGATCGTCAACCTGCTGCCGCTGGAGCAGGACGAACGTATCACCGCGATCCTGC
CGGTGACCGAGTTTGAAGAAGGCGTGAAAGTCTTCATGGCGACCGCTAACGGTACTGTGAAGAAAACCGTCCTCACCGAG
TTCAACCGTCTGCGTACCGCCGGTAAAGTGGCGATCAAACTGGTTGAAGGCGATGAGCTGATCGGCGTTGACCTGACCAG
CGGCGAAGACGAAGTAATGCTGTTCTCCGCCGAAGGTAAAGTGGTGCGCTTTAAAGAGTCTTCTGTCCGTGCGATGGGCT
GCAACACCACCGGTGTTCGCGGTATTCGTTTAGGCGAAGGTGATAAAGTCGTCTCTCTGATCGTGCCTCGTGGCGATGGC
GCAATCCTCACCGCAACGCAGAACGGTTATGGTAAACGTACCGCAGTGGCGGAATACCCGACTAAGTCGCGTGCGACGAA
AGGGGTTATCTCCATCAAGGTTACCGAACGTAACGGTTTAGTGGTTGGCGCGGTGCAGGTAGATGATTGCGATCAGATCA
TGATGATCACCGACGCCGGTACGCTGGTACGTACTCGCGTTTCAGAAATCAGCATCGTGGGCCGTAACACCCAGGGCGTG
ATCCTCATCCGTACTGCGGAAGATGAAAACGTAGTGGGTCTGCAACGTGTTGCTGAACCGGTTGACGAGGAAGATCTGGA
CACCATCGACGGCAGTGCCGCGGAAGGGGACGATGAAATCGCTCCGGAAGTGGACGTTGACGACGAGCCAGAAGAAGAAT
AATTTTACTTCTTCATGCCAAAAGGGAGCTATCTCCCTTGTTTGAATTGAAAAGTCCAGGCTGCAAAGTCTGGGCTTTTG
TCGTATTAGGGCACGGTAAAGTTTGGCTGTGCCCGTAAAAAATGGCTGGCTATACACAAGGAATGTGGCAATGAGTGGTG
AAAAAAAGGCGAAAGGCTGGCGGTTCTATGGTCTTGTAGGTTTTGGCGCAATAGCACTGCTTTCCGCTGGCGTCTGGGCG
TTGCAATATGCTGGCAGTGGGCCAGAAAAAACGTTGTCGCCGCTGGTGGTGCACAACAATCTGCAAATCGATCTCAATGA
GCCGGACCTCTTTCTCGACAGCGACTCTCTGAGCCAGCTTCCCAAAGATCTCCTCACCATTCCGTTTCTCCACGATGTTC
TGAGTGAAGATTTCGTTTTCTATTATCAGAATCATGCCGATCGTCTGGGCATTGAAGGCAGCATTCGCCGCATTGTCTAT
GAACACGATCTCACGCTGAAAGATAAGCTCTTTTCGTCACTCTTAGATCAGCCCGCGCAGGCGGCGCTATGGCACGATAA
ACAAGGCCATCTTTCACATTACATAGTGCTGATCCAGCGCAGTGGTTTAAGCAAACTGCTGGAGCCATTGTTGTTTGCCG
CTACCAGCGACAGCCAGTTAAGCAAAACGGAAATCAGTAGCATCAAGATAAATAGTGAAACTATTCCTGTTTATCAGTTG
CGCTATAACGGTAATAACGCCCTGATGTTCGCGACATATCAGGACAAGATGCTGGTGTTTTCCAGCACGGATATGCTGTT
TAAAGATGATCAGCAGGATACCGAAGCCACGGCGATCGCAAGTGATTTGTTGAGCGGCAAAAAACGCTGGCAAGCCAGCT
TTGGCCTGGAAGAGCGTGCTGCCGAAAAAACGCCAGTACGCCAGCGCATCGTGGCCAGCGCCAGGTTGCTGGGTTTTGGC
TACCAGCGGTTAATGCCTTCTTTTGCTGGCGTACGCTTCGAAATGGGTAACGACGGCTGGCACAGTTTTGTGGCGTTAAA
TGATGAATCCGCCAGCGTAGATGCCAGTTTCGATTTTACGCCGGTCTGGAACAGTATGCCTGCCGGGGCCAGCTTCTGTG
TGGCGGTGCCGTATTCACACGGTATTGCCGAAGAGATGCTTTCGCACATCAGCCAGGAAAACGATAAGCTGAATGGGGCG
TTAGACGGTGCCGCGGGGCTGTGCTGGTATGAAGACTCAAAATTGCAAACCCCGCTGTTTGTCGGTCAGTTTGATGGCAC
TGCCGAACAGGCGCAATTGCCAGGGAAACTGTTTACGCAAAATATTGGTGCGCACGAAAGCAAAGCGCCAGAAGGTGTTT
TGCCGGTAAGCCAGACTCAGCAGGGCGAAGCGCAAATCTGGCGTCGCGAAGTGAGTTCCCGATACGGTCAGTATCTGAAA
GCGCAGGCGGCGCAACCCGATCAATTAATGTCGGATTATTTTTTCCGCGTGTCGCTGGCGATGCAAAACAAAACGCTGCT
TTTCTCCCTCGATGACACGCTGGTTAATAACGCCCTGCAAACACTGAATAAAACCCGCCCGGCAATGGTAGATGTAATAC
CCACTGATGGCATCGTTCCGCTCTATATCAATCCACAAGGAATGGCGAAACTGCTGCGTAACGAAACGCTGACCAGTCTG
CCGAAGAATCTCGAACCGGTTTTTTATAACGCCGCACAAACTTTATTAATGCCGAAGCTGGACGCTTTATCTCAACAACC
GCGTTATGTCATGAAGCTGGCCCAGATGGAACCCGGTGTCGCCTGGCAGTGGCTACCCATAACCTGGCAGCCGCTATGAG
GCACGGGCTGCTGGCGCTGATTTGCTGGCTGTGTTGTGTTGTTGCCCATAGCGAAATGCTGAATGTCGAACAATCCGGGC
TGTTTCGCGCCTGGTTTGTACGCATTGCACAGGAACAGCTCCGCCAGGGGCCAAGTCCACGCTGGTATCAGCAGGATTGT
GCGGGCCTGGTGCGATTTGCAGCGAACGAGGCGCTGAAAGTTCACGACAGTAAATGGCTAAAAAGTAACGGGTTATCTAA
CCAGTATTTGCCGCCAGAGATGTCGCTAACACCTGAACAGCGTCAACTGGCGCAAAACTGGAATCAGGGGAACGGGAAAA
CCGGCCCCTACGTGACCGCGATTAATTTGATTCAGTACAACAGCCAGTTTATTGGCCAGGACATAAACCAGGCGCTGCCT
GGCGATATGATTTTTTTCGATCAGGGCGATGCCCAGCACTTAATGGTCTGGATGGGGCGTTACGTCATCTACCACACCGG
AAGCGCCACGAAAACTGACAACGGAATGCGCGCAGTCAGTCTGCAACAACTTATGACATGGAAGGACACCCGATGGATAC
CCAACGATTCCAATCCCAATTTCATTGGCATTTATCGTTTAAATTTTCTGGCGCGATAGCAGCGTGCTTGTCCCTGTCTC
TTGTGGGAACAGGGCTTGCTAATGCTGATGATTCGCTTCCTTCCAGTAACTATGCGCCGCCCGCAGGGGGAACATTCTTT
TTGCTTGCTGACAGCAGTTTTAGCAGCAGTGAAGAGGCGAAAGTGCGACTGGAAGCGCCGGGGCGTGATTATCGGCGCTA
TCAGATGGAAGAGTACGGCGGTGTGGACGTTCGCCTGTATCGTATTCCTGACCCGATGGCATTTTTGCGCCAGCAGAAAA
ACCTGCATCGCATTGTGGTGCAACCGCAATATCTGGGCGACGGGCTGAACAATACGCTGACCTGGCTGTGGGATAACTGG
TACGGCAAATCTCGCCGCGTGATGCAGCGTACTTTCTCTTCTCAGTCACGGCAGAATGTGACTCAGGCATTACCCGAATT
ACATCTCGGCAATGCCATTATTAAACCTTCCCGTTATGTACAGAACAACCAGTTTTCCCCGCTGAAAAAATATCCCCTGG
TGGAACAGTTCCGTTATCCACTATGGCAGGCTAAACCGGTCGAGCCGCAGCAAGGGGTAAAACTGGAAGGCGCATCCAGC
AATTTCATCTCGCCGCAGCCGGGTAACATTTATATTCCTCTCGGCCAACAAGAGCCGGGACTGTACCTCGTCGAGGCGAT
GGTTGGTGGGTATCGGGCGACGACGGTGGTGTTTGTTTCCGATACCGTGGCGCTTAGCAAAGTGTCAGGCAAAGAGCTTC
TGGTGTGGACCGCGGGTAAAAAACAGGGTGAAGCGAAGCCAGGCTCAGAGATCTTGTGGACTGACGGTCTTGGCGTGATG
ACCCGCGGTGTGACCGATGACAGCGGTACCTTGCAGTTACAACATATATCGCCAGAACGTTCATACATTCTGGGTAAGGA
TGCCGAAGGCGGCGTTTTTGTCTCCGAGAACTTCTTCTACGAAAGCGAAATCTACAACACCCGCTTGTATATTTTTACCG
ATCGCCCGCTATATCGCGCAGGCGATCGTGTCGATGTTAAAGTGATGGGCCGCGAGTTCCACGATCCGTTGCATTCATCC
CCCATCGTCAGCGCCCCGGCGAAGCTTTCGGTGCTGGACGCCAACGGCAGTCTGTTGCAAACCGTCGATGTCACGCTGGA
TGCGCGCAATGGCGGGCAGGGAAGTTTCCGCCTGCCAGAAAATGCCATTGCCGGAGGTTATGAGTTACGTCTTGCTTACC
GCAATCAGGTCTATAGCAGTAGTTTTCGCGTAGCCAACTATATCAAGCCACATTTCGAGATTGGTTTAGCTCTCGACAAA
AAAGAGTTCAAAACTGGCGAAGCGGTCAGCGGCAAACTGCAACTGCTCTACCCGGATGGTGAGCCGGTAAAAGATGCCCG
CGTGCAGTTAAGTTTGCGCGCTCAGCAATTATCAATGGTCGGTAACGATTTGCGTTATGCCGGACGTTTCCCCGTGTCGC
TGGAAGGCAGTGAAACGGTGTCCGACGATAGCGGTCATGTGGCGTTAAATCTCCCCGCCGCCGATAAACCAAGCCGCTAT
TTGTTAACCGTCTCCGCCAGTGACGGCGCGGCGTATCGCGTCACCACCACCAAAGAGATCCTCATTGAACGCGGCCTGGC
GCATTACTCTTTAAGTACCGCCGCACAATACAGTAATAGCGGCGAGTCGGTTGTGTTCCGTTATGCCGCGCTGGAATCTT
CAAAACAGGTTCCTGTTACGTATGAATGGTTGCGTCTCGAAGACCGCACGAGCCATAGCGGAGAGCTACCGTCAGGCGGC
AAATCCTTTACCGTCAATTTCGCTAAACCTGGCAACTACAATCTGACATTACGCGATAAAGACGGCTTAATTCTCGCTGG
GTTAAGTCATGCCGTCAGCGGTAAGGGCAGCATGTCGCATACTGGTACGGTAGATATCGTGGCAGATAAAACGCTGTACC
AGCCTGGCGAAACCGCGAAGATGCTGATTACCTTTCCGGAGCCAATTGATGAAGCATTATTGACGCTGGAACGCGATCGC
GTGGAACAGCAGTCGCTGCTTTCGCATCCGGCAAACTGGCTAACGCTACAACGTTTAAACGATACCCAGTATGAAGCCCG
GGTTCCAGTGAGCAATTCCTTTGCGCCTAACATCACTTTTTCGGTGCTGTATACCCGTAACGGTCAGTACAGTTTTCAGA
ATGCCGGGATCAAAGTTGCCGTTCCCCAGCTGGATATCCGGGTGAAAACGGACAAAACCCATTACCAGCCTGGTGAACTG
GTCAATGTCGAATTAACCTCGTCGCTGAAAGGTAAACCTGTTTCTGCGCAGCTAACGGTAGGCGTGGTCGATGAAATGAT
CTACGCGCTGCAACCAGAAATCGCGCCGAATATCGGCAAATTTTTCTATCCGCTGGGGCGTAACAATGTGCGTACCAGCT
CCAGTCTGTCGTTTATCAGCTACGACCAGGCGCTCTCCAACGAGCCGGTTGCGCCTGGCGCAACTAACCGCAGCGAGCGG
CGAGTAAAAATGCTTGAACGTCCACGGCGTGAAGAGGTGGATACCGCGGCATGGATGCCGTCACTCACAACCGATAAACA
AGGCAAAGCGTATTTCACGTTCCTGATGCCTGATTCGTTAACCCGCTGGCGTATCACCGCGCGTGGGATGAACGGCGACG
GGCTGGTCGGGCAGGGGCGTGCTTATCTGCGTTCGGAAAAAAATCTCTACATGAAGTGGAGTATGCCAACGGTGTATCGC
GTGGGCGACAAACCGGCGGCAGGACTGTTTATCTTCAGTCAGCAGGATAACGAACCGGTGGCGCTGGTGACTAAATTTGC
AGGCGCTGAGATGCGCCAGACGCTGACGCTGCACAAAGGGGCGAATTATATTTCGCTGACGCAGAATATTCAGCAATCTG
GCTTGTTAAGTGCAGAACTGCAACAAAATGGGCAAGTGCAGGACAGCATTAGCACAAAACTGTCTTTTGTGGATAACAGC
TGGCCCGTTGAACAGCAGAAAAATATCATGCTCGGTGGTGGCGATAACGCGCTGATGTTGCCCGAGCAGGCGAGCAATAT
CCGGCTACAAAGTAGTGAAACGCCGCAGGAGATTTTCCGCAACAATCTTGATGCGTTAGTCGATGAACCGTGGGGTGGGG
TGATCAACACCGGTAGCCGTCTGATCCCGCTCAGTCTCGCCTGGCGTTCGCTTGCCGATCATCAAAGTGCCGCCGCTAAC
GACATTCGTCAGATGATTCAGGATAACCGTCTGCGGCTGATGCAACTGGCGGGGCCCGGAGCGCGCTTTACCTGGTGGGG
TGAAGATGGCAATGGTGACGCCTTCCTTACGGCATGGGCATGGTACGCCGACTGGCAGGCCAGCCAGGCGCTCGGCGTAA
CGCAACAACCGGAATACTGGCAGCATATGCTCGACAGTTATGCCGAGCAGGCAGATAACATGCCGTTATTGCATCGGGCG
CTGGTGCTGGCGTGGGCACAGGAGATGAATCTGCCGTGCAAAACGTTGTTGAAAGGGTTGGATGAAGCTATCGCCCGGCG
CGGAACTAAAACTGAAGATTTCTCTGAGGAAGCCCCCCGCGATATCAATGACAGCCTGATCCTCGATACACCGGAATCTC
CACTGGCAGATGCGGTGGCAAACGTCTTAACCATGACGTTGCTGAAAAAAGCGCAGTTGAAGTCCACGGTGATGCCACAG
GTTCAGCAATATGCGTGGGATAAAGCGGCAAACAGCAATCAGCCGCTGGCGCACACGGTTGTGCTGCTCAATAGCGGGGG
CGACGCTACCCAGGCGGCTGCTATTTTAAGTGGTTTGACCGCTGAGCAATCTACTATTGAGCGCGCGCTGGCCATGAACT
GGCTGGCGAAATATATGGCGACAATGCCTCCAGTTGTTTTGCCTGCGCCTGCGGGCGCATGGGCCAAACATAAGTTAACT
GGAGGGGGCGAATACTGGCGTTGGGTTGGTCAGGGCGTGCCGGACATTCTCTCTTTTGGTGACGAATTATCGCCGCAAAA
TGTGCAGGTCCGCTGGCATGAACCGGCAAAAACGGCTCAACAAAGTAACATTCCGGTGACCGTTGAACGCCAGTTGTATC
GGCTTATCCCCGGTGAAGAAGAGATGAGCTTTACTCTGCAGCCGGTGACCAGCAATGAGATTGACAGCGATGCGCTGTAT
CTCGATGAAATTACGCTTACCAGCGAGCAGGATGCAGTTCTGCGCTATGGTCAGGTGGAAGTACCGCTCCCGCCGGGAGC
CGACGTTGAGCGCACAACATGGGGCATTTCAGTCAATAAACCCAACGCCGCGAAACAGCAGGGGCAATTGCTGGAAAAAG
CGCGTAATGAAATGGGCGAACTGGCCTATATGGTGCCGGTGAAAGAACTGACGGGAACGGTCACTTTCCGCCATTTGCTG
CGCTTCTCGCAAAAAGGGCAATTCGTTCTGCCTCCTGCTCGTTATGTGCGTTCCTATGCACCTGCGCAGCAAAGTGTTGC
GGCAGGGAGCGAATGGCCCGGGATGCAGGTGAAATAAGTGAACTGGCGCAGAATCGTCTGGCTATTGGCGTTGGTTACTC
TGCCAACGCTTGCGGAGGAGACGCCGTTACAACTGGCACTGCGTGGTGCGCAGCACGATCAACTGTATCAGCTGTCGTCA
TCAGGCGTGACCAAAGCCTCGACATTACCTGACTCGCTCACCACGCCGTTAGGGAGTTTGTGGAAACTGTATGTTTACGC
CTGGCTGGAGGATACCCATCAACCGGAGCAGCCCTACCAGTGTCGCGGAAACTCCCCGGAAGAGGTTTATTGTTGTCAGG
CTGGGGAGAGCATAACGCGCGATACCGCGCTGGTACGTTCCTGTGGGCTCTATTTTGCGCCGCAGCGGTTGCATATTGGC
GCAGATGTGTGGGGGCAATACTGGCAACAGCGTCAGGCACCTGCGTGGTTAGCGTCTCTTACTACGCTGAAGCCAGAAAC
CTCGGTAACGGTTAAATCGCTGCTTGATTCATTAGCGACGTTACCTGCGCAAAACAAAGCTCAGGAAGTCTTACTGGAAG
TGGTGCTGGACGAGGCGAAAATCGGTGTCGCATCCATGCTCGGTAGTCGGGTTCGGGTGAAAACCTGGAGCTGGTTTGCC
GATGATAAACAGGAAATCCGTCAGGGTGGTTTTGCCGGCTGGTTAACCGATGGTACACCGCTGTGGGTTACTGGCAGTGG
CACCAGCAAAACGGTACTGACCCGTTATGCGACGGTGCTTAATCGGGTTTTGCCAGTGCCGACACAAGTTGCCAGTGGGC
AATGTGTAGAGGTGGAGCTATTTGCCCGCTATCCGCTGAAGAAAATCACAGCGGAAAAGAGTACGACGTCAGTAAAACCC
GGCGTACTTAATGGGCGCTATCGTGTGACATTTGCCAATGGTAACCACATTACGTTTGTCAGCCACGGTGAGACGACCTT
ACTGACCGAAAAGGGCAAACTGAAATTGCAGTCGCATCTCGATCGTGAAGAGTACGTTGCCAGAGTTCTGGATCGCGAGG
CGAAAAGTACGCCACCTGAGGCAGCGAAAGCCATGACCGTGGCGATACGCACTTTTTTACAGCAAAACGCCAATCGGGAA
GGCGATTGCCTGACCATCCCCGACAGCAGCGCCACGCAGCGTGTTTCTGCTTCGCCAGCGACCACGGGGGCGCGAACGAT
GACCGCCTGGACGCAGGATCTCATCTATGCGGGCGATCCGGTTCATTATCACGGCAGTCGCGCTACCGAAGGGACGCTTT
CCTGGCGGCAAGCCATGGCCCAGGCCGGGCAGGGAGAGCGTTACGACCAGATACTCGCGTTTGCTTATCCCGACAACAGC
CTTAGCCGCTGGGGAGCGCCACGCTCAACCTGTCAGTTATTACCCAAAGCGAAAGCCTGGCTGGCGAAAAAAATGCCGCA
GTGGCGGCGTATATTAGAAGGCGAGACGGGGTACAACGAACCAGACGTGTTTGCGGTCTGTCGTTTAGTCTCAGGTTTCC
CCTATACCGATCGGCAGCAGAAACGGCTGTTTATTCGTAACTTCTTTACGCTTCAGGATCGGCTGGATTTAACCCATGAG
TATCTGCACCTGGCCTTTGATGGTTATCCCACCGGGCTTGATGAGAACTATATCGAAACGCTGACCCGACAATTATTAAT
GGACTAATGCTATGCGAAAGATTTTTCTTCCGTTGTTACTGGTGGCACTTTCGCCTGTCGCTCACAGTGAAGGTGTGCAG
GAAGTCGAGATTGACGCACCGCTCTCTGGCTGGCATCCGGCAGAGGGCGAAGATGCCAGTTTTTCACAATCGATCAATTA
CCCGGCGTCGTCCGTCAACATGGCAGATGATCAAAATATCTCAGCGCAGATCCGCGGCAAAATAAAGAATTATGCTGCGG
CGGGTAAAGTTCAGCAGGGCCGGCTGGTGGTCAACGGTGCCAGTATGCCGCAGAGAGTTGAATCCGATGGTTCATTTGCA
CGCCCTTATATTTTCACTGAAGGCAGCAACAGCGTGCAGGTCATCAGCCCGGATGGGCAAAGCCGACAAAAAATGCAGTT
TTACTCAACGCCGGGTACAGGAACGATTCGTGCACGTTTACGGCTGGTTCTCTCGTGGGATACGGACAATACCGATCTCG
ATCTCCATGTTGTCACGCCCGATGGAGAACACGCCTGGTACGGTAACACCGTGCTGAAAAACAGTGGTGCACTGGATATG
GATGTCACGACGGGGTATGGACCCGAGATTTTCGCCATGCCAGCACCAGTTCACGGGCGCTATCAGGTGTATATCAACTA
CTATGGTGGGCGCAGCGAAACGGAATTGACGACCGCCCAACTGACGCTGATTACCGATGAAGGATCGGTCAATGAGAAAC
AGGAAACATTTATTGTACCGATGCGTAATGCTGGCGAGCTGACGCTGGTGAAAAGTTTTGACTGGTGATTAATGGGGTTA
CCTTCGCCGTCGATGTTCAAGAAAACACCCGATAACTTTCGCTATCGGGTGTTTTTATTGATTAATTCAACCGTTCAATC
ACCATCGCAATTCCCTGGCCGCCACCAATGCACAGTGTTGCCAGCCCCAGCGTTTTATCGCGTGCCTGCATGGCATGTAA
TAGTGTGACCAGAATACGAGCACCACTGGCACCGATAGGATGCCCGAGCGCGATGGCCCCGCCGTTGACATTCACTTTCT
CAGAATCAAAGCCCAGGGTTTTCCCAACGGCAAGGAACTGTGCAGCAAATGCTTCATTAGCCTCAATGAGATCAATATCC
GCCAGTTGCAGCCCCGCCAGTTGTAACGCTTTTTGCGTGGCAGGTACTGGACCCATACCCATCAATGCGGGGGGCACGCC
ACCGCTGGCATAACTTTTAATGCGAGCCAGGGGGGTAAGGCCTGCTGCCAGCGCCGCAGATTCTTCCATAATCACCAGAG
CGGCAGCACCGTCGTTAATACCAGACGCGTTCCCGGCGGTGACTGTTCCTGCTTTATCGAAGGCCGGGCGCAATGCGCCT
AACGCTTCAGTCGTAGAATCCGCTTTCGGGAATTCGTCTTGACTGAAGACGAAGGTTTTCTTCCGAGTGACAACATTTAC
CGGGACGATTTCGGCTGTAAAAGCACCGGACTCAATTGCGGCTGCCGCTTTACGCTGTGAATGCAGCGCCAGTTCATCCT
GCATTTCTCGGGTAATTCCGTACTCTTTGGCCACGTTCTCGGCGGTAATCCCCATATGATAACCATGGGTGGCGCACATC
AGACCATCGCGCAGGATTACGTCATAAACCTGTCCGTCTCCAAGACGATAACCAGAGCGTGCTTTTGCATCGAGTAAGTA
GGGCGCTAAACTCATATTTTCCATACCCCCCGCCACAATGCTTTGCGCCTGACCTGCCTGAATTGCCTGGGCGGCAAGCG
CCACACTTTTAAGACCCGAACCACACACTTTATTGACCGTGAATCCGCACACCGTTTCTGCCAGCCCGCTTTTTAACAGT
GCCTGACGTGCCGGATTTTGCCCCAACCCGGCTTGCAACACGTTACCCATAATCACTTCATCAATGTGTAGTGAATCGAT
TTTTGCACGTTCAATGGCGGCTTTAATTACTGTCGCCCCCAGGTCGATGGCGCTGGTGGAAGCGAGTGAACCGTTAAAAC
TACCGATAGCAGTACGTACCGCACTGACGATGACACAATTTTTCATTTTTTATTCCTTCTGTCTGTAGGGGTGCCGTCAG
AACAGCGTTAAACCAATGACGAAAATGACGCCGGAGAAGAGCAGGGCAGTGATGCAATAGCCCATGATGTCGCGGACACC
GAGTCCGGCGATTGCCAGTGCTGGCAGCGCCCAGAATGGTTGTGCCATGTTCATCCATTGCTCGCCGTAGGCGATCGCCA
TTACCGATTTACCGAGGTCAGCGCCCAGCGCCTGGGCTGCGGGTATCACGAAAGGTCCCTGAATAACCCAGTGACCGCCG
CCAGACGGAACGGCGAAGTTAATCAGTGCAGAACTAAAAAAGGTCATTACCGGGAAGGTGTCTTTGTTCGCAACATTGAT
GAAGAATTCGGTAATGAGTCCGCCCAGACCGGAATGCTCCATCATCAGTTGGATCCCAGCGTAGAAGGGGAATTGCACCA
GAATACCGGCGGTACTGCGTGCTGCCGCGCTGATAGCACGCATATAAGCCATTGGCGTTTTATGTAGCAGCAGACCCGCA
ATCATAAACATCAGGTTGACGGTATTGATGGTGATGTTGAAGCCATGTTCGCTGAAGTACATCGCCAGGTAAGCGATACC
GAGTGCGCCGATGATCAACGTCAGAATGCGGCTTTCTTCCAGTCGCTCGGACGGTGGAGCATCTTTCGGTAGCTGCTTTT
GAAAATCAGCCTCTTCCATGAGTAGTTTTGGATCGATACTCACCACGTCAGACGGTTTTGGCATCATCATGCGGGTGATA
AATGGCATCACCACAATCAACGCCACAGTGATGAAAATGTTAAAACCACTGAACAGAGTATCGCCCACCGGGATCAGCCC
GGCGATATGCTCAACCGGGTTGCCCGGTGTTGCAGCCAACAGAGGCATTGATCCAGAGAAGCCGCCACCCCAGGTGAGAA
AACCAATGTAGGCGCAGGCAATGAGCAACGGATAATCAGAACCGGGGACTCGCCGGGCGACTTCACGGGCAAACATTGCG
CCGACAACCAAACCAAATCCCCAGTTGATGACACAAGCGACTGAACCGAAGAAAGTGACCAGCATGACGCCCTGTACGGG
CGTCTTTGCGGCGGAGGCGGCAGTACGCAGCAAACTTTTCACCGGAGCAGAGCTGGCAAGGGCATGACCGGTAACGATGA
TAAGCGCCATCTGCATACCAAACGCCAGCAAGTTCCAGAAACCGTCACCCCACATTTTCACCATGCTGATCGGCGTTTGT
GGTGTTAACCAAAGCGCGATCACGAATGTTAGCAATGTCAGCAACATGGCAAAGATCAGTGGATCGGGAAGCCACCGGCT
GACAAAACGCGTCATAAAACGCGATATGCGACCAATCATAAATCACCCCGTTGCGTATTCAGATCGGCGGCGACTTCAAA
CCGAGCTTCTGTTTTGGCACGCACGGTAGCTAAATCACACCCGTCGGCAATTTCGGTGAGCCACATTTTGCCGTCAATAA
AACGAAAGACAGCCAGTTCAGTAACCAGCATATGCACCGCATGTTGCGCAGTGAGTGGCATGGTGCAGCGGCGCAAAATT
TTTGCTGAACCATCTTTGGCGCAATGTTCCATGGCGATGATCACTTTGCGCGACCCGGTCACCAGATCCATCGCGCCACC
CATACCGGGCACCATTTTCCCAGGCACTACCCAGTTCGCGAGGTTTGCTTCTTCGTCTACTTGCAAACCGCCGAGCACGC
AGGCATCAATATGACCGCCGCGGATTAGCGCAAATGACATGGCGCTATCAAACATGGCTGCACCGGGTAAAATACCGCAC
GGTTGTCCGCCAGCGTTCACCAGATCTGGATGCGCTGTCGTGACCGGGCCTAAACCGAGGAAGCCGTTTTCCGATTGCAG
AGTGATATGAATACCCTCCGGTAAATAATTGGCGACCATTGTGGGTAAACCGATCCCTAAGTTAACGATGTCACCATCAC
GAAGCTCTTGCGCCACACGGCGCGCAATACGTTGTTTCGCATCCATTATTTGCTCTCCTGTGAAACGATGATGTGGTCGA
TAACGGCACCAGGGGTGACAATATGGTCAGGTTGCAGCTCGCCGGTTTCGACAAGTTCATCTGGCTCTACCAGCGTGATA
TCAGCCGCAAGGGCTATCAGGGGGTTAAAGTTGCGGGCGCTAAGTTGATAGGTCAGGTTGCCAAGTGTGTCGCAACGATG
AGCGCGAATTAGCGCCAGGTCGGCGCGCAGTGGGCGTTCGAGCAGCCAGGTTTTACCGTCGAGTGTCAGTGTCTGTTTGC
CTTCCTCTACGACGGTGCCGACACCCGTTGGGGTGAGAAAACCACCAAGTCCAGCTCCACCACAGCGAATTTGCTCGATT
AGCGTACCTTGCGGCACCAGAACGACGTCCATCTCACCAGATATCATGCGCCGACCTGTTTCCGGGTTGGTGCCGATATG
TGAAGCAATCACTTTGCGGACTCGACCATTGACGATGAGCGGACCGATGCCGGTATCAACAAACGCGGTATCATTGGCTA
TCAATGTCAGGTCGCGAACACCAGATTCCAGTAATGCTTCAACCAGGCGGGATGGAGTGCCAATCCCCATAAATCCGCCC
ACCATGATGGTCATGCCGTCACGAAAGAAGCCGGTGGCGTCTTGTAATGTCATCAATTTTGTTTTCATTTTTTATCCCTC
TTGCATACACCGTTGTGGGTACAGTCAGGGAATAGCAAGGGGAGTGCCAGAATGAGATTATTGGATGTTTTTATTTAACT
AATTGAATAGAAAAGGATAAATTAGATGGGGATTCATAAGGAGAATGAGCTGCTATGCAGAAAATTGCGCACTGTGCAAA
TTTCTGCATAGCAAGTTTTGGTGTTATACATCCGCCGGATCGATACCGTATTCCTGGAGTTTATACATCAATGCACGGCG
ACTGATGCCCAGCATTAAAGCAGTGCGGGTTCGGTTTCCTTCTTGTTGTTCCAGCACTTCCATAATGATGCGTTTTTCGA
CGCGTTTAATTTCCTCTTTTAAATTACGCTCTCCGACAGGGGCTGTTTTTACCTCGCCAGCATTACAGACTGGCTGACGA
ATCTGCGGCGGAAGATCCTCAGAAAAAATGATCGGGCCTGAATTCATCACGACGGCGCGTTCAATAACGTTGGAAAGCTC
TCGAATATTTCCCGGCCATGACCAGGCGGTAAGCAGTGACATTGCCATCGGATCGATGTCGATAATATCGCGCTGATTCT
CACTACTGAATTTTTGCAAAAAGTGATTAGCTAACAGGGAAATATCTTCCCGGCGATCGCGCAGAGGCGGCAGTATTAAA
TGAATAACGTTAAGGCGATAAAAGAGATCTTCACGGAAGGTGCCTTCTTTTACCATTGCCTGCAAGTCGCGGTTGGTGGC
AGCAATGATGCGGATATCAACTTTTATGGTCTGATGGCCGCCAATCCGTTCAAATTCCCGTTCCTGCAGAATGCGTAGTA
ATTTGGCTTGCAGTACCAGCGGCATTTCGCCAATTTCGTCGAGGAGCAGAGTACCTTCGTTGGCACGTTCAAATAATCCC
TGACGCAAGGTTTGTGCACCAGTAAATGCACCTTTTTCATGACCAAACAGTTCACTTTCGAGCAACGATTCCGGCAGCGC
CGCGCAGTTGACTTTAATGAACGGCCCCTTTGCCCGCCGCGAATTGTAGTGAATCGCTCTGGCAATCAACTCTTTCCCGG
TGCCGCTTTCACCGCTAATCAAGACGCTGGCCTGAGAAAGGGCAATTTTGGCGGTGTCTTTGCAGATATCCATCATCGCC
GGGCTGTTGGTGAGAATGTGCCCCCATTGCCAGCTGGTGCTCAGTGCCTGGTGCAGATGACGGATCTCTTTTTTCATTGA
CTGGAGTTGTAAAGCGCGCTGAACGATTAAATTCAACTCATCGAGATCAAACGGTTTAATAACATAGTCGAAGGCCCCGC
AGCGTAGCGCTTCGACGGCGGTTTCCACTTCAGCATAGGCCGTCATCAGAATAACGGGTGTCCGGGTCTCATTACTGCGC
ATCTCCTTTAGTGCCTTGATGCCGTCCATCTCTGGCATGCGGATATCCATCAACACCACGTCAGGGTGAATATCAGCAAA
CAGGTGTAATGCTGTGCGTCCGTTGTTCGCACAATGTGTTTCGAAACCTTGTAGTGCAAAAGCGGTGCTCAGCATACGGC
GAACATTATCTTCATCATCCACAATAAGGATGCGATTAATAGCAGTCATACAGTCTGATTTCCCTGCGGGTTGATTGGTA
AAATAAGCGTGAAGGTTGCGCCGTAGCCCGGCAAACTGGCGACGCGAATATCACCCTGATGGGCATTAATGATGCGTTGA
CTTAACGCCAGACCAAGCCCGGTTCCTGAGGCTTTGGTGGTGAAAAAGGGATCGAAGATCTTTTTTTGCAGCGAGAGATC
AATGCCACAGCCGTTGTCCTCTATCGAAATGGCCTGTTGTGAGTCGCTGTATTGCCAGGTTTGAATGCGAATTTTCCCTC
GTGCGCTGATAGCCTGGACGGCATTGATCAGGATATTCAGTAGTACCTGTTTGAGCAGTTCACGATCGGCGTTAATCGGG
TTTAATTCATTATCCAGTTCGCTTATGAAGTCGACCCGCGCTTGTACGCCGGCGGTTTGTACCAGTACCAGAGTTTCTTC
AACCAATGCATTGAGACTGACTTGTTGCCATTGACTGTGGCGTGGACGTGAAAATTCGAGCAATTGCTGAATAACTTTGT
TAATTGAATCGATTTCTTTGAGTACTACGGACAGATATTCCTGATGTATTAGGTCGCTGGTTTGTTGGCGCAAGATCTGT
ACATAACCACGAATAGCCGTTAGCGGATTACGTACTTCATGCGCGACGCCAGCCATCAGCTCACCCAGTGTGGCGAGGCG
TTCTGCTTGCGCCATGCGGCGCTGGGTTTCTTTGCGGGCAGTTAAATCAGAGAAAATAACCAAAGCACCTATCATTTCAC
CATGCGTGTTATGAATACGACTGGTAGTGACACTGAGTTCAATGGTGCGGTCACGGCCTGGAAAACTGATCTCCAGCGCT
ACATGTTCGGTGCCATGTTCCAGCGTATCCAGTACTGGACTGTAGAACTGAGTATTGTCGAACAACATGGAGTAAGGCTG
CCCTACCAGTTCATGACGTTGATAGCCAGTGATGACTTCTGCTGCCGGGTTCATGGTGGTTACATCACCCTGGCGGTCAA
TGGCAATGACGCCATCGGCAGCGTTTTCAATAATCAGATCGTTAAGTGTCCGCGTTTCACGCAGTGCCTGGGCGAGGTTG
TTAACACTCTGACTGATTTGCCCCATTTCACCGGGCAATTGTGGTAATCGAGTGGGAATATTTTGTGCCAGAGTCGAGAG
GCCATCGGTGATGATATCAATATTGGCGCTCAGGCGACGGGAGAAAAGGACAATCAACAGCAGGCTTATCAGCAAACCGG
CGGTGAGCACAATGATAATCCTCACATCCATTTTCCAGGCCTGGCGGCGAATATCTTCGGTTAATTCATTGGCCCAGATA
TAGCCGAGAATTTCACCATTACGCTCAATGGGGATCATTGAATTCAAAATATCGCCGCGCACCTGCCTGCCTGAATAAAC
CAAAGGGGTATTTGTACGCATGACTTCGCGACCAGGGTGATCTGCGGCAATGGTAACGCCCACATTATTCTGATATAGCG
CTGAAGGCGCGTAGGTGATTATCGCATCCAGCGTTTTGTTGTAATAACCAGCGCCGATGCCAGGGAAGGCGTGAGTGATA
TTTTCGGTAATGGGGGCAAGTTCTGCATTTAATGCGCGGATACGCTCCTCACGTGGTAAGTCGATGTAGAGATCATAGCG
ATCGCCTAGTGCCTGATTAAGCAGGTTGACCACGGCAGAAAGTTTTTTCTCTTTTTCAGATAAGACTGCTGAACGTCCTT
CCGTTTCTACGATATAACCAATAGTAAGCGTTGGGACAATGACCATCAGGATTGCCATCAGGATCATTTGATTGCGTAAG
CGGCGTGGATAAATCCACTTCATATAATGCATGCTGAAATCCACTAGTCTTGTCCGGTATATGACGATTATCAGAGGTTA
AGGTGATGATTTCTCGGCGGTGTATCATATTCCAGAGAAGAGAGAACATTGCGGTAACACGCTTTTACCGCTACCTTAAC
CACACTCCATCGGTCACCTGAGGCGGAGCTTCGCCCCTTTGAAATACCTTGCTTCTTTTCGTACAACCCTGAAAGCCTCG
CGCTACATGTTCAGAGCATTGGCGTTAGTGCTCTGGCTGTTGATTGCTTTTTCATCCGTTTTTTACATCGTTAATGCGTT
ACATCAGCGAGAATCGGAAATTCGTCAGGAATTTAATCTGAGTTCCGATCAGGCTCAGCGCTTTATTCAACGCACCTCTG
ATGTGATGAAAGAGCTGAAGTACATCGCTGAAAATCGCTTATCGGCAGAAAACGGTGTGCTTTCCCCGCGTGGACGAGAA
ACGCAGGCGGATGTGCCTGCGTTTGAACCGCTGTTTGCCGACTCCGATTGTTCCGCAATGAGTAACACCTGGCGAGGTTC
TCTGGAGTCATTGGCGTGGTTTATGCGCTACTGGCGCGATAATTTTTCTGCGGCTTACGATCTCAACCGGGTATTTTTAA
TCGGCAGCGATAACCTCTGCATGGCCAATTTCGGTCTGCGTGATATGCCAGTGGAACGCGATACCGCGTTGAAAGCTTTG
CATGAACGCATCAATAAATATCGAAATGCACCACAAGATGATAGCGGCAGTAACCTCTACTGGATCAGCGAAGGTCCGCG
CCCTGGCGTCGGGTATTTTTACGCGTTGACGCCAGTTTATCTGGCGAACCGGTTGCAGGCGCTTTTGGGTGTCGAGCAGA
CCATCCGGATGGAGAACTTTTTCTTACCTGGTACGTTGCCGATGGGGGTTACCATTCTTGATGAAAATGGTCATACCCTG
ATTTCGCTTACCGGACCAGAAAGTAAAATTAAGGGCGATCCTCGCTGGATGCAGGAACGCTCCTGGTTTGGCTATACGGA
AGGGTTCCGGGAGCTGGTGCTGAAGAAAAATCTGCCACCCTCATCGCTAAGCATCGTGTATTCGGTGCCGGTTGATAAGG
TGCTGGAACGCATTCGCATGTTGATCCTTAACGCAATTTTGCTGAATGTGCTTGCTGGAGCTGCATTGTTTACTCTCGCG
CGGATGTACGAGCGGCGTATTTTCATTCCGGCGGAAAGCGACGCCCTGAGACTGGAAGAACATGAGCAGTTTAACCGCAA
GATTGTCGCCTCCGCGCCAGTGGGTATCTGTATTTTGCGTACCGCAGATGGCGTCAATATTTTAAGTAACGAACTGGCGC
ATACCTATCTCAATATGCTTACGCATGAGGACCGCCAACGGCTGACACAAATTATCTGTGGGCAGCAGGTCAATTTTGTT
GATGTCCTGACCAGCAACAATACCAATCTGCAAATCAGCTTCGTCCATTCGCGCTATCGTAATGAAAACGTGGCCATTTG
TGTGCTGGTGGATGTTTCTTCGCGCGTGAAGATGGAAGAGTCGTTGCAGGAGATGGCACAAGCAGCGGAACAGGCGAGCC
AGTCAAAATCGATGTTCCTTGCCACCGTCAGTCATGAGCTGCGAACGCCGCTGTATGGCATTATCGGTAACCTGGATCTG
TTGCAAACCAAAGAGTTACCGAAAGGCGTCGATCGTCTGGTGACGGCAATGAACAACTCTTCCAGCCTGTTGTTGAAAAT
TATCAGCGATATTCTCGATTTCTCGAAGATTGAATCGGAACAGTTGAAGATCGAACCGCGTGAGTTTTCACCGCGTGAAG
TGATGAACCACATCACCGCCAACTATTTACCGCTGGTGGTACGCAAGCAGTTAGGCTTGTACTGCTTTATTGAACCGGAT
GTGCCAGTGGCCTTAAATGGCGACCCGATGCGTTTACAGCAGGTCATCTCCAATCTGTTGAGTAACGCCATAAAATTCAC
CGATACCGGCTGTATAGTTTTGCATGTTCGCGCTGATGGCGATTATCTCTCTATCCGTGTTCGCGATACCGGCGTGGGGA
TTCCGGCGAAAGAAGTGGTGCGCTTGTTTGATCCCTTCTTCCAGGTCGGAACGGGCGTACAGCGAAACTTCCAGGGGACC
GGTCTGGGTCTGGCGATTTGTGAAAAACTGATCAGCATGATGGACGGCGATATCTCGGTAGATTCAGAACCGGGAATGGG
CAGCCAGTTTACCGTGCGTATTCCGTTGTACGGCGCTCAGTACCCGCAGAAAAAAGGCGTGGAAGGGTTGAGTGGTAAAC
GCTGCTGGCTGGCGGTCCGCAATGCGTCGCTCTGTCAGTTCCTGGAAACCAGTTTGCAGCGCAGCGGCATCGTCGTAACA
ACATACGAAGGGCAGGAACCGACTCCCGAAGATGTGTTAATCACTGACGAGGTAGTGAGTAAAAAATGGCAGGGCAGAGC
GGTAGTGACCTTCTGTCGTCGACATATTGGTATTCCGCTGGAGAAAGCGCCAGGGGAGTGGGTACACAGTGTGGCTGCCC
CGCATGAGCTACCGGCATTGTTGGCGCGTATTTATTTGATCGAGATGGAGAGCGACGATCCTGCTAACGCTCTGCCGTCG
ACGGACAAAGCGGTCAGCGATAATGACGATATGATGATTCTGGTCGTGGATGATCATCCGATTAACCGACGTCTGCTGGC
AGATCAGTTGGGATCGTTGGGCTATCAATGTAAAACCGCGAATGATGGCGTCGATGCGCTTAATGTACTTAGCAAGAATC
ATATTGATATCGTGCTTAGCGACGTCAACATGCCAAATATGGATGGTTACCGCTTGACGCAACGCATTCGTCAGTTGGGA
CTGACGTTGCCGGTAATCGGAGTAACTGCTAATGCGTTGGCTGAAGAGAAGCAGCGGTGTCTGGAGTCCGGTATGGACAG
CTGCCTGTCGAAGCCGGTAACGCTGGATGTAATAAAACAGACGCTGACGGTATATGCCGAGAGGGTCAGGAAATCGCGGG
AATCGTAGGACGGATAAGGCGTTTACGCCGCATCTGGCATTCAGTGCAAATGCCAGATGCGACGCTGACGCCTCTTATCT
GGCCTACTTTAATGTAATCTGTTGAAATAATGGGAATCGTAGGCCGGATAAGGCGTTTACGCCGCATCCGGCAATCGGTG
CAAATGCCAGATAAGACACTAACGCGTCTTATCTGGCCTACAGATGATTAGTCTTTATCTGCCGGACTTAAGGTCACAGA
AGAGAGATAATTCAGCAGGGCGATATCGTTCTCGACACCCAGCTTCATCATCGCAGATTTCTTCTGGCTACTGATGGTTT
TAATACTGCGGTTCAGCTTTTTAGCGATCTCGGTCACCAGGAAGCCTTCCGCAAACAGGCGCAGAACTTCACTCTCTTTT
GGCGAGAGACGCTTGTCACCGTAACCACCAGCACTGATTTTTTCCAACAGGCGAGAAACGCTTTCCGGGGTAAATTTCTT
CCCTTTCTGCAGCGCGGCGAGAGCTTTCGGCAGATCGGTCGGTGCACCTTGTTTCAGCACGATCCCTTCGATATCCAGAT
CCAATACCGCACTAAGAATCGCCGGGTTGTTGTTCATAGTCAGAACAATGATCGACAGGCTTGGGAAATGGCGCTTGATG
TACTTGATTAAGGTAATGCCATCGCCGTACTTATCGCCAGGCATGGAGAGATCGGTAATCAACACATGCGCATCCAGTTT
CGGCAGGTTGTTGATCAGTGCTGTAGAGTCTTCAAATTCGCCGACAACATTCACCCACTCAATTTGCTCAAGTGATTTGC
GAATACCGAACAAGACTATCGGATGGTCATCGGCAATAATTACGTTCATATTGTTCATGTAATAGGCTACCTTGCTACAG
CAAGCTCTTGACATAACTGTCAATGTCGCTGATGTATTTTTCTATTCCTGGAACATCCTTCTCACGAATCAGATGTTCCA
GCGTTTCACATAACTGCTTGCCGGGTACCAGATTTAGCATGGCAAATACGCCTTTAAGACGATGAGCCGTTTGGGCTAAC
GCAGCAAAGTCACTGGTTGCTGCTTCAGTATACAGCCTCTTAACATCATCCGGTACTGTGTCTACAAAGAGCGCATAATA
GCCGCTGGCATGGAGTTGCGCATTTTCATCTCCGCCCAGAGGCGATTCTGTCACCTCTTCCTGCGCCAGTTGCACTTCAA
TTAATTGTAAGACCGCTTCCTGCATAGCGTTGCTCATATTGAAGTTGACGCACAATTGACCAGGCCCAATTTCCCGTACG
CCAGACTCATCATCGCTTAAAAGCAAGCCAGAGGCAGTAAGATTAGACGGATTATCCGTTAAAAAGATATCATAATCTTG
ACTAATTAATCTTTCATCGGGTGTGATACAGGTTGCACCCCAATTTTCTAACTGGCGAGTGACAATATTCCGAATTTCTG
CCGAAGTAACATCCACCATTACGCAGACATCATCCAGTAAACGCTCTTCTTCCTCTTCAACTTCCGGGTCAGCTGCGAGC
ATTTTGATATGCACAGAGTAGCGTGTACCAAGCCCATCCCGCGTTTTGATGTTTAAATGACCGCCCAGTTTACGTGCCAG
TTGATCGCTCAGCCAGAATGCCAGCGGGTCCGCCTTGCCATAGCGATCGTTTTGGGTCTGGTTGATAAACGGGAAGTGCA
AATTATCCATTTCATGAATGCTTACGCCTTCTCCGGTGTCCAGAATGCGGAACGTCAGGCGGTCTTCGGAGGACTCATCC
TGATCAACCTCAAGGGTGATTTTTCCCAATTGCGTTGAGGTCACGGCATATTGCATCAGTAGCAGCAAAATACGTCGTAA
GGCATCGCGATCGCCACGGCGCATATCGTGTGCTTTCAGATGATTGTTAATCAGCAGTTGCAGACCTTTACGCTTGATGG
CAGGCAACACTGAAGGCACAACTTCATCAATTAAATCCTGCACGGAGAACAGCACCGTCTCACTTTTCCAGCTATCGTCC
GCAAGCATGTTCGCTAACTGTATTTCATCGACCAGCCGCACCAGCACATCTGCCTGATTCGCCAGTTGTTTGCTTTCCGG
GGCGTTGAGTTTAGCCGCGCTCTCCGCCAGGGACTGTGCAGGTTCTTTCAGCGCATCGCCAATGTTTTTCATAAAGGTCA
TCCGCCCCTGCTGGTTTTTCTCATACAGACGCTGCGCCTGCTTGAGTTTCTTGTTTACCAGCACTTCGCGATCCTGATCG
CGAATAATGAAAATTTGTGTGCGCGGCGCGACCTGGCTGCGGAACATGCGGATCTCATACAGCTCGTTATTGATCGTCGC
CTGAATAATCCCCTGATGCTGTTCCGCCATGGTGGTGATGTTTTGCAGATTCAAATGCGGCAGCAAATGATCGGCAATTT
TGTTACTTATGACAGTGCGGTTCGATTCCTGATCGTGAACCAGCAGGCCGAGCGGCAGCAGTGAGACTATCTCTTCATTG
ATTGCCCGTAAAATGCGCAATTCGTTATTGACCGCCGTGTTGGGTAGACTTTCTGTACTGCGACTGGAGAAATGGCGAAA
TGTGGTATAGCCAAATAACGCCAGCGCCAGCAAACCGATGTTCAGCAGCAGTGGCAGCAGAATGTTTTGCAACGTATCCA
GCAATAAGGTGCCATAAGGAACCTGCCAGACCAGGCGCATATCAGTAGAGTTGAGTGCCGAGGAGATTTCAATCTTCGTA
CTGTTAAAGTGGATACTGACGCTATCCGTCCCTTCTTTCTCATTATCATTGTTTCCCGTTGCCGTCGCGTCTGGCTCAAG
GCGGAAACTGTCCAGCGGCATACCCGGTGGGATCAAATCATTAATCGGCAGATCAAAAGCCACGACCGTTGCCAGATGTC
CTGGCTGGTTAAAGGTAGTACGCAAGGTAAAGTAATGACCGTTCTGCCAGGCCAGGCGGCGCATGTTAGAAAAACTTTCG
CGTTCATCGAGGGCGTTGGCCTGTTGCAACATCTCTGCACGACGTGAATCAACAATGTCACTGACGGTCGATTCTTTAAA
TCCGGAGGTGAGATCTTTGAGGGGCAGGGTTGAGATCAGTACCAGACTGTTATCCTGACCATTCAGGTAATACATTGACC
ACGGTACATTTTCTGCGCCCCACAATGTATCCAGATAAGTGGACATCCGTTGAGTCATCTCAAGCGTTGAGTTGTCGTGA
GAGCCAAAGATTAACGCTTCCGTTTTGCGGCGCGGTTTTTCCAGATAGTAGACATCCTGTTTCAGGCGCGTCTCTTGTAA
ACCTTCGCCGGAGGAGGGGGAGGTCGTCGCGGCAATGTTGTCGTAGATCTGCCAGGTCACGTAACGCCAGGTATCGACGC
GCTTTTGGATTGCGTGGGTAATGTCGACAATCTGGTAACTTTTATCTTTCAGCCAGGCGTTAACGGCGCTTTGTACCATT
ACACCCATCGTCACCAGTAACACAATGATCAACAGTAAAAAGAAGCGGGTAATGCTCCCGGGTAGGAGTGAAAAGCGGGT
CGTGGCCGTTGTCTCTTTCTGACGCATTCGTGTTTATGACCTGTTAAAACTTCGCGAAGTGATAGGGCAGTATAAAGGGT
ACAGTGTGAAATTCCAGACTCTTACCTGATTGATGATTCTCTATTCTCCTGTGATATTTATCATCCTGTATGGGGGGAAA
TAGATGTACAAGCGCCATTTTGCTGTACAAATAACCTACGAAAAGCCCAACGAAATTAATTGCAAATAAACGAAAATTGC
TGGAAATTATGCTGATGTTAATTATTTGTGAAATAGTTAACAAGCGTTATAGTTTTTCTCTGGTAGCACAGAATAATGAA
AAGTGTGTAAAGAAGGGTAAAAAAAACCGGATGCGAGGCATCCGGTTGAAATAGGGGTAAACAGACATTCAGAAATGAAT
GACGGTAATAAATAAAGTTAATGATGATAGCGGGAGTTATTCTAGTTGCGAGTGAAGGTTTTGTTTTGACATTCAGTGCT
GTCAAATACTTAAGAATAAGTTATTGATTTTAACCTTGAATTATTATTGCTTGATGTTAGGTGCTTATTTCGCCATTCCG
CAATAATCTTAAAAAGTTCCCTTGCATTTACATTTTGAAACATCTATAGCGATAAATGAAACATCTTAAAAGTTTTAGTA
TCATATTCGTGTTGGATTATTCTGCATTTTTGGGGAGAATGGACTTGCCGACTGATTAATGAGGGTTAATCAGTATGCAG
TGGCATAAAAAAGCAAATAAAGGCATATAACAGAGGGTTAATAACATGAAAGTTAAAGTACTGTCCCTCCTGGTCCCAGC
TCTGCTGGTAGCAGGCGCAGCAAACGCTGCTGAAGTTTACAACAAAGACGGCAACAAATTAGATCTGTACGGTAAAGTAG
ACGGCCTGCACTATTTCTCTGACAACAAGTCAGAAGACGGCGACCAGACCTATGTACGTCTTGGTTTCAAAGGCGAAACT
CAGGTTACTGACCAGCTGACCGGTTACGGCCAGTGGGAATATCAGATCCAGGGCAATACCTCTGAAGACAACAAAGAAAA
CTCCTGGACCCGTGTGGCATTCGCAGGTCTGAAATTCCAGGATGTTGGTTCTTTCGACTACGGTCGTAACTACGGCGTTG
TTTACGACGTAACTTCCTGGACCGACGTACTGCCAGAATTCGGTGGTGACACTTACGGTTCTGACAACTTCATGCAGCAG
CGTGGTAACGGCTTCGCGACCTACCGTAACACTGACTTCTTCGGGCTGGTTGATGGCCTGAACTTTGCTGTTCAGTACCA
GGGCAAAAATGGTAGCGTAAGCGGCGAAGGCATGACCAACAATGGTCGTGGTGCTCTGCGTCAGAATGGCGACGGTGTCG
GCGGATCTATCACTTATGATTACGAAGGCTTCGGTATCGGTGCTGCAGTTTCCAGCTCCAAACGTACTGATGCTCAGAAC
ACCGCTGCTTACATCGGTAACGGCGACCGTGCTGAAACCTACACTGGTGGTCTGAAATACGATGCTAACAACATCTACCT
GGCTGCTCAGTACACCCAGACCTACAACGCAACTCGCGTAGGTTCCCTGGGTTGGGCGAACAAAGCACAGAACTTCGAAG
CTGTTGCTCAGTACCAGTTCGACTTCGGTCTGCGCCCGTCTGTAGCATACCTGCAGTCTAAAGGTAAAAACCTGGGCACC
ATCGGTACTCGTAACTACGACGACGAAGATATCCTGAAATATGTTGATGTTGGTGCAACCTACTACTTCAACAAAAACAT
GTCCACCTACGTTGACTACAAAATCAACCTGCTGGACGACAACCAGTTCACTCGTGACGCTGGCATCAACACTGATAACA
TCGTAGCTCTGGGTCTGGTTTACCAGTTCTAATCTCGATTGATATCGAACAAAGGGCCTGCGGGCCCTTTTTTCATTGTT
TTCAGCGTACAAACTCAGTTTTTTGGTGTACTCTTGCGACCGTTCGCATGAGGATAATCACGTATGGAAATAAGCTTTAC
CCGCGTGGCACTGCTGGCTGCCGCGCTCTTCTTTGTTGGTTGCGATCAAAAACCACAACCCGCCAAAACCCACGCTACTG
AAGTTACCGTTCTTGAAGGCAAAACCATGGGTACCTTCTGGCGTGCCAGCATCCCGGGCATTGATGCCAAACGCAGTGCC
GAACTTAAAGAAAAGATTCAGACCCAGCTGGACGCCGACGATCAGCTGCTTTCGACCTATAAAAAAGATTCCGCGCTGAT
GCGCTTTAACGACTCGCAAAGTTTGTCGCCGTGGCCGGTAAGTGAAGCGATGGCCGATATCGTCACCACCTCGCTGCGCA
TTGGCGCAAGGACCGATGGTGCGATGGATATAACCGTCGGGCCGCTGGTGAATCTGTGGGGCTTTGGCCCGGAACAACAG
CCGGTTCAAATTCCGAGCCAGGAACAGATCGATGCGATGAAAGCCAAAACCGGCTTACAGCACCTGACGGTCATTAATCA
GTCGCATCAGCAATATCTGCAAAAAGACCTGCCGGATTTATATGTCGATCTCTCCACCGTCGGTGAAGGTTATGCGGCGG
ATCACCTGGCACGCTTGATGGAGCAGGAAGGGATTTCCCGCTATCTGGTGTCGGTGGGCGGCGCGCTGAACAGCCGTGGT
ATGAACGGTGAAGGCCTGCCGTGGCGGGTAGCGATTCAAAAACCAACCGATAAAGAAAACGCGGTTCAGGCTGTGGTGGA
TATCAACGGTCATGGGATTAGCACCTCTGGCAGCTACCGTAACTATTACGAATTGGACGGCAAACGTCTTTCCCATGTTA
TCGATCCGCAAACCGGGCGTCCCATCGAACACAATCTGGTATCCGTGACGGTGATTGCTCCGACGGCGCTGGAAGCCGAT
GCCTGGGATACTGGCTTGATGGTACTCGGGCCGGAGAAAGCCAAAGAGGTTGTTCGCCGGGAAGGGCTGGCGGTTTATAT
GATCACCAAAGAAGGCGATAGCTTTAAAACCTGGATGTCACCACAGTTTAAAAGCTTCCTTGTCAGCGAAAAAAATTAAA
GCGCAAGATTGTTGGTTTTTGCGTGATGGTGACCGGGCAGACTAAAGGCTATCCTTAACCAGGGAGCTGATTATGAAAAA
CGCCACATGCTTAACTGACGATCAACGCTGGCAATCTGTCTTAGCCCGCGACCCGAATGCCGACGGCGAATTCGTTTTCG
CCGTGCGCACCACAGGCATCTTTTGCCGTCCGTCTTGCCGCGCCAGACATGCCTTGCGGGAAAATGTCTCCTTCTACGCA
AATGCCAGCGAGGCACTCGCCGCCGGATTTCGCCCCTGCAAACGCTGCCAACCTGATAAAGCCAATGCCCAGCAACATCG
GTTGGATAAAATCACCCACGCGTGTCGACTGCTGGAACAGGAAACGCCTGTAACGTTGGAAGCCTTAGCTGACCAGGTGG
CGATGAGTCCATTTCATCTACATCGGTTGTTTAAAGCGACTACCGGAATGACGCCTAAAGCCTGGCAACAGGCCTGGCGC
GCTCGCCGTTTGCGCGAATCGCTGGCGAAAGGGGAGAGCGTGACGACGTCTATTCTTAACGCCGGATTCCCCGACAGCAG
CAGTTACTACCGCAAAGCTGACGAAACGCTGGGCATGACGGCTAAACAATTCCGTCACGGTGGCGAAAATCTGGCGGTGC
GTTACGCGCTGGCTGATTGTGAGCTGGGTCGTTGCCTGGTGGCAGAAAGCGAGCGGGGGATTTGCGCGATATTGCTGGGC
GATGATGACGCGACATTAATCAGCGAGTTGCAGCAGATGTTTCCCGCTGCCGACAACGCGCCTGCCGATCTGATGTTTCA
GCAACATGTGCGTGAAGTGATCGCCAGCCTCAATCAACGCGATACGCCGCTGACGTTACCGCTGGATATTCGCGGCACTG
CTTTTCAGCAACAAGTCTGGCAGGCACTGCGCACGATACCTTGCGGTGAAACCGTCAGTTATCAGCAACTGGCTAACGCC
ATCGGCAAACCGAAAGCGGTACGGGCCGTTGCAAGTGCCTGTGCCGCCAACAAGCTGGCTATCGTTATACCCTGTCATCG
GGTAGTACGCGGTGATGGATCGCTTTCAGGTTACCGCTGGGGCGCGTCGCGCAAAGCGCAACTGCTGCGCCGCGAAGCTG
AGAATGAGGAGAGGTAATGTTGGATCTGTTTGCCGATGCTGAACCGTGGCAAGAGCCACTGGCGGCTGGTGCGGTAATTT
TACGGCGTTTTGCTTTTAATGCTGCGGAGCAACTGATCCGCGATATTAATGACGTTGCCAGCCAGTCGCCGTTTCGCCAG
ATGGTCACCCCCGGGGGATATACCATGTCGGTGGCGATGACCAACTGTGGGCATCTGGGCTGGACGACCCATCGGCAAGG
TTATCTCTATTCGCCCATTGATCCGCAAACAAATAAACCGTGGCCCGCCATGCCGCAGAGTTTTCATAATTTATGTCAAC
GTGCGGCTACGGCGGCGGGCTATCCAGATTTCCAGCCAGATGCTTGTCTTATCAACCGCTACGCTCCTGGCGCGAAACTG
TCGCTGCATCAGGATAAAGACGAACCGGATCTGCGCGCGCCAATTGTTTCTGTTTCTCTGGGCTTACCCGCTATTTTTCA
ATTTGGCGGCCTGAAACGAAATGATCCGCTAAAACGATTGTTGTTGGAACATGGCGATGTGGTGGTATGGGGCGGTGAAT
CGCGGCTGTTTTATCACGGCATTCAACCGCTGAAAGCGGGGTTTCATCCACTCACCGGCGACTGCCGTTACAACCTGACA
TTCCGTCAGGCAGGTAAAAAAGAATAAAAATAAGAATTATTATTGCTGTGCGCGCGAAGATGTTTAAACTGCGGGCTGTA
ATTCATTGTCCGGGTTTTCTGCATGGAACTTCTTGTACTTGTCTGGCGGCAGTATCGCTGGCCATTTATCAGTGTGATGG
CGCTAAGCCTCGCCAGTGCGGCTTTAGGCATTGGCTTAATTGCTTTTATCAATCAGCGCCTTATCGAAACGGCGGATACC
AGTCTGCTGGTGTTGCCGGAGTTTCTGGGATTATTGCTGCTGTTGATGGCAGTCACTCTCGGATCGCAACTGGCGCTCAC
CACTTTGGGGCATCACTTCGTTTACCGACTGCGTAGTGAATTTATCAAGCGGATTCTGGATACCCACGTCGAGCGCATTG
AACAACTCGGTAGCGCCTCGTTGCTGGCGGGATTAACCAGCGATGTGCGCAATATCACCATTGCTTTTGTGCGTCTGCCG
GAACTGGTGCAGGGGATCATTCTCACTATCGGTTCCGCGGCGTATCTGTGGATGCTGTCGGGCAAAATGTTGCTGGTAAC
GGCTATCTGGATGGCAGTCACCATCTGGGGCGGTTTTGTGCTGGTGGCGCGGGTGTACAAACATATGGCGACCCTGCGTG
AAACCGAAGACAAGCTGTACACGGATTTTCAAACCGTACTCGAAGGGCGCAAAGAGCTGACTCTGAACCGGGAACGCGCC
GAGTATGTGTTTAACAACCTCTACATTCCTGATGCGCAAGAGTATCGCCATCATATTATTCGCGCAGACACCTTCCATCT
TAGTGCCGTGAACTGGTCAAACATCATGATGCTGGGCGCAATCGGTCTGGTGTTCTGGATGGCGAACAGTCTCGGTTGGG
CTGATACCAACGTTGCCGCGACCTATTCGTTGACGTTGTTATTCCTGCGTACGCCGCTGCTTTCGGCGGTTGGCGCATTG
CCGACGCTGCTGACGGCGCAGGTGGCGTTTAACAAGCTGAACAAATTCGCGCTCGCGCCTTTCAAAGCAGAGTTTCCGCG
CCCGCAGGCGTTTCCCAACTGGCAAACGCTGGAGCTGCGTAACGTGATGTTTGCTTATCAGGATAACGCGTTTTCCGTTG
GTCCGATTAATCTCACCATCAAACGTGGCGAGCTGCTGTTTCTGATTGGCGGCAACGGTAGCGGAAAATCGACGCTGGCG
ATGTTGTTGACGGGCTTGTATCAGCCACAAAGCGGCGAAATCTTGCTGGATGGCAAACCTGTCAGCGGCGAACAACCGGA
AGATTATCGCAAACTGTTTTCGGCAGTGTTTACCGATGTCTGGCTGTTTGATCAACTGCTGGGGCCGGAGGGTAAACCCG
CTAACCCGCAACTGGTTGAGAAGTGGCTGGCGCAGCTGAAAATGGCTCATAAGCTTGAGTTAAGCAACGGGCGTATTGTT
AACCTGAAGTTATCAAAAGGACAGAAAAAACGCGTGGCGCTGTTGCTGGCGCTGGCAGAAGAACGCGATATTATCCTGCT
GGATGAATGGGCGGCGGATCAGGATCCACACTTCCGTCGTGAGTTTTATCAGGTGTTGCTGCCGCTGATGCAGGAGATGG
GTAAAACTATTTTCGCCATCAGTCATGATGATCATTACTTTATCCACGCCGACCGCCTGCTGGAGATGCGCAACGGGCAA
CTTAGCGAGCTGACGGGCGAAGAGCGCGATGCCGCTTCGCGTGATGCCGTTGCCCGGACGGCATAATATTACGACGCTGA
CCTGGCGGACTGCTGCCGCCAGGTCAATATGCTAAAAATCCCTTCATTTCTAATAACCCTATAATTAATCAACGAAATTA
TAATGTTTCTAAAATTAGAATATAATTTATAAACATTATTTAAATGTTGTTACTTAAGTGTTACCGTTGATGCCGCGCAA
ATCTCACCTGCAATAAAGCGACTAAAAGTAAGGCATTAACAAGATGAAAAAAGTGACTGCCATGCTCTTCTCGATGGCCG
TGGGGCTTAATGCCGTTTCGATGGCGGCAAAAGCGAAAGCGTCCGAGGAGCAGGAAACTGATGTACTGTTGATTGGCGGC
GGCATTATGAGCGCCACGTTGGGGACCTATTTACGCGAGCTGGAGCCTGAATGGTCGATGACCATGGTGGAGCGCCTGGA
GGGTGTCGCGCAGGAGAGTTCGAACGGCTGGAATAACGCCGGAACCGGGCATTCTGCACTGATGGAACTGAACTACACCC
CGCAAAACGCCGATGGCAGCATCAGTATTGAAAAAGCAGTCGCCATTAACGAAGCATTTCAGATTTCCCGCCAGTTCTGG
GCGCACCAGGTCGAGCGCGGCGTGCTGCGTACTCCGCGTTCATTTATCAATACCGTTCCGCATATGAGCTTTGTCTGGGG
CGAGGATAACGTTAATTTCCTGCGCGCCCGTTACGCCGCGTTGCAACAAAGCTCGCTGTTTCGCGGTATGCGTTACTCTG
AAGATCACGCGCAGATCAAAGAGTGGGCACCGTTAGTGATGGAAGGGCGCGATCCGCAACAGAAAGTGGCAGCCACGCGT
ACGGAAATTGGTACCGATGTGAACTACGGCGAGATCACCCGCCAGTTAATTGCTTCCTTGCAGAAGAAATCTAACTTCTC
GCTGCAACTCAGCAGCGAAGTCCGCGCCCTAAAGCGTAATGACGATAACACCTGGACCGTTACCGTTGCCGATCTGAAAA
ATGGCACTGCACAGAACATCCGTGCGAAATTTGTCTTTATCGGCGCGGGCGGTGCGGCACTGAAGCTGTTACAGGAATCG
GGGATTCCGGAAGCGAAAGACTACGCCGGTTTCCCGGTGGGCGGTCAGTTCCTTGTTTCGGAAAACCCGGACGTGGTTAA
TCACCATCTGGCGAAGGTTTACGGTAAAGCATCCGTTGGCGCACCACCGATGTCGGTTCCGCATATCGATACCCGTGTTC
TGGACGGTAAACGCGTAGTGCTGTTTGGGCCATTTGCCACCTTCTCAACCAAATTCCTCAAAAACGGTTCATTGTGGGAT
CTGATGAGTTCCACCACCACCTCTAACGTGATGCCGATGATGCACGTCGGGCTGGATAATTTCGATCTGGTGAAATATCT
GGTGAGTCAGGTGATGTTGAGTGAAGAGGATCGTTTTGAAGCGTTGAAAGAGTACTATCCGCAAGCGAAAAAAGAGGACT
GGCGTTTGTGGCAAGCGGGGCAGCGTGTGCAGATTATCAAGCGTGATGCCGATAAAGGTGGTGTACTGCGTCTGGGTACT
GAAGTGGTCAGTGACCAGCAAGGAACCATTGCCGCGCTCCTGGGGGCATCGCCAGGGGCGTCAACCGCCGCGCCGATTAT
GTTGAATCTGCTGGAAAAAGTATTTGGCGATCGCGTTTCCAGCCCGCAATGGCAGGCTACGTTGAAAGCGATCGTTCCGT
CTTATGGACGCAAGCTGAACGGTGATGTAGCGGCAACAGAACGCGAGTTGCAGTACACCAGCGAAGTGCTGGGGCTGAAA
TACGACAAACCGCAAGCAGCAGATAGTACGCCGAAACCGCAGCTGAAACCGCAACCCGTTCAAAAAGAAGTGGCGGATAT
TGCGTTGTAATGATGTGCCACATCCGGCATGGTATGCCGGATGTGGCGTATGCTGATAAGACGCGCCAGCGTCGCATCAG
GCAACCGGCTCGGGCGTTAGATGTTGGATGCGGCGTAACCGCCTTATCCAACCTACGGGGTGGAGCACTTCACAGCGGTG
TAGGCCTGATAAGACGCGTCAGCGTCGCATCAGGCAACCGGCTCGGACGTTGGATGTTGGATGCGGCGTAACCGCCTTAT
CCGACCTACGGGGTGGAGCACTTCACAGCGGTGTAGGCCTGATAAGACGCGCCAGCGTCGCATCAGGCAACCGGCTCGGG
CGTTAGATGTCGGATGCGGCGTGACCGCTTTATCCAACCTACGGGGTGCCGCACTTCACGGCAGTTTAGCGAACTACCGC
GTTGTCAATCTTCTCTTCCGCCTTCCAGACGCGGTACTTCACATCTACATTGTCTGGCGTATACACCACGATCGGCAGCT
TGCTGTTGTAACGCAGCATTCCAGCATCACCCAGATACGCGGTGACAAATTTCTTCTCTTTTTTGCCATCCGGGCAGGCC
ATCATCGTCGAAACCGGGGAACTGACTTTATCAAAGACATAATAATCATAGCCCCAGCCTTCCAGCGTTTTGCTTTCCAG
CTTCCCGCCGAGACGATGCAAATTGCAATCGACTTCCAGCGTCTGACCGATTAACAGTTCTACTTTCAGGGTAGATTCCT
CTTCTTGCGGGGTTAACTGAATCACCTGACGCTTCATGCCTTTTTCAGCTTGTGGATAAGGCGCGATTTTTTCCAGTGGC
TGGACGCTCTCTGCCGCCCAGGCGGAAGTGGTGGCGAAAGCGGCAAACAATACTGCAGGTAGAATGGTCTTCATTTTTTG
CTTTCCTTCTTCATTTATAGGTTTGCACCGATGATGTCGCTGAAGGTTAACATATTCATCAGATTTATTAATTTGCTTTA
TGAATAACTTAAAGAATATTCAGACAATTTTACCTGCTCTTTTAGTGTTAAATTCTGATGAGAGAGCAAACCAGCAGAAA
TATCTCTGGTGAATTAATCGCTATATAAATATATTTATAACCATTTGAAATGTGAGCAAAAGCCCGTTTTTGCCACGCTT
CCCGCCACTCTTTTGATCCTGCTACAGGTTTTACCTCGATCGGGGTATGCATCTTTGACACATCCTTTAATATCTTAGCG
GCTATAAAAATGGCTTATTAATTATGCGGTTTATTTGGTCGCTCTCAATTTTCAGAGCGCGTTAATGATGGAAGGTCAAT
GTGAAGATTGATGCATCCCGTCGGGGCATACTCACTGGTCGCTGGCGCAAAGCCAGTAACGGTATCCGTCCGCCCTGGTC
CGGTGATGAATCTCATTTTCTGACCCATTGCACCCGCTGCGACGCTTGTATTAATGCTTGTGAAAACAACATTCTGCAAC
GCGGCGCGGGCGGCTATCCGAGCGTTAATTTCAAAAATAACGAGTGCAGCTTCTGTTACGCCTGCGCGCAGGCTTGCCCC
GAATCGCTATTTTCTCCGCGCCACACCAGGGCCTGGGATTTGCAGTTCACCATTGGGGACGCGTGCCTGGCGTATCTGTC
AGTTGAATGCCGCCGCTGTCAGGATAGCTGTGAGCCAATGGCAATTATCTTTCGCCCGACGCTCTCCGGGATCTACCAGC
CGCAACTTAATAGCCAACTTTGCAACGGATGTGGAGCATGTGCAGCCAGCTGTCCGGTATCAGCCATAACTGCGGAGTAT
CTCCATGCACACTAACTGGCAAGTTTGCAGCCTGGTCGTGCAGGCCAAAAGCGAACGAATTTCAGACATCAGCACCCAAC
TGAACGCCTTTCCCGGCTGTGAAGTTGCTGTCAGCGACGCGCCGAGCGGTCAGTTGATTGTGGTGGTGGAAGCAGAAGAC
AGCGAAACGCTGATCCAAACCATTGAGTCAGTACGCAACGTAGAGGGCGTGCTGGCGGTGTCGCTGGTTTATCACCAGCA
GGAAGAGCAAGGTGAGGAAACACCATGAAACTCAGTCGTCGTAGCTTTATGAAAGCTAACGCCGTTGCGGCCGCTGCGGC
GGCTGCCGGTCTCAGCGTGCCGGGCGTTGCCCGCGCCGTTGTTGGTCAGCAGGAAGCCATCAAATGGGATAAAGCGCCGT
GCCGTTTCTGCGGTACTGGTTGCGGCGTTCTGGTCGGAACGCAGCAGGGGCGTGTGGTGGCCTGTCAGGGCGACCCGGAC
GCACCGGTTAACCGTGGCCTGAACTGCATTAAGGGCTATTTCCTGCCCAAGATCATGTACGGTAAAGACCGTTTGACGCA
GCCGCTGCTGCGTATGAAAAACGGTAAATATGACAAAGAAGGCGAATTTACCCCAATCACCTGGGATCAGGCCTTCGATG
TGATGGAAGAGAAATTCAAAACCGCCCTGAAAGAAAAAGGGCCGGAATCGATCGGTATGTTCGGTTCTGGTCAGTGGACT
ATCTGGGAAGGTTATGCCGCGTCCAAGCTGTTTAAAGCGGGCTTCCGTTCGAACAACATCGACCCGAACGCGCGTCACTG
TATGGCGTCGGCAGTAGTTGGCTTTATGCGTACCTTTGGTATGGATGAGCCGATGGGCTGCTATGACGACATCGAGCAGG
CTGACGCGTTTGTGCTGTGGGGCGCAAACATGGCGGAAATGCACCCGATCCTCTGGTCGCGCATCACTAACCGTCGTCTC
TCTAACCAGAACGTCACCGTGGCGGTGCTTTCTACCTACCAGCATCGTAGCTTCGAGCTGGCGGATAACGGCATCATCTT
TACTCCGCAATCTGACCTGGTGATCCTGAACTACATCGCCAACTATATCATTCAAAACAATGCGATAAATCAGGACTTCT
TCAGCAAGCACGTCAACCTGCGCAAAGGTGCGACGGACATCGGCTACGGTTTACGTCCGACCCATCCGCTGGAAAAAGCA
GCGAAGAATCCGGGTTCTGATGCTTCCGAACCGATGAGCTTTGAAGATTACAAAGCCTTCGTTGCTGAGTATACGCTGGA
AAAAACCGCTGAAATGACCGGCGTGCCGAAAGACCAGTTAGAACAACTGGCGCAGCTGTATGCCGATCCGAACAAGAAAG
TCATCTCCTACTGGACGATGGGCTTCAACCAGCATACCCGTGGTGTGTGGGCCAACAACCTGGTCTACAACCTGCACCTG
CTGACCGGCAAAATTTCCCAGCCGGGTTGCGGTCCGTTCTCCCTGACCGGGCAGCCTTCCGCGTGTGGTACTGCGCGTGA
AGTGGGCACCTTTGCCCACCGTCTGCCTGCGGACATGGTGGTGACTAACGAGAAACACCGTGATATCTGCGAGAAGAAGT
GGAATATCCCGAGCGGCACCATTCCGGCGAAAATCGGTCTGCACGCGGTGGCACAAGACCGTGCGCTGAAAGACGGCAAG
CTGAATGTTTACTGGACTATGTGTACCAACAACATGCAGGCCGGGCCGAACATCAATGAAGAGCGTATGCCGGGCTGGCG
CGATCCGCGCAACTTCATCATCGTCTCCGATCCGTATCCGACAGTCAGTGCGCTGGCCGCCGACTTGATCCTGCCGACCG
CAATGTGGGTAGAGAAAGAGGGCGCTTACGGTAACGCCGAACGCCGTACTCAGTTCTGGCGTCAGCAGGTACAGGCACCG
GGCGAAGCGAAATCGGATCTCTGGCAGTTAGTCCAGTTCTCCCGCCGCTTCAAAACTGAAGAAGTATGGCCGGAAGAGCT
GCTGGCGAAGAAACCGGAACTGCGTGGCAAAACGCTGTACGAAGTTCTGTATGCCACCCCCGAAGTGAGCAAATTCCCGG
TATCCGAACTGGCGGAAGATCAGCTGAACGATGAATCCCGCGAGCTGGGCTTCTATCTGCAAAAAGGGTTGTTCGAAGAG
TACGCATGGTTTGGTCGCGGCCACGGTCACGATCTCGCGCCGTTCGATGACTACCACAAAGCGCGCGGTCTGCGCTGGCC
GGTGGTGAACGGTAAAGAAACGCAGTGGCGTTACAGCGAAGGTAACGACCCGTACGTGAAAGCGGGCGAAGGCTATAAGT
TCTACGGTAAACCGGATGGTAAAGCGGTGATCTTCGCGCTGCCGTTCGAACCGGCGGCGGAAGCACCGGATGAAGAGTAC
GACCTGTGGCTCTCTACCGGACGCGTCCTGGAGCACTGGCACACCGGCAGTATGACTCGCCGTGTGCCGGAACTGCACCG
TGCCTTCCCGGAAGCGGTCCTGTTTATTCACCCGTTGGATGCGAAAGCGCGCGATCTGCGCCGTGGCGACAAAGTGAAAG
TGGTTTCTCGCCGTGGCGAAGTGATCTCGATTGTCGAAACGCGCGGTCGTAACCGTCCGCCGCAGGGCCTGGTGTACATG
CCGTTCTTCGACGCCGCACAGCTGGTTAACAAACTAACGCTGGACGCGACCGATCCGCTCTCGAAAGAGACGGACTTCAA
GAAGTGCGCGGTCAAACTGGAGAAGGTGTAAGCCATTATGTCCCGGTCAGCGAAACCTCAAAATGGTCGCCGCCGCTTTC
TGCGCGATGTCGTTCGCACAGCAGGCGGGCTGGCTGCCGTGGGTGTGGCGCTGGGGTTACAACAGCAAACCGCACGCGCA
TCTGGCGTGCGGTTGCGCCCGCCCGGAGCCATAAACGAGAACGCCTTTGCCAGTGCCTGTGTGCGTTGCGGTCAGTGTGT
TCAGGCTTGCCCTTACGACACCTTAAAACTGGCGACGCTGGCCTCTGGCCTGTCGGCGGGCACGCCATATTTTGTCGCAC
GGGATATTCCTTGCGAAATGTGTGAGGACATTCCGTGCGCCAAAGTGTGCCCGAGCGGTGCGCTGGATCGTGAGATTGAA
TCGATCGACGACGCGCGGATGGGGCTGGCGGTACTGGTGGACCAGGAAAACTGTCTCAACTTTCAGGGGCTGCGCTGCGA
TGTTTGTTATCGCGAATGCCCGAAAATTGATGAGGCCATCACCCTGGAGCTGGAGCGCAACACGCGTACCGGTAAGCACG
CCCGCTTTCTGCCGACGGTTCACAGCGACGCCTGTACCGGTTGCGGTAAGTGCGAAAAAGTGTGCGTGCTGGAACAACCG
GCAATCAAGGTGTTACCGCTGTCACTGGCGAAAGGGGAGTTAGGTCACCATTACCGCTTCGGCTGGCTGGAGGGGAACAA
TGGCAAATCGTAAACGTGACGCCGGGCGCGAGGCGCTGGAGAAAAAAGGCTGGTGGCGCAGTCACCGTTGGCTGGTGTTA
CGTCGCCTTTGTCAGTTCTTCGTGCTGGGGATGTTTTTGAGCGGTCCGTGGTTTGGTGTGTGGATCTTGCACGGCAACTA
CAGCAGTAGCCTGTTATTCGACACCGTTCCGCTGACCGATCCGCTGATGACGCTGCAAAGTCTTGCCAGCGGTCATCTGC
CTGCCACGGTGGCGTTGACCGGTGCGGTGATTATCACCGTGCTCTACGCTCTGGCAGGAAAGCGATTATTTTGCAGCTGG
GTCTGCCCGCTGAACCCGATTACCGACTTAGCGAACTGGTTACGCAGGCGCTTTGACCTCAATCAGTCTGCGACGATCCC
TCGCCACATTCGCTACGTACTGTTGGTGGTCATTCTGCTGGGATCGGCCTTAACTGGCACGCTCATCTGGGAATGGATCA
ACCCCGTTTCTCTGATGGGGCGTAGCCTGGTAATGGGCTTCGGCAGCGGCGCGCTGCTTATTGTCGCGCTGTTTTTATTT
GATCTACTGGTCGTTGAACACGGCTGGTGCGGGCACATTTGTCCGGTTGGCGCGCTGTATGGCGTGCTGGGTAGCAAAGG
TGTGATTACCGTTGCGGCCAGCGATCGGCAGAAATGTAACCGCTGTATGGATTGTTTTCATGTTTGCCCGGAACCGCATG
TGCTACGTGCCCCGGTGCTGGATGAACAAAGCCCGGTGCAGGTCACCAGCCGCGATTGCATGACGTGCGGTCGCTGCGTG
GATGTCTGTTCTGAGGATGTATTTACAATAACTACACGATGGAGTTCGGGAGCGAAATCATGAAAAGCCATGACCTGAAG
AAAGCGCTGTGTCAATGGACGGCGATGCTGGCCCTGGTGGTAAGCGGCGCGGTTTGGGCGGCTAATGGCGTCGATTTTAG
CCAGTCGCCGGAAGTATCCGGGACGCAGGAAGGGGCCATTCGGATGCCAAAAGAGCAGGATCGGATGCCGCTGAACTATG
TGAATCAGCCGCCAATGATCCCGCATAGCGTTGAAGGTTATCAGGTAACGACCAATACCAACCGCTGCTTGCAGTGCCAC
GGTGTCGAAAGCTATCGCACCACTGGCGCGCCGCGTATCAGTCCTACTCACTTTATGGACAGCGACGGCAAAGTGGGCGC
GGAAGTGGCTCCGCGTCGTTATTTCTGTCTGCAATGTCACGTACCGCAGGCCGATACCGCGCCAATCGTGGGGAATACCT
TTACCCCATCAAAAGGTTACGGGAAATAAGAGGTTATTATGGGAAATTCTGACCGTAAGCCTGGTCTGATTAAGCGCCTG
TGGAAATGGTGGCGTACCCCCAGCCGTCTGGCGCTGGGGACGCTGCTGTTGATCGGTTTTGTCGGCGGCATCGTCTTCTG
GGGCGGCTTTAACACCGGAATGGAAAAAGCCAATACCGAGGAGTTCTGCATTAGCTGCCACGAAATGCGTAACACGGTGT
ATCAGGAATACATGGATTCCGTGCACTACAACAACCGTAGCGGCGTCCGTGCGACCTGTCCGGATTGTCACGTTCCGCAC
GAGTTTGTGCCGAAGATGATACGCAAGCTCAAAGCAAGTAAAGAGCTGTATGGTAAAATTTTTGGCGTTATTGACACGCC
GCAGAAATTTGAAGCTCATCGCCTGACGATGGCACAGAATGAGTGGCGGCGCATGAAGGACAATAACTCGCAGGAGTGCC
GTAACTGTCACAACTTCGAGTATATGGATACAACCGCCCAGAAATCGGTTGCCGCGAAGATGCATGACCAGGCGGTGAAA
GATGGGCAAACCTGTATTGATTGCCATAAAGGGATAGCGCACAAGCTGCCCGATATGCGTGAAGTCGAGCTAGGTTTTTA
ACAGGGTTATTGCGTGGGTATGCTTGAAGCCAGAGAGTTACTTTGTGAGCGGGATGAACGAACCTTATTTAGTGGCTTGT
CATTTACGCTGAACGCAGGAGAGTGGGTACAAATCACCGGTAGCAACGGCGCGGGGAAGACAACGCTTCTCCGTTTGCTG
ACGGGGTTGTCTCGCCCTGACGCAGGCGAGGTTCTCTGGCAAGGGCAGCCCTTGCATCAGGTACGCGACAGCTACCATCA
AAACCTGTTATGGATAGGCCATCAGCCGGGGATCAAAACCCGGCTGACGGCGTTAGAAAATCTGCACTTTTATCATCGCG
ATGGCGATACCGCACAATGTCTGGAAGCCCTGGCGCAGGCCGGGCTTGCCGGATTCGAAGATATTCCGGTAAATCAACTT
TCTGCCGGGCAACAACGCCGCGTCGCTTTAGCGCGTCTGTGGCTGACCCGTGCCACGTTATGGATCCTCGACGAGCCTTT
TACCGCGATTGACGTCAACGGCGTCGATCGTCTGACCCAGCGTATGGCGCAGCATACGGAGCAGGGGGGGATTGTGATTC
TGACTACCCACCAGCCGCTCAACGTTGCTGAAAGTAAAATTCGCCGCATTTCACTGACGCAAACGAGGGCCGTATGATGT
TCTGGCGCATTTTCCGTCTTGAGCTGCGCGTAGCGTTTCGCCATAGCGCCGAAATCGCCAACCCGCTGTGGTTCTTCCTG
ATTGTAATTACCCTTTTTCCGCTCAGTATCGGTCCGGAGCCGCAACTGCTGGCGCGTATTGCACCGGGCATTATCTGGGT
TGCAGCCCTGCTTTCATCCTTGCTGGCGCTGGAACGACTGTTCCGTGACGATTTGCAGGACGGCAGTCTTGAACAATTGA
TGTTGTTGCCGTTACCCTTGCCCGCCGTTGTGCTGGCGAAGGTGATGGCGCACTGGATGGTAACCGGTCTGCCGTTACTC
ATCCTTTCGCCACTGGTAGCAATGCTACTGGGAATGGATGTTTATGGCTGGCAAGTGATGGCGCTGACGCTGCTGCTGGG
AACGCCTACGCTTGGCTTTCTCGGTGCACCGGGCGTGGCGCTGACAGTGGGACTTAAACGCGGTGGTGTGCTGCTCAGCA
TACTGGTGTTACCGCTGACTATCCCATTACTCATCTTTGCCACCGCCGCGATGGACGCGGCTTCCATGCATTTGCCCGTT
GACGGGTATCTGGCAATTTTAGGCGCGTTGCTGGCAGGCACCGCGACATTAAGTCCTTTTGCGACGGCGGCAGCGTTACG
AATCAGCATTCAATAACGCTGGATTACTGATTTTTGTTCGAGTCTGGTATCGAAACTATGTGGAAAACACTGCATCAACT
GGCGATCCCACCACGGCTGTATCAAATCTGTGGCTGGTTTATACCGTGGCTGGCAATTGCCAGTGTGGTCGTGCTTACCG
TCGGCTGGATCTGGGGATTCGGCTTTGCTCCGGCTGATTATCAACAGGGAAATAGCTACCGCATTATTTACCTGCATGTG
CCTGCGGCGATCTGGTCGATGGGCATTTATGCATCAATGGCGGTGGCGGCGTTTATTGGCCTTGTCTGGCAGATGAAAAT
GGCCAACCTGGCGGTGGCGGCGATGGCCCCCATTGGTGCCGTGTTTACCTTTATTGCCCTGGTTACCGGCTCTGCATGGG
GAAAACCGATGTGGGGCACCTGGTGGGTATGGGATGCACGTCTGACTTCTGAACTGGTGCTGCTGTTTTTGTATGTGGGT
GTGATTGCCCTGTGGCACGCCTTCGACGACCGCCGTCTGGCGGGCCGTGCGGCAGGTATCCTGGTGCTGATTGGCGTGGT
GAATCTGCCGATTATTCATTACTCCGTTGAGTGGTGGAACACCCTGCATCAGGGATCAACGCGGATGCAGCAAAGTATCG
ATCCGGCGATGCGTTCGCCGCTGCGCTGGTCGATTTTTGGCTTCCTGCTCCTGTCTGCCACGCTGACGCTGATGCGGATG
CGGAATTTGATTTTGCTGATGGAAAAACGCCGTCCGTGGGTGAGTGAACTGATACTGAAAAGAGGCCGTAAATGACCCCT
GCATTTGCTTCCTGGAATGAATTTTTCGCAATGGGCGGTTACGCCTTTTTTGTCTGGCTGGCGGTGGTGATGACCGTTAT
TCCGCTGGTGGTTTTGGTCGTGCACTCGGTGATGCAGCATCGCGCAATTCTGCGTGGTGTGGCGCAACAGCGGGCGCGTG
AGGCGCGTTTACGTGCTGCGCAACAGCAGGAGGCTGCATGAATATTCGCCGTAAAAACCGCTTGTGGATTGCCTGTGCCG
TGTTGGCAGGGCTGGCGCTGACTATCGGTCTGGTGCTATATGCGCTGCGCTCGAATATCGATCTCTTTTATACGCCGGGG
GAAATTCTCTACGGCAAGCGTGAAACTCAGCAGATGCCGGAAGTCGGTCAGCGTCTGCGCGTTGGCGGGATGGTGATGCC
GGGTAGCGTGCAGCGCGATCCCAATTCGCTGAAAGTGACCTTCACCATTTACGATGCTGAAGGCTCAGTGGATGTCTCTT
ACGAAGGCATTTTGCCGGATCTGTTCCGTGAAGGGCAGGGCGTTGTGGTGCAGGGCGAGCTGGAAAAAGGCAATCATATC
CTCGCAAAAGAAGTGCTGGCGAAACATGATGAAAACTACACGCCGCCAGAAGTTGAGAAAGCGATGGAAGCTAACCACCG
TCGCCCGGCGAGTGTTTATAAGGACCCAGCATCATGATGCCGGAAATTGGTAACGGGCTGCTGTGCCTGGCGTTAGGGAT
TGCGCTGCTGCTGTCCGTGTATCCGCTATGGGGCGTGGCGCGCGGAGATGCGCGCATGATGGCGTCTTCCCGCTTGTTTG
CCTGGCTGCTGTTTATGTCTGTGGCTGGCGCATTTCTGGTGCTGGTCAATGCTTTCGTGGTCAACGACTTTACCGTCACC
TATGTTGCCAGCAACTCCAATACCCAGCTTCCGGTGTGGTATCGCGTGGCGGCTACCTGGGGCGCACATGAAGGCTCACT
GCTGCTGTGGGTGCTGCTGATGAGCGGCTGGACCTTTGCGGTGGCGATTTTTAGTCAGCGTATTCCGCTGGATATTGTGG
CCCGCGTACTGGCGATAATGGGGATGGTCAGCGTCGGCTTTTTGCTGTTCATTCTCTTTACCTCTAACCCATTCTCACGC
ACGCTGCCGAACTTCCCGATTGAAGGGCGCGATCTTAACCCGCTGTTACAGGATCCGGGGCTGATCTTCCATCCGCCTCT
GCTTTATATGGGGTACGTGGGTTTCTCGGTGGCGTTTGCTTTTGCCATTGCTTCTTTGCTGAGCGGGCGTCTGGACAGCA
CTTATGCGCGTTTTACTCGTCCGTGGACGCTGGCGGCGTGGATTTTCCTGACGCTCGGCATTGTGCTCGGTTCCGCATGG
GCCTATTACGAACTCGGCTGGGGTGGCTGGTGGTTCTGGGATCCGGTAGAAAACGCCTCGTTTATGCCGTGGCTGGTGGG
GACTGCGCTGATGCACTCACTGGCGGTCACTGAACAACGCGCCAGCTTCAAAGCGTGGACATTACTGCTGGCAATCAGTG
CCTTCTCGTTGTGTCTGTTGGGGACTTTCCTCGTGCGTTCCGGCGTGCTGGTATCGGTACACGCGTTTGCGTCTGATCCG
GCGCGCGGTATGTTTATCCTCGCCTTTATGGTGCTGGTGATTGGCGGTTCGCTGCTGCTGTTTGCCGCGCGTGGACACAA
AGTTCGCTCACGCGTAAACAATGCGCTGTGGTCGCGGGAATCTTTGCTGTTAGCGAACAACGTTTTGCTGGTCGCCGCGA
TGCTGGTAGTGTTGCTGGGGACGCTGCTGCCGCTGGTGCACAAGCAACTGGGACTGGGCAGTATTTCGATTGGCGAACCG
TTCTTCAACACCATGTTTACCTGGCTGATGGTGCCGTTTGCGCTACTGCTTGGTGTCGGTCCTCTGGTGCGCTGGGGGCG
CGATCGCCCACGTAAAATCCGCAATTTATTGATTATCGCCTTCATCTCTACGCTGGTGCTGTCTCTGCTGCTGCCGTGGC
TGTTCGAAAGCAAAGTTGTGGCGATGACGGTGCTCGGCCTGGCAATGGCCTGCTGGATTGCGGTGCTGGCAATTGCGGAA
GCTGTGCTGCGTATTTCACGCGGCACGAAAACCACCTTCAGTTATTGGGGGATGGTGGCGGCTCACCTGGGGCTGGCAGT
GACAATTGTTGGCATTGCCTTTAGTCAGAACTACAGTGTTGAGCGTGATGTGCGCATGAAGTCCGGCGATAGCGTCGATA
TTCATGAATATCGCTTCACCTTCCGTGATGTCAAAGAGGTGACTGGCCCGAACTGGCGTGGCGGTGTGGCGACTATCGGC
GTAACGCGAGAGGGTAAACCGGAAACAGTGCTGTATGCGGAAAAACGTTATTACAACACTGCCGGGTCGATGATGACCGA
AGCGGCGATTGACGGTGGCATCACGCGTGACCTGTACGCCGCGCTCGGTGAAGAGCTGGAAAACGGCGCGTGGGCTGTGC
GTCTTTACTACAAACCGTTTGTTCGCTGGATTTGGGCGGGCGGGCTGATGATGGCGTTGGGCGGACTGCTGTGTCTGTTT
GATCCTCGCTATCGTAAGCGCGTAAGTCCGCAAAAAACTGCGCCGGAGGCTGTATGAAGCGCAAAGTATTGTTAATTCCG
TTGATTATCTTCCTGGCGATTGCCGCGGCGCTGCTGTGGCAGCTGGCGCGTAATGCCGAAGGGGATGATCCGACCAATCT
GGAATCGGCGCTCATTGGCAAGCCAGTGCCGAAGTTTCGCCTCGAATCACTGGACAATCCGGGGCAGTTTTATCAGGCGG
ATGTGCTGACTCAGGGCAAACCAGTGCTGCTTAACGTCTGGGCGACCTGGTGTCCGACCTGCCGTGCGGAACATCAATAT
CTGAATCAGCTTTCTGCGCAGGGCATCCGCGTGGTCGGCATGAACTATAAAGACGATCGCCAGAAGGCAATCAGCTGGCT
GAAAGAGCTGGGCAATCCTTACGCGCTAAGCCTGTTTGATGGCGATGGCATGTTAGGGCTGGATCTCGGTGTCTATGGCG
CGCCAGAAACGTTCCTTATTGACGGCAACGGCATCATTCGCTATCGCCATGCGGGCGATCTCAATCCTCGCGTCTGGGAG
GAAGAGATCAAGCCGCTGTGGGAGAAATACAGTAAGGAGGCCGCACAATGAGGTTTTTATTGGGCGTGCTGATGCTGATG
ATCTCCGGCTCAGCGCTGGCGACCATCGACGTGTTGCAGTTTAAAGATGAAGCACAGGAACAACAGTTCCGTCAGCTCAC
TGAAGAACTGCGCTGCCCGAAATGCCAGAACAACAGCATTGCCGATTCCAACTCGATGATTGCCACCGACCTGCGTCAGA
AAGTGTATGAACTGATGCAGGAAGGTAAAAGTAAAAAAGAGATTGTCGATTATATGGTGGCACGTTACGGCAACTTCGTC
ACTTACGATCCGCCGTTAACGCCGCTGACCGTGCTGCTGTGGGTGCTGCCAGTAGTGGCTATTGGCATTGGCGGTTGGGT
CATATACGCCCGCTCGCGGCGTCGGGTACGCGTGGTGCCGGAAGCGTTTCCTGAACAAAGCGTGCCGGAAGGTAAGCGTG
CCGGATATGTTGTTTATCTGCCGGGTATTGTGGTGGCGTTAATTGTGGCTGGCGTCAGCTACTACCAGACTGGCAATTAT
CAGCAGGTGAAAATCTGGCAGCAGGCCACGGCACAGGCTCCGGCGTTGCTGGACAGGGCGCTGGATCCGAAAGCCGATCC
GCTCAACGAAGAAGAGATGTCGCGTCTTGCGCTGGGGATGCGTACTCAACTGCAAAAAAATCCGGGAGATATAGAAGGCT
GGATTATGTTGGGCCGCGTTGGCATGGCGCTGGGTAACGCCAGTATCGCCACCGATGCATACGCCACTGCGTATCGCCTC
GATCCGAAGAATAGCGATGCCGCACTGGGATACGCTGAAGCGTTGACACGTTCATCTGATCCCAACGACAACCGCCTCGG
CGGCGAACTGCTGCGCCAGTTGGTGAGAAGCGACCACAGCAATATCCGTGTGTTAAGCATGTATGCGTTTAATGCCTTTG
AGCAGCAGCGATTTGGCGAAGCCGTTGCCGCGTGGGAGATGATGTTGAAACTCTTACCTGCCAACGATACTCGCCGTGCG
GTGATTGAACGTAGTATCGCGCAGGCGATGCAACATTTGTCGCCGCAGGAGAGTAAATAAAAAGTGGCCCGATGGTGATG
CCATCAGGCCAGACTGATGACAAAGTGCGCTTAGTTTATGCCGGATGCGGCGTGAACGCCTTATCCGGCCTACAAAATCG
TGTGAATTCAATAAATTGATCGATCCGCGTAGGCCTGATAAGCGTAGCGCATCAGGCAGTTTTGCGTTTGTCATAAATCT
CAGCCCGATGATAAATCCATCGGGCTATTTTTATTGTGCCCCGCGTTGTTGCAGGAACAGAATGGTGGCCGCCACGCGTG
AGCGGACATTGAGTTTACGCAGCAGATTGCGAATATGTACTTTTACTGTCTGCTCGGAAATATTCAATACCGAGGCAATC
TGTTTATTTGACAGCCCCTGTGCCAGCTCGTGCAGAACATCCAGCTCGCGCTCCGTCAGCACGCTGAAGGGATCTTCTTC
CGCGCCAAACATTTCACGTTCACGTAAGTACTGATTGACGCGTTCGCTAAAGACTTTGCTGCCTTTCGCTCCGGCACGAA
TCGCTTCCAGCAATACTTCCGGGTCGCTGTCTTTCAACAGATAACCGTCTGCGCCTGCGTCTATCAGCGCAAAGACATCG
CTGGAGGCATCGGATACGGTCAGGATAATAATTTGCGCGGTAACGCCATCCCTGCGCAAGGCATTGAGGGTATCCAGGCC
ACTCATACCTTTCATATTGAGATCCAGCAAGATCACGTCGATATCCAGTCTATTCGCCAGATCGATAGCGCTCGCGCCGT
CGCCCGCTTCGGCGACCACTTCAAAGCCAGGATCAAGCTCCAGTAACTGACGAACACCGCGTCGCATAAGTGGATGATCA
TCCACAATCATCACCTGAAAAGGCGTTGCTTCAGGCATAGTAGTCTCCTGAGGTTTTATTAGAATCATTATGTTTGAGCG
TAGCGTTGGTAACGCTACCAGGCGCGTGAATGTTACCCCATTTTATGTATGGACATGTAGTGAAAACTACAACCTTGTCC
TTCGCTTTGGCATCATTTTCATTATAAAGACGGAATTTTGCATCAGCTTCTCATCAAGAAAAACAACTAAAAAATCAATC
ACAATACTTGTGCATTTCTTTAAACAGTTTTTAAAAACTGACTCCGGGTATGGAGCTATGGGTATTTTCTGTACCCAATG
CTTTTAACAGCAATTAATTTCATAGGATGAAAGCTCAATGCATCAATCTGGTTCTGTTTCTCTTTGTCGTTCCGCAATAT
CTGTTCTGGTGGCTACAGCGTTATATTCACCCATAGCATTGGCATCAACAGTTGAGTATGGTGAGACAGTTGATGGTGTT
GTCCTGGAAAAAGATATCCAGCTGGTTTATGGGATCGCCAATAATACGAAAATCAATCCTGGCGGAGAACAGCATATTAA
AGAATTTGGTGTAAGTAATAATACTGAAATTAACGGAGGGTATCAGTACATTGAAATGAATGGCGCCGCAGAATACTCAG
TATTAAATGACGGTTATCAAATTGTTCAAATGGGTGGCGCGGCAAACCAGACTACGCTCAATAATGGTGTGCTACAGGTT
TATGGCGCAGCGAATGATCCCACGATTAAAGGCGGGCGCTTAATCGTTGAAAAAGATGGGGGGGCCGTCTTTGTCGCTAT
CGAAAAGGGAGGACTACTGGAGGTTAAAGAGGGGGGATTTGCATTTGCGGTAGATCAGAAAGCAGGCGGTGCTATTAAAA
CAACCACGCGGGCCATGGAGGTATTCGGAACAAACCGTCTCGGTCAGTTCGATATCAAGAATGGTATTGCTAATAATATG
TTGTTGGAAAACGGCGGAAGTTTGCGAGTTGAAGAAAATGACTTCGCTTATAATACCACTGTGGATAGTGGCGGCTTACT
GGAGGTTATGGATGGCGGGACTGCAACTGGCGTTGATAAAAAAGCAGGCGGGAAATTAATTGTCTCAACGAATGCGCTGG
AAGTGAGTGGTACAAACAGTAAAGGCCAATTTAGTATAAAAGATGGTGTGTCAAAAAATTATGAACTGGATGATGGTTCC
GGGCTCATTGTTATGGAGGACACGCAGGCCATTGACACTATCCTTGATGAGCATGCCACTATGCAATCGCTGGGAAAGGA
TACTGGTACGAAAGTGCAGGCAAATGCGGTATATGATCTCGGTCGATCAGACCAGAATGGAAGTATCACGTATTCCTCAA
AAGCCATCTCTGAAAATATGGTAATCAACAATGGCCGCGCTAATGTCTGGGCTGGCACAATGGTTAACGTGTCAGTCAGA
GGGAATGATGGCATTCTTGAGGTCATGAAGCCGCAAATAAATTATGCACCTGCTATGTTGGTGGGTAAGGTAGTGGTTTC
TGAGGGCGCTTCTTTTAGAACGCATGGTGCCGTGGATACCAGCAAAGCGGACGTTTCGCTCGAAAATAGCGCATGGACCA
TCATTGCCGATATCACTACGACGAACCAAAACACCCGCCTCAACTTAGCCAACCTTGTGATGTCTGGCGCAAATGTGATT
ATGATGGCTGAGACAGTGACTCGTTCATCTGTGACAGCAAGTGCGGAAAATTTCATAACGTTGACCACCAATACCCTGTC
GGGAAACGGCAATTTTTATATGCGTACCGATATGGCCAATCATCAGAGCGATCAGCTTAACGTCACTGGCCAGGCAACAG
GTGATTTCAAAATATTTGTGACGGACACGGGGGCCAGCCCGGCAGCAGGTGATAGCCTTACACTGGTAACAACGGGCGGC
GGTGATGCTGCATTTACGTTGGGCAATGCCGGAGGCGTTGTTGATATCGGTACGTATGAATATACCTTGCTGGATAATGG
CAACCATAGCTGGAGCCTCGCAGAGAATCGCGCGCAAATTACCCCTTCAACCACTGATGTGCTGAACATGGCAGCAGCAC
AACCGCTGGTATTTGATGCAGAACTGGACACCGTGCGTGAGCGTCTTGGTAGCGTAAAAGGCGTTAATTACGATACGGCG
ATGTGGAGTTCGGCAATTAACACCCGCAACAACGTGACCACTGATGCGGGAGCTGGCTTTGAGCAAACATTGACGGGGCT
GACGCTCGGTATCGATAGCCGTTTCTCCCGTGAAGAAAGCAGCACAATTCGCGGCTTGTTCTTTGGTTACTCTCATTCTG
ATATTGGTTTTGATCGCGGCGGCAAAGGTAATGTCGATAGCTATACCCTGGGGGCTTATGCCGGTTGGGAGCATCAGAAC
GGTGCCTATGTTGATGGAGTGGTGAAAGTTGATCGTTTTGCCAACACCATCCATGGCAAGATGAGTAATGGGGCAACAGC
GTTTGGCGATTACAGTAGTAACGGCGCGGGTGCTCATGTCGAGAGCGGGTTCCGTTGGGTTGACGGATTGTGGAGTGTTA
GACCCTATCTGGCCTTTACCGGCTTTACCACAGATGGTCAGGACTACACGTTATCAAACGGCATGCGCGCTGATGTGGGA
AATACCCGGATATTACGCGCTGAAGCGGGAACGGCGGTAAGCTATCACATGGACCTGCAAAATGGTACGACGCTGGAACC
CTGGCTGAAAGCCGCCGTACGTCAGGAATACGCCGATTCTAACCAGGTGAAAGTTAATGACGATGGCAAATTTAATAATG
ATGTGGCTGGAACCCGTGGCGTTTATCAGGCTGGGATAAGGTCATCGTTTACCCCGACGTTAAGCGGTCATTTGTCAGTC
AGCTATGGCAATGGCGCAGGGGTAGAATCGCCGTGGAATACTCAGGCGGGAGTGGTCTGGACGTTCTGATAACAGAAAAT
AAACAGGCCGTGATGTGTCGCGGTCTGTTTATCTAATTAATTGCAGATATAAAAAAAAACCAACCGTAAAGGTTGGTTTT
TTCTTGGGATTTTTGGTCGGCACGAGAGGATTTGAACCTCCGACCCCCGACACCCCATGACGGTGCGCTACCAGGCTGCG
CTACGTGCCGACTCGTGGCTGCTAATACTACCGTTTTCCACACCGATTGCAAGTAAGATATTTTGCTAACTGATTTATAA
TTAATCAGTTAGCGATAAAACGCTTCTCGTCTGTCAGTACTTGCAATAACAAACTTAACTGTGGTTTTTCATCTTTCACT
CTTTCACCACGTAAGTTGTAAGTGCGGTATTTACCGTTATTGTTCAGCACCAGCGTCTTTTTCGGGGTGGTTATTGCCAG
CGTATCGTTATCCGCTGCGGTTACCCAGTAATGACGGCGTTGAGGGTTGAACAAATCCTGACCTTGCGAATATTCGCTGG
CAGGTGTGCTGACATGTAGCAGGCGTTGCATCAGCGTCGTCATCAGATCGGTATGATCAGTCAGCGCATTAATACGCTGC
GCCGGCGTGCCTGGCCAGTGAATCACTAATGGCACCTGCAGATGACCGTGGGACCAGTCAAAGGTTTCTTCCTCTTCGCT
CAGTGGAATACCCCGACCGGCAGTGATAATTACAACCGTATTGTCCAGTTTGCCAGAATCACGCAGTGCATTGAGCACGC
GGTTGATCTGGTCATCGACATTGCCTGCCGCCCGGCTATATTTCCGTGCAAATGCCTGCTGATTGCTGTCGTCAATGTTA
GTACCATTGAAAGAAACCCACGAGAACCAGCGGTTATCTTCTTGTGCGTAGCGTCCCAGCCAGTTGATCCACTGCGTGGC
GGTCTGCTCGTCGGATTGGGTGCGTACGCTCGGCATCGAGAAGTCTGACAACAATGCCTGGCGATACAGCGGGCTGGTAA
AGCCATCTGATGAGAATAACCCCAGCTGATAGCCTTGCTGATTAAGCGCAGTAATTAATGCCGCAGGCGTACGGGTCGAC
AGAATGCCGTCCATATAGCTCGGCGAGATGCCATAGAACAGGCCAAAGATGCCGTTGTCTGTAGTGTTGCCGGAGCTCAT
ATGGCGCGTGAACGAAATATTTTGCTCAGCAAAACCTGCCAGCGCAGGCATCTGCTTCTCGAAGCGTGAGTAGTTCAGGC
CATCGACAGTAATCAACAGCACATTCTGCCCGGTGCCCATATCGCGATAGCGCAGTTCGCTTAACGGATACTGAACGGAA
ACGGCGTCTGGATTACCTTGCTCAATAAGACGGCGTTGATACTCCTGCGCATCAAGCAGACCATGCTTCTCAAGAAAACG
TCGCGCCGTCATCGGGTACGAAAGCGGCAGGTTAGCGCGCTGCATGGTGATCGGGCGATAGAAGTTGGCATCGGCCCAGA
TATACACCACATGCGAGGCGATAAAGGCGATAAATAAGAATGCGGCCAGCGGACGCGCGAAGCGCCGACGACGCGTCAGG
CTGCGCAGCTTTTGCCAGCTCCACGTCGCAAACACCAGTTCAAGCAATAAAATAACCGGCACGCTAATGAACATCAGCTG
CCAGTCGCGCGCCATCTCATTTTCGTCTGGATTAATAACCAGTTGCCAGACGATGGGATTAAGATGGAGATGGAAACGAG
TAAAGACTTCGCTATCGATCAGTAATAGCGTCATTCCCGCCGTTGCCAGAATGACGGACAAAAACCTCATCAGCCTCTGG
GAGCCGACGATAAAGGTCAGCGGGAAGAGGATCAGCAAATAGGTGGCGAAGACCAGGAAGCTGAAATGGCCGATAATGCT
TACGTAGGAATAAATGCGACCAGCAAGCGTTGTCGGCCAGTCGGCGATAAACAGGTAACGGCTGCCAATGACGAGCGAAA
GCAGAATATTGAACAGTGCAAACCAGTGCCCCCAACTGACCATTTGGGAGACTTTTTCACGGTAGCGCTGACGATGAGTT
ACCATAACCTGTTATCTGTTTCCCTTAGTGCGCTTTTTCTTCGTTGATAGAGGACTGTAAGGCGCGGGCAAAAGAGTTGG
CAATTGCCTGGCGTTGGGCCGGGGCAATGCTGGTGTTGATAAGGTTAGTGACCATGTTGCCTAACACCATCAGGGAAAGG
TCGGTCGGAGCCTTATGTTTTTCCAGTACGTTGAGCAGCTCTGCGAGCAATTGTTCAACCTGTTCATCACTGTAGCGGGA
AATTTGTGGCATAAATCGAAATCAGTTAGTTGATGAAAGGGCAACATATTACCGTAGCAACGGTTTTTTTTCTGCTTTTT
TATGCGTTAAATCATTCTCGTTACGCTGCCTTCTGTAAAATGACCGCCATCTTTTATTGCGTCGCTTAACCGGCGGTGGT
TGAATACCGCCCGGTCTTAAAGGAGAGTTTATCATGAGTCTGGATATCAACCAGATTGCTCTGCACCAGCTTATCAAGCG
TGATGAGCAGAACCTTGAGCTGGTGTTGCGCGATTCATTGCTGGAACCGACAGAAACCGTCGTTGAGATGGTGGCAGAAC
TGCATCGGGTCTATAGCGCCAAAAATAAAGCTTACGGCTTGTTTAGCGAAGAGAGTGAACTGGCGCAGACGCTGCGCTTA
CAGCGTCAGGGCGAAGAGGACTTTCTGGCATTTAGCCGCGCGGCAACCGGCCGCCTGCGTGACGAATTAGCGAAATATCC
TTTTGCTGACGGTGGATTCGTGCTGTTTTGCCACTACCGTTATCTGGCGGTGGAGTATCTGCTGGTGGCAGTCCTGAGCA
ACCTGAGCAGTATGCGCGTTAACGAAAATCTCGACATCAACCCAACCCATTATCTTGATATCAATCATGCGGATATTGTT
GCGCGTATCGATTTAACCGAATGGGAAACCAATCCAGAGTCGACCCGCTATCTCACTTTCCTGAAAGGGAGAGTAGGGCG
CAAAGTGGCGGATTTCTTTATGGATTTCCTCGGGGCCAGCGAAGGATTGAACGCGAAAGCGCAAAACCGTGGGCTGTTGC
AAGCGGTTGATGATTTCACTGCCGAAGCACAACTGGATAAAGCAGAGCGACAGAACGTGCGCCAGCAGGTTTATAGCTAC
TGTAATGAGCAGCTGCAGGCAGGCGAAGAGATTGAACTGGAATCGCTGTCGAAAGAGCTGGCAGGCGTAAGCGAAGTGAG
CTTCACGGAGTTTGCGGCTGAAAAAGGCTACGAACTGGAAGAGAGCTTCCCGGCAGACCGTAGCACACTGCGTCAGTTGA
CAAAGTTTGCCGGTAGCGGCGGTGGCTTGACTATTAACTTTGATGCGATGCTGTTAGGTGAGCGGATTTTCTGGGATCCA
GCAACCGATACCCTGACCATTAAAGGCACGCCGCCGAATTTGCGCGACCAATTGCAGCGCCGGACGTCTGGCGGCAATTA
ATCGGTTTTGTGTTCTGAATGCCAGATGCGGCGTGAACGCCTTATCTGGCCTGCAAAAAATAGCAATACCGTAATCAGGC
ATAATCTGCAGATACAAAAAACCCCGCCGGAGCGGGGTTTTTTACAACTTATTCAGCAATTAAGCGCGAACGAAGTCGAT
GTGCTGCAGCTTCGGTTTGTACGGGTGACGCTGTACGTCCTGAGCTTTAACTTTGATTTCTTTACCGTCAACAACGATGG
TCAGAACTTCGCTGTAGAATTCAGCTTTAGCTTGCATGTTCATGACTTTGTCGTGATCCAGCTCGATAGCCAGCGGTGCT
TCTTTGCCACCGTAGATGATTGCCGGGAACTTGTTAGCGGCACGCAGGCGGCGGCTCGCACCCTTACCCTGCTCTTTACG
TACTTCTGCGTTGATAGTAAACATTTCTTTCTCTCTTAAATTAATCCTGCTACAGGCGACCCAGCAACAGGTAAGTGATC
TGCTTTGCGTATGCAAAAGCGGGCGAGATTCTATACTCAATCGCCTTATACATCAATCAAAACTACCATTAACCGCGTAA
TTCGTGCGCCCGACGAAAACGACCTTCGTAATCGAACACTTTTTCACGCACTTGCCAGTACTGACCTTTCATGCGGGCGA
CGACAAAATCCGGATGTCGCAGTAAGGCTTGCTGGGCGAGGATATCGGCGGCGGTGATCCAGCGCAGAGGGATGCCCGGT
GTGCGCGTATGCGGGCGGATAAAAAGCTGCTCGAAAGCAGTTCGCTGGGCGGGCGTTTGCAGACGGAAACGCTCACTCAC
ATCCGCGCCGTCTTCATCGTAATAGGTGATTTTCAACCATTCGCCTTTCTCGTCGTGCCCATGCTGCAAAGACATGCCGC
TACAGCGTAATACCAGCGCATCTTTCAGTCGTAGCGCCGCTTTTAACATATCATCCGGATCAACCAGTACCGTGTCACAT
TCGCGGCAGCGGCGAGCGGCAATATCATTTTCTGCGTTACATTGCGGGCAATTTTTAAAACGGAAACGGAAGTCACACTG
TTCGCGATGACCGTCGTCATCTTCAAACCATCCCTGACAGCGGCGACCAAAGTGTTCAATCAATGTCCCGTCGGCGGTCG
TTTTCCCCCAAAAGGTGTTGGCAAAACCGCAGGCAGGGCAGAAAACCTGTACCGGAACGTTGTCACTTTTGCCTTTCGGT
GTACCAACTTCCGGCGCGTAGAGATCGTGAGGATTACCCGCATAATCAAGAATTAAACAATCAGTCTTGCCCGGAGCGAG
ACGCAGACCGCGCCCGACAATTTGTTGGTAAAGACTCACTGATTCGGTAGGGCGCAGAATGGCGATAAGATCGACGTGCG
GGGCGTCAAATCCGGTGGTCAGTACCGCGACGTTGACCAGATAGCGAAAACGCTGGGCTTTAAAATCTTCAATTAACACA
TCGCGCTCAGCGCCGGGGGTGTCGCCAGTAATCAGTGCAGCATCTTCGGCGGGTAGTAATCCCACAATCTCTTTTGCGTG
TTCAACGGTGGCGGCGAAAATCATCACCCCTTTGCGCGTTGCAGCAAACTCCATAATCTGGCTGATGATGTGCGGGGTAA
TACGTTGTTGTTTTTTTAGCTCGCGGTTGAGATCGGCTTCGCTGAACAGCCCATTACTCTGTGCCTGCAAGCGGCTGAAA
TCGTATTGCACTACTGGCATATCCAGTCGTTCTGGCGGCGTCAGATAGCCGTGTTTAATCATATAACGCAGCGGCAGTTC
ATAAATGCAGTCACGGAAAAGGGCTTTCTCATCGCCGCGTACCATGCCGTGATAATGGAACTGGTAGATCCAGCCTTTGC
CCAGTCGAAAAGGCGTGGCAGTCAGCCCCAGCAGGCGTAAGTGGGGATTCACTTTTGTCAGGTGAGTGAGGATTTGCTGA
TACTGGCTCTCTTCATCGTCACCAATACGGTGACATTCATCGACAATCAACAGCGAAAATTCACCCTGAAAGGCATCAAG
ATTACGGGCGACCGACTGCACGCTGCCAAATACCACTTTACCGTGGCTCTCTTTGCGCTTTAGCCCGGCGGCAAAAATAT
CGGCTTCCAGCCCCAGCGCCTGATACTTTGCATGGTTTTGCGCCACCAGTTCTTTAACGTGTGCCAGCACCAGCACGCGA
CCACGAGCCAGCCGCGCAAGTTCCGCTATCACCAGGCTTTTACCTGCACCGGTGGGCAGCACGATAACGGCAGGGGTTTT
ATGACGACGAAAATGGTTGAGCGTGGCATCCACGGCTTCTTGCTGATATGGGCGGAGTGTAAAAATCATGGTCTCGCGTA
GGTAGATTATTCTGCTAATAGTATGCCACGGTTCTTTTTCCCTTGAGGGAAGTTATTAGACCGCTATACTGGGCAGACAA
CAGTTCAGATTTTCGGGTCAATGCCCGACCTCCGTTTTTACAGGCAAAATCACACACATGCGACTTGATAAATTTATCGC
ACAGCAACTCGGCGTTAGCCGTGCTATTGCCGGGCGTGAAATCCGCGGCAATCGTGTCACCGTCGATGGCGAAATCGTCC
GTAATGCAGCGTTCAAACTGCTTCCTGAACATGATGTCGCTTACGATGGCAACCCACTGGCGCAGCAACACGGTCCACGT
TACTTCATGCTCAATAAGCCTCAGGGCTATGTTTGCTCCACGGACGACCCTGATCACCCAACGGTGCTCTATTTTCTAGA
TGAACCAGTGGCGTGGAAACTGCACGCCGCAGGGCGGCTGGATATCGATACCACCGGTCTGGTACTAATGACAGATGATG
GTCAGTGGTCACACCGCATTACTTCTCCGCGCCATCATTGCGAGAAGACTTATCTGGTGACGCTGGAATCACCCGTAGCT
GACGATACGGCAGAGCAATTTGCTAAAGGCGTGCAGCTGCATAACGAAAAAGATCTCACTAAGCCGGCGGTGCTGGAAGT
GATTACCCCAACGCAGGTTCGTCTGACCATCAGCGAAGGGCGTTATCATCAGGTGAAACGCATGTTCGCCGCCGTGGGTA
ACCATGTGGTTGAGCTGCATCGTGAACGTATTGGCGGCATTACGCTGGATGCTGATTTAGCCCCCGGTGAATATCGTCCG
TTAACTGAAGAAGAAATTGCCAGCGTCGTCTAACTTTTCAATGACTTTCAGGAGCCCGTTGTGACCACCCGACAGCATTC
GTCGTTTGCTATTGTTTTTATCCTTGGCCTGCTGGCCATGTTGATGCCGCTGTCGATTGATATGTATCTGCCCGCGCTAC
CGGTAATTTCAGCGCAGTTTGGCGTACCGGCGGGCAGTACGCAGATGACCCTCAGTACTTATATTCTGGGCTTTGCGTTG
GGGCAGTTAATCTACGGGCCGATGGCAGACAGCTTCGGGCGTAAGCCGGTGGTTCTTGGCGGTACGCTGGTGTTTGCCGC
CGCCGCGGTGGCGTGTGCGTTGGCACAAACCATCGATCAGCTGATTGTGATGCGTTTCTTCCACGGGCTGGCGGCGGCTG
CGGCCAGCGTGGTTATCAACGCCTTGATGCGTGATATCTACCCGAAAGAAGAGTTCTCGCGGATGATGTCGTTTGTCATG
CTGGTGACAACCATTGCACCGCTGATGGCACCGATAGTTGGCGGCTGGGTGCTGGTGTGGCTGAGCTGGCATTACATCTT
CTGGATCCTCGCCGTGGCGGCGATTCTGGCTTCGGCAATGATCTTCTTTCTGATCAAAGAAACCTTACCACCGGAGCGTC
GCCAGCCTTTTCACATTCGTACCACTATTGGTAACTTTGCGGCGCTGTTCCGTCATAAGCGTGTCCTGAGTTATATGCTG
GCCAGTGGTTTCAGCTTTGCCGGGATGTTCTCGTTCTTAAGCGCCGGACCGTTTGTCTACATTGAAATTAACCACGTCGC
GCCGGAAAACTTTGGTTATTACTTTGCACTAAACATTGTTTTCCTGTTCGTGATGACCATCTTTAATAGCCGCTTCGTCC
GCCGTATTGGCGCGTTAAATATGTTCCGCTCGGGGTTGTGGATACAATTTATTATGGCAGCGTGGATGGTCATCAGTGCG
CTGCTGGGGCTGGGATTTTGGTCGCTGGTGGTTGGCGTTGCGGCGTTTGTGGGCTGCGTGTCGATGGTGTCATCCAATGC
GATGGCGGTCATTCTTGATGAGTTTCCCCATATGGCGGGAACGGCATCTTCACTGGCAGGAACCTTCCGTTTTGGCATAG
GGGCAATTGTTGGCGCATTGCTTTCTCTTGCGACCTTTAACTCTGCATGGCCGATGATTTGGTCAATTGCATTCTGCGCA
ACCAGCTCCATTCTCTTCTGTCTGTACGCCAGTCGGCCGAAAAAACGGTGATCTATTGCACAACGAGGAAGCTAAAAGGC
TTCCTTTGTTGATGCATGTCAACCACAAATCTATCATTCCCCCGATATATGTTTATTTTATGTAAAATCAATTTATGTAA
AAAGTCACATCATTGTAGTTAAAAAGGTTGAGTTAGATCGCAGAAACGGGTACATATAGCCCCGCAAACGTGACCACGCC
CGCAGATATTACTTAAATCAGAGCCATAGAGGCCACGCAGGCGAGGCATCAATCTTTACGATCTGTATAAAGACGGATTG
TTGATGATGTGTTAAAATTGATGTAAACAAATTGTGAAGTAAATGTGCTTCCGGGGAAAATAAGTGACTTCATTACAACT
CTCAATCGTCCATCGACTGCCGCAGAACTATCGCTGGTCTGCTGGTTTCGCAGGTTCGAAGGTTGAACCGATTCCGCAAA
ATGGACCGTGCGGTGACAACAGCCTGGTGGCGCTTAAATTGCTTAGCCCGGATGGTGATAATGCATGGTCGGTGATGTAT
AAACTAAGCCAGGCGTTAAGCGACATCGAAGTTCCATGTTCGGTGCTGGAGTGTGAAGGTGAGCCGTGCCTGTTTGTAAA
TCGCCAGGACGAGTTTGCTGCAACATGCCGATTGAAAAATTTTGGTGTGGCAATTGCCGAACCCTTTTCAAACTACAATC
CTTTTTAAGCGTCAGCTCAACGCCAGTAGCTGACGCGTATACTCCTGCTGCGGTGTGGCAAACACGCGCGCGCACGGTCC
TTGTTCCACTACTTCCCCTTGTCGCAGTACGATAACCTGATGACATAACGCGCGGACAACGTGCAAATCATGGCTGATAA
ACAAATAGGCCAGTTGATGCTTTTGTTGCAATGATTTCAATAGCGTCAATATTTGCGCCTGTACCGTTTTGTCGAGTGAT
GATGTCGGTTCATCAAGTATGATCAGCGAGGGCTTAAGAATTAATGCCCTGGCAATCGCAATACGTTGTCGCTGACCACC
AGAGAACTCCGCCGGATAACGGTGGCGTGTTTCAGGATCTAATCCCACTTCATGCATCACGGCTATCACTTGTTGTTCGC
GTTGTGCGGCAGAAAGCGTCGGCTGGTGAACCCGTAAGCCTTCCTCAATAATCTGCAAAACGTTGAGTCGTGGGTTGAGC
GAGGAGTTTGGATCCTGAAATACCACCTGAATGCGATGACGAATAGGTAACAGCTGGCGGCGATTTAAATTTTGCAGTGG
CTGACCGTCAAAGACGATGCTGCCCTGAGAATTAATCAGTCGCAGCAGCGCCAGTCCCGTCGTGCTTTTCCCGGAACCGG
ACTCGCCCACTAAACCCAGTGTTTCACCCGCCCGTAGCGTAAAACTGATGTTTTTCACCACCACATTATGATCCACAATG
CGCTTCAAGATCCCTTTGCGAATGGGGAAGGCAACCTGAAGCTGTTCAACATCCAGCAACGTTGAGGCAGGTTCTGGCAA
CGGCACCGGGTCGCCTGACGGTTCACTGTTGAGTAGCTTTTGTGTGTAAGGATGAGTGGGTGAGGCAAATAGCGTAGCGG
CGTTATTTTGCTCGACACAGCGACCATTTTGCATTACCGCCACGCGGTGGGCCAGTTTTCTGACAATGCTGAGGTTATGA
GTAATAAACAGCATGCCCATATTCAGCTCGCCTTGCAGTTCGCGCAACAGCTGTAAAATCTGCGCCTGGACAGAGACGTC
CAGTGCGGTGGTTGGTTCATCGGCAATTAATAATTCCGGTCGCGTTAACAGCGCCATCGCAATCATCACCCGCTGGCGTT
CGCCGCCGGAGAGCTGATGCGGATAATCTGTCAGCCGTTTTGCCGCCTGGCGGATACCGACGCGATCAAGGCAGTTAAGA
ATTTCGCCACGAGCCGCTTCCCGACGCATCCCGCGGTGGAGTGAAAGCACTTCATAAAGCTGTTTTTCCAGGGTATGCAA
TGGATTTAACGACACCATCGGCTCCTGAAAAATCATGGCGATCTTATTACCGCGTACACCGCGCAACGTTTGATCGCTGG
CATGAAGCAGCGATTCGCCATGAAAACGAATATCGCCGGAGAGATATTCAACCGGCGGGGAAGGGAGCAGACGTAAAATT
GACAGCGCGGTAACGCTTTTGCCAGAACCTGACTCACCCACCAGCGCCAGCGTTTCGCCAGCCTCAATCTGTAGTGAAAC
ATCATTGACTACTGTACGTACGGTTTGCTGATGGCGAAAACCCACCGACAAATTTTCAATCGCTAACAGAGTTTGCGTCA
TGCTACACCGCCTTATTAGGATCAAATGCGTCGCGGACGGCTTCACCAATAAAGATCAGCAAAGACAATAATATCGCCAC
CGACAAGAAGGCGGTGATCCCAAGCCACGGAGCCTGAAGGTTATTTTTCCCTTGTAACAGCAGTTCACCGAGTGACGGTG
AACCGAGCGGCAGACCGAAGCCGAGGAAATCGAGTGAGGTCAGGGTGGTTATCGAACTACATAAAATAAACGGTAAAAAG
GTGAGCGTAGCGACCATGGCATTAGGCAACATATGACGCAGGATGATACTGCGATCGCTGACGCCAAGCGCCTGCGCCGC
ACGAATGTAGTCGAAATTACGGGTACGTAAAAACTCCGCCCGCACCACGCCGACCAGACTCATCCAGCCAAACAAGACAG
TAATTGCCAGCAGCCACCAGAAGTTAGGCTGTACGACGCTGGAAAGTAAAATAATCAAAAACAGCGTCGGCATCCCCGAC
CATACTTCAATAAAGCGTTGCCCCCAGAGATCGACTTTACCGCCGTAATAGCCTTGTAGCGCCCCCGCCAGCACGCCCAT
CACGCTGGAACAGAGAGTCAGCATCAGGCCAAACAGAACCGAGATCCGCGTGCCATAGAGAATACGTGCCAGCACATCGC
CGCCGTTGGCATCCGTTCCCAGCCAGTTTTGCCGGGAGGGTGGAGAAGGGAAGGGCTTATCGGTAGCAAAGTTGATACTG
GTAGCACCAAAGCGAATCGGTGCCCACAGTACCCAGCCATTATTTTCCAGCCGTTGTTTCAGCCACGGGTCCTGATAATC
AGCCTGACTTGCCAGCGGGCCGCCAAAATCGCTTTCGCTGTAGTTTTTCAATAACGGGAAATACCAACTGCCGTCATAAC
GTACCAGCAACGGTTTATCGTTGGCGATAAGCTCAGAACACAAACTCAAACCAAACAAGACGAGGAAAATCCATAACGAC
CAGTAGCCGCGACGGTTATGACGAAAACGCGCCCAACGGGCCTGATTGACGGGGCTGAGTCGCGACATTAACGTCCCTCA
AAATCTATACGCGGATCGACCAGCGTATAGCTGATATCACTGACAATATTCAGCAGCAGGCCAATCAGGGTGAAAATATA
CAAGGTACCAAACATTACAGGATAATCGCGCGAGACGGTCGCTTCGTAGCCCAGTAAGCCAAGACCATTGAGTGAAAACA
TCACCTCAATCAGCAGCGAGCCGGTAAAAAACATGCTGATAAACGTCGCCGGAAAACCAGCAATCACCAGCAGCATGGCG
TTGCGGAACACATGTTTCCAGAGAATGTTTTTCTCACTTACCCCTTTCGCACGCGCGGTCACCACGTATTGCTTGCGCAC
TTCATCAAGGAATGAGTTTTTGGTCAGCATGGTCAGCGCCGCAAAGCCACCAATCACCGTCGCCAGCACCGGCAGCGTGA
TATGCCATAGATAATCGGTGATTTTCTGATACCACGGCAGCGAATCAAAGTTAGCGGAAACCAGGCCGCGTAGAGGGAAC
AGGTCGAAATAGCTGCCGCCTGCGAAGAAGACAATCAGCAGGATGGCAAACAAAAAGGCCGGAATGGCGTAGCCGATGAT
GATAAATGCGCTACTCCAGACGTCAAAGCGGCTCCCATTATAAACAGCTTTGCGAATGCCTAACGGAATCGACACCAGAT
AGATAATCAGCGTGCTCCACAATCCGAGGGTGATGGAAACCGGCAGACTGTCTTTAATCAGCGTCAGCACCGAGGCGCTG
CGAAACAGGCTATCGCCAAAATCAAAGCGGATGTAGTCCCAGAGCATTTTGAAGTAACGTTCGTGGATCGGCTTATCGAA
ACCGTAGCGATGAGTGATCTCGGCGATCACTTCTGGATCTAATCCGCGTCCGCCACGGTAATTACTGTCGCTGATATTAC
CGACGCCCGTTTGCGCATGGCTGGCGCGAACGCCTTCACCGCCTGCGCCGGGTAATACTCCGGCATTACCAAACTCAATG
GCGGCGATGGCCTGGTCGACCGGACCGCCAGGCGCAATTTGCACGATGAAAAAGTTGATAGTGATAATCGCCCATAACGT
TGGGATCACCAGCAACAGACGGCGAATCAGATATGCGCCCATCTACTCTCCCTGTTGTCTGGCTGACGGCAGTTTGGCCG
CTTTATTAACGTCATACCACCAGGTATCGATACCCAGGCTGTAAACAGGGCGTACAGCGGGTTGGGAGAATTTATCCCAC
CAGGCGAGACGGTCTTCCGCCATGTACCACATTGGCAGCATGTAATAATTCCACGTTAATACGCGATCCAGTGCTCGCCC
TAACGGCAGTAATTTTTCTTTATTTCCCTGCGCGGCAATAATTTGGTTGATCAGCGAGTCGATAACCGGGCTTTGCACGC
CGGGGGCATTATAAGTGGAATTGATATATTCCGATGACCAGGAAATCTGTAAATCGGAACTGGGCCACGGCATCGCCCGC
CATACGCGCGGCATCATGTCATAGTCGCGACTGCGCATGCGGTTGGTGATTTGCGAGTTATCCACCTTGCGAATGTCCAT
GTTGATACCCAGCCGTTGCAGGCTGTGCTGGAACGGCAATACCCACTGACTATTGCTGCTTGCGGGAAGCAATAATTCAA
AGCTGAGTGGCTGACCCGTTGTGGCATTAACGCGTTGCTGACCCTTCAGCACCCAGCCCGCTTCGTTGAGAAGTTTGTCG
GCTTTTAACAGGTTGTCACGATCGTAGCCATCGCCTTTAGATACCGGCGGCTGGTAGATTTGTGTGAAGACTTCTGACGG
TAGATCTTTTTTCATTGGTGCCAGAAGCACCAGCTCCGCGGCGTCGGGGTAATTTCTGGCCGCGTATTCGGTATTCTGAA
AATAACTGTTCGTGCGACTCCAGGCATTGTAAAACAACGCCTTGTTCATCCATTCAAAGTCAAAGGCGAGAGTGATCGCT
TCCCGGACCCGGCGATCGCTGAATACCGGACGTTGGATATTAAACGCCAGCCAGCGCGTATCCTGGGCTGATTCGTTCTT
TTGCTCATCTTTGATGATGTATTTTTTATCGAAATTTTTACCGGTATAACGCGTGGCCCAGTTTTTAGCGTCGTTTTCCA
TACGCAAATCAAAGGCACCTGCTTTAAACGCTTCAAAGGCGACGTTATCATCGAGGTAATAATCGTAGCGAATGGTGTCG
AAATTCCAGCGTCCACGGTTTACCGGTAAGTTTGCTGCCCAGTAATCTTTCACGCGGGAATAGACAATATTTTGCCCCAT
TTTCCAGGACGTAATGCGGTACGGACCACTGGCAAGCGGAGGCGTGGCGAGCGGATCGCTAAGTTTGTGATCCTTCCAGT
ACTTTTCTGGAAATACCGGCAGCGAAAACAGACTCAACATATCTTCTTTGCCGGGTTTAGCTAACTCAATGCGCACGGTT
AACGGCGCAATGGCTTTGACGGTGGTGCCTTTGTAGACCAGACGAAATTGCGGCACGCCTTCGGTCATAAATTTTTGAAA
AGTAAACTCTACATCGCGGGCAGTAATGGGCGAACCATCATGAAAACGGGCGCGCGGATTAATAGCGACCTCCACCCAGG
AATAATCGTCAGCATAGCGTGCACTTTCAGCAATCAGCGGGTAATAACTGCCTGGTTCGTCATCGGAAGTCGTAAATAGC
GTGTCGTACAACTGCTCGGTGCGTGCGCCCGGGTTGCCGCGCAGTGCATAGCGGTTGAAATTATCGAAGGTGCCGAGGGC
TGACAACGTTATCTGCCCACCTTTTGGCGCGGCGGGGTTCACATAATCAAAATGGTTGAAATTAAACGCGTACCGGGGTT
CGCCCAGCACGGCAAAGGCATAGCTTTCCTTGATAGCCTGCGCCTGCGCACCGAAGGTGAACAGAGCGATAAACAGCAGC
AGTATGCGCACAATCATCTGCAACGGATTTCCTTTTACTCATCATTAGCCGCAAACCGGCATGCTTTCACTATGAATAAT
AAGGGACGTAAGCACACCTTACCACTGCGGCCTATACGGTTTCTTCAGCCAGCGAACAAAATCGTCCAGCGGTAACGGGC
GACTAATCCAGTAGCCTTGCATGAAATTAACGCCGCGTTCGCTTAGCCATCGCGCTTGTTCCGGCGTTTCGACCCCTTCA
GCAACTGTCAGCATATTGAGACGTTTCGCCAGCGTCAGCACCGCGTCAAGTACGGGTGAAGTGATCGTTTCCGTACCGAT
GGCGTTGATAAATCCACGGTCAATTTTCAGATAATCGAGCGTAAAACGCTCAAGATAGATAAGCGCGCTGTGCCCGGTGC
CGAAGTCATCAATAGCAATTTCTATGCCGACCGAGTGCAGCCAGGCGAAGAGTTGTGTGGCTTCTTGCTCTTTCAGCATA
TCGCGCTCGGTAATTTCCAGCACAATCTGGAAATGGTGTGCGGGTAGGGAGGTGAGCAGTTTCTGGATATCTGCTTTAAA
GCTTTCGCTGTGCAGATGGTCCGGCGCAATGTTAATGCCAAATTTGACGCCTACCGGCAGCACTTTTTCTAATTCTGCGG
CATCGCGGGCAATTAACTCAAACAGGTGCTGAGTCAGCGGTACAATCATCTTTTGCGATTCGGCAAAGTTAATGAAGGCA
TCCGGGGGAATTTCTCCCGCGACAGGATGCCGCCAGCGTAGCAGTACTTCCAGGCCCGTTACTCGCAAAGCTTGTGTATC
CACCACCGGTTGATACGCCACGTAAAATTGTTCGCGCTTGATGGCGGTCATGATTTCTCTGCCGGGGCGCATACGTACGC
TCATCAGGTAATAGCAGAGCAGGCCAACGACAGTTCCACTCATGCCGCCCAGTAAAAATGCGTACCACACATCGTTCCAT
GTCCAGTCATCTGCATAAAGCCGAACGGTCAGAGGAATGCCCGCAATTTTAGTTTCACGGACTGGCATGTCGGTTAATTC
GTTAACGTTCATCAAACGTGAAGAAAAGGTAGATAGCGCAGTATTGCCAATAATGAGGGCGACGCCATCGTAATCTTCCT
GCCGTGAACTATAAAAGAGTGAAGGCGTCAGGTTGAGATTCAGAGCGGCAAAGACGCCGCTATTTTTCAGCAAAGGGTTG
CGATACCAGATGACGATTGCGGGTTTGTTCGGCACCATCGGCGTGCCGGGTAAGATCGCCATATCGACATTTTTATTAAT
GTCGAGCGCCGGAATCAATTCATTGAGTGGAATGTCCATCTCACCGGTCGCAGATGAACAGAATGTTTTTTTATCTTTCA
CCAGCACAAACGTTCGGACATTCATGCTAAACGCCGCGCGGGCGGTCAGTTCGGGGTTAGCTTGCTGGCAGGTATCTAAG
GTCAGCGGCTGGAGCCGGTCAGTAGTGGATTTCAGGTCGGCAAAATAGGTATCGAGATACTTTTGTACGTCGGTAATCAG
TGTGTCGTATTTGACTTCGTGCTTATGCCAGGCCACTAAAAACTGAAGGCAACTCACCAGTATCGCAATCATTACGCCTG
CAACAATGCAGGTAAGCAGGAGCTTACGTCCAGAATTGGGAGCGCGTATGAACATGATTCCGTTAATTTCCTGAAATTAC
GACAACATTTAAAAGATAACAATGACCGGACTATAGCCTGGATCAAGACGCGGAAACATCATTTTCTCTGATGAATGAAA
ACAAAAAAGCACTGCCTAAGCAGTGCTTTCAGTTAACTCGTCAGGATAGCCAAGGGATTGCATCCAAACGGTTTATTAGC
TGCGGCTGAGAACCCGGCGTGCTTCGTTGTAACGCTTCTTCCAGTACGGTTCATTCATGCTGGAAATAATAACACCACTG
CTGGTGGAAGCATGGACAAACTGATTGTTGCCGATATAAATACCGACATGGCGTCCCGTTGAACCGGCACGGAACAGAAC
TAAATCACCCGTACGCAAATTACTGCGGGAAACAGATTTACCCATTTCCTGCTGTTCGTAAGTCGAACGCGGAAGTTCTA
AGCCAAATTGCTCACGGAATGTACGCTGTACGAAACCAGAACAATCGATACCTTTTTTAGTGCTGCCGCCCAGACGATAA
CGTACGCCTTTCCAGTCAGCATACTGATCCATAATTCGCGATTTTACGTCGACATTACGAACCAGGTTTTCAAATTCATC
CTGAGAAGCTTGCAGTGATGATGTTTCACTACCCACTGCACGTGTCTCAGGATGCATATTCTTTGCGGTGTTATTTGCAC
TACATGCAGAAAGCAGAACCGCTACTGCAATCGCGGGGATCCCGCGCAAGATATATCTCAAAATCGGTTGAGATTTGACC
ATGTTGTTTGTTTTCCCTTGAAGTCCTTAACGACAAATATCGTTATAAAAAAATGCCAAGCGACACGAGACTAATTACCT
GGGCATGTTGAAACAATTCCTTAAGGCCAAATCTGTGGACTAACGCACAAAATTATATGCTGTGAGGATAATCTACCGCC
GAGGCAAAACGAGTTCGAGATTACCCGATTGGTGCGGTCTTGGCGAGCGGTTTTACATGATTTTTTATAAGAAAAAGTGA
TACAGAAAGTTAATAAGCGGGATTGCTCAATTAAAGTACGATTGAGTGAAACGCATGCAATCCATTCATTTACTTAGAGA
ATGATTTTTGCTTTCGATGCATGAAAGCACGGTGCGCATCATCAGGATTATCCTCACTATAAAAATAAACCTGATGATGT
TAATTACTGTGAGTTATTTGTTTTGGAAATGTTTGTTTTTTCCCGGTAGTGATTTGTCAAAAAAGGTGATTAATCGATCA
CTTAATGGCGTCAGCAACACCCAGGGCAAACCGATCAATATCACGGTCATCGAACCGACAATGATGTCAGTAAACCAGTG
TGCGCCAATCATTACTCTGGGAAACGCAAAAACCACAAAAATAATAAGGGCGATAAGACCTGCAACTTTGCCGAAATAGC
GCCACATGAATGCCGAAAAAATAAGCAGCATCATGCCGTGATCGCCGGGAAAGCTATCTCGTGAGGCATCTTTCGTGGGG
ACAGAGAGCAGCAGTTCGCTGACGCGGTTAATATCGGTAAAAGTCAATGTTGGGCTGGCCCGTTTTACAGGAATTAATGC
CTGACCCAGCTGGTTTAATACCACTGCAGTTAATAGCATGACCAGACCAATAATCACGATACGTCGTCTGCCTGGGGCGT
TTTCTTTCAGCCAGAAACTCAGCATCAACATTCCCATCGCCAGCAGTGAACAACCGTCGAAAGCGCGATTGTTGGTCAAT
GCAACCAGCCACAAAAAGGCCTTACTTTCGACCAGTTTCTGATTAAAGAAATAAAAAATATCCGCATCAATCGGCAACCA
GAATCCATGATTAACGGGAATATACCAGGAAAGAAACAGCGCGAGGCCGACAATATTCAACAACACTATTTGCGGCAAAT
TTTTAATCATATTTTCTCTAATTATCTTACTGAAAAACGCAGGCAACCTTACGCGGTAGTCGCTAAACGAAGCTTCAACA
GCGCGCTCTGCAAGGCATTCCAGTCAGCTTCGCTGCTGGAAATCAGCTCAATACGGCTGTCCGGTGGCGCAACGTTTTGC
GTTTCAATGTGCAGGTCATCGCCCTGACGGTTGATTCGCACCAGCCCTTCGGGAATACGCAGCACGCCTTTGACGCGTTC
CACCGGTGCAAGTCGCGCCCATTCCAGAATGCCAATGGTGTCGAATACCGTATCAGCGTCGAATATCCAGCCGCAGGCCT
GATATCCTTGCCCGCTGTTCAGACTGCGACGCCAGCGTTGATGCTCTGGCAGGCTTAACGCTGCTAACCCTTTTTTCACG
ACATGCTGATGAGAATGCGCGGCGCTGGCGGGCAACTCGGCTAAATTGCGACGCGGCAAATCCAGAAGATGACCGTCAAC
TTTCCCATGCTCACTGTGAATTAATTGCCGATCGCCACCATTTTGCTGCCACCAGCGCTGTAGCGCTTGCTCGCTTTCAG
GTGTCGCACGGTCGGATTTATTGGCGACAATGATGTCTGCGGCAGCCAGCTGGTCACGGAAGTTTTCATTGCTGGCGCTT
TTTTCGTCCAGCAGCAGGCGTGGATCGAGAATGCACAACGTGGCGCGCAGATCTATCCACGGTTCATAGACTGGTGCGGT
TAACAGATCGAGGATCTGTTTCGGATGGCCCAGCCCGGTCGGCTCTATCAACAAGCGGTCTGGTTTTCCCTGACGCAGTA
AGGTATTCAACCCTACCTGCATGGGTAAACCATTAACGCAGCACATGCAGCCGCCGGGGATCTCTTTCAGCAATGCGCCG
CTATCGGCGAGCAAAGCACCATCAATTCCGACTTCCCCAAATTCATTAACCAGTACCGCCCATTTTTCGTTGGGATCTTT
ATGGGCTAACAGATGAAGAATCGACGTAGTTTTCCCGCTGCCGAGAAAACCGGTGATGAGGTTGGTCCTGGTCACAACGG
CTCCGCAATACTCTGATAAGTTAACTGAGCGTTAATCCTGGCTAAAAACGGCAGAAAAGAGAAGGGGAGAGCGGACGAAG
GTGAGCTTCATCCGCTTTAACCGCAGAAATCGTTAAATTTTGAGGGTGTTTAATAGCGCCTGATGCGCGCCGAATTGTGC
GATTTGTTGCCAGGCTTGTTCGATGGCCTGCACAAAATGCGGGTTATCTGGCAGATCATCACCGAAAACTTCACGCAGGG
AAAGCAGGGCGGTGACGCGTTGCTCACTGCTGCTGCCCGCAACAAGATCGCGAATTTTATCGCTAAGCGGATCGCGAACA
TCAATGGCATTTCCGGCATCATCAACGCCGCTGACGTAACGCATCCAGCCTGCAACGCCTAATGCCAGCAACGACCAGTC
CGTTTCGCGCCCCAGATGTATGCGAATACCTGCCAGCATACGTTGCGGTAATTTCTGGCTGCCATCCATCGCGATTTGCC
AGGTCTTATGTTTCAGCGCCGGATTAGCAAAACGTGCAATTAACTTATCCGCATATTGTGTTAAATCGACATCTTTAATT
TGCAGTGTCGGCGCTTGCTCATCCAGCATTAATGTTCTGGCAGCATGGCGAAATGCGCGATCCTGCATGCAATCACTGAT
ATGGGCGAATCCTGAGAGGTAACCCAGATAAGCGAGAAAAGAGTGGCTGCCATTAAGCATACGCAGTTTCATCTCTTCCC
ATGGCAGGACATCATTCACCATTTGTACACCTGCGACTTCCCAGGCAGGACGCCCAGCGACGAAGTGATCTTCCACCACC
CACTGGATAAACGGTTCGCAGCTAATCGCGCAGGGATCATTTACCCCCAGATGCTGGCTGATTTCTGCCAGTGATTCGTC
GGTTGCAGCCGGAACAATGCGGTCGACCATGGTTCCCGGAAAACTGACGTGTTCTTTTATCCACCCGGCGAGTTCTGGCG
AACGTTTTTCTGCCATTCCCAGCACCGCGTTTTTCACCACATGGCCATTGTCGGGAATATTGTCGCAGGAGAGCACGGTA
AACGGTGTAAGGCCGCGCTCACGGCGGCGTTTCAGTGCTTCGACGAGAATACCTGGCGCGGAGTGAGGTTCTTCAGGGTT
TTGTAGATCGTGAATAATCCGCGGATTGCTGGTGTCGAGTGCACCGGTGGCCGGGTCAATACAATAGCCTTTTTCGGTAA
TCGTCAGGGAAACAATTGCCACCTGTGGCTCGCAAAATTTCTCAATAATTGCCGCTAAGGAATCCAGTTTTGCATTCAGG
CATTCGTGAACGGCACCGACAATTATCGCCTGATTGCCGTCCGCCCCTTTCTCCAGCACGGTGTATAAATGGTTCTGTGC
GCGGAGCTGGCTCATCAGTTGATCACCGCTGAACAAGCTGATTTCACAGATCCCCCAGTCACCGCCCTGGGCATTCAGCA
CACGATCGGTCAGTAACGCCTGATGTGCGCGGTGAAAGGCTCCAAAGCCAAAATGAACGATACGTGATTGCAACTGCTGG
CGATCGTAGCGTGGAGCGTGTACATGATGCGGGAGCGTAACGGAGGCGATTGTATTCATAGGAGTCACGTCTTAGTAACG
ATTAATTAACAATGACAGTGTAAAGTTATATGACAGCAATTGAAATTGGTCTGGATTGTTAATGCGATGAAGTGTGAGGG
CGATCAATCAACGAGTGAAAATTGAGGGCGTAAGGTGTTCAGGAAGCACAAAATAGAAGATTGGTATAATAAATTAAAAA
AGGGACAGCCTGAGCTATCCCTTTTCTGCATGCGGCTGAAGTTAGTCAGCACGACCCATATAACGGCGTTCTTCGATATG
GATACGAATTTTTTCGCCCGGGCTTAAGTATTCTGGTACCTGAATCACCAGACCAGTGCTCAATGTCGCCGGTTTGTTAC
GGGCGCTGGCAGATGCCCCTTTGATGCCTGGTGCAGTTTCAACGATTTCCAGATCAACGGTCTGCGGCAGCTCAAGCGCC
AGCAGTTGACCGTCCCAGGTCAGCACCTGCATGTCCGGCATGCCGCCCTCTGGCATAAACAGCAACTCTTCTTCAATCTG
ATCTTTGGTGAAGGTATACGGGGTATAGTCTTCTTTATCCATAAAGACATATTCGTTGCCATCGACATAGGAGAAGTCAA
CGTAACGGCGGGTCAGCGTCACGGTGTCAACGATATCATCTCCTTTGAAACGCTCTTCTACTTTCAGCCCGGTACGGACA
TCAGAAAAACGCATTTTGTACAGCGTAGCGGCACCGCGGGCAGTGGGCGACTGAATATCAATGTCCTTAACCAGCAGCAG
TTTGCCGTTGTAATTCAGTACCATACCTTTTTTAATTTCGTTCGCTCTTGGCATCGAAAAATTCCTGTAGTCGAAAATGT
CAAAAATATCGCGACAAAGTACTCGCGACGGGCCTTTCGGGCAAGTGGTATTCGCACTTTTGCTAGTGCAAAAAAGGTGG
TACTGTGCGCGCTCATCAATCCGGTGGTTAACCTTAAGAGAACAACGTATGGAATGCCGTCCGGGTTGCGGGGCGTGTTG
CACTGCCCCTTCAATTTCCAGCCCTATTCCCGGTATGCCAGATGGCAAGCCCGCCAATACGCCCTGCATTCAGCTTGATG
AACAGCAACGCTGTAAAATTTTCACCTCGCCACTGCGACCGAAAGTCTGTGCAGGCTTACAAGCCAGCGCTGAAATGTGT
GGTAACTCGCGTCAGCAGGCCATGACCTGGCTTATCGATCTGGAAATGTTGACCGCGCCTTAAACATCTTTAATCCGCAG
TAAGCAAAACAGAGTGGCGATAATCATCACCATCGCAAACCAGAACACAGCGTGATAATTCCAGATCTCGGCGACGATGC
CCGCCACTGATCCTGCGATGATCCAGCCCACGCGCGACGTGTTGGTATAGAGCGTGGTGGCTGAACCTGCCTGACCGGGC
ATCAAATCCTGAAAATAGAGCATCCCGATGCCGCCCAGAATGCCAATAAAAATAGCATTTAGCAGCTGCAAGCCCAACAG
AATGATAGGTGAATGCGCCATCAGCATTCCTGCGTAAAAACAGACGCCACCCACGGCAGCAACGCGCATTAAGAAACGCT
TACCCAGACGTTTGGCGAAATATCCGGCAATCAACATCGTCGGGATTTCCAGCCCGGCGGCGGTCCCCATCATCACACCG
GCCAGTTTCTCGGGAAGATGCAGTTCGTTGATAATAAATAGCGGCATGTTGATGATGTACAGACTGTTCGAGCCCCACAT
CAATGTACAAATGACAAACAGCAGCAGCGTATCGCGACGGTTACGGCGCGGCGCTTCAACCGTGCCGGTCGCCAACGGAA
GCTCTTTTTGCATCGACGGTAAAAACAGCCACACCATCACGCCGCAAACAATAAATGCTACCGCTGCGCTCAGATACATT
ACCGTAAAGCTGAAACCCATCGCTAAGGCATAAGCCAGCGGTGGGCCAATGACCCATGCCAGTGAAACCTGAGCGCGTAA
AAAAGAGCTGAACATCACCGCCTCACGTCCGGTTTTGTCGGCATGTTCACGGGCAAGGGCAAACATTTGCGGGTTAGCGG
TCGAGCCAAAGCTGCTAAGAAAGACGCCAACGAATAGCAACACAAAGTAGTTGCGATTCCAGGCAAAAAGGGTGCAGGCC
AGCACGCCTAACAGGCAGCAAAAGACAATCAGCGATTTGCGATCGCCGCGCTTATCAGAGCGCCCGGCGAGAAACTGACT
CACCAGAATCCCAATGACAGCGCTGCCGGTAAAGAAGAATCCCACCATCGCCGGACGGGCATGTACTTCATCGGTAAGAA
AAATACTGAGTGTCGGGGTTTGCAGAGCGCCCGCAATACCGGTGAGAAAGGCAACGATTAAAAACGCCGTCGAGGTCAGG
TCAAACGATTTCGCGCTGGAGACTGCGGGGGAGTTATGCATGCTGGTCGATCATTGGAAGAGGAAGACGCGGAGTTTACG
CTGCTTGTCAGAAAATAAACAGACAGCGAAATCAAAAGCGCCACGAATAATCAAAATGCCATTTCACTGTTGCTGATTGG
CTGCTGACGCTGCTGAAATGAAATTGCTGATAACGGATTTTTCCATCAGCAGTTCGGAAAAATGACAAAAAATTGTGCAG
CACATCAAACTTTTGCTCATAACTTTACGGCTTTCCTTGCGTGCTGAAACAGAAGTATTATGCTTTCTTGAAACGTTTCA
GCGCGATCTTGTCTTTAACCCTAAGCCAGGTTGGCGCTTTTTTTCTCATAGAAGCTGAATCGTTTCAATTCAGCAAGAGA
GGAGAACTATGTTCCAGTTATCCGTACAGGACATCCATCCGGGCGAAAAGGCCGGAGACAAAGAAGAGGCGATTCGCCAG
GTCGCTGCGGCGCTGGTGCAGGCCGGTAATGTAGCAGAAGGCTACGTCAATGGCATGCTGGCGCGCGAACAGCAAACCTC
AACGTTCCTCGGCAATGGTATTGCTATTCCACACGGCACTACCGACACCCGCGATCAGGTGCTGAAAACCGGCGTTCAGG
TATTTCAGTTCCCGGAAGGCGTCACTTGGGGTGACGGTCAGGTAGCGTACGTAGCGATCGGTATTGCTGCCAGCTCGGAT
GAGCATCTGGGCCTGCTACGCCAGCTGACCCACGTACTGAGCGATGATTCCGTTGCTGAACAACTGAAGTCAGCAACAAC
AGCAGAAGAACTTCGCGCATTGCTGATGGGCGAAAAGCAGAGTGAGCAGCTGAAGCTCGACAACGAAATGCTGACACTGG
ATATCGTCGCCAGCGATCTGCTGACTCTTCAGGCGCTGAACGCTGCGCGTCTGAAAGAAGCGGGGGCAGTTGACGCCACT
TTCGTCACCAAAGCCATCAATGAACAACCGCTGAACCTCGGACAGGGCATCTGGCTGAGCGATAGCGCCGAAGGCAATTT
GCGTAGCGCGATTGCGGTAAGCCGTGCGGCAAATGCTTTTGATGTGGACGGCGAAACGGCAGCCATGCTGGTGAGTGTGG
CGATGAATGACGATCAGCCCATTGCGGTTCTTAAGCGTCTCGCTGATTTGTTGCTCGACAATAAAGCTGACCGCTTGCTG
AAAGCGGATGCGGCAACGTTGCTGGCGCTGCTGACCAGCGATGATGCGCCGACCGACGACGTGTTAAGCGCGGAGTTTGT
GGTGCGCAATGAACACGGCCTGCATGCTCGTCCAGGTACCATGCTGGTCAACACCATTAAACAATTTAACAGTGATATTA
CCGTGACAAACCTTGATGGTACCGGCAAACCGGCAAACGGACGTAGTCTGATGAAAGTTGTGGCACTTGGCGTTAAGAAA
GGTCATCGCCTACGCTTTACCGCCCAGGGTGCAGATGCTGAACAGGCGCTGAAAGCAATCGGCGACGCTATCGCTGCTGG
TCTTGGGGAGGGCGCATAATGAGCAGACGTGTTGCTACTATCACCCTTAATCCGGCTTATGACCTTGTTGGTTTCTGCCC
GGAAATTGAACGCGGCGAAGTGAACCTGGTGAAAACCACCGGTCTGCATGCGGCGGGTAAAGGCATCAACGTGGCCAAAG
TATTAAAAGACCTGGGAATTGATGTCACCGTTGGCGGCTTCCTCGGTAAAGACAATCAGGATGGTTTTCAGCAACTGTTC
AGCGAGCTGGGCATTGCCAACCGTTTCCAGGTTGTACAGGGGCGCACCCGAATTAACGTTAAGCTGACGGAAAAAGACGG
CGAAGTGACTGACTTCAACTTCTCGGGTTTTGAAGTCACTCCCGCCGACTGGGAACGCTTTGTGACTGATTCTCTGAGCT
GGCTCGGTCAGTTCGATATGGTCTGTGTCAGCGGAAGCTTACCGTCAGGCGTCAGCCCGGAAGCGTTCACCGACTGGATG
ACTCGCCTGCGTAGTCAGTGTCCTTGCATTATCTTTGATAGTAGCCGTGAAGCGTTAGTAGCAGGTTTGAAAGCGGCACC
GTGGCTGGTGAAACCTAACCGCCGCGAGCTGGAAATCTGGGCAGGCCGTAAACTGCCTGAAATGAAAGATGTGATTGAAG
CTGCGCATGCGCTGCGTGAACAAGGTATTGCGCATGTCGTTATTTCACTGGGTGCCGAAGGCGCGCTTTGGGTTAATGCC
TCCGGCGAATGGATCGCCAAACCACCGTCAGTCGATGTCGTAAGCACCGTTGGCGCAGGGGATTCTATGGTTGGTGGCCT
GATTTATGGCTTGCTAATGCGTGAATCCAGTGAACACACACTGCGTCTGGCGACTGCTGTTGCAGCCCTGGCGGTAAGTC
AAAGCAATGTGGGTATTACCGATCGTCCGCAGTTGGCCGCAATGATGGCGCGCGTCGACTTACAACCTTTTAACTGACAG
CAGGAGAGGCATAATGAAAACGCTGCTGATTATTGACGCTAATCTCGGTCAGGCACGCGCCTATATGGCGAAGACCCTGC
TGGGCGCGGCGGCGCGAAAAGCAAAACTGGAAATCATCGACAATCCGAACGACGCAGAAATGGCGATTGTTCTCGGTGAT
TCCATCCCGAATGACAGCGCGCTGAACGGTAAAAATGTCTGGCTGGGCGATATTTCCCGGGCAGTTGCGCACCCTGAGCT
GTTCCTGAGTGAAGCCAAAGGCCATGCGAAACCTTACACTGCGCCGGTCGCTGCGACAGCACCGGTTGCCGCCAGCGGTC
CGAAACGCGTAGTTGCGGTGACTGCTTGCCCGACTGGCGTAGCACACACCTTTATGGCGGCTGAAGCCATTGAAACCGAA
GCGAAAAAACGTGGCTGGTGGGTGAAAGTTGAAACCCGTGGTTCTGTTGGTGCGGGTAATGCAATCACCCCCGAAGAAGT
AGCCGCAGCGGATCTGGTGATTGTGGCGGCAGATATCGAAGTGGATCTGGCGAAATTTGCGGGTAAACCGATGTATCGCA
CCTCTACCGGTCTGGCGCTGAAGAAAACCGCGCAGGAACTGGATAAAGCGATTGCTGAAGCAACGCCGTATGAACCGGCG
GGCAAAGCTCAAACGGCGACCACTGAAGGTAAGAAAGAGAGTGCAGGCGCTTATCGTCACTTGCTGACGGGCGTCTCTTA
CATGCTGCCGATGGTCGTTGCAGGTGGTCTGTGTATCGCGCTTTCTTTTGCTTTTGGTATCGAAGCGTTTAAAGAGCCGG
GTACGTTGGCAGCGGCGCTGATGCAGATTGGTGGTGGTTCAGCCTTTGCGCTGATGGTGCCGGTACTGGCAGGTTACATT
GCCTTCTCCATTGCCGATCGTCCGGGTCTCACGCCGGGTCTGATTGGCGGTATGCTGGCGGTCAGCACCGGTTCTGGCTT
CATTGGCGGTATTATTGCGGGCTTCCTGGCTGGTTACATTGCGAAGTTAATCAGTACGCAACTGAAACTGCCACAGAGTA
TGGAGGCGCTGAAACCGATCCTGATCATTCCGCTAATTTCCAGTCTGGTGGTCGGTCTGGCGATGATCTACCTGATCGGT
AAACCGGTTGCTGGCATTCTCGAAGGGTTGACTCACTGGCTGCAGACCATGGGGACTGCGAATGCGGTTCTGCTGGGGGC
GATCCTCGGTGGCATGATGTGTACTGACATGGGCGGTCCGGTAAATAAAGCAGCGTACGCATTCGGTGTGGGTCTGCTGA
GTACTCAAACCTATGGCCCGATGGCGGCGATTATGGCGGCAGGTATGGTGCCACCGCTGGCAATGGGCCTGGCAACAATG
GTGGCGCGTCGCAAATTCGACAAAGCGCAGCAGGAAGGTGGCAAAGCCGCTCTGGTACTGGGACTGTGCTTTATTTCGGA
AGGTGCAATTCCGTTTGCTGCTCGTGATCCGATGCGTGTGCTGCCGTGCTGTATCGTGGGTGGGGCGCTGACTGGCGCAA
TCTCAATGGCGATTGGTGCGAAACTGATGGCACCGCACGGTGGTCTGTTTGTTCTGCTGATCCCTGGCGCTATTACGCCG
GTACTGGGTTACCTGGTAGCAATTATTGCCGGTACGCTGGTGGCGGGTTTGGCCTATGCCTTCCTGAAACGTCCGGAAGT
GGACGCAGTAGCGAAAGCCGCGTAATAAAAGGTGTGTTACAGGGCAGAAATTTACTGCCCTGTATCATTGGATGAGCGCA
AAGAGAATGACCGGTTTGTGAATGTAATTTTATGAATTTAAATGGTTTTATCTTTCAGTAGAAACCTGAAACGTTCATCA
AATACTAAGGTTATTTCCTCAAGGGCAGATTCTTTTCTGCCCTTTTTTAGTGTTCATGTTCTGTGCATCCCGTCACAAAT
TCCTCGCTTTTGTAATTCAGGCATTTAATCGCATTTTGTGAGCCTGCTCAAATCTGCCTATTTTGCCTCTCTGGCGGTAA
TTTACTTTACGTAAAACATGCATACTATGAGCACATGTTTAAATATGAACACATGTTTAAACCGTCTTTGCAGTATCTAT
ATTCTTGTGGATTGACAGGGTTGGTAATTTTTACCAGAGGACGTGCTATGCGCGAAAAGGATTATGTCGTAATTATAGGT
TCGGCGAATATTGATGTCGCCGGATATTCACATGAATCATTAAATTATGCGGATTCAAATCCAGGTAAAATAAAATTTAC
GCCTGGTGGAGTAGGGCGCAATATTGCACAAAACCTGGCGTTGCTGGGTAACAAAGCCTGGCTACTGAGCGCCGTAGGCA
GTGATTTTTATGGTCAATCGCTGCTAACGCAAACCAATCAATCAGGCGTTTATGTCGATAAATGCCTGATTGTGCCGGGA
GAAAATACGTCGAGTTATTTATCATTACTCGATAATACCGGTGAAATGCTGGTTGCTATAAATGACATGAATATTAGCAA
CGCTATTACAGCTGAATATCTCGCACAGCACCGTGAATTTATTCAGAGGGCAAAGGTCATTGTCGCGGACTGTAATATCA
GTGAAGAGGCACTGGCATGGATTCTGGATAATGCCGCCAACGTACCTGTATTTGTCGATCCGGTTTCCGCGTGGAAATGT
GTCAAAGTGCACGACCGTCTAAATCAGATCCACACTCTCAAGCCAAACCGCCTTGAAGCGGAAACCCTGAGTGGGATTGC
GCTGTCAGGGCGTGAAGATGTGGCAAAAGTTGCTGCCTGGTTCCATCAACATGGCCTGAACCGACTGGTATTGAGCATGG
GCGGCGATGGCGTTTATTACAGTGATATCAGCGGTGAAAGTGGCTGGTCTGCCCCGATCAAAACCAATGTTATTAATGTT
ACCGGAGCGGGCGATGCCATGATGGCGGGACTTGCTTCGTGTTGGGTAGACGGAATGCCGTTTGCCGAATCTGTTCGTTT
CGCACAGGGATGTTCGTCAATGGCGCTCTCCTGTGAATACACCAATAACCCCGATTTATCGATTGCCAACGTTATATCGT
TAGTGGAGAACGCAGAATGTCTGAATTAAAAATTTCCCCTGAATTATTACAAATTTCCCCGGAAGTGCAGGACGCTTTAA
AAAACAAAAAACCGGTTGTGGCGCTGGAATCGACCATTATTTCTCACGGGATGCCGTTCCCACAAAATGCCCAGACCGCA
ATTGAAGTTGAAGAAACTATTCGTAAACAGGGCGCTGTACCTGCCACTATCGCCATTATTGGCGGCGTGATGAAAGTGGG
TTTAAGCAAAGAAGAAATTGAATTACTGGGTCGTGAAGGGCATAACGTGACCAAAGTTAGTCGTCGCGATTTACCTTTTG
TTGTTGCCGCCGGAAAAAATGGCGCAACCACTGTGGCTTCAACGATGATTATTGCGGCGCTTGCCGGAATTAAAGTATTT
GCCACCGGGGGAATTGGTGGTGTGCATCGCGGGGCGGAACATACCTTCGATATTTCTGCCGATTTGCAAGAACTGGCAAA
TACTAATGTCACCGTTGTTTGTGCCGGGGCGAAATCTATTCTCGATTTAGGATTAACCACTGAGTATTTAGAAACCTTCG
GTGTGCCGTTAATTGGCTATCAGACTAAAGCGCTGCCTGCGTTTTTCTGCCGTACCAGCCCGTTTGACGTCAGCATTCGT
CTCGACAGCGCCTGTGAAATTGCCCGTGCAATGGCGGTGAAATGGCAAAGCGGGCTGAACGGTGGCCTCGTGGTAGCGAA
CCCGATCCCGGAACAGTTTGCGATGCCAGAACACACTATCAATGCGGCGATCGATCAGGCGGTAGCTGAAGCTGAAGCGC
AGGGTGTTATTGGTAAAGAAAGTACGCCATTCCTGCTGGCGCGCGTTGCTGAACTGACCGGCGGTGACAGCCTGAAATCC
AACATCCAACTGGTGTTCAACAACGCCATTCTGGCGAGTGAAATTGCCAAAGAATACCAGCGTCTCGCGGGTTAATTTCT
GACGGGCAGAAAGCCGTCGCCCGTACTCATCAAACATACCAAAACCTGGCGCTGACGCCGGGTTTACTGGCATGAAGGGA
AAATCATTATGGACATAATGAGAAGTGTTGTGGGGATGGTGGTGTTACTGGCAATAGCATTTCTGTTGTCAGTGAATAAA
AAGAGCATCAGTTTGCGTACGGTTGGAGCCGCACTACTGCTGCAAATTGCTATTGGTGGCATCATGCTCTATTTTCCGCC
GGGAAAGTGGGCTGTAGAACAGGCGGCATTAGGCGTTCATAAAGTGATGTCTTACAGTGATGCCGGTAGCGCCTTCATTT
TTGGTTCGCTGGTCGGGCCGAAAATGGATGTCCTCTTTGACGGTGCGGGTTTTATCTTCGCCTTTCGCGTACTCCCGGCG
ATTATCTTCGTCACTGCGCTCATTAGTCTGCTGTACTACATTGGCGTGATGGGGCTGCTGATTCGCATCCTTGGCAGCAT
TTTCCAGAAAGCCCTCAACATCAGCAAAATCGAATCTTTTGTTGCGGTTACCACTATTTTCCTCGGGCAAAATGAGATCC
CGGCGATCGTTAAACCGTTTATCGATCGCATGAATCGCAACGAGTTGTTTACCGCAATTTGTAGCGGGATGGCGTCCATT
GCGGGTTCGATGATGATTGGTTATGCCGGAATGGGCGTACCAATTGACTACCTGTTGGCGGCATCGCTGATGGCGATCCC
CGGCGGTATTTTGTTTGCACGTATTCTTAGTCCGGCAACCGAGCCTTCGCAGGTCACATTTGAAAATCTGTCGTTCAGTG
AAACGCCGCCAAAAAGCTTTATCGAAGCGGCGGCGAGCGGTGCGATGACCGGGTTGAAAATCGCCGCCGGTGTGGCGACG
GTGGTAATGGCGTTTGTCGCAATTATTGCGCTGATTAATGGCATTATCGGCGGAATTGGCGGCTGGTTTGGTTTTACCAA
TGCTTCTCTGGAAAGTATTTTTGGCTATGTGCTGGCACCGCTGGCGTGGATCATGGGTGTGGACTGGAGTGATGCTAACC
TTGCGGGTAGCCTGATTGGGCAGAAACTGGCGATTAACGAATTCGTCGCTTACCTGAGTTTCTCCCCATACCTGCAAACG
GGCGGCACGCTGGGAGTGAAAACCATTGCGATTATCTCCTTTGCGCTTTGTGGTTTTGCTAACTTTGGTTCTATCGGTGT
TGTCGTTGGCGCATTTTCGGCTATTTCGCCAAAACGTGCACCGGAAATCGCCCAGCTTGGTTTACGGGCGCTGGCAGCAG
CAACGCTTTCCAACCTGATGAGCGCGACCATTGCCGGGTTCTTTATTGGTTTAGCTTGAGTTTCATTGCCGGATGTACTC
GCTTATTAAGCGTTGCATCCGGCAATCGCGCTATTGCAAATAATTTTTACTGCATCATCCCGGAGAATTTATTCTCCGGG
TCCATCTCCAGCGCCAGTCCTGACAACTGCCTTTTGTTTTTAATGAGATACCCTTTCTTGCTTTTAATTAATAAACCGTC
GTGAATGAATTGCGCGAGAACATATAAAAGATGTCGATAAGAAACGCCTAAATACTCTGCCGCTTGCGTATGCTTTTCGT
GATAAAGATCACCTTCTTGTGAGAGTAATATAAATGCTGCCAGGCGATTCACTAACGGAAATGATTGGTTCTGAGTTAAA
GAAACAATATTACGATAATTTTTATGACTTAAGGTGACGCAAAGTTTTCGTAAAAATAGGGTGTCGTTTAATAACAGCGG
ACGGTAATGTTTCATAGGGAGCGCAAGGCACCAACACTCTTCAATCGCCTGTACTGCACGTGGTTCATGGTCTTTATCGA
TTAACTCAATCTCGCCAATAAAACAGGGGGCGGCAAAGAAATCGATCAGCGACACGCGACCATTAGCTAGCGTGGCGTAA
AGCCTGGCGCGGCCTCGCGTCAGGTAAAACAGCCAGGACGGCTGTTGCCCTTCCTGCACAATGTAGTCACGCGCTAAAAA
ATGAAACAGCCGCGTATCGGCTGAAACATCCGTTAAAAAGCAATCCTTAAACGCGGATTCACTCATCAATTGCAGCTTAA
GATCATTATTGTGGATTTCTTTCACGATGTTTATCCGCTGTGAGATTTCTCATATTTAGCATACGTACGCTGTTGTTAAG
ATTCAATCATCGGCCCGGTCGAAATTTCTTTGCTGTAGAAAAAAATAACGCAACTGGAAACAGAGGAAATAAACAATGGA
AAAGAGAAAAATTATTCTGGATTGTGATCCGGGTCATGATGATGCTATTGCTATAATGATGGCGGCGAAACATCCGGCGA
TTGATTTATTAGGTATCACCATTGTTGCGGGTAATCAGACGCTTGATAAAACATTAATTAATGGCCTGAATGTTTGCCAG
AAACTGGAGATTAATGTTCCGGTTTATGCGGGGATGCCGCAACCCATTATGCGTCAACAAATCGTTGCCGATAATATTCA
CGGTGAAACCGGACTGGATGGCCCGGTATTCGAGCCGCTGACCCGCCAGGCAGAAAGTACCCACGCGGTGAAATACATCA
TTGATACCCTGATGGCAAGCGATGGCGATATCACTCTGGTGCCGGTTGGTCCGTTGTCAAATATCGCGGTGGCAATGCGT
ATGCAACCCGCAATCCTGCCCAAAATCCGTGAAATTGTGCTAATGGGCGGCGCTTACGGTACAGGCAACTTCACGCCATC
TGCCGAGTTCAACATCTTTGCTGACCCGGAAGCCGCACGCGTGGTGTTCACCTCTGGCGTTCCATTAGTGATGATGGGCC
TCGATCTCACCAACCAGACCGTTTGCACCCCGGACGTGATTGCACGAATGGAAAGGGCAGGCGGCCCTGCCGGAGAGCTG
TTCAGCGACATCATGAACTTCACTCTCAAAACCCAGTTCGAAAACTACGGCCTGGCTGGCGGCCCGGTGCACGACGCCAC
CTGCATCGGTTATCTGATTAACCCTGATGGCATTAAAACCCAGGAGATGTACGTCGAAGTGGACGTCAACAGTGGCCCTT
GCTATGGGCGTACCGTCTGCGACGAGCTGGGCGTTCTTGGCAAGCCCGCTAATACCAAAGTCGGCATCACTATTGATACC
GACTGGTTCTGGGGCTTAGTCGAAGAGTGCGTGCGCGGCTACATCAAAACCCATTAAGTGTTGATAACAAGCCGGGTCAG
TATCGCAAGATGCAGGCCCGGCTATTTCTGAGGGGCAGAAAGCCGTCGCCCAATATGACATGAAGAGATAATAACTATGG
ATGTCATGAGAAGTGTTCTGGGAATGGTGGTATTGCTGACGATTGCGTTTTTACTGTCAGTAAACAAGAAGAAGATCAGC
CTGCGTACCGTTGGCGCGGCGTTAGTGTTACAGGTTGTGATTGGCGGGATTATGCTTTGGTTACCGCCAGGGCGTTGGGT
CGCTGAAAAAGTCGCTTTTGGCGTGCATAAAGTGATGGCGTACAGCGACGCGGGTAGCGCATTTATCTTCGGTTCGCTGG
TCGGGCCGAAAATGGACACGCTGTTTGATGGCGCAGGATTTATCTTTGGTTTCAGGGTGTTACCGGCAATTATCTTCGTC
ACCGCGCTGGTGAGTATTCTCTATTACATCGGTGTGATGGGGATCTTAATTCGCATTCTCGGCGGTATATTCCAGAAAGC
ATTAAATATCAGCAAGATCGAGTCATTCGTCGCGGTCACTACCATTTTCCTCGGGCAAAACGAAATTCCGGCGATCGTCA
AACCCTTTATCGATCGTCTGAATCGCAATGAATTATTTACAGCGATTTGTAGTGGCATGGCCTCGATTGCTGGTTCGACA
ATGATTGGTTACGCCGCACTGGGCGTACCTGTGGAATATTTGCTGGCGGCATCGTTAATGGCGATCCCCGGCGGGATCTT
GTTTGCCCGCATGCTAAGCCCGGCTACGGAATCTTCACAGGTTTCCTTTAATAACCTCTCTTTCACCGAAACACCGCCAA
AAAGCATTATTGAAGCGGCAGCGACAGGGGCGATGACCGGGCTGAAAATCGCTGCGGGTGTGGCAACAGTGGTGATGGCA
TTTGTTGCCATCATTGCGTTAATTAACGGTATTATCGGCGGCGTAGGCGGCTGGTTTGGTTTTGAACATGCCTCGCTGGA
GTCCATTTTAGGTTACCTGCTGGCCCCACTGGCGTGGGTAATGGGTGTTGACTGGAGTGATGCGAATCTTGCCGGGAGTT
TGATTGGACAGAAACTGGCAATAAATGAATTTGTCGCTTATCTCAATTTCTCACCCTATCTGCAAACGGCTGACACGCTG
GATGCTAAAACCGTGGCGATTATTTCCTTCGCGTTGTGCGGTTTCGCTAACTTTGGTTCTATCGGGGTGGTGGTGGGGGC
GTTTTCTGCGGTTGCGCCACACCGTGCGCCGGAAATCGCCCAGCTTGGTTTACGCGCGCTGGCGGCGGCGACACTTTCTA
ACCTGATGAGTGCCACCATTGCCGGGTTCTTTATTGGTTTAGCGTAGTGTGCGATTTATGAGCCGGATTAGATGCGGTCA
AGCGTCGAATCCGGCAACATTGTTACACCATTGGCACTAATGACAGCGCGTTATCGGCAGACAGGGTAGGGTTGTTTAAG
CTGCCGCTGGCGCGTGAAATTGCCGCGCAGGCCATCGCAAAACGGGCGCTGTCACGGAAATTGTTTCCCTCCAGAAAGCT
ATATACCAGGCCCGCCATAAAACCATCGTCAGCACCAAAACTGTCTACTGTCGTATGCGCTGGTGCGGTCAGCAAAAATT
GTTCACCATCCTTTTCGCTGCAATAAACTGACTCATCGGGCAAATAAACAAACAGTTGCTGAACACCTTGCTGATGCAAC
GCATTCACTGCGGCATTACGGTCAGCATCGCTGGTGATCGCCTGTCCCCATAAAATTTCCAGCTCCGGTAAAGTGGGTTT
CAGGGTGTGAATATGCGCCAGCCAGGGTTTGATTTTGCCCGCTTTGAATTCTGAAACGGTATCGACAAACACCGGGATTT
GATCAGCGAGGGTAAAGACCCATTCCAGCGCCTCGGCTGTCAGGTTGCAATCAGCCAGTACCACGCCCGCATGACGAAGT
AAATCGCGCGACCCGTTCAGTAGTTGCGGTGTCAACTGTTCCAGCAGATGGGTATCGTTAATCGCCAGCACGGTTTGATC
GTCTCGATTGGCAATTGCCAGATACGTCGATGTGCTTTGACCATGTAAACGAACGCAGCCGGAGACATTCACGCCGGCAC
GGCGCGTTTCTTCCAGGAGCATTTCGCCATAAAAGTCATCGCCAATCACTGAAAGCAAATGGACGTCGCGGCCTAACAGC
GCCAGATTGTGGGCGATATTGCGTCCAACGCCGCCTGCCGAGCAATGAATTGTACCGGGATGAGAAGCCGCTTGCGGGTA
ACGGATATCCGCCATCCCGCGAATATCCATATTGATTGTCCCCACCACTACGCAGTATTCCTGCTCGGTGAGAATGTAAC
CTTTGCCTTTAATCCGCCCTTTGCGCATTAAATCCATAATATGCGCCGCAACGCGCGAACGACTGATTTGCAGCATGTCC
GCAATTTCGTTCTGCTGAATCAGCGGGTTACGCCGTAAAATTGCAAGGATCTCCTTTTCCCGGTTATTCATCTTCAGGCA
ACCGCTTTTTCAGTTTGTTGCGCTTTCAGCCAGGCGATCTCTTCTGCCCAGATATCCGGGTTAATGGTTTCAAGGATCAG
CGGAATGCCGTCGAAACGGTCGTCCTGCATGATCCAGCGGAACGCATCATGACCGATATTGCCTTCACCGAGGCTATGAT
GGCGGTCAACGCGGCTGCCAAAGGTGCTTTTCGCATCGTTAAGGTGCATCCCGCGCAGATACTTAAAGCCGACAATACGG
GCAAAATCAGCGAACGTTTTCTCGCATTCGGCTGGAGTACGCAAATCATACCCGGCAGCGAAAGCATGGCAGGTATCAAT
GCAGATGCCGACACGGGATTTATCTTCCACGCCGTCGATAATCGCCGCGAGATGTTCGAATTTAAACCCTAAGTTACTGC
CCTGACCGGCGGTGTTTTCAATCACCGCGGTCACACCTTGAGTTTTATCCAGCGCAATGTTGATGGATTCGGCAATACGC
GCAAGGCAATCCTCTTCTGAAATCTGCATCAGATGGCTGCCAGGGTGGAAGTTGAGCAAAGAAAGCCCCAGTTGTTCGCA
ACGCTGCATTTCATCTATAAAGGCATCGCGCGATTTTTCCAGAGCTTCAGTGACCGGATGTCCGAGGTTAATCAGATAGC
TGTCGTGGGGAAGAATTTGCGCCGATGTGTAGTGATATTTTTCACAGGCGGCTTTGAATTCATCGATGGTTTGCGTCGTG
AGCGGTGCGGCACGCCACTGACGTTGGTTTTTGGTGAACAAGGCAAACGCGGTTGCGTCGATTTCGGCGGCGCGAATTGC
GGCATTTGCCAGACCGCCAGCAGCACTAACGTGCGCTCCAATGTATTTCATGCGAGGACTCCTGTTAAACCCGCTGGAGG
AAAACGGTAATGATAGCGGGTTAACAGGAGCAAGATGTAGTGGTTTATGCGATGACGCTTTGAATCACATAGTTAATCGC
ACCACCACCAACAATCAGCCAGGCAAACAGTACCAGTGCCATCAGCAGAGGTTTCGCCCCAGCTTTTTTCAGCGCGCTGA
CGTGAGTGGTCAGACCCAGCGCCGCCATCGCCATTGCCAGCAGGAAGGTATCCAGCGTTACCAGCATGTTCACCACGCTC
TGCGGTAACAGGTGGAACGAGTTAAAGATGGCAACTACGATGAACAAGATGGCAAACCACGGAATAGTGATTTTGCTTTT
CTCGCCGCTGTTCGCCCCAGACAGCTGTTTAACACGCGCCGCCAGCAGGATGAGGAACGGAGCCAGCATCATCACGCGCA
GCATTTTGGAAATAACTGCTGCGTTTTCCGCATCCGGGCTGATGGCATGACCTGCCGCCACCACCTGCGCCACTTCGTGC
ACAGTAGAACCAATGTAGATACCGAAAGTTTCCGGACTAAACCATTGAGACATCAGCGGATATATCGCCGGGTAGAGGAA
AATCGCGACGGTCCCGAAGATAACAACGGTTGCAACAGCCACGGTTACTTTACTGGCTTCCGCTTTCACTACCGGCTCAG
TCGCCAGTACCGCGGCAGCACCACAGATACTGCTACCGGCACCGATCAACCAGCTGGTGTGCTTATCCAGACCAAACACT
TTCTGCCCCAGGAAGCAAGCCAGCAGGAAGGTACTGGACAGCGTCAACACGTCAATGATGATCCCACTGATACCGACATC
GGCAATTTGCGAGAACGTCAGACGGAAGCCATAAAGAATGATACCCAGACGTAATAAATATTGCTTGGCAAACAGCACAC
CACCGTCACAGCTTTTCCAGATGTGCGGATAGATGGTGTTGCCTAAAACCATCCCCAACAAGATTGCGAGGGTGAGGGCA
CTAAACCCGGCACCCGCAACCGCGGGAATGGAACCACCCCACAGGGCGACCCCGGTGATAACTGCACTCAGGGCTAACCC
CGGAATAAAATGCCACAGTGTACGATGTTGTTTCTGTAAGGTGATATTCGTCATAACCCTCTCCTTTAACCGGGCATAAG
GTTACGACTAACTGGTTTAAAAATAAAATTGATTATATATTTATAATTAATCTTTATAAGTGGTAAGCGACTATGCACAT
CACCCTCCGGCAGTTGGAAGTTTTTGCAGAAGTATTGAAAAGTGGATCAACCACCCAGGCGTCGGTGATGCTGGCGTTGT
CGCAATCAGCAGTGAGCGCAGCCTTGACCGACCTGGAAGGGCAGCTTGGCGTTCAACTGTTTGATCGCGTGGGGAAAAGA
CTGGTTGTTAATGAACACGGGCGGCTGCTCTATCCGCGTGCGTTGGCATTGCTTGAACAGGCGGTTGAAATCGAACAACT
GTTTCGCGAAGACAACGGCGCGATTCGTATCTATGCCAGTAGTACCATCGGTAACTACATTCTGCCTGCAGTTATCGCCC
GTTATCGCCATGATTATCCGCAGTTGCCGATTGAACTTAGCGTTGGGAACAGCCAGGACGTGATGCAAGCGGTGCTGGAT
TTCCGCGTTGATATTGGCTTTATTGAAGGACCGTGCCACAGCACTGAAATCATTTCTGAACCGTGGCTGGAAGACGAGCT
GGTGGTTTTCGCCGCGCCGACTTCGCCGTTGGCCCGTGGTCCGGTCACCTTAGAACAGCTGGCCGCTGCGCCGTGGATCC
TGCGTGAACGCGGTTCCGGCACGCGGGAGATTGTCGATTATCTGTTGCTGTCACATTTACCGAAGTTTGAGATGGCGATG
GAATTAGGTAACTCCGAGGCAATCAAACATGCGGTGCGTCATGGGTTGGGAATTAGTTGCCTGTCGCGACGGGTGATTGA
AGACCAATTGCAGGCAGGCACATTAAGTGAAGTTGCGGTCCCTCTGCCGCGCCTGATGCGTACGTTGTGGCGTATACATC
ATCGGCAAAAACACCTTTCCAACGCGCTACGGCGCTTTCTGGACTATTGCGATCCCGCAAATGTGCCGCGTTAAGTTGCT
GTACAAGAACATGCTGGTGCTGTGTCGATTTCGTGACGCAGCGCCTTCAGCATGCATTCGCCAGAAAAGAGATTGGCTGC
TTTACTTATAATCCCTGGGCGATCATGAAGGTGTCTTATAACCGTGTATTTCTGCCGGAAGGATTGCCAATCGTCTGCTA
CAATCGCGCCTCATTTTTTAGATGGATAGCATTTTTGTATGGTTTCCGAAACTAAAACCACAGAAGCGCCGGGCTTACGC
CGTGAATTAAAGGCGCGTCACCTGACGATGATTGCCATTGGCGGTTCCATCGGTACAGGTCTTTTTGTTGCCTCTGGCGC
AACGATTTCTCAGGCAGGTCCGGGCGGGGCATTGCTCTCGTATATGCTGATTGGCCTGATGGTTTACTTCCTGATGACCA
GTCTCGGTGAACTGGCTGCATATATGCCGGTTTCCGGTTCGTTTGCCACTTACGGTCAGAACTATGTTGAAGAAGGCTTT
GGCTTCGCGCTGGGCTGGAACTACTGGTACAACTGGGCGGTGACTATCGCCGTTGACCTGGTTGCAGCTCAGCTGGTCAT
GAGCTGGTGGTTCCCGGATACACCGGGCTGGATCTGGAGTGCGTTGTTCCTCGGCGTTATCTTCCTGCTGAACTACATCT
CTGTTCGCGGCTTTGGTGAAGCGGAATACTGGTTCTCACTGATCAAAGTCACGACAGTTATTGTCTTTATCATCGTTGGC
GTGCTGATGATTATCGGTATCTTCAAAGGCGCGCAGCCTGCGGGCTGGAGCAACTGGACAATCGGCGAAGCGCCGTTTGC
TGGTGGTTTTGCGGCGATGATCGGCGTAGCTATGATTGTCGGCTTCTCTTTCCAGGGAACCGAGCTGATCGGTATTGCTG
CAGGCGAGTCCGAAGATCCGGCGAAAAACATTCCACGCGCGGTACGTCAGGTGTTCTGGCGAATCCTGTTGTTCTATGTG
TTCGCGATTCTGATTATCAGCCTGATTATTCCGTACACCGATCCGAGCCTGCTGCGTAACGATGTTAAAGACATCAGCGT
TAGTCCGTTCACCCTGGTGTTCCAGCATGCGGGTCTGCTCTCTGCGGCGGCGGTGATGAACGCAGTTATTCTGACGGCGG
TGCTGTCAGCGGGTAACTCCGGTATGTATGCGTCTACTCGTATGCTGTACACCCTGGCGTGTGACGGTAAAGCGCCGCGC
ATTTTCGCTAAACTGTCGCGTGGTGGCGTGCCGCGTAATGCGCTGTATGCGACGACGGTGATTGCCGGTCTGTGCTTCCT
GACCTCCATGTTTGGCAACCAGACGGTATACCTGTGGCTGCTGAATACCTCCGGGATGACCGGTTTTATCGCCTGGCTGG
GGATTGCCATTAGCCACTATCGCTTCCGTCGCGGTTACGTATTGCAGGGACACGACATTAACGATCTGCCGTACCGTTCA
GGTTTCTTCCCATTGGGGCCGATCTTCGCATTCATTCTGTGTCTGATTATCACTTTGGGCCAGAACTACGAAGCGTTCCT
GAAAGATACCATTGACTGGGGCGGCGTAGCGGCAACGTATATTGGTATTCCGCTGTTCCTGATTATTTGGTTCGGCTACA
AGCTGATTAAAGGAACTCACTTCGTACGCTACAGCGAAATGAAGTTCCCGCAGAACGATAAGAAATAAGTTTCCTCCCTT
CCTTGCTAAGCCCTCTCAACCGAGAGGGCTTTTTCAATTCCATTTCCCTGACAAATCATGCGGATATAAAATTTAACATT
TGGATTGATAATTGTTATCGTTTGCATTATCGTTACGCCGCAATCAAAAAAGGCTGACAAATCAGAGGCTGTTCCGGCTT
TCTGGGATGATCACCTGCATACAAATAAGTCCACCGCGATGCTGCCGTACGCAAGGGGACGTGAAGAAGATGTGAGCGAT
AACCCATTTTATTTTCGTAGTTACCTCATGGAGATATGGAATGTTTAGGTTGAACCCTTTCGTACGGGTCGGGCTGTGTT
TGTCCGCTATTTCTTGTGCATGGCCTGTGTTAGCGGTCGATGATGATGGCGAAACGATGGTTGTCACTGCATCTTCCGTT
GAACAAAACCTTAAAGATGCACCCGCCAGTATCAGCGTCATTACCTAGGAAGACCTGCAGCGAAAACCGGTACAGAATCT
GAAGGATGTCCTCAAAGAAGTGCCTGGCGTACAACTGACGAACGAAGGGGATAACCGTAAGGGCGTTAGTATTCGTGGTC
TGGACAGCAGCTACACCCTGATTCTTGTCGACGGTAAACGCGTTAACTCCCGCAATGCCGTCTTCCGCCACAATGATTTC
GATCTGAACTGGATCCCGGTCGATTCCATCGAACGTATTGAAGTGGTCCGTGGCCCGATGTCGTCGCTGTACGGTTCCGA
TGCGCTCGGCGGTGTAGTGAATATCATCACCAAAAAAATCGGTCAGAAATGGTCGGGTACCGTTACCGTCGATACCACCA
TTCAGGAACATCGCGATCGCGGTGATACCTATAACGGTCAGTTCTTTACCAGTGGACCATTAATTGATGGTGTGCTGGGA
ATGAAAGCTTACGGCAGCCTGGCAAAACGTGAAAAGGATGACCCGCAAAACTCAACGACCACCGATACCGGAGAAACGCC
GCGTATTGAAGGATTCTCCAGCCGCGACGGCAATGTCGAATTTGCCTGGACACCGAATCAAAATCACGATTTTACTGCCG
GATACGGTTTCGACCGTCAGGATCGTGATTCCGACTCGCTGGACAAAAACCGCCTGGAACGCCAGAACTACTCCGTCAGC
CATAATGGGCGTTGGGATTACGGCACCAGCGAACTGAAATACTACGGTGAGAAAGTCGAGAACAAAAACCCTGGCAACAG
CAGCCCGATAACTTCCGAAAGCAATACGGTCGACGGCAAATACACGTTGCCGCTGACGGCGATTAATCAGTTTCTCACGG
TTGGCGGTGAATGGCGTCACGACAAACTTAGCGATGCGGTGAACCTGACCGGGGGAACCAGCTCCAAAACGTCTGCCAGC
CAGTACGCGCTGTTTGTGGAAGATGAATGGCGGATCTTCGAGCCGCTGGCGCTGACGACCGGCGTGCGTATGGACGATCA
CGAAACCTACGGTGAACACTGGAGTCCGCGTGCCTACCTGGTTTATAACGCCACCGACACCGTAACGGTGAAAGGGGGCT
GGGCGACGGCATTTAAAGCGCCTTCTCTGTTGCAACTTAGCCCTGACTGGACGAGCAATTCCTGCCGTGGCGCATGTAAG
ATTGTAGGTAGCCCGGATCTGAAACCAGAAACCAGCGAAAGTTGGGAGCTGGGGCTGTACTACATGGGTGAAGAAGGCTG
GCTGGAAGGGGTTGAATCCAGCGTTACCGTTTTCCGTAACGATGTGAAAGATCGCATCAGCATCAGCCGTACGTCTGACG
TCAATGCTGCACCGGGCTACCAAAACTTTGTCGGTTTTGAGACGGGCGCTAACGGACGGCGCATACCGGTATTTAGCTAC
TACAACGTTAACAAAGCTCGTATTCAGGGCGTGGAAACCGAACTGAAAATTCCGTTCAACGATGAATGGAAACTGTCACT
CAACTACACCTATAACGATGGTCGTGATGTCAGCAACGGCGAAAACAAACCGCTATCCGATCTGCCGTTCCATACCGCTA
ACGGTACGCTGGACTGGAAACCGCTGGCGCTGGAAGACTGGTCATTCTATGTTTCTGGTCACTATACCGGGCAGAAACGA
GCCGACAGCGCGACGGCTAAAACACCGGGCGGTTATACCATCTGGAATACCGGCGCGGCCTGGCAGGTGACTAAAGACGT
CAAACTGCGCGCAGGTGTGCTGAACCTTGGCGACAAGGATCTCAGTCGTGACGACTACAGCTATAACGAAGACGGACGTC
GTTACTTTATGGCAGTGGATTATCGCTTCTGATGAGAAGATGCCCGGCGAACCGGGCGGACTTTCACTTCAGTAAATACT
GCGCATGGAAGCGCAGGTGATCCTCTATAAAAGAGGCGATGAAGTAGTAACTGTGATCATATCCCGGCTGAATACGCAGC
GTCATCGGCCATGCTTTCTGGCGCGCGGCTTCTGCAAGTACTGCAGGTTGCAGTTGGTCAGCAAGAAACTGATCGTTATC
ACCCTGATCGATAAGCGTCGGGATCGCATCCTGCGCGTTACTGGCATACATCAGCGCGCAACTGTCCCATTCCAGCCATG
CATTTTTGTCCTCACCTAAATAGCGGCTAAACGCTTTGATTCCCCACGGGACGCTGCACGGATTCACAATTGGCGCAAAG
GCGGAAACGCTGGCGTATTTGCCCGGGTTTTTCAGCGCCATAATCAGCGCACCGTGACCACCCATTGAATGACCGCTAAT
GGCGCAGCGGTCGCTGACATTAAATTGCGACTGAATCAGCGCCGGTAATTCATCGCGCAGATAATCATACATCCGGTAAT
GCGTCGCCCACGGCGGTTGCGTGGCGTTAAGATAAAAGCCCGCGCCCTGGCCTAAATCGTAGCCATCGTCGTTGGCAACC
TGTTCACCGCGCGGGCTGGTGTCTGGCATCACCAGTACAATCCCCAGTTCCGCCGCCACGCGCTGGGCACCCGCCTTGGT
GGTGAAGTTCTCGTCATTGCAGGTTAATCCGGAAAGCCAGTACAGCACTGGTGGCGGGGTGTGATCACGAGGGGGTGGGA
GAAAGATACTGAACGTCATCGGGCAGTTTAAGGTACTGGAGTAGTGTCGCCAGCGTTGCTGCCAGCCTTCAAAACAGCGG
TGCTCTTCGAGCATTTCCATGCGTGGCTCCTTGTTGTGTTGTTTGCAATTTCTTCATCATACCGTTTATTCAATGTGCTG
TGAGTAACTTTCACTTCCGTATTTGCATAACGATGTTTTAACATCTGCTGATGAAAGGCAGCGGCAATTACAATAATTAT
CGCTGTGAATACTGGATTATGTGCGCCGCCTCACGCACAATAATCAGGCTGTAAATCAGCTTAATAACTTTGCCCCCACG
CAGGGCGGAGGCGTCACACCTGCAGGAGAAATCATAAATGCCATCACTCAGTAAAGAAGCGGCCCTGGTTCATGAAGCGT
TAGTTGCGCGAGGACTGGAAACACCGCTGCGCCCGCCCGTGCATGAAATGGATAACGAAACGCGCAAAAGCCTTATTGCT
GGTCATATGACCGAAATCATGCAGCTGCTGAATCTCGACCTGGCTGATGACAGTTTGATGGAAACGCCGCATCGCATCGC
TAAAATGTATGTCGATGAAATTTTCTCCGGTCTGGATTACGCCAATTTCCCGAAAATCACCCTCATTGAAAACAAAATGA
AGGTCGATGAAATGGTCACCGTGCGCGATATCACTCTGACCAGTACCTGTGAACACCATTTTGTTACCATCGATGGCAAA
GCGACGGTGGCTTATATCCCGAAAGATTCGGTGATCGGTCTGTCAAAAATTAACCGTATCGTGCAGTTCTTTGCCCAGCG
TCCGCAGGTGCAGGAACGTCTGACGCAGCAAATTCTCATTGCGCTACAAACGCTGTTGGGCACCAATAACGTGGCTGTTT
CTATCGACGCGGTGCATTACTGCGTGAAGGCGCGTGGCATCCGCGATGCAACCAGTGCCACGACAACGACCTCTCTTGGT
GGATTGTTCAAATCCAGTCAGAATACGCGCCACGAGTTTCTGCGCGCTGTGCGTCATCACAACTGATTAAAAGGCAGGAA
CCATGGAGCGCAACGTCACGCTCGATTTTGTTCGCGGCGTCGCCATTCTGGGGATCCTGCTATTAAACATCAGCGCCTTT
GGGCTACCAAAGGCGGCTTATCTTAATCCCGCCTGGTACGGCGCTATTACGCCGCAGGATGCATGGACCTGGGCATTTCT
CGATCTCATCGGCCAGGTGAAATTCCTCACGCTTTTTGCGCTGCTGTTTGGTGCTGGCCTGCAAATGTTGCTGCCCCGTG
GCAGACGCTGGATCCAGTCGCGGTTAACGCTGTTAGTCTTGCTGGGCTTTATTCACGGTTTATTGTTCTGGGACGGCGAT
ATTCTGCTGGCTTACGGGCTGGTGGGCTTAATCTGCTGGCGGCTGGTGCGCGATGCGCCATCGGTAAAAAGCCTGTTTAA
TACAGGCGTCATGCTTTATCTGGTGGGGCTTGGCGTTTTGCTGTTATTGGGGTTGATTTCCGATACCCAGACCAGCCGCG
CCTGGACGCCGGATGCATCGGCTATTTTGTATGAAAAATACTGGAAGCTTCACGGCGGCGTTGAAGCGATCAGTAATCGT
GCCGATGGTGTTGGGAACAGTTTACTGGCACTGGGCGCACAGTATGGCTGGCAACTGGCTGGGATGATGCTCATTGGTGC
GGCGCTGATGCGCAGCGGCTGGCTGAAAGGGCAGTTCAGCTTACGTCACTATCGTCGTACTGGTTTTGTGCTGGTGGCGA
TTGGGGTGATCATTAACCTTCCTGCCATCGCCCTGCAATGGCGGCTGGACTGGGCATATCGCTGGTGCGCCTTCTTACTT
CAGATGCCGCGGGAACTGAGTGCACCGTTTCAGGCGATTGGCTATGCGTCGCTGTTTTATGGTTTCTGGCCGCAATTGAG
CCGCTTTAAGCTGGTGCTTGCGATCGCCTGCGTCGGACGGATGGCGCTGACCAACTATCTATTGCAAACGCTGATTTGTA
CCACGCTTTTTTATCACCTCGGTTTGTTTATGCAGTTTGACCGTCTGGGATTGCTGGCGTTTGTTATTCCGGTATGGCTG
GCGAATATCCTCTTCTCTGTTATCTGGCTGCGTTACTTCCGCCAGGGGCCGGTGGAATGGCTCTGGCGTCAGTTAACTTT
GCGTGCTGCCGGACCGGCAATATCTAAAACATCAAGATAACGATCTGGATCACATTCGTTAACAAAACGGCTGTAACCGT
TTCCATTGCTGTGACTCGATTCACGAAGTCCTGTATTCAGTGCTGACAAAATAGCCGCCAGCAAGCAGTCATTTACTGCA
ATCTCATAACAGGTAGTGAATATGATCACCATTCGTGATGTAGCGCGTCAGGCTGGCGTCTCTGTGGCAACGGTTTCCCG
GGTGCTCAATAACAGCACGCTGGTCAGTGCCGACACGCGTGAAGCAGTAATGAAAGCCGTGAGTGAGCTGGATTATCGGC
CAAACGCCAATGCCCAGGCGCTGGCAACTCAGGTTAGCGACACCATTGGCGTGGTGGTGATGGACGTTTCTGATGCGTTT
TTCGGCGCGCTGGTAAAAGCGGTGGATCTGGTCGCCCAGCAGCATCAGAAATACGTGCTAATCGGCAATAGCTATCATGA
AGCGGAAAAAGAACGTCACGCCATTGAGGTGTTAATTCGCCAGCGTTGTAATGCATTGATTGTTCACTCAAAAGCATTGA
GTGACGATGAACTGGCGCAATTTATGGATAACATTCCCGGTATGGTGTTAATCAACCGCGTTGTGCCGGGGTACGCCCAT
CGTTGCGTTTGCCTGGATAATCTCAGCGGTGCCCGAATGGCGACGCGCATGTTGCTGAATAACGGTCATCAACGTATTGG
TTATCTTTCTTCCAGCCACGGCATTGAAGATGACGCCATGCGTAAAGCAGGCTGGATGAGTGCGTTGAAAGAGCAGGATA
TTATTCCGCCGGAAAGCTGGATTGGCACTGGTACGCCGGACATGCCGGGCGGTGAGGCGGCGATGGTTGAACTGCTGGGG
CGCAATCTACAACTTACCGCTGTATTTGCTTATAACGACAATATGGCTGCTGGCGCACTGACAGCATTAAAAGATAATGG
TATTGCGATTCCGTTACATCTCTCAATCATCGGTTTCGATGATATTCCCATCGCCCGTTACACCGACCCGCAATTAACGA
CCGTGCGTTATCCCATTGCTTCAATGGCTAAATTAGCCACCGAACTGGCCTTGCAGGGGGCAGCAGGCAATATTGATCCT
CGTGCCAGCCACTGTTTTATGCCGACGTTAGTGCGTCGTCATTCTGTCGCAACGCGCCAGAATGCGGCGGCGATCACTAA
CTCAACAAATCAGGCGATGTAACCGCTTTCAATCTGTGAGTGATTTCACAGTATCTTAACAATGTGATAGCTATGATTGC
ACCGTTTTAACGTTGTAACCCGTATGTAACAGTGAATAATCACTTTCACCGAGGTAATAGCGTCATAACAACAATTAAAG
CCGTTTTCTGGAGCGTTACCGGGCACTGATGAATCCCCTAATGATTTTGGTAAAAATCATTAAGTTAAGGTGGATACACA
TCTTGTCATATGATCAAATGGTTTCGCGAAAAATCAA
CTTGAGACTTGGTATTCATTTTTCGTCTTGCGACGTTAAGAATCCGTATCTTCGAGTGCCCACACAGATTGTCTGATAAA
TTGTTAAAGAGCAGTTGCGACGCGGCTTTCAGCTCACTGTCGCGAGGTGGCGTATATTACGCTTTCCTCTTTCAGAGTCA
ACCCTGAATTTCAGGATTTTTTCTCTTCAACCGAACAGGCTGTTTGTGTGAAGTGATTCACATCCGCCGTGTCGATGGAG
GCGCATTATAGGGAGTCGGCTCAGGAAGACAAGCGGAAAAATGCATTTTTATTTCAACCGCTCATCTTTTAATCATTACG
CCGGTTTTTGCTGCTTTTTTATCGCTTGCGGCAGGTCTGCCAGGCTATTTAACACCCAATCTGCCGCGTTTTCTGCTTCA
GGTGTAATAGGTTTACCCGTACGCACCAGCACTTTTGTTCCCACGTTCGCCGCAGCCGCTGCCTGCATATCTTCTAATTT
ATCGCCCACCATATAAGAGGCGGCCATATCAATATGCAAATAATCGCGTGCTGACAAAAGCATCCCCGGATGTGGTTTGC
GGCAATCGCAGACCTGGCGAAACTCTTCAACACTACCCTGCGGATGATGCGGGCAATAATAGATACCATCCAGATCGACA
TCGCGGTCCGCCAGCGACCAGTCCATCCACTCGGTCAGCGTTTCAAACTGTGCTTCAGTAAATTTACCGCGAGCAATGCC
AGACTGGTTGGTTACTATCACCAGCGCAAAGCCCATTTTTTTCAGCTCGCGCATGGCGTCAATAACACCGTCGATAAATT
CAAAGTTGTCGATCTCATGGACATAGCCGTGATCGACATTAATGGTGCCATCACGGTCAAGAAAAATTGCGGGTACGCTC
TTCGCCACCTTTTATAGCTCCTTAATAAGGCATGTGGCGCTAGTATCGCATGTTTCGACCTGCAAGAAAGTGCTCTTCGC
ATAAACCTGATTGATTTAGACGTCTGGATGCCTTAACATCCATTTCATTGACGGCGTTGCCCGTTTCAGGCATTCGAAAT
GCCACGACTAACTTAATGACGATAATAAATATTCAATGATAAAACTTTCGAATATCACCAAAGTGTTCCACCAGGGCACC
CGCACCATCCAGGCGTTGAACAACGTCAGCCTGCATGTGCCAACTGGACAAATTTATGGCGTTATCGGGGCCTCAGGCGC
GGGTAAGAGTACGCTTATACGTTGTGTAAACCTGCTGGAGCGCCCAACCGAGGGTAGCGTGCTGGTCGATGGACAGGAAC
TGACCACGCTGTCAGAATCCGAGTTGACCAAAGCTCGCCGCCAGATTGGTATGATTTTCCAGCATTTTAACCTGCTCTCT
TCGCGTACTGTTTTTGGCAACGTGGCTCTGCCGCTGGAGCTGGACAACACACCGAAAGACGAGATCAAACGTCGCGTGAC
GGAATTGCTGTCATTGGTTGGTCTTGGCGATAAGCATGATAGCTACCCGTCGAATCTTTCCGGTGGGCAGAAACAACGTG
TGGCGATTGCCCGTGCATTAGCCAGCAATCCCAAAGTATTGCTGTGTGATGAAGCCACCAGCGCGCTGGACCCGGCAACG
ACACGTTCTATTCTCGAACTGCTGAAAGACATCAACCGCCGTCTGGGTTTGACGATTCTGTTGATCACTCACGAAATGGA
CGTTGTGAAGCGCATTTGTGATTGCGTGGCGGTCATCAGCAATGGCGAACTGATCGAGCAGGACACGGTAAGTGAAGTGT
TCTCACATCCGAAAACGCCGCTGGCGCAGAAGTTTATTCAGTCAACCCTGCATCTGGATATCCCGGAAGATTACCAGGAA
CGTCTGCAAGCGGAGCCATTCACTGACTGCGTGCCGATGCTGCGTCTGGAGTTTACCGGTCAATCGGTCGATGCCCCACT
GCTTTCTGAAACCGCGCGTCGTTTTAACGTCAACAACAACATTATTAGCGCGCAGATGGATTACGCCGGTGGCGTTAAGT
TCGGCATCATGCTGACTGAAATGCATGGCACACAACAAGATACGCAAGCCGCCATTGCCTGGCTGCAGGAACACCATGTA
AAAGTAGAGGTACTGGGTTATGTCTGAGCCGATGATGTGGCTGCTGGTTCGTGGCGTATGGGAAACGCTGGCAATGACCT
TCGTATCCGGATTTTTTGGGTTTGTGATTGGTCTGCCGGTTGGCGTCCTGCTTTATGTCACGCGTCCGGGGCAAATTATT
GCTAACGCGAAGCTGTATCGTACCGTTTCTGCGATTGTGAACATTTTCCGTTCCATCCCGTTCATTATCTTGCTGGTATG
GATGATTCCGTTTACCCGCGTTATTGTCGGTACATCGATTGGTTTGCAGGCAGCGATTGTTCCGTTAACCGTTGGCGCAG
CGCCGTTTATTGCCCGTATGGTCGAGAACGCTCTTCTGGAGATCCCAACCGGGTTAATTGAAGCTTCCCGCGCAATGGGT
GCCACTCCAATGCAGATCGTCCGTAAGGTGCTGTTACCGGAAGCGTTGCCGGGTCTGGTGAATGCGGCAACTATCACCCT
GATTACCCTGGTCGGTTATTCCGCGATGGGTGGTGCAGTCGGTGCCGGTGGTTTAGGTCAGATTGGCTATCAGTATGGCT
ACATCGGCTACAACGCGACGGTTATGAATACGGTACTGGTATTGCTGGTCATTCTGGTTTATTTAATTCAGTTCGCAGGC
GACCGCATCGTCCGGGCTGTCACTCGCAAGTAACGTTCAACACAACATAAATAATTGAAGAAGGAATAAGGTATGGCGTT
CAAATTCAAAACCTTTGCGGCAGTGGGAGCCCTGATCGGATCACTGGCACTGGTAGGCTGCGGTCAGGATGAAAAAGATC
CAAACCACATTAAAGTCGGCGTGATTGTTGGTGCCGAACAGCAGGTTGCAGAAGTCGCGCAGAAAGTTGCGAAAGACAAA
TATGGCCTGGACGTTGAGCTGGTAACCTTCAACGACTATGTTCTGCCAAACGAAGCATTGAGCAAAGGCGATATCGACGC
CAACGCCTTCCAGCATAAACCGTACCTTGATCAGCAACTGAAAGATCGTGGCTACAAACTGGTCGCAGTAGGCAACACTT
TTGTTTATCCGATTGCTGGTTACTCCAAGAAAATCAAATCACTGGATGAACTGCAGGATGGTTCGCAGGTTGCCGTGCCA
AACGACCCAACTAACCTTGGTCGTTCACTGCTGCTGCTGCAAAAAGTGGGCTTGATCAAACTGAAAGATGGCGTTGGCCT
GCTGCCGACCGTACTTGATGTTGTTGAGAACCCAAAAAATCTGAAAATTGTTGAGCTGGAAGCACCGCAGCTGCCTCGCT
CTCTGGACGACGCGCAAATCGCTCTGGCAGTTATCAATACCACCTATGCCAGCCAGATTGGCCTGACTCCAGCGAAAGAC
GGTATCTTTGTCGAAGATAAAGACTCCCCGTACGTAAACCTGATCGTGACGCGTGAAGATAACAAAGACGCCGAGAACGT
GAAGAAATTCGTCCAGGCTTATCAGTCTGACGAAGTTTACGAAGCAGCAAACAAAGTGTTTAACGGCGGCGCTGTTAAAG
GCTGGTAATTTTTAGGCTGTTTCCACAATTTGTAATATCATTCAGGACGGGCGCTTGCCCGTCTTGTCATTTTTACAAGC
TCCTGATTCAATATTGACGTTTTGATCATACATTGAGGAAATACTATGCGTGCTTTACCGATCTGTTTAGTAGCACTCAT
GCTAAGCGGCTGTTCCATGTTAAGCAGATCCCCTGTCGAACCCGTTCAAAGCACTGCACCCCAGCCGAAAGCGGAGCCTG
CAAAACCGAAAGCGCCGCGCGCCACGCCGGTCCGAATTTATACCAATGCAGAAGAATTAGTCGGCAAACCGTTCCGCGAT
CTCGGTGAAGTCAGTGGCGACTCTTGCCAGGCCTCTAATCAGGACTCTCCGCCGAGCATTCCAACCGCACGTAAGCGGAT
GCAAATCAACGCCTCTAAAATGAAAGCCAATGCTGTATTACTGCATAGCTGCGAAGTCACCAGCGGTACGCCGGGCTGCT
ATCGTCAGGCTGTATGTATCGGCTCTGCGCTTAACATTACGGCGAAATGAGCAGTTTCCAGTTCGAGCAAATAGGCGTTA
TTCGCTCGCCCTATAAAGAAAAATTCGCCGTTCCGCGCCAGCCTGGTCTGGTAAAAAGCGCCAACGGCGAACTGCATCTC
ATTGCTCCCTACAACCAGGCCGACGCCGTTCGCGGCCTGGAAGCATTCAGCCATTTATGGATCCTTTTCGTCTTTCATCA
AACGATGGAAGGCGGCTGGCGTCCGACTGTGCGTCCGCCTCGTCTTGGCGGTAATGCCAGAATGGGTGTTTTCGCTACGC
GTTCCACTTTTCGCCCTAACCCAATTGGTATGTCGTTGGTAGAGCTGAAAGAGGTTGTTTGCCATAAAGACAGCGTGATT
CTGAAGCTCGGCAGTATGGATCTGGTCGATGGTACGCCGGTAGTGGATATCAAACCGTATCTCCCCTTTGCTGAATCGCT
TCCCGATGCCTGTGCCAGCTATGCGCAAAGTGCGCCAGCGGCAGAGATGACGGTGAGTTTTACCGCAGAGGTCGAAAAGC
AGCTTTTGACGCTGGAGAAGCGTTATCCGCAGTTAACCCTGTTTATCCGCGAAGTACTGGCGCAAGACCCACGCCCGGCC
TATCGTAAAGGTGAGGAAACGGGTAAAACCTATGCCGTCTGGCTACATGATTTTAACGTTCGCTGGCGCGTCACCGACGC
AGGTTTTGAAGTCTTTGCGCTGGAACCGCGTTAAATTCACGCCCTTCTCTTTTGACATTTCTTTTGCACTGGTAAACTAA
ATCACTTTTTTTGTCCCAGGCTCGCCTTGAGCCTGTTCTACCTTCCAACTGGAACCGTAACAACATGCGTACTAGCCAAT
ACCTGCTCTCCACTCTCAAGGAGACACCTGCCGACGCCGAGGTGATCAGCCATCAGCTGATGCTGCGCGCCGGGATGATC
CGCAAGCTGGCCTCCGGGTTATATACCTGGCTGCCGACCGGCGTGCGCGTTCTGAAAAAAGTCGAAAACATCGTGCGTGA
AGAGATGAACAACGCCGGTGCAATCGAGGTGTCGATGCCGGTGGTTCAGCCAGCCGATTTGTGGCAAGAGAGTGGTCGTT
GGGAACAGTACGGTCCGGAACTGCTGCGTTTTGTTGACCGTGGCGAGCGTCCGTTCGTACTCGGCCCAACTCATGAAGAA
GTTATCACTGACCTGATTCGTAACGAGCTTAGCTCTTACAAACAGCTGCCGCTGAACTTCTATCAGATCCAGACCAAGTT
CCGCGACGAAGTGCGTCCGCGTTTCGGCGTCATGCGTTCCCGCGAATTCCTGATGAAAGATGCTTACTCTTTCCATACTT
CTCAGGAATCCCTGCAGGAAACCTACGATGCAATGTATGCGGCCTACAGCAAAATCTTCAGCCGCATGGGGCTGGATTTC
CGCGCCGTACAGGCCGACACCGGTTCTATCGGCGGCAGCGCCTCTCACGAATTCCAGGTGCTGGCGCAGAGCGGTGAAGA
CGATGTGGTCTTCTCCGACACCTCTGACTATGCAGCGAACATTGAACTGGCAGAAGCTATCGCGCCGAAAGAACCGCGCG
CTGCTGCTACCCAGGAAATGACGCTGGTTGATACGCCGAACGCGAAAACCATCGCGGAACTGGTTGAACAGTTCAATCTG
CCGATTAAGAAAACGGTTAAGACTCTGCTGGTTAAAGCGGTTGAAGGCAGTAGCTTCCCGCTGGTTGCGCTGCTGGTGCG
CGGTGATCACGAGCTGAACGAAGTTAAAGCAGAAAAACTGCCGCAGGTTGCAAGCCCGCTGACTTTCGCGACCGAAGAAG
AAATTCGTGCCGTGGTTAAAGCCGGTCCGGGTTCACTGGGTCCAGTAAACATGCCGATTCCGGTGGTGATTGACCGTACC
GTTGCGGCGATGAGTGATTTCGCTGCTGGTGCTAACATCGATGGTAAACACTACTTCGGTATCAACTGGGATCGCGATGT
CGCTACCCCAGAAATTGCTGATATCCGCAACGTGGTGGCGGGCGATCCAAGCCCGGATGGTCAGGGTACGCTGCTGATCA
AACGTGGTATCGAAGTCGGTCACATCTTCCAGCTGGGTACCAAGTACTCCGAAGCACTGAAAGCCTCCGTACAGGGTGAA
GATGGCCGTAACCAAATCCTGACTATGGGTTGCTACGGTATCGGCGTAACGCGCGTAGTAGCTGCAGCAATTGAGCAGAA
CTACGACGAACGCGGCATCGTATGGCCTGACGCGATCGCACCGTTCCAGGTAGCGATTCTGCCTATGAATATGCACAAGT
CCTTCCGTGTACAAGAGCTGGCCGAGAAGCTGTACAGCGAACTGCGTGCACAAGGTATCGAAGTCCTGCTGGATGACCGC
AAAGAGCGTCCGGGCGTGATGTTTGCTGATATGGAACTGATCGGTATTCCGCACACTATTGTGCTGGGCGACCGTAACCT
CGACAACGACGATATCGAATACAAATACCGTCGTAACGGCGAGAAACAGTTAATTAAGACCGGTGACATCGTCGATTATC
TGGTGAAACAGATTAAAGGCTGATGCCAGAAAGGGTCCTGAATTTCAGGACCCTTTTTTACAGGGATTGTATAAAATGGA
TAAACCAAAGGCATACTGCCGCCTGCTTCTCCCCTGCTTTCTTTTACTTTCGGCCTGTACCGTTGATATCAGCCAGCCAG
ACTCCTCAGCCACAGCGATAGATACCGAGGCGAAAACATGGGCTGTCAAATTCCAGCATCAAAGCTCTTTCACCGAACAA
TCAATAAAAGAAATAACAGAACCTGACCTCAAACCCGGCGATTTGCTGTTCTCCTCAAGTCTTGGGGTAACCTCATTTGG
TATCCGCGTCTTCAGCACTTCCTCAGTGAGTCACGTTGCAATCTATCTGGGTGATAACAACGTTGCAGAAGCGACAGGGG
CTGGCGTCCAGATTGTTTCCCTTAAAAAAGCGATGAAGCATAGCGATAAGCTTTTCGTCTTACGAGTCCCGGATCTTACC
CCGCAACAAGCCACAGAAATCACCGCGTTCGCCAACAAAATTAAAGATAGCGGTTACAACTATCGCGGCATTGTCGAATT
TATTCCCTTTATGGTGACTCGCCAGATGTGCTCACTGAATCCGTTCTCCGAGGATTTTCGCCAACAGTGCGTCAGCGGCC
TGGCGAAAGCGCAGTTAAGCAGTGTGGGCGAAGGAGACAAAAAGTCGTGGTTTTGTTCGGAATTTGTCACTGATGCATTT
GCCAAAGCCGGGCATCCGCTTACGCTGGCGCAATCGGGCTGGATTAGCCCTGCCGATCTGATGCATATGCGTATTGGTGA
TGTCTCTGCGTTTAAGCCAGAAACGCAGTTACAGTATGTTGGGCACCTGAAGCCAGGGATTTATATCAAGGCGGGTCGCT
TTGTTGGTTTGACTCAGTGATAAAGCCAGCCTCGTGCACAAAATGCCGGATGCGGCGTGAACGCCTTATCCGGCCTACAA
AATCGTGCTAATTCAAAATGTTGCATTATATGCTGTAGGCCTGATAAGCGCAGCGCATCAGGCAATTTTGCGTTTGTTTC
TGCCTTAAGCAGGTTTACTGCCCCAAACTACTGCAATCCTGGTTCGGATAAAATTTACCCGCCGTATCGGGCGCTAATAC
TTTGGTCGGCGCACCGGTATCCGGATTAGCCTCAAGCGTAAAGTGACCTTCTACTGACAGTAACACCGGTTTTTCACTGT
GCCCGCGCGCAGCCAGGTAGCCACGCTCCAGCTCTGCGTTATTCGCTACCATGAAACGTTTTCCGGTCGCGCAATCAGTG
AAGGTCGCCGCATCAGCCATATAAAAATACATGCCCCGCAGAGTCATCGGCGTCATGGGTAAACTGGATTGTGCCGCTTC
CAGCGTATAGTTGAACTGCGATTCAATCGGTTTACCTTCACGATCGAGCATCTCCAGCGCATCGCCTTTCGCCCGATAAT
ATGACTTTTCACCTTTGCTGTCGGTTAATACCAGCTTGTCAGCGGTTCGCGCCCATGTACCGTAGGAAGCGAAGGAGGAA
GGTTCTTCACGAGCACCGAGATAACGCTCATTCATCACCCATGTTCCGTCTTTTTCGAGGAACAGAGAGGTTTCGATTCC
TTCGCAATCGGCACACGGCAGCACGCCGCGCCAACTTTGCGGCATCGGTTTCAGTTCGGCTGCCTGCGCCGGAGAAAGCG
TATCGACTTCGGCCCGATTATTACAACCCATCAGAGTAAAGAGGCTGATTACAGCCATCGCTGTCACTATCGCTTTTTTC
ACCATCCATTCCTTCTTTTTATTCCCGACCGCTGCGCACTTTGCCGCGCATCGCCTTCACGCTTGATTTTTGTGCTTTCG
ATGCCAGCCTGCGCTCTTTCGATGCACGGGTGGGCCACGTGGGTCGTCGGGCTTTTTGTTCTGTTGTTAATTCTTTAATC
ACAGCCACCAGCCGGGCCAGAGCTGCTTCGCGGTTCAGTTCCTGACTGCGGTATTCCTGTGCCTTAATGACAATCACGCC
ATCACTGCTGATCAAATGATGGCTGGCGGCGAGCAGACGCTCTTTGTAATACTCTGGCAGGCTGGACGCCCGAATGTCAA
AACGCAGATGAATAGCCGTTGAGGTCTTATTAACATGCTGCCCGCCCGCGCCCTGCGCACGAATGGCGGTGATCTCAAGC
TCACCATCGGGAATAGCAACATGTCGGGAAATCACAATCATGAAGGTTGTTGCCAGGCGGTTAAGTTCACTTCCAGATTA
TTCTTATCATCCGATAACCAGATCACGCCATCCTGAATCGTTGCCTGCAGCGTCATGGTACGATCGGCAAAGGCGCTTAC
TTTCGCCAGTTGTTCATCGTCCAGATACCAGACGGAAAGATTGGCAAACTGCACACATTTGCTCTGATTTTGCTGCCACC
AGATTTGCGCCGCCCGACTATTATAGGTAAACAGCGCCACTTCTGCGGCCTGGGTGCAGGCTTTCTTAATCCGCCGCTCA
TCCGGCAGCCCCAGCTCAATCCACAAATCAATGCCCAGGTGATCGTTACGCAGCCACGCTTCCGGCTCATCATCGGCACA
CAAACCACGGGTAAATTGCAGACGTTCATCAGCATATTTCAGCCACGCCAGCAAGCGCAGCATCATACGCTCCTGGGTTT
CTGAAGGGTGGCGCGCCAGCGTCAGAGAGGCATCGAGAAACTGGTTGCGGTCGAGATCGGCCACATTAACCGTCGCTTTA
TAAATTGTCGCTTTAAGCGCCATAAGAAAACTCCTTTCGAATCAGGAGGCCATTGTAACGGAATACGTGCAGTTGCGGCG
CTGATATTGCAGAAATGAGTGTGGTATAGTCACCTTGCGAAACAGAGTTTATCTTCGTAGGCTTAGACTTGCATCCACGG
TTAAGTCAGAGTGCTGACAGGAGGGCATGTGGAAAAATATTGTGAGTTAATACGCAAGCGGTACGCGGAAATCGCCAGCG
GAGACTTAGGATACGTTCCGGACGCGCTGGGCTGCGTTTTGAAAGTGCTGAATGAAATGGCTGCCGACGACGCCCTTTCT
GAGGCTGTCAGGGAAAAAGCAGCATACGCTGCGGCAAACTTACTGGTGAGCGATTATGTCAATGAATGATACGTATCAAC
CAATCAATTGTGATGATTACGATAATCTTGAGCTCGCCTGCCAGCATCATTTAATGCTGACACTTGAGCTGAAAGATGGC
GAAAAATTGCAGGCAAAAGCCAGCGATTTAGTCTCCCGCAAAAATGTGGAGTATCTGGTCGTCGAGGCCGCTGGCGAAAC
CCGTGAGCTACGTCTGGATAAAATTACCAGCTTTAGCCACCCGGAAATCGGTACGGTGGTGGTGAGCGAGTCCTGATTGA
CTTTCGCCGGATGCGACGCTTAATGCGTCATATCCGGCCTTCACTTAACTAAGCGTTTCGCTGCCAGACAAAACTTATGC
CATTCTCACCTTCAGCCACACCTTCTTGCGTCACAAATACCCCTGCCGCCGCAATCAGCGTTTCGCCATAAAACAGCAGT
GGCGTGGTGTCACGTAGCCACGGCGGCACGCCCAGCTCTTGCCAGATTTTCTTTAGCTTACGTCCGCCGTTACGCCCGAC
AATATGCAGCAATCCTGGCGCTTTGAAACGCACGCTGACCGCTTCGTCTGCACGCGGAGGGCGAATATCGCCTCCCGCAT
TAAGCTGTACACTTCCCAGCCCCGCCGGTAATTCCAGCGGTTGAAGCCACGTCTGCCACGGCACAATGTTTTCGCTTTGC
CCGGTGACGGATTTAATCCACCACAGTTGCGACTGATAGCGTCGGATTTCAAACGCGCCCAAACGTAAACAGGGGGAGGC
ATCTTCCCGCGCCAGCGCCACTTCCTGCCAGATCCGCCCCAACGCGTCGCGGGAAGGCATCGGTGCATTCTGCCCTGCAA
GCCAGCGGCGGATAATCGCCGCGCGGCGGGCATCACTCATCGCCAGCATTGGCGCAATCTGCAGCGTCCTCTGCGGCGAT
TGACAGTGTGCTAAATCATCCGCCAGCAGTTCATCCAACAGGCTCTCTTGTTCAGCGCAAAGTGCGGCGCTGCGGGCTGT
TGCTTCGGCAAAATGCGGCCAACGCTGCTGCAATAACGGCACTACGCGCAGGCGCAGAAAGTTACGATCGTATGAGTCGT
CCTGATTACTTTCGTCTTCAATCCAGCGTAAACCATGCGCCAATGCCCACTGCGCCAGTTCCCCCCGCGTGCGGGCAAGC
AACGGGCGGATAAGCCGTGTTCCGGCAAACTCCGAAACTTCCGCCATAGCCGAAAGCCCGGCAGGGCCGCTACCGCGTTT
TAGCGCCAGCAGAAAAGTTTCACATTGATCGTCGAGATGTTGCGCGGTGACCAGCACTTCACCGGGCAACAAGGTGCGGG
CAAATGCCTGATAACGCGCCTGCCGCGCCTGGGCCTCAATGCCCAGTCCTTCTTGCGCAAGTTGCACGCGCTCGACCACC
AGCGGCACCTGCCACTGTTGGCAGATGTTCTCGCAATGCCTAACCCAGGCATCGGCATTGGCACTTAAACCGTGATGCAC
ATGAATAGCGCGCAGAGTGACGCCCGGATTTTCCGCCCGCCACTGCACCAACTGATGCAGCAGAACGGTGGAGTCAAGCC
CGCCGCTAAAGGCCACCAGAATCTGGCGTGAGGTGAGAAGTTGTCTATTGAGCGTGAGTGTCATGATGGTGCGATTTTAC
AGTAGCAATGCCCGGCACGTTACCGGGCAAATGCGGCGATGACAAGCCTTACTGCTCATACAGTTCCAACGGCAGCCCGT
CCGGATCGTTAAAGAACGTGAAGCGTTTTTGCGTGTATGGATCGACACGGATGGCTTCACACTTCACGTTATGGCTTTCA
AGGTGCGCCACTGCCGCATCGATATCATCAACGCTAAAAGCCAGATGACGCAGGCCGCAAGCTTCCGGTCGGCTGGGGCG
CTCCGGCGGGAACGGAAATGAGAAAAGCTCAATCACATATTGCCCATTAAGCGCCAAATCCCCTTTCCACGAGTCGCGCG
CTTCGCGATAGACTTCGCTTTGCAGCGTGAAACCAAGAATATCGCAGTAGAAAGCTTTGCTCACCGCATAATCCGTCGCA
ATAATCGCAATATGGTGAACCTGTTTTAAACCCAGCATAACGTCTCCTTTATTTGTTAACAGCACGTTACTCGCCCGGAA
GCCGCTCTGGCAAGTTATCCCGCCATTTTTAGGACTCGTACGCGGTAAACGCCGTCTTCGTCCTGTTTCGCGCCGTGAAT
ATCCGTTTCAAAACCGGGGTAATGTTGCCCTACGGAACAAAGCATCAGTAGAAAATCGAGTACTGTGCGGCTCTCTTTGG
TCAGCATTTCTCCAGGCATCAACAGCGGTACGCCCGGTGGATAAGGCAGGATCATATTTGCCGATACTCTACCGACCAGT
TGTTCCAGCGCAATGGTTTCTACTTCACCTTTAATCTGTCTCTGCCATGCCTGATGTGGCGTCATGATCATTTCCGGCAA
AGTATCGAATGCCCGCAACATCAAACCGGGAAGATCGTGTTTACGAATCAGCTTATGGATCCCTTGCGCCAGATCCTGAA
TACGCATATTGCGGTAGAAATCGGGATCTTCAGCATAGAGATCGGGTAGCATATTTTTGATCCGCAGGTTGAGATCGTAA
GAGCGCTTAAATTCCGTCAGCCCACGCAATAATCCCATTGCTTTGGTTTTATCAATGCCAATACTAAAGAGAAACAGCAG
GTTATAAGGGCCGGTTTTCTCTACTACGATCCCACGTTCGTCGAGGAATTTTGCCACCAGCGCCGCCGGGATCCCCTCCT
CACTCATATTGCCCTGTTCGTCCATCCCCGGTGTCAAAATAGTGACTTTAACCGGATCGAGAAACATATGATCGGCATCC
GCATCGTTAAAGCCGTGCCACTGTTCGCTAGGCGCAACGGGCCAGCATTCGGCTTCATCCACCTGCGGCGGTTGCCAGAT
ATCGAAAAACCAACCGTCAGACTCTTCCCGCAACCGCTGGACCTCTTTGCGAAAATGCAGAGCTCGTTCTACTGAACGAT
TAATCAGCCGTTTGCCCGGATTACCACGCAGCATCGCCGCCGCCGTCTCAACCGAAGCAACAATGGGATAACTGGGCGAG
GTGGTGGTATGCATCATAAAGGCTTCGTTAAAGGCCTCTTCGTCATACTCGCCTTTAATGTGGATCAGCGAAGCCTGCGA
TAACGCCGCCAGCATTTTGTGGGTCGATTGCGTTTCGAAGATCACTTTTCCCGCAACACGCTCGCCGCTCATACCACTTT
TACCCTGGTAGATCGGATGAAAATGGGTGTACGGCACCCAGGCGGAATCGAAGTGGATCGAGGGGACATCCAGCGTCTGT
TTGATCCAGTCGGTGTTGTAGAGCAAGCCATCATAGGTGGAGTTGGTGATCACCGCATGAACCGGCCATTGTGCCTGCGT
GGTGGCAGCGACTTTCTCTTCGATGCTGTCGCGAGTAAATTCACGGCGCGGGATCCCACCAAGAATCCCCAACGCATTAC
GCGTCGGTTTCAGCCAGACTGGCACTACATCGTTCATCATCAACAGATGCGCCAGCGATTTATGACAATTGCGGTCGATC
AACAGCGTGCTGCCGGATGGCGCGGCGTACATACCCACAATTTTGTTCGACGTCGATGTTCCGTTGGTAACGATATAACT
CTGTTCCGCGCCAAAAGTCCGCGCGATGTACTCTTCCGCTTCCAGATGTGGCCCGGTGTGGTCGAGCAACGAACCAAGCT
CGGTGACCGAAATAGAGACATCAGCCTTAAGGGTATTCCCGCCGAAAAAATCATAAAACAGACAGCCAACCGGGCTTTTT
TGATATGCGGTGCCGCCCATATGACCCGGCGTACAAAAGGTGTACTTCCGCTCTTTGACGTAGGTAAACAAGGCTTTCGT
GAACGGTGGGGTAATGTTATCAAGATATTCGTTGGTGTACTGACGCATACGAATAGCGATATCTTCCGCCTGCCCCAGCG
CATATTCAAAAAACCAGAGCGCCATCCGCATATCCTGCACGCTGACATCCATCGTCGAGTGGGTGTTGATGAAGGCATAA
AGCGGGAGATATTCATTAAGCTGATTGATATCGCTACATAAATCGAGACTGTACTCATCCCAGTCAAAAATCACGCCGCA
AATTCGTGGGTTATGTTCGATAAACTTCAGCAAATCAACGCTGTTTTGTGGCCAGATAATCTGAAAGCCTTGCGCCACCA
GCGCCGACTCCAGTTCTTTGATGGGCTCATCTTTATAAAAGACGCCATGCGGTCCCATAATGGCAATGATGTTCATGTGT
TCCTCCTGGAAAATCCTTCCTTAATCATAGCCTGCTCAAACCGTGGCGATAAAAAAGGGCCACCGAAGTGACCCTTTTTC
AGAACTTTTGCGAATTACGCGTAACCGTAGCTCATCAGGCGCTGATAACGACGATTTTTTAAATCTTCAGTGCTTAACAC
GTCGAGATCGGCCAGATCCGCCAGCAGTTGCGCTTTCAACGATGCCGCCATCGCTTCCGGGTTACGGTGAGCACCACCCA
GCGGTTCCGGGATGATGGAGTCGATCAGTTTTAGTTCTTTCAGACGCGGAGCGATGATACCCATCGCTTCAGCTGCCAGC
GGTGCTTTGTCGGCGCTCTTCCACAGAATGGACGCACAACCTTCCGGCGAGATAACGGAATAGGTGCTGTATTGCAGCAT
ATTCACTTTATCGCCCACGCCAATCGCCAGCGCGCCGCCAGAACCACCTTCACCGATAACCGTACAAACTACCGGTACAC
CGAGGCGAGACATTTCACGCAGGTTGCGTGCAATAGCTTCAGACTGACCGCGTTCTTCTGCGCCCACGCCCGGATAAGCC
CCCGGGGTGTCGATAAAGGTGATGATTGGCATCTTAAAGCGTTCAGCCATTTGCATCAGACGCAGTGCTTTGCGGTAACC
TTCTGGCGCTGGCATACCAAAGTTACGGCGAATTTTTTCTTTGGTTTCACGACCTTTTTGATGACCAATGATCATCACCG
GACGACCATCGAGACGGGCGATACCACCGACGATAGCTTTATCGTCTGCATACGCGCGGTCGCCAGCCAGTTCGTCAAAT
TCATCAAATGCCAGGCGAACGTAATCCAGGGTATAAGGACGCTGTGGATGGCGTGCCAGTTGCGCAATCTGCCATGCACC
GAGATCGGCGAAGATTTTACGCGTCAGTTCTACGCTTTTTTCACGCAGACGATGCACTTCTTCATCGATGTTAATATCCA
GTTTCTCATCCTGACGGCTAACCGCAGTCAGAGAATCGATTTTCGCTTCCAGCTCTGCAATCGGCTGTTCAAAATCAAGG
AAATTCAGACTCATAGTATTCCTGTATTAGTCAAACTCCAGTTCCACCTGCTCCGAACCAATGAGGCCACGGAGATCGTT
TAATAAACGATCGCTCGGAGAGACACGCCACGTCGCGCCAAAACGCAACCGCGCGCGTGCATCCGCCCTCTGATAGTAGA
GATGTACTGGAATTGTCCCAGAGCGGTGGGGTTCCAGAGACTGACGGAGTCGGTTTAAAAGCTGGTCATCAATTTGCCTG
TCCGTCAGCGAGATAGCAAGCCCGCGAGCATATTTTTCCCGGGCTTCGTCAATATCCATCACTTCGCGAGCGGTCATTTT
AAGCCCACCGCTGAAGTCATCAAAGCTGACCTGTCCGCTGACGATAAGTATGCGGTCTTTTTCCAGCAATTGCTGGTATT
TATCCAGGGCGTCAGTAAACAACATCACTTCCAGCCGCCCGGAACGGTCATCCAGCGTGCAGATACCGATACGATTGCCG
CGCTTGGTGACCATAACCCGCGCGGCAACAACGAGCCCCGCAGCCGTGATGACTTTACCACGTTCTGTCGGGTGCATGTC
TTTCAGCCTTACGCCTCCGACATAACGCTCAATCTCTTTTAAATACTGGTTGATAGGGTGTCCGGTCAGGTACAGGCCTA
ACGTTTCACGTTCCCCATCTAATACCACCTGCTCCGGCCACGGTTGGCAGCTGGCGTAGGATTGTTCAATTTGTTCCGGT
TCTTCGGCCAGCACGCCGAACATATCGGCCTGACCGATAGCTTCCGCTTTCGCGTGTTGATCTGCCGCTTTTAACGCATC
ACCCAGCGAGTTCATCAGTGCCGCGCGGTGTGGCCCAAGACGGTCAAACGCCCCGGACATGATCAGTTTTTCCAGCACCC
GCCGGTTTAACTTTTTGGTGTCGGTTCGGGCGCAGAGATCAAACAGTTCGCGGAAGTAGCCGCCTTTATTACGGGCTTCG
ATGATCGCCTCAATCGGACCTTCACCGACCCCTTTGATCGCGCCAATACCATACACGATTTCGCCGTCGTCGTTGACGTG
GAAATGGTAAAGACCGGAGTTTATATCTGGTGGCAGGATTTTCAGCCCCATCCGCCAGCACTCATCCACCAGGCCCACCA
CCTTCTCGGTGTTGTCCATATCGGCGGTCATTACCGCCGCCATAAACTCTGCCGGATAGTGCGCTTTCAGCCATAATGTT
TGATATGACACCAAAGCATAGGCCGCAGAGTGCGATTTGTTAAATCCGTAACCAGCGAATTTCTCCACCAGGTCGAAGAT
TTTCATCGCCAGTTCGGCGTTGATTCCGTTCTTTTCTGCACCTTCAGCAAATACAGAACGCTGCTTAGCCATCTCTTCCG
GCTTTTTCTTACCCATCGCACGACGCAGCATATCCGCGCCACCGAGGGTATAACCAGAGAGCACCTGCGCAATCTGCATG
ACCTGTTCCTGATACAGGATAATGCCGTAGGTTGGCTCCAGTACTGGTTTCAGGCTTTCATGCTGCCACTGCACGTCCGG
GTAGGAAATCTCTTCGCGACCATGTTTACGGTCGATAAAGTTATCCACCATCCCTGATTGCAACGGACCAGGGCGGAACA
GTGCCACCAGTGCGATCATATCTTCGAAGCAGTCAGGTTGCAGACGCTTGATCAGGTCCTTCATGCCGCGCGATTCAAGC
TGGAATACCGCCGTGGTTTCCGAGCGTTGCAGCATGTCGAAGCTTTTCTTGTCATCCAGCGGGATCGCGGCGATATCCAG
CGGCGGCTCGCCATTCTTCGCCCGCCGCTTGTTGATCATCTCCAGCGCCCAGTTGATGATGGTGAGCGTACGTAAACCAA
GGAAGTCGAACTTCACCAGTCCGGCATATTCAACGTCGCTTTTATCAAACTGGGTGACCGGATGTTTGCCCTCTTCATCG
CAATAAAGCGGCGCAAAATCGGTAATTTTGGTCGGCGCGATAACCACTCCACCGGCGTGCTTACCGGCGTTACGGGTGAC
CCCTTCCAGTTTGCGCGCCATGTCGATCAGCGCCTTAACTTCTTCATCCGCTTCGTAGATTTCCGGCAGCTGCGGCTCGG
CTTCAAACGCTTTCGCCAGCGTCATGCCCGGATCGGGCGGGATCAGTTTCGAGATACGGTCGACAAAGCCGTACGGATGC
CCCAGCACGCGGCCTACGTCGCGGATCACCGCTTTCGCCGCCATCGTACCGAAGGTGATAATCTGCGATACCGCATCACG
ACCGTACATGTCCGCTACGTGCTCGATAACCTGGTCGCGTTTCTCCATACAGAAGTCAACGTCGAAGTCAGGCATGGAGA
CACGTTCCGGGTTAAGGAAACGTTCGAACAGCAGGTCAAATTCCAGCGGATCGAGGTCGGTGATTTTCAGCGCGTAGGCC
ACCAGTGAACCCGCACCGGAGCCACGGCCTGGCCCTACCGGTACGCCGTTATCTTTCGACCACTGGATAAATTCCATAAC
GATGAGGAAGTAGCCCGGGAAGCCCATCTGGTTGATAACCTGAAGTTCAGTCTCCAGACGTTCGTCATATTCCGGGCGGC
GCTTAAGACGTTCTTCCTCATCAGGGAATAAAAAGGCCAGACGCTCTTCCAGGCCTTCTTTTGCACGCTTGACCAGATAA
TCTTCGGTGCTCATGTCCCCGGTCGGGAACTGCGGCAGGAAGTATTCACCCAGACGCACAGTTACGTTACAACGTTTGGC
GATCTCAACGGTGTTGGCAAGGGCTTCGGGGATGTCGGCAAACAGCTCGCACATCTCCTCTTCGCTACGCATATATTGCT
GCGGCGAATAGTTACGCGGGCGTTTAGGATCGTCGAGGGTAAAGCCGTCGTGGATCGCGACGCGGATTTCGTGTGCGTCA
AAGTCGCTGCTGTCGATAAAGCGCACATCGTTAGTCGCCACGACGGGCAAACCGCGCGCTTCCGCCAGTTCCACCGCCGC
GTGCAGATAGCTTTCTTCATCCGGCCTGCCGGTGCGGATCAGCTCGAGAAAATAGCGATCCGGGAAGTGTTCTTCATAAA
ACGCGACACACTCATCTACCAGCGCGCTGTTGCCACGCAAAAGACTGCGTCCGACGTCGCCCATGCGCCCGCCGGAAAGA
AGGATCAACCCTTCGTTTAATTCGATAAGCCAGTCGCGATCGATGATCGGCCCGGCGGCACCGTACCCGCGCTGATACGC
TTTTGAGATCAGCAACGTCAGATTCTGATAGCCGGTATTGTTCGCCGCCAGTACCGTCAGGTGGGTTAACTCATCACCCA
GCAGGTCGCACTGGACGTTAAAATCTGCCCCGACGATAGGCTTAATCCCTGCGCCATGTCCCGCTCCGTAGAACTTCACC
AGACCGCAAAGGTTGGTGAAATCGGTGATCGCCAGTGCTGGCATACCCAACGCCGCCGCCTTTTTTACCAGCGGTGCGGT
TTTGGCCAGGCCATCGATCATCGAGTAGTCGCTGTGCACCCGCAGGTGTACGAAACGTGGTTCAGACATCTTCAGATTCC
GGTTTACTTAATCTCGACACAAGAATCAGGACGCAAGTCCCAGTGCTCGTTTGACAGGCCCAAAGCTGCGACGATGATGT
TCAGTCGCGCCATATTCAGCCAGTTTTTCCAGATGAAAAGCGGTTGGATACCCTTTGTGTTGGGCAAAACCATATTGCGG
GAAAACAATATCCAGCGCCGCCATTTCGGCGTCACGCGTCACTTTCGCCAGGATAGACGCGGCACTGATTTCCGGTACGC
GGCTATCGCCTTTCACCACTGCCATCGAAGGCATCGGTAATTTCGGGCAGCGGTTACCATCAATCAACACATATTCCGGC
GCAATATGCAGCCCAGCAACGGCACGCTGCATCGCCAGCATGGTCGCATGTAAAATATTCAGTTCATCGATTTCGTGAGG
TTCCGCGCGGCCCAGACTCCAGCTCAACGCTTTCTCTTTGATCTCTTCACAGAGCGCCAGACGACGTTTTTCGCTCAGCT
TTTTGGAATCATTCAGCCCGGCAATCGGGCGCGCCGGGTCGAGAATCACCGCAGCGGTGACGACCGCGCCAACTAACGGC
CCGCGTCCGGCTTCATCCACACCCGCAACCAGCTGCGTGTGCGGATAGACAAATTCGATCATTGTGCTAACTCCAGAACG
GCTTGTGCCGCCTGCTCATCGGCATTGCAGCGGATCTGCTGATGCAGTTCACGGAAGGTATCGTGCATCGCGTGGCTGGT
TTTCCCGTTCGCCAACAGCGGTAACAGCGCCGCAGCCAGTTTTTGCGGCTCACACTCTTCCTGCAATAACTCTTTGACTA
ACTCTCTGCCCGCCAGCAGATTTGGCAGCGAGACATAATCAGTTTTCACCAGACGCTTCGCCAACCAGAAAGTGAAAGGC
TTCATGCGATACCCCACCACCATCGGGCATTTCGCCAGCATACACTCCAGTGCTGCCGTACCCGACGCCAGTAGCGCCGC
ATCGCTGGCAACCATCGCCTCACGGCCCATTCCATCCAGCAAATGAACCGACAGGTCTGGCGCGACTGCAGCTTTGATGC
GTTCAAACTGCTCGCGGCGTTTGGCATTCACCAGCGGCACCACGATTTCGAGATCTGGATATGTCTGGCGCAAAAGCTGG
GCCGTTTTCAGGAAATCGGCACTAAGCATTTCGACTTCTGCACCACGGCTGCCCGGCAACAATGCCAGACAGTGGGCATC
GTAAGGGATCCCCAGCACATCACGGGCACCATTTTTATCTGGATCTAATGGCATGGCATCAGCCATGGTATGACCGATAA
AGCGGCACGGTACGTTGTATTTGTCATAAAACGCTTTTTCGAAAGGCAGAAATGCGAGCACCAGATCGGTGGCTCTGCCT
ATTTTGAAAACGCGTTTCTGTCGCCACGCCCAGACGGACGGACTGACGTAATGAATGGTTTTGATACCCTGCTTTTTGAG
GTTACCTTCAAGAGTAATATTGAAGTCAGGCGCATCAATACCGACAAAAACATCTGGCTTCAGTTCGCCAAAACGCTTTG
TCAGATCGGCACGAATATGCAGTAAGCGACGCAGACGACCGAGCACTTCAACAATGCCCATTACCGCCAGTTCTTCCATT
TCGTACCAGGCTTCGCAGCCTTCAGCTTGCATTCGTGGCCCGGCAACACCAACAAAGCGGGCGTTGGGCACACGTTCTTT
CAGAGCGCGGATTAAACCGGCCCCCAGGATATCGCCGGAGGTTTCTCCGGCGACCAGGGCAATCGTTAATGGACGCTGTT
CAGTCATTAACGAATCAGACCGCGCGTTGAGCGTGCAAAGAAATCGGTAAAGGCTTTCACTTCCGGATATGTTTCCGCCA
GTTCAGCAATTTCCGGTTTCACTTCATCGAGCGTTTTACCGCTACGATAAATCAGCTTATACGCATTGCGGATAGCGGTA
ATCGCCTCACGGCTGAATCCGCGGCGCTTCAGCCCTTCGATATTGACACCGAACGGCGTTGCGTGGTTACCCTGCGCAAT
GACATAAGGAGGGACGTCCTGCGCCACACCGGAGCAGCCGCCAACCATCACATGCGCACCAATGATGCAGAACTGATGGA
CTGCGGTCATGCCGCCGATGATCGCGAAGTCGTCAACCGATACGTGACCCGCCAGCGTTGCGTTGTTGGCGAGAATACAG
CGGTTACCTACCGTACAATCGTGCGCAATGTGCGCGTTGATCATCAGTAAGTTGTCGCTGCCCACCTTCGTCAATCCACC
GCCCTGGACTGTGCCACGATGAATGGTGACGCTTTCGCGAATGCGGTTACGATCGCCGATTTCCACACGGGTCGGTTCGC
CAGCATATTTCAAATCCTGGTTAACTTCGCCGATGGAGGCGAACTGATAAATCTCATTATCGCGGCCAATTTTAGTATGA
CCATTCACGACAACGTGAGATTTCAGTACGGTACCCTCACCAATTTCGACATGGGGTCCAACGATACAAAAAGGACCAAT
GTGTGCGTTCGCGCCAATCGACGCGCCCTCTTCCACAATGGCGGTTGGATGCACAAAGGCGGATTTATCAATCACGTATC
AGGCCTCCCGGCTACGAGCACACATCATCGTTGCTTCGCAAACTACTTTACCGTCGACCAGAGCAACCCCTTTAAAACGG
GTCAGGCCGCGGCGCGTTTTTTCGAAAGTGACTTCCATGATCATTTGATCGCCAGGCACGACCGGGCGCTTGAAGCGCGC
TTCGTCAATACCGGCGAAGTAGTACAGCTCACCCGGTTCCAGTTTTCCTACGCTTTTAAACGCCAGAATACCTGTTGCCT
GTGCCATTGCTTCCAGAATCAGCACACCCGGGAAAATCGGTTTTCCAGGGAAATGGCCCTGGAAGAATGGCTCATTGACA
GAGACATTTTTTACTGCGCGCAGAAAACGACCTTCTTCAAAATCCAGCACGCGATCCACCAGTAAGAACGGGAAACGGTG
CGGCAGAAGTTCTAAAATCTCTTCAATCTGCAGAGTATGAGTGTTAGTAGTCAAGATACTCTTCCTGTCAAAATATAAGA
AACGACAATAATAACACGGCCTGCCGCAATCGTAAGAATGAGACAGGCCGTAAAGTTTGGCGAACAAAAGATGGAACGTT
AGTCTTGTTGATTAACCTTGCGCTCAAGCGATTTCAGACGCTTGCTCATGTCATCAATGTTCATCACCAGTGCAGCGGTT
TTGCGCCAGACTTTGTTGGGTTGCAGCGGAATGCCTGAGGAATAGACGCCTGGTTCAGTGATGGGACGCATCACCATACC
CATGCCCGTAACCGTCACTTTGTCGCATATTTCCATATGCCCGTTGATTACGCTGGCTCCGCCGATCATGCAGTAACGAC
CAATTTTCAGGCTGCCCGCCATAATGACGCCACCGGCAACCGCCGTATTGTCGCCAATCACGACGTTATGTGCAATCTGG
CACTGGTTATCAATGATCACGCCATTGCCAATAACCGTGTCATCCAGCGCGCCGCGATCGATGGTAGTGCAGGCACCGAT
CTCCACGCGATCGCCAATAATTACGCGACCAATCTGTGGGATCTTCACCCAGTTACCACGATCGTTGGCATAACCAAAGC
CGTCTGCGCCTACCACTGTTCCGGACTGGATCAGGCAATTCTGACCGATCTGGATCTCATGGTAAATGGTTACATTCGCC
CAGAGACGCGAACCTGCACCGATTTTGCTGTTTTTACCTACGAAGCAACCGGCACCGATAATCACGTTATCGCCCAGTTC
AACGCCGGACTCAATCACCGCGTTAGCGCCAATCGATACGTTGTTACCCAGCTTCGCCGTCGCGTCGATCACTGCACTGG
GTGCAATATTCTGCGCGGGCTGCGGCGTGGTATCTAAAATTTGCGCCATGCGCGCGTAAGTCAGGTAGGGATTCTTCACT
ACCAGCGCGGCACTTTTCGCGAAAGGAAGATCGTCCTGGGTCATGACAACCGCGGATGCCTGGCACAAGCCTAAATGCTC
ACGGTATTTTGGGTTAACCATGAACGTAATGTGACCTGTTTGTGCAGATTGCATGGACGCAACGCCGGTGATGACGATAT
CGCCATCACCGTGTAGTTCTGCATCCAACTGCTGCGCTAAATCAGCCAGTCGAATTGAAGGCATTACTTATTTAACCTGT
TTCAGTACGTCGGCAGTGATGTCTTTTACATCGCTGCTGTTGTAAGCAACGGCGTTTGCATCAACAACCAGATCGATATC
CTGGCTGTTGGCAACGGATTTCACAGCAGTCTGGATACGAGTAACCAGTTTGCCGCGTTCTTCGTTGGAACGACGTGCGC
GATCCTGCTCAAAAGCCTGCGCTTTCTGAGCAAAAGTCTGGCGCTGAGCCATCACGTCTTTTTCCAGCTTAGTGCGATCG
CTGCCCGCTTTCATGGACTGCAGCTTTTTCATTTTAGCCTGCAGATCGGTTTCCATACGCTGCAGTTCGCTGGCACGGCC
TTTGAACTCATTTTCCAGCGTGTTAGAAACACCGGTTTTCTGCGCTACCTGCTGGAACAGGCTGCCCATGTTGACGATTG
CAATTTTGTCAGCCGCCTGAGCAGATGTTGCCAGTGCTAAACCGAGACCTGCAGCTAATAACCACTTTTTCACAATAAAC
TCCTTACCATCCCATTTGCACCGGAGGGTGCAGTTCTTTGCGTGGCCCGGCGATCTTATATTGATCGCCTAAAGTCATCG
CTACACTACCACTACATTCCTTTGTGGAGAACACTTACCAAGTTTTACCGATGTTAAACTGGAACTGTTCTGCCTTGTCT
CCATCGTACTTTTTGAACGGCTGGGCGTAGGAGAACACCAACGGCCCCAATGGGGACATCCATTGTAATGCGATACCCGC
AGACATACGGATATTGCTTGGATCACTATAGTCCGGATATCCAGAATATTGGCTGGAATCCCAGTTTGTATCCCAAACGG
TACCCATATCCCAGAAGAAGGAAGTACGAACCGAGTTAGCATACTTATCGCTAATAAACGGAGTCGGGGTTATGAACTCG
AGGCTGGCAACCGCCATGGCGTTACCGCCTACAGCATCATCCGATTTACACAGGTCTTTCGCGCCGTCCTGAGTCGCACA
TTCGTAATCATAGTCCGGATCATAATTACTGGCCTGATGCGGGAAGTAAACTGCTTTCGGACCAATGGTATTGGACTGGA
AGCCACGGACGGTGCTGGAACCACCGGCATAGAAGTTCTCGTAGAACGGCATCTCTTTGCCGCCTAAACCATCACCATAA
CCCCAGCGGGTACGACCCAGAACAACCCATTTGTGATCGTCATCGATCGGCACATAAGTCGCCGTGTCTAACGTCACTTT
GTAGTATTCGTTATCCGATCCCGGAATGGTCACTTTACCGGTCAGGTTGACACGTGAACCATCTGTCGGGAAGTAACCAC
GGTCAAGCTTGTTATAGGTCCAACCATAGTTGAACGTGAAGTCGTCTGTTTTGAAGCTGTTATCCTGATCAGAGGTGCTC
GGATGTTCACCCATAGAGTACAGATAACGCCACATCGCAACCTGAGGCTGCATGTTGGACAGGGAGTTATGTACATAACC
CAGACCTGCACGCAGCGAGTTATATTCGTTAATCGGGAAGCCCAACGTCACGTCTGTACCATAACTCTTGTTGGTATAGT
CGGACAGGTCGGCGTCATCTGCCTGGAAGTCATTATAGAAGAGACGACCACCGAGGCTTACGCCATCTACGGTGAAGTAC
GGGTTGGTTACCGACAGTTCAGCATAGGTCTGGTAATCGTTTTTGGTCCCGTTGATACCAACAGCATAACCTGTACCTAA
CCAGTTATCCTGTTGCACACCAGCCTGGAAGCTCACGCCACTTTCAGTACCGTAACCAATACCAAAGTTGAAGCTACCGG
TGTTGCGCTCTTTTACCTTGTAGACTACATCAACCTGGTCCGGGCTACCCGGAACACGTTGGGTATCGGTATCGACAGTT
TCAAAGAAGCCCAGACGATTCAGACGCTCCTTACCCTGATCGACCAGATCGCTCCCCAGCCATGCACCTTCCATCTGACG
CATTTCGCGACGCAGGACGGCATCTTTCGAGGTATCGTTACCTTCAAAACGGATCTTACGCACGTAGAAACGGTTACCCG
CATCAACGTTCACACGTAATTTAACGGTTTTGTCGGCATCGTTAATTTCGGGCATGGACTGTACGCGCGGATAGGCATAA
CCATAGCGACCGAGAAGCTTTTTAATGTCATCTTCCATCTTGGTCACTTTGGTGCCGTTATACAGCTCACCCGGCTCGAT
CTTAGTCAGCTGCTCAATTTCAGCGGAGTGCCCGGCAAGGTTGCCGCTCACTTCAACGCCAGAAAGCTTGTACTGATCGC
CTTCGGTGATGTTCACCGTGACGTAAATACCTTTTTTATCTGGCGTCAGACTGACCTGGGTAGAGTCGATGTTGAAACGG
GCATAACCGCGGTCCAGATAGTAGCTGCGCAGGGTTTCAAGGTCGCCCGCCAGTTTCTGTTTCTGGTATTTACGATCGCC
TACCACGTTCCACCACGGCACTTCGTCACGCAGTTGGAAATGAGAGATCAGTTCGTCGGTGGTGAAAGCATGGTTACCAA
CAATGTTAATTTGCTGGATTTCAGCTGACACACCTTCCTGGAACACCAGTTTTAGGTCAACACGGTTGCGCGGCAGCGGG
GTCACGACAGCTTTAACGCTGGCGCTATATTTACCGACGCTGTAGTAGAAGTCTTCCAGACCTTTCTCGATATCGGCAAT
GGTGGTGCGATCGAGGGATTCGCCCACACGCACACCAGAAGCCTCGAGGTTTTGCTTCAGCATGTCATCTTTCACCGATT
TGTTACCGGAGAAAGTAATGCTGGCAATGGTCGGACGTTCTTTTACCTGAACCAGAAGGGTATCACCATCACGAAGGACG
CGAACATCCTCAAAGTTGCCGGTAGCAAACAGAGCGCGAATGGTATTACTGATATCTTCATCATTAACCGTGTCGCCTGT
GCGCACCGGCATACTGAGGAGGGCCGCACCAACGGCGACACGCTGAAGGCCTTCGAAATGAATATCTTTCACTACGAACC
CTTCAGCACCGTATACGGTGGCGCTGCTAAACAGCAGCGACGCTATGAGCAACTTTTTCATCGCCATCGTTATTATGCGT
TCTTCCTAACTAACTCTCATAACCGAGAGAAATCATTGAAAAGTGCAAGCCCCATTAACAGCACCAGCAGAATCGAGCCA
ATGCGATAACAAAAGTCTTGAACCCGCTCGGATACCGGTCCGCCCTTGATCTTTTCGATCGCAAGGAACAGCAGATGCCC
CCCGTCAAGTACGGGCAACGGAAACAGGTTAATTATCCCTAAGTTCACGCTAATAAGCGCAAGAAACGGCAGGTAATAAA
CTACCCCGAGTTCCGCTGTCATCCCAGCCCCCTTGGCGATAGAGATCGGCCCACTGAGGTTGTTCAGTTTCACATCACCG
GTGATCAATTTTCCCAGCATACTGACCGTCAGCTTCATCAGCTGCCACGTTTTGTCCGTGGCTTCGACGATGGCGTTGAA
CGGCCCATACTGGCGTACAACTTTATACTCATCTGGCAAAGGAATGACTTTCGGCTCAATACCGACAAAACCAATCGCTT
TACCATTACCCGGTTTACTCTCCGGGATTAATGTCAAAGACAAGGGACTCCCCTGCCTTTCGATTTCTAACGCTAAGGAT
TTACCCGGGTTATCCCGGACAAGCATCACAAAGGTCACCCACTGCGTTAAGGGCTGACCATCGACTTTAACGATCCTGTC
GCCTGCTTGCAAACCTGCCTTGCTTGCCGCCGAGTTTGGCTGCACATTTTCCAGTACAGGTTCAATTTGCGGTCCACGAG
GACGAATCCCCAGCGAAGATACCGGATCTTCTTTATCAGGCTCAAACGCCCAGTGACGTAAATCGAGCTTTACATCCCGC
CGTTGGTCGCTGCCAAATGGCGCTACTGTAATGGTGGTGCTTTCATCGCCAATTTTATCGACCAACTGCAAACGCACAGC
ATCCCAATCAGGCGTTTCGATACCATCTACGGCTTTTAGTTCCGTACCTGGTGCAATTTGTGCTTCCGCAGCTATCGAAT
TGGCTGCTATTTCGCCAACCACCGGACGTACGCCAGGCACACCAATAATAAAAACCAGCCAGTAGGCAAAGATAGCAAAA
ATGAAGTTTGCAACCGGACCTGCGGCAATAATCGCCGCTCGTTGGCCGACAGATTTATTATTGAAGGCATGGTGGCGGAG
TTCCGGAACGACCGGTTCTGCGCGCTCATCCAGCATTTTGACATAACCGCCCAGCGGGATCAGGGCGATAACATATTCGG
TACCGAGCTTATCAGTTCGCCGCCAGAGCGCCTTACCAAACCCTATTGAGAAACGCTCAACGCGAACACCACAACGCCGG
GCAACCCAGAAATGACCAAATTCATGCACGGTGATAAGTACACCCAGTGCAACGATGAACGAAGCCAAATCCCAGAGAAA
ACTCAGCATATTACCTTCCGTTAAAGCGTCCTGAATACCAGTAACAACAAGCAAGCAAAGACCGGTACCGCAGCCGTCAG
GCTATCAATACGATCTAAAATACCACCGTGTCCTGGAATTAAATGACCGCTGTCCTTAATTCCTGCTTCACGCTTAAACA
TACTCTCGGTCAGATCGCCGAGCACTGAGGCTAACGCTGCGACAATAGAGCAAATGAGTAAGGTGACGGGAGCGACGTCG
AGATTCGCCCACATGCCATAACCCCATGAGATTACCGCTGCGGTCGCTAGTCCACCTATAAAGCCTTGCCAGGTTTTACC
CGGAGAAACCTTCGGTGCCAGCTTATGTTTACCAAACAATTTGCCAAACATATATGCGCCAGAGTCAGCGCCCCATACCA
GGATCATGACATAGAGCAGCCATATTGCGCCACTGTAATGATTCTCGTCGTAGTGCCAGGCCCGTAACGCCAGCATGCCC
CAGAAGAAGGGAACAATGGTTAGCACGCCAAAAATAAGGCGCAATGTTTTAGAGTTACGCCAGATTGCTGCGGAATCTGG
GTAAAACAGCACCAGCAATAGCGCGACAATCCACCAACCCAACGAAGCCCAAAGTGAGATTTCAACCAGCGGTTGATGAA
TATTTCGGTGATATTCCGGCAACAGAAAAAGCATCAGCGCCAACAATAACCCGCATAACACCGCCAACCATACTCGCTGC
GAACGAGTGGTAAAACCGCTAAGCTGTCCCCATTCCCACGCTGCCAGCATGCAGACCACCAGCGTTACAATGGCGAACCC
CACCGGCGGCAACAGAAACAACGCCGCGATGACGACGGGTATTAACACAAAAGCAGATATCAGGCGATACTTCAGCAAAA
GCGACCCCCATCAGGCTGTTTCATCACCGGGCTCGGTGCCGCCGAAACGACGCTCTCGATTAGCAAAGGCATTTAACGCC
CCTTCAAAGTCTTGTTCATCGAAATCGGGCCAGAGAACATCTGTAAAGTAAAGTTCGGCATAGGCAATTTGCCAAAGCAA
AAAGTTACTAATGCGATGCTCCCCCCCAGTCCTAATTACTAAATCTACAGGGGCCAGTTCATGCATACAGACATGCTGGT
TTAGCATCTCTTCATCTATCTGATCTGGTTGCAGGTTTCCTTGCTGCACCTTTTCAGCCAGTTGCCTGACTCCCTGGACT
ATATCCCAACGTCCACCGTAGTTCGCCGCAATATTCAGCGTCAGACCGGTATTCCCGGCTGTTAGCGCTTCAGATTTACG
AATACGTTCTTGCAAACGCGAGTTAAAGCGACTGGTATCGCCAATAATACGCAGACGCACGTTATGTCGGTGCAGACTTT
TTACTTCGCTATCGAGCGCCCACACAAACAGTTCCATTAACGCACTGACTTCCTGCGCTGGTCGGTTCCAGTTTTCACTA
CTAAAGGCATACAGCGTTAACGCCTCAATACCGTTGTTGGCCGCAAAAGAGACAGCCCGGCGGACGGATTTTGCCCCGGC
TTTATGCCCAAAGGCACGAATCTTCCCTTGCTTTTTTGCCCAGCGACCATTGCCGTCCATAATGATCGCAACATGACGGC
AGCCATGCGCTGGCAATTTTTCGCTAAGTGGTTGAGTAGCAGACAACATCACGCGTTTTTTATTCCCTGACAGGGTTTAC
GGTACTCAGGAATACTGAAGCCTATACAAAAAAAAGCCGTGTAAAACCACGGCATACCTGACCTTATAAAGCCAACTACT
TACGATCAGATGGCGCAGACTATATCACTGAAGCCCTACGCTAACAAATAGCGCGACTCTCTGTAGCCGGATTATCCTCA
GCTTGCGAGACGCATCACCTCTTTTCTGGCGACTTCACGCGCGTTCGCATCAACAGATAACACATCGTCCACACATTGTG
GTTCGCGCATATCCATTTTTTCCAGTACGGATAAATTCAACGCAGCGATATCCGTAAAGCGGATTTGTTGCGCAAGAAAA
GCAGCAACGGTGATTTCGTTTGCGGCATTCAATGCTGTCGTCGCTGCCTGACCTTGTTCGAACGCCTCCATCGCCAGTTT
CAGGCATGGATAACGATCATAATCCGGTGCGGCAAATGTCAACGCACTTAGTTTGCAAAAATCGAGCGGCTTCACGCCAG
AGTTCACGCGATTCGGCCATGCCATGGTGTGGGCAATTGGCGTACGCATATCCGGTTCCCCCAGCTGCGCCAGAACACTG
CCGTCCTGATAGCGCACCATTGAGTGAATCACTGACTGCGGGTGAATCAGCACTTCCATCTGGCTGGCGCTGGCGTTAAA
CAGCCAACGCGCTTCAATGTATTCCAGACCTTTGTTCATCATGGTAGCCGAATCGACAGAAATTTTACGTCCCATCGACC
AGTTCGGATGACGGCAGGCTTGATGGGGCGTCATTGTTGCCAAATCGCGCAATGGCGTCTCACGGAAAGGGCCACCAGAC
CCGGTAAGTAAAATGGACACCACGCCATTTTGCTCAAGGTCAGCGTATCCCAGATTATGCTGGATAGGTTGCGGTAAACT
CTGAAAAATAGCGTTATGTTCGCTATCGACCGGTAACAATTGCGCTTTGCTCTGCTTTACGGCGTCCATAAACAGACGTC
CGCAGGTAACCAGTGATTCTTTATTGGCCAGCAAAATGGTTTTACCCGCGCGGATCGCAGCAAGCGTAGGTAACAGCCCA
GCAGCACCAACAATGGCTGCCATCACCTGATCAACCTCCTCAAGCGCTGCCATATCGCAAGCGGCTTGTTGCCCACTTAA
GACTTCGGTGCGGCTCCCCTGTTGCTGTAGCATCGTTTTAAGAAGTTTCGCACTCGCTTCATCGTCCATTACGGCATAGC
GGGGAGAGAATTCCAGGCACTGTTCTACCATGCGAGTGACATTTTTGCCTGCCACCAGCGCAACTACGCGGAAGTGTTCG
GGATTATGGCGCACCACGTCCAGCGTGCTGCAACCAATCGAGCCGGTCGAGCCCAGAATGGTGAGTTGCTTCATGAAACA
TCCAGAGTTGAGACAGAATAAAAAGCAAAACGCCGCCAGCCGATCCGCAAGGATCTACTAAGCGGCGTTTTTGTCGTTCA
AGAAATCAGAACTGCATCAGTTCTGCTTCTTTGTCTGCCAGCGCCGCTTCAATTTTCTTGATTGCAGCATCAGTCAGTTT
CTGTACATCGTCCTGAGAACGGCGATCGTCGTCTTCGCTGATCTCTTTATCTTTCAACAGTGCTTTCACTTTGTCGTTCG
CGTCACGACGCACGTTACGTACTGCAACACGCGCTTGTTCTGCTTCACCACGAACGATTTTGGTCAGATCTTTACGACGT
TCTTCCGTCAGCGGCGGCAGCGGAACACGGATGTCGCTACCCGCAGAGTTCGGGTTCAGGCCAAGATCGGACGCCATAAT
CGCTTTTTCAACGGCCGGAGACATTGAACGATCAAACACGTTGATTTTCAGAGTACGGGAATCTTCTACCGTTACGCTTG
CCAGCTGACGCAGCGGCGTCGGCGTGCCGTAATATTCCACGACAATGCCATCCAGCAGGCTGGGAGAAGCACGACCCGTG
CGTATTTTGCTGATTTGGGTTTTGAACGCTTCTACGCATTTGTCCATGCGTACTTCAGCATCTTTTCTGATATCGCTAAT
CACGTTACGAATCCTTGAAAACTTGTCTCAGTCAGACCAGACAGTCACACACAGTGGAAGTGTGCTAAGTATAGCCCTGA
TTAAACATATTACGGGTAATCGTCTGGATTATTAGGCTATTTTATTTGCCATTTTGGCCCCGGGCAGTGCTCGCCATCCT
CACGTACTTTTGTACGCTCCGGTTGCTGCGCGCTGGCCGTGACCAAACTGCCTGCAACAATAACGCCTTATAACCAGACT
TACGCCCCCGCGATACTTATGCGGAATCTTACCCTTATTTATCCATCACGGGAATTATTCCGTGATTAAAGTCCCTTCTT
TTTCACCCATTACCACACGGCGCAGCGCACCCGGTTTGTTCATGTTGAAAACACGAATCGGTAATTTATGGTCACGAGCC
AGCGTGAAGGCCGCCAGGTCCATGACTTTCAGCTCTTTTTCCAGCACTTCGCTGTAAGTCAGTTGCTCGTACATGGTTGC
AGTTGGATCTTTCGCCGGATCAGCAGTAAACACGCCGTCAACTTTGGTTGCTTTCAGCACCACATCGGCTTCAATTTCGA
TACCACGCAGGCAAGCTGCTGAGTCGGTGGTAAAGAACGGGTTACCTGTACCGGCGGAGAGGATCACCACACGGTTGTTG
CGCAACAGGCTGATAGCTTCTGCCCAACTGTAGCTGTCGCACACGCCATTCAATGGAATAGCGGACATCAGGCGAGCGTT
CACATAGGCGCGGTGCAGTGCATCACGCATTGCCAGGCCGTTCATTACGGTCGCCAGCATCCCCATGTGGTCGCCCACAA
CGCGGTTCATACCCGCTTTCGCCAGACCAGCGCCACGGAACAGGTTACCCCCACCAATCACCACACCAACCTGAATACCC
AGTTCAACCAGTTCTTTGATTTCCTGAGCCATGCGATCCAGTATGCTTGCATCAATACCGAAGCCTTCAGTGCCCTGCAG
AGCTTCGCCACTCAACTTAAGCAGAATGCGTTTATAGACGGGTTTTGCATTGGTAGCCATGTTTCTTTCCTGAGACTGTC
AACGATTGAAATGAATTAATACTAGCGACATTGTACGTCGCTATTCAGCGCAGCCCCACAAGGGTTAGCTGAATTTACAA
GATGGGCACAAAAAGAAGCCGCCCTCAGGCGGCTCCTTTTCGATGATTAAGACTGCTTGGACATCGCAGCAACTTCTGCT
GCAAAGTCAGTCTCAACTTTCTCGATGCCTTCACCTACTTCGAAGCGGATGAAGCCAGTCACTTCAGCGTTATGCTCTTT
CAGCAGCTGACCAACAGTTTTTGCCGGTTCCATAACGAACGGCTGACCAGTCAGAGAAACTTCGCCGGTGAATTTCTTCA
TGCGGCCTTCAACCATTTTCTCTGCGATTTCTTTCGGCTTACCAGACTGCATCGCGATATCCAGCTGTACCTGGTATTCT
TTTTCTACCACTTCAGCGGATACGTCTTCTGGTTTGATGAATTCTGGCTTGCTTGCAGCAACGTGCATAGCGATGTGTTT
AACCAGCTCTTCGTCAGCGCCTTTAGCAGCAACCAGAACGCCGATACGCGCACCGTGCTGATAAGAACCCAGAACGTCGC
CTTCCAGCGCAGCAACGCGGCGAATGTTGATGTTTTCACCAATTTTCGCTACCAGCGCAACACGTTCTTCTTCGAACTGT
GCTTTCAGAACTTCAACGTCAGTGATTTTGCCAGCAACAGCTGCGTCCAGAACTTTGTCTGCGAACGCCTGGAAACCAGC
GTCTTTTGCAACGAAGTCAGTCTGGCAGTTAACTTCCAGAATGATGCCGTAGTTGCCGTCGATTTTGGTTTTGATCACGC
CGTCAGCAGCAACGTTGCCTGCTTTTTTCGCTGCTTTAATAGCACCGGACTTACGCATGTTTTCGATTGCCAGCTCGATG
TCGCCGTTAGCTTCAGTCAGTGCTTTTTTGCAATCCATCATGCCTGCGCCAGTACGCTCACGCAGCTCTTTTACCAGGGA
TGCGGTAATTTCAGCCATTCTAAAATCCTCGGAGATGTGATCTGCCCGGCATTAAACCGCACAGATATAAAAGTGAAAAA
GGGGGCCATATGCAGGCCCCCTAACCAAACGTGTACTACCTGGTCTATAAGGGCTCTCCCCCTTCATATTTCGCGCCGCA
GATGCGTTGTCTTCGCTCGCTCATCCCGGTCACTTACTGATGTAAGCTCCCGGGAATTCTCGAGCTTGCCGCCTTTCTGC
AACTCGAACTATTTTGGGGGAGTTATCAAGCCTTATTACTCAGCTTCTACGAAGCTTTCTTCCGCCTGGGAAGCCAGATC
CTGAGAACGGCCTTCACGTACGGTTGCAGCAACAGCGCCCAGGTACAGGGTCACAGCACGGATTGCGTCGTCGTTACCCG
GGATAACGAAGTCAACACCGTCCGGATCAGAGTTGGTATCAACGATAGCAAATACCGGAATACCCAGGTTGTTTGCTTCT
TTGATAGCAATGTGTTCGTGGTCAGCATCGATTACAAACAGAGCGTCCGGCAGACCGCCCATGTCTTTGATACCGCCCAG
GCTGTTTTCCAGTTTCTCCAGCTCACGAGTGCGCATCAGCGCTTCTTTCTTGGTCAGCTTGTCGAAAGTACCGTCCTGAG
ACTGAGTTTCCAGGTCTTTCAGACGTTTGATGGACTGACGAACGGTTTTCCAGTTAGTCAGCATACCGCCCAGCCAGCGA
TGGTTCACGAAGAACTGGTCGCAGCTCAGAGCAGCGTCTTTCACCGCTTCGCTTGCAGCGCGTTTAGTACCAACGAAAAG
GATTTTACCTTTGCGAGAAGCAATCTTGTTCAGTTCAGCCAGAGCTTCGTTGAACATCGGTACAGTTTTCTCAAGGTTGA
TGATGTGAACTTTGTTACGCGCACCGAAGATGAACGGCTTCATTTTCGGGTTCCAGTAACGGGTCTGGTGACCGAAGTGA
ACACCAGCCTTGAGCATGTCGCGCATGGAAACAGTTGCCATGATTAAAACCTCTATATAAAAGTTGGGGTTATGCCTCCA
CGTATCCCATATTACCGACCCCAAAGGGCACCCCGGAATATGTGCCGATACGTGTGTGTTGTTACACAAAGTGAGATTGT
CGCTTCCGTCCAGTCTGTGTATACGAAATGGATCGGAAGTCCGGCGCGCTTTATACCACAAATACGTCTGGGACACCAAT
AATTGTTGGCGCTGTGTACAGCATCAGACGTCGAATTTTCTATTATAGAAAACCTTCAGTGGCACGTTTGGCGAAATTCA
GAATGATTCTCAATTTGCCCGGGTGTGATACCATTGACGGCACTTACATATATATTGTCGGTATCACCGACGCTGATGGA
CAGAATTAATGGCTATCTCAATCAAGACCCCAGAAGATATCGAAAAAATGCGCGTCGCTGGCCGACTGGCTGCCGAAGTG
CTGGAGATGATCGAACCGTATGTTAAACCGGGCGTCAGCACCGGCGAGCTGGATCGCATCTGTAATGATTACATTGTTAA
TGAACAACACGCGGTTTCTGCCTGCCTCGGCTATCACGGTTATCCGAAATCCGTTTGCATCTCAATTAATGAAGTGGTGT
GCCACGGTATTCCGGACGATGCTAAGCTGCTGAAAGATGGCGATATCGTTAACATTGATGTCACCGTAATCAAAGATGGT
TTCCACGGCGATACCTCGAAAATGTTTATCGTCGGTAAGCCGACCATCATGGGCGAACGTCTGTGCCGTATCACGCAAGA
AAGCCTGTACCTGGCGCTACGCATGGTAAAACCAGGCATTAATCTGCGCGAAATCGGTGCGGCGATTCAGAAATTTGTCG
AAGCAGAAGGCTTCTCCGTCGTTCGTGAATATTGCGGACACGGTATTGGTCGCGGCTTCCATGAAGAACCGCAGGTGCTG
CACTATGACTCCCGTGAAACCAACGTCGTACTGAAACCTGGGATGACGTTCACCATCGAGCCAATGGTCAACGCGGGTAA
AAAAGAGATCCGCACCATGAAAGATGGCTGGACGGTAAAAACCAAAGATCGCAGCTTGTCTGCACAATATGAGCATACTA
TTGTGGTGACTGATAACGGCTGCGAAATTCTGACGCTACGCAAGGATGACACCATCCCGGCGATAATCTCGCACGACGAA
TAAAATGAAGCCGGCGAATGCCGGCTTTTTTAATGCGATAATTTAATCTTATGGGTGGCGCACAATGAATACCCTTCCAG
AACAGTACGCAAACACCGCTCTCCCCACCCTGCCCGGTCAACCGCAAAATCCATGCGCCTGGCCCCGTGATGAATTAACC
GTCGGTGGGATAAAAGCCCATATCGATACTTTCCAGCGTTGGCTGGGTGATGCCTTTGACAATGGTATCTCCGCAGAACA
GTTGATTGAGGCGCGTACCGAGTTTATCGACCAGCTCCTGCAACGATTATGGATTGAAGCGGGATTCAGCCAGATTGCCG
ACCTGGCATTGGTCGCCGTCGGTGGCTACGGTCGTGGCGAGCTGCATCCACTTTCAGACGTCGATTTACTGATTTTAAGC
CGTAAAAAGCTCCCGGACGATCAAGCGCAAAAAGTGGGCGAGCTGTTAACGCTGCTCTGGGATGTAAAGCTGGAAGTCGG
TCATAGTGTGCGCACGCTTGAAGAGTGCATGCTGGAAGGGTTATCGGATTTAACCGTCGCCACCAATTTAATCGAATCCC
GCTTATTAATTGGCGATGTTGCGCTGTTCCTCGAACTGCAAAAACATATTTTCAGCGAAGGATTCTGGCCTTCCGACAAG
TTCTACGCGGCGAAAGTTGAAGAACAGAACCAGCGCCATCAGCGTTACCATGGCACCAGCTACAACCTTGAACCAGACAT
CAAAAGCAGCCCTGGCGGCTTGCGCGATATCCACACTCTGCAATGGGTGGCCCGCCGTCATTTTGGCGCAACATCGCTGG
ATGAAATGGTCGGGTTTGGCTTCTTAACCTCAGCGGAGCGGGCGGAATTAAACGAATGTCTGCATATATTGTGGCGTATT
CGCTTTGCCCTGCATCTGGTCGTCAGCCGTTACGATAATCGCCTGTTATTCGATCGCCAGCTTAGCGTCGCCCAGCGTCT
GAATTACAGTGGCGAAGGTAACGAACCGGTCGAGCGGATGATGAAGGATTACTTCCGCGTGACACGCCGCGTCAGTGAAC
TCAACCAGATGCTGCTGCAACTGTTCGATGAAGCGATCCTCGCCCTTCCCGCCGACGAAAAACCCCGTCCAATCGACGAT
GAGTTTCAGCTACGCGGTACGCTAATCGACCTGCGTGATGAAACACTATTTATGCGCCAGCCGGAAGCCATCTTGCGTAT
GTTCTACACCATGGTGCGCAACAGTGCGATCACCGGCATTTACTCCACCACACTGCGCCAGTTACGCCATGCCCGTCGCC
ATCTGCAACAACCGCTGTGTAATATTCCGGAAGCACGAAAACTGTTTTTGAGCATTCTGCGTCACCCCGGAGCGGTGCGG
CGCGGGCTATTGCCAATGCATCGCCATAGCGTGCTCGGCGCGTATATGCCGCAATGGTCGCATATCGTCGGGCAGATGCA
GTTTGATCTGTTCCACGCCTACACGGTGGATGAACATACTATCCGCGTGATGCTGAAACTGGAGAGTTTTGCCAGTGAAG
AAACGCGCCAGCGCCATCCGTTGTGTGTGGACGTCTGGCCGCGCCTACCGTCAACTGAGCTGATTTTCATCGCCGCGCTG
TTTCACGATATCGCCAAAGGACGCGGCGGCGACCATTCCATTCTCGGTGCTCAGGATGTAGTGCATTTTACCGAACTCCA
CGGGCTGAACTCACGCGAAACACAGCTGGTCGCCTGGCTGGTTCGCCAGCACTTGCTGATGTCGGTGACAGCTCAGCGTC
GCGATATTCAGGACCCGGAAGTCATCAAGCAGTTTGCCGAAGAAGTTCAAACGGAAAATCGTCTGCGCTATCTGGTATGC
CTGACAGTGGCTGACATTTGCGCCACCAACGAAACGCTGTGGAATAGCTGGAAGCAAAGTCTGTTGCGCGAACTCTATTT
TGCCACCGAAAAACAGCTACGACGCGGAATGCAAAACACGCCGGATATGCGCGAACGGGTTCGCCATCACCAACTCCAGG
CGCTGGCACTGCTGCGCATGGATAACATCGACGAAGAGGCGCTGCACCAAATTTGGTCACGCTGTCGTGCTAACTATTTT
GTCCGCCATAGCCCAAATCAACTGGCCTGGCATGCGCGCCATTTATTACAGCATGATTTAAGCAAACCGCTGGTATTGCT
TAGTCCGCAGGCTACGCGTGGAGGCACCGAGATTTTTATCTGGAGCCCGGACCGCCCCTATCTGTTTGCCGCCGTCTGTG
CCGAATTAGACCGCCGCAATTTAAGTGTTCACGACGCACAAATTTTCACCACTCGCGACGGTATGGCGATGGATACCTTT
ATCGTGCTGGAACCCGATGGTAGCCCGCTATCCGCAGATCGCCATGAGGTTATTCGGTTTGGTCTGGAGCAAGTACTGAC
ACAAAGTAGCTGGCAGCCACCACAGCCGCGTCGTCAACCGGCTAAACTACGTCACTTTACTGTTGAAACCGAAGTGACGT
TTTTGCCTACCCATACCGACCGAAAATCATTCCTTGAGCTTATCGCGCTCGACCAGCCAGGACTGCTGGCGAGAGTCGGG
AAAATTTTTGCCGATCTGGGAATTTCGCTTCATGGCGCCCGAATTACAACCATTGGCGAGCGAGTAGAAGATTTATTCAT
AATTGCCACCGCTGACCGGCGTGCACTTAATAACGAGTTGCAGCAGGAAGTGCATCAGCGGTTGACAGAGGCCCTCAATC
CAAACGATAAAGGGTGATGTGTTTACTGATATGAAAAGAGTTTAACAATGCAGCAGTTACAGAACATTATTGAAACCGCT
TTTGAACGCCGTGCCGAGATCACGCCAGCCAATGCAGACACCGTTACCCGCGAAGCGGTAAATCAGGTGATCACCCTGCT
GGATTCCGGCGCACTGCGTGTAGCGGAAAAAATTGACGGTCAGTGGGTGACGCATCAGTGGTTAAAAAAAGCGGTGCTGC
TCTCTTTCCGTATTAATGATAATCAGGTGATCGAAGGGGCAGAAAGCCGCTACTTCGACAAAGTGCCGATGAAATTCGCC
GACTACGACGAAGCACGTTTCCAGAAAGAAGGCTTCCGCGTTGTACCACCAGCGGCGGTACGTCAGGGTGCGTTTATTGC
CCGTAACACCGTGCTGATGCCGTCTTACGTCAACATCGGCGCATATGTTGATGAAGGCACGATGGTTGATACCTGGGCGA
CCGTCGGTTCTTGTGCGCAGATTGGTAAAAACGTCCACCTTTCCGGTGGCGTGGGCATCGGCGGCGTGCTGGAGCCGCTG
CAGGCTAACCCGACCATTATTGAAGATAACTGCTTCATTGGCGCACGCTCTGAAGTGGTTGAAGGGGTGATTGTCGAAGA
AGGTTCCGTCATCTCTATGGGCGTATACATTGGTCAGAGCACCCGTATTTACGACCGTGAAACCGGCGAAATCCACTACG
GTCGCGTTCCGGCGGGGTCTGTGGTTGTTTCAGGTAATCTGCCGTCAAAAGATGGCAAATACAGCCTCTACTGTGCGGTT
ATCGTTAAGAAAGTTGACGCGAAAACTCGCGGTAAAGTTGGTATTAACGAACTGCTGCGTACCATCGACTAAAAGTATGT
ACACGGGCAGCACGACGCTGCCCGATTGCTTTCTGGTTCAGAATAATTCGTCCTACTCATTCTTCCTCCCCCTTTTTTAA
ATACTTTTTCATCTTGTTTCGGACTGTCATGTAATTCGCAAAACGAAGATAAATGTGCTAATCCATCCCATGGAATATCG
CCACAATAAAGCAGGTAATTTTTTGATTTTTACGCCATGATAGAAGTCTGGAAGAAAAAGGCTTTCTGCGATCACAGTCG
AGCCGGGCGGGCCAGGCCAAATGCTAAAATAAGCACAATTTACTGACTCATTTTGAGGTAACGCTATGTACGACAATCTG
AAAAGTCTGGGTATTACCAATCCTGAAGAAATTGATCGTTACAGCCTCCGGCAGGAAGCCAACAACGATATTCTGAAAAT
CTATTTCCAGAAAGACAAAGGCGAGTTTTTCGCCAAGAGCGTGAAGTTTAAATATCCGCGTCAGCGTAAAACGGTCGTCG
CTGATGGTGTGGGTCAGGGTTATAAAGAAGTCCAGGAAATCAGCCCGAATCTACGGTATATCATTGATGAGCTTGATCAA
ATCTGCCAGCGTGACCGCAGCGAAGTTGATCTTAAGCGTAAGATCCTCGACGACTTACGTCACCTGGAGTCAGTCGTAAC
CAATAAGATCAGCGAGATTGAAGCCGATCTGGAAAAACTAACGCGTAAATAATCCCGAACTGACGGTTAACTCGGGCATT
CCCCTCTCCCCTTCGGGCTGAGGGGAATGAGCCAGCGCCGCCTCAACCTTAACGCATAACCTACCGCTCTTCATCCAGTT
GTAACGCCACATACAGCAGCAACCTGTCATCAAAATTGCCCAAATCAAGCCCGGTCAGTTCCGATATACGATTAAGCCGA
TACTCCAGAGTATTACGATGAATAAACAACGCCTTTGACGTTGCCAGCGGTTGCACATTGTGACGAAACCACGCCGCCAG
CGTTCGCCGCAGCAAGCCGTTATTGTCCATCGCTTTCAGCCGCGCCAGCGGTCGCGCCAGTTCGTTGGCCTGCCAGTCGC
CACGCAAACTGTCGAGTAACACAGGTAACATCAGATCCTGATAAAAATAGCAGCGACTTTCTGGCATCCGCTGTTTACCC
ACCACCATCGTCGTTTTCGCCGTACGATAGGATCGGGCAATACTGCCAGGACCAGTAAAATAGTTGCCCAGCGAAACGCG
AAAACGCAGCTGGCCGTACTCTTTCATGCGGGTAATCAGTTGTTCAACTCGCTTACGATGATCTTCTGCATCCCAGCGCC
CAAAAGAGTTCAACGCCGGTTTCAACACCACCATTTCGGTTAGCGAGACAATCGCCACCAGATTATTACGCTCGGGCGTA
GTCAGCGCATTTTGCAGTTGTTGTAACTCCGCCATTGCGCTGTCCACGCCAAGCTGACCGCTGTCGACCTCAACAATAGC
CACTACTCGCGGTTGATTGAGATCGATCCCCAGCCGTTGCGCCCATTCAGTAAGTGCGGGAGTATTCTCCTCAGCCTGAA
TCAGGTTCATCACCAGTTCTTCCCGCAAACGGCTATCCTGCGCCAACAGGTGCATCAACCGCGACTGTTCCAGCATCATT
TCAGCCGTCATGCAGACCAGTTCGCCATATTTACGCAGGTTCTCTGGTTCACCTGTCAGGCCAATTACGCCGACAATTTC
ACCTTCCAGCCGTAACGGTAGATTAATCCCCTGCCGCACACCGTGCAGATGACGTGCCACCGCGTCATCGATATCGACGA
CTCGTCCCTGTGAAAGTACCAGCAATGCACCTTCGTGCAATTCACCAATACGCTCACGATCGCCGCTGCCGATAATTCGC
CCGCGGGCATCCATTACGTTGATATTGGTATCGATGATGCGCATGGTATGTGCCACGATATCCTGCGCCATTTTGGTATC
AAGATGCCAGCCAGCCATAAGTCCTCCGTTATGCACGGCTTAGCATAAGGAAGTACGTAACGTACGGCATTGTGCAAATG
CCTAAAGGATGATGAAGATGTATGGAGTTGTGGTGAAGTTCACAGATTGTAAGGAGAACCCCTTCCCGTTTTCAGGAAGG
GGTTGAGGGAGATTACTGCATTAACAGGTAGATGGTGCTGTCGCCGCGCTGAATGTTCAGTGCCAGCACAGACGGTTTGC
TGTCGAGAACTTTACGCAGTTCAGCGATGTTTTTCACTGCCTGCTGGTTCGCGCCAATAATCACATCACCTTTCTTCAGG
CCGATCTGCGCAGCCGGAGTGCCCGTTTTCACGTTGTTCACTACCACGCCCTGATCTTTGCCTTTGTTGCTCATCTCAGC
ACCTTCAATGCCGTTGAAGATGGAGCTGGAATCAACCTGATTCTGGCTGCTCTGCTGCAGTTCCAGATTCACGTTGACCT
GCTTACCGTCGCGCAGCAAGCCCAGGGTCAGTTTGCTGCCCACCGGCATAGTACCCACCTGAGCACGCAGTGCGGCAAAG
CTGCTGATCGGCTTACCGTTCAGTGAGGTGATCACATCACCCGCTTTAATGCCCGCTTTTGCAGCGGAGGAATTAGGCAG
AACCTGGCTTACGAAAGCACCGCGCTGGGCGTCAACTTTCATCGCTTTCGCCAGTTCGGAATTCAGCTCAGTCCCCATAA
TACCCAGCTCACCGCGTTTCACCTGGCCGTATTCCACCATCTGCGAGGTCAGGTTTTTCACCATGTTGCTCGGGATAGCA
AAACCGATACCGATGTTGCCGCCGTCCGGTGCGAGGATCGCGGTGTTGATACCGATCAGTTCGCCGTTCAGGTTAACCAG
CGCACCACCGGAGTTACCACGGTTGATCGCTGCATCGGTCTGGATGAAGTTTTCGTAGTTTTCGGCATTCAGGCCGCTAC
GCCCCAGCGCAGAGACAATCCCGGAAGTTACCGTCTCGCCCAGACCAAACGGGTTACCAATCGCTACGGTGTAATCACCC
ACGCGCAGTGCATCAGAATCCGCCATCTTAATTGCGGTCAGGTTTTTCGGATTCTGGATTTGGATCAGCGCGATATCAGA
GCGCGGATCTTTGCCAACCATCTTCGCGTCGAACTTACGGCCATCGCTCAGTTGAACTTTAATGACCGTCGCGTTATCAA
CAACGTGGTTGTTGGTGACGACATAGCCTTTATCGGCATCAATGATGACGCCGGAACCCAGCGCCATGAATTTCTGTTGC
TGGCCGCCACCATTACCGCCCTGGCCACCCTGGCAGAACGGAGAGCTCTGGAACGGAGAACCTTCCTGGCAGAACGGAGA
ATCATCACCGAAGAACTGCTGGAAATTACGCGGCATACGCGGCGTATTAACGGTTGTGCTACCTTCTACGTTAATGCTGA
CCACTGAAGGCATCACCTTTTCGAGCATCGGTGCAAGGCTTGGCATCTGCTGGGCTGTCGTTGCTGAAGAAGTCTCAGCC
GCCGTTGCAGAGAGCGGAGATAACGCCAAACCTAAACTCAGAGCCAGTGCACTCAGTGCTAATGTGGTTTTTTTCATGTA
TTTCAGTCTCGATTAACAGATAACGCAAAATTGCTGTGTTCTTCAGATTCGTTTTATAGCGCGAAGTTCCGAACTAAAGT
TTCTGCAAAAGGTAAAAATTTATTGTTCGTCTTTACAAAAGCCTGGTTATTGTTCTACGGCCATCAGACGTCGGTATTCA
TCCCACGCATAGAGGTCGGTCATACCGCTGATATAATCATGCAGCAGGCGGCAACGGTAATAATATTCCCATAGCGGAAA
CTCAGGAGAATCTGACGGTAATTTACTGACAGCTTCGACATAGGCCAGCCGATGGCGCGTCGAGAGTTTGTGGAATAAGC
GCGATTCAATAGGGAAACGTTTCACCCGTTCTTTTTCTACCAGTTCAGTAAAGTCTGATAACGACAGGCTTAATAAAGGA
CGATAAATCTCTAATAATCCGCTAATGACCCGATAGCCCTGCAATTCAAGCTGCTCGACATCTGGATGGCTAAACACATG
TTTTACAGCGACATTTTTATATAGCTTAAGAAGATCGCTGCATTCGCTGGCATCTTCCAATAATGCATGATTAAACGTTC
CGGCGAAAATCGCAGGCAGATTATCAATAAATCGTTGTGCCGCGTAGGGTACCAGTTTATTTAGGGTATTTACCCGTAAA
TACATAAAAAACTGATCTTCCGTACTGCGGCTTAAACTATTTGAGCGTGATTTTTCCCAGGCATTTTCAACCACTAGCGA
AAAGAGCGAACCTTTCTCATGCTGACCCCACGCCTCGTGCAAATGATGATAAAGCTGCTCAACGGTAAATATTCTTTTCT
CTACCGCATCTTCAAGGTCTGCCACACAATAGGAGATGTCGTCGGCAGCTTCCATAATCCACGTTAATGGAAAACGACTG
TAAAGCGCCAAATTAAGTTCTTTACGCAACCGGGCAATATAGGCTTCTTCAGAAAGATAATAACCCGGCTTTTTCATTAA
ATAGTGATGTGTCTCAGGCGTTTCGCCACGCCACCACGCCGGACGGGTATATTTTAAAATACCGCCAACCTGTGCCCAGG
TGAGATTCATCCTCATCAATGTATGCACCAGACGAATGCCTTGTGCATTCCCCTCAAAATGACATAAGTCCTGACGAATC
TTGCGCCGCAGCTCGTTAAGCGGTTCTTCCCCGTCCCGTAAACGTAGTGCTGCCACGCTGCAGCGATCGTCAGTCAGAGG
CTGGCTTTCGGCATCTTCCGGGTATAAACGCTGGCGAAACCAGTCATTTATCGCCGCTTCGCCAAAATGACCAAACGGCG
GATTGCCGATATCGTGCATCAGGCATGACATCTCAACAATGCTTTCAAAAGGTCCGGTCAGTTCATCCAGGCCGTATGCT
TCCAGCAATTTAAGCTCTTTCAGACGGCTTAAAATTTCTTTGGCGATGTAGCGCCCCACCTGCTGGACTTCCATCGAGTG
GGTAAGACGCGTGCGCACGGCGGCATTGCGCTCCAGTGGAAAAACCTGGGTCTTTTGTTGCAGACGACGAATTGCCGGAG
AGTTGATGATACGCCCGCGATCGCTCTCGAAGATCCGCAGGATCTCATGTTCGGTTTTAACGCCCTGCGGTGAACGGTAA
CGACGATGCCAGTTTATTTTTTTTCGGAAATCAATCTGTGCCATGTCCTCTCCCGCGTGAGAAATACGCTTCCCCGTAAG
CGCATGGTAAACTATGCCTTCAAATCGGGCTTATCGCGAGTAAATCTATGAAAATCGGCATCATTGGTGCAATGGAAGAA
GAAGTTACGCTACTGCGTGACAAAATCGAAAACCGTCAAACTATCAGTCTCGGCGGTTGCGAAATCTATACCGGCCAACT
GAATGGAACCGAGGTTGCGCTTCTGAAATCGGGCATCGGTAAAGTCGCTGCGGCGCTGGGTGCCACTTTGCTGTTGGAAC
ACTGCAAGCCAGATGTGATTATTAACACCGGTTCTGCCGGTGGCCTGGCACCAACGTTGAAAGTGGGCGATATCGTTGTC
TCGGACGAAGCACGTTATCACGACGCGGATGTCACGGCATTTGGTTATGAATACGGTCAGTTACCAGGCTGTCCGGCAGG
CTTTAAAGCTGACGATAAACTGATCGCTGCCGCTGAGGCCTGCATTGCCGAACTGAATCTTAACGCTGTACGTGGCCTGA
TTGTTAGCGGCGACGCTTTCATCAACGGTTCTGTTGGTCTGGCGAAAATCCGCCACAACTTCCCACAGGCCATTGCTGTA
GAGATGGAAGCGACGGCAATCGCCCATGTCTGCCACAATTTCAACGTCCCGTTTGTTGTCGTACGCGCCATCTCCGACGT
GGCCGATCAACAGTCTCATCTTAGCTTCGATGAGTTCCTGGCTGTTGCCGCTAAACAGTCCAGCCTGATGGTTGAGTCAC
TGGTGCAGAAACTGGCACATGGCTAAGTCACTGTTCAGGGCGCTGGTCGCCCTGTCTTTTCTCGCGCCACTGTGGCTCAA
CGCGGCACCGCGCGTCATCACGCTTTCTCCCGCCAACACTGAACTTGCCTTTGCCGCCGGGATCACGCCGGTTGGGGTCA
GCAGCTATTCCGACTATCCTCCACAAGCGCAAAAGATTGAGCAGGTTTCCACCTGGCAGGGGATGAATCTGGAACGCATT
GTCGCGCTGAAACCCGATCTGGTGATTGCCTGGCGTGGAGGTAATGCCGAGCGGCAGGTTGACCAGCTGGCTTCGCTGGG
AATAAAAGTGATGTGGGTCGATGCGACAAGCATTGAACAAATTGCCAATGCGTTACGTCAACTGGCCCCCTGGAGTCCGC
AACCGGATAAGGCCGAACAAGCCGCGCAATCCCTGCTGGATCAGTACGCGCAATTGAAAGCGCAATATGCTGATAAACCT
AAAAAACGTGTTTTTCTGCAATTCGGCATTAATCCGCCATTTACCAGTGGAAAAGAGTCGATTCAGAACCAGGTACTCGA
AGTTTGTGGCGGAGAAAACATCTTTAAAGACAGCCGGGTTCCCTGGCCGCAAGTTAGCCGCGAACAGGTGTTAGCACGCT
CGCCACAGGCGATTGTCATTACAGGCGGACCGGACCAAATTCCTAAAATCAAACAATACTGGGGTGAACAGCTCAAAATT
CCCGTTATTCCTCTCACGAGTGACTGGTTTGAACGTGCAAGCCCACGTATTATCCTCGCTGCACAACAGCTCTGTAATGC
GCTTTCACAGGTAGATTAGTGCCTGACCTTTTCAGGTGCTCAGTGGGGATTGAACAATGCTCGTCTATTGGCTGGATATA
GTCGGCACAGCGGTATTTGCCATCTCCGGCGTTTTGTTAGCCGGAAAATTGCGTATGGACCCTTTTGGTGTTCTGGTATT
GGGCGTGGTTACCGCAGTAGGCGGCGGGACAATTCGCGACATGGCGCTGGATCACGGCCCGGTATTTTGGGTGAAAGATC
CCACCGATCTGGTCGTTGCAATGGTCACCAGCATGCTGACCATCGTGCTGGTGCGCCAGCCAAGACGCTTACCAAAATGG
ATGTTGCCGGTGCTGGACGCCGTTGGTCTGGCGGTGTTTGTCGGCATTGGCGTGAATAAAGCCTTTAATGCGGAAGCCGG
TCCGTTAATCGCGGTTTGCATGGGCGTCATTACTGGCGTTGGCGGCGGGATTATTCGTGATGTACTGGCCCGCGAGATCC
CCATGATTTTACGTACAGAAATCTACGCAACAGCCTGTATTATCGGCGGTATTGTCCACGCTACGGCTTATTACACATTT
TCCGTACCACTGGAAACAGCCAGTATGATGGGCATGGTCGTGACGCTATTGATTCGGCTGGCGGCTATTCGTTGGCATCT
TAAGCTACCGACGTTTGCGCTGGATGAGAATGGGCGTTGAAGAGAGAAGATGTGCCGGATAGTTTATCCGGCACATGAAC
AACAGATTAGATGCTAAAGGAAGAACCGCAACCGCAGGTGCTTTTCGCGTTCGGGTTGGTCACGATGAAACGAGAACCTT
CCAGTCCTTCGGTGTAGTCAACGGAACCGCCGACCAGATATTGCAGGCTCATCGGATCAACCACCAGGCCAACGCCCTGT
TTTTCGATGGTCATATCGCCTTCGTTCACCTGATCATCAAAGGTGAAACCATACTGGAAGCCGCTGCAACCGCCACCGGT
GATATACACGCGTAATTTCAGATTCGGGTTATCTTCGTCAGCGATCAGGCTTTTAACTTTGTTGGCTGCTGCGTCGGTAA
ACTCCAGCGGCAGTGCTACGTCATCACTCATATTTTGCTCCAAACGACATCGGCAATTGGGCAAATTCTAACCCAATAAT
AATCGCCATTATCTAATACCCTGGTATTTCGTTCAAGTATTCTCGCTGGCTAATGCGGCCTTGCTTCGCGCCAGTTGCTC
AGCTTCCTGTTTTGCCAGCGTGCGCGCAAGAATCGCCGAGTATAGCGGTTTCCCACCGGTAAATTGCGCTAATAGTGTTG
CGCCAAGACCGGTAATAATCATTGGCAAAATGAGCTGGTAGTTATCGGTCATCTCCAGAACCAGAATGATCCCCGTTAAC
GGCGCGCGAATAGATGCCGCCAGTAACGCCCCCATTCCGGCAATAGCAAATGTCCCCGCCTCAAGGTGATATTGCGGAAA
CAGCTCAACGGCAACCATTCCGAAAGCGGTTCCCAGCACAGTACCCAGCGCCAGCATCGGGGCAAAAATACCGCCCGGCG
CGCCGGAAGAGAAGCACAGTAAAGTGGTAATGACCCGCGCGACGAAGATAAACACCAGCATTCCCATGCTGAAATTCCCC
GCGGTAGCGATAGGAATCAGGTTAAAACCGCCGCCCGACGTTGCTGGTGCCACAAACCCCAGCAATCCACACAGACCGCC
AATCGCACCACCCATCAGTACCCATTTGGTAATATTGCCGCCGTGCACACGGTGCAGCAAATCCTGCATTCCCAGCACCC
ATTTATTAAAAATAGGGCCGAAAATGCCAAAAATAATACCGAGGATCAGATAAAGCCACAGCGTATTAAGCGGCGCATCA
GAAAGTTTACCGACGTCAATCAACGCAACTTCATGATTAAAAATCCGGTACATAATGGTCGACATAATGACACCAATAAA
TACCGCTTTAATCGAAATTAACGTATAGCGAAACTGCGGACGCATCTCTTCGATAATAAACAAAATACCCGCCAGCGGCG
CGTTAAAGGCCGCCGCCAGCCCCGCAGCAGCACCGGTTGCCAGCAGCGTATGGCGAGCTTCATCACCTTTCAGGCGGAAA
ACATCGAGTACCATCCGCCCGATATTGCCGCCGATCTGCACGGTTGGCCCTTCGCGCCCCAACACCATGCCTCCGCCGAG
CGTCCCCAGCCCGCCAAAGAATTTCACCGGCAATACACGCCACCAGCGAACGGGACGTTGATCTTCCAGCGCCCCTTCAA
TTTCCGGGATCCCCGACCCCCCTGCTTCCGGCGCGTATTTGCGCACCAAAAAGTAGCCGAACATCGCCAGCAGCGCCGAA
CAGAGAAAAGCGACGGTTAACAGAAGCGGATAATTATCAGCAGTATGTACCAGCGCCCCCATACGTTGGTTCTGCAACCA
GGCGACACCTTTGTCAAAAGCAACCGCTGCCAGCCCGACAAGCGTGCCGACGACTGCCGCCATAAACAAAATGGCTAACG
GGGTTTTATCGCGCTCAAGAAGTTGGCGAATCAGTTGTCTGCGTCGCAGGCGCGCGGCCTGCGGTGTTTCTAAAGAGGGA
GTATCAGTTTTCATCCAATGATCACTTATTGGTCATACAAATAAGATGACGGCATTTTACTCGCACGTTCCATGAAAATC
CTTTGCAAAGCGTAATGTTTCAAATGCACAAAACTTTTATACTCTAAGAAATCAGGATTGCACCAGTACAAGCAGCCTGA
TGTTTGACGAGTATTTAACTTGTTATGAATAACATAGAATAGCAGCCATTCACTTTTTCTACGAATCAGGAACCCTCCAT
GAGTAAGTCTGAAAATCTTTACAGCGCAGCGCGCGAGCTGATCCCTGGCGGTGTGAACTCCCCTGTTCGCGCCTTTACTG
GCGTGGGCGGCACTCCACTGTTTATCGAAAAAGCGGACGGCGCTTATCTGTACGATGTTGATGGCAAAGCCTATATCGAT
TATGTCGGTTCCTGGGGGCCGATGGTGCTGGGCCATAACCATCCGGCGATCCGCAATGCCGTGATTGAAGCCGCCGAGCG
TGGTTTAAGCTTTGGTGCACCGACCGAAATGGAAGTGAGAATGGCGCAACTGGTGACCGAACTGGTCCCGACCATGGATA
TGGTGCGCATGGTGAACTCCGGCACCGAGGCGACCATGAGCGCCATCCGCCTGGCCCGTGGTTTTACCGGTCGCGACAAA
ATTATTAAATTTGAAGGTTGTTACCACGGTCACGCTGACTGCCTGCTGGTAAAAGCCGGTTCTGGCGCACTCACGTTAGG
CCAGCCAAACTCGCCGGGCGTTCCGGCAGATTTCGCCAAACATACCTTAACCTGTACTTATAACGATCTGGCTTCTGTAC
GCGCCGCGTTTGAGCAATACCCGCAAGAGATTGCCTGTATTATCGTCGAGCCGGTGGCAGGCAATATGAACTGTGTTCCG
CCGCTGCCAGAGTTCCTGCCAGGTCTGCGTGCGCTGTGTGACGAATTTGGCGCGTTGCTGATCATCGATGAAGTGATGAC
CGGTTTCCGCGTAGCGCTAGCTGGCGCACAGGATTATTACGGCGTAGTGCCAGATTTAACCTGCCTCGGAAAAATCATCG
GCGGTGGAATGCCGGTAGGCGCATTCGGTGGTCGTCGTGATGTAATGGATGCGCTGGCCCCGACGGGTCCGGTCTATCAG
GCGGGTACGCTTTCCGGTAACCCAATTGCGATGGCAGCCGGTTTCGCCTGTCTGAATGAAGTCGCGCAGCCGGGCGTTCA
CGAAACGCTGGATGAGCTGACAACACGTCTGGCAGAAGGTCTGCTGGAAGCGGCAGAAGAAGCCGGAATTCCGCTGGTCG
TTAACCACGTCGGTGGTATGTTCGGTATCTTCTTTACCGACGCCGGGTCCGTGACGTGCTATCAGGATGTGATGGCCTGT
GACGTCGAGCGCTTTAAGCGTTTCTTCCATATGATGCTGGATGAAGGTGTTTACCTGGCACCGTCAGCGTTTGAAGCGGG
CTTTATGTCTGTGGCGCACAGCATGGAAGATATCAATAACACCATCGATGCTGCACGTCGGGTGTTTGCGAAGTTGTGAT
GATTTTGCCTCGCCCACCGGGCGAGGCATTCTATTAACGGCTCTGCTTTCTCAACAAATAGATAAAATATGGCGCGCCGA
TAAAGGTCGACAGCAGCCCCGCCGGGATCTGGAATGGAAACAGCACCATCCGCCCACACCAGTCAGCGAATACCAGCAGT
AAACCACCCACCAGCGCCGAAATTACGATGTGTGGCATCGTCCGTCGAAAACCCATCATCCGCGCAATATGCGGTGCCAT
TAAACCAACAAAACTCAACGGTCCAATAGTCATCGTCGCGGTCGCCGTCAGGCAAGCCGCTAACAGCAGCAGCGCAATTC
GCGTCGGCGTCAGCGCCATTCCTACGGCTCGGGCGGTATCACCACCCAGCGGTAAAATGGTCAGCCAGCGGCGGCACAGC
GGGGTAATCGCCAGCAAAATCACCATCACAATTCCGGTGCGCCAGACCTGCGCATCGGTCGCGTTGTAGGTCGAACCGGA
AATCCAGGTCAGCACTTGCGCCATTCGCGGGTCACCGCTCGCCTGCAACATCATCAAAAGCATGGTGAATGCGGTACTTA
ACGCCATCCCCGCCAGTAACATACGGTGTGGGGAAAATCCACCGCGTCCGGCGGCGATCATAATGATCAACAGCGTCACC
GCCGCCCCGAGACTGCCTGCGGGTAACAGCCAGCCAAAGGCATTACCCGGTACCAGAAACAGCATTAACACCACGCCAAA
CGCCGCGCCGGAGCTAATCCCCAGCACTTCCGGGCTTGCCATCGGGTTTCCGGTCAGCCGCTGAATAATACAGCCCGCCA
CCGCCAGCATGACGCCCGCAAACAGCGCCGCCATAATTCGCGGCCAGCGCCAGGGCATTAAATCATCGAGCAACGCCCCG
CTCGCCCACGTCCAGCCGTGCGCATCACGACCAAACGACAGCGCCACCACCACAGCCATCAACAGCAGCACGCCGCCCGC
GAGGGCAAACGCCAGCACATGTTGGCGTTCAGCCGCGACACGATCGTTGACCTTCATATCCGGCGCGCTAATGCTGCGTA
AACGCGGCAACAGCCACAGTAGCAGCGGCGCACCGATCAACGCAGTGACCGAACCGGTGGACACTTCCATCCACACACGA
GTCAGCCAGAGGATGATTTGATCGGAAAGCCAGAGGATCAGCGCCCCAATCAGCGACGCCAGCATCAACCGTGGCAGCAG
ACGCCGCGCCCCCAGCATTTTTGCCAGCAGCGGCGCGAACAACCCGATAAAGCCGATAATCCCTACCGCATTCACCAGCA
GCGCACTGATGACAATCGCCAGCGACAGCGCCGCCAGACGCGCGAGCGACAAGGCCAGCCCGAGATTGCGCGCCACGCCA
TCATCAAGCCCCATCAGGGTTAACGGGCGAAGTAGCAATAACGTCAGCATCACGCCGCCCAGCAGCTGCGGCCATAAACG
CTCAACGCCGCCCCAGTCGGTTTGCGTCAGCGTTCCAGTGCTCCACAGAAACATGCTTTGCAACTGGTCATGATGGAAGA
TAACCAGTAATTGATTGATTGCCCCACAATAAAGGCTCACTACCAGCCCCGCGAGAATCAGCGTTACCGGCGACAGCCGT
TTCCCCCACGCGACGCCAAAGACAATTAAGCCAACAACACAAGCCCCTGCCAGCGCAGCAAACTGGCTCGCCATCGCACC
AGGGATCGCCCAGAGCGTCGTGACGGTAATCCCCAGTTGCGCGCCTGTAGCAACGCCCAACGTCGTCGGTTCCGCCAGCG
GGTTACGCAGCACTTGCTGAAACAGCACGCCCACCAGCCCCAGGCCCGCGCCCACCAGCAGCGAAATCGCCAGACGCGGC
AACAAGCTGTAGTGAAAAATCATCTGCTCGATGACGTCAATATCCGGCGACCAGGCAGCCTGCGCCCACTGGCTACGCGG
CAGCGCCTGCGAGAAGTTCATCCAGGTGAGCGCCGTAGCGACAATCACTAACAGCGCCAGCAATAACGCCGGGAAAAGCG
CAATTCGTTTACTCACGCTTTACCTCCGATGGCGTTATCCAGAATACGCACAAAGTGCATTGCCGAGAGCGTCGCACCAT
AAAACCAGACTGCAGGTACGCGCTGAAAGCGCCCTGTACGGACAAACGGCATGGCCTGCCACAGCGGGGTTGCCATTAGC
GCATCCATGTCTTTGCTGTTGTCGTGATCAAAACAGAGCACATCAACATCTTTATACGCCGCCAGACGATCGATACTGAC
GGCGGTGCTGCCCCAGAAGTTGGTTTCCCCTTGCCAGGCATTTGGGATGCCGTACTCATCGAGAATTTCCTGGAACAAGC
TGTTTGGCCCGAAGACCAACATATGGCGCGGATCGATAAGCGTCGTCAGCAATAACGGGCGTGCACCACGCTTCACAAAG
CGGGGTTTCATGCTGCGGATAAAGTCTTCGTATTGCGCTAAATGCGTTTCCGCTGCGCTTTGCAGGTTAAGTAAATCTGC
CATTTCCGTCAGTGATTTACGCGCCATCGCCAGCGGCTGTTTGCCGTCGCTGAAGTTAAATCCGCGCCCCGGCGCAATAC
GAGCCAGCATTTCTGGTGAAGGGCCATATCCTGCCGACCAGACCATAAACGACGGTTTCATTTCGGTCAGCAGTTCAAGG
TTAGGTTCTGTGCGCAAACCGACGTCAATCACCGATTCAGGTAACGGTGGTTCGCTAACCCACAGGCGATAGTTGATGGT
GTCCGCCACGCCATAAGGCACGATGCCGAGCGCCAGCAGTAATTCCACCGGCAACCACTCCAGCGCCACAATACGATTGG
GATCAATAGCCGCCGCGTGGGCGGCATTCATCTGCCATAACAACGGAGAAAGCGCCATCGCCGTTAACAGTCGACGGCGC
GAAATAAGAGGTAAGCCGCTCATCAATAAACAAAACTCACAGGTGCAGCACCCGCCGGATGCGGCAAAATACCCATCGGG
ATGCCATAAATCATTTCGAGGGTTTCGCCGCGCATAATTTCCGCAGGCGTTCCCTGAGCAATCATTTCACCGCCGCGCAG
GGCGACCAGATAATCACAGTAGCGTGCCGCCATATTGATATCGTGCAGCACGGCAATGACCGTCAGACCACGTTCCTGAC
TTAAACGGTGCACCAGCGCCAGCACATCAACCTGGTGGGCGATATCCAACGCCGAGGTCGGTTCGTCGAGCAACAGACAA
CGGCTATCCTGCGCCACCAGCATGGCGATCCACGCCCGCTGACGCTCACCGCCAGAGAGACTATCGACCAGCCGATGCGC
CAGCGGTTTTAAGCCAACCAGCGAGATAGCTTCCTCAACTTTTTCGCGATCTGCCGCACCAAAGCGCCCCAGCGCGCCAT
GCCACGGGTAACGACCAATCGCCACCAGTTCACGCACGGTCATCCCTTCTGCCGGAGGAAGCTGCTGCGGCAAATAAGCC
ACTTTGCGGGCGAATGCTTTGCTACTCCAGCTTTCCAGCGGCTGGGCATCAAGAAGAATTTCACCTTCTGACGGCGGCTG
ATGACGGCCCAACATTTTTAACAGCGTGGATTTACCAGAACCGTTGTGACCAATCAAACCAGTCACTTTTCCGGCAGGAA
AGGTTAACGACAGCGGATGCAAAAGCGTGCGCCCTGGCACACGAAAGGAGATATTACGCAGTGCAAAAGTGGTATCGGAA
TGATTCGTGTATTCCTGCATAACAGCCAACTTGTGAAACGGGCACGGAAATCCGTGCCCCAAAAGAGAAATTAGAAACGG
AAGGTTGCGGTTGCAACGACCTGACGTTCTGCGCCCCAGAAGCAGCCATAAGTGTTAAAGCAGCTGGCGACGTATTCACG
ATCGAACAGGTTGTTAACATGCAGCGCCACGTTGGAGCCAGCCATGCCGACTCGCGCCAGATCATAACGCACTAACGCAT
CCACGACCGTATAACTTCCCACTTTAAAGGAGTTAGCCGGATCACCATAGCTGGAGCCAGTATAACGACCACCGGTGCCC
AGCGTCAGACCTGAAAGCGGACCGTCAAAGAAGGTATAGTCAGCCCACAGCGAAGCCATGTGTTTTGGCACCTGTGCCGG
CGTATTGCCTTTGTAGTTGGTGTCAGTGGTGTATTCCGCGTCGGTGTAGGTGTAAGAACCAACTAAGTTAACACTCGCCG
ATAGTGCCGCTTTCGCTTCCAGCTCTACGCCACGCGCACGAATCTCACCGCCTTCAACCGAGAACAGTGAACCGTTCGGA
TCCGCCATCAGGTTATTAGTTTTGGTAAGCTGATACAGTGCGCCAGTCACCACAATTGGGCGATCTTCTGGCACATATTT
CACGCCGACTTCATACTGTTTGCCTTTCGAAGGTGCAAACAGATCGCCGTTTGCATCGGTCTGCGAAGCGGGTTCAAACG
ATTCACTGTAGCTGAAATAAGGCGTTACGCCGTTGTCGAACAGATAGTTAACACCGCCACGCCAGGTGAACTGTTTATCA
TCGCGATCGGATTTATTACCGTAATCACGGTTGAAAGATGACTGATCGGCCCAGTCATAGCGACCGCCAAGCGTAACCAG
CACTTTATCCCACTGCGCCTGATCCTGAACATACAGACCGGTTTGTTTCTGTTTCAGCAGAACGCGGTATGGACCAGACG
GATTTGGGTGAGCGCCAAAATCAAAGTCACTACGGTCTAAATTATAGATATCAGATGGTGCAACTGAACCGGCATATCCG
AACCAGGAGTCGATGTCATTACGCATACGCATAAAGTCAACGCCAGTCAGCAGAGTGTGATCCACTGAACCGGTTGCGAA
TTTGCTTTGCAACTGAGTATCAACAGAGAAGTTTTCTAACTTCTCATTATCGATAACGTACTGACGAGTCAGTGTATGGC
CCCATTGAGACTGCGGCACGTTGGCACATGGACTCGAAGAGGGGTTTGAGGAATAGAGAGGATCTGAACACATGCCGTAG
CCATATACGCTCTTTTGCGAAACTTTATTTTGCGCAAAGCGAAGGTTCTGACGTACGGTAAAGGTGTCGTTAAATTCGTG
GTCGAAGCTATAGCCAATCATCTTCTCATTACGAGAATAGGTGTTGTTCTTCGCCCCTTCGTTAAAGTCTGTCGGCAGAC
GCTTACCGTTCGGCAGCGGCTCAACGGTTCCCTCTTTCGGCAACCAGCCGTAATAACCGGTTTCCGGCTCGTTCTGGAAG
TAAGAGAGGAAGGTGAAATTGGTTTTATCGTCCGGACGCCAGGTGAACGCTGGCGCAATGGCATAACGCTGCTCTTCCGC
GCCCTTTTGCTGGGCATTGGCAGAGCGCGCAAGACCGGTCAGACGATAAGAGTAAACGCCGTCATCATCCAGCGCATCGC
TGAAGTCAAAACCGGTCTGGAACAGGCTGTCAGTACCGGCCTTAAACTGAACTTCTTTCAACGGTTCAGTGGTCGGGCGC
TTGCTGACCATGTTCAACAGGCCACCTGGGCTGCTTTTCCCATACAGCACGGAAACCGGGCCACGCATGATTTCAGCGCG
CTCCAGCATATATGGGTCAATAACCGCATCGTTATAGAAGTTGCCCTGCATCTTCAGGCCATTCAGATAGTTGTTCTGGC
TTTGGCCGTCAGCGGCGAATCCGCGGATGATCAGGTAATCGTAAGTGTTGGATGCGCCACGAGTTCCCACGGCAACGCCA
GGAGTGTAGCTAAGCGCTTCTTTTACCGACTTCGGCTGATGCAGCGCCATCTCTTCGGCGGTCACAACAGAAATAGACTG
TGGCACTTTTTGAATCGGCGTATCGGTTTTAGTGCCGGTAGCTGACTGTCGCGCCGCAATAGTTGCAGCAGGCCCCCATG
CGCTTTCTTGCGGCGCAGGTGCAGCGGTAACGGTGATAGTGTCTTCTTTCGGTTCAACCGCTGCCTGTGCATAAACAGAC
ATGCCGCTAACCGCTGTGGCTACTACAACTGCGATTTTACGCAGTGAGTGTTTTGGCTGAGCAGTTTTGGAACGCGCCAT
TGGTATATCTCTGATGTAAAGTGAATGATAACGTAAACGAGAATGATTATTATAAAGATAAGATAATATTCGAAACGCTG
GCGGGTTCGCAAGCGGTACGCAATCTGAGCGTTCCTGAAGGGTTAATAAACAACCAGATGAAAAGAAAGGGTTAATACTT
TAGGTGGGATGTTATTTTACCGGATGGCAACTCGCCATCCGGTATGTCACGTTTAGACGTTAATTACTACCAAACATATC
CTTGATCCAACCGGCTACACCGTCGCTGTCTTTCTGCTCTTGCTGAGCAGGTTGCTGTTGCGGCTGTTGCTGCGGCTGAG
AAGACTGATCAAACGGATTGCCTGACGGCTGCTGCTGCATCTCACTCTGCTGGCACAGCGATTGCGGATCGCTGGTCCAG
ACCGGCAAGACACGCATGCCACCGCTGCAAACAAAGTTGCCGTCGTAGTCCACGCCCATATCTGCAATATCTTCTGGCGG
AACAAGATTCAGCGGCGTTGGCGTCTGGTTTGCCAGATAACGCTGATAAATCGACATTGCCCCGCTGGCACCATACAGTT
TGGTCGGCTGGTTGTTATCACGGCCGACCCAGGTGATGGTCACCGTGCTGCCGTCAATGCCCGCAAACCAGGTATCTACG
TTATTGTTGGTAGTCCCTGTTTTCCCTGCCAGATGCAGGTTCGGGTATTTCGCCCCAAGCTGACGACCCGTACCGCGTTG
TACAACCTGCTGCATGGTCCATAGTGTCAGATACGCCGCCTGCGCCGGAACAGCGCGTTCCGCCTGCGGGAAGCTCTGAT
ACAGCACTTTGCCATCTTCCGCGATTACCGAACGCAGCGCAGAAAGCGGTGCACGGTTACCACCGCTGGCGATGGTCTGG
AATGCCTGCGCCACTTCGATTGGCGTTAAGTTCAACGCCCCCAGCAGCATTGCCGGAACCGGATGCAACTGATCTTTCGG
TACGCCCAGTTTAATCCAGGTATCCGTAACCGCAGGCAGCCCCAGCGCCATCCCCAGATTTACCGTCGGCACGTTCATCG
AACGGGTCAACGCATCCACCAGCATCACTCTGCCGCTTTCGCTATAACGACGGTCATCATTCTGCGGTGACCAGACCTGG
CCATTCGGCTGACGCAGCGCAATTGGCGCATCCGCAATCCACGTATTCAGACGATAGATTTTCGGCTGGCTTAAGGCCGT
CAGATAAGTCGCTGGTTTTGCAAGGGAACCAATCGAACGACGCGCCTGCATCGCACGGTTGTAGCCCGCAAACTGCGGCT
CAGAACCTCCGACCATCGCACGAACTTCACCACTAAAGCGGTCGACGACCACAATCGCGGTTTCCAGATCGCTCAGCTTA
CGCTGTTTCTTCAGTGCCGGAATGCCTTCCACGGCGGCTTTTTCTGCCGCGTCCTGGGCCACCGAGTCAAAGGTAGTGAA
GATCTTCACGCCGGAGAGATCTTTTACCTTATCGCCTAATTTAGCCTGAAGCTCCTGACGCACCAGTTGCATAAAGGCTG
GCTGAGGAGAGATCACCCCACCGCGCGGCTGAACACCCAGCGGACGCGCACTCAACATGTCATAGAGTTCTTGATCAATA
ATCTGTTGCTGTTGCAGCAGACGCAGTACCAGATTACGTCGCTCCAGCGCCAGTTTCGGGTTACGCCACGGGTTGTAGAT
GGACGCTCCTTTCACCATACCGACTAACAGCGCCTGCTGATCGAGGCTCAATTCTTCTACCGGGCGACCAAAGTAATACA
AGCTCGCCAGCGGGAAGCCACGGATTTCGTTGTCGCCACTCTGACCGAGATACACCTCGTTCATATACAGCTCAAGAATA
CGGTCTTTGCTGTAACGCGCGTCCATGATCAGCGCCATGTAGGCTTCATTCGCTTTACGCCAGTAAGAGCGCTCGCTGGA
GAGGAACAGGTTTTTCACCAGCTGTTGCGTCAGCGTACTCGCTCCCTGCACCGTGCGTCCGGCGGTCAGGTTTGCCAGCA
CCGCACGTCCGATTGAGTAGAGACTGATCCCATCATGCTCGTAGAAATGACGGTCTTCTGTCGCCAGCAAAGTATCCACC
AGCAAATCCGGGAAACCACTGCGCGGCACAAACAAACGCTGCTCACCGTTTGGTGAGGAGATCATGGTGATCAGACGCGG
ATCAAGACGGAAGAAACCGAACTGACGGTTGTTCTCCATATTGACGATCGTCGCCAGATGATCGCCATCAAAGGTCAGAC
GCGCACGCACCTGCCCTTCTTTGCTGTCCGGAAAATCAAACGGACGGCGGATCATCTCAATGCTGTTAGCCTGCACAGTA
AATTCGCCAGGACGGGTCATTTTCGACACCTGACGATACTGTGTTGCCTCCAGCAGCTTCACCATCTCGTTCTTGCTGAT
GGTCATGTCTGGCTCAAGGTTGACCATTCGACCATAAACTGCCGCAGGCAGTTGCCAGACCTTGCCATCAATACGGCTAC
GAATTTTTTGATCGAGATAAACGCCGTAAATGGCGATCAGCACGGCAAAAACGATAGCCAGTTTTAACAGCAGCCATAGC
CAGCCGCGTTTGCCACGAGGCTTACGCCCTTTGCCTTTGCCCTTACCTTTGCGCGGCATCGGTTCTTCATCCTCATAGTC
ATCATAATCGTCGTAATCATCGTCATCTTCGTAACGACGACGGCTTACCTTTTGTTTGACCGGACGCGTCGGTTTCCCTT
TGCGTCCAATTGGCTCGCGGTCATTCCCGGCCATGCTTTTTCTCCGCAATATTCAGGCGCAAAAGCCCGATTTTCTGTTC
TTCTGTTACAAGACAGAAGAAGATATCTCTCAAAATTTGTGCTCGATCGGTCCCCTCTCCCTTGAGGGTGAGGGTGAACG
TACGCGCTGATGCCCTCACCCCGGCCCTCTCCCACAGGGAGAGGGAGAAAACCAACCTTACGAATACTTTTTCGTCCGTC
GCGTCGGTGCCGTGTTTGCCGGGTCGTCCGGCCAGACGTGTTTGGGATAACGCCCTTTCATCTCTTTTTGCACCTCACGA
TACGCCCCTTTCCAGAAGGCCCCCAAATCACGCGTGATTTGCAGCGGCCTTTGGGCAGGGGAAAGCAACTCCAGCACCAG
CGGCACGCGCCCCTGAGCGATCGTCGGATTGGTGGCCTCACCAAACATCTCCTGCATTCTCACCGCCAGCGCGGGCGGGT
TATCTTCATGATAACGAATGGCGATCCGGCTTCCCGTCGGCACAGTGTAATGCGCAGGCAATTCACTATCCAGACGTTGC
TGCATTCCCCAATCAAGTAATCCGCGTAGTGCCTGATAAATGTCGAGTGATTTCAGGCCGCGTAGTGAATGTACACCGGC
CATATGTGGCAGCAGCCACGTTTCCAGCGTCGCCAACAAACTTTCATCATCAACCGCTGGCCAGTCATATTCTGGCAACC
ACTTTCCGGCGCATAACAAACGCAAGCGTAGCTGTTCCGCTTCCGCCGTCCAGTTGAGCACGCTTAAACCTTTATCACGG
ATGCCGTTAAGCATCGCCTGATGCAACTCGTCTTCTGACGGTTTCGCCAACGGCTGCACTTTCACCGTCAACTGACCGAT
TTGCAGCCGACGCCAGGCTTTCAGCGTACCTTGCGCGTCATCCCATTCCACGGTGTCAGATTGCTGCACCAGCTGCGGAC
AGCGTCGCACTAATTCATCAATATCGACCGGTAGCGCCAGTAAAATCCGCGCATCCGGCGAGGCGCTGCCCTGCAATAAT
AACGGTGCGATCAACCATTCGTGGCGGCTTAGCGCGTCGTCGGCATCGAGCATCGCTCCCATGCCGTTTGCCAGTTGATA
GCGTCCATCTTGCCCACGGCGGCGAGCAATGCGATCGGCAAACGCCCCGGCAAGTAGCAGCGCGATAAGCGAACTGTCTG
CCTCACCGCCGTATACGTTTAAGCGTTTTAACAGTTGCTGACTACGTTGCTGCCAGGCTGGCTGATTGCGCGAAAACACC
ACGCCCAGGTCACTATTGCCCATCCGTGGCGGCTCTTCGAGAATGGCGGCAATTTTTGCCGCGGTAGCAGCTTCGTCGTC
GCTCTTTGCGCTAACCAGCATTGCCGCTAAACGCGGATCGTTACCCAGCGCTGCCATTTTTTGCCCCTGCGCACTAAGCC
GTTCACCGTCCAGCGCCCCCAGCATCCGTAACAGGCGTTTCGCGGCCAGTAGATTCACCGTTGGCGGTTGATCCAGCCAG
CTCATCTGCGCCGGATCGCTGCATCCCCATTGCAGTAATTCCATCAGCAAACCGGAAAGATCGCTTTGTAATATTTCCGG
TTCACTTTGCGCCGCGGCGCGTTCTGCTTGTTCCTTGGCGATTAAATGCAGGCAGATACCCGGCTCCAGACGCCCGGCGC
GCCCGGCACGCTGCGTCATCGACGCCTGACTGATTCGCTGAGTAATTAGTCGCGTAAGCCCTGTTCGCGGATCAAAACGC
GCCACCCTTTCCTGGGCGCAATCCACCACCAGACGAATACCTTCGATAGTTAAACTGGTTTCAGCAATATTGGTCGCCAG
CACGACTTTGCGCATCCCTTGCGGTGCCGGGAGGATCGCTTTTCGCTGATCGTTCAGCGACAACGCGCCATACAGCGGGC
AGAGCAACACATCACTGCCGATACGCGAAGCCAGTTGTTCCTGCACACGCTGAATTTCTCCGACGCCCGGTAAAAATAAC
AGTAATGATCCACTTTCCTGACGCAGCATTTCGGCGGTCGCAACCGCGACGGCTTCGTCAAAACGCTGATGGGCGGGCAG
CGGTAAATAACGGCGTTCAACCGGAAACGAGCGCCCTTCTGAGATGACGACGGGCGCTTCTGGTAGCATTTGTTGCAAGC
GGTCGTTGTCCAGCGTAGCCGACATAATCAGCAGTTTAAGGTCATCACGCAGACCTTGTTGCACATCGAGTAACAGCGCC
AACGCCAAATCCGCCTGCAAGCTACGCTCATGAAATTCATCAAGGATCACCAATCCAACACCGCTCAACTCCGGGTCACG
CTGGATCATCCGCGTCAGCACGCCTTCGGTAACCACTTCCAGGCGGGTATTCGGCCCGACGCAGTTTTGCGCACGCATCC
GGTAGCCAACGGTATCGCCTGGCTTTTCGTTAAGCAGCTCCGCCAGCCGTTGCGCGACGTTACGCGCCGCCAGACGCCGT
GGCTCCAACAGGATAATTTTCCCGTTAATGCCGGGATGCGCCAGCAGTTGCAGCGGCAGCCAGGTTGATTTCCCGGCCCC
GGTCGGCGCACTTAATAATACCTGCGGCGCACAATCGAGAGCGGTAAGTAATTCAGGTAAGACGGCAGCAACGGGCAACG
ACGACACAAAACGCTCCAGAGGGTTAACATTCTTCGCGCCACATTGTAGCATCGCGGTAATTCATAACCGAGTGCCTCAC
ATGTCTGAACCGCAACGTCTGTTCTTTGCTATCGACTTACCTGCAGAAATCCGCGAACAGATTATCCACTGGCGCGCCAC
ACACTTCCCACTTGAGGCGGGACGTCCGGTCGCCGCCGATAATTTGCATCTGACTCTGGCATTTTTAGGCGAAGTGAGCG
CCGAGAAAGAGAAGGCGCTTTCTCTTTTAGCCGGACGGATTCGTCAACCTGGTTTCACACTCACGCTTGATGACGCCGGA
CAATGGCTGCGTTCGCGTGTGGTGTGGTTAGGGATGCGTCAGCCTCCACGCGGCTTAATCCAGCTGGCGAATATGCTCCG
TTCACAGGCTGCCCGCAGCGGTTGTTTTCAAAGCAATCGTCCGTTTCATCCACATATTACCTTATTGCGCGACGCCAGCG
AGGCGGTGACAATCCCGCCGCCAGGTTTTAACTGGTCGTATGCGGTGACGGAGTTCACCCTTTACGCCTCCTCGTTTGCC
CGTGGACGCACACGCTACACGCCGCTAAAACGCTGGGCGCTAACGCAATAACAAGGATTGTCGCAATGGAATTTTCTCCC
CCTCTACAGCGCGCGACGCTAATTCAGCGTTACAAACGTTTTTTAGCCGATGTGATCACACCCGATGGTCGCGAATTAAC
GCTACACTGCCCGAATACGGGTGCGATGACCGGTTGTGCAACGCCTGGCGATACCGTCTGGTATTCGACTTCAGACAACA
CCAAACGGAAATACCCACACACCTGGGAATTAACTCAAAGCCAGAGTGGCGCATTTATTTGCGTCAACACGCTTTGGGCT
AACAGGTTGACGAAAGAGGCTATCCTTAATGAATCAATTTCAGAACTGTCAGGCTATAGCTCGCTGAAAAGCGAAGTAAA
ATACGGCGCAGAACGCAGCCGTATTGACTTTATGTTGCAGGCGGATTCGCGTCCAGACTGCTATATTGAAGTGAAATCGG
TTACGTTAGCGGAGAACGAACAGGGATATTTTCCCGATGCGGTCACTGAACGAGGTCAGAAACACCTTCGGGAGTTGATG
AGCGTAGCGGCTGAAGGCCAGCGTGCGGTTATCTTTTTCGCCGTGCTGCATTCAGCCATTACACGGTTTTCACCCGCGCG
CCACATCGATGAGAAATACGCGCAACTATTGTCAGAAGCTCAACAGAGGGGGGTAGAAATTCTGGCTTACAAAGCGGAAA
TTTCTGCTGAAGGCATGGCTCTTAAAAAATCACTGCCGGTTACATTGTAGTAAAGTAAGTAACTGGTTAATTTACATTCT
GGTCGCGTGCGCAAATACGCTTTTCCTCACACAGTTGTCAAGTGTTACGTTTAGATAATTGCTATCCGGAAAAGCATCTG
CTATTTATAGCGGCCTCATTTTTCCCCCGAACATGGGGATCGATAGTGCGTGTTAAGGAGAAGCAACATGCAAGAAGGGC
AAAACCGTAAAACATCGTCCCTGAGTATTCTCGCCATCGCTGGGGTGGAACCATATCAGGAGAAGCCGGGCGAAGAGTAT
ATGAATGAAGCCCAGCTGGCGCACTTCCGTCGTATTCTGGAAGCATGGCGTAATCAACTCAGGGATGAAGTCGATCGCAC
CGTTACACATATGCAGGATGAAGCAGCCAACTTCCCGGACCCGGTAGACCGTGCAGCCCAGGAAGAAGAGTTCAGCCTCG
AACTGCGTAACCGCGATCGCGAGCGTAAGCTGATCAAAAAGATCGAGAAGACGCTGAAAAAAGTGGAAGACGAAGATTTC
GGCTACTGCGAATCCTGCGGTGTTGAAATTGGTATTCGCCGTCTGGAAGCGCGCCCGACAGCCGATCTGTGCATCGACTG
CAAAACGCTGGCTGAAATTCGCGAAAAACAGATGGCTGGCTAATTACAGCCGTTCCATCACGTTTACCACAGGCGGGAAA
TGCTCCCGCCTTATTTTTTGTTCAAAGAGATGACAGACACACACTATATTGGCCGCTTCGCCCCCTCTCCTTCCGGCGAG
CTTCATTTTGGTTCTCTGATTGCTGCGCTTGGCAGCTATTTGCAGGCTCACGCCCGGCAAGGTCGCTGGCTGGTACGTAT
AGAAGATATCGACCCGCCTCGTGAAGTTCCCGGTGCCGCAGAAACTATCCTGCGCCAGCTGGAACATTACGGCCTGCACT
GGGACGGCGATGTTCTCTGGCAATCGCAACGTCACCACGCCTATCGCGAAGCACTCGCCTGGTTACATGAGCAAGGACTA
AGTTATTACTGCACCTGCACGCGTGCACGTATTCAAAGCATTGGCGGTATTTACGACGGTCATTGCCGGGAATTGCATCA
TGGACCAGACAACGCCGCAGTGCGTATCCGCCAGCAGCATCCGGTCACCCAGTTTACTGACCTGCTGCGAGGCATTATTC
ACGCCGACGAAAAACTGGCACGGGAAGATTTTATTATTCATCGCCGTGATGGTTTGTTTGCCTATAACCTGGCGGTGGTG
GTGGATGATCACTTCCAGGGTGTGAGCGAAATTGTCCGCGGGGCAGATTTGATCGAACCGACAGTGCGGCAAATCTCGCT
GTACCAGCTTTTTGGCTGGAAAGTGCCAGATTACATTCATCTGCCGCTGGCGCTTAATCCACAAGGCGCTAAACTTTCCA
AGCAGAATCATGCGCCTGCGTTGCCGAAAGGCGATCCACGCCCGGTACTAATCGCGGCACTTCAATTTCTGGGGCAGCAG
GCAGAAGCACACTGGCAGGATTTCAGCGTCGAGCAAATCCTTCAGTCAGCCGTCAAAAACTGGACGCTGACCGCCGTGCC
TGAGTCGGCAATTGTAAATTCAACATTCTCAAATGCGTCATGCTGAGCTATGATTAGCCGCTATTTTTTTGTCCTGAATG
ATGTTTGACACTACCGAGGTGTACTATTTTTACCCGAGTCGCTAATTTTTGCCGCAAGGTGCTAAGCCGCGAGGAAAGCG
AGGCTGAACAGGCAGTCGCCCGTCCACAGGTGACGGTGATCCCGCGTGAGCAGCATGCTATTTCCCGCAAAGATATCAGT
GAAAATGCCCTGAAGGTAATGTACAGGCTCAATAAAGCGGGATACGAAGCCTGGCTGGTTGGCGGCGGCGTGCGCGACCT
GTTACTCGGCAAAAAGCCGAAAGATTTTGACGTAACCACTAACGCCACGCCTGAGCAGGTGCGCAAACTGTTCCGTAACT
GCCGCCTGGTGGGTCGCCGTTTCCGTCTGGCTCATGTGATGTTTGGCCCGGAGATTATCGAAGTTGCGACCTTCCGTGGA
CACCACGAAGGTAACGTCAGCGACCGCACGACTTCCCAACGCGGGCAAAACGGCATGTTGCTGCGCGACAACATTTTCGG
CTCCATCGAAGAAGACGCCCAGCGCCGCGATTTTACTATCAACAGCCTGTATTACAGCGTAGCGGATTTTACCGTCCGTG
ATTACGTTGGCGGTATGAAGGATCTGAAGGACGGTGTTATCCGTCTGATTGGTAACCCGGAAACGCGCTACCGTGAAGAT
CCGGTACGTATGCTGCGCGCGGTACGTTTTGCCGCCAAATTGGGTATGCGCATCAGCCCGGAAACCGCAGAACCGATCCC
TCGCCTCGCTACCCTGCTGAACGATATCCCACCAGCACGCCTGTTTGAAGAATCGCTTAAACTGCTACAAGCGGGCTACG
GTTACGAAACCTATAAGCTGCTGTGTGAATATCATCTGTTCCAGCCGCTGTTCCCGACCATTACCCGCTACTTCACGGAA
AATGGCGACAGCCCGATGGAGCGGATCATTGAACAGGTGCTGAAGAATACCGATACGCGTATCCATAACGATATGCGCGT
GAACCCGGCGTTCCTGTTTGCCGCCATGTTCTGGTACCCACTGCTGGAGACGGCACAGAAGATCGCCCAGGAAAGCGGCC
TGACCTATCACGACGCTTTCGCGCTGGCGATGAACGACGTGCTGGACGAAGCCTGCCGTTCACTGGCAATCCCGAAACGC
CTGACGACGTTAACCCGCGATATCTGGCAGTTGCAATTGCGTATGTCCCGACGTCAGGGTAAACGCGCATGGAAACTGCT
GGAGCATCCTAAGTTCCGTGCGGCTTATGACTTGTTGGCCTTGCGAGCTGAAGTTGAACGTAACGCTGAATTGCAGCGTC
TGGTGAAATGGTGGGGTGAGTTCCAGGTTTCCGCGCCACCAGACCAAAAAGGGATGCTCAACGAGCTGGATGAAGAACCG
TCACCGCGTCGTCGTACTCGTCGTCCACGCAAACGCGCACCACGTCGTGAGGGTACCGCATGACAGTGGCGTATATTGCC
ATAGGCAGCAATCTGGCCTCTCCGCTGGAGCAGGTCAATGCTGCCTTGAAAGCATTAGGCGATATCCCTGAAAGCCACAT
TCTTGCCGTTTCTTCGTTTTACCGCACCCCACCGCTGGGGCCGCAAGATCAACCCGATTACTTAAACGCAGCCGTGGCGC
TGAAAACCTCTCTTGCACCTGAAGAGTTACTCAATCACACTCAGCGTATTGAATTGCAGCAAGGTCGCGTCCGTAAAGCT
GAACGCTGGGGACCGCGCACACTCGATCTTGATATCATGTTGTTTGGTAATGAAACCATTAATACCGAACGACTCACCGT
TCCGCATTATGATATGAAGAATCGCGGCTTTATGCTGTGGCCGCTGTTTGAGATTGCCCCGGAACTCGTGTTTCCTGATG
GGGAGACATTACGTGAAATACTCACTTCGCTAGCAGTACCACAACCTGCCATCTGGTAATAGCTGTATTATTTTATTTTC
TTGACGAGAGGAATACAAAATGATACGGCTATTTCATCCACCAAGAAAAAATTATTTTCTTATCTTACTCCTCACTTCCC
CCCTTACATATTAAATATACTTAATTTACATTTTAGTTTTTTTTAATTCATTCATGAAATAGCACTTCATGCAAATAAAT
TAGGCATTTTTTGTTTAAACAACCTAAAATAACAACAATTCAATACACCACATAAATATATTCACATCCGTGATAACTCA
CCCCTATTACATCCTCCAAAAACTTTGAGTAATATCCGCTCGCAATATTAATTTCATATAATTTTTGTAAGGATGCATGT
AATGAAAAAAGCACTTCTCGCAGCCGTTCTGGTTATGGCTTCTGGTTCCGCCCTGGCTGTAGATGGTGGTCATATCGACT
TTAACGGTATGGTACAGTCCGGTACCTGTAAAGTGGGTGTGGTAGATACCGGTATGCACGGCATCAGCACTGATGGCGTG
GTTACCCTGGATACTGCAAATGTTACTGATAACTTTGCTGAAGTAAGCGCTGCTGCTGTTGGTTTACTGCCGAAAGAGTT
CATGATTTCTGTGGATTGCGAACCGGGTAAAACAACTGCCCAGTTGACCATGGGTTCTGCAAGCTACGCGAACACCAGCG
GCACCCTGAACAACAATACCAATATCACGATTAACGGTATTCAACCGGCTCAGAACGTGAACATTGCTGTTCATAACATG
AAAAACAAAGCTGGCGCTGCTGAAATTAAGCAGGTCCATATGAACAATTCTTCTGAAATCCAGGAATTGACATTAGACGC
ACAAGGCAACGGTCAGTATGTGTTTAACGCATCTTACGTTAAAGCACCGAACAGCCAGGCTGTTACTGCTGGTCACGTTA
CCACTAACGCACTGTACACCATTACTTATCAGTAATTGATAGCGAATTGAGTATAGGGTTTGTCATCAGGCAAACCTTAT
TTTCGCTAATTTTATCTCAACACAGACAGCAAGGAGTGCTTATGTTTCCCTTGGTTAAAAAAACGGTTAGTGTATTATTT
GTGAGTACTCTGTTAGCCAGTACGCCAGCATTCGCTGACATTATTATTTCCGGGACTCGTATCATTTATAACGCTGATAA
AAAAGATGTTAACGTTCGTCTGGAAAATAAAGGGAATCGCCCCTTACTGATTCAGAACTGGTTGGACACCGGCAATGACA
ATGTCGACCCCAGCCAGATCAAAGTGCCCTTTACCTCTACGCCCCCCGTTTCACGCGTGGAGCCAAAACGCGGGCAAACC
GTAAAAGTAATGTATACCGGTGCAACAGCCCTACCTAAAGACCGGGAAAGTGTCTACTGGTTTAACGTGCTGGAAGTGCC
GCCAAAGCCGAAAGATGCCCAGGCTGACAAAAACTTACTACAACTGGCTTTCCGCACGCGCATCAAACTTTTTTATCGCC
CGAGCGGTTTGCAGGGTGAACCTGCTGAAGCGCCAGCAAAAATCACCTGGAAGTTGAACAACACGCAATTGCAGGCGAAT
AACCCAACGCCTTATTACGTGTCATTCAATGACGTCAAACTGGAAAGCGGCGGCAAAAGCTACAAAGTCGATTCCAGCAT
GATCGCGCCGTTCAGTCAGGCAAGCTTTAGCGTAACGGGTCTGTCAGGTGGCGTTTCATCGGGCAAAGTCGTGTTCCAGG
CCATAAATGACTTTGGCGGCAATATCGATGGTTCAGCAACATTCTAAAAAATAAACGGATTCTTTTAACATCGCCAGGAA
TGCAACCTTGTACCAGTTTACTCATCACAAAAGTCGTACACCGAAAAAAACGCTACTTGCGGCCTGTTGCGCCCTCCTTT
ATAGCAGCAACGGTGCTGCGGCAGACACGGTGGAATATGACAGTTCCTTCTTAATGGGAACTGGCTCATCAACCATTGAT
GTTAAACGCTATGCTCAAGGTAACCCGACACCGCCGGGTCTTTATAATGTCCGCGTGTTTGTAAACGGTCAGGCCACCTC
CAGTTTAGAAATTCCGTTTGTGGATATTGGTGAAAACAGCGCGGCGGCCTGTATTACCCGCAAAAACCTGGCGCAGTTAC
ACATTAAACAATCCGAACAGCTTGTGACCCTACTCGCCAGAGAAGGTGAAGAAGAAGACTGTCTTGATCTGGCAAAGTCA
TACGATCAGGCCGAAGTTCAATTTGATGGCAGTGACCAGTATCTCGATCTGACCATTCCTCAGGCCTATGTCCTGAAGAG
CTATGGCGGCTACGTTGATCCTTCCTTATGGGAGTCGGGAATTAACGCTGCCACGCTGTCGTATTCCTTGAACGCGTATC
ACACAAGTTCAGAAGACAACAATAACGATAGTGTCTATGGCGCATTTAACTCAGGTATCAATTTAGGTGCCTGGCATTTC
CGTGCGCGCGGCAACTATAACTGGACAACAGATAGCGGCAGTGATTTCGATTTCCAGGATCGTTACCTACAGCGTGATAT
TCCGGCAATACGTTCACAGATAATCATGGGTGATGCCTACACCACCGGTGAAACGTTTGACTCTGTCAACGTCCGGGGTG
TTCGCCTGTACAGTGACAGCCGTATGCTGCCTTCTGCGTTAGCCAGCTACGCCCCGACCATTCGTGGTGTGGCAAACTCT
AACGCCAAAGTTACCGTGACGCAGAACGGCTATAAAATCTATGAAACCACCGTTCCGCCAGGTGAGTTTGTTATTGATGA
CATCAGCCCTTCCGGATTTGGTAGCGAACTGGTTATTACCATTGAAGAAGCGGATGGTTCCAAACGTTCCTTTACGCAGC
CCTTCTCCTCCGTCGTGCAGATGCAGCGTCCTGGCGTGGGTCGTTGGGATTTCAGTGCCGGTAAAGTTATTGATGACAGC
CTGCGATCCGAACCTAATATGGGGCAAGCCTCTTATTACTATGGTCTGAATAACCTCTTCACGGGTTACACCGGCATTCA
GTTCACCGACAACAACTATCTTGCCGGACTGTTAGGTGTGGGTATTAACACCAGCATCGGTGCTTTTGCGATGGACGTTA
CCCATTCCCGCGCTGAAATTCCGGATGATAAAACCTACCAGGGGCAAAGTTATCGCGTAACCTGGAACAAACTTTTCCAG
GATACCGGAACATCATTTAACCTGGCGGCTTACCGCTATTCCACCCAGGATTACCTGGGCCTGCATGACGCGTTAGTCCT
CATTGACGACGCGAAACATATGTCTGCCGATGAAGACAAAAACACCATGCAGACATACTCACGCATGAAAAACCAGTTTA
CCGTCAGCATCAACCAACCGTTGAACATCGCCTATGTCGATTACGGTTCGCTGTTTATTTCCGGTAGCTGGACGGACTAC
TGGGCGGCGAACAATAGCAGGACTGAATATAACGTCGGTTACAGTAAAAGCGTTTCGTGGGGTAGCTTCAGCGTTAACCT
GCAACGTAGCTGGAATGAAGATGGCGATAAAGATGACGCAATGTATGTCAGCGTTAGCGTGCCTTTTGAGAATATTTTCG
GTGGCAAACGCAAGACTTCCGGTTTCCGTAATTTAAATACTCAGCTCAATACCGATTTTGATGGTTCACACCAGTTGAAT
ATGAACAGTTCCGGTAGCAATGAAAGCGGCCAGGTGAACTATAGCGTCAACACAGGTTATAGCATGGATAAAAATTACGG
CGATCTAGCTTCTGTTGGCGGTTATCTCAACTATGAATCTGGGTTAGGCGGTATTTCCGCTTCGGCCTCTGCCTCTTCTG
ATAATAGCCAACAGTACTCCATCTCAACCGATGGCGGCTTTGTGTTACACAGCGGTGGTCTGACATTTACCAATAACAGT
TTCAGCAGTAACGATACGCTGGTGTTAGTCAATGCCCCAGGCGCTAAAGGCGCACGAGTCAATAACAGTAATAACGAAAT
CGATCGCTGGGGATATGCCGTAACGTCCGCTGTCAGCCCATACCGTGAAAACCGCGTAGGCCTGAACATTGAGTCGCTGG
AAAACGACGTAGAACTGAAAAGTACCAGCGCCACCACCGTACCACGTAGCGGGTCCGTTGTTTTGACCCGTTTTGAAACT
GACGAAGGGCGTTCTGCCGTGCTGAATATTACCTCCAACACTGACAAACCGATTCCGTTTGCTGCGGAGGTTTACCAGGA
TGAAGTCATGATCGGCAGTATGGGCCAGGGCGGTCAGGCATTTGTGCGTGGTATTAACGACAGTGGGGAATTAACCGTGC
GCTGGTTTGAAAACAACCAAACCGTGGACTGTAAGTTGCATTACCAGTTCCCGGCCCAGCCACAAACTCTGGGAAGCACT
AACACCTTATTACTTAACAATCTTACCTGTCAGGTAGCAAAACATTAATATGGAAAATTCTATGAAAAGGATACTACTAA
CATCCGCGTTAATAGGCCTGGGTTTACCGGCAGTTGGCTCTGCAACAGATCTCAAAGTCGATTTTACGGCCACTGTACTC
GCCACCACCTGTACGATAACCATTGAACAAGATGGTGGCCCCGTGGTGACCAGTAGCGGTAACGATGAATACAGCCTGAC
CATTCCTGATGTTGGCCTGGACAAAGTTGTCACTGGTGATGTTGCAGCGCAAGCCAACTTTAAATTAAAGGCTAAAGATT
GCAGCGATGGTTACTCAAAAATTTTTACCACACTTACAGGAACGTCTGTTTCAGGCAAGTTGATTGTCAATGAAGCAAGC
TCTGGCGCTGCTGGTGTGGGTATGGGTATTAAGCGTAGAGATGCCGCAGACTCGGCTTTCTTCACGCCCAATAATACTGA
CAAATTTGAATGGTCTTCCGATGAGAAAACTAACGGTGTGCCTCTGACCGTTGCACTGCGCGAAACCACGGCGGGAGCGG
GACGCACCGGTGCGTTTCAGGCAAAAGCCACCTTTAACTTCACCTACGAATAACAGGGACAGCCACCATGAAATTAAAAG
TCATCGCCACACTGATTGCTACTGTTGCCGTAGGTGCAAGCTTTAATTCAAATCTCGCCTATGCGAGTACTACTTCTGCA
TCTTTAACCGTAAACAGTAACCTGACTATGGGTACCTGTAGTGCTCAGGTTCTGGATTCCAGCAATAAAGCGACAGATAC
TGTTGCCCTGGGCAATGTTTATATTTCTGAGTTAGCGGCAAAAAGCAAAGTGCAACCATTCAAAATCCGCTTCAGTGATT
GTGCCGGTCTTCCAGGGAAGAGTGCTCAACTCGTTTTAGCGCCCAGGCCTGGTACGGGTTGCGCTGGCGGTCAGTCTAAC
ACTGCCGGCTTTGCAAATTCAATTTCCTCCGGCGCTGGTGGTTCAAGCAGAGCAGCGGTCGAAGTATGGACGACTACGAC
CCCCGAGGGAAGCGGCAGTCAGCAACTCAGTTGTGTTCAACGAAACGTCATCACGGTTGATCTTTCTAATGCCAGTACAA
CACAGCCTTATGATTACGATTTAAGTGCGCGGATGATTATCGCCGATGGAAGAACGGTTAATGATGTATTACCGGGCGAG
TTTCTTTCTCCCACCACCTTCACTATCACTTATCAGTAATAGCAGATAAGGATATTAGAATGCTATGCAGGCATCATAAA
TTTGTATGTTTTTTGGGGCTGGCAACAGCCCTCATAACGCCTTTTGCCTATGCTGGTCAGGATGTGAATCTCACCGCGCA
GATTGTCGCCAGTACCTGTCAGGTTGAAGTGAGTAATAATGGCGTGGTGGATCTCGGCAGTGTGACCCTGGACTATTTTG
CCGACAACGTAACTCCAACAACGGATTATGCGGGTGGCAAGACGTTTAATGTTAACGTGGTCGCCTGCGATAATATTCAA
ACGACCCAGTCGCAAATGAAATTAGATTTTCAGCCGCAGGCAGGTTCGCTTGCGCAGGTGAATAATCAAATTTTTAGTAA
TGAATATGAACAGCAGGCTACCGGGGCAAAAAACGTCGGCATTGTAATATTTTCGGCACAGCCGAATCAGCAGACCTTTA
ACGTGCGGGGAACGGACGGTTCCTCAACGGCGATTTATTCTGTCGCTCCAGGCAATGCTGTTCCGTCAACCTGGACCTTT
TATTCCCGTATGCAACGGGTGAATAATGCTCTCCCACCCGAGTCGGGGATGGTGAGAAGCCAGGTTATTGTTAATGTTTC
TTACGAATAATAAGGATAATTATGCAAAGGAAAGGCAATAAACTGTTACGACAGTTATGCAGTGCAATACTGTTATTTTT
TATGTGCTCCTTGTCTGCATCTGCGATGGAATGTTATATAGAAAAATGGGCGGGGGGAACTTATGACATGGTCATAAACC
CTGAGGTTGAAAGTATAACAACGCAAATGGTATCTTCGCCACAAGAAATAAGCGACATGGTTCATGATACAAATATTAAA
CTTAAGGACAGGAACGGTGAGACGATTGGATGTAAGTCCGATATAGGGGGTACTACTTCAGTACACTTTCTTAACACTGC
GGATGCAGGTTTGTTATCAACCTATGTTTCGAAAGATAATGGCGCATTATTAAAAACAACAGTTCCTGGTATTGTCTACT
CCGTAGAATTGGTATGTATAAGCTGTGGTGCTGCAGATGAACTTGATTTAGTTTTACCTGCACAAAGCGGCGCAGATAAC
TTCATACCGGCCAGCGATACCAAGTGGGCTTATGAATACAGTGACAACGACTGGTATTTGCGTTTTCGTTTTTACTGGAC
GCCGGAATTTAAACCTCAAAATGGGGTTTTCGAAGGATATGCCTTGCCAGGAAAAATTGCTTCCTGGTATATAGGTGATA
ATACCCAGGCATGGGTAAACTTTACTGTTCAGGATAGTGCCGTTCACTTTTACGTTGACCAACCAACCTGTTCAATGATT
ACCCTGGATCAGGACAAAGGCAATGTGAGTGGCACAGAAATCCAGTTAGGTAACAGTTACGTATCCGAAGTTAAAAATGG
TCTTACCCGAGAAGTTCCCTTTGCTATCCGTGGTGAGTATTGTTATGCCAGCAAGATTACGGTTAAGCTGACGGCTGCAA
ATGCAGCCACTGACAAAAATCTGGTGGGTAAAACAACTGGCTCTGCCACAGGCGTGGCTGTAAGAGTTAATTCAACTTAT
AATGATAGCAAAGTGTTATTAAAACCAGATGGCGTTGCTTCCATTGATTATAACTTCCCTGTCTGGTCGAATAACTTGTT
GTCATTCCCTTTTACAGCACAACTCGTCCCCGATGGCAGTGGTAAACCTATCGGAACAGGAACATTCTCCGGTAACGCGA
CCTTCTCCTTTACCTACGAATAAGTAAAACGTTATTCCCTCCTCATCGCACCAGAGTTCTGCTCTGGTGCGAACGTTTTC
CCCACACTAAAAACCATTGCCCCCCTGATTTCGGCTGTTAGAATGCGAACAGATCTGACTTTAGCCATCAGGACACGTTA
TGAAACCGACCACCATTGCTTCATTGCAAAAATGCAAACAGGAAAAAAAACGTTTCGCGACCATCACCGCTTACGACTAT
AGCTTCGCCAAACTCTTTACCGATGAAGGACTTAACGTCATGCTGGTAGGCGACTCGCTGGGCATGACGGTTCAGGGGCA
CGACTCCACCCTGCCAGTTACCGTTGCTGATATCGCCTACCACACTGCCGCCGTACGTCGTGGCGCGCCAAACTGCCTGT
TGTTGGCTGACCTGCCGTTTATGGCGTATGCCACGCCGGAACAGGCCTTTGAAAATGCCGCCACAGTAATGCGTGCCGGA
GCCAATATGGTCAAAATCGAAGGTGGCGCATGGCTGGTGGAAACCGTGCAGATGCTGACTGAACGCGCGGTTCCGGTATG
TGGTCATTTAGGTTTAACGCCGCAGTCAGTGAACATTTTCGGCGGCTACAAAGTACAAGGGCGTGGCGAGGCAGGCGATC
AACTGCTCAGCGATGCATTAGCCTTAGAAGCCGCTGGTGCACAGTTGCTGGTGCTGGAATGCGTACCAGTTGAACTGGCA
AAACGTATTACCGAGGCGCTGGCTATTCCGGTTATCGGTATCGGCGCAGGTAACGTCACCGACGGGCAGATCCTCGTCAT
GCACGACGCCTTCGGTATTACTGGCGGTCATATCCCTAAATTTGCCAAAAATTTCCTTGCTGAAACGGGCGACATCCGCG
CGGCTGTGCGGCAGTATATGGCTGAAGTGGAGTCCGGCGTATATCCGGGCGAAGAACACAGTTTCCATTAAGGAGTCACG
TTGTGTTAATTATCGAAACCCTGCCGCTGCTGCGTCAGCAAATTCGCCGCCTGCGTATGGAAGGCAAGCGCGTGGCGCTG
GTGCCTACTATGGGTAACCTGCACGATGGCCATATGAAGCTGGTCGACGAAGCCAAAGCCCGCGCCGATGTGGTCGTCGT
CAGTATTTTCGTTAACCCAATGCAGTTTGACCGCCCGGAAGATCTGGCACGTTATCCACGGACCTTGCAGGAAGACTGCG
AAAAGCTAAACAAACGTAAAGTGGATTTAGTTTTCGCCCCTTCGGTAAAAGAGATCTACCCGAACGGTACTGAAACCCAC
ACTTACGTTGACGTTCCTGGTCTTTCCACCATGCTGGAAGGTGCCAGCCGTCCTGGCCATTTTCGCGGCGTTTCGACTAT
TGTCAGCAAGCTGTTCAACCTGGTCCAGCCGGACATCGCCTGCTTCGGTGAAAAAGATTTTCAGCAACTGGCGCTGATCC
GCAAAATGGTTGCTGATATGGGCTTTGATATTGAGATTGTCGGTGTGCCAATTATGCGCGCCAAAGACGGTCTGGCGCTG
AGTTCCCGTAACGGTTATCTGACAGCGGAACAACGCAAAATTGCGCCCGGTCTGTACAAAGTTTTAAGTTCAATTGCCGA
CAAATTGCAGGCTGGCGAACGGGATCTCGATGAAATTATTGCTATTGCCGGGCAAGAACTGAATGAAAAAGGCTTCCGCG
CCGATGATATTCAGATTCGCGATGCCGACACGTTGCTGGAAGTCTCTGAAACCAGCAAACGAGCTGTGATTCTGGTAGCC
GCCTGGCTTGGCGATGCCCGCCTGATCGACAACAAAATGGTCGAACTGGCGTAATACTTAACTGGCGCTACGGCTGATGG
CGCCAGTTATTAATTTGCCCTACGTCATGGCGATGACGTCTGTAAGTGATTATTCATATCGCTGGCAATTTAGTTAGAGT
TAATTAGCTTATCAATCTCTGTAAGAGGTAAAGTTGTCACCTCTGCAACGTCTTCCCGAGACATCCCTTTACTTAGAAAA
CGCTGGGCGAATTCCTGTCTTACCTTCTGGAGTTCCTCTTGATATCCCTTCTGAAATCCCTTCTCTTCAAACCACTGCGC
CAACGTCTGCCTGGTTTCTCTCCGTGTCTTTATTTCCATAGGTTCCCTTAATTATCTGGTCAGTTAACAATAACAATTAT
CTGGCTATAACTGATGATGCAGACAACTTAGTTAATCAGCTTATCAATCTCGGCAAGGGGTAAATTTGCCATCTCTGCAA
CGTCTTCCCGAGACATTCCTTTATTCAGAAGACGCAGGACGAATTCTTGCCTTTCCTCCTGTCTTCCCCTCTCTTCAAAC
CACTGCGCCAGCGTCATCATAGACTCCCCTCCCGTTTCCCTGTCTCTCAGCACACCATAAAACAAATCCGCTTGTTCAGT
ATGACCGCGTTGCAGCATATAGTTTTGCATGGCAACTAACTGACTTCCGCTAGTGTACCCTTCGTCAATCAGCGTGACCA
GTTGCTCCAGCAATAACATTAAGTCGCGCTGGCGAATATGTTTTTGCAGTAGTTCGAGAATCGCAATCCGCCGATGTTGC
ATGATTTCGTCATCCGGTGTGATGGTGATATCCACCAGCGGGAAAGGACTGTTATAGACGCGTCGCGCCAGCTCCGGAGA
GTAAAACATATCAAACCAGCACATTGAGAGCGGATAAGGTGTGGCCTCGCCCTGATAAAAGAGAATCGGCACTACCAGCG
GTAGTTTGTCGTGATCCGCCTCCAGATGCCGATGCATGGCGGCTATAGAATAACGCATCATGCGAAAGGCCATTTTCTTA
TCCGGCTTGCTTTGGTGTTCAATCACAACATGCAGATAACCGGGATTGCCCTGCATTTGCACGGAATAGAGCACGTCCGT
GCTGTGTCCTTTCAGGCTCTCTTCAATGAAACTCCCCGACTCTAAATGAAGCGTGTTGAGGTCACAAAGTTCGCGTAATT
CCACTGGCAAATGTATCTCCAGAAAGTCGCGAGCCGTCTCCGCATGCATTAAAAATTGTTTAAATACCGCGTCATGCGGT
GTAGTACTCGGTGCATCCATCTTCCCTGTCTTCCGTGTTGTCTTGCGTGAAGGCAGTATCCAGCCAAGGCGCGCCGTCGT
CAGCCACCTCTTTATTGTTTACCGAGCAGCGTTCAGAGAAATATCAATTCGTTACAGGCGATACATGGCACACTTCGGCG
CGGTACGCAAACTGCTGATGCAAATGCCGTCAGATGAGTAGACACTAAACAAAAATCGGGCAATACTGCGTGAGAATTTC
CTCAAAGCAGGCACCGCCTGCTTCGTTAACGACAGGGTAGAAAGGTAGAAGTTATGATTCGCACGATGCTGCAGGGCAAA
CTCCACCGCGTGAAAGTGACTCATGCGGACCTGCACTATGAAGGTTCTTGCGCCATTGACCAGGATTTTCTTGACGCAGC
CGGTATTCTCGAAAACGAAGCCATTGATATCTGGAATGTCACCAACGGCAAGCGTTTCTCCACTTATGCCATCGCGGCAG
AACGCGGTTCGAGAATTATTTCTGTTAACGGTGCGGCGGCCCACTGCGCCAGTGTCGGCGATATTGTCATCATCGCTAGC
TTCGTTACCATGCCAGATGAAGAAGCTCGCACCTGGCGACCCAACGTCGCCTATTTTGAAGGCGACAATGAAATGAAACG
TACCGCGAAAGCGATTCCGGTACAGGTTGCTTGATTGTTATCCCTGCGGCTGGTTACTCACCAGCCGCGACATCGTCTCG
AGCGAATCCGTTCTTAAGATATAAAGTCGTTTTAGTAACAACGGATTATCCCCCGGTTTTACTTTGCCTTTCATGGTTGT
CACCGCCAAGTGAAATCCGGCATCGTTTGCTGCCTTCACGGCTTTGTCATTAAATCCGCCAAACGGATACGAAAGATACC
AGACATGCGGATTAAATTGCGCCAGAGCGCGGCGTGAACGTGCAAAATCAAACAGAATATTGTGCTCACTACGACTCAGT
AATATGGGGCGGCGATAGCCATCCACCCGATGCAAAAAATGGGTATGTGACTGAAAATCAAAAACATCGCGAATTTCGTT
AAGCTCAGAAACGCTCATAAATTGCAGCGATTTTGGGTTCCACTTCTGCGGGTGACGTTTGATGCGTGAGGTAACAATAA
ACGCCGTCGCCTTCATGCCATATTGTTTCAACACAGGATACGCATAGCGGCTCACCGACTTGAGGCCATCATCAAAGGTA
ATCACCACCGCTCGCGCAGGGAGATTGATCTTATTCTTCACGTAGCCTTCCAGCTGCACCATGCTCAGTGTCGCGTATCC
CCTGTCGCGCAGCCAGGCCATCTGGTTATTGAAAGCGCGTACCGAGGTGGTCGTCGAAGTGTGGCGAAAACGGGTGTTTT
CTTCGTCGCGCAGAATATGATGATAGGTTAGCACCGGAAGGCCATTATCGGGTTGGGCATCCAGCGCGCTGATATAGGCC
AGTCGATCGCCAATACGGACCTGATACCAGGTTTGATTTAACCTGTCTTTCAGTTTATGCAAAATCGGGTAGCGCAAATT
GTCCGCCAGTACCCCAAATGGCGCACTGCCCACACTCGGCGCGTTATAGACCGGCGTATCTTTCCAGGTAACTAAGTTCT
GATTACTCAGCGGCTTGTTGAGGTCACCCAAACCGTCTTCAACTTTTTGTCGCCCCTGAACCGGCTCGAGATGCCCTTTA
TCGATAAACCCTTTACCAAAGCCAAAATTAAATGCGTAATAACTTGCGGCAGTGGGCTCCACGGCAATGATTTGTCCGGC
CCGAATATTCCCCACGGTCACCATCTTGTCGCCAATTTGCGCCCAGACCGCAGCATTTTCGATGGTTTGCATATAACGGG
CAGGTAACGCGGCACTGACACTTGCGGTAAACAGCATCAGCAGGAGAATAACAGCTTGTTTGTACATGAAAAAATAACCG
AGGGTGAAACAACGCTTTTATTGTAGCAAAAGCGCTATAAGAATCGTGGGTTAATACTCATACAAATTATGTTTGAGGAC
GAAAGGTGGATTTTTTTGTTGTTGGTGCCAAAGACTACTCACCTCCGGCCCACCCAGTTCGACAATACGCTCGCGAAACT
CTGAACTGGTCATGGTTTCACGGCAAGCCATCATCTGTTCAATTAACGGTAACGTGACACCAGAAATCACTTCGCAACGG
GAGTGTTTGTGGCTTAATAATGAAGCCACGCGGTACGGTGGCGCTCCGGCTATATCGGTTAAGAAGATGACACCCTCACC
AGAGTCCGCTTCATGCAGAGCATCGCACATCATGCGGCTGAGCATATTAGAGCTTAACCCACGCCAGAAATTCACGGCCC
GGCACTGAAGAAGTGCCCCATGTTTTTTCTCCAGCGCATCCAGTATCTCTTGCGCCCGGTCATCGTGACAGGTAATTACC
CAACCTAACATCGCCTTCCTCCTTAGCCGAAAATCAGTCTACCCTGACCATTGTTGATAAAGGGTGATAGCCGTCAAAAC
TCCTCTCCCCCAAATCCAGAGGAGAGGAAATAGCCTTAGCTACGCAAACCACGTCCACGTTGGATCAGCGACCAACAGAT
CAAATAAAACGCCACAATAAAGACCACCAGTACGCCAAAGGTAGTGACCAGCGGAACATCATTGATACCGAGGAAGCCGT
AGCGGAAACCACTGATCATATAAACGATTGGGTTCAGGTGCGACAGCCCTTGCCAGAACGGCGGCAACAAAGTCAGTGAG
TAAAAGACCCCACCCAAATACGTGAGTGGCGTTAACACAAAGGTTGGCACCAGGCTGATGTCATCGAACGTTTTGGCAAA
CACACCGTTCAGCAAACCCGCAAGGGAGAACAACACCGCCGTGAGCACCAGGGTTAAGGCAACGAATACCCATGAATGCA
CCTGAAACGGCACAAAAAACAGTGAAATTGCCGTCACCAGAATGCCAACAAACAGACCACGCGCCACGCCACCGCCGACA
TATCCGGCAATAATGACGTGAGTCGGAACCGGCGCTACCAGCAGCTCTTCAATATTACGCTGGAATTTGGCACCAAAAAA
TGATGACGCGACGTTAGCGTAGGCGTTGGTGATCACCGACATCATGATCAGCCCCGGTACGATGAACTGCATGTAGCTGA
AGCCATGCATATCGCCAATACGCGAACCAATCAGGTTACCGAAGATAATAAAGTAAAGGGTCATGGTGATGACTGGCGGC
ACCAGCGTCTGCACCCAGATACGCATAAAGCGATGGATCTCTTTCGCCCAGATGCTTTTTAGCGCCACCCAGTAAAGATG
CATCATGCGCGATCTCCTTGTTTTTCATTAACCAGTGAAACAAACAGCTCTTCCAGACGGTTAGCTTTGTTACGCATACT
TAATACCTGAATGCCCTGCTCACTTAACTGCGTAAATACGCTGTTGATCCCCTGCTCACGCAGCACTTCAACTTCCAGCG
TCGCGGTATCGACCAGTCGATACTGATAGCCATCGAGCTTCGGTAACGGACTTTTCGGTGCGAGATCGAGAATAAAGGTT
TCCGATTTCAGCTTCGCCAGCAGCGCCTTCATCGAGGTATTTTCCACCAGCTCACCATGTTGAATAATGCCGATATTGCG
GCACAGCATTTCTGCTTCTTCCAGGTAGTGTGTGGTGAGAATGATGGTGGTGCCTTTGTCGTTTAAATCCTTCAAAAAGC
CCCACATTGAGCGGCGAAGCTCAATATCCACGCCTGCCGTTGGCTCGTCGAGAATCAGCAGTTTAGGTTCATGCATTAAC
GCACGGGCAATCATTAAACGACGCTTCATCCCGCCCGATAACATGCGCGCACGTTCGTTGCGTTTTCCCCATAAATCGAG
CTGCTTAAGATACTTTTCGCTGCGGATGTACGCTTCTTTGCGCTCCACGCCGTAGTACCCTGCCTGATTCACCACAATTT
GCTGCACGGTTTCAAACGGGTTGAAGTTAAATTCCTGCGGCACCAGTCCCAACTGACGTTTAGCGTTCACGACATCCTTC
TCGAGATCGTAACCAAATACGCTGACCCGCCCGGAGGTTTTATTTACCAGAGAGCTGATAATACCGATAGTGGTCGATTT
CCCGGCCCCGTTCGGCCCGAGAAGCGCATAAAAATCACCCGCTTCGACCTGCAAATCTATTCCACGAAGCGCCTGAACGC
CGCCTGGATAGGTTTTTTTAAGCTGTTGAAGTTCCAGTGCAATGGTCATAAATTTTTACTTACCTTACGTTCTTACACTT
TATCTGTGGTTTAAATCGTCCCGGAGTTGCCCTATATTAGCCAAACGTAATTATTTGGTTACAGGTCGTTAACCTCCATG
AAAGACATAGATACACTCATCAGCAACAATGCACTATGGTCAAAAATGCTGGTGGAAGAGGATCCCGGGTTTTTTGAGAA
ACTGGCACAAGCGCAAAAACCGCGCTTTCTATGGATTGGATGTTCCGACAGTCGCGTTCCTGCAGAACGTTTAACCGGTC
TTGAGCCGGGCGAACTCTTTGTTCACCGTAATGTTGCTAACCTGGTCATTCACACCGACCTGAACTGCCTTTCCGTGGTT
CAGTATGCAGTGGATGTACTCGAAGTTGAACACATTATTATCTGTGGCCACTACGGTTGCGGCGGCGTACAAGCCGCAGT
TGAAAACCCGGAACTGGGGCTTATCAACAACTGGCTGCTGCATATCCGCGATATCTGGTTCAAACATAGCTCATTGCTCG
GCGAAATGCCGCAAGAGCGCCGTCTGGATACCTTGTGTGAACTGAACGTCATGGAACAGGTGTATAACCTGGGCCACTCC
ACCATTATGCAATCAGCGTGGAAACGCGGGCAGAAAGTTACCATTCACGGCTGGGCCTACGGTATTCACGACGGCTTGCT
GCGTGATCTGGATGTCACAGCGACCAACCGCGAAACCCTTGAGCAACGTTACCGTCATGGGATTTCCAACCTCAAGCTGA
AACACGCCAACCACAAATAAAAATGCCATGCCGGATGCAACACATCCGGCAACTTCACACTTACTCGTCCAGCAGAATCA
CTTTGCCGATATACGGCAGATGACGGTAACGCTGTGCGTAATCAATGCCGTAACCCACCACAAACTCATCCGGGATCGAG
AAACCGATAAATTCTACCGGGACGTTCACTTCACGACGGGACGGTTTATCCAGCAGCGTACAAATCGCCAGCGACTTCGG
TTCGCGCAGGCTTAAGATCTCACGCACTTTCGACAGTGTATTCCCCGAGTCGATGATATCTTCAACAATCAGCACGTCCT
TGCCACGGATATCTTCATCCAGATCTTTGAGGATTTTCACATCACGGGTGGTGGACATGCCGCTACCGTAGCTGGAGGCG
GTCATAAAGTCGACTTCATGAGATACCTGAACTTCACGGCACAGGTCCGCCATAAACATAAATGAGCCACGCAGCAGACC
CACCAGCACCATATCGCTGCCGCTGTCTTTGTAACGCTCAGTAATCTGACGACCCAGTTCGGCGATACGCGCTTTAATCT
CCGCTTCGGGGATCATTACTTCTACAGTATGTTTCATATCTCTAACCATATGATTTAAAAACAAATCACTTCGCACGGGC
AGGTTTTGGCACCGCAACAAAGCGCAAGACACGCAGTATACCAGTAAAACTATTCATTCGCGGAATCTGTTAATAAAGCT
CGAATTGTGATGACGGTCACACATGTTAAAACCTATAATTAATTGCTACTAAAATATTAATGAATTGAAATGGTGTCTCT
TTATGGCAATTAACAATACAGGCTCGCGACGATTACTCGTCACGCTAACAGCCCTTTTTGCAGCGCTTTGCGGGCTGTAT
CTACTCATTGGCGGAGGCTGGCTGGTCGCGATTGGCGGCTCCTGGTACTACCCTATCGCTGGCCTTGTGATGCTCGGCGT
CGCCTGGATGCTGTGGCGCAGTAAACGTGCCGCGCTTTGGCTATACGCCGCCCTGCTGCTCGGCACCATGATTTGGGGCG
TCTGGGAAGTTGGTTTCGACTTCTGGGCGCTGACTCCGCGCAGCGATATTCTGGTCTTCTTCGGCATCTGGCTGATCCTG
CCGTTTGTCTGGCGTCGCCTGGTCATTCCTGCCAGCGGCGCAGTTGCCGCACTGGTGGTGGCACTGCTGATTAGCGGTAG
TATCCTGACCTGGGCCGGATTTAACGATCCGCAGGAAATCAACGGCACCTTAAGCGCCGATGCCACACCTGCGGAAGCTA
TCTCACCCGTTGCCGATCAGGACTGGCCTGCCTATGGTCGCAATCAGGAAGGTCAACGCTTTTCACCTCTGAAACAAATT
AACGCCGATAACGTCCATAATCTGAAAGAAGCCTGGGTGTTCCGTACTGGCGATGTGAAGCAGCCGAACGATCCGGGCGA
AATCACCAATGAAGTGACGCCGATTAAAGTGGGCGACACCCTTTACCTGTGTACCGCTCACCAGCGCCTGTTTGCGCTCG
ATGCCGCCAGCGGCAAAGAGAAATGGCATTACGATCCTGAGCTGAAAACTAACGAGTCTTTCCAGCACGTAACCTGCCGT
GGCGTCTCTTATCATGAAGCCAAAGCAGAAACGGCTTCGCCGGAAGTGATGGCGGATTGCCCGCGTCGTATCATTCTTCC
GGTCAATGATGGTCGACTGATTGCGATTAACGCTGAAAACGGCAAACTGTGCGAAACCTTCGCCAATAAAGGCGTGCTCA
ATCTGCAAAGCAATATGCCAGACACCAAACCGGGTCTGTATGAACCGACTTCGCCACCGATTATCACCGATAAAACCATC
GTGATGGCAGGTTCAGTTACCGATAACTTCTCAACCCGCGAAACGTCTGGTGTGATCCGTGGTTTTGATGTCAACACCGG
GGAGCTGCTGTGGGCTTTTGATCCGGGCGCGAAAGATCCGAACGCAATCCCGTCTGACGAACACACCTTTACCTTTAACT
CGCCAAACTCGTGGGCACCAGCGGCCTATGACGCGAAGCTGGATCTGGTGTATCTGCCGATGGGCGTGACCACGCCGGAT
ATCTGGGGCGGTAACCGCACACCGGAACAGGAACGTTATGCCAGCTCGATTCTGGCGCTGAATGCCACAACCGGGAAATT
GGCGTGGAGCTACCAGACCGTTCACCACGACCTGTGGGATATGGATCTTCCGGCACAGCCGACGCTGGCGGACATCACCG
TTAATGGTCAGAAAGTGCCAGTTATTTACGCTCCGGCGAAAACCGGCAACATTTTTGTGCTCGATCGTCGCAATGGTGAA
CTGGTGGTTCCTGCCCCGGAAAAACCGGTTCCCCAAGGCGCTGCCAAAGGCGATTACGTAACCCCAACTCAACCGTTTTC
TGAACTGAGCTTCCGTCCGACGAAAGATTTGAGCGGAGCGGATATGTGGGGCGCCACCATGTTTGACCAACTGGTGTGCC
GCGTGATGTTCCACCAGATGCGCTATGAAGGCATTTTCACGCCGCCATCTGAACAGGGTACGCTGGTCTTCCCTGGTAAC
CTGGGGATGTTCGAATGGGGCGGGATTTCTGTCGATCCGAATCGTGAAGTAGCAATTGCCAACCCAATGGCGCTGCCGTT
TGTTTCGAAACTGATCCCTCGCGGTCCGGGTAACCCAATGGAGCAGCCGAAAGATGCCAAAGGCACGGGTACGGAATCCG
GCATTCAGCCACAGTACGGTGTACCGTATGGTGTCACGCTCAACCCGTTCCTCTCACCATTTGGTCTGCCATGTAAACAG
CCAGCATGGGGTTATATCTCGGCGCTGGATCTGAAAACTAATGAAGTGGTGTGGAAGAAACGTATTGGTACGCCGCAGGA
CAGTATGCCGTTCCCGATGCCTGTACCGGTGCCGTTCAATATGGGTATGCCGATGCTGGGCGGGCCAATCTCCACGGCGG
GTAACGTGCTGTTTATCGCCGCTACGGCAGATAACTACCTGCGCGCTTACAACATGAGCAACGGTGAAAAACTGTGGCAA
GGTCGTTTACCAGCGGGTGGTCAGGCGACGCCAATGACCTATGAAGTGAATGGTAAGCAGTATGTGGTGATCTCCGCAGG
CGGTCACGGTTCATTTGGTACGAAGATGGGCGACTATATTGTGGCTTATGCGCTGCCGGATGATGTGAAGTAAGACTTGC
TCAGATTGCTGACAACGTGCGCGTTGTTCATGCCGGATGCGGCGTGAACGCCTTATCCAGCCTACAAAATTGTGCAAAAT
CAATGGATTGCACAGGTAGCGTAGGCCTGATAAGCGTAGCGCATCAGGCAGATTTGCGTTTGTCATCAGTTTAATGCCCG
GAGAGATCCGGGCATATTCCCGAATACGGTCTTTTTATACCGTAAACCCTAACATCATCCCCGTATCTTCATGCTCCAGC
AGATGGCAGTGCGCCATATAAGCATGTTCTTTCGGTGCGTCGTGATTAAACTTCACCAGCACTTCGCTGACATTACCTTC
TACCTTAACGGTATCTTTCCAGCCCGCGCGATGCGTCGCTGGCGGTTTGCCATTTTCTGACAAGATACGGAACTGCGTGC
CGTGAATATGGAACGGATGCAGCATCATGTCGCCCACGCCAGAGATAACCCAACGTTCGTACTGCCCTTTCGCCGCCGCA
AACATCGGCTTATTCATATCAAACGCCTGACCGTTGATTTTATTGGCATGGTGGAAATCGAACTTCCCGCCGTGGTTCAT
ATGATTCATATTGCCGTGCCCCATATGGCCCATCATCTGGCTGTGATCCATTCCGGCCATCGCCTGATCGCCATATTTCT
CCATTAGCATCTGCATCCCCATCATATCTAGCATCGGGTCCATAGAAAGTTGCAGCTTGCGTACCGTCAGCCCTTCCAGC
GAAGGTAACGCAGGCAGGCTACTTAATGTGTCTGGCAAAGCACCGGAGGCACTAATAGCAATCGGCTGAATCCGCATTAC
CGGATGCGGCTTGTCAAACGGCGCAATCGCCATCCCCATCTGGCTGACCGGCAGCGTCACCAGGTCAAAGGGTTTGTTGT
CGTTAACCTCCACCAGCACTTCAAAACGCTCGCCCATCAGCACCGGCAGCTCGTTCACCTTCACCGGTTCAGGTAGCAGA
CCACCGTCGCTGGCAATCACATAAAGCGGGCGATTGTCGCTGGTGGCGAAATTGAGCGAGCGGGCATTACAGCCATTGAG
CAAACGCAGGCGCAGCCAACCACGCGGGGCAGCGTGTTGCGGGTAGATTGCACCGTTGGTCAGCAACGTATCGCCAAACC
AGCCCACGGCGGCGGTCATCACATCCAGTTGATAATCAATCTGCCCGTCGGCGCTAAATTTCTTATCCTGAACGATCACC
GGAACATCATCGATACCCCACTGTTTTGGCAGCATTAATTTCAGGATCTCGTCATCTTCAATTACCACCAGACCAGCCAG
CCCCATCGCCACCTGTCGCCCGGTCTTGCCATGTTGATGTGGATGGAACCAGCAGGTAGCGGCAGGTTGATCAACGTTCA
ACGTCACCGAGCGCTTGCCACCTGGCGGAATAATTCCCTGTGGGCCGCCGTCGACTTCACCCGGTACTTCCAGCCCGTGC
CAGTGCAACGTCGTCTCTTCCGTCAGTTGGTTATAGATATCAACCGTTACCGCTTTGCCGCGCTGTAATTTCACCGCCGG
CCCCAACAGATTGCCGTTATAGCCCCAGGTAGTTGCAGTTTTCTCGCCAAAGGTAGACTGACCTGCGCCAATAGTTAACT
GAATGCGATTACGGGCATCGGTCGTGAGCAAATCAGGGATCGGTAACGTTGGGCGTTCCGCCGCAAAAACTGCACGGCTC
CACAGTGGCAAGGCTGAAGCCACACCCAGTGCGACGGAATATTTCAAGAAATCACGACGTTGCATAGTTATTTCCTTATT
CTTAAGCAGGCGAAACAAAATCAAACGTTGAGCATAGTCCTTCCCCTTACGGGAAGGTCAAGCCGCAGACACAATTTAAT
CGACAATAATGGTCGTCGCCTCGCTCGCAGTGTGCTAACGTTTATCTTCTTTAAGCCCCTGGTAGAAGCAATGAAGACGT
TTTTCAGAACAGTGTTATTCGGCAGCCTGATGGCCGTTTGCGCAAACAGTTACGCGCTCAGCGAGTCTGAAGCCGAAGAT
ATGGCCGATTTAACGGCAGTTTTTGTCTTTCTGAAGAACGATTGTGGTTACCAGAACTTACCTAACGGGCAAATTCGTCG
CGCACTGGTCTTTTTCGCCCAGCAAAACCAGTGGGATCTCAGTAATTACGACACCTTCGACATGAAAGCTCTCGGTGAAG
ACAGCTACCGCGATCTCAGCGGCATTGGCATTCCCGTCGCTAAAAAATGCAAAGCCCTGGCCCGCGATTCCTTAAGCCTG
CTTGCCTACGTCAAATAATCCCTGATACCTTTTTGTAGAAATATTGACCGTGCATCCGCGGTCAATGTTAGCTATTATGT
TGCGCCCTTTTTTTACGGGTGTTAACAAAGGAGGTATCAACCCATGGCCGAAAAAAAACAGTGGCATGAAACGCTACACG
ACCAGTTTGGGCAGTACTTTGCAGTAGATAACGTTCTGTATCATGAAAAGACCGATCACCAGGATTTGATCATTTTTGAG
AACGCTGCATTTGGTCGCGTAATGGCGCTGGATGGCGTAGTACAAACCACCGAACGCGACGAGTTTATCTATCATGAGAT
GATGACCCATGTTCCGCTACTGGCCCACGGTCACGCGAAACATGTGCTGATTATCGGCGGCGGCGACGGCGCCATGCTGC
GTGAAGTGACCCGACATAAAAACGTTGAGTCAATCACGATGGTGGAAATCGATGCGGGTGTCGTGTCGTTCTGCCGTCAA
TATCTGCCCAACCATAACGCCGGTAGCTACGACGATCCGCGCTTTAAGCTGGTGATCGACGATGGCGTCAATTTCGTTAA
TCAAACCAGCCAGACCTTTGATGTTATTATCTCCGACTGCACCGATCCTATCGGGCCCGGCGAAAGCCTTTTCACTTCGG
CATTTTATGAAGGCTGCAAACGTTGCCTGAATCCTGGCGGTATCTTCGTCGCACAAAACGGCGTCTGCTTTTTACAGCAG
GAAGAAGCCATCGACAGCCATCGCAAACTCAGCCATTACTTCAGCGACGTTGGCTTTTATCAGGCGGCGATCCCGACCTA
TTACGGCGGTATCATGACTTTTGCATGGGCGACAGATAACGACGCCTTACGCCATCTCTCAACCGAAATTATTCAGGCGC
GTTTTCTCGCCTCTGGCCTGAAATGCCGTTATTACAATCCGGCAGTCCATACGGCAGCTTTTGCCTTACCCCAGTATCTG
CAAGACGCACTGGCTTCACAGCCGTCCTAAGGAGAAGATAAGAAATTGAAAAAACTGAAACTGCATGGCTTTAATAATCT
GACCAAAAGTCTGAGTTTTTGTATTTACGATATCTGCTACGCCAAAACTGCCGAAGAGCGCGACGGTTATATTGCTTATA
TCGATGAACTCTATAATGCCAACCGTCTGACCGAAATCCTGTCAGAAACCTGTTCCATTATCGGGGCTAATATTCTTAAC
ATCGCCCGCCAGGATTACGAACCACAGGGTGCCAGCGTCACTATTCTGGTGAGTGAAGAACCGGTTGACCCGAAACTCAT
CGACAAAACAGAACACCCCGGCCCACTGCCAGAAACGGTCGTTGCCCATCTCGATAAAAGTCATATTTGCGTACATACCT
ACCCGGAAAGTCATCCTGAAGGCGGTTTATGTACCTTCCGCGCCGATATTGAAGTCTCTACCTGCGGCGTGATTTCTCCG
CTGAAGGCGCTGAATTACCTGATCCACCAGCTTGAGTCCGATATCGTAACCATTGATTATCGCGTGCGCGGTTTTACCCG
CGACATTAACGGTATGAAGCACTTTATCGACCATGAGATTAATTCGATTCAGAACTTTATGTCTGACGATATGAAGGCGC
TGTATGACATGGTGGATGTAAACGTCTATCAGGAAAATATCTTCCATACCAAGATGTTGCTTAAAGAGTTCGATCTTAAG
CACTACATGTTCCACACCAAACCGGAAGATTTAACCGACAGCGAGCGCCAGGAAATTACCGCTGCGCTGTGGAAAGAGAT
GCGCGAGATTTATTACGGGCGCAATATGCCAGCTGTTTAACGGCTCTGGCGGAGCTCCCAGGCTCCGCCAGATTTATTTA
CTTCTGCTGCACGAAATTACGGTAAGCCGCCACCACCTGCAGAAAATCCTCAACGCCGCATAGCGACAGGCTTTCTTCGT
CGTAGTAGTTCATCCCCTCTTCCATTTCATCGCCAGCGAATTCCAGTTGATTGGCGCGAACCATCACCTCTTCACCGTCC
ATCCACAGGGTGTATTCGTGCCCTGCCCGTTGCCAGGACCGTTCGCTACCTTTCAGTGCGTGCGCTGCTTGTTCCACTTC
ATCAAGCAAGGCCAGGTTTTCTTTCACCTCTTCATTAAACCAGTGCCCGACCACTTCATGCCCCATGGACATACGCACCT
TTACCACTCCGGTAATATCGCGCAGAAATTCGTAATCCATAGTGTGTTCCTCTGCTCCCGGCAATGCGCCGAAATCGCAT
TGCGCCATTGATGTAATTATCGCAGCCTTACCGGAGAAAAACAGCGGAACGGCGATGGTTTAGAAATAAAAAATGCCCGG
GAATCTCATTCACCGGGCATTGTGTCGTTTATGCGCAGCGCGTGCGCTGACTTTTTAAACTGCAGTCTGGAAAATCACAC
CATCGGCTTTTTCAGTGTACTGAGAAAGCTGGTTGAAGTTCAGGTAACGGTAAGTATCAACGGCAGTTTTATCCACCTGC
GCCACGTAGGTCTGGTACTCTTCCGGCGTCGGCAGTTTGCCAATCAGCGCCGCAACAGCAGCCAGTTCCGCAGAAGCCAG
GAAGACATTCGCGCCAGTCCCCAGACGGTTCGGGAAGTTACGGGTCGAGGTGGAAACCACCGTCGCGCCGTCTGCCACAC
GCGCCTGGTTACCCATACACAGGGAACAGCCAGGGATCTCGATACGCGCACCACTCTTACCGAAGACGCTGTAGTAGCCT
TCTTCGGTCAACTGCGCAGCGTCCATACGGGTTGGCGGTGCCACCCACAGGCGCGTCGGCAGTTGGCCTTTGTGCGCATC
CAGCAGTTTACCCGCAGCACGGAAGTGACCGATGTTGGTCATGCAGGAACCGATAAATACTTCGTCGATCTTCTCGCCCT
GTACCGCTGACAGCGGACGTGCGTCATCTGGATCGTTCGGAGCACAGAGGATTGGCTCTTTAATATCCGCCAGATCGATG
TCGATCACTGCCGCGTATTCCGCATCCGCATCGGCTTCCAGCAGCTCAGGATTCGCCAGCCATTTTTCCATGCCCTGAAT
ACGACGTTCCAGGGTACGACGATCGCCATAACCTTCCGCGATCATCCACTTCAGCAGGACGATGTTGGAGTTCAGGTATT
CGATGATCGGTTCTTTGTTCAGCTTGATGGTACAACCGGCAGCAGAACGCTCGGCGGACGCATCGGTTAGCTCAAAGGCC
TGCTCAACTTTCAGATCCGGCAGACCTTCAATTTCCAGAATGCGGCCAGAGAAGATGTTTTTCTTGCCTTTCTTCTCAAC
GGTCAGCAGACCTTGTTTGATCGCATACAGCGGAATGGCGTGTACCAGATCGCGCAGGGTGATGCCCGGCTGCATTTTGC
CTTTGAAGCGCACCAGAACGGATTCCGGCATATCCAGCGGCATTACGCCTGTTGCGGCAGCAAATGCCACCAGACCAGAA
CCCGCCGGGAAAGAGATACCGATCGGGAAACGGGTATGGGAGTCACCACCGGTACCGACGGTATCCGGCAGCAGCATACG
GTTCAGCCAGGAGTGGATTACGCCGTCACCCGGACGCAGCGACACACCGCCACGGTTCATAATGAAGTCCGGCAGCGTGT
GGTGCGTGTTCACGTCAACTGGCTTCGGATACGCCGCGGTGTGGCAGAAAGACTGCATCACCAGGTCAGCCGAGAAGCCC
AGGCACGCCAGGTCTTTCAGTTCATCACGGGTCATCGGGCCGGTGGTGTCCTGAGAGCCTACAGAAGTCATTTTCGGTTC
GCAGTACGCGCCCGGACGAATGCCTTTCACGCCACAGGCACGGCCCACCATTTTCTGCGCCAGCGAGAAGCCGCGATCGC
TCTCAGCGACATCTTTCGCCTGACGGAACACATCACTGTGTGGCAGACCAAGTGCTTCACGCGCTTTGGTGGTCAGGCCA
CGCCCGATAATCAGCGGAATACGGCCGCCAGCACGCACTTCATCAATCAGCACGTCGGTTTTCAGTTCGAAGGTCGCCAG
CAGTTCGCCGGTTTCGTGGTTACGCACTTCACCTTTGTACGGGTAAACGTCAATTACGTCGCCCATGTTCAGGTTAGAGA
CGTCGACTTCGATTGGCAGTGCACCCGCGTCTTCCATCGTGTTAAAGAAGATGGGTGCAATTTTACCGCCGAGGCACAAA
[truncated: 5,007,986 more chars]
