# Supplementary material for: Escherichia coli ST302: Genomic Analysis of Virulence Potential and Antimicrobial Resistance Mediated by Mobile Genetic Elements
Source: Front Microbiol. 2020 Jan 21;10:3098. doi: 10.3389/fmicb.2019.03098 (PMC6985150; doi:10.3389/fmicb.2019.03098)
Supplement: DATA S2 — ST302 SNP analysis. [file Data_Sheet_2.ZIP › SNP_Analysis/ST302_SNP/SNP_analysis/core/ST302.tab]

CHR	POS	REF	BA8907-ND-ST302.out	BA9503-ND-ST302.out	CA0191-ND-ST302.out	CA0229-ND-ST302.out	EA1682-Poultry-ST302.out	EA2455-Poultry-ST302.out	EA8393-Porcine-ST302.out	F2_18C-Porcine-ST302.out	FA0416-Human-ST302.out	FA5537-ND-ST302.out	IA1186-Poultry-ST302.out	IA1729-Canine-ST302.out	IA4731-Poultry-ST302.out	IA7122-Poultry-ST302.out
EA2454	617	C	C	C	C	C	C	C	T	C	C	C	C	C	C	C
EA2454	749	A	A	A	A	A	A	A	A	A	G	G	G	A	A	A
EA2454	977	T	C	C	C	C	C	T	C	C	C	C	C	C	C	C
EA2454	2432	G	T	T	G	G	G	G	G	G	G	G	G	G	G	G
EA2454	2877	C	C	C	C	C	C	C	C	C	A	C	A	C	C	C
EA2454	3463	C	C	C	C	C	C	C	C	C	C	T	C	C	C	C
EA2454	4901	T	C	C	T	T	T	T	C	C	C	C	C	C	T	T
EA2454	5064	A	A	A	A	A	A	A	A	A	G	A	G	A	A	A
EA2454	5594	C	C	C	C	C	C	C	C	C	A	C	A	C	C	C
EA2454	5849	C	C	C	C	C	C	C	C	T	C	C	C	C	C	C
EA2454	6107	C	C	C	C	C	C	C	C	C	C	C	C	C	C	T
EA2454	6517	C	C	C	C	C	C	C	C	C	C	C	C	C	T	C
EA2454	6985	T	T	T	T	T	T	T	T	T	T	C	T	T	T	T
EA2454	8399	C	C	C	C	C	C	C	C	C	C	G	C	C	C	C
EA2454	8504	C	C	C	C	C	C	C	C	C	A	C	A	C	C	C
EA2454	9014	C	C	C	C	C	C	C	C	C	C	T	C	C	C	C
EA2454	9241	C	C	C	C	C	C	C	C	C	T	C	T	C	C	C
EA2454	9683	G	G	G	G	G	G	G	G	G	T	G	T	G	G	G
EA2454	10139	A	G	G	A	A	A	A	A	G	A	A	A	A	A	A
EA2454	10877	T	T	T	G	T	T	T	T	T	T	T	T	T	T	T
EA2454	11382	A	G	G	G	G	G	A	G	G	G	G	G	G	G	A
EA2454	11615	T	G	G	T	T	T	T	G	G	G	G	G	G	T	T
EA2454	11847	G	G	G	A	G	G	G	G	G	G	G	G	G	G	G
EA2454	16529	C	C	C	C	C	C	C	C	C	T	C	T	C	C	C
EA2454	18559	G	T	T	G	G	G	G	G	G	G	G	G	G	G	G
EA2454	18716	G	G	G	G	G	G	G	G	G	A	G	A	G	G	G
EA2454	18822	A	A	A	A	A	A	A	A	A	A	A	A	G	A	A
EA2454	18933	C	C	C	C	C	C	C	C	C	C	T	C	C	C	C
EA2454	19283	C	C	C	C	C	C	C	C	C	T	C	T	C	C	C
EA2454	19381	C	C	C	C	C	C	C	T	C	C	C	C	T	C	C
EA2454	22484	C	C	C	C	C	C	C	T	C	C	C	C	T	C	C
EA2454	22955	G	G	G	G	G	G	G	A	G	G	G	G	A	G	G
EA2454	24420	T	G	G	T	T	T	T	G	G	G	G	G	G	T	T
EA2454	25194	A	A	A	A	A	A	A	A	A	A	C	A	A	A	A
EA2454	25719	T	C	C	C	C	C	T	C	C	C	C	C	C	C	T
EA2454	26663	C	C	C	C	C	T	C	C	C	C	C	C	C	C	C
EA2454	28509	G	G	G	G	G	G	G	G	G	G	A	G	G	G	G
EA2454	29082	A	A	A	A	A	A	A	T	A	A	A	A	T	A	A
EA2454	30275	C	C	C	C	C	C	C	C	C	T	C	T	C	C	C
EA2454	30862	A	A	A	A	A	A	A	A	A	A	A	A	A	C	A
EA2454	31045	G	G	G	G	G	G	G	G	G	G	T	G	G	G	G
EA2454	31143	G	G	G	G	G	G	G	G	G	G	A	G	G	G	G
EA2454	31644	C	C	C	C	C	C	C	C	C	C	T	C	C	C	C
EA2454	32987	C	C	C	C	C	C	C	C	T	C	C	C	C	C	C
EA2454	33245	G	G	G	G	G	G	G	G	G	T	G	T	G	G	G
EA2454	34038	C	C	C	C	C	C	C	C	T	C	C	C	C	C	C
EA2454	34322	C	C	C	C	C	C	C	C	C	C	A	C	C	C	C
EA2454	34494	T	C	C	C	C	C	T	C	C	C	C	C	C	C	C
EA2454	36375	C	A	A	A	A	A	C	A	A	A	A	A	A	A	C
EA2454	36724	G	T	T	G	G	G	G	G	G	G	G	G	G	G	G
EA2454	36951	T	T	T	T	T	T	T	T	T	G	T	G	T	T	T
EA2454	37550	G	T	T	G	G	G	G	T	T	G	G	G	T	G	G
EA2454	37757	G	G	G	G	G	G	G	G	G	A	G	A	G	G	G
EA2454	37987	T	C	C	C	C	C	T	C	C	C	C	C	C	C	T
EA2454	37993	A	G	G	A	A	A	A	A	A	A	A	A	A	A	A
EA2454	38902	A	A	A	A	A	A	A	G	A	A	A	A	G	A	A
EA2454	39065	T	T	T	T	C	C	T	T	T	T	T	T	T	C	T
EA2454	39850	A	A	A	C	A	A	A	A	A	A	A	A	A	A	A
EA2454	41857	T	T	T	T	T	T	T	T	T	C	T	C	T	T	T
EA2454	41873	G	G	G	G	G	G	G	T	G	G	G	G	T	G	G
EA2454	42059	T	T	T	T	T	T	T	T	C	T	T	T	T	T	T
EA2454	42905	T	T	T	T	T	T	T	G	T	T	T	T	G	T	T
EA2454	42911	C	C	C	C	C	C	C	C	C	C	C	C	A	C	C
EA2454	42949	T	T	T	T	T	T	T	T	T	T	G	T	T	T	T
EA2454	43068	G	G	G	G	G	G	G	G	G	G	C	G	G	G	G
EA2454	44496	G	G	G	G	G	G	G	G	G	T	G	T	G	G	G
EA2454	44498	A	A	A	A	A	A	A	C	A	A	A	A	A	A	A
EA2454	45773	C	C	C	C	T	C	C	C	C	C	C	C	C	C	C
EA2454	45787	A	A	A	A	A	A	A	A	A	A	A	G	A	A	A
EA2454	48190	C	A	A	C	C	C	C	A	A	A	A	A	A	C	C
EA2454	48201	T	T	T	T	T	T	T	T	T	A	T	A	T	T	T
EA2454	49192	T	T	T	T	T	T	T	T	T	G	G	G	T	T	T
EA2454	49672	C	C	C	C	C	C	C	A	C	C	C	C	A	C	C
EA2454	50495	C	C	C	C	C	C	C	C	C	T	C	T	C	C	C
EA2454	50851	A	C	C	A	A	A	A	C	C	C	C	C	C	A	A
EA2454	51400	C	C	C	C	C	C	C	C	C	T	C	T	C	C	C
EA2454	51521	C	C	C	C	C	C	C	T	C	C	C	C	T	C	C
EA2454	52423	A	A	A	C	C	C	A	A	A	A	A	A	A	C	A
EA2454	53157	C	T	T	C	C	C	C	T	T	T	T	T	T	C	C
EA2454	53772	T	T	T	T	T	T	T	G	T	T	T	T	G	T	T
EA2454	54525	T	T	T	T	T	T	T	T	T	A	T	A	T	T	T
EA2454	54840	C	C	C	C	C	C	C	C	C	C	T	C	C	C	C
EA2454	54992	T	C	C	T	T	T	T	C	C	C	C	C	C	T	T
EA2454	55249	C	C	C	C	C	C	C	C	A	C	C	C	C	C	C
EA2454	56257	C	C	C	T	C	C	C	C	C	C	C	C	C	C	C
EA2454	56269	T	T	T	T	T	T	T	T	T	C	T	C	T	T	T
EA2454	56628	A	C	C	C	C	C	A	C	C	C	C	C	C	C	A
EA2454	57116	A	A	A	A	T	T	A	A	A	A	A	A	A	T	A
EA2454	58152	T	C	C	C	C	C	T	C	C	C	C	C	C	C	T
EA2454	59415	C	C	C	C	C	C	C	C	C	T	C	T	C	C	C
EA2454	59954	T	T	T	T	T	T	T	T	T	A	T	A	T	T	T
EA2454	59959	G	T	T	G	G	G	G	T	T	G	G	G	T	G	G
EA2454	60871	C	C	C	T	C	C	C	C	C	C	C	C	C	C	C
EA2454	61069	A	T	T	A	A	A	A	A	A	A	A	A	A	A	A
EA2454	61315	T	G	G	T	T	T	T	T	T	T	T	T	T	T	T
EA2454	61686	C	C	C	C	C	C	C	C	C	A	C	A	C	C	C
EA2454	61856	A	A	A	A	A	A	A	A	A	G	A	G	A	A	A
EA2454	63271	C	C	C	C	C	C	C	C	C	C	T	C	C	C	C
EA2454	64224	C	C	C	C	C	C	C	C	A	C	C	C	C	C	C
EA2454	64676	G	G	G	A	G	G	G	G	G	G	G	G	G	G	G
EA2454	65206	G	G	G	G	G	G	G	A	G	G	G	G	A	G	G
EA2454	67315	A	C	C	C	C	C	A	C	C	C	C	C	C	C	C
EA2454	68202	A	A	A	A	A	A	A	A	A	G	G	G	A	A	A
EA2454	68735	A	A	A	A	A	A	A	A	A	T	A	T	A	A	A
EA2454	68937	G	G	G	G	A	G	G	G	G	G	G	G	G	G	G
EA2454	69114	A	C	C	A	A	A	A	A	C	A	A	A	A	A	A
EA2454	69374	A	A	A	A	A	A	A	A	A	T	A	T	A	A	A
EA2454	69595	A	G	G	G	G	G	A	G	G	G	G	G	G	G	A
EA2454	71773	G	G	G	G	G	G	G	G	A	G	G	G	G	G	G
EA2454	71896	C	T	T	C	C	C	C	T	T	C	C	C	T	C	C
EA2454	73302	G	G	G	G	G	G	G	G	G	A	G	A	G	G	G
EA2454	73628	T	T	T	T	T	T	T	T	T	G	T	G	T	T	T
EA2454	74671	A	G	G	A	A	A	A	G	G	G	G	G	G	A	A
EA2454	74952	G	G	G	T	T	T	G	G	G	G	G	G	G	T	G
EA2454	75553	G	G	G	G	G	G	G	G	G	A	G	A	G	G	G
EA2454	76545	G	G	G	G	G	G	G	G	G	A	G	A	G	G	G
EA2454	77252	A	C	C	A	A	A	A	A	C	A	A	A	A	A	A
EA2454	77346	C	C	C	C	C	C	C	C	C	T	C	T	C	C	C
EA2454	77443	C	C	C	T	C	C	C	C	C	C	C	C	C	C	C
EA2454	78031	C	C	C	A	C	C	C	C	C	C	C	C	C	C	C
EA2454	78608	G	G	G	A	G	G	G	G	G	G	G	G	G	G	G
EA2454	79118	G	G	G	G	G	G	G	G	G	G	A	G	G	G	G
EA2454	80371	C	T	T	C	C	C	C	T	T	C	C	C	T	C	C
EA2454	80560	C	C	C	C	C	T	C	C	C	C	C	C	C	C	C
EA2454	81213	G	G	G	G	G	G	G	G	G	G	G	G	T	G	G
EA2454	81449	T	T	T	T	T	T	T	T	T	T	T	T	T	T	G
EA2454	82347	T	T	T	T	T	T	T	T	C	T	T	T	T	T	T
EA2454	82631	G	C	C	G	G	G	G	G	G	G	G	G	G	G	G
EA2454	83654	C	C	C	C	C	C	C	C	C	A	C	A	C	C	C
EA2454	83706	C	C	C	C	C	C	C	C	C	T	C	T	C	C	C
EA2454	84163	T	T	T	A	T	T	T	T	T	T	T	T	T	T	T
EA2454	84557	T	G	G	G	G	G	T	G	G	G	G	G	G	G	T
EA2454	85537	G	G	G	G	A	G	G	G	G	G	G	G	G	G	G
EA2454	86028	C	C	C	C	C	C	C	T	C	C	C	C	T	C	C
EA2454	86305	G	G	G	G	G	G	G	T	G	G	G	G	T	G	G
EA2454	90096	T	T	T	T	T	T	T	T	T	A	T	A	T	T	T
EA2454	91235	T	T	T	T	T	T	T	T	T	C	T	C	T	T	T
EA2454	92015	G	G	G	G	G	G	G	G	G	A	G	A	G	G	G
EA2454	93093	A	A	A	A	A	A	A	A	A	C	A	C	A	A	A
EA2454	93133	A	A	A	A	A	A	A	A	A	C	A	C	A	A	A
EA2454	93722	C	C	C	C	C	C	C	C	C	C	C	C	T	C	C
EA2454	94250	T	T	T	T	T	T	T	T	T	C	C	C	T	T	T
EA2454	94636	C	C	C	C	C	C	C	C	C	C	C	C	T	C	C
EA2454	94795	G	G	G	A	G	G	G	G	G	G	G	G	G	G	G
EA2454	95361	C	C	C	C	C	C	C	C	C	C	T	C	C	C	C
EA2454	96463	C	C	C	C	C	C	C	C	C	T	C	T	C	C	C
EA2454	96697	T	C	C	T	T	T	T	T	T	T	T	T	T	T	T
EA2454	97055	C	C	C	C	C	C	C	C	C	A	C	A	C	C	C
EA2454	97248	A	C	C	A	A	A	A	A	A	A	A	A	A	A	A
EA2454	97312	C	C	C	C	C	C	C	C	C	C	T	C	C	C	C
EA2454	97811	C	C	C	C	C	C	C	C	C	T	C	T	C	C	C
EA2454	98200	A	A	A	A	A	A	A	G	A	A	A	A	G	A	A
EA2454	99010	C	C	C	T	C	C	C	C	C	C	C	C	C	C	C
EA2454	99180	G	G	G	G	G	G	G	G	G	T	G	T	G	G	G
EA2454	99924	C	T	T	C	C	C	C	T	T	C	C	C	T	C	C
EA2454	100572	C	C	C	G	C	C	C	C	C	C	C	C	C	C	C
EA2454	100587	G	G	G	G	G	G	G	G	G	G	G	G	T	G	G
EA2454	101541	A	A	A	A	A	A	A	A	A	G	A	G	A	A	A
EA2454	101724	A	C	C	A	A	A	A	C	C	A	A	A	C	A	A
EA2454	102014	A	A	A	A	T	T	A	A	A	A	A	A	A	T	A
EA2454	102030	T	C	C	T	T	T	T	T	T	T	T	T	T	T	T
EA2454	103004	T	G	G	T	T	T	T	T	T	T	T	T	T	T	T
EA2454	103925	A	A	A	A	A	A	A	A	G	A	A	A	A	A	A
EA2454	104045	G	G	G	G	G	G	G	G	G	A	G	A	G	G	G
EA2454	105325	G	G	G	G	G	G	G	G	G	G	T	G	G	G	G
EA2454	105773	A	A	A	A	A	A	A	G	A	A	A	A	G	A	A
EA2454	106273	C	C	C	C	C	C	C	C	C	T	C	T	C	C	C
EA2454	107456	C	C	C	C	A	C	C	C	C	C	C	C	C	C	C
EA2454	107466	C	C	C	T	C	C	C	C	C	C	C	C	C	C	C
EA2454	108354	C	C	C	C	T	C	C	C	C	C	C	C	C	C	C
EA2454	108720	C	C	C	C	T	C	C	C	C	C	C	C	C	C	C
EA2454	109128	C	C	C	C	C	T	C	C	C	C	C	C	C	C	C
EA2454	109299	G	G	G	G	G	G	G	G	G	G	A	G	G	G	G
EA2454	109606	G	G	G	G	G	G	G	G	G	G	A	G	G	G	G
EA2454	110963	C	C	C	C	C	C	C	C	C	C	T	C	C	C	C
EA2454	111773	C	G	G	G	G	G	C	G	G	G	G	G	G	G	G
EA2454	112319	G	G	G	G	G	G	G	G	G	G	A	G	G	G	G
EA2454	112602	C	C	C	C	C	C	C	C	C	T	C	T	C	C	C
EA2454	112615	T	T	T	T	T	T	T	T	G	T	T	T	T	T	T
EA2454	113186	C	T	T	C	C	C	C	C	T	C	C	C	C	C	C
EA2454	114259	G	G	G	G	G	G	G	G	G	A	G	A	G	G	G
EA2454	116260	C	C	C	C	C	C	C	C	C	T	C	T	C	C	C
EA2454	116969	C	T	T	C	C	C	C	C	T	C	C	C	C	C	C
EA2454	117419	T	T	T	T	T	T	T	T	T	C	T	C	T	T	T
EA2454	117807	C	C	C	C	C	C	C	C	T	C	C	C	C	C	C
EA2454	119029	A	G	G	A	A	A	A	G	G	A	A	A	G	A	A
EA2454	120366	C	C	C	C	C	C	C	C	A	C	C	C	C	C	C
EA2454	123376	G	A	A	G	G	G	G	A	A	G	G	G	A	G	G
EA2454	124825	G	G	G	A	G	G	G	G	G	G	G	G	G	G	G
EA2454	124865	T	C	C	C	C	C	T	C	C	C	C	C	C	C	T
EA2454	126504	A	G	G	A	A	A	A	G	G	G	G	G	G	A	A
EA2454	126514	G	G	G	A	G	G	G	G	G	G	G	G	G	G	G
EA2454	128072	A	A	A	A	A	A	A	A	G	A	A	A	A	A	A
EA2454	128903	A	A	A	A	A	A	A	G	A	A	A	A	G	A	A
EA2454	130629	C	C	C	C	C	C	C	C	C	C	C	C	C	T	C
EA2454	131613	A	G	G	G	G	G	A	G	G	G	G	G	G	G	A
EA2454	131667	G	A	A	G	G	G	G	A	A	A	A	A	A	G	G
EA2454	131768	G	A	A	G	G	G	G	G	A	G	G	G	G	G	G
EA2454	132114	T	T	T	T	T	T	T	T	C	T	T	T	T	T	T
EA2454	133953	C	C	C	C	C	C	C	C	C	T	C	T	C	C	C
EA2454	134246	C	C	C	C	C	C	C	C	C	C	A	C	C	C	C
EA2454	134431	C	T	T	C	C	C	C	C	C	C	C	C	C	C	C
EA2454	134828	A	A	A	A	A	A	A	A	A	C	C	C	A	A	A
EA2454	137550	C	C	C	C	C	C	C	C	C	C	T	C	C	C	C
EA2454	138031	A	A	A	A	A	A	A	A	A	A	C	A	A	A	A
EA2454	140343	T	T	T	T	C	T	T	T	T	T	T	T	T	T	T
EA2454	140951	T	G	G	G	G	G	T	G	G	G	G	G	G	G	T
EA2454	142815	C	C	C	C	C	C	C	C	C	C	T	C	C	C	C
EA2454	144883	G	G	G	G	G	G	G	G	G	G	A	G	G	G	G
EA2454	145428	T	C	C	T	T	T	T	C	C	C	C	C	C	T	T
EA2454	145887	C	C	C	T	C	C	C	C	C	C	C	C	C	C	C
EA2454	146087	A	C	C	C	C	C	A	C	C	C	C	C	C	C	A
EA2454	146572	A	A	A	A	A	A	A	A	A	G	A	G	A	A	A
EA2454	147126	C	C	C	C	C	C	C	C	C	T	C	T	C	C	C
EA2454	147861	C	C	C	C	C	C	C	C	T	C	C	C	C	C	C
EA2454	150693	A	A	A	A	A	A	A	A	A	A	C	A	A	A	A
EA2454	152345	G	G	G	G	G	G	G	T	G	G	G	G	G	G	G
EA2454	153405	C	C	C	C	C	C	C	C	C	T	C	T	C	C	C
EA2454	156220	T	T	T	T	T	T	T	T	T	G	T	G	T	T	T
EA2454	157367	G	G	G	G	G	G	G	G	G	A	G	A	G	G	G
EA2454	158053	G	G	G	A	G	G	G	G	G	G	G	G	G	G	G
EA2454	158307	G	G	G	G	G	G	G	G	G	G	A	G	G	G	G
EA2454	158449	C	C	C	T	C	C	C	C	C	C	C	C	C	C	C
EA2454	158592	T	G	G	T	T	T	T	T	T	T	T	T	T	T	T
EA2454	158623	C	C	C	C	C	C	C	C	C	T	C	T	C	C	C
EA2454	160440	A	A	A	A	A	A	A	A	C	A	A	A	A	A	A
EA2454	161661	C	C	C	C	C	C	C	C	C	T	C	T	C	C	C
EA2454	162974	G	G	G	T	T	T	G	G	G	G	G	G	G	T	G
EA2454	164297	C	C	C	C	C	C	C	C	C	T	C	T	C	C	C
EA2454	164371	T	T	T	A	A	A	T	T	T	T	T	T	T	A	T
EA2454	165649	C	C	C	C	C	C	C	C	C	T	C	T	C	C	C
EA2454	165798	T	A	A	T	T	T	T	T	T	T	T	T	T	T	T
EA2454	166408	T	T	T	T	T	T	T	T	C	T	T	T	T	T	T
EA2454	166894	T	T	T	T	T	T	T	T	T	T	T	T	G	T	T
EA2454	167773	G	G	G	G	G	G	G	G	G	G	G	G	T	G	G
EA2454	168669	T	T	T	T	T	T	T	T	T	T	A	T	T	T	T
EA2454	169390	C	C	C	T	C	C	C	C	C	C	C	C	C	C	C
EA2454	170333	C	C	C	C	C	C	C	C	C	T	C	T	C	C	C
EA2454	170380	G	G	G	G	G	G	G	G	C	G	G	G	G	G	G
EA2454	170928	C	C	C	C	C	C	C	C	T	C	C	C	C	C	C
EA2454	171513	G	G	G	G	G	G	G	A	G	G	G	G	G	G	G
EA2454	171781	C	C	C	C	C	C	C	C	C	T	C	T	C	C	C
EA2454	172664	C	T	T	C	C	C	C	T	T	C	C	C	T	C	C
EA2454	173304	C	C	C	C	C	C	C	T	C	C	C	C	T	C	C
EA2454	173739	C	T	T	C	C	C	C	C	C	C	C	C	C	C	C
EA2454	174420	A	G	G	G	G	G	A	G	G	G	G	G	G	G	A
EA2454	175505	G	G	G	G	G	G	G	G	G	T	G	T	G	G	G
EA2454	176813	G	G	G	G	G	G	G	G	G	A	G	A	G	G	G
EA2454	177375	G	G	G	G	G	G	G	G	G	G	A	G	G	G	G
EA2454	177572	C	C	C	C	C	C	C	C	T	C	C	C	C	C	C
EA2454	177774	C	C	C	C	C	C	C	C	C	T	C	T	C	C	C
EA2454	178258	C	C	C	T	C	C	C	C	C	C	C	C	C	C	C
EA2454	178495	C	C	C	C	C	C	C	C	C	T	C	T	C	C	C
EA2454	181477	G	G	G	G	G	G	G	T	G	G	G	G	T	G	G
EA2454	181896	T	T	T	T	T	T	T	T	T	T	T	A	T	T	T
EA2454	181904	G	G	G	A	G	G	G	G	G	G	G	G	G	G	G
EA2454	182299	A	A	A	A	A	A	A	C	A	A	A	A	A	A	A
EA2454	183092	C	C	C	C	C	C	C	C	T	C	C	C	C	C	C
EA2454	183811	G	G	G	G	G	G	G	G	G	G	A	G	G	G	G
EA2454	184074	A	A	A	A	A	A	A	A	A	C	A	C	A	A	A
EA2454	186323	C	C	C	C	C	C	C	C	A	C	C	C	C	C	C
EA2454	186550	T	C	C	C	C	C	T	C	C	C	C	C	C	C	T
EA2454	187144	T	T	T	T	T	T	T	T	T	T	C	T	T	T	T
EA2454	187172	C	C	C	C	C	C	C	C	C	A	C	A	C	C	C
EA2454	187820	C	C	C	T	C	C	C	C	C	C	C	C	C	C	C
EA2454	187941	A	G	G	A	A	A	A	G	G	G	G	G	G	A	A
EA2454	188717	C	C	C	C	C	T	C	C	C	C	C	C	C	C	C
EA2454	188826	C	C	C	C	C	C	C	C	C	C	C	C	T	C	C
EA2454	190313	T	C	C	C	C	C	T	C	C	C	C	C	C	C	T
EA2454	190389	C	C	C	C	C	C	C	C	C	C	T	C	C	C	C
EA2454	190570	T	T	T	T	T	T	T	T	G	T	T	T	T	T	T
EA2454	190604	C	C	C	C	C	C	C	C	C	T	C	T	C	C	C
EA2454	190823	G	G	G	G	G	G	G	G	G	A	G	A	G	G	G
EA2454	191951	G	G	G	G	G	G	G	G	G	G	A	G	G	G	G
EA2454	192742	A	A	A	A	A	A	A	A	A	A	A	A	T	A	A
EA2454	196598	C	C	C	C	C	C	C	C	C	T	C	T	C	C	C
EA2454	197805	C	C	C	C	C	C	C	C	C	T	C	T	C	C	C
EA2454	197892	C	C	C	C	C	C	C	C	C	T	C	T	C	C	C
EA2454	204163	C	C	C	C	C	C	C	C	C	T	C	T	C	C	C
EA2454	204250	C	C	C	C	C	C	C	C	C	T	C	T	C	C	C
EA2454	204541	A	A	A	A	A	A	A	A	A	A	T	A	A	A	A
EA2454	205385	G	G	G	G	G	G	G	G	T	G	G	G	G	G	G
EA2454	207302	C	C	C	C	C	C	C	C	C	T	T	T	C	C	C
EA2454	209698	C	C	C	C	C	C	C	C	C	T	C	T	C	C	C
EA2454	209960	C	C	C	C	C	C	C	C	C	C	T	C	C	C	C
EA2454	210083	A	A	A	A	A	A	A	T	A	A	A	A	A	A	A
EA2454	211504	C	C	C	C	C	C	C	C	C	T	C	T	C	C	C
EA2454	211521	G	G	G	G	G	G	G	G	G	A	G	A	G	G	G
EA2454	212068	A	A	A	A	A	A	A	A	A	C	A	C	A	A	A
EA2454	212390	C	C	C	C	C	C	C	T	C	C	C	C	T	C	C
EA2454	212904	C	C	C	C	C	C	C	C	T	C	C	C	C	C	C
EA2454	213327	A	A	A	A	A	A	A	A	A	G	G	G	A	A	A
EA2454	214871	G	G	G	G	G	G	G	G	G	T	G	T	G	G	G
EA2454	216313	C	C	C	C	C	C	C	C	T	C	C	C	C	C	C
EA2454	217065	C	C	C	C	C	C	C	C	C	T	C	T	C	C	C
EA2454	217635	C	T	T	C	C	C	C	T	T	C	C	C	T	C	C
EA2454	217762	G	G	G	G	G	G	G	G	G	G	A	G	G	G	G
EA2454	217813	C	C	C	C	C	C	C	C	C	T	C	T	C	C	C
EA2454	218007	C	C	C	C	C	C	C	C	C	C	T	C	C	C	C
EA2454	219080	T	T	T	T	T	T	T	T	T	T	G	T	T	T	T
EA2454	219775	C	C	C	C	C	C	C	C	C	C	T	C	C	C	C
EA2454	220032	G	G	G	G	G	G	G	G	G	A	G	A	G	G	G
EA2454	220392	T	T	T	T	T	T	T	T	T	G	T	G	T	T	T
EA2454	220420	C	C	C	C	T	C	C	C	C	C	C	C	C	C	C
EA2454	220577	G	A	A	A	A	A	G	A	A	A	A	A	A	A	G
EA2454	220684	T	T	T	T	T	T	T	T	T	T	T	T	C	T	T
EA2454	221141	C	C	C	C	C	C	C	C	C	C	T	C	C	C	C
EA2454	222064	C	C	C	C	C	C	C	C	C	C	A	C	C	C	C
EA2454	222087	C	C	C	C	C	C	C	C	C	T	C	T	C	C	C
EA2454	222359	G	G	G	G	G	G	G	G	G	G	A	G	G	G	G
EA2454	222361	A	A	A	A	A	A	A	A	A	G	A	G	A	A	A
EA2454	222778	G	G	G	G	G	G	G	G	G	A	G	A	G	G	G
EA2454	223134	A	A	A	G	A	A	A	A	A	A	A	A	A	A	A
EA2454	223654	C	C	C	C	T	C	C	C	C	C	C	C	C	C	C
EA2454	225044	C	T	T	C	C	C	C	C	C	C	C	C	C	C	C
EA2454	225955	T	T	T	T	T	T	T	T	T	G	T	G	T	T	T
EA2454	226823	C	T	T	C	C	C	C	C	C	C	C	C	C	C	C
EA2454	227599	C	C	C	C	C	C	C	C	C	A	C	A	C	C	C
EA2454	227792	C	C	C	T	C	C	C	C	C	C	C	C	C	C	C
EA2454	229621	A	G	G	A	A	G	A	A	A	A	A	A	A	G	A
EA2454	229626	G	C	C	G	G	C	G	G	G	G	G	G	G	C	C
EA2454	230399	C	C	C	C	C	C	C	C	C	T	C	T	C	C	C
EA2454	231065	C	C	C	C	C	C	C	T	C	C	C	C	C	C	C
EA2454	232504	G	G	G	G	G	G	G	G	G	G	A	G	G	G	G
EA2454	233181	T	T	T	T	T	T	T	T	T	C	T	C	T	T	T
EA2454	233235	A	A	A	A	A	A	A	A	A	G	A	G	A	A	A
EA2454	233746	C	C	C	C	C	C	C	C	C	C	T	C	C	C	C
EA2454	233750	C	C	C	C	C	C	C	C	C	C	T	C	C	C	C
EA2454	234256	C	C	C	C	C	C	C	C	C	A	C	A	C	C	C
EA2454	234965	G	G	G	G	G	G	G	G	T	G	G	G	G	G	G
EA2454	239199	T	T	T	T	T	T	T	T	T	C	T	C	T	T	T
EA2454	239221	A	G	G	G	G	G	A	G	G	G	G	G	G	G	A
EA2454	241567	A	A	A	A	A	A	A	A	A	A	A	A	A	G	A
EA2454	241572	G	G	G	G	G	G	G	G	G	G	G	G	G	A	G
EA2454	241578	T	T	T	T	T	T	T	T	T	C	C	C	T	T	T
EA2454	241603	G	G	G	G	G	G	G	G	G	G	G	G	G	A	G
EA2454	241652	C	C	C	C	C	C	C	C	C	C	C	C	C	T	C
EA2454	243559	A	A	A	A	A	A	A	A	G	A	A	A	A	A	A
EA2454	244668	T	T	T	T	T	T	T	T	T	C	T	C	T	T	T
EA2454	245043	C	T	T	C	C	C	C	C	C	C	C	C	C	C	C
EA2454	245301	C	T	T	T	T	T	C	T	T	T	T	T	T	T	C
EA2454	245648	C	C	C	C	C	C	C	C	T	C	C	C	C	C	C
EA2454	245953	G	G	G	G	G	G	G	G	G	A	G	A	G	G	G
EA2454	246188	A	A	A	G	A	A	A	A	A	A	A	A	A	A	A
EA2454	246285	G	G	G	G	G	G	G	T	G	G	G	G	T	G	G
EA2454	246850	T	T	T	T	T	T	T	T	T	C	C	C	T	T	T
EA2454	248471	T	C	C	T	T	T	T	C	C	C	C	C	C	T	T
EA2454	248849	C	C	C	C	C	C	C	C	C	T	C	T	C	C	C
EA2454	250111	C	C	C	C	C	C	C	C	A	C	C	C	C	C	C
EA2454	251758	T	T	T	T	T	T	T	T	C	T	T	T	T	T	T
EA2454	251923	C	C	C	C	C	C	C	C	C	T	C	T	C	C	C
EA2454	253532	G	G	G	G	G	G	G	G	G	G	G	G	G	G	T
EA2454	254440	C	C	C	C	C	C	C	C	C	T	C	T	C	C	C
EA2454	254462	C	C	C	C	C	C	C	C	C	C	T	C	C	C	C
EA2454	254482	A	A	A	A	A	A	A	A	A	A	A	C	A	A	A
EA2454	254506	T	T	T	T	T	T	T	A	T	T	T	T	A	T	T
EA2454	255292	A	A	A	A	A	A	A	A	A	G	A	G	A	A	A
EA2454	255306	G	A	A	G	G	G	G	G	A	G	G	G	G	G	G
EA2454	255537	C	C	C	C	C	C	C	T	C	C	C	C	T	C	C
EA2454	255936	A	A	A	A	A	A	A	A	A	A	T	A	A	A	A
EA2454	256442	C	C	C	C	C	C	C	C	C	T	C	T	C	C	C
EA2454	256488	G	T	T	G	G	G	G	G	G	G	G	G	G	G	G
EA2454	257208	C	C	C	C	C	C	C	C	C	T	C	T	C	C	C
EA2454	259013	A	A	A	A	A	A	A	G	A	A	A	A	G	A	A
EA2454	259268	G	G	G	G	G	G	G	G	G	A	G	A	G	G	G
EA2454	259777	C	C	C	C	C	C	C	C	C	T	C	T	C	C	C
EA2454	260007	C	A	A	C	C	C	C	C	A	C	C	C	C	C	C
EA2454	261169	A	A	A	A	A	A	A	A	A	A	C	A	A	A	A
EA2454	261901	A	A	A	C	A	A	A	A	A	A	A	A	A	A	A
EA2454	262173	C	T	T	C	C	C	C	C	C	C	C	C	C	C	C
EA2454	264457	C	C	C	C	T	C	C	C	C	C	C	C	C	C	C
EA2454	266099	T	T	T	T	T	T	T	G	T	T	T	T	T	T	T
EA2454	266355	G	G	G	T	G	G	G	G	G	G	G	G	G	G	G
EA2454	267088	C	C	C	C	C	C	C	C	C	C	C	C	T	C	C
EA2454	267736	C	C	C	C	C	C	C	A	C	C	C	C	A	C	C
EA2454	268207	C	C	C	C	T	C	C	C	C	C	C	C	C	C	C
EA2454	268722	G	G	G	G	G	G	G	G	G	A	G	A	G	G	G
EA2454	268752	G	G	G	G	G	G	G	G	G	G	G	G	A	G	G
EA2454	268949	C	C	C	C	C	C	C	C	C	T	C	T	C	C	C
EA2454	269495	C	C	C	C	C	C	C	C	C	A	C	A	C	C	C
EA2454	270040	C	C	C	C	C	C	C	C	C	T	C	T	C	C	C
EA2454	270317	A	A	A	A	A	T	A	A	A	A	A	A	A	T	A
EA2454	271114	C	C	C	C	C	C	C	C	C	C	T	C	C	C	C
EA2454	271185	C	C	C	C	C	C	C	C	C	A	C	C	C	C	C
EA2454	271991	T	T	T	T	T	T	T	G	T	T	T	T	G	T	T
EA2454	272479	T	T	T	T	T	T	T	T	T	G	T	G	T	T	T
EA2454	272480	T	T	T	T	T	T	T	T	T	G	T	G	T	T	T
EA2454	272615	A	A	A	A	A	A	A	A	A	T	T	T	A	A	A
EA2454	273279	C	C	C	C	C	C	C	C	C	C	C	C	C	T	C
EA2454	273409	C	T	T	C	C	C	C	C	C	C	C	C	C	C	C
EA2454	274246	C	T	T	C	C	C	C	C	C	C	C	C	C	C	C
EA2454	274429	G	G	G	G	G	G	G	G	A	G	G	G	G	G	G
EA2454	275599	G	A	A	G	G	G	G	A	A	A	A	A	A	G	G
EA2454	276026	C	C	C	C	C	C	C	T	C	C	C	C	T	C	C
EA2454	276220	T	T	T	T	T	T	T	T	T	T	T	T	T	C	T
EA2454	276716	C	C	C	C	C	C	C	C	C	C	T	C	C	C	C
EA2454	277305	G	G	G	G	G	G	G	G	G	A	G	A	G	G	G
EA2454	277376	C	C	C	C	C	C	C	C	T	C	C	C	C	C	C
EA2454	277907	G	T	T	T	T	T	G	T	T	T	T	T	T	T	G
EA2454	278291	C	C	C	C	C	C	C	C	C	A	C	A	C	C	C
EA2454	278848	A	G	G	A	A	A	A	G	G	G	G	G	G	A	A
EA2454	278978	C	C	C	C	C	C	C	C	C	C	T	C	C	C	C
EA2454	280058	T	T	T	T	T	T	T	C	T	T	T	T	C	T	T
EA2454	280614	C	C	C	C	C	C	C	C	T	C	C	C	C	C	C
EA2454	281250	C	C	C	C	C	C	C	C	C	T	C	T	C	C	C
EA2454	281316	C	C	C	C	C	T	C	C	C	C	C	C	C	T	C
EA2454	281498	A	A	A	A	A	A	A	A	A	G	A	G	A	A	A
EA2454	281916	A	A	A	A	A	A	A	A	G	A	A	A	A	A	A
EA2454	282666	C	C	C	C	C	C	C	C	C	C	T	C	C	C	C
EA2454	282929	C	T	T	C	C	C	C	C	T	C	C	C	C	C	C
EA2454	284131	A	G	G	A	A	A	A	G	G	G	G	G	G	A	A
EA2454	286429	G	G	G	G	G	G	G	G	G	G	A	G	G	G	G
EA2454	286636	T	T	T	T	T	T	T	T	T	T	G	T	T	T	T
EA2454	286856	G	G	G	G	G	G	G	A	G	G	G	G	A	G	G
EA2454	288026	A	A	A	A	A	A	A	A	A	A	A	A	C	A	A
EA2454	288225	C	C	C	C	C	C	C	C	C	T	C	T	C	C	C
EA2454	288870	C	C	C	C	C	C	C	C	C	C	T	C	C	C	C
EA2454	288991	C	C	C	C	C	C	C	T	C	C	C	C	T	C	C
EA2454	288994	T	T	T	T	T	T	T	C	T	T	T	T	C	T	T
EA2454	289050	T	T	T	T	T	T	T	C	T	T	T	T	C	T	T
EA2454	289137	T	T	T	T	T	T	T	C	T	T	T	T	C	T	T
EA2454	289140	T	T	T	T	T	T	T	C	T	T	T	T	C	T	T
EA2454	289188	G	G	G	G	G	G	G	A	G	G	G	G	A	G	G
EA2454	289242	A	A	A	A	A	A	A	G	A	A	A	A	G	A	A
EA2454	289260	G	G	G	G	G	G	G	C	G	G	G	G	C	G	G
EA2454	289326	C	C	C	C	C	C	C	A	C	C	C	C	A	C	C
EA2454	289332	T	T	T	T	T	T	T	C	T	T	T	T	C	T	T
EA2454	289335	T	T	T	T	T	T	T	C	T	T	T	T	C	T	T
EA2454	289341	T	T	T	T	T	T	T	C	T	T	T	T	C	T	T
EA2454	289582	C	C	C	C	C	C	C	C	T	C	C	C	C	C	C
EA2454	289594	A	A	A	A	A	A	A	T	A	A	A	A	T	A	A
EA2454	289640	G	G	G	G	G	G	G	A	G	G	G	G	A	G	G
EA2454	289704	A	A	A	A	A	A	A	T	A	A	A	A	T	A	A
EA2454	289839	G	G	G	G	G	G	G	A	G	G	G	G	A	G	G
EA2454	289842	T	T	T	T	T	T	T	A	T	T	T	T	A	T	T
EA2454	289854	T	T	T	T	T	T	T	C	T	T	T	T	C	T	T
EA2454	289860	C	C	C	C	C	C	C	T	C	C	C	C	T	C	C
EA2454	289866	T	T	T	T	T	T	T	A	T	T	T	T	A	T	T
EA2454	289962	A	A	A	A	A	A	A	G	A	A	A	A	G	A	A
EA2454	290058	T	T	T	T	T	T	T	C	T	T	T	T	C	T	T
EA2454	290061	C	C	C	C	C	C	C	T	C	C	C	C	T	C	C
EA2454	290064	C	C	C	C	C	C	C	T	C	C	C	C	T	C	C
EA2454	290076	C	C	C	C	C	C	C	T	C	C	C	C	T	C	C
EA2454	290134	T	T	T	T	T	T	T	C	T	T	T	T	C	T	T
EA2454	290136	G	G	G	G	G	G	G	T	G	G	G	G	T	G	G
EA2454	290172	A	A	A	A	A	A	A	G	A	A	A	A	G	A	A
EA2454	290187	C	A	A	C	C	C	C	C	A	C	C	C	C	C	C
EA2454	290212	G	G	G	T	G	G	G	G	G	G	G	G	G	G	G
EA2454	290262	T	T	T	T	T	T	T	C	T	T	T	T	C	T	T
EA2454	290283	G	G	G	G	G	G	G	A	G	G	G	G	A	G	G
EA2454	290292	C	C	C	C	C	C	C	A	C	C	C	C	A	C	C
EA2454	290295	T	T	T	T	T	T	T	C	T	T	T	T	C	T	T
EA2454	290364	A	A	A	A	A	A	A	T	A	A	A	A	T	A	A
EA2454	290367	A	A	A	A	A	A	A	G	A	A	A	A	G	A	A
EA2454	290388	T	T	T	T	T	T	T	C	T	T	T	T	C	T	T
EA2454	290433	C	C	C	C	C	C	C	G	C	C	C	C	G	C	C
EA2454	290454	G	G	G	G	G	G	G	T	G	G	G	G	T	G	G
EA2454	290610	T	T	T	T	T	T	T	C	T	T	T	T	C	T	T
EA2454	290640	C	C	C	C	C	C	C	A	C	C	C	C	A	C	C
EA2454	290655	C	C	C	C	C	C	C	A	C	C	C	C	A	C	C
EA2454	290717	T	T	T	T	T	T	T	C	T	T	T	T	C	T	T
EA2454	290719	A	A	A	A	A	A	A	G	A	A	A	A	G	A	A
EA2454	290739	C	C	C	C	C	C	C	T	C	C	C	C	T	C	C
EA2454	290752	G	G	G	G	G	G	G	T	G	G	G	G	T	G	G
EA2454	290793	A	A	A	A	A	A	A	C	A	A	A	A	C	A	A
EA2454	290916	T	T	T	T	T	T	T	C	T	T	T	T	C	T	T
EA2454	290928	G	G	G	G	G	G	G	C	G	G	G	G	C	G	G
EA2454	291036	G	G	G	G	G	G	G	T	G	G	G	G	T	G	G
EA2454	291045	G	G	G	G	G	G	G	A	G	G	G	G	A	G	G
EA2454	291057	C	C	C	C	C	C	C	T	C	C	C	C	T	C	C
EA2454	291060	G	G	G	G	G	G	G	C	G	G	G	G	C	G	G
EA2454	291061	C	C	C	C	C	C	C	T	C	C	C	C	T	C	C
EA2454	291063	G	G	G	G	G	G	G	A	G	G	G	G	A	G	G
EA2454	291072	C	C	C	C	C	C	C	T	C	C	C	C	T	C	C
EA2454	291144	T	T	T	T	T	T	T	C	T	T	T	T	C	T	T
EA2454	291165	C	C	C	C	C	C	C	T	C	C	C	C	T	C	C
EA2454	291174	C	C	C	C	C	C	C	A	C	C	C	C	A	C	C
EA2454	291189	A	A	A	A	A	A	A	C	A	A	A	A	C	A	A
EA2454	291240	T	T	T	T	T	T	T	C	T	T	T	T	C	T	T
EA2454	291273	G	G	G	G	G	G	G	A	G	G	G	G	A	G	G
EA2454	291387	A	A	A	A	A	A	A	G	A	A	A	A	G	A	A
EA2454	291400	T	T	T	T	T	T	T	C	T	T	T	T	C	T	T
EA2454	291414	G	G	G	G	G	G	G	A	G	G	G	G	A	G	G
EA2454	291429	C	C	C	C	C	C	C	T	C	C	C	C	T	C	C
EA2454	291449	G	G	G	G	G	G	G	G	G	G	G	G	A	G	G
EA2454	291451	A	A	A	A	A	A	A	C	A	A	A	A	C	A	A
EA2454	291454	C	C	C	C	C	C	C	T	C	C	C	C	T	C	C
EA2454	291465	T	T	T	T	T	T	T	A	T	T	T	T	A	T	T
EA2454	291477	A	A	A	A	A	A	A	G	A	A	A	A	G	A	A
EA2454	291537	G	G	G	G	G	G	G	C	G	G	G	G	C	G	G
EA2454	291540	A	A	A	A	A	A	A	T	A	A	A	A	T	A	A
EA2454	291552	G	G	G	G	G	G	G	A	G	G	G	G	A	G	G
EA2454	291573	T	T	T	T	T	T	T	C	T	T	T	T	C	T	T
EA2454	291576	G	G	G	G	G	G	G	A	G	G	G	G	A	G	G
EA2454	291609	C	C	C	C	C	C	C	A	C	C	C	C	A	C	C
EA2454	291612	C	C	C	C	C	C	C	A	C	C	C	C	A	C	C
EA2454	291621	A	A	A	A	A	A	A	G	A	A	A	A	G	A	A
EA2454	291645	A	A	A	A	A	A	A	T	A	A	A	A	T	A	A
EA2454	291648	C	C	C	C	C	C	C	T	C	C	C	C	T	C	C
EA2454	291705	C	C	C	C	C	C	C	T	C	C	C	C	T	C	C
EA2454	291720	A	A	A	A	A	A	A	G	A	A	A	A	G	A	A
EA2454	291729	T	T	T	T	T	T	T	G	T	T	T	T	G	T	T
EA2454	291833	A	A	A	A	A	A	A	G	A	A	A	A	G	A	A
EA2454	291837	G	G	G	G	G	G	G	T	G	G	G	G	T	G	G
EA2454	291840	G	G	G	G	G	G	G	C	G	G	G	G	C	G	G
EA2454	291852	C	C	C	C	C	C	C	T	C	C	C	C	T	C	C
EA2454	291908	T	T	T	T	T	T	T	G	T	T	T	T	G	T	T
EA2454	291975	C	C	C	C	C	C	C	G	C	C	C	C	G	C	C
EA2454	291993	A	A	A	A	A	A	A	G	A	A	A	A	G	A	A
EA2454	291999	T	T	T	T	T	T	T	C	T	T	T	T	C	T	T
EA2454	292003	C	C	C	C	C	C	C	T	C	C	C	C	T	C	C
EA2454	292124	C	C	C	C	C	C	C	A	C	C	C	C	A	C	C
EA2454	292175	T	T	T	T	T	T	T	C	T	T	T	T	C	T	T
EA2454	292193	C	C	C	C	C	C	C	T	C	C	C	C	T	C	C
EA2454	292195	T	T	T	T	T	T	T	C	T	T	T	T	C	T	T
EA2454	292214	A	A	A	A	A	A	A	G	A	A	A	A	G	A	A
EA2454	292221	T	T	T	T	T	T	T	C	T	T	T	T	C	T	T
EA2454	292225	T	T	T	T	T	T	T	A	T	T	T	T	A	T	T
EA2454	292229	C	C	C	C	C	C	C	T	C	C	C	C	T	C	C
EA2454	292232	C	C	C	C	C	C	C	A	C	C	C	C	A	C	C
EA2454	292267	C	C	C	C	C	C	C	C	C	C	A	C	C	C	C
EA2454	292304	T	T	T	T	T	T	T	C	T	T	T	T	C	T	T
EA2454	292325	A	A	A	A	A	A	A	T	A	A	A	A	T	A	A
EA2454	292400	C	C	C	C	C	C	C	T	C	C	C	C	T	C	C
EA2454	292414	C	C	C	C	C	C	C	T	C	C	C	C	T	C	C
EA2454	292506	G	G	G	G	G	G	G	T	G	G	G	G	T	G	G
EA2454	292561	G	G	G	G	G	G	G	C	G	G	G	G	C	G	G
EA2454	292766	T	T	T	T	T	T	T	C	T	T	T	T	C	T	T
EA2454	292868	G	G	G	G	G	G	G	A	G	G	G	G	A	G	G
EA2454	292898	A	A	A	A	A	A	A	G	A	A	A	A	G	A	A
EA2454	292907	A	A	A	A	A	A	A	C	A	A	A	A	C	A	A
EA2454	292916	T	T	T	T	T	T	T	C	T	T	T	T	C	T	T
EA2454	292919	C	C	C	C	C	C	C	T	C	C	C	C	T	C	C
EA2454	292951	C	C	C	C	C	C	C	A	C	C	C	C	A	C	C
EA2454	293047	C	C	C	C	C	C	C	C	C	T	C	T	C	C	C
EA2454	293057	C	C	C	C	C	C	C	G	C	C	C	C	G	C	C
EA2454	293102	A	A	A	A	A	A	A	G	A	A	A	A	G	A	A
EA2454	293197	G	G	G	G	G	G	G	G	G	A	G	A	G	G	G
EA2454	293200	A	A	A	A	A	A	A	T	A	A	A	A	T	A	A
EA2454	293263	A	A	A	A	A	A	A	G	A	A	A	A	G	A	A
EA2454	293272	A	A	A	A	A	A	A	G	A	A	A	A	G	A	A
EA2454	293435	A	A	A	A	A	A	A	G	A	A	A	A	G	A	A
EA2454	293449	A	A	A	A	A	A	A	C	A	A	A	A	C	A	A
EA2454	293455	C	C	C	C	C	C	C	T	C	C	C	C	T	C	C
EA2454	293526	T	T	T	T	T	T	T	C	T	T	T	T	C	T	T
EA2454	293533	A	A	A	A	A	A	A	G	A	A	A	A	G	A	A
EA2454	293620	A	A	A	A	A	A	A	T	A	A	A	A	T	A	A
EA2454	293629	G	G	G	G	G	G	G	T	G	G	G	G	T	G	G
EA2454	293752	T	T	T	T	T	T	T	C	T	T	T	T	C	T	T
EA2454	293839	G	G	G	G	G	G	G	A	G	G	G	G	A	G	G
EA2454	294054	G	G	G	G	G	G	G	G	G	G	T	G	G	G	G
EA2454	294088	T	T	T	T	T	T	T	T	T	C	T	C	T	T	T
EA2454	295395	G	G	G	G	G	G	G	G	G	G	A	G	G	G	G
EA2454	295413	T	T	T	T	T	T	T	G	T	T	T	T	G	T	T
EA2454	295650	C	C	C	C	C	C	C	T	C	C	C	C	T	C	C
EA2454	295992	G	G	G	G	G	G	G	T	G	G	G	G	T	G	G
EA2454	296004	C	C	C	C	C	C	C	T	C	C	C	C	T	C	C
EA2454	296339	T	T	T	T	T	T	T	A	T	T	T	T	A	T	T
EA2454	296802	T	T	T	T	T	T	T	A	T	T	T	T	A	T	T
EA2454	296808	C	C	C	C	C	C	C	T	C	C	C	C	T	C	C
EA2454	297129	T	T	T	T	T	T	T	C	T	T	T	T	C	T	T
EA2454	297228	T	T	T	T	T	T	T	C	T	T	T	T	C	T	T
EA2454	297486	T	T	T	T	T	T	T	C	T	T	T	T	C	T	T
EA2454	297501	C	C	C	C	C	C	C	G	C	C	C	C	G	C	C
EA2454	297613	T	T	T	T	T	T	T	C	T	T	T	T	C	T	T
EA2454	297690	C	C	C	C	C	C	C	T	C	C	C	C	T	C	C
EA2454	297729	T	T	T	T	T	T	T	C	T	T	T	T	C	T	T
EA2454	298022	C	C	C	C	C	C	C	A	C	C	C	C	A	C	C
EA2454	298055	G	T	T	G	G	G	G	G	T	G	G	G	G	G	G
EA2454	298240	T	T	T	T	T	T	T	G	T	T	T	T	G	T	T
EA2454	298249	C	C	C	C	C	C	C	T	C	C	C	C	T	C	C
EA2454	298264	C	C	C	C	C	C	C	T	C	C	C	C	T	C	C
EA2454	298286	T	C	C	C	C	C	T	C	C	C	C	C	C	C	T
EA2454	298363	C	C	C	C	C	C	C	C	C	T	C	T	C	C	C
EA2454	298414	C	C	C	C	C	C	C	T	C	C	C	C	T	C	C
EA2454	298426	T	T	T	T	T	T	T	C	T	T	T	T	C	T	T
EA2454	298444	T	T	T	T	T	T	T	G	T	T	T	T	G	T	T
EA2454	298666	T	T	T	T	T	T	T	C	T	T	T	T	C	T	T
EA2454	299380	G	G	G	G	G	G	G	A	G	G	G	G	A	G	G
EA2454	299446	A	A	A	A	A	A	A	G	A	A	A	A	G	A	A
EA2454	299497	G	G	G	G	G	G	G	T	G	G	G	G	T	G	G
EA2454	299575	C	C	C	C	C	C	C	T	C	C	C	C	T	C	C
EA2454	299605	T	T	T	T	T	T	T	C	T	T	T	T	C	T	T
EA2454	299632	C	C	C	C	C	C	C	T	C	C	C	C	T	C	C
EA2454	299758	A	A	A	A	A	A	A	G	A	A	A	A	G	A	A
EA2454	299759	C	C	C	C	C	C	C	A	C	C	C	C	A	C	C
EA2454	299773	T	T	T	T	T	T	T	C	T	T	T	T	C	T	T
EA2454	299836	C	C	C	C	C	C	C	T	C	C	C	C	T	C	C
EA2454	299899	T	T	T	T	T	T	T	G	T	T	T	T	G	T	T
EA2454	299920	A	A	A	A	A	A	A	C	A	A	A	A	C	A	A
EA2454	299974	C	T	T	C	C	C	C	C	C	C	C	C	C	C	C
EA2454	300016	T	C	C	T	T	T	T	C	T	T	T	T	C	T	T
EA2454	300252	T	C	C	T	T	T	T	C	T	T	T	T	C	T	T
EA2454	300276	A	C	C	A	A	A	A	C	A	A	A	A	C	A	A
EA2454	300279	T	C	C	T	T	T	T	T	T	T	T	T	T	T	T
EA2454	300282	T	T	T	T	T	T	T	C	T	T	T	T	C	T	T
EA2454	300285	A	G	G	A	A	A	A	A	A	A	A	A	A	A	A
EA2454	300293	G	G	G	G	G	G	G	A	G	G	G	G	A	G	G
EA2454	300294	T	T	T	T	T	T	T	C	T	T	T	T	C	T	T
EA2454	300300	A	A	A	A	A	A	A	G	A	A	A	A	G	A	A
EA2454	300315	G	A	A	G	G	G	G	A	G	G	G	G	A	G	G
EA2454	300321	A	A	A	A	A	A	A	G	A	A	A	A	G	A	A
EA2454	300375	C	C	C	C	C	C	C	T	C	C	C	C	T	C	C
EA2454	300378	G	A	A	G	G	G	G	G	G	G	G	G	G	G	G
EA2454	300424	C	G	G	C	C	C	C	C	C	C	C	C	C	C	C
EA2454	300425	G	T	T	G	G	G	G	T	G	G	G	G	T	G	G
EA2454	300438	G	A	A	G	G	G	G	G	G	G	G	G	G	G	G
EA2454	300441	T	G	G	T	T	T	T	T	T	T	T	T	T	T	T
EA2454	300447	C	G	G	C	C	C	C	C	C	C	C	C	C	C	C
EA2454	300450	G	T	T	G	G	G	G	G	G	G	G	G	G	G	G
EA2454	300459	C	T	T	C	C	C	C	C	C	C	C	C	C	C	C
EA2454	300471	T	C	C	T	T	T	T	T	T	T	T	T	T	T	T
EA2454	300483	G	G	G	G	G	G	G	C	G	G	G	G	C	G	G
EA2454	300494	C	T	T	C	C	C	C	T	C	C	C	C	T	C	C
EA2454	300501	G	G	G	G	G	G	G	A	G	G	G	G	A	G	G
EA2454	300507	G	G	G	G	G	G	G	A	G	G	G	G	A	G	G
EA2454	300549	A	A	A	A	A	A	A	G	A	A	A	A	G	A	A
EA2454	300561	G	A	A	G	G	G	G	G	G	G	G	G	G	G	G
EA2454	300596	T	T	T	T	T	T	T	C	T	T	T	T	C	T	T
EA2454	300651	C	A	A	C	C	C	C	C	C	C	C	C	C	C	C
EA2454	300666	G	A	A	G	G	G	G	A	G	G	G	G	A	G	G
EA2454	300681	C	T	T	C	C	C	C	T	C	C	C	C	T	C	C
EA2454	300718	A	G	G	A	A	A	A	A	A	A	A	A	A	A	A
EA2454	300722	G	G	G	G	G	G	G	T	G	G	G	G	T	G	G
EA2454	300726	A	G	G	A	A	A	A	G	A	A	A	A	G	A	A
EA2454	300777	C	C	C	C	C	C	C	T	C	C	C	C	T	C	C
EA2454	300780	G	G	G	G	G	G	G	C	G	G	G	G	C	G	G
EA2454	300788	C	T	T	C	C	C	C	C	C	C	C	C	C	C	C
EA2454	300858	G	G	G	G	G	G	G	A	G	G	G	G	A	G	G
EA2454	300863	G	T	T	G	G	G	G	G	G	G	G	G	G	G	G
EA2454	300867	A	G	G	A	A	A	A	A	A	A	A	A	A	A	A
EA2454	300870	A	G	G	A	A	A	A	A	A	A	A	A	A	A	A
EA2454	300873	G	C	C	G	G	G	G	T	G	G	G	G	T	G	G
EA2454	300876	T	T	T	G	T	T	T	A	T	T	T	T	A	T	T
EA2454	300879	G	C	C	G	G	G	G	G	G	G	G	G	G	G	G
EA2454	300881	G	A	A	G	G	G	G	G	G	G	G	G	G	G	G
EA2454	300923	A	C	C	A	A	A	A	C	A	A	A	A	C	A	A
EA2454	301126	T	C	C	T	T	T	T	T	T	T	T	T	T	T	T
EA2454	301555	T	C	C	T	T	T	T	T	T	T	T	T	T	T	T
EA2454	301564	T	C	C	T	T	T	T	C	T	T	T	T	C	T	T
EA2454	301612	T	T	T	T	T	T	T	C	T	T	T	T	C	T	T
EA2454	301657	T	C	C	T	T	T	T	C	T	T	T	T	C	T	T
EA2454	301660	C	C	C	C	C	C	C	T	C	C	C	C	T	C	C
EA2454	301681	T	C	C	T	T	T	T	T	T	T	T	T	T	T	T
EA2454	301684	G	A	A	G	G	G	G	G	G	G	G	G	G	G	G
EA2454	301690	G	A	A	G	G	G	G	G	G	G	G	G	G	G	G
EA2454	301705	G	C	C	G	G	G	G	G	G	G	G	G	G	G	G
EA2454	301717	C	C	C	C	C	C	C	T	C	C	C	C	T	C	C
EA2454	301736	T	C	C	T	T	T	T	C	T	T	T	T	C	T	T
EA2454	301759	T	C	C	T	T	T	T	C	T	T	T	T	C	T	T
EA2454	301762	T	T	T	T	T	T	T	G	T	T	T	T	G	T	T
EA2454	301807	T	C	C	T	T	T	T	T	T	T	T	T	T	T	T
EA2454	301822	G	A	A	G	G	G	G	G	G	G	G	G	G	G	G
EA2454	302008	C	C	C	C	C	C	C	G	C	C	C	C	G	C	C
EA2454	302024	T	C	C	T	T	T	T	C	T	T	T	T	C	T	T
EA2454	302042	C	C	C	C	C	C	C	T	C	C	C	C	T	C	C
EA2454	302056	A	A	A	A	A	A	A	G	A	A	A	A	G	A	A
EA2454	302069	C	C	C	C	C	C	C	T	C	C	C	C	T	C	C
EA2454	302081	C	C	C	C	C	C	C	T	C	C	C	C	T	C	C
EA2454	302123	G	G	G	G	G	G	G	A	G	G	G	G	A	G	G
EA2454	302135	T	G	G	T	T	T	T	G	T	T	T	T	G	T	T
EA2454	302202	C	C	C	C	C	C	C	T	C	C	C	C	T	C	C
EA2454	302244	C	C	C	C	C	C	C	T	C	C	C	C	T	C	C
EA2454	302258	G	T	T	G	G	G	G	G	G	G	G	G	G	G	G
EA2454	302303	G	A	A	G	G	G	G	G	G	G	G	G	G	G	G
EA2454	302324	A	C	C	A	A	A	A	A	A	A	A	A	A	A	A
EA2454	302373	T	T	T	T	T	T	T	C	T	T	T	T	C	T	T
EA2454	302384	T	T	T	T	T	T	T	C	T	T	T	T	C	T	T
EA2454	302386	C	G	G	C	C	C	C	G	C	C	C	C	G	C	C
EA2454	302472	A	G	G	A	A	A	A	A	A	A	A	A	A	A	A
EA2454	302495	G	A	A	G	G	G	G	C	G	G	G	G	C	G	G
EA2454	302540	T	A	A	T	T	T	T	A	T	T	T	T	A	T	T
EA2454	302650	T	T	T	T	T	T	T	C	T	T	T	T	C	T	T
EA2454	302666	C	T	T	C	C	C	C	C	C	C	C	C	C	C	C
EA2454	302683	G	G	G	G	G	G	G	A	G	G	G	G	A	G	G
EA2454	302696	A	G	G	A	A	A	A	G	A	A	A	A	G	A	A
EA2454	302708	C	C	C	C	C	C	C	T	C	C	C	C	T	C	C
EA2454	302723	G	G	G	G	G	G	G	A	G	G	G	G	A	G	G
EA2454	302744	A	G	G	A	A	A	A	G	A	A	A	A	G	A	A
EA2454	302783	T	C	C	T	T	T	T	C	T	T	T	T	C	T	T
EA2454	302798	G	A	A	G	G	G	G	G	G	G	G	G	G	G	G
EA2454	302816	G	A	A	G	G	G	G	G	G	G	G	G	G	G	G
EA2454	302819	T	G	G	T	T	T	T	T	T	T	T	T	T	T	T
EA2454	302822	G	A	A	G	G	G	G	G	G	G	G	G	G	G	G
EA2454	302846	G	A	A	G	G	G	G	G	G	G	G	G	G	G	G
EA2454	302894	T	C	C	T	T	T	T	C	T	T	T	T	C	T	T
EA2454	302914	A	T	T	A	A	A	A	A	A	A	A	A	A	A	A
EA2454	302915	G	G	G	G	G	G	G	T	G	G	G	G	T	G	G
EA2454	302924	T	T	T	T	T	T	T	C	T	T	T	T	C	T	T
EA2454	302929	G	A	A	G	G	G	G	A	G	G	G	G	A	G	G
EA2454	302930	A	A	A	A	A	A	A	G	A	A	A	A	G	A	A
EA2454	302931	T	T	T	T	T	T	T	C	T	T	T	T	C	T	T
EA2454	302969	C	T	T	C	C	C	C	C	C	C	C	C	C	C	C
EA2454	303028	G	G	G	G	G	G	G	A	G	G	G	G	A	G	G
EA2454	303047	T	A	A	T	T	T	T	T	T	T	T	T	T	T	T
EA2454	303050	C	T	T	C	C	C	C	C	C	C	C	C	C	C	C
EA2454	303053	A	G	G	A	A	A	A	A	A	A	A	A	A	A	A
EA2454	303061	T	G	G	T	T	T	T	T	T	T	T	T	T	T	T
EA2454	303062	A	T	T	A	A	A	A	A	A	A	A	A	A	A	A
EA2454	303359	G	A	A	G	G	G	G	G	G	G	G	G	G	G	G
EA2454	303365	C	T	T	C	C	C	C	C	C	C	C	C	C	C	C
EA2454	303476	C	C	C	C	C	C	C	T	C	C	C	C	T	C	C
EA2454	303533	A	G	G	A	A	A	A	G	A	A	A	A	G	A	A
EA2454	303542	C	T	T	C	C	C	C	C	C	C	C	C	C	C	C
EA2454	303575	A	G	G	A	A	A	A	G	A	A	A	A	G	A	A
EA2454	303605	C	T	T	C	C	C	C	C	C	C	C	C	C	C	C
EA2454	303617	G	A	A	G	G	G	G	G	G	G	G	G	G	G	G
EA2454	303707	C	T	T	C	C	C	C	C	C	C	C	C	C	C	C
EA2454	303867	A	A	A	A	A	A	A	G	A	A	A	A	G	A	A
EA2454	303869	T	A	A	T	T	T	T	T	T	T	T	T	T	T	T
EA2454	303968	T	C	C	T	T	T	T	C	T	T	T	T	C	T	T
EA2454	304001	T	C	C	T	T	T	T	C	T	T	T	T	C	T	T
EA2454	304012	C	C	C	C	C	C	C	T	C	C	C	C	T	C	C
EA2454	304106	G	G	G	G	G	G	G	A	G	G	G	G	G	G	G
EA2454	304109	T	T	T	T	T	T	T	G	T	T	T	T	G	T	T
EA2454	304160	T	G	G	T	T	T	T	T	T	T	T	T	T	T	T
EA2454	304199	T	C	C	T	T	T	T	C	T	T	T	T	C	T	T
EA2454	304214	G	G	G	G	G	G	G	A	G	G	G	G	A	G	G
EA2454	304252	A	T	T	A	A	A	A	A	A	A	A	A	A	A	A
EA2454	304367	C	C	C	C	C	C	C	T	C	C	C	C	T	C	C
EA2454	304368	A	A	A	A	A	A	A	G	A	A	A	A	G	A	A
EA2454	304378	T	T	T	T	T	T	T	C	T	T	T	T	C	T	T
EA2454	305129	G	G	G	G	G	G	G	G	G	G	A	G	G	G	G
EA2454	305507	G	G	G	G	G	G	G	G	G	A	G	A	G	G	G
EA2454	306354	G	G	G	A	G	G	G	G	G	G	G	G	G	G	G
EA2454	307088	G	G	G	G	G	G	G	G	G	A	G	A	G	G	G
EA2454	307680	T	T	T	T	T	T	T	T	T	A	T	A	T	T	T
EA2454	307802	C	C	C	T	C	C	C	C	C	C	C	C	C	C	C
EA2454	308042	A	A	A	A	A	A	A	A	A	C	A	C	A	A	A
EA2454	310094	G	G	G	G	G	G	G	G	G	A	G	A	G	G	G
EA2454	310181	G	G	G	G	G	G	G	G	A	G	G	G	G	G	G
EA2454	310398	C	C	C	C	C	C	C	C	C	T	C	T	C	C	C
EA2454	311207	A	A	A	A	A	A	A	A	A	C	A	C	A	A	A
EA2454	311347	G	A	A	G	G	G	G	G	A	G	G	G	G	G	G
EA2454	311941	C	C	C	C	T	C	C	C	C	C	C	C	C	C	C
EA2454	312009	G	G	G	G	G	G	G	G	G	T	G	T	G	G	G
EA2454	312992	C	C	C	C	C	C	C	T	C	C	C	C	T	C	C
EA2454	313034	A	G	G	G	G	G	A	G	G	G	G	G	G	G	A
EA2454	313922	G	G	G	G	G	G	G	A	G	G	G	G	A	G	G
EA2454	314410	A	A	A	A	A	A	A	A	A	T	A	T	A	A	A
EA2454	314871	C	C	C	C	C	C	C	C	C	C	C	C	C	T	C
EA2454	315163	G	G	G	G	G	G	G	G	G	A	G	A	G	G	G
EA2454	316012	C	C	C	T	C	C	C	C	C	C	C	C	C	C	C
EA2454	316769	C	A	A	C	C	C	C	C	A	C	C	C	C	C	C
EA2454	317106	T	C	C	C	C	C	T	C	C	C	C	C	C	C	T
EA2454	318467	T	T	T	C	C	C	T	T	T	T	T	T	T	C	T
EA2454	319327	G	G	G	G	G	G	G	G	G	C	G	C	G	G	G
EA2454	321573	C	C	C	C	C	C	C	C	C	A	C	A	C	C	C
EA2454	322495	G	G	G	G	G	G	G	G	G	A	G	A	G	G	G
EA2454	322834	C	C	C	C	C	C	C	C	C	C	C	C	C	T	C
EA2454	323459	G	G	G	G	G	G	G	G	G	G	A	G	G	G	G
EA2454	323836	G	G	G	G	G	G	G	G	G	G	T	G	G	G	G
EA2454	324216	G	G	G	G	G	G	G	G	G	A	G	A	G	G	G
EA2454	325533	G	G	G	A	G	G	G	G	G	G	G	G	G	G	G
EA2454	327651	C	C	C	C	C	C	C	C	C	C	G	C	C	C	C
EA2454	327678	A	A	A	A	A	A	A	A	A	C	A	C	A	A	A
EA2454	327934	C	C	C	C	C	C	C	C	C	C	T	C	C	C	C
EA2454	328787	T	T	T	T	T	T	T	T	T	T	T	T	G	T	T
EA2454	329517	C	C	C	C	C	C	C	C	C	G	C	G	C	C	C
EA2454	331665	G	G	G	G	G	G	G	G	G	G	A	G	G	G	G
EA2454	332521	A	A	A	A	A	A	A	A	A	A	A	A	A	C	A
EA2454	332708	C	C	C	C	C	C	C	T	C	C	C	C	T	C	C
EA2454	333155	G	G	G	G	T	T	G	G	G	G	G	G	G	T	G
EA2454	333766	T	G	G	T	T	T	T	T	T	T	T	T	T	T	T
EA2454	334084	G	G	G	A	A	A	G	G	G	G	G	G	G	A	G
EA2454	334446	T	T	T	T	T	T	T	T	C	T	T	T	T	T	T
EA2454	334855	A	A	A	A	A	A	A	A	A	C	A	C	A	A	A
EA2454	335397	A	A	A	A	A	A	A	A	A	A	G	A	A	A	A
EA2454	335897	T	T	T	T	T	T	T	T	T	A	T	A	T	T	T
EA2454	337102	G	G	G	A	A	A	G	G	G	G	G	G	G	A	G
EA2454	339420	C	T	T	C	C	C	C	C	C	C	C	C	C	C	C
EA2454	340318	G	G	G	G	G	G	G	G	G	A	G	A	G	G	G
EA2454	341041	C	T	T	C	C	C	C	C	T	C	C	C	C	C	C
EA2454	341930	C	C	C	C	C	C	C	C	C	C	A	C	C	C	C
EA2454	342188	G	G	G	G	A	A	G	G	G	G	G	G	G	A	G
EA2454	343126	C	C	C	A	C	C	C	C	C	C	C	C	C	C	C
EA2454	343195	G	G	G	G	G	G	G	G	G	A	G	A	G	G	G
EA2454	343262	G	G	G	G	G	G	G	G	G	G	T	G	G	G	G
EA2454	343648	G	A	A	G	G	G	G	G	A	G	G	G	G	G	G
EA2454	343988	G	G	G	G	G	G	G	G	G	G	A	G	G	G	G
EA2454	344966	T	C	C	T	T	T	T	C	C	C	C	C	C	T	T
EA2454	346719	C	C	C	C	A	C	C	C	C	C	C	C	C	C	C
EA2454	346796	A	A	A	A	A	A	A	A	A	C	C	C	A	A	A
EA2454	348047	C	C	C	C	C	C	C	A	C	C	C	C	A	C	C
EA2454	350137	C	C	C	C	C	C	C	C	C	C	C	C	T	C	C
EA2454	350563	C	C	C	C	C	C	C	C	C	C	C	C	T	C	C
EA2454	350969	A	G	G	G	G	G	A	G	G	G	G	G	G	G	A
EA2454	351850	G	C	C	G	G	G	G	G	G	G	G	G	G	G	G
EA2454	352054	C	A	A	C	C	C	C	A	A	A	C	A	A	C	C
EA2454	352488	A	C	C	A	A	A	A	A	C	A	A	A	A	A	A
EA2454	353870	G	G	G	G	A	G	G	G	G	G	G	G	G	G	G
EA2454	354492	C	T	T	C	C	C	C	C	C	C	C	C	C	C	C
EA2454	354964	G	G	G	G	G	G	G	G	A	G	G	G	G	G	G
EA2454	356278	C	C	C	T	C	C	C	C	C	C	C	C	C	C	C
EA2454	356329	G	G	G	G	G	G	G	G	G	A	G	A	G	G	G
EA2454	356343	G	G	G	G	G	G	G	G	G	A	G	A	G	G	G
EA2454	356914	G	G	G	G	G	G	G	A	G	G	G	G	G	G	G
EA2454	357162	G	G	G	G	A	G	G	G	G	G	G	G	G	G	G
EA2454	359110	C	C	C	C	C	C	C	C	T	C	C	C	C	C	C
EA2454	359276	G	G	G	A	G	G	G	G	G	G	G	G	G	G	G
EA2454	359344	T	T	T	T	T	T	T	T	A	T	T	T	T	T	T
EA2454	359374	C	C	C	T	T	T	C	C	C	C	C	C	C	T	C
EA2454	359494	G	A	A	G	G	G	G	G	A	G	G	G	G	G	G
EA2454	359829	C	C	C	A	C	C	C	C	C	C	C	C	C	C	C
EA2454	359909	C	C	C	C	C	C	C	C	C	T	C	T	C	C	C
EA2454	359916	G	G	G	G	G	G	G	G	G	A	G	A	G	G	G
EA2454	360484	G	G	G	G	G	G	G	G	A	G	G	G	G	G	G
EA2454	360856	G	A	A	G	G	G	G	G	G	G	G	G	G	G	G
EA2454	361440	G	A	A	G	G	G	G	G	A	G	G	G	G	G	G
EA2454	364430	G	G	G	G	G	G	G	G	G	C	G	C	G	G	G
EA2454	364865	T	T	T	T	T	T	T	T	T	C	T	C	T	T	T
EA2454	365820	C	T	T	C	C	C	C	C	C	C	C	C	C	C	C
EA2454	366365	C	C	C	C	C	C	C	C	C	A	C	A	C	C	C
EA2454	367149	C	T	T	C	C	C	C	C	C	C	C	C	C	C	C
EA2454	367885	C	C	C	C	C	C	C	C	C	C	A	C	C	C	C
EA2454	369429	T	C	C	T	T	T	T	C	C	C	C	C	C	T	T
EA2454	369480	G	G	G	G	G	A	G	G	G	G	G	G	G	G	G
EA2454	369746	C	C	C	T	C	C	C	C	C	C	C	C	C	C	C
EA2454	369840	A	G	G	A	A	A	A	A	A	A	A	A	A	A	A
EA2454	371150	T	C	C	C	C	C	T	C	C	C	C	C	C	C	T
EA2454	371977	G	G	G	G	G	G	G	G	G	G	A	G	G	G	G
EA2454	371990	G	G	G	G	G	G	G	G	G	G	T	G	G	G	G
EA2454	372193	G	G	G	G	G	G	G	G	G	G	A	G	G	G	G
EA2454	373608	G	G	G	G	G	G	G	G	G	A	G	A	G	G	G
EA2454	374297	A	A	A	A	A	A	A	G	A	A	A	A	A	A	A
EA2454	375476	A	A	A	A	A	A	A	A	A	C	A	C	A	A	A
EA2454	375553	T	T	T	T	T	T	T	T	T	A	T	A	T	T	T
EA2454	375861	G	G	G	G	G	G	G	G	G	A	G	A	G	G	G
EA2454	375982	G	A	A	G	G	G	G	G	G	G	G	G	G	G	G
EA2454	376903	G	G	G	A	A	A	G	G	G	G	G	G	G	A	G
EA2454	376932	G	G	G	G	G	G	G	A	G	G	G	G	A	G	G
EA2454	378279	G	G	G	G	G	G	G	G	A	G	G	G	G	G	G
EA2454	380076	G	G	G	G	G	G	G	G	G	G	A	G	G	G	G
EA2454	380911	G	G	G	G	G	G	G	G	G	A	G	A	G	G	G
EA2454	381439	G	G	G	G	G	G	G	G	G	A	G	A	G	G	G
EA2454	381924	C	C	C	C	C	C	C	C	C	T	C	T	C	C	C
EA2454	382085	T	T	T	T	T	T	T	C	T	T	T	T	C	T	T
EA2454	382482	C	C	C	C	C	C	C	C	C	T	C	T	C	C	C
EA2454	383169	A	A	A	A	A	A	A	A	A	A	A	A	C	A	A
EA2454	384068	T	T	T	T	T	T	T	T	T	T	A	T	T	T	T
EA2454	384244	G	G	G	G	G	G	G	G	G	G	A	G	G	G	G
EA2454	385327	G	G	G	G	G	G	G	G	G	A	G	A	G	G	G
EA2454	386099	G	G	G	G	G	G	G	G	G	A	G	A	G	G	G
EA2454	386139	C	C	C	C	C	C	C	C	C	C	T	C	C	C	C
EA2454	386406	C	C	C	A	C	C	C	C	C	C	C	C	C	C	C
EA2454	387481	T	T	T	T	T	T	T	T	T	T	A	T	T	T	T
EA2454	388160	A	A	A	A	A	A	A	A	A	A	A	A	C	A	A
EA2454	388702	G	G	G	G	G	G	G	G	G	G	A	G	G	G	G
EA2454	388918	T	T	T	G	G	G	T	T	T	T	T	T	T	G	T
EA2454	390573	G	G	G	G	G	G	G	A	G	G	G	G	A	G	G
EA2454	391067	T	T	T	T	T	T	T	G	T	T	T	T	G	T	T
EA2454	392511	T	C	C	T	T	T	T	C	C	C	C	C	C	T	T
EA2454	393575	A	G	G	G	G	G	A	G	G	G	G	G	G	G	G
EA2454	393743	A	G	G	G	G	G	A	G	G	G	G	G	G	G	A
EA2454	396055	T	T	T	T	T	T	T	T	T	C	C	C	T	T	T
EA2454	396436	C	A	A	C	C	C	C	C	A	C	C	C	C	C	C
EA2454	396458	G	G	G	G	G	G	G	G	G	A	G	A	G	G	G
EA2454	396912	T	T	T	T	T	T	T	T	T	T	T	T	T	A	T
EA2454	397444	C	G	G	G	G	G	C	G	G	G	G	G	G	G	C
EA2454	398396	C	C	C	C	C	C	C	T	C	C	C	C	T	C	C
EA2454	400978	C	C	C	C	C	C	C	C	C	T	C	T	C	C	C
EA2454	401544	C	C	C	C	C	C	C	C	T	C	C	C	C	C	C
EA2454	402042	G	G	G	G	G	G	G	G	A	G	G	G	G	G	G
EA2454	405953	T	A	A	T	T	T	T	T	T	T	T	T	T	T	T
EA2454	406821	G	G	G	G	A	G	G	G	G	G	G	G	G	G	G
EA2454	407023	A	A	A	A	A	A	A	A	A	C	A	C	A	A	A
EA2454	407113	A	G	G	G	G	G	A	G	G	G	G	G	G	G	A
EA2454	407411	A	A	A	A	A	A	A	C	A	A	A	A	A	A	A
EA2454	407887	C	G	G	G	G	G	C	G	G	G	G	G	G	G	C
EA2454	408866	T	T	T	T	T	T	T	T	C	T	T	T	T	T	T
EA2454	409424	G	G	G	G	G	G	G	G	T	G	G	G	G	G	G
EA2454	409884	T	G	G	T	T	T	T	G	G	G	G	G	G	T	T
EA2454	410785	G	A	A	G	G	G	G	G	G	G	G	G	G	G	G
EA2454	411290	A	A	A	A	A	A	A	T	A	A	A	A	T	A	A
EA2454	411520	T	T	T	T	T	T	T	T	T	T	A	T	T	T	T
EA2454	411572	T	T	T	T	T	T	T	T	T	T	C	T	T	T	T
EA2454	412377	A	A	A	A	A	A	A	A	A	C	A	C	A	A	A
EA2454	412458	G	G	G	G	A	A	G	G	G	G	G	G	G	A	G
EA2454	412599	C	T	T	C	C	C	C	T	T	C	C	C	T	C	C
EA2454	412632	A	A	A	A	A	A	A	A	A	G	A	G	A	A	A
EA2454	413942	G	A	A	G	G	G	G	G	A	G	G	G	G	G	G
EA2454	414943	G	G	G	G	G	G	G	G	A	G	G	G	G	G	G
EA2454	415150	G	A	A	G	G	G	G	G	A	G	G	G	G	G	G
EA2454	415473	T	T	T	T	C	T	T	T	T	T	T	T	T	T	T
EA2454	415498	G	A	A	G	G	G	G	G	G	G	G	G	G	G	G
EA2454	415692	G	G	G	G	G	G	G	G	G	A	G	A	G	G	G
EA2454	416393	T	T	T	T	T	T	T	T	T	T	A	T	T	T	T
EA2454	416875	G	G	G	G	G	G	G	G	G	G	A	G	G	G	G
EA2454	417355	T	A	A	T	T	T	T	A	A	T	T	T	A	T	T
EA2454	418125	G	G	G	A	G	G	G	G	G	G	G	G	G	G	G
EA2454	418538	C	C	C	C	C	C	C	C	C	T	C	T	C	C	C
EA2454	420347	A	A	A	A	A	A	A	A	A	C	A	C	A	A	A
EA2454	420707	A	A	A	A	A	A	A	A	A	C	A	C	A	A	A
EA2454	421662	T	T	T	T	T	T	T	A	T	T	T	T	T	T	T
EA2454	423123	T	T	T	T	T	T	T	T	T	C	T	C	T	T	T
EA2454	423435	C	C	C	C	C	C	C	A	C	C	C	C	A	C	C
EA2454	425610	C	C	C	C	C	T	C	C	C	C	C	C	C	C	C
EA2454	425636	A	A	A	A	A	A	A	A	A	A	G	A	A	A	A
EA2454	427323	C	T	T	C	C	C	C	C	C	C	C	C	C	C	C
EA2454	428546	G	A	A	G	G	G	G	G	A	G	G	G	G	G	G
EA2454	429193	C	C	C	C	C	C	C	T	C	C	C	C	T	C	C
EA2454	429541	G	G	G	G	G	A	G	G	G	G	G	G	G	G	G
EA2454	429890	G	C	C	G	G	G	G	G	G	G	G	G	G	G	G
EA2454	429895	C	C	C	C	C	C	C	C	A	C	C	C	C	C	C
EA2454	430947	T	C	C	T	T	T	T	C	C	C	C	C	C	T	T
EA2454	432665	A	A	A	A	A	A	A	A	A	C	A	C	A	A	A
EA2454	436532	T	T	T	T	T	G	T	T	T	T	T	T	T	T	T
EA2454	437474	A	G	G	G	G	G	A	G	G	G	G	G	G	G	A
EA2454	438148	G	G	G	G	G	G	G	G	G	T	G	T	G	G	G
EA2454	438347	G	G	G	G	G	A	G	G	G	G	G	G	G	G	G
EA2454	438577	G	G	G	G	G	G	G	G	G	G	A	G	G	G	G
EA2454	440671	C	T	T	C	C	C	C	C	C	C	C	C	C	C	C
EA2454	440837	C	A	A	A	A	A	C	A	A	A	A	A	A	A	C
EA2454	442423	G	G	G	G	G	G	G	A	G	G	G	G	A	G	G
EA2454	444160	C	C	C	C	C	C	C	T	C	C	C	C	T	C	C
EA2454	444428	G	G	G	G	G	G	G	G	G	A	G	A	G	G	G
EA2454	445363	C	C	C	A	C	C	C	C	C	C	C	C	C	C	C
EA2454	445627	G	G	G	G	G	G	G	G	T	G	G	G	G	G	G
EA2454	445869	T	C	C	T	T	T	T	T	T	T	T	T	T	T	T
EA2454	447459	A	G	G	G	G	G	A	G	G	G	G	G	G	G	A
EA2454	448711	A	G	G	G	G	G	A	G	G	G	G	G	G	G	A
EA2454	448932	T	T	T	T	T	T	T	T	T	T	T	T	G	T	T
EA2454	449063	T	T	T	T	T	T	T	T	T	C	T	C	T	T	T
EA2454	449600	C	C	C	C	C	C	C	C	C	A	C	A	C	C	C
EA2454	449737	A	A	A	A	A	A	A	A	A	A	C	A	A	A	A
EA2454	450076	G	G	G	G	A	G	G	G	G	G	G	G	G	G	G
EA2454	452246	A	A	A	A	A	A	A	A	A	C	A	C	A	A	A
EA2454	452556	C	A	A	C	C	C	C	C	A	C	C	C	C	C	C
EA2454	452711	T	A	A	T	T	T	T	A	A	A	A	A	A	T	T
EA2454	452751	C	T	T	C	C	C	C	C	C	C	C	C	C	C	C
EA2454	453153	G	G	G	G	G	G	G	G	G	G	A	G	G	G	G
EA2454	453785	C	C	C	C	C	C	C	C	A	C	C	C	C	C	C
EA2454	453943	G	G	G	G	G	G	G	G	G	T	G	T	G	G	G
EA2454	454771	C	C	C	T	C	C	C	C	C	C	C	C	C	C	C
EA2454	454890	C	C	C	T	T	T	C	C	C	C	C	C	C	T	C
EA2454	454953	T	T	T	T	T	T	T	T	T	T	C	T	T	T	T
EA2454	456123	G	G	G	G	G	G	G	G	G	G	G	G	G	A	G
EA2454	457082	C	T	T	T	T	T	C	T	T	T	T	T	T	T	C
EA2454	457893	C	C	C	C	C	C	C	A	C	C	C	C	A	C	C
EA2454	459248	A	G	G	A	A	A	A	G	G	G	G	G	G	A	A
EA2454	460233	G	G	G	G	G	G	G	G	G	A	G	A	G	G	G
EA2454	460261	G	G	G	G	G	G	G	G	G	A	G	A	G	G	G
EA2454	463635	G	G	G	G	G	G	G	T	G	G	G	G	T	G	G
EA2454	464006	A	C	C	A	A	A	A	A	C	A	A	A	A	A	A
EA2454	465826	A	T	T	T	T	T	A	T	T	T	T	T	T	T	A
EA2454	465874	G	G	G	G	G	G	G	G	A	G	G	G	G	G	G
EA2454	466128	A	A	A	A	A	A	A	A	A	T	A	T	A	A	A
EA2454	467184	C	C	C	C	C	C	C	C	C	T	C	T	C	C	C
EA2454	468099	G	G	G	G	G	G	G	G	G	G	A	G	G	G	G
EA2454	469328	G	A	A	G	G	G	G	G	A	G	G	G	G	G	G
EA2454	470437	C	C	C	T	T	T	C	C	C	C	C	C	C	T	C
EA2454	471459	A	T	T	A	A	A	A	A	A	A	A	A	A	A	A
EA2454	471709	A	A	A	A	A	A	A	G	A	A	A	A	G	A	A
EA2454	471914	T	T	T	T	T	T	T	T	T	T	T	T	T	T	G
EA2454	472868	A	A	A	A	A	A	A	A	C	A	A	A	A	A	A
EA2454	472911	T	C	C	C	C	C	T	C	C	C	C	C	C	C	T
EA2454	473611	A	A	A	A	A	A	A	G	A	A	A	A	G	A	A
EA2454	474394	G	A	A	G	G	G	G	G	A	G	G	G	G	G	G
EA2454	474428	C	T	T	C	C	C	C	C	C	C	C	C	C	C	C
EA2454	474484	G	G	G	G	G	G	G	A	G	G	G	G	A	G	G
EA2454	475511	T	T	T	T	T	T	T	A	T	T	T	T	A	T	T
EA2454	476124	C	C	C	T	C	C	C	C	C	C	C	C	C	C	C
EA2454	477552	G	A	A	G	G	G	G	A	A	A	A	A	A	G	G
EA2454	477965	G	G	G	G	G	G	G	G	G	G	T	G	G	G	G
EA2454	478727	C	A	A	A	A	A	C	A	A	A	A	A	A	A	C
EA2454	479208	C	C	C	C	C	C	C	C	C	T	C	T	C	C	C
EA2454	481815	T	T	T	T	T	T	T	T	T	G	T	G	T	T	T
EA2454	482022	T	T	T	T	G	T	T	T	T	T	T	T	T	T	T
EA2454	482454	C	C	C	C	C	C	C	C	C	T	C	T	C	C	C
EA2454	483311	T	T	T	T	T	T	T	T	T	G	T	G	T	T	T
EA2454	483564	C	C	C	C	C	C	C	C	C	A	C	A	C	C	C
EA2454	483790	C	C	C	C	T	C	C	C	C	C	C	C	C	C	C
EA2454	483805	G	G	G	A	G	G	G	G	G	G	G	G	G	G	G
EA2454	483833	G	G	G	G	G	G	G	G	G	G	G	G	G	A	G
EA2454	484002	G	A	A	G	G	G	G	G	A	G	G	G	G	G	G
EA2454	485022	G	G	G	G	G	G	G	G	G	G	A	G	G	G	G
EA2454	485082	T	T	T	T	T	T	T	T	T	T	G	T	T	T	T
EA2454	485246	C	C	C	T	T	T	C	C	C	C	C	C	C	T	C
EA2454	485759	C	C	C	C	C	C	C	T	C	C	C	C	T	C	C
EA2454	485779	C	G	G	G	G	G	C	G	G	G	G	G	G	G	C
EA2454	485836	G	G	G	G	G	G	G	G	G	A	G	A	G	G	G
EA2454	485953	C	A	A	C	C	C	C	C	C	C	C	C	C	C	C
EA2454	485955	G	G	G	G	T	T	G	G	G	G	G	G	G	T	G
EA2454	485957	T	T	T	T	T	T	T	T	T	C	T	C	T	T	T
EA2454	486024	G	G	G	G	G	G	G	G	G	G	G	G	G	A	G
EA2454	486093	C	C	C	C	C	C	C	C	C	C	T	C	C	C	C
EA2454	487623	T	C	C	T	T	T	T	T	T	T	T	T	T	T	T
EA2454	488244	G	G	G	A	G	G	G	G	G	G	G	G	G	G	G
EA2454	488462	G	A	A	G	G	G	G	A	A	G	G	G	A	G	G
EA2454	489881	G	G	G	G	G	G	G	G	G	A	G	A	G	G	G
EA2454	489901	G	G	G	T	G	G	G	G	G	G	G	G	G	G	G
EA2454	493601	C	C	C	C	C	C	C	C	C	A	C	A	C	C	C
EA2454	496818	T	T	T	T	T	T	T	T	T	T	A	T	T	T	T
EA2454	497207	C	C	C	C	C	C	C	C	C	A	C	A	C	C	C
EA2454	497460	T	G	G	G	G	G	T	G	G	G	G	G	G	G	T
EA2454	497568	A	A	A	A	A	A	A	A	A	A	A	A	A	A	T
EA2454	498706	G	G	G	G	G	G	G	A	G	G	G	G	A	G	G
EA2454	499083	A	T	T	A	A	A	A	A	T	A	A	A	A	A	A
EA2454	499232	G	T	T	G	G	G	G	G	T	G	G	G	G	G	G
EA2454	499783	C	C	C	C	T	C	C	C	C	C	C	C	C	C	C
EA2454	499875	C	C	C	C	C	C	C	C	A	C	C	C	C	C	C
EA2454	500218	G	G	G	G	G	G	G	G	G	A	G	A	G	G	G
EA2454	500446	C	C	C	C	C	T	C	C	C	C	C	C	C	C	C
EA2454	501060	A	A	A	A	A	A	A	A	A	A	G	A	A	A	A
EA2454	502913	G	A	A	G	G	G	G	G	A	G	G	G	G	G	G
EA2454	503007	G	G	G	G	G	G	G	G	G	A	G	A	G	G	G
EA2454	506728	G	G	G	G	G	A	G	G	G	G	G	G	G	G	G
EA2454	507555	G	G	G	A	G	G	G	G	G	G	G	G	G	G	G
EA2454	508293	C	C	C	C	T	C	C	C	C	C	C	C	C	C	C
EA2454	508877	G	G	G	G	G	G	G	G	G	A	G	A	G	G	G
EA2454	509958	G	A	A	G	G	G	G	G	G	G	G	G	G	G	G
EA2454	510234	T	T	T	T	T	T	T	T	T	T	A	T	T	T	T
EA2454	510992	C	C	C	T	T	T	C	C	C	C	C	C	C	T	C
EA2454	511266	C	C	C	C	C	C	C	C	T	C	C	C	C	C	C
EA2454	511307	C	C	C	C	C	C	C	C	C	T	C	T	C	C	C
EA2454	511943	A	G	G	A	A	A	A	G	G	G	G	G	G	A	A
EA2454	512740	C	C	C	C	C	C	C	C	C	T	C	T	C	C	C
EA2454	516039	T	T	T	T	T	T	T	T	C	T	T	T	T	T	T
EA2454	517520	G	G	G	G	G	G	G	A	G	G	G	G	A	G	G
EA2454	517655	C	C	C	C	C	C	C	C	C	T	C	T	C	C	C
EA2454	517972	G	G	G	G	G	G	G	G	A	G	G	G	G	G	G
EA2454	518663	G	G	G	G	G	G	G	G	G	A	G	A	G	G	G
EA2454	518900	G	G	G	G	G	G	G	A	G	G	G	G	A	G	G
EA2454	519195	G	G	G	A	A	A	G	G	G	G	G	G	G	A	G
EA2454	519811	A	C	C	C	C	C	A	C	C	C	C	C	C	C	A
EA2454	520294	C	C	C	C	C	C	C	C	C	C	C	C	C	T	C
EA2454	520384	C	C	C	C	C	C	C	C	C	A	C	A	C	C	C
EA2454	523715	T	T	T	T	T	T	T	T	T	T	G	T	T	T	T
EA2454	523923	C	G	G	C	C	C	C	G	G	G	G	G	G	C	C
EA2454	523962	C	C	C	C	T	C	C	C	C	C	C	C	C	C	C
EA2454	524002	C	C	C	C	C	C	C	C	C	T	C	T	C	C	C
EA2454	524994	T	T	T	T	T	G	T	T	T	T	T	T	T	T	T
EA2454	527024	T	T	T	C	T	T	T	T	T	T	T	T	T	T	T
EA2454	527663	T	T	T	T	T	T	T	A	T	T	T	T	A	T	T
EA2454	528096	C	C	C	C	C	C	C	C	C	C	C	C	T	C	C
EA2454	528123	A	T	T	T	T	T	A	T	T	T	T	T	T	T	A
EA2454	529040	C	T	T	C	C	C	C	C	T	C	C	C	C	C	C
EA2454	530275	C	C	C	C	C	C	C	C	A	C	C	C	C	C	C
EA2454	530600	G	G	G	G	G	G	G	G	G	T	G	T	G	G	G
EA2454	531431	A	A	A	A	A	A	A	G	A	A	A	A	G	A	A
EA2454	531539	G	A	A	G	G	G	G	A	A	G	G	G	A	G	G
EA2454	531874	C	C	C	C	C	C	C	C	C	T	C	C	C	C	C
EA2454	531907	T	T	T	C	T	T	T	T	T	T	T	T	T	T	T
EA2454	532052	G	G	G	G	G	G	G	G	G	A	G	A	G	G	G
EA2454	534151	A	G	G	G	G	G	A	G	G	G	G	G	G	G	A
EA2454	535476	C	C	C	C	C	C	C	C	C	A	C	A	C	C	C
EA2454	536338	C	C	C	C	C	C	C	C	C	T	C	T	C	C	C
EA2454	537585	G	G	G	G	A	G	G	G	G	G	G	G	G	G	G
EA2454	538864	G	G	G	G	G	G	G	G	G	A	G	A	G	G	G
EA2454	538980	G	G	G	G	G	A	G	G	G	G	G	G	G	G	G
EA2454	539426	T	C	C	C	C	C	T	C	C	C	C	C	C	C	C
EA2454	539532	C	C	C	C	C	C	C	C	C	A	C	A	C	C	C
EA2454	540409	G	A	A	G	G	G	G	G	G	G	G	G	G	G	G
EA2454	542323	G	G	G	G	G	G	G	G	G	G	G	G	G	G	A
EA2454	542430	A	A	A	A	A	A	A	A	A	T	A	T	A	A	A
EA2454	543142	C	T	T	C	C	C	C	T	T	C	C	C	T	C	C
EA2454	543679	G	G	G	G	G	G	G	G	G	G	A	G	G	G	G
EA2454	545737	G	A	A	G	G	G	G	G	A	G	G	G	G	G	G
EA2454	546117	C	C	C	C	C	C	C	C	C	C	T	C	C	C	C
EA2454	546428	A	C	C	C	C	C	A	C	C	C	C	C	C	C	A
EA2454	546813	C	C	C	C	T	C	C	C	C	C	C	C	C	C	C
EA2454	547086	A	A	A	A	A	A	A	A	A	C	A	C	A	A	A
EA2454	547138	T	T	T	T	T	T	T	T	T	T	A	T	T	T	T
EA2454	547798	G	G	G	G	G	G	G	G	A	G	G	G	G	G	G
EA2454	547882	G	T	T	G	G	G	G	G	G	G	G	G	G	G	G
EA2454	548687	A	A	A	A	A	A	A	A	A	A	A	A	G	A	A
EA2454	549063	A	A	A	A	A	A	A	A	A	G	G	G	A	A	A
EA2454	549981	C	T	T	C	C	C	C	C	T	C	C	C	C	C	C
EA2454	550000	G	G	G	A	A	A	G	G	G	G	G	G	G	A	G
EA2454	550155	G	G	G	G	G	G	G	G	G	G	G	G	T	G	G
EA2454	550156	C	C	C	C	C	C	C	C	C	T	C	T	C	C	C
EA2454	550654	T	C	C	T	T	T	T	C	C	C	C	C	C	T	T
EA2454	552561	C	T	T	C	C	C	C	T	T	T	T	T	T	C	C
EA2454	554463	G	G	G	G	G	G	G	G	G	G	A	G	G	G	G
EA2454	554466	A	A	A	A	A	A	A	A	A	G	G	G	A	A	A
EA2454	554830	G	G	G	G	G	G	G	G	G	A	G	A	G	G	G
EA2454	555130	G	A	A	G	G	G	G	G	G	G	G	G	G	G	G
EA2454	556108	G	G	G	G	G	G	G	G	G	C	G	C	G	G	G
EA2454	556318	G	G	G	A	G	G	G	G	G	G	G	G	G	G	G
EA2454	557809	C	C	C	C	C	C	C	T	C	C	C	C	C	C	C
EA2454	559017	A	G	G	G	G	G	A	G	G	G	G	G	G	G	A
EA2454	559185	G	G	G	G	G	G	G	G	G	G	G	G	G	A	G
EA2454	559470	T	T	T	T	T	T	T	T	T	T	C	T	T	T	T
EA2454	559965	A	G	G	A	A	A	A	A	A	A	A	A	A	A	A
EA2454	560855	G	G	G	G	G	G	G	G	G	G	G	G	A	G	G
EA2454	561226	G	A	A	A	A	A	G	A	A	A	A	A	A	A	G
EA2454	562933	T	C	C	C	C	C	T	C	C	C	C	C	C	C	T
EA2454	562951	C	T	T	C	C	C	C	C	T	C	C	C	C	C	C
EA2454	563413	G	G	G	G	G	G	G	G	G	A	G	A	G	G	G
EA2454	564605	T	T	T	T	T	T	T	T	T	G	T	G	T	T	T
EA2454	564631	C	T	T	C	C	C	C	C	C	C	C	C	C	C	C
EA2454	565030	T	T	T	T	T	T	T	T	T	T	C	T	T	T	T
EA2454	569410	C	C	C	C	C	C	C	C	C	C	C	C	C	C	T
EA2454	569495	G	G	G	G	G	G	G	G	G	G	G	G	A	G	G
EA2454	569666	T	T	T	T	C	T	T	T	T	T	T	T	T	T	T
EA2454	569691	C	C	C	C	C	C	C	C	C	T	C	T	C	C	C
EA2454	569748	T	T	T	T	T	T	T	T	C	T	T	T	T	T	T
EA2454	569752	G	G	G	G	G	G	G	G	A	G	G	G	G	G	G
EA2454	570422	C	C	C	C	C	C	C	C	C	T	C	T	C	C	C
EA2454	571709	A	G	G	A	A	A	A	G	G	A	A	A	G	A	A
EA2454	571951	C	C	C	C	C	C	C	A	C	C	C	C	A	C	C
EA2454	571989	C	C	C	C	C	C	C	C	C	C	T	C	C	C	C
EA2454	572372	T	G	G	T	T	T	T	T	T	T	T	T	T	T	T
EA2454	573038	C	C	C	C	T	C	C	C	C	C	C	C	C	C	C
EA2454	573172	T	T	T	T	T	T	T	T	T	G	T	G	T	T	T
EA2454	574054	C	T	T	C	C	C	C	C	C	C	C	C	C	C	C
EA2454	575654	T	T	T	T	T	T	T	T	T	T	C	T	T	T	T
EA2454	577660	T	C	C	T	T	T	T	T	T	T	T	T	T	T	T
EA2454	577678	C	C	C	C	C	C	C	C	C	T	C	T	C	C	C
EA2454	578357	C	C	C	C	T	C	C	C	C	C	C	C	C	C	C
EA2454	579241	C	C	C	C	C	C	C	C	C	T	C	T	C	C	C
EA2454	580223	C	C	C	C	C	C	C	C	C	T	C	T	C	C	C
EA2454	582745	C	C	C	C	C	C	C	C	C	C	C	C	C	T	C
EA2454	583662	T	T	T	T	T	T	T	A	T	T	T	T	A	T	T
EA2454	586152	G	A	A	G	G	G	G	G	A	G	G	G	G	G	G
EA2454	586529	G	G	G	G	G	G	G	G	G	T	G	T	G	G	G
EA2454	586722	C	C	C	C	C	C	C	C	C	T	C	T	C	C	C
EA2454	588129	C	C	C	C	C	C	C	C	C	T	C	T	C	C	C
EA2454	588217	T	T	T	G	T	T	T	T	T	T	T	T	T	T	T
EA2454	588790	T	T	T	T	T	T	T	T	T	T	G	T	T	T	T
EA2454	589102	T	T	T	T	T	T	T	T	T	C	C	C	T	T	T
EA2454	589319	G	G	G	G	G	G	G	G	G	A	G	A	G	G	G
EA2454	589335	A	A	A	A	A	A	A	A	A	G	G	G	A	A	A
EA2454	589738	A	A	A	A	A	A	A	A	A	A	T	A	A	A	A
EA2454	590812	C	C	C	C	C	T	C	C	C	C	C	C	C	C	C
EA2454	591286	G	G	G	G	G	G	G	G	G	G	T	G	G	G	G
EA2454	594309	G	T	T	G	G	G	G	G	G	G	G	G	G	G	G
EA2454	597386	A	G	G	G	G	G	A	G	G	G	G	G	G	G	A
EA2454	597988	A	A	A	A	A	A	A	A	A	G	A	G	A	A	A
EA2454	598848	G	C	C	G	G	G	G	G	G	G	G	G	G	G	G
EA2454	598918	C	C	C	C	C	C	C	C	C	A	C	A	C	C	C
EA2454	598973	T	T	T	T	T	T	T	T	T	G	T	G	T	T	T
EA2454	600738	A	G	G	A	A	A	A	A	A	A	A	A	A	A	A
EA2454	600783	T	T	T	T	T	T	T	T	T	G	T	G	T	T	T
EA2454	602583	A	G	G	A	A	A	A	G	G	G	G	G	G	A	A
EA2454	602608	C	C	C	C	C	C	C	T	C	C	C	C	T	C	C
EA2454	603196	T	T	T	T	T	T	T	T	T	T	T	T	C	T	T
EA2454	605227	C	C	C	C	C	C	C	C	C	A	C	A	C	C	C
EA2454	605299	A	A	A	A	A	A	A	A	A	G	A	G	A	A	A
EA2454	605439	C	C	C	C	C	C	C	C	C	A	C	A	C	C	C
EA2454	606231	T	T	T	T	T	T	T	T	T	T	C	T	T	T	T
EA2454	606400	T	T	T	T	T	T	T	T	G	T	T	T	T	T	T
EA2454	608651	T	T	T	T	T	T	T	T	T	G	T	G	T	T	T
EA2454	609793	C	C	C	C	C	C	C	C	C	C	T	C	C	C	C
EA2454	610464	A	C	C	A	A	A	A	C	C	C	C	C	C	A	A
EA2454	610623	G	G	G	G	G	G	G	G	G	G	A	G	G	G	G
EA2454	610851	C	C	C	C	C	C	C	T	C	C	C	C	T	C	C
EA2454	611188	G	A	A	G	G	G	G	A	A	G	G	G	A	G	G
EA2454	612410	C	C	C	C	C	C	C	C	T	C	C	C	C	C	C
EA2454	613561	T	T	T	T	T	T	T	T	T	T	C	T	T	T	T
EA2454	613659	G	G	G	G	G	G	G	G	G	G	G	G	A	G	G
EA2454	613781	C	A	A	C	C	C	C	C	C	C	C	C	C	C	C
EA2454	613906	C	A	A	A	A	A	C	A	A	A	A	A	A	A	C
EA2454	613974	C	T	T	C	C	C	C	C	T	C	C	C	C	C	C
EA2454	614432	A	A	A	A	A	A	A	A	A	A	T	A	A	A	A
EA2454	615269	C	C	C	T	C	C	C	C	C	C	C	C	C	C	C
EA2454	615321	G	G	G	G	G	G	G	G	G	A	G	A	G	G	G
EA2454	615783	C	T	T	C	C	C	C	C	C	C	C	C	C	C	C
EA2454	615886	G	G	G	G	G	G	G	G	G	A	G	A	G	G	G
EA2454	618954	T	T	T	T	T	T	T	T	T	G	T	G	T	T	T
EA2454	618990	C	C	C	C	T	C	C	C	C	C	C	C	C	C	C
EA2454	619121	G	A	A	G	G	G	G	G	G	G	G	G	G	G	G
EA2454	620506	A	C	C	A	A	A	A	A	A	A	A	A	A	A	A
EA2454	621505	C	C	C	C	C	C	C	C	C	C	C	C	T	C	C
EA2454	622099	C	C	C	C	C	C	C	C	C	T	C	T	C	C	C
EA2454	622741	T	G	G	T	T	T	T	G	G	G	G	G	G	T	T
EA2454	623335	C	C	C	C	C	C	C	C	C	C	A	C	C	C	C
EA2454	623622	C	C	C	C	C	C	C	C	T	C	C	C	C	C	C
EA2454	623874	G	G	G	G	A	G	G	G	G	G	G	G	G	G	G
EA2454	625047	T	T	T	T	T	T	T	T	T	T	G	T	T	T	T
EA2454	626310	G	G	G	A	G	G	G	G	G	G	G	G	G	G	G
EA2454	626592	T	T	T	T	T	T	T	G	T	T	T	T	T	T	T
EA2454	627598	G	G	G	G	G	G	G	G	G	A	G	A	G	G	G
EA2454	631335	T	C	C	T	T	T	T	C	C	C	C	C	C	T	T
EA2454	632104	C	C	C	C	C	C	C	C	C	C	T	C	C	C	C
EA2454	632317	A	A	A	A	A	A	A	A	A	T	A	T	A	A	A
EA2454	632908	C	C	C	T	C	C	C	C	C	C	C	C	C	C	C
EA2454	633668	T	T	T	T	T	T	T	T	T	C	T	C	T	T	T
EA2454	633800	C	C	C	C	C	C	C	C	C	A	C	A	C	C	C
EA2454	634477	C	C	C	C	C	C	C	C	C	C	C	C	C	A	C
EA2454	634760	G	G	G	G	G	G	G	G	T	G	G	G	G	G	G
EA2454	634772	G	G	G	G	G	G	G	G	G	T	G	T	G	G	G
EA2454	635649	A	C	C	A	A	A	A	C	C	C	C	C	C	A	A
EA2454	635707	C	A	A	C	C	C	C	C	A	C	C	C	C	C	C
EA2454	637713	C	C	C	C	C	C	C	C	C	A	C	A	C	C	C
EA2454	638418	C	C	C	C	T	C	C	C	C	C	C	C	C	C	C
EA2454	639428	C	C	C	C	G	C	C	C	C	C	C	C	C	C	C
EA2454	639663	C	C	C	C	C	C	C	C	C	C	T	C	C	C	C
EA2454	641601	A	A	A	A	A	A	A	A	A	C	A	C	A	A	A
EA2454	642011	G	G	G	G	C	G	G	G	G	G	G	G	G	G	G
EA2454	642337	A	A	A	G	G	G	A	A	A	A	A	A	A	G	A
EA2454	644101	A	G	G	A	A	A	A	G	G	G	G	G	G	A	A
EA2454	644770	G	G	G	G	G	G	G	T	G	G	G	G	T	G	G
EA2454	644913	T	C	C	T	T	T	T	C	C	C	C	C	C	T	T
EA2454	646569	G	G	G	G	G	G	G	A	G	G	G	G	A	G	G
EA2454	649480	T	T	T	T	T	T	T	T	T	T	T	T	T	T	C
EA2454	649659	T	T	T	T	T	T	T	T	T	C	T	C	T	T	T
EA2454	649668	G	T	T	G	G	G	G	G	T	G	G	G	G	G	G
EA2454	650009	C	C	C	C	C	C	C	T	C	C	C	C	T	C	C
EA2454	652389	A	A	A	A	A	A	A	A	A	T	A	T	A	A	A
EA2454	653031	C	T	T	C	C	C	C	T	T	C	C	C	T	C	C
EA2454	653774	T	G	G	T	T	T	T	T	T	T	T	T	T	T	T
EA2454	654968	T	T	T	T	T	T	T	T	G	T	T	T	T	T	T
EA2454	656155	T	T	T	T	T	T	T	T	T	T	G	T	T	T	T
EA2454	657614	G	G	G	G	G	G	G	G	G	A	G	A	G	G	G
EA2454	657820	G	G	G	G	G	G	G	G	G	G	T	G	G	G	G
EA2454	658193	C	C	C	C	C	C	C	C	C	T	C	T	C	C	C
EA2454	658970	T	T	T	T	T	T	T	T	T	C	T	C	T	T	T
EA2454	658975	A	A	A	G	A	A	A	A	A	A	A	A	A	A	A
EA2454	660468	C	C	C	C	C	C	C	C	C	A	C	A	C	C	C
EA2454	660524	G	G	G	G	G	G	G	G	G	G	A	G	G	G	G
EA2454	660547	G	G	G	G	G	G	G	A	G	G	G	G	G	G	G
EA2454	660863	C	C	C	C	C	C	C	C	C	T	C	T	C	C	C
EA2454	660999	C	C	C	C	C	C	C	C	C	T	C	T	C	C	C
EA2454	661455	A	A	A	A	A	A	A	A	A	A	A	A	C	A	A
EA2454	663798	G	G	G	G	G	G	G	T	G	G	G	G	G	G	G
EA2454	664195	G	G	G	G	G	G	G	G	G	A	G	A	G	G	G
EA2454	665110	C	G	G	C	C	C	C	G	G	C	C	C	G	C	C
EA2454	665946	G	G	G	G	G	G	G	G	G	A	G	A	G	G	G
EA2454	666854	A	G	G	A	A	A	A	A	A	A	A	A	A	A	A
EA2454	666857	C	C	C	C	C	C	C	C	C	G	C	G	C	C	C
EA2454	668427	T	T	T	T	T	T	T	T	T	G	T	G	T	T	T
EA2454	669330	A	G	G	G	G	G	A	G	G	G	G	G	G	G	G
EA2454	669751	C	T	T	C	C	C	C	C	C	C	C	C	C	C	C
EA2454	670594	C	C	C	A	A	A	C	C	C	C	C	C	C	A	C
EA2454	670919	C	T	T	C	C	C	C	C	C	C	C	C	C	C	C
EA2454	670954	C	C	C	C	C	C	C	T	C	C	C	C	T	C	C
EA2454	674033	C	C	C	C	C	C	C	C	C	T	C	T	C	C	C
EA2454	674190	T	T	T	T	T	T	T	T	G	T	T	T	T	T	T
EA2454	674305	G	C	C	G	G	G	G	C	C	C	C	C	C	G	G
EA2454	675340	C	C	C	C	C	C	C	C	C	T	C	T	C	C	C
EA2454	676368	G	G	G	G	G	G	G	G	G	G	G	G	G	A	G
EA2454	677753	G	G	G	G	G	G	G	A	G	G	G	G	A	G	G
EA2454	677980	G	G	G	A	G	G	G	G	G	G	G	G	G	G	G
EA2454	677981	T	T	T	T	T	T	T	T	T	T	G	T	T	T	T
EA2454	678422	C	C	C	C	C	C	C	C	C	C	C	C	T	C	C
EA2454	678809	G	A	A	G	G	G	G	G	G	G	G	G	G	G	G
EA2454	679527	G	G	G	G	G	G	G	G	G	G	A	G	G	G	G
EA2454	679653	A	A	A	A	A	A	A	A	A	G	G	G	A	A	A
EA2454	680620	C	C	C	C	T	C	C	C	C	C	C	C	C	C	C
EA2454	681652	C	C	C	C	C	C	C	C	C	C	A	C	C	C	C
EA2454	681959	T	T	T	T	T	T	T	T	T	C	T	C	T	T	T
EA2454	681970	G	G	G	G	G	G	G	G	G	A	G	A	G	G	G
EA2454	682546	A	A	A	A	A	A	A	A	A	A	A	A	A	A	T
EA2454	683177	T	G	G	G	G	G	T	G	G	G	G	G	G	G	T
EA2454	683886	C	C	C	C	C	C	C	C	C	T	C	T	C	C	C
EA2454	684313	C	C	C	C	C	C	C	C	T	C	C	C	C	C	C
EA2454	685213	G	G	G	G	G	G	G	G	A	G	G	G	G	G	G
EA2454	685406	C	C	C	C	C	C	C	C	C	T	C	T	C	C	C
EA2454	686003	A	G	G	G	G	G	A	G	G	G	G	G	G	G	A
EA2454	686104	G	C	C	C	C	C	G	C	C	C	C	C	C	C	G
EA2454	686561	C	C	C	C	C	C	C	T	C	C	C	C	C	C	C
EA2454	687373	G	G	G	G	G	G	G	G	G	A	G	A	G	G	G
EA2454	687410	A	G	G	G	G	G	A	G	G	G	G	G	G	G	A
EA2454	687536	C	C	C	C	C	C	C	C	C	A	C	A	C	C	C
EA2454	687596	G	G	G	G	G	G	G	G	A	G	G	G	G	G	G
EA2454	688277	A	A	A	A	A	A	A	A	A	C	A	C	A	A	A
EA2454	688399	C	C	C	T	C	C	C	C	C	C	C	C	C	C	C
EA2454	688812	A	A	A	G	A	A	A	A	A	A	A	A	A	A	A
EA2454	689159	C	T	T	C	C	C	C	C	C	C	C	C	C	C	C
EA2454	689970	C	T	T	C	C	C	C	C	C	C	C	C	C	C	C
EA2454	690408	A	G	G	G	G	G	A	G	G	G	G	G	G	G	A
EA2454	690611	T	C	C	C	C	C	C	C	C	C	C	C	C	C	C
EA2454	691294	T	T	T	T	T	C	T	T	T	T	T	T	T	T	T
EA2454	691401	C	C	C	C	C	T	C	C	C	C	C	C	C	T	C
EA2454	691761	C	C	C	C	C	C	C	C	C	T	C	T	C	C	C
EA2454	692641	T	T	T	T	T	T	T	T	T	T	T	G	T	T	T
EA2454	693295	C	C	C	C	C	C	C	T	C	C	C	C	T	C	C
EA2454	694775	C	C	C	C	C	C	C	C	C	C	T	C	C	C	C
EA2454	697887	T	T	T	T	T	T	T	T	T	T	C	T	T	T	T
EA2454	698300	A	A	A	A	A	A	A	A	A	T	A	T	A	A	A
EA2454	698327	A	A	A	A	A	A	A	A	A	G	G	G	A	A	A
EA2454	701549	C	C	C	C	C	C	C	C	C	T	C	T	C	C	C
EA2454	704676	C	C	C	C	C	C	C	C	T	C	C	C	C	C	C
EA2454	705171	C	C	C	C	C	C	C	T	C	C	C	C	T	C	C
EA2454	705263	C	A	A	A	A	A	C	A	A	A	A	A	A	A	C
EA2454	707477	C	C	C	C	C	C	C	T	C	C	C	C	T	C	C
EA2454	707817	C	C	C	C	C	C	C	C	T	C	C	C	C	C	C
EA2454	708965	C	C	C	C	C	C	C	C	C	T	C	T	C	C	C
EA2454	709632	T	C	C	C	C	C	T	C	C	C	C	C	C	C	T
EA2454	710706	C	C	C	C	C	C	C	C	C	T	C	T	C	C	C
EA2454	710977	A	G	G	G	G	G	A	G	G	G	G	G	G	G	A
EA2454	712612	T	T	T	T	T	T	T	T	T	T	G	T	T	T	T
EA2454	713026	T	T	T	T	T	T	T	G	T	T	T	T	T	T	T
EA2454	713766	C	C	C	T	C	C	C	C	C	C	C	C	C	C	C
EA2454	713997	C	C	C	C	C	C	C	C	C	A	C	C	C	C	C
EA2454	714973	C	C	C	C	C	C	C	C	C	C	C	C	C	T	C
EA2454	715370	C	C	C	T	T	T	C	C	C	C	C	C	C	T	C
EA2454	715745	T	T	T	T	T	T	T	T	T	T	G	T	T	T	T
EA2454	719734	C	C	C	T	T	T	C	C	C	C	C	C	C	T	C
EA2454	719989	A	A	A	A	A	A	A	A	A	T	A	T	A	A	A
EA2454	721973	C	C	C	C	C	C	C	C	C	T	C	T	C	C	C
EA2454	723157	A	G	G	A	A	A	A	A	A	A	A	A	A	A	A
EA2454	723869	C	C	C	C	T	C	C	C	C	C	C	C	C	C	C
EA2454	724890	G	A	A	G	G	G	G	G	A	G	G	G	G	G	G
EA2454	724929	A	A	A	A	A	A	A	A	A	A	A	A	G	A	A
EA2454	725151	G	G	G	G	G	G	G	G	G	A	G	A	G	G	G
EA2454	726867	C	C	C	C	C	C	C	C	C	C	T	C	C	C	C
EA2454	726930	G	G	G	G	G	G	G	G	G	T	G	T	G	G	G
EA2454	726938	T	C	C	T	T	T	T	T	T	T	T	T	T	T	T
EA2454	727032	C	T	T	C	C	C	C	C	C	C	C	C	C	C	C
EA2454	728053	A	A	A	A	A	A	A	A	A	A	G	A	A	A	A
EA2454	728788	G	T	T	G	G	G	G	G	G	G	G	G	G	G	G
EA2454	729583	G	G	G	G	G	G	G	A	G	G	G	G	A	G	G
EA2454	729913	G	G	G	G	G	G	G	G	G	G	A	G	G	G	G
EA2454	730566	C	C	C	C	C	C	C	T	C	C	C	C	T	C	C
EA2454	730776	G	G	G	G	G	G	G	G	G	A	G	A	G	G	G
EA2454	731219	T	G	G	G	G	G	T	G	G	G	G	G	G	G	T
EA2454	731329	G	A	A	A	A	A	A	A	A	A	A	A	A	A	A
EA2454	732275	G	G	G	G	G	G	G	G	G	A	G	A	G	G	G
EA2454	732941	A	A	A	A	A	A	A	A	A	A	A	A	G	A	A
EA2454	733335	C	C	C	C	C	C	C	C	C	C	T	C	C	C	C
EA2454	734642	T	T	T	T	T	T	T	T	T	C	T	C	T	T	T
EA2454	735016	T	T	T	T	T	T	T	T	T	T	C	T	T	T	T
EA2454	736137	C	C	C	C	C	C	C	C	C	T	C	T	C	C	C
EA2454	737158	C	T	T	C	C	C	C	T	T	C	C	C	T	C	C
EA2454	737672	A	A	A	A	A	A	A	A	A	A	A	A	A	G	A
EA2454	738321	C	C	C	C	T	C	C	C	C	C	C	C	C	C	C
EA2454	738814	A	A	A	A	A	C	A	A	A	A	A	A	A	A	A
EA2454	740461	C	T	T	C	C	C	C	C	C	C	C	C	C	C	C
EA2454	740948	C	C	C	C	C	C	C	C	C	G	C	G	C	C	C
EA2454	742876	T	C	C	T	T	T	T	T	C	T	T	T	T	T	T
EA2454	743375	T	T	T	A	A	A	T	T	T	T	T	T	T	A	T
EA2454	743512	G	G	G	G	G	G	G	G	G	A	G	A	G	G	G
EA2454	744988	A	A	A	A	A	A	A	A	A	A	A	A	A	A	G
EA2454	746000	C	C	C	C	C	C	C	C	C	T	C	T	C	C	C
EA2454	746060	C	C	C	C	C	C	C	C	C	T	C	T	C	C	C
EA2454	746284	C	C	C	C	C	C	C	C	C	C	T	C	C	C	C
EA2454	746522	T	T	T	T	T	T	T	C	T	T	T	T	C	T	T
EA2454	746983	A	A	A	A	A	A	A	T	A	A	A	A	T	A	A
EA2454	747597	G	G	G	G	G	G	G	G	G	C	G	C	G	G	G
EA2454	747621	C	C	C	C	C	C	C	C	C	C	A	C	C	C	C
EA2454	747674	T	T	T	T	T	T	T	G	T	T	T	T	G	T	T
EA2454	748435	G	G	G	G	G	G	G	G	G	A	G	A	G	G	G
EA2454	748560	G	C	C	G	G	G	G	C	C	C	C	C	C	G	G
EA2454	749156	C	C	C	C	C	C	C	C	A	C	C	C	C	C	C
EA2454	749526	T	C	C	T	T	T	T	T	T	T	T	T	T	T	T
EA2454	751046	G	G	G	A	G	G	G	G	G	G	G	G	G	G	G
EA2454	751386	G	G	G	A	A	A	G	G	G	G	G	G	G	A	G
EA2454	751988	C	C	C	C	C	C	C	C	C	C	T	C	C	C	C
EA2454	753604	C	C	C	C	T	C	C	C	C	C	C	C	C	C	C
EA2454	753727	T	C	C	T	T	T	T	C	C	C	C	C	C	T	T
EA2454	754152	T	T	T	T	T	T	T	T	T	G	T	G	T	T	T
EA2454	754601	C	A	A	C	C	C	C	C	A	C	C	C	C	C	C
EA2454	754782	C	C	C	C	C	C	C	C	C	T	C	T	C	C	C
EA2454	754898	G	G	G	G	G	A	G	G	G	G	G	G	G	A	G
EA2454	755366	A	G	G	G	G	G	A	G	G	G	G	G	G	G	G
EA2454	756040	T	G	G	G	G	G	T	G	G	G	G	G	G	G	T
EA2454	756857	T	T	T	T	T	T	T	T	T	G	T	G	T	T	T
EA2454	758394	C	T	T	T	T	T	C	T	T	T	T	T	T	T	C
EA2454	758587	C	C	C	C	C	C	C	C	C	T	C	T	C	C	C
EA2454	759931	C	C	C	C	C	C	C	C	C	T	C	T	C	C	C
EA2454	763677	C	T	T	C	C	C	C	C	C	C	C	C	C	C	C
EA2454	765032	T	C	C	C	C	C	T	C	C	C	C	C	C	C	T
EA2454	765166	C	C	C	C	C	C	C	C	C	T	C	T	C	C	C
EA2454	765368	T	C	C	T	T	T	T	T	T	T	T	T	T	T	T
EA2454	767310	C	C	C	C	C	C	C	C	C	C	C	C	T	C	C
EA2454	774395	G	G	G	G	G	G	G	G	G	A	G	A	G	G	G
EA2454	774445	G	G	G	G	G	G	G	G	G	T	G	T	G	G	G
EA2454	774482	G	A	A	G	G	G	G	G	A	G	G	G	G	G	G
EA2454	774531	A	A	A	C	A	A	A	A	A	A	A	A	A	A	A
EA2454	783701	G	G	G	G	G	G	G	G	G	G	G	G	G	G	A
EA2454	783857	T	C	C	T	T	T	T	T	C	T	T	T	T	T	T
EA2454	784404	C	C	C	C	C	C	C	C	T	C	C	C	C	C	C
EA2454	784434	T	C	C	T	T	T	T	T	C	T	T	T	T	T	T
EA2454	784455	A	T	T	A	A	A	A	A	T	A	A	A	A	A	A
EA2454	784542	G	A	A	G	G	G	G	G	A	G	G	G	G	G	G
EA2454	784570	A	C	C	A	A	A	A	A	C	A	A	A	A	A	A
EA2454	784592	C	G	G	C	C	C	C	C	G	C	C	C	C	C	C
EA2454	784626	G	G	G	G	G	G	G	G	G	A	G	A	G	G	G
EA2454	784987	T	T	T	T	T	T	T	T	C	T	T	T	T	T	T
EA2454	791956	G	G	G	G	G	G	G	A	G	G	G	G	A	G	G
EA2454	792970	C	C	C	C	C	C	C	C	C	T	C	T	C	C	C
EA2454	793051	A	G	G	A	A	A	A	G	G	G	G	G	G	A	A
EA2454	793067	G	G	G	G	G	G	G	G	G	G	A	G	G	G	G
EA2454	796255	G	G	G	G	G	G	G	G	G	G	A	G	G	G	G
EA2454	796276	C	C	C	C	C	C	C	C	C	C	A	C	C	C	C
EA2454	796729	G	T	T	G	G	G	G	G	G	G	G	G	G	G	G
EA2454	796926	G	G	G	G	G	G	G	G	G	A	G	A	G	G	G
EA2454	796935	C	C	C	G	C	C	C	C	C	C	C	C	C	C	C
EA2454	797460	G	A	A	G	G	G	G	G	G	G	G	G	G	G	G
EA2454	797963	C	C	C	C	C	C	C	T	C	C	C	C	T	C	C
EA2454	798063	C	C	C	C	C	C	C	T	C	C	C	C	C	C	C
EA2454	798552	T	G	G	T	T	T	T	T	G	T	T	T	T	T	T
EA2454	799162	G	G	G	G	G	G	G	A	G	G	G	G	A	G	G
EA2454	800237	G	G	G	G	G	G	G	G	G	G	A	G	G	G	G
EA2454	802510	G	G	G	G	G	G	G	G	G	G	T	G	G	G	G
EA2454	802567	G	G	G	A	G	G	G	G	G	G	G	G	G	G	G
EA2454	803079	G	G	G	G	G	G	G	G	G	G	A	G	G	G	G
EA2454	803220	G	G	G	G	A	A	G	G	G	G	G	G	G	A	G
EA2454	804225	T	T	T	T	T	T	T	T	T	A	T	A	T	T	T
EA2454	804247	G	G	G	G	G	G	G	A	G	G	G	G	A	G	G
EA2454	804998	A	A	A	A	A	A	A	C	A	A	A	A	C	A	A
EA2454	805105	A	A	A	A	A	A	A	A	A	A	C	A	A	A	A
EA2454	805162	G	G	G	G	G	G	G	G	G	G	G	G	A	G	G
EA2454	805180	A	A	A	A	A	A	A	A	T	A	A	A	A	A	A
EA2454	805200	G	G	G	G	G	G	G	G	G	G	A	G	G	G	G
EA2454	805481	A	G	G	G	G	G	A	G	G	G	G	G	G	G	A
EA2454	807876	G	G	G	G	G	G	G	G	G	T	G	T	G	G	G
EA2454	808146	G	G	G	A	G	G	G	G	G	G	G	G	G	G	G
EA2454	811479	A	C	C	A	A	A	A	A	A	A	A	A	A	A	A
EA2454	811549	C	C	C	C	C	C	C	C	C	T	C	T	C	C	C
EA2454	811792	T	C	C	T	T	T	T	T	T	T	T	T	T	T	T
EA2454	812453	C	T	T	C	C	C	C	C	C	C	C	C	C	C	C
EA2454	813446	G	G	G	G	G	G	G	G	G	A	G	A	G	G	G
EA2454	815252	C	C	C	T	C	C	C	C	C	C	C	C	C	C	C
EA2454	815518	A	A	A	A	A	A	A	A	A	G	A	G	A	A	A
EA2454	815610	T	T	T	A	A	A	T	T	T	T	T	T	T	A	T
EA2454	816627	C	C	C	C	C	C	C	C	T	C	C	C	C	C	C
EA2454	816840	G	G	G	G	G	G	G	G	T	G	G	G	G	G	G
EA2454	817088	G	G	G	G	G	G	G	G	G	T	G	T	G	G	G
EA2454	817446	A	G	G	A	A	A	A	G	G	G	G	G	G	A	A
EA2454	817985	T	G	G	G	G	G	T	G	G	G	G	G	G	G	G
EA2454	818649	A	C	C	C	C	C	A	C	C	C	C	C	C	C	A
EA2454	819830	G	G	G	G	G	G	G	G	G	T	G	T	G	G	G
EA2454	819976	C	C	C	C	C	C	C	C	C	C	T	C	C	C	C
EA2454	820251	G	T	T	G	G	G	G	T	T	G	G	G	T	G	G
EA2454	820901	G	G	G	G	G	G	G	A	G	G	G	G	G	G	G
EA2454	821110	A	C	C	A	A	A	A	C	C	C	C	C	C	A	A
EA2454	821289	C	C	C	C	T	C	C	C	C	C	C	C	C	C	C
EA2454	822250	G	G	G	G	G	G	G	G	G	A	G	A	G	G	G
EA2454	822614	C	C	C	T	C	C	C	C	C	C	C	C	C	C	C
EA2454	822872	C	C	C	C	C	C	C	C	C	C	T	C	C	C	C
EA2454	823756	G	G	G	G	G	G	G	G	G	G	A	G	G	G	G
EA2454	824349	T	T	T	T	C	T	T	T	T	T	T	T	T	T	T
EA2454	825262	T	T	T	T	T	T	T	T	T	T	T	T	T	T	G
EA2454	825661	A	A	A	A	A	A	A	A	A	A	C	A	A	A	A
EA2454	828744	A	A	A	G	A	A	A	A	A	A	A	A	A	A	A
EA2454	829515	G	T	T	G	G	G	G	G	G	G	G	G	G	G	G
EA2454	829606	G	G	G	G	A	A	G	G	G	G	G	G	G	A	G
EA2454	829636	G	G	G	G	G	G	G	G	G	T	G	T	G	G	G
EA2454	830335	C	C	C	C	C	C	C	C	C	T	C	T	C	C	C
EA2454	830637	T	T	T	T	T	T	T	T	T	G	T	G	T	T	T
EA2454	830653	A	A	A	A	A	A	A	A	A	A	C	A	A	A	A
EA2454	831520	G	G	G	T	T	T	G	G	G	G	G	G	G	T	G
EA2454	831717	G	G	G	G	G	G	G	G	G	G	T	G	G	G	G
EA2454	831794	G	C	C	G	G	G	G	G	G	G	G	G	G	G	G
EA2454	832051	A	A	A	A	A	A	A	A	A	T	A	T	A	A	A
EA2454	832382	G	G	G	G	G	G	G	G	G	A	G	A	G	G	G
EA2454	832537	C	C	C	C	C	C	C	T	C	C	C	C	C	C	C
EA2454	833175	T	T	T	T	T	T	T	G	T	T	T	T	T	T	T
EA2454	833584	C	C	C	C	C	C	C	C	C	A	C	A	C	C	C
EA2454	833658	A	A	A	A	A	A	A	A	A	C	A	C	A	A	A
EA2454	834488	T	T	T	T	T	T	T	T	T	C	C	C	T	T	T
EA2454	835751	C	C	C	C	C	C	C	G	C	C	C	C	C	C	C
EA2454	835799	C	C	C	T	C	C	C	C	C	C	C	C	C	C	C
EA2454	836515	G	G	G	G	G	G	G	G	G	G	G	G	T	G	G
EA2454	836643	T	C	C	T	T	T	T	T	T	T	T	T	T	T	T
EA2454	837160	A	A	A	A	A	A	A	A	A	C	A	C	A	A	A
EA2454	837322	C	T	T	C	C	C	C	C	C	C	C	C	C	C	C
EA2454	838094	A	A	A	A	A	A	A	A	A	C	A	C	A	A	A
EA2454	839081	G	G	G	G	G	G	G	G	A	G	G	G	G	G	G
EA2454	840204	G	G	G	G	G	G	G	G	A	G	G	G	G	G	G
EA2454	840811	G	G	G	G	G	G	G	A	G	G	G	G	G	G	G
EA2454	841024	G	G	G	A	G	G	G	G	G	G	G	G	G	G	G
EA2454	841039	A	A	A	A	A	A	A	A	G	A	A	A	A	A	A
EA2454	841908	C	C	C	C	C	C	C	C	C	A	C	A	C	C	C
EA2454	842772	C	C	C	C	C	C	C	T	C	C	C	C	T	C	C
EA2454	844850	A	A	A	A	A	A	A	C	A	A	A	A	C	A	A
EA2454	845081	G	G	G	G	G	G	G	G	G	A	G	A	G	G	G
EA2454	845338	G	G	G	G	G	G	G	G	A	G	G	G	G	G	G
EA2454	846335	G	G	G	G	G	G	G	T	G	G	G	G	T	G	G
EA2454	848036	G	G	G	G	G	G	G	G	G	A	G	A	G	G	G
EA2454	848276	G	G	G	G	G	G	G	G	A	G	G	G	G	G	G
EA2454	848455	G	G	G	G	G	G	G	T	G	G	G	G	T	G	G
EA2454	848779	G	G	G	T	G	G	G	G	G	G	G	G	G	G	G
EA2454	849124	G	G	G	G	G	G	G	G	G	G	A	G	G	G	G
EA2454	849346	G	A	A	G	G	G	G	G	G	G	G	G	G	G	G
EA2454	849614	G	G	G	G	G	G	G	G	G	G	A	G	G	G	G
EA2454	850201	G	G	G	G	G	G	G	T	G	G	G	G	T	G	G
EA2454	850239	C	C	C	C	C	C	C	C	C	C	T	C	C	C	C
EA2454	850726	T	T	T	C	T	T	T	T	T	T	T	T	T	T	T
EA2454	850727	G	G	G	A	G	G	G	G	G	G	G	G	G	G	G
EA2454	850728	T	T	T	G	T	T	T	T	T	T	T	T	T	T	T
EA2454	851976	T	T	T	A	T	T	T	T	T	T	T	T	T	T	T
EA2454	852415	G	G	G	G	G	G	G	G	G	T	G	T	G	G	G
EA2454	852695	A	G	G	G	G	G	A	G	G	G	G	G	G	G	A
EA2454	853768	A	A	A	A	A	A	A	G	A	A	A	A	G	A	A
EA2454	854766	G	G	G	G	G	G	G	G	T	G	G	G	G	G	G
EA2454	854948	T	T	T	T	T	T	T	C	T	T	T	T	T	T	T
EA2454	855440	G	G	G	G	G	G	G	G	G	G	G	G	T	G	G
EA2454	855868	A	A	A	A	A	A	A	A	C	A	A	A	A	A	A
EA2454	856001	G	G	G	G	G	G	G	G	G	G	A	G	G	G	G
EA2454	856143	C	C	C	C	C	C	C	C	C	A	C	A	C	C	C
EA2454	856304	G	G	G	G	G	G	G	G	G	G	A	G	G	G	G
EA2454	857444	T	T	T	T	T	T	T	T	C	T	T	T	T	T	T
EA2454	857633	A	A	A	A	A	A	A	A	T	A	A	A	A	A	A
EA2454	859445	A	A	A	T	A	A	A	A	A	A	A	A	A	A	A
EA2454	860226	C	C	C	A	A	A	C	C	C	C	C	C	C	A	C
EA2454	860485	G	G	G	G	G	G	G	G	G	A	G	A	G	G	G
EA2454	860740	C	C	C	C	C	C	C	C	C	T	C	T	C	C	C
EA2454	861257	G	G	G	G	G	G	G	G	G	A	G	A	G	G	G
EA2454	861549	G	G	G	G	A	G	G	G	G	G	G	G	G	G	G
EA2454	861588	G	G	G	G	G	G	G	G	A	G	G	G	G	G	G
EA2454	861738	C	C	C	T	C	C	C	C	C	C	C	C	C	C	C
EA2454	862033	G	G	G	A	G	G	G	G	G	G	G	G	G	G	G
EA2454	862190	T	T	T	T	T	T	T	T	T	C	T	C	T	T	T
EA2454	863496	A	G	G	A	A	A	A	G	G	G	G	G	G	A	A
EA2454	864446	T	T	T	T	T	T	T	T	T	T	C	T	T	T	T
EA2454	864447	G	G	G	G	G	G	G	G	G	A	G	A	G	G	G
EA2454	865819	T	T	T	T	T	T	T	T	T	G	T	G	T	T	T
EA2454	866649	A	A	A	A	A	A	A	A	A	C	A	C	A	A	A
EA2454	866700	C	T	T	C	C	C	C	C	C	C	C	C	C	C	C
EA2454	867427	C	C	C	C	C	C	C	C	C	T	C	T	C	C	C
EA2454	869546	C	C	C	C	C	C	C	C	C	C	T	C	C	C	C
EA2454	874702	T	T	T	T	T	T	T	C	T	T	T	T	C	T	T
EA2454	875102	G	G	G	G	G	G	G	G	G	A	G	A	G	G	G
EA2454	875313	T	T	T	T	T	T	T	T	T	C	C	C	T	T	T
EA2454	875685	A	A	A	A	A	A	A	A	A	G	A	G	A	A	A
EA2454	876176	G	G	G	A	G	G	G	G	G	G	G	G	G	G	G
EA2454	876895	C	C	C	C	C	C	C	C	C	A	C	A	C	C	C
EA2454	877031	G	G	G	A	G	G	G	G	G	A	G	A	G	G	G
EA2454	877061	T	A	A	T	T	T	T	T	T	T	T	T	T	T	T
EA2454	877501	T	T	T	T	T	T	T	T	G	T	T	T	T	T	T
EA2454	879121	C	C	C	C	C	C	C	A	C	C	C	C	A	C	C
EA2454	879699	G	G	G	A	G	G	G	G	G	G	G	G	G	G	G
EA2454	880933	G	G	G	G	G	G	G	G	G	G	A	G	G	G	G
EA2454	881078	A	A	A	A	A	T	A	A	A	A	A	A	A	A	A
EA2454	881396	A	A	A	G	A	A	A	A	A	A	A	A	A	A	A
EA2454	882358	C	C	C	C	C	C	C	C	C	T	C	T	C	C	C
EA2454	883189	G	G	G	G	G	G	G	G	G	A	G	A	G	G	G
EA2454	884502	T	T	T	T	T	T	T	G	T	T	T	T	T	T	T
EA2454	887404	C	C	C	C	C	C	C	C	C	T	C	T	C	C	C
EA2454	889463	G	G	G	G	G	G	G	G	G	A	A	A	G	G	G
EA2454	891216	A	A	A	A	A	A	A	A	A	C	A	C	A	A	A
EA2454	891369	A	G	G	A	A	A	A	A	G	A	A	A	A	A	A
EA2454	891641	G	G	G	G	A	G	G	G	G	G	G	G	G	G	G
EA2454	892965	G	G	G	G	G	G	G	G	G	T	G	T	G	G	G
EA2454	893180	G	G	G	G	G	G	G	G	G	T	G	T	G	G	G
EA2454	893994	A	A	A	A	A	A	A	A	A	T	A	T	A	A	A
EA2454	894027	G	A	A	G	G	G	G	G	G	G	G	G	G	G	G
EA2454	894224	G	G	G	G	G	A	G	G	G	G	G	G	G	G	G
EA2454	894437	A	A	A	A	A	A	A	A	A	G	A	G	A	A	A
EA2454	894538	C	T	T	T	T	T	C	T	T	T	T	T	T	T	C
EA2454	894751	T	G	G	T	T	T	T	T	T	T	T	T	T	T	T
EA2454	896090	C	C	C	C	C	C	C	T	C	C	C	C	T	C	C
EA2454	897780	C	C	C	A	C	C	C	C	C	C	C	C	C	C	C
EA2454	898882	C	C	C	C	C	C	C	C	C	T	C	T	C	C	C
EA2454	899104	T	A	A	T	T	T	T	T	A	T	T	T	T	T	T
EA2454	902918	G	G	G	G	G	G	G	G	G	A	G	A	G	G	G
EA2454	903527	G	G	G	G	G	G	G	G	G	A	G	A	G	G	G
EA2454	903996	T	T	T	T	T	T	T	T	T	C	T	C	T	T	T
EA2454	904220	T	T	T	C	T	T	T	T	T	T	T	T	T	T	T
EA2454	904482	A	G	G	G	G	G	A	G	G	G	G	G	G	G	A
EA2454	904788	C	C	C	T	C	C	C	C	C	C	C	C	C	C	C
EA2454	904955	G	T	T	G	G	G	G	T	T	G	G	G	T	G	G
EA2454	906503	C	C	C	C	C	C	C	C	C	T	C	T	C	C	C
EA2454	906890	G	G	G	G	G	G	G	G	G	G	A	G	G	G	G
EA2454	907131	C	C	C	C	C	C	C	A	C	C	C	C	C	C	C
EA2454	907381	C	C	C	C	C	C	C	C	C	A	C	A	C	C	C
EA2454	907528	G	G	G	T	G	G	G	G	G	G	G	G	G	G	G
EA2454	907900	A	A	A	A	A	A	A	C	A	A	A	A	C	A	A
EA2454	910030	G	G	G	G	G	G	G	G	T	G	G	G	G	G	G
EA2454	910148	T	T	T	C	T	T	T	T	T	T	T	T	T	T	T
EA2454	910897	A	A	A	A	A	A	A	G	A	A	A	A	G	A	A
EA2454	911296	C	C	C	C	C	C	C	C	T	C	C	C	C	C	C
EA2454	911716	G	G	G	G	G	G	G	G	A	G	G	G	G	G	G
EA2454	911740	G	G	G	G	G	G	G	G	G	T	G	T	G	G	G
EA2454	912171	G	G	G	G	G	G	G	G	G	G	G	G	A	G	G
EA2454	916363	G	G	G	G	G	A	G	G	G	G	G	G	G	G	G
EA2454	916891	C	C	C	C	C	C	C	C	C	A	C	A	C	C	C
EA2454	918989	G	G	G	G	G	G	G	G	A	G	G	G	G	G	G
EA2454	919060	T	G	G	T	T	T	T	G	G	G	G	G	G	T	T
EA2454	921266	G	G	G	G	G	G	G	A	G	G	G	G	A	G	G
EA2454	921834	G	G	G	G	G	G	G	G	G	A	G	A	G	G	G
EA2454	922709	C	C	C	C	C	C	C	C	C	T	C	T	C	C	C
EA2454	922830	G	G	G	G	G	G	G	G	G	G	G	G	T	G	G
EA2454	923353	G	G	G	A	G	G	G	G	G	G	G	G	G	G	G
EA2454	923875	T	T	T	A	A	A	T	T	T	T	T	T	T	A	T
EA2454	924418	G	G	G	G	G	G	G	A	G	G	G	G	G	G	G
EA2454	924524	C	T	T	C	C	C	C	T	T	C	C	C	T	C	C
EA2454	924579	T	C	C	C	C	C	T	C	C	C	C	C	C	C	T
EA2454	926548	G	G	G	G	A	A	G	G	G	G	G	G	G	A	G
EA2454	927419	G	G	G	G	G	G	G	G	G	A	G	A	G	G	G
EA2454	927563	C	C	C	C	C	C	C	C	C	C	C	C	T	C	C
EA2454	927966	G	G	G	G	G	G	G	G	G	G	G	A	G	G	G
EA2454	928814	G	G	G	G	G	G	G	G	G	C	G	C	G	G	G
EA2454	930102	A	G	G	G	G	G	A	G	G	G	G	G	G	G	A
EA2454	931665	G	G	G	G	G	G	G	G	A	G	G	G	G	G	G
EA2454	931959	C	G	G	C	C	C	C	C	C	C	C	C	C	C	C
EA2454	933541	G	G	G	G	G	G	G	G	G	A	A	A	G	G	G
EA2454	935854	C	C	C	C	C	C	C	C	C	C	C	C	C	T	C
EA2454	936248	A	A	A	A	A	A	A	C	A	A	A	A	C	A	A
EA2454	936296	C	C	C	C	C	C	C	C	T	C	C	C	C	C	C
EA2454	936615	C	C	C	A	C	C	C	C	C	C	C	C	C	C	C
EA2454	937614	C	T	T	C	C	C	C	T	T	T	T	T	T	C	C
EA2454	938004	C	C	C	T	C	C	C	C	C	C	C	C	C	C	C
EA2454	938195	A	G	G	A	A	A	A	G	G	G	G	G	G	A	A
EA2454	938336	A	C	C	A	A	A	A	A	A	A	A	A	A	A	A
EA2454	938496	C	C	C	C	C	C	C	C	C	C	A	C	C	C	C
EA2454	938615	G	G	G	A	G	G	G	G	G	G	G	G	G	G	G
EA2454	938891	T	T	T	T	C	C	T	T	T	T	T	T	T	C	T
EA2454	938923	G	G	G	G	G	A	G	G	G	G	G	G	G	A	G
EA2454	940518	G	G	G	A	G	G	G	G	G	G	G	G	G	G	G
EA2454	941489	C	A	A	C	C	C	C	A	A	A	A	A	A	C	C
EA2454	941829	T	T	T	T	T	T	T	T	T	A	T	A	T	T	T
EA2454	944490	C	C	C	C	C	C	C	T	C	C	C	C	T	C	C
EA2454	945162	A	G	G	G	G	G	A	G	G	G	G	G	G	G	A
EA2454	946638	T	T	T	T	T	T	T	T	T	G	T	G	T	T	T
EA2454	946875	T	C	C	C	C	C	T	C	C	C	C	C	C	C	T
EA2454	947237	G	G	G	G	G	G	G	G	G	A	G	A	G	G	G
EA2454	948450	T	T	T	T	T	T	T	T	C	T	T	T	T	T	T
EA2454	949189	G	G	G	G	G	G	G	G	G	A	G	A	G	G	G
EA2454	949221	C	C	A	C	C	C	C	A	A	C	A	C	A	C	C
EA2454	949222	C	C	C	C	T	C	C	C	C	C	C	C	C	C	C
EA2454	951396	G	A	A	G	G	G	G	G	A	G	G	G	G	G	G
EA2454	983278	T	G	G	T	T	T	T	G	G	T	T	T	G	T	T
EA2454	983325	T	A	A	T	T	T	T	A	A	T	T	T	A	T	T
EA2454	983327	G	C	C	G	G	G	G	C	C	G	G	G	C	G	G
EA2454	983359	G	A	A	G	G	G	G	A	A	G	G	G	A	G	G
EA2454	983362	T	C	C	T	T	T	T	C	C	T	T	T	C	T	T
EA2454	983363	A	T	T	A	A	A	A	T	T	A	A	A	T	A	A
EA2454	983371	G	A	A	G	G	G	G	A	A	G	G	G	A	G	G
EA2454	983404	T	C	C	T	T	T	T	C	C	T	T	T	C	T	T
EA2454	983426	G	A	A	G	G	G	G	A	A	G	G	G	A	G	G
EA2454	983446	A	C	C	A	A	A	A	C	C	A	A	A	C	A	A
EA2454	983525	A	G	G	A	A	A	A	G	G	A	A	A	G	A	A
EA2454	983570	C	T	T	C	C	C	C	T	T	C	C	C	T	C	C
EA2454	983573	C	T	T	C	C	C	C	T	T	C	C	C	T	C	C
EA2454	983743	A	A	A	A	A	A	A	A	A	A	A	A	A	G	A
EA2454	983840	A	G	G	A	A	A	A	G	G	A	A	A	G	A	A
EA2454	983889	G	A	A	G	G	G	G	G	A	G	G	G	G	G	G
EA2454	983899	T	T	T	T	T	T	T	T	T	T	C	T	T	T	T
EA2454	983901	C	T	T	C	C	C	C	T	T	C	C	C	T	C	C
EA2454	983906	T	C	C	T	T	T	T	C	C	T	T	T	C	T	T
EA2454	983909	T	C	C	T	T	T	T	C	C	T	T	T	C	T	T
EA2454	984038	A	G	G	A	A	A	A	G	G	A	A	A	G	A	A
EA2454	984050	G	T	T	G	G	G	G	T	T	G	G	G	T	G	G
EA2454	984129	A	G	G	A	A	A	A	G	G	A	A	A	G	A	A
EA2454	984131	T	C	C	T	T	T	T	C	C	T	T	T	C	T	T
EA2454	984135	G	T	T	G	G	G	G	T	T	G	G	G	T	G	G
EA2454	984294	G	A	A	G	G	G	G	A	A	G	G	G	A	G	G
EA2454	984305	A	T	T	A	A	A	A	T	T	A	A	A	T	A	A
EA2454	984308	A	T	T	A	A	A	A	T	T	A	A	A	T	A	A
EA2454	984317	A	G	G	A	A	A	A	G	G	A	A	A	G	A	A
EA2454	984344	C	T	T	C	C	C	C	T	T	C	C	C	T	C	C
EA2454	984401	A	T	T	A	A	A	A	T	T	A	A	A	T	A	A
EA2454	984422	G	A	A	G	G	G	G	A	A	G	G	G	A	G	G
EA2454	984426	A	G	G	A	A	A	A	G	G	A	A	A	G	A	A
EA2454	984428	C	T	T	C	C	C	C	T	T	C	C	C	T	C	C
EA2454	984434	G	A	A	G	G	G	G	A	A	G	G	G	A	G	G
EA2454	984440	T	C	C	T	T	T	T	C	C	T	T	T	C	T	T
EA2454	989594	T	A	A	T	T	T	T	A	A	T	T	T	A	T	T
EA2454	989710	T	C	C	T	T	T	T	C	C	T	T	T	C	T	T
EA2454	989712	T	T	T	T	T	T	T	T	T	C	T	C	T	T	T
EA2454	989713	C	T	T	C	C	C	C	T	T	C	C	C	T	C	C
EA2454	989731	G	A	A	G	G	G	G	A	A	G	G	G	A	G	G
EA2454	989794	C	T	T	C	C	C	C	T	T	C	C	C	T	C	C
EA2454	989798	A	G	G	A	A	A	A	G	G	A	A	A	G	A	A
EA2454	989831	G	A	A	G	G	G	G	A	A	G	G	G	A	G	G
EA2454	989932	A	G	G	A	A	A	A	G	G	A	A	A	G	A	A
EA2454	989938	A	G	G	A	A	A	A	G	G	A	A	A	G	A	A
EA2454	989941	C	T	T	C	C	C	C	T	T	C	C	C	T	C	C
EA2454	989989	A	G	G	A	A	A	A	G	G	A	A	A	G	A	A
EA2454	990058	G	T	T	T	T	T	G	T	T	T	T	T	T	T	G
EA2454	990059	C	T	T	C	C	C	C	T	T	C	C	C	T	C	C
EA2454	990100	A	T	T	A	A	A	A	T	T	A	A	A	T	A	A
EA2454	990118	T	A	A	T	T	T	T	A	A	T	T	T	A	T	T
EA2454	990124	T	C	C	T	T	T	T	C	C	T	T	T	C	T	T
EA2454	990230	T	C	C	T	T	T	T	C	C	T	T	T	C	T	T
EA2454	990308	G	G	G	A	G	G	G	G	G	G	G	G	G	G	G
EA2454	990374	C	C	C	A	A	A	C	C	C	C	C	C	C	A	C
EA2454	990400	A	G	G	A	A	A	A	G	G	A	A	A	G	A	A
EA2454	990418	C	C	C	C	C	C	C	C	C	C	T	C	C	C	C
EA2454	990463	A	G	G	A	A	A	A	G	G	A	A	A	G	A	A
EA2454	990562	T	C	C	T	T	T	T	C	C	T	T	T	C	T	T
EA2454	990572	G	A	A	G	G	G	G	A	A	G	G	G	A	G	G
EA2454	990627	C	T	T	C	C	C	C	T	T	C	C	C	T	C	C
EA2454	990637	G	A	A	G	G	G	G	A	A	G	G	G	A	G	G
EA2454	990685	A	G	G	A	A	A	A	G	G	A	A	A	G	A	A
EA2454	990691	G	T	T	G	G	G	G	T	T	G	G	G	T	G	G
EA2454	990697	C	G	G	C	C	C	C	G	G	C	C	C	G	C	C
EA2454	990708	G	G	G	G	A	G	G	G	G	G	G	G	G	G	G
EA2454	990727	G	A	A	G	G	G	G	A	A	G	G	G	A	G	G
EA2454	990730	T	G	G	T	T	T	T	G	G	T	T	T	G	T	T
EA2454	990742	C	T	T	C	C	C	C	T	T	C	C	C	T	C	C
EA2454	990757	A	G	G	A	A	A	A	G	G	A	A	A	G	A	A
EA2454	990763	G	A	A	G	G	G	G	A	A	G	G	G	A	G	G
EA2454	990766	A	G	G	A	A	A	A	G	G	A	A	A	G	A	A
EA2454	990872	T	G	G	T	T	T	T	G	G	T	T	T	G	T	T
EA2454	990874	T	A	A	T	T	T	T	A	A	T	T	T	A	T	T
EA2454	990880	C	A	A	C	C	C	C	A	A	C	C	C	A	C	C
EA2454	990883	T	C	C	T	T	T	T	C	C	T	T	T	C	T	T
EA2454	990884	A	G	G	A	A	A	A	G	G	A	A	A	G	A	A
EA2454	990904	C	T	T	C	C	C	C	T	T	C	C	C	T	C	C
EA2454	990905	C	G	G	C	C	C	C	G	G	C	C	C	G	C	C
EA2454	990908	A	G	G	A	A	A	A	G	G	A	A	A	G	A	A
EA2454	990909	C	T	T	C	C	C	C	T	T	C	C	C	T	C	C
EA2454	990925	A	G	G	A	A	A	A	G	G	A	A	A	G	A	A
EA2454	990931	A	G	G	A	A	A	A	G	G	A	A	A	G	A	A
EA2454	990970	C	T	T	C	C	C	C	T	T	C	C	C	T	C	C
EA2454	991009	T	G	G	T	T	T	T	G	G	T	T	T	G	T	T
EA2454	991060	G	A	A	G	G	G	G	A	A	G	G	G	A	G	G
EA2454	991066	A	G	G	A	A	A	A	G	G	A	A	A	G	A	A
EA2454	991069	G	G	G	G	G	G	G	A	G	G	G	G	A	G	G
EA2454	991169	C	T	T	C	C	C	C	T	T	C	C	C	T	C	C
EA2454	991239	A	C	C	A	A	A	A	C	C	A	A	A	C	A	A
EA2454	991259	C	T	T	C	C	C	C	T	T	C	C	C	T	C	C
EA2454	991260	A	C	C	A	A	A	A	C	C	A	A	A	C	A	A
EA2454	991311	A	G	G	A	A	A	A	G	G	A	A	A	G	A	A
EA2454	991365	A	G	G	A	A	A	A	G	G	A	A	A	G	A	A
EA2454	991386	G	A	A	G	G	G	G	A	A	G	G	G	A	G	G
EA2454	991404	A	G	G	A	A	A	A	G	G	A	A	A	G	A	A
EA2454	991428	G	A	A	G	G	G	G	A	A	G	G	G	A	G	G
EA2454	991560	C	T	T	C	C	C	C	T	T	C	C	C	T	C	C
EA2454	991590	A	G	G	A	A	A	A	G	G	A	A	A	G	A	A
EA2454	991596	G	A	A	G	G	G	G	A	A	G	G	G	A	G	G
EA2454	991611	G	A	A	G	G	G	G	A	A	G	G	G	A	G	G
EA2454	991638	C	A	A	C	C	C	C	A	A	C	C	C	A	C	C
EA2454	991686	G	A	A	G	G	G	G	A	A	G	G	G	A	G	G
EA2454	991800	C	T	T	C	C	C	C	T	T	C	C	C	T	C	C
EA2454	991983	A	G	G	A	A	A	A	G	G	A	A	A	G	A	A
EA2454	992001	T	C	C	T	T	T	T	C	C	T	T	T	C	T	T
EA2454	992040	A	C	C	A	A	A	A	C	C	A	A	A	C	A	A
EA2454	992055	G	A	A	G	G	G	G	A	A	G	G	G	A	G	G
EA2454	992231	G	A	A	G	G	G	G	A	A	G	G	G	A	G	G
EA2454	992244	C	T	T	C	C	C	C	T	T	C	C	C	T	C	C
EA2454	992692	G	A	A	G	G	G	G	A	A	G	G	G	A	G	G
EA2454	992921	C	T	T	C	C	C	C	T	T	C	C	C	T	C	C
EA2454	993116	C	T	T	C	C	C	C	T	T	C	C	C	T	C	C
EA2454	994056	A	G	G	A	A	A	A	G	G	A	A	A	G	A	A
EA2454	994074	T	C	C	T	T	T	T	C	C	T	T	T	C	T	T
EA2454	994116	G	A	A	G	G	G	G	A	A	G	G	G	A	G	G
EA2454	994161	G	G	G	G	G	G	G	G	G	A	G	A	G	G	G
EA2454	994311	T	C	C	T	T	T	T	C	C	T	T	T	C	T	T
EA2454	994443	A	G	G	A	A	A	A	G	G	A	A	A	G	A	A
EA2454	994617	C	T	T	C	C	C	C	T	T	C	C	C	T	C	C
EA2454	994626	G	T	T	G	G	G	G	T	T	G	G	G	T	G	G
EA2454	994884	T	C	C	T	T	T	T	C	C	T	T	T	C	T	T
EA2454	994890	T	C	C	T	T	T	T	C	C	T	T	T	C	T	T
EA2454	994998	A	G	G	A	A	A	A	G	G	A	A	A	G	A	A
EA2454	995076	A	G	G	A	A	A	A	G	G	A	A	A	G	A	A
EA2454	995109	G	G	G	G	G	G	G	G	A	G	G	G	G	G	G
EA2454	995121	T	A	A	T	T	T	T	A	A	T	T	T	A	T	T
EA2454	995151	A	C	C	A	A	A	A	C	C	A	A	A	C	A	A
EA2454	995154	C	A	A	C	C	C	C	A	A	C	C	C	A	C	C
EA2454	995193	A	G	G	A	A	A	A	G	G	A	A	A	G	A	A
EA2454	995293	T	T	T	T	T	T	T	T	T	C	T	C	T	T	T
EA2454	995575	T	A	A	T	T	T	T	A	A	T	T	T	A	T	T
EA2454	996391	G	C	C	G	G	G	G	C	C	G	G	G	C	G	G
EA2454	996427	C	G	G	C	C	C	C	G	G	C	C	C	G	C	C
EA2454	996451	C	G	G	C	C	C	C	G	G	C	C	C	G	C	C
EA2454	996466	A	G	G	A	A	A	A	G	G	A	A	A	G	A	A
EA2454	996547	T	C	C	T	T	T	T	C	C	T	T	T	C	T	T
EA2454	996653	G	G	G	G	G	G	G	G	A	G	G	G	G	G	G
EA2454	996660	A	A	A	A	A	A	A	A	A	G	A	G	A	A	A
EA2454	996667	T	C	C	T	T	T	T	C	C	T	T	T	C	T	T
EA2454	996676	C	T	T	C	C	C	C	T	T	C	C	C	T	C	C
EA2454	996712	T	C	C	T	T	T	T	C	C	T	T	T	C	T	T
EA2454	996715	C	T	T	C	C	C	C	T	T	C	C	C	T	C	C
EA2454	996751	T	C	C	T	T	T	T	C	C	T	T	T	C	T	T
EA2454	996775	G	A	A	G	G	G	G	A	A	G	G	G	A	G	G
EA2454	996850	A	G	G	A	A	A	A	G	G	A	A	A	G	A	A
EA2454	996856	T	C	C	T	T	T	T	C	C	T	T	T	C	T	T
EA2454	996886	G	C	C	G	G	G	G	C	C	G	G	G	C	G	G
EA2454	996901	G	C	C	G	G	G	G	C	C	G	G	G	C	G	G
EA2454	997000	A	G	G	A	A	A	A	G	G	A	A	A	G	A	A
EA2454	997012	G	A	A	G	G	G	G	A	A	G	G	G	A	G	G
EA2454	997024	C	G	G	C	C	C	C	G	G	C	C	C	G	C	C
EA2454	997036	T	C	C	T	T	T	T	C	C	T	T	T	C	T	T
EA2454	997180	C	T	T	C	C	C	C	T	T	C	C	C	T	C	C
EA2454	997183	G	A	A	G	G	G	G	A	A	G	G	G	A	G	G
EA2454	997189	A	G	G	A	A	A	A	G	G	A	A	A	G	A	A
EA2454	997200	T	T	T	T	T	T	T	C	T	T	T	T	C	T	T
EA2454	997480	A	T	T	A	A	A	A	T	T	A	A	A	T	A	A
EA2454	997504	A	C	C	A	A	A	A	C	C	A	A	A	C	A	A
EA2454	997510	C	T	T	C	C	C	C	T	T	C	C	C	T	C	C
EA2454	997540	T	C	C	T	T	T	T	C	C	T	T	T	C	T	T
EA2454	997543	T	C	C	T	T	T	T	C	C	T	T	T	C	T	T
EA2454	997555	T	C	C	T	T	T	T	C	C	T	T	T	C	T	T
EA2454	997639	C	T	T	C	C	C	C	T	T	C	C	C	T	C	C
EA2454	997654	C	T	T	C	C	C	C	T	T	C	C	C	T	C	C
EA2454	997681	G	A	A	G	G	G	G	A	A	G	G	G	A	G	G
EA2454	997708	T	C	C	T	T	T	T	C	C	T	T	T	C	T	T
EA2454	997744	G	A	A	G	G	G	G	A	A	G	G	G	A	G	G
EA2454	997756	G	A	A	G	G	G	G	A	A	G	G	G	A	G	G
EA2454	997819	G	A	A	G	G	G	G	A	A	G	G	G	A	G	G
EA2454	997834	T	C	C	T	T	T	T	C	C	T	T	T	C	T	T
EA2454	997879	A	G	G	A	A	A	A	G	G	A	A	A	G	A	A
EA2454	997918	A	G	G	A	A	A	A	G	G	A	A	A	G	A	A
EA2454	997930	C	T	T	C	C	C	C	T	T	C	C	C	T	C	C
EA2454	997987	G	A	A	G	G	G	G	A	A	G	G	G	A	G	G
EA2454	998008	C	T	T	C	C	C	C	T	T	C	C	C	T	C	C
EA2454	998014	T	C	C	T	T	T	T	C	C	T	T	T	C	T	T
EA2454	998017	T	C	C	T	T	T	T	C	C	T	T	T	C	T	T
EA2454	998023	G	T	T	G	G	G	G	G	G	G	G	G	G	G	G
EA2454	998026	G	A	A	G	G	G	G	A	A	G	G	G	A	G	G
EA2454	998158	C	T	T	C	C	C	C	T	T	C	C	C	T	C	C
EA2454	998200	A	C	C	A	A	A	A	C	C	A	A	A	C	A	A
EA2454	998219	G	G	G	G	G	G	G	G	G	A	G	A	G	G	G
EA2454	998404	T	C	C	T	T	T	T	C	C	T	T	T	C	T	T
EA2454	998413	G	A	A	G	G	G	G	A	A	G	G	G	A	G	G
EA2454	998510	A	G	G	A	A	A	A	G	G	A	A	A	G	A	A
EA2454	998626	T	C	C	T	T	T	T	C	C	T	T	T	C	T	T
EA2454	998880	A	C	C	A	A	A	A	C	C	A	A	A	C	A	A
EA2454	998883	A	C	C	A	A	A	A	C	C	A	A	A	C	A	A
EA2454	998895	C	A	A	C	C	C	C	A	A	C	C	C	A	C	C
EA2454	998908	C	A	A	C	C	C	C	A	A	C	C	C	A	C	C
EA2454	999123	C	T	T	C	C	C	C	T	T	C	C	C	T	C	C
EA2454	999159	T	A	A	T	T	T	T	A	A	T	T	T	A	T	T
EA2454	999352	G	A	A	G	G	G	G	A	A	G	G	G	A	G	G
EA2454	999377	G	G	G	G	G	G	G	G	G	G	G	G	G	A	G
EA2454	999551	T	T	T	T	T	T	T	C	T	T	T	T	C	T	T
EA2454	999667	G	G	G	G	G	G	G	G	G	A	G	A	G	G	G
EA2454	999750	G	A	A	G	G	G	G	A	A	G	G	G	A	G	G
EA2454	999759	A	G	G	A	A	A	A	G	G	A	A	A	G	A	A
EA2454	999829	C	T	T	C	C	C	C	T	T	C	C	C	T	C	C
EA2454	1000365	C	T	T	C	C	C	C	T	T	C	C	C	T	C	C
EA2454	1000385	T	C	C	T	T	T	T	C	C	T	T	T	C	T	T
EA2454	1000493	G	T	T	G	G	G	G	T	T	G	G	G	T	G	G
EA2454	1000515	G	A	A	G	G	G	G	G	G	G	G	G	G	G	G
EA2454	1000664	G	A	A	G	G	G	G	A	A	G	G	G	A	G	G
EA2454	1000840	A	G	G	A	A	A	A	G	G	A	A	A	G	A	A
EA2454	1000929	G	A	A	G	G	G	G	A	A	G	G	G	A	G	G
EA2454	1001022	A	A	A	A	A	A	A	A	A	C	A	C	A	A	A
EA2454	1001211	G	G	G	G	G	G	G	G	A	G	G	G	G	G	G
EA2454	1001318	A	T	T	A	A	A	A	T	T	A	A	A	T	A	A
EA2454	1001337	G	A	A	G	G	G	G	A	A	G	G	G	A	G	G
EA2454	1001375	C	G	G	C	C	C	C	G	G	C	C	C	G	C	C
EA2454	1001396	C	C	C	C	C	C	C	C	C	T	C	T	C	C	C
EA2454	1001425	A	A	A	A	A	G	A	G	A	G	G	G	G	A	A
EA2454	1001433	C	C	C	C	C	C	C	T	C	C	C	C	T	C	C
EA2454	1001516	C	T	T	C	C	C	C	T	T	C	C	C	T	C	C
EA2454	1001557	C	T	T	C	C	C	C	T	T	C	C	C	T	C	C
EA2454	1001617	C	T	T	C	C	C	C	T	T	C	C	C	T	C	C
EA2454	1001665	C	T	T	C	C	C	C	T	T	C	C	C	T	C	C
EA2454	1001689	T	C	C	T	T	T	T	C	C	T	T	T	C	T	T
EA2454	1001692	T	C	C	T	T	T	T	C	C	T	T	T	C	T	T
EA2454	1001899	T	C	C	T	T	T	T	C	C	T	T	T	C	T	T
EA2454	1001941	A	G	G	A	A	A	A	G	G	A	A	A	G	A	A
EA2454	1001956	C	A	A	C	C	C	C	A	A	C	C	C	A	C	C
EA2454	1001959	T	C	C	T	T	T	T	C	C	T	T	T	C	T	T
EA2454	1002058	T	C	C	T	T	T	T	C	C	T	T	T	C	T	T
EA2454	1002091	A	G	G	A	A	A	A	G	G	A	A	A	G	A	A
EA2454	1002109	G	A	A	G	G	G	G	A	A	G	G	G	A	G	G
EA2454	1002145	G	A	A	G	G	G	G	A	A	G	G	G	A	G	G
EA2454	1002160	G	T	T	G	G	G	G	T	T	G	G	G	T	G	G
EA2454	1002181	A	G	G	A	A	A	A	G	G	A	A	A	G	A	A
EA2454	1002196	A	G	G	A	A	A	A	G	G	A	A	A	G	A	A
EA2454	1002217	C	T	T	C	C	C	C	T	T	C	C	C	T	C	C
EA2454	1002219	G	A	A	G	G	G	G	A	A	G	G	G	A	G	G
EA2454	1002277	T	G	G	T	T	T	T	G	G	T	T	T	G	T	T
EA2454	1002406	C	T	T	C	C	C	C	T	T	C	C	C	T	C	C
EA2454	1006922	T	A	A	T	T	T	T	A	A	T	T	T	A	T	T
EA2454	1006936	C	T	T	C	C	C	C	T	T	C	C	C	T	C	C
EA2454	1006947	T	C	C	T	T	T	T	C	C	T	T	T	C	T	T
EA2454	1006994	C	T	T	C	C	C	C	T	T	C	C	C	T	C	C
EA2454	1007029	A	G	G	A	A	A	A	G	G	A	A	A	G	A	A
EA2454	1007067	C	T	T	C	C	C	C	T	T	C	C	C	T	C	C
EA2454	1007078	G	T	T	G	G	G	G	T	T	G	G	G	T	G	G
EA2454	1007079	T	C	C	T	T	T	T	C	C	T	T	T	C	T	T
EA2454	1007373	A	C	C	A	A	A	A	C	C	A	A	A	C	A	A
EA2454	1007487	C	T	T	C	C	C	C	T	T	C	C	C	T	C	C
EA2454	1007529	T	A	A	T	T	T	T	A	A	T	T	T	A	T	T
EA2454	1007532	C	T	T	C	C	C	C	T	T	C	C	C	T	C	C
EA2454	1007819	C	T	T	C	C	C	C	C	T	C	C	C	C	C	C
EA2454	1007872	C	T	T	C	C	C	C	T	T	C	C	C	T	C	C
EA2454	1007952	T	C	C	T	T	T	T	C	C	T	T	T	C	T	T
EA2454	1007970	C	A	A	C	C	C	C	A	A	C	C	C	A	C	C
EA2454	1008024	T	C	C	T	T	T	T	C	C	T	T	T	C	T	T
EA2454	1008048	C	T	T	C	C	C	C	T	T	C	C	C	T	C	C
EA2454	1008057	A	G	G	A	A	A	A	G	G	A	A	A	G	A	A
EA2454	1008063	A	G	G	A	A	A	A	G	G	A	A	A	G	A	A
EA2454	1008219	T	C	C	T	T	T	T	C	C	T	T	T	C	T	T
EA2454	1008249	G	A	A	G	G	G	G	A	A	G	G	G	A	G	G
EA2454	1008423	T	C	C	T	T	T	T	C	C	T	T	T	C	T	T
EA2454	1008591	G	A	A	G	G	G	G	A	A	G	G	G	A	G	G
EA2454	1008918	T	C	C	T	T	T	T	C	C	T	T	T	C	T	T
EA2454	1008921	A	G	G	A	A	A	A	G	G	A	A	A	G	A	A
EA2454	1009017	T	A	A	T	T	T	T	A	A	T	T	T	A	T	T
EA2454	1009020	T	C	C	T	T	T	T	C	C	T	T	T	C	T	T
EA2454	1009047	T	C	C	T	T	T	T	C	C	T	T	T	C	T	T
EA2454	1009059	A	G	G	A	A	A	A	G	G	A	A	A	G	A	A
EA2454	1009086	A	T	T	A	A	A	A	T	T	A	A	A	T	A	A
EA2454	1009089	C	T	T	C	C	C	C	T	T	C	C	C	T	C	C
EA2454	1009092	C	T	T	C	C	C	C	T	T	C	C	C	T	C	C
EA2454	1009095	T	C	C	T	T	T	T	C	C	T	T	T	C	T	T
EA2454	1009122	C	T	T	C	C	C	C	T	T	C	C	C	T	C	C
EA2454	1009179	G	A	A	G	G	G	G	A	A	G	G	G	A	G	G
EA2454	1009381	A	G	G	A	A	A	A	G	G	A	A	A	G	A	A
EA2454	1009529	T	C	C	T	T	T	T	C	C	T	T	T	C	T	T
EA2454	1009531	A	G	G	A	A	A	A	G	G	A	A	A	G	A	A
EA2454	1009532	T	C	C	T	T	T	T	C	C	T	T	T	C	T	T
EA2454	1009649	A	G	G	A	A	A	A	G	G	A	A	A	G	A	A
EA2454	1009733	A	G	G	A	A	A	A	G	G	A	A	A	G	A	A
EA2454	1009832	A	G	G	A	A	A	A	G	G	A	A	A	G	A	A
EA2454	1009904	G	A	A	G	G	G	G	A	A	G	G	G	A	G	G
EA2454	1009970	T	C	C	T	T	T	T	C	C	T	T	T	C	T	T
EA2454	1010000	A	G	G	A	A	A	A	G	G	A	A	A	G	A	A
EA2454	1010019	A	A	A	G	A	A	A	A	A	A	A	A	A	A	A
EA2454	1010048	T	A	A	T	T	T	T	A	A	T	T	T	A	T	T
EA2454	1010054	C	T	T	C	C	C	C	T	T	C	C	C	T	C	C
EA2454	1010222	A	G	G	A	A	A	A	G	G	A	A	A	G	A	A
EA2454	1010230	A	G	G	A	A	A	A	G	G	A	A	A	G	A	A
EA2454	1010267	G	A	A	G	G	G	G	A	A	G	G	G	A	G	G
EA2454	1010270	G	A	A	G	G	G	G	A	A	G	G	G	A	G	G
EA2454	1010287	G	A	A	G	G	G	G	G	G	G	G	G	G	G	G
EA2454	1010309	A	G	G	A	A	A	A	G	G	A	A	A	G	A	A
EA2454	1010462	G	A	A	G	G	G	G	A	A	G	G	G	A	G	G
EA2454	1010594	G	A	A	G	G	G	G	A	A	G	G	G	A	G	G
EA2454	1010870	A	G	G	A	A	A	A	G	G	A	A	A	G	A	A
EA2454	1010888	G	A	A	G	G	G	G	A	A	G	G	G	A	G	G
EA2454	1010972	A	G	G	A	A	A	A	G	G	A	A	A	G	A	A
EA2454	1010978	C	T	T	C	C	C	C	T	T	C	C	C	T	C	C
EA2454	1010990	G	A	A	G	G	G	G	A	A	G	G	G	A	G	G
EA2454	1011035	G	A	A	G	G	G	G	A	A	G	G	G	A	G	G
EA2454	1011339	C	C	C	C	C	C	C	C	C	T	C	T	C	C	C
EA2454	1011647	T	A	A	T	T	T	T	A	A	T	T	T	A	T	T
EA2454	1011722	T	A	A	T	T	T	T	A	A	T	T	T	A	T	T
EA2454	1011815	G	T	T	G	G	G	G	T	T	G	G	G	T	G	G
EA2454	1012482	G	A	A	G	G	G	G	A	A	G	G	G	A	G	G
EA2454	1012525	G	A	A	G	G	G	G	A	A	G	G	G	A	G	G
EA2454	1012705	C	T	T	C	C	C	C	T	T	C	C	C	T	C	C
EA2454	1012801	C	C	C	C	C	C	C	C	C	T	C	T	C	C	C
EA2454	1012856	G	G	G	G	G	G	G	A	G	G	G	G	A	G	G
EA2454	1012876	C	T	T	C	C	C	C	T	T	C	C	C	T	C	C
EA2454	1012885	C	A	A	C	C	C	C	A	A	C	C	C	A	C	C
EA2454	1012934	G	A	A	G	G	G	G	A	A	G	G	G	A	G	G
EA2454	1013020	C	T	T	C	C	C	C	T	T	C	C	C	T	C	C
EA2454	1013065	G	T	T	G	G	G	G	T	T	G	G	G	T	G	G
EA2454	1013137	C	G	G	C	C	C	C	G	G	C	C	C	G	C	C
EA2454	1013167	A	G	G	A	A	A	A	G	G	A	A	A	G	A	A
EA2454	1013194	C	T	T	C	C	C	C	T	T	C	C	C	T	C	C
EA2454	1013197	C	G	G	C	C	C	C	G	G	C	C	C	G	C	C
EA2454	1013293	G	A	A	G	G	G	G	A	A	G	G	G	A	G	G
EA2454	1013296	A	G	G	A	A	A	A	G	G	A	A	A	G	A	A
EA2454	1013311	T	C	C	T	T	T	T	C	C	T	T	T	C	T	T
EA2454	1013338	T	C	C	T	T	T	T	C	C	T	T	T	C	T	T
EA2454	1013374	G	A	A	G	G	G	G	A	A	G	G	G	A	G	G
EA2454	1013383	G	A	A	G	G	G	G	A	A	G	G	G	A	G	G
EA2454	1013633	A	G	G	A	A	A	A	G	G	A	A	A	G	A	A
EA2454	1013771	C	T	T	C	C	C	C	T	T	C	C	C	T	C	C
EA2454	1013795	G	A	A	G	G	G	G	A	A	G	G	G	A	G	G
EA2454	1013910	C	T	T	C	C	C	C	T	T	C	C	C	T	C	C
EA2454	1013927	T	C	C	T	T	T	T	C	C	T	T	T	C	T	T
EA2454	1013990	A	G	G	A	A	A	A	G	G	A	A	A	G	A	A
EA2454	1014080	G	T	T	G	G	G	G	T	T	G	G	G	T	G	G
EA2454	1014125	C	T	T	C	C	C	C	T	T	C	C	C	T	C	C
EA2454	1014160	A	A	A	A	G	A	A	A	A	A	A	A	A	A	A
EA2454	1014236	G	A	A	G	G	G	G	A	A	G	G	G	A	G	G
EA2454	1014261	G	A	A	G	G	G	G	G	G	G	G	G	G	G	G
EA2454	1014275	G	A	A	G	G	G	G	A	A	G	G	G	A	G	G
EA2454	1014281	A	G	G	A	A	A	A	G	G	A	A	A	G	A	A
EA2454	1014320	A	G	G	A	A	A	A	G	G	A	A	A	G	A	A
EA2454	1014344	G	A	A	G	G	G	G	A	A	G	G	G	A	G	G
EA2454	1014422	T	C	C	T	T	T	T	C	C	T	T	T	C	T	T
EA2454	1014473	C	T	T	C	C	C	C	T	T	C	C	C	T	C	C
EA2454	1014500	C	G	G	C	C	C	C	G	G	C	C	C	G	C	C
EA2454	1014518	G	C	C	G	G	G	G	C	C	G	G	G	C	G	G
EA2454	1014533	G	C	C	G	G	G	G	C	C	G	G	G	C	G	G
EA2454	1014541	T	T	T	C	T	T	T	T	T	T	T	T	T	T	T
EA2454	1014572	T	C	C	T	T	T	T	C	C	T	T	T	C	T	T
EA2454	1014662	A	G	G	A	A	A	A	G	G	A	A	A	G	A	A
EA2454	1014683	G	C	C	G	G	G	G	C	C	G	G	G	C	G	G
EA2454	1014686	G	T	T	G	G	G	G	T	T	G	G	G	T	G	G
EA2454	1014824	C	T	T	C	C	C	C	T	T	C	C	C	T	C	C
EA2454	1014898	T	C	C	T	T	T	T	C	C	T	T	T	C	T	T
EA2454	1014971	T	C	C	T	T	T	T	C	C	T	T	T	C	T	T
EA2454	1015006	C	T	T	C	C	C	C	T	T	C	C	C	T	C	C
EA2454	1015113	T	C	C	T	T	T	T	C	C	T	T	T	C	T	T
EA2454	1015148	A	G	G	A	A	A	A	G	G	A	A	A	G	A	A
EA2454	1015257	C	T	T	C	C	C	C	T	T	C	C	C	T	C	C
EA2454	1015329	C	T	T	C	C	C	C	T	T	C	C	C	T	C	C
EA2454	1015530	A	G	G	A	A	A	A	G	G	A	A	A	G	A	A
EA2454	1015610	C	T	T	C	C	C	C	T	T	C	C	C	T	C	C
EA2454	1015646	C	C	C	C	C	C	C	T	C	C	C	C	T	C	C
EA2454	1015656	G	A	A	G	G	G	G	A	A	G	G	G	A	G	G
EA2454	1015668	A	T	T	A	A	A	A	T	T	A	A	A	T	A	A
EA2454	1015728	A	G	G	A	A	A	A	G	G	A	A	A	G	A	A
EA2454	1015834	A	A	A	A	A	A	A	A	A	A	G	A	A	A	A
EA2454	1015884	A	C	C	A	A	A	A	C	C	A	A	A	C	A	A
EA2454	1015887	C	T	T	C	C	C	C	T	T	C	C	C	T	C	C
EA2454	1016017	G	A	A	G	G	G	G	A	A	G	G	G	A	G	G
EA2454	1016175	A	G	G	A	A	A	A	G	G	A	A	A	G	A	A
EA2454	1016214	G	T	T	G	G	G	G	T	T	G	G	G	T	G	G
EA2454	1016337	T	G	G	T	T	T	T	G	G	T	T	T	G	T	T
EA2454	1016385	T	G	G	T	T	T	T	G	G	T	T	T	G	T	T
EA2454	1016394	G	G	G	G	G	G	G	G	A	G	G	G	G	G	G
EA2454	1016440	G	A	A	G	G	G	G	A	A	G	G	G	A	G	G
EA2454	1016442	T	C	C	T	T	T	T	C	C	T	T	T	C	T	T
EA2454	1016561	T	C	C	T	T	T	T	C	C	T	T	T	C	T	T
EA2454	1016651	G	G	G	G	G	G	G	G	G	A	G	A	G	G	G
EA2454	1016852	C	A	A	C	C	C	C	A	A	C	C	C	A	C	C
EA2454	1017030	T	C	C	T	T	T	T	C	C	T	T	T	C	T	T
EA2454	1017255	T	C	C	T	T	T	T	C	C	T	T	T	C	T	T
EA2454	1017279	T	C	C	T	T	T	T	C	C	T	T	T	C	T	T
EA2454	1017291	A	G	G	A	A	A	A	G	G	A	A	A	G	A	A
EA2454	1017315	T	C	C	T	T	T	T	C	C	T	T	T	C	T	T
EA2454	1017579	G	A	A	G	G	G	G	A	A	G	G	G	A	G	G
EA2454	1017585	C	T	T	C	C	C	C	T	T	C	C	C	T	C	C
EA2454	1017645	G	A	A	G	G	G	G	A	A	G	G	G	A	G	G
EA2454	1017684	T	A	A	T	T	T	T	A	A	T	T	T	A	T	T
EA2454	1017696	T	G	G	T	T	T	T	G	G	T	T	T	G	T	T
EA2454	1017723	C	T	T	C	C	C	C	T	T	C	C	C	T	C	C
EA2454	1017830	A	G	G	A	A	A	A	G	G	A	A	A	G	A	A
EA2454	1017843	C	A	A	C	C	C	C	A	A	C	C	C	A	C	C
EA2454	1017924	C	T	T	C	C	C	C	T	T	C	C	C	T	C	C
EA2454	1017939	G	A	A	G	G	G	G	A	A	G	G	G	A	G	G
EA2454	1017954	C	T	T	C	C	C	C	T	T	C	C	C	T	C	C
[truncated: 11,800 more rows]
