# Supplementary material for: Escherichia coli ST302: Genomic Analysis of Virulence Potential and Antimicrobial Resistance Mediated by Mobile Genetic Elements
Source: Front Microbiol. 2020 Jan 21;10:3098. doi: 10.3389/fmicb.2019.03098 (PMC6985150; doi:10.3389/fmicb.2019.03098)
Supplement: DATA S2 — ST302 SNP analysis. [file Data_Sheet_2.ZIP › SNP_Analysis/ST302_SNP/SNP_analysis/core/ST302.txt]

ID	LENGTH	ALIGNED	UNALIGNED	VARIANT	HET	MASKED	LOWCOV
BA8907-ND-ST302.out	5341018	4690286	617889	10901	3461	0	29382
BA9503-ND-ST302.out	5341018	4690654	590421	10773	3223	0	56720
CA0191-ND-ST302.out	5341018	4901305	414366	2463	3611	0	21736
CA0229-ND-ST302.out	5341018	4926455	367233	2164	2405	0	44925
EA1682-Poultry-ST302.out	5341018	4945744	265600	1586	1422	0	128252
EA2455-Poultry-ST302.out	5341018	5312525	6188	67	1006	0	21299
EA8393-Porcine-ST302.out	5341018	4552116	757759	7636	2340	0	28803
F2_18C-Porcine-ST302.out	5341018	4681788	629817	4023	1839	0	27574
FA0416-Human-ST302.out	5341018	4556943	748695	2974	4167	0	31213
FA5537-ND-ST302.out	5341018	4830146	428706	1644	5972	0	76194
IA1186-Poultry-ST302.out	5341018	4450244	749814	2687	3016	0	137944
IA1729-Canine-ST302.out	5341018	4665008	655889	6371	2416	0	17705
IA4731-Poultry-ST302.out	5341018	5007403	263499	678	5388	0	64728
IA7122-Poultry-ST302.out	5341018	5124639	130178	1282	5123	0	81078
Reference	5341018	5341018	0	0	0	0	0
