# Supplementary material for: Escherichia coli ST302: Genomic Analysis of Virulence Potential and Antimicrobial Resistance Mediated by Mobile Genetic Elements
Source: Front Microbiol. 2020 Jan 21;10:3098. doi: 10.3389/fmicb.2019.03098 (PMC6985150; doi:10.3389/fmicb.2019.03098)
Supplement: DATA S2 — ST302 SNP analysis. [file Data_Sheet_2.ZIP › SNP_Analysis/ST302_SNP/SNP_analysis/core/ST302.vcf]

##fileformat=VCFv4.2
##commandLine="snippy-core --prefix data/ST302_reads_output/core/EA2454 --ref /home/cjreid/Data/ST302_reads/EA2454.fa data/ST302_reads_output/snippyout/EA2454/BA8907-ND-ST302.out data/ST302_reads_output/snippyout/EA2454/BA9503-ND-ST302.out data/ST302_reads_output/snippyout/EA2454/CA0191-ND-ST302.out data/ST302_reads_output/snippyout/EA2454/CA0229-ND-ST302.out data/ST302_reads_output/snippyout/EA2…
##FORMAT=<ID=GT,Number=1,Type=String,Description="Genotype">
##INFO=<ID=TYPE,Number=A,Type=String,Description="Allele type: snp ins del">
##contig=<ID=EA2454,len=5341018>
#CHROM	POS	ID	REF	ALT	QUAL	FILTER	INFO	FORMAT	BA8907-ND-ST302.out	BA9503-ND-ST302.out	CA0191-ND-ST302.out	CA0229-ND-ST302.out	EA1682-Poultry-ST302.out	EA2455-Poultry-ST302.out	EA8393-Porcine-ST302.out	F2_18C-Porcine-ST302.out	FA0416-Human-ST302.out	FA5537-ND-ST302.out	IA1186-Poultry-ST302.out	IA1729-Canine-ST302.out	IA4731-Poultry-ST302.out	IA7122-Poultry-ST302.out
EA2454	617	.	C	T	.	PASS	TYPE=snp	GT	0	0	0	0	0	0	1	0	0	0	0	0	0	0
EA2454	749	.	A	G	.	PASS	TYPE=snp	GT	0	0	0	0	0	0	0	0	1	1	1	0	0	0
EA2454	977	.	T	C	.	PASS	TYPE=snp	GT	1	1	1	1	1	0	1	1	1	1	1	1	1	1
EA2454	2432	.	G	T	.	PASS	TYPE=snp	GT	1	1	0	0	0	0	0	0	0	0	0	0	0	0
EA2454	2877	.	C	A	.	PASS	TYPE=snp	GT	0	0	0	0	0	0	0	0	1	0	1	0	0	0
EA2454	3463	.	C	T	.	PASS	TYPE=snp	GT	0	0	0	0	0	0	0	0	0	1	0	0	0	0
EA2454	4901	.	T	C	.	PASS	TYPE=snp	GT	1	1	0	0	0	0	1	1	1	1	1	1	0	0
EA2454	5064	.	A	G	.	PASS	TYPE=snp	GT	0	0	0	0	0	0	0	0	1	0	1	0	0	0
EA2454	5594	.	C	A	.	PASS	TYPE=snp	GT	0	0	0	0	0	0	0	0	1	0	1	0	0	0
EA2454	5849	.	C	T	.	PASS	TYPE=snp	GT	0	0	0	0	0	0	0	1	0	0	0	0	0	0
EA2454	6107	.	C	T	.	PASS	TYPE=snp	GT	0	0	0	0	0	0	0	0	0	0	0	0	0	1
EA2454	6517	.	C	T	.	PASS	TYPE=snp	GT	0	0	0	0	0	0	0	0	0	0	0	0	1	0
EA2454	6985	.	T	C	.	PASS	TYPE=snp	GT	0	0	0	0	0	0	0	0	0	1	0	0	0	0
EA2454	8399	.	C	G	.	PASS	TYPE=snp	GT	0	0	0	0	0	0	0	0	0	1	0	0	0	0
EA2454	8504	.	C	A	.	PASS	TYPE=snp	GT	0	0	0	0	0	0	0	0	1	0	1	0	0	0
EA2454	9014	.	C	T	.	PASS	TYPE=snp	GT	0	0	0	0	0	0	0	0	0	1	0	0	0	0
EA2454	9241	.	C	T	.	PASS	TYPE=snp	GT	0	0	0	0	0	0	0	0	1	0	1	0	0	0
EA2454	9683	.	G	T	.	PASS	TYPE=snp	GT	0	0	0	0	0	0	0	0	1	0	1	0	0	0
EA2454	10139	.	A	G	.	PASS	TYPE=snp	GT	1	1	0	0	0	0	0	1	0	0	0	0	0	0
EA2454	10877	.	T	G	.	PASS	TYPE=snp	GT	0	0	1	0	0	0	0	0	0	0	0	0	0	0
EA2454	11382	.	A	G	.	PASS	TYPE=snp	GT	1	1	1	1	1	0	1	1	1	1	1	1	1	0
EA2454	11615	.	T	G	.	PASS	TYPE=snp	GT	1	1	0	0	0	0	1	1	1	1	1	1	0	0
EA2454	11847	.	G	A	.	PASS	TYPE=snp	GT	0	0	1	0	0	0	0	0	0	0	0	0	0	0
EA2454	16529	.	C	T	.	PASS	TYPE=snp	GT	0	0	0	0	0	0	0	0	1	0	1	0	0	0
EA2454	18559	.	G	T	.	PASS	TYPE=snp	GT	1	1	0	0	0	0	0	0	0	0	0	0	0	0
EA2454	18716	.	G	A	.	PASS	TYPE=snp	GT	0	0	0	0	0	0	0	0	1	0	1	0	0	0
EA2454	18822	.	A	G	.	PASS	TYPE=snp	GT	0	0	0	0	0	0	0	0	0	0	0	1	0	0
EA2454	18933	.	C	T	.	PASS	TYPE=snp	GT	0	0	0	0	0	0	0	0	0	1	0	0	0	0
EA2454	19283	.	C	T	.	PASS	TYPE=snp	GT	0	0	0	0	0	0	0	0	1	0	1	0	0	0
EA2454	19381	.	C	T	.	PASS	TYPE=snp	GT	0	0	0	0	0	0	1	0	0	0	0	1	0	0
EA2454	22484	.	C	T	.	PASS	TYPE=snp	GT	0	0	0	0	0	0	1	0	0	0	0	1	0	0
EA2454	22955	.	G	A	.	PASS	TYPE=snp	GT	0	0	0	0	0	0	1	0	0	0	0	1	0	0
EA2454	24420	.	T	G	.	PASS	TYPE=snp	GT	1	1	0	0	0	0	1	1	1	1	1	1	0	0
EA2454	25194	.	A	C	.	PASS	TYPE=snp	GT	0	0	0	0	0	0	0	0	0	1	0	0	0	0
EA2454	25719	.	T	C	.	PASS	TYPE=snp	GT	1	1	1	1	1	0	1	1	1	1	1	1	1	0
EA2454	26663	.	C	T	.	PASS	TYPE=snp	GT	0	0	0	0	1	0	0	0	0	0	0	0	0	0
EA2454	28509	.	G	A	.	PASS	TYPE=snp	GT	0	0	0	0	0	0	0	0	0	1	0	0	0	0
EA2454	29082	.	A	T	.	PASS	TYPE=snp	GT	0	0	0	0	0	0	1	0	0	0	0	1	0	0
EA2454	30275	.	C	T	.	PASS	TYPE=snp	GT	0	0	0	0	0	0	0	0	1	0	1	0	0	0
EA2454	30862	.	A	C	.	PASS	TYPE=snp	GT	0	0	0	0	0	0	0	0	0	0	0	0	1	0
EA2454	31045	.	G	T	.	PASS	TYPE=snp	GT	0	0	0	0	0	0	0	0	0	1	0	0	0	0
EA2454	31143	.	G	A	.	PASS	TYPE=snp	GT	0	0	0	0	0	0	0	0	0	1	0	0	0	0
EA2454	31644	.	C	T	.	PASS	TYPE=snp	GT	0	0	0	0	0	0	0	0	0	1	0	0	0	0
EA2454	32987	.	C	T	.	PASS	TYPE=snp	GT	0	0	0	0	0	0	0	1	0	0	0	0	0	0
EA2454	33245	.	G	T	.	PASS	TYPE=snp	GT	0	0	0	0	0	0	0	0	1	0	1	0	0	0
EA2454	34038	.	C	T	.	PASS	TYPE=snp	GT	0	0	0	0	0	0	0	1	0	0	0	0	0	0
EA2454	34322	.	C	A	.	PASS	TYPE=snp	GT	0	0	0	0	0	0	0	0	0	1	0	0	0	0
EA2454	34494	.	T	C	.	PASS	TYPE=snp	GT	1	1	1	1	1	0	1	1	1	1	1	1	1	1
EA2454	36375	.	C	A	.	PASS	TYPE=snp	GT	1	1	1	1	1	0	1	1	1	1	1	1	1	0
EA2454	36724	.	G	T	.	PASS	TYPE=snp	GT	1	1	0	0	0	0	0	0	0	0	0	0	0	0
EA2454	36951	.	T	G	.	PASS	TYPE=snp	GT	0	0	0	0	0	0	0	0	1	0	1	0	0	0
EA2454	37550	.	G	T	.	PASS	TYPE=snp	GT	1	1	0	0	0	0	1	1	0	0	0	1	0	0
EA2454	37757	.	G	A	.	PASS	TYPE=snp	GT	0	0	0	0	0	0	0	0	1	0	1	0	0	0
EA2454	37987	.	T	C	.	PASS	TYPE=snp	GT	1	1	1	1	1	0	1	1	1	1	1	1	1	0
EA2454	37993	.	A	G	.	PASS	TYPE=snp	GT	1	1	0	0	0	0	0	0	0	0	0	0	0	0
EA2454	38902	.	A	G	.	PASS	TYPE=snp	GT	0	0	0	0	0	0	1	0	0	0	0	1	0	0
EA2454	39065	.	T	C	.	PASS	TYPE=snp	GT	0	0	0	1	1	0	0	0	0	0	0	0	1	0
EA2454	39850	.	A	C	.	PASS	TYPE=snp	GT	0	0	1	0	0	0	0	0	0	0	0	0	0	0
EA2454	41857	.	T	C	.	PASS	TYPE=snp	GT	0	0	0	0	0	0	0	0	1	0	1	0	0	0
EA2454	41873	.	G	T	.	PASS	TYPE=snp	GT	0	0	0	0	0	0	1	0	0	0	0	1	0	0
EA2454	42059	.	T	C	.	PASS	TYPE=snp	GT	0	0	0	0	0	0	0	1	0	0	0	0	0	0
EA2454	42905	.	T	G	.	PASS	TYPE=snp	GT	0	0	0	0	0	0	1	0	0	0	0	1	0	0
EA2454	42911	.	C	A	.	PASS	TYPE=snp	GT	0	0	0	0	0	0	0	0	0	0	0	1	0	0
EA2454	42949	.	T	G	.	PASS	TYPE=snp	GT	0	0	0	0	0	0	0	0	0	1	0	0	0	0
EA2454	43068	.	G	C	.	PASS	TYPE=snp	GT	0	0	0	0	0	0	0	0	0	1	0	0	0	0
EA2454	44496	.	G	T	.	PASS	TYPE=snp	GT	0	0	0	0	0	0	0	0	1	0	1	0	0	0
EA2454	44498	.	A	C	.	PASS	TYPE=snp	GT	0	0	0	0	0	0	1	0	0	0	0	0	0	0
EA2454	45773	.	C	T	.	PASS	TYPE=snp	GT	0	0	0	1	0	0	0	0	0	0	0	0	0	0
EA2454	45787	.	A	G	.	PASS	TYPE=snp	GT	0	0	0	0	0	0	0	0	0	0	1	0	0	0
EA2454	48190	.	C	A	.	PASS	TYPE=snp	GT	1	1	0	0	0	0	1	1	1	1	1	1	0	0
EA2454	48201	.	T	A	.	PASS	TYPE=snp	GT	0	0	0	0	0	0	0	0	1	0	1	0	0	0
EA2454	49192	.	T	G	.	PASS	TYPE=snp	GT	0	0	0	0	0	0	0	0	1	1	1	0	0	0
EA2454	49672	.	C	A	.	PASS	TYPE=snp	GT	0	0	0	0	0	0	1	0	0	0	0	1	0	0
EA2454	50495	.	C	T	.	PASS	TYPE=snp	GT	0	0	0	0	0	0	0	0	1	0	1	0	0	0
EA2454	50851	.	A	C	.	PASS	TYPE=snp	GT	1	1	0	0	0	0	1	1	1	1	1	1	0	0
EA2454	51400	.	C	T	.	PASS	TYPE=snp	GT	0	0	0	0	0	0	0	0	1	0	1	0	0	0
EA2454	51521	.	C	T	.	PASS	TYPE=snp	GT	0	0	0	0	0	0	1	0	0	0	0	1	0	0
EA2454	52423	.	A	C	.	PASS	TYPE=snp	GT	0	0	1	1	1	0	0	0	0	0	0	0	1	0
EA2454	53157	.	C	T	.	PASS	TYPE=snp	GT	1	1	0	0	0	0	1	1	1	1	1	1	0	0
EA2454	53772	.	T	G	.	PASS	TYPE=snp	GT	0	0	0	0	0	0	1	0	0	0	0	1	0	0
EA2454	54525	.	T	A	.	PASS	TYPE=snp	GT	0	0	0	0	0	0	0	0	1	0	1	0	0	0
EA2454	54840	.	C	T	.	PASS	TYPE=snp	GT	0	0	0	0	0	0	0	0	0	1	0	0	0	0
EA2454	54992	.	T	C	.	PASS	TYPE=snp	GT	1	1	0	0	0	0	1	1	1	1	1	1	0	0
EA2454	55249	.	C	A	.	PASS	TYPE=snp	GT	0	0	0	0	0	0	0	1	0	0	0	0	0	0
EA2454	56257	.	C	T	.	PASS	TYPE=snp	GT	0	0	1	0	0	0	0	0	0	0	0	0	0	0
EA2454	56269	.	T	C	.	PASS	TYPE=snp	GT	0	0	0	0	0	0	0	0	1	0	1	0	0	0
EA2454	56628	.	A	C	.	PASS	TYPE=snp	GT	1	1	1	1	1	0	1	1	1	1	1	1	1	0
EA2454	57116	.	A	T	.	PASS	TYPE=snp	GT	0	0	0	1	1	0	0	0	0	0	0	0	1	0
EA2454	58152	.	T	C	.	PASS	TYPE=snp	GT	1	1	1	1	1	0	1	1	1	1	1	1	1	0
EA2454	59415	.	C	T	.	PASS	TYPE=snp	GT	0	0	0	0	0	0	0	0	1	0	1	0	0	0
EA2454	59954	.	T	A	.	PASS	TYPE=snp	GT	0	0	0	0	0	0	0	0	1	0	1	0	0	0
EA2454	59959	.	G	T	.	PASS	TYPE=snp	GT	1	1	0	0	0	0	1	1	0	0	0	1	0	0
EA2454	60871	.	C	T	.	PASS	TYPE=snp	GT	0	0	1	0	0	0	0	0	0	0	0	0	0	0
EA2454	61069	.	A	T	.	PASS	TYPE=snp	GT	1	1	0	0	0	0	0	0	0	0	0	0	0	0
EA2454	61315	.	T	G	.	PASS	TYPE=snp	GT	1	1	0	0	0	0	0	0	0	0	0	0	0	0
EA2454	61686	.	C	A	.	PASS	TYPE=snp	GT	0	0	0	0	0	0	0	0	1	0	1	0	0	0
EA2454	61856	.	A	G	.	PASS	TYPE=snp	GT	0	0	0	0	0	0	0	0	1	0	1	0	0	0
EA2454	63271	.	C	T	.	PASS	TYPE=snp	GT	0	0	0	0	0	0	0	0	0	1	0	0	0	0
EA2454	64224	.	C	A	.	PASS	TYPE=snp	GT	0	0	0	0	0	0	0	1	0	0	0	0	0	0
EA2454	64676	.	G	A	.	PASS	TYPE=snp	GT	0	0	1	0	0	0	0	0	0	0	0	0	0	0
EA2454	65206	.	G	A	.	PASS	TYPE=snp	GT	0	0	0	0	0	0	1	0	0	0	0	1	0	0
EA2454	67315	.	A	C	.	PASS	TYPE=snp	GT	1	1	1	1	1	0	1	1	1	1	1	1	1	1
EA2454	68202	.	A	G	.	PASS	TYPE=snp	GT	0	0	0	0	0	0	0	0	1	1	1	0	0	0
EA2454	68735	.	A	T	.	PASS	TYPE=snp	GT	0	0	0	0	0	0	0	0	1	0	1	0	0	0
EA2454	68937	.	G	A	.	PASS	TYPE=snp	GT	0	0	0	1	0	0	0	0	0	0	0	0	0	0
EA2454	69114	.	A	C	.	PASS	TYPE=snp	GT	1	1	0	0	0	0	0	1	0	0	0	0	0	0
EA2454	69374	.	A	T	.	PASS	TYPE=snp	GT	0	0	0	0	0	0	0	0	1	0	1	0	0	0
EA2454	69595	.	A	G	.	PASS	TYPE=snp	GT	1	1	1	1	1	0	1	1	1	1	1	1	1	0
EA2454	71773	.	G	A	.	PASS	TYPE=snp	GT	0	0	0	0	0	0	0	1	0	0	0	0	0	0
EA2454	71896	.	C	T	.	PASS	TYPE=snp	GT	1	1	0	0	0	0	1	1	0	0	0	1	0	0
EA2454	73302	.	G	A	.	PASS	TYPE=snp	GT	0	0	0	0	0	0	0	0	1	0	1	0	0	0
EA2454	73628	.	T	G	.	PASS	TYPE=snp	GT	0	0	0	0	0	0	0	0	1	0	1	0	0	0
EA2454	74671	.	A	G	.	PASS	TYPE=snp	GT	1	1	0	0	0	0	1	1	1	1	1	1	0	0
EA2454	74952	.	G	T	.	PASS	TYPE=snp	GT	0	0	1	1	1	0	0	0	0	0	0	0	1	0
EA2454	75553	.	G	A	.	PASS	TYPE=snp	GT	0	0	0	0	0	0	0	0	1	0	1	0	0	0
EA2454	76545	.	G	A	.	PASS	TYPE=snp	GT	0	0	0	0	0	0	0	0	1	0	1	0	0	0
EA2454	77252	.	A	C	.	PASS	TYPE=snp	GT	1	1	0	0	0	0	0	1	0	0	0	0	0	0
EA2454	77346	.	C	T	.	PASS	TYPE=snp	GT	0	0	0	0	0	0	0	0	1	0	1	0	0	0
EA2454	77443	.	C	T	.	PASS	TYPE=snp	GT	0	0	1	0	0	0	0	0	0	0	0	0	0	0
EA2454	78031	.	C	A	.	PASS	TYPE=snp	GT	0	0	1	0	0	0	0	0	0	0	0	0	0	0
EA2454	78608	.	G	A	.	PASS	TYPE=snp	GT	0	0	1	0	0	0	0	0	0	0	0	0	0	0
EA2454	79118	.	G	A	.	PASS	TYPE=snp	GT	0	0	0	0	0	0	0	0	0	1	0	0	0	0
EA2454	80371	.	C	T	.	PASS	TYPE=snp	GT	1	1	0	0	0	0	1	1	0	0	0	1	0	0
EA2454	80560	.	C	T	.	PASS	TYPE=snp	GT	0	0	0	0	1	0	0	0	0	0	0	0	0	0
EA2454	81213	.	G	T	.	PASS	TYPE=snp	GT	0	0	0	0	0	0	0	0	0	0	0	1	0	0
EA2454	81449	.	T	G	.	PASS	TYPE=snp	GT	0	0	0	0	0	0	0	0	0	0	0	0	0	1
EA2454	82347	.	T	C	.	PASS	TYPE=snp	GT	0	0	0	0	0	0	0	1	0	0	0	0	0	0
EA2454	82631	.	G	C	.	PASS	TYPE=snp	GT	1	1	0	0	0	0	0	0	0	0	0	0	0	0
EA2454	83654	.	C	A	.	PASS	TYPE=snp	GT	0	0	0	0	0	0	0	0	1	0	1	0	0	0
EA2454	83706	.	C	T	.	PASS	TYPE=snp	GT	0	0	0	0	0	0	0	0	1	0	1	0	0	0
EA2454	84163	.	T	A	.	PASS	TYPE=snp	GT	0	0	1	0	0	0	0	0	0	0	0	0	0	0
EA2454	84557	.	T	G	.	PASS	TYPE=snp	GT	1	1	1	1	1	0	1	1	1	1	1	1	1	0
EA2454	85537	.	G	A	.	PASS	TYPE=snp	GT	0	0	0	1	0	0	0	0	0	0	0	0	0	0
EA2454	86028	.	C	T	.	PASS	TYPE=snp	GT	0	0	0	0	0	0	1	0	0	0	0	1	0	0
EA2454	86305	.	G	T	.	PASS	TYPE=snp	GT	0	0	0	0	0	0	1	0	0	0	0	1	0	0
EA2454	90096	.	T	A	.	PASS	TYPE=snp	GT	0	0	0	0	0	0	0	0	1	0	1	0	0	0
EA2454	91235	.	T	C	.	PASS	TYPE=snp	GT	0	0	0	0	0	0	0	0	1	0	1	0	0	0
EA2454	92015	.	G	A	.	PASS	TYPE=snp	GT	0	0	0	0	0	0	0	0	1	0	1	0	0	0
EA2454	93093	.	A	C	.	PASS	TYPE=snp	GT	0	0	0	0	0	0	0	0	1	0	1	0	0	0
EA2454	93133	.	A	C	.	PASS	TYPE=snp	GT	0	0	0	0	0	0	0	0	1	0	1	0	0	0
EA2454	93722	.	C	T	.	PASS	TYPE=snp	GT	0	0	0	0	0	0	0	0	0	0	0	1	0	0
EA2454	94250	.	T	C	.	PASS	TYPE=snp	GT	0	0	0	0	0	0	0	0	1	1	1	0	0	0
EA2454	94636	.	C	T	.	PASS	TYPE=snp	GT	0	0	0	0	0	0	0	0	0	0	0	1	0	0
EA2454	94795	.	G	A	.	PASS	TYPE=snp	GT	0	0	1	0	0	0	0	0	0	0	0	0	0	0
EA2454	95361	.	C	T	.	PASS	TYPE=snp	GT	0	0	0	0	0	0	0	0	0	1	0	0	0	0
EA2454	96463	.	C	T	.	PASS	TYPE=snp	GT	0	0	0	0	0	0	0	0	1	0	1	0	0	0
EA2454	96697	.	T	C	.	PASS	TYPE=snp	GT	1	1	0	0	0	0	0	0	0	0	0	0	0	0
EA2454	97055	.	C	A	.	PASS	TYPE=snp	GT	0	0	0	0	0	0	0	0	1	0	1	0	0	0
EA2454	97248	.	A	C	.	PASS	TYPE=snp	GT	1	1	0	0	0	0	0	0	0	0	0	0	0	0
EA2454	97312	.	C	T	.	PASS	TYPE=snp	GT	0	0	0	0	0	0	0	0	0	1	0	0	0	0
EA2454	97811	.	C	T	.	PASS	TYPE=snp	GT	0	0	0	0	0	0	0	0	1	0	1	0	0	0
EA2454	98200	.	A	G	.	PASS	TYPE=snp	GT	0	0	0	0	0	0	1	0	0	0	0	1	0	0
EA2454	99010	.	C	T	.	PASS	TYPE=snp	GT	0	0	1	0	0	0	0	0	0	0	0	0	0	0
EA2454	99180	.	G	T	.	PASS	TYPE=snp	GT	0	0	0	0	0	0	0	0	1	0	1	0	0	0
EA2454	99924	.	C	T	.	PASS	TYPE=snp	GT	1	1	0	0	0	0	1	1	0	0	0	1	0	0
EA2454	100572	.	C	G	.	PASS	TYPE=snp	GT	0	0	1	0	0	0	0	0	0	0	0	0	0	0
EA2454	100587	.	G	T	.	PASS	TYPE=snp	GT	0	0	0	0	0	0	0	0	0	0	0	1	0	0
EA2454	101541	.	A	G	.	PASS	TYPE=snp	GT	0	0	0	0	0	0	0	0	1	0	1	0	0	0
EA2454	101724	.	A	C	.	PASS	TYPE=snp	GT	1	1	0	0	0	0	1	1	0	0	0	1	0	0
EA2454	102014	.	A	T	.	PASS	TYPE=snp	GT	0	0	0	1	1	0	0	0	0	0	0	0	1	0
EA2454	102030	.	T	C	.	PASS	TYPE=snp	GT	1	1	0	0	0	0	0	0	0	0	0	0	0	0
EA2454	103004	.	T	G	.	PASS	TYPE=snp	GT	1	1	0	0	0	0	0	0	0	0	0	0	0	0
EA2454	103925	.	A	G	.	PASS	TYPE=snp	GT	0	0	0	0	0	0	0	1	0	0	0	0	0	0
EA2454	104045	.	G	A	.	PASS	TYPE=snp	GT	0	0	0	0	0	0	0	0	1	0	1	0	0	0
EA2454	105325	.	G	T	.	PASS	TYPE=snp	GT	0	0	0	0	0	0	0	0	0	1	0	0	0	0
EA2454	105773	.	A	G	.	PASS	TYPE=snp	GT	0	0	0	0	0	0	1	0	0	0	0	1	0	0
EA2454	106273	.	C	T	.	PASS	TYPE=snp	GT	0	0	0	0	0	0	0	0	1	0	1	0	0	0
EA2454	107456	.	C	A	.	PASS	TYPE=snp	GT	0	0	0	1	0	0	0	0	0	0	0	0	0	0
EA2454	107466	.	C	T	.	PASS	TYPE=snp	GT	0	0	1	0	0	0	0	0	0	0	0	0	0	0
EA2454	108354	.	C	T	.	PASS	TYPE=snp	GT	0	0	0	1	0	0	0	0	0	0	0	0	0	0
EA2454	108720	.	C	T	.	PASS	TYPE=snp	GT	0	0	0	1	0	0	0	0	0	0	0	0	0	0
EA2454	109128	.	C	T	.	PASS	TYPE=snp	GT	0	0	0	0	1	0	0	0	0	0	0	0	0	0
EA2454	109299	.	G	A	.	PASS	TYPE=snp	GT	0	0	0	0	0	0	0	0	0	1	0	0	0	0
EA2454	109606	.	G	A	.	PASS	TYPE=snp	GT	0	0	0	0	0	0	0	0	0	1	0	0	0	0
EA2454	110963	.	C	T	.	PASS	TYPE=snp	GT	0	0	0	0	0	0	0	0	0	1	0	0	0	0
EA2454	111773	.	C	G	.	PASS	TYPE=snp	GT	1	1	1	1	1	0	1	1	1	1	1	1	1	1
EA2454	112319	.	G	A	.	PASS	TYPE=snp	GT	0	0	0	0	0	0	0	0	0	1	0	0	0	0
EA2454	112602	.	C	T	.	PASS	TYPE=snp	GT	0	0	0	0	0	0	0	0	1	0	1	0	0	0
EA2454	112615	.	T	G	.	PASS	TYPE=snp	GT	0	0	0	0	0	0	0	1	0	0	0	0	0	0
EA2454	113186	.	C	T	.	PASS	TYPE=snp	GT	1	1	0	0	0	0	0	1	0	0	0	0	0	0
EA2454	114259	.	G	A	.	PASS	TYPE=snp	GT	0	0	0	0	0	0	0	0	1	0	1	0	0	0
EA2454	116260	.	C	T	.	PASS	TYPE=snp	GT	0	0	0	0	0	0	0	0	1	0	1	0	0	0
EA2454	116969	.	C	T	.	PASS	TYPE=snp	GT	1	1	0	0	0	0	0	1	0	0	0	0	0	0
EA2454	117419	.	T	C	.	PASS	TYPE=snp	GT	0	0	0	0	0	0	0	0	1	0	1	0	0	0
EA2454	117807	.	C	T	.	PASS	TYPE=snp	GT	0	0	0	0	0	0	0	1	0	0	0	0	0	0
EA2454	119029	.	A	G	.	PASS	TYPE=snp	GT	1	1	0	0	0	0	1	1	0	0	0	1	0	0
EA2454	120366	.	C	A	.	PASS	TYPE=snp	GT	0	0	0	0	0	0	0	1	0	0	0	0	0	0
EA2454	123376	.	G	A	.	PASS	TYPE=snp	GT	1	1	0	0	0	0	1	1	0	0	0	1	0	0
EA2454	124825	.	G	A	.	PASS	TYPE=snp	GT	0	0	1	0	0	0	0	0	0	0	0	0	0	0
EA2454	124865	.	T	C	.	PASS	TYPE=snp	GT	1	1	1	1	1	0	1	1	1	1	1	1	1	0
EA2454	126504	.	A	G	.	PASS	TYPE=snp	GT	1	1	0	0	0	0	1	1	1	1	1	1	0	0
EA2454	126514	.	G	A	.	PASS	TYPE=snp	GT	0	0	1	0	0	0	0	0	0	0	0	0	0	0
EA2454	128072	.	A	G	.	PASS	TYPE=snp	GT	0	0	0	0	0	0	0	1	0	0	0	0	0	0
EA2454	128903	.	A	G	.	PASS	TYPE=snp	GT	0	0	0	0	0	0	1	0	0	0	0	1	0	0
EA2454	130629	.	C	T	.	PASS	TYPE=snp	GT	0	0	0	0	0	0	0	0	0	0	0	0	1	0
EA2454	131613	.	A	G	.	PASS	TYPE=snp	GT	1	1	1	1	1	0	1	1	1	1	1	1	1	0
EA2454	131667	.	G	A	.	PASS	TYPE=snp	GT	1	1	0	0	0	0	1	1	1	1	1	1	0	0
EA2454	131768	.	G	A	.	PASS	TYPE=snp	GT	1	1	0	0	0	0	0	1	0	0	0	0	0	0
EA2454	132114	.	T	C	.	PASS	TYPE=snp	GT	0	0	0	0	0	0	0	1	0	0	0	0	0	0
EA2454	133953	.	C	T	.	PASS	TYPE=snp	GT	0	0	0	0	0	0	0	0	1	0	1	0	0	0
EA2454	134246	.	C	A	.	PASS	TYPE=snp	GT	0	0	0	0	0	0	0	0	0	1	0	0	0	0
EA2454	134431	.	C	T	.	PASS	TYPE=snp	GT	1	1	0	0	0	0	0	0	0	0	0	0	0	0
EA2454	134828	.	A	C	.	PASS	TYPE=snp	GT	0	0	0	0	0	0	0	0	1	1	1	0	0	0
EA2454	137550	.	C	T	.	PASS	TYPE=snp	GT	0	0	0	0	0	0	0	0	0	1	0	0	0	0
EA2454	138031	.	A	C	.	PASS	TYPE=snp	GT	0	0	0	0	0	0	0	0	0	1	0	0	0	0
EA2454	140343	.	T	C	.	PASS	TYPE=snp	GT	0	0	0	1	0	0	0	0	0	0	0	0	0	0
EA2454	140951	.	T	G	.	PASS	TYPE=snp	GT	1	1	1	1	1	0	1	1	1	1	1	1	1	0
EA2454	142815	.	C	T	.	PASS	TYPE=snp	GT	0	0	0	0	0	0	0	0	0	1	0	0	0	0
EA2454	144883	.	G	A	.	PASS	TYPE=snp	GT	0	0	0	0	0	0	0	0	0	1	0	0	0	0
EA2454	145428	.	T	C	.	PASS	TYPE=snp	GT	1	1	0	0	0	0	1	1	1	1	1	1	0	0
EA2454	145887	.	C	T	.	PASS	TYPE=snp	GT	0	0	1	0	0	0	0	0	0	0	0	0	0	0
EA2454	146087	.	A	C	.	PASS	TYPE=snp	GT	1	1	1	1	1	0	1	1	1	1	1	1	1	0
EA2454	146572	.	A	G	.	PASS	TYPE=snp	GT	0	0	0	0	0	0	0	0	1	0	1	0	0	0
EA2454	147126	.	C	T	.	PASS	TYPE=snp	GT	0	0	0	0	0	0	0	0	1	0	1	0	0	0
EA2454	147861	.	C	T	.	PASS	TYPE=snp	GT	0	0	0	0	0	0	0	1	0	0	0	0	0	0
EA2454	150693	.	A	C	.	PASS	TYPE=snp	GT	0	0	0	0	0	0	0	0	0	1	0	0	0	0
EA2454	152345	.	G	T	.	PASS	TYPE=snp	GT	0	0	0	0	0	0	1	0	0	0	0	0	0	0
EA2454	153405	.	C	T	.	PASS	TYPE=snp	GT	0	0	0	0	0	0	0	0	1	0	1	0	0	0
EA2454	156220	.	T	G	.	PASS	TYPE=snp	GT	0	0	0	0	0	0	0	0	1	0	1	0	0	0
EA2454	157367	.	G	A	.	PASS	TYPE=snp	GT	0	0	0	0	0	0	0	0	1	0	1	0	0	0
EA2454	158053	.	G	A	.	PASS	TYPE=snp	GT	0	0	1	0	0	0	0	0	0	0	0	0	0	0
EA2454	158307	.	G	A	.	PASS	TYPE=snp	GT	0	0	0	0	0	0	0	0	0	1	0	0	0	0
EA2454	158449	.	C	T	.	PASS	TYPE=snp	GT	0	0	1	0	0	0	0	0	0	0	0	0	0	0
EA2454	158592	.	T	G	.	PASS	TYPE=snp	GT	1	1	0	0	0	0	0	0	0	0	0	0	0	0
EA2454	158623	.	C	T	.	PASS	TYPE=snp	GT	0	0	0	0	0	0	0	0	1	0	1	0	0	0
EA2454	160440	.	A	C	.	PASS	TYPE=snp	GT	0	0	0	0	0	0	0	1	0	0	0	0	0	0
EA2454	161661	.	C	T	.	PASS	TYPE=snp	GT	0	0	0	0	0	0	0	0	1	0	1	0	0	0
EA2454	162974	.	G	T	.	PASS	TYPE=snp	GT	0	0	1	1	1	0	0	0	0	0	0	0	1	0
EA2454	164297	.	C	T	.	PASS	TYPE=snp	GT	0	0	0	0	0	0	0	0	1	0	1	0	0	0
EA2454	164371	.	T	A	.	PASS	TYPE=snp	GT	0	0	1	1	1	0	0	0	0	0	0	0	1	0
EA2454	165649	.	C	T	.	PASS	TYPE=snp	GT	0	0	0	0	0	0	0	0	1	0	1	0	0	0
EA2454	165798	.	T	A	.	PASS	TYPE=snp	GT	1	1	0	0	0	0	0	0	0	0	0	0	0	0
EA2454	166408	.	T	C	.	PASS	TYPE=snp	GT	0	0	0	0	0	0	0	1	0	0	0	0	0	0
EA2454	166894	.	T	G	.	PASS	TYPE=snp	GT	0	0	0	0	0	0	0	0	0	0	0	1	0	0
EA2454	167773	.	G	T	.	PASS	TYPE=snp	GT	0	0	0	0	0	0	0	0	0	0	0	1	0	0
EA2454	168669	.	T	A	.	PASS	TYPE=snp	GT	0	0	0	0	0	0	0	0	0	1	0	0	0	0
EA2454	169390	.	C	T	.	PASS	TYPE=snp	GT	0	0	1	0	0	0	0	0	0	0	0	0	0	0
EA2454	170333	.	C	T	.	PASS	TYPE=snp	GT	0	0	0	0	0	0	0	0	1	0	1	0	0	0
EA2454	170380	.	G	C	.	PASS	TYPE=snp	GT	0	0	0	0	0	0	0	1	0	0	0	0	0	0
EA2454	170928	.	C	T	.	PASS	TYPE=snp	GT	0	0	0	0	0	0	0	1	0	0	0	0	0	0
EA2454	171513	.	G	A	.	PASS	TYPE=snp	GT	0	0	0	0	0	0	1	0	0	0	0	0	0	0
EA2454	171781	.	C	T	.	PASS	TYPE=snp	GT	0	0	0	0	0	0	0	0	1	0	1	0	0	0
EA2454	172664	.	C	T	.	PASS	TYPE=snp	GT	1	1	0	0	0	0	1	1	0	0	0	1	0	0
EA2454	173304	.	C	T	.	PASS	TYPE=snp	GT	0	0	0	0	0	0	1	0	0	0	0	1	0	0
EA2454	173739	.	C	T	.	PASS	TYPE=snp	GT	1	1	0	0	0	0	0	0	0	0	0	0	0	0
EA2454	174420	.	A	G	.	PASS	TYPE=snp	GT	1	1	1	1	1	0	1	1	1	1	1	1	1	0
EA2454	175505	.	G	T	.	PASS	TYPE=snp	GT	0	0	0	0	0	0	0	0	1	0	1	0	0	0
EA2454	176813	.	G	A	.	PASS	TYPE=snp	GT	0	0	0	0	0	0	0	0	1	0	1	0	0	0
EA2454	177375	.	G	A	.	PASS	TYPE=snp	GT	0	0	0	0	0	0	0	0	0	1	0	0	0	0
EA2454	177572	.	C	T	.	PASS	TYPE=snp	GT	0	0	0	0	0	0	0	1	0	0	0	0	0	0
EA2454	177774	.	C	T	.	PASS	TYPE=snp	GT	0	0	0	0	0	0	0	0	1	0	1	0	0	0
EA2454	178258	.	C	T	.	PASS	TYPE=snp	GT	0	0	1	0	0	0	0	0	0	0	0	0	0	0
EA2454	178495	.	C	T	.	PASS	TYPE=snp	GT	0	0	0	0	0	0	0	0	1	0	1	0	0	0
EA2454	181477	.	G	T	.	PASS	TYPE=snp	GT	0	0	0	0	0	0	1	0	0	0	0	1	0	0
EA2454	181896	.	T	A	.	PASS	TYPE=snp	GT	0	0	0	0	0	0	0	0	0	0	1	0	0	0
EA2454	181904	.	G	A	.	PASS	TYPE=snp	GT	0	0	1	0	0	0	0	0	0	0	0	0	0	0
EA2454	182299	.	A	C	.	PASS	TYPE=snp	GT	0	0	0	0	0	0	1	0	0	0	0	0	0	0
EA2454	183092	.	C	T	.	PASS	TYPE=snp	GT	0	0	0	0	0	0	0	1	0	0	0	0	0	0
EA2454	183811	.	G	A	.	PASS	TYPE=snp	GT	0	0	0	0	0	0	0	0	0	1	0	0	0	0
EA2454	184074	.	A	C	.	PASS	TYPE=snp	GT	0	0	0	0	0	0	0	0	1	0	1	0	0	0
EA2454	186323	.	C	A	.	PASS	TYPE=snp	GT	0	0	0	0	0	0	0	1	0	0	0	0	0	0
EA2454	186550	.	T	C	.	PASS	TYPE=snp	GT	1	1	1	1	1	0	1	1	1	1	1	1	1	0
EA2454	187144	.	T	C	.	PASS	TYPE=snp	GT	0	0	0	0	0	0	0	0	0	1	0	0	0	0
EA2454	187172	.	C	A	.	PASS	TYPE=snp	GT	0	0	0	0	0	0	0	0	1	0	1	0	0	0
EA2454	187820	.	C	T	.	PASS	TYPE=snp	GT	0	0	1	0	0	0	0	0	0	0	0	0	0	0
EA2454	187941	.	A	G	.	PASS	TYPE=snp	GT	1	1	0	0	0	0	1	1	1	1	1	1	0	0
EA2454	188717	.	C	T	.	PASS	TYPE=snp	GT	0	0	0	0	1	0	0	0	0	0	0	0	0	0
EA2454	188826	.	C	T	.	PASS	TYPE=snp	GT	0	0	0	0	0	0	0	0	0	0	0	1	0	0
EA2454	190313	.	T	C	.	PASS	TYPE=snp	GT	1	1	1	1	1	0	1	1	1	1	1	1	1	0
EA2454	190389	.	C	T	.	PASS	TYPE=snp	GT	0	0	0	0	0	0	0	0	0	1	0	0	0	0
EA2454	190570	.	T	G	.	PASS	TYPE=snp	GT	0	0	0	0	0	0	0	1	0	0	0	0	0	0
EA2454	190604	.	C	T	.	PASS	TYPE=snp	GT	0	0	0	0	0	0	0	0	1	0	1	0	0	0
EA2454	190823	.	G	A	.	PASS	TYPE=snp	GT	0	0	0	0	0	0	0	0	1	0	1	0	0	0
EA2454	191951	.	G	A	.	PASS	TYPE=snp	GT	0	0	0	0	0	0	0	0	0	1	0	0	0	0
EA2454	192742	.	A	T	.	PASS	TYPE=snp	GT	0	0	0	0	0	0	0	0	0	0	0	1	0	0
EA2454	196598	.	C	T	.	PASS	TYPE=snp	GT	0	0	0	0	0	0	0	0	1	0	1	0	0	0
EA2454	197805	.	C	T	.	PASS	TYPE=snp	GT	0	0	0	0	0	0	0	0	1	0	1	0	0	0
EA2454	197892	.	C	T	.	PASS	TYPE=snp	GT	0	0	0	0	0	0	0	0	1	0	1	0	0	0
EA2454	204163	.	C	T	.	PASS	TYPE=snp	GT	0	0	0	0	0	0	0	0	1	0	1	0	0	0
EA2454	204250	.	C	T	.	PASS	TYPE=snp	GT	0	0	0	0	0	0	0	0	1	0	1	0	0	0
EA2454	204541	.	A	T	.	PASS	TYPE=snp	GT	0	0	0	0	0	0	0	0	0	1	0	0	0	0
EA2454	205385	.	G	T	.	PASS	TYPE=snp	GT	0	0	0	0	0	0	0	1	0	0	0	0	0	0
EA2454	207302	.	C	T	.	PASS	TYPE=snp	GT	0	0	0	0	0	0	0	0	1	1	1	0	0	0
EA2454	209698	.	C	T	.	PASS	TYPE=snp	GT	0	0	0	0	0	0	0	0	1	0	1	0	0	0
EA2454	209960	.	C	T	.	PASS	TYPE=snp	GT	0	0	0	0	0	0	0	0	0	1	0	0	0	0
EA2454	210083	.	A	T	.	PASS	TYPE=snp	GT	0	0	0	0	0	0	1	0	0	0	0	0	0	0
EA2454	211504	.	C	T	.	PASS	TYPE=snp	GT	0	0	0	0	0	0	0	0	1	0	1	0	0	0
EA2454	211521	.	G	A	.	PASS	TYPE=snp	GT	0	0	0	0	0	0	0	0	1	0	1	0	0	0
EA2454	212068	.	A	C	.	PASS	TYPE=snp	GT	0	0	0	0	0	0	0	0	1	0	1	0	0	0
EA2454	212390	.	C	T	.	PASS	TYPE=snp	GT	0	0	0	0	0	0	1	0	0	0	0	1	0	0
EA2454	212904	.	C	T	.	PASS	TYPE=snp	GT	0	0	0	0	0	0	0	1	0	0	0	0	0	0
EA2454	213327	.	A	G	.	PASS	TYPE=snp	GT	0	0	0	0	0	0	0	0	1	1	1	0	0	0
EA2454	214871	.	G	T	.	PASS	TYPE=snp	GT	0	0	0	0	0	0	0	0	1	0	1	0	0	0
EA2454	216313	.	C	T	.	PASS	TYPE=snp	GT	0	0	0	0	0	0	0	1	0	0	0	0	0	0
EA2454	217065	.	C	T	.	PASS	TYPE=snp	GT	0	0	0	0	0	0	0	0	1	0	1	0	0	0
EA2454	217635	.	C	T	.	PASS	TYPE=snp	GT	1	1	0	0	0	0	1	1	0	0	0	1	0	0
EA2454	217762	.	G	A	.	PASS	TYPE=snp	GT	0	0	0	0	0	0	0	0	0	1	0	0	0	0
EA2454	217813	.	C	T	.	PASS	TYPE=snp	GT	0	0	0	0	0	0	0	0	1	0	1	0	0	0
EA2454	218007	.	C	T	.	PASS	TYPE=snp	GT	0	0	0	0	0	0	0	0	0	1	0	0	0	0
EA2454	219080	.	T	G	.	PASS	TYPE=snp	GT	0	0	0	0	0	0	0	0	0	1	0	0	0	0
EA2454	219775	.	C	T	.	PASS	TYPE=snp	GT	0	0	0	0	0	0	0	0	0	1	0	0	0	0
EA2454	220032	.	G	A	.	PASS	TYPE=snp	GT	0	0	0	0	0	0	0	0	1	0	1	0	0	0
EA2454	220392	.	T	G	.	PASS	TYPE=snp	GT	0	0	0	0	0	0	0	0	1	0	1	0	0	0
EA2454	220420	.	C	T	.	PASS	TYPE=snp	GT	0	0	0	1	0	0	0	0	0	0	0	0	0	0
EA2454	220577	.	G	A	.	PASS	TYPE=snp	GT	1	1	1	1	1	0	1	1	1	1	1	1	1	0
EA2454	220684	.	T	C	.	PASS	TYPE=snp	GT	0	0	0	0	0	0	0	0	0	0	0	1	0	0
EA2454	221141	.	C	T	.	PASS	TYPE=snp	GT	0	0	0	0	0	0	0	0	0	1	0	0	0	0
EA2454	222064	.	C	A	.	PASS	TYPE=snp	GT	0	0	0	0	0	0	0	0	0	1	0	0	0	0
EA2454	222087	.	C	T	.	PASS	TYPE=snp	GT	0	0	0	0	0	0	0	0	1	0	1	0	0	0
EA2454	222359	.	G	A	.	PASS	TYPE=snp	GT	0	0	0	0	0	0	0	0	0	1	0	0	0	0
EA2454	222361	.	A	G	.	PASS	TYPE=snp	GT	0	0	0	0	0	0	0	0	1	0	1	0	0	0
EA2454	222778	.	G	A	.	PASS	TYPE=snp	GT	0	0	0	0	0	0	0	0	1	0	1	0	0	0
EA2454	223134	.	A	G	.	PASS	TYPE=snp	GT	0	0	1	0	0	0	0	0	0	0	0	0	0	0
EA2454	223654	.	C	T	.	PASS	TYPE=snp	GT	0	0	0	1	0	0	0	0	0	0	0	0	0	0
EA2454	225044	.	C	T	.	PASS	TYPE=snp	GT	1	1	0	0	0	0	0	0	0	0	0	0	0	0
EA2454	225955	.	T	G	.	PASS	TYPE=snp	GT	0	0	0	0	0	0	0	0	1	0	1	0	0	0
EA2454	226823	.	C	T	.	PASS	TYPE=snp	GT	1	1	0	0	0	0	0	0	0	0	0	0	0	0
EA2454	227599	.	C	A	.	PASS	TYPE=snp	GT	0	0	0	0	0	0	0	0	1	0	1	0	0	0
EA2454	227792	.	C	T	.	PASS	TYPE=snp	GT	0	0	1	0	0	0	0	0	0	0	0	0	0	0
EA2454	229621	.	A	G	.	PASS	TYPE=snp	GT	1	1	0	0	1	0	0	0	0	0	0	0	1	0
EA2454	229626	.	G	C	.	PASS	TYPE=snp	GT	1	1	0	0	1	0	0	0	0	0	0	0	1	1
EA2454	230399	.	C	T	.	PASS	TYPE=snp	GT	0	0	0	0	0	0	0	0	1	0	1	0	0	0
EA2454	231065	.	C	T	.	PASS	TYPE=snp	GT	0	0	0	0	0	0	1	0	0	0	0	0	0	0
EA2454	232504	.	G	A	.	PASS	TYPE=snp	GT	0	0	0	0	0	0	0	0	0	1	0	0	0	0
EA2454	233181	.	T	C	.	PASS	TYPE=snp	GT	0	0	0	0	0	0	0	0	1	0	1	0	0	0
EA2454	233235	.	A	G	.	PASS	TYPE=snp	GT	0	0	0	0	0	0	0	0	1	0	1	0	0	0
EA2454	233746	.	C	T	.	PASS	TYPE=snp	GT	0	0	0	0	0	0	0	0	0	1	0	0	0	0
EA2454	233750	.	C	T	.	PASS	TYPE=snp	GT	0	0	0	0	0	0	0	0	0	1	0	0	0	0
EA2454	234256	.	C	A	.	PASS	TYPE=snp	GT	0	0	0	0	0	0	0	0	1	0	1	0	0	0
EA2454	234965	.	G	T	.	PASS	TYPE=snp	GT	0	0	0	0	0	0	0	1	0	0	0	0	0	0
EA2454	239199	.	T	C	.	PASS	TYPE=snp	GT	0	0	0	0	0	0	0	0	1	0	1	0	0	0
EA2454	239221	.	A	G	.	PASS	TYPE=snp	GT	1	1	1	1	1	0	1	1	1	1	1	1	1	0
EA2454	241567	.	A	G	.	PASS	TYPE=snp	GT	0	0	0	0	0	0	0	0	0	0	0	0	1	0
EA2454	241572	.	G	A	.	PASS	TYPE=snp	GT	0	0	0	0	0	0	0	0	0	0	0	0	1	0
EA2454	241578	.	T	C	.	PASS	TYPE=snp	GT	0	0	0	0	0	0	0	0	1	1	1	0	0	0
EA2454	241603	.	G	A	.	PASS	TYPE=snp	GT	0	0	0	0	0	0	0	0	0	0	0	0	1	0
EA2454	241652	.	C	T	.	PASS	TYPE=snp	GT	0	0	0	0	0	0	0	0	0	0	0	0	1	0
EA2454	243559	.	A	G	.	PASS	TYPE=snp	GT	0	0	0	0	0	0	0	1	0	0	0	0	0	0
EA2454	244668	.	T	C	.	PASS	TYPE=snp	GT	0	0	0	0	0	0	0	0	1	0	1	0	0	0
EA2454	245043	.	C	T	.	PASS	TYPE=snp	GT	1	1	0	0	0	0	0	0	0	0	0	0	0	0
EA2454	245301	.	C	T	.	PASS	TYPE=snp	GT	1	1	1	1	1	0	1	1	1	1	1	1	1	0
EA2454	245648	.	C	T	.	PASS	TYPE=snp	GT	0	0	0	0	0	0	0	1	0	0	0	0	0	0
EA2454	245953	.	G	A	.	PASS	TYPE=snp	GT	0	0	0	0	0	0	0	0	1	0	1	0	0	0
EA2454	246188	.	A	G	.	PASS	TYPE=snp	GT	0	0	1	0	0	0	0	0	0	0	0	0	0	0
EA2454	246285	.	G	T	.	PASS	TYPE=snp	GT	0	0	0	0	0	0	1	0	0	0	0	1	0	0
EA2454	246850	.	T	C	.	PASS	TYPE=snp	GT	0	0	0	0	0	0	0	0	1	1	1	0	0	0
EA2454	248471	.	T	C	.	PASS	TYPE=snp	GT	1	1	0	0	0	0	1	1	1	1	1	1	0	0
EA2454	248849	.	C	T	.	PASS	TYPE=snp	GT	0	0	0	0	0	0	0	0	1	0	1	0	0	0
EA2454	250111	.	C	A	.	PASS	TYPE=snp	GT	0	0	0	0	0	0	0	1	0	0	0	0	0	0
EA2454	251758	.	T	C	.	PASS	TYPE=snp	GT	0	0	0	0	0	0	0	1	0	0	0	0	0	0
EA2454	251923	.	C	T	.	PASS	TYPE=snp	GT	0	0	0	0	0	0	0	0	1	0	1	0	0	0
EA2454	253532	.	G	T	.	PASS	TYPE=snp	GT	0	0	0	0	0	0	0	0	0	0	0	0	0	1
EA2454	254440	.	C	T	.	PASS	TYPE=snp	GT	0	0	0	0	0	0	0	0	1	0	1	0	0	0
EA2454	254462	.	C	T	.	PASS	TYPE=snp	GT	0	0	0	0	0	0	0	0	0	1	0	0	0	0
EA2454	254482	.	A	C	.	PASS	TYPE=snp	GT	0	0	0	0	0	0	0	0	0	0	1	0	0	0
EA2454	254506	.	T	A	.	PASS	TYPE=snp	GT	0	0	0	0	0	0	1	0	0	0	0	1	0	0
EA2454	255292	.	A	G	.	PASS	TYPE=snp	GT	0	0	0	0	0	0	0	0	1	0	1	0	0	0
EA2454	255306	.	G	A	.	PASS	TYPE=snp	GT	1	1	0	0	0	0	0	1	0	0	0	0	0	0
EA2454	255537	.	C	T	.	PASS	TYPE=snp	GT	0	0	0	0	0	0	1	0	0	0	0	1	0	0
EA2454	255936	.	A	T	.	PASS	TYPE=snp	GT	0	0	0	0	0	0	0	0	0	1	0	0	0	0
EA2454	256442	.	C	T	.	PASS	TYPE=snp	GT	0	0	0	0	0	0	0	0	1	0	1	0	0	0
EA2454	256488	.	G	T	.	PASS	TYPE=snp	GT	1	1	0	0	0	0	0	0	0	0	0	0	0	0
EA2454	257208	.	C	T	.	PASS	TYPE=snp	GT	0	0	0	0	0	0	0	0	1	0	1	0	0	0
EA2454	259013	.	A	G	.	PASS	TYPE=snp	GT	0	0	0	0	0	0	1	0	0	0	0	1	0	0
EA2454	259268	.	G	A	.	PASS	TYPE=snp	GT	0	0	0	0	0	0	0	0	1	0	1	0	0	0
EA2454	259777	.	C	T	.	PASS	TYPE=snp	GT	0	0	0	0	0	0	0	0	1	0	1	0	0	0
EA2454	260007	.	C	A	.	PASS	TYPE=snp	GT	1	1	0	0	0	0	0	1	0	0	0	0	0	0
EA2454	261169	.	A	C	.	PASS	TYPE=snp	GT	0	0	0	0	0	0	0	0	0	1	0	0	0	0
EA2454	261901	.	A	C	.	PASS	TYPE=snp	GT	0	0	1	0	0	0	0	0	0	0	0	0	0	0
EA2454	262173	.	C	T	.	PASS	TYPE=snp	GT	1	1	0	0	0	0	0	0	0	0	0	0	0	0
EA2454	264457	.	C	T	.	PASS	TYPE=snp	GT	0	0	0	1	0	0	0	0	0	0	0	0	0	0
EA2454	266099	.	T	G	.	PASS	TYPE=snp	GT	0	0	0	0	0	0	1	0	0	0	0	0	0	0
EA2454	266355	.	G	T	.	PASS	TYPE=snp	GT	0	0	1	0	0	0	0	0	0	0	0	0	0	0
EA2454	267088	.	C	T	.	PASS	TYPE=snp	GT	0	0	0	0	0	0	0	0	0	0	0	1	0	0
EA2454	267736	.	C	A	.	PASS	TYPE=snp	GT	0	0	0	0	0	0	1	0	0	0	0	1	0	0
EA2454	268207	.	C	T	.	PASS	TYPE=snp	GT	0	0	0	1	0	0	0	0	0	0	0	0	0	0
EA2454	268722	.	G	A	.	PASS	TYPE=snp	GT	0	0	0	0	0	0	0	0	1	0	1	0	0	0
EA2454	268752	.	G	A	.	PASS	TYPE=snp	GT	0	0	0	0	0	0	0	0	0	0	0	1	0	0
EA2454	268949	.	C	T	.	PASS	TYPE=snp	GT	0	0	0	0	0	0	0	0	1	0	1	0	0	0
EA2454	269495	.	C	A	.	PASS	TYPE=snp	GT	0	0	0	0	0	0	0	0	1	0	1	0	0	0
EA2454	270040	.	C	T	.	PASS	TYPE=snp	GT	0	0	0	0	0	0	0	0	1	0	1	0	0	0
EA2454	270317	.	A	T	.	PASS	TYPE=snp	GT	0	0	0	0	1	0	0	0	0	0	0	0	1	0
EA2454	271114	.	C	T	.	PASS	TYPE=snp	GT	0	0	0	0	0	0	0	0	0	1	0	0	0	0
EA2454	271185	.	C	A	.	PASS	TYPE=snp	GT	0	0	0	0	0	0	0	0	1	0	0	0	0	0
EA2454	271991	.	T	G	.	PASS	TYPE=snp	GT	0	0	0	0	0	0	1	0	0	0	0	1	0	0
EA2454	272479	.	T	G	.	PASS	TYPE=snp	GT	0	0	0	0	0	0	0	0	1	0	1	0	0	0
EA2454	272480	.	T	G	.	PASS	TYPE=snp	GT	0	0	0	0	0	0	0	0	1	0	1	0	0	0
EA2454	272615	.	A	T	.	PASS	TYPE=snp	GT	0	0	0	0	0	0	0	0	1	1	1	0	0	0
EA2454	273279	.	C	T	.	PASS	TYPE=snp	GT	0	0	0	0	0	0	0	0	0	0	0	0	1	0
EA2454	273409	.	C	T	.	PASS	TYPE=snp	GT	1	1	0	0	0	0	0	0	0	0	0	0	0	0
EA2454	274246	.	C	T	.	PASS	TYPE=snp	GT	1	1	0	0	0	0	0	0	0	0	0	0	0	0
EA2454	274429	.	G	A	.	PASS	TYPE=snp	GT	0	0	0	0	0	0	0	1	0	0	0	0	0	0
EA2454	275599	.	G	A	.	PASS	TYPE=snp	GT	1	1	0	0	0	0	1	1	1	1	1	1	0	0
EA2454	276026	.	C	T	.	PASS	TYPE=snp	GT	0	0	0	0	0	0	1	0	0	0	0	1	0	0
EA2454	276220	.	T	C	.	PASS	TYPE=snp	GT	0	0	0	0	0	0	0	0	0	0	0	0	1	0
EA2454	276716	.	C	T	.	PASS	TYPE=snp	GT	0	0	0	0	0	0	0	0	0	1	0	0	0	0
EA2454	277305	.	G	A	.	PASS	TYPE=snp	GT	0	0	0	0	0	0	0	0	1	0	1	0	0	0
EA2454	277376	.	C	T	.	PASS	TYPE=snp	GT	0	0	0	0	0	0	0	1	0	0	0	0	0	0
EA2454	277907	.	G	T	.	PASS	TYPE=snp	GT	1	1	1	1	1	0	1	1	1	1	1	1	1	0
EA2454	278291	.	C	A	.	PASS	TYPE=snp	GT	0	0	0	0	0	0	0	0	1	0	1	0	0	0
EA2454	278848	.	A	G	.	PASS	TYPE=snp	GT	1	1	0	0	0	0	1	1	1	1	1	1	0	0
EA2454	278978	.	C	T	.	PASS	TYPE=snp	GT	0	0	0	0	0	0	0	0	0	1	0	0	0	0
EA2454	280058	.	T	C	.	PASS	TYPE=snp	GT	0	0	0	0	0	0	1	0	0	0	0	1	0	0
EA2454	280614	.	C	T	.	PASS	TYPE=snp	GT	0	0	0	0	0	0	0	1	0	0	0	0	0	0
EA2454	281250	.	C	T	.	PASS	TYPE=snp	GT	0	0	0	0	0	0	0	0	1	0	1	0	0	0
EA2454	281316	.	C	T	.	PASS	TYPE=snp	GT	0	0	0	0	1	0	0	0	0	0	0	0	1	0
EA2454	281498	.	A	G	.	PASS	TYPE=snp	GT	0	0	0	0	0	0	0	0	1	0	1	0	0	0
EA2454	281916	.	A	G	.	PASS	TYPE=snp	GT	0	0	0	0	0	0	0	1	0	0	0	0	0	0
EA2454	282666	.	C	T	.	PASS	TYPE=snp	GT	0	0	0	0	0	0	0	0	0	1	0	0	0	0
EA2454	282929	.	C	T	.	PASS	TYPE=snp	GT	1	1	0	0	0	0	0	1	0	0	0	0	0	0
EA2454	284131	.	A	G	.	PASS	TYPE=snp	GT	1	1	0	0	0	0	1	1	1	1	1	1	0	0
EA2454	286429	.	G	A	.	PASS	TYPE=snp	GT	0	0	0	0	0	0	0	0	0	1	0	0	0	0
EA2454	286636	.	T	G	.	PASS	TYPE=snp	GT	0	0	0	0	0	0	0	0	0	1	0	0	0	0
EA2454	286856	.	G	A	.	PASS	TYPE=snp	GT	0	0	0	0	0	0	1	0	0	0	0	1	0	0
EA2454	288026	.	A	C	.	PASS	TYPE=snp	GT	0	0	0	0	0	0	0	0	0	0	0	1	0	0
EA2454	288225	.	C	T	.	PASS	TYPE=snp	GT	0	0	0	0	0	0	0	0	1	0	1	0	0	0
EA2454	288870	.	C	T	.	PASS	TYPE=snp	GT	0	0	0	0	0	0	0	0	0	1	0	0	0	0
EA2454	288991	.	C	T	.	PASS	TYPE=snp	GT	0	0	0	0	0	0	1	0	0	0	0	1	0	0
EA2454	288994	.	T	C	.	PASS	TYPE=snp	GT	0	0	0	0	0	0	1	0	0	0	0	1	0	0
EA2454	289050	.	T	C	.	PASS	TYPE=snp	GT	0	0	0	0	0	0	1	0	0	0	0	1	0	0
EA2454	289137	.	T	C	.	PASS	TYPE=snp	GT	0	0	0	0	0	0	1	0	0	0	0	1	0	0
EA2454	289140	.	T	C	.	PASS	TYPE=snp	GT	0	0	0	0	0	0	1	0	0	0	0	1	0	0
EA2454	289188	.	G	A	.	PASS	TYPE=snp	GT	0	0	0	0	0	0	1	0	0	0	0	1	0	0
EA2454	289242	.	A	G	.	PASS	TYPE=snp	GT	0	0	0	0	0	0	1	0	0	0	0	1	0	0
EA2454	289260	.	G	C	.	PASS	TYPE=snp	GT	0	0	0	0	0	0	1	0	0	0	0	1	0	0
EA2454	289326	.	C	A	.	PASS	TYPE=snp	GT	0	0	0	0	0	0	1	0	0	0	0	1	0	0
EA2454	289332	.	T	C	.	PASS	TYPE=snp	GT	0	0	0	0	0	0	1	0	0	0	0	1	0	0
EA2454	289335	.	T	C	.	PASS	TYPE=snp	GT	0	0	0	0	0	0	1	0	0	0	0	1	0	0
EA2454	289341	.	T	C	.	PASS	TYPE=snp	GT	0	0	0	0	0	0	1	0	0	0	0	1	0	0
EA2454	289582	.	C	T	.	PASS	TYPE=snp	GT	0	0	0	0	0	0	0	1	0	0	0	0	0	0
EA2454	289594	.	A	T	.	PASS	TYPE=snp	GT	0	0	0	0	0	0	1	0	0	0	0	1	0	0
EA2454	289640	.	G	A	.	PASS	TYPE=snp	GT	0	0	0	0	0	0	1	0	0	0	0	1	0	0
EA2454	289704	.	A	T	.	PASS	TYPE=snp	GT	0	0	0	0	0	0	1	0	0	0	0	1	0	0
EA2454	289839	.	G	A	.	PASS	TYPE=snp	GT	0	0	0	0	0	0	1	0	0	0	0	1	0	0
EA2454	289842	.	T	A	.	PASS	TYPE=snp	GT	0	0	0	0	0	0	1	0	0	0	0	1	0	0
EA2454	289854	.	T	C	.	PASS	TYPE=snp	GT	0	0	0	0	0	0	1	0	0	0	0	1	0	0
EA2454	289860	.	C	T	.	PASS	TYPE=snp	GT	0	0	0	0	0	0	1	0	0	0	0	1	0	0
EA2454	289866	.	T	A	.	PASS	TYPE=snp	GT	0	0	0	0	0	0	1	0	0	0	0	1	0	0
EA2454	289962	.	A	G	.	PASS	TYPE=snp	GT	0	0	0	0	0	0	1	0	0	0	0	1	0	0
EA2454	290058	.	T	C	.	PASS	TYPE=snp	GT	0	0	0	0	0	0	1	0	0	0	0	1	0	0
EA2454	290061	.	C	T	.	PASS	TYPE=snp	GT	0	0	0	0	0	0	1	0	0	0	0	1	0	0
EA2454	290064	.	C	T	.	PASS	TYPE=snp	GT	0	0	0	0	0	0	1	0	0	0	0	1	0	0
EA2454	290076	.	C	T	.	PASS	TYPE=snp	GT	0	0	0	0	0	0	1	0	0	0	0	1	0	0
EA2454	290134	.	T	C	.	PASS	TYPE=snp	GT	0	0	0	0	0	0	1	0	0	0	0	1	0	0
EA2454	290136	.	G	T	.	PASS	TYPE=snp	GT	0	0	0	0	0	0	1	0	0	0	0	1	0	0
EA2454	290172	.	A	G	.	PASS	TYPE=snp	GT	0	0	0	0	0	0	1	0	0	0	0	1	0	0
EA2454	290187	.	C	A	.	PASS	TYPE=snp	GT	1	1	0	0	0	0	0	1	0	0	0	0	0	0
EA2454	290212	.	G	T	.	PASS	TYPE=snp	GT	0	0	1	0	0	0	0	0	0	0	0	0	0	0
EA2454	290262	.	T	C	.	PASS	TYPE=snp	GT	0	0	0	0	0	0	1	0	0	0	0	1	0	0
EA2454	290283	.	G	A	.	PASS	TYPE=snp	GT	0	0	0	0	0	0	1	0	0	0	0	1	0	0
EA2454	290292	.	C	A	.	PASS	TYPE=snp	GT	0	0	0	0	0	0	1	0	0	0	0	1	0	0
EA2454	290295	.	T	C	.	PASS	TYPE=snp	GT	0	0	0	0	0	0	1	0	0	0	0	1	0	0
EA2454	290364	.	A	T	.	PASS	TYPE=snp	GT	0	0	0	0	0	0	1	0	0	0	0	1	0	0
EA2454	290367	.	A	G	.	PASS	TYPE=snp	GT	0	0	0	0	0	0	1	0	0	0	0	1	0	0
EA2454	290388	.	T	C	.	PASS	TYPE=snp	GT	0	0	0	0	0	0	1	0	0	0	0	1	0	0
EA2454	290433	.	C	G	.	PASS	TYPE=snp	GT	0	0	0	0	0	0	1	0	0	0	0	1	0	0
EA2454	290454	.	G	T	.	PASS	TYPE=snp	GT	0	0	0	0	0	0	1	0	0	0	0	1	0	0
EA2454	290610	.	T	C	.	PASS	TYPE=snp	GT	0	0	0	0	0	0	1	0	0	0	0	1	0	0
EA2454	290640	.	C	A	.	PASS	TYPE=snp	GT	0	0	0	0	0	0	1	0	0	0	0	1	0	0
EA2454	290655	.	C	A	.	PASS	TYPE=snp	GT	0	0	0	0	0	0	1	0	0	0	0	1	0	0
EA2454	290717	.	T	C	.	PASS	TYPE=snp	GT	0	0	0	0	0	0	1	0	0	0	0	1	0	0
EA2454	290719	.	A	G	.	PASS	TYPE=snp	GT	0	0	0	0	0	0	1	0	0	0	0	1	0	0
EA2454	290739	.	C	T	.	PASS	TYPE=snp	GT	0	0	0	0	0	0	1	0	0	0	0	1	0	0
EA2454	290752	.	G	T	.	PASS	TYPE=snp	GT	0	0	0	0	0	0	1	0	0	0	0	1	0	0
EA2454	290793	.	A	C	.	PASS	TYPE=snp	GT	0	0	0	0	0	0	1	0	0	0	0	1	0	0
EA2454	290916	.	T	C	.	PASS	TYPE=snp	GT	0	0	0	0	0	0	1	0	0	0	0	1	0	0
EA2454	290928	.	G	C	.	PASS	TYPE=snp	GT	0	0	0	0	0	0	1	0	0	0	0	1	0	0
EA2454	291036	.	G	T	.	PASS	TYPE=snp	GT	0	0	0	0	0	0	1	0	0	0	0	1	0	0
EA2454	291045	.	G	A	.	PASS	TYPE=snp	GT	0	0	0	0	0	0	1	0	0	0	0	1	0	0
EA2454	291057	.	C	T	.	PASS	TYPE=snp	GT	0	0	0	0	0	0	1	0	0	0	0	1	0	0
EA2454	291060	.	G	C	.	PASS	TYPE=snp	GT	0	0	0	0	0	0	1	0	0	0	0	1	0	0
EA2454	291061	.	C	T	.	PASS	TYPE=snp	GT	0	0	0	0	0	0	1	0	0	0	0	1	0	0
EA2454	291063	.	G	A	.	PASS	TYPE=snp	GT	0	0	0	0	0	0	1	0	0	0	0	1	0	0
EA2454	291072	.	C	T	.	PASS	TYPE=snp	GT	0	0	0	0	0	0	1	0	0	0	0	1	0	0
EA2454	291144	.	T	C	.	PASS	TYPE=snp	GT	0	0	0	0	0	0	1	0	0	0	0	1	0	0
EA2454	291165	.	C	T	.	PASS	TYPE=snp	GT	0	0	0	0	0	0	1	0	0	0	0	1	0	0
EA2454	291174	.	C	A	.	PASS	TYPE=snp	GT	0	0	0	0	0	0	1	0	0	0	0	1	0	0
EA2454	291189	.	A	C	.	PASS	TYPE=snp	GT	0	0	0	0	0	0	1	0	0	0	0	1	0	0
EA2454	291240	.	T	C	.	PASS	TYPE=snp	GT	0	0	0	0	0	0	1	0	0	0	0	1	0	0
EA2454	291273	.	G	A	.	PASS	TYPE=snp	GT	0	0	0	0	0	0	1	0	0	0	0	1	0	0
EA2454	291387	.	A	G	.	PASS	TYPE=snp	GT	0	0	0	0	0	0	1	0	0	0	0	1	0	0
EA2454	291400	.	T	C	.	PASS	TYPE=snp	GT	0	0	0	0	0	0	1	0	0	0	0	1	0	0
EA2454	291414	.	G	A	.	PASS	TYPE=snp	GT	0	0	0	0	0	0	1	0	0	0	0	1	0	0
EA2454	291429	.	C	T	.	PASS	TYPE=snp	GT	0	0	0	0	0	0	1	0	0	0	0	1	0	0
EA2454	291449	.	G	A	.	PASS	TYPE=snp	GT	0	0	0	0	0	0	0	0	0	0	0	1	0	0
EA2454	291451	.	A	C	.	PASS	TYPE=snp	GT	0	0	0	0	0	0	1	0	0	0	0	1	0	0
EA2454	291454	.	C	T	.	PASS	TYPE=snp	GT	0	0	0	0	0	0	1	0	0	0	0	1	0	0
EA2454	291465	.	T	A	.	PASS	TYPE=snp	GT	0	0	0	0	0	0	1	0	0	0	0	1	0	0
EA2454	291477	.	A	G	.	PASS	TYPE=snp	GT	0	0	0	0	0	0	1	0	0	0	0	1	0	0
EA2454	291537	.	G	C	.	PASS	TYPE=snp	GT	0	0	0	0	0	0	1	0	0	0	0	1	0	0
EA2454	291540	.	A	T	.	PASS	TYPE=snp	GT	0	0	0	0	0	0	1	0	0	0	0	1	0	0
EA2454	291552	.	G	A	.	PASS	TYPE=snp	GT	0	0	0	0	0	0	1	0	0	0	0	1	0	0
EA2454	291573	.	T	C	.	PASS	TYPE=snp	GT	0	0	0	0	0	0	1	0	0	0	0	1	0	0
EA2454	291576	.	G	A	.	PASS	TYPE=snp	GT	0	0	0	0	0	0	1	0	0	0	0	1	0	0
EA2454	291609	.	C	A	.	PASS	TYPE=snp	GT	0	0	0	0	0	0	1	0	0	0	0	1	0	0
EA2454	291612	.	C	A	.	PASS	TYPE=snp	GT	0	0	0	0	0	0	1	0	0	0	0	1	0	0
EA2454	291621	.	A	G	.	PASS	TYPE=snp	GT	0	0	0	0	0	0	1	0	0	0	0	1	0	0
EA2454	291645	.	A	T	.	PASS	TYPE=snp	GT	0	0	0	0	0	0	1	0	0	0	0	1	0	0
EA2454	291648	.	C	T	.	PASS	TYPE=snp	GT	0	0	0	0	0	0	1	0	0	0	0	1	0	0
EA2454	291705	.	C	T	.	PASS	TYPE=snp	GT	0	0	0	0	0	0	1	0	0	0	0	1	0	0
EA2454	291720	.	A	G	.	PASS	TYPE=snp	GT	0	0	0	0	0	0	1	0	0	0	0	1	0	0
EA2454	291729	.	T	G	.	PASS	TYPE=snp	GT	0	0	0	0	0	0	1	0	0	0	0	1	0	0
EA2454	291833	.	A	G	.	PASS	TYPE=snp	GT	0	0	0	0	0	0	1	0	0	0	0	1	0	0
EA2454	291837	.	G	T	.	PASS	TYPE=snp	GT	0	0	0	0	0	0	1	0	0	0	0	1	0	0
EA2454	291840	.	G	C	.	PASS	TYPE=snp	GT	0	0	0	0	0	0	1	0	0	0	0	1	0	0
EA2454	291852	.	C	T	.	PASS	TYPE=snp	GT	0	0	0	0	0	0	1	0	0	0	0	1	0	0
EA2454	291908	.	T	G	.	PASS	TYPE=snp	GT	0	0	0	0	0	0	1	0	0	0	0	1	0	0
EA2454	291975	.	C	G	.	PASS	TYPE=snp	GT	0	0	0	0	0	0	1	0	0	0	0	1	0	0
EA2454	291993	.	A	G	.	PASS	TYPE=snp	GT	0	0	0	0	0	0	1	0	0	0	0	1	0	0
EA2454	291999	.	T	C	.	PASS	TYPE=snp	GT	0	0	0	0	0	0	1	0	0	0	0	1	0	0
EA2454	292003	.	C	T	.	PASS	TYPE=snp	GT	0	0	0	0	0	0	1	0	0	0	0	1	0	0
EA2454	292124	.	C	A	.	PASS	TYPE=snp	GT	0	0	0	0	0	0	1	0	0	0	0	1	0	0
EA2454	292175	.	T	C	.	PASS	TYPE=snp	GT	0	0	0	0	0	0	1	0	0	0	0	1	0	0
EA2454	292193	.	C	T	.	PASS	TYPE=snp	GT	0	0	0	0	0	0	1	0	0	0	0	1	0	0
EA2454	292195	.	T	C	.	PASS	TYPE=snp	GT	0	0	0	0	0	0	1	0	0	0	0	1	0	0
EA2454	292214	.	A	G	.	PASS	TYPE=snp	GT	0	0	0	0	0	0	1	0	0	0	0	1	0	0
EA2454	292221	.	T	C	.	PASS	TYPE=snp	GT	0	0	0	0	0	0	1	0	0	0	0	1	0	0
EA2454	292225	.	T	A	.	PASS	TYPE=snp	GT	0	0	0	0	0	0	1	0	0	0	0	1	0	0
EA2454	292229	.	C	T	.	PASS	TYPE=snp	GT	0	0	0	0	0	0	1	0	0	0	0	1	0	0
EA2454	292232	.	C	A	.	PASS	TYPE=snp	GT	0	0	0	0	0	0	1	0	0	0	0	1	0	0
EA2454	292267	.	C	A	.	PASS	TYPE=snp	GT	0	0	0	0	0	0	0	0	0	1	0	0	0	0
EA2454	292304	.	T	C	.	PASS	TYPE=snp	GT	0	0	0	0	0	0	1	0	0	0	0	1	0	0
EA2454	292325	.	A	T	.	PASS	TYPE=snp	GT	0	0	0	0	0	0	1	0	0	0	0	1	0	0
EA2454	292400	.	C	T	.	PASS	TYPE=snp	GT	0	0	0	0	0	0	1	0	0	0	0	1	0	0
EA2454	292414	.	C	T	.	PASS	TYPE=snp	GT	0	0	0	0	0	0	1	0	0	0	0	1	0	0
EA2454	292506	.	G	T	.	PASS	TYPE=snp	GT	0	0	0	0	0	0	1	0	0	0	0	1	0	0
EA2454	292561	.	G	C	.	PASS	TYPE=snp	GT	0	0	0	0	0	0	1	0	0	0	0	1	0	0
EA2454	292766	.	T	C	.	PASS	TYPE=snp	GT	0	0	0	0	0	0	1	0	0	0	0	1	0	0
EA2454	292868	.	G	A	.	PASS	TYPE=snp	GT	0	0	0	0	0	0	1	0	0	0	0	1	0	0
EA2454	292898	.	A	G	.	PASS	TYPE=snp	GT	0	0	0	0	0	0	1	0	0	0	0	1	0	0
EA2454	292907	.	A	C	.	PASS	TYPE=snp	GT	0	0	0	0	0	0	1	0	0	0	0	1	0	0
EA2454	292916	.	T	C	.	PASS	TYPE=snp	GT	0	0	0	0	0	0	1	0	0	0	0	1	0	0
EA2454	292919	.	C	T	.	PASS	TYPE=snp	GT	0	0	0	0	0	0	1	0	0	0	0	1	0	0
EA2454	292951	.	C	A	.	PASS	TYPE=snp	GT	0	0	0	0	0	0	1	0	0	0	0	1	0	0
EA2454	293047	.	C	T	.	PASS	TYPE=snp	GT	0	0	0	0	0	0	0	0	1	0	1	0	0	0
EA2454	293057	.	C	G	.	PASS	TYPE=snp	GT	0	0	0	0	0	0	1	0	0	0	0	1	0	0
EA2454	293102	.	A	G	.	PASS	TYPE=snp	GT	0	0	0	0	0	0	1	0	0	0	0	1	0	0
EA2454	293197	.	G	A	.	PASS	TYPE=snp	GT	0	0	0	0	0	0	0	0	1	0	1	0	0	0
EA2454	293200	.	A	T	.	PASS	TYPE=snp	GT	0	0	0	0	0	0	1	0	0	0	0	1	0	0
EA2454	293263	.	A	G	.	PASS	TYPE=snp	GT	0	0	0	0	0	0	1	0	0	0	0	1	0	0
EA2454	293272	.	A	G	.	PASS	TYPE=snp	GT	0	0	0	0	0	0	1	0	0	0	0	1	0	0
EA2454	293435	.	A	G	.	PASS	TYPE=snp	GT	0	0	0	0	0	0	1	0	0	0	0	1	0	0
EA2454	293449	.	A	C	.	PASS	TYPE=snp	GT	0	0	0	0	0	0	1	0	0	0	0	1	0	0
EA2454	293455	.	C	T	.	PASS	TYPE=snp	GT	0	0	0	0	0	0	1	0	0	0	0	1	0	0
EA2454	293526	.	T	C	.	PASS	TYPE=snp	GT	0	0	0	0	0	0	1	0	0	0	0	1	0	0
EA2454	293533	.	A	G	.	PASS	TYPE=snp	GT	0	0	0	0	0	0	1	0	0	0	0	1	0	0
EA2454	293620	.	A	T	.	PASS	TYPE=snp	GT	0	0	0	0	0	0	1	0	0	0	0	1	0	0
EA2454	293629	.	G	T	.	PASS	TYPE=snp	GT	0	0	0	0	0	0	1	0	0	0	0	1	0	0
EA2454	293752	.	T	C	.	PASS	TYPE=snp	GT	0	0	0	0	0	0	1	0	0	0	0	1	0	0
EA2454	293839	.	G	A	.	PASS	TYPE=snp	GT	0	0	0	0	0	0	1	0	0	0	0	1	0	0
EA2454	294054	.	G	T	.	PASS	TYPE=snp	GT	0	0	0	0	0	0	0	0	0	1	0	0	0	0
EA2454	294088	.	T	C	.	PASS	TYPE=snp	GT	0	0	0	0	0	0	0	0	1	0	1	0	0	0
EA2454	295395	.	G	A	.	PASS	TYPE=snp	GT	0	0	0	0	0	0	0	0	0	1	0	0	0	0
EA2454	295413	.	T	G	.	PASS	TYPE=snp	GT	0	0	0	0	0	0	1	0	0	0	0	1	0	0
EA2454	295650	.	C	T	.	PASS	TYPE=snp	GT	0	0	0	0	0	0	1	0	0	0	0	1	0	0
EA2454	295992	.	G	T	.	PASS	TYPE=snp	GT	0	0	0	0	0	0	1	0	0	0	0	1	0	0
EA2454	296004	.	C	T	.	PASS	TYPE=snp	GT	0	0	0	0	0	0	1	0	0	0	0	1	0	0
EA2454	296339	.	T	A	.	PASS	TYPE=snp	GT	0	0	0	0	0	0	1	0	0	0	0	1	0	0
EA2454	296802	.	T	A	.	PASS	TYPE=snp	GT	0	0	0	0	0	0	1	0	0	0	0	1	0	0
EA2454	296808	.	C	T	.	PASS	TYPE=snp	GT	0	0	0	0	0	0	1	0	0	0	0	1	0	0
EA2454	297129	.	T	C	.	PASS	TYPE=snp	GT	0	0	0	0	0	0	1	0	0	0	0	1	0	0
EA2454	297228	.	T	C	.	PASS	TYPE=snp	GT	0	0	0	0	0	0	1	0	0	0	0	1	0	0
EA2454	297486	.	T	C	.	PASS	TYPE=snp	GT	0	0	0	0	0	0	1	0	0	0	0	1	0	0
EA2454	297501	.	C	G	.	PASS	TYPE=snp	GT	0	0	0	0	0	0	1	0	0	0	0	1	0	0
EA2454	297613	.	T	C	.	PASS	TYPE=snp	GT	0	0	0	0	0	0	1	0	0	0	0	1	0	0
EA2454	297690	.	C	T	.	PASS	TYPE=snp	GT	0	0	0	0	0	0	1	0	0	0	0	1	0	0
EA2454	297729	.	T	C	.	PASS	TYPE=snp	GT	0	0	0	0	0	0	1	0	0	0	0	1	0	0
EA2454	298022	.	C	A	.	PASS	TYPE=snp	GT	0	0	0	0	0	0	1	0	0	0	0	1	0	0
EA2454	298055	.	G	T	.	PASS	TYPE=snp	GT	1	1	0	0	0	0	0	1	0	0	0	0	0	0
EA2454	298240	.	T	G	.	PASS	TYPE=snp	GT	0	0	0	0	0	0	1	0	0	0	0	1	0	0
EA2454	298249	.	C	T	.	PASS	TYPE=snp	GT	0	0	0	0	0	0	1	0	0	0	0	1	0	0
EA2454	298264	.	C	T	.	PASS	TYPE=snp	GT	0	0	0	0	0	0	1	0	0	0	0	1	0	0
EA2454	298286	.	T	C	.	PASS	TYPE=snp	GT	1	1	1	1	1	0	1	1	1	1	1	1	1	0
EA2454	298363	.	C	T	.	PASS	TYPE=snp	GT	0	0	0	0	0	0	0	0	1	0	1	0	0	0
EA2454	298414	.	C	T	.	PASS	TYPE=snp	GT	0	0	0	0	0	0	1	0	0	0	0	1	0	0
EA2454	298426	.	T	C	.	PASS	TYPE=snp	GT	0	0	0	0	0	0	1	0	0	0	0	1	0	0
EA2454	298444	.	T	G	.	PASS	TYPE=snp	GT	0	0	0	0	0	0	1	0	0	0	0	1	0	0
EA2454	298666	.	T	C	.	PASS	TYPE=snp	GT	0	0	0	0	0	0	1	0	0	0	0	1	0	0
EA2454	299380	.	G	A	.	PASS	TYPE=snp	GT	0	0	0	0	0	0	1	0	0	0	0	1	0	0
EA2454	299446	.	A	G	.	PASS	TYPE=snp	GT	0	0	0	0	0	0	1	0	0	0	0	1	0	0
EA2454	299497	.	G	T	.	PASS	TYPE=snp	GT	0	0	0	0	0	0	1	0	0	0	0	1	0	0
EA2454	299575	.	C	T	.	PASS	TYPE=snp	GT	0	0	0	0	0	0	1	0	0	0	0	1	0	0
EA2454	299605	.	T	C	.	PASS	TYPE=snp	GT	0	0	0	0	0	0	1	0	0	0	0	1	0	0
EA2454	299632	.	C	T	.	PASS	TYPE=snp	GT	0	0	0	0	0	0	1	0	0	0	0	1	0	0
EA2454	299758	.	A	G	.	PASS	TYPE=snp	GT	0	0	0	0	0	0	1	0	0	0	0	1	0	0
EA2454	299759	.	C	A	.	PASS	TYPE=snp	GT	0	0	0	0	0	0	1	0	0	0	0	1	0	0
EA2454	299773	.	T	C	.	PASS	TYPE=snp	GT	0	0	0	0	0	0	1	0	0	0	0	1	0	0
EA2454	299836	.	C	T	.	PASS	TYPE=snp	GT	0	0	0	0	0	0	1	0	0	0	0	1	0	0
EA2454	299899	.	T	G	.	PASS	TYPE=snp	GT	0	0	0	0	0	0	1	0	0	0	0	1	0	0
EA2454	299920	.	A	C	.	PASS	TYPE=snp	GT	0	0	0	0	0	0	1	0	0	0	0	1	0	0
EA2454	299974	.	C	T	.	PASS	TYPE=snp	GT	1	1	0	0	0	0	0	0	0	0	0	0	0	0
EA2454	300016	.	T	C	.	PASS	TYPE=snp	GT	1	1	0	0	0	0	1	0	0	0	0	1	0	0
EA2454	300252	.	T	C	.	PASS	TYPE=snp	GT	1	1	0	0	0	0	1	0	0	0	0	1	0	0
EA2454	300276	.	A	C	.	PASS	TYPE=snp	GT	1	1	0	0	0	0	1	0	0	0	0	1	0	0
EA2454	300279	.	T	C	.	PASS	TYPE=snp	GT	1	1	0	0	0	0	0	0	0	0	0	0	0	0
EA2454	300282	.	T	C	.	PASS	TYPE=snp	GT	0	0	0	0	0	0	1	0	0	0	0	1	0	0
EA2454	300285	.	A	G	.	PASS	TYPE=snp	GT	1	1	0	0	0	0	0	0	0	0	0	0	0	0
EA2454	300293	.	G	A	.	PASS	TYPE=snp	GT	0	0	0	0	0	0	1	0	0	0	0	1	0	0
EA2454	300294	.	T	C	.	PASS	TYPE=snp	GT	0	0	0	0	0	0	1	0	0	0	0	1	0	0
EA2454	300300	.	A	G	.	PASS	TYPE=snp	GT	0	0	0	0	0	0	1	0	0	0	0	1	0	0
EA2454	300315	.	G	A	.	PASS	TYPE=snp	GT	1	1	0	0	0	0	1	0	0	0	0	1	0	0
EA2454	300321	.	A	G	.	PASS	TYPE=snp	GT	0	0	0	0	0	0	1	0	0	0	0	1	0	0
EA2454	300375	.	C	T	.	PASS	TYPE=snp	GT	0	0	0	0	0	0	1	0	0	0	0	1	0	0
EA2454	300378	.	G	A	.	PASS	TYPE=snp	GT	1	1	0	0	0	0	0	0	0	0	0	0	0	0
EA2454	300424	.	C	G	.	PASS	TYPE=snp	GT	1	1	0	0	0	0	0	0	0	0	0	0	0	0
EA2454	300425	.	G	T	.	PASS	TYPE=snp	GT	1	1	0	0	0	0	1	0	0	0	0	1	0	0
EA2454	300438	.	G	A	.	PASS	TYPE=snp	GT	1	1	0	0	0	0	0	0	0	0	0	0	0	0
EA2454	300441	.	T	G	.	PASS	TYPE=snp	GT	1	1	0	0	0	0	0	0	0	0	0	0	0	0
EA2454	300447	.	C	G	.	PASS	TYPE=snp	GT	1	1	0	0	0	0	0	0	0	0	0	0	0	0
EA2454	300450	.	G	T	.	PASS	TYPE=snp	GT	1	1	0	0	0	0	0	0	0	0	0	0	0	0
EA2454	300459	.	C	T	.	PASS	TYPE=snp	GT	1	1	0	0	0	0	0	0	0	0	0	0	0	0
EA2454	300471	.	T	C	.	PASS	TYPE=snp	GT	1	1	0	0	0	0	0	0	0	0	0	0	0	0
EA2454	300483	.	G	C	.	PASS	TYPE=snp	GT	0	0	0	0	0	0	1	0	0	0	0	1	0	0
EA2454	300494	.	C	T	.	PASS	TYPE=snp	GT	1	1	0	0	0	0	1	0	0	0	0	1	0	0
EA2454	300501	.	G	A	.	PASS	TYPE=snp	GT	0	0	0	0	0	0	1	0	0	0	0	1	0	0
EA2454	300507	.	G	A	.	PASS	TYPE=snp	GT	0	0	0	0	0	0	1	0	0	0	0	1	0	0
EA2454	300549	.	A	G	.	PASS	TYPE=snp	GT	0	0	0	0	0	0	1	0	0	0	0	1	0	0
EA2454	300561	.	G	A	.	PASS	TYPE=snp	GT	1	1	0	0	0	0	0	0	0	0	0	0	0	0
EA2454	300596	.	T	C	.	PASS	TYPE=snp	GT	0	0	0	0	0	0	1	0	0	0	0	1	0	0
EA2454	300651	.	C	A	.	PASS	TYPE=snp	GT	1	1	0	0	0	0	0	0	0	0	0	0	0	0
EA2454	300666	.	G	A	.	PASS	TYPE=snp	GT	1	1	0	0	0	0	1	0	0	0	0	1	0	0
EA2454	300681	.	C	T	.	PASS	TYPE=snp	GT	1	1	0	0	0	0	1	0	0	0	0	1	0	0
EA2454	300718	.	A	G	.	PASS	TYPE=snp	GT	1	1	0	0	0	0	0	0	0	0	0	0	0	0
EA2454	300722	.	G	T	.	PASS	TYPE=snp	GT	0	0	0	0	0	0	1	0	0	0	0	1	0	0
EA2454	300726	.	A	G	.	PASS	TYPE=snp	GT	1	1	0	0	0	0	1	0	0	0	0	1	0	0
EA2454	300777	.	C	T	.	PASS	TYPE=snp	GT	0	0	0	0	0	0	1	0	0	0	0	1	0	0
EA2454	300780	.	G	C	.	PASS	TYPE=snp	GT	0	0	0	0	0	0	1	0	0	0	0	1	0	0
EA2454	300788	.	C	T	.	PASS	TYPE=snp	GT	1	1	0	0	0	0	0	0	0	0	0	0	0	0
EA2454	300858	.	G	A	.	PASS	TYPE=snp	GT	0	0	0	0	0	0	1	0	0	0	0	1	0	0
EA2454	300863	.	G	T	.	PASS	TYPE=snp	GT	1	1	0	0	0	0	0	0	0	0	0	0	0	0
EA2454	300867	.	A	G	.	PASS	TYPE=snp	GT	1	1	0	0	0	0	0	0	0	0	0	0	0	0
EA2454	300870	.	A	G	.	PASS	TYPE=snp	GT	1	1	0	0	0	0	0	0	0	0	0	0	0	0
EA2454	300873	.	G	C,T	.	PASS	TYPE=snp	GT	1	1	0	0	0	0	2	0	0	0	0	2	0	0
EA2454	300876	.	T	A,G	.	PASS	TYPE=snp	GT	0	0	2	0	0	0	1	0	0	0	0	1	0	0
EA2454	300879	.	G	C	.	PASS	TYPE=snp	GT	1	1	0	0	0	0	0	0	0	0	0	0	0	0
EA2454	300881	.	G	A	.	PASS	TYPE=snp	GT	1	1	0	0	0	0	0	0	0	0	0	0	0	0
EA2454	300923	.	A	C	.	PASS	TYPE=snp	GT	1	1	0	0	0	0	1	0	0	0	0	1	0	0
EA2454	301126	.	T	C	.	PASS	TYPE=snp	GT	1	1	0	0	0	0	0	0	0	0	0	0	0	0
EA2454	301555	.	T	C	.	PASS	TYPE=snp	GT	1	1	0	0	0	0	0	0	0	0	0	0	0	0
EA2454	301564	.	T	C	.	PASS	TYPE=snp	GT	1	1	0	0	0	0	1	0	0	0	0	1	0	0
EA2454	301612	.	T	C	.	PASS	TYPE=snp	GT	0	0	0	0	0	0	1	0	0	0	0	1	0	0
EA2454	301657	.	T	C	.	PASS	TYPE=snp	GT	1	1	0	0	0	0	1	0	0	0	0	1	0	0
EA2454	301660	.	C	T	.	PASS	TYPE=snp	GT	0	0	0	0	0	0	1	0	0	0	0	1	0	0
EA2454	301681	.	T	C	.	PASS	TYPE=snp	GT	1	1	0	0	0	0	0	0	0	0	0	0	0	0
EA2454	301684	.	G	A	.	PASS	TYPE=snp	GT	1	1	0	0	0	0	0	0	0	0	0	0	0	0
EA2454	301690	.	G	A	.	PASS	TYPE=snp	GT	1	1	0	0	0	0	0	0	0	0	0	0	0	0
EA2454	301705	.	G	C	.	PASS	TYPE=snp	GT	1	1	0	0	0	0	0	0	0	0	0	0	0	0
EA2454	301717	.	C	T	.	PASS	TYPE=snp	GT	0	0	0	0	0	0	1	0	0	0	0	1	0	0
EA2454	301736	.	T	C	.	PASS	TYPE=snp	GT	1	1	0	0	0	0	1	0	0	0	0	1	0	0
EA2454	301759	.	T	C	.	PASS	TYPE=snp	GT	1	1	0	0	0	0	1	0	0	0	0	1	0	0
EA2454	301762	.	T	G	.	PASS	TYPE=snp	GT	0	0	0	0	0	0	1	0	0	0	0	1	0	0
EA2454	301807	.	T	C	.	PASS	TYPE=snp	GT	1	1	0	0	0	0	0	0	0	0	0	0	0	0
EA2454	301822	.	G	A	.	PASS	TYPE=snp	GT	1	1	0	0	0	0	0	0	0	0	0	0	0	0
EA2454	302008	.	C	G	.	PASS	TYPE=snp	GT	0	0	0	0	0	0	1	0	0	0	0	1	0	0
EA2454	302024	.	T	C	.	PASS	TYPE=snp	GT	1	1	0	0	0	0	1	0	0	0	0	1	0	0
EA2454	302042	.	C	T	.	PASS	TYPE=snp	GT	0	0	0	0	0	0	1	0	0	0	0	1	0	0
EA2454	302056	.	A	G	.	PASS	TYPE=snp	GT	0	0	0	0	0	0	1	0	0	0	0	1	0	0
EA2454	302069	.	C	T	.	PASS	TYPE=snp	GT	0	0	0	0	0	0	1	0	0	0	0	1	0	0
EA2454	302081	.	C	T	.	PASS	TYPE=snp	GT	0	0	0	0	0	0	1	0	0	0	0	1	0	0
EA2454	302123	.	G	A	.	PASS	TYPE=snp	GT	0	0	0	0	0	0	1	0	0	0	0	1	0	0
EA2454	302135	.	T	G	.	PASS	TYPE=snp	GT	1	1	0	0	0	0	1	0	0	0	0	1	0	0
EA2454	302202	.	C	T	.	PASS	TYPE=snp	GT	0	0	0	0	0	0	1	0	0	0	0	1	0	0
EA2454	302244	.	C	T	.	PASS	TYPE=snp	GT	0	0	0	0	0	0	1	0	0	0	0	1	0	0
EA2454	302258	.	G	T	.	PASS	TYPE=snp	GT	1	1	0	0	0	0	0	0	0	0	0	0	0	0
EA2454	302303	.	G	A	.	PASS	TYPE=snp	GT	1	1	0	0	0	0	0	0	0	0	0	0	0	0
EA2454	302324	.	A	C	.	PASS	TYPE=snp	GT	1	1	0	0	0	0	0	0	0	0	0	0	0	0
EA2454	302373	.	T	C	.	PASS	TYPE=snp	GT	0	0	0	0	0	0	1	0	0	0	0	1	0	0
EA2454	302384	.	T	C	.	PASS	TYPE=snp	GT	0	0	0	0	0	0	1	0	0	0	0	1	0	0
EA2454	302386	.	C	G	.	PASS	TYPE=snp	GT	1	1	0	0	0	0	1	0	0	0	0	1	0	0
EA2454	302472	.	A	G	.	PASS	TYPE=snp	GT	1	1	0	0	0	0	0	0	0	0	0	0	0	0
EA2454	302495	.	G	A,C	.	PASS	TYPE=snp	GT	1	1	0	0	0	0	2	0	0	0	0	2	0	0
EA2454	302540	.	T	A	.	PASS	TYPE=snp	GT	1	1	0	0	0	0	1	0	0	0	0	1	0	0
EA2454	302650	.	T	C	.	PASS	TYPE=snp	GT	0	0	0	0	0	0	1	0	0	0	0	1	0	0
EA2454	302666	.	C	T	.	PASS	TYPE=snp	GT	1	1	0	0	0	0	0	0	0	0	0	0	0	0
EA2454	302683	.	G	A	.	PASS	TYPE=snp	GT	0	0	0	0	0	0	1	0	0	0	0	1	0	0
EA2454	302696	.	A	G	.	PASS	TYPE=snp	GT	1	1	0	0	0	0	1	0	0	0	0	1	0	0
EA2454	302708	.	C	T	.	PASS	TYPE=snp	GT	0	0	0	0	0	0	1	0	0	0	0	1	0	0
EA2454	302723	.	G	A	.	PASS	TYPE=snp	GT	0	0	0	0	0	0	1	0	0	0	0	1	0	0
EA2454	302744	.	A	G	.	PASS	TYPE=snp	GT	1	1	0	0	0	0	1	0	0	0	0	1	0	0
EA2454	302783	.	T	C	.	PASS	TYPE=snp	GT	1	1	0	0	0	0	1	0	0	0	0	1	0	0
EA2454	302798	.	G	A	.	PASS	TYPE=snp	GT	1	1	0	0	0	0	0	0	0	0	0	0	0	0
EA2454	302816	.	G	A	.	PASS	TYPE=snp	GT	1	1	0	0	0	0	0	0	0	0	0	0	0	0
EA2454	302819	.	T	G	.	PASS	TYPE=snp	GT	1	1	0	0	0	0	0	0	0	0	0	0	0	0
EA2454	302822	.	G	A	.	PASS	TYPE=snp	GT	1	1	0	0	0	0	0	0	0	0	0	0	0	0
EA2454	302846	.	G	A	.	PASS	TYPE=snp	GT	1	1	0	0	0	0	0	0	0	0	0	0	0	0
EA2454	302894	.	T	C	.	PASS	TYPE=snp	GT	1	1	0	0	0	0	1	0	0	0	0	1	0	0
EA2454	302914	.	A	T	.	PASS	TYPE=snp	GT	1	1	0	0	0	0	0	0	0	0	0	0	0	0
EA2454	302915	.	G	T	.	PASS	TYPE=snp	GT	0	0	0	0	0	0	1	0	0	0	0	1	0	0
EA2454	302924	.	T	C	.	PASS	TYPE=snp	GT	0	0	0	0	0	0	1	0	0	0	0	1	0	0
EA2454	302929	.	G	A	.	PASS	TYPE=snp	GT	1	1	0	0	0	0	1	0	0	0	0	1	0	0
EA2454	302930	.	A	G	.	PASS	TYPE=snp	GT	0	0	0	0	0	0	1	0	0	0	0	1	0	0
EA2454	302931	.	T	C	.	PASS	TYPE=snp	GT	0	0	0	0	0	0	1	0	0	0	0	1	0	0
EA2454	302969	.	C	T	.	PASS	TYPE=snp	GT	1	1	0	0	0	0	0	0	0	0	0	0	0	0
EA2454	303028	.	G	A	.	PASS	TYPE=snp	GT	0	0	0	0	0	0	1	0	0	0	0	1	0	0
EA2454	303047	.	T	A	.	PASS	TYPE=snp	GT	1	1	0	0	0	0	0	0	0	0	0	0	0	0
EA2454	303050	.	C	T	.	PASS	TYPE=snp	GT	1	1	0	0	0	0	0	0	0	0	0	0	0	0
EA2454	303053	.	A	G	.	PASS	TYPE=snp	GT	1	1	0	0	0	0	0	0	0	0	0	0	0	0
EA2454	303061	.	T	G	.	PASS	TYPE=snp	GT	1	1	0	0	0	0	0	0	0	0	0	0	0	0
EA2454	303062	.	A	T	.	PASS	TYPE=snp	GT	1	1	0	0	0	0	0	0	0	0	0	0	0	0
EA2454	303359	.	G	A	.	PASS	TYPE=snp	GT	1	1	0	0	0	0	0	0	0	0	0	0	0	0
EA2454	303365	.	C	T	.	PASS	TYPE=snp	GT	1	1	0	0	0	0	0	0	0	0	0	0	0	0
EA2454	303476	.	C	T	.	PASS	TYPE=snp	GT	0	0	0	0	0	0	1	0	0	0	0	1	0	0
EA2454	303533	.	A	G	.	PASS	TYPE=snp	GT	1	1	0	0	0	0	1	0	0	0	0	1	0	0
EA2454	303542	.	C	T	.	PASS	TYPE=snp	GT	1	1	0	0	0	0	0	0	0	0	0	0	0	0
EA2454	303575	.	A	G	.	PASS	TYPE=snp	GT	1	1	0	0	0	0	1	0	0	0	0	1	0	0
EA2454	303605	.	C	T	.	PASS	TYPE=snp	GT	1	1	0	0	0	0	0	0	0	0	0	0	0	0
EA2454	303617	.	G	A	.	PASS	TYPE=snp	GT	1	1	0	0	0	0	0	0	0	0	0	0	0	0
EA2454	303707	.	C	T	.	PASS	TYPE=snp	GT	1	1	0	0	0	0	0	0	0	0	0	0	0	0
EA2454	303867	.	A	G	.	PASS	TYPE=snp	GT	0	0	0	0	0	0	1	0	0	0	0	1	0	0
EA2454	303869	.	T	A	.	PASS	TYPE=snp	GT	1	1	0	0	0	0	0	0	0	0	0	0	0	0
EA2454	303968	.	T	C	.	PASS	TYPE=snp	GT	1	1	0	0	0	0	1	0	0	0	0	1	0	0
EA2454	304001	.	T	C	.	PASS	TYPE=snp	GT	1	1	0	0	0	0	1	0	0	0	0	1	0	0
EA2454	304012	.	C	T	.	PASS	TYPE=snp	GT	0	0	0	0	0	0	1	0	0	0	0	1	0	0
EA2454	304106	.	G	A	.	PASS	TYPE=snp	GT	0	0	0	0	0	0	1	0	0	0	0	0	0	0
EA2454	304109	.	T	G	.	PASS	TYPE=snp	GT	0	0	0	0	0	0	1	0	0	0	0	1	0	0
EA2454	304160	.	T	G	.	PASS	TYPE=snp	GT	1	1	0	0	0	0	0	0	0	0	0	0	0	0
EA2454	304199	.	T	C	.	PASS	TYPE=snp	GT	1	1	0	0	0	0	1	0	0	0	0	1	0	0
EA2454	304214	.	G	A	.	PASS	TYPE=snp	GT	0	0	0	0	0	0	1	0	0	0	0	1	0	0
EA2454	304252	.	A	T	.	PASS	TYPE=snp	GT	1	1	0	0	0	0	0	0	0	0	0	0	0	0
EA2454	304367	.	C	T	.	PASS	TYPE=snp	GT	0	0	0	0	0	0	1	0	0	0	0	1	0	0
EA2454	304368	.	A	G	.	PASS	TYPE=snp	GT	0	0	0	0	0	0	1	0	0	0	0	1	0	0
EA2454	304378	.	T	C	.	PASS	TYPE=snp	GT	0	0	0	0	0	0	1	0	0	0	0	1	0	0
EA2454	305129	.	G	A	.	PASS	TYPE=snp	GT	0	0	0	0	0	0	0	0	0	1	0	0	0	0
EA2454	305507	.	G	A	.	PASS	TYPE=snp	GT	0	0	0	0	0	0	0	0	1	0	1	0	0	0
EA2454	306354	.	G	A	.	PASS	TYPE=snp	GT	0	0	1	0	0	0	0	0	0	0	0	0	0	0
EA2454	307088	.	G	A	.	PASS	TYPE=snp	GT	0	0	0	0	0	0	0	0	1	0	1	0	0	0
EA2454	307680	.	T	A	.	PASS	TYPE=snp	GT	0	0	0	0	0	0	0	0	1	0	1	0	0	0
EA2454	307802	.	C	T	.	PASS	TYPE=snp	GT	0	0	1	0	0	0	0	0	0	0	0	0	0	0
EA2454	308042	.	A	C	.	PASS	TYPE=snp	GT	0	0	0	0	0	0	0	0	1	0	1	0	0	0
EA2454	310094	.	G	A	.	PASS	TYPE=snp	GT	0	0	0	0	0	0	0	0	1	0	1	0	0	0
EA2454	310181	.	G	A	.	PASS	TYPE=snp	GT	0	0	0	0	0	0	0	1	0	0	0	0	0	0
EA2454	310398	.	C	T	.	PASS	TYPE=snp	GT	0	0	0	0	0	0	0	0	1	0	1	0	0	0
EA2454	311207	.	A	C	.	PASS	TYPE=snp	GT	0	0	0	0	0	0	0	0	1	0	1	0	0	0
EA2454	311347	.	G	A	.	PASS	TYPE=snp	GT	1	1	0	0	0	0	0	1	0	0	0	0	0	0
EA2454	311941	.	C	T	.	PASS	TYPE=snp	GT	0	0	0	1	0	0	0	0	0	0	0	0	0	0
EA2454	312009	.	G	T	.	PASS	TYPE=snp	GT	0	0	0	0	0	0	0	0	1	0	1	0	0	0
EA2454	312992	.	C	T	.	PASS	TYPE=snp	GT	0	0	0	0	0	0	1	0	0	0	0	1	0	0
EA2454	313034	.	A	G	.	PASS	TYPE=snp	GT	1	1	1	1	1	0	1	1	1	1	1	1	1	0
EA2454	313922	.	G	A	.	PASS	TYPE=snp	GT	0	0	0	0	0	0	1	0	0	0	0	1	0	0
EA2454	314410	.	A	T	.	PASS	TYPE=snp	GT	0	0	0	0	0	0	0	0	1	0	1	0	0	0
EA2454	314871	.	C	T	.	PASS	TYPE=snp	GT	0	0	0	0	0	0	0	0	0	0	0	0	1	0
EA2454	315163	.	G	A	.	PASS	TYPE=snp	GT	0	0	0	0	0	0	0	0	1	0	1	0	0	0
EA2454	316012	.	C	T	.	PASS	TYPE=snp	GT	0	0	1	0	0	0	0	0	0	0	0	0	0	0
EA2454	316769	.	C	A	.	PASS	TYPE=snp	GT	1	1	0	0	0	0	0	1	0	0	0	0	0	0
EA2454	317106	.	T	C	.	PASS	TYPE=snp	GT	1	1	1	1	1	0	1	1	1	1	1	1	1	0
EA2454	318467	.	T	C	.	PASS	TYPE=snp	GT	0	0	1	1	1	0	0	0	0	0	0	0	1	0
EA2454	319327	.	G	C	.	PASS	TYPE=snp	GT	0	0	0	0	0	0	0	0	1	0	1	0	0	0
EA2454	321573	.	C	A	.	PASS	TYPE=snp	GT	0	0	0	0	0	0	0	0	1	0	1	0	0	0
EA2454	322495	.	G	A	.	PASS	TYPE=snp	GT	0	0	0	0	0	0	0	0	1	0	1	0	0	0
EA2454	322834	.	C	T	.	PASS	TYPE=snp	GT	0	0	0	0	0	0	0	0	0	0	0	0	1	0
EA2454	323459	.	G	A	.	PASS	TYPE=snp	GT	0	0	0	0	0	0	0	0	0	1	0	0	0	0
EA2454	323836	.	G	T	.	PASS	TYPE=snp	GT	0	0	0	0	0	0	0	0	0	1	0	0	0	0
EA2454	324216	.	G	A	.	PASS	TYPE=snp	GT	0	0	0	0	0	0	0	0	1	0	1	0	0	0
EA2454	325533	.	G	A	.	PASS	TYPE=snp	GT	0	0	1	0	0	0	0	0	0	0	0	0	0	0
EA2454	327651	.	C	G	.	PASS	TYPE=snp	GT	0	0	0	0	0	0	0	0	0	1	0	0	0	0
EA2454	327678	.	A	C	.	PASS	TYPE=snp	GT	0	0	0	0	0	0	0	0	1	0	1	0	0	0
EA2454	327934	.	C	T	.	PASS	TYPE=snp	GT	0	0	0	0	0	0	0	0	0	1	0	0	0	0
EA2454	328787	.	T	G	.	PASS	TYPE=snp	GT	0	0	0	0	0	0	0	0	0	0	0	1	0	0
EA2454	329517	.	C	G	.	PASS	TYPE=snp	GT	0	0	0	0	0	0	0	0	1	0	1	0	0	0
EA2454	331665	.	G	A	.	PASS	TYPE=snp	GT	0	0	0	0	0	0	0	0	0	1	0	0	0	0
EA2454	332521	.	A	C	.	PASS	TYPE=snp	GT	0	0	0	0	0	0	0	0	0	0	0	0	1	0
EA2454	332708	.	C	T	.	PASS	TYPE=snp	GT	0	0	0	0	0	0	1	0	0	0	0	1	0	0
EA2454	333155	.	G	T	.	PASS	TYPE=snp	GT	0	0	0	1	1	0	0	0	0	0	0	0	1	0
EA2454	333766	.	T	G	.	PASS	TYPE=snp	GT	1	1	0	0	0	0	0	0	0	0	0	0	0	0
EA2454	334084	.	G	A	.	PASS	TYPE=snp	GT	0	0	1	1	1	0	0	0	0	0	0	0	1	0
EA2454	334446	.	T	C	.	PASS	TYPE=snp	GT	0	0	0	0	0	0	0	1	0	0	0	0	0	0
EA2454	334855	.	A	C	.	PASS	TYPE=snp	GT	0	0	0	0	0	0	0	0	1	0	1	0	0	0
EA2454	335397	.	A	G	.	PASS	TYPE=snp	GT	0	0	0	0	0	0	0	0	0	1	0	0	0	0
EA2454	335897	.	T	A	.	PASS	TYPE=snp	GT	0	0	0	0	0	0	0	0	1	0	1	0	0	0
EA2454	337102	.	G	A	.	PASS	TYPE=snp	GT	0	0	1	1	1	0	0	0	0	0	0	0	1	0
EA2454	339420	.	C	T	.	PASS	TYPE=snp	GT	1	1	0	0	0	0	0	0	0	0	0	0	0	0
EA2454	340318	.	G	A	.	PASS	TYPE=snp	GT	0	0	0	0	0	0	0	0	1	0	1	0	0	0
EA2454	341041	.	C	T	.	PASS	TYPE=snp	GT	1	1	0	0	0	0	0	1	0	0	0	0	0	0
EA2454	341930	.	C	A	.	PASS	TYPE=snp	GT	0	0	0	0	0	0	0	0	0	1	0	0	0	0
EA2454	342188	.	G	A	.	PASS	TYPE=snp	GT	0	0	0	1	1	0	0	0	0	0	0	0	1	0
EA2454	343126	.	C	A	.	PASS	TYPE=snp	GT	0	0	1	0	0	0	0	0	0	0	0	0	0	0
EA2454	343195	.	G	A	.	PASS	TYPE=snp	GT	0	0	0	0	0	0	0	0	1	0	1	0	0	0
EA2454	343262	.	G	T	.	PASS	TYPE=snp	GT	0	0	0	0	0	0	0	0	0	1	0	0	0	0
EA2454	343648	.	G	A	.	PASS	TYPE=snp	GT	1	1	0	0	0	0	0	1	0	0	0	0	0	0
EA2454	343988	.	G	A	.	PASS	TYPE=snp	GT	0	0	0	0	0	0	0	0	0	1	0	0	0	0
EA2454	344966	.	T	C	.	PASS	TYPE=snp	GT	1	1	0	0	0	0	1	1	1	1	1	1	0	0
EA2454	346719	.	C	A	.	PASS	TYPE=snp	GT	0	0	0	1	0	0	0	0	0	0	0	0	0	0
EA2454	346796	.	A	C	.	PASS	TYPE=snp	GT	0	0	0	0	0	0	0	0	1	1	1	0	0	0
EA2454	348047	.	C	A	.	PASS	TYPE=snp	GT	0	0	0	0	0	0	1	0	0	0	0	1	0	0
EA2454	350137	.	C	T	.	PASS	TYPE=snp	GT	0	0	0	0	0	0	0	0	0	0	0	1	0	0
EA2454	350563	.	C	T	.	PASS	TYPE=snp	GT	0	0	0	0	0	0	0	0	0	0	0	1	0	0
EA2454	350969	.	A	G	.	PASS	TYPE=snp	GT	1	1	1	1	1	0	1	1	1	1	1	1	1	0
EA2454	351850	.	G	C	.	PASS	TYPE=snp	GT	1	1	0	0	0	0	0	0	0	0	0	0	0	0
EA2454	352054	.	C	A	.	PASS	TYPE=snp	GT	1	1	0	0	0	0	1	1	1	0	1	1	0	0
EA2454	352488	.	A	C	.	PASS	TYPE=snp	GT	1	1	0	0	0	0	0	1	0	0	0	0	0	0
EA2454	353870	.	G	A	.	PASS	TYPE=snp	GT	0	0	0	1	0	0	0	0	0	0	0	0	0	0
EA2454	354492	.	C	T	.	PASS	TYPE=snp	GT	1	1	0	0	0	0	0	0	0	0	0	0	0	0
EA2454	354964	.	G	A	.	PASS	TYPE=snp	GT	0	0	0	0	0	0	0	1	0	0	0	0	0	0
EA2454	356278	.	C	T	.	PASS	TYPE=snp	GT	0	0	1	0	0	0	0	0	0	0	0	0	0	0
EA2454	356329	.	G	A	.	PASS	TYPE=snp	GT	0	0	0	0	0	0	0	0	1	0	1	0	0	0
EA2454	356343	.	G	A	.	PASS	TYPE=snp	GT	0	0	0	0	0	0	0	0	1	0	1	0	0	0
EA2454	356914	.	G	A	.	PASS	TYPE=snp	GT	0	0	0	0	0	0	1	0	0	0	0	0	0	0
EA2454	357162	.	G	A	.	PASS	TYPE=snp	GT	0	0	0	1	0	0	0	0	0	0	0	0	0	0
EA2454	359110	.	C	T	.	PASS	TYPE=snp	GT	0	0	0	0	0	0	0	1	0	0	0	0	0	0
EA2454	359276	.	G	A	.	PASS	TYPE=snp	GT	0	0	1	0	0	0	0	0	0	0	0	0	0	0
EA2454	359344	.	T	A	.	PASS	TYPE=snp	GT	0	0	0	0	0	0	0	1	0	0	0	0	0	0
EA2454	359374	.	C	T	.	PASS	TYPE=snp	GT	0	0	1	1	1	0	0	0	0	0	0	0	1	0
EA2454	359494	.	G	A	.	PASS	TYPE=snp	GT	1	1	0	0	0	0	0	1	0	0	0	0	0	0
EA2454	359829	.	C	A	.	PASS	TYPE=snp	GT	0	0	1	0	0	0	0	0	0	0	0	0	0	0
EA2454	359909	.	C	T	.	PASS	TYPE=snp	GT	0	0	0	0	0	0	0	0	1	0	1	0	0	0
EA2454	359916	.	G	A	.	PASS	TYPE=snp	GT	0	0	0	0	0	0	0	0	1	0	1	0	0	0
EA2454	360484	.	G	A	.	PASS	TYPE=snp	GT	0	0	0	0	0	0	0	1	0	0	0	0	0	0
EA2454	360856	.	G	A	.	PASS	TYPE=snp	GT	1	1	0	0	0	0	0	0	0	0	0	0	0	0
EA2454	361440	.	G	A	.	PASS	TYPE=snp	GT	1	1	0	0	0	0	0	1	0	0	0	0	0	0
EA2454	364430	.	G	C	.	PASS	TYPE=snp	GT	0	0	0	0	0	0	0	0	1	0	1	0	0	0
EA2454	364865	.	T	C	.	PASS	TYPE=snp	GT	0	0	0	0	0	0	0	0	1	0	1	0	0	0
EA2454	365820	.	C	T	.	PASS	TYPE=snp	GT	1	1	0	0	0	0	0	0	0	0	0	0	0	0
EA2454	366365	.	C	A	.	PASS	TYPE=snp	GT	0	0	0	0	0	0	0	0	1	0	1	0	0	0
EA2454	367149	.	C	T	.	PASS	TYPE=snp	GT	1	1	0	0	0	0	0	0	0	0	0	0	0	0
EA2454	367885	.	C	A	.	PASS	TYPE=snp	GT	0	0	0	0	0	0	0	0	0	1	0	0	0	0
EA2454	369429	.	T	C	.	PASS	TYPE=snp	GT	1	1	0	0	0	0	1	1	1	1	1	1	0	0
EA2454	369480	.	G	A	.	PASS	TYPE=snp	GT	0	0	0	0	1	0	0	0	0	0	0	0	0	0
EA2454	369746	.	C	T	.	PASS	TYPE=snp	GT	0	0	1	0	0	0	0	0	0	0	0	0	0	0
EA2454	369840	.	A	G	.	PASS	TYPE=snp	GT	1	1	0	0	0	0	0	0	0	0	0	0	0	0
EA2454	371150	.	T	C	.	PASS	TYPE=snp	GT	1	1	1	1	1	0	1	1	1	1	1	1	1	0
EA2454	371977	.	G	A	.	PASS	TYPE=snp	GT	0	0	0	0	0	0	0	0	0	1	0	0	0	0
EA2454	371990	.	G	T	.	PASS	TYPE=snp	GT	0	0	0	0	0	0	0	0	0	1	0	0	0	0
EA2454	372193	.	G	A	.	PASS	TYPE=snp	GT	0	0	0	0	0	0	0	0	0	1	0	0	0	0
EA2454	373608	.	G	A	.	PASS	TYPE=snp	GT	0	0	0	0	0	0	0	0	1	0	1	0	0	0
EA2454	374297	.	A	G	.	PASS	TYPE=snp	GT	0	0	0	0	0	0	1	0	0	0	0	0	0	0
EA2454	375476	.	A	C	.	PASS	TYPE=snp	GT	0	0	0	0	0	0	0	0	1	0	1	0	0	0
EA2454	375553	.	T	A	.	PASS	TYPE=snp	GT	0	0	0	0	0	0	0	0	1	0	1	0	0	0
EA2454	375861	.	G	A	.	PASS	TYPE=snp	GT	0	0	0	0	0	0	0	0	1	0	1	0	0	0
EA2454	375982	.	G	A	.	PASS	TYPE=snp	GT	1	1	0	0	0	0	0	0	0	0	0	0	0	0
EA2454	376903	.	G	A	.	PASS	TYPE=snp	GT	0	0	1	1	1	0	0	0	0	0	0	0	1	0
EA2454	376932	.	G	A	.	PASS	TYPE=snp	GT	0	0	0	0	0	0	1	0	0	0	0	1	0	0
EA2454	378279	.	G	A	.	PASS	TYPE=snp	GT	0	0	0	0	0	0	0	1	0	0	0	0	0	0
EA2454	380076	.	G	A	.	PASS	TYPE=snp	GT	0	0	0	0	0	0	0	0	0	1	0	0	0	0
EA2454	380911	.	G	A	.	PASS	TYPE=snp	GT	0	0	0	0	0	0	0	0	1	0	1	0	0	0
EA2454	381439	.	G	A	.	PASS	TYPE=snp	GT	0	0	0	0	0	0	0	0	1	0	1	0	0	0
EA2454	381924	.	C	T	.	PASS	TYPE=snp	GT	0	0	0	0	0	0	0	0	1	0	1	0	0	0
EA2454	382085	.	T	C	.	PASS	TYPE=snp	GT	0	0	0	0	0	0	1	0	0	0	0	1	0	0
EA2454	382482	.	C	T	.	PASS	TYPE=snp	GT	0	0	0	0	0	0	0	0	1	0	1	0	0	0
EA2454	383169	.	A	C	.	PASS	TYPE=snp	GT	0	0	0	0	0	0	0	0	0	0	0	1	0	0
EA2454	384068	.	T	A	.	PASS	TYPE=snp	GT	0	0	0	0	0	0	0	0	0	1	0	0	0	0
EA2454	384244	.	G	A	.	PASS	TYPE=snp	GT	0	0	0	0	0	0	0	0	0	1	0	0	0	0
EA2454	385327	.	G	A	.	PASS	TYPE=snp	GT	0	0	0	0	0	0	0	0	1	0	1	0	0	0
EA2454	386099	.	G	A	.	PASS	TYPE=snp	GT	0	0	0	0	0	0	0	0	1	0	1	0	0	0
EA2454	386139	.	C	T	.	PASS	TYPE=snp	GT	0	0	0	0	0	0	0	0	0	1	0	0	0	0
EA2454	386406	.	C	A	.	PASS	TYPE=snp	GT	0	0	1	0	0	0	0	0	0	0	0	0	0	0
EA2454	387481	.	T	A	.	PASS	TYPE=snp	GT	0	0	0	0	0	0	0	0	0	1	0	0	0	0
EA2454	388160	.	A	C	.	PASS	TYPE=snp	GT	0	0	0	0	0	0	0	0	0	0	0	1	0	0
EA2454	388702	.	G	A	.	PASS	TYPE=snp	GT	0	0	0	0	0	0	0	0	0	1	0	0	0	0
EA2454	388918	.	T	G	.	PASS	TYPE=snp	GT	0	0	1	1	1	0	0	0	0	0	0	0	1	0
EA2454	390573	.	G	A	.	PASS	TYPE=snp	GT	0	0	0	0	0	0	1	0	0	0	0	1	0	0
EA2454	391067	.	T	G	.	PASS	TYPE=snp	GT	0	0	0	0	0	0	1	0	0	0	0	1	0	0
EA2454	392511	.	T	C	.	PASS	TYPE=snp	GT	1	1	0	0	0	0	1	1	1	1	1	1	0	0
EA2454	393575	.	A	G	.	PASS	TYPE=snp	GT	1	1	1	1	1	0	1	1	1	1	1	1	1	1
EA2454	393743	.	A	G	.	PASS	TYPE=snp	GT	1	1	1	1	1	0	1	1	1	1	1	1	1	0
EA2454	396055	.	T	C	.	PASS	TYPE=snp	GT	0	0	0	0	0	0	0	0	1	1	1	0	0	0
EA2454	396436	.	C	A	.	PASS	TYPE=snp	GT	1	1	0	0	0	0	0	1	0	0	0	0	0	0
EA2454	396458	.	G	A	.	PASS	TYPE=snp	GT	0	0	0	0	0	0	0	0	1	0	1	0	0	0
EA2454	396912	.	T	A	.	PASS	TYPE=snp	GT	0	0	0	0	0	0	0	0	0	0	0	0	1	0
EA2454	397444	.	C	G	.	PASS	TYPE=snp	GT	1	1	1	1	1	0	1	1	1	1	1	1	1	0
EA2454	398396	.	C	T	.	PASS	TYPE=snp	GT	0	0	0	0	0	0	1	0	0	0	0	1	0	0
EA2454	400978	.	C	T	.	PASS	TYPE=snp	GT	0	0	0	0	0	0	0	0	1	0	1	0	0	0
EA2454	401544	.	C	T	.	PASS	TYPE=snp	GT	0	0	0	0	0	0	0	1	0	0	0	0	0	0
EA2454	402042	.	G	A	.	PASS	TYPE=snp	GT	0	0	0	0	0	0	0	1	0	0	0	0	0	0
EA2454	405953	.	T	A	.	PASS	TYPE=snp	GT	1	1	0	0	0	0	0	0	0	0	0	0	0	0
EA2454	406821	.	G	A	.	PASS	TYPE=snp	GT	0	0	0	1	0	0	0	0	0	0	0	0	0	0
EA2454	407023	.	A	C	.	PASS	TYPE=snp	GT	0	0	0	0	0	0	0	0	1	0	1	0	0	0
EA2454	407113	.	A	G	.	PASS	TYPE=snp	GT	1	1	1	1	1	0	1	1	1	1	1	1	1	0
EA2454	407411	.	A	C	.	PASS	TYPE=snp	GT	0	0	0	0	0	0	1	0	0	0	0	0	0	0
EA2454	407887	.	C	G	.	PASS	TYPE=snp	GT	1	1	1	1	1	0	1	1	1	1	1	1	1	0
EA2454	408866	.	T	C	.	PASS	TYPE=snp	GT	0	0	0	0	0	0	0	1	0	0	0	0	0	0
EA2454	409424	.	G	T	.	PASS	TYPE=snp	GT	0	0	0	0	0	0	0	1	0	0	0	0	0	0
EA2454	409884	.	T	G	.	PASS	TYPE=snp	GT	1	1	0	0	0	0	1	1	1	1	1	1	0	0
EA2454	410785	.	G	A	.	PASS	TYPE=snp	GT	1	1	0	0	0	0	0	0	0	0	0	0	0	0
EA2454	411290	.	A	T	.	PASS	TYPE=snp	GT	0	0	0	0	0	0	1	0	0	0	0	1	0	0
EA2454	411520	.	T	A	.	PASS	TYPE=snp	GT	0	0	0	0	0	0	0	0	0	1	0	0	0	0
EA2454	411572	.	T	C	.	PASS	TYPE=snp	GT	0	0	0	0	0	0	0	0	0	1	0	0	0	0
EA2454	412377	.	A	C	.	PASS	TYPE=snp	GT	0	0	0	0	0	0	0	0	1	0	1	0	0	0
EA2454	412458	.	G	A	.	PASS	TYPE=snp	GT	0	0	0	1	1	0	0	0	0	0	0	0	1	0
EA2454	412599	.	C	T	.	PASS	TYPE=snp	GT	1	1	0	0	0	0	1	1	0	0	0	1	0	0
EA2454	412632	.	A	G	.	PASS	TYPE=snp	GT	0	0	0	0	0	0	0	0	1	0	1	0	0	0
EA2454	413942	.	G	A	.	PASS	TYPE=snp	GT	1	1	0	0	0	0	0	1	0	0	0	0	0	0
EA2454	414943	.	G	A	.	PASS	TYPE=snp	GT	0	0	0	0	0	0	0	1	0	0	0	0	0	0
EA2454	415150	.	G	A	.	PASS	TYPE=snp	GT	1	1	0	0	0	0	0	1	0	0	0	0	0	0
EA2454	415473	.	T	C	.	PASS	TYPE=snp	GT	0	0	0	1	0	0	0	0	0	0	0	0	0	0
EA2454	415498	.	G	A	.	PASS	TYPE=snp	GT	1	1	0	0	0	0	0	0	0	0	0	0	0	0
EA2454	415692	.	G	A	.	PASS	TYPE=snp	GT	0	0	0	0	0	0	0	0	1	0	1	0	0	0
EA2454	416393	.	T	A	.	PASS	TYPE=snp	GT	0	0	0	0	0	0	0	0	0	1	0	0	0	0
EA2454	416875	.	G	A	.	PASS	TYPE=snp	GT	0	0	0	0	0	0	0	0	0	1	0	0	0	0
EA2454	417355	.	T	A	.	PASS	TYPE=snp	GT	1	1	0	0	0	0	1	1	0	0	0	1	0	0
EA2454	418125	.	G	A	.	PASS	TYPE=snp	GT	0	0	1	0	0	0	0	0	0	0	0	0	0	0
EA2454	418538	.	C	T	.	PASS	TYPE=snp	GT	0	0	0	0	0	0	0	0	1	0	1	0	0	0
EA2454	420347	.	A	C	.	PASS	TYPE=snp	GT	0	0	0	0	0	0	0	0	1	0	1	0	0	0
EA2454	420707	.	A	C	.	PASS	TYPE=snp	GT	0	0	0	0	0	0	0	0	1	0	1	0	0	0
EA2454	421662	.	T	A	.	PASS	TYPE=snp	GT	0	0	0	0	0	0	1	0	0	0	0	0	0	0
EA2454	423123	.	T	C	.	PASS	TYPE=snp	GT	0	0	0	0	0	0	0	0	1	0	1	0	0	0
EA2454	423435	.	C	A	.	PASS	TYPE=snp	GT	0	0	0	0	0	0	1	0	0	0	0	1	0	0
EA2454	425610	.	C	T	.	PASS	TYPE=snp	GT	0	0	0	0	1	0	0	0	0	0	0	0	0	0
EA2454	425636	.	A	G	.	PASS	TYPE=snp	GT	0	0	0	0	0	0	0	0	0	1	0	0	0	0
EA2454	427323	.	C	T	.	PASS	TYPE=snp	GT	1	1	0	0	0	0	0	0	0	0	0	0	0	0
EA2454	428546	.	G	A	.	PASS	TYPE=snp	GT	1	1	0	0	0	0	0	1	0	0	0	0	0	0
EA2454	429193	.	C	T	.	PASS	TYPE=snp	GT	0	0	0	0	0	0	1	0	0	0	0	1	0	0
EA2454	429541	.	G	A	.	PASS	TYPE=snp	GT	0	0	0	0	1	0	0	0	0	0	0	0	0	0
EA2454	429890	.	G	C	.	PASS	TYPE=snp	GT	1	1	0	0	0	0	0	0	0	0	0	0	0	0
EA2454	429895	.	C	A	.	PASS	TYPE=snp	GT	0	0	0	0	0	0	0	1	0	0	0	0	0	0
EA2454	430947	.	T	C	.	PASS	TYPE=snp	GT	1	1	0	0	0	0	1	1	1	1	1	1	0	0
EA2454	432665	.	A	C	.	PASS	TYPE=snp	GT	0	0	0	0	0	0	0	0	1	0	1	0	0	0
EA2454	436532	.	T	G	.	PASS	TYPE=snp	GT	0	0	0	0	1	0	0	0	0	0	0	0	0	0
EA2454	437474	.	A	G	.	PASS	TYPE=snp	GT	1	1	1	1	1	0	1	1	1	1	1	1	1	0
EA2454	438148	.	G	T	.	PASS	TYPE=snp	GT	0	0	0	0	0	0	0	0	1	0	1	0	0	0
EA2454	438347	.	G	A	.	PASS	TYPE=snp	GT	0	0	0	0	1	0	0	0	0	0	0	0	0	0
EA2454	438577	.	G	A	.	PASS	TYPE=snp	GT	0	0	0	0	0	0	0	0	0	1	0	0	0	0
EA2454	440671	.	C	T	.	PASS	TYPE=snp	GT	1	1	0	0	0	0	0	0	0	0	0	0	0	0
EA2454	440837	.	C	A	.	PASS	TYPE=snp	GT	1	1	1	1	1	0	1	1	1	1	1	1	1	0
EA2454	442423	.	G	A	.	PASS	TYPE=snp	GT	0	0	0	0	0	0	1	0	0	0	0	1	0	0
EA2454	444160	.	C	T	.	PASS	TYPE=snp	GT	0	0	0	0	0	0	1	0	0	0	0	1	0	0
EA2454	444428	.	G	A	.	PASS	TYPE=snp	GT	0	0	0	0	0	0	0	0	1	0	1	0	0	0
EA2454	445363	.	C	A	.	PASS	TYPE=snp	GT	0	0	1	0	0	0	0	0	0	0	0	0	0	0
EA2454	445627	.	G	T	.	PASS	TYPE=snp	GT	0	0	0	0	0	0	0	1	0	0	0	0	0	0
EA2454	445869	.	T	C	.	PASS	TYPE=snp	GT	1	1	0	0	0	0	0	0	0	0	0	0	0	0
EA2454	447459	.	A	G	.	PASS	TYPE=snp	GT	1	1	1	1	1	0	1	1	1	1	1	1	1	0
EA2454	448711	.	A	G	.	PASS	TYPE=snp	GT	1	1	1	1	1	0	1	1	1	1	1	1	1	0
EA2454	448932	.	T	G	.	PASS	TYPE=snp	GT	0	0	0	0	0	0	0	0	0	0	0	1	0	0
EA2454	449063	.	T	C	.	PASS	TYPE=snp	GT	0	0	0	0	0	0	0	0	1	0	1	0	0	0
EA2454	449600	.	C	A	.	PASS	TYPE=snp	GT	0	0	0	0	0	0	0	0	1	0	1	0	0	0
EA2454	449737	.	A	C	.	PASS	TYPE=snp	GT	0	0	0	0	0	0	0	0	0	1	0	0	0	0
EA2454	450076	.	G	A	.	PASS	TYPE=snp	GT	0	0	0	1	0	0	0	0	0	0	0	0	0	0
EA2454	452246	.	A	C	.	PASS	TYPE=snp	GT	0	0	0	0	0	0	0	0	1	0	1	0	0	0
EA2454	452556	.	C	A	.	PASS	TYPE=snp	GT	1	1	0	0	0	0	0	1	0	0	0	0	0	0
EA2454	452711	.	T	A	.	PASS	TYPE=snp	GT	1	1	0	0	0	0	1	1	1	1	1	1	0	0
EA2454	452751	.	C	T	.	PASS	TYPE=snp	GT	1	1	0	0	0	0	0	0	0	0	0	0	0	0
EA2454	453153	.	G	A	.	PASS	TYPE=snp	GT	0	0	0	0	0	0	0	0	0	1	0	0	0	0
EA2454	453785	.	C	A	.	PASS	TYPE=snp	GT	0	0	0	0	0	0	0	1	0	0	0	0	0	0
EA2454	453943	.	G	T	.	PASS	TYPE=snp	GT	0	0	0	0	0	0	0	0	1	0	1	0	0	0
EA2454	454771	.	C	T	.	PASS	TYPE=snp	GT	0	0	1	0	0	0	0	0	0	0	0	0	0	0
EA2454	454890	.	C	T	.	PASS	TYPE=snp	GT	0	0	1	1	1	0	0	0	0	0	0	0	1	0
EA2454	454953	.	T	C	.	PASS	TYPE=snp	GT	0	0	0	0	0	0	0	0	0	1	0	0	0	0
EA2454	456123	.	G	A	.	PASS	TYPE=snp	GT	0	0	0	0	0	0	0	0	0	0	0	0	1	0
EA2454	457082	.	C	T	.	PASS	TYPE=snp	GT	1	1	1	1	1	0	1	1	1	1	1	1	1	0
EA2454	457893	.	C	A	.	PASS	TYPE=snp	GT	0	0	0	0	0	0	1	0	0	0	0	1	0	0
EA2454	459248	.	A	G	.	PASS	TYPE=snp	GT	1	1	0	0	0	0	1	1	1	1	1	1	0	0
EA2454	460233	.	G	A	.	PASS	TYPE=snp	GT	0	0	0	0	0	0	0	0	1	0	1	0	0	0
EA2454	460261	.	G	A	.	PASS	TYPE=snp	GT	0	0	0	0	0	0	0	0	1	0	1	0	0	0
EA2454	463635	.	G	T	.	PASS	TYPE=snp	GT	0	0	0	0	0	0	1	0	0	0	0	1	0	0
EA2454	464006	.	A	C	.	PASS	TYPE=snp	GT	1	1	0	0	0	0	0	1	0	0	0	0	0	0
EA2454	465826	.	A	T	.	PASS	TYPE=snp	GT	1	1	1	1	1	0	1	1	1	1	1	1	1	0
EA2454	465874	.	G	A	.	PASS	TYPE=snp	GT	0	0	0	0	0	0	0	1	0	0	0	0	0	0
EA2454	466128	.	A	T	.	PASS	TYPE=snp	GT	0	0	0	0	0	0	0	0	1	0	1	0	0	0
EA2454	467184	.	C	T	.	PASS	TYPE=snp	GT	0	0	0	0	0	0	0	0	1	0	1	0	0	0
EA2454	468099	.	G	A	.	PASS	TYPE=snp	GT	0	0	0	0	0	0	0	0	0	1	0	0	0	0
EA2454	469328	.	G	A	.	PASS	TYPE=snp	GT	1	1	0	0	0	0	0	1	0	0	0	0	0	0
EA2454	470437	.	C	T	.	PASS	TYPE=snp	GT	0	0	1	1	1	0	0	0	0	0	0	0	1	0
EA2454	471459	.	A	T	.	PASS	TYPE=snp	GT	1	1	0	0	0	0	0	0	0	0	0	0	0	0
EA2454	471709	.	A	G	.	PASS	TYPE=snp	GT	0	0	0	0	0	0	1	0	0	0	0	1	0	0
EA2454	471914	.	T	G	.	PASS	TYPE=snp	GT	0	0	0	0	0	0	0	0	0	0	0	0	0	1
EA2454	472868	.	A	C	.	PASS	TYPE=snp	GT	0	0	0	0	0	0	0	1	0	0	0	0	0	0
EA2454	472911	.	T	C	.	PASS	TYPE=snp	GT	1	1	1	1	1	0	1	1	1	1	1	1	1	0
EA2454	473611	.	A	G	.	PASS	TYPE=snp	GT	0	0	0	0	0	0	1	0	0	0	0	1	0	0
EA2454	474394	.	G	A	.	PASS	TYPE=snp	GT	1	1	0	0	0	0	0	1	0	0	0	0	0	0
EA2454	474428	.	C	T	.	PASS	TYPE=snp	GT	1	1	0	0	0	0	0	0	0	0	0	0	0	0
EA2454	474484	.	G	A	.	PASS	TYPE=snp	GT	0	0	0	0	0	0	1	0	0	0	0	1	0	0
EA2454	475511	.	T	A	.	PASS	TYPE=snp	GT	0	0	0	0	0	0	1	0	0	0	0	1	0	0
EA2454	476124	.	C	T	.	PASS	TYPE=snp	GT	0	0	1	0	0	0	0	0	0	0	0	0	0	0
EA2454	477552	.	G	A	.	PASS	TYPE=snp	GT	1	1	0	0	0	0	1	1	1	1	1	1	0	0
EA2454	477965	.	G	T	.	PASS	TYPE=snp	GT	0	0	0	0	0	0	0	0	0	1	0	0	0	0
EA2454	478727	.	C	A	.	PASS	TYPE=snp	GT	1	1	1	1	1	0	1	1	1	1	1	1	1	0
EA2454	479208	.	C	T	.	PASS	TYPE=snp	GT	0	0	0	0	0	0	0	0	1	0	1	0	0	0
EA2454	481815	.	T	G	.	PASS	TYPE=snp	GT	0	0	0	0	0	0	0	0	1	0	1	0	0	0
EA2454	482022	.	T	G	.	PASS	TYPE=snp	GT	0	0	0	1	0	0	0	0	0	0	0	0	0	0
EA2454	482454	.	C	T	.	PASS	TYPE=snp	GT	0	0	0	0	0	0	0	0	1	0	1	0	0	0
EA2454	483311	.	T	G	.	PASS	TYPE=snp	GT	0	0	0	0	0	0	0	0	1	0	1	0	0	0
EA2454	483564	.	C	A	.	PASS	TYPE=snp	GT	0	0	0	0	0	0	0	0	1	0	1	0	0	0
EA2454	483790	.	C	T	.	PASS	TYPE=snp	GT	0	0	0	1	0	0	0	0	0	0	0	0	0	0
EA2454	483805	.	G	A	.	PASS	TYPE=snp	GT	0	0	1	0	0	0	0	0	0	0	0	0	0	0
EA2454	483833	.	G	A	.	PASS	TYPE=snp	GT	0	0	0	0	0	0	0	0	0	0	0	0	1	0
EA2454	484002	.	G	A	.	PASS	TYPE=snp	GT	1	1	0	0	0	0	0	1	0	0	0	0	0	0
EA2454	485022	.	G	A	.	PASS	TYPE=snp	GT	0	0	0	0	0	0	0	0	0	1	0	0	0	0
EA2454	485082	.	T	G	.	PASS	TYPE=snp	GT	0	0	0	0	0	0	0	0	0	1	0	0	0	0
EA2454	485246	.	C	T	.	PASS	TYPE=snp	GT	0	0	1	1	1	0	0	0	0	0	0	0	1	0
EA2454	485759	.	C	T	.	PASS	TYPE=snp	GT	0	0	0	0	0	0	1	0	0	0	0	1	0	0
EA2454	485779	.	C	G	.	PASS	TYPE=snp	GT	1	1	1	1	1	0	1	1	1	1	1	1	1	0
EA2454	485836	.	G	A	.	PASS	TYPE=snp	GT	0	0	0	0	0	0	0	0	1	0	1	0	0	0
EA2454	485953	.	C	A	.	PASS	TYPE=snp	GT	1	1	0	0	0	0	0	0	0	0	0	0	0	0
EA2454	485955	.	G	T	.	PASS	TYPE=snp	GT	0	0	0	1	1	0	0	0	0	0	0	0	1	0
EA2454	485957	.	T	C	.	PASS	TYPE=snp	GT	0	0	0	0	0	0	0	0	1	0	1	0	0	0
EA2454	486024	.	G	A	.	PASS	TYPE=snp	GT	0	0	0	0	0	0	0	0	0	0	0	0	1	0
EA2454	486093	.	C	T	.	PASS	TYPE=snp	GT	0	0	0	0	0	0	0	0	0	1	0	0	0	0
EA2454	487623	.	T	C	.	PASS	TYPE=snp	GT	1	1	0	0	0	0	0	0	0	0	0	0	0	0
EA2454	488244	.	G	A	.	PASS	TYPE=snp	GT	0	0	1	0	0	0	0	0	0	0	0	0	0	0
EA2454	488462	.	G	A	.	PASS	TYPE=snp	GT	1	1	0	0	0	0	1	1	0	0	0	1	0	0
EA2454	489881	.	G	A	.	PASS	TYPE=snp	GT	0	0	0	0	0	0	0	0	1	0	1	0	0	0
EA2454	489901	.	G	T	.	PASS	TYPE=snp	GT	0	0	1	0	0	0	0	0	0	0	0	0	0	0
EA2454	493601	.	C	A	.	PASS	TYPE=snp	GT	0	0	0	0	0	0	0	0	1	0	1	0	0	0
EA2454	496818	.	T	A	.	PASS	TYPE=snp	GT	0	0	0	0	0	0	0	0	0	1	0	0	0	0
EA2454	497207	.	C	A	.	PASS	TYPE=snp	GT	0	0	0	0	0	0	0	0	1	0	1	0	0	0
EA2454	497460	.	T	G	.	PASS	TYPE=snp	GT	1	1	1	1	1	0	1	1	1	1	1	1	1	0
EA2454	497568	.	A	T	.	PASS	TYPE=snp	GT	0	0	0	0	0	0	0	0	0	0	0	0	0	1
EA2454	498706	.	G	A	.	PASS	TYPE=snp	GT	0	0	0	0	0	0	1	0	0	0	0	1	0	0
EA2454	499083	.	A	T	.	PASS	TYPE=snp	GT	1	1	0	0	0	0	0	1	0	0	0	0	0	0
EA2454	499232	.	G	T	.	PASS	TYPE=snp	GT	1	1	0	0	0	0	0	1	0	0	0	0	0	0
EA2454	499783	.	C	T	.	PASS	TYPE=snp	GT	0	0	0	1	0	0	0	0	0	0	0	0	0	0
EA2454	499875	.	C	A	.	PASS	TYPE=snp	GT	0	0	0	0	0	0	0	1	0	0	0	0	0	0
EA2454	500218	.	G	A	.	PASS	TYPE=snp	GT	0	0	0	0	0	0	0	0	1	0	1	0	0	0
EA2454	500446	.	C	T	.	PASS	TYPE=snp	GT	0	0	0	0	1	0	0	0	0	0	0	0	0	0
EA2454	501060	.	A	G	.	PASS	TYPE=snp	GT	0	0	0	0	0	0	0	0	0	1	0	0	0	0
EA2454	502913	.	G	A	.	PASS	TYPE=snp	GT	1	1	0	0	0	0	0	1	0	0	0	0	0	0
EA2454	503007	.	G	A	.	PASS	TYPE=snp	GT	0	0	0	0	0	0	0	0	1	0	1	0	0	0
EA2454	506728	.	G	A	.	PASS	TYPE=snp	GT	0	0	0	0	1	0	0	0	0	0	0	0	0	0
EA2454	507555	.	G	A	.	PASS	TYPE=snp	GT	0	0	1	0	0	0	0	0	0	0	0	0	0	0
EA2454	508293	.	C	T	.	PASS	TYPE=snp	GT	0	0	0	1	0	0	0	0	0	0	0	0	0	0
EA2454	508877	.	G	A	.	PASS	TYPE=snp	GT	0	0	0	0	0	0	0	0	1	0	1	0	0	0
EA2454	509958	.	G	A	.	PASS	TYPE=snp	GT	1	1	0	0	0	0	0	0	0	0	0	0	0	0
EA2454	510234	.	T	A	.	PASS	TYPE=snp	GT	0	0	0	0	0	0	0	0	0	1	0	0	0	0
EA2454	510992	.	C	T	.	PASS	TYPE=snp	GT	0	0	1	1	1	0	0	0	0	0	0	0	1	0
EA2454	511266	.	C	T	.	PASS	TYPE=snp	GT	0	0	0	0	0	0	0	1	0	0	0	0	0	0
EA2454	511307	.	C	T	.	PASS	TYPE=snp	GT	0	0	0	0	0	0	0	0	1	0	1	0	0	0
EA2454	511943	.	A	G	.	PASS	TYPE=snp	GT	1	1	0	0	0	0	1	1	1	1	1	1	0	0
EA2454	512740	.	C	T	.	PASS	TYPE=snp	GT	0	0	0	0	0	0	0	0	1	0	1	0	0	0
EA2454	516039	.	T	C	.	PASS	TYPE=snp	GT	0	0	0	0	0	0	0	1	0	0	0	0	0	0
EA2454	517520	.	G	A	.	PASS	TYPE=snp	GT	0	0	0	0	0	0	1	0	0	0	0	1	0	0
EA2454	517655	.	C	T	.	PASS	TYPE=snp	GT	0	0	0	0	0	0	0	0	1	0	1	0	0	0
EA2454	517972	.	G	A	.	PASS	TYPE=snp	GT	0	0	0	0	0	0	0	1	0	0	0	0	0	0
EA2454	518663	.	G	A	.	PASS	TYPE=snp	GT	0	0	0	0	0	0	0	0	1	0	1	0	0	0
EA2454	518900	.	G	A	.	PASS	TYPE=snp	GT	0	0	0	0	0	0	1	0	0	0	0	1	0	0
EA2454	519195	.	G	A	.	PASS	TYPE=snp	GT	0	0	1	1	1	0	0	0	0	0	0	0	1	0
EA2454	519811	.	A	C	.	PASS	TYPE=snp	GT	1	1	1	1	1	0	1	1	1	1	1	1	1	0
EA2454	520294	.	C	T	.	PASS	TYPE=snp	GT	0	0	0	0	0	0	0	0	0	0	0	0	1	0
EA2454	520384	.	C	A	.	PASS	TYPE=snp	GT	0	0	0	0	0	0	0	0	1	0	1	0	0	0
EA2454	523715	.	T	G	.	PASS	TYPE=snp	GT	0	0	0	0	0	0	0	0	0	1	0	0	0	0
EA2454	523923	.	C	G	.	PASS	TYPE=snp	GT	1	1	0	0	0	0	1	1	1	1	1	1	0	0
EA2454	523962	.	C	T	.	PASS	TYPE=snp	GT	0	0	0	1	0	0	0	0	0	0	0	0	0	0
EA2454	524002	.	C	T	.	PASS	TYPE=snp	GT	0	0	0	0	0	0	0	0	1	0	1	0	0	0
EA2454	524994	.	T	G	.	PASS	TYPE=snp	GT	0	0	0	0	1	0	0	0	0	0	0	0	0	0
EA2454	527024	.	T	C	.	PASS	TYPE=snp	GT	0	0	1	0	0	0	0	0	0	0	0	0	0	0
EA2454	527663	.	T	A	.	PASS	TYPE=snp	GT	0	0	0	0	0	0	1	0	0	0	0	1	0	0
EA2454	528096	.	C	T	.	PASS	TYPE=snp	GT	0	0	0	0	0	0	0	0	0	0	0	1	0	0
EA2454	528123	.	A	T	.	PASS	TYPE=snp	GT	1	1	1	1	1	0	1	1	1	1	1	1	1	0
EA2454	529040	.	C	T	.	PASS	TYPE=snp	GT	1	1	0	0	0	0	0	1	0	0	0	0	0	0
EA2454	530275	.	C	A	.	PASS	TYPE=snp	GT	0	0	0	0	0	0	0	1	0	0	0	0	0	0
EA2454	530600	.	G	T	.	PASS	TYPE=snp	GT	0	0	0	0	0	0	0	0	1	0	1	0	0	0
EA2454	531431	.	A	G	.	PASS	TYPE=snp	GT	0	0	0	0	0	0	1	0	0	0	0	1	0	0
EA2454	531539	.	G	A	.	PASS	TYPE=snp	GT	1	1	0	0	0	0	1	1	0	0	0	1	0	0
EA2454	531874	.	C	T	.	PASS	TYPE=snp	GT	0	0	0	0	0	0	0	0	1	0	0	0	0	0
EA2454	531907	.	T	C	.	PASS	TYPE=snp	GT	0	0	1	0	0	0	0	0	0	0	0	0	0	0
EA2454	532052	.	G	A	.	PASS	TYPE=snp	GT	0	0	0	0	0	0	0	0	1	0	1	0	0	0
EA2454	534151	.	A	G	.	PASS	TYPE=snp	GT	1	1	1	1	1	0	1	1	1	1	1	1	1	0
EA2454	535476	.	C	A	.	PASS	TYPE=snp	GT	0	0	0	0	0	0	0	0	1	0	1	0	0	0
EA2454	536338	.	C	T	.	PASS	TYPE=snp	GT	0	0	0	0	0	0	0	0	1	0	1	0	0	0
EA2454	537585	.	G	A	.	PASS	TYPE=snp	GT	0	0	0	1	0	0	0	0	0	0	0	0	0	0
EA2454	538864	.	G	A	.	PASS	TYPE=snp	GT	0	0	0	0	0	0	0	0	1	0	1	0	0	0
EA2454	538980	.	G	A	.	PASS	TYPE=snp	GT	0	0	0	0	1	0	0	0	0	0	0	0	0	0
EA2454	539426	.	T	C	.	PASS	TYPE=snp	GT	1	1	1	1	1	0	1	1	1	1	1	1	1	1
EA2454	539532	.	C	A	.	PASS	TYPE=snp	GT	0	0	0	0	0	0	0	0	1	0	1	0	0	0
EA2454	540409	.	G	A	.	PASS	TYPE=snp	GT	1	1	0	0	0	0	0	0	0	0	0	0	0	0
EA2454	542323	.	G	A	.	PASS	TYPE=snp	GT	0	0	0	0	0	0	0	0	0	0	0	0	0	1
EA2454	542430	.	A	T	.	PASS	TYPE=snp	GT	0	0	0	0	0	0	0	0	1	0	1	0	0	0
EA2454	543142	.	C	T	.	PASS	TYPE=snp	GT	1	1	0	0	0	0	1	1	0	0	0	1	0	0
EA2454	543679	.	G	A	.	PASS	TYPE=snp	GT	0	0	0	0	0	0	0	0	0	1	0	0	0	0
EA2454	545737	.	G	A	.	PASS	TYPE=snp	GT	1	1	0	0	0	0	0	1	0	0	0	0	0	0
EA2454	546117	.	C	T	.	PASS	TYPE=snp	GT	0	0	0	0	0	0	0	0	0	1	0	0	0	0
EA2454	546428	.	A	C	.	PASS	TYPE=snp	GT	1	1	1	1	1	0	1	1	1	1	1	1	1	0
EA2454	546813	.	C	T	.	PASS	TYPE=snp	GT	0	0	0	1	0	0	0	0	0	0	0	0	0	0
EA2454	547086	.	A	C	.	PASS	TYPE=snp	GT	0	0	0	0	0	0	0	0	1	0	1	0	0	0
EA2454	547138	.	T	A	.	PASS	TYPE=snp	GT	0	0	0	0	0	0	0	0	0	1	0	0	0	0
EA2454	547798	.	G	A	.	PASS	TYPE=snp	GT	0	0	0	0	0	0	0	1	0	0	0	0	0	0
EA2454	547882	.	G	T	.	PASS	TYPE=snp	GT	1	1	0	0	0	0	0	0	0	0	0	0	0	0
EA2454	548687	.	A	G	.	PASS	TYPE=snp	GT	0	0	0	0	0	0	0	0	0	0	0	1	0	0
EA2454	549063	.	A	G	.	PASS	TYPE=snp	GT	0	0	0	0	0	0	0	0	1	1	1	0	0	0
EA2454	549981	.	C	T	.	PASS	TYPE=snp	GT	1	1	0	0	0	0	0	1	0	0	0	0	0	0
EA2454	550000	.	G	A	.	PASS	TYPE=snp	GT	0	0	1	1	1	0	0	0	0	0	0	0	1	0
EA2454	550155	.	G	T	.	PASS	TYPE=snp	GT	0	0	0	0	0	0	0	0	0	0	0	1	0	0
EA2454	550156	.	C	T	.	PASS	TYPE=snp	GT	0	0	0	0	0	0	0	0	1	0	1	0	0	0
EA2454	550654	.	T	C	.	PASS	TYPE=snp	GT	1	1	0	0	0	0	1	1	1	1	1	1	0	0
EA2454	552561	.	C	T	.	PASS	TYPE=snp	GT	1	1	0	0	0	0	1	1	1	1	1	1	0	0
EA2454	554463	.	G	A	.	PASS	TYPE=snp	GT	0	0	0	0	0	0	0	0	0	1	0	0	0	0
EA2454	554466	.	A	G	.	PASS	TYPE=snp	GT	0	0	0	0	0	0	0	0	1	1	1	0	0	0
EA2454	554830	.	G	A	.	PASS	TYPE=snp	GT	0	0	0	0	0	0	0	0	1	0	1	0	0	0
EA2454	555130	.	G	A	.	PASS	TYPE=snp	GT	1	1	0	0	0	0	0	0	0	0	0	0	0	0
EA2454	556108	.	G	C	.	PASS	TYPE=snp	GT	0	0	0	0	0	0	0	0	1	0	1	0	0	0
EA2454	556318	.	G	A	.	PASS	TYPE=snp	GT	0	0	1	0	0	0	0	0	0	0	0	0	0	0
EA2454	557809	.	C	T	.	PASS	TYPE=snp	GT	0	0	0	0	0	0	1	0	0	0	0	0	0	0
EA2454	559017	.	A	G	.	PASS	TYPE=snp	GT	1	1	1	1	1	0	1	1	1	1	1	1	1	0
EA2454	559185	.	G	A	.	PASS	TYPE=snp	GT	0	0	0	0	0	0	0	0	0	0	0	0	1	0
EA2454	559470	.	T	C	.	PASS	TYPE=snp	GT	0	0	0	0	0	0	0	0	0	1	0	0	0	0
EA2454	559965	.	A	G	.	PASS	TYPE=snp	GT	1	1	0	0	0	0	0	0	0	0	0	0	0	0
EA2454	560855	.	G	A	.	PASS	TYPE=snp	GT	0	0	0	0	0	0	0	0	0	0	0	1	0	0
EA2454	561226	.	G	A	.	PASS	TYPE=snp	GT	1	1	1	1	1	0	1	1	1	1	1	1	1	0
EA2454	562933	.	T	C	.	PASS	TYPE=snp	GT	1	1	1	1	1	0	1	1	1	1	1	1	1	0
EA2454	562951	.	C	T	.	PASS	TYPE=snp	GT	1	1	0	0	0	0	0	1	0	0	0	0	0	0
EA2454	563413	.	G	A	.	PASS	TYPE=snp	GT	0	0	0	0	0	0	0	0	1	0	1	0	0	0
EA2454	564605	.	T	G	.	PASS	TYPE=snp	GT	0	0	0	0	0	0	0	0	1	0	1	0	0	0
EA2454	564631	.	C	T	.	PASS	TYPE=snp	GT	1	1	0	0	0	0	0	0	0	0	0	0	0	0
EA2454	565030	.	T	C	.	PASS	TYPE=snp	GT	0	0	0	0	0	0	0	0	0	1	0	0	0	0
EA2454	569410	.	C	T	.	PASS	TYPE=snp	GT	0	0	0	0	0	0	0	0	0	0	0	0	0	1
EA2454	569495	.	G	A	.	PASS	TYPE=snp	GT	0	0	0	0	0	0	0	0	0	0	0	1	0	0
EA2454	569666	.	T	C	.	PASS	TYPE=snp	GT	0	0	0	1	0	0	0	0	0	0	0	0	0	0
EA2454	569691	.	C	T	.	PASS	TYPE=snp	GT	0	0	0	0	0	0	0	0	1	0	1	0	0	0
EA2454	569748	.	T	C	.	PASS	TYPE=snp	GT	0	0	0	0	0	0	0	1	0	0	0	0	0	0
EA2454	569752	.	G	A	.	PASS	TYPE=snp	GT	0	0	0	0	0	0	0	1	0	0	0	0	0	0
EA2454	570422	.	C	T	.	PASS	TYPE=snp	GT	0	0	0	0	0	0	0	0	1	0	1	0	0	0
EA2454	571709	.	A	G	.	PASS	TYPE=snp	GT	1	1	0	0	0	0	1	1	0	0	0	1	0	0
EA2454	571951	.	C	A	.	PASS	TYPE=snp	GT	0	0	0	0	0	0	1	0	0	0	0	1	0	0
EA2454	571989	.	C	T	.	PASS	TYPE=snp	GT	0	0	0	0	0	0	0	0	0	1	0	0	0	0
EA2454	572372	.	T	G	.	PASS	TYPE=snp	GT	1	1	0	0	0	0	0	0	0	0	0	0	0	0
EA2454	573038	.	C	T	.	PASS	TYPE=snp	GT	0	0	0	1	0	0	0	0	0	0	0	0	0	0
EA2454	573172	.	T	G	.	PASS	TYPE=snp	GT	0	0	0	0	0	0	0	0	1	0	1	0	0	0
EA2454	574054	.	C	T	.	PASS	TYPE=snp	GT	1	1	0	0	0	0	0	0	0	0	0	0	0	0
EA2454	575654	.	T	C	.	PASS	TYPE=snp	GT	0	0	0	0	0	0	0	0	0	1	0	0	0	0
EA2454	577660	.	T	C	.	PASS	TYPE=snp	GT	1	1	0	0	0	0	0	0	0	0	0	0	0	0
EA2454	577678	.	C	T	.	PASS	TYPE=snp	GT	0	0	0	0	0	0	0	0	1	0	1	0	0	0
EA2454	578357	.	C	T	.	PASS	TYPE=snp	GT	0	0	0	1	0	0	0	0	0	0	0	0	0	0
EA2454	579241	.	C	T	.	PASS	TYPE=snp	GT	0	0	0	0	0	0	0	0	1	0	1	0	0	0
EA2454	580223	.	C	T	.	PASS	TYPE=snp	GT	0	0	0	0	0	0	0	0	1	0	1	0	0	0
EA2454	582745	.	C	T	.	PASS	TYPE=snp	GT	0	0	0	0	0	0	0	0	0	0	0	0	1	0
EA2454	583662	.	T	A	.	PASS	TYPE=snp	GT	0	0	0	0	0	0	1	0	0	0	0	1	0	0
EA2454	586152	.	G	A	.	PASS	TYPE=snp	GT	1	1	0	0	0	0	0	1	0	0	0	0	0	0
EA2454	586529	.	G	T	.	PASS	TYPE=snp	GT	0	0	0	0	0	0	0	0	1	0	1	0	0	0
EA2454	586722	.	C	T	.	PASS	TYPE=snp	GT	0	0	0	0	0	0	0	0	1	0	1	0	0	0
EA2454	588129	.	C	T	.	PASS	TYPE=snp	GT	0	0	0	0	0	0	0	0	1	0	1	0	0	0
EA2454	588217	.	T	G	.	PASS	TYPE=snp	GT	0	0	1	0	0	0	0	0	0	0	0	0	0	0
EA2454	588790	.	T	G	.	PASS	TYPE=snp	GT	0	0	0	0	0	0	0	0	0	1	0	0	0	0
EA2454	589102	.	T	C	.	PASS	TYPE=snp	GT	0	0	0	0	0	0	0	0	1	1	1	0	0	0
EA2454	589319	.	G	A	.	PASS	TYPE=snp	GT	0	0	0	0	0	0	0	0	1	0	1	0	0	0
EA2454	589335	.	A	G	.	PASS	TYPE=snp	GT	0	0	0	0	0	0	0	0	1	1	1	0	0	0
EA2454	589738	.	A	T	.	PASS	TYPE=snp	GT	0	0	0	0	0	0	0	0	0	1	0	0	0	0
EA2454	590812	.	C	T	.	PASS	TYPE=snp	GT	0	0	0	0	1	0	0	0	0	0	0	0	0	0
EA2454	591286	.	G	T	.	PASS	TYPE=snp	GT	0	0	0	0	0	0	0	0	0	1	0	0	0	0
EA2454	594309	.	G	T	.	PASS	TYPE=snp	GT	1	1	0	0	0	0	0	0	0	0	0	0	0	0
EA2454	597386	.	A	G	.	PASS	TYPE=snp	GT	1	1	1	1	1	0	1	1	1	1	1	1	1	0
EA2454	597988	.	A	G	.	PASS	TYPE=snp	GT	0	0	0	0	0	0	0	0	1	0	1	0	0	0
EA2454	598848	.	G	C	.	PASS	TYPE=snp	GT	1	1	0	0	0	0	0	0	0	0	0	0	0	0
EA2454	598918	.	C	A	.	PASS	TYPE=snp	GT	0	0	0	0	0	0	0	0	1	0	1	0	0	0
EA2454	598973	.	T	G	.	PASS	TYPE=snp	GT	0	0	0	0	0	0	0	0	1	0	1	0	0	0
EA2454	600738	.	A	G	.	PASS	TYPE=snp	GT	1	1	0	0	0	0	0	0	0	0	0	0	0	0
EA2454	600783	.	T	G	.	PASS	TYPE=snp	GT	0	0	0	0	0	0	0	0	1	0	1	0	0	0
EA2454	602583	.	A	G	.	PASS	TYPE=snp	GT	1	1	0	0	0	0	1	1	1	1	1	1	0	0
EA2454	602608	.	C	T	.	PASS	TYPE=snp	GT	0	0	0	0	0	0	1	0	0	0	0	1	0	0
EA2454	603196	.	T	C	.	PASS	TYPE=snp	GT	0	0	0	0	0	0	0	0	0	0	0	1	0	0
EA2454	605227	.	C	A	.	PASS	TYPE=snp	GT	0	0	0	0	0	0	0	0	1	0	1	0	0	0
EA2454	605299	.	A	G	.	PASS	TYPE=snp	GT	0	0	0	0	0	0	0	0	1	0	1	0	0	0
EA2454	605439	.	C	A	.	PASS	TYPE=snp	GT	0	0	0	0	0	0	0	0	1	0	1	0	0	0
EA2454	606231	.	T	C	.	PASS	TYPE=snp	GT	0	0	0	0	0	0	0	0	0	1	0	0	0	0
EA2454	606400	.	T	G	.	PASS	TYPE=snp	GT	0	0	0	0	0	0	0	1	0	0	0	0	0	0
EA2454	608651	.	T	G	.	PASS	TYPE=snp	GT	0	0	0	0	0	0	0	0	1	0	1	0	0	0
EA2454	609793	.	C	T	.	PASS	TYPE=snp	GT	0	0	0	0	0	0	0	0	0	1	0	0	0	0
EA2454	610464	.	A	C	.	PASS	TYPE=snp	GT	1	1	0	0	0	0	1	1	1	1	1	1	0	0
EA2454	610623	.	G	A	.	PASS	TYPE=snp	GT	0	0	0	0	0	0	0	0	0	1	0	0	0	0
EA2454	610851	.	C	T	.	PASS	TYPE=snp	GT	0	0	0	0	0	0	1	0	0	0	0	1	0	0
EA2454	611188	.	G	A	.	PASS	TYPE=snp	GT	1	1	0	0	0	0	1	1	0	0	0	1	0	0
EA2454	612410	.	C	T	.	PASS	TYPE=snp	GT	0	0	0	0	0	0	0	1	0	0	0	0	0	0
EA2454	613561	.	T	C	.	PASS	TYPE=snp	GT	0	0	0	0	0	0	0	0	0	1	0	0	0	0
EA2454	613659	.	G	A	.	PASS	TYPE=snp	GT	0	0	0	0	0	0	0	0	0	0	0	1	0	0
EA2454	613781	.	C	A	.	PASS	TYPE=snp	GT	1	1	0	0	0	0	0	0	0	0	0	0	0	0
EA2454	613906	.	C	A	.	PASS	TYPE=snp	GT	1	1	1	1	1	0	1	1	1	1	1	1	1	0
EA2454	613974	.	C	T	.	PASS	TYPE=snp	GT	1	1	0	0	0	0	0	1	0	0	0	0	0	0
EA2454	614432	.	A	T	.	PASS	TYPE=snp	GT	0	0	0	0	0	0	0	0	0	1	0	0	0	0
EA2454	615269	.	C	T	.	PASS	TYPE=snp	GT	0	0	1	0	0	0	0	0	0	0	0	0	0	0
EA2454	615321	.	G	A	.	PASS	TYPE=snp	GT	0	0	0	0	0	0	0	0	1	0	1	0	0	0
EA2454	615783	.	C	T	.	PASS	TYPE=snp	GT	1	1	0	0	0	0	0	0	0	0	0	0	0	0
EA2454	615886	.	G	A	.	PASS	TYPE=snp	GT	0	0	0	0	0	0	0	0	1	0	1	0	0	0
EA2454	618954	.	T	G	.	PASS	TYPE=snp	GT	0	0	0	0	0	0	0	0	1	0	1	0	0	0
EA2454	618990	.	C	T	.	PASS	TYPE=snp	GT	0	0	0	1	0	0	0	0	0	0	0	0	0	0
EA2454	619121	.	G	A	.	PASS	TYPE=snp	GT	1	1	0	0	0	0	0	0	0	0	0	0	0	0
EA2454	620506	.	A	C	.	PASS	TYPE=snp	GT	1	1	0	0	0	0	0	0	0	0	0	0	0	0
EA2454	621505	.	C	T	.	PASS	TYPE=snp	GT	0	0	0	0	0	0	0	0	0	0	0	1	0	0
EA2454	622099	.	C	T	.	PASS	TYPE=snp	GT	0	0	0	0	0	0	0	0	1	0	1	0	0	0
EA2454	622741	.	T	G	.	PASS	TYPE=snp	GT	1	1	0	0	0	0	1	1	1	1	1	1	0	0
EA2454	623335	.	C	A	.	PASS	TYPE=snp	GT	0	0	0	0	0	0	0	0	0	1	0	0	0	0
EA2454	623622	.	C	T	.	PASS	TYPE=snp	GT	0	0	0	0	0	0	0	1	0	0	0	0	0	0
EA2454	623874	.	G	A	.	PASS	TYPE=snp	GT	0	0	0	1	0	0	0	0	0	0	0	0	0	0
EA2454	625047	.	T	G	.	PASS	TYPE=snp	GT	0	0	0	0	0	0	0	0	0	1	0	0	0	0
EA2454	626310	.	G	A	.	PASS	TYPE=snp	GT	0	0	1	0	0	0	0	0	0	0	0	0	0	0
EA2454	626592	.	T	G	.	PASS	TYPE=snp	GT	0	0	0	0	0	0	1	0	0	0	0	0	0	0
EA2454	627598	.	G	A	.	PASS	TYPE=snp	GT	0	0	0	0	0	0	0	0	1	0	1	0	0	0
EA2454	631335	.	T	C	.	PASS	TYPE=snp	GT	1	1	0	0	0	0	1	1	1	1	1	1	0	0
EA2454	632104	.	C	T	.	PASS	TYPE=snp	GT	0	0	0	0	0	0	0	0	0	1	0	0	0	0
EA2454	632317	.	A	T	.	PASS	TYPE=snp	GT	0	0	0	0	0	0	0	0	1	0	1	0	0	0
EA2454	632908	.	C	T	.	PASS	TYPE=snp	GT	0	0	1	0	0	0	0	0	0	0	0	0	0	0
EA2454	633668	.	T	C	.	PASS	TYPE=snp	GT	0	0	0	0	0	0	0	0	1	0	1	0	0	0
EA2454	633800	.	C	A	.	PASS	TYPE=snp	GT	0	0	0	0	0	0	0	0	1	0	1	0	0	0
EA2454	634477	.	C	A	.	PASS	TYPE=snp	GT	0	0	0	0	0	0	0	0	0	0	0	0	1	0
EA2454	634760	.	G	T	.	PASS	TYPE=snp	GT	0	0	0	0	0	0	0	1	0	0	0	0	0	0
EA2454	634772	.	G	T	.	PASS	TYPE=snp	GT	0	0	0	0	0	0	0	0	1	0	1	0	0	0
EA2454	635649	.	A	C	.	PASS	TYPE=snp	GT	1	1	0	0	0	0	1	1	1	1	1	1	0	0
EA2454	635707	.	C	A	.	PASS	TYPE=snp	GT	1	1	0	0	0	0	0	1	0	0	0	0	0	0
EA2454	637713	.	C	A	.	PASS	TYPE=snp	GT	0	0	0	0	0	0	0	0	1	0	1	0	0	0
EA2454	638418	.	C	T	.	PASS	TYPE=snp	GT	0	0	0	1	0	0	0	0	0	0	0	0	0	0
EA2454	639428	.	C	G	.	PASS	TYPE=snp	GT	0	0	0	1	0	0	0	0	0	0	0	0	0	0
EA2454	639663	.	C	T	.	PASS	TYPE=snp	GT	0	0	0	0	0	0	0	0	0	1	0	0	0	0
EA2454	641601	.	A	C	.	PASS	TYPE=snp	GT	0	0	0	0	0	0	0	0	1	0	1	0	0	0
EA2454	642011	.	G	C	.	PASS	TYPE=snp	GT	0	0	0	1	0	0	0	0	0	0	0	0	0	0
EA2454	642337	.	A	G	.	PASS	TYPE=snp	GT	0	0	1	1	1	0	0	0	0	0	0	0	1	0
EA2454	644101	.	A	G	.	PASS	TYPE=snp	GT	1	1	0	0	0	0	1	1	1	1	1	1	0	0
EA2454	644770	.	G	T	.	PASS	TYPE=snp	GT	0	0	0	0	0	0	1	0	0	0	0	1	0	0
EA2454	644913	.	T	C	.	PASS	TYPE=snp	GT	1	1	0	0	0	0	1	1	1	1	1	1	0	0
EA2454	646569	.	G	A	.	PASS	TYPE=snp	GT	0	0	0	0	0	0	1	0	0	0	0	1	0	0
EA2454	649480	.	T	C	.	PASS	TYPE=snp	GT	0	0	0	0	0	0	0	0	0	0	0	0	0	1
EA2454	649659	.	T	C	.	PASS	TYPE=snp	GT	0	0	0	0	0	0	0	0	1	0	1	0	0	0
EA2454	649668	.	G	T	.	PASS	TYPE=snp	GT	1	1	0	0	0	0	0	1	0	0	0	0	0	0
EA2454	650009	.	C	T	.	PASS	TYPE=snp	GT	0	0	0	0	0	0	1	0	0	0	0	1	0	0
EA2454	652389	.	A	T	.	PASS	TYPE=snp	GT	0	0	0	0	0	0	0	0	1	0	1	0	0	0
EA2454	653031	.	C	T	.	PASS	TYPE=snp	GT	1	1	0	0	0	0	1	1	0	0	0	1	0	0
EA2454	653774	.	T	G	.	PASS	TYPE=snp	GT	1	1	0	0	0	0	0	0	0	0	0	0	0	0
EA2454	654968	.	T	G	.	PASS	TYPE=snp	GT	0	0	0	0	0	0	0	1	0	0	0	0	0	0
EA2454	656155	.	T	G	.	PASS	TYPE=snp	GT	0	0	0	0	0	0	0	0	0	1	0	0	0	0
EA2454	657614	.	G	A	.	PASS	TYPE=snp	GT	0	0	0	0	0	0	0	0	1	0	1	0	0	0
EA2454	657820	.	G	T	.	PASS	TYPE=snp	GT	0	0	0	0	0	0	0	0	0	1	0	0	0	0
EA2454	658193	.	C	T	.	PASS	TYPE=snp	GT	0	0	0	0	0	0	0	0	1	0	1	0	0	0
EA2454	658970	.	T	C	.	PASS	TYPE=snp	GT	0	0	0	0	0	0	0	0	1	0	1	0	0	0
EA2454	658975	.	A	G	.	PASS	TYPE=snp	GT	0	0	1	0	0	0	0	0	0	0	0	0	0	0
EA2454	660468	.	C	A	.	PASS	TYPE=snp	GT	0	0	0	0	0	0	0	0	1	0	1	0	0	0
EA2454	660524	.	G	A	.	PASS	TYPE=snp	GT	0	0	0	0	0	0	0	0	0	1	0	0	0	0
EA2454	660547	.	G	A	.	PASS	TYPE=snp	GT	0	0	0	0	0	0	1	0	0	0	0	0	0	0
EA2454	660863	.	C	T	.	PASS	TYPE=snp	GT	0	0	0	0	0	0	0	0	1	0	1	0	0	0
EA2454	660999	.	C	T	.	PASS	TYPE=snp	GT	0	0	0	0	0	0	0	0	1	0	1	0	0	0
EA2454	661455	.	A	C	.	PASS	TYPE=snp	GT	0	0	0	0	0	0	0	0	0	0	0	1	0	0
EA2454	663798	.	G	T	.	PASS	TYPE=snp	GT	0	0	0	0	0	0	1	0	0	0	0	0	0	0
EA2454	664195	.	G	A	.	PASS	TYPE=snp	GT	0	0	0	0	0	0	0	0	1	0	1	0	0	0
EA2454	665110	.	C	G	.	PASS	TYPE=snp	GT	1	1	0	0	0	0	1	1	0	0	0	1	0	0
EA2454	665946	.	G	A	.	PASS	TYPE=snp	GT	0	0	0	0	0	0	0	0	1	0	1	0	0	0
EA2454	666854	.	A	G	.	PASS	TYPE=snp	GT	1	1	0	0	0	0	0	0	0	0	0	0	0	0
EA2454	666857	.	C	G	.	PASS	TYPE=snp	GT	0	0	0	0	0	0	0	0	1	0	1	0	0	0
EA2454	668427	.	T	G	.	PASS	TYPE=snp	GT	0	0	0	0	0	0	0	0	1	0	1	0	0	0
EA2454	669330	.	A	G	.	PASS	TYPE=snp	GT	1	1	1	1	1	0	1	1	1	1	1	1	1	1
EA2454	669751	.	C	T	.	PASS	TYPE=snp	GT	1	1	0	0	0	0	0	0	0	0	0	0	0	0
EA2454	670594	.	C	A	.	PASS	TYPE=snp	GT	0	0	1	1	1	0	0	0	0	0	0	0	1	0
EA2454	670919	.	C	T	.	PASS	TYPE=snp	GT	1	1	0	0	0	0	0	0	0	0	0	0	0	0
EA2454	670954	.	C	T	.	PASS	TYPE=snp	GT	0	0	0	0	0	0	1	0	0	0	0	1	0	0
EA2454	674033	.	C	T	.	PASS	TYPE=snp	GT	0	0	0	0	0	0	0	0	1	0	1	0	0	0
EA2454	674190	.	T	G	.	PASS	TYPE=snp	GT	0	0	0	0	0	0	0	1	0	0	0	0	0	0
EA2454	674305	.	G	C	.	PASS	TYPE=snp	GT	1	1	0	0	0	0	1	1	1	1	1	1	0	0
EA2454	675340	.	C	T	.	PASS	TYPE=snp	GT	0	0	0	0	0	0	0	0	1	0	1	0	0	0
EA2454	676368	.	G	A	.	PASS	TYPE=snp	GT	0	0	0	0	0	0	0	0	0	0	0	0	1	0
EA2454	677753	.	G	A	.	PASS	TYPE=snp	GT	0	0	0	0	0	0	1	0	0	0	0	1	0	0
EA2454	677980	.	G	A	.	PASS	TYPE=snp	GT	0	0	1	0	0	0	0	0	0	0	0	0	0	0
EA2454	677981	.	T	G	.	PASS	TYPE=snp	GT	0	0	0	0	0	0	0	0	0	1	0	0	0	0
EA2454	678422	.	C	T	.	PASS	TYPE=snp	GT	0	0	0	0	0	0	0	0	0	0	0	1	0	0
EA2454	678809	.	G	A	.	PASS	TYPE=snp	GT	1	1	0	0	0	0	0	0	0	0	0	0	0	0
EA2454	679527	.	G	A	.	PASS	TYPE=snp	GT	0	0	0	0	0	0	0	0	0	1	0	0	0	0
EA2454	679653	.	A	G	.	PASS	TYPE=snp	GT	0	0	0	0	0	0	0	0	1	1	1	0	0	0
EA2454	680620	.	C	T	.	PASS	TYPE=snp	GT	0	0	0	1	0	0	0	0	0	0	0	0	0	0
EA2454	681652	.	C	A	.	PASS	TYPE=snp	GT	0	0	0	0	0	0	0	0	0	1	0	0	0	0
EA2454	681959	.	T	C	.	PASS	TYPE=snp	GT	0	0	0	0	0	0	0	0	1	0	1	0	0	0
EA2454	681970	.	G	A	.	PASS	TYPE=snp	GT	0	0	0	0	0	0	0	0	1	0	1	0	0	0
EA2454	682546	.	A	T	.	PASS	TYPE=snp	GT	0	0	0	0	0	0	0	0	0	0	0	0	0	1
EA2454	683177	.	T	G	.	PASS	TYPE=snp	GT	1	1	1	1	1	0	1	1	1	1	1	1	1	0
EA2454	683886	.	C	T	.	PASS	TYPE=snp	GT	0	0	0	0	0	0	0	0	1	0	1	0	0	0
EA2454	684313	.	C	T	.	PASS	TYPE=snp	GT	0	0	0	0	0	0	0	1	0	0	0	0	0	0
EA2454	685213	.	G	A	.	PASS	TYPE=snp	GT	0	0	0	0	0	0	0	1	0	0	0	0	0	0
EA2454	685406	.	C	T	.	PASS	TYPE=snp	GT	0	0	0	0	0	0	0	0	1	0	1	0	0	0
EA2454	686003	.	A	G	.	PASS	TYPE=snp	GT	1	1	1	1	1	0	1	1	1	1	1	1	1	0
EA2454	686104	.	G	C	.	PASS	TYPE=snp	GT	1	1	1	1	1	0	1	1	1	1	1	1	1	0
EA2454	686561	.	C	T	.	PASS	TYPE=snp	GT	0	0	0	0	0	0	1	0	0	0	0	0	0	0
EA2454	687373	.	G	A	.	PASS	TYPE=snp	GT	0	0	0	0	0	0	0	0	1	0	1	0	0	0
EA2454	687410	.	A	G	.	PASS	TYPE=snp	GT	1	1	1	1	1	0	1	1	1	1	1	1	1	0
EA2454	687536	.	C	A	.	PASS	TYPE=snp	GT	0	0	0	0	0	0	0	0	1	0	1	0	0	0
EA2454	687596	.	G	A	.	PASS	TYPE=snp	GT	0	0	0	0	0	0	0	1	0	0	0	0	0	0
EA2454	688277	.	A	C	.	PASS	TYPE=snp	GT	0	0	0	0	0	0	0	0	1	0	1	0	0	0
EA2454	688399	.	C	T	.	PASS	TYPE=snp	GT	0	0	1	0	0	0	0	0	0	0	0	0	0	0
EA2454	688812	.	A	G	.	PASS	TYPE=snp	GT	0	0	1	0	0	0	0	0	0	0	0	0	0	0
EA2454	689159	.	C	T	.	PASS	TYPE=snp	GT	1	1	0	0	0	0	0	0	0	0	0	0	0	0
EA2454	689970	.	C	T	.	PASS	TYPE=snp	GT	1	1	0	0	0	0	0	0	0	0	0	0	0	0
EA2454	690408	.	A	G	.	PASS	TYPE=snp	GT	1	1	1	1	1	0	1	1	1	1	1	1	1	0
EA2454	690611	.	T	C	.	PASS	TYPE=snp	GT	1	1	1	1	1	1	1	1	1	1	1	1	1	1
EA2454	691294	.	T	C	.	PASS	TYPE=snp	GT	0	0	0	0	1	0	0	0	0	0	0	0	0	0
EA2454	691401	.	C	T	.	PASS	TYPE=snp	GT	0	0	0	0	1	0	0	0	0	0	0	0	1	0
EA2454	691761	.	C	T	.	PASS	TYPE=snp	GT	0	0	0	0	0	0	0	0	1	0	1	0	0	0
EA2454	692641	.	T	G	.	PASS	TYPE=snp	GT	0	0	0	0	0	0	0	0	0	0	1	0	0	0
EA2454	693295	.	C	T	.	PASS	TYPE=snp	GT	0	0	0	0	0	0	1	0	0	0	0	1	0	0
EA2454	694775	.	C	T	.	PASS	TYPE=snp	GT	0	0	0	0	0	0	0	0	0	1	0	0	0	0
EA2454	697887	.	T	C	.	PASS	TYPE=snp	GT	0	0	0	0	0	0	0	0	0	1	0	0	0	0
EA2454	698300	.	A	T	.	PASS	TYPE=snp	GT	0	0	0	0	0	0	0	0	1	0	1	0	0	0
EA2454	698327	.	A	G	.	PASS	TYPE=snp	GT	0	0	0	0	0	0	0	0	1	1	1	0	0	0
EA2454	701549	.	C	T	.	PASS	TYPE=snp	GT	0	0	0	0	0	0	0	0	1	0	1	0	0	0
EA2454	704676	.	C	T	.	PASS	TYPE=snp	GT	0	0	0	0	0	0	0	1	0	0	0	0	0	0
EA2454	705171	.	C	T	.	PASS	TYPE=snp	GT	0	0	0	0	0	0	1	0	0	0	0	1	0	0
EA2454	705263	.	C	A	.	PASS	TYPE=snp	GT	1	1	1	1	1	0	1	1	1	1	1	1	1	0
EA2454	707477	.	C	T	.	PASS	TYPE=snp	GT	0	0	0	0	0	0	1	0	0	0	0	1	0	0
EA2454	707817	.	C	T	.	PASS	TYPE=snp	GT	0	0	0	0	0	0	0	1	0	0	0	0	0	0
EA2454	708965	.	C	T	.	PASS	TYPE=snp	GT	0	0	0	0	0	0	0	0	1	0	1	0	0	0
EA2454	709632	.	T	C	.	PASS	TYPE=snp	GT	1	1	1	1	1	0	1	1	1	1	1	1	1	0
EA2454	710706	.	C	T	.	PASS	TYPE=snp	GT	0	0	0	0	0	0	0	0	1	0	1	0	0	0
EA2454	710977	.	A	G	.	PASS	TYPE=snp	GT	1	1	1	1	1	0	1	1	1	1	1	1	1	0
EA2454	712612	.	T	G	.	PASS	TYPE=snp	GT	0	0	0	0	0	0	0	0	0	1	0	0	0	0
EA2454	713026	.	T	G	.	PASS	TYPE=snp	GT	0	0	0	0	0	0	1	0	0	0	0	0	0	0
EA2454	713766	.	C	T	.	PASS	TYPE=snp	GT	0	0	1	0	0	0	0	0	0	0	0	0	0	0
EA2454	713997	.	C	A	.	PASS	TYPE=snp	GT	0	0	0	0	0	0	0	0	1	0	0	0	0	0
EA2454	714973	.	C	T	.	PASS	TYPE=snp	GT	0	0	0	0	0	0	0	0	0	0	0	0	1	0
EA2454	715370	.	C	T	.	PASS	TYPE=snp	GT	0	0	1	1	1	0	0	0	0	0	0	0	1	0
EA2454	715745	.	T	G	.	PASS	TYPE=snp	GT	0	0	0	0	0	0	0	0	0	1	0	0	0	0
EA2454	719734	.	C	T	.	PASS	TYPE=snp	GT	0	0	1	1	1	0	0	0	0	0	0	0	1	0
EA2454	719989	.	A	T	.	PASS	TYPE=snp	GT	0	0	0	0	0	0	0	0	1	0	1	0	0	0
EA2454	721973	.	C	T	.	PASS	TYPE=snp	GT	0	0	0	0	0	0	0	0	1	0	1	0	0	0
EA2454	723157	.	A	G	.	PASS	TYPE=snp	GT	1	1	0	0	0	0	0	0	0	0	0	0	0	0
EA2454	723869	.	C	T	.	PASS	TYPE=snp	GT	0	0	0	1	0	0	0	0	0	0	0	0	0	0
EA2454	724890	.	G	A	.	PASS	TYPE=snp	GT	1	1	0	0	0	0	0	1	0	0	0	0	0	0
EA2454	724929	.	A	G	.	PASS	TYPE=snp	GT	0	0	0	0	0	0	0	0	0	0	0	1	0	0
EA2454	725151	.	G	A	.	PASS	TYPE=snp	GT	0	0	0	0	0	0	0	0	1	0	1	0	0	0
EA2454	726867	.	C	T	.	PASS	TYPE=snp	GT	0	0	0	0	0	0	0	0	0	1	0	0	0	0
EA2454	726930	.	G	T	.	PASS	TYPE=snp	GT	0	0	0	0	0	0	0	0	1	0	1	0	0	0
EA2454	726938	.	T	C	.	PASS	TYPE=snp	GT	1	1	0	0	0	0	0	0	0	0	0	0	0	0
EA2454	727032	.	C	T	.	PASS	TYPE=snp	GT	1	1	0	0	0	0	0	0	0	0	0	0	0	0
EA2454	728053	.	A	G	.	PASS	TYPE=snp	GT	0	0	0	0	0	0	0	0	0	1	0	0	0	0
EA2454	728788	.	G	T	.	PASS	TYPE=snp	GT	1	1	0	0	0	0	0	0	0	0	0	0	0	0
EA2454	729583	.	G	A	.	PASS	TYPE=snp	GT	0	0	0	0	0	0	1	0	0	0	0	1	0	0
EA2454	729913	.	G	A	.	PASS	TYPE=snp	GT	0	0	0	0	0	0	0	0	0	1	0	0	0	0
EA2454	730566	.	C	T	.	PASS	TYPE=snp	GT	0	0	0	0	0	0	1	0	0	0	0	1	0	0
EA2454	730776	.	G	A	.	PASS	TYPE=snp	GT	0	0	0	0	0	0	0	0	1	0	1	0	0	0
EA2454	731219	.	T	G	.	PASS	TYPE=snp	GT	1	1	1	1	1	0	1	1	1	1	1	1	1	0
EA2454	731329	.	G	A	.	PASS	TYPE=snp	GT	1	1	1	1	1	1	1	1	1	1	1	1	1	1
EA2454	732275	.	G	A	.	PASS	TYPE=snp	GT	0	0	0	0	0	0	0	0	1	0	1	0	0	0
EA2454	732941	.	A	G	.	PASS	TYPE=snp	GT	0	0	0	0	0	0	0	0	0	0	0	1	0	0
EA2454	733335	.	C	T	.	PASS	TYPE=snp	GT	0	0	0	0	0	0	0	0	0	1	0	0	0	0
EA2454	734642	.	T	C	.	PASS	TYPE=snp	GT	0	0	0	0	0	0	0	0	1	0	1	0	0	0
EA2454	735016	.	T	C	.	PASS	TYPE=snp	GT	0	0	0	0	0	0	0	0	0	1	0	0	0	0
EA2454	736137	.	C	T	.	PASS	TYPE=snp	GT	0	0	0	0	0	0	0	0	1	0	1	0	0	0
EA2454	737158	.	C	T	.	PASS	TYPE=snp	GT	1	1	0	0	0	0	1	1	0	0	0	1	0	0
EA2454	737672	.	A	G	.	PASS	TYPE=snp	GT	0	0	0	0	0	0	0	0	0	0	0	0	1	0
EA2454	738321	.	C	T	.	PASS	TYPE=snp	GT	0	0	0	1	0	0	0	0	0	0	0	0	0	0
EA2454	738814	.	A	C	.	PASS	TYPE=snp	GT	0	0	0	0	1	0	0	0	0	0	0	0	0	0
EA2454	740461	.	C	T	.	PASS	TYPE=snp	GT	1	1	0	0	0	0	0	0	0	0	0	0	0	0
EA2454	740948	.	C	G	.	PASS	TYPE=snp	GT	0	0	0	0	0	0	0	0	1	0	1	0	0	0
EA2454	742876	.	T	C	.	PASS	TYPE=snp	GT	1	1	0	0	0	0	0	1	0	0	0	0	0	0
EA2454	743375	.	T	A	.	PASS	TYPE=snp	GT	0	0	1	1	1	0	0	0	0	0	0	0	1	0
EA2454	743512	.	G	A	.	PASS	TYPE=snp	GT	0	0	0	0	0	0	0	0	1	0	1	0	0	0
EA2454	744988	.	A	G	.	PASS	TYPE=snp	GT	0	0	0	0	0	0	0	0	0	0	0	0	0	1
EA2454	746000	.	C	T	.	PASS	TYPE=snp	GT	0	0	0	0	0	0	0	0	1	0	1	0	0	0
EA2454	746060	.	C	T	.	PASS	TYPE=snp	GT	0	0	0	0	0	0	0	0	1	0	1	0	0	0
EA2454	746284	.	C	T	.	PASS	TYPE=snp	GT	0	0	0	0	0	0	0	0	0	1	0	0	0	0
EA2454	746522	.	T	C	.	PASS	TYPE=snp	GT	0	0	0	0	0	0	1	0	0	0	0	1	0	0
EA2454	746983	.	A	T	.	PASS	TYPE=snp	GT	0	0	0	0	0	0	1	0	0	0	0	1	0	0
EA2454	747597	.	G	C	.	PASS	TYPE=snp	GT	0	0	0	0	0	0	0	0	1	0	1	0	0	0
EA2454	747621	.	C	A	.	PASS	TYPE=snp	GT	0	0	0	0	0	0	0	0	0	1	0	0	0	0
EA2454	747674	.	T	G	.	PASS	TYPE=snp	GT	0	0	0	0	0	0	1	0	0	0	0	1	0	0
EA2454	748435	.	G	A	.	PASS	TYPE=snp	GT	0	0	0	0	0	0	0	0	1	0	1	0	0	0
EA2454	748560	.	G	C	.	PASS	TYPE=snp	GT	1	1	0	0	0	0	1	1	1	1	1	1	0	0
EA2454	749156	.	C	A	.	PASS	TYPE=snp	GT	0	0	0	0	0	0	0	1	0	0	0	0	0	0
EA2454	749526	.	T	C	.	PASS	TYPE=snp	GT	1	1	0	0	0	0	0	0	0	0	0	0	0	0
EA2454	751046	.	G	A	.	PASS	TYPE=snp	GT	0	0	1	0	0	0	0	0	0	0	0	0	0	0
EA2454	751386	.	G	A	.	PASS	TYPE=snp	GT	0	0	1	1	1	0	0	0	0	0	0	0	1	0
EA2454	751988	.	C	T	.	PASS	TYPE=snp	GT	0	0	0	0	0	0	0	0	0	1	0	0	0	0
EA2454	753604	.	C	T	.	PASS	TYPE=snp	GT	0	0	0	1	0	0	0	0	0	0	0	0	0	0
EA2454	753727	.	T	C	.	PASS	TYPE=snp	GT	1	1	0	0	0	0	1	1	1	1	1	1	0	0
EA2454	754152	.	T	G	.	PASS	TYPE=snp	GT	0	0	0	0	0	0	0	0	1	0	1	0	0	0
EA2454	754601	.	C	A	.	PASS	TYPE=snp	GT	1	1	0	0	0	0	0	1	0	0	0	0	0	0
EA2454	754782	.	C	T	.	PASS	TYPE=snp	GT	0	0	0	0	0	0	0	0	1	0	1	0	0	0
EA2454	754898	.	G	A	.	PASS	TYPE=snp	GT	0	0	0	0	1	0	0	0	0	0	0	0	1	0
EA2454	755366	.	A	G	.	PASS	TYPE=snp	GT	1	1	1	1	1	0	1	1	1	1	1	1	1	1
EA2454	756040	.	T	G	.	PASS	TYPE=snp	GT	1	1	1	1	1	0	1	1	1	1	1	1	1	0
EA2454	756857	.	T	G	.	PASS	TYPE=snp	GT	0	0	0	0	0	0	0	0	1	0	1	0	0	0
EA2454	758394	.	C	T	.	PASS	TYPE=snp	GT	1	1	1	1	1	0	1	1	1	1	1	1	1	0
EA2454	758587	.	C	T	.	PASS	TYPE=snp	GT	0	0	0	0	0	0	0	0	1	0	1	0	0	0
EA2454	759931	.	C	T	.	PASS	TYPE=snp	GT	0	0	0	0	0	0	0	0	1	0	1	0	0	0
EA2454	763677	.	C	T	.	PASS	TYPE=snp	GT	1	1	0	0	0	0	0	0	0	0	0	0	0	0
EA2454	765032	.	T	C	.	PASS	TYPE=snp	GT	1	1	1	1	1	0	1	1	1	1	1	1	1	0
EA2454	765166	.	C	T	.	PASS	TYPE=snp	GT	0	0	0	0	0	0	0	0	1	0	1	0	0	0
EA2454	765368	.	T	C	.	PASS	TYPE=snp	GT	1	1	0	0	0	0	0	0	0	0	0	0	0	0
EA2454	767310	.	C	T	.	PASS	TYPE=snp	GT	0	0	0	0	0	0	0	0	0	0	0	1	0	0
EA2454	774395	.	G	A	.	PASS	TYPE=snp	GT	0	0	0	0	0	0	0	0	1	0	1	0	0	0
EA2454	774445	.	G	T	.	PASS	TYPE=snp	GT	0	0	0	0	0	0	0	0	1	0	1	0	0	0
EA2454	774482	.	G	A	.	PASS	TYPE=snp	GT	1	1	0	0	0	0	0	1	0	0	0	0	0	0
EA2454	774531	.	A	C	.	PASS	TYPE=snp	GT	0	0	1	0	0	0	0	0	0	0	0	0	0	0
EA2454	783701	.	G	A	.	PASS	TYPE=snp	GT	0	0	0	0	0	0	0	0	0	0	0	0	0	1
EA2454	783857	.	T	C	.	PASS	TYPE=snp	GT	1	1	0	0	0	0	0	1	0	0	0	0	0	0
EA2454	784404	.	C	T	.	PASS	TYPE=snp	GT	0	0	0	0	0	0	0	1	0	0	0	0	0	0
EA2454	784434	.	T	C	.	PASS	TYPE=snp	GT	1	1	0	0	0	0	0	1	0	0	0	0	0	0
EA2454	784455	.	A	T	.	PASS	TYPE=snp	GT	1	1	0	0	0	0	0	1	0	0	0	0	0	0
EA2454	784542	.	G	A	.	PASS	TYPE=snp	GT	1	1	0	0	0	0	0	1	0	0	0	0	0	0
EA2454	784570	.	A	C	.	PASS	TYPE=snp	GT	1	1	0	0	0	0	0	1	0	0	0	0	0	0
EA2454	784592	.	C	G	.	PASS	TYPE=snp	GT	1	1	0	0	0	0	0	1	0	0	0	0	0	0
EA2454	784626	.	G	A	.	PASS	TYPE=snp	GT	0	0	0	0	0	0	0	0	1	0	1	0	0	0
EA2454	784987	.	T	C	.	PASS	TYPE=snp	GT	0	0	0	0	0	0	0	1	0	0	0	0	0	0
EA2454	791956	.	G	A	.	PASS	TYPE=snp	GT	0	0	0	0	0	0	1	0	0	0	0	1	0	0
EA2454	792970	.	C	T	.	PASS	TYPE=snp	GT	0	0	0	0	0	0	0	0	1	0	1	0	0	0
EA2454	793051	.	A	G	.	PASS	TYPE=snp	GT	1	1	0	0	0	0	1	1	1	1	1	1	0	0
EA2454	793067	.	G	A	.	PASS	TYPE=snp	GT	0	0	0	0	0	0	0	0	0	1	0	0	0	0
EA2454	796255	.	G	A	.	PASS	TYPE=snp	GT	0	0	0	0	0	0	0	0	0	1	0	0	0	0
EA2454	796276	.	C	A	.	PASS	TYPE=snp	GT	0	0	0	0	0	0	0	0	0	1	0	0	0	0
EA2454	796729	.	G	T	.	PASS	TYPE=snp	GT	1	1	0	0	0	0	0	0	0	0	0	0	0	0
EA2454	796926	.	G	A	.	PASS	TYPE=snp	GT	0	0	0	0	0	0	0	0	1	0	1	0	0	0
EA2454	796935	.	C	G	.	PASS	TYPE=snp	GT	0	0	1	0	0	0	0	0	0	0	0	0	0	0
EA2454	797460	.	G	A	.	PASS	TYPE=snp	GT	1	1	0	0	0	0	0	0	0	0	0	0	0	0
EA2454	797963	.	C	T	.	PASS	TYPE=snp	GT	0	0	0	0	0	0	1	0	0	0	0	1	0	0
EA2454	798063	.	C	T	.	PASS	TYPE=snp	GT	0	0	0	0	0	0	1	0	0	0	0	0	0	0
EA2454	798552	.	T	G	.	PASS	TYPE=snp	GT	1	1	0	0	0	0	0	1	0	0	0	0	0	0
EA2454	799162	.	G	A	.	PASS	TYPE=snp	GT	0	0	0	0	0	0	1	0	0	0	0	1	0	0
EA2454	800237	.	G	A	.	PASS	TYPE=snp	GT	0	0	0	0	0	0	0	0	0	1	0	0	0	0
EA2454	802510	.	G	T	.	PASS	TYPE=snp	GT	0	0	0	0	0	0	0	0	0	1	0	0	0	0
EA2454	802567	.	G	A	.	PASS	TYPE=snp	GT	0	0	1	0	0	0	0	0	0	0	0	0	0	0
EA2454	803079	.	G	A	.	PASS	TYPE=snp	GT	0	0	0	0	0	0	0	0	0	1	0	0	0	0
EA2454	803220	.	G	A	.	PASS	TYPE=snp	GT	0	0	0	1	1	0	0	0	0	0	0	0	1	0
EA2454	804225	.	T	A	.	PASS	TYPE=snp	GT	0	0	0	0	0	0	0	0	1	0	1	0	0	0
EA2454	804247	.	G	A	.	PASS	TYPE=snp	GT	0	0	0	0	0	0	1	0	0	0	0	1	0	0
EA2454	804998	.	A	C	.	PASS	TYPE=snp	GT	0	0	0	0	0	0	1	0	0	0	0	1	0	0
EA2454	805105	.	A	C	.	PASS	TYPE=snp	GT	0	0	0	0	0	0	0	0	0	1	0	0	0	0
EA2454	805162	.	G	A	.	PASS	TYPE=snp	GT	0	0	0	0	0	0	0	0	0	0	0	1	0	0
EA2454	805180	.	A	T	.	PASS	TYPE=snp	GT	0	0	0	0	0	0	0	1	0	0	0	0	0	0
EA2454	805200	.	G	A	.	PASS	TYPE=snp	GT	0	0	0	0	0	0	0	0	0	1	0	0	0	0
EA2454	805481	.	A	G	.	PASS	TYPE=snp	GT	1	1	1	1	1	0	1	1	1	1	1	1	1	0
EA2454	807876	.	G	T	.	PASS	TYPE=snp	GT	0	0	0	0	0	0	0	0	1	0	1	0	0	0
EA2454	808146	.	G	A	.	PASS	TYPE=snp	GT	0	0	1	0	0	0	0	0	0	0	0	0	0	0
EA2454	811479	.	A	C	.	PASS	TYPE=snp	GT	1	1	0	0	0	0	0	0	0	0	0	0	0	0
EA2454	811549	.	C	T	.	PASS	TYPE=snp	GT	0	0	0	0	0	0	0	0	1	0	1	0	0	0
EA2454	811792	.	T	C	.	PASS	TYPE=snp	GT	1	1	0	0	0	0	0	0	0	0	0	0	0	0
EA2454	812453	.	C	T	.	PASS	TYPE=snp	GT	1	1	0	0	0	0	0	0	0	0	0	0	0	0
EA2454	813446	.	G	A	.	PASS	TYPE=snp	GT	0	0	0	0	0	0	0	0	1	0	1	0	0	0
EA2454	815252	.	C	T	.	PASS	TYPE=snp	GT	0	0	1	0	0	0	0	0	0	0	0	0	0	0
EA2454	815518	.	A	G	.	PASS	TYPE=snp	GT	0	0	0	0	0	0	0	0	1	0	1	0	0	0
EA2454	815610	.	T	A	.	PASS	TYPE=snp	GT	0	0	1	1	1	0	0	0	0	0	0	0	1	0
EA2454	816627	.	C	T	.	PASS	TYPE=snp	GT	0	0	0	0	0	0	0	1	0	0	0	0	0	0
EA2454	816840	.	G	T	.	PASS	TYPE=snp	GT	0	0	0	0	0	0	0	1	0	0	0	0	0	0
EA2454	817088	.	G	T	.	PASS	TYPE=snp	GT	0	0	0	0	0	0	0	0	1	0	1	0	0	0
EA2454	817446	.	A	G	.	PASS	TYPE=snp	GT	1	1	0	0	0	0	1	1	1	1	1	1	0	0
EA2454	817985	.	T	G	.	PASS	TYPE=snp	GT	1	1	1	1	1	0	1	1	1	1	1	1	1	1
EA2454	818649	.	A	C	.	PASS	TYPE=snp	GT	1	1	1	1	1	0	1	1	1	1	1	1	1	0
EA2454	819830	.	G	T	.	PASS	TYPE=snp	GT	0	0	0	0	0	0	0	0	1	0	1	0	0	0
EA2454	819976	.	C	T	.	PASS	TYPE=snp	GT	0	0	0	0	0	0	0	0	0	1	0	0	0	0
EA2454	820251	.	G	T	.	PASS	TYPE=snp	GT	1	1	0	0	0	0	1	1	0	0	0	1	0	0
EA2454	820901	.	G	A	.	PASS	TYPE=snp	GT	0	0	0	0	0	0	1	0	0	0	0	0	0	0
EA2454	821110	.	A	C	.	PASS	TYPE=snp	GT	1	1	0	0	0	0	1	1	1	1	1	1	0	0
EA2454	821289	.	C	T	.	PASS	TYPE=snp	GT	0	0	0	1	0	0	0	0	0	0	0	0	0	0
EA2454	822250	.	G	A	.	PASS	TYPE=snp	GT	0	0	0	0	0	0	0	0	1	0	1	0	0	0
EA2454	822614	.	C	T	.	PASS	TYPE=snp	GT	0	0	1	0	0	0	0	0	0	0	0	0	0	0
EA2454	822872	.	C	T	.	PASS	TYPE=snp	GT	0	0	0	0	0	0	0	0	0	1	0	0	0	0
EA2454	823756	.	G	A	.	PASS	TYPE=snp	GT	0	0	0	0	0	0	0	0	0	1	0	0	0	0
EA2454	824349	.	T	C	.	PASS	TYPE=snp	GT	0	0	0	1	0	0	0	0	0	0	0	0	0	0
EA2454	825262	.	T	G	.	PASS	TYPE=snp	GT	0	0	0	0	0	0	0	0	0	0	0	0	0	1
EA2454	825661	.	A	C	.	PASS	TYPE=snp	GT	0	0	0	0	0	0	0	0	0	1	0	0	0	0
EA2454	828744	.	A	G	.	PASS	TYPE=snp	GT	0	0	1	0	0	0	0	0	0	0	0	0	0	0
EA2454	829515	.	G	T	.	PASS	TYPE=snp	GT	1	1	0	0	0	0	0	0	0	0	0	0	0	0
EA2454	829606	.	G	A	.	PASS	TYPE=snp	GT	0	0	0	1	1	0	0	0	0	0	0	0	1	0
EA2454	829636	.	G	T	.	PASS	TYPE=snp	GT	0	0	0	0	0	0	0	0	1	0	1	0	0	0
EA2454	830335	.	C	T	.	PASS	TYPE=snp	GT	0	0	0	0	0	0	0	0	1	0	1	0	0	0
EA2454	830637	.	T	G	.	PASS	TYPE=snp	GT	0	0	0	0	0	0	0	0	1	0	1	0	0	0
EA2454	830653	.	A	C	.	PASS	TYPE=snp	GT	0	0	0	0	0	0	0	0	0	1	0	0	0	0
EA2454	831520	.	G	T	.	PASS	TYPE=snp	GT	0	0	1	1	1	0	0	0	0	0	0	0	1	0
EA2454	831717	.	G	T	.	PASS	TYPE=snp	GT	0	0	0	0	0	0	0	0	0	1	0	0	0	0
EA2454	831794	.	G	C	.	PASS	TYPE=snp	GT	1	1	0	0	0	0	0	0	0	0	0	0	0	0
EA2454	832051	.	A	T	.	PASS	TYPE=snp	GT	0	0	0	0	0	0	0	0	1	0	1	0	0	0
EA2454	832382	.	G	A	.	PASS	TYPE=snp	GT	0	0	0	0	0	0	0	0	1	0	1	0	0	0
EA2454	832537	.	C	T	.	PASS	TYPE=snp	GT	0	0	0	0	0	0	1	0	0	0	0	0	0	0
EA2454	833175	.	T	G	.	PASS	TYPE=snp	GT	0	0	0	0	0	0	1	0	0	0	0	0	0	0
EA2454	833584	.	C	A	.	PASS	TYPE=snp	GT	0	0	0	0	0	0	0	0	1	0	1	0	0	0
EA2454	833658	.	A	C	.	PASS	TYPE=snp	GT	0	0	0	0	0	0	0	0	1	0	1	0	0	0
EA2454	834488	.	T	C	.	PASS	TYPE=snp	GT	0	0	0	0	0	0	0	0	1	1	1	0	0	0
EA2454	835751	.	C	G	.	PASS	TYPE=snp	GT	0	0	0	0	0	0	1	0	0	0	0	0	0	0
EA2454	835799	.	C	T	.	PASS	TYPE=snp	GT	0	0	1	0	0	0	0	0	0	0	0	0	0	0
EA2454	836515	.	G	T	.	PASS	TYPE=snp	GT	0	0	0	0	0	0	0	0	0	0	0	1	0	0
EA2454	836643	.	T	C	.	PASS	TYPE=snp	GT	1	1	0	0	0	0	0	0	0	0	0	0	0	0
EA2454	837160	.	A	C	.	PASS	TYPE=snp	GT	0	0	0	0	0	0	0	0	1	0	1	0	0	0
EA2454	837322	.	C	T	.	PASS	TYPE=snp	GT	1	1	0	0	0	0	0	0	0	0	0	0	0	0
EA2454	838094	.	A	C	.	PASS	TYPE=snp	GT	0	0	0	0	0	0	0	0	1	0	1	0	0	0
EA2454	839081	.	G	A	.	PASS	TYPE=snp	GT	0	0	0	0	0	0	0	1	0	0	0	0	0	0
EA2454	840204	.	G	A	.	PASS	TYPE=snp	GT	0	0	0	0	0	0	0	1	0	0	0	0	0	0
EA2454	840811	.	G	A	.	PASS	TYPE=snp	GT	0	0	0	0	0	0	1	0	0	0	0	0	0	0
EA2454	841024	.	G	A	.	PASS	TYPE=snp	GT	0	0	1	0	0	0	0	0	0	0	0	0	0	0
EA2454	841039	.	A	G	.	PASS	TYPE=snp	GT	0	0	0	0	0	0	0	1	0	0	0	0	0	0
EA2454	841908	.	C	A	.	PASS	TYPE=snp	GT	0	0	0	0	0	0	0	0	1	0	1	0	0	0
EA2454	842772	.	C	T	.	PASS	TYPE=snp	GT	0	0	0	0	0	0	1	0	0	0	0	1	0	0
EA2454	844850	.	A	C	.	PASS	TYPE=snp	GT	0	0	0	0	0	0	1	0	0	0	0	1	0	0
EA2454	845081	.	G	A	.	PASS	TYPE=snp	GT	0	0	0	0	0	0	0	0	1	0	1	0	0	0
EA2454	845338	.	G	A	.	PASS	TYPE=snp	GT	0	0	0	0	0	0	0	1	0	0	0	0	0	0
EA2454	846335	.	G	T	.	PASS	TYPE=snp	GT	0	0	0	0	0	0	1	0	0	0	0	1	0	0
EA2454	848036	.	G	A	.	PASS	TYPE=snp	GT	0	0	0	0	0	0	0	0	1	0	1	0	0	0
EA2454	848276	.	G	A	.	PASS	TYPE=snp	GT	0	0	0	0	0	0	0	1	0	0	0	0	0	0
EA2454	848455	.	G	T	.	PASS	TYPE=snp	GT	0	0	0	0	0	0	1	0	0	0	0	1	0	0
EA2454	848779	.	G	T	.	PASS	TYPE=snp	GT	0	0	1	0	0	0	0	0	0	0	0	0	0	0
EA2454	849124	.	G	A	.	PASS	TYPE=snp	GT	0	0	0	0	0	0	0	0	0	1	0	0	0	0
EA2454	849346	.	G	A	.	PASS	TYPE=snp	GT	1	1	0	0	0	0	0	0	0	0	0	0	0	0
EA2454	849614	.	G	A	.	PASS	TYPE=snp	GT	0	0	0	0	0	0	0	0	0	1	0	0	0	0
EA2454	850201	.	G	T	.	PASS	TYPE=snp	GT	0	0	0	0	0	0	1	0	0	0	0	1	0	0
EA2454	850239	.	C	T	.	PASS	TYPE=snp	GT	0	0	0	0	0	0	0	0	0	1	0	0	0	0
EA2454	850726	.	T	C	.	PASS	TYPE=snp	GT	0	0	1	0	0	0	0	0	0	0	0	0	0	0
EA2454	850727	.	G	A	.	PASS	TYPE=snp	GT	0	0	1	0	0	0	0	0	0	0	0	0	0	0
EA2454	850728	.	T	G	.	PASS	TYPE=snp	GT	0	0	1	0	0	0	0	0	0	0	0	0	0	0
EA2454	851976	.	T	A	.	PASS	TYPE=snp	GT	0	0	1	0	0	0	0	0	0	0	0	0	0	0
EA2454	852415	.	G	T	.	PASS	TYPE=snp	GT	0	0	0	0	0	0	0	0	1	0	1	0	0	0
EA2454	852695	.	A	G	.	PASS	TYPE=snp	GT	1	1	1	1	1	0	1	1	1	1	1	1	1	0
EA2454	853768	.	A	G	.	PASS	TYPE=snp	GT	0	0	0	0	0	0	1	0	0	0	0	1	0	0
EA2454	854766	.	G	T	.	PASS	TYPE=snp	GT	0	0	0	0	0	0	0	1	0	0	0	0	0	0
EA2454	854948	.	T	C	.	PASS	TYPE=snp	GT	0	0	0	0	0	0	1	0	0	0	0	0	0	0
EA2454	855440	.	G	T	.	PASS	TYPE=snp	GT	0	0	0	0	0	0	0	0	0	0	0	1	0	0
EA2454	855868	.	A	C	.	PASS	TYPE=snp	GT	0	0	0	0	0	0	0	1	0	0	0	0	0	0
EA2454	856001	.	G	A	.	PASS	TYPE=snp	GT	0	0	0	0	0	0	0	0	0	1	0	0	0	0
EA2454	856143	.	C	A	.	PASS	TYPE=snp	GT	0	0	0	0	0	0	0	0	1	0	1	0	0	0
EA2454	856304	.	G	A	.	PASS	TYPE=snp	GT	0	0	0	0	0	0	0	0	0	1	0	0	0	0
EA2454	857444	.	T	C	.	PASS	TYPE=snp	GT	0	0	0	0	0	0	0	1	0	0	0	0	0	0
EA2454	857633	.	A	T	.	PASS	TYPE=snp	GT	0	0	0	0	0	0	0	1	0	0	0	0	0	0
EA2454	859445	.	A	T	.	PASS	TYPE=snp	GT	0	0	1	0	0	0	0	0	0	0	0	0	0	0
EA2454	860226	.	C	A	.	PASS	TYPE=snp	GT	0	0	1	1	1	0	0	0	0	0	0	0	1	0
EA2454	860485	.	G	A	.	PASS	TYPE=snp	GT	0	0	0	0	0	0	0	0	1	0	1	0	0	0
EA2454	860740	.	C	T	.	PASS	TYPE=snp	GT	0	0	0	0	0	0	0	0	1	0	1	0	0	0
EA2454	861257	.	G	A	.	PASS	TYPE=snp	GT	0	0	0	0	0	0	0	0	1	0	1	0	0	0
EA2454	861549	.	G	A	.	PASS	TYPE=snp	GT	0	0	0	1	0	0	0	0	0	0	0	0	0	0
EA2454	861588	.	G	A	.	PASS	TYPE=snp	GT	0	0	0	0	0	0	0	1	0	0	0	0	0	0
EA2454	861738	.	C	T	.	PASS	TYPE=snp	GT	0	0	1	0	0	0	0	0	0	0	0	0	0	0
EA2454	862033	.	G	A	.	PASS	TYPE=snp	GT	0	0	1	0	0	0	0	0	0	0	0	0	0	0
EA2454	862190	.	T	C	.	PASS	TYPE=snp	GT	0	0	0	0	0	0	0	0	1	0	1	0	0	0
EA2454	863496	.	A	G	.	PASS	TYPE=snp	GT	1	1	0	0	0	0	1	1	1	1	1	1	0	0
EA2454	864446	.	T	C	.	PASS	TYPE=snp	GT	0	0	0	0	0	0	0	0	0	1	0	0	0	0
EA2454	864447	.	G	A	.	PASS	TYPE=snp	GT	0	0	0	0	0	0	0	0	1	0	1	0	0	0
EA2454	865819	.	T	G	.	PASS	TYPE=snp	GT	0	0	0	0	0	0	0	0	1	0	1	0	0	0
EA2454	866649	.	A	C	.	PASS	TYPE=snp	GT	0	0	0	0	0	0	0	0	1	0	1	0	0	0
EA2454	866700	.	C	T	.	PASS	TYPE=snp	GT	1	1	0	0	0	0	0	0	0	0	0	0	0	0
EA2454	867427	.	C	T	.	PASS	TYPE=snp	GT	0	0	0	0	0	0	0	0	1	0	1	0	0	0
EA2454	869546	.	C	T	.	PASS	TYPE=snp	GT	0	0	0	0	0	0	0	0	0	1	0	0	0	0
EA2454	874702	.	T	C	.	PASS	TYPE=snp	GT	0	0	0	0	0	0	1	0	0	0	0	1	0	0
EA2454	875102	.	G	A	.	PASS	TYPE=snp	GT	0	0	0	0	0	0	0	0	1	0	1	0	0	0
EA2454	875313	.	T	C	.	PASS	TYPE=snp	GT	0	0	0	0	0	0	0	0	1	1	1	0	0	0
EA2454	875685	.	A	G	.	PASS	TYPE=snp	GT	0	0	0	0	0	0	0	0	1	0	1	0	0	0
EA2454	876176	.	G	A	.	PASS	TYPE=snp	GT	0	0	1	0	0	0	0	0	0	0	0	0	0	0
EA2454	876895	.	C	A	.	PASS	TYPE=snp	GT	0	0	0	0	0	0	0	0	1	0	1	0	0	0
EA2454	877031	.	G	A	.	PASS	TYPE=snp	GT	0	0	1	0	0	0	0	0	1	0	1	0	0	0
EA2454	877061	.	T	A	.	PASS	TYPE=snp	GT	1	1	0	0	0	0	0	0	0	0	0	0	0	0
EA2454	877501	.	T	G	.	PASS	TYPE=snp	GT	0	0	0	0	0	0	0	1	0	0	0	0	0	0
EA2454	879121	.	C	A	.	PASS	TYPE=snp	GT	0	0	0	0	0	0	1	0	0	0	0	1	0	0
EA2454	879699	.	G	A	.	PASS	TYPE=snp	GT	0	0	1	0	0	0	0	0	0	0	0	0	0	0
EA2454	880933	.	G	A	.	PASS	TYPE=snp	GT	0	0	0	0	0	0	0	0	0	1	0	0	0	0
EA2454	881078	.	A	T	.	PASS	TYPE=snp	GT	0	0	0	0	1	0	0	0	0	0	0	0	0	0
EA2454	881396	.	A	G	.	PASS	TYPE=snp	GT	0	0	1	0	0	0	0	0	0	0	0	0	0	0
EA2454	882358	.	C	T	.	PASS	TYPE=snp	GT	0	0	0	0	0	0	0	0	1	0	1	0	0	0
EA2454	883189	.	G	A	.	PASS	TYPE=snp	GT	0	0	0	0	0	0	0	0	1	0	1	0	0	0
EA2454	884502	.	T	G	.	PASS	TYPE=snp	GT	0	0	0	0	0	0	1	0	0	0	0	0	0	0
EA2454	887404	.	C	T	.	PASS	TYPE=snp	GT	0	0	0	0	0	0	0	0	1	0	1	0	0	0
EA2454	889463	.	G	A	.	PASS	TYPE=snp	GT	0	0	0	0	0	0	0	0	1	1	1	0	0	0
EA2454	891216	.	A	C	.	PASS	TYPE=snp	GT	0	0	0	0	0	0	0	0	1	0	1	0	0	0
EA2454	891369	.	A	G	.	PASS	TYPE=snp	GT	1	1	0	0	0	0	0	1	0	0	0	0	0	0
EA2454	891641	.	G	A	.	PASS	TYPE=snp	GT	0	0	0	1	0	0	0	0	0	0	0	0	0	0
EA2454	892965	.	G	T	.	PASS	TYPE=snp	GT	0	0	0	0	0	0	0	0	1	0	1	0	0	0
EA2454	893180	.	G	T	.	PASS	TYPE=snp	GT	0	0	0	0	0	0	0	0	1	0	1	0	0	0
EA2454	893994	.	A	T	.	PASS	TYPE=snp	GT	0	0	0	0	0	0	0	0	1	0	1	0	0	0
EA2454	894027	.	G	A	.	PASS	TYPE=snp	GT	1	1	0	0	0	0	0	0	0	0	0	0	0	0
EA2454	894224	.	G	A	.	PASS	TYPE=snp	GT	0	0	0	0	1	0	0	0	0	0	0	0	0	0
EA2454	894437	.	A	G	.	PASS	TYPE=snp	GT	0	0	0	0	0	0	0	0	1	0	1	0	0	0
EA2454	894538	.	C	T	.	PASS	TYPE=snp	GT	1	1	1	1	1	0	1	1	1	1	1	1	1	0
EA2454	894751	.	T	G	.	PASS	TYPE=snp	GT	1	1	0	0	0	0	0	0	0	0	0	0	0	0
EA2454	896090	.	C	T	.	PASS	TYPE=snp	GT	0	0	0	0	0	0	1	0	0	0	0	1	0	0
EA2454	897780	.	C	A	.	PASS	TYPE=snp	GT	0	0	1	0	0	0	0	0	0	0	0	0	0	0
EA2454	898882	.	C	T	.	PASS	TYPE=snp	GT	0	0	0	0	0	0	0	0	1	0	1	0	0	0
EA2454	899104	.	T	A	.	PASS	TYPE=snp	GT	1	1	0	0	0	0	0	1	0	0	0	0	0	0
EA2454	902918	.	G	A	.	PASS	TYPE=snp	GT	0	0	0	0	0	0	0	0	1	0	1	0	0	0
EA2454	903527	.	G	A	.	PASS	TYPE=snp	GT	0	0	0	0	0	0	0	0	1	0	1	0	0	0
EA2454	903996	.	T	C	.	PASS	TYPE=snp	GT	0	0	0	0	0	0	0	0	1	0	1	0	0	0
EA2454	904220	.	T	C	.	PASS	TYPE=snp	GT	0	0	1	0	0	0	0	0	0	0	0	0	0	0
EA2454	904482	.	A	G	.	PASS	TYPE=snp	GT	1	1	1	1	1	0	1	1	1	1	1	1	1	0
EA2454	904788	.	C	T	.	PASS	TYPE=snp	GT	0	0	1	0	0	0	0	0	0	0	0	0	0	0
EA2454	904955	.	G	T	.	PASS	TYPE=snp	GT	1	1	0	0	0	0	1	1	0	0	0	1	0	0
EA2454	906503	.	C	T	.	PASS	TYPE=snp	GT	0	0	0	0	0	0	0	0	1	0	1	0	0	0
EA2454	906890	.	G	A	.	PASS	TYPE=snp	GT	0	0	0	0	0	0	0	0	0	1	0	0	0	0
EA2454	907131	.	C	A	.	PASS	TYPE=snp	GT	0	0	0	0	0	0	1	0	0	0	0	0	0	0
EA2454	907381	.	C	A	.	PASS	TYPE=snp	GT	0	0	0	0	0	0	0	0	1	0	1	0	0	0
EA2454	907528	.	G	T	.	PASS	TYPE=snp	GT	0	0	1	0	0	0	0	0	0	0	0	0	0	0
EA2454	907900	.	A	C	.	PASS	TYPE=snp	GT	0	0	0	0	0	0	1	0	0	0	0	1	0	0
EA2454	910030	.	G	T	.	PASS	TYPE=snp	GT	0	0	0	0	0	0	0	1	0	0	0	0	0	0
EA2454	910148	.	T	C	.	PASS	TYPE=snp	GT	0	0	1	0	0	0	0	0	0	0	0	0	0	0
EA2454	910897	.	A	G	.	PASS	TYPE=snp	GT	0	0	0	0	0	0	1	0	0	0	0	1	0	0
EA2454	911296	.	C	T	.	PASS	TYPE=snp	GT	0	0	0	0	0	0	0	1	0	0	0	0	0	0
EA2454	911716	.	G	A	.	PASS	TYPE=snp	GT	0	0	0	0	0	0	0	1	0	0	0	0	0	0
EA2454	911740	.	G	T	.	PASS	TYPE=snp	GT	0	0	0	0	0	0	0	0	1	0	1	0	0	0
EA2454	912171	.	G	A	.	PASS	TYPE=snp	GT	0	0	0	0	0	0	0	0	0	0	0	1	0	0
EA2454	916363	.	G	A	.	PASS	TYPE=snp	GT	0	0	0	0	1	0	0	0	0	0	0	0	0	0
EA2454	916891	.	C	A	.	PASS	TYPE=snp	GT	0	0	0	0	0	0	0	0	1	0	1	0	0	0
EA2454	918989	.	G	A	.	PASS	TYPE=snp	GT	0	0	0	0	0	0	0	1	0	0	0	0	0	0
EA2454	919060	.	T	G	.	PASS	TYPE=snp	GT	1	1	0	0	0	0	1	1	1	1	1	1	0	0
EA2454	921266	.	G	A	.	PASS	TYPE=snp	GT	0	0	0	0	0	0	1	0	0	0	0	1	0	0
EA2454	921834	.	G	A	.	PASS	TYPE=snp	GT	0	0	0	0	0	0	0	0	1	0	1	0	0	0
EA2454	922709	.	C	T	.	PASS	TYPE=snp	GT	0	0	0	0	0	0	0	0	1	0	1	0	0	0
EA2454	922830	.	G	T	.	PASS	TYPE=snp	GT	0	0	0	0	0	0	0	0	0	0	0	1	0	0
EA2454	923353	.	G	A	.	PASS	TYPE=snp	GT	0	0	1	0	0	0	0	0	0	0	0	0	0	0
EA2454	923875	.	T	A	.	PASS	TYPE=snp	GT	0	0	1	1	1	0	0	0	0	0	0	0	1	0
EA2454	924418	.	G	A	.	PASS	TYPE=snp	GT	0	0	0	0	0	0	1	0	0	0	0	0	0	0
EA2454	924524	.	C	T	.	PASS	TYPE=snp	GT	1	1	0	0	0	0	1	1	0	0	0	1	0	0
EA2454	924579	.	T	C	.	PASS	TYPE=snp	GT	1	1	1	1	1	0	1	1	1	1	1	1	1	0
EA2454	926548	.	G	A	.	PASS	TYPE=snp	GT	0	0	0	1	1	0	0	0	0	0	0	0	1	0
EA2454	927419	.	G	A	.	PASS	TYPE=snp	GT	0	0	0	0	0	0	0	0	1	0	1	0	0	0
EA2454	927563	.	C	T	.	PASS	TYPE=snp	GT	0	0	0	0	0	0	0	0	0	0	0	1	0	0
EA2454	927966	.	G	A	.	PASS	TYPE=snp	GT	0	0	0	0	0	0	0	0	0	0	1	0	0	0
EA2454	928814	.	G	C	.	PASS	TYPE=snp	GT	0	0	0	0	0	0	0	0	1	0	1	0	0	0
EA2454	930102	.	A	G	.	PASS	TYPE=snp	GT	1	1	1	1	1	0	1	1	1	1	1	1	1	0
EA2454	931665	.	G	A	.	PASS	TYPE=snp	GT	0	0	0	0	0	0	0	1	0	0	0	0	0	0
EA2454	931959	.	C	G	.	PASS	TYPE=snp	GT	1	1	0	0	0	0	0	0	0	0	0	0	0	0
EA2454	933541	.	G	A	.	PASS	TYPE=snp	GT	0	0	0	0	0	0	0	0	1	1	1	0	0	0
EA2454	935854	.	C	T	.	PASS	TYPE=snp	GT	0	0	0	0	0	0	0	0	0	0	0	0	1	0
EA2454	936248	.	A	C	.	PASS	TYPE=snp	GT	0	0	0	0	0	0	1	0	0	0	0	1	0	0
EA2454	936296	.	C	T	.	PASS	TYPE=snp	GT	0	0	0	0	0	0	0	1	0	0	0	0	0	0
EA2454	936615	.	C	A	.	PASS	TYPE=snp	GT	0	0	1	0	0	0	0	0	0	0	0	0	0	0
EA2454	937614	.	C	T	.	PASS	TYPE=snp	GT	1	1	0	0	0	0	1	1	1	1	1	1	0	0
EA2454	938004	.	C	T	.	PASS	TYPE=snp	GT	0	0	1	0	0	0	0	0	0	0	0	0	0	0
EA2454	938195	.	A	G	.	PASS	TYPE=snp	GT	1	1	0	0	0	0	1	1	1	1	1	1	0	0
EA2454	938336	.	A	C	.	PASS	TYPE=snp	GT	1	1	0	0	0	0	0	0	0	0	0	0	0	0
EA2454	938496	.	C	A	.	PASS	TYPE=snp	GT	0	0	0	0	0	0	0	0	0	1	0	0	0	0
EA2454	938615	.	G	A	.	PASS	TYPE=snp	GT	0	0	1	0	0	0	0	0	0	0	0	0	0	0
EA2454	938891	.	T	C	.	PASS	TYPE=snp	GT	0	0	0	1	1	0	0	0	0	0	0	0	1	0
EA2454	938923	.	G	A	.	PASS	TYPE=snp	GT	0	0	0	0	1	0	0	0	0	0	0	0	1	0
EA2454	940518	.	G	A	.	PASS	TYPE=snp	GT	0	0	1	0	0	0	0	0	0	0	0	0	0	0
EA2454	941489	.	C	A	.	PASS	TYPE=snp	GT	1	1	0	0	0	0	1	1	1	1	1	1	0	0
EA2454	941829	.	T	A	.	PASS	TYPE=snp	GT	0	0	0	0	0	0	0	0	1	0	1	0	0	0
EA2454	944490	.	C	T	.	PASS	TYPE=snp	GT	0	0	0	0	0	0	1	0	0	0	0	1	0	0
EA2454	945162	.	A	G	.	PASS	TYPE=snp	GT	1	1	1	1	1	0	1	1	1	1	1	1	1	0
EA2454	946638	.	T	G	.	PASS	TYPE=snp	GT	0	0	0	0	0	0	0	0	1	0	1	0	0	0
EA2454	946875	.	T	C	.	PASS	TYPE=snp	GT	1	1	1	1	1	0	1	1	1	1	1	1	1	0
EA2454	947237	.	G	A	.	PASS	TYPE=snp	GT	0	0	0	0	0	0	0	0	1	0	1	0	0	0
EA2454	948450	.	T	C	.	PASS	TYPE=snp	GT	0	0	0	0	0	0	0	1	0	0	0	0	0	0
EA2454	949189	.	G	A	.	PASS	TYPE=snp	GT	0	0	0	0	0	0	0	0	1	0	1	0	0	0
EA2454	949221	.	C	A	.	PASS	TYPE=snp	GT	0	1	0	0	0	0	1	1	0	1	0	1	0	0
EA2454	949222	.	C	T	.	PASS	TYPE=snp	GT	0	0	0	1	0	0	0	0	0	0	0	0	0	0
EA2454	951396	.	G	A	.	PASS	TYPE=snp	GT	1	1	0	0	0	0	0	1	0	0	0	0	0	0
EA2454	983278	.	T	G	.	PASS	TYPE=snp	GT	1	1	0	0	0	0	1	1	0	0	0	1	0	0
EA2454	983325	.	T	A	.	PASS	TYPE=snp	GT	1	1	0	0	0	0	1	1	0	0	0	1	0	0
EA2454	983327	.	G	C	.	PASS	TYPE=snp	GT	1	1	0	0	0	0	1	1	0	0	0	1	0	0
EA2454	983359	.	G	A	.	PASS	TYPE=snp	GT	1	1	0	0	0	0	1	1	0	0	0	1	0	0
EA2454	983362	.	T	C	.	PASS	TYPE=snp	GT	1	1	0	0	0	0	1	1	0	0	0	1	0	0
EA2454	983363	.	A	T	.	PASS	TYPE=snp	GT	1	1	0	0	0	0	1	1	0	0	0	1	0	0
EA2454	983371	.	G	A	.	PASS	TYPE=snp	GT	1	1	0	0	0	0	1	1	0	0	0	1	0	0
EA2454	983404	.	T	C	.	PASS	TYPE=snp	GT	1	1	0	0	0	0	1	1	0	0	0	1	0	0
EA2454	983426	.	G	A	.	PASS	TYPE=snp	GT	1	1	0	0	0	0	1	1	0	0	0	1	0	0
EA2454	983446	.	A	C	.	PASS	TYPE=snp	GT	1	1	0	0	0	0	1	1	0	0	0	1	0	0
EA2454	983525	.	A	G	.	PASS	TYPE=snp	GT	1	1	0	0	0	0	1	1	0	0	0	1	0	0
EA2454	983570	.	C	T	.	PASS	TYPE=snp	GT	1	1	0	0	0	0	1	1	0	0	0	1	0	0
EA2454	983573	.	C	T	.	PASS	TYPE=snp	GT	1	1	0	0	0	0	1	1	0	0	0	1	0	0
EA2454	983743	.	A	G	.	PASS	TYPE=snp	GT	0	0	0	0	0	0	0	0	0	0	0	0	1	0
EA2454	983840	.	A	G	.	PASS	TYPE=snp	GT	1	1	0	0	0	0	1	1	0	0	0	1	0	0
EA2454	983889	.	G	A	.	PASS	TYPE=snp	GT	1	1	0	0	0	0	0	1	0	0	0	0	0	0
EA2454	983899	.	T	C	.	PASS	TYPE=snp	GT	0	0	0	0	0	0	0	0	0	1	0	0	0	0
EA2454	983901	.	C	T	.	PASS	TYPE=snp	GT	1	1	0	0	0	0	1	1	0	0	0	1	0	0
EA2454	983906	.	T	C	.	PASS	TYPE=snp	GT	1	1	0	0	0	0	1	1	0	0	0	1	0	0
EA2454	983909	.	T	C	.	PASS	TYPE=snp	GT	1	1	0	0	0	0	1	1	0	0	0	1	0	0
EA2454	984038	.	A	G	.	PASS	TYPE=snp	GT	1	1	0	0	0	0	1	1	0	0	0	1	0	0
EA2454	984050	.	G	T	.	PASS	TYPE=snp	GT	1	1	0	0	0	0	1	1	0	0	0	1	0	0
EA2454	984129	.	A	G	.	PASS	TYPE=snp	GT	1	1	0	0	0	0	1	1	0	0	0	1	0	0
EA2454	984131	.	T	C	.	PASS	TYPE=snp	GT	1	1	0	0	0	0	1	1	0	0	0	1	0	0
EA2454	984135	.	G	T	.	PASS	TYPE=snp	GT	1	1	0	0	0	0	1	1	0	0	0	1	0	0
EA2454	984294	.	G	A	.	PASS	TYPE=snp	GT	1	1	0	0	0	0	1	1	0	0	0	1	0	0
EA2454	984305	.	A	T	.	PASS	TYPE=snp	GT	1	1	0	0	0	0	1	1	0	0	0	1	0	0
EA2454	984308	.	A	T	.	PASS	TYPE=snp	GT	1	1	0	0	0	0	1	1	0	0	0	1	0	0
EA2454	984317	.	A	G	.	PASS	TYPE=snp	GT	1	1	0	0	0	0	1	1	0	0	0	1	0	0
EA2454	984344	.	C	T	.	PASS	TYPE=snp	GT	1	1	0	0	0	0	1	1	0	0	0	1	0	0
EA2454	984401	.	A	T	.	PASS	TYPE=snp	GT	1	1	0	0	0	0	1	1	0	0	0	1	0	0
EA2454	984422	.	G	A	.	PASS	TYPE=snp	GT	1	1	0	0	0	0	1	1	0	0	0	1	0	0
EA2454	984426	.	A	G	.	PASS	TYPE=snp	GT	1	1	0	0	0	0	1	1	0	0	0	1	0	0
EA2454	984428	.	C	T	.	PASS	TYPE=snp	GT	1	1	0	0	0	0	1	1	0	0	0	1	0	0
EA2454	984434	.	G	A	.	PASS	TYPE=snp	GT	1	1	0	0	0	0	1	1	0	0	0	1	0	0
EA2454	984440	.	T	C	.	PASS	TYPE=snp	GT	1	1	0	0	0	0	1	1	0	0	0	1	0	0
EA2454	989594	.	T	A	.	PASS	TYPE=snp	GT	1	1	0	0	0	0	1	1	0	0	0	1	0	0
EA2454	989710	.	T	C	.	PASS	TYPE=snp	GT	1	1	0	0	0	0	1	1	0	0	0	1	0	0
EA2454	989712	.	T	C	.	PASS	TYPE=snp	GT	0	0	0	0	0	0	0	0	1	0	1	0	0	0
EA2454	989713	.	C	T	.	PASS	TYPE=snp	GT	1	1	0	0	0	0	1	1	0	0	0	1	0	0
EA2454	989731	.	G	A	.	PASS	TYPE=snp	GT	1	1	0	0	0	0	1	1	0	0	0	1	0	0
EA2454	989794	.	C	T	.	PASS	TYPE=snp	GT	1	1	0	0	0	0	1	1	0	0	0	1	0	0
EA2454	989798	.	A	G	.	PASS	TYPE=snp	GT	1	1	0	0	0	0	1	1	0	0	0	1	0	0
EA2454	989831	.	G	A	.	PASS	TYPE=snp	GT	1	1	0	0	0	0	1	1	0	0	0	1	0	0
EA2454	989932	.	A	G	.	PASS	TYPE=snp	GT	1	1	0	0	0	0	1	1	0	0	0	1	0	0
EA2454	989938	.	A	G	.	PASS	TYPE=snp	GT	1	1	0	0	0	0	1	1	0	0	0	1	0	0
EA2454	989941	.	C	T	.	PASS	TYPE=snp	GT	1	1	0	0	0	0	1	1	0	0	0	1	0	0
EA2454	989989	.	A	G	.	PASS	TYPE=snp	GT	1	1	0	0	0	0	1	1	0	0	0	1	0	0
EA2454	990058	.	G	T	.	PASS	TYPE=snp	GT	1	1	1	1	1	0	1	1	1	1	1	1	1	0
EA2454	990059	.	C	T	.	PASS	TYPE=snp	GT	1	1	0	0	0	0	1	1	0	0	0	1	0	0
EA2454	990100	.	A	T	.	PASS	TYPE=snp	GT	1	1	0	0	0	0	1	1	0	0	0	1	0	0
EA2454	990118	.	T	A	.	PASS	TYPE=snp	GT	1	1	0	0	0	0	1	1	0	0	0	1	0	0
EA2454	990124	.	T	C	.	PASS	TYPE=snp	GT	1	1	0	0	0	0	1	1	0	0	0	1	0	0
EA2454	990230	.	T	C	.	PASS	TYPE=snp	GT	1	1	0	0	0	0	1	1	0	0	0	1	0	0
EA2454	990308	.	G	A	.	PASS	TYPE=snp	GT	0	0	1	0	0	0	0	0	0	0	0	0	0	0
EA2454	990374	.	C	A	.	PASS	TYPE=snp	GT	0	0	1	1	1	0	0	0	0	0	0	0	1	0
EA2454	990400	.	A	G	.	PASS	TYPE=snp	GT	1	1	0	0	0	0	1	1	0	0	0	1	0	0
EA2454	990418	.	C	T	.	PASS	TYPE=snp	GT	0	0	0	0	0	0	0	0	0	1	0	0	0	0
EA2454	990463	.	A	G	.	PASS	TYPE=snp	GT	1	1	0	0	0	0	1	1	0	0	0	1	0	0
EA2454	990562	.	T	C	.	PASS	TYPE=snp	GT	1	1	0	0	0	0	1	1	0	0	0	1	0	0
EA2454	990572	.	G	A	.	PASS	TYPE=snp	GT	1	1	0	0	0	0	1	1	0	0	0	1	0	0
EA2454	990627	.	C	T	.	PASS	TYPE=snp	GT	1	1	0	0	0	0	1	1	0	0	0	1	0	0
EA2454	990637	.	G	A	.	PASS	TYPE=snp	GT	1	1	0	0	0	0	1	1	0	0	0	1	0	0
EA2454	990685	.	A	G	.	PASS	TYPE=snp	GT	1	1	0	0	0	0	1	1	0	0	0	1	0	0
EA2454	990691	.	G	T	.	PASS	TYPE=snp	GT	1	1	0	0	0	0	1	1	0	0	0	1	0	0
EA2454	990697	.	C	G	.	PASS	TYPE=snp	GT	1	1	0	0	0	0	1	1	0	0	0	1	0	0
EA2454	990708	.	G	A	.	PASS	TYPE=snp	GT	0	0	0	1	0	0	0	0	0	0	0	0	0	0
EA2454	990727	.	G	A	.	PASS	TYPE=snp	GT	1	1	0	0	0	0	1	1	0	0	0	1	0	0
EA2454	990730	.	T	G	.	PASS	TYPE=snp	GT	1	1	0	0	0	0	1	1	0	0	0	1	0	0
EA2454	990742	.	C	T	.	PASS	TYPE=snp	GT	1	1	0	0	0	0	1	1	0	0	0	1	0	0
EA2454	990757	.	A	G	.	PASS	TYPE=snp	GT	1	1	0	0	0	0	1	1	0	0	0	1	0	0
EA2454	990763	.	G	A	.	PASS	TYPE=snp	GT	1	1	0	0	0	0	1	1	0	0	0	1	0	0
EA2454	990766	.	A	G	.	PASS	TYPE=snp	GT	1	1	0	0	0	0	1	1	0	0	0	1	0	0
EA2454	990872	.	T	G	.	PASS	TYPE=snp	GT	1	1	0	0	0	0	1	1	0	0	0	1	0	0
EA2454	990874	.	T	A	.	PASS	TYPE=snp	GT	1	1	0	0	0	0	1	1	0	0	0	1	0	0
EA2454	990880	.	C	A	.	PASS	TYPE=snp	GT	1	1	0	0	0	0	1	1	0	0	0	1	0	0
EA2454	990883	.	T	C	.	PASS	TYPE=snp	GT	1	1	0	0	0	0	1	1	0	0	0	1	0	0
EA2454	990884	.	A	G	.	PASS	TYPE=snp	GT	1	1	0	0	0	0	1	1	0	0	0	1	0	0
EA2454	990904	.	C	T	.	PASS	TYPE=snp	GT	1	1	0	0	0	0	1	1	0	0	0	1	0	0
EA2454	990905	.	C	G	.	PASS	TYPE=snp	GT	1	1	0	0	0	0	1	1	0	0	0	1	0	0
EA2454	990908	.	A	G	.	PASS	TYPE=snp	GT	1	1	0	0	0	0	1	1	0	0	0	1	0	0
EA2454	990909	.	C	T	.	PASS	TYPE=snp	GT	1	1	0	0	0	0	1	1	0	0	0	1	0	0
EA2454	990925	.	A	G	.	PASS	TYPE=snp	GT	1	1	0	0	0	0	1	1	0	0	0	1	0	0
EA2454	990931	.	A	G	.	PASS	TYPE=snp	GT	1	1	0	0	0	0	1	1	0	0	0	1	0	0
EA2454	990970	.	C	T	.	PASS	TYPE=snp	GT	1	1	0	0	0	0	1	1	0	0	0	1	0	0
EA2454	991009	.	T	G	.	PASS	TYPE=snp	GT	1	1	0	0	0	0	1	1	0	0	0	1	0	0
EA2454	991060	.	G	A	.	PASS	TYPE=snp	GT	1	1	0	0	0	0	1	1	0	0	0	1	0	0
EA2454	991066	.	A	G	.	PASS	TYPE=snp	GT	1	1	0	0	0	0	1	1	0	0	0	1	0	0
EA2454	991069	.	G	A	.	PASS	TYPE=snp	GT	0	0	0	0	0	0	1	0	0	0	0	1	0	0
EA2454	991169	.	C	T	.	PASS	TYPE=snp	GT	1	1	0	0	0	0	1	1	0	0	0	1	0	0
EA2454	991239	.	A	C	.	PASS	TYPE=snp	GT	1	1	0	0	0	0	1	1	0	0	0	1	0	0
EA2454	991259	.	C	T	.	PASS	TYPE=snp	GT	1	1	0	0	0	0	1	1	0	0	0	1	0	0
EA2454	991260	.	A	C	.	PASS	TYPE=snp	GT	1	1	0	0	0	0	1	1	0	0	0	1	0	0
EA2454	991311	.	A	G	.	PASS	TYPE=snp	GT	1	1	0	0	0	0	1	1	0	0	0	1	0	0
EA2454	991365	.	A	G	.	PASS	TYPE=snp	GT	1	1	0	0	0	0	1	1	0	0	0	1	0	0
EA2454	991386	.	G	A	.	PASS	TYPE=snp	GT	1	1	0	0	0	0	1	1	0	0	0	1	0	0
EA2454	991404	.	A	G	.	PASS	TYPE=snp	GT	1	1	0	0	0	0	1	1	0	0	0	1	0	0
EA2454	991428	.	G	A	.	PASS	TYPE=snp	GT	1	1	0	0	0	0	1	1	0	0	0	1	0	0
EA2454	991560	.	C	T	.	PASS	TYPE=snp	GT	1	1	0	0	0	0	1	1	0	0	0	1	0	0
EA2454	991590	.	A	G	.	PASS	TYPE=snp	GT	1	1	0	0	0	0	1	1	0	0	0	1	0	0
EA2454	991596	.	G	A	.	PASS	TYPE=snp	GT	1	1	0	0	0	0	1	1	0	0	0	1	0	0
EA2454	991611	.	G	A	.	PASS	TYPE=snp	GT	1	1	0	0	0	0	1	1	0	0	0	1	0	0
EA2454	991638	.	C	A	.	PASS	TYPE=snp	GT	1	1	0	0	0	0	1	1	0	0	0	1	0	0
EA2454	991686	.	G	A	.	PASS	TYPE=snp	GT	1	1	0	0	0	0	1	1	0	0	0	1	0	0
EA2454	991800	.	C	T	.	PASS	TYPE=snp	GT	1	1	0	0	0	0	1	1	0	0	0	1	0	0
EA2454	991983	.	A	G	.	PASS	TYPE=snp	GT	1	1	0	0	0	0	1	1	0	0	0	1	0	0
EA2454	992001	.	T	C	.	PASS	TYPE=snp	GT	1	1	0	0	0	0	1	1	0	0	0	1	0	0
EA2454	992040	.	A	C	.	PASS	TYPE=snp	GT	1	1	0	0	0	0	1	1	0	0	0	1	0	0
EA2454	992055	.	G	A	.	PASS	TYPE=snp	GT	1	1	0	0	0	0	1	1	0	0	0	1	0	0
EA2454	992231	.	G	A	.	PASS	TYPE=snp	GT	1	1	0	0	0	0	1	1	0	0	0	1	0	0
EA2454	992244	.	C	T	.	PASS	TYPE=snp	GT	1	1	0	0	0	0	1	1	0	0	0	1	0	0
EA2454	992692	.	G	A	.	PASS	TYPE=snp	GT	1	1	0	0	0	0	1	1	0	0	0	1	0	0
EA2454	992921	.	C	T	.	PASS	TYPE=snp	GT	1	1	0	0	0	0	1	1	0	0	0	1	0	0
EA2454	993116	.	C	T	.	PASS	TYPE=snp	GT	1	1	0	0	0	0	1	1	0	0	0	1	0	0
EA2454	994056	.	A	G	.	PASS	TYPE=snp	GT	1	1	0	0	0	0	1	1	0	0	0	1	0	0
EA2454	994074	.	T	C	.	PASS	TYPE=snp	GT	1	1	0	0	0	0	1	1	0	0	0	1	0	0
EA2454	994116	.	G	A	.	PASS	TYPE=snp	GT	1	1	0	0	0	0	1	1	0	0	0	1	0	0
EA2454	994161	.	G	A	.	PASS	TYPE=snp	GT	0	0	0	0	0	0	0	0	1	0	1	0	0	0
EA2454	994311	.	T	C	.	PASS	TYPE=snp	GT	1	1	0	0	0	0	1	1	0	0	0	1	0	0
EA2454	994443	.	A	G	.	PASS	TYPE=snp	GT	1	1	0	0	0	0	1	1	0	0	0	1	0	0
EA2454	994617	.	C	T	.	PASS	TYPE=snp	GT	1	1	0	0	0	0	1	1	0	0	0	1	0	0
EA2454	994626	.	G	T	.	PASS	TYPE=snp	GT	1	1	0	0	0	0	1	1	0	0	0	1	0	0
EA2454	994884	.	T	C	.	PASS	TYPE=snp	GT	1	1	0	0	0	0	1	1	0	0	0	1	0	0
EA2454	994890	.	T	C	.	PASS	TYPE=snp	GT	1	1	0	0	0	0	1	1	0	0	0	1	0	0
EA2454	994998	.	A	G	.	PASS	TYPE=snp	GT	1	1	0	0	0	0	1	1	0	0	0	1	0	0
EA2454	995076	.	A	G	.	PASS	TYPE=snp	GT	1	1	0	0	0	0	1	1	0	0	0	1	0	0
EA2454	995109	.	G	A	.	PASS	TYPE=snp	GT	0	0	0	0	0	0	0	1	0	0	0	0	0	0
EA2454	995121	.	T	A	.	PASS	TYPE=snp	GT	1	1	0	0	0	0	1	1	0	0	0	1	0	0
EA2454	995151	.	A	C	.	PASS	TYPE=snp	GT	1	1	0	0	0	0	1	1	0	0	0	1	0	0
EA2454	995154	.	C	A	.	PASS	TYPE=snp	GT	1	1	0	0	0	0	1	1	0	0	0	1	0	0
EA2454	995193	.	A	G	.	PASS	TYPE=snp	GT	1	1	0	0	0	0	1	1	0	0	0	1	0	0
EA2454	995293	.	T	C	.	PASS	TYPE=snp	GT	0	0	0	0	0	0	0	0	1	0	1	0	0	0
EA2454	995575	.	T	A	.	PASS	TYPE=snp	GT	1	1	0	0	0	0	1	1	0	0	0	1	0	0
EA2454	996391	.	G	C	.	PASS	TYPE=snp	GT	1	1	0	0	0	0	1	1	0	0	0	1	0	0
EA2454	996427	.	C	G	.	PASS	TYPE=snp	GT	1	1	0	0	0	0	1	1	0	0	0	1	0	0
EA2454	996451	.	C	G	.	PASS	TYPE=snp	GT	1	1	0	0	0	0	1	1	0	0	0	1	0	0
EA2454	996466	.	A	G	.	PASS	TYPE=snp	GT	1	1	0	0	0	0	1	1	0	0	0	1	0	0
EA2454	996547	.	T	C	.	PASS	TYPE=snp	GT	1	1	0	0	0	0	1	1	0	0	0	1	0	0
EA2454	996653	.	G	A	.	PASS	TYPE=snp	GT	0	0	0	0	0	0	0	1	0	0	0	0	0	0
EA2454	996660	.	A	G	.	PASS	TYPE=snp	GT	0	0	0	0	0	0	0	0	1	0	1	0	0	0
EA2454	996667	.	T	C	.	PASS	TYPE=snp	GT	1	1	0	0	0	0	1	1	0	0	0	1	0	0
EA2454	996676	.	C	T	.	PASS	TYPE=snp	GT	1	1	0	0	0	0	1	1	0	0	0	1	0	0
EA2454	996712	.	T	C	.	PASS	TYPE=snp	GT	1	1	0	0	0	0	1	1	0	0	0	1	0	0
EA2454	996715	.	C	T	.	PASS	TYPE=snp	GT	1	1	0	0	0	0	1	1	0	0	0	1	0	0
EA2454	996751	.	T	C	.	PASS	TYPE=snp	GT	1	1	0	0	0	0	1	1	0	0	0	1	0	0
EA2454	996775	.	G	A	.	PASS	TYPE=snp	GT	1	1	0	0	0	0	1	1	0	0	0	1	0	0
EA2454	996850	.	A	G	.	PASS	TYPE=snp	GT	1	1	0	0	0	0	1	1	0	0	0	1	0	0
EA2454	996856	.	T	C	.	PASS	TYPE=snp	GT	1	1	0	0	0	0	1	1	0	0	0	1	0	0
EA2454	996886	.	G	C	.	PASS	TYPE=snp	GT	1	1	0	0	0	0	1	1	0	0	0	1	0	0
EA2454	996901	.	G	C	.	PASS	TYPE=snp	GT	1	1	0	0	0	0	1	1	0	0	0	1	0	0
EA2454	997000	.	A	G	.	PASS	TYPE=snp	GT	1	1	0	0	0	0	1	1	0	0	0	1	0	0
EA2454	997012	.	G	A	.	PASS	TYPE=snp	GT	1	1	0	0	0	0	1	1	0	0	0	1	0	0
EA2454	997024	.	C	G	.	PASS	TYPE=snp	GT	1	1	0	0	0	0	1	1	0	0	0	1	0	0
EA2454	997036	.	T	C	.	PASS	TYPE=snp	GT	1	1	0	0	0	0	1	1	0	0	0	1	0	0
EA2454	997180	.	C	T	.	PASS	TYPE=snp	GT	1	1	0	0	0	0	1	1	0	0	0	1	0	0
EA2454	997183	.	G	A	.	PASS	TYPE=snp	GT	1	1	0	0	0	0	1	1	0	0	0	1	0	0
EA2454	997189	.	A	G	.	PASS	TYPE=snp	GT	1	1	0	0	0	0	1	1	0	0	0	1	0	0
EA2454	997200	.	T	C	.	PASS	TYPE=snp	GT	0	0	0	0	0	0	1	0	0	0	0	1	0	0
EA2454	997480	.	A	T	.	PASS	TYPE=snp	GT	1	1	0	0	0	0	1	1	0	0	0	1	0	0
EA2454	997504	.	A	C	.	PASS	TYPE=snp	GT	1	1	0	0	0	0	1	1	0	0	0	1	0	0
EA2454	997510	.	C	T	.	PASS	TYPE=snp	GT	1	1	0	0	0	0	1	1	0	0	0	1	0	0
EA2454	997540	.	T	C	.	PASS	TYPE=snp	GT	1	1	0	0	0	0	1	1	0	0	0	1	0	0
EA2454	997543	.	T	C	.	PASS	TYPE=snp	GT	1	1	0	0	0	0	1	1	0	0	0	1	0	0
EA2454	997555	.	T	C	.	PASS	TYPE=snp	GT	1	1	0	0	0	0	1	1	0	0	0	1	0	0
EA2454	997639	.	C	T	.	PASS	TYPE=snp	GT	1	1	0	0	0	0	1	1	0	0	0	1	0	0
EA2454	997654	.	C	T	.	PASS	TYPE=snp	GT	1	1	0	0	0	0	1	1	0	0	0	1	0	0
EA2454	997681	.	G	A	.	PASS	TYPE=snp	GT	1	1	0	0	0	0	1	1	0	0	0	1	0	0
EA2454	997708	.	T	C	.	PASS	TYPE=snp	GT	1	1	0	0	0	0	1	1	0	0	0	1	0	0
EA2454	997744	.	G	A	.	PASS	TYPE=snp	GT	1	1	0	0	0	0	1	1	0	0	0	1	0	0
EA2454	997756	.	G	A	.	PASS	TYPE=snp	GT	1	1	0	0	0	0	1	1	0	0	0	1	0	0
EA2454	997819	.	G	A	.	PASS	TYPE=snp	GT	1	1	0	0	0	0	1	1	0	0	0	1	0	0
EA2454	997834	.	T	C	.	PASS	TYPE=snp	GT	1	1	0	0	0	0	1	1	0	0	0	1	0	0
EA2454	997879	.	A	G	.	PASS	TYPE=snp	GT	1	1	0	0	0	0	1	1	0	0	0	1	0	0
EA2454	997918	.	A	G	.	PASS	TYPE=snp	GT	1	1	0	0	0	0	1	1	0	0	0	1	0	0
EA2454	997930	.	C	T	.	PASS	TYPE=snp	GT	1	1	0	0	0	0	1	1	0	0	0	1	0	0
EA2454	997987	.	G	A	.	PASS	TYPE=snp	GT	1	1	0	0	0	0	1	1	0	0	0	1	0	0
EA2454	998008	.	C	T	.	PASS	TYPE=snp	GT	1	1	0	0	0	0	1	1	0	0	0	1	0	0
EA2454	998014	.	T	C	.	PASS	TYPE=snp	GT	1	1	0	0	0	0	1	1	0	0	0	1	0	0
EA2454	998017	.	T	C	.	PASS	TYPE=snp	GT	1	1	0	0	0	0	1	1	0	0	0	1	0	0
EA2454	998023	.	G	T	.	PASS	TYPE=snp	GT	1	1	0	0	0	0	0	0	0	0	0	0	0	0
EA2454	998026	.	G	A	.	PASS	TYPE=snp	GT	1	1	0	0	0	0	1	1	0	0	0	1	0	0
EA2454	998158	.	C	T	.	PASS	TYPE=snp	GT	1	1	0	0	0	0	1	1	0	0	0	1	0	0
EA2454	998200	.	A	C	.	PASS	TYPE=snp	GT	1	1	0	0	0	0	1	1	0	0	0	1	0	0
EA2454	998219	.	G	A	.	PASS	TYPE=snp	GT	0	0	0	0	0	0	0	0	1	0	1	0	0	0
EA2454	998404	.	T	C	.	PASS	TYPE=snp	GT	1	1	0	0	0	0	1	1	0	0	0	1	0	0
EA2454	998413	.	G	A	.	PASS	TYPE=snp	GT	1	1	0	0	0	0	1	1	0	0	0	1	0	0
EA2454	998510	.	A	G	.	PASS	TYPE=snp	GT	1	1	0	0	0	0	1	1	0	0	0	1	0	0
EA2454	998626	.	T	C	.	PASS	TYPE=snp	GT	1	1	0	0	0	0	1	1	0	0	0	1	0	0
EA2454	998880	.	A	C	.	PASS	TYPE=snp	GT	1	1	0	0	0	0	1	1	0	0	0	1	0	0
EA2454	998883	.	A	C	.	PASS	TYPE=snp	GT	1	1	0	0	0	0	1	1	0	0	0	1	0	0
EA2454	998895	.	C	A	.	PASS	TYPE=snp	GT	1	1	0	0	0	0	1	1	0	0	0	1	0	0
EA2454	998908	.	C	A	.	PASS	TYPE=snp	GT	1	1	0	0	0	0	1	1	0	0	0	1	0	0
EA2454	999123	.	C	T	.	PASS	TYPE=snp	GT	1	1	0	0	0	0	1	1	0	0	0	1	0	0
EA2454	999159	.	T	A	.	PASS	TYPE=snp	GT	1	1	0	0	0	0	1	1	0	0	0	1	0	0
EA2454	999352	.	G	A	.	PASS	TYPE=snp	GT	1	1	0	0	0	0	1	1	0	0	0	1	0	0
EA2454	999377	.	G	A	.	PASS	TYPE=snp	GT	0	0	0	0	0	0	0	0	0	0	0	0	1	0
EA2454	999551	.	T	C	.	PASS	TYPE=snp	GT	0	0	0	0	0	0	1	0	0	0	0	1	0	0
EA2454	999667	.	G	A	.	PASS	TYPE=snp	GT	0	0	0	0	0	0	0	0	1	0	1	0	0	0
EA2454	999750	.	G	A	.	PASS	TYPE=snp	GT	1	1	0	0	0	0	1	1	0	0	0	1	0	0
EA2454	999759	.	A	G	.	PASS	TYPE=snp	GT	1	1	0	0	0	0	1	1	0	0	0	1	0	0
EA2454	999829	.	C	T	.	PASS	TYPE=snp	GT	1	1	0	0	0	0	1	1	0	0	0	1	0	0
EA2454	1000365	.	C	T	.	PASS	TYPE=snp	GT	1	1	0	0	0	0	1	1	0	0	0	1	0	0
EA2454	1000385	.	T	C	.	PASS	TYPE=snp	GT	1	1	0	0	0	0	1	1	0	0	0	1	0	0
EA2454	1000493	.	G	T	.	PASS	TYPE=snp	GT	1	1	0	0	0	0	1	1	0	0	0	1	0	0
EA2454	1000515	.	G	A	.	PASS	TYPE=snp	GT	1	1	0	0	0	0	0	0	0	0	0	0	0	0
EA2454	1000664	.	G	A	.	PASS	TYPE=snp	GT	1	1	0	0	0	0	1	1	0	0	0	1	0	0
EA2454	1000840	.	A	G	.	PASS	TYPE=snp	GT	1	1	0	0	0	0	1	1	0	0	0	1	0	0
EA2454	1000929	.	G	A	.	PASS	TYPE=snp	GT	1	1	0	0	0	0	1	1	0	0	0	1	0	0
EA2454	1001022	.	A	C	.	PASS	TYPE=snp	GT	0	0	0	0	0	0	0	0	1	0	1	0	0	0
EA2454	1001211	.	G	A	.	PASS	TYPE=snp	GT	0	0	0	0	0	0	0	1	0	0	0	0	0	0
EA2454	1001318	.	A	T	.	PASS	TYPE=snp	GT	1	1	0	0	0	0	1	1	0	0	0	1	0	0
EA2454	1001337	.	G	A	.	PASS	TYPE=snp	GT	1	1	0	0	0	0	1	1	0	0	0	1	0	0
EA2454	1001375	.	C	G	.	PASS	TYPE=snp	GT	1	1	0	0	0	0	1	1	0	0	0	1	0	0
EA2454	1001396	.	C	T	.	PASS	TYPE=snp	GT	0	0	0	0	0	0	0	0	1	0	1	0	0	0
EA2454	1001425	.	A	G	.	PASS	TYPE=snp	GT	0	0	0	0	1	0	1	0	1	1	1	1	0	0
EA2454	1001433	.	C	T	.	PASS	TYPE=snp	GT	0	0	0	0	0	0	1	0	0	0	0	1	0	0
EA2454	1001516	.	C	T	.	PASS	TYPE=snp	GT	1	1	0	0	0	0	1	1	0	0	0	1	0	0
EA2454	1001557	.	C	T	.	PASS	TYPE=snp	GT	1	1	0	0	0	0	1	1	0	0	0	1	0	0
EA2454	1001617	.	C	T	.	PASS	TYPE=snp	GT	1	1	0	0	0	0	1	1	0	0	0	1	0	0
EA2454	1001665	.	C	T	.	PASS	TYPE=snp	GT	1	1	0	0	0	0	1	1	0	0	0	1	0	0
EA2454	1001689	.	T	C	.	PASS	TYPE=snp	GT	1	1	0	0	0	0	1	1	0	0	0	1	0	0
EA2454	1001692	.	T	C	.	PASS	TYPE=snp	GT	1	1	0	0	0	0	1	1	0	0	0	1	0	0
EA2454	1001899	.	T	C	.	PASS	TYPE=snp	GT	1	1	0	0	0	0	1	1	0	0	0	1	0	0
EA2454	1001941	.	A	G	.	PASS	TYPE=snp	GT	1	1	0	0	0	0	1	1	0	0	0	1	0	0
EA2454	1001956	.	C	A	.	PASS	TYPE=snp	GT	1	1	0	0	0	0	1	1	0	0	0	1	0	0
EA2454	1001959	.	T	C	.	PASS	TYPE=snp	GT	1	1	0	0	0	0	1	1	0	0	0	1	0	0
EA2454	1002058	.	T	C	.	PASS	TYPE=snp	GT	1	1	0	0	0	0	1	1	0	0	0	1	0	0
EA2454	1002091	.	A	G	.	PASS	TYPE=snp	GT	1	1	0	0	0	0	1	1	0	0	0	1	0	0
EA2454	1002109	.	G	A	.	PASS	TYPE=snp	GT	1	1	0	0	0	0	1	1	0	0	0	1	0	0
EA2454	1002145	.	G	A	.	PASS	TYPE=snp	GT	1	1	0	0	0	0	1	1	0	0	0	1	0	0
EA2454	1002160	.	G	T	.	PASS	TYPE=snp	GT	1	1	0	0	0	0	1	1	0	0	0	1	0	0
EA2454	1002181	.	A	G	.	PASS	TYPE=snp	GT	1	1	0	0	0	0	1	1	0	0	0	1	0	0
EA2454	1002196	.	A	G	.	PASS	TYPE=snp	GT	1	1	0	0	0	0	1	1	0	0	0	1	0	0
EA2454	1002217	.	C	T	.	PASS	TYPE=snp	GT	1	1	0	0	0	0	1	1	0	0	0	1	0	0
EA2454	1002219	.	G	A	.	PASS	TYPE=snp	GT	1	1	0	0	0	0	1	1	0	0	0	1	0	0
EA2454	1002277	.	T	G	.	PASS	TYPE=snp	GT	1	1	0	0	0	0	1	1	0	0	0	1	0	0
EA2454	1002406	.	C	T	.	PASS	TYPE=snp	GT	1	1	0	0	0	0	1	1	0	0	0	1	0	0
EA2454	1006922	.	T	A	.	PASS	TYPE=snp	GT	1	1	0	0	0	0	1	1	0	0	0	1	0	0
EA2454	1006936	.	C	T	.	PASS	TYPE=snp	GT	1	1	0	0	0	0	1	1	0	0	0	1	0	0
EA2454	1006947	.	T	C	.	PASS	TYPE=snp	GT	1	1	0	0	0	0	1	1	0	0	0	1	0	0
EA2454	1006994	.	C	T	.	PASS	TYPE=snp	GT	1	1	0	0	0	0	1	1	0	0	0	1	0	0
EA2454	1007029	.	A	G	.	PASS	TYPE=snp	GT	1	1	0	0	0	0	1	1	0	0	0	1	0	0
EA2454	1007067	.	C	T	.	PASS	TYPE=snp	GT	1	1	0	0	0	0	1	1	0	0	0	1	0	0
EA2454	1007078	.	G	T	.	PASS	TYPE=snp	GT	1	1	0	0	0	0	1	1	0	0	0	1	0	0
EA2454	1007079	.	T	C	.	PASS	TYPE=snp	GT	1	1	0	0	0	0	1	1	0	0	0	1	0	0
EA2454	1007373	.	A	C	.	PASS	TYPE=snp	GT	1	1	0	0	0	0	1	1	0	0	0	1	0	0
EA2454	1007487	.	C	T	.	PASS	TYPE=snp	GT	1	1	0	0	0	0	1	1	0	0	0	1	0	0
EA2454	1007529	.	T	A	.	PASS	TYPE=snp	GT	1	1	0	0	0	0	1	1	0	0	0	1	0	0
EA2454	1007532	.	C	T	.	PASS	TYPE=snp	GT	1	1	0	0	0	0	1	1	0	0	0	1	0	0
EA2454	1007819	.	C	T	.	PASS	TYPE=snp	GT	1	1	0	0	0	0	0	1	0	0	0	0	0	0
EA2454	1007872	.	C	T	.	PASS	TYPE=snp	GT	1	1	0	0	0	0	1	1	0	0	0	1	0	0
EA2454	1007952	.	T	C	.	PASS	TYPE=snp	GT	1	1	0	0	0	0	1	1	0	0	0	1	0	0
EA2454	1007970	.	C	A	.	PASS	TYPE=snp	GT	1	1	0	0	0	0	1	1	0	0	0	1	0	0
EA2454	1008024	.	T	C	.	PASS	TYPE=snp	GT	1	1	0	0	0	0	1	1	0	0	0	1	0	0
EA2454	1008048	.	C	T	.	PASS	TYPE=snp	GT	1	1	0	0	0	0	1	1	0	0	0	1	0	0
EA2454	1008057	.	A	G	.	PASS	TYPE=snp	GT	1	1	0	0	0	0	1	1	0	0	0	1	0	0
EA2454	1008063	.	A	G	.	PASS	TYPE=snp	GT	1	1	0	0	0	0	1	1	0	0	0	1	0	0
EA2454	1008219	.	T	C	.	PASS	TYPE=snp	GT	1	1	0	0	0	0	1	1	0	0	0	1	0	0
EA2454	1008249	.	G	A	.	PASS	TYPE=snp	GT	1	1	0	0	0	0	1	1	0	0	0	1	0	0
EA2454	1008423	.	T	C	.	PASS	TYPE=snp	GT	1	1	0	0	0	0	1	1	0	0	0	1	0	0
EA2454	1008591	.	G	A	.	PASS	TYPE=snp	GT	1	1	0	0	0	0	1	1	0	0	0	1	0	0
EA2454	1008918	.	T	C	.	PASS	TYPE=snp	GT	1	1	0	0	0	0	1	1	0	0	0	1	0	0
EA2454	1008921	.	A	G	.	PASS	TYPE=snp	GT	1	1	0	0	0	0	1	1	0	0	0	1	0	0
EA2454	1009017	.	T	A	.	PASS	TYPE=snp	GT	1	1	0	0	0	0	1	1	0	0	0	1	0	0
EA2454	1009020	.	T	C	.	PASS	TYPE=snp	GT	1	1	0	0	0	0	1	1	0	0	0	1	0	0
EA2454	1009047	.	T	C	.	PASS	TYPE=snp	GT	1	1	0	0	0	0	1	1	0	0	0	1	0	0
EA2454	1009059	.	A	G	.	PASS	TYPE=snp	GT	1	1	0	0	0	0	1	1	0	0	0	1	0	0
EA2454	1009086	.	A	T	.	PASS	TYPE=snp	GT	1	1	0	0	0	0	1	1	0	0	0	1	0	0
EA2454	1009089	.	C	T	.	PASS	TYPE=snp	GT	1	1	0	0	0	0	1	1	0	0	0	1	0	0
EA2454	1009092	.	C	T	.	PASS	TYPE=snp	GT	1	1	0	0	0	0	1	1	0	0	0	1	0	0
EA2454	1009095	.	T	C	.	PASS	TYPE=snp	GT	1	1	0	0	0	0	1	1	0	0	0	1	0	0
EA2454	1009122	.	C	T	.	PASS	TYPE=snp	GT	1	1	0	0	0	0	1	1	0	0	0	1	0	0
EA2454	1009179	.	G	A	.	PASS	TYPE=snp	GT	1	1	0	0	0	0	1	1	0	0	0	1	0	0
EA2454	1009381	.	A	G	.	PASS	TYPE=snp	GT	1	1	0	0	0	0	1	1	0	0	0	1	0	0
EA2454	1009529	.	T	C	.	PASS	TYPE=snp	GT	1	1	0	0	0	0	1	1	0	0	0	1	0	0
EA2454	1009531	.	A	G	.	PASS	TYPE=snp	GT	1	1	0	0	0	0	1	1	0	0	0	1	0	0
EA2454	1009532	.	T	C	.	PASS	TYPE=snp	GT	1	1	0	0	0	0	1	1	0	0	0	1	0	0
EA2454	1009649	.	A	G	.	PASS	TYPE=snp	GT	1	1	0	0	0	0	1	1	0	0	0	1	0	0
EA2454	1009733	.	A	G	.	PASS	TYPE=snp	GT	1	1	0	0	0	0	1	1	0	0	0	1	0	0
EA2454	1009832	.	A	G	.	PASS	TYPE=snp	GT	1	1	0	0	0	0	1	1	0	0	0	1	0	0
EA2454	1009904	.	G	A	.	PASS	TYPE=snp	GT	1	1	0	0	0	0	1	1	0	0	0	1	0	0
EA2454	1009970	.	T	C	.	PASS	TYPE=snp	GT	1	1	0	0	0	0	1	1	0	0	0	1	0	0
EA2454	1010000	.	A	G	.	PASS	TYPE=snp	GT	1	1	0	0	0	0	1	1	0	0	0	1	0	0
EA2454	1010019	.	A	G	.	PASS	TYPE=snp	GT	0	0	1	0	0	0	0	0	0	0	0	0	0	0
EA2454	1010048	.	T	A	.	PASS	TYPE=snp	GT	1	1	0	0	0	0	1	1	0	0	0	1	0	0
EA2454	1010054	.	C	T	.	PASS	TYPE=snp	GT	1	1	0	0	0	0	1	1	0	0	0	1	0	0
EA2454	1010222	.	A	G	.	PASS	TYPE=snp	GT	1	1	0	0	0	0	1	1	0	0	0	1	0	0
EA2454	1010230	.	A	G	.	PASS	TYPE=snp	GT	1	1	0	0	0	0	1	1	0	0	0	1	0	0
EA2454	1010267	.	G	A	.	PASS	TYPE=snp	GT	1	1	0	0	0	0	1	1	0	0	0	1	0	0
EA2454	1010270	.	G	A	.	PASS	TYPE=snp	GT	1	1	0	0	0	0	1	1	0	0	0	1	0	0
EA2454	1010287	.	G	A	.	PASS	TYPE=snp	GT	1	1	0	0	0	0	0	0	0	0	0	0	0	0
EA2454	1010309	.	A	G	.	PASS	TYPE=snp	GT	1	1	0	0	0	0	1	1	0	0	0	1	0	0
EA2454	1010462	.	G	A	.	PASS	TYPE=snp	GT	1	1	0	0	0	0	1	1	0	0	0	1	0	0
EA2454	1010594	.	G	A	.	PASS	TYPE=snp	GT	1	1	0	0	0	0	1	1	0	0	0	1	0	0
EA2454	1010870	.	A	G	.	PASS	TYPE=snp	GT	1	1	0	0	0	0	1	1	0	0	0	1	0	0
EA2454	1010888	.	G	A	.	PASS	TYPE=snp	GT	1	1	0	0	0	0	1	1	0	0	0	1	0	0
EA2454	1010972	.	A	G	.	PASS	TYPE=snp	GT	1	1	0	0	0	0	1	1	0	0	0	1	0	0
EA2454	1010978	.	C	T	.	PASS	TYPE=snp	GT	1	1	0	0	0	0	1	1	0	0	0	1	0	0
EA2454	1010990	.	G	A	.	PASS	TYPE=snp	GT	1	1	0	0	0	0	1	1	0	0	0	1	0	0
EA2454	1011035	.	G	A	.	PASS	TYPE=snp	GT	1	1	0	0	0	0	1	1	0	0	0	1	0	0
EA2454	1011339	.	C	T	.	PASS	TYPE=snp	GT	0	0	0	0	0	0	0	0	1	0	1	0	0	0
EA2454	1011647	.	T	A	.	PASS	TYPE=snp	GT	1	1	0	0	0	0	1	1	0	0	0	1	0	0
EA2454	1011722	.	T	A	.	PASS	TYPE=snp	GT	1	1	0	0	0	0	1	1	0	0	0	1	0	0
EA2454	1011815	.	G	T	.	PASS	TYPE=snp	GT	1	1	0	0	0	0	1	1	0	0	0	1	0	0
EA2454	1012482	.	G	A	.	PASS	TYPE=snp	GT	1	1	0	0	0	0	1	1	0	0	0	1	0	0
EA2454	1012525	.	G	A	.	PASS	TYPE=snp	GT	1	1	0	0	0	0	1	1	0	0	0	1	0	0
EA2454	1012705	.	C	T	.	PASS	TYPE=snp	GT	1	1	0	0	0	0	1	1	0	0	0	1	0	0
EA2454	1012801	.	C	T	.	PASS	TYPE=snp	GT	0	0	0	0	0	0	0	0	1	0	1	0	0	0
EA2454	1012856	.	G	A	.	PASS	TYPE=snp	GT	0	0	0	0	0	0	1	0	0	0	0	1	0	0
EA2454	1012876	.	C	T	.	PASS	TYPE=snp	GT	1	1	0	0	0	0	1	1	0	0	0	1	0	0
EA2454	1012885	.	C	A	.	PASS	TYPE=snp	GT	1	1	0	0	0	0	1	1	0	0	0	1	0	0
EA2454	1012934	.	G	A	.	PASS	TYPE=snp	GT	1	1	0	0	0	0	1	1	0	0	0	1	0	0
EA2454	1013020	.	C	T	.	PASS	TYPE=snp	GT	1	1	0	0	0	0	1	1	0	0	0	1	0	0
EA2454	1013065	.	G	T	.	PASS	TYPE=snp	GT	1	1	0	0	0	0	1	1	0	0	0	1	0	0
EA2454	1013137	.	C	G	.	PASS	TYPE=snp	GT	1	1	0	0	0	0	1	1	0	0	0	1	0	0
EA2454	1013167	.	A	G	.	PASS	TYPE=snp	GT	1	1	0	0	0	0	1	1	0	0	0	1	0	0
EA2454	1013194	.	C	T	.	PASS	TYPE=snp	GT	1	1	0	0	0	0	1	1	0	0	0	1	0	0
EA2454	1013197	.	C	G	.	PASS	TYPE=snp	GT	1	1	0	0	0	0	1	1	0	0	0	1	0	0
EA2454	1013293	.	G	A	.	PASS	TYPE=snp	GT	1	1	0	0	0	0	1	1	0	0	0	1	0	0
EA2454	1013296	.	A	G	.	PASS	TYPE=snp	GT	1	1	0	0	0	0	1	1	0	0	0	1	0	0
EA2454	1013311	.	T	C	.	PASS	TYPE=snp	GT	1	1	0	0	0	0	1	1	0	0	0	1	0	0
EA2454	1013338	.	T	C	.	PASS	TYPE=snp	GT	1	1	0	0	0	0	1	1	0	0	0	1	0	0
EA2454	1013374	.	G	A	.	PASS	TYPE=snp	GT	1	1	0	0	0	0	1	1	0	0	0	1	0	0
EA2454	1013383	.	G	A	.	PASS	TYPE=snp	GT	1	1	0	0	0	0	1	1	0	0	0	1	0	0
EA2454	1013633	.	A	G	.	PASS	TYPE=snp	GT	1	1	0	0	0	0	1	1	0	0	0	1	0	0
EA2454	1013771	.	C	T	.	PASS	TYPE=snp	GT	1	1	0	0	0	0	1	1	0	0	0	1	0	0
EA2454	1013795	.	G	A	.	PASS	TYPE=snp	GT	1	1	0	0	0	0	1	1	0	0	0	1	0	0
EA2454	1013910	.	C	T	.	PASS	TYPE=snp	GT	1	1	0	0	0	0	1	1	0	0	0	1	0	0
EA2454	1013927	.	T	C	.	PASS	TYPE=snp	GT	1	1	0	0	0	0	1	1	0	0	0	1	0	0
EA2454	1013990	.	A	G	.	PASS	TYPE=snp	GT	1	1	0	0	0	0	1	1	0	0	0	1	0	0
EA2454	1014080	.	G	T	.	PASS	TYPE=snp	GT	1	1	0	0	0	0	1	1	0	0	0	1	0	0
EA2454	1014125	.	C	T	.	PASS	TYPE=snp	GT	1	1	0	0	0	0	1	1	0	0	0	1	0	0
EA2454	1014160	.	A	G	.	PASS	TYPE=snp	GT	0	0	0	1	0	0	0	0	0	0	0	0	0	0
EA2454	1014236	.	G	A	.	PASS	TYPE=snp	GT	1	1	0	0	0	0	1	1	0	0	0	1	0	0
EA2454	1014261	.	G	A	.	PASS	TYPE=snp	GT	1	1	0	0	0	0	0	0	0	0	0	0	0	0
EA2454	1014275	.	G	A	.	PASS	TYPE=snp	GT	1	1	0	0	0	0	1	1	0	0	0	1	0	0
EA2454	1014281	.	A	G	.	PASS	TYPE=snp	GT	1	1	0	0	0	0	1	1	0	0	0	1	0	0
EA2454	1014320	.	A	G	.	PASS	TYPE=snp	GT	1	1	0	0	0	0	1	1	0	0	0	1	0	0
EA2454	1014344	.	G	A	.	PASS	TYPE=snp	GT	1	1	0	0	0	0	1	1	0	0	0	1	0	0
EA2454	1014422	.	T	C	.	PASS	TYPE=snp	GT	1	1	0	0	0	0	1	1	0	0	0	1	0	0
EA2454	1014473	.	C	T	.	PASS	TYPE=snp	GT	1	1	0	0	0	0	1	1	0	0	0	1	0	0
EA2454	1014500	.	C	G	.	PASS	TYPE=snp	GT	1	1	0	0	0	0	1	1	0	0	0	1	0	0
EA2454	1014518	.	G	C	.	PASS	TYPE=snp	GT	1	1	0	0	0	0	1	1	0	0	0	1	0	0
EA2454	1014533	.	G	C	.	PASS	TYPE=snp	GT	1	1	0	0	0	0	1	1	0	0	0	1	0	0
EA2454	1014541	.	T	C	.	PASS	TYPE=snp	GT	0	0	1	0	0	0	0	0	0	0	0	0	0	0
EA2454	1014572	.	T	C	.	PASS	TYPE=snp	GT	1	1	0	0	0	0	1	1	0	0	0	1	0	0
EA2454	1014662	.	A	G	.	PASS	TYPE=snp	GT	1	1	0	0	0	0	1	1	0	0	0	1	0	0
EA2454	1014683	.	G	C	.	PASS	TYPE=snp	GT	1	1	0	0	0	0	1	1	0	0	0	1	0	0
EA2454	1014686	.	G	T	.	PASS	TYPE=snp	GT	1	1	0	0	0	0	1	1	0	0	0	1	0	0
EA2454	1014824	.	C	T	.	PASS	TYPE=snp	GT	1	1	0	0	0	0	1	1	0	0	0	1	0	0
EA2454	1014898	.	T	C	.	PASS	TYPE=snp	GT	1	1	0	0	0	0	1	1	0	0	0	1	0	0
EA2454	1014971	.	T	C	.	PASS	TYPE=snp	GT	1	1	0	0	0	0	1	1	0	0	0	1	0	0
EA2454	1015006	.	C	T	.	PASS	TYPE=snp	GT	1	1	0	0	0	0	1	1	0	0	0	1	0	0
EA2454	1015113	.	T	C	.	PASS	TYPE=snp	GT	1	1	0	0	0	0	1	1	0	0	0	1	0	0
EA2454	1015148	.	A	G	.	PASS	TYPE=snp	GT	1	1	0	0	0	0	1	1	0	0	0	1	0	0
EA2454	1015257	.	C	T	.	PASS	TYPE=snp	GT	1	1	0	0	0	0	1	1	0	0	0	1	0	0
EA2454	1015329	.	C	T	.	PASS	TYPE=snp	GT	1	1	0	0	0	0	1	1	0	0	0	1	0	0
EA2454	1015530	.	A	G	.	PASS	TYPE=snp	GT	1	1	0	0	0	0	1	1	0	0	0	1	0	0
EA2454	1015610	.	C	T	.	PASS	TYPE=snp	GT	1	1	0	0	0	0	1	1	0	0	0	1	0	0
EA2454	1015646	.	C	T	.	PASS	TYPE=snp	GT	0	0	0	0	0	0	1	0	0	0	0	1	0	0
EA2454	1015656	.	G	A	.	PASS	TYPE=snp	GT	1	1	0	0	0	0	1	1	0	0	0	1	0	0
EA2454	1015668	.	A	T	.	PASS	TYPE=snp	GT	1	1	0	0	0	0	1	1	0	0	0	1	0	0
EA2454	1015728	.	A	G	.	PASS	TYPE=snp	GT	1	1	0	0	0	0	1	1	0	0	0	1	0	0
EA2454	1015834	.	A	G	.	PASS	TYPE=snp	GT	0	0	0	0	0	0	0	0	0	1	0	0	0	0
EA2454	1015884	.	A	C	.	PASS	TYPE=snp	GT	1	1	0	0	0	0	1	1	0	0	0	1	0	0
EA2454	1015887	.	C	T	.	PASS	TYPE=snp	GT	1	1	0	0	0	0	1	1	0	0	0	1	0	0
EA2454	1016017	.	G	A	.	PASS	TYPE=snp	GT	1	1	0	0	0	0	1	1	0	0	0	1	0	0
EA2454	1016175	.	A	G	.	PASS	TYPE=snp	GT	1	1	0	0	0	0	1	1	0	0	0	1	0	0
EA2454	1016214	.	G	T	.	PASS	TYPE=snp	GT	1	1	0	0	0	0	1	1	0	0	0	1	0	0
EA2454	1016337	.	T	G	.	PASS	TYPE=snp	GT	1	1	0	0	0	0	1	1	0	0	0	1	0	0
EA2454	1016385	.	T	G	.	PASS	TYPE=snp	GT	1	1	0	0	0	0	1	1	0	0	0	1	0	0
EA2454	1016394	.	G	A	.	PASS	TYPE=snp	GT	0	0	0	0	0	0	0	1	0	0	0	0	0	0
EA2454	1016440	.	G	A	.	PASS	TYPE=snp	GT	1	1	0	0	0	0	1	1	0	0	0	1	0	0
EA2454	1016442	.	T	C	.	PASS	TYPE=snp	GT	1	1	0	0	0	0	1	1	0	0	0	1	0	0
EA2454	1016561	.	T	C	.	PASS	TYPE=snp	GT	1	1	0	0	0	0	1	1	0	0	0	1	0	0
EA2454	1016651	.	G	A	.	PASS	TYPE=snp	GT	0	0	0	0	0	0	0	0	1	0	1	0	0	0
EA2454	1016852	.	C	A	.	PASS	TYPE=snp	GT	1	1	0	0	0	0	1	1	0	0	0	1	0	0
EA2454	1017030	.	T	C	.	PASS	TYPE=snp	GT	1	1	0	0	0	0	1	1	0	0	0	1	0	0
EA2454	1017255	.	T	C	.	PASS	TYPE=snp	GT	1	1	0	0	0	0	1	1	0	0	0	1	0	0
EA2454	1017279	.	T	C	.	PASS	TYPE=snp	GT	1	1	0	0	0	0	1	1	0	0	0	1	0	0
EA2454	1017291	.	A	G	.	PASS	TYPE=snp	GT	1	1	0	0	0	0	1	1	0	0	0	1	0	0
EA2454	1017315	.	T	C	.	PASS	TYPE=snp	GT	1	1	0	0	0	0	1	1	0	0	0	1	0	0
EA2454	1017579	.	G	A	.	PASS	TYPE=snp	GT	1	1	0	0	0	0	1	1	0	0	0	1	0	0
EA2454	1017585	.	C	T	.	PASS	TYPE=snp	GT	1	1	0	0	0	0	1	1	0	0	0	1	0	0
EA2454	1017645	.	G	A	.	PASS	TYPE=snp	GT	1	1	0	0	0	0	1	1	0	0	0	1	0	0
EA2454	1017684	.	T	A	.	PASS	TYPE=snp	GT	1	1	0	0	0	0	1	1	0	0	0	1	0	0
EA2454	1017696	.	T	G	.	PASS	TYPE=snp	GT	1	1	0	0	0	0	1	1	0	0	0	1	0	0
EA2454	1017723	.	C	T	.	PASS	TYPE=snp	GT	1	1	0	0	0	0	1	1	0	0	0	1	0	0
[truncated: 11,805 more rows]
