# Supplementary material for: Escherichia coli ST302: Genomic Analysis of Virulence Potential and Antimicrobial Resistance Mediated by Mobile Genetic Elements
Source: Front Microbiol. 2020 Jan 21;10:3098. doi: 10.3389/fmicb.2019.03098 (PMC6985150; doi:10.3389/fmicb.2019.03098)
Supplement: DATA S2 — ST302 SNP analysis. [file Data_Sheet_2.ZIP › SNP_Analysis/ST302_SNP/SNP_analysis/fasttree/ST302_SNP.tree]

(EA1682-Poultry-ST302:0.029089047,IA4731-Poultry-ST302:0.026706910,(CA0229-ND-ST302:0.034034052,(CA0191-ND-ST302:0.092173353,((IA7122-Poultry-ST302:0.010645858,(EA2455-Poultry-ST302:0.000236827,Reference:0.001675150)0.999:0.006030690)1.000:0.075807551,(((EA8393-Porcine-ST302:0.020793636,IA1729-Canine-ST302:0.035171951)1.000:0.096468067,(F2_18C-Porcine-ST302:0.093534969,(BA8907-ND-ST302:0.000239247,BA9503-ND-ST302:0.000000005)1.000:0.091835630)1.000:0.046578639)1.000:0.025940385,(FA5537-ND-ST302:0.235226896,(FA0416-Human-ST302:0.002970235,IA1186-Poultry-ST302:0.003054216)1.000:0.486405128)1.000:0.000000005)1.000:0.055884702)1.000:0.023955682)0.999:0.007130764)0.996:0.005383284);
