# Supplementary material for: Escherichia coli ST302: Genomic Analysis of Virulence Potential and Antimicrobial Resistance Mediated by Mobile Genetic Elements
Source: Front Microbiol. 2020 Jan 21;10:3098. doi: 10.3389/fmicb.2019.03098 (PMC6985150; doi:10.3389/fmicb.2019.03098)
Supplement: DATA S2 — ST302 SNP analysis. [file Data_Sheet_2.ZIP › SNP_Analysis/ST302_SNP/SNP_analysis/gubbins/branch_base_reconstruction.embl]

FT   variation       572900
FT                   /node="internal_20->Reference"
FT                   /colour="4"
FT                   /taxa="Reference"
FT                   /parent_base="A"
FT                   /replace="G"
FT   variation       690611
FT                   /node="internal_20->Reference"
FT                   /colour="4"
FT                   /taxa="Reference"
FT                   /parent_base="C"
FT                   /replace="T"
FT   variation       731329
FT                   /node="internal_20->Reference"
FT                   /colour="4"
FT                   /taxa="Reference"
FT                   /parent_base="A"
FT                   /replace="G"
FT   variation       951585
FT                   /node="internal_20->Reference"
FT                   /colour="4"
FT                   /taxa="Reference"
FT                   /parent_base="A"
FT                   /replace="G"
FT   variation       1026843
FT                   /node="internal_20->Reference"
FT                   /colour="4"
FT                   /taxa="Reference"
FT                   /parent_base="C"
FT                   /replace="T"
FT   variation       1120746
FT                   /node="internal_20->Reference"
FT                   /colour="4"
FT                   /taxa="Reference"
FT                   /parent_base="A"
FT                   /replace="C"
FT   variation       1799132
FT                   /node="internal_20->Reference"
FT                   /colour="4"
FT                   /taxa="Reference"
FT                   /parent_base="A"
FT                   /replace="G"
FT   variation       1970914
FT                   /node="internal_20->Reference"
FT                   /colour="4"
FT                   /taxa="Reference"
FT                   /parent_base="T"
FT                   /replace="A"
FT   variation       1970924
FT                   /node="internal_20->Reference"
FT                   /colour="4"
FT                   /taxa="Reference"
FT                   /parent_base="A"
FT                   /replace="C"
FT   variation       1970925
FT                   /node="internal_20->Reference"
FT                   /colour="4"
FT                   /taxa="Reference"
FT                   /parent_base="T"
FT                   /replace="A"
FT   variation       1970926
FT                   /node="internal_20->Reference"
FT                   /colour="4"
FT                   /taxa="Reference"
FT                   /parent_base="C"
FT                   /replace="A"
FT   variation       1970935
FT                   /node="internal_20->Reference"
FT                   /colour="4"
FT                   /taxa="Reference"
FT                   /parent_base="A"
FT                   /replace="C"
FT   variation       2644202
FT                   /node="internal_20->Reference"
FT                   /colour="4"
FT                   /taxa="Reference"
FT                   /parent_base="G"
FT                   /replace="T"
FT   variation       2941498
FT                   /node="internal_20->Reference"
FT                   /colour="4"
FT                   /taxa="Reference"
FT                   /parent_base="A"
FT                   /replace="G"
FT   variation       2963100
FT                   /node="internal_20->Reference"
FT                   /colour="4"
FT                   /taxa="Reference"
FT                   /parent_base="A"
FT                   /replace="G"
FT   variation       3554302
FT                   /node="internal_20->Reference"
FT                   /colour="4"
FT                   /taxa="Reference"
FT                   /parent_base="T"
FT                   /replace="G"
FT   variation       3662284
FT                   /node="internal_20->Reference"
FT                   /colour="4"
FT                   /taxa="Reference"
FT                   /parent_base="G"
FT                   /replace="A"
FT   variation       3905020
FT                   /node="internal_20->Reference"
FT                   /colour="4"
FT                   /taxa="Reference"
FT                   /parent_base="C"
FT                   /replace="A"
FT   variation       4960645
FT                   /node="internal_20->Reference"
FT                   /colour="4"
FT                   /taxa="Reference"
FT                   /parent_base="A"
FT                   /replace="G"
FT   variation       4968314
FT                   /node="internal_20->Reference"
FT                   /colour="4"
FT                   /taxa="Reference"
FT                   /parent_base="T"
FT                   /replace="C"
FT   variation       5196683
FT                   /node="internal_20->Reference"
FT                   /colour="4"
FT                   /taxa="Reference"
FT                   /parent_base="C"
FT                   /replace="T"
FT   variation       5275612
FT                   /node="internal_20->Reference"
FT                   /colour="4"
FT                   /taxa="Reference"
FT                   /parent_base="G"
FT                   /replace="C"
FT   variation       5275614
FT                   /node="internal_20->Reference"
FT                   /colour="4"
FT                   /taxa="Reference"
FT                   /parent_base="T"
FT                   /replace="A"
FT   variation       5284659
FT                   /node="internal_20->Reference"
FT                   /colour="4"
FT                   /taxa="Reference"
FT                   /parent_base="C"
FT                   /replace="A"
FT   variation       5284660
FT                   /node="internal_20->Reference"
FT                   /colour="4"
FT                   /taxa="Reference"
FT                   /parent_base="G"
FT                   /replace="A"
FT   variation       5284662
FT                   /node="internal_20->Reference"
FT                   /colour="4"
FT                   /taxa="Reference"
FT                   /parent_base="A"
FT                   /replace="T"
FT   variation       5284677
FT                   /node="internal_20->Reference"
FT                   /colour="4"
FT                   /taxa="Reference"
FT                   /parent_base="G"
FT                   /replace="C"
FT   variation       5284678
FT                   /node="internal_20->Reference"
FT                   /colour="4"
FT                   /taxa="Reference"
FT                   /parent_base="T"
FT                   /replace="C"
FT   variation       5284681
FT                   /node="internal_20->Reference"
FT                   /colour="4"
FT                   /taxa="Reference"
FT                   /parent_base="G"
FT                   /replace="C"
FT   variation       5284688
FT                   /node="internal_20->Reference"
FT                   /colour="4"
FT                   /taxa="Reference"
FT                   /parent_base="C"
FT                   /replace="G"
FT   variation       5284697
FT                   /node="internal_20->Reference"
FT                   /colour="4"
FT                   /taxa="Reference"
FT                   /parent_base="C"
FT                   /replace="T"
FT   variation       5284731
FT                   /node="internal_20->Reference"
FT                   /colour="4"
FT                   /taxa="Reference"
FT                   /parent_base="A"
FT                   /replace="G"
FT   variation       5284735
FT                   /node="internal_20->Reference"
FT                   /colour="4"
FT                   /taxa="Reference"
FT                   /parent_base="A"
FT                   /replace="C"
FT   variation       5284748
FT                   /node="internal_20->Reference"
FT                   /colour="4"
FT                   /taxa="Reference"
FT                   /parent_base="C"
FT                   /replace="T"
FT   variation       5284759
FT                   /node="internal_20->Reference"
FT                   /colour="4"
FT                   /taxa="Reference"
FT                   /parent_base="G"
FT                   /replace="T"
FT   variation       5284763
FT                   /node="internal_20->Reference"
FT                   /colour="4"
FT                   /taxa="Reference"
FT                   /parent_base="C"
FT                   /replace="A"
FT   variation       5284764
FT                   /node="internal_20->Reference"
FT                   /colour="4"
FT                   /taxa="Reference"
FT                   /parent_base="T"
FT                   /replace="A"
FT   variation       5284800
FT                   /node="internal_20->Reference"
FT                   /colour="4"
FT                   /taxa="Reference"
FT                   /parent_base="C"
FT                   /replace="T"
FT   variation       5284896
FT                   /node="internal_20->Reference"
FT                   /colour="4"
FT                   /taxa="Reference"
FT                   /parent_base="A"
FT                   /replace="G"
FT   variation       5284899
FT                   /node="internal_20->Reference"
FT                   /colour="4"
FT                   /taxa="Reference"
FT                   /parent_base="T"
FT                   /replace="C"
FT   variation       5289040
FT                   /node="internal_20->Reference"
FT                   /colour="4"
FT                   /taxa="Reference"
FT                   /parent_base="C"
FT                   /replace="T"
FT   variation       5304218
FT                   /node="internal_20->Reference"
FT                   /colour="4"
FT                   /taxa="Reference"
FT                   /parent_base="G"
FT                   /replace="T"
FT   variation       5307725
FT                   /node="internal_20->Reference"
FT                   /colour="4"
FT                   /taxa="Reference"
FT                   /parent_base="T"
FT                   /replace="C"
FT   variation       5307730
FT                   /node="internal_20->Reference"
FT                   /colour="4"
FT                   /taxa="Reference"
FT                   /parent_base="T"
FT                   /replace="G"
FT   variation       5307744
FT                   /node="internal_20->Reference"
FT                   /colour="4"
FT                   /taxa="Reference"
FT                   /parent_base="G"
FT                   /replace="T"
FT   variation       5311943
FT                   /node="internal_20->Reference"
FT                   /colour="4"
FT                   /taxa="Reference"
FT                   /parent_base="T"
FT                   /replace="G"
FT   variation       5313050
FT                   /node="internal_20->Reference"
FT                   /colour="4"
FT                   /taxa="Reference"
FT                   /parent_base="C"
FT                   /replace="A"
FT   variation       5313211
FT                   /node="internal_20->Reference"
FT                   /colour="4"
FT                   /taxa="Reference"
FT                   /parent_base="A"
FT                   /replace="T"
FT   variation       5313359
FT                   /node="internal_20->Reference"
FT                   /colour="4"
FT                   /taxa="Reference"
FT                   /parent_base="C"
FT                   /replace="A"
FT   variation       5314769
FT                   /node="internal_20->Reference"
FT                   /colour="4"
FT                   /taxa="Reference"
FT                   /parent_base="T"
FT                   /replace="G"
FT   variation       5315735
FT                   /node="internal_20->Reference"
FT                   /colour="4"
FT                   /taxa="Reference"
FT                   /parent_base="G"
FT                   /replace="C"
FT   variation       5323190
FT                   /node="internal_20->Reference"
FT                   /colour="4"
FT                   /taxa="Reference"
FT                   /parent_base="C"
FT                   /replace="A"
FT   variation       5323207
FT                   /node="internal_20->Reference"
FT                   /colour="4"
FT                   /taxa="Reference"
FT                   /parent_base="G"
FT                   /replace="T"
FT   variation       5323221
FT                   /node="internal_20->Reference"
FT                   /colour="4"
FT                   /taxa="Reference"
FT                   /parent_base="T"
FT                   /replace="A"
FT   variation       5323231
FT                   /node="internal_20->Reference"
FT                   /colour="4"
FT                   /taxa="Reference"
FT                   /parent_base="G"
FT                   /replace="T"
FT   variation       5323236
FT                   /node="internal_20->Reference"
FT                   /colour="4"
FT                   /taxa="Reference"
FT                   /parent_base="G"
FT                   /replace="C"
FT   variation       5323239
FT                   /node="internal_20->Reference"
FT                   /colour="4"
FT                   /taxa="Reference"
FT                   /parent_base="C"
FT                   /replace="A"
FT   variation       5323249
FT                   /node="internal_20->Reference"
FT                   /colour="4"
FT                   /taxa="Reference"
FT                   /parent_base="G"
FT                   /replace="C"
FT   variation       5323250
FT                   /node="internal_20->Reference"
FT                   /colour="4"
FT                   /taxa="Reference"
FT                   /parent_base="C"
FT                   /replace="A"
FT   variation       5323252
FT                   /node="internal_20->Reference"
FT                   /colour="4"
FT                   /taxa="Reference"
FT                   /parent_base="T"
FT                   /replace="A"
FT   variation       5323260
FT                   /node="internal_20->Reference"
FT                   /colour="4"
FT                   /taxa="Reference"
FT                   /parent_base="G"
FT                   /replace="T"
FT   variation       5323286
FT                   /node="internal_20->Reference"
FT                   /colour="4"
FT                   /taxa="Reference"
FT                   /parent_base="G"
FT                   /replace="T"
FT   variation       5323406
FT                   /node="internal_20->Reference"
FT                   /colour="4"
FT                   /taxa="Reference"
FT                   /parent_base="C"
FT                   /replace="A"
FT   variation       5327411
FT                   /node="internal_20->Reference"
FT                   /colour="4"
FT                   /taxa="Reference"
FT                   /parent_base="A"
FT                   /replace="T"
FT   variation       5327419
FT                   /node="internal_20->Reference"
FT                   /colour="4"
FT                   /taxa="Reference"
FT                   /parent_base="A"
FT                   /replace="T"
FT   variation       5327442
FT                   /node="internal_20->Reference"
FT                   /colour="4"
FT                   /taxa="Reference"
FT                   /parent_base="G"
FT                   /replace="T"
FT   variation       5327445
FT                   /node="internal_20->Reference"
FT                   /colour="4"
FT                   /taxa="Reference"
FT                   /parent_base="G"
FT                   /replace="T"
FT   variation       5327462
FT                   /node="internal_20->Reference"
FT                   /colour="4"
FT                   /taxa="Reference"
FT                   /parent_base="A"
FT                   /replace="T"
FT   variation       5327484
FT                   /node="internal_20->Reference"
FT                   /colour="4"
FT                   /taxa="Reference"
FT                   /parent_base="A"
FT                   /replace="T"
FT   variation       5327539
FT                   /node="internal_20->Reference"
FT                   /colour="4"
FT                   /taxa="Reference"
FT                   /parent_base="A"
FT                   /replace="T"
FT   variation       5327918
FT                   /node="internal_20->Reference"
FT                   /colour="4"
FT                   /taxa="Reference"
FT                   /parent_base="A"
FT                   /replace="T"
FT   variation       5327973
FT                   /node="internal_20->Reference"
FT                   /colour="4"
FT                   /taxa="Reference"
FT                   /parent_base="T"
FT                   /replace="A"
FT   variation       5327986
FT                   /node="internal_20->Reference"
FT                   /colour="4"
FT                   /taxa="Reference"
FT                   /parent_base="G"
FT                   /replace="T"
FT   variation       5328099
FT                   /node="internal_20->Reference"
FT                   /colour="4"
FT                   /taxa="Reference"
FT                   /parent_base="A"
FT                   /replace="C"
FT   variation       5328113
FT                   /node="internal_20->Reference"
FT                   /colour="4"
FT                   /taxa="Reference"
FT                   /parent_base="A"
FT                   /replace="C"
FT   variation       5328120
FT                   /node="internal_20->Reference"
FT                   /colour="4"
FT                   /taxa="Reference"
FT                   /parent_base="A"
FT                   /replace="C"
FT   variation       5328122
FT                   /node="internal_20->Reference"
FT                   /colour="4"
FT                   /taxa="Reference"
FT                   /parent_base="T"
FT                   /replace="C"
FT   variation       5328165
FT                   /node="internal_20->Reference"
FT                   /colour="4"
FT                   /taxa="Reference"
FT                   /parent_base="T"
FT                   /replace="G"
FT   variation       5328197
FT                   /node="internal_20->Reference"
FT                   /colour="4"
FT                   /taxa="Reference"
FT                   /parent_base="A"
FT                   /replace="C"
FT   variation       5328208
FT                   /node="internal_20->Reference"
FT                   /colour="4"
FT                   /taxa="Reference"
FT                   /parent_base="T"
FT                   /replace="G"
FT   variation       5329596
FT                   /node="internal_20->Reference"
FT                   /colour="4"
FT                   /taxa="Reference"
FT                   /parent_base="A"
FT                   /replace="C"
FT   variation       5329635
FT                   /node="internal_20->Reference"
FT                   /colour="4"
FT                   /taxa="Reference"
FT                   /parent_base="A"
FT                   /replace="C"
FT   variation       5329636
FT                   /node="internal_20->Reference"
FT                   /colour="4"
FT                   /taxa="Reference"
FT                   /parent_base="T"
FT                   /replace="G"
FT   variation       5329648
FT                   /node="internal_20->Reference"
FT                   /colour="4"
FT                   /taxa="Reference"
FT                   /parent_base="G"
FT                   /replace="T"
FT   variation       5329842
FT                   /node="internal_20->Reference"
FT                   /colour="4"
FT                   /taxa="Reference"
FT                   /parent_base="T"
FT                   /replace="G"
FT   variation       5329844
FT                   /node="internal_20->Reference"
FT                   /colour="4"
FT                   /taxa="Reference"
FT                   /parent_base="T"
FT                   /replace="A"
FT   variation       5329856
FT                   /node="internal_20->Reference"
FT                   /colour="4"
FT                   /taxa="Reference"
FT                   /parent_base="T"
FT                   /replace="G"
FT   variation       5329860
FT                   /node="internal_20->Reference"
FT                   /colour="4"
FT                   /taxa="Reference"
FT                   /parent_base="A"
FT                   /replace="T"
FT   variation       5329861
FT                   /node="internal_20->Reference"
FT                   /colour="4"
FT                   /taxa="Reference"
FT                   /parent_base="G"
FT                   /replace="T"
FT   variation       5329868
FT                   /node="internal_20->Reference"
FT                   /colour="4"
FT                   /taxa="Reference"
FT                   /parent_base="C"
FT                   /replace="G"
FT   variation       5329877
FT                   /node="internal_20->Reference"
FT                   /colour="4"
FT                   /taxa="Reference"
FT                   /parent_base="C"
FT                   /replace="G"
FT   variation       5330066
FT                   /node="internal_20->Reference"
FT                   /colour="4"
FT                   /taxa="Reference"
FT                   /parent_base="G"
FT                   /replace="T"
FT   variation       5339167
FT                   /node="internal_20->Reference"
FT                   /colour="4"
FT                   /taxa="Reference"
FT                   /parent_base="G"
FT                   /replace="A"
FT   variation       5339174
FT                   /node="internal_20->Reference"
FT                   /colour="4"
FT                   /taxa="Reference"
FT                   /parent_base="G"
FT                   /replace="A"
FT   variation       5339184
FT                   /node="internal_20->Reference"
FT                   /colour="4"
FT                   /taxa="Reference"
FT                   /parent_base="T"
FT                   /replace="A"
FT   variation       5339185
FT                   /node="internal_20->Reference"
FT                   /colour="4"
FT                   /taxa="Reference"
FT                   /parent_base="G"
FT                   /replace="T"
FT   variation       5339325
FT                   /node="internal_20->Reference"
FT                   /colour="4"
FT                   /taxa="Reference"
FT                   /parent_base="T"
FT                   /replace="C"
FT   variation       977
FT                   /node="internal_19->IA7122-Poultry-ST302"
FT                   /colour="4"
FT                   /taxa="IA7122-Poultry-ST302"
FT                   /parent_base="T"
FT                   /replace="C"
FT   variation       6107
FT                   /node="internal_19->IA7122-Poultry-ST302"
FT                   /colour="4"
FT                   /taxa="IA7122-Poultry-ST302"
FT                   /parent_base="C"
FT                   /replace="T"
FT   variation       34494
FT                   /node="internal_19->IA7122-Poultry-ST302"
FT                   /colour="4"
FT                   /taxa="IA7122-Poultry-ST302"
FT                   /parent_base="T"
FT                   /replace="C"
FT   variation       67315
FT                   /node="internal_19->IA7122-Poultry-ST302"
FT                   /colour="4"
FT                   /taxa="IA7122-Poultry-ST302"
FT                   /parent_base="A"
FT                   /replace="C"
FT   variation       81449
FT                   /node="internal_19->IA7122-Poultry-ST302"
FT                   /colour="4"
FT                   /taxa="IA7122-Poultry-ST302"
FT                   /parent_base="T"
FT                   /replace="G"
FT   variation       111773
FT                   /node="internal_19->IA7122-Poultry-ST302"
FT                   /colour="4"
FT                   /taxa="IA7122-Poultry-ST302"
FT                   /parent_base="C"
FT                   /replace="G"
FT   variation       229626
FT                   /node="internal_19->IA7122-Poultry-ST302"
FT                   /colour="4"
FT                   /taxa="IA7122-Poultry-ST302"
FT                   /parent_base="G"
FT                   /replace="C"
FT   variation       253532
FT                   /node="internal_19->IA7122-Poultry-ST302"
FT                   /colour="4"
FT                   /taxa="IA7122-Poultry-ST302"
FT                   /parent_base="G"
FT                   /replace="T"
FT   variation       393575
FT                   /node="internal_19->IA7122-Poultry-ST302"
FT                   /colour="4"
FT                   /taxa="IA7122-Poultry-ST302"
FT                   /parent_base="A"
FT                   /replace="G"
FT   variation       471914
FT                   /node="internal_19->IA7122-Poultry-ST302"
FT                   /colour="4"
FT                   /taxa="IA7122-Poultry-ST302"
FT                   /parent_base="T"
FT                   /replace="G"
FT   variation       497568
FT                   /node="internal_19->IA7122-Poultry-ST302"
FT                   /colour="4"
FT                   /taxa="IA7122-Poultry-ST302"
FT                   /parent_base="A"
FT                   /replace="T"
FT   variation       539426
FT                   /node="internal_19->IA7122-Poultry-ST302"
FT                   /colour="4"
FT                   /taxa="IA7122-Poultry-ST302"
FT                   /parent_base="T"
FT                   /replace="C"
FT   variation       542323
FT                   /node="internal_19->IA7122-Poultry-ST302"
FT                   /colour="4"
FT                   /taxa="IA7122-Poultry-ST302"
FT                   /parent_base="G"
FT                   /replace="A"
FT   variation       569410
FT                   /node="internal_19->IA7122-Poultry-ST302"
FT                   /colour="4"
FT                   /taxa="IA7122-Poultry-ST302"
FT                   /parent_base="C"
FT                   /replace="T"
FT   variation       649480
FT                   /node="internal_19->IA7122-Poultry-ST302"
FT                   /colour="4"
FT                   /taxa="IA7122-Poultry-ST302"
FT                   /parent_base="T"
FT                   /replace="C"
FT   variation       669330
FT                   /node="internal_19->IA7122-Poultry-ST302"
FT                   /colour="4"
FT                   /taxa="IA7122-Poultry-ST302"
FT                   /parent_base="A"
FT                   /replace="G"
FT   variation       682546
FT                   /node="internal_19->IA7122-Poultry-ST302"
FT                   /colour="4"
FT                   /taxa="IA7122-Poultry-ST302"
FT                   /parent_base="A"
FT                   /replace="T"
FT   variation       744988
FT                   /node="internal_19->IA7122-Poultry-ST302"
FT                   /colour="4"
FT                   /taxa="IA7122-Poultry-ST302"
FT                   /parent_base="A"
FT                   /replace="G"
FT   variation       755366
FT                   /node="internal_19->IA7122-Poultry-ST302"
FT                   /colour="4"
FT                   /taxa="IA7122-Poultry-ST302"
FT                   /parent_base="A"
FT                   /replace="G"
FT   variation       775062
FT                   /node="internal_19->IA7122-Poultry-ST302"
FT                   /colour="4"
FT                   /taxa="IA7122-Poultry-ST302"
FT                   /parent_base="G"
FT                   /replace="A"
FT   variation       783701
FT                   /node="internal_19->IA7122-Poultry-ST302"
FT                   /colour="4"
FT                   /taxa="IA7122-Poultry-ST302"
FT                   /parent_base="G"
FT                   /replace="A"
FT   variation       817985
FT                   /node="internal_19->IA7122-Poultry-ST302"
FT                   /colour="4"
FT                   /taxa="IA7122-Poultry-ST302"
FT                   /parent_base="T"
FT                   /replace="G"
FT   variation       825262
FT                   /node="internal_19->IA7122-Poultry-ST302"
FT                   /colour="4"
FT                   /taxa="IA7122-Poultry-ST302"
FT                   /parent_base="T"
FT                   /replace="G"
FT   variation       966712
FT                   /node="internal_19->IA7122-Poultry-ST302"
FT                   /colour="4"
FT                   /taxa="IA7122-Poultry-ST302"
FT                   /parent_base="T"
FT                   /replace="C"
FT   variation       1084393
FT                   /node="internal_19->IA7122-Poultry-ST302"
FT                   /colour="4"
FT                   /taxa="IA7122-Poultry-ST302"
FT                   /parent_base="G"
FT                   /replace="A"
FT   variation       1160822
FT                   /node="internal_19->IA7122-Poultry-ST302"
FT                   /colour="4"
FT                   /taxa="IA7122-Poultry-ST302"
FT                   /parent_base="A"
FT                   /replace="T"
FT   variation       1236723
FT                   /node="internal_19->IA7122-Poultry-ST302"
FT                   /colour="4"
FT                   /taxa="IA7122-Poultry-ST302"
FT                   /parent_base="T"
FT                   /replace="C"
FT   variation       1318145
FT                   /node="internal_19->IA7122-Poultry-ST302"
FT                   /colour="4"
FT                   /taxa="IA7122-Poultry-ST302"
FT                   /parent_base="G"
FT                   /replace="T"
FT   variation       1364207
FT                   /node="internal_19->IA7122-Poultry-ST302"
FT                   /colour="4"
FT                   /taxa="IA7122-Poultry-ST302"
FT                   /parent_base="C"
FT                   /replace="G"
FT   variation       1380330
FT                   /node="internal_19->IA7122-Poultry-ST302"
FT                   /colour="4"
FT                   /taxa="IA7122-Poultry-ST302"
FT                   /parent_base="C"
FT                   /replace="T"
FT   variation       1394505
FT                   /node="internal_19->IA7122-Poultry-ST302"
FT                   /colour="4"
FT                   /taxa="IA7122-Poultry-ST302"
FT                   /parent_base="A"
FT                   /replace="G"
FT   variation       1440039
FT                   /node="internal_19->IA7122-Poultry-ST302"
FT                   /colour="4"
FT                   /taxa="IA7122-Poultry-ST302"
FT                   /parent_base="C"
FT                   /replace="T"
FT   variation       1520287
FT                   /node="internal_19->IA7122-Poultry-ST302"
FT                   /colour="4"
FT                   /taxa="IA7122-Poultry-ST302"
FT                   /parent_base="C"
FT                   /replace="T"
FT   variation       1525679
FT                   /node="internal_19->IA7122-Poultry-ST302"
FT                   /colour="4"
FT                   /taxa="IA7122-Poultry-ST302"
FT                   /parent_base="C"
FT                   /replace="T"
FT   variation       1560679
FT                   /node="internal_19->IA7122-Poultry-ST302"
FT                   /colour="4"
FT                   /taxa="IA7122-Poultry-ST302"
FT                   /parent_base="G"
FT                   /replace="A"
FT   variation       1619109
FT                   /node="internal_19->IA7122-Poultry-ST302"
FT                   /colour="4"
FT                   /taxa="IA7122-Poultry-ST302"
FT                   /parent_base="T"
FT                   /replace="A"
FT   variation       1620374
FT                   /node="internal_19->IA7122-Poultry-ST302"
FT                   /colour="4"
FT                   /taxa="IA7122-Poultry-ST302"
FT                   /parent_base="A"
FT                   /replace="G"
FT   variation       1620378
FT                   /node="internal_19->IA7122-Poultry-ST302"
FT                   /colour="4"
FT                   /taxa="IA7122-Poultry-ST302"
FT                   /parent_base="T"
FT                   /replace="G"
FT   variation       1620389
FT                   /node="internal_19->IA7122-Poultry-ST302"
FT                   /colour="4"
FT                   /taxa="IA7122-Poultry-ST302"
FT                   /parent_base="G"
FT                   /replace="C"
FT   variation       1620403
FT                   /node="internal_19->IA7122-Poultry-ST302"
FT                   /colour="4"
FT                   /taxa="IA7122-Poultry-ST302"
FT                   /parent_base="A"
FT                   /replace="T"
FT   variation       1620466
FT                   /node="internal_19->IA7122-Poultry-ST302"
FT                   /colour="4"
FT                   /taxa="IA7122-Poultry-ST302"
FT                   /parent_base="T"
FT                   /replace="C"
FT   variation       1620785
FT                   /node="internal_19->IA7122-Poultry-ST302"
FT                   /colour="4"
FT                   /taxa="IA7122-Poultry-ST302"
FT                   /parent_base="T"
FT                   /replace="C"
FT   variation       1620828
FT                   /node="internal_19->IA7122-Poultry-ST302"
FT                   /colour="4"
FT                   /taxa="IA7122-Poultry-ST302"
FT                   /parent_base="T"
FT                   /replace="C"
FT   variation       1620912
FT                   /node="internal_19->IA7122-Poultry-ST302"
FT                   /colour="4"
FT                   /taxa="IA7122-Poultry-ST302"
FT                   /parent_base="G"
FT                   /replace="T"
FT   variation       1620915
FT                   /node="internal_19->IA7122-Poultry-ST302"
FT                   /colour="4"
FT                   /taxa="IA7122-Poultry-ST302"
FT                   /parent_base="A"
FT                   /replace="T"
FT   variation       1621047
FT                   /node="internal_19->IA7122-Poultry-ST302"
FT                   /colour="4"
FT                   /taxa="IA7122-Poultry-ST302"
FT                   /parent_base="C"
FT                   /replace="G"
FT   variation       1621140
FT                   /node="internal_19->IA7122-Poultry-ST302"
FT                   /colour="4"
FT                   /taxa="IA7122-Poultry-ST302"
FT                   /parent_base="C"
FT                   /replace="A"
FT   variation       1621305
FT                   /node="internal_19->IA7122-Poultry-ST302"
FT                   /colour="4"
FT                   /taxa="IA7122-Poultry-ST302"
FT                   /parent_base="G"
FT                   /replace="T"
FT   variation       1621358
FT                   /node="internal_19->IA7122-Poultry-ST302"
FT                   /colour="4"
FT                   /taxa="IA7122-Poultry-ST302"
FT                   /parent_base="G"
FT                   /replace="A"
FT   variation       1622531
FT                   /node="internal_19->IA7122-Poultry-ST302"
FT                   /colour="4"
FT                   /taxa="IA7122-Poultry-ST302"
FT                   /parent_base="C"
FT                   /replace="A"
FT   variation       1624169
FT                   /node="internal_19->IA7122-Poultry-ST302"
FT                   /colour="4"
FT                   /taxa="IA7122-Poultry-ST302"
FT                   /parent_base="A"
FT                   /replace="G"
FT   variation       1624244
FT                   /node="internal_19->IA7122-Poultry-ST302"
FT                   /colour="4"
FT                   /taxa="IA7122-Poultry-ST302"
FT                   /parent_base="C"
FT                   /replace="T"
FT   variation       1624279
FT                   /node="internal_19->IA7122-Poultry-ST302"
FT                   /colour="4"
FT                   /taxa="IA7122-Poultry-ST302"
FT                   /parent_base="G"
FT                   /replace="T"
FT   variation       1624280
FT                   /node="internal_19->IA7122-Poultry-ST302"
FT                   /colour="4"
FT                   /taxa="IA7122-Poultry-ST302"
FT                   /parent_base="T"
FT                   /replace="C"
FT   variation       1624285
FT                   /node="internal_19->IA7122-Poultry-ST302"
FT                   /colour="4"
FT                   /taxa="IA7122-Poultry-ST302"
FT                   /parent_base="A"
FT                   /replace="C"
FT   variation       1624316
FT                   /node="internal_19->IA7122-Poultry-ST302"
FT                   /colour="4"
FT                   /taxa="IA7122-Poultry-ST302"
FT                   /parent_base="C"
FT                   /replace="A"
FT   variation       1624351
FT                   /node="internal_19->IA7122-Poultry-ST302"
FT                   /colour="4"
FT                   /taxa="IA7122-Poultry-ST302"
FT                   /parent_base="G"
FT                   /replace="T"
FT   variation       1624352
FT                   /node="internal_19->IA7122-Poultry-ST302"
FT                   /colour="4"
FT                   /taxa="IA7122-Poultry-ST302"
FT                   /parent_base="T"
FT                   /replace="C"
FT   variation       1624956
FT                   /node="internal_19->IA7122-Poultry-ST302"
FT                   /colour="4"
FT                   /taxa="IA7122-Poultry-ST302"
FT                   /parent_base="C"
FT                   /replace="T"
FT   variation       1624998
FT                   /node="internal_19->IA7122-Poultry-ST302"
FT                   /colour="4"
FT                   /taxa="IA7122-Poultry-ST302"
FT                   /parent_base="C"
FT                   /replace="T"
FT   variation       1625001
FT                   /node="internal_19->IA7122-Poultry-ST302"
FT                   /colour="4"
FT                   /taxa="IA7122-Poultry-ST302"
FT                   /parent_base="G"
FT                   /replace="A"
FT   variation       1625089
FT                   /node="internal_19->IA7122-Poultry-ST302"
FT                   /colour="4"
FT                   /taxa="IA7122-Poultry-ST302"
FT                   /parent_base="C"
FT                   /replace="T"
FT   variation       1625102
FT                   /node="internal_19->IA7122-Poultry-ST302"
FT                   /colour="4"
FT                   /taxa="IA7122-Poultry-ST302"
FT                   /parent_base="G"
FT                   /replace="A"
FT   variation       1625124
FT                   /node="internal_19->IA7122-Poultry-ST302"
FT                   /colour="4"
FT                   /taxa="IA7122-Poultry-ST302"
FT                   /parent_base="C"
FT                   /replace="T"
FT   variation       1625175
FT                   /node="internal_19->IA7122-Poultry-ST302"
FT                   /colour="4"
FT                   /taxa="IA7122-Poultry-ST302"
FT                   /parent_base="T"
FT                   /replace="C"
FT   variation       1625184
FT                   /node="internal_19->IA7122-Poultry-ST302"
FT                   /colour="4"
FT                   /taxa="IA7122-Poultry-ST302"
FT                   /parent_base="T"
FT                   /replace="C"
FT   variation       1625187
FT                   /node="internal_19->IA7122-Poultry-ST302"
FT                   /colour="4"
FT                   /taxa="IA7122-Poultry-ST302"
FT                   /parent_base="C"
FT                   /replace="T"
FT   variation       1625235
FT                   /node="internal_19->IA7122-Poultry-ST302"
FT                   /colour="4"
FT                   /taxa="IA7122-Poultry-ST302"
FT                   /parent_base="A"
FT                   /replace="G"
FT   variation       1625283
FT                   /node="internal_19->IA7122-Poultry-ST302"
FT                   /colour="4"
FT                   /taxa="IA7122-Poultry-ST302"
FT                   /parent_base="G"
FT                   /replace="A"
FT   variation       1625502
FT                   /node="internal_19->IA7122-Poultry-ST302"
FT                   /colour="4"
FT                   /taxa="IA7122-Poultry-ST302"
FT                   /parent_base="G"
FT                   /replace="A"
FT   variation       1625526
FT                   /node="internal_19->IA7122-Poultry-ST302"
FT                   /colour="4"
FT                   /taxa="IA7122-Poultry-ST302"
FT                   /parent_base="T"
FT                   /replace="G"
FT   variation       1625541
FT                   /node="internal_19->IA7122-Poultry-ST302"
FT                   /colour="4"
FT                   /taxa="IA7122-Poultry-ST302"
FT                   /parent_base="T"
FT                   /replace="C"
FT   variation       1625589
FT                   /node="internal_19->IA7122-Poultry-ST302"
FT                   /colour="4"
FT                   /taxa="IA7122-Poultry-ST302"
FT                   /parent_base="C"
FT                   /replace="T"
FT   variation       1629122
FT                   /node="internal_19->IA7122-Poultry-ST302"
FT                   /colour="4"
FT                   /taxa="IA7122-Poultry-ST302"
FT                   /parent_base="A"
FT                   /replace="G"
FT   variation       1629149
FT                   /node="internal_19->IA7122-Poultry-ST302"
FT                   /colour="4"
FT                   /taxa="IA7122-Poultry-ST302"
FT                   /parent_base="T"
FT                   /replace="C"
FT   variation       1629156
FT                   /node="internal_19->IA7122-Poultry-ST302"
FT                   /colour="4"
FT                   /taxa="IA7122-Poultry-ST302"
FT                   /parent_base="A"
FT                   /replace="G"
FT   variation       1629183
FT                   /node="internal_19->IA7122-Poultry-ST302"
FT                   /colour="4"
FT                   /taxa="IA7122-Poultry-ST302"
FT                   /parent_base="A"
FT                   /replace="C"
FT   variation       1629200
FT                   /node="internal_19->IA7122-Poultry-ST302"
FT                   /colour="4"
FT                   /taxa="IA7122-Poultry-ST302"
FT                   /parent_base="T"
FT                   /replace="C"
FT   variation       1629240
FT                   /node="internal_19->IA7122-Poultry-ST302"
FT                   /colour="4"
FT                   /taxa="IA7122-Poultry-ST302"
FT                   /parent_base="T"
FT                   /replace="C"
FT   variation       1629255
FT                   /node="internal_19->IA7122-Poultry-ST302"
FT                   /colour="4"
FT                   /taxa="IA7122-Poultry-ST302"
FT                   /parent_base="G"
FT                   /replace="A"
FT   variation       1629281
FT                   /node="internal_19->IA7122-Poultry-ST302"
FT                   /colour="4"
FT                   /taxa="IA7122-Poultry-ST302"
FT                   /parent_base="C"
FT                   /replace="T"
FT   variation       1629285
FT                   /node="internal_19->IA7122-Poultry-ST302"
FT                   /colour="4"
FT                   /taxa="IA7122-Poultry-ST302"
FT                   /parent_base="G"
FT                   /replace="A"
FT   variation       1629288
FT                   /node="internal_19->IA7122-Poultry-ST302"
FT                   /colour="4"
FT                   /taxa="IA7122-Poultry-ST302"
FT                   /parent_base="C"
FT                   /replace="T"
FT   variation       1629295
FT                   /node="internal_19->IA7122-Poultry-ST302"
FT                   /colour="4"
FT                   /taxa="IA7122-Poultry-ST302"
FT                   /parent_base="A"
FT                   /replace="T"
FT   variation       1629297
FT                   /node="internal_19->IA7122-Poultry-ST302"
FT                   /colour="4"
FT                   /taxa="IA7122-Poultry-ST302"
FT                   /parent_base="A"
FT                   /replace="T"
FT   variation       1629306
FT                   /node="internal_19->IA7122-Poultry-ST302"
FT                   /colour="4"
FT                   /taxa="IA7122-Poultry-ST302"
FT                   /parent_base="C"
FT                   /replace="G"
FT   variation       1629336
FT                   /node="internal_19->IA7122-Poultry-ST302"
FT                   /colour="4"
FT                   /taxa="IA7122-Poultry-ST302"
FT                   /parent_base="T"
FT                   /replace="G"
FT   variation       1629375
FT                   /node="internal_19->IA7122-Poultry-ST302"
FT                   /colour="4"
FT                   /taxa="IA7122-Poultry-ST302"
FT                   /parent_base="G"
FT                   /replace="A"
FT   variation       1629399
FT                   /node="internal_19->IA7122-Poultry-ST302"
FT                   /colour="4"
FT                   /taxa="IA7122-Poultry-ST302"
FT                   /parent_base="G"
FT                   /replace="A"
FT   variation       1629423
FT                   /node="internal_19->IA7122-Poultry-ST302"
FT                   /colour="4"
FT                   /taxa="IA7122-Poultry-ST302"
FT                   /parent_base="A"
FT                   /replace="G"
FT   variation       1629427
FT                   /node="internal_19->IA7122-Poultry-ST302"
FT                   /colour="4"
FT                   /taxa="IA7122-Poultry-ST302"
FT                   /parent_base="A"
FT                   /replace="T"
FT   variation       1629435
FT                   /node="internal_19->IA7122-Poultry-ST302"
FT                   /colour="4"
FT                   /taxa="IA7122-Poultry-ST302"
FT                   /parent_base="G"
FT                   /replace="A"
FT   variation       1629538
FT                   /node="internal_19->IA7122-Poultry-ST302"
FT                   /colour="4"
FT                   /taxa="IA7122-Poultry-ST302"
FT                   /parent_base="A"
FT                   /replace="C"
FT   variation       1629550
FT                   /node="internal_19->IA7122-Poultry-ST302"
FT                   /colour="4"
FT                   /taxa="IA7122-Poultry-ST302"
FT                   /parent_base="A"
FT                   /replace="G"
FT   variation       1629565
FT                   /node="internal_19->IA7122-Poultry-ST302"
FT                   /colour="4"
FT                   /taxa="IA7122-Poultry-ST302"
FT                   /parent_base="A"
FT                   /replace="G"
FT   variation       1629667
FT                   /node="internal_19->IA7122-Poultry-ST302"
FT                   /colour="4"
FT                   /taxa="IA7122-Poultry-ST302"
FT                   /parent_base="G"
FT                   /replace="A"
FT   variation       1629743
FT                   /node="internal_19->IA7122-Poultry-ST302"
FT                   /colour="4"
FT                   /taxa="IA7122-Poultry-ST302"
FT                   /parent_base="A"
FT                   /replace="G"
FT   variation       1629890
FT                   /node="internal_19->IA7122-Poultry-ST302"
FT                   /colour="4"
FT                   /taxa="IA7122-Poultry-ST302"
FT                   /parent_base="G"
FT                   /replace="A"
FT   variation       1629968
FT                   /node="internal_19->IA7122-Poultry-ST302"
FT                   /colour="4"
FT                   /taxa="IA7122-Poultry-ST302"
FT                   /parent_base="G"
FT                   /replace="A"
FT   variation       1630016
FT                   /node="internal_19->IA7122-Poultry-ST302"
FT                   /colour="4"
FT                   /taxa="IA7122-Poultry-ST302"
FT                   /parent_base="T"
FT                   /replace="C"
FT   variation       1630100
FT                   /node="internal_19->IA7122-Poultry-ST302"
FT                   /colour="4"
FT                   /taxa="IA7122-Poultry-ST302"
FT                   /parent_base="G"
FT                   /replace="A"
FT   variation       1630127
FT                   /node="internal_19->IA7122-Poultry-ST302"
FT                   /colour="4"
FT                   /taxa="IA7122-Poultry-ST302"
FT                   /parent_base="A"
FT                   /replace="C"
FT   variation       1630181
FT                   /node="internal_19->IA7122-Poultry-ST302"
FT                   /colour="4"
FT                   /taxa="IA7122-Poultry-ST302"
FT                   /parent_base="A"
FT                   /replace="G"
FT   variation       1630208
FT                   /node="internal_19->IA7122-Poultry-ST302"
FT                   /colour="4"
FT                   /taxa="IA7122-Poultry-ST302"
FT                   /parent_base="G"
FT                   /replace="A"
FT   variation       1630220
FT                   /node="internal_19->IA7122-Poultry-ST302"
FT                   /colour="4"
FT                   /taxa="IA7122-Poultry-ST302"
FT                   /parent_base="T"
FT                   /replace="C"
FT   variation       1630304
FT                   /node="internal_19->IA7122-Poultry-ST302"
FT                   /colour="4"
FT                   /taxa="IA7122-Poultry-ST302"
FT                   /parent_base="A"
FT                   /replace="G"
FT   variation       1630448
FT                   /node="internal_19->IA7122-Poultry-ST302"
FT                   /colour="4"
FT                   /taxa="IA7122-Poultry-ST302"
FT                   /parent_base="T"
FT                   /replace="C"
FT   variation       1630496
FT                   /node="internal_19->IA7122-Poultry-ST302"
FT                   /colour="4"
FT                   /taxa="IA7122-Poultry-ST302"
FT                   /parent_base="C"
FT                   /replace="T"
FT   variation       1630550
FT                   /node="internal_19->IA7122-Poultry-ST302"
FT                   /colour="4"
FT                   /taxa="IA7122-Poultry-ST302"
FT                   /parent_base="G"
FT                   /replace="A"
FT   variation       1630872
FT                   /node="internal_19->IA7122-Poultry-ST302"
FT                   /colour="4"
FT                   /taxa="IA7122-Poultry-ST302"
FT                   /parent_base="G"
FT                   /replace="A"
FT   variation       1630874
FT                   /node="internal_19->IA7122-Poultry-ST302"
FT                   /colour="4"
FT                   /taxa="IA7122-Poultry-ST302"
FT                   /parent_base="T"
FT                   /replace="A"
FT   variation       1630941
FT                   /node="internal_19->IA7122-Poultry-ST302"
FT                   /colour="4"
FT                   /taxa="IA7122-Poultry-ST302"
FT                   /parent_base="A"
FT                   /replace="G"
FT   variation       1630947
FT                   /node="internal_19->IA7122-Poultry-ST302"
FT                   /colour="4"
FT                   /taxa="IA7122-Poultry-ST302"
FT                   /parent_base="T"
FT                   /replace="C"
FT   variation       1630956
FT                   /node="internal_19->IA7122-Poultry-ST302"
FT                   /colour="4"
FT                   /taxa="IA7122-Poultry-ST302"
FT                   /parent_base="G"
FT                   /replace="A"
FT   variation       1630981
FT                   /node="internal_19->IA7122-Poultry-ST302"
FT                   /colour="4"
FT                   /taxa="IA7122-Poultry-ST302"
FT                   /parent_base="A"
FT                   /replace="G"
FT   variation       1646924
FT                   /node="internal_19->IA7122-Poultry-ST302"
FT                   /colour="4"
FT                   /taxa="IA7122-Poultry-ST302"
FT                   /parent_base="G"
FT                   /replace="A"
FT   variation       1679531
FT                   /node="internal_19->IA7122-Poultry-ST302"
FT                   /colour="4"
FT                   /taxa="IA7122-Poultry-ST302"
FT                   /parent_base="C"
FT                   /replace="T"
FT   variation       1966999
FT                   /node="internal_19->IA7122-Poultry-ST302"
FT                   /colour="4"
FT                   /taxa="IA7122-Poultry-ST302"
FT                   /parent_base="G"
FT                   /replace="T"
FT   variation       1999916
FT                   /node="internal_19->IA7122-Poultry-ST302"
FT                   /colour="4"
FT                   /taxa="IA7122-Poultry-ST302"
FT                   /parent_base="A"
FT                   /replace="C"
FT   variation       2040728
FT                   /node="internal_19->IA7122-Poultry-ST302"
FT                   /colour="4"
FT                   /taxa="IA7122-Poultry-ST302"
FT                   /parent_base="C"
FT                   /replace="T"
FT   variation       2113179
FT                   /node="internal_19->IA7122-Poultry-ST302"
FT                   /colour="4"
FT                   /taxa="IA7122-Poultry-ST302"
FT                   /parent_base="G"
FT                   /replace="A"
FT   variation       2183355
FT                   /node="internal_19->IA7122-Poultry-ST302"
FT                   /colour="4"
FT                   /taxa="IA7122-Poultry-ST302"
FT                   /parent_base="T"
FT                   /replace="C"
FT   variation       2187722
FT                   /node="internal_19->IA7122-Poultry-ST302"
FT                   /colour="4"
FT                   /taxa="IA7122-Poultry-ST302"
FT                   /parent_base="C"
FT                   /replace="A"
FT   variation       2292077
FT                   /node="internal_19->IA7122-Poultry-ST302"
FT                   /colour="4"
FT                   /taxa="IA7122-Poultry-ST302"
FT                   /parent_base="C"
FT                   /replace="T"
FT   variation       2364340
FT                   /node="internal_19->IA7122-Poultry-ST302"
FT                   /colour="4"
FT                   /taxa="IA7122-Poultry-ST302"
FT                   /parent_base="T"
FT                   /replace="G"
FT   variation       2493670
FT                   /node="internal_19->IA7122-Poultry-ST302"
FT                   /colour="4"
FT                   /taxa="IA7122-Poultry-ST302"
FT                   /parent_base="A"
FT                   /replace="C"
FT   variation       2538679
FT                   /node="internal_19->IA7122-Poultry-ST302"
FT                   /colour="4"
FT                   /taxa="IA7122-Poultry-ST302"
FT                   /parent_base="T"
FT                   /replace="C"
FT   variation       2555441
FT                   /node="internal_19->IA7122-Poultry-ST302"
FT                   /colour="4"
FT                   /taxa="IA7122-Poultry-ST302"
FT                   /parent_base="A"
FT                   /replace="G"
FT   variation       2623767
FT                   /node="internal_19->IA7122-Poultry-ST302"
FT                   /colour="4"
FT                   /taxa="IA7122-Poultry-ST302"
FT                   /parent_base="C"
FT                   /replace="A"
FT   variation       2641059
FT                   /node="internal_19->IA7122-Poultry-ST302"
FT                   /colour="4"
FT                   /taxa="IA7122-Poultry-ST302"
FT                   /parent_base="T"
FT                   /replace="C"
FT   variation       2693407
FT                   /node="internal_19->IA7122-Poultry-ST302"
FT                   /colour="4"
FT                   /taxa="IA7122-Poultry-ST302"
FT                   /parent_base="G"
FT                   /replace="A"
FT   variation       2752557
FT                   /node="internal_19->IA7122-Poultry-ST302"
FT                   /colour="4"
FT                   /taxa="IA7122-Poultry-ST302"
FT                   /parent_base="C"
FT                   /replace="T"
FT   variation       2764522
FT                   /node="internal_19->IA7122-Poultry-ST302"
FT                   /colour="4"
FT                   /taxa="IA7122-Poultry-ST302"
FT                   /parent_base="C"
FT                   /replace="A"
FT   variation       2835582
FT                   /node="internal_19->IA7122-Poultry-ST302"
FT                   /colour="4"
FT                   /taxa="IA7122-Poultry-ST302"
FT                   /parent_base="C"
FT                   /replace="T"
FT   variation       2883184
FT                   /node="internal_19->IA7122-Poultry-ST302"
FT                   /colour="4"
FT                   /taxa="IA7122-Poultry-ST302"
FT                   /parent_base="T"
FT                   /replace="C"
FT   variation       2952105
FT                   /node="internal_19->IA7122-Poultry-ST302"
FT                   /colour="4"
FT                   /taxa="IA7122-Poultry-ST302"
FT                   /parent_base="A"
FT                   /replace="G"
FT   variation       2952106
FT                   /node="internal_19->IA7122-Poultry-ST302"
FT                   /colour="4"
FT                   /taxa="IA7122-Poultry-ST302"
FT                   /parent_base="G"
FT                   /replace="A"
FT   variation       2952236
FT                   /node="internal_19->IA7122-Poultry-ST302"
FT                   /colour="4"
FT                   /taxa="IA7122-Poultry-ST302"
FT                   /parent_base="A"
FT                   /replace="G"
FT   variation       2952306
FT                   /node="internal_19->IA7122-Poultry-ST302"
FT                   /colour="4"
FT                   /taxa="IA7122-Poultry-ST302"
FT                   /parent_base="T"
FT                   /replace="C"
FT   variation       2952337
FT                   /node="internal_19->IA7122-Poultry-ST302"
FT                   /colour="4"
FT                   /taxa="IA7122-Poultry-ST302"
FT                   /parent_base="G"
FT                   /replace="A"
FT   variation       2952364
FT                   /node="internal_19->IA7122-Poultry-ST302"
FT                   /colour="4"
FT                   /taxa="IA7122-Poultry-ST302"
FT                   /parent_base="C"
FT                   /replace="T"
FT   variation       2952367
FT                   /node="internal_19->IA7122-Poultry-ST302"
FT                   /colour="4"
FT                   /taxa="IA7122-Poultry-ST302"
FT                   /parent_base="G"
FT                   /replace="A"
FT   variation       2952391
FT                   /node="internal_19->IA7122-Poultry-ST302"
FT                   /colour="4"
FT                   /taxa="IA7122-Poultry-ST302"
FT                   /parent_base="T"
FT                   /replace="C"
FT   variation       2952403
FT                   /node="internal_19->IA7122-Poultry-ST302"
FT                   /colour="4"
FT                   /taxa="IA7122-Poultry-ST302"
FT                   /parent_base="A"
FT                   /replace="T"
FT   variation       2952433
FT                   /node="internal_19->IA7122-Poultry-ST302"
FT                   /colour="4"
FT                   /taxa="IA7122-Poultry-ST302"
FT                   /parent_base="C"
FT                   /replace="T"
FT   variation       2952439
FT                   /node="internal_19->IA7122-Poultry-ST302"
FT                   /colour="4"
FT                   /taxa="IA7122-Poultry-ST302"
FT                   /parent_base="A"
FT                   /replace="G"
FT   variation       2952472
FT                   /node="internal_19->IA7122-Poultry-ST302"
FT                   /colour="4"
FT                   /taxa="IA7122-Poultry-ST302"
FT                   /parent_base="T"
FT                   /replace="C"
FT   variation       2952475
FT                   /node="internal_19->IA7122-Poultry-ST302"
FT                   /colour="4"
FT                   /taxa="IA7122-Poultry-ST302"
FT                   /parent_base="T"
FT                   /replace="C"
FT   variation       2952476
FT                   /node="internal_19->IA7122-Poultry-ST302"
FT                   /colour="4"
FT                   /taxa="IA7122-Poultry-ST302"
FT                   /parent_base="C"
FT                   /replace="T"
FT   variation       2952478
FT                   /node="internal_19->IA7122-Poultry-ST302"
FT                   /colour="4"
FT                   /taxa="IA7122-Poultry-ST302"
FT                   /parent_base="T"
FT                   /replace="C"
FT   variation       2952502
FT                   /node="internal_19->IA7122-Poultry-ST302"
FT                   /colour="4"
FT                   /taxa="IA7122-Poultry-ST302"
FT                   /parent_base="A"
FT                   /replace="G"
FT   variation       2952505
FT                   /node="internal_19->IA7122-Poultry-ST302"
FT                   /colour="4"
FT                   /taxa="IA7122-Poultry-ST302"
FT                   /parent_base="C"
FT                   /replace="T"
FT   variation       2952508
FT                   /node="internal_19->IA7122-Poultry-ST302"
FT                   /colour="4"
FT                   /taxa="IA7122-Poultry-ST302"
FT                   /parent_base="G"
FT                   /replace="A"
FT   variation       2952511
FT                   /node="internal_19->IA7122-Poultry-ST302"
FT                   /colour="4"
FT                   /taxa="IA7122-Poultry-ST302"
FT                   /parent_base="C"
FT                   /replace="T"
FT   variation       2952514
FT                   /node="internal_19->IA7122-Poultry-ST302"
FT                   /colour="4"
FT                   /taxa="IA7122-Poultry-ST302"
FT                   /parent_base="G"
FT                   /replace="A"
FT   variation       2952517
FT                   /node="internal_19->IA7122-Poultry-ST302"
FT                   /colour="4"
FT                   /taxa="IA7122-Poultry-ST302"
FT                   /parent_base="C"
FT                   /replace="T"
FT   variation       2952529
FT                   /node="internal_19->IA7122-Poultry-ST302"
FT                   /colour="4"
FT                   /taxa="IA7122-Poultry-ST302"
FT                   /parent_base="C"
FT                   /replace="T"
FT   variation       2952531
FT                   /node="internal_19->IA7122-Poultry-ST302"
FT                   /colour="4"
FT                   /taxa="IA7122-Poultry-ST302"
FT                   /parent_base="T"
FT                   /replace="G"
FT   variation       2952535
FT                   /node="internal_19->IA7122-Poultry-ST302"
FT                   /colour="4"
FT                   /taxa="IA7122-Poultry-ST302"
FT                   /parent_base="T"
FT                   /replace="C"
FT   variation       2952544
FT                   /node="internal_19->IA7122-Poultry-ST302"
FT                   /colour="4"
FT                   /taxa="IA7122-Poultry-ST302"
FT                   /parent_base="T"
FT                   /replace="A"
FT   variation       2952550
FT                   /node="internal_19->IA7122-Poultry-ST302"
FT                   /colour="4"
FT                   /taxa="IA7122-Poultry-ST302"
FT                   /parent_base="C"
FT                   /replace="T"
FT   variation       2952555
FT                   /node="internal_19->IA7122-Poultry-ST302"
FT                   /colour="4"
FT                   /taxa="IA7122-Poultry-ST302"
FT                   /parent_base="G"
FT                   /replace="A"
FT   variation       2952558
FT                   /node="internal_19->IA7122-Poultry-ST302"
FT                   /colour="4"
FT                   /taxa="IA7122-Poultry-ST302"
FT                   /parent_base="A"
FT                   /replace="T"
FT   variation       2952568
FT                   /node="internal_19->IA7122-Poultry-ST302"
FT                   /colour="4"
FT                   /taxa="IA7122-Poultry-ST302"
FT                   /parent_base="G"
FT                   /replace="A"
FT   variation       2952625
FT                   /node="internal_19->IA7122-Poultry-ST302"
FT                   /colour="4"
FT                   /taxa="IA7122-Poultry-ST302"
FT                   /parent_base="T"
FT                   /replace="G"
FT   variation       2952633
FT                   /node="internal_19->IA7122-Poultry-ST302"
FT                   /colour="4"
FT                   /taxa="IA7122-Poultry-ST302"
FT                   /parent_base="G"
FT                   /replace="A"
FT   variation       2952775
FT                   /node="internal_19->IA7122-Poultry-ST302"
FT                   /colour="4"
FT                   /taxa="IA7122-Poultry-ST302"
FT                   /parent_base="A"
FT                   /replace="G"
FT   variation       2952778
FT                   /node="internal_19->IA7122-Poultry-ST302"
FT                   /colour="4"
FT                   /taxa="IA7122-Poultry-ST302"
FT                   /parent_base="T"
FT                   /replace="C"
FT   variation       2952787
FT                   /node="internal_19->IA7122-Poultry-ST302"
FT                   /colour="4"
FT                   /taxa="IA7122-Poultry-ST302"
FT                   /parent_base="T"
FT                   /replace="G"
FT   variation       2952790
FT                   /node="internal_19->IA7122-Poultry-ST302"
FT                   /colour="4"
FT                   /taxa="IA7122-Poultry-ST302"
FT                   /parent_base="C"
FT                   /replace="T"
FT   variation       2952814
FT                   /node="internal_19->IA7122-Poultry-ST302"
FT                   /colour="4"
FT                   /taxa="IA7122-Poultry-ST302"
FT                   /parent_base="T"
FT                   /replace="A"
FT   variation       2952823
FT                   /node="internal_19->IA7122-Poultry-ST302"
FT                   /colour="4"
FT                   /taxa="IA7122-Poultry-ST302"
FT                   /parent_base="G"
FT                   /replace="A"
FT   variation       2952841
FT                   /node="internal_19->IA7122-Poultry-ST302"
FT                   /colour="4"
FT                   /taxa="IA7122-Poultry-ST302"
FT                   /parent_base="A"
FT                   /replace="G"
FT   variation       2952847
FT                   /node="internal_19->IA7122-Poultry-ST302"
FT                   /colour="4"
FT                   /taxa="IA7122-Poultry-ST302"
FT                   /parent_base="T"
FT                   /replace="C"
FT   variation       2952850
FT                   /node="internal_19->IA7122-Poultry-ST302"
FT                   /colour="4"
FT                   /taxa="IA7122-Poultry-ST302"
FT                   /parent_base="A"
FT                   /replace="T"
FT   variation       2952859
FT                   /node="internal_19->IA7122-Poultry-ST302"
FT                   /colour="4"
FT                   /taxa="IA7122-Poultry-ST302"
FT                   /parent_base="C"
FT                   /replace="T"
FT   variation       2952871
FT                   /node="internal_19->IA7122-Poultry-ST302"
FT                   /colour="4"
FT                   /taxa="IA7122-Poultry-ST302"
FT                   /parent_base="T"
FT                   /replace="A"
FT   variation       2952883
FT                   /node="internal_19->IA7122-Poultry-ST302"
FT                   /colour="4"
FT                   /taxa="IA7122-Poultry-ST302"
FT                   /parent_base="C"
FT                   /replace="T"
FT   variation       2952889
FT                   /node="internal_19->IA7122-Poultry-ST302"
FT                   /colour="4"
FT                   /taxa="IA7122-Poultry-ST302"
FT                   /parent_base="A"
FT                   /replace="G"
FT   variation       2952899
FT                   /node="internal_19->IA7122-Poultry-ST302"
FT                   /colour="4"
FT                   /taxa="IA7122-Poultry-ST302"
FT                   /parent_base="T"
FT                   /replace="C"
FT   variation       2952901
FT                   /node="internal_19->IA7122-Poultry-ST302"
FT                   /colour="4"
FT                   /taxa="IA7122-Poultry-ST302"
FT                   /parent_base="T"
FT                   /replace="C"
FT   variation       2952907
FT                   /node="internal_19->IA7122-Poultry-ST302"
FT                   /colour="4"
FT                   /taxa="IA7122-Poultry-ST302"
FT                   /parent_base="A"
FT                   /replace="G"
FT   variation       2952916
FT                   /node="internal_19->IA7122-Poultry-ST302"
FT                   /colour="4"
FT                   /taxa="IA7122-Poultry-ST302"
FT                   /parent_base="A"
FT                   /replace="G"
FT   variation       2953004
FT                   /node="internal_19->IA7122-Poultry-ST302"
FT                   /colour="4"
FT                   /taxa="IA7122-Poultry-ST302"
FT                   /parent_base="A"
FT                   /replace="T"
FT   variation       2953018
FT                   /node="internal_19->IA7122-Poultry-ST302"
FT                   /colour="4"
FT                   /taxa="IA7122-Poultry-ST302"
FT                   /parent_base="C"
FT                   /replace="G"
FT   variation       2953033
FT                   /node="internal_19->IA7122-Poultry-ST302"
FT                   /colour="4"
FT                   /taxa="IA7122-Poultry-ST302"
FT                   /parent_base="G"
FT                   /replace="A"
FT   variation       2953068
FT                   /node="internal_19->IA7122-Poultry-ST302"
FT                   /colour="4"
FT                   /taxa="IA7122-Poultry-ST302"
FT                   /parent_base="C"
FT                   /replace="T"
FT   variation       2953102
FT                   /node="internal_19->IA7122-Poultry-ST302"
FT                   /colour="4"
FT                   /taxa="IA7122-Poultry-ST302"
FT                   /parent_base="T"
FT                   /replace="C"
FT   variation       2953114
FT                   /node="internal_19->IA7122-Poultry-ST302"
FT                   /colour="4"
FT                   /taxa="IA7122-Poultry-ST302"
FT                   /parent_base="G"
FT                   /replace="A"
FT   variation       2953203
FT                   /node="internal_19->IA7122-Poultry-ST302"
FT                   /colour="4"
FT                   /taxa="IA7122-Poultry-ST302"
FT                   /parent_base="T"
FT                   /replace="A"
FT   variation       2953204
FT                   /node="internal_19->IA7122-Poultry-ST302"
FT                   /colour="4"
FT                   /taxa="IA7122-Poultry-ST302"
FT                   /parent_base="G"
FT                   /replace="A"
FT   variation       2953223
FT                   /node="internal_19->IA7122-Poultry-ST302"
FT                   /colour="4"
FT                   /taxa="IA7122-Poultry-ST302"
FT                   /parent_base="T"
FT                   /replace="C"
FT   variation       2953224
FT                   /node="internal_19->IA7122-Poultry-ST302"
FT                   /colour="4"
FT                   /taxa="IA7122-Poultry-ST302"
FT                   /parent_base="T"
FT                   /replace="C"
FT   variation       2953258
FT                   /node="internal_19->IA7122-Poultry-ST302"
FT                   /colour="4"
FT                   /taxa="IA7122-Poultry-ST302"
FT                   /parent_base="T"
FT                   /replace="C"
FT   variation       2953291
FT                   /node="internal_19->IA7122-Poultry-ST302"
FT                   /colour="4"
FT                   /taxa="IA7122-Poultry-ST302"
FT                   /parent_base="G"
FT                   /replace="A"
FT   variation       2953306
FT                   /node="internal_19->IA7122-Poultry-ST302"
FT                   /colour="4"
FT                   /taxa="IA7122-Poultry-ST302"
FT                   /parent_base="T"
FT                   /replace="C"
FT   variation       2953321
FT                   /node="internal_19->IA7122-Poultry-ST302"
FT                   /colour="4"
FT                   /taxa="IA7122-Poultry-ST302"
FT                   /parent_base="C"
FT                   /replace="G"
FT   variation       2953327
FT                   /node="internal_19->IA7122-Poultry-ST302"
FT                   /colour="4"
FT                   /taxa="IA7122-Poultry-ST302"
FT                   /parent_base="A"
FT                   /replace="G"
FT   variation       2953376
FT                   /node="internal_19->IA7122-Poultry-ST302"
FT                   /colour="4"
FT                   /taxa="IA7122-Poultry-ST302"
FT                   /parent_base="T"
FT                   /replace="C"
FT   variation       2953379
FT                   /node="internal_19->IA7122-Poultry-ST302"
FT                   /colour="4"
FT                   /taxa="IA7122-Poultry-ST302"
FT                   /parent_base="C"
FT                   /replace="T"
FT   variation       2953382
FT                   /node="internal_19->IA7122-Poultry-ST302"
FT                   /colour="4"
FT                   /taxa="IA7122-Poultry-ST302"
FT                   /parent_base="G"
FT                   /replace="A"
FT   variation       2953430
FT                   /node="internal_19->IA7122-Poultry-ST302"
FT                   /colour="4"
FT                   /taxa="IA7122-Poultry-ST302"
FT                   /parent_base="T"
FT                   /replace="C"
FT   variation       2953442
FT                   /node="internal_19->IA7122-Poultry-ST302"
FT                   /colour="4"
FT                   /taxa="IA7122-Poultry-ST302"
FT                   /parent_base="A"
FT                   /replace="T"
FT   variation       2953502
FT                   /node="internal_19->IA7122-Poultry-ST302"
FT                   /colour="4"
FT                   /taxa="IA7122-Poultry-ST302"
FT                   /parent_base="C"
FT                   /replace="T"
FT   variation       2953529
FT                   /node="internal_19->IA7122-Poultry-ST302"
FT                   /colour="4"
FT                   /taxa="IA7122-Poultry-ST302"
FT                   /parent_base="A"
FT                   /replace="G"
FT   variation       2953532
FT                   /node="internal_19->IA7122-Poultry-ST302"
FT                   /colour="4"
FT                   /taxa="IA7122-Poultry-ST302"
FT                   /parent_base="C"
FT                   /replace="T"
FT   variation       2953544
FT                   /node="internal_19->IA7122-Poultry-ST302"
FT                   /colour="4"
FT                   /taxa="IA7122-Poultry-ST302"
FT                   /parent_base="G"
FT                   /replace="A"
FT   variation       2953556
FT                   /node="internal_19->IA7122-Poultry-ST302"
FT                   /colour="4"
FT                   /taxa="IA7122-Poultry-ST302"
FT                   /parent_base="A"
FT                   /replace="T"
FT   variation       2953614
FT                   /node="internal_19->IA7122-Poultry-ST302"
FT                   /colour="4"
FT                   /taxa="IA7122-Poultry-ST302"
FT                   /parent_base="A"
FT                   /replace="C"
FT   variation       2953624
FT                   /node="internal_19->IA7122-Poultry-ST302"
FT                   /colour="4"
FT                   /taxa="IA7122-Poultry-ST302"
FT                   /parent_base="A"
FT                   /replace="G"
FT   variation       2953632
FT                   /node="internal_19->IA7122-Poultry-ST302"
FT                   /colour="4"
FT                   /taxa="IA7122-Poultry-ST302"
FT                   /parent_base="C"
FT                   /replace="T"
FT   variation       2953637
FT                   /node="internal_19->IA7122-Poultry-ST302"
FT                   /colour="4"
FT                   /taxa="IA7122-Poultry-ST302"
FT                   /parent_base="C"
FT                   /replace="G"
FT   variation       2953638
FT                   /node="internal_19->IA7122-Poultry-ST302"
FT                   /colour="4"
FT                   /taxa="IA7122-Poultry-ST302"
FT                   /parent_base="G"
FT                   /replace="A"
FT   variation       2953643
FT                   /node="internal_19->IA7122-Poultry-ST302"
FT                   /colour="4"
FT                   /taxa="IA7122-Poultry-ST302"
FT                   /parent_base="T"
FT                   /replace="C"
FT   variation       2953650
FT                   /node="internal_19->IA7122-Poultry-ST302"
FT                   /colour="4"
FT                   /taxa="IA7122-Poultry-ST302"
FT                   /parent_base="G"
FT                   /replace="A"
FT   variation       2954237
FT                   /node="internal_19->IA7122-Poultry-ST302"
FT                   /colour="4"
FT                   /taxa="IA7122-Poultry-ST302"
FT                   /parent_base="C"
FT                   /replace="T"
FT   variation       2954253
FT                   /node="internal_19->IA7122-Poultry-ST302"
FT                   /colour="4"
FT                   /taxa="IA7122-Poultry-ST302"
FT                   /parent_base="C"
FT                   /replace="T"
FT   variation       2954254
FT                   /node="internal_19->IA7122-Poultry-ST302"
FT                   /colour="4"
FT                   /taxa="IA7122-Poultry-ST302"
FT                   /parent_base="A"
FT                   /replace="G"
FT   variation       2954277
FT                   /node="internal_19->IA7122-Poultry-ST302"
FT                   /colour="4"
FT                   /taxa="IA7122-Poultry-ST302"
FT                   /parent_base="A"
FT                   /replace="G"
FT   variation       2954301
FT                   /node="internal_19->IA7122-Poultry-ST302"
FT                   /colour="4"
FT                   /taxa="IA7122-Poultry-ST302"
FT                   /parent_base="T"
FT                   /replace="G"
FT   variation       2954328
FT                   /node="internal_19->IA7122-Poultry-ST302"
FT                   /colour="4"
FT                   /taxa="IA7122-Poultry-ST302"
FT                   /parent_base="G"
FT                   /replace="T"
FT   variation       2954391
FT                   /node="internal_19->IA7122-Poultry-ST302"
FT                   /colour="4"
FT                   /taxa="IA7122-Poultry-ST302"
FT                   /parent_base="T"
FT                   /replace="G"
FT   variation       2954402
FT                   /node="internal_19->IA7122-Poultry-ST302"
FT                   /colour="4"
FT                   /taxa="IA7122-Poultry-ST302"
FT                   /parent_base="C"
FT                   /replace="T"
FT   variation       2954420
FT                   /node="internal_19->IA7122-Poultry-ST302"
FT                   /colour="4"
FT                   /taxa="IA7122-Poultry-ST302"
FT                   /parent_base="C"
FT                   /replace="T"
FT   variation       2954433
FT                   /node="internal_19->IA7122-Poultry-ST302"
FT                   /colour="4"
FT                   /taxa="IA7122-Poultry-ST302"
FT                   /parent_base="G"
FT                   /replace="A"
FT   variation       2954439
FT                   /node="internal_19->IA7122-Poultry-ST302"
FT                   /colour="4"
FT                   /taxa="IA7122-Poultry-ST302"
FT                   /parent_base="A"
FT                   /replace="G"
FT   variation       2954451
FT                   /node="internal_19->IA7122-Poultry-ST302"
FT                   /colour="4"
FT                   /taxa="IA7122-Poultry-ST302"
FT                   /parent_base="G"
FT                   /replace="A"
FT   variation       2954452
FT                   /node="internal_19->IA7122-Poultry-ST302"
FT                   /colour="4"
FT                   /taxa="IA7122-Poultry-ST302"
FT                   /parent_base="C"
FT                   /replace="T"
FT   variation       2954454
FT                   /node="internal_19->IA7122-Poultry-ST302"
FT                   /colour="4"
FT                   /taxa="IA7122-Poultry-ST302"
FT                   /parent_base="G"
FT                   /replace="C"
FT   variation       2954460
FT                   /node="internal_19->IA7122-Poultry-ST302"
FT                   /colour="4"
FT                   /taxa="IA7122-Poultry-ST302"
FT                   /parent_base="G"
FT                   /replace="A"
FT   variation       2954462
FT                   /node="internal_19->IA7122-Poultry-ST302"
FT                   /colour="4"
FT                   /taxa="IA7122-Poultry-ST302"
FT                   /parent_base="T"
FT                   /replace="A"
FT   variation       2954475
FT                   /node="internal_19->IA7122-Poultry-ST302"
FT                   /colour="4"
FT                   /taxa="IA7122-Poultry-ST302"
FT                   /parent_base="G"
FT                   /replace="A"
FT   variation       2954476
FT                   /node="internal_19->IA7122-Poultry-ST302"
FT                   /colour="4"
FT                   /taxa="IA7122-Poultry-ST302"
FT                   /parent_base="G"
FT                   /replace="T"
FT   variation       2954481
FT                   /node="internal_19->IA7122-Poultry-ST302"
FT                   /colour="4"
FT                   /taxa="IA7122-Poultry-ST302"
FT                   /parent_base="G"
FT                   /replace="A"
FT   variation       2954571
FT                   /node="internal_19->IA7122-Poultry-ST302"
FT                   /colour="4"
FT                   /taxa="IA7122-Poultry-ST302"
FT                   /parent_base="T"
FT                   /replace="C"
FT   variation       2954576
FT                   /node="internal_19->IA7122-Poultry-ST302"
FT                   /colour="4"
FT                   /taxa="IA7122-Poultry-ST302"
FT                   /parent_base="A"
FT                   /replace="C"
FT   variation       2954581
FT                   /node="internal_19->IA7122-Poultry-ST302"
FT                   /colour="4"
FT                   /taxa="IA7122-Poultry-ST302"
FT                   /parent_base="C"
FT                   /replace="T"
FT   variation       2954660
FT                   /node="internal_19->IA7122-Poultry-ST302"
FT                   /colour="4"
FT                   /taxa="IA7122-Poultry-ST302"
FT                   /parent_base="C"
FT                   /replace="T"
FT   variation       2954679
FT                   /node="internal_19->IA7122-Poultry-ST302"
FT                   /colour="4"
FT                   /taxa="IA7122-Poultry-ST302"
FT                   /parent_base="T"
FT                   /replace="A"
FT   variation       2954691
FT                   /node="internal_19->IA7122-Poultry-ST302"
FT                   /colour="4"
FT                   /taxa="IA7122-Poultry-ST302"
FT                   /parent_base="A"
FT                   /replace="C"
FT   variation       2954993
FT                   /node="internal_19->IA7122-Poultry-ST302"
FT                   /colour="4"
FT                   /taxa="IA7122-Poultry-ST302"
FT                   /parent_base="T"
FT                   /replace="C"
FT   variation       2955083
FT                   /node="internal_19->IA7122-Poultry-ST302"
FT                   /colour="4"
FT                   /taxa="IA7122-Poultry-ST302"
FT                   /parent_base="T"
FT                   /replace="C"
FT   variation       2955094
FT                   /node="internal_19->IA7122-Poultry-ST302"
FT                   /colour="4"
FT                   /taxa="IA7122-Poultry-ST302"
FT                   /parent_base="G"
FT                   /replace="C"
FT   variation       2998642
FT                   /node="internal_19->IA7122-Poultry-ST302"
FT                   /colour="4"
FT                   /taxa="IA7122-Poultry-ST302"
FT                   /parent_base="G"
FT                   /replace="A"
FT   variation       3006788
FT                   /node="internal_19->IA7122-Poultry-ST302"
FT                   /colour="4"
FT                   /taxa="IA7122-Poultry-ST302"
FT                   /parent_base="T"
FT                   /replace="G"
FT   variation       3036124
FT                   /node="internal_19->IA7122-Poultry-ST302"
FT                   /colour="4"
FT                   /taxa="IA7122-Poultry-ST302"
FT                   /parent_base="C"
FT                   /replace="T"
FT   variation       3038860
FT                   /node="internal_19->IA7122-Poultry-ST302"
FT                   /colour="4"
FT                   /taxa="IA7122-Poultry-ST302"
FT                   /parent_base="C"
FT                   /replace="T"
FT   variation       3041125
FT                   /node="internal_19->IA7122-Poultry-ST302"
FT                   /colour="4"
FT                   /taxa="IA7122-Poultry-ST302"
FT                   /parent_base="T"
FT                   /replace="G"
FT   variation       3056545
FT                   /node="internal_19->IA7122-Poultry-ST302"
FT                   /colour="4"
FT                   /taxa="IA7122-Poultry-ST302"
FT                   /parent_base="G"
FT                   /replace="A"
FT   variation       3214904
FT                   /node="internal_19->IA7122-Poultry-ST302"
FT                   /colour="4"
FT                   /taxa="IA7122-Poultry-ST302"
FT                   /parent_base="A"
FT                   /replace="C"
FT   variation       3292219
FT                   /node="internal_19->IA7122-Poultry-ST302"
FT                   /colour="4"
FT                   /taxa="IA7122-Poultry-ST302"
FT                   /parent_base="C"
FT                   /replace="T"
FT   variation       3339461
FT                   /node="internal_19->IA7122-Poultry-ST302"
FT                   /colour="4"
FT                   /taxa="IA7122-Poultry-ST302"
FT                   /parent_base="T"
FT                   /replace="C"
FT   variation       3339497
FT                   /node="internal_19->IA7122-Poultry-ST302"
FT                   /colour="4"
FT                   /taxa="IA7122-Poultry-ST302"
FT                   /parent_base="C"
FT                   /replace="T"
FT   variation       3339614
FT                   /node="internal_19->IA7122-Poultry-ST302"
FT                   /colour="4"
FT                   /taxa="IA7122-Poultry-ST302"
FT                   /parent_base="A"
FT                   /replace="T"
FT   variation       3339638
FT                   /node="internal_19->IA7122-Poultry-ST302"
FT                   /colour="4"
FT                   /taxa="IA7122-Poultry-ST302"
FT                   /parent_base="T"
FT                   /replace="G"
FT   variation       3339673
FT                   /node="internal_19->IA7122-Poultry-ST302"
FT                   /colour="4"
FT                   /taxa="IA7122-Poultry-ST302"
FT                   /parent_base="C"
FT                   /replace="T"
FT   variation       3339677
FT                   /node="internal_19->IA7122-Poultry-ST302"
FT                   /colour="4"
FT                   /taxa="IA7122-Poultry-ST302"
FT                   /parent_base="G"
FT                   /replace="C"
FT   variation       3339680
FT                   /node="internal_19->IA7122-Poultry-ST302"
FT                   /colour="4"
FT                   /taxa="IA7122-Poultry-ST302"
FT                   /parent_base="C"
FT                   /replace="G"
FT   variation       3339740
FT                   /node="internal_19->IA7122-Poultry-ST302"
FT                   /colour="4"
FT                   /taxa="IA7122-Poultry-ST302"
FT                   /parent_base="G"
FT                   /replace="A"
FT   variation       3339755
FT                   /node="internal_19->IA7122-Poultry-ST302"
FT                   /colour="4"
FT                   /taxa="IA7122-Poultry-ST302"
FT                   /parent_base="C"
FT                   /replace="T"
FT   variation       3339797
FT                   /node="internal_19->IA7122-Poultry-ST302"
FT                   /colour="4"
FT                   /taxa="IA7122-Poultry-ST302"
FT                   /parent_base="A"
FT                   /replace="G"
FT   variation       3339800
FT                   /node="internal_19->IA7122-Poultry-ST302"
FT                   /colour="4"
FT                   /taxa="IA7122-Poultry-ST302"
FT                   /parent_base="T"
FT                   /replace="C"
FT   variation       3339818
FT                   /node="internal_19->IA7122-Poultry-ST302"
FT                   /colour="4"
FT                   /taxa="IA7122-Poultry-ST302"
FT                   /parent_base="G"
FT                   /replace="T"
FT   variation       3339839
FT                   /node="internal_19->IA7122-Poultry-ST302"
FT                   /colour="4"
FT                   /taxa="IA7122-Poultry-ST302"
FT                   /parent_base="A"
FT                   /replace="C"
FT   variation       3339848
FT                   /node="internal_19->IA7122-Poultry-ST302"
FT                   /colour="4"
FT                   /taxa="IA7122-Poultry-ST302"
FT                   /parent_base="A"
FT                   /replace="G"
FT   variation       3339851
FT                   /node="internal_19->IA7122-Poultry-ST302"
FT                   /colour="4"
FT                   /taxa="IA7122-Poultry-ST302"
FT                   /parent_base="C"
FT                   /replace="G"
FT   variation       3339854
FT                   /node="internal_19->IA7122-Poultry-ST302"
FT                   /colour="4"
FT                   /taxa="IA7122-Poultry-ST302"
FT                   /parent_base="A"
FT                   /replace="G"
FT   variation       3339866
FT                   /node="internal_19->IA7122-Poultry-ST302"
FT                   /colour="4"
FT                   /taxa="IA7122-Poultry-ST302"
FT                   /parent_base="T"
FT                   /replace="C"
FT   variation       3339907
FT                   /node="internal_19->IA7122-Poultry-ST302"
FT                   /colour="4"
FT                   /taxa="IA7122-Poultry-ST302"
FT                   /parent_base="G"
FT                   /replace="A"
FT   variation       3339910
FT                   /node="internal_19->IA7122-Poultry-ST302"
FT                   /colour="4"
FT                   /taxa="IA7122-Poultry-ST302"
FT                   /parent_base="A"
FT                   /replace="G"
FT   variation       3339913
FT                   /node="internal_19->IA7122-Poultry-ST302"
FT                   /colour="4"
FT                   /taxa="IA7122-Poultry-ST302"
FT                   /parent_base="T"
FT                   /replace="G"
FT   variation       3339918
FT                   /node="internal_19->IA7122-Poultry-ST302"
FT                   /colour="4"
FT                   /taxa="IA7122-Poultry-ST302"
FT                   /parent_base="C"
FT                   /replace="T"
FT   variation       3339964
FT                   /node="internal_19->IA7122-Poultry-ST302"
FT                   /colour="4"
FT                   /taxa="IA7122-Poultry-ST302"
FT                   /parent_base="G"
FT                   /replace="A"
FT   variation       3340054
FT                   /node="internal_19->IA7122-Poultry-ST302"
FT                   /colour="4"
FT                   /taxa="IA7122-Poultry-ST302"
FT                   /parent_base="A"
FT                   /replace="G"
FT   variation       3381306
FT                   /node="internal_19->IA7122-Poultry-ST302"
FT                   /colour="4"
FT                   /taxa="IA7122-Poultry-ST302"
FT                   /parent_base="G"
FT                   /replace="A"
FT   variation       3383117
FT                   /node="internal_19->IA7122-Poultry-ST302"
FT                   /colour="4"
FT                   /taxa="IA7122-Poultry-ST302"
FT                   /parent_base="A"
FT                   /replace="T"
FT   variation       3412663
FT                   /node="internal_19->IA7122-Poultry-ST302"
FT                   /colour="4"
FT                   /taxa="IA7122-Poultry-ST302"
FT                   /parent_base="G"
FT                   /replace="A"
FT   variation       3484930
FT                   /node="internal_19->IA7122-Poultry-ST302"
FT                   /colour="4"
FT                   /taxa="IA7122-Poultry-ST302"
FT                   /parent_base="C"
FT                   /replace="T"
FT   variation       3591244
FT                   /node="internal_19->IA7122-Poultry-ST302"
FT                   /colour="4"
FT                   /taxa="IA7122-Poultry-ST302"
FT                   /parent_base="T"
FT                   /replace="G"
FT   variation       3657942
FT                   /node="internal_19->IA7122-Poultry-ST302"
FT                   /colour="4"
FT                   /taxa="IA7122-Poultry-ST302"
FT                   /parent_base="T"
FT                   /replace="G"
FT   variation       3729296
FT                   /node="internal_19->IA7122-Poultry-ST302"
FT                   /colour="4"
FT                   /taxa="IA7122-Poultry-ST302"
FT                   /parent_base="G"
FT                   /replace="A"
FT   variation       3729404
FT                   /node="internal_19->IA7122-Poultry-ST302"
FT                   /colour="4"
FT                   /taxa="IA7122-Poultry-ST302"
FT                   /parent_base="A"
FT                   /replace="G"
FT   variation       3729452
FT                   /node="internal_19->IA7122-Poultry-ST302"
FT                   /colour="4"
FT                   /taxa="IA7122-Poultry-ST302"
FT                   /parent_base="A"
FT                   /replace="C"
FT   variation       3729991
FT                   /node="internal_19->IA7122-Poultry-ST302"
FT                   /colour="4"
FT                   /taxa="IA7122-Poultry-ST302"
FT                   /parent_base="C"
FT                   /replace="T"
FT   variation       3730012
FT                   /node="internal_19->IA7122-Poultry-ST302"
FT                   /colour="4"
FT                   /taxa="IA7122-Poultry-ST302"
FT                   /parent_base="C"
FT                   /replace="G"
FT   variation       3730027
FT                   /node="internal_19->IA7122-Poultry-ST302"
FT                   /colour="4"
FT                   /taxa="IA7122-Poultry-ST302"
FT                   /parent_base="A"
FT                   /replace="G"
FT   variation       3730165
FT                   /node="internal_19->IA7122-Poultry-ST302"
FT                   /colour="4"
FT                   /taxa="IA7122-Poultry-ST302"
FT                   /parent_base="C"
FT                   /replace="T"
FT   variation       3730234
FT                   /node="internal_19->IA7122-Poultry-ST302"
FT                   /colour="4"
FT                   /taxa="IA7122-Poultry-ST302"
FT                   /parent_base="G"
FT                   /replace="T"
FT   variation       3730246
FT                   /node="internal_19->IA7122-Poultry-ST302"
FT                   /colour="4"
FT                   /taxa="IA7122-Poultry-ST302"
FT                   /parent_base="G"
FT                   /replace="A"
FT   variation       3730273
FT                   /node="internal_19->IA7122-Poultry-ST302"
FT                   /colour="4"
FT                   /taxa="IA7122-Poultry-ST302"
FT                   /parent_base="T"
FT                   /replace="C"
FT   variation       3730279
FT                   /node="internal_19->IA7122-Poultry-ST302"
FT                   /colour="4"
FT                   /taxa="IA7122-Poultry-ST302"
FT                   /parent_base="G"
FT                   /replace="A"
FT   variation       3730288
FT                   /node="internal_19->IA7122-Poultry-ST302"
FT                   /colour="4"
FT                   /taxa="IA7122-Poultry-ST302"
FT                   /parent_base="G"
FT                   /replace="A"
FT   variation       3730297
FT                   /node="internal_19->IA7122-Poultry-ST302"
FT                   /colour="4"
FT                   /taxa="IA7122-Poultry-ST302"
FT                   /parent_base="T"
FT                   /replace="C"
FT   variation       3730307
FT                   /node="internal_19->IA7122-Poultry-ST302"
FT                   /colour="4"
FT                   /taxa="IA7122-Poultry-ST302"
FT                   /parent_base="T"
FT                   /replace="A"
FT   variation       3730363
FT                   /node="internal_19->IA7122-Poultry-ST302"
FT                   /colour="4"
FT                   /taxa="IA7122-Poultry-ST302"
FT                   /parent_base="C"
FT                   /replace="T"
FT   variation       3730366
FT                   /node="internal_19->IA7122-Poultry-ST302"
FT                   /colour="4"
FT                   /taxa="IA7122-Poultry-ST302"
FT                   /parent_base="G"
FT                   /replace="A"
FT   variation       3730447
FT                   /node="internal_19->IA7122-Poultry-ST302"
FT                   /colour="4"
FT                   /taxa="IA7122-Poultry-ST302"
FT                   /parent_base="G"
FT                   /replace="T"
FT   variation       3730615
FT                   /node="internal_19->IA7122-Poultry-ST302"
FT                   /colour="4"
FT                   /taxa="IA7122-Poultry-ST302"
FT                   /parent_base="T"
FT                   /replace="C"
FT   variation       3730642
FT                   /node="internal_19->IA7122-Poultry-ST302"
FT                   /colour="4"
FT                   /taxa="IA7122-Poultry-ST302"
FT                   /parent_base="C"
FT                   /replace="T"
FT   variation       3730666
FT                   /node="internal_19->IA7122-Poultry-ST302"
FT                   /colour="4"
FT                   /taxa="IA7122-Poultry-ST302"
FT                   /parent_base="A"
FT                   /replace="G"
FT   variation       3732121
FT                   /node="internal_19->IA7122-Poultry-ST302"
FT                   /colour="4"
FT                   /taxa="IA7122-Poultry-ST302"
FT                   /parent_base="A"
FT                   /replace="G"
FT   variation       3732141
FT                   /node="internal_19->IA7122-Poultry-ST302"
FT                   /colour="4"
FT                   /taxa="IA7122-Poultry-ST302"
FT                   /parent_base="G"
FT                   /replace="T"
FT   variation       3732406
FT                   /node="internal_19->IA7122-Poultry-ST302"
FT                   /colour="4"
FT                   /taxa="IA7122-Poultry-ST302"
FT                   /parent_base="T"
FT                   /replace="C"
FT   variation       3732532
FT                   /node="internal_19->IA7122-Poultry-ST302"
FT                   /colour="4"
FT                   /taxa="IA7122-Poultry-ST302"
FT                   /parent_base="T"
FT                   /replace="C"
FT   variation       3732538
FT                   /node="internal_19->IA7122-Poultry-ST302"
FT                   /colour="4"
FT                   /taxa="IA7122-Poultry-ST302"
FT                   /parent_base="G"
FT                   /replace="A"
FT   variation       3732544
FT                   /node="internal_19->IA7122-Poultry-ST302"
FT                   /colour="4"
FT                   /taxa="IA7122-Poultry-ST302"
FT                   /parent_base="T"
FT                   /replace="C"
FT   variation       3732613
FT                   /node="internal_19->IA7122-Poultry-ST302"
FT                   /colour="4"
FT                   /taxa="IA7122-Poultry-ST302"
FT                   /parent_base="G"
FT                   /replace="A"
FT   variation       3732626
FT                   /node="internal_19->IA7122-Poultry-ST302"
FT                   /colour="4"
FT                   /taxa="IA7122-Poultry-ST302"
FT                   /parent_base="T"
FT                   /replace="C"
FT   variation       3732649
FT                   /node="internal_19->IA7122-Poultry-ST302"
FT                   /colour="4"
FT                   /taxa="IA7122-Poultry-ST302"
FT                   /parent_base="C"
FT                   /replace="T"
FT   variation       3732652
FT                   /node="internal_19->IA7122-Poultry-ST302"
FT                   /colour="4"
FT                   /taxa="IA7122-Poultry-ST302"
FT                   /parent_base="C"
FT                   /replace="T"
FT   variation       3732701
FT                   /node="internal_19->IA7122-Poultry-ST302"
FT                   /colour="4"
FT                   /taxa="IA7122-Poultry-ST302"
FT                   /parent_base="G"
FT                   /replace="T"
FT   variation       3732769
FT                   /node="internal_19->IA7122-Poultry-ST302"
FT                   /colour="4"
FT                   /taxa="IA7122-Poultry-ST302"
FT                   /parent_base="T"
FT                   /replace="C"
FT   variation       3732877
FT                   /node="internal_19->IA7122-Poultry-ST302"
FT                   /colour="4"
FT                   /taxa="IA7122-Poultry-ST302"
FT                   /parent_base="A"
FT                   /replace="T"
FT   variation       3732907
FT                   /node="internal_19->IA7122-Poultry-ST302"
FT                   /colour="4"
FT                   /taxa="IA7122-Poultry-ST302"
FT                   /parent_base="C"
FT                   /replace="T"
FT   variation       3732940
FT                   /node="internal_19->IA7122-Poultry-ST302"
FT                   /colour="4"
FT                   /taxa="IA7122-Poultry-ST302"
FT                   /parent_base="T"
FT                   /replace="C"
FT   variation       3732955
FT                   /node="internal_19->IA7122-Poultry-ST302"
FT                   /colour="4"
FT                   /taxa="IA7122-Poultry-ST302"
FT                   /parent_base="C"
FT                   /replace="T"
FT   variation       3732964
FT                   /node="internal_19->IA7122-Poultry-ST302"
FT                   /colour="4"
FT                   /taxa="IA7122-Poultry-ST302"
FT                   /parent_base="G"
FT                   /replace="A"
FT   variation       3732976
FT                   /node="internal_19->IA7122-Poultry-ST302"
FT                   /colour="4"
FT                   /taxa="IA7122-Poultry-ST302"
FT                   /parent_base="A"
FT                   /replace="G"
FT   variation       3733096
FT                   /node="internal_19->IA7122-Poultry-ST302"
FT                   /colour="4"
FT                   /taxa="IA7122-Poultry-ST302"
FT                   /parent_base="T"
FT                   /replace="C"
FT   variation       3733117
FT                   /node="internal_19->IA7122-Poultry-ST302"
FT                   /colour="4"
FT                   /taxa="IA7122-Poultry-ST302"
FT                   /parent_base="T"
FT                   /replace="C"
FT   variation       3733123
FT                   /node="internal_19->IA7122-Poultry-ST302"
FT                   /colour="4"
FT                   /taxa="IA7122-Poultry-ST302"
FT                   /parent_base="G"
FT                   /replace="A"
FT   variation       3733150
FT                   /node="internal_19->IA7122-Poultry-ST302"
FT                   /colour="4"
FT                   /taxa="IA7122-Poultry-ST302"
FT                   /parent_base="C"
FT                   /replace="T"
FT   variation       3733171
FT                   /node="internal_19->IA7122-Poultry-ST302"
FT                   /colour="4"
FT                   /taxa="IA7122-Poultry-ST302"
FT                   /parent_base="C"
FT                   /replace="G"
FT   variation       3733274
FT                   /node="internal_19->IA7122-Poultry-ST302"
FT                   /colour="4"
FT                   /taxa="IA7122-Poultry-ST302"
FT                   /parent_base="A"
FT                   /replace="G"
FT   variation       3733350
FT                   /node="internal_19->IA7122-Poultry-ST302"
FT                   /colour="4"
FT                   /taxa="IA7122-Poultry-ST302"
FT                   /parent_base="T"
FT                   /replace="C"
FT   variation       3733353
FT                   /node="internal_19->IA7122-Poultry-ST302"
FT                   /colour="4"
FT                   /taxa="IA7122-Poultry-ST302"
FT                   /parent_base="A"
FT                   /replace="T"
FT   variation       3733378
FT                   /node="internal_19->IA7122-Poultry-ST302"
FT                   /colour="4"
FT                   /taxa="IA7122-Poultry-ST302"
FT                   /parent_base="G"
FT                   /replace="A"
FT   variation       3733380
FT                   /node="internal_19->IA7122-Poultry-ST302"
FT                   /colour="4"
FT                   /taxa="IA7122-Poultry-ST302"
FT                   /parent_base="A"
FT                   /replace="G"
FT   variation       3733383
FT                   /node="internal_19->IA7122-Poultry-ST302"
FT                   /colour="4"
FT                   /taxa="IA7122-Poultry-ST302"
FT                   /parent_base="C"
FT                   /replace="T"
FT   variation       3733392
FT                   /node="internal_19->IA7122-Poultry-ST302"
FT                   /colour="4"
FT                   /taxa="IA7122-Poultry-ST302"
FT                   /parent_base="G"
FT                   /replace="A"
FT   variation       3733401
FT                   /node="internal_19->IA7122-Poultry-ST302"
FT                   /colour="4"
FT                   /taxa="IA7122-Poultry-ST302"
FT                   /parent_base="G"
FT                   /replace="T"
FT   variation       3733407
FT                   /node="internal_19->IA7122-Poultry-ST302"
FT                   /colour="4"
FT                   /taxa="IA7122-Poultry-ST302"
FT                   /parent_base="T"
FT                   /replace="C"
FT   variation       3733410
FT                   /node="internal_19->IA7122-Poultry-ST302"
FT                   /colour="4"
FT                   /taxa="IA7122-Poultry-ST302"
FT                   /parent_base="T"
FT                   /replace="C"
FT   variation       3733430
FT                   /node="internal_19->IA7122-Poultry-ST302"
FT                   /colour="4"
FT                   /taxa="IA7122-Poultry-ST302"
FT                   /parent_base="G"
FT                   /replace="C"
FT   variation       3733441
FT                   /node="internal_19->IA7122-Poultry-ST302"
FT                   /colour="4"
FT                   /taxa="IA7122-Poultry-ST302"
FT                   /parent_base="T"
FT                   /replace="C"
FT   variation       3733461
FT                   /node="internal_19->IA7122-Poultry-ST302"
FT                   /colour="4"
FT                   /taxa="IA7122-Poultry-ST302"
FT                   /parent_base="G"
FT                   /replace="A"
FT   variation       3733491
FT                   /node="internal_19->IA7122-Poultry-ST302"
FT                   /colour="4"
FT                   /taxa="IA7122-Poultry-ST302"
FT                   /parent_base="G"
FT                   /replace="C"
FT   variation       3733494
FT                   /node="internal_19->IA7122-Poultry-ST302"
FT                   /colour="4"
FT                   /taxa="IA7122-Poultry-ST302"
FT                   /parent_base="A"
FT                   /replace="G"
FT   variation       3733495
FT                   /node="internal_19->IA7122-Poultry-ST302"
FT                   /colour="4"
FT                   /taxa="IA7122-Poultry-ST302"
FT                   /parent_base="C"
FT                   /replace="T"
FT   variation       3733527
FT                   /node="internal_19->IA7122-Poultry-ST302"
FT                   /colour="4"
FT                   /taxa="IA7122-Poultry-ST302"
FT                   /parent_base="C"
FT                   /replace="T"
FT   variation       3733562
FT                   /node="internal_19->IA7122-Poultry-ST302"
FT                   /colour="4"
FT                   /taxa="IA7122-Poultry-ST302"
FT                   /parent_base="A"
FT                   /replace="C"
FT   variation       3733572
FT                   /node="internal_19->IA7122-Poultry-ST302"
FT                   /colour="4"
FT                   /taxa="IA7122-Poultry-ST302"
FT                   /parent_base="T"
FT                   /replace="A"
FT   variation       3733590
FT                   /node="internal_19->IA7122-Poultry-ST302"
FT                   /colour="4"
FT                   /taxa="IA7122-Poultry-ST302"
FT                   /parent_base="G"
FT                   /replace="A"
FT   variation       3733602
FT                   /node="internal_19->IA7122-Poultry-ST302"
FT                   /colour="4"
FT                   /taxa="IA7122-Poultry-ST302"
FT                   /parent_base="A"
FT                   /replace="G"
FT   variation       3733617
FT                   /node="internal_19->IA7122-Poultry-ST302"
FT                   /colour="4"
FT                   /taxa="IA7122-Poultry-ST302"
FT                   /parent_base="C"
FT                   /replace="G"
FT   variation       3733626
FT                   /node="internal_19->IA7122-Poultry-ST302"
FT                   /colour="4"
FT                   /taxa="IA7122-Poultry-ST302"
FT                   /parent_base="T"
FT                   /replace="G"
FT   variation       3733629
FT                   /node="internal_19->IA7122-Poultry-ST302"
FT                   /colour="4"
FT                   /taxa="IA7122-Poultry-ST302"
FT                   /parent_base="G"
FT                   /replace="T"
FT   variation       3733701
FT                   /node="internal_19->IA7122-Poultry-ST302"
FT                   /colour="4"
FT                   /taxa="IA7122-Poultry-ST302"
FT                   /parent_base="G"
FT                   /replace="A"
FT   variation       3733704
FT                   /node="internal_19->IA7122-Poultry-ST302"
FT                   /colour="4"
FT                   /taxa="IA7122-Poultry-ST302"
FT                   /parent_base="C"
FT                   /replace="T"
FT   variation       3733707
FT                   /node="internal_19->IA7122-Poultry-ST302"
FT                   /colour="4"
FT                   /taxa="IA7122-Poultry-ST302"
FT                   /parent_base="T"
FT                   /replace="C"
FT   variation       3733710
FT                   /node="internal_19->IA7122-Poultry-ST302"
FT                   /colour="4"
FT                   /taxa="IA7122-Poultry-ST302"
FT                   /parent_base="A"
FT                   /replace="T"
FT   variation       3733776
FT                   /node="internal_19->IA7122-Poultry-ST302"
FT                   /colour="4"
FT                   /taxa="IA7122-Poultry-ST302"
FT                   /parent_base="T"
FT                   /replace="C"
FT   variation       3733779
FT                   /node="internal_19->IA7122-Poultry-ST302"
FT                   /colour="4"
FT                   /taxa="IA7122-Poultry-ST302"
FT                   /parent_base="A"
FT                   /replace="G"
FT   variation       3733821
FT                   /node="internal_19->IA7122-Poultry-ST302"
FT                   /colour="4"
FT                   /taxa="IA7122-Poultry-ST302"
FT                   /parent_base="A"
FT                   /replace="G"
FT   variation       3733896
FT                   /node="internal_19->IA7122-Poultry-ST302"
FT                   /colour="4"
FT                   /taxa="IA7122-Poultry-ST302"
FT                   /parent_base="G"
FT                   /replace="A"
FT   variation       3733902
FT                   /node="internal_19->IA7122-Poultry-ST302"
FT                   /colour="4"
FT                   /taxa="IA7122-Poultry-ST302"
FT                   /parent_base="T"
FT                   /replace="C"
FT   variation       3733908
FT                   /node="internal_19->IA7122-Poultry-ST302"
FT                   /colour="4"
FT                   /taxa="IA7122-Poultry-ST302"
FT                   /parent_base="G"
FT                   /replace="A"
FT   variation       3733950
FT                   /node="internal_19->IA7122-Poultry-ST302"
FT                   /colour="4"
FT                   /taxa="IA7122-Poultry-ST302"
FT                   /parent_base="C"
FT                   /replace="T"
FT   variation       3733963
FT                   /node="internal_19->IA7122-Poultry-ST302"
FT                   /colour="4"
FT                   /taxa="IA7122-Poultry-ST302"
FT                   /parent_base="T"
FT                   /replace="C"
FT   variation       3733968
FT                   /node="internal_19->IA7122-Poultry-ST302"
FT                   /colour="4"
FT                   /taxa="IA7122-Poultry-ST302"
FT                   /parent_base="C"
FT                   /replace="G"
FT   variation       3733974
FT                   /node="internal_19->IA7122-Poultry-ST302"
FT                   /colour="4"
FT                   /taxa="IA7122-Poultry-ST302"
FT                   /parent_base="C"
FT                   /replace="T"
FT   variation       3733986
FT                   /node="internal_19->IA7122-Poultry-ST302"
FT                   /colour="4"
FT                   /taxa="IA7122-Poultry-ST302"
FT                   /parent_base="A"
FT                   /replace="T"
FT   variation       3733988
FT                   /node="internal_19->IA7122-Poultry-ST302"
FT                   /colour="4"
FT                   /taxa="IA7122-Poultry-ST302"
FT                   /parent_base="T"
FT                   /replace="C"
FT   variation       3734064
FT                   /node="internal_19->IA7122-Poultry-ST302"
FT                   /colour="4"
FT                   /taxa="IA7122-Poultry-ST302"
FT                   /parent_base="T"
FT                   /replace="C"
FT   variation       3734067
FT                   /node="internal_19->IA7122-Poultry-ST302"
FT                   /colour="4"
FT                   /taxa="IA7122-Poultry-ST302"
FT                   /parent_base="C"
FT                   /replace="T"
FT   variation       3734068
FT                   /node="internal_19->IA7122-Poultry-ST302"
FT                   /colour="4"
FT                   /taxa="IA7122-Poultry-ST302"
FT                   /parent_base="G"
FT                   /replace="A"
FT   variation       3734094
FT                   /node="internal_19->IA7122-Poultry-ST302"
FT                   /colour="4"
FT                   /taxa="IA7122-Poultry-ST302"
FT                   /parent_base="A"
FT                   /replace="G"
FT   variation       3734109
FT                   /node="internal_19->IA7122-Poultry-ST302"
FT                   /colour="4"
FT                   /taxa="IA7122-Poultry-ST302"
FT                   /parent_base="G"
FT                   /replace="A"
FT   variation       3734110
FT                   /node="internal_19->IA7122-Poultry-ST302"
FT                   /colour="4"
FT                   /taxa="IA7122-Poultry-ST302"
FT                   /parent_base="T"
FT                   /replace="C"
FT   variation       3734112
FT                   /node="internal_19->IA7122-Poultry-ST302"
FT                   /colour="4"
FT                   /taxa="IA7122-Poultry-ST302"
FT                   /parent_base="A"
FT                   /replace="G"
FT   variation       3734153
FT                   /node="internal_19->IA7122-Poultry-ST302"
FT                   /colour="4"
FT                   /taxa="IA7122-Poultry-ST302"
FT                   /parent_base="A"
FT                   /replace="G"
FT   variation       3734196
FT                   /node="internal_19->IA7122-Poultry-ST302"
FT                   /colour="4"
FT                   /taxa="IA7122-Poultry-ST302"
FT                   /parent_base="G"
FT                   /replace="A"
FT   variation       3734202
FT                   /node="internal_19->IA7122-Poultry-ST302"
FT                   /colour="4"
FT                   /taxa="IA7122-Poultry-ST302"
FT                   /parent_base="C"
FT                   /replace="T"
FT   variation       3734205
FT                   /node="internal_19->IA7122-Poultry-ST302"
FT                   /colour="4"
FT                   /taxa="IA7122-Poultry-ST302"
FT                   /parent_base="C"
FT                   /replace="T"
FT   variation       3734208
FT                   /node="internal_19->IA7122-Poultry-ST302"
FT                   /colour="4"
FT                   /taxa="IA7122-Poultry-ST302"
FT                   /parent_base="C"
FT                   /replace="T"
FT   variation       3734250
FT                   /node="internal_19->IA7122-Poultry-ST302"
FT                   /colour="4"
FT                   /taxa="IA7122-Poultry-ST302"
FT                   /parent_base="T"
FT                   /replace="C"
FT   variation       3734256
FT                   /node="internal_19->IA7122-Poultry-ST302"
FT                   /colour="4"
FT                   /taxa="IA7122-Poultry-ST302"
FT                   /parent_base="T"
FT                   /replace="G"
FT   variation       3734310
FT                   /node="internal_19->IA7122-Poultry-ST302"
FT                   /colour="4"
FT                   /taxa="IA7122-Poultry-ST302"
FT                   /parent_base="C"
FT                   /replace="G"
FT   variation       3734319
FT                   /node="internal_19->IA7122-Poultry-ST302"
FT                   /colour="4"
FT                   /taxa="IA7122-Poultry-ST302"
FT                   /parent_base="G"
FT                   /replace="A"
FT   variation       3734322
FT                   /node="internal_19->IA7122-Poultry-ST302"
FT                   /colour="4"
FT                   /taxa="IA7122-Poultry-ST302"
FT                   /parent_base="T"
FT                   /replace="C"
FT   variation       3734325
FT                   /node="internal_19->IA7122-Poultry-ST302"
FT                   /colour="4"
FT                   /taxa="IA7122-Poultry-ST302"
FT                   /parent_base="T"
FT                   /replace="C"
FT   variation       3734328
FT                   /node="internal_19->IA7122-Poultry-ST302"
FT                   /colour="4"
FT                   /taxa="IA7122-Poultry-ST302"
FT                   /parent_base="C"
FT                   /replace="T"
FT   variation       3734337
FT                   /node="internal_19->IA7122-Poultry-ST302"
FT                   /colour="4"
FT                   /taxa="IA7122-Poultry-ST302"
FT                   /parent_base="C"
FT                   /replace="T"
FT   variation       3734352
FT                   /node="internal_19->IA7122-Poultry-ST302"
FT                   /colour="4"
FT                   /taxa="IA7122-Poultry-ST302"
FT                   /parent_base="G"
FT                   /replace="A"
FT   variation       3734367
FT                   /node="internal_19->IA7122-Poultry-ST302"
FT                   /colour="4"
FT                   /taxa="IA7122-Poultry-ST302"
FT                   /parent_base="C"
FT                   /replace="T"
FT   variation       3734373
FT                   /node="internal_19->IA7122-Poultry-ST302"
FT                   /colour="4"
FT                   /taxa="IA7122-Poultry-ST302"
FT                   /parent_base="C"
FT                   /replace="G"
FT   variation       3734376
FT                   /node="internal_19->IA7122-Poultry-ST302"
FT                   /colour="4"
FT                   /taxa="IA7122-Poultry-ST302"
FT                   /parent_base="C"
FT                   /replace="G"
FT   variation       3734391
FT                   /node="internal_19->IA7122-Poultry-ST302"
FT                   /colour="4"
FT                   /taxa="IA7122-Poultry-ST302"
FT                   /parent_base="G"
FT                   /replace="C"
FT   variation       3734397
FT                   /node="internal_19->IA7122-Poultry-ST302"
FT                   /colour="4"
FT                   /taxa="IA7122-Poultry-ST302"
FT                   /parent_base="A"
FT                   /replace="T"
FT   variation       3734412
FT                   /node="internal_19->IA7122-Poultry-ST302"
FT                   /colour="4"
FT                   /taxa="IA7122-Poultry-ST302"
FT                   /parent_base="C"
FT                   /replace="T"
FT   variation       3734427
FT                   /node="internal_19->IA7122-Poultry-ST302"
FT                   /colour="4"
FT                   /taxa="IA7122-Poultry-ST302"
FT                   /parent_base="A"
FT                   /replace="G"
FT   variation       3734439
FT                   /node="internal_19->IA7122-Poultry-ST302"
FT                   /colour="4"
FT                   /taxa="IA7122-Poultry-ST302"
FT                   /parent_base="G"
FT                   /replace="A"
FT   variation       3734442
FT                   /node="internal_19->IA7122-Poultry-ST302"
FT                   /colour="4"
FT                   /taxa="IA7122-Poultry-ST302"
FT                   /parent_base="G"
FT                   /replace="T"
FT   variation       3734460
FT                   /node="internal_19->IA7122-Poultry-ST302"
FT                   /colour="4"
FT                   /taxa="IA7122-Poultry-ST302"
FT                   /parent_base="A"
FT                   /replace="G"
FT   variation       3734466
FT                   /node="internal_19->IA7122-Poultry-ST302"
FT                   /colour="4"
FT                   /taxa="IA7122-Poultry-ST302"
FT                   /parent_base="A"
FT                   /replace="T"
FT   variation       3734496
FT                   /node="internal_19->IA7122-Poultry-ST302"
FT                   /colour="4"
FT                   /taxa="IA7122-Poultry-ST302"
FT                   /parent_base="C"
FT                   /replace="T"
FT   variation       3734509
FT                   /node="internal_19->IA7122-Poultry-ST302"
FT                   /colour="4"
FT                   /taxa="IA7122-Poultry-ST302"
FT                   /parent_base="A"
FT                   /replace="G"
FT   variation       3734699
FT                   /node="internal_19->IA7122-Poultry-ST302"
FT                   /colour="4"
FT                   /taxa="IA7122-Poultry-ST302"
FT                   /parent_base="G"
FT                   /replace="A"
FT   variation       3734774
FT                   /node="internal_19->IA7122-Poultry-ST302"
FT                   /colour="4"
FT                   /taxa="IA7122-Poultry-ST302"
FT                   /parent_base="A"
FT                   /replace="G"
FT   variation       3734816
FT                   /node="internal_19->IA7122-Poultry-ST302"
FT                   /colour="4"
FT                   /taxa="IA7122-Poultry-ST302"
FT                   /parent_base="G"
FT                   /replace="A"
FT   variation       3734822
FT                   /node="internal_19->IA7122-Poultry-ST302"
FT                   /colour="4"
FT                   /taxa="IA7122-Poultry-ST302"
FT                   /parent_base="C"
FT                   /replace="T"
FT   variation       3734840
FT                   /node="internal_19->IA7122-Poultry-ST302"
FT                   /colour="4"
FT                   /taxa="IA7122-Poultry-ST302"
FT                   /parent_base="A"
FT                   /replace="G"
FT   variation       3734852
FT                   /node="internal_19->IA7122-Poultry-ST302"
FT                   /colour="4"
FT                   /taxa="IA7122-Poultry-ST302"
FT                   /parent_base="C"
FT                   /replace="A"
FT   variation       3734897
FT                   /node="internal_19->IA7122-Poultry-ST302"
FT                   /colour="4"
FT                   /taxa="IA7122-Poultry-ST302"
FT                   /parent_base="C"
FT                   /replace="T"
FT   variation       3734935
FT                   /node="internal_19->IA7122-Poultry-ST302"
FT                   /colour="4"
FT                   /taxa="IA7122-Poultry-ST302"
FT                   /parent_base="A"
FT                   /replace="T"
FT   variation       3734939
FT                   /node="internal_19->IA7122-Poultry-ST302"
FT                   /colour="4"
FT                   /taxa="IA7122-Poultry-ST302"
FT                   /parent_base="C"
FT                   /replace="A"
FT   variation       3735020
FT                   /node="internal_19->IA7122-Poultry-ST302"
FT                   /colour="4"
FT                   /taxa="IA7122-Poultry-ST302"
FT                   /parent_base="C"
FT                   /replace="A"
FT   variation       3735026
FT                   /node="internal_19->IA7122-Poultry-ST302"
FT                   /colour="4"
FT                   /taxa="IA7122-Poultry-ST302"
FT                   /parent_base="A"
FT                   /replace="G"
FT   variation       3735056
FT                   /node="internal_19->IA7122-Poultry-ST302"
FT                   /colour="4"
FT                   /taxa="IA7122-Poultry-ST302"
FT                   /parent_base="C"
FT                   /replace="T"
FT   variation       3735071
FT                   /node="internal_19->IA7122-Poultry-ST302"
FT                   /colour="4"
FT                   /taxa="IA7122-Poultry-ST302"
FT                   /parent_base="G"
FT                   /replace="C"
FT   variation       3735080
FT                   /node="internal_19->IA7122-Poultry-ST302"
FT                   /colour="4"
FT                   /taxa="IA7122-Poultry-ST302"
FT                   /parent_base="G"
FT                   /replace="A"
FT   variation       3735122
FT                   /node="internal_19->IA7122-Poultry-ST302"
FT                   /colour="4"
FT                   /taxa="IA7122-Poultry-ST302"
FT                   /parent_base="A"
FT                   /replace="G"
FT   variation       3735173
FT                   /node="internal_19->IA7122-Poultry-ST302"
FT                   /colour="4"
FT                   /taxa="IA7122-Poultry-ST302"
FT                   /parent_base="A"
FT                   /replace="G"
FT   variation       3735197
FT                   /node="internal_19->IA7122-Poultry-ST302"
FT                   /colour="4"
FT                   /taxa="IA7122-Poultry-ST302"
FT                   /parent_base="T"
FT                   /replace="G"
FT   variation       3735198
FT                   /node="internal_19->IA7122-Poultry-ST302"
FT                   /colour="4"
FT                   /taxa="IA7122-Poultry-ST302"
FT                   /parent_base="C"
FT                   /replace="T"
FT   variation       3735206
FT                   /node="internal_19->IA7122-Poultry-ST302"
FT                   /colour="4"
FT                   /taxa="IA7122-Poultry-ST302"
FT                   /parent_base="C"
FT                   /replace="G"
FT   variation       3735266
FT                   /node="internal_19->IA7122-Poultry-ST302"
FT                   /colour="4"
FT                   /taxa="IA7122-Poultry-ST302"
FT                   /parent_base="T"
FT                   /replace="C"
FT   variation       3735305
FT                   /node="internal_19->IA7122-Poultry-ST302"
FT                   /colour="4"
FT                   /taxa="IA7122-Poultry-ST302"
FT                   /parent_base="G"
FT                   /replace="C"
FT   variation       3735308
FT                   /node="internal_19->IA7122-Poultry-ST302"
FT                   /colour="4"
FT                   /taxa="IA7122-Poultry-ST302"
FT                   /parent_base="C"
FT                   /replace="A"
FT   variation       3735329
FT                   /node="internal_19->IA7122-Poultry-ST302"
FT                   /colour="4"
FT                   /taxa="IA7122-Poultry-ST302"
FT                   /parent_base="G"
FT                   /replace="A"
FT   variation       3735344
FT                   /node="internal_19->IA7122-Poultry-ST302"
FT                   /colour="4"
FT                   /taxa="IA7122-Poultry-ST302"
FT                   /parent_base="T"
FT                   /replace="C"
FT   variation       3735347
FT                   /node="internal_19->IA7122-Poultry-ST302"
FT                   /colour="4"
FT                   /taxa="IA7122-Poultry-ST302"
FT                   /parent_base="G"
FT                   /replace="A"
FT   variation       3735415
FT                   /node="internal_19->IA7122-Poultry-ST302"
FT                   /colour="4"
FT                   /taxa="IA7122-Poultry-ST302"
FT                   /parent_base="G"
FT                   /replace="A"
FT   variation       3735425
FT                   /node="internal_19->IA7122-Poultry-ST302"
FT                   /colour="4"
FT                   /taxa="IA7122-Poultry-ST302"
FT                   /parent_base="C"
FT                   /replace="T"
FT   variation       3735527
FT                   /node="internal_19->IA7122-Poultry-ST302"
FT                   /colour="4"
FT                   /taxa="IA7122-Poultry-ST302"
FT                   /parent_base="A"
FT                   /replace="C"
FT   variation       3735582
FT                   /node="internal_19->IA7122-Poultry-ST302"
FT                   /colour="4"
FT                   /taxa="IA7122-Poultry-ST302"
FT                   /parent_base="C"
FT                   /replace="T"
FT   variation       3735718
FT                   /node="internal_19->IA7122-Poultry-ST302"
FT                   /colour="4"
FT                   /taxa="IA7122-Poultry-ST302"
FT                   /parent_base="A"
FT                   /replace="G"
FT   variation       3735757
FT                   /node="internal_19->IA7122-Poultry-ST302"
FT                   /colour="4"
FT                   /taxa="IA7122-Poultry-ST302"
FT                   /parent_base="C"
FT                   /replace="A"
FT   variation       3735760
FT                   /node="internal_19->IA7122-Poultry-ST302"
FT                   /colour="4"
FT                   /taxa="IA7122-Poultry-ST302"
FT                   /parent_base="C"
FT                   /replace="T"
FT   variation       3735763
FT                   /node="internal_19->IA7122-Poultry-ST302"
FT                   /colour="4"
FT                   /taxa="IA7122-Poultry-ST302"
FT                   /parent_base="A"
FT                   /replace="G"
FT   variation       3735769
FT                   /node="internal_19->IA7122-Poultry-ST302"
FT                   /colour="4"
FT                   /taxa="IA7122-Poultry-ST302"
FT                   /parent_base="A"
FT                   /replace="G"
FT   variation       3735778
FT                   /node="internal_19->IA7122-Poultry-ST302"
FT                   /colour="4"
FT                   /taxa="IA7122-Poultry-ST302"
FT                   /parent_base="C"
FT                   /replace="T"
FT   variation       3735793
FT                   /node="internal_19->IA7122-Poultry-ST302"
FT                   /colour="4"
FT                   /taxa="IA7122-Poultry-ST302"
FT                   /parent_base="G"
FT                   /replace="T"
FT   variation       3735799
FT                   /node="internal_19->IA7122-Poultry-ST302"
FT                   /colour="4"
FT                   /taxa="IA7122-Poultry-ST302"
FT                   /parent_base="G"
FT                   /replace="A"
FT   variation       3735865
FT                   /node="internal_19->IA7122-Poultry-ST302"
FT                   /colour="4"
FT                   /taxa="IA7122-Poultry-ST302"
FT                   /parent_base="A"
FT                   /replace="G"
FT   variation       3735871
FT                   /node="internal_19->IA7122-Poultry-ST302"
FT                   /colour="4"
FT                   /taxa="IA7122-Poultry-ST302"
FT                   /parent_base="G"
FT                   /replace="A"
FT   variation       3735895
FT                   /node="internal_19->IA7122-Poultry-ST302"
FT                   /colour="4"
FT                   /taxa="IA7122-Poultry-ST302"
FT                   /parent_base="T"
FT                   /replace="C"
FT   variation       3735898
FT                   /node="internal_19->IA7122-Poultry-ST302"
FT                   /colour="4"
FT                   /taxa="IA7122-Poultry-ST302"
FT                   /parent_base="G"
FT                   /replace="A"
FT   variation       3735958
FT                   /node="internal_19->IA7122-Poultry-ST302"
FT                   /colour="4"
FT                   /taxa="IA7122-Poultry-ST302"
FT                   /parent_base="C"
FT                   /replace="T"
FT   variation       3735961
FT                   /node="internal_19->IA7122-Poultry-ST302"
FT                   /colour="4"
FT                   /taxa="IA7122-Poultry-ST302"
FT                   /parent_base="T"
FT                   /replace="C"
FT   variation       3735982
FT                   /node="internal_19->IA7122-Poultry-ST302"
FT                   /colour="4"
FT                   /taxa="IA7122-Poultry-ST302"
FT                   /parent_base="T"
FT                   /replace="C"
FT   variation       3736027
FT                   /node="internal_19->IA7122-Poultry-ST302"
FT                   /colour="4"
FT                   /taxa="IA7122-Poultry-ST302"
FT                   /parent_base="C"
FT                   /replace="G"
FT   variation       3736030
FT                   /node="internal_19->IA7122-Poultry-ST302"
FT                   /colour="4"
FT                   /taxa="IA7122-Poultry-ST302"
FT                   /parent_base="T"
FT                   /replace="G"
FT   variation       3736047
FT                   /node="internal_19->IA7122-Poultry-ST302"
FT                   /colour="4"
FT                   /taxa="IA7122-Poultry-ST302"
FT                   /parent_base="C"
FT                   /replace="A"
FT   variation       3736070
FT                   /node="internal_19->IA7122-Poultry-ST302"
FT                   /colour="4"
FT                   /taxa="IA7122-Poultry-ST302"
FT                   /parent_base="A"
FT                   /replace="G"
FT   variation       3736096
FT                   /node="internal_19->IA7122-Poultry-ST302"
FT                   /colour="4"
FT                   /taxa="IA7122-Poultry-ST302"
FT                   /parent_base="G"
FT                   /replace="A"
FT   variation       3736105
FT                   /node="internal_19->IA7122-Poultry-ST302"
FT                   /colour="4"
FT                   /taxa="IA7122-Poultry-ST302"
FT                   /parent_base="T"
FT                   /replace="C"
FT   variation       3736126
FT                   /node="internal_19->IA7122-Poultry-ST302"
FT                   /colour="4"
FT                   /taxa="IA7122-Poultry-ST302"
FT                   /parent_base="C"
FT                   /replace="T"
FT   variation       3736153
FT                   /node="internal_19->IA7122-Poultry-ST302"
FT                   /colour="4"
FT                   /taxa="IA7122-Poultry-ST302"
FT                   /parent_base="A"
FT                   /replace="G"
FT   variation       3736162
FT                   /node="internal_19->IA7122-Poultry-ST302"
FT                   /colour="4"
FT                   /taxa="IA7122-Poultry-ST302"
FT                   /parent_base="C"
FT                   /replace="T"
FT   variation       3736168
FT                   /node="internal_19->IA7122-Poultry-ST302"
FT                   /colour="4"
FT                   /taxa="IA7122-Poultry-ST302"
FT                   /parent_base="G"
FT                   /replace="A"
FT   variation       3736180
FT                   /node="internal_19->IA7122-Poultry-ST302"
FT                   /colour="4"
FT                   /taxa="IA7122-Poultry-ST302"
FT                   /parent_base="T"
FT                   /replace="C"
FT   variation       3736225
FT                   /node="internal_19->IA7122-Poultry-ST302"
FT                   /colour="4"
FT                   /taxa="IA7122-Poultry-ST302"
FT                   /parent_base="C"
FT                   /replace="T"
FT   variation       3736243
FT                   /node="internal_19->IA7122-Poultry-ST302"
FT                   /colour="4"
FT                   /taxa="IA7122-Poultry-ST302"
FT                   /parent_base="C"
FT                   /replace="T"
FT   variation       3736261
FT                   /node="internal_19->IA7122-Poultry-ST302"
FT                   /colour="4"
FT                   /taxa="IA7122-Poultry-ST302"
FT                   /parent_base="C"
FT                   /replace="T"
FT   variation       3736336
FT                   /node="internal_19->IA7122-Poultry-ST302"
FT                   /colour="4"
FT                   /taxa="IA7122-Poultry-ST302"
FT                   /parent_base="C"
FT                   /replace="G"
FT   variation       3736423
FT                   /node="internal_19->IA7122-Poultry-ST302"
FT                   /colour="4"
FT                   /taxa="IA7122-Poultry-ST302"
FT                   /parent_base="T"
FT                   /replace="C"
FT   variation       3736426
FT                   /node="internal_19->IA7122-Poultry-ST302"
FT                   /colour="4"
FT                   /taxa="IA7122-Poultry-ST302"
FT                   /parent_base="A"
FT                   /replace="G"
FT   variation       3736465
FT                   /node="internal_19->IA7122-Poultry-ST302"
FT                   /colour="4"
FT                   /taxa="IA7122-Poultry-ST302"
FT                   /parent_base="C"
FT                   /replace="T"
FT   variation       3736504
FT                   /node="internal_19->IA7122-Poultry-ST302"
FT                   /colour="4"
FT                   /taxa="IA7122-Poultry-ST302"
FT                   /parent_base="A"
FT                   /replace="G"
FT   variation       3736531
FT                   /node="internal_19->IA7122-Poultry-ST302"
FT                   /colour="4"
FT                   /taxa="IA7122-Poultry-ST302"
FT                   /parent_base="C"
FT                   /replace="T"
FT   variation       3736552
FT                   /node="internal_19->IA7122-Poultry-ST302"
FT                   /colour="4"
FT                   /taxa="IA7122-Poultry-ST302"
FT                   /parent_base="C"
FT                   /replace="G"
FT   variation       3736555
FT                   /node="internal_19->IA7122-Poultry-ST302"
FT                   /colour="4"
FT                   /taxa="IA7122-Poultry-ST302"
FT                   /parent_base="G"
FT                   /replace="A"
FT   variation       3736585
FT                   /node="internal_19->IA7122-Poultry-ST302"
FT                   /colour="4"
FT                   /taxa="IA7122-Poultry-ST302"
FT                   /parent_base="C"
FT                   /replace="T"
FT   variation       3736600
FT                   /node="internal_19->IA7122-Poultry-ST302"
FT                   /colour="4"
FT                   /taxa="IA7122-Poultry-ST302"
FT                   /parent_base="C"
FT                   /replace="T"
FT   variation       3736654
FT                   /node="internal_19->IA7122-Poultry-ST302"
FT                   /colour="4"
FT                   /taxa="IA7122-Poultry-ST302"
FT                   /parent_base="T"
FT                   /replace="C"
FT   variation       3736719
FT                   /node="internal_19->IA7122-Poultry-ST302"
FT                   /colour="4"
FT                   /taxa="IA7122-Poultry-ST302"
FT                   /parent_base="C"
FT                   /replace="T"
FT   variation       3736788
FT                   /node="internal_19->IA7122-Poultry-ST302"
FT                   /colour="4"
FT                   /taxa="IA7122-Poultry-ST302"
FT                   /parent_base="C"
FT                   /replace="A"
FT   variation       3736791
FT                   /node="internal_19->IA7122-Poultry-ST302"
FT                   /colour="4"
FT                   /taxa="IA7122-Poultry-ST302"
FT                   /parent_base="A"
FT                   /replace="G"
FT   variation       3736830
FT                   /node="internal_19->IA7122-Poultry-ST302"
FT                   /colour="4"
FT                   /taxa="IA7122-Poultry-ST302"
FT                   /parent_base="T"
FT                   /replace="C"
FT   variation       3736956
FT                   /node="internal_19->IA7122-Poultry-ST302"
FT                   /colour="4"
FT                   /taxa="IA7122-Poultry-ST302"
FT                   /parent_base="T"
FT                   /replace="C"
FT   variation       3737127
FT                   /node="internal_19->IA7122-Poultry-ST302"
FT                   /colour="4"
FT                   /taxa="IA7122-Poultry-ST302"
FT                   /parent_base="G"
FT                   /replace="A"
FT   variation       3737375
FT                   /node="internal_19->IA7122-Poultry-ST302"
FT                   /colour="4"
FT                   /taxa="IA7122-Poultry-ST302"
FT                   /parent_base="C"
FT                   /replace="A"
FT   variation       3737378
FT                   /node="internal_19->IA7122-Poultry-ST302"
FT                   /colour="4"
FT                   /taxa="IA7122-Poultry-ST302"
FT                   /parent_base="A"
FT                   /replace="G"
FT   variation       3737409
FT                   /node="internal_19->IA7122-Poultry-ST302"
FT                   /colour="4"
FT                   /taxa="IA7122-Poultry-ST302"
FT                   /parent_base="C"
FT                   /replace="T"
FT   variation       3737480
FT                   /node="internal_19->IA7122-Poultry-ST302"
FT                   /colour="4"
FT                   /taxa="IA7122-Poultry-ST302"
FT                   /parent_base="C"
FT                   /replace="G"
FT   variation       3737516
FT                   /node="internal_19->IA7122-Poultry-ST302"
FT                   /colour="4"
FT                   /taxa="IA7122-Poultry-ST302"
FT                   /parent_base="T"
FT                   /replace="C"
FT   variation       3737555
FT                   /node="internal_19->IA7122-Poultry-ST302"
FT                   /colour="4"
FT                   /taxa="IA7122-Poultry-ST302"
FT                   /parent_base="A"
FT                   /replace="G"
FT   variation       3737567
FT                   /node="internal_19->IA7122-Poultry-ST302"
FT                   /colour="4"
FT                   /taxa="IA7122-Poultry-ST302"
FT                   /parent_base="T"
FT                   /replace="C"
FT   variation       3737627
FT                   /node="internal_19->IA7122-Poultry-ST302"
FT                   /colour="4"
FT                   /taxa="IA7122-Poultry-ST302"
FT                   /parent_base="C"
FT                   /replace="T"
FT   variation       3737672
FT                   /node="internal_19->IA7122-Poultry-ST302"
FT                   /colour="4"
FT                   /taxa="IA7122-Poultry-ST302"
FT                   /parent_base="C"
FT                   /replace="T"
FT   variation       3737699
FT                   /node="internal_19->IA7122-Poultry-ST302"
FT                   /colour="4"
FT                   /taxa="IA7122-Poultry-ST302"
FT                   /parent_base="C"
FT                   /replace="T"
FT   variation       3737777
FT                   /node="internal_19->IA7122-Poultry-ST302"
FT                   /colour="4"
FT                   /taxa="IA7122-Poultry-ST302"
FT                   /parent_base="G"
FT                   /replace="A"
FT   variation       3737816
FT                   /node="internal_19->IA7122-Poultry-ST302"
FT                   /colour="4"
FT                   /taxa="IA7122-Poultry-ST302"
FT                   /parent_base="T"
FT                   /replace="C"
FT   variation       3737825
FT                   /node="internal_19->IA7122-Poultry-ST302"
FT                   /colour="4"
FT                   /taxa="IA7122-Poultry-ST302"
FT                   /parent_base="C"
FT                   /replace="T"
FT   variation       3737867
FT                   /node="internal_19->IA7122-Poultry-ST302"
FT                   /colour="4"
FT                   /taxa="IA7122-Poultry-ST302"
FT                   /parent_base="G"
FT                   /replace="A"
FT   variation       3737876
FT                   /node="internal_19->IA7122-Poultry-ST302"
FT                   /colour="4"
FT                   /taxa="IA7122-Poultry-ST302"
FT                   /parent_base="C"
FT                   /replace="A"
FT   variation       3737885
FT                   /node="internal_19->IA7122-Poultry-ST302"
FT                   /colour="4"
FT                   /taxa="IA7122-Poultry-ST302"
FT                   /parent_base="T"
FT                   /replace="C"
FT   variation       3737898
FT                   /node="internal_19->IA7122-Poultry-ST302"
FT                   /colour="4"
FT                   /taxa="IA7122-Poultry-ST302"
FT                   /parent_base="G"
FT                   /replace="A"
FT   variation       3737906
FT                   /node="internal_19->IA7122-Poultry-ST302"
FT                   /colour="4"
FT                   /taxa="IA7122-Poultry-ST302"
FT                   /parent_base="G"
FT                   /replace="T"
FT   variation       3737909
FT                   /node="internal_19->IA7122-Poultry-ST302"
FT                   /colour="4"
FT                   /taxa="IA7122-Poultry-ST302"
FT                   /parent_base="G"
FT                   /replace="T"
FT   variation       3737921
FT                   /node="internal_19->IA7122-Poultry-ST302"
FT                   /colour="4"
FT                   /taxa="IA7122-Poultry-ST302"
FT                   /parent_base="T"
FT                   /replace="C"
FT   variation       3738088
FT                   /node="internal_19->IA7122-Poultry-ST302"
FT                   /colour="4"
FT                   /taxa="IA7122-Poultry-ST302"
FT                   /parent_base="C"
FT                   /replace="T"
FT   variation       3738091
FT                   /node="internal_19->IA7122-Poultry-ST302"
FT                   /colour="4"
FT                   /taxa="IA7122-Poultry-ST302"
FT                   /parent_base="G"
FT                   /replace="A"
FT   variation       3738112
FT                   /node="internal_19->IA7122-Poultry-ST302"
FT                   /colour="4"
FT                   /taxa="IA7122-Poultry-ST302"
FT                   /parent_base="T"
FT                   /replace="C"
FT   variation       3738142
FT                   /node="internal_19->IA7122-Poultry-ST302"
FT                   /colour="4"
FT                   /taxa="IA7122-Poultry-ST302"
FT                   /parent_base="T"
FT                   /replace="C"
FT   variation       3738166
FT                   /node="internal_19->IA7122-Poultry-ST302"
FT                   /colour="4"
FT                   /taxa="IA7122-Poultry-ST302"
FT                   /parent_base="C"
FT                   /replace="T"
FT   variation       3738195
FT                   /node="internal_19->IA7122-Poultry-ST302"
FT                   /colour="4"
FT                   /taxa="IA7122-Poultry-ST302"
FT                   /parent_base="T"
FT                   /replace="G"
FT   variation       3738325
FT                   /node="internal_19->IA7122-Poultry-ST302"
FT                   /colour="4"
FT                   /taxa="IA7122-Poultry-ST302"
FT                   /parent_base="A"
FT                   /replace="G"
FT   variation       3738349
FT                   /node="internal_19->IA7122-Poultry-ST302"
FT                   /colour="4"
FT                   /taxa="IA7122-Poultry-ST302"
FT                   /parent_base="T"
FT                   /replace="C"
FT   variation       3738361
FT                   /node="internal_19->IA7122-Poultry-ST302"
FT                   /colour="4"
FT                   /taxa="IA7122-Poultry-ST302"
FT                   /parent_base="G"
FT                   /replace="A"
FT   variation       3738364
FT                   /node="internal_19->IA7122-Poultry-ST302"
FT                   /colour="4"
FT                   /taxa="IA7122-Poultry-ST302"
FT                   /parent_base="T"
FT                   /replace="C"
FT   variation       3738373
FT                   /node="internal_19->IA7122-Poultry-ST302"
FT                   /colour="4"
FT                   /taxa="IA7122-Poultry-ST302"
FT                   /parent_base="G"
FT                   /replace="C"
FT   variation       3738376
FT                   /node="internal_19->IA7122-Poultry-ST302"
FT                   /colour="4"
FT                   /taxa="IA7122-Poultry-ST302"
FT                   /parent_base="T"
FT                   /replace="C"
FT   variation       3738451
FT                   /node="internal_19->IA7122-Poultry-ST302"
FT                   /colour="4"
FT                   /taxa="IA7122-Poultry-ST302"
FT                   /parent_base="C"
FT                   /replace="T"
FT   variation       3738469
FT                   /node="internal_19->IA7122-Poultry-ST302"
FT                   /colour="4"
FT                   /taxa="IA7122-Poultry-ST302"
FT                   /parent_base="G"
FT                   /replace="A"
FT   variation       3738499
FT                   /node="internal_19->IA7122-Poultry-ST302"
FT                   /colour="4"
FT                   /taxa="IA7122-Poultry-ST302"
FT                   /parent_base="C"
FT                   /replace="T"
FT   variation       3738502
FT                   /node="internal_19->IA7122-Poultry-ST302"
FT                   /colour="4"
FT                   /taxa="IA7122-Poultry-ST302"
FT                   /parent_base="T"
FT                   /replace="A"
FT   variation       3738523
FT                   /node="internal_19->IA7122-Poultry-ST302"
FT                   /colour="4"
FT                   /taxa="IA7122-Poultry-ST302"
FT                   /parent_base="T"
FT                   /replace="C"
FT   variation       3738565
FT                   /node="internal_19->IA7122-Poultry-ST302"
FT                   /colour="4"
FT                   /taxa="IA7122-Poultry-ST302"
FT                   /parent_base="A"
FT                   /replace="G"
FT   variation       3738580
FT                   /node="internal_19->IA7122-Poultry-ST302"
FT                   /colour="4"
FT                   /taxa="IA7122-Poultry-ST302"
FT                   /parent_base="G"
FT                   /replace="A"
FT   variation       3738586
FT                   /node="internal_19->IA7122-Poultry-ST302"
FT                   /colour="4"
FT                   /taxa="IA7122-Poultry-ST302"
FT                   /parent_base="G"
FT                   /replace="A"
FT   variation       3738625
FT                   /node="internal_19->IA7122-Poultry-ST302"
FT                   /colour="4"
FT                   /taxa="IA7122-Poultry-ST302"
FT                   /parent_base="C"
FT                   /replace="G"
FT   variation       3738673
FT                   /node="internal_19->IA7122-Poultry-ST302"
FT                   /colour="4"
FT                   /taxa="IA7122-Poultry-ST302"
FT                   /parent_base="C"
FT                   /replace="T"
FT   variation       3738783
FT                   /node="internal_19->IA7122-Poultry-ST302"
FT                   /colour="4"
FT                   /taxa="IA7122-Poultry-ST302"
FT                   /parent_base="C"
FT                   /replace="T"
FT   variation       3738816
FT                   /node="internal_19->IA7122-Poultry-ST302"
FT                   /colour="4"
FT                   /taxa="IA7122-Poultry-ST302"
FT                   /parent_base="T"
FT                   /replace="G"
FT   variation       3738849
FT                   /node="internal_19->IA7122-Poultry-ST302"
FT                   /colour="4"
FT                   /taxa="IA7122-Poultry-ST302"
FT                   /parent_base="C"
FT                   /replace="T"
FT   variation       3738856
FT                   /node="internal_19->IA7122-Poultry-ST302"
FT                   /colour="4"
FT                   /taxa="IA7122-Poultry-ST302"
FT                   /parent_base="C"
FT                   /replace="T"
FT   variation       3738918
FT                   /node="internal_19->IA7122-Poultry-ST302"
FT                   /colour="4"
FT                   /taxa="IA7122-Poultry-ST302"
FT                   /parent_base="T"
FT                   /replace="C"
FT   variation       3738981
FT                   /node="internal_19->IA7122-Poultry-ST302"
FT                   /colour="4"
FT                   /taxa="IA7122-Poultry-ST302"
FT                   /parent_base="C"
FT                   /replace="T"
FT   variation       3738984
FT                   /node="internal_19->IA7122-Poultry-ST302"
FT                   /colour="4"
FT                   /taxa="IA7122-Poultry-ST302"
FT                   /parent_base="A"
FT                   /replace="G"
FT   variation       3738987
FT                   /node="internal_19->IA7122-Poultry-ST302"
FT                   /colour="4"
FT                   /taxa="IA7122-Poultry-ST302"
FT                   /parent_base="A"
FT                   /replace="G"
FT   variation       3738989
FT                   /node="internal_19->IA7122-Poultry-ST302"
FT                   /colour="4"
FT                   /taxa="IA7122-Poultry-ST302"
FT                   /parent_base="A"
FT                   /replace="G"
FT   variation       3738996
FT                   /node="internal_19->IA7122-Poultry-ST302"
FT                   /colour="4"
FT                   /taxa="IA7122-Poultry-ST302"
FT                   /parent_base="G"
FT                   /replace="T"
FT   variation       3739005
FT                   /node="internal_19->IA7122-Poultry-ST302"
FT                   /colour="4"
FT                   /taxa="IA7122-Poultry-ST302"
FT                   /parent_base="C"
FT                   /replace="T"
FT   variation       3739018
FT                   /node="internal_19->IA7122-Poultry-ST302"
FT                   /colour="4"
FT                   /taxa="IA7122-Poultry-ST302"
FT                   /parent_base="C"
FT                   /replace="T"
FT   variation       3739026
FT                   /node="internal_19->IA7122-Poultry-ST302"
FT                   /colour="4"
FT                   /taxa="IA7122-Poultry-ST302"
FT                   /parent_base="A"
FT                   /replace="G"
FT   variation       3739032
FT                   /node="internal_19->IA7122-Poultry-ST302"
FT                   /colour="4"
FT                   /taxa="IA7122-Poultry-ST302"
FT                   /parent_base="G"
FT                   /replace="A"
FT   variation       3739038
FT                   /node="internal_19->IA7122-Poultry-ST302"
FT                   /colour="4"
FT                   /taxa="IA7122-Poultry-ST302"
FT                   /parent_base="T"
FT                   /replace="A"
FT   variation       3739044
FT                   /node="internal_19->IA7122-Poultry-ST302"
FT                   /colour="4"
FT                   /taxa="IA7122-Poultry-ST302"
FT                   /parent_base="A"
FT                   /replace="G"
FT   variation       3739095
FT                   /node="internal_19->IA7122-Poultry-ST302"
FT                   /colour="4"
FT                   /taxa="IA7122-Poultry-ST302"
FT                   /parent_base="A"
FT                   /replace="G"
FT   variation       3739137
FT                   /node="internal_19->IA7122-Poultry-ST302"
FT                   /colour="4"
FT                   /taxa="IA7122-Poultry-ST302"
FT                   /parent_base="C"
FT                   /replace="T"
FT   variation       3739194
FT                   /node="internal_19->IA7122-Poultry-ST302"
FT                   /colour="4"
FT                   /taxa="IA7122-Poultry-ST302"
FT                   /parent_base="G"
FT                   /replace="A"
FT   variation       3739212
FT                   /node="internal_19->IA7122-Poultry-ST302"
FT                   /colour="4"
FT                   /taxa="IA7122-Poultry-ST302"
FT                   /parent_base="A"
FT                   /replace="G"
FT   variation       3739281
FT                   /node="internal_19->IA7122-Poultry-ST302"
FT                   /colour="4"
FT                   /taxa="IA7122-Poultry-ST302"
FT                   /parent_base="A"
FT                   /replace="G"
FT   variation       3739287
FT                   /node="internal_19->IA7122-Poultry-ST302"
FT                   /colour="4"
FT                   /taxa="IA7122-Poultry-ST302"
FT                   /parent_base="C"
FT                   /replace="T"
FT   variation       3739308
FT                   /node="internal_19->IA7122-Poultry-ST302"
FT                   /colour="4"
FT                   /taxa="IA7122-Poultry-ST302"
FT                   /parent_base="G"
FT                   /replace="A"
FT   variation       3739309
FT                   /node="internal_19->IA7122-Poultry-ST302"
FT                   /colour="4"
FT                   /taxa="IA7122-Poultry-ST302"
FT                   /parent_base="C"
FT                   /replace="T"
FT   variation       3739332
FT                   /node="internal_19->IA7122-Poultry-ST302"
FT                   /colour="4"
FT                   /taxa="IA7122-Poultry-ST302"
FT                   /parent_base="C"
FT                   /replace="T"
FT   variation       3739344
FT                   /node="internal_19->IA7122-Poultry-ST302"
FT                   /colour="4"
FT                   /taxa="IA7122-Poultry-ST302"
FT                   /parent_base="G"
FT                   /replace="A"
FT   variation       3739356
FT                   /node="internal_19->IA7122-Poultry-ST302"
FT                   /colour="4"
FT                   /taxa="IA7122-Poultry-ST302"
FT                   /parent_base="G"
FT                   /replace="A"
FT   variation       3739358
FT                   /node="internal_19->IA7122-Poultry-ST302"
FT                   /colour="4"
FT                   /taxa="IA7122-Poultry-ST302"
FT                   /parent_base="G"
FT                   /replace="A"
FT   variation       3739463
FT                   /node="internal_19->IA7122-Poultry-ST302"
FT                   /colour="4"
FT                   /taxa="IA7122-Poultry-ST302"
FT                   /parent_base="G"
FT                   /replace="A"
FT   variation       3739465
FT                   /node="internal_19->IA7122-Poultry-ST302"
FT                   /colour="4"
FT                   /taxa="IA7122-Poultry-ST302"
FT                   /parent_base="T"
FT                   /replace="C"
FT   variation       3739466
FT                   /node="internal_19->IA7122-Poultry-ST302"
FT                   /colour="4"
FT                   /taxa="IA7122-Poultry-ST302"
FT                   /parent_base="G"
FT                   /replace="A"
FT   variation       3739467
FT                   /node="internal_19->IA7122-Poultry-ST302"
FT                   /colour="4"
FT                   /taxa="IA7122-Poultry-ST302"
FT                   /parent_base="C"
FT                   /replace="A"
FT   variation       3739476
FT                   /node="internal_19->IA7122-Poultry-ST302"
FT                   /colour="4"
FT                   /taxa="IA7122-Poultry-ST302"
FT                   /parent_base="T"
FT                   /replace="C"
FT   variation       3739482
FT                   /node="internal_19->IA7122-Poultry-ST302"
FT                   /colour="4"
FT                   /taxa="IA7122-Poultry-ST302"
FT                   /parent_base="A"
FT                   /replace="G"
FT   variation       3739500
FT                   /node="internal_19->IA7122-Poultry-ST302"
FT                   /colour="4"
FT                   /taxa="IA7122-Poultry-ST302"
FT                   /parent_base="A"
FT                   /replace="G"
FT   variation       3739611
FT                   /node="internal_19->IA7122-Poultry-ST302"
FT                   /colour="4"
FT                   /taxa="IA7122-Poultry-ST302"
FT                   /parent_base="T"
FT                   /replace="C"
FT   variation       3739617
FT                   /node="internal_19->IA7122-Poultry-ST302"
FT                   /colour="4"
FT                   /taxa="IA7122-Poultry-ST302"
FT                   /parent_base="G"
FT                   /replace="A"
FT   variation       3739647
FT                   /node="internal_19->IA7122-Poultry-ST302"
FT                   /colour="4"
FT                   /taxa="IA7122-Poultry-ST302"
FT                   /parent_base="T"
FT                   /replace="C"
FT   variation       3739654
FT                   /node="internal_19->IA7122-Poultry-ST302"
FT                   /colour="4"
FT                   /taxa="IA7122-Poultry-ST302"
FT                   /parent_base="C"
FT                   /replace="T"
FT   variation       3739659
FT                   /node="internal_19->IA7122-Poultry-ST302"
FT                   /colour="4"
FT                   /taxa="IA7122-Poultry-ST302"
FT                   /parent_base="G"
FT                   /replace="A"
FT   variation       3739667
FT                   /node="internal_19->IA7122-Poultry-ST302"
FT                   /colour="4"
FT                   /taxa="IA7122-Poultry-ST302"
FT                   /parent_base="G"
FT                   /replace="A"
FT   variation       3739680
FT                   /node="internal_19->IA7122-Poultry-ST302"
FT                   /colour="4"
FT                   /taxa="IA7122-Poultry-ST302"
FT                   /parent_base="T"
FT                   /replace="A"
FT   variation       3739725
FT                   /node="internal_19->IA7122-Poultry-ST302"
FT                   /colour="4"
FT                   /taxa="IA7122-Poultry-ST302"
FT                   /parent_base="G"
FT                   /replace="A"
FT   variation       3739887
FT                   /node="internal_19->IA7122-Poultry-ST302"
FT                   /colour="4"
FT                   /taxa="IA7122-Poultry-ST302"
FT                   /parent_base="G"
FT                   /replace="A"
FT   variation       3739890
FT                   /node="internal_19->IA7122-Poultry-ST302"
FT                   /colour="4"
FT                   /taxa="IA7122-Poultry-ST302"
FT                   /parent_base="T"
FT                   /replace="C"
FT   variation       3739903
FT                   /node="internal_19->IA7122-Poultry-ST302"
FT                   /colour="4"
FT                   /taxa="IA7122-Poultry-ST302"
FT                   /parent_base="T"
FT                   /replace="C"
FT   variation       3739907
FT                   /node="internal_19->IA7122-Poultry-ST302"
FT                   /colour="4"
FT                   /taxa="IA7122-Poultry-ST302"
FT                   /parent_base="G"
FT                   /replace="A"
FT   variation       3739965
FT                   /node="internal_19->IA7122-Poultry-ST302"
FT                   /colour="4"
FT                   /taxa="IA7122-Poultry-ST302"
FT                   /parent_base="T"
FT                   /replace="C"
FT   variation       3739969
FT                   /node="internal_19->IA7122-Poultry-ST302"
FT                   /colour="4"
FT                   /taxa="IA7122-Poultry-ST302"
FT                   /parent_base="T"
FT                   /replace="A"
FT   variation       3739971
FT                   /node="internal_19->IA7122-Poultry-ST302"
FT                   /colour="4"
FT                   /taxa="IA7122-Poultry-ST302"
FT                   /parent_base="G"
FT                   /replace="A"
FT   variation       3740001
FT                   /node="internal_19->IA7122-Poultry-ST302"
FT                   /colour="4"
FT                   /taxa="IA7122-Poultry-ST302"
FT                   /parent_base="C"
FT                   /replace="T"
FT   variation       3740003
FT                   /node="internal_19->IA7122-Poultry-ST302"
FT                   /colour="4"
FT                   /taxa="IA7122-Poultry-ST302"
FT                   /parent_base="T"
FT                   /replace="G"
FT   variation       3740013
FT                   /node="internal_19->IA7122-Poultry-ST302"
FT                   /colour="4"
FT                   /taxa="IA7122-Poultry-ST302"
FT                   /parent_base="C"
FT                   /replace="T"
FT   variation       3740052
FT                   /node="internal_19->IA7122-Poultry-ST302"
FT                   /colour="4"
FT                   /taxa="IA7122-Poultry-ST302"
FT                   /parent_base="T"
FT                   /replace="C"
FT   variation       3740064
FT                   /node="internal_19->IA7122-Poultry-ST302"
FT                   /colour="4"
FT                   /taxa="IA7122-Poultry-ST302"
FT                   /parent_base="T"
FT                   /replace="G"
FT   variation       3740076
FT                   /node="internal_19->IA7122-Poultry-ST302"
FT                   /colour="4"
FT                   /taxa="IA7122-Poultry-ST302"
FT                   /parent_base="G"
FT                   /replace="A"
FT   variation       3740097
FT                   /node="internal_19->IA7122-Poultry-ST302"
FT                   /colour="4"
FT                   /taxa="IA7122-Poultry-ST302"
FT                   /parent_base="C"
FT                   /replace="T"
FT   variation       3740103
FT                   /node="internal_19->IA7122-Poultry-ST302"
FT                   /colour="4"
FT                   /taxa="IA7122-Poultry-ST302"
FT                   /parent_base="T"
FT                   /replace="A"
FT   variation       3740105
FT                   /node="internal_19->IA7122-Poultry-ST302"
FT                   /colour="4"
FT                   /taxa="IA7122-Poultry-ST302"
FT                   /parent_base="C"
FT                   /replace="G"
FT   variation       3740115
FT                   /node="internal_19->IA7122-Poultry-ST302"
FT                   /colour="4"
FT                   /taxa="IA7122-Poultry-ST302"
FT                   /parent_base="G"
FT                   /replace="A"
FT   variation       3740169
FT                   /node="internal_19->IA7122-Poultry-ST302"
FT                   /colour="4"
FT                   /taxa="IA7122-Poultry-ST302"
FT                   /parent_base="T"
FT                   /replace="C"
FT   variation       3740204
FT                   /node="internal_19->IA7122-Poultry-ST302"
FT                   /colour="4"
FT                   /taxa="IA7122-Poultry-ST302"
FT                   /parent_base="G"
FT                   /replace="A"
FT   variation       3740205
FT                   /node="internal_19->IA7122-Poultry-ST302"
FT                   /colour="4"
FT                   /taxa="IA7122-Poultry-ST302"
FT                   /parent_base="A"
FT                   /replace="T"
FT   variation       3740343
FT                   /node="internal_19->IA7122-Poultry-ST302"
FT                   /colour="4"
FT                   /taxa="IA7122-Poultry-ST302"
FT                   /parent_base="G"
FT                   /replace="A"
FT   variation       3740384
FT                   /node="internal_19->IA7122-Poultry-ST302"
FT                   /colour="4"
FT                   /taxa="IA7122-Poultry-ST302"
FT                   /parent_base="A"
FT                   /replace="T"
FT   variation       3740503
FT                   /node="internal_19->IA7122-Poultry-ST302"
FT                   /colour="4"
FT                   /taxa="IA7122-Poultry-ST302"
FT                   /parent_base="G"
FT                   /replace="C"
FT   variation       3740504
FT                   /node="internal_19->IA7122-Poultry-ST302"
FT                   /colour="4"
FT                   /taxa="IA7122-Poultry-ST302"
FT                   /parent_base="C"
FT                   /replace="T"
FT   variation       3740506
FT                   /node="internal_19->IA7122-Poultry-ST302"
FT                   /colour="4"
FT                   /taxa="IA7122-Poultry-ST302"
FT                   /parent_base="A"
FT                   /replace="G"
FT   variation       3740524
FT                   /node="internal_19->IA7122-Poultry-ST302"
FT                   /colour="4"
FT                   /taxa="IA7122-Poultry-ST302"
FT                   /parent_base="A"
FT                   /replace="G"
FT   variation       3740548
FT                   /node="internal_19->IA7122-Poultry-ST302"
FT                   /colour="4"
FT                   /taxa="IA7122-Poultry-ST302"
FT                   /parent_base="A"
FT                   /replace="T"
FT   variation       3740612
FT                   /node="internal_19->IA7122-Poultry-ST302"
FT                   /colour="4"
FT                   /taxa="IA7122-Poultry-ST302"
FT                   /parent_base="A"
FT                   /replace="G"
FT   variation       3740672
FT                   /node="internal_19->IA7122-Poultry-ST302"
FT                   /colour="4"
FT                   /taxa="IA7122-Poultry-ST302"
FT                   /parent_base="G"
FT                   /replace="A"
FT   variation       3740681
FT                   /node="internal_19->IA7122-Poultry-ST302"
FT                   /colour="4"
FT                   /taxa="IA7122-Poultry-ST302"
FT                   /parent_base="G"
FT                   /replace="A"
FT   variation       3740735
FT                   /node="internal_19->IA7122-Poultry-ST302"
FT                   /colour="4"
FT                   /taxa="IA7122-Poultry-ST302"
FT                   /parent_base="C"
FT                   /replace="T"
FT   variation       3740738
FT                   /node="internal_19->IA7122-Poultry-ST302"
FT                   /colour="4"
FT                   /taxa="IA7122-Poultry-ST302"
FT                   /parent_base="G"
FT                   /replace="A"
FT   variation       3740762
FT                   /node="internal_19->IA7122-Poultry-ST302"
FT                   /colour="4"
FT                   /taxa="IA7122-Poultry-ST302"
FT                   /parent_base="A"
FT                   /replace="G"
FT   variation       3740879
FT                   /node="internal_19->IA7122-Poultry-ST302"
FT                   /colour="4"
FT                   /taxa="IA7122-Poultry-ST302"
FT                   /parent_base="T"
FT                   /replace="C"
FT   variation       3740909
FT                   /node="internal_19->IA7122-Poultry-ST302"
FT                   /colour="4"
FT                   /taxa="IA7122-Poultry-ST302"
FT                   /parent_base="G"
FT                   /replace="A"
FT   variation       3740933
FT                   /node="internal_19->IA7122-Poultry-ST302"
FT                   /colour="4"
FT                   /taxa="IA7122-Poultry-ST302"
FT                   /parent_base="G"
FT                   /replace="A"
FT   variation       3740980
FT                   /node="internal_19->IA7122-Poultry-ST302"
FT                   /colour="4"
FT                   /taxa="IA7122-Poultry-ST302"
FT                   /parent_base="A"
FT                   /replace="G"
FT   variation       3741053
FT                   /node="internal_19->IA7122-Poultry-ST302"
FT                   /colour="4"
FT                   /taxa="IA7122-Poultry-ST302"
FT                   /parent_base="A"
FT                   /replace="G"
FT   variation       3741056
FT                   /node="internal_19->IA7122-Poultry-ST302"
FT                   /colour="4"
FT                   /taxa="IA7122-Poultry-ST302"
FT                   /parent_base="C"
FT                   /replace="T"
FT   variation       3741059
FT                   /node="internal_19->IA7122-Poultry-ST302"
FT                   /colour="4"
FT                   /taxa="IA7122-Poultry-ST302"
FT                   /parent_base="A"
FT                   /replace="G"
FT   variation       3741167
FT                   /node="internal_19->IA7122-Poultry-ST302"
FT                   /colour="4"
FT                   /taxa="IA7122-Poultry-ST302"
FT                   /parent_base="G"
FT                   /replace="A"
FT   variation       3741170
FT                   /node="internal_19->IA7122-Poultry-ST302"
FT                   /colour="4"
FT                   /taxa="IA7122-Poultry-ST302"
FT                   /parent_base="A"
FT                   /replace="C"
FT   variation       3741176
FT                   /node="internal_19->IA7122-Poultry-ST302"
FT                   /colour="4"
FT                   /taxa="IA7122-Poultry-ST302"
FT                   /parent_base="A"
FT                   /replace="T"
FT   variation       3741191
FT                   /node="internal_19->IA7122-Poultry-ST302"
FT                   /colour="4"
FT                   /taxa="IA7122-Poultry-ST302"
FT                   /parent_base="G"
FT                   /replace="A"
FT   variation       3741194
FT                   /node="internal_19->IA7122-Poultry-ST302"
FT                   /colour="4"
FT                   /taxa="IA7122-Poultry-ST302"
FT                   /parent_base="T"
FT                   /replace="G"
FT   variation       3741197
FT                   /node="internal_19->IA7122-Poultry-ST302"
FT                   /colour="4"
FT                   /taxa="IA7122-Poultry-ST302"
FT                   /parent_base="A"
FT                   /replace="G"
FT   variation       3741213
FT                   /node="internal_19->IA7122-Poultry-ST302"
FT                   /colour="4"
FT                   /taxa="IA7122-Poultry-ST302"
FT                   /parent_base="A"
FT                   /replace="G"
FT   variation       3741245
FT                   /node="internal_19->IA7122-Poultry-ST302"
FT                   /colour="4"
FT                   /taxa="IA7122-Poultry-ST302"
FT                   /parent_base="T"
FT                   /replace="C"
FT   variation       3741287
FT                   /node="internal_19->IA7122-Poultry-ST302"
FT                   /colour="4"
FT                   /taxa="IA7122-Poultry-ST302"
FT                   /parent_base="G"
FT                   /replace="T"
FT   variation       3741305
FT                   /node="internal_19->IA7122-Poultry-ST302"
FT                   /colour="4"
FT                   /taxa="IA7122-Poultry-ST302"
FT                   /parent_base="G"
FT                   /replace="A"
FT   variation       3741308
FT                   /node="internal_19->IA7122-Poultry-ST302"
FT                   /colour="4"
FT                   /taxa="IA7122-Poultry-ST302"
FT                   /parent_base="A"
FT                   /replace="G"
FT   variation       3741320
FT                   /node="internal_19->IA7122-Poultry-ST302"
FT                   /colour="4"
FT                   /taxa="IA7122-Poultry-ST302"
FT                   /parent_base="G"
FT                   /replace="A"
FT   variation       3741527
FT                   /node="internal_19->IA7122-Poultry-ST302"
FT                   /colour="4"
FT                   /taxa="IA7122-Poultry-ST302"
FT                   /parent_base="G"
FT                   /replace="A"
FT   variation       3741659
FT                   /node="internal_19->IA7122-Poultry-ST302"
FT                   /colour="4"
FT                   /taxa="IA7122-Poultry-ST302"
FT                   /parent_base="C"
FT                   /replace="A"
FT   variation       3741712
FT                   /node="internal_19->IA7122-Poultry-ST302"
FT                   /colour="4"
FT                   /taxa="IA7122-Poultry-ST302"
FT                   /parent_base="G"
FT                   /replace="A"
FT   variation       3741731
FT                   /node="internal_19->IA7122-Poultry-ST302"
FT                   /colour="4"
FT                   /taxa="IA7122-Poultry-ST302"
FT                   /parent_base="T"
FT                   /replace="A"
FT   variation       3741937
FT                   /node="internal_19->IA7122-Poultry-ST302"
FT                   /colour="4"
FT                   /taxa="IA7122-Poultry-ST302"
FT                   /parent_base="T"
FT                   /replace="C"
FT   variation       3741952
FT                   /node="internal_19->IA7122-Poultry-ST302"
FT                   /colour="4"
FT                   /taxa="IA7122-Poultry-ST302"
FT                   /parent_base="G"
FT                   /replace="A"
FT   variation       3742122
FT                   /node="internal_19->IA7122-Poultry-ST302"
FT                   /colour="4"
FT                   /taxa="IA7122-Poultry-ST302"
FT                   /parent_base="G"
FT                   /replace="A"
FT   variation       3742134
FT                   /node="internal_19->IA7122-Poultry-ST302"
FT                   /colour="4"
FT                   /taxa="IA7122-Poultry-ST302"
FT                   /parent_base="G"
FT                   /replace="A"
FT   variation       3742152
FT                   /node="internal_19->IA7122-Poultry-ST302"
FT                   /colour="4"
FT                   /taxa="IA7122-Poultry-ST302"
FT                   /parent_base="A"
FT                   /replace="G"
FT   variation       3742161
FT                   /node="internal_19->IA7122-Poultry-ST302"
FT                   /colour="4"
FT                   /taxa="IA7122-Poultry-ST302"
FT                   /parent_base="A"
FT                   /replace="C"
FT   variation       3742167
FT                   /node="internal_19->IA7122-Poultry-ST302"
FT                   /colour="4"
FT                   /taxa="IA7122-Poultry-ST302"
FT                   /parent_base="A"
FT                   /replace="C"
FT   variation       3742221
FT                   /node="internal_19->IA7122-Poultry-ST302"
FT                   /colour="4"
FT                   /taxa="IA7122-Poultry-ST302"
FT                   /parent_base="G"
FT                   /replace="A"
FT   variation       3742236
FT                   /node="internal_19->IA7122-Poultry-ST302"
FT                   /colour="4"
FT                   /taxa="IA7122-Poultry-ST302"
FT                   /parent_base="C"
FT                   /replace="T"
FT   variation       3742239
FT                   /node="internal_19->IA7122-Poultry-ST302"
FT                   /colour="4"
FT                   /taxa="IA7122-Poultry-ST302"
FT                   /parent_base="G"
FT                   /replace="A"
FT   variation       3742284
FT                   /node="internal_19->IA7122-Poultry-ST302"
FT                   /colour="4"
FT                   /taxa="IA7122-Poultry-ST302"
FT                   /parent_base="A"
FT                   /replace="G"
FT   variation       3742293
FT                   /node="internal_19->IA7122-Poultry-ST302"
FT                   /colour="4"
FT                   /taxa="IA7122-Poultry-ST302"
FT                   /parent_base="A"
FT                   /replace="G"
FT   variation       3742332
FT                   /node="internal_19->IA7122-Poultry-ST302"
FT                   /colour="4"
FT                   /taxa="IA7122-Poultry-ST302"
FT                   /parent_base="A"
FT                   /replace="G"
FT   variation       3742356
FT                   /node="internal_19->IA7122-Poultry-ST302"
FT                   /colour="4"
FT                   /taxa="IA7122-Poultry-ST302"
FT                   /parent_base="G"
FT                   /replace="A"
FT   variation       3742392
FT                   /node="internal_19->IA7122-Poultry-ST302"
FT                   /colour="4"
FT                   /taxa="IA7122-Poultry-ST302"
FT                   /parent_base="A"
FT                   /replace="G"
FT   variation       3742395
FT                   /node="internal_19->IA7122-Poultry-ST302"
FT                   /colour="4"
FT                   /taxa="IA7122-Poultry-ST302"
FT                   /parent_base="A"
FT                   /replace="G"
FT   variation       3742398
FT                   /node="internal_19->IA7122-Poultry-ST302"
FT                   /colour="4"
FT                   /taxa="IA7122-Poultry-ST302"
FT                   /parent_base="C"
FT                   /replace="T"
FT   variation       3742416
FT                   /node="internal_19->IA7122-Poultry-ST302"
FT                   /colour="4"
FT                   /taxa="IA7122-Poultry-ST302"
FT                   /parent_base="G"
FT                   /replace="A"
FT   variation       3742419
FT                   /node="internal_19->IA7122-Poultry-ST302"
FT                   /colour="4"
FT                   /taxa="IA7122-Poultry-ST302"
FT                   /parent_base="G"
FT                   /replace="A"
FT   variation       3742446
FT                   /node="internal_19->IA7122-Poultry-ST302"
FT                   /colour="4"
FT                   /taxa="IA7122-Poultry-ST302"
FT                   /parent_base="A"
FT                   /replace="C"
FT   variation       3742452
FT                   /node="internal_19->IA7122-Poultry-ST302"
FT                   /colour="4"
FT                   /taxa="IA7122-Poultry-ST302"
FT                   /parent_base="A"
FT                   /replace="G"
FT   variation       3742485
FT                   /node="internal_19->IA7122-Poultry-ST302"
FT                   /colour="4"
FT                   /taxa="IA7122-Poultry-ST302"
FT                   /parent_base="A"
FT                   /replace="T"
FT   variation       3742494
FT                   /node="internal_19->IA7122-Poultry-ST302"
FT                   /colour="4"
FT                   /taxa="IA7122-Poultry-ST302"
FT                   /parent_base="C"
FT                   /replace="T"
FT   variation       3742521
FT                   /node="internal_19->IA7122-Poultry-ST302"
FT                   /colour="4"
FT                   /taxa="IA7122-Poultry-ST302"
FT                   /parent_base="C"
FT                   /replace="T"
FT   variation       3742530
FT                   /node="internal_19->IA7122-Poultry-ST302"
FT                   /colour="4"
FT                   /taxa="IA7122-Poultry-ST302"
FT                   /parent_base="G"
FT                   /replace="A"
FT   variation       3742542
FT                   /node="internal_19->IA7122-Poultry-ST302"
FT                   /colour="4"
FT                   /taxa="IA7122-Poultry-ST302"
FT                   /parent_base="T"
FT                   /replace="C"
FT   variation       3742611
FT                   /node="internal_19->IA7122-Poultry-ST302"
FT                   /colour="4"
FT                   /taxa="IA7122-Poultry-ST302"
FT                   /parent_base="A"
FT                   /replace="G"
FT   variation       3742620
FT                   /node="internal_19->IA7122-Poultry-ST302"
FT                   /colour="4"
FT                   /taxa="IA7122-Poultry-ST302"
FT                   /parent_base="G"
FT                   /replace="A"
FT   variation       3742629
FT                   /node="internal_19->IA7122-Poultry-ST302"
FT                   /colour="4"
FT                   /taxa="IA7122-Poultry-ST302"
FT                   /parent_base="G"
FT                   /replace="A"
FT   variation       3742632
FT                   /node="internal_19->IA7122-Poultry-ST302"
FT                   /colour="4"
FT                   /taxa="IA7122-Poultry-ST302"
FT                   /parent_base="C"
FT                   /replace="G"
FT   variation       3742641
FT                   /node="internal_19->IA7122-Poultry-ST302"
FT                   /colour="4"
FT                   /taxa="IA7122-Poultry-ST302"
FT                   /parent_base="A"
FT                   /replace="G"
FT   variation       3742644
FT                   /node="internal_19->IA7122-Poultry-ST302"
FT                   /colour="4"
FT                   /taxa="IA7122-Poultry-ST302"
FT                   /parent_base="T"
FT                   /replace="A"
FT   variation       3742647
FT                   /node="internal_19->IA7122-Poultry-ST302"
FT                   /colour="4"
FT                   /taxa="IA7122-Poultry-ST302"
FT                   /parent_base="T"
FT                   /replace="C"
FT   variation       3742659
FT                   /node="internal_19->IA7122-Poultry-ST302"
FT                   /colour="4"
FT                   /taxa="IA7122-Poultry-ST302"
FT                   /parent_base="A"
FT                   /replace="G"
FT   variation       3742674
FT                   /node="internal_19->IA7122-Poultry-ST302"
FT                   /colour="4"
FT                   /taxa="IA7122-Poultry-ST302"
FT                   /parent_base="G"
FT                   /replace="A"
FT   variation       3742713
FT                   /node="internal_19->IA7122-Poultry-ST302"
FT                   /colour="4"
FT                   /taxa="IA7122-Poultry-ST302"
FT                   /parent_base="A"
FT                   /replace="G"
FT   variation       3742764
FT                   /node="internal_19->IA7122-Poultry-ST302"
FT                   /colour="4"
FT                   /taxa="IA7122-Poultry-ST302"
FT                   /parent_base="C"
FT                   /replace="G"
FT   variation       3742775
FT                   /node="internal_19->IA7122-Poultry-ST302"
FT                   /colour="4"
FT                   /taxa="IA7122-Poultry-ST302"
FT                   /parent_base="G"
FT                   /replace="A"
FT   variation       3742787
FT                   /node="internal_19->IA7122-Poultry-ST302"
FT                   /colour="4"
FT                   /taxa="IA7122-Poultry-ST302"
FT                   /parent_base="A"
FT                   /replace="T"
FT   variation       3742788
FT                   /node="internal_19->IA7122-Poultry-ST302"
FT                   /colour="4"
FT                   /taxa="IA7122-Poultry-ST302"
FT                   /parent_base="A"
FT                   /replace="G"
FT   variation       3742830
FT                   /node="internal_19->IA7122-Poultry-ST302"
FT                   /colour="4"
FT                   /taxa="IA7122-Poultry-ST302"
FT                   /parent_base="T"
FT                   /replace="C"
FT   variation       3742832
FT                   /node="internal_19->IA7122-Poultry-ST302"
FT                   /colour="4"
FT                   /taxa="IA7122-Poultry-ST302"
FT                   /parent_base="A"
FT                   /replace="G"
FT   variation       3742842
FT                   /node="internal_19->IA7122-Poultry-ST302"
FT                   /colour="4"
FT                   /taxa="IA7122-Poultry-ST302"
FT                   /parent_base="A"
FT                   /replace="G"
FT   variation       3742869
FT                   /node="internal_19->IA7122-Poultry-ST302"
FT                   /colour="4"
FT                   /taxa="IA7122-Poultry-ST302"
FT                   /parent_base="T"
FT                   /replace="C"
FT   variation       3742884
FT                   /node="internal_19->IA7122-Poultry-ST302"
FT                   /colour="4"
FT                   /taxa="IA7122-Poultry-ST302"
FT                   /parent_base="C"
FT                   /replace="T"
FT   variation       3742905
FT                   /node="internal_19->IA7122-Poultry-ST302"
FT                   /colour="4"
FT                   /taxa="IA7122-Poultry-ST302"
FT                   /parent_base="T"
FT                   /replace="G"
FT   variation       3742914
FT                   /node="internal_19->IA7122-Poultry-ST302"
FT                   /colour="4"
FT                   /taxa="IA7122-Poultry-ST302"
FT                   /parent_base="C"
FT                   /replace="T"
FT   variation       3742917
FT                   /node="internal_19->IA7122-Poultry-ST302"
FT                   /colour="4"
FT                   /taxa="IA7122-Poultry-ST302"
FT                   /parent_base="T"
FT                   /replace="C"
FT   variation       3742920
FT                   /node="internal_19->IA7122-Poultry-ST302"
FT                   /colour="4"
FT                   /taxa="IA7122-Poultry-ST302"
FT                   /parent_base="G"
FT                   /replace="A"
FT   variation       3742923
FT                   /node="internal_19->IA7122-Poultry-ST302"
FT                   /colour="4"
FT                   /taxa="IA7122-Poultry-ST302"
FT                   /parent_base="A"
FT                   /replace="G"
FT   variation       3742932
FT                   /node="internal_19->IA7122-Poultry-ST302"
FT                   /colour="4"
FT                   /taxa="IA7122-Poultry-ST302"
FT                   /parent_base="A"
FT                   /replace="C"
FT   variation       3742935
FT                   /node="internal_19->IA7122-Poultry-ST302"
FT                   /colour="4"
FT                   /taxa="IA7122-Poultry-ST302"
FT                   /parent_base="G"
FT                   /replace="T"
FT   variation       3742959
FT                   /node="internal_19->IA7122-Poultry-ST302"
FT                   /colour="4"
FT                   /taxa="IA7122-Poultry-ST302"
FT                   /parent_base="A"
FT                   /replace="C"
FT   variation       3742986
FT                   /node="internal_19->IA7122-Poultry-ST302"
FT                   /colour="4"
FT                   /taxa="IA7122-Poultry-ST302"
FT                   /parent_base="G"
FT                   /replace="T"
FT   variation       3743022
FT                   /node="internal_19->IA7122-Poultry-ST302"
FT                   /colour="4"
FT                   /taxa="IA7122-Poultry-ST302"
FT                   /parent_base="C"
FT                   /replace="T"
FT   variation       3743037
FT                   /node="internal_19->IA7122-Poultry-ST302"
FT                   /colour="4"
FT                   /taxa="IA7122-Poultry-ST302"
FT                   /parent_base="A"
FT                   /replace="G"
FT   variation       3743049
FT                   /node="internal_19->IA7122-Poultry-ST302"
FT                   /colour="4"
FT                   /taxa="IA7122-Poultry-ST302"
FT                   /parent_base="G"
FT                   /replace="A"
FT   variation       3743052
FT                   /node="internal_19->IA7122-Poultry-ST302"
FT                   /colour="4"
FT                   /taxa="IA7122-Poultry-ST302"
FT                   /parent_base="A"
FT                   /replace="G"
FT   variation       3743061
FT                   /node="internal_19->IA7122-Poultry-ST302"
FT                   /colour="4"
FT                   /taxa="IA7122-Poultry-ST302"
FT                   /parent_base="A"
FT                   /replace="G"
FT   variation       3743181
FT                   /node="internal_19->IA7122-Poultry-ST302"
FT                   /colour="4"
FT                   /taxa="IA7122-Poultry-ST302"
FT                   /parent_base="C"
FT                   /replace="G"
FT   variation       3743226
FT                   /node="internal_19->IA7122-Poultry-ST302"
FT                   /colour="4"
FT                   /taxa="IA7122-Poultry-ST302"
FT                   /parent_base="A"
FT                   /replace="C"
FT   variation       3743238
FT                   /node="internal_19->IA7122-Poultry-ST302"
FT                   /colour="4"
FT                   /taxa="IA7122-Poultry-ST302"
FT                   /parent_base="A"
FT                   /replace="G"
FT   variation       3743373
FT                   /node="internal_19->IA7122-Poultry-ST302"
FT                   /colour="4"
FT                   /taxa="IA7122-Poultry-ST302"
FT                   /parent_base="C"
FT                   /replace="T"
FT   variation       3743394
FT                   /node="internal_19->IA7122-Poultry-ST302"
FT                   /colour="4"
FT                   /taxa="IA7122-Poultry-ST302"
FT                   /parent_base="G"
FT                   /replace="T"
FT   variation       3743400
FT                   /node="internal_19->IA7122-Poultry-ST302"
FT                   /colour="4"
FT                   /taxa="IA7122-Poultry-ST302"
FT                   /parent_base="G"
FT                   /replace="A"
FT   variation       3762952
FT                   /node="internal_19->IA7122-Poultry-ST302"
FT                   /colour="4"
FT                   /taxa="IA7122-Poultry-ST302"
FT                   /parent_base="A"
FT                   /replace="C"
FT   variation       3762967
FT                   /node="internal_19->IA7122-Poultry-ST302"
FT                   /colour="4"
FT                   /taxa="IA7122-Poultry-ST302"
FT                   /parent_base="G"
FT                   /replace="A"
FT   variation       3762970
FT                   /node="internal_19->IA7122-Poultry-ST302"
FT                   /colour="4"
FT                   /taxa="IA7122-Poultry-ST302"
FT                   /parent_base="T"
FT                   /replace="A"
FT   variation       3763000
FT                   /node="internal_19->IA7122-Poultry-ST302"
FT                   /colour="4"
FT                   /taxa="IA7122-Poultry-ST302"
FT                   /parent_base="T"
FT                   /replace="A"
FT   variation       3763015
FT                   /node="internal_19->IA7122-Poultry-ST302"
FT                   /colour="4"
FT                   /taxa="IA7122-Poultry-ST302"
FT                   /parent_base="G"
FT                   /replace="T"
FT   variation       3763024
FT                   /node="internal_19->IA7122-Poultry-ST302"
FT                   /colour="4"
FT                   /taxa="IA7122-Poultry-ST302"
FT                   /parent_base="G"
FT                   /replace="A"
FT   variation       3763041
FT                   /node="internal_19->IA7122-Poultry-ST302"
FT                   /colour="4"
FT                   /taxa="IA7122-Poultry-ST302"
FT                   /parent_base="G"
FT                   /replace="T"
FT   variation       3763057
FT                   /node="internal_19->IA7122-Poultry-ST302"
FT                   /colour="4"
FT                   /taxa="IA7122-Poultry-ST302"
FT                   /parent_base="A"
FT                   /replace="T"
FT   variation       3763063
FT                   /node="internal_19->IA7122-Poultry-ST302"
FT                   /colour="4"
FT                   /taxa="IA7122-Poultry-ST302"
FT                   /parent_base="C"
FT                   /replace="T"
FT   variation       3763066
FT                   /node="internal_19->IA7122-Poultry-ST302"
FT                   /colour="4"
FT                   /taxa="IA7122-Poultry-ST302"
FT                   /parent_base="A"
FT                   /replace="G"
FT   variation       3763087
FT                   /node="internal_19->IA7122-Poultry-ST302"
FT                   /colour="4"
FT                   /taxa="IA7122-Poultry-ST302"
FT                   /parent_base="T"
FT                   /replace="C"
FT   variation       3763099
FT                   /node="internal_19->IA7122-Poultry-ST302"
FT                   /colour="4"
FT                   /taxa="IA7122-Poultry-ST302"
FT                   /parent_base="T"
FT                   /replace="A"
FT   variation       3763117
FT                   /node="internal_19->IA7122-Poultry-ST302"
FT                   /colour="4"
FT                   /taxa="IA7122-Poultry-ST302"
FT                   /parent_base="G"
FT                   /replace="T"
FT   variation       3763195
FT                   /node="internal_19->IA7122-Poultry-ST302"
FT                   /colour="4"
FT                   /taxa="IA7122-Poultry-ST302"
FT                   /parent_base="G"
FT                   /replace="A"
FT   variation       3763198
FT                   /node="internal_19->IA7122-Poultry-ST302"
FT                   /colour="4"
FT                   /taxa="IA7122-Poultry-ST302"
FT                   /parent_base="G"
FT                   /replace="A"
FT   variation       3763204
FT                   /node="internal_19->IA7122-Poultry-ST302"
FT                   /colour="4"
FT                   /taxa="IA7122-Poultry-ST302"
FT                   /parent_base="A"
FT                   /replace="G"
FT   variation       3763213
FT                   /node="internal_19->IA7122-Poultry-ST302"
FT                   /colour="4"
FT                   /taxa="IA7122-Poultry-ST302"
FT                   /parent_base="A"
FT                   /replace="G"
FT   variation       3763219
FT                   /node="internal_19->IA7122-Poultry-ST302"
FT                   /colour="4"
FT                   /taxa="IA7122-Poultry-ST302"
FT                   /parent_base="A"
FT                   /replace="G"
FT   variation       3763222
FT                   /node="internal_19->IA7122-Poultry-ST302"
FT                   /colour="4"
FT                   /taxa="IA7122-Poultry-ST302"
FT                   /parent_base="G"
FT                   /replace="A"
FT   variation       3763231
FT                   /node="internal_19->IA7122-Poultry-ST302"
FT                   /colour="4"
FT                   /taxa="IA7122-Poultry-ST302"
FT                   /parent_base="C"
FT                   /replace="T"
FT   variation       3763243
FT                   /node="internal_19->IA7122-Poultry-ST302"
FT                   /colour="4"
FT                   /taxa="IA7122-Poultry-ST302"
FT                   /parent_base="G"
FT                   /replace="A"
FT   variation       3763249
FT                   /node="internal_19->IA7122-Poultry-ST302"
FT                   /colour="4"
FT                   /taxa="IA7122-Poultry-ST302"
FT                   /parent_base="C"
FT                   /replace="G"
FT   variation       3763264
FT                   /node="internal_19->IA7122-Poultry-ST302"
FT                   /colour="4"
FT                   /taxa="IA7122-Poultry-ST302"
FT                   /parent_base="G"
FT                   /replace="A"
FT   variation       3763267
FT                   /node="internal_19->IA7122-Poultry-ST302"
FT                   /colour="4"
FT                   /taxa="IA7122-Poultry-ST302"
FT                   /parent_base="A"
FT                   /replace="G"
FT   variation       3763294
FT                   /node="internal_19->IA7122-Poultry-ST302"
FT                   /colour="4"
FT                   /taxa="IA7122-Poultry-ST302"
FT                   /parent_base="A"
FT                   /replace="G"
FT   variation       3763300
FT                   /node="internal_19->IA7122-Poultry-ST302"
FT                   /colour="4"
FT                   /taxa="IA7122-Poultry-ST302"
FT                   /parent_base="G"
FT                   /replace="T"
FT   variation       3763309
FT                   /node="internal_19->IA7122-Poultry-ST302"
FT                   /colour="4"
FT                   /taxa="IA7122-Poultry-ST302"
FT                   /parent_base="A"
FT                   /replace="T"
FT   variation       3763315
FT                   /node="internal_19->IA7122-Poultry-ST302"
FT                   /colour="4"
FT                   /taxa="IA7122-Poultry-ST302"
FT                   /parent_base="A"
FT                   /replace="G"
FT   variation       3763318
FT                   /node="internal_19->IA7122-Poultry-ST302"
FT                   /colour="4"
FT                   /taxa="IA7122-Poultry-ST302"
FT                   /parent_base="T"
FT                   /replace="C"
FT   variation       3763330
FT                   /node="internal_19->IA7122-Poultry-ST302"
FT                   /colour="4"
FT                   /taxa="IA7122-Poultry-ST302"
FT                   /parent_base="A"
FT                   /replace="T"
FT   variation       3763342
FT                   /node="internal_19->IA7122-Poultry-ST302"
FT                   /colour="4"
FT                   /taxa="IA7122-Poultry-ST302"
FT                   /parent_base="A"
FT                   /replace="G"
FT   variation       3763363
FT                   /node="internal_19->IA7122-Poultry-ST302"
FT                   /colour="4"
FT                   /taxa="IA7122-Poultry-ST302"
FT                   /parent_base="G"
FT                   /replace="A"
FT   variation       3763402
FT                   /node="internal_19->IA7122-Poultry-ST302"
FT                   /colour="4"
FT                   /taxa="IA7122-Poultry-ST302"
FT                   /parent_base="A"
FT                   /replace="G"
FT   variation       3763417
FT                   /node="internal_19->IA7122-Poultry-ST302"
FT                   /colour="4"
FT                   /taxa="IA7122-Poultry-ST302"
FT                   /parent_base="A"
FT                   /replace="G"
FT   variation       3763429
FT                   /node="internal_19->IA7122-Poultry-ST302"
FT                   /colour="4"
FT                   /taxa="IA7122-Poultry-ST302"
FT                   /parent_base="T"
FT                   /replace="C"
FT   variation       3763444
FT                   /node="internal_19->IA7122-Poultry-ST302"
FT                   /colour="4"
FT                   /taxa="IA7122-Poultry-ST302"
FT                   /parent_base="C"
FT                   /replace="T"
FT   variation       3763492
FT                   /node="internal_19->IA7122-Poultry-ST302"
FT                   /colour="4"
FT                   /taxa="IA7122-Poultry-ST302"
FT                   /parent_base="C"
FT                   /replace="T"
FT   variation       3763531
FT                   /node="internal_19->IA7122-Poultry-ST302"
FT                   /colour="4"
FT                   /taxa="IA7122-Poultry-ST302"
FT                   /parent_base="T"
FT                   /replace="C"
FT   variation       3763540
FT                   /node="internal_19->IA7122-Poultry-ST302"
FT                   /colour="4"
FT                   /taxa="IA7122-Poultry-ST302"
FT                   /parent_base="T"
FT                   /replace="C"
FT   variation       3763564
FT                   /node="internal_19->IA7122-Poultry-ST302"
FT                   /colour="4"
FT                   /taxa="IA7122-Poultry-ST302"
FT                   /parent_base="A"
FT                   /replace="T"
FT   variation       3763866
FT                   /node="internal_19->IA7122-Poultry-ST302"
FT                   /colour="4"
FT                   /taxa="IA7122-Poultry-ST302"
FT                   /parent_base="T"
FT                   /replace="G"
FT   variation       3763954
FT                   /node="internal_19->IA7122-Poultry-ST302"
FT                   /colour="4"
FT                   /taxa="IA7122-Poultry-ST302"
FT                   /parent_base="T"
FT                   /replace="C"
FT   variation       3764038
FT                   /node="internal_19->IA7122-Poultry-ST302"
FT                   /colour="4"
FT                   /taxa="IA7122-Poultry-ST302"
FT                   /parent_base="A"
FT                   /replace="T"
FT   variation       3764143
FT                   /node="internal_19->IA7122-Poultry-ST302"
FT                   /colour="4"
FT                   /taxa="IA7122-Poultry-ST302"
FT                   /parent_base="T"
FT                   /replace="G"
FT   variation       3764179
FT                   /node="internal_19->IA7122-Poultry-ST302"
FT                   /colour="4"
FT                   /taxa="IA7122-Poultry-ST302"
FT                   /parent_base="A"
FT                   /replace="T"
FT   variation       3764209
FT                   /node="internal_19->IA7122-Poultry-ST302"
FT                   /colour="4"
FT                   /taxa="IA7122-Poultry-ST302"
FT                   /parent_base="A"
FT                   /replace="T"
FT   variation       3764211
FT                   /node="internal_19->IA7122-Poultry-ST302"
FT                   /colour="4"
FT                   /taxa="IA7122-Poultry-ST302"
FT                   /parent_base="G"
FT                   /replace="A"
FT   variation       3764221
FT                   /node="internal_19->IA7122-Poultry-ST302"
FT                   /colour="4"
FT                   /taxa="IA7122-Poultry-ST302"
FT                   /parent_base="G"
FT                   /replace="C"
FT   variation       3764232
FT                   /node="internal_19->IA7122-Poultry-ST302"
FT                   /colour="4"
FT                   /taxa="IA7122-Poultry-ST302"
FT                   /parent_base="T"
FT                   /replace="C"
FT   variation       3764275
FT                   /node="internal_19->IA7122-Poultry-ST302"
FT                   /colour="4"
FT                   /taxa="IA7122-Poultry-ST302"
FT                   /parent_base="G"
FT                   /replace="A"
FT   variation       3764323
FT                   /node="internal_19->IA7122-Poultry-ST302"
FT                   /colour="4"
FT                   /taxa="IA7122-Poultry-ST302"
FT                   /parent_base="T"
FT                   /replace="C"
FT   variation       3764389
FT                   /node="internal_19->IA7122-Poultry-ST302"
FT                   /colour="4"
FT                   /taxa="IA7122-Poultry-ST302"
FT                   /parent_base="T"
FT                   /replace="G"
FT   variation       3764464
FT                   /node="internal_19->IA7122-Poultry-ST302"
FT                   /colour="4"
FT                   /taxa="IA7122-Poultry-ST302"
FT                   /parent_base="C"
FT                   /replace="G"
FT   variation       3764476
FT                   /node="internal_19->IA7122-Poultry-ST302"
FT                   /colour="4"
FT                   /taxa="IA7122-Poultry-ST302"
FT                   /parent_base="G"
FT                   /replace="A"
FT   variation       3764500
FT                   /node="internal_19->IA7122-Poultry-ST302"
FT                   /colour="4"
FT                   /taxa="IA7122-Poultry-ST302"
FT                   /parent_base="C"
FT                   /replace="T"
FT   variation       3764511
FT                   /node="internal_19->IA7122-Poultry-ST302"
FT                   /colour="4"
FT                   /taxa="IA7122-Poultry-ST302"
FT                   /parent_base="A"
FT                   /replace="G"
FT   variation       3764632
FT                   /node="internal_19->IA7122-Poultry-ST302"
FT                   /colour="4"
FT                   /taxa="IA7122-Poultry-ST302"
FT                   /parent_base="A"
FT                   /replace="G"
FT   variation       3764638
FT                   /node="internal_19->IA7122-Poultry-ST302"
FT                   /colour="4"
FT                   /taxa="IA7122-Poultry-ST302"
FT                   /parent_base="A"
FT                   /replace="G"
FT   variation       3764641
FT                   /node="internal_19->IA7122-Poultry-ST302"
FT                   /colour="4"
FT                   /taxa="IA7122-Poultry-ST302"
FT                   /parent_base="A"
FT                   /replace="G"
FT   variation       3764647
FT                   /node="internal_19->IA7122-Poultry-ST302"
FT                   /colour="4"
FT                   /taxa="IA7122-Poultry-ST302"
FT                   /parent_base="C"
FT                   /replace="A"
FT   variation       3764652
FT                   /node="internal_19->IA7122-Poultry-ST302"
FT                   /colour="4"
FT                   /taxa="IA7122-Poultry-ST302"
FT                   /parent_base="C"
FT                   /replace="A"
FT   variation       3764656
FT                   /node="internal_19->IA7122-Poultry-ST302"
FT                   /colour="4"
FT                   /taxa="IA7122-Poultry-ST302"
FT                   /parent_base="G"
FT                   /replace="A"
FT   variation       3764665
FT                   /node="internal_19->IA7122-Poultry-ST302"
FT                   /colour="4"
FT                   /taxa="IA7122-Poultry-ST302"
FT                   /parent_base="A"
FT                   /replace="G"
FT   variation       3764684
FT                   /node="internal_19->IA7122-Poultry-ST302"
FT                   /colour="4"
FT                   /taxa="IA7122-Poultry-ST302"
FT                   /parent_base="C"
FT                   /replace="T"
FT   variation       3764689
FT                   /node="internal_19->IA7122-Poultry-ST302"
FT                   /colour="4"
FT                   /taxa="IA7122-Poultry-ST302"
FT                   /parent_base="G"
FT                   /replace="A"
FT   variation       3764764
FT                   /node="internal_19->IA7122-Poultry-ST302"
FT                   /colour="4"
FT                   /taxa="IA7122-Poultry-ST302"
FT                   /parent_base="G"
FT                   /replace="A"
FT   variation       3764770
FT                   /node="internal_19->IA7122-Poultry-ST302"
FT                   /colour="4"
FT                   /taxa="IA7122-Poultry-ST302"
FT                   /parent_base="G"
FT                   /replace="C"
FT   variation       3764794
FT                   /node="internal_19->IA7122-Poultry-ST302"
FT                   /colour="4"
FT                   /taxa="IA7122-Poultry-ST302"
FT                   /parent_base="G"
FT                   /replace="A"
FT   variation       3764839
FT                   /node="internal_19->IA7122-Poultry-ST302"
FT                   /colour="4"
FT                   /taxa="IA7122-Poultry-ST302"
FT                   /parent_base="C"
FT                   /replace="T"
FT   variation       3764842
FT                   /node="internal_19->IA7122-Poultry-ST302"
FT                   /colour="4"
FT                   /taxa="IA7122-Poultry-ST302"
FT                   /parent_base="A"
FT                   /replace="G"
FT   variation       3764845
FT                   /node="internal_19->IA7122-Poultry-ST302"
FT                   /colour="4"
FT                   /taxa="IA7122-Poultry-ST302"
FT                   /parent_base="A"
FT                   /replace="G"
FT   variation       3766011
FT                   /node="internal_19->IA7122-Poultry-ST302"
FT                   /colour="4"
FT                   /taxa="IA7122-Poultry-ST302"
FT                   /parent_base="A"
FT                   /replace="C"
FT   variation       3785445
FT                   /node="internal_19->IA7122-Poultry-ST302"
FT                   /colour="4"
FT                   /taxa="IA7122-Poultry-ST302"
FT                   /parent_base="G"
FT                   /replace="T"
FT   variation       3785909
FT                   /node="internal_19->IA7122-Poultry-ST302"
FT                   /colour="4"
FT                   /taxa="IA7122-Poultry-ST302"
FT                   /parent_base="C"
FT                   /replace="T"
FT   variation       3841154
FT                   /node="internal_19->IA7122-Poultry-ST302"
FT                   /colour="4"
FT                   /taxa="IA7122-Poultry-ST302"
FT                   /parent_base="G"
FT                   /replace="T"
FT   variation       3851565
FT                   /node="internal_19->IA7122-Poultry-ST302"
FT                   /colour="4"
FT                   /taxa="IA7122-Poultry-ST302"
FT                   /parent_base="T"
FT                   /replace="C"
FT   variation       3851567
FT                   /node="internal_19->IA7122-Poultry-ST302"
FT                   /colour="4"
FT                   /taxa="IA7122-Poultry-ST302"
FT                   /parent_base="A"
FT                   /replace="G"
FT   variation       3851569
FT                   /node="internal_19->IA7122-Poultry-ST302"
FT                   /colour="4"
FT                   /taxa="IA7122-Poultry-ST302"
FT                   /parent_base="C"
FT                   /replace="T"
FT   variation       3851575
FT                   /node="internal_19->IA7122-Poultry-ST302"
FT                   /colour="4"
FT                   /taxa="IA7122-Poultry-ST302"
FT                   /parent_base="A"
FT                   /replace="T"
FT   variation       3851580
FT                   /node="internal_19->IA7122-Poultry-ST302"
FT                   /colour="4"
FT                   /taxa="IA7122-Poultry-ST302"
FT                   /parent_base="A"
FT                   /replace="T"
FT   variation       3851581
FT                   /node="internal_19->IA7122-Poultry-ST302"
FT                   /colour="4"
FT                   /taxa="IA7122-Poultry-ST302"
FT                   /parent_base="C"
FT                   /replace="T"
FT   variation       3851695
FT                   /node="internal_19->IA7122-Poultry-ST302"
FT                   /colour="4"
FT                   /taxa="IA7122-Poultry-ST302"
FT                   /parent_base="T"
FT                   /replace="C"
FT   variation       3851703
FT                   /node="internal_19->IA7122-Poultry-ST302"
FT                   /colour="4"
FT                   /taxa="IA7122-Poultry-ST302"
FT                   /parent_base="A"
FT                   /replace="G"
FT   variation       3851706
FT                   /node="internal_19->IA7122-Poultry-ST302"
FT                   /colour="4"
FT                   /taxa="IA7122-Poultry-ST302"
FT                   /parent_base="A"
FT                   /replace="T"
FT   variation       3851770
FT                   /node="internal_19->IA7122-Poultry-ST302"
FT                   /colour="4"
FT                   /taxa="IA7122-Poultry-ST302"
FT                   /parent_base="T"
FT                   /replace="C"
FT   variation       3851774
FT                   /node="internal_19->IA7122-Poultry-ST302"
FT                   /colour="4"
FT                   /taxa="IA7122-Poultry-ST302"
FT                   /parent_base="C"
FT                   /replace="G"
FT   variation       3851884
FT                   /node="internal_19->IA7122-Poultry-ST302"
FT                   /colour="4"
FT                   /taxa="IA7122-Poultry-ST302"
FT                   /parent_base="C"
FT                   /replace="T"
FT   variation       3851887
FT                   /node="internal_19->IA7122-Poultry-ST302"
FT                   /colour="4"
FT                   /taxa="IA7122-Poultry-ST302"
FT                   /parent_base="C"
FT                   /replace="T"
FT   variation       3851913
FT                   /node="internal_19->IA7122-Poultry-ST302"
FT                   /colour="4"
FT                   /taxa="IA7122-Poultry-ST302"
FT                   /parent_base="G"
FT                   /replace="A"
FT   variation       3852607
FT                   /node="internal_19->IA7122-Poultry-ST302"
FT                   /colour="4"
FT                   /taxa="IA7122-Poultry-ST302"
FT                   /parent_base="C"
FT                   /replace="T"
FT   variation       3852611
FT                   /node="internal_19->IA7122-Poultry-ST302"
FT                   /colour="4"
FT                   /taxa="IA7122-Poultry-ST302"
FT                   /parent_base="T"
FT                   /replace="C"
FT   variation       3852799
FT                   /node="internal_19->IA7122-Poultry-ST302"
FT                   /colour="4"
FT                   /taxa="IA7122-Poultry-ST302"
FT                   /parent_base="A"
FT                   /replace="G"
FT   variation       3852974
FT                   /node="internal_19->IA7122-Poultry-ST302"
FT                   /colour="4"
FT                   /taxa="IA7122-Poultry-ST302"
FT                   /parent_base="A"
FT                   /replace="G"
FT   variation       3852999
FT                   /node="internal_19->IA7122-Poultry-ST302"
FT                   /colour="4"
FT                   /taxa="IA7122-Poultry-ST302"
FT                   /parent_base="T"
FT                   /replace="C"
FT   variation       3853929
FT                   /node="internal_19->IA7122-Poultry-ST302"
FT                   /colour="4"
FT                   /taxa="IA7122-Poultry-ST302"
FT                   /parent_base="A"
FT                   /replace="C"
FT   variation       3854000
FT                   /node="internal_19->IA7122-Poultry-ST302"
FT                   /colour="4"
FT                   /taxa="IA7122-Poultry-ST302"
FT                   /parent_base="A"
FT                   /replace="G"
FT   variation       3854060
FT                   /node="internal_19->IA7122-Poultry-ST302"
FT                   /colour="4"
FT                   /taxa="IA7122-Poultry-ST302"
FT                   /parent_base="G"
FT                   /replace="A"
FT   variation       3854630
FT                   /node="internal_19->IA7122-Poultry-ST302"
FT                   /colour="4"
FT                   /taxa="IA7122-Poultry-ST302"
FT                   /parent_base="A"
FT                   /replace="G"
FT   variation       3854838
FT                   /node="internal_19->IA7122-Poultry-ST302"
FT                   /colour="4"
FT                   /taxa="IA7122-Poultry-ST302"
FT                   /parent_base="C"
FT                   /replace="T"
FT   variation       3855001
FT                   /node="internal_19->IA7122-Poultry-ST302"
FT                   /colour="4"
FT                   /taxa="IA7122-Poultry-ST302"
FT                   /parent_base="A"
FT                   /replace="G"
FT   variation       3855008
FT                   /node="internal_19->IA7122-Poultry-ST302"
FT                   /colour="4"
FT                   /taxa="IA7122-Poultry-ST302"
FT                   /parent_base="A"
FT                   /replace="T"
FT   variation       3855032
FT                   /node="internal_19->IA7122-Poultry-ST302"
FT                   /colour="4"
FT                   /taxa="IA7122-Poultry-ST302"
FT                   /parent_base="C"
FT                   /replace="T"
FT   variation       3855138
FT                   /node="internal_19->IA7122-Poultry-ST302"
FT                   /colour="4"
FT                   /taxa="IA7122-Poultry-ST302"
FT                   /parent_base="A"
FT                   /replace="G"
FT   variation       3855170
FT                   /node="internal_19->IA7122-Poultry-ST302"
FT                   /colour="4"
FT                   /taxa="IA7122-Poultry-ST302"
FT                   /parent_base="C"
FT                   /replace="T"
FT   variation       3855627
FT                   /node="internal_19->IA7122-Poultry-ST302"
FT                   /colour="4"
FT                   /taxa="IA7122-Poultry-ST302"
FT                   /parent_base="T"
FT                   /replace="A"
FT   variation       3856458
FT                   /node="internal_19->IA7122-Poultry-ST302"
FT                   /colour="4"
FT                   /taxa="IA7122-Poultry-ST302"
FT                   /parent_base="A"
FT                   /replace="G"
FT   variation       3856485
FT                   /node="internal_19->IA7122-Poultry-ST302"
FT                   /colour="4"
FT                   /taxa="IA7122-Poultry-ST302"
FT                   /parent_base="G"
FT                   /replace="A"
FT   variation       3856521
FT                   /node="internal_19->IA7122-Poultry-ST302"
FT                   /colour="4"
FT                   /taxa="IA7122-Poultry-ST302"
FT                   /parent_base="T"
FT                   /replace="C"
FT   variation       3856590
FT                   /node="internal_19->IA7122-Poultry-ST302"
FT                   /colour="4"
FT                   /taxa="IA7122-Poultry-ST302"
FT                   /parent_base="C"
FT                   /replace="T"
FT   variation       3856623
FT                   /node="internal_19->IA7122-Poultry-ST302"
FT                   /colour="4"
FT                   /taxa="IA7122-Poultry-ST302"
FT                   /parent_base="T"
FT                   /replace="C"
FT   variation       3856715
FT                   /node="internal_19->IA7122-Poultry-ST302"
FT                   /colour="4"
FT                   /taxa="IA7122-Poultry-ST302"
FT                   /parent_base="A"
FT                   /replace="C"
FT   variation       3857191
FT                   /node="internal_19->IA7122-Poultry-ST302"
FT                   /colour="4"
FT                   /taxa="IA7122-Poultry-ST302"
FT                   /parent_base="A"
FT                   /replace="T"
FT   variation       3857194
FT                   /node="internal_19->IA7122-Poultry-ST302"
FT                   /colour="4"
FT                   /taxa="IA7122-Poultry-ST302"
FT                   /parent_base="A"
FT                   /replace="G"
FT   variation       3857197
FT                   /node="internal_19->IA7122-Poultry-ST302"
FT                   /colour="4"
FT                   /taxa="IA7122-Poultry-ST302"
FT                   /parent_base="T"
FT                   /replace="G"
FT   variation       3857206
FT                   /node="internal_19->IA7122-Poultry-ST302"
FT                   /colour="4"
FT                   /taxa="IA7122-Poultry-ST302"
FT                   /parent_base="T"
FT                   /replace="C"
FT   variation       3857293
FT                   /node="internal_19->IA7122-Poultry-ST302"
FT                   /colour="4"
FT                   /taxa="IA7122-Poultry-ST302"
FT                   /parent_base="T"
FT                   /replace="A"
FT   variation       3859504
FT                   /node="internal_19->IA7122-Poultry-ST302"
FT                   /colour="4"
FT                   /taxa="IA7122-Poultry-ST302"
FT                   /parent_base="C"
FT                   /replace="G"
FT   variation       3859719
FT                   /node="internal_19->IA7122-Poultry-ST302"
FT                   /colour="4"
FT                   /taxa="IA7122-Poultry-ST302"
FT                   /parent_base="G"
FT                   /replace="A"
FT   variation       3860286
FT                   /node="internal_19->IA7122-Poultry-ST302"
FT                   /colour="4"
FT                   /taxa="IA7122-Poultry-ST302"
FT                   /parent_base="T"
FT                   /replace="C"
FT   variation       3860512
FT                   /node="internal_19->IA7122-Poultry-ST302"
FT                   /colour="4"
FT                   /taxa="IA7122-Poultry-ST302"
FT                   /parent_base="A"
FT                   /replace="T"
FT   variation       3860678
FT                   /node="internal_19->IA7122-Poultry-ST302"
FT                   /colour="4"
FT                   /taxa="IA7122-Poultry-ST302"
FT                   /parent_base="C"
FT                   /replace="T"
FT   variation       3860700
FT                   /node="internal_19->IA7122-Poultry-ST302"
FT                   /colour="4"
FT                   /taxa="IA7122-Poultry-ST302"
FT                   /parent_base="C"
FT                   /replace="T"
FT   variation       3861180
FT                   /node="internal_19->IA7122-Poultry-ST302"
FT                   /colour="4"
FT                   /taxa="IA7122-Poultry-ST302"
FT                   /parent_base="C"
FT                   /replace="T"
FT   variation       3861252
FT                   /node="internal_19->IA7122-Poultry-ST302"
FT                   /colour="4"
FT                   /taxa="IA7122-Poultry-ST302"
FT                   /parent_base="T"
FT                   /replace="G"
FT   variation       3861253
FT                   /node="internal_19->IA7122-Poultry-ST302"
FT                   /colour="4"
FT                   /taxa="IA7122-Poultry-ST302"
FT                   /parent_base="A"
FT                   /replace="G"
FT   variation       3861255
FT                   /node="internal_19->IA7122-Poultry-ST302"
FT                   /colour="4"
FT                   /taxa="IA7122-Poultry-ST302"
FT                   /parent_base="T"
FT                   /replace="G"
FT   variation       3861261
FT                   /node="internal_19->IA7122-Poultry-ST302"
FT                   /colour="4"
FT                   /taxa="IA7122-Poultry-ST302"
FT                   /parent_base="G"
FT                   /replace="C"
FT   variation       3861264
FT                   /node="internal_19->IA7122-Poultry-ST302"
FT                   /colour="4"
FT                   /taxa="IA7122-Poultry-ST302"
FT                   /parent_base="T"
FT                   /replace="C"
FT   variation       3861333
FT                   /node="internal_19->IA7122-Poultry-ST302"
FT                   /colour="4"
FT                   /taxa="IA7122-Poultry-ST302"
FT                   /parent_base="A"
FT                   /replace="G"
FT   variation       3861384
FT                   /node="internal_19->IA7122-Poultry-ST302"
FT                   /colour="4"
FT                   /taxa="IA7122-Poultry-ST302"
FT                   /parent_base="A"
FT                   /replace="C"
FT   variation       3861498
FT                   /node="internal_19->IA7122-Poultry-ST302"
FT                   /colour="4"
FT                   /taxa="IA7122-Poultry-ST302"
FT                   /parent_base="C"
FT                   /replace="T"
FT   variation       3861516
FT                   /node="internal_19->IA7122-Poultry-ST302"
FT                   /colour="4"
FT                   /taxa="IA7122-Poultry-ST302"
FT                   /parent_base="T"
FT                   /replace="C"
FT   variation       3861585
FT                   /node="internal_19->IA7122-Poultry-ST302"
FT                   /colour="4"
FT                   /taxa="IA7122-Poultry-ST302"
FT                   /parent_base="T"
FT                   /replace="C"
FT   variation       3861588
FT                   /node="internal_19->IA7122-Poultry-ST302"
FT                   /colour="4"
FT                   /taxa="IA7122-Poultry-ST302"
FT                   /parent_base="C"
FT                   /replace="T"
FT   variation       3861594
FT                   /node="internal_19->IA7122-Poultry-ST302"
FT                   /colour="4"
FT                   /taxa="IA7122-Poultry-ST302"
FT                   /parent_base="G"
FT                   /replace="T"
FT   variation       3861621
FT                   /node="internal_19->IA7122-Poultry-ST302"
FT                   /colour="4"
FT                   /taxa="IA7122-Poultry-ST302"
FT                   /parent_base="T"
FT                   /replace="C"
FT   variation       3861630
FT                   /node="internal_19->IA7122-Poultry-ST302"
FT                   /colour="4"
FT                   /taxa="IA7122-Poultry-ST302"
FT                   /parent_base="T"
FT                   /replace="C"
FT   variation       3861636
FT                   /node="internal_19->IA7122-Poultry-ST302"
FT                   /colour="4"
FT                   /taxa="IA7122-Poultry-ST302"
FT                   /parent_base="C"
FT                   /replace="T"
FT   variation       3861820
FT                   /node="internal_19->IA7122-Poultry-ST302"
FT                   /colour="4"
FT                   /taxa="IA7122-Poultry-ST302"
FT                   /parent_base="A"
FT                   /replace="G"
FT   variation       3861840
FT                   /node="internal_19->IA7122-Poultry-ST302"
FT                   /colour="4"
FT                   /taxa="IA7122-Poultry-ST302"
FT                   /parent_base="T"
FT                   /replace="C"
FT   variation       3861856
FT                   /node="internal_19->IA7122-Poultry-ST302"
FT                   /colour="4"
FT                   /taxa="IA7122-Poultry-ST302"
FT                   /parent_base="A"
FT                   /replace="C"
FT   variation       3861864
FT                   /node="internal_19->IA7122-Poultry-ST302"
FT                   /colour="4"
FT                   /taxa="IA7122-Poultry-ST302"
FT                   /parent_base="T"
FT                   /replace="C"
FT   variation       3861870
FT                   /node="internal_19->IA7122-Poultry-ST302"
FT                   /colour="4"
FT                   /taxa="IA7122-Poultry-ST302"
FT                   /parent_base="C"
FT                   /replace="T"
FT   variation       3861873
FT                   /node="internal_19->IA7122-Poultry-ST302"
FT                   /colour="4"
FT                   /taxa="IA7122-Poultry-ST302"
FT                   /parent_base="A"
FT                   /replace="G"
FT   variation       3861957
FT                   /node="internal_19->IA7122-Poultry-ST302"
FT                   /colour="4"
FT                   /taxa="IA7122-Poultry-ST302"
FT                   /parent_base="G"
FT                   /replace="A"
FT   variation       3861966
FT                   /node="internal_19->IA7122-Poultry-ST302"
FT                   /colour="4"
FT                   /taxa="IA7122-Poultry-ST302"
FT                   /parent_base="G"
FT                   /replace="A"
FT   variation       3861990
FT                   /node="internal_19->IA7122-Poultry-ST302"
FT                   /colour="4"
FT                   /taxa="IA7122-Poultry-ST302"
FT                   /parent_base="G"
FT                   /replace="C"
FT   variation       3861993
FT                   /node="internal_19->IA7122-Poultry-ST302"
FT                   /colour="4"
FT                   /taxa="IA7122-Poultry-ST302"
FT                   /parent_base="A"
FT                   /replace="C"
FT   variation       3861996
FT                   /node="internal_19->IA7122-Poultry-ST302"
FT                   /colour="4"
FT                   /taxa="IA7122-Poultry-ST302"
FT                   /parent_base="T"
FT                   /replace="G"
FT   variation       3861999
FT                   /node="internal_19->IA7122-Poultry-ST302"
FT                   /colour="4"
FT                   /taxa="IA7122-Poultry-ST302"
FT                   /parent_base="A"
FT                   /replace="G"
FT   variation       3862002
FT                   /node="internal_19->IA7122-Poultry-ST302"
FT                   /colour="4"
FT                   /taxa="IA7122-Poultry-ST302"
FT                   /parent_base="G"
FT                   /replace="A"
FT   variation       3862023
FT                   /node="internal_19->IA7122-Poultry-ST302"
FT                   /colour="4"
FT                   /taxa="IA7122-Poultry-ST302"
FT                   /parent_base="G"
FT                   /replace="A"
FT   variation       3862029
FT                   /node="internal_19->IA7122-Poultry-ST302"
FT                   /colour="4"
FT                   /taxa="IA7122-Poultry-ST302"
FT                   /parent_base="C"
FT                   /replace="T"
FT   variation       3862185
FT                   /node="internal_19->IA7122-Poultry-ST302"
FT                   /colour="4"
FT                   /taxa="IA7122-Poultry-ST302"
FT                   /parent_base="C"
FT                   /replace="T"
FT   variation       3862290
FT                   /node="internal_19->IA7122-Poultry-ST302"
FT                   /colour="4"
FT                   /taxa="IA7122-Poultry-ST302"
FT                   /parent_base="G"
FT                   /replace="T"
FT   variation       3862338
FT                   /node="internal_19->IA7122-Poultry-ST302"
FT                   /colour="4"
FT                   /taxa="IA7122-Poultry-ST302"
FT                   /parent_base="C"
FT                   /replace="T"
FT   variation       3862353
FT                   /node="internal_19->IA7122-Poultry-ST302"
FT                   /colour="4"
FT                   /taxa="IA7122-Poultry-ST302"
FT                   /parent_base="T"
FT                   /replace="C"
FT   variation       3862383
FT                   /node="internal_19->IA7122-Poultry-ST302"
FT                   /colour="4"
FT                   /taxa="IA7122-Poultry-ST302"
FT                   /parent_base="C"
FT                   /replace="T"
FT   variation       3862390
FT                   /node="internal_19->IA7122-Poultry-ST302"
FT                   /colour="4"
FT                   /taxa="IA7122-Poultry-ST302"
FT                   /parent_base="A"
FT                   /replace="C"
FT   variation       3862391
FT                   /node="internal_19->IA7122-Poultry-ST302"
FT                   /colour="4"
FT                   /taxa="IA7122-Poultry-ST302"
FT                   /parent_base="A"
FT                   /replace="G"
FT   variation       3862456
FT                   /node="internal_19->IA7122-Poultry-ST302"
FT                   /colour="4"
FT                   /taxa="IA7122-Poultry-ST302"
FT                   /parent_base="T"
FT                   /replace="C"
FT   variation       3862467
FT                   /node="internal_19->IA7122-Poultry-ST302"
FT                   /colour="4"
FT                   /taxa="IA7122-Poultry-ST302"
FT                   /parent_base="A"
FT                   /replace="C"
FT   variation       3862476
FT                   /node="internal_19->IA7122-Poultry-ST302"
FT                   /colour="4"
FT                   /taxa="IA7122-Poultry-ST302"
FT                   /parent_base="T"
FT                   /replace="C"
FT   variation       3862512
FT                   /node="internal_19->IA7122-Poultry-ST302"
FT                   /colour="4"
FT                   /taxa="IA7122-Poultry-ST302"
FT                   /parent_base="C"
FT                   /replace="T"
FT   variation       3862527
FT                   /node="internal_19->IA7122-Poultry-ST302"
FT                   /colour="4"
FT                   /taxa="IA7122-Poultry-ST302"
FT                   /parent_base="C"
FT                   /replace="A"
FT   variation       3862530
FT                   /node="internal_19->IA7122-Poultry-ST302"
FT                   /colour="4"
FT                   /taxa="IA7122-Poultry-ST302"
FT                   /parent_base="C"
FT                   /replace="T"
FT   variation       3862554
FT                   /node="internal_19->IA7122-Poultry-ST302"
FT                   /colour="4"
FT                   /taxa="IA7122-Poultry-ST302"
FT                   /parent_base="G"
FT                   /replace="C"
FT   variation       3862557
FT                   /node="internal_19->IA7122-Poultry-ST302"
FT                   /colour="4"
FT                   /taxa="IA7122-Poultry-ST302"
FT                   /parent_base="C"
FT                   /replace="G"
FT   variation       3862560
FT                   /node="internal_19->IA7122-Poultry-ST302"
FT                   /colour="4"
FT                   /taxa="IA7122-Poultry-ST302"
FT                   /parent_base="A"
FT                   /replace="G"
FT   variation       3862614
FT                   /node="internal_19->IA7122-Poultry-ST302"
FT                   /colour="4"
FT                   /taxa="IA7122-Poultry-ST302"
FT                   /parent_base="C"
FT                   /replace="T"
FT   variation       3862638
FT                   /node="internal_19->IA7122-Poultry-ST302"
FT                   /colour="4"
FT                   /taxa="IA7122-Poultry-ST302"
FT                   /parent_base="C"
FT                   /replace="T"
FT   variation       3862715
FT                   /node="internal_19->IA7122-Poultry-ST302"
FT                   /colour="4"
FT                   /taxa="IA7122-Poultry-ST302"
FT                   /parent_base="A"
FT                   /replace="G"
FT   variation       3862716
FT                   /node="internal_19->IA7122-Poultry-ST302"
FT                   /colour="4"
FT                   /taxa="IA7122-Poultry-ST302"
FT                   /parent_base="A"
FT                   /replace="G"
FT   variation       3862731
FT                   /node="internal_19->IA7122-Poultry-ST302"
FT                   /colour="4"
FT                   /taxa="IA7122-Poultry-ST302"
FT                   /parent_base="C"
FT                   /replace="T"
FT   variation       3862740
FT                   /node="internal_19->IA7122-Poultry-ST302"
FT                   /colour="4"
FT                   /taxa="IA7122-Poultry-ST302"
FT                   /parent_base="T"
FT                   /replace="C"
FT   variation       3862741
FT                   /node="internal_19->IA7122-Poultry-ST302"
FT                   /colour="4"
FT                   /taxa="IA7122-Poultry-ST302"
FT                   /parent_base="C"
FT                   /replace="A"
FT   variation       3862742
FT                   /node="internal_19->IA7122-Poultry-ST302"
FT                   /colour="4"
FT                   /taxa="IA7122-Poultry-ST302"
FT                   /parent_base="A"
FT                   /replace="G"
FT   variation       3862752
FT                   /node="internal_19->IA7122-Poultry-ST302"
FT                   /colour="4"
FT                   /taxa="IA7122-Poultry-ST302"
FT                   /parent_base="T"
FT                   /replace="C"
FT   variation       3862765
FT                   /node="internal_19->IA7122-Poultry-ST302"
FT                   /colour="4"
FT                   /taxa="IA7122-Poultry-ST302"
FT                   /parent_base="A"
FT                   /replace="G"
FT   variation       3862783
FT                   /node="internal_19->IA7122-Poultry-ST302"
FT                   /colour="4"
FT                   /taxa="IA7122-Poultry-ST302"
FT                   /parent_base="A"
FT                   /replace="C"
FT   variation       3862788
FT                   /node="internal_19->IA7122-Poultry-ST302"
FT                   /colour="4"
FT                   /taxa="IA7122-Poultry-ST302"
FT                   /parent_base="C"
FT                   /replace="T"
FT   variation       3862790
FT                   /node="internal_19->IA7122-Poultry-ST302"
FT                   /colour="4"
FT                   /taxa="IA7122-Poultry-ST302"
FT                   /parent_base="G"
FT                   /replace="A"
FT   variation       3862794
FT                   /node="internal_19->IA7122-Poultry-ST302"
FT                   /colour="4"
FT                   /taxa="IA7122-Poultry-ST302"
FT                   /parent_base="G"
FT                   /replace="C"
FT   variation       3862802
FT                   /node="internal_19->IA7122-Poultry-ST302"
FT                   /colour="4"
FT                   /taxa="IA7122-Poultry-ST302"
FT                   /parent_base="C"
FT                   /replace="T"
FT   variation       3862866
FT                   /node="internal_19->IA7122-Poultry-ST302"
FT                   /colour="4"
FT                   /taxa="IA7122-Poultry-ST302"
FT                   /parent_base="C"
FT                   /replace="T"
FT   variation       3862878
FT                   /node="internal_19->IA7122-Poultry-ST302"
FT                   /colour="4"
FT                   /taxa="IA7122-Poultry-ST302"
FT                   /parent_base="T"
FT                   /replace="C"
FT   variation       3862883
FT                   /node="internal_19->IA7122-Poultry-ST302"
FT                   /colour="4"
FT                   /taxa="IA7122-Poultry-ST302"
FT                   /parent_base="G"
FT                   /replace="A"
FT   variation       3862890
FT                   /node="internal_19->IA7122-Poultry-ST302"
FT                   /colour="4"
FT                   /taxa="IA7122-Poultry-ST302"
FT                   /parent_base="T"
FT                   /replace="C"
FT   variation       3862896
FT                   /node="internal_19->IA7122-Poultry-ST302"
FT                   /colour="4"
FT                   /taxa="IA7122-Poultry-ST302"
FT                   /parent_base="T"
FT                   /replace="C"
FT   variation       3862923
FT                   /node="internal_19->IA7122-Poultry-ST302"
FT                   /colour="4"
FT                   /taxa="IA7122-Poultry-ST302"
FT                   /parent_base="C"
FT                   /replace="G"
FT   variation       3862925
FT                   /node="internal_19->IA7122-Poultry-ST302"
FT                   /colour="4"
FT                   /taxa="IA7122-Poultry-ST302"
FT                   /parent_base="G"
FT                   /replace="A"
FT   variation       3862947
FT                   /node="internal_19->IA7122-Poultry-ST302"
FT                   /colour="4"
FT                   /taxa="IA7122-Poultry-ST302"
FT                   /parent_base="G"
FT                   /replace="C"
FT   variation       3862974
FT                   /node="internal_19->IA7122-Poultry-ST302"
FT                   /colour="4"
FT                   /taxa="IA7122-Poultry-ST302"
FT                   /parent_base="T"
FT                   /replace="G"
FT   variation       3862990
FT                   /node="internal_19->IA7122-Poultry-ST302"
FT                   /colour="4"
FT                   /taxa="IA7122-Poultry-ST302"
FT                   /parent_base="T"
FT                   /replace="A"
FT   variation       3862991
FT                   /node="internal_19->IA7122-Poultry-ST302"
FT                   /colour="4"
FT                   /taxa="IA7122-Poultry-ST302"
FT                   /parent_base="C"
FT                   /replace="G"
FT   variation       3862995
FT                   /node="internal_19->IA7122-Poultry-ST302"
FT                   /colour="4"
FT                   /taxa="IA7122-Poultry-ST302"
FT                   /parent_base="G"
FT                   /replace="T"
FT   variation       3862998
FT                   /node="internal_19->IA7122-Poultry-ST302"
FT                   /colour="4"
FT                   /taxa="IA7122-Poultry-ST302"
FT                   /parent_base="T"
FT                   /replace="C"
FT   variation       3863001
FT                   /node="internal_19->IA7122-Poultry-ST302"
FT                   /colour="4"
FT                   /taxa="IA7122-Poultry-ST302"
FT                   /parent_base="C"
FT                   /replace="T"
FT   variation       3863007
FT                   /node="internal_19->IA7122-Poultry-ST302"
FT                   /colour="4"
FT                   /taxa="IA7122-Poultry-ST302"
FT                   /parent_base="C"
FT                   /replace="T"
FT   variation       3863014
FT                   /node="internal_19->IA7122-Poultry-ST302"
FT                   /colour="4"
FT                   /taxa="IA7122-Poultry-ST302"
FT                   /parent_base="A"
FT                   /replace="C"
FT   variation       3863036
FT                   /node="internal_19->IA7122-Poultry-ST302"
FT                   /colour="4"
FT                   /taxa="IA7122-Poultry-ST302"
FT                   /parent_base="C"
FT                   /replace="A"
FT   variation       3863037
FT                   /node="internal_19->IA7122-Poultry-ST302"
FT                   /colour="4"
FT                   /taxa="IA7122-Poultry-ST302"
FT                   /parent_base="T"
FT                   /replace="C"
FT   variation       3863043
FT                   /node="internal_19->IA7122-Poultry-ST302"
FT                   /colour="4"
FT                   /taxa="IA7122-Poultry-ST302"
FT                   /parent_base="A"
FT                   /replace="G"
FT   variation       3863093
FT                   /node="internal_19->IA7122-Poultry-ST302"
FT                   /colour="4"
FT                   /taxa="IA7122-Poultry-ST302"
FT                   /parent_base="G"
FT                   /replace="A"
FT   variation       3863094
FT                   /node="internal_19->IA7122-Poultry-ST302"
FT                   /colour="4"
FT                   /taxa="IA7122-Poultry-ST302"
FT                   /parent_base="T"
FT                   /replace="C"
FT   variation       3863097
FT                   /node="internal_19->IA7122-Poultry-ST302"
FT                   /colour="4"
FT                   /taxa="IA7122-Poultry-ST302"
FT                   /parent_base="A"
FT                   /replace="G"
FT   variation       3863106
FT                   /node="internal_19->IA7122-Poultry-ST302"
FT                   /colour="4"
FT                   /taxa="IA7122-Poultry-ST302"
FT                   /parent_base="G"
FT                   /replace="A"
FT   variation       3863113
FT                   /node="internal_19->IA7122-Poultry-ST302"
FT                   /colour="4"
FT                   /taxa="IA7122-Poultry-ST302"
FT                   /parent_base="C"
FT                   /replace="G"
FT   variation       3863115
FT                   /node="internal_19->IA7122-Poultry-ST302"
FT                   /colour="4"
FT                   /taxa="IA7122-Poultry-ST302"
FT                   /parent_base="A"
FT                   /replace="G"
FT   variation       3863121
FT                   /node="internal_19->IA7122-Poultry-ST302"
FT                   /colour="4"
FT                   /taxa="IA7122-Poultry-ST302"
FT                   /parent_base="T"
FT                   /replace="C"
FT   variation       3863127
FT                   /node="internal_19->IA7122-Poultry-ST302"
FT                   /colour="4"
FT                   /taxa="IA7122-Poultry-ST302"
FT                   /parent_base="C"
FT                   /replace="T"
FT   variation       3863131
FT                   /node="internal_19->IA7122-Poultry-ST302"
FT                   /colour="4"
FT                   /taxa="IA7122-Poultry-ST302"
FT                   /parent_base="T"
FT                   /replace="G"
FT   variation       3863132
FT                   /node="internal_19->IA7122-Poultry-ST302"
FT                   /colour="4"
FT                   /taxa="IA7122-Poultry-ST302"
FT                   /parent_base="G"
FT                   /replace="C"
FT   variation       3863133
FT                   /node="internal_19->IA7122-Poultry-ST302"
FT                   /colour="4"
FT                   /taxa="IA7122-Poultry-ST302"
FT                   /parent_base="T"
FT                   /replace="C"
FT   variation       3863139
FT                   /node="internal_19->IA7122-Poultry-ST302"
FT                   /colour="4"
FT                   /taxa="IA7122-Poultry-ST302"
FT                   /parent_base="C"
FT                   /replace="T"
FT   variation       3863208
FT                   /node="internal_19->IA7122-Poultry-ST302"
FT                   /colour="4"
FT                   /taxa="IA7122-Poultry-ST302"
FT                   /parent_base="T"
FT                   /replace="G"
FT   variation       3863217
FT                   /node="internal_19->IA7122-Poultry-ST302"
FT                   /colour="4"
FT                   /taxa="IA7122-Poultry-ST302"
FT                   /parent_base="G"
FT                   /replace="A"
FT   variation       3863280
FT                   /node="internal_19->IA7122-Poultry-ST302"
FT                   /colour="4"
FT                   /taxa="IA7122-Poultry-ST302"
FT                   /parent_base="T"
FT                   /replace="C"
FT   variation       3863287
FT                   /node="internal_19->IA7122-Poultry-ST302"
FT                   /colour="4"
FT                   /taxa="IA7122-Poultry-ST302"
FT                   /parent_base="T"
FT                   /replace="C"
FT   variation       3863289
FT                   /node="internal_19->IA7122-Poultry-ST302"
FT                   /colour="4"
FT                   /taxa="IA7122-Poultry-ST302"
FT                   /parent_base="A"
FT                   /replace="G"
FT   variation       3863291
FT                   /node="internal_19->IA7122-Poultry-ST302"
FT                   /colour="4"
FT                   /taxa="IA7122-Poultry-ST302"
FT                   /parent_base="T"
FT                   /replace="A"
FT   variation       3863292
FT                   /node="internal_19->IA7122-Poultry-ST302"
FT                   /colour="4"
FT                   /taxa="IA7122-Poultry-ST302"
FT                   /parent_base="C"
FT                   /replace="T"
FT   variation       3863319
FT                   /node="internal_19->IA7122-Poultry-ST302"
FT                   /colour="4"
FT                   /taxa="IA7122-Poultry-ST302"
FT                   /parent_base="G"
FT                   /replace="T"
FT   variation       3863331
FT                   /node="internal_19->IA7122-Poultry-ST302"
FT                   /colour="4"
FT                   /taxa="IA7122-Poultry-ST302"
FT                   /parent_base="C"
FT                   /replace="T"
FT   variation       3863337
FT                   /node="internal_19->IA7122-Poultry-ST302"
FT                   /colour="4"
FT                   /taxa="IA7122-Poultry-ST302"
FT                   /parent_base="T"
FT                   /replace="C"
FT   variation       3863346
FT                   /node="internal_19->IA7122-Poultry-ST302"
FT                   /colour="4"
FT                   /taxa="IA7122-Poultry-ST302"
FT                   /parent_base="T"
FT                   /replace="C"
FT   variation       3863352
FT                   /node="internal_19->IA7122-Poultry-ST302"
FT                   /colour="4"
FT                   /taxa="IA7122-Poultry-ST302"
FT                   /parent_base="C"
FT                   /replace="T"
FT   variation       3863406
FT                   /node="internal_19->IA7122-Poultry-ST302"
FT                   /colour="4"
FT                   /taxa="IA7122-Poultry-ST302"
FT                   /parent_base="T"
FT                   /replace="C"
FT   variation       3863478
FT                   /node="internal_19->IA7122-Poultry-ST302"
FT                   /colour="4"
FT                   /taxa="IA7122-Poultry-ST302"
FT                   /parent_base="A"
FT                   /replace="G"
FT   variation       3863481
FT                   /node="internal_19->IA7122-Poultry-ST302"
FT                   /colour="4"
FT                   /taxa="IA7122-Poultry-ST302"
FT                   /parent_base="C"
FT                   /replace="T"
FT   variation       3863483
FT                   /node="internal_19->IA7122-Poultry-ST302"
FT                   /colour="4"
FT                   /taxa="IA7122-Poultry-ST302"
FT                   /parent_base="G"
FT                   /replace="A"
FT   variation       3863484
FT                   /node="internal_19->IA7122-Poultry-ST302"
FT                   /colour="4"
FT                   /taxa="IA7122-Poultry-ST302"
FT                   /parent_base="G"
FT                   /replace="A"
FT   variation       3863490
FT                   /node="internal_19->IA7122-Poultry-ST302"
FT                   /colour="4"
FT                   /taxa="IA7122-Poultry-ST302"
FT                   /parent_base="C"
FT                   /replace="G"
FT   variation       3863532
FT                   /node="internal_19->IA7122-Poultry-ST302"
FT                   /colour="4"
FT                   /taxa="IA7122-Poultry-ST302"
FT                   /parent_base="A"
FT                   /replace="G"
FT   variation       3863535
FT                   /node="internal_19->IA7122-Poultry-ST302"
FT                   /colour="4"
FT                   /taxa="IA7122-Poultry-ST302"
FT                   /parent_base="G"
FT                   /replace="A"
FT   variation       3863559
FT                   /node="internal_19->IA7122-Poultry-ST302"
FT                   /colour="4"
FT                   /taxa="IA7122-Poultry-ST302"
FT                   /parent_base="G"
FT                   /replace="A"
FT   variation       3863700
FT                   /node="internal_19->IA7122-Poultry-ST302"
FT                   /colour="4"
FT                   /taxa="IA7122-Poultry-ST302"
FT                   /parent_base="G"
FT                   /replace="A"
FT   variation       3863732
FT                   /node="internal_19->IA7122-Poultry-ST302"
FT                   /colour="4"
FT                   /taxa="IA7122-Poultry-ST302"
FT                   /parent_base="A"
FT                   /replace="G"
FT   variation       3863740
FT                   /node="internal_19->IA7122-Poultry-ST302"
FT                   /colour="4"
FT                   /taxa="IA7122-Poultry-ST302"
FT                   /parent_base="T"
FT                   /replace="C"
FT   variation       3863840
FT                   /node="internal_19->IA7122-Poultry-ST302"
FT                   /colour="4"
FT                   /taxa="IA7122-Poultry-ST302"
FT                   /parent_base="T"
FT                   /replace="C"
FT   variation       3863865
FT                   /node="internal_19->IA7122-Poultry-ST302"
FT                   /colour="4"
FT                   /taxa="IA7122-Poultry-ST302"
FT                   /parent_base="A"
FT                   /replace="G"
FT   variation       3863867
FT                   /node="internal_19->IA7122-Poultry-ST302"
FT                   /colour="4"
FT                   /taxa="IA7122-Poultry-ST302"
FT                   /parent_base="G"
FT                   /replace="A"
FT   variation       3863900
FT                   /node="internal_19->IA7122-Poultry-ST302"
FT                   /colour="4"
FT                   /taxa="IA7122-Poultry-ST302"
FT                   /parent_base="T"
FT                   /replace="G"
FT   variation       3863924
FT                   /node="internal_19->IA7122-Poultry-ST302"
FT                   /colour="4"
FT                   /taxa="IA7122-Poultry-ST302"
FT                   /parent_base="A"
FT                   /replace="T"
FT   variation       3863966
FT                   /node="internal_19->IA7122-Poultry-ST302"
FT                   /colour="4"
FT                   /taxa="IA7122-Poultry-ST302"
FT                   /parent_base="G"
FT                   /replace="A"
FT   variation       3863978
FT                   /node="internal_19->IA7122-Poultry-ST302"
FT                   /colour="4"
FT                   /taxa="IA7122-Poultry-ST302"
FT                   /parent_base="G"
FT                   /replace="A"
FT   variation       3864011
FT                   /node="internal_19->IA7122-Poultry-ST302"
FT                   /colour="4"
FT                   /taxa="IA7122-Poultry-ST302"
FT                   /parent_base="A"
FT                   /replace="G"
FT   variation       3864034
FT                   /node="internal_19->IA7122-Poultry-ST302"
FT                   /colour="4"
FT                   /taxa="IA7122-Poultry-ST302"
FT                   /parent_base="A"
FT                   /replace="C"
FT   variation       3864070
FT                   /node="internal_19->IA7122-Poultry-ST302"
FT                   /colour="4"
FT                   /taxa="IA7122-Poultry-ST302"
FT                   /parent_base="G"
FT                   /replace="A"
FT   variation       3864071
FT                   /node="internal_19->IA7122-Poultry-ST302"
FT                   /colour="4"
FT                   /taxa="IA7122-Poultry-ST302"
FT                   /parent_base="C"
FT                   /replace="A"
FT   variation       3864181
FT                   /node="internal_19->IA7122-Poultry-ST302"
FT                   /colour="4"
FT                   /taxa="IA7122-Poultry-ST302"
FT                   /parent_base="C"
FT                   /replace="T"
FT   variation       3864199
FT                   /node="internal_19->IA7122-Poultry-ST302"
FT                   /colour="4"
FT                   /taxa="IA7122-Poultry-ST302"
FT                   /parent_base="T"
FT                   /replace="G"
FT   variation       3864202
FT                   /node="internal_19->IA7122-Poultry-ST302"
FT                   /colour="4"
FT                   /taxa="IA7122-Poultry-ST302"
FT                   /parent_base="T"
FT                   /replace="C"
FT   variation       3864205
FT                   /node="internal_19->IA7122-Poultry-ST302"
FT                   /colour="4"
FT                   /taxa="IA7122-Poultry-ST302"
FT                   /parent_base="A"
FT                   /replace="T"
FT   variation       3864220
FT                   /node="internal_19->IA7122-Poultry-ST302"
FT                   /colour="4"
FT                   /taxa="IA7122-Poultry-ST302"
FT                   /parent_base="A"
FT                   /replace="G"
FT   variation       3864262
FT                   /node="internal_19->IA7122-Poultry-ST302"
FT                   /colour="4"
FT                   /taxa="IA7122-Poultry-ST302"
FT                   /parent_base="T"
FT                   /replace="G"
FT   variation       3864307
FT                   /node="internal_19->IA7122-Poultry-ST302"
FT                   /colour="4"
FT                   /taxa="IA7122-Poultry-ST302"
FT                   /parent_base="A"
FT                   /replace="T"
FT   variation       3864334
FT                   /node="internal_19->IA7122-Poultry-ST302"
FT                   /colour="4"
FT                   /taxa="IA7122-Poultry-ST302"
FT                   /parent_base="T"
FT                   /replace="G"
FT   variation       3864841
FT                   /node="internal_19->IA7122-Poultry-ST302"
FT                   /colour="4"
FT                   /taxa="IA7122-Poultry-ST302"
FT                   /parent_base="T"
FT                   /replace="A"
FT   variation       3864900
FT                   /node="internal_19->IA7122-Poultry-ST302"
FT                   /colour="4"
FT                   /taxa="IA7122-Poultry-ST302"
FT                   /parent_base="G"
FT                   /replace="A"
FT   variation       3864918
FT                   /node="internal_19->IA7122-Poultry-ST302"
FT                   /colour="4"
FT                   /taxa="IA7122-Poultry-ST302"
FT                   /parent_base="G"
FT                   /replace="T"
FT   variation       3865044
FT                   /node="internal_19->IA7122-Poultry-ST302"
FT                   /colour="4"
FT                   /taxa="IA7122-Poultry-ST302"
FT                   /parent_base="G"
FT                   /replace="T"
FT   variation       3865110
FT                   /node="internal_19->IA7122-Poultry-ST302"
FT                   /colour="4"
FT                   /taxa="IA7122-Poultry-ST302"
FT                   /parent_base="T"
FT                   /replace="C"
FT   variation       3865119
FT                   /node="internal_19->IA7122-Poultry-ST302"
FT                   /colour="4"
FT                   /taxa="IA7122-Poultry-ST302"
FT                   /parent_base="A"
FT                   /replace="C"
FT   variation       3865227
FT                   /node="internal_19->IA7122-Poultry-ST302"
FT                   /colour="4"
FT                   /taxa="IA7122-Poultry-ST302"
FT                   /parent_base="T"
FT                   /replace="C"
FT   variation       3865473
FT                   /node="internal_19->IA7122-Poultry-ST302"
FT                   /colour="4"
FT                   /taxa="IA7122-Poultry-ST302"
FT                   /parent_base="C"
FT                   /replace="T"
FT   variation       3865485
FT                   /node="internal_19->IA7122-Poultry-ST302"
FT                   /colour="4"
FT                   /taxa="IA7122-Poultry-ST302"
FT                   /parent_base="A"
FT                   /replace="G"
FT   variation       3865509
FT                   /node="internal_19->IA7122-Poultry-ST302"
FT                   /colour="4"
FT                   /taxa="IA7122-Poultry-ST302"
FT                   /parent_base="T"
FT                   /replace="C"
FT   variation       3865545
FT                   /node="internal_19->IA7122-Poultry-ST302"
FT                   /colour="4"
FT                   /taxa="IA7122-Poultry-ST302"
FT                   /parent_base="T"
FT                   /replace="C"
FT   variation       3865854
FT                   /node="internal_19->IA7122-Poultry-ST302"
FT                   /colour="4"
FT                   /taxa="IA7122-Poultry-ST302"
FT                   /parent_base="A"
FT                   /replace="G"
FT   variation       3867113
FT                   /node="internal_19->IA7122-Poultry-ST302"
FT                   /colour="4"
FT                   /taxa="IA7122-Poultry-ST302"
FT                   /parent_base="C"
FT                   /replace="T"
FT   variation       3867122
FT                   /node="internal_19->IA7122-Poultry-ST302"
FT                   /colour="4"
FT                   /taxa="IA7122-Poultry-ST302"
FT                   /parent_base="C"
FT                   /replace="T"
FT   variation       3867188
FT                   /node="internal_19->IA7122-Poultry-ST302"
FT                   /colour="4"
FT                   /taxa="IA7122-Poultry-ST302"
FT                   /parent_base="C"
FT                   /replace="T"
FT   variation       3867227
FT                   /node="internal_19->IA7122-Poultry-ST302"
FT                   /colour="4"
FT                   /taxa="IA7122-Poultry-ST302"
FT                   /parent_base="T"
FT                   /replace="G"
FT   variation       3867239
FT                   /node="internal_19->IA7122-Poultry-ST302"
FT                   /colour="4"
FT                   /taxa="IA7122-Poultry-ST302"
FT                   /parent_base="A"
FT                   /replace="G"
FT   variation       3867296
FT                   /node="internal_19->IA7122-Poultry-ST302"
FT                   /colour="4"
FT                   /taxa="IA7122-Poultry-ST302"
FT                   /parent_base="C"
FT                   /replace="T"
FT   variation       3867326
FT                   /node="internal_19->IA7122-Poultry-ST302"
FT                   /colour="4"
FT                   /taxa="IA7122-Poultry-ST302"
FT                   /parent_base="T"
FT                   /replace="A"
FT   variation       3867328
FT                   /node="internal_19->IA7122-Poultry-ST302"
FT                   /colour="4"
FT                   /taxa="IA7122-Poultry-ST302"
FT                   /parent_base="G"
FT                   /replace="A"
FT   variation       3867332
FT                   /node="internal_19->IA7122-Poultry-ST302"
FT                   /colour="4"
FT                   /taxa="IA7122-Poultry-ST302"
FT                   /parent_base="G"
FT                   /replace="C"
FT   variation       3868706
FT                   /node="internal_19->IA7122-Poultry-ST302"
FT                   /colour="4"
FT                   /taxa="IA7122-Poultry-ST302"
FT                   /parent_base="T"
FT                   /replace="C"
FT   variation       3868760
FT                   /node="internal_19->IA7122-Poultry-ST302"
FT                   /colour="4"
FT                   /taxa="IA7122-Poultry-ST302"
FT                   /parent_base="A"
FT                   /replace="G"
FT   variation       3868774
FT                   /node="internal_19->IA7122-Poultry-ST302"
FT                   /colour="4"
FT                   /taxa="IA7122-Poultry-ST302"
FT                   /parent_base="A"
FT                   /replace="G"
FT   variation       3868778
FT                   /node="internal_19->IA7122-Poultry-ST302"
FT                   /colour="4"
FT                   /taxa="IA7122-Poultry-ST302"
FT                   /parent_base="T"
FT                   /replace="C"
FT   variation       3868787
FT                   /node="internal_19->IA7122-Poultry-ST302"
FT                   /colour="4"
FT                   /taxa="IA7122-Poultry-ST302"
FT                   /parent_base="A"
FT                   /replace="G"
FT   variation       3868798
FT                   /node="internal_19->IA7122-Poultry-ST302"
FT                   /colour="4"
FT                   /taxa="IA7122-Poultry-ST302"
FT                   /parent_base="A"
FT                   /replace="G"
FT   variation       3868909
FT                   /node="internal_19->IA7122-Poultry-ST302"
FT                   /colour="4"
FT                   /taxa="IA7122-Poultry-ST302"
FT                   /parent_base="T"
FT                   /replace="G"
FT   variation       3868913
FT                   /node="internal_19->IA7122-Poultry-ST302"
FT                   /colour="4"
FT                   /taxa="IA7122-Poultry-ST302"
FT                   /parent_base="G"
FT                   /replace="A"
FT   variation       3868914
FT                   /node="internal_19->IA7122-Poultry-ST302"
FT                   /colour="4"
FT                   /taxa="IA7122-Poultry-ST302"
FT                   /parent_base="G"
FT                   /replace="A"
FT   variation       3868915
FT                   /node="internal_19->IA7122-Poultry-ST302"
FT                   /colour="4"
FT                   /taxa="IA7122-Poultry-ST302"
FT                   /parent_base="T"
FT                   /replace="C"
FT   variation       3868917
FT                   /node="internal_19->IA7122-Poultry-ST302"
FT                   /colour="4"
FT                   /taxa="IA7122-Poultry-ST302"
FT                   /parent_base="A"
FT                   /replace="G"
FT   variation       3868921
FT                   /node="internal_19->IA7122-Poultry-ST302"
FT                   /colour="4"
FT                   /taxa="IA7122-Poultry-ST302"
FT                   /parent_base="A"
FT                   /replace="G"
FT   variation       3868927
FT                   /node="internal_19->IA7122-Poultry-ST302"
FT                   /colour="4"
FT                   /taxa="IA7122-Poultry-ST302"
FT                   /parent_base="T"
FT                   /replace="C"
FT   variation       3869028
FT                   /node="internal_19->IA7122-Poultry-ST302"
FT                   /colour="4"
FT                   /taxa="IA7122-Poultry-ST302"
FT                   /parent_base="G"
FT                   /replace="A"
FT   variation       3869102
FT                   /node="internal_19->IA7122-Poultry-ST302"
FT                   /colour="4"
FT                   /taxa="IA7122-Poultry-ST302"
FT                   /parent_base="A"
FT                   /replace="G"
FT   variation       3869195
FT                   /node="internal_19->IA7122-Poultry-ST302"
FT                   /colour="4"
FT                   /taxa="IA7122-Poultry-ST302"
FT                   /parent_base="C"
FT                   /replace="T"
FT   variation       3869216
FT                   /node="internal_19->IA7122-Poultry-ST302"
FT                   /colour="4"
FT                   /taxa="IA7122-Poultry-ST302"
FT                   /parent_base="A"
FT                   /replace="G"
FT   variation       3869360
FT                   /node="internal_19->IA7122-Poultry-ST302"
FT                   /colour="4"
FT                   /taxa="IA7122-Poultry-ST302"
FT                   /parent_base="G"
FT                   /replace="A"
FT   variation       3869426
FT                   /node="internal_19->IA7122-Poultry-ST302"
FT                   /colour="4"
FT                   /taxa="IA7122-Poultry-ST302"
FT                   /parent_base="G"
FT                   /replace="A"
FT   variation       3869547
FT                   /node="internal_19->IA7122-Poultry-ST302"
FT                   /colour="4"
FT                   /taxa="IA7122-Poultry-ST302"
FT                   /parent_base="A"
FT                   /replace="C"
FT   variation       3869555
FT                   /node="internal_19->IA7122-Poultry-ST302"
FT                   /colour="4"
FT                   /taxa="IA7122-Poultry-ST302"
FT                   /parent_base="C"
FT                   /replace="G"
FT   variation       3869591
FT                   /node="internal_19->IA7122-Poultry-ST302"
FT                   /colour="4"
FT                   /taxa="IA7122-Poultry-ST302"
FT                   /parent_base="T"
FT                   /replace="C"
FT   variation       3869705
FT                   /node="internal_19->IA7122-Poultry-ST302"
FT                   /colour="4"
FT                   /taxa="IA7122-Poultry-ST302"
FT                   /parent_base="T"
FT                   /replace="C"
FT   variation       3869920
FT                   /node="internal_19->IA7122-Poultry-ST302"
FT                   /colour="4"
FT                   /taxa="IA7122-Poultry-ST302"
FT                   /parent_base="A"
FT                   /replace="T"
FT   variation       3870310
FT                   /node="internal_19->IA7122-Poultry-ST302"
FT                   /colour="4"
FT                   /taxa="IA7122-Poultry-ST302"
FT                   /parent_base="A"
FT                   /replace="G"
FT   variation       3870334
FT                   /node="internal_19->IA7122-Poultry-ST302"
FT                   /colour="4"
FT                   /taxa="IA7122-Poultry-ST302"
FT                   /parent_base="T"
FT                   /replace="C"
FT   variation       3870424
FT                   /node="internal_19->IA7122-Poultry-ST302"
FT                   /colour="4"
FT                   /taxa="IA7122-Poultry-ST302"
FT                   /parent_base="C"
FT                   /replace="T"
FT   variation       3870529
FT                   /node="internal_19->IA7122-Poultry-ST302"
FT                   /colour="4"
FT                   /taxa="IA7122-Poultry-ST302"
FT                   /parent_base="A"
FT                   /replace="G"
FT   variation       3870848
FT                   /node="internal_19->IA7122-Poultry-ST302"
FT                   /colour="4"
FT                   /taxa="IA7122-Poultry-ST302"
FT                   /parent_base="C"
FT                   /replace="T"
FT   variation       3870881
FT                   /node="internal_19->IA7122-Poultry-ST302"
FT                   /colour="4"
FT                   /taxa="IA7122-Poultry-ST302"
FT                   /parent_base="G"
FT                   /replace="A"
FT   variation       3870904
FT                   /node="internal_19->IA7122-Poultry-ST302"
FT                   /colour="4"
FT                   /taxa="IA7122-Poultry-ST302"
FT                   /parent_base="T"
FT                   /replace="C"
FT   variation       3871047
FT                   /node="internal_19->IA7122-Poultry-ST302"
FT                   /colour="4"
FT                   /taxa="IA7122-Poultry-ST302"
FT                   /parent_base="G"
FT                   /replace="A"
FT   variation       3871049
FT                   /node="internal_19->IA7122-Poultry-ST302"
FT                   /colour="4"
FT                   /taxa="IA7122-Poultry-ST302"
FT                   /parent_base="A"
FT                   /replace="G"
FT   variation       3871083
FT                   /node="internal_19->IA7122-Poultry-ST302"
FT                   /colour="4"
FT                   /taxa="IA7122-Poultry-ST302"
FT                   /parent_base="T"
FT                   /replace="C"
FT   variation       3871146
FT                   /node="internal_19->IA7122-Poultry-ST302"
FT                   /colour="4"
FT                   /taxa="IA7122-Poultry-ST302"
FT                   /parent_base="A"
FT                   /replace="G"
FT   variation       3872518
FT                   /node="internal_19->IA7122-Poultry-ST302"
FT                   /colour="4"
FT                   /taxa="IA7122-Poultry-ST302"
FT                   /parent_base="A"
FT                   /replace="G"
FT   variation       3872599
FT                   /node="internal_19->IA7122-Poultry-ST302"
FT                   /colour="4"
FT                   /taxa="IA7122-Poultry-ST302"
FT                   /parent_base="G"
FT                   /replace="A"
FT   variation       3873309
FT                   /node="internal_19->IA7122-Poultry-ST302"
FT                   /colour="4"
FT                   /taxa="IA7122-Poultry-ST302"
FT                   /parent_base="C"
FT                   /replace="T"
FT   variation       3873396
FT                   /node="internal_19->IA7122-Poultry-ST302"
FT                   /colour="4"
FT                   /taxa="IA7122-Poultry-ST302"
FT                   /parent_base="T"
FT                   /replace="C"
FT   variation       3873594
FT                   /node="internal_19->IA7122-Poultry-ST302"
FT                   /colour="4"
FT                   /taxa="IA7122-Poultry-ST302"
FT                   /parent_base="G"
FT                   /replace="A"
FT   variation       3873609
FT                   /node="internal_19->IA7122-Poultry-ST302"
FT                   /colour="4"
FT                   /taxa="IA7122-Poultry-ST302"
FT                   /parent_base="A"
FT                   /replace="G"
FT   variation       3873636
FT                   /node="internal_19->IA7122-Poultry-ST302"
FT                   /colour="4"
FT                   /taxa="IA7122-Poultry-ST302"
FT                   /parent_base="G"
FT                   /replace="A"
FT   variation       3873750
FT                   /node="internal_19->IA7122-Poultry-ST302"
FT                   /colour="4"
FT                   /taxa="IA7122-Poultry-ST302"
FT                   /parent_base="T"
FT                   /replace="C"
FT   variation       3874068
FT                   /node="internal_19->IA7122-Poultry-ST302"
FT                   /colour="4"
FT                   /taxa="IA7122-Poultry-ST302"
FT                   /parent_base="T"
FT                   /replace="C"
FT   variation       3874077
FT                   /node="internal_19->IA7122-Poultry-ST302"
FT                   /colour="4"
FT                   /taxa="IA7122-Poultry-ST302"
FT                   /parent_base="G"
FT                   /replace="A"
FT   variation       3874083
FT                   /node="internal_19->IA7122-Poultry-ST302"
FT                   /colour="4"
FT                   /taxa="IA7122-Poultry-ST302"
FT                   /parent_base="T"
FT                   /replace="C"
FT   variation       3874221
FT                   /node="internal_19->IA7122-Poultry-ST302"
FT                   /colour="4"
FT                   /taxa="IA7122-Poultry-ST302"
FT                   /parent_base="T"
FT                   /replace="C"
FT   variation       3874329
FT                   /node="internal_19->IA7122-Poultry-ST302"
FT                   /colour="4"
FT                   /taxa="IA7122-Poultry-ST302"
FT                   /parent_base="G"
FT                   /replace="A"
FT   variation       3874332
FT                   /node="internal_19->IA7122-Poultry-ST302"
FT                   /colour="4"
FT                   /taxa="IA7122-Poultry-ST302"
FT                   /parent_base="G"
FT                   /replace="A"
FT   variation       3874393
FT                   /node="internal_19->IA7122-Poultry-ST302"
FT                   /colour="4"
FT                   /taxa="IA7122-Poultry-ST302"
FT                   /parent_base="T"
FT                   /replace="A"
FT   variation       3874500
FT                   /node="internal_19->IA7122-Poultry-ST302"
FT                   /colour="4"
FT                   /taxa="IA7122-Poultry-ST302"
FT                   /parent_base="C"
FT                   /replace="T"
FT   variation       3874551
FT                   /node="internal_19->IA7122-Poultry-ST302"
FT                   /colour="4"
FT                   /taxa="IA7122-Poultry-ST302"
FT                   /parent_base="A"
FT                   /replace="T"
FT   variation       3874552
FT                   /node="internal_19->IA7122-Poultry-ST302"
FT                   /colour="4"
FT                   /taxa="IA7122-Poultry-ST302"
FT                   /parent_base="A"
FT                   /replace="C"
FT   variation       3874553
FT                   /node="internal_19->IA7122-Poultry-ST302"
FT                   /colour="4"
FT                   /taxa="IA7122-Poultry-ST302"
FT                   /parent_base="G"
FT                   /replace="A"
FT   variation       3874554
FT                   /node="internal_19->IA7122-Poultry-ST302"
FT                   /colour="4"
FT                   /taxa="IA7122-Poultry-ST302"
FT                   /parent_base="A"
FT                   /replace="G"
FT   variation       3874566
FT                   /node="internal_19->IA7122-Poultry-ST302"
FT                   /colour="4"
FT                   /taxa="IA7122-Poultry-ST302"
FT                   /parent_base="A"
FT                   /replace="C"
FT   variation       3874580
FT                   /node="internal_19->IA7122-Poultry-ST302"
FT                   /colour="4"
FT                   /taxa="IA7122-Poultry-ST302"
FT                   /parent_base="G"
FT                   /replace="C"
FT   variation       3874587
FT                   /node="internal_19->IA7122-Poultry-ST302"
FT                   /colour="4"
FT                   /taxa="IA7122-Poultry-ST302"
FT                   /parent_base="G"
FT                   /replace="C"
FT   variation       3874599
FT                   /node="internal_19->IA7122-Poultry-ST302"
FT                   /colour="4"
FT                   /taxa="IA7122-Poultry-ST302"
FT                   /parent_base="C"
FT                   /replace="A"
FT   variation       3874680
FT                   /node="internal_19->IA7122-Poultry-ST302"
FT                   /colour="4"
FT                   /taxa="IA7122-Poultry-ST302"
FT                   /parent_base="A"
FT                   /replace="T"
FT   variation       3874681
FT                   /node="internal_19->IA7122-Poultry-ST302"
FT                   /colour="4"
FT                   /taxa="IA7122-Poultry-ST302"
FT                   /parent_base="A"
FT                   /replace="G"
FT   variation       3874683
FT                   /node="internal_19->IA7122-Poultry-ST302"
FT                   /colour="4"
FT                   /taxa="IA7122-Poultry-ST302"
FT                   /parent_base="T"
FT                   /replace="C"
FT   variation       3874701
FT                   /node="internal_19->IA7122-Poultry-ST302"
FT                   /colour="4"
FT                   /taxa="IA7122-Poultry-ST302"
FT                   /parent_base="G"
FT                   /replace="T"
FT   variation       3874744
FT                   /node="internal_19->IA7122-Poultry-ST302"
FT                   /colour="4"
FT                   /taxa="IA7122-Poultry-ST302"
FT                   /parent_base="A"
FT                   /replace="G"
FT   variation       3874749
FT                   /node="internal_19->IA7122-Poultry-ST302"
FT                   /colour="4"
FT                   /taxa="IA7122-Poultry-ST302"
FT                   /parent_base="C"
FT                   /replace="T"
FT   variation       3874767
FT                   /node="internal_19->IA7122-Poultry-ST302"
FT                   /colour="4"
FT                   /taxa="IA7122-Poultry-ST302"
FT                   /parent_base="G"
FT                   /replace="A"
FT   variation       3874824
FT                   /node="internal_19->IA7122-Poultry-ST302"
FT                   /colour="4"
FT                   /taxa="IA7122-Poultry-ST302"
FT                   /parent_base="A"
FT                   /replace="G"
FT   variation       3874839
FT                   /node="internal_19->IA7122-Poultry-ST302"
FT                   /colour="4"
FT                   /taxa="IA7122-Poultry-ST302"
FT                   /parent_base="G"
FT                   /replace="T"
FT   variation       3874851
FT                   /node="internal_19->IA7122-Poultry-ST302"
FT                   /colour="4"
FT                   /taxa="IA7122-Poultry-ST302"
FT                   /parent_base="C"
FT                   /replace="T"
FT   variation       3874866
FT                   /node="internal_19->IA7122-Poultry-ST302"
FT                   /colour="4"
FT                   /taxa="IA7122-Poultry-ST302"
FT                   /parent_base="C"
FT                   /replace="T"
FT   variation       3874870
FT                   /node="internal_19->IA7122-Poultry-ST302"
FT                   /colour="4"
FT                   /taxa="IA7122-Poultry-ST302"
FT                   /parent_base="C"
FT                   /replace="T"
FT   variation       3874887
FT                   /node="internal_19->IA7122-Poultry-ST302"
FT                   /colour="4"
FT                   /taxa="IA7122-Poultry-ST302"
FT                   /parent_base="C"
FT                   /replace="T"
FT   variation       3874893
FT                   /node="internal_19->IA7122-Poultry-ST302"
FT                   /colour="4"
FT                   /taxa="IA7122-Poultry-ST302"
FT                   /parent_base="A"
FT                   /replace="G"
FT   variation       3874896
FT                   /node="internal_19->IA7122-Poultry-ST302"
FT                   /colour="4"
FT                   /taxa="IA7122-Poultry-ST302"
FT                   /parent_base="A"
FT                   /replace="G"
FT   variation       3874996
FT                   /node="internal_19->IA7122-Poultry-ST302"
FT                   /colour="4"
FT                   /taxa="IA7122-Poultry-ST302"
FT                   /parent_base="C"
FT                   /replace="T"
FT   variation       3875022
FT                   /node="internal_19->IA7122-Poultry-ST302"
FT                   /colour="4"
FT                   /taxa="IA7122-Poultry-ST302"
FT                   /parent_base="G"
FT                   /replace="A"
FT   variation       3875037
FT                   /node="internal_19->IA7122-Poultry-ST302"
FT                   /colour="4"
FT                   /taxa="IA7122-Poultry-ST302"
FT                   /parent_base="G"
FT                   /replace="A"
FT   variation       3875046
FT                   /node="internal_19->IA7122-Poultry-ST302"
FT                   /colour="4"
FT                   /taxa="IA7122-Poultry-ST302"
FT                   /parent_base="C"
FT                   /replace="A"
FT   variation       3875073
FT                   /node="internal_19->IA7122-Poultry-ST302"
FT                   /colour="4"
FT                   /taxa="IA7122-Poultry-ST302"
FT                   /parent_base="C"
FT                   /replace="A"
FT   variation       3875100
FT                   /node="internal_19->IA7122-Poultry-ST302"
FT                   /colour="4"
FT                   /taxa="IA7122-Poultry-ST302"
FT                   /parent_base="T"
FT                   /replace="G"
FT   variation       3875106
FT                   /node="internal_19->IA7122-Poultry-ST302"
FT                   /colour="4"
FT                   /taxa="IA7122-Poultry-ST302"
FT                   /parent_base="G"
FT                   /replace="C"
FT   variation       3875118
FT                   /node="internal_19->IA7122-Poultry-ST302"
FT                   /colour="4"
FT                   /taxa="IA7122-Poultry-ST302"
FT                   /parent_base="T"
FT                   /replace="G"
FT   variation       3875157
FT                   /node="internal_19->IA7122-Poultry-ST302"
FT                   /colour="4"
FT                   /taxa="IA7122-Poultry-ST302"
FT                   /parent_base="T"
FT                   /replace="G"
FT   variation       3875169
FT                   /node="internal_19->IA7122-Poultry-ST302"
FT                   /colour="4"
FT                   /taxa="IA7122-Poultry-ST302"
FT                   /parent_base="G"
FT                   /replace="C"
FT   variation       3875172
FT                   /node="internal_19->IA7122-Poultry-ST302"
FT                   /colour="4"
FT                   /taxa="IA7122-Poultry-ST302"
FT                   /parent_base="C"
FT                   /replace="T"
FT   variation       3875175
FT                   /node="internal_19->IA7122-Poultry-ST302"
FT                   /colour="4"
FT                   /taxa="IA7122-Poultry-ST302"
FT                   /parent_base="C"
FT                   /replace="T"
FT   variation       3875205
FT                   /node="internal_19->IA7122-Poultry-ST302"
FT                   /colour="4"
FT                   /taxa="IA7122-Poultry-ST302"
FT                   /parent_base="G"
FT                   /replace="T"
FT   variation       3875208
FT                   /node="internal_19->IA7122-Poultry-ST302"
FT                   /colour="4"
FT                   /taxa="IA7122-Poultry-ST302"
FT                   /parent_base="G"
FT                   /replace="T"
FT   variation       3875214
FT                   /node="internal_19->IA7122-Poultry-ST302"
FT                   /colour="4"
FT                   /taxa="IA7122-Poultry-ST302"
FT                   /parent_base="C"
FT                   /replace="T"
FT   variation       3875232
FT                   /node="internal_19->IA7122-Poultry-ST302"
FT                   /colour="4"
FT                   /taxa="IA7122-Poultry-ST302"
FT                   /parent_base="T"
FT                   /replace="C"
FT   variation       3875328
FT                   /node="internal_19->IA7122-Poultry-ST302"
FT                   /colour="4"
FT                   /taxa="IA7122-Poultry-ST302"
FT                   /parent_base="C"
FT                   /replace="T"
FT   variation       3875329
FT                   /node="internal_19->IA7122-Poultry-ST302"
FT                   /colour="4"
FT                   /taxa="IA7122-Poultry-ST302"
FT                   /parent_base="C"
FT                   /replace="A"
FT   variation       3875330
FT                   /node="internal_19->IA7122-Poultry-ST302"
FT                   /colour="4"
FT                   /taxa="IA7122-Poultry-ST302"
FT                   /parent_base="G"
FT                   /replace="A"
FT   variation       3875334
FT                   /node="internal_19->IA7122-Poultry-ST302"
FT                   /colour="4"
FT                   /taxa="IA7122-Poultry-ST302"
FT                   /parent_base="C"
FT                   /replace="G"
FT   variation       3875340
FT                   /node="internal_19->IA7122-Poultry-ST302"
FT                   /colour="4"
FT                   /taxa="IA7122-Poultry-ST302"
FT                   /parent_base="C"
FT                   /replace="A"
FT   variation       3875343
FT                   /node="internal_19->IA7122-Poultry-ST302"
FT                   /colour="4"
FT                   /taxa="IA7122-Poultry-ST302"
FT                   /parent_base="A"
FT                   /replace="T"
FT   variation       3875354
FT                   /node="internal_19->IA7122-Poultry-ST302"
FT                   /colour="4"
FT                   /taxa="IA7122-Poultry-ST302"
FT                   /parent_base="G"
FT                   /replace="A"
FT   variation       3875370
FT                   /node="internal_19->IA7122-Poultry-ST302"
FT                   /colour="4"
FT                   /taxa="IA7122-Poultry-ST302"
FT                   /parent_base="A"
FT                   /replace="G"
FT   variation       3875383
FT                   /node="internal_19->IA7122-Poultry-ST302"
FT                   /colour="4"
FT                   /taxa="IA7122-Poultry-ST302"
FT                   /parent_base="G"
FT                   /replace="A"
FT   variation       3875386
FT                   /node="internal_19->IA7122-Poultry-ST302"
FT                   /colour="4"
FT                   /taxa="IA7122-Poultry-ST302"
FT                   /parent_base="A"
FT                   /replace="G"
FT   variation       3875403
FT                   /node="internal_19->IA7122-Poultry-ST302"
FT                   /colour="4"
FT                   /taxa="IA7122-Poultry-ST302"
FT                   /parent_base="A"
FT                   /replace="G"
FT   variation       3875406
FT                   /node="internal_19->IA7122-Poultry-ST302"
FT                   /colour="4"
FT                   /taxa="IA7122-Poultry-ST302"
FT                   /parent_base="A"
FT                   /replace="G"
FT   variation       3875437
FT                   /node="internal_19->IA7122-Poultry-ST302"
FT                   /colour="4"
FT                   /taxa="IA7122-Poultry-ST302"
FT                   /parent_base="A"
FT                   /replace="G"
FT   variation       3875460
FT                   /node="internal_19->IA7122-Poultry-ST302"
FT                   /colour="4"
FT                   /taxa="IA7122-Poultry-ST302"
FT                   /parent_base="A"
FT                   /replace="G"
FT   variation       3875465
FT                   /node="internal_19->IA7122-Poultry-ST302"
FT                   /colour="4"
FT                   /taxa="IA7122-Poultry-ST302"
FT                   /parent_base="G"
FT                   /replace="C"
FT   variation       3875514
FT                   /node="internal_19->IA7122-Poultry-ST302"
FT                   /colour="4"
FT                   /taxa="IA7122-Poultry-ST302"
FT                   /parent_base="A"
FT                   /replace="G"
FT   variation       3875523
FT                   /node="internal_19->IA7122-Poultry-ST302"
FT                   /colour="4"
FT                   /taxa="IA7122-Poultry-ST302"
FT                   /parent_base="G"
FT                   /replace="A"
FT   variation       3875536
FT                   /node="internal_19->IA7122-Poultry-ST302"
FT                   /colour="4"
FT                   /taxa="IA7122-Poultry-ST302"
FT                   /parent_base="C"
FT                   /replace="T"
FT   variation       3875538
FT                   /node="internal_19->IA7122-Poultry-ST302"
FT                   /colour="4"
FT                   /taxa="IA7122-Poultry-ST302"
FT                   /parent_base="C"
FT                   /replace="T"
FT   variation       3875549
FT                   /node="internal_19->IA7122-Poultry-ST302"
FT                   /colour="4"
FT                   /taxa="IA7122-Poultry-ST302"
FT                   /parent_base="A"
FT                   /replace="G"
FT   variation       3875550
FT                   /node="internal_19->IA7122-Poultry-ST302"
FT                   /colour="4"
FT                   /taxa="IA7122-Poultry-ST302"
FT                   /parent_base="T"
FT                   /replace="C"
FT   variation       3875554
FT                   /node="internal_19->IA7122-Poultry-ST302"
FT                   /colour="4"
FT                   /taxa="IA7122-Poultry-ST302"
FT                   /parent_base="A"
FT                   /replace="T"
FT   variation       3875556
FT                   /node="internal_19->IA7122-Poultry-ST302"
FT                   /colour="4"
FT                   /taxa="IA7122-Poultry-ST302"
FT                   /parent_base="G"
FT                   /replace="T"
FT   variation       3875572
FT                   /node="internal_19->IA7122-Poultry-ST302"
FT                   /colour="4"
FT                   /taxa="IA7122-Poultry-ST302"
FT                   /parent_base="A"
FT                   /replace="G"
FT   variation       3875574
FT                   /node="internal_19->IA7122-Poultry-ST302"
FT                   /colour="4"
FT                   /taxa="IA7122-Poultry-ST302"
FT                   /parent_base="A"
FT                   /replace="T"
FT   variation       3875575
FT                   /node="internal_19->IA7122-Poultry-ST302"
FT                   /colour="4"
FT                   /taxa="IA7122-Poultry-ST302"
FT                   /parent_base="A"
FT                   /replace="G"
FT   variation       3875580
FT                   /node="internal_19->IA7122-Poultry-ST302"
FT                   /colour="4"
FT                   /taxa="IA7122-Poultry-ST302"
FT                   /parent_base="G"
FT                   /replace="A"
FT   variation       3875582
FT                   /node="internal_19->IA7122-Poultry-ST302"
FT                   /colour="4"
FT                   /taxa="IA7122-Poultry-ST302"
FT                   /parent_base="T"
FT                   /replace="C"
FT   variation       3875597
FT                   /node="internal_19->IA7122-Poultry-ST302"
FT                   /colour="4"
FT                   /taxa="IA7122-Poultry-ST302"
FT                   /parent_base="G"
FT                   /replace="A"
FT   variation       3875612
FT                   /node="internal_19->IA7122-Poultry-ST302"
FT                   /colour="4"
FT                   /taxa="IA7122-Poultry-ST302"
FT                   /parent_base="C"
FT                   /replace="T"
FT   variation       3875615
FT                   /node="internal_19->IA7122-Poultry-ST302"
FT                   /colour="4"
FT                   /taxa="IA7122-Poultry-ST302"
FT                   /parent_base="T"
FT                   /replace="C"
FT   variation       3875632
FT                   /node="internal_19->IA7122-Poultry-ST302"
FT                   /colour="4"
FT                   /taxa="IA7122-Poultry-ST302"
FT                   /parent_base="A"
FT                   /replace="G"
FT   variation       3875641
FT                   /node="internal_19->IA7122-Poultry-ST302"
FT                   /colour="4"
FT                   /taxa="IA7122-Poultry-ST302"
FT                   /parent_base="G"
FT                   /replace="A"
FT   variation       3875652
FT                   /node="internal_19->IA7122-Poultry-ST302"
FT                   /colour="4"
FT                   /taxa="IA7122-Poultry-ST302"
FT                   /parent_base="G"
FT                   /replace="A"
FT   variation       3875660
FT                   /node="internal_19->IA7122-Poultry-ST302"
FT                   /colour="4"
FT                   /taxa="IA7122-Poultry-ST302"
FT                   /parent_base="C"
FT                   /replace="G"
FT   variation       3875665
FT                   /node="internal_19->IA7122-Poultry-ST302"
FT                   /colour="4"
FT                   /taxa="IA7122-Poultry-ST302"
FT                   /parent_base="G"
FT                   /replace="T"
FT   variation       3875669
FT                   /node="internal_19->IA7122-Poultry-ST302"
FT                   /colour="4"
FT                   /taxa="IA7122-Poultry-ST302"
FT                   /parent_base="T"
FT                   /replace="C"
FT   variation       3875672
FT                   /node="internal_19->IA7122-Poultry-ST302"
FT                   /colour="4"
FT                   /taxa="IA7122-Poultry-ST302"
FT                   /parent_base="T"
FT                   /replace="A"
FT   variation       3875688
FT                   /node="internal_19->IA7122-Poultry-ST302"
FT                   /colour="4"
FT                   /taxa="IA7122-Poultry-ST302"
FT                   /parent_base="T"
FT                   /replace="C"
FT   variation       3875702
FT                   /node="internal_19->IA7122-Poultry-ST302"
FT                   /colour="4"
FT                   /taxa="IA7122-Poultry-ST302"
FT                   /parent_base="A"
FT                   /replace="G"
FT   variation       3875705
FT                   /node="internal_19->IA7122-Poultry-ST302"
FT                   /colour="4"
FT                   /taxa="IA7122-Poultry-ST302"
FT                   /parent_base="T"
FT                   /replace="C"
FT   variation       3875727
FT                   /node="internal_19->IA7122-Poultry-ST302"
FT                   /colour="4"
FT                   /taxa="IA7122-Poultry-ST302"
FT                   /parent_base="C"
FT                   /replace="A"
FT   variation       3875747
FT                   /node="internal_19->IA7122-Poultry-ST302"
FT                   /colour="4"
FT                   /taxa="IA7122-Poultry-ST302"
FT                   /parent_base="A"
FT                   /replace="G"
FT   variation       3875750
FT                   /node="internal_19->IA7122-Poultry-ST302"
FT                   /colour="4"
FT                   /taxa="IA7122-Poultry-ST302"
FT                   /parent_base="C"
FT                   /replace="T"
FT   variation       3875772
FT                   /node="internal_19->IA7122-Poultry-ST302"
FT                   /colour="4"
FT                   /taxa="IA7122-Poultry-ST302"
FT                   /parent_base="C"
FT                   /replace="A"
FT   variation       3875773
FT                   /node="internal_19->IA7122-Poultry-ST302"
FT                   /colour="4"
FT                   /taxa="IA7122-Poultry-ST302"
FT                   /parent_base="T"
FT                   /replace="C"
FT   variation       3877989
FT                   /node="internal_19->IA7122-Poultry-ST302"
FT                   /colour="4"
FT                   /taxa="IA7122-Poultry-ST302"
FT                   /parent_base="T"
FT                   /replace="C"
FT   variation       3881618
FT                   /node="internal_19->IA7122-Poultry-ST302"
FT                   /colour="4"
FT                   /taxa="IA7122-Poultry-ST302"
FT                   /parent_base="A"
FT                   /replace="G"
FT   variation       3881743
FT                   /node="internal_19->IA7122-Poultry-ST302"
FT                   /colour="4"
FT                   /taxa="IA7122-Poultry-ST302"
FT                   /parent_base="T"
FT                   /replace="C"
FT   variation       3881813
FT                   /node="internal_19->IA7122-Poultry-ST302"
FT                   /colour="4"
FT                   /taxa="IA7122-Poultry-ST302"
FT                   /parent_base="G"
FT                   /replace="A"
FT   variation       3881990
FT                   /node="internal_19->IA7122-Poultry-ST302"
FT                   /colour="4"
FT                   /taxa="IA7122-Poultry-ST302"
FT                   /parent_base="G"
FT                   /replace="T"
FT   variation       3881993
FT                   /node="internal_19->IA7122-Poultry-ST302"
FT                   /colour="4"
FT                   /taxa="IA7122-Poultry-ST302"
FT                   /parent_base="A"
FT                   /replace="C"
FT   variation       3882005
FT                   /node="internal_19->IA7122-Poultry-ST302"
FT                   /colour="4"
FT                   /taxa="IA7122-Poultry-ST302"
FT                   /parent_base="A"
FT                   /replace="G"
FT   variation       3885267
FT                   /node="internal_19->IA7122-Poultry-ST302"
FT                   /colour="4"
FT                   /taxa="IA7122-Poultry-ST302"
FT                   /parent_base="A"
FT                   /replace="G"
FT   variation       3888966
FT                   /node="internal_19->IA7122-Poultry-ST302"
FT                   /colour="4"
FT                   /taxa="IA7122-Poultry-ST302"
FT                   /parent_base="A"
FT                   /replace="C"
FT   variation       3890101
FT                   /node="internal_19->IA7122-Poultry-ST302"
FT                   /colour="4"
FT                   /taxa="IA7122-Poultry-ST302"
FT                   /parent_base="C"
FT                   /replace="T"
FT   variation       3890179
FT                   /node="internal_19->IA7122-Poultry-ST302"
FT                   /colour="4"
FT                   /taxa="IA7122-Poultry-ST302"
FT                   /parent_base="G"
FT                   /replace="A"
FT   variation       3890560
FT                   /node="internal_19->IA7122-Poultry-ST302"
FT                   /colour="4"
FT                   /taxa="IA7122-Poultry-ST302"
FT                   /parent_base="T"
FT                   /replace="C"
FT   variation       3890645
FT                   /node="internal_19->IA7122-Poultry-ST302"
FT                   /colour="4"
FT                   /taxa="IA7122-Poultry-ST302"
FT                   /parent_base="A"
FT                   /replace="G"
FT   variation       3890648
FT                   /node="internal_19->IA7122-Poultry-ST302"
FT                   /colour="4"
FT                   /taxa="IA7122-Poultry-ST302"
FT                   /parent_base="A"
FT                   /replace="G"
FT   variation       3890657
FT                   /node="internal_19->IA7122-Poultry-ST302"
FT                   /colour="4"
FT                   /taxa="IA7122-Poultry-ST302"
FT                   /parent_base="G"
FT                   /replace="C"
FT   variation       3890658
FT                   /node="internal_19->IA7122-Poultry-ST302"
FT                   /colour="4"
FT                   /taxa="IA7122-Poultry-ST302"
FT                   /parent_base="C"
FT                   /replace="T"
FT   variation       3890660
FT                   /node="internal_19->IA7122-Poultry-ST302"
FT                   /colour="4"
FT                   /taxa="IA7122-Poultry-ST302"
FT                   /parent_base="T"
FT                   /replace="C"
FT   variation       3890663
FT                   /node="internal_19->IA7122-Poultry-ST302"
FT                   /colour="4"
FT                   /taxa="IA7122-Poultry-ST302"
FT                   /parent_base="G"
FT                   /replace="C"
FT   variation       3890664
FT                   /node="internal_19->IA7122-Poultry-ST302"
FT                   /colour="4"
FT                   /taxa="IA7122-Poultry-ST302"
FT                   /parent_base="C"
FT                   /replace="A"
FT   variation       3893975
FT                   /node="internal_19->IA7122-Poultry-ST302"
FT                   /colour="4"
FT                   /taxa="IA7122-Poultry-ST302"
FT                   /parent_base="G"
FT                   /replace="A"
FT   variation       3894436
FT                   /node="internal_19->IA7122-Poultry-ST302"
FT                   /colour="4"
FT                   /taxa="IA7122-Poultry-ST302"
FT                   /parent_base="T"
FT                   /replace="C"
FT   variation       3894437
FT                   /node="internal_19->IA7122-Poultry-ST302"
FT                   /colour="4"
FT                   /taxa="IA7122-Poultry-ST302"
FT                   /parent_base="A"
FT                   /replace="C"
FT   variation       3894443
FT                   /node="internal_19->IA7122-Poultry-ST302"
FT                   /colour="4"
FT                   /taxa="IA7122-Poultry-ST302"
FT                   /parent_base="A"
FT                   /replace="G"
FT   variation       3894927
FT                   /node="internal_19->IA7122-Poultry-ST302"
FT                   /colour="4"
FT                   /taxa="IA7122-Poultry-ST302"
FT                   /parent_base="G"
FT                   /replace="A"
FT   variation       3895094
FT                   /node="internal_19->IA7122-Poultry-ST302"
FT                   /colour="4"
FT                   /taxa="IA7122-Poultry-ST302"
FT                   /parent_base="A"
FT                   /replace="T"
FT   variation       3895411
FT                   /node="internal_19->IA7122-Poultry-ST302"
FT                   /colour="4"
FT                   /taxa="IA7122-Poultry-ST302"
FT                   /parent_base="T"
FT                   /replace="C"
FT   variation       3897276
FT                   /node="internal_19->IA7122-Poultry-ST302"
FT                   /colour="4"
FT                   /taxa="IA7122-Poultry-ST302"
FT                   /parent_base="A"
FT                   /replace="G"
FT   variation       3898302
FT                   /node="internal_19->IA7122-Poultry-ST302"
FT                   /colour="4"
FT                   /taxa="IA7122-Poultry-ST302"
FT                   /parent_base="G"
FT                   /replace="A"
FT   variation       3900076
FT                   /node="internal_19->IA7122-Poultry-ST302"
FT                   /colour="4"
FT                   /taxa="IA7122-Poultry-ST302"
FT                   /parent_base="G"
FT                   /replace="T"
FT   variation       3900079
FT                   /node="internal_19->IA7122-Poultry-ST302"
FT                   /colour="4"
FT                   /taxa="IA7122-Poultry-ST302"
FT                   /parent_base="A"
FT                   /replace="G"
FT   variation       3900788
FT                   /node="internal_19->IA7122-Poultry-ST302"
FT                   /colour="4"
FT                   /taxa="IA7122-Poultry-ST302"
FT                   /parent_base="T"
FT                   /replace="C"
FT   variation       3901046
FT                   /node="internal_19->IA7122-Poultry-ST302"
FT                   /colour="4"
FT                   /taxa="IA7122-Poultry-ST302"
FT                   /parent_base="T"
FT                   /replace="G"
FT   variation       3901349
FT                   /node="internal_19->IA7122-Poultry-ST302"
FT                   /colour="4"
FT                   /taxa="IA7122-Poultry-ST302"
FT                   /parent_base="A"
FT                   /replace="C"
FT   variation       3901468
FT                   /node="internal_19->IA7122-Poultry-ST302"
FT                   /colour="4"
FT                   /taxa="IA7122-Poultry-ST302"
FT                   /parent_base="A"
FT                   /replace="G"
FT   variation       3901670
FT                   /node="internal_19->IA7122-Poultry-ST302"
FT                   /colour="4"
FT                   /taxa="IA7122-Poultry-ST302"
FT                   /parent_base="A"
FT                   /replace="C"
FT   variation       3901676
FT                   /node="internal_19->IA7122-Poultry-ST302"
FT                   /colour="4"
FT                   /taxa="IA7122-Poultry-ST302"
FT                   /parent_base="T"
FT                   /replace="G"
FT   variation       3901681
FT                   /node="internal_19->IA7122-Poultry-ST302"
FT                   /colour="4"
FT                   /taxa="IA7122-Poultry-ST302"
FT                   /parent_base="C"
FT                   /replace="A"
FT   variation       3901685
FT                   /node="internal_19->IA7122-Poultry-ST302"
FT                   /colour="4"
FT                   /taxa="IA7122-Poultry-ST302"
FT                   /parent_base="G"
FT                   /replace="A"
FT   variation       3901969
FT                   /node="internal_19->IA7122-Poultry-ST302"
FT                   /colour="4"
FT                   /taxa="IA7122-Poultry-ST302"
FT                   /parent_base="T"
FT                   /replace="A"
FT   variation       3902889
FT                   /node="internal_19->IA7122-Poultry-ST302"
FT                   /colour="4"
FT                   /taxa="IA7122-Poultry-ST302"
FT                   /parent_base="G"
FT                   /replace="C"
FT   variation       3903505
FT                   /node="internal_19->IA7122-Poultry-ST302"
FT                   /colour="4"
FT                   /taxa="IA7122-Poultry-ST302"
FT                   /parent_base="G"
FT                   /replace="A"
FT   variation       3904266
FT                   /node="internal_19->IA7122-Poultry-ST302"
FT                   /colour="4"
FT                   /taxa="IA7122-Poultry-ST302"
FT                   /parent_base="T"
FT                   /replace="C"
FT   variation       3904888
FT                   /node="internal_19->IA7122-Poultry-ST302"
FT                   /colour="4"
FT                   /taxa="IA7122-Poultry-ST302"
FT                   /parent_base="C"
FT                   /replace="T"
FT   variation       3904915
FT                   /node="internal_19->IA7122-Poultry-ST302"
FT                   /colour="4"
FT                   /taxa="IA7122-Poultry-ST302"
FT                   /parent_base="A"
FT                   /replace="T"
FT   variation       3905167
FT                   /node="internal_19->IA7122-Poultry-ST302"
FT                   /colour="4"
FT                   /taxa="IA7122-Poultry-ST302"
FT                   /parent_base="C"
FT                   /replace="A"
FT   variation       3905252
FT                   /node="internal_19->IA7122-Poultry-ST302"
FT                   /colour="4"
FT                   /taxa="IA7122-Poultry-ST302"
FT                   /parent_base="G"
FT                   /replace="A"
FT   variation       3906820
FT                   /node="internal_19->IA7122-Poultry-ST302"
FT                   /colour="4"
FT                   /taxa="IA7122-Poultry-ST302"
FT                   /parent_base="G"
FT                   /replace="A"
FT   variation       3906853
FT                   /node="internal_19->IA7122-Poultry-ST302"
FT                   /colour="4"
FT                   /taxa="IA7122-Poultry-ST302"
FT                   /parent_base="G"
FT                   /replace="A"
FT   variation       3906959
FT                   /node="internal_19->IA7122-Poultry-ST302"
FT                   /colour="4"
FT                   /taxa="IA7122-Poultry-ST302"
FT                   /parent_base="G"
FT                   /replace="A"
FT   variation       3908657
FT                   /node="internal_19->IA7122-Poultry-ST302"
FT                   /colour="4"
FT                   /taxa="IA7122-Poultry-ST302"
FT                   /parent_base="T"
FT                   /replace="C"
FT   variation       3908840
FT                   /node="internal_19->IA7122-Poultry-ST302"
FT                   /colour="4"
FT                   /taxa="IA7122-Poultry-ST302"
FT                   /parent_base="C"
FT                   /replace="A"
FT   variation       3909285
FT                   /node="internal_19->IA7122-Poultry-ST302"
FT                   /colour="4"
FT                   /taxa="IA7122-Poultry-ST302"
FT                   /parent_base="G"
FT                   /replace="A"
FT   variation       3909320
FT                   /node="internal_19->IA7122-Poultry-ST302"
FT                   /colour="4"
FT                   /taxa="IA7122-Poultry-ST302"
FT                   /parent_base="T"
FT                   /replace="C"
FT   variation       3909916
FT                   /node="internal_19->IA7122-Poultry-ST302"
FT                   /colour="4"
FT                   /taxa="IA7122-Poultry-ST302"
FT                   /parent_base="T"
FT                   /replace="G"
FT   variation       3910184
FT                   /node="internal_19->IA7122-Poultry-ST302"
FT                   /colour="4"
FT                   /taxa="IA7122-Poultry-ST302"
FT                   /parent_base="C"
FT                   /replace="T"
FT   variation       3914479
FT                   /node="internal_19->IA7122-Poultry-ST302"
FT                   /colour="4"
FT                   /taxa="IA7122-Poultry-ST302"
FT                   /parent_base="T"
FT                   /replace="C"
FT   variation       3914657
FT                   /node="internal_19->IA7122-Poultry-ST302"
FT                   /colour="4"
FT                   /taxa="IA7122-Poultry-ST302"
FT                   /parent_base="A"
FT                   /replace="G"
FT   variation       3914694
FT                   /node="internal_19->IA7122-Poultry-ST302"
FT                   /colour="4"
FT                   /taxa="IA7122-Poultry-ST302"
FT                   /parent_base="G"
FT                   /replace="T"
FT   variation       3915502
FT                   /node="internal_19->IA7122-Poultry-ST302"
FT                   /colour="4"
FT                   /taxa="IA7122-Poultry-ST302"
FT                   /parent_base="T"
FT                   /replace="C"
FT   variation       3915505
FT                   /node="internal_19->IA7122-Poultry-ST302"
FT                   /colour="4"
FT                   /taxa="IA7122-Poultry-ST302"
FT                   /parent_base="G"
FT                   /replace="A"
FT   variation       3916927
FT                   /node="internal_19->IA7122-Poultry-ST302"
FT                   /colour="4"
FT                   /taxa="IA7122-Poultry-ST302"
FT                   /parent_base="A"
FT                   /replace="C"
FT   variation       3918830
FT                   /node="internal_19->IA7122-Poultry-ST302"
FT                   /colour="4"
FT                   /taxa="IA7122-Poultry-ST302"
FT                   /parent_base="A"
FT                   /replace="G"
FT   variation       3918863
FT                   /node="internal_19->IA7122-Poultry-ST302"
FT                   /colour="4"
FT                   /taxa="IA7122-Poultry-ST302"
FT                   /parent_base="C"
FT                   /replace="T"
FT   variation       3919614
FT                   /node="internal_19->IA7122-Poultry-ST302"
FT                   /colour="4"
FT                   /taxa="IA7122-Poultry-ST302"
FT                   /parent_base="A"
FT                   /replace="C"
FT   variation       3919962
FT                   /node="internal_19->IA7122-Poultry-ST302"
FT                   /colour="4"
FT                   /taxa="IA7122-Poultry-ST302"
FT                   /parent_base="A"
FT                   /replace="G"
FT   variation       3920088
FT                   /node="internal_19->IA7122-Poultry-ST302"
FT                   /colour="4"
FT                   /taxa="IA7122-Poultry-ST302"
FT                   /parent_base="A"
FT                   /replace="G"
FT   variation       3920864
FT                   /node="internal_19->IA7122-Poultry-ST302"
FT                   /colour="4"
FT                   /taxa="IA7122-Poultry-ST302"
FT                   /parent_base="A"
FT                   /replace="G"
FT   variation       3920963
FT                   /node="internal_19->IA7122-Poultry-ST302"
FT                   /colour="4"
FT                   /taxa="IA7122-Poultry-ST302"
FT                   /parent_base="C"
FT                   /replace="T"
FT   variation       3922597
FT                   /node="internal_19->IA7122-Poultry-ST302"
FT                   /colour="4"
FT                   /taxa="IA7122-Poultry-ST302"
FT                   /parent_base="G"
FT                   /replace="T"
FT   variation       3923073
FT                   /node="internal_19->IA7122-Poultry-ST302"
FT                   /colour="4"
FT                   /taxa="IA7122-Poultry-ST302"
FT                   /parent_base="C"
FT                   /replace="A"
FT   variation       3923719
FT                   /node="internal_19->IA7122-Poultry-ST302"
FT                   /colour="4"
FT                   /taxa="IA7122-Poultry-ST302"
FT                   /parent_base="G"
FT                   /replace="A"
FT   variation       3924830
FT                   /node="internal_19->IA7122-Poultry-ST302"
FT                   /colour="4"
FT                   /taxa="IA7122-Poultry-ST302"
FT                   /parent_base="G"
FT                   /replace="A"
FT   variation       3925471
FT                   /node="internal_19->IA7122-Poultry-ST302"
FT                   /colour="4"
FT                   /taxa="IA7122-Poultry-ST302"
FT                   /parent_base="A"
FT                   /replace="G"
FT   variation       3925516
FT                   /node="internal_19->IA7122-Poultry-ST302"
FT                   /colour="4"
FT                   /taxa="IA7122-Poultry-ST302"
FT                   /parent_base="C"
FT                   /replace="T"
FT   variation       3925534
FT                   /node="internal_19->IA7122-Poultry-ST302"
FT                   /colour="4"
FT                   /taxa="IA7122-Poultry-ST302"
FT                   /parent_base="C"
FT                   /replace="T"
FT   variation       3925556
FT                   /node="internal_19->IA7122-Poultry-ST302"
FT                   /colour="4"
FT                   /taxa="IA7122-Poultry-ST302"
FT                   /parent_base="T"
FT                   /replace="C"
FT   variation       3925925
FT                   /node="internal_19->IA7122-Poultry-ST302"
FT                   /colour="4"
FT                   /taxa="IA7122-Poultry-ST302"
FT                   /parent_base="G"
FT                   /replace="C"
FT   variation       3926066
FT                   /node="internal_19->IA7122-Poultry-ST302"
FT                   /colour="4"
FT                   /taxa="IA7122-Poultry-ST302"
FT                   /parent_base="A"
FT                   /replace="T"
FT   variation       3926469
FT                   /node="internal_19->IA7122-Poultry-ST302"
FT                   /colour="4"
FT                   /taxa="IA7122-Poultry-ST302"
FT                   /parent_base="C"
FT                   /replace="A"
FT   variation       3927872
FT                   /node="internal_19->IA7122-Poultry-ST302"
FT                   /colour="4"
FT                   /taxa="IA7122-Poultry-ST302"
FT                   /parent_base="A"
FT                   /replace="G"
FT   variation       3928796
FT                   /node="internal_19->IA7122-Poultry-ST302"
FT                   /colour="4"
FT                   /taxa="IA7122-Poultry-ST302"
FT                   /parent_base="A"
FT                   /replace="T"
FT   variation       3929569
FT                   /node="internal_19->IA7122-Poultry-ST302"
FT                   /colour="4"
FT                   /taxa="IA7122-Poultry-ST302"
FT                   /parent_base="T"
FT                   /replace="A"
FT   variation       3929766
FT                   /node="internal_19->IA7122-Poultry-ST302"
FT                   /colour="4"
FT                   /taxa="IA7122-Poultry-ST302"
FT                   /parent_base="T"
FT                   /replace="A"
FT   variation       3930273
FT                   /node="internal_19->IA7122-Poultry-ST302"
FT                   /colour="4"
FT                   /taxa="IA7122-Poultry-ST302"
FT                   /parent_base="A"
FT                   /replace="G"
FT   variation       3930584
FT                   /node="internal_19->IA7122-Poultry-ST302"
FT                   /colour="4"
FT                   /taxa="IA7122-Poultry-ST302"
FT                   /parent_base="T"
FT                   /replace="C"
FT   variation       3931130
FT                   /node="internal_19->IA7122-Poultry-ST302"
FT                   /colour="4"
FT                   /taxa="IA7122-Poultry-ST302"
FT                   /parent_base="T"
FT                   /replace="C"
FT   variation       3960724
FT                   /node="internal_19->IA7122-Poultry-ST302"
FT                   /colour="4"
FT                   /taxa="IA7122-Poultry-ST302"
FT                   /parent_base="G"
FT                   /replace="A"
FT   variation       3970086
FT                   /node="internal_19->IA7122-Poultry-ST302"
FT                   /colour="4"
FT                   /taxa="IA7122-Poultry-ST302"
FT                   /parent_base="A"
FT                   /replace="G"
FT   variation       3970089
FT                   /node="internal_19->IA7122-Poultry-ST302"
FT                   /colour="4"
FT                   /taxa="IA7122-Poultry-ST302"
FT                   /parent_base="A"
FT                   /replace="G"
FT   variation       3970127
FT                   /node="internal_19->IA7122-Poultry-ST302"
FT                   /colour="4"
FT                   /taxa="IA7122-Poultry-ST302"
FT                   /parent_base="T"
FT                   /replace="C"
FT   variation       3970160
FT                   /node="internal_19->IA7122-Poultry-ST302"
FT                   /colour="4"
FT                   /taxa="IA7122-Poultry-ST302"
FT                   /parent_base="C"
FT                   /replace="T"
FT   variation       3970212
FT                   /node="internal_19->IA7122-Poultry-ST302"
FT                   /colour="4"
FT                   /taxa="IA7122-Poultry-ST302"
FT                   /parent_base="G"
FT                   /replace="A"
FT   variation       3970215
FT                   /node="internal_19->IA7122-Poultry-ST302"
FT                   /colour="4"
FT                   /taxa="IA7122-Poultry-ST302"
FT                   /parent_base="G"
FT                   /replace="T"
FT   variation       3970217
FT                   /node="internal_19->IA7122-Poultry-ST302"
FT                   /colour="4"
FT                   /taxa="IA7122-Poultry-ST302"
FT                   /parent_base="G"
FT                   /replace="C"
FT   variation       3970221
FT                   /node="internal_19->IA7122-Poultry-ST302"
FT                   /colour="4"
FT                   /taxa="IA7122-Poultry-ST302"
FT                   /parent_base="G"
FT                   /replace="A"
FT   variation       3970248
FT                   /node="internal_19->IA7122-Poultry-ST302"
FT                   /colour="4"
FT                   /taxa="IA7122-Poultry-ST302"
FT                   /parent_base="A"
FT                   /replace="G"
FT   variation       3970254
FT                   /node="internal_19->IA7122-Poultry-ST302"
FT                   /colour="4"
FT                   /taxa="IA7122-Poultry-ST302"
FT                   /parent_base="G"
FT                   /replace="C"
FT   variation       3970275
FT                   /node="internal_19->IA7122-Poultry-ST302"
FT                   /colour="4"
FT                   /taxa="IA7122-Poultry-ST302"
FT                   /parent_base="T"
FT                   /replace="C"
FT   variation       3970398
FT                   /node="internal_19->IA7122-Poultry-ST302"
FT                   /colour="4"
FT                   /taxa="IA7122-Poultry-ST302"
FT                   /parent_base="C"
FT                   /replace="G"
FT   variation       3970435
FT                   /node="internal_19->IA7122-Poultry-ST302"
FT                   /colour="4"
FT                   /taxa="IA7122-Poultry-ST302"
FT                   /parent_base="G"
FT                   /replace="T"
FT   variation       3970471
FT                   /node="internal_19->IA7122-Poultry-ST302"
FT                   /colour="4"
FT                   /taxa="IA7122-Poultry-ST302"
FT                   /parent_base="T"
FT                   /replace="C"
FT   variation       3970534
FT                   /node="internal_19->IA7122-Poultry-ST302"
FT                   /colour="4"
FT                   /taxa="IA7122-Poultry-ST302"
FT                   /parent_base="C"
FT                   /replace="A"
FT   variation       3970545
FT                   /node="internal_19->IA7122-Poultry-ST302"
FT                   /colour="4"
FT                   /taxa="IA7122-Poultry-ST302"
FT                   /parent_base="C"
FT                   /replace="T"
FT   variation       3970563
FT                   /node="internal_19->IA7122-Poultry-ST302"
FT                   /colour="4"
FT                   /taxa="IA7122-Poultry-ST302"
FT                   /parent_base="C"
FT                   /replace="T"
FT   variation       3970564
FT                   /node="internal_19->IA7122-Poultry-ST302"
FT                   /colour="4"
FT                   /taxa="IA7122-Poultry-ST302"
FT                   /parent_base="A"
FT                   /replace="G"
FT   variation       3970591
FT                   /node="internal_19->IA7122-Poultry-ST302"
FT                   /colour="4"
FT                   /taxa="IA7122-Poultry-ST302"
FT                   /parent_base="A"
FT                   /replace="G"
FT   variation       3970651
FT                   /node="internal_19->IA7122-Poultry-ST302"
FT                   /colour="4"
FT                   /taxa="IA7122-Poultry-ST302"
FT                   /parent_base="C"
FT                   /replace="A"
FT   variation       3970660
FT                   /node="internal_19->IA7122-Poultry-ST302"
FT                   /colour="4"
FT                   /taxa="IA7122-Poultry-ST302"
FT                   /parent_base="C"
FT                   /replace="T"
FT   variation       3970681
FT                   /node="internal_19->IA7122-Poultry-ST302"
FT                   /colour="4"
FT                   /taxa="IA7122-Poultry-ST302"
FT                   /parent_base="A"
FT                   /replace="T"
FT   variation       3970687
FT                   /node="internal_19->IA7122-Poultry-ST302"
FT                   /colour="4"
FT                   /taxa="IA7122-Poultry-ST302"
FT                   /parent_base="C"
FT                   /replace="A"
FT   variation       3970708
FT                   /node="internal_19->IA7122-Poultry-ST302"
FT                   /colour="4"
FT                   /taxa="IA7122-Poultry-ST302"
FT                   /parent_base="C"
FT                   /replace="T"
FT   variation       3970717
FT                   /node="internal_19->IA7122-Poultry-ST302"
FT                   /colour="4"
FT                   /taxa="IA7122-Poultry-ST302"
FT                   /parent_base="C"
FT                   /replace="T"
FT   variation       3970723
FT                   /node="internal_19->IA7122-Poultry-ST302"
FT                   /colour="4"
FT                   /taxa="IA7122-Poultry-ST302"
FT                   /parent_base="T"
FT                   /replace="C"
FT   variation       3970732
FT                   /node="internal_19->IA7122-Poultry-ST302"
FT                   /colour="4"
FT                   /taxa="IA7122-Poultry-ST302"
FT                   /parent_base="G"
FT                   /replace="A"
FT   variation       3970744
FT                   /node="internal_19->IA7122-Poultry-ST302"
FT                   /colour="4"
FT                   /taxa="IA7122-Poultry-ST302"
FT                   /parent_base="G"
FT                   /replace="A"
FT   variation       3970753
FT                   /node="internal_19->IA7122-Poultry-ST302"
FT                   /colour="4"
FT                   /taxa="IA7122-Poultry-ST302"
FT                   /parent_base="G"
FT                   /replace="A"
FT   variation       3970756
FT                   /node="internal_19->IA7122-Poultry-ST302"
FT                   /colour="4"
FT                   /taxa="IA7122-Poultry-ST302"
FT                   /parent_base="C"
FT                   /replace="T"
FT   variation       3970759
FT                   /node="internal_19->IA7122-Poultry-ST302"
FT                   /colour="4"
FT                   /taxa="IA7122-Poultry-ST302"
FT                   /parent_base="T"
FT                   /replace="A"
FT   variation       3970873
FT                   /node="internal_19->IA7122-Poultry-ST302"
FT                   /colour="4"
FT                   /taxa="IA7122-Poultry-ST302"
FT                   /parent_base="G"
FT                   /replace="A"
FT   variation       3970884
FT                   /node="internal_19->IA7122-Poultry-ST302"
FT                   /colour="4"
FT                   /taxa="IA7122-Poultry-ST302"
FT                   /parent_base="T"
FT                   /replace="G"
FT   variation       3970926
FT                   /node="internal_19->IA7122-Poultry-ST302"
FT                   /colour="4"
FT                   /taxa="IA7122-Poultry-ST302"
FT                   /parent_base="C"
FT                   /replace="T"
FT   variation       3970945
FT                   /node="internal_19->IA7122-Poultry-ST302"
FT                   /colour="4"
FT                   /taxa="IA7122-Poultry-ST302"
FT                   /parent_base="C"
FT                   /replace="A"
FT   variation       3970948
FT                   /node="internal_19->IA7122-Poultry-ST302"
FT                   /colour="4"
FT                   /taxa="IA7122-Poultry-ST302"
FT                   /parent_base="A"
FT                   /replace="G"
FT   variation       3970981
FT                   /node="internal_19->IA7122-Poultry-ST302"
FT                   /colour="4"
FT                   /taxa="IA7122-Poultry-ST302"
FT                   /parent_base="C"
FT                   /replace="T"
FT   variation       3971002
FT                   /node="internal_19->IA7122-Poultry-ST302"
FT                   /colour="4"
FT                   /taxa="IA7122-Poultry-ST302"
FT                   /parent_base="A"
FT                   /replace="G"
FT   variation       3971122
FT                   /node="internal_19->IA7122-Poultry-ST302"
FT                   /colour="4"
FT                   /taxa="IA7122-Poultry-ST302"
FT                   /parent_base="T"
FT                   /replace="G"
FT   variation       3971130
FT                   /node="internal_19->IA7122-Poultry-ST302"
FT                   /colour="4"
FT                   /taxa="IA7122-Poultry-ST302"
FT                   /parent_base="G"
FT                   /replace="A"
FT   variation       3971173
FT                   /node="internal_19->IA7122-Poultry-ST302"
FT                   /colour="4"
FT                   /taxa="IA7122-Poultry-ST302"
FT                   /parent_base="T"
FT                   /replace="C"
FT   variation       3971191
FT                   /node="internal_19->IA7122-Poultry-ST302"
FT                   /colour="4"
FT                   /taxa="IA7122-Poultry-ST302"
FT                   /parent_base="G"
FT                   /replace="A"
FT   variation       3971215
FT                   /node="internal_19->IA7122-Poultry-ST302"
FT                   /colour="4"
FT                   /taxa="IA7122-Poultry-ST302"
FT                   /parent_base="G"
FT                   /replace="A"
FT   variation       3971224
FT                   /node="internal_19->IA7122-Poultry-ST302"
FT                   /colour="4"
FT                   /taxa="IA7122-Poultry-ST302"
FT                   /parent_base="A"
FT                   /replace="G"
FT   variation       3971233
FT                   /node="internal_19->IA7122-Poultry-ST302"
FT                   /colour="4"
FT                   /taxa="IA7122-Poultry-ST302"
FT                   /parent_base="G"
FT                   /replace="A"
FT   variation       3971236
FT                   /node="internal_19->IA7122-Poultry-ST302"
FT                   /colour="4"
FT                   /taxa="IA7122-Poultry-ST302"
FT                   /parent_base="G"
FT                   /replace="A"
FT   variation       3971314
FT                   /node="internal_19->IA7122-Poultry-ST302"
FT                   /colour="4"
FT                   /taxa="IA7122-Poultry-ST302"
FT                   /parent_base="A"
FT                   /replace="G"
FT   variation       3971317
FT                   /node="internal_19->IA7122-Poultry-ST302"
FT                   /colour="4"
FT                   /taxa="IA7122-Poultry-ST302"
FT                   /parent_base="G"
FT                   /replace="C"
FT   variation       3971326
FT                   /node="internal_19->IA7122-Poultry-ST302"
FT                   /colour="4"
FT                   /taxa="IA7122-Poultry-ST302"
FT                   /parent_base="A"
FT                   /replace="G"
FT   variation       3971327
FT                   /node="internal_19->IA7122-Poultry-ST302"
FT                   /colour="4"
FT                   /taxa="IA7122-Poultry-ST302"
FT                   /parent_base="T"
FT                   /replace="C"
FT   variation       3971374
FT                   /node="internal_19->IA7122-Poultry-ST302"
FT                   /colour="4"
FT                   /taxa="IA7122-Poultry-ST302"
FT                   /parent_base="T"
FT                   /replace="C"
FT   variation       3971383
FT                   /node="internal_19->IA7122-Poultry-ST302"
FT                   /colour="4"
FT                   /taxa="IA7122-Poultry-ST302"
FT                   /parent_base="A"
FT                   /replace="G"
FT   variation       3971438
FT                   /node="internal_19->IA7122-Poultry-ST302"
FT                   /colour="4"
FT                   /taxa="IA7122-Poultry-ST302"
FT                   /parent_base="T"
FT                   /replace="C"
FT   variation       3971440
FT                   /node="internal_19->IA7122-Poultry-ST302"
FT                   /colour="4"
FT                   /taxa="IA7122-Poultry-ST302"
FT                   /parent_base="T"
FT                   /replace="C"
FT   variation       3971449
FT                   /node="internal_19->IA7122-Poultry-ST302"
FT                   /colour="4"
FT                   /taxa="IA7122-Poultry-ST302"
FT                   /parent_base="G"
FT                   /replace="A"
FT   variation       3971463
FT                   /node="internal_19->IA7122-Poultry-ST302"
FT                   /colour="4"
FT                   /taxa="IA7122-Poultry-ST302"
FT                   /parent_base="A"
FT                   /replace="G"
FT   variation       3971467
FT                   /node="internal_19->IA7122-Poultry-ST302"
FT                   /colour="4"
FT                   /taxa="IA7122-Poultry-ST302"
FT                   /parent_base="T"
FT                   /replace="C"
FT   variation       3971473
FT                   /node="internal_19->IA7122-Poultry-ST302"
FT                   /colour="4"
FT                   /taxa="IA7122-Poultry-ST302"
FT                   /parent_base="A"
FT                   /replace="C"
FT   variation       3971482
FT                   /node="internal_19->IA7122-Poultry-ST302"
FT                   /colour="4"
FT                   /taxa="IA7122-Poultry-ST302"
FT                   /parent_base="T"
FT                   /replace="C"
FT   variation       3971483
FT                   /node="internal_19->IA7122-Poultry-ST302"
FT                   /colour="4"
FT                   /taxa="IA7122-Poultry-ST302"
FT                   /parent_base="T"
FT                   /replace="G"
FT   variation       3971484
FT                   /node="internal_19->IA7122-Poultry-ST302"
FT                   /colour="4"
FT                   /taxa="IA7122-Poultry-ST302"
FT                   /parent_base="G"
FT                   /replace="T"
FT   variation       3971485
FT                   /node="internal_19->IA7122-Poultry-ST302"
FT                   /colour="4"
FT                   /taxa="IA7122-Poultry-ST302"
FT                   /parent_base="T"
FT                   /replace="A"
FT   variation       3971503
FT                   /node="internal_19->IA7122-Poultry-ST302"
FT                   /colour="4"
FT                   /taxa="IA7122-Poultry-ST302"
FT                   /parent_base="G"
FT                   /replace="T"
FT   variation       3971548
FT                   /node="internal_19->IA7122-Poultry-ST302"
FT                   /colour="4"
FT                   /taxa="IA7122-Poultry-ST302"
FT                   /parent_base="A"
FT                   /replace="G"
FT   variation       3971551
FT                   /node="internal_19->IA7122-Poultry-ST302"
FT                   /colour="4"
FT                   /taxa="IA7122-Poultry-ST302"
FT                   /parent_base="C"
FT                   /replace="T"
FT   variation       3971554
FT                   /node="internal_19->IA7122-Poultry-ST302"
FT                   /colour="4"
FT                   /taxa="IA7122-Poultry-ST302"
FT                   /parent_base="G"
FT                   /replace="T"
FT   variation       3971587
FT                   /node="internal_19->IA7122-Poultry-ST302"
FT                   /colour="4"
FT                   /taxa="IA7122-Poultry-ST302"
FT                   /parent_base="T"
FT                   /replace="C"
FT   variation       3971620
FT                   /node="internal_19->IA7122-Poultry-ST302"
FT                   /colour="4"
FT                   /taxa="IA7122-Poultry-ST302"
FT                   /parent_base="A"
FT                   /replace="G"
FT   variation       3971671
FT                   /node="internal_19->IA7122-Poultry-ST302"
FT                   /colour="4"
FT                   /taxa="IA7122-Poultry-ST302"
FT                   /parent_base="G"
FT                   /replace="A"
FT   variation       3971683
FT                   /node="internal_19->IA7122-Poultry-ST302"
FT                   /colour="4"
FT                   /taxa="IA7122-Poultry-ST302"
FT                   /parent_base="A"
FT                   /replace="G"
FT   variation       3971691
FT                   /node="internal_19->IA7122-Poultry-ST302"
FT                   /colour="4"
FT                   /taxa="IA7122-Poultry-ST302"
FT                   /parent_base="G"
FT                   /replace="A"
FT   variation       3971700
FT                   /node="internal_19->IA7122-Poultry-ST302"
FT                   /colour="4"
FT                   /taxa="IA7122-Poultry-ST302"
FT                   /parent_base="A"
FT                   /replace="C"
FT   variation       3971703
FT                   /node="internal_19->IA7122-Poultry-ST302"
FT                   /colour="4"
FT                   /taxa="IA7122-Poultry-ST302"
FT                   /parent_base="C"
FT                   /replace="T"
FT   variation       3971706
FT                   /node="internal_19->IA7122-Poultry-ST302"
FT                   /colour="4"
FT                   /taxa="IA7122-Poultry-ST302"
FT                   /parent_base="A"
FT                   /replace="G"
FT   variation       3971709
FT                   /node="internal_19->IA7122-Poultry-ST302"
FT                   /colour="4"
FT                   /taxa="IA7122-Poultry-ST302"
FT                   /parent_base="T"
FT                   /replace="C"
FT   variation       3971730
FT                   /node="internal_19->IA7122-Poultry-ST302"
FT                   /colour="4"
FT                   /taxa="IA7122-Poultry-ST302"
FT                   /parent_base="A"
FT                   /replace="C"
FT   variation       3971748
FT                   /node="internal_19->IA7122-Poultry-ST302"
FT                   /colour="4"
FT                   /taxa="IA7122-Poultry-ST302"
FT                   /parent_base="A"
FT                   /replace="G"
FT   variation       3971755
FT                   /node="internal_19->IA7122-Poultry-ST302"
FT                   /colour="4"
FT                   /taxa="IA7122-Poultry-ST302"
FT                   /parent_base="T"
FT                   /replace="C"
FT   variation       3971844
FT                   /node="internal_19->IA7122-Poultry-ST302"
FT                   /colour="4"
FT                   /taxa="IA7122-Poultry-ST302"
FT                   /parent_base="T"
FT                   /replace="C"
FT   variation       3971864
FT                   /node="internal_19->IA7122-Poultry-ST302"
FT                   /colour="4"
FT                   /taxa="IA7122-Poultry-ST302"
FT                   /parent_base="G"
FT                   /replace="A"
FT   variation       3971874
FT                   /node="internal_19->IA7122-Poultry-ST302"
FT                   /colour="4"
FT                   /taxa="IA7122-Poultry-ST302"
FT                   /parent_base="G"
FT                   /replace="A"
FT   variation       3971940
FT                   /node="internal_19->IA7122-Poultry-ST302"
FT                   /colour="4"
FT                   /taxa="IA7122-Poultry-ST302"
FT                   /parent_base="A"
FT                   /replace="G"
FT   variation       3971952
FT                   /node="internal_19->IA7122-Poultry-ST302"
FT                   /colour="4"
FT                   /taxa="IA7122-Poultry-ST302"
FT                   /parent_base="A"
FT                   /replace="G"
FT   variation       3971961
FT                   /node="internal_19->IA7122-Poultry-ST302"
FT                   /colour="4"
FT                   /taxa="IA7122-Poultry-ST302"
FT                   /parent_base="A"
FT                   /replace="G"
FT   variation       3971979
FT                   /node="internal_19->IA7122-Poultry-ST302"
FT                   /colour="4"
FT                   /taxa="IA7122-Poultry-ST302"
FT                   /parent_base="A"
FT                   /replace="C"
FT   variation       3971982
FT                   /node="internal_19->IA7122-Poultry-ST302"
FT                   /colour="4"
FT                   /taxa="IA7122-Poultry-ST302"
FT                   /parent_base="G"
FT                   /replace="C"
FT   variation       3972009
FT                   /node="internal_19->IA7122-Poultry-ST302"
FT                   /colour="4"
FT                   /taxa="IA7122-Poultry-ST302"
FT                   /parent_base="A"
FT                   /replace="G"
FT   variation       3972030
FT                   /node="internal_19->IA7122-Poultry-ST302"
FT                   /colour="4"
FT                   /taxa="IA7122-Poultry-ST302"
FT                   /parent_base="G"
FT                   /replace="A"
FT   variation       3972051
FT                   /node="internal_19->IA7122-Poultry-ST302"
FT                   /colour="4"
FT                   /taxa="IA7122-Poultry-ST302"
FT                   /parent_base="A"
FT                   /replace="G"
FT   variation       3972060
FT                   /node="internal_19->IA7122-Poultry-ST302"
FT                   /colour="4"
FT                   /taxa="IA7122-Poultry-ST302"
FT                   /parent_base="C"
FT                   /replace="T"
FT   variation       3972096
FT                   /node="internal_19->IA7122-Poultry-ST302"
FT                   /colour="4"
FT                   /taxa="IA7122-Poultry-ST302"
FT                   /parent_base="A"
FT                   /replace="G"
FT   variation       3972120
FT                   /node="internal_19->IA7122-Poultry-ST302"
FT                   /colour="4"
FT                   /taxa="IA7122-Poultry-ST302"
FT                   /parent_base="G"
FT                   /replace="T"
FT   variation       3972138
FT                   /node="internal_19->IA7122-Poultry-ST302"
FT                   /colour="4"
FT                   /taxa="IA7122-Poultry-ST302"
FT                   /parent_base="G"
FT                   /replace="C"
FT   variation       3972192
FT                   /node="internal_19->IA7122-Poultry-ST302"
FT                   /colour="4"
FT                   /taxa="IA7122-Poultry-ST302"
FT                   /parent_base="C"
FT                   /replace="T"
FT   variation       3972312
FT                   /node="internal_19->IA7122-Poultry-ST302"
FT                   /colour="4"
FT                   /taxa="IA7122-Poultry-ST302"
FT                   /parent_base="G"
FT                   /replace="T"
FT   variation       3972350
FT                   /node="internal_19->IA7122-Poultry-ST302"
FT                   /colour="4"
FT                   /taxa="IA7122-Poultry-ST302"
FT                   /parent_base="G"
FT                   /replace="C"
FT   variation       3972354
FT                   /node="internal_19->IA7122-Poultry-ST302"
FT                   /colour="4"
FT                   /taxa="IA7122-Poultry-ST302"
FT                   /parent_base="A"
FT                   /replace="C"
FT   variation       3972390
FT                   /node="internal_19->IA7122-Poultry-ST302"
FT                   /colour="4"
FT                   /taxa="IA7122-Poultry-ST302"
FT                   /parent_base="A"
FT                   /replace="T"
FT   variation       3972393
FT                   /node="internal_19->IA7122-Poultry-ST302"
FT                   /colour="4"
FT                   /taxa="IA7122-Poultry-ST302"
FT                   /parent_base="A"
FT                   /replace="G"
FT   variation       3972425
FT                   /node="internal_19->IA7122-Poultry-ST302"
FT                   /colour="4"
FT                   /taxa="IA7122-Poultry-ST302"
FT                   /parent_base="C"
FT                   /replace="T"
FT   variation       3972480
FT                   /node="internal_19->IA7122-Poultry-ST302"
FT                   /colour="4"
FT                   /taxa="IA7122-Poultry-ST302"
FT                   /parent_base="G"
FT                   /replace="A"
FT   variation       3972525
FT                   /node="internal_19->IA7122-Poultry-ST302"
FT                   /colour="4"
FT                   /taxa="IA7122-Poultry-ST302"
FT                   /parent_base="C"
FT                   /replace="T"
FT   variation       3972558
FT                   /node="internal_19->IA7122-Poultry-ST302"
FT                   /colour="4"
FT                   /taxa="IA7122-Poultry-ST302"
FT                   /parent_base="A"
FT                   /replace="G"
FT   variation       3972591
FT                   /node="internal_19->IA7122-Poultry-ST302"
FT                   /colour="4"
FT                   /taxa="IA7122-Poultry-ST302"
FT                   /parent_base="G"
FT                   /replace="A"
FT   variation       3972675
FT                   /node="internal_19->IA7122-Poultry-ST302"
FT                   /colour="4"
FT                   /taxa="IA7122-Poultry-ST302"
FT                   /parent_base="G"
FT                   /replace="A"
FT   variation       3972684
FT                   /node="internal_19->IA7122-Poultry-ST302"
FT                   /colour="4"
FT                   /taxa="IA7122-Poultry-ST302"
FT                   /parent_base="C"
FT                   /replace="T"
FT   variation       3972692
FT                   /node="internal_19->IA7122-Poultry-ST302"
FT                   /colour="4"
FT                   /taxa="IA7122-Poultry-ST302"
FT                   /parent_base="G"
FT                   /replace="A"
FT   variation       3972702
FT                   /node="internal_19->IA7122-Poultry-ST302"
FT                   /colour="4"
FT                   /taxa="IA7122-Poultry-ST302"
FT                   /parent_base="C"
FT                   /replace="T"
FT   variation       3972717
FT                   /node="internal_19->IA7122-Poultry-ST302"
FT                   /colour="4"
FT                   /taxa="IA7122-Poultry-ST302"
FT                   /parent_base="G"
FT                   /replace="A"
FT   variation       3972774
FT                   /node="internal_19->IA7122-Poultry-ST302"
FT                   /colour="4"
FT                   /taxa="IA7122-Poultry-ST302"
FT                   /parent_base="A"
FT                   /replace="C"
FT   variation       3972789
FT                   /node="internal_19->IA7122-Poultry-ST302"
FT                   /colour="4"
FT                   /taxa="IA7122-Poultry-ST302"
FT                   /parent_base="A"
FT                   /replace="G"
FT   variation       3972899
FT                   /node="internal_19->IA7122-Poultry-ST302"
FT                   /colour="4"
FT                   /taxa="IA7122-Poultry-ST302"
FT                   /parent_base="G"
FT                   /replace="A"
FT   variation       3972991
FT                   /node="internal_19->IA7122-Poultry-ST302"
FT                   /colour="4"
FT                   /taxa="IA7122-Poultry-ST302"
FT                   /parent_base="T"
FT                   /replace="C"
FT   variation       3972999
FT                   /node="internal_19->IA7122-Poultry-ST302"
FT                   /colour="4"
FT                   /taxa="IA7122-Poultry-ST302"
FT                   /parent_base="G"
FT                   /replace="T"
FT   variation       3973003
FT                   /node="internal_19->IA7122-Poultry-ST302"
FT                   /colour="4"
FT                   /taxa="IA7122-Poultry-ST302"
FT                   /parent_base="C"
FT                   /replace="T"
FT   variation       3973034
FT                   /node="internal_19->IA7122-Poultry-ST302"
FT                   /colour="4"
FT                   /taxa="IA7122-Poultry-ST302"
FT                   /parent_base="G"
FT                   /replace="A"
FT   variation       3973420
FT                   /node="internal_19->IA7122-Poultry-ST302"
FT                   /colour="4"
FT                   /taxa="IA7122-Poultry-ST302"
FT                   /parent_base="A"
FT                   /replace="G"
FT   variation       3973521
FT                   /node="internal_19->IA7122-Poultry-ST302"
FT                   /colour="4"
FT                   /taxa="IA7122-Poultry-ST302"
FT                   /parent_base="T"
FT                   /replace="C"
FT   variation       3973611
FT                   /node="internal_19->IA7122-Poultry-ST302"
FT                   /colour="4"
FT                   /taxa="IA7122-Poultry-ST302"
FT                   /parent_base="G"
FT                   /replace="A"
FT   variation       3973632
FT                   /node="internal_19->IA7122-Poultry-ST302"
FT                   /colour="4"
FT                   /taxa="IA7122-Poultry-ST302"
FT                   /parent_base="T"
FT                   /replace="G"
FT   variation       3973746
FT                   /node="internal_19->IA7122-Poultry-ST302"
FT                   /colour="4"
FT                   /taxa="IA7122-Poultry-ST302"
FT                   /parent_base="G"
FT                   /replace="A"
FT   variation       3973749
FT                   /node="internal_19->IA7122-Poultry-ST302"
FT                   /colour="4"
FT                   /taxa="IA7122-Poultry-ST302"
FT                   /parent_base="A"
FT                   /replace="G"
FT   variation       3973812
FT                   /node="internal_19->IA7122-Poultry-ST302"
FT                   /colour="4"
FT                   /taxa="IA7122-Poultry-ST302"
FT                   /parent_base="T"
FT                   /replace="G"
FT   variation       3973842
FT                   /node="internal_19->IA7122-Poultry-ST302"
FT                   /colour="4"
FT                   /taxa="IA7122-Poultry-ST302"
FT                   /parent_base="A"
FT                   /replace="G"
FT   variation       3973890
FT                   /node="internal_19->IA7122-Poultry-ST302"
FT                   /colour="4"
FT                   /taxa="IA7122-Poultry-ST302"
FT                   /parent_base="C"
FT                   /replace="G"
FT   variation       3973893
FT                   /node="internal_19->IA7122-Poultry-ST302"
FT                   /colour="4"
FT                   /taxa="IA7122-Poultry-ST302"
FT                   /parent_base="A"
FT                   /replace="G"
FT   variation       3973908
FT                   /node="internal_19->IA7122-Poultry-ST302"
FT                   /colour="4"
FT                   /taxa="IA7122-Poultry-ST302"
FT                   /parent_base="C"
FT                   /replace="A"
FT   variation       3973910
FT                   /node="internal_19->IA7122-Poultry-ST302"
FT                   /colour="4"
FT                   /taxa="IA7122-Poultry-ST302"
FT                   /parent_base="C"
FT                   /replace="T"
FT   variation       3973950
FT                   /node="internal_19->IA7122-Poultry-ST302"
FT                   /colour="4"
FT                   /taxa="IA7122-Poultry-ST302"
FT                   /parent_base="C"
FT                   /replace="T"
FT   variation       3973953
FT                   /node="internal_19->IA7122-Poultry-ST302"
FT                   /colour="4"
FT                   /taxa="IA7122-Poultry-ST302"
FT                   /parent_base="A"
FT                   /replace="G"
FT   variation       3973956
FT                   /node="internal_19->IA7122-Poultry-ST302"
FT                   /colour="4"
FT                   /taxa="IA7122-Poultry-ST302"
FT                   /parent_base="A"
FT                   /replace="G"
FT   variation       3973959
FT                   /node="internal_19->IA7122-Poultry-ST302"
FT                   /colour="4"
FT                   /taxa="IA7122-Poultry-ST302"
FT                   /parent_base="G"
FT                   /replace="T"
FT   variation       3973971
FT                   /node="internal_19->IA7122-Poultry-ST302"
FT                   /colour="4"
FT                   /taxa="IA7122-Poultry-ST302"
FT                   /parent_base="A"
FT                   /replace="G"
FT   variation       3974028
FT                   /node="internal_19->IA7122-Poultry-ST302"
FT                   /colour="4"
FT                   /taxa="IA7122-Poultry-ST302"
FT                   /parent_base="C"
FT                   /replace="T"
FT   variation       3974052
FT                   /node="internal_19->IA7122-Poultry-ST302"
FT                   /colour="4"
FT                   /taxa="IA7122-Poultry-ST302"
FT                   /parent_base="G"
FT                   /replace="A"
FT   variation       3974055
FT                   /node="internal_19->IA7122-Poultry-ST302"
FT                   /colour="4"
FT                   /taxa="IA7122-Poultry-ST302"
FT                   /parent_base="G"
FT                   /replace="A"
FT   variation       3974070
FT                   /node="internal_19->IA7122-Poultry-ST302"
FT                   /colour="4"
FT                   /taxa="IA7122-Poultry-ST302"
FT                   /parent_base="G"
FT                   /replace="A"
FT   variation       3974088
FT                   /node="internal_19->IA7122-Poultry-ST302"
FT                   /colour="4"
FT                   /taxa="IA7122-Poultry-ST302"
FT                   /parent_base="A"
FT                   /replace="G"
FT   variation       3974091
FT                   /node="internal_19->IA7122-Poultry-ST302"
FT                   /colour="4"
FT                   /taxa="IA7122-Poultry-ST302"
FT                   /parent_base="C"
FT                   /replace="T"
FT   variation       3974109
FT                   /node="internal_19->IA7122-Poultry-ST302"
FT                   /colour="4"
FT                   /taxa="IA7122-Poultry-ST302"
FT                   /parent_base="C"
FT                   /replace="G"
FT   variation       3974118
FT                   /node="internal_19->IA7122-Poultry-ST302"
FT                   /colour="4"
FT                   /taxa="IA7122-Poultry-ST302"
FT                   /parent_base="T"
FT                   /replace="G"
FT   variation       3974136
FT                   /node="internal_19->IA7122-Poultry-ST302"
FT                   /colour="4"
FT                   /taxa="IA7122-Poultry-ST302"
FT                   /parent_base="A"
FT                   /replace="T"
FT   variation       3974162
FT                   /node="internal_19->IA7122-Poultry-ST302"
FT                   /colour="4"
FT                   /taxa="IA7122-Poultry-ST302"
FT                   /parent_base="A"
FT                   /replace="G"
FT   variation       3974169
FT                   /node="internal_19->IA7122-Poultry-ST302"
FT                   /colour="4"
FT                   /taxa="IA7122-Poultry-ST302"
FT                   /parent_base="T"
FT                   /replace="C"
FT   variation       3974183
FT                   /node="internal_19->IA7122-Poultry-ST302"
FT                   /colour="4"
FT                   /taxa="IA7122-Poultry-ST302"
FT                   /parent_base="C"
FT                   /replace="T"
FT   variation       3974280
FT                   /node="internal_19->IA7122-Poultry-ST302"
FT                   /colour="4"
FT                   /taxa="IA7122-Poultry-ST302"
FT                   /parent_base="T"
FT                   /replace="C"
FT   variation       3974328
FT                   /node="internal_19->IA7122-Poultry-ST302"
FT                   /colour="4"
FT                   /taxa="IA7122-Poultry-ST302"
FT                   /parent_base="T"
FT                   /replace="G"
FT   variation       3974496
FT                   /node="internal_19->IA7122-Poultry-ST302"
FT                   /colour="4"
FT                   /taxa="IA7122-Poultry-ST302"
FT                   /parent_base="T"
FT                   /replace="C"
FT   variation       3974583
FT                   /node="internal_19->IA7122-Poultry-ST302"
FT                   /colour="4"
FT                   /taxa="IA7122-Poultry-ST302"
FT                   /parent_base="A"
FT                   /replace="G"
FT   variation       3974603
FT                   /node="internal_19->IA7122-Poultry-ST302"
FT                   /colour="4"
FT                   /taxa="IA7122-Poultry-ST302"
FT                   /parent_base="C"
FT                   /replace="G"
FT   variation       3974615
FT                   /node="internal_19->IA7122-Poultry-ST302"
FT                   /colour="4"
FT                   /taxa="IA7122-Poultry-ST302"
FT                   /parent_base="G"
FT                   /replace="A"
FT   variation       3974637
FT                   /node="internal_19->IA7122-Poultry-ST302"
FT                   /colour="4"
FT                   /taxa="IA7122-Poultry-ST302"
FT                   /parent_base="G"
FT                   /replace="A"
FT   variation       3974639
FT                   /node="internal_19->IA7122-Poultry-ST302"
FT                   /colour="4"
FT                   /taxa="IA7122-Poultry-ST302"
FT                   /parent_base="T"
FT                   /replace="G"
FT   variation       3974646
FT                   /node="internal_19->IA7122-Poultry-ST302"
FT                   /colour="4"
FT                   /taxa="IA7122-Poultry-ST302"
FT                   /parent_base="T"
FT                   /replace="C"
FT   variation       3974649
FT                   /node="internal_19->IA7122-Poultry-ST302"
FT                   /colour="4"
FT                   /taxa="IA7122-Poultry-ST302"
FT                   /parent_base="G"
FT                   /replace="A"
FT   variation       3974754
FT                   /node="internal_19->IA7122-Poultry-ST302"
FT                   /colour="4"
FT                   /taxa="IA7122-Poultry-ST302"
FT                   /parent_base="A"
FT                   /replace="G"
FT   variation       3974769
FT                   /node="internal_19->IA7122-Poultry-ST302"
FT                   /colour="4"
FT                   /taxa="IA7122-Poultry-ST302"
FT                   /parent_base="A"
FT                   /replace="G"
FT   variation       3974772
FT                   /node="internal_19->IA7122-Poultry-ST302"
FT                   /colour="4"
FT                   /taxa="IA7122-Poultry-ST302"
FT                   /parent_base="C"
FT                   /replace="A"
FT   variation       3974835
FT                   /node="internal_19->IA7122-Poultry-ST302"
FT                   /colour="4"
FT                   /taxa="IA7122-Poultry-ST302"
FT                   /parent_base="A"
FT                   /replace="G"
FT   variation       3974853
FT                   /node="internal_19->IA7122-Poultry-ST302"
FT                   /colour="4"
FT                   /taxa="IA7122-Poultry-ST302"
FT                   /parent_base="A"
FT                   /replace="G"
FT   variation       3974929
FT                   /node="internal_19->IA7122-Poultry-ST302"
FT                   /colour="4"
FT                   /taxa="IA7122-Poultry-ST302"
FT                   /parent_base="G"
FT                   /replace="T"
FT   variation       3975031
FT                   /node="internal_19->IA7122-Poultry-ST302"
FT                   /colour="4"
FT                   /taxa="IA7122-Poultry-ST302"
FT                   /parent_base="C"
FT                   /replace="T"
FT   variation       3975073
FT                   /node="internal_19->IA7122-Poultry-ST302"
FT                   /colour="4"
FT                   /taxa="IA7122-Poultry-ST302"
FT                   /parent_base="G"
FT                   /replace="A"
FT   variation       3975160
FT                   /node="internal_19->IA7122-Poultry-ST302"
FT                   /colour="4"
FT                   /taxa="IA7122-Poultry-ST302"
FT                   /parent_base="T"
FT                   /replace="C"
FT   variation       3975163
FT                   /node="internal_19->IA7122-Poultry-ST302"
FT                   /colour="4"
FT                   /taxa="IA7122-Poultry-ST302"
FT                   /parent_base="A"
FT                   /replace="G"
FT   variation       3975166
FT                   /node="internal_19->IA7122-Poultry-ST302"
FT                   /colour="4"
FT                   /taxa="IA7122-Poultry-ST302"
FT                   /parent_base="C"
FT                   /replace="A"
FT   variation       3975210
FT                   /node="internal_19->IA7122-Poultry-ST302"
FT                   /colour="4"
FT                   /taxa="IA7122-Poultry-ST302"
FT                   /parent_base="G"
FT                   /replace="A"
FT   variation       3975244
FT                   /node="internal_19->IA7122-Poultry-ST302"
FT                   /colour="4"
FT                   /taxa="IA7122-Poultry-ST302"
FT                   /parent_base="C"
FT                   /replace="A"
FT   variation       3975280
FT                   /node="internal_19->IA7122-Poultry-ST302"
FT                   /colour="4"
FT                   /taxa="IA7122-Poultry-ST302"
FT                   /parent_base="G"
FT                   /replace="A"
FT   variation       3975340
FT                   /node="internal_19->IA7122-Poultry-ST302"
FT                   /colour="4"
FT                   /taxa="IA7122-Poultry-ST302"
FT                   /parent_base="C"
FT                   /replace="T"
FT   variation       3975676
FT                   /node="internal_19->IA7122-Poultry-ST302"
FT                   /colour="4"
FT                   /taxa="IA7122-Poultry-ST302"
FT                   /parent_base="G"
FT                   /replace="A"
FT   variation       3975694
FT                   /node="internal_19->IA7122-Poultry-ST302"
FT                   /colour="4"
FT                   /taxa="IA7122-Poultry-ST302"
FT                   /parent_base="C"
FT                   /replace="T"
FT   variation       3975700
FT                   /node="internal_19->IA7122-Poultry-ST302"
FT                   /colour="4"
FT                   /taxa="IA7122-Poultry-ST302"
FT                   /parent_base="C"
FT                   /replace="A"
FT   variation       3975703
FT                   /node="internal_19->IA7122-Poultry-ST302"
FT                   /colour="4"
FT                   /taxa="IA7122-Poultry-ST302"
FT                   /parent_base="G"
FT                   /replace="A"
FT   variation       3975724
FT                   /node="internal_19->IA7122-Poultry-ST302"
FT                   /colour="4"
FT                   /taxa="IA7122-Poultry-ST302"
FT                   /parent_base="A"
FT                   /replace="G"
FT   variation       3975916
FT                   /node="internal_19->IA7122-Poultry-ST302"
FT                   /colour="4"
FT                   /taxa="IA7122-Poultry-ST302"
FT                   /parent_base="T"
FT                   /replace="C"
FT   variation       3976039
FT                   /node="internal_19->IA7122-Poultry-ST302"
FT                   /colour="4"
FT                   /taxa="IA7122-Poultry-ST302"
FT                   /parent_base="G"
FT                   /replace="A"
FT   variation       3976054
FT                   /node="internal_19->IA7122-Poultry-ST302"
FT                   /colour="4"
FT                   /taxa="IA7122-Poultry-ST302"
FT                   /parent_base="G"
FT                   /replace="A"
FT   variation       3976111
FT                   /node="internal_19->IA7122-Poultry-ST302"
FT                   /colour="4"
FT                   /taxa="IA7122-Poultry-ST302"
FT                   /parent_base="A"
FT                   /replace="G"
FT   variation       3976177
FT                   /node="internal_19->IA7122-Poultry-ST302"
FT                   /colour="4"
FT                   /taxa="IA7122-Poultry-ST302"
FT                   /parent_base="G"
FT                   /replace="T"
FT   variation       3976360
FT                   /node="internal_19->IA7122-Poultry-ST302"
FT                   /colour="4"
FT                   /taxa="IA7122-Poultry-ST302"
FT                   /parent_base="A"
FT                   /replace="G"
FT   variation       3976405
FT                   /node="internal_19->IA7122-Poultry-ST302"
FT                   /colour="4"
FT                   /taxa="IA7122-Poultry-ST302"
FT                   /parent_base="T"
FT                   /replace="C"
FT   variation       3976414
FT                   /node="internal_19->IA7122-Poultry-ST302"
FT                   /colour="4"
FT                   /taxa="IA7122-Poultry-ST302"
FT                   /parent_base="G"
FT                   /replace="A"
FT   variation       3976458
FT                   /node="internal_19->IA7122-Poultry-ST302"
FT                   /colour="4"
FT                   /taxa="IA7122-Poultry-ST302"
FT                   /parent_base="T"
FT                   /replace="A"
FT   variation       3976570
FT                   /node="internal_19->IA7122-Poultry-ST302"
FT                   /colour="4"
FT                   /taxa="IA7122-Poultry-ST302"
FT                   /parent_base="G"
FT                   /replace="T"
FT   variation       3976609
FT                   /node="internal_19->IA7122-Poultry-ST302"
FT                   /colour="4"
FT                   /taxa="IA7122-Poultry-ST302"
FT                   /parent_base="T"
FT                   /replace="C"
FT   variation       3976612
FT                   /node="internal_19->IA7122-Poultry-ST302"
FT                   /colour="4"
FT                   /taxa="IA7122-Poultry-ST302"
FT                   /parent_base="T"
FT                   /replace="C"
FT   variation       3976627
FT                   /node="internal_19->IA7122-Poultry-ST302"
FT                   /colour="4"
FT                   /taxa="IA7122-Poultry-ST302"
FT                   /parent_base="C"
FT                   /replace="T"
FT   variation       3976646
FT                   /node="internal_19->IA7122-Poultry-ST302"
FT                   /colour="4"
FT                   /taxa="IA7122-Poultry-ST302"
FT                   /parent_base="T"
FT                   /replace="C"
FT   variation       3976648
FT                   /node="internal_19->IA7122-Poultry-ST302"
FT                   /colour="4"
FT                   /taxa="IA7122-Poultry-ST302"
FT                   /parent_base="T"
FT                   /replace="C"
FT   variation       3976649
FT                   /node="internal_19->IA7122-Poultry-ST302"
FT                   /colour="4"
FT                   /taxa="IA7122-Poultry-ST302"
FT                   /parent_base="C"
FT                   /replace="T"
FT   variation       3976660
FT                   /node="internal_19->IA7122-Poultry-ST302"
FT                   /colour="4"
FT                   /taxa="IA7122-Poultry-ST302"
FT                   /parent_base="C"
FT                   /replace="T"
FT   variation       3976672
FT                   /node="internal_19->IA7122-Poultry-ST302"
FT                   /colour="4"
FT                   /taxa="IA7122-Poultry-ST302"
FT                   /parent_base="G"
FT                   /replace="T"
FT   variation       3976680
FT                   /node="internal_19->IA7122-Poultry-ST302"
FT                   /colour="4"
FT                   /taxa="IA7122-Poultry-ST302"
FT                   /parent_base="G"
FT                   /replace="A"
FT   variation       3976816
FT                   /node="internal_19->IA7122-Poultry-ST302"
FT                   /colour="4"
FT                   /taxa="IA7122-Poultry-ST302"
FT                   /parent_base="T"
FT                   /replace="G"
FT   variation       3976822
FT                   /node="internal_19->IA7122-Poultry-ST302"
FT                   /colour="4"
FT                   /taxa="IA7122-Poultry-ST302"
FT                   /parent_base="G"
FT                   /replace="A"
FT   variation       3976825
FT                   /node="internal_19->IA7122-Poultry-ST302"
FT                   /colour="4"
FT                   /taxa="IA7122-Poultry-ST302"
FT                   /parent_base="C"
FT                   /replace="T"
FT   variation       3976831
FT                   /node="internal_19->IA7122-Poultry-ST302"
FT                   /colour="4"
FT                   /taxa="IA7122-Poultry-ST302"
FT                   /parent_base="G"
FT                   /replace="A"
FT   variation       3976846
FT                   /node="internal_19->IA7122-Poultry-ST302"
FT                   /colour="4"
FT                   /taxa="IA7122-Poultry-ST302"
FT                   /parent_base="A"
FT                   /replace="G"
FT   variation       3976917
FT                   /node="internal_19->IA7122-Poultry-ST302"
FT                   /colour="4"
FT                   /taxa="IA7122-Poultry-ST302"
FT                   /parent_base="A"
FT                   /replace="G"
FT   variation       3976933
FT                   /node="internal_19->IA7122-Poultry-ST302"
FT                   /colour="4"
FT                   /taxa="IA7122-Poultry-ST302"
FT                   /parent_base="G"
FT                   /replace="A"
FT   variation       3976942
FT                   /node="internal_19->IA7122-Poultry-ST302"
FT                   /colour="4"
FT                   /taxa="IA7122-Poultry-ST302"
FT                   /parent_base="A"
FT                   /replace="G"
FT   variation       3976972
FT                   /node="internal_19->IA7122-Poultry-ST302"
FT                   /colour="4"
FT                   /taxa="IA7122-Poultry-ST302"
FT                   /parent_base="G"
FT                   /replace="A"
FT   variation       3976978
FT                   /node="internal_19->IA7122-Poultry-ST302"
FT                   /colour="4"
FT                   /taxa="IA7122-Poultry-ST302"
FT                   /parent_base="A"
FT                   /replace="G"
FT   variation       3976987
FT                   /node="internal_19->IA7122-Poultry-ST302"
FT                   /colour="4"
FT                   /taxa="IA7122-Poultry-ST302"
FT                   /parent_base="A"
FT                   /replace="G"
FT   variation       3976990
FT                   /node="internal_19->IA7122-Poultry-ST302"
FT                   /colour="4"
FT                   /taxa="IA7122-Poultry-ST302"
FT                   /parent_base="G"
FT                   /replace="A"
FT   variation       3977050
FT                   /node="internal_19->IA7122-Poultry-ST302"
FT                   /colour="4"
FT                   /taxa="IA7122-Poultry-ST302"
FT                   /parent_base="A"
FT                   /replace="G"
FT   variation       3977062
FT                   /node="internal_19->IA7122-Poultry-ST302"
FT                   /colour="4"
FT                   /taxa="IA7122-Poultry-ST302"
FT                   /parent_base="C"
FT                   /replace="T"
FT   variation       3977102
FT                   /node="internal_19->IA7122-Poultry-ST302"
FT                   /colour="4"
FT                   /taxa="IA7122-Poultry-ST302"
FT                   /parent_base="A"
FT                   /replace="G"
FT   variation       3977110
FT                   /node="internal_19->IA7122-Poultry-ST302"
FT                   /colour="4"
FT                   /taxa="IA7122-Poultry-ST302"
FT                   /parent_base="C"
FT                   /replace="T"
FT   variation       3977128
FT                   /node="internal_19->IA7122-Poultry-ST302"
FT                   /colour="4"
FT                   /taxa="IA7122-Poultry-ST302"
FT                   /parent_base="G"
FT                   /replace="C"
FT   variation       3977134
FT                   /node="internal_19->IA7122-Poultry-ST302"
FT                   /colour="4"
FT                   /taxa="IA7122-Poultry-ST302"
FT                   /parent_base="A"
FT                   /replace="G"
FT   variation       3977143
FT                   /node="internal_19->IA7122-Poultry-ST302"
FT                   /colour="4"
FT                   /taxa="IA7122-Poultry-ST302"
FT                   /parent_base="G"
FT                   /replace="T"
FT   variation       3977149
FT                   /node="internal_19->IA7122-Poultry-ST302"
FT                   /colour="4"
FT                   /taxa="IA7122-Poultry-ST302"
FT                   /parent_base="G"
FT                   /replace="T"
FT   variation       3977161
FT                   /node="internal_19->IA7122-Poultry-ST302"
FT                   /colour="4"
FT                   /taxa="IA7122-Poultry-ST302"
FT                   /parent_base="A"
FT                   /replace="G"
FT   variation       3977163
FT                   /node="internal_19->IA7122-Poultry-ST302"
FT                   /colour="4"
FT                   /taxa="IA7122-Poultry-ST302"
FT                   /parent_base="C"
FT                   /replace="T"
FT   variation       3977200
FT                   /node="internal_19->IA7122-Poultry-ST302"
FT                   /colour="4"
FT                   /taxa="IA7122-Poultry-ST302"
FT                   /parent_base="A"
FT                   /replace="G"
FT   variation       3977291
FT                   /node="internal_19->IA7122-Poultry-ST302"
FT                   /colour="4"
FT                   /taxa="IA7122-Poultry-ST302"
FT                   /parent_base="C"
FT                   /replace="T"
FT   variation       3977350
FT                   /node="internal_19->IA7122-Poultry-ST302"
FT                   /colour="4"
FT                   /taxa="IA7122-Poultry-ST302"
FT                   /parent_base="T"
FT                   /replace="G"
FT   variation       3977410
FT                   /node="internal_19->IA7122-Poultry-ST302"
FT                   /colour="4"
FT                   /taxa="IA7122-Poultry-ST302"
FT                   /parent_base="G"
FT                   /replace="A"
FT   variation       3977425
FT                   /node="internal_19->IA7122-Poultry-ST302"
FT                   /colour="4"
FT                   /taxa="IA7122-Poultry-ST302"
FT                   /parent_base="G"
FT                   /replace="A"
FT   variation       3977522
FT                   /node="internal_19->IA7122-Poultry-ST302"
FT                   /colour="4"
FT                   /taxa="IA7122-Poultry-ST302"
FT                   /parent_base="T"
FT                   /replace="A"
FT   variation       3977725
FT                   /node="internal_19->IA7122-Poultry-ST302"
FT                   /colour="4"
FT                   /taxa="IA7122-Poultry-ST302"
FT                   /parent_base="G"
FT                   /replace="A"
FT   variation       3977765
FT                   /node="internal_19->IA7122-Poultry-ST302"
FT                   /colour="4"
FT                   /taxa="IA7122-Poultry-ST302"
FT                   /parent_base="G"
FT                   /replace="A"
FT   variation       3977876
FT                   /node="internal_19->IA7122-Poultry-ST302"
FT                   /colour="4"
FT                   /taxa="IA7122-Poultry-ST302"
FT                   /parent_base="A"
FT                   /replace="G"
FT   variation       3978061
FT                   /node="internal_19->IA7122-Poultry-ST302"
FT                   /colour="4"
FT                   /taxa="IA7122-Poultry-ST302"
FT                   /parent_base="G"
FT                   /replace="A"
FT   variation       3978094
FT                   /node="internal_19->IA7122-Poultry-ST302"
FT                   /colour="4"
FT                   /taxa="IA7122-Poultry-ST302"
FT                   /parent_base="A"
FT                   /replace="G"
FT   variation       3978241
FT                   /node="internal_19->IA7122-Poultry-ST302"
FT                   /colour="4"
FT                   /taxa="IA7122-Poultry-ST302"
FT                   /parent_base="G"
FT                   /replace="A"
FT   variation       3978247
FT                   /node="internal_19->IA7122-Poultry-ST302"
FT                   /colour="4"
FT                   /taxa="IA7122-Poultry-ST302"
FT                   /parent_base="G"
FT                   /replace="C"
FT   variation       3978259
FT                   /node="internal_19->IA7122-Poultry-ST302"
FT                   /colour="4"
FT                   /taxa="IA7122-Poultry-ST302"
FT                   /parent_base="T"
FT                   /replace="C"
FT   variation       3978280
FT                   /node="internal_19->IA7122-Poultry-ST302"
FT                   /colour="4"
FT                   /taxa="IA7122-Poultry-ST302"
FT                   /parent_base="A"
FT                   /replace="G"
FT   variation       3978292
FT                   /node="internal_19->IA7122-Poultry-ST302"
FT                   /colour="4"
FT                   /taxa="IA7122-Poultry-ST302"
FT                   /parent_base="C"
FT                   /replace="T"
FT   variation       3978325
FT                   /node="internal_19->IA7122-Poultry-ST302"
FT                   /colour="4"
FT                   /taxa="IA7122-Poultry-ST302"
FT                   /parent_base="A"
FT                   /replace="G"
FT   variation       3978328
FT                   /node="internal_19->IA7122-Poultry-ST302"
FT                   /colour="4"
FT                   /taxa="IA7122-Poultry-ST302"
FT                   /parent_base="G"
FT                   /replace="A"
FT   variation       3978364
FT                   /node="internal_19->IA7122-Poultry-ST302"
FT                   /colour="4"
FT                   /taxa="IA7122-Poultry-ST302"
FT                   /parent_base="T"
FT                   /replace="C"
FT   variation       3978367
FT                   /node="internal_19->IA7122-Poultry-ST302"
FT                   /colour="4"
FT                   /taxa="IA7122-Poultry-ST302"
FT                   /parent_base="C"
FT                   /replace="T"
FT   variation       3978372
FT                   /node="internal_19->IA7122-Poultry-ST302"
FT                   /colour="4"
FT                   /taxa="IA7122-Poultry-ST302"
FT                   /parent_base="A"
FT                   /replace="G"
FT   variation       3978604
FT                   /node="internal_19->IA7122-Poultry-ST302"
FT                   /colour="4"
FT                   /taxa="IA7122-Poultry-ST302"
FT                   /parent_base="G"
FT                   /replace="C"
FT   variation       3978625
FT                   /node="internal_19->IA7122-Poultry-ST302"
FT                   /colour="4"
FT                   /taxa="IA7122-Poultry-ST302"
FT                   /parent_base="G"
FT                   /replace="A"
FT   variation       3978637
FT                   /node="internal_19->IA7122-Poultry-ST302"
FT                   /colour="4"
FT                   /taxa="IA7122-Poultry-ST302"
FT                   /parent_base="G"
FT                   /replace="A"
FT   variation       3978679
FT                   /node="internal_19->IA7122-Poultry-ST302"
FT                   /colour="4"
FT                   /taxa="IA7122-Poultry-ST302"
FT                   /parent_base="A"
FT                   /replace="G"
FT   variation       3978742
FT                   /node="internal_19->IA7122-Poultry-ST302"
FT                   /colour="4"
FT                   /taxa="IA7122-Poultry-ST302"
FT                   /parent_base="G"
FT                   /replace="A"
FT   variation       3978836
FT                   /node="internal_19->IA7122-Poultry-ST302"
FT                   /colour="4"
FT                   /taxa="IA7122-Poultry-ST302"
FT                   /parent_base="A"
FT                   /replace="G"
FT   variation       3978853
FT                   /node="internal_19->IA7122-Poultry-ST302"
FT                   /colour="4"
FT                   /taxa="IA7122-Poultry-ST302"
FT                   /parent_base="A"
FT                   /replace="C"
FT   variation       3978883
FT                   /node="internal_19->IA7122-Poultry-ST302"
FT                   /colour="4"
FT                   /taxa="IA7122-Poultry-ST302"
FT                   /parent_base="A"
FT                   /replace="T"
FT   variation       3978943
FT                   /node="internal_19->IA7122-Poultry-ST302"
FT                   /colour="4"
FT                   /taxa="IA7122-Poultry-ST302"
FT                   /parent_base="T"
FT                   /replace="C"
FT   variation       3978964
FT                   /node="internal_19->IA7122-Poultry-ST302"
FT                   /colour="4"
FT                   /taxa="IA7122-Poultry-ST302"
FT                   /parent_base="A"
FT                   /replace="G"
FT   variation       3979008
FT                   /node="internal_19->IA7122-Poultry-ST302"
FT                   /colour="4"
FT                   /taxa="IA7122-Poultry-ST302"
FT                   /parent_base="A"
FT                   /replace="G"
FT   variation       3979009
FT                   /node="internal_19->IA7122-Poultry-ST302"
FT                   /colour="4"
FT                   /taxa="IA7122-Poultry-ST302"
FT                   /parent_base="T"
FT                   /replace="C"
FT   variation       3979028
FT                   /node="internal_19->IA7122-Poultry-ST302"
FT                   /colour="4"
FT                   /taxa="IA7122-Poultry-ST302"
FT                   /parent_base="T"
FT                   /replace="C"
FT   variation       3979096
FT                   /node="internal_19->IA7122-Poultry-ST302"
FT                   /colour="4"
FT                   /taxa="IA7122-Poultry-ST302"
FT                   /parent_base="A"
FT                   /replace="C"
FT   variation       3979135
FT                   /node="internal_19->IA7122-Poultry-ST302"
FT                   /colour="4"
FT                   /taxa="IA7122-Poultry-ST302"
FT                   /parent_base="G"
FT                   /replace="A"
FT   variation       3979201
FT                   /node="internal_19->IA7122-Poultry-ST302"
FT                   /colour="4"
FT                   /taxa="IA7122-Poultry-ST302"
FT                   /parent_base="T"
FT                   /replace="C"
FT   variation       3979451
FT                   /node="internal_19->IA7122-Poultry-ST302"
FT                   /colour="4"
FT                   /taxa="IA7122-Poultry-ST302"
FT                   /parent_base="G"
FT                   /replace="A"
FT   variation       3979455
FT                   /node="internal_19->IA7122-Poultry-ST302"
FT                   /colour="4"
FT                   /taxa="IA7122-Poultry-ST302"
FT                   /parent_base="G"
FT                   /replace="A"
FT   variation       3979467
FT                   /node="internal_19->IA7122-Poultry-ST302"
FT                   /colour="4"
FT                   /taxa="IA7122-Poultry-ST302"
FT                   /parent_base="A"
FT                   /replace="G"
FT   variation       3979503
FT                   /node="internal_19->IA7122-Poultry-ST302"
FT                   /colour="4"
FT                   /taxa="IA7122-Poultry-ST302"
FT                   /parent_base="C"
FT                   /replace="T"
FT   variation       3979542
FT                   /node="internal_19->IA7122-Poultry-ST302"
FT                   /colour="4"
FT                   /taxa="IA7122-Poultry-ST302"
FT                   /parent_base="T"
FT                   /replace="C"
FT   variation       3979560
FT                   /node="internal_19->IA7122-Poultry-ST302"
FT                   /colour="4"
FT                   /taxa="IA7122-Poultry-ST302"
FT                   /parent_base="T"
FT                   /replace="C"
FT   variation       3979665
FT                   /node="internal_19->IA7122-Poultry-ST302"
FT                   /colour="4"
FT                   /taxa="IA7122-Poultry-ST302"
FT                   /parent_base="C"
FT                   /replace="G"
FT   variation       3979713
FT                   /node="internal_19->IA7122-Poultry-ST302"
FT                   /colour="4"
FT                   /taxa="IA7122-Poultry-ST302"
FT                   /parent_base="A"
FT                   /replace="G"
FT   variation       3979815
FT                   /node="internal_19->IA7122-Poultry-ST302"
FT                   /colour="4"
FT                   /taxa="IA7122-Poultry-ST302"
FT                   /parent_base="G"
FT                   /replace="A"
FT   variation       3979818
FT                   /node="internal_19->IA7122-Poultry-ST302"
FT                   /colour="4"
FT                   /taxa="IA7122-Poultry-ST302"
FT                   /parent_base="T"
FT                   /replace="A"
FT   variation       3979822
FT                   /node="internal_19->IA7122-Poultry-ST302"
FT                   /colour="4"
FT                   /taxa="IA7122-Poultry-ST302"
FT                   /parent_base="G"
FT                   /replace="A"
FT   variation       3979935
FT                   /node="internal_19->IA7122-Poultry-ST302"
FT                   /colour="4"
FT                   /taxa="IA7122-Poultry-ST302"
FT                   /parent_base="A"
FT                   /replace="G"
FT   variation       3979948
FT                   /node="internal_19->IA7122-Poultry-ST302"
FT                   /colour="4"
FT                   /taxa="IA7122-Poultry-ST302"
FT                   /parent_base="T"
FT                   /replace="C"
FT   variation       3979992
FT                   /node="internal_19->IA7122-Poultry-ST302"
FT                   /colour="4"
FT                   /taxa="IA7122-Poultry-ST302"
FT                   /parent_base="C"
FT                   /replace="A"
FT   variation       3979996
FT                   /node="internal_19->IA7122-Poultry-ST302"
FT                   /colour="4"
FT                   /taxa="IA7122-Poultry-ST302"
FT                   /parent_base="T"
FT                   /replace="G"
FT   variation       3980004
FT                   /node="internal_19->IA7122-Poultry-ST302"
FT                   /colour="4"
FT                   /taxa="IA7122-Poultry-ST302"
FT                   /parent_base="A"
FT                   /replace="G"
FT   variation       3980091
FT                   /node="internal_19->IA7122-Poultry-ST302"
FT                   /colour="4"
FT                   /taxa="IA7122-Poultry-ST302"
FT                   /parent_base="C"
FT                   /replace="T"
FT   variation       3980154
FT                   /node="internal_19->IA7122-Poultry-ST302"
FT                   /colour="4"
FT                   /taxa="IA7122-Poultry-ST302"
FT                   /parent_base="C"
FT                   /replace="T"
FT   variation       3980190
FT                   /node="internal_19->IA7122-Poultry-ST302"
FT                   /colour="4"
FT                   /taxa="IA7122-Poultry-ST302"
FT                   /parent_base="G"
FT                   /replace="A"
FT   variation       3980244
FT                   /node="internal_19->IA7122-Poultry-ST302"
FT                   /colour="4"
FT                   /taxa="IA7122-Poultry-ST302"
FT                   /parent_base="T"
FT                   /replace="C"
FT   variation       3980259
FT                   /node="internal_19->IA7122-Poultry-ST302"
FT                   /colour="4"
FT                   /taxa="IA7122-Poultry-ST302"
FT                   /parent_base="C"
FT                   /replace="A"
FT   variation       3980430
FT                   /node="internal_19->IA7122-Poultry-ST302"
FT                   /colour="4"
FT                   /taxa="IA7122-Poultry-ST302"
FT                   /parent_base="G"
FT                   /replace="A"
FT   variation       3980442
FT                   /node="internal_19->IA7122-Poultry-ST302"
FT                   /colour="4"
FT                   /taxa="IA7122-Poultry-ST302"
FT                   /parent_base="C"
FT                   /replace="T"
FT   variation       3980535
FT                   /node="internal_19->IA7122-Poultry-ST302"
FT                   /colour="4"
FT                   /taxa="IA7122-Poultry-ST302"
FT                   /parent_base="A"
FT                   /replace="G"
FT   variation       3980571
FT                   /node="internal_19->IA7122-Poultry-ST302"
FT                   /colour="4"
FT                   /taxa="IA7122-Poultry-ST302"
FT                   /parent_base="A"
FT                   /replace="T"
FT   variation       3980657
FT                   /node="internal_19->IA7122-Poultry-ST302"
FT                   /colour="4"
FT                   /taxa="IA7122-Poultry-ST302"
FT                   /parent_base="T"
FT                   /replace="C"
FT   variation       3980660
FT                   /node="internal_19->IA7122-Poultry-ST302"
FT                   /colour="4"
FT                   /taxa="IA7122-Poultry-ST302"
FT                   /parent_base="A"
FT                   /replace="G"
FT   variation       3980711
FT                   /node="internal_19->IA7122-Poultry-ST302"
FT                   /colour="4"
FT                   /taxa="IA7122-Poultry-ST302"
FT                   /parent_base="T"
FT                   /replace="A"
FT   variation       3980720
FT                   /node="internal_19->IA7122-Poultry-ST302"
FT                   /colour="4"
FT                   /taxa="IA7122-Poultry-ST302"
FT                   /parent_base="C"
FT                   /replace="A"
FT   variation       3980723
FT                   /node="internal_19->IA7122-Poultry-ST302"
FT                   /colour="4"
FT                   /taxa="IA7122-Poultry-ST302"
FT                   /parent_base="T"
FT                   /replace="G"
FT   variation       3980774
FT                   /node="internal_19->IA7122-Poultry-ST302"
FT                   /colour="4"
FT                   /taxa="IA7122-Poultry-ST302"
FT                   /parent_base="A"
FT                   /replace="G"
FT   variation       3981172
FT                   /node="internal_19->IA7122-Poultry-ST302"
FT                   /colour="4"
FT                   /taxa="IA7122-Poultry-ST302"
FT                   /parent_base="C"
FT                   /replace="T"
FT   variation       3981199
FT                   /node="internal_19->IA7122-Poultry-ST302"
FT                   /colour="4"
FT                   /taxa="IA7122-Poultry-ST302"
FT                   /parent_base="G"
FT                   /replace="A"
FT   variation       3981256
FT                   /node="internal_19->IA7122-Poultry-ST302"
FT                   /colour="4"
FT                   /taxa="IA7122-Poultry-ST302"
FT                   /parent_base="T"
FT                   /replace="C"
FT   variation       3981301
FT                   /node="internal_19->IA7122-Poultry-ST302"
FT                   /colour="4"
FT                   /taxa="IA7122-Poultry-ST302"
FT                   /parent_base="T"
FT                   /replace="C"
FT   variation       3981322
FT                   /node="internal_19->IA7122-Poultry-ST302"
FT                   /colour="4"
FT                   /taxa="IA7122-Poultry-ST302"
FT                   /parent_base="T"
FT                   /replace="C"
FT   variation       3981337
FT                   /node="internal_19->IA7122-Poultry-ST302"
FT                   /colour="4"
FT                   /taxa="IA7122-Poultry-ST302"
FT                   /parent_base="G"
FT                   /replace="A"
FT   variation       3981352
FT                   /node="internal_19->IA7122-Poultry-ST302"
FT                   /colour="4"
FT                   /taxa="IA7122-Poultry-ST302"
FT                   /parent_base="C"
FT                   /replace="G"
FT   variation       3981391
FT                   /node="internal_19->IA7122-Poultry-ST302"
FT                   /colour="4"
FT                   /taxa="IA7122-Poultry-ST302"
FT                   /parent_base="A"
FT                   /replace="G"
FT   variation       3981412
FT                   /node="internal_19->IA7122-Poultry-ST302"
FT                   /colour="4"
FT                   /taxa="IA7122-Poultry-ST302"
FT                   /parent_base="A"
FT                   /replace="G"
FT   variation       3981436
FT                   /node="internal_19->IA7122-Poultry-ST302"
FT                   /colour="4"
FT                   /taxa="IA7122-Poultry-ST302"
FT                   /parent_base="C"
FT                   /replace="T"
FT   variation       3981466
FT                   /node="internal_19->IA7122-Poultry-ST302"
FT                   /colour="4"
FT                   /taxa="IA7122-Poultry-ST302"
FT                   /parent_base="A"
FT                   /replace="G"
FT   variation       3981562
FT                   /node="internal_19->IA7122-Poultry-ST302"
FT                   /colour="4"
FT                   /taxa="IA7122-Poultry-ST302"
FT                   /parent_base="A"
FT                   /replace="G"
FT   variation       3981625
FT                   /node="internal_19->IA7122-Poultry-ST302"
FT                   /colour="4"
FT                   /taxa="IA7122-Poultry-ST302"
FT                   /parent_base="G"
FT                   /replace="A"
FT   variation       3981697
FT                   /node="internal_19->IA7122-Poultry-ST302"
FT                   /colour="4"
FT                   /taxa="IA7122-Poultry-ST302"
FT                   /parent_base="G"
FT                   /replace="A"
FT   variation       3981709
FT                   /node="internal_19->IA7122-Poultry-ST302"
FT                   /colour="4"
FT                   /taxa="IA7122-Poultry-ST302"
FT                   /parent_base="A"
FT                   /replace="G"
FT   variation       3981781
FT                   /node="internal_19->IA7122-Poultry-ST302"
FT                   /colour="4"
FT                   /taxa="IA7122-Poultry-ST302"
FT                   /parent_base="G"
FT                   /replace="A"
FT   variation       3981835
FT                   /node="internal_19->IA7122-Poultry-ST302"
FT                   /colour="4"
FT                   /taxa="IA7122-Poultry-ST302"
FT                   /parent_base="C"
FT                   /replace="G"
FT   variation       3981973
FT                   /node="internal_19->IA7122-Poultry-ST302"
FT                   /colour="4"
FT                   /taxa="IA7122-Poultry-ST302"
FT                   /parent_base="A"
FT                   /replace="G"
FT   variation       3982000
FT                   /node="internal_19->IA7122-Poultry-ST302"
FT                   /colour="4"
FT                   /taxa="IA7122-Poultry-ST302"
FT                   /parent_base="G"
FT                   /replace="A"
FT   variation       3982203
FT                   /node="internal_19->IA7122-Poultry-ST302"
FT                   /colour="4"
FT                   /taxa="IA7122-Poultry-ST302"
FT                   /parent_base="T"
FT                   /replace="A"
FT   variation       3982224
FT                   /node="internal_19->IA7122-Poultry-ST302"
FT                   /colour="4"
FT                   /taxa="IA7122-Poultry-ST302"
FT                   /parent_base="G"
FT                   /replace="A"
FT   variation       3982272
FT                   /node="internal_19->IA7122-Poultry-ST302"
FT                   /colour="4"
FT                   /taxa="IA7122-Poultry-ST302"
FT                   /parent_base="C"
FT                   /replace="T"
FT   variation       3982292
FT                   /node="internal_19->IA7122-Poultry-ST302"
FT                   /colour="4"
FT                   /taxa="IA7122-Poultry-ST302"
FT                   /parent_base="T"
FT                   /replace="A"
FT   variation       3982308
FT                   /node="internal_19->IA7122-Poultry-ST302"
FT                   /colour="4"
FT                   /taxa="IA7122-Poultry-ST302"
FT                   /parent_base="A"
FT                   /replace="G"
FT   variation       3982347
FT                   /node="internal_19->IA7122-Poultry-ST302"
FT                   /colour="4"
FT                   /taxa="IA7122-Poultry-ST302"
FT                   /parent_base="T"
FT                   /replace="C"
FT   variation       3982395
FT                   /node="internal_19->IA7122-Poultry-ST302"
FT                   /colour="4"
FT                   /taxa="IA7122-Poultry-ST302"
FT                   /parent_base="A"
FT                   /replace="G"
FT   variation       3982410
FT                   /node="internal_19->IA7122-Poultry-ST302"
FT                   /colour="4"
FT                   /taxa="IA7122-Poultry-ST302"
FT                   /parent_base="C"
FT                   /replace="T"
FT   variation       3982446
FT                   /node="internal_19->IA7122-Poultry-ST302"
FT                   /colour="4"
FT                   /taxa="IA7122-Poultry-ST302"
FT                   /parent_base="G"
FT                   /replace="T"
FT   variation       3982611
FT                   /node="internal_19->IA7122-Poultry-ST302"
FT                   /colour="4"
FT                   /taxa="IA7122-Poultry-ST302"
FT                   /parent_base="A"
FT                   /replace="G"
FT   variation       3982623
FT                   /node="internal_19->IA7122-Poultry-ST302"
FT                   /colour="4"
FT                   /taxa="IA7122-Poultry-ST302"
FT                   /parent_base="A"
FT                   /replace="G"
FT   variation       3982659
FT                   /node="internal_19->IA7122-Poultry-ST302"
FT                   /colour="4"
FT                   /taxa="IA7122-Poultry-ST302"
FT                   /parent_base="G"
FT                   /replace="A"
FT   variation       3982692
FT                   /node="internal_19->IA7122-Poultry-ST302"
FT                   /colour="4"
FT                   /taxa="IA7122-Poultry-ST302"
FT                   /parent_base="G"
FT                   /replace="A"
FT   variation       3982749
FT                   /node="internal_19->IA7122-Poultry-ST302"
FT                   /colour="4"
FT                   /taxa="IA7122-Poultry-ST302"
FT                   /parent_base="G"
FT                   /replace="A"
FT   variation       3982770
FT                   /node="internal_19->IA7122-Poultry-ST302"
FT                   /colour="4"
FT                   /taxa="IA7122-Poultry-ST302"
FT                   /parent_base="G"
FT                   /replace="A"
FT   variation       3982806
FT                   /node="internal_19->IA7122-Poultry-ST302"
FT                   /colour="4"
FT                   /taxa="IA7122-Poultry-ST302"
FT                   /parent_base="C"
FT                   /replace="G"
FT   variation       3982887
FT                   /node="internal_19->IA7122-Poultry-ST302"
FT                   /colour="4"
FT                   /taxa="IA7122-Poultry-ST302"
FT                   /parent_base="G"
FT                   /replace="C"
FT   variation       3982914
FT                   /node="internal_19->IA7122-Poultry-ST302"
FT                   /colour="4"
FT                   /taxa="IA7122-Poultry-ST302"
FT                   /parent_base="C"
FT                   /replace="T"
FT   variation       3983043
FT                   /node="internal_19->IA7122-Poultry-ST302"
FT                   /colour="4"
FT                   /taxa="IA7122-Poultry-ST302"
FT                   /parent_base="A"
FT                   /replace="G"
FT   variation       3983396
FT                   /node="internal_19->IA7122-Poultry-ST302"
FT                   /colour="4"
FT                   /taxa="IA7122-Poultry-ST302"
FT                   /parent_base="C"
FT                   /replace="A"
FT   variation       3983474
FT                   /node="internal_19->IA7122-Poultry-ST302"
FT                   /colour="4"
FT                   /taxa="IA7122-Poultry-ST302"
FT                   /parent_base="G"
FT                   /replace="C"
FT   variation       3983540
FT                   /node="internal_19->IA7122-Poultry-ST302"
FT                   /colour="4"
FT                   /taxa="IA7122-Poultry-ST302"
FT                   /parent_base="C"
FT                   /replace="A"
FT   variation       3983558
FT                   /node="internal_19->IA7122-Poultry-ST302"
FT                   /colour="4"
FT                   /taxa="IA7122-Poultry-ST302"
FT                   /parent_base="T"
FT                   /replace="A"
FT   variation       3983570
FT                   /node="internal_19->IA7122-Poultry-ST302"
FT                   /colour="4"
FT                   /taxa="IA7122-Poultry-ST302"
FT                   /parent_base="G"
FT                   /replace="C"
FT   variation       3983678
FT                   /node="internal_19->IA7122-Poultry-ST302"
FT                   /colour="4"
FT                   /taxa="IA7122-Poultry-ST302"
FT                   /parent_base="A"
FT                   /replace="C"
FT   variation       3983705
FT                   /node="internal_19->IA7122-Poultry-ST302"
FT                   /colour="4"
FT                   /taxa="IA7122-Poultry-ST302"
FT                   /parent_base="A"
FT                   /replace="T"
FT   variation       3983708
FT                   /node="internal_19->IA7122-Poultry-ST302"
FT                   /colour="4"
FT                   /taxa="IA7122-Poultry-ST302"
FT                   /parent_base="G"
FT                   /replace="A"
FT   variation       3983849
FT                   /node="internal_19->IA7122-Poultry-ST302"
FT                   /colour="4"
FT                   /taxa="IA7122-Poultry-ST302"
FT                   /parent_base="G"
FT                   /replace="C"
FT   variation       3983882
FT                   /node="internal_19->IA7122-Poultry-ST302"
FT                   /colour="4"
FT                   /taxa="IA7122-Poultry-ST302"
FT                   /parent_base="T"
FT                   /replace="A"
FT   variation       3983897
FT                   /node="internal_19->IA7122-Poultry-ST302"
FT                   /colour="4"
FT                   /taxa="IA7122-Poultry-ST302"
FT                   /parent_base="G"
FT                   /replace="A"
FT   variation       3983903
FT                   /node="internal_19->IA7122-Poultry-ST302"
FT                   /colour="4"
FT                   /taxa="IA7122-Poultry-ST302"
FT                   /parent_base="C"
FT                   /replace="T"
FT   variation       3983942
FT                   /node="internal_19->IA7122-Poultry-ST302"
FT                   /colour="4"
FT                   /taxa="IA7122-Poultry-ST302"
FT                   /parent_base="G"
FT                   /replace="T"
FT   variation       3983957
FT                   /node="internal_19->IA7122-Poultry-ST302"
FT                   /colour="4"
FT                   /taxa="IA7122-Poultry-ST302"
FT                   /parent_base="A"
FT                   /replace="G"
FT   variation       3983960
FT                   /node="internal_19->IA7122-Poultry-ST302"
FT                   /colour="4"
FT                   /taxa="IA7122-Poultry-ST302"
FT                   /parent_base="C"
FT                   /replace="T"
FT   variation       3983975
FT                   /node="internal_19->IA7122-Poultry-ST302"
FT                   /colour="4"
FT                   /taxa="IA7122-Poultry-ST302"
FT                   /parent_base="G"
FT                   /replace="A"
FT   variation       3984184
FT                   /node="internal_19->IA7122-Poultry-ST302"
FT                   /colour="4"
FT                   /taxa="IA7122-Poultry-ST302"
FT                   /parent_base="T"
FT                   /replace="A"
FT   variation       3984257
FT                   /node="internal_19->IA7122-Poultry-ST302"
FT                   /colour="4"
FT                   /taxa="IA7122-Poultry-ST302"
FT                   /parent_base="T"
FT                   /replace="C"
FT   variation       3984347
FT                   /node="internal_19->IA7122-Poultry-ST302"
FT                   /colour="4"
FT                   /taxa="IA7122-Poultry-ST302"
FT                   /parent_base="A"
FT                   /replace="G"
FT   variation       3984353
FT                   /node="internal_19->IA7122-Poultry-ST302"
FT                   /colour="4"
FT                   /taxa="IA7122-Poultry-ST302"
FT                   /parent_base="G"
FT                   /replace="A"
FT   variation       3984359
FT                   /node="internal_19->IA7122-Poultry-ST302"
FT                   /colour="4"
FT                   /taxa="IA7122-Poultry-ST302"
FT                   /parent_base="A"
FT                   /replace="G"
FT   variation       3984440
FT                   /node="internal_19->IA7122-Poultry-ST302"
FT                   /colour="4"
FT                   /taxa="IA7122-Poultry-ST302"
FT                   /parent_base="T"
FT                   /replace="C"
FT   variation       3984879
FT                   /node="internal_19->IA7122-Poultry-ST302"
FT                   /colour="4"
FT                   /taxa="IA7122-Poultry-ST302"
FT                   /parent_base="C"
FT                   /replace="T"
FT   variation       3984912
FT                   /node="internal_19->IA7122-Poultry-ST302"
FT                   /colour="4"
FT                   /taxa="IA7122-Poultry-ST302"
FT                   /parent_base="G"
FT                   /replace="A"
FT   variation       3984933
FT                   /node="internal_19->IA7122-Poultry-ST302"
FT                   /colour="4"
FT                   /taxa="IA7122-Poultry-ST302"
FT                   /parent_base="T"
FT                   /replace="C"
FT   variation       3984936
FT                   /node="internal_19->IA7122-Poultry-ST302"
FT                   /colour="4"
FT                   /taxa="IA7122-Poultry-ST302"
FT                   /parent_base="A"
FT                   /replace="G"
FT   variation       3985224
FT                   /node="internal_19->IA7122-Poultry-ST302"
FT                   /colour="4"
FT                   /taxa="IA7122-Poultry-ST302"
FT                   /parent_base="G"
FT                   /replace="A"
FT   variation       3985293
FT                   /node="internal_19->IA7122-Poultry-ST302"
FT                   /colour="4"
FT                   /taxa="IA7122-Poultry-ST302"
FT                   /parent_base="G"
FT                   /replace="A"
FT   variation       3985311
FT                   /node="internal_19->IA7122-Poultry-ST302"
FT                   /colour="4"
FT                   /taxa="IA7122-Poultry-ST302"
FT                   /parent_base="C"
FT                   /replace="T"
FT   variation       3985322
[truncated: 13,294,885 more chars]
