# Supplementary material for: Escherichia coli ST302: Genomic Analysis of Virulence Potential and Antimicrobial Resistance Mediated by Mobile Genetic Elements
Source: Front Microbiol. 2020 Jan 21;10:3098. doi: 10.3389/fmicb.2019.03098 (PMC6985150; doi:10.3389/fmicb.2019.03098)
Supplement: DATA S2 — ST302 SNP analysis. [file Data_Sheet_2.ZIP › SNP_Analysis/ST302_SNP/SNP_analysis/gubbins/filtered_polymorphic_sites.fasta]

>BA8907-ND-ST302
CACTCCCACCCCTCCCCGGTGGGCTGACCCCGGACCGACAGGCCGCCCATTTGCG-ATATGTTCTGGACAATTCCCCCATTTCCCCTCACCTTCTGCACCGGCAAGCAGGTGTGGGGCCCCGGTCGTTCCCTGGGCGGTTATTGAACTCGCTCTCCCACGCCCCCCACGTCGACACGAGGACCCCCCGGCGGCTTGCTTCGCAGCGGAACGAATCCTACATGCCGCCCACCAGCTGGGCGCACCCGTCTCTCATTGTCCGCGCTCTGGGGCCCCGGTGACGACCTCCGCCCCTCGGATAGCCCCCCAGCCCACGACCAGCCTGCCTCGTCATCCCGAGACTTTCC-GCGGCCCGTACCCGTGAGTGCCATTTCGAGTCCCTCGCCATAACACTCAGCAAATCTGCCCGGCCCACCTTTACTTGACTCGCTCGCTCCCAACTGGTGACCCAGCCGGTGTCCNGGGGTCAGGCAACGCGGACGCACTGCGCGGGGCACTCGACGGGTAATGTGTCGCGGAGCCACCCGCACGTGCGGGGCGTCACCGGAAGTTCTCCGCGAGCGGGGAATGAGGGGGGCTCATGGGCCTAGTGTCGGTAGTGCCCGCAGAGAGTGGAATTAGTAAGATAGTGAGCAATTCCATACGCCCATGGGGTACAGGGGACGCGCGGTTCAGAGAAATGCGCCTGTCGGGGCTGACGACTATACAATGTCAGACTTCTCCGGAGGGTCCGGAGTGCCGAGGCTCGTGAGTTCCGCAAGGGGGGGACGATCCCGCTGCGGGGCCCTGCCTTTCTTCGAACTTGGCCCGGGCCAGATGACCCATGTAATGGCCTGAGAGGCGGTGGAA-CTGTTTCGTCTGCGCCG--CT-ATTCCCCCCTAGCCTTTGAACGTAGACTGACCTGTGCTCACTTTCCGCAGTCGATGAATACGTGTCACCCGCCGTGTGCCACTCCGGCACCCCAGAGGCGTTTCATGTTGGCTACGGCCAGGGGGCTGTCTCCTCCGGGTCAGACCTGAGCCGCGCCGGCGACATTGCTCCTCCTAACCCACCCCCGTTCCCCTCACGCAAGCGCTATGGCGGAGACTTCTACATCCTGACCCTAGCTGCCCAAGGCCCTACGGGTTCCTCCCCNNNNNNNNNNNNNNNNNNACGGTTCGGTCCAGCGGGCTGCACCGGGGGGGGTGAAGAGGGGGCCCCTGCATCGGGGCGCTGCCGCCGTTAATTGGCTAGGCAGCTCATCCGCATAGAGGGACCG-GAGGGGGGGGAGGCTGTTGGAGTGAGCGTATAACGCGGGCGTGTGTATCCTGTAGCGATCGGAACGTCGAAGGGGAAGATGCCCAGGTTGCTCGCCGAGTACGGGGCGGGGCGGTGTCGGCGGGGGGGACACCTCGCCGTGGATCGTCGTGNNNNNNNNNNNNNNNNNNNNNNNNNNNNNNNNNNNNNNNNNNNNNNNNNNNNNNNNNNNNNNNNNNNNNNNNNNNNNNNNNNNNNNNNNNNNNNNGGTTGAGTTACNNNAGCAGTCTGGGCTCAGCTAGTGGGATGGTACGCGGGGAAAACGGGTGGATTCCGCTAGGGAGGGGCAGCCACCGCGCCGACGAGAGCTCCCGGCCG-G-GCCATTGAGACGAGAAACTAACGCAACCCAACGAGCTCCTCTCGTGTCAGCGCGATGGGCGATCCACGTCCAACCCGCCGCTCTACATTTCCAGACCTCCGCCACCTCTCGGCCCAGCTTCGCC-CGCTACCCAGCTCGCTGCCACCCGTGTTCCTCCGGACGACTTGCGAGTCTTCGAGTTGCCTCCTTCAAGTGGGAGT-------------------------------------------------GGGAGCGCGCTAGTACCCCGAAGGTGCCGGACGCCGCGCTAAGGGTCGTCGGGCAGCCGCTAGGCCCTTTGGTGCCTGCCCCGGTGTCGCCCCGTGTCCCGCCTAGCCGTGTCTCCGCCCCCTCAGCAAACCCGCGGCTGTACTGGAAGGCCGCTGAGGGCCACACCGAGTGCTGGTGATGTTGCAATCTGTTTACGTTACGGCGGAGCGCCGACGAGTCTCGACTGGTACCGGTAGTGGTGCCTTCCCTGAGTCCATCACCGGAGATAACCTCCGCACGCCCCCCCCGGTGTCAGCGGTCGTCCCCGCACGAACCCTACGCAACAGGTCAGCAGCGTCGCTACTACCGCTCCGTCGGATAAAATATACGCCAAAATCCGCCTGGGAGCCGCTGACCATACCCTGGCGCCCGCACGTGGGAGGTANTTACTGCAGAGCCACCGTGCCCCAGAATCTCGGCTGACACGCCCTAAAACTCCCGTCCCGACTGACCCGCCAGGTCGCCAGCATCGTTACTAGCATTAAGCCCTTGGCACCCAGCGTCCCTGCATTTCGCGGTGCAGAACCGGCCGCGGGCAGAGTCTCGAGCACGCGCGCAAACTGCGCCCCGGGCGGAGGGTCAAGGATCGCCTCAGAGTGTCGTACAGGTTAGGGTGTCGCAGCCGTAGAAAACGTTGCGTTGACACAGCAGGCGGCAAAGGACCACTTTGGCCCTCTTAATTCACTCCCTAGCCGCGCCTCGTACCTGCTCACCGGCTCTGTTTCCGCGAACGCGTCCGGAGGACCTCTGGGCACACGGCCCTGCCGAAGCCAGCCCGCGCGCCGTAATTGATGGTACGCCCCTATCACGACTCCGGTGGCACGCGACTGCTGGCGTGTCACGCTCTT--TACCCACGGGGGGGGTGGTAGGCGGAAAGGGTCCAGCGAAAAGGGCCCCGTGGGTGGAACCTAGAAGGCAACGGCTGCCCGCGGGGGACGGAGGCGACGCGCAAGGGACTGATGCCAGCGAAGTAGCGTCGACGCGCTGTTACGGCG-----GTAATAAGCGTTGAGAAGTTTCGCGACAGGGACGGGGGCCTCATCAAGGACCAGCGGCGCGGTACAGTGGGCTGACATCGCCAACGGAGCGTCATCTGGCGTGCTACTCCGGATCATATATTCGTATCACATCCGACAGAGGCCGTCGTACTGAGCGGGGGTAGAGGTGCGTTTACGAGAGGATCGTTCGCAGAGGAGTTCGCAAGGCCAACGGAGGGACTGCGGTGTGGGACGCCCAGCGGCATAACGGGTAGCCGCGTCGCCTGAACCGGCGGTAGAGTGGCGGCCTACGAGGCGTGCCGCGGAGATCAACGGGGAGGGTAGGGCGCCGGAATCGTATACTGCNGGCCCCATACGTCACCGACTTTGCACTACGCCGAGGACGCCCTATCCCTGCGCGATCAGGTCAAGATTACTACACATACCCTATCTTTAATGCATGCATGCTTGACTGTCTGTACGCGCCCCCCGCTGATGCCTTCTGAGCGCCCACGGCCTCCGCACTAGGATTCGGCAAGTCGTCCGTATACCCAAGGAAATGAGAGAACGGACCCCATCCGCAAGGCGGCCCTGGCCTAGACGGCGTCACGCTTAGGCCCTCGCTCACTTCAAAGTCCCCGACGAAGGCCACGAACCCGCCCCCCCAAGGGGCACAGGTAGGATATACACGAGGGGGATAAACGCTAAGTGGGAGCACCCCGGAACGCCGCACACGTGCGTGTCTGCGGGGGTGTTCATCTTGTGAGGTGTCGGCTGGCCCTCTTGGACCTAGCCTCGCGGGGGGGATGGTAACTTTCCCGGGGTCGGCGCACTGGGGCGAGGGCGAGCGACCGACAATAATTCAGGAGGTGGACTGACATCCTCCGGTCGACTTTATAGGGCGGGCAAGTAGAACTAGCTAGACAGTTGTCGCCTCCGCACCCACACAAGTCGGACCCCTTGCGCTGAGACGCCCGGCCCTAGAGACCCGGCGCCCCGCGAACACCTTGCCAAGGGTCCCGCGTATCCGGCCGGGTCTTCCCTCCG-GCACAGCAAGAGGGAGATGCGCCTGGGGGACTTGCACCTGTGTCACCAGGGATGAGCACGACCATGCGTTGGTTGNNNNNNNNNNNNNNNNNNNNNNNNNNNNNNNNNNNNNNNNNNNNNNNNNNNNNNNNNNNNNNNTACTACCGGCCCGANNNNNNNNNNNGTCCGCCACGCCCTAGGCCCACTCGGCAGACCCGCCCCACCTCGTGCCCCCACTGCGCGGCGCTACGGTTGTCCAGAGGCCAGGGTCCCCGGCCCTCGCGTGTCGACACCGTCTCGACCGAGCGGCCCGAAACACGCAGAAGGCGTGTCGCTCCCCGACGTGTCAGCACGAGCCGACCGTCAATGGTCC-ACTCAGGTAGAAAGGGGCGTGGGGGGGA-AATGGTTTGTAATGTTGCGTCAGGGGAGCGTGCCCGCGGTGGCGACCATGTCGGCACGGAATGGACTATGGCCTCGNNNNNNNNTTGATATCTAGCCGGCCCAATGTCCAACCCCCGGGGAGCTGCTACCGGCTGGGTATACGGCCCGTGCTGGTG-----AGCCCTGA---CCCCTGTTTCGTCGATACGGACCTTAGCGGCCCACCCCCCTCGCCCGCACGTGTCCTGTCAAAGCGCGCGTTTCGTTCCTCTTTAACGGGACGGAGGGGGCCCGTGCGAGCCTTCCGGTACCACGCCCCCGCCGCTCCCATGGCGTCACCTCCTACATTCATA-GGACACTCTCGCTCCCGGGCGGCAT----CCGTGGGGGTCGCAGTCGTTGGGTGAGCCCGCACAGGAGGNNNNNNNNNNNNNNNNNNNNNNNNNNNNNNNNNNNNNNNNNNNNNNNNNNNNNNNNNNNNNNNNNNNNNNNG-AGCCCTAGTATCGCTCGTGTCATAGTCACCACNTGAGGCCTGAAGTGTAAGGGGAATTCCGGCCTGATCGAAGCATCCGCGAAAGCTCTGTGTGTCCA---GCCCCGTCCCGCTGCCATGTGCAAAGATGCGTTGGCGCGCGCCGGCCGTCGCCGCGTCGAGCCGCGCCCCGTGCCTCGC-------NNNNNNNN--TACAGGCCGACCCCCCTGCTATCTGCCAGCCCCTCCTTCCGTACGCGGTCCTCGCCGCTTGGGGTTGTGGGCCATGTTCCCGGGCACCCAAGCACGAACGACCGGCGGCGTCCTGAGAGGTGACCCCTTCCGCTAGCGCATCCCGCGCAGCCAAGCAAATTGTTATGCCTCGCAACATAGCGCTTCTGATCAGGAGGAGACGAGGAGTCGATGCGCAGGACTGGTTGATCCACCCGCGGCCTGTGTCCCGCGGGACCAGGGGACGACCGACCACGGGATAGTGCGCAATAGGACTTGGGGCGAGCAGAGGTGCGACATGGTCCNNNNNNNNNNNNNNNNNNNNNNNNNNNNNNNNNNNNNNNNNNNNNNNNNNNAACTAGGTCTAAAGTCCTTCCCCTATCCCCGCTGCGCGCCCTGTTCCCGCCTCTTACTCCGCAGTGTTCGCTGCCGGGCCCCCGAACCAGGTGCGCCGCCGGATAGGATCCGGAGGCGTGTTGGGTTCTACCCGCCCGCACCTTACNNAGTGAGGTTTTCGATTATGATGCGATCGCTCCAGGAGGGAACCGCACAGCTCGCGGTATACGGTGATGCTAAGCCCGGCCTTAAAAGTAAGGAATA-TCGGTAGCCAGGCTAGTCTGCGACGAATGCCCGGGGGTGGGTNNNNNNNNNNNNNNNNNNNNNNNNNNNNNNNNACAAAATCTCGCCAGACCCACCCACCGGTCCTCCGATGTGCGCCACCTCGGGCGCGCCNNNNNNNNNNNNNNNNNNNNNNNNNNNNNNNNNNNNNNNNNCTGCGCCTCCCGCCCCGCGCCCCCCGCAATGCCTACTGAGAACCTTCCCCTCTGCCGGCGTGGGCTGCACCTTTCGCAAGTAGGCGCGCNNNNNNNNNNNNNNNCGGCTTCTAGCTGCCTGGACATGGCCGTACCGGACTCCACCCCTAGCCACTACTGGCGGCCCCGATGGCCTAGCCCCTCCGAGGGCGCCTGGCTCCTCCCCCCTCAAGTGATGACGGGTGCTTTACATGACT-CGAGGTGCTGCGCAGGGCGTGATGCTCACGGGCGTGCAACCCTGCCCAGCGNNATGCGAGCAGCAATCTGCACTATCTAGTCAAAACCGAGACTAGAAGATCGCGGCCCCNNGGCCCCTCCTAGCAATTTAGTCGGACCCTGGAAGCCNN---GTGAAGAGTGGCCTCAGTGGCTCTGTGTCA---------CCGCAGGCCCCCCTG--ANCCATCCGGTTCCCGAGCTTCCTTACCTTACCTAGAACCAAGACCGATGGCCACACCGGTGCCGTGTCAGGAGGGGACACNNNNNNNNC----------GATAGGCAGGTCGGTTAAGGGCAGCATCATGAGCCGTTATCCCTGACACCGGCAGATGGGTTCTATCGCGGACAATCCAACCAGAGGTCCCCGGTATCCGCGCGGATTCGGGAAGGGCAGCAGGGNNNNNNNNNNNNNNNNNNNNCGAGTGGCGCCAT---GAAC--NNNNNNTGGGAACAGACCGTACGGAACACAGGAGAA-AGCCAGCTCGTGCTGACGGGAGGGCTCATTCGCGGGGTGACAGGTGTGCGGGGAGAGAGAGGCAGAGCAGCTCCGTTACCATATGATGGGGGTGTGGCGACCTGCCTAGTCACCGATTG-GGGGACCGGGATGGAGCCGCGACGCGA-CACGTAATGCTCC-CCCTCCCGCAA-NNNNNNNNNTTCTCCCGGCCAACATTCTGACCCCCGNNNNTGCGCGTGTAATAGCATAAGCAGCAG-TTCC-CGTTCACGAACGTTGAACTCCTCGTCGAG-TACTTGCACGGCCCGCCCCCCTTCGTATTTTC-T--GACT-----GGGCCC----CNNNNNNNNGGCTCTGAGCTGGTGAACCCTCGTAGGCT-----TGGGTCCCCGCCTT-NNNNNNNNNNNNNNNNNNNNNNNNNNNNNNNNNNNNNNN--GCGTANNNNNNNNNNN-GTCAGCCCTGTGGT--A--GT--TATATTNNNNNNNNN
>BA9503-ND-ST302
CACTCCCACCCCTCCCCGGTGGGCTGACCCCGGACCGACAGGCCGCCCATTTGCG-ATATGTTCTGGACAATTCCCCCATTTCCCCTCACCTTCTGCACCGGCAAGCAGGTGTGGGGCCCCGGTCGTTCCCTGGGCGGTTATTGAACTCGCTCTCCCACGCCCCCCACGTCGACACGAGGACCCCCCGGCGGCTTGCTTCGCAGCGGAACGAATCCTACATGCCGCCCACCAGCTGGGCGCACCCGTCTCTCATTGTCCGCGCTCTGGGGCCCCGGTGACGACCTCCGCCCCTCGGATAGCCCCCCAGCCCACGACCAGCCTGCCTCGTCATCCCGAGACTTTCC-GCGGCCCGTACCCGTGAGTGCCATTTCGAGTCCCTCGCCATAACACTCAGCAAATCTGCCCGGCCCACCTTTACTTGACTCGCTCGCTCCCAACTGGTGACCCAGCCGGTGTCCNGGGGTCAGGCAACGCGGACGCACTGCGCGGGGCACTCGACGGGTAATGTGTCGCGGAGCCACCCGCACGTGCGGGGCGTCACCGGAAGTTCTCCGCGAGCGGGGAATGAGGGGGGCTCATGGGCCTAGTGTCGGTAGTGCCCGCAGAGAGTGGAATTAGTAAGATAGTGAGCAATTCCATACGCCCATGGGGTACAGGGGACGCGCGGTTCAGAGAAATGCGCCTGTCGGGGCTGACGACTATACAATGTCAGACTTCTCCGGAGGGTCCGGAGTGCCGAGGCTCGTGAGTTCCGCAAGGGGGGGACGATCCCGCTGCGGGGCCCTGCCTTTCTTCGAACTTGGCCCGGGCCAGATGACCCATGTAATGGCCTGAGAGGCGGTGGA--CTGTTTCGTCTGCGCCG--CT-ATTCCCCCCTAGCCTTTGAACGTAGACTGACCTGTGCTCACTTTCCGCAGTCGATGAATACGTGTCACCCGCCGTGTGCCACTCCGGCACCCCAGAGGCGTTTCATGTTGGCTACGGCCAGGGGGCTGTCTCCTCCGGGTCAGACCTGAGCCGCGCCGGCGACATTGCTCCTCCTAACCCACCCCCGTTCCCCTCACGCAAGCGCTATGGCGGAGACTTCTACATCCTGACCCTAGCTGCCCAAGGCCCTACGGGTTCCTCCCCNNNNNNNNNNNNNNNNNNACGGTTCGGTCCAGCGGGCTGCACCGGGGGGGGTGAAGAGGGGGCCCCTGCATCGGGGCGCTGCCGCCGTTAATTGGCTAGGCAGCTCATCCGCATAGAGGGACCG-GAGGGGGGGGAGGCTGTTGGAGTGAGCGTATAACGCGGGCGTGTGTATCCTGTAGCGATCGGAACGTCGAAGGGGAAGATGCCCAGGTTGCTCGCCGAGTACGGGGCGGGGCGGTGTCGGCGGGGGGGACACCTCGCCGTGGATCGTCGTGNNNNNNNNNNNNNNNNNNNNNNNNNNNNNNNNNNNNNNNNNNNNNNNNNNNNNNNNNNNNNNNNNNNNNNNNNNNNNNNNNNNNNNNNNNNNNNNGGTTGAGTTACNNNAGCAGTCTGGGCTCAGCTAGTGGGATGGTACGCGGGGAAAACGGGTGGATTCCGCTAGGGAGGGGCAGCCACCGCGCCGACGAGAGCTCCCGGCCG-G-GCCATTGAGACGAGAAACTAACGCAACCCAACGAGCTCCTCTCGTGTCAGCGCGATGGGCGATCCACGTCCAACCCGCCGCTCTACATTTCCAGACCTCCGCCACCTCTCGGCCCAGCTTCGCC-CGCTACCCAGCTCGCTGCCACCCGTGTTCCTCCGGACGACTTGCGAGTCTTCGAGTTGCCTCCTTCAAGTGGGAGT-------------------------------------------------GGGAGCGCGCTAGTACCCCGAAGGTGCCGGACGCCGCGCTAAGGGTCGTCGGGCAGCCGCTAGGCCCTTTGGTGCCTGCCCCGGTGTCGCCCCGTGTCCCGCCTAGCCGTGTCTCCGCCCCCTCAGCAAACCCGCGGCTGTACTGGAAGGCCGCTGAGGGCCACACCGAGTGCTGGTGATGTTGCAATCTGTTTACGTTACGGCGGAGCGCCGACGAGTCTCGACTGGTACCGGTAGTGGTGCCTTCCCTGAGTCCATCACCGGAGATAACCTCCGCACGCCCCCCCCGGTGTCAGCGGTCGTCCCCGCACGAACCCTACGCAACAGGTCAGCAGCGTCGCTACTACCGCTCCGTCGGATAAAATATACGCCAAAATCCGCCTGGGAGCCGCTGACCATACCCTGGCGCCCGCACGTGGGAGGTANTTACTGCAGAGCCACCGTGCCCCAGAATCTCGGCTGACACGCCCTAAAACTCCCGTCCCGACTGACCCGCCAGGTCGCCAGCATCGTTACTAGCATTAAGCCCTTGGCACCCAGCGTCCCTGCATTTCGCGGTGCAGAACCGGCCGCGGGCAGAGTCTCGAGCACGCGCGCAAACTGCGCCCCGGGCGGAGGGTCAAGGATCGCCTCAGAGTGTCGTACAGGTTAGGGTGTCGCAGCCGTAGAAAACGTTGCGTTGACACAGCAGGCGGCAAAGGACCACTTTGGCCCTCTTAATTCACTCCCTAGCCGCGCCTCGTACCTGCTCACCGGCTCTGTTTCCGCGAACGCGTCCGGAGGACCTCTGGGCACACGGCCCTGCCGAAGCCAGCCCGCGCGCCGTAATTGATGGTACGCCCCTATCACGACTCCGGTGGCACGCGACTGCTGGCGTGTCACGCTCTT--TACCCACGGGGGGGGTGGTAGGCGGAAAGGGTCCAGCGAAAAGGGCCCCGTGGGTGGAACCTAGAAGGCAACGGCTGCCCGCGGGGGACGGAGGCGACGCGCAAGGGACTGATGCCAGCGAAGTAGCGTCGACGCGCTGTTACGGCG-----GTAATAAGCGTTGAGAAGTTTCGCGACAGGGACGGGGGCCTCATCAAGGACCAGCGGCGCGGTACAGTGGGCTGACATCGCCAACGGAGCGTCATCTGGCGTGCTACTCCGGATCATATATTCGTATCACATCCGACAGAGGCCGTCGTACTGAGCGGGGGTAGAGGTGCGTTTACGAGAGGATCGTTCGCAGAGGAGTTCGCAAGGCCAACGGAGGGACTGCGGTGTGGGACGCCCAGCGGCATAACGGGTAGCCGCGTCGCCTGAACCGGCGGTAGAGTGGCGGCCTACGAGGCGTGCCGCGGAGATCAACGGGGAGGGTAGGGCGCCGGAATCGTATACTGCNGGCCCCATACGTCACCGACTTTGCACTACGCCGAGGACGCCCTATCCCTGCGCGATCAGGTCAAGATTACTACACATACCCTATCTTTAATGCATGCATGCTTGACTGTCTGTACGCGCCCCCCGCTGATGCCTTCTGAGCGCCCACGGCCTCCGCACTAGGATTCGGCAAGTCGTCCGTATACCCAAGGAAATGAGGGAACGGACCCCATCCGCAAGGCGGCCCTGGCCTAGACGGCGTCACGCTTAGGCCCTCGCTCACTTCAAAGTCCCCGACGAAGGCCACGAACCCGCCCCCCCAAGGGGCACAGGTAGGATATACACGAGGGGGATAAACGCTAAGTGGGAGCACCCCGGAACGCCGCACACGTGCGTGTCTGCGGGGGTGTTCATCTTGTGAGGTGTCGGCTGGCCCTCTTGGACCTAGCCTCGCGGGGGGGATGGTAACTTTCCCGGGGTCGGCGCACTGGGGCGAGGGCGAGCGACCGACAATAATTCAGGAGGTGGACTGACATCCTCCGGTCGACTTTATAGGGCGGGCAAGTAGAACTAGCTAGACAGTTGTCGCCTCCGCACCCACACAAGTCGGACCCCTTGCGCTGAGACGCCCGGCCCTAGAGACCCGGCGCCCCGCGAACACCTTGCCAAGGGTCCCGCGTATCCGGCCGGGTCTTCCCTCCG-GCACAGCAAGAGGGAGATGCGCCTGGGGGACTTGCACCTGTGTCACCAGGGATGAGCACGACCATGCGTTGGTTGNNNNNNNNNNNNNNNNNNNNNNNNNNNNNNNNNNNNNNNNNNNNNNNNNNNNNNNNNNNNNNNTACTACCGGCCCGANNNNNNNNNNNGTCCGCCACGCCCTAGGCCCACTCGGCAGACCCGCCCCACCTCGTGCCCCCACTGCGCGGCGCTACGGTTGTCCAGAGGCCAGGGTCCCCGGCCCTCGCGTGTCGACACCGTCTCGACCGAGCGGCCCGAAACACGCAGAAGGCGTGTCGCTCCCCGACGTGTCAGCACGAGCCGACCGTCAATGGTCC-ACTCAGGTAGAAAGGGGCGTGGGGGGGA-AATGGTTTGTAATGTTGCGTCAGGGGAGCGTGCCCGCGGTGGCGACCATGTCGGCACGGAATGGACTATGGCC-CGNNNNNNNNTTGATATCTAGCCGGCCCAATGTCCAACCCCCGGGGAGCTGCTACCGGCTGGGTATACGGCCCGTGCTGGTG-----AGCCCTGA---CCCCTGTTTCGTCGATACGGACCTTAGCGGCCCACCCCCCTCGCCCGCACGTGTCCTGTCAAAGCGCGCGTTTCGTTCCTCTTTAACGGGACGGAGGGGGCCCGTGCGAGCCTTCCGGTACCACGCCCCCGCCGCTCCCATGGCGTCACCTCCTACATTCATA-GGACACTCTCGCTCCCGGGCGGCAT----CCGTGGGGGTCGCAGTCGTTGGGTGAGCCCGCACAGGAGGNNNNNNNNNNNNNNNNNNNNNNNNNNNNNNNNNNNNNNNNNNNNNNNNNNNNNNNNNNNNNNNNNNNNNNNG-AGCCCTAGTATCGCTCGTGTCATAGTCACCACNTGAGGCCTGAAGTGTAAGGGGAATTCCGGCCTGATCGAAGCATCCGCGAAAGCTCTGTGTGTCCA---GCCCCGTCCCGCTGCCATGTGCAAAGATGCGTTGGCGCGCGCCGGCCGTCGCCGCGTCGAGCCGCGCCCCGTGCCTCGC-------NNNNNNNN--TACAGGCCGACCCCCCTGCTATCTGCCAGCCCCTCCTTCCGTACGCGGTCCTCGCCGCTTGGGGTTGTGGGCCATGTTCCCGGGCACCCAAGCACGAACGACCGGCGGCGTCCTGAGAGGTGACCCCTTCCGCTAGCGCATCCCGCGCAGCCAAGCAAATTGTTATGCCTCGCAACATAGCGCTTCTGATCAGGAGGAGACGAGGAGTCGATGCGCAGGACTGGTTGATCCACCCGCGGCCTGTGTCCCGCGGGACCAGGGGACGACCGACCACGGGATAGTGCGCAATAGGACTTGGGGCGAGCAGAGGTGCGACATGGTCCNNNNNNNNNNNNNNNNNNNNNNNNNNNNNNNNNNNNNNNNNNNNNNNNNNNAACTAGGTCTAAAGTCCTTCCCCTATCCCCGCTGCGCGCCCTGTTCCCGCCTCTTACTCCGCAGTGTTCGCTGCCGGGCCCCCGAACCAGGTGCGCCGCCGGATAGGATCCGGAGGCGTGTTGGGTTCTACCCGCCCGCACCTTACNNAGTGAGGTTTTCGATTATGATGCGATCGCTCCAGGAGGGAACCGCACAGCTCGCGGTATACGGTGATGCTAAGCCCGGCCTTAAAAGTAAGGAATA-TCGGTAGCCAGGCTAGTCTGCGACGAATGCCCGGGGGTGGGTNNNNNNNNNNNNNNNNNNNNNNNNNNNNNNNNACAAAATCTCGCCAGACCCACCCACCGGTCCTCCGATGTGCGCCACCTCGGGCGCGCCNNNNNNNNNNNNNNNNNNNNNNNNNNNNNNNNNNNNNNNNNCTGCGCCTCCCGCCCCGCGCCCCCCGCAATGCCTACTGAGAACCTTCCCCTCTGCCGGCGTGGGCTGCACCTTTCGCAAGTAGGCGCGCNNNNNNNNNNNNNNNCGGCTTCTAGCTGCCTGGACATGGCCGTACCGGACTCCACCCCTAGCCACTACTGGCGGCCCCGATGGCCTAGCCCCTCCGAGGGCGCCTGGCTCCTCCCCCCTCAAGTGATGACGGGTGCTTTACATGACT-CGAGGTGCTGCGCAGGGCGTGATGCTCACGGGCGTGCAACCCTGCCCAGCGNNATGCGAGCAGCAATCTGCACTATCTAGTCAAAACCGAGACTAGAAGATCGCGGCCCCNNGGCCCCTCCTAGCAATTTAGTCGGACCCTGGAAGCCNN---GTGAAGAGTGGCCTCAGTGGCTCTGTGTCA---------CCGCAGGCCCCCCTG--ANCCATCCGGTTCCCGAGCTTCCTTACCTTACCTAGAACCAAGACCGATGGCCACACCGGTGCCGTGTCAGGAGGGGACACNNNNNNNNC----------GATAGGCAGGTCGGTTAAGGGCAGCATCATGAGCCGTTATCCCTGACACCGGCAGATGGGTTCTATCGCGGACAATCCAACCAGAGGTCCCCGGTATCCGCGCGGATTCGGGAAGGGCAGCAGGGNNNNNNNNNNNNNNNNNNNNCGAGTGGCGCCAT---GAAC--NNNNNNTGGGAA-AGACCGTACGGAACACAGGAGAA-AGCCAGCTCGTGCTGACGGGAGGGCTCATTCGCGGGGTGACAGGTGTGCGGGGAGAGAGAGGCAGAGCAGATCCGTTACCATATGATGGGGGTGTGGCGACCTGCCTAGTCACCGATTG-GGGGACCGGGATGGAGCCGCGACGCGA-CACGTAATGCTCC-CCCTCCCGCAA-NNNNNNNNNTTCTCCCGGCCAACATTCTGACCCCCGNNNNTGCGCGTGTAATAGCATAAGCAGCAG-TTCC-CGTTCACGAACGTTGAACTCCTCGTCGAG-TACTTGCACGGCCCGCCCCCCTTCGTATTTTC-T--GACT-----GGGCCC---ACNNNNNNNNGGCTCTGAGCTGGTGAACCCTCGTAGGCT-----TGGGTCCCCGCCTT-NNNNNNNNNNNNNNNNNNNNNNNNNNNNNNNNNNNNNNN--GCGTANNNNNNNNNNN-GTCA-CCCTGTGGT--A--GT--TATATTNNNNNNNNN
>CA0191-ND-ST302
CACGCCTACCCCTCCCCGAGGTACGGACCCCGTACCGACAGGCCGCCCAGTGGCAAATCTGTTCTGGACACTTCCACCCCTTCTCTTCACCTGTATCACCAGCAAGAAGGCGTATGGACTAAGCCGTTGCCAGGGCGATCTTTGAACTCACTCTCCCACGCTCACCATGCGGAAATTAGGACCTCCCGGCGGCTCGCCTCACGACAAAACGGGTCCCACATGCCGTTCACCAGCTGAGTTCACCCTCTGCACTTTGTTCGCGCCCCGGGGCCTCGGTAACGACCTCTACCCCTCGGATGGCCCCCCAGCCCACGACCAGCCCGCCTCGTCATCCCGAGGCCTCCTCAAAAGCCGTACCCGTGAGTGCCATCTCGGGTTCCTCGCCATAGCACGCAGCCACCCTTCCCGGCCCACCTTTACCCGGCTCGCTCACTCCCAACCAGTGACCCCTCCGGTGGCCGGGAGTTAGGCAGCGCGGACGTCCCGCGCGGGACACTCGACGTATAATACGCCGAGGGGTCACCCGGCAGCGTGGGGCATTGACGGGGGTCCCCTGTAAACGGGGAATGGAGGGGGCTCATGGGCATAGGGTTGGTCGTGCCCGCTGAGAGTGTGATTAGCAGGGTGGTGTACAATTCCACGCGGCTATGGGGCATAGGGGTCGAGTGGTTCAGAGACTCGCGTTTGTCAGGGATGACGGTAATACAGCGTTGGACTTCTCCAGGAGGTTCGGCGTGCTAGGTCTCTTGAGAGCCGCAGGAGGGGAACGGTTCCACTGCGGGACCCTCCCTCTCTCCGAGCCTGGCCCGGGCCGGACGGCCCATGGAACAGCTCGAGGGACGGTAGAA-CCGTCTCGTCTGCACCT--CT-ACTTCCCCCTGGCCGTTGAACGGTGGTTGAGCTATACTCACTTTCAGCGGTCGCTGCACATGCGTCGACCTCCGTATGTCATTCCGGACCCCCAGGAGTGTTGCACTTTGGCTGCGGCCAGGCGACTGCACCCTGCGGATCGGACCTGAGCCGCGCCGGCGATGCCGCTCCTCCTAACCCACCCCCGTTTCCTTTACACGAGCGTCAGGGCGGAGACTTCCACACCTAGACCCTAGCTGGCTTTAACCTTCCGGGTTCCCCCTCAT--GTCAGTAA----TGGACGTCAGGTTCAGCAGGCGGGGCCTGGGAGGGTGAAGAGGGAGACTTCGTAACGGAGCGCGGACGTCGTTAGTGGGCTATGGAGCTCATCTGTACAGAGGAACCGCGAGGGGGGTGGGGCCAGAGGAGTGAGCGAATATAGCGGGTATATGTACCCTGTAACATTCAGAGCGTCGAAAGGGAGGATTCACTGGTCGTGCGCCTAGCACGGGGCGTGGCGAAGCCGGCGGGGCGAGCACACTAACATGACTCGTCGTGCCATC-NNNNNNNNNNNNNNNAATATGGATTAACGGTAGGGACACCCCGA--TGGCCACAGGACTGCCCGCCTCCTTGAGAACGGGCCATAGGACAGTTAGACTCCGGCAGCGGTCCGGGTTAAGCCGGTGGAATGGTACGCAGGGAAAACGGGTTGTTTCCGCTAGGGAGAGGTAGGCACCGTATTGACGCGAGCTCCCGGCTAGCGGCCATCGTGATGAGAAACTGGCGCCACCCAACAAGCTTCTCTCGGGTCTGTGTGGTGGGCGCTCTACACCCAACCCGCCGCTCTACATTGTCAGACATCCGCCACCTCGCGGCCCAGCTCCGTC-CGCCACCCAGCTCGTAGCTATCCGTGCACATCCTGACGACTTACGTTCCCTTGGGTCGCCCCCCGTAAACGGGAGCGCCGGAGTTGTCTCGGTCCCTGCTCGGCTCCATATACGCAAGATCACTT-GGCGCGCGTACGTCCCTCGAAGGTGCCGAACGCCGCGCCAAGGGTTGCCGTGCAGCCGCAGGTTCCTTTGGCGCGTGCCCGGGTGTCGACCCGTGCCCCGCTTCATTTTGCTTCCGCTCATGAGACAAACCCGTGGCTGTATTGGAAGGCCTCTGAAAGCCACGCCGTAAGCCAGTGCTATCGCCAGTGGGTAACGTGATACCAGAGCGCCGGCGAGTCTCAATTGGTACTGGGAATGGTGCCTTCCTTGATTCCACCACCGAATAGAGCCTTAGCACGCTTCCCCTGGTGTCGGCGACCACTCCCGCATGCCCCCCATACGATATGCCAACGGCGTCGCCACTGGCGCGCCGTCAGATAGGATATACGCTCAAATCCGCCTGGGAGCCGCTGGGCATGCCCTAGTGTCCGCACGTAGGAGGGAGCTACTGCAGGGCCACCGTGCCCCAGTGTTTCGACCTATGCATTCCAAAATTACCACCCCGACTTACCCACCAGTTCGTCCGCACTGTTACATAAGTCAAGCCCTGATCACGCAGCGTGCCGGAATTTTGCGGCGCGGAACTGGCCGTGGGCAGTGTCTCGGGCACGTGCGCAAACTGTGCCCCGGTCGGAAGGTCATGGTTCGCCTCAGAGCATCGTACAGGTCCAGGGGGCGCAGTCGCGTCCACCGCTGTCTCGACACAGCAGTCGGCACGCGACCACTATGGCCCTCTTAATTTGCCCCCCAGCCGCGACTCGTCCCTGCGCACTGGTTTTGTTCCTACGGACGCGTCCGGATGGCTTATGGGCACACTGCCCTGCCGAGAACAGCCCGTGCACCTTGATTGATGGCACGTCCCTGTCACGGCCACGGTGGCACGCGGCTACTAGCGTGTCACGC----TTCACACACAGGGGGGGGGTGTGATAGGAACGATCCAGCGAACAGGGCCTAGTAGGTGGGGGCTAGGGGGCATCGGCTGCCTGCAAGGGATGGAGGCGACACGCGCAGGATCGACGCCAGCGAAGGAGCGTTGACGCACTGCCGCAGTG-----GTTGTGGGCGTTGAAGTGTTCCGCGGCAAGGATGGGGTCCTCGTCAGAGATCGGCGGCATAGGGCAGTAGGCCGACCGCGACGACGGGGCGTCATCTGGCGCGCCATCACAACACATATGTCTGCGGCCCCTTCACCGAGGACCGTCGTGCCGACCGGGAGTAGGGGTGTATTTAAGACAGGATTGTCCGCGGAGAAGTCCGCAAGGTCAGTTGGAAAACCGCGGTGGGGAACGATCAGAGGCATAGCAGGTAACCGCGTCGCCTGAATTGGCAGCTAATTAGCTACCTGCGAGGCATGCCGCGGAAAGCGGCGGGGTGAGTTGGGTACCGGAACCAGATACGGCNGGCTCCATACATCACCGGCTTTATACTGCGCCGAGAACATCCCATTCCTGCGCGGTCAGGTCAGGCATGTTACACATACCCCATCTTTCATGCATGCATTTCTAACGGTCCGTACGCGCCCCCCGCTGCCGCCGGTTGAACGCCCACGTCCCCCGCAATATGAGTCGGCAAGCCGTCCGAGGACCCGATGCAATGATGGAATGGACCACGTCGGCGCGGCGGTAGTGGCCGGGAATGCGTCACGTTTAGTCTCTCGTTCACCGTAACGTC-----CGAAGACTTTGTCCCCACCCCCCCAGGGGGAACAGGCAGAATGCGCGCGCGTAGGGTGGACACTAAGCGGAGGCACCCCGGGATACCGAACATGTGAGTGAGGGCGGGGGTGTTCATCCGGTGAGGTGCCGGCAGGCTCGCTTGGACATGGCCTCGCGGGGGGGATAGTGACGTTCCTGGGGTATGCGCACTGGGGCGAGGGCGAATGACCGACCCCAATTTGGGAGGTGGGGAGACAATCTCCGGTCGACTCTGGAGGGCGGTCAGTTTGAACTAGTTGGACGATTGCTGCCTCTACACCCACACAAGCCGGTCCCCCCATGCTGAGATGCCCGGCCCTAAAGACCCAACGCCCCGTGAGCTCTTTGCCAAGAGGTCCGTT--GCCGCCCAAGTCTACTCCCCG-GCAAGACAAGAAGGAGATGCGCTCGGGGGACGTGCGTCTATGTCCCCGGGGATGGGCGTGACCGTACGATGGTTGCGCCTGCAGTCCCGGAAATAGGGTCGCCGCACTGGGGGAATCTCGACACGCGCAGAACATTCTTATTACCGGCCTGAGAGCGCGAGAGGTCCGCCACGCTCCGAGCCCACCTGGCAGGCCCGCCCCATCATGTGCTCCCACTGCGCGGTGCCACGGTTGTCCAGAGGCCAAGGTCTCCGGCCCCCGCACATCTACGTTGCATCGACCGAACGGCCCGAAACGCGCAGGAGGCGTATCCCTCCCCGACATGCCCGCACAAGCCGACCCTCGATGGTCC-TGTCATACGGAGAGAAGCGCGGGGCGGAGTGAGGTTTTTAATGCTGCTCCGGGGGGGCTCGCCCGCGGTGGCGGACATGTCAGCACGGGATTGACTATAGCCCCTG-------TTAGTATCCGGTCGGCCCAATGCCCAACTCCCGGGGTGCTACCACCGACCGGGTCAACGATCCGTACCGGTGCGGAAAAACCTAAG--TTCCTGCATTGTCGCCGCGGACCTTAGCGGTCTACCCCCCTCGCCCGCACGCGTTCAATCGTAGCGCGCGTTTCGTTCCCCCTTAGTGGGGCGACGGGGGCCCGTGCGAGCCTTCCGCTACCGTACCCTTGCCGCTCCCAGGGCTTCCTCGACTACACATGCA-GGACAGACTCGCCTACGGGCGGCGTCGGTTCGTGGGGGTCGCAGCCGAGGGGTGCACCCGCAACGG---GCTTTACCTTTCCCATTCTCTT-CCATGACCGCCGAATGCGAGGCGTACCGCCT-AAGATTTCTATTAGATG-AGCTCCAGTATCGTTCGTTTCGCGGTCACT--TTGCGGCCCGAAGTGTAAGAGGAATGCTGGCCTGATTGCCGCATCAGCTCAAGTTCTTTGGGTCCGAG-GCCCCGTCCCGCTGCCGTGTGCGGAGAGGCGTTGGCGCGCGCCGGTCGCTGCCGTTCCGAACCGCGCCCCGTGCCTCGCTCAGANNNNNNNNNNAATGGGGACCAGCCACCCCGCCACCCGCCACGCCCCCCATCCGCGCTCGGTCCTCGCCGCCGGAGGTTGTAGGCCATGCTCCCGGTTATCCAAGAACGAACGATCGACGGAACCTCGAGTATCGGCCTCTTCTGCTGGCGTAACTCGCGCAGGGGATCAAATTGCGACGCCTGGTAGCACAGCGCGTTTGACTCGGAGGAGACGAGGAGACGACACACCTGACTGATTGACCCACTCGCGGGCGG---CTCGCGAAACCAGGGGGCGACCAACCGCGGGACGATGCACAGGGAGATTTAGGGCGGACGGAGGTACGATATGGCAAATGGAAGCCCCGAGGACAGAGCCGCGCCTGGGCGTAGTGGCCGGGAAGAAGCATTATGGTCAAGGTCCCCGCCTCAGTCCCGCTGCGCATCCGGACCCCGCCTCCCACTCCGCAGTGCCCGTTACCGGGACCCTGA----NNNNNGTCGCCAGTCAGGATCCGGAAGCGTGTTGGGTGCGACCCTCCCTCACCCTGCNNNNNNNNNNNNNNNNNNNNNNNNNNNNNNNNNNNNNNNNNNNNNNNNNNNNNNGCAATANNNNNNNNNNNNNNNNNNNNNNNNAGAGGCGGAGATCTCCCGGGAGCCAGGCTAGTCTGCGCCGGGTGCTCGGGTGTAGGTAGACGGAGGACGAAGCGCCGAGGCTAGTAGCCACCGGATCTCGCCGTACCAACTCGTCGGGCCCCAGGTACGTGCCACCTCGGGCGCGCCACCATGTGTATAGGTGGCACCCTGTGAAATCTGCT-----ACTGCACCTTCCGCCCCGCTCCTCCCGCAGGACCTTCTAACAGCCTTCCCCGATTCCGGCAAGGATCGGA-CCTTAGCAAGGAGGTGCGCGAAGGTTATTTAGATCGGCTTCTAGCTGCTTGGACACGGCCGTACCAGACACCACCTAGAGCCACTACGGATGGCCCCGCTGGCCTAGTCCCTCCGGAGTTACCTTACTCTGCCCCCTTCAAGTGATGACAAGCGCGTTACCTGGCC-CGAGACACTGCGCGGAGAGTGATGATCGCGAGTGTGTAACCCCACCCAGCGTCACACGGCCAACAGTCTGCACAATCTAGACAAACCTAGGGCCAGAAGATCGCGGCCCCCTAGCCCCTCCCGGCGGTTCGGGCAGATTCGAGAGGCT-----GTGAGAAGTGGCCTCCGTGACTCTGTGTTG---------CCGCAGTCCACCCTGAGGTCCATCCGGTTTCCGGGCTTCCCCATCTTACCAGATGCCAAAACTGACGGCCGCGCTGGTGCCGATACGGAAGGGGACACGAACGACGCAAAGCTGATAGATGAGCAGGTAGGTTACGAGTGACATCATGACCCGTTAGCCATGACACCGGCAGGTGGATTCCACCGCGAGCGATTCAACCAGGAGTTCCCGGTAACCGCGTGGATTTGGGAAAGGCAGCAGGAN-CACCNNNNNNA-GTGAAGCGGGCGGTGCTACATTGAGCACAGCTGTTGAGTACATCCCGTACGACACACAGGAGGACGGTCAGTTAATGCTAACGGGTAGGTTTTCCCGATGGGTGACAGGTGTTCGGGAAGAGCGGGGTAGAGAAAATCCGTCACCATATGCTGGGGTTGTGACGCCCCTCCCCGACATAGATTG-GGGAATTGGGACGGAGACGCGACATGA-TACGTAGTACTCC-TCACTCACCGAAGTAAGN---TCCCTCCGGCCGACAGCCTTACTCCCGGCAATGCGAGTGTATTAGCATAAGCAGCAGATCTC-CATACACGGATGCTGAATTCCTTAACGAG-TACTTGCATGGTCCGCCCTCCTCCGTGTTTCC-T--GGCT-TG--AGACATTAAACNNTGGTGAGGCTCTGAGGTGGCGAATCACCTTGGGCTGTTAGTGGTTCCCCGCCCA---TGCCGGGTTTAGCTTTCTC-GG-TATTGTCNNNNNNNNG---TATTTGACTAGGGGATCGGCCTGGTAATTCNNNNNNNNNNNNNACTTN---T
>CA0229-ND-ST302
CACGCCTACCCCTCCCCGATGTGCGGACCCCGTACCGACAGGCCGCCCAGTGGCAAACATGTTCTGGATACTTCCACCCCTTCTCCTCTCCTGCATCACCGGCAAAAAGGCGTATGGACCCGGCCGTTGCCTGGACGATCATTGAACTCGCTCTCCCACGCTCACCACGCCGAATTTAGGACACTTCGGCGGCTCGCCTCACGGCAGAACGGGTCCCACACGCCGTCCACCAGCTGGGCTCACCCTCTGCACTTTGTCCGCGCCCCGGGGCCCCGGTGACGACCTCCACCCCTCGGATAGCCCCCCAGCCCACGACCAGCCCGCCTCGTTATCCCGAGATCTCCCNNNNNNCCGTACCCGTGAGTGCCATCTCGAGTTCCTCGCCATAGCACGCAGCCAACTTGCCTGGCCCACCTTTACCCGGCTCGCTCACTCCCAACCAGTGACCCCGCCGGTGGCCTGGGGTCAGGCAGTGCGGACGCCCCGCGCGGGGCACTCGACTTATAATACGCCACGGGGTAACCCGGCAACGCGGGACGTTGCCGGGGGTCCCCTGCAAACGGGGAATGGAGGGGGCTCATGGGCCTAGGGTTGGTCGTGCCCGCTAAGAGTGTGATTAACAGGGCGGTGTGCAATTCCACGCGGCTATGGGGCATAGGGATCGCGTGGTTCAAAGACTCGCGCTTGTCAGGGATGACGGTAATACAGCGTCGGACTGCTCTGGGAGGTTCGGCTTGCTGGGGCTCTTGAGAGTCGCAGGAGGGGGATGGTTCCACTGCGGGACCCTCTCTTTCTCCGAGCTTGGCCCAGGCCGGACGGCCTATGGAACAGCTCGAGGGGCGGTAGAA-CCGTCTCGCCTGCACCT--TT-ACTTCTCCCTGGCCTTTGAACGGTCATTGAGCTATACTCACTTTCAGCGGTCGCTGCACACGCGTTGACCTCCATGTGTCACTCCGGACCTGCACGAGTGTTGCACTTTGGCTACGGCCAGGCGACTGCACCCTGCGGGTCGGATCTGAGCCGCGCCGGCGACACCGCTCCTCCTAACCCACCCCCGTTCCCTTTACATGAGCGTCAGGGCGGAGACTTCCATACCTAGACCCTAGCTGGCTTTGACTTTCCGGGTTCCCCCTCGT--GGAAGCTATCGGTGGACGTCAGGTCCAGCAGGCGGCGCCTGGGGGGATGAAGAGGGGGACTTCGCAACGGAGCGCGGATGCCGCTAATGAGCTATGGAGCTCATCCGTACAGAGGGACCACGAGGGGGGGGGGGCTGTTGGAGTGAGCGAATAAAGCGAGCGTATGTACCCTGTAGCGTTCGGAACGTCGAAAAGGAGGATTCCCTGGTTGCGCGCCGAGTACGGGGCGTGGCGGAGCCAGCGGGGCGAGCACCCCAACGCGGCTCGTCGTGCTCCC-NNNNNNNNNNNNNNN-ATATTGATTGACAGTAGGGACACTCTGA--CTACCGTAGGACTGCCCGCCTCCTTTAGAACGTGCTATAGGACAGTTGGGCTCCGGCAGCGGTCCGGGCTAAGCCGGTGGAATGGTACGCAGGGAAAACAGGCGGTTTCCGCGAGGGAGAGGTAGGCACCGCGTCGACGCGATCTCCCGGCCGTGCGCCACCGTGATGAGAAACTGACGCCACCCAACAAGCTTCTCTCGTGCCTGTGTGGTGGGCGATCTACGCCCATCCCGCCGCTCTACATTGCCAGACATCCTCCACCTCGCGGATCAGCTCCGCC-CGCCACCCAGCTCGTAGCCACCCGTGCACATTCTGACGACTTACGTGCCCTCGGGTCGTCCCCCTTAAACGGGAGTGCCGGATTTTTCTCGGTCCCTGCTCGGCTCCGTATACGCGAGATCACTTAGGCGCGCGTACATCCCTCGAAGGTGCCGGACGCCGCGCCAAGGGTCGCCGTGCAGCCGCTGGTTCCTTTGGCGCGTGCCTGGGTGACGACCCGTGCCCCGCCTCGTCTTGCTTCCGCCCACTAGACAAACCCGTGGCTGTACTGGAAGGCCGCTGAAGGCTACGCCGTGAGCCAGTGCTATCGCCAGCTGGTAACGTTACGCCGGAGCGCCGGCAAGTCCCAATTGGTACCGGTAATGGTGCCTTCCTTGATTCCACCACCGAATAGGACCTTCGCACGTTTCCTCTGGTGTCAGCGACCGCTCCCGCATGCCCCCCATACGACATGCCAACGGCGTCGCCACTGCCGCGCTGTCGGATAGGATATACGCCCAAATCCGCCTGGGAGTCGCTGGGCATGCTCTGGTGCCCGCACGTAGGAGGTAGCTACTGCAGGGCCACCGTGCCCCAGTGTTTCGAATGATACACCCCAAAATTACCACCCCGACTTATCCGCCAGTTCGTCCGCACTGTTACAAGCGTCAAGCCCTGATTACGTAGCGTGCCGGCATTCCACGGCGCGGAACTGATGGTGGGCAGTGTCTTGGGCACGCGCGCAAACTGTGCCCCGGTCGGAGGGTCATGGTTCGTCTCCGAGCAGCGTACAGGTTCAGGGGGCGTAGTCGCGTACACCGCTGCCTCGACATAGCAATCGGCACGGGGCCACTTTGGTCCACTTAATTTGCCCCCCAGTCGCGACTCGTCCCTGCGCACCGGCTTTGTTCCCGCGAACGCGTCCGGATGGCTTCTGGGCACACTGCCCTGCCGAGAACAGCCCGCGCACCGGGATTGCTGGCACGCCCCTGTCACGGCCACGGTGGCACGCGGCTACTGGCGTATCACGTTTTG-TCACCCACGGGAGGGGGGTGTGGTAGGAACGGTCCAGCGAAAAGGACCTCGTGGGTGGGGGCTAGGGGGCATCGGCTGCCCGCGACGGGCGGAGGCGACGCGCGCGGGATCGACGCCAGCGAAGGAGCGTCGACGCGCTGCCGCAGTGCAGTCGTTGTGGGTGTTGAGGTGTTCCGCGGCAGGAATGGGGTCCTCGTCAGAGACCGGCGGCATAGTGTAGTGGGCCGACATCGACGACGGGGCGTCATCTGGCGCGCTGCCACAACACTTATGTTTGCGGCACCTCCAACGGGGATCGTCGTGCCGACCGGGAGTAGAGGCGTGTCTAACACAGGATTGTCAGCGGAGAAGTCCGCAAGGTCCACTGGGGAACCGCGGTGTGGAACGCCCAGCGGCATAGCGGGTAGCCGCATCGCTTGAATTGGCGGCTGAGTAGCTGCCTGCGAGGCATGTCGCGGAAATCGGCGGGGTGAGTTGGATGCCGGAACCGGATACGGCNGGCCCCATACATCACCGGCTTTACACTGCGCCGAGGACACCCCATTCCTGCGCGGTCTGGCCAGGCATGTTACACATACCTTATCTTTCATGCATGCATTCTTAACTGTCCGTACGCGCCCCCCGCTGCCGCCGGCTGAACGCCCACGTCTCCCGCACTATGAGTCGGCAGGCCGTCCGAGGACGCGAGGCAATGAGGGAATGGACCACGTTGGCGCGGCGGCCGTGGCCGGGACGGCGTCACGTTTAAGCCCTCGTTCACCTCAACGTCCCCGACGAAGGCCTTGACCCCACCCCCCCAGGGGGAGCAGGCAAGATGCGCGCGAGTAGGGTAGACACTAAGTGGAGGCACCCCGGGATACCGAACACGTGAGTGTGGGCGGGGGTGCTCATCCGGTGAGGTGTCGGCTGGCCCGCTTGGACATGGTCTCGCGGGGGGGATGGTGACGTTCCTGGGGTATGCGCACTGGGGCGAGGGCGAACGACCGACCCCAATTTGGTAGGTGGGGTGACAATCCCCGGTCGACTCTGGAGGGCGGTCAGTTAGAACTAGCTAGACGGTTGCTGCCTCTACACCCACACAAGCCGGTCCCCTCACGCTGAGATGCCCGGCCCTAAAGACCCGACGCCCCGTGAGCTCTTTGCCAAGGGTCCCGCTTATCCGCTCAAGTCTACTCCTCG-GCAAGGCAAGAGGGAGATGCGCTCGGGGGACTTGCATCTGTGTCCCCGGGGATGGGCGTGACCGTGCGATGGTTGCGCCTGCGGTCCCGGAAATGGGGTCGCCGCACTGGGAGTGTCACTGCACACGCAGAACACTTTTACTACCGGCCCGAGAGCGC--GCGGTCCGCCACGCTCCGAGCCCACCCGGCAGGCCCGCCCCATCACGTGCTCCCACTGCGCGGCGCCACGGTTGTCCAGAGGCCAGGGTCTCCGGCCCCCGTGCATCTACGTTGCATCGTCCGAACGGCCCGAAACGTGCAGGAGGCGTGTCCCTCCCCGACGTGCCCGCACAAGCCGACCCTCGATGGTC--TGTCATGCGGAGAGAGGCGTGGGGCGGAGAAAGATTTTTAATGCTGCTCCGGGGGGGCTCGCCCGTGGTGGCGGCCATGTCGGTACGGGATTGACTATGGCCTC-AGCTTGATTTAGTATCCAGCCGGCCCAATGCCCAACTCCCGGGGTACTACCACCGGCCGGGTCACCGATCCGTACCAGTGCGGAAAAACCTAAGGGCTCCTGCATCGTCGCTGCGGACCTTAGCGGTCTACCCCCCTCGCCCGCACGCGTTCTATCATAGCGCGCGTTTCGTTCCCCCTTAGCGGGGCGAAGGGAGCCCGTGCGAACCTTCCGCTACCGCGCTCTTGCCGCTCCCAGGGCTTTCTCGACTACACATGTA-GGACAGACTCGCCTACGGGCGGCGTCGGTCCGAGGGGGTCGCAGCCAAGGGGTGCACCCGCACCGAAGAGCATTGCTTTTCCCATCCTCTTTCCGCGGCCGCCGACCGCGAGGCGTACCGCCTTAAGATTTCTATTAGA--TAGCCCCAGTATCGCTCGTGTCGCGGTCACC---TGCGGCCCGAGGTGTAAGGGGAATGCCGGCCTGATTGACGCATCCGCTCAAGTTCTTTGGGTCCGCG-GCCCCGTCCCGCTGCCGTGTGCGAAGAGGCGTTGGCGCGCGCCGGTCGCTGCCGTTTCGAACCGCGCCCCGTGCCTTGC-----NN-------N--TAGGGGCCGGCCCCCCCGCCACCCGCCACGCCCCCCATCCGCACGCGGTCCTCGCCGCCTGAGGTTGTAGGCCATGCTCCCGGTTATCCAAGAACGAACGATCGGCGGAACCTTGAGTATCGGCCTCTTCTGCCGGCGCAACCCCCGCAGGGGATCAAATTGCGACGCCTGGCAGCACAGCGCGTCTGACTCGGAGGAGACAAGGAGACTACACACCTGACTGGTTGATCCACTCGCAGGCGGTGTTTCGCGGGACCAGGGGGCGACCGACCGCGGGATGATGCGCTGGGGGATTTGGGGCGGGCGGAGGTACGACATGGCCCGTGGAAACCCCGGGGAAAGGGCCGCGTCCGGGCGTAGTGGCCGGGAAGAAGAACTATGGCCAAGGTCCCCGCCCCAGTCCCGCTTTGCACCCGGACCCCGCCTCCCACTCCGCAGTGCCCGTTGCCGGGACCCTGAACCANNNNNGTCGCCAGTCAGGATCCGGAATCGTGTTGGGTGCGACCCTTCCGCACCCAGCNNNGTGAGGCTTTCGGTTATGATGTGGTCGCTCCAGGAGGGGACCCCACAGTTCGCGATAGACCGTAACGGTTAGTCTAGTCTCAGAGGCGGGGAATTCCCGGGAGCCAGGCTAGTCTGCGCCGGGTGCTCGGGTGTGGGTACACGGAGGACGATGCGCTGGGGCTAGTAGCTACCAGATCTCGCCGTACCAATCCACCGGGCCCCAGATACGCGCCACCTCGGGCGCGCCACCATGTGTATCGGTGGCACCCTGTAAAATCTGCT------CTACACCTCCCGCTCCGCTCCTCCCGAAGGACCTTCGGACAACCTTCCCCTCTGCTTGTAAGTGCCGGA-TCTTAACAAGGAGGCGCGCTAGGTTTACCTAAATCGGCTTCTAGCTGCTTGGACACGGTCGTACCAGACACCACCTCGAGCCACTACTGATGGCCCCGCTGGCCTAGTCCCTCCGGAATCACCTTGCTCTGCCCCCCTCAAGTGATGACAGGCGCGTTACCTGGCC-CTGGACGCTGCGCGGAGAGTGATGATCGCGGGCGTGCAACCCCGCCCAGCGTTACACGACCAACAGTCTGCACTATCTAGACAAACCCGGGGCCAGAAGATCGTGGCTCCCTGGCCCCTCCCGTCGATTTGGGCGGACCCGAGAGGCC-----GTGAGGAGTGGCCTCAGTGACTCTGCGTTG-------TACCGCAGTCCACCCTGGGATCCATCCGGTTCCCGGGCGTCCCTATCTTACCAGACACCAAAACTGACGGCAGCGCTGGTGCTGTTTCGGAAGGGGACACGAACGACGCGAAGCTGATAGATGGGCAGGTAGGTTACAAGTAGCATCATGACCCGTTAGCCATGACACCGGCAGGAGGATTCCACCGCGGACGATCCAACCAGAAGTTCCCGGTATCCGCGTGGATTTGGGAAAGGCAGCAGAAN-CACCNNNNNNA-GTGCGGCGGGCAGTGCTACGCTGAGC----CC--------AATACCGTACGACACACAAGAGGACGGTCAGCTAGTGCTGACGGGTAGGTTTACTTGCTGGGTGACAGGTGTGCGGGGAAAGAGGGGCAGAGCAGACCCGTTACCATATGCTGGGGTTGTGGCGCCCCTCCCAGACATAGATTG-GGGGATTGGGACGGAGCCGCGACGCGA-TACGTGATGGTCT-CCCCTCACCGA----------TCCCTCCGGCCGACAGCCTTACCCCCGGCAATGCGAGTGCAATAGCATAAGTAGCAGATCTC-CATTCACGGATGCTGAATTCCTTGTCAAG-TACTTGCATGGCCCGTCCTCCTCCGTGTCTCCATTTGACT-----AGACATTAAACCTTAGTGGGGCTCTGAGCCGGTGAACCACCGTAGGCTACGAGTAGGTCCCTGCCCA---TGCCGGGTTTGGCTAAAATGGG-TATTGTCNNNNNNNAGGCGTA-ATGTCTAGGAGATCGGCCTGGTAATTCNNNNNNNNNNNNNAC--N---T
>EA1682-Poultry-ST302
CACGCCTACCCCTCCCCGATGTGCGGACCCCGTACTGACAGGCCGCCCAGTGGCAAACATGTTCTGGACACTTCCACCCCTTCTCCTCTCCTGCATCACCGGCAAGAAGGCGTATGGACCCGGCTGTTGCCTGGGCGATCATTGAACTCGC---------CTCACCACGCCGAATTTAGGACCCCCTGGCGGCTCGCCTCACGGCAGAACGGGTCCCACATGCCGTCCACCAGCTGGGCTCACCCT---CACTTTGTCCGCGCCCCGGGGCCCCG-TGACGACCTCCATCCCTCGGATAGCCCCCCAGCCCACGACCAGCCCGCCTCGTCATCCCGAGACCTCCCTNNNNNCCGTACCCGTGAGTGC-ATCTCGAGTTCCTCGCCATAGCACGCAGCCAACCTGCCCGGCCCTCCTTTACCCGGCTCGCTCACTCCTAACCAGTGACCCCGCCGGTGGCCTGGGGTCAGGCAGCGCGGACGCCCCGCGCGGGGCACTCGACTTATAATACGCCACGGGGTCACCCGGCAGCGCGGGGCGTTGCCGGGGGTCCCCTACAAACGGGGAATGGAGGGGGCTCATGGGCCTAGGGTTGGTCGTGCCCG-TGAGAGTGTGATTAACAGGGTGGTGTGCAATTCTACGCAGCTAGGGAGCAT-G----CGCGTGGTTCAGAGACTCGCGCTTGTCAGGGATGACGGTAATACAGCGTCGGACTTCTCCGGGAGGTTCGGCTTGCTGGGGCTC-TGAGAGCCGTAGG----AGACGGTTCCACTGCGGGACCCTCCCGTTCTCCGAGCTTGGCC-GGACCGGACGGCCCATGGAACAGCTCGAGGGGCGGTAGAAACCGTCTCGTCTGCACCTC-CT--CTTCCCCCTGGCCTTTGAATGGT----GAGCTATACTCACTTTCAGCG--C-CTGCACACGCGTCGACCTCCGTGTGTCACTCCGGACCCCCAGGAGTGTTGCACTTTGGCTACGGCCAGGCGACTGCACCCTGCGGGTCGGACCTGAGCCGCGCCGGCGACACCGCCTCTCCTAACCCACCCCCGTTCCCTTTACACGAGCGTCAGGGCGGAGACTTCCACCCCTAGACCCTAGCTGGCT--GACCTTCCAGGTTCCCCCTCGT--GGAAGCAA----TGGACGTCAGGTCCAGCAGGCGGCGCCTGGGGGGATGAAGAGGGGGACT-CGCAACGGAGCGCGGACGCCGTTAATGAGCTATGGAGCTCATCCGTACAGAGGGACCGCGAGGGGGGGGGGGCTGTTGGAGTGAGCG-ATAAAGCGGGCGTATGTACCCTGTAGCGTTCGGTACGTCGAAAGGGAGAATTCCCTGGTTGCGCGCCGAGTACGGGACGTGGCGGAGCCAGCGGGGCGAGCACCCCAACGCAGCTCGTCGTGCCCC--NNNNNNNNNNNNNNN-ATATGGATTGACGGTAGGGACGC---GA----ACCATAGGACTGCCCGCCTCCTTTAGAACGGGCTATAGGACAGTTGGGCTCCGGCAGC-GTCCGAGCTAATCCGGTGGAATGGTACGCAGGGAAAACGGGTGGTTTACGCGAGGGAGAGGTAGGCACCGCGTCG-CGCGAGCCCCCGGTCGTGCG--ATCGTG-TTAG---CTGAAGCCACCCAACAAGC----CTCGTGTCTGTGTAGGGGGCGATCTACGCCCAATCCGCCGCTCTACATTGCCAGACATCCGCCACCTCGCGGCCCAGCTCCGCC-CGCCACCCAGCTCGTAGTCACCCGG-CACATTCTGACGACTGACGTGCCCTCGGGTCGCCCCCCTTACACGGGAGTGCCGGAGTTTTCTCGGTCCCTGCTCGGCTCTGTAT-TGCGAAATCACTTGGGCGCGCGTACATCCCTCGAAGGTGCCGGACGCCGCGCCAAGGGTCGCCGTGCTGCCGCTGGTTCCTTTGGCGCGTGCCCGGGTGTCGACCCGTACCCCGCCTCGTCTTGCTTCTGCCCACTAGACAAACCTGTGGCTGTACTGGAAGGCCGCTGAAGGCCGCGCCGTGAGCCAGTGCTATCGCCAGCTG-TAACGTTACGCCGGAGCGCCGGCAAGTCTCAATTGGTACCGGTAATAGTGCGTTCCTTGATTCCACCACCGATTAGAACCTTCGCACGCTTCCCCTGGTGTCAGCGACCGCTCTCGCATGCCCCCCATACGACATGCCAACGGCGTCGCCACTGCCGCGCCGTCGGATAGGATATACGCCCAAATCCGCCTGGGAGCCGTTGGGCATGCCCTGGTGCCCGCACGTAGGAGGTAGCTACTGCAAGGCCACCGTGCCCCAGTGTTTCGACTGATACACCCCAAAATTACCACCCCGACTTACCCGCCAGTTCGTCCGCACTGTTACAAGCGTCAAGCTCTGATCACGTAGGGCGCCGGCATTTCGCGGCGCGGAACTGGTCGTGGGCAGTGTCTCGGGCACG-ACGTAAACTGTGCCCCGGTCGGAGGAT--TGGTTCACCTCCGAGCATCGAACAGGTTCAGGGGGCGTAGTCGCGTACACCGC-GCCTCGACACAGCAGTCGGCACGGGGCCACTTTGGCCCACT------GCCCCCCAGTCGCGACGCGCCCCTGCGCACCGTCTTTATTCCCGTGAACGCGTCCGGATGGCTTCTGGGCACACTGCCCTGCCGAGAACAGCCCGCGCACCGTG-TTGCTAGCACGCCCCTG-CACGGCCACGGTGG-ACGCGGCTACTGGCGTATCACG-TCTG-TCACCCACGG-GGGGGGGTGTGGTAGGAACGGTCCAGCGAAAAGGGCCTCGTGGGTGGGGGCTAGGGGGCATCGGCTACCCGCGAGGGACGGAGGCGACGCGCGCGGGATCGACACCAACGAAGGAGCGTCG-CTCGCTGCCGCAGTG-----GTTGTGGGCGTTGAGGTGTTCCGCGGCAGGGATGGGGTC-CCGTCAGAGACCGGCGG-ATAGTGCAGTGGGCCGACATCGACGACGGGGCGTCAGCTGGCGCGCTACCACAACACATATGTTTGCGGCACCCCCAACGGGGACCGTCGTGCCGACCGGGAGTA-----G-GTTTA---CAGGATTGTCCGCGGAGAAGTCCGCAAGGTCAACTGGGGAACCGCGGTGTGGAGCGCCCAGCGGCATAGCGGGTAGCCGCGTAGCC-GAATTGGCGGCT-AGTAGCTGCCTGCGAGACATGTCGCGGAAATCGGCGGGGTGAGTTGGGTGCCGGAACCGGATACGGCNGGCCCTATACATCACCGGCTTTA-ACTGCACCGAG--CACCCCATTCCTGCGCGGTTTGGTCAGGCAGGTTATACATACCCTATCTTTCATGCATGCATTCTTAACTGTCCGCACGCGCCCCCCGCTGCCGCCGGCTGAACGCCTATGTCCCC-GCAC--TGAGTCGGCAGTCCGTCCGAG-ACCCGAGGCA--G-GGGAATGGATCACGTCGGCGCGGCGGCCGTGGCCGGGACGGTGTCACGTTTAAGCCCTCGTTCACCTCAACGTCCCCGACGAAGGCCTTGACCCCACCCCCCCAGGGGGAACAGGCAAGATGCGCG-AAGTAGGGC---CACTAAG-GGAGGCACCCCGGGATACCGAATACGTGAGTGTGGGCGGGG--G-T-A-CCGGTGAGGTGTCGGCTGGCCCGCTTGGACATGGCCTCGCGGGGGGGATGGTGACGG--CTGGGGTATGCGCACTGAGGTGAGGACGA-CAACCGACCCCAATTTGGGAGGTGGGGTGAC-----CCAGTCGACTC-GGAGGGCGGTCAGTTAGATTTAGCT--ACGGT-ACTGCCTCTACACCCACACAAGCCGGTCTCCTCACGCTAAGATGCCCGGCCCTAAAGACCCGACGCCTCGTGAGCTCTTTGCCAAGGGTCCCA--TATCTGCCCAAGTCTACTCCTCG-GCAAGGCAAGAGGGAGATGCGCTCGGGGGACT-GCATCTGTGTCCCC-GGGATGGGCGTGACCGTGCGATGGTTGGGCCTGCGGTCCCGAAAATGGGGTCGCCGCACTG-GGGTGTCACTGCACGCGCAGTACACTCTTA--ACCGGCCCGAGAGCGCGAGAGGTCCGCCAAGTTCCGAGCCCACCCGGTAGGCCCGCCCCATCACGTGCTCCCACTGCACGGCGCCACGGTTGTCCAGAGGCCAGGGTCTCCGGCCCCCGCGCATCTAC-TTGCATCGACCGAACGGCTCGAAAAGCGCAGGAGGCGTGTCCCTCCCCGACGTGCCCGCACAAGC-GACCCTCGATGGTC--TGT--TGCGGAGAGGG-CGTGGGGCGGAGAAAGGTTTTAAATGCTGCTCTGGGAGGGCTCGCCCGCGGTGGCGGCCATGTCGGCACGGGATTGACTATA--CTCGAGCTTG-TTTAGTACCC-GCCGGCCCATTGCCCAACTCTCGGGGTGCTACCACCGGCCGGGTCAACGATCCGTACCG-TGTGGAAAAACCTAAGGGCTCCTGCATCGTCG-TGCGGACCTTAGCGGTCTACTCCCCTCGCCCGCACGCGTTCTATCATAGCGCGCGTTTCGTTCCCCCTTTGCGGGGCGAAGAGGGCCCGTGCGAGCC-TCCGCT-CCGCGCCCTTGCCGCTCCCAGGGCTTTCTC--C-A--C-TGTA-GGACAGACTCGCCTACGGGCGGCGTCGGTCCGTGGGGGTCGCAGCCGAGGGGTGCAC-C-AGCCGGAGAGCATTGCCTTTCCCATCCT-TTCCCGCGGCCGCCGACCGCGAGGCGTACCGCTT-AAGATTTCTATTAG-TG-AGTCCCAGTATGGCTCGTGTCGCGGTCACC---TGCGGCCCGAAATGTAAGGGGAATGCCGG--TGATTGACGCATCCGCTCAGGTTCTTTGGGTCCGCG-GCCCCGTCCCGCTGCCGTGTGCG-AGAGGCGTTGGCGCGCGCCGGTCGCTGCCGTTTCGAACCGCGCCCCGCGCCTCGC-----NN-T--AC-NG-TA--GGCCGGCCCCCCCGCCACCCGCCACGCCCCCCATCCGCACGCGGTCATCGCCGCCTGAGGTTGTAGGCCATGCTCCCGGTTATCCAAG-ACGAACGATCGGCGGAACC-TGAG-ATC--CCTCTTCTGCCGGCGCAACCCCCGCAGGGGATCAAATTGCGACGCCTGGCAGCACAGCGCGTCTGACTCGGAGGAGACGAGGAGACGACACACCTGACTG--TG-TCCACTCGCGGGCGGTGTCTCGCGGGACCAGGGGGCGACCGACCGCGGGATGATGCGCAGGGGGATTTGGGGCGGGCGGAGGTACGACATGGCCCATGGAAGCCCCGGAGAAAGGGCCGCGTCCGGGC--AG-GG-CGGGAAGAAGAACT-TGGCCAAGGTCCCCGCCCCAGTCCCGCTGCGCACCCGGACCCCGCCTCCCACTCCGCAGTGCCCGTTGCTGGGACCCTGA----NNNNNGTCGCCAGTCAGGATCCGGA-GCGTGTTGGGTGCGACCCTCCCGCACCCTGCNNN-TGAGGT-TT--G--A-GATGCGGTC-----AGTAGG-GACCC-ACAGTTCGCG---GACCGAA--G---AGTCTAGTCTCAGAGGCGGG-A-T-CCTGGGAGCCAGGCTAGT--GCGCCGGGAGCTCGGGTGCGGGTAGACGGAGGACTATGCGCCGGGGCTAGTAGCTACCAGATCTCGCCGTACCAACCC-CCGGGCCCCAGATACGCATCACCTCGGGTGCGCCACAATGTGTATCGGTGGCACCCTGTAAAACCTGCT------CTACACCTCCCGCCCCGCTTCTCCCGCAGGACCTTCTGACAACCTTCCCCTCTGCTGGCAAGGGCCGGACCCTTAGCAAGGAGGCGCACGAAGTTTA--TAGATCGGCTTCTAGCTGCTTGGACACGGCTGT--CAGACACCACCTCGAACCACTACTGATGGCCCCGCTGGCCTAGTCCCTCCGGAGTCACCTTGCTCTGCCCCCCTCAAGTGATGACAGGCGCGTTACCTAGCC-CGAGACGCTGCGCGGAGAGTGATGATCGCGGGCGTGCAACCCCGCCCGGC-----ACGACCAACAGTCTGCACTATCTAGACAAAACCGGGGCCAGAA-ATCGCGGCCCCCCGG--CCTCCCGTCGATT-GGGCGGACCCGAGAGGCCA----GTGAGGAGTGGCCTCAGTGAC-CTGCGTTG-------GACCGCAGTCCACCCTGGGATCCATTCGGTTCCCGGGCTTCTCTCTCT--CCAGACACCAGAACTGACGGCAGCGCTGGTGCCGTTTCGGAAGGGG-CACGAACGACGCG-AGCTGATAGATGGGCAGGTAGG----GAGTAGCATC-TGACCCGTTAGCCATGACACCAGCAG-TGGATTCCACCGCGGACGATCCAACCAGAAGTTCCTGGTATCCGCGTGGATTTG-GAAAGGCAGCAGGAN-CACCNNNNNNGAGTGCGGCAGGCGGTGCTACGCTGAGCAT-CCCGTTGGGTA-ATACCGTACGACACACAGGAGGACGGTCAGCTAGTACTGACGGGTAGGTTTACTCGCTGGGTGACAGGAGTG-GGGGAGAGAGGGGCAGAGCT-ATCTGTTA-CATATGCTGGGGTTGTGGCGCCCCTCCCAGAC-TAG-TTGAGGGGATTAGGACGAAGCCGCGACGCGA-TACGTA--GCTCT-CCCCTCACCGA-A----ACC-TCCCTCCGGCCGACAGCCTTACCCCCGGCAATGCGAGAGCAATAGCATAAGCAGCAGATCTC-CATTCACGG--GCTGA-T-CATTGTCGAG-TACTTGCATGGCCCGCCCTCCGCTGTGTCTC-ATTTG-CT-TGTAATACATTAAACTC--GTGGGGCTCTG---TGGTGAACCAC---AGGCTGTTGGTAGGTCCCCGCC-A---TGCCGGGTTTGGC-AAAATGCG-TAT-GTCNNNNNNNAGGCGTACATGT--AGT-GATCGGCCT-GTAAT-CNNNNNNNNNNNNN-CGCN---T
>EA2455-Poultry-ST302
CATGCCTACCCCTCCCCGATATGCGGACCCCGTATCGACAGGCCGCCTCGTGGTAAATATGTTCTGGACACTTCCACCACTTCTCCTAATCTGCATCACCGGAAAGAAAGCGTAGGGACCCGGCCGTTGCCTTGGCGATCATTGAACTCGCT-------GCTCACCACGCCGAAATTAGGACCCCCCGGCCGCTCGCCTCACGGTAGAACAGGTCCCACATTCCGTCAACCAGCTGGGCTCACCCGCTGCTCTTTGTCCGCGCCCCAGGGCCCCGGTGACGACTTCCACCTCTCGGATAGCCCCCCAGCCCACGACCAGCCCGCCTCGTCGTCCCGAGACCTCCCCAAAAGCCGTACCCGTAAGTGCCATCCCGAGTTCCTCGCCATAGCACGCAGCCAACCTGCCCGGCCCACCTTTACCCGGCTCGCGCACTCCCAACCAGTGACCCCGCCGGTGGTCTGGGGTCAGGCAGCGCAGACGCCTTGCGCGGGGCACTCGACGTGTAATGCGCCGCGGGGTCACCCAGCAGCGCGGGGCGTCGCCGGGGGTCCCCTGCAAATGGGGAATGGGGGGGGCTCATGGGCCTAGTGTTAATCGTCCCCGCTGAAACTGTGATTAGCAGGGTGGTGTGCAATTCCACGCGGCTATAGGGCCTAGAGGTCGCGTAATTCAGAGACTCGCGCCTGCCAGGGAAGACGGCAATATAGCGTCGGCCTTCTCCGGGAGGTCCCGCGTGCTGGGGCTCTTTAGAGCCGCAGGATGGGGACGGTCCCACTGCGGGGACCTCCCTTTCACCGAGCTTGACCGGGGTCGGACGGCACATGGAACGGCTCGAGGGGCAGTAGGCTTCGTCTCGTCTGCACCTCACT-ACTTCCCCCTGGCCTTTGAACGGTGATTAAGCTATACTCACTTTCAGCGATCACTGCCCACGCGTCGACCTCCGTGTGTCACTCCGGACCCCCAGAAGTGTTGCACTTTGGCTACGGCCAGGCGACTACCCCCTGCGGGTCGGACCTGATCCGCAGCGACGACACCACTCCTCCTAACCCCCCCTCATTCCCCTCACACGAGCGTCAGGGCGTAGACTTCCACACCTTGACCCTAGCTGGCTTTGGCCTTCCGATTCCCCTCTCGTAGGGAAGCAATCGGTGGACGTTAGGGCAAGCAGGCGGCGCCTGGGGGGGTGAAGAGAGGGACTTCGCATCGGATAGCGGACGCCGTTAATGGGCTAGGGAGCTCATCCGTACAGTGGGACCGCGAGGGGGGGGGGGCTGTTGAAGTGAGCGAATAACGCGGGCGTATGTACCCTGTAGCGTTCGGAACGTCGAAAGGGAGGACTCCCTGGTTACGCGCCGAGTACGGGGCGTGGCGGTGCTGGCGGAGCGGGCACCCCAACGTGGCTCATTGTGCCCC-ANNNNNNNNNNTTTAGAATGTGGATGGCCGGTAGGGACACTCTACCTTGACCATAGGACTGCCCGCCTCCTTTAGAACGGGCTGTGGGACGGTTGGGCCCCGTCAGCGGTCCGGGCTCAGCCGGTAGAATGGTATGCGGGGAAAACGGGTGATTTCCGCTAGGGAGAGGTAGGCACCGCGTCGACGCGAGCTACCGGCCGTGCGTCATCGTGATGAGAAACTGACGCCACTCAACAAGCTCTTCTCGTGTCTGTGTGGTGGGCGAACTACGCCTAACCCGCCGCTCTATATTGCCAGACATCCGCTACCGCGCGGCCCAGCTCCGCCGCGCCACCCAGCTTGTAGCCACCCGTACACCTCCTGACGACTTATGTGCCCTCGGGTCGCCCCCCTCAAACGGGAGTGCAGAAGTTTTCTCGGTCCCTGCTCGGCTCCGTCTACGCAAGATCACTCGGGCGCGCGTACGTCCCTCGAGGGTGCCAGATGTCGCGCCAAGGTTCGCCGTGCAGCAGCTGGTTCCTTTGGCGCGTGCCCGGATATCGACCCGTGCCCTGCCTCGTCTTGCTTCCGCCCACTAGACAAACCCGCGACTGTACTGGAAGACCGCTGAAGGCCACGTCGTGAGACAGTGCTATCGCCAGCTGTTAACGTTGCGCCGGAGCGCCGGCGAGTCTCGACTGGTACCGGTGGTGGTGCCTTCCTTGATTCCGCCACCGAATATAACCTTCGCACGCCTCCCCTGGTGTCATCGACCGCTCCCGCATGCCCCCCATACGACATGCCTGCGGCGTCGCCACTGCCGCGCCGTCGGATAGGGTATACGCCCAAACCCGCCTGAAAGCCGCTGGGCATGCCCGGGTGCTCGCACGTAGGAAGTAGCTGCTGCAGGGCCACCATGCCCCAGTGTTTCGGCTGATACACCCCAAAATTCACGCCCTGACTTACTCGCCAGTTTGCCCACACTGTTACAAGCGTCGTACCCTGGTCACGCAGCATGCCGGCATTTCGCGACGCGGAACCGGCCGTGGGCGGTGTCTCGGGCACGCGCGCAAACTGTGCCCCGAGCGGAGGGTCATGGTTCGCCTCAGAGCATCGTACAGATTCAGGGGGCGCAGTTGCGTACACCGCTGCCTCGACACAGCAGGCGGTACGGGACCACTTTGACCCTCTTAATTTGCCCCTCAGCAGCGACTCGTCCCTGCTTACCGGCTCTGTTCCCGCGAACGCGTCCGGATGGCTTCTGGGCACACTACCCTGCCGAGACTAGCCCGCGCACCGTAATTGATGGCATGCTCTTGTCACGGCCACGGTGGCACGCGGCTACTGGCGTGTCACGCTCTGTTTACCCACGGGGGGGGGGGGTGGTAGGAACGGTCCAGCGAAAAGAGCCTCGTGGGTGGGGGCTAGGGGGCAACGGTTGCCCGCGAGGGACGGAGGCGACGCGCGCGGGATCGACGTCAGCTAAGGAGCGTCGACGTGCTGCCGCGGTG-----GTTGTGGGCACTGAGGTGTTCCGCGGCAGGGATGGGGGTCTCGCCAGAGACCGGCGGCGTAGTGCAGTGGGCCGACATCGACGACGGGGCGTCATCTGGCGCGCTACCACGACACATATGTTTGCGGCACCTCCAACGGGGACTGTTGTGCCTACTGGGAGTAAAGGTGTGTTTAAGACAGGATTGTTCGTGAAGGAGTCCGCAAGGTCAACTGGGGGACCGCGGTGTGGAACGCCTAGCGGCATAGCGGGTAGCCGCGTCGCCTGAACTGGCGGCTGAGTAGCTGCCTGCGAGGCGTGCCGCGGAAATCGGCGGGGTAAGTTGGGTGCCGGAATTGGATACGGCNGGCCTCATACATCACCGGCTTTACACTACGCCGAGGACACCCCATTCTTGCGCGATCAGGTCAGGCATGCTGCGCATACCCTATGTTTCATGCATGCATTCTTAATTATCCGTATGCGCCCTCCGCTGCCGCCGGCTGAACGCCCACGTCCCCCGCACTATGAGTCGGCAAGCCGTCCGAGGGCCCGAGGCAATGAGGGAATGGACTACGTCGACGCGGCGACCGTGGCCGGTACGGCGTTACGTTTAAGCCCTCGTTCACCTCAACGTCCCCGACGAAGGCCTTGACCCCACCCCCTCAGGGGAAACAGGCAGGATGCGCGCGAGTAGGGTAGACACTAAGTGGAGGCACCCCGGGATACCGAACACGTGAGTGTGGGCGGAGGTGTTCATCCGGTGAGGTGTCGGCTGGCCCGCTTGGACATGGCCTCGCGGGGGGGATGGTGACGTTCATGGGGCATGCGTACTGGGGCGAGGGTGAACGACCGACCCCAATTTGGGAGGTGAGGTGCCATTCTCCGGTCGACTCTGGAGGGCGGTCAGTTAGAACCAGCTAGATGGTTGCTGCCTCTGTATCCACACAAGCCGGACCCCTCACGCTGAGATGCCCGGCCCTAAAAAGCCGACGCCCCGCGAGTTCTTTGCCAAGGGTCCCGCTTATACACCCAGGTCTACCCCCCGCGCAAGGCAAGAGGGAGATGCGCTCGGGGGACTTGCATCTGTGTCACCGAGGATGGGCGTGACCGTGCGATTGTTGCGCCTGCGGCGCCAGAAATGAGGTCGCCGCTCTAATGGTGCCTCTGTACGCGCAGAACACTCTTACTACGGGCCCGAACGCGCGAGAGGTCCGGCACGCCCCGAGCCTACCCGCCAGGTCCGCCACTTCACGTGCTCCCACTTCGCGGCGCCATGGTTGTCCAGAGACCAGGGTTTCCGGGCCCTGCGCATCTACGTTGCATCGACCGAGCGACCCGAACCGCGCAGGAGGCGTGTCCCTCCCCGATGTTCCCACACAAACCGACCCTCGGTGGTCN-TGTTATGCGGAGAGGGACGTGGGGCGGAGAAAGGTTTTAAATGCTGCTCTGGGAGGGCTCGCCCGCGGTGGCGGCCATGTCGGCACGGGATTGACTATGGCCTCGAGCTTGATTTAGTATCCAGCCGGCCCAATGCCCAACTCCCGGGTTGCTACCACCGGCCGGGTCAACGGTGCGTGCCGGTACGGAAAAACCTAAGGACTCCTGCATCGTTGCTGTGGATCTTAGCAGTCCACCCCCCTCACCCGCTCCCGTTCTATCATAACGCGCGTTTCGGTACCCCTTAGCGGGGCGGAGGGGGCCCGTGCGAGCCTTCCGCTATCGCGCCCTTGCCGCTCCTTGGGCTTCCTCGATTATACATGTACGGACAGACTTGACTACGGGCGTCGTCGGTCCGTGGAGGTCGCAGCCGAGGGGTGCACCCGCACCGGACAGCTCTGTCTTTCCCGTCCTTTGTCCGCGGCCGCCGACCGCGAGGCGTACCAGCCAAAGATTTCTATTAGATAGAGCCCCAGTATCGCTCGTGTCGCGGTCACCATCTGCGGCCCGAAGGGTAAGGGAAATGCCGGCCTGTTTGACGCATCCGCTAAAGTTCTTTGTGTCCGCGGGCCCCGTCCTGCTGCCGTGTGCGAAGAGGCGTCGGTACGCGCCGGCCGCCGCCGTTTCGAACCGCGCTCCATGCCTCGC----GAGTTGAACACGCTACGGGCCGGCCCCCCCGCCACCCGCTACGCCTTCCATCCGCACGCGGTCCTTGGCGCCTGAGGTTGTGGGCCATGCTCTCGGTTACCCAAGAACGAACGATCGGCGGAACCCTGAGTATCGGCTCCTTCTGCTGTCGCAACCCGCGCCGGGGATCAAATTGCGGTTACTGACAGCACCGCGCGACCGACTCGGAAGAGACGGGGAGACGACACACCTTACTGGTTGATCCGCCCGCGGGCGGTGTCTCGCGGGACCAGGGTGCGACCGACCGCGGTATGATGCGCAGGGGGATCTGAGGCGAGCGGAGGTGCGACATGGCCCATGGAAGCCCCGGGGGCAGGGCCACGTCCGGGCGCAGTGGCTGGGAAGAAAAGCTATGGCCATGGTCCCCGCCCCAGCCCCGCTGCGCACCCGGACCCTGCCTCCCACTCCGCAATGCCCGCTGCCGGGATCCTGAACCAGGTGCGTCGCCAGTCAGGATCCGGCAGCGTGTCGGGTGCGACTCTCCCGCACCCTGCNNGGTGAGGTTTTCGGTTATGATGCGGTTGCACC-GGAGGGGACCCCATCGTTCGCGATAGACCGTAACGGTTAGCCTAGCCTCAGAGGCGGGAGATTACCGGGAGCAAGGCTAGTCTGCGCCGGGTGCTCGGGTGTGGGTAGACGGAGGACGATGCGCCGGGGCTAACGGCCGCCAGATCTCGTCGTTCCAACCCACCGGTCCCCAGAGACGCATCACCTCGGGTGCGCCACCGTGTGTATCGGTTGCACCATGTAAAATCTGCTTGACGCCTGCACCTCCCGCCCCGCTCCTCCCACAGGACCTTCTGACAACCTTCCCCTCTGCCGGCAAGGGCCGGACCCTTAGCAAGGAGACGCACGAAGTCGTCCTAGATCGGCTGCTAGCTGCCCGGACACAACCGCACCGGACACCACCTCGAGCCACTACTGACGACCCCGCTAGCCTAACCCCTCCGGGGTCACCTTGCTCTGCCCCCCTCAAGTGATGACAGGCGCGTTACCTAGCC-TGAGGCGCGGCACGGAGAGTGATGATCGCGGGCGTGCGACCCCGCCCAGC----CACGACCAACAGTCTGCACTATCTAGACAAAACCGGGGCCAGAAGATCGCGGTCCCCCGGCCCCTCCCGTCGAGGTGAGCGGACCTGAAAGGCCATACAGTGAGGAGAGGCCTCAGTGACTCTGTGTTGACAGCACTGCCGCAGTCCACCTTGGGATCTCTCCGATTCCCGGGCTTCCCTATCTTATCAGACACCAAAACTGACGGCCGCGCTGGTGCCATGTCGGAAGGGA-CACGAACGACGCGAAGTTGATAAATGGGAAGATAGGTTACGAGTAGCACAATGACCCGTTAGCCCGGACACCGATAGATGGATTTCACCGCAGACGATCCAACCAGAGGCTCCCGGTATCCGCGTGGACTCGGGAAGGACAGCCGGGN-----ACAAACACTGGCGGCGGACGGTGTCACGCTTAGCAT---NATTGGGTACAGACTGTACGGCACACAGGAGGACGGTCAGCTAGTGCTGACGGGTAGGTTTACTCGCTGGGTGACAGATGTGGGGGGAGAGAGGGGCAAAGCAGATCCGTTACCATGTGATAGGGTAGTGGCGCCCCTCCCAGACACAGATTGAGGGGATTGGGACGGAGCCACGGCGCGACTATGTAATGCACTGCTCCTCCCCGTAATAAGACTTTCCCTCCGGCCGACCGCCTTACCCCCGGCAATGTGAGTGTGATAGCATAAGCAGTAGATCTC-CACTCACGGATGCTGAATTCCTTGTTGAGTTACGTGTACGGCCTGCCCTCCTCCGTGTTCCCATTTGACA-TGTAGGACATTAAACNNNGGTGGGGCTATGATCTGATGATCCACCGTAGGCTGTTAGCGGGTCTCCGCCCATTATACCGGGTTTGGCTAAAATAGACGGCTGCCNNNNNNCTAATATACNCATTGGGGAGATCGGCCTGGTAGTTAAAGATCCCGGTCCACGCGGTGT
>EA8393-Porcine-ST302
TACGCCCACCCCTCCCCGATGGGCGGACCTTAGACCGTCAGGCCGCCCAGTTGCACGTATTTGCTGGCCAATTACCCTATGTCCCCTCACCTTCATCACCGACAAGAAGGTGTGGGGACCCGGTCGTTGCCTGGGTTGTTATTGAACTCGCT-------GCTCACCGCGTCGACATTAGGGCCCCCCGGCGGCTCGCCTCGCAGCGGAGCGAGTCCCACATGCCGCCCACCATCTGGGCTCACCCGCCGCTCTTTGTCCGCACTTCGGGGCCCCTGTGCCGACCTCCGCCCCTCGGACAACCCCCCAGCCCTCGATCAGCCTGCCTCGTCATCCCGAGACCTCCCCAAAAGCTGTACCCGTGAGTGCCATCTCGATTCCCTCGCCAAAGTACGCGGCCAACCGGCACGGCCCACCGTTACCCGATTCGCTCGCCCCCAACCGGTAACCNNNNNNNNNNNNNGGGGTCAGGCAGCGTGAACGCCCTGCGCGGGGCACTCGATGTGTAATGCGCCGCGGGGCCAACCGGAAGCGCGGAGCGTCGCCGGGGGTCCCCCGCAAGCGGGGGATGGGAGGGGCCCATGGGCCTAGTAGCGGTCGTGTCCGCTGAGCGTGGGTTTAGTAGGGTGGTGAGCAAATACACGTGGCCATGGGGCACAAGAGATGCGTGGTTCAGAGACACGCGCCTGTAGGGTATGACGGCAGTACGGCAACAGACTTCTCCGGGGGGTCTGGCGTGCTGAGGCTCGTGAAAGCCGCAGGAGGGGGACGGTCCCGCTACGGAGCCCTGCCTTACTCCGGACTTGGCCCGGGCCGGATGGCCCATGGAACGGCCTGAGGGGTGGTAGAAACCGTCTCGTCTGCGACT--CT-GCTTCCCCCAGGCCTTTGAACGGAGACTGAGCTATGTTCACTTTCCGTAGTCGCTGCACACGCGTCGACCGCCGTGGGCCACTCCGGCCCCCCAGAGTCATTGTATTTTGGCTACGACCATGGGACTGCCCTCTCCGAGTCGGACCTGAGCCGCGCTGGCGACACCGCTCCTTCTAACCTATCCCCGTGCCCCTCACACGAGCGTCAGAGTGGAGACTTCTACACCTTGACCCCTGCGGCCTTTGGCCCTCCGGGTTCCCCCTCNNNNNNNNNNNNNNNNNNGACGTTCAGTCCAACGGGCGGCGTTTAGGGGGGTACAGAGGGGAACTCCGCATCGGGGCGCTACCGCCGTTAATGGGCTAGGGAGTGCATGCGTACAGAGAGACTGTGCGGTGGTGGGGTCTGTTGGGGCGAGCGTATAACGCGGGCGTGTGTACCCCGTAGCGTTAGGAACGGCGAAAGGGAGGATTTCCTGGTTGCTCGACGCGTGCGGGGCGGAGCGGTATCGGCGGGGCGGGCCCCTCGACGTGGATTGTCGTGACNNNNNNNNNNNNNNNNNNNNNNNNNNNNNNNNNNNNNNNNNNNNNNNNNNNNNNNNNNNNNNNNNNNNNNNNNNNNNNNNNNNNNNNNNNNNNGGTTGGGCTCCNNNATCGGTCCGGGCTCAGCCGGTGGGATGGTACGCGGGGAAACCGAGTGGTTTCCGCTAGGAAGAGGCAGGCATCGCGCCGACGCGAGCTCCTGGCCG-G-GCTATTGTGACGAGAAACTGACGCCATCCAACGTGTTCC-CTTGTGTCAGCGCGATGGGCGATTCACGCCCAACCTGCCGCTCTACATTTCCAGATATCCGCCATCTCGCGGCCCAATTCCGCCACGCCTCCCAGCTCGTAGCCACTCTTGTACCTCCTGACGACTTGCGTGCCCTCGGACTACCCCCCTCAAGCGGGGGTGCCGAAGTTTTCTCGGCCCCTTCTCGGCTCCGTACACGCAAGAGCGCTC-GGCGCGCGCACGTCCCTCGAAGGTGCCGGACGCCGCGTCGGGTGTCGCCGGGCAGCCGATGGGCCCTTTGGCGCCGGCCCCGGTGTCGACC-GTGTCCCGCCTCGCCTTGCCTCCGCCCACTAGGCAGCCCCGCGGCTGTACTGAAAGGTCGCTGAAGGCCACACCG------------------------------------------------------------------------------------------------------------CACGCCCCTCCCAGGGTCAGCGGCCGTCCCCACATGCCCCCCTCGCGACATACCAGCGGCGTCGATCTTGCGGCGCCGTCGGATAAAAGACACGACAAAATCCGTCTGGGAGCCGCTGGGCATGCCTTGGCGCCCGCGCGTGGGAGGTGACTACTGCAGATCCCCCGTGCCCCAGAGTTTCGGCTGATACACCCCAAAACTCCCGCCCCGACTGCCCCGCCAGGTCACCAGCGCTGTTGCAAGCATCAAGCCCTTGTCGCCCAGCGTGCCGGCATTTCGCGGCGCGGAACCGGCCGCCTATAGTGGCTCGGGCACGCGCGCAAACTGCGCCCTTGGTGGCGGGTTATGGATAGCCTCAGTGCATCGTACAGGATCGGAGGGTGCAGTCGCGTAAACCGCTGCGTCGACACAGCAGGCGGCACGGAACCACTTTGGCCCTCG---T--GCTCCCCAGCCGCGACTCGTCCCTGCTCACCGGCTCTGTTCCCGCGAACGTCTCTGGATTGCCTCGGGGCACACGGCCCTGCCGAGGCCAGCCCGCACACCGTAATTAATGGCACGCCCCTATTACAGCCCCGGTGG-ATGCGGCTGCTGGCATGTCGTG-----TCTACCCACGAGGGGGGGG-GTGGCAGAAAGGGTCCAGCGCAAAGGGCCCCGTGGGTGGAGCTTAGGGGGCAACGGCGGCCCGCGGGGGACGACGGTGACGCGCACGGGATTGCCGCCAGCGAAGGAGCGTCGACGCGCTGCCGTGGTG-----ATTGTGGGCGTAGAGGAGTTCCACGGCAGGGACGGGGGCCTCATCAGGGACCGGCGGCGTGGTGCCGTGGGCCGACAT--CCGACGGAGCTTCATCTGGCGTGCTACCACGGCACATATATTCACGGCATCTCAGACAGAAGCCGCCGTGCCGCCCGGGGATA----TGTGTTTAAGAGATGCTTATTCGCGGAGGAGTCCGAATAGCCAACGGGGGGCCCGCGGGGTGGGACGCCCAACGGCATAGCGGGCAGCCGAGTCGCCTGC-CCCGCGTCAGAGAGGCTGTATACGAGGCGTGCCGCGGAGGTCGGCGGGGAGGATTGGGCGCCGGAGTCGGATACGGCNGGCCCCTTACGCCTCCGGCTTTACACTACGTAGAAGACACCCCATCCCAGCGCGATCAGATCAGGAATACTACACATACCCTATCTTTCATGCATGCATTCTTAACTGCCCGTACGCGCCCCCCGCTGCTGCTGTCTGAACTTCCACGGCCCTCGTACT-TGAGTCCGCAAGCCGTTCAAGGACCCGAGGCTATGGGGG--CGGACCCCGGCGGCGAGGCGGCCGTGGCCGGGACGGCGTCACGCTTGGGCCCTCGTGCTCCTCCTCGTCCTCGTCGGAGGCCTCGACCCCACCCCCCCAAGGGG------------ATGTGCGATGGAGGT-AACATTAAG-GGGAGCATCCCGGGACGCCGCACACGTGAGTGTGGGCGAGGGTG-TCATCTGGTGAGGTATCAGCTGGTCCGCTTGGACCTGGCCCCGCGGCGGGGATGGTGACGTTCCCGAGATCGGCGCACCGGGGCGAAGGCGAGCGACCGACAACAATTTGGGAGGGGGGCTGACATCCTCCGATCGACTCTGTAGGGCGGTCAGTCAGAACTAGCTAGACGGTTGCCGCCTCCGCACCCACACAAGCCGGACCCTTCACGCTGAGTCGCCCGGCCCTAGAGACCCGGCGCCCCTCGAGCACCTTGCCTTGGGTCCCG-TTGTCCGCCAGGATCTACCCTCCGTGCACAGCAAGCGGGAGTTGCACCCGGGGGCCTCGCACCTGTGTAACCGGGGTTGGGCGTGACCATGCGACGACCGNNNNNNNNNNNNNNNNNNNNNNNNNNNNNNNNNNNNNNNNNNNNNNNNNNNNNNNNNNNNNNNTACTTCCGGCCCGANNNNNNNNNNNGCACGCCACCCCTCGGGCTCACCCAGCAGGCCCGCCCCACCACGTGCCCCCTCTGCGCGGCGTCGCGGGGGTCCAGGGGCTCGGATCCCCGGCCCCCGCGCGTCTGCACCGCCTCGACCGAGTGGACCGGAACGCGCAAGAGACGTGTCCACCCCCGACGTGCCAGCACGAGCCGACCCTCGATGGTCNTA---------------GTGTAGAGCGGAGAAAGGTTTTTAATGCGGCGTCGGGGAGGCGTGCCCGCGGTAGCGGCCATGTCGGCACGGGTCTGACCATGGCG---NNNNNNNNTTAGTATCTAGCCGGCCCAATGCCCAACTCCCGGGGTGCTACTACCGGCTGGGG-AACGGCCTATGCCGGTG-----AAACCCGAG--CTTCTGTATCGTCGCTGCGGACCTTAGCGGCCCGCCTCCCTCGCACGCACGCGTCTTGTCATAGCGCGCTTTTCGTACCCCTTTAGCAGGGCGGAGGGGGCCCGTGCGAGCCTACCGCTACCACGCCCCCGTCGCTCACATAGCTTCCCTTCCTACACATATA-GGACCGACTCGCCCACGGGCGGCAGCGGCCCGTGGGGGTCGCAGCCGTGGGGTGCGCCCA-----------NNNNNNNNNNNNNNNNNNNNNNNNNNNNNNNNNNNNNNNNNNNNNNNNNNNNNNNNNNNNNNNNNNNNNG-AGCCCTAGTATCG-----------------GCNTACGGCCCGAAGTGTAA--------------------------CCACTAAAGCTCTTTGTGTCCA---GCCCAGTTCCGCTGCCGTGTTCGAAGGGGCGTTGGCGTGCTCCGGCCGCCGCCGCTTCCAACCGCATCTCGTACCTCGC-------NNNNNNNN--TACGGGCCGACCCCTCTACCACCCGCCACGTCCTCCTCCCGCACGCGATCCTCGCCGCCTGAGGTTGTGGGCCATGCCACCGGTTACC----------------------------------------------------------------------------------GGCGGCACAACGCG--TGGCCAGGAGGAGACGAGACGACGACACACCTGACTGG-TATTCTACCTGCGGGCGGAGTCTCGCGGGACCAGGGGGCGACCGCCCACAGGATGGTGCGCAGTGGGACTTGGGGCGAGCAGAGGTGTGACA---CCCATGNNNNNNNNNNNNNNNNNNNNNNNNNNNNNNNNNNNNNNNNNNNNNNNNAACGATGGCCAAGATCCTCCCCCCAGCCCCGCTGCGCACCCGGACCCCGCTTCTCACTTCGCAGTGTCCGCTGCCGGGACCCTG----------GTCGCCGGACAGGATCCGGAGGCGTGGTAGGGGCGACCCGCCCGCACCCTGCNN--TAAGGTCTTCGGTTATGATGCGATCACTCCAGGAGGGGCCTCCACAGCTCGCGATATACCGTGGTGGGAATCTCGGCCTCAGAGGTGAGGAATTACCGGTATCCAGGCTCGCCAGCGACGGATACTCGGGGGTAGATNNNNNNNNNNNNNNNNNNNNNNNNNNNNNNNNACCAGATCTCGCCGGACCATCCCACCGGTCCCCCGATATGCGCCACCTCGGGCGCGCCNNNNNNNNNNNNNNNNNNNNNNNNNNNNNNNNNNNNNNNNNCTGTGTCTCCCGCCCCGCGCCCCCCGCAGGGCCTACTGAGAATCTTTCCCTCTGCCGGCATGGGCCGGA-CCCAAGCAAGGAAGCGCGCNNNNNNNNNNNNNNNCAGCTTCTAGCTGCCTGGACGCGGCCGTACCGGACACCACCCCTAGCCACTACTGGCCGCCCCGCGGACCTAGCCCCTTCGNNNTCGCCTTGCTTCGCTCCCCTCGAGTGATGACGGGCGCTTTCCCTGACT-CGAGGTGCTGCGTAGAAAGTACTGATCGCGGGCGTGCAACCCCGCCCAGC-----GCGACCAGTAGTCAGCACTATCTGGTCCAAACCGGGGCCAGAAGGTCACGGCCCCNNGGTCCTTCCCGGCGATTTGGGCGGACCCGGGAGACCNN---GGGAGGCGTGGCCTCAGTGACTCTGTGTTG---------CCACAGGCCACTCTGGTANCCATCCGGTTCCCGGGCTGCCCTATC------------------------------------GTGTTATGAGGGG-NNNNNNNNNNNN----------GATGGGCAGGGAGGTTACGGGTAGCATCATGACCCGTTATCCCTGTTACCGGCAGATGGATTCCATCGTGGACAATCCAACCAGAGATCCCCGGTTTCCGCGCG------GGAAGGGCAGCAGGGNNNNNNNNNNNNNNNNNNNNCGGGCGTCGCCACGCTGAAC--NNNNNNGGGGTA-AGACCATACGGAACACCGGCAG-GGGTCAGCTAGTGCTGATGGATGGGCTCACTCACTGGGTGACAGGTATGCGGGGAGAGAGAGGCAGAGCAGATCCGTTACCATATGATGGGGGTGTGGTGCCCCTCCCAGTCACCGATTG-GGGGACCGGACTAGAGCCGCGACGCGA-TTCGTAATGCTCC-CCCCTCCCCAA-NNNNNNNNNTCCCTCCGGCCGGCATTCCTACCCCCNNNNN------TGTAATAGCCTAAACAGCTG-TCTC-C-----------------TCCTTGTCGAG-TACTTACCCGGCCCGCCCCCCTCCGCACTTCT-TTTGANNN----------AAA-TNNNNNNNNGGCCCTGAGCTGGTGAACCACCGTAAGCT-----TGGGTCCCCG-----NNNNNNNNNNNNNNNNNNNNNNNNNNNNNNNNNNNNNNNNNNNNNNNNNNNNNNNNNCGCTAATGTT----------G--CTGGTTTNNNNNNNNN
>F2_18C-Porcine-ST302
CACGCCCACTCCTCCCCGGTGGGCGGACCCCGGACCGACAGGCTGTCCAGTTGCA-ATATGCTCTGGACAATTCCCCCATTTCCACTCACCTTCATCACAGGCAAGCAGATGTGGGGCCCCGGTCGTCGCCTGGGCGGTTATTGAACTCGCTCTCCCACGCTCACCACGTCGACATTGGGACCCCCCGGCGGCGTGCTTTGAAGCGGGACGAACCCCACATGCCGCCCACTAGCTGGGCTCCCCCGTCGCTCTCTGTCCCTGCTCCGGGGTCCCGGTGATGAACTCCGCCCCGCGGATAGCCCCCCATCCCACGACTAGTCTGCCTCGTCATCCCGAGACCTCCCCAAAAGCCGTACCCTTGAGTGCCGTCTTGAGTCCACCGCCATAACACGCAGCAAACCTGCCCGGCCCACCTTTACCCAACTCGTTCGCTTCCAGCTGGTGACCTAGCCGGTGTCCTGGGGTCAGACAACGCGGACGCACTGCGCGGGGCACTCGACGTGCAATGCGTCGCGGAGCCACCCGGACGCACGGGGTGACACCGAGAGTCCCCCGCAAGCGGGGAATGGGGAGGGCTCATGGGCCTAGTGTCGGTAGTGCCTACTGAGAGCTGGATTAGTAAAATGGTGAGCAATTCCACACGGACATGGGGCACAGGGGACGCTTGGTTCAGAGAAACGAGCCTGTCGGGGCTAACGACAATCCAACGTCAGACTTCTCCGGAGGGTCCGGCGTGCTGAGGCTCGTGAGTTCAGCAAGAGGAGGACGGTCTCGCCGCAGGGCCCTGCCTTTCTTAGAACTTGGCCCGGGCCGGATGACCCATAGAATGGCCTGAGGGGCGGTAGAAACTGTCTCGTCCACGCCT--CT-ACTTCCCCCTAGCCTTTGAACGGAGACTGAGCTATGCTCACTGTCCGCAGTTGCTGCATACGCGTCGACCGCTGTGTGCCACTCCTGCACCCCAGAGGCGTTTCATTGTGGCTACGGCCAGGGGACTGCCCCCGCCGGGTCGGACCTGAGCTACGCCGGCAACACCGCTCCTCCTAACTCACTCCCGTTCCCCTCACACAAGCGTCAGGGCGGAGACTTCTACACCCTGACCCTAGCTGCATTTGGCCCTACGGGTTCCCCCTCNNNNNNNNNNNNNNNNNNACGGCTCGGTCCAGCGGGCGGCGCCGGGGGGGGTGAAGTGGGGGACTCCGCATTTGGGCGCTGCCGCCGTTAACGGGCTAGGGAGCTCATCCGTACAA-AGGGCCGCGAGAGGAGGGGGGCTGTTGGATTGCGCGTACTACGCGGACGTGTGTACCCTGTAGCGTGCGGAACGTCGAAGGGGAGGATTCCCAGGTTGCTCGCCGATTATAGGGCAGGGCGGTGTCGGCGGGACGGACATCTCGACGTGGATCGTCGCGACNNNNNNNNNNNNNNNNNNNNNNNNNNNNNNNNNNNNNNNNNNNNNNNNNNNNNNNNNNNNNNNNNNNNNNNNNNNNNNNNNNNNNNNNNNNNNGGTTGAGCTCCNNNAGTGGTCCGGGCTCAGCCAGTGGGATGGCACGCGGGGGAAACGGGTGGTCTCCGCTAGGGAGAGGCAGGCACCGCGCCGACGCGAGCTCCCGGCCGTGCGCCGTTGAGACGTGAAACTAACGCCACCCAACGAGCTCCTCTCGTATCAACGCGATGGGCGATCCACGTCCAACCCGCCGCTCTACATTTCTAGACATCCGCCACCTCGCGGCCCGGCTTCTCC-CACTACCCAGCTCGCAGCCACCCGTGTTACTCCTGACGACTTGCGTGTCTTCAAGTTGCTCTCTTCAAGCAGGAGT--------------------------------------------------GGCGCGCGCACGTACCCTCAAGGCGACGGACTCCGCGCCAAGGGTCGTCGGGCAGCCGCTGGGCCCTTTGTCGCCTGCCCCGGTGTCGACCCGTGTCCCGCCTCGCCGTGCCTCCGCCCACTAGGCAAACCCGCGGCCGGACTGGAAGGCCGCTGTAGGTCACACCATGTGCCGGTGCTGTCGGAATCTGTTTACATTACGGCGTAGCGCCGGTGAGCATCGACTGGTACCGGTAGTGGTGCCTTTCCTTATACCACTACCAGAGTTAACCTTCACACGCCCCCCCCGGTGTGAGCGGCCGTCCCCGCATGCC-----CGTGACGTGCCAGCGGCGCCGCTACTGCCGTTCCGTTGGATAAAATCTACGCCAAAATTGGCCTGGGAGCCCCTGGGCATGCCCTGGCGCCCGCACGTGGGAGGTAATTATTCCAGAGCTACCGTGCCCCAGAATCTCGGCTGCCACACCTCAAAACTCCCGCCCCGATTGACCCGCCAGGTCGCCAGCATTGTTACAAGCAT-AAGCCCT-GGCACCCAGCGTGCCGGCATTTCGCTGTGCGGAACCGGCCGCGGGCAAAGTCACGAGTACGCGCTCACACTGCATCCCGGGCAGAGGGTCATGGATCGCTTCAGAGTATTGTACATGTTCGGGGGGCACAGCCACGTAAAACGCTGCGTCGCCACAGCTGGCGGCAAGGGACTACTTTGGCCCTCTTAATTTGCTCCCCAGCCGCGACTCGTCGCTGCTCACCGGCCCTGTTCCCGCGAACGCGTACGGGTGGCCCCTGTGCACACGGCCCGGCCGAGGCCAGCCCGCGCACCGTAATTGATGGCACGCCCCTATCACGGCTCCGGGGGCACGCGGCTGCTGGCGTGTCACGCGCGT-CTACCTACGGGGGGGGGGGTTGGCAGAAGGGGTCCAGCGAAAAAGGCCCCGTGGGTGGAACCTAGGAGGCAACAGCTGCCCGTGTGGGACAGAGGCGACGCGTACGGG-CTGACGCCAGCGTAGGAGCATCAACGCGCTGCCGCGGCG----AGTTGTGGACGTTAAGGAGTTCCGCGGCAGGGACGGGGGCTTCATAAGGGACCAGCGGCGTGGTACAGTGGGCCGACAT--CCGACGGAGCGTCATCTGGCGTTCTACCACGGCATATATAGTCGCATTACATCCGATAGAGGCCGTCGTGTCGACCAGGGGTCGAGGTATGTTTAAGGGAGAATCGTTCTCAGAAGAGTCCGCTAGACCAACGGAGGGACCGCGGTGTGGGACGCCCAGCGGCATAGCGGGTAGCCACGTCGCCTGAACCGGCGGTAGAGTGGTTGCCTACGAAGCGAGCCACGGAGATCAGTGGAGAGGGTTGGGCGCCGGAATCGTATACTGCNGGCCCCATAC-TCACCGGCTTTACACTACGCCGAGGACGCCTCATCTCTGCGAGATCAGGTCAGGATTACTACACGTATCCTATCCTTAATGCATGCAAGCTTAACTGTCCGTACGCGCCCCCTGCTGATGCCGTCTGAACGCCCACGGCCTCTGCACTAGGGTTCGGCAAGCAGTCCGAGGACCCGAGGCAATGAGGGAACGGACCCCGTCCGCGAAGCGGCCGTGGCCGGGACGGCGTCACGCATAGGTCCGCGCTCAATTCAACGTCCCCGACGAAGGCCACGAACCCGCCCCCCCCAGGAGAACAGGTAGGAGATGCGCGAGGGGGGTAAAGGCTACGTAGGAGCACCCCGGAACGCCGCACACGTGCGCGTCGGCGGGGATGTTCGGCTGGTAAGGTGTCGGCTGGCCCGCTTGGAACTAGCCTCGCAGGGGGGGTGATGACGTTCCCGGGGTCGGCGCGCTGGGGCGAGGGCGAGCGACCGACAATAATTCAGGAGATGGGCTAACGTCCTACGGTCACCTCTGTAGGGCAGGCAGTTAGGACTTGCTAGACGGCAGTCGCTTCCGCACTCACACAAGTCGGACCCCTCGCGCGGGGACGCCCGGCCCTGGAGACCCGGCGCCCCGCGAACACCTTGCCAATGGTCCCGCGTATCCGCCCGGGTCTACCCTCCG-GCACAGCAAGAGGGAGATGCGTCCGGGGGACTTACACCTGTGTCACCGGGGATGGGTGCGACCATGCGTTGGTTANNNNNNNNNNNNNNNNNNNNNNNNNNNNNNNNNNNNNNNNNNNNNNNNNNNNNNNNNNNNNNNTACTACCAGCCCGANNNNNNNNNNNGTCCGCCACGCCCCAGGCCCACCCGGCAGGCCAGCCCCACCTCGTGCCCTCACTGCGCGGCTCCACGGTTGGCCAGAAGCCAGGGTCCCCGGCCCCCTCGCGTCTATACCGTCTCAATCGAGCGGCCCGAAACGCACAGGAGGCGTGTCCCTCCCTGGCGTGCCAGCACGAGCCAACCGTTAATGGTC--AGTCATGCAGAAAAGGGCGTGGGGCGGAGAAAGGTTTGTGGTGTTGCGTCGGGGGGGCGTGCCCGCGGTGGCGACTGTGTCGGCACGGGATTGACTATGGCCTCGNNNNNNNNTTGGTATCTAGCCGGCCCAATGTTCAATTCCCGGGGTGCTACTACCGGATGG------------------------------TGAG--CCCCAGTATCGTCGCTACAGCCCTTAGCGGCCCACCCCCCTCGCCCGCACGCGGCCTGTTATAGCCCGCGTTTCGTTCTCTTTTAACGGGGCGGAGGGGGCCCGTGCGAGCCTTCCGGTACCACGCCCCCGCCGCTCCCATGGTTTCCCCTCCACCTCACATA-GGACAGACTCGCCCACAGGCGGCATCAGCCCGTAGGGGTCGCAACCGTGGAGTGCGCCCGCACCTGGGGGCNNNNCCTATTCCNNNNNNNNNNNNNNNNNNNNNNNNNNNNNNNNNNNNNNNNNNNNNNNNNNNNNNNNN--AGCCCTAGTATCACTCGGGT-GCGGCCACC-CNTGCGGACTGAAGTGTAAGGGGAACTCCGGCCCGATCGAAATATCCGCTAAAGCTCTTTGTGTCC----GCCACGTCCCGCTTCTGTGAGTGAAAATGCGTTGGCGCGCGCCGGCCGCCGCCGCTTCGAACCGCGCCCCGTGCCTCGA-------NNNNNNNN--TACGGGCCGACCCCCCTGATACCCGCCACGCCCTTCTTCCGCACGCGGTCCTCGCCGCCTGGGGTTGTGGGCTATTCTCCCGGTTACCTAAGAACGACCGACGGGCAGAATCCTGAGAGGTAACCCCTTCCGCTG-CGCATTCGGCGCAACGAAGCAAACTGTGATGCCTGGCAGCATAGCGCTTCTGATCAGGAGGAGACGAGGAGACGACACGCCTGATTGGTTGATCCACCCGCGCCCTGTG-CCCGCGGGACCAGGGGAAGAACGACCAGGGGATAGTGCGCAATGGGACTTGGTGCAAGCAGCGGTGCGACCTGGCCCATGNNNNNNNNNNNNNNNNNNNNNNNTCCAGGCGCGGTGGCCAGNNNNNNNAACTAGGTCCAAAGTCCTTCCCCCAGCCCTGCTGCGCACTCGGATCCCGCCACTCATTCCGCTGTATCCGCTGCCGGGACCCTTA---------GCTGTTGGACTGAATCCGAAGGCGTGTTGAGTTCTATCCGCTCGCACCCTGTNNGGTGAGGTTCACGATTATGATGCGATCGCTCCAGGAGGGGACCCCACAGCTCGTGATATCTCATGATCGTAAGCCCGACTTTAGAGGTGAGGAATTACCGGTGGCCAGGCTAGTATGCGACGAATGCTTGGGGGTGGGTNNNNNNNNNNNNNNNNNNNNNNNNNNNNNNNNACAAGATTTCGCCAGACCAACCCACCGGTCCTTCGATATGCGCCACCTCGGGCGCGCTANNNNNNNNNNNNNNNNNNNNNNNNNNNNNNNNNNNNNNNNCTGCGCCCCCCGCCCCGCGCCCCCCGCAGTGCCTACTGAGAACCTTCCCCTCTGCCGGCATGGGCCGGA-CTTTAGTCAGTAGGCACGCNNNNNNNNNNNNNNNCGGCTTCTAGCTGCCTGGGCACGGCCGTACCGAAAACCACCCCTAGCTGCTACTGGCGGCCTCGCT--CCTTGCCCCTCCGAGGTCGCCTTGCTCCGCCTTCCTCAAATGATGACGGGCGCTTTACATGAGT-CGAGGTGCTGCGCAGAGAGTGATAACGGCGGTCGTGCAACCCCGCCAAACGTTATGCGACCAGCAGTCTGCACTATCTAGTCAAAACCGAGGCCAGAAGATCGCGGCCCCNNGGCCCCTCCTGGTAATTTAGTCGGACCCTGGAAGCCNN---GTGAGGAGTGGCCTCAGTGGATCCGTGTTGCATCACA--CTGGAGGCCACCCCGGGANCCATCTGGTACTCGAGCTTCCTTATCTTACCAAGAATCAAGACCGACGGCCAAGCCGGTGCCGTGTCAGGAGGGGACACGCACGAAGCGGTACGTCCCGATGGACAGGTAGGTTACGGATAGCGTCATGAGCCGTCATCCCTGACACCGGCAGATGAATTCCATCGCGGACAATCCAACTATAGGTCCCCGGTATCCACGCGGATTCGGGAAGCGCAGCAGGGNNNNNNNNNNNNNNNNNNNNCGGGTGGCGCCAC---GAAC--NNNNNNTGGCTCCAGACCGCACGGAACACAGGAGGAGGATCAGCTAGTGCTGACGGGTGGGCTCACTCGCTGGGTGACATGTGTGCGGGGAGTGAGAGTCGGAGCAGATCCGTTATTATATGATGGGGGTGTGGCGCCCCGCCTAGTCTCCGGTTT-GGGGACCGGGATGGAGCCGCTACGCGA-TACGTAATGCTTC-CCCCTCCCCAA-NNNNNNNNNTCCTTCCGGCCAAAATTCTTACCCTCGNNNNTGCGAGTGTAATAGCATAAGCAGCAG-TTTC-CGTTCACGGATGTCGAACCCCTTGTCGAT-TACTTGCACGGCCCGCTCCCCTCCTTATTTCC-T--TACT-----GGGCAC----CNNNNNNNNCGCTCTGGGCTGGTGAACCACCGTAGGCT-----TGGGACCTCGCACA-NNNNNNNNNNNNNNNNNNNNNNNNNNNNNNNNNNNNNNN-----TANNNNNNNNNNNGATCGGCCT-GTGGT--AAGGTCCTGGTTTNNNNNNNNN
>FA0416-Human-ST302
CGCGACCGACCCTCACTTATGGGTGAACTCCGGACCGATAGGCCTCCCAGGGACACATACGTTCTGTACAAAGCTCTCATTACCCCCCACTAGCATAGCCGGCGTGATGGCAGGGAAATCCGGCCGTTGATTGAGCGGCCAACACCCCCGCCTCCTCGTATTAACTACTCCGGAATTAAGATCCCCCGGCGGTTCATCCCACGGCGGAACGAGTTCCCCATGCAGCCCGTCAGTGAGGCTTATCTGCCGTTTTTTGTCTGCGTCCCGTAGCTCTGGTGACGCCCTACGCCCCTTAGA---TTTTTTAGTTCATACCCGTCTCGTCTCAGCATCCTGGAACCGCACCAAAAGTCGCGCCAGCGAGCGCCACCTCAAGCCTCTTGTCATGGCATGTAATCAACCTGCCCAGTATACATGGTCCCGACTCACTAGCTCTCGACCGGTGATCCCGCTAGCGGCTTGAGAACCAGTCGCTCGGTCACCCTCAACGGAGCCCTGGACGTGTCAAGCACCGCAGGGCCCCCCGGAAGCGCAAGGCGTCGCTAGGGCCCACCCGCAC-CGGGAACAAGGGGGAATTTATGAACCTAGTGTCGGCCATGCTCGATGCGAGTGGGATTCGCGGGGTGATGTGTCCTCCCACGCGGCCCTGTGGCACAGGNNTCACGTGGTCAAGA-CCACGCTCCTGTCGAAGATGTTGGCAATACAGCGTCAGATGTTGACGGGAAGTCCGACGCGCTGGAGATAGCGAGAGCCACAGAAGGGGGCCAGTCCTGTTGTGAGGCCATGCTTTTCTCCTAGTTAAGATCGAGCAGGTCGGCCCCTGGAGCGGTCTGGAGCGCGGTAGA--CCAGCTCGTTTGTACCT--CG-ACTTTCTTCTGTTTTTCAGACGGTGACTGGGAGAGGCTAGATTGCCGCG-CCGCTGCACACACAGCGACTGCCGTGTACCTCCACGTCCACCCCGAGGCGTCGCTCTTTAGTCAAGGTTAGACAAGGGCCCCTTCTGGGTCGGGCCCAAGTCGTGCCAGAGCCACCGCTCTTCCTTGTCCACCTCTGTTCACCTCTTACGAACTTCAGGGCAGAAACCTTCACACGTTAATTCTACCTACCTTTGGCCCGCTGGGGTTTCCTTC-NNNNNNNNNNNTCGG-GGACAT--------GTGGGCGACGCCTGGGGGGGAGAAGAGGTG-ATTTCACGTCGTGGCTCGGCCACCGTTAATGGTTGAGGGTACTACCCCGTCCCGAGGGAAC---AAGGAGGGGGGGCTGTTTGAGTGAGAGTATAACATAGGCGCGTAGCCTCTACGGAATTCGGAATATTATCAGTTTGGGTTCCTTAACTGCGTGCAGAGTACGTGGAGGGATGGTGCCGACGCGGCA--CACCTCGACGTGGAACGGCATACCANNNCTGTCATTAA-AAGACATATGGACTGCCGACGAGACTGC---------ATTATAATGCCGCCCGTTAACGGTCAACCAGGCTAAGAGGTGGTGGGGCTCCAGCC-CGACCCAGACTCGGCCGGTGG-GGTGTACATGGAGACTACGGATGGTTCCAGCTGGGGAGAAGCGAGCACTGCGCCACTACCTGCTCTCGACCGTGGT--ATCATCTCGAAGAGTTGACATCACCCGCCGAACCCCCAGCTTGTCTGCGCGGTAAATCATCCCTGCCCAACACATAACGCAACACTGCCAAGCAGCCGTCCCCTAGCGACCTAGCCCTGCC-CGCCACTCAGTCCTTAGCCACCTGTGCACCTCCTTATGATCTGCNNNNNNNNNNNNNNNNNNNNNNNNNNNGAACTGCCAAAGTGTGACTAGCATCTTTGCGTCTCCGAA----------------ATCGTTCGCACGACTTTCGGAAGTACAGGACGCCCCGCCAAGGGACACCAGGTAAACGCTGAGCTTAGTGGCGCCTATCCGGGCGTCGACACTCGCCTCTTCACGCCTGACCCCCACCCACTAGGTCAATTCACAGTTATTCTGGTAGGCTGTTAAAGGCCATGCAGTGATCCAATGCTGTCACCAGCTATCTCTGTTACGCTGGGATACCGG--------------------------TATCCTCACTGCTTTTACCATTGGAGA----CTTCGCAGTCCTCCCCCGGTCCCAGCTACAGCTCCAGCCTGCCTTTCACGCGCCATGCCAGC--TATTACCACCGCCGCGGCATCGAGCAGGATATACGCCAGATTCCGCCATGGGACTGCTAGGCGGGTCCTGACGCCTGTACTAGGCAGATAACCACGGTTGAGTCACTGTCCCGTAAAGCTTCAGC-GATATACCCCGAGTTACCCGCTTCGCCTGACCCGTTGATTCGCCCGCACTACCATAAGCGACAAGCCCCTGTNNNNCCACGTGCAGGCCCATCGCGGCATGGGCTCGGCCACC---AGTATATCGGACCTTCGCGCCAAAAACGCCTCGGGCGGAGAGTCTTGGATCGCCTCAAAACATCGTACGGGTTCGAGGGGCGCCATCGCGTACGCTACCACGGCGACACAACAGGAGGCGCGGGATCGTCTCGGCAATCTCAATTTGACCACCGTCCACTAATTTTCCTTGTTCCACAGCTCTGTCCACGCGATCGCGTCCAGATGGCCTCTGGGTTTGTGGCTCTATCAAGGCCAGCCTACGCAATGTA-GGGATGACACGCCCCTACCACGGCCCCGATGACG-ACTGATGTCGGCGAGTCACG-----A-TGTCCCAGGGGAATGGT-GTTGCAAAAAGAGGCCAGTAACAAGGGTTCCATGAGCGAGGCCACAGGAACCATGGCTGCCCGCGGGGAACGGAGACGCTGCGCGCGTGG--GACGCTTGAGAAAGGATGCCGCTGCGTTGCCGC-GTG-----GTTGTGGGCGTTGGGGTGACCAGCTGCTGAGTCGAGGGCCTTATCGGGAACTGATGTTGTGGTGCATGGAATCGCCATCGCAGCCAGATCGACCTTAAACAC--------------------------------------------------------------------GCTGTAGAGGGGAATGAT--CGGCGGGACCCGCAAGGCCAACTAGGGGATCACGATT--AGACGCCCCGCCGTCACGTGGGTAGCCGCGCCAACTGAACCGGTGGCTGGGTGGCTGCCGGTGTGGTGTGCCGTGGCGATCGGCGAGGTGAGCTGAGCGTTGAGATCGGGTCCGACAAGTCCCATACATTATCGGTGTCACATTACGCCAGGGATACTCCGTCCCTGGACGATCAAGTTAGGAATGCAACATATACTCTTCCTTCCTGGTAAGCATTCTTAACTGTTCATTCCTGCTCCCCTTGACCATCGTCTATACGCTCGCTGTCCCCTCTCTGTAAGTTGGTCAGCCATCCGAGGAACGGAGACAGTG-GGA--CGGCCCCCGTCGGCGCGGTGGCCGCTGCTGGGGCGGCACCATGCTCAGGCCTTTTTTTACCTCAACGCGTCCAACAAAAGCCTCCACTTTATTCCCCTAAAAGGAAAAAGCTGGCTGTGCGTGAGTGGAGTAAGCACGTAATGGGAGAACATTAGGGTGACTCGCCCATGAATTTGGGCAGGAGCGTTAATCCGACGAAGCG-CGGTTAACCCGTTTAAACCCGGCCTTGCGTGAAGGATGGAGAA--ACCTAGGGTCGACACATTAGAACATGAGCAGGCGGTTGACCCC-ATCTGGGGAGTAGGCTGACATTTTCCGGGAGATACCGTAGGAAGATTAGTTAAAACTAACTAA------GCCACCTTCGCGCCCATGACAGCCTGATCTCTCACGTTGAGACGCTCGTTGTTAGAGTCCTGGTATCCTGCAGGCTTCGAGTTAAGGGTCTCGCTCATCCGCCCGGGTCAATCATCTA--CTCGGTGGGAGAAAAAGGTACCCCGAGAATTTGCACTCGAAGCATTGGGGATGGTCGTAGTAACGTGATGGTTGCAATCGCGGTCTCAGGGTTGGGAGCACCAAATC--TGATGCC-----GTGTATGGACTGCTCACACTATCGTATCGCGAATCTNNNN-GTCAGCCACGCCCCGGACCCGTCCGGCAGGCTCTTTCCACTACGTACCTCTATAGCGTAGCGCCACGATTATTCTGAGGTCAGAGTCCTCGTCTTCCGCGCGCCTACGTCGCCGTGACTTAGCGGCCTGATACGCGTAGGAGGCGAGGTCCTGCTCGACGTGCCCGTGCGAGACGATCCGCGAGAGTTN--------------------------------AAGTTGTTAACGCTATGCCGGGGGGAATCGCTTGCAGGGATTGCCATGGGGACATAAGATTAACTGTGATC-----------GCAGGGTACAACCGGCCCAATGCCCCGCTCCTGAAGTGCTATCACCAGCTTGGTCAACGGCCCGCGTCG---CAGAAAAATCTGCA--CTCTTTCACCTTCGCTGCGTACTTCTGCGGCCCACCCCTAATGACTGCACGCATCCTATCATTGAGAACGCCTTATTCCCCCACAGCGATGCGGAAGGGGATTGGGGATGTTATTTGCAG-TGCGTCGCCACCACC----------------------------AGGCAGAAGCGCCCACGTATGGCATCGGTCTATGAGGACCACGGCCGTGAGGTACGCTC----------ATTCAGCCCTGCGTACCCAC---CCGCAGTAGCTTGCCACAGGTTTGTTTGCCC-TGAGCCGTAGA---------CCCTAGCGGCGCCCATGTCGCGCTTGCC-CCTGCATCCCAAAGTAGGGAGGGCATTGCGATATGAGTAACGCCTTCGTTAAAGCGCGTCATACCA----GTTCCGTCTCGTTGCCGTA-------AGGTATTGACGCACGTTGACCACCATCACTTTCAACTACGCCCTGTGCTCCGC-CAGAGT-GNNNNNN--GACGAGCTGATGCTCTCGCCACGCATCGCGCTCTCGTTTTTCATGTGGCCCTCACTGCCTGAGGTTGTGTGCCATGCTCCTGGTTTCCCTAAAACGAATTGTCGGCGAAACCCTGGATGTC-ATCCTTATCATTGGCGCTA-CCGTTCAGGG-----TATTGCGATGCAGNGCAGTTCAGCATGTCTAACCCAAGGAGGATGAGGAAATGACACATCTGACCGGCC--TTCATCCATGGGTGATGACTTAAAGGGATATAAGGCTACAGAGTGCGG-GTGGTATGAAGTGGGACTTGGGACGAGCGGAGACGCGACAGAACCCACGACGGTCCCGGGAGCGGGGTAGCATTCGAGGGCAACGTCCGGCGTGAGAAACTGTGGCCGAGGGTTCCCTTCCAGCTCCTCCGCGCACCT----CCCGCCTCCCGCACCAAAGAGTCCACGGACAAAACCTTGA---------TTCACCGGACAAGACTCAGAGGCGGGTTGGGTGTGTCCTGCCTGCGTACTGCTAGAAGGAATTTTCTGCGGTGCAGCCGGCGCTACCAGAAAAGACCCCACAGCTCGCGACGNNNNNNNNNNNNNNNNC------CTGA-----------ACCAATAGCCAAATAAATCTTCGACGGGAGATCGGGGTTGGGTGGGCAAGGAGCGGTACCTCCGAGCTGGCGGCCACCAGATCATACCGGAT-AACCTACCGG-TCCCCGATATGCGCCATCTTAGACGAATCATCGAGGAATCCAATGACTCTCCGTAGCATGCAATGA----TTGCGCTTCCTACCCTATGCGCTTTGCGGGATC-TTTGTGGACCTGCTTCTCAGCCGGCAAAGGCCGG--CCTT----------------------NNNTGGGTCGATGTTGATTGGTCTGTATACGGCCGTGCTGGGCACTCCACCTAGCCATTACTAGCGGCTCCG------AAGCCCTCCTANNNNNGTCTTGTTCCGTCCCTCGTAAGCAGCGTTGGGCGATTAACCTGGCC--GAAGCGTTGCGCGTAGATTGATGATCGTTGGCGTACACTTTCGATCAGCGTTATGCTACTGGCTGGTTTCACTTTCCAGTTACCACCGGGGGCTATTAACAGCAACCCTGCGTCTTCCTTCGGCGATTTGGGTGGGCCCGAGTGGTCNNNNNATGCGGAGTGATGCCAGTAACGTTATACTG---------G---AAGCCAT----NNNATCAC---GCTCCTAGATTTCCCTATCCTTCCAGACACTAAGGTTGGCGATCGCGTCATTGAC-------GAGAGGGACGT-AAGACGGGGAGCTGATC------------AACTGCGGGTAGCATCGAAGCACGATTGCCCTAACGTCGGCGAATGGATCCCCCATCGGATGTCCCTGTCTGAGGTCTTCAACATATGCTCGGCTACATAAGGGGTAGTAAGGANNNNNNNNNNNNNNNNNNNCGGGCGGCACCGCGCTG-----TCNN---------AGATCGTCTGGAACCTAGAAGGACGGTTAACT-----CGTCAAGTGAACGCACTCGCTAGAGAGTAGGTGAGCGGGGGGATAAGCGCAGAGCAGATCCACTACCACACAATGGATTTGGGGCACTTCTTCCAGTTACCAACTG-TGAGACCGGGACGGGGCCGTGAAGCAA-T------------NNCCCTTCCTGA--GGTAT---TCACTTCGATTGACAGCCTTGCCTCAGTTATTA----TATAATGACACGGGCCACAGATCTT-TATTTCTAGTTACTGTAC------------CTATTGCACAGCACGCCCCTCTCCNNNNNNNNNNNNNNNNNNNNNNNNNNNNNNNNNNNGCCAGGACTCTGAGCTTGTAAACTACAGCAGGCG-----TGAGTCCCCGTCCATNNNNNNTGACATGACGNNNNNNNNNTGTCNNN-CGTAA------GT-NNNNNNNNNNNNNNNNNCTGGTAGG--NNNNNNNNNNNNN--NN-AATC
>FA5537-ND-ST302
CGCGCTCACCCCCGCTCGATGGGCGGATCCCGGCCCAACATATCGCACAGTGGCACATATGTTCGCGACAATGCCCCCATTTTCCCTCACCTGCATCATCGGCGAGAAGGCGTGGGGACCCGACCGTTGCCTGGGCGGCCATTGAACCCGTTCTCCCACGCTCATCACGCCGAAATTAGTACCCCCCAATGACTCGCCTCACGGCGGAACGAGTCACCTCTGTCACCCACCCGCTGGACTCACACGCCGCTCTTTGACCGCGCCCCGGGACCCCGGTGACAACCCCCGCCCTTCGAATAGCCCCCCTGTCTACGACCGGCCCACTGTGTCATTACAAGACCTCCCCAAAAGCCATATTCGTGAGCGCTATCTCGAGCCCCTCGCTATAGCTCGCAGCCCACCTGCCCGGCCCATCTTTTCCCGACTTGCTCGTTCCCAATCGAGGACTCCGACGTTAGCCTAGGGTCAGGCAGCGCGGACGCCCTGCGCATGGGATTCAACGTGTAGTGCGCAGCGTGACCCCCCGGCAGCGCGGGGCGTCGCCGGGGGTCCCACGCAAGCATAGAATGGGGGAGGCTCAAAGGTCAAATGTCGGCCGTGCCCGCTGAGAGTGGGAACAGCAGGGTGGAATGCAATTCCGCGCGGCCATGGGACACGGGGGTCGCGTGGTTCCGAAACACACGCCCGTCGGGGATGACAGCAATACAGCGTCATACTTCTCCGGGAGAGCCGGCGTGTTGGGGCACGTGAGAGCCGCGGGAGTGGGACGGACCCGCTGCGGGGCCCGGCCTTTCTCCGAGCTTGGCCCGGGCCGGACAGTCCAAGGAGCGGCCTAGGGGGCGGCAGAAACCGTCCCGTCTGCACTT--CT-ACCTCCCCCTGGCCTGCGGTCTGTGACTGAGCTATGCTCACCTTTCACGGTCGCCGCACTCGCGTCGACCGACGGGTGCTACTCCGGCCCCCTAGAGGCGTTGCACTTGGTCTACAGCCAGGCGACTGCCCCCTCCGGGGCGAGCATGAGCCGCGCCGGCGACACCGCTCCTCTCAGCCCACCCCCGGTCCCCGCACACGAGTGTCGGGACGGAGATTCCCACACCTTGACCTTAGATGCCTTTGGTCCTCCGGGTTCCCCCTCGAGACGATGCAGTC-GTGGACGTTCGATCCCGCGAAAGGCGCCTGATGAAGTGACGAAGGGGACTTCGCATCGGGGCGTGGCCGCTATTCATGGGCTCGTGAGCTCACCCGTACAGAGGGACCGCAAGGGGGGGAGAGTTGTTGGAGTGAACATGTAACGCGGGCGTGCGTACCTTGCAGCGTTCGAAACGTCAAAAGGGAGGATTCCCTGGTTGCGCACCGAGTACGGGGCGGGGCGGTGCCGGCGGGGCAGGCACCTCGAAGTGGATCGTCGTGACCNNNACACAGCAGG-AAGACACAAGATTTGCTGGTAGGGACGCTTTGA--TGACCATGGGATTACCCACCACCTTTAGAACGGATTAAGGAACGACTGGGCTCAGGTAGCGGTTCGGGCCCAGTCGAAGCGATGATCCGCGAGGAAAATGGGTGGTTTCCATTGTAGCAAGACAGGTGCCACGCCGACGCGAGTTCCCGGCTGGGGGCCATCGTGACGAGAGACTGACGCCTCCTACTGAGCTCCTCTCGTGTTTGCACGGTGGGCGATCCCCGCTCCACCCGCCGCGTTGCGTTGCCGGACATCTGCCACTTCGTAGCCCAGCTCCGCT-TGTCAACCGACTCGTAACCCCCCGTGCACCACTTGGCGCCCTGCATGCTCGCGGGTCGCCCCATTCAAGCGGGAGTACCGACGGGTTCCCGACACTGTCTATGTCTCGTACACTTAAGTGTATTC-GGCTCGCACACGACCCTCGAAGGTGCCGGTCGCTGTACCAAAGGTCGCTGGGCAGCCACTGGGCCTTTCTGCCACTGCTCGAGTGTCGACCCGTGCTCCGCCTCGCCTTGCCTCCGTCAACTAGGCCAACCCGCGGCTGTACGGGAGAGCCGCAGAAGGCCACGCCGTGAGCCAGTGCTGTCGCCCGCTGTTTACGTTACGCCGGAGCGCCAGCGAGTCTCGACCGGTATCGTTAGCGTTGCCTGCCCAGATTCCACCACCGGAGATAATCTTCGTTCGCCTCCCCCGGTGTCAGTGACCGCTCCCGTATGCCCCCCACGCGACATGCCAGTGACGTCGCCACCGCCACGCCGGCGGATCGGATATACTCCAAGATCCCCTTGGGAGCCGCCGGGTATGCCCTGGCACCCGCATGTGGGGGGTAACTACTGCAGAGCCATCGGCTAGCGGAGTTTTGGCTGATACACCCCGCAATTCCTGCCCCTACGGACCCGCCGGTCCGCTCGTACTGTCACAAGCGACAAGCCTTTGTNNNNCAGCGTGTCGACATTTCGCGGCGCGGAACCAGCCGCGGGCAGTGTCTCAGGCACGCGCGCAAACTGCGCCCCGGGCGAAGGGCCATAAAGCGCCGTAGAACATCGTGCGGGTTCGGGGAGCGCAGTCGCGTACACCGCTGCGTCAATACAGTAGGCTGCACGGGACCACCTTCGCCCTCTTAATGTGACCCCCAGCCGTGACTCGTCCCTACTCACCGGCTCCGGTCCCGCTAATACGTCCGCATGGTCTCTAGGCACACGGTCGTGCTGAGGCCATTGCGCGTACCGTAGTTGAAGGCGCACCCCCATCTTGGCCCCAGTGGTACGCGGCCGCTGGAGAGACACA-------TACCCACGGGGGGGAGG-GCGGCAGATAGGGTTTAGCGACACGG--CCCGCGGGTAGGGCCTAGGGGGTAACGACTGCACACGGGAGACGGCTGCAACGAGCGCGGA-TCAACGCCTGCGAGGGAGTGTCGACGCGCATCCGCGGTT-----GTTGTGGGCGTTGGGGTGTTCCGGTGAAGGGACTGAAGCCTCATCGGGGACCGGTGGCGTGGTGCAGTGGGCCAATATATCAGACGGAGTGTCCTCTGGTGCGTTACCACGGCACATATGTTCGCGGCACCTCCGACGGAGGCCGTCGCGCCGACCGGAGGGAGAAGTGTGTTTAAGAGGGGATTGTTCGCGGAGGAGTCCTCAAGGCGAACTGGGGGACCGTGGTGTAGGAAGCCCAGCGTCATAGCGTTTGGTTGCGTCGCCCAACCCGACGGCTGAGTGACTGCCGGCGAGGCGTACTGCAAAGATTGGCGGGCTGAGCTAGGCGCCGGGATCGGATACGGTGGACCCCACGTATCACTGGCTCTACCCCATGCCGAGGGCACCCCACCCCTACGCAATCAGGTCCGAAATGCTACACAAGCCCTATCTCTCATTCATGTGTTCTTAGCTGTCCGTTCGCACCTCCCGCTGCCGCCGTCTAAATGCCCACGGCCCCCGCACCATGAGGCGACAAGCCGCCCGAGGACCCGAGGCAACTAGGGAACAAACCCTGTCGGTGCGACAGCCGTGGTCGGGACGACGTCGCTCTTAGGCCCTCGTTCACCTCAACGCCCCTGATGAGGGTCTTGACCCCACCCCTCCAAGGGGAACGGACAGGATGTGCGTGAGTGGGGTAAACACTAAGTGTGAACGCCCCGAGATGCCGCACCCGAGAGTGTGGATGGGGGTATCCATTCGGTGGGATGTTGACTGGCCGGCCGGGACCTGGCTTCCGGGGGGAAATGGTGGCGTTTCTGGTGTCGGTGCACTGGGGCGAGGGCGAGCGACCGATCCCAACTTGGGAGGTGGGCTGATATTCTCCGGTCGACTCTGTATTGCGGTCAGTTAGAACTAGCCAGGCGGTTGCCGTCGCCGCGCCTACACATACTGGACCCCTCACACTGACACTCCTGGCCCGAGGGACTCGGCGCCCCGCGAGCTCCTTGCCAAGGATCCTGCT--TCCGCCCGGGCTTACCCTCCGTGCACGGCAGAAGGGGGATGCGCCCGAGGGACTTGTACCTGTGTCACCGGTAATAGGCGTGACCATGCAACGGTTGCGCCTTCGATCCTAGGAAGGGAGGCGTCGCACTGGTGGTGCCTTTGCGCGCGCGAACCACCCTTGCCACCGGCCCGAGAGCGCACA-CATCCACTACGCCCCGGGCCCGCCCGGCGGGCCCGCCCTACCACATGACCCCACTGCGCGGCGCCACGATTGTCTAGAGGCCAGGGTCCCTTGCCCCCGCGCGCCTACGTCACCTCGACCGGGCTGCCCGAAACGCGCGGGAAGTATGTCCCTCTCCGACGAGCTCGCACGGGCAGACACGCGATGTTCTAAGACGTGCAGGGAGGGGCATGAGACAAAAAAAGGATTTTAACACTGCGCCGAGGGGGCTCAGCCACGATGGCGGCCATGTCGGCCCGGGATTGATTACGGCCTTGAAACCAGATTAGTATCCAGCCAGTTTCAGACCCAACTCCCCGGGTGTAACCTCTGGCTGAATCAATTGCCCGCGCCGGGGCGTTTAAACTTGAG--CTCCTGCACCGGCACTGCGGACCCTAATGACTCATCCCCCTCGCCCAAACGCGTCCTAGCATAGCGCGTGCTTCGTTCCCCCTCAGCGGGGTGGAGGAGGCCCATACGAGCCTTCCGCTACCGCGCCCCCGCTGTCTCCATGACTGCCCCGACTACACATGTA-GTGAAGACTCGCCCAAGGGCAGAATAGATCCGTGGGAGTGGTGGCTGTGGGAAGCGTCC----------GCTCTGCCTTTCCCATCTTCGTTTAGCGGCCATCGACCGCGGAGCGGACCGCCCAAAGATTTCTATCAG-CG-ATCCTTGATATCGCCCGTGTCGCGGTCACC-TCCGCGGCTCGCAGTGTAGGGGGAATTCCCGCCTAATTGACGCATCCGCTACAACTCTTTATGCTCA---ACCCCTTCCCTCTGTCGGGTGCGATGAGACGATGGCGCGTGCCGGCCGCCGCTGCTTCGTATCGCGCCCCGTGTCTCGC---------NNNNNN--TACGGGCCGACCCCCCCGCCGCCCGCCACGCCCTCGTTCCGCACGCAGTCCCCGCCAGCTAAAACTTAGGGACAAGCTCCCATTTACTCAAGATTGAATGGTCTGTGGAACCCTTAGTGTCGACCCCTTCCGCTGGAACAACCCGCGAAGGGGAGTGAGTTGCGATGCCTNGCAGCACAGGGCGTCTGACCCGAAGGAACCGAAGAGACGCCATACCTGGCTGGTTGATCCACCCGCGGGCGG-ATCTCGCGGGACCATGGGGCGGCCGACCGCGAGATGGTGCGCAGTGGGCCTCGGGGTGAGCGAATGTGCAACATGGCCCATAGAAGCTTGAGGGGCGAGACCGTGTCCGGACCCAGTGGTCGTCGTAGAAAACTATTGCCAAGGTCCCCCCCCCCGCCACGCTGCGCACCCGAACTTCACCTTCCACTCTACAGTGTCGGCGGCCGGGACTCTGTCTAGATAAGGTCGCCGTACAGGATCTGGAGGTGGATTGGGTGCGACCCGCCCGTACCCTGCCGGGTGGGATTTTATGCGGTTCTACCGTCGTTCCAAGAAAAGAACCTGCAACGTGCGATANNNNNNNNNNNNNNNNCCAGCCCCTGAGACGGGGAATTACCGGTAGTCCGGCTAGTCTTTAATTGGTGCTCAGAGGTGGGCG-GTGGAAGATGATGTGCCCGGGCCAGCGACCATCAGACCTCGCTGGACCAACCCACAGATCTCCCAATATACGCTGCTCCGGGCGCGCCCCCGTATGAATCGGCGGTATCCCGCAGAGTCTGCCGA----CCGCGCCTCCCGTCTCGCGCCCCCCGCAGGACTTTCTGAGAACCGTCCCTTCTGTCGGCAAGGGCCAGATCCTTAGCACAGAGGCGTGTGGAG---NNNCAGGCCGGCTTCTGGCTGCCTTGACACGGCCATAACGGACATCACCCCTCGTCACGTCTGGCGGTCCTACTGGTCTAGCATCCCCGNNNNNGCCGTGCGCCGCCCCCCTCATGCGACGACGGACACTATATCTGGCC-CGAGGCGCTACGCGGAGAGGGATGATCGCTGGCACGCAACCCCGCCCAGCATTATGTGACCGGCAGTCTGCATTAACTAATCAAAATCGGGGCCAGAAGATCGCGGCCTCGCGGCCCCTCCCGGCGATTTGGGCGGACCCGAGAGGCCNNNNNGTAAGGAATAGCCTAATGGACTCTGTGTTG---------G--CGGGTGACCCTCNNNACCATCCAGTTCCCGGACTTACCTATTTTACTAGACACCAAGATTGGCGGCCGCGCCGGTACCGTGACGGGGAGAGACACGAGCACCACGGAGCTGATCGATGGGATAGTAGGTCACGGGTAGTATCATGACCGGTTAGCTCTGACACTGGCAGATTGACTCCACCGCGGATGATCAAACCAGAGGTCCCCGGTATCCGCGCGAATTCGGGAGGGGCTACAGGGGNNNNNNNNNNNNNNNNNNNTGGGCGGCGCCACGCGGGGT----NNGCTCG----GGACCGTACGGCACACAGGAGGA-GGTCAGCGAGCGTCGACGGGTGGGCTCACTCGCTGGGTGACGGGTGTGCAAAGAGAGAGGGGCAGTGCAGATTCGCTACCATACGACGGGGTTATAGCGCCCCTCCCAATCACCGATTG-GAGGGCCGAGACGGAGCTGCGACGCGG-TACATAATGCTCCNNCCCTCCCCGA----------GCCCTCAGGCCGACAGCTTTGCCCCCATCCATGCTATTGTAAGAGCATAAGCAGCAAAACTC-CATTCACGGATGCTGAACTTCCTGTCGGG-CAATCGCACGACCCGCCTCCCTCCNNNNNNNNGTGGGATTCNNNNNNNNNNNNNNNTCCGGTGGGGTTCTAAGCTGGTGTACCACCGTAGGAT-----TGGGTTCCCGCCCACCGTGCAGAGTTGGATTNNNNNNNNNTGTTATTCTACCC------TA-NNNNNNNA-NNNNNNNNCTGATAGT--NNNNNNNNNNNNNCTNNA----
>IA1186-Poultry-ST302
CGCGACCGACCCTCACTTATGGGTGAACTCCGGACCGATAGGCCTCCCAGGGACACATACGTTCTGTACGAAGCTCTCATTACCCCCCACTAGCATAGCCGGCGTGATGGCAGGGAAATCCGGCCGTTGATTGAGCG----ACACCCCCGC---------TTAACTACTCCGGAATTAAGATCCCCCGGCGGTTCATCCCACGGCGGAACGAGTTCCCCATGC-GCCCGTCAGTGAGGCTTAT--G---TTTTTTGTCTGCGTCCCGTAGCTCTGGAGACGCCCTACGCCCCTTAGA---TTT-TTAGTTCATACCCGTCTCGTCTCAGCATCCTGGAACCGCACCAAAAGTCGCGCCAGCGAGCGC-ACCTCAAGCCTCTTGTCCTGGCATGTAATCAACCTGCCCAGTATACCTGGTCCCGACTCACTAGCTCTCGACCGGTGATCCCGCTAGCGGCTTGAGAACCAGTCGCTCGGTCACCCTCAACGGAGCCCTGGACGTGTCAAGCACCGCAGGGCCCCCCGGAAGCGCAAGGCGTCGCTAGGGCCCACCCGCA--CGGGAACAAGGGGGAATTTATGAACCTAGTGTCGGCCATGCTCG-TGCGAGTGGGATTCGCGGGGTGATGTGTCCTCCCACGCGGCCCTGTGGCACAG-NN-CACGTGGTCAAG--CCACGCTCCTGTCGAAGATGTTGGCAATACAGCGTCAGATGTTGACGGG--GTCCGACGCGCTGGAGATAGCGAGAGCCACAGA----GG-CAGTCCTGTTGTGAGGCCATGCTTTTCTCCTAGCT-AGATCGAGCAGGTCGGCCCCTGGAGCGGTCTGGAGCGCGGTAGAAACCAGCTCGTTTGTACCT--CGTACTTTCTTCTGTTTTTCAGACGG-GAC-GGGAGAGGCTAGATTGCCGCG--C--TGCACACACAGCGACTGCCGTGTACCTCCACGTCCACCCCGAGGCGTCGCTCTTTAGTCAAGGTTAGACAAGGGCCCCTTCTGGGTCGGGCCCAAGTCGTGCCAGAGCCACCGCTCTGCCTTGTCCACCTCTGTTCCCCTCTTACGAACTTCAGGGCAGAAACCTTCACACGTTAATTCTACCTACCT--GGCCCGCTGGGGTTTCCTTC-NNNNNNNNNNNTCGGAGGACAT--------GTGGGCGACGCCTGGGG-GGAGAAGAGGTG-ATT-CACGTCGTGGCTCGGCCACCGTTAA-GGTTGAGGGTACTACCCCGTCCCGAGGGAAC---AAGGAGGGGGGGCTGTTTGAGTGAGAGT-TAACATAGGCGCGTAGCCTCTACGGAATTCGGAATATTA-CAGTTTGGGTTCCTTAACTGCGTGCAGAGTACGTGGAGGGATGGTGCCGACACGGCA--CACCTCGACGTGGAACGGCATACC-NNN----------------ATATGGACTGCCGACGAGACTG----------ATTATAATGCCGCCTGTTAACGTTAAGCCA-GCTAAGAGGTGGTGGGGCTCCAGCC-C-ACCCAGACTCGGCCGGTGG--GTGTACATGGAGACTACGGATGGTTCCAGCTGGGGAGAAGCGAGCACTGCGCCA-TACCTGCTCTCGACCGTGGT---TCATCTCGAA-AGTTGACATCACCCGCCGAAC-C--AGCTTGTCTGCGCGGTAAATCATCCCTGCCCAACACATAACGCTACACTGCCAAGCAGCCGTCCCCTAGCGACCTAGCCCTGCC-CGC-ACT-AGTCCTTAGCCACCTGT-CACCTCCTTATGATCTGCNNNNNNNNNNNNNNNNNNNNNNNNNNNGAACTGCCAAAGTGTGACTAGCATCTTTGCGTCTCCGAA----------------ATCGTTCGCACGACTTTCGGAAGTACAGGACGCCCCGCCAAGGGACACCAGGTAAACGCTGAGCTTAGTGGCGCCTATCCGGGCGTCGACACTCGCCTCTTCACGCCTGACCCCCACCCACTAGGTCAATTCACAGTTATTCTGGTAGGCTGTTAAAGGCCATGCAGTGATCCAATGCAGTCACCAGCTA-CTCTGTTACGCTGGGATACCGGCGCATCTTGGCTATAACCGGTAGTGGTATCCTCACTGCTTTTACCATTGGAGA----CTTCGCAGTCCTCCCCCGTTCCCAGCTACAGCTTCAGCCTGCCTTTCACGCGC-ATGCCAGC--TATTACCACCGCCGCGGCATCGAGCAGGATATACGCCAGATTCCGCCATGGGACTGCTAGGCGGGTCCGGACGCCTGTACTAGGCAGATAACCACGGTTGAGTCACTGTCCCGTAAAGCTTCAGC-GATATACCCCGAGTTACCCGCTTCGCCTGACCCGTTGATTCGCCCGCACTACCATAAGCGACAAGCCCCTGTNNNNCCACGTGCAGGCCCATCGCGGCATGGGCTCGGCCACCTG-AGTATATCGGACCTT-GCGCCAAAAACGCCTCGGGCGGAGAGT----GATCGCCTCAAAA-ATCGTACGGGTTCGAGGGGCGCCATCGCGTACGCTACCACGGCGACACAACAGGAGGCGCGGGATCGTCTCGGCAATCT------GACCACCGTCCACTAATTT-CCTTGTTCCACAGCTCTGTCCACGCGATCGCGTCCAGATGGCCTCTGGGTTTGTGGCTCTGTCAAGGCCAGCCTACGCAATGTA-GGGATGACACGCCCCTA-CACGGCCCCGATGA---ACTGATGTCGGCGAGTCACG-----A-TGTCCCAGGGGAATGGT-GTTGCAAAAAGAGGCCAGTAACAAGGGTTCCATGAGTGAGGCCACAGGAACCATGGCTGCCCGCGGGGAACGGAGACGCTGCGCGCGTGG--GACGCTTGAGAAAGGATGCCG-TGCGTTGCCGC-GT------GTTGTGGGCGTTGGGGTGACCAGCTGCTGAGTCGAGGGC-TTATCGGGAACTGATGT-GTGGTGCATGGAATCGCCATCGCAGCCAGATCGACCTTAAACAC--------------------------------------------------------------------GCTGTAG--GGGAATGAT--CGGCGGGACCCGCAAGGCCAACTAGGGGATCACGATT--AGACGCCCCGCCGTCACGTGGGTAGCCGCGCCAAC-GAACCGGTGGCTGGGTGGCTGCCGGTGTGGTGTGCCGTGGCGATCGGCGAGGT-AGCTGAGCGTTGAGATCGGGTCCGACAAGTCCCATACATTATCGGTGTCA-ATTACGCCAGGGATACTCCGTCCCTGGACGATCAAGTTAGGAATGCAACATATACTCTTCCTTCCTGGTAAGCATTCTTAACTGTTCATTCCTGCTCCCCTTGACCATCGTCTATACGCTCGCTGTCCC-TCTC--TAAGTTGGTCAGCCATCCGAG-AACGGAGACA----GG-TTCGGCCCCCGTCGGCGCGGTGGCCGCTACTGGGGCGGCACCATGCTCAGGCCTTTTTTTACCTCAACGCGTCCAACAAAAGCCTCCACTTTATTCCCCTAAAAGGAAAAAGCTGGCTGTGCG-GAGTGGAGT---CACGTAA-GGGAGAACATTAGGGTGACTCGCCCATAAATTTGGGCAGGAGCG-T---CCGACGAAGCG-CGGTTAACCCGTTTAAACCC---CTTGCGTGAAGGATGGAGAA---CCTAGGGTCGACACATTAGAACATGAGCAG-CGGTTGACCCCGATCTGGGGAGTAGGCTGAC-----CCGGGAGATACCGTAGGAAGATTAGTTAAAACTAAC----------CCACCTTCGCGCCCATGACAGCCTGATCTCTCACGTTGAGACGCTCGTTGTTAGAGTCCTGGTATCCTGCAGGCTTCGAGTTAAGGGTCTCG----TCCGCCCGGGTCAATCATCTATACTCGGTGGGAGAAAAAGGCACCCCGAGAATT-GCACTCGAAGCATT-GGGATGGTCGTAGTAACGTGATGGTTGCAATCGCGGTCTC----TTGGGAGCACCA-AT---TGATGCC-----GTGTATGGACTGCTCAC---ATCGTATCGCGAATCTNNNN-GTCAGCCACGCCCCGGACCCGTCCGGCAGGCTCTCTCCACTACGTACCTCTATAGCGTAGCGCCACGATTATTCTGAGGTCAGAGT-CTCGTCTTCCGCGCGCCTACGTCGCCGTGACTGAGCGGCCTGATACGCGTAGGAGGCGAGGTCCTGCTCGACGTGCCCGTGCGAGACGATCCGCGAGAGTTN--------------------------------AAGTTGTTAACGCTATGCCGGGGGGAATCGCTTGCAGGGA--GCCATGGGGACATAAGATTAACTGTGATC-----------GCAGGGTAC-ACCGGCCCAATGCCCCGCTCCTGAAGTGCTATCACCAGCTTGGTCAACGGCCCGCGTCG---CAGAAAAATCTGCA--CTCTTTCACCTTCGCTGCGTACTTCTGCGGCCCACCCCTAATGACTGCATGCATCCTATCATTGAGAACGCCTTATTCCCCCACAGCGATGCGGAAGGGGATTGGGGATGTT-TTTGCA--TGCGTCGCCACCACC----------------------------AGGCAGAAGCACCCACGTATGGCATCGGTCTATGAGGACCACGGCCGTGAGGTACGC-T----------ATTCAGCCCTGCGTACCCA----CCGCAGTAGCTTGCCACAGGTTTGTTTGCCC---AGCCGTAG--CTG-----CCCTAG---C-CCCATGTCGCGCTTGCC--CTGCATCCCAAAGTAGGGAGGGCATTGCGAT---AGTAACGCCTTCGTTAAAGCGCGTCATACCA----GTTCCGTCTCGTTGCCGTA-------AGGTATTGACGCACGTTGACCACCACCACTTTCAACTACGCCCTGTGCTCCGC---------NNNNNN---AC-AGCTGATGCTCTCGCCACGCATCGCGCTCTCGTTTTTCATGTGGCCCTCACTGCCTGAGGTTGTGGGCCATGCTCCTGGTTTCCCTAA-ACGAATTGTCGGCGAA----TGG--GTC--CCCTTATCATTGGCGCT--CCGTTCAGGG-----TATTGCGATGCAGNGCAGTTCAGCATGTCTAACCCAAGGAGGATGAGGAAATGACACATCTGACCG------TCATCCATGGGTGATGACTTAAAGGGATATAAGGCTACAGAGTGCGGGGTGGTATGAAGTGGAACTTGGGACGAGCGGAGACGCGACAGAACCCACGACGGTCCCGGGAGCGGGGTAGCATTCGAGG-C----TCCGGCGTGAGAAACTGTGGCCGAGGGTTCCCTT-CAGCTCCTCCGCGCACCT----CCCGCCTCCCGCACCAAAGAGTCCACGGACAAAACCTTG----------TTCACCGGACAAGACTCAGA-GCGGGTTGGGTGTGTCCTGCCTGCGTACTGC----AGGAA--T---G--G-GCAGCCGGCG----CAG----GACCC-ACAGCT-GCG---NNNNNNNNNNNNNNNNC------CTGA-----------ACCAATAGCCAAATAAAT--TCGACGGGAGATCGGGGTTGGGTGGGCAAGGAGCGGTACCTCCGAGCTGGCGGCCACC--ATCATACCGGAT-AACCT-CCGG-TCCCCGATATGCGCCATCTTAGACGAATCATCGAGGAATCCAATGACTCTCCGTAGCATG-AATG-----TTGCGCTTCCTACCCTATGCGCTTTGCGGGATCCTTTGTGGACCTGCTTCTCAGCCGGCAAAGGCCGGA-CCTT----------------------NNNTGGGTCGATGTTGATTGGTCTGTATACGGCCGT--TGGGCACTCCACCTAGCCATTACTAGCGGCTCCG-------AGCCCTCCTANNNNNGTCTTGTTCCGTCCCTCGTAAGCAGCGATGGGCGATTAACCTGGCCACGAAGCGTTGCGCGTAGATTGATGATCGTTGGCGTACACTTTCGATCAGC-----GCTACTGGCTGGTTTCACTTTCCAGTTACCACCGGGGGCTATT-ACAGCAACCCTGCGT--TCCTTCGGCGATTTGGGTGGGCCCGAGTGGTCNNNNNATGCGGAGTGATGCCAGTAAC-TTATACTG-------------AAGCCAT----NNNATCAC---GCTCCTAGATTTCCCTAT-C--CCAGACACTAAGGTTGGCGATCGCGTCATTGAC--------AGAGG-ACGT-AAGACGGGGAGCTGATC------------AAC---GGGTAGCA---AAGCACAATTGCCCTAACGTCGGC---T-GATCCCCCATCGGATGTCCCTGTCTGAGGTCTTCA-CATATGCTCGGCTAC--AAGGGGTAGTAAGG-NNNNNNNNNNNNNNNNNNNCGGGCGGCACCG-GCTG-------NN---------AGATCGTCTGGAACCTAGAAGGA-GGTTAACT-----CGTCAAGT--ACGCACTCGCTAGAGAGTAGGTGAGCGGGGGGATAAGCGCAGAGCA--TCCACTA-CATACAATGGATTTGGGGCACTTCTTCCAGTT-CCA-CTG-TGAGACCGGGACGGGGCCGTGAAGCAA-T------------NNCCCTTCCTG-GGGGTA----TCACTTCGATTGACAGCCTTGCCTCAGTTATTA----TATAATGACACGGGCCACAGATCTT-TATTTCTAGT-ACTGT--------------CTATTGCACAGCACGCCCCTCTCCNNNNNNNNNNNNNNNNNNNNNNNNNNNNNNNNNNN-C-AGGACTCTGAGC--GTAAACTAC--CAGGCG-----TGAGTC-CCGTC-A-NNNNNNTGACATGAC-NNNNNNNNNTGT-NNNTC----T-----GT-NNNNNNNNNNNNNNNNNCT-GTAGG--NNNNNNNNNNNNN--NN-----
>IA1729-Canine-ST302
CACGCCCACCCCTCCCCGATGGGCGGGCCTTAGACCGTCAGGCCGCCCAGTTGCACGTATTTGATGGACAATTACCCTATGTCCCCTCACCTTCATCACCGACAAGAAGGTGTGGGGACCCGGTCTTTGCCTGGGTTGTTATTGAATTTGCTCTTCTACGCTCACCGCGTCTACATTAGGGCCCCCCGGCGGCTCGCCTCGCAGCGGAGCGAGTCCCACATGCCGCCCACCAGCTGGGCTCACCCGCCGCTCTTGTTCCGCGCTTCGGGGCCCCTTTGACGACCTCCGCTCCTCGGT---CCCCCCAGCCCACGATCAGCCTGCCTCGTCACCCCGAGACCTCCCCAAAAGCCGTACCCGTGAGTGCCATCTCGATTCCCTCGCCAAAGTACGCGGCCAACCTGTACGACCCACCGTTACCCGATTCGCTCGCCCCCAACCGGTACCCNNNNNNNNNNNNNGGGGTCAGGCAGCGTGAACGCCCTGCGCGGGGCACGCGATGTGTAATGCGCCGCGGGGCCAATTGGAAGCGCGGGGCGTCGCCGGGGGTCCCCCGCAAGCGGGGAATGGGAGGGGCCCCTGGGCCTCGTAGCGGTCGTGTCCGCTGAGAGTGGGTTTAGTAGGGTGGTGAGCAATTACACGTGGCCATGGGGCACAAGAGATGCGTGGGTCAGTGACACGCGCCTGTAGGGTATGACGGCAGTACGGCAACAGACTTCTCCGGGGGGTCTGGCGTGCTGAGGCTCGTGAAAGCCGCAGGAGGGGGACGGTCCCGCTACGGAGCCCTGCCTTATTCCGGACTTGGCCCGGGCCGGATGGCCCATGGGACGTCCTGAGGGGCGGTAAA--CCGTCTCATCTGCGACTT-CT-ACTTCCCCCAGGCCTTTGAACGGAGACCGAGCTATGTCCACTTTCCGTAGTCGCTACACACGCGTCGATCGCCGTGTGCCACTCCGGCCCCCCAGAGTCATTGTATTTTGGCTACGGCCCGGGGACTGCCCTCTCCGAGTTGGACCTGAGCCGCGCCGGCGACACCGCTCCTTCTAACCTATCCCCGTTCCCCTCACACGGGCGTCAGAGTGGAGGCTTCTACACCTTGACCCCTGCGGCCTTTGGCCCTCCGGGTTCCCCCTTNNNNNNNNNNNNNNNNNNGACGTTCAGTCCAACGGGCGGCGTCTAGGGGGGTACAAAGGGGGACTCCGCATCGGGGCGCTGCCGCCGTTAATGGGCTAGGGAGCTCATCCTTACAGAGGGACTGTGCGGTGGTGGGGTCTGTTGGGGTTAGCGTATAACGCGGGCGTGTGTACCCCGTAGCGTTAGGAACGTCGAAAGGGAGGATTTCCTGGTTGCTCGCCGCGTGCGGAGCGGAGCTGTGTCGGTGGGGCGGGCCCCTCGACGTGGATTGTCGTGACNNNNNNNNNNNNNNNNNNNNNNNNNNNNNNNNNNNNNNNNNNNNNNNNNNNNNNNNNNNNNNNNNNNNNNNNNNNNNNNNNNNNNNNNNNNNNGGTTGGGCTCCNNNATCGGTCCGGGCTCAGCCGGTGGGATGGTACGCGGGGAAACCGAGTGGTTTCCGCTAGGAAGAGGCAGGCATCGCGCCGA--CGAGCTCCTAGCCG-G-GCTATTGTGACGAGAAACGGACGCCATCCAACGTGTTCCTCTTGTGTCAGCGCGATGGGCGATTCACGCCCAACCTGCCGCTCTACATCTCCAGATATTCGCCATCTCGCGGCCCAACTCCGCCACGCCACCCAGCTCGTAGCCACTCTTGTACCTCCTGACAACTTGCGTGCCCTCGGGTTGCCCCCCTCAAGCGTGAGTGTCGAAGTTTTCTCGGCCCCTTCTCGGCTCCGTACGCGCAAGAGCACCC-GGCGCGTGCACGTCCCTCGAAGGTGCCGGACGCCGCGTCGGGTGTCGCCGGTCAGCCGATGGGCCCTTTGGCGCCGGCCCCGGTGTTAATCCGTGTCCCGCCTCGCCTTGCCTCCGCCCACTAGGCAGACCCGCGGCTGTACTGAAAGGTCGCTGAAGTCCACACCG-------GGGCTGGCGCCAGCTGTTTACGTTACGCCGGAGCGCTGGCGAGTCTCGACTGGTTCCTGTAGTGGGGCCTTCCCTGATTCCACCGCCGGAGATAACTATCGCACGCCCTTCCCAGTGTCAGCGGCCGTCCCCGCATGCCCCCCTCGCGACATACTAGCGGCGTCGATCTTGCGGCGCCGTCGGATAAAAGACGCGCCAAAATCCGTCTGGGAGCCGCTGGGCATGCCTTGGCGCCCGCACGTGAGAGGTGACTACTGCAGATCCCCCGTGCCCCAGAGTTTCGGCTGATACACCCCAAAACTCCCGCCCCGACTGCCCCGCCAGGTCGCCAGCGCTGTTGCAAGCATCAAGCCCTTGTCATCCAGCGTGCCGGCATTTCGAGGCGCGGAACCGGCCGCC---AGTGGCTCGGGCACGCGCGCAAGCTGCGCCCTGGGTGGCGGGTTATGGATAGCCTCAGTGCATCGTACAGGATCGGAGGGTGCAGTCGCGTAAACCGCTGCGTCGACACGGCAGGCGGCACGGGACCACTTTGGCCCTGGTGGCTTGCTTCCCAGCCGCGACTCGTCCCTGCTCACCGGCTCTGTTCCCGCGAACGTCTCTGGATTGCCTCGGGGCACACGGCCCTGCCGAGGCCCGCCCGCACACCGTAATTAATGGCACGCCTCTATTACAGTCCTGGTAGCATGTGGCTGCTGACGTGTTGTG------CTACCCACGAGGGGGGGG-GTGGCAGAAAGGGTCCTACGCAAAGGGCCCCGTGGATGGAGCTTAGGGGGCAACGGCGGCCCGCGGGGGACGACGGTGACGCCCACGGGATTGCCGCCAGCGAAGGAGCGTCGACGCGCTGCCGTGGT-----CATTGTGGGCGTAGAGGAATTCCGCGGCAGGGACGGGGGCCTCATCAGGGACCGGCGGCGTGGTGCCGTGGGCCGACATCGCCGACGAAGCTTCATCTGGCGTG---CCACGGCACATATATTCACGGCATCTCAGACAGAAGCCGCCATGCCGCCCGAGGATAGAGATGTGTTTAAGAGATGCTTATTCGCGGAGGAGTCTGAATAGCCAACGGGGGGCCCGCGGGGTGGGACACCCAACGGCATAGCGGGCAGCCGAGTCGCCTGCACCCGCGGCAGAGAGGCTGTCTACGAGGCGTGCCGCGGAGGTCGGCGGGGAGGATTGGGCGCCGGAGTCGGATACGGCNGGCCCCATAC-CCTCCAGCTTTACACTACGTAGAAGACACCCCATCCCAGCGCGACCAGATCAGGAATACTACACATA--CTATCTTTCATGCATACATTCTGAACTGCCCGTACGCGCCCCCCGCTGCTGCTGTCGGAACTTCCACGGCCCT-GTACTATGAGTCG-CAAGCCGTTCAAGGACCCGAGGCTATGAGGG--CGGACCCCGGCGGCGAGGCGGCCGTGGCCGGGACGGCGTCACGCTTGGGCCCTCGTGCTCCTCCACGTCCTCGACGAAGGCCTCGACCCCACCCTCCCAAGGGG------------ATGTGCGATGGAGGTAAACATTAAG-GGGAGCACCCCGGGACGCCGCACACGTGAGTGTGGGCGGGGGTGTTCATCTGGTGAGGTGTCAGCTGGTCCGCTTGGACCTGGCCCCGCGGCGGGGAAGGTGACGT-CCCGAGGTCGGCGCACTGGGGCGAAGGCGAGCGACCTTCAACAATTTGGGAGGGGGGCTGACATCCTCCGATCGACTCTGTAGGGCGGTCGGTCAGAACTAGCTAGACGGTTGCCGCCTCCGCACCCACACAAGCCGGACCCTTCACGCTGAGTCGCCCAGCCCTAGAGACCCGGCGCCCCTCGAGCACCTTGCCTTGGGTCCCGCTTGTCCGCCAGGATCTACCCTCCG-GCACAGCAAGCGGGAGTTGCACCCGGGAGCCTCGCACCTGTGTAACCGGGGTTGGGCGTGACCATGCGATGACTGNNNNNNNNNNNNNNNNNNNNNNNNNNNNNNNNNNNNNNNNNNNNNNNNNNNNNNNNNNNNNNNTACTTCCGGCCCTANNNNNNNNNNNGCACGCCCCGCCCCGGGCTCACCCAGCAGGCCCGCCCCACCACGAGCCCCCTCTGAGCGTCGTCGCGGGGGTCCATGGGCTCGGAGCCCCGGCCCCCGCGCGTATACACCGCCTCGACCGAGTGGACCGGAACGCGCAGGAGACGTGTCCACCCCCAACGTGCCAGCACGAGCCGACCCTCGATGGTCN-AG-------------------------CGAAAGGTATTTAATGCGGCGTCGGGGAGGCGTGCCCGCGGTAGCGGCCATTTCGGCACGGGTCTGACTATGGCA---NNNNNNNNTTAGTATCTAGCCGTCCCAATGCCCAACTCCCGGGGTGCTACTAGCGGCTGGGGCAACGGCCTGTGCCGGTG-----AAACCTGAGA-CTTCTGTATCGTCGCTGCGGACCTTAGCGGCCCGCCTACCTCGCACGCACGCGTCTTGTCATAGCGCGCGTTGCGTACCCCTTTAGCAGGGCAGAGGGGACCCGTGCGAGCCTTCCGCTACCACGCCCCCGTCGCTCACATAGCTTCCCTTCCTACACATATTTGGACCGACTCGCCCACGGGCGGCAGCGGCCCGTGGGGGTCGCAGCCGTGGGGTGCGCNNN-----------NNNNNNNNNNNNNNNNNNNNNNNNNNNNNNNNNNNNNNNNNNNNNNNNNNNNNNNNNNNNNNNNNNNNN-GGGCCCTAGTATCGCTTGTGATGCGGTCATCGCNTGCGGCCCGAAGTGTAA-------------------------CCCGCTAAAGCTCTTTGTGTCCA--AGCCCAGGTCCGCGGCCGTGTTCGAAGGGGCGTTGGCGTGCTCCGGCTGCCGCCGCTTCCAACCGCATCTCGTACCTCGC-------NNNNNNNN--TACGGGTCGACCCCTCTACCACCCGCCACGCCCTCCTCCCGCACGCGATCCTCGCCGCCTGAGGTTGTGGTCCCTGCTACCGGTTACCCACGAACGAACGACCGGCGGAATACTGAGTGGCGACCCCTTCCGCTGGCGCAACCCGCGCAGGGGTGCAAATGACGATGCCTGGCGGCACAACGCGT-TGACCAGGAGGAGACGAGACGACGACACACCTGACTGGTTGTTCTACCTGCGGGCGG---CTCGCGGGACCAGGGGGCGACCGCCCACAGGATGGGGCGCAGTGGGACTTGGGGCGAGCAGAGGTGTGGCAT--CCCATGNNNNNNNNNNNNNNNNNNNNNNNNNNNNNNNNNNNNNNNNNNNNNNNNAACTATGGCCAAGATCCTCCCCCCAGCCCCGCTGCGCACCCGGACCCCGCTTCTCACTTCGCAGTGTCCGCTGCCGGGACCCTGAACCAGGTGCGTCGCCGGACAGGGTCCGGAGGCGTGTTAGGGGCGACCCGCCCGCACCCTGCNNGGTAAGGTCTTCGGTTAAGATGCGATCACTCCAGGAGGGGCCTCCACAGCTCGCGATATACCGTGGTGGGAATCTCGGCCT---CGGTGAGG----------------GCTCGCCAGCGACGGATGCTCGGGGGTAGATNNNNNNNNNNNNNNNNNNNNNNNNNNNNNNNNACCAGGTCTCGCCGGACAAACCCACCAGTCCCCCGATATGCGCCACCTCGGGCGCGCCNNNNNNNNNNNNNNNNNNNNNNNNNNNNNNNNNNNNNNNNNCTGTGCCTCCCGCCCCGCGCCCCCCGCAGGGCCTACTGAGAATCTTCCCCTCTGCCGACATGGGCCGGC-CC---GCAAGGAAGCGCGCNNNNNNNNNNNNNNNTAGCTTCTAGCTGCCTGGACGCGGCCGTACCGGACACCAACCCTAGCCACTACTGGCGGCCCCGCGGACCTAGCCCCTCCGNNNTCGCTTTGCTTCGCCCCCCTCGAGTGATAACGGGCGCTTTCCCTGACT--GAGGTGCTGCGTAGAAAGTACGGATCGCGGGCGTGCAACCCCGCCCAGTGGTGTGCGACCAGTAGTCAGCACTATCTGGTCAAAACCGGGGCCAGAAGATCACGGCCCCNNGGTCCCTCCCGGCGATTTGGGCGGACCCGGGAGACCNN---GGGAGGCGTGGCCTCAGTGACTCTGTGTTG---------CCACAGGCCACTCTGGTANCCATCCGGTTCCCGGGCTGCCCTATCTCACCAAAAACCGAGACTTACAGCCACGCCGGTGCCGTGTTATGAGGGGANNNNNNNNNNNN----------GGGGGGCAGGGAGGTTACGGGTAGCATCATGACCCGTTATTCCTGTTACCGGCAGATGGATTCCATCGTGGACAATCCAACCAGAGATCCCCGGTTTCCGTGCAGATTCGGGCAGGGCAGC----NNNNNNNNNNNNNNNNNNNNCGGGCGGCGCCACGCTGAAC--NNNNNNGGGGTACAGACCATCCGGATTACCGGCAGCGGGTCCGCTAGTGCTGACGGATGGGCTCACTCACTGAGTGACAGGTATGCGGGGAGAGAGAGGCAGAACAGATCCGTTACCATATGATGGGGGTGTGGTGCCCCTCCCAGTCACCGATCGTGGGGACCGGACTAGAACCGCGACGCGAGTTCGTAATGCTCCACCCCTCCCCA--NNNNNNNNNTCCCTCCGGCCGGCATTCCTACCCCCNNNNN------TGTAATAGCATAAACAGCTGTTCTCGC---------------CCTCCTTGTCGAGCTACTTACACGGCCCGCCCCCCTCCGCACTTCC-GTTGANNNCACG-------AAACNNNNNNNNGGCTCCGAGCTGGTGAACCACCGTAAGCT----CTGGGTCCCCACCCA-NNNNNNNNNNNNNNNNNNNNNNNNNNNNNNNNNNNNNNNNNNNNNNNNNNNNNNNNNCGCT--TGTTGGAGT--TGAGCAT----TTNNNNNNNNN
>IA4731-Poultry-ST302
CACGCCTACCCTTCCCCGATGTGCGGACCCCGTACCGACCGGCCGCCCAGTGGCAAACATGTTCTGGACACTTCCACCCCTTCTCCTCTCCTGCATCACCGGCAAGAAGGCGTATGGACCCGGCCGTTGCCTG-GCG-TCATTGAACTCGCTCTC-----CTCACCACGCCGAATTTAGGACCCCCCGGCGGCTCGCCTCACGGCAGAATGGGTCCCACATGCCGTCCACCAGCTGGGCTCACCCTCTGCACTTTGTCCGCGCCCCGGGGCCCCG-TGACGACCTCCACCCCTCGGATAGCCCCCCAGCCCACGACCAGCCCGCCTCGTCATCCCGAGACCTCCCTNNNNNCCGTACCCGTGGATATCATCTCGAGTTCCTCGCCATAGCACGCAGCCAACCTGCCCGGCCCTCCTTTATCCGGCCCGCTCACTCCTAACCAGTGACCCCGCCGGTGGCCTGGGGTCAGGCAGCGCGGATGCCCCGCGTGGGGCACTCGCCTTATAATACGCCACGGGGTCACCCGGCAGCGCGGGGCGTTGCCGGGGGTCCCCTGCAAACGGGGAATGGAGGGGGCTCATGGGCCTAGGGTTGGTCGAGCCCGCTGAGAGTGTGATTAACAGGGTGGTGTGCAATTCCACGCGGCTATGGGGCA-AG----CGCGTGGTTCAG-GACTCGCGCTTATCAGGGATGACGGTAATACAGCGTCGGACTTCTCCGAGAGGTTCGGCTTACTGGGGCTC--GAGAGCCGCAGGAGGGGGACGGTTCCACTGCGGGACTCTCCCTTTCTCCGAGCTTGGCCCGGGCCGGACGGCCCATGGAACAGCTCGAGGGGCGATAGAAACCGTCTCGTCTGCACCT--CTCACTTCCCCTTGGCCTTTGAACGGTGAT-GAGCTATACTCACTTTCAGCGGTCGCTGCACACGCGTCGACCTCCGTGTGTCACTCAGGACCCCCAGGAGTGTTGCACTTTGGCTACGGCCAGGCGACTGCACCCTGCAGGTCGGACCTGAGCCGCGCCGGCGACACCGCTTCTCCTAACCCACCCCCGTTCCTTTTACACGAGCGTCAGGGCGGAGACTTCCGCACCTAGACCCTAGCTGGCTTTGACCTTCCAGGTTCCCCCTCGT--GGAAGCAAGAAATGGACGTCAGGTCCAGCAGGCGGCGCCTGGGGGGATGAAGAGGGGGACTTCGCAACGGAGCGCGGACGCCGTTAA-GAGCTATGGAGCTCATCCGTACAGAGGGACCGCGAGGGGGGGGGGGCTGTTGGAGTGAGCGAATAAAGCGGGCGTATGTACCCTGTAGCGTTCGGAACGTCGAAAGGGAGGATTCCCTGGTTGCGCGCCGAGTACGGGGCGTGGCGGAGCCAGCGGGGCGAGTACCCCAACGCAGCTCGTCGTGCCCC--NNNNNNNNNNNNNNNCGTATGGATTGACGGTAGAGACAT---GATCTGACCATAGGACTGCTCGCCTCATTTAGAATGGGCTATAGGACAGTTGGGCTCCGGCAGCGGTCCGGGCTAAGCCGGTGGAATGGTACGCAGGGAAAACGGGTGGTTTCCGCGAGGGAGAGGTAGGCACCGCGTCGACGCGAGCTCCCGGCCGTGCGC-ATCGTGATGAGAAACTGACGCCACCCAACAAGCTTC-CTCGTGTCTGTGTAGTGGGCGATCTACGCCCAACCCGCCGTTCTACATTGCCAGACATCCGCCACCTCGCGGCCCAGCTCCGCC-CGCCACCTAGCTCGTAGCCACCCGT-CACATTCTGACGACTTACGTGCCCTCGGGTCGCCCCCCTTGAACGGGAGTGCCGGAGTTTTCTCGGTCCCTGCTCGGCTCTGTATACGCGGGATCACTTGGGCGCGCGTACATCCCTCGAAGGTGCCGGACGCCGCGCCAAGGGTCGCCGTGCAGCCGCTGGTTCCTTTGGCGCGTGCCCGGGTGTCGACCCGTGCCCCGCCTCGTCTTGCTTCTGCCCACTAGACAAACCCGTGGCTGTACTAGAAGGCCGCTGAAGGCCACGCCGTGAGCCAGTACTATCGCCAGCTGGTAACGATACGCCGGAGCGCCGGCAAGTCTCAATTGGTACCGGTAATGGTGCCTTCCTTGATTCCACCACCGAATAGAACCTTCGCACGCTTCCCTTGGTGTCAGCGACCGCTCTCGCATACCCCCCATACGACATGCCAACGGCGTCGCCACTGCCGCGCCGTCGGATAGGATATACGCCCAAATCCGCCTGGGAGCCGCTGGGCATGCCCTGGTGCCCACACGTAGGAGGTAGCTACTGCAGGGCCACCGTGCCCCAGTGTTCCGACTGATACACCCCAAAATTACCACCCCGACTTACCTGCCAGTTCGTCCGCACTGTTACAAGCGTCAAGTCCTGATCACGTCGCGTGCCGGCATTTCGCGGCGCGGAACTGGTCGTGGGCAGTGTCTCGGGCACGCAGGCAAACTGTGCCCCGGTCGGAGGGTC---GTTCGCCTCCGAGCATCTTAGAGGTTCAGGGGGCGTAGTCGCGTACACCGCTGCCTCGACGCAGCAGTCGACACGGGGCCACTTTGGCCCACT----TTGCCCCCCAGTCGCGACTCGTCCCCGCGCACCGGCTTTATTCCCGCGAACGCGCCCGGATGGCTTCTGGACACACTGCCCTGCCGAGAACAGCCCGCGCACCGTGATTGCTGGCACGCCCCTG-CACGGCCACGGTGG-ACGCGGCTACTGGCGTATCACGCTCTG-TCACCCACGGAGGGGGGGTGTGGTAGGAACGGTCCAGCGAAAAGGGCCTCGTGGGTGGGGGCTAGGGGGCATCGGCTATCCGCGAGGGACGGAGGCGACGCGCGCGGGATCGACACCAGCGAAGGAGCGTCGACGCGCTGCCGCAGTG-----GGTGAGGGCGTTGAGGTGTTCCGCGGCAGGGATGGGGTC-TCGTCAGAGACCGGCAG-ATAATGCAGTGGGCCGACATCGACGATGGGGCGTAATCTGGCGCGCTACCACAACACACGCGTTTGCGGCACCTCCAACGGGGACCTTCGTGCCGACCGGGAGTA-----GTGTTTAAGACAGGATTGTCCGCGGAGAAGTCCGCAAGGTCAACTGGGGAACCGCGGTGTGGAACGCCCCGCGGCATAGCGGGTAGCCGCGTCGCCTGAATTGGCGGCTGAGTAGCTGCCTGCTAGGCATGTCGCGGAAATCGGCAGGGT-AGTTGGGTGCCAGAACCGGAAACGGCNGGCCCCATACATCACCGGCTTTACACTGCGCCGAGGACACCCCATTCCTGCGCGGTCTGGTCAGGCATGTTACACATACCCTATCTTTCATGCGTGCATTCTTAACTGTCCGTACGCGTCCCCCGCTGCCGCCGGCTGAACGCCCACGTCCCC-GCAC--TGAGTCGGCAGGCCGTCTGAG-ACCCGGGGCAATG-GGGAATGGACCACGTCGGCGCGGCGGCCGTGGCCGGGACGGCGTCACGTTTAAGCCCTCGTTCACCTCAACATCCCCGACGAAGGCCTTGACCCCACCTCCCCAGGGGGAACAGGCAAGATGCGCG-AAGTAGGGTA--CACTAAGTGGAGGCACCCCGGGATACTGAACACGTGAGTGTGGGCGGGGGTGTTCATCCGGTGAGGTGTCGGCTGGCCCGCTTGGACATGACCTCGCGGGGGGGATGGTGAC-TTCCTGGGGTATGCGCACTGGGGTGAGGACGAACGACCGACCCCACTTTGAGAGGTGGGGTGACA----CAAGTCGACTCTGGGGGGCGGTCAGTTAGAACTAGCTAGACGGTTACTGCCTCTACACCCGCACAAGCCGATCCCCTCACGCTGAGATGCCCGGCCCTAAAGACCCGACGCTCCGTGAGCTCTTTGCCAAGGGTCCCG----TCCGCCCAAGTCTACTCCTCGTGTAAGGCAAGAGGGAGATGCGCTCGGGGGACTTGCATCTGTGTCCCCGGGGAAGGGCGTGACCGTGCGATGGTTGCGCCTGCGGTCCCGAAAATGGGGTCGCTGCACTGGGGGTGTTACTGCACGCGCAGAACACTCTTACTACCGGCCCGAGAGCGCGAGAGGTCCGCCAAGTTCCGAGCCCACCCGGCAAGCCCGCCCCATCACGTGCTCCCACTGCGCGGCGCCACAGTTGTCCAGAGGCCAGGGTCTCCGGCCCCCGCGCATCTACGTTGCATCGACCGAACGGCCCTAAACGCGCAGGGGGCGTGTCCCTCCCCGACGTGCCCGCATAAGCCGACCCTCGATGGGC--TGT-ATGCGCAGAGAGGCGTGGGGCGGAGAAAGGTTTTTAATGCTGCTCCGGGGGGGCTCGCCCGCGGTGGCGGCCATGTCGGCACGGGATTGCCTATGGCC--GAGCTTGATTTAGTATCCAGCTGGCCCAATGCCCAACTCCCGGGGTGCTACCACCGGCCGGGTCAACGATCCGTACCGGTGCGGAAGAACCTAAGGGCTCCTGCATCGTCGCTGCGGACCTTAGCGGTCTACCCCCCTCGCCCGCACGCGTTCTATCATAGCGCGCGTTTCGTTCCCCCTTTGCGGGGCGAAGGGGGCCCGTGCGAGCCTTCCACT-CCGCGCCCTTGCCGCTCCCAGGGCTTTCTCGAC-ACACATGTA-GGACAGACTCGCCTACGGGCGGCGTCGGTCCGTGGGGGTCGCAGCCGAGGGGTGCACCCGCACCGGAGAGCATTGCCTTTCCCATCCTCTTTCCGCGGCCGCCGACCGCGAGGCGTACCGCCT---GATTTCTATTAG-TG-AGCCCCAGTATGGCTCGTGTCGCGGTCACC---TGCGGCCCGAAGTGTAAGGGGAATGCCGGCCTGATTGACGCATCCGCTCAAGTTTTTTGGGTCCGCG-GCCCCGTCCCGCTGCCGTGTGCGAAGAGGCGTTTGCGCGCGCCAGTCGCTGCCGTTTCGAACCGTGCCCCGCGCCTCAC-----NNCTACCTGNG-TAG-GGCCGGCCCCCCCGCCACCCGCCACGCCCCCCATCCGCACGCGGTTCTCGCCGCCTGAGGTTGTAGGCCATGCTCCCGGTTATCCAAGAACTCACGATCGGCGGAACCTTGAG-ATC-GCCTCTTCTGCCGGCGCAACCCCCGCAGGGGATCAAATTGCGACGCCTGGCAGCACAGCGCGTCTGACTCGGAGGAGACGAGGAGACGACACACCTGACTG--TGATCCACTCGCGGGCGGTGTCTCGCGGGACCTGGGGGCGACCGACCGCGGGATGATGCGCAGGGGGATTTGGGGCGGGTGGAGGTACGACATGGCCCATGGAAGCCCCGGGGAAAGGGCCGCGTCCGGGCGTAGTTGCCGGGAAGAAGAACT-TGGCCAAGGTCCCCGCCCCAGTCCCGTTGCGCACCCGGACCCCGTCTCCCACTCCGCAGTGCCCGTTGCCGGGACCCTGA---GNNNNNGTCGCCAGTCAGGATCCGGAAGCATGTTGGGTGCGACCCTCCCGCACCCTGCNNN-TGAGGTTTT-GGTTATGATGCGGTCGC---AGGGGGGAACCCCACAGTTCACGATAGACCGTA-CGG--GGTCTAGTCTCAGAGGCGGGGAA--CCCGGGAGCCAGGCTAGTC-GCGCCGGGTGCTCGGGTGTGTGTA-ACGGAGGACGATGCGCCGGGATTAGTAGCTACCAGATCTCGCCGTACCAACCC-CCGGGCCCCAGATACGCGCCACCTCGGGCACGCCACCATGTGTATCGGTGGCACCCTATAAAATCTGCTGG----CTACACCTCTCGCCCCGCTCCTCCCGCAGGACCTTCTGACAACCTTCCCCTCTGCTGGCAAGGGCCGGANNCTTAGCAAGGTGGCGCGCGAGATTTAC-TAGATCGGCTTCTAGCTAC-TGGACACGGCTGT--CAGACACCACCTCGAACCACTATTGATGGCCCCGCTGGCTTAGTCCCTCCGGAGTCACCTTGCTCTGCCCCCCTCAAGTGATGACAGGCGCGTTACCCGGCC-CGAGACGCTGTGCGGAGAGTGATGATCGCGGGCGTGCAACCCCGCCCAGC-----ACGACCAACAGTCTGTCCTATGTAGACAAACCCGGAGCCAGAA-ATCGCGGCCCCCTGG-CCCTCCCGTCGATTTGGGCGGACCCGAGAGGCCTG---GTGAGGAGTGGCCTCAGTGACTCTGCGTTG-------TACCGCAGTCCACCCTGGGATCCATTCGGTTCCCGGGCTTCCCTAT-TTACCAGACACCAAAACTGACGGCAGCGCTGGAGCCGTTTCGGAAGGGG-CAC-AACGACGCGAAGCTGATAGATGGGCAGGTAGGTTACGAGTAGCATCATGACCCGTTAGCCATGACACCGGCAGGTGGATTCCACCGCGGACGATCCAACCAGAAGTTCCCGGTATCCGCGTGGATTTGGGAAAGGCAGCAGGANGCACCNNNNNNAAGTACGGCGGGCGGTGCTACGCTGAGCGCT-C-GTTGGGTA-ATACCGTACAACACACAGGAGGACGGTCAGCTAGTGCTGACGGGTAGGTT-ACTCGCTGGGTGACAGGTGTG-GGGGAGAGAGGGGCAGAGCAGATCCGTTACCGTATGCTGGGGTTGTGGCGCCCCTCTCAGACATAGATTG-GGGGATTGGGACGGAGCCGCGACGCGA-TACGTA--GCTCT-CCCCTCACCGAAATAAG-GTGTCCCTCCAGCC-ACAGCCTTATCCCCGGCAATGCGAGTGCAATAGTATAAGCAGCAGATCTC-CATTCACGGA-GCTAAATTCCTTGTCGAG-TACTTGCATGGCCCACCCTCCTCCGTGTCTC-ATTTGACT--G-AAGATATTGGGCCTTGGTGGGGCTCTGAGCTGGTGAACCACCGTAGGCTGTTAGTAGGTCCCCGCCCA---TGCCGGGTTTGGCTNNNNNNNNNNNNNNNNNNNNNNNAGGCGTA-ATGT---GGAGATCGGCC--GTAAT-CNNNNNNNNNNNNNNNNNN---T
>IA7122-Poultry-ST302
CACGCCTACCTCTCCCCGATATGCGGACCCCGTATCGACAGGCCGCCCCGTGGTAAATATGTTCTGGACACTTCCACCACTTCTCCTAATCTGCATCACCGGCAAGAAAGCGTAGGGACCCGGCCGGTGCCTTGGCGATCATTGAACTCGCT--------CTCACCACGCCGAAATTAGGACCCCCCGGCGGCTCGCCTCACGGTAGAACAGGTCCCACATTCCGTCAACCAGCTGGGCTCACCCGCTGCTCTTTGTCCGCGCCCCAGGGCCCCGGTGACGACTTCCACCTCTCGGATAGCCCCCCAGCCCACGACCAGCCCGCCTCGTCGTCCCGAGACCTCCC----ACCCGTACCCGTAAGTGCCATCCCGAGTTCCTCTCCATAGCACGCAGCCAACCTGCCCGGCCCACCTTTACCCGGCTCGCGCACTCCCAACCAGTGACCCCGCCGGTGGTCTGGGGTCAGGCAGCGCAGACGCCTTGCGCGGGGCACTCGACGTGTAATGCGCCGCGGGGTCACCCAGCAGCGCGGGGCGTCGCCGGGGGTCCCCTGCAAATGGGGAATGGGGGGGGCTCATGGGCCTAGTGTTGATCGTCCCCGCTGAAACTGTGATTAGCAGGGTGGTGTGCAATTCCACGCGGCTATAGGGCCTAG---TCGCGTAATTCAGAGACTCGCGCCTGCCAGGGAAGACGGCAAGATAGCGTCGGCCTTCTCCGGGAGGTCCCGCGTGCTGGGGCTCTTTTGAGCCGCAGGATGGGGACGGTCCCACTGCGGGGACCTCCCTTTCACCGAGCTTGACCGGGGCCGAACGGCACATGGAACGGCTCGAGGGGCAGTAGGCTTCGTCTTGTCTGCACCTCACTCACTTCCCCCTGGCCTTTGAACGGTGATTAAGCTATACTCACTTTCAGCGATCACTGCCCACGCGTCGACCTCCGTGTGTCACTCCGGACCCCCAGAAGTGCTGCACTTTGGCTACGGCCAGGCGACTGCCCCCTGCGGGTCGGACCTGTTCCGCAGCGACGACACCACTCCTCCTAACCCCCCCTCATTCCCCTCACACGAGCGTCAGGGCGTAGACTTCCACACCTTGGCCCTAGCTGGCTTTGGCCTTCCGGTTCCCCTCTCGTAGGGAAACAATCGGTAGACGTTAGGGCAAGCAGGCGGCGCCTGGGGGGGTGAAGAGAGGGACTTCGCATCGGAGAGCGGACGCCGTGAATGGGCTAGGGAGCTCATCCGTACAGTGGGACCGCGAGGGGGGGGGGGCTGTTGAAGTGAGCGAATAACGCGGGCGTATGTACCCTGTAGCGTTCGGAACGTCGAAAGGGAGGACTCCCTGGTTACGCGCCGAGTACGGGGCGTGGCGGTGCTGGCGGAGCGGGCACCCCAACGTGGCTCATTGTGCCCC-ANNNNNNNNNNC-----ATGTGGATGGCCGGTAGGGACAC--TAC-TTGACCATAGGACTGCCCGCCTCCTTTAGAACGGGCTGTGGGACGGTTGGGCCCCGTCAGCGGTCCGGGCTCAGCCGGTAGAATGGTATGCGGGAAAAACGGGTGATTTCCGCTAGGGAGAGGTAGGCACCGCGTCGACGCGAGCTCCCGGC-G---G-CATCGTGATGAGA--CTGACGCCACTCAACAAGCTCT-CTCGTGTCTGTGTGGTGGGCGATCTACGCCTAACCCGCCGCTCTATATTGCCAGACATCCGCTACCGCGCGGCCCAGCTCCGCCGCGCCACCCAGCTTGTAGCCACCCGT-CACCTCCTGACGACTTACGTGCCCTCGGGTCGCCCCCCTCAAACGGGAGTGCAGAAGTTTTCTCGGTCCCTGCTCGGCTCCGTCT-CGCAAGATCACTC-GGCGCGCGTACGTCCCTCGAGGTTGCCAGATGTCGCGCCAAGGTTCGCCGTGCAGCAGCTGGTTCCTTTGGCGCGTGCCCGGATATCGACCGGTGCCCTGCCTCGTCTTGCTTTCGCCCACTAGACAAACCCGCGGCTGTACTGGAAGACCGCTGAAGGCCACGTCGTGAGACAGTGCTATCGCCAGCTGTTAACGTTGCGCCGGAGCGTCGGCGAGTCTCGACTGGTACCGGTGGTGGTGCCTTCCTTGATTCCGCCACCGAATATAACCTTCGCACGCCTCCCCTGGTGTCATCGACCGCTCCCGCATGCCCCCCATACGACATGCCTGCGGCGTCGCCACTGCCGCGCCGTCGGATAGGGTATATGCCCAAATCCGCCTGAAAGCCGCTGGGCATGCCCGGGTGCTCGCACGTAGGAAGTAGCTACTGCAGGGCCACCATGCCCCAGTGTTTCGGCTGATACACCCCAAAATTCACGCCCTGACTTACTCGCCAGTTTGCCCACACTGTTACAAGCGTCGTACCCTGGTCACGCAGCATGCCGGCATTTCGCGACGCGAAACCGGCCGTGGGCGGTGTCTCGGGCACGCGCGCAAACTGTGCTCCGAGCGGAGGGTCATGGTTCGCCTCAGAGCATCGTACAGATTCAGGGGGCGCAGTTGCGTACACCGCTGCCTCGACACAGCAGGCGGTACGGGACCACTTTGACCCTCT------GCCCCTCAGCAGCGACTCGTCCCTGCTTACCGGCTCTGTTCCCGCGAACGCGTCCGGATGGCTTCTGGGCACACTACCCTGCCGAGACTAGCCCGCGCACCGTAATTGATGGCATGCTCTTGTCACGGCCACGGTGG-ACGCGGCTACTGGCGTGTCACGCTCTGT-TACCCACGGGGGGGGGGGGTGGTAGGAACGGTCCAGCGAAAAGAGCCTCGTGGGTGGGGGCTAGGGGGCAACGGTTGCCCGCGAGGGACGGAGGCGACGCGCGCGGGATCGACGTCAGCTAAGGAGCGTCGACGTGCTGCCGCGTTG-----GTTGTGGGCACTGAGGTGTTCCGCGGCAGGGATGGGGGTCTCGCCAGAGCCCGGCGGCGTAGTGCAGTGGGCCGACATCGACGACGGGGCGTCATCTGGCGCGCTACCATGACACATATGTTTGCGGCACCTCCAACGGGGACTGTTGTGCCTACTGGGAGTAA----GTGTTTAAGACAGGATTGTTCGTGAAGGAGTCCGCAAGGTCAACTGGGGGACCGCAGTGTGGAACGCCTAGCGGCATAGCGGGTAGCCGCGTCGCCTGAACTGGCGGCTGAGTAGCTGCCTGCGAGGCGTGCCGCGGAAATCGGCGGGGTAAGTTGGGTGCCGGAATCGGATAAGGCNGGCCTCATACATCACCGGCTTTACACTACGCCGAGGACACCCCATTCTTGCGCGATCAGGTCAGGCATGCTGCGCATACCCTATGTTTCATGCATGCATTCTTAATTATCCGTATGCGCCCTTCGCTGCCGCCGGCTGAACGCCCACGTCCCCCGCAC--TGAGTCGGCAAGCCGTCCGAGGGCCCGAGGCAATGAGGGAATGGACTACGTCGACGCGGCGACCGTGGCCGGGACGGCGTTACGTTTAAGCCCTCGTTCACCTCAACGTCCCCGACGAAGGCCTTGACCCCACCCCCTCAGGGGAAACAGGCAGGATGCGCGCGAGTAGGGTAG-CACTAAGTGGAGGCACCCCGGGATACCGAACACGTGAGTGTGGGCGGAGGTGTTCATCCGGTGAGGTG-CGGCTGGCCCGCTTGGCCATGGCCTCGCGGGGGGGATGGTGACGTTCATGGGGCATGCGTACTGGGGCGAGGGCGAACGACCGACCCCAATTTGGGAGGTGGGGTGCCA---TCCGGTCGACTCTGGAGGGCGGTCAGTTAGAACCAGCTAGATGGTTGCTGCCTCTGTATCCACACAAGCCGGACCCCTCACGCTGAGATGACCGGCCCTAAAAAGCCGACGCCCCGCGAGCTCTTTGCCAAGGGTCCCGCTTATACACCCAGGTCTACCCCCCGCGCAAGGCAAGAGGGAGATACGCTCGGGGGACTTGCATCTGTGTCACCGAGGATGGGCGTGACCGTGCGATTGTTGCGCCTGTGGCGCCAGAAATGAGGTAGCCGCTCTAATGGTGCCTCTGTACGCGCAGAACACTCTTACTACGGGCCCGAACGCGCGAGAGGTCCGGCACGCCCCGAGTCTACCCGCCAGGTCCGCCACTTCACGTGCTCCCACTTCGCGGCGCCATGGTTGTCCAGAGACCAGGGTTTCCGGGCCCCGCGCATCTACGTTGCATCGACCGAGCGACCCGAACCGCGCAGGAGGCGTGTCCCTCCCCGATGTTCCCACACAAACCGACCCTCGGTGGTCN-TGT-ATGCGGAGAGGGACGTGGGGCGGAGAAAGGTTTTAAATGCTGCTCTGGAAGGGCTCGCCCGCGGTGGCGGCCAGGTCGGCACGGGATTGACTATGGCCTCGAGCTTGATTTAGTATCCAGCCGGCCCAATGCCTAACTTCCGGGGTGCTACCACCGGCCGGGTCAACGGTGCGTGCCGATACGGAAAAACCTAAGGACTCCTGCATCGTTGCTGTGGATCTTAGCAGTCCACCCCCCTCACCCGCTCCCGTTCTATCATAACGCGCGTTTCGGTACCCCTTAGCGGGGCGGAGGGGGCCCGTGCGAGCCTTCCGCTATCGCGCCCTTGCCGCTCCTTGGGCTTCCTCGATTAT-CATGTACGGACAGACTTGACTCCGGGCGTCGTCGGTCCGTGGAGGTCGCAGCCGAGGGGTGCAC-CGCACCGGACAGCTCTGTCTTTCCCGTCCTTTGTCCGCGGCCGCCGACCGTGAGGCGTACCAGCCAAAGATTTCTATTAG-TAGAGCCCCAGTATCGCTCGTGTCGCGGTCACC-NNTGCGGCCCGAAGGGTAAGGAAATTGCCGGCCTGTTTGACGCATCCGCTAAAGTTCTTTGTGTCCGCA-GCCCCGTCCTGCTGCCGTGTGCG-AGAGGCGTCGGTACGCGCCGGCCGCCGCCGTTTCGAACCGCGCTCCATGCCTCGC-------TT-AACATG-TAC-GGCCGGCCCCCCCGCCACCCGCTACGCCTTCCATCCGCACGCGGTCCTTGGCGCCTGAGGTTGTGGGCCATGCTCTCGGTTACCCAAGAACGAACGATCGGCGGAACCCTGAGTATC-GCTCCGTCTGCTGTCGCAACCCGCGCCGGGGATCAAATTGCGGTTACTGACAGCACCGCGCGACCGACTCGGAAGAGACGGGGAGACG-CACACCTGACTGGTTGATCCGCCCGCGGGCGGTGTCTCGCGGGACCAGGGTGCGACCGACCGCGGTATGATGCGCAGGGGGATCTGAGGCGAGCGGAGGTGCGACATGGCCCATGGAAGCCCCGNNNNNNNNNNNNNNNNNNNNNNNNNNNNNNNNNNNNNNNCGCTATGGCCATGGTCCCCGCCCCAGCCCCGCTGCTTACCCGGACCCTGCCTCCCACTCCGCAATGCCCGCTGCCGGGATCCTGAACCAGGTGCGTCGCCAGTCAGGATCCGGCAGCGTGTCGGTTGCGACTCTCCCGCACCCTGCNNNNNNNNNNNNNNNNNNNNNNNNNNNNNNNNNNNNNNNNNNNNNNNNNNNNNNNNNNNNNNNNNNNNNNNNNNNNNNNNNNNCAGAGGCGGGAGAT-ACCGGGAGCAAGGCTAGTCTGCGCCGGGTGCTCGAGTGTGGGTAGNNNNNNNNNNNNNNNNNNNNNCTAACGGTCGCCAGATCTCGTCGTACCAACCCACCGGTCCCCAGAGACGCATCACCTCGAGTGCGCCACCGTGTGTATCGGTTGCACCATGTAAAATCTGCT--GTANCTGCACCTCCCGCCCCGCTCCTCCCACAGGACCTTCTGACAACATTCCCCTCTGCCGGCAAGGGCCGGA-CCTTAGCAAGGAGGCGCACGAAGTCGACCTAGATCGGCTGCTAGCTGCCCGGACACAGCCGC--CGGACACCACCTCGAGCCACTACTGACGACCCCGCTAGCCTAACCCCTCCGGGGTCACCTTGCTCTGCCCCCCTCAAGTGATGACAGGCGCGTTACCTAGCC-CGAGGCGCGGCACGGAGAGTGATGATCGCGGGCGTGCGACCCCGCCCAGC---ACACGACCAACAGTCTGCACTATCTAGACAAAACCGGGGCCAGAAGATCGCGGCCCCCCGGCCCCTCCCGTCGAGGTGAGCGTACCTGAGAGGCC-TCTCGTGAGGAGAGGCCTCAGTGACTCTGTGTTGACAGCACTGCCGCAGTCCACCTTGGGATCTCTCCGATTCCCGGGCTTCCCTAT-TTATCAGACACCAAAACTGACGGCCGCGCTGGTGCCATGTCGGAAGGGA-CACGAACGACGCGAAGTTGATAAATGGGCAGATAGGTTACGAGTAGCACAATGACCCGTTAGCCCGGACACCGATAGATGGATTTCACCGCAGACGATCCAACCAGAGGCTCCCGGTATCCGCGTGGACTCGGGAAGGACAGCCGGGNNNNNNGTGCCTACTGGCGTCGGACGGTGTCACGCTTAGC-----NATTGGGTACAGACTGTACGGCACACAGGAGGACGGTCAGCTAGTGCTGACGGGTAGGTT-ACTCGCTGGGTGACAGATGTGGGGGGAGAGAGGGGCAAAGCAGATCCGTTTCCATGTGATAAGGTAGTGGCGCCCCTCCCAGACACAGATTGAGGGGATTGGGACGGAGCCACGGCGCGA-TATGCAACGCACT-CTCCTCCCCGT-A-----CTTTCCCTCCGGCCGACCGCCTTACCCCCGGCAATGTGAGTGTGATAGCATAAGCAGTAGATCTC-CACTCACGGATGCTGAATTCCTTGTCGAG-TACGTGTACGGCCTGCCCTCTTCCGTGTTCCCATTTGACA--G-AGGACATTAAACNNN-GTGGGGCTATGAGCTGATGATCCACCGTAGACTGTTAGCGGGTCTCCGCCCA---GAGCGGGTTTGGCT------GATGGTTGCCNNNNNN-TA---TA-N-ATTGGGGAGATCGGCCT-GTAGTGAAAGATCCC---CCACNNA----
>Reference
CATGCCTACCCCTCCCCGATATGCGGACCCCGTATCGACAGGCCGCCTCGTGGTAAATATGTTCTGGACACTTCCACCACTTCTCCTAATCTGCATCACCGGAAAGAAAGCGTAGGGACCCGGCCGTTGCCTTGGCGATCATTGAACTCGCTCTCCCACGCTCACCACGCCGAAATTAGGACCCCCCGGCCGCTCGCCTCACGGTAGAACAGGTCCCACATTCCGTCAACCAGCTGGGCTCACCCGCTGCTCTTTGTCCGCGCCCCAGGGCCCCGGTGACGACTTCCACCTCTCGGATAGCCCCCCAGCCCACGACCAGCCCGCCTCGTCGTCCCGAGACCTCCCCAAAAGCCGTACCCGTAAGTGCCATCCCGAGTTCCTCGCCATAGCACGCAGCCAACCTGCCCGGCCCACCTTTACCCGGCTCGCGCACTCCCAACCAGTGACCCCGCCGGTGGTCTGGGGTCAGGCAGCGCAGACGCCTTGCGCGGGGCACTCGACGTGTAATGCGCCGCGGGGTCACCCAGCAGCGCGGGGCGTCGCCGGGGGTCCCCTGCAAATGGGGAATGGGGGGGGCTCATGGGCCTAGTGTTAATCGTCCCCGCTGAAACTGTGATTAGCAGGGTGGTGTGCAATTCCACGCGGCTATAGGGCCTAGAGGTCGCGTAATTCAGAGACTCGCGCCTGCCAGGGAAGACGGCAATATAGCGTCGGCCTTCTCCGGGAGGTCCCGCGTGCTGGGGCTCTTTAGAGCCGCAGGATGGGGACGGTCCCACTGCGGGGACCTCCCTTTCACCGAGCTTGACCGGGGTCGGACGGCACATGGAACGGCTCGAGGGGCAGTAGGCTTCGTCTCGTCTGCACCTCGCTCACTTCCCCCTGGCCTTTGAACGGTGATTAAGCTATACTCACTTTCAGCGATCACTGCCCACGCGTCGACCTCCGTGTGTCACTCCGGACCCCCAGAAGTGTTGCACTTTGGCTACGGCCAGGCGACTACCCCCTGCGGGTCGGACCTGATCCGCAGCGACGACACCATTCCTCCTAACCCCCCCTCATTCCCCTCACACGAGCGTCAGGGCGTGGACTTCCACACCTTGACCCTAGCTGGCTTTGGCCTTCCGATTCCCCTCTCGTAGGGAAGCAATCGGTGGACGTTAGGGCAAGCAGGCGGCGCCTGGGGGGGTGAAGAGAGGGACTTCGCATCGGATAGCGGACGCCGTTAATGGGCTAGGGAGCTCATCCGTACAGTGGGACCGCGAGGGGGGGGGGGCTGTTGAAGTGAGCGAATAACGCGGGCGTATGTACCCTGTAGCGTTCGGAACGTCGAAAGGGAGGACTCCCTGGTTACGCGCCGAGTACGGGGCGTGGCGGTGCTGGCGGAGCGGGCACCCCAACGTGGCTCATTGTGCCCCAGNNNNNNNNNNTTTAGAATGTGGATGGCCGGTAGGGACACTCTACCTTGACCATAGGACTGTCCGCCTCCTTTAGAACGGGCTGTGGGACGGTTGGGCCCCGTCAGCGGTCCGGGCTCAGCCGGTAGAATGGTATGCGGGGAAAACGGGTGATTTCCGCTAGGGAGAGGTAGGCACCGCGTCGACGCGAGCTCCCGGCCGTGCGTCATCGTGATGAGAAACTGACGCCACTCAACAAGCTCTTCTCGTGTCTGTGTGGTGGGCGAACTACGCCTAACCCGCCGCTCTATATTGCCAGACATCCGCTACCGCGCGGCCCAGCTCCGCCGCGCCACCCAGCTTGTAGCCACCCGTACACCTCCTGACGACTTATGTGCCCTCGGGTCGCCCCCCTCAAACGGGAGTGCAGAAGTTTTCTCGGTCCCTGCTCGGCTCCGTCTACGCAAGATCACTCGGGCGCGCGTACGTCCCTCGAGGGTGCCAGATGTCGCGCCAAGGTTCGCCGTGCAGCAGCTGGTTCCTTTGGCGCGTGCCCGGATATCGACCCGTGCCCTGCCTCGTCTTGCTTCCGCCCACTAGACAAACCCGCGACTGTACTGGAAGACCGCTGAAGGCCACGTCGTGAGACAGTGCTATCGCCAGCTGTTAACGTTGCGCCGGAGCGCCGGCGAGTCTCGACTGGTACCGGTGGTGGTGCCTTCCTTGATTCCGCCACCGAATATAACCTTCGCACGCCTCCCCTGGTGTCATCGACCGCTCCCGCATGCCCCCCATACGACATGCCTGCGGCGTCGCCACTGCCGCGCCGTCGGATAGGGTATACGCCCAAACCCGCCTGAAAGCCGCTGGGCATGCCCGGGTGCTCGCACGTAGGAAGTAGCTGCTGCAGGGCCACCATGCCCCAGTGTTTCGGCTGATACACCCCAAAATTCACGCCCTGACTTACTCGCCAGTTTGCCCACACTGTTACAAGCGTCGTACCCTGGTCACGCAGCATGCCGGCATTTCGCGACGCGGAACCGGCCGTGGGCGGTGTCTCGGGCACGCGCGCAAACTGTGCCCCGAGCGGAGGGTCATGGTTCGCCTCAGAGCATCGTACAGATTCAGGGGGCGCAGTTGCGTACACCGCTGCCTCGACACAGCAGGCGGTACGGGACCACTTTGACCCTCTTAATTTGCCCCTCAGCAGCGACTCGTCCCTGCTTACCGGCTCTGTTCCCGCGAACGCGTCCGGATGGCTTCTGGGCACACTACCCTGCCGGGACTAGCCCGCGCACCGTAATTGATGGCATGCTCTTGTCACGGCCACGGTGGCACGCGGCTACTGGCGTGTCACGCTCTGTTTACCCACGGGGGGGGGGGGTGGTAGGAACGGTCCAGCGAAAAGAGCCTCGTGGGTGGGGGCTAGGGGGCAACGGTTGCCCGCGAGGGACGGAGGCGACGCGCGCGGGATCGACGTCAGCTAAGGAGCGTCGACGTGCTGCCGCGGTGGCCGAGTTGTGGGCACTGAGGTGTTCCGCGGCAGGGATGGGGGTCTCGCCAGAGACCGGCGGCGTAGTGCAGTGGGCCGACATCGACGACGGGGCGTCATCTGGCGCGCTACCACGACACATATGTTTGCGGCACCTCCAACGGGGACTGTTGTGCCTACTGGGAGTAAAGGTGTGTTTAAGACAGGATTGTTCGTGAAGGAGTCCGCAAGGTCAACTGGGGGACCGCGGTGTGGAACGCCTAGCGGCATAGCGGGTAGCCGCGTCGCCTGAACTGGCGGCTGAGTAGCTGCCTGCGAGGCGTGCCGCGGAAATCGGCGGGGTAAGTTGGGTGCCGGAATTGGATACGGCNGGCCTCATACATCACCGGCTTTACACTACGCCGAGGACACCCCATTCTTGCGCGATCAGGTCAGGCATGCTGCGCATACCCTATGTTTCATGCATGCATTCTTAATTATCCGTATGCGCCCTCCGCTGCCGCCGGCTGAACGCCCACGTCCCCCGCACTATGAGTCGGCAAGCCGTCCGAGGGCCCGAGGCAATGAGGGAATGGACTACGTCGACGCGGCGACCGTGGCCGGTACGGCGTTACGTTTAAGCCCTCGTTCACCTCAACGTCCCCGACGAAGGCCTTGACCCCACCCCCTCAGGGGAAACAGGCAGGATGCGCGCGAGTAGGGTAGACACTAAGTGGAGGCACCCCGGGATACCGAACACGTGAGTGTGGGCGGAGGTGTTCATCCGGTGAGGTGTCGGCTGGCCCGCTTGGACATGGCCTCGCGGGGGGGATGGTGACGTTCATGGGGCATGCGTACTGGGGCGAGGGTGAACGACCGACCCCAATTTGGGAGGTGAGGTGCCATTCTCCGGTCGACTCTGGAGGGCGGTCAGTTAGAACCAGCTAGATGGTTGCTGCCTCTGTATCCACACAAGCCGGACCCCTCACGCTGAGATGCCCGGCCCTAAAAAGCCGACGCCCCGCGAGTTCTTTTCCAAGGGTCCCGCTTATACACCCAGGTCTACCCCCCGCGCAAGGCAAGAGGGAGATGCGCTCGGGGGACTTGCATCTGTGTCACCGAGGATGGGCGTGACCGTGCGATTGTTGCGCCTGCGGCGCCAGAAATGAGGTCGCCGCTCTAATGGTGCCTCTGTACGCGCAGAACACTCTTACTACGGGCCCGAACGCGCGAGAGGTCCGGCACGCCCCGAGCCTACCCGCCAGGTCCGCCACTTCACGTGCTCCCACTTCGCGGCGCCATGGTTGTCCAGAGACCAGGGTTTCCGGGCCCTGCGCATCTACGTTGCATCGACCGAGCGACCCGAACCGCGCAGGAGGCGTGTCCCTCCCCGATGTTCCCACACAAACCGGCCCTCGGTGGTCNATGTTATGCGGAGGGGGACGTGGGGCGGAGAAAGGTTTTAAATGCTGCTCTGGGAGGGCTCGCCCGCGGTGGCGGCCATGTCGGCACGGGATTGACTATGGCCTCGAGCTTGATTTAGTATCCAGCCGGCCCAATGCCCAACTCCCGGGTTGCTACCACCGGCCGGGTCAACGGTGCGTGCCGGTACGGAAAAACCTAAGGACTCCTGCATCGTTGCTGTGGATCTTAGCAGTCCACCCCCCTCACCCGCTCCCGTTCTATCATAACGCGCGTTTCGGTACCCCTTAGCGGGGCGGAGGGGGCCCGTGCGAGCCTTCCGCTATCGCGCCCTTGCCGCTCCTTGGGCTTCCTCGATTATACATGTACGGACAGACTTGACTACGGGCGTCGTCGGTCCGTGGAGGTCGCAGCCGAGGGGTGCACCCGCACCGGACAGCTCTGTCTTTCCCGTCCTTTGTCCGCGGCCGCCGACCGCGAGGCGTACCAGCCAAAGATTTCTATTAGATAGAGCCCCAGTATCGCTCGTGTCGCGGTCACCATCTGCGGCCCGAAGGGTAAGGGAAATGCCGGCCTGTTTGACGCATCCGCTAAAGTTCTTTGTGTCCGCGGGCCCCGTCCTGCTGCCGTGTGCGAAGAGGCGTCGGTACGCGCCGGCCGCCGCCGTTTCGAACCGCGCTCCATGCCTCGCAGGTGAGTTGAACACGCTACGGGCCGGCCCCCCCGCCACCCGCTACGCCTTCCATCCGCACGCGGTCCTTGGCGCCTGAGGTGGTGGGCCATGCTCTCGGTTACCCAAGAACGAACGATCGGCGGAACCCTGAGTATCGGCTCCTTCTGCTGTCGCAACCCGCGCCGGGGATCAAATTGCGGTTACTGACAGCACCGCGCGACCGACTCGGAAGAGACGGGGAGACGACACACCTTACTAGTTGATCCGCCCGCGGGCGGTGTCTCGCGGGACCAGGGTGCGACCGACCGCGGTATGATGCGCAGGGGGATCTGAGGCGAGCGGAGGTGCGACATGGCCCATGGAAGCCCCGGGGGCAGGGCCACGTCCGGGCGCAGTGGCTGGGAAGAAAAGCTATGGCCATGGTCCCCGCCCCAGCCCCGCTGCGCACCCGGACCCTGCCTCCCACTCCGCAATGCCCGCTGCCGGGATCCTGAACCAGGTGCGTCGCCAGTCAGGATCCGGCAGCGTGTCGGGTGCGACTCTCCCGCACCCTGCNNGGTGAGGTTTTCGGTTATGATGCGGTTGCACACGGAGGGGACCCCATCGTTCGCGATAGACCGTAACGGTTAGCCTAGCCTCAGAGGCGGGAGATTACCGGGAGCAAGGCTAGTCTGCGCCGGGTGCTCGGGTGTGGGTAGACGGAGGACGATGCGCCGGGGCTAACGGCCGCCAGATCTCGTCGTTCCAACCCACCGGTCCCCAGAGACGCATCACCTCGGGTGCGCCACCGTGTGTATCGGTTGCACCATGTAAAATCTGCTTGACGCCTGCACCTCCCGCCCCGCTCCTCCCACAGGACCTTCTGACAACCTTCCCCTCTGCCGGCAAGGGCCGGACCCTTAGCAAGGAGACGCACGAAGTCGTCCTAGATCGGCTGCTAGCTGCCCGGACACAACCGCACCGGACACCACCTCGAGCCACTACTGACGACCCCGCTAGCCTAACCCCTCCGGGGTCACCTTGCTCTGCCCCCCTCAAGTGATGACAGGCGCGTTACCTAGCCTTGAGGCGCGGCACGGAGAGTGATGATCGCGGGCGTGCGACCCCGCCCAGCGTTACACGACCAACAGTCTGCACTATCTAGACAAAACCGGGGCCAGAAGATCGCGGTCCCCCGGCCCCTCCCGTCGAGGTGAGCGGACCTGAAAGGCCATACAGTGAGGAGAGGCCTCAGTGACTCTGTGTTGACAGCACTGCCGCAGTCCACCTTGGGATCTCTCCGATTCCCGGGCTTCCCTATCTTATCAGACACCAAAACTGACGGCCGCGCTGGTGCCATGTCGGAAGGGAACACGAACGACGCGAAGTTGATAAATGGGAAGATAGGTTACGAGTAGCACAATGACCCGTTAGCCCGGACACCGATAGATGGATTTCACCGCAGACGATCCAACCAGAGGCTCCCGGTATCCGCGTGGACTCGGGAAGGACAGCCGGGNATGTTACAAACACTGGCGGCGGACGGTGTCACGCTTAGCATTCTNATTGGGTACAGACTGTACGGCACACAGGAGGACGGTCAGCTAGTGCTGACGGGTAGGTTTACTCGCTGGGTGACAGATGTGGGGGGAGAGAGGGGCAAAGCAGATCCGTTACCATGTGATAGGGTAGTGGCGCCCCTCCCAGACACAGATTGAGGGGATTGGGACGGAGCCACGGCGCGACTATGTAATGCACTGCTCCTCCCCGTAATAAGACTTTCCCTCCGGCCGACCGCCTTACCCCCGGCAACGTGAGTGTGATAGCATAAGCAGTAGATCTCACACTCACGGATGCTGAATTCCTTGTTGAGTTACGTGTACGGCCTGCCCTCCTCCGTGTTCCCATTTGACAATGTAGGACATTAAACNNNGGTGGGGCTATGATCTGATGATCCACCGTAGGCTGTTAGCGGGTCTCCGCCCATTATACCGGGTTTGGCTAAAATAGACGGCTGCCNNNNNNCTAATATACNTATTGGGGAGATCGGCCTGGTAGTTAAAGATCCCGGTCCNNGCNNNNN
