# Supplementary material for: Escherichia coli ST302: Genomic Analysis of Virulence Potential and Antimicrobial Resistance Mediated by Mobile Genetic Elements
Source: Front Microbiol. 2020 Jan 21;10:3098. doi: 10.3389/fmicb.2019.03098 (PMC6985150; doi:10.3389/fmicb.2019.03098)
Supplement: DATA S2 — ST302 SNP analysis. [file Data_Sheet_2.ZIP › SNP_Analysis/ST302_SNP/SNP_analysis/gubbins/filtered_polymorphic_sites.phylip]

15 7022
BA8907-ND-ST302	CACTCCCACCCCTCCCCGGTGGGCTGACCCCGGACCGACAGGCCGCCCATTTGCG-ATATGTTCTGGACAATTCCCCCATTTCCCCTCACCTTCTGCACCGGCAAGCAGGTGTGGGGCCCCGGTCGTTCCCTGGGCGGTTATTGAACTCGCTCTCCCACGCCCCCCACGTCGACACGAGGACCCCCCGGCGGCTTGCTTCGCAGCGGAACGAATCCTACATGCCGCCCACCAGCTGGGCGCACCCGTCTCTCATTGTCCGCGCTCTGGGGCCCCGGTGACGACCTCCGCCCCTCGGATAGCCCCCCAGCCCACGACCAGCCTGCCTCGTCATCCCGAGACTTTCC-GCGGCCCGTACCCGTGAGTGCCATTTCGAGTCCCTCGCCATAACACTCAGCAA…
BA9503-ND-ST302	CACTCCCACCCCTCCCCGGTGGGCTGACCCCGGACCGACAGGCCGCCCATTTGCG-ATATGTTCTGGACAATTCCCCCATTTCCCCTCACCTTCTGCACCGGCAAGCAGGTGTGGGGCCCCGGTCGTTCCCTGGGCGGTTATTGAACTCGCTCTCCCACGCCCCCCACGTCGACACGAGGACCCCCCGGCGGCTTGCTTCGCAGCGGAACGAATCCTACATGCCGCCCACCAGCTGGGCGCACCCGTCTCTCATTGTCCGCGCTCTGGGGCCCCGGTGACGACCTCCGCCCCTCGGATAGCCCCCCAGCCCACGACCAGCCTGCCTCGTCATCCCGAGACTTTCC-GCGGCCCGTACCCGTGAGTGCCATTTCGAGTCCCTCGCCATAACACTCAGCAA…
CA0191-ND-ST302	CACGCCTACCCCTCCCCGAGGTACGGACCCCGTACCGACAGGCCGCCCAGTGGCAAATCTGTTCTGGACACTTCCACCCCTTCTCTTCACCTGTATCACCAGCAAGAAGGCGTATGGACTAAGCCGTTGCCAGGGCGATCTTTGAACTCACTCTCCCACGCTCACCATGCGGAAATTAGGACCTCCCGGCGGCTCGCCTCACGACAAAACGGGTCCCACATGCCGTTCACCAGCTGAGTTCACCCTCTGCACTTTGTTCGCGCCCCGGGGCCTCGGTAACGACCTCTACCCCTCGGATGGCCCCCCAGCCCACGACCAGCCCGCCTCGTCATCCCGAGGCCTCCTCAAAAGCCGTACCCGTGAGTGCCATCTCGGGTTCCTCGCCATAGCACGCAGCCA…
CA0229-ND-ST302	CACGCCTACCCCTCCCCGATGTGCGGACCCCGTACCGACAGGCCGCCCAGTGGCAAACATGTTCTGGATACTTCCACCCCTTCTCCTCTCCTGCATCACCGGCAAAAAGGCGTATGGACCCGGCCGTTGCCTGGACGATCATTGAACTCGCTCTCCCACGCTCACCACGCCGAATTTAGGACACTTCGGCGGCTCGCCTCACGGCAGAACGGGTCCCACACGCCGTCCACCAGCTGGGCTCACCCTCTGCACTTTGTCCGCGCCCCGGGGCCCCGGTGACGACCTCCACCCCTCGGATAGCCCCCCAGCCCACGACCAGCCCGCCTCGTTATCCCGAGATCTCCCNNNNNNCCGTACCCGTGAGTGCCATCTCGAGTTCCTCGCCATAGCACGCAGCCA…
EA1682-Poultry-ST302	CACGCCTACCCCTCCCCGATGTGCGGACCCCGTACTGACAGGCCGCCCAGTGGCAAACATGTTCTGGACACTTCCACCCCTTCTCCTCTCCTGCATCACCGGCAAGAAGGCGTATGGACCCGGCTGTTGCCTGGGCGATCATTGAACTCGC---------CTCACCACGCCGAATTTAGGACCCCCTGGCGGCTCGCCTCACGGCAGAACGGGTCCCACATGCCGTCCACCAGCTGGGCTCACCCT---CACTTTGTCCGCGCCCCGGGGCCCCG-TGACGACCTCCATCCCTCGGATAGCCCCCCAGCCCACGACCAGCCCGCCTCGTCATCCCGAGACCTCCCTNNNNNCCGTACCCGTGAGTGC-ATCTCGAGTTCCTCGCCATAGCACGCAGCCA…
EA2455-Poultry-ST302	CATGCCTACCCCTCCCCGATATGCGGACCCCGTATCGACAGGCCGCCTCGTGGTAAATATGTTCTGGACACTTCCACCACTTCTCCTAATCTGCATCACCGGAAAGAAAGCGTAGGGACCCGGCCGTTGCCTTGGCGATCATTGAACTCGCT-------GCTCACCACGCCGAAATTAGGACCCCCCGGCCGCTCGCCTCACGGTAGAACAGGTCCCACATTCCGTCAACCAGCTGGGCTCACCCGCTGCTCTTTGTCCGCGCCCCAGGGCCCCGGTGACGACTTCCACCTCTCGGATAGCCCCCCAGCCCACGACCAGCCCGCCTCGTCGTCCCGAGACCTCCCCAAAAGCCGTACCCGTAAGTGCCATCCCGAGTTCCTCGCCATAGCACGCAGCCA…
EA8393-Porcine-ST302	TACGCCCACCCCTCCCCGATGGGCGGACCTTAGACCGTCAGGCCGCCCAGTTGCACGTATTTGCTGGCCAATTACCCTATGTCCCCTCACCTTCATCACCGACAAGAAGGTGTGGGGACCCGGTCGTTGCCTGGGTTGTTATTGAACTCGCT-------GCTCACCGCGTCGACATTAGGGCCCCCCGGCGGCTCGCCTCGCAGCGGAGCGAGTCCCACATGCCGCCCACCATCTGGGCTCACCCGCCGCTCTTTGTCCGCACTTCGGGGCCCCTGTGCCGACCTCCGCCCCTCGGACAACCCCCCAGCCCTCGATCAGCCTGCCTCGTCATCCCGAGACCTCCCCAAAAGCTGTACCCGTGAGTGCCATCTCGATTCCCTCGCCAAAGTACGCGGCCA…
F2_18C-Porcine-ST302	CACGCCCACTCCTCCCCGGTGGGCGGACCCCGGACCGACAGGCTGTCCAGTTGCA-ATATGCTCTGGACAATTCCCCCATTTCCACTCACCTTCATCACAGGCAAGCAGATGTGGGGCCCCGGTCGTCGCCTGGGCGGTTATTGAACTCGCTCTCCCACGCTCACCACGTCGACATTGGGACCCCCCGGCGGCGTGCTTTGAAGCGGGACGAACCCCACATGCCGCCCACTAGCTGGGCTCCCCCGTCGCTCTCTGTCCCTGCTCCGGGGTCCCGGTGATGAACTCCGCCCCGCGGATAGCCCCCCATCCCACGACTAGTCTGCCTCGTCATCCCGAGACCTCCCCAAAAGCCGTACCCTTGAGTGCCGTCTTGAGTCCACCGCCATAACACGCAGCAA…
FA0416-Human-ST302	CGCGACCGACCCTCACTTATGGGTGAACTCCGGACCGATAGGCCTCCCAGGGACACATACGTTCTGTACAAAGCTCTCATTACCCCCCACTAGCATAGCCGGCGTGATGGCAGGGAAATCCGGCCGTTGATTGAGCGGCCAACACCCCCGCCTCCTCGTATTAACTACTCCGGAATTAAGATCCCCCGGCGGTTCATCCCACGGCGGAACGAGTTCCCCATGCAGCCCGTCAGTGAGGCTTATCTGCCGTTTTTTGTCTGCGTCCCGTAGCTCTGGTGACGCCCTACGCCCCTTAGA---TTTTTTAGTTCATACCCGTCTCGTCTCAGCATCCTGGAACCGCACCAAAAGTCGCGCCAGCGAGCGCCACCTCAAGCCTCTTGTCATGGCATGTAATCA…
FA5537-ND-ST302	CGCGCTCACCCCCGCTCGATGGGCGGATCCCGGCCCAACATATCGCACAGTGGCACATATGTTCGCGACAATGCCCCCATTTTCCCTCACCTGCATCATCGGCGAGAAGGCGTGGGGACCCGACCGTTGCCTGGGCGGCCATTGAACCCGTTCTCCCACGCTCATCACGCCGAAATTAGTACCCCCCAATGACTCGCCTCACGGCGGAACGAGTCACCTCTGTCACCCACCCGCTGGACTCACACGCCGCTCTTTGACCGCGCCCCGGGACCCCGGTGACAACCCCCGCCCTTCGAATAGCCCCCCTGTCTACGACCGGCCCACTGTGTCATTACAAGACCTCCCCAAAAGCCATATTCGTGAGCGCTATCTCGAGCCCCTCGCTATAGCTCGCAGCCC…
IA1186-Poultry-ST302	CGCGACCGACCCTCACTTATGGGTGAACTCCGGACCGATAGGCCTCCCAGGGACACATACGTTCTGTACGAAGCTCTCATTACCCCCCACTAGCATAGCCGGCGTGATGGCAGGGAAATCCGGCCGTTGATTGAGCG----ACACCCCCGC---------TTAACTACTCCGGAATTAAGATCCCCCGGCGGTTCATCCCACGGCGGAACGAGTTCCCCATGC-GCCCGTCAGTGAGGCTTAT--G---TTTTTTGTCTGCGTCCCGTAGCTCTGGAGACGCCCTACGCCCCTTAGA---TTT-TTAGTTCATACCCGTCTCGTCTCAGCATCCTGGAACCGCACCAAAAGTCGCGCCAGCGAGCGC-ACCTCAAGCCTCTTGTCCTGGCATGTAATCA…
IA1729-Canine-ST302	CACGCCCACCCCTCCCCGATGGGCGGGCCTTAGACCGTCAGGCCGCCCAGTTGCACGTATTTGATGGACAATTACCCTATGTCCCCTCACCTTCATCACCGACAAGAAGGTGTGGGGACCCGGTCTTTGCCTGGGTTGTTATTGAATTTGCTCTTCTACGCTCACCGCGTCTACATTAGGGCCCCCCGGCGGCTCGCCTCGCAGCGGAGCGAGTCCCACATGCCGCCCACCAGCTGGGCTCACCCGCCGCTCTTGTTCCGCGCTTCGGGGCCCCTTTGACGACCTCCGCTCCTCGGT---CCCCCCAGCCCACGATCAGCCTGCCTCGTCACCCCGAGACCTCCCCAAAAGCCGTACCCGTGAGTGCCATCTCGATTCCCTCGCCAAAGTACGCGGCCA…
IA4731-Poultry-ST302	CACGCCTACCCTTCCCCGATGTGCGGACCCCGTACCGACCGGCCGCCCAGTGGCAAACATGTTCTGGACACTTCCACCCCTTCTCCTCTCCTGCATCACCGGCAAGAAGGCGTATGGACCCGGCCGTTGCCTG-GCG-TCATTGAACTCGCTCTC-----CTCACCACGCCGAATTTAGGACCCCCCGGCGGCTCGCCTCACGGCAGAATGGGTCCCACATGCCGTCCACCAGCTGGGCTCACCCTCTGCACTTTGTCCGCGCCCCGGGGCCCCG-TGACGACCTCCACCCCTCGGATAGCCCCCCAGCCCACGACCAGCCCGCCTCGTCATCCCGAGACCTCCCTNNNNNCCGTACCCGTGGATATCATCTCGAGTTCCTCGCCATAGCACGCAGCCA…
IA7122-Poultry-ST302	CACGCCTACCTCTCCCCGATATGCGGACCCCGTATCGACAGGCCGCCCCGTGGTAAATATGTTCTGGACACTTCCACCACTTCTCCTAATCTGCATCACCGGCAAGAAAGCGTAGGGACCCGGCCGGTGCCTTGGCGATCATTGAACTCGCT--------CTCACCACGCCGAAATTAGGACCCCCCGGCGGCTCGCCTCACGGTAGAACAGGTCCCACATTCCGTCAACCAGCTGGGCTCACCCGCTGCTCTTTGTCCGCGCCCCAGGGCCCCGGTGACGACTTCCACCTCTCGGATAGCCCCCCAGCCCACGACCAGCCCGCCTCGTCGTCCCGAGACCTCCC----ACCCGTACCCGTAAGTGCCATCCCGAGTTCCTCTCCATAGCACGCAGCCA…
Reference	CATGCCTACCCCTCCCCGATATGCGGACCCCGTATCGACAGGCCGCCTCGTGGTAAATATGTTCTGGACACTTCCACCACTTCTCCTAATCTGCATCACCGGAAAGAAAGCGTAGGGACCCGGCCGTTGCCTTGGCGATCATTGAACTCGCTCTCCCACGCTCACCACGCCGAAATTAGGACCCCCCGGCCGCTCGCCTCACGGTAGAACAGGTCCCACATTCCGTCAACCAGCTGGGCTCACCCGCTGCTCTTTGTCCGCGCCCCAGGGCCCCGGTGACGACTTCCACCTCTCGGATAGCCCCCCAGCCCACGACCAGCCCGCCTCGTCGTCCCGAGACCTCCCCAAAAGCCGTACCCGTAAGTGCCATCCCGAGTTCCTCGCCATAGCACGCAGCCA…
