# Supplementary material for: Escherichia coli ST302: Genomic Analysis of Virulence Potential and Antimicrobial Resistance Mediated by Mobile Genetic Elements
Source: Front Microbiol. 2020 Jan 21;10:3098. doi: 10.3389/fmicb.2019.03098 (PMC6985150; doi:10.3389/fmicb.2019.03098)
Supplement: DATA S2 — ST302 SNP analysis. [file Data_Sheet_2.ZIP › SNP_Analysis/ST302_SNP/SNP_analysis/gubbins/node_labelled.final_tree.tre]

((((IA7122-Poultry-ST302:80.645737,(EA2455-Poultry-ST302:1.734113,Reference:13.743834)internal_20:40.982029)internal_19:492.304474,(((EA1682-Poultry-ST302:173.565964,IA4731-Poultry-ST302:174.520676)internal_23:28.358120,CA0229-ND-ST302:212.979187)internal_22:44.878876,CA0191-ND-ST302:596.419800)internal_21:162.797897)internal_18:361.149567,((EA8393-Porcine-ST302:121.506302,IA1729-Canine-ST302:207.934906)internal_25:583.759094,(F2_18C-Porcine-ST302:583.438965,(BA8907-ND-ST302:2.242382,BA9503-ND-ST302:0.007022)internal_27:566.539734)internal_26:268.285522)internal_24:166.709702)internal_17:0.007022,((FA0416-Human-ST302:18.834442,IA1186-Poultry-ST302:19.769747)internal_16:2955.524902,FA5537-ND-ST302:1421.984985)internal_28:0.000000)internal_ROOT:0.000000;
