# Supplementary material for: Escherichia coli ST302: Genomic Analysis of Virulence Potential and Antimicrobial Resistance Mediated by Mobile Genetic Elements
Source: Front Microbiol. 2020 Jan 21;10:3098. doi: 10.3389/fmicb.2019.03098 (PMC6985150; doi:10.3389/fmicb.2019.03098)
Supplement: DATA S2 — ST302 SNP analysis. [file Data_Sheet_2.ZIP › SNP_Analysis/ST302_SNP/SNP_analysis/gubbins/per_branch_statistics.csv]

Node	Total SNPs	Num of SNPs inside recombinations	Num of SNPs outside recombinations	Num of Recombination Blocks	Bases in Recombinations	r/m	rho/theta	Genome Length	Bases in Clonal Frame
BA8907-ND-ST302	0	0	0	0	938806	0.000000	0.000000	4690286	3805816
BA9503-ND-ST302	23	12	11	2	938806	1.090909	0.181818	4690654	3806255
CA0191-ND-ST302	1534	917	617	18	486509	1.486224	0.029173	4901305	4476810
CA0229-ND-ST302	1331	1077	254	8	425320	4.240158	0.031496	4926455	4501854
EA1682-Poultry-ST302	0	0	0	0	425315	0.000000	0.000000	4945744	4522499
EA2455-Poultry-ST302	0	0	0	0	338484	0.000000	0.000000	5312525	4974145
EA8393-Porcine-ST302	0	0	0	0	972335	0.000000	0.000000	4552116	3652120
F2_18C-Porcine-ST302	0	0	0	0	904411	0.000000	0.000000	4681788	3835183
FA0416-Human-ST302	0	0	0	0	568592	0.000000	0.000000	4556943	4026049
FA5537-ND-ST302	0	0	0	0	500071	0.000000	0.000000	4830146	4331618
IA1186-Poultry-ST302	323	258	65	10	568592	3.969231	0.153846	4450244	3919548
IA1729-Canine-ST302	377	39	338	4	973774	0.115385	0.011834	4665008	3771685
IA4731-Poultry-ST302	1612	1286	326	14	459348	3.944785	0.042945	5007403	4583435
IA7122-Poultry-ST302	3177	3047	130	24	458013	23.438461	0.184615	5124639	4786638
Reference	97	78	19	4	350692	4.105263	0.210526	5341018	5002499
internal_20	1	0	1	0	338484	0.000000	0.000000	5341018	5002499
internal_19	3206	2545	661	28	338484	3.850227	0.042360	5341018	5036564
internal_23	548	371	177	6	425315	2.096045	0.033898	5062499	4638200
internal_22	529	480	49	12	425315	9.795918	0.244898	5089210	4664578
internal_21	1711	1598	113	24	425283	14.141593	0.212389	5112632	4808389
internal_18	1176	950	226	27	304419	4.203540	0.119469	5341018	5084656
internal_25	6202	5051	1151	23	972335	4.388358	0.019983	4752481	3905247
internal_27	5431	4394	1037	16	938806	4.237223	0.015429	4693444	3843028
internal_26	640	448	192	7	904411	2.333333	0.036458	4754158	3903036
internal_24	9154	8186	968	36	900508	8.456612	0.037190	4915050	4658791
internal_17	2191	1803	388	32	256330	4.646907	0.082474	5341018	5341018
internal_16	5074	2265	2809	21	568592	0.806337	0.007476	4586645	4094526
internal_28	4510	3390	1120	31	500071	3.026786	0.027679	4936371	4936371
internal_ROOT	0	0	0	0	0	0.000000	0.000000	5341018	5341018
