# Supplementary material for: Escherichia coli ST302: Genomic Analysis of Virulence Potential and Antimicrobial Resistance Mediated by Mobile Genetic Elements
Source: Front Microbiol. 2020 Jan 21;10:3098. doi: 10.3389/fmicb.2019.03098 (PMC6985150; doi:10.3389/fmicb.2019.03098)
Supplement: DATA S2 — ST302 SNP analysis. [file Data_Sheet_2.ZIP › SNP_Analysis/ST302_SNP/SNP_analysis/gubbins/recombination_predictions.embl]

FT   misc_feature    5323190..5339325
FT                   /node="internal_20->Reference"
FT                   /neg_log_likelihood="417.590167"
FT                   /colour="4"
FT                   /taxa="Reference"
FT                   /SNP_count="46"
FT   misc_feature    5284659..5284899
FT                   /node="internal_20->Reference"
FT                   /neg_log_likelihood="222.107265"
FT                   /colour="4"
FT                   /taxa="Reference"
FT                   /SNP_count="17"
FT   misc_feature    1970914..1970935
FT                   /node="internal_20->Reference"
FT                   /neg_log_likelihood="174.944557"
FT                   /colour="4"
FT                   /taxa="Reference"
FT                   /SNP_count="5"
FT   misc_feature    5304218..5315735
FT                   /node="internal_20->Reference"
FT                   /neg_log_likelihood="149.043236"
FT                   /colour="4"
FT                   /taxa="Reference"
FT                   /SNP_count="10"
FT   misc_feature    3970086..4001916
FT                   /node="internal_19->IA7122-Poultry-ST302"
FT                   /neg_log_likelihood="10767.998680"
FT                   /colour="4"
FT                   /taxa="IA7122-Poultry-ST302"
FT                   /SNP_count="680"
FT   misc_feature    3729296..3764845
FT                   /node="internal_19->IA7122-Poultry-ST302"
FT                   /neg_log_likelihood="8691.213374"
FT                   /colour="4"
FT                   /taxa="IA7122-Poultry-ST302"
FT                   /SNP_count="469"
FT   misc_feature    3851565..3875773
FT                   /node="internal_19->IA7122-Poultry-ST302"
FT                   /neg_log_likelihood="7364.135415"
FT                   /colour="4"
FT                   /taxa="IA7122-Poultry-ST302"
FT                   /SNP_count="340"
FT   misc_feature    4105692..4115167
FT                   /node="internal_19->IA7122-Poultry-ST302"
FT                   /neg_log_likelihood="6260.274823"
FT                   /colour="4"
FT                   /taxa="IA7122-Poultry-ST302"
FT                   /SNP_count="222"
FT   misc_feature    4668242..4682669
FT                   /node="internal_19->IA7122-Poultry-ST302"
FT                   /neg_log_likelihood="5553.375409"
FT                   /colour="4"
FT                   /taxa="IA7122-Poultry-ST302"
FT                   /SNP_count="198"
FT   misc_feature    4182589..4189998
FT                   /node="internal_19->IA7122-Poultry-ST302"
FT                   /neg_log_likelihood="4888.358287"
FT                   /colour="4"
FT                   /taxa="IA7122-Poultry-ST302"
FT                   /SNP_count="119"
FT   misc_feature    4704964..4708510
FT                   /node="internal_19->IA7122-Poultry-ST302"
FT                   /neg_log_likelihood="4453.916784"
FT                   /colour="4"
FT                   /taxa="IA7122-Poultry-ST302"
FT                   /SNP_count="126"
FT   misc_feature    2952105..2955094
FT                   /node="internal_19->IA7122-Poultry-ST302"
FT                   /neg_log_likelihood="4008.732132"
FT                   /colour="4"
FT                   /taxa="IA7122-Poultry-ST302"
FT                   /SNP_count="108"
FT   misc_feature    4449508..4451125
FT                   /node="internal_19->IA7122-Poultry-ST302"
FT                   /neg_log_likelihood="3618.834148"
FT                   /colour="4"
FT                   /taxa="IA7122-Poultry-ST302"
FT                   /SNP_count="96"
FT   misc_feature    5268884..5286557
FT                   /node="internal_19->IA7122-Poultry-ST302"
FT                   /neg_log_likelihood="3324.379555"
FT                   /colour="4"
FT                   /taxa="IA7122-Poultry-ST302"
FT                   /SNP_count="109"
FT   misc_feature    1620374..1630981
FT                   /node="internal_19->IA7122-Poultry-ST302"
FT                   /neg_log_likelihood="2917.406264"
FT                   /colour="4"
FT                   /taxa="IA7122-Poultry-ST302"
FT                   /SNP_count="79"
FT   misc_feature    4520296..4521991
FT                   /node="internal_19->IA7122-Poultry-ST302"
FT                   /neg_log_likelihood="2628.192115"
FT                   /colour="4"
FT                   /taxa="IA7122-Poultry-ST302"
FT                   /SNP_count="54"
FT   misc_feature    5186048..5190488
FT                   /node="internal_19->IA7122-Poultry-ST302"
FT                   /neg_log_likelihood="2414.688653"
FT                   /colour="4"
FT                   /taxa="IA7122-Poultry-ST302"
FT                   /SNP_count="51"
FT   misc_feature    5047794..5051466
FT                   /node="internal_19->IA7122-Poultry-ST302"
FT                   /neg_log_likelihood="2226.285034"
FT                   /colour="4"
FT                   /taxa="IA7122-Poultry-ST302"
FT                   /SNP_count="47"
FT   misc_feature    4962912..4966585
FT                   /node="internal_19->IA7122-Poultry-ST302"
FT                   /neg_log_likelihood="2038.933278"
FT                   /colour="4"
FT                   /taxa="IA7122-Poultry-ST302"
FT                   /SNP_count="52"
FT   misc_feature    5143285..5153795
FT                   /node="internal_19->IA7122-Poultry-ST302"
FT                   /neg_log_likelihood="1832.103351"
FT                   /colour="4"
FT                   /taxa="IA7122-Poultry-ST302"
FT                   /SNP_count="63"
FT   misc_feature    3888966..3931130
FT                   /node="internal_19->IA7122-Poultry-ST302"
FT                   /neg_log_likelihood="1583.347294"
FT                   /colour="4"
FT                   /taxa="IA7122-Poultry-ST302"
FT                   /SNP_count="78"
FT   misc_feature    5302104..5306408
FT                   /node="internal_19->IA7122-Poultry-ST302"
FT                   /neg_log_likelihood="1252.224923"
FT                   /colour="4"
FT                   /taxa="IA7122-Poultry-ST302"
FT                   /SNP_count="45"
FT   misc_feature    5233798..5235579
FT                   /node="internal_19->IA7122-Poultry-ST302"
FT                   /neg_log_likelihood="1062.586934"
FT                   /colour="4"
FT                   /taxa="IA7122-Poultry-ST302"
FT                   /SNP_count="37"
FT   misc_feature    3339461..3340054
FT                   /node="internal_19->IA7122-Poultry-ST302"
FT                   /neg_log_likelihood="926.554525"
FT                   /colour="4"
FT                   /taxa="IA7122-Poultry-ST302"
FT                   /SNP_count="23"
FT   misc_feature    5317142..5325225
FT                   /node="internal_19->IA7122-Poultry-ST302"
FT                   /neg_log_likelihood="844.084498"
FT                   /colour="4"
FT                   /taxa="IA7122-Poultry-ST302"
FT                   /SNP_count="24"
FT   misc_feature    4397996..4399485
FT                   /node="internal_19->IA7122-Poultry-ST302"
FT                   /neg_log_likelihood="748.310246"
FT                   /colour="4"
FT                   /taxa="IA7122-Poultry-ST302"
FT                   /SNP_count="12"
FT   misc_feature    5261252..5261881
FT                   /node="internal_19->IA7122-Poultry-ST302"
FT                   /neg_log_likelihood="702.216304"
FT                   /colour="4"
FT                   /taxa="IA7122-Poultry-ST302"
FT                   /SNP_count="9"
FT   misc_feature    3881618..3882005
FT                   /node="internal_19->IA7122-Poultry-ST302"
FT                   /neg_log_likelihood="667.830491"
FT                   /colour="4"
FT                   /taxa="IA7122-Poultry-ST302"
FT                   /SNP_count="6"
FT   misc_feature    3485805..3516841
FT                   /node="internal_23->IA4731-Poultry-ST302"
FT                   /neg_log_likelihood="5951.492938"
FT                   /colour="4"
FT                   /taxa="IA4731-Poultry-ST302"
FT                   /SNP_count="316"
FT   misc_feature    4425528..4441714
FT                   /node="internal_23->IA4731-Poultry-ST302"
FT                   /neg_log_likelihood="4960.925848"
FT                   /colour="4"
FT                   /taxa="IA4731-Poultry-ST302"
FT                   /SNP_count="183"
FT   misc_feature    4182701..4190304
FT                   /node="internal_23->IA4731-Poultry-ST302"
FT                   /neg_log_likelihood="4309.952141"
FT                   /colour="4"
FT                   /taxa="IA4731-Poultry-ST302"
FT                   /SNP_count="119"
FT   misc_feature    3851580..3892842
FT                   /node="internal_23->IA4731-Poultry-ST302"
FT                   /neg_log_likelihood="3869.644815"
FT                   /colour="4"
FT                   /taxa="IA4731-Poultry-ST302"
FT                   /SNP_count="219"
FT   misc_feature    4696851..4710391
FT                   /node="internal_23->IA4731-Poultry-ST302"
FT                   /neg_log_likelihood="3130.380076"
FT                   /colour="4"
FT                   /taxa="IA4731-Poultry-ST302"
FT                   /SNP_count="103"
FT   misc_feature    5261819..5290990
FT                   /node="internal_23->IA4731-Poultry-ST302"
FT                   /neg_log_likelihood="2760.646655"
FT                   /colour="4"
FT                   /taxa="IA4731-Poultry-ST302"
FT                   /SNP_count="109"
FT   misc_feature    5201650..5203940
FT                   /node="internal_23->IA4731-Poultry-ST302"
FT                   /neg_log_likelihood="2358.284610"
FT                   /colour="4"
FT                   /taxa="IA4731-Poultry-ST302"
FT                   /SNP_count="54"
FT   misc_feature    3470650..3471664
FT                   /node="internal_23->IA4731-Poultry-ST302"
FT                   /neg_log_likelihood="2182.316156"
FT                   /colour="4"
FT                   /taxa="IA4731-Poultry-ST302"
FT                   /SNP_count="33"
FT   misc_feature    5116070..5145883
FT                   /node="internal_23->IA4731-Poultry-ST302"
FT                   /neg_log_likelihood="2059.322294"
FT                   /colour="4"
FT                   /taxa="IA4731-Poultry-ST302"
FT                   /SNP_count="56"
FT   misc_feature    5311613..5334335
FT                   /node="internal_23->IA4731-Poultry-ST302"
FT                   /neg_log_likelihood="1856.804547"
FT                   /colour="4"
FT                   /taxa="IA4731-Poultry-ST302"
FT                   /SNP_count="34"
FT   misc_feature    4397902..4398538
FT                   /node="internal_23->IA4731-Poultry-ST302"
FT                   /neg_log_likelihood="1716.952443"
FT                   /colour="4"
FT                   /taxa="IA4731-Poultry-ST302"
FT                   /SNP_count="17"
FT   misc_feature    4951286..4957042
FT                   /node="internal_23->IA4731-Poultry-ST302"
FT                   /neg_log_likelihood="1651.466323"
FT                   /colour="4"
FT                   /taxa="IA4731-Poultry-ST302"
FT                   /SNP_count="23"
FT   misc_feature    962114..962176
FT                   /node="internal_23->IA4731-Poultry-ST302"
FT                   /neg_log_likelihood="1558.944750"
FT                   /colour="4"
FT                   /taxa="IA4731-Poultry-ST302"
FT                   /SNP_count="10"
FT   misc_feature    5234554..5235141
FT                   /node="internal_23->IA4731-Poultry-ST302"
FT                   /neg_log_likelihood="1525.748805"
FT                   /colour="4"
FT                   /taxa="IA4731-Poultry-ST302"
FT                   /SNP_count="10"
FT   misc_feature    3852061..3891120
FT                   /node="internal_22->internal_23"
FT                   /neg_log_likelihood="2170.745955"
FT                   /colour="2"
FT                   /taxa=" EA1682-Poultry-ST302 IA4731-Poultry-ST302"
FT                   /SNP_count="185"
FT   misc_feature    4696851..4710391
FT                   /node="internal_22->internal_23"
FT                   /neg_log_likelihood="1471.927952"
FT                   /colour="2"
FT                   /taxa=" EA1682-Poultry-ST302 IA4731-Poultry-ST302"
FT                   /SNP_count="103"
FT   misc_feature    5201484..5203940
FT                   /node="internal_22->internal_23"
FT                   /neg_log_likelihood="1101.600232"
FT                   /colour="2"
FT                   /taxa=" EA1682-Poultry-ST302 IA4731-Poultry-ST302"
FT                   /SNP_count="56"
FT   misc_feature    5235078..5235141
FT                   /node="internal_22->internal_23"
FT                   /neg_log_likelihood="963.016300"
FT                   /colour="2"
FT                   /taxa=" EA1682-Poultry-ST302 IA4731-Poultry-ST302"
FT                   /SNP_count="8"
FT   misc_feature    4953124..4954579
FT                   /node="internal_22->internal_23"
FT                   /neg_log_likelihood="930.804093"
FT                   /colour="2"
FT                   /taxa=" EA1682-Poultry-ST302 IA4731-Poultry-ST302"
FT                   /SNP_count="11"
FT   misc_feature    5279560..5281357
FT                   /node="internal_22->internal_23"
FT                   /neg_log_likelihood="889.090374"
FT                   /colour="2"
FT                   /taxa=" EA1682-Poultry-ST302 IA4731-Poultry-ST302"
FT                   /SNP_count="8"
FT   misc_feature    3852049..3890866
FT                   /node="internal_22->CA0229-ND-ST302"
FT                   /neg_log_likelihood="4175.237138"
FT                   /colour="4"
FT                   /taxa="CA0229-ND-ST302"
FT                   /SNP_count="721"
FT   misc_feature    4702378..4710413
FT                   /node="internal_22->CA0229-ND-ST302"
FT                   /neg_log_likelihood="2252.322903"
FT                   /colour="4"
FT                   /taxa="CA0229-ND-ST302"
FT                   /SNP_count="202"
FT   misc_feature    5201437..5206213
FT                   /node="internal_22->CA0229-ND-ST302"
FT                   /neg_log_likelihood="1677.300954"
FT                   /colour="4"
FT                   /taxa="CA0229-ND-ST302"
FT                   /SNP_count="83"
FT   misc_feature    5279357..5281532
FT                   /node="internal_22->CA0229-ND-ST302"
FT                   /neg_log_likelihood="1470.432043"
FT                   /colour="4"
FT                   /taxa="CA0229-ND-ST302"
FT                   /SNP_count="15"
FT   misc_feature    5304781..5311854
FT                   /node="internal_22->CA0229-ND-ST302"
FT                   /neg_log_likelihood="1408.588411"
FT                   /colour="4"
FT                   /taxa="CA0229-ND-ST302"
FT                   /SNP_count="22"
FT   misc_feature    229589..229626
FT                   /node="internal_22->CA0229-ND-ST302"
FT                   /neg_log_likelihood="1320.983258"
FT                   /colour="4"
FT                   /taxa="CA0229-ND-ST302"
FT                   /SNP_count="8"
FT   misc_feature    4953143..4962682
FT                   /node="internal_22->CA0229-ND-ST302"
FT                   /neg_log_likelihood="1292.225646"
FT                   /colour="4"
FT                   /taxa="CA0229-ND-ST302"
FT                   /SNP_count="14"
FT   misc_feature    4757483..4764491
FT                   /node="internal_22->CA0229-ND-ST302"
FT                   /neg_log_likelihood="1233.891721"
FT                   /colour="4"
FT                   /taxa="CA0229-ND-ST302"
FT                   /SNP_count="12"
FT   misc_feature    3851569..3895125
FT                   /node="internal_21->internal_22"
FT                   /neg_log_likelihood="2107.033956"
FT                   /colour="2"
FT                   /taxa="  EA1682-Poultry-ST302 IA4731-Poultry-ST302 CA0229-ND-ST302"
FT                   /SNP_count="181"
FT   misc_feature    4702308..4710444
FT                   /node="internal_21->internal_22"
FT                   /neg_log_likelihood="1390.663905"
FT                   /colour="2"
FT                   /taxa="  EA1682-Poultry-ST302 IA4731-Poultry-ST302 CA0229-ND-ST302"
FT                   /SNP_count="109"
FT   misc_feature    5201484..5206212
FT                   /node="internal_21->internal_22"
FT                   /neg_log_likelihood="1010.722614"
FT                   /colour="2"
FT                   /taxa="  EA1682-Poultry-ST302 IA4731-Poultry-ST302 CA0229-ND-ST302"
FT                   /SNP_count="62"
FT   misc_feature    4758550..4761164
FT                   /node="internal_21->internal_22"
FT                   /neg_log_likelihood="801.562837"
FT                   /colour="2"
FT                   /taxa="  EA1682-Poultry-ST302 IA4731-Poultry-ST302 CA0229-ND-ST302"
FT                   /SNP_count="31"
FT   misc_feature    4953112..4957173
FT                   /node="internal_21->internal_22"
FT                   /neg_log_likelihood="689.265788"
FT                   /colour="2"
FT                   /taxa="  EA1682-Poultry-ST302 IA4731-Poultry-ST302 CA0229-ND-ST302"
FT                   /SNP_count="21"
FT   misc_feature    5234937..5247234
FT                   /node="internal_21->internal_22"
FT                   /neg_log_likelihood="594.358249"
FT                   /colour="2"
FT                   /taxa="  EA1682-Poultry-ST302 IA4731-Poultry-ST302 CA0229-ND-ST302"
FT                   /SNP_count="24"
FT   misc_feature    5050639..5051057
FT                   /node="internal_21->internal_22"
FT                   /neg_log_likelihood="488.264895"
FT                   /colour="2"
FT                   /taxa="  EA1682-Poultry-ST302 IA4731-Poultry-ST302 CA0229-ND-ST302"
FT                   /SNP_count="12"
FT   misc_feature    5304703..5305095
FT                   /node="internal_21->internal_22"
FT                   /neg_log_likelihood="433.914273"
FT                   /colour="2"
FT                   /taxa="  EA1682-Poultry-ST302 IA4731-Poultry-ST302 CA0229-ND-ST302"
FT                   /SNP_count="11"
FT   misc_feature    229594..229626
FT                   /node="internal_21->internal_22"
FT                   /neg_log_likelihood="390.832902"
FT                   /colour="2"
FT                   /taxa="  EA1682-Poultry-ST302 IA4731-Poultry-ST302 CA0229-ND-ST302"
FT                   /SNP_count="6"
FT   misc_feature    4520058..4521928
FT                   /node="internal_21->internal_22"
FT                   /neg_log_likelihood="361.611884"
FT                   /colour="2"
FT                   /taxa="  EA1682-Poultry-ST302 IA4731-Poultry-ST302 CA0229-ND-ST302"
FT                   /SNP_count="9"
FT   misc_feature    5269370..5270984
FT                   /node="internal_21->internal_22"
FT                   /neg_log_likelihood="318.478805"
FT                   /colour="2"
FT                   /taxa="  EA1682-Poultry-ST302 IA4731-Poultry-ST302 CA0229-ND-ST302"
FT                   /SNP_count="9"
FT   misc_feature    4962262..4966056
FT                   /node="internal_21->internal_22"
FT                   /neg_log_likelihood="283.484212"
FT                   /colour="2"
FT                   /taxa="  EA1682-Poultry-ST302 IA4731-Poultry-ST302 CA0229-ND-ST302"
FT                   /SNP_count="5"
FT   misc_feature    4951286..4967663
FT                   /node="internal_21->CA0191-ND-ST302"
FT                   /neg_log_likelihood="5725.393021"
FT                   /colour="4"
FT                   /taxa="CA0191-ND-ST302"
FT                   /SNP_count="224"
FT   misc_feature    3865886..3910184
FT                   /node="internal_21->CA0191-ND-ST302"
FT                   /neg_log_likelihood="4998.538975"
FT                   /colour="4"
FT                   /taxa="CA0191-ND-ST302"
FT                   /SNP_count="254"
FT   misc_feature    3851565..3855899
FT                   /node="internal_21->CA0191-ND-ST302"
FT                   /neg_log_likelihood="4219.124568"
FT                   /colour="4"
FT                   /taxa="CA0191-ND-ST302"
FT                   /SNP_count="67"
FT   misc_feature    3468880..3520161
FT                   /node="internal_21->CA0191-ND-ST302"
FT                   /neg_log_likelihood="3996.828892"
FT                   /colour="4"
FT                   /taxa="CA0191-ND-ST302"
FT                   /SNP_count="40"
FT   misc_feature    4895562..4897692
FT                   /node="internal_21->CA0191-ND-ST302"
FT                   /neg_log_likelihood="3873.653073"
FT                   /colour="4"
FT                   /taxa="CA0191-ND-ST302"
FT                   /SNP_count="31"
FT   misc_feature    4425344..4425623
FT                   /node="internal_21->CA0191-ND-ST302"
FT                   /neg_log_likelihood="3768.596357"
FT                   /colour="4"
FT                   /taxa="CA0191-ND-ST302"
FT                   /SNP_count="22"
FT   misc_feature    4912284..4913080
FT                   /node="internal_21->CA0191-ND-ST302"
FT                   /neg_log_likelihood="3687.469334"
FT                   /colour="4"
FT                   /taxa="CA0191-ND-ST302"
FT                   /SNP_count="26"
FT   misc_feature    5047818..5053192
FT                   /node="internal_21->CA0191-ND-ST302"
FT                   /neg_log_likelihood="3593.752080"
FT                   /colour="4"
FT                   /taxa="CA0191-ND-ST302"
FT                   /SNP_count="37"
FT   misc_feature    5244337..5247222
FT                   /node="internal_21->CA0191-ND-ST302"
FT                   /neg_log_likelihood="3456.925030"
FT                   /colour="4"
FT                   /taxa="CA0191-ND-ST302"
FT                   /SNP_count="28"
FT   misc_feature    4398335..4399766
FT                   /node="internal_21->CA0191-ND-ST302"
FT                   /neg_log_likelihood="3359.426322"
FT                   /colour="4"
FT                   /taxa="CA0191-ND-ST302"
FT                   /SNP_count="17"
FT   misc_feature    5297345..5311478
FT                   /node="internal_21->CA0191-ND-ST302"
FT                   /neg_log_likelihood="3295.423039"
FT                   /colour="4"
FT                   /taxa="CA0191-ND-ST302"
FT                   /SNP_count="35"
FT   misc_feature    5138039..5167257
FT                   /node="internal_21->CA0191-ND-ST302"
FT                   /neg_log_likelihood="3171.717042"
FT                   /colour="4"
FT                   /taxa="CA0191-ND-ST302"
FT                   /SNP_count="25"
FT   misc_feature    3914479..3932233
FT                   /node="internal_21->CA0191-ND-ST302"
FT                   /neg_log_likelihood="3076.253121"
FT                   /colour="4"
FT                   /taxa="CA0191-ND-ST302"
FT                   /SNP_count="32"
FT   misc_feature    5261252..5271023
FT                   /node="internal_21->CA0191-ND-ST302"
FT                   /neg_log_likelihood="2954.133999"
FT                   /colour="4"
FT                   /taxa="CA0191-ND-ST302"
FT                   /SNP_count="21"
FT   misc_feature    5201440..5203189
FT                   /node="internal_21->CA0191-ND-ST302"
FT                   /neg_log_likelihood="2873.943339"
FT                   /colour="4"
FT                   /taxa="CA0191-ND-ST302"
FT                   /SNP_count="15"
FT   misc_feature    4703604..4710432
FT                   /node="internal_21->CA0191-ND-ST302"
FT                   /neg_log_likelihood="2816.387298"
FT                   /colour="4"
FT                   /taxa="CA0191-ND-ST302"
FT                   /SNP_count="21"
FT   misc_feature    4754677..4761252
FT                   /node="internal_21->CA0191-ND-ST302"
FT                   /neg_log_likelihood="2739.330771"
FT                   /colour="4"
FT                   /taxa="CA0191-ND-ST302"
FT                   /SNP_count="15"
FT   misc_feature    5180647..5180654
FT                   /node="internal_21->CA0191-ND-ST302"
FT                   /neg_log_likelihood="2672.965713"
FT                   /colour="4"
FT                   /taxa="CA0191-ND-ST302"
FT                   /SNP_count="7"
FT   misc_feature    3851580..3891535
FT                   /node="internal_18->internal_19"
FT                   /neg_log_likelihood="11311.912199"
FT                   /colour="2"
FT                   /taxa=" IA7122-Poultry-ST302  EA2455-Poultry-ST302 Reference"
FT                   /SNP_count="456"
FT   misc_feature    1619172..1630990
FT                   /node="internal_18->internal_19"
FT                   /neg_log_likelihood="10022.514469"
FT                   /colour="2"
FT                   /taxa=" IA7122-Poultry-ST302  EA2455-Poultry-ST302 Reference"
FT                   /SNP_count="190"
FT   misc_feature    4950721..4966468
FT                   /node="internal_18->internal_19"
FT                   /neg_log_likelihood="9392.865367"
FT                   /colour="2"
FT                   /taxa=" IA7122-Poultry-ST302  EA2455-Poultry-ST302 Reference"
FT                   /SNP_count="202"
FT   misc_feature    4696797..4712732
FT                   /node="internal_18->internal_19"
FT                   /neg_log_likelihood="8737.147105"
FT                   /colour="2"
FT                   /taxa=" IA7122-Poultry-ST302  EA2455-Poultry-ST302 Reference"
FT                   /SNP_count="184"
FT   misc_feature    3357862..3363089
FT                   /node="internal_18->internal_19"
FT                   /neg_log_likelihood="8125.238586"
FT                   /colour="2"
FT                   /taxa=" IA7122-Poultry-ST302  EA2455-Poultry-ST302 Reference"
FT                   /SNP_count="129"
FT   misc_feature    5199395..5208907
FT                   /node="internal_18->internal_19"
FT                   /neg_log_likelihood="7686.861437"
FT                   /colour="2"
FT                   /taxa=" IA7122-Poultry-ST302  EA2455-Poultry-ST302 Reference"
FT                   /SNP_count="147"
FT   misc_feature    4750294..4765609
FT                   /node="internal_18->internal_19"
FT                   /neg_log_likelihood="7185.950554"
FT                   /colour="2"
FT                   /taxa=" IA7122-Poultry-ST302  EA2455-Poultry-ST302 Reference"
FT                   /SNP_count="161"
FT   misc_feature    4449842..4452355
FT                   /node="internal_18->internal_19"
FT                   /neg_log_likelihood="6627.386893"
FT                   /colour="2"
FT                   /taxa=" IA7122-Poultry-ST302  EA2455-Poultry-ST302 Reference"
FT                   /SNP_count="102"
FT   misc_feature    962086..964710
FT                   /node="internal_18->internal_19"
FT                   /neg_log_likelihood="6309.790584"
FT                   /colour="2"
FT                   /taxa=" IA7122-Poultry-ST302  EA2455-Poultry-ST302 Reference"
FT                   /SNP_count="83"
FT   misc_feature    4675971..4684668
FT                   /node="internal_18->internal_19"
FT                   /neg_log_likelihood="6040.968453"
FT                   /colour="2"
FT                   /taxa=" IA7122-Poultry-ST302  EA2455-Poultry-ST302 Reference"
FT                   /SNP_count="94"
FT   misc_feature    5137753..5143454
FT                   /node="internal_18->internal_19"
FT                   /neg_log_likelihood="5705.572693"
FT                   /colour="2"
FT                   /taxa=" IA7122-Poultry-ST302  EA2455-Poultry-ST302 Reference"
FT                   /SNP_count="84"
FT   misc_feature    5234260..5235489
FT                   /node="internal_18->internal_19"
FT                   /neg_log_likelihood="5409.308089"
FT                   /colour="2"
FT                   /taxa=" IA7122-Poultry-ST302  EA2455-Poultry-ST302 Reference"
FT                   /SNP_count="58"
FT   misc_feature    5261503..5269927
FT                   /node="internal_18->internal_19"
FT                   /neg_log_likelihood="5213.770972"
FT                   /colour="2"
FT                   /taxa=" IA7122-Poultry-ST302  EA2455-Poultry-ST302 Reference"
FT                   /SNP_count="80"
FT   misc_feature    4519908..4521979
FT                   /node="internal_18->internal_19"
FT                   /neg_log_likelihood="4946.324287"
FT                   /colour="2"
FT                   /taxa=" IA7122-Poultry-ST302  EA2455-Poultry-ST302 Reference"
FT                   /SNP_count="46"
FT   misc_feature    5150774..5157293
FT                   /node="internal_18->internal_19"
FT                   /neg_log_likelihood="4778.559630"
FT                   /colour="2"
FT                   /taxa=" IA7122-Poultry-ST302  EA2455-Poultry-ST302 Reference"
FT                   /SNP_count="60"
FT   misc_feature    5246366..5249504
FT                   /node="internal_18->internal_19"
FT                   /neg_log_likelihood="4560.151865"
FT                   /colour="2"
FT                   /taxa=" IA7122-Poultry-ST302  EA2455-Poultry-ST302 Reference"
FT                   /SNP_count="49"
FT   misc_feature    5297772..5310886
FT                   /node="internal_18->internal_19"
FT                   /neg_log_likelihood="4386.772106"
FT                   /colour="2"
FT                   /taxa=" IA7122-Poultry-ST302  EA2455-Poultry-ST302 Reference"
FT                   /SNP_count="65"
FT   misc_feature    5279357..5289781
FT                   /node="internal_18->internal_19"
FT                   /neg_log_likelihood="4145.234819"
FT                   /colour="2"
FT                   /taxa=" IA7122-Poultry-ST302  EA2455-Poultry-ST302 Reference"
FT                   /SNP_count="60"
FT   misc_feature    5186489..5192433
FT                   /node="internal_18->internal_19"
FT                   /neg_log_likelihood="3927.756146"
FT                   /colour="2"
FT                   /taxa=" IA7122-Poultry-ST302  EA2455-Poultry-ST302 Reference"
FT                   /SNP_count="47"
FT   misc_feature    3487552..3515445
FT                   /node="internal_18->internal_19"
FT                   /neg_log_likelihood="3754.613671"
FT                   /colour="2"
FT                   /taxa=" IA7122-Poultry-ST302  EA2455-Poultry-ST302 Reference"
FT                   /SNP_count="70"
FT   misc_feature    4183029..4184706
FT                   /node="internal_18->internal_19"
FT                   /neg_log_likelihood="3492.436610"
FT                   /colour="2"
FT                   /taxa=" IA7122-Poultry-ST302  EA2455-Poultry-ST302 Reference"
FT                   /SNP_count="31"
FT   misc_feature    5034204..5034232
FT                   /node="internal_18->internal_19"
FT                   /neg_log_likelihood="3385.934890"
FT                   /colour="2"
FT                   /taxa=" IA7122-Poultry-ST302  EA2455-Poultry-ST302 Reference"
FT                   /SNP_count="13"
FT   misc_feature    4425949..4441745
FT                   /node="internal_18->internal_19"
FT                   /neg_log_likelihood="3336.165745"
FT                   /colour="2"
FT                   /taxa=" IA7122-Poultry-ST302  EA2455-Poultry-ST302 Reference"
FT                   /SNP_count="45"
FT   misc_feature    2954356..2955083
FT                   /node="internal_18->internal_19"
FT                   /neg_log_likelihood="3170.552459"
FT                   /colour="2"
FT                   /taxa=" IA7122-Poultry-ST302  EA2455-Poultry-ST302 Reference"
FT                   /SNP_count="18"
FT   misc_feature    5124909..5126190
FT                   /node="internal_18->internal_19"
FT                   /neg_log_likelihood="3105.417770"
FT                   /colour="2"
FT                   /taxa=" IA7122-Poultry-ST302  EA2455-Poultry-ST302 Reference"
FT                   /SNP_count="18"
FT   misc_feature    5323151..5331019
FT                   /node="internal_18->internal_19"
FT                   /neg_log_likelihood="3041.296433"
FT                   /colour="2"
FT                   /taxa=" IA7122-Poultry-ST302  EA2455-Poultry-ST302 Reference"
FT                   /SNP_count="24"
FT   misc_feature    953284..954391
FT                   /node="internal_18->internal_19"
FT                   /neg_log_likelihood="2951.396091"
FT                   /colour="2"
FT                   /taxa=" IA7122-Poultry-ST302  EA2455-Poultry-ST302 Reference"
FT                   /SNP_count="13"
FT   misc_feature    5047772..5053618
FT                   /node="internal_18->internal_19"
FT                   /neg_log_likelihood="2905.566977"
FT                   /colour="2"
FT                   /taxa=" IA7122-Poultry-ST302  EA2455-Poultry-ST302 Reference"
FT                   /SNP_count="16"
FT   misc_feature    4672819..4710444
FT                   /node="internal_18->internal_21"
FT                   /neg_log_likelihood="6314.838798"
FT                   /colour="2"
FT                   /taxa="   EA1682-Poultry-ST302 IA4731-Poultry-ST302 CA0229-ND-ST302 CA0191-ND-ST302"
FT                   /SNP_count="285"
FT   misc_feature    4950837..4966139
FT                   /node="internal_18->internal_21"
FT                   /neg_log_likelihood="5335.852956"
FT                   /colour="2"
FT                   /taxa="   EA1682-Poultry-ST302 IA4731-Poultry-ST302 CA0229-ND-ST302 CA0191-ND-ST302"
FT                   /SNP_count="251"
FT   misc_feature    5138039..5162773
FT                   /node="internal_18->internal_21"
FT                   /neg_log_likelihood="4548.148003"
FT                   /colour="2"
FT                   /taxa="   EA1682-Poultry-ST302 IA4731-Poultry-ST302 CA0229-ND-ST302 CA0191-ND-ST302"
FT                   /SNP_count="174"
FT   misc_feature    3851569..3895125
FT                   /node="internal_18->internal_21"
FT                   /neg_log_likelihood="3923.817281"
FT                   /colour="2"
FT                   /taxa="   EA1682-Poultry-ST302 IA4731-Poultry-ST302 CA0229-ND-ST302 CA0191-ND-ST302"
FT                   /SNP_count="212"
FT   misc_feature    951627..981732
FT                   /node="internal_18->internal_21"
FT                   /neg_log_likelihood="3228.245682"
FT                   /colour="2"
FT                   /taxa="   EA1682-Poultry-ST302 IA4731-Poultry-ST302 CA0229-ND-ST302 CA0191-ND-ST302"
FT                   /SNP_count="75"
FT   misc_feature    4751508..4766666
FT                   /node="internal_18->internal_21"
FT                   /neg_log_likelihood="2945.769413"
FT                   /colour="2"
FT                   /taxa="   EA1682-Poultry-ST302 IA4731-Poultry-ST302 CA0229-ND-ST302 CA0191-ND-ST302"
FT                   /SNP_count="81"
FT   misc_feature    5185976..5191066
FT                   /node="internal_18->internal_21"
FT                   /neg_log_likelihood="2644.629208"
FT                   /colour="2"
FT                   /taxa="   EA1682-Poultry-ST302 IA4731-Poultry-ST302 CA0229-ND-ST302 CA0191-ND-ST302"
FT                   /SNP_count="52"
FT   misc_feature    5234251..5247661
FT                   /node="internal_18->internal_21"
FT                   /neg_log_likelihood="2442.887258"
FT                   /colour="2"
FT                   /taxa="   EA1682-Poultry-ST302 IA4731-Poultry-ST302 CA0229-ND-ST302 CA0191-ND-ST302"
FT                   /SNP_count="74"
FT   misc_feature    3339812..3363013
FT                   /node="internal_18->internal_21"
FT                   /neg_log_likelihood="2147.048817"
FT                   /colour="2"
FT                   /taxa="   EA1682-Poultry-ST302 IA4731-Poultry-ST302 CA0229-ND-ST302 CA0191-ND-ST302"
FT                   /SNP_count="60"
FT   misc_feature    5201650..5211609
FT                   /node="internal_18->internal_21"
FT                   /neg_log_likelihood="1902.960184"
FT                   /colour="2"
FT                   /taxa="   EA1682-Poultry-ST302 IA4731-Poultry-ST302 CA0229-ND-ST302 CA0191-ND-ST302"
FT                   /SNP_count="68"
FT   misc_feature    5047818..5051002
FT                   /node="internal_18->internal_21"
FT                   /neg_log_likelihood="1670.744785"
FT                   /colour="2"
FT                   /taxa="   EA1682-Poultry-ST302 IA4731-Poultry-ST302 CA0229-ND-ST302 CA0191-ND-ST302"
FT                   /SNP_count="33"
FT   misc_feature    3483883..3514824
FT                   /node="internal_18->internal_21"
FT                   /neg_log_likelihood="1538.520732"
FT                   /colour="2"
FT                   /taxa="   EA1682-Poultry-ST302 IA4731-Poultry-ST302 CA0229-ND-ST302 CA0191-ND-ST302"
FT                   /SNP_count="50"
FT   misc_feature    4452121..4452443
FT                   /node="internal_18->internal_21"
FT                   /neg_log_likelihood="1329.558286"
FT                   /colour="2"
FT                   /taxa="   EA1682-Poultry-ST302 IA4731-Poultry-ST302 CA0229-ND-ST302 CA0191-ND-ST302"
FT                   /SNP_count="20"
FT   misc_feature    4425528..4434098
FT                   /node="internal_18->internal_21"
FT                   /neg_log_likelihood="1244.660341"
FT                   /colour="2"
FT                   /taxa="   EA1682-Poultry-ST302 IA4731-Poultry-ST302 CA0229-ND-ST302 CA0191-ND-ST302"
FT                   /SNP_count="34"
FT   misc_feature    4519927..4521927
FT                   /node="internal_18->internal_21"
FT                   /neg_log_likelihood="1102.713570"
FT                   /colour="2"
FT                   /taxa="   EA1682-Poultry-ST302 IA4731-Poultry-ST302 CA0229-ND-ST302 CA0191-ND-ST302"
FT                   /SNP_count="23"
FT   misc_feature    2190122..2191618
FT                   /node="internal_18->internal_21"
FT                   /neg_log_likelihood="1004.024563"
FT                   /colour="2"
FT                   /taxa="   EA1682-Poultry-ST302 IA4731-Poultry-ST302 CA0229-ND-ST302 CA0191-ND-ST302"
FT                   /SNP_count="18"
FT   misc_feature    5280049..5286410
FT                   /node="internal_18->internal_21"
FT                   /neg_log_likelihood="942.409943"
FT                   /colour="2"
FT                   /taxa="   EA1682-Poultry-ST302 IA4731-Poultry-ST302 CA0229-ND-ST302 CA0191-ND-ST302"
FT                   /SNP_count="19"
FT   misc_feature    5301894..5305095
FT                   /node="internal_18->internal_21"
FT                   /neg_log_likelihood="864.358090"
FT                   /colour="2"
FT                   /taxa="   EA1682-Poultry-ST302 IA4731-Poultry-ST302 CA0229-ND-ST302 CA0191-ND-ST302"
FT                   /SNP_count="14"
FT   misc_feature    3468865..3470710
FT                   /node="internal_18->internal_21"
FT                   /neg_log_likelihood="802.550546"
FT                   /colour="2"
FT                   /taxa="   EA1682-Poultry-ST302 IA4731-Poultry-ST302 CA0229-ND-ST302 CA0191-ND-ST302"
FT                   /SNP_count="12"
FT   misc_feature    2954325..2954976
FT                   /node="internal_18->internal_21"
FT                   /neg_log_likelihood="753.531826"
FT                   /colour="2"
FT                   /taxa="   EA1682-Poultry-ST302 IA4731-Poultry-ST302 CA0229-ND-ST302 CA0191-ND-ST302"
FT                   /SNP_count="8"
FT   misc_feature    5324240..5338995
FT                   /node="internal_18->internal_21"
FT                   /neg_log_likelihood="719.127604"
FT                   /colour="2"
FT                   /taxa="   EA1682-Poultry-ST302 IA4731-Poultry-ST302 CA0229-ND-ST302 CA0191-ND-ST302"
FT                   /SNP_count="13"
FT   misc_feature    5261565..5274060
FT                   /node="internal_18->internal_21"
FT                   /neg_log_likelihood="662.675985"
FT                   /colour="2"
FT                   /taxa="   EA1682-Poultry-ST302 IA4731-Poultry-ST302 CA0229-ND-ST302 CA0191-ND-ST302"
FT                   /SNP_count="11"
FT   misc_feature    3817839..3817843
FT                   /node="internal_18->internal_21"
FT                   /neg_log_likelihood="605.587790"
FT                   /colour="2"
FT                   /taxa="   EA1682-Poultry-ST302 IA4731-Poultry-ST302 CA0229-ND-ST302 CA0191-ND-ST302"
FT                   /SNP_count="5"
FT   misc_feature    4098708..4114856
FT                   /node="internal_18->internal_21"
FT                   /neg_log_likelihood="589.238233"
FT                   /colour="2"
FT                   /taxa="   EA1682-Poultry-ST302 IA4731-Poultry-ST302 CA0229-ND-ST302 CA0191-ND-ST302"
FT                   /SNP_count="6"
FT   misc_feature    3294028..3294041
FT                   /node="internal_25->IA1729-Canine-ST302"
FT                   /neg_log_likelihood="1672.649966"
FT                   /colour="4"
FT                   /taxa="IA1729-Canine-ST302"
FT                   /SNP_count="10"
FT   misc_feature    770775..770939
FT                   /node="internal_25->IA1729-Canine-ST302"
FT                   /neg_log_likelihood="1634.542474"
FT                   /colour="4"
FT                   /taxa="IA1729-Canine-ST302"
FT                   /SNP_count="13"
FT   misc_feature    5219771..5219781
FT                   /node="internal_25->IA1729-Canine-ST302"
FT                   /neg_log_likelihood="1581.330499"
FT                   /colour="4"
FT                   /taxa="IA1729-Canine-ST302"
FT                   /SNP_count="9"
FT   misc_feature    3243301..3244740
FT                   /node="internal_25->IA1729-Canine-ST302"
FT                   /neg_log_likelihood="1567.052580"
FT                   /colour="4"
FT                   /taxa="IA1729-Canine-ST302"
FT                   /SNP_count="7"
FT   misc_feature    5261351..5261397
FT                   /node="internal_27->BA9503-ND-ST302"
FT                   /neg_log_likelihood="107.550394"
FT                   /colour="4"
FT                   /taxa="BA9503-ND-ST302"
FT                   /SNP_count="7"
FT   misc_feature    3271508..3271519
FT                   /node="internal_27->BA9503-ND-ST302"
FT                   /neg_log_likelihood="75.238944"
FT                   /colour="4"
FT                   /taxa="BA9503-ND-ST302"
FT                   /SNP_count="5"
FT   misc_feature    3256048..3308819
FT                   /node="internal_26->internal_27"
FT                   /neg_log_likelihood="16792.182464"
FT                   /colour="2"
FT                   /taxa=" BA8907-ND-ST302 BA9503-ND-ST302"
FT                   /SNP_count="1405"
FT   misc_feature    4045331..4105967
FT                   /node="internal_26->internal_27"
FT                   /neg_log_likelihood="13027.172727"
FT                   /colour="2"
FT                   /taxa=" BA8907-ND-ST302 BA9503-ND-ST302"
FT                   /SNP_count="943"
FT   misc_feature    3969687..4007663
FT                   /node="internal_26->internal_27"
FT                   /neg_log_likelihood="10028.944441"
FT                   /colour="2"
FT                   /taxa=" BA8907-ND-ST302 BA9503-ND-ST302"
FT                   /SNP_count="904"
FT   misc_feature    3717325..3764861
FT                   /node="internal_26->internal_27"
FT                   /neg_log_likelihood="7283.558968"
FT                   /colour="2"
FT                   /taxa=" BA8907-ND-ST302 BA9503-ND-ST302"
FT                   /SNP_count="662"
FT   misc_feature    4722136..4728293
FT                   /node="internal_26->internal_27"
FT                   /neg_log_likelihood="5654.482239"
FT                   /colour="2"
FT                   /taxa=" BA8907-ND-ST302 BA9503-ND-ST302"
FT                   /SNP_count="181"
FT   misc_feature    299974..304252
FT                   /node="internal_26->internal_27"
FT                   /neg_log_likelihood="5181.264043"
FT                   /colour="2"
FT                   /taxa=" BA8907-ND-ST302 BA9503-ND-ST302"
FT                   /SNP_count="84"
FT   misc_feature    4580854..4584425
FT                   /node="internal_26->internal_27"
FT                   /neg_log_likelihood="4901.008649"
FT                   /colour="2"
FT                   /taxa=" BA8907-ND-ST302 BA9503-ND-ST302"
FT                   /SNP_count="70"
FT   misc_feature    5278759..5286648
FT                   /node="internal_26->internal_27"
FT                   /neg_log_likelihood="4713.078313"
FT                   /colour="2"
FT                   /taxa=" BA8907-ND-ST302 BA9503-ND-ST302"
FT                   /SNP_count="33"
FT   misc_feature    3622647..3624468
FT                   /node="internal_26->internal_27"
FT                   /neg_log_likelihood="4596.014799"
FT                   /colour="2"
FT                   /taxa=" BA8907-ND-ST302 BA9503-ND-ST302"
FT                   /SNP_count="27"
FT   misc_feature    4357871..4357972
FT                   /node="internal_26->internal_27"
FT                   /neg_log_likelihood="4503.139356"
FT                   /colour="2"
FT                   /taxa=" BA8907-ND-ST302 BA9503-ND-ST302"
FT                   /SNP_count="14"
FT   misc_feature    1559514..1559525
FT                   /node="internal_26->internal_27"
FT                   /neg_log_likelihood="4452.432836"
FT                   /colour="2"
FT                   /taxa=" BA8907-ND-ST302 BA9503-ND-ST302"
FT                   /SNP_count="10"
FT   misc_feature    4574950..4575390
FT                   /node="internal_26->internal_27"
FT                   /neg_log_likelihood="4429.053717"
FT                   /colour="2"
FT                   /taxa=" BA8907-ND-ST302 BA9503-ND-ST302"
FT                   /SNP_count="12"
FT   misc_feature    949221..949589
FT                   /node="internal_26->internal_27"
FT                   /neg_log_likelihood="4388.824209"
FT                   /colour="2"
FT                   /taxa=" BA8907-ND-ST302 BA9503-ND-ST302"
FT                   /SNP_count="10"
FT   misc_feature    3018710..3020781
FT                   /node="internal_26->internal_27"
FT                   /neg_log_likelihood="4353.731856"
FT                   /colour="2"
FT                   /taxa=" BA8907-ND-ST302 BA9503-ND-ST302"
FT                   /SNP_count="14"
FT   misc_feature    4751190..4754641
FT                   /node="internal_26->internal_27"
FT                   /neg_log_likelihood="4306.442350"
FT                   /colour="2"
FT                   /taxa=" BA8907-ND-ST302 BA9503-ND-ST302"
FT                   /SNP_count="12"
FT   misc_feature    5321706..5329054
FT                   /node="internal_26->internal_27"
FT                   /neg_log_likelihood="4264.171904"
FT                   /colour="2"
FT                   /taxa=" BA8907-ND-ST302 BA9503-ND-ST302"
FT                   /SNP_count="13"
FT   misc_feature    3256585..3308937
FT                   /node="internal_24->internal_25"
FT                   /neg_log_likelihood="19626.061533"
FT                   /colour="2"
FT                   /taxa=" EA8393-Porcine-ST302 IA1729-Canine-ST302"
FT                   /SNP_count="1077"
FT   misc_feature    3970059..4007642
FT                   /node="internal_24->internal_25"
FT                   /neg_log_likelihood="16647.210803"
FT                   /colour="2"
FT                   /taxa=" EA8393-Porcine-ST302 IA1729-Canine-ST302"
FT                   /SNP_count="814"
FT   misc_feature    3718500..3764884
FT                   /node="internal_24->internal_25"
FT                   /neg_log_likelihood="14301.628692"
FT                   /colour="2"
FT                   /taxa=" EA8393-Porcine-ST302 IA1729-Canine-ST302"
FT                   /SNP_count="633"
FT   misc_feature    4045552..4081190
FT                   /node="internal_24->internal_25"
FT                   /neg_log_likelihood="12452.467161"
FT                   /colour="2"
FT                   /taxa=" EA8393-Porcine-ST302 IA1729-Canine-ST302"
FT                   /SNP_count="566"
FT   misc_feature    3871864..3893591
FT                   /node="internal_24->internal_25"
FT                   /neg_log_likelihood="10694.363301"
FT                   /colour="2"
FT                   /taxa=" EA8393-Porcine-ST302 IA1729-Canine-ST302"
FT                   /SNP_count="437"
FT   misc_feature    4668383..4715362
FT                   /node="internal_24->internal_25"
FT                   /neg_log_likelihood="9532.685593"
FT                   /colour="2"
FT                   /taxa=" EA8393-Porcine-ST302 IA1729-Canine-ST302"
FT                   /SNP_count="260"
FT   misc_feature    5250765..5303391
FT                   /node="internal_24->internal_25"
FT                   /neg_log_likelihood="8685.092358"
FT                   /colour="2"
FT                   /taxa=" EA8393-Porcine-ST302 IA1729-Canine-ST302"
FT                   /SNP_count="314"
FT   misc_feature    288991..304378
FT                   /node="internal_24->internal_25"
FT                   /neg_log_likelihood="7652.375021"
FT                   /colour="2"
FT                   /taxa=" EA8393-Porcine-ST302 IA1729-Canine-ST302"
FT                   /SNP_count="238"
FT   misc_feature    5201554..5204892
FT                   /node="internal_24->internal_25"
FT                   /neg_log_likelihood="6872.473343"
FT                   /colour="2"
FT                   /taxa=" EA8393-Porcine-ST302 IA1729-Canine-ST302"
FT                   /SNP_count="147"
FT   misc_feature    5137843..5189355
FT                   /node="internal_24->internal_25"
FT                   /neg_log_likelihood="6488.793289"
FT                   /colour="2"
FT                   /taxa=" EA8393-Porcine-ST302 IA1729-Canine-ST302"
FT                   /SNP_count="125"
FT   misc_feature    3852208..3854557
FT                   /node="internal_24->internal_25"
FT                   /neg_log_likelihood="6082.072752"
FT                   /colour="2"
FT                   /taxa=" EA8393-Porcine-ST302 IA1729-Canine-ST302"
FT                   /SNP_count="66"
FT   misc_feature    3623087..3625257
FT                   /node="internal_24->internal_25"
FT                   /neg_log_likelihood="5890.968776"
FT                   /colour="2"
FT                   /taxa=" EA8393-Porcine-ST302 IA1729-Canine-ST302"
FT                   /SNP_count="48"
FT   misc_feature    2952165..2955094
FT                   /node="internal_24->internal_25"
FT                   /neg_log_likelihood="5737.445496"
FT                   /colour="2"
FT                   /taxa=" EA8393-Porcine-ST302 IA1729-Canine-ST302"
FT                   /SNP_count="39"
FT   misc_feature    4750921..4767022
FT                   /node="internal_24->internal_25"
FT                   /neg_log_likelihood="5608.632861"
FT                   /colour="2"
FT                   /taxa=" EA8393-Porcine-ST302 IA1729-Canine-ST302"
FT                   /SNP_count="43"
FT   misc_feature    4946489..4966381
FT                   /node="internal_24->internal_25"
FT                   /neg_log_likelihood="5462.634188"
FT                   /colour="2"
FT                   /taxa=" EA8393-Porcine-ST302 IA1729-Canine-ST302"
FT                   /SNP_count="44"
FT   misc_feature    2824629..2826222
FT                   /node="internal_24->internal_25"
FT                   /neg_log_likelihood="5309.955475"
FT                   /colour="2"
FT                   /taxa=" EA8393-Porcine-ST302 IA1729-Canine-ST302"
FT                   /SNP_count="28"
FT   misc_feature    4722478..4729301
FT                   /node="internal_24->internal_25"
FT                   /neg_log_likelihood="5213.363104"
FT                   /colour="2"
FT                   /taxa=" EA8393-Porcine-ST302 IA1729-Canine-ST302"
FT                   /SNP_count="36"
FT   misc_feature    949574..964628
FT                   /node="internal_24->internal_25"
FT                   /neg_log_likelihood="5091.355204"
FT                   /colour="2"
FT                   /taxa=" EA8393-Porcine-ST302 IA1729-Canine-ST302"
FT                   /SNP_count="34"
FT   misc_feature    770688..774557
FT                   /node="internal_24->internal_25"
FT                   /neg_log_likelihood="4971.455205"
FT                   /colour="2"
FT                   /taxa=" EA8393-Porcine-ST302 IA1729-Canine-ST302"
FT                   /SNP_count="22"
FT   misc_feature    5328822..5338988
FT                   /node="internal_24->internal_25"
FT                   /neg_log_likelihood="4899.201740"
FT                   /colour="2"
FT                   /taxa=" EA8393-Porcine-ST302 IA1729-Canine-ST302"
FT                   /SNP_count="26"
FT   misc_feature    4280139..4290114
FT                   /node="internal_24->internal_25"
FT                   /neg_log_likelihood="4811.457883"
FT                   /colour="2"
FT                   /taxa=" EA8393-Porcine-ST302 IA1729-Canine-ST302"
FT                   /SNP_count="20"
FT   misc_feature    5034157..5037114
FT                   /node="internal_24->internal_25"
FT                   /neg_log_likelihood="4740.492250"
FT                   /colour="2"
FT                   /taxa=" EA8393-Porcine-ST302 IA1729-Canine-ST302"
FT                   /SNP_count="16"
FT   misc_feature    4580115..4584648
FT                   /node="internal_24->internal_25"
FT                   /neg_log_likelihood="4683.152167"
FT                   /colour="2"
FT                   /taxa=" EA8393-Porcine-ST302 IA1729-Canine-ST302"
FT                   /SNP_count="18"
FT   misc_feature    3268100..3307900
FT                   /node="internal_24->internal_26"
FT                   /neg_log_likelihood="2638.199579"
FT                   /colour="2"
FT                   /taxa=" F2_18C-Porcine-ST302  BA8907-ND-ST302 BA9503-ND-ST302"
FT                   /SNP_count="121"
FT   misc_feature    3969687..4007524
FT                   /node="internal_24->internal_26"
FT                   /neg_log_likelihood="2159.351965"
FT                   /colour="2"
FT                   /taxa=" F2_18C-Porcine-ST302  BA8907-ND-ST302 BA9503-ND-ST302"
FT                   /SNP_count="114"
FT   misc_feature    4045630..4080011
FT                   /node="internal_24->internal_26"
FT                   /neg_log_likelihood="1718.086055"
FT                   /colour="2"
FT                   /taxa=" F2_18C-Porcine-ST302  BA8907-ND-ST302 BA9503-ND-ST302"
FT                   /SNP_count="93"
FT   misc_feature    3718770..3743181
FT                   /node="internal_24->internal_26"
FT                   /neg_log_likelihood="1333.369828"
FT                   /colour="2"
FT                   /taxa=" F2_18C-Porcine-ST302  BA8907-ND-ST302 BA9503-ND-ST302"
FT                   /SNP_count="80"
FT   misc_feature    3257112..3261681
FT                   /node="internal_24->internal_26"
FT                   /neg_log_likelihood="1071.410940"
FT                   /colour="2"
FT                   /taxa=" F2_18C-Porcine-ST302  BA8907-ND-ST302 BA9503-ND-ST302"
FT                   /SNP_count="19"
FT   misc_feature    3762952..3764712
FT                   /node="internal_24->internal_26"
FT                   /neg_log_likelihood="997.149417"
FT                   /colour="2"
FT                   /taxa=" F2_18C-Porcine-ST302  BA8907-ND-ST302 BA9503-ND-ST302"
FT                   /SNP_count="12"
FT   misc_feature    3622647..3624453
FT                   /node="internal_24->internal_26"
FT                   /neg_log_likelihood="951.089960"
FT                   /colour="2"
FT                   /taxa=" F2_18C-Porcine-ST302  BA8907-ND-ST302 BA9503-ND-ST302"
FT                   /SNP_count="9"
FT   misc_feature    3861588..3891545
FT                   /node="internal_17->internal_18"
FT                   /neg_log_likelihood="4663.345684"
FT                   /colour="2"
FT                   /taxa="  IA7122-Poultry-ST302  EA2455-Poultry-ST302 Reference    EA1682-Poultry-ST302 IA4731-Poultry-ST302 CA0229-ND-ST302 CA0191-ND-ST302"
FT                   /SNP_count="153"
FT   misc_feature    2952105..2954897
FT                   /node="internal_17->internal_18"
FT                   /neg_log_likelihood="4106.053536"
FT                   /colour="2"
FT                   /taxa="  IA7122-Poultry-ST302  EA2455-Poultry-ST302 Reference    EA1682-Poultry-ST302 IA4731-Poultry-ST302 CA0229-ND-ST302 CA0191-ND-ST302"
FT                   /SNP_count="80"
FT   misc_feature    5137753..5153852
FT                   /node="internal_17->internal_18"
FT                   /neg_log_likelihood="3808.834413"
FT                   /colour="2"
FT                   /taxa="  IA7122-Poultry-ST302  EA2455-Poultry-ST302 Reference    EA1682-Poultry-ST302 IA4731-Poultry-ST302 CA0229-ND-ST302 CA0191-ND-ST302"
FT                   /SNP_count="115"
FT   misc_feature    962086..964628
FT                   /node="internal_17->internal_18"
FT                   /neg_log_likelihood="3430.559446"
FT                   /colour="2"
FT                   /taxa="  IA7122-Poultry-ST302  EA2455-Poultry-ST302 Reference    EA1682-Poultry-ST302 IA4731-Poultry-ST302 CA0229-ND-ST302 CA0191-ND-ST302"
FT                   /SNP_count="49"
FT   misc_feature    4751169..4757064
FT                   /node="internal_17->internal_18"
FT                   /neg_log_likelihood="3252.269256"
FT                   /colour="2"
FT                   /taxa="  IA7122-Poultry-ST302  EA2455-Poultry-ST302 Reference    EA1682-Poultry-ST302 IA4731-Poultry-ST302 CA0229-ND-ST302 CA0191-ND-ST302"
FT                   /SNP_count="53"
FT   misc_feature    5199395..5205315
FT                   /node="internal_17->internal_18"
FT                   /neg_log_likelihood="3060.950387"
FT                   /colour="2"
FT                   /taxa="  IA7122-Poultry-ST302  EA2455-Poultry-ST302 Reference    EA1682-Poultry-ST302 IA4731-Poultry-ST302 CA0229-ND-ST302 CA0191-ND-ST302"
FT                   /SNP_count="45"
FT   misc_feature    980657..981442
FT                   /node="internal_17->internal_18"
FT                   /neg_log_likelihood="2892.552101"
FT                   /colour="2"
FT                   /taxa="  IA7122-Poultry-ST302  EA2455-Poultry-ST302 Reference    EA1682-Poultry-ST302 IA4731-Poultry-ST302 CA0229-ND-ST302 CA0191-ND-ST302"
FT                   /SNP_count="27"
FT   misc_feature    5261503..5270693
FT                   /node="internal_17->internal_18"
FT                   /neg_log_likelihood="2788.799091"
FT                   /colour="2"
FT                   /taxa="  IA7122-Poultry-ST302  EA2455-Poultry-ST302 Reference    EA1682-Poultry-ST302 IA4731-Poultry-ST302 CA0229-ND-ST302 CA0191-ND-ST302"
FT                   /SNP_count="44"
FT   misc_feature    5185973..5191066
FT                   /node="internal_17->internal_18"
FT                   /neg_log_likelihood="2623.786890"
FT                   /colour="2"
FT                   /taxa="  IA7122-Poultry-ST302  EA2455-Poultry-ST302 Reference    EA1682-Poultry-ST302 IA4731-Poultry-ST302 CA0229-ND-ST302 CA0191-ND-ST302"
FT                   /SNP_count="33"
FT   misc_feature    5242657..5248437
FT                   /node="internal_17->internal_18"
FT                   /neg_log_likelihood="2494.218524"
FT                   /colour="2"
FT                   /taxa="  IA7122-Poultry-ST302  EA2455-Poultry-ST302 Reference    EA1682-Poultry-ST302 IA4731-Poultry-ST302 CA0229-ND-ST302 CA0191-ND-ST302"
FT                   /SNP_count="33"
FT   misc_feature    4702030..4710291
FT                   /node="internal_17->internal_18"
FT                   /neg_log_likelihood="2362.054152"
FT                   /colour="2"
FT                   /taxa="  IA7122-Poultry-ST302  EA2455-Poultry-ST302 Reference    EA1682-Poultry-ST302 IA4731-Poultry-ST302 CA0229-ND-ST302 CA0191-ND-ST302"
FT                   /SNP_count="36"
FT   misc_feature    4675983..4684668
FT                   /node="internal_17->internal_18"
FT                   /neg_log_likelihood="2220.707073"
FT                   /colour="2"
FT                   /taxa="  IA7122-Poultry-ST302  EA2455-Poultry-ST302 Reference    EA1682-Poultry-ST302 IA4731-Poultry-ST302 CA0229-ND-ST302 CA0191-ND-ST302"
FT                   /SNP_count="34"
FT   misc_feature    3501444..3515445
FT                   /node="internal_17->internal_18"
FT                   /neg_log_likelihood="2083.161115"
FT                   /colour="2"
FT                   /taxa="  IA7122-Poultry-ST302  EA2455-Poultry-ST302 Reference    EA1682-Poultry-ST302 IA4731-Poultry-ST302 CA0229-ND-ST302 CA0191-ND-ST302"
FT                   /SNP_count="38"
FT   misc_feature    3358644..3362891
FT                   /node="internal_17->internal_18"
FT                   /neg_log_likelihood="1929.915527"
FT                   /colour="2"
FT                   /taxa="  IA7122-Poultry-ST302  EA2455-Poultry-ST302 Reference    EA1682-Poultry-ST302 IA4731-Poultry-ST302 CA0229-ND-ST302 CA0191-ND-ST302"
FT                   /SNP_count="27"
FT   misc_feature    4449842..4452346
FT                   /node="internal_17->internal_18"
FT                   /neg_log_likelihood="1818.997650"
FT                   /colour="2"
FT                   /taxa="  IA7122-Poultry-ST302  EA2455-Poultry-ST302 Reference    EA1682-Poultry-ST302 IA4731-Poultry-ST302 CA0229-ND-ST302 CA0191-ND-ST302"
FT                   /SNP_count="24"
FT   misc_feature    5234260..5235485
FT                   /node="internal_17->internal_18"
FT                   /neg_log_likelihood="1724.224431"
FT                   /colour="2"
FT                   /taxa="  IA7122-Poultry-ST302  EA2455-Poultry-ST302 Reference    EA1682-Poultry-ST302 IA4731-Poultry-ST302 CA0229-ND-ST302 CA0191-ND-ST302"
FT                   /SNP_count="19"
FT   misc_feature    4188742..4189974
FT                   /node="internal_17->internal_18"
FT                   /neg_log_likelihood="1656.492877"
FT                   /colour="2"
FT                   /taxa="  IA7122-Poultry-ST302  EA2455-Poultry-ST302 Reference    EA1682-Poultry-ST302 IA4731-Poultry-ST302 CA0229-ND-ST302 CA0191-ND-ST302"
FT                   /SNP_count="14"
FT   misc_feature    4428489..4437834
FT                   /node="internal_17->internal_18"
FT                   /neg_log_likelihood="1599.150854"
FT                   /colour="2"
FT                   /taxa="  IA7122-Poultry-ST302  EA2455-Poultry-ST302 Reference    EA1682-Poultry-ST302 IA4731-Poultry-ST302 CA0229-ND-ST302 CA0191-ND-ST302"
FT                   /SNP_count="21"
FT   misc_feature    5328822..5331007
FT                   /node="internal_17->internal_18"
FT                   /neg_log_likelihood="1510.711281"
FT                   /colour="2"
FT                   /taxa="  IA7122-Poultry-ST302  EA2455-Poultry-ST302 Reference    EA1682-Poultry-ST302 IA4731-Poultry-ST302 CA0229-ND-ST302 CA0191-ND-ST302"
FT                   /SNP_count="15"
FT   misc_feature    4956995..4966585
FT                   /node="internal_17->internal_18"
FT                   /neg_log_likelihood="1447.168153"
FT                   /colour="2"
FT                   /taxa="  IA7122-Poultry-ST302  EA2455-Poultry-ST302 Reference    EA1682-Poultry-ST302 IA4731-Poultry-ST302 CA0229-ND-ST302 CA0191-ND-ST302"
FT                   /SNP_count="21"
FT   misc_feature    2190131..2191594
FT                   /node="internal_17->internal_18"
FT                   /neg_log_likelihood="1359.761710"
FT                   /colour="2"
FT                   /taxa="  IA7122-Poultry-ST302  EA2455-Poultry-ST302 Reference    EA1682-Poultry-ST302 IA4731-Poultry-ST302 CA0229-ND-ST302 CA0191-ND-ST302"
FT                   /SNP_count="13"
FT   misc_feature    5297772..5298200
FT                   /node="internal_17->internal_18"
FT                   /neg_log_likelihood="1305.776393"
FT                   /colour="2"
FT                   /taxa="  IA7122-Poultry-ST302  EA2455-Poultry-ST302 Reference    EA1682-Poultry-ST302 IA4731-Poultry-ST302 CA0229-ND-ST302 CA0191-ND-ST302"
FT                   /SNP_count="10"
FT   misc_feature    4105692..4106570
FT                   /node="internal_17->internal_18"
FT                   /neg_log_likelihood="1265.713292"
FT                   /colour="2"
FT                   /taxa="  IA7122-Poultry-ST302  EA2455-Poultry-ST302 Reference    EA1682-Poultry-ST302 IA4731-Poultry-ST302 CA0229-ND-ST302 CA0191-ND-ST302"
FT                   /SNP_count="10"
FT   misc_feature    5124909..5126167
FT                   /node="internal_17->internal_18"
FT                   /neg_log_likelihood="1224.060456"
FT                   /colour="2"
FT                   /taxa="  IA7122-Poultry-ST302  EA2455-Poultry-ST302 Reference    EA1682-Poultry-ST302 IA4731-Poultry-ST302 CA0229-ND-ST302 CA0191-ND-ST302"
FT                   /SNP_count="10"
FT   misc_feature    4519927..4521784
FT                   /node="internal_17->internal_18"
FT                   /neg_log_likelihood="1182.340775"
FT                   /colour="2"
FT                   /taxa="  IA7122-Poultry-ST302  EA2455-Poultry-ST302 Reference    EA1682-Poultry-ST302 IA4731-Poultry-ST302 CA0229-ND-ST302 CA0191-ND-ST302"
FT                   /SNP_count="10"
FT   misc_feature    3852124..3852712
FT                   /node="internal_17->internal_18"
FT                   /neg_log_likelihood="1139.396743"
FT                   /colour="2"
FT                   /taxa="  IA7122-Poultry-ST302  EA2455-Poultry-ST302 Reference    EA1682-Poultry-ST302 IA4731-Poultry-ST302 CA0229-ND-ST302 CA0191-ND-ST302"
FT                   /SNP_count="8"
FT   misc_feature    3490655..3492474
FT                   /node="internal_17->internal_18"
FT                   /neg_log_likelihood="1107.995739"
FT                   /colour="2"
FT                   /taxa="  IA7122-Poultry-ST302  EA2455-Poultry-ST302 Reference    EA1682-Poultry-ST302 IA4731-Poultry-ST302 CA0229-ND-ST302 CA0191-ND-ST302"
FT                   /SNP_count="8"
FT   misc_feature    949574..1048062
FT                   /node="internal_17->internal_24"
FT                   /neg_log_likelihood="27966.172821"
FT                   /colour="2"
FT                   /taxa="  EA8393-Porcine-ST302 IA1729-Canine-ST302  F2_18C-Porcine-ST302  BA8907-ND-ST302 BA9503-ND-ST302"
FT                   /SNP_count="1434"
FT   misc_feature    3852007..3894734
FT                   /node="internal_17->internal_24"
FT                   /neg_log_likelihood="24222.244016"
FT                   /colour="2"
FT                   /taxa="  EA8393-Porcine-ST302 IA1729-Canine-ST302  F2_18C-Porcine-ST302  BA8907-ND-ST302 BA9503-ND-ST302"
FT                   /SNP_count="884"
FT   misc_feature    2748962..2808530
FT                   /node="internal_17->internal_24"
FT                   /neg_log_likelihood="21749.831052"
FT                   /colour="2"
FT                   /taxa="  EA8393-Porcine-ST302 IA1729-Canine-ST302  F2_18C-Porcine-ST302  BA8907-ND-ST302 BA9503-ND-ST302"
FT                   /SNP_count="847"
FT   misc_feature    4668251..4729149
FT                   /node="internal_17->internal_24"
FT                   /neg_log_likelihood="19394.119885"
FT                   /colour="2"
FT                   /taxa="  EA8393-Porcine-ST302 IA1729-Canine-ST302  F2_18C-Porcine-ST302  BA8907-ND-ST302 BA9503-ND-ST302"
FT                   /SNP_count="678"
FT   misc_feature    3470302..3519689
FT                   /node="internal_17->internal_24"
FT                   /neg_log_likelihood="17493.092275"
FT                   /colour="2"
FT                   /taxa="  EA8393-Porcine-ST302 IA1729-Canine-ST302  F2_18C-Porcine-ST302  BA8907-ND-ST302 BA9503-ND-ST302"
FT                   /SNP_count="624"
FT   misc_feature    5242621..5339325
FT                   /node="internal_17->internal_24"
FT                   /neg_log_likelihood="15688.069511"
FT                   /colour="2"
FT                   /taxa="  EA8393-Porcine-ST302 IA1729-Canine-ST302  F2_18C-Porcine-ST302  BA8907-ND-ST302 BA9503-ND-ST302"
FT                   /SNP_count="676"
FT   misc_feature    5180548..5223168
FT                   /node="internal_17->internal_24"
FT                   /neg_log_likelihood="13632.392892"
FT                   /colour="2"
FT                   /taxa="  EA8393-Porcine-ST302 IA1729-Canine-ST302  F2_18C-Porcine-ST302  BA8907-ND-ST302 BA9503-ND-ST302"
FT                   /SNP_count="424"
FT   misc_feature    4283271..4293181
FT                   /node="internal_17->internal_24"
FT                   /neg_log_likelihood="12348.695098"
FT                   /colour="2"
FT                   /taxa="  EA8393-Porcine-ST302 IA1729-Canine-ST302  F2_18C-Porcine-ST302  BA8907-ND-ST302 BA9503-ND-ST302"
FT                   /SNP_count="266"
FT   misc_feature    4425470..4450782
FT                   /node="internal_17->internal_24"
FT                   /neg_log_likelihood="11554.716973"
FT                   /colour="2"
FT                   /taxa="  EA8393-Porcine-ST302 IA1729-Canine-ST302  F2_18C-Porcine-ST302  BA8907-ND-ST302 BA9503-ND-ST302"
FT                   /SNP_count="291"
FT   misc_feature    4182454..4190010
FT                   /node="internal_17->internal_24"
FT                   /neg_log_likelihood="10651.357778"
FT                   /colour="2"
FT                   /taxa="  EA8393-Porcine-ST302 IA1729-Canine-ST302  F2_18C-Porcine-ST302  BA8907-ND-ST302 BA9503-ND-ST302"
FT                   /SNP_count="197"
FT   misc_feature    5096314..5162693
FT                   /node="internal_17->internal_24"
FT                   /neg_log_likelihood="10078.410960"
FT                   /colour="2"
FT                   /taxa="  EA8393-Porcine-ST302 IA1729-Canine-ST302  F2_18C-Porcine-ST302  BA8907-ND-ST302 BA9503-ND-ST302"
FT                   /SNP_count="317"
FT   misc_feature    4911564..4924390
FT                   /node="internal_17->internal_24"
FT                   /neg_log_likelihood="9045.559952"
FT                   /colour="2"
FT                   /taxa="  EA8393-Porcine-ST302 IA1729-Canine-ST302  F2_18C-Porcine-ST302  BA8907-ND-ST302 BA9503-ND-ST302"
FT                   /SNP_count="202"
FT   misc_feature    4077246..4115412
FT                   /node="internal_17->internal_24"
FT                   /neg_log_likelihood="8468.170658"
FT                   /colour="2"
FT                   /taxa="  EA8393-Porcine-ST302 IA1729-Canine-ST302  F2_18C-Porcine-ST302  BA8907-ND-ST302 BA9503-ND-ST302"
FT                   /SNP_count="129"
FT   misc_feature    5048199..5056959
FT                   /node="internal_17->internal_24"
FT                   /neg_log_likelihood="8051.029335"
FT                   /colour="2"
FT                   /taxa="  EA8393-Porcine-ST302 IA1729-Canine-ST302  F2_18C-Porcine-ST302  BA8907-ND-ST302 BA9503-ND-ST302"
FT                   /SNP_count="99"
FT   misc_feature    4748657..4767986
FT                   /node="internal_17->internal_24"
FT                   /neg_log_likelihood="7786.213922"
FT                   /colour="2"
FT                   /taxa="  EA8393-Porcine-ST302 IA1729-Canine-ST302  F2_18C-Porcine-ST302  BA8907-ND-ST302 BA9503-ND-ST302"
FT                   /SNP_count="87"
FT   misc_feature    4946949..4966748
FT                   /node="internal_17->internal_24"
FT                   /neg_log_likelihood="7494.299488"
FT                   /colour="2"
FT                   /taxa="  EA8393-Porcine-ST302 IA1729-Canine-ST302  F2_18C-Porcine-ST302  BA8907-ND-ST302 BA9503-ND-ST302"
FT                   /SNP_count="81"
FT   misc_feature    3268100..3310504
FT                   /node="internal_17->internal_24"
FT                   /neg_log_likelihood="7206.580748"
FT                   /colour="2"
FT                   /taxa="  EA8393-Porcine-ST302 IA1729-Canine-ST302  F2_18C-Porcine-ST302  BA8907-ND-ST302 BA9503-ND-ST302"
FT                   /SNP_count="162"
FT   misc_feature    3623087..3625257
FT                   /node="internal_17->internal_24"
FT                   /neg_log_likelihood="6672.663959"
FT                   /colour="2"
FT                   /taxa="  EA8393-Porcine-ST302 IA1729-Canine-ST302  F2_18C-Porcine-ST302  BA8907-ND-ST302 BA9503-ND-ST302"
FT                   /SNP_count="53"
FT   misc_feature    3339497..3356458
FT                   /node="internal_17->internal_24"
FT                   /neg_log_likelihood="6500.048064"
FT                   /colour="2"
FT                   /taxa="  EA8393-Porcine-ST302 IA1729-Canine-ST302  F2_18C-Porcine-ST302  BA8907-ND-ST302 BA9503-ND-ST302"
FT                   /SNP_count="41"
FT   misc_feature    3969691..4007524
FT                   /node="internal_17->internal_24"
FT                   /neg_log_likelihood="6357.512574"
FT                   /colour="2"
FT                   /taxa="  EA8393-Porcine-ST302 IA1729-Canine-ST302  F2_18C-Porcine-ST302  BA8907-ND-ST302 BA9503-ND-ST302"
FT                   /SNP_count="118"
FT   misc_feature    1053345..1056220
FT                   /node="internal_17->internal_24"
FT                   /neg_log_likelihood="5955.813400"
FT                   /colour="2"
FT                   /taxa="  EA8393-Porcine-ST302 IA1729-Canine-ST302  F2_18C-Porcine-ST302  BA8907-ND-ST302 BA9503-ND-ST302"
FT                   /SNP_count="45"
FT   misc_feature    1618779..1629412
FT                   /node="internal_17->internal_24"
FT                   /neg_log_likelihood="5799.794733"
FT                   /colour="2"
FT                   /taxa="  EA8393-Porcine-ST302 IA1729-Canine-ST302  F2_18C-Porcine-ST302  BA8907-ND-ST302 BA9503-ND-ST302"
FT                   /SNP_count="44"
FT   misc_feature    769268..784455
FT                   /node="internal_17->internal_24"
FT                   /neg_log_likelihood="5650.806127"
FT                   /colour="2"
FT                   /taxa="  EA8393-Porcine-ST302 IA1729-Canine-ST302  F2_18C-Porcine-ST302  BA8907-ND-ST302 BA9503-ND-ST302"
FT                   /SNP_count="62"
FT   misc_feature    3718500..3743181
FT                   /node="internal_17->internal_24"
FT                   /neg_log_likelihood="5433.610686"
FT                   /colour="2"
FT                   /taxa="  EA8393-Porcine-ST302 IA1729-Canine-ST302  F2_18C-Porcine-ST302  BA8907-ND-ST302 BA9503-ND-ST302"
FT                   /SNP_count="79"
FT   misc_feature    2815543..2826222
FT                   /node="internal_17->internal_24"
FT                   /neg_log_likelihood="5154.673530"
FT                   /colour="2"
FT                   /taxa="  EA8393-Porcine-ST302 IA1729-Canine-ST302  F2_18C-Porcine-ST302  BA8907-ND-ST302 BA9503-ND-ST302"
FT                   /SNP_count="53"
FT   misc_feature    4045630..4073787
FT                   /node="internal_17->internal_24"
FT                   /neg_log_likelihood="4964.634650"
FT                   /colour="2"
FT                   /taxa="  EA8393-Porcine-ST302 IA1729-Canine-ST302  F2_18C-Porcine-ST302  BA8907-ND-ST302 BA9503-ND-ST302"
FT                   /SNP_count="80"
FT   misc_feature    2952165..2954889
FT                   /node="internal_17->internal_24"
FT                   /neg_log_likelihood="4685.569226"
FT                   /colour="2"
FT                   /taxa="  EA8393-Porcine-ST302 IA1729-Canine-ST302  F2_18C-Porcine-ST302  BA8907-ND-ST302 BA9503-ND-ST302"
FT                   /SNP_count="31"
FT   misc_feature    4519952..4523556
FT                   /node="internal_17->internal_24"
FT                   /neg_log_likelihood="4576.414751"
FT                   /colour="2"
FT                   /taxa="  EA8393-Porcine-ST302 IA1729-Canine-ST302  F2_18C-Porcine-ST302  BA8907-ND-ST302 BA9503-ND-ST302"
FT                   /SNP_count="28"
FT   misc_feature    4395410..4399772
FT                   /node="internal_17->internal_24"
FT                   /neg_log_likelihood="4481.462204"
FT                   /colour="2"
FT                   /taxa="  EA8393-Porcine-ST302 IA1729-Canine-ST302  F2_18C-Porcine-ST302  BA8907-ND-ST302 BA9503-ND-ST302"
FT                   /SNP_count="30"
FT   misc_feature    4203092..4221328
FT                   /node="internal_17->internal_24"
FT                   /neg_log_likelihood="4380.420474"
FT                   /colour="2"
FT                   /taxa="  EA8393-Porcine-ST302 IA1729-Canine-ST302  F2_18C-Porcine-ST302  BA8907-ND-ST302 BA9503-ND-ST302"
FT                   /SNP_count="33"
FT   misc_feature    4897549..4897762
FT                   /node="internal_17->internal_24"
FT                   /neg_log_likelihood="4264.642000"
FT                   /colour="2"
FT                   /taxa="  EA8393-Porcine-ST302 IA1729-Canine-ST302  F2_18C-Porcine-ST302  BA8907-ND-ST302 BA9503-ND-ST302"
FT                   /SNP_count="12"
FT   misc_feature    5232263..5235891
FT                   /node="internal_17->internal_24"
FT                   /neg_log_likelihood="4221.438414"
FT                   /colour="2"
FT                   /taxa="  EA8393-Porcine-ST302 IA1729-Canine-ST302  F2_18C-Porcine-ST302  BA8907-ND-ST302 BA9503-ND-ST302"
FT                   /SNP_count="21"
FT   misc_feature    3257112..3261681
FT                   /node="internal_17->internal_24"
FT                   /neg_log_likelihood="4151.143908"
FT                   /colour="2"
FT                   /taxa="  EA8393-Porcine-ST302 IA1729-Canine-ST302  F2_18C-Porcine-ST302  BA8907-ND-ST302 BA9503-ND-ST302"
FT                   /SNP_count="19"
FT   misc_feature    2189617..2191582
FT                   /node="internal_17->internal_24"
FT                   /neg_log_likelihood="4081.959561"
FT                   /colour="2"
FT                   /taxa="  EA8393-Porcine-ST302 IA1729-Canine-ST302  F2_18C-Porcine-ST302  BA8907-ND-ST302 BA9503-ND-ST302"
FT                   /SNP_count="10"
FT   misc_feature    3018385..3020781
FT                   /node="internal_17->internal_24"
FT                   /neg_log_likelihood="4048.912054"
FT                   /colour="2"
FT                   /taxa="  EA8393-Porcine-ST302 IA1729-Canine-ST302  F2_18C-Porcine-ST302  BA8907-ND-ST302 BA9503-ND-ST302"
FT                   /SNP_count="13"
FT   misc_feature    3759726..3765838
FT                   /node="internal_17->internal_24"
FT                   /neg_log_likelihood="4002.722858"
FT                   /colour="2"
FT                   /taxa="  EA8393-Porcine-ST302 IA1729-Canine-ST302  F2_18C-Porcine-ST302  BA8907-ND-ST302 BA9503-ND-ST302"
FT                   /SNP_count="16"
FT   misc_feature    5138223..5143138
FT                   /node="internal_16->IA1186-Poultry-ST302"
FT                   /neg_log_likelihood="1220.399952"
FT                   /colour="4"
FT                   /taxa="IA1186-Poultry-ST302"
FT                   /SNP_count="111"
FT   misc_feature    5030070..5031746
FT                   /node="internal_16->IA1186-Poultry-ST302"
FT                   /neg_log_likelihood="834.237020"
FT                   /colour="4"
FT                   /taxa="IA1186-Poultry-ST302"
FT                   /SNP_count="68"
FT   misc_feature    5301893..5301939
FT                   /node="internal_16->IA1186-Poultry-ST302"
FT                   /neg_log_likelihood="678.377155"
FT                   /colour="4"
FT                   /taxa="IA1186-Poultry-ST302"
FT                   /SNP_count="10"
FT   misc_feature    5232479..5248437
FT                   /node="internal_16->IA1186-Poultry-ST302"
FT                   /neg_log_likelihood="633.092760"
FT                   /colour="4"
FT                   /taxa="IA1186-Poultry-ST302"
FT                   /SNP_count="20"
FT   misc_feature    2499573..2499648
FT                   /node="internal_16->IA1186-Poultry-ST302"
FT                   /neg_log_likelihood="547.026138"
FT                   /colour="4"
FT                   /taxa="IA1186-Poultry-ST302"
FT                   /SNP_count="9"
FT   misc_feature    4676424..4707231
FT                   /node="internal_16->IA1186-Poultry-ST302"
FT                   /neg_log_likelihood="506.949433"
FT                   /colour="4"
FT                   /taxa="IA1186-Poultry-ST302"
FT                   /SNP_count="14"
FT   misc_feature    952105..952177
FT                   /node="internal_16->IA1186-Poultry-ST302"
FT                   /neg_log_likelihood="443.164469"
FT                   /colour="4"
FT                   /taxa="IA1186-Poultry-ST302"
FT                   /SNP_count="8"
FT   misc_feature    3859069..3859091
FT                   /node="internal_16->IA1186-Poultry-ST302"
FT                   /neg_log_likelihood="405.600336"
FT                   /colour="4"
FT                   /taxa="IA1186-Poultry-ST302"
FT                   /SNP_count="7"
FT   misc_feature    4896395..4896647
FT                   /node="internal_16->IA1186-Poultry-ST302"
FT                   /neg_log_likelihood="385.046031"
FT                   /colour="4"
FT                   /taxa="IA1186-Poultry-ST302"
FT                   /SNP_count="5"
FT   misc_feature    3492435..3494356
FT                   /node="internal_16->IA1186-Poultry-ST302"
FT                   /neg_log_likelihood="362.083947"
FT                   /colour="4"
FT                   /taxa="IA1186-Poultry-ST302"
FT                   /SNP_count="6"
FT   misc_feature    3853367..3894133
FT                   /node="internal_28->internal_16"
FT                   /neg_log_likelihood="16799.279482"
FT                   /colour="2"
FT                   /taxa=" FA0416-Human-ST302 IA1186-Poultry-ST302"
FT                   /SNP_count="530"
FT   misc_feature    4668457..4729222
FT                   /node="internal_28->internal_16"
FT                   /neg_log_likelihood="15445.757448"
FT                   /colour="2"
FT                   /taxa=" FA0416-Human-ST302 IA1186-Poultry-ST302"
FT                   /SNP_count="216"
FT   misc_feature    4449842..4451271
FT                   /node="internal_28->internal_16"
FT                   /neg_log_likelihood="14793.825151"
FT                   /colour="2"
FT                   /taxa=" FA0416-Human-ST302 IA1186-Poultry-ST302"
FT                   /SNP_count="105"
FT   misc_feature    1616396..1629435
FT                   /node="internal_28->internal_16"
FT                   /neg_log_likelihood="14477.401645"
FT                   /colour="2"
FT                   /taxa=" FA0416-Human-ST302 IA1186-Poultry-ST302"
FT                   /SNP_count="166"
FT   misc_feature    1238000..1259798
FT                   /node="internal_28->internal_16"
FT                   /neg_log_likelihood="13991.269783"
FT                   /colour="2"
FT                   /taxa=" FA0416-Human-ST302 IA1186-Poultry-ST302"
FT                   /SNP_count="209"
FT   misc_feature    4748728..4754776
FT                   /node="internal_28->internal_16"
FT                   /neg_log_likelihood="13375.682994"
FT                   /colour="2"
FT                   /taxa=" FA0416-Human-ST302 IA1186-Poultry-ST302"
FT                   /SNP_count="104"
FT   misc_feature    5028311..5054094
FT                   /node="internal_28->internal_16"
FT                   /neg_log_likelihood="13067.403816"
FT                   /colour="2"
FT                   /taxa=" FA0416-Human-ST302 IA1186-Poultry-ST302"
FT                   /SNP_count="126"
FT   misc_feature    5259932..5279685
FT                   /node="internal_28->internal_16"
FT                   /neg_log_likelihood="12672.983466"
FT                   /colour="2"
FT                   /taxa=" FA0416-Human-ST302 IA1186-Poultry-ST302"
FT                   /SNP_count="129"
FT   misc_feature    5134874..5148789
FT                   /node="internal_28->internal_16"
FT                   /neg_log_likelihood="12268.513841"
FT                   /colour="2"
FT                   /taxa=" FA0416-Human-ST302 IA1186-Poultry-ST302"
FT                   /SNP_count="127"
FT   misc_feature    2821018..2825373
FT                   /node="internal_28->internal_16"
FT                   /neg_log_likelihood="11882.200270"
FT                   /colour="2"
FT                   /taxa=" FA0416-Human-ST302 IA1186-Poultry-ST302"
FT                   /SNP_count="46"
FT   misc_feature    769685..780834
FT                   /node="internal_28->internal_16"
FT                   /neg_log_likelihood="11742.048737"
FT                   /colour="2"
FT                   /taxa=" FA0416-Human-ST302 IA1186-Poultry-ST302"
FT                   /SNP_count="89"
FT   misc_feature    5187446..5223531
FT                   /node="internal_28->internal_16"
FT                   /neg_log_likelihood="11473.120048"
FT                   /colour="2"
FT                   /taxa=" FA0416-Human-ST302 IA1186-Poultry-ST302"
FT                   /SNP_count="122"
FT   misc_feature    443221..443248
FT                   /node="internal_28->internal_16"
FT                   /neg_log_likelihood="11087.153252"
FT                   /colour="2"
FT                   /taxa=" FA0416-Human-ST302 IA1186-Poultry-ST302"
FT                   /SNP_count="21"
FT   misc_feature    4426507..4427056
FT                   /node="internal_28->internal_16"
FT                   /neg_log_likelihood="11033.696141"
FT                   /colour="2"
FT                   /taxa=" FA0416-Human-ST302 IA1186-Poultry-ST302"
FT                   /SNP_count="30"
FT   misc_feature    4953386..4967476
FT                   /node="internal_28->internal_16"
FT                   /neg_log_likelihood="10944.932385"
FT                   /colour="2"
FT                   /taxa=" FA0416-Human-ST302 IA1186-Poultry-ST302"
FT                   /SNP_count="56"
FT   misc_feature    3625325..3628344
FT                   /node="internal_28->internal_16"
FT                   /neg_log_likelihood="10784.609528"
FT                   /colour="2"
FT                   /taxa=" FA0416-Human-ST302 IA1186-Poultry-ST302"
FT                   /SNP_count="27"
FT   misc_feature    5097281..5102863
FT                   /node="internal_28->internal_16"
FT                   /neg_log_likelihood="10699.756156"
FT                   /colour="2"
FT                   /taxa=" FA0416-Human-ST302 IA1186-Poultry-ST302"
FT                   /SNP_count="32"
FT   misc_feature    4283445..4295879
FT                   /node="internal_28->internal_16"
FT                   /neg_log_likelihood="10597.044271"
FT                   /colour="2"
FT                   /taxa=" FA0416-Human-ST302 IA1186-Poultry-ST302"
FT                   /SNP_count="32"
FT   misc_feature    5288171..5302335
FT                   /node="internal_28->internal_16"
FT                   /neg_log_likelihood="10493.801172"
FT                   /colour="2"
FT                   /taxa=" FA0416-Human-ST302 IA1186-Poultry-ST302"
FT                   /SNP_count="38"
FT   misc_feature    3915481..3928815
FT                   /node="internal_28->internal_16"
FT                   /neg_log_likelihood="10371.451376"
FT                   /colour="2"
FT                   /taxa=" FA0416-Human-ST302 IA1186-Poultry-ST302"
FT                   /SNP_count="44"
FT   misc_feature    2952105..2954993
FT                   /node="internal_28->internal_16"
FT                   /neg_log_likelihood="10233.680932"
FT                   /colour="2"
FT                   /taxa=" FA0416-Human-ST302 IA1186-Poultry-ST302"
FT                   /SNP_count="16"
FT   misc_feature    3851565..3895094
FT                   /node="internal_ROOT->internal_17"
FT                   /neg_log_likelihood="8062.878621"
FT                   /colour="2"
FT                   /taxa="   IA7122-Poultry-ST302  EA2455-Poultry-ST302 Reference    EA1682-Poultry-ST302 IA4731-Poultry-ST302 CA0229-ND-ST302 CA0191-ND-ST302   EA8393-Porcine-ST302 IA1729-Canine-ST302  F2_18C-Porcine-ST302  BA8907-ND-ST302 BA9503-ND-ST302"
FT                   /SNP_count="343"
FT   misc_feature    4701802..4715628
FT                   /node="internal_ROOT->internal_17"
FT                   /neg_log_likelihood="7032.488013"
FT                   /colour="2"
FT                   /taxa="   IA7122-Poultry-ST302  EA2455-Poultry-ST302 Reference    EA1682-Poultry-ST302 IA4731-Poultry-ST302 CA0229-ND-ST302 CA0191-ND-ST302   EA8393-Porcine-ST302 IA1729-Canine-ST302  F2_18C-Porcine-ST302  BA8907-ND-ST302 BA9503-ND-ST302"
FT                   /SNP_count="148"
FT   misc_feature    4668242..4670136
FT                   /node="internal_ROOT->internal_17"
FT                   /neg_log_likelihood="6547.462012"
FT                   /colour="2"
FT                   /taxa="   IA7122-Poultry-ST302  EA2455-Poultry-ST302 Reference    EA1682-Poultry-ST302 IA4731-Poultry-ST302 CA0229-ND-ST302 CA0191-ND-ST302   EA8393-Porcine-ST302 IA1729-Canine-ST302  F2_18C-Porcine-ST302  BA8907-ND-ST302 BA9503-ND-ST302"
FT                   /SNP_count="77"
FT   misc_feature    2952236..2954885
FT                   /node="internal_ROOT->internal_17"
FT                   /neg_log_likelihood="6285.150609"
FT                   /colour="2"
FT                   /taxa="   IA7122-Poultry-ST302  EA2455-Poultry-ST302 Reference    EA1682-Poultry-ST302 IA4731-Poultry-ST302 CA0229-ND-ST302 CA0191-ND-ST302   EA8393-Porcine-ST302 IA1729-Canine-ST302  F2_18C-Porcine-ST302  BA8907-ND-ST302 BA9503-ND-ST302"
FT                   /SNP_count="78"
FT   misc_feature    4283380..4293099
FT                   /node="internal_ROOT->internal_17"
FT                   /neg_log_likelihood="6014.791868"
FT                   /colour="2"
FT                   /taxa="   IA7122-Poultry-ST302  EA2455-Poultry-ST302 Reference    EA1682-Poultry-ST302 IA4731-Poultry-ST302 CA0229-ND-ST302 CA0191-ND-ST302   EA8393-Porcine-ST302 IA1729-Canine-ST302  F2_18C-Porcine-ST302  BA8907-ND-ST302 BA9503-ND-ST302"
FT                   /SNP_count="102"
FT   misc_feature    4182589..4190010
FT                   /node="internal_ROOT->internal_17"
FT                   /neg_log_likelihood="5659.249294"
FT                   /colour="2"
FT                   /taxa="   IA7122-Poultry-ST302  EA2455-Poultry-ST302 Reference    EA1682-Poultry-ST302 IA4731-Poultry-ST302 CA0229-ND-ST302 CA0191-ND-ST302   EA8393-Porcine-ST302 IA1729-Canine-ST302  F2_18C-Porcine-ST302  BA8907-ND-ST302 BA9503-ND-ST302"
FT                   /SNP_count="89"
FT   misc_feature    5243932..5285371
FT                   /node="internal_ROOT->internal_17"
FT                   /neg_log_likelihood="5341.408843"
FT                   /colour="2"
FT                   /taxa="   IA7122-Poultry-ST302  EA2455-Poultry-ST302 Reference    EA1682-Poultry-ST302 IA4731-Poultry-ST302 CA0229-ND-ST302 CA0191-ND-ST302   EA8393-Porcine-ST302 IA1729-Canine-ST302  F2_18C-Porcine-ST302  BA8907-ND-ST302 BA9503-ND-ST302"
FT                   /SNP_count="144"
FT   misc_feature    4085203..4085770
FT                   /node="internal_ROOT->internal_17"
FT                   /neg_log_likelihood="4814.908109"
FT                   /colour="2"
FT                   /taxa="   IA7122-Poultry-ST302  EA2455-Poultry-ST302 Reference    EA1682-Poultry-ST302 IA4731-Poultry-ST302 CA0229-ND-ST302 CA0191-ND-ST302   EA8393-Porcine-ST302 IA1729-Canine-ST302  F2_18C-Porcine-ST302  BA8907-ND-ST302 BA9503-ND-ST302"
FT                   /SNP_count="51"
FT   misc_feature    4750907..4755794
FT                   /node="internal_ROOT->internal_17"
FT                   /neg_log_likelihood="4639.929726"
FT                   /colour="2"
FT                   /taxa="   IA7122-Poultry-ST302  EA2455-Poultry-ST302 Reference    EA1682-Poultry-ST302 IA4731-Poultry-ST302 CA0229-ND-ST302 CA0191-ND-ST302   EA8393-Porcine-ST302 IA1729-Canine-ST302  F2_18C-Porcine-ST302  BA8907-ND-ST302 BA9503-ND-ST302"
FT                   /SNP_count="71"
FT   misc_feature    954055..964628
FT                   /node="internal_ROOT->internal_17"
FT                   /neg_log_likelihood="4397.215204"
FT                   /colour="2"
FT                   /taxa="   IA7122-Poultry-ST302  EA2455-Poultry-ST302 Reference    EA1682-Poultry-ST302 IA4731-Poultry-ST302 CA0229-ND-ST302 CA0191-ND-ST302   EA8393-Porcine-ST302 IA1729-Canine-ST302  F2_18C-Porcine-ST302  BA8907-ND-ST302 BA9503-ND-ST302"
FT                   /SNP_count="73"
FT   misc_feature    5201728..5205195
FT                   /node="internal_ROOT->internal_17"
FT                   /neg_log_likelihood="4133.620613"
FT                   /colour="2"
FT                   /taxa="   IA7122-Poultry-ST302  EA2455-Poultry-ST302 Reference    EA1682-Poultry-ST302 IA4731-Poultry-ST302 CA0229-ND-ST302 CA0191-ND-ST302   EA8393-Porcine-ST302 IA1729-Canine-ST302  F2_18C-Porcine-ST302  BA8907-ND-ST302 BA9503-ND-ST302"
FT                   /SNP_count="51"
FT   misc_feature    5186549..5190488
FT                   /node="internal_ROOT->internal_17"
FT                   /neg_log_likelihood="3948.917737"
FT                   /colour="2"
FT                   /taxa="   IA7122-Poultry-ST302  EA2455-Poultry-ST302 Reference    EA1682-Poultry-ST302 IA4731-Poultry-ST302 CA0229-ND-ST302 CA0191-ND-ST302   EA8393-Porcine-ST302 IA1729-Canine-ST302  F2_18C-Porcine-ST302  BA8907-ND-ST302 BA9503-ND-ST302"
FT                   /SNP_count="49"
FT   misc_feature    4951250..4966747
FT                   /node="internal_ROOT->internal_17"
FT                   /neg_log_likelihood="3766.272374"
FT                   /colour="2"
FT                   /taxa="   IA7122-Poultry-ST302  EA2455-Poultry-ST302 Reference    EA1682-Poultry-ST302 IA4731-Poultry-ST302 CA0229-ND-ST302 CA0191-ND-ST302   EA8393-Porcine-ST302 IA1729-Canine-ST302  F2_18C-Porcine-ST302  BA8907-ND-ST302 BA9503-ND-ST302"
FT                   /SNP_count="68"
FT   misc_feature    5048699..5051466
FT                   /node="internal_ROOT->internal_17"
FT                   /neg_log_likelihood="3511.851463"
FT                   /colour="2"
FT                   /taxa="   IA7122-Poultry-ST302  EA2455-Poultry-ST302 Reference    EA1682-Poultry-ST302 IA4731-Poultry-ST302 CA0229-ND-ST302 CA0191-ND-ST302   EA8393-Porcine-ST302 IA1729-Canine-ST302  F2_18C-Porcine-ST302  BA8907-ND-ST302 BA9503-ND-ST302"
FT                   /SNP_count="42"
FT   misc_feature    5138018..5144044
FT                   /node="internal_ROOT->internal_17"
FT                   /neg_log_likelihood="3353.057482"
FT                   /colour="2"
FT                   /taxa="   IA7122-Poultry-ST302  EA2455-Poultry-ST302 Reference    EA1682-Poultry-ST302 IA4731-Poultry-ST302 CA0229-ND-ST302 CA0191-ND-ST302   EA8393-Porcine-ST302 IA1729-Canine-ST302  F2_18C-Porcine-ST302  BA8907-ND-ST302 BA9503-ND-ST302"
FT                   /SNP_count="49"
FT   misc_feature    4425657..4441858
FT                   /node="internal_ROOT->internal_17"
FT                   /neg_log_likelihood="3168.927227"
FT                   /colour="2"
FT                   /taxa="   IA7122-Poultry-ST302  EA2455-Poultry-ST302 Reference    EA1682-Poultry-ST302 IA4731-Poultry-ST302 CA0229-ND-ST302 CA0191-ND-ST302   EA8393-Porcine-ST302 IA1729-Canine-ST302  F2_18C-Porcine-ST302  BA8907-ND-ST302 BA9503-ND-ST302"
FT                   /SNP_count="60"
FT   misc_feature    1619097..1630941
FT                   /node="internal_ROOT->internal_17"
FT                   /neg_log_likelihood="2941.064235"
FT                   /colour="2"
FT                   /taxa="   IA7122-Poultry-ST302  EA2455-Poultry-ST302 Reference    EA1682-Poultry-ST302 IA4731-Poultry-ST302 CA0229-ND-ST302 CA0191-ND-ST302   EA8393-Porcine-ST302 IA1729-Canine-ST302  F2_18C-Porcine-ST302  BA8907-ND-ST302 BA9503-ND-ST302"
FT                   /SNP_count="51"
FT   misc_feature    4519838..4521928
FT                   /node="internal_ROOT->internal_17"
FT                   /neg_log_likelihood="2749.602003"
FT                   /colour="2"
FT                   /taxa="   IA7122-Poultry-ST302  EA2455-Poultry-ST302 Reference    EA1682-Poultry-ST302 IA4731-Poultry-ST302 CA0229-ND-ST302 CA0191-ND-ST302   EA8393-Porcine-ST302 IA1729-Canine-ST302  F2_18C-Porcine-ST302  BA8907-ND-ST302 BA9503-ND-ST302"
FT                   /SNP_count="30"
FT   misc_feature    4449508..4450462
FT                   /node="internal_ROOT->internal_17"
FT                   /neg_log_likelihood="2642.827201"
FT                   /colour="2"
FT                   /taxa="   IA7122-Poultry-ST302  EA2455-Poultry-ST302 Reference    EA1682-Poultry-ST302 IA4731-Poultry-ST302 CA0229-ND-ST302 CA0191-ND-ST302   EA8393-Porcine-ST302 IA1729-Canine-ST302  F2_18C-Porcine-ST302  BA8907-ND-ST302 BA9503-ND-ST302"
FT                   /SNP_count="21"
FT   misc_feature    4105600..4106629
FT                   /node="internal_ROOT->internal_17"
FT                   /neg_log_likelihood="2560.611100"
FT                   /colour="2"
FT                   /taxa="   IA7122-Poultry-ST302  EA2455-Poultry-ST302 Reference    EA1682-Poultry-ST302 IA4731-Poultry-ST302 CA0229-ND-ST302 CA0191-ND-ST302   EA8393-Porcine-ST302 IA1729-Canine-ST302  F2_18C-Porcine-ST302  BA8907-ND-ST302 BA9503-ND-ST302"
FT                   /SNP_count="21"
FT   misc_feature    5318177..5329022
FT                   /node="internal_ROOT->internal_17"
FT                   /neg_log_likelihood="2479.832301"
FT                   /colour="2"
FT                   /taxa="   IA7122-Poultry-ST302  EA2455-Poultry-ST302 Reference    EA1682-Poultry-ST302 IA4731-Poultry-ST302 CA0229-ND-ST302 CA0191-ND-ST302   EA8393-Porcine-ST302 IA1729-Canine-ST302  F2_18C-Porcine-ST302  BA8907-ND-ST302 BA9503-ND-ST302"
FT                   /SNP_count="34"
FT   misc_feature    3490111..3501632
FT                   /node="internal_ROOT->internal_17"
FT                   /neg_log_likelihood="2347.388205"
FT                   /colour="2"
FT                   /taxa="   IA7122-Poultry-ST302  EA2455-Poultry-ST302 Reference    EA1682-Poultry-ST302 IA4731-Poultry-ST302 CA0229-ND-ST302 CA0191-ND-ST302   EA8393-Porcine-ST302 IA1729-Canine-ST302  F2_18C-Porcine-ST302  BA8907-ND-ST302 BA9503-ND-ST302"
FT                   /SNP_count="32"
FT   misc_feature    4764339..4766666
FT                   /node="internal_ROOT->internal_17"
FT                   /neg_log_likelihood="2227.520120"
FT                   /colour="2"
FT                   /taxa="   IA7122-Poultry-ST302  EA2455-Poultry-ST302 Reference    EA1682-Poultry-ST302 IA4731-Poultry-ST302 CA0229-ND-ST302 CA0191-ND-ST302   EA8393-Porcine-ST302 IA1729-Canine-ST302  F2_18C-Porcine-ST302  BA8907-ND-ST302 BA9503-ND-ST302"
FT                   /SNP_count="17"
FT   misc_feature    5291703..5311854
FT                   /node="internal_ROOT->internal_17"
FT                   /neg_log_likelihood="2159.262211"
FT                   /colour="2"
FT                   /taxa="   IA7122-Poultry-ST302  EA2455-Poultry-ST302 Reference    EA1682-Poultry-ST302 IA4731-Poultry-ST302 CA0229-ND-ST302 CA0191-ND-ST302   EA8393-Porcine-ST302 IA1729-Canine-ST302  F2_18C-Porcine-ST302  BA8907-ND-ST302 BA9503-ND-ST302"
FT                   /SNP_count="30"
FT   misc_feature    4397996..4399485
FT                   /node="internal_ROOT->internal_17"
FT                   /neg_log_likelihood="2041.874283"
FT                   /colour="2"
FT                   /taxa="   IA7122-Poultry-ST302  EA2455-Poultry-ST302 Reference    EA1682-Poultry-ST302 IA4731-Poultry-ST302 CA0229-ND-ST302 CA0191-ND-ST302   EA8393-Porcine-ST302 IA1729-Canine-ST302  F2_18C-Porcine-ST302  BA8907-ND-ST302 BA9503-ND-ST302"
FT                   /SNP_count="13"
FT   misc_feature    5097302..5097446
FT                   /node="internal_ROOT->internal_17"
FT                   /neg_log_likelihood="1991.234236"
FT                   /colour="2"
FT                   /taxa="   IA7122-Poultry-ST302  EA2455-Poultry-ST302 Reference    EA1682-Poultry-ST302 IA4731-Poultry-ST302 CA0229-ND-ST302 CA0191-ND-ST302   EA8393-Porcine-ST302 IA1729-Canine-ST302  F2_18C-Porcine-ST302  BA8907-ND-ST302 BA9503-ND-ST302"
FT                   /SNP_count="8"
FT   misc_feature    5210944..5211606
FT                   /node="internal_ROOT->internal_17"
FT                   /neg_log_likelihood="1961.234992"
FT                   /colour="2"
FT                   /taxa="   IA7122-Poultry-ST302  EA2455-Poultry-ST302 Reference    EA1682-Poultry-ST302 IA4731-Poultry-ST302 CA0229-ND-ST302 CA0191-ND-ST302   EA8393-Porcine-ST302 IA1729-Canine-ST302  F2_18C-Porcine-ST302  BA8907-ND-ST302 BA9503-ND-ST302"
FT                   /SNP_count="9"
FT   misc_feature    4675971..4676961
FT                   /node="internal_ROOT->internal_17"
FT                   /neg_log_likelihood="1925.910918"
FT                   /colour="2"
FT                   /taxa="   IA7122-Poultry-ST302  EA2455-Poultry-ST302 Reference    EA1682-Poultry-ST302 IA4731-Poultry-ST302 CA0229-ND-ST302 CA0191-ND-ST302   EA8393-Porcine-ST302 IA1729-Canine-ST302  F2_18C-Porcine-ST302  BA8907-ND-ST302 BA9503-ND-ST302"
FT                   /SNP_count="9"
FT   misc_feature    3623447..3625199
FT                   /node="internal_ROOT->internal_17"
FT                   /neg_log_likelihood="1891.062240"
FT                   /colour="2"
FT                   /taxa="   IA7122-Poultry-ST302  EA2455-Poultry-ST302 Reference    EA1682-Poultry-ST302 IA4731-Poultry-ST302 CA0229-ND-ST302 CA0191-ND-ST302   EA8393-Porcine-ST302 IA1729-Canine-ST302  F2_18C-Porcine-ST302  BA8907-ND-ST302 BA9503-ND-ST302"
FT                   /SNP_count="9"
FT   misc_feature    5232263..5235485
FT                   /node="internal_ROOT->internal_17"
FT                   /neg_log_likelihood="1854.688563"
FT                   /colour="2"
FT                   /taxa="   IA7122-Poultry-ST302  EA2455-Poultry-ST302 Reference    EA1682-Poultry-ST302 IA4731-Poultry-ST302 CA0229-ND-ST302 CA0191-ND-ST302   EA8393-Porcine-ST302 IA1729-Canine-ST302  F2_18C-Porcine-ST302  BA8907-ND-ST302 BA9503-ND-ST302"
FT                   /SNP_count="10"
FT   misc_feature    2189381..2191552
FT                   /node="internal_ROOT->internal_17"
FT                   /neg_log_likelihood="1815.359192"
FT                   /colour="2"
FT                   /taxa="   IA7122-Poultry-ST302  EA2455-Poultry-ST302 Reference    EA1682-Poultry-ST302 IA4731-Poultry-ST302 CA0229-ND-ST302 CA0191-ND-ST302   EA8393-Porcine-ST302 IA1729-Canine-ST302  F2_18C-Porcine-ST302  BA8907-ND-ST302 BA9503-ND-ST302"
FT                   /SNP_count="8"
FT   misc_feature    5115365..5116103
FT                   /node="internal_ROOT->internal_17"
FT                   /neg_log_likelihood="1783.190044"
FT                   /colour="2"
FT                   /taxa="   IA7122-Poultry-ST302  EA2455-Poultry-ST302 Reference    EA1682-Poultry-ST302 IA4731-Poultry-ST302 CA0229-ND-ST302 CA0191-ND-ST302   EA8393-Porcine-ST302 IA1729-Canine-ST302  F2_18C-Porcine-ST302  BA8907-ND-ST302 BA9503-ND-ST302"
FT                   /SNP_count="6"
FT   misc_feature    4669691..4729286
FT                   /node="internal_ROOT->internal_28"
FT                   /neg_log_likelihood="15303.164815"
FT                   /colour="2"
FT                   /taxa="  FA0416-Human-ST302 IA1186-Poultry-ST302 FA5537-ND-ST302"
FT                   /SNP_count="372"
FT   misc_feature    4425480..4472871
FT                   /node="internal_ROOT->internal_28"
FT                   /neg_log_likelihood="14143.386443"
FT                   /colour="2"
FT                   /taxa="  FA0416-Human-ST302 IA1186-Poultry-ST302 FA5537-ND-ST302"
FT                   /SNP_count="459"
FT   misc_feature    4279948..4295565
FT                   /node="internal_ROOT->internal_28"
FT                   /neg_log_likelihood="12854.750824"
FT                   /colour="2"
FT                   /taxa="  FA0416-Human-ST302 IA1186-Poultry-ST302 FA5537-ND-ST302"
FT                   /SNP_count="219"
FT   misc_feature    3472835..3520433
FT                   /node="internal_ROOT->internal_28"
FT                   /neg_log_likelihood="12183.080181"
FT                   /colour="2"
FT                   /taxa="  FA0416-Human-ST302 IA1186-Poultry-ST302 FA5537-ND-ST302"
FT                   /SNP_count="238"
FT   misc_feature    2498235..2499681
FT                   /node="internal_ROOT->internal_28"
FT                   /neg_log_likelihood="11442.865824"
FT                   /colour="2"
FT                   /taxa="  FA0416-Human-ST302 IA1186-Poultry-ST302 FA5537-ND-ST302"
FT                   /SNP_count="118"
FT   misc_feature    5258405..5311855
FT                   /node="internal_ROOT->internal_28"
FT                   /neg_log_likelihood="11110.520042"
FT                   /colour="2"
FT                   /taxa="  FA0416-Human-ST302 IA1186-Poultry-ST302 FA5537-ND-ST302"
FT                   /SNP_count="249"
FT   misc_feature    3852007..3894467
FT                   /node="internal_ROOT->internal_28"
FT                   /neg_log_likelihood="10224.032481"
FT                   /colour="2"
FT                   /taxa="  FA0416-Human-ST302 IA1186-Poultry-ST302 FA5537-ND-ST302"
FT                   /SNP_count="310"
FT   misc_feature    5186559..5214086
FT                   /node="internal_ROOT->internal_28"
FT                   /neg_log_likelihood="9280.520948"
FT                   /colour="2"
FT                   /taxa="  FA0416-Human-ST302 IA1186-Poultry-ST302 FA5537-ND-ST302"
FT                   /SNP_count="173"
FT   misc_feature    949618..961231
FT                   /node="internal_ROOT->internal_28"
FT                   /neg_log_likelihood="8725.235420"
FT                   /colour="2"
FT                   /taxa="  FA0416-Human-ST302 IA1186-Poultry-ST302 FA5537-ND-ST302"
FT                   /SNP_count="117"
FT   misc_feature    4748700..4764945
FT                   /node="internal_ROOT->internal_28"
FT                   /neg_log_likelihood="8359.350121"
FT                   /colour="2"
FT                   /taxa="  FA0416-Human-ST302 IA1186-Poultry-ST302 FA5537-ND-ST302"
FT                   /SNP_count="112"
FT   misc_feature    4105476..4107105
FT                   /node="internal_ROOT->internal_28"
FT                   /neg_log_likelihood="7989.478708"
FT                   /colour="2"
FT                   /taxa="  FA0416-Human-ST302 IA1186-Poultry-ST302 FA5537-ND-ST302"
FT                   /SNP_count="69"
FT   misc_feature    3339669..3359811
FT                   /node="internal_ROOT->internal_28"
FT                   /neg_log_likelihood="7757.498299"
FT                   /colour="2"
FT                   /taxa="  FA0416-Human-ST302 IA1186-Poultry-ST302 FA5537-ND-ST302"
FT                   /SNP_count="67"
FT   misc_feature    1616396..1630990
FT                   /node="internal_ROOT->internal_28"
FT                   /neg_log_likelihood="7552.103551"
FT                   /colour="2"
FT                   /taxa="  FA0416-Human-ST302 IA1186-Poultry-ST302 FA5537-ND-ST302"
FT                   /SNP_count="95"
FT   misc_feature    2189631..2191504
FT                   /node="internal_ROOT->internal_28"
FT                   /neg_log_likelihood="7233.577069"
FT                   /colour="2"
FT                   /taxa="  FA0416-Human-ST302 IA1186-Poultry-ST302 FA5537-ND-ST302"
FT                   /SNP_count="53"
FT   misc_feature    4952212..4967016
FT                   /node="internal_ROOT->internal_28"
FT                   /neg_log_likelihood="7071.212533"
FT                   /colour="2"
FT                   /taxa="  FA0416-Human-ST302 IA1186-Poultry-ST302 FA5537-ND-ST302"
FT                   /SNP_count="74"
FT   misc_feature    779842..781264
FT                   /node="internal_ROOT->internal_28"
FT                   /neg_log_likelihood="6820.936301"
FT                   /colour="2"
FT                   /taxa="  FA0416-Human-ST302 IA1186-Poultry-ST302 FA5537-ND-ST302"
FT                   /SNP_count="44"
FT   misc_feature    4895562..4900279
FT                   /node="internal_ROOT->internal_28"
FT                   /neg_log_likelihood="6673.314571"
FT                   /colour="2"
FT                   /taxa="  FA0416-Human-ST302 IA1186-Poultry-ST302 FA5537-ND-ST302"
FT                   /SNP_count="53"
FT   misc_feature    5232211..5248727
FT                   /node="internal_ROOT->internal_28"
FT                   /neg_log_likelihood="6491.294947"
FT                   /colour="2"
FT                   /taxa="  FA0416-Human-ST302 IA1186-Poultry-ST302 FA5537-ND-ST302"
FT                   /SNP_count="72"
FT   misc_feature    5314439..5333109
FT                   /node="internal_ROOT->internal_28"
FT                   /neg_log_likelihood="6240.036742"
FT                   /colour="2"
FT                   /taxa="  FA0416-Human-ST302 IA1186-Poultry-ST302 FA5537-ND-ST302"
FT                   /SNP_count="76"
FT   misc_feature    4398115..4399545
FT                   /node="internal_ROOT->internal_28"
FT                   /neg_log_likelihood="5976.210494"
FT                   /colour="2"
FT                   /taxa="  FA0416-Human-ST302 IA1186-Poultry-ST302 FA5537-ND-ST302"
FT                   /SNP_count="37"
FT   misc_feature    4210078..4217274
FT                   /node="internal_ROOT->internal_28"
FT                   /neg_log_likelihood="5853.024617"
FT                   /colour="2"
FT                   /taxa="  FA0416-Human-ST302 IA1186-Poultry-ST302 FA5537-ND-ST302"
FT                   /SNP_count="55"
FT   misc_feature    4517084..4522003
FT                   /node="internal_ROOT->internal_28"
FT                   /neg_log_likelihood="5661.260210"
FT                   /colour="2"
FT                   /taxa="  FA0416-Human-ST302 IA1186-Poultry-ST302 FA5537-ND-ST302"
FT                   /SNP_count="47"
FT   misc_feature    5027988..5031764
FT                   /node="internal_ROOT->internal_28"
FT                   /neg_log_likelihood="5495.355648"
FT                   /colour="2"
FT                   /taxa="  FA0416-Human-ST302 IA1186-Poultry-ST302 FA5537-ND-ST302"
FT                   /SNP_count="44"
FT   misc_feature    3622534..3628344
FT                   /node="internal_ROOT->internal_28"
FT                   /neg_log_likelihood="5343.869429"
FT                   /colour="2"
FT                   /taxa="  FA0416-Human-ST302 IA1186-Poultry-ST302 FA5537-ND-ST302"
FT                   /SNP_count="46"
FT   misc_feature    5137988..5145773
FT                   /node="internal_ROOT->internal_28"
FT                   /neg_log_likelihood="5180.635815"
FT                   /colour="2"
FT                   /taxa="  FA0416-Human-ST302 IA1186-Poultry-ST302 FA5537-ND-ST302"
FT                   /SNP_count="49"
FT   misc_feature    5097281..5097980
FT                   /node="internal_ROOT->internal_28"
FT                   /neg_log_likelihood="5020.564357"
FT                   /colour="2"
FT                   /taxa="  FA0416-Human-ST302 IA1186-Poultry-ST302 FA5537-ND-ST302"
FT                   /SNP_count="20"
FT   misc_feature    5115672..5130235
FT                   /node="internal_ROOT->internal_28"
FT                   /neg_log_likelihood="4950.554738"
FT                   /colour="2"
FT                   /taxa="  FA0416-Human-ST302 IA1186-Poultry-ST302 FA5537-ND-ST302"
FT                   /SNP_count="31"
FT   misc_feature    3914479..3930273
FT                   /node="internal_ROOT->internal_28"
FT                   /neg_log_likelihood="4849.157166"
FT                   /colour="2"
FT                   /taxa="  FA0416-Human-ST302 IA1186-Poultry-ST302 FA5537-ND-ST302"
FT                   /SNP_count="35"
FT   misc_feature    4178264..4183554
FT                   /node="internal_ROOT->internal_28"
FT                   /neg_log_likelihood="4726.621806"
FT                   /colour="2"
FT                   /taxa="  FA0416-Human-ST302 IA1186-Poultry-ST302 FA5537-ND-ST302"
FT                   /SNP_count="19"
FT   misc_feature    5219727..5223531
FT                   /node="internal_ROOT->internal_28"
FT                   /neg_log_likelihood="4659.258325"
FT                   /colour="2"
FT                   /taxa="  FA0416-Human-ST302 IA1186-Poultry-ST302 FA5537-ND-ST302"
FT                   /SNP_count="16"
FT   misc_feature    5037027..5048723
FT                   /node="internal_ROOT->internal_28"
FT                   /neg_log_likelihood="4601.888714"
FT                   /colour="2"
FT                   /taxa="  FA0416-Human-ST302 IA1186-Poultry-ST302 FA5537-ND-ST302"
FT                   /SNP_count="21"
