# Supplementary material for: Escherichia coli ST302: Genomic Analysis of Virulence Potential and Antimicrobial Resistance Mediated by Mobile Genetic Elements
Source: Front Microbiol. 2020 Jan 21;10:3098. doi: 10.3389/fmicb.2019.03098 (PMC6985150; doi:10.3389/fmicb.2019.03098)
Supplement: DATA S2 — ST302 SNP analysis. [file Data_Sheet_2.ZIP › SNP_Analysis/ST302_SNP/SNP_analysis/gubbins/recombination_predictions.gff]

##gff-version 3
##sequence-region SEQUENCE 1 5341018
SEQUENCE	GUBBINS	CDS	5323190	5339325	0.000	.	0	node="internal_20->Reference";neg_log_likelihood="417.590167";taxa="Reference";snp_count="46";
SEQUENCE	GUBBINS	CDS	5284659	5284899	0.000	.	0	node="internal_20->Reference";neg_log_likelihood="222.107265";taxa="Reference";snp_count="17";
SEQUENCE	GUBBINS	CDS	1970914	1970935	0.000	.	0	node="internal_20->Reference";neg_log_likelihood="174.944557";taxa="Reference";snp_count="5";
SEQUENCE	GUBBINS	CDS	5304218	5315735	0.000	.	0	node="internal_20->Reference";neg_log_likelihood="149.043236";taxa="Reference";snp_count="10";
SEQUENCE	GUBBINS	CDS	3970086	4001916	0.000	.	0	node="internal_19->IA7122-Poultry-ST302";neg_log_likelihood="10767.998680";taxa="IA7122-Poultry-ST302";snp_count="680";
SEQUENCE	GUBBINS	CDS	3729296	3764845	0.000	.	0	node="internal_19->IA7122-Poultry-ST302";neg_log_likelihood="8691.213374";taxa="IA7122-Poultry-ST302";snp_count="469";
SEQUENCE	GUBBINS	CDS	3851565	3875773	0.000	.	0	node="internal_19->IA7122-Poultry-ST302";neg_log_likelihood="7364.135415";taxa="IA7122-Poultry-ST302";snp_count="340";
SEQUENCE	GUBBINS	CDS	4105692	4115167	0.000	.	0	node="internal_19->IA7122-Poultry-ST302";neg_log_likelihood="6260.274823";taxa="IA7122-Poultry-ST302";snp_count="222";
SEQUENCE	GUBBINS	CDS	4668242	4682669	0.000	.	0	node="internal_19->IA7122-Poultry-ST302";neg_log_likelihood="5553.375409";taxa="IA7122-Poultry-ST302";snp_count="198";
SEQUENCE	GUBBINS	CDS	4182589	4189998	0.000	.	0	node="internal_19->IA7122-Poultry-ST302";neg_log_likelihood="4888.358287";taxa="IA7122-Poultry-ST302";snp_count="119";
SEQUENCE	GUBBINS	CDS	4704964	4708510	0.000	.	0	node="internal_19->IA7122-Poultry-ST302";neg_log_likelihood="4453.916784";taxa="IA7122-Poultry-ST302";snp_count="126";
SEQUENCE	GUBBINS	CDS	2952105	2955094	0.000	.	0	node="internal_19->IA7122-Poultry-ST302";neg_log_likelihood="4008.732132";taxa="IA7122-Poultry-ST302";snp_count="108";
SEQUENCE	GUBBINS	CDS	4449508	4451125	0.000	.	0	node="internal_19->IA7122-Poultry-ST302";neg_log_likelihood="3618.834148";taxa="IA7122-Poultry-ST302";snp_count="96";
SEQUENCE	GUBBINS	CDS	5268884	5286557	0.000	.	0	node="internal_19->IA7122-Poultry-ST302";neg_log_likelihood="3324.379555";taxa="IA7122-Poultry-ST302";snp_count="109";
SEQUENCE	GUBBINS	CDS	1620374	1630981	0.000	.	0	node="internal_19->IA7122-Poultry-ST302";neg_log_likelihood="2917.406264";taxa="IA7122-Poultry-ST302";snp_count="79";
SEQUENCE	GUBBINS	CDS	4520296	4521991	0.000	.	0	node="internal_19->IA7122-Poultry-ST302";neg_log_likelihood="2628.192115";taxa="IA7122-Poultry-ST302";snp_count="54";
SEQUENCE	GUBBINS	CDS	5186048	5190488	0.000	.	0	node="internal_19->IA7122-Poultry-ST302";neg_log_likelihood="2414.688653";taxa="IA7122-Poultry-ST302";snp_count="51";
SEQUENCE	GUBBINS	CDS	5047794	5051466	0.000	.	0	node="internal_19->IA7122-Poultry-ST302";neg_log_likelihood="2226.285034";taxa="IA7122-Poultry-ST302";snp_count="47";
SEQUENCE	GUBBINS	CDS	4962912	4966585	0.000	.	0	node="internal_19->IA7122-Poultry-ST302";neg_log_likelihood="2038.933278";taxa="IA7122-Poultry-ST302";snp_count="52";
SEQUENCE	GUBBINS	CDS	5143285	5153795	0.000	.	0	node="internal_19->IA7122-Poultry-ST302";neg_log_likelihood="1832.103351";taxa="IA7122-Poultry-ST302";snp_count="63";
SEQUENCE	GUBBINS	CDS	3888966	3931130	0.000	.	0	node="internal_19->IA7122-Poultry-ST302";neg_log_likelihood="1583.347294";taxa="IA7122-Poultry-ST302";snp_count="78";
SEQUENCE	GUBBINS	CDS	5302104	5306408	0.000	.	0	node="internal_19->IA7122-Poultry-ST302";neg_log_likelihood="1252.224923";taxa="IA7122-Poultry-ST302";snp_count="45";
SEQUENCE	GUBBINS	CDS	5233798	5235579	0.000	.	0	node="internal_19->IA7122-Poultry-ST302";neg_log_likelihood="1062.586934";taxa="IA7122-Poultry-ST302";snp_count="37";
SEQUENCE	GUBBINS	CDS	3339461	3340054	0.000	.	0	node="internal_19->IA7122-Poultry-ST302";neg_log_likelihood="926.554525";taxa="IA7122-Poultry-ST302";snp_count="23";
SEQUENCE	GUBBINS	CDS	5317142	5325225	0.000	.	0	node="internal_19->IA7122-Poultry-ST302";neg_log_likelihood="844.084498";taxa="IA7122-Poultry-ST302";snp_count="24";
SEQUENCE	GUBBINS	CDS	4397996	4399485	0.000	.	0	node="internal_19->IA7122-Poultry-ST302";neg_log_likelihood="748.310246";taxa="IA7122-Poultry-ST302";snp_count="12";
SEQUENCE	GUBBINS	CDS	5261252	5261881	0.000	.	0	node="internal_19->IA7122-Poultry-ST302";neg_log_likelihood="702.216304";taxa="IA7122-Poultry-ST302";snp_count="9";
SEQUENCE	GUBBINS	CDS	3881618	3882005	0.000	.	0	node="internal_19->IA7122-Poultry-ST302";neg_log_likelihood="667.830491";taxa="IA7122-Poultry-ST302";snp_count="6";
SEQUENCE	GUBBINS	CDS	3485805	3516841	0.000	.	0	node="internal_23->IA4731-Poultry-ST302";neg_log_likelihood="5951.492938";taxa="IA4731-Poultry-ST302";snp_count="316";
SEQUENCE	GUBBINS	CDS	4425528	4441714	0.000	.	0	node="internal_23->IA4731-Poultry-ST302";neg_log_likelihood="4960.925848";taxa="IA4731-Poultry-ST302";snp_count="183";
SEQUENCE	GUBBINS	CDS	4182701	4190304	0.000	.	0	node="internal_23->IA4731-Poultry-ST302";neg_log_likelihood="4309.952141";taxa="IA4731-Poultry-ST302";snp_count="119";
SEQUENCE	GUBBINS	CDS	3851580	3892842	0.000	.	0	node="internal_23->IA4731-Poultry-ST302";neg_log_likelihood="3869.644815";taxa="IA4731-Poultry-ST302";snp_count="219";
SEQUENCE	GUBBINS	CDS	4696851	4710391	0.000	.	0	node="internal_23->IA4731-Poultry-ST302";neg_log_likelihood="3130.380076";taxa="IA4731-Poultry-ST302";snp_count="103";
SEQUENCE	GUBBINS	CDS	5261819	5290990	0.000	.	0	node="internal_23->IA4731-Poultry-ST302";neg_log_likelihood="2760.646655";taxa="IA4731-Poultry-ST302";snp_count="109";
SEQUENCE	GUBBINS	CDS	5201650	5203940	0.000	.	0	node="internal_23->IA4731-Poultry-ST302";neg_log_likelihood="2358.284610";taxa="IA4731-Poultry-ST302";snp_count="54";
SEQUENCE	GUBBINS	CDS	3470650	3471664	0.000	.	0	node="internal_23->IA4731-Poultry-ST302";neg_log_likelihood="2182.316156";taxa="IA4731-Poultry-ST302";snp_count="33";
SEQUENCE	GUBBINS	CDS	5116070	5145883	0.000	.	0	node="internal_23->IA4731-Poultry-ST302";neg_log_likelihood="2059.322294";taxa="IA4731-Poultry-ST302";snp_count="56";
SEQUENCE	GUBBINS	CDS	5311613	5334335	0.000	.	0	node="internal_23->IA4731-Poultry-ST302";neg_log_likelihood="1856.804547";taxa="IA4731-Poultry-ST302";snp_count="34";
SEQUENCE	GUBBINS	CDS	4397902	4398538	0.000	.	0	node="internal_23->IA4731-Poultry-ST302";neg_log_likelihood="1716.952443";taxa="IA4731-Poultry-ST302";snp_count="17";
SEQUENCE	GUBBINS	CDS	4951286	4957042	0.000	.	0	node="internal_23->IA4731-Poultry-ST302";neg_log_likelihood="1651.466323";taxa="IA4731-Poultry-ST302";snp_count="23";
SEQUENCE	GUBBINS	CDS	962114	962176	0.000	.	0	node="internal_23->IA4731-Poultry-ST302";neg_log_likelihood="1558.944750";taxa="IA4731-Poultry-ST302";snp_count="10";
SEQUENCE	GUBBINS	CDS	5234554	5235141	0.000	.	0	node="internal_23->IA4731-Poultry-ST302";neg_log_likelihood="1525.748805";taxa="IA4731-Poultry-ST302";snp_count="10";
SEQUENCE	GUBBINS	CDS	3852061	3891120	0.000	.	0	node="internal_22->internal_23";neg_log_likelihood="2170.745955";taxa=" EA1682-Poultry-ST302 IA4731-Poultry-ST302";snp_count="185";
SEQUENCE	GUBBINS	CDS	4696851	4710391	0.000	.	0	node="internal_22->internal_23";neg_log_likelihood="1471.927952";taxa=" EA1682-Poultry-ST302 IA4731-Poultry-ST302";snp_count="103";
SEQUENCE	GUBBINS	CDS	5201484	5203940	0.000	.	0	node="internal_22->internal_23";neg_log_likelihood="1101.600232";taxa=" EA1682-Poultry-ST302 IA4731-Poultry-ST302";snp_count="56";
SEQUENCE	GUBBINS	CDS	5235078	5235141	0.000	.	0	node="internal_22->internal_23";neg_log_likelihood="963.016300";taxa=" EA1682-Poultry-ST302 IA4731-Poultry-ST302";snp_count="8";
SEQUENCE	GUBBINS	CDS	4953124	4954579	0.000	.	0	node="internal_22->internal_23";neg_log_likelihood="930.804093";taxa=" EA1682-Poultry-ST302 IA4731-Poultry-ST302";snp_count="11";
SEQUENCE	GUBBINS	CDS	5279560	5281357	0.000	.	0	node="internal_22->internal_23";neg_log_likelihood="889.090374";taxa=" EA1682-Poultry-ST302 IA4731-Poultry-ST302";snp_count="8";
SEQUENCE	GUBBINS	CDS	3852049	3890866	0.000	.	0	node="internal_22->CA0229-ND-ST302";neg_log_likelihood="4175.237138";taxa="CA0229-ND-ST302";snp_count="721";
SEQUENCE	GUBBINS	CDS	4702378	4710413	0.000	.	0	node="internal_22->CA0229-ND-ST302";neg_log_likelihood="2252.322903";taxa="CA0229-ND-ST302";snp_count="202";
SEQUENCE	GUBBINS	CDS	5201437	5206213	0.000	.	0	node="internal_22->CA0229-ND-ST302";neg_log_likelihood="1677.300954";taxa="CA0229-ND-ST302";snp_count="83";
SEQUENCE	GUBBINS	CDS	5279357	5281532	0.000	.	0	node="internal_22->CA0229-ND-ST302";neg_log_likelihood="1470.432043";taxa="CA0229-ND-ST302";snp_count="15";
SEQUENCE	GUBBINS	CDS	5304781	5311854	0.000	.	0	node="internal_22->CA0229-ND-ST302";neg_log_likelihood="1408.588411";taxa="CA0229-ND-ST302";snp_count="22";
SEQUENCE	GUBBINS	CDS	229589	229626	0.000	.	0	node="internal_22->CA0229-ND-ST302";neg_log_likelihood="1320.983258";taxa="CA0229-ND-ST302";snp_count="8";
SEQUENCE	GUBBINS	CDS	4953143	4962682	0.000	.	0	node="internal_22->CA0229-ND-ST302";neg_log_likelihood="1292.225646";taxa="CA0229-ND-ST302";snp_count="14";
SEQUENCE	GUBBINS	CDS	4757483	4764491	0.000	.	0	node="internal_22->CA0229-ND-ST302";neg_log_likelihood="1233.891721";taxa="CA0229-ND-ST302";snp_count="12";
SEQUENCE	GUBBINS	CDS	3851569	3895125	0.000	.	0	node="internal_21->internal_22";neg_log_likelihood="2107.033956";taxa=" EA1682-Poultry-ST302 IA4731-Poultry-ST302 CA0229-ND-ST302";snp_count="181";
SEQUENCE	GUBBINS	CDS	4702308	4710444	0.000	.	0	node="internal_21->internal_22";neg_log_likelihood="1390.663905";taxa=" EA1682-Poultry-ST302 IA4731-Poultry-ST302 CA0229-ND-ST302";snp_count="109";
SEQUENCE	GUBBINS	CDS	5201484	5206212	0.000	.	0	node="internal_21->internal_22";neg_log_likelihood="1010.722614";taxa=" EA1682-Poultry-ST302 IA4731-Poultry-ST302 CA0229-ND-ST302";snp_count="62";
SEQUENCE	GUBBINS	CDS	4758550	4761164	0.000	.	0	node="internal_21->internal_22";neg_log_likelihood="801.562837";taxa=" EA1682-Poultry-ST302 IA4731-Poultry-ST302 CA0229-ND-ST302";snp_count="31";
SEQUENCE	GUBBINS	CDS	4953112	4957173	0.000	.	0	node="internal_21->internal_22";neg_log_likelihood="689.265788";taxa=" EA1682-Poultry-ST302 IA4731-Poultry-ST302 CA0229-ND-ST302";snp_count="21";
SEQUENCE	GUBBINS	CDS	5234937	5247234	0.000	.	0	node="internal_21->internal_22";neg_log_likelihood="594.358249";taxa=" EA1682-Poultry-ST302 IA4731-Poultry-ST302 CA0229-ND-ST302";snp_count="24";
SEQUENCE	GUBBINS	CDS	5050639	5051057	0.000	.	0	node="internal_21->internal_22";neg_log_likelihood="488.264895";taxa=" EA1682-Poultry-ST302 IA4731-Poultry-ST302 CA0229-ND-ST302";snp_count="12";
SEQUENCE	GUBBINS	CDS	5304703	5305095	0.000	.	0	node="internal_21->internal_22";neg_log_likelihood="433.914273";taxa=" EA1682-Poultry-ST302 IA4731-Poultry-ST302 CA0229-ND-ST302";snp_count="11";
SEQUENCE	GUBBINS	CDS	229594	229626	0.000	.	0	node="internal_21->internal_22";neg_log_likelihood="390.832902";taxa=" EA1682-Poultry-ST302 IA4731-Poultry-ST302 CA0229-ND-ST302";snp_count="6";
SEQUENCE	GUBBINS	CDS	4520058	4521928	0.000	.	0	node="internal_21->internal_22";neg_log_likelihood="361.611884";taxa=" EA1682-Poultry-ST302 IA4731-Poultry-ST302 CA0229-ND-ST302";snp_count="9";
SEQUENCE	GUBBINS	CDS	5269370	5270984	0.000	.	0	node="internal_21->internal_22";neg_log_likelihood="318.478805";taxa=" EA1682-Poultry-ST302 IA4731-Poultry-ST302 CA0229-ND-ST302";snp_count="9";
SEQUENCE	GUBBINS	CDS	4962262	4966056	0.000	.	0	node="internal_21->internal_22";neg_log_likelihood="283.484212";taxa=" EA1682-Poultry-ST302 IA4731-Poultry-ST302 CA0229-ND-ST302";snp_count="5";
SEQUENCE	GUBBINS	CDS	4951286	4967663	0.000	.	0	node="internal_21->CA0191-ND-ST302";neg_log_likelihood="5725.393021";taxa="CA0191-ND-ST302";snp_count="224";
SEQUENCE	GUBBINS	CDS	3865886	3910184	0.000	.	0	node="internal_21->CA0191-ND-ST302";neg_log_likelihood="4998.538975";taxa="CA0191-ND-ST302";snp_count="254";
SEQUENCE	GUBBINS	CDS	3851565	3855899	0.000	.	0	node="internal_21->CA0191-ND-ST302";neg_log_likelihood="4219.124568";taxa="CA0191-ND-ST302";snp_count="67";
SEQUENCE	GUBBINS	CDS	3468880	3520161	0.000	.	0	node="internal_21->CA0191-ND-ST302";neg_log_likelihood="3996.828892";taxa="CA0191-ND-ST302";snp_count="40";
SEQUENCE	GUBBINS	CDS	4895562	4897692	0.000	.	0	node="internal_21->CA0191-ND-ST302";neg_log_likelihood="3873.653073";taxa="CA0191-ND-ST302";snp_count="31";
SEQUENCE	GUBBINS	CDS	4425344	4425623	0.000	.	0	node="internal_21->CA0191-ND-ST302";neg_log_likelihood="3768.596357";taxa="CA0191-ND-ST302";snp_count="22";
SEQUENCE	GUBBINS	CDS	4912284	4913080	0.000	.	0	node="internal_21->CA0191-ND-ST302";neg_log_likelihood="3687.469334";taxa="CA0191-ND-ST302";snp_count="26";
SEQUENCE	GUBBINS	CDS	5047818	5053192	0.000	.	0	node="internal_21->CA0191-ND-ST302";neg_log_likelihood="3593.752080";taxa="CA0191-ND-ST302";snp_count="37";
SEQUENCE	GUBBINS	CDS	5244337	5247222	0.000	.	0	node="internal_21->CA0191-ND-ST302";neg_log_likelihood="3456.925030";taxa="CA0191-ND-ST302";snp_count="28";
SEQUENCE	GUBBINS	CDS	4398335	4399766	0.000	.	0	node="internal_21->CA0191-ND-ST302";neg_log_likelihood="3359.426322";taxa="CA0191-ND-ST302";snp_count="17";
SEQUENCE	GUBBINS	CDS	5297345	5311478	0.000	.	0	node="internal_21->CA0191-ND-ST302";neg_log_likelihood="3295.423039";taxa="CA0191-ND-ST302";snp_count="35";
SEQUENCE	GUBBINS	CDS	5138039	5167257	0.000	.	0	node="internal_21->CA0191-ND-ST302";neg_log_likelihood="3171.717042";taxa="CA0191-ND-ST302";snp_count="25";
SEQUENCE	GUBBINS	CDS	3914479	3932233	0.000	.	0	node="internal_21->CA0191-ND-ST302";neg_log_likelihood="3076.253121";taxa="CA0191-ND-ST302";snp_count="32";
SEQUENCE	GUBBINS	CDS	5261252	5271023	0.000	.	0	node="internal_21->CA0191-ND-ST302";neg_log_likelihood="2954.133999";taxa="CA0191-ND-ST302";snp_count="21";
SEQUENCE	GUBBINS	CDS	5201440	5203189	0.000	.	0	node="internal_21->CA0191-ND-ST302";neg_log_likelihood="2873.943339";taxa="CA0191-ND-ST302";snp_count="15";
SEQUENCE	GUBBINS	CDS	4703604	4710432	0.000	.	0	node="internal_21->CA0191-ND-ST302";neg_log_likelihood="2816.387298";taxa="CA0191-ND-ST302";snp_count="21";
SEQUENCE	GUBBINS	CDS	4754677	4761252	0.000	.	0	node="internal_21->CA0191-ND-ST302";neg_log_likelihood="2739.330771";taxa="CA0191-ND-ST302";snp_count="15";
SEQUENCE	GUBBINS	CDS	5180647	5180654	0.000	.	0	node="internal_21->CA0191-ND-ST302";neg_log_likelihood="2672.965713";taxa="CA0191-ND-ST302";snp_count="7";
SEQUENCE	GUBBINS	CDS	3851580	3891535	0.000	.	0	node="internal_18->internal_19";neg_log_likelihood="11311.912199";taxa=" IA7122-Poultry-ST302 EA2455-Poultry-ST302 Reference";snp_count="456";
SEQUENCE	GUBBINS	CDS	1619172	1630990	0.000	.	0	node="internal_18->internal_19";neg_log_likelihood="10022.514469";taxa=" IA7122-Poultry-ST302 EA2455-Poultry-ST302 Reference";snp_count="190";
SEQUENCE	GUBBINS	CDS	4950721	4966468	0.000	.	0	node="internal_18->internal_19";neg_log_likelihood="9392.865367";taxa=" IA7122-Poultry-ST302 EA2455-Poultry-ST302 Reference";snp_count="202";
SEQUENCE	GUBBINS	CDS	4696797	4712732	0.000	.	0	node="internal_18->internal_19";neg_log_likelihood="8737.147105";taxa=" IA7122-Poultry-ST302 EA2455-Poultry-ST302 Reference";snp_count="184";
SEQUENCE	GUBBINS	CDS	3357862	3363089	0.000	.	0	node="internal_18->internal_19";neg_log_likelihood="8125.238586";taxa=" IA7122-Poultry-ST302 EA2455-Poultry-ST302 Reference";snp_count="129";
SEQUENCE	GUBBINS	CDS	5199395	5208907	0.000	.	0	node="internal_18->internal_19";neg_log_likelihood="7686.861437";taxa=" IA7122-Poultry-ST302 EA2455-Poultry-ST302 Reference";snp_count="147";
SEQUENCE	GUBBINS	CDS	4750294	4765609	0.000	.	0	node="internal_18->internal_19";neg_log_likelihood="7185.950554";taxa=" IA7122-Poultry-ST302 EA2455-Poultry-ST302 Reference";snp_count="161";
SEQUENCE	GUBBINS	CDS	4449842	4452355	0.000	.	0	node="internal_18->internal_19";neg_log_likelihood="6627.386893";taxa=" IA7122-Poultry-ST302 EA2455-Poultry-ST302 Reference";snp_count="102";
SEQUENCE	GUBBINS	CDS	962086	964710	0.000	.	0	node="internal_18->internal_19";neg_log_likelihood="6309.790584";taxa=" IA7122-Poultry-ST302 EA2455-Poultry-ST302 Reference";snp_count="83";
SEQUENCE	GUBBINS	CDS	4675971	4684668	0.000	.	0	node="internal_18->internal_19";neg_log_likelihood="6040.968453";taxa=" IA7122-Poultry-ST302 EA2455-Poultry-ST302 Reference";snp_count="94";
SEQUENCE	GUBBINS	CDS	5137753	5143454	0.000	.	0	node="internal_18->internal_19";neg_log_likelihood="5705.572693";taxa=" IA7122-Poultry-ST302 EA2455-Poultry-ST302 Reference";snp_count="84";
SEQUENCE	GUBBINS	CDS	5234260	5235489	0.000	.	0	node="internal_18->internal_19";neg_log_likelihood="5409.308089";taxa=" IA7122-Poultry-ST302 EA2455-Poultry-ST302 Reference";snp_count="58";
SEQUENCE	GUBBINS	CDS	5261503	5269927	0.000	.	0	node="internal_18->internal_19";neg_log_likelihood="5213.770972";taxa=" IA7122-Poultry-ST302 EA2455-Poultry-ST302 Reference";snp_count="80";
SEQUENCE	GUBBINS	CDS	4519908	4521979	0.000	.	0	node="internal_18->internal_19";neg_log_likelihood="4946.324287";taxa=" IA7122-Poultry-ST302 EA2455-Poultry-ST302 Reference";snp_count="46";
SEQUENCE	GUBBINS	CDS	5150774	5157293	0.000	.	0	node="internal_18->internal_19";neg_log_likelihood="4778.559630";taxa=" IA7122-Poultry-ST302 EA2455-Poultry-ST302 Reference";snp_count="60";
SEQUENCE	GUBBINS	CDS	5246366	5249504	0.000	.	0	node="internal_18->internal_19";neg_log_likelihood="4560.151865";taxa=" IA7122-Poultry-ST302 EA2455-Poultry-ST302 Reference";snp_count="49";
SEQUENCE	GUBBINS	CDS	5297772	5310886	0.000	.	0	node="internal_18->internal_19";neg_log_likelihood="4386.772106";taxa=" IA7122-Poultry-ST302 EA2455-Poultry-ST302 Reference";snp_count="65";
SEQUENCE	GUBBINS	CDS	5279357	5289781	0.000	.	0	node="internal_18->internal_19";neg_log_likelihood="4145.234819";taxa=" IA7122-Poultry-ST302 EA2455-Poultry-ST302 Reference";snp_count="60";
SEQUENCE	GUBBINS	CDS	5186489	5192433	0.000	.	0	node="internal_18->internal_19";neg_log_likelihood="3927.756146";taxa=" IA7122-Poultry-ST302 EA2455-Poultry-ST302 Reference";snp_count="47";
SEQUENCE	GUBBINS	CDS	3487552	3515445	0.000	.	0	node="internal_18->internal_19";neg_log_likelihood="3754.613671";taxa=" IA7122-Poultry-ST302 EA2455-Poultry-ST302 Reference";snp_count="70";
SEQUENCE	GUBBINS	CDS	4183029	4184706	0.000	.	0	node="internal_18->internal_19";neg_log_likelihood="3492.436610";taxa=" IA7122-Poultry-ST302 EA2455-Poultry-ST302 Reference";snp_count="31";
SEQUENCE	GUBBINS	CDS	5034204	5034232	0.000	.	0	node="internal_18->internal_19";neg_log_likelihood="3385.934890";taxa=" IA7122-Poultry-ST302 EA2455-Poultry-ST302 Reference";snp_count="13";
SEQUENCE	GUBBINS	CDS	4425949	4441745	0.000	.	0	node="internal_18->internal_19";neg_log_likelihood="3336.165745";taxa=" IA7122-Poultry-ST302 EA2455-Poultry-ST302 Reference";snp_count="45";
SEQUENCE	GUBBINS	CDS	2954356	2955083	0.000	.	0	node="internal_18->internal_19";neg_log_likelihood="3170.552459";taxa=" IA7122-Poultry-ST302 EA2455-Poultry-ST302 Reference";snp_count="18";
SEQUENCE	GUBBINS	CDS	5124909	5126190	0.000	.	0	node="internal_18->internal_19";neg_log_likelihood="3105.417770";taxa=" IA7122-Poultry-ST302 EA2455-Poultry-ST302 Reference";snp_count="18";
SEQUENCE	GUBBINS	CDS	5323151	5331019	0.000	.	0	node="internal_18->internal_19";neg_log_likelihood="3041.296433";taxa=" IA7122-Poultry-ST302 EA2455-Poultry-ST302 Reference";snp_count="24";
SEQUENCE	GUBBINS	CDS	953284	954391	0.000	.	0	node="internal_18->internal_19";neg_log_likelihood="2951.396091";taxa=" IA7122-Poultry-ST302 EA2455-Poultry-ST302 Reference";snp_count="13";
SEQUENCE	GUBBINS	CDS	5047772	5053618	0.000	.	0	node="internal_18->internal_19";neg_log_likelihood="2905.566977";taxa=" IA7122-Poultry-ST302 EA2455-Poultry-ST302 Reference";snp_count="16";
SEQUENCE	GUBBINS	CDS	4672819	4710444	0.000	.	0	node="internal_18->internal_21";neg_log_likelihood="6314.838798";taxa=" EA1682-Poultry-ST302 IA4731-Poultry-ST302 CA0229-ND-ST302 CA0191-ND-ST302";snp_count="285";
SEQUENCE	GUBBINS	CDS	4950837	4966139	0.000	.	0	node="internal_18->internal_21";neg_log_likelihood="5335.852956";taxa=" EA1682-Poultry-ST302 IA4731-Poultry-ST302 CA0229-ND-ST302 CA0191-ND-ST302";snp_count="251";
SEQUENCE	GUBBINS	CDS	5138039	5162773	0.000	.	0	node="internal_18->internal_21";neg_log_likelihood="4548.148003";taxa=" EA1682-Poultry-ST302 IA4731-Poultry-ST302 CA0229-ND-ST302 CA0191-ND-ST302";snp_count="174";
SEQUENCE	GUBBINS	CDS	3851569	3895125	0.000	.	0	node="internal_18->internal_21";neg_log_likelihood="3923.817281";taxa=" EA1682-Poultry-ST302 IA4731-Poultry-ST302 CA0229-ND-ST302 CA0191-ND-ST302";snp_count="212";
SEQUENCE	GUBBINS	CDS	951627	981732	0.000	.	0	node="internal_18->internal_21";neg_log_likelihood="3228.245682";taxa=" EA1682-Poultry-ST302 IA4731-Poultry-ST302 CA0229-ND-ST302 CA0191-ND-ST302";snp_count="75";
SEQUENCE	GUBBINS	CDS	4751508	4766666	0.000	.	0	node="internal_18->internal_21";neg_log_likelihood="2945.769413";taxa=" EA1682-Poultry-ST302 IA4731-Poultry-ST302 CA0229-ND-ST302 CA0191-ND-ST302";snp_count="81";
SEQUENCE	GUBBINS	CDS	5185976	5191066	0.000	.	0	node="internal_18->internal_21";neg_log_likelihood="2644.629208";taxa=" EA1682-Poultry-ST302 IA4731-Poultry-ST302 CA0229-ND-ST302 CA0191-ND-ST302";snp_count="52";
SEQUENCE	GUBBINS	CDS	5234251	5247661	0.000	.	0	node="internal_18->internal_21";neg_log_likelihood="2442.887258";taxa=" EA1682-Poultry-ST302 IA4731-Poultry-ST302 CA0229-ND-ST302 CA0191-ND-ST302";snp_count="74";
SEQUENCE	GUBBINS	CDS	3339812	3363013	0.000	.	0	node="internal_18->internal_21";neg_log_likelihood="2147.048817";taxa=" EA1682-Poultry-ST302 IA4731-Poultry-ST302 CA0229-ND-ST302 CA0191-ND-ST302";snp_count="60";
SEQUENCE	GUBBINS	CDS	5201650	5211609	0.000	.	0	node="internal_18->internal_21";neg_log_likelihood="1902.960184";taxa=" EA1682-Poultry-ST302 IA4731-Poultry-ST302 CA0229-ND-ST302 CA0191-ND-ST302";snp_count="68";
SEQUENCE	GUBBINS	CDS	5047818	5051002	0.000	.	0	node="internal_18->internal_21";neg_log_likelihood="1670.744785";taxa=" EA1682-Poultry-ST302 IA4731-Poultry-ST302 CA0229-ND-ST302 CA0191-ND-ST302";snp_count="33";
SEQUENCE	GUBBINS	CDS	3483883	3514824	0.000	.	0	node="internal_18->internal_21";neg_log_likelihood="1538.520732";taxa=" EA1682-Poultry-ST302 IA4731-Poultry-ST302 CA0229-ND-ST302 CA0191-ND-ST302";snp_count="50";
SEQUENCE	GUBBINS	CDS	4452121	4452443	0.000	.	0	node="internal_18->internal_21";neg_log_likelihood="1329.558286";taxa=" EA1682-Poultry-ST302 IA4731-Poultry-ST302 CA0229-ND-ST302 CA0191-ND-ST302";snp_count="20";
SEQUENCE	GUBBINS	CDS	4425528	4434098	0.000	.	0	node="internal_18->internal_21";neg_log_likelihood="1244.660341";taxa=" EA1682-Poultry-ST302 IA4731-Poultry-ST302 CA0229-ND-ST302 CA0191-ND-ST302";snp_count="34";
SEQUENCE	GUBBINS	CDS	4519927	4521927	0.000	.	0	node="internal_18->internal_21";neg_log_likelihood="1102.713570";taxa=" EA1682-Poultry-ST302 IA4731-Poultry-ST302 CA0229-ND-ST302 CA0191-ND-ST302";snp_count="23";
SEQUENCE	GUBBINS	CDS	2190122	2191618	0.000	.	0	node="internal_18->internal_21";neg_log_likelihood="1004.024563";taxa=" EA1682-Poultry-ST302 IA4731-Poultry-ST302 CA0229-ND-ST302 CA0191-ND-ST302";snp_count="18";
SEQUENCE	GUBBINS	CDS	5280049	5286410	0.000	.	0	node="internal_18->internal_21";neg_log_likelihood="942.409943";taxa=" EA1682-Poultry-ST302 IA4731-Poultry-ST302 CA0229-ND-ST302 CA0191-ND-ST302";snp_count="19";
SEQUENCE	GUBBINS	CDS	5301894	5305095	0.000	.	0	node="internal_18->internal_21";neg_log_likelihood="864.358090";taxa=" EA1682-Poultry-ST302 IA4731-Poultry-ST302 CA0229-ND-ST302 CA0191-ND-ST302";snp_count="14";
SEQUENCE	GUBBINS	CDS	3468865	3470710	0.000	.	0	node="internal_18->internal_21";neg_log_likelihood="802.550546";taxa=" EA1682-Poultry-ST302 IA4731-Poultry-ST302 CA0229-ND-ST302 CA0191-ND-ST302";snp_count="12";
SEQUENCE	GUBBINS	CDS	2954325	2954976	0.000	.	0	node="internal_18->internal_21";neg_log_likelihood="753.531826";taxa=" EA1682-Poultry-ST302 IA4731-Poultry-ST302 CA0229-ND-ST302 CA0191-ND-ST302";snp_count="8";
SEQUENCE	GUBBINS	CDS	5324240	5338995	0.000	.	0	node="internal_18->internal_21";neg_log_likelihood="719.127604";taxa=" EA1682-Poultry-ST302 IA4731-Poultry-ST302 CA0229-ND-ST302 CA0191-ND-ST302";snp_count="13";
SEQUENCE	GUBBINS	CDS	5261565	5274060	0.000	.	0	node="internal_18->internal_21";neg_log_likelihood="662.675985";taxa=" EA1682-Poultry-ST302 IA4731-Poultry-ST302 CA0229-ND-ST302 CA0191-ND-ST302";snp_count="11";
SEQUENCE	GUBBINS	CDS	3817839	3817843	0.000	.	0	node="internal_18->internal_21";neg_log_likelihood="605.587790";taxa=" EA1682-Poultry-ST302 IA4731-Poultry-ST302 CA0229-ND-ST302 CA0191-ND-ST302";snp_count="5";
SEQUENCE	GUBBINS	CDS	4098708	4114856	0.000	.	0	node="internal_18->internal_21";neg_log_likelihood="589.238233";taxa=" EA1682-Poultry-ST302 IA4731-Poultry-ST302 CA0229-ND-ST302 CA0191-ND-ST302";snp_count="6";
SEQUENCE	GUBBINS	CDS	3294028	3294041	0.000	.	0	node="internal_25->IA1729-Canine-ST302";neg_log_likelihood="1672.649966";taxa="IA1729-Canine-ST302";snp_count="10";
SEQUENCE	GUBBINS	CDS	770775	770939	0.000	.	0	node="internal_25->IA1729-Canine-ST302";neg_log_likelihood="1634.542474";taxa="IA1729-Canine-ST302";snp_count="13";
SEQUENCE	GUBBINS	CDS	5219771	5219781	0.000	.	0	node="internal_25->IA1729-Canine-ST302";neg_log_likelihood="1581.330499";taxa="IA1729-Canine-ST302";snp_count="9";
SEQUENCE	GUBBINS	CDS	3243301	3244740	0.000	.	0	node="internal_25->IA1729-Canine-ST302";neg_log_likelihood="1567.052580";taxa="IA1729-Canine-ST302";snp_count="7";
SEQUENCE	GUBBINS	CDS	5261351	5261397	0.000	.	0	node="internal_27->BA9503-ND-ST302";neg_log_likelihood="107.550394";taxa="BA9503-ND-ST302";snp_count="7";
SEQUENCE	GUBBINS	CDS	3271508	3271519	0.000	.	0	node="internal_27->BA9503-ND-ST302";neg_log_likelihood="75.238944";taxa="BA9503-ND-ST302";snp_count="5";
SEQUENCE	GUBBINS	CDS	3256048	3308819	0.000	.	0	node="internal_26->internal_27";neg_log_likelihood="16792.182464";taxa=" BA8907-ND-ST302 BA9503-ND-ST302";snp_count="1405";
SEQUENCE	GUBBINS	CDS	4045331	4105967	0.000	.	0	node="internal_26->internal_27";neg_log_likelihood="13027.172727";taxa=" BA8907-ND-ST302 BA9503-ND-ST302";snp_count="943";
SEQUENCE	GUBBINS	CDS	3969687	4007663	0.000	.	0	node="internal_26->internal_27";neg_log_likelihood="10028.944441";taxa=" BA8907-ND-ST302 BA9503-ND-ST302";snp_count="904";
SEQUENCE	GUBBINS	CDS	3717325	3764861	0.000	.	0	node="internal_26->internal_27";neg_log_likelihood="7283.558968";taxa=" BA8907-ND-ST302 BA9503-ND-ST302";snp_count="662";
SEQUENCE	GUBBINS	CDS	4722136	4728293	0.000	.	0	node="internal_26->internal_27";neg_log_likelihood="5654.482239";taxa=" BA8907-ND-ST302 BA9503-ND-ST302";snp_count="181";
SEQUENCE	GUBBINS	CDS	299974	304252	0.000	.	0	node="internal_26->internal_27";neg_log_likelihood="5181.264043";taxa=" BA8907-ND-ST302 BA9503-ND-ST302";snp_count="84";
SEQUENCE	GUBBINS	CDS	4580854	4584425	0.000	.	0	node="internal_26->internal_27";neg_log_likelihood="4901.008649";taxa=" BA8907-ND-ST302 BA9503-ND-ST302";snp_count="70";
SEQUENCE	GUBBINS	CDS	5278759	5286648	0.000	.	0	node="internal_26->internal_27";neg_log_likelihood="4713.078313";taxa=" BA8907-ND-ST302 BA9503-ND-ST302";snp_count="33";
SEQUENCE	GUBBINS	CDS	3622647	3624468	0.000	.	0	node="internal_26->internal_27";neg_log_likelihood="4596.014799";taxa=" BA8907-ND-ST302 BA9503-ND-ST302";snp_count="27";
SEQUENCE	GUBBINS	CDS	4357871	4357972	0.000	.	0	node="internal_26->internal_27";neg_log_likelihood="4503.139356";taxa=" BA8907-ND-ST302 BA9503-ND-ST302";snp_count="14";
SEQUENCE	GUBBINS	CDS	1559514	1559525	0.000	.	0	node="internal_26->internal_27";neg_log_likelihood="4452.432836";taxa=" BA8907-ND-ST302 BA9503-ND-ST302";snp_count="10";
SEQUENCE	GUBBINS	CDS	4574950	4575390	0.000	.	0	node="internal_26->internal_27";neg_log_likelihood="4429.053717";taxa=" BA8907-ND-ST302 BA9503-ND-ST302";snp_count="12";
SEQUENCE	GUBBINS	CDS	949221	949589	0.000	.	0	node="internal_26->internal_27";neg_log_likelihood="4388.824209";taxa=" BA8907-ND-ST302 BA9503-ND-ST302";snp_count="10";
SEQUENCE	GUBBINS	CDS	3018710	3020781	0.000	.	0	node="internal_26->internal_27";neg_log_likelihood="4353.731856";taxa=" BA8907-ND-ST302 BA9503-ND-ST302";snp_count="14";
SEQUENCE	GUBBINS	CDS	4751190	4754641	0.000	.	0	node="internal_26->internal_27";neg_log_likelihood="4306.442350";taxa=" BA8907-ND-ST302 BA9503-ND-ST302";snp_count="12";
SEQUENCE	GUBBINS	CDS	5321706	5329054	0.000	.	0	node="internal_26->internal_27";neg_log_likelihood="4264.171904";taxa=" BA8907-ND-ST302 BA9503-ND-ST302";snp_count="13";
SEQUENCE	GUBBINS	CDS	3256585	3308937	0.000	.	0	node="internal_24->internal_25";neg_log_likelihood="19626.061533";taxa=" EA8393-Porcine-ST302 IA1729-Canine-ST302";snp_count="1077";
SEQUENCE	GUBBINS	CDS	3970059	4007642	0.000	.	0	node="internal_24->internal_25";neg_log_likelihood="16647.210803";taxa=" EA8393-Porcine-ST302 IA1729-Canine-ST302";snp_count="814";
SEQUENCE	GUBBINS	CDS	3718500	3764884	0.000	.	0	node="internal_24->internal_25";neg_log_likelihood="14301.628692";taxa=" EA8393-Porcine-ST302 IA1729-Canine-ST302";snp_count="633";
SEQUENCE	GUBBINS	CDS	4045552	4081190	0.000	.	0	node="internal_24->internal_25";neg_log_likelihood="12452.467161";taxa=" EA8393-Porcine-ST302 IA1729-Canine-ST302";snp_count="566";
SEQUENCE	GUBBINS	CDS	3871864	3893591	0.000	.	0	node="internal_24->internal_25";neg_log_likelihood="10694.363301";taxa=" EA8393-Porcine-ST302 IA1729-Canine-ST302";snp_count="437";
SEQUENCE	GUBBINS	CDS	4668383	4715362	0.000	.	0	node="internal_24->internal_25";neg_log_likelihood="9532.685593";taxa=" EA8393-Porcine-ST302 IA1729-Canine-ST302";snp_count="260";
SEQUENCE	GUBBINS	CDS	5250765	5303391	0.000	.	0	node="internal_24->internal_25";neg_log_likelihood="8685.092358";taxa=" EA8393-Porcine-ST302 IA1729-Canine-ST302";snp_count="314";
SEQUENCE	GUBBINS	CDS	288991	304378	0.000	.	0	node="internal_24->internal_25";neg_log_likelihood="7652.375021";taxa=" EA8393-Porcine-ST302 IA1729-Canine-ST302";snp_count="238";
SEQUENCE	GUBBINS	CDS	5201554	5204892	0.000	.	0	node="internal_24->internal_25";neg_log_likelihood="6872.473343";taxa=" EA8393-Porcine-ST302 IA1729-Canine-ST302";snp_count="147";
SEQUENCE	GUBBINS	CDS	5137843	5189355	0.000	.	0	node="internal_24->internal_25";neg_log_likelihood="6488.793289";taxa=" EA8393-Porcine-ST302 IA1729-Canine-ST302";snp_count="125";
SEQUENCE	GUBBINS	CDS	3852208	3854557	0.000	.	0	node="internal_24->internal_25";neg_log_likelihood="6082.072752";taxa=" EA8393-Porcine-ST302 IA1729-Canine-ST302";snp_count="66";
SEQUENCE	GUBBINS	CDS	3623087	3625257	0.000	.	0	node="internal_24->internal_25";neg_log_likelihood="5890.968776";taxa=" EA8393-Porcine-ST302 IA1729-Canine-ST302";snp_count="48";
SEQUENCE	GUBBINS	CDS	2952165	2955094	0.000	.	0	node="internal_24->internal_25";neg_log_likelihood="5737.445496";taxa=" EA8393-Porcine-ST302 IA1729-Canine-ST302";snp_count="39";
SEQUENCE	GUBBINS	CDS	4750921	4767022	0.000	.	0	node="internal_24->internal_25";neg_log_likelihood="5608.632861";taxa=" EA8393-Porcine-ST302 IA1729-Canine-ST302";snp_count="43";
SEQUENCE	GUBBINS	CDS	4946489	4966381	0.000	.	0	node="internal_24->internal_25";neg_log_likelihood="5462.634188";taxa=" EA8393-Porcine-ST302 IA1729-Canine-ST302";snp_count="44";
SEQUENCE	GUBBINS	CDS	2824629	2826222	0.000	.	0	node="internal_24->internal_25";neg_log_likelihood="5309.955475";taxa=" EA8393-Porcine-ST302 IA1729-Canine-ST302";snp_count="28";
SEQUENCE	GUBBINS	CDS	4722478	4729301	0.000	.	0	node="internal_24->internal_25";neg_log_likelihood="5213.363104";taxa=" EA8393-Porcine-ST302 IA1729-Canine-ST302";snp_count="36";
SEQUENCE	GUBBINS	CDS	949574	964628	0.000	.	0	node="internal_24->internal_25";neg_log_likelihood="5091.355204";taxa=" EA8393-Porcine-ST302 IA1729-Canine-ST302";snp_count="34";
SEQUENCE	GUBBINS	CDS	770688	774557	0.000	.	0	node="internal_24->internal_25";neg_log_likelihood="4971.455205";taxa=" EA8393-Porcine-ST302 IA1729-Canine-ST302";snp_count="22";
SEQUENCE	GUBBINS	CDS	5328822	5338988	0.000	.	0	node="internal_24->internal_25";neg_log_likelihood="4899.201740";taxa=" EA8393-Porcine-ST302 IA1729-Canine-ST302";snp_count="26";
SEQUENCE	GUBBINS	CDS	4280139	4290114	0.000	.	0	node="internal_24->internal_25";neg_log_likelihood="4811.457883";taxa=" EA8393-Porcine-ST302 IA1729-Canine-ST302";snp_count="20";
SEQUENCE	GUBBINS	CDS	5034157	5037114	0.000	.	0	node="internal_24->internal_25";neg_log_likelihood="4740.492250";taxa=" EA8393-Porcine-ST302 IA1729-Canine-ST302";snp_count="16";
SEQUENCE	GUBBINS	CDS	4580115	4584648	0.000	.	0	node="internal_24->internal_25";neg_log_likelihood="4683.152167";taxa=" EA8393-Porcine-ST302 IA1729-Canine-ST302";snp_count="18";
SEQUENCE	GUBBINS	CDS	3268100	3307900	0.000	.	0	node="internal_24->internal_26";neg_log_likelihood="2638.199579";taxa=" F2_18C-Porcine-ST302 BA8907-ND-ST302 BA9503-ND-ST302";snp_count="121";
SEQUENCE	GUBBINS	CDS	3969687	4007524	0.000	.	0	node="internal_24->internal_26";neg_log_likelihood="2159.351965";taxa=" F2_18C-Porcine-ST302 BA8907-ND-ST302 BA9503-ND-ST302";snp_count="114";
SEQUENCE	GUBBINS	CDS	4045630	4080011	0.000	.	0	node="internal_24->internal_26";neg_log_likelihood="1718.086055";taxa=" F2_18C-Porcine-ST302 BA8907-ND-ST302 BA9503-ND-ST302";snp_count="93";
SEQUENCE	GUBBINS	CDS	3718770	3743181	0.000	.	0	node="internal_24->internal_26";neg_log_likelihood="1333.369828";taxa=" F2_18C-Porcine-ST302 BA8907-ND-ST302 BA9503-ND-ST302";snp_count="80";
SEQUENCE	GUBBINS	CDS	3257112	3261681	0.000	.	0	node="internal_24->internal_26";neg_log_likelihood="1071.410940";taxa=" F2_18C-Porcine-ST302 BA8907-ND-ST302 BA9503-ND-ST302";snp_count="19";
SEQUENCE	GUBBINS	CDS	3762952	3764712	0.000	.	0	node="internal_24->internal_26";neg_log_likelihood="997.149417";taxa=" F2_18C-Porcine-ST302 BA8907-ND-ST302 BA9503-ND-ST302";snp_count="12";
SEQUENCE	GUBBINS	CDS	3622647	3624453	0.000	.	0	node="internal_24->internal_26";neg_log_likelihood="951.089960";taxa=" F2_18C-Porcine-ST302 BA8907-ND-ST302 BA9503-ND-ST302";snp_count="9";
SEQUENCE	GUBBINS	CDS	3861588	3891545	0.000	.	0	node="internal_17->internal_18";neg_log_likelihood="4663.345684";taxa=" IA7122-Poultry-ST302 EA2455-Poultry-ST302 Reference EA1682-Poultry-ST302 IA4731-Poultry-ST302 CA0229-ND-ST302 CA0191-ND-ST302";snp_count="153";
SEQUENCE	GUBBINS	CDS	2952105	2954897	0.000	.	0	node="internal_17->internal_18";neg_log_likelihood="4106.053536";taxa=" IA7122-Poultry-ST302 EA2455-Poultry-ST302 Reference EA1682-Poultry-ST302 IA4731-Poultry-ST302 CA0229-ND-ST302 CA0191-ND-ST302";snp_count="80";
SEQUENCE	GUBBINS	CDS	5137753	5153852	0.000	.	0	node="internal_17->internal_18";neg_log_likelihood="3808.834413";taxa=" IA7122-Poultry-ST302 EA2455-Poultry-ST302 Reference EA1682-Poultry-ST302 IA4731-Poultry-ST302 CA0229-ND-ST302 CA0191-ND-ST302";snp_count="115";
SEQUENCE	GUBBINS	CDS	962086	964628	0.000	.	0	node="internal_17->internal_18";neg_log_likelihood="3430.559446";taxa=" IA7122-Poultry-ST302 EA2455-Poultry-ST302 Reference EA1682-Poultry-ST302 IA4731-Poultry-ST302 CA0229-ND-ST302 CA0191-ND-ST302";snp_count="49";
SEQUENCE	GUBBINS	CDS	4751169	4757064	0.000	.	0	node="internal_17->internal_18";neg_log_likelihood="3252.269256";taxa=" IA7122-Poultry-ST302 EA2455-Poultry-ST302 Reference EA1682-Poultry-ST302 IA4731-Poultry-ST302 CA0229-ND-ST302 CA0191-ND-ST302";snp_count="53";
SEQUENCE	GUBBINS	CDS	5199395	5205315	0.000	.	0	node="internal_17->internal_18";neg_log_likelihood="3060.950387";taxa=" IA7122-Poultry-ST302 EA2455-Poultry-ST302 Reference EA1682-Poultry-ST302 IA4731-Poultry-ST302 CA0229-ND-ST302 CA0191-ND-ST302";snp_count="45";
SEQUENCE	GUBBINS	CDS	980657	981442	0.000	.	0	node="internal_17->internal_18";neg_log_likelihood="2892.552101";taxa=" IA7122-Poultry-ST302 EA2455-Poultry-ST302 Reference EA1682-Poultry-ST302 IA4731-Poultry-ST302 CA0229-ND-ST302 CA0191-ND-ST302";snp_count="27";
SEQUENCE	GUBBINS	CDS	5261503	5270693	0.000	.	0	node="internal_17->internal_18";neg_log_likelihood="2788.799091";taxa=" IA7122-Poultry-ST302 EA2455-Poultry-ST302 Reference EA1682-Poultry-ST302 IA4731-Poultry-ST302 CA0229-ND-ST302 CA0191-ND-ST302";snp_count="44";
SEQUENCE	GUBBINS	CDS	5185973	5191066	0.000	.	0	node="internal_17->internal_18";neg_log_likelihood="2623.786890";taxa=" IA7122-Poultry-ST302 EA2455-Poultry-ST302 Reference EA1682-Poultry-ST302 IA4731-Poultry-ST302 CA0229-ND-ST302 CA0191-ND-ST302";snp_count="33";
SEQUENCE	GUBBINS	CDS	5242657	5248437	0.000	.	0	node="internal_17->internal_18";neg_log_likelihood="2494.218524";taxa=" IA7122-Poultry-ST302 EA2455-Poultry-ST302 Reference EA1682-Poultry-ST302 IA4731-Poultry-ST302 CA0229-ND-ST302 CA0191-ND-ST302";snp_count="33";
SEQUENCE	GUBBINS	CDS	4702030	4710291	0.000	.	0	node="internal_17->internal_18";neg_log_likelihood="2362.054152";taxa=" IA7122-Poultry-ST302 EA2455-Poultry-ST302 Reference EA1682-Poultry-ST302 IA4731-Poultry-ST302 CA0229-ND-ST302 CA0191-ND-ST302";snp_count="36";
SEQUENCE	GUBBINS	CDS	4675983	4684668	0.000	.	0	node="internal_17->internal_18";neg_log_likelihood="2220.707073";taxa=" IA7122-Poultry-ST302 EA2455-Poultry-ST302 Reference EA1682-Poultry-ST302 IA4731-Poultry-ST302 CA0229-ND-ST302 CA0191-ND-ST302";snp_count="34";
SEQUENCE	GUBBINS	CDS	3501444	3515445	0.000	.	0	node="internal_17->internal_18";neg_log_likelihood="2083.161115";taxa=" IA7122-Poultry-ST302 EA2455-Poultry-ST302 Reference EA1682-Poultry-ST302 IA4731-Poultry-ST302 CA0229-ND-ST302 CA0191-ND-ST302";snp_count="38";
SEQUENCE	GUBBINS	CDS	3358644	3362891	0.000	.	0	node="internal_17->internal_18";neg_log_likelihood="1929.915527";taxa=" IA7122-Poultry-ST302 EA2455-Poultry-ST302 Reference EA1682-Poultry-ST302 IA4731-Poultry-ST302 CA0229-ND-ST302 CA0191-ND-ST302";snp_count="27";
SEQUENCE	GUBBINS	CDS	4449842	4452346	0.000	.	0	node="internal_17->internal_18";neg_log_likelihood="1818.997650";taxa=" IA7122-Poultry-ST302 EA2455-Poultry-ST302 Reference EA1682-Poultry-ST302 IA4731-Poultry-ST302 CA0229-ND-ST302 CA0191-ND-ST302";snp_count="24";
SEQUENCE	GUBBINS	CDS	5234260	5235485	0.000	.	0	node="internal_17->internal_18";neg_log_likelihood="1724.224431";taxa=" IA7122-Poultry-ST302 EA2455-Poultry-ST302 Reference EA1682-Poultry-ST302 IA4731-Poultry-ST302 CA0229-ND-ST302 CA0191-ND-ST302";snp_count="19";
SEQUENCE	GUBBINS	CDS	4188742	4189974	0.000	.	0	node="internal_17->internal_18";neg_log_likelihood="1656.492877";taxa=" IA7122-Poultry-ST302 EA2455-Poultry-ST302 Reference EA1682-Poultry-ST302 IA4731-Poultry-ST302 CA0229-ND-ST302 CA0191-ND-ST302";snp_count="14";
SEQUENCE	GUBBINS	CDS	4428489	4437834	0.000	.	0	node="internal_17->internal_18";neg_log_likelihood="1599.150854";taxa=" IA7122-Poultry-ST302 EA2455-Poultry-ST302 Reference EA1682-Poultry-ST302 IA4731-Poultry-ST302 CA0229-ND-ST302 CA0191-ND-ST302";snp_count="21";
SEQUENCE	GUBBINS	CDS	5328822	5331007	0.000	.	0	node="internal_17->internal_18";neg_log_likelihood="1510.711281";taxa=" IA7122-Poultry-ST302 EA2455-Poultry-ST302 Reference EA1682-Poultry-ST302 IA4731-Poultry-ST302 CA0229-ND-ST302 CA0191-ND-ST302";snp_count="15";
SEQUENCE	GUBBINS	CDS	4956995	4966585	0.000	.	0	node="internal_17->internal_18";neg_log_likelihood="1447.168153";taxa=" IA7122-Poultry-ST302 EA2455-Poultry-ST302 Reference EA1682-Poultry-ST302 IA4731-Poultry-ST302 CA0229-ND-ST302 CA0191-ND-ST302";snp_count="21";
SEQUENCE	GUBBINS	CDS	2190131	2191594	0.000	.	0	node="internal_17->internal_18";neg_log_likelihood="1359.761710";taxa=" IA7122-Poultry-ST302 EA2455-Poultry-ST302 Reference EA1682-Poultry-ST302 IA4731-Poultry-ST302 CA0229-ND-ST302 CA0191-ND-ST302";snp_count="13";
SEQUENCE	GUBBINS	CDS	5297772	5298200	0.000	.	0	node="internal_17->internal_18";neg_log_likelihood="1305.776393";taxa=" IA7122-Poultry-ST302 EA2455-Poultry-ST302 Reference EA1682-Poultry-ST302 IA4731-Poultry-ST302 CA0229-ND-ST302 CA0191-ND-ST302";snp_count="10";
SEQUENCE	GUBBINS	CDS	4105692	4106570	0.000	.	0	node="internal_17->internal_18";neg_log_likelihood="1265.713292";taxa=" IA7122-Poultry-ST302 EA2455-Poultry-ST302 Reference EA1682-Poultry-ST302 IA4731-Poultry-ST302 CA0229-ND-ST302 CA0191-ND-ST302";snp_count="10";
SEQUENCE	GUBBINS	CDS	5124909	5126167	0.000	.	0	node="internal_17->internal_18";neg_log_likelihood="1224.060456";taxa=" IA7122-Poultry-ST302 EA2455-Poultry-ST302 Reference EA1682-Poultry-ST302 IA4731-Poultry-ST302 CA0229-ND-ST302 CA0191-ND-ST302";snp_count="10";
SEQUENCE	GUBBINS	CDS	4519927	4521784	0.000	.	0	node="internal_17->internal_18";neg_log_likelihood="1182.340775";taxa=" IA7122-Poultry-ST302 EA2455-Poultry-ST302 Reference EA1682-Poultry-ST302 IA4731-Poultry-ST302 CA0229-ND-ST302 CA0191-ND-ST302";snp_count="10";
SEQUENCE	GUBBINS	CDS	3852124	3852712	0.000	.	0	node="internal_17->internal_18";neg_log_likelihood="1139.396743";taxa=" IA7122-Poultry-ST302 EA2455-Poultry-ST302 Reference EA1682-Poultry-ST302 IA4731-Poultry-ST302 CA0229-ND-ST302 CA0191-ND-ST302";snp_count="8";
SEQUENCE	GUBBINS	CDS	3490655	3492474	0.000	.	0	node="internal_17->internal_18";neg_log_likelihood="1107.995739";taxa=" IA7122-Poultry-ST302 EA2455-Poultry-ST302 Reference EA1682-Poultry-ST302 IA4731-Poultry-ST302 CA0229-ND-ST302 CA0191-ND-ST302";snp_count="8";
SEQUENCE	GUBBINS	CDS	949574	1048062	0.000	.	0	node="internal_17->internal_24";neg_log_likelihood="27966.172821";taxa=" EA8393-Porcine-ST302 IA1729-Canine-ST302 F2_18C-Porcine-ST302 BA8907-ND-ST302 BA9503-ND-ST302";snp_count="1434";
SEQUENCE	GUBBINS	CDS	3852007	3894734	0.000	.	0	node="internal_17->internal_24";neg_log_likelihood="24222.244016";taxa=" EA8393-Porcine-ST302 IA1729-Canine-ST302 F2_18C-Porcine-ST302 BA8907-ND-ST302 BA9503-ND-ST302";snp_count="884";
SEQUENCE	GUBBINS	CDS	2748962	2808530	0.000	.	0	node="internal_17->internal_24";neg_log_likelihood="21749.831052";taxa=" EA8393-Porcine-ST302 IA1729-Canine-ST302 F2_18C-Porcine-ST302 BA8907-ND-ST302 BA9503-ND-ST302";snp_count="847";
SEQUENCE	GUBBINS	CDS	4668251	4729149	0.000	.	0	node="internal_17->internal_24";neg_log_likelihood="19394.119885";taxa=" EA8393-Porcine-ST302 IA1729-Canine-ST302 F2_18C-Porcine-ST302 BA8907-ND-ST302 BA9503-ND-ST302";snp_count="678";
SEQUENCE	GUBBINS	CDS	3470302	3519689	0.000	.	0	node="internal_17->internal_24";neg_log_likelihood="17493.092275";taxa=" EA8393-Porcine-ST302 IA1729-Canine-ST302 F2_18C-Porcine-ST302 BA8907-ND-ST302 BA9503-ND-ST302";snp_count="624";
SEQUENCE	GUBBINS	CDS	5242621	5339325	0.000	.	0	node="internal_17->internal_24";neg_log_likelihood="15688.069511";taxa=" EA8393-Porcine-ST302 IA1729-Canine-ST302 F2_18C-Porcine-ST302 BA8907-ND-ST302 BA9503-ND-ST302";snp_count="676";
SEQUENCE	GUBBINS	CDS	5180548	5223168	0.000	.	0	node="internal_17->internal_24";neg_log_likelihood="13632.392892";taxa=" EA8393-Porcine-ST302 IA1729-Canine-ST302 F2_18C-Porcine-ST302 BA8907-ND-ST302 BA9503-ND-ST302";snp_count="424";
SEQUENCE	GUBBINS	CDS	4283271	4293181	0.000	.	0	node="internal_17->internal_24";neg_log_likelihood="12348.695098";taxa=" EA8393-Porcine-ST302 IA1729-Canine-ST302 F2_18C-Porcine-ST302 BA8907-ND-ST302 BA9503-ND-ST302";snp_count="266";
SEQUENCE	GUBBINS	CDS	4425470	4450782	0.000	.	0	node="internal_17->internal_24";neg_log_likelihood="11554.716973";taxa=" EA8393-Porcine-ST302 IA1729-Canine-ST302 F2_18C-Porcine-ST302 BA8907-ND-ST302 BA9503-ND-ST302";snp_count="291";
SEQUENCE	GUBBINS	CDS	4182454	4190010	0.000	.	0	node="internal_17->internal_24";neg_log_likelihood="10651.357778";taxa=" EA8393-Porcine-ST302 IA1729-Canine-ST302 F2_18C-Porcine-ST302 BA8907-ND-ST302 BA9503-ND-ST302";snp_count="197";
SEQUENCE	GUBBINS	CDS	5096314	5162693	0.000	.	0	node="internal_17->internal_24";neg_log_likelihood="10078.410960";taxa=" EA8393-Porcine-ST302 IA1729-Canine-ST302 F2_18C-Porcine-ST302 BA8907-ND-ST302 BA9503-ND-ST302";snp_count="317";
SEQUENCE	GUBBINS	CDS	4911564	4924390	0.000	.	0	node="internal_17->internal_24";neg_log_likelihood="9045.559952";taxa=" EA8393-Porcine-ST302 IA1729-Canine-ST302 F2_18C-Porcine-ST302 BA8907-ND-ST302 BA9503-ND-ST302";snp_count="202";
SEQUENCE	GUBBINS	CDS	4077246	4115412	0.000	.	0	node="internal_17->internal_24";neg_log_likelihood="8468.170658";taxa=" EA8393-Porcine-ST302 IA1729-Canine-ST302 F2_18C-Porcine-ST302 BA8907-ND-ST302 BA9503-ND-ST302";snp_count="129";
SEQUENCE	GUBBINS	CDS	5048199	5056959	0.000	.	0	node="internal_17->internal_24";neg_log_likelihood="8051.029335";taxa=" EA8393-Porcine-ST302 IA1729-Canine-ST302 F2_18C-Porcine-ST302 BA8907-ND-ST302 BA9503-ND-ST302";snp_count="99";
SEQUENCE	GUBBINS	CDS	4748657	4767986	0.000	.	0	node="internal_17->internal_24";neg_log_likelihood="7786.213922";taxa=" EA8393-Porcine-ST302 IA1729-Canine-ST302 F2_18C-Porcine-ST302 BA8907-ND-ST302 BA9503-ND-ST302";snp_count="87";
SEQUENCE	GUBBINS	CDS	4946949	4966748	0.000	.	0	node="internal_17->internal_24";neg_log_likelihood="7494.299488";taxa=" EA8393-Porcine-ST302 IA1729-Canine-ST302 F2_18C-Porcine-ST302 BA8907-ND-ST302 BA9503-ND-ST302";snp_count="81";
SEQUENCE	GUBBINS	CDS	3268100	3310504	0.000	.	0	node="internal_17->internal_24";neg_log_likelihood="7206.580748";taxa=" EA8393-Porcine-ST302 IA1729-Canine-ST302 F2_18C-Porcine-ST302 BA8907-ND-ST302 BA9503-ND-ST302";snp_count="162";
SEQUENCE	GUBBINS	CDS	3623087	3625257	0.000	.	0	node="internal_17->internal_24";neg_log_likelihood="6672.663959";taxa=" EA8393-Porcine-ST302 IA1729-Canine-ST302 F2_18C-Porcine-ST302 BA8907-ND-ST302 BA9503-ND-ST302";snp_count="53";
SEQUENCE	GUBBINS	CDS	3339497	3356458	0.000	.	0	node="internal_17->internal_24";neg_log_likelihood="6500.048064";taxa=" EA8393-Porcine-ST302 IA1729-Canine-ST302 F2_18C-Porcine-ST302 BA8907-ND-ST302 BA9503-ND-ST302";snp_count="41";
SEQUENCE	GUBBINS	CDS	3969691	4007524	0.000	.	0	node="internal_17->internal_24";neg_log_likelihood="6357.512574";taxa=" EA8393-Porcine-ST302 IA1729-Canine-ST302 F2_18C-Porcine-ST302 BA8907-ND-ST302 BA9503-ND-ST302";snp_count="118";
SEQUENCE	GUBBINS	CDS	1053345	1056220	0.000	.	0	node="internal_17->internal_24";neg_log_likelihood="5955.813400";taxa=" EA8393-Porcine-ST302 IA1729-Canine-ST302 F2_18C-Porcine-ST302 BA8907-ND-ST302 BA9503-ND-ST302";snp_count="45";
SEQUENCE	GUBBINS	CDS	1618779	1629412	0.000	.	0	node="internal_17->internal_24";neg_log_likelihood="5799.794733";taxa=" EA8393-Porcine-ST302 IA1729-Canine-ST302 F2_18C-Porcine-ST302 BA8907-ND-ST302 BA9503-ND-ST302";snp_count="44";
SEQUENCE	GUBBINS	CDS	769268	784455	0.000	.	0	node="internal_17->internal_24";neg_log_likelihood="5650.806127";taxa=" EA8393-Porcine-ST302 IA1729-Canine-ST302 F2_18C-Porcine-ST302 BA8907-ND-ST302 BA9503-ND-ST302";snp_count="62";
SEQUENCE	GUBBINS	CDS	3718500	3743181	0.000	.	0	node="internal_17->internal_24";neg_log_likelihood="5433.610686";taxa=" EA8393-Porcine-ST302 IA1729-Canine-ST302 F2_18C-Porcine-ST302 BA8907-ND-ST302 BA9503-ND-ST302";snp_count="79";
SEQUENCE	GUBBINS	CDS	2815543	2826222	0.000	.	0	node="internal_17->internal_24";neg_log_likelihood="5154.673530";taxa=" EA8393-Porcine-ST302 IA1729-Canine-ST302 F2_18C-Porcine-ST302 BA8907-ND-ST302 BA9503-ND-ST302";snp_count="53";
SEQUENCE	GUBBINS	CDS	4045630	4073787	0.000	.	0	node="internal_17->internal_24";neg_log_likelihood="4964.634650";taxa=" EA8393-Porcine-ST302 IA1729-Canine-ST302 F2_18C-Porcine-ST302 BA8907-ND-ST302 BA9503-ND-ST302";snp_count="80";
SEQUENCE	GUBBINS	CDS	2952165	2954889	0.000	.	0	node="internal_17->internal_24";neg_log_likelihood="4685.569226";taxa=" EA8393-Porcine-ST302 IA1729-Canine-ST302 F2_18C-Porcine-ST302 BA8907-ND-ST302 BA9503-ND-ST302";snp_count="31";
SEQUENCE	GUBBINS	CDS	4519952	4523556	0.000	.	0	node="internal_17->internal_24";neg_log_likelihood="4576.414751";taxa=" EA8393-Porcine-ST302 IA1729-Canine-ST302 F2_18C-Porcine-ST302 BA8907-ND-ST302 BA9503-ND-ST302";snp_count="28";
SEQUENCE	GUBBINS	CDS	4395410	4399772	0.000	.	0	node="internal_17->internal_24";neg_log_likelihood="4481.462204";taxa=" EA8393-Porcine-ST302 IA1729-Canine-ST302 F2_18C-Porcine-ST302 BA8907-ND-ST302 BA9503-ND-ST302";snp_count="30";
SEQUENCE	GUBBINS	CDS	4203092	4221328	0.000	.	0	node="internal_17->internal_24";neg_log_likelihood="4380.420474";taxa=" EA8393-Porcine-ST302 IA1729-Canine-ST302 F2_18C-Porcine-ST302 BA8907-ND-ST302 BA9503-ND-ST302";snp_count="33";
SEQUENCE	GUBBINS	CDS	4897549	4897762	0.000	.	0	node="internal_17->internal_24";neg_log_likelihood="4264.642000";taxa=" EA8393-Porcine-ST302 IA1729-Canine-ST302 F2_18C-Porcine-ST302 BA8907-ND-ST302 BA9503-ND-ST302";snp_count="12";
SEQUENCE	GUBBINS	CDS	5232263	5235891	0.000	.	0	node="internal_17->internal_24";neg_log_likelihood="4221.438414";taxa=" EA8393-Porcine-ST302 IA1729-Canine-ST302 F2_18C-Porcine-ST302 BA8907-ND-ST302 BA9503-ND-ST302";snp_count="21";
SEQUENCE	GUBBINS	CDS	3257112	3261681	0.000	.	0	node="internal_17->internal_24";neg_log_likelihood="4151.143908";taxa=" EA8393-Porcine-ST302 IA1729-Canine-ST302 F2_18C-Porcine-ST302 BA8907-ND-ST302 BA9503-ND-ST302";snp_count="19";
SEQUENCE	GUBBINS	CDS	2189617	2191582	0.000	.	0	node="internal_17->internal_24";neg_log_likelihood="4081.959561";taxa=" EA8393-Porcine-ST302 IA1729-Canine-ST302 F2_18C-Porcine-ST302 BA8907-ND-ST302 BA9503-ND-ST302";snp_count="10";
SEQUENCE	GUBBINS	CDS	3018385	3020781	0.000	.	0	node="internal_17->internal_24";neg_log_likelihood="4048.912054";taxa=" EA8393-Porcine-ST302 IA1729-Canine-ST302 F2_18C-Porcine-ST302 BA8907-ND-ST302 BA9503-ND-ST302";snp_count="13";
SEQUENCE	GUBBINS	CDS	3759726	3765838	0.000	.	0	node="internal_17->internal_24";neg_log_likelihood="4002.722858";taxa=" EA8393-Porcine-ST302 IA1729-Canine-ST302 F2_18C-Porcine-ST302 BA8907-ND-ST302 BA9503-ND-ST302";snp_count="16";
SEQUENCE	GUBBINS	CDS	5138223	5143138	0.000	.	0	node="internal_16->IA1186-Poultry-ST302";neg_log_likelihood="1220.399952";taxa="IA1186-Poultry-ST302";snp_count="111";
SEQUENCE	GUBBINS	CDS	5030070	5031746	0.000	.	0	node="internal_16->IA1186-Poultry-ST302";neg_log_likelihood="834.237020";taxa="IA1186-Poultry-ST302";snp_count="68";
SEQUENCE	GUBBINS	CDS	5301893	5301939	0.000	.	0	node="internal_16->IA1186-Poultry-ST302";neg_log_likelihood="678.377155";taxa="IA1186-Poultry-ST302";snp_count="10";
SEQUENCE	GUBBINS	CDS	5232479	5248437	0.000	.	0	node="internal_16->IA1186-Poultry-ST302";neg_log_likelihood="633.092760";taxa="IA1186-Poultry-ST302";snp_count="20";
SEQUENCE	GUBBINS	CDS	2499573	2499648	0.000	.	0	node="internal_16->IA1186-Poultry-ST302";neg_log_likelihood="547.026138";taxa="IA1186-Poultry-ST302";snp_count="9";
SEQUENCE	GUBBINS	CDS	4676424	4707231	0.000	.	0	node="internal_16->IA1186-Poultry-ST302";neg_log_likelihood="506.949433";taxa="IA1186-Poultry-ST302";snp_count="14";
SEQUENCE	GUBBINS	CDS	952105	952177	0.000	.	0	node="internal_16->IA1186-Poultry-ST302";neg_log_likelihood="443.164469";taxa="IA1186-Poultry-ST302";snp_count="8";
SEQUENCE	GUBBINS	CDS	3859069	3859091	0.000	.	0	node="internal_16->IA1186-Poultry-ST302";neg_log_likelihood="405.600336";taxa="IA1186-Poultry-ST302";snp_count="7";
SEQUENCE	GUBBINS	CDS	4896395	4896647	0.000	.	0	node="internal_16->IA1186-Poultry-ST302";neg_log_likelihood="385.046031";taxa="IA1186-Poultry-ST302";snp_count="5";
SEQUENCE	GUBBINS	CDS	3492435	3494356	0.000	.	0	node="internal_16->IA1186-Poultry-ST302";neg_log_likelihood="362.083947";taxa="IA1186-Poultry-ST302";snp_count="6";
SEQUENCE	GUBBINS	CDS	3853367	3894133	0.000	.	0	node="internal_28->internal_16";neg_log_likelihood="16799.279482";taxa=" FA0416-Human-ST302 IA1186-Poultry-ST302";snp_count="530";
SEQUENCE	GUBBINS	CDS	4668457	4729222	0.000	.	0	node="internal_28->internal_16";neg_log_likelihood="15445.757448";taxa=" FA0416-Human-ST302 IA1186-Poultry-ST302";snp_count="216";
SEQUENCE	GUBBINS	CDS	4449842	4451271	0.000	.	0	node="internal_28->internal_16";neg_log_likelihood="14793.825151";taxa=" FA0416-Human-ST302 IA1186-Poultry-ST302";snp_count="105";
SEQUENCE	GUBBINS	CDS	1616396	1629435	0.000	.	0	node="internal_28->internal_16";neg_log_likelihood="14477.401645";taxa=" FA0416-Human-ST302 IA1186-Poultry-ST302";snp_count="166";
SEQUENCE	GUBBINS	CDS	1238000	1259798	0.000	.	0	node="internal_28->internal_16";neg_log_likelihood="13991.269783";taxa=" FA0416-Human-ST302 IA1186-Poultry-ST302";snp_count="209";
SEQUENCE	GUBBINS	CDS	4748728	4754776	0.000	.	0	node="internal_28->internal_16";neg_log_likelihood="13375.682994";taxa=" FA0416-Human-ST302 IA1186-Poultry-ST302";snp_count="104";
SEQUENCE	GUBBINS	CDS	5028311	5054094	0.000	.	0	node="internal_28->internal_16";neg_log_likelihood="13067.403816";taxa=" FA0416-Human-ST302 IA1186-Poultry-ST302";snp_count="126";
SEQUENCE	GUBBINS	CDS	5259932	5279685	0.000	.	0	node="internal_28->internal_16";neg_log_likelihood="12672.983466";taxa=" FA0416-Human-ST302 IA1186-Poultry-ST302";snp_count="129";
SEQUENCE	GUBBINS	CDS	5134874	5148789	0.000	.	0	node="internal_28->internal_16";neg_log_likelihood="12268.513841";taxa=" FA0416-Human-ST302 IA1186-Poultry-ST302";snp_count="127";
SEQUENCE	GUBBINS	CDS	2821018	2825373	0.000	.	0	node="internal_28->internal_16";neg_log_likelihood="11882.200270";taxa=" FA0416-Human-ST302 IA1186-Poultry-ST302";snp_count="46";
SEQUENCE	GUBBINS	CDS	769685	780834	0.000	.	0	node="internal_28->internal_16";neg_log_likelihood="11742.048737";taxa=" FA0416-Human-ST302 IA1186-Poultry-ST302";snp_count="89";
SEQUENCE	GUBBINS	CDS	5187446	5223531	0.000	.	0	node="internal_28->internal_16";neg_log_likelihood="11473.120048";taxa=" FA0416-Human-ST302 IA1186-Poultry-ST302";snp_count="122";
SEQUENCE	GUBBINS	CDS	443221	443248	0.000	.	0	node="internal_28->internal_16";neg_log_likelihood="11087.153252";taxa=" FA0416-Human-ST302 IA1186-Poultry-ST302";snp_count="21";
SEQUENCE	GUBBINS	CDS	4426507	4427056	0.000	.	0	node="internal_28->internal_16";neg_log_likelihood="11033.696141";taxa=" FA0416-Human-ST302 IA1186-Poultry-ST302";snp_count="30";
SEQUENCE	GUBBINS	CDS	4953386	4967476	0.000	.	0	node="internal_28->internal_16";neg_log_likelihood="10944.932385";taxa=" FA0416-Human-ST302 IA1186-Poultry-ST302";snp_count="56";
SEQUENCE	GUBBINS	CDS	3625325	3628344	0.000	.	0	node="internal_28->internal_16";neg_log_likelihood="10784.609528";taxa=" FA0416-Human-ST302 IA1186-Poultry-ST302";snp_count="27";
SEQUENCE	GUBBINS	CDS	5097281	5102863	0.000	.	0	node="internal_28->internal_16";neg_log_likelihood="10699.756156";taxa=" FA0416-Human-ST302 IA1186-Poultry-ST302";snp_count="32";
SEQUENCE	GUBBINS	CDS	4283445	4295879	0.000	.	0	node="internal_28->internal_16";neg_log_likelihood="10597.044271";taxa=" FA0416-Human-ST302 IA1186-Poultry-ST302";snp_count="32";
SEQUENCE	GUBBINS	CDS	5288171	5302335	0.000	.	0	node="internal_28->internal_16";neg_log_likelihood="10493.801172";taxa=" FA0416-Human-ST302 IA1186-Poultry-ST302";snp_count="38";
SEQUENCE	GUBBINS	CDS	3915481	3928815	0.000	.	0	node="internal_28->internal_16";neg_log_likelihood="10371.451376";taxa=" FA0416-Human-ST302 IA1186-Poultry-ST302";snp_count="44";
SEQUENCE	GUBBINS	CDS	2952105	2954993	0.000	.	0	node="internal_28->internal_16";neg_log_likelihood="10233.680932";taxa=" FA0416-Human-ST302 IA1186-Poultry-ST302";snp_count="16";
SEQUENCE	GUBBINS	CDS	3851565	3895094	0.000	.	0	node="internal_ROOT->internal_17";neg_log_likelihood="8062.878621";taxa=" IA7122-Poultry-ST302 EA2455-Poultry-ST302 Reference EA1682-Poultry-ST302 IA4731-Poultry-ST302 CA0229-ND-ST302 CA0191-ND-ST302 EA8393-Porcine-ST302 IA1729-Canine-ST302 F2_18C-Porcine-ST302 BA8907-ND-ST302 BA9503-ND-ST302";snp_count="343";
SEQUENCE	GUBBINS	CDS	4701802	4715628	0.000	.	0	node="internal_ROOT->internal_17";neg_log_likelihood="7032.488013";taxa=" IA7122-Poultry-ST302 EA2455-Poultry-ST302 Reference EA1682-Poultry-ST302 IA4731-Poultry-ST302 CA0229-ND-ST302 CA0191-ND-ST302 EA8393-Porcine-ST302 IA1729-Canine-ST302 F2_18C-Porcine-ST302 BA8907-ND-ST302 BA9503-ND-ST302";snp_count="148";
SEQUENCE	GUBBINS	CDS	4668242	4670136	0.000	.	0	node="internal_ROOT->internal_17";neg_log_likelihood="6547.462012";taxa=" IA7122-Poultry-ST302 EA2455-Poultry-ST302 Reference EA1682-Poultry-ST302 IA4731-Poultry-ST302 CA0229-ND-ST302 CA0191-ND-ST302 EA8393-Porcine-ST302 IA1729-Canine-ST302 F2_18C-Porcine-ST302 BA8907-ND-ST302 BA9503-ND-ST302";snp_count="77";
SEQUENCE	GUBBINS	CDS	2952236	2954885	0.000	.	0	node="internal_ROOT->internal_17";neg_log_likelihood="6285.150609";taxa=" IA7122-Poultry-ST302 EA2455-Poultry-ST302 Reference EA1682-Poultry-ST302 IA4731-Poultry-ST302 CA0229-ND-ST302 CA0191-ND-ST302 EA8393-Porcine-ST302 IA1729-Canine-ST302 F2_18C-Porcine-ST302 BA8907-ND-ST302 BA9503-ND-ST302";snp_count="78";
SEQUENCE	GUBBINS	CDS	4283380	4293099	0.000	.	0	node="internal_ROOT->internal_17";neg_log_likelihood="6014.791868";taxa=" IA7122-Poultry-ST302 EA2455-Poultry-ST302 Reference EA1682-Poultry-ST302 IA4731-Poultry-ST302 CA0229-ND-ST302 CA0191-ND-ST302 EA8393-Porcine-ST302 IA1729-Canine-ST302 F2_18C-Porcine-ST302 BA8907-ND-ST302 BA9503-ND-ST302";snp_count="102";
SEQUENCE	GUBBINS	CDS	4182589	4190010	0.000	.	0	node="internal_ROOT->internal_17";neg_log_likelihood="5659.249294";taxa=" IA7122-Poultry-ST302 EA2455-Poultry-ST302 Reference EA1682-Poultry-ST302 IA4731-Poultry-ST302 CA0229-ND-ST302 CA0191-ND-ST302 EA8393-Porcine-ST302 IA1729-Canine-ST302 F2_18C-Porcine-ST302 BA8907-ND-ST302 BA9503-ND-ST302";snp_count="89";
SEQUENCE	GUBBINS	CDS	5243932	5285371	0.000	.	0	node="internal_ROOT->internal_17";neg_log_likelihood="5341.408843";taxa=" IA7122-Poultry-ST302 EA2455-Poultry-ST302 Reference EA1682-Poultry-ST302 IA4731-Poultry-ST302 CA0229-ND-ST302 CA0191-ND-ST302 EA8393-Porcine-ST302 IA1729-Canine-ST302 F2_18C-Porcine-ST302 BA8907-ND-ST302 BA9503-ND-ST302";snp_count="144";
SEQUENCE	GUBBINS	CDS	4085203	4085770	0.000	.	0	node="internal_ROOT->internal_17";neg_log_likelihood="4814.908109";taxa=" IA7122-Poultry-ST302 EA2455-Poultry-ST302 Reference EA1682-Poultry-ST302 IA4731-Poultry-ST302 CA0229-ND-ST302 CA0191-ND-ST302 EA8393-Porcine-ST302 IA1729-Canine-ST302 F2_18C-Porcine-ST302 BA8907-ND-ST302 BA9503-ND-ST302";snp_count="51";
SEQUENCE	GUBBINS	CDS	4750907	4755794	0.000	.	0	node="internal_ROOT->internal_17";neg_log_likelihood="4639.929726";taxa=" IA7122-Poultry-ST302 EA2455-Poultry-ST302 Reference EA1682-Poultry-ST302 IA4731-Poultry-ST302 CA0229-ND-ST302 CA0191-ND-ST302 EA8393-Porcine-ST302 IA1729-Canine-ST302 F2_18C-Porcine-ST302 BA8907-ND-ST302 BA9503-ND-ST302";snp_count="71";
SEQUENCE	GUBBINS	CDS	954055	964628	0.000	.	0	node="internal_ROOT->internal_17";neg_log_likelihood="4397.215204";taxa=" IA7122-Poultry-ST302 EA2455-Poultry-ST302 Reference EA1682-Poultry-ST302 IA4731-Poultry-ST302 CA0229-ND-ST302 CA0191-ND-ST302 EA8393-Porcine-ST302 IA1729-Canine-ST302 F2_18C-Porcine-ST302 BA8907-ND-ST302 BA9503-ND-ST302";snp_count="73";
SEQUENCE	GUBBINS	CDS	5201728	5205195	0.000	.	0	node="internal_ROOT->internal_17";neg_log_likelihood="4133.620613";taxa=" IA7122-Poultry-ST302 EA2455-Poultry-ST302 Reference EA1682-Poultry-ST302 IA4731-Poultry-ST302 CA0229-ND-ST302 CA0191-ND-ST302 EA8393-Porcine-ST302 IA1729-Canine-ST302 F2_18C-Porcine-ST302 BA8907-ND-ST302 BA9503-ND-ST302";snp_count="51";
SEQUENCE	GUBBINS	CDS	5186549	5190488	0.000	.	0	node="internal_ROOT->internal_17";neg_log_likelihood="3948.917737";taxa=" IA7122-Poultry-ST302 EA2455-Poultry-ST302 Reference EA1682-Poultry-ST302 IA4731-Poultry-ST302 CA0229-ND-ST302 CA0191-ND-ST302 EA8393-Porcine-ST302 IA1729-Canine-ST302 F2_18C-Porcine-ST302 BA8907-ND-ST302 BA9503-ND-ST302";snp_count="49";
SEQUENCE	GUBBINS	CDS	4951250	4966747	0.000	.	0	node="internal_ROOT->internal_17";neg_log_likelihood="3766.272374";taxa=" IA7122-Poultry-ST302 EA2455-Poultry-ST302 Reference EA1682-Poultry-ST302 IA4731-Poultry-ST302 CA0229-ND-ST302 CA0191-ND-ST302 EA8393-Porcine-ST302 IA1729-Canine-ST302 F2_18C-Porcine-ST302 BA8907-ND-ST302 BA9503-ND-ST302";snp_count="68";
SEQUENCE	GUBBINS	CDS	5048699	5051466	0.000	.	0	node="internal_ROOT->internal_17";neg_log_likelihood="3511.851463";taxa=" IA7122-Poultry-ST302 EA2455-Poultry-ST302 Reference EA1682-Poultry-ST302 IA4731-Poultry-ST302 CA0229-ND-ST302 CA0191-ND-ST302 EA8393-Porcine-ST302 IA1729-Canine-ST302 F2_18C-Porcine-ST302 BA8907-ND-ST302 BA9503-ND-ST302";snp_count="42";
SEQUENCE	GUBBINS	CDS	5138018	5144044	0.000	.	0	node="internal_ROOT->internal_17";neg_log_likelihood="3353.057482";taxa=" IA7122-Poultry-ST302 EA2455-Poultry-ST302 Reference EA1682-Poultry-ST302 IA4731-Poultry-ST302 CA0229-ND-ST302 CA0191-ND-ST302 EA8393-Porcine-ST302 IA1729-Canine-ST302 F2_18C-Porcine-ST302 BA8907-ND-ST302 BA9503-ND-ST302";snp_count="49";
SEQUENCE	GUBBINS	CDS	4425657	4441858	0.000	.	0	node="internal_ROOT->internal_17";neg_log_likelihood="3168.927227";taxa=" IA7122-Poultry-ST302 EA2455-Poultry-ST302 Reference EA1682-Poultry-ST302 IA4731-Poultry-ST302 CA0229-ND-ST302 CA0191-ND-ST302 EA8393-Porcine-ST302 IA1729-Canine-ST302 F2_18C-Porcine-ST302 BA8907-ND-ST302 BA9503-ND-ST302";snp_count="60";
SEQUENCE	GUBBINS	CDS	1619097	1630941	0.000	.	0	node="internal_ROOT->internal_17";neg_log_likelihood="2941.064235";taxa=" IA7122-Poultry-ST302 EA2455-Poultry-ST302 Reference EA1682-Poultry-ST302 IA4731-Poultry-ST302 CA0229-ND-ST302 CA0191-ND-ST302 EA8393-Porcine-ST302 IA1729-Canine-ST302 F2_18C-Porcine-ST302 BA8907-ND-ST302 BA9503-ND-ST302";snp_count="51";
SEQUENCE	GUBBINS	CDS	4519838	4521928	0.000	.	0	node="internal_ROOT->internal_17";neg_log_likelihood="2749.602003";taxa=" IA7122-Poultry-ST302 EA2455-Poultry-ST302 Reference EA1682-Poultry-ST302 IA4731-Poultry-ST302 CA0229-ND-ST302 CA0191-ND-ST302 EA8393-Porcine-ST302 IA1729-Canine-ST302 F2_18C-Porcine-ST302 BA8907-ND-ST302 BA9503-ND-ST302";snp_count="30";
SEQUENCE	GUBBINS	CDS	4449508	4450462	0.000	.	0	node="internal_ROOT->internal_17";neg_log_likelihood="2642.827201";taxa=" IA7122-Poultry-ST302 EA2455-Poultry-ST302 Reference EA1682-Poultry-ST302 IA4731-Poultry-ST302 CA0229-ND-ST302 CA0191-ND-ST302 EA8393-Porcine-ST302 IA1729-Canine-ST302 F2_18C-Porcine-ST302 BA8907-ND-ST302 BA9503-ND-ST302";snp_count="21";
SEQUENCE	GUBBINS	CDS	4105600	4106629	0.000	.	0	node="internal_ROOT->internal_17";neg_log_likelihood="2560.611100";taxa=" IA7122-Poultry-ST302 EA2455-Poultry-ST302 Reference EA1682-Poultry-ST302 IA4731-Poultry-ST302 CA0229-ND-ST302 CA0191-ND-ST302 EA8393-Porcine-ST302 IA1729-Canine-ST302 F2_18C-Porcine-ST302 BA8907-ND-ST302 BA9503-ND-ST302";snp_count="21";
SEQUENCE	GUBBINS	CDS	5318177	5329022	0.000	.	0	node="internal_ROOT->internal_17";neg_log_likelihood="2479.832301";taxa=" IA7122-Poultry-ST302 EA2455-Poultry-ST302 Reference EA1682-Poultry-ST302 IA4731-Poultry-ST302 CA0229-ND-ST302 CA0191-ND-ST302 EA8393-Porcine-ST302 IA1729-Canine-ST302 F2_18C-Porcine-ST302 BA8907-ND-ST302 BA9503-ND-ST302";snp_count="34";
SEQUENCE	GUBBINS	CDS	3490111	3501632	0.000	.	0	node="internal_ROOT->internal_17";neg_log_likelihood="2347.388205";taxa=" IA7122-Poultry-ST302 EA2455-Poultry-ST302 Reference EA1682-Poultry-ST302 IA4731-Poultry-ST302 CA0229-ND-ST302 CA0191-ND-ST302 EA8393-Porcine-ST302 IA1729-Canine-ST302 F2_18C-Porcine-ST302 BA8907-ND-ST302 BA9503-ND-ST302";snp_count="32";
SEQUENCE	GUBBINS	CDS	4764339	4766666	0.000	.	0	node="internal_ROOT->internal_17";neg_log_likelihood="2227.520120";taxa=" IA7122-Poultry-ST302 EA2455-Poultry-ST302 Reference EA1682-Poultry-ST302 IA4731-Poultry-ST302 CA0229-ND-ST302 CA0191-ND-ST302 EA8393-Porcine-ST302 IA1729-Canine-ST302 F2_18C-Porcine-ST302 BA8907-ND-ST302 BA9503-ND-ST302";snp_count="17";
SEQUENCE	GUBBINS	CDS	5291703	5311854	0.000	.	0	node="internal_ROOT->internal_17";neg_log_likelihood="2159.262211";taxa=" IA7122-Poultry-ST302 EA2455-Poultry-ST302 Reference EA1682-Poultry-ST302 IA4731-Poultry-ST302 CA0229-ND-ST302 CA0191-ND-ST302 EA8393-Porcine-ST302 IA1729-Canine-ST302 F2_18C-Porcine-ST302 BA8907-ND-ST302 BA9503-ND-ST302";snp_count="30";
SEQUENCE	GUBBINS	CDS	4397996	4399485	0.000	.	0	node="internal_ROOT->internal_17";neg_log_likelihood="2041.874283";taxa=" IA7122-Poultry-ST302 EA2455-Poultry-ST302 Reference EA1682-Poultry-ST302 IA4731-Poultry-ST302 CA0229-ND-ST302 CA0191-ND-ST302 EA8393-Porcine-ST302 IA1729-Canine-ST302 F2_18C-Porcine-ST302 BA8907-ND-ST302 BA9503-ND-ST302";snp_count="13";
SEQUENCE	GUBBINS	CDS	5097302	5097446	0.000	.	0	node="internal_ROOT->internal_17";neg_log_likelihood="1991.234236";taxa=" IA7122-Poultry-ST302 EA2455-Poultry-ST302 Reference EA1682-Poultry-ST302 IA4731-Poultry-ST302 CA0229-ND-ST302 CA0191-ND-ST302 EA8393-Porcine-ST302 IA1729-Canine-ST302 F2_18C-Porcine-ST302 BA8907-ND-ST302 BA9503-ND-ST302";snp_count="8";
SEQUENCE	GUBBINS	CDS	5210944	5211606	0.000	.	0	node="internal_ROOT->internal_17";neg_log_likelihood="1961.234992";taxa=" IA7122-Poultry-ST302 EA2455-Poultry-ST302 Reference EA1682-Poultry-ST302 IA4731-Poultry-ST302 CA0229-ND-ST302 CA0191-ND-ST302 EA8393-Porcine-ST302 IA1729-Canine-ST302 F2_18C-Porcine-ST302 BA8907-ND-ST302 BA9503-ND-ST302";snp_count="9";
SEQUENCE	GUBBINS	CDS	4675971	4676961	0.000	.	0	node="internal_ROOT->internal_17";neg_log_likelihood="1925.910918";taxa=" IA7122-Poultry-ST302 EA2455-Poultry-ST302 Reference EA1682-Poultry-ST302 IA4731-Poultry-ST302 CA0229-ND-ST302 CA0191-ND-ST302 EA8393-Porcine-ST302 IA1729-Canine-ST302 F2_18C-Porcine-ST302 BA8907-ND-ST302 BA9503-ND-ST302";snp_count="9";
SEQUENCE	GUBBINS	CDS	3623447	3625199	0.000	.	0	node="internal_ROOT->internal_17";neg_log_likelihood="1891.062240";taxa=" IA7122-Poultry-ST302 EA2455-Poultry-ST302 Reference EA1682-Poultry-ST302 IA4731-Poultry-ST302 CA0229-ND-ST302 CA0191-ND-ST302 EA8393-Porcine-ST302 IA1729-Canine-ST302 F2_18C-Porcine-ST302 BA8907-ND-ST302 BA9503-ND-ST302";snp_count="9";
SEQUENCE	GUBBINS	CDS	5232263	5235485	0.000	.	0	node="internal_ROOT->internal_17";neg_log_likelihood="1854.688563";taxa=" IA7122-Poultry-ST302 EA2455-Poultry-ST302 Reference EA1682-Poultry-ST302 IA4731-Poultry-ST302 CA0229-ND-ST302 CA0191-ND-ST302 EA8393-Porcine-ST302 IA1729-Canine-ST302 F2_18C-Porcine-ST302 BA8907-ND-ST302 BA9503-ND-ST302";snp_count="10";
SEQUENCE	GUBBINS	CDS	2189381	2191552	0.000	.	0	node="internal_ROOT->internal_17";neg_log_likelihood="1815.359192";taxa=" IA7122-Poultry-ST302 EA2455-Poultry-ST302 Reference EA1682-Poultry-ST302 IA4731-Poultry-ST302 CA0229-ND-ST302 CA0191-ND-ST302 EA8393-Porcine-ST302 IA1729-Canine-ST302 F2_18C-Porcine-ST302 BA8907-ND-ST302 BA9503-ND-ST302";snp_count="8";
SEQUENCE	GUBBINS	CDS	5115365	5116103	0.000	.	0	node="internal_ROOT->internal_17";neg_log_likelihood="1783.190044";taxa=" IA7122-Poultry-ST302 EA2455-Poultry-ST302 Reference EA1682-Poultry-ST302 IA4731-Poultry-ST302 CA0229-ND-ST302 CA0191-ND-ST302 EA8393-Porcine-ST302 IA1729-Canine-ST302 F2_18C-Porcine-ST302 BA8907-ND-ST302 BA9503-ND-ST302";snp_count="6";
SEQUENCE	GUBBINS	CDS	4669691	4729286	0.000	.	0	node="internal_ROOT->internal_28";neg_log_likelihood="15303.164815";taxa=" FA0416-Human-ST302 IA1186-Poultry-ST302 FA5537-ND-ST302";snp_count="372";
SEQUENCE	GUBBINS	CDS	4425480	4472871	0.000	.	0	node="internal_ROOT->internal_28";neg_log_likelihood="14143.386443";taxa=" FA0416-Human-ST302 IA1186-Poultry-ST302 FA5537-ND-ST302";snp_count="459";
SEQUENCE	GUBBINS	CDS	4279948	4295565	0.000	.	0	node="internal_ROOT->internal_28";neg_log_likelihood="12854.750824";taxa=" FA0416-Human-ST302 IA1186-Poultry-ST302 FA5537-ND-ST302";snp_count="219";
SEQUENCE	GUBBINS	CDS	3472835	3520433	0.000	.	0	node="internal_ROOT->internal_28";neg_log_likelihood="12183.080181";taxa=" FA0416-Human-ST302 IA1186-Poultry-ST302 FA5537-ND-ST302";snp_count="238";
SEQUENCE	GUBBINS	CDS	2498235	2499681	0.000	.	0	node="internal_ROOT->internal_28";neg_log_likelihood="11442.865824";taxa=" FA0416-Human-ST302 IA1186-Poultry-ST302 FA5537-ND-ST302";snp_count="118";
SEQUENCE	GUBBINS	CDS	5258405	5311855	0.000	.	0	node="internal_ROOT->internal_28";neg_log_likelihood="11110.520042";taxa=" FA0416-Human-ST302 IA1186-Poultry-ST302 FA5537-ND-ST302";snp_count="249";
SEQUENCE	GUBBINS	CDS	3852007	3894467	0.000	.	0	node="internal_ROOT->internal_28";neg_log_likelihood="10224.032481";taxa=" FA0416-Human-ST302 IA1186-Poultry-ST302 FA5537-ND-ST302";snp_count="310";
SEQUENCE	GUBBINS	CDS	5186559	5214086	0.000	.	0	node="internal_ROOT->internal_28";neg_log_likelihood="9280.520948";taxa=" FA0416-Human-ST302 IA1186-Poultry-ST302 FA5537-ND-ST302";snp_count="173";
SEQUENCE	GUBBINS	CDS	949618	961231	0.000	.	0	node="internal_ROOT->internal_28";neg_log_likelihood="8725.235420";taxa=" FA0416-Human-ST302 IA1186-Poultry-ST302 FA5537-ND-ST302";snp_count="117";
SEQUENCE	GUBBINS	CDS	4748700	4764945	0.000	.	0	node="internal_ROOT->internal_28";neg_log_likelihood="8359.350121";taxa=" FA0416-Human-ST302 IA1186-Poultry-ST302 FA5537-ND-ST302";snp_count="112";
SEQUENCE	GUBBINS	CDS	4105476	4107105	0.000	.	0	node="internal_ROOT->internal_28";neg_log_likelihood="7989.478708";taxa=" FA0416-Human-ST302 IA1186-Poultry-ST302 FA5537-ND-ST302";snp_count="69";
SEQUENCE	GUBBINS	CDS	3339669	3359811	0.000	.	0	node="internal_ROOT->internal_28";neg_log_likelihood="7757.498299";taxa=" FA0416-Human-ST302 IA1186-Poultry-ST302 FA5537-ND-ST302";snp_count="67";
SEQUENCE	GUBBINS	CDS	1616396	1630990	0.000	.	0	node="internal_ROOT->internal_28";neg_log_likelihood="7552.103551";taxa=" FA0416-Human-ST302 IA1186-Poultry-ST302 FA5537-ND-ST302";snp_count="95";
SEQUENCE	GUBBINS	CDS	2189631	2191504	0.000	.	0	node="internal_ROOT->internal_28";neg_log_likelihood="7233.577069";taxa=" FA0416-Human-ST302 IA1186-Poultry-ST302 FA5537-ND-ST302";snp_count="53";
SEQUENCE	GUBBINS	CDS	4952212	4967016	0.000	.	0	node="internal_ROOT->internal_28";neg_log_likelihood="7071.212533";taxa=" FA0416-Human-ST302 IA1186-Poultry-ST302 FA5537-ND-ST302";snp_count="74";
SEQUENCE	GUBBINS	CDS	779842	781264	0.000	.	0	node="internal_ROOT->internal_28";neg_log_likelihood="6820.936301";taxa=" FA0416-Human-ST302 IA1186-Poultry-ST302 FA5537-ND-ST302";snp_count="44";
SEQUENCE	GUBBINS	CDS	4895562	4900279	0.000	.	0	node="internal_ROOT->internal_28";neg_log_likelihood="6673.314571";taxa=" FA0416-Human-ST302 IA1186-Poultry-ST302 FA5537-ND-ST302";snp_count="53";
SEQUENCE	GUBBINS	CDS	5232211	5248727	0.000	.	0	node="internal_ROOT->internal_28";neg_log_likelihood="6491.294947";taxa=" FA0416-Human-ST302 IA1186-Poultry-ST302 FA5537-ND-ST302";snp_count="72";
SEQUENCE	GUBBINS	CDS	5314439	5333109	0.000	.	0	node="internal_ROOT->internal_28";neg_log_likelihood="6240.036742";taxa=" FA0416-Human-ST302 IA1186-Poultry-ST302 FA5537-ND-ST302";snp_count="76";
SEQUENCE	GUBBINS	CDS	4398115	4399545	0.000	.	0	node="internal_ROOT->internal_28";neg_log_likelihood="5976.210494";taxa=" FA0416-Human-ST302 IA1186-Poultry-ST302 FA5537-ND-ST302";snp_count="37";
SEQUENCE	GUBBINS	CDS	4210078	4217274	0.000	.	0	node="internal_ROOT->internal_28";neg_log_likelihood="5853.024617";taxa=" FA0416-Human-ST302 IA1186-Poultry-ST302 FA5537-ND-ST302";snp_count="55";
SEQUENCE	GUBBINS	CDS	4517084	4522003	0.000	.	0	node="internal_ROOT->internal_28";neg_log_likelihood="5661.260210";taxa=" FA0416-Human-ST302 IA1186-Poultry-ST302 FA5537-ND-ST302";snp_count="47";
SEQUENCE	GUBBINS	CDS	5027988	5031764	0.000	.	0	node="internal_ROOT->internal_28";neg_log_likelihood="5495.355648";taxa=" FA0416-Human-ST302 IA1186-Poultry-ST302 FA5537-ND-ST302";snp_count="44";
SEQUENCE	GUBBINS	CDS	3622534	3628344	0.000	.	0	node="internal_ROOT->internal_28";neg_log_likelihood="5343.869429";taxa=" FA0416-Human-ST302 IA1186-Poultry-ST302 FA5537-ND-ST302";snp_count="46";
SEQUENCE	GUBBINS	CDS	5137988	5145773	0.000	.	0	node="internal_ROOT->internal_28";neg_log_likelihood="5180.635815";taxa=" FA0416-Human-ST302 IA1186-Poultry-ST302 FA5537-ND-ST302";snp_count="49";
SEQUENCE	GUBBINS	CDS	5097281	5097980	0.000	.	0	node="internal_ROOT->internal_28";neg_log_likelihood="5020.564357";taxa=" FA0416-Human-ST302 IA1186-Poultry-ST302 FA5537-ND-ST302";snp_count="20";
SEQUENCE	GUBBINS	CDS	5115672	5130235	0.000	.	0	node="internal_ROOT->internal_28";neg_log_likelihood="4950.554738";taxa=" FA0416-Human-ST302 IA1186-Poultry-ST302 FA5537-ND-ST302";snp_count="31";
SEQUENCE	GUBBINS	CDS	3914479	3930273	0.000	.	0	node="internal_ROOT->internal_28";neg_log_likelihood="4849.157166";taxa=" FA0416-Human-ST302 IA1186-Poultry-ST302 FA5537-ND-ST302";snp_count="35";
SEQUENCE	GUBBINS	CDS	4178264	4183554	0.000	.	0	node="internal_ROOT->internal_28";neg_log_likelihood="4726.621806";taxa=" FA0416-Human-ST302 IA1186-Poultry-ST302 FA5537-ND-ST302";snp_count="19";
SEQUENCE	GUBBINS	CDS	5219727	5223531	0.000	.	0	node="internal_ROOT->internal_28";neg_log_likelihood="4659.258325";taxa=" FA0416-Human-ST302 IA1186-Poultry-ST302 FA5537-ND-ST302";snp_count="16";
SEQUENCE	GUBBINS	CDS	5037027	5048723	0.000	.	0	node="internal_ROOT->internal_28";neg_log_likelihood="4601.888714";taxa=" FA0416-Human-ST302 IA1186-Poultry-ST302 FA5537-ND-ST302";snp_count="21";
