# Supplementary material for: Escherichia coli ST302: Genomic Analysis of Virulence Potential and Antimicrobial Resistance Mediated by Mobile Genetic Elements
Source: Front Microbiol. 2020 Jan 21;10:3098. doi: 10.3389/fmicb.2019.03098 (PMC6985150; doi:10.3389/fmicb.2019.03098)
Supplement: DATA S2 — ST302 SNP analysis. [file Data_Sheet_2.ZIP › SNP_Analysis/ST302_SNP/SNP_analysis/gubbins/summary_of_snp_distribution.vcf]

##fileformat=VCFv4.2
##contig=<ID=1,length=5341018>
##FORMAT=<ID=AB,Number=1,Type=String,Description="Alt Base">
#CHROM	POS	ID	REF	ALT	QUAL	FILTER	INFO	FORMAT	BA8907-ND-ST302	BA9503-ND-ST302	CA0191-ND-ST302	CA0229-ND-ST302	EA1682-Poultry-ST302	EA2455-Poultry-ST302	EA8393-Porcine-ST302	F2_18C-Porcine-ST302	FA0416-Human-ST302	FA5537-ND-ST302	IA1186-Poultry-ST302	IA1729-Canine-ST302	IA4731-Poultry-ST302	IA7122-Poultry-ST302	Reference
1	617	.	C	T	.	.	.	AB	C	C	C	C	C	C	T	C	C	C	C	C	C	C	C
1	749	.	A	G	.	.	.	AB	A	A	A	A	A	A	A	A	G	G	G	A	A	A	A
1	977	.	C	T	.	.	.	AB	C	C	C	C	C	T	C	C	C	C	C	C	C	C	T
1	2432	.	T	G	.	.	.	AB	T	T	G	G	G	G	G	G	G	G	G	G	G	G	G
1	2877	.	C	A	.	.	.	AB	C	C	C	C	C	C	C	C	A	C	A	C	C	C	C
1	3463	.	C	T	.	.	.	AB	C	C	C	C	C	C	C	C	C	T	C	C	C	C	C
1	4901	.	C	T	.	.	.	AB	C	C	T	T	T	T	C	C	C	C	C	C	T	T	T
1	5064	.	A	G	.	.	.	AB	A	A	A	A	A	A	A	A	G	A	G	A	A	A	A
1	5594	.	C	A	.	.	.	AB	C	C	C	C	C	C	C	C	A	C	A	C	C	C	C
1	5849	.	C	T	.	.	.	AB	C	C	C	C	C	C	C	T	C	C	C	C	C	C	C
1	6107	.	C	T	.	.	.	AB	C	C	C	C	C	C	C	C	C	C	C	C	C	T	C
1	6517	.	C	T	.	.	.	AB	C	C	C	C	C	C	C	C	C	C	C	C	T	C	C
1	6985	.	T	C	.	.	.	AB	T	T	T	T	T	T	T	T	T	C	T	T	T	T	T
1	8399	.	C	G	.	.	.	AB	C	C	C	C	C	C	C	C	C	G	C	C	C	C	C
1	8504	.	C	A	.	.	.	AB	C	C	C	C	C	C	C	C	A	C	A	C	C	C	C
1	9014	.	C	T	.	.	.	AB	C	C	C	C	C	C	C	C	C	T	C	C	C	C	C
1	9241	.	C	T	.	.	.	AB	C	C	C	C	C	C	C	C	T	C	T	C	C	C	C
1	9683	.	G	T	.	.	.	AB	G	G	G	G	G	G	G	G	T	G	T	G	G	G	G
1	10139	.	G	A	.	.	.	AB	G	G	A	A	A	A	A	G	A	A	A	A	A	A	A
1	10877	.	T	G	.	.	.	AB	T	T	G	T	T	T	T	T	T	T	T	T	T	T	T
1	11382	.	G	A	.	.	.	AB	G	G	G	G	G	A	G	G	G	G	G	G	G	A	A
1	11615	.	G	T	.	.	.	AB	G	G	T	T	T	T	G	G	G	G	G	G	T	T	T
1	11847	.	G	A	.	.	.	AB	G	G	A	G	G	G	G	G	G	G	G	G	G	G	G
1	16529	.	C	T	.	.	.	AB	C	C	C	C	C	C	C	C	T	C	T	C	C	C	C
1	18559	.	T	G	.	.	.	AB	T	T	G	G	G	G	G	G	G	G	G	G	G	G	G
1	18716	.	G	A	.	.	.	AB	G	G	G	G	G	G	G	G	A	G	A	G	G	G	G
1	18822	.	A	G	.	.	.	AB	A	A	A	A	A	A	A	A	A	A	A	G	A	A	A
1	18933	.	C	T	.	.	.	AB	C	C	C	C	C	C	C	C	C	T	C	C	C	C	C
1	19283	.	C	T	.	.	.	AB	C	C	C	C	C	C	C	C	T	C	T	C	C	C	C
1	19381	.	C	T	.	.	.	AB	C	C	C	C	C	C	T	C	C	C	C	T	C	C	C
1	22484	.	C	T	.	.	.	AB	C	C	C	C	C	C	T	C	C	C	C	T	C	C	C
1	22955	.	G	A	.	.	.	AB	G	G	G	G	G	G	A	G	G	G	G	A	G	G	G
1	24420	.	G	T	.	.	.	AB	G	G	T	T	T	T	G	G	G	G	G	G	T	T	T
1	25194	.	A	C	.	.	.	AB	A	A	A	A	A	A	A	A	A	C	A	A	A	A	A
1	25719	.	C	T	.	.	.	AB	C	C	C	C	C	T	C	C	C	C	C	C	C	T	T
1	26663	.	C	T	.	.	.	AB	C	C	C	C	T	C	C	C	C	C	C	C	C	C	C
1	28509	.	G	A	.	.	.	AB	G	G	G	G	G	G	G	G	G	A	G	G	G	G	G
1	29082	.	A	T	.	.	.	AB	A	A	A	A	A	A	T	A	A	A	A	T	A	A	A
1	30275	.	C	T	.	.	.	AB	C	C	C	C	C	C	C	C	T	C	T	C	C	C	C
1	30862	.	A	C	.	.	.	AB	A	A	A	A	A	A	A	A	A	A	A	A	C	A	A
1	31045	.	G	T	.	.	.	AB	G	G	G	G	G	G	G	G	G	T	G	G	G	G	G
1	31143	.	G	A	.	.	.	AB	G	G	G	G	G	G	G	G	G	A	G	G	G	G	G
1	31644	.	C	T	.	.	.	AB	C	C	C	C	C	C	C	C	C	T	C	C	C	C	C
1	32987	.	C	T	.	.	.	AB	C	C	C	C	C	C	C	T	C	C	C	C	C	C	C
1	33245	.	G	T	.	.	.	AB	G	G	G	G	G	G	G	G	T	G	T	G	G	G	G
1	34038	.	C	T	.	.	.	AB	C	C	C	C	C	C	C	T	C	C	C	C	C	C	C
1	34322	.	C	A	.	.	.	AB	C	C	C	C	C	C	C	C	C	A	C	C	C	C	C
1	34494	.	C	T	.	.	.	AB	C	C	C	C	C	T	C	C	C	C	C	C	C	C	T
1	36375	.	A	C	.	.	.	AB	A	A	A	A	A	C	A	A	A	A	A	A	A	C	C
1	36724	.	T	G	.	.	.	AB	T	T	G	G	G	G	G	G	G	G	G	G	G	G	G
1	36951	.	T	G	.	.	.	AB	T	T	T	T	T	T	T	T	G	T	G	T	T	T	T
1	37550	.	T	G	.	.	.	AB	T	T	G	G	G	G	T	T	G	G	G	T	G	G	G
1	37757	.	G	A	.	.	.	AB	G	G	G	G	G	G	G	G	A	G	A	G	G	G	G
1	37987	.	C	T	.	.	.	AB	C	C	C	C	C	T	C	C	C	C	C	C	C	T	T
1	37993	.	G	A	.	.	.	AB	G	G	A	A	A	A	A	A	A	A	A	A	A	A	A
1	38677	.	-	A,C	.	.	.	AB	-	-	A	A	A	A	C	-	C	C	C	C	A	A	A
1	38902	.	A	G	.	.	.	AB	A	A	A	A	A	A	G	A	A	A	A	G	A	A	A
1	39065	.	T	C	.	.	.	AB	T	T	T	C	C	T	T	T	T	T	T	T	C	T	T
1	39850	.	A	C	.	.	.	AB	A	A	C	A	A	A	A	A	A	A	A	A	A	A	A
1	41857	.	T	C	.	.	.	AB	T	T	T	T	T	T	T	T	C	T	C	T	T	T	T
1	41873	.	G	T	.	.	.	AB	G	G	G	G	G	G	T	G	G	G	G	T	G	G	G
1	42059	.	T	C	.	.	.	AB	T	T	T	T	T	T	T	C	T	T	T	T	T	T	T
1	42905	.	T	G	.	.	.	AB	T	T	T	T	T	T	G	T	T	T	T	G	T	T	T
1	42911	.	C	A	.	.	.	AB	C	C	C	C	C	C	C	C	C	C	C	A	C	C	C
1	42949	.	T	G	.	.	.	AB	T	T	T	T	T	T	T	T	T	G	T	T	T	T	T
1	43068	.	G	C	.	.	.	AB	G	G	G	G	G	G	G	G	G	C	G	G	G	G	G
1	44496	.	G	T	.	.	.	AB	G	G	G	G	G	G	G	G	T	G	T	G	G	G	G
1	44498	.	A	C	.	.	.	AB	A	A	A	A	A	A	C	A	A	A	A	A	A	A	A
1	45773	.	C	T	.	.	.	AB	C	C	C	T	C	C	C	C	C	C	C	C	C	C	C
1	45787	.	A	G	.	.	.	AB	A	A	A	A	A	A	A	A	A	A	G	A	A	A	A
1	48190	.	A	C	.	.	.	AB	A	A	C	C	C	C	A	A	A	A	A	A	C	C	C
1	48201	.	T	A	.	.	.	AB	T	T	T	T	T	T	T	T	A	T	A	T	T	T	T
1	49192	.	T	G	.	.	.	AB	T	T	T	T	T	T	T	T	G	G	G	T	T	T	T
1	49672	.	C	A	.	.	.	AB	C	C	C	C	C	C	A	C	C	C	C	A	C	C	C
1	50495	.	C	T	.	.	.	AB	C	C	C	C	C	C	C	C	T	C	T	C	C	C	C
1	50851	.	C	A	.	.	.	AB	C	C	A	A	A	A	C	C	C	C	C	C	A	A	A
1	51400	.	C	T	.	.	.	AB	C	C	C	C	C	C	C	C	T	C	T	C	C	C	C
1	51521	.	C	T	.	.	.	AB	C	C	C	C	C	C	T	C	C	C	C	T	C	C	C
1	52423	.	A	C	.	.	.	AB	A	A	C	C	C	A	A	A	A	A	A	A	C	A	A
1	53157	.	T	C	.	.	.	AB	T	T	C	C	C	C	T	T	T	T	T	T	C	C	C
1	53772	.	T	G	.	.	.	AB	T	T	T	T	T	T	G	T	T	T	T	G	T	T	T
1	54525	.	T	A	.	.	.	AB	T	T	T	T	T	T	T	T	A	T	A	T	T	T	T
1	54840	.	C	T	.	.	.	AB	C	C	C	C	C	C	C	C	C	T	C	C	C	C	C
1	54992	.	C	T	.	.	.	AB	C	C	T	T	T	T	C	C	C	C	C	C	T	T	T
1	55249	.	C	A	.	.	.	AB	C	C	C	C	C	C	C	A	C	C	C	C	C	C	C
1	56257	.	C	T	.	.	.	AB	C	C	T	C	C	C	C	C	C	C	C	C	C	C	C
1	56269	.	T	C	.	.	.	AB	T	T	T	T	T	T	T	T	C	T	C	T	T	T	T
1	56628	.	C	A	.	.	.	AB	C	C	C	C	C	A	C	C	C	C	C	C	C	A	A
1	57116	.	A	T	.	.	.	AB	A	A	A	T	T	A	A	A	A	A	A	A	T	A	A
1	58152	.	C	T	.	.	.	AB	C	C	C	C	C	T	C	C	C	C	C	C	C	T	T
1	59415	.	C	T	.	.	.	AB	C	C	C	C	C	C	C	C	T	C	T	C	C	C	C
1	59954	.	T	A	.	.	.	AB	T	T	T	T	T	T	T	T	A	T	A	T	T	T	T
1	59959	.	T	G	.	.	.	AB	T	T	G	G	G	G	T	T	G	G	G	T	G	G	G
1	60871	.	C	T	.	.	.	AB	C	C	T	C	C	C	C	C	C	C	C	C	C	C	C
1	61069	.	T	A	.	.	.	AB	T	T	A	A	A	A	A	A	A	A	A	A	A	A	A
1	61315	.	G	T	.	.	.	AB	G	G	T	T	T	T	T	T	T	T	T	T	T	T	T
1	61686	.	C	A	.	.	.	AB	C	C	C	C	C	C	C	C	A	C	A	C	C	C	C
1	61856	.	A	G	.	.	.	AB	A	A	A	A	A	A	A	A	G	A	G	A	A	A	A
1	63271	.	C	T	.	.	.	AB	C	C	C	C	C	C	C	C	C	T	C	C	C	C	C
1	64224	.	C	A	.	.	.	AB	C	C	C	C	C	C	C	A	C	C	C	C	C	C	C
1	64676	.	G	A	.	.	.	AB	G	G	A	G	G	G	G	G	G	G	G	G	G	G	G
1	65206	.	G	A	.	.	.	AB	G	G	G	G	G	G	A	G	G	G	G	A	G	G	G
1	67315	.	C	A	.	.	.	AB	C	C	C	C	C	A	C	C	C	C	C	C	C	C	A
1	68202	.	A	G	.	.	.	AB	A	A	A	A	A	A	A	A	G	G	G	A	A	A	A
1	68735	.	A	T	.	.	.	AB	A	A	A	A	A	A	A	A	T	A	T	A	A	A	A
1	68937	.	G	A	.	.	.	AB	G	G	G	A	G	G	G	G	G	G	G	G	G	G	G
1	69114	.	C	A	.	.	.	AB	C	C	A	A	A	A	A	C	A	A	A	A	A	A	A
1	69374	.	A	T	.	.	.	AB	A	A	A	A	A	A	A	A	T	A	T	A	A	A	A
1	69595	.	G	A	.	.	.	AB	G	G	G	G	G	A	G	G	G	G	G	G	G	A	A
1	71773	.	G	A	.	.	.	AB	G	G	G	G	G	G	G	A	G	G	G	G	G	G	G
1	71896	.	T	C	.	.	.	AB	T	T	C	C	C	C	T	T	C	C	C	T	C	C	C
1	73302	.	G	A	.	.	.	AB	G	G	G	G	G	G	G	G	A	G	A	G	G	G	G
1	73628	.	T	G	.	.	.	AB	T	T	T	T	T	T	T	T	G	T	G	T	T	T	T
1	74671	.	G	A	.	.	.	AB	G	G	A	A	A	A	G	G	G	G	G	G	A	A	A
1	74952	.	G	T	.	.	.	AB	G	G	T	T	T	G	G	G	G	G	G	G	T	G	G
1	75553	.	G	A	.	.	.	AB	G	G	G	G	G	G	G	G	A	G	A	G	G	G	G
1	76545	.	G	A	.	.	.	AB	G	G	G	G	G	G	G	G	A	G	A	G	G	G	G
1	77252	.	C	A	.	.	.	AB	C	C	A	A	A	A	A	C	A	A	A	A	A	A	A
1	77346	.	C	T	.	.	.	AB	C	C	C	C	C	C	C	C	T	C	T	C	C	C	C
1	77443	.	C	T	.	.	.	AB	C	C	T	C	C	C	C	C	C	C	C	C	C	C	C
1	78031	.	C	A	.	.	.	AB	C	C	A	C	C	C	C	C	C	C	C	C	C	C	C
1	78608	.	G	A	.	.	.	AB	G	G	A	G	G	G	G	G	G	G	G	G	G	G	G
1	79118	.	G	A	.	.	.	AB	G	G	G	G	G	G	G	G	G	A	G	G	G	G	G
1	80371	.	T	C	.	.	.	AB	T	T	C	C	C	C	T	T	C	C	C	T	C	C	C
1	80560	.	C	T	.	.	.	AB	C	C	C	C	T	C	C	C	C	C	C	C	C	C	C
1	81213	.	G	T	.	.	.	AB	G	G	G	G	G	G	G	G	G	G	G	T	G	G	G
1	81449	.	T	G	.	.	.	AB	T	T	T	T	T	T	T	T	T	T	T	T	T	G	T
1	82347	.	T	C	.	.	.	AB	T	T	T	T	T	T	T	C	T	T	T	T	T	T	T
1	82631	.	C	G	.	.	.	AB	C	C	G	G	G	G	G	G	G	G	G	G	G	G	G
1	83654	.	C	A	.	.	.	AB	C	C	C	C	C	C	C	C	A	C	A	C	C	C	C
1	83706	.	C	T	.	.	.	AB	C	C	C	C	C	C	C	C	T	C	T	C	C	C	C
1	84163	.	T	A	.	.	.	AB	T	T	A	T	T	T	T	T	T	T	T	T	T	T	T
1	84557	.	G	T	.	.	.	AB	G	G	G	G	G	T	G	G	G	G	G	G	G	T	T
1	85103	.	G	A,-	.	.	.	AB	G	G	G	G	G	G	G	G	A	G	A	G	-	G	G
1	85537	.	G	A	.	.	.	AB	G	G	G	A	G	G	G	G	G	G	G	G	G	G	G
1	86028	.	C	T	.	.	.	AB	C	C	C	C	C	C	T	C	C	C	C	T	C	C	C
1	86305	.	G	T	.	.	.	AB	G	G	G	G	G	G	T	G	G	G	G	T	G	G	G
1	87412	.	G	A,-	.	.	.	AB	G	G	A	A	A	A	G	G	G	G	-	G	-	A	A
1	88282	.	T	C,-	.	.	.	AB	T	T	T	T	T	T	T	T	C	C	-	T	T	T	T
1	88705	.	T	C,-	.	.	.	AB	T	T	C	C	C	C	T	T	C	C	-	T	C	C	C
1	88729	.	A	T,-	.	.	.	AB	A	A	T	A	A	A	A	A	A	A	-	A	A	A	A
1	90096	.	T	A	.	.	.	AB	T	T	T	T	T	T	T	T	A	T	A	T	T	T	T
1	91235	.	T	C	.	.	.	AB	T	T	T	T	T	T	T	T	C	T	C	T	T	T	T
1	92015	.	G	A	.	.	.	AB	G	G	G	G	G	G	G	G	A	G	A	G	G	G	G
1	93093	.	A	C	.	.	.	AB	A	A	A	A	A	A	A	A	C	A	C	A	A	A	A
1	93133	.	A	C	.	.	.	AB	A	A	A	A	A	A	A	A	C	A	C	A	A	A	A
1	93722	.	C	T	.	.	.	AB	C	C	C	C	C	C	C	C	C	C	C	T	C	C	C
1	94250	.	T	C	.	.	.	AB	T	T	T	T	T	T	T	T	C	C	C	T	T	T	T
1	94636	.	C	T	.	.	.	AB	C	C	C	C	C	C	C	C	C	C	C	T	C	C	C
1	94795	.	G	A	.	.	.	AB	G	G	A	G	G	G	G	G	G	G	G	G	G	G	G
1	95361	.	C	T	.	.	.	AB	C	C	C	C	C	C	C	C	C	T	C	C	C	C	C
1	95589	.	T	-,C	.	.	.	AB	T	T	T	T	-	T	T	T	C	T	-	T	T	T	T
1	95626	.	C	-,T	.	.	.	AB	C	C	C	C	-	-	-	C	T	C	-	C	C	-	C
1	95698	.	T	-,C	.	.	.	AB	T	T	T	T	-	-	-	T	C	T	-	T	T	-	T
1	95711	.	C	-,T	.	.	.	AB	C	C	C	C	-	-	-	C	C	C	-	T	C	-	C
1	95734	.	C	-,T	.	.	.	AB	C	C	C	C	-	-	-	C	T	C	-	C	-	-	C
1	95792	.	C	-,T	.	.	.	AB	C	C	C	C	-	-	-	C	C	C	-	T	-	-	C
1	95793	.	A	-,G	.	.	.	AB	A	A	A	A	-	-	-	A	G	A	-	A	-	-	A
1	95830	.	C	-,T	.	.	.	AB	C	C	C	C	-	-	-	C	T	C	-	C	-	-	C
1	95854	.	G	-,A	.	.	.	AB	G	G	G	G	-	G	G	G	A	G	-	G	-	-	G
1	96463	.	C	T	.	.	.	AB	C	C	C	C	C	C	C	C	T	C	T	C	C	C	C
1	96697	.	C	T	.	.	.	AB	C	C	T	T	T	T	T	T	T	T	T	T	T	T	T
1	97055	.	C	A	.	.	.	AB	C	C	C	C	C	C	C	C	A	C	A	C	C	C	C
1	97248	.	C	A	.	.	.	AB	C	C	A	A	A	A	A	A	A	A	A	A	A	A	A
1	97312	.	C	T	.	.	.	AB	C	C	C	C	C	C	C	C	C	T	C	C	C	C	C
1	97811	.	C	T	.	.	.	AB	C	C	C	C	C	C	C	C	T	C	T	C	C	C	C
1	98200	.	A	G	.	.	.	AB	A	A	A	A	A	A	G	A	A	A	A	G	A	A	A
1	99010	.	C	T	.	.	.	AB	C	C	T	C	C	C	C	C	C	C	C	C	C	C	C
1	99180	.	G	T	.	.	.	AB	G	G	G	G	G	G	G	G	T	G	T	G	G	G	G
1	99924	.	T	C	.	.	.	AB	T	T	C	C	C	C	T	T	C	C	C	T	C	C	C
1	100572	.	C	G	.	.	.	AB	C	C	G	C	C	C	C	C	C	C	C	C	C	C	C
1	100587	.	G	T	.	.	.	AB	G	G	G	G	G	G	G	G	G	G	G	T	G	G	G
1	101541	.	A	G	.	.	.	AB	A	A	A	A	A	A	A	A	G	A	G	A	A	A	A
1	101724	.	C	A	.	.	.	AB	C	C	A	A	A	A	C	C	A	A	A	C	A	A	A
1	102014	.	A	T	.	.	.	AB	A	A	A	T	T	A	A	A	A	A	A	A	T	A	A
1	102030	.	C	T	.	.	.	AB	C	C	T	T	T	T	T	T	T	T	T	T	T	T	T
1	103004	.	G	T	.	.	.	AB	G	G	T	T	T	T	T	T	T	T	T	T	T	T	T
1	103925	.	A	G	.	.	.	AB	A	A	A	A	A	A	A	G	A	A	A	A	A	A	A
1	104045	.	G	A	.	.	.	AB	G	G	G	G	G	G	G	G	A	G	A	G	G	G	G
1	105325	.	G	T	.	.	.	AB	G	G	G	G	G	G	G	G	G	T	G	G	G	G	G
1	105773	.	A	G	.	.	.	AB	A	A	A	A	A	A	G	A	A	A	A	G	A	A	A
1	106273	.	C	T	.	.	.	AB	C	C	C	C	C	C	C	C	T	C	T	C	C	C	C
1	107456	.	C	A	.	.	.	AB	C	C	C	A	C	C	C	C	C	C	C	C	C	C	C
1	107466	.	C	T	.	.	.	AB	C	C	T	C	C	C	C	C	C	C	C	C	C	C	C
1	108354	.	C	T	.	.	.	AB	C	C	C	T	C	C	C	C	C	C	C	C	C	C	C
1	108720	.	C	T	.	.	.	AB	C	C	C	T	C	C	C	C	C	C	C	C	C	C	C
1	109128	.	C	T	.	.	.	AB	C	C	C	C	T	C	C	C	C	C	C	C	C	C	C
1	109299	.	G	A	.	.	.	AB	G	G	G	G	G	G	G	G	G	A	G	G	G	G	G
1	109606	.	G	A	.	.	.	AB	G	G	G	G	G	G	G	G	G	A	G	G	G	G	G
1	110963	.	C	T	.	.	.	AB	C	C	C	C	C	C	C	C	C	T	C	C	C	C	C
1	111773	.	G	C	.	.	.	AB	G	G	G	G	G	C	G	G	G	G	G	G	G	G	C
1	112319	.	G	A	.	.	.	AB	G	G	G	G	G	G	G	G	G	A	G	G	G	G	G
1	112602	.	C	T	.	.	.	AB	C	C	C	C	C	C	C	C	T	C	T	C	C	C	C
1	112615	.	T	G	.	.	.	AB	T	T	T	T	T	T	T	G	T	T	T	T	T	T	T
1	113186	.	T	C	.	.	.	AB	T	T	C	C	C	C	C	T	C	C	C	C	C	C	C
1	114259	.	G	A	.	.	.	AB	G	G	G	G	G	G	G	G	A	G	A	G	G	G	G
1	116260	.	C	T	.	.	.	AB	C	C	C	C	C	C	C	C	T	C	T	C	C	C	C
1	116969	.	T	C	.	.	.	AB	T	T	C	C	C	C	C	T	C	C	C	C	C	C	C
1	117419	.	T	C	.	.	.	AB	T	T	T	T	T	T	T	T	C	T	C	T	T	T	T
1	117807	.	C	T	.	.	.	AB	C	C	C	C	C	C	C	T	C	C	C	C	C	C	C
1	119029	.	G	A	.	.	.	AB	G	G	A	A	A	A	G	G	A	A	A	G	A	A	A
1	120366	.	C	A	.	.	.	AB	C	C	C	C	C	C	C	A	C	C	C	C	C	C	C
1	123376	.	A	G	.	.	.	AB	A	A	G	G	G	G	A	A	G	G	G	A	G	G	G
1	124825	.	G	A	.	.	.	AB	G	G	A	G	G	G	G	G	G	G	G	G	G	G	G
1	124865	.	C	T	.	.	.	AB	C	C	C	C	C	T	C	C	C	C	C	C	C	T	T
1	126504	.	G	A	.	.	.	AB	G	G	A	A	A	A	G	G	G	G	G	G	A	A	A
1	126514	.	G	A	.	.	.	AB	G	G	A	G	G	G	G	G	G	G	G	G	G	G	G
1	128072	.	A	G	.	.	.	AB	A	A	A	A	A	A	A	G	A	A	A	A	A	A	A
1	128903	.	A	G	.	.	.	AB	A	A	A	A	A	A	G	A	A	A	A	G	A	A	A
1	130629	.	C	T	.	.	.	AB	C	C	C	C	C	C	C	C	C	C	C	C	T	C	C
1	131613	.	G	A	.	.	.	AB	G	G	G	G	G	A	G	G	G	G	G	G	G	A	A
1	131667	.	A	G	.	.	.	AB	A	A	G	G	G	G	A	A	A	A	A	A	G	G	G
1	131768	.	A	G	.	.	.	AB	A	A	G	G	G	G	G	A	G	G	G	G	G	G	G
1	132114	.	T	C	.	.	.	AB	T	T	T	T	T	T	T	C	T	T	T	T	T	T	T
1	133953	.	C	T	.	.	.	AB	C	C	C	C	C	C	C	C	T	C	T	C	C	C	C
1	134246	.	C	A	.	.	.	AB	C	C	C	C	C	C	C	C	C	A	C	C	C	C	C
1	134431	.	T	C	.	.	.	AB	T	T	C	C	C	C	C	C	C	C	C	C	C	C	C
1	134828	.	A	C	.	.	.	AB	A	A	A	A	A	A	A	A	C	C	C	A	A	A	A
1	137550	.	C	T	.	.	.	AB	C	C	C	C	C	C	C	C	C	T	C	C	C	C	C
1	138031	.	A	C	.	.	.	AB	A	A	A	A	A	A	A	A	A	C	A	A	A	A	A
1	140343	.	T	C	.	.	.	AB	T	T	T	C	T	T	T	T	T	T	T	T	T	T	T
1	140951	.	G	T	.	.	.	AB	G	G	G	G	G	T	G	G	G	G	G	G	G	T	T
1	142815	.	C	T	.	.	.	AB	C	C	C	C	C	C	C	C	C	T	C	C	C	C	C
1	144441	.	C	A,-	.	.	.	AB	C	C	C	C	C	C	C	C	A	C	-	C	C	C	C
1	144883	.	G	A	.	.	.	AB	G	G	G	G	G	G	G	G	G	A	G	G	G	G	G
1	145428	.	C	T	.	.	.	AB	C	C	T	T	T	T	C	C	C	C	C	C	T	T	T
1	145887	.	C	T	.	.	.	AB	C	C	T	C	C	C	C	C	C	C	C	C	C	C	C
1	146087	.	C	A	.	.	.	AB	C	C	C	C	C	A	C	C	C	C	C	C	C	A	A
1	146572	.	A	G	.	.	.	AB	A	A	A	A	A	A	A	A	G	A	G	A	A	A	A
1	147126	.	C	T	.	.	.	AB	C	C	C	C	C	C	C	C	T	C	T	C	C	C	C
1	147861	.	C	T	.	.	.	AB	C	C	C	C	C	C	C	T	C	C	C	C	C	C	C
1	150693	.	A	C	.	.	.	AB	A	A	A	A	A	A	A	A	A	C	A	A	A	A	A
1	152345	.	G	T	.	.	.	AB	G	G	G	G	G	G	T	G	G	G	G	G	G	G	G
1	153405	.	C	T	.	.	.	AB	C	C	C	C	C	C	C	C	T	C	T	C	C	C	C
1	156220	.	T	G	.	.	.	AB	T	T	T	T	T	T	T	T	G	T	G	T	T	T	T
1	157367	.	G	A	.	.	.	AB	G	G	G	G	G	G	G	G	A	G	A	G	G	G	G
1	158053	.	G	A	.	.	.	AB	G	G	A	G	G	G	G	G	G	G	G	G	G	G	G
1	158307	.	G	A	.	.	.	AB	G	G	G	G	G	G	G	G	G	A	G	G	G	G	G
1	158449	.	C	T	.	.	.	AB	C	C	T	C	C	C	C	C	C	C	C	C	C	C	C
1	158592	.	G	T	.	.	.	AB	G	G	T	T	T	T	T	T	T	T	T	T	T	T	T
1	158623	.	C	T	.	.	.	AB	C	C	C	C	C	C	C	C	T	C	T	C	C	C	C
1	160440	.	A	C	.	.	.	AB	A	A	A	A	A	A	A	C	A	A	A	A	A	A	A
1	161661	.	C	T	.	.	.	AB	C	C	C	C	C	C	C	C	T	C	T	C	C	C	C
1	162528	.	C	A,-	.	.	.	AB	C	C	C	C	C	C	C	C	C	A	-	C	C	C	C
1	162646	.	C	T,-	.	.	.	AB	C	C	C	C	C	C	C	C	T	C	-	C	C	C	C
1	162974	.	G	T	.	.	.	AB	G	G	T	T	T	G	G	G	G	G	G	G	T	G	G
1	163764	.	T	C,-	.	.	.	AB	T	T	C	C	-	C	C	T	C	C	-	C	C	C	C
1	163798	.	C	T,-	.	.	.	AB	C	C	T	T	-	T	C	C	C	C	-	C	T	T	T
1	163935	.	T	G,-	.	.	.	AB	T	T	G	G	-	G	G	G	G	G	-	G	G	G	G
1	164297	.	C	T	.	.	.	AB	C	C	C	C	C	C	C	C	T	C	T	C	C	C	C
1	164371	.	T	A	.	.	.	AB	T	T	A	A	A	T	T	T	T	T	T	T	A	T	T
1	165649	.	C	T	.	.	.	AB	C	C	C	C	C	C	C	C	T	C	T	C	C	C	C
1	165798	.	A	T	.	.	.	AB	A	A	T	T	T	T	T	T	T	T	T	T	T	T	T
1	166408	.	T	C	.	.	.	AB	T	T	T	T	T	T	T	C	T	T	T	T	T	T	T
1	166894	.	T	G	.	.	.	AB	T	T	T	T	T	T	T	T	T	T	T	G	T	T	T
1	167773	.	G	T	.	.	.	AB	G	G	G	G	G	G	G	G	G	G	G	T	G	G	G
1	168669	.	T	A	.	.	.	AB	T	T	T	T	T	T	T	T	T	A	T	T	T	T	T
1	169390	.	C	T	.	.	.	AB	C	C	T	C	C	C	C	C	C	C	C	C	C	C	C
1	170333	.	C	T	.	.	.	AB	C	C	C	C	C	C	C	C	T	C	T	C	C	C	C
1	170380	.	G	C	.	.	.	AB	G	G	G	G	G	G	G	C	G	G	G	G	G	G	G
1	170928	.	C	T	.	.	.	AB	C	C	C	C	C	C	C	T	C	C	C	C	C	C	C
1	171513	.	G	A	.	.	.	AB	G	G	G	G	G	G	A	G	G	G	G	G	G	G	G
1	171781	.	C	T	.	.	.	AB	C	C	C	C	C	C	C	C	T	C	T	C	C	C	C
1	172664	.	T	C	.	.	.	AB	T	T	C	C	C	C	T	T	C	C	C	T	C	C	C
1	173304	.	C	T	.	.	.	AB	C	C	C	C	C	C	T	C	C	C	C	T	C	C	C
1	173739	.	T	C	.	.	.	AB	T	T	C	C	C	C	C	C	C	C	C	C	C	C	C
1	174420	.	G	A	.	.	.	AB	G	G	G	G	G	A	G	G	G	G	G	G	G	A	A
1	175505	.	G	T	.	.	.	AB	G	G	G	G	G	G	G	G	T	G	T	G	G	G	G
1	176813	.	G	A	.	.	.	AB	G	G	G	G	G	G	G	G	A	G	A	G	G	G	G
1	177375	.	G	A	.	.	.	AB	G	G	G	G	G	G	G	G	G	A	G	G	G	G	G
1	177572	.	C	T	.	.	.	AB	C	C	C	C	C	C	C	T	C	C	C	C	C	C	C
1	177774	.	C	T	.	.	.	AB	C	C	C	C	C	C	C	C	T	C	T	C	C	C	C
1	178258	.	C	T	.	.	.	AB	C	C	T	C	C	C	C	C	C	C	C	C	C	C	C
1	178495	.	C	T	.	.	.	AB	C	C	C	C	C	C	C	C	T	C	T	C	C	C	C
1	181477	.	G	T	.	.	.	AB	G	G	G	G	G	G	T	G	G	G	G	T	G	G	G
1	181677	.	G	-,T	.	.	.	AB	G	G	G	G	-	G	G	G	G	G	G	T	-	G	G
1	181896	.	T	A	.	.	.	AB	T	T	T	T	T	T	T	T	T	T	A	T	T	T	T
1	181904	.	G	A	.	.	.	AB	G	G	A	G	G	G	G	G	G	G	G	G	G	G	G
1	182299	.	A	C	.	.	.	AB	A	A	A	A	A	A	C	A	A	A	A	A	A	A	A
1	183092	.	C	T	.	.	.	AB	C	C	C	C	C	C	C	T	C	C	C	C	C	C	C
1	183811	.	G	A	.	.	.	AB	G	G	G	G	G	G	G	G	G	A	G	G	G	G	G
1	184074	.	A	C	.	.	.	AB	A	A	A	A	A	A	A	A	C	A	C	A	A	A	A
1	186323	.	C	A	.	.	.	AB	C	C	C	C	C	C	C	A	C	C	C	C	C	C	C
1	186550	.	C	T	.	.	.	AB	C	C	C	C	C	T	C	C	C	C	C	C	C	T	T
1	187144	.	T	C	.	.	.	AB	T	T	T	T	T	T	T	T	T	C	T	T	T	T	T
1	187172	.	C	A	.	.	.	AB	C	C	C	C	C	C	C	C	A	C	A	C	C	C	C
1	187820	.	C	T	.	.	.	AB	C	C	T	C	C	C	C	C	C	C	C	C	C	C	C
1	187941	.	G	A	.	.	.	AB	G	G	A	A	A	A	G	G	G	G	G	G	A	A	A
1	188717	.	C	T	.	.	.	AB	C	C	C	C	T	C	C	C	C	C	C	C	C	C	C
1	188826	.	C	T	.	.	.	AB	C	C	C	C	C	C	C	C	C	C	C	T	C	C	C
1	190313	.	C	T	.	.	.	AB	C	C	C	C	C	T	C	C	C	C	C	C	C	T	T
1	190389	.	C	T	.	.	.	AB	C	C	C	C	C	C	C	C	C	T	C	C	C	C	C
1	190570	.	T	G	.	.	.	AB	T	T	T	T	T	T	T	G	T	T	T	T	T	T	T
1	190604	.	C	T	.	.	.	AB	C	C	C	C	C	C	C	C	T	C	T	C	C	C	C
1	190823	.	G	A	.	.	.	AB	G	G	G	G	G	G	G	G	A	G	A	G	G	G	G
1	191951	.	G	A	.	.	.	AB	G	G	G	G	G	G	G	G	G	A	G	G	G	G	G
1	192742	.	A	T	.	.	.	AB	A	A	A	A	A	A	A	A	A	A	A	T	A	A	A
1	193359	.	T	C,-	.	.	.	AB	T	T	T	T	T	T	C	T	-	T	-	-	T	T	T
1	193500	.	A	G,-	.	.	.	AB	A	A	G	A	A	A	A	A	-	A	-	-	A	A	A
1	193861	.	G	A,-	.	.	.	AB	G	G	G	G	G	G	A	G	-	G	-	-	G	G	G
1	196598	.	C	T	.	.	.	AB	C	C	C	C	C	C	C	C	T	C	T	C	C	C	C
1	197805	.	C	T	.	.	.	AB	C	C	C	C	C	C	C	C	T	C	T	C	C	C	C
1	197892	.	C	T	.	.	.	AB	C	C	C	C	C	C	C	C	T	C	T	C	C	C	C
1	199219	.	C	T,-	.	.	.	AB	C	C	C	C	C	C	C	C	T	C	-	C	C	C	C
1	204163	.	C	T	.	.	.	AB	C	C	C	C	C	C	C	C	T	C	T	C	C	C	C
1	204250	.	C	T	.	.	.	AB	C	C	C	C	C	C	C	C	T	C	T	C	C	C	C
1	204541	.	A	T	.	.	.	AB	A	A	A	A	A	A	A	A	A	T	A	A	A	A	A
1	205385	.	G	T	.	.	.	AB	G	G	G	G	G	G	G	T	G	G	G	G	G	G	G
1	207302	.	C	T	.	.	.	AB	C	C	C	C	C	C	C	C	T	T	T	C	C	C	C
1	209698	.	C	T	.	.	.	AB	C	C	C	C	C	C	C	C	T	C	T	C	C	C	C
1	209960	.	C	T	.	.	.	AB	C	C	C	C	C	C	C	C	C	T	C	C	C	C	C
1	210083	.	A	T	.	.	.	AB	A	A	A	A	A	A	T	A	A	A	A	A	A	A	A
1	211504	.	C	T	.	.	.	AB	C	C	C	C	C	C	C	C	T	C	T	C	C	C	C
1	211521	.	G	A	.	.	.	AB	G	G	G	G	G	G	G	G	A	G	A	G	G	G	G
1	212068	.	A	C	.	.	.	AB	A	A	A	A	A	A	A	A	C	A	C	A	A	A	A
1	212390	.	C	T	.	.	.	AB	C	C	C	C	C	C	T	C	C	C	C	T	C	C	C
1	212904	.	C	T	.	.	.	AB	C	C	C	C	C	C	C	T	C	C	C	C	C	C	C
1	213327	.	A	G	.	.	.	AB	A	A	A	A	A	A	A	A	G	G	G	A	A	A	A
1	214871	.	G	T	.	.	.	AB	G	G	G	G	G	G	G	G	T	G	T	G	G	G	G
1	216313	.	C	T	.	.	.	AB	C	C	C	C	C	C	C	T	C	C	C	C	C	C	C
1	217065	.	C	T	.	.	.	AB	C	C	C	C	C	C	C	C	T	C	T	C	C	C	C
1	217635	.	T	C	.	.	.	AB	T	T	C	C	C	C	T	T	C	C	C	T	C	C	C
1	217762	.	G	A	.	.	.	AB	G	G	G	G	G	G	G	G	G	A	G	G	G	G	G
1	217813	.	C	T	.	.	.	AB	C	C	C	C	C	C	C	C	T	C	T	C	C	C	C
1	218007	.	C	T	.	.	.	AB	C	C	C	C	C	C	C	C	C	T	C	C	C	C	C
1	219080	.	T	G	.	.	.	AB	T	T	T	T	T	T	T	T	T	G	T	T	T	T	T
1	219775	.	C	T	.	.	.	AB	C	C	C	C	C	C	C	C	C	T	C	C	C	C	C
1	220032	.	G	A	.	.	.	AB	G	G	G	G	G	G	G	G	A	G	A	G	G	G	G
1	220392	.	T	G	.	.	.	AB	T	T	T	T	T	T	T	T	G	T	G	T	T	T	T
1	220420	.	C	T	.	.	.	AB	C	C	C	T	C	C	C	C	C	C	C	C	C	C	C
1	220577	.	A	G	.	.	.	AB	A	A	A	A	A	G	A	A	A	A	A	A	A	G	G
1	220684	.	T	C	.	.	.	AB	T	T	T	T	T	T	T	T	T	T	T	C	T	T	T
1	221141	.	C	T	.	.	.	AB	C	C	C	C	C	C	C	C	C	T	C	C	C	C	C
1	222064	.	C	A	.	.	.	AB	C	C	C	C	C	C	C	C	C	A	C	C	C	C	C
1	222087	.	C	T	.	.	.	AB	C	C	C	C	C	C	C	C	T	C	T	C	C	C	C
1	222359	.	G	A	.	.	.	AB	G	G	G	G	G	G	G	G	G	A	G	G	G	G	G
1	222361	.	A	G	.	.	.	AB	A	A	A	A	A	A	A	A	G	A	G	A	A	A	A
1	222778	.	G	A	.	.	.	AB	G	G	G	G	G	G	G	G	A	G	A	G	G	G	G
1	223134	.	A	G	.	.	.	AB	A	A	G	A	A	A	A	A	A	A	A	A	A	A	A
1	223654	.	C	T	.	.	.	AB	C	C	C	T	C	C	C	C	C	C	C	C	C	C	C
1	225044	.	T	C	.	.	.	AB	T	T	C	C	C	C	C	C	C	C	C	C	C	C	C
1	225955	.	T	G	.	.	.	AB	T	T	T	T	T	T	T	T	G	T	G	T	T	T	T
1	226823	.	T	C	.	.	.	AB	T	T	C	C	C	C	C	C	C	C	C	C	C	C	C
1	227599	.	C	A	.	.	.	AB	C	C	C	C	C	C	C	C	A	C	A	C	C	C	C
1	227792	.	C	T	.	.	.	AB	C	C	T	C	C	C	C	C	C	C	C	C	C	C	C
1	229589	.	-	C,N,T	.	.	.	AB	-	-	C	N	T	C	C	C	C	C	C	C	T	-	C
1	229613	.	G	A,N,-	.	.	.	AB	G	G	A	N	N	A	A	A	A	A	A	A	N	-	A
1	229614	.	C	A,N,-	.	.	.	AB	C	C	A	N	N	A	A	A	A	A	A	A	N	-	A
1	229618	.	G	A,N,-	.	.	.	AB	G	G	A	N	N	A	A	A	A	A	A	A	N	-	A
1	229621	.	G	A,N	.	.	.	AB	G	G	A	N	N	A	A	A	A	A	A	A	N	A	A
1	229626	.	C	G,N	.	.	.	AB	C	C	G	N	N	G	G	G	G	G	G	G	N	C	G
1	230399	.	C	T	.	.	.	AB	C	C	C	C	C	C	C	C	T	C	T	C	C	C	C
1	231065	.	C	T	.	.	.	AB	C	C	C	C	C	C	T	C	C	C	C	C	C	C	C
1	232504	.	G	A	.	.	.	AB	G	G	G	G	G	G	G	G	G	A	G	G	G	G	G
1	233181	.	T	C	.	.	.	AB	T	T	T	T	T	T	T	T	C	T	C	T	T	T	T
1	233235	.	A	G	.	.	.	AB	A	A	A	A	A	A	A	A	G	A	G	A	A	A	A
1	233746	.	C	T	.	.	.	AB	C	C	C	C	C	C	C	C	C	T	C	C	C	C	C
1	233750	.	C	T	.	.	.	AB	C	C	C	C	C	C	C	C	C	T	C	C	C	C	C
1	234256	.	C	A	.	.	.	AB	C	C	C	C	C	C	C	C	A	C	A	C	C	C	C
1	234965	.	G	T	.	.	.	AB	G	G	G	G	G	G	G	T	G	G	G	G	G	G	G
1	239199	.	T	C	.	.	.	AB	T	T	T	T	T	T	T	T	C	T	C	T	T	T	T
1	239221	.	G	A	.	.	.	AB	G	G	G	G	G	A	G	G	G	G	G	G	G	A	A
1	241567	.	A	G	.	.	.	AB	A	A	A	A	A	A	A	A	A	A	A	A	G	A	A
1	241572	.	G	A	.	.	.	AB	G	G	G	G	G	G	G	G	G	G	G	G	A	G	G
1	241578	.	T	C	.	.	.	AB	T	T	T	T	T	T	T	T	C	C	C	T	T	T	T
1	241603	.	G	A	.	.	.	AB	G	G	G	G	G	G	G	G	G	G	G	G	A	G	G
1	241652	.	C	T	.	.	.	AB	C	C	C	C	C	C	C	C	C	C	C	C	T	C	C
1	242419	.	C	-,T	.	.	.	AB	C	C	C	C	-	C	C	C	C	T	-	C	C	C	C
1	243559	.	A	G	.	.	.	AB	A	A	A	A	A	A	A	G	A	A	A	A	A	A	A
1	244668	.	T	C	.	.	.	AB	T	T	T	T	T	T	T	T	C	T	C	T	T	T	T
1	245043	.	T	C	.	.	.	AB	T	T	C	C	C	C	C	C	C	C	C	C	C	C	C
1	245301	.	T	C	.	.	.	AB	T	T	T	T	T	C	T	T	T	T	T	T	T	C	C
1	245648	.	C	T	.	.	.	AB	C	C	C	C	C	C	C	T	C	C	C	C	C	C	C
1	245953	.	G	A	.	.	.	AB	G	G	G	G	G	G	G	G	A	G	A	G	G	G	G
1	246188	.	A	G	.	.	.	AB	A	A	G	A	A	A	A	A	A	A	A	A	A	A	A
1	246285	.	G	T	.	.	.	AB	G	G	G	G	G	G	T	G	G	G	G	T	G	G	G
1	246850	.	T	C	.	.	.	AB	T	T	T	T	T	T	T	T	C	C	C	T	T	T	T
1	248471	.	C	T	.	.	.	AB	C	C	T	T	T	T	C	C	C	C	C	C	T	T	T
1	248849	.	C	T	.	.	.	AB	C	C	C	C	C	C	C	C	T	C	T	C	C	C	C
1	250111	.	C	A	.	.	.	AB	C	C	C	C	C	C	C	A	C	C	C	C	C	C	C
1	251758	.	T	C	.	.	.	AB	T	T	T	T	T	T	T	C	T	T	T	T	T	T	T
1	251923	.	C	T	.	.	.	AB	C	C	C	C	C	C	C	C	T	C	T	C	C	C	C
1	253532	.	G	T	.	.	.	AB	G	G	G	G	G	G	G	G	G	G	G	G	G	T	G
1	254440	.	C	T	.	.	.	AB	C	C	C	C	C	C	C	C	T	C	T	C	C	C	C
1	254462	.	C	T	.	.	.	AB	C	C	C	C	C	C	C	C	C	T	C	C	C	C	C
1	254482	.	A	C	.	.	.	AB	A	A	A	A	A	A	A	A	A	A	C	A	A	A	A
1	254506	.	T	A	.	.	.	AB	T	T	T	T	T	T	A	T	T	T	T	A	T	T	T
1	255292	.	A	G	.	.	.	AB	A	A	A	A	A	A	A	A	G	A	G	A	A	A	A
1	255306	.	A	G	.	.	.	AB	A	A	G	G	G	G	G	A	G	G	G	G	G	G	G
1	255537	.	C	T	.	.	.	AB	C	C	C	C	C	C	T	C	C	C	C	T	C	C	C
1	255936	.	A	T	.	.	.	AB	A	A	A	A	A	A	A	A	A	T	A	A	A	A	A
1	256442	.	C	T	.	.	.	AB	C	C	C	C	C	C	C	C	T	C	T	C	C	C	C
1	256488	.	T	G	.	.	.	AB	T	T	G	G	G	G	G	G	G	G	G	G	G	G	G
1	257208	.	C	T	.	.	.	AB	C	C	C	C	C	C	C	C	T	C	T	C	C	C	C
1	259013	.	A	G	.	.	.	AB	A	A	A	A	A	A	G	A	A	A	A	G	A	A	A
1	259268	.	G	A	.	.	.	AB	G	G	G	G	G	G	G	G	A	G	A	G	G	G	G
1	259777	.	C	T	.	.	.	AB	C	C	C	C	C	C	C	C	T	C	T	C	C	C	C
1	260007	.	A	C	.	.	.	AB	A	A	C	C	C	C	C	A	C	C	C	C	C	C	C
1	261169	.	A	C	.	.	.	AB	A	A	A	A	A	A	A	A	A	C	A	A	A	A	A
1	261901	.	A	C	.	.	.	AB	A	A	C	A	A	A	A	A	A	A	A	A	A	A	A
1	262173	.	T	C	.	.	.	AB	T	T	C	C	C	C	C	C	C	C	C	C	C	C	C
1	264457	.	C	T	.	.	.	AB	C	C	C	T	C	C	C	C	C	C	C	C	C	C	C
1	266099	.	T	G	.	.	.	AB	T	T	T	T	T	T	G	T	T	T	T	T	T	T	T
1	266355	.	G	T	.	.	.	AB	G	G	T	G	G	G	G	G	G	G	G	G	G	G	G
1	267088	.	C	T	.	.	.	AB	C	C	C	C	C	C	C	C	C	C	C	T	C	C	C
1	267736	.	C	A	.	.	.	AB	C	C	C	C	C	C	A	C	C	C	C	A	C	C	C
1	268207	.	C	T	.	.	.	AB	C	C	C	T	C	C	C	C	C	C	C	C	C	C	C
1	268722	.	G	A	.	.	.	AB	G	G	G	G	G	G	G	G	A	G	A	G	G	G	G
1	268752	.	G	A	.	.	.	AB	G	G	G	G	G	G	G	G	G	G	G	A	G	G	G
1	268949	.	C	T	.	.	.	AB	C	C	C	C	C	C	C	C	T	C	T	C	C	C	C
1	269495	.	C	A	.	.	.	AB	C	C	C	C	C	C	C	C	A	C	A	C	C	C	C
1	270040	.	C	T	.	.	.	AB	C	C	C	C	C	C	C	C	T	C	T	C	C	C	C
1	270317	.	A	T	.	.	.	AB	A	A	A	A	T	A	A	A	A	A	A	A	T	A	A
1	271114	.	C	T	.	.	.	AB	C	C	C	C	C	C	C	C	C	T	C	C	C	C	C
1	271185	.	C	A	.	.	.	AB	C	C	C	C	C	C	C	C	A	C	C	C	C	C	C
1	271991	.	T	G	.	.	.	AB	T	T	T	T	T	T	G	T	T	T	T	G	T	T	T
1	272479	.	T	G	.	.	.	AB	T	T	T	T	T	T	T	T	G	T	G	T	T	T	T
1	272480	.	T	G	.	.	.	AB	T	T	T	T	T	T	T	T	G	T	G	T	T	T	T
1	272615	.	A	T	.	.	.	AB	A	A	A	A	A	A	A	A	T	T	T	A	A	A	A
1	273279	.	C	T	.	.	.	AB	C	C	C	C	C	C	C	C	C	C	C	C	T	C	C
1	273409	.	T	C	.	.	.	AB	T	T	C	C	C	C	C	C	C	C	C	C	C	C	C
1	274246	.	T	C	.	.	.	AB	T	T	C	C	C	C	C	C	C	C	C	C	C	C	C
1	274429	.	G	A	.	.	.	AB	G	G	G	G	G	G	G	A	G	G	G	G	G	G	G
1	275599	.	A	G	.	.	.	AB	A	A	G	G	G	G	A	A	A	A	A	A	G	G	G
1	276026	.	C	T	.	.	.	AB	C	C	C	C	C	C	T	C	C	C	C	T	C	C	C
1	276220	.	T	C	.	.	.	AB	T	T	T	T	T	T	T	T	T	T	T	T	C	T	T
1	276716	.	C	T	.	.	.	AB	C	C	C	C	C	C	C	C	C	T	C	C	C	C	C
1	277305	.	G	A	.	.	.	AB	G	G	G	G	G	G	G	G	A	G	A	G	G	G	G
1	277376	.	C	T	.	.	.	AB	C	C	C	C	C	C	C	T	C	C	C	C	C	C	C
1	277907	.	T	G	.	.	.	AB	T	T	T	T	T	G	T	T	T	T	T	T	T	G	G
1	278291	.	C	A	.	.	.	AB	C	C	C	C	C	C	C	C	A	C	A	C	C	C	C
1	278848	.	G	A	.	.	.	AB	G	G	A	A	A	A	G	G	G	G	G	G	A	A	A
1	278978	.	C	T	.	.	.	AB	C	C	C	C	C	C	C	C	C	T	C	C	C	C	C
1	280058	.	T	C	.	.	.	AB	T	T	T	T	T	T	C	T	T	T	T	C	T	T	T
1	280614	.	C	T	.	.	.	AB	C	C	C	C	C	C	C	T	C	C	C	C	C	C	C
1	281250	.	C	T	.	.	.	AB	C	C	C	C	C	C	C	C	T	C	T	C	C	C	C
1	281316	.	C	T	.	.	.	AB	C	C	C	C	T	C	C	C	C	C	C	C	T	C	C
1	281498	.	A	G	.	.	.	AB	A	A	A	A	A	A	A	A	G	A	G	A	A	A	A
1	281916	.	A	G	.	.	.	AB	A	A	A	A	A	A	A	G	A	A	A	A	A	A	A
1	282666	.	C	T	.	.	.	AB	C	C	C	C	C	C	C	C	C	T	C	C	C	C	C
1	282929	.	T	C	.	.	.	AB	T	T	C	C	C	C	C	T	C	C	C	C	C	C	C
1	284131	.	G	A	.	.	.	AB	G	G	A	A	A	A	G	G	G	G	G	G	A	A	A
1	286429	.	G	A	.	.	.	AB	G	G	G	G	G	G	G	G	G	A	G	G	G	G	G
1	286636	.	T	G	.	.	.	AB	T	T	T	T	T	T	T	T	T	G	T	T	T	T	T
1	286856	.	G	A	.	.	.	AB	G	G	G	G	G	G	A	G	G	G	G	A	G	G	G
1	288026	.	A	C	.	.	.	AB	A	A	A	A	A	A	A	A	A	A	A	C	A	A	A
1	288225	.	C	T	.	.	.	AB	C	C	C	C	C	C	C	C	T	C	T	C	C	C	C
1	288870	.	C	T	.	.	.	AB	C	C	C	C	C	C	C	C	C	T	C	C	C	C	C
1	289582	.	C	N,T	.	.	.	AB	C	C	C	C	C	C	N	T	C	C	C	N	C	C	C
1	290187	.	A	C,N	.	.	.	AB	A	A	C	C	C	C	N	A	C	C	C	N	C	C	C
1	290212	.	G	T,N	.	.	.	AB	G	G	T	G	G	G	N	G	G	G	G	N	G	G	G
1	292267	.	C	N,A	.	.	.	AB	C	C	C	C	C	C	N	C	C	A	C	N	C	C	C
1	293047	.	C	N,T	.	.	.	AB	C	C	C	C	C	C	N	C	T	C	T	N	C	C	C
1	293197	.	G	N,A	.	.	.	AB	G	G	G	G	G	G	N	G	A	G	A	N	G	G	G
1	294054	.	G	N,T	.	.	.	AB	G	G	G	G	G	G	N	G	G	T	G	N	G	G	G
1	294088	.	T	N,C	.	.	.	AB	T	T	T	T	T	T	N	T	C	T	C	N	T	T	T
1	295395	.	G	N,A	.	.	.	AB	G	G	G	G	G	G	N	G	G	A	G	N	G	G	G
1	298055	.	T	G,N	.	.	.	AB	T	T	G	G	G	G	N	T	G	G	G	N	G	G	G
1	298286	.	C	T,N	.	.	.	AB	C	C	C	C	C	T	N	C	C	C	C	N	C	T	T
1	298363	.	C	N,T	.	.	.	AB	C	C	C	C	C	C	N	C	T	C	T	N	C	C	C
1	300876	.	N	G,T	.	.	.	AB	N	N	G	T	T	T	N	T	T	T	T	N	T	T	T
1	305129	.	G	A	.	.	.	AB	G	G	G	G	G	G	G	G	G	A	G	G	G	G	G
1	305507	.	G	A	.	.	.	AB	G	G	G	G	G	G	G	G	A	G	A	G	G	G	G
1	306354	.	G	A	.	.	.	AB	G	G	A	G	G	G	G	G	G	G	G	G	G	G	G
1	307088	.	G	A	.	.	.	AB	G	G	G	G	G	G	G	G	A	G	A	G	G	G	G
1	307680	.	T	A	.	.	.	AB	T	T	T	T	T	T	T	T	A	T	A	T	T	T	T
1	307802	.	C	T	.	.	.	AB	C	C	T	C	C	C	C	C	C	C	C	C	C	C	C
1	308042	.	A	C	.	.	.	AB	A	A	A	A	A	A	A	A	C	A	C	A	A	A	A
1	310094	.	G	A	.	.	.	AB	G	G	G	G	G	G	G	G	A	G	A	G	G	G	G
1	310181	.	G	A	.	.	.	AB	G	G	G	G	G	G	G	A	G	G	G	G	G	G	G
1	310398	.	C	T	.	.	.	AB	C	C	C	C	C	C	C	C	T	C	T	C	C	C	C
1	311207	.	A	C	.	.	.	AB	A	A	A	A	A	A	A	A	C	A	C	A	A	A	A
1	311347	.	A	G	.	.	.	AB	A	A	G	G	G	G	G	A	G	G	G	G	G	G	G
1	311941	.	C	T	.	.	.	AB	C	C	C	T	C	C	C	C	C	C	C	C	C	C	C
1	312009	.	G	T	.	.	.	AB	G	G	G	G	G	G	G	G	T	G	T	G	G	G	G
1	312992	.	C	T	.	.	.	AB	C	C	C	C	C	C	T	C	C	C	C	T	C	C	C
1	313034	.	G	A	.	.	.	AB	G	G	G	G	G	A	G	G	G	G	G	G	G	A	A
1	313922	.	G	A	.	.	.	AB	G	G	G	G	G	G	A	G	G	G	G	A	G	G	G
1	314410	.	A	T	.	.	.	AB	A	A	A	A	A	A	A	A	T	A	T	A	A	A	A
1	314871	.	C	T	.	.	.	AB	C	C	C	C	C	C	C	C	C	C	C	C	T	C	C
1	315163	.	G	A	.	.	.	AB	G	G	G	G	G	G	G	G	A	G	A	G	G	G	G
1	316012	.	C	T	.	.	.	AB	C	C	T	C	C	C	C	C	C	C	C	C	C	C	C
1	316769	.	A	C	.	.	.	AB	A	A	C	C	C	C	C	A	C	C	C	C	C	C	C
1	317106	.	C	T	.	.	.	AB	C	C	C	C	C	T	C	C	C	C	C	C	C	T	T
1	318467	.	T	C	.	.	.	AB	T	T	C	C	C	T	T	T	T	T	T	T	C	T	T
1	319327	.	G	C	.	.	.	AB	G	G	G	G	G	G	G	G	C	G	C	G	G	G	G
1	321573	.	C	A	.	.	.	AB	C	C	C	C	C	C	C	C	A	C	A	C	C	C	C
1	322495	.	G	A	.	.	.	AB	G	G	G	G	G	G	G	G	A	G	A	G	G	G	G
1	322834	.	C	T	.	.	.	AB	C	C	C	C	C	C	C	C	C	C	C	C	T	C	C
1	323459	.	G	A	.	.	.	AB	G	G	G	G	G	G	G	G	G	A	G	G	G	G	G
1	323836	.	G	T	.	.	.	AB	G	G	G	G	G	G	G	G	G	T	G	G	G	G	G
1	324216	.	G	A	.	.	.	AB	G	G	G	G	G	G	G	G	A	G	A	G	G	G	G
1	325533	.	G	A	.	.	.	AB	G	G	A	G	G	G	G	G	G	G	G	G	G	G	G
1	327651	.	C	G	.	.	.	AB	C	C	C	C	C	C	C	C	C	G	C	C	C	C	C
1	327678	.	A	C	.	.	.	AB	A	A	A	A	A	A	A	A	C	A	C	A	A	A	A
1	327934	.	C	T	.	.	.	AB	C	C	C	C	C	C	C	C	C	T	C	C	C	C	C
1	328787	.	T	G	.	.	.	AB	T	T	T	T	T	T	T	T	T	T	T	G	T	T	T
1	329517	.	C	G	.	.	.	AB	C	C	C	C	C	C	C	C	G	C	G	C	C	C	C
1	331665	.	G	A	.	.	.	AB	G	G	G	G	G	G	G	G	G	A	G	G	G	G	G
1	332521	.	A	C	.	.	.	AB	A	A	A	A	A	A	A	A	A	A	A	A	C	A	A
1	332708	.	C	T	.	.	.	AB	C	C	C	C	C	C	T	C	C	C	C	T	C	C	C
1	333155	.	G	T	.	.	.	AB	G	G	G	T	T	G	G	G	G	G	G	G	T	G	G
1	333766	.	G	T	.	.	.	AB	G	G	T	T	T	T	T	T	T	T	T	T	T	T	T
1	334084	.	G	A	.	.	.	AB	G	G	A	A	A	G	G	G	G	G	G	G	A	G	G
1	334446	.	T	C	.	.	.	AB	T	T	T	T	T	T	T	C	T	T	T	T	T	T	T
1	334855	.	A	C	.	.	.	AB	A	A	A	A	A	A	A	A	C	A	C	A	A	A	A
1	335397	.	A	G	.	.	.	AB	A	A	A	A	A	A	A	A	A	G	A	A	A	A	A
1	335897	.	T	A	.	.	.	AB	T	T	T	T	T	T	T	T	A	T	A	T	T	T	T
1	337102	.	G	A	.	.	.	AB	G	G	A	A	A	G	G	G	G	G	G	G	A	G	G
1	339420	.	T	C	.	.	.	AB	T	T	C	C	C	C	C	C	C	C	C	C	C	C	C
1	340318	.	G	A	.	.	.	AB	G	G	G	G	G	G	G	G	A	G	A	G	G	G	G
1	341041	.	T	C	.	.	.	AB	T	T	C	C	C	C	C	T	C	C	C	C	C	C	C
1	341930	.	C	A	.	.	.	AB	C	C	C	C	C	C	C	C	C	A	C	C	C	C	C
1	342188	.	G	A	.	.	.	AB	G	G	G	A	A	G	G	G	G	G	G	G	A	G	G
1	343126	.	C	A	.	.	.	AB	C	C	A	C	C	C	C	C	C	C	C	C	C	C	C
1	343195	.	G	A	.	.	.	AB	G	G	G	G	G	G	G	G	A	G	A	G	G	G	G
1	343262	.	G	T	.	.	.	AB	G	G	G	G	G	G	G	G	G	T	G	G	G	G	G
1	343648	.	A	G	.	.	.	AB	A	A	G	G	G	G	G	A	G	G	G	G	G	G	G
1	343988	.	G	A	.	.	.	AB	G	G	G	G	G	G	G	G	G	A	G	G	G	G	G
1	344966	.	C	T	.	.	.	AB	C	C	T	T	T	T	C	C	C	C	C	C	T	T	T
1	346719	.	C	A	.	.	.	AB	C	C	C	A	C	C	C	C	C	C	C	C	C	C	C
1	346796	.	A	C	.	.	.	AB	A	A	A	A	A	A	A	A	C	C	C	A	A	A	A
1	348047	.	C	A	.	.	.	AB	C	C	C	C	C	C	A	C	C	C	C	A	C	C	C
1	350137	.	C	T	.	.	.	AB	C	C	C	C	C	C	C	C	C	C	C	T	C	C	C
1	350563	.	C	T	.	.	.	AB	C	C	C	C	C	C	C	C	C	C	C	T	C	C	C
1	350969	.	G	A	.	.	.	AB	G	G	G	G	G	A	G	G	G	G	G	G	G	A	A
1	351850	.	C	G	.	.	.	AB	C	C	G	G	G	G	G	G	G	G	G	G	G	G	G
1	352054	.	A	C	.	.	.	AB	A	A	C	C	C	C	A	A	A	C	A	A	C	C	C
1	352488	.	C	A	.	.	.	AB	C	C	A	A	A	A	A	C	A	A	A	A	A	A	A
1	353870	.	G	A	.	.	.	AB	G	G	G	A	G	G	G	G	G	G	G	G	G	G	G
1	354492	.	T	C	.	.	.	AB	T	T	C	C	C	C	C	C	C	C	C	C	C	C	C
1	354964	.	G	A	.	.	.	AB	G	G	G	G	G	G	G	A	G	G	G	G	G	G	G
1	356278	.	C	T	.	.	.	AB	C	C	T	C	C	C	C	C	C	C	C	C	C	C	C
1	356329	.	G	A	.	.	.	AB	G	G	G	G	G	G	G	G	A	G	A	G	G	G	G
1	356343	.	G	A	.	.	.	AB	G	G	G	G	G	G	G	G	A	G	A	G	G	G	G
1	356914	.	G	A	.	.	.	AB	G	G	G	G	G	G	A	G	G	G	G	G	G	G	G
1	357162	.	G	A	.	.	.	AB	G	G	G	A	G	G	G	G	G	G	G	G	G	G	G
1	359110	.	C	T	.	.	.	AB	C	C	C	C	C	C	C	T	C	C	C	C	C	C	C
1	359276	.	G	A	.	.	.	AB	G	G	A	G	G	G	G	G	G	G	G	G	G	G	G
1	359344	.	T	A	.	.	.	AB	T	T	T	T	T	T	T	A	T	T	T	T	T	T	T
1	359374	.	C	T	.	.	.	AB	C	C	T	T	T	C	C	C	C	C	C	C	T	C	C
1	359494	.	A	G	.	.	.	AB	A	A	G	G	G	G	G	A	G	G	G	G	G	G	G
1	359829	.	C	A	.	.	.	AB	C	C	A	C	C	C	C	C	C	C	C	C	C	C	C
1	359909	.	C	T	.	.	.	AB	C	C	C	C	C	C	C	C	T	C	T	C	C	C	C
1	359916	.	G	A	.	.	.	AB	G	G	G	G	G	G	G	G	A	G	A	G	G	G	G
1	360484	.	G	A	.	.	.	AB	G	G	G	G	G	G	G	A	G	G	G	G	G	G	G
1	360856	.	A	G	.	.	.	AB	A	A	G	G	G	G	G	G	G	G	G	G	G	G	G
1	361440	.	A	G	.	.	.	AB	A	A	G	G	G	G	G	A	G	G	G	G	G	G	G
1	364430	.	G	C	.	.	.	AB	G	G	G	G	G	G	G	G	C	G	C	G	G	G	G
1	364865	.	T	C	.	.	.	AB	T	T	T	T	T	T	T	T	C	T	C	T	T	T	T
1	365820	.	T	C	.	.	.	AB	T	T	C	C	C	C	C	C	C	C	C	C	C	C	C
1	366365	.	C	A	.	.	.	AB	C	C	C	C	C	C	C	C	A	C	A	C	C	C	C
1	367149	.	T	C	.	.	.	AB	T	T	C	C	C	C	C	C	C	C	C	C	C	C	C
1	367885	.	C	A	.	.	.	AB	C	C	C	C	C	C	C	C	C	A	C	C	C	C	C
1	369429	.	C	T	.	.	.	AB	C	C	T	T	T	T	C	C	C	C	C	C	T	T	T
1	369480	.	G	A	.	.	.	AB	G	G	G	G	A	G	G	G	G	G	G	G	G	G	G
1	369746	.	C	T	.	.	.	AB	C	C	T	C	C	C	C	C	C	C	C	C	C	C	C
1	369840	.	G	A	.	.	.	AB	G	G	A	A	A	A	A	A	A	A	A	A	A	A	A
1	370357	.	A	C,-	.	.	.	AB	A	A	A	A	A	A	A	A	C	A	-	A	A	A	A
1	371038	.	G	A,-	.	.	.	AB	G	G	A	A	A	A	G	G	-	G	-	G	A	A	A
1	371150	.	C	T	.	.	.	AB	C	C	C	C	C	T	C	C	C	C	C	C	C	T	T
1	371977	.	G	A	.	.	.	AB	G	G	G	G	G	G	G	G	G	A	G	G	G	G	G
1	371990	.	G	T	.	.	.	AB	G	G	G	G	G	G	G	G	G	T	G	G	G	G	G
1	372193	.	G	A	.	.	.	AB	G	G	G	G	G	G	G	G	G	A	G	G	G	G	G
1	373608	.	G	A	.	.	.	AB	G	G	G	G	G	G	G	G	A	G	A	G	G	G	G
1	374297	.	A	G	.	.	.	AB	A	A	A	A	A	A	G	A	A	A	A	A	A	A	A
1	375476	.	A	C	.	.	.	AB	A	A	A	A	A	A	A	A	C	A	C	A	A	A	A
1	375553	.	T	A	.	.	.	AB	T	T	T	T	T	T	T	T	A	T	A	T	T	T	T
1	375861	.	G	A	.	.	.	AB	G	G	G	G	G	G	G	G	A	G	A	G	G	G	G
1	375982	.	A	G	.	.	.	AB	A	A	G	G	G	G	G	G	G	G	G	G	G	G	G
1	376903	.	G	A	.	.	.	AB	G	G	A	A	A	G	G	G	G	G	G	G	A	G	G
1	376932	.	G	A	.	.	.	AB	G	G	G	G	G	G	A	G	G	G	G	A	G	G	G
1	378279	.	G	A	.	.	.	AB	G	G	G	G	G	G	G	A	G	G	G	G	G	G	G
1	380076	.	G	A	.	.	.	AB	G	G	G	G	G	G	G	G	G	A	G	G	G	G	G
1	380911	.	G	A	.	.	.	AB	G	G	G	G	G	G	G	G	A	G	A	G	G	G	G
1	381439	.	G	A	.	.	.	AB	G	G	G	G	G	G	G	G	A	G	A	G	G	G	G
1	381924	.	C	T	.	.	.	AB	C	C	C	C	C	C	C	C	T	C	T	C	C	C	C
1	382085	.	T	C	.	.	.	AB	T	T	T	T	T	T	C	T	T	T	T	C	T	T	T
1	382482	.	C	T	.	.	.	AB	C	C	C	C	C	C	C	C	T	C	T	C	C	C	C
1	383169	.	A	C	.	.	.	AB	A	A	A	A	A	A	A	A	A	A	A	C	A	A	A
1	384068	.	T	A	.	.	.	AB	T	T	T	T	T	T	T	T	T	A	T	T	T	T	T
1	384244	.	G	A	.	.	.	AB	G	G	G	G	G	G	G	G	G	A	G	G	G	G	G
1	385327	.	G	A	.	.	.	AB	G	G	G	G	G	G	G	G	A	G	A	G	G	G	G
1	386099	.	G	A	.	.	.	AB	G	G	G	G	G	G	G	G	A	G	A	G	G	G	G
1	386139	.	C	T	.	.	.	AB	C	C	C	C	C	C	C	C	C	T	C	C	C	C	C
1	386406	.	C	A	.	.	.	AB	C	C	A	C	C	C	C	C	C	C	C	C	C	C	C
1	387481	.	T	A	.	.	.	AB	T	T	T	T	T	T	T	T	T	A	T	T	T	T	T
1	388160	.	A	C	.	.	.	AB	A	A	A	A	A	A	A	A	A	A	A	C	A	A	A
1	388702	.	G	A	.	.	.	AB	G	G	G	G	G	G	G	G	G	A	G	G	G	G	G
1	388918	.	T	G	.	.	.	AB	T	T	G	G	G	T	T	T	T	T	T	T	G	T	T
1	390573	.	G	A	.	.	.	AB	G	G	G	G	G	G	A	G	G	G	G	A	G	G	G
1	391067	.	T	G	.	.	.	AB	T	T	T	T	T	T	G	T	T	T	T	G	T	T	T
1	392511	.	C	T	.	.	.	AB	C	C	T	T	T	T	C	C	C	C	C	C	T	T	T
1	393575	.	G	A	.	.	.	AB	G	G	G	G	G	A	G	G	G	G	G	G	G	G	A
1	393743	.	G	A	.	.	.	AB	G	G	G	G	G	A	G	G	G	G	G	G	G	A	A
1	396055	.	T	C	.	.	.	AB	T	T	T	T	T	T	T	T	C	C	C	T	T	T	T
1	396436	.	A	C	.	.	.	AB	A	A	C	C	C	C	C	A	C	C	C	C	C	C	C
1	396458	.	G	A	.	.	.	AB	G	G	G	G	G	G	G	G	A	G	A	G	G	G	G
1	396912	.	T	A	.	.	.	AB	T	T	T	T	T	T	T	T	T	T	T	T	A	T	T
1	397444	.	G	C	.	.	.	AB	G	G	G	G	G	C	G	G	G	G	G	G	G	C	C
1	398396	.	C	T	.	.	.	AB	C	C	C	C	C	C	T	C	C	C	C	T	C	C	C
1	400978	.	C	T	.	.	.	AB	C	C	C	C	C	C	C	C	T	C	T	C	C	C	C
1	401544	.	C	T	.	.	.	AB	C	C	C	C	C	C	C	T	C	C	C	C	C	C	C
1	402042	.	G	A	.	.	.	AB	G	G	G	G	G	G	G	A	G	G	G	G	G	G	G
1	405500	.	C	-,A	.	.	.	AB	C	C	C	C	-	C	C	C	A	C	-	C	C	C	C
1	405953	.	A	T	.	.	.	AB	A	A	T	T	T	T	T	T	T	T	T	T	T	T	T
1	406821	.	G	A	.	.	.	AB	G	G	G	A	G	G	G	G	G	G	G	G	G	G	G
1	407023	.	A	C	.	.	.	AB	A	A	A	A	A	A	A	A	C	A	C	A	A	A	A
1	407113	.	G	A	.	.	.	AB	G	G	G	G	G	A	G	G	G	G	G	G	G	A	A
1	407411	.	A	C	.	.	.	AB	A	A	A	A	A	A	C	A	A	A	A	A	A	A	A
1	407887	.	G	C	.	.	.	AB	G	G	G	G	G	C	G	G	G	G	G	G	G	C	C
1	408866	.	T	C	.	.	.	AB	T	T	T	T	T	T	T	C	T	T	T	T	T	T	T
1	409424	.	G	T	.	.	.	AB	G	G	G	G	G	G	G	T	G	G	G	G	G	G	G
1	409884	.	G	T	.	.	.	AB	G	G	T	T	T	T	G	G	G	G	G	G	T	T	T
1	410785	.	A	G	.	.	.	AB	A	A	G	G	G	G	G	G	G	G	G	G	G	G	G
1	411290	.	A	T	.	.	.	AB	A	A	A	A	A	A	T	A	A	A	A	T	A	A	A
1	411520	.	T	A	.	.	.	AB	T	T	T	T	T	T	T	T	T	A	T	T	T	T	T
1	411572	.	T	C	.	.	.	AB	T	T	T	T	T	T	T	T	T	C	T	T	T	T	T
1	412377	.	A	C	.	.	.	AB	A	A	A	A	A	A	A	A	C	A	C	A	A	A	A
1	412458	.	G	A	.	.	.	AB	G	G	G	A	A	G	G	G	G	G	G	G	A	G	G
1	412599	.	T	C	.	.	.	AB	T	T	C	C	C	C	T	T	C	C	C	T	C	C	C
1	412632	.	A	G	.	.	.	AB	A	A	A	A	A	A	A	A	G	A	G	A	A	A	A
1	413942	.	A	G	.	.	.	AB	A	A	G	G	G	G	G	A	G	G	G	G	G	G	G
1	414943	.	G	A	.	.	.	AB	G	G	G	G	G	G	G	A	G	G	G	G	G	G	G
1	415150	.	A	G	.	.	.	AB	A	A	G	G	G	G	G	A	G	G	G	G	G	G	G
1	415473	.	T	C	.	.	.	AB	T	T	T	C	T	T	T	T	T	T	T	T	T	T	T
1	415498	.	A	G	.	.	.	AB	A	A	G	G	G	G	G	G	G	G	G	G	G	G	G
1	415692	.	G	A	.	.	.	AB	G	G	G	G	G	G	G	G	A	G	A	G	G	G	G
1	416393	.	T	A	.	.	.	AB	T	T	T	T	T	T	T	T	T	A	T	T	T	T	T
1	416875	.	G	A	.	.	.	AB	G	G	G	G	G	G	G	G	G	A	G	G	G	G	G
1	417355	.	A	T	.	.	.	AB	A	A	T	T	T	T	A	A	T	T	T	A	T	T	T
1	418125	.	G	A	.	.	.	AB	G	G	A	G	G	G	G	G	G	G	G	G	G	G	G
1	418538	.	C	T	.	.	.	AB	C	C	C	C	C	C	C	C	T	C	T	C	C	C	C
1	420347	.	A	C	.	.	.	AB	A	A	A	A	A	A	A	A	C	A	C	A	A	A	A
1	420707	.	A	C	.	.	.	AB	A	A	A	A	A	A	A	A	C	A	C	A	A	A	A
1	421662	.	T	A	.	.	.	AB	T	T	T	T	T	T	A	T	T	T	T	T	T	T	T
1	423123	.	T	C	.	.	.	AB	T	T	T	T	T	T	T	T	C	T	C	T	T	T	T
1	423435	.	C	A	.	.	.	AB	C	C	C	C	C	C	A	C	C	C	C	A	C	C	C
1	425610	.	C	T	.	.	.	AB	C	C	C	C	T	C	C	C	C	C	C	C	C	C	C
1	425636	.	A	G	.	.	.	AB	A	A	A	A	A	A	A	A	A	G	A	A	A	A	A
1	427323	.	T	C	.	.	.	AB	T	T	C	C	C	C	C	C	C	C	C	C	C	C	C
1	428546	.	A	G	.	.	.	AB	A	A	G	G	G	G	G	A	G	G	G	G	G	G	G
1	429193	.	C	T	.	.	.	AB	C	C	C	C	C	C	T	C	C	C	C	T	C	C	C
1	429541	.	G	A	.	.	.	AB	G	G	G	G	A	G	G	G	G	G	G	G	G	G	G
1	429890	.	C	G	.	.	.	AB	C	C	G	G	G	G	G	G	G	G	G	G	G	G	G
1	429895	.	C	A	.	.	.	AB	C	C	C	C	C	C	C	A	C	C	C	C	C	C	C
1	430947	.	C	T	.	.	.	AB	C	C	T	T	T	T	C	C	C	C	C	C	T	T	T
1	432665	.	A	C	.	.	.	AB	A	A	A	A	A	A	A	A	C	A	C	A	A	A	A
1	436532	.	T	G	.	.	.	AB	T	T	T	T	G	T	T	T	T	T	T	T	T	T	T
1	437474	.	G	A	.	.	.	AB	G	G	G	G	G	A	G	G	G	G	G	G	G	A	A
1	438148	.	G	T	.	.	.	AB	G	G	G	G	G	G	G	G	T	G	T	G	G	G	G
1	438347	.	G	A	.	.	.	AB	G	G	G	G	A	G	G	G	G	G	G	G	G	G	G
1	438577	.	G	A	.	.	.	AB	G	G	G	G	G	G	G	G	G	A	G	G	G	G	G
1	440671	.	T	C	.	.	.	AB	T	T	C	C	C	C	C	C	C	C	C	C	C	C	C
1	440837	.	A	C	.	.	.	AB	A	A	A	A	A	C	A	A	A	A	A	A	A	C	C
1	441911	.	C	T,-	.	.	.	AB	C	C	T	T	T	T	C	C	C	C	C	C	-	T	T
1	441944	.	A	-,G	.	.	.	AB	A	A	A	A	-	A	A	A	A	G	A	A	A	A	A
1	442423	.	G	A	.	.	.	AB	G	G	G	G	G	G	A	G	G	G	G	A	G	G	G
1	443213	.	G	-,A	.	.	.	AB	G	G	G	G	-	A	G	G	G	G	-	G	-	-	A
1	443237	.	G	-,A,N	.	.	.	AB	G	G	G	G	-	G	A	G	N	G	N	A	-	-	G
1	443244	.	G	A,-,N	.	.	.	AB	G	G	G	A	-	G	G	G	N	G	N	G	-	-	G
1	443268	.	A	T,-	.	.	.	AB	A	A	T	T	-	T	A	A	T	T	-	A	-	T	T
1	444160	.	C	T	.	.	.	AB	C	C	C	C	C	C	T	C	C	C	C	T	C	C	C
1	444428	.	G	A	.	.	.	AB	G	G	G	G	G	G	G	G	A	G	A	G	G	G	G
1	445363	.	C	A	.	.	.	AB	C	C	A	C	C	C	C	C	C	C	C	C	C	C	C
1	445627	.	G	T	.	.	.	AB	G	G	G	G	G	G	G	T	G	G	G	G	G	G	G
1	445869	.	C	T	.	.	.	AB	C	C	T	T	T	T	T	T	T	T	T	T	T	T	T
1	447459	.	G	A	.	.	.	AB	G	G	G	G	G	A	G	G	G	G	G	G	G	A	A
1	448711	.	G	A	.	.	.	AB	G	G	G	G	G	A	G	G	G	G	G	G	G	A	A
1	448932	.	T	G	.	.	.	AB	T	T	T	T	T	T	T	T	T	T	T	G	T	T	T
1	449063	.	T	C	.	.	.	AB	T	T	T	T	T	T	T	T	C	T	C	T	T	T	T
1	449600	.	C	A	.	.	.	AB	C	C	C	C	C	C	C	C	A	C	A	C	C	C	C
1	449737	.	A	C	.	.	.	AB	A	A	A	A	A	A	A	A	A	C	A	A	A	A	A
1	450076	.	G	A	.	.	.	AB	G	G	G	A	G	G	G	G	G	G	G	G	G	G	G
1	450849	.	A	-,T	.	.	.	AB	A	A	A	A	A	A	A	A	A	A	-	T	-	A	A
1	451164	.	G	-,A	.	.	.	AB	G	G	G	G	G	G	G	G	-	A	-	G	G	G	G
1	452246	.	A	C	.	.	.	AB	A	A	A	A	A	A	A	A	C	A	C	A	A	A	A
1	452556	.	A	C	.	.	.	AB	A	A	C	C	C	C	C	A	C	C	C	C	C	C	C
1	452711	.	A	T	.	.	.	AB	A	A	T	T	T	T	A	A	A	A	A	A	T	T	T
1	452751	.	T	C	.	.	.	AB	T	T	C	C	C	C	C	C	C	C	C	C	C	C	C
1	453153	.	G	A	.	.	.	AB	G	G	G	G	G	G	G	G	G	A	G	G	G	G	G
1	453785	.	C	A	.	.	.	AB	C	C	C	C	C	C	C	A	C	C	C	C	C	C	C
1	453943	.	G	T	.	.	.	AB	G	G	G	G	G	G	G	G	T	G	T	G	G	G	G
1	454771	.	C	T	.	.	.	AB	C	C	T	C	C	C	C	C	C	C	C	C	C	C	C
1	454890	.	C	T	.	.	.	AB	C	C	T	T	T	C	C	C	C	C	C	C	T	C	C
1	454953	.	T	C	.	.	.	AB	T	T	T	T	T	T	T	T	T	C	T	T	T	T	T
1	456123	.	G	A	.	.	.	AB	G	G	G	G	G	G	G	G	G	G	G	G	A	G	G
1	457082	.	T	C	.	.	.	AB	T	T	T	T	T	C	T	T	T	T	T	T	T	C	C
1	457893	.	C	A	.	.	.	AB	C	C	C	C	C	C	A	C	C	C	C	A	C	C	C
1	459248	.	G	A	.	.	.	AB	G	G	A	A	A	A	G	G	G	G	G	G	A	A	A
1	460233	.	G	A	.	.	.	AB	G	G	G	G	G	G	G	G	A	G	A	G	G	G	G
1	460261	.	G	A	.	.	.	AB	G	G	G	G	G	G	G	G	A	G	A	G	G	G	G
1	463635	.	G	T	.	.	.	AB	G	G	G	G	G	G	T	G	G	G	G	T	G	G	G
1	464006	.	C	A	.	.	.	AB	C	C	A	A	A	A	A	C	A	A	A	A	A	A	A
1	465826	.	T	A	.	.	.	AB	T	T	T	T	T	A	T	T	T	T	T	T	T	A	A
1	465874	.	G	A	.	.	.	AB	G	G	G	G	G	G	G	A	G	G	G	G	G	G	G
1	466128	.	A	T	.	.	.	AB	A	A	A	A	A	A	A	A	T	A	T	A	A	A	A
1	467184	.	C	T	.	.	.	AB	C	C	C	C	C	C	C	C	T	C	T	C	C	C	C
1	468099	.	G	A	.	.	.	AB	G	G	G	G	G	G	G	G	G	A	G	G	G	G	G
1	469328	.	A	G	.	.	.	AB	A	A	G	G	G	G	G	A	G	G	G	G	G	G	G
1	470437	.	C	T	.	.	.	AB	C	C	T	T	T	C	C	C	C	C	C	C	T	C	C
1	471459	.	T	A	.	.	.	AB	T	T	A	A	A	A	A	A	A	A	A	A	A	A	A
1	471709	.	A	G	.	.	.	AB	A	A	A	A	A	A	G	A	A	A	A	G	A	A	A
1	471914	.	T	G	.	.	.	AB	T	T	T	T	T	T	T	T	T	T	T	T	T	G	T
1	472868	.	A	C	.	.	.	AB	A	A	A	A	A	A	A	C	A	A	A	A	A	A	A
1	472911	.	C	T	.	.	.	AB	C	C	C	C	C	T	C	C	C	C	C	C	C	T	T
1	473611	.	A	G	.	.	.	AB	A	A	A	A	A	A	G	A	A	A	A	G	A	A	A
1	474394	.	A	G	.	.	.	AB	A	A	G	G	G	G	G	A	G	G	G	G	G	G	G
1	474428	.	T	C	.	.	.	AB	T	T	C	C	C	C	C	C	C	C	C	C	C	C	C
1	474484	.	G	A	.	.	.	AB	G	G	G	G	G	G	A	G	G	G	G	A	G	G	G
1	475511	.	T	A	.	.	.	AB	T	T	T	T	T	T	A	T	T	T	T	A	T	T	T
1	476124	.	C	T	.	.	.	AB	C	C	T	C	C	C	C	C	C	C	C	C	C	C	C
1	477552	.	A	G	.	.	.	AB	A	A	G	G	G	G	A	A	A	A	A	A	G	G	G
1	477965	.	G	T	.	.	.	AB	G	G	G	G	G	G	G	G	G	T	G	G	G	G	G
1	478727	.	A	C	.	.	.	AB	A	A	A	A	A	C	A	A	A	A	A	A	A	C	C
1	479208	.	C	T	.	.	.	AB	C	C	C	C	C	C	C	C	T	C	T	C	C	C	C
1	481815	.	T	G	.	.	.	AB	T	T	T	T	T	T	T	T	G	T	G	T	T	T	T
1	482022	.	T	G	.	.	.	AB	T	T	T	G	T	T	T	T	T	T	T	T	T	T	T
1	482454	.	C	T	.	.	.	AB	C	C	C	C	C	C	C	C	T	C	T	C	C	C	C
1	483311	.	T	G	.	.	.	AB	T	T	T	T	T	T	T	T	G	T	G	T	T	T	T
1	483564	.	C	A	.	.	.	AB	C	C	C	C	C	C	C	C	A	C	A	C	C	C	C
1	483790	.	C	T	.	.	.	AB	C	C	C	T	C	C	C	C	C	C	C	C	C	C	C
1	483805	.	G	A	.	.	.	AB	G	G	A	G	G	G	G	G	G	G	G	G	G	G	G
1	483833	.	G	A	.	.	.	AB	G	G	G	G	G	G	G	G	G	G	G	G	A	G	G
1	484002	.	A	G	.	.	.	AB	A	A	G	G	G	G	G	A	G	G	G	G	G	G	G
1	484564	.	G	A,-	.	.	.	AB	G	G	A	A	A	A	G	G	A	A	-	G	A	A	A
1	484571	.	G	A,-	.	.	.	AB	G	G	G	G	G	G	G	G	A	G	-	G	G	G	G
1	485022	.	G	A	.	.	.	AB	G	G	G	G	G	G	G	G	G	A	G	G	G	G	G
1	485082	.	T	G	.	.	.	AB	T	T	T	T	T	T	T	T	T	G	T	T	T	T	T
1	485246	.	C	T	.	.	.	AB	C	C	T	T	T	C	C	C	C	C	C	C	T	C	C
1	485759	.	C	T	.	.	.	AB	C	C	C	C	C	C	T	C	C	C	C	T	C	C	C
1	485779	.	G	C	.	.	.	AB	G	G	G	G	G	C	G	G	G	G	G	G	G	C	C
1	485836	.	G	A	.	.	.	AB	G	G	G	G	G	G	G	G	A	G	A	G	G	G	G
1	485953	.	A	C	.	.	.	AB	A	A	C	C	C	C	C	C	C	C	C	C	C	C	C
1	485955	.	G	T	.	.	.	AB	G	G	G	T	T	G	G	G	G	G	G	G	T	G	G
1	485957	.	T	C	.	.	.	AB	T	T	T	T	T	T	T	T	C	T	C	T	T	T	T
1	486024	.	G	A	.	.	.	AB	G	G	G	G	G	G	G	G	G	G	G	G	A	G	G
1	486093	.	C	T	.	.	.	AB	C	C	C	C	C	C	C	C	C	T	C	C	C	C	C
1	487623	.	C	T	.	.	.	AB	C	C	T	T	T	T	T	T	T	T	T	T	T	T	T
1	488244	.	G	A	.	.	.	AB	G	G	A	G	G	G	G	G	G	G	G	G	G	G	G
1	488462	.	A	G	.	.	.	AB	A	A	G	G	G	G	A	A	G	G	G	A	G	G	G
1	489881	.	G	A	.	.	.	AB	G	G	G	G	G	G	G	G	A	G	A	G	G	G	G
1	489901	.	G	T	.	.	.	AB	G	G	T	G	G	G	G	G	G	G	G	G	G	G	G
1	493601	.	C	A	.	.	.	AB	C	C	C	C	C	C	C	C	A	C	A	C	C	C	C
1	496818	.	T	A	.	.	.	AB	T	T	T	T	T	T	T	T	T	A	T	T	T	T	T
1	497207	.	C	A	.	.	.	AB	C	C	C	C	C	C	C	C	A	C	A	C	C	C	C
1	497400	.	G	T,-	.	.	.	AB	G	G	T	T	-	T	G	G	G	G	G	G	-	T	T
1	497439	.	T	C,-	.	.	.	AB	T	T	T	T	T	T	T	T	C	T	C	T	-	T	T
1	497460	.	G	T	.	.	.	AB	G	G	G	G	G	T	G	G	G	G	G	G	G	T	T
1	497568	.	A	T	.	.	.	AB	A	A	A	A	A	A	A	A	A	A	A	A	A	T	A
1	498706	.	G	A	.	.	.	AB	G	G	G	G	G	G	A	G	G	G	G	A	G	G	G
1	499083	.	T	A	.	.	.	AB	T	T	A	A	A	A	A	T	A	A	A	A	A	A	A
1	499232	.	T	G	.	.	.	AB	T	T	G	G	G	G	G	T	G	G	G	G	G	G	G
1	499783	.	C	T	.	.	.	AB	C	C	C	T	C	C	C	C	C	C	C	C	C	C	C
1	499875	.	C	A	.	.	.	AB	C	C	C	C	C	C	C	A	C	C	C	C	C	C	C
1	500218	.	G	A	.	.	.	AB	G	G	G	G	G	G	G	G	A	G	A	G	G	G	G
1	500446	.	C	T	.	.	.	AB	C	C	C	C	T	C	C	C	C	C	C	C	C	C	C
1	501060	.	A	G	.	.	.	AB	A	A	A	A	A	A	A	A	A	G	A	A	A	A	A
1	502913	.	A	G	.	.	.	AB	A	A	G	G	G	G	G	A	G	G	G	G	G	G	G
1	503007	.	G	A	.	.	.	AB	G	G	G	G	G	G	G	G	A	G	A	G	G	G	G
1	506290	.	G	A,-	.	.	.	AB	G	G	A	A	-	A	A	A	A	A	-	A	A	A	A
1	506352	.	G	-,T	.	.	.	AB	G	G	G	G	-	T	G	G	G	G	-	G	G	T	T
1	506381	.	G	-,T	.	.	.	AB	G	G	G	G	-	G	G	G	G	T	-	G	G	G	G
1	506422	.	G	-,A	.	.	.	AB	G	G	G	G	-	G	G	A	G	G	-	G	G	G	G
1	506728	.	G	A	.	.	.	AB	G	G	G	G	A	G	G	G	G	G	G	G	G	G	G
1	507555	.	G	A	.	.	.	AB	G	G	A	G	G	G	G	G	G	G	G	G	G	G	G
1	507750	.	A	C,-	.	.	.	AB	A	A	A	A	A	A	A	A	C	A	-	A	A	A	A
1	508293	.	C	T	.	.	.	AB	C	C	C	T	C	C	C	C	C	C	C	C	C	C	C
1	508877	.	G	A	.	.	.	AB	G	G	G	G	G	G	G	G	A	G	A	G	G	G	G
1	509958	.	A	G	.	.	.	AB	A	A	G	G	G	G	G	G	G	G	G	G	G	G	G
1	510234	.	T	A	.	.	.	AB	T	T	T	T	T	T	T	T	T	A	T	T	T	T	T
1	510992	.	C	T	.	.	.	AB	C	C	T	T	T	C	C	C	C	C	C	C	T	C	C
1	511266	.	C	T	.	.	.	AB	C	C	C	C	C	C	C	T	C	C	C	C	C	C	C
1	511307	.	C	T	.	.	.	AB	C	C	C	C	C	C	C	C	T	C	T	C	C	C	C
1	511943	.	G	A	.	.	.	AB	G	G	A	A	A	A	G	G	G	G	G	G	A	A	A
1	512740	.	C	T	.	.	.	AB	C	C	C	C	C	C	C	C	T	C	T	C	C	C	C
1	516039	.	T	C	.	.	.	AB	T	T	T	T	T	T	T	C	T	T	T	T	T	T	T
1	517520	.	G	A	.	.	.	AB	G	G	G	G	G	G	A	G	G	G	G	A	G	G	G
1	517655	.	C	T	.	.	.	AB	C	C	C	C	C	C	C	C	T	C	T	C	C	C	C
1	517972	.	G	A	.	.	.	AB	G	G	G	G	G	G	G	A	G	G	G	G	G	G	G
1	518663	.	G	A	.	.	.	AB	G	G	G	G	G	G	G	G	A	G	A	G	G	G	G
1	518900	.	G	A	.	.	.	AB	G	G	G	G	G	G	A	G	G	G	G	A	G	G	G
1	519195	.	G	A	.	.	.	AB	G	G	A	A	A	G	G	G	G	G	G	G	A	G	G
1	519811	.	C	A	.	.	.	AB	C	C	C	C	C	A	C	C	C	C	C	C	C	A	A
1	520294	.	C	T	.	.	.	AB	C	C	C	C	C	C	C	C	C	C	C	C	T	C	C
1	520384	.	C	A	.	.	.	AB	C	C	C	C	C	C	C	C	A	C	A	C	C	C	C
1	523715	.	T	G	.	.	.	AB	T	T	T	T	T	T	T	T	T	G	T	T	T	T	T
1	523923	.	G	C	.	.	.	AB	G	G	C	C	C	C	G	G	G	G	G	G	C	C	C
1	523962	.	C	T	.	.	.	AB	C	C	C	T	C	C	C	C	C	C	C	C	C	C	C
1	524002	.	C	T	.	.	.	AB	C	C	C	C	C	C	C	C	T	C	T	C	C	C	C
1	524994	.	T	G	.	.	.	AB	T	T	T	T	G	T	T	T	T	T	T	T	T	T	T
1	527024	.	T	C	.	.	.	AB	T	T	C	T	T	T	T	T	T	T	T	T	T	T	T
1	527663	.	T	A	.	.	.	AB	T	T	T	T	T	T	A	T	T	T	T	A	T	T	T
1	528096	.	C	T	.	.	.	AB	C	C	C	C	C	C	C	C	C	C	C	T	C	C	C
1	528123	.	T	A	.	.	.	AB	T	T	T	T	T	A	T	T	T	T	T	T	T	A	A
1	529040	.	T	C	.	.	.	AB	T	T	C	C	C	C	C	T	C	C	C	C	C	C	C
1	530275	.	C	A	.	.	.	AB	C	C	C	C	C	C	C	A	C	C	C	C	C	C	C
1	530600	.	G	T	.	.	.	AB	G	G	G	G	G	G	G	G	T	G	T	G	G	G	G
1	531431	.	A	G	.	.	.	AB	A	A	A	A	A	A	G	A	A	A	A	G	A	A	A
1	531539	.	A	G	.	.	.	AB	A	A	G	G	G	G	A	A	G	G	G	A	G	G	G
1	531874	.	C	T	.	.	.	AB	C	C	C	C	C	C	C	C	T	C	C	C	C	C	C
1	531907	.	T	C	.	.	.	AB	T	T	C	T	T	T	T	T	T	T	T	T	T	T	T
1	531927	.	T	A,-	.	.	.	AB	T	T	T	T	T	T	T	T	A	T	-	T	T	T	T
1	532052	.	G	A	.	.	.	AB	G	G	G	G	G	G	G	G	A	G	A	G	G	G	G
1	534151	.	G	A	.	.	.	AB	G	G	G	G	G	A	G	G	G	G	G	G	G	A	A
1	535476	.	C	A	.	.	.	AB	C	C	C	C	C	C	C	C	A	C	A	C	C	C	C
1	536338	.	C	T	.	.	.	AB	C	C	C	C	C	C	C	C	T	C	T	C	C	C	C
1	537287	.	C	-,G	.	.	.	AB	C	C	C	C	-	G	C	C	C	C	C	C	C	G	G
1	537585	.	G	A	.	.	.	AB	G	G	G	A	G	G	G	G	G	G	G	G	G	G	G
1	538864	.	G	A	.	.	.	AB	G	G	G	G	G	G	G	G	A	G	A	G	G	G	G
1	538980	.	G	A	.	.	.	AB	G	G	G	G	A	G	G	G	G	G	G	G	G	G	G
1	539426	.	C	T	.	.	.	AB	C	C	C	C	C	T	C	C	C	C	C	C	C	C	T
1	539532	.	C	A	.	.	.	AB	C	C	C	C	C	C	C	C	A	C	A	C	C	C	C
1	540409	.	A	G	.	.	.	AB	A	A	G	G	G	G	G	G	G	G	G	G	G	G	G
1	542323	.	G	A	.	.	.	AB	G	G	G	G	G	G	G	G	G	G	G	G	G	A	G
1	542430	.	A	T	.	.	.	AB	A	A	A	A	A	A	A	A	T	A	T	A	A	A	A
1	543142	.	T	C	.	.	.	AB	T	T	C	C	C	C	T	T	C	C	C	T	C	C	C
1	543679	.	G	A	.	.	.	AB	G	G	G	G	G	G	G	G	G	A	G	G	G	G	G
1	545737	.	A	G	.	.	.	AB	A	A	G	G	G	G	G	A	G	G	G	G	G	G	G
1	546117	.	C	T	.	.	.	AB	C	C	C	C	C	C	C	C	C	T	C	C	C	C	C
1	546428	.	C	A	.	.	.	AB	C	C	C	C	C	A	C	C	C	C	C	C	C	A	A
1	546813	.	C	T	.	.	.	AB	C	C	C	T	C	C	C	C	C	C	C	C	C	C	C
1	547086	.	A	C	.	.	.	AB	A	A	A	A	A	A	A	A	C	A	C	A	A	A	A
1	547138	.	T	A	.	.	.	AB	T	T	T	T	T	T	T	T	T	A	T	T	T	T	T
1	547798	.	G	A	.	.	.	AB	G	G	G	G	G	G	G	A	G	G	G	G	G	G	G
1	547882	.	T	G	.	.	.	AB	T	T	G	G	G	G	G	G	G	G	G	G	G	G	G
1	548687	.	A	G	.	.	.	AB	A	A	A	A	A	A	A	A	A	A	A	G	A	A	A
1	549063	.	A	G	.	.	.	AB	A	A	A	A	A	A	A	A	G	G	G	A	A	A	A
1	549981	.	T	C	.	.	.	AB	T	T	C	C	C	C	C	T	C	C	C	C	C	C	C
1	550000	.	G	A	.	.	.	AB	G	G	A	A	A	G	G	G	G	G	G	G	A	G	G
1	550155	.	G	T	.	.	.	AB	G	G	G	G	G	G	G	G	G	G	G	T	G	G	G
1	550156	.	C	T	.	.	.	AB	C	C	C	C	C	C	C	C	T	C	T	C	C	C	C
1	550654	.	C	T	.	.	.	AB	C	C	T	T	T	T	C	C	C	C	C	C	T	T	T
1	552561	.	T	C	.	.	.	AB	T	T	C	C	C	C	T	T	T	T	T	T	C	C	C
1	554463	.	G	A	.	.	.	AB	G	G	G	G	G	G	G	G	G	A	G	G	G	G	G
1	554466	.	A	G	.	.	.	AB	A	A	A	A	A	A	A	A	G	G	G	A	A	A	A
1	554830	.	G	A	.	.	.	AB	G	G	G	G	G	G	G	G	A	G	A	G	G	G	G
1	555130	.	A	G	.	.	.	AB	A	A	G	G	G	G	G	G	G	G	G	G	G	G	G
1	556108	.	G	C	.	.	.	AB	G	G	G	G	G	G	G	G	C	G	C	G	G	G	G
1	556318	.	G	A	.	.	.	AB	G	G	A	G	G	G	G	G	G	G	G	G	G	G	G
1	557809	.	C	T	.	.	.	AB	C	C	C	C	C	C	T	C	C	C	C	C	C	C	C
1	559017	.	G	A	.	.	.	AB	G	G	G	G	G	A	G	G	G	G	G	G	G	A	A
1	559185	.	G	A	.	.	.	AB	G	G	G	G	G	G	G	G	G	G	G	G	A	G	G
1	559470	.	T	C	.	.	.	AB	T	T	T	T	T	T	T	T	T	C	T	T	T	T	T
1	559965	.	G	A	.	.	.	AB	G	G	A	A	A	A	A	A	A	A	A	A	A	A	A
1	560855	.	G	A	.	.	.	AB	G	G	G	G	G	G	G	G	G	G	G	A	G	G	G
1	561226	.	A	G	.	.	.	AB	A	A	A	A	A	G	A	A	A	A	A	A	A	G	G
1	561259	.	A	-,C	.	.	.	AB	A	-	A	A	A	C	A	A	-	A	A	-	A	C	C
1	561272	.	-	A,T	.	.	.	AB	-	-	-	-	A	T	A	A	-	A	A	-	A	T	T
1	562933	.	C	T	.	.	.	AB	C	C	C	C	C	T	C	C	C	C	C	C	C	T	T
1	562951	.	T	C	.	.	.	AB	T	T	C	C	C	C	C	T	C	C	C	C	C	C	C
1	563413	.	G	A	.	.	.	AB	G	G	G	G	G	G	G	G	A	G	A	G	G	G	G
1	564605	.	T	G	.	.	.	AB	T	T	T	T	T	T	T	T	G	T	G	T	T	T	T
1	564631	.	T	C	.	.	.	AB	T	T	C	C	C	C	C	C	C	C	C	C	C	C	C
1	565030	.	T	C	.	.	.	AB	T	T	T	T	T	T	T	T	T	C	T	T	T	T	T
1	569410	.	C	T	.	.	.	AB	C	C	C	C	C	C	C	C	C	C	C	C	C	T	C
1	569495	.	G	A	.	.	.	AB	G	G	G	G	G	G	G	G	G	G	G	A	G	G	G
1	569666	.	T	C	.	.	.	AB	T	T	T	C	T	T	T	T	T	T	T	T	T	T	T
1	569691	.	C	T	.	.	.	AB	C	C	C	C	C	C	C	C	T	C	T	C	C	C	C
1	569748	.	T	C	.	.	.	AB	T	T	T	T	T	T	T	C	T	T	T	T	T	T	T
1	569752	.	G	A	.	.	.	AB	G	G	G	G	G	G	G	A	G	G	G	G	G	G	G
1	570422	.	C	T	.	.	.	AB	C	C	C	C	C	C	C	C	T	C	T	C	C	C	C
1	571709	.	G	A	.	.	.	AB	G	G	A	A	A	A	G	G	A	A	A	G	A	A	A
1	571951	.	C	A	.	.	.	AB	C	C	C	C	C	C	A	C	C	C	C	A	C	C	C
1	571989	.	C	T	.	.	.	AB	C	C	C	C	C	C	C	C	C	T	C	C	C	C	C
1	572372	.	G	T	.	.	.	AB	G	G	T	T	T	T	T	T	T	T	T	T	T	T	T
1	572642	.	-	C,T	.	.	.	AB	-	-	-	-	C	C	-	-	-	-	-	T	-	C	C
1	572900	.	-	A,G	.	.	.	AB	-	-	-	-	-	A	-	-	-	-	-	-	-	A	G
1	573038	.	C	T	.	.	.	AB	C	C	C	T	C	C	C	C	C	C	C	C	C	C	C
1	573172	.	T	G	.	.	.	AB	T	T	T	T	T	T	T	T	G	T	G	T	T	T	T
1	573477	.	-	T,C	.	.	.	AB	-	-	-	-	-	-	-	-	-	-	T	-	C	C	C
1	573830	.	A	-,G	.	.	.	AB	A	A	A	A	-	A	G	A	A	A	A	A	A	A	A
1	574054	.	T	C	.	.	.	AB	T	T	C	C	C	C	C	C	C	C	C	C	C	C	C
1	575654	.	T	C	.	.	.	AB	T	T	T	T	T	T	T	T	T	C	T	T	T	T	T
1	577660	.	C	T	.	.	.	AB	C	C	T	T	T	T	T	T	T	T	T	T	T	T	T
1	577678	.	C	T	.	.	.	AB	C	C	C	C	C	C	C	C	T	C	T	C	C	C	C
1	578357	.	C	T	.	.	.	AB	C	C	C	T	C	C	C	C	C	C	C	C	C	C	C
1	579241	.	C	T	.	.	.	AB	C	C	C	C	C	C	C	C	T	C	T	C	C	C	C
1	580223	.	C	T	.	.	.	AB	C	C	C	C	C	C	C	C	T	C	T	C	C	C	C
1	582745	.	C	T	.	.	.	AB	C	C	C	C	C	C	C	C	C	C	C	C	T	C	C
1	583662	.	T	A	.	.	.	AB	T	T	T	T	T	T	A	T	T	T	T	A	T	T	T
1	586152	.	A	G	.	.	.	AB	A	A	G	G	G	G	G	A	G	G	G	G	G	G	G
1	586529	.	G	T	.	.	.	AB	G	G	G	G	G	G	G	G	T	G	T	G	G	G	G
1	586722	.	C	T	.	.	.	AB	C	C	C	C	C	C	C	C	T	C	T	C	C	C	C
1	588129	.	C	T	.	.	.	AB	C	C	C	C	C	C	C	C	T	C	T	C	C	C	C
1	588217	.	T	G	.	.	.	AB	T	T	G	T	T	T	T	T	T	T	T	T	T	T	T
1	588790	.	T	G	.	.	.	AB	T	T	T	T	T	T	T	T	T	G	T	T	T	T	T
1	589102	.	T	C	.	.	.	AB	T	T	T	T	T	T	T	T	C	C	C	T	T	T	T
1	589319	.	G	A	.	.	.	AB	G	G	G	G	G	G	G	G	A	G	A	G	G	G	G
1	589335	.	A	G	.	.	.	AB	A	A	A	A	A	A	A	A	G	G	G	A	A	A	A
1	589738	.	A	T	.	.	.	AB	A	A	A	A	A	A	A	A	A	T	A	A	A	A	A
1	590812	.	C	T	.	.	.	AB	C	C	C	C	T	C	C	C	C	C	C	C	C	C	C
1	591286	.	G	T	.	.	.	AB	G	G	G	G	G	G	G	G	G	T	G	G	G	G	G
1	594309	.	T	G	.	.	.	AB	T	T	G	G	G	G	G	G	G	G	G	G	G	G	G
1	595216	.	A	T,-	.	.	.	AB	A	A	T	T	T	T	A	A	T	T	-	A	T	T	T
1	595632	.	G	C,-	.	.	.	AB	G	G	G	C	-	G	G	G	G	G	G	G	G	G	G
1	595652	.	A	G,-	.	.	.	AB	A	A	G	A	-	A	A	A	A	A	A	A	A	A	A
1	595654	.	C	T,-	.	.	.	AB	C	C	T	T	-	T	C	C	C	C	C	C	T	T	T
1	595785	.	T	-,C	.	.	.	AB	T	T	T	T	-	T	T	T	T	T	-	C	-	T	T
1	597386	.	G	A	.	.	.	AB	G	G	G	G	G	A	G	G	G	G	G	G	G	A	A
1	597988	.	A	G	.	.	.	AB	A	A	A	A	A	A	A	A	G	A	G	A	A	A	A
1	598848	.	C	G	.	.	.	AB	C	C	G	G	G	G	G	G	G	G	G	G	G	G	G
1	598918	.	C	A	.	.	.	AB	C	C	C	C	C	C	C	C	A	C	A	C	C	C	C
1	598973	.	T	G	.	.	.	AB	T	T	T	T	T	T	T	T	G	T	G	T	T	T	T
1	600738	.	G	A	.	.	.	AB	G	G	A	A	A	A	A	A	A	A	A	A	A	A	A
1	600783	.	T	G	.	.	.	AB	T	T	T	T	T	T	T	T	G	T	G	T	T	T	T
1	602583	.	G	A	.	.	.	AB	G	G	A	A	A	A	G	G	G	G	G	G	A	A	A
1	602608	.	C	T	.	.	.	AB	C	C	C	C	C	C	T	C	C	C	C	T	C	C	C
1	603196	.	T	C	.	.	.	AB	T	T	T	T	T	T	T	T	T	T	T	C	T	T	T
1	605227	.	C	A	.	.	.	AB	C	C	C	C	C	C	C	C	A	C	A	C	C	C	C
1	605299	.	A	G	.	.	.	AB	A	A	A	A	A	A	A	A	G	A	G	A	A	A	A
1	605439	.	C	A	.	.	.	AB	C	C	C	C	C	C	C	C	A	C	A	C	C	C	C
1	606231	.	T	C	.	.	.	AB	T	T	T	T	T	T	T	T	T	C	T	T	T	T	T
1	606400	.	T	G	.	.	.	AB	T	T	T	T	T	T	T	G	T	T	T	T	T	T	T
1	608651	.	T	G	.	.	.	AB	T	T	T	T	T	T	T	T	G	T	G	T	T	T	T
1	609793	.	C	T	.	.	.	AB	C	C	C	C	C	C	C	C	C	T	C	C	C	C	C
1	610464	.	C	A	.	.	.	AB	C	C	A	A	A	A	C	C	C	C	C	C	A	A	A
1	610623	.	G	A	.	.	.	AB	G	G	G	G	G	G	G	G	G	A	G	G	G	G	G
1	610851	.	C	T	.	.	.	AB	C	C	C	C	C	C	T	C	C	C	C	T	C	C	C
1	611188	.	A	G	.	.	.	AB	A	A	G	G	G	G	A	A	G	G	G	A	G	G	G
1	611872	.	G	-,A	.	.	.	AB	G	G	G	G	-	A	G	G	-	G	-	G	G	A	A
1	612031	.	T	-,C	.	.	.	AB	T	T	T	T	-	T	T	T	C	T	-	T	T	T	T
1	612410	.	C	T	.	.	.	AB	C	C	C	C	C	C	C	T	C	C	C	C	C	C	C
1	612726	.	G	-,A	.	.	.	AB	G	G	G	G	-	A	G	G	G	G	-	G	G	A	A
1	612848	.	A	C,-	.	.	.	AB	A	A	C	C	C	C	C	C	C	C	-	C	C	C	C
1	613561	.	T	C	.	.	.	AB	T	T	T	T	T	T	T	T	T	C	T	T	T	T	T
1	613659	.	G	A	.	.	.	AB	G	G	G	G	G	G	G	G	G	G	G	A	G	G	G
1	613781	.	A	C	.	.	.	AB	A	A	C	C	C	C	C	C	C	C	C	C	C	C	C
1	613906	.	A	C	.	.	.	AB	A	A	A	A	A	C	A	A	A	A	A	A	A	C	C
1	613974	.	T	C	.	.	.	AB	T	T	C	C	C	C	C	T	C	C	C	C	C	C	C
1	614432	.	A	T	.	.	.	AB	A	A	A	A	A	A	A	A	A	T	A	A	A	A	A
1	615269	.	C	T	.	.	.	AB	C	C	T	C	C	C	C	C	C	C	C	C	C	C	C
1	615321	.	G	A	.	.	.	AB	G	G	G	G	G	G	G	G	A	G	A	G	G	G	G
1	615783	.	T	C	.	.	.	AB	T	T	C	C	C	C	C	C	C	C	C	C	C	C	C
1	615886	.	G	A	.	.	.	AB	G	G	G	G	G	G	G	G	A	G	A	G	G	G	G
1	618954	.	T	G	.	.	.	AB	T	T	T	T	T	T	T	T	G	T	G	T	T	T	T
1	618990	.	C	T	.	.	.	AB	C	C	C	T	C	C	C	C	C	C	C	C	C	C	C
1	619121	.	A	G	.	.	.	AB	A	A	G	G	G	G	G	G	G	G	G	G	G	G	G
1	620506	.	C	A	.	.	.	AB	C	C	A	A	A	A	A	A	A	A	A	A	A	A	A
1	621505	.	C	T	.	.	.	AB	C	C	C	C	C	C	C	C	C	C	C	T	C	C	C
1	622099	.	C	T	.	.	.	AB	C	C	C	C	C	C	C	C	T	C	T	C	C	C	C
1	622741	.	G	T	.	.	.	AB	G	G	T	T	T	T	G	G	G	G	G	G	T	T	T
1	623335	.	C	A	.	.	.	AB	C	C	C	C	C	C	C	C	C	A	C	C	C	C	C
1	623622	.	C	T	.	.	.	AB	C	C	C	C	C	C	C	T	C	C	C	C	C	C	C
1	623874	.	G	A	.	.	.	AB	G	G	G	A	G	G	G	G	G	G	G	G	G	G	G
1	625047	.	T	G	.	.	.	AB	T	T	T	T	T	T	T	T	T	G	T	T	T	T	T
1	626310	.	G	A	.	.	.	AB	G	G	A	G	G	G	G	G	G	G	G	G	G	G	G
1	626592	.	T	G	.	.	.	AB	T	T	T	T	T	T	G	T	T	T	T	T	T	T	T
1	627598	.	G	A	.	.	.	AB	G	G	G	G	G	G	G	G	A	G	A	G	G	G	G
1	631335	.	C	T	.	.	.	AB	C	C	T	T	T	T	C	C	C	C	C	C	T	T	T
1	632104	.	C	T	.	.	.	AB	C	C	C	C	C	C	C	C	C	T	C	C	C	C	C
1	632317	.	A	T	.	.	.	AB	A	A	A	A	A	A	A	A	T	A	T	A	A	A	A
1	632908	.	C	T	.	.	.	AB	C	C	T	C	C	C	C	C	C	C	C	C	C	C	C
1	633668	.	T	C	.	.	.	AB	T	T	T	T	T	T	T	T	C	T	C	T	T	T	T
1	633800	.	C	A	.	.	.	AB	C	C	C	C	C	C	C	C	A	C	A	C	C	C	C
1	634477	.	C	A	.	.	.	AB	C	C	C	C	C	C	C	C	C	C	C	C	A	C	C
1	634760	.	G	T	.	.	.	AB	G	G	G	G	G	G	G	T	G	G	G	G	G	G	G
1	634772	.	G	T	.	.	.	AB	G	G	G	G	G	G	G	G	T	G	T	G	G	G	G
1	635649	.	C	A	.	.	.	AB	C	C	A	A	A	A	C	C	C	C	C	C	A	A	A
1	635707	.	A	C	.	.	.	AB	A	A	C	C	C	C	C	A	C	C	C	C	C	C	C
1	637713	.	C	A	.	.	.	AB	C	C	C	C	C	C	C	C	A	C	A	C	C	C	C
1	638418	.	C	T	.	.	.	AB	C	C	C	T	C	C	C	C	C	C	C	C	C	C	C
1	639428	.	C	G	.	.	.	AB	C	C	C	G	C	C	C	C	C	C	C	C	C	C	C
1	639663	.	C	T	.	.	.	AB	C	C	C	C	C	C	C	C	C	T	C	C	C	C	C
1	641601	.	A	C	.	.	.	AB	A	A	A	A	A	A	A	A	C	A	C	A	A	A	A
1	642011	.	G	C	.	.	.	AB	G	G	G	C	G	G	G	G	G	G	G	G	G	G	G
1	642337	.	A	G	.	.	.	AB	A	A	G	G	G	A	A	A	A	A	A	A	G	A	A
1	644101	.	G	A	.	.	.	AB	G	G	A	A	A	A	G	G	G	G	G	G	A	A	A
1	644770	.	G	T	.	.	.	AB	G	G	G	G	G	G	T	G	G	G	G	T	G	G	G
1	644913	.	C	T	.	.	.	AB	C	C	T	T	T	T	C	C	C	C	C	C	T	T	T
1	646569	.	G	A	.	.	.	AB	G	G	G	G	G	G	A	G	G	G	G	A	G	G	G
1	649480	.	T	C	.	.	.	AB	T	T	T	T	T	T	T	T	T	T	T	T	T	C	T
1	649659	.	T	C	.	.	.	AB	T	T	T	T	T	T	T	T	C	T	C	T	T	T	T
1	649668	.	T	G	.	.	.	AB	T	T	G	G	G	G	G	T	G	G	G	G	G	G	G
1	650009	.	C	T	.	.	.	AB	C	C	C	C	C	C	T	C	C	C	C	T	C	C	C
1	652389	.	A	T	.	.	.	AB	A	A	A	A	A	A	A	A	T	A	T	A	A	A	A
1	653031	.	T	C	.	.	.	AB	T	T	C	C	C	C	T	T	C	C	C	T	C	C	C
1	653774	.	G	T	.	.	.	AB	G	G	T	T	T	T	T	T	T	T	T	T	T	T	T
1	654968	.	T	G	.	.	.	AB	T	T	T	T	T	T	T	G	T	T	T	T	T	T	T
1	656155	.	T	G	.	.	.	AB	T	T	T	T	T	T	T	T	T	G	T	T	T	T	T
1	657614	.	G	A	.	.	.	AB	G	G	G	G	G	G	G	G	A	G	A	G	G	G	G
1	657820	.	G	T	.	.	.	AB	G	G	G	G	G	G	G	G	G	T	G	G	G	G	G
1	658193	.	C	T	.	.	.	AB	C	C	C	C	C	C	C	C	T	C	T	C	C	C	C
1	658970	.	T	C	.	.	.	AB	T	T	T	T	T	T	T	T	C	T	C	T	T	T	T
1	658975	.	A	G	.	.	.	AB	A	A	G	A	A	A	A	A	A	A	A	A	A	A	A
1	660468	.	C	A	.	.	.	AB	C	C	C	C	C	C	C	C	A	C	A	C	C	C	C
1	660524	.	G	A	.	.	.	AB	G	G	G	G	G	G	G	G	G	A	G	G	G	G	G
1	660547	.	G	A	.	.	.	AB	G	G	G	G	G	G	A	G	G	G	G	G	G	G	G
1	660863	.	C	T	.	.	.	AB	C	C	C	C	C	C	C	C	T	C	T	C	C	C	C
1	660999	.	C	T	.	.	.	AB	C	C	C	C	C	C	C	C	T	C	T	C	C	C	C
1	661455	.	A	C	.	.	.	AB	A	A	A	A	A	A	A	A	A	A	A	C	A	A	A
1	663798	.	G	T	.	.	.	AB	G	G	G	G	G	G	T	G	G	G	G	G	G	G	G
1	664195	.	G	A	.	.	.	AB	G	G	G	G	G	G	G	G	A	G	A	G	G	G	G
1	665110	.	G	C	.	.	.	AB	G	G	C	C	C	C	G	G	C	C	C	G	C	C	C
1	665946	.	G	A	.	.	.	AB	G	G	G	G	G	G	G	G	A	G	A	G	G	G	G
1	666854	.	G	A	.	.	.	AB	G	G	A	A	A	A	A	A	A	A	A	A	A	A	A
1	666857	.	C	G	.	.	.	AB	C	C	C	C	C	C	C	C	G	C	G	C	C	C	C
1	668427	.	T	G	.	.	.	AB	T	T	T	T	T	T	T	T	G	T	G	T	T	T	T
1	669330	.	G	A	.	.	.	AB	G	G	G	G	G	A	G	G	G	G	G	G	G	G	A
1	669751	.	T	C	.	.	.	AB	T	T	C	C	C	C	C	C	C	C	C	C	C	C	C
1	670594	.	C	A	.	.	.	AB	C	C	A	A	A	C	C	C	C	C	C	C	A	C	C
1	670919	.	T	C	.	.	.	AB	T	T	C	C	C	C	C	C	C	C	C	C	C	C	C
1	670954	.	C	T	.	.	.	AB	C	C	C	C	C	C	T	C	C	C	C	T	C	C	C
1	674033	.	C	T	.	.	.	AB	C	C	C	C	C	C	C	C	T	C	T	C	C	C	C
1	674190	.	T	G	.	.	.	AB	T	T	T	T	T	T	T	G	T	T	T	T	T	T	T
1	674305	.	C	G	.	.	.	AB	C	C	G	G	G	G	C	C	C	C	C	C	G	G	G
1	675340	.	C	T	.	.	.	AB	C	C	C	C	C	C	C	C	T	C	T	C	C	C	C
1	676368	.	G	A	.	.	.	AB	G	G	G	G	G	G	G	G	G	G	G	G	A	G	G
1	677753	.	G	A	.	.	.	AB	G	G	G	G	G	G	A	G	G	G	G	A	G	G	G
1	677980	.	G	A	.	.	.	AB	G	G	A	G	G	G	G	G	G	G	G	G	G	G	G
1	677981	.	T	G	.	.	.	AB	T	T	T	T	T	T	T	T	T	G	T	T	T	T	T
1	678422	.	C	T	.	.	.	AB	C	C	C	C	C	C	C	C	C	C	C	T	C	C	C
1	678809	.	A	G	.	.	.	AB	A	A	G	G	G	G	G	G	G	G	G	G	G	G	G
1	679527	.	G	A	.	.	.	AB	G	G	G	G	G	G	G	G	G	A	G	G	G	G	G
1	679653	.	A	G	.	.	.	AB	A	A	A	A	A	A	A	A	G	G	G	A	A	A	A
1	680620	.	C	T	.	.	.	AB	C	C	C	T	C	C	C	C	C	C	C	C	C	C	C
1	681652	.	C	A	.	.	.	AB	C	C	C	C	C	C	C	C	C	A	C	C	C	C	C
1	681959	.	T	C	.	.	.	AB	T	T	T	T	T	T	T	T	C	T	C	T	T	T	T
1	681970	.	G	A	.	.	.	AB	G	G	G	G	G	G	G	G	A	G	A	G	G	G	G
1	682546	.	A	T	.	.	.	AB	A	A	A	A	A	A	A	A	A	A	A	A	A	T	A
1	683177	.	G	T	.	.	.	AB	G	G	G	G	G	T	G	G	G	G	G	G	G	T	T
1	683886	.	C	T	.	.	.	AB	C	C	C	C	C	C	C	C	T	C	T	C	C	C	C
1	684313	.	C	T	.	.	.	AB	C	C	C	C	C	C	C	T	C	C	C	C	C	C	C
1	685213	.	G	A	.	.	.	AB	G	G	G	G	G	G	G	A	G	G	G	G	G	G	G
1	685406	.	C	T	.	.	.	AB	C	C	C	C	C	C	C	C	T	C	T	C	C	C	C
1	686003	.	G	A	.	.	.	AB	G	G	G	G	G	A	G	G	G	G	G	G	G	A	A
1	686104	.	C	G	.	.	.	AB	C	C	C	C	C	G	C	C	C	C	C	C	C	G	G
1	686561	.	C	T	.	.	.	AB	C	C	C	C	C	C	T	C	C	C	C	C	C	C	C
1	687373	.	G	A	.	.	.	AB	G	G	G	G	G	G	G	G	A	G	A	G	G	G	G
1	687410	.	G	A	.	.	.	AB	G	G	G	G	G	A	G	G	G	G	G	G	G	A	A
1	687536	.	C	A	.	.	.	AB	C	C	C	C	C	C	C	C	A	C	A	C	C	C	C
1	687596	.	G	A	.	.	.	AB	G	G	G	G	G	G	G	A	G	G	G	G	G	G	G
1	688277	.	A	C	.	.	.	AB	A	A	A	A	A	A	A	A	C	A	C	A	A	A	A
1	688399	.	C	T	.	.	.	AB	C	C	T	C	C	C	C	C	C	C	C	C	C	C	C
1	688812	.	A	G	.	.	.	AB	A	A	G	A	A	A	A	A	A	A	A	A	A	A	A
1	689159	.	T	C	.	.	.	AB	T	T	C	C	C	C	C	C	C	C	C	C	C	C	C
1	689970	.	T	C	.	.	.	AB	T	T	C	C	C	C	C	C	C	C	C	C	C	C	C
1	690408	.	G	A	.	.	.	AB	G	G	G	G	G	A	G	G	G	G	G	G	G	A	A
1	690611	.	C	T	.	.	.	AB	C	C	C	C	C	C	C	C	C	C	C	C	C	C	T
1	691294	.	T	C	.	.	.	AB	T	T	T	T	C	T	T	T	T	T	T	T	T	T	T
1	691401	.	C	T	.	.	.	AB	C	C	C	C	T	C	C	C	C	C	C	C	T	C	C
1	691761	.	C	T	.	.	.	AB	C	C	C	C	C	C	C	C	T	C	T	C	C	C	C
1	692641	.	T	G	.	.	.	AB	T	T	T	T	T	T	T	T	T	T	G	T	T	T	T
1	693295	.	C	T	.	.	.	AB	C	C	C	C	C	C	T	C	C	C	C	T	C	C	C
1	694775	.	C	T	.	.	.	AB	C	C	C	C	C	C	C	C	C	T	C	C	C	C	C
1	697887	.	T	C	.	.	.	AB	T	T	T	T	T	T	T	T	T	C	T	T	T	T	T
1	698300	.	A	T	.	.	.	AB	A	A	A	A	A	A	A	A	T	A	T	A	A	A	A
1	698327	.	A	G	.	.	.	AB	A	A	A	A	A	A	A	A	G	G	G	A	A	A	A
1	701549	.	C	T	.	.	.	AB	C	C	C	C	C	C	C	C	T	C	T	C	C	C	C
1	704676	.	C	T	.	.	.	AB	C	C	C	C	C	C	C	T	C	C	C	C	C	C	C
1	705171	.	C	T	.	.	.	AB	C	C	C	C	C	C	T	C	C	C	C	T	C	C	C
1	705263	.	A	C	.	.	.	AB	A	A	A	A	A	C	A	A	A	A	A	A	A	C	C
1	707477	.	C	T	.	.	.	AB	C	C	C	C	C	C	T	C	C	C	C	T	C	C	C
1	707817	.	C	T	.	.	.	AB	C	C	C	C	C	C	C	T	C	C	C	C	C	C	C
1	708965	.	C	T	.	.	.	AB	C	C	C	C	C	C	C	C	T	C	T	C	C	C	C
1	709632	.	C	T	.	.	.	AB	C	C	C	C	C	T	C	C	C	C	C	C	C	T	T
1	710706	.	C	T	.	.	.	AB	C	C	C	C	C	C	C	C	T	C	T	C	C	C	C
1	710977	.	G	A	.	.	.	AB	G	G	G	G	G	A	G	G	G	G	G	G	G	A	A
1	712612	.	T	G	.	.	.	AB	T	T	T	T	T	T	T	T	T	G	T	T	T	T	T
1	713026	.	T	G	.	.	.	AB	T	T	T	T	T	T	G	T	T	T	T	T	T	T	T
1	713766	.	C	T	.	.	.	AB	C	C	T	C	C	C	C	C	C	C	C	C	C	C	C
1	713997	.	C	A	.	.	.	AB	C	C	C	C	C	C	C	C	A	C	C	C	C	C	C
1	714973	.	C	T	.	.	.	AB	C	C	C	C	C	C	C	C	C	C	C	C	T	C	C
1	715370	.	C	T	.	.	.	AB	C	C	T	T	T	C	C	C	C	C	C	C	T	C	C
1	715745	.	T	G	.	.	.	AB	T	T	T	T	T	T	T	T	T	G	T	T	T	T	T
1	719734	.	C	T	.	.	.	AB	C	C	T	T	T	C	C	C	C	C	C	C	T	C	C
1	719989	.	A	T	.	.	.	AB	A	A	A	A	A	A	A	A	T	A	T	A	A	A	A
1	721973	.	C	T	.	.	.	AB	C	C	C	C	C	C	C	C	T	C	T	C	C	C	C
1	723157	.	G	A	.	.	.	AB	G	G	A	A	A	A	A	A	A	A	A	A	A	A	A
1	723869	.	C	T	.	.	.	AB	C	C	C	T	C	C	C	C	C	C	C	C	C	C	C
1	724890	.	A	G	.	.	.	AB	A	A	G	G	G	G	G	A	G	G	G	G	G	G	G
1	724929	.	A	G	.	.	.	AB	A	A	A	A	A	A	A	A	A	A	A	G	A	A	A
1	725151	.	G	A	.	.	.	AB	G	G	G	G	G	G	G	G	A	G	A	G	G	G	G
1	726867	.	C	T	.	.	.	AB	C	C	C	C	C	C	C	C	C	T	C	C	C	C	C
1	726930	.	G	T	.	.	.	AB	G	G	G	G	G	G	G	G	T	G	T	G	G	G	G
1	726938	.	C	T	.	.	.	AB	C	C	T	T	T	T	T	T	T	T	T	T	T	T	T
1	727032	.	T	C	.	.	.	AB	T	T	C	C	C	C	C	C	C	C	C	C	C	C	C
1	728053	.	A	G	.	.	.	AB	A	A	A	A	A	A	A	A	A	G	A	A	A	A	A
1	728788	.	T	G	.	.	.	AB	T	T	G	G	G	G	G	G	G	G	G	G	G	G	G
1	729583	.	G	A	.	.	.	AB	G	G	G	G	G	G	A	G	G	G	G	A	G	G	G
1	729913	.	G	A	.	.	.	AB	G	G	G	G	G	G	G	G	G	A	G	G	G	G	G
1	730566	.	C	T	.	.	.	AB	C	C	C	C	C	C	T	C	C	C	C	T	C	C	C
1	730776	.	G	A	.	.	.	AB	G	G	G	G	G	G	G	G	A	G	A	G	G	G	G
1	731219	.	G	T	.	.	.	AB	G	G	G	G	G	T	G	G	G	G	G	G	G	T	T
1	731329	.	A	G	.	.	.	AB	A	A	A	A	A	A	A	A	A	A	A	A	A	A	G
1	732275	.	G	A	.	.	.	AB	G	G	G	G	G	G	G	G	A	G	A	G	G	G	G
1	732941	.	A	G	.	.	.	AB	A	A	A	A	A	A	A	A	A	A	A	G	A	A	A
1	733335	.	C	T	.	.	.	AB	C	C	C	C	C	C	C	C	C	T	C	C	C	C	C
1	734642	.	T	C	.	.	.	AB	T	T	T	T	T	T	T	T	C	T	C	T	T	T	T
1	735016	.	T	C	.	.	.	AB	T	T	T	T	T	T	T	T	T	C	T	T	T	T	T
1	736137	.	C	T	.	.	.	AB	C	C	C	C	C	C	C	C	T	C	T	C	C	C	C
1	737158	.	T	C	.	.	.	AB	T	T	C	C	C	C	T	T	C	C	C	T	C	C	C
1	737672	.	A	G	.	.	.	AB	A	A	A	A	A	A	A	A	A	A	A	A	G	A	A
1	738321	.	C	T	.	.	.	AB	C	C	C	T	C	C	C	C	C	C	C	C	C	C	C
1	738814	.	A	C	.	.	.	AB	A	A	A	A	C	A	A	A	A	A	A	A	A	A	A
1	740461	.	T	C	.	.	.	AB	T	T	C	C	C	C	C	C	C	C	C	C	C	C	C
1	740948	.	C	G	.	.	.	AB	C	C	C	C	C	C	C	C	G	C	G	C	C	C	C
1	742876	.	C	T	.	.	.	AB	C	C	T	T	T	T	T	C	T	T	T	T	T	T	T
1	743375	.	T	A	.	.	.	AB	T	T	A	A	A	T	T	T	T	T	T	T	A	T	T
1	743512	.	G	A	.	.	.	AB	G	G	G	G	G	G	G	G	A	G	A	G	G	G	G
1	744988	.	A	G	.	.	.	AB	A	A	A	A	A	A	A	A	A	A	A	A	A	G	A
1	746000	.	C	T	.	.	.	AB	C	C	C	C	C	C	C	C	T	C	T	C	C	C	C
1	746060	.	C	T	.	.	.	AB	C	C	C	C	C	C	C	C	T	C	T	C	C	C	C
1	746284	.	C	T	.	.	.	AB	C	C	C	C	C	C	C	C	C	T	C	C	C	C	C
1	746522	.	T	C	.	.	.	AB	T	T	T	T	T	T	C	T	T	T	T	C	T	T	T
1	746983	.	A	T	.	.	.	AB	A	A	A	A	A	A	T	A	A	A	A	T	A	A	A
1	747597	.	G	C	.	.	.	AB	G	G	G	G	G	G	G	G	C	G	C	G	G	G	G
1	747621	.	C	A	.	.	.	AB	C	C	C	C	C	C	C	C	C	A	C	C	C	C	C
1	747674	.	T	G	.	.	.	AB	T	T	T	T	T	T	G	T	T	T	T	G	T	T	T
1	748435	.	G	A	.	.	.	AB	G	G	G	G	G	G	G	G	A	G	A	G	G	G	G
1	748560	.	C	G	.	.	.	AB	C	C	G	G	G	G	C	C	C	C	C	C	G	G	G
1	749156	.	C	A	.	.	.	AB	C	C	C	C	C	C	C	A	C	C	C	C	C	C	C
1	749526	.	C	T	.	.	.	AB	C	C	T	T	T	T	T	T	T	T	T	T	T	T	T
1	749890	.	A	T,-	.	.	.	AB	A	A	T	T	-	T	T	T	T	T	-	T	T	T	T
1	749891	.	A	T,-	.	.	.	AB	A	A	T	T	-	T	T	T	T	T	-	T	T	T	T
1	751046	.	G	A	.	.	.	AB	G	G	A	G	G	G	G	G	G	G	G	G	G	G	G
1	751386	.	G	A	.	.	.	AB	G	G	A	A	A	G	G	G	G	G	G	G	A	G	G
1	751988	.	C	T	.	.	.	AB	C	C	C	C	C	C	C	C	C	T	C	C	C	C	C
1	753604	.	C	T	.	.	.	AB	C	C	C	T	C	C	C	C	C	C	C	C	C	C	C
1	753727	.	C	T	.	.	.	AB	C	C	T	T	T	T	C	C	C	C	C	C	T	T	T
1	754152	.	T	G	.	.	.	AB	T	T	T	T	T	T	T	T	G	T	G	T	T	T	T
1	754601	.	A	C	.	.	.	AB	A	A	C	C	C	C	C	A	C	C	C	C	C	C	C
1	754782	.	C	T	.	.	.	AB	C	C	C	C	C	C	C	C	T	C	T	C	C	C	C
1	754898	.	G	A	.	.	.	AB	G	G	G	G	A	G	G	G	G	G	G	G	A	G	G
1	755366	.	G	A	.	.	.	AB	G	G	G	G	G	A	G	G	G	G	G	G	G	G	A
1	756040	.	G	T	.	.	.	AB	G	G	G	G	G	T	G	G	G	G	G	G	G	T	T
1	756857	.	T	G	.	.	.	AB	T	T	T	T	T	T	T	T	G	T	G	T	T	T	T
1	758394	.	T	C	.	.	.	AB	T	T	T	T	T	C	T	T	T	T	T	T	T	C	C
1	758587	.	C	T	.	.	.	AB	C	C	C	C	C	C	C	C	T	C	T	C	C	C	C
1	759931	.	C	T	.	.	.	AB	C	C	C	C	C	C	C	C	T	C	T	C	C	C	C
1	763677	.	T	C	.	.	.	AB	T	T	C	C	C	C	C	C	C	C	C	C	C	C	C
1	765032	.	C	T	.	.	.	AB	C	C	C	C	C	T	C	C	C	C	C	C	C	T	T
1	765166	.	C	T	.	.	.	AB	C	C	C	C	C	C	C	C	T	C	T	C	C	C	C
1	765368	.	C	T	.	.	.	AB	C	C	T	T	T	T	T	T	T	T	T	T	T	T	T
1	767310	.	C	T	.	.	.	AB	C	C	C	C	C	C	C	C	C	C	C	T	C	C	C
1	769424	.	N	A,G,-	.	.	.	AB	N	N	A	G	G	G	N	N	-	G	-	N	G	G	G
1	770110	.	N	T,A	.	.	.	AB	N	N	T	T	T	T	N	N	N	A	N	N	T	T	T
1	770938	.	N	-,A,G	.	.	.	AB	N	N	-	-	-	A	N	N	N	G	N	N	-	A	A
1	770939	.	N	-,G,A	.	.	.	AB	N	N	-	-	-	G	N	N	N	A	N	N	-	G	G
1	771794	.	N	G,C	.	.	.	AB	N	N	G	G	G	G	N	N	N	C	N	N	G	G	G
1	773288	.	N	T,G	.	.	.	AB	N	N	T	G	G	G	N	N	N	G	N	N	G	G	G
1	774531	.	N	C,A	.	.	.	AB	N	N	C	A	A	A	N	N	N	A	N	N	A	A	A
1	774920	.	N	A,T	.	.	.	AB	N	N	A	A	A	A	N	N	N	T	N	N	A	A	A
1	775062	.	N	G,A	.	.	.	AB	N	N	G	G	G	G	N	N	N	G	N	N	G	A	G
1	775463	.	N	T,C	.	.	.	AB	N	N	T	C	C	C	N	N	N	C	N	N	C	C	C
1	777744	.	N	A,T	.	.	.	AB	N	N	A	T	A	A	N	N	N	A	N	N	A	A	A
1	778154	.	N	A,G	.	.	.	AB	N	N	A	A	A	A	N	N	N	G	N	N	A	A	A
1	781424	.	N	-,T,G	.	.	.	AB	N	N	-	T	-	T	N	N	T	T	T	N	G	T	T
1	781436	.	N	-,C,A	.	.	.	AB	N	N	-	C	-	C	N	N	C	C	C	N	A	C	C
1	781442	.	N	-,G,A	.	.	.	AB	N	N	-	G	-	G	N	N	G	-	G	N	A	G	G
1	781448	.	N	-,G,A	.	.	.	AB	N	N	-	G	-	G	N	N	G	G	G	N	A	G	G
1	782854	.	N	T,-,A	.	.	.	AB	N	N	T	T	T	T	N	N	-	T	A	N	T	T	T
1	783701	.	N	G,A	.	.	.	AB	N	N	G	G	G	G	N	N	G	G	G	N	G	A	G
1	784542	.	A	G	.	.	.	AB	A	A	G	G	G	G	G	A	G	G	G	G	G	G	G
1	784570	.	C	A	.	.	.	AB	C	C	A	A	A	A	A	C	A	A	A	A	A	A	A
1	784592	.	G	C	.	.	.	AB	G	G	C	C	C	C	C	G	C	C	C	C	C	C	C
1	784626	.	G	A	.	.	.	AB	G	G	G	G	G	G	G	G	A	G	A	G	G	G	G
1	784987	.	T	C	.	.	.	AB	T	T	T	T	T	T	T	C	T	T	T	T	T	T	T
1	785375	.	T	C,-	.	.	.	AB	T	T	C	C	C	T	T	T	-	T	-	T	C	T	T
1	786559	.	C	A,-	.	.	.	AB	C	C	A	A	A	A	C	C	-	C	-	C	A	A	A
1	786570	.	G	A,-	.	.	.	AB	G	G	G	G	G	G	A	G	-	G	-	A	G	G	G
1	787809	.	G	-,A	.	.	.	AB	G	G	G	G	G	G	G	G	-	A	-	G	G	G	G
1	788461	.	T	G,-	.	.	.	AB	T	T	T	T	T	G	T	T	-	T	-	T	T	G	G
1	789146	.	C	T,-	.	.	.	AB	C	C	T	C	C	C	C	C	-	C	-	C	C	C	C
1	789417	.	C	A,-	.	.	.	AB	C	C	C	C	C	A	C	C	-	C	-	C	C	A	A
1	790703	.	A	-,C	.	.	.	AB	A	A	A	A	A	A	A	A	-	C	-	A	A	A	A
1	791956	.	G	A	.	.	.	AB	G	G	G	G	G	G	A	G	G	G	G	A	G	G	G
1	792970	.	C	T	.	.	.	AB	C	C	C	C	C	C	C	C	T	C	T	C	C	C	C
1	793051	.	G	A	.	.	.	AB	G	G	A	A	A	A	G	G	G	G	G	G	A	A	A
1	793067	.	G	A	.	.	.	AB	G	G	G	G	G	G	G	G	G	A	G	G	G	G	G
1	796255	.	G	A	.	.	.	AB	G	G	G	G	G	G	G	G	G	A	G	G	G	G	G
1	796276	.	C	A	.	.	.	AB	C	C	C	C	C	C	C	C	C	A	C	C	C	C	C
1	796729	.	T	G	.	.	.	AB	T	T	G	G	G	G	G	G	G	G	G	G	G	G	G
1	796926	.	G	A	.	.	.	AB	G	G	G	G	G	G	G	G	A	G	A	G	G	G	G
1	796935	.	C	G	.	.	.	AB	C	C	G	C	C	C	C	C	C	C	C	C	C	C	C
1	797460	.	A	G	.	.	.	AB	A	A	G	G	G	G	G	G	G	G	G	G	G	G	G
1	797963	.	C	T	.	.	.	AB	C	C	C	C	C	C	T	C	C	C	C	T	C	C	C
1	798063	.	C	T	.	.	.	AB	C	C	C	C	C	C	T	C	C	C	C	C	C	C	C
1	798552	.	G	T	.	.	.	AB	G	G	T	T	T	T	T	G	T	T	T	T	T	T	T
1	799162	.	G	A	.	.	.	AB	G	G	G	G	G	G	A	G	G	G	G	A	G	G	G
1	800237	.	G	A	.	.	.	AB	G	G	G	G	G	G	G	G	G	A	G	G	G	G	G
1	802510	.	G	T	.	.	.	AB	G	G	G	G	G	G	G	G	G	T	G	G	G	G	G
1	802567	.	G	A	.	.	.	AB	G	G	A	G	G	G	G	G	G	G	G	G	G	G	G
1	802895	.	G	A,-	.	.	.	AB	G	G	G	G	G	G	G	G	G	A	-	G	G	G	G
1	803079	.	G	A	.	.	.	AB	G	G	G	G	G	G	G	G	G	A	G	G	G	G	G
1	803220	.	G	A	.	.	.	AB	G	G	G	A	A	G	G	G	G	G	G	G	A	G	G
1	804225	.	T	A	.	.	.	AB	T	T	T	T	T	T	T	T	A	T	A	T	T	T	T
1	804247	.	G	A	.	.	.	AB	G	G	G	G	G	G	A	G	G	G	G	A	G	G	G
1	804998	.	A	C	.	.	.	AB	A	A	A	A	A	A	C	A	A	A	A	C	A	A	A
1	805105	.	A	C	.	.	.	AB	A	A	A	A	A	A	A	A	A	C	A	A	A	A	A
1	805162	.	G	A	.	.	.	AB	G	G	G	G	G	G	G	G	G	G	G	A	G	G	G
1	805180	.	A	T	.	.	.	AB	A	A	A	A	A	A	A	T	A	A	A	A	A	A	A
1	805200	.	G	A	.	.	.	AB	G	G	G	G	G	G	G	G	G	A	G	G	G	G	G
1	805481	.	G	A	.	.	.	AB	G	G	G	G	G	A	G	G	G	G	G	G	G	A	A
1	807876	.	G	T	.	.	.	AB	G	G	G	G	G	G	G	G	T	G	T	G	G	G	G
1	808146	.	G	A	.	.	.	AB	G	G	A	G	G	G	G	G	G	G	G	G	G	G	G
1	809867	.	G	A,-	.	.	.	AB	G	G	G	G	G	G	A	G	-	G	-	G	G	G	G
1	811479	.	C	A	.	.	.	AB	C	C	A	A	A	A	A	A	A	A	A	A	A	A	A
1	811549	.	C	T	.	.	.	AB	C	C	C	C	C	C	C	C	T	C	T	C	C	C	C
1	811792	.	C	T	.	.	.	AB	C	C	T	T	T	T	T	T	T	T	T	T	T	T	T
1	811804	.	C	T,-	.	.	.	AB	C	C	T	T	-	T	C	C	T	T	-	C	T	T	T
1	812453	.	T	C	.	.	.	AB	T	T	C	C	C	C	C	C	C	C	C	C	C	C	C
1	813446	.	G	A	.	.	.	AB	G	G	G	G	G	G	G	G	A	G	A	G	G	G	G
1	815252	.	C	T	.	.	.	AB	C	C	T	C	C	C	C	C	C	C	C	C	C	C	C
1	815518	.	A	G	.	.	.	AB	A	A	A	A	A	A	A	A	G	A	G	A	A	A	A
1	815610	.	T	A	.	.	.	AB	T	T	A	A	A	T	T	T	T	T	T	T	A	T	T
1	816627	.	C	T	.	.	.	AB	C	C	C	C	C	C	C	T	C	C	C	C	C	C	C
1	816840	.	G	T	.	.	.	AB	G	G	G	G	G	G	G	T	G	G	G	G	G	G	G
1	817088	.	G	T	.	.	.	AB	G	G	G	G	G	G	G	G	T	G	T	G	G	G	G
1	817446	.	G	A	.	.	.	AB	G	G	A	A	A	A	G	G	G	G	G	G	A	A	A
1	817985	.	G	T	.	.	.	AB	G	G	G	G	G	T	G	G	G	G	G	G	G	G	T
1	818649	.	C	A	.	.	.	AB	C	C	C	C	C	A	C	C	C	C	C	C	C	A	A
1	819830	.	G	T	.	.	.	AB	G	G	G	G	G	G	G	G	T	G	T	G	G	G	G
1	819976	.	C	T	.	.	.	AB	C	C	C	C	C	C	C	C	C	T	C	C	C	C	C
1	820251	.	T	G	.	.	.	AB	T	T	G	G	G	G	T	T	G	G	G	T	G	G	G
1	820901	.	G	A	.	.	.	AB	G	G	G	G	G	G	A	G	G	G	G	G	G	G	G
1	821110	.	C	A	.	.	.	AB	C	C	A	A	A	A	C	C	C	C	C	C	A	A	A
1	821289	.	C	T	.	.	.	AB	C	C	C	T	C	C	C	C	C	C	C	C	C	C	C
1	822250	.	G	A	.	.	.	AB	G	G	G	G	G	G	G	G	A	G	A	G	G	G	G
1	822614	.	C	T	.	.	.	AB	C	C	T	C	C	C	C	C	C	C	C	C	C	C	C
1	822872	.	C	T	.	.	.	AB	C	C	C	C	C	C	C	C	C	T	C	C	C	C	C
1	823756	.	G	A	.	.	.	AB	G	G	G	G	G	G	G	G	G	A	G	G	G	G	G
1	824349	.	T	C	.	.	.	AB	T	T	T	C	T	T	T	T	T	T	T	T	T	T	T
1	825262	.	T	G	.	.	.	AB	T	T	T	T	T	T	T	T	T	T	T	T	T	G	T
1	825661	.	A	C	.	.	.	AB	A	A	A	A	A	A	A	A	A	C	A	A	A	A	A
1	828744	.	A	G	.	.	.	AB	A	A	G	A	A	A	A	A	A	A	A	A	A	A	A
1	828884	.	T	C,-	.	.	.	AB	T	T	T	T	T	T	T	C	T	T	-	T	-	T	T
1	829515	.	T	G	.	.	.	AB	T	T	G	G	G	G	G	G	G	G	G	G	G	G	G
1	829606	.	G	A	.	.	.	AB	G	G	G	A	A	G	G	G	G	G	G	G	A	G	G
1	829636	.	G	T	.	.	.	AB	G	G	G	G	G	G	G	G	T	G	T	G	G	G	G
1	830335	.	C	T	.	.	.	AB	C	C	C	C	C	C	C	C	T	C	T	C	C	C	C
1	830637	.	T	G	.	.	.	AB	T	T	T	T	T	T	T	T	G	T	G	T	T	T	T
1	830653	.	A	C	.	.	.	AB	A	A	A	A	A	A	A	A	A	C	A	A	A	A	A
1	831520	.	G	T	.	.	.	AB	G	G	T	T	T	G	G	G	G	G	G	G	T	G	G
1	831717	.	G	T	.	.	.	AB	G	G	G	G	G	G	G	G	G	T	G	G	G	G	G
1	831794	.	C	G	.	.	.	AB	C	C	G	G	G	G	G	G	G	G	G	G	G	G	G
1	832051	.	A	T	.	.	.	AB	A	A	A	A	A	A	A	A	T	A	T	A	A	A	A
1	832382	.	G	A	.	.	.	AB	G	G	G	G	G	G	G	G	A	G	A	G	G	G	G
1	832537	.	C	T	.	.	.	AB	C	C	C	C	C	C	T	C	C	C	C	C	C	C	C
1	833175	.	T	G	.	.	.	AB	T	T	T	T	T	T	G	T	T	T	T	T	T	T	T
1	833584	.	C	A	.	.	.	AB	C	C	C	C	C	C	C	C	A	C	A	C	C	C	C
1	833658	.	A	C	.	.	.	AB	A	A	A	A	A	A	A	A	C	A	C	A	A	A	A
1	834488	.	T	C	.	.	.	AB	T	T	T	T	T	T	T	T	C	C	C	T	T	T	T
1	835751	.	C	G	.	.	.	AB	C	C	C	C	C	C	G	C	C	C	C	C	C	C	C
1	835799	.	C	T	.	.	.	AB	C	C	T	C	C	C	C	C	C	C	C	C	C	C	C
1	836515	.	G	T	.	.	.	AB	G	G	G	G	G	G	G	G	G	G	G	T	G	G	G
1	836643	.	C	T	.	.	.	AB	C	C	T	T	T	T	T	T	T	T	T	T	T	T	T
1	837160	.	A	C	.	.	.	AB	A	A	A	A	A	A	A	A	C	A	C	A	A	A	A
1	837322	.	T	C	.	.	.	AB	T	T	C	C	C	C	C	C	C	C	C	C	C	C	C
1	838094	.	A	C	.	.	.	AB	A	A	A	A	A	A	A	A	C	A	C	A	A	A	A
1	839081	.	G	A	.	.	.	AB	G	G	G	G	G	G	G	A	G	G	G	G	G	G	G
1	839497	.	A	T,-	.	.	.	AB	A	A	A	A	A	T	A	-	A	A	A	A	A	T	T
1	840204	.	G	A	.	.	.	AB	G	G	G	G	G	G	G	A	G	G	G	G	G	G	G
1	840811	.	G	A	.	.	.	AB	G	G	G	G	G	G	A	G	G	G	G	G	G	G	G
1	841024	.	G	A	.	.	.	AB	G	G	A	G	G	G	G	G	G	G	G	G	G	G	G
1	841039	.	A	G	.	.	.	AB	A	A	A	A	A	A	A	G	A	A	A	A	A	A	A
1	841908	.	C	A	.	.	.	AB	C	C	C	C	C	C	C	C	A	C	A	C	C	C	C
1	842772	.	C	T	.	.	.	AB	C	C	C	C	C	C	T	C	C	C	C	T	C	C	C
1	842890	.	G	A,-	.	.	.	AB	G	G	G	A	G	G	G	G	-	G	-	G	G	G	G
1	843890	.	-	C,T	.	.	.	AB	-	-	C	C	C	C	T	C	-	C	-	T	C	C	C
1	844687	.	G	-,A	.	.	.	AB	G	G	G	G	G	G	G	G	-	A	-	G	G	G	G
1	844850	.	A	C	.	.	.	AB	A	A	A	A	A	A	C	A	A	A	A	C	A	A	A
1	845081	.	G	A	.	.	.	AB	G	G	G	G	G	G	G	G	A	G	A	G	G	G	G
1	845338	.	G	A	.	.	.	AB	G	G	G	G	G	G	G	A	G	G	G	G	G	G	G
1	846335	.	G	T	.	.	.	AB	G	G	G	G	G	G	T	G	G	G	G	T	G	G	G
1	848036	.	G	A	.	.	.	AB	G	G	G	G	G	G	G	G	A	G	A	G	G	G	G
1	848276	.	G	A	.	.	.	AB	G	G	G	G	G	G	G	A	G	G	G	G	G	G	G
1	848455	.	G	T	.	.	.	AB	G	G	G	G	G	G	T	G	G	G	G	T	G	G	G
1	848779	.	G	T	.	.	.	AB	G	G	T	G	G	G	G	G	G	G	G	G	G	G	G
1	849124	.	G	A	.	.	.	AB	G	G	G	G	G	G	G	G	G	A	G	G	G	G	G
1	849346	.	A	G	.	.	.	AB	A	A	G	G	G	G	G	G	G	G	G	G	G	G	G
1	849614	.	G	A	.	.	.	AB	G	G	G	G	G	G	G	G	G	A	G	G	G	G	G
1	850201	.	G	T	.	.	.	AB	G	G	G	G	G	G	T	G	G	G	G	T	G	G	G
1	850239	.	C	T	.	.	.	AB	C	C	C	C	C	C	C	C	C	T	C	C	C	C	C
1	850726	.	T	C	.	.	.	AB	T	T	C	T	T	T	T	T	T	T	T	T	T	T	T
1	850727	.	G	A	.	.	.	AB	G	G	A	G	G	G	G	G	G	G	G	G	G	G	G
1	850728	.	T	G	.	.	.	AB	T	T	G	T	T	T	T	T	T	T	T	T	T	T	T
1	851976	.	T	A	.	.	.	AB	T	T	A	T	T	T	T	T	T	T	T	T	T	T	T
1	852415	.	G	T	.	.	.	AB	G	G	G	G	G	G	G	G	T	G	T	G	G	G	G
1	852695	.	G	A	.	.	.	AB	G	G	G	G	G	A	G	G	G	G	G	G	G	A	A
1	853768	.	A	G	.	.	.	AB	A	A	A	A	A	A	G	A	A	A	A	G	A	A	A
1	854766	.	G	T	.	.	.	AB	G	G	G	G	G	G	G	T	G	G	G	G	G	G	G
1	854948	.	T	C	.	.	.	AB	T	T	T	T	T	T	C	T	T	T	T	T	T	T	T
1	855440	.	G	T	.	.	.	AB	G	G	G	G	G	G	G	G	G	G	G	T	G	G	G
1	855868	.	A	C	.	.	.	AB	A	A	A	A	A	A	A	C	A	A	A	A	A	A	A
1	856001	.	G	A	.	.	.	AB	G	G	G	G	G	G	G	G	G	A	G	G	G	G	G
1	856143	.	C	A	.	.	.	AB	C	C	C	C	C	C	C	C	A	C	A	C	C	C	C
1	856304	.	G	A	.	.	.	AB	G	G	G	G	G	G	G	G	G	A	G	G	G	G	G
1	856699	.	T	A,-	.	.	.	AB	T	T	A	A	-	A	T	T	T	T	T	T	A	A	A
1	857021	.	A	G,-	.	.	.	AB	A	A	A	A	A	A	A	A	A	G	-	A	A	A	A
1	857444	.	T	C	.	.	.	AB	T	T	T	T	T	T	T	C	T	T	T	T	T	T	T
1	857633	.	A	T	.	.	.	AB	A	A	A	A	A	A	A	T	A	A	A	A	A	A	A
1	859445	.	A	T	.	.	.	AB	A	A	T	A	A	A	A	A	A	A	A	A	A	A	A
1	860226	.	C	A	.	.	.	AB	C	C	A	A	A	C	C	C	C	C	C	C	A	C	C
1	860485	.	G	A	.	.	.	AB	G	G	G	G	G	G	G	G	A	G	A	G	G	G	G
1	860740	.	C	T	.	.	.	AB	C	C	C	C	C	C	C	C	T	C	T	C	C	C	C
1	861257	.	G	A	.	.	.	AB	G	G	G	G	G	G	G	G	A	G	A	G	G	G	G
1	861549	.	G	A	.	.	.	AB	G	G	G	A	G	G	G	G	G	G	G	G	G	G	G
1	861588	.	G	A	.	.	.	AB	G	G	G	G	G	G	G	A	G	G	G	G	G	G	G
1	861738	.	C	T	.	.	.	AB	C	C	T	C	C	C	C	C	C	C	C	C	C	C	C
1	862033	.	G	A	.	.	.	AB	G	G	A	G	G	G	G	G	G	G	G	G	G	G	G
1	862190	.	T	C	.	.	.	AB	T	T	T	T	T	T	T	T	C	T	C	T	T	T	T
1	863496	.	G	A	.	.	.	AB	G	G	A	A	A	A	G	G	G	G	G	G	A	A	A
1	864446	.	T	C	.	.	.	AB	T	T	T	T	T	T	T	T	T	C	T	T	T	T	T
1	864447	.	G	A	.	.	.	AB	G	G	G	G	G	G	G	G	A	G	A	G	G	G	G
1	865819	.	T	G	.	.	.	AB	T	T	T	T	T	T	T	T	G	T	G	T	T	T	T
1	866649	.	A	C	.	.	.	AB	A	A	A	A	A	A	A	A	C	A	C	A	A	A	A
1	866700	.	T	C	.	.	.	AB	T	T	C	C	C	C	C	C	C	C	C	C	C	C	C
1	867427	.	C	T	.	.	.	AB	C	C	C	C	C	C	C	C	T	C	T	C	C	C	C
1	869546	.	C	T	.	.	.	AB	C	C	C	C	C	C	C	C	C	T	C	C	C	C	C
1	874702	.	T	C	.	.	.	AB	T	T	T	T	T	T	C	T	T	T	T	C	T	T	T
1	875102	.	G	A	.	.	.	AB	G	G	G	G	G	G	G	G	A	G	A	G	G	G	G
1	875313	.	T	C	.	.	.	AB	T	T	T	T	T	T	T	T	C	C	C	T	T	T	T
1	875685	.	A	G	.	.	.	AB	A	A	A	A	A	A	A	A	G	A	G	A	A	A	A
1	876176	.	G	A	.	.	.	AB	G	G	A	G	G	G	G	G	G	G	G	G	G	G	G
1	876895	.	C	A	.	.	.	AB	C	C	C	C	C	C	C	C	A	C	A	C	C	C	C
1	877031	.	G	A	.	.	.	AB	G	G	A	G	G	G	G	G	A	G	A	G	G	G	G
1	877061	.	A	T	.	.	.	AB	A	A	T	T	T	T	T	T	T	T	T	T	T	T	T
1	877501	.	T	G	.	.	.	AB	T	T	T	T	T	T	T	G	T	T	T	T	T	T	T
1	879121	.	C	A	.	.	.	AB	C	C	C	C	C	C	A	C	C	C	C	A	C	C	C
1	879699	.	G	A	.	.	.	AB	G	G	A	G	G	G	G	G	G	G	G	G	G	G	G
1	880933	.	G	A	.	.	.	AB	G	G	G	G	G	G	G	G	G	A	G	G	G	G	G
1	881078	.	A	T	.	.	.	AB	A	A	A	A	T	A	A	A	A	A	A	A	A	A	A
1	881396	.	A	G	.	.	.	AB	A	A	G	A	A	A	A	A	A	A	A	A	A	A	A
1	882358	.	C	T	.	.	.	AB	C	C	C	C	C	C	C	C	T	C	T	C	C	C	C
1	883189	.	G	A	.	.	.	AB	G	G	G	G	G	G	G	G	A	G	A	G	G	G	G
1	884502	.	T	G	.	.	.	AB	T	T	T	T	T	T	G	T	T	T	T	T	T	T	T
1	887404	.	C	T	.	.	.	AB	C	C	C	C	C	C	C	C	T	C	T	C	C	C	C
1	889463	.	G	A	.	.	.	AB	G	G	G	G	G	G	G	G	A	A	A	G	G	G	G
1	889695	.	A	T,-	.	.	.	AB	A	A	A	A	A	A	A	A	T	A	-	A	A	A	A
1	891216	.	A	C	.	.	.	AB	A	A	A	A	A	A	A	A	C	A	C	A	A	A	A
1	891369	.	G	A	.	.	.	AB	G	G	A	A	A	A	A	G	A	A	A	A	A	A	A
1	891641	.	G	A	.	.	.	AB	G	G	G	A	G	G	G	G	G	G	G	G	G	G	G
1	892965	.	G	T	.	.	.	AB	G	G	G	G	G	G	G	G	T	G	T	G	G	G	G
1	893180	.	G	T	.	.	.	AB	G	G	G	G	G	G	G	G	T	G	T	G	G	G	G
1	893994	.	A	T	.	.	.	AB	A	A	A	A	A	A	A	A	T	A	T	A	A	A	A
1	894027	.	A	G	.	.	.	AB	A	A	G	G	G	G	G	G	G	G	G	G	G	G	G
1	894224	.	G	A	.	.	.	AB	G	G	G	G	A	G	G	G	G	G	G	G	G	G	G
1	894437	.	A	G	.	.	.	AB	A	A	A	A	A	A	A	A	G	A	G	A	A	A	A
1	894538	.	T	C	.	.	.	AB	T	T	T	T	T	C	T	T	T	T	T	T	T	C	C
1	894751	.	G	T	.	.	.	AB	G	G	T	T	T	T	T	T	T	T	T	T	T	T	T
1	896090	.	C	T	.	.	.	AB	C	C	C	C	C	C	T	C	C	C	C	T	C	C	C
1	897780	.	C	A	.	.	.	AB	C	C	A	C	C	C	C	C	C	C	C	C	C	C	C
1	898882	.	C	T	.	.	.	AB	C	C	C	C	C	C	C	C	T	C	T	C	C	C	C
1	899104	.	A	T	.	.	.	AB	A	A	T	T	T	T	T	A	T	T	T	T	T	T	T
1	902918	.	G	A	.	.	.	AB	G	G	G	G	G	G	G	G	A	G	A	G	G	G	G
1	903527	.	G	A	.	.	.	AB	G	G	G	G	G	G	G	G	A	G	A	G	G	G	G
1	903996	.	T	C	.	.	.	AB	T	T	T	T	T	T	T	T	C	T	C	T	T	T	T
1	904220	.	T	C	.	.	.	AB	T	T	C	T	T	T	T	T	T	T	T	T	T	T	T
1	904482	.	G	A	.	.	.	AB	G	G	G	G	G	A	G	G	G	G	G	G	G	A	A
1	904788	.	C	T	.	.	.	AB	C	C	T	C	C	C	C	C	C	C	C	C	C	C	C
1	904955	.	T	G	.	.	.	AB	T	T	G	G	G	G	T	T	G	G	G	T	G	G	G
1	906503	.	C	T	.	.	.	AB	C	C	C	C	C	C	C	C	T	C	T	C	C	C	C
1	906890	.	G	A	.	.	.	AB	G	G	G	G	G	G	G	G	G	A	G	G	G	G	G
1	907131	.	C	A	.	.	.	AB	C	C	C	C	C	C	A	C	C	C	C	C	C	C	C
1	907381	.	C	A	.	.	.	AB	C	C	C	C	C	C	C	C	A	C	A	C	C	C	C
1	907528	.	G	T	.	.	.	AB	G	G	T	G	G	G	G	G	G	G	G	G	G	G	G
1	907900	.	A	C	.	.	.	AB	A	A	A	A	A	A	C	A	A	A	A	C	A	A	A
1	910030	.	G	T	.	.	.	AB	G	G	G	G	G	G	G	T	G	G	G	G	G	G	G
1	910148	.	T	C	.	.	.	AB	T	T	C	T	T	T	T	T	T	T	T	T	T	T	T
1	910897	.	A	G	.	.	.	AB	A	A	A	A	A	A	G	A	A	A	A	G	A	A	A
1	911296	.	C	T	.	.	.	AB	C	C	C	C	C	C	C	T	C	C	C	C	C	C	C
1	911716	.	G	A	.	.	.	AB	G	G	G	G	G	G	G	A	G	G	G	G	G	G	G
1	911740	.	G	T	.	.	.	AB	G	G	G	G	G	G	G	G	T	G	T	G	G	G	G
1	912171	.	G	A	.	.	.	AB	G	G	G	G	G	G	G	G	G	G	G	A	G	G	G
1	916363	.	G	A	.	.	.	AB	G	G	G	G	A	G	G	G	G	G	G	G	G	G	G
1	916891	.	C	A	.	.	.	AB	C	C	C	C	C	C	C	C	A	C	A	C	C	C	C
1	918989	.	G	A	.	.	.	AB	G	G	G	G	G	G	G	A	G	G	G	G	G	G	G
1	919060	.	G	T	.	.	.	AB	G	G	T	T	T	T	G	G	G	G	G	G	T	T	T
1	921266	.	G	A	.	.	.	AB	G	G	G	G	G	G	A	G	G	G	G	A	G	G	G
1	921834	.	G	A	.	.	.	AB	G	G	G	G	G	G	G	G	A	G	A	G	G	G	G
1	922709	.	C	T	.	.	.	AB	C	C	C	C	C	C	C	C	T	C	T	C	C	C	C
1	922830	.	G	T	.	.	.	AB	G	G	G	G	G	G	G	G	G	G	G	T	G	G	G
1	923353	.	G	A	.	.	.	AB	G	G	A	G	G	G	G	G	G	G	G	G	G	G	G
1	923875	.	T	A	.	.	.	AB	T	T	A	A	A	T	T	T	T	T	T	T	A	T	T
1	924418	.	G	A	.	.	.	AB	G	G	G	G	G	G	A	G	G	G	G	G	G	G	G
1	924524	.	T	C	.	.	.	AB	T	T	C	C	C	C	T	T	C	C	C	T	C	C	C
1	924579	.	C	T	.	.	.	AB	C	C	C	C	C	T	C	C	C	C	C	C	C	T	T
1	926548	.	G	A	.	.	.	AB	G	G	G	A	A	G	G	G	G	G	G	G	A	G	G
1	927419	.	G	A	.	.	.	AB	G	G	G	G	G	G	G	G	A	G	A	G	G	G	G
1	927563	.	C	T	.	.	.	AB	C	C	C	C	C	C	C	C	C	C	C	T	C	C	C
1	927966	.	G	A	.	.	.	AB	G	G	G	G	G	G	G	G	G	G	A	G	G	G	G
1	928814	.	G	C	.	.	.	AB	G	G	G	G	G	G	G	G	C	G	C	G	G	G	G
1	930102	.	G	A	.	.	.	AB	G	G	G	G	G	A	G	G	G	G	G	G	G	A	A
1	931665	.	G	A	.	.	.	AB	G	G	G	G	G	G	G	A	G	G	G	G	G	G	G
1	931959	.	G	C	.	.	.	AB	G	G	C	C	C	C	C	C	C	C	C	C	C	C	C
1	933541	.	G	A	.	.	.	AB	G	G	G	G	G	G	G	G	A	A	A	G	G	G	G
1	934663	.	G	A,-	.	.	.	AB	G	G	A	A	A	G	G	G	-	G	-	G	A	G	G
1	934870	.	A	G,-	.	.	.	AB	A	A	G	G	G	G	G	A	-	G	-	G	G	G	G
1	935854	.	C	T	.	.	.	AB	C	C	C	C	C	C	C	C	C	C	C	C	T	C	C
1	936248	.	A	C	.	.	.	AB	A	A	A	A	A	A	C	A	A	A	A	C	A	A	A
1	936296	.	C	T	.	.	.	AB	C	C	C	C	C	C	C	T	C	C	C	C	C	C	C
1	936615	.	C	A	.	.	.	AB	C	C	A	C	C	C	C	C	C	C	C	C	C	C	C
1	937614	.	T	C	.	.	.	AB	T	T	C	C	C	C	T	T	T	T	T	T	C	C	C
1	938004	.	C	T	.	.	.	AB	C	C	T	C	C	C	C	C	C	C	C	C	C	C	C
1	938195	.	G	A	.	.	.	AB	G	G	A	A	A	A	G	G	G	G	G	G	A	A	A
1	938336	.	C	A	.	.	.	AB	C	C	A	A	A	A	A	A	A	A	A	A	A	A	A
1	938496	.	C	A	.	.	.	AB	C	C	C	C	C	C	C	C	C	A	C	C	C	C	C
1	938615	.	G	A	.	.	.	AB	G	G	A	G	G	G	G	G	G	G	G	G	G	G	G
1	938891	.	T	C	.	.	.	AB	T	T	T	C	C	T	T	T	T	T	T	T	C	T	T
1	938923	.	G	A	.	.	.	AB	G	G	G	G	A	G	G	G	G	G	G	G	A	G	G
1	940518	.	G	A	.	.	.	AB	G	G	A	G	G	G	G	G	G	G	G	G	G	G	G
1	941489	.	A	C	.	.	.	AB	A	A	C	C	C	C	A	A	A	A	A	A	C	C	C
1	941829	.	T	A	.	.	.	AB	T	T	T	T	T	T	T	T	A	T	A	T	T	T	T
1	944490	.	C	T	.	.	.	AB	C	C	C	C	C	C	T	C	C	C	C	T	C	C	C
1	945162	.	G	A	.	.	.	AB	G	G	G	G	G	A	G	G	G	G	G	G	G	A	A
1	946638	.	T	G	.	.	.	AB	T	T	T	T	T	T	T	T	G	T	G	T	T	T	T
1	946875	.	C	T	.	.	.	AB	C	C	C	C	C	T	C	C	C	C	C	C	C	T	T
1	947237	.	G	A	.	.	.	AB	G	G	G	G	G	G	G	G	A	G	A	G	G	G	G
1	948450	.	T	C	.	.	.	AB	T	T	T	T	T	T	T	C	T	T	T	T	T	T	T
1	949189	.	G	A	.	.	.	AB	G	G	G	G	G	G	G	G	A	G	A	G	G	G	G
1	949221	.	N	C,A	.	.	.	AB	N	N	C	C	C	C	A	A	C	A	C	A	C	C	C
1	949222	.	N	C,T	.	.	.	AB	N	N	C	T	C	C	C	C	C	C	C	C	C	C	C
1	949610	.	N	A,C,-	.	.	.	AB	N	N	A	C	C	C	N	N	A	C	-	N	C	C	C
1	949618	.	N	T,C	.	.	.	AB	N	N	T	C	C	C	N	N	N	N	N	N	C	C	C
1	951474	.	N	C,-,A	.	.	.	AB	N	N	C	C	-	-	N	N	N	N	N	N	-	-	A
1	951585	.	N	-,A,G	.	.	.	AB	N	N	-	-	-	A	N	N	N	N	N	N	-	A	G
1	962096	.	N	C,A,-	.	.	.	AB	N	N	N	N	N	N	N	N	C	A	-	N	N	N	N
1	962158	.	N	T,C,-	.	.	.	AB	N	N	N	N	N	N	N	N	T	C	-	N	N	N	N
1	962188	.	N	G,A,-	.	.	.	AB	N	N	N	N	N	N	N	N	G	A	-	N	N	N	N
1	963569	.	N	T,C,-	.	.	.	AB	N	N	N	N	N	N	N	N	T	C	-	N	N	N	N
1	963571	.	N	C,A,-	.	.	.	AB	N	N	N	N	N	N	N	N	C	A	-	N	N	N	N
1	963588	.	N	A,G,-	.	.	.	AB	N	N	N	N	N	N	N	N	A	G	-	N	N	N	N
1	963620	.	N	T,C,-	.	.	.	AB	N	N	N	N	N	N	N	N	T	C	-	N	N	N	N
1	963646	.	N	T,A,-	.	.	.	AB	N	N	N	N	N	N	N	N	T	A	-	N	N	N	N
1	963654	.	N	A,G,-	.	.	.	AB	N	N	N	N	N	N	N	N	A	G	-	N	N	N	N
1	963706	.	N	A,G,-	.	.	.	AB	N	N	N	N	N	N	N	N	A	G	-	N	N	N	N
1	966712	.	N	T,-,C	.	.	.	AB	N	N	N	N	N	T	N	N	-	-	-	N	N	C	T
1	981609	.	N	T,A,-	.	.	.	AB	N	N	N	N	N	T	N	N	A	A	-	N	N	-	T
1	981682	.	N	T,A,-	.	.	.	AB	N	N	N	N	N	T	N	N	A	A	-	N	N	-	T
1	981692	.	N	A,G,-	.	.	.	AB	N	N	N	N	N	A	N	N	G	G	-	N	N	-	A
1	981702	.	N	G,A,-	.	.	.	AB	N	N	N	N	N	G	N	N	A	A	-	N	N	-	G
1	981741	.	N	A,-,C	.	.	.	AB	N	N	A	-	-	A	N	N	C	C	-	N	C	-	A
1	983743	.	N	A,G	.	.	.	AB	N	N	A	A	A	A	N	N	A	A	A	N	G	A	A
1	983899	.	N	T,C	.	.	.	AB	N	N	T	T	T	T	N	N	T	C	T	N	T	T	T
1	986640	.	N	A,G	.	.	.	AB	N	N	A	A	A	G	N	N	A	A	A	N	A	G	G
1	987362	.	N	T,A	.	.	.	AB	N	N	T	T	T	T	N	N	T	A	T	N	T	T	T
1	988307	.	N	G,T	.	.	.	AB	N	N	G	T	G	G	N	N	G	G	G	N	G	G	G
1	989167	.	N	G,A	.	.	.	AB	N	N	G	G	G	G	N	N	G	A	G	N	G	G	G
1	989367	.	N	A,T	.	.	.	AB	N	N	A	A	A	A	N	N	A	T	A	N	A	A	A
1	989712	.	N	T,C	.	.	.	AB	N	N	T	T	T	T	N	N	C	T	C	N	T	T	T
1	990058	.	N	T,G	.	.	.	AB	N	N	T	T	T	G	N	N	T	T	T	N	T	G	G
1	990308	.	N	A,G	.	.	.	AB	N	N	A	G	G	G	N	N	G	G	G	N	G	G	G
1	990374	.	N	A,C	.	.	.	AB	N	N	A	A	A	C	N	N	C	C	C	N	A	C	C
1	990418	.	N	C,T	.	.	.	AB	N	N	C	C	C	C	N	N	C	T	C	N	C	C	C
1	990708	.	N	G,A	.	.	.	AB	N	N	G	A	G	G	N	N	G	G	G	N	G	G	G
1	994161	.	N	G,A	.	.	.	AB	N	N	G	G	G	G	N	N	A	G	A	N	G	G	G
1	995293	.	N	T,C	.	.	.	AB	N	N	T	T	T	T	N	N	C	T	C	N	T	T	T
1	996660	.	N	A,G	.	.	.	AB	N	N	A	A	A	A	N	N	G	A	G	N	A	A	A
1	998219	.	N	G,A	.	.	.	AB	N	N	G	G	G	G	N	N	A	G	A	N	G	G	G
1	999377	.	N	G,A	.	.	.	AB	N	N	G	G	G	G	N	N	G	G	G	N	A	G	G
1	999667	.	N	G,A	.	.	.	AB	N	N	G	G	G	G	N	N	A	G	A	N	G	G	G
1	1001022	.	N	A,C	.	.	.	AB	N	N	A	A	A	A	N	N	C	A	C	N	A	A	A
1	1001396	.	N	C,T	.	.	.	AB	N	N	C	C	C	C	N	N	T	C	T	N	C	C	C
1	1001425	.	N	A,G	.	.	.	AB	N	N	A	A	G	A	N	N	G	G	G	N	A	A	A
1	1002504	.	N	C,-,T	.	.	.	AB	N	N	C	C	C	C	N	N	C	C	-	N	T	C	C
1	1002794	.	N	C,T,-	.	.	.	AB	N	N	C	T	-	T	N	N	-	T	-	N	-	-	T
1	1002890	.	N	C,-,T	.	.	.	AB	N	N	C	C	-	C	N	N	-	T	-	N	-	-	C
1	1002926	.	N	C,T,-	.	.	.	AB	N	N	C	T	-	T	N	N	-	T	-	N	-	T	T
1	1003603	.	N	G,A,-	.	.	.	AB	N	N	G	G	G	A	N	N	-	G	-	N	G	A	A
1	1003611	.	N	A,C,-	.	.	.	AB	N	N	A	A	A	C	N	N	-	A	-	N	A	C	C
1	1003672	.	N	-,C,T	.	.	.	AB	N	N	-	-	-	C	N	N	-	-	-	N	T	-	C
1	1003690	.	N	-,T,C	.	.	.	AB	N	N	-	-	-	T	N	N	-	-	-	N	C	T	T
1	1003715	.	N	T,C,-	.	.	.	AB	N	N	T	C	-	T	N	N	-	T	-	N	T	T	T
1	1003721	.	N	G,T,-	.	.	.	AB	N	N	G	T	-	G	N	N	-	G	-	N	G	G	G
1	1010019	.	N	G,A	.	.	.	AB	N	N	G	A	A	A	N	N	A	A	A	N	A	A	A
1	1011339	.	N	C,T	.	.	.	AB	N	N	C	C	C	C	N	N	T	C	T	N	C	C	C
1	1012801	.	N	C,T	.	.	.	AB	N	N	C	C	C	C	N	N	T	C	T	N	C	C	C
1	1014160	.	N	A,G	.	.	.	AB	N	N	A	G	A	A	N	N	A	A	A	N	A	A	A
1	1014541	.	N	C,T	.	.	.	AB	N	N	C	T	T	T	N	N	T	T	T	N	T	T	T
1	1015834	.	N	A,G	.	.	.	AB	N	N	A	A	A	A	N	N	A	G	A	N	A	A	A
1	1016651	.	N	G,A	.	.	.	AB	N	N	G	G	G	G	N	N	A	G	A	N	G	G	G
1	1018623	.	N	G,T	.	.	.	AB	N	N	G	G	G	G	N	N	T	G	T	N	G	G	G
1	1022926	.	N	A,G	.	.	.	AB	N	N	A	A	A	A	N	N	G	A	G	N	A	A	A
1	1023793	.	N	C,T	.	.	.	AB	N	N	C	C	C	C	N	N	C	T	C	N	C	C	C
1	1023979	.	N	T,C	.	.	.	AB	N	N	T	T	T	T	N	N	C	T	C	N	T	T	T
1	1025817	.	N	G,A	.	.	.	AB	N	N	G	G	G	G	N	N	G	A	G	N	G	G	G
1	1026843	.	N	C,T	.	.	.	AB	N	N	C	C	C	C	N	N	C	C	C	N	C	C	T
1	1026952	.	N	C,T	.	.	.	AB	N	N	C	C	C	C	N	N	C	C	C	N	T	C	C
1	1027154	.	N	C,T	.	.	.	AB	N	N	C	C	C	C	N	N	C	C	T	N	C	C	C
1	1027956	.	N	G,A	.	.	.	AB	N	N	G	G	G	G	N	N	G	A	G	N	G	G	G
1	1028534	.	N	C,T	.	.	.	AB	N	N	C	C	C	C	N	N	T	C	T	N	C	C	C
1	1029538	.	N	C,T	.	.	.	AB	N	N	C	C	C	C	N	N	T	C	T	N	C	C	C
1	1029670	.	N	T,A	.	.	.	AB	N	N	T	T	T	T	N	N	A	A	A	N	T	T	T
1	1031919	.	N	C,A	.	.	.	AB	N	N	C	C	C	C	N	N	A	C	A	N	C	C	C
1	1033522	.	N	C,A	.	.	.	AB	N	N	C	C	C	C	N	N	C	C	C	N	A	C	C
1	1034198	.	N	T,G	.	.	.	AB	N	N	T	T	T	T	N	N	G	T	G	N	T	T	T
1	1035530	.	N	T,G	.	.	.	AB	N	N	T	T	T	T	N	N	G	T	T	N	T	T	T
1	1036957	.	N	G,T	.	.	.	AB	N	N	G	T	T	T	N	N	T	T	T	N	T	T	T
1	1037288	.	N	A,C	.	.	.	AB	N	N	A	A	A	A	N	N	C	A	A	N	A	A	A
1	1037848	.	N	G,A	.	.	.	AB	N	N	G	G	G	G	N	N	A	G	A	N	G	G	G
1	1038410	.	N	A,G	.	.	.	AB	N	N	A	A	A	A	N	N	A	A	G	N	A	A	A
1	1039888	.	N	A,C	.	.	.	AB	N	N	A	A	A	A	N	N	C	A	C	N	A	A	A
1	1041381	.	N	C,T	.	.	.	AB	N	N	C	C	C	C	N	N	C	C	C	N	T	C	C
1	1041944	.	N	G,A	.	.	.	AB	N	N	G	G	G	G	N	N	A	G	A	N	G	G	G
1	1041958	.	N	G,T,-	.	.	.	AB	N	N	G	T	G	G	N	N	G	G	-	N	G	G	G
1	1042978	.	N	G,A	.	.	.	AB	N	N	G	G	G	G	N	N	G	A	G	N	G	G	G
1	1043191	.	N	C,T	.	.	.	AB	N	N	C	C	C	C	N	N	C	T	C	N	C	C	C
1	1044678	.	N	C,T	.	.	.	AB	N	N	C	T	T	T	N	N	T	T	T	N	T	T	T
1	1044717	.	N	A,G	.	.	.	AB	N	N	A	A	A	G	N	N	A	A	A	N	A	G	G
1	1044888	.	N	T,A	.	.	.	AB	N	N	T	T	T	T	N	N	A	A	A	N	T	T	T
1	1046210	.	N	A,G	.	.	.	AB	N	N	A	A	A	G	N	N	G	G	G	N	A	G	G
1	1046955	.	N	G,A	.	.	.	AB	N	N	G	G	G	G	N	N	A	G	A	N	G	G	G
1	1047640	.	N	G,A	.	.	.	AB	N	N	G	G	G	G	N	N	G	A	G	N	G	G	G
1	1047757	.	N	A,G	.	.	.	AB	N	N	A	A	A	A	N	N	G	A	G	N	A	A	A
1	1047884	.	N	C,T	.	.	.	AB	N	N	C	C	C	C	N	N	T	C	T	N	C	C	C
1	1049442	.	G	A	.	.	.	AB	G	G	A	A	A	G	G	G	G	G	G	G	A	G	G
1	1050102	.	G	A	.	.	.	AB	G	G	G	G	G	G	G	G	G	A	G	G	G	G	G
1	1050746	.	T	C	.	.	.	AB	T	T	T	T	T	T	T	T	T	C	T	T	T	T	T
1	1050751	.	T	G	.	.	.	AB	T	T	T	T	T	T	T	T	G	T	G	T	T	T	T
1	1051108	.	G	A	.	.	.	AB	G	G	A	G	G	G	G	G	G	G	G	G	G	G	G
1	1051652	.	A	G	.	.	.	AB	A	A	G	G	G	G	G	A	G	G	G	G	G	G	G
1	1052010	.	G	A	.	.	.	AB	G	G	A	G	G	G	G	G	G	G	G	G	G	G	G
1	1052091	.	T	C	.	.	.	AB	T	T	C	C	C	C	C	C	C	C	C	C	C	C	C
1	1052435	.	T	C	.	.	.	AB	T	T	T	T	T	C	T	T	T	T	T	T	T	C	C
1	1052471	.	A	C	.	.	.	AB	A	A	C	C	C	C	C	C	C	C	C	C	C	C	C
1	1052621	.	C	A	.	.	.	AB	C	C	C	C	C	C	C	C	C	A	C	C	C	C	C
1	1053565	.	N	G,A	.	.	.	AB	N	N	G	G	G	G	N	N	A	G	A	N	G	G	G
1	1055114	.	N	G,T	.	.	.	AB	N	N	G	G	G	T	N	N	G	G	G	N	G	T	T
1	1055414	.	N	C,T	.	.	.	AB	N	N	C	C	C	C	N	N	C	T	C	N	C	C	C
1	1056456	.	A	C	.	.	.	AB	A	A	A	A	A	A	A	A	C	A	C	A	A	A	A
1	1059191	.	G	T,-	.	.	.	AB	G	G	G	G	G	G	T	G	-	G	-	T	G	G	G
1	1059646	.	C	T	.	.	.	AB	C	C	C	C	C	C	C	T	C	C	C	C	C	C	C
1	1059962	.	A	G,-	.	.	.	AB	A	A	G	G	-	G	G	G	G	G	-	G	G	G	G
1	1060810	.	G	A	.	.	.	AB	G	G	G	G	G	G	G	G	A	G	A	G	G	G	G
1	1062738	.	T	C	.	.	.	AB	T	T	T	T	T	T	T	T	C	T	C	T	T	T	T
1	1062982	.	C	T	.	.	.	AB	C	C	C	C	C	C	C	C	C	T	C	C	C	C	C
1	1063121	.	T	C	.	.	.	AB	T	T	C	C	C	C	C	C	C	C	C	C	C	C	C
1	1064483	.	G	A	.	.	.	AB	G	G	G	G	G	G	G	G	A	G	A	G	G	G	G
1	1065372	.	G	A	.	.	.	AB	G	G	G	G	A	G	G	G	G	G	G	G	G	G	G
1	1065884	.	G	A	.	.	.	AB	G	G	G	G	G	G	G	G	A	G	A	G	G	G	G
1	1066461	.	C	T	.	.	.	AB	C	C	T	C	C	C	C	C	C	C	C	C	C	C	C
1	1066947	.	T	C	.	.	.	AB	T	T	T	T	T	T	T	T	T	C	T	T	T	T	T
1	1067401	.	C	A	.	.	.	AB	C	C	A	A	A	C	C	C	C	C	C	C	A	C	C
1	1067764	.	A	G	.	.	.	AB	A	A	A	A	A	A	A	A	G	A	G	A	A	A	A
1	1067992	.	G	T	.	.	.	AB	G	G	G	G	T	G	G	G	G	G	G	G	G	G	G
1	1068806	.	C	T	.	.	.	AB	C	C	C	C	C	C	C	C	C	T	C	C	C	C	C
1	1071417	.	T	C	.	.	.	AB	T	T	C	C	C	C	C	C	C	C	C	C	C	C	C
1	1072190	.	A	G	.	.	.	AB	A	A	G	G	G	G	G	A	G	G	G	G	G	G	G
1	1072860	.	G	A	.	.	.	AB	G	G	G	G	G	G	G	G	G	A	G	G	G	G	G
1	1073559	.	T	A	.	.	.	AB	T	T	T	T	T	T	T	T	T	A	T	T	T	T	T
1	1073767	.	G	A	.	.	.	AB	G	G	G	G	G	A	G	G	G	G	G	G	G	A	A
1	1074029	.	G	C	.	.	.	AB	G	G	G	G	G	G	G	G	G	C	G	G	G	G	G
1	1075753	.	G	A,-	.	.	.	AB	G	G	A	A	A	A	G	G	-	G	-	G	A	A	A
1	1075844	.	A	G,-	.	.	.	AB	A	A	A	A	A	A	A	A	G	A	-	A	A	A	A
1	1076508	.	T	G	.	.	.	AB	T	T	T	T	T	T	T	T	G	T	G	T	T	T	T
1	1076681	.	G	T	.	.	.	AB	G	G	G	G	G	G	G	G	T	G	T	G	G	G	G
1	1077208	.	G	A	.	.	.	AB	G	G	G	G	G	G	G	G	G	A	G	G	G	G	G
1	1078051	.	T	C	.	.	.	AB	T	T	T	T	T	T	T	C	T	T	T	T	T	T	T
1	1078828	.	A	C	.	.	.	AB	A	A	A	A	A	A	A	A	A	C	A	A	A	A	A
1	1079000	.	C	T	.	.	.	AB	C	C	C	C	C	T	C	C	C	C	C	C	C	T	T
1	1079639	.	G	A	.	.	.	AB	G	G	G	G	G	G	G	G	A	G	A	G	G	G	G
1	1080544	.	C	T	.	.	.	AB	C	C	C	C	C	C	C	C	T	C	T	C	C	C	C
1	1082762	.	G	A	.	.	.	AB	G	G	A	A	A	G	G	G	G	G	G	G	A	G	G
1	1083045	.	G	A	.	.	.	AB	G	G	G	G	G	G	G	G	G	A	G	G	G	G	G
1	1084034	.	G	A	.	.	.	AB	G	G	G	G	G	G	G	G	A	G	A	G	G	G	G
1	1084393	.	G	A	.	.	.	AB	G	G	G	G	G	G	G	G	G	G	G	G	G	A	G
1	1085536	.	A	G	.	.	.	AB	A	A	A	A	A	A	A	G	A	A	A	A	A	A	A
1	1086753	.	A	C	.	.	.	AB	A	A	A	A	A	A	A	A	C	A	C	A	A	A	A
1	1086768	.	A	T	.	.	.	AB	A	A	A	A	A	A	A	A	T	A	T	A	A	A	A
1	1087521	.	A	C	.	.	.	AB	A	A	A	A	A	A	C	A	A	A	A	C	A	A	A
1	1088099	.	C	T	.	.	.	AB	C	C	C	C	C	C	C	C	C	T	C	C	C	C	C
1	1088754	.	G	A	.	.	.	AB	G	G	G	A	G	G	G	G	G	G	G	G	G	G	G
1	1088904	.	G	A	.	.	.	AB	G	G	G	G	G	G	A	G	G	G	G	A	G	G	G
1	1089065	.	G	A	.	.	.	AB	G	G	G	G	G	G	G	G	A	G	A	G	G	G	G
1	1090049	.	T	C	.	.	.	AB	T	T	T	C	T	T	T	T	T	T	T	T	T	T	T
1	1092459	.	G	T	.	.	.	AB	G	G	T	G	G	G	G	G	G	G	G	G	G	G	G
1	1093309	.	G	A	.	.	.	AB	G	G	G	G	G	A	G	G	G	G	G	G	G	A	A
1	1094210	.	A	T	.	.	.	AB	A	A	T	T	T	T	T	T	T	T	T	T	T	T	T
1	1095102	.	T	C	.	.	.	AB	T	T	T	T	T	T	T	C	T	T	T	T	T	T	T
1	1095132	.	T	C	.	.	.	AB	T	T	T	T	T	T	T	T	C	T	C	T	T	T	T
1	1095599	.	C	A	.	.	.	AB	C	C	C	C	A	C	C	C	C	C	C	C	C	C	C
1	1096870	.	C	A	.	.	.	AB	C	C	C	C	C	C	C	C	A	C	A	C	C	C	C
1	1097356	.	G	A	.	.	.	AB	G	G	G	G	G	G	G	G	G	A	G	G	G	G	G
1	1097467	.	C	T	.	.	.	AB	C	C	C	C	C	C	C	C	C	T	C	C	C	C	C
1	1098037	.	T	G	.	.	.	AB	T	T	T	G	G	T	T	T	T	T	T	T	G	T	T
1	1098620	.	A	G	.	.	.	AB	A	A	A	A	A	A	A	A	G	G	G	A	A	A	A
1	1099453	.	G	T	.	.	.	AB	G	G	G	G	G	G	G	G	G	T	G	G	G	G	G
1	1100113	.	G	A	.	.	.	AB	G	G	G	G	G	G	G	G	G	A	G	G	G	G	G
1	1100866	.	G	A	.	.	.	AB	G	G	G	G	G	G	A	G	G	G	G	A	G	G	G
1	1101458	.	A	C	.	.	.	AB	A	A	A	A	A	A	A	A	A	C	A	A	A	A	A
1	1102661	.	G	A	.	.	.	AB	G	G	G	G	G	G	G	G	G	A	G	G	G	G	G
1	1102822	.	G	A	.	.	.	AB	G	G	A	A	A	A	A	A	A	A	A	A	A	A	A
1	1102928	.	G	A	.	.	.	AB	G	G	G	G	G	G	G	G	A	G	A	G	G	G	G
1	1103332	.	G	A	.	.	.	AB	G	G	G	G	G	G	G	G	G	A	G	G	G	G	G
1	1103669	.	C	T	.	.	.	AB	C	C	T	T	T	T	C	C	C	C	C	C	T	T	T
1	1104480	.	A	G	.	.	.	AB	A	A	A	A	A	A	A	A	G	A	G	A	A	A	A
1	1104729	.	G	A	.	.	.	AB	G	G	G	G	G	G	G	G	A	G	A	G	G	G	G
1	1104834	.	C	G	.	.	.	AB	C	C	G	G	G	G	G	G	G	G	G	G	G	G	G
1	1104984	.	C	T	.	.	.	AB	C	C	C	C	C	C	C	C	C	T	C	C	C	C	C
1	1105586	.	A	G	.	.	.	AB	A	A	A	A	A	A	A	A	A	G	A	A	A	A	A
1	1107237	.	C	T	.	.	.	AB	C	C	C	C	C	C	T	C	C	C	C	T	C	C	C
1	1107647	.	C	T	.	.	.	AB	C	C	C	C	C	C	C	C	T	C	T	C	C	C	C
1	1107899	.	G	A	.	.	.	AB	G	G	G	G	G	G	G	G	G	A	G	G	G	G	G
1	1109296	.	C	T	.	.	.	AB	C	C	T	C	C	C	C	C	C	C	C	C	C	C	C
1	1109567	.	G	A	.	.	.	AB	G	G	A	G	G	G	G	G	G	G	G	G	G	G	G
1	1109672	.	C	T	.	.	.	AB	C	C	T	T	T	T	C	C	C	C	C	C	T	T	T
1	1110696	.	C	T	.	.	.	AB	C	C	T	C	C	C	C	C	C	C	C	C	C	C	C
1	1111172	.	G	A	.	.	.	AB	G	G	G	G	G	G	G	G	A	G	A	G	G	G	G
1	1113010	.	A	-,C	.	.	.	AB	A	A	A	A	-	A	A	A	C	A	-	A	A	A	A
1	1113160	.	C	T,-	.	.	.	AB	C	C	C	C	C	C	C	C	T	C	T	-	C	C	C
1	1113344	.	G	A,-	.	.	.	AB	G	G	G	G	G	G	G	G	A	G	A	-	G	G	G
1	1113581	.	A	C	.	.	.	AB	A	A	C	C	C	C	C	C	C	C	C	C	C	C	C
1	1116997	.	G	C	.	.	.	AB	G	G	G	G	G	G	G	G	C	G	C	G	G	G	G
1	1117351	.	A	T	.	.	.	AB	A	A	A	A	A	A	A	A	T	A	T	A	A	A	A
1	1117455	.	G	T	.	.	.	AB	G	G	G	T	G	G	G	G	G	G	G	G	G	G	G
1	1118913	.	C	T	.	.	.	AB	C	C	C	C	C	C	C	C	C	T	C	C	C	C	C
1	1120563	.	T	C	.	.	.	AB	T	T	T	T	C	T	T	T	T	T	T	T	T	T	T
1	1120746	.	C	A	.	.	.	AB	C	C	C	C	C	A	C	C	C	C	C	C	C	C	C
1	1122378	.	C	T	.	.	.	AB	C	C	C	C	C	C	C	C	T	C	T	C	C	C	C
1	1122934	.	C	T	.	.	.	AB	C	C	C	C	C	C	T	C	C	C	C	T	C	C	C
1	1124033	.	G	A	.	.	.	AB	G	G	G	G	G	G	G	G	G	G	G	A	G	G	G
1	1125113	.	G	A	.	.	.	AB	G	G	G	G	G	G	G	G	A	G	A	G	G	G	G
1	1125821	.	C	T	.	.	.	AB	C	C	C	C	T	C	C	C	C	C	C	C	C	C	C
1	1126572	.	C	T,-	.	.	.	AB	C	C	T	C	C	C	C	C	C	T	C	C	C	-	C
1	1126887	.	G	A	.	.	.	AB	G	G	A	G	G	G	G	G	G	G	G	G	G	G	G
1	1127119	.	-	G,T	.	.	.	AB	-	-	G	T	T	T	-	T	T	G	T	-	T	-	T
1	1127224	.	G	C,-	.	.	.	AB	G	G	C	G	G	G	G	G	G	G	G	G	G	-	G
1	1127311	.	-	G,C	.	.	.	AB	-	-	G	C	C	C	-	C	G	G	G	-	C	-	C
1	1127645	.	G	T	.	.	.	AB	G	G	G	G	G	G	G	G	T	G	T	G	G	G	G
1	1128458	.	C	-,T	.	.	.	AB	C	C	C	C	-	T	C	C	-	C	-	C	C	-	T
1	1128599	.	C	-,T	.	.	.	AB	C	C	C	C	-	C	T	C	-	C	-	T	-	C	C
1	1129086	.	A	G,-	.	.	.	AB	A	A	A	A	A	A	A	G	A	A	-	A	A	A	A
1	1129150	.	T	C	.	.	.	AB	T	T	T	C	T	T	T	T	T	T	T	T	T	T	T
1	1129220	.	T	C	.	.	.	AB	T	T	C	C	C	C	T	T	C	C	C	T	C	C	C
1	1129291	.	G	A	.	.	.	AB	G	G	G	G	G	G	G	G	A	G	A	G	G	G	G
1	1129342	.	A	T	.	.	.	AB	A	A	T	T	T	T	T	A	T	T	T	T	T	T	T
1	1129384	.	G	C	.	.	.	AB	G	G	G	G	G	G	G	G	C	G	C	G	G	G	G
1	1129472	.	A	-,T	.	.	.	AB	A	A	A	A	-	A	A	A	T	A	T	A	A	A	A
1	1130101	.	C	T	.	.	.	AB	C	C	T	T	T	T	C	C	C	C	C	C	T	T	T
1	1130184	.	G	T	.	.	.	AB	G	G	G	G	T	G	G	G	G	G	G	G	G	G	G
1	1130209	.	A	T	.	.	.	AB	A	A	A	A	A	A	A	T	A	A	A	A	A	A	A
1	1130210	.	G	A	.	.	.	AB	G	G	G	G	G	G	G	G	A	G	A	G	G	G	G
1	1130595	.	A	-,G	.	.	.	AB	A	A	A	A	-	A	A	A	G	A	-	A	A	A	A
1	1130623	.	A	-,G	.	.	.	AB	A	A	A	A	-	A	A	A	A	G	A	A	A	-	A
1	1130627	.	A	-,G	.	.	.	AB	A	A	A	A	-	A	A	A	G	A	G	A	A	-	A
1	1130762	.	C	T	.	.	.	AB	C	C	C	C	C	C	C	C	T	C	T	C	C	C	C
1	1130813	.	T	G	.	.	.	AB	T	T	T	T	T	T	T	T	T	T	T	G	T	T	T
1	1130924	.	A	G	.	.	.	AB	A	A	G	G	G	G	G	A	G	G	G	G	G	G	G
1	1131065	.	A	G	.	.	.	AB	A	A	G	A	A	A	A	A	A	A	A	A	A	A	A
1	1131579	.	C	A	.	.	.	AB	C	C	C	C	A	C	C	C	C	C	C	C	C	C	C
1	1135615	.	G	A	.	.	.	AB	G	G	G	G	G	G	G	G	A	G	A	G	G	G	G
1	1135881	.	C	T	.	.	.	AB	C	C	C	C	C	C	C	C	T	C	T	C	C	C	C
1	1136794	.	A	C	.	.	.	AB	A	A	C	C	C	C	C	C	C	C	C	C	C	C	C
1	1137206	.	A	T	.	.	.	AB	A	A	A	A	A	A	A	A	A	T	A	A	A	A	A
1	1137327	.	C	T	.	.	.	AB	C	C	C	C	C	C	T	C	C	C	C	T	C	C	C
1	1138215	.	C	T	.	.	.	AB	C	C	C	C	C	T	C	C	C	C	C	C	C	T	T
1	1138883	.	C	T	.	.	.	AB	C	C	C	C	C	C	C	C	C	T	C	C	C	C	C
1	1139316	.	A	G	.	.	.	AB	A	A	A	A	A	A	A	A	G	A	G	A	A	A	A
1	1139685	.	A	C	.	.	.	AB	A	A	A	A	A	A	A	A	C	C	C	A	A	A	A
1	1140206	.	C	T	.	.	.	AB	C	C	C	C	C	C	C	C	C	T	C	C	C	C	C
1	1140326	.	G	A	.	.	.	AB	G	G	A	A	A	A	G	G	G	G	G	G	A	A	A
1	1141515	.	A	T	.	.	.	AB	A	A	A	A	A	A	T	A	A	A	A	T	A	A	A
1	1143431	.	G	A	.	.	.	AB	G	G	G	G	G	G	G	G	A	G	A	G	G	G	G
1	1143467	.	C	T	.	.	.	AB	C	C	C	C	C	C	T	C	C	C	C	T	C	C	C
1	1144534	.	T	-,C	.	.	.	AB	T	T	T	T	-	T	T	T	C	T	-	T	T	T	T
1	1144904	.	C	T,-	.	.	.	AB	C	C	T	T	-	C	C	C	C	C	C	C	T	C	C
1	1144975	.	C	-,T	.	.	.	AB	C	C	C	C	-	T	C	C	C	C	-	C	C	T	T
1	1145030	.	T	-,C	.	.	.	AB	T	T	T	T	-	T	-	T	C	T	-	T	-	-	T
1	1145328	.	C	A	.	.	.	AB	C	C	C	C	C	C	C	C	A	C	A	C	C	C	C
1	1146345	.	T	G	.	.	.	AB	T	T	T	T	T	T	T	T	G	T	G	T	T	T	T
1	1147228	.	C	T	.	.	.	AB	C	C	C	C	C	C	T	C	C	C	C	T	C	C	C
1	1147289	.	G	T	.	.	.	AB	G	G	G	G	G	G	G	G	T	G	T	G	G	G	G
1	1147548	.	T	G	.	.	.	AB	T	T	G	T	T	T	T	T	T	T	T	T	T	T	T
1	1147859	.	G	A	.	.	.	AB	G	G	G	G	G	G	G	A	G	G	G	G	G	G	G
1	1148345	.	T	C	.	.	.	AB	T	T	T	C	T	T	T	T	T	T	T	T	T	T	T
1	1149182	.	C	T	.	.	.	AB	C	C	C	C	C	C	C	C	C	T	C	C	C	C	C
1	1150160	.	A	T	.	.	.	AB	A	A	T	T	T	T	A	A	T	T	T	A	T	T	T
1	1150447	.	G	A	.	.	.	AB	G	G	G	G	G	G	G	A	G	G	G	G	G	G	G
1	1151448	.	C	T	.	.	.	AB	C	C	T	T	T	T	C	C	C	C	C	C	T	T	T
1	1153019	.	G	A	.	.	.	AB	G	G	G	G	G	G	G	G	G	A	G	G	G	G	G
1	1153447	.	C	T	.	.	.	AB	C	C	T	T	T	T	C	C	C	C	C	C	T	T	T
1	1153745	.	G	A	.	.	.	AB	G	G	G	G	A	G	G	G	G	G	G	G	A	G	G
1	1153937	.	A	G	.	.	.	AB	A	A	G	G	G	G	A	A	G	G	G	A	G	G	G
1	1155705	.	T	G	.	.	.	AB	T	T	T	T	G	T	T	T	T	T	T	T	T	T	T
1	1156361	.	G	A	.	.	.	AB	G	G	G	G	G	G	G	G	A	G	A	G	G	G	G
1	1157990	.	G	A	.	.	.	AB	G	G	G	G	G	G	G	G	A	G	A	G	G	G	G
1	1158642	.	G	A	.	.	.	AB	G	G	G	G	G	G	G	G	A	G	A	G	G	G	G
1	1159315	.	C	T	.	.	.	AB	C	C	C	C	C	C	C	C	T	C	T	C	C	C	C
1	1160172	.	G	C	.	.	.	AB	G	G	G	G	G	G	G	G	C	G	C	G	G	G	G
1	1160665	.	A	C	.	.	.	AB	A	A	C	A	A	A	A	A	A	A	A	A	A	A	A
1	1160822	.	T	A	.	.	.	AB	T	T	T	T	T	A	T	T	T	T	T	T	T	T	A
1	1161286	.	C	T	.	.	.	AB	C	C	C	C	C	C	T	C	C	C	C	T	C	C	C
1	1162900	.	C	T	.	.	.	AB	C	C	T	T	T	T	C	C	C	C	C	C	T	T	T
1	1163629	.	A	C	.	.	.	AB	A	A	A	A	A	A	A	A	C	C	C	A	A	A	A
1	1163886	.	C	T	.	.	.	AB	C	C	C	C	C	C	C	C	T	C	T	C	C	C	C
1	1165050	.	G	A	.	.	.	AB	G	G	A	G	G	G	G	G	G	G	G	G	G	G	G
1	1167591	.	T	C	.	.	.	AB	T	T	C	C	C	C	C	T	C	C	C	C	C	C	C
1	1167644	.	C	T	.	.	.	AB	C	C	C	C	C	C	C	C	C	T	C	C	C	C	C
1	1167666	.	C	T	.	.	.	AB	C	C	C	C	C	T	C	C	C	C	C	C	C	T	T
1	1168533	.	A	C	.	.	.	AB	A	A	A	A	A	A	A	A	A	C	A	A	A	A	A
1	1168565	.	A	T	.	.	.	AB	A	A	A	T	A	A	A	A	A	A	A	A	A	A	A
1	1170071	.	C	T	.	.	.	AB	C	C	C	C	T	C	C	C	C	C	C	C	C	C	C
1	1170565	.	C	A	.	.	.	AB	C	C	C	C	C	C	C	C	A	C	A	C	C	C	C
1	1171208	.	C	T	.	.	.	AB	C	C	C	C	C	C	T	C	C	C	C	T	C	C	C
1	1171440	.	G	A	.	.	.	AB	G	G	G	G	G	G	G	G	A	G	A	G	G	G	G
1	1172578	.	C	T	.	.	.	AB	C	C	C	C	C	C	C	C	T	C	T	C	C	C	C
1	1172716	.	C	A	.	.	.	AB	C	C	C	C	C	C	C	C	A	C	A	C	C	C	C
1	1172787	.	G	A	.	.	.	AB	G	G	G	G	G	G	G	G	A	G	A	G	G	G	G
1	1173060	.	C	T	.	.	.	AB	C	C	C	C	C	C	C	C	C	C	C	C	T	C	C
1	1173180	.	T	G	.	.	.	AB	T	T	T	T	T	T	T	T	G	G	G	T	T	T	T
1	1173574	.	C	T	.	.	.	AB	C	C	C	C	C	C	C	C	C	T	C	C	C	C	C
1	1174325	.	T	A	.	.	.	AB	T	T	T	T	T	T	T	T	A	T	T	T	T	T	T
1	1174340	.	A	G	.	.	.	AB	A	A	A	A	A	A	A	A	A	G	A	A	A	A	A
1	1174352	.	C	T	.	.	.	AB	C	C	C	C	C	T	C	C	C	C	C	C	C	T	T
1	1175022	.	A	G	.	.	.	AB	A	A	A	A	A	A	A	A	A	G	A	A	A	A	A
1	1175596	.	T	C	.	.	.	AB	T	T	T	T	T	T	T	T	C	T	C	T	T	T	T
1	1175614	.	T	C	.	.	.	AB	T	T	T	T	T	T	T	T	T	T	T	C	T	T	T
1	1175890	.	T	G	.	.	.	AB	T	T	G	G	G	G	T	T	G	G	G	T	G	G	G
1	1177501	.	C	T	.	.	.	AB	C	C	T	C	C	C	C	C	C	C	C	C	C	C	C
1	1177965	.	C	T	.	.	.	AB	C	C	C	C	C	C	C	T	C	C	C	C	C	C	C
1	1178845	.	A	G	.	.	.	AB	A	A	A	A	A	A	A	A	A	G	A	A	A	A	A
1	1179085	.	G	A	.	.	.	AB	G	G	G	G	G	G	G	G	A	G	A	G	G	G	G
1	1179979	.	A	G	.	.	.	AB	A	A	A	A	A	A	A	A	G	A	G	A	A	A	A
1	1180279	.	C	T	.	.	.	AB	C	C	C	C	C	C	T	C	C	C	C	T	C	C	C
1	1180351	.	C	A	.	.	.	AB	C	C	A	A	A	A	A	A	A	A	A	A	A	A	A
1	1183946	.	T	G	.	.	.	AB	T	T	T	T	T	T	T	T	G	T	G	T	T	T	T
1	1184312	.	C	T	.	.	.	AB	C	C	C	C	C	C	C	C	C	C	C	T	C	C	C
1	1185789	.	C	T	.	.	.	AB	C	C	C	C	C	C	C	C	C	T	C	C	C	C	C
1	1185904	.	G	T	.	.	.	AB	G	G	G	T	G	G	G	G	G	G	G	G	G	G	G
1	1186463	.	C	T	.	.	.	AB	C	C	C	C	C	C	C	C	T	C	T	C	C	C	C
1	1186746	.	C	T	.	.	.	AB	C	C	C	C	C	T	C	C	C	C	C	C	C	T	T
1	1187404	.	A	C	.	.	.	AB	A	A	A	A	A	A	A	A	C	A	C	A	A	A	A
1	1187745	.	C	T	.	.	.	AB	C	C	C	C	C	C	T	C	C	C	C	T	C	C	C
1	1188186	.	C	T	.	.	.	AB	C	C	C	C	C	C	C	C	C	T	C	C	C	C	C
1	1190353	.	T	G	.	.	.	AB	T	T	T	T	T	G	T	T	T	T	T	T	T	G	G
1	1190718	.	C	A	.	.	.	AB	C	C	C	C	C	C	C	C	A	C	A	C	C	C	C
1	1191097	.	T	G	.	.	.	AB	T	T	G	G	G	G	G	G	G	G	G	G	G	G	G
1	1191178	.	C	T	.	.	.	AB	C	C	C	C	C	C	C	C	C	T	C	C	C	C	C
1	1191842	.	G	A	.	.	.	AB	G	G	G	G	G	G	G	G	G	A	G	G	G	G	G
1	1194043	.	G	A	.	.	.	AB	G	G	G	G	G	G	G	G	A	G	A	G	G	G	G
1	1194501	.	C	A	.	.	.	AB	C	C	C	A	C	C	C	C	C	C	C	C	C	C	C
1	1194697	.	C	T	.	.	.	AB	C	C	C	T	C	C	C	C	C	C	C	C	C	C	C
1	1195414	.	C	T	.	.	.	AB	C	C	C	C	C	C	C	C	T	C	T	C	C	C	C
1	1195825	.	A	G	.	.	.	AB	A	A	A	A	A	A	A	G	A	A	A	A	A	A	A
1	1197020	.	G	A	.	.	.	AB	G	G	G	G	G	G	A	G	G	G	G	A	G	G	G
1	1197286	.	C	T	.	.	.	AB	C	C	C	C	C	C	T	C	C	C	C	C	C	C	C
1	1198856	.	T	C	.	.	.	AB	T	T	T	T	T	T	T	T	C	T	C	T	T	T	T
1	1200329	.	T	C	.	.	.	AB	T	T	C	C	C	C	C	T	C	C	C	C	C	C	C
1	1200881	.	C	T	.	.	.	AB	C	C	C	C	C	C	C	C	T	C	T	C	C	C	C
1	1200950	.	G	T	.	.	.	AB	G	G	G	G	G	G	G	T	G	G	G	G	G	G	G
1	1201358	.	C	T	.	.	.	AB	C	C	T	C	C	C	C	C	C	C	C	C	C	C	C
1	1201573	.	C	T	.	.	.	AB	C	C	C	C	C	C	C	C	C	T	C	C	C	C	C
1	1201704	.	-	G,A	.	.	.	AB	-	-	-	-	-	G	A	-	-	-	-	A	-	G	G
1	1201978	.	C	T	.	.	.	AB	C	C	C	C	C	C	C	C	C	T	C	C	C	C	C
1	1202012	.	G	A	.	.	.	AB	G	G	G	G	G	G	G	A	G	G	G	G	G	G	G
1	1202219	.	C	T	.	.	.	AB	C	C	C	C	C	C	C	C	C	T	C	C	C	C	C
1	1203653	.	T	C,-	.	.	.	AB	T	T	C	C	C	C	C	T	C	C	-	C	C	C	C
1	1204279	.	A	T	.	.	.	AB	A	A	A	A	A	A	T	A	A	A	A	A	A	A	A
1	1204294	.	C	A	.	.	.	AB	C	C	C	C	C	C	C	C	C	A	C	C	C	C	C
1	1204303	.	C	T	.	.	.	AB	C	C	C	C	C	C	C	C	T	C	T	C	C	C	C
1	1204325	.	C	-,T	.	.	.	AB	C	C	C	C	C	C	C	C	C	C	-	C	T	C	C
1	1206487	.	A	G	.	.	.	AB	A	A	A	A	A	A	A	A	A	G	A	A	A	A	A
1	1206863	.	G	A	.	.	.	AB	G	G	G	G	G	G	G	G	G	A	G	G	G	G	G
1	1207826	.	C	T	.	.	.	AB	C	C	C	C	C	C	C	C	T	C	T	C	C	C	C
1	1208016	.	T	C	.	.	.	AB	T	T	T	T	T	T	T	T	C	T	C	T	T	T	T
1	1211256	.	C	T	.	.	.	AB	C	C	C	C	C	T	C	C	C	C	C	C	C	T	T
1	1211373	.	G	T	.	.	.	AB	G	G	G	G	G	G	G	G	T	G	T	G	G	G	G
1	1211513	.	C	T	.	.	.	AB	C	C	T	T	T	T	T	C	T	T	T	T	T	T	T
1	1212518	.	T	A	.	.	.	AB	T	T	A	A	A	A	A	A	A	A	A	A	A	A	A
1	1213346	.	G	A	.	.	.	AB	G	G	G	G	G	G	G	G	G	A	G	G	G	G	G
1	1214132	.	C	T	.	.	.	AB	C	C	C	C	T	C	C	C	C	C	C	C	C	C	C
1	1215720	.	C	T	.	.	.	AB	C	C	T	C	C	C	C	C	C	C	C	C	C	C	C
1	1216445	.	A	C	.	.	.	AB	A	A	A	A	A	A	A	A	A	C	A	A	A	A	A
1	1216578	.	C	T	.	.	.	AB	C	C	T	C	C	C	C	C	C	C	C	C	C	C	C
1	1216869	.	C	T	.	.	.	AB	C	C	C	C	C	C	T	C	C	C	C	T	C	C	C
1	1216907	.	C	T	.	.	.	AB	C	C	C	C	C	C	C	C	T	C	T	C	C	C	C
1	1216961	.	G	T	.	.	.	AB	G	G	G	G	G	G	T	G	G	G	G	T	G	G	G
1	1217059	.	T	G	.	.	.	AB	T	T	T	T	G	T	T	T	T	T	T	T	T	T	T
1	1218789	.	G	-,A	.	.	.	AB	G	G	G	G	-	A	G	G	G	G	-	G	-	-	A
1	1219256	.	T	C	.	.	.	AB	T	T	C	C	C	C	T	T	C	C	C	T	C	C	C
1	1219723	.	T	A	.	.	.	AB	T	T	A	A	A	A	A	T	A	A	A	A	A	A	A
1	1221602	.	C	A	.	.	.	AB	C	C	C	C	C	C	C	A	C	C	C	C	C	C	C
1	1225308	.	C	A	.	.	.	AB	C	C	A	A	A	C	C	C	C	C	C	C	A	C	C
1	1227370	.	T	A	.	.	.	AB	T	T	T	T	T	T	T	T	T	A	T	T	T	T	T
1	1228038	.	C	T	.	.	.	AB	C	C	C	T	T	C	C	C	C	C	C	C	T	C	C
1	1228055	.	C	T	.	.	.	AB	C	C	C	C	C	C	C	C	C	T	C	C	C	C	C
1	1228710	.	G	T	.	.	.	AB	G	G	T	T	T	T	T	T	T	T	T	T	T	T	T
1	1229894	.	G	T	.	.	.	AB	G	G	G	G	G	G	G	G	T	G	T	G	G	G	G
1	1229906	.	A	G	.	.	.	AB	A	A	A	A	A	A	A	A	A	G	A	A	A	A	A
1	1230133	.	C	T	.	.	.	AB	C	C	C	C	C	C	C	C	T	C	T	C	C	C	C
1	1231927	.	G	A	.	.	.	AB	G	G	G	G	G	G	G	G	G	G	G	A	G	G	G
1	1232819	.	A	C	.	.	.	AB	A	A	A	A	A	A	A	A	A	C	A	A	A	A	A
1	1233937	.	C	T	.	.	.	AB	C	C	C	C	C	C	C	C	T	C	T	C	C	C	C
1	1234548	.	T	C	.	.	.	AB	T	T	T	T	T	T	T	T	C	C	C	T	T	T	T
1	1234596	.	T	G	.	.	.	AB	T	T	T	T	G	T	T	T	T	T	T	T	T	T	T
1	1235752	.	G	A	.	.	.	AB	G	G	A	A	A	A	G	G	G	G	G	G	A	A	A
1	1236723	.	C	T	.	.	.	AB	C	C	C	C	C	T	C	C	C	C	C	C	C	C	T
1	1238020	.	G	N,A	.	.	.	AB	G	G	G	G	G	G	G	G	N	A	N	G	G	G	G
1	1240273	.	A	T,N	.	.	.	AB	A	A	T	T	T	T	T	T	N	T	N	T	T	T	T
1	1240486	.	G	T,N	.	.	.	AB	G	G	T	G	G	G	G	G	N	G	N	G	G	G	G
1	1240553	.	T	C,N	.	.	.	AB	T	T	C	C	C	C	C	T	N	C	N	C	C	C	C
1	1240664	.	C	N,T	.	.	.	AB	C	C	C	C	C	C	C	C	N	T	N	C	C	C	C
1	1242819	.	T	C,N	.	.	.	AB	T	T	C	C	C	C	C	T	N	C	N	C	C	C	C
1	1242995	.	T	N,G	.	.	.	AB	T	T	T	T	T	T	T	T	N	G	N	T	T	T	T
1	1243573	.	C	T,N	.	.	.	AB	C	C	T	C	C	C	C	C	N	C	N	C	C	C	C
1	1244558	.	G	A,N	.	.	.	AB	G	G	G	G	G	G	G	A	N	G	N	G	G	G	G
1	1244842	.	A	G,N	.	.	.	AB	A	A	G	G	G	G	G	A	N	G	N	G	G	G	G
1	1244877	.	G	A,N	.	.	.	AB	G	G	G	G	G	G	A	G	N	G	N	G	G	G	G
1	1244950	.	T	C,N	.	.	.	AB	T	T	T	T	T	T	C	T	N	T	N	T	T	T	T
1	1245865	.	T	C,N	.	.	.	AB	T	T	C	C	C	C	T	T	N	C	N	T	C	C	C
1	1245983	.	G	A,N	.	.	.	AB	G	G	G	G	G	G	A	G	N	G	N	G	G	G	G
1	1246399	.	C	T,N	.	.	.	AB	C	C	C	T	C	C	C	C	N	C	N	C	C	C	C
1	1246858	.	C	T,N	.	.	.	AB	C	C	C	C	C	C	C	T	N	C	N	C	C	C	C
1	1248084	.	T	C,N	.	.	.	AB	T	T	C	C	C	C	C	C	N	C	N	C	C	C	C
1	1248857	.	C	T,N	.	.	.	AB	C	C	C	C	C	C	C	T	N	C	N	C	C	C	C
1	1248859	.	C	N,A	.	.	.	AB	C	C	C	C	C	C	C	C	N	A	N	C	C	C	C
1	1248869	.	T	C,N	.	.	.	AB	T	T	C	C	C	C	C	T	N	T	N	C	C	C	C
1	1251478	.	T	G,N	.	.	.	AB	T	T	G	T	T	T	T	T	N	T	N	T	T	T	T
1	1253669	.	C	T,N	.	.	.	AB	C	C	T	T	T	C	C	C	N	C	N	C	T	C	C
1	1254097	.	A	N,G	.	.	.	AB	A	A	A	A	A	A	A	A	N	A	N	A	G	A	A
1	1255231	.	A	C,N	.	.	.	AB	A	A	A	A	C	A	A	A	N	A	N	A	A	A	A
1	1255549	.	G	A,N	.	.	.	AB	G	G	A	A	A	A	G	G	N	G	N	G	A	A	A
1	1256987	.	T	C,N	.	.	.	AB	T	T	C	C	C	C	C	C	N	C	N	C	C	C	C
1	1258437	.	G	A,N	.	.	.	AB	G	G	G	G	G	G	G	A	N	G	N	G	G	G	G
1	1260022	.	G	T	.	.	.	AB	G	G	G	G	G	G	G	G	G	G	G	T	G	G	G
1	1260209	.	G	A	.	.	.	AB	G	G	G	G	G	G	G	G	A	G	A	G	G	G	G
1	1260391	.	A	G	.	.	.	AB	A	A	A	A	A	A	G	A	A	A	A	A	A	A	A
1	1260689	.	G	C	.	.	.	AB	G	G	G	G	G	G	G	G	C	G	C	G	G	G	G
1	1260696	.	T	C	.	.	.	AB	T	T	C	T	T	T	T	T	T	T	T	T	T	T	T
1	1261109	.	-	G,A	.	.	.	AB	-	-	G	G	G	G	G	-	G	A	G	G	G	G	G
1	1261600	.	-	C,T	.	.	.	AB	-	-	C	C	C	C	C	-	C	C	C	T	C	C	C
1	1261876	.	-	C,A	.	.	.	AB	-	-	C	C	C	A	C	-	C	C	C	C	C	A	A
1	1264013	.	-	G,A	.	.	.	AB	-	-	G	G	G	G	G	-	A	G	A	G	G	G	G
1	1264081	.	-	G,A	.	.	.	AB	-	-	G	G	G	A	A	-	A	A	A	A	G	A	A
1	1264824	.	-	A,C	.	.	.	AB	-	-	A	A	A	A	A	-	A	C	A	A	A	A	A
1	1268846	.	-	G,T	.	.	.	AB	-	-	G	T	G	G	G	-	G	G	G	G	G	G	G
1	1269483	.	-	T,G	.	.	.	AB	-	-	T	T	T	T	T	-	T	G	T	T	T	T	T
1	1271061	.	-	T,G	.	.	.	AB	-	-	T	T	T	T	T	-	G	G	G	T	T	T	T
1	1271559	.	-	G,T	.	.	.	AB	-	-	G	T	T	T	T	-	T	T	T	T	T	T	T
1	1271712	.	-	T,G	.	.	.	AB	-	-	T	T	T	T	T	-	G	T	G	T	T	T	T
1	1272023	.	-	C,A	.	.	.	AB	-	-	C	C	C	C	C	-	A	C	A	C	C	C	C
1	1272090	.	-	T,C	.	.	.	AB	-	-	T	T	T	T	T	-	C	C	C	T	T	T	T
1	1272808	.	-	C,T	.	.	.	AB	-	-	C	C	C	C	C	-	T	C	T	C	C	C	C
1	1272885	.	-	G,A	.	.	.	AB	-	-	G	G	G	G	G	-	A	G	A	G	G	G	G
1	1272896	.	-	G,A	.	.	.	AB	-	-	G	G	G	G	G	-	G	A	G	G	G	G	G
1	1272930	.	-	T,C	.	.	.	AB	-	-	T	T	T	T	C	-	C	C	C	C	T	T	T
1	1273072	.	-	C,A	.	.	.	AB	-	-	C	C	C	C	C	-	A	A	A	C	C	C	C
1	1273428	.	-	C,T	.	.	.	AB	-	-	C	C	C	C	C	-	T	C	T	C	C	C	C
1	1273834	.	-	C,T	.	.	.	AB	-	-	C	C	C	C	C	-	C	T	C	C	C	C	C
1	1274920	.	-	T,G	.	.	.	AB	-	-	T	T	T	T	T	-	T	G	T	T	T	T	T
1	1274943	.	-	G,T	.	.	.	AB	-	-	G	G	G	G	T	-	T	T	T	T	G	G	G
1	1275421	.	-	C,T	.	.	.	AB	-	-	C	C	C	C	C	-	T	C	T	C	C	C	C
1	1276678	.	-	T,G	.	.	.	AB	-	-	T	T	T	T	T	-	G	T	G	T	T	T	T
1	1276996	.	-	C,A	.	.	.	AB	-	-	C	C	C	C	C	-	C	A	C	C	C	C	C
1	1277132	.	-	G,T	.	.	.	AB	-	-	G	G	G	G	G	-	G	T	G	G	G	G	G
1	1277401	.	-	G,T	.	.	.	AB	-	-	G	G	G	G	G	-	T	G	T	G	G	G	G
1	1278681	.	-	C,T	.	.	.	AB	-	-	C	C	C	C	C	-	C	T	C	C	C	C	C
1	1278689	.	-	T,C	.	.	.	AB	-	-	T	T	T	T	T	-	T	C	T	T	T	T	T
1	1278780	.	-	C,T	.	.	.	AB	-	-	C	C	C	C	C	-	C	T	C	C	C	C	C
1	1279253	.	-	C,T	.	.	.	AB	-	-	C	C	T	C	C	-	C	C	C	C	T	C	C
1	1280254	.	-	A,G	.	.	.	AB	-	-	A	G	G	G	G	-	G	G	G	G	G	G	G
1	1280415	.	-	T,A	.	.	.	AB	-	-	T	T	T	T	T	-	A	T	A	T	T	T	T
1	1280572	.	-	A,C	.	.	.	AB	-	-	A	A	A	C	A	-	A	A	A	A	A	C	C
1	1282553	.	-	T,C	.	.	.	AB	-	-	T	T	T	T	C	-	-	C	-	C	T	T	T
1	1283629	.	-	A,G	.	.	.	AB	-	-	A	A	-	A	A	-	-	A	-	G	A	-	A
1	1284261	.	-	C,T	.	.	.	AB	-	-	C	C	T	C	C	-	-	C	-	C	C	C	C
1	1288723	.	-	G,T	.	.	.	AB	-	-	G	G	G	G	G	-	-	T	-	G	G	G	G
1	1289659	.	-	C,T	.	.	.	AB	-	-	C	C	C	C	C	-	-	T	-	C	C	C	C
1	1289894	.	-	A,G	.	.	.	AB	-	-	A	G	G	A	A	-	-	A	-	A	G	A	A
1	1292233	.	-	A,G	.	.	.	AB	-	-	A	A	A	A	A	-	-	A	-	A	G	A	A
1	1292634	.	-	G,A	.	.	.	AB	-	-	G	G	A	G	G	-	-	G	-	G	G	G	G
1	1294678	.	-	A,T	.	.	.	AB	-	-	A	A	A	A	A	-	-	T	-	A	A	A	A
1	1297315	.	-	T,G	.	.	.	AB	-	-	T	T	T	T	G	-	-	G	-	G	T	T	T
1	1297886	.	-	C,T	.	.	.	AB	-	-	C	C	C	C	C	-	-	T	-	C	C	C	C
1	1298224	.	-	A,G	.	.	.	AB	-	-	A	A	A	A	G	-	-	A	-	A	A	A	A
1	1298966	.	-	C,T	.	.	.	AB	-	-	C	C	C	C	C	-	-	T	-	C	C	C	C
1	1299372	.	-	T,C	.	.	.	AB	-	-	T	T	T	T	T	-	-	T	-	C	T	T	T
1	1299878	.	-	T,C	.	.	.	AB	-	-	T	T	T	C	C	-	-	C	-	C	T	C	C
1	1301017	.	G	-,A	.	.	.	AB	G	G	-	A	G	G	-	-	-	-	-	-	G	-	G
1	1302583	.	G	A	.	.	.	AB	G	G	G	G	G	G	G	G	A	G	A	G	G	G	G
1	1303945	.	G	T	.	.	.	AB	G	G	G	G	G	G	G	G	T	G	T	G	G	G	G
1	1304597	.	A	C	.	.	.	AB	A	A	C	C	C	C	C	C	C	C	C	C	C	C	C
1	1306374	.	G	T	.	.	.	AB	G	G	G	G	G	G	G	G	G	T	G	G	G	G	G
1	1306594	.	C	T	.	.	.	AB	C	C	C	C	C	C	C	C	T	C	T	C	C	C	C
1	1307521	.	G	T	.	.	.	AB	G	G	G	G	G	G	G	G	T	G	T	G	G	G	G
1	1307648	.	C	T	.	.	.	AB	C	C	C	C	C	C	C	C	C	C	C	T	C	C	C
1	1308914	.	G	A	.	.	.	AB	G	G	G	G	G	G	G	G	G	A	G	G	G	G	G
1	1309315	.	C	T	.	.	.	AB	C	C	T	T	T	T	C	C	C	C	C	C	T	T	T
1	1309351	.	T	A	.	.	.	AB	T	T	A	A	A	A	A	A	A	A	A	A	A	A	A
1	1310409	.	A	C	.	.	.	AB	A	A	C	C	C	C	C	C	C	C	C	C	C	C	C
1	1311735	.	G	A	.	.	.	AB	G	G	G	A	A	G	G	G	G	G	G	G	A	G	G
1	1312640	.	T	A	.	.	.	AB	T	T	T	T	T	T	T	T	A	A	A	T	T	T	T
1	1312736	.	A	C	.	.	.	AB	A	A	C	C	C	C	C	A	C	C	C	C	C	C	C
1	1312912	.	C	T	.	.	.	AB	C	C	C	C	C	C	C	C	T	C	T	C	C	C	C
1	1314014	.	C	T	.	.	.	AB	C	C	C	C	C	C	C	C	T	C	T	C	C	C	C
1	1314434	.	C	T	.	.	.	AB	C	C	T	T	T	T	T	C	T	T	T	T	T	T	T
1	1315117	.	C	T	.	.	.	AB	C	C	C	C	C	C	C	T	C	C	C	C	C	C	C
1	1316323	.	G	C	.	.	.	AB	G	G	G	G	G	G	G	C	G	G	G	G	G	G	G
1	1316648	.	A	G	.	.	.	AB	A	A	A	A	A	A	A	A	G	A	G	A	A	A	A
1	1317400	.	A	G	.	.	.	AB	A	A	A	A	A	G	A	A	A	A	A	A	A	G	G
1	1317963	.	G	A	.	.	.	AB	G	G	G	G	G	G	G	G	A	G	A	G	G	G	G
1	1318145	.	G	T	.	.	.	AB	G	G	G	G	G	G	G	G	G	G	G	G	G	T	G
1	1318955	.	T	C	.	.	.	AB	T	T	T	T	T	T	T	C	T	T	T	T	T	T	T
1	1320024	.	G	A	.	.	.	AB	G	G	G	G	G	G	G	G	A	G	A	G	G	G	G
1	1320142	.	C	A	.	.	.	AB	C	C	C	C	C	C	C	A	C	C	C	C	C	C	C
1	1320282	.	C	A	.	.	.	AB	C	C	C	C	C	C	C	C	A	C	A	C	C	C	C
1	1320805	.	G	A	.	.	.	AB	G	G	G	G	G	A	G	G	G	G	G	G	G	A	A
1	1321341	.	G	A	.	.	.	AB	G	G	A	G	G	G	G	G	G	G	G	G	G	G	G
1	1321941	.	A	T	.	.	.	AB	A	A	A	A	A	A	A	A	A	T	A	A	A	A	A
1	1322163	.	C	T	.	.	.	AB	C	C	C	C	C	T	C	C	C	C	C	C	C	T	T
1	1322279	.	G	T	.	.	.	AB	G	G	G	G	G	G	G	T	G	G	G	G	G	G	G
1	1322665	.	C	T	.	.	.	AB	C	C	C	C	C	T	C	C	C	C	C	C	C	T	T
1	1322681	.	C	T	.	.	.	AB	C	C	C	C	C	C	C	C	C	T	C	C	C	C	C
1	1322994	.	G	C	.	.	.	AB	G	G	G	G	G	G	G	G	C	G	C	G	G	G	G
1	1324727	.	C	T	.	.	.	AB	C	C	C	C	C	C	C	C	C	T	C	C	C	C	C
1	1325308	.	G	A	.	.	.	AB	G	G	G	G	G	G	G	G	G	A	G	G	G	G	G
1	1325571	.	C	T	.	.	.	AB	C	C	C	C	C	C	T	C	C	C	C	T	C	C	C
1	1325596	.	T	C	.	.	.	AB	T	T	C	C	C	C	C	C	C	C	C	C	C	C	C
1	1328307	.	A	G	.	.	.	AB	A	A	A	A	A	A	G	A	A	A	A	G	A	A	A
1	1328311	.	A	G	.	.	.	AB	A	A	A	A	A	A	G	A	A	A	A	G	A	A	A
1	1329424	.	G	A	.	.	.	AB	G	G	G	G	G	G	G	G	G	A	G	G	G	G	G
1	1330704	.	G	T	.	.	.	AB	G	G	G	G	G	G	T	G	G	G	G	T	G	G	G
1	1331179	.	G	T	.	.	.	AB	G	G	G	G	G	T	G	G	G	G	G	G	G	T	T
1	1332489	.	T	A	.	.	.	AB	T	T	T	T	T	T	T	T	A	T	A	T	T	T	T
1	1334209	.	C	T	.	.	.	AB	C	C	T	C	C	C	C	C	C	C	C	C	C	C	C
1	1334598	.	G	A	.	.	.	AB	G	G	G	G	G	G	G	G	A	G	A	G	G	G	G
1	1334752	.	T	C	.	.	.	AB	T	T	C	C	C	C	C	T	C	C	C	C	C	C	C
1	1334810	.	C	T	.	.	.	AB	C	C	C	C	C	C	C	C	C	T	C	C	C	C	C
1	1335374	.	G	A	.	.	.	AB	G	G	G	G	G	G	G	G	A	G	A	G	G	G	G
1	1335631	.	G	T	.	.	.	AB	G	G	T	T	T	T	G	G	G	G	G	G	T	T	T
1	1336195	.	G	T	.	.	.	AB	G	G	G	G	G	G	G	G	G	G	G	T	G	G	G
1	1336281	.	C	T	.	.	.	AB	C	C	C	C	C	C	C	C	T	C	T	C	C	C	C
1	1337753	.	A	T	.	.	.	AB	A	A	A	A	T	A	A	A	A	A	A	A	A	A	A
1	1337824	.	G	A	.	.	.	AB	G	G	G	G	G	G	G	G	A	G	A	G	G	G	G
1	1338014	.	C	A	.	.	.	AB	C	C	C	C	C	C	C	C	A	C	A	C	C	C	C
1	1340886	.	C	A	.	.	.	AB	C	C	C	C	C	A	C	C	C	C	C	C	C	A	A
1	1341226	.	G	A	.	.	.	AB	G	G	G	G	G	G	G	G	G	A	G	G	G	G	G
1	1343278	.	C	A	.	.	.	AB	C	C	C	C	C	C	A	C	C	C	C	A	C	C	C
1	1345147	.	T	A	.	.	.	AB	T	T	A	T	T	T	T	T	T	T	T	T	T	T	T
1	1345225	.	A	G	.	.	.	AB	A	A	G	G	G	G	G	G	G	G	G	G	G	G	G
1	1345269	.	G	A	.	.	.	AB	G	G	G	G	G	G	G	G	A	G	A	G	G	G	G
1	1345460	.	G	T	.	.	.	AB	G	G	T	T	T	T	G	G	G	G	G	G	T	T	T
1	1345847	.	C	T	.	.	.	AB	C	C	T	T	T	T	C	C	C	C	C	C	T	T	T
1	1348317	.	C	T	.	.	.	AB	C	C	C	C	C	C	C	C	T	C	T	C	C	C	C
1	1348897	.	C	T	.	.	.	AB	C	C	C	C	C	C	C	C	T	T	T	C	C	C	C
1	1349164	.	T	A	.	.	.	AB	T	T	T	T	T	T	T	T	A	T	A	T	T	T	T
1	1349308	.	T	G	.	.	.	AB	T	T	T	T	T	T	T	T	G	T	G	T	T	T	T
1	1350390	.	T	C	.	.	.	AB	T	T	T	T	T	T	T	T	T	C	T	T	T	T	T
1	1350805	.	G	T	.	.	.	AB	G	G	G	G	G	G	G	G	G	T	G	G	G	G	G
1	1350929	.	G	T	.	.	.	AB	G	G	G	G	G	G	G	T	G	G	G	G	G	G	G
1	1350980	.	T	C	.	.	.	AB	T	T	C	C	C	C	C	C	C	C	C	C	C	C	C
1	1350994	.	G	C	.	.	.	AB	G	G	G	G	G	G	G	G	G	C	G	G	G	G	G
1	1351159	.	C	A	.	.	.	AB	C	C	C	C	C	C	C	C	C	A	C	C	C	C	C
1	1351707	.	C	G	.	.	.	AB	C	C	G	G	G	G	C	C	C	C	C	C	G	G	G
1	1351769	.	T	G	.	.	.	AB	T	T	T	T	T	T	G	T	T	T	T	G	T	T	T
1	1352900	.	G	A	.	.	.	AB	G	G	G	G	G	G	G	G	A	G	A	G	G	G	G
1	1353793	.	C	T	.	.	.	AB	C	C	C	C	C	C	C	C	T	C	T	C	C	C	C
1	1354507	.	C	T	.	.	.	AB	C	C	C	C	C	C	C	C	C	T	C	C	C	C	C
1	1354737	.	C	T	.	.	.	AB	C	C	C	T	C	C	C	C	C	C	C	C	C	C	C
1	1355247	.	C	G	.	.	.	AB	C	C	G	G	G	G	C	C	G	G	G	C	G	G	G
1	1356176	.	G	A	.	.	.	AB	G	G	G	G	G	G	G	G	G	A	G	G	G	G	G
1	1358384	.	G	A	.	.	.	AB	G	G	G	G	G	A	G	G	G	G	G	G	G	A	A
1	1359526	.	T	C	.	.	.	AB	T	T	T	T	T	T	T	T	C	T	C	T	T	T	T
1	1360577	.	G	A	.	.	.	AB	G	G	G	G	G	A	G	G	G	G	G	G	G	A	A
1	1360982	.	T	A	.	.	.	AB	T	T	T	A	T	T	T	T	T	T	T	T	T	T	T
1	1361115	.	C	T	.	.	.	AB	C	C	C	C	C	C	C	C	C	C	C	T	C	C	C
1	1361133	.	G	A	.	.	.	AB	G	G	G	G	G	G	G	G	G	G	G	A	G	G	G
1	1361694	.	C	A	.	.	.	AB	C	C	A	A	A	A	A	A	A	A	A	A	A	A	A
1	1363598	.	C	T	.	.	.	AB	C	C	C	C	C	C	C	C	C	C	C	T	C	C	C
1	1364098	.	C	A	.	.	.	AB	C	C	C	C	C	C	C	C	A	C	A	C	C	C	C
1	1364207	.	C	-,G	.	.	.	AB	C	C	C	C	C	C	-	C	C	C	C	C	C	G	C
1	1364526	.	G	T	.	.	.	AB	G	G	G	G	G	G	G	G	T	G	T	G	G	G	G
1	1364939	.	T	C	.	.	.	AB	T	T	T	T	T	T	T	T	C	T	C	T	T	T	T
1	1365639	.	G	A	.	.	.	AB	G	G	G	G	A	G	G	G	G	G	G	G	G	G	G
1	1365707	.	T	C	.	.	.	AB	T	T	C	C	C	C	T	T	C	C	C	T	C	C	C
1	1367509	.	C	T	.	.	.	AB	C	C	C	C	C	C	C	C	C	T	C	C	C	C	C
1	1368097	.	C	T	.	.	.	AB	C	C	C	C	C	C	C	C	T	C	T	C	C	C	C
1	1371250	.	C	T	.	.	.	AB	C	C	C	C	C	T	C	C	C	C	C	C	C	T	T
1	1371701	.	G	T	.	.	.	AB	G	G	G	G	G	G	G	G	T	G	T	G	G	G	G
1	1372535	.	C	T	.	.	.	AB	C	C	C	C	C	C	C	C	T	C	T	C	C	C	C
1	1372740	.	C	T	.	.	.	AB	C	C	T	C	C	C	C	C	C	C	C	C	C	C	C
1	1372915	.	T	A	.	.	.	AB	T	T	T	T	T	T	T	T	A	T	A	T	T	T	T
1	1373404	.	A	C	.	.	.	AB	A	A	C	C	C	C	C	C	C	C	C	C	C	C	C
1	1373417	.	G	A	.	.	.	AB	G	G	A	G	G	G	G	G	G	G	G	G	G	G	G
1	1373482	.	C	T	.	.	.	AB	C	C	T	T	T	T	C	C	C	C	C	C	T	T	T
1	1373493	.	C	T	.	.	.	AB	C	C	T	C	C	C	C	C	C	C	C	C	C	C	C
1	1373586	.	G	T	.	.	.	AB	G	G	T	T	T	T	T	G	T	T	T	T	T	T	T
1	1373955	.	T	G	.	.	.	AB	T	T	T	T	T	T	T	T	G	T	G	T	T	T	T
1	1374456	.	G	A	.	.	.	AB	G	G	G	G	G	G	G	G	A	G	A	G	G	G	G
1	1377269	.	T	C	.	.	.	AB	T	T	C	C	C	C	C	C	C	C	C	C	C	C	C
1	1378312	.	C	T	.	.	.	AB	C	C	T	T	T	T	C	C	C	C	C	C	T	T	T
1	1379647	.	T	C	.	.	.	AB	T	T	T	T	T	T	T	T	C	T	C	T	T	T	T
1	1380330	.	C	T	.	.	.	AB	C	C	C	C	C	C	C	C	C	C	C	C	C	T	C
1	1382646	.	C	T	.	.	.	AB	C	C	C	C	T	C	C	C	C	C	C	C	T	C	C
1	1382832	.	G	A	.	.	.	AB	G	G	G	G	G	G	G	G	A	G	A	G	G	G	G
1	1383170	.	C	T	.	.	.	AB	C	C	C	C	C	C	C	C	C	T	C	C	C	C	C
1	1384155	.	C	T	.	.	.	AB	C	C	T	C	C	C	C	C	C	C	C	C	C	C	C
1	1385263	.	C	A	.	.	.	AB	C	C	C	C	C	C	C	C	C	A	C	C	C	C	C
1	1385489	.	C	A	.	.	.	AB	C	C	A	A	A	A	A	A	A	A	A	A	A	A	A
1	1385530	.	C	T	.	.	.	AB	C	C	T	C	C	C	C	C	C	C	C	C	C	C	C
1	1385945	.	T	G	.	.	.	AB	T	T	G	T	T	T	T	T	T	T	T	T	T	T	T
1	1386531	.	C	A	.	.	.	AB	C	C	A	A	A	A	A	A	A	A	A	A	A	A	A
1	1386535	.	A	G	.	.	.	AB	A	A	G	G	G	G	G	G	G	G	G	G	G	G	G
1	1387493	.	G	A	.	.	.	AB	G	G	A	A	A	A	G	G	G	G	G	G	A	A	A
1	1388233	.	C	T	.	.	.	AB	C	C	C	C	C	C	C	C	T	C	T	C	C	C	C
[truncated: 5,026 more rows]
