# Supplementary material for: Escherichia coli ST302: Genomic Analysis of Virulence Potential and Antimicrobial Resistance Mediated by Mobile Genetic Elements
Source: Front Microbiol. 2020 Jan 21;10:3098. doi: 10.3389/fmicb.2019.03098 (PMC6985150; doi:10.3389/fmicb.2019.03098)
Supplement: DATA S2 — ST302 SNP analysis. [file Data_Sheet_2.ZIP › SNP_Analysis/ST302_SNP/SNP_analysis/snippyout/ST302/BA8907-ND-ST302.out/snps.csv]

CHROM	POS	TYPE	REF	ALT	EVIDENCE	FTYPE	STRAND	NT_POS	AA_POS	EFFECT	LOCUS_TAG	GENE	PRODUCT
EA2454	977	snp	T	C	C:92 T:0
EA2454	2432	snp	G	T	T:98 G:0
EA2454	4901	snp	T	C	C:99 T:0
EA2454	10139	snp	A	G	G:108 A:0
EA2454	11382	snp	A	G	G:74 A:0
EA2454	11615	snp	T	G	G:103 T:0
EA2454	18559	snp	G	T	T:93 G:0
EA2454	24420	snp	T	G	G:98 T:0
EA2454	25719	snp	T	C	C:89 T:0
EA2454	34494	snp	T	C	C:100 T:0
EA2454	36375	snp	C	A	A:104 C:0
EA2454	36724	snp	G	T	T:77 G:0
EA2454	37550	snp	G	T	T:102 G:0
EA2454	37987	snp	T	C	C:97 T:0
EA2454	37993	snp	A	G	G:99 A:0
EA2454	48190	snp	C	A	A:95 C:0
EA2454	50851	snp	A	C	C:111 A:0
EA2454	53157	snp	C	T	T:114 C:0
EA2454	54992	snp	T	C	C:101 T:0
EA2454	56628	snp	A	C	C:103 A:0
EA2454	58152	snp	T	C	C:92 T:0
EA2454	59959	snp	G	T	T:115 G:0
EA2454	61069	snp	A	T	T:110 A:0
EA2454	61315	snp	T	G	G:103 T:0
EA2454	64446	ins	C	CA	CA:90 C:0
EA2454	67315	snp	A	C	C:94 A:0
EA2454	69114	snp	A	C	C:79 A:0
EA2454	69595	snp	A	G	G:96 A:0
EA2454	71896	snp	C	T	T:85 C:0
EA2454	74671	snp	A	G	G:87 A:0
EA2454	77252	snp	A	C	C:118 A:0
EA2454	80371	snp	C	T	T:96 C:0
EA2454	82631	snp	G	C	C:95 G:0
EA2454	84557	snp	T	G	G:93 T:0
EA2454	87412	snp	A	G	G:114 A:0
EA2454	88223	ins	T	TTCAATA	TTCAATA:34 T:0
EA2454	88705	snp	C	T	T:115 C:0
EA2454	95651	ins	A	AT	AT:96 A:0
EA2454	95737	del	CT	C	C:111 CT:0
EA2454	96697	snp	T	C	C:99 T:0
EA2454	97248	snp	A	C	C:93 A:0
EA2454	99924	snp	C	T	T:102 C:0
EA2454	101724	snp	A	C	C:100 A:0
EA2454	102030	snp	T	C	C:96 T:0
EA2454	103004	snp	T	G	G:103 T:0
EA2454	105425	del	TA	T	T:63 TA:0
EA2454	111773	snp	C	G	G:70 C:0
EA2454	113186	snp	C	T	T:109 C:0
EA2454	116969	snp	C	T	T:113 C:0
EA2454	119029	snp	A	G	G:105 A:0
EA2454	123376	snp	G	A	A:87 G:0
EA2454	124865	snp	T	C	C:81 T:0
EA2454	126504	snp	A	G	G:102 A:0
EA2454	131613	snp	A	G	G:105 A:0
EA2454	131667	snp	G	A	A:107 G:0
EA2454	131768	snp	G	A	A:93 G:0
EA2454	134431	snp	C	T	T:108 C:0
EA2454	140951	snp	T	G	G:82 T:0
EA2454	145428	snp	T	C	C:88 T:0
EA2454	146087	snp	A	C	C:104 A:0
EA2454	158592	snp	T	G	G:102 T:0
EA2454	163764	snp	C	T	T:119 C:0
EA2454	163798	snp	T	C	C:119 T:0
EA2454	163935	snp	G	T	T:128 G:0
EA2454	163970	del	AT	A	A:81 AT:0
EA2454	165798	snp	T	A	A:110 T:1
EA2454	172664	snp	C	T	T:81 C:0
EA2454	173739	snp	C	T	T:93 C:0
EA2454	174420	snp	A	G	G:99 A:0
EA2454	186550	snp	T	C	C:82 T:0
EA2454	187941	snp	A	G	G:107 A:0
EA2454	190313	snp	T	C	C:102 T:0
EA2454	217635	snp	C	T	T:103 C:0
EA2454	220577	snp	G	A	A:95 G:0
EA2454	225044	snp	C	T	T:115 C:0
EA2454	226823	snp	C	T	T:114 C:1
EA2454	229613	complex	AAGACACTA	GCGACGCTG	GCGACGCTG:20 AAGACACTA:0
EA2454	229626	snp	G	C	C:27 G:0
EA2454	239221	snp	A	G	G:100 A:0
EA2454	245043	snp	C	T	T:80 C:0
EA2454	245301	snp	C	T	T:102 C:0
EA2454	248471	snp	T	C	C:94 T:0
EA2454	255306	snp	G	A	A:114 G:0
EA2454	256488	snp	G	T	T:101 G:0
EA2454	260007	snp	C	A	A:112 C:0
EA2454	262173	snp	C	T	T:99 C:0
EA2454	273409	snp	C	T	T:106 C:0
EA2454	274246	snp	C	T	T:104 C:0
EA2454	275599	snp	G	A	A:92 G:0
EA2454	275686	del	GAGC	G	G:78 GAGC:0
EA2454	277907	snp	G	T	T:98 G:0
EA2454	278848	snp	A	G	G:108 A:0
EA2454	282929	snp	C	T	T:87 C:0
EA2454	284131	snp	A	G	G:93 A:0
EA2454	285627	ins	A	AT	AT:98 A:0
EA2454	289718	del	GA	G	G:90 GA:0
EA2454	290187	snp	C	A	A:97 C:0
EA2454	298055	snp	G	T	T:110 G:0
EA2454	298286	snp	T	C	C:76 T:0
EA2454	299974	snp	C	T	T:97 C:0
EA2454	300016	snp	T	C	C:94 T:0
EA2454	300252	snp	T	C	C:127 T:0
EA2454	300276	complex	AAGT	CAGC	CAGC:116 AAGT:0
EA2454	300285	snp	A	G	G:119 A:0
EA2454	300315	snp	G	A	A:117 G:0
EA2454	300378	snp	G	A	A:109 G:0
EA2454	300424	complex	CG	GT	GT:98 CG:0
EA2454	300438	complex	GATT	AATG	AATG:94 GATT:0
EA2454	300447	complex	CGGG	GGGT	GGGT:87 CGGG:0
EA2454	300459	snp	C	T	T:98 C:0
EA2454	300471	snp	T	C	C:100 T:0
EA2454	300494	snp	C	T	T:97 C:0
EA2454	300561	snp	G	A	A:90 G:2
EA2454	300651	snp	C	A	A:102 C:0
EA2454	300666	snp	G	A	A:95 G:0
EA2454	300681	snp	C	T	T:103 C:0
EA2454	300718	snp	A	G	G:104 A:1
EA2454	300726	snp	A	G	G:104 A:0
EA2454	300788	snp	C	T	T:90 C:1
EA2454	300863	complex	GATCACGAGGG	TATCGCGGGGC	TATCGCGGGGC:72 GATCACGAGGG:0
EA2454	300879	complex	GAG	CAA	CAA:78 GAG:1
EA2454	300923	snp	A	C	C:90 A:0
EA2454	301126	snp	T	C	C:119 T:0
EA2454	301555	snp	T	C	C:73 T:0
EA2454	301564	snp	T	C	C:73 T:0
EA2454	301657	snp	T	C	C:99 T:0
EA2454	301681	complex	TCCG	CCCA	CCCA:82 TCCG:0
EA2454	301690	snp	G	A	A:86 G:0
EA2454	301705	snp	G	C	C:81 G:0
EA2454	301736	snp	T	C	C:73 T:0
EA2454	301759	snp	T	C	C:70 T:0
EA2454	301807	snp	T	C	C:78 T:0
EA2454	301822	snp	G	A	A:83 G:0
EA2454	302024	snp	T	C	C:108 T:0
EA2454	302135	snp	T	G	G:85 T:0
EA2454	302258	snp	G	T	T:80 G:0
EA2454	302303	snp	G	A	A:73 G:0
EA2454	302324	snp	A	C	C:75 A:0
EA2454	302386	snp	C	G	G:92 C:0
EA2454	302472	snp	A	G	G:101 A:0
EA2454	302495	snp	G	A	A:96 G:0
EA2454	302540	snp	T	A	A:89 T:0
EA2454	302666	snp	C	T	T:99 C:0
EA2454	302696	snp	A	G	G:91 A:0
EA2454	302744	snp	A	G	G:93 A:0
EA2454	302783	snp	T	C	C:90 T:0
EA2454	302798	snp	G	A	A:83 G:0
EA2454	302816	complex	GCTTGCG	ACTGGCA	ACTGGCA:71 GCTTGCG:0
EA2454	302846	snp	G	A	A:89 G:0
EA2454	302894	snp	T	C	C:92 T:0
EA2454	302914	snp	A	T	T:94 A:0
EA2454	302929	snp	G	A	A:88 G:0
EA2454	302969	snp	C	T	T:83 C:0
EA2454	303047	complex	TGCCGGA	AGCTGGG	AGCTGGG:76 TGCCGGA:0
EA2454	303061	complex	TA	GT	GT:77 TA:0
EA2454	303359	snp	G	A	A:102 G:0
EA2454	303365	snp	C	T	T:104 C:0
EA2454	303533	snp	A	G	G:93 A:0
EA2454	303542	snp	C	T	T:96 C:0
EA2454	303575	snp	A	G	G:100 A:0
EA2454	303605	snp	C	T	T:103 C:0
EA2454	303617	snp	G	A	A:97 G:0
EA2454	303707	snp	C	T	T:114 C:0
EA2454	303869	snp	T	A	A:123 T:0
EA2454	303968	snp	T	C	C:103 T:0
EA2454	304001	snp	T	C	C:108 T:0
EA2454	304160	snp	T	G	G:115 T:0
EA2454	304199	snp	T	C	C:106 T:0
EA2454	304252	snp	A	T	T:91 A:0
EA2454	311347	snp	G	A	A:100 G:1
EA2454	313034	snp	A	G	G:91 A:0
EA2454	316769	snp	C	A	A:100 C:0
EA2454	317106	snp	T	C	C:101 T:0
EA2454	333766	snp	T	G	G:80 T:1
EA2454	339420	snp	C	T	T:104 C:0
EA2454	341041	snp	C	T	T:93 C:0
EA2454	343648	snp	G	A	A:112 G:0
EA2454	344966	snp	T	C	C:105 T:0
EA2454	350969	snp	A	G	G:92 A:0
EA2454	351850	snp	G	C	C:74 G:0
EA2454	352054	snp	C	A	A:82 C:0
EA2454	352488	snp	A	C	C:122 A:0
EA2454	354492	snp	C	T	T:105 C:1
EA2454	359494	snp	G	A	A:104 G:0
EA2454	360856	snp	G	A	A:85 G:0
EA2454	361440	snp	G	A	A:99 G:0
EA2454	365820	snp	C	T	T:103 C:0
EA2454	367149	snp	C	T	T:76 C:0
EA2454	369429	snp	T	C	C:101 T:0
EA2454	369840	snp	A	G	G:111 A:0
EA2454	371038	snp	A	G	G:122 A:0
EA2454	371150	snp	T	C	C:106 T:0
EA2454	375982	snp	G	A	A:99 G:0
EA2454	392511	snp	T	C	C:108 T:0
EA2454	393575	snp	A	G	G:101 A:0
EA2454	393743	snp	A	G	G:92 A:0
EA2454	396436	snp	C	A	A:94 C:0
EA2454	397444	snp	C	G	G:107 C:0
EA2454	405953	snp	T	A	A:117 T:0
EA2454	407113	snp	A	G	G:102 A:0
EA2454	407887	snp	C	G	G:96 C:0
EA2454	409884	snp	T	G	G:104 T:0
EA2454	410785	snp	G	A	A:97 G:0
EA2454	412599	snp	C	T	T:113 C:0
EA2454	413942	snp	G	A	A:107 G:1
EA2454	415150	snp	G	A	A:105 G:0
EA2454	415498	snp	G	A	A:107 G:0
EA2454	417355	snp	T	A	A:81 T:0
EA2454	427323	snp	C	T	T:86 C:0
EA2454	428546	snp	G	A	A:105 G:0
EA2454	429890	snp	G	C	C:94 G:0
EA2454	430947	snp	T	C	C:97 T:1
EA2454	437474	snp	A	G	G:109 A:0
EA2454	440671	snp	C	T	T:93 C:0
EA2454	440837	snp	C	A	A:93 C:0
EA2454	441911	snp	T	C	C:105 T:0
EA2454	443213	snp	A	G	G:127 A:0
EA2454	443268	snp	T	A	A:122 T:0
EA2454	445869	snp	T	C	C:101 T:1
EA2454	447459	snp	A	G	G:85 A:0
EA2454	448711	snp	A	G	G:106 A:0
EA2454	452556	snp	C	A	A:95 C:0
EA2454	452711	snp	T	A	A:107 T:0
EA2454	452751	snp	C	T	T:109 C:0
EA2454	457082	snp	C	T	T:84 C:1
EA2454	459248	snp	A	G	G:118 A:0
EA2454	464006	snp	A	C	C:92 A:0
EA2454	465826	snp	A	T	T:100 A:0
EA2454	469328	snp	G	A	A:101 G:0
EA2454	471459	snp	A	T	T:111 A:0
EA2454	472911	snp	T	C	C:89 T:0
EA2454	474394	snp	G	A	A:99 G:0
EA2454	474428	snp	C	T	T:105 C:0
EA2454	477552	snp	G	A	A:85 G:0
EA2454	478727	snp	C	A	A:82 C:2
EA2454	484002	snp	G	A	A:107 G:0
EA2454	484518	del	AT	A	A:93 AT:0
EA2454	484564	snp	A	G	G:118 A:1
EA2454	485779	snp	C	G	G:105 C:0
EA2454	485953	snp	C	A	A:91 C:0
EA2454	487623	snp	T	C	C:100 T:0
EA2454	488462	snp	G	A	A:87 G:0
EA2454	497400	snp	T	G	G:122 T:0
EA2454	497460	snp	T	G	G:126 T:0
EA2454	499083	snp	A	T	T:100 A:0
EA2454	499232	snp	G	T	T:85 G:0
EA2454	502913	snp	G	A	A:95 G:0
EA2454	506290	snp	A	G	G:125 A:1
EA2454	506352	snp	T	G	G:121 T:0
EA2454	509958	snp	G	A	A:118 G:0
EA2454	511943	snp	A	G	G:108 A:0
EA2454	519811	snp	A	C	C:113 A:0
EA2454	523923	snp	C	G	G:112 C:0
EA2454	528123	snp	A	T	T:93 A:0
EA2454	529040	snp	C	T	T:96 C:0
EA2454	531539	snp	G	A	A:95 G:0
EA2454	534151	snp	A	G	G:110 A:0
EA2454	537287	snp	G	C	C:110 G:0
EA2454	539426	snp	T	C	C:96 T:0
EA2454	540409	snp	G	A	A:106 G:0
EA2454	543142	snp	C	T	T:111 C:0
EA2454	545737	snp	G	A	A:93 G:0
EA2454	546428	snp	A	C	C:105 A:0
EA2454	547882	snp	G	T	T:86 G:0
EA2454	549981	snp	C	T	T:102 C:0
EA2454	550654	snp	T	C	C:104 T:0
EA2454	552561	snp	C	T	T:114 C:0
EA2454	555130	snp	G	A	A:89 G:0
EA2454	559017	snp	A	G	G:98 A:0
EA2454	559965	snp	A	G	G:100 A:0
EA2454	561226	snp	G	A	A:43 G:0
EA2454	561259	snp	C	A	A:10 C:0
EA2454	562933	snp	T	C	C:87 T:0
EA2454	562951	snp	C	T	T:86 C:1
EA2454	564631	snp	C	T	T:104 C:0
EA2454	571709	snp	A	G	G:115 A:0
EA2454	572372	snp	T	G	G:122 T:0
EA2454	574054	snp	C	T	T:122 C:0
EA2454	577660	snp	T	C	C:94 T:0
EA2454	586152	snp	G	A	A:103 G:0
EA2454	590181	ins	T	TA	TA:83 T:2
EA2454	594309	snp	G	T	T:117 G:0
EA2454	595216	snp	T	A	A:129 T:1
EA2454	595654	snp	T	C	C:115 T:0
EA2454	597386	snp	A	G	G:93 A:0
EA2454	598848	snp	G	C	C:102 G:0
EA2454	600738	snp	A	G	G:96 A:0
EA2454	602583	snp	A	G	G:90 A:0
EA2454	606088	ins	G	GA	GA:81 G:0
EA2454	610464	snp	A	C	C:109 A:0
EA2454	611188	snp	G	A	A:105 G:0
EA2454	611872	snp	A	G	G:130 A:0
EA2454	612726	snp	A	G	G:124 A:0
EA2454	612848	snp	C	A	A:114 C:0
EA2454	613781	snp	C	A	A:121 C:0
EA2454	613906	snp	C	A	A:111 C:0
EA2454	613974	snp	C	T	T:121 C:0
EA2454	615783	snp	C	T	T:86 C:0
EA2454	619121	snp	G	A	A:91 G:0
EA2454	620506	snp	A	C	C:96 A:0
EA2454	622741	snp	T	G	G:69 T:0
EA2454	631335	snp	T	C	C:118 T:0
EA2454	635649	snp	A	C	C:77 A:0
EA2454	635707	snp	C	A	A:87 C:0
EA2454	644101	snp	A	G	G:89 A:0
EA2454	644913	snp	T	C	C:107 T:0
EA2454	649668	snp	G	T	T:102 G:0
EA2454	653031	snp	C	T	T:89 C:0
EA2454	653774	snp	T	G	G:97 T:0
EA2454	665110	snp	C	G	G:97 C:1
EA2454	666854	snp	A	G	G:117 A:0
EA2454	669330	snp	A	G	G:87 A:0
EA2454	669751	snp	C	T	T:84 C:0
EA2454	670919	snp	C	T	T:97 C:0
EA2454	674305	snp	G	C	C:82 G:0
EA2454	678809	snp	G	A	A:95 G:0
EA2454	683177	snp	T	G	G:88 T:0
EA2454	686003	snp	A	G	G:89 A:0
EA2454	686104	snp	G	C	C:73 G:0
EA2454	686464	ins	A	AT	AT:66 A:0
EA2454	687410	snp	A	G	G:88 A:0
EA2454	689159	snp	C	T	T:117 C:0
EA2454	689970	snp	C	T	T:108 C:0
EA2454	690408	snp	A	G	G:101 A:0
EA2454	690611	snp	T	C	C:93 T:0
EA2454	705263	snp	C	A	A:119 C:0
EA2454	709632	snp	T	C	C:111 T:0
EA2454	710977	snp	A	G	G:103 A:0
EA2454	723157	snp	A	G	G:116 A:1
EA2454	724890	snp	G	A	A:120 G:0
EA2454	726938	snp	T	C	C:115 T:0
EA2454	727032	snp	C	T	T:103 C:0
EA2454	728788	snp	G	T	T:90 G:0
EA2454	731219	snp	T	G	G:102 T:0
EA2454	731329	snp	G	A	A:118 G:0
EA2454	737158	snp	C	T	T:101 C:1
EA2454	740461	snp	C	T	T:127 C:0
EA2454	742876	snp	T	C	C:100 T:0
EA2454	748560	snp	G	C	C:89 G:0
EA2454	749526	snp	T	C	C:82 T:0
EA2454	749890	complex	TT	AA	AA:111 TT:0
EA2454	753727	snp	T	C	C:116 T:0
EA2454	754601	snp	C	A	A:107 C:0
EA2454	755366	snp	A	G	G:100 A:0
EA2454	756040	snp	T	G	G:110 T:0
EA2454	758394	snp	C	T	T:83 C:0
EA2454	763677	snp	C	T	T:102 C:0
EA2454	765032	snp	T	C	C:73 T:0
EA2454	765368	snp	T	C	C:93 T:0
EA2454	769716	complex	GGGCA	AGACG	AGACG:71 GGGCA:0
EA2454	769727	snp	G	C	C:98 G:0
EA2454	769759	snp	C	T	T:98 C:0
EA2454	769764	complex	CC	AACT	AACT:94 CC:0
EA2454	769777	snp	G	T	T:102 G:0
EA2454	769784	complex	ATC	GTA	GTA:94 ATC:0
EA2454	769823	snp	C	T	T:110 C:0
EA2454	769965	snp	T	G	G:90 T:0
EA2454	769976	snp	T	C	C:93 T:0
EA2454	770001	snp	T	C	C:105 T:0
EA2454	770022	complex	GCAGA	ACAGG	ACAGG:107 GCAGA:0
EA2454	770037	snp	C	T	T:115 C:0
EA2454	770046	snp	A	C	C:120 A:0
EA2454	770058	complex	TGGT	CGGC	CGGC:118 TGGT:0
EA2454	770751	snp	C	T	T:155 C:0
EA2454	770774	snp	A	G	G:160 A:0
EA2454	771044	snp	C	T	T:20 C:0
EA2454	771049	complex	TTAACTTA	AAATTTTG	AAATTTTG:16 TTAACTTA:0
EA2454	774332	complex	GTCCACC	ATCTACT	ATCTACT:12 GTCCACC:0
EA2454	774347	snp	A	G	G:26 A:0
EA2454	774482	snp	G	A	A:73 G:0
EA2454	774557	snp	A	T	T:17 A:0
EA2454	783857	snp	T	C	C:101 T:0
EA2454	784434	snp	T	C	C:98 T:0
EA2454	784455	snp	A	T	T:102 A:0
EA2454	784542	snp	G	A	A:103 G:0
EA2454	784570	snp	A	C	C:93 A:0
EA2454	784592	snp	C	G	G:91 C:0
EA2454	786559	snp	A	C	C:93 A:0
EA2454	788461	snp	G	T	T:93 G:0
EA2454	789417	snp	A	C	C:104 A:0
EA2454	793051	snp	A	G	G:102 A:0
EA2454	796729	snp	G	T	T:85 G:0
EA2454	797460	snp	G	A	A:115 G:0
EA2454	798552	snp	T	G	G:89 T:0
EA2454	805481	snp	A	G	G:95 A:1
EA2454	811479	snp	A	C	C:94 A:2
EA2454	811792	snp	T	C	C:116 T:0
EA2454	811804	snp	T	C	C:116 T:0
EA2454	812453	snp	C	T	T:105 C:0
EA2454	817446	snp	A	G	G:100 A:0
EA2454	817985	snp	T	G	G:95 T:0
EA2454	818649	snp	A	C	C:88 A:0
EA2454	820251	snp	G	T	T:100 G:0
EA2454	821110	snp	A	C	C:69 A:0
EA2454	829515	snp	G	T	T:107 G:1
EA2454	831794	snp	G	C	C:79 G:0
EA2454	834575	ins	A	AT	AT:59 A:0
EA2454	836643	snp	T	C	C:100 T:0
EA2454	837322	snp	C	T	T:83 C:0
EA2454	839497	snp	T	A	A:71 T:0
EA2454	849346	snp	G	A	A:98 G:0
EA2454	852695	snp	A	G	G:83 A:0
EA2454	856699	snp	A	T	T:109 A:0
EA2454	863496	snp	A	G	G:108 A:0
EA2454	866700	snp	C	T	T:112 C:0
EA2454	877061	snp	T	A	A:82 T:0
EA2454	891369	snp	A	G	G:108 A:0
EA2454	894027	snp	G	A	A:88 G:0
EA2454	894538	snp	C	T	T:108 C:0
EA2454	894751	snp	T	G	G:107 T:0
EA2454	899104	snp	T	A	A:96 T:0
EA2454	904482	snp	A	G	G:101 A:0
EA2454	904955	snp	G	T	T:108 G:0
EA2454	919060	snp	T	G	G:130 T:0
EA2454	924524	snp	C	T	T:110 C:0
EA2454	924579	snp	T	C	C:115 T:0
EA2454	930102	snp	A	G	G:85 A:0
EA2454	931959	snp	C	G	G:82 C:0
EA2454	934870	snp	G	A	A:137 G:0
EA2454	935073	ins	C	CA	CA:96 C:1
EA2454	937614	snp	C	T	T:95 C:0
EA2454	938195	snp	A	G	G:102 A:0
EA2454	938336	snp	A	C	C:114 A:0
EA2454	941489	snp	C	A	A:118 C:0
EA2454	945162	snp	A	G	G:84 A:0
EA2454	946875	snp	T	C	C:106 T:0
EA2454	949589	del	GT	G	G:79 GT:0
EA2454	949625	del	GT	G	G:58 GT:0
EA2454	950384	snp	A	G	G:123 A:0
EA2454	951396	snp	G	A	A:77 G:0
EA2454	951474	snp	A	C	C:19 A:0
EA2454	952095	snp	C	T	T:15 C:0
EA2454	952106	complex	CTGTT	TTGTC	TTGTC:21 CTGTT:0
EA2454	952119	snp	A	G	G:34 A:0
EA2454	952194	snp	G	A	A:31 G:0
EA2454	952200	snp	A	G	G:26 A:0
EA2454	952213	complex	ACCACG	GCAACA	GCAACA:13 ACCACG:0
EA2454	952638	snp	A	G	G:20 A:0
EA2454	952665	snp	G	C	C:37 G:0
EA2454	952674	snp	C	A	A:43 C:0
EA2454	952683	complex	GTCT	ATCC	ATCC:47 GTCT:0
EA2454	952697	complex	CG	TA	TA:51 CG:0
EA2454	952704	snp	T	C	C:54 T:0
EA2454	952755	snp	A	C	C:52 A:0
EA2454	952773	snp	C	T	T:38 C:0
EA2454	952799	snp	G	C	C:19 G:0
EA2454	952804	snp	A	C	C:17 A:1
EA2454	952962	snp	T	C	C:10 T:0
EA2454	953284	snp	T	A	A:39 T:0
EA2454	953505	snp	T	C	C:32 T:0
EA2454	953513	snp	G	C	C:31 G:0
EA2454	953539	snp	T	C	C:31 T:0
EA2454	953576	snp	T	C	C:20 T:0
EA2454	953594	complex	CCCT	TCCA	TCCA:10 CCCT:0
EA2454	958042	complex	TTACGG	GTGCGC	GTGCGC:10 TTACGG:0
EA2454	958130	snp	C	T	T:89 C:0
EA2454	958173	snp	G	A	A:89 G:0
EA2454	958179	snp	T	C	C:90 T:0
EA2454	958188	snp	T	G	G:89 T:0
EA2454	958196	snp	T	A	A:89 T:0
EA2454	958239	snp	A	G	G:83 A:0
EA2454	958275	snp	A	G	G:81 A:0
EA2454	958296	complex	AGAATGGTGTT	CGAACGCTGCC	CGAACGCTGCC:59 AGAATGGTGTT:0
EA2454	958329	snp	C	G	G:86 C:0
EA2454	958418	snp	C	T	T:75 C:0
EA2454	958428	complex	AGGG	CGGA	CGGA:78 AGGG:0
EA2454	958452	snp	G	A	A:97 G:0
EA2454	958461	snp	G	T	T:81 G:1
EA2454	958503	snp	A	C	C:96 A:0
EA2454	958609	mnp	CAT	AGC	AGC:70 CAT:0
EA2454	958617	snp	G	A	A:75 G:0
EA2454	958633	snp	T	G	G:68 T:0
EA2454	958660	complex	AT	G	G:32 AT:0
EA2454	958678	snp	T	C	C:26 T:0
EA2454	958683	snp	T	C	C:23 T:0
EA2454	958695	snp	G	A	A:11 G:0
EA2454	958882	snp	C	T	T:15 C:0
EA2454	958894	snp	C	T	T:22 C:0
EA2454	958900	snp	A	G	G:24 A:0
EA2454	958924	snp	C	T	T:42 C:0
EA2454	958937	mnp	GT	AG	AG:46 GT:0
EA2454	959079	snp	G	A	A:92 G:0
EA2454	959109	snp	G	T	T:83 G:0
EA2454	959227	snp	G	A	A:98 G:0
EA2454	959236	snp	C	A	A:89 C:0
EA2454	959242	complex	CCTT	TCCG	TCCG:77 CCTT:0
EA2454	959254	ins	G	GC	GC:94 G:0
EA2454	959267	complex	TGT	CGA	CGA:101 TGT:0
EA2454	959327	snp	C	A	A:51 C:0
EA2454	959363	snp	T	G	G:16 T:0
EA2454	959505	complex	GCG	ACA	ACA:15 GCG:0
EA2454	959526	snp	T	A	A:34 T:0
EA2454	959537	snp	T	G	G:48 T:0
EA2454	959555	snp	A	T	T:61 A:0
EA2454	959576	snp	A	T	T:82 A:0
EA2454	959599	complex	TGCA	CG	CG:74 TGCA:0
EA2454	959671	complex	AGGACTGGCTGTATCAGC	CAGT	CAGT:64 AGGACTGGCTGTATCAGC:0
EA2454	959714	snp	A	G	G:87 A:0
EA2454	959754	snp	C	T	T:79 C:0
EA2454	959762	snp	G	A	A:68 G:0
EA2454	959771	snp	T	C	C:66 T:0
EA2454	959782	complex	CGGTC	TGGTT	TGGTT:63 CGGTC:0
EA2454	959793	snp	C	T	T:68 C:0
EA2454	959810	snp	G	A	A:56 G:0
EA2454	959819	snp	A	G	G:51 A:0
EA2454	959825	snp	T	C	C:44 T:0
EA2454	959831	complex	CGTGCCG	TGTTCCC	TGTTCCC:25 CGTGCCG:0
EA2454	959843	snp	C	A	A:25 C:0
EA2454	959860	snp	C	T	T:20 C:0
EA2454	959865	snp	A	G	G:23 A:0
EA2454	959870	snp	T	C	C:26 T:0
EA2454	959881	complex	GCGGTATT	ACTGCATC	ACTGCATC:11 GCGGTATT:0
EA2454	959904	complex	TGCTCTG	CGCTT	CGCTT:24 TGCTCTG:0
EA2454	959921	snp	T	A	A:39 T:0
EA2454	959926	complex	GTT	CTC	CTC:39 GTT:0
EA2454	960040	del	GT	G	G:24 GT:0
EA2454	960146	snp	T	C	C:16 T:0
EA2454	960157	snp	C	T	T:23 C:0
EA2454	960163	snp	G	A	A:23 G:0
EA2454	960167	del	TA	T	T:22 TA:0
EA2454	960192	snp	G	A	A:33 G:0
EA2454	960211	complex	CAGTCGGGT	TAGTTGGGG	TAGTTGGGG:36 CAGTCGGGT:0
EA2454	960239	complex	TATTGCCCGGTTGGGGATA	CAGTGTCCTGCCGGAGGTC	CAGTGTCCTGCCGGAGGTC:13 TATTGCCCGGTTGGGGATA:0
EA2454	960286	snp	G	A	A:33 G:0
EA2454	960292	snp	T	C	C:36 T:0
EA2454	960303	del	GAACGA	G	G:34 GAACGA:0
EA2454	960358	snp	A	G	G:75 A:0
EA2454	960367	snp	C	T	T:75 C:0
EA2454	960381	complex	TGCG	GGCA	GGCA:76 TGCG:0
EA2454	960392	snp	G	A	A:86 G:0
EA2454	960434	snp	C	T	T:80 C:0
EA2454	960449	snp	T	G	G:85 T:0
EA2454	960463	snp	G	A	A:87 G:0
EA2454	960506	snp	A	G	G:75 A:0
EA2454	960520	snp	G	A	A:69 G:0
EA2454	960528	complex	GCCGT	ATCGG	ATCGG:55 GCCGT:0
EA2454	960547	snp	A	G	G:48 A:0
EA2454	960556	snp	G	C	C:39 G:0
EA2454	960570	snp	C	T	T:27 C:0
EA2454	960619	complex	CC	GA	GA:20 CC:0
EA2454	960631	snp	C	T	T:32 C:0
EA2454	960658	snp	C	T	T:32 C:0
EA2454	960667	complex	CGA	TGC	TGC:31 CGA:0
EA2454	960674	complex	TGG	GGA	GGA:32 TGG:0
EA2454	960688	snp	A	G	G:48 A:0
EA2454	960695	snp	G	A	A:50 G:0
EA2454	960703	snp	C	G	G:57 C:0
EA2454	960721	snp	G	A	A:56 G:0
EA2454	960729	complex	CCGGATGCT	TCGGGTGCC	TCGGGTGCC:49 CCGGATGCT:0
EA2454	960762	complex	TCA	CCT	CCT:75 TCA:0
EA2454	960860	complex	GCCACT	TGCACC	TGCACC:14 GCCACT:0
EA2454	960877	snp	C	T	T:10 C:0
EA2454	961186	snp	C	T	T:12 C:0
EA2454	961206	snp	G	T	T:12 G:0
EA2454	961232	snp	G	A	A:12 G:0
EA2454	961240	snp	T	A	A:10 T:0
EA2454	961418	mnp	TA	GG	GG:80 TA:0
EA2454	961439	snp	G	A	A:86 G:0
EA2454	961448	snp	A	G	G:90 A:0
EA2454	961458	snp	G	A	A:89 G:0
EA2454	961503	snp	C	T	T:109 C:0
EA2454	961518	snp	T	A	A:113 T:0
EA2454	961533	complex	ACT	CCA	CCA:109 ACT:0
EA2454	961563	complex	TTGT	ATGC	ATGC:106 TTGT:0
EA2454	961579	complex	AAT	CAG	CAG:93 AAT:0
EA2454	961747	snp	T	C	C:73 T:0
EA2454	964577	snp	A	G	G:81 A:0
EA2454	964586	snp	A	G	G:134 A:0
EA2454	964604	snp	T	G	G:213 T:0
EA2454	964710	snp	T	C	C:113 T:0
EA2454	976647	snp	T	C	C:94 T:0
EA2454	983278	snp	T	G	G:62 T:0
EA2454	983325	complex	TCG	ACC	ACC:54 TCG:1
EA2454	983359	complex	GCATA	ACACT	ACACT:44 GCATA:1
EA2454	983371	snp	G	A	A:59 G:1
EA2454	983404	snp	T	C	C:65 T:0
EA2454	983426	snp	G	A	A:71 G:0
EA2454	983446	snp	A	C	C:84 A:0
EA2454	983525	snp	A	G	G:88 A:0
EA2454	983570	complex	CTGC	TTGT	TTGT:78 CTGC:0
EA2454	983840	snp	A	G	G:107 A:0
EA2454	983889	snp	G	A	A:118 G:0
EA2454	983901	snp	C	T	T:116 C:0
EA2454	983906	complex	TGGT	CGGC	CGGC:115 TGGT:0
EA2454	984038	snp	A	G	G:92 A:0
EA2454	984050	snp	G	T	T:102 G:0
EA2454	984129	complex	ACTCTGG	GCCCTGT	GCCCTGT:95 ACTCTGG:0
EA2454	984294	snp	G	A	A:94 G:0
EA2454	984305	complex	AGCA	TGCT	TGCT:86 AGCA:0
EA2454	984317	snp	A	G	G:91 A:0
EA2454	984344	snp	C	T	T:83 C:0
EA2454	984401	snp	A	T	T:54 A:0
EA2454	984422	complex	GCGCAAC	ACGCGAT	ACGCGAT:28 GCGCAAC:0
EA2454	984434	snp	G	A	A:26 G:0
EA2454	984440	snp	T	C	C:24 T:0
EA2454	984452	snp	T	C	C:16 T:0
EA2454	989594	snp	T	A	A:34 T:0
EA2454	989710	complex	TGTC	CGTT	CGTT:76 TGTC:0
EA2454	989731	snp	G	A	A:98 G:0
EA2454	989794	complex	CATCA	TATCG	TATCG:95 CATCA:0
EA2454	989831	snp	G	A	A:87 G:0
EA2454	989932	snp	A	G	G:85 A:0
EA2454	989938	complex	AGAC	GGAT	GGAT:83 AGAC:0
EA2454	989989	snp	A	G	G:89 A:0
EA2454	990058	complex	GC	TT	TT:98 GC:0
EA2454	990100	snp	A	T	T:96 A:0
EA2454	990118	snp	T	A	A:94 T:0
EA2454	990124	snp	T	C	C:94 T:2
EA2454	990230	snp	T	C	C:105 T:0
EA2454	990400	snp	A	G	G:93 A:0
EA2454	990463	snp	A	G	G:94 A:0
EA2454	990562	snp	T	C	C:103 T:0
EA2454	990572	snp	G	A	A:107 G:0
EA2454	990627	snp	C	T	T:103 C:0
EA2454	990637	snp	G	A	A:108 G:0
EA2454	990685	snp	A	G	G:114 A:0
EA2454	990691	snp	G	T	T:121 G:0
EA2454	990697	snp	C	G	G:116 C:0
EA2454	990727	complex	GCGT	ACGG	ACGG:112 GCGT:0
EA2454	990742	snp	C	T	T:110 C:0
EA2454	990757	snp	A	G	G:97 A:0
EA2454	990763	complex	GCCA	ACCG	ACCG:91 GCCA:0
EA2454	990872	complex	TTT	GTA	GTA:73 TTT:0
EA2454	990880	complex	CAGTA	AAGCG	AAGCG:72 CAGTA:0
EA2454	990904	complex	CCCCAC	TGCCGT	TGCCGT:72 CCCCAC:0
EA2454	990925	snp	A	G	G:89 A:0
EA2454	990931	snp	A	G	G:88 A:0
EA2454	990970	snp	C	T	T:83 C:0
EA2454	991009	snp	T	G	G:91 T:0
EA2454	991060	snp	G	A	A:96 G:0
EA2454	991066	snp	A	G	G:97 A:0
EA2454	991169	snp	C	T	T:103 C:0
EA2454	991239	snp	A	C	C:105 A:0
EA2454	991259	mnp	CA	TC	TC:97 CA:0
EA2454	991311	snp	A	G	G:118 A:0
EA2454	991365	snp	A	G	G:131 A:0
EA2454	991386	snp	G	A	A:119 G:0
EA2454	991404	snp	A	G	G:122 A:0
EA2454	991428	snp	G	A	A:115 G:0
EA2454	991560	snp	C	T	T:101 C:0
EA2454	991590	snp	A	G	G:100 A:0
EA2454	991596	snp	G	A	A:101 G:0
EA2454	991611	snp	G	A	A:99 G:1
EA2454	991638	snp	C	A	A:98 C:0
EA2454	991686	snp	G	A	A:96 G:0
EA2454	991800	snp	C	T	T:102 C:1
EA2454	991983	snp	A	G	G:96 A:0
EA2454	992001	snp	T	C	C:86 T:0
EA2454	992040	snp	A	C	C:80 A:0
EA2454	992055	snp	G	A	A:67 G:0
EA2454	992231	snp	G	A	A:78 G:0
EA2454	992244	snp	C	T	T:78 C:0
EA2454	992692	snp	G	A	A:80 G:0
EA2454	992921	snp	C	T	T:95 C:0
EA2454	993116	snp	C	T	T:92 C:0
EA2454	994056	snp	A	G	G:107 A:0
EA2454	994074	snp	T	C	C:105 T:0
EA2454	994116	snp	G	A	A:116 G:0
EA2454	994311	snp	T	C	C:112 T:0
EA2454	994443	snp	A	G	G:109 A:0
EA2454	994617	snp	C	T	T:67 C:0
EA2454	994626	snp	G	T	T:72 G:0
EA2454	994884	snp	T	C	C:105 T:0
EA2454	994890	snp	T	C	C:107 T:0
EA2454	994998	snp	A	G	G:96 A:0
EA2454	995076	snp	A	G	G:91 A:0
EA2454	995121	snp	T	A	A:79 T:0
EA2454	995151	complex	AGCC	CGCA	CGCA:76 AGCC:0
EA2454	995193	snp	A	G	G:94 A:1
EA2454	995575	snp	T	A	A:97 T:0
EA2454	996391	snp	G	C	C:111 G:0
EA2454	996427	snp	C	G	G:104 C:0
EA2454	996451	snp	C	G	G:106 C:0
EA2454	996466	snp	A	G	G:105 A:0
EA2454	996547	snp	T	C	C:111 T:0
EA2454	996667	snp	T	C	C:94 T:0
EA2454	996676	snp	C	T	T:97 C:0
EA2454	996712	complex	TGGC	CGGT	CGGT:85 TGGC:0
EA2454	996751	snp	T	C	C:95 T:0
EA2454	996775	snp	G	A	A:90 G:0
EA2454	996850	snp	A	G	G:97 A:0
EA2454	996856	snp	T	C	C:93 T:0
EA2454	996886	snp	G	C	C:88 G:0
EA2454	996901	snp	G	C	C:90 G:0
EA2454	997000	snp	A	G	G:94 A:0
EA2454	997012	snp	G	A	A:94 G:0
EA2454	997024	snp	C	G	G:84 C:0
EA2454	997036	snp	T	C	C:92 T:0
EA2454	997180	complex	CGTG	TGTA	TGTA:81 CGTG:0
EA2454	997189	snp	A	G	G:84 A:0
EA2454	997480	snp	A	T	T:99 A:0
EA2454	997504	snp	A	C	C:92 A:0
EA2454	997510	snp	C	T	T:91 C:0
EA2454	997540	complex	TGGT	CGGC	CGGC:89 TGGT:0
EA2454	997555	snp	T	C	C:91 T:0
EA2454	997639	snp	C	T	T:88 C:0
EA2454	997654	snp	C	T	T:85 C:0
EA2454	997681	snp	G	A	A:83 G:0
EA2454	997708	snp	T	C	C:82 T:0
EA2454	997744	snp	G	A	A:99 G:0
EA2454	997756	snp	G	A	A:103 G:1
EA2454	997819	snp	G	A	A:103 G:0
EA2454	997834	snp	T	C	C:95 T:0
EA2454	997879	snp	A	G	G:102 A:0
EA2454	997918	snp	A	G	G:108 A:0
EA2454	997930	snp	C	T	T:106 C:0
EA2454	997987	snp	G	A	A:93 G:0
EA2454	998008	snp	C	T	T:93 C:0
EA2454	998014	complex	TGGT	CGGC	CGGC:74 TGGT:0
EA2454	998023	complex	GACG	TACA	TACA:74 GACG:0
EA2454	998158	snp	C	T	T:86 C:0
EA2454	998200	snp	A	C	C:85 A:1
EA2454	998404	snp	T	C	C:83 T:0
EA2454	998413	snp	G	A	A:89 G:1
EA2454	998510	snp	A	G	G:85 A:0
EA2454	998626	snp	T	C	C:86 T:0
EA2454	998880	complex	AACACA	CACC	CACC:89 AACACA:0
EA2454	998895	snp	C	A	A:96 C:0
EA2454	998908	snp	C	A	A:101 C:0
EA2454	999123	snp	C	T	T:103 C:0
EA2454	999159	snp	T	A	A:95 T:0
EA2454	999352	snp	G	A	A:121 G:0
EA2454	999750	snp	G	A	A:114 G:0
EA2454	999759	snp	A	G	G:115 A:0
EA2454	999829	snp	C	T	T:124 C:0
EA2454	999857	snp	A	T	T:126 A:0
EA2454	999924	snp	T	C	C:133 T:0
EA2454	1000250	snp	T	C	C:115 T:1
EA2454	1000365	snp	C	T	T:106 C:0
EA2454	1000385	snp	T	C	C:106 T:0
EA2454	1000493	snp	G	T	T:110 G:0
EA2454	1000515	snp	G	A	A:112 G:0
EA2454	1000664	snp	G	A	A:119 G:0
EA2454	1000840	snp	A	G	G:110 A:0
EA2454	1000929	snp	G	A	A:108 G:0
EA2454	1001318	snp	A	T	T:104 A:0
EA2454	1001337	snp	G	A	A:97 G:0
EA2454	1001375	snp	C	G	G:89 C:0
EA2454	1001516	snp	C	T	T:90 C:0
EA2454	1001557	snp	C	T	T:100 C:0
EA2454	1001617	snp	C	T	T:108 C:0
EA2454	1001665	snp	C	T	T:97 C:0
EA2454	1001689	complex	TAGT	CAGC	CAGC:87 TAGT:0
EA2454	1001899	snp	T	C	C:89 T:0
EA2454	1001941	snp	A	G	G:94 A:0
EA2454	1001956	complex	CAAT	AAAC	AAAC:94 CAAT:0
EA2454	1002058	snp	T	C	C:102 T:0
EA2454	1002091	snp	A	G	G:95 A:0
EA2454	1002109	snp	G	A	A:109 G:1
EA2454	1002145	snp	G	A	A:110 G:1
EA2454	1002160	snp	G	T	T:104 G:3
EA2454	1002181	snp	A	G	G:101 A:0
EA2454	1002196	snp	A	G	G:113 A:0
EA2454	1002217	complex	CAG	TAA	TAA:114 CAG:0
EA2454	1002277	snp	T	G	G:117 T:0
EA2454	1002406	snp	C	T	T:104 C:0
EA2454	1002450	complex	TAAATAATTAATATCT	AATTGATATCG	AATTGATATCG:79 TAAATAATTAATATCT:0
EA2454	1002492	complex	AA	CT	CT:75 AA:0
EA2454	1002518	complex	CAGTG	TAGTA	TAGTA:40 CAGTG:2
EA2454	1002529	complex	TTTTTATTCCAG	CTATTCTACCAC	CTATTCTACCAC:23 TTTTTATTCCAG:0
EA2454	1002556	snp	G	A	A:21 G:1
EA2454	1002949	snp	C	T	T:11 C:0
EA2454	1002972	snp	T	G	G:28 T:0
EA2454	1002978	mnp	TA	CG	CG:29 TA:0
EA2454	1002990	complex	TTT	ATC	ATC:38 TTT:0
EA2454	1003002	snp	C	T	T:38 C:0
EA2454	1003013	complex	CAG	TAC	TAC:38 CAG:0
EA2454	1003025	snp	T	C	C:38 T:0
EA2454	1003047	complex	G	AA	AA:19 G:0
EA2454	1003056	snp	T	G	G:18 T:0
EA2454	1003091	snp	T	C	C:22 T:0
EA2454	1003104	complex	TACG	CACA	CACA:35 TACG:0
EA2454	1003118	snp	G	A	A:49 G:0
EA2454	1003129	snp	G	T	T:56 G:0
EA2454	1003138	snp	T	C	C:56 T:0
EA2454	1003170	snp	C	A	A:58 C:0
EA2454	1003180	snp	T	C	C:53 T:0
EA2454	1003192	snp	T	A	A:39 T:0
EA2454	1003200	complex	CAATTC	GGATTT	GGATTT:21 CAATTC:0
EA2454	1003216	complex	ACCAAC	TCCAGA	TCCAGA:14 ACCAAC:0
EA2454	1003228	complex	TGGATG	CCGATA	CCGATA:16 TGGATG:0
EA2454	1003245	snp	A	G	G:23 A:0
EA2454	1003251	complex	CTTT	TTTC	TTTC:20 CTTT:0
EA2454	1003269	snp	T	A	A:20 T:0
EA2454	1003295	mnp	TCA	CTT	CTT:15 TCA:0
EA2454	1003425	complex	TACATG	CATATA	CATATA:30 TACATG:0
EA2454	1003452	snp	G	T	T:54 G:0
EA2454	1003464	snp	A	T	T:69 A:0
EA2454	1003476	snp	A	G	G:75 A:0
EA2454	1003484	snp	T	G	G:87 T:0
EA2454	1003521	complex	ACC	GTT	GTT:53 ACC:0
EA2454	1003542	complex	ATT	GTA	GTA:39 ATT:0
EA2454	1003554	complex	CTGCGAG	ATGAGGA	ATGAGGA:22 CTGCGAG:0
EA2454	1003733	complex	TCTGATGAT	CCTGCGGAA	CCTGCGGAA:19 TCTGATGAT:0
EA2454	1003755	snp	C	A	A:49 C:0
EA2454	1003796	snp	C	T	T:90 C:0
EA2454	1003824	snp	A	C	C:96 A:0
EA2454	1003842	complex	AGACTTC	GGATTTT	GGATTTT:79 AGACTTC:0
EA2454	1003858	snp	C	G	G:103 C:1
EA2454	1003877	snp	A	G	G:93 A:0
EA2454	1003882	complex	TT	GA	GA:83 TT:0
EA2454	1003894	snp	A	G	G:94 A:0
EA2454	1003917	complex	TTTAGTAG	ATTATTAA	ATTATTAA:87 TTTAGTAG:0
EA2454	1003950	complex	CTT	TTC	TTC:54 CTT:0
EA2454	1003995	complex	GTA	AAC	AAC:39 GTA:0
EA2454	1004003	snp	T	G	G:39 T:0
EA2454	1004008	snp	T	A	A:40 T:1
EA2454	1004014	snp	T	C	C:40 T:0
EA2454	1004023	complex	GTATCTTTAGA	TTATTTTTGAT	TTATTTTTGAT:34 GTATCTTTAGA:0
EA2454	1004043	snp	A	G	G:50 A:0
EA2454	1004121	complex	CTTTG	TTTTA	TTTTA:27 CTTTG:0
EA2454	1004182	complex	CCGG	TCGA	TCGA:20 CCGG:2
EA2454	1004201	snp	C	T	T:37 C:1
EA2454	1004211	complex	CACATA	AACACG	AACACG:40 CACATA:1
EA2454	1004225	complex	CTAAGG	TTAAAA	TTAAAA:45 CTAAGG:0
EA2454	1004236	snp	T	C	C:57 T:1
EA2454	1004308	snp	A	G	G:97 A:0
EA2454	1004348	snp	T	C	C:116 T:0
EA2454	1004471	snp	T	C	C:103 T:0
EA2454	1004521	snp	C	T	T:98 C:0
EA2454	1004537	snp	T	A	A:103 T:0
EA2454	1004690	snp	G	A	A:90 G:0
EA2454	1004774	snp	G	A	A:90 G:0
EA2454	1004790	snp	A	G	G:98 A:0
EA2454	1004801	snp	T	C	C:95 T:0
EA2454	1004946	snp	T	C	C:115 T:0
EA2454	1004951	snp	C	T	T:118 C:0
EA2454	1005037	snp	T	G	G:101 T:0
EA2454	1005062	snp	G	T	T:114 G:0
EA2454	1005089	snp	G	T	T:111 G:0
EA2454	1005131	snp	G	C	C:108 G:0
EA2454	1005199	snp	C	T	T:113 C:0
EA2454	1005243	snp	T	A	A:99 T:0
EA2454	1005263	snp	G	A	A:78 G:0
EA2454	1005296	snp	G	A	A:99 G:0
EA2454	1005336	snp	G	A	A:101 G:0
EA2454	1005347	snp	C	G	G:106 C:0
EA2454	1005353	snp	C	T	T:107 C:0
EA2454	1005404	snp	A	G	G:101 A:0
EA2454	1005437	complex	CTTAT	TTTAC	TTTAC:95 CTTAT:0
EA2454	1005567	snp	A	G	G:111 A:0
EA2454	1005624	complex	TT	CC	CC:93 TT:0
EA2454	1005737	snp	A	T	T:94 A:0
EA2454	1005819	snp	G	A	A:119 G:0
EA2454	1005884	snp	T	C	C:110 T:0
EA2454	1005956	snp	T	G	G:94 T:0
EA2454	1006016	complex	ATAC	TTAT	TTAT:89 ATAC:0
EA2454	1006133	snp	T	C	C:79 T:0
EA2454	1006145	snp	A	G	G:88 A:0
EA2454	1006199	snp	C	T	T:91 C:0
EA2454	1006272	snp	G	A	A:95 G:0
EA2454	1006277	snp	T	G	G:96 T:0
EA2454	1006283	snp	C	T	T:105 C:0
EA2454	1006296	snp	G	A	A:108 G:1
EA2454	1006430	mnp	TC	AT	AT:122 TC:1
EA2454	1006482	snp	T	C	C:132 T:0
EA2454	1006489	complex	TAT	GAG	GAG:109 TAT:0
EA2454	1006575	snp	G	A	A:117 G:0
EA2454	1006584	snp	A	G	G:118 A:0
EA2454	1006770	snp	T	C	C:87 T:0
EA2454	1006788	snp	A	C	C:90 A:0
EA2454	1006812	snp	G	A	A:101 G:0
EA2454	1006833	snp	G	C	C:106 G:0
EA2454	1006847	snp	C	A	A:104 C:0
EA2454	1006863	snp	C	T	T:96 C:0
EA2454	1006922	snp	T	A	A:96 T:1
EA2454	1006936	snp	C	T	T:93 C:0
EA2454	1006947	snp	T	C	C:96 T:1
EA2454	1006994	snp	C	T	T:90 C:0
EA2454	1007029	snp	A	G	G:91 A:1
EA2454	1007067	complex	C	TG	TG:96 C:0
EA2454	1007078	complex	GT	TC	TC:108 GT:0
EA2454	1007097	complex	TT	CC	CC:121 TT:0
EA2454	1007107	snp	A	T	T:131 A:0
EA2454	1007373	snp	A	C	C:92 A:0
EA2454	1007487	snp	C	T	T:70 C:0
EA2454	1007529	complex	TTCC	ATCT	ATCT:65 TTCC:0
EA2454	1007819	snp	C	T	T:91 C:0
EA2454	1007872	snp	C	T	T:102 C:0
EA2454	1007952	snp	T	C	C:102 T:0
EA2454	1007970	snp	C	A	A:106 C:0
EA2454	1008024	snp	T	C	C:101 T:0
EA2454	1008048	snp	C	T	T:101 C:0
EA2454	1008057	snp	A	G	G:96 A:0
EA2454	1008063	snp	A	G	G:100 A:0
EA2454	1008219	snp	T	C	C:118 T:0
EA2454	1008249	snp	G	A	A:107 G:0
EA2454	1008423	snp	T	C	C:97 T:0
EA2454	1008591	snp	G	A	A:97 G:0
EA2454	1008918	complex	TCAA	CCAG	CCAG:68 TCAA:0
EA2454	1009017	complex	TGGT	AGGC	AGGC:91 TGGT:0
EA2454	1009047	snp	T	C	C:103 T:0
EA2454	1009059	snp	A	G	G:98 A:0
EA2454	1009086	complex	AAACGCCACT	TAATGCTACC	TAATGCTACC:86 AAACGCCACT:0
EA2454	1009122	snp	C	T	T:100 C:1
EA2454	1009179	snp	G	A	A:96 G:0
EA2454	1009381	snp	A	G	G:100 A:0
EA2454	1009529	complex	TAAT	CAGC	CAGC:92 TAAT:0
EA2454	1009649	snp	A	G	G:82 A:0
EA2454	1009733	snp	A	G	G:71 A:0
EA2454	1009832	snp	A	G	G:98 A:0
EA2454	1009904	snp	G	A	A:112 G:0
EA2454	1009970	snp	T	C	C:119 T:0
EA2454	1010000	snp	A	G	G:125 A:0
EA2454	1010048	snp	T	A	A:118 T:0
EA2454	1010054	snp	C	T	T:126 C:0
EA2454	1010222	snp	A	G	G:120 A:0
EA2454	1010230	snp	A	G	G:123 A:0
EA2454	1010267	complex	GCGG	ACGA	ACGA:107 GCGG:0
EA2454	1010287	snp	G	A	A:107 G:0
EA2454	1010309	snp	A	G	G:106 A:0
EA2454	1010462	snp	G	A	A:102 G:0
EA2454	1010594	snp	G	A	A:100 G:0
EA2454	1010870	snp	A	G	G:90 A:0
EA2454	1010888	snp	G	A	A:83 G:0
EA2454	1010972	snp	A	G	G:99 A:0
EA2454	1010978	snp	C	T	T:99 C:0
EA2454	1010990	snp	G	A	A:101 G:0
EA2454	1011035	snp	G	A	A:100 G:0
EA2454	1011647	snp	T	A	A:91 T:0
EA2454	1011722	snp	T	A	A:97 T:0
EA2454	1011815	snp	G	T	T:84 G:0
EA2454	1012482	snp	G	A	A:102 G:0
EA2454	1012525	snp	G	A	A:97 G:0
EA2454	1012705	snp	C	T	T:100 C:0
EA2454	1012876	snp	C	T	T:111 C:0
EA2454	1012885	snp	C	A	A:103 C:0
EA2454	1012934	snp	G	A	A:101 G:0
EA2454	1013020	snp	C	T	T:101 C:0
EA2454	1013065	snp	G	T	T:102 G:0
EA2454	1013137	snp	C	G	G:99 C:0
EA2454	1013167	snp	A	G	G:95 A:0
EA2454	1013194	complex	CGCC	TGCG	TGCG:78 CGCC:0
EA2454	1013293	complex	GCCA	ACCG	ACCG:83 GCCA:0
EA2454	1013311	snp	T	C	C:84 T:0
EA2454	1013338	snp	T	C	C:87 T:0
EA2454	1013374	snp	G	A	A:81 G:0
EA2454	1013383	snp	G	A	A:78 G:0
EA2454	1013633	snp	A	G	G:87 A:0
EA2454	1013771	snp	C	T	T:109 C:0
EA2454	1013795	snp	G	A	A:110 G:0
EA2454	1013910	snp	C	T	T:113 C:0
EA2454	1013927	snp	T	C	C:115 T:0
EA2454	1013990	snp	A	G	G:117 A:0
EA2454	1014080	snp	G	T	T:96 G:0
EA2454	1014125	snp	C	T	T:99 C:0
EA2454	1014236	snp	G	A	A:109 G:0
EA2454	1014261	snp	G	A	A:112 G:0
EA2454	1014275	snp	G	A	A:114 G:0
EA2454	1014281	snp	A	G	G:115 A:0
EA2454	1014320	snp	A	G	G:116 A:0
EA2454	1014344	snp	G	A	A:105 G:0
EA2454	1014422	snp	T	C	C:88 T:0
EA2454	1014473	snp	C	T	T:104 C:0
EA2454	1014500	snp	C	G	G:100 C:0
EA2454	1014518	snp	G	C	C:101 G:0
EA2454	1014533	snp	G	C	C:104 G:0
EA2454	1014572	snp	T	C	C:92 T:0
EA2454	1014662	snp	A	G	G:112 A:1
EA2454	1014683	complex	GGCG	CGCT	CGCT:97 GGCG:1
EA2454	1014824	snp	C	T	T:84 C:0
EA2454	1014898	snp	T	C	C:98 T:0
EA2454	1014971	snp	T	C	C:98 T:0
EA2454	1015006	snp	C	T	T:97 C:0
EA2454	1015113	snp	T	C	C:90 T:0
EA2454	1015148	snp	A	G	G:88 A:0
EA2454	1015257	snp	C	T	T:79 C:0
EA2454	1015329	snp	C	T	T:88 C:0
EA2454	1015530	snp	A	G	G:104 A:0
EA2454	1015610	snp	C	T	T:86 C:0
EA2454	1015656	snp	G	A	A:77 G:0
EA2454	1015668	snp	A	T	T:90 A:0
EA2454	1015728	snp	A	G	G:91 A:0
EA2454	1015884	complex	AGGC	CGGT	CGGT:85 AGGC:0
EA2454	1016017	snp	G	A	A:108 G:0
EA2454	1016175	snp	A	G	G:101 A:0
EA2454	1016214	snp	G	T	T:89 G:0
EA2454	1016337	snp	T	G	G:76 T:0
EA2454	1016385	snp	T	G	G:83 T:0
EA2454	1016440	complex	GTT	ATC	ATC:85 GTT:0
EA2454	1016561	snp	T	C	C:87 T:0
EA2454	1016852	snp	C	A	A:101 C:0
EA2454	1017030	snp	T	C	C:96 T:0
EA2454	1017255	snp	T	C	C:82 T:0
EA2454	1017279	snp	T	C	C:82 T:0
EA2454	1017291	snp	A	G	G:88 A:0
EA2454	1017315	snp	T	C	C:96 T:0
EA2454	1017579	snp	G	A	A:93 G:0
EA2454	1017585	snp	C	T	T:96 C:0
EA2454	1017645	snp	G	A	A:103 G:0
EA2454	1017684	snp	T	A	A:115 T:0
EA2454	1017696	snp	T	G	G:118 T:0
EA2454	1017723	snp	C	T	T:106 C:0
EA2454	1017830	snp	A	G	G:106 A:0
EA2454	1017843	snp	C	A	A:97 C:0
EA2454	1017924	snp	C	T	T:91 C:0
EA2454	1017939	snp	G	A	A:88 G:0
EA2454	1017954	snp	C	T	T:80 C:0
EA2454	1017984	snp	G	A	A:80 G:0
EA2454	1018029	snp	C	T	T:70 C:0
EA2454	1018089	snp	C	T	T:86 C:0
EA2454	1018155	snp	A	G	G:92 A:0
EA2454	1018425	snp	C	G	G:110 C:0
EA2454	1018458	snp	C	T	T:101 C:0
EA2454	1018617	snp	T	C	C:104 T:0
EA2454	1018635	snp	C	G	G:106 C:0
EA2454	1018815	snp	C	T	T:77 C:0
EA2454	1018935	snp	G	A	A:91 G:0
EA2454	1019229	snp	A	C	C:106 A:0
EA2454	1019284	complex	TTGC	CGGCTG	CGGCTG:77 TTGC:0
EA2454	1019307	snp	G	A	A:100 G:0
EA2454	1019343	snp	T	C	C:100 T:0
EA2454	1019503	snp	C	T	T:106 C:0
EA2454	1019578	snp	T	G	G:97 T:0
EA2454	1019642	snp	C	A	A:109 C:0
EA2454	1019667	snp	G	A	A:109 G:0
EA2454	1019707	snp	A	T	T:112 A:0
EA2454	1019749	snp	G	A	A:107 G:1
EA2454	1019968	snp	A	T	T:91 A:0
EA2454	1019995	snp	G	A	A:84 G:0
EA2454	1020007	snp	G	A	A:94 G:0
EA2454	1020019	snp	G	A	A:94 G:0
EA2454	1020046	complex	TGGC	CGGT	CGGT:73 TGGC:0
EA2454	1020055	complex	TC	AT	AT:68 TC:0
EA2454	1020061	snp	C	G	G:73 C:0
EA2454	1020097	snp	C	T	T:92 C:0
EA2454	1020103	snp	A	G	G:90 A:0
EA2454	1020109	complex	TTTG	CTTC	CTTC:84 TTTG:0
EA2454	1020167	snp	T	G	G:104 T:0
EA2454	1020265	snp	T	A	A:43 T:0
EA2454	1020455	complex	TACTGT	ACTGC	ACTGC:23 TACTGT:0
EA2454	1020589	snp	C	A	A:88 C:0
EA2454	1020610	complex	ATTC	GTTT	GTTT:68 ATTC:2
EA2454	1020631	snp	T	C	C:75 T:2
EA2454	1020658	snp	G	T	T:88 G:2
EA2454	1020681	mnp	AT	GC	GC:75 AT:0
EA2454	1020721	complex	CTGC	TTGT	TTGT:81 CTGC:0
EA2454	1020736	snp	A	C	C:86 A:0
EA2454	1020802	snp	C	T	T:83 C:0
EA2454	1020811	snp	G	A	A:85 G:0
EA2454	1020889	snp	G	A	A:85 G:0
EA2454	1020901	snp	C	T	T:95 C:0
EA2454	1020997	snp	A	G	G:100 A:0
EA2454	1021005	snp	A	C	C:95 A:0
EA2454	1021072	snp	T	C	C:95 T:0
EA2454	1021108	snp	A	G	G:99 A:0
EA2454	1021132	snp	A	G	G:113 A:0
EA2454	1021141	snp	G	A	A:112 G:0
EA2454	1021255	snp	T	A	A:118 T:0
EA2454	1021345	snp	G	A	A:80 G:1
EA2454	1021360	snp	C	T	T:83 C:1
EA2454	1021366	snp	C	T	T:87 C:0
EA2454	1021432	snp	G	A	A:99 G:0
EA2454	1021441	snp	T	C	C:92 T:0
EA2454	1021447	snp	G	C	C:94 G:1
EA2454	1021531	complex	AGTA	GGTG	GGTG:80 AGTA:0
EA2454	1022304	snp	G	A	A:88 G:0
EA2454	1022310	snp	A	G	G:87 A:0
EA2454	1022349	snp	A	T	T:85 A:0
EA2454	1022358	snp	C	T	T:81 C:0
EA2454	1022430	complex	GTTA	ACTG	ACTG:56 GTTA:0
EA2454	1022442	snp	C	T	T:70 C:0
EA2454	1022471	snp	A	T	T:74 A:0
EA2454	1022561	snp	A	G	G:65 A:0
EA2454	1022577	complex	AATG	CTACGCACA	CTACGCACA:41 AATG:0
EA2454	1022593	snp	A	G	G:62 A:0
EA2454	1022809	snp	C	T	T:78 C:0
EA2454	1022856	snp	A	G	G:70 A:0
EA2454	1022929	snp	A	G	G:78 A:0
EA2454	1022953	snp	C	A	A:97 C:0
EA2454	1023004	snp	G	T	T:92 G:0
EA2454	1023040	snp	A	G	G:88 A:0
EA2454	1023046	snp	A	G	G:85 A:0
EA2454	1023109	snp	T	C	C:103 T:0
EA2454	1023193	snp	A	G	G:96 A:0
EA2454	1023205	snp	A	G	G:100 A:0
EA2454	1023211	complex	GTCA	ATCG	ATCG:92 GTCA:0
EA2454	1023220	snp	T	C	C:101 T:0
EA2454	1023244	snp	C	T	T:101 C:0
EA2454	1023466	snp	A	G	G:97 A:0
EA2454	1023519	snp	C	T	T:100 C:0
EA2454	1023571	snp	T	C	C:97 T:0
EA2454	1023577	snp	G	T	T:90 G:0
EA2454	1023592	snp	A	G	G:88 A:0
EA2454	1023640	snp	G	A	A:81 G:0
EA2454	1023832	snp	C	T	T:88 C:0
EA2454	1023943	snp	T	C	C:98 T:0
EA2454	1024055	snp	T	C	C:107 T:0
EA2454	1024090	complex	GA	CC	CC:93 GA:0
EA2454	1024112	snp	G	A	A:120 G:2
EA2454	1024339	snp	G	A	A:83 G:0
EA2454	1024456	snp	C	T	T:110 C:0
EA2454	1024483	snp	C	A	A:102 C:0
EA2454	1024549	snp	A	C	C:96 A:0
EA2454	1024837	snp	G	A	A:109 G:0
EA2454	1024852	snp	T	G	G:111 T:0
EA2454	1024954	snp	T	C	C:105 T:0
EA2454	1024966	complex	ACTG	GCTT	GCTT:96 ACTG:0
EA2454	1025406	snp	A	G	G:89 A:0
EA2454	1025422	snp	C	T	T:88 C:0
EA2454	1025440	snp	G	A	A:76 G:0
EA2454	1025530	snp	A	G	G:112 A:0
EA2454	1025581	snp	T	C	C:92 T:0
EA2454	1025590	complex	CGCA	TGCG	TGCG:81 CGCA:0
EA2454	1025599	snp	C	G	G:82 C:0
EA2454	1025611	snp	C	T	T:84 C:0
EA2454	1025626	snp	G	A	A:90 G:0
EA2454	1025647	complex	TATG	AATA	AATA:80 TATG:0
EA2454	1025670	snp	G	A	A:95 G:0
EA2454	1025761	snp	G	A	A:112 G:0
EA2454	1025791	snp	G	A	A:104 G:0
EA2454	1025809	snp	T	C	C:105 T:0
EA2454	1025856	snp	G	A	A:104 G:0
EA2454	1025875	snp	A	G	G:101 A:0
EA2454	1025890	snp	T	C	C:106 T:0
EA2454	1025899	snp	C	T	T:108 C:0
EA2454	1025908	snp	T	C	C:105 T:0
EA2454	1025914	complex	CAA	TAG	TAG:97 CAA:0
EA2454	1025962	snp	G	A	A:116 G:0
EA2454	1026329	snp	A	C	C:75 A:0
EA2454	1026335	complex	TGAG	CGAA	CGAA:73 TGAG:0
EA2454	1026344	snp	C	T	T:76 C:0
EA2454	1026353	snp	G	A	A:78 G:0
EA2454	1026374	complex	ACCA	GCCG	GCCG:88 ACCA:0
EA2454	1026383	snp	C	A	A:94 C:0
EA2454	1026401	snp	A	G	G:94 A:0
EA2454	1026419	snp	T	C	C:95 T:0
EA2454	1026428	snp	G	A	A:100 G:0
EA2454	1026473	snp	G	A	A:97 G:0
EA2454	1026485	snp	T	C	C:100 T:0
EA2454	1026506	snp	G	A	A:101 G:0
EA2454	1026521	complex	TCGT	CCGC	CCGC:96 TCGT:0
EA2454	1026530	complex	AACT	TACC	TACC:93 AACT:0
EA2454	1026569	snp	A	G	G:91 A:0
EA2454	1026575	snp	A	G	G:94 A:0
EA2454	1026617	snp	G	C	C:84 G:0
EA2454	1026622	snp	G	T	T:88 G:0
EA2454	1026638	complex	AATT	GATA	GATA:87 AATT:0
EA2454	1026647	snp	T	C	C:87 T:0
EA2454	1026674	snp	G	A	A:86 G:0
EA2454	1026680	snp	G	A	A:86 G:0
EA2454	1026770	snp	A	G	G:77 A:0
EA2454	1026776	snp	G	A	A:80 G:0
EA2454	1026839	complex	GGTGT	AGTGC	AGTGC:67 GGTGT:0
EA2454	1026932	snp	T	C	C:70 T:0
EA2454	1026953	complex	GGTG	TGTT	TGTT:68 GGTG:0
EA2454	1026974	complex	GCCAATC	TCCGATA	TCCGATA:55 GCCAATC:0
EA2454	1026985	complex	GTAA	ACAG	ACAG:55 GTAA:0
EA2454	1026998	complex	AGCT	GGCC	GGCC:68 AGCT:0
EA2454	1027034	snp	C	T	T:78 C:0
EA2454	1027049	snp	A	G	G:85 A:0
EA2454	1027143	snp	C	A	A:105 C:0
EA2454	1027293	snp	A	G	G:99 A:0
EA2454	1027311	snp	C	T	T:95 C:0
EA2454	1027413	snp	G	A	A:92 G:0
EA2454	1027470	snp	T	C	C:99 T:0
EA2454	1027491	snp	G	A	A:100 G:0
EA2454	1027578	snp	A	G	G:84 A:1
EA2454	1027590	snp	T	A	A:86 T:0
EA2454	1027647	snp	A	G	G:101 A:0
EA2454	1027692	complex	GATA	AATG	AATG:81 GATA:0
EA2454	1027704	complex	TGAC	CGAA	CGAA:86 TGAC:0
EA2454	1027729	snp	G	T	T:85 G:0
EA2454	1027755	snp	A	C	C:92 A:0
EA2454	1027824	snp	G	T	T:97 G:0
EA2454	1027908	snp	T	G	G:107 T:0
EA2454	1028015	snp	G	A	A:114 G:0
EA2454	1028106	snp	G	A	A:102 G:0
EA2454	1028127	snp	A	G	G:100 A:0
EA2454	1028146	snp	C	T	T:92 C:0
EA2454	1028160	snp	T	C	C:93 T:0
EA2454	1028238	snp	G	A	A:105 G:0
EA2454	1028274	snp	A	G	G:106 A:1
EA2454	1028283	snp	A	G	G:109 A:0
EA2454	1028346	snp	A	G	G:108 A:0
EA2454	1028358	snp	C	G	G:99 C:0
EA2454	1028364	snp	A	G	G:94 A:0
EA2454	1028379	snp	A	G	G:97 A:0
EA2454	1028385	snp	G	A	A:100 G:0
EA2454	1028424	snp	G	T	T:96 G:0
EA2454	1028436	snp	A	G	G:90 A:0
EA2454	1028442	snp	T	G	G:94 T:0
EA2454	1028448	snp	G	A	A:91 G:0
EA2454	1028529	snp	A	T	T:106 A:0
EA2454	1028535	snp	G	A	A:109 G:0
EA2454	1028556	snp	C	T	T:116 C:0
EA2454	1028565	snp	C	T	T:102 C:0
EA2454	1028601	snp	A	G	G:90 A:0
EA2454	1028679	snp	T	C	C:96 T:0
EA2454	1028693	mnp	CG	TA	TA:79 CG:0
EA2454	1028774	snp	T	C	C:95 T:0
EA2454	1028781	snp	T	C	C:98 T:0
EA2454	1028896	snp	G	A	A:72 G:0
EA2454	1028914	complex	TAA	CAG	CAG:64 TAA:0
EA2454	1028965	snp	A	G	G:47 A:0
EA2454	1028971	snp	A	G	G:48 A:0
EA2454	1028986	snp	G	A	A:46 G:0
EA2454	1029004	snp	G	A	A:43 G:0
EA2454	1029025	snp	C	A	A:52 C:0
EA2454	1029043	snp	G	A	A:57 G:0
EA2454	1029052	snp	A	G	G:58 A:1
EA2454	1029058	complex	AATG	GATA	GATA:51 AATG:0
EA2454	1029067	complex	CGTGAGG	TGTCAGA	TGTCAGA:51 CGTGAGG:0
EA2454	1029085	snp	C	T	T:70 C:0
EA2454	1029325	snp	G	A	A:118 G:0
EA2454	1029388	snp	G	A	A:103 G:0
EA2454	1029397	snp	A	G	G:99 A:0
EA2454	1029406	snp	G	A	A:98 G:0
EA2454	1029421	snp	A	G	G:101 A:0
EA2454	1029460	snp	G	A	A:104 G:1
EA2454	1029526	snp	T	A	A:104 T:0
EA2454	1029532	snp	G	A	A:102 G:0
EA2454	1029568	complex	TGCA	CGCG	CGCG:117 TGCA:0
EA2454	1029670	snp	T	A	A:108 T:0
EA2454	1029694	snp	G	A	A:116 G:0
EA2454	1029816	snp	A	G	G:118 A:0
EA2454	1029901	snp	A	G	G:102 A:0
EA2454	1030004	complex	CTGGT	TTGGC	TTGGC:116 CTGGT:0
EA2454	1030266	snp	A	G	G:109 A:0
EA2454	1030314	snp	A	G	G:104 A:0
EA2454	1030443	snp	C	A	A:100 C:0
EA2454	1030611	snp	C	T	T:97 C:0
EA2454	1030626	snp	C	A	A:92 C:0
EA2454	1030645	snp	A	C	C:71 A:1
EA2454	1031377	snp	G	A	A:10 G:0
EA2454	1031388	snp	T	C	C:10 T:0
EA2454	1031410	complex	TTAAT	ATTGC	ATTGC:10 TTAAT:0
EA2454	1031488	snp	A	T	T:15 A:0
EA2454	1032037	snp	C	T	T:106 C:0
EA2454	1032370	snp	G	A	A:85 G:0
EA2454	1032916	snp	G	A	A:75 G:0
EA2454	1033048	snp	G	A	A:82 G:0
EA2454	1033258	snp	C	T	T:90 C:0
EA2454	1033357	snp	C	G	G:81 C:0
EA2454	1033426	snp	C	T	T:84 C:0
EA2454	1033434	snp	T	G	G:83 T:0
EA2454	1033441	snp	G	C	C:88 G:0
EA2454	1033480	complex	AGCC	GGCA	GGCA:85 AGCC:0
EA2454	1033570	snp	A	G	G:116 A:0
EA2454	1033731	snp	G	A	A:99 G:1
EA2454	1033741	snp	C	T	T:90 C:1
EA2454	1034035	snp	A	G	G:89 A:0
EA2454	1034080	snp	T	C	C:87 T:0
EA2454	1034095	snp	C	A	A:87 C:0
EA2454	1034218	snp	A	G	G:84 A:0
EA2454	1034269	snp	C	T	T:89 C:0
EA2454	1034274	snp	A	T	T:84 A:0
EA2454	1034282	snp	A	G	G:83 A:0
EA2454	1034379	snp	A	C	C:90 A:0
EA2454	1034713	snp	T	C	C:99 T:0
EA2454	1034746	complex	GCTG	ACTA	ACTA:92 GCTG:0
EA2454	1034755	snp	G	A	A:97 G:0
EA2454	1034761	snp	A	G	G:97 A:0
EA2454	1034815	complex	CTGGT	TTGAC	TTGAC:81 CTGGT:0
EA2454	1034889	snp	G	T	T:88 G:0
EA2454	1034956	complex	GAGT	AAGC	AAGC:85 GAGT:0
EA2454	1034964	snp	G	A	A:96 G:0
EA2454	1035037	snp	A	C	C:102 A:0
EA2454	1035058	snp	C	T	T:105 C:0
EA2454	1035073	snp	C	T	T:96 C:0
EA2454	1035106	snp	G	A	A:93 G:1
EA2454	1035130	snp	A	C	C:90 A:0
EA2454	1035169	snp	A	G	G:105 A:0
EA2454	1035193	snp	C	T	T:115 C:0
EA2454	1035211	snp	T	C	C:118 T:0
EA2454	1035217	snp	A	G	G:120 A:0
EA2454	1035226	snp	A	G	G:120 A:0
EA2454	1035232	snp	C	T	T:115 C:0
EA2454	1035241	complex	CGTC	TGTT	TGTT:101 CGTC:0
EA2454	1035259	snp	A	C	C:101 A:0
EA2454	1035316	snp	A	G	G:93 A:0
EA2454	1035328	snp	A	G	G:90 A:0
EA2454	1035337	snp	G	A	A:99 G:0
EA2454	1035346	snp	A	G	G:96 A:0
EA2454	1035364	complex	GTT	ATC	ATC:95 GTT:0
EA2454	1035379	complex	GCTA	ACTG	ACTG:91 GCTA:0
EA2454	1035427	snp	C	T	T:101 C:0
EA2454	1035439	snp	T	C	C:95 T:0
EA2454	1035507	snp	T	C	C:98 T:0
EA2454	1035753	snp	C	T	T:83 C:0
EA2454	1035975	snp	G	A	A:87 G:0
EA2454	1036254	snp	A	G	G:85 A:0
EA2454	1036473	snp	A	G	G:96 A:0
EA2454	1036515	snp	C	T	T:85 C:0
EA2454	1036707	snp	T	C	C:96 T:0
EA2454	1036712	snp	A	G	G:103 A:0
EA2454	1036971	snp	T	C	C:125 T:0
EA2454	1037052	snp	A	G	G:111 A:0
EA2454	1037510	complex	AGC	GGT	GGT:98 AGC:0
EA2454	1037532	snp	T	G	G:112 T:0
EA2454	1037793	snp	A	C	C:110 A:0
EA2454	1037808	snp	C	A	A:120 C:0
EA2454	1038081	snp	C	T	T:91 C:0
EA2454	1038089	snp	G	A	A:95 G:0
EA2454	1038273	snp	G	A	A:89 G:0
EA2454	1038350	snp	C	T	T:100 C:0
EA2454	1038937	complex	GGTG	TGTC	TGTC:101 GGTG:0
EA2454	1039012	snp	C	A	A:101 C:0
EA2454	1039024	snp	G	A	A:99 G:0
EA2454	1039186	snp	T	G	G:89 T:0
EA2454	1039462	snp	A	T	T:74 A:0
EA2454	1039501	snp	A	G	G:86 A:0
EA2454	1039522	snp	C	T	T:97 C:0
EA2454	1039552	snp	G	A	A:96 G:0
EA2454	1039564	snp	A	G	G:99 A:0
EA2454	1039621	complex	TCCG	CCCA	CCCA:81 TCCG:0
EA2454	1039660	snp	A	G	G:93 A:0
EA2454	1039774	snp	T	G	G:95 T:0
EA2454	1039895	snp	T	G	G:80 T:0
EA2454	1039930	del	ATTACTGCATAGCACTTT	A	A:40 ATTACTGCATAGCACTTT:0
EA2454	1040587	complex	ACCT	GCCG	GCCG:100 ACCT:0
EA2454	1040608	snp	G	A	A:110 G:0
EA2454	1040662	snp	G	A	A:109 G:0
EA2454	1040683	snp	G	A	A:103 G:0
EA2454	1040758	snp	A	G	G:93 A:0
EA2454	1040776	snp	T	C	C:101 T:0
EA2454	1040824	complex	CGGC	AGGG	AGGG:94 CGGC:0
EA2454	1040905	snp	A	C	C:97 A:0
EA2454	1040962	complex	AGAC	GGAT	GGAT:72 AGAC:0
EA2454	1041003	snp	C	A	A:42 C:0
EA2454	1041027	snp	C	A	A:21 C:0
EA2454	1042286	snp	C	T	T:29 C:0
EA2454	1042343	snp	G	A	A:92 G:0
EA2454	1042379	snp	T	A	A:98 T:0
EA2454	1042391	snp	G	A	A:86 G:0
EA2454	1042436	snp	T	C	C:93 T:0
EA2454	1042547	snp	C	A	A:77 C:0
EA2454	1042571	complex	ACG	GCA	GCA:69 ACG:0
EA2454	1042595	snp	G	A	A:70 G:0
EA2454	1042613	complex	CGCT	GGCC	GGCC:77 CGCT:0
EA2454	1042642	snp	C	T	T:88 C:0
EA2454	1042667	snp	G	A	A:87 G:0
EA2454	1042832	snp	C	A	A:79 C:0
EA2454	1042874	snp	T	A	A:86 T:0
EA2454	1043143	snp	A	G	G:95 A:0
EA2454	1043266	snp	G	A	A:86 G:0
EA2454	1043392	snp	T	G	G:84 T:0
EA2454	1043455	snp	G	A	A:81 G:0
EA2454	1043483	snp	A	G	G:56 A:0
EA2454	1043488	snp	C	T	T:50 C:0
EA2454	1043494	snp	C	T	T:46 C:0
EA2454	1043503	complex	ATTA	GCTG	GCTG:29 ATTA:0
EA2454	1043518	snp	C	T	T:20 C:0
EA2454	1043524	snp	C	G	G:15 C:0
EA2454	1043570	snp	A	C	C:44 A:0
EA2454	1043582	snp	C	T	T:52 C:0
EA2454	1043587	snp	A	G	G:57 A:0
EA2454	1043878	snp	G	A	A:108 G:0
EA2454	1043899	snp	A	G	G:113 A:0
EA2454	1043938	snp	G	T	T:104 G:0
EA2454	1043962	snp	T	C	C:98 T:0
EA2454	1044107	snp	G	A	A:101 G:0
EA2454	1044129	snp	T	C	C:101 T:0
EA2454	1044169	snp	T	C	C:101 T:0
EA2454	1044247	snp	T	C	C:92 T:0
EA2454	1044271	snp	T	C	C:89 T:0
EA2454	1044325	complex	AGTA	GGTG	GGTG:96 AGTA:0
EA2454	1044358	snp	A	G	G:120 A:0
EA2454	1044412	snp	C	T	T:111 C:0
EA2454	1044445	snp	C	T	T:109 C:0
EA2454	1044605	complex	AACAG	GACAA	GACAA:97 AACAG:0
EA2454	1044658	snp	T	C	C:101 T:0
EA2454	1044667	snp	T	G	G:101 T:0
EA2454	1044706	snp	C	T	T:95 C:0
EA2454	1044717	snp	G	A	A:96 G:0
EA2454	1044734	snp	A	G	G:93 A:0
EA2454	1044748	complex	AGAGC	GGAAA	GGAAA:79 AGAGC:0
EA2454	1044808	snp	C	G	G:105 C:0
EA2454	1044888	snp	T	A	A:98 T:0
EA2454	1044988	snp	T	A	A:96 T:0
EA2454	1045030	snp	G	A	A:108 G:0
EA2454	1045045	snp	A	G	G:102 A:0
EA2454	1045139	snp	A	T	T:108 A:0
EA2454	1045170	snp	T	C	C:96 T:0
EA2454	1045182	complex	TTTATTGG	CTTTTGT	CTTTTGT:80 TTTATTGG:0
EA2454	1045231	complex	AC	GA	GA:87 AC:0
EA2454	1045243	snp	A	G	G:86 A:0
EA2454	1045259	snp	T	G	G:80 T:0
EA2454	1045627	snp	C	T	T:106 C:0
EA2454	1045784	snp	G	A	A:102 G:0
EA2454	1045855	complex	CCTGG	ACTGA	ACTGA:87 CCTGG:0
EA2454	1046012	snp	G	A	A:77 G:0
EA2454	1046044	snp	C	T	T:74 C:0
EA2454	1046050	complex	ACATGCA	TCACGCG	TCACGCG:61 ACATGCA:0
EA2454	1046061	complex	CCTCC	AATCT	AATCT:60 CCTCC:0
EA2454	1046108	snp	C	T	T:67 C:0
EA2454	1046157	snp	G	C	C:92 G:0
EA2454	1046167	snp	C	T	T:85 C:0
EA2454	1046192	complex	AAA	GAG	GAG:79 AAA:0
EA2454	1046215	snp	G	C	C:83 G:0
EA2454	1046233	snp	C	T	T:80 C:0
EA2454	1046239	snp	A	G	G:76 A:0
EA2454	1046290	snp	T	C	C:75 T:0
EA2454	1046314	snp	A	G	G:79 A:1
EA2454	1046329	snp	C	T	T:82 C:0
EA2454	1046408	snp	G	A	A:84 G:0
EA2454	1046419	snp	C	T	T:87 C:0
EA2454	1046425	snp	A	G	G:85 A:0
EA2454	1046437	complex	CGGA	TGGC	TGGC:77 CGGA:1
EA2454	1046446	snp	C	T	T:80 C:0
EA2454	1046497	snp	T	C	C:76 T:0
EA2454	1046510	snp	A	G	G:72 A:0
EA2454	1046524	snp	T	G	G:64 T:0
EA2454	1046593	snp	C	A	A:69 C:0
EA2454	1046602	snp	A	T	T:78 A:0
EA2454	1046779	snp	A	G	G:97 A:1
EA2454	1046842	snp	G	A	A:99 G:2
EA2454	1046890	snp	G	C	C:99 G:2
EA2454	1046935	snp	T	C	C:73 T:1
EA2454	1046986	snp	C	T	T:72 C:1
EA2454	1046998	snp	C	T	T:73 C:1
EA2454	1047016	snp	G	C	C:77 G:0
EA2454	1047137	snp	G	A	A:79 G:0
EA2454	1047190	snp	G	A	A:102 G:0
EA2454	1047217	snp	G	A	A:96 G:0
EA2454	1047283	snp	A	G	G:90 A:0
EA2454	1047304	snp	A	G	G:88 A:0
EA2454	1047354	mnp	CG	TA	TA:86 CG:0
EA2454	1047374	snp	C	T	T:93 C:0
EA2454	1047379	snp	C	T	T:94 C:0
EA2454	1047400	snp	A	G	G:93 A:0
EA2454	1047416	snp	A	G	G:91 A:0
EA2454	1047445	snp	C	T	T:82 C:0
EA2454	1047508	snp	T	C	C:80 T:0
EA2454	1047520	snp	G	A	A:79 G:0
EA2454	1047547	complex	ACTC	GATA	GATA:61 ACTC:0
EA2454	1047571	snp	A	G	G:85 A:0
EA2454	1047602	snp	A	G	G:100 A:0
EA2454	1047616	complex	CGCG	TGCA	TGCA:88 CGCG:0
EA2454	1047674	snp	G	A	A:113 G:0
EA2454	1047745	snp	G	A	A:117 G:0
EA2454	1047834	snp	A	G	G:110 A:0
EA2454	1047894	snp	C	T	T:96 C:0
EA2454	1047939	snp	A	G	G:97 A:0
EA2454	1047951	snp	C	T	T:100 C:0
EA2454	1048005	snp	T	C	C:103 T:0
EA2454	1048047	mnp	GT	AC	AC:108 GT:0
EA2454	1048062	snp	T	C	C:103 T:0
EA2454	1051652	snp	G	A	A:106 G:0
EA2454	1052091	snp	C	T	T:130 C:0
EA2454	1052435	snp	C	T	T:121 C:0
EA2454	1052471	snp	C	A	A:113 C:0
EA2454	1053345	complex	GCCCG	TCCC	TCCC:83 GCCCG:0
EA2454	1053700	snp	A	G	G:96 A:0
EA2454	1053814	snp	C	T	T:90 C:0
EA2454	1053873	snp	T	C	C:91 T:0
EA2454	1053931	snp	C	T	T:108 C:0
EA2454	1053973	snp	G	A	A:107 G:0
EA2454	1054078	snp	T	A	A:115 T:0
EA2454	1054099	snp	G	T	T:114 G:1
EA2454	1054213	snp	G	A	A:117 G:1
EA2454	1054264	snp	C	T	T:117 C:1
EA2454	1054270	snp	G	A	A:113 G:1
EA2454	1054276	snp	T	C	C:113 T:0
EA2454	1054315	snp	T	C	C:116 T:0
EA2454	1054372	snp	T	C	C:111 T:0
EA2454	1054393	snp	G	A	A:119 G:2
EA2454	1054462	snp	C	A	A:108 C:0
EA2454	1054699	snp	C	T	T:107 C:0
EA2454	1054758	snp	C	T	T:111 C:0
EA2454	1054882	snp	T	C	C:119 T:0
EA2454	1055114	snp	T	G	G:90 T:0
EA2454	1055170	snp	C	T	T:85 C:0
EA2454	1055371	snp	G	A	A:67 G:0
EA2454	1055413	snp	C	G	G:87 C:0
EA2454	1055650	snp	C	T	T:103 C:0
EA2454	1055698	snp	A	G	G:108 A:0
EA2454	1055818	snp	G	A	A:90 G:0
EA2454	1055875	snp	T	C	C:81 T:0
EA2454	1055905	snp	G	T	T:73 G:0
EA2454	1055962	snp	T	G	G:76 T:0
EA2454	1055971	complex	TCTGTTTGGTTGT	GTTTTTCGGCTGC	GTTTTTCGGCTGC:58 TCTGTTTGGTTGT:0
EA2454	1056124	snp	C	G	G:101 C:0
EA2454	1056130	snp	T	C	C:101 T:0
EA2454	1056139	snp	T	A	A:100 T:0
EA2454	1056145	snp	T	C	C:93 T:1
EA2454	1056160	snp	C	T	T:95 C:0
EA2454	1056196	snp	C	T	T:99 C:0
EA2454	1056202	snp	T	C	C:98 T:0
EA2454	1056211	complex	TGATGTAATT	CGATATAACA	CGATATAACA:78 TGATGTAATT:0
EA2454	1059962	snp	G	A	A:106 G:0
EA2454	1063121	snp	C	T	T:106 C:1
EA2454	1063175	del	CT	C	C:98 CT:1
EA2454	1067810	ins	T	TG	TG:108 T:0
EA2454	1071417	snp	C	T	T:102 C:0
EA2454	1072190	snp	G	A	A:92 G:1
EA2454	1073767	snp	A	G	G:118 A:0
EA2454	1075753	snp	A	G	G:99 A:0
EA2454	1079000	snp	T	C	C:92 T:0
EA2454	1093309	snp	A	G	G:88 A:0
EA2454	1094210	snp	T	A	A:102 T:0
EA2454	1102822	snp	A	G	G:91 A:0
EA2454	1103669	snp	T	C	C:118 T:0
EA2454	1104834	snp	G	C	C:122 G:0
EA2454	1109672	snp	T	C	C:79 T:0
EA2454	1113581	snp	C	A	A:97 C:0
EA2454	1128458	snp	T	C	C:147 T:0
EA2454	1129220	snp	C	T	T:104 C:0
EA2454	1129342	snp	T	A	A:110 T:0
EA2454	1130101	snp	T	C	C:104 T:0
EA2454	1130924	snp	G	A	A:110 G:0
EA2454	1136794	snp	C	A	A:82 C:1
EA2454	1138215	snp	T	C	C:78 T:0
EA2454	1140326	snp	A	G	G:110 A:0
EA2454	1144585	ins	C	CA	CA:123 C:1
EA2454	1144975	snp	T	C	C:117 T:0
EA2454	1150160	snp	T	A	A:118 T:0
EA2454	1151448	snp	T	C	C:92 T:0
EA2454	1153447	snp	T	C	C:103 T:0
EA2454	1153937	snp	G	A	A:87 G:0
EA2454	1160822	snp	A	T	T:88 A:0
EA2454	1162900	snp	T	C	C:91 T:0
EA2454	1167591	snp	C	T	T:96 C:0
EA2454	1167666	snp	T	C	C:100 T:0
EA2454	1174352	snp	T	C	C:100 T:0
EA2454	1175890	snp	G	T	T:112 G:0
EA2454	1180351	snp	A	C	C:100 A:0
EA2454	1186746	snp	T	C	C:88 T:0
EA2454	1190353	snp	G	T	T:127 G:0
EA2454	1191097	snp	G	T	T:106 G:0
EA2454	1200329	snp	C	T	T:77 C:0
EA2454	1203653	snp	C	T	T:109 C:0
EA2454	1211256	snp	T	C	C:92 T:0
EA2454	1211513	snp	T	C	C:117 T:0
EA2454	1212518	snp	A	T	T:106 A:0
EA2454	1218789	snp	A	G	G:122 A:0
EA2454	1219256	snp	C	T	T:99 C:0
EA2454	1219723	snp	A	T	T:103 A:0
EA2454	1228710	snp	T	G	G:99 T:0
EA2454	1235752	snp	A	G	G:76 A:0
EA2454	1236723	snp	T	C	C:77 T:0
EA2454	1240273	snp	T	A	A:98 T:0
EA2454	1240553	snp	C	T	T:124 C:0
EA2454	1242819	snp	C	T	T:105 C:0
EA2454	1244842	snp	G	A	A:111 G:0
EA2454	1245865	snp	C	T	T:105 C:0
EA2454	1248084	snp	C	T	T:102 C:0
EA2454	1248869	snp	C	T	T:108 C:0
EA2454	1255549	snp	A	G	G:114 A:0
EA2454	1256987	snp	C	T	T:89 C:0
EA2454	1304597	snp	C	A	A:120 C:0
EA2454	1309315	snp	T	C	C:69 T:1
EA2454	1309351	snp	A	T	T:74 A:0
EA2454	1310409	snp	C	A	A:81 C:0
EA2454	1312736	snp	C	A	A:87 C:2
EA2454	1314434	snp	T	C	C:94 T:0
EA2454	1317400	snp	G	A	A:75 G:7
EA2454	1320805	snp	A	G	G:95 A:0
EA2454	1322163	snp	T	C	C:70 T:0
EA2454	1322665	snp	T	C	C:82 T:0
EA2454	1325596	snp	C	T	T:84 C:0
EA2454	1331179	snp	T	G	G:92 T:0
EA2454	1334752	snp	C	T	T:103 C:0
EA2454	1335631	snp	T	G	G:117 T:0
EA2454	1340886	snp	A	C	C:120 A:0
EA2454	1345225	snp	G	A	A:99 G:2
EA2454	1345460	snp	T	G	G:110 T:1
EA2454	1345847	snp	T	C	C:104 T:0
EA2454	1350980	snp	C	T	T:85 C:0
EA2454	1351707	snp	G	C	C:83 G:0
EA2454	1355247	snp	G	C	C:100 G:0
EA2454	1358384	snp	A	G	G:112 A:0
EA2454	1360577	snp	A	G	G:101 A:0
EA2454	1361694	snp	A	C	C:93 A:0
EA2454	1365707	snp	C	T	T:104 C:0
EA2454	1371250	snp	T	C	C:99 T:0
EA2454	1373404	snp	C	A	A:111 C:0
EA2454	1373482	snp	T	C	C:124 T:0
EA2454	1373586	snp	T	G	G:102 T:0
EA2454	1377269	snp	C	T	T:87 C:0
EA2454	1378312	snp	T	C	C:88 T:0
EA2454	1382325	ins	G	GT	GT:89 G:0
EA2454	1385489	snp	A	C	C:97 A:0
EA2454	1386531	complex	AACAG	CACAA	CACAA:106 AACAG:0
EA2454	1387493	snp	A	G	G:98 A:0
EA2454	1394505	snp	A	G	G:122 A:0
EA2454	1401264	snp	A	G	G:87 A:0
EA2454	1406791	snp	A	G	G:125 A:0
EA2454	1413069	snp	G	A	A:99 G:0
EA2454	1413295	snp	T	C	C:104 T:0
EA2454	1414989	snp	T	A	A:77 T:1
EA2454	1415609	snp	A	T	T:72 A:0
EA2454	1416501	snp	A	C	C:77 A:0
EA2454	1416561	snp	C	T	T:76 C:0
EA2454	1416578	snp	A	G	G:76 A:0
EA2454	1421672	snp	C	A	A:121 C:0
EA2454	1422407	snp	A	G	G:91 A:0
EA2454	1422512	snp	C	T	T:85 C:0
EA2454	1423055	snp	C	A	A:87 C:0
EA2454	1424795	snp	G	T	T:99 G:0
EA2454	1428495	snp	A	T	T:93 A:0
EA2454	1435223	snp	G	A	A:118 G:0
EA2454	1437290	snp	C	G	G:102 C:0
EA2454	1441149	snp	G	A	A:111 G:0
EA2454	1445619	snp	G	A	A:102 G:0
EA2454	1452075	snp	T	C	C:93 T:0
EA2454	1452930	snp	T	G	G:98 T:0
EA2454	1455169	snp	G	A	A:101 G:0
EA2454	1455265	snp	C	T	T:93 C:0
EA2454	1458467	snp	A	G	G:94 A:0
EA2454	1459664	snp	T	G	G:108 T:0
EA2454	1464787	snp	T	C	C:100 T:0
EA2454	1473808	snp	T	C	C:84 T:0
EA2454	1476139	snp	T	C	C:103 T:0
EA2454	1480708	snp	T	G	G:108 T:0
EA2454	1482449	snp	A	G	G:124 A:1
EA2454	1482846	snp	C	T	T:89 C:0
EA2454	1483731	snp	C	T	T:93 C:0
EA2454	1483915	snp	T	C	C:91 T:0
EA2454	1487352	snp	T	C	C:120 T:0
EA2454	1487443	snp	C	A	A:115 C:0
EA2454	1488029	snp	C	A	A:68 C:0
EA2454	1490331	snp	C	T	T:92 C:0
EA2454	1491226	snp	T	C	C:106 T:0
EA2454	1491674	snp	A	G	G:122 A:0
EA2454	1492092	snp	G	A	A:92 G:0
EA2454	1492527	ins	C	CA	CA:81 C:1
EA2454	1494618	snp	T	G	G:109 T:0
EA2454	1495396	snp	C	T	T:93 C:1
EA2454	1495581	snp	T	A	A:76 T:1
EA2454	1498603	snp	G	A	A:103 G:0
EA2454	1500517	ins	T	TA	TA:98 T:0
EA2454	1505571	snp	C	T	T:97 C:0
EA2454	1508544	snp	G	A	A:95 G:1
EA2454	1511208	snp	G	T	T:76 G:0
EA2454	1518451	complex	GGAAG	AAAAA	AAAAA:91 GGAAG:0
EA2454	1521514	snp	C	A	A:101 C:0
EA2454	1525679	snp	C	T	T:108 C:0
EA2454	1533339	snp	A	G	G:99 A:0
EA2454	1534292	snp	A	G	G:110 A:0
EA2454	1534747	del	TC	T	T:89 TC:0
EA2454	1540056	snp	G	A	A:85 G:1
EA2454	1540173	snp	G	C	C:94 G:1
EA2454	1544567	snp	G	A	A:73 G:0
EA2454	1547465	snp	G	T	T:81 G:0
EA2454	1548845	snp	T	C	C:102 T:0
EA2454	1549828	snp	T	C	C:81 T:0
EA2454	1549834	del	ACGCCATTG	A	A:57 ACGCCATTG:0
EA2454	1556519	snp	A	G	G:84 A:0
EA2454	1557966	snp	A	G	G:92 A:0
EA2454	1559514	complex	GTGATGGCTTGG	TGATGGCTTGA	TGATGGCTTGA:93 GTGATGGCTTGG:0
EA2454	1559541	snp	C	T	T:116 C:0
EA2454	1560679	snp	G	A	A:84 G:0
EA2454	1562488	snp	G	A	A:108 G:0
EA2454	1570233	snp	A	G	G:72 A:1
EA2454	1573803	snp	T	A	A:131 T:0
EA2454	1574124	snp	G	A	A:91 G:0
EA2454	1575613	snp	T	C	C:122 T:0
EA2454	1581265	snp	T	C	C:98 T:0
EA2454	1582522	snp	A	G	G:86 A:0
EA2454	1585759	snp	C	T	T:68 C:0
EA2454	1587379	snp	T	C	C:84 T:0
EA2454	1587792	snp	A	C	C:102 A:0
EA2454	1590018	snp	C	T	T:120 C:0
EA2454	1592505	snp	T	C	C:111 T:0
EA2454	1596282	snp	T	G	G:94 T:0
EA2454	1597496	snp	T	C	C:108 T:0
EA2454	1599599	snp	T	G	G:92 T:1
EA2454	1599906	snp	T	C	C:100 T:0
EA2454	1600258	snp	C	A	A:104 C:1
EA2454	1600919	snp	A	G	G:86 A:0
EA2454	1602481	snp	C	T	T:102 C:0
EA2454	1602794	snp	T	C	C:118 T:0
EA2454	1607735	snp	A	T	T:92 A:0
EA2454	1610176	snp	G	A	A:98 G:0
EA2454	1610501	del	AT	A	A:92 AT:0
EA2454	1612207	snp	C	T	T:94 C:0
EA2454	1612435	snp	G	A	A:82 G:0
EA2454	1613406	snp	T	A	A:86 T:0
EA2454	1613463	snp	A	G	G:96 A:0
EA2454	1614409	snp	G	T	T:111 G:0
EA2454	1616260	snp	T	G	G:115 T:0
EA2454	1617684	snp	G	C	C:100 G:0
EA2454	1618779	snp	G	T	T:109 G:0
EA2454	1619178	snp	T	A	A:25 T:0
EA2454	1619184	snp	T	C	C:28 T:0
EA2454	1619194	complex	ATTTC	TTTTT	TTTTT:34 ATTTC:0
EA2454	1619213	snp	C	T	T:45 C:0
EA2454	1619310	snp	G	T	T:73 G:0
EA2454	1619341	snp	G	A	A:71 G:0
EA2454	1619530	snp	A	G	G:92 A:0
EA2454	1619683	snp	A	G	G:96 A:0
EA2454	1619695	complex	GT	AC	AC:91 GT:0
EA2454	1619713	complex	ACCG	CCCT	CCCT:80 ACCG:0
EA2454	1619739	snp	C	A	A:90 C:0
EA2454	1619761	snp	T	C	C:83 T:0
EA2454	1619773	snp	A	G	G:78 A:0
EA2454	1619938	snp	T	G	G:72 T:0
EA2454	1629068	snp	G	A	A:23 G:0
EA2454	1629119	complex	CGCA	AGCG	AGCG:76 CGCA:0
EA2454	1629149	complex	TGGCTATA	CGGTTATG	CGGTTATG:85 TGGCTATA:0
EA2454	1629200	snp	T	C	C:89 T:0
EA2454	1629240	snp	T	C	C:79 T:0
EA2454	1629285	complex	GTAC	ATAT	ATAT:69 GTAC:0
EA2454	1629295	complex	ACAAAAT	TCTAAAC	TCTAAAC:68 ACAAAAT:0
EA2454	1629306	snp	C	G	G:75 C:0
EA2454	1629375	snp	G	A	A:85 G:0
EA2454	1629399	snp	G	A	A:68 G:0
EA2454	1629404	snp	T	A	A:65 T:0
EA2454	1629412	complex	TGAG	AGAA	AGAA:51 TGAG:0
EA2454	1629423	complex	ATATA	GTATT	GTATT:44 ATATA:0
EA2454	1629435	snp	G	A	A:39 G:0
EA2454	1629457	snp	A	T	T:17 A:0
EA2454	1630981	snp	A	G	G:21 A:0
EA2454	1630990	snp	T	C	C:32 T:0
EA2454	1634228	snp	A	G	G:103 A:0
EA2454	1635043	snp	G	C	C:99 G:0
EA2454	1636485	snp	G	T	T:101 G:0
EA2454	1642336	snp	A	G	G:100 A:0
EA2454	1644685	snp	C	T	T:108 C:0
EA2454	1645968	snp	G	A	A:86 G:0
EA2454	1652108	snp	T	C	C:93 T:0
EA2454	1652374	snp	G	A	A:88 G:0
EA2454	1653997	snp	T	A	A:112 T:0
EA2454	1659343	snp	G	A	A:87 G:0
EA2454	1676378	snp	T	C	C:138 T:0
EA2454	1682457	snp	A	G	G:84 A:0
EA2454	1686797	snp	T	A	A:116 T:0
EA2454	1689622	snp	T	A	A:103 T:0
EA2454	1693725	del	GCGCCATTCATTT	G	G:82 GCGCCATTCATTT:0
EA2454	1695261	snp	C	T	T:117 C:0
EA2454	1695320	snp	A	G	G:96 A:0
EA2454	1701919	snp	A	G	G:103 A:0
EA2454	1706905	snp	C	A	A:93 C:0
EA2454	1707192	snp	A	G	G:89 A:0
EA2454	1708197	snp	G	T	T:87 G:0
EA2454	1709856	snp	G	T	T:101 G:0
EA2454	1713864	snp	T	C	C:104 T:0
EA2454	1714697	snp	T	C	C:90 T:0
EA2454	1716018	snp	C	T	T:95 C:0
EA2454	1716594	snp	G	A	A:78 G:0
EA2454	1716783	snp	T	G	G:107 T:0
EA2454	1717835	snp	C	A	A:112 C:0
EA2454	1718788	snp	C	A	A:94 C:0
EA2454	1719146	snp	C	T	T:122 C:0
EA2454	1719996	snp	C	G	G:87 C:0
EA2454	1720465	snp	C	T	T:86 C:0
EA2454	1730329	snp	T	C	C:117 T:0
EA2454	1730717	snp	C	A	A:105 C:0
EA2454	1732191	snp	G	A	A:97 G:0
EA2454	1737561	snp	A	G	G:108 A:0
EA2454	1739772	del	CG	C	C:82 CG:0
EA2454	1741011	snp	T	C	C:112 T:0
EA2454	1742704	snp	G	A	A:106 G:0
EA2454	1743887	snp	C	T	T:83 C:0
EA2454	1745576	snp	T	C	C:99 T:0
EA2454	1746928	snp	C	T	T:90 C:0
EA2454	1748585	snp	A	C	C:80 A:0
EA2454	1751806	snp	A	C	C:110 A:0
EA2454	1755344	snp	C	A	A:96 C:0
EA2454	1763293	snp	T	C	C:103 T:0
EA2454	1774304	snp	C	T	T:83 C:0
EA2454	1784800	snp	T	G	G:110 T:0
EA2454	1786099	snp	G	A	A:85 G:0
EA2454	1786685	snp	T	C	C:76 T:0
EA2454	1794938	snp	T	G	G:101 T:0
EA2454	1795161	snp	A	G	G:103 A:0
EA2454	1799132	snp	G	A	A:84 G:0
EA2454	1801433	snp	G	A	A:92 G:0
EA2454	1802874	snp	A	G	G:88 A:0
EA2454	1803664	snp	T	C	C:104 T:0
EA2454	1811123	snp	A	G	G:92 A:0
EA2454	1818775	snp	C	T	T:92 C:0
EA2454	1820083	snp	T	C	C:102 T:0
EA2454	1824156	snp	T	C	C:96 T:0
EA2454	1824499	snp	T	C	C:107 T:1
EA2454	1825107	snp	G	A	A:100 G:1
EA2454	1827513	snp	G	A	A:114 G:1
EA2454	1832503	snp	C	T	T:101 C:0
EA2454	1832674	snp	A	C	C:96 A:0
EA2454	1842345	snp	G	A	A:70 G:0
EA2454	1844569	snp	A	G	G:110 A:0
EA2454	1859194	snp	G	T	T:116 G:0
EA2454	1874154	snp	G	T	T:117 G:0
EA2454	1875820	snp	G	T	T:99 G:0
EA2454	1875844	snp	T	A	A:103 T:0
EA2454	1877345	snp	T	C	C:80 T:0
EA2454	1878461	snp	A	G	G:97 A:0
EA2454	1880076	snp	G	A	A:125 G:0
EA2454	1881056	snp	C	G	G:122 C:0
EA2454	1887544	snp	A	G	G:79 A:0
EA2454	1890386	snp	T	C	C:118 T:0
EA2454	1901401	snp	G	A	A:79 G:1
EA2454	1902101	snp	G	A	A:106 G:0
EA2454	1902291	snp	G	C	C:110 G:0
EA2454	1904962	snp	G	A	A:122 G:0
EA2454	1905044	snp	G	A	A:107 G:0
EA2454	1909088	snp	T	C	C:98 T:0
EA2454	1912473	snp	A	G	G:104 A:0
EA2454	1929193	ins	T	TTTA	TTTA:91 T:0
EA2454	1932163	snp	G	A	A:115 G:0
EA2454	1932379	snp	C	A	A:94 C:0
EA2454	1942330	snp	T	C	C:84 T:0
EA2454	1943617	snp	C	T	T:92 C:0
EA2454	1944313	snp	C	T	T:129 C:0
EA2454	1945608	snp	T	C	C:101 T:0
EA2454	1950298	snp	T	G	G:104 T:0
EA2454	1952561	snp	G	T	T:128 G:0
EA2454	1958733	snp	T	C	C:99 T:0
EA2454	1960725	snp	C	T	T:82 C:0
EA2454	1964210	snp	C	T	T:97 C:0
EA2454	1964602	snp	G	A	A:109 G:0
EA2454	1968172	snp	T	C	C:85 T:0
EA2454	1970914	snp	A	T	T:16 A:0
EA2454	1970924	complex	CAA	ATC	ATC:17 CAA:0
EA2454	1970935	snp	C	A	A:28 C:0
EA2454	1972065	snp	T	A	A:108 T:0
EA2454	1973744	snp	G	A	A:84 G:0
EA2454	1973985	snp	G	A	A:97 G:0
EA2454	1974480	snp	G	A	A:102 G:0
EA2454	1979564	snp	A	G	G:96 A:0
EA2454	1980186	snp	C	T	T:95 C:0
EA2454	1982408	snp	G	A	A:121 G:0
EA2454	1983040	snp	T	A	A:129 T:0
EA2454	1984663	snp	C	T	T:102 C:0
EA2454	1986212	snp	G	A	A:120 G:0
EA2454	1991121	snp	T	C	C:101 T:0
EA2454	1995211	snp	T	C	C:143 T:0
EA2454	1997790	snp	G	A	A:86 G:0
EA2454	1997936	snp	C	T	T:97 C:0
EA2454	1999122	snp	G	A	A:99 G:0
EA2454	1999636	snp	A	G	G:79 A:0
EA2454	2001388	snp	G	A	A:91 G:0
EA2454	2007593	snp	T	C	C:96 T:0
EA2454	2007738	snp	A	G	G:95 A:0
EA2454	2010387	snp	G	A	A:114 G:0
EA2454	2018461	snp	C	T	T:99 C:0
EA2454	2023335	snp	A	C	C:77 A:0
EA2454	2024835	snp	G	A	A:111 G:0
EA2454	2027149	snp	G	A	A:93 G:0
EA2454	2036702	snp	C	T	T:112 C:0
EA2454	2038279	ins	A	AAC	AAC:97 A:0
EA2454	2039441	snp	C	T	T:95 C:0
EA2454	2039625	snp	A	C	C:110 A:0
EA2454	2041809	snp	A	G	G:94 A:0
EA2454	2043610	complex	CTCA	ATCT	ATCT:87 CTCA:0
EA2454	2045195	snp	G	A	A:88 G:0
EA2454	2046204	snp	T	C	C:103 T:0
EA2454	2046833	snp	C	T	T:98 C:0
EA2454	2049495	snp	G	A	A:84 G:0
EA2454	2049993	snp	G	T	T:95 G:0
EA2454	2052588	snp	C	A	A:98 C:0
EA2454	2055836	snp	A	G	G:94 A:0
EA2454	2057764	snp	G	A	A:74 G:0
EA2454	2059644	snp	G	A	A:110 G:0
EA2454	2060675	snp	A	G	G:81 A:0
EA2454	2062156	snp	T	C	C:117 T:0
EA2454	2063839	snp	T	C	C:96 T:0
EA2454	2065088	snp	G	A	A:87 G:0
EA2454	2068016	snp	C	T	T:109 C:0
EA2454	2068297	snp	T	G	G:102 T:0
EA2454	2069426	snp	C	G	G:99 C:0
EA2454	2070162	snp	T	C	C:97 T:0
EA2454	2078028	snp	A	G	G:83 A:0
EA2454	2079477	snp	A	G	G:126 A:0
EA2454	2079621	ins	C	CA	CA:98 C:0
EA2454	2080805	snp	T	C	C:108 T:0
EA2454	2086362	del	CG	C	C:101 CG:0
EA2454	2088108	snp	A	C	C:120 A:0
EA2454	2088535	snp	C	G	G:129 C:0
EA2454	2091149	snp	T	C	C:84 T:0
EA2454	2094829	snp	T	C	C:100 T:0
EA2454	2095954	snp	G	A	A:106 G:0
EA2454	2096088	snp	A	G	G:95 A:0
EA2454	2100910	snp	C	T	T:99 C:0
EA2454	2102993	snp	T	C	C:94 T:0
EA2454	2105260	snp	T	G	G:81 T:0
EA2454	2108215	snp	G	A	A:97 G:0
EA2454	2112900	snp	C	T	T:86 C:0
EA2454	2117468	snp	A	G	G:129 A:0
EA2454	2119737	snp	T	C	C:119 T:0
EA2454	2126160	snp	G	A	A:101 G:0
EA2454	2142320	snp	T	C	C:84 T:0
EA2454	2147622	snp	C	T	T:106 C:0
EA2454	2148878	snp	T	A	A:86 T:0
EA2454	2149924	snp	A	G	G:91 A:0
EA2454	2153182	snp	T	G	G:120 T:0
EA2454	2155859	snp	G	A	A:97 G:0
EA2454	2162365	snp	A	G	G:81 A:0
EA2454	2166869	snp	G	A	A:90 G:0
EA2454	2167940	snp	G	A	A:101 G:0
EA2454	2171579	snp	T	A	A:117 T:0
EA2454	2171889	snp	A	G	G:130 A:0
EA2454	2173082	snp	A	G	G:87 A:0
EA2454	2175056	snp	T	A	A:102 T:0
EA2454	2177349	snp	T	C	C:103 T:0
EA2454	2183355	snp	T	C	C:99 T:0
EA2454	2184344	snp	G	T	T:97 G:0
EA2454	2188277	snp	G	T	T:109 G:0
EA2454	2189381	snp	A	G	G:96 A:0
EA2454	2195062	snp	T	C	C:90 T:0
EA2454	2201778	snp	A	G	G:22 A:0
EA2454	2206382	snp	G	A	A:117 G:0
EA2454	2208493	snp	A	G	G:128 A:0
EA2454	2220538	snp	A	G	G:108 A:0
EA2454	2224200	snp	C	T	T:94 C:0
EA2454	2226298	snp	T	C	C:84 T:0
EA2454	2228600	snp	T	C	C:103 T:0
EA2454	2241319	snp	G	A	A:100 G:0
EA2454	2245025	snp	C	A	A:84 C:0
EA2454	2246386	snp	A	T	T:109 A:1
EA2454	2252185	snp	G	A	A:121 G:0
EA2454	2256445	snp	G	A	A:89 G:0
EA2454	2259197	snp	G	A	A:100 G:0
EA2454	2268389	snp	G	C	C:118 G:0
EA2454	2271416	snp	C	A	A:84 C:0
EA2454	2280681	snp	T	G	G:90 T:0
EA2454	2280907	snp	A	G	G:125 A:0
EA2454	2283117	snp	T	C	C:89 T:0
EA2454	2283880	snp	A	G	G:67 A:0
EA2454	2285810	snp	C	T	T:95 C:0
EA2454	2289041	snp	T	C	C:80 T:0
EA2454	2291863	snp	T	C	C:81 T:0
EA2454	2293649	snp	C	A	A:95 C:0
EA2454	2293725	snp	C	T	T:81 C:0
EA2454	2298496	snp	G	T	T:96 G:0
EA2454	2298963	snp	G	T	T:76 G:0
EA2454	2303821	snp	A	G	G:84 A:0
EA2454	2311767	snp	T	G	G:89 T:0
EA2454	2314156	snp	C	T	T:89 C:0
EA2454	2322703	snp	T	G	G:81 T:0
EA2454	2324838	snp	G	T	T:94 G:0
EA2454	2331830	snp	C	T	T:80 C:0
EA2454	2335946	ins	C	CA	CA:73 C:0
EA2454	2336981	snp	A	T	T:115 A:0
EA2454	2337058	snp	G	A	A:118 G:0
EA2454	2337492	snp	G	T	T:116 G:0
EA2454	2338673	snp	G	A	A:109 G:0
EA2454	2345097	snp	G	A	A:90 G:0
EA2454	2346392	snp	C	A	A:116 C:0
EA2454	2347920	snp	G	A	A:132 G:0
EA2454	2349078	snp	T	C	C:88 T:0
EA2454	2350339	snp	T	C	C:85 T:0
EA2454	2351375	snp	A	C	C:90 A:0
EA2454	2352385	snp	G	A	A:95 G:0
EA2454	2354110	snp	G	C	C:109 G:0
EA2454	2354351	snp	A	G	G:78 A:0
EA2454	2354775	snp	G	A	A:87 G:0
EA2454	2356836	snp	C	A	A:103 C:0
EA2454	2359024	snp	A	G	G:97 A:0
EA2454	2361366	snp	G	C	C:92 G:0
EA2454	2363816	snp	G	T	T:89 G:0
EA2454	2364327	snp	G	A	A:99 G:0
EA2454	2364340	snp	T	G	G:102 T:0
EA2454	2371672	snp	T	C	C:98 T:0
EA2454	2372914	snp	T	C	C:92 T:0
EA2454	2373982	snp	A	G	G:98 A:0
EA2454	2379341	snp	T	C	C:58 T:0
EA2454	2382380	snp	C	T	T:100 C:0
EA2454	2383150	snp	C	A	A:88 C:0
EA2454	2396147	snp	T	A	A:50 T:0
EA2454	2396547	del	TCAGCGAA	T	T:65 TCAGCGAA:0
EA2454	2397205	snp	T	C	C:83 T:0
EA2454	2397603	snp	C	A	A:82 C:0
EA2454	2399010	snp	A	G	G:96 A:0
EA2454	2403442	snp	T	C	C:95 T:0
EA2454	2405136	snp	G	A	A:101 G:0
EA2454	2407449	snp	A	G	G:96 A:0
EA2454	2407910	snp	A	C	C:104 A:0
EA2454	2412014	snp	C	T	T:114 C:0
EA2454	2415138	snp	G	A	A:92 G:0
EA2454	2416531	snp	C	T	T:94 C:0
EA2454	2416803	snp	G	A	A:121 G:0
EA2454	2418799	snp	G	A	A:100 G:1
EA2454	2423399	snp	T	G	G:99 T:0
EA2454	2424078	snp	A	G	G:69 A:0
EA2454	2426659	snp	G	A	A:88 G:0
EA2454	2428008	del	AT	A	A:83 AT:0
EA2454	2428499	snp	G	A	A:136 G:0
EA2454	2429573	snp	A	G	G:88 A:0
EA2454	2438443	ins	G	GCACCAT	GCACCAT:68 G:0
EA2454	2438685	snp	A	G	G:98 A:0
EA2454	2439096	snp	G	A	A:124 G:0
EA2454	2447662	snp	G	A	A:92 G:0
EA2454	2448724	snp	T	C	C:121 T:0
EA2454	2449435	snp	A	G	G:123 A:0
EA2454	2450258	snp	A	C	C:106 A:0
EA2454	2453744	snp	A	C	C:64 A:0
EA2454	2456498	snp	G	C	C:113 G:0
EA2454	2456513	snp	G	T	T:110 G:1
EA2454	2461974	snp	A	G	G:112 A:0
EA2454	2468021	snp	C	T	T:100 C:0
EA2454	2469000	snp	G	T	T:91 G:0
EA2454	2487560	snp	G	T	T:86 G:0
EA2454	2495743	snp	A	C	C:116 A:0
EA2454	2496339	del	CG	C	C:94 CG:0
EA2454	2498006	snp	G	A	A:134 G:0
EA2454	2512037	snp	G	A	A:98 G:0
EA2454	2515657	snp	G	T	T:96 G:0
EA2454	2518906	snp	A	C	C:102 A:0
EA2454	2520061	snp	T	C	C:96 T:0
EA2454	2521382	snp	C	T	T:102 C:0
EA2454	2522720	snp	A	C	C:87 A:0
EA2454	2524981	snp	T	G	G:90 T:0
EA2454	2528246	snp	T	C	C:99 T:0
EA2454	2538679	snp	T	C	C:107 T:0
EA2454	2542786	snp	A	G	G:110 A:0
EA2454	2545615	complex	CTC	ATA	ATA:83 CTC:0
EA2454	2546596	snp	C	T	T:92 C:0
[truncated: 6,905 more rows]
