# Supplementary material for: Escherichia coli ST302: Genomic Analysis of Virulence Potential and Antimicrobial Resistance Mediated by Mobile Genetic Elements
Source: Front Microbiol. 2020 Jan 21;10:3098. doi: 10.3389/fmicb.2019.03098 (PMC6985150; doi:10.3389/fmicb.2019.03098)
Supplement: DATA S2 — ST302 SNP analysis. [file Data_Sheet_2.ZIP › SNP_Analysis/ST302_SNP/SNP_analysis/snippyout/ST302/BA9503-ND-ST302.out/snps.consensus.fa]

>EA2454
ACTTAGGATAGCCAACCATCAGATGCTGCATTTGCATAGTGCAATCTCCCCTTACTTATC
CGGAGGCAATTGCAATATCTCTGTGAACTTACACAGGGGGAGCTTTTACCTGAAATACGC
CACGGAGGCGGGTATGAAACTGGCAGTCGTCACTGGACAAATTGTTTGTACCGTACGCCA
TCACGGACTGGCGCATGACAAATTGCTGATGGTGGAAATGATTGATCCACAAGGTAATCC
TGACGGGCAATGCGCCGTCGCCATCGACAATATTGGCGCGGGAACCGGGGAGTGGGTGTT
ACTGGTGAGTGGCAGTTCCGCCCGCCAGGCGCATAAAAGCGAAACGTCACCGGTCGATCT
GTGCGTGATTGGCATTGTCGATGAGGTGGTGTCTGGCGGTCAGGTAATTTTCCACAAATA
AGGCAGAACATCATGAATCAACAGGATATTGAACAGGTGGTGAAAGCGGTACTGCTGAAA
ATGCAAAGCAGTGACACGCCGCCCGCCGCCGTTCATGAGATGGGCGTTTTCGCGTCCCTG
GATGACGCCGTTGCGGCAGCCAAAGTCGCCCAGCAAGGGTTAAAGAGCGTGGCAATGCGC
CAGTTAGCCATTGCTGCCATTCGTGAAGCAGGCGAAAAACACGCCAGAGATTTAGCGGAA
CTTGCCGTCAGTGAAACCGGCATGGGGCGCGTTGAAGATAAATTTGCAAAAAACGTCGCT
CAGGCGCGCGGCACACCAGGCGTTGAGTACCTCTCTCCGCAAGTGCTGACTGGCGACAAC
GGCCTGACCCTAATTGAAAACGCACCCTGGGGCGTGGTGGCTTCGGTGACGCCGTCCACT
AACCCGGCGGCAACCGTAATTAACAACGCCATCAGCCTGATTGCCGCGGGCAACAGCGTC
ATTTTTGCCCCGCATCCGGCGGCGAAAAAAGTCTCCCAGCGGGCGATTACGCTGCTCAAC
CAGGCGATTGTTGCCGCAGGTGGGCCGGAAAACTTACTGGTTACTGTGGCAAATCCGGAT
ATCGAAACCGCGCAACGCTTGTTCAAGTTTCCGGGCATCGGCCTGCTGGTGGTGACCGGC
GGCGAAGCGGTAGTAGAAGCGGCGCGTAAACACACCAATAAACGTCTGATTGCCGCAGGC
GCTGGCAACCCGCCGGTAGTGGTGGATGAAACCGCTGACCTCGCCCGTGCTGCTCAGTCC
ATCGTTAAAGGCGCGTCTTTCGATAACAACATCATTTGTGCCGACGAAAAGGTACTGATT
GTTGTTGATAGCGTAGCCGATGAACTGATGCGTCTGATGGAAGGCCAGCACGCGGTGAAA
CTGACCGCAGAGCAGGCGCAGCAATTGCAACCGGTGTTGCTGAAAAATATCGACGAGCGC
GGAAAAGGTACCGTCAGCCGTGACTGGGTAGGTCGCGATGCAGGCAAAATCGCGGCGGCA
ATCGGCCTTAAAGTTCCGGAACAAACGCGATTGCTGTTTGTAGAAACCACCGCAGAACAT
CCGTTTGCCGTGACTGAACTGATGATGCCGGTGTTGCCCGTCGTGCGCGTCGCCAACGTG
GCGGATGCCATTGCGCTGGCGGTGAAACTGGAAGGCGGTTGCCACCACACGGCGGCAATG
CACTCGCGCAATATCGAGAACATGAACCAGATGGCGAATGCCATTGATACCAGCATTTTC
GTTAAGAACGGACCGTGCATTGCCGGGCTGGGGCTGGGCGGGGAAGGCTGGACCACCATG
ACCATCACCACGCCAACCGGTGAAGGGGTAACCAGCGCGCGTACGTTTGTCCGTCTGCGT
CGCTGTGTATTAGTCGATGCGTTTCGCATTGTTTAAGGAGTAACAGATGGCGCACGACGA
ACAATGGCTCACCCCACGTCTGCAAACGGCGGCAACGCTGTGTAACCAGACGCCCGCCGC
GACGGAATCTCCGCTGTGGCTGGGGGTGGATCTGGGCACCTGCGATGTGGTGTCGATGGT
TGTCGACCGCGACGGTCAGCCGGTGGCGGTATGCCTCGACTGGGCCGATGTGGTCCGCGA
CGGCATCGTCTGGGATTTCTTCGGCGCGGTCACCATTGTTCGTCGCCATCTCGACACGCT
CGAGCAGCAATTCGGTCGTCGTTTTAGCCATGCGGCGACTTCATTTCCTCCAGGTACGGA
CCCGCGTATTTCCATCAACGTGCTGGAGTCTGCCGGGCTGGAAGTGAGCCATGTGCTGGA
TGAGCCAACCGCAGTCGCGGATCTACTGCAACTGGATAACGCAGGCGTAGTGGATATCGG
CGGTGGCACTACCGGCATTGCCATCGTGAAAAAGGGCAAAGTGACGTACTCGGCGGATGA
AGCCACCGGCGGACATCACATCTCTCTGACTCTCGCCGGAAATCGCCGTATTTCGCTGGA
AGAGGCGGAGCAGTACAAGCGCGGTCACGGTTAAGAGATTTGGCCTGCGGTGAAACCGGT
GTACGAAAAAATGGCGGACATTGTCGCCCGGCATATTGAAGGGCAGGGCATTACTGATTT
ATGGCTGGCGGGCGGCTCTTGTATGCAACCGGGCGTGGCGGAACTGTTTCGCAAACAATT
CCCGGCGTTACAGGTGCATTTACCGCAGCACAGTTTGTTTATGACCCCGCTGGCAATCGC
CAGTAGTGGGCGAGAGAAAGCGGAGGGGCTATATGCAAAATGAATTGCAGACCGCGCTCT
TTCAGGCGTTCGATACCCTGAATCTGCAACGGGTAAAAACATTTAGCGTTCCACCGGTGA
CGCTTTGCGGTCCGGGCTCGGTGAGCAGTTGCGGACAGCAAGCGCAAACGCGTGGGCTGA
AACATCTGTTCGTGATGGCAGACAGCTTTTTGCATCAGGCAGGGATGACCGCCGGGCTGA
CGCGTAGCCTGGCCGTTAAAGGTATCGCCATGACGCTCTGGCCATGTCCGGTGGGCGAAC
CGTGCATTACCGACGTGTGTGCAGCCGTGGCGCAGTTGCGTGAGTCAGGTTGTGACGGGG
TGATCGCATTTGGCGGCGGCTCGGTGCTGGATGCGGCGAAAGCCGTGGCGTTGCTGGTGA
CGAACCCGGATAGCACGCTGGCAGAGATGTCAGAAACCAGCGTTCTGCAACCGCGCTTGC
CGCTGATTGCCATTCCAACTACCGCCGGAACCGGCTCTGAAACCACCAATGTAACGGTGA
TTATCGACGCGGTGAGCGGGCGCAAGCAGGTGTTAGCCCATGCCTCGCTGATGCCGGATG
TGGCGATCCTCGACGCCGCATTGACCGAAGGTGTGCCGTCGCATGTCACGGCGATGACCG
GCATTGATGCGTTAACCCATGCCATTGAAGCATACAGCGCCCTGAACGCTACACCGTTTA
CCGACAGTCTGGCGATTGGTGCCATTGCGATGATTGGCAAATCGCTGCCGAAAGCGGTGG
GCTACGGTCACGACCTTGCCGCGCGCGAGAGCATGTTGCTGGCTTCATGTATGGCGGGAA
TGGCGTTTTCCAGTGCGGGTCTTGGGTTGTGCCACGCGATGGCGCATCAGCCGGGCGCGG
CGCTGCATATTCCGCACGGTCTGGCGAACGCTATGTTGCTGCCAACGGTGATGGAGTTTA
ACCGGATGGTATGTCGCGAACGCTTTAGTCAGATTGGTCGGGCACTGCGAACTAAAAAAT
CCGACGATCGTGACGCTATTAACGCGGTAAGTGAGCTGATTGCGGAAGTTGGGATTGGTA
AACGACTGGGCGATGTTGGCGCGACATCTGCGCATTACGGTGCATGGGCGCAGGCCGCGC
AGGAAGATATTTGTCTGCGCAGCAACCCGCGTACCGCCAGCCTGGAACAGATTGTCGGCC
TGTACGCGGCGGCGCAATAAATGCCGCGTCTTATCCGGTCTGTGGGATTGCACATGTAGT
GCGGATAAGGCTTCACGCAGCATCCGCTAATAAATAACAACTAACAGGGAGTAAAGGCGA
TGGGAATTAACGAAATCATCATGTACATCATGATGTTCTTTATGCTGATAGCTGCCGTAG
ACAGGATCCTGTCACAGTTCGGCGGTTCTGCTCGTTTCCTCGGTAAGTTCGGTAAAAGTA
TCGAAGGATCAGGCGGTCAGTTCGAAGAAGGCTTTATGGCAATGGGCGCTCTGGGTCTGG
CGATGGTCGGTATGACCGCGCTGGCACCGGTACTGGCTCACGTACTCGGGCCGGTAATTA
TCCCGGTTTACGAAATGCTCGGCGCAAACCCGTCAATGTTCGCCGGAACGCTGCTGGCGT
GCGATATGGGCGGCTTCTTCCTCGCCAAAGAGCTGGCGGGCGGCGACGTAGCAGCGTGGC
TATACTCTGGGTTAATTCTCGGGTCGATGATGGGGCCAACGATTGTGTTTTCCATTCCGG
TGGCGCTCGGCATTATCGAACCTTCTGACCGTCGTTATCTGGCGCTCGGCGTGCTGGCGG
GCATTGTGACCATTCCGATTGGTTGTATCGCTGGTGGTCTGGTAGCTATGTACTCCGGTG
TTCAGATCAACGGCCAGCCGGTGGAATTCACTTTCGCCCTGATCCTGATGAACATGATCC
CGGTGATCATTGTTGCGATTCTGGTGGCGCTGGGGCTGAAATTCATCCCGGAAAAAATGA
TCAACGGCTTCCAGATCTTCGCCAAATTCCTCGTTGCATTGATCACCCTCGGTCTTGCCG
CTGCGGTAGTGAAATTCCTGCTTGGCTGGGAACTGATCCCCGGTCTGGATCCTATCTTTA
TGGCCCCTGGCGATAAACCCGGTGAGGTGATGCGCGCCATTGAAGTTATCGGTTCTATCT
CCTGCGTTCTGTTAGGGGCGTATCCAATGGTGCTGCTGCTGACCCGCTGGTTTGAAAAAC
CGCTGATGAGCGTCGGTAAAGTGCTGAATATGAACAACATCGCGGCAGCCGGCATGGTGG
CAACGCTTGCCAACAACATCCCGATGTTCGGCATGATGAAGCAGATGGATACCCGCGGCA
AAGTCATCAACTGCGCCTTCGCCGTTTCCGCTGCTTTCGCCCTGGGCGACCACTTAGGCT
TCGCCGCTGCCAACATGAATGCCATGATCTTCCCGATGATTGTCGGCAAGTTGATCGGCG
GCGTAACGGCGATTGGCGTGGCGATGATGCTGGTGCCAAAAGACGACGCGACCGCGGCTA
AAACCGAAGCGGAGGCACAATCGTGAACACTCGCCAGCTACTGAGCGTCGGTATCGATAT
CGGCACCACCACCACCCAGGTGATTTTCTCCCACCTGGAACTGGTTAACCGTGCGGCGGT
GTCGCAGGTGCCGCGCTACGAATTCATCAAACGCGAAATTAGCTGGCAAAGCCCGGTGTT
CTTTACCCCTGTCGATAAACAGGGTGGTTTAAAAGAAGCGGAACTGAAATCGCTGATTTT
AGAGCAATATCAGGCTGCGGGCATTGCGCCGGAAAGCGTTGATTCTGGTGCCATCATCAT
CACCGGTGAAAGCGCGAAAACCCGCAATGCTCGCCCGGCGGTGATGGCGCTCTCTCAGTC
GCTGGGCGATTTTGTCGTCGCCAGCGCCGGGCCGCACCTCGAATCCGTGATCGCCGGTCA
CGGTGCCGGGGCGCAAACCCTTTCTGAACAACGGCTGTGTCGGGTACTGAATATCGACAT
CGGCGGTGGCACCGCGAACTACGCCCTGTTCGATGCCGGAAAAATCAGCGGCACTGCCTG
CCTCAACGTCGGTGGTCGCCTGCTGGAAACCGACAGCCAGGGGCGCGTGGTTTACGCTCA
TAAACCGGGGCAGATGATTGTGGATGAGTGCTTCGGCGCAGGCACCGACGCCCGTTCGCT
GACCGGCGCGCAGCTGGTGCAGGTTACCCGGCGGATGGCAGAGCTGATTGTCGAAGTGAT
TGACGGAACGCTTTCGCCGCTCGCGCAGGCATTAATGCAAACCGGTTTGCTGCCCGCAGG
TGTTACGCCCGAAATCATTACGCTTTCTGGCGGCGTGGGCGAATGTTATCGCCACCAGCC
CGCCGACCCGTTCTGTTTTGCCGATATTGGCCCGCTTCTGGCAACGGCGCTGCATGACCA
TCCGCGCCTGCGTGAGATGAACGTGCAGTTTCCGGCGCAAACCGTACGCGCCACGGTGAT
TGGCGCGGGTGCACATACCCTTTCGCTCTCTGGCAGCACAATCTGGCTGGAGGGCGTACA
ACTGCCGCTGCGCAATTTGCCGGTGGCGATCCCGATTGATGAAACGGATCTGGTGAGTGC
CTGGCAACAGGCGCTGATTCAGCTGGATCTTGATCCCAAAACTGACGCGTACGTGCTGGC
GCTTCCCGCCTCGCTGCCTGTGCGTTACGCCGCGGTACTGACGGTCATCAACGCGTTGGT
CGATTTCGTCGCGCGTTTTCCGAATCCGCATCCCCTGCTGGTGGTGGCCGGGCAGGACTT
TGGTAAAGCTCTGGGCATGTTGTTGCGCCCACAGCTACAACAACTCCCGTTGGCAGTCAT
TGACGAAGTGATTGTCCGCGCGGGGGACTATATCGACATTGGTACGCCTCTTTTTGGCGG
ATCGGTTGTGCCGGTGACGGTGAAATCACTCGCATTTCCTTCCTGAGGGAACGACTTATG
AAACTAAAGACCACATTGTTCGGCAATGTATATCAGTTTAAGGATGTAAAAGAGGTGCTG
GCTAAAGCCAACGAACTGCGTTCGGGGGATGTGCTGGCGGGCGTTGCAGCGGCAAGCTCA
CAGGAGCGCGTGGCAGCAAAGCAGGTGTTGTCGGAAATGACCGTAGCGGACATCCGCAAT
AATCCGGTGATTGCCTATGAAGATGACTGCGTGACGCGGCTGATTCAGGACGATGTTAAC
GAAACGGCCTACAACCAGATTAAAAACTGGAGCATCAGCGAACTGCGTGAGTATGTGCTG
AGCGATGAAACCAGCGTGGACGACATTGCCTTTACCCGCAAAGGGCTGACCTCGGAAGTG
GTCGCGGCGGTAGCGAAGATTTGCTCCAACGCGGACCTGATCTACGGCGCGAAGAAAATG
CCGGTAATCAAAAAGGCCAATACCACCATCGGTATTCCGGGCACCTTTAGCGCCCGTTTG
CAGCCAAATGACACCCGTGACGACGTGCAAAGTATCGCCGCGCAAATCTACGAAGGGCTT
TCCTTCGGGGTGGGCGATGCGGTGATCGGCGTCAACCCGGTAACTGACGACGTGGAAAAC
TTAAGCCGCGTGCTGGACACCATCTATGGCGTGATCGACAAATTCAACATCCCAACTCAG
GGCTGCGTACTGGCGCACGTCACCACCCAGATCGAAGCGATTCGTCGTGGCGCACCAGGC
GGGCTGATTTTCCAGAGTATCTGTGGCAGTGAAAAAGGGCTGAAAGAGTTTGGCGTGGAA
CTGGCGATGCTCGACGAAGCGCGCGCAGTGGGTGCAGAGTTCAACCGTATCGCCGGGGAA
AACTGCCTCTACTTCGAAACCGGGCAAGGTTCGGCGCTGTCGGCGGGTGCCAACTACGGC
GCAGACCAGGTGACCATGGAAGCGCGTAACTACGGGCTGGCGCGTCATTACGATCCGTTT
ATCGTCAACACCGTGGTCGGCTTTATTGGGCCGGAGTATCTCTACAATGACCGCCAGATT
ATTCGTGCGGGCTTAGAAGATCACTTTATGGGCAAGCTGAGCGGCATCTCTATGGGCTGT
GACTGCTGTTACACCAACCACGCTGACGCTGACCAGAACCTCAACGAAAACCTGATGATC
CTGCTCGCCACCGCAGGCTGCAACTACATCATGGGGATGCCGCTGGGTGATGACATCATG
CTCAATTACCAGACCACCGCATTCCACGATACCGCCACTGTGCGTCAGTTACTCAACCTG
CGCCCGTCACCGGAGTTTGAACGCTGGCTGGAAAGCATGGGCATTATGGCAAACGGTCGC
CTGACCAAACGGGCGGGCGATCCGTCACTGTTCTTCTGATGACGCGGAGATAACACATCA
TGGATCAAAAACAGATTGAAGAAATTGTACGCAGCGTGATGGCGTCAATGGGACAAACGG
CCCCCGCGCCGTCAGAAGCAAAGTGCGCCACTACCACCTGTGCGGCACCGGTGACCTCGG
AAAGCTGTGCGCTGGATTTAGGTTCCGCTGAAGCAAAAGCGTGGATTGGTGTTGAAAACC
CGCATCGCGCAGACGTATTAACAGAACTGCGCCGCAGCACCGTGGCCCGCGTTTGTACCG
GTCGTGCCGGTCCGCGTCCGCGTACCCAGGCGCTGCTGCGTTTCCTGGCCGATCACTCTC
GTTCGAAAGATACCGTACTGAAAGAAGTGCCGGAAGAGTGGGTGAAAGCGCAGGGCTTGC
TGGAAGTACGCTCCGAAATTAGCGACAAAAATCTCTACCTGACTCGCCCGGATATGGGCC
GCCGCCTGTGTGCAGAAGCTGTTGAAGCGCTGAAAGCACAGTGTGTTGCTAATCCGGACG
TACAGGTCGTTATTTCTGATGGCCTGTCAACTGATGCGATCACCGTGAACTACGAAGAGA
TCCTGCCACCGCTGATGGCGGGCCTGAAACAGGCCGGGCTGAAAGTCGGTACACCATTCT
TTGTTCGTTATGGTCGCGTGAAGATTGAAGATCAGATCGGTGAGATCCTCGGCGCGAAAG
TAGTGATCCTGCTGGTGGGCGAACGTCCGGGGTTGGGTCAGTCAGAAAGCCTCTCCTGCT
ACGCCGTTTACTCGCCGCGTATGGCGACCACCGTTGAGGCCGATCGCACCTGTATCTCTA
ACATTCACCAGGGCGGCACGCCGCCGGTTGAAGCCGCAGCCGTCATTGTGGATTTGGCGA
AACGTATGCTGGAGCAGAAAGCATCCGGCATCAACATGACCCGATAAGGAGGCATCATGC
CAGCTTTAGATTTGATTCGACCGTCGGTAACCGCCATGCGGGTGATTGCCTCCGTTAACG
CCGAATTTGCGCGTGAACTGAAATTGCCGCCGCATATTCGTAGCCTCGGGCTGATTTCTG
CTGATTCCGATGACGTCACCTACATTGCCGCTGATGAAGCAACCAAACAGGCGATGGTCG
AAGTGGTGTATGGCCGCTCGCTGTATGCGGGCGCTGCACACGGCCCGTCACCGACTGCCG
GTGAAGTGCTGATTATGCTTGGTGGGCCAAACCCGGCGGAAGTGCGTGCAGGTCTGGATG
CGATGGTTGCGCATATTGAAAATGGCGCTGCTTTCCAGTGGGCTAATGATGCGCAAGATA
CGGCATTCCTGGCACATGTAGTTTCGCGTACCGGTTCTTATCTCTCATCAACCGCCGGGA
TCACGCTTGGCGATCCGATGGCGTATCTGGTGGCACCGCCGCTGGAAGCGACCTACGGCA
TTGATGCAGCGTTGAAATCTGCCGACGTACAGCTGGTGACCTATGTCCCGCCACCGTCTG
AAACTAACTACTCGGCAGCATTTTTAACCGGTAGCCAGGCAGCGTGTAAAGCGGCCTGTA
ACGCCTTTACCGATGCAGTGCTGGAAATCGCGCGTAATCCAATCCAGCGTGCGTAATGGA
GGTTGCCGATGATCAATGCACTGGGATTGCTGGAAGTGGACGGCATGGTCGCTGCGATAG
ATGCAGCGGATGCCATGCTCAAAGCAGCTAACGTTCGTCTGCTCAGTCACGAAGTGCTTG
ACCCTGGTCGCTTAACGCTGGTGGTGGAAGGCGATCTGGCGGCGTGTCGTGCTGCGCTGG
ACGCAGGTTGTGCTGCCGCGATGCGTACCGGGCGTGTCATCAGCCGTAAGGAGATCGGTC
GGCCAGACGATGACACCCAGTGGCTGGTTACTGGCTTTAACCGCCAGCCGAAGCAACCCG
TACAGGAACCCGACGCGCCAGTTATCGTCGCGGAATCTGCTGACGAGTTGTTGGCGCTGT
TAACATCAGTACGTCAGGGAATGACGGCAGGAGAAGTGGCTGCCCACTTTGGCTGGCCGC
TGGAAAAAGCCAGAAATGCGCTCGAACAGCTCTTTTCTGCCGGGACGTTACGTAAACGCA
GTAGTCGTTATCGTCTCAAGCCCCATTAACCTGTCGGAGGTGCCGGGTGTCCTACAACAC
CCGGCATTAACATCATGAAAAAGACCCGTACAGCCAATTTGCACCATCTTTATCATGAGC
CCTTACCCGAAAACCTGAAGCTCACGCCGAAGGTCGAAGTGGATAATGTTCATCAACGAC
AGACAACGGATGTCTATGAACATGCTTTAACGATTACCGCCTGGCAGCAGATTTACGATC
AGCTGCATCCGGGCAAGTTTCATGGTGAATTTACGGAAATTCTACTCGATGATATTCAGG
TTTTTCGTGAATACACCGGTCTGGCGCTGCGTCAGTCGTGTCTGGTCTGGCCGAACTCGT
TCTGGTTTGGCATTCCGGCGACGCGCGGTGAGCAGGGATTTATCGGTTCGCAATGTCTGG
GAAGCGCAGAAATAGCGACGCGCCCTGGTGGAACCGAGTTTGAATTAAGTACGCCGGACG
ATTACACGATCCTGGGCGTAGTGCTTTCTGAAGATGTCATCACCCGTCAGGCTAACTTTT
TGCATAATCCGGATCGGGTATTACATATGTTGCGTAGCCAGTCGGCGCTGGAAGTGAAAG
AGCAGCATAAAGCCGCGCTGTGGGGCTTTGTCCAACAGGCGCTGGCGACGTTTTGCGAGA
ACCCGGAAAATCTTCATCAGCCTGCAGTGCGAAAAGTGCTGGGGGATAATTTGCTAATGG
CGATGGGGGCGATGCTGGAAGAAGCGCAACCAATGGTGACGGCGGAAAGCATCAGTCATC
AGAGTTACCGTAGATTACTTTCCCGCGCCCGTGAATATGTGCTGGAAAACATGTCCGAAC
CGGTGACGGTGCTGGATTTGTGTAATCAACTGCATGTCAGCCGCCGCACGCTACAAAACG
CGTTTCACGCTATTTTAGGCATTGGCCCAAACGCGTGGCTGAAACGCATTCGCCTGAACG
CCGTACGCCGCGAACTGATAAGCCCGTGGTCGCAAAGCACAACGGTAAAAGACGCCGCCA
TGCAGTGGGGATTCTGGCATCTGGGGCAATTTGCCACGGATTACCAGCAGCTGTTTGCCG
AGAAGCCGTCGTTGACGTTGCATCAGCGGATGCGGGAATGGGGGTGAGGGAGTTACACCC
AATCCCTGACCTTAATAAACTCACTTAACGCCGCTTCTGGGCTGCCATCTTTTGGCTGAT
AATCATACTCCCAGCGTACCAGTGGCGGCATTGACATCAGGATCGACTCGGTGCGCCCGC
CAGTTTGCAGGCCAAACAGAGTGCCGCGATCCCAGACCAGATTGAACTCGACATAACGAC
CGCGACGGTAGAGCTGAAAATTGCGCTCGCGCTCGCCGTAGGCCATCGCTTTCCGTCGCT
CTACAATTGGTAAATAAGCGTCGGTGTAGCCTTTGCCTACCGCCTGCATAAAGGCAAAAC
AGTGGTCGAAATCTGGCGTGTTCAGATCATCAAAGAACAGCCCGCCAATACCGCGCTGTT
CGTTGCGATGTTTGAGGTAGAAGTAATCGTCGCACCATTTTTTGTAACGGGGATAAACGT
CTTCACCAAATGGCAGGCACAGGTCACGGGCGGTGCGGTGCCAGTGAATGGCATCTTCTT
CAAAACCATAGAAAGGGGTTAAATCGAAGCCGCCGCCAAACCACCAGACTGGCTCTGCAC
CCGGTTTTTCGGCAATAAAAAAGCGCACATTCGCGTGGCTGGTGGGAACATACGGGTTAT
GCGGATGCACTACCAGTGAAACGCCCATCGCCTCGAAACTGCGCCCGGCAAGTTCCGGGC
GATGAGCGGTGGCGGAAGCAGGCATCGCCTCACCATGGACATGTGAAAAGTTGACGCCCG
CCTGTTCGAAAACACCACCATTACGCAACACCCGGCTACGTCCGCCGCCGCCAGCTTCGC
GCTGCCAGCTATCTTCGACAAATTCTGTGCCATCGACGGCGGTCAGCTGCTGACAAATCG
TATCCTGAAGGTTGAGCAGAAACTGTTTAACCTGGTGTGCGTCGGGTTTCATAACTTATC
GCTTTTTCGAATGTGCTTTCTGGTTGTCGAACCAGTGGAAATAACTGATCACGCCTTCAG
CAATCGCTGTGGCGATTTTCTGACGAAACGCCGCCGTGCCTAACAGTCGCTCTTCTTCTG
GGTTGGTGATAAACGAGGTTTCCACCAGCACCGAAGGAACCGACGGCGATTTCAACACCA
CAAACGCGGCTTGTTCGGTGTTGCGGCTGTGCAGTTTATGCACCGGCTTAATCTTTTTCA
GAATATGCGAGCCGAGCGTCAGGCTGTTTTTAATAGTATCGGTTTGCACCAGATCAAACA
GCACTTGCTGCAATAGGTGATCCTTGTCAGTCGCCTTTTTACCGGCAACTTCATCGGCGC
GGTTTTCGCGTTCAGACAGGTATTTCGCCATTGCGCTACTTGCCCCACGGTTAGAGAGGG
CAAATACCGAAGCACCGGCAGCTTTCGGGTTGGTAAAGCCATCGGCATGAATTGACATAA
ACAGATCTGCGCCATGTTTATGGGCGATTTCAACGCGATCGTAAAGTGGGATAAACGTAT
CGCCAGAACGCGTTAAACGCGCATCAATCCCATGATTACGCAAAATGGAACGGACGTTTT
TAGCAATCGCCAGCACCACATGTTTTTCTTTCGAACCGTTGCGCCCGATCGCTCCGGTAT
CAATTCCGCCGTGGCCTGGATCGAGAACAACGACACGTTTGCCGCCAGATTTTTTGGCTT
TCGGCTTGCTGTGTCCGTTGCTGGTTTTTAAAGGTTCGTCTTTGGCGATGGCTTGCGACA
TTCCTGACAACGTCAGGGCAGCCAAACCGGCTTTCAGCACCTGGCGGCGCGAAGTGAGTG
TTTTTAGTGGTTTAAAAGTGCTCATACGGCCTGAGTTGTAATAATAAAGTTCCAGATGTT
ATATCGTATCGCGTAATCCGTTACGACCGTTTGCTGTTGAGAATTGTTTTACTTTTCATT
TCAATAGTTGACAACTCCCCATTATGCCACTTTTTCAACCGATTTTCGTCAGATATTGGC
TAATTCGACCGTTCACGCCATAATCAGCCTTTTAACCCGCAAAAAGGTAACGAATACCAT
GGAGATACGCGTATTTCGCCAGGAAGATTTCGAAGAGGTCATCACCCTTTGGGAGCGTTG
CGACTTGCTGCGTCCGTGGAACGATCCGGAAATGGACATCGAGCGTAAGATGAACCATGA
CGTCAGTTTGTTTCTGGTCGCTGAGGTGAACGGTGAAGTGGTCGGAACGGTGATGGGCGG
TTATGACGGGCATCGCGGGTCTGCTTATTATCTTGGCGTGCATCCAGAGTTTCGTGGGCG
TGGAATTGCCAATGCGTTGCTTAACCGGCTGGAGAAAAAGCTGATTGCTCGCGGCTGCCC
GAAAATTCAGATCAACGTGCCGGAAGATAACGACATGGTGCTCGGAATGTATGAACGCCT
GGGATATGAACACGCCGACGTGCTGAGTCTGGGTAAGCGTTTGATTGAAGATGAAGAGTA
CTGAGTTTCATCCTGTCCATTATGATGCGCACGGTCGCCTGCGTTTACCCTTGCTCTTCT
GGCTTGTGCTATTGCTTCAGGCGCGAACCTGGGTGCTGTTTGTTATTGCCGGTGCGTCGC
GCGAGCAGGGTACTGCGCTGCTAAATCTGTTTTATCCCGATCACGATAATTTCTGGCTGG
GGCTGATTCCTGGCATTCCGGCGGTGCTGGCGTTTTTGCTGAGTGGTCGGCGGGCTTCGT
TTCCCCGTATCTGGCATGTGCTCTATTTTCTGTTGCTGTTGGCGCAAGTGGTTTTACTTT
GCTGGCAACCGTGGCTGTGGCTGAACGGTGAATCCGTTAGCGGTTTCGGTCTGGCGCTGG
TAGTGGCGGATATTGTGGCATTAATCTGGCTGCTGACCAATCGACGTTTACGCGCTTGTT
TTAATGAAGTAAAAGAATAACGGCACTTTTTGGTGAATTTGCACTCCAAGCAACGTTATT
GAATAACCAAAGGAAGTGACATGAAATCGCTGCGTTTAATGTTATGCGCTATGCCATTGA
TGCTGACCGGCTGTTCCACGATGTCGTCAGTTAACTGGTCTGCCGCTAACCCGTGGAACT
GGTTTGGGTCGTCCACCAAAGTGAGCGAGCAGGGCGTTGGTGAATTAACGGCGTCCACAC
CACTGCAAGAACAAGCCATTGCCGATGCGCTTGATGGCGATTATCGCCTGCGCAGCGGAA
TGAAAACCGCGAACGGCAACGTGGTGCGCTTTTTTGAAGTGATGAAGGGCGACAACGTGG
CGATGGTGATTAACGGCGATCAAGGCACGATCAGTCGCATTGACGTGCTGGATAGCGATA
TTCCTGCTGACACCGGTGTTAAAATCGGTACACCGTTTAGCGACCTTTACAGCAAAGCAT
TTGGCAATTGCCAAAAAGCTGATGGTGATGATAATCGTGCCGTCGAATGTAAAGCCGAAG
GCAGTCAACATATTAGCTACCAGTTCAGCGGGGAATGGAGTGGTCCTGAAGGGTTAATGC
CTTCGGACGATACCCTGAAAAACTGGAAAGTCAGTAAAATTATCTGGCGGCGTTAATTTG
CGTCTGAACAAACCGCCGCCGCGAAAAAACACGTAAAATAGCGCTCAACAATGCCACGGA
TTGCGTGGCATTATTATTTTCAGGAGGAACAATGTCTCAGGTTCAGAGTGGCATTTTGCC
AGAACATTGCCGCGCGGCGATTTGGATCGAAGCCAACGTGAAAGGGGAAGTTGACGCCCT
GCGTGCGGCCAGTAAAACATTTGCCGACAAACTGGCAACTTTTGAAGCGAAATTCCCGGA
CGCGCATCTTGGTGCGGTGGTTGCCTTTGGTAACAACACCTGGCGCGCTCTGAGCGGCGG
CGTTGGGGCAGAAGAGCTGAAAGATTTTCCGGGCTACGGTAAAGGCCTTGCGCCGACCAC
CCAGTTCGATGTGTTGATCCACATTCTTTCTCTGCGTCACGACGTAAACTTCTCTGTCGC
CCAGGCGGCGATGGAAGCCTTTGGTGACTGCATTGAAGTGAAAGAAGAGATCCACGGCTT
CCGTTGGGTGGAAGAGCGTGACCTGAGCGGCTTTGTTGACGGTACAGAAAACCCGGCGGG
TGAAGAGACGCGTCGCGAAGTGGCGGTTATCAAAGACGGCGTGGATGCCGGCGGCAGCTA
TGTGTTTGTGCAGCGTTGGGAGCACAACCTGAAGCAGCTCAACCGGATGAGCGTTCACGA
TCAGGAGATGATGATCGGGCGCACCAAAGAGGCCAACGAAGAGATTGACGGCGACGAACG
TCCGGAAACCTCTCACCTCACCCGCGTTGATCTGAAAGAAGATGGCAAAGGGCTGAAGAT
TGTTCGCCAGAGCCTGCCGTACGGCACCGCCAGTGGCACTCACGGTCTGTACTTCTGCGC
CTACTGCGCGCGTCTGCATAACATTGAGCAGCAACTGCTGAGCATGTTTGGCGATACCGA
TGGTAAGCGTGATGCGATGTTGCGTTTCACCAAACCGGTAACCGGCGGCTATTATTTCGC
ACCGTCGCTGGACAAGTTGATGGCGCTGTAAGCGTTTCTGATTCATTGATTAAAGGCCAG
GCAGTAACATTACTGACTGGCCTTTTTATTACTTTTGCTTTAACGCCGCATACACCTGAT
CAACTACCCAACCATACGTTGCAATCGGCAGCTGACCGCTTTCGAACATATTGGGATTCT
TTTGCGGATCGGCAACCGGCGAATGTGGCTTGTTGCTTAACATCACAATCGCCATATGAT
TCACCGGATCGATAACGGTCACCGTTCCGGTCCAGCCAGTGTGACCGTAGGTTTGCGGGC
TTGCCAGCGTGCCAAACGTCGGCGTCATGGTGGCATTACCATTCACGCGCCAGCCGAGGC
CAAAAGTGGCATCTTCCTTAGAGCTGGTGGTGAACATCTTCACCGTTTCCGCACTGAACA
GCTGCACATCGCCATAGCCCCCGCCGTTCAGCATCGTTTGCATTAACACCGCAATATCGC
CGGTATTGGAAAACAAACCTGCGTGCCCGGAAACGCCGCCCATCGAATAAAAGGCTTTTT
CATCGTGCACCTGACCCCAGAGAGTGGAGGTGCGGATATTCGGGAAGTGGATCACTCCAT
CGCGGGTATTGCCGTTCAATTCCGTGGCGGCAATTTGTTGCGGTTTAAAGCCTTTCAGCA
GCGGGTTAAATACCGTATGTGTCAGGCCGAGCGGGCGATAAATCGACTCTTCAACATAGC
GGTCAAGCGGCTGACCGGTGACCGACTCGACGATAAATCCAAGCAGCATATAATCGACAT
CACTGTAAATATGCTTGCTGCCGGGCTGATACTCTAGCGGCGTGCGCTTGATCATCTCCA
GCGTCTGGCCTTTATCCTGGGAATATAACGCGCCCGCGACCGCTTTATTCGGATATTGTG
GGTCCGCCGGGAAACCGCCGCTGTGATGCAGCAGGTCAGAAATCCGCAGCGTGTTTTTGC
CTTTGATGGTGTCATTTGGACTATCGGCAAACCCCGAAATATATTTCGCAATCCGATCGT
CAGGATGCAGCTTGCCTTCGCTCATTAGCTTTTGCAGAGCAAAGTTAGTGGCGTACATTT
TGGTATTGGAAGCCAGGTCATACAGCGTCCCGGTGGTGGCTTTGACAGGCTGTTCCATCA
ATACGCTGCCATCGTACTTTTTCGCCGCTCCCCAGGCTTTGCGATACACAATCTGATTAT
CTTTTATAATCAGCAGGTTTACGCCGGGATAACCGGCGTCCACTTGCTGGCTAATCCAGC
GATCCATCTGGTTAAGCCGTTCGACGTTGAACCCTGCTTTCTCTGGCGAACTTTCTGTCA
GAACAGGGTATTTTGCGGCGCTGACGCTACAACTGACAGCCAGCAGAGAAAGATAGAGCA
TTGTCCGTTTCATAATATCAGTCCAGATTGACGTTACGGCAGCCAAAGAGCGTGGTGAAA
ATAAACCCGCAAACCCATGCCACCAGAATCCCACCTGCATATACCGCCATGGCCGGAAGG
ATGCCTTGCGCGGATGTCATCAGCGGCAGCGCCACCAGACCAGACGGCCCAAAGGCGCTG
TTTAAGCCCATCGGCAGACCCCACCAGGCTATCAGCCCGATAAACAAACCGCCCGCTGCG
CCGCCTAAACAGGCGGTAATAAACGGTTTCATGCGGGGCAGGGTGACGCCGTAAATCAGC
GGTTCGCCAACGCCCAGCAGACCAGGAATAATCGCCCCGCGTACCTGACTGCGTAATGCA
CTGTGCGGTTGCGCCCGCCAGTAGAGTGCCAGCGCCGCGCCCACCTGGCCCGCGCCTGCC
ATTGAAAGGATGGGAAATAAGCTGTTGAATCCCTGGCTGTCCATTAACGCGAGGTAAACA
GGAATAAAGCCCTGATGCACGCCAAATACCACGGCGATCAGGAACAGCCCGGCTAAAACC
GCACAACCGAGCGGATTACTGTTCAGGTGCATAAACAGCCACGACATACCTTCGAATAAC
CAGCCGCCCAGCGGCATAATGATCAGGTAGGCCAGCGTAGCGGTGATCAGTAGGGTGATT
AACGAGGTCAGCAGCATGTCGAGATCGTCCGGCATAAAGCGGCGCACCATGCCTTCAATG
CGAGCGCAGGCCCATGCGGCAATCAACACGCCGATAATATTGCCGCGCGGATCGATGGGC
AGACCAAAGAAATCGTGAAAACCGGCGTAGTAACCGGTGGTTGCAGCGGGGTTATAACCG
AGCAAAAAGAGTGCGGCAATAATTGCGCCATTGACGCCCGTGCCGCCAAATGCCTGGGCG
GCGTTATAGCCCACCAGAATCACCAGGAAGGTGAACAAACCTTTGCTGAACACCTTCATA
AAATTCAGCGCGTCGGGTAGCGTGCCCTGAGCATCTGCCGGAACGTGCATCACCGTGGCA
AATAACGTCGCTATCCCCAGCAGCAGACCGGCGGCAATAAAACCGGGGATAAGCGGCGTA
AAGATGGTGGCGAATTTAGCGAGAAATTGTTGCACGCCGGAGGTTTGTTTGGCTTTTAAC
TGACGTTTGTTCTGGGCGGCGATTTCTGCGGCATCCTGTACCGGTGCTTCTCCCAGCAGC
TCGCTCATCGCTTTTGCGGCACGATGCGCTTTACCAGGCCCAAAAACGACCTGCACCTGG
TCGCTGGTCAAAATGACGCCCTTCACGCCTTCCAGCGTTTTGATATTGGGATCAACCAGT
GAACTGTCATGTACACCCAGACGCAGGCGCGTCATACAGTTACCACAACTGGCGATATTT
CCCGGTCCGCCGACACGGGTAAGAATGGTGTTCAGAAGTTCACTGCTGATCTCTTTGACC
ATGGGTTATTCCTTGTCTAAAACCTGACGAATAAAGCCGCCGTGTTGATCCAGGCGTTTT
TTAGCTTCTGTGGCATCGAGATTTTTCAGCACCATCACAATGGCCGTTTTACAGTTGCGC
TCGCAGGCAATTAACGCCTCTTCCGCTTGTTCGGCATTACATCCGGTGGCGTTTTTAACG
ATATTGACCTGGCGCACATGCAGTTTTTCGTTGGTGGCGACCACATCGACCATCAGGTTG
CCGAACACTTTGCCGGATTTAATCATCAGCCCGGTGGAGAGCATATTGAGCACCAGTTTC
TGCGCTGTACCTGCTTTCATCCGCGAAGAACCGGTAACCACTTCGGCACCTACAATCGGT
GTAATGGCAAACTCTGCGGTGGTTGAAACGGCGCTCCCCGGATTACAGGAAATTCCCACT
GTGCGGCAGCCGAGCTGGCGTGCGTATTCCAGTCCGGCAATTACATACGGCGTGCGACCA
CTGGCCGCAATACCAACCACCACATCCTGTGCCGTTAAATTAATATTTTTCAGATCGTTA
ACACCACCTTCCCGGCTATCTTCAGCGCCTTCCACCGCGTGCTGAATGGCATATTCGCCT
CCAGCAATCAAACCAACTACCAGACCCGGTTTCACGCCGTAGGTGGGCGGACATTCGCTG
GCATCCAGAATCCCCAGACGACCGGATGTTCCCGCACCGAGATAAATCAGACGACCGCCG
CCGCTTACCTGGGCGTGGATAACATCGATCGCCGCGGCGATATCCGGCAGTACGCGCTCA
ACGGCAAGCGGTACGGTTTTATCTTCATCGTTGATAATCCGGCACATTTCCAGCGTTGAT
ACGCGGTCAATTTCAGCCGAGGCGGCGTTCGAGCCTTCGGTAATCATCTTTTCAAGTTGC
ATCGGTGGTGACCTTACTATTTACGATCAAATAATTGCAGATGTATGGAATCATATATCC
CGAATTGACAGACTTAAAGGAATCATTGAGTCTACACTCGCAGAGTGTGAAGAGCGTCAT
AAGAACTTAAGCGGAATTTTTGCTGCCAGCCCAGGAGAGTGGAAGATGTTGTACCTGACG
AAAATACGCAATGCGGAAAGTGAATTTACCGAGAACGAGCAAAAAATTGCTGACTTTCTG
CGGGCCAACGTGAGTGAGCTGAAATCCGTCTCTTCGCGCAAGATGGCGAAACAGCTCGGC
ATCAGCCAGTCGAGTATTGTGAAATTTGCCCAGAAGCTCGGCGCGCAAGGATTTACTGAA
TTGCGTATGGCGTTAATTGGCGAATACAGTGCCAGCCGGGAGAAAACGAATGCCACGGCG
CTGCACCTGCACAGTTCGATTACCAGTGATGATTCGCTGGAAGTGATTGCCCGCAAATTG
AATCGCGAAAAAGAGCTGGCGCTGGATCAAACCTGTGCGTTGTTCGACTACGCGCGGATG
CAAAAAATCATTGAGGTCATCAGTAAAGCACCGTTTATCCAGATAACGGGCCTGGGCGGA
TCGGCGCTGGTGGGGCGCGATCTGTCGTTCAAACTGATGAAAATTGGCTATCGCGTGGCC
TGCGAAGCCGACACGCACGTACAAGCTACCGTTTCCCAGGCGTTGAAAAAAGGCGATGTA
CAAATCGCTATCTCTTACAGCGGCAGTAAAAAAGAGATTGTCTTGTGCGCAGAAGCGGCA
CGAAAGCAGGGGGCAACGGTGATTGCCATTACTTCTCTGGCTGACTCTCCGCTGCGGCGG
CTGGCGCATTTCACGCTCGATACCGTTTCCGGTGAAACCGAATGGCGTAGCTCGTCGATG
TCTACCCGCACGGCGCAAAATTCTGTTACCGATTTACTGTTTGTTGGTCTTGTGCAACTC
AATGATGTGGAGTCATTGAAAATGATTCAGCGCAGCAGTGAGCTAACACAACGCCTGAAA
TGATGCATAAAGCAGCGACTGGATTGAGATTTTCCTGAATTAGTGAGCTGATCCGCAGCA
ATATTTTGTTTATCCTGTATTTTCAGAGGGAATGGAGTGTAACGCTCTGTATTAACAAGG
AGAGCATTAAAATGGGTAAACTCACGGGCAAGACAGCACTGATTACGGGCGCATTGCAGG
GAATTGGCGAAGGAATTGCCAGAACTTTTGCGCGTCATGGCGCAAACCTAATCTTGCTGG
ATATCTCCCCTGAGATCGAAAAGCTGGCGGACGAACTGTGTGGTCGTGGTCATCGCTGTA
CGGCGGTTGTCGCCGATGTGCGTGACCCGGCGTCGGTAGCCGCAGCTATCAAACGCGCGA
AGGAAAAAGAAGGGCGCATTGATATCCTGGTGAATAACGCAGGCGTTTGTCGTCTGGGCA
GTTTCCTCGATATGAGCGATGACGATCGCGATTTCCATATTGATATCAATATTAAAGGCG
TATGGAACGTCACGAAGGCGGTGTTGCCGGAGATGATTGCCCGCAAAGATGGTCGCATTG
TGATGATGTCTTCAGTCACTGGCGATATGGTGGCCGATCCGGGTGAAACGGCGTATGCCT
TAACGAAAGCGGCGATTGTTGGCCTGACTAAATCGCTGGCGGTGGAGTACGCGCAGTCTG
GTATTCGCGTTAACGCCATCTGCCCGGGATACGTTCGCACGCCAATGGCGGAAAGCATTG
CCCGCCAGTCGAACCCGGAAGATCCAGAATCGGTGCTGACTGAAATGGCAAAAGCAATCC
CGCTGCGTCGCCTCGCCGATCCGCTGGAAGTCGGCGAACTGGCAGCCTTCCTCGCATCGG
ATGAATCAAGTTATTTAACCGGTACACAGAATGTGATTGATGGCGGCAGCACACTGCCGG
AGACGGTTAGCGTCGGCATCTGATTCACCTCTGTTTCCTCCCTGCATGTGTGGGGAGGAT
TTCGTCTTATTCCCTTTTCAACTTCCAAATCACCAAACGGTATATAAAACCGTTACTCCT
TTCACGTCCGTTATAAATATGATGGCTATTAGAAAGTCATTAAATTTATAAGGGTGCGCA
ATGGCCGTTAACTTACTGAAAAAGAACTCACTCGCGCTGGTCGCTTCTCTGCTGCTGGCG
GGCCATGTACAGGCAACGGAACTGCTGAACAGTTCTTATGACGTCTCCCGCGAGCTGTTT
GCCGCCCTGAACCCGCCGTTTGAGCAACAATGGGCCAAAGATAACGGCGGCGACAAACTG
ACGATAAAACAATCTCATGCCGGGTCATCAAAACAGGCGCTGGCAATTTTGCAGGGCTTA
AAAGCCGACGTTGTCACTTATAACCAGGTGACCGACGTACAAATTCTGCACGATAAAGGC
AAGCTTATCCCGGCGGACTGGCAGTCGCGCCTGCCGAATAATAGCTCGCCGTTCTACTCC
ACCATGGGCTTCCTGGTGCGTAAGGGCAACCCGAAGAATATCCACGACTGGAACGACCTG
GTGCGCTCCGACGTGAAGCTGATTTTCCCGAACCCGAAAACGTCGGGTAACGCGCGTTAT
ACCTATCTGGCGGCATGGGGCGCAGCGGATAAAGCTGACGGTGGCGACAAAGCCAAAACC
GAACAGTTTATGACCCAGTTCCTGAAAAACGTTGAAGTGTTCGATACTGGCGGTCGTGGC
GCGACCACCACTTTTGCCGAGCGCGGCCTGGGCGATGTGCTGATCAGCTTCGAGTCGGAA
GTGAACAACATCCGCAAACAGTATGAAGCGCAGGGCTTTGAAGTGGTGATTCCGAAAACC
AACATTCTGGCGGAATTCCCGGTGGCGTGGGTCGATAAAAACGTGCAGGCCAACGGTACG
GAAAAAGCAGCAAAAGCCTACCTGAACTGGCTCTACAGCCCGCAGGCGCAGACCATCATC
ACCGACTATTACTACCGCGTAAATAACCCGGAAGTCATGGACAAACTGAAAGATAAATTC
CCGCAGACCGAACTGTTCCGCGTGGAAGACAAATTTGGCTCCTGGCCGGAAGTGATGAAA
ACCCACTTCACCAGCGGCGGCGAGTTAGACAAGCTGTTAGCGGCGGGGCGTAACTGATGT
TTGCAGTTTCATCAAGACGCGTGCTGCCGGGCTTTACCTTAAGCCTCGGCACCAGTCTGC
TGTTTGTTTGCCTGATTTTGCTCCTGCCACTCTCCGCGCTGGTGATGCAGCTGGCCCAGA
TGAGCTGGGCGCAGTACTGGGAGGTGATCACCAACCCGCAGGTGGTCGCAGCCTACAAAG
TGACGCTGCTGTCGGCGTTTGTGGCATCGATTTTTAACGGCGTTTTCGGCCTGCTGATGG
CGTGGATCTTAACTCGTTATCGCTTCCCTGGCCGCACGCTGCTTGATGCGCTGATGGATT
TACCCTTTGCGCTGCCAACGGCAGTCGCCGGTTTAACGCTGGCCTCGCTCTTTTCCGTGA
ACGGTTTTTACGGTGAATGGCTGGCGAAGTTTGATATCAAAGTCACCTACACCTGGCTTG
GGATTGCGGTGGCGATGGCCTTTACCAGCATTCCGTTTGTGGTGCGTACCGTGCAGCCGG
TGCTGGAAGAGTTAGGCCCGGAATATGAAGAAGCGGCGGAAACGCTTGGTGCAACGCGCT
GGCAGAGTTTCTGCAAAGTGGTGCTGCCGGAACTTTCTCCGGCGCTGGTGGCGGGCGTGG
CGTTGTCGTTTACCCGTAGTCTTGGTGAGTTTGGCGCGGTGATATTTATCGCCGGGAACA
TCGCCTGGAAGACGGAAGTGACGTCGCTGATGATTTTTGTGCGCTTGCAGGAGTTTGATT
ACCCGGCAGCGAGCGCGATTGCTTCGGTGATCCTCGCGGCATCTCTGCTGCTGCTGTTCT
CAATTAACACTCTGCAAAGTCGCTTTGGTCGGCGTGTGGTAGGTCATTAATGGCGGAAGT
TACCCAATTGAAGCGTTATGACGCGCGCCCGATTAACTGGGGCAAATGGTTTCTGATTGG
CATCGGGATGCTGGTATCGGCGTTCATCCTGCTGGTGCCGATGATTTATATCTTCGTACA
GGCGTTCAGCAAAGGGCTGATGCCGGTTTTACAGAATCTGGCCGATCCGGATATGCTGCA
CGCCATCTGGCTGACGGTGATGATCGCGCTGATTGCCGTACCGGTAAACCTGGTGTTCGG
CATTCTGCTGGCCTGGCTGGTGACGCGCTTTAACTTCCCTGGACGCCAGTTACTGCTGAC
GCTACTGGACATTCCGTTTGCCGTATCGCCGGTGGTTGCCGGTCTGGTGTATCTGCTGTT
CTACGGCTCTAACGGCCCGCTCGGCGGCTGGCTGGATGAACATAATCTGCAAATTATGTT
CTCCTGGCCGGGAATGGTGCTGGTCACCATCTTTGTGACATGTCCGTTTGTGGTGCGCGA
GCTGGTGCCGGTGATGTTAAGCCAGGGCAGCCAGGAAGACGAAGCGGCGATTTTGCTTGG
CGCGTCTGGCTGGCAGATGTTCCGCCGTGTCACATTGCCGAACATCCGCTGGGCGCTGCT
TTATGGCGTAGTGCTGACCAACGCCCGCGCGATTGGCGAGTTTGGCGCGGTGTCGGTGGT
TTCCGGCTCGATTCGCGGCGAAACACTTTCGCTGCCGTTACAGATTGAATTGCTGGAGCA
GGACTACAACACCGTCGGCTCCTTTACCGCCGCCGCGCTGTTGACGCTGATGGCGATTAT
CACCCTGTTTTTAAAGAGTATGTTGCAGTGGCGTCTGGAGAATCAGGAAAAACGCGCGCA
GCAGGAGGAGCATCATGAGCATTGAGATTGCCAATATTAAGAAGTCTTTTGGTCGCACCC
AGGTGCTGAACGATATCTCACTGGATATTCCTTCAGGTCAGATGGTCGCGTTGCTGGGGC
CGTCCGGTTCCGGGAAAACCACGCTGCTGCGCATTATCGCCGGGCTGGAGCATCAAACCA
GCGGGCATATTCGCTTCCACGGCACCGACGTGAGCCGCCTGCACGCACGTGATCGTAAAG
TCGGTTTCGTGTTCCAGCATTACGCGCTGTTCCGCCATATGACGGTGTTCGACAATATCG
CTTTTGGCCTGACGGTGCTGCCGCGTCGCGAGCGCCCGAATGCCGCAGCCATCAAAGCGA
AAGTGACAAAATTGCTGGAAATGGTCCAGCTTGCCCATCTGGCGGATCGTTATCCGGCGC
AGCTTTCCGGCGGCCAGAAACAGCGCGTGGCGCTGGCGCGCGCGCTGGCTGTGGAACCGC
AAATTCTGCTGCTTGATGAACCGTTTGGCGCGCTGGATGCGCAGGTGCGTAAAGAGCTGC
GTCGCTGGCTGCGTCAACTCCATGAAGAACTAAAATTCACCAGCGTTTTTGTGACCCACG
ATCAGGAAGAAGCGACCGAAGTAGCTGATCGTGTAGTTGTGATGAGCCAGGGCAATATTG
AACAGGCTGACGCGCCGGATCAGGTATGGCGCGAACCGGCGACCCGTTTTGTGCTCGAAT
TTATGGGCGAAGTGAACCGCCTGCAGGGAACCATTCGCGGCGGGCAGTTCCATGTTGGCG
CGCATCGCTGGCCGCTGGGCTACACACCTGCATATCAGGGGCCGGTGGATCTCTTCCTGC
GCCCTTGGGAAGTGGATATCAGCCGCCGTACCAGCCTCGATTCGCCGCTGCCGGTACAGG
TACTGGAAGCCAGCCCGAAAGGTCACTACACCCAATTAGTGGTGCAGCCGCTGGGGTGGT
ACAACGAACCGCTGACGGTCGTGATGCATGGCGACGATGCCCCGCAGCGTGGCGAGCGTT
TATTCGTTGGTCTGCAACATGCGCGGCTGTATAACGGCGACGAGCGTATCGAAACCCGAG
ATGAGGAACTTGCTCTCGCACAAAGCGCCTGATAGGTTGAGTGAATGTTAAACGCCCGGA
GGCGCTTCCCGCGATCCGGGCTTTTTAATGGCAAGGTTTGTAACCTGTAGGCCTGATAAG
ACGCGCAAGCGTCGCATCAGGCAACACCACGTATGGATAGAGATCGTGAGTACATTAGAA
CAAACAATTGGCAATACACCTCTGGTGAAGTTGCAGCGAATGGGGCCGAATAACGGCAGT
GAAGTGTGGTTGAAACTGGAAGGCAATAACCCGGCAGGTTCGGTAAAAGATCGTGCGGCG
CTTTCGATGATCGTCGAGGCGGAAAAGCGCGGGGAAATTAAACCGGGTGATGTGTTAATC
GAAGCCACCAGTGGTAACACCGGCATTGCGCTGGCAATGATTGCCGCGCTTAAAGGCTAT
CGCATGAAATTGCTGATGCCCGACAACATGAGCCAGGAACGCCGTGCGGCGATGCGTGCT
TATGGTGCGGAACTGATTCTTGTCACCAAAGAGCAGGGCATGGAAGGTGCGCGCGATCTG
GCGCTGGAGATGGCGAATCGTGGTGAAGGAAAGCTGCTCGATCAGTTCAATAATCCCGAT
AACCCTTACGCCCATTACACCACTACCGGGCCGGAAATCTGGCAGCAAACTGGCGGGCGC
ATTACCCATTTTGTCTCCAGCATGGGAACAACCGGCACTATCACCGGCGTGTCACGCTTT
ATGCGCGAACAATCCAAACCGGTGACCATTGTCGGCCTGCAACCGGAAGAGGGCAGCAGC
ATTCCCGGCATTCGCCGCTGGCCTGCGGAATATCTGCCGGGGATTTTCAACGCTTCGCTG
ATGGATGAGGTGCTGGATATTCATCAGCGCGATGCGGAAAACACCATGCGCGAACTGGCA
GTGCGGGAAGGAATATTCTGTGGCGTCAGCTCCGGCGGCGCGGTTGCTGGAGCACTGCGG
GTGGCAAAAGCTAACCCTGGTGCGGTGGTGGTAGCGATCATCTGCGATCGTGGCGATCGC
TACCTTTCCACCGGGGTGTTTGGGGAAGAGCATTTTAGTCAGGGGGCGGGGATTTAAGAT
TATTGCGCAGGCACCGTTTTATCCGTCTGCGCAATTAACGCATGTAAAAAAGGCTGTGCA
TTCTCATCGCTCTTACCGGGCATCTTCACGATATACGGCTTCCCGGTAATCGATGATGAC
GAAGCAACCTTATCAATAAACTGCTCGGCAGTGTTAATGCGGTTACGGGTATTGCCGAGC
TTCAGACGCAGATGAGAAACCGCTTCATCGCAGGTATGTTCATCACCGTTGCGCACAAAT
ATCAAATCCTTTTTCTGTGCTAATCCCTCCAGCATGGCGTTGATGCGGGCTTCTTCATGG
GCAGTTAACTTCGCGTAAGCGGGGAGTGTCATTAGTAGTGTAATGACCAGACAAATGATT
TTCTTCATTGAATTACCTTATCCTTGTTTTGTGATAGCCGATTTGACTGCCAGAATCAGG
TAAAGTTTCGGTTGGAATACGATGAGGATCATCGGCAAGGAGAAAAAATTAAATGAGTAG
TTTGTTGTTGTTTAACGATAAGAGCAGGGCACTGCAGGCGGATATCGTCGCCGTGCAGTC
GCAGGTAGTGTACGGCAGCGTAGGCAACAGCATTGCGGTGCCTGCTATCAAACAGAACGG
TCTGAATGTCTTTGCCGTGCCGACGGTATTGCTGAGCAATACGCCGCATTATGACACTTT
CTACGGTGGTGCGATTCCGGACGAATGGTTTAGCGGCTATTTGCGTGCGCTTCAGGAGCG
TGATGCGCTGCGCCAACTTCGAGCTGTAACCACGGGCTATATGGGAACGGCATCGCAAAT
CAAAATCCTTGCCGAGTGGCTGACTGCGCTACGCAAAGACCATCCTGACCTATTGATCAT
GGTCGATCCGGTGATTGGCGATATTGATAGCGGAATTTATGTCAAACCTGACCTTCCCGA
GGCGTATCGACAATATTTACTGCCACTAGCGCAGGGAATTACCCCCAATATCTTTGAGCT
GGAAATCCTGACCGGTAAAAATTGCCGCGATCTCGACAGTGCCATTGCTGCCGCAAAAAG
TCTGCTTTCAGACACATTAAAATGGGTGGTGATTACCAGCGCCTCCGGTAATGAAGAAAA
TCAGGAGATGCAGGTGGTGGTGGTCACTGCCGACAGCGTGAATGTCATTTCCCATTCACG
GGTAAAAACCGACCTGAAAGGGACTGGCGACCTGTTTTGTGCTCAGCTTATCAGTGGTTT
GCTGAAAGGGAAGGCGTTAACCGATGCAGTGCACCGAGCGGGGTTGCGCGTACTGGAAGT
GATGCGCTACACCCAGCAGCATGAGAGCGATGAATTGATTTTGCCGCCGCTGGCGGAAGC
ATAAAAAAATGGCGCCGATGGGCGCCATTTTTCACTGCGGCAAGAATTACTTCTTGATGC
GGATAACCGGGGTTTCACCCACGGTTACGCTACCGGACAGTTTGATCAGTTCTTTGATTT
CGTCCATGTTGGAGATAACAACCGGAGTCAGGGTAGACTTGGCTTTCTCTTCCAGCAGCG
GCAGATCAAATTCAATGACAGTATCGCCAACTTTCACGCGCTGACCTTCTTCAGCAATAC
GCTTGAAGCCTTCGCCTTTCAGTTCAACGGTGTCGATACCGAAGTGGACGAACAGTTCAA
CGCCGCTATCAGATTCGATAGAGAATGCGTGGTTGGTTTCAAAGATTTTACCAATGGTAC
CGTCTACAGGCGCGACCATTTTGTTACCCGTTGGTTTGATAGCAATACCATCACCAACGA
TTTTTTCCGCAAAAACGACATCCGGCACGTCTTCGATATTGACGATCTCGCCAGAGAGCG
GAGCAATGATCTCAATAGTTCCGGTATCCTTCTTGTCGTCGGAAACCAGAGATTTCAGTT
TATCGAACAAACCCATGATCTTCTCCTAAGCAGTAAATTGGGCCGCATCTCGTGGATTAG
CAGATTGTTTTTTCTTCAATGAACTTGTTAACCAGCGTCATTAACTCGTCCGTTGTCGGT
TGAGCAAGAGCCTGCTCTGCTAACACCTTCGCATCTTCGAAGTTCGTGTTACGGATAATC
TTCTTAATGCGCGGGATAGAAATGGCGCTCATAGAGAATTCGTCCAGACCCATCCCCAGC
AACAGAAGTGTAGCACGTTCATCGCCAGCAAGCTCACCACACATGCCAGTCCATTTGCCT
TCAGCATGAGAAGCATCAATAACTTGCTTGATCAAGTTCAGCACGGACGGTGACATTGGC
TGGTAAAGGTGTGAAATCATATCATTACCACGGTCAACTGCCAGAGTGTACTGCGTTAAA
TCATTGGTGCCGATACTAAAGAAATCAACTTCTTTGGCTAAATGACGTGCAATTGTTGCG
GCAGCCGGTGTTTCCACCATTACGCCGATTTCAATTGACTCGTCAAACGCTTTACCTTCG
TCGCGCAGTTCCTGTTTGTAGATTTCGATCTCTTTGCGCAGTGCACGCACTTCTTCAACA
GAGATGATCATCGGGAACATAATGCGCAATTTACCGAAAGCCGAGGCACGCAGGATAGCG
CGGAGCTGATCGCGCAGGATCTCTTTACGATCCATTGCGATACGGATAGCGCGCCAGCCG
AGGAACGGGTTCTCTTCTTTCGGGAAGTTCATGTATGGCAGCTCTTTGTCGCCGCCGATG
TCCATGGTACGAACGATAACCGCCTGCGAGCCACACGCTTCAGCCACTGCTTTGTAAGCA
GCAAACTGTTCTTCTTCAGTGGGCAGCGCGTCGCGGTCCATGAACAGGAACTCAGTACGA
TACAGACCAACGCCTTCAGCGCCGTTACGCTCTGCACCTTCAACGTCACGAACCGTACCA
ATGTTAGCGCATACTTCTACCTGGTGACCGTCCAGCGTAATAGCTGGCAGATCTTTCAGT
TTAGCAAGCTCTGCTTTTTCAGAAGCCACTTGCTCCTGAACAGCGCGCATTTTATCAATA
ACTTCGTTGGTTGGATTGACGTAAACCTGATTATTTACGGCATCCAGAATCAGATAGTCG
TCATTTTTCACCTGAGAGGTGACGCTACCGGTACCCACGATAGCAGGTAGTTCCAGAGAA
CGCGCCATGATAGAGGTGTGGGAAGTACGGCCACCCGCGTCGGTGATGAAACCCAGCACC
TTCTTCAGGTTCAGCTGTGCGGTTTCGGACGGCGTCAGGTCAGCGGCAACCAGAATGACT
TCATCCTGAATGGCGCTCAGGTCGATAATCTTCAGGCCCAGGATGTTGCGCAGCAGGCGC
TTACCGATATCACGTACGTCAGCCGCACGTTCTTTCAGGTATTCATCATCCAGCTCTTCC
AGGGCAGAAGCCTGACCTTCGATAACTTCATGAGCAGCTGCGTCAGCTGTCATGTGCTTA
TCTTTAATCAGGGCTATGATTTCCTGCTCCAGCTCCTCATCTTCGAGCAGCATAATATGC
CCTTCAAAGATGGCTTCTTTTTCTTCACCGAACGTTTCACCAGCTTTCGTTTTGATCGTT
TCCAGCTGGGCTGATGCCTTGGCACGACCGCTCAGAAAACGTTCAACTTCCTGATCAACC
TGGTCGGCAGAAATTTTTTTCCGGTCAATGACAATTTCGTCTTCTTTCAGAAGCAGAGCT
TTACCGAAAGCGATACCCGGGGATGCTAAAATGCCTGAAATCATAACCCTACCTTACTTG
TGACTGATTTTTAAAAGAACCCGGGAAATTACTCGAGTTCCGCCATCAGTTTAACCAGAT
GTTCAACCGCTTTCTGCTCGTCTTCGCCTTCTGCGGAGATAGTCACAACGGTACCTTGAG
TCAGGCCCAGAGTCTGCAGTTTAAACAGGCTTTTCGCGCTGGCGCTTTTGCCGTTGGAAG
TCACAGTAATTTCAGAAGTGAAGCCCTTAGCTTCTTTTACAAACTGGGCAGCAGGGCGGG
TGTGCAGACCGTTCGGAGCGGTAATGGTAACTTCTTGCTGGAACATTGTATTTCCCCAAC
TTATAGGTTTAGTGTTGTGGAACTAAAGTCTAGCCTGGCGGTTCGACTTTAGCCTGTATT
GTTAGCGCCAGTTTTTAACAGACGCGACGCACGAAGAGCGCAATACAGTCCATTGCTGGC
GGGTGTTGACCGCTGACGTTTCGTACGTCATTAAACATTATGCCGCTAAAGGAAGAATTG
AACCAAATCATAAAATCGATTCAGCTTTGGCTTTTCCTGTAACGATTAATTTCGCGCATC
AAAATAATTAGTCTGGTTAAATACCAGTTCCGACAGGCTGAATCAATGCCAGGAGGGGCG
AAAGTTTGAAGCAGGCCACAAAAAAGCACCTAAAAAGGTGCTTTTTTACGCATTTTTAAC
AAGCTGGCATTACTGTTGCAGTTCTTTCTCAGTGAAGAGATCGGCAAACAATGCGGTGCT
TAAATAACGCTCACCCGATGACGGTAGAATAACCACAATATTCTTGTTGGTAAAGCTTTC
ATCTTCTTGTAGTTTCAACGCCGCAGCAACAGCTGCTCCAGAAGAGATACCTGCAAGAAT
ACCTTCTTCTTCCATCAGACGACGCGCGGTAGAAATGGCTTCTTCATTGGTAATGCCAAT
GACTTTATCGATCAGCTTGAGATCGAGGTTAGCCGGGATAAAACCAGCGCCAATACCCTG
AATTTTATGCGGGCCAGGTTTAATCTCTTCACCTGCCAGCGCCTGGGCGATAACTGGAGA
ATCGGTTGGCTCAACGGCGACAGAGATAAGATCGGTCTTGCCTTTGGTGCCTTTAATGTA
GCGGCTGACGCCGGTCAGCGTACCGCCAGTCCCAACGCCAGCAATAAATACATCAACCTG
ACCGTCGGTATCTTCCCAGATCTCCGGACCGGTGGTTTTTTCGTGAATTTCAGGGTTTGC
CGGATTGCTGAATTGTTGCAGCAGCAGGTATTTCTCTGGATTGCTGGCGACAATTTCTTC
TGCTTTTTGGATTGCGCCTTTCATGCCTTTAGCACCTTCGGTCAGCACCAGGTTTGCACC
TAACGCTTTCAGCAGCTTGCGGCGTTCAATACTCATGGTTTCTGGCATGGTCAGGGTGAG
TTTGTAACCGCGAGCGGCAGCTACATAGGCCAGTGCAATCCCGGTATTACCGCTGGTCGG
TTCAACCAGTTCAACGCCTGGTTTCAGCACGCCGCGCTTTTCGGCATCCCAAATCATGTT
GGCACCGATACGGCACTTAACGCTGAAGCTGGGGTTACGAGATTCCACCTTCGCCAGAAT
GCGTCCGTTACCGATGCGATTCAGGCGAACCAGCGGCGTGTGACCGATAGTCAGCGAGTT
ATCTTCAAAAATCTTACTCATGGCCTGTCCTTAACTGTATGAAATTGGGATACAACAGGT
AGCATACCCGCTCAGAGAATATGCGGAAGTAAGGATTTAGCATATCTATATACAGAAGGG
AAATAATGACATGCAAGATGGAATAAGGGGCGGCATAAGCCACCCCTGTTTCACACAAAC
GGTTTACAAAATAACCGGTAGATTGTTACCGCCACATCGCGTGTTTATCGCGATAGCAAT
CGACCCACATCGCCGTCGCGCCACAAACGGCAACGGGCATGATGAACAGATTAAGCAGCG
GGATCATCGTAAACAGGCTGGTTAAAGCACCAAACTGCATATTGGTGATTTTGCGTGTGC
GCAGGGCGGTGCGCATCTCTTTAAACGGCACTTTGTGGTTATCGAAGGGGTAATCGCAAT
ACTGGATGGCTAACATCCAGGCGCTAAACAGGAACCACAGTACCGGCGCGACGGTTTGCC
CAATACCAGGGATGAAGTAAAGAATTAGTAATACAATTGCGCGCGGCAGATACCAGGCAA
ATTTTTGCCATTCGCGTTTCATGATTCGCGGCACATCTTTCATGATACCGAAAATCCCGG
TATCTGGCGGTGTAGCGCCAGTCAATCGTGCTTCCAGTTGTTCAGCCAATAAACCGTTAA
ACGGAGCGGCAATCCAGTTAGCAATCGTGGAGAAGAAATAGCCAAACACTAACAGCACAG
AGATGACAGCCAGAGGCCACAACAGATAGCTCAGCCATTGTAACCAGTCCGGAACATAAC
TCATGAGAGTCGGGATCCAGACATCGAGTTGCGTAAAGAGCCACCAGAATGCGCCCCCCA
TCAACAAAATATTGACCAGCAGCGGTAAAATAACGAAACGCCGAATCCCAGGTTGCGAGA
CGAGCTTCCAGCCTTGCGCAAAATAGTAAAAACCGCTGCGTGGGGCAGATGTGAATGATG
AAACCATAATCAGGATGAGCTCCTTTTGACCAATCCCAGGAAAATTGTGCGTATTTTACC
GGGTAATTGCGCAATGGACAGTTAGGATATGTTCGAAAAAACAGCAAAAAGCACGATTTC
ATCTATCTTTGTGCTGTGAAAGTTAATAGTGCACTTGCACTTGAGGTAATCGGCAAATAC
TCTTAGTGAGTAAATGTTTGCCGTGGTGGCAAGGTGTTAGAACAACAGAGAATATAATGA
TGCAGGATTTGCGTCTGATATTAATCATTGTTGGCGCGATCGCCATAATCGCTTTACTGG
TACATGGTTTCTGGACCAGCCGTAAAGAACGATCTTCTATGTTCCGCGATCGGCCATTAA
AACGAATGAAGTCAAAACGTGACGACGATTCTTATGACGAGGATGTCGAAGATGATGAGG
GCGTTGGTGAGGTTCGTGTTCACCGCGTGAATCATGCCCCGGCTAACGCCCAGGAGCATG
AGGCTGCTCGTCCGTCGCCGCAACACCAGTACCAACCGCCTTATGCGTCTGCGCAGCCGC
GTCAACCGGTCCAGCAGCCGCCTGAAGCGCAGGTACCGCCGCAACATGCTCCGCGTCCAG
CGCAGCCGGTGCAGCAACCCGTGCAGCAGCCTGCCTATCAGCCGCAGCCTGAACAGCCGT
TGCAGCAGCCAGTTTCGCCACAGGTCGCGCCAGCGCCGCAGCCAGTGCATTCAGCACCGC
AACCGGCACAACAGGCTTTCCAGCCTGCAGAACCCGTAGCGGCACCACAGCCTGAGCCTG
TAGCGGAACCGGCTCCAGTTATGGATAAACCGAAGCGCAAAGAAGCGGTGATTATCATGA
ACGTCGCGGCGCATCACGGTAGCGAGCTAAACGGTGAACTGCTTCTTAACAGCATTCAAC
AAGCGGGCTTCATTTTTGGCGATATGAATATTTACCATCGTCATCTTAGCCCGGATGGCA
GCGGCCCGGCGTTATTCAGCCTGGCGAATATGGTGAAACCGGGAACCTTTGATCCTGAAA
TGAAGGATTTCACTACTCCGGGTGTCACTATCTTTATGCAGGTACCGTCTTACGGTGACG
AGCTGCAGAACTTCAAGCTGATGCTGCAATCTGCGCAGCATATTGCCGATGAAGTGGGCG
GTGTCGTGCTTGACGATCAGCGCCGTATGATGACTCCGCAGAAATTGCGCGAGTACCAGG
ACATCATCCGCGAAGTCAAAGACGCCAACGCCTGATACACTTAAGGCAAATTAACTCCTC
TTCGAACCCCCGCTTGTCGGGGGTTTTTAGCATTGATGGTGCGATATGGAATCAATCGAA
CAACAACTGACAGAACTGCGAACGACGCTTCGCCATCATGAATATCTTTATCATGTGATG
GATGCGCCGGAAATTCCCGACGCTGAATACGACAGGCTGATGCGCGAACTGCGCGAGCTG
GAAACCAAACATCCAGAACTGATTACGCCTGATTCGCCTACCCAACGTGTAGGTGCTGCG
CCGCTGGCGGCTTTCAGCCAGATTCGCCATGAAGTGCCAATGCTGTCGCTGGATAACGTT
TTTGATGAAGAAAGCTTTCTTGCTTTCAACAAACGTGTGCAGGACCGTCTGAAAAGCAAC
GAGAAAGTCACCTGGTGCTGTGAGCTGAAGCTGGATGGCCTTGCCGTCAGTATTCTGTAT
GAAAATGGCGTTTTAGTCAGTGCCGCGACCCGTGGCGATGGCACCACCGGGGAAGATATC
ACGTCTAATGTGCGTACTATTCGCGCCATTCCGCTGAAGCTGCACGGAGAGAATATCCCG
GCGCGTCTGGAAGTGCGTGGTGAAGTGTTCCTGCCGCAGGCGGGGTTCGAAAAGATTAAC
GAAGATGCGCGACGCACGGGCGGGAAAGTGTTTGCTAACCCACGTAATGCGGCAGCTGGT
TCACTGCGTCAGCTTGATCCGCGTATTACAGCGAAGCGACCGCTCACTTTTTTCTGCTAT
GGCGTTGGTGTTCTGGAAGGTGGCGAGCTGCCGGATACTCATCTTGGCCGTTTACTGCAA
TTTAAAAAGTGGGGGTTGCCGGTCAGCGATCGGGTAACGCTTTGTGAATCGGCGGAAGAA
GTGCTGGCGTTCTATCACAAAGTGGAAGAAGACCGCCCGACGCTGGGCTTTGATATCGAC
GGCGTGGTGATTAAGGTCAACTCACTGGAACAGCAGGAGCAGCTTGGCTTTGTCGCGCGT
GCCCCGCGCTGGGCGGTAGCGTTTAAATTCCCGGCGCAGGAGCAGATGACCTTTGTGCGT
GACGTCGAGTTTCAGGTTGGGCGTACTGGCGCGATTACGCCTGTTGCGCGTCTGGAACCT
GTCCATGTTGCTGGCGTGCTGGTGAGTAACGCAACCTTACACAATGCGGATGAAATCGAA
CGTCTTGGTTTACGCATTGGCGATAAAGTGGTGATTCGCCGCGCTGGCGACGTGATCCCG
CAGGTGGTTAACGTCGTGCTTTCTGAACGCCCGGAAGATACCCGTGAGGTTGTATTCCCG
ACGCATTGTCCGGTATGTGGTTCTGACGTTGAGCGTGTGGAAGGTGAAGCTGTTGCCCGC
TGTACCGGTGGCCTGATTTGCGGTGCGCAGCGTAAAGAGTCGCTGAAACACTTTGTTTCC
CGCCGTGCGATGGATGTTGACGGAATGGGCGACAAAATCATCGATCAGCTGGTTGAAAAA
GAATATGTCCACACTCCGGCGGATCTGTTCAAACTCACCGCAGGCAAACTTACCGGACTG
GAGCGTATGGGGCCAAAATCGGCACAAAACGTGGTTAACGCGCTGGAAAAAGCGAAAGAA
ACCACCTTTGCTCGCTTCCTCTATGCACTTGGCATCCGTGAAGTCGGCGAGGCCACCGCA
GCAGGTCTGGCGGCATATTTCGGCACGCTGGAAGCGCTGGAAGCCGCTTCGATTGAAGAA
CTGCAAAAGGTGCCTGATGTTGGCATTGTCGTTGCATCCCACGTTCACAACTTCTTTGCC
GAAGAAAGCAACCGCAATGTCATCAGCGAGCTGTTGGCGGAAGGTGTTCACTGGCCTGCG
CCGATCGTTATCAACGCGGAAGAGATTGACAGCCCGTTTGCTGGTAAAACCGTGGTGCTT
ACGGGCAGCTTAAGCCAGATGTCGCGTGATGACGCTAAAGCTCGACTGGTCGAACTGGGC
GCGAAAGTCGCGGGCAGCGTGTCGAAGAAAACCGATCTGGTGATAGCGGGTGAAGCTGCA
GGATCTAAACTGGCGAAGGCGCAGGAACTGGGCATTGAAGTCATCGACGAAGCGGAAATG
CTGCGTTTGCTGGGTAGCTGAGATGGAAAAAGAGCAGCTGATTGAAATAGCCAATACGAT
AATGCCGTTTGGCAAATACAAAGGGCGTCGCTTAATCGACCTGCCGGAGGAGTATCTGCT
GTGGTTTGCCCGCAAAGATGAGTTCCCGGCAGGGAAGCTCGGTGAGCTAATGCAAATCAC
GCTGCTGATTAAAACCGAGGGGCTGACGCAACTGGTCCAGCCCCTGAAGCGTCCGCTTTA
AGCTTTATCGGTGCTGCTTTCCTGCTGTGCCTGTAACTGTTCGGTCTGGCGTTTGTATCG
CCGCGCCAGCACCGCACAGACCATCAATTGGATCTGATGGAAAATCATCAGGGGCAGCAC
CATCATACCGATCACCGATGTGGGGAACAGAATGTTTGCCATCGGGATGCCATTTGCCAG
ACTCTTTTTCGAACCACAAAAGACGATAGTAATTTCATCTGCTTTATTGAAGCCTAGTCG
GCGTGCCATAAAGACGTTAACTACAATCACGATAGCCAGAAGAACGCAGCTGACCACCAC
GATAAACAGCAATGATCCCCAGCCAACTTTATGCCAGATACCATTAACGACGGCTTCGCT
GAACGCTGTATAAACCACCAACAGAATGGACGTCTGGTCAGTTTTCGCAATCCATTTTTT
ATTGCGCGACACCCAGTCACCAATCCACGGCCGGGAAAGATGCCCCAACACAAACGGCAG
CAACAGTTGCAGCATAATTTTACCGACCTGCTCAAGGCTGCCCCCTGCACCGTGAACATT
CATCACCAGGCCAACCAGCAATGGTGAAAGGAAAATCCCCAGCAGGCTGGATGCCGACGC
AGAACAAACCGCCGCCGCGACGTTACCGCCCGCCATTGACGTGAAGGCGATTGCAGACTG
CACTGTAGCCGGGAGAATGCACAAGTAGAGAAAACCGGAGTAGAGCATCGGGTCGACATT
TACCGGTTTCCACCAGGCAAACAGTACACCCAGAATCGGAAACAGCACGAAGGTGCTGCA
CATTACCCACAAATGCAGTCGCCAGTGACCACCGCCAGCAATAATCGCCTCACGCGACAA
CTTCGCGCCGTGCATAAAGAACAGCAGGGCAATAGCTGCGGTGGTCAGATTTTCAAAGAA
GGGGACGAAATCGCCTCTGGCCGGAAAGAAAGAGGCCAGCAACACCACCGTGATCAGGGT
TAAGGTGAAAGGATCGAGGATACGAAAAAGTTTCATAAAGACTCCAGATGATCGATGGTT
CTATTGTGCTTCTTCCAGTTTGAGAAATAAAATTGATTTATTGCATCCATTCATGAAGAA
AACAGATGAATTATTCTTTAAAACAGTTAAAGGTTTTCGTCACAGTAGCGCAGGAGAAAA
GTTTTAGTCGTGCAGGAGAGCGTATCGGCCTGAGCCAGTCGGCAGTAAGTCACAGTGTGA
AGGAGCTGGAAAATCATACAGGTGTTCGCCTGCTGGACAGAACCACGCGTGAAGTGGTAC
TTACAGATGCAGGGCAGCAGTTGGCTTTGCGTCTTGAGCGACTGCTGGATGAACTTAACA
GCACGTTGCGCGATACCGGGCGTATGGGGCAACAACTGAGCGGAAAAGTTCGGGTCGCTG
CCAGCCAGACCATTTCCGCGCATCTTATTCCGCAATGCATTGCTGAAAGCCATCGCCGCT
ATCCAGATATTCAGTTTGTCCTGCACGATCGTCCGCAGCAGTGGGTGATTGAAAGTATTC
GCCAGGGAGATGTCGACTTTGGCATCGTCATAGATCCAGGCCCAGTGGGCGATCTGCAAT
GTGAAGCGATTCTTTCCGAGCCTTTCTTTCTGCTTTGCCATCGCGATAGCGCTTTGGCCG
TGGAAGATTATGTACCCTGGCAGGCATTACAGGGAGCGAAATTGGTGTTGCAGGATTACG
CGTCAGGCAGCCGACCGCTGATTGACGCAGCGCTGGCGCGCAATGGTATTCAGGCGAATA
TTGTGCAGGAGATTGGACATCCGGCGACGCTGTTCCCGATGGTAGCCGCAGGCATCGGCA
TCAGTATTCTTCCCGCACTGGCGCTACCATTGCCTGAAGGTAGCCCACTGGTGGTAAAGC
GCATTACGCCGGTGGTGGAACGCCAGTTGATGCTGGTGCGCAGGAAAAACCGTTCACTTT
CCACCGCCGCTGGAGCGTTATGGGACGTGGTACGAGACCAGGGCAATACGCTAATGGCTG
GGCGGGAAGGGGATCCGTTGTATCAGATATAGATATCGATATGAGTCGTATTTTCAACAG
GATTTAGAAGGGATACATTCAGAGACAAACGCTGCTCTTTCTCCTGCGCCTTTTCTGCCT
GCTGTCTCTGCAACTGCGCCAGTTGTGTTTCCAGTAGGGTGATTTGCTGTTGAATCAATT
CGGCCTGTTTTTGCTTGTCTTCAGCACTGCCGCTAGTGTCTACAATCTCTTTAATTTGTT
GAGTGAGTTTGATGATTTGCTGACTTATCCGCGCGATTTGTGAAGCAACATCGCTACCTT
GTGATGCCCTGTTACTACTCTGTGTTTGTATGGAAGGAATTGAAGTTGAAGAGATAGTGG
CCATTGTTCAGTCCTCGTCACTGTACGAGGTAATATCGGTAGAAGAACAAGGAACTTGAG
AAGAAAAATCAATCTTACAAATCGCAGATAGCAAAAAAGCGCCTTTAGGGCGCTTTTTTA
CATTGGTGGGTCGTGCAGGATGACTCGCTTCGCTCGCCCTTCGGGCCGTCGCCGCGAGCG
GCTCCGTTGTTTCGCTGCGCTCAACTCGAACCTGCTGCAGGTTCGAATCTTTGAGTATCG
CAGATAGCAAAAAAGCGCCTTTAGGGCGCCTTTTTAAATTGGTGGGTCGTGCAGGATTCG
AACCTGCGACCAATTGATTAAAAGTCAACTGCTCTACCAACTGAGCTAACGACCCGAAGT
GGTGGGTGATGACGGGATCGAACCGCCGACCCCCTCCTTGTAAGGGAGGTGCTCTCCCAG
CTGAGCTAATCACCCACTTCTCAATTTCTTGCTACACGGCGGAGACTACATAAAGTAGTT
GGTGGGTGATGACGGGATCGAACCGCCGACCCCCTCCTTGTAAGGGAGGTGCTCTCCCAG
CTGAGCTAATCACCCCCGCTGTGTGGAGTCGCATTATAGGGAGAGTTCAAAATGAGTCAA
CGCATTTTCTAAAGAAATTGTTCGTTCGTCGTAAATTTAAGCAAGATGATCGCAAAACAG
ACCGTGTTGCGCAATTTGTCAACGAAAACAATAATGCGTAAGGTTGCAACCCGAACTACA
TTGAGGAATCAGGCGGGAGTGATAGAATATCGCCCACTCAATTTTTCCAGGATTTGCCGG
TTGTCGGCATCTTTCTAAACGTAAGGCCATTTCATGAAAATCAAAACTCGCTTCGCGCCA
AGCCCAACAGGCTATCTGCACGTTGGCGGCGCGCGTACTGCTCTTTACTCCTGGCTTTTT
GCACGTAATCACGGCGGTGAGTTCGTGCTGCGTATTGAAGACACCGATCTTGAGCGTTCC
ACGCCGGAAGCTATCGAAGCCATTATGGATGGCATGAACTGGCTGAGCCTGGAGTGGGAT
GAAGGTCCGTACTTCCAGACCAAACGTTTTGATCGCTACAACGCGGTGATCGATCAGATG
CTGGAAGAGGGCACAGCTTATAAATGCTATTGCTCTAAAGAGCGCCTGGAAGCGCTGCGC
GAAGAGCAAATGGCGAAAGGTGAGAAGCCGCGTTATGACGGTCGCTGCCGCCACAGTCAT
GAGCATCACGCTGATGATGAGCCGTGTGTCGTACGTTTTGCTAACCCGCAGGAAGGTTCT
GTTGTTTTTGACGATCAGATCCGTGGTCCGATCGAGTTCAGCAACCAGGAACTGGACGAT
CTTATTATCCGCCGTACCGATGGTTCCCCAACCTATAACTTCTGTGTGGTTGTCGATGAC
TGGGATATGGAAATCACCCACGTTATCCGTGGCGAAGACCATATCAACAACACGCCACGC
CAGATCAACATTCTTAAGGCCCTGAAAGCGCCGGTGCCGGTTTACGCGCACGTTTCTATG
ATCAACGGCGATGACGGTAAAAAACTGTCCAAACGTCACGGGGCGGTCAGCGTAATGCAG
TATCGTGACGACGGTTATTTGCCAGAAGCACTGCTGAACTATCTGGTGCGTCTGGGCTGG
TCCCACGGCGATCAGGAAATCTTCACTCGTGAAGAGATGATCAAATACTTCACCCTGAAT
GCCGTCAGCAAATCTGCCAGTGCGTTCAACACCGACAAGCTGCTGTGGCTGAACCATCAC
TACATTAACGCGCTGCCGCCGGAGTATGTTGCTACTCACTTACAGTGGCACATTGAGCAG
GAAAATATCGATACCCGTAACGGCCCGCAGCTGGCTGATCTGGTGAAACTGCTGGGCGAA
CGCTGCAAGACGCTGAAAGAGATGGCACAGAGCTGCCGTTATTTCTACGAAGATTTTGCA
GAGTTCGATGCCGACGCCGCGAAAAAACATCTGCGTCCGGTAGCGCGTCAGCCGCTGGAA
GTGGTTCGTGACAAACTGGCCGCGATTACTGACTGGACCGCTGAAAACGTTCATCACGCT
ATTCAGGCGACGGCGGATGAGCTGGAAGTGGGTATGGGTAAAGTTGGTATGCCGCTGCGT
GTCGCCGTAACCGGTGCGGGGCAGTCTCCAGCACTGGATGTTACCGTTCACGCGATCGGT
AAGACACGTAGCATTGAGCGTATCAACAAAGCGCTGGCTTTTATTGCTGAACGCGAAAAT
CAGCAGTAATTAGCGCATAAAAGACAAACGGCAGGAGAGAAACCCCTGCCGTTTTTTATT
TATGCTGATTCATTTATGTCGAGACGAGCCAGGAAATTACGAATTCCTTCGCGTGACAAA
AATTGCGCAACTTTTTCCTGCTCACTGTGAGTCATGTTGTCTATTGCGCTTATGATTTGT
CGATAAGCAGGAGTGCGAATCCCCGGTGCGTATTCGGCAAGGGGTTCTTCGGCTTCCAGA
AGCATCGGTGTGTTATGGAAGGCTGGCGTGTTCTGAATAAACTCGCAAACTTGCGTATCG
ACCAGAATAAGTCTGGCACGACCGCCTTTCACGCCGGGAAATTTTTCCGTTTTCCAGCCT
TTTTCTCTGATCCAACGGTTAACAGTTTGTTTAGCCACACCGAGGCATTCAGCCAGTTCT
TCGGTGGTCATTTTGTTGCGTAATCTTTTCATATTATTTGCTATCGCGAATCCCTAAGCG
TTGTAACAATCCGATAATCCCTTCCCGCAGAAGCAAGGATGTAAACTGTTTTTGTTCAAC
TGGCGTCATCTCTTTCGCCAGTGTCACCAGCAATACTTCAAGCGGCGCATCACCAGAAAG
GGCAGGCGCTTCTCCCTGACCTTCTGGACGTTCAGCATTACGAATATATTCACGAACCTG
TTCATTGACGTGAACCAGTCGGGCTTTGCCACCCTGGACGCCTGGTTTTGGTGACGTCGT
CCAGCCTTCCTTGCGTACCCATTTATTAATGGTCTGGCGGCTATAGCCGGTCAGTCTGGC
AAGTTCATCTGGTGTCATCCTCTCCTTGAACATAACAATTCCCTGAATGTATGTGGGTCT
ATTAGTAGTTCATTTTATAGCACCACTTTACAGGAAACCGTGACATGAATAACTACTGAA
TGCGAGCGGTTTTCCAAAATTGTTCATTTGCCTGATTTTTCAGCGATTGAAACTACACGT
TGCAATTTGCCGTTGACACATTCGGGCGGAATTCATATGATGCCGCCCGTCAACTCGACA
AGCTTTACGTGACGGGGCTATAGCTCAGCTGGGAGAGCGCTTGCATGGCATGCAAGAGGT
CAGCGGTTCGATCCCGCTTAGCTCCACCAAATTTTGCACCCAGCAAATTTGGTACGTAAA
CGCATCGTGGGGCTATAGCTCAGCTGGGAGAGCGCTTGCATGGCATGCAAGAGGTCAGCG
GTTCGATCCCGCTTAGCTCCACCAAATTTCCAACCCTCGCTGCAAAGCGGGGGTTTTTTG
TCTCTGCTTTTTGCCGCTTTTGTAATACAGTCTACGTCCGGGTTAGTGCCGCCTGGTGAA
AGCATCATTGGATGAAAAATCGGCAACAGGCTGGCCCCTGTTTGCTTCGCGATGCGAATA
AACTTATTATTTGTGTGCCTGAAAACCCCGATCAGTGAGAGTAGTGTACTCATGTTTGTG
GAGCATAACCTGATAAAAAATATCAAGATATTCACACTAGCGTTTACGCTCACCGTGGTA
CTTATTCAGCTATCCCGTTTTATTTCGCCACTTGCCATTATCCATTCCAGTTATATCTTT
CTGGCGTGGATGCCACTGTGCGTAATGCTGTCAATCTTGTTTATCTTTGGCTGGCGCGGT
GTCGTTCCCGTTTTATGCGGGATGTTTTGCACCAATCTGTGGAACTTTCATCTCTCTTTT
TTACAGACTGCGGTCATGCTCGGCAGCCAGACGTTTGTCGTGTTGTGTGCCTGCGCAATA
TTACGCTGGCAGCTGGGGACGCGTTGGCGTTATGGATTGACCAGCCGATATGTCTGGCAA
CGTCTGTTCTGGCTTGGTTTGGTGACGCCGATCGGCATCAAATGCAGCATGTATTTTGTG
GGGAGCTTCTTTGATTTCCCGCTAAAGATATCCACCTTTTTCGGCGATGCGGATGCCATT
TTCACGGTTGTTGATTTACTAAGCCTTTTCACCGCTGTGCTGATTTACAACATGCTTTTC
TACTATCTCACTCGCATGATTGTAAGTCCCCACTTTGCGCAGATATTGTGGCGCAGGGAT
ATCGCTCCGTCGTTGGGCAAAGAGAAACGCGCATTTACCTTAAGCTGGCTGGCAGCGTTA
AGCGTGCTGCTACTTCTGTTGTGCACACCTTATGAAAACGACTTTATTGCCGGTTACCTG
GTACCCGTTTTCTTCATCATCTTTACCCTCGGGGTCGGTAAGCTTCGCTATCCGTTTTTA
AATCTCACCTGGGCTGTTTCAACGCTTTGCCTGCTGAATTACAACCAGAACTTTTTGCAA
GGGGTGGAAACCGAATATTCGCTGGCATTTATTCTTGCGGTGCTGATTTCCTTTAGCGTT
TGCCTGCTCTATATGGTGCGCATTTATCATCGCAGTGAATGGCTTAATCGACGCTGGCAT
TTGCAGGCGCTGACCGATCCGTTAACGCTCCTACCCAATTTTCGTGCGTTGGAACAAGCG
CCGGAGCAAGAGGCGGGCAAGAGTTTTTGCTGCCTGCGCATTGATAATCTTGAGTTTATG
AGTCGTCATTACGGGTTAATGATGCGCGTTCACTGTATCCGATCAATTTACCGTACGCTG
CTGCCGTTGATGCAGGAAAACGAAAAGTTGTATCAATTGCCGGGTAGTGAACTGCTGTTA
GTGCTGAGCGGGCCGGAAACGGAAGGGCGACTCCAGCATATGGTTAACATCCTGAATAGT
CGGCAAATTCACTGGAACAATACCGGGCTGGATATGGGCTATGGTGCTGCCTGGGGGCGT
TTTGATGGAAATCAGGAAACCCTGCAACCCTTGTTGGGGCAGTTAAGCTGGCTGGCGGAG
CAATCCTGCGCACATCATCATGTGCTGGCGCTGGATAGCAGAGAGGAGATGGTTTCCGGG
CAGACCACTAAACAAGTGCTATTGCTGAATACCATTCGCACGGCGTTAGATCAGGGTGAT
TTGCTGCTCTACGCCCAGCCAATTCGCAACAAAGAGGGTGAAGGTTATGATGAGATCCTC
GCGCGACTGAAGTATGACGGCGGCATTATGACCCCGGATAAGTTTCTGCCCCTTATTGCT
CAGTTTAACCTTAGCGCGCGTTTTGATTTGCAAGTGCTGGAATCCTTGTTGAAGTGGCTG
GCAACACACCCTTGCGACAAAAAAGGCCCGCGCTTTTCAGTTAATTTAATGCCGCTCACG
CTGCTACAAAAGAATATTGCCGGGCGGATTATTCGTCTGTTTAAGCGTTATCACATCTCC
CCGCAGGCGGTCATTCTTGAGATCACCGAGGAGCAGGCGTTTTCTAACGCAGAAAGCAGC
ATGTACAACATCGAGCAACTGCATAAGTTTGGCTTCCGGATTGCGATTGATGACTTTGGC
ACCGGCTATGCCAACTACGAACGGTTAAAGCGTTTGCAGGCTGATATCATCAAAATTGAT
GGTGTCTTTGTGAAAGATATCGTCACGAATACGCTGGATGCGATGATTGTGAGATCAATT
ACCGATCTGGCGAAAGCGAAGTCATTGAGTGTGGTTGCGGAGTTTGTCGAGACGCAACAG
CAGCAGGCGTTATTGCATAAGCTCGGGGTGCAATATCTGCAAGGGTATTTGATTGGTCGC
CCGCAGCCATTAGCTGATTAACAGGCGTAAAAAAACCGGGGAATTATCCCCGGCTTTTTT
ATGTATGGTCTTACAGCACCAGTGCTGCGATTGACGCAGACAGCACACTCACCAGGGTAG
AGCCGTAAACCAGTTTCAGACCGAAGCGAGAAACCACGTTACCTTGCTCTTCATTCAGAC
CCTTAACTGCACCTGCGATAATCCCGATTGAAGAGAAGTTAGCGAAGGAAACCAGGAACA
CAGAGATGATGCCTTCAGCACGCGGAGAGAGCGTGGAAGCAATTTTCTGCAGATCCATCA
TCGCAACGAACTCGTTGGAAACCAGTTTGGTCGCCATGATACTGCCCACTTGCAGTGCTT
CGCTGGACGGAACACCCATCACCCATGCAATCGGATAGAAGATGTAGCCCAGGATGCCCT
GGAAGGAGATGCTGTAGCCAAACCAGCCAGTCACGGTGGCAAACAGTGCGTTCAACGCGG
CGATCAGGGCGATAAAGCCGATCAGCATCGCGGCAACGATAATGGCAACTTTGAAACCTG
CCAGAATGTATTCACCCAGCATTTCGAAGAAGCTCTGACCTTCGTGCAGGTTGGACATCT
GAATGTTTTCTTCACTGGCATCAACACGGTAAGGGTTGATCAGCGACAGCACGATAAAGG
TGCTGAACATGTTCAGTACCAGCGCCGCAACGACATATTTCGGCTCCAGCATGGTCATGT
ATGCACCAACGATGGACATAGATACGGTGGACATCGCCGTTGCTGCCATGGTGTACATAC
GATTGCGGGAGATTTTGCCGAGGATATCTTTATAGGCAATAAAGTTTTCAGACTGACCCA
GAATCAGAGAGCTGACGGCGTTAAAGGATTCCAGTTTGCCCATGCCGTTGACTTTGGAGA
GCAGGAAACCAATTGCGCGGATAATCACCGGCAACACGCGAATGTGCTGGAGAATACCGA
TCAGTGCAGAGATAAAGACGATTGGGCACAGCACTTTCAGGAAGAAGAATGCCAGGCCTT
GATCATTCATGCTACCAAAGACGAAGTTAGTCCCTTCGTTGGCAAATCCGAGCAGTTTTT
CGAACATTTCGGAGAAGCCTTTCACGAAGCCTAAACCAACGTCGGAGTTCAGGAAGAACC
ACGCCAGTAACACTTCGATAACAAGCAGTTGAATAACATAACGGATACGAATTTTTTTGC
GGTCGCTGCTTACCAGCAGTGCGAGAATCGCAACAACGGCAAGTGCCAGTACAAAATGAA
GGACGCGGTCCATATTTGCTCCAAATATGAGGCAGGTTAAATTTCCGTGCACATTCTATG
TAACATGGTTAAGGAAAACGAGATCTGACACACACTATAATGACGTCCTGTGACAAGCTT
CAAAAATAGTGAGCTGTCATACATTTCTGCTATGTTGTGTATGGAAGCTGAAAGTTATGT
AAATGTGCTAACATTAAACATAACCATAACATTCAAGTCATCAATCTTTTCGTAGTCATA
ATCCTGGTCTATCAGAGAAATCACCACAACCCATTTAAATGAATTTGATAATCATTCTCG
TTTGGCATAGCATGAAACATAGCAAAGGCTATGTTTTAGAGGCACAAGATGACGAACTAT
CGCGTTGAGAGTAGCAGCGGACGGGCGGCGCGCAAGATGAGGCTCGCATTAATGGGACCT
GCGTTCATTGCGGCGATTGGTTATATCGATCCCGGTAACTTTGCGACCAATATTCAGGCG
GGTGCCAGCTTCGGCTATCAGCTACTGTGGGTTGTCGTTTGGGCCAACCTGATGGCGATG
CTGATTCAGATCCTCTCTGCCAAACTAGGGATTGCCACCGGTAAAAATCTGGCGGAGCAG
ATTCGCGATCACTATCCGCGTCCCGTAGTGTGGTTCTATTGGGTTCAGGCAGAAATTATT
GCGATGGCAACCGACCTGGCGGAATTTATTGGTGCGGCGATCGGTTTTAAACTCATTCTT
GGTGTTTCGTTGTTGCAGGGCGCGGTGCTGACGGGGATCGCGACTTTCCTGATTTTAATG
CTGCAACGTCGCGGGCAAAAACCGCTGGAGAAAGTGATTGGCGGGTTACTGTTGTTTGTT
GCCGCGGCTTACATCGTCGAGTTGATTTTCTCCCAGCCTAACCTGGCGCAGCTGGGTAAA
GGAATGGTGATCCCGAGTTTACCTACTTCGGAGGCGGTCTTCCTGGCAGCAGGCGTGTTA
GGGGCGACGATTATGCCGCATGTGATTTATTTGCACTCTTCGCTCACTCAGCATTTACAT
GGCGGTTCGCGTCAACAACGTTATTCCGCCACCAAATGGGATGTGGCTATCGCCATGACT
ATTGCCGGTTTTGTCAATCTGGCGATGATGGCTACAGCTGCGGCGGCGTTCCACTTTTCT
GGTCATACTGGTGTTGCCGATCTTGATGAGGCTTATCTGACGCTGCAACCGCTGTTAAGC
CATGCTGCGGCAACGGTCTTTGGATTAAGCCTGGTTGCTGCCGGACTGTCCTCAACGGTG
GTGGGGACACTGGCGGGGCAGGTGGTGATGCAGGGCTTCATTCGCTTCCATATCCCGCTG
TGGGTGCGTCGTACAGTCACCATGTTGCCATCATTTATTGTCATTCTGATGGGATTAGAT
CCGACACGGATTCTGGTTATGAGTCAGGTACTGTTAAGTTTTGGCATCGCCCTGGCGCTG
GTTCCACTGCTGATTTTCACCAGTGACAGCAAGTTGATGGGCGATCTGGTGAACAGCAAA
CGCGTAAAACAGACAGGCTGGGTGATTGTAGTGCTGGTCGTGGCGCTGAATATCTGGTTG
TTGGTGGGGACGGCGCTGGGATTGTAGTTGAATGAGCGTCGCATCTGGCACTATTGGCGG
ATGCGGCGTAAACGCCTTATCCGCCTTACGCGTTAAAGAGCCGGTTTGTAGGCCTGATAA
GACGCACTAGCGTCGCATCAGGCCTTGTGCTCCATTGGCAAATGTGTTTAATGGCGGTGC
CCATGTCCGCGGCCTTTTCCGCGATGATCGTCACGATCGCGCCAGCCTTCACGATAGCCA
CGCTCATACGCTTTACGCTTATCCCAGCCACGATGATAGCCATTATCATGACGCCACCAG
CGGTTTTTGCGCCACTCATAATTGCGATGCCAGTAATCACGATCTCGCCAGTGACCACCG
TCCCAGTAATTACCGTAATGATCGCGATCGCCAATTTGTAATTTGATTGATGGCAGTAGG
GTGATTTCACCTGCGTTTGCTGCAAGCGGGGTAAATGCCATCAGGGCGGCCGCCAGAAAC
AGTGACCTGAACATTGTTATTCTCCTTCACGATCGAAGCCGTCAGCGGCCTGTTAACGCA
ATATTACGGGGAGGTAAAGCCCCGTATCATCGCCATAACTCTTAAATCATAAAGGAGAGC
ATTTTTTGTTAAACGTTATCGTGGGGTGGCTGTTGCTTCGGACGATTGACCATCATCATC
GGCTTACCTGCTAATAACAGCCATGCCGGAAGCATGACGATACAGAGCAGCGGTAGCAAT
GTGGTATTGGGTACAACGACTGCCGCCATAAAAAGACTTAACCAGCCATCGCGTGTTACC
ACCAGCACGATGCCGAGAATAGCGCAGGAAACGGTTATTGCCGCTGGAACGGCGGGGACG
TGCTCATGCAGCATCAACCCTAATGCCACGCCGACGAACACTGCCGGGAAAATTCGTCCA
CCGCGAAAGCCACTGGCGGCAGCAACGACCAGGGCGGTAAGTTTAATCACCGCCAGTAAA
AAGTAATCGCTGGTGCTGAAAGCCTGATTTGCCACCATCTGCTGCATCTCATCCAGTCCT
TTAAACAGCGAAACTGGTCCACCAATAACCCCCAGAATACCGAGAATAAATCCGCCAATA
CCCAGCACGAGCACCGGATTTTTCATTTGATGCATCATCGCGTGCAACCGTGGTAAGCAC
CATACGGCGACCATCCCTGCTGCGATGGCAATCGCCGCGACAATTGCACCGCTGAGAATA
TCGGTCATTTCCATCTGTCCGTAATGCGCAATGGGCAGTGAAAAATGGGGATGGAAAAAT
AATCCGGTAGTAAGTGCACCAGCTGCTGCCGCCATTAACGGCGCAAAAAGACGATCCCAT
AGCGGAACTTCACTACTGCCATTTAAGGTTTGCGAAAATATCAACGCCGCCGCAACAGGT
GTACCAAACAGCGCGCCGATGGTTCCGGCAGAGGCTAAAATAGTCCACTCCATTCGGTTG
ACGCGCGGTAACAGACGAGCGCCAATGGCAACCGCAAGGGCGATATTGACGGTCATGATC
GGATGTTCCGGCCCCAGGCTGACGCCGCCAGCAAGACCGAGAATTAATGCTACGATAAGT
CCTGGTAGCGCAGAGGGCGGAACCGGTGCGCCGATCAGCGGTTCACAGGCGGGGTCTGGT
CCGGCATGACCCTGGCTGAAACGGATAACCAACCCCACTGCAATACCCGTTAACGTTAAT
ACACCGATGATCCAGAGAGGTGAATCCTGGGCTATCCCCAGAGTTCCCGGCAGTCGTTGC
CAGAGCAAATTCTGTAATGCCGAGGCGATTTTCATCACCACAATCAGAATAAGACTGGAC
GCAATCCCAATTGCCACGGCGGGGAGCGATAATAACAACATGGTTCTGGCTCGCGGATGG
AGCATGTTCTATTCCTTATGCGGGGTCAGATACTTAGTTTGCCCAGCTTGCAAAAAGGCA
TCGCTGCAATTGGTGCTGAAACGATAAAGTAATTGTGTGACCCAGATCGATATTTACAGG
GAGCCTGCCTTTCCGGCGTTGTTGTTATGCCCCCAGGTATTTACAGTGTGAGAAAGAATT
ATTTTGACTTTAGCGGAGCAGTTGAAGAATGACAAAGTATGCATTAGTCGGTGATGTGGG
CGGCACCAACGCACGTCTTGCTCTGTGTGATATTGCCAGTGGTGAAATCTCTCAGGCTAA
GACCTATTCAGGGCTTGATTACCCCAGCCTCGAAGCGGTCATTCGCGTTTATCTTGAAGA
ACATAAGGTCGAGGTGAAAGACGGCTGTATTGCCATCGCTTGCCCGATTACCGGAGACTG
GGTGGCAATGACCAACCATACCTGGGCGTTCTCAATTGCCGAAATGAAAAAGAATCTCGG
TTTTAGCCATCTGGAAATTATTAACGATTTTACCGCTGTATCGATGGCGATTCCGATGCT
GAAAAAAGAGCATCTGATTCAGTTTGGTGGCGCAGAACCGGTAGAAGGTAAACCTATTGC
GGTTTACGGTGCCGGAACGGGGCTTGGGGTTGCGCATCTGGTCCATGTCGATAAGCGTTG
GGTAAGCTTGCCGGGCGAAGGCGGTCACGTTGATTTTGCGCCGAATAGTGAAGAAGAGGC
CATTATCCTCGAAATATTGCGTGCGGAAATTGGCCATGTTTCGGCGGAACGCGTGCTTTC
TGGCCCTGGGCTGGTGAATTTGTATCGCGCAATTGTGAAAGCTGACAACCGCCTGCCAGA
AAATCTCAAGCCAAAAGATATTACCGAACGCGCGCTGGCTGACAGCTGCACCGATTGCCG
CCGTGCGTTGTCGCTGTTTTGCGTCATTATGGGCCGTTTTGGCGGCAATCTGGCGCTCAA
TCTCGGGACATTTGGGGGCGTGTTTATTGCGGGCGGTATCGTGCCGCGCTTCCTTGAGTT
CTTCAAAGCCTCTGGTTTCCGTGCCGCATTTGAAGATAAAGGGCGCTTTAAAGAATATGT
CCATGATATTCCGGTGTATCTCATCGTCCATGACAATCCGGGTCTTCTCGGTTCCGGTGC
ACATTTACGCCAGACCTTAGGTCACATTCTGTAAATCCTTCCTGTTATATCGGGAGGTAA
CTCTCCCGATAATCTTTTAAATCATACAGTTAATTCAATTTTTCTTTGTGTCCCCTCACA
AGGCCGACCTGCGTCACACTTCCGTACAGCGGGATTAATTCTCCAGTAAATGCATTATTT
GTCTGGTAACGGCGATTTGTTTTGCACGTTCATAATTTCACTCGTCAACTATCACTGAAC
GAGGAATTAACGATGAGTAAGAAACTGATTGCATTATGTGCCTGCCCAATGGGCCTGGCT
CACACTTTTATGGCCGCTCAGGCGCTGGAAGAAGCGGCGGTAGAAGCCGGTTATGAAGTG
AAAATTGAAACCCAGGGCGCGGACGGTATCCAGAATCGCCTGACGGCGCAGGATATCGCC
GAAGCGACCATCATCATCCACTCCGTGGCAGTTACCCCGGAAGATAACGAACGTTTCGAA
TCACGCGACGTTTATGAAATCACTTTGCAGGACGCAATTAAAAACGCTGCGGGCATCATC
AAAGAAATCGAAGAGATGATTGCCTCTGAACAACAGTAATATTCGACAGGGATAATTGTT
ATGGCCATTAAAAAACGCAGTGCAACCGTTGTGCCTGGCGCATCCGGTGCGGCAGCGGCA
GTTAAGAATCCGCAGGCCTCTAAAAGCAGCTTCTGGGGTGAACTCCCGCAGCATGTGATG
TCAGGGATTTCACGCATGGTGCCGACCTTAATTATGGGCGGTGTGATCCTCGCTTTCAGC
CAGCTGATTGCTTATAGCTGGCTTAAAATTCCTGCTGATATCGGCATCATGGATGCTCTT
AATAGCGGGAAATTCTCCGGTTTCGACCTCTCCTTACTGAAATTTGCCTGGTTGTCGCAG
TCCTTCGGCGGCGTGTTGTTTGGTTTTGCCATTCCGATGTTTGCTGCTTTTGTGGCGAAC
TCTATCGGTGGCAAACTGGCGTTTCCGGCTGGTTTTATCGGCGGCTTGATGTCTACCCAG
CCGACGCAACTGCTGAACTTCGATCCCAGCACTATGCAATGGGCGACCTCTTCGCCGGTG
CCGTCCACCTTCATTGGTGCGCTGATTATTTCTATCGTTGCCGGTTACCTTGTGAAATGG
ATGAACCAGAAAATCCAGTTACCGGATTTCCTGTTAGCGTTCAAAACCACATTTTTGCTC
CCGATTCTTTCCGCCATTTTTGTCATGCTGGCGATGTACTACGTGATCACCCCCTTTGGC
GGCTGGATCAACGGTGGTATCCGTACCGTGCTGACTGCCGCAGGTGAGAAGGGCGCGCTA
ATGTATGCGATGGGGATCGCCGCGGCGACAGCAATCGACCTTGGTGGCCCGATCAACAAA
GCCGCAGGTTTCGTTGCCTTCAGCTTTACCACTGACCACGTATTACCGGTCACCGCACGT
TCTATCGCAATCGTTATTCCGCCGATTGGTCTGGGGCTGGCGACCATTATCGACCGTCGT
TTAACCGGCAAACGCCTGTTCAACGCTCAACTTTATCCGCAGGGTAAGACCGCCATGTTC
CTGGCGTTTATGGGGATTAGTGAGGGTGCGATTCCGTTTGCGCTGGAAAGCCCCATCACC
GCCATTCCGTCGTATATGGTCGGCGCGATTGTCGGCTCAACCGCCGCTGTCTGGCTGGGC
GCAGTGCAATGGTTCCCGGAATCCGCTATCTGGGCATGGCCGCTGGTCACTAACCTCGGC
GTCTACATGGCGGGGATCGCGCTGGGGGCAGTCATTACTGCGCTGATGGTGGTGTTCCTG
CGTCTGATGATGTTCCGTAAAGGCAAATTGTTAATCGATAGCCTGTAAGAAGGAAAATCC
AGATGACATTACTCGCTTCGCTGCGTGACTGGCTTAAGGCGCAACAACTGGATGCGGTGC
TTCTCTCCTCACGGCAGAACAAACAGCCGCATCTGGGGATCTCCACCGGATCAGGCTATG
TGCTGATTAGCCGTGAAAGTGCGCACATTCTGGTGGACTCGCGCTATTACGCGGATGTAG
AAGCCCGCACGCAAGGTTACCAGCTGCATTTGCTTGACGCGACGCACACGCTTACAACCA
TCGCCAGGCAAATCATTGCCGATGAGCAGTTGCAAACGCTCGGTTTTGAAGGCCAGCAGG
TGAGTTGGGAAACCGCGCACCGCTGGCAGTCTGAACTCAATGCGAAACTGGTTAGCGCCA
CGCCGGATGTGCTGCGGCAAATCAAAACGCCAGAGGAGGTGGAGAAAATCCGCCTTGCCT
GTGGGATTGCCGATCGCGGTGCAGAGCATATTCGCCGCTTTATTCAGGCGGGGATGAGCG
AGCGCGAGATAGCCGCTGAACTGGAGTGGTTTATGCGTCAGCAAGGCGCGGAAAAAGCCT
CTTTTGACACCATTGTCGCCAGTGGCTGGCGTGGGGCGCTGCCGCACGGCAAAGCCAGCG
ACAAGATTGTTGCAGCGGGCGAGTTTGTCACTCTCGATTTCGGTGCGCTGTATCAGGGCT
ACTGCTCTGATATGACGCGCACCTTGCTGGTGAATGGCGAAGGGGTGAGCGCCGAATCTC
ATCCGCTGTTTAACGTCTATCAGATTGTTTTGCAGGCACAGCTCGCAGCAATCTCTGCAA
TTCGCCCCGGCGTGCGCTGCCAGCAGGTTGACGACGCCGCGCGCCGGGTCATTACAGAAG
CCGGTTATGGCGACTATTTCGGTCATAACACCGGTCATGCTATCGGCATTGAAGTACACG
AAGATCCGCGCTTTTCACCGCGGGACACCACGACGCTACAGCCAGGCATGTTACTGACCG
TGGAGCCGGGGATTTATTTGCCAGGGCAAGGGGGCGTGCGCATCGAGGATGTTGTGCTGG
TCACCCCGCAAGGCGCAGAAGTGCTCTACGCCATGCCGAAAACAGTGTTGCTCACGGGAG
AGGCATAATGGATTTATCGCTATTGAAAGCGTTGAGCGAGGCAGATGCGATCGCCTCCTC
GGAACAGGAAGTGCGGCAGATCCTGCTGGAAGAAGCGGATCGCCTGCAAAAAGAAGTGCG
ATTTGATGGGCTGGGATCGGTGCTGATCCGCCTCAATGAATCGACAGGTCCGAAAGTGAT
GATCTGTGCGCATATGGACGAAGTTGGATTTATGGTGCGCAGTATCTCCCGCGAAGGCGC
AATTGATGTGCTGCCGGTTGGCAACGTGCGCATGGCTGCCCGCCAGCTGCAGCCGGTGCG
CATCACCACCCGTGAAGAGTGCAAAATTCCAGGCCTGCTTGACGGCGACCGGCAGGGGAA
TGACGTCAGCGCCATGCGCGTGGATATTGGCGCGCGCTCGTATGACGAAGTGATGCAGGC
GGGAATTCGTCCAGGCGATCGCGTCACGTTCGATACCACTTTTCAGGTTCTCCCCCACCA
GCGAGTGATGGGGAAAGCCTTTGATGACCGCCTTGGTTGCTATCTGCTGGTGACGTTACT
ATGTGAGCTGCACGACGCCGAACTGCCTGCGGAAGTGTGGCTGGTGGCAAGTTCCAGCGA
AGAGGTGGGATTACGCGGCGGGCAAACTGCCACCCGCGCGGTGTCGCCGGACGTCGCCAT
TGTGCTTGATACCGCCTGCTGGGCGAAAAACTTTGATTATGGCGCGGCTAACCATCGCCA
GATTGGTAACGGCCCGATGCTGGTGTTAAGCGACAAGTCGCTGATTGCGCCGCCAAAACT
TACCGCCTGGGTCGAAACCGTGGCGGCAGAAATTGGCGTGCCGTTGCAGGCAGATATGTT
CAGCAACGGCGGCACGGACGGCGGGGCGGTGCACTTAACCGGCACCGGCGTGCCCACAGT
GGTGATGGGGCCAGCAACCCGCCATGGACATTGCGCCGCATCGATTGCCGATTGCCGCGA
CATTTTGCAGATGCAGCAACTTTTATCTGCCCTGATTCAACGTCTTACGCGTGAGACGGT
TGTTCAACTGACGGATTTCAGATGATCTCCTGATTAACCCGGAGCGGTTATGCTAACGAT
TCAATTTCTCTGTCCTTTGCCTAACGGTCTTCATGCCCGTCCGGCGTGGGAACTTAAAGA
ACAGTGCAGCCAGTGGCAAAGCGAAATCACCTTCATCAACCATCGCCAGAACGCAAAGGC
CGATGCCAAAAGCTCGCTGGCGCTGATTGGCACCGGCACCTTATTTAATGACAGTTGCAG
CCTGAACATTAGCGGCAGCGATGAAGAGCAGGCGCGGCGCGTGCTGGAAGAGTACATCCA
GGTGTGCTTTATTGACAGCGACAGCGTTCAGCCAACGCAGGCAGAACTGACGGCGCATCC
GCTGCCGCGTTCATTAAGCCGCCTTAACCCGGATTTACTGTACGGCAATGTGCTGGCAAG
CGGCGTCGGCGTGGGTACGCTGACCCTGTTACAAAGCGACAGCCTCGACAGTTATCGGGC
AATCCCCGCCAGTGCGCAAGACTCCACCCGGCTGGAGCACAGCCTGGCAACGCTTGCCGA
GCAACTGAACCAGCAATTGCGTGAGCGTGACGGCGAAAGCAAAACTATCCTCAGCGCCCA
TTTGTCGCTGATTCAGGATGATGAGTTCGCGGGCAATATCCGTCGCCTGATGACAGAACA
GCATCAGGGGCTGGGGGCGGCGATCATCAGCAATATGGAGCAGGTTTGCGCCAAACTATC
TGCTTCTGCCAGCGATTATCTGCGCGAGCGGGTTAGCGACATTCGCGATATCAGCGAACA
GTTGCTGCATATCACCTGGCCGGAACTGAAGCCGCGCAACAATCTGGTGCTTGAAAAACC
GACCATTCTGGTGGCTGAAGATTTAACCCCAAGCCAGTTTTTGAGCCTTGATTTGAAAAA
TCTTGCGGGCATGATTCTGGAGAAAACCGGGCGCACCTCGCATACCCTGATTCTGGCCCG
CGCCTCGGCGATCCCGGTACTGAGCGGCCTGCCGCTGGATGCGATTGCCCGTTATGCCGG
GCAACCTGCAGTGCTTGACGCCCAGTGCGGCGTGCTGGCGATTAACCCGAATGACGCGGT
GAGCGGTTATTATCAGGTCGCGCAGACGCTGGCGGATAAACGCCAAAAACAACAGGCGCA
GGCTGCCGCGCAGCTGGCTTATTCCCGTGATAACAAGCGTATTGATATCGCGGCGAATAT
TGGCACCGCTCTGGAAGCGCCTGGCGCGTTTGCCAACGGCGCGGAAGGCGTCGGGCTGTT
CCGTACCGAAATGCTCTATATGGATCGCGACAGCGCGCCGGACGAGCAGGAGCAATTTGA
AGCCTACCAGCAGGTGCTACTGGCAGCGGGCGATAAGCCGATTATCTTCCGCACAATGGA
CATCGGAGGCGATAAAAGCATTCCTTATCTGAATATTCCCCAGGAAGAGAACCCGTTCCT
CGGCTATCGCGCGGTACGTATTTACCCGGAATTTGCTGGCCTGTTCCGCACTCAACTGCG
GGCCATTTTGCGCGCCGCCAGTTTCGGCAACGCCCAGTTGATGATCCCGATGGTCCACAG
CCTCGATCAGATCTTATGGGTGAAGGGCGAGATCCAAAAAGCGATCGTTGAGCTTAAGCG
CGATGGCCTGCGTCATGCAGAGACGATTACGCTGGGTATCATGGTGGAAGTGCCGTCGGT
GTGCTACATCATCGATCACTTCTGCGATGAGGTCGATTTCTTCAGTATCGGCTCCAACGA
TATGACCCAGTATCTTTATGCGGTCGATCGTAATAACCCGCGCGTATCGCCGCTATATAA
CCCGATTACGCCATCGTTCCTGCGCATGTTGCAGCAAATAGTTACCACTGCGCATCAGCG
GGGCAAATGGGTAGGCATTTGCGGTGAACTGGGAGGCGAAAGTCGTTACCTGCCGCTACT
GCTTGGGCTGGGCCTGGATGAGCTGAGTATGAGTAGCCCGCGCATTCCGGCGGTGAAAAG
CCAGCTTCGTCAACTGGATAGCGAGGCGTGTCGGGAACTGGCACGTCAGGCGTGTGAATG
TCGCAGCGCGCAGGAAATTGAAGCGTTACTCACCGCCTTTACGCCGGAAGAAGACGTTCG
CCCGCTGCTGGCGCTGGAGAATATCTTCGTTGATCAGGCCTTTAGCAATAAAGAGCAGGC
GATCCAGTTCCTGTGCGGTAACCTCGGCGTTAACGGGCGCACTGAACATCCGTTCGAGCT
GGAAGAGGATGTCTGGCAGCGGGAAGAGATTGTCACCACTGGCGTTGGTTTTGGCGTGGC
GATCCCGCACACCAAATCGCAGTGGATCCGTCATTCCAGTATCAGCATTGCCCGGCTGGT
GAAACCGGTTGACTGGCAGTCAGAAATGGGCGAAGTCGAACTGGTGATCATGCTGACGCT
GGGCGCTAACGAAGGGATGAATCATGTGAAAGTCTTCTCGCAGCTGGCGCGTAAACTGGT
GAATAAAAACTTCCGCCAGTCGTTGTTTGCCGCGCAAGATGCACAAAGTATCCTGACGCT
GCTGGAAACAGAATTAACCTTCTGACGTTAGCCCTGAAAACGGGCGCTGTACTCTCCCGG
CGTCAGACCAAACTGACGCCGGAAAACGCGACAAAAATAGTCGCTATCCGGAAAACCGCA
ACGCTGTGCCACTTCATGAATTGACAGATGATATTTCTGCAAAATCATCCTCGCCTTCGC
CATTCGCACCCAACGCACATACTCGATAAAACGCATCGTTCCATGCTGAGCAAACAGTTT
TGACAGATGATTGGGCGTGATATTAAAAAACTGCGCCACGCTCTCGCGGGTGAGCGGCTG
GGCATAATTATCCTGAACCCAGTTACAAATGCTGTGATAGAGAAAATCGCCGCGCGGCTG
CGAATTGCCCGGCGGCATATTCACCACGTTACGGCAAAGATGCAGCAAACTTAACACCAG
CGGCTGAATGATATTTTGCTCCAGCGGCGAACGGCTAAGATGGGTGAGGGCGGTAAGCAT
CGCTTCACCTTCACCGCGTTGCAGGCTGGGAAGCTGGATCTGGCGAGCAGGATGCAACAA
CGACGTGGTGCGGCTATCGTAAAACGATAACCCAAGCCAGGTCGGAGCGAACACCAGGCT
TAACAGCATCACCGGTTTGTTGTTGACCGGTAAATTAGCCGCGCGCGCCGGAATAAACAG
CATTTCTCCTTCCACCAAACGTTGCTGCTTTGCTTCCAGCAGATTGCCGTATTCGCCGCG
CAGCACGATATCCAGACGGGGAAAATCAATACATAAACTGCCCACCGGCAACGAGGCAGG
CTGGCTGGCAAAACAGACGCGCCCCAGTAGTTGCGGGTTAAGCACCAGGCCGCTGAACAG
ATCGGCGAAAAATTGTTGATCGGCGGGCAAGCCTGGTGCTTTCATGAAAGTTCCCGATTA
AAGATGCATTAACTGGCGAAATTCTTTTACTTTGCTGCGGCTGACTGGCACTTCAAAATC
CAGATCTTTCAGCCGCAGAATATAGGTGTTATTAAACCACGGTTCGATTTCGCGGATTTT
GTTCAGATTGACACAAAATGAGCGATGGCAGCGGAAAAAATGCGACGGCGGCAGTTTGCT
GCAAAATTCGGTAATGTTCATCGGCATTACGTAGGATTCACGCCGCGTATAGACAAAGGT
CATTTTCTCGTGCGCTTCGGCGTAATAGATATCGTTAATTGGCGTGACGATTATTCGCTC
ATCTTTCACCAGATTAATGGTGTCATTCTCACGCGTTACCGTCGCGGCAGGCGTGCTGCT
GGTCTGCTGTTGCTGCCAGGCCGCTTCCAGTTTTTGCAGCATCCCGGTAATGCGAGACTC
CTGATACGGTTTGAGAATGTAGTCAAACGCCTCAAGTTCAAACGCTTCTACCGCATGTTC
TTTCCACGCGGTGATGAACACAATAAACGGTTTATGGGCGAACTGGCTGATGTTTTGCGC
CAGCAACACACCATCCAGCGACGGAATATTGATATCCAGAAAAATGGCGTCGACGCGGTT
ATGCTGCAAAAACTTCAACACGTCCAGACCGTCGTCAAAGGTGCCGACAATCTCCATCTG
GCTGTGCTCTTTAATTAGCCAGCTCAGTTCCTGTTGTGCCAGGAATTCGTCTTCAACAAT
GATGACTTTCACAATATCACTCCGGCTCAAAGCAATAACGTAGCCTGTGAGGCGACTGGG
GTGCGTTGGTTAGGAATGTAAAACGCAATTTCCGTTCCTGGTTCCAGGCGGCGGATATGC
AGCCCCTCGCCATACAATAACTTCACGCGATGATGAACATTCAGCAGGCCAATTTTATTG
CCCGGCATTTCATTCGCTTCGACCCGCTCAATCACCTTTGGATCGATGCCGTGCCCGGTA
TCCCGCACCGCAATGCGTACCCGATTGCCGCACTCTGCAACGCTGATGGTGACAACGCCT
TTACCTTTGCAAGGCTGGATACCGTGGACAATGGCATTCTCCACCAACGGCTGGATCAGC
AGGCTGGGAATGCAGCAATTCACCTCTTCATCAATATCATAGATAACCGTCAGCTTGTCG
CCAAAGCGGGCCTGCTCAATGGCAATATAGTCTTTAATTTGATACAGCTCTTTTTTGATA
TCGATTTGCTCATCGTCTTTTAATTCAATGTTATAGCGCAGATAACGCGACAGATTAAAG
ATCAGCTGGCGAGCGGTATCCGGATTCAGACGGATCGACGATGAAATAGCGTTCAAAGCG
TTAAACAGGAAATGGGGATTAATTTTGCTTTGCAGGGCGCGAAGCTCTGCCTTATTTGCC
ATTTCACGTAGCTGCTCGGCGCGTGAAACCTCCAGTTGCGTGGAGATGATTTGCGACAGA
CCAACCGCCATTTCCTGTAATGACGAGGTTATCTGATGCGCGTGGCAGTAGTAAATTTTC
AGCGTTCCGGTCACAACGCCTTTCTCCCACAATGGGATCACCAGCATGGAATGAATCTCT
GGTGTGCGGTGGGCTTCATCATTGTTTTTAATGATGATTTTTCCGTAATTCATCGCCTGA
CGGGTAGTCGGGCTAATGAAGTCATCGCCATTCTGATAGTTATGTTCACCCACGCCAACA
TAGGCCAGCACATGATCGGTATTGGTAATCGCCACCGCATCGGCGTGAATGTCATCGCGA
ATAATTTCACAAACTTTGCGTAATGACTCGCTATTGACATGGCGAAACAGAGGTAGCGTT
TTGTTGGCGATATCCAGCGCCAACTTGGCCTGCCGCGCGGCGCTGGCCTCTTTTTCGCCC
TCAACGCTTTGCACCAGAAGCACAATAAAGCCGATACAGACGCTGCCGAGGATCATTGGA
ATCCCGATTTTAGAGACGATATCGATCCCCAACGCGGTAGTTGGTGCCCAGACAATCACC
AGAATCATGGTCAACGTTTCACACAACATGCCGCCGAGAATACCGACGCGCCAGCGCTGT
GCTTTGGGGATTTTCAGGTTGATCCAGCCCGATATACAACCAGCCAGAATGCTGGTGATA
AAGCAGGGGATCGCCGTCACGCCGCCGATATCAATTAAATAACGATGAATACCCGCAATC
ACGCCGGTAATGATGCCCACCCACGGGCCAAACAGAATCCCGCCGGACATCACCGCGATA
ATACGTACGTTCACCAGCGAGCCTTCTACGGGAACGCCGGACCAGGTGCTGAACAGGGCG
AACAGCGAGAAAATGGCGGTAACGGCGAGCAACTCTTTCGGTGAGTGTGCCGACTTGTGC
AACAGTTCGCGAAACAGGCGGATACGGATGAGAAAGAACAGGCAGATAAGCATTAACGCT
GCCCGATCGAAGACCGCCAGCAGCATGTTGAATATTTCGTGCACGGGTGACTCTGAATAA
GGATTAAACCTCTATGATAGGTAACCTGAAGGCTGATGACCAGCAGGCCGTTTTTGAGGA
AAAACCACAATTTTAAAATGGGATTGATAGATAAATGGTGTATTAGCAATGCATCTCTTG
ATAATGCACTTCTGGTTAGTAAATTTATTGAAATTATTATGTTAATAAAATGAGTGGTAA
TTTTCTTGTTAGCGCAGATAAATTTCCTGTTTTTAAAGCAGAGTTCCTCATTTAACGTCA
TTAATAAAAATGTTCTAAAACGCTGGACAGACAGAAATTAATCAGGCTATTTTCAAAACA
GCCACCATCGTGGCAGCGTCGCTCGGACGGTCCGGGCGCTAACGTTAATCTGAGGAAATT
ATGGCTGACACTCGCCCTGAACGTCGCTTTACGCGCATTGATCGTCTCCCGCCCTATGTT
TTTAACATTACCGCTGAACTGAAAATGGCTGCGCGTCGGCGCGGCGAAGATATTATCGAT
TTCAGTATGGGTAACCCGGACGGTGCGACTCCGCCGCATATCGTCGAAAAATTATGTACT
GTGGCCCAGCGCCCGGACACGCATGGTTACTCCACTTCACGCGGTATTCCGCGGCTACGT
CGCGCCATTTCCCGCTGGTATCAGGATCGCTACGACGTTGAAATCGACCCGGAATCAGAA
GCCATCGTCACTATTGGTTCGAAAGAGGGCCTGGCGCATCTGATGCTGGCGACACTGGAT
CACGGTGACACAGTGCTGGTGCCGAATCCAAGTTACCCCATTCATATTTACGGCGCGGTG
ATTGCCGGGGCTCAGGTACGCTCAGTGCCGCTGGTGGAAGGTGTCGATTTCTTCAACGAA
CTGGAGCGCGCCATTCGTGAAAGTTATCCGAAACCGAAGATGATGATCCTCGGCTTCCCG
TCGAACCCAACCGCGCAATGCGTGGAACTGGAGTTCTTCGAAAAGGTTGTGGCGCTGGCG
AAACGCTACGATGTGCTGGTGGTCCATGACCTGGCCTATGCCGATATCGTCTACGATGGC
TGGAAAGCGCCGTCAATCATGCAGGTGCCGGGTGCACGCGATGTGGCGGTCGAGTTCTTT
ACGCTGTCGAAAAGCTACAACATGGCGGGCTGGCGTATCGGCTTTATGGTTGGCAACAAA
ACGCTGGTCAGCGCCCTGGCACGTATTAAAAGCTATCACGATTACGGCTCCTTTACGCCG
TTGCAGGTGGCGGCGATTGCGGCACTCGAGGGCGATCAACAGTGCGTGCGCGACATTGCC
GAACAGTACAAACGCCGCCGTGATGTATTGGTTAAAGGGCTGCATGAAGCGGGCTGGATG
GTCGAAATGCCGAAGGCTTCGATGTATGTCTGGGCGAAAATCCCTGAACCTTACGCTGCC
ATGGGCTCGCTGGAGTTTGCCAAGAAATTACTTAACGAAGCGAAGGTTTGTGTCGCGCCG
GGGATCGGCTTTGGCGACTATGGTGATACGCATGTGCGCTTTGCACTGATTGAAAACCGC
GACCGTATTCGTCAGGCGATTCGTGGGATTAAAGCGATGTTCCGTGCCGACGGTTTACTA
CCCGCCAGCAGCAAACATATTCACGAAAACGCGGAATAAACACCGACCTCAGAAATGCAA
ACAGGAGCCTGATGGCTCCTGTTTTTCATTGCACAGTTTGCTTTTAGATCATCAGGGCAA
AAGTACCGGCCCAAACGATGACCATAAAAGAAATGCCCATAAAGAAATATTTCACTTTAC
ATCTCTCCGCGTAATTGCTGTTACGCCTGAATGACTTCATTACACCTGATACAGTGAGTT
GACACCGGGCAAAACGACCTTAAAAGTCCTGTATTTTACCGTGGGCATCACCCCAGAATT
CTGAGCTAAACTGCTCGAGACGGCGCTAATGTACGCCTAAAACTGAAACGAGACAAGAGG
CATTTTCTTATTTACTTTTAGTAACTTACAGGTGTCTCATATCGGCGACAGTTTAATTTC
TGACGGTAATAATTAGATATTCAGCGAAGGAAAAAACCTTAAGAAAAAAGCCATAAAAAC
CATGAGGTTATTATGGCTTATGTGAGGAGGTAAAGAGTCAGAGCAGTTTGTTAAATGTAT
AACGACGATTCTCCCACCGGGCGCGTTTTAAAGCGACGGTGGATCCAGAGGTACTGCTCC
GGTGCGCGCATGATCTCTTTCTCGATAATCTTGTTCATATAGGCAGCGGCTTGATTTTCA
TCTGTCGGGTAGCCTTCCATCTCTGGGGTGATGAACAAACGATATCCGCTGTAATCCGCT
TTTCTTACCATCGTTACGGTCAACATGGCTGCGCCAGAGAGACGGGAGAGAACATAGGTG
CCATTGGTTGTGGCGACATTTTCTACCGCAAAGAACGGCGCGAAGGAGCTGCCTTTACGA
CCATAATCCTGATCGGGAGCAAACCATACCGCTTCACCTTTCTTCAGTGCACTGACAATG
CCGCGCAGATTATTTCTGCCGATCATCGCTTTGTTAGAGCGCATGCGACCACGGGTCTGC
ACCCATTCCATCAGCTGATTATTATGTGGACGATAGGTAGCCATCATTGGCTGACAAAGT
CCCATCACGCGGCCGCCCAGTTCCAGCGACATAAAATGGACGCCGACAACCATTACGCCG
CGATTTTGCATTTGTGCGCGTTTAAGGTTATCCAGCCCTTCAACATCAAACCATTTACGT
ACGCGACTGTCGGGCCAGAACCACGCCATGCCGGTTTCTACCAGCGCCATGCCGAGTGAA
CGAAAGTTTTCGGCAATCATCTTCTCGCGTTCTTCCGCAGAATGCTGCGGGAAGCAAAGT
TCCAGGTTTTTACGGGCGATAGATTCACGCCGTTTCAGGAATGGTCGCGCCATTGCGCCA
ATACGCGTGCCGAGAAAGCAGAGAACAGGATAAGGAAGCTGTACCCAAAGCCAGAGTACA
CCAAGCCCAAACCATGTGAGCCAGTAGCGAGGATGCAGAAACTCGCGGGAAAATTTGCAT
TGTGGAAACATAGTTACCTTCTGTAGATACGAATTGTTGTATCGCAGAAGATTCCATGTC
GACAGCGGTACACTCAATTGGTTGGGCCATCATGTACGACAATGGTTCCTGTAAAGAGTG
TAAAGACTAGTCAGGACATAACCACGAGGAGCATGAATGCGGTGGCTCTACTTTATCACT
GGCTGACTGCTTTCAGCTACTGATTATTAATCGTGCAAAGTAAAAAATTTTCCGCATGCA
ATAGTGTTGCATTTAACATGCTGTTTTCATTGATGCTTAGCAAAAATTGCCAGAGGGTAA
GGATTGTCTTACTATTAAAGTGACTGAAGTTACAGGTTTTTTAGCGCGGCAGGAGGTTGA
GCTATGATTTATTTATGGATGTTTCTCGCCCTGTGTATTGTCTGCGTAAGCGGATACATC
GGTCAGGTACTGAACGTGGTATCGGCGGTCTCTTCTTTCTTCGGCATGGTGATCCTCGCT
GCACTCATTTATTACTTCACCATGTGGTTAACTGGCGGTAATGAACTGGTGACGGGGATA
TTTATGTTTCTTGCCCCGGCTTGTGGCTTGATGATTCGCTTTATGGTGGGGTATGGCAGG
CGATAGTGGGTCAGGATGGCTCATTTGGGCAGGTGTTCACATCAGCATCAGACATGATTG
TTCACCTGCCAGGTGACAGACGCTATCGCACAGGATGAATAAGATAATTCGCCTTTGTCG
GAAAAGGGGGCGTGGTTTCTTCTGTGAGGTTTAATGGTGGCGCATCTTCTCTCATCTTAA
ACAAAATTGCCTGTGATGGCTGAATTTTTGTAGAGTGAGTTGTCGTCATCGCTGATGTTT
TTTCCGTCTCTTTATAGCTCCTCTCACTTCCACCACCAGAAATGGAAAATGCAAAAACAT
TGCATGCCATAATAGAGACCAATAAAAATAAGCTAAAAAGTATTAAGTTTACTTTCATAG
AAAGTTATCCTGAAAATGGTTCACTGAGAATGTACGATGTTATGGCTGTATTTACATATA
ATTAATCAATATTTACATCGATATAATAAATGACATCTCTTTGTGGTACATAAGAATAGT
TCTCTGTGACAGGAAGCATATTCCTACAATTGTAAGACTAAAATACTTCTTGCGATAATA
ACTACAACTGTAAGATAACCCTTTCAAAATGACCGTTGCTCTCTGATTTCTCATTTCATG
CTCACCCAATATGATGGCGGCGTTTTCTAAAACTGTTAAAGAATGAGGTAAGTATGAAAC
GTTTAATTATGGCCACGATGGTCACAGCAATTCTGGCATCTTCAACTGTATGGGCTGCTG
ATAATGCTCCGGTAGCGGCACAACAGCAAACTCAGCAAGTTCAGCAAACCCAGAAAACGG
CAGCGGCAGCAGAGCGTATCTCTGAACAAGGTTTATATGCGATGCGTGACGTGCAGGTAG
CGCGCCTGGCTCTGTTTCATGGCGATCCGGAAAAGGCAAAAGAACTGACCAATGAAGCTT
CCGCTTTGTTGTCAGATGACAGTACCGAATGGGCAAAGTTCGCTAAGCCAGGTAAAAAGA
CCAATCATCAATGATGACCAATATATTGTCATTAATGCATCTGTCGGAATTTCTGAGAGT
TATGTAGCAACACCCGAAAAAGAAGCCGCGATAAAAATTGCCAATGAAAAAATGGCGAAA
GGGGATAAAAAGGGCGCAATGGAAGAGCTTCGCCTGGCCGGTGTTGGCGTAATGGAAAAC
CAATATCTGATGCCGCTTAAACAGACTCGTAATGCACTTGCTGATGCGCAGAAACTGCTT
GATAAAAAGCAATACTACGAGGCAAACCTGGCGCTTAAAGGTGCGGAAGATGGAATCATC
GTCGATAGCGAAGCACTGTTTGTGAACTAATGCTGACAGGCAGTATATTGAGGTAAAGGA
TTTAACTCCCTCCAGCCGACAATTTTTTATGACCACAATACGACAGGTTGTGGTCATAAA
ATTATTTGGCGCTCGCGGTTCTATAAACTCGCATTTTATATTCCTCAAAGTAAACCGCAA
TAATCCCGTGTCATCACAAATCATTTAATATGTTATATTTTATGGTACGCTTTAAAAAGC
GTAATCATACCCTTACTTGTAAATCACCGGCGCTTCTTACAGTTGTAAGAATAACATCAC
AAATGTCGCGACTCTCTCTGATTACCACGAACCAATATTTATCATATTCTTCTTTTCGTC
CTCACTACTTACCATGCAGAAAGGAATTGGAAGTAGCGATGAAATGATTTTCAGTACTTG
ATACAGGAATGTGAAAATATCGAGTGCAGCTACGACGATATTTTGCGGATTATTTATAGA
GGCGTTATGCCTTAAATAAACGCTAAATTAACACATATTTAATTAACTAATAGGTATTGC
TATGTCAACTCCACTTCAAGGAATTAAAGTTCTCGATTTCACCGGTGTGCAATCTGGCCC
ATCTTGTACTCAAATGCTGGCCTGGTTTGGCGCTGACGTCATTAAAATTGAACGCCCCGG
CGTTGGTGACGTAACGCGTCACCAGCTGCGAGATATTCCTGATATCGATGCGCTTTACTT
CACCATGCTTAACAGTAACAAACGTTCTATTGAATTAAATACCAAAACAGCGGAAGGCAA
AGAGGTAATGGAAAAGCTGATCCGCGAAGCTGATATCTTAGTCGAGAACTTTCATCCAGG
GGCCATTGATCATATGGGCTTCACTTGGGAGCATATTCAAGAAATCAATCCACGTCTGAT
TTTTGGTTCGATCAAAGGGTTTGATGAGTGTTCGCCTTATGTGAATGTAAAAGCCTATGA
AAACGTTGCTCAGGCAGCGGGTGGCGCGGCATCTACTACGGGTTTTTGGGACGGTCCGCC
GCTGGTAAGCGCTGCAGCGTTGGGTGACAGCAACACCGGAATGCATTTACTGATCGGTTT
ACTTGCTGCTTTGCTGCATCGAGAAAAAACGGGGCGTGGGCAACGAGTCACCATGTCAAT
GCAGGATGCCGTATTGAACCTTTGCCGCGTGAAATTACGCGACCAGCAGCGTCTCGATAA
ATTGGGTTATCTGGAAGAATACCCGCAGTATCCGAATGGCACATTTGGTGATGCAGTTCC
CCGCGGTGGTAATGCGGGTGGTGGCGGTCAGCCTGGCTGGATCCTGAAATGTAAAGGCTG
GGAAACAGATCCTAACGCCTATATTTATTTCACTATTCAGGAGCAAAACTGGGAAAACAC
CTGTAAAGCCATCGGCAAACCAGATTGGATTACCGATCCGGCATACAGTACAGCCCATGC
CCGACAGCCACATATTTTCGATATTTTTGCTGAAATCGAAAAATACACTGTCACTATTGA
TAAACATGAAGCGGTGGCCTATTTGACTCAGTTTGATATTCCTTGTGCACCGGTTTTAAG
TATGAAAGAAATTTCACTTGATCCCTCTTTACGCCAAAGTGGCAGTGTTGTCGAAGTGGA
ACAACCGTTGCGTGGAAAATATCTGACAGTTGGTTGTCCAATGAAATTCTCTGCCTTTAC
GCCAGATATTAAAGCTGCGCCGCTATTAGGTGAACATACCGCTGCTGTATTGCAGGAGCT
GGGTTATAGCGACGATGAAATTGCTGCAATGAAGCAAAACCACGCCATCTGATATTAACG
GGGGCTTCTGGCTCCCAATTTATAAAAATTTCGAGGTTATTAATCATGTCAGATCAACTT
CAAATGACAGATGGTATGCATATCATCGTTGAAGCATTAAAACAGAATAATATTGACACT
ATTTATGGTGTTGTAGGTATTCCTGTGACGGATATGGCGCGCCATGCCCAGGCGGAAGGC
ATTCGTTATATTGGTTTTCGTCATGAGCAGTCGGCAGGCTATGCCGCTGCGGCAAGCGGT
TTTCTTACCCAAAAACCAGGGATCTGCCTGACAGTGTCTGCGCCAGGATTCCTCAATGGT
TTGACCGCATTGGCCAACGCAACGGTAAATGGTTTTCCGATGATCATGATTAGCGGCTCC
AGCGACCGCGCGATCGTCGACCTACAGCAAGGTGATTATGAAGAGCTGGACCAAATGAAT
GCGGCAAAACCGTATGCCAAAGCAGCATTTCGCGTTAATCAGCCGCAGGATCTTGGCATT
GCATTGGCACGCGCTATCCGGGTCTCGATATCGGGTCGCCCTGGCGGAGTTTATCTTGAT
TTGCCAGCAAATGTCCTGGCCGCGACGATGGAAAAAGACGAAGCGTTAACCACGATTGTA
AAAGTTGAAAATCCGTCGCCAGCATTATTGCCATGCCCGAAGTCAGTCGCTAGCGCAATT
TCGCTTTTAGCAAAAGCTGAACGACCATTAGTTATCCTTGGCAAAGGCGCGGCGTATTCA
CAAGCTGATGAACAGCTTCGTGAATTTATTGAAAGTGCCCAGATTCCATTCCTGCCAATG
TCTATGGCGAAAGGGATCCTCGAAGATACGCATCCACTTTCTGCGGCAGCTGCGCGTTCG
TTTGCCCTGGCAAATGCTGACGTTGTCATGCTTGTTGGTGCACGACTGAATTGGTTACTG
GCACACGGTAAAAAAGGATGGGCGGCAGATACACAGTTTATTCAACTGGATATTGAACCG
CAGGAAATTGACAGCAACCGCCCCATTGCTGTGCCAGTCGTTGGTGATATTGCATCCAGT
ATGCAAGGTATGCTGGCAGAACTGAAACAAAACACATTTACGACTCCACTGGTATGGCGC
GATATTTTAAATATCCACAAGCAGCAAAATGCACAAAAAATGCATGAAAAATTAAGTACA
GATACCCAACCATTAAATTACTTTAATGCATTAAGTGCTGTGCGCGATGTATTGCGCGAG
AACCAGGATATTTATTTAGTTAATGAAGGGGCAAATACCCTGGATAATGCACGAAATATT
ATTGATATGTATAAACCACGTCGTCGTCTGGATTGTGGTACCTGGGGTGTCATGGGCATC
GGTATGGGCTATGCCATCGGTGCTAGCGTGACTTCTGGTTCTCCGGTTGTCGCCATTGAA
GGTGATAGTGCTTTTGGTTTCAGTGGGATGGAAATTGAAACGATTTGTCGATATAACCTG
CCGGTAACGATCGTTATTTTTAATAATGGCGGCATCTACAGAGGAGACGGTGTTGATCTC
AGTGGCGCTGGTGCACCATCACCAACAGATCTGTTGCACCATGCAAGGTATGACAAATTA
ATGGATGCGTTTCGTGGCGTTGGCTATAACGTCACCACGACAGATGAACTTCGTCATGCT
TTAACCACCGGTATTCAGTCGCGCAAACCGACCATTATTAATATGGTCATCGACCCTGCA
GCAGGAACTGAAAGTGGCCATATTACCAAACTGAACCCAAAACAAGTCGCTGGTAATTAA
ATACTGACATCGTCTCCTCTTGCCAACTCATTATGCGATGGTGAGGGGACCCTTATCGGA
AATACTATTATGCTAACATTTTTTATTGGCGATTTATTGCCTATTATCGTAATCATGCTG
TTGGGTTATTTTAGCGGCAGACGAGAAACATTTTCAGAAGATCAAGCTCGGGCATTTAAT
AAACTGGTATTAAACTACGCGCTTCCTGCGGCTCTATTTGTATCTATTACCCGGGCAAAC
AGGGAAATGATTTTTGCGGACACTCGTCTGACCCTTGTATCACTTGTGGTTATTGTCGGA
TGTTTCTTTTTCTCCTGGTTCGGTTGCTACAAATTTTTTAAACGTACTCATGCAGAAGCA
GCTGTATGTGCATTAATTGCAGGTTCACCTACCATTGGATTCCTGGGGTTTGCAGTTCTC
GATCCTATTTATGGTGATTCCGTATCAACAGGTTTAGTGGTAGCAATTATTTCTATTATT
GTTAACGCAATTACTATTCCTATTGGTCTGTATTTGCTGAATCCTTCCTCAGGAGCGGAT
GGTAAGAAGAATAGTAATCTGAGCGCATTAATTTCTGCGGCAAAGGAGCCAGTTGTATGG
GCACCTGTTCTGGCAACGATCCTGGTGTTGGTTGGGGTAAAAATTCCGGCAGCATGGGAC
CCAACCTTTAATCTGATTGCGAAGGCTAACTCAGGGGTAGCGGTATTCGCTGCGGGGTTG
ACTCTGGCTGCACATAAATTCGAGTTCAGTGCCGAAATTGCTTATAACACCTTCCTGAAG
CTGATTCTGATGCCACTGGCGCTGCTTCTCGTTGGTATGGCATGTCATTTGAACCGCGAA
CATTTGCAGATGATGGTACTGGCAGGCGCATTACCGCCGGCATTCTCCGGAATCATTATT
GCCAGCCGGTTTAATGTCTACACCCGCACTGGTACAGCGTCATTGGCTGTGAGCGTACTG
GGCTTTGTCGTCACGGCTCCCTTGTGGATTTATGTCAGTCGACTGGTTTCATAATTAATC
ATGTTATTGATTTTACATAAATGCCGAAGTGTCTTTTCACCTTCGGCTTTTTTCAAGGCA
TAAGCAAATGACAAATAATGAAAGCAAAGGGCCGTTTGAAGGCTTATTAGTTATCGATAT
GACACATGTCCTTAATGGACCTTTCGGAACTCAACTTCTTTGTAATATGGGCGCAAGGGT
AATTAAAGTTGAGCCGCCGGGCCATGGTGATGATACCCGCACATTTGGTCCCTATGTGGA
TGGACAGTCACTCTATTACAGTTTTATTAATCATGGCAAAGAGAGTGTGGTTCTTGATTT
AAAGAATGATCACGATAAAAGTATATTTATAAATATGCTTAAACAAGCTGATGTATTAGC
TGAGAATTTTCGCCCAGGTACAATGGAAAAACTAGGGTTTTCATGGGAAAGGTTACAAGA
AATCAACCCGCGCCTCATATATGCTTCATCGTCAGGTTTCGGACATACCGGTCCGCTAAA
AGATGCTCCTGCCTACGATACCATCATTCAGGCAATGAGCGGGATAATGATGGAAACAGG
GTACCCTGATGCTCCGCCAGTGCGTGTTGGTACCTCTCTTGCGGATCTATGCGGCGGTGT
CTATTTATTCAGCGGAATAGTGAGTGCACTTTATGGCCGCGAAAAGAGCCAGAGAGGGGC
GCATGTCGATATAGCGATGTTTGATGCTACTCTGAGTTTTCTGGAGCACGGGCTGATGGC
ATATATCGCGACTGGGAAGTCACCACAACGTTTGGGAAATCGCCACCCCTACATGGCACC
TTTTGATGTTTTCGATACTCAGGATAAGCCGATTACGATTTGTTGTGGTAATGACAAGCT
TTTCTCTGCGTTATGCCAGGCACTGGAGCTTACGGAACTGGTTAATGATCCCAGATTTAG
CAGCAATATTTTACGCGTACAAAACCAGGCTATTCTTAAACAATATATTGAGCGGACGTT
AAAAACGCAGGCAGCTGAAGTTTGGTTAGCCAAAATACATGAAGTTGGTGTGCCCGTCGC
GCCGTTATTAAGTGTGGCTGAGGCCATTAATTTGCCACAAACTCAGGCGAGAAATATGTT
GATTGAAGCCGGAGGAATAATGATGCCAGGTAATCCGATAAAAATCAGCGGCTGCGCGGA
CCCGCATGTTATGCCGGGAGCGGCAATGCTCGACCAGCATGGGGAACAAATTCGCCAGGA
GTTCTCATCATAAATGTAAGATGTGCTGGTAAATAGCTCCCACATTTGAACATTGTGGGA
GCCACTATTTAGTTATTTTGTTGACAGAAAACAGCAATCTCCTGGTCCAGCTCTGCAATG
TGTTCTTTTACAGAGTTCAGCAACTGAAGAATTTCAGGCTTACTGTCATCTGAAACAGGT
GTTATTTCTAACTGATGGCTAATATTAATCAACTTTTGCAAATTCAGGATGTTAGCCGCA
CCGTGGATGCGATGAATACATTGATGGAAAGTTCTGTTATCGCCAGCTTCTAGTGCATGA
AACGCAGCGGGTAGATCTTTATGCGTTTCATGCTGGAAAGTCATGAGAATCTCCTGCATC
AGTTGTAGATCGTTCGCCGTATTATTTTTCAGGGCTTCGATATCAAGGTGGCGATACTGA
GGTGCAATATGCGCAACCTGGTGTAACTGACTTAAATGTGTTTTCAGTACATCCAGGGTC
AACGGTTTGAACAAACATAAGTTCATGCCGCAATTTAACCCTTTTTCACGTTCGTTAGCC
TGTGCGTTGGCTGTAAGCCCCCAGATGGGTAAGGAAGAATTTTGCTCACGGAGTTTGCGA
GTCAACTCAAAACCATCCATATTCGGCATATTAACGTCAGTAATAAGCAGATCATAATGT
TGCATACTGACTTTGTGTAGCGCTTGCACACCATCAGTGGCTTCATCAACATCATATCCT
AATAGATTTAGCTGGCGTTTGAGTAATAGCCTGTTGGTCGGATGATCATCCGCGATTAAT
ATGCTCAACTTTTCAGGTAGTGTGATGGGTTGTTCTGCTTTTGCCTCGACAGTCGCCACT
TGTTGGATAATTTCTACCGGGATTGTGATCGTAAATGTTGTTCCTATGCCTGGATGACTT
TCTAATGACAAATCACCCTGCATGTTTTTAATTAATTCTTTGCAGATCATTAAGCCTAAA
CCAGAACCTGTTTGCTGACGACCTGCACTTGTTTGGCTATAGCGTTTAAACAGTTGTTGT
TGTTCTTCCTGCGATAATCCACTTCCAGAATCCATAATCGTCATTTTGATTACAGCGTGG
TTGTCATCAATGTGAACCAGGGAGGTCGTAATTTTTACTGCCCCCTCGGTGGTAAATTTG
AGAGCATTACTCAGTAAATTTGATAAGACCTGCTTAAACGCCTGAGGGTCGATCTTAACC
AGGTAATGTTCAGGAAACGTACTGCTGCAACTTAATGCGATCGATTTGCTTGCAGCAATC
GCACCGAAAGAGTGACAAGTGTTCTGGACTAAAGTAGGGATATCGACCCATTGTGGTTGA
AGTTGATAGTTACCCGATTCAATTTTGTCGACATCAAGGATTTCACCAATTAAGCCGAGG
AGTGATTGTCCGGTGGTGTAGGCAAGTGAAATCGCCTCCACCCGTTGCTCCTTGCTAAGA
CCAGAACCCGACAGAAGTTCCAGGAAGCCCATAATGGAGCTTATTGGTGTTCTTATTTCG
TGACTCATTGTTGCCAGAAACTGACTTTTTGCGACAGTTGCATTGATCGCTTTATTTCTC
TCTACTTCGAGTGCATGAATTAAATCACGCGTCTCGGTAATATCTTGCCAACCACAAATA
TAAACAGCATGATCGCTGGCTGGCAGATTGCATAATGTATGCCAGTGATTAATGCATCTT
TTCTCGATGCCATTATCAATTTCAAATACCTGTGTGTATATTGTTCGATTTTCTTTCGTT
TCTGCTGTGACTTCATGCGCATTAGAAAAAACATCTTTAAAGGGTGAGTCACTGTTTTCT
AATGGTAACATTGCATTTTTGTAGTAATCAGCAGTGAAATAATGTTCAAATGCACTATTG
TGACTAATGACATTACCTTGCCAGTTTACAACATAAGTTGGATTCGGTAAGGAGTCCGAG
AGCGCTTTCCGGAATGATATTTGGTTTTCTAAATCACCCTGAATGACTTTACGACGACGA
ACTGAGCGTAACAGGTAGAATCCCCATAAAAGGCTACTGCCAACTAATAAAACGGATAAT
GTCGTAACAATATAAAATTGCTCGCTATAGAGGTCCCATGTGTCAATGGTCACATTGGGC
ATTTTAATCCATTTTTCGGTCAGGCGCAGAACTTCGCTTGGGGGGATTGCATTCAGTGCT
TTATTAATAATATCCTTAAGTTCCGGTTCTCCGCGAGGAAAAGCGAACGAAAGCGATGCA
TTCGGAACGCCGGGAATAAGAAAATGATACAGTTCATTAGGATAGTAATGGTCGATCATG
TAACGCGAATTTAACTGTGTCGCGACCAGAGCATCAAGTTCACCTTCCTTGACCTTGTGA
AATGCAGCGCTGGCGTTATCGACTTTTATCCACTCTACCTCCGGATACATCTCTTTTAAT
TGCGAATGCAGCTCATAATAATATGGAATGGCAACTTTCATTCCTTTTTTTAATGTTTGT
TCACTGTCAGGCGCTTTTTGCATGACAAAAACGTAAGGCGTTGTTATGAAGGCTTCAGCA
AATAAAACATTATTTTCTCTATCTTCACTATAAATAGCACCGGGTAATATATCCCATCCG
CCGGGATTCAGCTGTGTTCCAGCATGGATATTGTGTGAAACGGTGATCGGAGAAAAATTT
AAACCTGTTTGCAAAGTAATAATATTAAGAATATCCCCCATAACGCCCCGAACCGAGCCA
TTTTCATCCGTCATAGAATAGGGAGGGGAGTAAGGATTTTCCAGCACCTTTAAATCGGGA
TGCTGCTTAATCCATTGTTTTTCATGTTCAGTGAGTTCTAATGGTTTGTTCAGAAAGGCC
AGGTTTCCTGTATCAAGCCAATTTTGTGATACTTCATAGCGAACTTCATTTGTCAAAGCA
TCAACAAATCGATTGAGTACTTCATTAAGAACGACAGATTCTTTTCTGGTCAAGAAAAAA
TTATATTGACGCGGTGAGTTATAATATTTCACTACATTTAAGGAGTGAGTGAAATAGCGG
GAAATCATACTGCTGGTAATGATGTTACTACCAATAAAGTAATCATTCTGTCCGGCTGAG
ACGGATGCTAATGCCTGATATAAATTTGTAAAAGAGATAATTGTTGCTTTTGGAAATGAT
TGATGAATTACCTCGTCAGGGGGATAATTTGCTACTCGAGCAATATTTACTGGTTTTGAT
GAGGTAAGCGGTCGCATTGAATCGTGAAGGGTGGTGACGAGCGCCGGAAAGGTAATTATC
AGTGGTTTGGTTGCAGCAATGTCATCATTAAGAGGCGGCGAAGCAACTAAATGTGATAAC
ACTATATCGACTTCACCTTCTTCCAGCGCGTCCATTGCTTTTTGATGATCGGCGTATTCC
CGGAGTGTTAGTTTGATATTTAACGCTCTTTTTAAAAGATTTAAATAATCAGCATTAATA
CCACGAACCCGTTGCTGCGAATCGGTATGCAACAACGTAGCCGTTTGGGACTTGTGTACT
GCAATCACAAGATTTTTTTTGCTCGCTAACCAACGTAATTCCTTGTTGCTCAGACGTAGT
GGATCAAGTGTGACACGGTTGTTACTACTGATGCCACGATATTCGATGTAATCTTCGTCT
GCGAAACTTATGGTCGACCAAAGACCACAACAGAGAAGAAAAATATAGGGTAAAAACTTC
ATGTGGTTAGCCGATTTTGTTACGTTGTGCGAATGTGTAAAGATCCATCAGTGATTTACA
TTCTAATTTTTCCATCAGGCGACTTTTATAAGTGCTGACAGTTTTGTTGCTGATGAACAT
TTTTTCAGCAATGTCATTATTATCCTTGCCATCAAGAATATAGCGCATGACACTAATTTC
TTGTTTCGATAAGGAGTCGAGTTTTTGCTGGTCGGACGTTAAACTTCCAACAAACCGGTT
GAGAGAGAAGGGGAAATAGCAGTAGCCATTTTTTGCAGCTTCAATAGCCGCAATGATATT
GTTCATGCCTTCTTTTTTACTCACGAAACCATTAGCGCCAGCATCAGCACAATGTTTCCC
GTAAAAATGGTCATTTTTAGCGGAGACGATAATAATAATTCCGCTATATTGGCGCTTCCT
CAGCGTTTCTAACACCTGGATACCGTTAACTCCGGGGATATCGACATCAATGATGACGAT
ATCAGGCTTAAGTGTTTCCACCCGCTGAACGGCACTTCCGCCTTCAGTCAACTCTGCTAA
GATTTCAATATCGTTTTTGATCAATAAATTACGAATTGCTGCGATAGCAAGAGGATGGTC
ATCAATAATTATTGCGTTCATAGATTATTCCCTTTGCAATGAAGCATCTCCCTTCTCCCT
GTAGTAATACAGACATAAGGCATCATCTCATTTTCTCAATAAAAATAAGAAAATTTGAGC
TTCCTTTAAGATAATTCGACAAGTATACCATATAAATAGTCGGCATATATGAAATGTCAA
CAATAAAATCAGGGATTGTACCGATGATTTATAGTTTCACATTAGCACTATAAGTCTTCT
CACTAATCCTACAGGCGTAAGAATTGTATTGCAAAAGCCACGGTTTAGTCCTCTGTTGTT
TTTTTTGCACCTCATTTAAATTAGGCCTCCAACGTTCCTGGGATAATGTGCAACACATGC
ACTGTGTTTGATATGAAGAATGAATACTCTTTTCATTCAATTCATAAATTTCATCTATGC
GAAATGAGAGATAAAAGTGGAACAGATTAATTCAAATAAAAAACATTCTAACAGAAGAAA
ATACTTTTCTTTATTGGCGGTAGTTTTATTTATTGCGTTTTCAGGTGCCTATGCCTATTG
GTCAATGGAATTAGAAGACATGATTAGTACAGATGACGCCTATGTCACGGGGAATGCAGA
TCCAATTTCTGCACAAGTCTCAGGTAGTGTCACTGTAGTTAATCATAAAGATACGAACTA
CGTTCGACAAGGTGACATTTTAGTTTCACTGGATAAAACTGATGCCACTATCGCACTCAA
TAAAGCTAAAAATAATCTGGCAAATATTGTTCGGCAAACGAATAAACTATACTTACAGGA
TAAACAATACAGTGCCGAAGTCGCTTCAGCGCGTATTCAGTATCAACAATCTTTAGAAGA
TTATAACCGTCGAGTGCCGTTAGCGAAGCAGGGGGTTATTTCAAAAGAAACGCTGGAGCA
TACCAAAGATACGTTAATAAGTAGCAAAGCGGCATTGAATGCCGCTATCCAGGCTTATAA
AGCGAATAAAGCTTTAGTAATGAACACACCATTAAACCGTCAGCCACAAGTCGTTGAAGC
GGCGGATGCAACTAAAGAAGCCTGGTTGGCGCTTAAACGTACGGATATTAAGAGTCCGGT
TACCGGCTATATTGCCCAGAGAAGTGTTCAGGTCGGCGAAACAGTGAGCCCCGGACAATC
GTTAATGGCTGTCGTACCGGCACGTCAAATGTGGGTTAATGCCAACTTTAAAGAAACACA
ACTCACGGATGTACGGATTGGTCAATCGGTCAATATTATCAGCGATCTTTATGGTGAAAA
TGTTGTGTTTCATGGTCGGGTGACAGGGATCAATATGGGAACCGGCAATGCGTTCTCCTT
ATTACCTGCACAAAATGCGACAGGGAACTGGATCAAAATCGTTCAGCGTGTACCGGTTGA
AGTTTCTCTGGATCCAAAAGAACTCATGGAACACCCCTTGCGCATTGGTTTATCGATGAC
TGCAACTATTGATACCAGGAACGAAGACATTGCTGAGATGCCTGATCTGGCTTCAACCGT
GACCTCCATGCCTGCTTATACCAGTAAGGCTTTAGTTATCGATACCAGTCCGATAGAAAA
AGAAATTAGCAACATTATTTCGCATAATGGACAACTTTAATGGCAATCACTAAATCAACT
CCGGCACCATTAACCGGTGGGACGTTATGGTGCGTCACTATTGCATTGTCATTAGCGACA
TTTATGCAAATGTTGGATTCCACTATTTCTAACGTCGCAATACCGACAATATCTGGCTTT
CTGGGAGCATCAACAGACGAAGGTACCTGGGTTATCACCTCGTTTGGCGTAGCAAATGCC
ATTGCGATCCCTGTTACCGGCAGGCTGGCACAAAGAATAGGCGAATTAAGGTTATTTTTA
CTTTCAGTCACTTTTTTTTCGCTGTCTTCCTTAATGTGTAGTTTATCGACCAATCTTGAT
GTGCTGATATTTTTTAGAGTCGTTCAGGGGTTAATGGCAGGGCCGTTAATTCCACTGTCA
CAGAGTTTATTATTAAGGAATTATCCACCAGAAAAAAGAACATTTGCTCTGGCATTATGG
TCAATGACCGTGATTATCGCTCCGATATGTGGGCCGATATTGGGCGGTTATATTTGTGAT
AACTTTAGCTGGGGTTGGATATTTTTAATCAATGTCCCTATGGGGGTTATCGTCCTGACA
TTATGCTTAACCTTACTTAAAGGAAGAGAAACTGAGACTTCACCGGTCAAAATGAATCTA
CCAGGACTGACCCTGTTAGTGCTTGGTGTTGGTGGCTTGCAAATTATGCTTGATAAAGGG
CGCGATCTGGATTGGTTCAACTCGAGTACAATAATAATATTAACAGTAGTATCAGTTATT
TCTCTGATCTCTTTAGTCATTTGGGAGTCAACCTCAGAGAACCCGATTCTTGATCTCAGT
TTGTTTAAGTCCCGTAATTTCACCATTGGTATTGTGAGTATCACATGCGCGTATTTATTT
TACTCTGGAGCGATAGTCCTTATGCCGCAGTTCCTCCAGGAAACAATGGGGTATAATGCG
ATTTGGGCTGGGCTTGCTTATGCGCCCATCGGCATCATGCCACTATTAATTTCACCTTTG
ATAGGACGTTATGGCAACAAAATAGACATGCGGTTGTTAGTGACATTTAGTTTTTTGATG
TATGCGGTTTGCTATTACTGGCGTTCTGTGACATTTATGCCAACGATTGATTTTACAGGC
ATCATTTTGCCACAGTTTTTCCAGGGATTCGCCGTTGCCTGTTTCTTTTTACCCTTAACA
ACGATTTCGTTTTCAGGGTTGCCAGATAATAAATTTGCCAATGCCTCGAGTATGAGTAAT
TTTTTTCGTACCTTGTCAGGATCAGTTGGTACGTCGTTGACAATGACGCTGTGGGGACGA
CGCGAATCGTTACACCATAGTCAGTTGACAGCAACCATCGATCAATTTAACCCCGTGTTT
AATTCATCGTCACAAATTATGGATAAATACTATGGTTCGCTTTCAGGAGTTCTTAATGAA
ATTAATAATGAAATAACCCAGCAGTCACTTTCTATTTCTGCAAATGAGATTTTCCGTATG
GCGGCTATTGCTTTTATCTTACTTACGGTTTTGGTTTGGTTTGCGAAACCGCCGTTTACA
GCGAAAGGCGTTGGGTGATGGTAAAAGCAGGGGGTTATAGCGGGTAAGACCGGGGATCTT
AAGTCTGCGCCATCGGCAGCATCGCTCATCCAGGGAAAGGATGGCGATGCTGAATTGAAA
ATTAATTAGCGGCCTTTTGCCAGATATTGCTCCATCTCTTCTTCCGGCACCATTCCACCT
CCCGTCGCCCACACCAGATGAGTGGCATTACGCAGTTGTTCTGCGCTGCAACCGTGCATC
TGTTGGTAACTTACTGATGCGCACACGCGCTGAGGCCCGGCCATACCCGCCAGTGCCGAA
GGTTCAAGACGAATGCCTTCTTCCTGCGCCAGCCAGCCAAGCATGTTATACATGGTTTGA
TCGCTAAGGGTATAGAAGCCATCCAGTAGACGCTCCATTGCCCGCCCGACAAAGCCTGAT
GCGCGACCAACTGCAAGGCCATCCGCTGCGGTAAGGTTGTCGATACCAATATCCTGAACA
GAAATCTGATCGTGTAATCCTGTATGGACGCCTAACAGCATACAAGGGGAGTGCGTTGGT
TCGGCAAAAAAGCAGTGAACATGATCGCCAAACGCCAGTTTAAGCCCGAATGCGACGCCA
CCAGGACCACCGCCAACACCACACGGCAGATAGACAAACAGAGGGTTATCAGCATCGACA
ATACGACCTTGCTCGGCAAATTGCGCTTTAAGACGCTGGCCAGCGACGGAATACCCAAGG
AACAACGTGCGGGAATTTTCGTCATCAATAAAGAAACAGTTCGGGTCAGACTGCGCTGCT
CTACGTCCTTCCTCGACGGCAACACCATAATCTTGCTCATATTCCACGACCGTAACGCCA
TGGCTGCGCAGTTTCGCTTTTTTCCATGCCCGGGCATCAGCAGACATATGCACTGTCACC
TTAAAGCCAATGCGGGCGCTCATAATGCCGATTGATAACCCCAGATTTCCGGTTGAGCCC
ACAGCAATGCTGTATTGGCTAAAGAACTGTTTAAACTCCGGAGAAAGCAGTTTGCTGTAG
TCATCATCAAGCGTCAGCAACCCCGCTTCCAGAGCCAGTTTTTCTGCGTGTGCCAGGACT
TCATAAATCCCGCCGCGTGCTTTTATGGAGCCGGAAATGGGCAAATGGCTATCTTTTTTC
AGTAACAGTTGCCCGCTGATCGGTTGTTGATATTCCTTTTCCAGCCGTTTTTGCATAGCC
GGAATGGCAACCAGTTCTGATTCAATAATCCCCCCAGTGGCAGCAGTTTCAGGAAATGCT
TTTGTCAGATAGGGTGCAAAACGGGATAAGCGCGCATGGGCGTCCTGAACATCCTGTTCG
GTCAGGCCAACATAAGGTAAACCTTCAGCCAATGAGGTCGTGCCAGGATTAAACCAGGTG
GTTTCTTTAAGAGCAACCAGATCCTTTACCAACGGATACTGGGCGATGAGCGAGTTCATT
TTAGCGTTTTCCATAGTACGTCTCTTTGCGCTTAGATGATAAATGACAGCAGGAATGTGC
CCGCCAGAGCGACGACTGAAGCGATAAATGTCGCTGTCGTATAGTATTTAAATGTTTCAT
TGAGCGTAGCGCCGCAATATTGCTTCACCAGCCAGAAAAGCGAGTCCGTAACGATAGTGC
AGCCAATTGCACCTGAACCGATAGCAATCGCAATAATTTCCGGGCTGATGTCGGGATACA
GCGGCAGCACAATGATCCATATTTATATTTTCTTCTCCAGGTTGGCGATGCCAGTTGGCA
TGTTTTACTTACTTGCCTATATGGTTACTCGTTGGCGAGAACAGAGGCGGAATTGGGGAC
AATTGGCCGGGAATTATTGTTATTTTTTATTGTATTGCCGTGTCAGGTGATAGGGCGTTG
GATCTCGCCAGTGACGTCTGTTTCTGCTACAGTGCCCGTTTTACGACAAACGGCTTGGGT
ATGGCTTCATTAAAGGATGTCGCACGCCTGGCGGGAGTGTCGATGATGACAGTCTCCCGG
GTGATGCATAATGCAGAATCTGTGCGTCCTGCAACGCGTGACCGCGTATTGCAGGCAATC
CAGACCCTGAATTATGTTCCTGATCTTTCCGCCCGTAAGATGCGCGCTCAAGGACGTAAG
CCGTCGACTCTCGCCGTGCTGGCGCAGGACACTGCTACCACTCCTTTCTCTGTTGATATT
CTGCTTGCCATTGAGCAAACCGCCAGCGAGTTCGGCTGGAATAGTTTTTTAATCAATATT
TTTTCTGAAGATGACGCTGCCCGCGCGGCACGTCAGCTGCTTGCCCACCGTCCGGATGGC
ATTATCTATACTACAATGGGGCTGCGACATATCACGCTGCCTGAGTCTCTGTATGGTGAA
AATATTGTATTGGCGAACTGTGTGGCGGATGACCCAGCGTTACCCAGTTATATCCCTGAT
GATTACACTGCACAATATGAATCAACACAGCATTTGCTCGCGGCGGGCTATCGTCAACCG
TTATGCTTCTGGCTACCGGAAAGTGCGTTGGTAACAGGGTATCGTCGGCAGGGATTTGAG
CAGGCCTGGCGTGATGCTGGACGAGATCTGGCTGAGGTGAAACAATTTCACATGGCAACA
GGTGATGATCACTACACCGATCTCGCAAGTTTACTCAATGACCACTTCAAATCGGGCAAA
CCAGATTTTGATGTTCTGATATGTGGTAACGATCGCGCAGCCTTTGTGGCTTATCAGGTT
CTCCTGGCGAAGGGGGTACGTATCCCGCAGGATGTCGCCGTAATGGGCTTTGATAATCTG
GTTGGCGTCGGGCATCTGTTTTTACCGCCGCTGACCACAATTCAGCTTCCACATGACATT
ATCGGGCGGGAAGCTGCATTGCATATTATTGAAGGTCGTGAAGGGGGAAGTGTGACGCGG
ATCCCTTGCCCGCTGTTGATCCGTTGTTCCACCTGATATTATGCTAACCCAGTTGCCAGA
GTGCTCCATGTTGCACCACAGCCACTCCGTGGGAGGCATAAAGCGACAGTTCCCGTTCTT
CTGGCTGCGGATAGATTCGACTACTCATCACCGCTTCCCCGTCGTTAATAAATACTTCCA
CGGATGATGTATCGATAAATATCCTTAGGGCGAGCGTCTCACCCTGCGGGAGGGGAATAC
TACGGTAGCCGTCTAAATTCTCGTGTGGGTAATACCGCCACAAAACAAGTCGCTCAGATT
GGTTATCAATATACAGCCGCATTCCAGTGCCGAGCTGTAATCCGTAATGTTCGGCATCAC
TGTTCTTCAGCGCCCACTGCAACTGAATCTCAACTGCTTGCGCGTTTTCCTGCAAAACAT
ATTTATTGCTGATTGTGCGGGGAGAGATAGATTGATGCTGCTGGCGTAACGACTCAGCTT
CGTGTACCGGGCGTTGTAGGAGTTTGCCATTGCTCTCTGATAGCTCGCGCGCCAGCGTCA
TGCAGCCTGCCCAGCCTTCACGTTTTGAGGGCATTGGCGATTCCCACATATCCATCCAGC
CGATAACAATACGCCGACCATCCTTCGCTACAAAGCTTTGTGGTGCATAAAAGTCATGCC
CGTTATCAAGTTCAGTAAAATGCCCGGATTGTGCAAAAAGTCGTCCTGGCGACCACATTC
CGGGTATTACGCCACTTTGAAAGCGATTTCGGTAACTGTATCCCTCGGCATTCATTCCCT
GCGGGGAAAACATCAGATAATGCTGATCGCCAAGGCTGAAAAAGTCCGGACATTCCCACA
TATAGCTTTCACCCGCATCAGCGTGGGCCAGTACGCGATCGAAAGTCCATTCACGTAATG
AACTGCCGCGATAAAGCAGGATCTGCCCCGTGTTGCCTGGGTCTTTCGCCCCGACTACCA
TCCACCATGAGTCGGCTTCACGCCACACTTTAGGATCGCGGAAGTGCATGATTCCTTCTG
GTGGAGTGAGGATCACACCCTGTTTCTCGAAATGAATACCATCCCGACTGGTAGCCAGAC
ATTGTACTTCGCGAATTGCATCGTCATTACCTGCACCATCGAGCCAGACGTGTCCGGTGT
AGATAAGTGAGAGGACACCATTGTCATCGACAGCACTACCTGAAAAACACCCGTCTTTGT
CATTATCGTCTCCTGGCGCTAGCGCAATAGGCTCATGCTGCCAGTGGATCATATCGTCGC
TGGTGGCATGTCCCCAGTGCATTGGCCCCCAGTGTTCGCTCATCGGGTGATGTTGATAAA
ACGCGTGATAACGATCGTTAAACCAGATCAGGCCGTTTGGATCGTTCATCCACCCGGCAG
GAGGCGCGAGGTGAAAATGGGGATAGAAAGTGTTACCCCGGTGCTCATGAAGTTTTGCTA
GTGCGTTTTGCGCCGCATGCAATCGAGATTGCGTCATTTTAATCATCCTGGTTAAGCAAA
TTTGGTGAATTGTTAACGTTAACTTTTATAAAAATAAAGTCCCTTACTTTCATAAATGCG
ATGAATATCACAAATGTTAACGTTAACTATGACATTTTGTGATCGAATATGCATGTTTTA
GTAAATCCATGACGATTTTGCGAAAAAGAGGTTTATCACTATGCGTAAGTCAGATGAATT
TAAGGGAAAAAAATGTCAGCCAAAGTATGGGTTTTAGGGGATGCGGTAGTAGATCTCTTG
CCAGAATCAGACGGGCGCCTACTGCCTTGTCCTGGCGGCGCGCCAGCTAACGTTGCGGTG
GGAATCGCCAGATTAGGCGGAATAAGTGGGTTTATAGGTCGGGTCGGTGATGATCCTTTT
GGTGCGTTAATCCAAAGAACTCTGCTAACTGAGGGAGTCGATATCACGTATCTGAAGCAA
GATGAATGGCACCGGACATCCACGGTGCTTGTCGATCTGAACGATCAAGGGGAACGTTCA
TTTACGTTTATGGTTCGCCCCAGTGCCGATCTTTTTTTAGAGACGACAGACTTGCCCTGC
TGGCGACATGGCGAATGGTTACATCTCTGTTCAATTGCGTTGTCTGCCGAGCCTTCGCGT
ACCAGCGCATTTACTGCGATGACGGCGATCCGGCATGCCGGAGGTTTTGTCAGCTTCGAT
CCCAATATTCGTGAAGATCTATGGCAAGACGAGCATTTGCTCCGCTTGTGTTTGCGGCAG
GCGCTACAACTGGCGGATGTCGTCAAGCTCTCGGAAGAAGAATGGCGACTTATCAGTGGA
AAAACACAGAACGATCGGGATATATGCGCCCTGGCAAAAGAGTATGAGATCGCCATGCTG
TTGGTGACTAAAGGTGCAGAAGGGGTGGTGGTCTGTTATCGAGGACAAGTTCACCATTTT
GCTGGAATGTCTGTGAATTGTGTCGATAGCACGGGGGCGGGAGATGCGTTCGTTGCCGGG
TTACTCACAGGTCTGTCCTCTACGGGATTATCTACAGATGAGAGAGAAATGCGACGAATT
ATCGATCTCGCTCAACGTTGCGGAGCGCTTGCAGTAACGGCGAAAGGGGCAATGACAGCG
CTGCCATGTCGACAAGAACTGGAATAGTGAGAAGTAAACGGCGAAGTCGCTCTTATCTCT
AAATAGGACGTGAATTTTTTAACGACAGGCAGGTAATTATGGCACTGAATATTCCATTCA
GAAATGCGTACTATCGTTTTGCATCCAGTTACTCATTTCTCTTTTTTATTTCCTGGTCGC
TGTGGTGGTCGTTATACGCTATTTGGCTGAAAGGACATCTAGGGTTGACAGGGACGGAAT
TAGGTACACTTTATTCGGTCAACCAGTTTACCAGCATTCTATTTATGATGTTCTACGGCA
TCGTTCAGGATAAACTCGGTCTGAAGAAACCGCTCATCTGGTGTATGAGTTTCATCCTGG
TCTTGACCGGACCGTTTATGATTTACGTTTATGAACCGTTACTGCAAAGCAATTTTTCTG
TAGGTCTAATTCTGGGGGCGCTCTTTTTTGGCTTGGGGTATCTGGCGGGATGCGGTTTGC
TTGACAGCTTCACCGAAAAAATGGCGCGAAATTTTCATTTCGAATATGGAACAGCGCGCG
CCTGGGGATCTTTTGGCTATGCTATTGGCGCGTTCTTTGCCGGCATATTTTTTAGTATCA
GTCCCCATATCAACTTCTGGTTGGTCTCGCTATTTGGCGCTGTATTTATGATGATCAACA
TGTGTTTTAAAGACCAGGATCACCAGTGCGTAGCGGCGGATGCGGGAGGGGTAAAAAAAG
AGGATTTTATCGCAGTTTTCAAGGATCGAAACTTCTGGGTTTTCGTCATATTTATTGTGG
GGACGTGGTCTTTCTATAACATTTTTGATCAACAACTCTTTCCTGTCTTTTATGCAGGTT
TATTCGAATCACACGATGTAGGAACGCGCCTGTATGGTTATCTCAACTCATTCCAGGTGG
TACTCGAAGCGCTGTGCATGGCGATTATTCCTTTCTTTGTGAATCGGGTAGGGCCAAAAA
ATGCATTACTTATCGGTGTTGTGATTATGGCGTTGCGTATCCTTTCCTGCGCGCTGTTCG
TTAACCCCTGGATTATTTCATTAGTGAAGTTGTTACATGCCATTGAGGTTCCACTTTGTG
TCATATCCGTCTTCAAATACAGCGTGGCAAACTTTGATAAGCGCCTGTCGTCGACGATCT
TTCTGATTGGTTTTCAAATTGCCAGTTCGCTTGGGATTGTGCTGCTTTCAACGCCGACTG
GGATACTCTTTGACCACGCAGGCTACCAGACAGTTTTCTTCGCAATTTCGGGTATTGTCT
GCCTGATGTTGCTATTTGGTATTTTCTTCTTGAGTAAAAAACGCGAGCAAATAGTTATGG
AAACGCCTGTACCTTCAGCAATATAGACATAAACTTTTTCCGGTTGTTGTCGATATCTCC
ATATCCCTCAACCGGAAAATAATAATACTAAAATGCTTAGGCCTGCTAATAATCGCCTAA
TCCAAACACCTCATTCATGTTCTGGTACAGTCGCTCAAATGTACTCCGGATACACGGTTC
GCTGATTTCCAGGACATTGTCGTCATTCAGCGACCTGTCCCGTGTATTACGGGCCTGCGA
ATTCATCAAGGAATGCATTGCGGAGTGAAGTATCGAGTCACGCCATATTTCGCTATCAGG
ATTCTGTGTGATGGTTACATCGCCCGGCCCAGGGCTGTTTAGTCATCAGCGCTTTCTGAC
AGTGCTGAGATTTCAACCTGTTGCAGTAAAAATGAGTAGATATAGGGCAAGTGTGCTGCC
AAACCCATCTTTTACGGGGTGAAGGTAGATTTGGTTTGAAGGGTATCTGGTGTCCCCTGC
AGGAATCGAACCTGCAATTAGCCCTTAGGAGGGGCTCGTTATATCCATTTAACTAAGAGG
ACAATGCGGCATGAGTATACCCGCTAATGGACTGCGGGGTAAGTACGCTGCCGCTCGATT
GCTTAAACCCTCGCCATTTATGCCGGGTTTTTATCATTTTTCTTAATGTTTTCCGCACGT
TCTGCTTTTTGGCGTGCTTCTGCTTTGCGCTTGTTGCTCATGTCGTTACGGATCTGTGCA
TGACTCATTAACGCGAAGATAAAGGTGCCGCCGCAGATGTTCCCCGCTAAAGTAGGTAGT
GCGAAGGGCCAGATGAAATCGCTCCAGTGCAGCGTGCCGTTAAACACCAGATAGAGGATT
TCAACAGAACCGACAACGATGTGGGTGGTGTCACCCAGGGCAATAAGCCAGGTCATCAAT
ATAATCACCACAATCTTTGCCGCACCCGCTGCAGGAAACATCCATACCATAGTGGCGATC
AGCCAGCCGGAAATGATCGCGTTGGCAAACATCTCGCTGGGGGTGTTCTTCATCACATCC
ATGCCGATATTGACAAATGCATCGCGAGTTTCTTCATTGAAGATTGGCATATATTCAAAT
GCCCACGCCGCAATACCTGTCCCGAGAATATTACCCAGCAGCACGACGCCCCATAACCGC
ATAAGTAAGCCAACGTTGCTCATTGTCGGTTTTTGCATGACGGGTAGTACCGCAGTCACG
GTGTTTTCGGTAAATAATTGCTGGCGGGCCATAATGACGATAATAAAACCAAAGGTATAA
CCGAGATTCTCCAGCAAGAAGCTGCCCGGCACACCTTCCAGTTCGACATGAAATATCCCT
TTTGCCAGTAATGAAGCGCCCATCGACAGACCCGCCGCAATGGCTGACCACAGTAGTGCC
ATTGCGTCGCGTTCCAGCTCTTTTTCACCATCCTGGCGGATATGCTCATGAATTGCCATC
GCCCGGGAGGGGAGTCGATCTTCATCTATTTCTATTTTTTTGCCACGCTCTTTTTCTTCG
CTCTCAACTTCAATTTCGTCGCTGTGTTGATCAATTTTGTCGTTGTCCATGGTCTCTTCT
CTTGAATTAGCACGTATAGCTAAAGCGTAGCGGCTTTTTTGCTCGCAACTGGCGGGAGTT
ACTCTGAAAATGTAGAAAAGGCCGCGTTTGCCTTTTTCTGTTTCCATAGAATCAAGTAGC
CTACAGGGCGGCGATTACCAGGCTATGATCAAATCAGCAAATCAGGGCGTCTGGACATCA
GTTGACGTGCTGTTACAATCGCCCACACCTAAACAGGCGGATACGGTATCGTTCCGTCAT
GGATGGCAAACTGCATAAGCCATAAAAAAACAGGGAGACATTTATGAAGCTTCGCCTGTC
GGCGCTTGCTCTGGGAACTACGCTTCTGGTGGGGTGTGCGAGTTCCGGTACAGATCAGCA
AGGGCGTTCTGACCCGTTAGAAGGGTTCAACCGCACCATGTACAACTTCAACTTCAACGT
ACTAGACCCGTATATTGTTCGACCGGTCGCTGTCGCCTGGCGTGATTATGTTCCGCAACC
GGCGCGTAACGGTTTGAGCAACTTTACCGGCAACCTTGAAGAACCTGCGGTGATGGTTAA
CTACTTCTTGCAGGGCGACCCTTATCAGGGGATGGTCCACTTTACCCGCTTTTTCCTGAA
CACCATTTTGGGGATGGGCGGCTTTATTGATGTTGCAGGGATGGCGAACCCGAAACTGCA
ACGGACTGAACCTCACCGCTTCGGTAGTACGCTTGGTCATTATGGCGTGGGTTATGGGCC
GTACGTTCAGTTACCATTCTACGGTAGCTTCACGCTGCGTGATGACGGTGGTGATATGGC
GGATGGTCTTTACCCGGTTCTTTCCTGGTTGACCTGGCCGATGTCTGTGGGTAAATGGAC
GCTTGAAGGGATCGAAACCCGCGCTCAGCTGCTGGATTCCGACGGTCTGCTGCGTCAGTC
GTCCGATCCTTATATTATGGTGCGCGAAGCGTACTTCCAGCGTCATGATTTCATCGCTAA
TGGCGGCGAACTCAAACCGCAGGAAAATCCGAACGCGCAAGCGATTCAGGATGATTTAAA
AGATATCGATTCTGAATAAGAAACAAATAAAAAAGGTGAGTCGCAAAACTCACCTTTTTT
GTTGTTATCCCTCAATTACCACAAGTAAAAGGAGATAAACCGACAATGACCCGGACGTAA
TGATGTAAAAATACTGATGTTCGTCACTGACTATTTCCGATATTCAGGCGTTGAAAAATC
AAAAAACTGGAAAAATAATTTTAAATATCATCAAAATTAACACCTGGCGCATATAGTTGA
TTAATTTCATTTTGATATTCCGTCTGGCGATTTTGAAGCCTTTCTTCAATTTTACCTTCG
AGTTCCTTATAGTGCATATATATATTTTGAGAATGGTCAACGTTAACTTCGTTACCGAAT
AAAGTAGAAACTATTTCTTTTGTATTCTTAAGTGTATATTTTCTATCATCCTCTTAATAT
TCATATCCTCTTGCTAGATTTGAAGGATTAAAAGCTTCGTTAGGTTCTCTCAGTCTTTCC
CCTTTGAGTTCGTTTACAACTTGATGATCGGGACCTGTTGCAAATGATTCTGCGATGATT
GCTTTACTGTGTTCAAACCACGCAGAAGCACTCCTGGCTTTTTTACTACAATATTGGGTG
AGATTATCACCATCAATACGAAATCCTTTTTGAATGTGGTAGCCATCCTGATCGTAGTAA
CCGAGAGATAAGTAATCATTTCCATTTTTATTTTTTATTACAATAGCGAGAGAGTCGCCT
TTTTTATCTTTACCGTACCAGGTAAATAAGCACGTTGGTTCGCTTTTCCCGCTCTCATCG
AATTCCGTTACCGTATGTCTGAGTTTGTGTGATATTTTATCGAAGATAAAACTTGGATTT
TCATCATATATTTCTTTTATTGCGCTGAAGATCATTTTCTTGTTATTGATATCATGAGTA
TTCTCTACTATGTTTTCATTGATGATGGTTTGACCGACTTTTTTGTTTTCATCGTTCGCG
GGTGATTTTGTTGGTTCTTGATTTTCAATATCAATATCAATATCAATATCAATATCAATA
TCAATATCAATATCAAAAGTAATATCGTTTGTATCATTGGAGTCAATACCAATATCACTA
CGATCATCAATACCACTAATAATAATACCATCAGTAAATTCAGCATTATTTATATCATCA
TGAGTCTTCTCAACTATGTTGTCATTAATGATAGTACGGACGAGTTCTTTGTCTTTATAA
CTCGCAGGTAATTTTATTGGTTCTTGGTTGTCGATACCAATAGTAATATGGTCTGTATCA
TTGGAACCAATATTAATATAAGTAACTGAAGAATTATTGATATTTATTCTATCAGGATCG
TCGTTTCCTCGTATGGCGTTTTTTATAAGCTCAAGTAGATGTTTAATACAGGTGCTTATT
CCTTCCTTACCATTAAAAAGGTTTTTGAACTCTTGTACTAATCCATTAACTTCATCATTG
TTATTTTCATTGATGGATTCTGGGTAAGCTGTGCTGGTATTGTTGATTGAAATAGATGGT
AGCATGATTTTATTCCATGTTGATTGATTTGTTACAAATATATATTACCTAATGAAATAG
ACTATCAAAAAACGCTCATTTATTTAGACCCTATCTTTAATTTGAGTGTATGAGCGCACA
ATAGCCAGGGTGGTTTGAGTATCCTGGAAATTCAGAAAAGTAAACTCTTTGAGAAAGACG
AGCAGAACGCCTGAAAATATGCCTTTCCCTTCAGGTTTGTCTGTGGATACCACTTAATGA
TTTGAAAGGGCAAGCTACCATCAGGCTGTTTGCAAAACTCAGGAGGCAAGCAATGAGGAC
ACTACTTTCGGTGAAGTGGGGAAGTTAAAGTCACCTGCATAGCAGGTGACTTTAACCAGG
CGAACGCGTTATCAGAACGCGTAGTTAAAGTTAGTACCGAACAGCCAGGCTTTACCTTCA
GATTTAAAGGTATATGCTGCTGGCCCTTCACCTTCAGTAAACTTCACATTCTGACCGTGC
ATATAAGATGCACCAACGTCAATGGATGCATCTTCATTAAATGCATAAGTCGCACCTGCA
CTTAACCACAGACGATCCTGATCTGGGATAGAGATAGAACGTTTATCTGCCGGAACCGGG
CTGTCATCGAATGCAATACCCGTACGGAAGGTCCAGTTTTTATCGTGGTAGTAGGTTGTA
CCTAACGCGATACGGTAAGCATCCCGGAAACCTTCGTCTTTATAGAACAGCGTTTGACCA
GAGTCTCCTTTCGCTTTCAGTTCCTGGAATTGACTCCAACTGGTATACGCCAGACTATAG
TGGATAGCCCATTGTGGTGCGACACGGTTATAGCCAGAAATTTCCCACATCTCAGGTAAA
TTCAGCGTTAAGGACCCATTTTGGGTTGCACCCATTGTGCCATATGGTAAACCCATGCTA
CCCAAGATGTTGTTCAGATTTGGGTTGATGGAGCTTTTGTAATCTCCTTCAAAGTCAATT
TTCACTTCTGAACGATAGGTTAGGCCCCAACGGTTATCTTTATCCAGTTCATAAAGAATA
CCGGCGTTCCAGCCGAATCCCCATTCATCACCCTTGAGATGAGCAATTTGCGAATCCGGT
GTATTGATGCCGTTTGTCCAACTTTGTGGCACGCCTTGCGCTATCAGTTGTTGGGAAAGC
AATGGACCGAGTGAACCGGCAGTACGCTCAATTTTTGCCTTAGCGTATACAGCATCAAAA
CCAAGACCAAAACTCCAGCTATTGTTAAGGCGGTAGGCTCCGCTAAGGTTAAGGTTGATC
GTCTGCAGATCGGTTTTACCGCCATAGATTCCAGCAGCGTAGTTATCATTAAATTCCGTG
GCCAGACCATAGTTCGAGGTAATAGAAGCCCCCCAACCAAACTGATCGTTAATAGGTGCT
ACGAAATGTAGGTTAGGCACCCACGCAGTTGGTGCAATATTATCTGCATCAGCACGCTGG
CCCGTTAAATCGGAACGCCCAGAAATATCTACATCCGGGTCAATATAAACCGCACCCGCA
GAAAATGTCGGGCGGTCAAACATGGTAATCAATGCGGGGTTACGGCTGACGTTACCTGCA
TCATCGGCAATTGCGCCTTCCCCTGAATAAGCCCGGCCCAGGCCAGAGGAAGAAAATTCG
TTTAACTGAAAGCCTGCCGACCAGGCCTGGGTGGAGATAAGTGCCACTGCGACTGCGAGA
GCAGACTTTGTAAACAGGGTTTTCTGGCTCATGACCATAACCTCAATGATTTATTTTTAT
ACAAACTATGTTACGTGCTGTAACAGGAGCGCGAAGTGTAGGGTCTGAGGTACATCTTAG
AAATCAGACCAGTGGCGAGAGTATAGGTCGGACCAGCTGGAATGTTGCAAGTATGTTTCT
ATCTTTTTTCAAATATGATCTAAGAAACGCGATCCAGCTGGCAAAATTTGGAGGTGGCGC
ACTCATGGATTCGGGTGAATTTTGTTTTAGATCATTTTTAAGTGTGATTTCGGTCACTTA
TCCGATTTTGCAGAATTAACAACTGGAGCAGCACTTTCCGGAAGCGTAAAATATCCACAA
CGTTTATCTGGCACCTTGGGTGCACATACAGAGGAAATCAACGATGAGTAAATGTAGTGC
TGATGAAACCCCGGTTTGCTGCTGTATGGATGTTGGCACCATTATGGACAACTCCGACTG
CACCGCGTCTTACAGCCGCGTGTTTGCAAACCGCGCAGAAGCAGAACAAACGCTGGCGGC
ACTGACTGAGAAAGCCCGTAGCGTGGAATCCGAACCGTGCAAAATCTCCCCGACTTTCAC
TGAAGAGTCTGATGGTGTGCGCCTGGATATCGATTTCACTTTTGCCTGCGAAGCTGAAAT
GCTGATCTTCCAGCTGGGTCTGCGTTAATTCCTCTCGGGTACGTACGCCCCTGTCAGTTG
CTGGCAGGGGCGTTTTCTTTTCTCTTCTTCTTTTCTCTCTGTGTCATAGCTCCCACTTTC
CCTTTTCTCCGCTTGGCTAAATGTAAAAAAATGGTTAAGACTATGATCAGGTCAGACCAC
TTTATTTATTTTTTTACAGGGGAGTGTTATGGGTCAGGTTTTACCGCTGGTTACCCGCCA
GGGCGATCGTATCGCCATTGTTAGCGGTTTACGTACGCCTTTTGCCCGCCAGGCGACGGC
TTTTCATGGCATTCCCGCGGTTGATTTAGGGAAGATGGTGGTAGGCGAACTGCTGGCACG
CAGCGAGATCCCCGCCGAAGTGATTGAACAACTGGTCTTTGGTCAGGTCGTACAAATGCC
TGAAGCTCCCAACATTGCGCGTGAAATTGTTCTCGGTACTGGAATGAATGTGCATACCGA
TGCTTACAGCGTCAGCCGCGCTTGCGCTACCAGTTTCCAGGCGGTTGCAAACGTCGCAGA
AAGCCTGATGGCGGGGACTATCCGAGCGGGGATTGCCGGTGGGGCAGATTCCTCTTCGGT
ATTGCCAATTGGCGTCAGTAAAAAACTGGCGCGCGTGCTGGTTGATGTCAACAAAGCCCG
CACAATGAGCCAGCGTCTGAAACTCTTCTCTCGCCTGCGTTTGCGCGACTTAATGCCCGT
ACCACCTGCGGTAGCAGAATATTCTACCGGCTTGCGGATGGGCGACACTGCAGAGCAAAT
GGCGAAAACCTACGGCATCACCCGAGAACAGCAAGATGCATTAGCGCACCGTTCGCATCA
GCGTGCCGCTCAGGCATGGTCAGACGGAAAACTCAAAGAAGAGGTGATGACTGCCTTTAT
CCCTCCTTATAAACAACTGCTCGCGGAAGACAACAATATTCGCGGTAATTCCTCGCTTGC
TGATTACGCAAAGCTGCGTCCGGCGTTTGATCGTAAACACGGAACGGTAACGGCGGCGAA
CAGTACGCCGCTGACCGATGGCGCAGCGGCGGTGATCCTGATGACTGAATCCCGGGCGAA
AGAATTAGGGCTGGTACCGCTGGGATATCTGCGCAGCTACGCATTTACCGCTATCGATGT
CTGGCAGGACATGTTGCTCGGTCCAGCCTGGTCAACACCGCTGGCGCTGGAGCGTGCCGG
TTTGACGATGAGCGATCTGACATTGATCGATATGCACGAAGCCTTTGCAGCTCAGACACT
GGCGAATATTCAGTTGCTGGGTAGTGAACGTTTTGCTCGTGAAGCACTGGGGCGTGCACA
TGCCACTGGCGAAGTGGACGATAGCAAATTTAACGTGCTTGGCGGTTCGATTGCTTACGG
GCATCCCTTCGCGGCGACCGGCGCGCGGATGATTACCCAGACATTGCATGAACTTCGCCG
TCGCGGCGGTGGATTTGGTTTAGTTACCGCCTGTGCTGCTGGTGGGCTTGGCGCGGCAAT
GGTTCTGGAGGCGGAATAATGGAAATGACATCAGCGTTTACCCTTAATGTTCGTCTGGAC
AACATTGCCGTTATCACCATCGACGTACCGGGTGAGAAAATGAATACCCTGAAGGCGGAG
TTTGCCTCGCAGGTGCGCGCCATTATTAAGCAACTCCGTGAAAACAAAGAGTTGCGAGGC
GTGGTGTTTGTCTCCGCTAAACCGGACAACTTCATTGCTGGCGCAGACATCAACATGATC
GGCAATTGCAAAACGGCGCAAGAAGCGGAAGCTCTGGCGCGGCAGGGCCAACAGTTGATG
GCGGAGATTCATGCTTTGCCCATTCAGGTTATCGCGGCTATTCATGGCGCTTGCCTGGGT
GGTGGGCTGGAGTTGGCGCTGGCGTGCCACGGTCGCGTTTGTACTGACGATCCTAAAACG
GTGCTCGGTTTGCCTGAAGTACAACTTGGATTGTTACCCGGTTCAGGCGGCACCCAGCGT
TTACCGCGTCTGATAGGCGTCAGCACAGCATTAGAGATGATCCTCACCGGAAAACAACTT
CGGGCGAAACAGGCATTAAAGCTGGGGCTGGTGGATGATGTTGTTCCGCACTCCATTCTG
CTGGAAGCCGCTGTTGAGCTGGTAAAGAAGGATCGCCCATCTTCCCGCCCTCTACCTGTA
CGCGAGCGTATTCTGGCGGGGCCGTTAGGTCGTGCGCTGCTGTTCAAAATGGTCGGCAAG
AAAACAGAACACAAAACTCAAGGCAATTATCCGGCGACAGAACGCATCCTGGAGGTTGTT
GAAACGGGATTAGCGCAGGGCACCAGCAGTGGCTATGACGCTGAAGCACGGGCGTTTGGC
GAACTGGCGATGACGCCACAATCGCAAGCTTTGCGTAGTATCTTTTTTGCCAGTACGGAA
GTGAAGAAAGATCCCGGCAGTGATGCGCCGCCTGCGCCATTAAACAGCGTGGGGATTTTA
GGTGGTGGCTTGATGGGCGGCGGTATTGCTTATGTCACTGCTTGTAAAGCGGGGATTCCG
GTCAGAATTAAAGATATCAACCCGCAGGGCATAAATCATGCGCTGAAGTACAGTTGGGAT
CAGCTGGAGGGCAAAGTTCGCCGTCGTCATCTCAAAGCCAGCGAACGTGACAAACAGCTG
GCATTAATCTCCGGAACGACGGACTATCGCGGCTTTGCCCATCGCGATCTGATTATTGAA
GCGGTGTTTGAAAATCTCGAATTGAAACAACAGATGGTGGCGGAAGTTGAGCAAAATTGC
GCCGCTCATACCATCTTTGCTTCGAATACGTCATCTTTACCGATTGGTGATATCGCCGCT
CACGCCACGCGACCTGAGCAAGTTATCGGCCTGCATTTCTTCAGTCCGGTGGAAAAAATG
CCGCTGGTGGAGATTATTCCTCATGCGGGTACATCAGCGCAAACCATCGCCACTACGGTA
AAACTGGCGAAAAAACAGGGCAAAACGCCCATTGTCGTGCGTGACAAAGCCGGGTTTTAC
GTCAATCGCATCTTAGCGCCTTACATTAATGAAGCTATCCGCATGCTGACCGAAGGTGAA
CGGGTAGAGCACATTGATGCCGCGCTAGTGAAATTTGGTTTTCCGGTAGGTCCAATCCAA
CTTTTGGATGAGGTAGGAATCGACACCGGGACTAAAATTATTCCTGTACTGGAAGCTGCT
TATGGAGAACGTTTTAGCGCGCCTGCAAATGTTGTTTCTTCAATTTTGAACGACGATCGC
AAAGGCAGAAAAAATGGTCGGGGTTTCTATCTTTATGGTCAGAAAGGGCGTAAAAGCAAA
AAACAGGTCGATCCTGCCATTTACCCGCTCATTGGCGCACAAGGGCAGGGGCGACTCTCC
GCACCGCAGGTTGCTGAACGGTGTGTGATGTTGATGCTGAATGAAGCAGTACGTTGTGTT
GATGAGCAGGTTATCCGTAGCGTGCGTGACGGGGATATTGGTGCGGTATTTGGCATTGGT
TTTCCGCCATTTCTCGGTGGACCGTTCCGCTATATCGATTCTCTCGGCGCGGGCGAAGTG
GTTGCAATAATGCAACGACTTGCCACGCAGTATGGTTCCCGTTTTACCCCCTGTGAGCGT
TTGGTCGAGATGGGCGAGCGTGGGGAAAGTTTTTGGAAAACAACTGCAACTGACCTGCAA
TAAGAAGGTCAAAGCTATATGAATCCGCGCTGAATGGCGGATAGTTGGTCAAAATGTAAA
CGCATATTGACTATACTTACGCCATTGAGGTAAAAAACAGCGTTTCATTCGGTGAATGGA
TAAGGCACAATGCCGGCCACCGTTTTCTTTCTCTGGTTTCAGATGAAAGAAAACGGGCGA
ATCTGGTTAACAAAAGCGGTGCAATATGCAAGTTTTTATCATGCGTCACGGCGACGCAGC
CCTCGATGCCGCCAGTGATTCGGTTCGTCCTCTGACTACTAATGGTTGTGACGAATCTCG
CCTGATGGCGAACTGGCTGAAAGGTCAAAAAGTGGAAATCGAACGCGTTCTGGTGAGCCC
GTTCCTGCGAGCCGAGCAAACACTGGAGGAAGTAGGGGATTGTCTGAACCTGCCTTCCAG
TGCAGAAGTTCTGCCGGAGTTAACGCCCTGCGGCGATGTTGGTCTGGTCAGTGCCTATTT
GCAGGCGTTGACCAATGAAGGTGTTGCTTCGGTGTTGGTTATCTCCCACTTACCGTTAGT
TGGGTATCTGGTCGCCGAGTTATGTCCGGGCGAAACGCCGCCTATGTTTACCACCTCGGC
CATTGCCAGCGTCACGCTTGATGAAAGCGGAAACGGCACATTCAACTGGCAGATGAGCCC
GTGTAATCTGAAGATGGCGAAAGCTATCTGATTTGTTTGAAAAAATGCCCGATGTAAGCT
GTACATCGGGCATTTGTCTTTTTGCAATAGTATAAATTCACTCAAAACCCTTCACGGAGT
TGGTATGCTGCGATGATGATTTCATCGCACTCTTTCCTCTGCTTCCCTATTAATTTCTGA
TGAAATGAGACTAAGTTGTAATATATTTTTACAAATTATAAAACTAATGGAACAATTAAC
AGTAAAAAAGAAATGATATTTTTTGTGTCTTGATTTAATATTATTTGTGATGCTTTAATA
TTATATCTTCAAAAAATACAATTTCAAAATTAATCTAAGATCGTCTTTTTTGTATACATT
TCCCATAAATTTTAATTATGTAAAAGATGTTTTCTAAGCATTTTATTTGTTTTTTATAAG
TAAACTCTCAAAATTTCACCTTTTTGATTATATGTTAAGTGCTCCTTAATTTACTGTTAA
GTAAATATAAATTGAAACAATAAAGACAAAACATCACCATCCACCCACACCAAAGAATAT
CTTCTTATGCGACCTATTTTCTTGTTAGTTAGATCGGATAGCTTATTCAATGGCTGAGTA
TAAATAATTGCTATTGACTGAATCAATGTATTGCAATGTTTATATTTTTAATTATTTATG
GTTTAAGGACAAATAATGAGTAAGTTTGTAAAAACAGCTATTGCTGCAACAATGGTAATG
GGTGCGTTCGCTTCTACTTCAACAATCGCCGCTGGCAACAACGGTACAGCTCGTTTTTAC
GGCACCATTGAAGATTCCCCGTGCTCCATCGTTCCTGATGATCACAAACTGGAAGTGGAT
ATGGGTGACATTGGTTCGGGGATCCTGAAAAATAACGGGACCTCCACGCCGAAAGCTTTC
CAGATCCATCTGCAAGACTGCGTGTTTGACACCCAGACAACCATGACAACGACCTTCACC
GGTAACGCGTCCGCTACCAACAGCGGCAATTACTACACCATTTACAATACCGACACCGGC
GCGGCATTTAACAATGTCAGCCTGGCGATTGGTGATGCTCAGGGGACCTCTTACAAAAGC
GGTACGGGCATCAACCAGACAATTGTAAAAGATACTGCCACCAACAAAGGCAAAGCGAAG
CAGACGCTGGACTTTAAAGCCTGGCTGGTGGGCGCTGCTGATGCGCCAGATTTGGGTAAC
TTCGAAGCCAACACGACTTTCCAGATTACTTATCTCTAAGTGATATCCCCATAGCCTTCG
GCTATGGGGTTTTTTAAATGGAATTTGCGCAAATTATAATAATCACGGATGGATACGTGC
ATGCCTGACGATTCTCTTTTCCGACTGCGGGTGCTTCCCTGCTGCATTGCGCTGGCAATG
TCAGGGTGTTATGTCAATGCCTGGGCTGAAGATGAAATTCAGTTTGATTCCCGTTTCCTG
GAGTTAAAAGGCGACACAAAAATCGATCTGAAGCGATTTTCCAGCCAGGGATATGTCGAA
CCTGGTAAATACAATTTACAGGTTCAACTAAATAAACAGCCGCTGGCGGAAGAATACGAT
ATTTACTGGTACGCCTCTGAGAACGATGCCAGTAAAACCTATGCCTGCCTGACACCTGAA
CTGGTCGCTCAGTTTGGTTTAAAAGAGGATGCGGCAAAAAACCTGCAATGGATCCACGAC
GGCAAATGTTTGAAACCCGGCCAGCTGGAAGGCATTGATATTAAAGCTGACCTGAGTCAG
TCAGCGTTAGTCATTTCATTACCCCAGGCTTACCTTGAATATACCGACACCGACTGGGAC
CCACCTTCACGCTGGGATGACGGTATTTCTGGTTTAATTGCTGACTACAGTATTCCCGCC
CAGACACGACATGAAGAAAATGGCGGGGATGACAGCAATGAAATTAGCGGCAACGGAACG
GTTGGGGTTAACCTCGGCGCATGGCGTCTGCGAGCCGACTGGCAGACCGACTACCAGCAC
AGCAAAAGCAATGATGAAGATGTTATCAACGGTGATGACACGCAAAAAAACTGGGAGTGG
AGCCGCTACTACGCCTGGCGGGCTTTACCGTCGCTAAAAGCCAAACTTGGCCTTGGCGAA
GACTACCTTAATTCTGATATTTTCGACGGCTTTAACTACGTGGGTGGCAGTATCAGCACC
GACGATCAAATGTTGCCGCCGAATCTGCGCGGCTATGCGCCGGATATCTCCGGCGTGGCG
CACACCACCGCGAAAGTGACCGTCAGCCAGATGGGCCGCGTGATTTACGAAACGCAGGTT
CCGGCGGGGCCGTTCCGCATCCAGGATCTTGGCGATTCTGTCTCCGGTACACTGCACATC
CGCATTGAAGAACAGAACGGCCAGGTGCAGGAATATGACATCAACACCGCCTCGATGCCG
TTCCTGACCCGCCCCGGCCAGGTGCGCTATAAGCTGATGATGGGCCGCCCGCAGGAGTGG
GGGCATCATGTTGAAGGTGGTTTCTTCTCCGGCGGCGAAGCTTCATGGGGGATTGCCAAC
GGCTGGTCGCTCTACGGCGGAGCGCTGGCAGATGAACACTATCAGTCGGCGGCGCTTGGC
GTCGGTCGCGACCTGTCTGTCTTTGGCGCAGTCGCCTTTGATATCACCCACTCGCATACC
CGCCTGGATAAAGAGACCGCCTACGGTAAAGGTTCACTGGACGGTAACTCGTTTCGCGTG
AGCTATTCCAAAGACTTCGATGAACTGAACAGCCGCGTCACTTTTGCCGGATACCGCTTC
TCGGAAGAGAACTTCATGACCATGAGCGAGTATCTCGATGCCAGCGACAGCGAAATGGTG
CGCACTGGCAACGACAAAGAGATGTACACCGCCACCTACAACCAGAACTTCAGGGATGCC
GGTGTGTCTGTTTATCTAAACTACACCCGCCATACCTACTGGGATCGCGACGAACAGACC
AACTACAACGTCATGCTCTCGCACTACTTCAACCTGGGCAGTATCCGCAATATGAGTATT
TCCATGACCGGATACCGCTACGAATATGACAACCGCGCCGATAAAGGTGTGTACATATCG
CTCAGTATGCCGTGGGGCGACAGCAGCACCATCAGCTATAACGGTAACTACGGCAGCGGT
GCGGACAGCAGCCAGGTGGGGTATTTCAGCCGTGTCGATGACGCAACCCACTACCAGTTG
AACGTGGGAACCAGTGACAAACACTCCAGCGTTGACGGCTATTACAGCCACGATGGTTCG
CTGGCGCAGGTCGATCTCAGCGCCAACTACCATGAAGGGCAGTACACCTCGGCGGGCATT
TCCTTACAGGGCGGCGCGACGCTCACCGCACAAGGTGGCGCGCTTCACCGTACCCAGAAT
ATGGGCGGCACGCGTCTGCTGATTGATGCCGACGGCGTGGCTGGTGTTCCGGTAGAAGGA
AATGGTGCGGCGGTTTACACCAATATGTTCGGTAAGGCCGTGGTGGCAGACGTCAACAAC
TACTACCGCAACCAGGCGTATATCGACCTTAACAACCTGCCGGAAAACGCCGAAGCCACC
CAGTCCGTGGTGCAGGCGACGCTTACCGAAGGAGCCATTGGCTACCGTAAGTTTTCGGTT
ATCAGCGGGCAAAAAGCGATGGCGGTATTGCGCCTGCAAGATGGCAGTCATCCGCCGTTT
GGCGCGGAAGTGAAAAATGACAACGCGCAGAACGTCGGTCTGGTTGATGATGATGGCAAC
GTCTACCTCGCGGGTGTGAAACCTGGCGAGCATATGACCGTTTCATGGGGCGGCGTGGCC
CACTGTGATATTCATCTGCCGGACCCACTGCCTGCCGATCTGTTCAATGGCCTGTTATTG
CCATGTCAGCAAACAGGGCCGATATCTCCTTCGATGCCCAATGAAATTAAGCCGGTGATC
CAGGAGCAGACCCAGCAGGTGATGCCAACGGAAGCGCCGGTATCGGTATCCGCCAATTAA
CAACGTGATTAAGGAATGATCCATGACGAATCTATTTTGCTCTGCCAGAACGGCCGCAAC
GACGCTGGCGTTACTGATAACTGCCGCCAGCCTGTCAGCACAGGCCTCTGTCACGCCGGA
CCGTACACGCCTGATTTTTAACGAAAGTGATAAATCAATCAGTGTCACGCTGCGCAATAA
CGACCCGAAAATGCCGTATCTGGCACAAAGCTGGATGGAAGATGAACAGGGTAACAAGAT
TAGCTCGCCACTGACGGTACTGCCGCCGGTGCAGCGCATCGATTCCATGATGAACGGTCA
GGTGAAGGTACAGGGCATGCCGGATATCAACAAGCTGCCTGCCGACCGCGAGAGCGTGTT
CTATTTCAACGTGCGTGAGATCCCGCCGAAATCGAACAAACCCAACACGTTACAGATTGC
GCTGCAAACGCGCATCAAGCTGTTCTGGCGACCAAAGGCGCTGGAAAACGTCAGCATGAA
AAATCCATGGCAGCATAAGGTGACCTTAACCCGCAGCGGCCAGGAGTTTACTGTCAATAA
CCCGACGCCGTACTTCGTGGTTATCAGTAATGCCAGCGCGCAGAAAAACGGCAATCCGGC
AGCGGGATTTTCTCCCATGGTGATATCGCCAAAAACCTCCGTGCCGCTGAATGTCAAAAT
GGATAGCGTCCCGGTGCTGACCTACGTCAACGACTATGGCGCGCGGATGCCGCTGTATTT
TAAATGTGGTGGCGATACCTGCCAGGTGGACGCAGAGCAGAGCCGCAAAGGCTGATGCCG
GGAGAGCCATATGAAAATAATTTATCTGGCGGTGTCGGGCATTGCGCTGCTGGCCTGGAA
TGTCGCCAGTGCAGAAACGAAACCCGTCAACCTGGAACTCAGAGTCCTGGTGGATGCGCC
GCCGCCCTGTACCGTGACCGGTAGTGCAGTGGAGTTTGGCGATGTGCTGATCGCCAGTAT
CGATGGCAACAATTACCGCCAGAACGCGGGCTATACCCTCGATTGTTCGGGGCGTCTGGC
AGACGATCTGCGGATGCAACTGAAGGGCACCACCACAACCGTGAACGGTGAAACTGTGCT
GGATGCAGGCATTGCCGGGTTTGGCATCCGCATCGAAAACGCCGCCGATAACTCGCTGTT
TTCCATTGGTGAAAATAACTGGACGCCTTTTGCATTTAACTCTCTGCCGCAACTGAAGGC
TGTGCCGGTAAAACAGAACGGCGTGCAGCTCGCGCCAACGGAATTTAACGCCAGTATGAC
CATGGTGGTGGATTACCAATGAAACGACTCGCACTTTTCCTGATTTGGGGTGCCTGCGGG
GGCGCTCTGGCCTCACCGGATATCACCTTTCACGGCACGCTGGTGTCGCCGCCTGCCTGC
ACCATCAACGAAGGCCAGACCATTGAACTGGAGTTTCGCGATGTACTTATCGACAGCATT
GATGGCAACTACGCCCGCCAGGAGGTGCCGTACACCATCAAATGTGACTCCGACGTTCGC
AATGAGGCCTGGCAGATGACGCTCACCTGGACCGGGACGCAAACCAGCTACAACGATGCG
GCAATCGAAACCGATGTTCCGGGATTCGGGATTCAGCTTTTGCAAAACGGGCAACGTTTT
CAGCTTAATACCCCACTGACCATCAATGCCACGGATTTGACACAAAAACCGAAGCTTGAG
GCCGTTCCGGTTAAAGCGAGTGACGCTGTTTTAAACGACGGCACGTTTTCAGCGTACGCA
ACATTACGGGTGGAATATCAATGAAGACAAATACCGGATGTGTGCTTCTGGCAAGCCTGA
TGCTCACCGCCAGCGGAACCACGTTGGCGGCGGACAACCTGCATTTTTACGGCAACTTGT
TAAGTAAATCCTGCACGCTGGTGGTGGATGGTGAAGTGCTGGCGGAAGTGCATTTCCCGA
CCATCAGCAACCAGGATTTAACGGTGGCGGGCCAGTCTTCCAGGGTGCAGGTGGTCTTTA
AGTTGAAAGATTGCAAAGGCCCGGCGGATTACCAGGTCAAAGTCACGCTGACCGGTACGG
AAGATAGCGAACAGCCAGGTTTTCTGGCGCTTGACCCGGCATCCAGCGCGCAAGGGGTAG
GGATTGGTATGGAAAAGTCAGACGGTACCTGGGTGCCGCTTAACGATTCTGCCGGTGCCA
CCTTTAACCTCACTAACGGCGCGAATAACCTCAATTTTAATGCCTGGTTGCAGGCGAAAA
GCGGTCGTGAAGTGACTTCTGGTGACTTCACCGCCAGCCTGACTGCCACTTTTGAGTATA
TTTAAGATGAAGATAATACGAAACTTTTTGGGGCTGTTGACGCTGATGGTGTTGAGCCTG
ACGGCTCAGGCACAGACATTTCAGATGTATCCCCCTATGGGTGTACCAGGCGCTTTAGCC
AGGATAATATTTACTCTGGAAGTTGTTACCCCTGCAGGCGTTTATACAGGTACATATCAG
TCGCGCGATCCCAGGATGCTTCTCGTTGGCAATTTAACATTGTTAAGCTGGAATGGTCCA
TCTTCAATTCCTGCGCCAACTATTTATCTGGATCATTCGAACGAAATAAATATGTCAAAT
TGTCCCGGTCTTGCTGGCGTTCCCTCCACCAACGGCAAAGGATGGGATTGTTATGCTGCT
GATTTAAAAGTCACGGTAACAGGGGACGTGCAGGGGCGTCCATGGCTGGTTTCAACCCAG
ATTACCACTACGGACCTGGGAGATGTGGGGGCTACCTATGTAGGTCCTAAATACAATAAC
TCCACCTGTCCATCAATCCCACTGACGACATATGATGTTTCCTGGGATGAGAATACGGTG
ATTCATAAAAAAACATTGAATCTGAAATCAACAGACGCCGTAGGGGGAATCATCGAGAAA
ACCCTGTCGACCTATTTAATGGAAAGTGAGAGGCTGTGTGATGGTAGCCAGTTTGATCCT
CGCGGGGCAAATTGCCGTTTTGTTTCGCAGATGATCACTTTTACAGCATCAGGCTGCGAC
GATGCCAAAGTGACGGTGACGCCGGTTCCGCATCCGATTACTGACAGGCAACTGCATGAT
ATTGTGGTGCGCGTCGATGCCAGCGCATTGCAGCCTATTGATTCAACGTGTCGCTTCCAG
TATGTGTTGAATATGTTCTAGCACATACCAGCCTGGTGACAGGAGTTTACCAGGCTTTTT
TTCTCTCATATTGGATAATTTGCCCTACCTGAACACATTTAGGCCGGATAAGGCGTTTAC
CCCGCATCCGGCATTCGATACCAGCATTCAGGGCGAAATGGCAAAACGCATCCGCCCCTA
ATATTCACGGTAACTCCGGCGGCAGCCACTCTTCCACTTCAATCAACACTAACAACGCTG
CATCTCCGCCGTACTCTTTCGGTGCCTGGTGAAATGCCATTACATGCGGATGTTGCGCCA
GCCACAGCGGCGTTTGCTGTTTCAAAATATGCTTCCCGTGCCCGTGCATTACGCATGCGC
AAAACACATGTTCACGGCGGCAGGCGGCAATCAACGCCCCCAGTTCCTGCTTGGCCTGCA
TTTGCGTCAAACCATGTAAATCGAGGAAAAGCTCCGGTGAATAATCGCCGCGTCGCAACT
TCTTCGCCTCAAAATGACTCACATCCGGGCGGACATATTTCACCGGGCCTGCGGTATTCA
ATAACGGCTGAAACTCATCTGAGAAATAATGGCTGGCATCGGCCTGCTCCTGAATCAACC
GTTTCACCGGCACTTCGCTGATTTTCTTACGCTGCGGTCGGTGGACAATCGTGTCCTGCT
TAATCTTGCGAGTCCCCGCCATCAACTGGCGAAACAGAGCCTGGTCCTCCTCGCTAAGTG
TTGTTTTCTTTTTCATTTATCTGTCTCTATTTCTAATTTTCCTACAGTTTACCCGACTCG
TAGCGCAATCGATCGTTTTAAACGTATTTTTCCTCACTCACCGCGCGTGAATGCTGATTT
ATCGTCATCTTCGTGGCAAACTAGCCGCCGAAATTATTGCGATCATGCCCTGGAGGAATA
CGTGGATAAAATTTTCGTTGATGAAGCAGTTAATGAGCTGCAAACCATTCAGGACATGTT
GCGCTGGTCGGTTAGCCGCTTCAGCGCGGCAAATATCTGGTACGGTCACGGCACCGATAA
CCCGTGGGATGAAGCGGTACAATTGGTGTTGCCGTCGCTCTACCTGCCGCTGGATATTCC
GGAAGATATGCGCACCGCGCGTCTGACCTCCAGCGAAAAACATCGTATTGTTGAGCGCGT
GATCCGCCGCGTCAACGAACGCATTCCGGTGGCTTACCTGACCAATAAAGCATGGTTCTG
CGGTCATGAATTTTACGTCGATGAACGTGTGCTGGTGCCGCGCTCGCCGATTGGTGAACT
GATCAACAATAAATTTGCCGGGCTAATCAGCAAGCAACCGCAGCATATTTTAGATATGTG
TACCGGTAGCGGCTGCATTGCCATTGCCTGTGCTTATGCCTTCCCGGAAGCGGAAGTCGA
TGCGGTAGATATCTCTCCCGACGCGCTGGCGGTTGCCGAACAGAACATCGAAGAACACGG
TCTGATCCACAATGTCATACCGATTCGTTCCGATCTGTTCCGTGATTTGCCGAAAGTGCA
GTACGACTTGATCGTCACTAACCCGCCGTATGTCGATGCGGAAGATATGTCCGACCTGCC
AAACGAATACCGTCACGAGCCAGAACTGGGCCTGGCATCTGGCACTGACGGCCTGAAACT
GACGCGTCGCATTCTCGGTAACGCGGCAGATTACCTTGCTGATGATGGTGTGCTGATTTG
TGAAGTCGGCAACAGCATGGTACATCTTATGGAACAATATCCGGATGTTCCGTTCACCTG
GCTGGAGTTTGATAACGGCGGCGATGGTGTGTTTATGCTCACCAAAGAGCAGCTGCTGGC
GGCCCGTGAACATTTCGCGATTTATAAAGATTAAGTAAACACGCAAACACAACAATAACG
GAGCCGTGATGGCTGGAAACACAATTGGACAACTCTTTCGCGTAACCACCTTCGGCGAAT
CGCACGGGCTGGCGCTTGGCTGCATCGTCGATGGTGTTCCGCCAGGCATTCCGCTGACGG
AAGCGGACCTGCAACATGACCTTGATCGTCGTCGCCCTGGGACATCGCGCTATACCACCC
AGCGTCGTGAGCCAGATCAGGTCAAAATTCTCTCCGGTGTTTTTGAAGGTGTTACTACCG
GCACCAGCATTGGTTTGTTGATCGAAAATACCGATCAGCGTTCTCAGGATTATAGTGCGA
TTAAGGACGTTTTCCGTCCTGGCCATGCCGATTACACCTACGAACAAAAATACGGTCTGC
GCGATTATCGCGGCGGTGGACGTTCTTCCGCCCGCGAAACCGCCATGCGCGTGGCGGCAG
GGGCGATTGCCAAAAAATATCTCGCCGAGAAATTTGGTATTGAAATCCGCGGCTGCCTGA
CCCAGATGGGCGACATTCCGCTGGAAATCAAAGACTGGTCGCAGGTTGAACAAAATCCGT
TCTTCTGCCCGGACCCGGACAAAATCGACGCGTTAGATGAACTGATGCGCGCGCTGAAAA
AAGAGGGCGACTCCATCGGCGCGAAAGTCACCGTTGTAGCCAGTGGTGTCCCCGCCGGAC
TTGGCGAGCCGGTCTTTGACCGCCTGGATGCCGACATCGCCCATGCGCTGATGAGCATCA
ACGCGGTGAAAGGCGTGGAAATTGGCGACGGTTTTGACGTAGTGGCGCTGCGCGGCAGCC
AGAATCGCGACGAAATCACCAAAGACGGTTTCCAGAGCAACCATGCGGGCGGCATTCTTG
GCGGTATCAGCAGCGGGCAGCAAATCATTGCCCATATGGCGCTGAAACCGACCTCCAGCA
TTACCGTGCCGGGGCGCACCATTAACCGCTTTGGCGAAGAAGTTGAGATGATCACCAAAG
GCCGTCACGATCCTTGTGTCGGGATCCGCGCGGTGCCGATCGCTGAAGCGATGCTGGCGA
TCGTTTTAATGGATCACCTGCTACGGCAGCGGGCGCAAAATGCCGATGTGAAGACTGATA
TTCCACGCTGGTAAAAATGAACAAAACCGCGATTGCGCTGCTGGCCCTGCTTGCCAGTAG
CGCCAGCCTGGCAGCGACGCCGTGGCAAAAAATAACCCAACCTGTGCCGGGTAGCGCACA
ATCGATAGGCAGTTTTTCTAATGGCTGTATCGTCGGCGCTGACACGCTGCCGATACAGTC
CGAACATTATCAGGTCATGCGTACCGATCAGCGTCGCTATTTCGGTCACCCGGACCTGGT
GATGTTTATCCAGCGTCTGAGTAGCCAGGTGAGCAATCTGGGCATGGGTACGGTGCTGAT
TGGCGATATGGGGATGCCCGCTGGTGGGCGTTTCAACGGCGGTCATGCCAGCCACCAGAC
CGGACTGGATGTCGATATCTTTCTGCAACTGCCGAAAACACGCTGGACCTCCGCGCAGCT
CTTGCGCCCGCAAGCACTGGACTTAGTTTCCCGCGACGGTAAACACGTTGTCCCCACGCT
GTGGAAGCCAGAAATTTTCAGCTTGATCAAACTCGCCGCCCAGGACAAAGACGTCACACG
CATTTTTGTTAATCCGGCGATTAAACAACAACTTTGCCTTGATGCGGGCACCGATCGCGA
CTGGTTGCGCAAAGTGCGACCCTGGTTCCAGCATCGCGCGCATATGCATGTACGATTACG
TTGTCCTGCCGATAGTCTGGAGTGTGAAGATCAACCTTTACCGCCACCAGGCGATGGTTG
CGGGGCAGAACTGCAAAGCTGGTTTGAACCTCCAAAACCGGGAACAACAAAGCCTGAGAA
GAAGACACCGCCTCCGTTGCCGCCTTCCTGCCAGGCGCTACTGGATGAGCACGTGATCTA
ATGGAAACGTTTAATAGCCTGTTTATGGTTTCCCCGCTGTTGCTGGGAGTTCTCTTTTTT
GTCGCCATGCTGGCGGGATTTATCGACTCGATTGCCGGTGGTGGTGGGTTACTCACGATT
CCGGCATTAATGGCTGCGGGGATGTCTCCCGCTAATGCGCTGGCAACCAATAAACTGCAA
GCCTGCGGCGGCTCTATTTCCGCCACTATCTACTTTATTCGCCGCAAAGTGGTTAGTTTA
AGCGATCAGAAACTCAATATCGCCATGACCTTTATCGGCTCAATGAGCGGCGCACTGCTG
GTGCAATACGTTCAGGCTGATGTCTTACGGCAGATTTTGCCCATTCTGGTGATTTGTATC
GGCCTCTATTTCTTGCTGATGCCAAAGCTGGGTGAAGAAGATCGCCAGCGCCGGATGTAC
GGTTTACCCTTCGCGTTAATTGCCGGTGGCTGCGTCGGTTTTTACGACGGATTCTTTGGT
CCGGCAGCCGGATCGTTTTACGCGCTGGCCTTTGTTACGCTGTGCGGATTCAACCTCGCC
AAAGCCACGGCTCACGCCAAATTACTTAACGCAACGTCAAACATCGGCGGTTTGCTGCTG
TTTATTCTCGGCGGCAAAGTGATTTGGGCGACGGGCTTTGTGATGCTGGTGGGGCAGTTC
CTCGGCGCGCGCATGGGTTCAAGACTGGTGTTGAGCAAAGGACAAAAGCTGATCCGCCCG
ATGATTGTTATCGTCTCGGCGGTGATGAGTGCCAAATTACTTTACGATAGCCATGGACAG
GAGATCCTCCACTGGTTGGGGATGAACTAATGAACAGTACACACCACTATGAGCAGTTGA
TTGAAATTTTTAATAGCTGCTTTGCCGATGATTTTAATACCCGTCTGATTAAAGGCGACG
ACGAACCGATCTATCTTCCCGCTGAAGCGGAAGTACCGTATAACCGAATCGTCTTTGCTC
ATGGCTTTTATGCCAGCGCAATTCATGAGATTTCGCACTGGTGTATTGCCGGAAAAGCGC
GCCGTAAGCTGGTTGATTTCGGCTACTGGTATTGCCCGGACGGACGCGATGCCCAAACGC
AAAGCCAGTTTGAAGATGTTGAAGTGAAGCCGCAGGCGCTCGACTGGTTGTTCTGCGTGG
CGGCGGGATATCCGTTTAACGTCAGTTGCGACAATCTGGAAGGGGATTTCGAACCGGACC
GCGTGGTGTTTCAACGGCGGGTACATGCGCAGGTGATGGATTATCTGGCAAATGGCATTC
CGGAACGCCCGGCACGTTTCATTAAAGCACTACAAAATTATTATCACACGCCGGAACTTA
CGGCGGAACAGTTCCCGTGGCCGGAAGCGCTAAACTAAAGCCAGTGCCACGTTTTACAAT
GAGGAAAGAAGATGATCGCGGAGTTTGAATCACGCATTCTGGCATTAATCGACGGTATGG
TTGACCATGCCAGTGATGATGAGTTGTTTGCCAGTGGGTATTTGCGTGGCCACCTGACAT
TAGCCATCGCAGAACTGGAAAGTGGTGATGACCACTCCGCTCAGGCGGTGCATACGACCG
TTAGCCAGAGTCTGGAAAAAGCCATTGGTGCTGGTGAATTGTCGCCGCGTGACCAGGCGC
TGGTGACCGATATGTGGGAAAACCTGTTTCAGCAGGCATCACAGCAGTAAGTTGCGGCGT
CTGGAGCACCATGCCTGATGCGACGCTTATCGCGTCTTATCAGGCCTACACGTCACACGT
AGGTCGGATAAGGCGTTCACGCCGCATCCGACAAACAATGCCAAAGCTGGTTACCCAGCC
TTAACTGCTTTACCCTTCAACAATTTCCGCACCCATAACCGATTCGGATTTAACGCCGCC
AGCGTACTGGCATCCATCGGAATCGGTTCTTCACTCATCTGTGCCGCCAGAATCTCTGCG
CACAGTGGGGCAGAACACAAACCACGCGAACCCAAAGCAGCAAGCATAAAGAGATCGTCA
TAAACCGGCGCGCTTACCGCCTTATCTTTCTGCTCCGCCAGCGACGCATATTCCACAAGT
GTTGCCTCATAATCGGGAACATTACCTACCATTGGTAGATGATCGCGGGTGGCACAACGC
ACACCGCAGCGCGCCTCTTTCTCACTGATATCAACCTCTTTTGCCCACTGTGCCTGCGGG
AAACAATCAATCAACCGCTGGCGATTCTGCTGCTGATCTTCATCACTGTACGTCGTATCT
TCGCTGCCGCGATGATAACTGGCACCAATACAATGATGCTGATTCGCCGGATTTTGTGGC
GTGAGATAACCGTCATAGCACAGCACCTGCTTCAGTTTTGCCAGTTCCGGTGTCGTCGGA
ATATGGCTGACCTGACCGGCAACCGAATATACTGGCAGAGATGATGTTTGGCTGAAACGG
CTGATTTGATGCCCGTTCGCCAGTACCACTACGCTGTGTGTTGCTTGCTGATCTCCTGCA
AAATTCAACAACCAACAGTCATCCTTACGGGATAAATCCTGTAACTGATATTGATAATAA
ATCTGCAACCCCTGCTGTTGCGCCAGTTCCAGCACATTACGGGTCAGTTCTGCTGGGCAC
AGCCAACCACCTTGCGGATAAGTAATGCCGCTGCAATTTGTCGCAACGCCCGTAATTTGT
TCAACCGCATTTGCCTCAACGGCTACAGCCAGTTCTTCGGGTAAATCCATTGACAACATC
TGTGCGATTTTATGCTGGCTTTTCTCATCCCAGCCTAACTGCGTGACGCCGCACCAGTCA
TGATCAAATTTAACGGGTAATTGGTCGTAAAACCGACGAGCAAAAGTAAACGCATTAGAG
AAAAAGCGGTTTAGCGCCTCATCGTGTTTGCTTAATAACGGATACAACGCCCCCTGGCGA
TTGCCGGAAGCACCCAGCGCGGGGGCTTCATCCGCGCAATAAAGCGTTACCTGCCAGCCG
CGGCGTAATAACGCCAGCGACAACAACGCGCTGGCAATACCACCGCCGATAATCGCCGCT
TCCAGTTTGCTGCTGCCCGTACGATTAAACCACGGCGTGGAGCAGGGGAGTGGTAATGTC
TGTTCCATCACCCCACAAAGCATTTCCCGTTTGCGCCCAAAGCCCTTACGTTTTTGCATC
GTGAATCCGGCTTCCTGCAAACCGCGGCGGACAAAACCGGCAGACGTAAATGTCGCCAGC
GTGCCGCCTGGACGCGCCAACCTTGCCATGGCGTTAAACAGATTTTGCGTCCACATATCC
GGGTTTTTAGCTGGCGCAAAGCCGTCCAGAAACCAGGCATCTACTTTTTGATTTAGAGAA
TCGTCCAGTTGGCTGGTCAGTTCATTAATATCGCCAAACCATAAATCCAGCGTCACGCGG
CCTTCATCGAGTAATAAACGATGGCAACCGGGCAAGGGCATTGGCCACTGCGCCTGAAGT
TGTTCTGCCCACGGAGTCAGTTCCGGCCAGTGTTGATGCGCTAAGGCTAAATCCGCACGG
GTGAGGGGAAATTTCTCAAAACTAATGAAATGTAAGCGTTGTAATTGCGCTTGCGGATGC
GCTTCGCGAAACTGATCAAATGCCTGCCATAGCGTCAGGAAGTTTAATCCGGTGCCGAAG
CCGCTCTCTGCTACCACAAACAGAGGATGTGGATGTTCAGGAAAGCGTGCCTCTAATTGG
TTACCTCCCAGAAAAACATAACGCGTCTCTTCCAGCCCGTTATCGTTGGAAAAATAGACA
TCGTCAAAATCTCGGGAAACAGGTGTACCCTCAGCATTAAATTCGAGGTTGGCAGGTTGT
ATGGAGTAGTGTTTCACGTAAGTTACTCGTCTTACAGGCGGTGGCTCGATCTTAGCGATG
TGTGTAAGGCTGCGCAAATTTCTCTATTAATTGGCTGATCGGACTTGTTCGGCGTACAAG
TGTACGCTATTGTGCATTCGAAACTTACTCTATGTGCGACTTACAGAGGTATTGAATGAA
ACGTGCAGTGATTACTGGCCTGGGCATTGTTTCCAGCATCGGTAATAACCAGCAGGAAGT
CCTGGCATCTCTGCGTGAAGGACGTTCAGGGATCACTTTCTCTCAGGAGCTGAAGGATTC
CGGCATGCGTAGCCACGTCTGGGGCAACGTAAAACTGGATACCACTGGCCTCATTGACCG
CAAAGTTGTGCGCTTTATGAGCGACGCATCCATTTATGCATTCCTTTCTATGGAGCAGGC
AATCGCTGATGCGGGCCTCTCTCCGGAAGCTTACCAGAATAACCCGCGCGTTGGCCTGAT
TGCAGGTTCCGGCGGCGGCTCCCCGCGTTTCCAGGTGTTCGGCGCTGACGCAATGCGCGG
CCCGCGCGGCCTGAAAGCGGTTGGCCCGTATGTGGTCACCAAAGCGATGGCATCCGGCGT
TTCTGCCTGCCTCGCCACCCCGTTTAAAATTCATGGCGTTAACTACTCCATCAGCTCCGC
GTGTGCGACTTCCGCACACTGTATCGGTAACGCAGTAGAGCAGATCCAACTGGGCAAACA
GGACATCGTGTTTGCTGGCGGCGGCGAAGAGCTGTGCTGGGAAATGGCTTGCGAATTCGA
CGCGATGGGTGCGCTGTCTACTAAATACAACGACACCCCGGAAAAAGCCTCCCGTACTTA
CGATGCTCACCGTGACGGTTTTGTTATCGCTGGCGGCGGCGGTATGGTTGTGGTCGAAGA
ACTGGAACACGCGTTGGCACGTGGTGCTCATATCTACGCTGAAATCGTTGGCTACGGCGC
AACGTCTGATGGCGCAGACATGGTTGCTCCATCTGGCGAAGGCGCAGTGCGCTGCATGAA
GATGGCGATGCACGGTGTTGATACGCCAATCGACTACCTGAACTCCCACGGTACTTCGAC
TCCGGTTGGCGACGTGAAAGAGCTGGCTGCTATCCGTGAAGTGTTCGGCGATAAGAGCCC
GGCGATTTCTGCAACCAAAGCCATGACCGGTCACTCTCTGGGCGCTGCTGGCGTACAGGA
AGCTATCTACTCTCTGCTGATGCTGGAACACGGCTTTATCGCCCCGAGCATCAACATTGA
AGAGCTGGACGAGCAGGCTGCGGGTCTGAATATCGTGACCGAAACGACCGATCGCGAACT
GACCACCGTTATGTCTAACAGCTTCGGCTTCGGCGGCACCAACGCCACGCTGGTAATGCG
CAAGCTGAAAGATTAATTCGGAGTAGGTCGGAGTAGGTCGGATAAGACGCGCCAGCGTCG
CATCCGACGTTACGCGCCAATGCGGCATTCGGCACTAACGCCAAAGGGAACCCGATGGTT
CCCTTTTTCACATCATTGACAATCGCCGCCTGTTCCAGGCAAACTTCCCGCTTTGTCGAT
TTCCTTCTGAAAAGACGTACGCGTTAATTCCTGCCAACGCACCGTAACCCTGAAACCAGA
GAGATGAGACGGGGATACTCCTCGCCTTGCGCTGCATTCTGGAGTAATGCATGACTGCTG
TAAGCCAAACCGAAACACGATCTTCTGCCAATTTTTCGCTCTTCCGCATCGCTTTTGCGG
TTTTTCTCACCTACATGACCGTAGGGCTGCCGTTGCCGGTTATCCCGCTGTTTGTTCATC
ATGAACTGGGCTATGGCAATACCATGGTCGGCATTGCCGTCGGGATTCAGTTTCTGGCTA
CGGTGCTGACGCGTGGCTATGCCGGGCGACTGGCCGATCAATATGGCGCAAAACGTTCGG
CGCTTCAGGGGATGTTAGCTTGTGGTCTGGCGGGGGGCGCGTTGCTGCTGGCGGCGATTT
TGCCCGTCTCCGCACCGTTCAAATTTGCCCTGTTGGTCGTCGGGCGTTTGATTCTTGGCT
TTGGTGAAAGCCAGTTACTGACAGGCGCTCTGACCTGGGGATTAGGCATCGTAGGGCCAA
AACACTCTGGCAAAGTAATGTCATGGAACGGAATGGCGATTTACGGTGCCCTCGCTGTTG
GTGCACCGCTTGGCCTGTTGATTCATAGCCATTACGGTTTTGCCGCACTGGCGATCACCA
CAATGGCATTACCCTTACTGGCGTGGGCCTGTAACGGCACAGTGCGCAAAGTACCGGCCC
TGGCGGGAGAACGTCCATCGCTGTGGAGCGTTGTCGGGCTTATCTGGAAACCAGGGTTAG
GTCTGGCACTACAAGGCGTTGGTTTTGCGGTTATCGGGACTTTCGTTTCGCTCTACTTTG
CCAGCAAAGGATGGGCGATGGCGGGCTTTACTCTTACCGCGTTTGGCGGGGCATTTGTCG
TGATGCGCGTCATGTTTGGCTGGATGCCGGACCGTTTTGGCGGCGTGAAAGTGGCGATAG
TCTCTCTGCTTGTAGAAACGGTGGGCTTGTTGCTGCTCTGGCAAGCCCCGGGTGCGTGGG
TCGCATTAGCGGGCGCGGCGTTAACCGGAGCCGGATGTTCGCTTATCTTTCCTGCGCTGG
GCGTGGAGGTGGTTAAACGCGTCCCCTCACAAGTTCGCGGCACCGCACTGGGCGGTTACG
CCGCGTTTCAGGATATCGCCCTCGGCGTCTCCGGGCCGCTGGCGGGAATGCTGGCGACCA
CGTTTGGTTACTCTTCGGTATTTCTTGCCGGGGCGATCTCTGCAGTGCTGGGAATTATTG
TCACGATACTGTCATTTCGTCGGGGCTAACGAACCAGCCAGACCAGCATCAGGATAATCG
CGACTAACAGTATCCACAGCGCGGGACGCGTTGCCATATTTTGCAACGTGTCCATCATCG
GTGGAAAAGGATTAAGCAGCGGTTGCATATCACGCGGATCAATCCCTTTAACCCGCCGTT
GATAAAGCTGATTAAGAATATCCTCGGCCTGGGCAGAAGAAAGCGATGATTGCGCAGAAA
GGCCATATTTTTGCTGGATATATGCCGATAACGCCGCCAGTTCACTGGCATCTAAAGGTT
GTTTTAGCGCCATCTGTAGTGATTCCAGCGTTGGCGTATTTTGCTGGCTTAGCGTCTGAC
GCGCCTGTAGCCAGGTCACCAGATGGTTAAACAGTTTCGCTGGAATTAACTCGCCATCTT
TCACCCCGGAAAGTTCCAGCATCGATTGCCAGATCTGTTTGCTGGGTTCCCCCGTTGCCG
CCGCAAGTTTGGTCACCAGCTGTTTGAGCGCATTGTGCTCCGCCGGTAATAAAGGACGAT
CGGTCGCCTCGCGCTGCTGCGGTTGCGGAATAACCATCTTCCCTTCCTGCAACAGGGTTA
GAATGGTTTTTAATTGCTCCGGTGAGAGCTGATTCAGCGGCGTCTGACCAAAGTTATGAC
GGATATAATCCGTGACCGCCTGACGATTATTCCCCAGACGTAAATACTCCCCTAATTGCG
CTAAAAGCTGGCGGGCAGAATGGCTTTTTTGCGCGGCCAGCAGACGTTGCGCCAGATTAT
GCTCAGCGGCAGGGAAGTGACGCGAAAGCAGCGGTGAATCTCCCGACAGACCAATATCGT
GCCTGATACCCGCCCACAGTTCTGCTCTTTGCTGTTGCGTCAGTGAGGTCACTTTCGTCA
TTAAGCTTTCCAGCGAAGTACGTTGCTGACTGGATAAAGGCTGATTGCCCGCGCCAGACG
GCAGGTTATCTCCCTGACCTGGTGGTTGCCCAGGAGGAGGGCCGGAAATAGGTTGTATCA
TTACGTATCCTTATACCTGAAATCTTCGCAAGTATGCCTGGCCGCGAGATTATGGCACAC
TTGTCCGGTTAACTCTCGTCTCATACAGGTAACACAAACGTGAAAATCCTTGTTGATGAA
AATATGCCTTATGCCCGCGACTTATTTAGCCGTTTGGGTGAGGTGACCGCGGTTCCCGGG
CGTCCAATCCCCGTCGCTCAACTGGCAGACGCGGATGCGCTGATGGTGCGTTCGGTCACG
AAAGTGAATGAATCTTTGCTGGCAGGAAAACCCATTAAATTTGTTGGCACTGCCACTGCG
GGGACCGACCATGTCGATGAAGCATGGTTGAAGCAGGCGGGAATTGGTTTTTCCGCTGCA
CCTGGCTGTAATGCGATTGCGGTGGTGGAATATGTTTTCTCCTCCCTGCTGATGCTTGCC
GAACGCGATGGATTTTCACTGCACGAGCGTACCGTGGGGATCGTGGGCGTTGGTAACGTT
GGACGTCGATTGCAGGCGCGACTGGAAGCGTTAGGGATTAAAACCTTGCTTTGCGATCCG
CCTCGCGCTGACCGTGGGGATGAGGGTGATTTCCGCTCGCTGGATGAGTTAGTCCAGCGC
GCGGATATTCTGACTTTCCATACGCCACTCTTTAAAGATGGTCCGTACAAAACGCTACAT
CTGGCGGATGAAAAACTGATCCGTAGCCTGAAGCCGGGAGCGATTCTGATTAACGCCTGC
CGTGGCGCAGTCGTCGATAATACCGCGCTGCTGACCTGCCTGAATGAAGGCCAGAAGTTA
AGCGTGGTGCTGGATGTCTGGGAAGGCGAGCCGGAACTTAATGTGGAATTGCTGACAAAA
GTGGATATCGGCACGCCGCATATTGCAGGCTATACCCTGGAAGGTAAAGCACGCGGTACT
ACGCAAGTGTTTGAAGCCTATAGCAAGTTTATTGGGCATGAACAGCACGTTGCGCTGGAT
ACATTACTGCCCGCGCCAGAGTTTGGTCGCATTACGCTGCATGGCCCGCTCGATCAACCG
ACGCTGAAAAGGCTGGTGCATTTGGTGTATGATGTGCGCCGCGATGACGCACCGCTGCGT
AAAGTCGCCGGGATACCGGGTGAGTTCGATAAACTGCGCAAAAACTATCTTGAGCGCCGT
GAATGGTCATCTCTGTATGTAATTTGTGATGACGCCAGTGCGGCATCATTGCTGTGTAAA
CTGGGTTTTAACGCCGTTCATCATCCGGCACGTTAATCTCTTCTTCATGCTCTCTGCTGT
AACATTGGCAGGGAGCTTTGCTATTTCTGGAGTAAACCACCATGTCTGAAGGCTGGAACA
TTGCCGTCCTGGGCGCAACTGGCGCTGTGGGCGAAGCCCTGCTTGAAACGCTGGCTGAAC
GTCAGTTCCCGGTTGGGGAAATTTATGCACTGGCACGTAACGAAAGCGCAGGCGAACAAC
TGCGCTTTGGTGGTAAAACAATCACCGTGCAGGATGCCGCTGAATTCGACTGGACGCAGG
CGCAGCTGGCATTTTTTGTCGCAGGCAAAGAAGCTACCGCTGCCTGGGTTGAAGAAGCGA
CCAACTCAGGTTGCCTGGTGATCGACAGCAGCGGACTGTTTGCTCTCGAACCAGACGTAC
CGCTGGTGGTGCCGGAAGTAAACCCGTTTGTACTGACCGATTACCGCAACCGGAATGTCA
TCGCCGTACCGGACAGTCTGACCAGCCAGTTGCTGGCGGCACTGAAACCGTTAATCGATC
AGGGCGGTTTATCACGTATCAGCGTTACCAGCCTGATTTCAGCCTCCGCCCAGGGCAAAA
AAGCGGTCGATGCGTTAGCGGGGCAGAGTGCGAAATTGCTCAACGGCATTCCGATTGACG
AAGAAGATTTCTTCGGGCGTCAGCTGGCGTTCAACATGCTGCCGTTACTGCCGGATAGCG
AAGGTAGCGTGCGTGAAGAACGTCGTATCGTTGACGAAGTACGCAAAATCCTGCAGGACG
AAGGGCTGATGATTTCGGCAAGCGTCGTCCAGGCACCGGTATTCTACGGTCATGCCCAGA
TGGTCAACTTTGAAGCACTGCGTCCGCTGGCGGCAGAAGAAGCGCGTGATGCGTTTGCTC
AGGGCGAAGATATTGTGCTCTCTGAAGAGAACGAATTCCCGACTCAGGTAGGGGATGCTT
CTGGTACGCCGCATCTTTCTGTTGGCTGCGTGCGTAATGACTACGGTATGCCGGAGCAAG
TCCAGTTCTGGTCGGTGGCCGATAACGTTCGCTTTGGCGGCGCGCTGATGGCAGTAAAAA
TCGCCGAGAAACTGGTGCAGGAGTATCTGTACTAATGTCCGACCAGCAACAACCGCCAGT
TTATAAAATTGCGCTGGGCATTGAGTACGACGGCAGTAAGTATTACGGCTGGCAACGGCA
GAACGAAGTTCGCAGTGTGCAGGAGAAGCTGGAAAAGGCGCTCTCCCAGGTGGCGAACGA
ACCCATCACCGTCTTCTGCGCCGGGCGTACTGACGCAGGGGTACACGGTACCGGGCAGGT
TGTGCATTTCGAAACAACCGCGCAGCGCAAAGACGCTGCGTGGACGTTGGGCGTAAATGC
GAATTTACCTGGTGACATCGCCGTGCGTTGGGTTAAAGCTGTACCTGATGATTTTCATGC
CCGATTTAGCGCCACGGCTCGCCGTTATCGCTACATCATCTACAATCATCGGCTGCGCCC
GGCGGTACTGAGTAAAGGGGTAACCCATTTTTACGAACCGCTGGACGCTGAACGGATGCA
TCGGGCTGCGCAATGCTTGCTGGGCGAGAATGATTTCACCTCGTTCCGTGCGGTGCAGTG
CCAGTCCCGAACCCCGTGGCGCAACGTTATGCATATTAATGTCACGCGTCACGGTCCTTA
TGTGGTGGTAGATATCAAAGCGAATGCCTTTGTACATCATATGGTCAGGAATATTGTCGG
CAGCCTGATGGAAGTCGGTGCCCACAACCAGCCGGAGAGCTGGATAGCAGAGTTGCTGGC
GGCAAAGGACAGAACGCTGGCGGCAGCAACGGCAAAAGCGGAAGGGCTGTATCTGGTCGC
GGTGGATTACCCTGACCGGTATGATCTTCCAAAATCGCCAATGGGCCCGCTATTTCTGGC
GGACTAACGAGAATAACGCTCGTAACATTTCAGGCTGTAGCCAACGTAGTTACAGCCTGA
AAGATGACGAGTACAAGGCATAGGCAAATATGGACCTGATTTATTTCCTCATCGATTTTA
TCCTGCACATTGACGTGCATCTGGCAGAGCTGGTCGCGGAGTACGGCGTCTGGGTTTATG
CCATTTTGTTCTTAATTTTGTTCTGTGAAACCGGTCTGGTGGTAACGCCGTTTTTACCGG
GTGATTCATTGCTGTTTGTTGCCGGTGCGTTGGCATCACTGGAAACCAACGATCTCAACG
TCCATATGATGGTGGTGCTGATGCTGATCGCCGCGATTGTGGGTGACGCGGTCAATTACA
CTATCGGGCGGTTGTTCGGTGAAAAGTTATTCAGTAATCCCAATTCGAAAATTTTCCGTC
GCAGTTATCTCGACAAAACCCATCAGTTTTATGAGAAACATGGCGGCAAAACGATTATTC
TCGCCCGTTTTGTGCCGATCGTCAGAACGTTCGCCCCGTTTGTTGCGGGAATGGGCCACA
TGTCGTACCGTCATTTCGCTGCTTATAACGTGATCGGCGCACTGTTGTGGGTACTGCTTT
TTACCTACGCAGGCTATTTCTTCGGTACAATCCCGATGGTTCAGGATAACCTTAAGCTGC
TGATCGTCGGGATTATTGTGGTTTCTATTTTGCCGGGCGTCATCGAAATAATCCGTCACA
AACGCGCTGCGGCACGCGCCGCAAAATAAAAAGTAACTCAGCGGTTCGACCACTTTTTTA
TCCAAAGTTTCGGGCTGTTATGTTTTAATGTGCAACATTCATGGTCTGTTGGGGGCAAAA
ATGGCATTATGCGTCCCCAAAGATAAAACTGGCATCGAACCAGGTTCAGACAGAAAGGTC
CCTAATGAGCTGGATTGAACGAATTAAAAGCAACATTACTCCCACCCGCAAGGCGAGCAT
TCCTGAAGGGGTGTGGACTAAGTGTGATAGCTGCGGTCAGGTTTTATACCGCGCTGAGCT
GGAACGTAATCTTGAGGTCTGTCCGAAGTGTGACCATCACATGCGTATGACAGCGCGTAA
TCGCCTGCATAGCCTGTTAGATGAAGGAAGCCTTGTGGAGCTGGGTAGCGAGCTTGAGCC
GAAAGATGTGCTGAAGTTTCGTGACTCCAAGAAGTATAAAGACCGTCTGGCATCTGCGCA
GAAAGAAACCGGCGAAAAAGATGCGCTGGTGGTGATGAAAGGCACTCTGTATGGAATGCC
GGTTGTCGCTGCGGCATTCGAGTTCGCCTTTATGGGCGGTTCAATGGGGTCTGTTGTGGG
TGCACGTTTCGTGCGTGCCGTTGAGCAGGCGCTGGAAGATAACTGCCCGCTGATCTGCTT
CTCCGCCTCTGGTGGCGCACGTATGCAGGAAGCACTGATGTCGCTGATGCAGATGGCGAA
AACCTCTGCGGCACTGGCAAAAATGCAGGAGCGCGGCTTGCCGTACATCTCCGTGCTGAC
CGACCCGACGATGGGCGGTGTTTCTGCAAGTTTCGCCATGCTGGGCGATCTCAACATCGC
TGAACCGAAAGCGTTAATCGGCTTTGCCGGTCCGCGTGTTATCGAACAGACCGTTCGCGA
AAAACTGCCGCCAGGATTCCAGCGCAGTGAATTCCTGATCGAGAAAGGCGCGATCGACAT
GATCGTCCGTCGTCCGGAAATGCGCCTGAAACTGGCGAGCATTCTGGCGAAGTTGATGAA
TCTGCCTGCGCCGAATCCTGAAGCGCCGCGTGAAGGCGTAGTGGTACCCCCGGTACCGGA
TCAGGAACCTGAGGCCTGATAACTGATAAGGGCAGGGCCACTGGCTCTGCCCTTTTGCTA
TTCTCACCGTAACGAATCAGCGGATACCATGATTATCAAACGCACTCCTCAAGCCGCGTC
GCCTCTGGCTTCGTGGCTTTCTTATCTGGAAAACCTGCACAGTAAAACTATCGATCTCGG
CCTTGAGCGCGTGAGCCAGGTCGCGGCGCGTCTTGGCGTTCTGAAACCAGCGCCGTTTGT
GTTTACCGTTGCGGGTACGAATGGCAAAGGCACCACCTGCCGTACGCTGGAGTCGATTCT
GATGGCGGCAGGGTACAAAGTGGGCGTCTACAGTTCGCCTCATCTGGTGCGTTATACCGA
GCGCGTACGTGTGCAGGGTCAGGAATTGCCGGAATCGGCCCACACCGCCTCTTTTGCGGA
GATTGAATCGGCACGCGGTGATATTTCCCTGACCTATTTCGAGTACGGTACGCTGTCGGC
GTTGTGGCTGTTCAAACAGGCACAACTTGACGTGGTGATTCTGGAAGTAGGGCTGGGCGG
TCGTCTGGACGCAACCAATATTGTCGACGCCGATGTCGCGGTAGTAACCAGTATTGCGCT
GGATCATACCGACTGGCTGGGGCCAGATCGCGAAAGTATTGGTCGCGAGAAAGCAGGCAT
CTTCCGCAGCGAAAAACCGGCAATTGTCGGTGAGCCGGAAATGCCTTCTACCATTGCTGA
TGTGGCGCAGGAAAAAGGTGCACTGTTACAACGTCGGGGCGTTGAGTGGAACTATTCCGT
CACCGATCATTACTGGGCGTTTAGCGATGCTCACGGCACGCTGGAAAATCTGCCGTTGCC
GCTTGTCCCGCAACCGAATGCCGCAACGGCGCTGGCGGCACTGCGTGCCAGCGGGCTGGA
GGTCAGTGAAAATGCCATTCGCGACGGGATTGCCAGCGCAATTTTGCCGGGACGTTTCCA
GATTGTGAGCGAGTCGCCACGCGTTATTTTTGATGTCGCGCATAATCCACATGCGGCGGA
ATATCTCACCGGGCGTATGAAAGCGCTACCGAAAAACGGGCGCGTGCTGGCGGTTATCGG
TATGCTACATGATAAAGATATTGCCGGAACTCTGGCCTGGTTGAAAAGCGTGGTTGATGA
CTGGTATTGTGCGCCACTGGAAGGGCCGCGCGGTGCCACGGCAGAACAACTGCTTGAGCA
TTTGGGTAACGGCAAATCATTTGATAGCGTTGCGCAGGCATGGGATGCCGCAATGGCGGA
CGCTAAAGCGGAAGACACCGTGCTGGTGTGTGGTTCTTTCCACACGGTCGCACATGTCAT
GGAAGTGATTGACGCGAGGAGAAGCGGTGGCAAGTAAGTTTCAGAATCGGTTAGTGGGCA
CGATCGTGCTGGTGGCGCTGGGGGTGATTGTACTTCCAGGGCTGCTGGACGGGCAGAAAA
AACATTATCAGGATGAGTTTGCGGCTATCCCGCTGGTTCCAAAAGCGGGCGATCGCGATG
AGCCTGATATGATGCCAGCCGCCACCCAGGCGTTGCCGACGCAGCCGCCGGAAGGCGCAG
CGGAAGAGGTGCGGGCAGGTGATGCCGCAGCACCGTCGCTCGATCCGGCCACTATTGCAG
CCAATAACACCGAGTTTGAACCGGAACCTGCACCGGTCGCGCCACCGAAGCCGAAACCGG
TGGAGCCGCCTAAACCAAAGGTTGAAGCACCACCTGCGCCGAAGCCAGAACCGAAGCCGG
TCGTGGAAGAAAAAGCTGCACCGACGGGTAAAGCCTATGTTGTGCAACTGGGTGCGCTGA
AAAATGCCGATAAAGTGAATGAAATTGTCGGTAAGCTGCGCGGTGCCGGTTATCGGGTTT
ATACGTCGCCATCCACGCCAGTGCAGGGTAAAATTACCCGTATTCTGGTTGGGCCGGATG
CCTCGAAAGATAAGCTGAAAGGTTCGCTGGGTGAGTTGAAGCAACTTTCTGGCTTAAGTG
GCGTGGTAATGGGCTATACGCCGAATTAATACGGTCTTGCCTGATGCGACGCTGGCGCGT
CTTATCAGGCCTACGCAGGGGTAGAACCGTAGGTTGGATAAGGCGTTTACGCCGCATCCG
ACACGCATTGCACGATGCCGCAAAGGCATAAAAAGTCGATGGCGTTGAATATTTTTTCAG
CGCCATTTTTATTGATGCGCGGGAAGGAAATCCCTACGCAAACGTTTTCTTTTTCTGTTA
GAATGCGCCCCGAACAGGATGACAGGGCGTAAAATCGTAGGACACATATGGTCTGGATTG
ATTACGCCATAATCGCGGTGATTGCTTTTTCCTCTCTGGTTAGCCTGATCCGCGGCTTTG
TTCGTGAAGCGTTATCGCTGGTGACATGGGGTTGTGCTTTCTTTGTTGCCAGTCATTACT
ACACTTACCTGTCAGTCTGGTTTACGGGCTTTGAAGACGAACTGGTTCGAAATGGGATTG
CCATCGCGGTACTGTTTATCGCTACCCTGATCGTTGGTGCTATCGTGAACTTCGTGATAG
GCCAGTTGGTGGAGAAAACGGGGTTGTCAGGCACCGATCGGGTGCTGGGCGTCTGTTTCG
GTGCGTTGCGCGGTGTGTTGATTGTTGCCGCCATTCTCTTCTTTCTCGACTCCTTTACCG
GGGTGTCGAAAAGCGAAGACTGGAGCAAATCACAGCTGATCCCGCAGTTCAGTTTTATCA
TCAGATGGTTTTTTGATTATCTGCAAAGCTCGTCAAGTTTCTTGCCCAGAGCGTAAGTGC
TCTGAGATGTGGCTTAACGAGGAAAAAGACGTATGTGCGGTATTGTCGGTATCGCCGGTG
TTATGCCGGTTAACCAGTCGATTTATGATGCCTTAACGGTGCTTCAGCATCGCGGTCAGG
ATGCCGCCGGCATCATCACCATAGATGCCAATAACTGCTTCCGTTTGCGTAAAGCGAACG
GGCTGGTGAGCGATGTATTTGAAGCTCGCCATATGCAGCGTTTGCAGGGCAATATGGGCA
TTGGTCATGTGCGTTACCCCACGGCTGGCAGCTCCAGCGCCTCTGAAGCGCAGCCGTTTT
ACGTTAACTCTCCGTATGGCATTACGCTTGCCCACAACGGCAATCTGACCAACGCTCACG
AGTTGCGTAAAAAACTGTTTGAAGAAAAACGCCGCCACATCAACACCACTTCCGACTCGG
AAATTCTGCTTAATATCTTCGCCAGCGAGCTGGACAACTTCCGCCACTACCCGCTGGAAG
CCGACAACATTTTCGCCGCCATCGCTGCTACAAACCGCTTAATCCGCGGCGCGTATGCCT
GTGTGGCGATGATTATCGGCCACGGTATGGTTGCTTTCCGCGATCCTAACGGTATTCGTC
CGCTGGTACTGGGAAAACGTGATATTGACGAGAACCGCACAGAATATATGGTCGCTTCCG
AAAGCGTTGCGCTCGATACACTGGGCTTTGATTTCCTGCGTGACGTCGCGCCTGGCGAAG
CGATTTACATCACTGAAGAAGGGCAGTTGTTTACCCGTCAATGTGCTGACAATCCGGTCA
GCAATCCGTGCCTGTTTGAGTATGTATACTTTGCTCGCCCGGACTCGTTCATCGACAAAA
TTTCCGTTTACAGCGCGCGTGTGAATATGGGCACGAAGCTGGGCGAGAAAATTGCCCGCG
AATGGGAAGATCTGGATATCGACGTGGTGATCCCGATCCCGGAAACCTCGTGTGATATCG
CGCTGGAAATTGCGCGTATTCTGGGCAAACCGTACCGCCAGGGCTTCGTTAAAAACCGCT
ATGTTGGCCGCACCTTCATCATGCCGGGCCAGCAGCTGCGTCGTAAGTCCGTGCGCCGTA
AACTGAACGCCAACCGCGCCGAGTTCCGCGATAAAAACGTCCTGCTGGTCGACGACTCCA
TCGTCCGTGGCACCACTTCTGAGCAGATTATCGAGATGGCACGCGAAGCCGGAGCGAAGA
AAGTGTACCTCGCTTCTGCGGCACCGGAAATTCGCTTCCCGAACGTTTACGGTATCGATA
TGCCGAGCGCTACGGAACTGATCGCTCACGGTCGCGAAGTAGATGAAATTCGCCAGATCA
TCGGTGCTGACGGGTTGATTTTCCAGGATCTGAACGATCTGATCGAAGCCGTTCGCGCTG
AAAACCCGGATATCCAGCAGTTTGAATGCTCGGTGTTCAACGGCGTCTACGTCACCAAAG
ATGTTGATCAGGGCTACCTCGATTTCCTCGATACTTTACGTAATGACGACGCCAAAGCAG
TGCAACGTCAGAACGAAGTGGAAAATCTCGAAATGCATAACGAAGGATGATGCCTTCGCT
CAGGGTGCCGATCTGGCACCCTGACTTGCAACTCCCGCCGAAATCCTGCAAAGTCTGCCT
GCAAGTCTGACAGGGCAACTATTTATGAAACGACTTATTGTGGGCATCAGCGGTGCCAGC
GGCGCGATTTATGGCGTGCGTTTATTACAGGTTCTGCGCGATGTCACAGATATCGAAACG
CATCTGGTAATGAGCCAGGCGGCGCGCCAGACCTTATCCCTCGAAACGGATTTTTCCCTG
CGCGAAGTGCAGGCGTTAGCCAATGTCACGCACGATGCGCGCGATATTGCCGCCAGCATC
TCTTCCGGTTCTTTCCAGACGTTGGGGATGGTGATTTTACCCTGTTCAATCAAAACCCTG
TCCGGCATTGTCCATAGCTATACTGATGGCTTACTGACCCGTGCGGCAGATGTTGTGCTG
AAAGAGCGTCGCCCGTTGGTGCTCTGCGTGCGTGAAACACCATTGCACTTAGGCCATCTG
CGTTTAATGACGCAGGCAGCAGAAATCGGTGCGGTGATTATGCCTCCCGTTCCGGCGTTT
TATCATCGCCCGCAATCCCTTGATGATGTGATAAATCAGACGGTTAATCGTGTTCTTGAC
CAGTTTGCGATAACCCTTCCTGAAGATCTCTTTGCCCGCTGGCAGGGCGCATAACTCCGC
TGTTGCCCTGTTTCAGGGCAATTTTGCAACCGCGATCAAATCCTCGACATTTTGTTTCTG
CCATTCAATCGAAACGCTGCGATTCAACCGCTATACCTGCTATCTTCAACTTTAGGACAA
TAATGCAACGTCTTATTAACATATTTAACGTTGAATGTTATTGTTGTCGTCAAGATGGCA
TAAGACCTGCATGAAAGAGCCTGCAAACACACAACACAATACACAACATAAAAAGCCATT
TTTACTTGAGGGTTATGTATGAAGAAGTCGATTCTCGCTCTGTCTTTGTTAGTCGGTCTC
TCCGCAGCGGCTTCCAGCTATGCGGCGCTACCGGAGACGGTACGTATCGGAACCGATACC
ACCTATGCGCCGTTCTCGTCGAAAGATGCTAAAGGTGATTTTGTTGGCTTTGATATCGAT
CTCGGTAACGAGATGTGCAAACGGATGCAGGTGAAATGTACCTGGGTTGCCAGTGACTTT
GACGCGCTGATCCCCTCACTGAAAGCGAAAAAAATCGACGCCATTATTTCGTCGCTCTCC
ATTACCGATAAACGTCAGCAGGAGATTGCTTTCTCCGACAAGTTGTACGCCGCAGATTCT
CGTTTGATTGCCGCCAAAGGTTCGCCGATTCAGCCAACGCTGGATTCACTGAAAGGTAAA
CATGTTGGTGTGCTGCAGGGATCAACCCAGGAAGCTTACGCTAACGAGACCTGGCGTAGC
AAAGGTGTGGATGTGGTGGCCTATGCCAACCAGGATTTGGTCTATTCCGATCTGGCTGCA
GGACGTCTGGATGCTGCACTGCAGGATGAAGTTGCTGCCAGCGAAGGATTCCTCAAGCAA
CCTGCTGGTAAAGACTTCGCCTTTGCTGGCTCATCAGTGAAAGACAAAAAATACTTCGGT
GACGGCACCGGTGTAGGGCTACGTAAAGATGATGCTGAACTGACGGCTGCCTTCAATAAG
GCGCTTGGCGAGCTGCGTCAGGACGGCACCTACGACAAGATGGCGAAAAAGTATTTTGAC
TTTAATGTCTACGGTGACTGATACGTCGCAGGGAAGCTGTACCTGATGGAATGATCATCA
TGGTGCACGCCAGGTTTGTTGCACTATTGTGGTGCATTGAAATGCATACTTAAGCATTTT
TAATGAAAAATAATACGTCTAACGGGGCGGGATATTTTGCCTTGATGGTCAATTTTATGG
CACGATAAGTGTAACAAACCTGTAAATATTCCCTATAAAAAGACTGTCAGTTGAGGACAT
TATGAAAAAACTGGTGCTATCGCTCTCTCTGGTTCTGGCCTTCTCCAGCGCAACTGCGGC
ATTTGCTGCGATTCCGCAAAACATCCGCATCGGTACCGACCCGACCTATGCGCCATTTGA
ATCAAAAAATTCACAAGGCGAACTGGTTGGCTTCGATATCGATCTGGCAAAGGAATTATG
CAAACGCATCAATACGCAATGTACGTTTGTCGAAAATCCGCTGGATGCGTTAATCCCGTC
CTTAAAAGCGAAGAAGATTGACGCCATCATGTCATCGCTTTCCATTACGGAAAAACGTCA
GCAAGAAATAGCCTTCACCGACAAACTGTACGCTGCCGATTCTCGTCTGGTGGTGGCGAA
AAATTCTGACATTCAGCCGACAGTCGAGTCGCTGAAAGGCAAACGGGTAGGCGTATTGCA
GGGCACCACCCAGGAGACGTTCGGTAACGAACACTGGGCACCAAAAGGCATTGAAATCGT
CTCGTATCAGGGGCAGGACAACATTTATTCTGACCTGACTGCCGGACGTATTGATGCCGC
GTTCCAGGATGAGGTCGCTGCCAGCGAAGGTTTCCTTAAACAACCTGTCGGTAAAGATTA
CAAATTCGGTGGCCCGTCTGTTAAAGATGAAAAACTGTTTGGCGTAGGGACCGGCATGGG
CCTACGTAAAGAAGATAACGAACTGCGCGAGGCACTGAACAAAGCCTTTGCCGAAATGCG
CGCTGACGGTACTTACGAGAAATTAGCGAAAAAGTACTTCGATTTTGATGTTTATGGTGG
CTAATCGCCATCGGTGAAAGAAAGCCCGCTCCCTTCGGGTAACCGGAGGGAGACAAGAGG
CGGTAATTCACCACACACGACAGGACAGGCTGCATGTTGTATGGGTTTTCAGGTGTTATT
TTACAGGGTGCGCTCGTCACGCTGGAGCTGGCTATCAGCTCTGTAGTGCTCGCTGTAATC
ATCGGTTTAATTGGCGCTGGCGGTAAGCTCTCTCAAAATCGGCTTTCGGGGCTGATTTTC
GAAGGGTACACCACGCTGATTCGTGGCGTGCCGGACTTAGTGTTGATGCTGCTGATTTTC
TACGGTTTGCAGATTGCGCTAAACACGGTGACGGAGGCGATGGGCGTCGGGCAGATTGAT
ATCGATCCGATGGTCGCTGGTATTATCACTCTCGGTTTTATCTACGGTGCTTATTTTACC
GAAACGTTCCGTGGTGCTTTTATGGCAGTGCCGAAAGGACATATAGAGGCGGCGACGGCG
TTCGGTTTTACTCGTGGGCAAGTGTTTCGGCGGATCATGTTTCCGGCGATGATGCGTTAC
GCCCTGCCAGGCATTGGCAACAACTGGCAGGTGATCCTCAAATCTACCGCACTGGTTTCG
TTACTCGGCCTGGAAGATGTGGTCAAAGCCACGCAGCTGGCAGGCAAAAGTACCTGGGAA
CCGTTCTATTTCGCCATCGTCTGTGGCGTGATTTACCTGGTTTTCACCACCGTTTCCAAT
GGTGTGCTGCTGTTCCTTGAGCGCCGCTACTCCGTGGGTGTGAAGAGGGCTGACCTGTGA
TCGAAATCTTACATGAATACTGGAAACCGCTGCTGTGGACCGACGGTTATCGCTTTACTG
GTGTGGCGATCACTCTGTGGCTGCTTATTTTGTCGGTAGTGATAGGCGGAGTCCTGGCGC
TGTTTCTGGCGATTGGTCGTGTCTCCAGTAATAAATACATCCAGTTTCCAATCTGGTTAT
TTACCTATATTTTTCGCGGTACGCCGCTGTATGTTCAGTTGCTGGTGTTCTATTCCGGCA
TGTATACGCTGGAGATTGTTAAGGGGACCGAGTTTCTTAACGCCTTTTTCCGCAGTGGCC
TGAACTGTACCGTGCTGGCGCTGACGCTTAACACCTGCGCTTACACTACCGAGATTTTTG
CTGGGGCAATCCGTTCGGTTCCGCATGGGGAAATTGAAGCCGCCAGAGCCTATGGCTTCT
CGACTTTTAAAATGTATCGCTGCATTATTTTGCCTTCTGCGCTGCGTATTGCGTTACCGG
CATACAGCAACGAAGTGATCCTGATGCTGCACTCTACTGCGTTGGCATTTACTGCCACGG
TGCCGGATCTGCTGAAAATAGCCCGCGATATTAACGCCGCCACGTATCAACCTTTTACCG
CCTTCGGCATTGCCGCGGTGCTCTATTTAATCATCTCTTATGTCCTGATCAGCCTCTTTC
GCAGAGCGGAAAAACGCTGGTTGCAGCATGTGAAACCTTCTTCAACGCACTGAGAATACG
ATGTCCGAGAATAAATTAAACGTTATCGATTTGCACAAACGCTATGGCGAACACGAAGTG
CTGAAAGGGGTGTCACTGCAAGCGAATGCCGGAGATGTCATAAGCATCATCGGATCGTCG
GGATCGGGGAAAAGTACCTTTCTGCGCTGCATTAACTTCCTCGAAAAACCGAGTGAAGGG
TCGATCGTGGTCAATGGCCAGACGATCAATCTGGTGCGCGGCAAAGACGGTCAACTCAAA
GTCGCCGATAAAAATCAACTGCGCTTACTGCGCACACGCCTGACGATGGTATTCCAGCAC
TTCAATCTCTGGAGCCATATGACGGTGCTGGAAAACGTCATGGAAGCGCCGATTCAGGTG
TTGGGCCTGAGCAAGCAGGAAGCGCGCGAGCGGGCGGTGAAGTATCTGGCAAAAGTTGGG
ATAGACGAACGTGCACAGGGGAAATATCCGGTGCATCTTTCCGGCGGTCAGCAACAGCGT
GTTTCTATCGCGCGGGCGCTGGCGATGGAACCGGAAGTTTTACTGTTTGATGAACCTACC
TCGGCGCTCGATCCTGAACTGGTAGGCGAAGTGTTGCGCATTATGCAGCAACTGGCAGAA
GAGGGGAAAACCATGGTGGTTGTGACTCACGAAATGGGCTTTGCTCGTCATGTTTCTACT
CACGTCATTTTCCTCCATCAGGGGAAAATAGAGGAAGAAGGCGCGCCGGAGCAGTTATTT
GGCAACCCGCAAAGCCCTCGTCTGCAACAGTTCCTTAAAGGTTCGCTGAAATAATTGCCT
CTCCGGTGGCTAACGCTGCCGGAGTATTTTCAAGGGGAATTTGCGAGTCAGCTTCCGCTG
AAATGTAAAAGTTGCAGTCCGCTAAAAATACTTCTGAATTCGCTGTCCAAAGATAAAAAC
TGCCTGCTGCATTGGGTGTTAATCGTGGTTATTGTCGCGTCATCTTAAATTTGAGGGGTG
ACGGAACGCCATGACAATATCGACAACTTCCACGCCGCATGATGCGGTATTTAAATCTTT
TTTACGCCATCCAGACACCGCGCGGGATTTTATTGATATTCATCTTCCCGCGCCGCTGCG
CAAACTGTGAGATTTAACGACGCTTAAACTGGAACCAAACAGTTTTATTGATGAAGACCT
GCGGCAATATTATTCCGACCTCTTATGGTCTGTGAAAACGCAGGAGGGAGTGGGTTATAT
TTATGTAGTGATAGAGCACCAAAGTAAGCCGGAAGAATTAATGGCTTTTCGCATGATGCG
TTATTCCATTGCGGCAATGCAAAACCATCTTGATGCGGGCTATAAAGAGCTTCCATTGGT
GATCCCGATGCTGTTTTATCATGGTTGCAGAAGTCCTTATCCTTATTCACTCTGCTGGCT
TGATGAATTTGCCGAGCCTGCGATTGCCCGTAAAATATATTCATCGGCTTTTCCGTTGGT
GGATATTACCGTGGTGCCGGATGACGAGATTATGCAACATCGCAAAATGGCGCTGTTGGA
GTTAATTCAGAAACATATTCGTCAGCGCGATCTGTTGGGATTAGTCGACCAAATTGTTTC
GCTGCTAGTTACAGGGAACACTAATGACAGACAGCTAAAAGCCCTGTTTAATTATGTATT
ACAAACGGGAGATGCCCAGCGTTTCCGTGCATTTATTGGTGAGATAGCAGAACGCGCACC
ACAGGAAAAGGAGAAACTGATGACCATTGCTGACAGATTACGTGAAGAAGGGCGGAATGA
TGGATTAATTCTTGGCAAACGCGAAGAAGCCCTGCGTATTGCTCAGGAGATGCTGGATAG
AGGTTTAGACCGAGAGTTAGTTATGATGGTGACCCGACTTTCACCAGACGATCTTATCGC
GCAAAGCCACTAACCCTGTAACACCGGGAGTTAACTGGCGGATGTTTGCAGTAAACCACA
TCAGCGAACGACATCCGCCAGCGCCTCTTCTAAATCGTACCAACGAAACGCAAAACCCGC
TTCTTCCAGCCGTTTAGGCAGCGCGCGTTGTCCACCTAATACCAGTACTGAAGATTCGCC
CATTAACAGCCGAATGGCGGTTGCGGGGACGCGCAAAATAGCCGGGCGATGCAGCGCATG
ACCGAGCGCATGGGCAAATTGTTCATTGCGTATCGGGTAGGGCGAAACCATATTAAATGG
CCCGCGCAGCTCGTTATCCAGCAGCCAGAGAATGCCGTTGACCATATCATCGATATGAAT
CCAGGCCAGATACTGCCGACCGGAACCAATCGGCCCGCCCAGGCCAAGACGAAACGGCGG
CAGCATTTTACCGAGAATACCGCCATCCGGTGCCAGCACTACGCCGGTACGCAGCAGGCA
CACTCGCGTTTTGTCACTTTGCGCCCGGCAGGCAATTTCTTCCCAGCGGGCGCAGAGTTT
ATGGGTAAATTCGTTATGCGGCGGTTCCTCTTCGGTAACCACCACTTCACCTAAGTCGCC
ATAATAGCCCGTTGCCGAGCCGGAAATGAGTACCGACGGTGGCGTGTCGCTGGCATTAAT
CAAATCGACCAGTTTTTGCGTGATATTCCAGCGGCTTTGGCAGAGACGCTCTTTTTGCTC
GTGAGTCCAGCGTTTATCAGCAATCGGTTCTCCGGCGAGGTTGATTACCGCATCAACGCC
GTTGAGGTTGCTTTGATCGGCAAGCCCTTGCCATAGCGTCACCTGCGGCCCGAGCACGGA
ACTGGCTTTCTGCGGGTTACGCGTCATTACCGTGATTTGATGGCCCAGCTCCAGCAAACG
TGGAATCAAATGGCGACCAATTAATCCCGTCCCTCCGGTGATCACTATGTTCATGCAGCC
TCCCGATATGGCGGTTAACGCTGCCAGCTTAAGGTCATGGATACCGAATCGGCGTAGCGC
AGCGCGTGCAGTTTATCGATCTCCACTTCAGCATACGTCACCCAGTGATGTTCACGTGCG
ATATCGAGCACATCCTGAGTTAATTTTTCCAGCAAAGAGAAACGGTTATTCTCTACATGC
TGAATAATGTTTTTCGTTACGGTGCGATAATTCAGCGCATCGTTGATATCTTCGCTGGTG
CGCGCTTTATCGGCGGGGTAGTGGATCGTCACATTGATAACAATATCCTGACGGTTGTTA
ATTTCTTCTTCCTTAATTCCGATAAATGTACGTAAACGAAGGTTCTTTATACGAATAATA
GCGGCAGGTTGTGCCATTGCAGGTTCTCCGTTGTTTTACTTAGGATGAAATAATACACGA
GAACCTGTTTCTGTTAACTATCCGAACGCTCATCACCGAGTTGTGCTTTTAGCAGTGCCT
GCCCAGTGGCAGGGCGCGAACGGATCCGCTCATGCCAGTTCTTGACTGCCGGATACATTG
CGAGGTCAATTCGCTGGCGAGTCCAGGCATTAACCCACGGCCAGCAGGCAATATCCGCAA
TGCTGTAGTTCTCACCTCCCAGCCAGGGCGAGTTTTCCAGCCGCTTGTTCAGTACATGGT
ACAGGCGCTGAGTTTCAACCTGATAACGTTCAATAGCGTAAGGAATGGTTTGGGGGGCTG
CGTGATTAAAATGATGATTTTGCCCAAGCATCGGCCCCAGTCCGCCTACCTGCCAGAATA
ACCACTGTAATGTGGCGGCGCGCTCACGCGTTTCATGACTCAAAAAGAGTCCTGTTTTCT
CAGCCAGATACAACAAAATGGCACCAGATTCAAAGAGGCTTAGCGGTTCGCCGCCATCGG
CTGGAGAATGATCAACAATTGCCGGAATTTTGTTGTTAGGCGAAATGCGCAAAAATTCCG
GGCGAAACTGACCGCCTTTCCCCAGGTCTACCTTTATCAAGCGATAATCCAGCCCTGCTT
CTTCGAGAAACAGCGTAATTTTGTGGCCATTGGGTGTCGGGGCGAAATAGAGATCGATCA
TTGCAGCTCCGGTTGTCTAATCATCTGAACACCACAAGTATAGAAAGCGCGGCGACTTGC
GTGAGTATTCGTCACGTGACAGTGACAAAAAGGCTCTATAGTTTGATAGCCAGCCCCCTT
TATTGCCGAGGACATAATGAGTAAACCCGCTATCACGCTTTGGTCAGATGCCCATTTTTT
CTCCCCTTATGTGTTATCCGCCTGGGTGGCGTTGCAGGAAAAAGGCCTGTCGTTTCATAT
CAAGACCATCGACCTCGACAGCGGTGAACATTTGCAACCGACGTGGCAAGGTTACGGTCA
GACACGCCGTGTGCCGTTATTACAAATCGATGATTTTGAGTTGAGTGAATCTTCTGCCAT
TGCGGAGTATCTGGAAGATCGATTTGCGCCACCGACCTGGGAACGTATTTATCCGCTTGA
TTTAGAAAATCGTGCGCGTGCACGACAGATTCAGGCCTGGCTGCGCAGCGATCTGATGCC
CATTCGCGAAGAGCGTCCGACGGATGTTGTCTTTGCGGGGGCGAAAAAAGCGCCACTAAC
GGCCGAGGGAAAAACCAGTGCAGAGAAACTGTTCGCGATGGCAGAACATTTGTTAGTACT
GGGTCAGCCGAATTTATTTGGTGAATGGTGCATTGCTGATACTGATCTGGCGCTAATGAT
TAACCGCCTGGTACTACATGGCGATGAGGTGCCAGAACGCCTGGTGGATTATGCGACATT
CCAGTGGCAGCGAGCGTCTGTCCAGCGTTTTATTGCACTTTCAGCGAAGCAATCTGGCTG
ATAGCAACGACAGAATCCAGTATCATAGCTTACGTTTTTTCGACGAGGAGTGAGTGATGA
AACTGATGTTTGCATCGGACATTCATGGGTCGTTACCGGCGACGGAACGTGTTCTGGAGT
TGTTTGCCCAAAGCGGTGCCCAGTGGCTGGTGATCCTTGGCGACGTGTTGAATCACGGCC
CGCGTAATGCTTTACCGGAGGGTTACGCGCCAGCCAAAGTCGCTGAACGGCTTAATGAAG
TGGCACATAAGGTTATCGCTGTGCGCGGCAACTGCGACAGCGAAGTGGATCAAATGCTGC
TGCATTTCCCGATAACCGCGCCGTGGCAACAGGTATTACTGGAAAAACAACGTCTGTTTT
TGACGCATGGTCATCTTTTTGGCCCGGAAAATCTGCCTGCTTTAAACCAGAACGATGTGC
TGGTTTACGGTCATACCCATCTGCCAGTAGCAGAACAGCGGGGGGAGATTTTCCACTTCA
ACCCCGGCTCGGTGAGTATTCCGAAAGGCGGTAATCCGGCGAGTTATGGCATGCTGGATA
ATGACGTACTTAGTGTAATCGCACTCAATGATCAAAGTATCATTGCGCAGGTCGCGATTA
ATCCGTAATTTACCCACAACTCAAAATGCGCCGTAAGAGCGCCAGAAAAAGAAGGTTTCC
TGATAATGGAACAGCGTCGTTTGGCAAGTACTGAATGGGTGGATATTGTCAATGAAGAGA
ACGAAGTCATTGCACAAGCCAGCCGGGAGCAAATGCGGGCACAGTGTCTGCGTCATCGTG
CAACTTACATCGTCGTGCATGATGGCATGGGCAAAATTCTGGTCCAGCGTCGTACCGAGA
CAAAAGACTTTTTACCCGGCATGTTAGATGCGACCGCAGGCGGTGTGGTTCAGGCCGATG
AGCAACTGCTGGAATCCGCGCGTCGCGAAGCGGAAGAAGAGTTGGGCATTGCCGGTGTCC
CCTTTGCCGAGCACGGGCAGTTCTATTTCGAAGATAAAAATTGCCGTGTCTGGGGCGCAT
TGTTCAGCTGCGTCTCTCACGGTCCCTTCGCCCTACAGGAAGATGAAGTCAGTGAAGTTT
GCTGGCTGACGCCGGAAGAAATCACCGCACGCTGCGATGAGTTCACTCCAGACTCGCTGA
AAGCGCTAGCGTTGTGGATGAAGCGCAATGCCAAAAATGAAGCCGTAGAGACTGAAACGG
CAGAATGAAAAAAGAGCCGCAATTGCGGCTCTTAACATTTTTAGTGGTAGCCCATCAACT
GAGCGCCGATCACTACGACGCTGGACATAATAAACAGCAGTCCAAGTAGGGTCGCGCCCA
CCTTCAGCCAGTTACGGAAGTCCACCCTGCACACACCGAGCGTTGCCATTAACGAAGCTG
AGGTTGGGTAAATGATGTGACTGAAGCCATCACCAAACTGGAACGCCAGCACGGTAACCT
GACGGTTAACACCGACCAGATCGCCAAGCGGTGCCAGTAACGGCATGGTTAACGCCGCCT
GACCAGAACCGGACGTCACGAAGAAATTAAATACCGCCTGGAAGAGCAACATAAACCAGG
CCGCGACCGCGTTGTCCAGACCGCTAATGGCATTGGCAATGCTGTTGAGGATAGTATTTA
ACACGCTGGCCTCACCTGCTTCACCATTACCAACCAGCAGCAAAATCCCTTTGGCGAAAC
CCACCAGCAGGGCAGGGGCGATCATCATTCGCGCCCCTTCGGTAAAGGATGAAGCCATGG
TATTAACCGTCATGCCGTTAAGGCGGAAAACAACGCCGATGATGCCAATCACCAGACCCA
TGGTGAAGAACTGGCTGGCAATTTCTGGAATAAACCAGGCATTAACGATCACGCCCCAAA
TCACCCAGACCATTACGGCGGTCAGGACAATCAATACCAGCCAGTCACCAAAGGTAAACG
GACGTTGTTCAACATCCGCCTGCTTTTCACGAAAGAAGCGGTCGGACTCATGCACGCGTG
ACAGAAGAGGATTCTTTTTCACTCGTGAGGCGTAGACCATGGTAAAGATCAGGCCAATCA
GAGTGGCGATAACCCACACCACGATGCGCAACCCGGAGCCAGAAAGCACCGGAACGCCGG
CAATCCCCTGAGCAACGACCACACAAAACGGGTTCATCCACGAACTGGCAAAACCGATTT
GCGTGGCAATATAGGTCACCAGGACGGTGGTAATACTGTCATAGCCCAGCCGGACCATTA
GCGGTGCGATGATAATGGCAAAGGCGACGGCCTCTTCTCCCATACCAAATACCGCGCCGC
CAAGTGAAAACAGAATAAACAGCGCAGGAATAAAGAGAATTTCATTCCCGCGGGTATGGC
GAATAAGCGCCAGGATACCGTTATCAATGGTTCCTGTACGCATCACAATGCCAAACGCGC
CGCCAATCACCAGCATAAACATGATGATGCCAACGGTTGTCCCGTATTTCGATCCTGAGG
TTAACCCTTCAAACGGGAAGTTCATCAGGCCCGGGCGTTCATCGCCCGTCGTGAACAGCT
GTACGCGGTGATACTCAGGTTCGCCTGCTTCGTTAGTCAGAATGCGAAATGAGTGTGGAT
CTACGACTTTGCGTGTTTTTGTTTGACCATCAACCTGATACTGCACTTCCTGACTGTCAA
ACATCCCCACCGGAACTACCCAGGTGGCAAGGCTGGTTAAAATAGCAACAAAAAAGATAA
TCACCAACGTATCGGGCATTGCCCATCTTCTTGTTGGTTTGGATTCAGTGATTGCGGACA
TAGCGCAAATATTCCCTTGCACAAAACAAAGTGGTAAGTATGCAAAGTGAGATGGCGCAA
TTCATTGATGCAGAGCAGTTAAGCAAGATAATCAGAAAGGATTAATGCAAATTAAGAGAA
TAAAAAACCGGAAATAGTGACTATTTCCGGTTCAGATATCCGCAGCGCAAAGCTGCGGAT
GATGACGAGGTTACTGCTGCTGTGCAGACTGAATCGCAGTCAGCGCGATAGTGTAGACGA
TATCGTCAACCAGTGCGCCACGGGACAGGTCGTTAACCGGCTTGCGCATACCCTGCAGCA
TCGGCCCGATGGAGATCAGGTCGGCAGAACGCTGTACCGCTTTGTAGGTGGTGTTACCGG
TGTTCAGATCCGGGAAGATGAACACGGTAGCGCGACCTGCAACCGGAGAGTTCGGCGCTT
TGGATTTCGCAACGTCAGCCATTACCGCAGCGTCGTACTGCAGCGGACCGTCGATCATCA
GGTCAGGACGTTTTTCCTGCGCCAGACGAGTTGCTTCGCGAACTTTTTCTACGTCGCTAC
CTGCACCAGAAGTACCGGTGGAGTAGGAGAGCATAGCAACGCGCGGTTCGATACCGAAGG
CTGCAGCGGAATCAGCGGACTGAATCGCGATTTCTGCCAGCTGTTCTGCGGTCGGATCCG
GGTTGATCGCACAGTCACCGTAAACGTAAACCTGTTCCGGCAGCAGCATGAAGAACACGG
AAGATACCAGGGAGCTGCCCGGTGCAGTTTTGATCAGCTGCAGCGGCGGACGGATGGTGT
TTGCGGTAGTGTGAACAGCACCGGAAACCAGACCATCAACTTCATCCTGTTCCAGCATCA
GCGTACCGAGCACCACGTTGTCTTCCAGCTGTTCGCGGGCAACGGTTTCGGTCATGCCTT
TGTTCTTACGCAGCTCGACCAGACGACCAACATAGCTTTCGCGAACCACTTCTGGATCAA
CGATTTCAATGCCTGCACCCAGTTCTACACCCTGAGACGCTGCAACACGGTTGATCTCTG
CCGGATTACCCAGCAGTACGCAAGTTGCGATACCACGTTCAGCACAGATAGCGGCTGCTT
TAACGGTACGCGGTTCGTCACCTTCCGGCAGTACGATACGTTTGCCCGCTTTGCGCGCAA
GTTCAGTCAGCTGATAACGGAACGCTGGCGGAGACAGACGACGGCTGCGCTCAGAAGTGG
CAGTCAGAGAATCGATCCAGTCAGCGTTGATGTAGTTAGCAACGTATTCCTGAACTTTCT
CGATACGCTCGTGATCGTCAACTGGAACTTCCAGGTTGAAGCTCTGCAGGCTCAGAGAAG
TCTGCCAGGTGTTGGTGTTCACCATAAATACCGGCAGGCCGGTAGCGAAAGCACGTTCGC
ACAGTTTAGAAATGCGCGCGTCCATTTCGTAGCCGCCAGTCAGCAGCAGGGCACCGATTT
CTACGCCGTTCATGGCAGCCAGGCAAGCGGCAACCAGCACGTCAGGACGGTCTGCGGAAG
TCACCAGCAGAGAACCGGCACGGAAGTGCTCCAGCATGTGCGGAATGCTGCGTGCGCAGA
AAGTGACGGATTTAACGCGGCGAGTATTGATGTCGCCTTCGTTGATGATGGTCGCATTCA
GGTGGCGAGCCATATCGATCGCACGAGTCGCGATCAGGTCAAAGCTCCACGGCACAGCGC
CGAGAACCGGCAGCGGGCTGGATTCTTGCAGCTTCGCCGGATCAACATTGTTTACTTTAG
CTTTGGAAGAGTCGTCGAAAATCTCGGACAGATCCGGGCGAGTACGACCCTGTTCATCAA
CCGGTGCGTTCAGTTTGTTAACGATAACGCCGGTGATGTTGGTGTTTTTGGCACCGCCGA
AGCTGTTGCGGGTCAGTTCGATACGCTCTTTCAGCTGTTCCGGGGTGTCAGTGCCCTGAG
ACATAACGAAGACGATTTCCGCATTCAGCGTTTTAGCGATTTCGTAGTTCAGAGACTGGG
CAAACTGGTGCTTACGTGTCGGGACCAGACCTTCAACCAGAACGACTTCAGCGTCTTTGG
TGTTAGCGTGGTAGTTTGCGACGATCTCTTCCATCAGCACATCTTTCTGATTGCTGGAAA
GCAGACCTTCAACGTAGCTCATTTTCAGCGGTTCAGCGGCCGTCGTGGTGGAAGAGTTCG
CACGCACGATAGTCGTAGTCTGATCGGGCGCATCGCCACCGGTACGCGGCTGAGCGATAG
GTTTGAAAACGCTCAGACGAACGCCTTTGCGTTCCATTGCACGGATCACGCCAAGGCTGA
CGCTGGTCAGACCGACGCTGGTTCCGGTAGGGATCAGCATAATAATACGGGACACGGTTT
ATCCTCTTTCGTTACCGCCGATTTGGCGGGTTACAAAACAGCACCGCCAGCTGAGCTGGC
GGTGTGAAATCAGGCAGTCAGGCGGCTCGCGTCTTGCGCGATAACCAGTTCTTCGTTGGT
TGGGATAACCACCGCAGGACGGGTACCTTCTTTGTTGATGAAACCAGATTTGCCGAAACG
TGCAGCCAGGTTGCGTTCATGATCAACTTCAAAGCCCAGCACGCCCAGTTTGCCCAGAGA
CAGTTCACGAACCATCGCGGCATTTTCACCGATACCACCGGTGAATACAACAGCGTCCAG
ACGACCATCCATCAGCGCAGTGTAGGCACCGATGTATTTCGCCAGGCGGTGGCAGTAAAC
GTCCATTGCGCGCTTCGCGTCTTCTTTCGTCGCGTAGTTGTCTTCAACATAGCGGCAGTC
GCTGGTCACTTCGGTCAGACCCAGCAGGCCAGACTCTTTGGTCAGCAGTTTGTTGATTGC
GTCAACGCTCATGCCCAGGGTGTCGTGCAGGTGGAAGATGATCGCCGGATCGATATCACC
AGAACGGGTACCCATGACCAGACCTTCCAGCGGGGTCAGGCCCATAGAGGTGTCAACGCA
TTTACCGTTGCGGATAGCAGAAACGGAACCACCGTTGCCCAGGTGGCAGGTGATGATGTT
CAGTTCTTCTACCGGTTTGTTCAGCATTTTTGCCGCTTCCTGGGTTACATAGAAGTGGCT
GGTGCCGTGCGCGCCGTAACGACGGATGCCGTGCTCTTTGTACAGGTTGTACGGCAGGGC
GTAGAGGTAAGACTCTTCCGGCATAGTCTGGTGGAACGCGGTGTCAAATACAGCAACGTT
TTTGTCTTTCAGCTGTGGGAAAGATTTCAGAGCTTCTTCGATACCGATCAGGTGAGCCGG
GTTGTGCAGCGGTGCAAAAGAAGCTGCATCTTTGATACCCTGAATAACAGACTCATCGAT
CACTACGGAGCTGGTATACTTTTCGCCGCCGTGTACGATACGGTGACCGATAGCAGTCAG
CTGCGCAGACAGTTCTGGTTTTTGTGCCAGAATAGTATTAACGATAAAGTTGAGCGCTTC
GCTGTGAGCGGCGCCTGCACCTAAAGCCGCTTCCTGTTTATTGCCGTCCATTTTCCATTT
GATACGTGCTTCGGGCAGGTGGAAACATTCGGCTAAACCAGAAAGGTACTCTTCACCATT
TACTGCATCGATGATGGCAAATTTCAGTGAAGAACTACCGCAGTTCAGAACCAGTACTAA
CTTACTCGACATGGAAGTACCTATAATTGATACGTGGCTAAAAAAACGTCAGGGAGCCAT
AGAGCGTAGCGCATGATGACACCGACATTTATGATTAACATCATGCACTGCAAATTTTTT
TTGCATGATGGAAGAAATATCTTGAGTCTATGCCATTTTGCGTAATTTTCAGCCAATGGC
ATAATGTATATGAATTTGACGACTCAATGAATATGTACTACTTAGGCCTTCAGGCTGCTA
AAGGATACCTGATAGTGGGTATGGAAGACAAAATGTTTTGAACGTTGTCCCGCTGAGTTG
TGAATTTGCACAAATTTTTGAATCTTTATATGTGAAGTTGAGGTGAAGCATGTCAACGCC
GGATAATCGTTCTGTTAATTTTTTTAGCTTGTTTCGCCGGGGACAGCATTACTCAAAGAC
GTGGCCGCTGGAAAAACGCCTTGCCCCGGTCTTTGTCGAAAATCGCGTTATCAAGATGAC
GCGTTATGCGATCCGTTTTATGCCGCCGATCGCCGTATTTACTCTCTGCTGGCAGATTGC
CCTGGGCGGTCAGCTTGGGCCGGCAGTTGCCACCGCCCTGTTCGCCTTAAGTTTACCCAT
GCAGGGATTGTGGTGGCTGGGCAAGCGTTCTGTCACGCCATTACCCCCTGCAATCCTCAA
CTGGTTTTATGAAGTTCGCGGTAAATTGCAGGAGTCTGGACAGGTGTTGGCACCCGTTGA
AGGCAAGCCTGATTACCAGGCATTAGCTGACACGCTTAAGCGCGCCTTCAAACAACTGGA
TAAAACTTTCCTTGATGATTTGTAATTGACCCCTGATTACGCATATAAAAGAAAGCATAC
TCAGCCTTCTTTTTTTTCACCGTAATAGAGTGATACAGGAGTCAACAATGGAAATGACCA
ACGCGCAACGTCTTATTTTGTCTAATCAGTACAAGATGATGACTATGCTCGATCCGGCAA
ATGCTGAACGTTACCGTCGCCTGCAAACAATTATTGAGCGTGGTTATGGATTACAGATGC
GTGAACTGGATCGCGAGTTTGGCGAGCTGAAAGAAGAAACCTGCCGCACTATCATCGACA
TTATGGAGATGTATCATGCGTTGCATGTTTCCTGGTCTAATTTGCAGGACCAGCAATCCA
TCGATGAACGTCGTGTCACCTTCCTCGGCTTTGACGCCGCCACTGAAGCACGTTACCTCG
GTTATGTCCGCTTTATGGTTAATGTGGAAGGGCGCTATACCCATTTTGACGCCGGAACTC
ACGGTTTTAACGCCCAGACGCCAATGTGGGAAAAATATCAGCGCATGCTTAATGTGTGGC
ATGCCTGCCCGCGTCAGTACCATTTGAGCGCCAACGAAATTAATCAAATTATCAACGCCT
GAGGAGGCCCGCGTGCGGTGCAAAGGTTTTCTGTTTGATCTTGATGGAACGCTGGTGGAT
TCCCTGCCTGCGGTAGAACGGGCGTGGAGCAACTGGGCCAGACGTCATGGGTTAGCGCCG
GAAGAGGTGCTGGCTTTCATTCACGGTAAACAGGCGATCACCTCTCTGCGCCATTTTATG
GCGGGCAAATCCGAGGCTGATATTGCCGCCGAGTTTACGCGTCTGGAGCAAATCGAGGCC
ACGGAAACCGAAGGTATTACCGCGCTTCCGGGGGCAATCGCCTTACTCAATCATTTGAAT
AAAGCAGGTATTCCGTGGGCCATTGTGACTTCTGGCTCCATGCCGGTAGCGCGAGCGCGC
CATAAAATAGCTGGGCTTCCCGCACCAGAGGTGTTTGTAACCGCTGAGCGAGTGAAGCGC
GGAAAACCAGAACCTGATGCGTATCTGTTAGGTGCGCAGCTGCTGGGGCTTGCGCCGCAG
GAGTGTGTGGTGGTGGAAGATGCTCCCGCTGGCGTGCTTTCTGGCCTGGCGGCGGGTTGC
CATGTCATTGCGGTTAACGCTCCGGCAGATACCCCGCGCCTGAATGAGGTCGATTTGGTC
CTCCACAGTCTGGAGCAAATTACTGTGACTAAACAGCCAAATGGCGATGTTATTATTCAG
TGAAACACCTGATCATGATTTAGCCCCGTCTCGTCGGGGCTTTTTTATGGCAGAATCAAG
TCATCCCCCTCAATTAACAAGGATAAGTTGTGAACGGTGAATTGATTTGGGTTCTTTCAT
TACTGGCCGTTGCCATCGTCTTGTTTGCGACGGGCAGAGTGCGTATGGATGCGGTCGCTT
TGTTTGTTATTGTCGCGTTTGCATTAAGCGGAACGCTGACAGTCCCAGAAGTATTTTCCG
GCTTTTCTGATCCTAACGTTGTCCTGATTGCCGCCTTGTTTATTATTGGCGATGGTTTGG
TCCGTACCGGTGTTGCCACCGTAATGGGAACATGGCTGGTCAAAGTTGCGGGCAACAGTG
AAATCAAAATGTTGGTTTTGTTGATGCTGACCGTCGCGGGGCTTGGCGCGTTTATGAGTT
CAACCGGTGTTGTCGCTATCTTTATTCCCGTGGTGTTAAGCGTTGCCATGCGTATGCAAA
CGTCGCCGTCACGTCTGATGATGCCGTTAAGTTTTGCCGGGCTGATTAGCGGCATGATGA
CGCTGGTGGCGACGCCGCCGAACCTGGTAGTCAACAGTGAATTGCTGCGTGAAGGCTATC
ACGGCTTCAGTTTCTTTAGCGTAACACCTATTGGCCTGGTCGTGCTGGTGCTGGGTATTT
TGTATATGTTAGTGATGCGTTTCATGCTGAAAGGGGATACCCAGACCCCGCAGCGCGAAG
GCTGGACGCGTCGAACCTTTCGCGATCTTATCCGTGAATATCGACTGACCGGGCGTGCGC
GACGTCTGGCTATTCGCCCCGGATCGCCAATGATTGGTCAACGGCTGGATGATCTCAAAT
TACGTGAGCGTTATGGCGCTAACGTCATCGGTGTTGAACGCTGGCGGCGTTTTCGTCGCG
TTATCGTGAACGTTAATGGGGTTTCTGAATTTCGCGCGCGTGACGTTTTGCTTATTGATA
TGTCTGCGGCTGATGTCGATCTCCGGCAATTTTGTAGTGAGCAATTGCTGGAGCCGATGG
TACTGCGCGGCGAGTATTTTTCTGACCAGGCCCTTGATGTGGGCATGGCAGAGATTTCAT
TAATTCCTGAGTCAGAACTGATTGGTAAATCGGTGCGCGAAATTGGTTTTCGTACACGCT
ACGGACTGAATGTGGTGGGGCTAAAGCGCAATGGCGTGGCGCTGGAAGGTTCGCTGGCGG
ATGAGCCTCTGCTGCTGGGCGATATCATTCTGGTTGTGGGTAACTGGAAACTGATCGGTA
TGCTGGCCAAACAGGGCCGCGACTTCGTAGCGCTGAACTTACCGGAAGAGGTGAGTGAAG
CATCGCCCGCGCACAGCCAGGCACCCCATGCCATTTTCTGTCTGGTGCTAATGGTGGCGT
TAATGCTGACAGATGAAATTCCTAATCCTGTTGCCGCTATCATCGCCTGCCTGCTGATGG
GGAAATTCCGCTGTATAGATGCTGAAAGCGCCTATAAATCCATTCACTGGCCGAGCATTA
TTTTGATCGTTGGGATGATGCCGTTTGCTGTGGCATTACAGAAAACGGGAGGTGTCGCGC
TGGCGGTGAAAGGGCTGATGGACATTGGCGGTGGTTACGGGCCACATATGATGCTGGGTT
GTTTGTTTGTCTTGTCGGCGGTTATTGGGCTATTTATCTCTAATACCGCGACGGCGGTGT
TGATGGCTCCGATTGCGCTGGCTGCTGCCAAAACGATGGGGGTGTCGCCTTATCCATTCG
CGATGGTCGTGGCGATGGCAGCATCCGCCGCCTTTATGACACCGGTTTCTTCACCGGTTA
ACACCCTGGTTTTAGGTCCGGGAAATTACAGCTTCAGTGACTTTGTGAAGTTGGGGGTAC
CGTTCACCATTATCGTGATGGCGGTTTGTGTGGTGATGATCCCGATGCTGTTTCCGTTTT
GACAAGAGCCTGATGTCGCATCCGGCGCTTATTGCCTGATGCGACGCAGACTCCAGCTGC
TTACAGCGGTGAATCCTGGCTAATCTCATCGAGCGAAAGATGGAAGCTGGGAACAAATAC
TTCCATGAAGTAGTCCATCTCCTGGCTGCGGCGCGCTTCAAGCGTCGCTTCCAGTCGCGT
TTTTGCCAGCAAGAATTCATTATTTCCGGCCGCGAGTTCTTCCAGACATTTCAGATATGC
ACACAGTGCATCTGCCTGTTTCACCAACGATTTTTCTTCATCGCTATATGCATGCTCGTC
AATTAACGGCGCAAAGATATCCCGCAGCTCTTCCGGAACCATATCGACCAGTTTTTGCTG
AGCGATTTTTTCAATAGCCTTGTATTCCTGAGCGATTTGCGAATTGAAGTATTTCACCGG
AGTAGGGAGATCGCCGGTGAGCACTTCTGAGGCATCGTGGTACATCGCCAGTAAAGCGAT
ACGTTCGGCGTTGACATTACCGCCAAATTTCCGATTTTTGATAGCTGCCAGCGCATGGGC
GACCATCGCTACCTGCAAACTGTGTTCGGACACATTTTCCGTCCGCACGTTGCGCATGAG
CGGCCAGCGGTTAATGAGTTTCAGGCGGGAGAGATGGGCAAAAAAATGGCTCTGTTTCAT
AGTGACCTTACGTATGATGACATCATCAGGTCATTGTGGCGGGATAACACTGCCGGATGC
AATCTCCGGCAGTGAAATTAAGATTACAGCTGATGATAACCAGAAAGGAAACGCGCGAAC
TTGCTCAAAGACAGCTCGATATCATCGACACGCGGTAGCGTGACAATGCGGAAGTGATCC
GGCCACGGCCAGTTGAATGCCGTCCCTTGCACCAACAGAACTTTTTCCTGCAACAGGAAA
TCCAGCACCATTTTCTGATCGTCGTGAATGTTAAAGCGTTTGGCGTCGATTTTCGGGAAC
ATGTACAGCGCACCACGAGGTTTCACGCAGGAAACGCCCGGAATATCGTTGATCAATTCC
CACGCGCGGTTACGCTGCTCATAAAGACGACCGCCAGGGGTAATAAATTCACTGATGCTC
TGATAACCACCCAGCGCGGTCTGAATGGCGTGTTGCGCAGGAACGTTAGCACACAGGCGC
ATTGAAGCCAGCATTTCCAGACCTTCGATGTAGCCTTTGGCGTGTTTTTTCGGCCCGTTC
AACACCATCCACCCCTGACGGAAGCCTGCAACGCGGTACGTTTTCGACAGTCCATTAAAG
GTAATGGTCAGCAGGTCAGGTGCCAGCGGCGCAATTGAGTGATGCTCAGCGTCGTCGTAG
AGAATTTTGTCATAAATTTCATCGGCGAAGATAATGAGATTATGCTGACGTGCAATCTCC
ACAATCTCCATTAAAAGCTCTTTGGAATATACCGCGCCGGTTGGGTTATTTGGGTTGATA
ATAACGATCCCACGCGTACGAGGCGTAATTTTAGCGCGAATATCATCGAGGTCCGGGAAC
CAGTCAGAGGATTCATCGCAAAGATAATGCACCGCTTTACCGCTGGAAAGCGAAACCGCC
GCGGTCCATAGTGGGTAATCTGGTGCAGGAACCAACATTTCGTCCCCGCTGTTCAGCAAT
GCCTGCATTGCCTGAACGATAAGCTCCGATACACCATTGCCGATGTAAATATCTTCCACG
GTAACATCACGCATGCCACGAGCCTGGTAGTGCTGCATGATGGCTTTACGCGCAGAGTAA
AGACCTTTGGAATCGCAATACCCTTGAGCTGTAGGCAGGTTGCGTATCACGTCAACGAGA
ATTTCATCTGGCGCGTCAAAACCGAACGGGGCTGGGTTGCCGATGTTCAGTTTCAGTACC
TTGTTACCTTCTTCTTCCAGTCGTTTTGCTTCTTTCAGCACCGGACCACGGATGTCATAA
CAGACATTCTCTAATTTGCTGGATTTTTCAATGGGGGACATGAATCTTGACCTTTTTTGC
TGTTATCGCCACTCCCTGCCGTGGAAGTCAGCTTAGAACAATGTACTCCCCCAGGACGGT
GTTTTGAAGGTCTGCAGAATAAGATTTTGCCAGAGGGGAAGGCTCGATTGTGCTGTTAAT
AACTTAATAATGACAAAATAATGAGGCGTATATGCTTTACATACAATGTTATATAGTGAA
TTGTTCTGATTCTTAATTGTAAGTCTGGTTTTTTTATCTGTAAGATAATTGTGTGAAAAT
GCCTCATTTAAGAATTCACTAATGAAACGCGATGATGATATTTCCGCATTACGGAGAGTT
TAACAGCGTGATGATTTCCGAGGTGTCGCAATGGGGGCAAGGTGTGAAACTATTGTTAAG
CGGAATTAATGAATGAGGATGATGCTAATTAATTATTATTTAATATTCAAAAAGGTTTTG
ATGTGCTTATTAATAATAGAAGATTACTTTGCCTAACATAACATAACTTTGCATCAGATA
ATTCGCAATGACCCTTATAAATAAAAGGTTTTTGGGGTAAAATGCTCGCATAAATGACGG
ATCCCTGCTCTTGATGCCGCCTCACCATTGCTGTTTGTACGTGTTCGCGTATGACCAGCG
ATGCTGCACGAGAGTGGAACAAGGACTCACATTTACATTTATACAAACACGCGCATGTCA
TAAATAGAAAAGAGTGAGTAACTTAATAGATATGCGATCCCTGAAGATATATTCTGTGAT
CTACTTCAGGCATTATAACGGAACAATGTGAGTCGCTTTTTTAGTGCAACTCATATGCAT
TTTTACTTTCGTCCGGGTTCCGGATGAAACTGCCAGGGAGGCACATTACAAATGGAATTG
CTTGTTTGTGTGTGCACAGCATTAACCAGCTCAGTATGAGCCGCCAGTAAGTGATAATAT
ATGATAAGTGCAAATCGTCCGATAATTAACCTCGACCTCGATCTGCTGAGAACATTTGTT
GCTGTTGCCGATCTGAACACTTTTGCTGCCGCAGCTGCCGCTGTGTGTCGTACTCAGTCC
GCCGTAAGTCAGCAAATGCAGCGTCTGGAACAACTCGTTGGGAAAGAACTGTTCGCTCGT
CACGGTCGCAACAAACTGTTAACTGAACATGGCATTCAACTTCTTGGTTACGCCAGGAAA
ATCCTGCGTTTTAATGATGAGGCCTGCTCATCATTAATGTTCAGTAATCTTCAGGGCGTG
TTAACTATCGGTGCTTCAGATGAATCTGCCGATACGATCTTACCTTTCCTGTTAAATCGC
GTGAGTTCGGTTTATCCGAAATTAGCGCTGGATGTCCGCGTTAAACGTAATGCCTATATG
GCAGAAATGCTGGAATCCCAGGAAGTGGATTTGATGGTAACCACCCATCGTCCTTCAGCG
TTTAAGGCATTGAACCTGCGTACCTCGCCAACACACTGGTACTGCGCAGCGGAATACGTA
TTGCAAAAAGGTGAGCCGATCCCTCTTGTATTGCTGGATGATCCAAGTCCGTTTCGCGAT
ATGGTGCTGGCGACGCTTAATAAAGCAGATATTCCCTGGCGACTGGCTTATGTCGCCTCG
ACGCTTCCGGCCGTTCGTGCGGCAGTGAAAGCCGGTCTTGGCGTGACGGCAAGGCCGGTC
GAGATGATGAGTCCGGACTTGCGTGTGCTGAGTGGAGTAGATGGCTTACCGCCGCTACCT
GATACCGAATATTTGCTGTGCTATGACCCGTCCAGTAATAATGAGCTGGCCCAGGTGATC
TATCAGGCGATGGAGAGCTACCATAATCCGTGGCAATACAGCCCAATATCTGCTCCGGAA
GGGGATGATTCATTGTTGATTGAAAGGGATATCGAGTAATCGACGGACGATAGATAATTC
CTGAGACAATAGTGTAAAAAACGAGCCGCTGGGGGTGTTTTAAACCCCAGCGGCTTTTTT
TTAGTAAAGAACCTTCTTCACATCGTGCAGAACGTACAAAACTGTTCATTTTTCAATCGC
CAGAGATTCACGCCCCGTACGCACAAATAATCGCCTGAAAAAAATCACCTGCTACAATGA
TGTTAAAAAATACGTAAATTTGTTGCTGCGTTTTTGTTATGGAATGACAAAAGCGTGTCA
CAGATCAAGAAAATACTCTCTTTTGGGGGGAGGAATCGACACAAATTCCTGTCAAAATAG
ACCCGTATTTTTTCCATTGCTTCACAACGGACACGATTCAACAACATCTAATTATCCTGG
AGTCGTCAAGGATCTGGGGTGAAAGGGCATTAAATGCTAATGGTGTTGATATTATGTAAA
CTAATGTGAAGAAACTTTTGTTAAAGTTGACAAAAGGTTATAGAAAGGAGTAAAAGACCA
CATCAATTAGCTGTATAAAAGAATTTCTACAGTGATTGTAAGGTTTTTTTTATTCCTCCC
CATGAATCGATGTGGCGTCCATCTGCCGTGAAGAGCAGTGAATCTGGCGCTACTTTTGAT
GAGTAAGCAATGAGTATGTCAACATCCACTGAAGTCATCGCTCATCACTGGGCATTCGCT
ATCTTTCTTATCGTTGCCATTGGCCTGTGTTGCCTGATGCTGGTAGGCGGTTGGTTTTTA
GGCGGTCGCGCACGCGCGAGGTCGAAAAACGTGCCGTTTGAATCCGGTATCGACTCGGTC
GGCTCCGCCCGCTTACGCCTGTCCGCCAAGTTTTATCTGGTGGCCATGTTCTTCGTTATC
TTCGACGTTGAAGCGCTGTATCTGTTCGCATGGTCAACCTCTATCCGCGAAAGCGGCTGG
GTAGGCTTTGTGGAAGCTGCAATTTTTATTTTTGTGTTACTGGCAGGTCTGGTTTATCTG
GTGCGTATTGGCGCGCTGGACTGGACGCCCGCGCGTTCACGCCGCGAGCGTATGAACCCG
GAAACGAACAGTATCGCTAATCGTCAACGCTAACCGCGAGGCATTAAGATGGATTATACG
CTCACCCGCATAGATCCCAACGGTGAGAACGACCGTTACCCCCTGCAAAAGCAGGAGATC
GTAACCGACCCTCTGGAGCAAGAAGTTAACAAAAACGTGTTTATGGGCAAGCTCAATGAC
ATGGTTAACTGGGGTCGTAAAAACTCAATTTGGCCGTATAACTTCGGTCTTTCCTGCTGT
TACGTTGAGATGGTGACTTCGTTTACCGCGGTGCATGACGTGGCGCGTTTTGGCGCAGAA
GTATTGCGTGCTTCGCCGCGTCAGGCTGACCTGATGGTGGTTGCAGGAACCTGCTTTACC
AAAATGGCACCGGTTATTCAGCGTCTGTATGACCAGATGCTGGAACCAAAATGGGTTATC
TCAATGGGTGCCTGTGCCAACTCTGGTGGTATGTACGATATTTATTCCGTTGTGCAGGGC
GTCGATAAATTCATCCCGGTTGATGTGTATATCCCGGGCTGCCCGCCGCGTCCTGAAGCG
TACATGCAGGCACTGATGCTGTTGCAGGAATCTATCGGCAAAGAACGTCGTCCGCTCTCC
TGGGTGGTTGGCGATCAGGGCGTTTATCGCGCCAATATGCAATCAGAGCGCGAACGCAAG
CGCGGTGAACGCATTGCCGTAACCAACCTGCGTACACCTGACGAGATTTAATTTGCGCCT
GTCGGCAAAGGGATTTTTCTTCGCTTATTCCTAAATCTATTTCGCGAAGCTTACTGCGCC
GACAGTCACCACGGACCATTTGCAATGGTGAACAATATGACCGACTTAACCGCGCAAGAA
CCCGCCTGGCAGACCCGCGATCATCTTGATGATCCGGTAATTGGCGAACTGCGCAACCGT
TTTGGGCCGGATGCCTTTACTGTTCAGGCGACTCGCACCGGGGTTCCCGTTGTGTGGATC
AAGCGTGAACAATTACTGGAAGTTGGCGATTTCTTAAAGAAACTGCCGAAACCTTACGTC
ATGCTGTTTGACTTACACGGCATGGACGAACGTCTGCGCACACACCGCGAAGGGTTACCT
GCCGCGGATTTTTCCGTTTTCTACCATCTGATTTCTATCGATCGTAACCGCGACATCATG
CTGAAGGTGGCGTTGGCAGAAAACGACCTGCACGTACCGACCTTCACCAAACTGTTCCCG
AACGCTAACTGGTATGAGCGTGAAACCTGGGATCTGTTTGGCATTACATTCGACGGTCAC
CCGAACCTGCGCCGCATCATGATGCCGCAAACCTGGAAAGGTCACCCGCTGCGTAAAGAT
TACCCGGCGCGCGCTACCGAATTCTCGCCGTTTGAGCTGACCAAAGCCAAACAGGATCTG
GAGATGGAAGCCCTGACCTTCAAACCGGAAGAGTGGGGGATGAAGCGCGGCACCGAAAAC
GAGGACTTCATGTTCCTCAACCTCGGCCCGAACCACCCGTCGGCGCACGGTGCTTTCCGT
ATCGTTTTGCAGCTTGATGGCGAAGAGATTGTCGACTGCGTACCAGACATCGGTTACCAC
CACCGTGGTGCGGAGAAAATGGGCGAACGCCAGTCCTGGCACAGCTACATTCCGTATACC
GACCGTATCGAATACCTCGGCGGCTGCGTTAACGAAATGCCTTACGTGCTGGCGGTAGAG
AAACTGGCCGGGATCACCGTGCCGGATCGCGTTAACGTCATTCGCGTAATGCTCTCCGAA
CTGTTCCGCATCAACAGCCACCTGCTGTATATCTCGACCTTTATTCAGGACGTCGGCGCA
ATGACGCCCGTGTTCTTCGCCTTTACCGATCGTCAGAAAATTTACGATCTGGTGGAAGCG
ATCACGGGTTTCCGTATGCACCCGGCGTGGTTCCGTATTGGCGGCGTAGCGCACGACCTG
CCGCGCGGCTGGGATCGCCTGCTGCGTGAGTTCCTCGACTGGATGCCGAAACGTCTGGCG
TCTTACGAGAAAGCGGCGCTGCAAAATACCATTCTGAAAGGTCGTTCCCAGGGCGTTGCC
GCCTATGGCGCGAAAGAGGCGCTGGAGTGGGGCACCACTGGCGCGGGCCTGCGTGCTACC
GGGATTGACTTCGACGTGCGTAAGGCGCGTCCTTATTCTGGCTATGAAAACTTCGACTTT
GAAATCCCGGTTGGTGGTGGTGTTTCTGACTGCTACACCCGCGTAATGCTGAAAGTGGAA
GAGCTGCGCCAGAGTCTGCGCATTCTTGAGCAGTGCCTCAACAACATGCCGGAAGGCCCG
TTCAAAGCGGATCACCCGCTGACCACGCCACCGCCGAAAGAGCGCACGCTGCAACATATC
GAAACCCTGATCACCCACTTCCTGCAAGTGTCGTGGGGGCCGGTGATGCCTGCCAATGAA
TCTTTCCAGATGATTGAGGCGACCAAGGGGATCAACAGTTACTACCTGACCAGCGACGGT
AGCACCATGAGTTATCGCACTCGTATCCGCACGCCGAGTTATGCGCATTTGCAGCAAATT
CCGGCGGCGATCCGCGGCAGCCTGGTGTCTGACCTGATTGTTTATCTGGGCAGTATCGAT
TTTGTTATGTCAGATGTGGACCGCTAATTATGCACGAGAATCAACAACCACAAACCGAGG
CTTTTGAGCTGAGTGCGGCAGAGCGTGAAGCGATTGAGCACGAGATGCACCACTACGAAG
ACCCGCGTGCGGCGTCCATTGAAGCGCTGAAAATCGTTCAGAAGCAGCGTGGCTGGGTGC
CGGATGGCGCGATCCACGCGATCGCCGATGTGCTGGGTATTCCGGCGAGCGACGTCGAAG
GCGTGGCAACGTTCTACAGCCAGATCTTCCGCCAGCCGGTTGGCCGCCATGTGATCCGTT
ATTGCGACAGCGTGGTCTGTCATATCAACGGTTACCAGGGTATTCAGGCGGCGCTCGAGA
AAAAGCTAAACATCAAACCAGGGCAAACGACATTTGACGGTCGCTTTACGCTGCTGCCAA
CTTGCTGCCTGGGGAACTGTGATAAAGGGCCAAACATGATGATCGATGAGGACACTCACG
CGCATCTGACCCCGGAAGCGATCCCTGAACTGCTGGAGCGGTATAAATGAAAAACATTAT
CCGTACTCCCGAAACGCATCCGCTGACCTGGCGTCTGCGCGATGACAAACAGCCAGTGTG
GCTGGACGAATACCGCAGCAAAAACGGTTACGAAGGCGCGCGTAAGGCGCTGACCGGGCT
GTCTCCGGACGAAATCGTTAATCAGGTAAAAGACGCTGGTCTGAAAGGGCGTGGCGGCGC
GGGTTTCTCGACTGGCCTGAAATGGAGCCTGATGCCGAAAGACGAATCCATGAACATCCG
TTACCTGCTGTGTAACGCCGATGAAATGGAGCCAGGCACCTATAAAGACCGCCTGCTGAT
GGAGCAACTGCCGCACCTGCTGGTGGAAGGCATGCTCATCTCCGCGTTTGCGCTGAAAGC
TTACCGTGGCTATATCTTCCTGCGCGGCGAATATATCGAAGCGGCAGTGAATCTACGCCG
TGCCATTGCCGAAGCGACTGAAGCGGGCTTGCTTGGCAAAAACATTATGGGAACAGGTTT
CGACTTCGAACTGTTCGTCCATACCGGGGCAGGGCGCTACATCTGCGGGGAAGAAACAGC
GTTAATCAACTCCCTGGAAGGGCGTCGTGCTAACCCGCGCTCGAAGCCTCCATTCCCGGC
GACCTCCGGCGCATGGGGTAAACCGACCTGTGTCAACAACGTCGAAACCCTGTGTAACGT
TCCGGCGATCCTCGCTAACGGCGTGGAGTGGTATCAGAACATCTCGAAAAGTAAAGATGC
TGGCACCAAGCTGATGGGCTTCTCCGGTCGGGTGAAAAATCCGGGCCTGTGGGAACTGCC
GTTTGGTACTACCGCGCGCGAGATCCTCGAAGATTACGCCGGTGGTATGCGTGACGGTCT
GAAATTCAAAGCCTGGCAGCCAGGCGGCGCGGGCACCGACTTCCTGACCGAAGCGCACCT
TGACCTGCCGATGGAATTCGAAAGTATCGGTAAAGCGGGAAGCCGTCTGGGTACGGCGCT
GGCGATGGCGGTTGACCATGAGATCAACATGGTGTCGCTGGTGCGTAACCTGGAAGAGTT
TTTCGCCCGTGAGTCCTGCGGCTGGTGTACGCCGTGCCGCGACGGTCTGCCGTGGAGCGT
GAAAATTCTGCGTGCGCTGGAGCGTGGTGAAGGTCAGCCGGGCGATATCGAAACACTTGA
GCAACTGTGTCGATTCTTAGGCCCGGGTAAAACTTTCTGTGCCCACGCACCTGGTGCAGT
GGAGCCGTTACAGAGCGCCATCAAATATTTCCGCGAAGAATTTGAGGCGGGGATCAAACA
GCCGTTCAGCAATACCCATTTGATTAATGGGATTCAGCCGAACCTGCTGAAAGAGCGCTG
GTAACCGAATTTCGATTAACGCTCAGTCTCTGACTGAGAAAACTGGAAGCATGCTAATGG
CTACAATTCATGTAGACGGCAAAGAATACGAGGTCAACGGAGCGGACAACCTGCTGGAAG
CTTGTCTGTCTCTTGGCCTTGATATTCCTTACTTTTGCTGGCATCCGGCGCTGGGAAGCG
TCGGTGCTTGCCGCCAGTGTGCGGTGAAGCAATACCAAAACGCGGAAGACACGCGTGGTC
GCCTGGTGATGTCCTGTATGACACCGGCTTCCGATGGCACCTTTATTTCCATTGACGACG
AAGAAGCGAAACAGTTCCGTGAAAGTGTGGTCGAGTGGTTAATGACCAACCACCCGCACG
ACTGTCCGGTATGTGAAGAAGGCGGTAACTGCCATCTTCAGGATATGACCGTGATGACCG
GACACAGCTTCCGTCGCTACCGTTTCACCAAACGTACCCACCGTAATCAGGATTTGGGAC
CGTTCATCTCTCACGAAATGAACCGCTGCATCGCCTGCTACCGCTGCGTGCGTTACTACA
AAGATTACGCTGACGGTACAGATCTGGGCGTTTATGGCGCGCACGACAACGTCTACTTCG
GTCGCCCGGAAGACGGCACGCTGGAAAGCGAATTTTCCGGTAACCTGGTCGAAATTTGCC
CGACTGGCGTATTTACCGACAAAACGCACTCCGAGCGTTACAACCGTAAATGGGATATGC
AGTTTGCGCCGAGCATCTGCCAGCAATGTTCCATCGGCTGTAACATCAGCCCCGGTGAAC
GTTATGGCGAACTGCGTCGTATCGAAAACCGTTACAACGGTACGGTAAACCACTACTTCC
TCTGCGACCGTGGTCGTTTCGGTTACGGTTACGTCAACCTGAAGGATCGTCCGCGTCAGC
CAGTACAGCGTCGTGGCGATGATTTCATTACCCTCAACGCCGAACAGGCAATGCAGGGCG
CGGCAGATATTCTGCGTCAGTCGAAGAAAGTGATCGGTATTGGTTCTCCGCGTGCCAGCG
TGGAAAGCAACTTTGCGCTGCGTGAACTGGTGGGCGAAGAAAACTTCTACACCGGTATCG
CTCACGGTGAGCAGGAACGTCTGCAACTGGCGCTGAAAGTGCTGCGTGAAGGCGGCATTT
ATACTCCGGCTCTGCGCGAAATCGAATCTTACGATGCGGTACTGGTGCTGGGCGAAGACG
TTACCCAGACCGGCGCGCGCGTCGCGCTGGCAGTGCGTCAGGCGGTGAAAGGTAAAGCGC
GCGAAATGGCGGCAGCACAGAAAGTGGCTGACTGGCAGATTGCGGCAATCCTCAACATCG
GTCAACGTGCGAAGCATCCGCTGTTTGTTACCAACGTTGATGACACCCGTCTGGATGATA
TCGCGGCGTGGACTTACCGCGCACCGGTTGAAGATCAGGCGCGTTTAGGTTTTGCCATCG
CCCATGCGCTGGATAACTCTGCACCAGCGGTTGACGGTATCGAACCTGAGCTGCAAAGCA
AAATCGACGTCATCGTGCAGGCACTGGCAGGTGCGAAGAAACCGTTGATTATCTCCGGGA
CGAACGCCGGTAGCGCTGAAGTAATTCAGGCTGCGGCTAACGTCGCGAAAGCCCTGAAAG
GTCGCGGCGCTGACGTCGGTATCACCATGATTGCCCGTTCCGTCAACAGCATGGGGCTGG
GCATTATGGGCGGTGGATCGCTTGAAGAAGCGTTAACCGAACTGGAAACCGGACGCGCCG
ACGCGGTGGTGGTGCTGGAGAACGATCTGCATCGTCACGCATCCGCTACCCGCGTGAATG
CTGCGCTGGCTAAAGCGCCGCTGGTGATGGTGGTTGACCATCAACGCACAGCGATCATGG
AAAACGCCCATCTGGTGCTTTCCGCCGCCAGCTTTGCTGAAAGCGACGGTACAGTGATCA
ACAACGAAGGCCGCGCCCAACGTTTCTTCCAGGTTTACGATCCGGCTTATTACGACAGCA
AAACTGTCATGCTGGAAAGCTGGCGCTGGTTACACTCGCTGCACAGCACTCTGCTGAGCC
GTGAAGTGGACTGGACGCAGCTCGACCATGTGATTGACGCTGTTGTGGCGAAAATCCCGG
AACTGGCAGGTATCAAAGATGCTGCGCCGGATGCGACATTCCGTATTCGTGGGCAGAAAC
TGGCCCGTGAACCGCACCGTTACAGCGGTCGTACCGCCATGCGCGCCAATATCAGCGTTC
ATGAGCCGCGTCAGCCGCAGGATATTGACACCATGTTCACCTTCTCGATGGAAGGTAACA
ACCAGCCGACCGCGCATCGTTCGCAAGTGCCGTTTGCCTGGGCTCCGGGCTGGAACTCCC
CGCAGGCGTGGAACAAATTCCAGGACGAAGTGGGCGGCAAACTGCGCTTTGGCGATCCGG
GCGTGCGTCTGTTTGAAACCAGCGAAAATGGTCTGGATTACTTCACCAGCGTACCGGCAC
GCTTCCAGCCGCAGGACGGGAAATGGCGTATCGCGCCGTATTACCACCTGTTTGGCAGTG
ATGAATTGTCACAGCGTGCTCCGGTCTTCCAGAGCCGTATGCCGCAGCCGTACATCAAAC
TCAACCCGGCAGATGCCGCGAAGTTGGGTGTGAATGCAGGTACACGCGTCTCCTTTAGTT
ACGATGGCAACACGGTCACGCTGCCGGTTGAAATCGCCGAAGGGCTGACGGCAGGGCAGG
TGGGCTTGCCGATGGGTATGTCCGGCATTGCTCCGGTGCTGGCTGGCGCGCATCTTGAGG
ATCTCAAGGAGGCACAACAATGAGTTGGATATCACCGGAACTGATTGAGATCCTGCTGAC
CATCCTCAAAGCGGTGGTGATCCTGCTGGTGGTTGTCACCTGCGGGGCATTCATGAGCTT
TGGCGAACGTCGCCTGCTGGGTCTGTTCCAGAACCGTTACGGACCTAACCGTGTTGGCTG
GGGCGGTTCGCTCCAGCTGGTTGCGGACATGATCAAAATGTTCTTTAAAGAAGACTGGAT
CCCGAAATTCTCGGATCGCGTCATCTTTACCCTGGCACCGATGATTGCCTTTACCTCGTT
GCTGCTGGCCTTTGCGATTGTGCCAGTCAGCCCGGGTTGGGTGGTTGCCGACCTGAACAT
CGGGATTTTGTTCTTCCTGATGATGGCTGGTCTGGCGGTTTACGCGGTGCTGTTTGCGGG
CTGGTCAAGTAACAACAAATACTCGCTGCTGGGTGCGATGCGTGCTTCTGCACAGACCCT
GAGCTACGAAGTGTTCCTCGGGCTTTCTCTGATGGGCGTGGTGGCGCAGGCCGGTTCATT
CAACATGACCGACATCGTCAACAGCCAGGCGCATGTGTGGAACGTCATCCCGCAATTCTT
TGGTTTTATTACCTTTGCCATCGCGGGTGTGGCGGTGTGTCACCGTCACCCGTTTGACCA
GCCGGAAGCCGAGCAGGAACTGGCGGATGGTTACCACATTGAATACTCCGGCATGAAGTT
CGGTCTGTTCTTCGTGGGTGAGTACATCGGGATTGTGACCATCTCTGCATTGATGGTGAC
GCTGTTCTTCGGTGGCTGGCAAGGCCCGTTGTTACCGCCATTCATCTGGTTCGCGCTGAA
AACCGCGTTCTTTATGATGATGTTCATTTTGATTCGTGCGTCGTTACCGCGTCCGCGTTA
TGACCAGGTAATGTCCTTCGGCTGGAAAATCTGCCTGCCGCTGACGCTGATCAACTTGCT
GGTAACGGCGGCTGTCATTCTCTGGCAGGCGCAATAAGGGGCAATAAGACCATGACCTTA
AAAGAATTGTTAGTAGGTTTCGGCACCCAGGTTCGTAGTATCTGGATGATCGGCCTGCAC
GCGTTCGCCAAACGCGAAACGCGAATGTACCCGGAAGAGCCGGTCTATCTGCCGCCCCGT
TATCGTGGTCGTATCGTTCTGACCCGCGACCCGGACGGCGAAGAGCGTTGCGTAGCCTGT
AACCTCTGTGCGGTAGCCTGCCCGGTCGGCTGTATCTCGCTGCAAAAAGCAGAAACCAAA
GACGGTCGCTGGTATCCGGAATTTTTCCGCATCAACTTCTCACGCTGCATTTTCTGTGGT
CTGTGCGAAGAAGCCTGTCCGACCACGGCGATTCAGTTAACCCCGGATTTCGAAATGGGG
GAATACAAGCGCCAGGATCTGGTTTACGAGAAAGAGGATCTGCTGATCTCCGGTCCGGGC
AAATACCCGGAATATAACTTCTACCGGATGGCAGGTATGGCAATCGACGGCAAAGATAAG
GGCGAAGCAGAGAACGAAGCCAAGCCTATCGACGTCAAGAGCCTGTTACCGTAAGGAGAG
GAGCAATGGAGTTCGCTTTTTATATCTGTGGCCTGATAGCCATACTTGCGACCTTGCGAG
TGATCACCCATACCAATCCGGTACACGCACTGCTGTACCTGATTATTTCGCTGCTGGCGA
TTTCTGGGGTGTTCTTCTCACTGGGCGCTTACTTCGCCGGTGCGCTGGAAATTATCGTCT
ACGCGGGTGCCATTATGGTGCTGTTCGTGTTCGTGGTGATGATGCTCAACCTGGGCGGTT
CAGAAATCGAACAGGAACGCCAGTGGCTGAAACCGCAGGTGTGGATTGGTCCGGCAATTT
TGTCGGCCATCATGCTGGTGGTGATTGTTTACGCCATCCTCGGTGTTAACGATCAGGGTA
TCGACGGTACGCCAATCAGTGCTAAAGCAGTGGGTATTACGCTGTTCGGGCCTTACGTAC
TGGCGGTGGAACTGGCTTCTATGCTGCTGCTCGCGGGTCTGGTTGTGGCCTTCCACGTCG
GTCGTGAAGAGCGTGCGGGTGAAGTGCTGAGCAATCGTAAAGACGACAGCGCGAAAAGAA
AAACGGAGGAGCACGCATGATCCCCTTACAACATGGACTGATCCTCGCGGCAATCTTATT
CGTTCTTGGCTTAACCGGTCTGGTTATCCGTCGCAATCTGCTGTTTATGCTGATTGGTCT
GGAAATCATGATTAACGCCTCCGCGCTGGCCTTTGTGGTCGCCGGAAGCTACTGGGGCCA
GACCGACGGTCAGGTGATGTACATTCTCGCCATCAGCCTCGCGGCGGCAGAAGCGAGTAT
CGGCCTTGCGCTGCTGCTGCAACTTCACCGTCGTCGCCAGAACCTGAACATCGATTCAGT
AAGTGAGATGCGCGGATGAACATGCTTGCCTTAACCATTATTTTGCCATTGATTGGCTTC
GTCCTGCTGGCGTTCTCCCGTGGGCGCTGGTCTGAAAACGTTTCGGCGATCGTCGGCGTT
GGCTCTGTGGGCCTGGCGGCGCTGGTAACCGCCTTTATCGGCGTTGATTTCTTCGCTAAC
GGCGAGCAGGCATACAGCCAGCCGCTGTGGACGTGGATGTCGGTAGGCGACTTTAACATC
GGTTTTAACCTGGTGCTGGACGGCCTGTCGCTGACCATGCTCTCGGTGGTCACTGGTGTG
GGTTTCCTGATCCACATGTACGCCTCCTGGTATATGCGTGGTGAAGAGGGCTACTCTCGC
TTCTTCGCCTACACCAACCTGTTCATCGCCAGCATGGTGGTTCTGGTGCTTGCCGATAAC
CTGCTGTTGATGTACCTCGGCTGGGAAGGCGTGGGCCTGTGCTCCTATCTGCTGATCGGT
TTCTATTACACCGATCCGAAGAATGGCGCAGCGGCAATGAAAGCGTTCGTCGTGACCCGT
GTGGGTGACGTGTTCCTCGCTTTCGCGCTGTTCATTCTTTACAACGAACTGGGCACCCTG
AACTTCCGCGAAATGGTGGAACTGGCACCAGCGCACTTTGCTGACGGCAATAACATGCTG
ATGTGGGCGACGCTGATGCTGCTGGGCGGTGCGGTCGGTAAATCTGCGCAGTTGCCGTTG
CAGACATGGCTTGCCGACGCGATGGCGGGCCCGACGCCTGTCTCCGCGCTGATCCACGCC
GCAACGATGGTAACCGCGGGTGTCTACCTGATCGCCCGTACCCACGGCCTGTTCCTGATG
ACCCCGGAAGTTCTGCATCTGGTGGGTATTGTCGGGGCAGTTACGCTGCTGCTGGCCGGT
TTTGCCGCGCTGGTACAGACCGACATCAAACGTGTTCTCGCTTACTCTACCATGAGCCAG
ATTGGCTACATGTTCCTCGCGCTTGGCGTGCAGGCATGGGATGCGGCGATTTTCCACTTG
ATGACTCACGCGTTCTTTAAAGCGCTGCTGTTCCTGGCATCCGGTTCCGTCATTCTGGCC
TGCCATCACGAACAGAACATCTTCAAGATGGGCGGTCTGCGTAAATCTATTCCGCTGGTT
TATCTCTGCTTCCTGGTGGGTGGTGCAGCACTGTCGGCACTGCCGCTGGTCACTGCGGGC
TTCTTCAGTAAGGATGAGATCCTCGCGGGTGCGATGGCGAATGGTCATATCAATCTGATG
GTGGCAGGTCTGGTCGGTGCGTTTATGACCTCGCTCTACACCTTCCGTATGATTTTCATC
GTCTTCCACGGAAAAGAACAAATTCACGCTCACGCCGTGAAAGGGGTAACTCACAGCCTG
CCGCTGATTGTGCTGCTGATCCTTTCCACCTTCGTTGGCGCACTGATTGTACCGCCGCTG
CAGGGCGTGCTTCCGCAAACGACGGAGCTGGCGCACGGCAGCATGTTGACCCTGGAAATT
ACCTCTGGCGTGGTCGCGGTGGTCGGCATTCTGCTGGCTGCCTGGCTGTGGCTGGGTAAA
CGTACTCTGGTGACCTCCATCGCCAACAGTGCGCCGGGCCGTCTGCTGGGCACCTGGTGG
TACAACGCCTGGGGCTTTGACTGGCTGTACGACAAAGTGTTCGTCAAGCCGTTCCTGGGT
ATTGCCTGGTTGCTGAAACGCGATCCGCTGAACGCAATGATGAACATTCCGGCGGTTCTT
TCCCGCTTTGCAGGTAAAGGTCTGCTGTTAAGCGAGAACGGCTATCTGCGCTGGTATGTG
GCATCCATGAGCATCGGGGCGGTCGTGGTGCTGGCACTGTTGATGGTACTGCGTTGAGTT
AAGGATTGTGGGATTGCCCCTGGGCATATAAGAACGTAGGTCGGATAAGCCTCCTTCGCG
GTGCATCCGACACTACCCCCAGTCCGAAGAGAATTTTCTGTCGTGAGAATTCGTTGAAAA
TCCGGTCCTGACGGGACTTTTACAAGGAATAAAGATCGCCATGTTACTACCCTGGCTAAT
ATTAATTCCCTTTATCGGCGGCTTCCTGTGCTGGCAGACCGAACGCTTTGGCGTCAAGGT
GCCGCGCTGGATCGCGCTGATCACCATGGGATTGACGCTGGCGCTGTCGCTGCAACTGTG
GTTGCAGGGCGGTTATTCACTGACGCAATCCGCCGGAATTCCGCAGTGGCAGTCTGAATT
CGACATGCCGTGGATCCCGCGTTTTGGTATCTCTATTCATCTCGCCATTGACGGGCTGTC
GCTGCTGATGGTCGTGCTGACCGGTCTGCTCGGTGTGCTGGCGGTACTCTGTTCGTGGAA
AGAGATCGAAAAATATCAGGGCTTCTTCCACCTCAACCTGATGTGGATCCTGGGCGGCGT
TATCGGCGTGTTCCTTGCCATCGACATGTTCCTGTTCTTCTTCTTCTGGGAAATGATGCT
GGTGCCGATGTACTTCCTGATCGCACTGTGGGGGCATAAAGCCTCTGACGGTAAAACGCG
TATCACGGCGGCAACCAAGTTCTTCATTTACACCCAGGCGAGTGGTCTTGTGATGTTGAT
CGCCATCCTGGCGCTGGTTTTTGTTCACTACAATGCGACCGGCGTCTGGACCTTCAACTA
TGAAGAGCTGCTGAATACGCCAATGTCCAGTGGTGTGGAATATCTGTTGATGCTGGGCTT
CTTCATCGCCTTCGCAGTCAAAATGCCGGTGGTTCCGCTGCATGGCTGGCTGCCGGATGC
GCACTCCCAGGCTCCGACCGCCGGTTCCGTTGACCTCGCGGGGATCTTGCTGAAAACTGC
CGCTTACGGTTTGCTGCGTTTCTCCCTGCCGCTGTTCCCAAATGCGTCGGCAGAGTTCGC
GCCAATCGCTATGTGGCTGGGTGTTATCGGCATCTTTTACGGTGCGTGGATGGCCTTCGC
CCAGACCGATATCAAACGTCTGATCGCCTACACCTCGGTTTCCCACATGGGCTTCGTGCT
GATTGCTATCTACACCGGCAGCCAGTTGGCCTACCAGGGCGCGGTAATCCAGATGATTGC
GCACGGCTTGTCGGCGGCGGGTCTGTTTATTCTCTGCGGTCAGCTTTATGAACGTATCCA
TACCCGCGACATGCGCATGATGGGCGGTCTGTGGAGCAAGATGAAATGGCTGCCAGCACT
GTCGCTGTTCTTTGCGGTGGCAACGCTTGGGATGCCTGGCACCGGTAACTTCGTCGGCGA
ATTTATGATTCTGTTCGGCAGCTTCCAGGTTGTCCCGGTGATTACCGTTATTTCTACCTT
TGGGCTGGTCTTTGCATCTGTTTATTCGCTGGCGATGTTGCATCGTGCTTACTTCGGTAA
AGCGAAAAGCCAGATTGCCAGCCAGGAACTGCCAGGGATGTCGCTGCGTGAGCTGTTTAT
GATCCTGTTGCTGGTGGTGCTGCTGGTACTGCTGGGCTTCTATCCGCAGCCGATTCTGGA
TACCTCGCACTCCGCGATTGGCAATATCCAGCAGTGGTTTGTTAATTCCGTTACTACTAC
AAGGCCGTAAATCGCCATGACAATAACTCCACAAAACCTGATCGCACTGCTACCGTTGCT
GATCGTCGGCTTGACGGTGGTGGTTGTGATGCTCTCCATTGCGTGGCGACGCAATCATTT
CCTCAACGCTACGCTCTCGGTTATTGGGCTTAACGCGGCGCTGGTTTCGCTCTGGTTTGT
CGGCCAGGCGGGCGCTATGGATGTTACGCCGCTGATGCGCGTTGATGGTTTCGCCATGCT
TTACACCGGGCTGGTCCTGCTGGCGAGCCTCGCCACCTGTACTTTCGCCTACCCGTGGCT
TGAAGGCTATAACGACAACAAGGATGAGTTCTACCTGTTGGTGTTAATTGCCGCGCTGGG
CGGGATCCTGCTGGCGAATGCCAACCATCTGGCGTCTCTGTTCCTCGGTATCGAACTGAT
CTCTTTGCCGCTGTTTGGCCTGGTCGGTTACGCTTTCCGCCAGAAACGTTCGCTGGAAGC
CAGTATCAAATACACCATCCTTTCTGCCGCAGCGTCTTCTTTCCTGCTGTTTGGTATGGC
GCTGGTGTATGCGCAGTCTGGCGACCTGTCGTTTGTCGCGTTGGGTAAAAACCTTGGCGA
CGGTATGCTCAACGAGCCGCTGTTGCTGGCAGGTTTCGGCCTGATGATTGTTGGCCTCGG
CTTCAAACTCTCTCTGGTGCCGTTCCACCTGTGGACGCCAGACGTATACCAGGGCGCGCC
TGCGCCGGTTTCCACTTTCCTGGCGACGGCGAGCAAAATCGCTATCTTCGGTGTGGTGAT
GCGTCTGTTCCTCTACGCACCGGTGGGTGACAGCGAAGCGATTCGCGTAGTACTGGCGAT
TATCGCCTTTGCCTCCATCATCTTCGGTAACCTGATGGCGTTGAGCCAGACCAACATCAA
ACGTCTGCTCGGTTACTCATCTATCTCTCACCTCGGCTATCTGCTGGTGGCGCTGATTGC
GCTGCAAACCGGCGAGATGTCGATGGAAGCGGTAGGGGTTTACCTGGCCGGTTATCTGTT
CAGCAGCCTCGGCGCGTTCGGCGTGGTCAGCCTGATGTCCAGCCCGTATCGTGGCCCGGA
TGCTGATTCCCTGTTCTCTTACCGCGGTCTGTTCTGGCATCGTCCGATCCTCGCGGCAGT
GATGACGGTGATGATGCTGTCTCTGGCCGGTATCCCGATGACGCTGGGCTTTATCGGTAA
GTTCTACGTGCTGGCGGTCGGTGTCCAGGCTCACTTGTGGTGGCTGGTGGGTGCCGTGGT
TGTCGGTTCGGCAATCGGCCTTTACTACTACCTGCGCGTGGCGGTGAGTCTGTACCTGCA
CGCACCGGAACAACCGGGTCGCGATGCACCGTCAAACTGGCAGTACAGCGCGGGCGGTAT
CGTGGTGCTGATTTCTGCACTGTTGGTACTGGTGCTGGGTGTATGGCCACAACCGCTGAT
TAGCATTGTGCGTTTGGCAATGCCGCTGATGTAATCTGTTAGTTTGTAAGTCAGAAAGCC
GCCGACATGCTCGGCGGTTTTTTTTGGCGCTCTGACACCATCACCCAACAATAACCGTCA
GCGCATGATTCCCTTGTCGCAGCATACGTCGATACGCGCTAATCAGCTTTTCCATATCAA
GCATGATCGAGGCAAAGAGTTGCCCCTCTAACTCTTCTGAAAAGGTCACTCCCGGATAAA
TCTCCATTTCATTGAGTCGCTTAATGGAAAACTGTTTACGCAGCTCACTTCGATCCAGTG
ATTCCAGTCGGTCGATTGTCGCGGCTAACTCCTGATTCCAGGTCAATCCCAGGAAGCCAT
CTATGCCATCTTCGAGGCTGTGTTCACCAAGCACGGCACGACTCAGCGGATCATTCTTCG
CGGGATCAAAAGCAGAGGTGCCTGTCAGCCCAAAGTGTAAAAAATCCCAGCGTTTATCAA
TATCCAGTCGGCGTAATCCTGAAAGCGTGTCATGTATATTATCCATCAAAGGTTTTTCAG
TAGACTCAAGCAGTTGGTTAATCTTTTCTGAGTCAATTTCTGCAAAATAACCAATCATTC
CCATTTATTTTTCCTCCATTGAATTTCATGTTTCGCATCTTAAAACAGACGAGGGAAAAT
AAAATGTGCATGTCGCTTTTTCTGGACCCGCCTCGAGAAATTTTTATTATTTACTGTTGT
ATAACAAATTTATAACACCATCCACCACCTGAGCCATTTTCTGATAATTCAATCTGTCTG
CGGTATCACCGGGCAAGTGGTATTGTTTATTACGATAAAAAGCGGTGTCAGTAATCATTA
CGGCGGGAATATCGTGTTGCCAATAATTCAGGTGGTCAGAGAAATCAATACCGGGAATAA
ACCCTGGGGCATTCATAGAATAAACAGATAAATCCCGGGATGACAACAATGCCGCTTTTA
CCTGACGAACGGCGTTGATATCCTGTATTCTGCCGACCAGGCAATAAAGTCCCCCCGATC
GGGATAAAGCCAGGACATTGCGGGTAAGGGTAATCCTGGCTACCAGGCGCAGAGTCGTAA
TAGCCAATCGGGGACGCCCTGCGCGGTAACTCTGGCACCGCTACTGACAAAGACCTCTTT
TATATACTCTACGGACCTATTCAGATTATCAATATTGTCGGCATTACGTGGATGCACAGC
TTGTGTAAGATAACGAACTGTTTTTTCTAATTGCTCAGGAATTACGTGTCGGGGCGTTGG
CGATAATGCAGTGACCCAGGGTTGGTAAAAATAATCAGAGGGAGTGAAAACAGAAATAAT
ATAACAAAAGGAAAATTTTTTCATATGTAAATTATCAATAAAAGGCGTTATTTCATTATT
ATTTATAATGAATTATGAGCGTTTATTTTATTACACTTGGTAGAGATATACAAAAAGTGT
TTTTTACAGTGGGTTCGCTATTTTTAAAAAGGAATTTCTGTGAGGAATAAAAATATAATT
ATGTTATTTATTGGCAGATTGAATTGACAAGTGGGGCAGAAATCTGAGGGTAAGAAAAGT
CAGCAACTACAATCCACTACATCAACAGACCAGCAATCGCGTGCCGAGATACGCTGGAAA
TACCCGAAGATTGAACTGCAGGGTGGTGTGACTGACATCAGTCAGTGATGACTTTTTAGC
AAACTATGTTCGACCAGTCAGCATATTTGCTGACTGGTCGAATTAATTAACAATGATGTT
AACTTACTCTTTTGCCTGATGCTCTATTTTGGGGTTGTGAGTGTTTTATTTCTAAGTCTC
TATAATAATCATTGATATTTGCATCGCCATATTTATCTAAATAACAATTTCTGTTTACCA
GTCGATGTTGAAAATCAATTTCGTACTGCTCTTCTGCTGAATATTTTTTAAATCTGTCAG
CATAGTTTTTTAATAACGTATAGGGGGCGCTGTCAGAATTACTTTCCCTTTGTTCAATCA
CTTCCTGGGCTGCCATGCACACAAATGCATCGCAACTTTGGCTTAAGTATTGCTGAAGAT
CGGCATGTAAAAATATTATCTCGGGTTCAGTTAAATGAACTTTTATATTATTATTCGACA
TTTCTCCCATGAGTTCAGAATTAAAACTATTAATGACACGCTTAAGTGAATTTTCTTTAT
CATGGCCTAGTGCGCGCAATTAGTTGAATATGACGCATTTTATTTGTTGTGTATTATTTT
TTTCATTTACTATTTTCTGTAGCGAAACTAATATCCAGTGTCCGCCAGTATTTATGGGGA
ATAACTGGACTTCATTCGGCCATGATGGATCGCTCTTAATATTTTCATTGAGAGCGTCTT
CCAGGTGAGTTCTGGTGGAGTAGGGGACGTAGAGACCAGTAGGATAATTGACTTCAGTAT
TTTTTGCATTAGCGGCGATCTTCTGAAGATAGCAATCTATTTCATCTGTGGTTAATTGAC
GATTTTTATCCCAGAAGTTTGTACCATCGCTCAGTTCATTATTCTCATCATTTAAAAGCA
CCTTCGAAAGCGACTGTTTTTCAGATATAAGAGGAATTTCATCACCGATAATTGTCATTA
ATTTCGAAGGGGAGAATAGCTTTTTGAACAGGAGATCATCTGAATTATCCGGACCAGTTG
GTTTAAGGTGGGAGTTGGTTGCGGTATGTGCCAAATTATATAATTTTAAACAGGCATTTT
TAATAAGTCGGATAATCGATAGGGTCTCATTTGTTGGGTTTCTAACAATATGGTAAAGAA
TATCTTCAGCTTTTTTTCCAAATTCATCATAACCTAACGCAATATTATGCAGTAACTCAA
TACTTTCTTCATCTCCGGATAACGCTGTTTTTTTTAAAGACTGCAGTAATTCCTCGGTCA
CAGTAAATTTTTCTGCAAATGTCTGACTGAGTTGGGTTTGAGATAATTGACAATAATTGC
TGACAACTGTAACCATCATATGCTCCTTTTAGTTGCAAAGGTTGTGCTGAATGAAGATAA
AAAGAGGCAACTTATTGCTCTGAATATAGTGCGTAAGGAGATGAATAAATATCAAAAATC
GCTCAATATGCCCGTGTGGGTGGATATATGTAGCGCGGGTTGCGATAACAGGGCAAGTTT
CGCCCTGTTTTTAATAATAAGCAGAGTTAAACGTTAAACACGGTGAAATCATTCGCTAGT
TCAGTCGCCGGGAAAATTGACCTGCATTCACGTAACAGGTGCTGACAACCTTTGTCATCA
TAGCGCGAGCTGACGTGGGTAATGATTAGCTTACCGACTCCAGCCTCACGGGCCAGTGTC
GCAGCCTGGCGTGTAGAGCTATGACCGCGACTATTGGCTTTGGCTTCCATGGTTATATCC
AGCGTCGCTTCGTGTACCATGACATCGACACCTTTAGCCAGGTCAAGTGCGGCATCGCAG
GGGCCGGTATCGCCGAAAATAGCGAGCGCTTTACCTGGCACTGGAGCAGCTAAGTAATCT
GCGCCGTTAATCTGCCTTCCATCTTCCAGCATGATTGTTTTGCCCGCTTTTAATTCCTGA
AACAGTGGGCCAGGCGGTACGCCAGCAGCTTTTAATGCCTGGGCATTTAATGCACCCGGT
TTATCATGTTCTTCAATACGATAGCCATAACATTCCAGTGGGTGTTCCATTGGATAAGCG
GTCACTTTGCGCAGGCCATCATCGAGAATTTCGCCAGCGCCAATTTCGACAATTTCCAGC
GGATAATCGGTCCATGAGCCGCTAATCCGCAGCGCGGTCTCCACAAATTCACGGATACCT
TGCGGACCATAAATCGTTAAGGGTTGGACAATACCAGACATAGAACGACTGCACAGCAAG
CCGGGTAAACCAAAGAGATGATCGCCATGAAGGTGACTAATAAAAATCTTGTCCAGTTTT
CCAGGGTTAAAGGCGGTATGCAGTAGCTGATGCTGGGTGCCTTCACCGCAGTCAAACAAC
CAAAGACCGCTCTGGGTCGGATGTTGCAGGTTAAGCAATATTGCCGTGACATTGCGCGTA
CGGGTTGGCACACCGGCTGAAGAACCTAAAAAAATTAATTCCATGAGTTCATCACGTTTC
AAAAAATATTCCGGCTAGTATAAGGCATACATCTAAAAGGAGAGCATTATGATTGAATGG
CAAGATCTGCATCACTCTGAATTATCGGTTTCCCAGCTTTATGCCTTATTACAACTGCGT
TGCGCGGTGTTTGTTGTCGAGCAGAATTGCCCTTATCAGGATATCGATGGTGATGATTTG
ACGGGGGATAATCGCCATATTCTCGGTTGGAAAAATGATGAACTGGTGGCATATGCGAGG
ATTCTGAAAAGTGATGATGATCTTGAGCCGGTCGTTATAGGTCGGGTGATTGTCAGTGAA
GCGTTGCGTGGCGAAAAAGTGGGGCAGCAACTGATGAGTAAAACCCTCGACACATGCACG
CATCACTGGCCTGATAAGCCTGTTTACCTTGGGGCGCAGGCGCATCTGCAAAACTTCTAC
CAGAGTTTCGGTTTTATCCCTGTGACGGAGATCTATGAAGAAGATGGTATCCCACACATT
GGGATGGCACGCGAGGTAATTCAGGCGTAATCAATAACCCTTGTCTATAGTTAGTGACAG
GTTTTACGCAAATGGAGAACGAGAATGTCTAATCAGTTTGGTGATACACGTATCGATGAC
GACCTGACGCTGCTTAGTGAAACACTGGAAGAGGTGCTCCGCTCCTCTGGCGATCCCGCC
GATCAGAAATATGTTGAGCTGAAAGCGCGTGCAGAAAAAGCGCTGGATGATGTGAAAAAA
CGGGTTAGCCAGGCTTCAGACAGTTATTACTATCGGGCGAAGCAGGCTGTTTATCGTGCT
GATGACTACGTCCACGAAAAACCCTGGCAGGGAATTGGTGTGGGTGCGGCCGTTGGGCTG
GTACTAGGACTGTTGCTGGCACGCCGTTAAAACCTCCCTACACCGGGGTACTGCATTTTT
TTTGTAGTACCCCGTATAATGTGAGGCTTTTAACAGGGAGAGGTCCGCGTGCAATCACTT
ACTACGGCGCTGGAAAATCTACTGCGCCATTTGTCGCAAGAGATTCCGGTGACACCCGGC
ATTCGGGTTATCGATATTCCTTTCCCTCTCAAAGACGCTTTTGATGCCTTGAGCTGGCTG
GCCAGTCAGCAAACGTACCCGCAATTCTACTGGCAACAACGTAATGGTGATGAAGAAGCT
GCCGTCCTGGGCGCGATTACCCGTTTTACGTCGTTGGACCAGGCACAACGTTTTCTTCGC
CAGCACCCGGAACACGCCGACTTACGCATTTGGGGGCTGAATGCGTTCGACCCGTCGCAG
GGCAATTTACTTTTACCACGCCTGGAATGGCGACGCTGTGGCGGTAAAGCCACGCTGCGG
CTGACGCTATTCAGCGAAAGCTCCCTTCAGCACGATGCGATTAAGGCAAGAGAATTTATC
GCCACACTGGTGAGTATCAAGCCCTTGCCTGGGTTACATTTAACCACTACGCGAGAACAA
CACTGGCCGGACAAAACGGGCTGGACGCAATTAATCGAACTGGCAACGAAAACCATCGCC
GAAGGGGAGCTCGACAAAGTGGTGCTTGCTCGGGCAACTGACCTGCATTTCGCAAGTCCG
GTCAATGCGGCGGCGATGATGGCTGCCAGTCGTCGACTGAATCTCAATTGCTACCATTTT
TACATGGCCTTTGATGGCGAAAATGCTTTTCTTGGCTCTTCACCGGAACGGTTATGGCGG
CGGCGTGACAAAGCGCTGCGTACTGAAGCGCTGGCGGGAACAGTAGCAAATCATCCTGAT
GATAAGCAGGCGCAGCAGTTAGGAGAGTGGCTGATGGCGGATGATAAAAACCAGCGCGAG
AACATGCTGGTGGTGGAAGATATCTGCCAACGATTACAGGCCGATACCCAGACGCTGGAT
GTTTTACCGCCGCAGGTACTGCGTCTGCGTAAAGTGCAGCATCTTCGCCGCTGTATCTGG
ACTTCACTCAACAAAGCGGATGATGTGATCTGTTTACATCAGTTGCAGCCAACGGCAGCA
GTTGCTGGCTTACCGCGCGATCTGGCGCGACAGTTTATCGCCCGTCACGAACCGTTCACC
CGAGAATGGTACGCCGGTTCTGCGGGCTATCTCTCATTACAACAAAGCGAATTCTGCGTT
TCCCTGCGCTCAGCAAAAATTAGCGGCAATGTCGTGCGATTATATGCTGGCGCGGGCATT
GTCCGTGGTTCCGACCCCGAGCAAGAGTGGCAGGAAATCGACAACAAAGCGGCAGGGCTG
CGTACTTTATTACAGATGGAATAGTAATGAGTCGCATCATTACCGATTCATATCAATAAT
CTATTTTTGTAGCTCCTTATACTTAGCCGCAATATTGATACCGGACAAACTCATGTCAGT
AAGCGCATTTAACCGACGCTGGGCGGCGGTCATTCTGGAAGCATTAACGCGTCACGGCGT
CAGACACATCTGTATCGCCCCAGGCTCGCGTTCTACACCGTTAACGTTAGCGGCGGCGGA
GAATTCCGCATTCATTCACCACACCCATTTCGATGAGCGTGGACTGGGGCATCTGGCGCT
GGGGCTGGCGAAAGTCAGCAAGCAGCCGGTGGCGGTGATTGTGACCTCCGGCACGGCGGT
AGCAAATCTCTATCCTGCACTGATTGAAGCTGGGTTAACCGGAGAAAAACTGATCCTGTT
AACCGCCGATCGCCCGCCGGAGCTAATTGACTGCGGCGCGAATCAGGCGATTCGTCAGCC
GGGAATGTTCGCCTCTCACCCCACGCACAGTATTTCATTGCCGCGCCCGACCCAGGATAT
CCCCGCAAGTTGGCTGGTTTCTACCATCGACCATGCTCTCGGTACGCTTCATGCGGGCGG
AGTCCATATCAACTGCCCGTTTGCTGAACCGCTGTATGGCGAGATGGACGACACTGGGCT
TAGCTGGCAACAGCGTCTGGGTGACTGGTGGCAGGATGATAAGCCGTGGCTGCGTGAAGC
GCCTCGTCTGGAAAGTGAAAAACAGCGCGACTGGTTCTTCTGGCGGCAAAAACGCGGCGT
GGTGGTTGCCGGGCGCATGAGTGCGGAAGAGGGCAAAAAAGTTGCACTGTGGGCGCAAAC
TCTTGGCTGGCCGCTGATTGGCGACGTGCTGTCGCAAACCGGACAGCCGCTGCCGTGTGC
CGATCTTTGGTTAGGCAATGCCAAAGCGACCAGCGAACTGCAACAGGCACAGATTGTGGT
GCAACTGGGCAGCAGCCTGACGGGCAAACGGCTCCTGCAATGGCAGGCAAGCTGTGAACC
CGAAGAGTACTGGATTGTGGATGACATCGAAGGGCGACTTGATCCGGCACACCATCGTGG
ACGCCGCTTAATTGCCAATATTGCCGACTGGCTGGAGCTGCATCCGGCAGAAAAACGCCA
GCCCTGGTGCGTTGAAATCCCGCGCCTGGCAGAACAGGCAATGCAGGCGGTTATTGCCCG
TCGCGATGCGTTTGGCGAAGCGCAACTGGCGCATCGCATCAGCGACTATCTGCCTGAACA
GGGGCAATTGTTTGTTGGTAACAGCCTGGTGGTACGTCTGATTGATGCGCTTTCGCAACT
TCCAGCAGGTTACCCGGTGTACAGCAACCGTGGGGCCAGCGGTATCGACGGACTGCTTTC
TACTGCCGCCGGCGTTCAGCGTGCCAGTGGCAAACCGACGCTGGCGATTGTGGGCGATCT
CTCCGCACTTTACGATCTCAACGCGCTGGCGTTATTGCGTCAGGTTTCCGCGCCGCTGGT
ATTAATTGTGGTGAATAACAACGGCGGGCAAATTTTTTCGCTGTTGCCAACGCCGCAAAG
CGAGCGCGAACGTTTCTATCTGATGCCGCAAAACGTTCATTTTGAGCACGCCGCCGCGAT
GTTCGAGCTGAAATATCATCGTCCGCAAAACTGGCAGGAACTTGAAACGGCACTTGCCGA
TGCCTGGCGCACGCCAACCACCACGGTAATTGAAATGGTGGTTAACGACACCGATGGTGC
GCAAACGCTCCAGCAACTTCTGGCGCAGGTAAGCCATTTATGATCCTGCACGCGCAGGCA
AAACACGGCAAACCAGGTTTACCCTGGCTGGTGTTTTTGCACGGTTTTTCCGGCGATTGC
CACGAATGGCAAGAAGTGGGCGAGGCGTTTGCCGACTACTCACGGTTGTATGTTGATCTT
CCCGGGCACGGTGGTTCGGCGGCGATTAGCGTCGATGGATTTGATGATGTCACCGACTTA
CTGCGTAAAACCCTGGTTAGTTACAACATCCTTAACTTCTGGCTGGTGGGGTACTCGCTT
GGCGGACGGGTGGCGATGATGGCCGCTTGCCAGGGGCTGGCGGGGCTTTGTGGGGTTATT
GTCGAAGGCGGGCATCCGGGGCTGCAAAATGCTGAACAACGTGCGGAACGTCAGCGTTCC
GATCGCCAATGGGCGCAGCGTTTTCGCACAGAACCGTTAACGGCGGTATTTGCCGACTGG
TATCAACAGTCTGTTTTTGCCTCGCTCAATGACGATCAACGCCGGGAGCTGGTGGCGCTG
CGCAGCAACAATAATGGCGCAACCCTTGCCGCCATGCTGGAGGCGACTTCTCTCGCCGTC
CAGCCTGATTTACGTGCTAACCTTAGCGCCCGCACATTTGCGTTTTATTATTTATGTGGT
GAACGTGACAGCAAATTCCGCGCTCTGGCGGCGGAACTGGCTGCCGACTGCCATGTCATT
CCTCGCGCCGGACATAACGCGCATCGGGAAAATCCCGCTGGCGTTATCGCAAGTCTGGCG
CAGATCTTGCGTTTCTGACTAAAGGACACAATATGATTTATCCTGATGAAGCAATGCTTT
ACGCACCGGTTGAATGGCACGACTGCTCCGAAGGTTTCGAGGACATTCGTTATGAAAAAT
CCACCGACGGTATCGCAAAAATCACCATTAATCGTCCGCAGGTGCGCAATGCCTTCCGTC
CTCTGACGGTAAAAGAGATGATCCAGGCACTGGCAGATGCGCGTTATGACGACAATATCG
GCGTGATCATTCTGACTGGCGCAGGCGATAAAGCGTTCTGCTCCGGTGGTGACCAGAAAG
TGCGTGGTGATTACGGCGGCTATAAAGATGATTCCGGCGTACATCACCTGAACGTGCTGG
ACTTCCAGCGTCAGATCCGTACCTGTCCGAAACCGGTTGTCGCGATGGTGGCTGGCTACT
CCATCGGCGGTGGTCACGTTCTGCACATGATGTGCGACCTGACTATCGCGGCAGATAATG
CCATCTTCGGTCAGACTGGCCCGAAAGTCGGTTCCTTCGACGGCGGCTGGGGCGCTTCCT
ACATGGCTCGTATCGTCGGGCAGAAAAAAGCGCGTGAAATCTGGTTCCTGTGCCGTCAGT
ACGACGCAAAACAGGCGCTGGATATGGGCCTTGTGAACACCGTGGTACCGCTGGCGGATC
TGGAAAAAGAAACCGTCCGTTGGTGCCGCGAAATGCTGCAAAACAGCCCGATGGCGCTGC
GCTGCCTGAAAGCTGCACTGAACGCCGACTGTGACGGTCAGGCAGGTCTGCAGGAGCTGG
CGGGCAACGCCACCATGCTGTTCTACATGACGGAAGAAGGTCAGGAAGGTCGCAACGCCT
TCAACCAGAAACGTCAGCCTGATTTCAGCAAATTTAAACGGAATCCGTAATGCGTAGCGC
GCAGGTATACCGCTGGCAGATCCCCATGGACGCGGGGGTGGTTCTGCGCGACAGGCGGTT
AAAAACCCGCGACGGGCTGTATGTTTGCCTGCGTGAAGGCGAGCGCGAAGGGTGGGGGGA
GATCTCCCCACTGCCGGGCTTCAGTCAGGAAACCTGGGAAGAGGCGCAAAGTGTGCTGCT
TGCCTGGGTAAATAACTGGCTGGCAGGCGATTGCGAATTACCGCAGCTGCCTTCCGTCGC
CTTTGGCGTAAGCTGTGCATTGGCGGAGCTGGCAGATACGCTCCCGCAGGCGGCCAATTA
CCGTGCGGCACCACTGTGTAATGGCGATCCTGACGATCTGATCCTCAAACTTGCTGATAT
GCCAGGCGAGAAAGTGGCGAAGGTCAAAGTGGGATTGTACGAAGCCGTGCGCGACGGCAT
GGTGGTGAATCTGTTGCTGGAGGCAATTCCGGATCTGCATTTGCGTCTTGACGCGAATCG
CGCCTGGACACCGCTGAAAGGCCAGCAGTTTGCCAAATATGTTAACCCGGATTATCGCCA
CCGCATCGCGTTTCTCGAAGAGCCGTGCAAAACCCGCGATGATTCGCGAGCGTTTGCCCG
TGAAACCGGCATTGCCATTGCCTGGGATGAAAGCTTGCGCGAGCCGGATTTTGCCTTTGT
GGCTGAAGAGGGCGTGCGCGCGGTAGTTATCAAACCCACGCTCACGGGCAGTCTGGAGAA
AGTACGCGAGCAGGTACAGGCGGCGCACGCGCTGGGGCTGACGGCGGTGATCAGTTCTTC
CATTGAATCGAGCTTAGGCTTAACGCAACTGGCGCGGATTGCCGCCTGGTTAACGCCGGA
CACCATTCCAGGGCTGGACACGCTGGATCTAATGCAGGCGCAGCAGGTACGTCGCTGGCC
GGGTAGCACGCTGCCTGTCGTGGAAGTTGATGCACTGGAGCGGTTGTTATGATCTTCTCT
GACTGGCCGTGGCGTCACTGGCGGCAAGTGCGGGGAGAAGCCATCGCCTTACGTCTTAAT
GACGAGCAACTCAACTGGCGCGAGCTTTGTGCTCGCGTCGATGAATTAGCCTCCGGCTTT
GCGGCGCAGGGCGTAGTTGAGGGCAGCGGCGTGATGTTGCGGGCGTGGAATACGCCGCAA
ACGCTGCTCGCCTGGCTGGCGTTACTGCAATGCGGGGCGCGGGTGTTGTCCGTGAACCCT
CAGCTGCCGCAACCGTTGCTTGAAGAATTGCTGCCCAATCTTACGCTGCAATTTGCGCTG
GTGCCGGAAGGGGAAAACACGTTTCCGGCGTTAGCGTCGCTGCACATTCAGCGGGTTGAA
GGCGCACATGCCGCTGCGTGGCAGCCGACGCGTCTGTGCTCAATGACGTTAACCTCTGGG
TCCACTGGCTTGCCGAAAGCCGCTGTTCATAATTACCAGGCTCATCTTGCCAGCGCCGAA
GGGGTGTTATCGCTGATTCCGTTTGGCGATCACGATGATTGGTTGCTCTCTTTACCGCTG
TTTCACGTCTCCGGTCAGGGAATTATGTGGCGCTGGTTATACGCTGGTGCGCGGATGACG
GTACGTGATAAACAGCCATTGGAGCAAATGCTGGCAGGCTGTACTCACGCTTCACTGGTG
CCAACACAACTCTGGCGTTTGCTGGTTAACCGCAGTTCCGTTTCCCTGAAAGCGGTGTTA
CTTGGCGGCGCGGCTATCCCGGTCGAGTTGACGGAACAGGCGCGCGAGCAGGGGATTCGT
TGCTTTTGCGGCTATGGTCTGACCGAGTTTGCCTCCACGGTGTGTGCGAAAGAAGCCGAC
GGCCTGGCAGACGTTGGTTCGCCGCTGCCGGGTCGGGAAGTGAAAATCGTTAATAATGAA
GTGTGGCTGCGGGCTGCCAGTATGGCAGAAGGTTACTGGCGTAACGGGCAACTGGTTTCA
CTGGTTAATGACGAAGGCTGGTACGCTACGCGCGATCGCGGTGAGATGCATAATGGCAAG
CTGACCATTGTCGGACGTTTAGACAATCTATTCTTCAGTGGCGGAGAGGGTATTCAGCCG
GAAGAAGTCGAGCGCGTAATTGCTGCACATCCTGCGGTTTTGCAGGTGTTTATCGTCCCC
GTTGCCGACAAGGAGTTTGGTCATCGACCGGTGGCGGTGATGGAGTATGACCACGAGAGC
GTTGATCTTAGTGAATGGGTGAAAGATAAGCTGGCCCGTTTTCAGCAACCGGTGCGTTGG
TTAACGTTGCCGCCTGAACTGAAAAACGGCGGTATTAAAATTTTACGTCAGGCGCTAAAA
GAGTGGGTGCAACGTCAGCAATAATTAACCCTCCGTTTCACTTCTCATTTCTGCCATTCC
ATTGCCGTTGATAAAGAGTTTATCTGTTAATCTGTAAATTGATGTGAAAACTCTTAGCAA
ACAGGATAATGCAATGGAATGGCTGGTCAAAAAATCGTGCTGCAATAAACAAGATAACAG
ACATGTACTTATGCTCTGCGATGCTGGCGGCGCGATAAAAATGATCGCCGAAGTGAAGAG
TGACTTCGCCGTGAAAGTGGGGGATTTACTCTCGCCTTTGCAGAATGCGCTTTATTGTAT
TAATCGTGAAAAGCTGCATACGGTGAAAGTCCTCTCGGCAAGCAGTTATAGCCCCGATGA
GTGGGAACGGCAGTGTAAAGCGGCAGGGAAAACTCAGTAACGTTGTTTTGTCGTGGGCAG
GAAAATCAGCATCAACCCGCTCATAATACAGGCTACTCCCAGTAGTGCTTTCAGCGAAAA
AGTCCCTTCCCAGCCGGGAAGTACCATTGAAGCAATCCATACCAGCACATAACTCATACT
GAGCAAGGCATAGGCTTTGCTTAGCGCAAGTATATGTAGCGTTTTATACCAACAAAAAAC
GGAAAGCAGATAACCCAGCAGCCCGAGTAACAGTATCCGGGCATCCAGGCCAAAAGCTAA
CAGCGTCGCGATAAAATCCCATAAGTGCGTCATCGGCGGCAGATGACTCGCCGCAAAACC
CAGGCTTAATTGCGCAGCTGAGGCAATAATGACGCTGAATAATCCCCACATCAGGCCCAT
TACACCGTACTCCCGAGGATCACAATGCCACCAATAATGAACGCCACCCCACACCAGTGA
CGCGGCGATACCGGTTCGTGCCACAGTTTTACTGCAGCCAGCGTCACCCAGACAAAATTC
AGACTTAACATCGGGTAGGCAATGCCTACCGGTACGTTCTGCAAGACCAGCAGCCAGAGC
ACCATGGCAAGACCAAGACAAGCCAGCGCCAGTCCCAGCCACAGCACGATATGTTTGCGC
CGTTTGTTTATCGCCACAAAGCAGGTTGCCTGTTTCTGACACAACTGCCCGGCAACGCTA
AGCAAGCTGGCAAAGACTAATGTTAGCCAGATCATTTGGGACGATACTGAATCAGCACCA
GACGCTCCTGACGATCGATGGCATCTGCGGGCGGAATGGCGAGACTGTTGATATCTTCAT
CGCGGTCAACCGAAAGCACGAGTGTAATAATCCCCTCCTGACGATGTTGATTAAGCCAGT
TTGCGAACTCATCACCGCTGACAAATCTCCCTTTCGCATCCGGATAATTAAGGCCGTATT
TCAACTCACCTGTCTGGCGATACATGATGATGTCATCGCGTTGCAGGCTCCATGCCAGAC
CTGCGGCAACACCGACGCTATCAGTAAGAATATAGCGGCTTGGCTGAAGTGATTCTTGTG
TCATCTCGACAAAAAATTGCGGATGTTTTCCTTCCATGACTCTGTCAGGAATTGAAAATC
CTACCAGCAACGCCAGCCCCAGCGGGCAAAGCGCGGCAAAAGACCAGGTCTTTTCGACGT
TTGTTAAGGTGTACCAGCCGAAAAATGCCCATAGTGAAAAAATCGACCAGGCACAAAAGA
CTTTATAGCTCTCGAAGGTTTGCCACACCGGCGTGTTCATTGGTCCCCAGGGGGAGACCA
CAAATGTGGCAATAATGCCAGTGACGCCAAAAGCGATGTTAATCCAGCCATTAATCCGCA
ACGCCAGAGGATTATTTTTTGCTGCCAGCAAAGCGTAATGCGCCATCAGCATTGCCAGAG
GTGCAAAGCAGGAAAGAATATAGGTGGGCAATTTACCTTTAGCGACGGAGAAAAACAGCA
GCGGCATTATCGTCCAGCTCAACAAATAGACGGTTGCGGAATGCTTGCGGTTTTTCCAGC
CTGCGTACAGTGCACCGGGGAGTAATCCCAGCCACGGCAGGCTACCGGCAATGATGACCG
GCACGTAGTACCAGAACGGAGCTCTATGTTGGGCATCATCCAGTGCAAAGCGTTGAATAT
GCTCAACCCAGAAAAAATAGTGCCAGAAGTCAGGCTCCCGCTGCGCTATCGCCAGTCCCC
AGGGGAGAACCGTCAGTACGCAACTGATAACCGCCAGCCAGCCGTAAATAAAGAGATCTT
TCCAGCGTTTTTGCGTCGCTACCCATGGCAGTACGCTTAATACCGGCACGGCAAGGGCGA
GAAAACCTTTGGTCATCACCCCCATGCCGCAGGTGATTCCCAGCAGTAAAAATCCTGCGC
TTTTGCCTTTCCACGTCTGTGCCTGCATTGCCAGCCAGAAGCTGCACATTCCCGCCACCA
GCCAGAATGCAATAAACGGATCGAGCACGGCATAAGTGCCGATGGCATAGACAATAAACA
ATGAGAGATAAATTACTGTGGCGAGTAGAGCCAGACGTTTATCGCGCCATAAGCGCAGAG
TAAACCAGGTCACCAGCGCGGCAGTTAACAGGGTCGCAAAGATAACGCCTGCCCGCACAC
CAAAGTTATTCGCACCAAATAGCCATTGCCCAATGCTGTTAATCCAGTATCCAGCAATGG
GTTTTTCAAAATAACGTAGCCCTAACAGATGGGGCACAATCCAGTCGCCGGATGCCAGCA
TTTCCCGACTGATTTCCGCATAACGCGTTTCATCGGGTTGCCAGAGCAGACGCGTGCTGA
TCGGTAACAGGTAATAGCAGGCAATAAACGCGAAGAGGCCGATAAGGTAACGTACCGATT
TCATCAGCGACTACCCGCAATTTGTTGGCAACCCAGCCAGCCTTCACGTCCGGCAATATT
TCCGCGAACAACTTGTCCGAGCGGCAACGTCTCTGATAACAGTTCGCTTAAAGGGCAAAA
TGTCACGCCTTCCTGAGCTGCGCGTTTGAGGAGATCCACAAAATTATGCTGATAAGCGCA
GCCTTCAACTTCTGCATGAATGGTATAAACCGGCGTGCCTTTATCTCGCAGGATGCGGTT
GAGTAACCAACCGTTAAAATCTTCTGCTTTCACATCCCGACCAATCACTTCATCCCAGGT
GGGTAAGGTCACCGGAATTTGCGCAGTGCCAGGGTTTCCTGATTCGAGCAGTGGACGGAA
CGGCATGGCCCCACGACAATCGCTGTTGTAGCGCAAATGGAACGCTTCTTTTGCTTCGAT
CACCTGCTGGTCGGCACGCCAGCCCGCAGCGGCAGAACAGGTTACCGGTTGACCGATAAT
CTCTTCCAGGGTGCGAAGGCCGAGTGCAATATCGTCGATCATTGTTTGCCGATCCCAGTT
ACCGCTATGGGCTTGCCAGGCATGGTGATCCCAGGCGTGCAGGCCGACTTCGTGATGTTT
AGCCGCTTCACGAATGATATCGGCATTGGCAGGACCAATCTCTTTACCTGGCCAGGCCGT
ACCTGCCAGTAAAATATCCCAGCCATAAAGCGATGCCGCGTTTGAGCGCAGCATCTTCCA
CAAAAACTGTGGCTTCACCAGTCGCCAGAGATGGCGGCCCATATTGTCCGGGCCGACGCT
GAAAAAAATGCTGGCCTGAATATTATGCTTACTCAAGATTTCCAGCAGACGCGGCACGCC
TTCACGGGTGCCACGAAAGGTATCGACATCAATGCGTAAGCCTACTTTGGTCATGATGGT
TTATCCGTAAGATCAACGGTGCGCAGGAAGAAATCCAGCGTTTCGTCGATGGTTTCCTGC
ATATCAATTTTCGGCTCCCAGTCCAGGCAGCGGTGGGCATTGCGGATGCTCGGTTTACGA
TGCTCTACGTCCTGATATCCTTTGCCGTAGTAGCTGCTACTTTCGACAACGCGAAAGCCC
GCAAACGGTGGGAAGTGATGGCGCAGCGGATGTTTTTCGAAGCTCGCCAGCAGCATCTCG
CCCAGTTCCTCAATGCTCGCTTCGTTCTCAGGATTGCCAATGTTGATAATTTCGCCGTCG
CAGCGATTTCCCACATTTTCGATAATGCGGTACAACGCCTCGATACCATCCCGGATATCA
GTAAAGCAGCGTTTTTGTTTTCCGCCATCAATCAGCTTAATCGGTGAACCTTCTACCAGA
TTGAGAATGAGTTGCGTAATAGCGCGGGAGCTGCCGATTCGTGCCGCATTAAGGTTATCC
AGTCGTGGTCCCATCCAGTTAAACGGGCGGAAGAGGGTGAACTGTAAACCCTCTTTTTCG
CCATAGGCCCAGATAACCCGATCAAGTAATTGTTTTGACACCGAATAAATCCAGCGTGGT
TTATTCACCGGGCCGACGATTAAATTAGAATGGTCCTCATCGAAGTATTTATCGCTACAC
ATCCCATAAACTTCTGAAGTTGACGGGAAGATGATTCGCTTACGGTACTTCACGCAGTAG
CGGATAATGCGCAGATTCTCTTCAAAATCGAGTTCAAATACGCGCAGCGGGTTGCGGGTA
TATTCAATCGGCGTGGCTATCGCCACCAGCGGCAAGACGACATCACATTTTTTGACGTGA
TACTCAATCCATTCGGAATGAATACTGATATCGCCTTCGACAAAGTGAAAATGCGGATGA
TTCAGAAAACGGCTTATCGCATCGCTGCCAATATCCAGACCGTAAACTTCATAATGATCT
TCGCGCAGCAGGCGTTCTGTCAGATGGTTGCCAATAAAGCCATTCACCCCGAGGATGAGT
ACCCGGGTACGGCGTCGGGCGGCACAGGCAGGCTGGCTATTCAAGCGTGAACCTTGCACC
AGGCCCAGCGTCTGCGCTAATTGCGAGCCCTGCATAGTAATGCCGTCGCCCGCCTGTCCG
GTGACGATTTCCAGCGCGCCATCGCCACAGGCAATCAGCAGTGGCGCAACAGAAATCACG
CTCCCCGGCTGCGCTGCGGATGTATGAGGATGTACGCGTGACGACCAGACGGTGAATTTC
TGATTGCCAGCATAGCTGAAGGCACCCGGCCACGGATCGGCAACGGCGCGGACCATGTTA
TGCAATACGGCTGCCGGTTTGTGCCACTCGAGGAAGCTATCTTCTGGTGTTCTGCGACCA
AAACAGGTGGCTTCGTTCTCGCGTTGGGCGATTTCCAGAATATTACCGTGTTTAATGGCG
GGTAATGTCTGTTCCAGTAGCTGGCGCGCGGCATGGCACAATTTATGATGCAGCGTAATA
GCGATATCGTCTGGCGCAATGGCAATGCGCAGTTGCGCCACAATGGCCCCGGCATCGGCA
CGTTTCACCATTCGGTGCAATGTAACGCCAGTTTCCGTTTCACCGTTGACCAGCACCCAG
TTCAGCGGCGCGCGACCACGATATTTTGGTAACAGCGAACCATGCAGATTAAATGCACCT
GCGGGAGCGAGCTGCAAAATTTCGTCGCAAATAAGATGGCGATAATAAAAAGAGAAAATC
ACCTCTGGTGATAGTTGGGCAATGCGTTCCACCCACAGCGGATGATTAACGTTATCCGGC
GCATAAACCGGAATGCCTCTTTCCGCTGCCAGACGAGCCACCGAACCATAAAAGGCTTTT
TCACCGGGATTATCAGTATGGGTAAAAATGGCGCTAATTTCGTAACCGGTAGCCAGCAGG
GCTTCAATACCGAGGCATCCCATATCGTGGTAGGCAAAAACGACGGTTTTCATTATTCAT
TTTCCTTGCTGGATGGACGGATAACTTGCTGAACAAAATAGCGGGGGCGGGCGCGGACAT
CGGTGTAGATCCTGCCGATATATTCACCGAGTAATCCCATGCCGATAAACTGAGCGCCAA
TAAAAGTAAACAGCACGGCAAATAGCATAAAGACGCCTTCTGCCGCCCATTGTGGTCCGA
AGGTCAGGCGTAAAATCACCAGCAGCACCGCAATGCTAAAACCTCCAATCGCAATAATGC
TGCCGAGCAGACTCAGCATACGTAGCGGCGTTGTGGTAAGGCAGGTCACCAGGTCGTACA
TCAAATTAATCAGGCGCATAAAACTGTATTTGGATTCACCAAACTCACGCTCGGCATGAT
GCACTGGAATTTCAATGGCACGGCGGGCGAAGATATTCGCCAGAATCGGGATAAAGGTGC
TGCGTTCATGGCAGTGCAACATCGCATCGACAATATGACGGCGATAGGCGCGCAGCATAC
AACCGTAGTCACCCATCGCTTTGCCGGTGGTGCGCTGAATAAGCCGGTTAATCATCTTCG
AAGCGGTTTTACGAAACCAGCTGTCCTGGCGGTTCTGGCGTACAGTCCCTACCACGTCGT
AACCTTCATCGGCTTTTGCCACCAGGCGGGGGATTTCTTCTGGCGGATTCTGGAGATCGG
CATCAAGGGTAATAATTAAGTCGCCAGTAACGTGACTGAATCCCGCCATAATCGCTGAAT
GTTGCCCGTAATTGCGGTTAAGCAAAATAGACACAATATGGCTGTTCTCCGCTTGTGAGG
CTTCGACCAGCATATGCGCGGAATTATCGCTACTGCCGTCATCAATCAGCAGGATCTCAT
ACTCTTTCCCCAGTGATTCACAGGCTGTGGTGGTGCGCCTGATTAATTCCGGTAAGCTTT
CCTGCTCGTTATAAACGGGAATAACCACCGAGACTTTCTTAACAGGGTGGATTTCAAACA
TGGCTTATTGTCCTGCGAGTTGCTGAAGGGCTGTGATGACGCGGTCGGCATCGGCGGTGG
TCATATCCGGGAACAGCGGCAACGAACAGATGCGTTCGCTATTCCATTCGCTATTCGGTA
ACGACAGCGTGGGAAAACGCTCGCGATAATATTTTTGTGTGTGAGCGGCGCGGAAATGTA
ACCCGGTACCAATACCTCTTTCTTTTAACGCTTCCATCAACGCATCGCGACTGATACCAC
AACGTTGTTCATCGACACGAATAATAAACAGATGCCAGGCGTGAACGTGCGGCCAGGCGG
GAAGGCTTAATGGCTGAAAGGGGAGAGCTGCCAGTGCTTGCTGATATTGCTGGGCAATTT
CGCGCCGACGGGTGTTGAGGTGCTCTAATTTGACTAACTGTGTCAGGGCAATCGCGGCGT
TAATATCGGTCAGATTGTACTTATAGCCCGGCGTTAAGACTTCAGCCTGCGGTACACGGC
CCCAGGTTTGTCTGTCATAGGCATCGACACCCAGACCGTGAAATTTCAGCATCCGTAGCT
GGCGGGCAAGGTTTTCATTATCAGTTACAATCAGGCCACCTTCAGCACAGGTAATATTTT
TAATGGCATGAAATGAAAAAATAGCGGTACCTTTTGCGCCAATATGTCGCCCTTTGTAAT
ACGTACCTACGGCATGGGCAGCATCTTCGATAACTGCGATGCCGTAACGTTCGCCAATGG
CGCGAATGGCGTCAATATCTGCTGGCGCACCGGCATAATGCACCGGAATGATGGCTTTAG
TGCGTGGCGTAATGGCTGACTCGATAGCTTCAGGCGTGACCATCAGCGTATCGCGGTCGA
CATCCACCATTACCGGCGTTGCACCCAACAAGGAAATCATATTGAGGGTTGAAACCCAGG
TCAGGGAAGGCGTAATCACTTCATCGCCCTTGCCAATTTCCAACGCCATTAGCGTGATAT
GCATTCCGGCGGTGGCTGAACTGACCGCGATGGCATGCTGATTTCCCGTCAACTGGCAAA
AGGCTTGCTCAAGCGCCTGATTCTTCGGACCGGTTGTGATCCAACCGGATTCGAGAACCT
CTTTAACTGCAGCGAGTTCCTCCACGCCCATTGCTGGTCGCGAAAAAGGCAAAAATTCTG
ACATTGCTTTTCCTTCCGCCATTGAATACCTGTCCACTTATATTTGCTATAAAGAGTGTT
GTGTATATTTTGCCATTTGGAGCGAAATTTTAAGGATAGAATATTAACTTAACCTTAAGA
AACTAATATTAGACGTAAATATTGAAATTTTTATATTTTTTCTTATTTAGGCTTTGCATT
TGGCAAAATTTTGAGGCATTTTGCCGGCATCGCAGGATTTTTAATATTACACCAACTGCT
AATTATCGCCAGAAATGTCGCTCAATTTCACGGTAATTGTCTGGTTGCGCTTGTCTATAG
GTGGAGTTTACGTGTTAGCTTTTTGCCGCTCTTCGTTGAAGTCAAAAAAATATTTCATCA
TTTTACTGGCGCTCGCTGCAATTGCCGGACTGGGTACTCATGCTGCCTGGAGTAGCAATG
GTTTGCCACGTATCGACAATAAAACACTGGCCAGACTGGCACAGCAGCACCCGGTTGTCG
TTTTGTTTCGCCATGCTGAACGTTGCGATCGTTCAACCAATCAATGCTTGTCAGATAAAA
CAGGTATTACGGTCAAAGGTACCCAGGATGCCCGAGAACTGGGCAACGCTTTTAGTGCTG
ATATCCCTGATTTCGATCTCTATTCCAGTAATACCGTCCGGACCATTCAGTCGGCGACCT
GGTTTTCAGCGGGTAAAAAATTGACGGTAGATAAACGACTTCTTCAGTGCGGTAATGAGA
TTTATAGTGCAATTAAGGACTTACAAAGCAAAGCGCCTGATAAAAATATCGTTATTTTCA
CCCATAATCATTGCCTGACATATATTGCTAAAGATAAGCGTGATGCGACATTTAAACCTG
ATTATCTGGATGGTTTAGTCATGCATGTGGAAAAAGGCAAAGTTTATCTGGATGGGGAAT
TCGTTAACCACTAAATTTTCAATCTGACAGCCAGTGATGGCTGTCATCATTGTTAAAGAA
GACCTTTCAAACGTAACGTTTTTCGGGTGGCAACATTCAAATCATAATGCACCAGATCTT
CAGGTTTTACCCTCGCGTAGTCCTGAAACTCTTCGTTTATTTTCACTTCTCGGTTGGCAG
AAACGCAGTCAAAAATCAGGTAAATCATATAAATCTCTTCCTTGCGACCATCTGCATACG
TCTTGGTGCGAATATCATCGCTGAAGGTCCACGGCGTGATTTCTGTCAAAAGCAGCTGTT
CTCCCAGTTCTTCGCGAATTTCGCGGCGTAGTGCCTCTTCAATTCGTTCGCCGGGCTCCA
CGCCGCCACCCGAAAGCGCCCATTGACCGGGGAAAACGCCGCGATCGTCGGCCATTTTAC
ACAGCAAATAAGCACCATCATTTTGAATCAAAGGGCATACAATAGTCCGTTGTCGCACAG
GGGTATTCCTTATAAATAAAAAGAAACCATGAGAATACGGTAACTCAGAAATATGTGAAA
GTGACAGTAATCTCTTTTGCGATGATAACTGCACTTATTATTATTTTTGTGTGTATCGGT
AAACTGTGTTTATTTTTTCGGCGTTTAATTATTTAAGAAGTATTTAGTTACAATAAGTGA
CTAGATCCCTTTTTTCGCTCATTGAATCCTCTGCGCCAGGCAGTACAATCCCGCAGCTTT
GGGAATTTTGATTAATTGCTTGTGGGAAAGGGGATAATGAAAAAAATTGCGCTAGCAGGT
CTGGCCGGAATGCTGTTGGTTTCTGCATCGGTCAATGCAATGAGCATCAGCGGCCAGGCG
GGTAAAGAATACACCAATATTGGTGTCGGTTTTGGGACTGAATCGACGGGCCTGGCTTTA
AGCGGTAACTGGACACATAACGACGACGACGGTGACGTCGCGGGCGTGGGGCTGGGGTTG
AATCTGCCTCTCGGGCCGTTAATGGCGACCGTTGGCGGAAAAGGCGTTTACACCAACCCG
AATTACGGCGATGAAGGTTATGCCGCAGCGGTAGGAGGTGGTTTGCAGTGGAAAATTGGC
AACAGCTTCCGTTTGTTTGGCGAGTATTACTACTCTCCGGATTCGCTCTCCAGCGGTATT
CAAAGTTATGAGGAAGCGAATGCTGGCGCGCGTTACACCATTATGCGTCCAGTCAGTATT
GAGGCGGGTTATCGCTACCTGAATCTGTCGGGTAAAGACGGCAACCGCGACAACGCCGTG
GCTGACGGCCCGTATGTTGGGGTTAACGCCAGTTTCTGATCCCTTCCGGCGCGGCATTCT
GCCGCGCCATTCAGTTTCTTACTACGCCTTATCTCCCTTTGCGTTATAGTGATTCGATAA
CAAAAGCAGGAGATAACCATGTTAAAAGTGGAAATGCTATCCACCGGGGATGAAGTGTTA
CACGGGCAAATCGTTGACACTAACGCTGCCTGGCTGGCCGATTTTTTCTTTCATCAGGGG
TTGCCATTATCTCGCCGCAATACGGTGGGGGATAACCTTGATGACTTAGTCACCATTCTT
CGCGAACGTAGTCAGCACGCCGATGTGCTGATCGTTAACGGCGGGCTGGGACCGACCAGC
GATGATTTAAGCGCACTCGCCGCTGCGACAGCAAAAGGTGAAGGCCTGGTGTTGCATGAA
GCCTGGCTCAAAGAGATGGAACGCTATTTCCACGAACGTGGACGAGTAATGGCACCGAGC
AACCGTAAACAAGCGGAGCTTCCTGCCAGTGCTGAATTTATCAATAACCCGGTAGGCACC
GCCTGTGGTTTTGCCGTGCAGCTTAATCGTTGCCTGATGTTCTTTACCCCCGGCGTACCG
TCAGAATTTAAGGTGATGGTCGAGCACGAAATCCTGCCGCGCCTGCGCGAGCGTTTTTCT
TTACCACAGCCGCCGGTTTGCCTGCGTTTGACTACCTTTGGTCGTTCGGAAAGCGATCTG
GCACAAAGCCTGGACACTCTACAACTGCCGCCGGGCGTAACAATGGGCTATCGCTCCTCA
ATGCCGATCATCGAACTGAAACTCACCGGACCGGCAAGCGAGCAACAGGCGATGGAAAAA
CTGTGGCTGGACGTTAAACGTGTTGCCGGACAGAGCGTGATTTTCGAAGGCACCGAAGGA
CTGCCCGCGCAAATCAGTCGCGAATTGCAAAACCGCCAGTTCAGCCTGACGTTGAGCGAG
CAATTCACCGGTGGTTTATTGGCTTTGCAACTTTCTCGCGCAGGTGCTCCATTGCTGGCG
TGTGAAGTGGTTCCTTCACAGGAAGAAACCCTGGCGCAAACTGCGCACTGGATTACAGAA
CGGCGGGCCAACCATTTTGCCGGGCTGGCACTGGCTGTTTCGGGTTTCGAGAACGAGCAT
CTCAACTTTGCGCTAGCCACGCCAGATGGCACTTTCGCTCTGCGTGTGCGTTTCAGCACT
ACACGCTATAGCCTGGCTATCCGTCAGGAAGTGTGCGCAATGATGGCACTGAATATGCTA
CGCCGTTGGTTAAACGGCCAGGACATTGCCAGTGAGCATGGCTGGATTGAGGTTGTTGAG
TCGTTGATGCTGTCGCCACAGGGGGCATGAAAGAGGCGCGCCGGGGAGAAGGCTTTTACC
CGGCACGTTGTCGCATTCATTGCAGGCTTAATGGAGCGAGATCGGCCTCGGTTAGCTGGG
TTGTTGCCAGCACCAGGTCAAGATCGATACCCTGCTCCAGCATGCGCAAGGCAATTTTAA
TGGCTTGTTCATGCATGCCTTGCTGCAAACCTTCTAATTTACCTTCCTGCCAGCCAATTT
GATGCCCTTCCTGCCTCAGCCGTTCAGCAATAGTCATTAATCTCTCCTTTTGTAGTGGTG
AACGTTCGGCAATCTCCTGAATAAAACGGGTGAAACGGGAGGTATCGCCGCATTGCAGCA
GATAATTAAACAGTGTTTGTAGCTGGCTGTCATTAGTGAAGCCTCTAACCAAAAGCGTGG
TGATCCTGTCGACCATACCGATTAAATCGCGGTCGCGAATATGCTTTTGAATCAGTTCAA
GCAGAGCTATACGCCGATGTTGCATGATCTCATCGTCAGGTACGATGGTGATATCCACCA
ACGGAAAAGCTTCGGTGTACAACTGCCGGGCAAGTTGCGGACCGTCAAACTCATCCAGCC
AGTTGAGTGAGTACGGGTAGGGCGAGGTTTCGCCATGATAAAACAGCAACGGCACCACCA
GCGGGACTCTGTCATAGCCTTTGTCCAGGTGACGCTGCATGGCGGCAGTGGCATAGCGCA
TTAGCCGAAAAGCCATATTCTTTTCTGCAGAGCTTTGATGTTCAATCACGCAGTAGATAT
AGCCGTCACCGTCGCTGGTTTCCACGGACCACAAAACATCCGAGTAGTAAGCGCGTAAAC
TTTTTTCAATAAAACTAGTGGGTTCCAGGCGTAAGGTTTGCAGGTTGCAAAGCTTGCGCA
GTGGTTCTGGTAAATGTATTTCGAGAAAATCCCGTGCGGTTTCGGGTGTGAACATAAAGG
TTTTAAATACTGCATCATGCGGGGAGGAGGTTGTTGATTCGGTCATGGTTGTCCGTCACC
TGATATTTATGATGACGCGACATTACGGTTATCCCAGGCCTTTGACATCTGCCAGTTTCA
GCCTTTGCGAGACGTTTTCAGAGGAATTTTCACTGCGTTGCAACGCATACATTGGGCACG
GAATCGTGTACGCAAAAATGCCCGGTAACCACATGCTTACCGGGCATCAGAAAGGAGTTT
AAGCCAGCGCCTGGGCCAGTAGCGTAATCGGATGTTCGCAGCGAAGACTTGTGGACATCT
CAATCTGCCATTTACAGGTTTCGCAGTCGGTGACCACCAGATCTGCGCCGCTTTCTTCTA
TCTGGCGGAACAGTGGTGCGCCGATGGCTTGTGAGGTGGGGTAGTTCTCTTTTTTGAAAC
CGTAAGTACCCGCAATACCGCAGCACTGGGAATCCAGCACCGTTAACTCAAGCCCCGGGA
TGTTACGCAACAGCTCCAGGGTGTAGAGCGTCCAGCCCATTTTTTCCATATGGCACGGAG
TGTGATAAACCACTTTCAGCGGCAGCGGTTTCAGCGGTAACGTTTTGCCTTCGTCCAGCT
TGCGCCACAACCAGCGGGTCGCCAGTTCGATATGATCGCGCAAGCCTTTGTTGTCGACAT
TCAGCACTTCCGGGTATTCGTCGCGCAGGGCAAATGTACAGGTTGAGGAGGTGGCAATCA
CCGGAATGCCTTTTACTCCCACAGCTTCGCGGATCGACTCTACATTCGTAATTGCCTGTT
TGCGTGCTTTATCGGTAAAGCCGTTGGCGATCAGCGGTACGCCGCAGCATTTTTCTTTGC
TGAGCAGTTGTACACCGGTACCCATTGCGTTGAGCACTTTAATTAAATCTTTACCTAACT
GCGGATGGTTGTAGTTAACGAAGCAGCCGTGAAAGAAAGCGACCTGGTCTTTATACTGCG
CTTGCTGAGCCGCCACGCTGCGATACCAGCGACGAAACGTGCCGAAGGAGTATTTCGGTA
GCGTGCGGCGATGATCGATTTTTAACGCCGCATCAAGCAACTGCCGCACCGGTTTCAGCG
AGGTAGCGGTGTTGACGATTGGTGCGAACGGCGTGGAAACGCTACCCATCAGGTCGGTAT
GACTCAACACAAAATTACGCAGCGACGGGCGCGTGGTGTCATATTTCGCCCGCGCGCGCT
GGATGATATCGCCAATCTTCACATCGGACGGGCAGGCGACTTCACAACGTTTGCAGTTGA
TACAATATTTCAGCGCCTCGTCATACAGTGCGCCATCTTTTAAACGCAGACGCTCGCCAT
CCGGCCCGGCTTGTTTTGGCCCTGGATAACCGGGATTCACCCGGCTCACTGGGCAGGCGG
TGGTGCAGACGGTGCACTTAATGCAGTTTTCGAAGCTGGTGTCATTCATTGTTGGCCTCC
TGCGCGTTGGGCAATCTGTTGAGCGGCATGTAAAGCACTGACGGCACAAACACCGCCGCC
GCATCCCTGGGCGATGGGATCAAATCCGCCCAGCACCGAACCGATGGCAAACAGGTTCTC
AATGGTTTGCCCTGCCTGTGATGGGCGTAGCGTCTTATCAGTGGTTACACCGAACTGCTG
CCACGGTTGCGGCGCAAAAAAATCTCCCTTATACCATTCACCCCGCGTGGCGGTTTGTAG
CACATCAAGGCCGAGAATCGGCTCTCGAATGCCGTTACGTTCCGCTACCAGTCCGCCACT
AAAGAAACTGCCGCTGGCGAGAACCGCGAAACGTGGACGTAGCGGGATATCGGCGTGATT
GCGGGTCCAGATTTCATTCACTACGCCATTTTTACAGGTCACTTTTTTCACTTCATCGCC
CGGCATCCACACGCCACCCTGGCGCACAAACTGGCGCTGTAACTGGTTTTGCAGACGAAT
GCCCAGCACGGAAGGCGGCAGCGTTGGCAAAAGCATCAGTGAACAAGGTAGTTTTTCATT
CAACCAACGCCACAGTTTGTCATCGGCCAGGCCGAAGCAGGCGGGCATCAGGATCATTTC
GCAGGTATTGGCGACAGGAATAAGCGCATCAAGTAACAGCGACCAGTTTTCTTCATTATC
AAGGAAACGGGCGATATTCACCGCGCGGAACTCGGTGGCGTTATTGCGCAGGACATCCAG
TTCCGGCAGCTCTATTTCTGCGGTTTCAACCGAAAGATCCAGTTCACGCAACGAAGCTGC
CGCAAGGTGCGCCTGAAAATCCATCAGCCCGCTTATCCCCACTACACATATCTTCTTCGC
GGGTAGCGGCCAGACGGGGACTTCTGGCGAACTTAACCAGGTTGCACGCAAAGTGCCGAG
CGGGGTAACGCGCTGATGGGCCAGTTCCACGCTGCCCTGCAATTGCGCACCGCTTTCAGC
GATTAATGCCTGCGCCTGGCAAGCGAGATCGAGCACGCGTTGTGGCCCGAGAAGAGAGTA
AGGATGTGCAGGTGCCTGCTGACGCAAAGATTCCAGTCCACTGTGAATGTCTGTCACCGC
TTGACCATCTGGCAGATGGCTCAGCAAATCCAGCGAACCGGATGAGAAATGCAGCGCGCT
TTGACCACGCGTGACAATGGCACAGCGCAGGCCGTGTTTTTGCAGTTGCAGGCCACAGAG
TAATCCGGCGAGGCCGCCGCCCATAATGACAGTATCAAAGCGCATCTTTCTGCTCCTTCT
CCAGACCACACAGTCCCTGATAAACCCAGCGGGTAAATTCGCTTTCGCGCAGTGCATCTC
CCCAGGCGATGGGTTGCACGCCTTTCCAGCGTTCGTTAAGGAAGGTGGAAAGTTGCTCGA
TAGATTGCGCGGACGTCGTGACGTTAAAACGTTGCAGCAGTCCGGCAGCGCGGCAGGCGC
AGAGTTCGCCCTGGCAGGTACCCATCCCCACACGGGTACGACGGCGTAAATCCAGCAGGC
TATTAACGTTTAAATTTTCTACCGCGTACTGCACTTCACCCGCAGTTACCGCTTCGCACT
CACATACCAGGCTACGGTGCAGACGGCCTTCGCTCAGCCAGGCAGGCGTGCGATCGCCAT
GACGATAAACCGCAGAACCGCGCAGCGGGGCAGGCAGGGAGATGACTTTACGTAAGGTAA
CTTCAGCGGGTTCTTGTGAACCAGGCAGTGCCAGATCGGCAGTCGTACAGGGGCGCGTGT
TGCCCAGTTTGCGGCATACCGCGTCGGTAGCCCATTCAGCCATCAGCCGATAGGTCATCA
GTTTGCCACCGGTGATGGTGATAAATCCGTCCAGACCATCGCGTTCAGCATGGTCGAGCA
GCACGATGCCACGGCTGACGTTACGTCCGCTCGGGTCGTCATCGCTGGCAACCAGCGGGC
GCACGCCAGAATAGGCCCGCAAAATGCGCGTTTTCGCCATCACGGGGGCCAGTTTTTCCC
CTTCACGCAGCAGAATATCAACCTCTTCTGCCGTCACTCGATTATCGTCAATCTCGTTGT
AATCAATACGTAAAGAGGTGGTGCCAATCAGCGAAATGGTATCGCCAGGCACCAGAATAT
CGGCGTCGGAAGGTTTACGGCAGCGGTTGATCACATGCTGGTTAATGCGGTGATCCATGA
TCAGCAGCGATCCTTTCGCCGGGAACATGCGAATGCGCAGATCGGCATATTCGGCAATGT
GTTGCCCCCAGATCCCAGCGGCATTAACCACGACAGGTGCATGAAGGGCCTGAGTTTCGC
CGGTGAGATGGTTACGTACACGAACACCGCACACCGTCGCGCCTTCACGAATCAGTCCCG
TGACTTCATGAGCGGTAAGGATAACGGCACCGTGTTCTTTGGCATCCAGCATGTTTGCTG
CGGTCAGACGAAATGGATCAACGGTGCCATCCGGAACTTTCACCGCGCCAATCAGTGCCG
GGTTAACGGCAGGTTCGATAATGCGCGCTTGCTGCGGGTCTATAGCTTCTGCGCTGATCC
CTGCTTCTTCGCAGGCGCGAATAAAAGTGGCCTGGAAGGAGAGGTCATCTTCCGGCAGGG
TGATAAACAGGCCGTTGGTTGGTTCAACGCAGTGACGTGCAATGCGTTTCAGGATCTGGT
TTTCACTAATGCATTCGCGGGCCGATTCCGCATCGGTTACCGCATAGCGCGCACCGCTGT
GCAGCAGGCCGTGGTTACGCCCGGTGGCACCGGTTGCGATGTCGTGGCGCTCAACCAAAA
TCACGCGCAGCCCGCGCAGGGCACAGTCGCGGGCAATCCCGGCTCCCGTTGCGCCGCCGC
CAATGATAATCACGTCACTTGATTGCGAGTCGCGAGTTTTCATTGTTATCCCTCTGAAGT
TCGTTTTTTACCATTTAGCCATAGTAAAAACATGAATTGTTTGATTTCGCGCATATTCGC
TCATAATTCGAAAGTGAAACGTGATTTCATGCGTCATTTTGAACATTTTGTAAATCTTAT
TTAATAATGTGTGCGGCAATTCACATTTAATTTATGAATGTTTTCTTAACATCGCGGCAA
CTCAAGAAACGGCAGGTTCTCTCACTGAATCAGGCTGTTAATCATAAATAAGACCACGGG
CCACGGAGGCTATCAATGTTGAGTATTTTTAAACCAGCGCCACACAAAGCGCGCTTACCT
GCCGCGGAGATCGATCCGACTTATCGTCGATTGCGCTGGCAAATTTTCCTGGGGATATTC
TTTGGCTATGCTGCTTACTATTTGGTTCGTAAGAACTTTGCGCTTGCTATGCCTTATCTG
GTTGAGCAGGGATTCTCACGCGGTGATTTAGGTTTTGCCCTTTCGGGGATCTCGATTGCT
TATGGATTTTCGAAATTCATCATGGGTTCGGTATCGGATCGCTCGAATCCGCGCGTTTTC
CTGCCCGCAGGTTTGATTCTGGCGGCGGCAGTGATGTTGTTTATGGGCTTTGTGCCATGG
GCGACGTCGAGCATTGCGGTGATGTTTGTACTGTTGTTCCTCTGCGGTTGGTTCCAGGGG
ATGGGGTGGCCGCCGTGTGGTCGTACTATGGTGCACTGGTGGTCGCAGAAAGAACGTGGC
GGCATTGTGTCAGTGTGGAACTGTGCGCACAACGTCGGTGGTGGTATTCCGCCGCTGCTG
TTCCTGCTGGGGATGGCCTGGTTCAATGACTGGCACGCGGCGCTCTATATGCCCGCTTTT
TGCGCCATTCTGGTGGCATTATTCGCCTTTGCGATGATGCGCGATACCCCGCAATCCTGT
GGCTTGCCGCCGATCGAAGAGTACAAAAATGATTATCCGGACGACTATAACGAAAAAGCG
GAACAGGAGCTGACCGCGAAGCAAATCTTCATGCAGTACGTGCTGCCGAACAAACTGCTG
TGGTACATCGCCATCGCCAACGTGTTCGTTTATCTGCTGCGTTACGGCATCCTCGACTGG
TCACCGACTTATCTGAAAGAGGTTAAGCATTTCGCGCTGGATAAATCCTCCTGGGCCTAC
TTCTTCTATGAGTATGCGGGTATTCCGGGCACCCTGCTGTGCGGCTGGATGTCGGACAAA
GTCTTCCGCGGTAACCGTGGGGCAACCGGCGTCTTCTTTATGACACTGGTGACCATCGCG
ACTATCGTTTACTGGATGAACCCGGCAGGTAACCCAACCGTCGATATGATTTGTATGATT
GTTATCGGCTTCCTGATCTACGGCCCTGTGATGCTGATCGGTCTGCATGCGCTGGAACTG
GCACCGAAAAAAGCGGCAGGAACGGCAGCGGGCTTTACCGGTCTGTTTGGTTACCTGGGC
GGTTCGGTGGCGGCGAGCGCGATTGTTGGCTACACCGTGGACTTCTTCGGCTGGGATGGC
GGCTTTATGGTAATGATTGGCGGCAGCATTCTGGCGGTTATCTTGTTGATTGTTGTGATG
ATTGGCGAAAAACGTCGCCATCAGGAATTACTGCAAAAACGCAACGGAGGCTAATGGCAT
GAAATTGACGCTGAAAAACCTTAGCATGGCGATCATGATGAGCACTATAGTCATGGGAAG
CAGTGCAATGGCGGCGAACAGCAACGAAAAAATAGTCATCGCCCATCGCGGTGCCAGTGG
ATATTTGCCGGAGCATACGCTGCCAGCAAAAGCGATGGCGTATGCGCAGGGAGCGGATTA
TCTGGAACAGGATTTGGTGATGACCAAAGACGACCATCTGGTTGTTCTGCATGACCATTA
CCTCGATCGTGTTACTGATGTTGCCGATCGTTTCCCGGATCGGGCGCGCAAAGACGGTCG
TTACTACGCGATAGATTTCACGCTGGATGAAATTAAGTCGCTGAAATTTACCGAAGGTTT
CGATATTGAAAACGGTAAAAAAGTGCAGACTTATCCGGGGCGTTTCCCAATGGGTAAGTC
CGACTTCCGGGTGCACTCCTTTGAAGAAGAGATTGAATTTGTTCAGGGGTTAAATCACTC
TACCGGGAAAAATATCGGTATCTATCCAGAAATTAAAGCGCCGTGGTTCCATCATCAGGA
AGGGAAGGATATTGCGGCAAAAACGCTGGAAGTGCTGAAGAAATATGGTTACACCGGTAA
GGACGACAAAGTTTATCTGCAATGCTTTGATGCTGATGAACTGAAGCGTATTAAGAATGA
GCTGGAACCTAAAATGGGTATGGACCTCAACCTGGTACAGCTGATTGCCTATACCGACTG
GAACGAAACTCAGCAGAAACAACCGGACGGAAGCTGGGTTAATTACAGCTATGACTGGAT
GTTTAAGCCGGGTGCCATGAAACAGGTGGCGGAATATGCTGATGGTATTGGCCCAGATTA
CCATATGTTGATTGAGGAGACATCGCAGCCGGGTAATATCAAACTCACTGGCATGGTGCA
AGATGCTCAGCAGAATAAACTGGTAGTGCATCCTTATACCGTGCGGTCAGATAAACTGCC
TGAATACACTACTGATGTGAATCAGTTATATGATGTTCTGTATAACAAAGCGGGTGTAAA
TGGGCTGTTTACTGATTTCCCTGATAAGGCAGTAAAATTCCTTAATAAAGAGTAATGCTA
CTGCAGGATGGCGTTCATGCGCCATCCTCAGCTAAAGCGAAATAATGCTACTACCGGTTA
TTCTATTCATTCACCTGAGCATCCTGTTAAAAAAGATGCCAACATATTTGCGTAAAACTC
ATTTGTTAGGAAAGCTAACACTGGGTATTGTTATTCTTTAAACAGTATGAATAGGGCTCA
ATAATAAATTGTAATGTAGTTTATAATATACAGTATTATTCGCATTTCGGGAAAGTAAAG
AAAATATTAATGTATCTTATTAATTTATCATATTGTTCTTGGGTGAATGCTGTTTGCACA
CCTTCAGGACAATACTCACCAGTAATAATCAGTTGCCCATTGCTGTGTTGTACCATTAAA
CCTTTTTTTTCCTTTGGATCTTCAAACTTAGAATTATCAAACGTGAAGATGTTATTTTCC
TGTTTTGAGTAAGCAAAGAAATCTCGTGTATAGCTGAAACTATCATTTATTAATGGTGCT
AACTTTTTGTCGGCGATATCGATAAGCTCACCACCTAATTTATTGATATATTTCATTTGG
TTCAATTTTTTCTGCGCTTGTACAATTTGCTTGTAGGTGTTTTTAATTTCCTTAGAAGAA
TTCTTGAATTTATCATAGCGTTCCTCGGAGGATGCGTATTTGTACCATTCTGTATTTTTC
TCAGAATGTTGTAGCAGGTCTGCATATTTTTTTTGATCGCTGTAAAGTTGACTTTTAATA
CTTTCCTCACTGCTGGTTTTATAAGGCTTATCAGAGCTGTTTATTTTTGAAATGTCTTTT
TCTGTCAGTGACTGGACCGTGTTGTGGGTATTTTCTTTTGCAACATGCTCATTGATGATG
TTAATTGCAGTTTCATATTCATTTAAGTTTATTGTTCTTTGTGAAATAGACCCTTCTTTG
CTTTCGATACTCAAAACACCTTCGTTGTTTTCACCTCGGGTAAAGGTAAGGGTATAGGGT
TCATAATCCGCTGCAAATTCATTTTTATACGTTATGACATGCTCGACAAAATGTCTTATT
GGTACGAAACCATAACTGTGAACGTCAATTTTTTGGGTCTTGATACTATCAATTTCATCT
GAGGCTTTCGTGAAAAAAGCCAATAAATTAGCTATGTTGTCTGCTGAGGTTGATAACCCG
AATCTACTTTGAGATATTTTTAGAAACTCATTGCAAAAAATCTCAAGTTTCGCGGTTTGT
TGTGATTCTTTGTAAATTTCTGCTGTTTGCAATTTATTATTTTGTAAAAGATTACAGCGA
GATAATTGAATAGATGTATTTGGCATAAATGATTCCTTGTATTGTGAGTTAACAAGATAC
AATTTAATCTTTGCAGAATATATTCACTATCAAATTTAGCTCATTTTATTACGAAGACCT
TTACGCATGTTAGAAAGTATCATTATTGTTAATAAACACGGTAATAAGTAACAAACAGAT
ATTGATAACTTCCCTGACAAGTTATTAGGTATCCCACTTGAAGATTGAGAGTGGCTCCAG
AGTAAACTGTGTACTGTTCGCCGGAGTGTCATTACTCTCAACAATCGGTTTTGACAGTGA
GTCGGGCGCTTCATACTGGTTTCTACCTGGAGTCATTGTCACTTCCCTAAACTGGATAAA
TATATATCGCTAATTCACAAAGTGGACCAAAATCAGGTGAAAACGAATTATTACGCCTGG
TAAAGACTACAGGCCAACTAAGTGTGGCGAATCAGGCAATCTTACATTTGTCATCAATCT
CATGTCTTACATCAAATTTTTCCACTCACCACGAGTTGTTCCGTACACATTTGTAGTAAA
AACAGTGGACTGCCTTCTACCGGCTTTTCTTTAGCCAGCAACGAAATCTGTCGATAGAAG
GTTGGTTCGAGAGGAACGGAACACAATTCATCTGCAATGGTTTTCAGCGTTAACTCTGGT
AATAAGGCGATGCCTAATCCCTGTCGAATAAAACTGATCGCTGTATCCGGGTGATTAAAT
TCATATTTTATCTGTGGGGTAATATTCTTTTCTTTAAATAGTGCCATAATGCTTAATTCA
TAGCGTCCTTTACTAATGATTAATGGTTCACCCATTAATTCTTCCACTGTAATAGTGCTG
TTTTTTGCCAGAGCATGGTTGGGCGGTAACACTACGGTGAATTTATCCTGATAAATGGGC
ACGGAGTACATTCCGCTCACCGGAAAATGAACAAAACCGGCATCAATGGATTCATTCTGA
AGCGAATCAATAATCGCTGTGCTATTTTCCTCAAAAGGAATAATTTTTATATTCGGATGA
TGAATTTCAAAGTAGCGAATCACAACCGGTAAGATACAGGCGCAGACGCTGGGGAAACAA
CCAAGTCTCAGCGTTCTTTGAGGGTTCTGCTTTTCCTGCTCGGCTATCTCTTTTACTGCG
TTAACTTCCCGATTAATGGCGCGCAGATGTTGCACAATGCGATGACCTGCTGTGGTCAGT
TGTATAGCTTTACGGCGATCGCGTAACAGTATATTCACACCAAGTTCTTGTTCGAGGGCA
GCAATTGCCTGACTTACCGCCGACTGCGTCATGAACAATCGCTTGCTGGCTTCAGTAAAG
CCACCGTAATCCAGCACGGCGAGTAAAGAATTTATTTGGGTAAGAGTCATTAGAGTTTGC
TAATCAATAATATTAAAACGATTAATTTCTCTAATAGCATGCCGCCATTTATACTTCTGT
TCTGCAAAGTACATCACAATTTGACGCAACCGCAGTAACGGGAGTGTTGTCTGCGTGCGT
CATCCTGACAGGCGGTAGGGTATGAAAGAGAAGTTATGGACGAAGGATTTTTGGGCAATA
ACCATCATCAGCTTTATTATTTTCTTCGTCTTTTATGTTTTACTAACATTGTTGCCAATT
TATATCTCTGACCGCTTGCATGCCTCTCCTGATAAAGCTGGTCTGCTGGTGACATTATTT
TTAATTGCGGCGATTGTTATTCGACCCTTTGCCGGGCAATGGGTGGGTAAATATTCGAAT
AAAACTATTCTGGTGCTCTCTTCTCTGGCCTTTTTGGTGGTCACTGCGCTGTATCCTTTT
TGCCACTCAATAGAATCACTGCTTTTTATTAGGGTGCTTCATGGTATTACCTTCGGGGTT
ATCACAACGGTAAAGGGAACGATTTCCGCGCGGCTGATCCCGGCCTCCCGACGTGGGGAG
GGCATCAGTTTTTTCTCTCTGGCAATGGGGCTGGCAATGGTGGTCGGGCCGTGGATTGGC
CTGAATATGGCGCGCTGGGAGGCCTTTAATATGGCTTTCTGGTTATGTACTGGCGTTGCG
GCGGTGGGGATTATCCTGTCGCTGATTATGACCGTGCCGCCGGTTATCAGCCATGCCGAC
GGTTCAAAGCCAAAGATGGGCTTCGCCGCCATGTTCGATCGCGCGGCATTGCCGTTTGCC
ATGGTTACATTCTTTATGACCTTTTCGTATGCCGGGGTTTCTGCCTTTCTGGCGCTTTAC
GCCCGCGAACTTAATCTGATGTCGGCGGCCAGTAATTTCCTGCTTTGCTACGCCATCTTC
CTGATGATCTGCCGTACCTTTACCGGCAATGTCTGCGACAAAAAAGGACCGAAATATGTG
GTTTACCCTTGCCTTGTGTTCTTTACGGTAGGACTGGTGGTTCTCGGCTACACCCAGGGA
AGCATAATGATGGTTGTTTCTGGCGCGTTGATTGGTATCGGGTATGGTTCCGTGACGCCA
GTTTTTCAGACGCAGATTATCAGTTCAGTGGAACCGCATAAAATCGGTGTCGCAAACTCC
CTCTTCTTCAATGCGATGGATGCAGGCCTGGCGCTGGGAGCCTGTGTGATGGGGATGATG
GTTGCACATACTGGCTACCGAATGATTTATCTGCTGGGCGCACTATTAGTGGTAGTGGCT
GGTGGAGTCTATGCGCTGCAAATGAAGGGTAAAAGCGGTGTCGCGCTAGTAGTGGCAAAA
GAAATTCATTAATACGACACGTTTCATTAAGATTTTTCGCAGGTAACCACCTATAGTCAT
TGTCGTTAATAAAAAATGACAGGCGATAGGGTATGGCAGTTTCAGCAAAGCACGACGAAT
TTAATCACTGGTGGGCAACAGAGGGCGACTGGGTTGAAGAGCCTAACTATCGCCGTAATG
GTATGAGCGGGGTGCAATGCGTCGAGCGCAACGGCAAAAAGCTATATGTAAAGCGCATGA
CGCATCATCTGTTTCATTCCGTACGTTATCCTTTCGGCCGACCAACGATTGTCCGTGAGG
TTGCGGTAATTAAAGAACTGGAACGGGCCGGTGTCATCGTGCCGAAGATCGTTTTTGGTG
AAGCGGTGAAAATTGAGGGTGAATGGCGAGCGTTGCTGGTGACTGAAGATATGGCGGGGT
TCATCAGCATTGCTGACTGGTATGCCCAGCATGCAGTATCGCCTTATTCTGACGAAGTAC
GGCAAGCCATGTTGAAAGCAGTGGCGCTGGCGTTTAAGAAAATGCATAGCATTAATCGTC
AGCATGGCTGTTGTTATGTTCGCCATATCTATGTGAAAACAGAAGGTAAGGCAGAAGCTG
GTTTTCTTGACCTGGAGAAAAGTCGTCGCCGCTTGCGTCGCGATAAAGCGATTAATCATG
ACTTCCGCCAGCTGGAAAAATATCTGGAGCCAATTCCCAAAGCGGACTGGGAGCAGGTGA
AAGCGTATTACTACGCCATGTAATCGTTGTAGGCCAGATAAGACGCATAAGCGTCGTATC
TGGCACTACAACCAATTCACATCTCGATTTCAATATCGCCTTTTGCCCGGCAACAACAGG
GCAAAATTTCCCCCGGCTGAATAAAGGCTAACGGTTCGGCAATCCAGTCCACCTGACCTG
CGACCAGTCGGGTGCGACAGGAGCCGCAGTAACCTTCGCGGCACTGGTACTCAACCGCCA
CATTGTGGGATTCCAGCGCCGCCAGAAGGGAAGGGTGTTCATCCTGGCACAGCAGTTGTG
TGCCAGTGATGCGCAGGGTAACGCGAGCCATCAGAGCTGGAAGTTACTCAAATCGTCGGT
GTCCACTTCCGAGTCAATCTGCCCGACCAGATAAGAACTGACTTCCACTTCCTGCGGAGC
AACCTGCACGTTATCAGACACCAGCCAGGTGTTGATCCACGGGATCGGGTTGGAGCGCGT
CTGGAACGGCAGATCCAAACCGACTGCCTGCATGCGGATATTGGTGATGTATTCAACGTA
CTGGCAGAGAATGTCTTTATTCAGACCAATCATCGAACCGTCACGGAACAGATAATCCGC
CCAGTCTTTCTCTTGCTGTGCCGCCTGGACAAACAGGTCATAGCACTCCTGCTTACATTC
TTCGGCAATTTCCGCCATCTCCGGATCATCCGCACCGCTGCGCAGCAGATTCAGCATATG
CTGAGTACCGGTCAGGTGCAGGGCTTCGTCGCGGGCAATCAGGCGAATAATTTTGGCGTT
ACCTTCCATCAGCTCACGTTCAGCGAATGCGAAAGAGCAGGCAAAGCTGACGTAGAAACG
AATCGCTTCCAGCGCGTTAACGCTCATCAGGCAGAGATACAGTTTTTTCTTCAGCTCGCG
CAGGCTAACGGTCACGGTTTTACCGTTAACGGTGTGGGTGCCTTCGCCCAGCAGATGCCA
GTAGCTGGTCATTTCGATCAGCTCATCGTAATAGCTGGAGATCCCTTCCGCACGTTTCTG
GATCTGCTCGTTGGTGACGATATCGTCAAACACAACAGACGGATCGTTAACGATATTACG
AATGATATGAGTATAGGAACGGGAATGAATCGTTTCTGAGAACGCCCAGGTTTCGACCCA
GGTTTCCAGTTCCGGAATAGAAATAAGCGGCAATAGCGCCACGTTCGGGCTACGACCCTG
AATGGAATCCAGCAGCGTCTGATATTTCAGGTTGCTGATAAAGATGTGTTTTTCGTGTTC
AGGCAATGCCTGGTAATCAATACGGTCACGAGAAACGTCAACTTCTTCCGGACGCCAGAA
GAAAGAGAGCTGCTTTTCGATCAGCTTTTCGAAGATGTCATATTTTTGCTGATCGTAGCG
AGCCACGTTGACCGGCTGACCAAAGAACATCGGTTCTTTGAGCTGATCATTTTTCGTCTG
TGAAAAGGTGGTATATGCCATGAGTGTGTCCTGTTGGGAGTTTAATGCCGGATAAGGCAT
TTTACGCCGCATCCTGTGCCTGATGCGACGCTGGCGCGTCTTATCAGGCCTACAAATCCG
AGCCGTAGGCCGGATAAGGCGTTCACGCTGCATCCGGCACCCGGAGCCTGATGCGACGCT
GGCGCGTCTTATCAGGCCTACAAACCGAGCCGTAGGCCGGATAAGGCGTTTACGCCGCAT
CCGGCATCTCAATATCAGATCTTACATGCGCCGCTTTCGCAGCCATCGTCCTGGATTGAC
GGCACCAGATCGTCCTGCGCGTCTTCAGCGCCGTCACGGGTGTTCTGATAATACAGCGTT
TTGACCCCGAATTTGTAGGCGGTGAGCAGGTCTTTCAGCAACTGCTGCATCGGCACTTTT
CCTGACGGGAAACGTGACGGATCGTAGTTGGTGTTAGCAGAGATCGACTGATCGATAAAT
TTCTGCATGATACCCACCAGTTGCAGGTAGCCATCGTTACCCGGCATTTCCCACAGCAGC
TCATAGGCGTCGTGCAGATGCTCGTAGTCCGGCACCACCTGGCGCAGAATACCGTCTTTC
GACGCTTTGATGCTGACGTAACCGCGCGGCGGTTCAATACCGTTAGTGGCGTTAGAGATC
TGCGAAGAAGTCTCGGACGGCATCAGAGCAGAAAGCGTGGAGTTACGCAGGCCGTGCGTT
TTGATTGACTCACGCAGAGCTTCCCAGTCGTAATGCAGCGGCTCATTAGCGATGGTATCC
AGATCTTTCTTATAGGTATCGATCGGCAGGATCCCTTTCGCGTAAGTGGTTTCGTTAAAC
CACGGGCACGCGCCTTGCTCTTTCGCCAGCTCATTAGACGCTTTCAGCAGGTAATACTGA
ATCGCTTCGAAGGTTTTATGCGTCAGGTTGTTGGCGCTGCCGTCGGAGTAGCGTTTACCA
TGCTTCGCCAGGTAGTAAGCGAAGTTGATCACACCAATACCCAGCGTACGACGACCCATC
GCTCCACGTTTGGCGGCCGGGATCGGGTAATCCTGATAATCCAGCAGCGCGTCAAGTGCA
CGAACCGCCAGAATTGCCAGCTCTTCCAGTTCATCCAGGCTATTAATTGCGCCCAGGTTG
AAAGCAGACAGCGTACACAGCGCGATTTCACCGTTCTCGTCGTTGACGTCGTTCAGCGGT
TTGGTCGGCAGGGCTATCTCCAGGCACAGGTTAGACTGACGCACTGGCGCGATGGCCGGA
TCAAACGGGCTATGGGTATTGCAGTGGTCAACGTTCTGAATATAGATACGACCGGTAGAC
GCACGTTCCTGCATCATCAGCGAGAACAGCTCAACGGCTTTCACACGCTGCTTGCGGATG
CTGTCGTCTTTCTCATATTTGGTATACAGACGTTCAAACTCTTCCTGATCGGCGAAGAAT
GCGTCGTACAGCCCCGGTACGTCGGACGGGCTGAACAGGGTGATATCTTCACCTTTCAGC
AGGCGGGTATACATCAGTTTGTTGATCTGTACCCCGTAGTCCATATGGCGCACGCGGTTG
CCTTCCACACCACGGTTGTTTTTCAACACCAGCAGGCTTTCCACTTCCAGATGCCACATC
GGGTAGAACAGCGTTGCCGCACCGCCGCGCACACCGCCCTGAGAGCAGGATTTCACCGCA
GTCTGGAAATGTTTGTAGAACGGAATGCAGCCGGTATGGAACGCTTCGCCACCGCGAATC
GGGCTACCCAGCGCACGAATACGCCCGGCGTTGATGCCGATCCCGGCACGCTGGGAAACA
TATTTCACAATCGCGCTGGAGGTGGCGTTGATGGAATCCAGGCTGTCGCCGCACTCGATC
AGTACGCAGGAGCTGAACTGACGAGTCGGGGTACGCACGCCGGACATGATTGGCGTCGGC
AGCGAAATTTTAAATGTGGAAACCGCGTCGTAAAAACGCTTCACATATTGCAGGCGCGTT
TCACGCGGGTAGTTCGAGAACAGGCACGCGGCAACCAGAATATAAAGGAACTGGGCGCTT
TCGTAGATTTCGCCGGTCACGCGGTTCTGTACCAGATATTTGCCTTCCAGTTGCTTAACG
GCAGCATAAGAGAAGGTCATATCACGGTCGTGATCGATAAACGTGTCCATCTGCTTGAAC
TCTTCTTCCGTGTAGTCTTCCAGCAGATGATTATCGTATTTGCCCATCTCGACCATTTTC
ACCACGTGGTCGTACAGCGCAGGCGGCTCAAACTGGCCGTAGGCTTTTTTACGCAGGTGG
AAGATCGCCAGGCGCGCGGCGAGATACTGATAATCCGGCGCATCACGGGAGATCAGGTCT
GCGGCAGCCTTGATAATAGTTTCGTGGATGTCAGAGGTCTTGATACCGTCATAAAACTGA
ATGTGGGAGCGCAGCTCGACCTGGGAAATCGAAACGTTATGCAGTCCTTCTGCCGCCCAA
TCCAGAACGCGATGGATTTTGTCGAGATTGATGCGCTCTGTGCTACCGTCGCGCTTTGTC
ACCAGCAGATTCTGATTCATGTATGTCGTACCTGTTTTTGGAATTCTTTCCGCAATAGTT
TCGTGCAGACTACCTGTAGTACGGGAAGCTGCTTAGAACACTATATATAGGGGGTATGTT
TGGGATTCACTGCAAGATAGTGTGAAAATGGCCCTCTTGCAAGTGCATAACTTTGTGGAT
AACTCAGGAAGGAAAAAGTGGCTTTCGCGCACCTTAGGTCAGACAAGGTGTCCGGGAAAG
TCAATGGGAAGAGAAAAATTTGTTAAAAATAACTGTTCGGCGATTTCTTGAACGGCAGAA
TAGGTTGGATAAATTGATATAGATGGTTTATTAATCTTTTTGCTAATGATTGCAAAAATT
GATCTAAGCACGAGTCATCACATAATCTGATGTATCAGTTGTGGTCAATATATAAGCGAA
TGTAAGCGATTGTTGATGTCGAAATGGTTGTTTTCTATTCGGTTATTGTTAAATGCGAAG
CCATTTTGTTAATTTACCTTATATTATAAGAAAATTATTCATTACTTTAATTTAGTTTAA
ATATAACTGGTATCCCTTAAGGTTATTAACTTGAATTATGACGCACTGATACTATTCATC
AAATAATAACAAAATAGCTATTGCATCGGGTTGGACAATTTACAAAAGAAAGATAACCCA
TATTGTATAATGCGTTTAAATATGCCGTCTTATATAAAATGATGGTCAGATTAATATGCG
AATTATTTTTCTACGCAAGGAGTATCTATCTTTACTCCCGTCAATGATTGCGTCTCTCTT
CTCTGCTAATGGCATTGCGGCAGTCACTGATTCATGCCAGGGATATGATATCAAAGCGAG
TTGCCAGGCCAGCAGGCAAAGCCTTGCAGGCATTACGCAGGACTGGAGCATCGCCGATGG
GCAATGGCTGGTTTTTTCGGATATGACCAATAATGCCAGCGGTGGGGCCGTATTTTTGCA
ACAAGGAGCGGAATTTACATTATCACCAGAAAATGAAACTGGAATGACTCTGTTTGCCAA
TAACACCGTTTCAGGAGAATATAATAACGGCGGGGCAATATTTGCTAAAGAAAACTCAAC
GCTGAATCTTACGGATGTTATTTTTTCTGGTAACGTCGCAGGCGGCTATGGTGGCGCAAT
CTATTCTTCTGGTACTAACGATACCGGTGCCATCGATTTACGTGTCACTAACGCCGTGTT
TCGCAATAACATCGCTAATGACGGCAAAGGTGGTGCAATTTATACCATCAATAATGATAT
CTATTTAAGTGATGATGTTTTTAACAATAACCAGGCATATACATCAACAAGTTACAGTGA
TGGCGATGGCGGCGCAATCGATGTCACAGATAATAATAGCGACAGCAAGCATCCTTCAGG
TTATACGATAATAAATAACACTGCCTTTACAAATAACACTGCCGAAGGTTATGGCGGGGC
GATATATACCAATAGCGCGACGGCTCCCTATCTTATTGATATTTCTGTTGATGACAGCTA
CAGCCAGAACGGAGGCGTGTTAGTCGATGAGAACAATAGCGCAGCAGGCTATGGAGATGG
TCCTTCCTCTGCGGCGGGTGGCTTTATGTATCTCGGCTTAAGTGAAGTTACATTTGATAT
TGCCGACGGAAAAACGCTGGTTATTGGCAATACAGAGAATGACGGAGCTGTTGACTCTAT
TGCTGGTACCGGGTTAATCACCAAAACAGGTTCCGGCGATCTGGTACTTAATGCAGATAA
CAATGACTTTACTGGTGAGATGCAGATTGAAAACGGTGAAGTTACCCTGGGCCGCAGCAA
CTCCCTGATGAATGTCGGCGATACGCATTGCCAGGACGATCCGCAAGACTGCTACGGTCT
GACGATAGGGAGTATTGATAAGTACCAGAATCAGGCAGAGCTAAATGTTGGCTCCACCCA
ACAAACCTTTGTGCACTCATTGACGGGCTTTCAGAATGGCACTTTAAATATCGATGCTGG
TGGCAATGTTACTGTTAATGAAGGCAGTTTTGCTGGCACCATCGAAGGTGCTGGTCAGCT
CACCATTGCGCAAAACGGCAGCTATGTGCTGGCGGGAGCGTCGTCGATGGCGCTAACCGG
CGATATAGTCGTTGATGATGGTGCGGTGCTTTCGCTGGAAGGCGACGCGGCAGATCTTGC
CGCTCTCCAGGACGATCCGCAGTCGATCGTGTTAAACGGCGGTGTGCTCGATCTCTCTGA
TTTCTCCACCTGGCAGAGCGGTACATCATACAAAGATGGCCTTGAAGTCAGCGGCAGCAG
CGGAACGGTTATCGGCAGTCAGGATGTGGTAGATCTTGCAGGCGGAAACGATATGCATAT
CGGCGGTGACGGGAAAGATGGCGTCTACGTGGTGATCGATGCGGGTGACGGGCAGGTCCG
CCTGGCAAATGACAATCAATACCTCGGCACAACGCAAATCGCCTCCGGTACGCTGATGGT
GAGCGACAACTCGCAGCTTGGAGATACCCATTACAACCGCCAGGTTATCTTTACCGATAA
TCAACAAGAAAGCGTGATGGAGATTACTGCCAATGTCGATACTCGCTCTACAACGACTGA
GCATGGGCGTGATATTGAAATGCGCGCCGACGGTGAAGTGGCAGTTGATGCGGGGGTAGA
CACGCAGTGGGGCGCACTGATGGCTGACAGCAGCGGGCAGCATCAGGATGAGGGTAGCAC
ATTGACGAAAACGGGGGCGGGTACGCTGGAGCTGACCGCCAGCGGTACAACGCAGTCGGC
GGTACGTGTCGAAGAAGGCACCCTGAAAGGTGATGTTGCTGATATCCTTCCTTATGCTTC
GTCACTGTGGGTTGGTGATGGGGCAACGTTCGTTACTGGCGCGGATCAGGATATTCAGTC
AATTGATGCTATTTCCAGCGGCACTATTGACATCAGCGATGGTACGGTTTTGCGCCTGAC
CGGGCAGGATACTTCCGTCGCCCTTAATGCCTCACTGTTTAACGGCGATGGGACGCTGGT
GAATGCCACCGATGGTGTGACGTTGACAGGTGAGCTTAATACCAACCTTGAAACTGACAG
CCTGACTTATCTTTCCAACGTGACGGTTAATGGCAATCTGACCAATACGTCCGGTGCGGT
TAGCCTGCAAAATGGCGTCGCTGGCGATACGCTGACGGTAAACGGTGATTATACCGGCGG
CGGTACGCTACTGCTCGATAGCGAATTAAACGGCGATGACTCGGTAAGCGATCAATTGGT
GATGAACGGTAATACTGCTGGCAACACAACTGTGGTGGTTAACTCCATTACAGGGATTGG
TGAGCCGACATCGACAGGCATTAAAGTGGTTGATTTCGCAGCTGATCCCACGCAGTTTCA
AAACAATGCGCAGTTCAGTCTGGCAGGCAGTGGCTACGTCAACATGGGAGCGTATGACTA
CACGCTGGTGGAAGATAACAACGACTGGTATCTGCGATCGCAAGAAGTAACGCCGCCATC
GCCACCTGATCCAGACCCGGACCCAACCCCCGATCCTGACCCAACACCCGATCCAATCCC
CGCTTACCAGCCGGTGCTGAATGCCAAAGTTGGCGGTTATCTCAATAACCTGCGGGCGGC
AAATCAGGCGTTTGTGATGGAGCGACGCGATCACGCTGGTGGCGATGGTCAGACGCTGAA
TTTACGTGTTATCGGCGGACGTTATCATTACACGGCGGCAGGGCAACTGGCTCAGCATGA
AGACACTTCTACGGTGCAGCTAAGCGGCGATCTGTTTAGCGGGCGCTGGGGCGATGATGG
CGAGTGGATGCTTGGGATTGTAGGTGGCTACAGCGATAACCAGGGCGACAGCCGCTCGAA
TCTGACCGGAACTCGCGCCGATAACCAGAACCACGGTTATGCCGTTGGGCTAACCTCAAG
CTGGTTTCAGCACGGTAATCAGAAGCAGGGGGCCTGGCTGGATAACTGGCTGCAATACGC
GTGGTTTAACAATGATGTTTCCGAACAAGACGATGGCGCGGATCATTACCATTCGTCGGG
GATTATCGCCTCGCTGGAAGCCGGGTATCAATGGTTACCGGGGCGTGGTGTGGTGATTGA
ACCGCAGGCGCAGGTGATTTATCAGGGCGTGCAGCAGGATGATTTTACCGCCGCTAACCG
TGCGCGCGTGTCACAATCGCAGGGTGATGATATTCAGACGCGGCTGGGTTTACACAGCGA
ATGGCGTACCGCTGTTCATGTCATACCAACATTAGATCTGAATTATTATCACGATCCCCA
TTCGACGGAAATTGAAGAGGATGGCAGCACTATCAGTGACGATGCGGTGAAGCAACGGGG
TGAAATAAAAGTGGGAGTCACGGGCAATATCAGTCAGCGAGTGTCCCTGCGCGGCAGCGT
GGCGTGGCAGAAAGGGAGTGATGATTTTGCCCAGACGGCAGGATTTTTGTCGATGACGGT
GAAATGGTAATCGCTGTCTGACCATCACTATTGCCGGATGCGGCGTAAACGCCTTATCTG
GCCTACGGAGAGCATTTGTAGGCCTGATAAGACGCGGCAAGCGTCGCATCAGGCATTGGC
GCGGTTGCCGGATGAATCCAAACAACAACCTCACTTATTCTGCGTGTGCAGCATATAGTT
CACATCCACGCCGGGGCCGAGTTTAAAAGAATTAGTGATCGGGTTGTAATGTAGCCCGGT
TATATGTCGCTCTTTAAGGCTTGTCTGATCTACCCAGCCAAGCAGCTCTGCCGGTTTAAT
AAACTTCTTCACATCATGCGTGCCTTTGGGCACCATGCGCAAAATATATTCCGCGCCAAC
CACCGCCATCAGCCATGACTTGCCGTTGCGGTTAAGCGTCGAGAAAAAGACATCGCCGCC
CGGTTTCACCAGTTGCGCACAGGCTCTGACTACTGACTGCGGATCGGGGACGTGCTCCAG
CATCTCCATGCAGGTCACCACATCATACTGCCCGGCATGTTTTGCCGCGTGCTCTTCCAC
GGTTTCCTGCACGTAATCCACCTGAATGCCGCTTTCCAGCGCGTGCAGCTTTGCCACCTG
CAATGGCTCAAAGCCCATATCCAGACCGGTCACCGTCGCGCCTTCGCGCGCCATACTCTC
GGCCAGAATGCCGCCGCCACAACCGACATCGAGCACCTTTTTGCCAAATAAACCGCCAGC
ACGCTCGGCAATATAGCCCAGACGTAGCGGATTAATGCGGTGCAACGGTTTGAACTCACC
TTCAAGATCCCACCAGCGGGAGGCGACGGCTTCAAATTTAGCGATCTCTTCGTGGTCTAC
GTTATGGTTTACCGGCGATTTTTCGGCATTCATTGGCACTTCTACTCCGTAATTGGCAAG
ACAAACGAGTATATCAGGCATTGGATGTGAATAAAGCGTATAGGTTTACCTCAAACTGCG
CGGCTGTGTTATAATTTGCGACCTTTGAATCCGGGATACAGTAGAGGGATAGCGGTTAGA
TGAGCGACCTTGCGAGAGAAATTACACCGGTCAACATTGAGGAAGAGCTGAAGAGCTCCT
ATCTGGATTATGCGATGTCGGTCATTGTTGGCCGTGCGCTGCCAGATGTCCGAGATGGCC
TGAAACCGGTACACCGTCGCGTACTTTACGCCATGAACGTACTAGGCAATGACTGGAACA
AAGCCTATAAAAAATCTGCCCGTGTCGTTGGTGACGTAATCGGTAAATACCATCCCCATG
GTGACTCGGCGGTTTATGACACGATCGTCCGTATGGCGCAGCCATTCTCGCTGCGTTACA
TGCTGGTAGACGGTCAGGGTAACTTCGGTTCCATCGACGGCGACTCTGCGGCGGCAATGC
GTTATACGGAAATCCGTCTGGCGAAAATTGCCCATGAACTGATGGCCGATCTCGAAAAAG
AGACGGTCGATTTCGTTGATAACTATGACGGCACGGAAAAAATTCCGGACGTCATGCCAA
CCAAAATTCCTAACCTGCTGGTGAACGGTTCTTCCGGTATCGCCGTAGGTATGGCAACCA
ACATCCCGCCGCACAACCTGACGGAAGTCATCAACGGTTGTCTGGCGTATATCGATGATG
AAGACATCAGCATTGAAGGGCTGATGGAATACATCCCGGGGCCGGACTTCCCGACGGCGG
CAATCATTAACGGTCGTCGCGGTATTGAAGAAGCTTACCGTACCGGTCGCGGCAAGGTAT
ATATCCGCGCCCGTGCTGAAGTGGAAGTTGACGCCAAAACCGGACGTGAAACCATTATCG
TCCACGAAATTCCGTATCAGGTAAACAAAGCGCGCCTGATCGAGAAGATTGCGGAACTGG
TAAAAGAAAAACGCGTGGAAGGCATCAGCGCGCTGCGTGACGAGTCTGACAAAGACGGTA
TGCGCATCGTGATTGAAGTGAAACGCGATGCGGTCGGTGAAGTTGTGCTCAACAACCTCT
ACTCCCAGACCCAGTTGCAGGTTTCTTTCGGTATCAACATGGTGGCATTGCACCATGGTC
AGCCGAAGATCATGAACCTGAAAGACATCATCGCGGCGTTTGTTCGTCACCGCCGTGAAG
TGGTGACCCGTCGTACTATTTTCGAACTGCGTAAAGCTCGCGATCGTGCTCATATCCTTG
AAGCATTAGCCGTGGCGCTGGCGAACATCGACCCGATCATCGAACTGATCCGTCATGCGC
CGACGCCTGCAGAAGCGAAAACTGCGCTGGTTGCTAATCCGTGGCAGCTGGGCAACGTTG
CCGCGATGCTCGAACGTGCTGGCGACGATGCTGCGCGTCCGGAATGGCTGGAGCCAGAGT
TCGGCGTGCGTGATGGTCTGTACTACCTGACCGAACAGCAAGCTCAGGCGATTCTGGATC
TGCGTTTGCAGAAACTGACCGGCCTTGAGCACGAAAAACTGCTCGACGAATACAAAGAGC
TGCTGGATCAGATCGCGGAACTGCTGCGTATTCTTGGTAGCGCCGATCGTCTGATGGAAG
TGATCCGTGAAGAGCTGGAGCTGGTTCGTGAACAGTTCGGTGACAAACGTCGTACTGAAA
TCACCGCCAACAGCGCAGACATCAACCTGGAAGATCTGATCACCCAGGAAGATGTGGTCG
TGACGCTCTCTCACCAGGGCTACGTTAAATATCAGCCGCTTTCTGAATACGAAGCGCAGC
GTCGTGGCGGGAAAGGTAAATCTGCCGCACGTATTAAAGAAGAAGACTTTATCGACCGAC
TGCTGGTGGCGAACACGCACGACCATATTCTGTGCTTCTCCAGCCGTGGTCGCGTCTATT
CGATGAAAGTTTACCAGTTGCCGGAGGCCACTCGTGGCGCGCGCGGTCGTCCGATCGTCA
ACCTGCTGCCGCTGGAGCAGGACGAACGTATCACCGCGATCCTGCCGGTGACCGAGTTTG
AAGAAGGCGTGAAAGTCTTCATGGCGACCGCTAACGGTACTGTGAAGAAAACCGTCCTCA
CCGAGTTCAACCGTCTGCGTACCGCCGGTAAAGTGGCGATCAAACTGGTTGAAGGCGATG
AGCTGATCGGCGTTGACCTGACCAGCGGCGAAGACGAAGTAATGCTGTTCTCCGCCGAAG
GTAAAGTGGTGCGCTTTAAAGAGTCTTCTGTCCGTGCGATGGGCTGCAACACCACCGGTG
TTCGCGGTATTCGTTTAGGCGAAGGTGATAAAGTCGTCTCTCTGATCGTGCCTCGTGGCG
ATGGCGCAATCCTCACCGCAACGCAGAACGGTTATGGTAAACGTACCGCAGTGGCGGAAT
ACCCGACTAAGTCGCGTGCGACGAAAGGGGTTATCTCCATCAAGGTTACCGAACGTAACG
GTTTAGTGGTTGGCGCGGTGCAGGTAGATGATTGCGATCAGATCATGATGATCACCGACG
CCGGTACGCTGGTACGTACTCGCGTTTCAGAAATCAGCATCGTGGGCCGTAACACCCAGG
GCGTGATCCTCATCCGTACTGCGGAAGATGAAAACGTAGTGGGTCTGCAACGTGTTGCTG
AACCGGTTGACGAGGAAGATCTGGACACCATCGACGGCAGTGCCGCGGAAGGGGACGATG
AAATCGCTCCGGAAGTGGACGTTGACGACGAGCCAGAAGAAGAATAATTTTACTTCTTCA
TGCCAAAAGGGAGCTATCTCCCTTGTTTGAATTGAAAAGTCCAGGCTGCAAAGTCTGGGC
TTTTGTCGTATTAGGGCACGGTAAAGTTTGGCTGTGCCCGTAAAAAATGGCTGGCTATAC
ACAAGGAATGTGGCAATGAGTGGTGAAAAAAAGGCGAAAGGCTGGCGGTTCTATGGTCTT
GTAGGTTTTGGCGCAATAGCACTGCTTTCCGCTGGCGTCTGGGCGTTGCAATATGCTGGC
AGTGGGCCAGAAAAAACGTTGTCGCCGCTGGTGGTGCACAACAATCTGCAAATCGATCTC
AATGAGCCGGACCTCTTTCTCGACAGCGACTCTCTGAGCCAGCTTCCCAAAGATCTCCTC
ACCATTCCGTTTCTCCACGATGTTCTGAGTGAAGATTTCGTTTTCTATTATCAGAATCAT
GCCGATCGTCTGGGCATTGAAGGCAGCATTCGCCGCATTGTCTATGAACACGATCTCACG
CTGAAAGATAAGCTCTTTTCGTCACTCTTAGATCAGCCCGCGCAGGCGGCGCTATGGCAC
GATAAACAAGGCCATCTTTCACATTACATAGTGCTGATCCAGCGCAGTGGTTTAAGCAAA
CTGCTGGAGCCATTGTTGTTTGCCGCTACCAGCGACAGCCAGTTAAGCAAAACGGAAATC
AGTAGCATCAAGATAAATAGTGAAACTATTCCTGTTTATCAGTTGCGCTATAACGGTAAT
AACGCCCTGATGTTCGCGACATATCAGGACAAGATGCTGGTGTTTTCCAGCACGGATATG
CTGTTTAAAGATGATCAGCAGGATACCGAAGCCACGGCGATCGCAAGTGATTTGTTGAGC
GGCAAAAAACGCTGGCAAGCCAGCTTTGGCCTGGAAGAGCGTGCTGCCGAAAAAACGCCA
GTACGCCAGCGCATCGTGGCCAGCGCCAGGTTGCTGGGTTTTGGCTACCAGCGGTTAATG
CCTTCTTTTGCTGGCGTACGCTTCGAAATGGGTAACGACGGCTGGCACAGTTTTGTGGCG
TTAAATGATGAATCCGCCAGCGTAGATGCCAGTTTCGATTTTACGCCGGTCTGGAACAGT
ATGCCTGCCGGGGCCAGCTTCTGTGTGGCGGTGCCGTATTCACACGGTATTGCCGAAGAG
ATGCTTTCGCACATCAGCCAGGAAAACGATAAGCTGAATGGGGCGTTAGACGGTGCCGCG
GGGCTGTGCTGGTATGAAGACTCAAAATTGCAAACCCCGCTGTTTGTCGGTCAGTTTGAT
GGCACTGCCGAACAGGCGCAATTGCCAGGGAAACTGTTTACGCAAAATATTGGTGCGCAC
GAAAGCAAAGCGCCAGAAGGTGTTTTGCCGGTAAGCCAGACTCAGCAGGGCGAAGCGCAA
ATCTGGCGTCGCGAAGTGAGTTCCCGATACGGTCAGTATCTGAAAGCGCAGGCGGCGCAA
CCCGATCAATTAATGTCGGATTATTTTTTCCGCGTGTCGCTGGCGATGCAAAACAAAACG
CTGCTTTTCTCCCTCGATGACACGCTGGTTAATAACGCCCTGCAAACACTGAATAAAACC
CGCCCGGCAATGGTAGATGTAATACCCACTGATGGCATCGTTCCGCTCTATATCAATCCA
CAAGGAATGGCGAAACTGCTGCGTAACGAAACGCTGACCAGTCTGCCGAAGAATCTCGAA
CCGGTTTTTTATAACGCCGCACAAACTTTATTAATGCCGAAGCTGGACGCTTTATCTCAA
CAACCGCGTTATGTCATGAAGCTGGCCCAGATGGAACCCGGTGTCGCCTGGCAGTGGCTA
CCCATAACCTGGCAGCCGCTATGAGGCACGGGCTGCTGGCGCTGATTTGCTGGCTGTGTT
GTGTTGTTGCCCATAGCGAAATGCTGAATGTCGAACAATCCGGGCTGTTTCGCGCCTGGT
TTGTACGCATTGCACAGGAACAGCTCCGCCAGGGGCCAAGTCCACGCTGGTATCAGCAGG
ATTGTGCGGGCCTGGTGCGATTTGCAGCGAACGAGGCGCTGAAAGTTCACGACAGTAAAT
GGCTAAAAAGTAACGGGTTATCTAACCAGTATTTGCCGCCAGAGATGTCGCTAACACCTG
AACAGCGTCAACTGGCGCAAAACTGGAATCAGGGGAACGGGAAAACCGGCCCCTACGTGA
CCGCGATTAATTTGATTCAGTACAACAGCCAGTTTATTGGCCAGGACATAAACCAGGCGC
TGCCTGGCGATATGATTTTTTTCGATCAGGGCGATGCCCAGCACTTAATGGTCTGGATGG
GGCGTTACGTCATCTACCACACCGGAAGCGCCACGAAAACTGACAACGGAATGCGCGCAG
TCAGTCTGCAACAACTTATGACATGGAAGGACACCCGATGGATACCCAACGATTCCAATC
CCAATTTCATTGGCATTTATCGTTTAAATTTTCTGGCGCGATAGCAGCGTGCTTGTCCCT
GTCTCTTGTGGGAACAGGGCTTGCTAATGCTGATGATTCGCTTCCTTCCAGTAACTATGC
GCCGCCCGCAGGGGGAACATTCTTTTTGCTTGCTGACAGCAGTTTTAGCAGCAGTGAAGA
GGCGAAAGTGCGACTGGAAGCGCCGGGGCGTGATTATCGGCGCTATCAGATGGAAGAGTA
CGGCGGTGTGGACGTTCGCCTGTATCGTATTCCTGACCCGATGGCATTTTTGCGCCAGCA
GAAAAACCTGCATCGCATTGTGGTGCAACCGCAATATCTGGGCGACGGGCTGAACAATAC
GCTGACCTGGCTGTGGGATAACTGGTACGGCAAATCTCGCCGCGTGATGCAGCGTACTTT
CTCTTCTCAGTCACGGCAGAATGTGACTCAGGCATTACCCGAATTACATCTCGGCAATGC
CATTATTAAACCTTCCCGTTATGTACAGAACAACCAGTTTTCCCCGCTGAAAAAATATCC
CCTGGTGGAACAGTTCCGTTATCCACTATGGCAGGCTAAACCGGTCGAGCCGCAGCAAGG
GGTAAAACTGGAAGGCGCATCCAGCAATTTCATCTCGCCGCAGCCGGGTAACATTTATAT
TCCTCTCGGCCAACAAGAGCCGGGACTGTACCTCGTCGAGGCGATGGTTGGTGGGTATCG
GGCGACGACGGTGGTGTTTGTTTCCGATACCGTGGCGCTTAGCAAAGTGTCAGGCAAAGA
GCTTCTGGTGTGGACCGCGGGTAAAAAACAGGGTGAAGCGAAGCCAGGCTCAGAGATCTT
GTGGACTGACGGTCTTGGCGTGATGACCCGCGGTGTGACCGATGACAGCGGTACCTTGCA
GTTACAACATATATCGCCAGAACGTTCATACATTCTGGGTAAGGATGCCGAAGGCGGCGT
TTTTGTCTCCGAGAACTTCTTCTACGAAAGCGAAATCTACAACACCCGCTTGTATATTTT
TACCGATCGCCCGCTATATCGCGCAGGCGATCGTGTCGATGTTAAAGTGATGGGCCGCGA
GTTCCACGATCCGTTGCATTCATCCCCCATCGTCAGCGCCCCGGCGAAGCTTTCGGTGCT
GGACGCCAACGGCAGTCTGTTGCAAACCGTCGATGTCACGCTGGATGCGCGCAATGGCGG
GCAGGGAAGTTTCCGCCTGCCAGAAAATGCCATTGCCGGAGGTTATGAGTTACGTCTTGC
TTACCGCAATCAGGTCTATAGCAGTAGTTTTCGCGTAGCCAACTATATCAAGCCACATTT
CGAGATTGGTTTAGCTCTCGACAAAAAAGAGTTCAAAACTGGCGAAGCGGTCAGCGGCAA
ACTGCAACTGCTCTACCCGGATGGTGAGCCGGTAAAAGATGCCCGCGTGCAGTTAAGTTT
GCGCGCTCAGCAATTATCAATGGTCGGTAACGATTTGCGTTATGCCGGACGTTTCCCCGT
GTCGCTGGAAGGCAGTGAAACGGTGTCCGACGATAGCGGTCATGTGGCGTTAAATCTCCC
CGCCGCCGATAAACCAAGCCGCTATTTGTTAACCGTCTCCGCCAGTGACGGCGCGGCGTA
TCGCGTCACCACCACCAAAGAGATCCTCATTGAACGCGGCCTGGCGCATTACTCTTTAAG
TACCGCCGCACAATACAGTAATAGCGGCGAGTCGGTTGTGTTCCGTTATGCCGCGCTGGA
ATCTTCAAAACAGGTTCCTGTTACGTATGAATGGTTGCGTCTCGAAGACCGCACGAGCCA
TAGCGGAGAGCTACCGTCAGGCGGCAAATCCTTTACCGTCAATTTCGCTAAACCTGGCAA
CTACAATCTGACATTACGCGATAAAGACGGCTTAATTCTCGCTGGGTTAAGTCATGCCGT
CAGCGGTAAGGGCAGCATGTCGCATACTGGTACGGTAGATATCGTGGCAGATAAAACGCT
GTACCAGCCTGGCGAAACCGCGAAGATGCTGATTACCTTTCCGGAGCCAATTGATGAAGC
ATTATTGACGCTGGAACGCGATCGCGTGGAACAGCAGTCGCTGCTTTCGCATCCGGCAAA
CTGGCTAACGCTACAACGTTTAAACGATACCCAGTATGAAGCCCGGGTTCCAGTGAGCAA
TTCCTTTGCGCCTAACATCACTTTTTCGGTGCTGTATACCCGTAACGGTCAGTACAGTTT
TCAGAATGCCGGGATCAAAGTTGCCGTTCCCCAGCTGGATATCCGGGTGAAAACGGACAA
AACCCATTACCAGCCTGGTGAACTGGTCAATGTCGAATTAACCTCGTCGCTGAAAGGTAA
ACCTGTTTCTGCGCAGCTAACGGTAGGCGTGGTCGATGAAATGATCTACGCGCTGCAACC
AGAAATCGCGCCGAATATCGGCAAATTTTTCTATCCGCTGGGGCGTAACAATGTGCGTAC
CAGCTCCAGTCTGTCGTTTATCAGCTACGACCAGGCGCTCTCCAACGAGCCGGTTGCGCC
TGGCGCAACTAACCGCAGCGAGCGGCGAGTAAAAATGCTTGAACGTCCACGGCGTGAAGA
GGTGGATACCGCGGCATGGATGCCGTCACTCACAACCGATAAACAAGGCAAAGCGTATTT
CACGTTCCTGATGCCTGATTCGTTAACCCGCTGGCGTATCACCGCGCGTGGGATGAACGG
CGACGGGCTGGTCGGGCAGGGGCGTGCTTATCTGCGTTCGGAAAAAAATCTCTACATGAA
GTGGAGTATGCCAACGGTGTATCGCGTGGGCGACAAACCGGCGGCAGGACTGTTTATCTT
CAGTCAGCAGGATAACGAACCGGTGGCGCTGGTGACTAAATTTGCAGGCGCTGAGATGCG
CCAGACGCTGACGCTGCACAAAGGGGCGAATTATATTTCGCTGACGCAGAATATTCAGCA
ATCTGGCTTGTTAAGTGCAGAACTGCAACAAAATGGGCAAGTGCAGGACAGCATTAGCAC
AAAACTGTCTTTTGTGGATAACAGCTGGCCCGTTGAACAGCAGAAAAATATCATGCTCGG
TGGTGGCGATAACGCGCTGATGTTGCCCGAGCAGGCGAGCAATATCCGGCTACAAAGTAG
TGAAACGCCGCAGGAGATTTTCCGCAACAATCTTGATGCGTTAGTCGATGAACCGTGGGG
TGGGGTGATCAACACCGGTAGCCGTCTGATCCCGCTCAGTCTCGCCTGGCGTTCGCTTGC
CGATCATCAAAGTGCCGCCGCTAACGACATTCGTCAGATGATTCAGGATAACCGTCTGCG
GCTGATGCAACTGGCGGGGCCCGGAGCGCGCTTTACCTGGTGGGGTGAAGATGGCAATGG
TGACGCCTTCCTTACGGCATGGGCATGGTACGCCGACTGGCAGGCCAGCCAGGCGCTCGG
CGTAACGCAACAACCGGAATACTGGCAGCATATGCTCGACAGTTATGCCGAGCAGGCAGA
TAACATGCCGTTATTGCATCGGGCGCTGGTGCTGGCGTGGGCACAGGAGATGAATCTGCC
GTGCAAAACGTTGTTGAAAGGGTTGGATGAAGCTATCGCCCGGCGCGGAACTAAAACTGA
AGATTTCTCTGAGGAAGCCCCCCGCGATATCAATGACAGCCTGATCCTCGATACACCGGA
ATCTCCACTGGCAGATGCGGTGGCAAACGTCTTAACCATGACGTTGCTGAAAAAAGCGCA
GTTGAAGTCCACGGTGATGCCACAGGTTCAGCAATATGCGTGGGATAAAGCGGCAAACAG
CAATCAGCCGCTGGCGCACACGGTTGTGCTGCTCAATAGCGGGGGCGACGCTACCCAGGC
GGCTGCTATTTTAAGTGGTTTGACCGCTGAGCAATCTACTATTGAGCGCGCGCTGGCCAT
GAACTGGCTGGCGAAATATATGGCGACAATGCCTCCAGTTGTTTTGCCTGCGCCTGCGGG
CGCATGGGCCAAACATAAGTTAACTGGAGGGGGCGAATACTGGCGTTGGGTTGGTCAGGG
CGTGCCGGACATTCTCTCTTTTGGTGACGAATTATCGCCGCAAAATGTGCAGGTCCGCTG
GCATGAACCGGCAAAAACGGCTCAACAAAGTAACATTCCGGTGACCGTTGAACGCCAGTT
GTATCGGCTTATCCCCGGTGAAGAAGAGATGAGCTTTACTCTGCAGCCGGTGACCAGCAA
TGAGATTGACAGCGATGCGCTGTATCTCGATGAAATTACGCTTACCAGCGAGCAGGATGC
AGTTCTGCGCTATGGTCAGGTGGAAGTACCGCTCCCGCCGGGAGCCGACGTTGAGCGCAC
AACATGGGGCATTTCAGTCAATAAACCCAACGCCGCGAAACAGCAGGGGCAATTGCTGGA
AAAAGCGCGTAATGAAATGGGCGAACTGGCCTATATGGTGCCGGTGAAAGAACTGACGGG
AACGGTCACTTTCCGCCATTTGCTGCGCTTCTCGCAAAAAGGGCAATTCGTTCTGCCTCC
TGCTCGTTATGTGCGTTCCTATGCACCTGCGCAGCAAAGTGTTGCGGCAGGGAGCGAATG
GCCCGGGATGCAGGTGAAATAAGTGAACTGGCGCAGAATCGTCTGGCTATTGGCGTTGGT
TACTCTGCCAACGCTTGCGGAGGAGACGCCGTTACAACTGGCACTGCGTGGTGCGCAGCA
CGATCAACTGTATCAGCTGTCGTCATCAGGCGTGACCAAAGCCTCGACATTACCTGACTC
GCTCACCACGCCGTTAGGGAGTTTGTGGAAACTGTATGTTTACGCCTGGCTGGAGGATAC
CCATCAACCGGAGCAGCCCTACCAGTGTCGCGGAAACTCCCCGGAAGAGGTTTATTGTTG
TCAGGCTGGGGAGAGCATAACGCGCGATACCGCGCTGGTACGTTCCTGTGGGCTCTATTT
TGCGCCGCAGCGGTTGCATATTGGCGCAGATGTGTGGGGGCAATACTGGCAACAGCGTCA
GGCACCTGCGTGGTTAGCGTCTCTTACTACGCTGAAGCCAGAAACCTCGGTAACGGTTAA
ATCGCTGCTTGATTCATTAGCGACGTTACCTGCGCAAAACAAAGCTCAGGAAGTCTTACT
GGAAGTGGTGCTGGACGAGGCGAAAATCGGTGTCGCATCCATGCTCGGTAGTCGGGTTCG
GGTGAAAACCTGGAGCTGGTTTGCCGATGATAAACAGGAAATCCGTCAGGGTGGTTTTGC
CGGCTGGTTAACCGATGGTACACCGCTGTGGGTTACTGGCAGTGGCACCAGCAAAACGGT
ACTGACCCGTTATGCGACGGTGCTTAATCGGGTTTTGCCAGTGCCGACACAAGTTGCCAG
TGGGCAATGTGTAGAGGTGGAGCTATTTGCCCGCTATCCGCTGAAGAAAATCACAGCGGA
AAAGAGTACGACGTCAGTAAAACCCGGCGTACTTAATGGGCGCTATCGTGTGACATTTGC
CAATGGTAACCACATTACGTTTGTCAGCCACGGTGAGACGACCTTACTGACCGAAAAGGG
CAAACTGAAATTGCAGTCGTATCTCGATCGTGAAGAGTACGTTGCCAGAGTTCTGGATCG
CGAGGCGAAAAGTACGCCACCTGAGGCAGCGAAAGCCATGACCGTGGCGATACGCACTTT
TTTACAGCAAAACGCCAATCGGGAAGGCGATTGCCTGACCATCCCCGACAGCAGCGCCAC
GCAGCGTGTTTCTGCTTCGCCAGCGACCACGGGGGCGCGAACGATGACCGCCTGGACGCA
GGATCTCATCTATGCGGGCGATCCGGTTCATTATCACGGCAGTCGCGCTACCGAAGGGAC
GCTTTCCTGGCGGCAAGCCATGGCCCAGGCCGGGCAGGGAGAGCGTTACGACCAGATACT
CGCGTTTGCTTATCCCGACAACAGCCTTAGCCGCTGGGGAGCGCCACGCTCAACCTGTCA
GTTATTACCCAAAGCGAAAGCCTGGCTGGCGAAAAAAATGCCGCAGTGGCGGCGTATATT
AGAAGGCGAGACGGGGTACAACGAACCAGACGTGTTTGCGGTCTGTCGTTTAGTCTCAGG
TTTCCCCTATACCGATCGGCAGCAGAAACGGCTGTTTATTCGTAACTTCTTTACGCTTCA
GGATCGGCTGGATTTAACCCATGAGTATCTGCACCTGGCCTTTGATGGTTATCCCACCGG
GCTTGATGAGAACTATATCGAAACGCTGACCCGACAATTATTAATGGACTAATGCTATGC
GAAAGATTTTTCTTCCGTTGTTACTGGTGGCACTTTCGCCTGTCGCTCACAGTGAAGGTG
TGCAGGAAGTCGAGATTGACGCACCGCTCTCTGGCTGGCATCCGGCAGAGGGCGAAGATG
CCAGTTTTTCACAATCGATCAATTACCCGGCGTCGTCCGTCAACATGGCAGATGATCAAA
ATATCTCAGCGCAGATCCGCGGCAAAATAAAGAATTATGCTGCGGCGGGTAAAGTTCAGC
AGGGCCGGCTGGTGGTCAACGGTGCCAGTATGCCGCAGAGAGTTGAATCCGATGGTTCAT
TTGCACGCCCTTATATTTTCACTGAAGGCAGCAACAGCGTGCAGGTCATCAGCCCGGATG
GGCAAAGCCGACAAAAAATGCAGTTTTACTCAACGCCGGGTACAGGAACGATTCGTGCAC
GTTTACGGCTGGTTCTCTCGTGGGATACGGACAATACCGATCTCGATCTCCATGTTGTCA
CGCCCGATGGAGAACACGCCTGGTACGGTAACACCGTGCTGAAAAACAGTGGTGCACTGG
ATATGGATGTCACGACGGGGTATGGACCCGAGATTTTCGCCATGCCAGCACCAGTTCACG
GGCGCTATCAGGTGTATATCAACTACTATGGTGGGCGCAGCGAAACGGAATTGACGACCG
CCCAACTGACGCTGATTACCGATGAAGGATCGGTCAATGAGAAACAGGAAACATTTATTG
TACCGATGCGTAATGCTGGCGAGCTGACGCTGGTGAAAAGTTTTGACTGGTGATTAATGG
GGTTACCTTCGCCGTCGATGTTCAAGAAAACACCCGATAACTTTCGCTATCGGGTGTTTT
TATTGATTAATTCAACCGTTCAATCACCATCGCAATTCCCTGGCCGCCACCAATGCACAG
TGTTGCCAGCCCCAGCGTTTTATCGCGTGCCTGCATGGCATGTAATAGTGTGACCAGAAT
ACGAGCACCACTGGCACCGATAGGATGCCCGAGCGCGATGGCCCCGCCGTTGACATTCAC
TTTCTCAGAATCAAAGCCCAGGGTTTTCCCAACGGCAAGGAACTGTGCAGCAAATGCTTC
ATTAGCCTCAATGAGATCAATATCCGCCAGTTGCAGCCCCGCCAGTTGTAACGCTTTTTG
CGTGGCAGGTACTGGACCCATACCCATCAATGCGGGGGGCACGCCACCGCTGGCATAACT
TTTAATGCGAGCCAGGGGGGTAAGGCCTGCTGCCAGCGCCGCAGATTCTTCCATAATCAC
CAGAGCGGCAGCACCGTCGTTAATACCAGACGCGTTCCCGGCGGTGACTGTTCCTGCTTT
ATCGAAGGCCGGGCGCAATGCGCCTAACGCTTCAGTCGTAGAATCCGCTTTCGGGAATTC
GTCTTGACTGAAGACGAAGGTTTTCTTCCGAGTGACAACATTTACCGGGACGATTTCGGC
TGTAAAAGCACCGGACTCAATTGCGGCTGCCGCTTTACGCTGTGAATGCAGCGCCAGTTC
ATCCTGCATTTCTCGGGTAATTCCGTACTCTTTGGCCACGTTCTCGGCGGTAATCCCCAT
ATGATAACCATGGGTGGCGCACATCAGACCATCGCGCAGGATTACGTCATAAACCTGTCC
GTCTCCAAGACGATAACCAGAGCGTGCTTTTGCATCGAGTAAGTAGGGCGCTAAACTCAT
ATTTTCCATACCCCCCGCCACAATGCTTTGCGCCTGACCTGCCTGAATTGCCTGGGCGGC
AAGCGCCACACTTTTAAGACCCGAACCACACACTTTATTGACCGTGAATCCGCACACCGT
TTCTGCCAGCCCGCTTTTTAACAGTGCCTGACGTGCCGGATTTTGCCCCAACCCGGCTTG
CAACACGTTACCCATAATCACTTCATCAATGTGTAGTGAATCGATTTTTGCACGTTCAAT
GGCGGCTTTAATTACTGTCGCCCCCAGGTCGATGGCGCTGGTGGAAGCGAGTGAACCGTT
AAAACTACCGATAGCAGTACGTACCGCACTGACGATGACACAATTTTTCATTTTTTATTC
CTTCTGTCTGTAGGGGTGCCGTCAGAACAGCGTTAAACCAATGACGAAAATGACGCCGGA
GAAGAGCAGGGCAGTGATGCAATAGCCCATGATGTCGCGGACACCGAGTCCGGCGATTGC
CAGTGCTGGCAGCGCCCAGAATGGTTGTGCCATGTTCATCCATTGCTCGCCGTAGGCGAT
CGCCATTACCGATTTACCGAGATCAGCGCCCAGCGCCTGGGCTGCGGGTATCACGAAAGG
TCCCTGAATAACCCAGTGACCGCCGCCAGACGGAACGGCGAAGTTAATCAGTGCAGAACT
AAAAAAGGTCATTACCGGGAAGGTGTCTTTGTTCGCAACATTGATGAAGAATTCGGTAAT
GAGTCCGCCCAGACCGGAATGCTCCATCATCAGTTGGATCCCAGCGTAGAAGGGGAATTG
CACCAGAATACCGGCGGTACTGCGTGCTGCCGCGCTGATAGCACGCATATAAGCCATTGG
CGTTTTATGTAGCAGCAGACCCGCAATCATAAACATCAGGTTGACGGTATTGATGGTGAT
GTTGAAGCCATGTTCGCTGAAGTACATCGCCAGGTAAGCGATACCGAGTGCGCCGATGAT
CAACGTCAGAATGCGGCTTTCTTCCAGTCGCTCGGACGGTGGAGCATCTTTCGGTAGCTG
CTTTTGAAAATCAGCCTCTTCCATGAGTAGTTTTGGATCGATACTCACCACGTCAGACGG
TTTTGGCATCATCATGCGGGTGATAAATGGCATCACCACAATCAACGCCACAGTGATGAA
AATGTTAAAACCACTGAACAGAGTATCGCCCACCGGGATCAGCCCGGCGATATGCTCAAC
CGGGTTGCCCGGTGTTGCAGCCAACAGAGGCATTGATCCAGAGAAGCCGCCACCCCAGGT
GAGAAAACCAATGTAGGCGCAGGCAATGAGCAACGGATAATCAGAACCGGGGACTCGCCG
GGCGACTTCACGGGCAAACATTGCGCCGACAACCAAACCAAATCCCCAGTTGATGACACA
AGCGACTGAACCGAAGAAAGTGACCAGCATGACGCCCTGTACGGGCGTCTTTGCGGCGGA
GGCGGCAGTACGCAGCAAACTTTTCACCGGAGCAGAGCTGGCAAGGGCATGACCGGTAAC
GATGATAAGCGCCATCTGCATACCAAACGCCAGCAAGTTCCAGAAACCGTCACCCCACAT
TTTCACCATGCTGATCGGCGTTTGTGGTGTTAACCAAAGCGCGATCACGAATGTTAGCAA
TGTCAGCAACATGGCAAAGATCAGTGGATCGGGAAGCCACCGGCTGACAAAACGCGTCAT
AAAACGCGATATGCGACCAATCATAAATCACCCCGTTGCGTATTCAGATCGGCGGCGACT
TCAAACCGAGCTTCTGTTTTGGCACGCACGGTAGCTAAATCACACCCGTCGGCAATTTCG
GTGAGCCACATTTTGCCGTCAATAAAACGAAAGACAGCCAGTTCAGTAACCAGCATATGC
ACCGCATGTTGCGCAGTGAGTGGCATGGTGCAGCGGCGCAAAATTTTTGCTGAACCATCT
TTGGCGCAATGTTCCATGGCGATGATCACTTTGCGCGACCCGGTCACCAGATCCATCGCG
CCACCCATACCGGGCACCATTTTCCCAGGCACTACCCAGTTCGCGAGGTTTGCTTCTTCG
TCTACTTGCAAACCGCCGAGCACGCAGGCATCAATATGACCGCCGCGGATTAGCGCAAAT
GACATGGCGCTATCAAACATGGCTGCACCGGGTAAAATACCGCACGGTTGTCCGCCAGCG
TTCACCAGATCTGGATGCGCTGTCGTGACCGGGCCTAAACCGAGGAAGCCGTTTTCCGAT
TGCAGAGTGATATGAATACCCTCCGGTAAATAATTGGCGACCATTGTGGGTAAACCGATC
CCTAAGTTAACGATGTCACCATCACGAAGCTCTTGCGCCACACGGCGCGCAATACGTTGT
TTCGCATCCATTATTTGCTCTCCTGTGAAACGATGATGTGGTCGATAACGGCACCAGGGG
TGACAATATGGTCAGGTTGCAGCTCGCCGGTTTCGACAAGTTCATCTGGCTCTACCAGCG
TGATATCAGCCGCAAGGGCTATCAGGGGGTTAAAGTTGCGGGCGCTAAGTTGATAGGTCA
GGTTGCCAAGTGTGTCGCAACGATGAGCGCGAATTAGCGCCAGGTCGGCGCGCAGTGGGC
GTTCGAGCAGCCAGGTTTTACCGTCGAGTGTCAGTGTCTGTTTGCCTTCCTCTACGACGG
TGCCGACACCCGTTGGGGTGAGAAAACCACCAAGTCCAGCTCCACCACAGCGAATTTGCT
CGATTAGCGTACCTTGCGGCACCAGAACGACGTCCATCTCACCAGATATCATGCGCCGAC
CTGTTTCCGGGTTGGTGCCGATATGTGAAGCAATCACTTTGCGGACTCGACCATTGACGA
TGAGCGGACCGATGCCGGTATCAACAAACGCGGTATCATTGGCTATCAATGTCAGGTCGC
GAACACCAGATTCCAGTAATGCTTCAACCAGGCGGGATGGAGTGCCAATCCCCATAAATC
CGCCCACCATGATGGTCATGCCGTCACGAAAGAAGCCGGTGGCGTCTTGTAATGTCATCA
ATTTTGTTTTCATTTTTTATCCCTCTTGCATACACCGTTGTGGGTACAGTCAGGGAATAG
CAAGGGGAGTGCCAGAATGAGATTATTGGATGTTTTTATTTAACTAATTGAATAGAAAAG
GATAAATTAGATGGGGATTCATAAGGAGAATGAGCTGCTATGCAGAAAATTGCGCACTGT
GCAAATTTCTGCATAGCAAGTTTTGGTGTTATACATCCGCCGGATCGATACCGTATTCCT
GGAGTTTATACATCAATGCACGGCGACTGATGCCCAGCATTAAAGCAGTGCGGGTTCGGT
TTCCTTCTTGTTGTTCCAGCACTTCCATAATGATGCGTTTTTCGACGCGTTTAATTTCCT
CTTTTAAATTACGCTCTCCGACAGGGGCTGTTTTTACCTCGCCAGCATTACAGACTGGCT
GACGAATCTGCGGCGGAAGATCCTCAGAAAAAATGATCGGGCCTGAATTCATCACGACGG
CGCGTTCAATAACGTTGGAAAGCTCTCGAATATTTCCCGGCCATGACCAGGCGGTAAGCA
GTGACATTGCCATCGGATCGATGTCGATAATATCGCGCTGATTCTCACTACTGAATTTTT
GCAAAAAGTGATTAGCTAACAGGGAAATATCTTCCCGGCGATCGCGCAGAGGCGGCAGTA
TTAAATGAATAACGTTAAGGCGATAAAAGAGATCTTCACGGAAGGTGCCTTCTTTTACCA
TTGCCTGCAAGTCGCGGTTGGTGGCAGCAATGATGCGGATATCAACTTTTATGGTCTGAT
GGCCGCCAATCCGTTCAAATTCCCGTTCCTGCAGAATGCGTAGTAATTTGGCTTGCAGTA
CCAGCGGCATTTCGCCAATTTCGTCGAGGAGCAGAGTACCTTCGTTGGCACGTTCAAATA
ATCCCTGACGCAAGGTTTGTGCACCAGTAAATGCACCTTTTTCATGACCAAACAGTTCAC
TTTCGAGCAACGATTCCGGCAGCGCCGCGCAGTTGACTTTAATGAACGGCCCCTTTGCCC
GCCGCGAATTGTAGTGAATCGCTCTGGCAATCAACTCTTTCCCGGTGCCGCTTTCACCGC
TAATCAAGACGCTGGCCTGAGAAAGGGCAATTTTGGCGGTGTCTTTGCAGATATCCATCA
TCGCCGGGCTGTTGGTGAGAATGTGCCCCCATTGCCAGCTGGTGCTCAGTGCCTGGTGCA
GATGACGGATCTCTTTTTTCATTGACTGGAGTTGTAAAGCGCGCTGAACGATTAAATTCA
ACTCATCGAGATCAAACGGTTTAATAACATAGTCGAAGGCCCCGCAGCGTAGCGCTTCGA
CGGCGGTTTCCACTTCAGCATAGGCCGTCATCAGAATAACGGGTGTCCGGGTCTCATTAC
TGCGCATCTCCTTTAGTGCCTTGATGCCGTCCATCTCTGGCATGCGGATATCCATCAACA
CCACGTCAGGGTGAATATCAGCAAACAGGTGTAATGCTGTGCGTCCGTTGTTCGCACAAT
GTGTTTCGAAACCTTGTAGTGCAAAAGCGGTGCTCAGCATACGGCGAACATTATCTTCAT
CATCCACAATAAGGATGCGATTAATAGCAGTCATACAGTCTGATTTCCCTGCGGGTTGAT
TGGTAAAATAAGCGTGAAGGTTGCGCCGTAGCCCGGCAAACTGGCGACGCGAATATCACC
CTGATGGGCATTAATGATGCGTTGACTTAACGCCAGACCAAGCCCGGTTCCTGAGGCTTT
GGTGGTGAAAAAGGGATCGAAGATCTTTTTTTGCAGCGAGAGATCAATGCCACAGCCGTT
GTCCTCTATCGAAATGGCCTGTTGTGAGTCGCTGTATTGCCAGGTTTGAATGCGAATTTT
CCCTCGTGCGCTGATAGCCTGGACGGCATTGATCAGGATATTCAGTAGTACCTGTTTGAG
CAGTTCACGATCGGCGTTAATCGGGTTTAATTCATTATCCAGTTCGCTTATGAAGTCGAC
CCGCGCTTGTACGCCGGCGGTTTGTACCAGTACCAGAGTTTCTTCAACTAATGCATTGAG
ACTGACTTGTTGCCATTGACTGTGGCGTGGACGTGAAAATTCGAGCAATTGCTGAATAAC
TTTGTTAATTGAATCGATTTCTTTGAGTACTACGGACAGATATTCCTGATGTATTAGGTC
GCTGGTTTGTTGGCGCAAGATCTGTACATAACCACGAATAGCCGTTAGCGGATTACGTAC
TTCATGCGCGACGCCAGCCATCAGCTCACCCAGTGTGGCGAGGCGTTCTGCTTGCGCCAT
GCGGCGCTGGGTTTCTTTGCGGGCAGTTAAATCAGAGAAAATAACCAAAGCACCTATCAT
TTCACCATGCGTGTTATGAATACGACTGGTAGTGACACTGAGTTCAATGGTGCGGTCACG
GCCTGGAAAACTGATCTCCAGCGCTACATGTTCGGTGCCATGTTCCAGCGTATCCAGTAC
TGGACTGTAGAACTGAGTATTGTCGAACAACATGGAGTAAGGCTGCCCTACCAGTTCATG
ACGTTGATAGCCAGTGATGACTTCTGCTGCCGGGTTCATGGTGGTTACATCACCCTGGCG
GTCAATGGCAATGACGCCATCGGCAGCGTTTTCAATAATCAGATCGTTAAGTGTCCGCGT
TTCACGCAGTGCCTGGGCGAGGTTGTTAACACTCTGACTGATTTGCCCCATTTCACCGGG
CAATTGTGGTAATCGAGTGGGAATATTTTGTGCCAGAGTCGAGAGGCCATCGGTGATGAT
ATCAATATTGGCGCTCAGGCGACGGGAGAAAAGGACAATCAACAGCAGGCTTATCAGCAA
ACCGGCGGTGAGCACAATGATAATCCTCACATCCATTTTCCAGGCCTGGCGGCGAATATC
TTCGGTTAATTCATTGGCCCAGATATAGCCGAGAATTTCACCATTACGCTCAATGGGGAT
CATTGAATTCAAAATATCGCCGCGCACCTGCCTGCCTGAATAAACCAAAGGGGTATTTGT
ACGCATGACTTCGCGACCAGGGTGATCTGCGGCAATGGTAACGCCCACATTATTCTGATA
TAGCGCTGAAGGCGCGTAGGTGATTATCGCATCCAGCGTTTTGTTGTAATAACCAGCGCC
GATGCCAGGGAAGGCGTGAGTGATATTTTCGGTAATGGGGGCAAGTTCTGCATTTAATGC
GCGGATACGCTCCTCACGTGGTAAGTCGATGTAGAGATCATAGCGATCGCCTAGTGCCTG
ATTAAGCAGGTTGACCACGGCAGAAAGTTTTTTCTCTTTTTCAGATAAGACTGCTGAACG
TCCTTCCGTTTCTACGATATAACCAATAGTAAGCGTTGGGACAATGACCATCAGGATTGC
CATCAGGATCATTTGATTGCGTAAGCGGCGTGGATAAATCCACTTCATATAATGCATGCT
GAAATCCACTAGTCTTGTCCGGTATATGACGATTATCAGAGGTTAAGGTGATGATTTCTC
GGCGGTGTATCATATTCCAGAGAAGAGAGAACATTGCGGTAACACGCTTTTACCGCTACC
TTAACCACACTCCATCGGTCACCTGAGGCGGAGCTTCGCCCCTTTGAAATACCTTGCTTC
TTTTCGTACAACCCTGAAAGCCTCGCGCTACATGTTCAGAGCATTGGCGTTAGTGCTCTG
GCTGTTGATTGCTTTTTCATCCGTTTTTTACATCGTTAATGCGTTACATCAGCGAGAATC
GGAAATTCGTCAGGAATTTAATCTGAGTTCCGATCAGGCTCAGCGCTTTATTCAACGCAC
CTCTGATGTGATGAAAGAGCTGAAGTATATCGCTGAAAATCGCTTATCGGCAGAAAACGG
TGTGCTTTCCCCGCGTGGACGAGAAACGCAGGCGGATGTGCCTGCGTTTGAACCGCTGTT
TGCCGACTCCGATTGTTCCGCAATGAGTAACACCTGGCGAGGTTCTCTGGAGTCATTGGC
GTGGTTTATGCGCTACTGGCGCGATAATTTTTCTGCGGCTTACGATCTCAACCGGGTATT
TTTAATCGGCAGCGATAACCTCTGCATGGCCAATTTCGGTCTGCGTGATATGCCAGTGGA
ACGCGATACCGCGTTGAAAGCTTTGCATGAACGCATCAATAAATATCGAAATGCACCACA
AGATGATAGCGGCAGTAACCTCTACTGGATCAGCGAAGGTCCGCGCCCTGGCGTCGGGTA
TTTTTACGCGTTGACGCCAGTTTATCTGGCGAACCGGTTGCAGGCGCTTTTGGGTGTCGA
GCAGACCATCCGGATGGAGAACTTTTTCTTACCTGGTACGTTGCCGATGGGGGTTACCAT
TCTTGATGAAAATGGTCATACCCTGATTTCGCTTACCGGACCAGAAAGTAAAATTAAGGG
CGATCCTCGCTGGATGCAGGAACGCTCCTGGTTTGGCTATACGGAAGGGTTCCGGGAGCT
GGTGCTGAAGAAAAATCTGCCACCCTCATCGCTAAGCATCGTGTATTCGGTGCCGGTTGA
TAAGGTGCTGGAACGCATTCGCATGTTGATCCTTAACGCAATTTTGCTGAATGTGCTTGC
TGGAGCTGCATTGTTTACTCTCGCGCGGATGTACGAGCGGCGTATTTTCATTCCGGCGGA
AAGCGACGCCCTGAGACTGGAAGAACATGAGCAGTTTAACCGCAAGATTGTCGCCTCCGC
GCCAGTGGGTATCTGTATTTTGCGTACCGCAGATGGCGTCAATATTTTAAGTAACGAACT
GGCGCATACCTATCTCAATATGCTTACGCATGAGGACCGCCAACGGCTGACACAAATTAT
CTGTGGGCAGCAGGTCAATTTTGTTGATGTCCTGACCAGCAACAATACCAATCTGCAAAT
CAGCTTCGTCCATTCGCGCTATCGTAATGAAAACGTGGCCATTTGTGTGCTGGTGGATGT
TTCTTCGCGCGTGAAGATGGAAGAGTCGTTGCAGGAGATGGCACAAGCAGCGGAACAGGC
GAGCCAGTCAAAATCGATGTTCCTTGCCACCGTCAGTCATGAGCTGCGAACGCCGCTGTA
TGGCATTATCGGTAACCTGGATCTGTTGCAAACCAAAGAGTTACCGAAAGGCGTCGATCG
TCTGGTGACGGCAATGAACAACTCTTCCAGCCTGTTGTTGAAAATTATCAGCGATATTCT
CGATTTCTCGAAGATTGAATCGGAACAGTTGAAGATCGAACCGCGTGAGTTTTCACCGCG
TGAAGTGATGAACCACATCACCGCCAACTATTTACCGCTGGTGGTACGCAAGCAGTTAGG
CTTGTACTGCTTTATTGAACCGGATGTGCCAGTGGCCTTAAATGGCGACCCGATGCGTTT
ACAGCAGGTCATCTCCAATCTGTTGAGTAACGCCATAAAATTCACCGATACCGGCTGTAT
AGTTTTGCATGTTCGCGCTGATGGCGATTATCTCTCTATCCGTGTTCGCGATACCGGCGT
GGGGATTCCGGCGAAAGAAGTGGTGCGCTTGTTTGATCCCTTCTTCCAGGTCGGAACGGG
CGTACAGCGAAACTTCCAGGGGACCGGTCTGGGTCTGGCGATTTGTGAAAAACTGATCAG
CATGATGGACGGCGATATCTCGGTAGATTCAGAACCGGGAATGGGCAGCCAGTTTACCGT
GCGTATTCCGTTGTACGGCGCTCAGTACCCGCAGAAAAAAGGCGTGGAAGGGTTGAGTGG
TAAACGCTGCTGGCTGGCGGTCCGCAATGCGTCGCTCTGTCAGTTCCTGGAAACCAGTTT
GCAGCGCAGCGGCATCGTCGTAACAACATACGAAGGGCAGGAACCGACTCCCGAAGATGT
GTTAATCACTGACGAGGTAGTGAGTAAAAAATGGCAGGGCAGAGCGGTAGTGACCTTCTG
TCGTCGACATATTGGTATTCCGCTGGAGAAAGCGCCAGGGGAGTGGGTACACAGTGTGGC
TGCCCCGCATGAGCTACCGGCATTGTTGGCGCGTATTTATTTGATCGAGATGGAGAGCGA
CGATCCTGCTAACGCTCTGCCGTCGACGGACAAAGCGGTCAGCGATAATGACGATATGAT
GATTCTGGTCGTGGATGATCATCCGATTAACCGACGTCTGCTGGCAGATCAGTTGGGATC
GTTGGGCTATCAATGTAAAACCGCGAATGATGGCGTCGATGCGCTTAATGTACTTAGCAA
GAATCATATTGATATCGTGCTTAGCGACGTCAACATGCCAAATATGGATGGTTACCGCTT
GACGCAACGCATTCGTCAGTTGGGACTGACGTTGCCGGTAATCGGAGTAACTGCTAATGC
GTTGGCTGAAGAGAAGCAGCGGTGTCTGGAGTCCGGTATGGACAGCTGCCTGTCGAAGCC
GGTAACGCTGGATGTAATAAAACAGACGCTGACGGTATATGCCGAGAGGGTCAGGAAATC
GCGGGAATCGTAGGACGGATAAGGCGTTTACGCCGCATCTGGCATTCAGTGCAAATGCCA
GATGCGACGCTGACGCCTCTTATCTGGCCTACTTTAATGTAATCTGTTGAAATAATGGGA
ATCGTAGGCCGGATAAGGCGTTTACGCCGCATCCGGCAATCGGTGCAAATGCCAGATGCG
ACGCTGACGCCTCTTATCTGGCCTACAGATGATTAGTCTTTATCTGCCGGACTTAAGGTC
ACAGAAGAGAGATAATTCAGCAGGGCGATATCGTTCTCGACACCCAGCTTCATCATCGCA
GATTTCTTCTGGCTACTGATGGTTTTAATACTGCGGTTCAGCTTTTTAGCGATCTCGGTC
ACCAGGAAGCCTTCCGCAAACAGGCGCAGAACTTCACTCTCTTTTGGCGAGAGACGCTTG
TCACCGTAACCACCAGCACTGATTTTTTCCAACAGGCGAGAAACGCTTTCCGGGGTAAAT
TTCTTCCCTTTCTGCAGCGCGGCGAGAGCTTTCGGCAGATCGGTCGGTGCACCTTGTTTC
AGCACGATCCCTTCGATATCCAGATCCAATACCGCACTAAGAATCGCCGGGTTGTTGTTC
ATAGTCAGAACAATGATCGACAGGCTTGGGAAATGGCGCTTGATGTACTTGATTAAGGTA
ATGCCATCGCCGTACTTATCGCCAGGCATGGAGAGATCGGTAATCAACACATGCGCATCC
AGTTTCGGCAGGTTGTTGATCAGTGCTGTAGAGTCTTCAAATTCGCCGACAACATTCACC
CACTCAATTTGCTCAAGTGATTTGCGAATACCGAACAAGACTATCGGATGGTCATCGGCA
ATAATTACGTTCATATTGTTCATGTAATAGGCTACCTTGCTACAGCAAGCTCTTGACATA
ACTGTCAATGTCGCTGATGTATTTTTCTATTCCTGGAACATCCTTCTCACGAATCAGATG
TTCCAGCGTTTCACATAACTGCTTGCCGGGTACCAGATTTAGCATGGCAAATACGCCTTT
AAGACGATGAGCCGTTTGGGCTAACGCAGCAAAGTCACTGGTTGCTGCTTCAGTATACAG
CCTCTTAACATCATCCGGTACTGTGTCTACAAAGAGCGCATAATAGCCGCTGGCATGGAG
TTGCGCATTTTCATCTCCGCCCAGAGGCGATTCTGTCACCTCTTCCTGCGCCAGTTGCAC
TTCAATTAATTGTAAGACCGCTTCCTGCATAGCGTTGCTCATATTGAAGTTGACGCACAA
TTGACCAGGCCCAATTTCCCGTACGCCAGACTCATCATCGCTTAAAAGCAAGCCAGAGGC
AGTAAGATTAGACGGATTATCCGTTAAAAAGATATCATAATCTTGACTAATTAATCTTTC
ATCGGGTGTGATACAGGTTGCACCCCAATTTTCTAACTGGCGAGTGACAATATTCCGAAT
TTCTGCCGAAGTAACATCCACCATTACGCAGACATCATCCAGTAAACGCTCTTCTTCCTC
TTCAACTTCCGGGTCAGCTGCGAGCATTTTGATATGCACAGAGTAGCGTGTACCAAGCCC
ATCCCGCGTTTTGATGTTTAAATGACCGCCCAGTTTACGTGCCAGTTGATCGCTCAGCCA
GAATGCCAGCGGGTCCGCCTTGCCATAGCGATCGTTTTGGGTCTGGTTGATAAACGGGAA
GTGCAAATTATCCATTTCATGAATGCTTACGCCTTCTCCGGTGTCCAGAATGCGGAACGT
CAGGCGGTCTTCGGAGGACTCATCCTGATCAACCTCAAGGGTGATTTTTCCCAATTGCGT
TGAGGTCACGGCATATTGCATCAGTAGCAGCAAAATACGTCGTAAGGCATCGCGATCGCC
ACGGCGCATATCGTGTGCTTTCAGATGATTGTTAATCAGCAGTTGCAGACCTTTACGCTT
GATGGCAGGCAACACTGAAGGCACAACTTCATCAATTAAATCCTGCACGGAGAACAGCAC
CGTCTCACTTTTCCAGCTATCGTCCGCAAGCATGTTCGCTAACTGTATTTCATCGACCAG
CCGCACCAGCACATCTGCCTGATTCGCCAGTTGTTTGCTTTCCGGGGCGTTGAGTTTAGC
CGCGCTCTCCGCCAGGGACTGTGCAGGTTCTTTCAGCGCATCGCCAATGTTTTTCATAAA
GGTCATCCGCCCCTGCTGGTTTTTCTCATACAGACGCTGCGCCTGCTTGAGTTTCTTGTT
TACCAGCACTTCGCGATCCTGATCGCGAATAATGAAAATTTGTGTGCGCGGCGCGACCTG
GCTGCGGAACATGCGGATCTCATACAGCTCGTTATTGATCGTCGCCTGAATAATCCCCTG
ATGCTGTTCCGCCATGGTGGTGATGTTTTGCAGATTCAAATGCGGCAGCAAATGATCGGC
AATTTTGTTACTTATGACAGTGCGGTTCGATTCCTGATCGTGAACCAGCAGGCCGAGCGG
CAGCAGTGAGACTATCTCTTCATTGATTGCCCGTAAAATGCGCAATTCGTTATTGACCGC
CGTGTTGGGTAGACTTTCTGTACTGCGACTGGAGAAATGGCGAAATGTGGTATAGCCAAA
TAACGCCAGCGCCAGCAAACCGATGTTCAGCAGCAGTGGCAGCAGAATGTTTTGCAACGT
ATCCAGCAATAAGGTGCCATAAGGAACCTGCCAGACCAGGCGCATATCAGTAGAGTTGAG
TGCCGAGGAGATTTCAATCTTCGTACTGTTAAAGTGGATACTGACGCTATCCGTCCCTTC
TTTCTCATTATCATTGTTTCCCGTTGCCGTCGCGTCTGGCTCAAGGCGGAAACTGTCCAG
CGGCATACCCGGTGGGATCAAATCATTAATCGGCAGATCAAAAGCCACGACCGTTGCCAG
ATGTCCTGGCTGGTTAAAGGTAGTACGCAAGGTAAAGTAATGACCGTTCTGCCAGGCCAG
GCGGCGCATGTTAGAAAAACTTTCGCGTTCATCGAGGGCGTTGGCCTGTTGCAACATCTC
TGCACGACGTGAATCAACAATGTCACTGACGGTCGATTCTTTAAATCCGGAGGTGAGATC
TTTGAGGGGCAGGGTTGAGATCAGTACCAGACTGTTATCCTGACCATTCAGGTAATACAT
TGACCACGGTACATTTTCTGCGCCCCACAATGTATCCAGATAAGTGGACATCCGTTGAGT
CATCTCAAGCGTTGAGTTGTCGTGAGAGCCAAAGATTAACGCTTCCGTTTTGCGGCGCGG
TTTTTCCAGATAGTAGACATCCTGTTTCAGGCGCGTCTCTTGTAAACCTTCGCCGGAGGA
GGGGGAGGTCGTCGCGGCAATGTTGTCGTAGATCTGCCAGGTCACGTAACGCCAGGTATC
GACGCGCTTTTGGATTGCGTGGGTAATGTCGACAATCTGGTAACTTTTATCTTTCAGCCA
GGCGTTAACGGCGCTTTGTACCATTACACCCATCGTCACCAGTAACACAATGATCAACAG
TAAAAAGAAGCGGGTAATGCTCCCGGGTAGGAGTGAAAAGCGGGTCGTGGCCGTTGTCTC
TTTCTGACGCATTCGTGTTTATGACCTGTTAAAACTTCGCGAAGTGATAGGGCAGTATAA
AGGGTACAGTGTGAAATTCCAGACTCTTACCTGATTGATGATTCTCTATTCTCCTGTGAT
ATTTATCATCCTGTATGGGGGGAAATAGATGTACAAGCGCCATTTTGCTGTACAAATAAC
CTACGAAAAGCCCAACGAAATTAATTGCAAATAAACGAAAATTGCTGGAAATTATGCTGA
TGTTAATTATTTGTGAAATAGTTAACAAGCGTTATAGTTTTTCTCTGGTAGCACAGAATA
ATGAAAAGTGTGTAAAGAAGGGTAAAAAAAACCGGATGCGAGGCATCCGGTTGAAATAGG
GGTAAACAGACATTCAGAAATGAATGACGGTAATAAATAAAGTTAATGATGATAGCGGGA
GTTATTCTAGTTGCGAGTGAAGGTTTTGTTTTGACATTCAGTGCTGTCAAATACTTAAGA
ATAAGTTATTGATTTTAACCTTGAATTATTATTGCTTGATGTTAGGTGCTTATTTCGCCA
TTCCGCAATAATCTTAAAAAGTTCCCTTGCATTTACATTTTGAAACATCTATAGCGATAA
ATGAAACATCTTAAAAGTTTTAGTATCATATTCGTGTTGGATTATTCTGCATTTTTGGGG
AGAATGGACTTGCCGACTGATTAATGAGGGTTAATCAGTATGCAGTGGCATAAAAAAGCA
AATAAAGGCATATAACAGAGGGTTAATAACATGAAAGTTAAAGTACTGTCCCTCCTGGTC
CCAGCTCTGCTGGTAGCAGGCGCAGCAAACGCTGCTGAAGTTTACAACAAAGACGGCAAC
AAATTAGATCTGTACGGTAAAGTAGACGGCCTGCACTATTTCTCTGACAACAAGTCAGAA
GACGGCGACCAGACCTATGTACGTCTTGGTTTCAAAGGCGAAACTCAGGTTACTGACCAG
CTGACCGGTTACGGCCAGTGGGAATATCAGATCCAGGGCAATACCTCTGAAGACAACAAA
GAAAACTCCTGGACCCGTGTGGCATTCGCAGGTCTGAAATTCCAGGATGTTGGTTCTTTC
GACTACGGTCGTAACTACGGCGTTGTTTACGACGTAACTTCCTGGACCGACGTACTGCCA
GAATTCGGTGGTGACACTTACGGTTCTGACAACTTCATGCAGCAGCGTGGTAACGGCTTC
GCGACCTACCGTAACACTGACTTCTTCGGGCTGGTTGATGGCCTGAACTTTGCTGTTCAG
TACCAGGGCAAAAATGGTAGCGTAAGCGGCGAAGGCATGACCAACAATGGTCGTGGTGCT
CTGCGTCAGAATGGCGACGGTGTCGGCGGATCTATCACTTATGATTACGAAGGCTTCGGT
ATCGGTGCTGCAGTTTCCAGCTCCAAACGTACTGATGCTCAGAACACCGCTGCTTACATC
GGTAACGGCGACCGTGCTGAAACCTACACTGGTGGTCTGAAATACGATGCTAACAACATC
TACCTGGCTGCTCAGTACACCCAGACCTACAACGCAACTCGCGTAGGTTCCCTGGGTTGG
GCGAACAAAGCACAGAACTTCGAAGCTGTTGCTCAGTACCAGTTCGACTTCGGTCTGCGC
CCGTCTGTAGCATACCTGCAGTCTAAAGGTAAAAACCTGGGCACCATCGGTACTCGTAAC
TACGACGACGAAGATATCCTGAAATATGTTGATGTTGGTGCAACCTACTACTTCAACAAA
AACATGTCCACCTACGTTGACTACAAAATCAACCTGCTGGACGACAACCAGTTCACTCGT
GACGCTGGCATCAACACTGATAACATCGTAGCTCTGGGTCTGGTTTACCAGTTCTAATCT
CGATTGATATCGAACAAAGGGCCTGCGGGCCCTTTTTTCATTGTTTTCAGCGTACAAACT
CAGTTTTTTGGTGTACTCTTGCGACCGTTCGCATGAGGATAATCACGTATGGAAATAAGC
TTTACCCGCGTGGCACTGCTGGCTGCCGCGCTCTTCTTTGTTGGTTGCGATCAAAAACCA
CAACCCGCCAAAACCCACGCTACTGAAGTTACCGTTCTTGAAGGCAAAACCATGGGTACC
TTCTGGCGTGCCAGCATCCCGGGCATTGATGCCAAACGCAGTGCCGAACTTAAAGAAAAG
ATTCAGACCCAGCTGGACGCCGACGATCAGCTGCTTTCGACCTATAAAAAAGATTCCGCG
CTGATGCGCTTTAACGACTCGCAAAGTTTGTCGCCGTGGCCGGTAAGTGAAGCGATGGCC
GATATCGTCACCACCTCGCTGCGCATTGGCGCAAGGACCGATGGTGCGATGGATATAACC
GTCGGGCCGCTGGTGAATCTGTGGGGCTTTGGCCCGGAACAACAGCCGGTTCAAATTCCG
AGCCAGGAACAGATCGATGCGATGAAAGCCAAAACCGGCTTACAGCACCTGACGGTCATT
AATCAGTCGCATCAGCAATATCTGCAAAAAGACCTGCCGGATTTATATGTCGATCTCTCC
ACCGTCGGTGAAGGTTATGCGGCGGATCACCTGGCACGCTTGATGGAGCAGGAAGGGATT
TCCCGCTATCTGGTGTCGGTGGGCGGCGCGCTGAACAGCCGTGGTATGAACGGTGAAGGC
CTGCCGTGGCGGGTAGCGATTCAAAAACCAACCGATAAAGAAAACGCGGTTCAGGCTGTG
GTGGATATCAACGGTCATGGGATTAGCACCTCTGGCAGCTACCGTAACTATTACGAATTG
GACGGCAAACGTCTTTCCCATGTTATCGATCCGCAAACCGGGCGTCCCATCGAACACAAT
CTGGTATCCGTGACGGTGATTGCTCCGACGGCGCTGGAAGCCGATGCCTGGGATACTGGC
TTGATGGTACTCGGGCCGGAGAAAGCCAAAGAGGTTGTTCGCCGGGAAGGGCTGGCGGTT
TATATGATCACCAAAGAAGGCGATAGCTTTAAAACCTGGATGTCACCACAGTTTAAAAGC
TTCCTTGTCAGCGAAAAAAATTAAAGCGCAAGATTGTTGGTTTTTGCGTGATGGTGACCG
GGCAGACTAAAGGCTATCCTTAACCAGGGAGCTGATTATGAAAAACGCCACATGCTTAAC
TGACGATCAACGCTGGCAATCTGTCTTAGCCCGCGACCCGAATGCCGACGGCGAATTCGT
TTTCGCCGTGCGCACCACAGGCATCTTTTGCCGTCCGTCTTGCCGCGCCAGACATGCCTT
GCGGGAAAATGTCTCCTTCTACGCAAATGCCAGCGAGGCACTCGCCGCCGGATTTCGCCC
CTGCAAACGCTGCCAACCTGATAAAGCCAATGCCCAGCAACATCGGTTGGATAAAATCAC
CCACGCGTGTCGACTGCTGGAACAGGAAACGCCTGTAACGTTGGAAGCCTTAGCTGACCA
GGTGGCGATGAGTCCATTTCATCTACATCGGTTGTTTAAAGCGACTACCGGAATGACGCC
TAAAGCCTGGCAACAGGCCTGGCGCGCTCGCCGTTTGCGCGAATCGCTGGCGAAAGGGGA
GAGCGTGACGACGTCTATTCTTAACGCCGGATTCCCCGACAGCAGCAGTTACTACCGCAA
AGCTGACGAAACGCTGGGCATGACGGCTAAACAATTCCGTCACGGTGGCGAAAATCTGGC
GGTGCGTTACGCGCTGGCTGATTGTGAGCTGGGTCGTTGCCTGGTGGCAGAAAGCGAGCG
GGGGATTTGCGCGATATTGCTGGGCGATGATGACGCGACATTAATCAGCGAGTTGCAGCA
GATGTTTCCCGCTGCCGACAACGCGCCTGCCGATCTGATGTTTCAGCAACATGTGCGTGA
AGTGATCGCCAGCCTCAATCAACGCGATACGCCGCTGACGTTACCGCTGGATATTCGCGG
CACTGCTTTTCAGCAACAAGTCTGGCAGGCACTGCGCACGATACCTTGCGGTGAAACCGT
CAGTTATCAGCAACTGGCTAACGCCATCGGCAAACCGAAAGCGGTACGGGCCGTTGCAAG
TGCCTGTGCCGCCAACAAGCTGGCTATCGTTATACCCTGTCATCGGGTAGTACGCGGTGA
TGGATCGCTTTCAGGTTACCGCTGGGGCGCGTCGCGCAAAGCGCAACTGCTGCGCCGCGA
AGCTGAGAATGAGGAGAGGTAATGTTGGATCTGTTTGCCGATGCTGAACCGTGGCAAGAG
CCACTGGCGGCTGGTGCGGTAATTTTACGGCGTTTTGCTTTTAATGCTGCGGAGCAACTG
ATCCGCGATATTAATGACGTTGCCAGCCAGTCGCCGTTTCGCCAGATGGTCACCCCCGGG
GGATATACCATGTCGGTGGCGATGACCAACTGTGGGCATCTGGGCTGGACGACCCATCGG
CAAGGTTATCTCTATTCGCCCATTGATCCGCAAACAAATAAACCGTGGCCCGCCATGCCG
CAGAGTTTTCATAATTTATGTCAACGTGCGGCTACGGCGGCGGGCTATCCAGATTTCCAG
CCAGATGCTTGTCTTATCAACCGCTACGCTCCTGGCGCGAAACTGTCGCTGCATCAGGAT
AAAGACGAACCGGATCTGCGCGCGCCAATTGTTTCTGTTTCTCTGGGCTTACCCGCTATT
TTTCAATTTGGCGGCCTGAAACGAAATGATCCGCTAAAACGATTGTTGTTGGAACATGGC
GATGTGGTGGTATGGGGCGGTGAATCGCGGCTGTTTTATCACGGCATTCAACCGCTGAAA
GCGGGGTTTCATCCACTCACCGGCGACTGCCGTTACAACCTGACATTCCGTCAGGCAGGT
AAAAAAGAATAAAAATAAGAATTATTATTGCTGTGCGCGCGAAGATGTTTAAACTGCGGG
CTGTAATTCATTGTCCGGGTTTTCTGCATGGAACTTCTTGTACTTGTCTGGCGGCAGTAT
CGCTGGCCATTTATCAGTGTGATGGCGCTAAGCCTCGCCAGTGCGGCTTTAGGCATTGGC
TTAATTGCTTTTATCAATCAGCGCCTTATCGAAACGGCGGATACCAGTCTGCTGGTGTTG
CCGGAGTTTCTGGGATTATTGCTGCTGTTGATGGCAGTCACTCTCGGATCGCAACTGGCG
CTCACCACTTTGGGGCATCACTTCGTTTACCGACTGCGTAGTGAATTTATCAAGCGGATT
CTGGATACCCACGTCGAGCGCATTGAACAACTCGGTAGCGCCTCGTTGCTGGCGGGATTA
ACCAGCGATGTGCGCAATATCACCATTGCTTTTGTGCGTCTGCCGGAACTGGTGCAGGGG
ATCATTCTCACTATCGGTTCCGCGGCGTATCTGTGGATGCTGTCGGGCAAAATGTTGCTG
GTAACGGCTATCTGGATGGCAGTCACCATCTGGGGCGGTTTTGTGCTGGTGGCGCGGGTG
TACAAACATATGGCGACCCTGCGTGAAACCGAAGACAAGCTGTACACGGATTTTCAAACC
GTACTCGAAGGGCGCAAAGAGCTGACTCTGAACCGGGAACGCGCCGAGTATGTGTTTAAC
AACCTCTACATTCCTGATGCGCAAGAGTATCGCCATCATATTATTCGCGCAGACACCTTC
CATCTTAGTGCCGTGAACTGGTCAAACATCATGATGCTGGGCGCAATCGGTCTGGTGTTC
TGGATGGCGAACAGTCTCGGTTGGGCTGATACCAACGTTGCCGCGACCTATTCGTTGACG
TTGTTATTCCTGCGTACGCCGCTGCTTTCGGCGGTTGGCGCATTGCCGACGCTGCTGACG
GCGCAGGTGGCGTTTAACAAGCTGAACAAATTCGCGCTCGCGCCTTTCAAAGCAGAGTTT
CCGCGCCCGCAGGCGTTTCCCAACTGGCAAACGCTGGAGCTGCGTAACGTGATGTTTGCT
TATCAGGATAACGCGTTTTCCGTTGGTCCGATTAATCTCACCATCAAACGTGGCGAGCTG
CTGTTTCTGATTGGCGGCAACGGTAGCGGAAAATCGACGCTGGCGATGTTGTTGACGGGC
TTGTATCAGCCACAAAGCGGCGAAATCTTGCTGGATGGCAAACCTGTCAGCGGCGAACAA
CCGGAAGATTATCGCAAACTGTTTTCGGCAGTGTTTACCGATGTCTGGCTGTTTGATCAA
CTGCTGGGGCCGGAGGGTAAACCCGCTAACCCGCAACTGGTTGAGAAGTGGCTGGCGCAG
CTGAAAATGGCTCATAAGCTTGAGTTAAGCAACGGGCGTATTGTTAACCTGAAGTTATCA
AAAGGGCAGAAAAAACGCGTGGCGCTGTTGCTGGCGCTGGCAGAAGAACGCGATATTATC
CTGCTGGATGAATGGGCGGCGGATCAGGATCCACACTTCCGTCGTGAGTTTTATCAGGTG
TTGCTGCCGCTGATGCAGGAGATGGGTAAAACTATTTTCGCCATCAGTCATGATGATCAT
TACTTTATCCACGCCGACCGCCTGCTGGAGATGCGCAACGGGCAACTTAGCGAGCTGACG
GGCGAAGAGCGCGATGCCGCTTCGCGTGATGCCGTTGCCCGGACGGCATAATATTACGAC
GCTGACCTGGCGGACTGCTGCCGCCAGGTCAATATGCTAAAAATCCCTTCATTTCTAATA
ACCCTATAATTAATCAACGAAATTATAATGTTTCTAAAATTAGAATATAATTTATAAACA
TTATTTAAATGTTGTTACTTAAGTGTTACCGTTGATGCCGCGCAAATCTCACCTGCAATA
AAGCGACTAAAAGTAAGGCATTAACAAGATGAAAAAAGTGACTGCCATGCTCTTCTCGAT
GGCCGTGGGGCTTAATGCCGTTTCGATGGCGGCAAAAGCGAAAGCGTCCGAGGAGCAGGA
AACTGATGTACTGTTGATTGGCGGCGGCATTATGAGCGCCACGTTGGGGACCTATTTACG
CGAGCTGGAGCCTGAATGGTCGATGACCATGGTGGAGCGCCTGGAGGGTGTCGCGCAGGA
GAGTTCGAACGGCTGGAATAACGCCGGAACCGGGCATTCTGCACTGATGGAACTGAACTA
CACCCCGCAAAACGCCGATGGCAGCATCAGTATTGAAAAAGCAGTCGCCATTAACGAAGC
ATTTCAGATTTCCCGCCAGTTCTGGGCGCACCAGGTCGAGCGCGGCGTGCTGCGTACTCC
GCGTTCATTTATCAATACCGTTCCGCATATGAGCTTTGTCTGGGGCGAGGATAACGTTAA
TTTCCTGCGCGCCCGTTACGCCGCGTTGCAACAAAGCTCGCTGTTTCGCGGTATGCGTTA
CTCTGAAGATCACGCGCAGATCAAAGAGTGGGCACCGTTAGTGATGGAAGGGCGCGATCC
GCAACAGAAAGTGGCAGCCACGCGTACGGAAATTGGTACCGATGTGAACTACGGCGAGAT
CACCCGCCAGTTAATTGCTTCCTTGCAGAAGAAATCTAACTTCTCGCTGCAACTCAGCAG
CGAAGTCCGCGCCCTAAAGCGTAATGACGATAACACCTGGACCGTTACCGTTGCCGATCT
GAAAAATGGCACTGCACAGAACATCCGTGCGAAATTTGTCTTTATCGGCGCGGGCGGTGC
GGCACTGAAGCTGTTACAGGAATCGGGGATTCCGGAAGCGAAAGACTACGCCGGTTTCCC
GGTGGGCGGTCAGTTCCTTGTTTCGGAAAACCCGGACGTGGTTAATCACCATCTGGCGAA
GGTTTACGGTAAAGCATCCGTTGGCGCACCACCGATGTCGGTTCCGCATATCGATACCCG
TGTTCTGGACGGTAAACGCGTAGTGCTGTTTGGGCCATTTGCCACCTTCTCAACCAAATT
CCTCAAAAACGGTTCATTGTGGGATCTGATGAGTTCCACCACCACCTCTAACGTGATGCC
GATGATGCACGTCGGGCTGGATAATTTCGATCTGGTGAAATATCTGGTGAGTCAGGTGAT
GTTGAGTGAAGAGGATCGTTTTGAAGCGTTGAAAGAGTACTATCCGCAAGCGAAAAAAGA
GGACTGGCGTTTGTGGCAAGCGGGGCAGCGTGTGCAGATTATCAAGCGTGATGCCGATAA
AGGTGGTGTACTGCGTCTGGGTACTGAAGTGGTCAGTGACCAGCAAGGAACCATTGCCGC
GCTCCTGGGGGCATCGCCAGGGGCGTCAACCGCCGCGCCGATTATGTTGAATCTGCTGGA
AAAAGTATTTGGCGATCGCGTTTCCAGCCCGCAATGGCAGGCTACGTTGAAAGCGATCGT
TCCGTCTTATGGACGCAAGCTGAACGGTGATGTAGCGGCAACAGAACGCGAGTTGCAGTA
CACCAGCGAAGTGCTGGGGCTGAAATACGACAAACCGCAAGCAGCAGATAGTACGCCGAA
ACCGCAGCTGAAACCGCAACCCGTTCAAAAAGAAGTGGCGGATATTGCGTTGTAATGATG
TGCCACATCCGGCATGGTATGCCGGATGTGGCGTATGCTGATAAGACGCGCCAGCGTCGC
ATCAGGCAACCGGCTCGGGCGTTAGATGTTGGATGCGGCGTAACCGCCTTATCCAACCTA
CGGGGTGGAGCACTTCACAGCGGTGTAGGCCTGATAAGACGCGTCAGCGTCGCATCAGGC
AACCGGCTCGGACGTTGGATGTTGGATGCGGCGTAACCGCCTTATCCGACCTACGGGGTG
GAGCACTTCACAGCGGTGTAGGCCTGATAAGACGCGCCAGCGTCGCATCAGGCAACCGGC
TCGGGCGTTAGATGTCGGATGCGGCGTGACCGCTTTATCCAACCTACGGGGTGCCGCACT
TCACGGCAGTTTAGCGAACTACCGCGTTGTCAATCTTCTCTTCCGCCTTCCAGACGCGGT
ACTTCACATCTACATTGTCTGGCGTATACACCACGATCGGCAGCTTGCTGTTGTAACGCA
GCATTCCAGCATCACCCAGATACGCGGTGACAAATTTCTTCTCTTTTTTGCCATCCGGGC
AGGCCATCATCGTCGAAACCGGGGAACTGACTTTATCAAAGACATAATAATCATAGCCCC
AGCCTTCCAGCGTTTTGCTTTCCAGCTTCCCGCCGAGACGATGCAAATTGCAATCGACTT
CCAGCGTCTGACCGATTAACAGTTCTACTTTCAGGGTAGATTCCTCTTCTTGCGGGGTTA
ACTGAATCACCTGACGCTTCATGCCTTTTTCAGCTTGTGGATAAGGCGCGATTTTTTCCA
GTGGCTGGACGCTCTCTGCCGCCCAGGCGGAAGTGGTGGCGAAAGCGGCAAACAATACTG
CAGGTAGAATGGTCTTCATTTTTTGCTTTCCTTCTTCATTTATAGGTTTGCACCGATGAT
GTCGCTGAAGGTTAACATATTCATCAGATTTATTAATTTGCTTTATGAATAACTTAAAGA
ATATTCAGACAATTTTACCTGCTCTTTTAGTGTTAAATTCTGATGAGAGAGCAAACCAGC
AGAAATATCTCTGGTGAATTAATCGCTATATAAATATATTTATAACCATTTGAAATGTGA
GCAAAAGCCCGTTTTTGCCACGCTTCCCGCCACTCTTTTGATCCTGCTACAGGTTTTACC
TCGATCGGGGTATGCATCTTTGACACATCCTTTAATATCTTAGCGGCTATAAAAATGGCT
TATTAATTATGCGGTTTATTTGGTCGCTCTCAATTTTCAGAGCGCGTTAATGATGGAAGG
TCAATGTGAAGATTGATGCATCCCGTCGGGGCATACTCACTGGTCGCTGGCGCAAAGCCA
GTAACGGTATCCGTCCGCCCTGGTCCGGTGATGAATCTCATTTTCTGACCCATTGCACCC
GCTGCGACGCTTGTATTAATGCTTGTGAAAACAACATTCTGCAACGCGGCGCGGGCGGCT
ATCCGAGCGTTAATTTCAAAAATAACGAGTGCAGCTTCTGTTACGCCTGCGCGCAGGCTT
GCCCCGAATCGCTATTTTCTCCGCGCCACACCAGGGCCTGGGATTTGCAGTTCACCATTG
GGGACGCGTGCCTGGCGTATCTGTCAGTTGAATGCCGCCGCTGTCAGGATAGCTGTGAGC
CAATGGCAATTATCTTTCGCCCGACGCTCTCCGGGATCTACCAGCCGCAACTTAATAGCC
AACTTTGCAACGGATGTGGAGCATGTGCAGCCAGCTGTCCGGTATCAGCCATAACTGCGG
AGTATCTCCATGCACACTAACTGGCAAGTTTGCAGCCTGGTCGTGCAGGCCAAAAGCGAA
CGAATTTCAGACATCAGCACCCAACTGAACGCCTTTCCCGGCTGTGAAGTTGCTGTCAGC
GACGCGCCGAGCGGTCAGTTGATTGTGGTGGTGGAAGCAGAAGACAGCGAAACGCTGATC
CAAACCATTGAGTCAGTACGCAACGTAGAGGGCGTGCTGGCGGTGTCGCTGGTTTATCAC
CAGCAGGAAGAGCAAGGTGAGGAAACACCATGAAACTCAGTCGTCGTAGCTTTATGAAAG
CTAACGCCGTTGCGGCCGCTGCGGCGGCTGCCGGTCTCAGCGTGCCGGGCGTTGCCCGCG
CCGTTGTTGGTCAGCAGGAAGCCATCAAATGGGATAAAGCGCCGTGCCGTTTCTGCGGTA
CTGGTTGCGGCGTTCTGGTCGGAACGCAGCAGGGGCGTGTGGTGGCCTGTCAGGGCGACC
CGGACGCACCGGTTAACCGTGGCCTGAACTGCATTAAGGGCTATTTCCTGCCCAAGATCA
TGTACGGTAAAGACCGTTTGACGCAGCCGCTGCTGCGTATGAAAAACGGTAAATATGACA
AAGAAGGCGAATTTACCCCAATCACCTGGGATCAGGCCTTCGATGTGATGGAAGAGAAAT
TCAAAACCGCCCTGAAAGAAAAAGGGCCGGAATCGATCGGTATGTTCGGTTCTGGTCAGT
GGACTATCTGGGAAGGTTATGCCGCGTCCAAGCTGTTTAAAGCGGGCTTCCGTTCGAACA
ACATCGACCCGAACGCGCGTCACTGTATGGCGTCGGCAGTAGTTGGCTTTATGCGTACCT
TTGGTATGGATGAGCCGATGGGCTGCTATGACGACATCGAGCAGGCTGACGCGTTTGTGC
TGTGGGGCGCAAACATGGCGGAAATGCACCCGATCCTCTGGTCGCGCATCACTAACCGTC
GTCTCTCTAACCAGAACGTCACCGTGGCGGTGCTTTCTACCTACCAGCATCGTAGCTTCG
AGCTGGCGGATAACGGCATCATCTTTACTCCGCAATCTGACCTGGTGATCCTGAACTACA
TCGCCAACTATATCATTCAAAACAATGCGATAAATCAGGACTTCTTCAGCAAGCACGTCA
ACCTGCGCAAAGGTGCGACGGACATCGGCTACGGTTTACGTCCGACCCATCCGCTGGAAA
AAGCAGCGAAGAATCCGGGTTCTGATGCTTCCGAACCGATGAGCTTTGAAGATTACAAAG
CCTTCGTTGCTGAGTATACGCTGGAAAAAACCGCTGAAATGACCGGCGTGCCGAAAGACC
AGTTAGAACAACTGGCGCAGCTGTATGCCGATCCGAACAAGAAAGTCATCTCCTACTGGA
CGATGGGCTTCAACCAGCATACCCGTGGTGTGTGGGCCAACAACCTGGTCTACAACCTGC
ACCTGCTGACCGGCAAAATTTCCCAGCCGGGTTGCGGTCCGTTCTCCCTGACCGGGCAGC
CTTCCGCGTGTGGTACTGCGCGTGAAGTGGGCACCTTTGCCCACCGTCTGCCTGCGGACA
TGGTGGTGACTAACGAGAAACACCGTGATATCTGCGAGAAGAAGTGGAATATCCCGAGCG
GCACCATTCCGGCGAAAATCGGTCTGCACGCGGTGGCACAAGACCGTGCGCTGAAAGACG
GCAAGCTGAATGTTTACTGGACTATGTGTACCAACAACATGCAGGCCGGGCCGAACATCA
ATGAAGAGCGTATGCCGGGCTGGCGCGATCCGCGCAACTTCATCATCGTCTCCGATCCGT
ATCCGACAGTCAGTGCGCTGGCCGCCGACTTGATCCTGCCGACCGCAATGTGGGTAGAGA
AAGAGGGCGCTTACGGTAACGCCGAACGCCGTACTCAGTTCTGGCGTCAGCAGGTACAGG
CACCGGGTGAAGCGAAATCGGATCTCTGGCAGTTAGTCCAGTTCTCCCGCCGCTTCAAAA
CTGAAGAAGTATGGCCGGAAGAGCTGCTGGCGAAGAAACCGGAACTGCGTGGCAAAACGC
TGTACGAAGTTCTGTATGCCACCCCCGAAGTGAGCAAATTCCCGGTATCCGAACTGGCGG
AAGATCAGCTGAACGATGAATCCCGCGAGCTGGGCTTCTATCTGCAAAAAGGGTTGTTCG
AAGAGTACGCATGGTTTGGTCGCGGTCACGGTCACGATCTCGCGCCGTTCGATGACTACC
ACAAAGCGCGCGGTCTGCGCTGGCCGGTGGTGAACGGTAAAGAAACGCAGTGGCGTTACA
GCGAAGGTAACGACCCGTACGTGAAAGCGGGCGAAGGCTATAAGTTCTACGGTAAACCGG
ATGGTAAAGCGGTGATCTTCGCGCTGCCGTTCGAACCGGCGGCGGAAGCACCGGATGAAG
AGTACGACCTGTGGCTCTCTACCGGACGCGTCCTGGAGCACTGGCACACCGGCAGTATGA
CTCGCCGTGTGCCGGAACTGCACCGTGCCTTCCCGGAAGCGGTCCTGTTTATTCACCCGT
TGGATGCGAAAGCGCGCGATCTGCGCCGTGGCGACAAAGTGAAAGTGGTTTCTCGCCGTG
GCGAAGTGATCTCGATTGTCGAAACGCGCGGTCGTAACCGTCCGCCGCAGGGCCTGGTGT
ACATGCCGTTCTTCGACGCCGCACAGCTGGTTAACAAACTAACGCTGGACGCGACCGATC
CGCTCTCGAAAGAGACGGACTTCAAGAAGTGCGCGGTCAAACTGGAGAAGGTGTAAGCCA
TTATGTCCCGGTCAGCGAAACCTCAAAATGGTCGCCGCCGCTTTCTGCGCGATGTCGTTC
GCACAGCAGGCGGGCTGGCTGCCGTGGGTGTGGCGCTGGGGTTACAACAGCAAACCGCAC
GCGCATCTGGCGTGCGGTTGCGCCCGCCCGGAGCCATAAACGAGAACGCCTTTGCCAGTG
CCTGTGTGCGTTGCGGTCAGTGTGTTCAGGCTTGCCCTTACGACACCTTAAAACTGGCGA
CGCTGGCCTCTGGCCTGTCGGCGGGCACGCCATATTTTGTCGCACGGGATATTCCTTGCG
AAATGTGTGAGGACATTCCGTGCGCCAAAGTGTGCCCGAGCGGTGCGCTGGATCGTGAGA
TTGAATCGATCGACGACGCGCGGATGGGGCTGGCGGTACTGGTGGACCAGGAAAACTGTC
TCAACTTTCAGGGGCTGCGCTGCGATGTTTGTTATCGCGAATGCCCGAAAATTGATGAGG
CCATCACCCTGGAGCTGGAGCGCAACACGCGTACCGGTAAGCACGCCCGCTTTCTGCCGA
CGGTTCACAGCGACGCCTGTACCGGTTGCGGTAAGTGCGAAAAAGTGTGCGTGCTGGAAC
AACCGGCAATCAAGGTGTTACCGCTGTCACTGGCGAAAGGGGAGTTAGGTCACCATTACC
GCTTCGGCTGGCTGGAGGGGAACAATGGCAAATCGTAAACGTGACGCCGGGCGCGAGGCG
CTGGAGAAAAAAGGCTGGTGGCGCAGTCACCGTTGGCTGGTGTTACGTCGCCTTTGTCAG
TTCTTCGTGCTGGGGATGTTTTTGAGCGGTCCGTGGTTTGGTGTGTGGATCTTGCACGGC
AACTACAGCAGTAGCCTGTTATTCGACACCGTTCCGCTGACCGATCCGCTGATGACGCTG
CAAAGTCTTGCCAGCGGTCATCTGCCTGCCACGGTGGCGTTGACCGGTGCGGTGATTATC
ACCGTGCTCTACGCTCTGGCAGGAAAGCGATTATTTTGCAGCTGGGTCTGCCCGCTGAAC
CCGATTACCGACTTAGCGAACTGGTTACGCAGGCGCTTTGACCTCAATCAGTCTGCGACG
ATCCCTCGCCACATTCGCTACGTACTGTTGGTGGTCATTCTGCTGGGATCGGCCTTAACT
GGCACGCTCATCTGGGAATGGATCAACCCCGTTTCTCTGATGGGGCGTAGCCTGGTAATG
GGCTTCGGCAGCGGCGCGCTGCTTATTGTCGCGCTGTTTTTATTTGATCTACTGGTCGTT
GAACACGGCTGGTGCGGGCACATTTGTCCGGTTGGCGCGCTGTATGGCGTGCTGGGTAGC
AAAGGTGTGATTACCGTTGCGGCCAGCGATCGGCAGAAATGTAACCGCTGTATGGATTGT
TTTCATGTTTGCCCGGAACCGCATGTGCTACGTGCCCCGGTGCTGGATGAACAAAGCCCG
GTGCAGGTCACCAGCCGCGATTGCATGACGTGCGGTCGCTGCGTGGATGTCTGTTCTGAG
GATGTATTTACAATAACTACACGATGGAGTTCGGGAGCGAAATCATGAAAAGCCATGACC
TGAAGAAAGCGCTGTGTCAATGGACGGCGATGCTGGCCCTGGTGGTAAGCGGCGCGGTTT
GGGCGGCTAATGGCGTCGATTTTAGCCAGTCGCCGGAAGTATCCGGGACGCAGGAAGGGG
CCATTCGGATGCCAAAAGAGCAGGATCGGATGCCGCTGAACTATGTGAATCAGCCGCCAA
TGATCCCGCATAGCGTTGAAGGTTATCAGGTAACGACCAATACCAACCGCTGCTTGCAGT
GCCACGGTGTCGAAAGCTATCGCACCACTGGCGCGCCGCGTATCAGTCCTACTCACTTTA
TGGACAGCGACGGCAAAGTGGGCGCGGAAGTGGCTCCGCGTCGTTATTTCTGTCTGCAAT
GTCACGTACCGCAGGCCGATACCGCGCCAATCGTGGGGAATACCTTTACCCCATCAAAAG
GTTACGGGAAATAAGAGGTTATTATGGGAAATTCTGACCGTAAGCCTGGTCTGATTAAGC
GCCTGTGGAAATGGTGGCGTACCCCCAGCCGTCTGGCGCTGGGGACGCTGCTGTTGATCG
GTTTTGTCGGCGGCATCGTCTTCTGGGGCGGCTTTAACACCGGAATGGAAAAAGCCAATA
CCGAGGAGTTCTGCATTAGCTGCCACGAAATGCGTAACACGGTGTATCAGGAATACATGG
ATTCCGTGCACTACAACAACCGTAGCGGCGTCCGTGCGACCTGTCCGGATTGTCACGTTC
CGCACGAGTTTGTGCCGAAGATGATACGCAAGCTCAAAGCAAGTAAAGAGCTGTATGGTA
AAATTTTTGGCGTTATTGACACGCCGCAGAAATTTGAAGCTCATCGCCTGACGATGGCAC
AGAATGAGTGGCGGCGCATGAAGGACAATAACTCGCAGGAGTGCCGTAACTGTCACAACT
TCGAGTATATGGATACAACCGCCCAGAAATCGGTTGCCGCGAAGATGCATGACCAGGCGG
TGAAAGATGGGCAAACCTGTATTGATTGCCATAAAGGGATAGCGCACAAGCTGCCCGATA
TGCGTGAAGTCGAGCCAGGTTTTTAACAGGGTTATTGCGTGGGTATGCTTGAAGCCAGAG
AGTTACTTTGTGAGCGGGATGAACGAACCTTATTTAGTGGCTTGTCATTTACGCTGAACG
CAGGAGAGTGGGTACAAATCACCGGTAGCAACGGCGCGGGGAAGACAACGCTTCTCCGTT
TGCTGACGGGGTTGTCTCGCCCTGACGCAGGCGAGGTTCTCTGGCAAGGGCAGCCCTTGC
ATCAGGTACGCGACAGCTACCATCAAAACCTGTTATGGATAGGCCATCAGCCGGGGATCA
AAACCCGGCTGACGGCGTTAGAAAATCTGCACTTTTATCATCGCGATGGCGATACCGCAC
AATGTCTGGAAGCCCTGGCGCAGGCCGGGCTTGCCGGATTCGAAGATATTCCGGTAAATC
AACTTTCTGCCGGGCAACAACGCCGCGTCGCTTTAGCGCGTCTGTGGCTGACCCGTGCCA
CGTTATGGATCCTCGACGAGCCTTTTACCGCGATTGACGTCAACGGCGTCGATCGTCTGA
CCCAGCGTATGGCGCAGCATACGGAGCAGGGGGGGATTGTGATTCTGACTACCCACCAGC
CGCTCAACGTTGCTGAAAGTAAAATTCGCCGCATTTCACTGACGCAAACGAGGGCCGTAT
GATGTTCTGGCGCATTTTCCGTCTTGAGCTGCGCGTAGCGTTTCGCCATAGCGCCGAAAT
CGCCAACCCGCTGTGGTTCTTCCTGATTGTAATTACCCTTTTTCCGCTCAGTATCGGTCC
GGAGCCGCAACTGCTGGCGCGTATTGCACCGGGCATTATCTGGGTTGCAGCCCTGCTTTC
ATCCTTGCTGGCGCTGGAACGACTGTTCCGTGACGATTTGCAGGACGGCAGTCTTGAACA
ATTGATGTTGTTGCCGTTACCCTTGCCCGCCGTTGTGCTGGCGAAGGTGATGGCGCACTG
GATGGTAACCGGTCTGCCGTTACTCATCCTTTCGCCACTGGTAGCAATGCTACTGGGAAT
GGATGTTTATGGCTGGCAAGTGATGGCGCTGACGCTGCTGCTGGGAACGCCTACGCTTGG
CTTTCTCGGTGCACCGGGCGTGGCGCTGACAGTGGGACTTAAACGCGGTGGTGTGCTGCT
CAGCATACTGGTGTTACCGCTGACTATCCCATTACTCATCTTTGCCACCGCCGCGATGGA
CGCGGCTTCCATGCATTTGCCCGTTGACGGGTATCTGGCAATTTTAGGCGCGTTGCTGGC
AGGCACCGCGACATTAAGTCCTTTTGCGACGGCGGCAGCGTTACGAATCAGCATTCAATA
ACGCTGGATTACTGATTTTTGTTCGAGTCTGGTATCGAAACTATGTGGAAAACACTGCAT
CAACTGGCGATCCCACCACGGCTGTATCAAATCTGTGGCTGGTTTATACCGTGGCTGGCA
ATTGCCAGTGTGGTCGTGCTTACCGTCGGCTGGATCTGGGGATTCGGCTTTGCTCCGGCT
GATTATCAACAGGGAAATAGCTACCGCATTATTTACCTGCATGTGCCTGCGGCGATCTGG
TCGATGGGCATTTATGCATCAATGGCGGTGGCGGCGTTTATTGGCCTTGTCTGGCAGATG
AAAATGGCCAACCTGGCGGTGGCGGCGATGGCCCCCATTGGTGCCGTGTTTACCTTTATT
GCCCTGGTTACCGGCTCTGCATGGGGAAAACCGATGTGGGGCACCTGGTGGGTATGGGAT
GCACGTCTGACTTCTGAACTGGTGCTGCTGTTTTTGTATGTGGGTGTGATTGCCCTGTGG
CACGCCTTCGACGACCGCCGTCTGGCGGGCCGTGCGGCAGGTATCCTGGTGCTGATTGGC
GTGGTGAATCTGCCGATTATTCATTACTCCGTTGAGTGGTGGAACACCCTGCATCAGGGA
TCAACGCGGATGCAGCAAAGTATCGATCCGGCGATGCGTTCGCCGCTGCGCTGGTCGATT
TTTGGCTTCCTGCTCCTGTCTGCCACGCTGACGCTGATGCGGATGCGGAATTTGATTTTG
CTGATGGAAAAACGCCGTCCGTGGGTGAGTGAACTGATACTGAAAAGAGGCCGTAAATGA
CCCCTGCATTTGCTTCCTGGAATGAATTTTTCGCAATGGGCGGTTACGCCTTTTTTGTCT
GGCTGGCGGTGGTGATGACCGTTATTCCGCTGGTGGTTTTGGTCGTGCACTCGGTGATGC
AGCATCGCGCAATTCTGCGTGGTGTGGCGCAACAGCGGGCGCGTGAGGCGCGTTTACGTG
CTGCGCAACAGCAGGAGGCTGCATGAATATTCGCCGTAAAAACCGCTTGTGGATTGCCTG
TGCCGTGTTGGCAGGGCTGGCGCTGACTATCGGTCTGGTGCTATATGCGCTGCGCTCGAA
TATCGATCTCTTTTATACGCCGGGGGAAATTCTCTACGGCAAGCGTGAAACTCAGCAGAT
GCCGGAAGTCGGTCAGCGTCTGCGCGTTGGCGGGATGGTGATGCCGGGTAGCGTGCAGCG
CGATCCCAATTCGCTGAAAGTGACCTTCACCATTTACGATGCTGAAGGCTCAGTGGATGT
CTCTTACGAAGGCATTTTGCCGGATCTGTTCCGTGAAGGGCAGGGCGTTGTGGTGCAGGG
CGAGCTGGAAAAAGGCAATCATATCCTCGCAAAAGAAGTGCTGGCGAAACATGATGAAAA
CTACACGCCGCCAGAAGTTGAGAAAGCGATGGAAGCTAACCACCGTCGCCCGGCGAGTGT
TTATAAGGACCCAGCATCATGATGCCGGAAATTGGTAACGGGCTGCTGTGCCTGGCGTTA
GGGATTGCGCTGCTGCTGTCCGTGTATCCGCTATGGGGCGTGGCGCGCGGAGATGCGCGC
ATGATGGCGTCTTCCCGCTTGTTTGCCTGGCTGCTGTTTATGTCTGTGGCTGGCGCATTT
CTGGTGCTGGTCAATGCTTTCGTGGTCAACGACTTTACCGTCACCTATGTTGCCAGCAAC
TCCAATACCCAGCTTCCGGTGTGGTATCGCGTGGCGGCTACCTGGGGCGCACATGAAGGC
TCACTGCTGCTGTGGGTGCTGCTGATGAGCGGCTGGACCTTTGCGGTGGCGATTTTTAGT
CAGCGTATTCCGCTGGATATTGTGGCCCGCGTACTGGCGATAATGGGGATGGTCAGCGTC
GGCTTTTTGCTGTTCATTCTCTTTACCTCTAACCCATTCTCACGCACGCTGCCGAACTTC
CCGATTGAAGGGCGCGATCTTAACCCGCTGTTACAGGATCCGGGGCTGATCTTCCATCCG
CCTCTGCTTTATATGGGGTACGTGGGTTTCTCGGTGGCGTTTGCTTTTGCCATTGCTTCT
TTGCTGAGCGGGCGTCTGGACAGCACTTATGCGCGTTTTACTCGTCCGTGGACGCTGGCG
GCGTGGATTTTCCTGACGCTCGGCATTGTGCTCGGTTCCGCATGGGCCTATTACGAACTC
GGCTGGGGTGGCTGGTGGTTCTGGGATCCGGTAGAAAACGCCTCGTTTATGCCGTGGCTG
GTGGGGACTGCGCTGATGCACTCACTGGCGGTCACTGAACAACGCGCCAGCTTCAAAGCG
TGGACATTACTGCTGGCAATCAGTGCCTTCTCGTTGTGTCTGTTGGGGACTTTCCTCGTG
CGTTCCGGCGTGCTGGTATCGGTACACGCGTTTGCGTCTGATCCGGCGCGCGGTATGTTT
ATCCTCGCCTTTATGGTGCTGGTGATTGGCGGTTCGCTGCTGCTGTTTGCCGCGCGTGGA
CACAAAGTTCGCTCACGCGTAAACAATGCGCTGTGGTCGCGGGAATCTTTGCTGTTAGCG
AACAACGTTTTGCTGGTCGCCGCGATGCTGGTAGTGTTGCTGGGGACGCTGCTGCCGCTG
GTGCACAAGCAACTGGGACTGGGCAGTATTTCGATTGGCGAACCGTTCTTCAACACCATG
TTTACCTGGCTGATGGTGCCGTTTGCGCTACTGCTTGGTGTCGGTCCTCTGGTGCGCTGG
GGGCGCGATCGCCCACGTAAAATCCGCAATTTATTGATTATCGCCTTCATCTCTACGCTG
GTGCTGTCTCTGCTGCTGCCGTGGCTGTTCGAAAGCAAAGTTGTGGCGATGACGGTGCTC
GGCCTGGCAATGGCCTGCTGGATTGCGGTGCTGGCAATTGCGGAAGCTGTGCTGCGTATT
TCACGCGGCACGAAAACCACCTTCAGTTATTGGGGGATGGTGGCGGCTCACCTGGGGCTG
GCAGTGACAATTGTTGGCATTGCCTTTAGTCAGAACTACAGTGTTGAGCGTGATGTGCGC
ATGAAGTCCGGCGATAGCGTCGATATTCATGAATATCGCTTCACCTTCCGTGATGTCAAA
GAGGTGACTGGCCCGAACTGGCGTGGCGGTGTGGCGACTATCGGCGTAACGCGAGAGGGT
AAACCGGAAACAGTGCTGTATGCGGAAAAACGTTATTACAACACTGCCGGGTCGATGATG
ACCGAAGCGGCGATTGACGGTGGCATCACGCGTGACCTGTACGCCGCGCTCGGTGAAGAG
CTGGAAAACGGCGCGTGGGCTGTGCGTCTTTACTACAAACCGTTTGTTCGCTGGATTTGG
GCGGGCGGGCTGATGATGGCGTTGGGCGGACTGCTGTGTCTGTTTGATCCTCGCTATCGT
AAGCGCGTAAGTCCGCAAAAAACTGCGCCGGAGGCTGTATGAAGCGCAAAGTATTGTTAA
TTCCGTTGATTATCTTCCTGGCGATTGCCGCGGCGCTGCTGTGGCAGCTGGCGCGTAATG
CCGAAGGGGATGATCCGACCAATCTGGAATCGGCGCTCATTGGCAAGCCAGTGCCGAAGT
TTCGCCTCGAATCACTGGACAATCCGGGGCAGTTTTATCAGGCGGATGTGCTGACTCAGG
GCAAACCAGTGCTGCTTAACGTCTGGGCGACCTGGTGTCCGACCTGCCGTGCGGAACATC
AATATCTGAATCAGCTTTCTGCGCAGGGCATCCGCGTGGTCGGCATGAACTATAAAGACG
ATCGCCAGAAGGCAATCAGCTGGCTGAAAGAGCTGGGCAATCCTTACGCGCTAAGCCTGT
TTGATGGCGATGGCATGTTAGGGCTGGATCTCGGTGTCTATGGCGCGCCAGAAACGTTCC
TTATTGACGGCAACGGCATCATTCGCTATCGCCATGCGGGCGATCTCAATCCTCGCGTCT
GGGAGGAAGAGATCAAGCCGCTGTGGGAGAAATACAGTAAGGAGGCCGCACAATGAGGTT
TTTATTGGGCGTGCTGATGCTGATGATCTCCGGCTCAGCGCTGGCGACCATCGACGTGTT
GCAGTTTAAAGATGAAGCACAGGAACAACAGTTCCGTCAGCTCACTGAAGAACTGCGCTG
CCCGAAATGCCAGAACAACAGCATTGCCGATTCCAACTCGATGATTGCCACCGACCTGCG
TCAGAAAGTGTATGAACTGATGCAGGAAGGTAAAAGTAAAAAAGAGATTGTCGATTATAT
GGTGGCACGTTACGGCAACTTCGTCACTTACGATCCGCCGTTAACGCCGCTGACCGTGCT
GCTGTGGGTGCTGCCAGTAGTGGCTATTGGCATTGGCGGTTGGGTCATATACGCCCGCTC
GCGGCGTCGGGTACGCGTGGTGCCGGAAGCGTTTCCTGAACAAAGCGTGCCGGAAGGTAA
GCGTGCCGGATATGTTGTTTATCTGCCGGGTATTGTGGTGGCGTTAATTGTGGCTGGCGT
CAGCTACTACCAGACTGGCAATTATCAGCAGGTGAAAATCTGGCAGCAGGCCACGGCACA
GGCTCCGGCGTTGCTGGACAGGGCGCTGGATCCGAAAGCCGATCCGCTCAACGAAGAAGA
GATGTCGCGTCTTGCGCTGGGGATGCGTACTCAACTGCAAAAAAATCCGGGAGATATAGA
AGGCTGGATTATGTTGGGCCGCGTTGGCATGGCGCTGGGTAACGCCAGTATCGCCACCGA
TGCATACGCCACTGCGTATCGCCTCGATCCGAAGAATAGCGATGCCGCACTGGGATACGC
TGAAGCGTTGACACGTTCATCTGATCCCAACGACAACCGCCTCGGCGGCGAACTGCTGCG
CCAGTTGGTGAGAAGCGACCACAGCAATATCCGTGTGTTAAGCATGTATGCGTTTAATGC
CTTTGAGCAGCAGCGATTTGGCGAAGCCGTTGCCGCGTGGGAGATGATGTTGAAACTCTT
ACCTGCCAACGATACTCGCCGTGCGGTGATTGAACGTAGTATCGCGCAGGCGATGCAACA
TTTGTCGCCGCAGGAGAGTAAATAAAAAGTGGCCCGATGGTGATGCCATCAGGCCAGACT
GATGACAAAGTGCGCTTAGTTTATGCCGGATGCGGCGTGAACGCCTTATCCGGCCTACAA
AATCGTGTGAATTCAATAAATTGATCGATCCGCGTAGGCCTGATAAGCGTAGCGCATCAG
GCAGTTTTGCGTTTGTCATAAATCTCAGCCCGATGATAAATCCATCGGGCTATTTTTATT
GTGCCCCGCGTTGTTGCAGGAACAGAATGGTGGCCGCCACGCGTGAGCGGACATTGAGTT
TACGCAGCAGATTGCGAATATGTACTTTTACTGTCTGCTCGGAAATATTCAATACCGAGG
CAATCTGTTTATTTGACAGCCCCTGTGCCAGCTCGTGCAGAACATCCAGCTCGCGCTCCG
TCAGCACGCTGAAGGGATCTTCTTCCGCGCCAAACATTTCACGTTCACGTAAGTACTGAT
TGACGCGTTCGCTAAAGACTTTGCTGCCTTTCGCTCCGGCACGAATCGCTTCCAGCAATA
CTTCCGGGTCACTGTCTTTCAACAGATAACCGTCTGCGCCTGCGTCTATCAGCGCAAAGA
CATCGCTGGAGGCATCGGATACGGTCAGGATAATAATTTGCGCGGTAACGCCATCCCTGC
GCAAGGCATTGAGGGTATCCAGGCCACTCATACCTTTCATATTGAGATCCAGCAAGATCA
CGTCGATATCCAGTCTATTCGCCAGATCGATAGCGCTCGCGCCGTCGCCCGCTTCGGCGA
CCACTTCAAAGCCAGGATCAAGCTCCAGTAACTGACGAACACCGCGTCGCATAAGTGGAT
GATCATCCACAATCATCACCTGAAAAGGCGTTGCTTCAGGCATAGTAGTCTCCTGAGGTT
TTATTAGAATCATTATGTTTGAGCGTAGCGTTGGTAACGCTACCAGGCGCGTGAATGTTA
CCCCATTTTATGTATGGACATGTAGTGAAAACTACAACCTTGTCCTTCGCTTTGGCATCA
TTTTCATTATAAAGACGGAATTTTGCATCAGCTTCTCATCAAGAAAAACAACTAAAAAAT
CAATCACAATACTTGTGCATTTCTTTAAACAGTTTTTAAAAACTGACTCCGGGTATGGAG
CTATGGGTATTTTCTGTACCCAATGCTTTTAACAGCAATTAATTTCATAGGATGAAAGCT
CAATGCATCAATCTGGTTCTGTTTCTCTTTGTCGTTCCGCAATATCTGTTCTGGTGGCTA
CAGCGTTATATTCACCCATAGCATTGGCATCAACAGTTGAGTATGGTGAGACAGTTGATG
GTGTTGTCCTGGAAAAAGATATCCAGCTGGTTTATGGGATCGCCAATAATACGAAAATCA
ATCCTGGCGGAGAACAGCATATTAAAGAATTTGGTGTAAGTAATAATACTGAAATTAACG
GAGGGTATCAGTACATTGAAATGAATGGCGCCGCAGAATACTCAGTATTAAATGACGGTT
ATCAAATTGTTCAAATGGGTGGCGCGGCAAACCAGACTACGCTCAATAATGGTGTGCTAC
AGGTTTATGGCGCAGCGAATGATCCCACGATTAAAGGCGGGCGCTTAATCGTTGAAAAAG
ATGGGGGGGCCGTCTTTGTCGCTATCGAAAAGGGAGGACTACTGGAGGTTAAAGAGGGGG
GATTTGCATTTGCGGTAGATCAGAAAGCAGGCGGTGCTATTAAAACAACCACTCGGGCCA
TGGAGGTATTCGGAACAAACCGTCTCGGTCAGTTCGATATCAAGAATGGTATTGCTAATA
ATATGTTGTTGGAAAACGGCGGAAGTTTGCGAGTTGAAGAAAATGACTTCGCTTATAATA
CCACTGTGGATAGTGGCGGCTTACTGGAGGTTATGGATGGCGGGACTGCAACTGGCGTTG
ATAAAAAAGCAGGCGGGAAATTAATTGTCTCAACGAATGCGCTGGAAGTGAGTGGTACAA
ACAGTAAAGGCCAATTTAGTATAAAAGATGGTGTGTCAAAAAATTATGAACTGGATGATG
GTTCCGGGCTCATTGTTATGGAGGACACGCAGGCCATTGACACTATCCTTGATGAGCATG
CCACTATGCAATCGCTGGGAAAGGATACTGGTACGAAAGTGCAGGCAAATGCGGTATATG
ATCTCGGTCGATCAGACCAGAATGGAAGTATCACGTATTCCTCAAAAGCCATCTCTGAAA
ATATGGTAATCAACAATGGCCGCGCTAATGTCTGGGCTGGCACAATGGTTAACGTGTCAG
TCAGAGGGAATGATGGCATTCTTGAGGTCATGAAGCCGCAAATAAATTATGCACCTGCTA
TGTTGGTGGGTAAGGTAGTGGTTTCTGAGGGCGCTTCTTTTAGAACGCATGGTGCCGTGG
ATACCAGCAAAGCGGACGTTTCGCTCGAAAATAGCGCATGGACCATCATTGCCGATATCA
CTACGACGAACCAAAACACCCGCCTCAACTTAGCCAACCTTGTGATGTCTGGCGCAAATG
TGATTATGATGGCTGAGACAGTGACTCGTTCATCTGTGACAGCAAGTGCGGAAAATTTCA
TAACGTTGACCACCAATACCCTGTCGGGAAACGGCAATTTTTATATGCGTACCGATATGG
CCAATCATCAGAGCGATCAGCTTAACGTCACTGGCCAGGCAACAGGTGATTTCAAAATAT
TTGTGACGGACACGGGGGCCAGCCCGGCAGCAGGTGATAGCCTTACACTGGTAACAACGG
GCGGCGGTGATGCTGCATTTACGTTGGGCAATGCCGGAGGCGTTGTTGATATCGGTACGT
ATGAATATACCTTGCTGGATAATGGCAACCATAGCTGGAGCCTCGCAGAGAATCGCGCGC
AAATTACCCCTTCAACCACTGATGTGCTGAACATGGCAGCAGCACAACCGCTGGTATTTG
ATGCAGAACTGGACACCGTGCGTGAGCGTCTTGGTAGCGTAAAAGGCGTTAATTACGATA
CGGCGATGTGGAGTTCGGCAATTAACACCCGCAACAACGTGACCACTGATGCGGGAGCTG
GCTTTGAGCAAACATTGACGGGGCTGACGCTCGGTATCGATAGCCGTTTCTCCCGTGAAG
AAAGCAGCACAATTCGCGGCTTGTTCTTTGGTTACTCTCATTCTGATATTGGTTTTGATC
GCGGCGGCAAAGGTAATGTCGATAGCTATACCCTGGGGGCTTATGCCGGTTGGGAGCATC
AGAACGGTGCCTATGTTGATGGAGTGGTGAAAGTTGATCGTTTTGCCAACACCATCCATG
GCAAGATGAGTAATGGGGCAACAGCGTTTGGCGATTACAGTAGTAACGGCGCGGGTGCTC
ATGTCGAGAGCGGGTTCCGTTGGGTTGACGGATTGTGGAGTGTTAGACCCTATCTGGCCT
TTACCGGCTTTACCACAGATGGTCAGGACTACACGTTATCAAACGGCATGCGCGCTGATG
TGGGAAATACCCGGATATTACGCGCTGAAGCGGGAACGGCGGTAAGCTATCACATGGACC
TGCAAAATGGTACGACGCTGGAACCCTGGCTGAAAGCCGCCGTACGTCAGGAATACGCCG
ATTCTAACCAGGTGAAAGTTAATGACGATGGCAAATTTAATAATGATGTGGCTGGAACCC
GTGGCGTTTATCAGGCTGGGATAAGGTCATCGTTTACCCCGACGTTAAGCGGTCATTTGT
CAGTCAGCTATGGCAATGGCGCAGGGGTAGAATCGCCGTGGAATACTCAGGCGGGAGTGG
TCTGGACGTTCTGATAACAGAAAATAAACAGGCCGTGATGTGTCGCGGTCTGTTTATCTA
ATTAATTGCAGATATAAAAAAAAACCAACCGTAAAGGTTGGTTTTTTCTTGGGATTTTTG
GTCGGCACGAGAGGATTTGAACCTCCGACCCCCGACACCCCATGACGGTGCGCTACCAGG
CTGCGCTACGTGCCGACTCGTGGCTGCTAATACTACCGTTTTCCACACCGATTGCAAGTA
AGATATTTTGCTAACTGATTTATAATTAATCAGTTAGCGATAAAACGCTTCTCGTCTGTC
AGTACTTGCAATAACAAACTTAACTGTGGTTTTTCATCTTTCACTCTTTCACCACGTAAG
TTGTAAGTGCGGTATTTACCGTTATTGTTCAGCACCAGCGTCTTTTTCGGGGTGGTTATT
GCCAGCGTATCGTTATCCGCTGCGGTTACCCAGTAATGACGGCGTTGAGGGTTGAACAAA
TCCTGACCTTGCGAATATTCGCTGGCAGGTGTGCTGACATGTAGCAGGCGTTGCATCAGC
GTCGTCATCAGATCGGTATGATCAGTCAGCGCATTAATACGCTGCGCCGGCGTGCCTGGC
CAGTGAATCACTAATGGCACCTGCAGATGACCGTGGGACCAGTCAAAGGTTTCTTCCTCT
TCGCTCAGTGGAATACCCCGACCGGCAGTGATAATTACAACCGTATTGTCCAGTTTGCCA
GAATCACGCAGTGCATTGAGCACGCGGTTGATCTGGTCATCGACATTGCCTGCCGCCCGG
CTATATTTCCGTGCAAATGCCTGCTGATTGCTGTCGTCAATGTTAGTACCATTGAAAGAA
ACCCACGAGAACCAGCGGTTATCTTCTTGTGCGTAGCGTCCCAGCCAGTTGATCCACTGC
GTGGCGGTCTGCTCGTCGGATTGGGTGCGTACGCTCGGCATCGAGAAGTCTGACAACAAT
GCCTGGCGATACAGCGGGCTGGTAAAGCCATCTGATGAGAATAACCCCAGCTGATAGCCT
TGCTGATTAAGCGCAGTAATTAATGCCGCAGGCGTACGGGTCGACAGAATGCCGTCCATA
TAGCTCGGCGAGATGCCATAGAACAGGCCAAAGATGCCGTTGTCTGTAGTGTTGCCGGAG
CTCATATGGCGCGTGAACGAAATATTTTGCTCAGCAAAACCTGCCAGCGCAGGCATCTGC
TTCTCGAAGCGTGAGTAGTTCAGGCCATCGACAGTAATCAACAGCACATTCTGCCCGGTG
CCCATATCGCGATAGCGCAGTTCGCTTAACGGATACTGAACGGAAACGGCGTCTGGATTA
CCTTGCTCAATAAGACGGCGTTGATACTCCTGCGCATCAAGCAGACCATGCTTCTCAAGA
AAACGTCGCGCCGTCATCGGGTACGAAAGCGGCAGGTTAGCGCGCTGCATGGTGATCGGG
CGATAGAAGTTGGCATCGGCCCAGATATACAACACATGCGAGGCGATAAAGGCGATAAAT
AAGAATGCGGCCAGCGGACGCGCGAAGCGCCGACGACGCGTCAGGCTGCGCAGCTTTTGC
CAGCTCCACGTCGCAAACACCAGTTCAAGCAATAAAATAACCGGCACGCTAATGAACATC
AGCTGCCAGTCGCGCGCCATCTCATTTTCGTCTGGATTAATAACCAGTTGCCAGACGATG
GGATTAAGATGGAGATGGAAACGAGTAAAGACTTCGCTATCGATCAGTAATAGCGTCATT
CCCGCCGTTGCCAGAATGACGGACAAAAACCTCATCAGCCTCTGGGAGCCGACGATAAAG
GTCAGCGGGAAGAGGATCAGCAAATAGGTGGCGAAGACCAGGAAGCTGAAATGGCCGATA
ATGCTTACGTAGGAATAAATGCGACCAGCAAGCGTTGTCGGCCAGTCGGCGATAAACAGG
TAACGGCTGCCAATGACGAGCGAAAGCAGAATATTGAACAGTGCAAACCAGTGCCCCCAA
CTGACCATTTGGGAGACTTTTTCACGGTAGCGCTGACGATGAGTTACCATAACCTGTTAT
CTGTTTCCCTTAGTGCGCTTTTTCTTCGTTGATAGAGGACTGTAAGGCGCGGGCAAAAGA
GTTGGCAATTGCCTGGCGTTGGGCCGGGGCAATGCTGGTGTTGATAAGGTTAGTGACCAT
GTTGCCTAACACCATCAGGGAAAGGTCGGTCGGAGCCTTATGTTTTTCCAGTACGTTGAG
CAGCTCTGCGAGCAATTGTTCAACCTGTTCATCACTGTAGCGGGAAATTTGTGGCATAAA
TCGAAATCAGTTAGTTGATGAAAGGGCAACATATTACCGTAGCAACGGTTTTTTTTCTGC
TTTTTTATGCGTTAAATCATTCTCGTTACGCTGCCTTCTGTAAAATGACCGCCATCTTTT
ATTGCGTCGCTTAACCGGCGGTGGTTGAATACCGCCCGGTCTTAAAGGAGAGTTTATCAT
GAGTCTGGATATCAACCAGATTGCTCTGCACCAGCTTATCAAGCGTGATGAGCAGAACCT
TGAGCTGGTGTTGCGCGATTCATTGCTGGAACCGACAGAAACCGTCGTTGAGATGGTGGC
AGAACTGCATCGGGTCTATAGCGCCAAAAATAAAGCTTACGGCTTGTTTAGCGAAGAGAG
TGAACTGGCGCAGACGCTGCGCTTACAGCGTCAGGGCGAAGAGGACTTTCTGGCATTTAG
CCGCGCGGCAACCGGCCGCCTGCGTGACGAATTAGCGAAATATCCTTTTGCTGACGGTGG
ATTCGTGCTGTTTTGCCACTACCGTTATCTGGCGGTGGAGTATCTGCTGGTGGCAGTCCT
GAGCAACCTGAGCAGTATGCGCGTTAACGAAAATCTCGACATCAACCCAACCCATTATCT
TGATATCAATCATGCGGATATTGTTGCGCGTATCGATTTAACCGAATGGGAAACCAATCC
AGAGTCGACCCGCTATCTCACTTTCCTGAAAGGGAGAGTAGGGCGCAAAGTGGCGGATTT
CTTTATGGATTTCCTCGGGGCCAGCGAAGGATTGAACGCGAAAGCGCAAAACCGTGGGCT
GTTGCAAGCGGTTGATGATTTCACTGCCGAAGCACAACTGGATAAAGCAGAGCGACAGAA
CGTGCGCCAGCAGGTTTATAGCTACTGTAATGAGCAGCTGCAGGCAGGCGAAGAGATTGA
ACTGGAATCGCTGTCGAAAGAGCTGGCAGGCGTAAGCGAAGTGAGCTTCACGGAGTTTGC
GGCTGAAAAAGGCTACGAACTGGAAGAGAGCTTCCCGGCAGACCGTAGCACACTGCGTCA
GTTGACAAAGTTTGCCGGTAGCGGCGGTGGCTTGACTATTAACTTTGATGCGATGCTGTT
AGGTGAGCGGATTTTCTGGGATCCAGCAACCGATACCCTGACCATTAAAGGCACGCCGCC
GAATTTGCGCGACCAATTGCAGCGCCGGACGTCTGGCGGCAATTAATCGGTTTTGTGTTC
TGAATGCCAGATGCGGCGTGAACGCCTTATCTGGCCTGCAAAAAATAGCAATACCGTAAT
CAGGCATAATCTGCAGATACAAAAAACCCCGCCGGAGCGGGGTTTTTTACAACTTATTCA
GCAATTAAGCGCGAACGAAGTCGATGTGCTGCAGCTTTGGTTTGTACGGGTGACGCTGTA
CGTCCTGAGCTTTAACTTTGATTTCTTTACCGTCAACAACGATGGTCAGAACTTCGCTGT
AGAATTCAGCTTTAGCTTGCATGTTCATGACTTTGTCGTGATCCAGCTCGATAGCCAGCG
GTGCTTCTTTGCCACCGTAGATGATTGCCGGGAACTTGTTAGCGGCACGCAGGCGGCGGC
TCGCACCCTTACCCTGCTCTTTACGTACTTCTGCGTTGATAGTAAACATTTCTTTCTCTC
TTAAATTAATCCTGCTACAGGCGACCCAGCAACAGGTAAGTGATCTGCTTTGCGTATGCA
AAAGCGGGCGAGATTCTATACTCAATCGCCTTATACATCAATCAAAACTACCATTAACCG
CGTAATTCGTGCGCCCGACGAAAACGACCTTCGTAATCGAACACTTTTTCACGCACTTGC
CAGTACTGACCTTTCATGCGGGCGACGACAAAATCCGGATGTCGCAGTAAGGCTTGCTGG
GCGAGGATATCGGCGGCGGTGATCCAGCGCAGAGGGATGCCCGGTGTGCGCGTATGCGGG
CGGATAAAAAGCTGCTCGAAAGCAGTTCGCTGGGCGGGCGTTTGCAGACGGAAACGCTCA
CTCACATCCGCGCCGTCTTCATCGTAATAGGTGATTTTCAACCATTCGCCTTTCTCGTCG
TGCCCATGCTGCAAAGACATGCCGCTACAGCGTAATACCAGCGCATCTTTCAGTCGTAGC
GCCGCTTTTAACATATCATCCGGATCAACCAGTACCGTGTCACATTCGCGGCAGCGGCGA
GCGGCAATATCATTTTCTGCGTTACATTGCGGGCAATTTTTAAAACGGAAACGGAAGTCA
CACTGTTCGCGATGACCGTCGTCATCTTCAAACCATCCCTGACAGCGGCGACCAAAGTGT
TCAATCAATGTCCCGTCGGCGGTCGTTTTCCCCCAAAAGGTGTTGGCAAAACCGCAGGCA
GGGCAGAAAACCTGTACCGGAACGTTGTCACTTTTGCCTTTCGGTGTACCAACTTCCGGC
GCGTAGAGATCGTGAGGATTACCCGCATAATCAAGAATTAAACAATCAGTCTTGCCCGGA
GCGAGACGCAGACCGCGCCCGACAATTTGTTGGTAAAGACTCACTGATTCGGTAGGGCGC
AGAATGGCGATAAGATCGACGTGCGGGGCGTCAAATCCGGTGGTCAGTACCGCGACGTTG
ACCAGATAGCGAAAACGCTGGGCTTTAAAATCTTCAATTAACACATCGCGCTCAGCGCCG
GGGGTGTCGCCAGTAATCAGTGCAGCATCTTCGGCGGGTAGTAATCCCACAATCTCTTTT
GCGTGTTCAACGGTGGCGGCGAAAATCATCACCCCTTTGCGCGTTGCAGCAAACTCCATA
ATCTGGCTGATGATGTGCGGGGTAATACGTTGTTGTTTTTTTAGCTCGCGGTTGAGATCG
GCTTCGCTGAACAGCCCATTACTCTGTGCCTGCAAGCGGCTGAAATCGTATTGCACTACT
GGCATATCCAGTCGTTCTGGCGGCGTCAGATAGCCGTGTTTAATCATATAACGCAGCGGC
AGTTCATAAATGCAGTCACGGAAAAGGGCTTTCTCATCGCCGCGTACCATGCCGTGATAA
TGGAACTGGTAGATCCAGCCTTTGCCCAGTCGAAAAGGCGTGGCAGTCAGCCCCAGCAGG
CGTAAGTGGGGATTCACTTTTGTCAGGTGAGTGAGGATTTGCTGATACTGGCTCTCTTCA
TCGTCACCAATACGGTGACATTCATCGACAATCAACAGCGAAAATTCACCCTGAAAGGCA
TCAAGATTACGGGCGACCGACTGCACGCTGCCAAATACCACTTTACCGTGGCTCTCTTTG
CGCTTTAGCCCGGCGGCAAAAATATCGGCTTCCAGCCCCAGCGCCTGATACTTTGCATGG
TTTTGCGCCACCAGTTCTTTAACGTGTGCCAGCACCAGCACGCGACCACGAGCCAGCCGC
GCAAGTTCCGCTATCACCAGGCTTTTACCTGCACCGGTGGGCAGCACGATAACGGCAGGG
GTTTTATGACGACGAAAATGGTTGAGCGTGGCATCCACGGCTTCTTGCTGATATGGGCGG
AGTGTAAAAATCATGGTCTCGCGTAGGTAGATTATTCTGCTAATAGTATGCCACGGTTCT
TTTTCCCTTGAGGGAAGTTATTAGACCGCTATACTGGGCAGACAACAGTTCAGATTTTCG
GGTCAATGCCCGACCTCCGTTTTTACAGGCAAAATCACACACATGCGACTTGATAAATTT
ATCGCACAGCAACTCGGCGTTAGCCGTGCTATTGCCGGGCGTGAAATCCGCGGCAATCGT
GTCACCGTCGATGGCGAAATCGTCCGTAATGCAGCGTTCAAACTGCTTCCTGAACATGAT
GTCGCTTACGATGGCAACCCACTGGCGCAGCAACACGGTCCACGTTACTTCATGCTCAAT
AAGCCTCAGGGCTATGTTTGCTCCACGGACGACCCTGATCACCCAACGGTGCTCTATTTT
CTAGATGAACCAGTGGCGTGGAAACTGCACGCCGCAGGGCGGCTGGATATCGATACCACC
GGTCTGGTACTAATGACAGATGATGGTCAGTGGTCACACCGCATTACTTCTCCGCGCCAT
CATTGCGAGAAGACTTATCTGGTGACGCTGGAATCACCCGTAGCTGACGATACGGCAGAG
CAATTTGCTAAAGGCGTGCAGCTGCATAACGAAAAAGATCTCACTAAGCCGGCGGTGCTG
GAAGTGATTACCCCAACGCAGGTTCGTCTGACCATCAGCGAAGGGCGTTATCATCAGGTG
AAACGCATGTTCGCCGCCGTGGGTAACCATGTGGTTGAGCTGCATCGTGAACGTATTGGC
GGCATTACGCTGGATGCTGATTTAGCCCCCGGTGAATATCGTCCGTTAACTGAAGAAGAA
ATTGCCAGCGTCGTCTAACTTTTCAATGACTTTCAGGAGCCCGTTGTGACCACCCGACAG
CATTCGTCGTTTGCTATTGTTTTTATCCTTGGCCTGCTGGCCATGTTGATGCCGCTGTCG
ATTGATATGTATCTGCCCGCGCTACCGGTAATTTCAGCGCAGTTTGGCGTACCGGCGGGC
AGTACGCAGATGACCCTCAGTACTTATATTCTGGGCTTTGCGTTGGGGCAGTTAATCTAC
GGGCCGATGGCAGACAGCTTCGGGCGTAAGCCGGTGGTTCTTGGCGGTACGCTGGTGTTT
GCCGCCGCCGCGGTGGCGTGTGCGTTGGCACAAACCATCGATCAGCTGATTGTGATGCGT
TTCTTCCACGGGCTGGCGGCGGCTGCGGCCAGCGTGGTTATCAACGCCTTGATGCGTGAT
ATCTACCCGAAAGAAGAGTTCTCGCGGATGATGTCGTTTGTCATGCTGGTGACAACCATT
GCACCGCTGATGGCACCGATAGTTGGCGGCTGGGTGCTGGTGTGGCTGAGCTGGCATTAC
ATCTTCTGGATCCTCGCCGTGGCGGCGATTCTGGCTTCGGCAATGATCTTCTTTCTGATC
AAAGAAACCTTACCACCGGAGCGTCGCCAGCCTTTTCACATTCGTACCACTATTGGTAAC
TTTGCGGCGCTGTTCCGTCATAAGCGTGTCCTGAGTTATATGCTGGCCAGTGGTTTCAGC
TTTGCCGGGATGTTCTCGTTCTTAAGCGCCGGACCGTTTGTCTACATTGAAATTAACCAC
GTCGCGCCGGAAAACTTTGGTTATTACTTTGCACTAAACATTGTTTTCCTGTTCGTGATG
ACCATCTTTAATAGCCGCTTCGTCCGCCGTATTGGCGCGTTAAATATGTTCCGCTCGGGG
TTGTGGATACAATTTATTATGGCAGCGTGGATGGTCATCAGTGCGCTGCTGGGGCTGGGA
TTTTGGTCGCTGGTGGTTGGCGTTGCGGCGTTTGTGGGCTGCGTGTCGATGGTGTCATCC
AATGCGATGGCGGTCATTCTTGATGAGTTTCCCCATATGGCGGGAACGGCATCTTCACTG
GCAGGAACCTTCCGTTTTGGCATAGGGGCAATTGTTGGCGCATTGCTTTCTCTTGCGACC
TTTAACTCTGCATGGCCGATGATTTGGTCAATTGCATTCTGCGCAACCAGCTCCATTCTC
TTCTGTCTGTACGCCAGTCGGCCGAAAAAACGGTGATCTATTGCACAACGAGGAAGCTAA
AAGGCTTCCTTTGTTGATGCATGTCAACCACAAATCTATCATTCCCCCGATATATGTTTA
TTTTATGTAAAATCAATTTATGTAAAAAGTCACATCATTGTAGTTAAAAAGGTTGAGTTA
GATCGCAGAAACGGGTACATATAGCCCCGCAAACGTGACCACGCCCGCAGATATTACTTA
AATCAGAGCCATAGAGGCCACGCAGGCGAGGCATCAATCTTTACGATCTGTATAAAGACG
GATTGTTGATGATGTGTTAAAATTGATGTAAACAAATTGTGAAGTAAATGTGCTTCCGGG
GAAAATAAGTGACTTCATTACAACTCTCAATCGTCCATCGACTGCCGCAGAACTATCGCT
GGTCTGCTGGTTTCGCAGGTTCGAAGGTTGAACCGATTCCGCAAAATGGACCGTGCGGTG
ACAACAGCCTGGTGGCGCTTAAATTGCTTAGCCCGGATGGTGATAATGCATGGTCGGTGA
TGTATAAACTAAGCCAGGCGTTAAGCGACATCGAAGTTCCATGTTCGGTGCTGGAGTGTG
AAGGTGAGCCGTGCCTGTTTGTAAATCGCCAGGACGAGTTTGCTGCAACATGCCGATTGA
AAAATTTTGGTGTGGCAATTGCCGAACCCTTTTCAAACTACAATCCTTTTTAAGCGTCAG
CTCAACGCCAGTAGCTGACGCGTATACTCCTGCTGCGGTGTGGCAAACACGCGCGCGCAC
GGTCCTTGTTCCACTACTTCCCCTTGTCGCAGTACGATAACCTGATGACATAACGCGCGG
ACAACGTGCAAATCATGGCTGATAAACAAATAGGCCAGTTGATGCTTTTGTTGCAATGAT
TTCAATAGCGTCAATATTTGCGCCTGTACCGTTTTGTCGAGTGATGATGTCGGTTCATCA
AGTATGATCAGCGAGGGCTTAAGAATTAATGCCCTGGCAATCGCAATACGTTGTCGCTGA
CCACCAGAGAACTCCGCCGGATAACGGTGGCGTGTTTCAGGATCTAATCCCACTTCATGC
ATCACGGCTATCACTTGTTGTTCGCGTTGTGCGGCAGAAAGCGTCGGCTGGTGAACCCGT
AAGCCTTCCTCAATAATCTGCAAAACGTTGAGTCGTGGGTTGAGCGAGGAGTTTGGATCC
TGAAATACCACCTGAATGCGATGACGAATAGGTAACAGCTGGCGGCGATTTAAATTTTGC
AGTGGCTGACCGTCAAAGACGATGCTGCCCTGAGAATTAATCAGTCGCAGCAGCGCCAGT
CCCGTCGTGCTTTTCCCGGAACCGGACTCGCCCACTAAACCCAGTGTTTCACCCGCCCGT
AGCGTAAAACTGATGTTTTTCACCACCACATTATGATCCACAATGCGCTTCAAGATCCCT
TTGCGAATGGGGAAGGCAACCTGAAGCTGTTCAACATCCAGCAACGTTGAGGCAGGTTCT
GGCAACGGCACCGGGTCGCCTGACGGTTCACTGTTGAGTAGCTTTTGTGTGTAAGGATGA
GTGGGTGAGGCAAATAGCGTAGCGGCGTTATTTTGCTCGACACAGCGACCATTTTGCATT
ACCGCCACGCGGTGGGCCAGTTTTCTGACAATGCTGAGGTTATGAGTAATAAACAGCATG
CCCATATTCAGCTCGCCTTGCAGTTCGCGCAACAGCTGTAAAATCTGCGCCTGGACAGAG
ACGTCCAGTGCGGTGGTTGGTTCATCGGCAATTAATAATTCCGGTCGCGTTAACAGCGCC
ATCGCAATCATCACCCGCTGGCGTTCGCCGCCGGAGAGCTGATGCGGATAATCTGTCAGC
CGTTTTGCCGCCTGGCGGATACCGACGCGATCAAGGCAGTTAAGAATTTCGCCACGAGCC
GCTTCCCGACGCATCCCGCGGTGGAGTGAAAGCACTTCATAAAGCTGTTTTTCCAGGGTA
TGCAATGGATTTAACGACACCATCGGCTCCTGAAAAATCATGGCGATCTTATTACCGCGT
ACACCGCGCAACGTTTGATCGCTGGCATGAAGCAGCGATTCGCCATGAAAACGAATATCG
CCGGAGAGATATTCAACCGGCGGGGAAGGGAGCAGACGTAAAATTGACAGCGCGGTAACG
CTTTTGCCAGAACCTGACTCACCCACCAGCGCCAGCGTTTCGCCAGCCTCAATCTGTAGT
GAAACATCATTGACTACTGTACGTACGGTTTGCTGATGGCGAAAACCCACCGACAAATTT
TCAATCGCTAACAGAGTTTGCGTCATGCTACACCGCCTTATTAGGATCAAATGCGTCGCG
GACGGCTTCACCAATAAAGATCAGCAAAGACAATAATATCGCCACCGACAAGAAGGCGGT
GATCCCAAGCCACGGAGCCTGAAGGTTATTTTTCCCTTGTAACAGCAGTTCACCGAGTGA
CGGTGAACCGAGCGGCAGACCGAAGCCGAGGAAATCGAGTGAGGTCAGGGTGGTTATCGA
ACTACATAAAATAAACGGTAAAAAGGTGAGCGTAGCGACCATGGCATTAGGCAACATATG
ACGCAGGATGATACTGCGATCGCTGACGCCAAGCGCCTGCGCCGCACGAATGTAGTCGAA
ATTACGGGTACGTAAAAACTCCGCCCGCACCACGCCGACCAGACTCATCCAGCCAAACAA
GACAGTAATTGCCAGCAGCCACCAGAAGTTAGGCTGTACGACGCTGGAAAGTAAAATAAT
CAAAAACAGCGTCGGCATCCCCGACCATACTTCAATAAAGCGTTGCCCCCAGAGATCGAC
TTTACCGCCGTAATAGCCTTGTAGCGCCCCCGCCAGCACGCCCATCACGCTGGAACAGAG
AGTCAGCATCAGGCCAAACAGAACCGAGATCCGCGTGCCATAGAGAATACGTGCCAGCAC
ATCGCCGCCGTTGGCATCCGTTCCCAGCCAGTTTTGCCGGGAGGGTGGAGAAGGGAAGGG
CTTATCGGTAGCAAAGTTGATACTGGTAGCACCAAAGCGAATCGGTGCCCACAGTACCCA
GCCATTATTTTCCAGCCGTTGTTTCAGCCACGGGTCCTGATAATCAGCCTGACTTGCCAG
CGGGCCGCCAAAATCGCTTTCGCTGTAGTTTTTCAATAACGGGAAATACCAACTGCCGTC
ATAACGTACCAGCAACGGTTTATCGTTGGCGATAAGCTCAGAACACAAACTCAAACCAAA
CAAGACGAGGAAAATCCATAACGACCAGTAGCCGCGACGGTTATGACGAAAACGCGCCCA
ACGGGCCTGATTGACGGGGCTGAGTCGCGACATTAACGTCCCTCAAAATCTATACGCGGA
TCGACCAGCGTATAGCTGATATCACTGACAATATTCAGCAGCAGGCCAATCAGGGTGAAA
ATATACAAGGTACCAAACATTACAGGATAATCGCGCGAGACGGTCGCTTCGTAGCCCAGT
AAGCCAAGACCATTGAGTGAAAACATCACCTCAATCAGCAGCGAGCCGGTAAAAAACATG
CTGATAAACGTCGCCGGAAAACCAGCAATCACCAGCAGCATGGCGTTGCGGAACACATGT
TTCCAGAGAATGTTTTTCTCACTTACCCCTTTCGCACGCGCGGTCACCACGTATTGCTTG
CGCACTTCATCAAGGAATGAGTTTTTGGTCAGCATGGTCAGCGCCGCAAAGCCACCAATC
ACCGTCGCCAGCACCGGCAGCGTGATATGCCATAGATAATCGGTGATTTTCTGATACCAC
GGCAGCGAATCAAAGTTAGCGGAAACCAGGCCGCGTAGAGGGAACAGGTCGAAATAGCTG
CCGCCTGCGAAGAAGACAATCAGCAGGATGGCAAACAAAAAGGCCGGAATGGCGTAGCCG
ATGATGATAAATGCGCTACTCCAGACGTCAAAGCGGCTCCCATTATAAACAGCTTTGCGA
ATGCCTAACGGAATCGACACCAGATAGATAATCAGCGTGCTCCACAATCCGAGGGTGATG
GAAACCGGCAGACTGTCTTTAATCAGCGTCAGCACCGAGGCGCTGCGAAACAGGCTATCG
CCAAAATCAAAGCGGATGTAGTCCCAGAGCATTTTGAAGTAACGTTCGTGGATCGGCTTA
TCGAAACCGTAGCGATGAGTGATCTCGGCGATCACTTCTGGATCTAATCCGCGTCCGCCA
CGGTAATTACTGTCGCTGATATTACCGACGCCCGTTTGCGCATGGCTGGCGCGAACGCCT
TCACCGCCTGCGCCGGGTAATACTCCGGCATTACCAAACTCAATGGCGGCGATGGCCTGG
TCGACCGGACCGCCAGGCGCAATTTGCACGATGAAAAAGTTGATAGTGATAATCGCCCAT
AACGTTGGGATCACCAGCAACAGACGGCGAATCAGATATGCGCCCATCTACTCTCCCTGT
TGTCTGGCTGACGGCAGTTTGGCCGCTTTATTAACGTCATACCACCAGGTATCGATACCC
AGGCTGTAAACAGGGCGTACAGCGGGTTGGGAGAATTTATCCCACCAGGCGAGACGGTCT
TCCGCCATGTACCACATTGGCAGCATGTAATAATTCCACGTTAATACGCGATCCAGTGCT
CGCCCTAACGGCAGTAATTTTTCTTTATTTCCCTGCGCGGCAATAATTTGGTTGATCAGC
GAGTCGATAACCGGGCTTTGCACGCCGGGGGCATTATAAGTGGAATTGATATATTCCGAT
GACCAGGAAATCTGTAAATCGGAACTGGGCCACGGCATCGCCCGCCATACGCGCGGCATC
ATGTCATAGTCGCGACTGCGCATGCGGTTGGTGATTTGCGAGTTATCCACCTTGCGAATG
TCCATGTTGATACCCAGCCGTTGCAGGCTGTGCTGGAACGGCAATACCCACTGACTATTG
CTGCTTGCGGGAAGCAATAATTCAAAGCTGAGTGGCTGACCCGTTGTGGCATTAACGCGT
TGCTGACCCTTCAGCACCCAGCCCGCTTCGTTGAGAAGTTTGTCGGCTTTTAACAGGTTG
TCACGATCGTAGCCATCGCCTTTAGATACCGGCGGCTGGTAGATTTGTGTGAAGACTTCT
GACGGTAGATCTTTTTTCATTGGTGCCAGAAGCACCAGCTCCGCGGCGTCGGGGTAATTT
CTGGCCGCGTATTCGGTATTCTGAAAATAACTGTTCGTGCGACTCCAGGCATTGTAAAAC
AACGCCTTGTTCATCCATTCAAAGTCAAAGGCGAGAGTGATCGCTTCCCGGACCCGGCGA
TCGCTGAATACCGGACGTTGGATATTAAACGCCAGCCAGCGCGTATCCTGGGCTGATTCG
TTCTTTTGCTCATCTTTGATGATGTATTTTTTATCGAAATTTTTACCGGTATAACGCGTG
GCCCAGTTTTTAGCGTCGTTTTCCATACGCAAATCAAAGGCACCTGCTTTAAACGCTTCA
AAGGCGACGTTATCATCGAGGTAATAATCGTAGCGAATGGTGTCGAAATTCCAGCGTCCA
CGGTTTACCGGTAAGTTTGCTGCCCAGTAATCTTTCACGCGGGAATAGACAATATTTTGC
CCCATTTTCCAGGACGTAATGCGGTACGGACCACTGGCAAGCGGAGGCGTGGCGAGCGGA
TCGCTAAGTTTGTGATCCTTCCAGTACTTTTCTGGAAATACCGGCAGCGAAAACAGACTC
AACATATCTTCTTTGCCGGGTTTAGCTAACTCAATGCGCACGGTTAACGGCGCAATGGCT
TTGACGGTGGTGCCTTTGTAGACCAGACGAAATTGCGGCACGCCTTCGGTCATAAATTTT
TGAAAAGTAAACTCTACATCGCGGGCAGTAATGGGCGAACCATCATGAAAACGGGCGCGC
GGATTAATAGCGACCTCCACCCAGGAATAATCGTCAGCATAGCGTGCACTTTCAGCAATC
AGCGGGTAATAACTGCCTGGTTCGTCATCGGAAGTCGTAAATAGCGTGTCGTACAACTGC
TCGGTGCGTGCGCCCGGGTTGCCGCGCAGTGCATAGCGGTTGAAATTATCGAAGGTGCCG
AGGGCTGACAACGTTATCTGCCCACCTTTTGGCGCGGCGGGGTTCACATAATCAAAATGG
TTGAAATTAAACGCGTACCGGGGTTCGCCCAGCACGGCAAAGGCATAGCTTTCCTTGATA
GCCTGCGCCTGCGCACCGAAGGTGAACAGAGCGATAAACAGCAGCAGTATGCGCACAATC
ATCTGCAACGGATTTCCTTTTACTCATCATTAGCCGCAAACCGGCATGCTTTCACTATGA
ATAATAAGGGACGTAAGCACACCTTACCACTGCGGCCTATACGGTTTCTTCAGCCAGCGA
ACAAAATCGTCCAGCGGTAACGGGCGACTAATCCAGTAGCCTTGCATGAAATTAACGCCG
CGTTCGCTTAGCCATCGCGCTTGTTCCGGCGTTTCGACCCCTTCAGCAACTGTCAGCATA
TTGAGACGTTTCGCCAGCGTCAGCACCGCGTCAAGTACGGGTGAAGTGATCGTTTCCGTA
CCGATGGCGTTGATAAATCCACGGTCAATTTTCAGATAATCGAGCGTAAAACGCTCAAGA
TAGATAAGCGCGCTGTGCCCGGTGCCGAAGTCATCAATAGCAATTTCTATGCCGACCGAG
TGCAGCCAGGCGAAGAGTTGTGTGGCTTCTTGCTCTTTCAGCATATCGCGCTCGGTAATT
TCCAGCACAATCTGGAAATGGTGTGCGGGTAGGGAGGTGAGCAGTTTCTGGATATCTGCT
TTAAAGCTTTCGCTGTGCAGATGGTCCGGCGCAATGTTAATGCCAAATTTGACGCCTACC
GGCAGCACTTTTTCTAATTCTGCGGCATCGCGGGCAATTAACTCAAACAGGTGCTGAGTC
AGCGGTACAATCATCTTTTGCGATTCGGCAAAGTTAATGAAGGCATCCGGGGGAATTTCT
CCCGCGACAGGATGCCGCCAGCGTAGCAGTACTTCCAGGCCCGTTACTCGCAAAGCTTGT
GTATCCACCACCGGTTGATACGCCACGTAAAATTGTTCGCGCTTGATGGCGGTTATGATT
TCTCTGCCGGGGCGCATACGTACGCTCATCAGGTAATAGCAGAGCAGGCCAACGACAGTT
CCACTCATGCCGCCCAGTAAAAATGCGTACCACACATCGTTCCATGTCCAGTCATCTGCA
TAAAGCCGAACGGTCAGAGGAATGCCCGCAATTTTAGTTTCACGGACTGGCATGTCGGTT
AATTCGTTAACGTTCATCAAACGTGAAGAAAAGGTAGATAGCGCAGTATTGCCAATAATG
AGGGCGACGCCATCGTAATCTTCCTGCCGTGAACTATAAAAGAGTGAAGGCGTCAGGTTG
AGATTCAGAGCGGCAAAGACGCCGCTATTTTTCAGCAAAGGGTTGCGATACCAGATGACG
ATTGCGGGTTTGTTCGGCACCATCGGCGTGCCGGGTAAGATCGCCATATCGACATTTTTA
TTAATGTCGAGCGCCGGAATCAATTCATTGAGTGGAATGTCCATCTCACCGGTCGCAGAT
GAACAGAATGTTTTTTTATCTTTCACCAGCACAAACGTTCGGACATTCATGCTAAACGCC
GCGCGGGCGGTCAGTTCGGGGTTAGCTTGCTGGCAGGTATCTAAGGTCAGCGGCTGGAGC
CGGTCAGTAGTGGATTTCAGGTCGGCAAAATAGGTATCGAGATACTTTTGTACGTCGGTA
ATCAGTGTGTCGTATTTGACTTCGTGCTTATGCCAGGCCACTAAAAACTGAAGGCAACTC
ACCAGTATCGCAATCATTACGCCTGCAACAATGCAGGTAAGCAGGAGCTTACGTCCAGAA
TTGGGAGCGCGTATGAACATGATTCCGTTAATTTCCTGAAATTACGACAATATTTAAAAG
ATAACAATGACCGGACTATAGCCTGGATCAAGACGCGGAAACATCATTTTCTCTGATGAA
TGAAAACAAAAAAGCACTGCCTAAGCAGTGCTTTCAGTTAACTCGTCAGGATAGCCAAGG
GATTGCATCCAAACGGTTTATTAGCTGCGGCTGAGAACCCGGCGTGCTTCGTTGTAACGC
TTCTTCCAGTACGGTTCATTCATGCTGGAAATAATAACACCACTGCTGGTGGAAGCATGG
ACAAACTGATTGTTGCCGATATAAATACCGACATGGCGTCCCGTTGAACCGGCACGGAAC
AGAACTAAATCACCCGTACGCAAATTACTGCGGGAAACAGATTTACCCATTTCCTGCTGT
TCGTAAGTCGAACGCGGAAGTTCTAAGCCAAATTGCTCACGGAATGTACGCTGTACGAAA
CCAGAACAATCGATACCTTTTTTAGTGCTGCCGCCCAGACGATAACGTACGCCTTTCCAG
TCAGCATACTGATCCATAATTCGCGATTTTACGTCGACATTACGAACCAGGTTTTCAAAT
TCATCCTGAGAAGCTTGCAGTGATGATGTTTCACTACCCACTGCACGTGTCTCAGGATGC
ATATTCTTTGCGGTGTTATTTGCACTACATGCAGAAAGCAGAACCGCTACTGCAATCGCG
GGGATCCCGCGCAAGATATATCTCAAAATCGGTTGAGATTTGACCATGTTGTTTGTTTTC
CCTTGAAGTCCTTAACGACAAATATCGTTATAAAAAAATGCCAAGCGACACGAGACTAAT
TACCTGGGCATGTTGAAACAATTCCTTAAGGCCAAATCTGTGGACTAACGCACAAAATTA
TATGCTGTGAGGATAATCTACCGCCGAGGCAAAACGAGTTCGAGATTACCCGATTGGTGC
GGTCTTGGCGAGCGGTTTTACATGATTTTTTATAAGAAAAAGTGATACAGAAAGTTAATA
AGCGGGATTGCTCAATTAAAGTACGATTGAGTGAAACGCATGCAATCCATTCATTTACTT
AGAGAATGATTTTTGCTTTCGATGCATGAAAGCACGGTGCGCATCATCAGGATTATCCTC
ACTATAAAAATAAACCTGATGATGTTAATTACTGTGAGTTATTTGTTTTGGAAATGTTTG
TTTTTTCCCGGTAGTGATTTGTCAAAAAAGGTGATTAATCGATCACTTAATGGCGTCAGC
AACACCCAGGGCAAACCGATCAATATCACGGTCATCGAACCGACAATGATGTCAGTAAAC
CAGTGTGCGCCAATCATTACTCTGGGAAACGCAAAAACCACAAAAATAATAAGGGCGATA
AGACCTGCAACTTTGCCGAAATAACGCCACATGAATGCCGAAAAAATAAGCAGCATCATG
CCGTGATCGCCGGGAAAGCTATCTCGTGAGGCATCTTTCGTGGGGACAGAGAGCAGTTCG
CTGACGCGGTTAATATCGGTAAAAGTCAATGTTGGGCTGGCCCGTTTTACAGGAATTAAT
GCCTGACCCAGCTGGTTTAATACCACTGCAGTTAATAGCATGACCAGACCAATAATCACG
ATACGTCGTCTGCCTGGGGCGTTTTCTTTCAGCCAGAAACTCAGCATCAACATTCCCATC
GCCAGCAGTGAACAACCGTCGAAAGCGCGATTGTTGGTCAATGCAACCAGCCACAAAAAG
GCCTTACTTTCGACCAGTTTCTGATTAAAGAAATAAAAAATATCCGCATCAATCGGCAAC
CAGAATCCATGATTAACGGGAATATACCAGGAAAGAAACAGCGCGAGGCCGACAATATTC
AACAACACTATTTGCGGCAAATTTTTAATCATATTTTCTCTAATTATCTTACTGAAAAAC
GCAGGCAACCTTACGCGGTAGTCGCTAAACGAAGCTTCAACAGCGCGCTCTGCAAGGCAT
TCCAGTCAGCTTCGCTGCTGGAAATCAGCTCAATACGGCTGTCCGGTGGCGCAACGTTTT
GCGTTTCAATGTGCAGGTCATCGCCCTGACGGTTGATTCGCACCAGCCCTTCGGGAATAC
GCAGCACGCCTTTGACGCGTTCCACCGGTGCAAGTCGCGCCCATTCCAGAATGCCAATGG
TGTCGAATACCGTATCAGCGTCGAATATCCAGCCGCAGGCCTGATATCCTTGCCCGCTGT
TCAGACTGCGACGCCAGCGTTGATGCTCTGGCAGGCTTAACGCTGCTAACCCTTTTTTCA
CGACATGCTGATGAGAATGCGCGGCGCTGGCGGGCAACTCGGCTAAATTGCGACGCGGCA
AATCCAGAAGATGACCGTCAACTTTCCCATGCTCACTGTGAATTAATTGCCGATCGCCAC
CATTTTGCTGCCACCAGCGCTGTAGCGCTTGCTCGCTTTCAGGTGTCGCACGGTCGGATT
TATTGGCGACAATGATGTCTGCGGCAGCCAGCTGGTCACGGAAGTTTTCATTGCTGGCGC
TTTTTTCGTCCAGCAGCAGGCGTGGATCGAGAATGCACAACGTGGCGCGCAGATCTATCC
ACGGTTCATAGACTGGTGCGGTTAACAGATCGAGGATCTGTTTCGGATGGCCCAGCCCGG
TCGGCTCTATCAACAAGCGGTCTGGTTTTCCCTGACGCAGTAAGGTATTCAACCCTACCT
GCATGGGTAAACCATTAACGCAGCACATGCAGCCGCCGGGGATCTCTTTCAGCAATGCGC
CGCTATCGGCGAGCAAAGCACCATCAATTCCGACTTCCCCAAATTCATTAACCAGTACCG
CCCATTTTTCGTTGGGATCTTTATGGGCTAACAGATGAAGAATCGACGTAGTTTTCCCGC
TGCCGAGAAAACCGGTGATGAGGTTGGTCCTGGTCACAACGGCTCCGCAATACTCTGATA
AGTTAACTGAGCGTTAATCCTGGCTAAAAACGGCAGAAAAGAGAAGGGGAGAGCGGACGA
AGGTGAGCTTCATCCGCTTTAACCGCAGAAATCGTTAAATTTTGAGGGTGTTTAATAGCG
CCTGATGCGCGCCGAATTGTGCGATTTGTTGCCAGGCTTGTTCGATGGCCTGCACAAAAT
GCGGGTTATCTGGCAGATCATCACCGAAAACTTCACGCAGGGAAAGCAGGGCGGTGACGC
GTTGCTCACTGCTGCTGCCCGCAACAAGATCGCGAATTTTATCGCTAAGCGGATCGCGAA
CATCAATGGCATTTCCGGCATCATCAACGCCGCTGACGTAACGCATCCAGCCTGCAACGC
CTAATGCCAGCAACGACCAGTCCGTTTCGCGCCCCAGATGTATGCGAATACCTGCCAGCA
TACGTTGCGGTAATTTCTGGCTGCCATCCATCGCGATTTGCCAGGTCTTATGTTTCAGCG
CCGGATTAGCAAAACGTGCAATTAACTTATCCGCATATTGTGTTAAATCGACATCTTTAA
TTTGCAGTGTCGGCGCTTGCTCATCCAGCATTAATGTTCTGGCAGCATGGCGAAATGCGC
GATCCTGCATGCAATCACTGATATGGGCGAATCCTGAGAGGTAACCCAGATAAGCGAGAA
AAGAGTGGCTGCCATTAAGCATACGCAGTTTCATCTCTTCCCATGGCAGGACATCATTCA
CCATTTGTACACCTGCGACTTCCCAGGCAGGACGCCCAGCGACGAAGTTATCTTCCACCA
CCCACTGGATAAACGGTTCGCAGCTAATCGCGCAGGGATCATTTACCCCCAGATGCTGGC
TGATTTCTGCCAGTGATTCGTCGGTTGCAGCCGGAACAATGCGGTCGACCATGGTTCCCG
GAAAACTGACGTGTTCTTTTATCCACCCGGCGAGTTCTGGCGAACGTTTTTCTGCCATTC
CCAGCACCGCGTTTTTCACCACATGGCCATTGTCGGGAATATTGTCGCAGGAGAGCACGG
TAAACGGTGTAAGGCCGCGCTCACGGCGGCGTTTCAGTGCTTCGACGAGAATACCTGGCG
CGGAGTGAGGTTCTTCAGGGTTTTGTAGATCGTGAATAATCCGCGGATTGCTGGTGTCGA
GTGCACCGGTGGCCGGGTCAATACAATAGCCTTTTTCGGTAATCGTCAGGGAAACAATTG
CCACCTGTGGCTCGCAAAATTTCTCAATAATTGCCGCTAAGGAATCCAGTTTTGCATTCA
GGCATTCGTGAACGGCACCGACAATTATCGCCTGATTGCCGTCCGCCCCTTTCTCCAGCA
CGGTGTATAAATGGTTCTGTGCGCGGAGCTGGCTCATCAGTTGATCACCGCTGAACAAGC
TGATTTCACAGATCCCCCAGTCACCGCCCTGGGCATTCAGCACACGATCGGTCAGTAACG
CCTGATGTGCGCGGTGAAAGGCTCCAAAGCCAAAATGAACGATACGTGATTGCAACTGCT
GGCGATCGTAGCGTGGAGCGTGTACATGATGCGGGAGCGTAACGGAGGCGATTGTATTCA
TAGGAGTCACGTCTTAGTAACGATTAATTAACAATGACAGTGTAAAGTTATATGACAGCA
ATTGAAATTGGTCTGGATTGTTAATGCGATGAAGTGTGAGGGCGATCAATCAACGAGTGA
AAATTGAGGGCGTAAGGTGTTCAGGAAGCGCAAAATAGAAGATTGGTATAATAAATTAAA
AAAGGGACAGCCTGAGCTATCCCTTTTCTGCATGCGGCTGAAGTTAGTCAGCACGACCCA
TATAACGGCGTTCTTCGATATGGATACGAATTTTTTCGCCCGGGCTTAAGTATTCTGGTA
CCTGAATCACCAGACCAGTGCTCAATGTCGCCGGTTTGTTACGGGCGCTGGCAGATGCCC
CTTTGATGCCTGGTGCAGTTTCAACGATTTCCAGATCAACGGTCTGCGGCAGCTCAAGCG
CCAGCAGTTGACCGTCCCAGGTCAGCACCTGCATGTCCGGCATGCCGCCCTCTGGCATAA
ACAGCAACTCTTCTTCAATCTGATCTTTGGTGAAGGTATACGGGGTATAGTCTTCTTTAT
CCATAAAGACATATTCGTTGCCATCGACATAGGAGAAGTCAACGTAACGGCGGGTCAGCG
TCACGGTGTCAACGATATCATCTCCTTTGAAACGCTCTTCTACTTTCAGCCCGGTACGGA
CATCAGAAAAACGCATTTTGTACAGCGTAGCGGCACCGCGGGCAGTGGGCGACTGAATAT
CAATGTCCTTAACCAGCAGCAGTTTGCCGTTGTAATTCAGTACCATACCTTTTTTAATTT
CGTTCGCTCTTGGCATCGAAAAATTCCTGTAGTCGAAAATGTCAAAAATATCGCGACAAA
GTACTCGCGACGGGCCTTTCGGGCAAGTGGTATTCGCACTTTTGCTAGTGCAAAAAAGGT
GGTACTGTGCGCGCTCATCAATCCGGTGGTTAACCTTAAGAGAACAACGTATGGAATGCC
GTCCGGGTTGCGGGGCGTGTTGCACTGCCCCTTCAATTTCCAGCCCTATTCCCGGTATGC
CAGATGGCAAGCCCGCCAATACGCCCTGCATTCAGCTTGATGAACAGCAACGCTGTAAAA
TTTTCACCTCGCCACTGCGACCGAAAGTCTGTGCAGGCTTACAAGCCAGCGCTGAAATGT
GTGGTAACTCGCGTCAGCAGGCCATGACCTGGCTTATCGATCTGGAAATGTTGACCGCGC
CTTAAACATCTTTAATCCGCAGTAAGCAAAACAGAGTGGCGATAATCATCACCATCGCAA
ACCAGAACACAGCGTGATAATTCCAGATCTCGGCGACGATGCCCGCCACTGATCCTGCGA
TGATCCAGCCCACGCGCGACGTGTTGGTATAGAGCGTGGTGGCTGAACCTGCCTGACCGG
GCATCAAATCCTGAAAATAGAGCATCCCGATGCCGCCCAGAATGCCAATAAAAATAGCAT
TTAGCAGCTGCAAGCCCAACAGAATGATAGGTGAATGCGCCATCAGCATTCCTGCGTAAA
AACAGACGCCACCCACGGCAGCAACGCGCATTAAGAAACGCTTACCCAGACGTTTGGCGA
AATATCCGGCAATCAACATCGTCGGGATTTCCAGCCCGGCGGCGGTCCCCATCATCACAC
CGGCCAGTTTCTCGGGAAGATGCAGTTCGTTGATAATAAATAGCGGCATGTTGATGATGT
ACAGACTGTTCGAGCCCCACATCAATGTACAAATGACAAACAGCAGCAGCGTATCGCGAC
GGTTACGGCGCGGCGCTTCAACCGTGCCGGTCGCCAACGGAAGCTCTTTTTGCATCGACG
GTAAAAACAGCCACACCATCACGCCGCAAACAATAAATGCTACCGCTGCGCTCAGATACA
TTACCGTAAAGCTGAAACCCATCGCTAAGGCATAAGCCAGCGGTGGGCCAATGACCCATG
CCAGTGAAACCTGAGCGCGTAAAAAAGAGCTGAACATCACCGCCTCACGTCCGGTTTTGT
CGGCATGTTCACGGGCAAGGGCAAACATTTGCGGGTTAGCGGTCGAGCCAAAGCTGCTAA
GAAAGACGCCAACGAATAGCAACACAAAGTAGTTGCGATTCCAGGCAAAAAGGGTGCAGG
CCAGCACGCCTAACAGGCAGCAAAAGACAATCAGCGATTTGCGATCGCCGCGCTTATCAG
AGCGCCCGGCGAGAAACTGACTCACCAGAATCCCAATGACAGCGCTGCCGGTAAAGAAGA
ATCCCACCATCGCCGGACGGGCATGTACTTCATCGGTAAGAAAAATACTGAGTGTCGGGG
TTTGCAGAGCGCCCGCAATACCGGTGAGAAAGGCAACGATTAAAAACGCCGTCGAGGTCA
GGTCAAACGATTTCGCGCTGGAGACTGCGGGGGAGTTATGCATGCTGGTCGATCATTGGA
AGAGGAAGACGCGGAGTTTACGCTGCTTGTCAGAAAATAAACAGACAGCGAAATCAAAAG
CGCCACGAATAATCAAAATGCCATTTCACTGTTGCTGATTGGCTGCTGACGCTGCTGAAA
TGAAATTGCTGATAACGGATTTTTCCATCAGCAGTTCGGAAAAATGACAAAAAATTGTGC
AGCACATCAAACTTTTGCTCATAACTTTACGGCTTTCCTTGCGTGCTGAAACAGAAGTAT
TATGCTTTCTTGAAACGTTTCAGCGCGATCTTGTCTTTAACCCTAAGCCAGGTTGGCGCT
TTTTTTCTCATAGAAGCTGAATCGTTTCAATTCAGCAAGAGAGGAGAACTATGTTCCAGT
TATCCGTACAGGACATCCATCCGGGCGAAAAGGCCGGAGACAAAGAAGAGGCGATTCGCC
AGGTCGCTGCGGCGCTGGTGCAGGCCGGTAATGTAGCAGAAGGCTACGTCAATGGCATGC
TGGCGCGCGAACAGCAAACCTCAACGTTCCTCGGCAATGGTATTGCTATTCCACACGGCA
CTACCGACACCCGCGATCAGGTGCTGAAAACCGGCGTTCAGGTATTTCAGTTCCCGGAAG
GCGTCACTTGGGGTGACGGTCAGGTAGCGTACGTAGCGATCGGTATTGCTGCCAGCTCGG
ATGAGCATCTGGGCCTGCTACGCCAGCTGACCCACGTACTGAGCGATGATTCCGTTGCTG
AACAACTGAAGTCAGCAACAACAGCAGAAGAACTTCGCGCATTGCTGATGGGCGAAAAGC
AGAGTGAGCAGCTGAAGCTCGACAACGAAATGCTGACACTGGATATCGTCGCCAGCGATC
TGCTGACTCTTCAGGCGCTGAACGCTGCGCGTCTGAAAGAAGCGGGGGCAGTTGACGCCA
CTTTCGTCACCAAAGCCATCAATGAACAACCGCTGAACCTCGGACAGGGCATCTGGCTGA
GCGATAGCGCCGAAGGCAATTTGCGTAGCGCGATTGCGGTAAGCCGTGCGGCAAATGCTT
TTGATGTGGACGGCGAAACGGCAGCCATGCTGGTGAGTGTGGCGATGAATGACGATCAGC
CCATTGCGGTTCTTAAGCGTCTCGCTGATTTGTTGCTCGACAATAAAGCTGACCGCTTGC
TGAAAGCGGATGCGGCAACGTTGCTGGCGCTGCTGACCAGCGATGATGCGCCGACCGACG
ACGTGTTAAGCGCGGAGTTTGTGGTGCGCAATGAACACGGCCTGCATGCTCGTCCAGGTA
CCATGCTGGTCAACACCATTAAACAATTTAACAGTGATATTACCGTGACAAACCTTGATG
GTACCGGCAAACCGGCAAACGGACGTAGTCTGATGAAAGTTGTGGCACTTGGCGTTAAGA
AAGGTCATCGCCTACGCTTTACCGCCCAGGGTGCAGATGCTGAACAGGCGCTGAAAGCAA
TCGGCGACGCTATCGCTGCTGGTCTTGGGGAGGGCGCATAATGAGCAGACGTGTTGCTAC
TATCACCCTTAATCCGGCTTATGACCTTGTTGGTTTCTGCCCGGAAATTGAACGCGGCGA
AGTGAACCTGGTGAAAACCACCGGTCTGCATGCGGCGGGTAAAGGCATCAACGTGGCCAA
AGTATTAAAAGACCTGGGAATTGATGTCACCGTTGGCGGCTTCCTCGGTAAAGACAATCA
GGATGGTTTTCAGCAACTGTTCAGCGAGCTGGGCATTGCCAACCGTTTCCAGGTTGTACA
GGGGCGCACCCGAATTAACGTTAAGCTGACGGAAAAAGACGGCGAAGTGACTGACTTCAA
CTTCTCGGGTTTTGAAGTCACTCCCGCCGATTGGGAACGCTTTGTGACTGATTCTCTGAG
CTGGCTCGGTCAGTTCGATATGGTCTGTGTCAGCGGAAGCTTACCGTCAGGCGTCAGCCC
GGAAGCGTTCACCGACTGGATGACTCGCCTGCGTAGTCAGTGTCCTTGCATTATCTTTGA
TAGTAGCCGTGAAGCGTTAGTAGCAGGTTTGAAAGCGGCACCGTGGCTGGTGAAACCTAA
CCGCCGCGAGCTGGAAATCTGGGCAGGCCGTAAACTGCCTGAAATGAAAGATGTGATTGA
AGCTGCGCATGCGCTGCGTGAACAAGGTATTGCGCATGTCGTTATTTCACTGGGTGCCGA
AGGCGCGCTTTGGGTTAATGCCTCCGGCGAATGGATCGCCAAACCACCGTCAGTCGATGT
CGTAAGCACCGTTGGCGCAGGGGATTCTATGGTTGGTGGCCTGATTTATGGCTTGCTAAT
GCGTGAATCCAGTGAACACACACTGCGTCTGGCGACTGCTGTTGCAGCCCTGGCGGTAAG
TCAAAGCAATGTGGGTATTACCGATCGTCCGCAGTTGGCCGCAATGATGGCGCGCGTCGA
CTTACAACCTTTTAACTGACAGCAGGAGAGGCATAATGAAAACGCTGCTGATTATTGACG
CTAATCTCGGTCAGGCACGCGCCTATATGGCGAAGACCCTGCTGGGCGCGGCGGCGCGAA
AAGCAAAACTGGAAATCATCGACAATCCGAACGACGCAGAAATGGCGATTGTTCTCGGTG
ATTCCATCCCGAATGACAGCGCGCTGAACGGTAAAAATGTCTGGCTGGGCGATATTTCCC
GGGCAGTTGCGCACCCTGAGCTGTTCCTGAGTGAAGCCAAAGGCCATGCGAAACCTTACA
CTGCGCCGGTCGCTGCGACAGCACCGGTTGCCGCCAGCGGTCCGAAACGCGTAGTTGCGG
TGACTGCTTGCCCGACTGGCGTAGCACACACCTTTATGGCGGCTGAAGCCATTGAAACCG
AAGCGAAAAAACGTGGCTGGTGGGTGAAAGTTGAAACCCGTGGTTCTGTTGGTGCGGGTA
ATGCAATCACCCCCGAAGAAGTAGCCGCAGCGGATCTGGTGATTGTGGCGGCAGATATCG
AAGTGGATCTGGCGAAATTTGCGGGTAAACCGATGTATCGCACCTCTACCGGTCTGGCGC
TGAAGAAAACCGCGCAGGAACTGGATAAAGCGGTTGCTGAAGCAACGCCGTATGAACCGG
CGGGCAAAGCTCAAACGGCGACCACTGAAGGTAAGAAAGAGAGTGCAGGCGCTTATCGTC
ACTTGCTGACGGGCGTCTCTTACATGCTGCCGATGGTCGTTGCAGGTGGTCTGTGTATCG
CGCTTTCTTTTGCTTTTGGTATCGAAGCGTTTAAAGAGCCGGGTACGTTGGCAGCGGCGC
TGATGCAGATTGGTGGTGGTTCAGCCTTTGCGCTGATGGTGCCGGTACTGGCAGGTTACA
TTGCCTTCTCCATTGCCGATCGTCCGGGTCTCACGCCGGGTCTGATTGGCGGTATGCTGG
CGGTCAGCACCGGTTCTGGCTTCATTGGCGGTATTATTGCGGGCTTCCTGGCTGGTTACA
TTGCGAAGTTAATCAGTACGCAACTGAAACTGCCACAGAGTATGGAGGCGCTGAAACCGA
TCCTGATCATTCCGCTAATTTCCAGTCTGGTGGTCGGTCTGGCGATGATCTACCTGATCG
GTAAACCGGTTGCTGGCATTCTCGAAGGGTTGACTCACTGGCTGCAGACCATGGGGACTG
CGAATGCGGTTCTGCTGGGGGCGATCCTCGGTGGCATGATGTGTACTGACATGGGCGGTC
CGGTAAATAAAGCAGCGTACGCATTCGGTGTGGGTCTGCTGAGTACTCAAACCTATGGCC
CGATGGCGGCGATTATGGCGGCAGGTATGGTGCCACCGCTGGCAATGGGCCTGGCAACAA
TGGTGGCGCGTCGCAAATTCGACAAAGCGCAGCAGGAAGGTGGCAAAGCCGCTCTGGTAC
TGGGACTGTGCTTTATTTCGGAAGGTGCAATTCCGTTTGCTGCTCGTGATCCGATGCGTG
TGCTGCCGTGCTGTATCGTGGGTGGGGCGCTGACTGGCGCAATCTCAATGGCGATTGGTG
CGAAACTGATGGCACCGCACGGTGGTCTGTTTGTTCTGCTGATCCCTGGCGCTATTACGC
CGGTACTGGGTTACCTGGTAGCAATTATTGCCGGTACGCTGGTGGCGGGTTTGGCCTATG
CCTTCCTGAAACGTCCGGAAGTGGACGCAGTAGCGAAAGCCGCGTAATAAAAGGTGTGTT
ACAGGGCAGAAATTTACTGCCCTGTATCATTGGATGAGCGCAAAGAGAATGACCGGTTTG
TGAATGTAATTTTATGAATTTAAATGGTTTTATCTTTCAGTAGAAACCTGAAACGTTCAT
CAAATACTAAGGTTATTTCCTCAAGGGCAGATTCTTTTCTGCCCTTTTTTAGTGTTCATG
TTCTGTGCATCCCGTCACAAATTCCTCGCTTTTGTAATTCAGGCATTTAATCGCATTTTG
TGAGCCTGCTCAAATCTGCCTATTTTGCCTCTCTGGCGGTAATTTACTTTACGTAAAACA
TGCATACTATGAGCACATGTTTAAATATGAACACATGTTTAAACCGTCTTTGCAGTATCT
ATATTCTTGTGGATTGACAGGGTTGGTAATTTTTTACCAGAGGACGTGCTATGCGCGAAA
AGGATTATGTCGTAATTATAGGTTCGGCGAATATTGATGTCGCCGGATATTCACATGAAT
CATTAAATTATGCGGATTCAAATCCAGGTAAAATAAAATTTACGCCTGGTGGAGTAGGGC
GCAATATTGCACAAAACCTGGCGTTGCTGGGTAACAAAGCCTGGCTACTGAGCGCCGTAG
GCAGTGATTTTTATGGTCAATCGCTGCTAACGCAAACCAATCAATCAGGCGTTTATGTCG
ATAAATGCCTGATTGTGCCGGGAGAAAATACGTCGAGTTATTTATCATTACTCGATAATA
CCGGTGAAATGCTGGTTGCTATAAATGACATGAATATTAGCAACGCTATTACAGCTGAAT
ATCTCGCACAGCACCGTGAATTTATTCAGAGGGCAAAGGTCATTGTCGCGGACTGTAATA
TCAGTGAAGAGGCACTGGCATGGATTCTGGATAATGCCGCCAACGTACCTGTATTTGTCG
ATCCGGTTTCCGCGTGGAAATGTGTCAAAGTGCACGACCGTCTAAATCAGATCCACACTC
TCAAGCCAAACCGCCTTGAAGCGGAAACCCTGAGTGGGATTGCGCTGTCAGGGCGTGAAG
ATGTGGCAAAAGTTGCTGCCTGGTTCCATCAACATGGCCTGAACCGACTGGTATTGAGCA
TGGGCGGCGATGGCGTTTATTACAGTGATATCAGCGGTGAAAGTGGCTGGTCTGCCCCGA
TCAAAACCAATGTTATTAATGTTACCGGAGCGGGCGATGCCATGATGGCGGGACTTGCTT
CGTGTTGGGTAGACGGAATGCCGTTTGCCGAATCTGTTCGTTTCGCACAGGGATGTTCGT
CAATGGCGCTCTCCTGTGAATACACCAATAACCCCGATTTATCGATTGCCAACGTTATAT
CGTTAGTGGAGAACGCAGAATGTCTGAATTAAAAATTTCCCCTGAATTATTACAAATTTC
CCCGGAAGTGCAGGACGCTTTAAAAAACAAAAAACCGGTTGTGGCGCTGGAATCGACCAT
TATTTCTCACGGGATGCCGTTCCCACAAAATGCCCAGACCGCAATTGAAGTTGAAGAAAC
TATTCGTAAACAGGGCGCTGTACCTGCCACTATCGCCATTATTGGCGGCGTGATGAAAGT
GGGTTTAAGCAAAGAAGAAATTGAATTACTGGGTCGTGAAGGGCATAACGTGACCAAAGT
TAGTCGTCGCGATTTACCTTTTGTTGTTGCCGCCGGAAAAAATGGCGCAACCACTGTGGC
TTCAACGATGATTATTGCGGCGCTTGCCGGAATTAAAGTATTTGCCACCGGGGGAATTGG
TGGTGTGCATCGCGGGGCGGAACATACCTTCGATATTTCTGCCGATTTGCAAGAACTGGC
AAATACTAATGTCACCGTTGTTTGTGCCGGGGCGAAATCTATTCTCGATTTAGGATTAAC
CACTGAGTATTTAGAAACCTTCGGTGTGCCGTTAATTGGCTATCAGACTAAAGCGCTGCC
TGCGTTTTTCTGCCGTACCAGCCCGTTTGACGTCAGCATTCGTCTCGACAGCGCCTGTGA
AATTGCCCGTGCAATGGCGGTGAAATGGCAAAGCGGGCTGAACGGTGGCCTCGTGGTAGC
GAACCCGATCCCGGAACAGTTTGCGATGCCAGAACACACTATCAATGCGGCGATCGATCA
GGCGGTAGCTGAAGCTGAAGCGCAGGGTGTTATTGGTAAAGAAAGTACGCCATTCCTGCT
GGCGCGCGTTGCTGAACTGACCGGCGGTGACAGCCTGAAATCCAACATCCAACTGGTGTT
CAACAACGCCATTCTGGCGAGTGAAATTGCCAAAGAATACCAGCGTCTCGCGGGTTAATT
TCTGACGGGCAGAAAGCCGTCGCCCGTACTCATCAAACATACCAAAACCTGGCGCTGACG
CCGGGTTTACTGGCATGAAGGGAAAATCATTATGGACATAATGAGAAGTGTTGTGGGGAT
GGTGGTGTTACTGGCAATAGCATTTCTGTTGTCAGTGAATAAAAAGAGCATCAGTTTGCG
TACGGTTGGAGCCGCACTACTGCTGCAAATTGCTATTGGTGGCATCATGCTCTATTTTCC
GCCGGGAAAGTGGGCTGTAGAACAGGCGGCATTAGGCGTTCATAAAGTGATGTCTTACAG
TGATGCCGGTAGCGCCTTCATTTTTGGTTCGCTGGTCGGGCCGAAAATGGATGTCCTCTT
TGACGGTGCGGGTTTTATCTTCGCCTTTCGCGTACTCCCGGCGATTATCTTCGTCACTGC
GCTCATTAGTCTGCTGTACTACATTGGCGTGATGGGGCTGCTGATTCGCATCCTTGGCAG
CATTTTCCAGAAAGCCCTCAACATCAGCAAAATCGAATCTTTTGTTGCGGTTACCACTAT
TTTCCTCGGGCAAAATGAGATCCCGGCGATCGTTAAACCGTTTATCGATCGCATGAATCG
CAACGAGTTGTTTACCGCAATTTGTAGCGGGATGGCGTCCATTGCGGGTTCGATGATGAT
TGGTTATGCCGGAATGGGCGTACCAATTGACTACCTGTTGGCGGCATCGCTGATGGCGAT
CCCCGGCGGTATTTTGTTTGCACGTATTCTTAGTCCGGCAACCGAGCCTTCGCAGGTCAC
ATTTGAAAATCTGTCGTTCAGTGAAACGCCGCCAAAAAGCTTTATCGAAGCGGCGGCGAG
CGGTGCGATGACCGGGTTGAAAATCGCCGCCGGTGTGGCGACGGTGGTAATGGCGTTTGT
CGCAATTATTGCGCTGATTAATGGCATTATCGGCGGAATTGGCGGCTGGTTTGGTTTTAC
CAATGCTTCTCTGGAAAGTATTTTTGGCTATGTGCTGGCACCGCTGGCGTGGATCATGGG
TGTGGACTGGAGTGATGCTAACCTTGCGGGTAGCCTGATTGGGCAGAAACTGGCGATTAA
CGAATTCGTCGCTTACCTGAGTTTCTCCCCATACCTGCAAACGGGCGGCACGCTGGGAGT
GAAAACCATTGCGATTATCTCCTTTGCGCTTTGTGGTTTTGCTAACTTTGGTTCTATCGG
TGTTGTCGTTGGCGCATTTTCGGCTATTTCGCCAAAACGTGCACCGGAAATCGCCCAGCT
TGGTTTACGGGCGCTGGCAGCAGCAACGCTTTCCAACCTGATGAGCGCGACCATTGCCGG
GTTCTTTATTGGTTTAGCTTGAGTTTCATTGCCGGATGTACTCGCTTATTAAGCGTTGCA
TCCGGCAATCGCGCTATTGCAAATAATTTTTACTGCATCATCCCGGAGAATTTATTCTCC
GGGTCCATCTCCAGCGCCAGTCCTGACAACTGCCTTTTGTTTTTAATGAGATACCCTTTC
TTGCTTTTAATTAATAAACCGTCGTGAATGAATTGCGCGAGAACATATAAAAGATGTCGA
TAAGAAACGCCTAAATACTCTGCCGCTTGCGTATGCTTTTCGTGATAAAGATCACCTTCT
TGTGAGAGTAATATAAATGCTGCCAGGCGATTCACTAACGGAAATGATTGGTTCTGAGTT
AAAGAAACAATATTACGATAATTTTTATGACTTAAGGTGACGCAAAGTTTTCGTAAAAAT
AGGGTGTCGTTTAATAACAGCGGACGGTAATGTTTCATAGGGAGCGCAAGGCACCAACAC
TCTTCAATCGCCTGTACTGCACGTGGTTCATGGTCTTTATCGATTAACTCAATCTCGCCA
ATAAAACAGGGGGCGGCAAAGAAATCGATCAGCGACACGCGACCATTAGCTAGCGTGGCG
TAAAGCCTGGCGCGGCCTCGCGTCAGGTAAAACAGCCAGGACGGCTGTTGCCCTTCCTGC
ACAATGTAGTCACGCGCTAAAAAATGAAACAGCCGCGTATCGGCTGAAACATCCGTTAAA
AAGCAATCCTTAAACGCGGATTCACTCATCAATTGCAGCTTAAGATCATTATTGTGGATT
TCTTTCACGATGTTTATCCGCTGTGAGATTTCTCATATTTAGCATACGTACGCTGTTGTT
AAGATTCAATCATCGGCCCGGTCGAAATTTCTTTGCTGTAGAAAAAATAACGCAACTGGA
AACAGAGGAAATAAACAATGGAAAAGAGAAAAATTATTCTGGATTGTGATCCGGGTCATG
ATGATGCTATTGCTATAATGATGGCGGCGAAACATCCGGCGATTGATTTATTAGGTATCA
CCATTGTTGCGGGTAATCAGACGCTTGATAAAACATTAATTAATGGCCTGAATGTTTGCC
AGAAACTGGAGATTAATGTTCCGGTTTATGCGGGGATGCCGCAACCCATTATGCGTCAAC
AAATCGTTGCCGATAATATTCACGGTGAAACCGGACTGGATGGCCCGGTATTCGAGCCGC
TGACCCGCCAGGCAGAAAGTACCCACGCGGTGAAATACATCATTGATACCCTGATGGCAA
GCGATGGCGATATCACTCTGGTGCCGGTTGGTCCGTTGTCAAATATCGCGGTGGCAATGC
GTATGCAACCCGCAATCCTGCCCAAAATACGTGAAATTGTGCTAATGGGCGGCGCTTACG
GTACAGGCAACTTCACGCCATCTGCCGAGTTCAACATCTTTGCTGACCCGGAAGCCGCAC
GCGTGGTGTTCACCTCTGGCGTTCCATTAGTGATGATGGGCCTCGATCTCACCAACCAGA
CCGTTTGCACCCCGGACGTGATTGCACGAATGGAAAGGGCAGGCGGCCCTGCCGGAGAGC
TGTTCAGCGACATCATGAACTTCACTCTCAAAACCCAGTTCGAAAACTACGGCCTGGCTG
GCGGCCCGGTGCACGACGCCACCTGCATCGGTTATCTGATTAACCCTGATGGCATTAAAA
CCCAGGAGATGTACGTCGAAGTGGACGTCAACAGTGGCCCTTGCTATGGGCGTACCGTCT
GCGACGAGCTGGGCGTTCTTGGCAAGCCCGCTAATACCAAAGTCGGCATCACTATTGATA
CCGACTGGTTCTGGGGCTTAGTCGAAGAGTGCGTGCGCGGCTACATCAAAACCCATTAAG
TGTTGATAACAAGCCGGGTCAGTATCGCAAGATGCAGGCCCGGCTATTTCTGAGGGGCAG
AAAGCCGTCGCCCAATATGACATGAAGAGATAATAACTATGGATGTCATGAGAAGTGTTC
TGGGAATGGTGGTATTGCTGACGATTGCGTTTTTACTGTCAGTAAACAAGAAGAAGATCA
GCCTGCGTACCGTTGGCGCGGCGTTAGTGTTACAGGTTGTGATTGGCGGGATTATGCTTT
GGTTACCGCCAGGGCGTTGGGTCGCTGAAAAAGTCGCTTTTGGCGTGCATAAAGTGATGG
CGTACAGCGACGCGGGTAGCGCATTTATCTTCGGTTCGCTGGTCGGGCCGAAAATGGACA
CGCTGTTTGATGGCGCAGGATTTATCTTTGGTTTCAGGGTGTTACCGGCAATTATCTTCG
TCACCGCGCTGGTGAGTATTCTCTATTACATCGGTGTGATGGGGATCTTAATTCGCATTC
TCGGCGGTATATTCCAGAAAGCATTAAATATCAGCAAGATCGAGTCATTCGTCGCGGTCA
CTACCATTTTCCTCGGGCAAAACGAAATTCCGGCGATCGTCAAACCCTTTATCGATCGTC
TGAATCGCAATGAATTATTTACAGCGATTTGTAGTGGCATGGCCTCGATTGCTGGTTCGA
CAATGATTGGTTACGCCGCACTGGGCGTACCTGTGGAATATTTGCTGGCGGCATCGTTAA
TGGCGATCCCCGGCGGGATCTTGTTTGCCCGCATGCTAAGCCCGGCTACGGAATCTTCAC
AGGTTTCCTTTAATAACCTCTCTTTCACCGAAACACCGCCAAAAAGCATTATTGAAGCGG
CAGCGACAGGGGCGATGACCGGGCTGAAAATCGCTGCGGGTGTGGCAACAGTGGTGATGG
CATTTGTTGCCATCATTGCGTTAATTAACGGTATTATCGGCGGCGTAGGCGGCTGGTTTG
GTTTTGAACATGCCTCGCTGGAGTCCATTTTAGGTTACCTGCTGGCCCCACTGGCGTGGG
TAATGGGTGTTGACTGGAGTGATGCGAATCTTGCCGGGAGTTTGATTGGACAGAAACTGG
CAATAAATGAATTTGTCGCTTATCTCAATTTCTCACCCTATCTGCAAACGGCTGACACGC
TGGATGCTAAAACCGTGGCGATTATTTCCTTCGCGTTGTGCGGTTTCGCTAACTTTGGTT
CTATCGGGGTGGTGGTGGGGGCGTTTTCTGCGGTTGCGCCACACCGTGCGCCGGAAATCG
CCCAGCTTGGTTTACGCGCGCTGGCGGCGGCGACACTTTCTAACCTGATGAGTGCCACCA
TTGCCGGGTTCTTTATTGGTTTAGCGTAGTGTGCGATTTATGAGCCGGATTAGATGCGGT
CAAGCGTCGAATCCGGCAACATTGTTACACCATTGGCACTAATGACAGCGCGTTATCGGC
AGACAGGGTAGGGTTGTTTAAGCTGCCGCTGGCGCGTGAAATTGCCGCGCAGGCCATCGC
AAAACGGGCGCTGTCACGGAAATTGTTTCCCTCCAGAAAGCTATATACCAGGCCCGCCAT
AAAACCATCGTCAGCACCAAAACTGTCTACTGTCGTATGCGCTGGTGCGGTCAGCAAAAA
TTGTTCACCATCCTTTTCGCTGCAATAAACTGACTCATCGGGCAAATAAACAAACAGTTG
CTGAACACCTTGCTGATGCAACGCATTCACTGCGGCATTACGGTCAGCATCGCTGGTGAT
CGCCTGTCCCCATAAAATTTCCAGCTCCGGTAAAGTGGGTTTCAGGGTGTGAATATGCGC
CAGCCAGGGTTTGATTTTGCCCGCTTTGAATTCTGAAACGGTATCGACAAACACCGGGAT
TTGATCAGCGAGGGTAAAGACCCATTCCAGCGCCTCGGCTGTCAGGTTGCAATCAGCCAG
TACCACGCCCGCATGACGAAGTAAATCGCGCGACCCGTTCAGTAGTTGCGGTGTCAACTG
TTCCAGCAGATGGGTATCGTTAATCGCCAGCACGGTTTGATCGTCTCGATTGGCAATTGC
CAGATACGTCGATGTGCTTTGACCATGTAAACGAACGCAGCCGGAGACATTCACGCCGGC
ACGGCGCGTTTCTTCCAGGAGCATTTCGCCATAAAAGTCATCGCCAATCACTGAAAGCAA
ATGGACGTCGCGGCCTAACAGCGCCAGATTGTGGGCGATATTGCGTCCAACGCCGCCTGC
CGAGCAATGAATTGTACCGGGATGAGAAGCCGCTTGCGGGTAACGGATATCCGCCATCCC
GCGAATATCCATATTGATTGTCCCCACCACTACGCAGTATTCCTGCTCGGTGAGAATGTA
ACCTTTGCCTTTAATCCGCCCTTTGCGCATTAAATCCATAATATGCGCCGCAACGCGCGA
ACGACTGATTTGCAGCATGTCCGCAATTTCGTTCTGCTGAATCAGCGGGTTACGCCGTAA
AATTGCAAGGATCTCCTTTTCCCGGTTATTCATCTTCAGGCAACCGCTTTTTCAGTTTGT
TGCGCTTTCAGCCAGGCGATCTCTTCTGCCCAGATATCCGGGTTAATGGTTTCAAGGATC
AGCGGAATGCCGTCGAAACGGTCGTCCTGCATGATCCAGCGGAACGCATCATGACCGATA
TTGCCTTCACCGAGGCTATGATGGCGGTCAACGCGGCTGCCAAAGGTGCTTTTCGCATCG
TTAAGGTGCATCCCGCGCAGATACTTAAAGCCGACAATACGGGCAAAATCAGCGAACGTT
TTCTCGCATTCGGCTGGAGTACGCAAATCATACCCGGCAGCGAAAGCATGGCAGGTATCA
ATGCAGATGCCGACACGGGATTTATCTTCCACGCCGTCGATAATCGCCGCGAGATGTTCG
AATTTAAACCCTAAGTTACTGCCCTGACCGGCGGTGTTTTCAATCACCGCGGTCACACCT
TGAGTTTTATCCAGCGCAATGTTGATGGATTCGGCAATACGCGCAAGGCAATCCTCTTCT
GAAATCTGCATCAGATGGCTGCCAGGGTGGAAGTTGAGCAAAGAAAGCCCCAGTTGTTCG
CAACGCTGCATTTCATCTATAAAGGCATCGCGCGATTTTTCCAGAGCTTCAGTGACCGGA
TGTCCGAGGTTAATCAGATAGCTGTCGTGGGGAAGAATTTGCGCCGATGTGTAGTGATAT
TTTTCACAGGCGGCTTTGAATTCATCGATGGTTTGCGTCGTGAGCGGTGCGGCACGCCAC
TGACGTTGGTTTTTGGTGAACAAGGCAAACGCGGTTGCGTCGATTTCGGCGGCGCGAATT
GCGGCATTTGCCAGACCGCCAGCAGCACTAACGTGCGCTCCAATGTATTTCATGCGAGGA
CTCCTGTTAAACCCGCTGGAGGAAAACGGTAATGATAGCGGGTTAACAGGAGCAAGATGT
AGTGGTTTATGCGATGACGCTTTGAATCACATAGTTAATCGCACCACCACCAACAATCAG
CCAGGCAAACAGTACCAGTGCCATCAGCAGAGGTTTCGCCCCAGCTTTTTTCAGCGCGCT
GACGTGAGTGGTCAGACCCAGCGCCGCCATCGCCATTGCCAGCAGGAAGGTATCCAGCGT
TACCAGCATGTTCACCACGCTCTGCGGTAACAGGTGGAACGAGTTAAAGATGGCAACTAC
GATGAACAAGATGGCAAACCACGGAATAGTGATTTTGCTTTTCTCGCCGCTGTTCGCCCC
AGACAGCTGTTTAACACGCGCCGCCAGCAGGATGAGGAACGGAGCCAGCATCATCACGCG
CAGCATTTTGGAAATAACTGCTGCGTTTTCCGCATCCGGGCTGATGGCATGACCTGCCGC
CACCACCTGCGCCACTTCGTGCACAGTAGAACCAATGTAGATACCGAAAGTTTCCGGACT
AAACCATTGAGACATCAGCGGATATATCGCCGGGTAGAGGAAAATCGCGACGGTCCCGAA
GATAACAACGGTTGCAACAGCCACGGTTACTTTACTGGCTTCCGCTTTCACTACCGGCTC
AGTCGCCAGTACCGCGGCAGCACCACAGATACTGCTACCGGCACCGATCAACCAGCTGGT
GTGCTTATCCAGACCAAACACTTTCTGCCCCAGGAAGCAAGCCAGCAGGAAGGTACTGGA
CAGCGTCAACACGTCAATGATGATCCCACTGATACCGACATCGGCAATTTGCGAGAACGT
CAGACGGAAGCCATAAAGAATGATACCCAGACGTAATAAATATTGCTTGGCAAACAGCAC
ACCACCGTCACAGCTTTTCCAGATGTGCGGATAGATGGTGTTGCCTAAAACCATCCCCAA
CAAGATTGCGAGGGTGAGGGCACTAAACCCGGCACCCGCAACCGCGGGAATGGAACCACC
CCACAGGGCGACCCCGGTGATAACTGCACTCAGGGCTAACCCCGGAATAAAATGCCACAG
TGTACGATGTTGTTTCTGTAAGGTGATATTCGTCATAACCCTCTCCTTTAACCGGGCATA
AGGTTACGACTAACTGGTTTAAAAATAAAATTGATTATATATTTATAATTAATCTTTATA
AGTGGTAAGCGACTATGCACATCACCCTCCGGCAGTTGGAAGTTTTTGCAGAAGTATTGA
AAAGTGGATCAACCACCCAGGCGTCGGTGATGCTGGCGTTGTCGCAATCAGCAGTGAGCG
CAGCCTTGACCGACCTGGAAGGGCAGCTTGGCGTTCAACTGTTTGATCGCGTGGGGAAAA
GACTGGTTGTTAATGAACACGGGCGGCTGCTCTATCCGCGTGCGTTGGCATTGCTTGAAC
AGGCGGTTGAAATCGAACAACTGTTTCGCGAAGACAACGGCGCGATTCGTATCTATGCCA
GTAGTACCATCGGTAACTACATTCTGCCTGCAGTTATCGCCCGTTATCGCCATGATTATC
CGCAGTTGCCGATTGAACTTAGCGTTGGGAACAGCCAGGACGTGATGCAAGCGGTGCTGG
ATTTCCGCGTTGATATTGGCTTTATTGAAGGACCGTGCCACAGCACTGAAATCATTTCTG
AACCGTGGCTGGAAGACGAGCTGGTGGTTTTCGCCGCGCCGACTTCGCCGTTGGCCCGTG
GTCCGGTCACCTTAGAACAGCTGGCCGCTGCGCCGTGGATCCTGCGTGAACGCGGTTCCG
GCACGCGGGAGATTGTCGATTATCTGTTGCTGTCACATTTACCGAAGTTTGAGATGGCGA
TGGAATTAGGTAACTCCGAGGCAATCAAACATGCGGTGCGTCATGGGTTGGGAATTAGTT
GCCTGTCGCGACGGGTGATTGAAGACCAATTGCAGGCAGGCACATTAAGTGAAGTTGCGG
TCCCTCTGCCGCGCCTGATGCGTACGTTGTGGCGTATACATCATCGGCAAAAACACCTTT
CCAACGCGCTACGGCGCTTTCTGGACTATTGCGATCCCGCAAATGTGCCGCGTTAAGTTG
CTGTACAAGAACATGCTGGTGCTGTGTCGATTTCGTGACGCAGCGCCTTCAGCATGCATT
CGCCAGAAAAGAGATTGGCTGCTTTACTTATAATCCCTGGGCGATCATGAAGGTGTCTTA
TAACCGTGTATTTCTGCCGGAAGGATTGCCAATCGTCTGCTACAATCGCGCCTCATTTTT
TAGATGGATAGCATTTTTGTATGGTTTCCGAAACTAAAACCACAGAAGCGCCGGGCTTAC
GCCGTGAATTAAAGGCGCGTCACCTGACGATGATTGCCATTGGCGGTTCCATCGGTACAG
GTCTTTTTGTTGCCTCTGGCGCAACGATTTCTCAGGCAGGTCCGGGCGGGGCATTGCTCT
CGTATATGCTGATTGGCCTGATGGTTTACTTCCTGATGACCAGTCTCGGTGAACTGGCTG
CATATATGCCGGTTTCCGGTTCGTTTGCCACTTACGGTCAGAACTATGTTGAAGAAGGCT
TTGGCTTCGCGCTGGGCTGGAACTACTGGTACAACTGGGCGGTGACTATCGCCGTTGACC
TGGTTGCAGCTCAGCTGGTCATGAGCTGGTGGTTCCCGGATACACCGGGCTGGATCTGGA
GTGCGTTGTTCCTCGGCGTTATCTTCCTGCTGAACTACATCTCTGTTCGCGGCTTTGGTG
AAGCGGAATACTGGTTCTCACTGATCAAAGTCACGACAGTTATTGTCTTTATCATCGTTG
GCGTGCTGATGATTATCGGTATCTTCAAAGGCGCGCAGCCTGCGGGCTGGAGCAACTGGA
CAATCGGCGAAGCGCCGTTTGCTGGTGGTTTTGCGGCGATGATCGGCGTAGCTATGATTG
TCGGCTTCTCTTTCCAGGGAACCGAGCTGATCGGTATTGCTGCAGGCGAGTCCGAAGATC
CGGCGAAAAACATTCCACGCGCGGTACGTCAGGTGTTCTGGCGAATCCTGTTGTTCTATG
TGTTCGCGATTCTGATTATCAGCCTGATTATTCCGTACACCGATCCGAGCCTGCTGCGTA
ACGATGTTAAAGACATCAGCGTTAGTCCGTTCACCCTGGTGTTCCAGCATGCGGGTCTGC
TCTCTGCGGCGGCGGTGATGAACGCAGTTATTCTGACGGCGGTGCTGTCAGCGGGTAACT
CCGGTATGTATGCGTCTACTCGTATGCTGTACACCCTGGCGTGTGACGGTAAAGCGCCGC
GCATTTTCGCTAAACTGTCGCGTGGTGGCGTGCCGCGTAATGCGCTGTATGCGACGACGG
TGATTGCCGGTCTGTGCTTCCTGACCTCCATGTTTGGCAACCAGACGGTATACCTGTGGC
TGCTGAATACCTCCGGGATGACCGGTTTTATCGCCTGGCTGGGGATTGCCATTAGCCACT
ATCGCTTCCGTCGCGGTTACGTATTGCAGGGACACGACATTAACGATCTGCCGTACCGTT
CAGGTTTCTTCCCATTGGGGCCGATCTTCGCATTCATTCTGTGTCTGATTATCACTTTGG
GCCAGAACTACGAAGCGTTCCTGAAAGATACCATTGACTGGGGCGGCGTAGCGGCAACGT
ATATTGGTATTCCGCTGTTCCTGATTATTTGGTTCGGCTACAAGCTGATTAAAGGAACTC
ACTTCGTACGCTACAGCGAAATGAAGTTCCCGCAGAACGATAAGAAATAAGTTTCCTCCC
TTCCTTGCTAAGCCCTCTCAACCGAGAGGGCTTTTTCAATTCCATTTCCCTGACAAATCA
TGCGGATATAAAATTTAACATTTGGATTGATAATTGTTATCGTTTGCATTATCGTTACGC
CGCAATCAAAAAAGGCTGACAAATCAGAGGCTGTTCCGGCTTTCTGGGATGATCACCTGC
ATACAAATAAGTCCACCGCGATGCTGCCGTACGCAATGGGACGTGAAGAAGATGTGAGCG
ATAACCCATTTTATTTTCGTAGTTACCTCATGGAGATATGGAATGTTTAGGTTGAACCCT
TTCGTACGGGTCGGGCTGTGTTTGTCCGCTATTTCTTGTGCATGGCCTGTGTTAGCGGTC
GATGATGATGGCGAAACGATGGTTGTCACTGCATCTTCCGTTGAACAAAACCTTAAAGAT
GCACCCGCCAGTATCAGCGTCATTACCCAGGAAGACCTGCAGCGAAAACCGGTACAGAAT
CTGAAGGATGTCCTCAAAGAAGTGCCTGGCGTACAACTGACGAACGAAGGGGATAACCGT
AAGGGCGTTAGTATTCGTGGTCTGGACAGCAGCTACACCCTGATTCTTGTCGACGGTAAA
CGCGTTAACTCCCGCAATGCCGTCTTCCGCCACAATGATTTCGATCTGAACTGGATCCCG
GTCGATTCCATCGAACGTATTGAAGTGGTCCGTGGCCCGATGTCGTCGCTGTACGGTTCC
GATGCGCTCGGCGGTGTAGTGAATATCATCACCAAAAAAATCGGTCAGAAATGGTCGGGT
ACCGTTACCGTCGATACCACCATTCAGGAACATCGCGATCGCGGTGATACCTATAACGGT
CAGTTCTTTACCAGTGGACCATTAATTGATGGTGTGCTGGGAATGAAAGCTTACGGCAGC
CTGGCAAAACGTGAAAAGGATGACCCGCAAAACTCAACGACCACCGATACCGGAGAAACG
CCGCGTATTGAAGGATTCTCCAGCCGCGACGGCAATGTCGAATTTGCCTGGACACCGAAT
CAAAATCACGATTTTACTGCCGGATACGGTTTCGACCGTCAGGATCGTGATTCCGACTCG
CTGGACAAAAACCGCCTGGAACGCCAGAACTACTCCGTCAGCCATAATGGGCGTTGGGAT
TACGGCACCAGCGAACTGAAATACTACGGTGAGAAAGTCGAGAACAAAAACCCTGGCAAC
AGCAGCCCGATAACTTCCGAAAGCAATACGGTCGACGGCAAATACACGTTGCCGCTGACG
GCGATTAATCAGTTTCTCACGGTTGGCGGTGAATGGCGTCACGACAAACTTAGCGATGCG
GTGAACCTGACCGGGGGAACCAGCTCCAAAACGTCTGCCAGCCAGTACGCGCTGTTTGTG
GAAGATGAATGGCGGATCTTCGAGCCGCTGGCGCTGACGACCGGCGTGCGTATGGACGAT
CACGAAACCTACGGTGAACACTGGAGTCCGCGTGCCTACCTGGTTTATAACGCCACCGAC
ACCGTAACGGTGAAAGGGGGCTGGGCGACGGCATTTAAAGCGCCTTCTCTGTTGCAACTT
AGCCCTGACTGGACGAGCAATTCCTGCCGTGGCGCATGTAAGATTGTAGGTAGCCCGGAT
CTGAAACCAGAAACCAGCGAAAGTTGGGAGCTGGGGCTGTACTACATGGGTGAAGAAGGC
TGGCTGGAAGGGGTTGAATCCAGCGTTACCGTTTTCCGTAACGATGTGAAAGATCGCATC
AGCATCAGCCGTACGTCTGACGTCAATGCTGCACCGGGCTACCAAAACTTTGTCGGTTTT
GAGACGGGCGCTAACGGACGGCGCATACCGGTATTTAGCTACTACAACGTTAACAAAGCT
CGTATTCAGGGCGTGGAAACCGAACTGAAAATTCCGTTCAACGATGAATGGAAACTGTCA
CTCAACTACACCTATAACGATGGTCGTGATGTCAGCAACGGCGAAAACAAACCGCTATCC
GATCTGCCGTTCCATACCGCTAACGGTACGCTGGACTGGAAACCGCTGGCGCTGGAAGAC
TGGTCATTCTATGTTTCTGGTCACTATACCGGGCAGAAACGAGCCGACAGCGCGACGGCT
AAAACACCGGGCGGTTATACCATCTGGAATACCGGTGCGGCCTGGCAGGTGACTAAAGAC
GTCAAACTGCGCGCAGGCGTGCTGAACCTTGGCGACAAGGATCTCAGTCGTGACGACTAC
AGCTATAACGAAGACGGACGTCGTTACTTTATGGCAGTGGATTATCGCTTCTGATGAGAA
GATGCCCGGCGAACCGGGCGGACTTTCACTTCAGTAAATACTGCGCATGGAAGCGCAGGT
GATCCTCTATAAAAGAGGCGATGAAGTAGTAACTGTGATCATATCCCGGCTGAATACGCA
GCGTCATCGGCCACGCTTTCTGGCGCGCGGCTTCTGCCAGCACTGCGGGTTGCAGTTGGT
CAGCAAGAAACTGATCATTATCACCCTGATCGATAAGCGTCGGGATCGCATCCTGCGCGT
TACTGGCATACATCAGCGCACAACTGTCCCATTCCAGCCATGCATTTTTGTCCTCACCTA
AATAGGTGCTAAACGCTTTAATGCCCCAGGGTACGCTGCATGGATTCACAATCGGCGCAA
AGGCGGAAACGCTGGTGTATTTGCCCGGGTTTTTCAGCGCCATAATCAGCGCACCGTGAC
CACCCATTGAATGACCGCTAATAGCGCAGCGGTCGCTGACATTAAATTGCGACTGAATCA
GCGCCGGTAATTCATCGCGCAGATAATCATACATCCGGTAATGCGTCGCCCAAGGCGGTT
GCGTGGCATTAAGATAAAAGCCTGCGCCCTGGCCTAAATCGTAGCCATCGTCGTTGGCAG
CCTGTTCGCCGCGCGGGCTGGTGTCTGGCATCACCAGTACAATCCCCAGTTCCGCCGCCA
CGCGCTGGGTACCCGCCTTGGTGGTGAAGTTCTCGTCATTGCAGGTTAATCCGGAAAGCC
AGTACAGCACTGGTGGCGGGGTGTTATCGCGGGGCGGTGGCAAAAAGATACTGAACGTCA
TCGGGCAGTTTAAGGTACTGGAGTCGTGTCGCCAGCGTTGCTGCCAGCCTTCAAAACAGC
GGTGCTCTTCGAGCATTTCCATGCGTGGCTCCTTGTTGTGTTGTTTGCAATTTCTTCATC
ATACCGTTTATTCAATGTGCTGTGAGTAACTTTCACTTCCGTATTTGCATAACGATGTTT
TAACATCTGCTGATGAAAGGCAGCGGCAATTACAATAATTATCGCTGCGAATACTGGATT
ATGTGCGCCGCCTCACGCACAATAATCAGGCTGTAAATCAGCTTAATAACTTTGCCCCCA
CGCAGGGCGGAGGCGTCACACCTGCAGGAGAAATCATAAATGCCATCACTCAGTAAAGAA
GCGGCCCTGGTTCATGAAGCGTTAGTTGCGCGAGGACTGGAAACACCGCTGCGCCCGCCC
GTGCATGAAATGGATAACGAAACGCGCAAAAGCCTTATTGCTGGTCATATGACCGAAATC
ATGCAGCTGCTGAATCTCGACCTGGCTGATGACAGTTTGATGGAAACGCCGCATCGCATC
GCTAAAATGTATGTCGATGAAATTTTCTCCGGTCTGGATTACGCCAATTTCCCGAAAATC
ACCCTCATTGAAAACAAAATGAAGGTCGATGAAATGGTCACCGTGCGCGATATCACCCTG
ACCAGCACCTGTGAACACCATTTTGTTACCATCGATGGCAAAGCGACGGTGGCTTATATC
CCGAAAGATTCGGTGATCGGTCTGTCAAAAATTAACCGCATCGTGCAGTTCTTTGCCCAG
CGCCCACAGGTACAGGAACGTCTGACCCAGCAAATTCTCATTGCGCTACAAACGCTGCTG
GGCACCAATAACGTGGCTGTCTCTATCGACGCGGTGCATTACTGCGTGAAGGCGCGTGGC
ATCCGCGACGCAACCAGTGCCACAACAACGACCTCTCTTGGTGGATTGTTCAAATCCAGT
CAGAATACGCGCCACGAGTTTCTGCGCGCTGTGCGTCATCACAACTGATTAAAAGGCAGG
AACCATGGAGCGCAACGTCACGCTCGATTTTGTTCGCGGCGTCGCCATTCTGGGGATCCT
GCTATTAAACATCAGCGCCTTTGGGCTACCAAAGGCGGCTTATCTCAATCCCGCCTGGTA
CGGCGCTATTACGCCGCAGGATGCATGGACCTGGGCATTTCTCGATCTCATCGGCCAGGT
GAAATTCCTCACGCTTTTTGCGCTGCTGTTTGGTGCGGGCCTGCAAATGTTGCTGCCCCG
TGGCAGACGCTGGATCCAGTCGCGGTTAACGCTGTTAGTCTTGCTGGGCTTTATTCACGG
TTTATTGTTCTGGGACGGCGATATTCTGCTGGCTTACGGTCTGGTGGGCTTAATCTGCTG
GCGGCTGGTGCGCGATGCGCCATCAGTAAAAAGCCTGTTTAATACCGGCGTCATGCTTTA
TCTGGTGGGGCTTGGCGTTTTGCTGTTATTGGGGTTGATTTCCGATAGCCAGACCAGCCG
CGCCTGGACGCCGGATGCATCGGCTATTTTGTATGAAAAATACTGGAAGCTTCACGGCGG
CGTTGAAGCGATCGGTAATCGTGCCGATGGTGTTGGAAACAGTTTACTGGCACTGGGCGC
ACAGTATGGCTGGCAACTGGCAGGGATGATGCTCATTGGTGCGGCGCTGATGCGCAGCGG
CTGGCTGAAAGGGCAGTTCAGCTTACGTCACTATCGTCGTACTGGTTTTGTGCTGGTGGC
GATTGGGGTGATCATTAACCTTCCTGCTATCGCCCTGCAATGGCGGCTGGACTGGGCGTA
TCGCTGGTGCGCCTTCTTACTTCAGATGCCGCGGGAACTGAGTGCGCCGTTTCAGGCGAT
TGGCTATGCGTCGCTGTTTTATGGCTTCTGGCCGCAATTAAGCCGCTTTAAGCTGGTACT
GGCAATCGCCTGCGTCGGACGGATGGCACTGACCAACTATCTATTGCAAACGCTGATTTG
TACCACGCTTTTTTACCACCTCGGTTTGTTTATGCTGTTTGACCGTCTGGAATTGCTGGC
GTTTGTTATTCCGGTATGGCTGGCGAATATTCTCTTCTCTGTTATCTGGCTGCGTTACTT
CCGCCAGGGGCCGGTGGAATGGCTCTGGCGTCAGTTAACTTTGCGTGCAGCTGGGCCGGC
AAGTTCTAAAACATCAAGATAACGATCTGGATCACATTCGTTAACAAAACGGCTGTAACC
GTTTCCATTGCTGTGACTCGATTCACGAAGTCCTGTATTCAGTGCTGACAAAATAGCCGC
CAGCAAGCAGTCATTTACTGCAATCTCATAACAGGTAGTGAATATGATCACCATTCGTGA
TGTAGCGCGTCAGGCTGGCGTCTCTGTGGCAACGGTTTCCCGGGTGCTCAATAACAGCAC
GCTGGTCAGTGCCGACACGCGTGAAGCAGTAATGAAAGCCGTGAGTGAGCTGGATTATCG
ACCAAATGCCAATGCCCAGGCGCTGGCAACTCAGGTTAGCGACACCATTGGCGTGGTGGT
GATGGACGTTTCTGATGCGTTTTTCGGCGCGCTGGTAAAAGCGGTGGATCTGGTCGCCCA
GCAGCATCAGAAATACGTGCTAATCGGCAATAGCTATCATGAAGCGGAAAAAGAGCGTCA
CGCTATTGAGGTGTTAATTCGCCAGCGTTGTAATGCGTTGATTGTTCACTCAAAAGCATT
GAGTGATGATGAACTGGCACAATTTATGGATAACATTCCCGGTATGGTGTTAATCAACCG
CGTTGTGCCGGGGTACGCCCATCGTTGCGTTTGCCTGGATAATCTCAGTGGTGCCCGAAT
GGCGACGCGCATGTTGCTGAATAACGGTCATCAACGTATTGGTTATCTTTCTTCCAGCCA
CGGCATTGAAGATGACGCCATGCGTAAAGCAGGCTGGATGAGTGCGTTGAAAGAGCAGGA
TATTATTCCGCCGGAAAGCTGGATTGGCACAGGTACGCCGGACATGCCGGGCGGTGAGGC
GGCGATGGTTGAACTGCTGGGGCGCAATCTACAACTTACCGCTGTATTTGCTTATAACGA
CAATATGGCCGCTGGCGCACTGACAGCATTAAAAGATAATGGCATTGCGATTCCGTTACA
TCTCTCAATCATCGGTTTCGATGATATTCCCATCGCCCGTTACACCGACCCGCAATTAAC
GACCGTGCGTTATCCCATTGCTTCAATGGCTAAATTAGCCACCGAACTGGCCTTGCAGGG
GGCAGCAGGCAATATTGATCCGCGTGCCAGCCACTGTTTTATGCCGACGTTAGTGCGTCG
CCATTCTGTCGCAACGCGCCAGAATGCGGCGGCGATCACTAACTCAACAAATCTGGCGAT
GTAACCGCTTTCAATCTGTGAGTGATTTCACAGTATCTTAACAATGTGATAGCTATGATT
GCACCGTTTTAACGTTGTAACCCGTATGTAACAGTGAATAATCACTTTCACCGAGGTAAT
AGCGTCATAACAACAATTAAAGCCGTTTTCTGGAGCGTTACCGGGCACTGATGAATCCCC
TAATGATTTTGGTAAAAATCATTAAGTTAAGGTGGATACACATCTTGTCATATGATCAAA
TGGTTTCGCGAAAAATCAACTTGAGACTTGGTATTCATTTTTCGTCTTGCGACGTTAAGA
ATCCGTATCTTCGAGTGCCCACACAGATTGTCTGATAAATTGTTAAAGAGCAGTTGCGAC
GCGGCTTTCAGCTCACTGTCGCGAGGTGGCGTATATTACGCTTTCCTCTTTCAGAGTCAA
CCCTGAATTTCAGGATTTTTTCTCTTCAACCGAACAGGCTGTTTGTGTGAAGTGATTCAC
ATCCGCCGTGTCGATGGAGGCGCATTATAGGGAGTCGGCTCAGGAAGACAAGCGGAAAAA
TGCATTTTTATTTCAACCGCTCATCTTTTAATCATTACGCCGGTTTTTGCTGCTTTTTTA
TCGCTTGCGGCAGGTCTGCCAGGCTATTTAACACCCAATCTGCCGCGTTTTCTGCTTCAG
GTGTAATAGGTTTACCCGTACGCACCAGCACTTTTGTTCCCACGTTCGCCGCAGCCGCTG
CCTGCATATCTTCTAATTTATCGCCCACCATATAAGAGGCGGCCATATCAATATGCAAAT
AATCGCGTGCTGACAAAAGCATCCCCGGATGTGGTTTGCGGCAATCGCAGACCTGGCGAA
ACTCTTCAACACTACCCTGCGGATGATGCGGGCAATAATAGATACCATCCAGATCGACAT
CGCGGTCCGCCAGCGACCAGTCCATCCACTCGGTCAGCGTTTCAAACTGTGCTTCAGTAA
ATTTACCGCGAGCAATGCCAGACTGGTTGGTTACTATCACCAGCGCAAAGCCCATTTTTT
TCAGCTCGCGCATGGCGTCAATAACACCGTCGATAAATTCAAAGTTGTCGATCTCATGGA
CATAGCCGTGATCGACATTAATGGTGCCATCACGGTCAAGAAAAATTGCGGGTACGCTCT
TCGCCACCTTTTATAGCTCCTTAATAAGGCATGTGGCGCTAGTATCGCATGTTTCGACCT
GCAAGAAAGTGCTCTTCGCATAAACCTGATTGATTTAGACGTCTGGATGCCTTAACATCC
ATTTCATTGACGGCGTTGCCCGTTTCAGGCATTCGAAATGCCACGACTAACTTAATGACG
ATAATAAATATTCAATGATAAAACTTTCGAATATCACCAAAGTGTTCCACCAGGGCACCC
GCACCATCCAGGCGTTGAACAACGTCAGCCTGCATGTGCCAACTGGACAAATTTATGGCG
TTATCGGGGCCTCAGGCGCGGGTAAGAGTACGCTTATACGTTGTGTAAACCTGCTGGAGC
GCCCAACCGAGGGTAGCGTGCTGGTCGATGGACAGGAACTGACCACGCTGTCAGAATCCG
AGTTGACCAAAGCTCGCCGCCAGATTGGTATGATTTTCCAGCATTTTAACCTGCTCTCTT
CGCGTACTGTTTTTGGCAACGTGGCTCTGCCGCTGGAGCTGGACAACACACCGAAAGACG
AGATCAAACGTCGCGTGACGGAATTGCTGTCATTGGTTGGTCTTGGCGATAAGCATGATA
GCTACCCGTCGAATCTTTCCGGTGGGCAGAAACAACGTGTGGCGATTGCCCGTGCATTAG
CCAGCAATCCCAAAGTATTGCTGTGTGATGAAGCCACCAGCGCGCTGGACCCGGCAACGA
CACGTTCTATTCTCGAACTGCTGAAAGACATCAACCGCCGTCTGGGTTTGACGATTCTGT
TGATCACTCACGAAATGGACGTTGTGAAGCGCATTTGTGATTGCGTGGCGGTCATCAGCA
ATGGCGAACTGATCGAGCAGGACACGGTAAGTGAAGTGTTCTCACATCCGAAAACGCCGC
TGGCGCAGAAGTTTATTCAGTCAACCCTGCATCTGGATATCCCGGAAGATTACCAGGAAC
GTCTGCAAGCGGAGCCATTCACTGACTGCGTGCCGATGCTGCGTCTGGAGTTTACCGGTC
AATCGGTCGATGCCCCACTGCTTTCTGAAACCGCGCGTCGTTTTAACGTCAACAACAACA
TTATTAGCGCGCAGATGGATTACGCCGGTGGCGTTAAGTTCGGCATCATGCTGACTGAAA
TGCATGGCACACAACAAGATACGCAAGCCGCCATTGCCTGGCTGCAGGAACACCATGTAA
AAGTAGAGGTACTGGGTTATGTCTGAGCCGATGATGTGGCTGCTGGTTCGTGGCGTATGG
GAAACGCTGGCAATGACCTTCGTATCCGGATTTTTTGGGTTTGTGATTGGTCTGCCGGTT
GGCGTCCTGCTTTATGTCACGCGTCCGGGGCAAATTATTGCTAACGCGAAGCTGTATCGT
ACCGTTTCTGCGATTGTGAACATTTTCCGTTCCATCCCGTTCATTATCTTGCTGGTATGG
ATGATTCCGTTTACCCGCGTTATTGTCGGTACATCGATTGGTTTGCAGGCAGCGATTGTT
CCGTTAACCGTTGGCGCAGCGCCGTTTATTGCCCGTATGGTCGAGAACGCTCTTCTGGAG
ATCCCAACCGGGTTAATTGAAGCTTCCCGCGCAATGGGTGCCACTCCAATGCAGATCGTC
CGTAAGGTGCTGTTACCGGAAGCGTTGCCGGGTCTGGTGAATGCGGCAACTATCACCCTG
ATTACCCTGGTCGGTTATTCCGCGATGGGTGGTGCAGTCGGTGCCGGTGGTTTAGGTCAG
ATTGGCTATCAGTATGGCTACATCGGCTACAACGCGACGGTTATGAATACGGTACTGGTA
TTGCTGGTCATTCTGGTTTATTTAATTCAGTTCGCAGGCGACCGCATCGTCCGGGCTGTC
ACTCGCAAGTAACGTTCAACACAACATAAATAATTGAAGAAGGAATAAGGTATGGCGTTC
AAATTCAAAACCTTTGCGGCAGTGGGAGCCCTGATCGGATCACTGGCACTGGTAGGCTGC
GGTCAGGATGAAAAAGATCCAAACCACATTAAAGTCGGCGTGATTGTTGGTGCCGAACAG
CAGGTTGCAGAAGTCGCGCAGAAAGTTGCGAAAGACAAATATGGCCTGGACGTTGAGCTG
GTAACCTTCAACGACTATGTTCTGCCAAACGAAGCATTGAGCAAAGGCGATATCGACGCC
AACGCCTTCCAGCATAAACCGTACCTTGATCAGCAACTGAAAGATCGTGGCTACAAACTG
GTCGCAGTAGGCAACACTTTTGTTTATCCGATTGCTGGTTACTCCAAGAAAATCAAATCA
CTGGATGAACTGCAGGATGGTTCGCAGGTTGCCGTGCCAAACGACCCAACTAACCTTGGT
CGTTCACTGCTGCTGCTGCAAAAAGTGGGCTTGATCAAACTGAAAGATGGCGTTGGCCTG
CTGCCGACCGTACTTGATGTTGTTGAGAACCCAAAAAATCTGAAAATTGTTGAGCTGGAA
GCACCGCAGCTGCCTCGCTCTCTGGACGACGCGCAAATCGCTCTGGCAGTTATCAATACC
ACCTATGCCAGCCAGATTGGCCTGACTCCAGCGAAAGACGGTATCTTTGTCGAAGATAAA
GACTCCCCGTACGTAAACCTGATCGTGACGCGTGAAGATAACAAAGACGCCGAGAACGTG
AAGAAATTCGTCCAGGCTTATCAGTCTGACGAAGTTTACGAAGCAGCAAACAAAGTGTTT
AACGGCGGCGCTGTTAAAGGCTGGTAATTTTTAGGCTGTTTCCACAATTTGTAATATCAT
TCAGGACGGGCGCTTGCCCGTCTTGTCATTTTTACAAGCTCCTGATTCAATATTGACGTT
TTGATCATACATTGAGGAAATACTATGCGTGCTTTACCGATCTGTTTAGTAGCACTCATG
CTAAGCGGCTGTTCCATGTTAAGCAGATCCCCTGTCGAACCCGTTCAAAGCACTGCACCC
CAGCCGAAAGCGGAGCCTGCAAAACCGAAAGCGCCGCGCGCCACGCCGGTCCGAATTTAT
ACCAATGCAGAAGAATTAGTCGGCAAACCGTTCCGCGATCTCGGTGAAGTCAGTGGCGAC
TCTTGCCAGGCCTCTAATCAGGACTCTCCGCCGAGCATTCCAACCGCACGTAAGCGGATG
CAAATCAACGCCTCTAAAATGAAAGCCAATGCTGTATTACTGCATAGCTGCGAAGTCACC
AGCGGTACGCCGGGCTGCTATCGTCAGGCTGTATGTATCGGCTCTGCGCTTAACATTACG
GCGAAATGAGCAGTTTCCAGTTCGAGCAAATAGGCGTTATTCGCTCGCCCTATAAAGAAA
AATTCGCCGTTCCGCGCCAGCCTGGTCTGGTAAAAAGCGCCAACGGCGAACTGCATCTCA
TTGCTCCCTACAACCAGGCCGACGCCGTTCGCGGCCTGGAAGCATTCAGCCATTTATGGA
TCCTTTTCGTCTTTCATCAAACGATGGAAGGCGGCTGGCGTCCGACTGTGCGTCCGCCTC
GTCTTGGCGGTAATGCCAGAATGGGTGTTTTCGCTACGCGTTCCACTTTTCGCCCTAACC
CAATTGGTATGTCGTTGGTAGAGCTGAAAGAGGTTGTTTGCCATAAAGACAGCGTGATTC
TGAAGCTCGGCAGTATGGATCTGGTCGATGGTACGCCGGTAGTGGATATCAAACCGTATC
TCCCCTTTGCTGAATCGCTTCCCGATGCCTGTGCCAGCTATGCGCAAAGTGCGCCAGCGG
CAGAGATGACGGTGAGTTTTACCGCAGAGGTCGAAAAGCAGCTTTTGACGCTGGAGAAGC
GTTATCCGCAGTTAACCCTGTTTATCCGCGAAGTACTGGCGCAAGACCCACGCCCGGCCT
ATCGTAAAGGTGAGGAAACGGGTAAAACCTATGCCGTCTGGCTACATGATTTTAACGTTC
GCTGGCGCGTCACCGACGCAGGTTTTGAAGTCTTTGCGCTGGAACCGCGTTAAATTCACG
CCCTTCTCTTTTGACATTTCTTTTGCACTGGTAAACTAAATCACTTTTTTTGTCCCAGGC
TCGCCTTGAGCCTGTTCTACCTTCCAACTGGAACCGTAACAACATGCGTACTAGCCAATA
CCTGCTCTCCACTCTCAAGGAGACACCTGCCGACGCCGAGGTGATCAGCCATCAGCTGAT
GCTGCGCGCCGGGATGATCCGCAAGCTGGCCTCCGGGTTATATACCTGGCTGCCGACCGG
CGTGCGCGTTCTGAAAAAAGTCGAAAACATCGTGCGTGAAGAGATGAACAACGCCGGTGC
AATCGAGGTGTCGATGCCGGTGGTTCAGCCAGCCGATTTGTGGCAAGAGAGTGGTCGTTG
GGAACAGTACGGTCCGGAACTGCTGCGTTTTGTTGACCGTGGCGAGCGTCCGTTCGTACT
CGGCCCAACTCATGAAGAAGTTATCACTGACCTGATTCGTAACGAGCTTAGCTCTTACAA
ACAGCTGCCGCTGAACTTCTATCAGATCCAGACCAAGTTCCGCGACGAAGTGCGTCCGCG
TTTCGGCGTCATGCGTTCCCGCGAATTCCTGATGAAAGATGCTTACTCTTTCCATACTTC
TCAGGAATCCCTGCAGGAAACCTACGATGCAATGTATGCGGCCTACAGCAAAATCTTCAG
CCGCATGGGGCTGGATTTCCGCGCCGTACAGGCCGACACCGGTTCTATCGGCGGCAGCGC
CTCTCACGAATTCCAGGTGCTGGCGCAGAGCGGTGAAGACGATGTGGTCTTCTCCGACAC
CTCTGACTATGCAGCGAACATTGAACTGGCAGAAGCTATCGCGCCGAAAGAACCGCGCGC
TGCTGCTACCCAGGAAATGACGCTGGTTGATACGCCGAACGCGAAAACCATCGCGGAACT
GGTTGAACAGTTCAATCTGCCGATTAAGAAAACGGTTAAGACTCTGCTGGTTAAAGCGGT
TGAAGGCAGTAGCTTCCCGCTGGTTGCGCTGCTGGTGCGCGGTGATCACGAGCTGAACGA
AGTTAAAGCAGAAAAACTGCCGCAGGTTGCAAGCCCGCTGACTTTCGCGACCGAAGAAGA
AATTCGTGCCGTGGTTAAAGCCGGTCCGGGTTCACTGGGTCCAGTAAACATGCCGATTCC
GGTGGTGATTGACCGTACCGTTGCGGCGATGAGTGATTTCGCTGCTGGTGCTAACATCGA
TGGTAAACACTACTTCGGTATCAACTGGGATCGCGATGTCGCTACCCCAGAAATTGCTGA
TATCCGCAACGTGGTGGCGGGCGATCCAAGCCCGGATGGTCAGGGTACGCTGCTGATCAA
ACGTGGTATCGAAGTCGGTCACATCTTCCAGCTGGGTACCAAGTACTCCGAAGCACTGAA
AGCCTCCGTACAGGGTGAAGATGGCCGTAACCAAATCCTGACTATGGGTTGCTACGGTAT
CGGCGTAACGCGCGTAGTAGCTGCAGCAATTGAGCAGAACTACGACGAACGCGGCATCGT
ATGGCCTGACGCGATCGCACCGTTCCAGGTAGCGATTCTGCCTATGAATATGCACAAGTC
CTTCCGTGTACAAGAGCTGGCCGAGAAGCTGTACAGCGAACTGCGTGCACAAGGTATCGA
AGTCCTGCTGGATGACCGCAAAGAGCGTCCGGGCGTGATGTTTGCTGATATGGAACTGAT
CGGTATTCCGCACACTATTGTGCTGGGCGACCGTAACCTCGACAACGACGATATCGAATA
CAAATACCGTCGTAACGGCGAGAAACAGTTAATTAAGACCGGTGACATCGTCGATTATCT
GGTGAAACAGATTAAAGGCTGATGCCAGAAAGGGTCCTGAATTTCAGGACCCTTTTTTAC
AGGGATTGTATAAAATGGATAAACCAAAGGCATACTGCCGCCTGCTTCTCCCCTGCTTTC
TTTTACTTTCGGCCTGTACCGTTGATATCAGCCAGCCAGACTCCTCAGCCACAGCGATAG
ATACCGAGACGAAAACATGGGCTGTCAAATTCCAGCATCAAAGCTCTTTCACCGAACAAT
CAATAAAAGAAATAACAGAACCTGACCTCAAACCCGGCGATTTGCTGTTCTCCTCAAGTC
TTGGGGTAACCTCATTTGGTATCCGCGTCTTCAGCACTTCCTCAGTGAGTCACGTTGCAA
TCTATCTGGGTGATAACAACGTTGCAGAAGCGACAGGGGCTGGCGTCCAGATTGTTTCCC
TTAAAAAAGCGATGAAGCATAGCGATAAGCTTTTCGTCTTACGAGTCCCGGATCTTACCC
CGCAACAAGCCACAGAAATCACCGCGTTCGCCAACAAAATTAAAGATAGCGGTTACAACT
ATCGCGGCATTGTCGAATTTATTCCCTTTATGGTGACTCGCCAGATGTGCTCACTGAATC
CGTTCTCCGAGGATTTTCGCCAACAGTGCGTCAGCGGCCTGGCGAAAGCGCAGTTAAGCA
GTGTGGGCGAAGGAGACAAAAAGTCGTGGTTTTGTTCGGAATTTGTCACTGATGCATTTG
CCAAAGCCGGGCATCCGCTTACGCTGGCGCAATCGGGCTGGATTAGCCCTGCCGATCTGA
TGCATATGCGTATTGGTGATGTCTCTGCGTTTAAGCCAGAAACGCAGTTACAGTATGTTG
GGCACCTGAAGCCAGGGATTTATATCAAGGCGGGTCGCTTTGTTGGTTTGACTCAGTGAT
AAAGCCAGCCTCGTGCACAAAATGCCGGATGCGGCGTGAACGCCTTATCCGGCCTACAAA
ATCGTGCTAATTCAAAATGTTGCATTATATGCTGTAGGCCTGATAAGCGCAGCGCATCAG
GCAATTTTGCGTTTGTTTCTGCCTTAAGCAGGTTTACTGCCCCAAACTACTGCAATCCTG
GTTCGGATAAAATTTACCCGCCGTATCGGGCGCTAATACTTTGGTCGGCGCACCGGTATC
CGGATTAGCCTCAAGCGTAAAGTGACCTTCTACTGACAGTAACACCGGTTTTTCACTGTG
CCCGCGCGCAGCCAGGTAGCCACGCTCCAGCTCTGCGTTATTCGCTACCATGAAACGTTT
TCCGGTCGCGCAATCAGTGAAGGTCGCCGCATCAGCCATATAAAAATACATGCCCCGCAG
AGTCATCGGCGTCATGGGTAAACTGGATTGTGCCGCTTCCAGCGTATAGTTGAACTGCGA
TTCAATCGGTTTACCTTCACGATCGAGCATCTCCAGCGCATCGCCTTTCGCCCGATAATA
TGACTTTTCACCTTTGCTGTCGGTTAATACCAGCTTGTCAGCGGTTCGCGCCCATGTACC
GTAGGAAGCGAAGGAGGAAGGTTCTTCACGAGCACCGAGATAACGCTCATTCATCACCCA
TGTTCCGTCTTTTTCGAGGAACAGAGAGGTTTCGATTCCTTCGCAATCGGCACACGGCAG
CACGCCGCGCCAACTTTGCGGCATCGGTTTCAGTTCGGCTGCCTGCGCCGGAGAAAGCGT
ATCGACTTCGGCCCGATTATTACAACCCATCAGAGTAAAGAGGCTGATTACAGCCATCGC
TGTCACTATCGCTTTTTTCACCATCCATTCCTTCTTTTTATTCCCGACCGCTGCGCACTT
TGCCGCGCATCGCCTTCACGCTTGATTTTTGTGCTTTCGATGCCAGCCTGCGCTCTTTCG
ATGCACGGGTGGGCCGCGTGGGTCGTCGGGCTTTTTGTTCTGTTGTTAATTCTTTAATCA
CAGCCACCAGCCGGGCCAGAGCTGCTTCGCGGTTCAGTTCCTGACTGCGGTATTCCTGTG
CCTTAATGACAATCACGCCATCACTGCTGATCAAATGATGGCTGGCGGCGAGCAGACGCT
CTTTGTAATACTCTGGCAGGCTGGACGCCCGAATGTCAAAACGCAGATGAATAGCCGTTG
AGGTCTTATTAACATGCTGCCCGCCCGCGCCCTGCGCACGAATGGCGGTGATCTCAAGCT
CACCATCGGGAATAGCAACATGTCGGGAAATCACAATCATGAAGGTTGTTGCCAGGCGGT
TAAGTTCACTTCCAGATTATTCTTATCATCCGATAACCAGATCACGCCATCCTGAATCGT
TGCCTGCAGCGTCATGGTACGATCGGCAAAGGCGCTTACTTTCGCCAGTTGTTCATCGTC
CAGATACCAGACGGAAAGATTGGCAAACTGCACACATTTGCTCTGATTTTGCTGCCACCA
GATTTGCGCCGCCCGACTATTATAGGTAAACAGCGCCACTTCTGCGGCCTGGGTGCAGGC
TTTCTTAATCCGCCGCTCATCCGGCAGCCCCAGCTCAATCCACAAATCAATGCCCAGGTG
ATCGTTACGCAGCCACGCTTCCGGCTCATCATCGGCACACAAACCACGGGTAAATTGCAG
ACGTTCATCAGCATATTTCAGCCACGCCAGCAAGCGCAGCATCATACGCTCCTGGGTTTC
TGAAGGGTGGCGCGCCAGCGTCAGAGAGGCATCGAGAAACTGGTTGCGGTCGAGATCGGC
CACATTAACCGTCGCTTTATAAATTGTCGCTTTAAGCGCCATAAGAAAACTCCTTTCGAA
TCAGGAGGCCATTGTAACGGAATACGTGCAGTTGCGGCGCTGATATTGCAGAAATGAGTG
TGGTATAGTCACCTTGCGAAACAGAGTTTATCTTCGTAGGCTTAGACTTGCATCCACGGT
TAAGTCAGAGTGCTGACAGGAGGGCATGTGGAAAAATATTGTGAGTTAATACGCAAGCGG
TACGCGGAAATCGCCAGCGGAGACTTAGGATACGTTCCGGACGCGCTGGGCTGCGTTTTG
AAAGTGCTGAATGAAATGGCTGCCGACGACGCCCTTTCTGAGGCTGTCAGGGAAAAAGCA
GCATACGCTGCGGCAAACTTACTGGTGAGCGATTATGTCAATGAATGATACGTATCAACC
AATCAATTGTGATGATTACGATAATCTTGAGCTCGCCTGCCAGCATCATTTAATGCTGAC
ACTTGAGCTGAAAGATGGCGAAAAATTGCAGGCAAAAGCCAGCGATTTAGTCTCCCGCAA
AAATGTGGAGTATCTGGTCGTCGAGGCCGCTGGCGAAACCCGTGAGCTACGTCTGGATAA
AATTACCAGCTTTAGCCACCCGGAAATCGGTACGGTGGTGGTGAGCGAGTCCTGATTGAC
TTTCGCCGGATGCGACGCTTAATGCGTCATATCCGGCCTTCACTTAACTAAGCGTTTCGC
TGCCAGACAAAACTTATGCCATTCTCACCTTCAGCCACACCTTCTTGCGTCACAAATACC
CCTGCCGCCGCAATCAGCGTTTCGCCATAAAACAGCAGTGGCGTGGTGTCACGTAGCCAC
GGCGGCACGCCCAGCTCTTGCCAGATTTTCTTTAGCTTACGTCCGCCGTTACGCCCGACA
ATATGCAGCAATCCTGGCGCTTTGAAACGCACGCTGACCGCTTCGTCTGCACGCGGAGGG
CGAATATCGCCTCCCGCATTAAGCTGTACACTTCCCAGCCCCGCCGGTAATTCCAGCGGT
TGAAGCCACGTCTGCCACGGCACAATGTTTTCGCTTTGCCCGGTGACGGATTTAATCCAC
CACAGTTGCGACTGATAGCGTCGGATTTCAAACGCGCCCAAACGTAAACAGGGGGAGGCA
TCTTCCCGCGCCAGCGCCACTTCCTGCCAGATCCGCCCCAACGCGTCGCGGGAAGGCATC
GGTGCATTCTGCCCTGCAAGCCAGCGGCGGATAATCGCCGCGCGGCGGGCATCACTCATC
GCCAGCATTGGCGCAATCTGCAGCGTCCTCTGCGGCGATTGACAGTGTGCTAAATCATCC
GCCAGCAGTTCATCCAACAGGCTCTCTTGTTCAGCGCAAAGTGCGGCGCTGCGGGCTGTT
GCTTCGGCAAAATGCGGCCAACGCTGCTGCAATAACGGCACTACGCGCAGGCGCAGAAAG
TTACGATCGTATGAGTCGTCCTGATTACTTTCGTCTTCAATCCAGCGTAAACCATGCGCC
AATGCCCACTGCGCCAGTTCCCCCCGCGTGCGGGCAAGCAACGGGCGGATAAGCCGTGTT
CCGGCAAACTCCGAAACTTCCGCCATAGCCGAAAGCCCGGCAGGGCCGCTACCGCGTTTT
AGCGCCAGCAGAAAAGTTTCACATTGATCGTCGAGATGTTGCGCGGTGACCAGCACTTCA
CCGGGCAACAAGGTGCGGGCAAATGCCTGATAACGCGCCTGCCGCGCCTGGGCCTCAATG
CCCAGTCCTTCTTGCGCAAGTTGCACGCGCTCGACCACCAGCGGCACCTGCCACTGTTGG
CAGATGTTCTCGCAATGCCTAACCCAGGCATCGGCATTGGCACTTAAACCGTGATGCACA
TGAATAGCGCGCAGAGTGACGCCCGGATTTTCCGCCCGCCACTGCACCAACTGATGCAGC
AGAACGGTGGAGTCAAGCCCGCCGCTAAAGGCCACCAGAATCTGGCGTGAGGTGAGAAGT
TGTCTATTGAGCGTGAGTGTCATGATGGTGCGATTTTACAGTAGCAATGCCCGGCACGTT
ACCGGGCAAATGCGGCGATGACAAGCCTTACTGCTCATACAGTTCCAACGGCAGCCCGTC
CGGATCGTTAAAGAACGTGAAGCGTTTTTGCGTGTATGGATCGACACGGATGGCTTCACA
CTTCACGTTATGGCTTTCAAGGTGCGCCACTGCCGCATCGATATCATCAACGCTAAAAGC
CAGATGACGCAGGCCGCAAGCTTCCGGTCGGCTGGGGCGCTCCGGCGGGAACGGAAATGA
GAAAAGCTCAATCACATATTGCCCATTAAGCGCCAAATCCCCTTTCCACGAGTCGCGCGC
TTCGCGATAGACTTCGCTTTGCAGCGTGAAACCAAGAATATCGCAGTAGAAAGCTTTGCT
CACCGCATAATCCGTCGCAATAATCGCAATATGGTGAACCTGTTTTAAACCCAGCATAAC
GTCTCCTTTATTTGTTAACAGCACGTTACTCGCCCGGAAGCCGCTCTGGCAAGTTATCCC
GCCATTTTTAGGACTCGTACGCGGTAAACGCCGTCTTCGTCCTGTTTCGCGCCGTGAATA
TCCGTTTCAAAACCGGGGTAATGTTGCCCTACGGAACAAAGCATCAGTAGAAAATCGAGT
ACTGTGCGGCTCTCTTTGGTCAGCATTTCTCCAGGCATCAACAGCGGTACGCCCGGTGGA
TAAGGCAGGATCATATTTGCCGATACTCTACCGACCAGTTGTTCCAGCGCAATGGTTTCT
ACTTCACCTTTAATCTGTCTCTGCCATGCCTGATGTGGCGTCATGATCATTTCCGGCAAA
GTATCGAATGCCCGCAACATCAAACCGGGAAGATCGTGTTTACGAATCAGCTTATGGATC
CCTTGCGCCAGATCCTGAATACGCATATTGAGGTAGAAATCGGGATCTTCAGCATAGAGA
TCGGGTAGCATATTTTTGATCCGCAGGTTGAGATCGTAAGAGCGCTTAAATTCCGTCAGC
CCACGCAATAATCCCATTGCTTTGGTTTTATCAATGCCAATACTAAAGAGAAACAGCAGG
TTATAAGGGCCGGTTTTCTCTACTACGATCCCACGTTCGTCGAGGAATTTTGCCACCAGC
GCCGCCGGGATCCCCTCCTCACTCATATTGCCCTGTTCGTCCATCCCCGGTGTCAAAATA
GTGACTTTAACCGGATCGAGAAACATATGATCGGCATCCGCATCGTTAAAGCCGTGCCAC
TGTTCGCCAGGCGCAACGGGCCAGCATTCGGCTTCATCCACCTGCGGCGGTTGCCAGATA
TCGAAAAACCAACCGTCAGACTCTTCCCGCAACCGCTGGACCTCTTTGCGAAAATGCAGA
GCTCGTTCTACTGAACGATTAATCAGCCGTTTGCCCGGATTACCACGCAGCATCGCCGCC
GCCGTCTCAACCGAAGCAACAATGGGATAACTGGGCGAGGTGGTGGTATGCATCATAAAG
GCTTCGTTAAAGGCCTCTTCGTCATACTCGCCTTTAATGTGGATCAGCGAAGCCTGCGAT
AACGCCGCCAGCATTTTGTGGGTCGATTGCGTTTCGAAGATCACTTTTCCCGCAACACGC
TCGCCGCTCATACCACTTTTACCCTGGTAGATCGGATGAAAATGGGTGTACGGCACCCAG
GCGGAATCGAAGTGGATCGAGGGGACATCCAGCGTCTGTTTGATCCAGTCGGTGTTGTAG
AGCAAGCCATCATAGGTGGAGTTGGTGATCACCGCATGAACCGGCCATTGTGCCTGCGTG
GTGGCAGCGACTTTCTCTTCGATGCTGTCGCGAGTAAATTCACGGCGCGGGATCCCACCA
AGAATCCCCAACGCATTACGCGTCGGTTTCAGCCAGACTGGCACTACATCGTTCATCATC
AACAGATGCGCCAGCGATTTATGACAATTGCGGTCGATCAACAGCGTGCTGCCGGATGGC
GCGGCGTACATACCCACAATTTTGTTCGACGTCGATGTTCCGTTGGTAACGATATAACTC
TGTTCCGCGCCAAAAGTCCGCGCGATGTACTCTTCCGCTTCCAGATGTGGCCCGGTGTGG
TCGAGCAACGAACCAAGCTCGGTGACCGAAATAGAGACATCAGCCTTAAGGGTATTCCCG
CCGAAAAAATCATAAAACAGACAGCCAACCGGGCTTTTTTGATATGCGGTGCCGCCCATA
TGACCCGGCGTACAAAAGGTGTACTTCCGCTCTTTGACGTAGGTAAACAAGGCTTTCGTG
AACGGTGGGGTAATGTTATCAAGATATTCGTTGGTGTACTGACGCATACGAATAGCGATA
TCTTCCGCCTGCCCCAGCGCATATTCAAAAAACCAGAGCGCCATCCGCATATCCTGCACG
CTGACATCCATCGTCGAGTGGGTGTTGATGAAGGCATAAAGCGGGAGATATTCATTAAGC
TGATTGATATCGCTACATAAATCGAGACTGTACTCATCCCAGTCAAAAATCACGCCGCAA
ATTCGTGGGTTATGTTCGATAAACTTCAGCAAATCAACGCTGTTTTGTGGCCAGATAATC
TGAAAGCCTTGCGCCACCAGCGCCGACTCCAGTTCTTTGATGGGCTCATCTTTATAAAAG
ACGCCATGCGGTCCCATAATGGCAATGATGTTCATGTGTTCCTCCTGGAAAATCCTTCCT
TAATCATAGCCTGCTCAAACCGTGGCGATAAAAAAGGGCCACCGAAGTGACCCTTTTTCA
GAACTTTTGCGAATTACGCGTAACCGTAGCTCATCAGGCGCTGATAACGACGATTTTTTA
AATCTTCAGTGCTTAACACGTCGAGATCGGCCAGATCCGCCAGCAGTTGCGCTTTCAACG
ATGCCGCCATCGCTTCCGGGTTACGGTGAGCACCACCCAGCGGTTCCGGGATGATGGAGT
CGATCAGTTTTAGTTCTTTCAGACGCGGAGCGATGATACCCATCGCTTCAGCTGCCAGCG
GTGCTTTGTCGGCGCTCTTCCACAGAATGGACGCACAACCTTCCGGCGAGATAACGGAAT
AGGTGCTGTATTGCAGCATATTCACTTTATCGCCCACGCCAATCGCCAGCGCGCCGCCAG
AACCACCTTCACCGATAACCGTACAAACTACCGGTACACCGAGGCGAGACATTTCACGCA
GGTTGCGTGCAATAGCTTCAGACTGACCGCGTTCTTCTGCGCCCACGCCCGGATAAGCCC
CCGGGGTGTCGATAAAGGTGATGATTGGCATCTTAAAGCGTTCAGCCATTTGCATCAGAC
GCAGTGCTTTGCGGTAACCTTCTGGCGCTGGCATACCAAAGTTACGGCGAATTTTTTCTT
TGGTTTCACGACCTTTTTGATGACCAATGATCATCACCGGACGACCATCGAGACGGGCGA
TACCACCGACGATAGCTTTATCGTCTGCATACGCGCGGTCGCCAGCCAGTTCGTCAAATT
CATCAAATGCCAGGCGAACGTAATCCAGGGTATAAGGACGCTGTGGATGGCGTGCCAGTT
GCGCAATCTGCCATGCACCGAGATCGGCGAAGATTTTACGCGTCAGTTCTACGCTTTTTT
CACGCAGACGATGCACTTCTTCATCGATGTTAATATCCAGTTTCTCATCCTGACGGCTAA
CCGCAGTCAGAGAATCGATTTTCGCTTCCAGCTCTGCAATCGGCTGTTCAAAATCAAGGA
AATTCAGACTCATAGTATTCCTGTATTAGTCAAACTCCAGTTCCACCTGCTCCGAACCAA
TGAGGCCACGGAGATCGTTTAATAAACGATCGCTCGGAGAGACACGCCACGTCGCGCCAA
AACGCAACCGCGCGCGTGCATCCGCCCTCTGATAGTAGAGATGTACTGGAATTGTCCCAG
AGCGGTGGGGTTCCAGAGACTGACGGAGTCGGTTTAAAAGCTGGTCATCAATTTGCCTGT
CCGTCAGCGAGATAGCAAGCCCGCGAGCATATTTTTCCCGGGCTTCGTCAATATCCATCA
CTTCGCGAGCGGTCATTTTAAGCCCACCGCTGAAGTCATCAAAGCTGACCTGTCCGCTGA
CGATAAGTATGCGGTCTTTTTCCAGCAATTGCTGGTATTTATCCAGGGCGTCAGTAAACA
ACATCACTTCCAGCCGCCCGGAACGGTCATCCAGCGTGCAGATACCGATACGATTGCCGC
GCTTGGTGACCATAACCCGCGCGGCAACAACGAGCCCCGCAGCCGTGATGACTTTACCAC
GTTCTGTCGGGTGCATGTCTTTCAGCCTTACGCCTCCGACATAACGCTCAATCTCTTTTA
AATACTGGTTGATAGGGTGTCCGGTCAGGTACAGGCCTAACGTTTCACGTTCCCCATCTA
ATACCACCTGCTCCGGCCACGGTTGGCAGCTGGCGTAGGATTGTTCAATTTGTTCCGGTT
CTTCGGCCAGCACGCCGAACATATCGGCCTGACCGATAGCTTCCGCTTTCGCGTGTTGAT
CTGCCGCTTTTAACGCATCACCCAGCGAGTTCATCAGTGCCGCGCGGTGTGGCCCAAGAC
GGTCAAACGCCCCGGACATGATCAGTTTTTCCAGCACCCGCCGGTTTAACTTTTTGGTGT
CGGTTCGGGCGCAGAGATCAAACAGTTCGCGGAAGTAGCCGCCTTTATTACGGGCTTCGA
TGATCGCCTCAATCGGACCTTCACCGACCCCTTTGATCGCGCCAATACCATACACGATTT
CGCCGTCGTCGTTGACGTGGAAATGGTAAAGACCGGAGTTTATATCTGGTGGCAGGATTT
TCAGCCCCATCCGCCAGCACTCATCCACCAGGCCCACCACCTTCTCGGTGTTGTCCATAT
CGGCGGTCATTACCGCCGCCATAAACTCTGCCGGATAGTGCGCTTTCAGCCATAATGTTT
GATATGACACCAAAGCATAGGCCGCAGAGTGCGATTTGTTAAATCCGTAACCAGCGAATT
TCTCCACCAGGTCGAAGATTTTCATCGCCAGTTCGGCGTTGATTCCGTTCTTTTCTGCAC
CTTCAGCAAATACAGAACGCTGCTTAGCCATCTCTTCCGGCTTTTTCTTACCCATCGCAC
GACGCAGCATATCCGCGCCACCGAGGGTATAACCAGAGAGCACCTGCGCAATCTGCATGA
CCTGTTCCTGATACAGGATAATGCCGTAGGTTGGCTCCAGTACTGGTTTCAGGCTTTCAT
GCTGCCACTGCACGTCCGGGTAGGAAATCTCTTCGCGACCATGTTTACGGTCGATAAAGT
TATCCACCATCCCTGATTGCAACGGACCAGGGCGGAACAGTGCCACCAGTGCGATCATAT
CTTCGAAGCAGTCAGGTTGCAGACGCTTGATCAGGTCCTTCATGCCGCGCGATTCAAGCT
GGAATACCGCCGTGGTTTCCGAGCGTTGCAGCATGTCGAAGCTTTTCTTGTCATCCAGCG
GGATCGCGGCGATATCCAGCGGCGGCTCGCCATTCTTCGCCCGCCGCTTGTTGATCATCT
CCAGCGCCCAGTTGATGATGGTGAGCGTACGTAAACCAAGGAAGTCGAACTTCACCAGTC
CGGCATATTCAACGTCGCTTTTATCAAACTGGGTGACCGGATGTTTGCCCTCTTCATCGC
AATAAAGCGGCGCAAAATCGGTAATTTTGGTCGGCGCGATAACCACTCCACCGGCGTGCT
TACCGGCGTTACGGGTGACCCCTTCCAGTTTGCGCGCCATGTCGATCAGCGCCTTAACTT
CTTCATCCGCTTCGTAGATTTCCGGCAGCTGCGGCTCGGCTTCAAACGCTTTCGCCAGCG
TCATGCCCGGATCGGGCGGGATCAGTTTCGAGATACGGTCGACAAAGCCGTACGGATGCC
CCAGCACGCGGCCTACGTCGCGGATCACCGCTTTCGCCGCCATCGTACCGAAGGTGATAA
TCTGCGATACCGCATCACGACCGTACATGTCCGCTACGTGCTCGATAACCTGGTCGCGTT
TCTCCATACAGAAGTCAACGTCGAAGTCAGGCATGGAGACACGTTCCGGGTTAAGGAAAC
GTTCGAACAGCAGGTCAAATTCCAGCGGATCGAGGTCGGTGATTTTCAGCGCGTAGGCCA
CCAGTGAACCCGCACCGGAGCCACGGCCTGGCCCTACCGGTACGCCGTTATCTTTCGACC
ACTGGATAAATTCCATAACGATGAGGAAGTAGCCCGGGAAGCCCATCTGGTTGATAACCT
GAAGTTCAGTCTCCAGACGTTCGTCATATTCCGGGCGGCGCTTAAGACGTTCTTCCTCAT
CAGGGAATAAAAAGGCCAGACGCTCTTCCAGGCCTTCTTTTGCACGCTTGACCAGATAAT
CTTCGGTGCTCATGTCCCCGGTCGGGAACTGCGGCAGGAAGTATTCACCCAGACGCACAG
TTACGTTACAACGTTTGGCGATCTCAACGGTGTTGGCAAGGGCTTCGGGGATGTCGGCAA
ACAGCTCGCACATCTCCTCTTCGCTACGCATATATTGCTGCGGCGAATAGTTACGCGGGC
GTTTAGGATCGTCGAGGGTAAAGCCGTCGTGGATCGCGACGCGGATTTCGTGTGCGTCAA
AGTCGCTGCTGTCGATAAAGCGCACATCGTTAGTCGCCACGACGGGCAAACCGCGCGCTT
CCGCCAGTTCCACCGCCGCGTGCAGATAGCTTTCTTCATCCGGCCTGCCGGTGCGGATCA
GCTCGAGAAAATAGCGATCCGGGAAGTGTTCTTCATAAAACGCGACACACTCATCTACCA
GCGCGCTGTTGCCACGCAAAAGACTGCGTCCGACGTCGCCCATGCGCCCGCCGGAAAGAA
GGATCAACCCTTCGTTTAATTCGATAAGCCAGTCGCGATCGATGATCGGCCCGGCGGCAC
CGTACCCGCGCTGATACGCTTTTGAGATCAGCAACGTCAGATTCTGATAGCCGGTATTGT
TCGCCGCCAGTACCGTCAGGTGGGTTAACTCATCACCCAGCAGGTCGCACTGGACGTTAA
AATCTGCCCCGACGATAGGCTTAATCCCTGCGCCATGTCCCGCTCCGTAGAACTTCACCA
GACCGCAAAGGTTGGTGAAATCGGTGATCGCCAGTGCTGGCATACCCAACGCCGCCGCCT
TTTTTACCAGCGGTGCGGTTTTGGCCAGGCCATCGATCATCGAGTAGTCGCTGTGCACCC
GCAGGTGTACGAAACGTGGTTCAGACATCTTCAGATTCCGGTTTACTTAATCTCGACACA
AGAATCAGGACGCAAGTCCCAGTGCTCGTTTGACAGGCCCAAAGCTGCGACGATGATGTT
CAGTCGCGCCATATTCAGCCAGTTTTTCCAGATGAAAAGCGGTTGGATACCCTTTGTGTT
GGGCAAAACCATATTGCGGGAAAACAATATCCAGCGCCGCCATTTCGGCGTCACGCGTCA
CTTTCGCCAGGATAGACGCGGCACTGATTTCCGGTACGCGGCTATCGCCTTTCACCACTG
CCATCGAAGGCATCGGTAATTTCGGGCAGCGGTTACCATCAATCAACACATATTCCGGCG
CAATATGCAGCCCAGCAACGGCACGCTGCATCGCCAGCATGGTCGCATGTAAAATATTCA
GTTCATCGATTTCGTGAGGTTCCGCGCGGCCCAGACTCCAGCTCAACGCTTTCTCTTTGA
TCTCTTCACAGAGCGCCAGACGACGTTTTTCGCTCAGCTTTTTGGAATCATTCAGCCCGG
CAATCGGGCGCGCCGGGTCGAGAATCACCGCAGCGGTGACGACCGCGCCAACTAACGGCC
CGCGTCCGGCTTCATCCACACCCGCAACCAGCTGCGTGTGCGGATAGACAAATTCGATCA
TTGTGCTAACTCCAGAACGGCTTGTGCCGCCTGCTCATCGGCATTGCAGCGGATCTGCTG
ATGCAGTTCACGGAAGGTATCGTGCATCGCGTGGCTGGTTTTCCCGTTCGCCAACAGCGG
TAACAGCGCCGCAGCCAGTTTTTGCGGCTCACACTCTTCCTGCAATAACTCTTTGACTAA
CTCTCTGCCCGCCAGCAGATTTGGCAGCGAGACATAATCAGTTTTCACCAGACGCTTCGC
CAACCAGAAAGTGAAAGGCTTCATGCGATACCCCACCACCATCGGGCATTTCGCCAGCAT
ACACTCCAGTGCTGCCGTACCCGACGCCAGTAGCGCCGCATCGCTGGCAACCATCGCCTC
ACGGCCCATTCCATCCAGCAAATGAACCGACAGGTCTGGCGCGACTGCAGCTTTGATGCG
TTCAAACTGCTCGCGGCGTTTGGCATTCACCAGCGGCACCACGATTTCGAGATCTGGATA
TGTCTGGCGCAAAAGCTGGGCCGTTTTCAGGAAATCGGCACTAAGCATTTCGACTTCTGC
ACCACGGCTGCCCGGCAACAATGCCAGACAGTGGGCATCGTAAGGGATCCCCAGCACATC
ACGGGCACCATTTTTATCTGGATCTAATGGCATGGCATCAGCCATGGTATGACCGATAAA
GCGGCACGGTACGTTGTATTTGTCATAAAACGCTTTTTCGAAAGGCAGAAATGCGAGCAC
CAGATCGGTGGCTCTGCCTATTTTGAAAACGCGTTTCTGTCGCCACGCCCAGACGGACGG
ACTGACGTAATGAATGGTTTTGATACCCTGCTTTTTGAGGTTACCTTCAAGAGTAATATT
GAAGTCAGGCGCATCAATACCGACAAAAACATCTGGCTTCAGTTCGCCAAAACGCTTTGT
CAGATCGGCACGAATATGCAGTAAGCGACGCAGACGACCGAGCACTTCAACAATGCCCAT
TACCGCCAGTTCTTCCATTTCGTACCAGGCTTCGCAGCCTTCAGCTTGCATTCGTGGCCC
GGCAACACCAACAAAGCGGGCGTTGGGCACACGTTCTTTCAGAGCGCGGATTAAACCGGC
CCCCAGGATATCGCCGGAGGTTTCTCCGGCGACCAGGGCAATCGTTAATGGACGCTGTTC
AGTCATTAACGAATCAGACCGCGCGTTGAGCGTGCAAAGAAATCGGTAAAGGCTTTCACT
TCCGGATATGTTTCCGCCAGTTCAGCAATTTCCGGTTTCACTTCATCGAGCGTTTTACCG
CTACGATAAATCAGCTTATACGCATTGCGGATAGCGGTAATCGCCTCACGGCTGAATCCG
CGGCGCTTCAGCCCTTCGATATTGACACCGAACGGCGTTGCGTGGTTACCCTGCGCAATG
ACATAAGGAGGGACGTCCTGCGCCACACCGGAGCAGCCGCCAACCATCACATGCGCACCA
ATGATGCAGAACTGATGGACTGCGGTCATGCCGCCGATGATCGCGAAGTCGTCAACCGAT
ACGTGACCCGCCAGCGTTGCGTTGTTGGCGAGAATACAGCGGTTACCTACCGTACAATCG
TGCGCAATGTGCGCGTTGATCATCAGTAAGTTGTCGCTGCCCACCTTCGTCAATCCACCG
CCCTGGACTGTGCCACGATGAATGGTGACGCTTTCGCGAATGCGGTTACGATCGCCGATT
TCCACACGGGTCGGTTCGCCAGCATATTTCAAATCCTGGTTAACTTCGCCGATGGAGGCG
AACTGATAAATCTCATTATCGCGGCCAATTTTAGTATGACCATTCACGACAACGTGAGAT
TTCAGTACGGTACCCTCACCAATTTCGACATGGGGTCCAACGATACAAAAAGGACCAATG
TGTGCGTTCGCGCCAATCGACGCGCCCTCTTCCACAATGGCGGTTGGATGCACAAAGGCG
GATTTATCAATCACGTATCAGGCCTCCCGGCTACGAGCACACATCATCGTTGCTTCGCAA
ACTACTTTACCGTCGACCAGAGCAACCCCTTTAAAACGGGTCAGGCCGCGGCGCGTTTTT
TCGAAAGTGACTTCCATGATCATTTGATCGCCAGGCACGACCGGGCGCTTGAAGCGCGCT
TCGTCAATACCGGCGAAGTAGTACAGCTCACCCGGTTCCAGTTTTCCTACGCTTTTAAAC
GCCAGAATACCTGTTGCCTGTGCCATTGCTTCCAGAATCAGCACACCCGGGAAAATCGGT
TTTCCAGGGAAATGGCCCTGGAAGAATGGCTCATTGACAGAGACATTTTTTACTGCGCGC
AGAAAACGACCTTCTTCAAAATCCAGCACGCGATCCACCAGTAAGAACGGGAAACGGTGC
GGCAGAAGTTCTAAAATCTCTTCAATCTGCAGAGTATGAGTGTTAGTAGTCAAGATACTC
TTCCTGTCAAAATATAAGAAACGACAATAATAACACGGCCTGCCGCAATCGTAAGAATGA
GACAGGCCGTAAAGTTTGGCGAACAAAAGATGGAACGTTAGTCTTGTTGATTAACCTTGC
GCTCAAGCGATTTCAGACGCTTGCTCATGTCATCAATGTTCATCACCAGTGCAGCGGTTT
TGCGCCAGACTTTGTTGGGTTGCAGCGGAATGCCTGAGGAATAGACGCCTGGTTCAGTGA
TGGGACGCATCACCATACCCATGCCCGTAACCGTCACTTTGTCGCATATTTCCATATGCC
CGTTGATTACGCTGGCTCCGCCGATCATGCAGTAACGACCAATTTTCAGGCTGCCCGCCA
TAATGACGCCACCGGCAACCGCCGTATTGTCGCCAATCACGACGTTATGTGCAATCTGGC
ACTGGTTATCAATGATCACGCCATTGCCAATAACCGTGTCATCCAGCGCGCCGCGATCGA
TGGTAGTGCAGGCACCGATCTCCACGCGATCGCCAATAATTACGCGACCAATCTGTGGGA
TCTTCACCCAGTTACCACGATCGTTGGCATAACCAAAGCCGTCTGCGCCTACCACTGTTC
CGGACTGGATCAGGCAATTCTGACCGATCTGGATCTCATGGTAAATGGTTACATTCGCCC
AGAGACGCGAACCTGCACCGATTTTGCTGTTTTTACCTACGAAGCAACCGGCACCGATAA
TCACGTTATCGCCCAGTTCAACGCCGGACTCAATCACCGCGTTAGCGCCAATCGATACGT
TGTTACCCAGCTTCGCCGTCGCGTCGATCACTGCACTGGGTGCAATATTCTGCGCGGGCT
GCGGCGTGGTATCTAAAATTTGCGCCATGCGCGCGTAAGTCAGGTAGGGATTCTTCACTA
CCAGCGCGGCACTTTTCGCGAAAGGAAGATCGTCCTGGGTCATGACAACCGCGGATGCCT
GGCACAAGCCTAAATGCTCACGGTATTTTGGGTTAACCATGAACGTAATGTGACCTGTTT
GTGCAGATTGCATGGACGCAACGCCGGTGATGACGATATCGCCATCACCGTGTAGTTCTG
CATCCAACTGCTGCGCTAAATCAGCCAGTCGAATTGAAGGCATTACTTATTTAACCTGTT
TCAGTACGTCGGCAGTGATGTCTTTTACATCGCTGCTGTTGTAAGCAACGGCGTTTGCAT
CAACAACCAGATCGATATCCTGGCTGTTGGCAACGGATTTCACAGCAGTCTGGATACGAG
TAACCAGTTTGCCGCGTTCTTCGTTGGAACGACGTGCGCGATCCTGCTCAAAAGCCTGCG
CTTTCTGAGCAAAAGTCTGGCGCTGAGCCATCACGTCTTTTTCCAGCTTAGTGCGATCGC
TGCCCGCTTTCATGGACTGCAGCTTTTTCATTTTAGCCTGCAGATCGGTTTCCATACGCT
GCAGTTCGCTGGCACGGCCTTTGAACTCATTTTCCAGCGTGTTAGAAACACCGGTTTTCT
GCGCTACCTGCTGGAACAGGCTGCCCATGTTGACGATTGCAATTTTGTCAGCCGCCTGAG
CAGATGTTGCCAGTGCTAAACCGAGACCTGCAGCTAATAACCACTTTTTCACAATAAACT
CCTTACCATCCCATTTGCACCGGAGGGTGCAGTTCTTTGCGTGGCCCGGCGATCTTATAT
TGATCGCCTAAAGTCATCGCTACACTACCACTACATTCCTTTGTGGAGAACACTTACCAA
GTTTTACCGATGTTAAACTGGAACTGTTCTGCCTTGTCTCCATCGTACTTTTTGAACGGC
TGGGCGTAGGAGAACACCAACGGCCCCAATGGGGACATCCATTGTAATGCGATACCCGCA
GACATACGGATATTGCTTGGATCACTATAGTCCGGATATCCAGAATATTGGCTGGAATCC
CAGTTTGTATCCCAAACGGTACCCATATCCCAGAAGAAGGAAGTACGAACCGAGTTAGCA
TACTTATCGCTAATAAACGGAGTCGGGGTTATGAACTCGAGGCTGGCAACCGCCATGGCG
TTACCGCCTACAGCATCATCCGATTTACACAGGTCTTTCGCGCCGTCCTGAGTCGCACAT
TCGTAATCATAGTCCGGATCATAATTACTGGCCTGATGCGGGAAGTAAACTGCTTTCGGA
CCAATGGTATTGGACTGGAAGCCACGGACGGTGCTGGAACCACCGGCATAGAAGTTCTCG
TAGAACGGCATCTCTTTGCCGCCTAAACCATCACCATAACCCCAGCGGGTACGACCCAGA
ACAACCCATTTGTGATCGTCATCGATCGGCACATAAGTCGCCGTGTCTAACGTCACTTTG
TAGTATTCGTTATCCGATCCCGGAATGGTCACTTTACCGGTCAGGTTGACACGTGAACCA
TCTGTCGGGAAGTAACCACGGTCAAGCTTGTTATAGGTCCAACCATAGTTGAACGTGAAG
TCGTCTGTTTTGAAGCTGTTATCCTGATCAGAGGTGCTCGGATGTTCACCCATAGAGTAC
AGATAACGCCACATCGCAACCTGAGGCTGCATGTTGGACAGGGAGTTATGTACATAACCC
AGACCTGCACGCAGCGAGTTATATTCGTTAATCGGGAAGCCCAACGTCACGTCTGTACCA
TAACTCTTGTTGGTATAGTCGGACAGGTCGGCGTCATCTGCCTGGAAGTCATTATAGAAG
AGACGACCACCGAGGCTTACGCCATCTACGGTGAAGTACGGGTTGGTTACCGACAGTTCA
GCATAGGTCTGGTAATCGTTTTTGGTCCCGTTGATACCAACAGCATAACCTGTACCTAAC
CAGTTATCCTGTTGCACACCAGCCTGGAAGCTCACGCCACTTTCAGTACCGTAACCAATA
CCAAAGTTGAAGCTACCGGTGTTGCGCTCTTTTACCTTGTAGACTACATCAACCTGGTCC
GGGCTACCCGGAACACGTTGGGTATCGGTATCGACAGTTTCAAAGAAGCCCAGACGATTC
AGACGCTCCTTACCCTGATCGACCAGATCGCTCCCCAGCCATGCACCTTCCATCTGACGC
ATTTCGCGACGCAGGACGGCATCTTTCGAGGTATCGTTACCTTCAAAACGGATCTTACGC
ACGTAGAAACGGTTACCCGCATCAACGTTCACACGTAATTTAACGGTTTTGTCGGCATCG
TTAATTTCGGGCATGGACTGTACGCGCGGATAGGCATAACCATAGCGACCGAGAAGCTTT
TTAATGTCATCTTCCATCTTGGTCACTTTGGTGCCGTTATACAGCTCACCCGGCTCGATC
TTAGTCAGCTGCTCAATTTCAGCGGAGTGCCCGGCAAGGTTGCCGCTCACTTCAACGCCA
GAAAGCTTGTACTGATCGCCTTCGGTGATGTTCACCGTGACGTAAATACCTTTTTTATCT
GGCGTCAGACTGACCTGGGTAGAGTCGATGTTGAAACGGGCATAACCGCGGTCCAGATAG
TAGCTGCGCAGGGTTTCAAGGTCGCCCGCCAGTTTCTGTTTCTGGTATTTACGATCGCCT
ACCACGTTCCACCACGGCACTTCGTCACGCAGTTGGAAATGAGAGATCAGTTCGTCGGTG
GTGAAAGCATGGTTACCAACAATGTTAATTTGCTGGATTTCAGCTGACACACCTTCCTGG
AACACCAGTTTTAGGTCAACACGGTTGCGCGGCAGCGGGGTCACGACAGCTTTAACGCTG
GCGCTATATTTACCGACGCTGTAGTAGAAGTCTTCCAGACCTTTCTCGATATCGGCAATG
GTGGTGCGATCGAGGGATTCGCCCACACGCACACCAGAAGCCTCGAGGTTTTGCTTCAGC
ATGTCATCTTTCACCGATTTGTTACCGGAGAAAGTAATGCTGGCAATGGTCGGACGTTCT
TTTACCTGAACCAGAAGGGTATCACCATCACGAAGGACGCGAACATCCTCAAAGTTGCCG
GTAGCAAACAGAGCGCGAATGGTATTACTGATATCTTCATCATTAACCGTGTCGCCTGTG
CGCACCGGCATACTGAGGAGGGCCGCACCAACGGCGACACGCTGAAGGCCTTCGAAATGA
ATATCTTTCACTACGAACCCTTCAGCACCGTATACGGTGGCGCTGCTAAACAGCAGCGAC
GCTATGAGCAACTTTTTCATCGCCATCGTTATTATGCGTTCTTCCTAACTAACTCTCATA
ACCGAGAGAAATCATTGAAAAGTGCAAGCCCCATTAACAGCACCAGCAGAATCGAGCCAA
TGCGATAACAAAAGTCTTGAACCCGCTCGGATACCGGTCCGCCCTTGATCTTTTCGATCG
CAAGGAACAGCAGATGCCCCCCGTCAAGTACGGGCAACGGAAACAGGTTAATTATCCCTA
AGTTCACGCTAATAAGCGCAAGAAACGGCAGGTAATAAACTACCCCGAGTTCCGCTGTCA
TCCCAGCCCCCTTGGCGATAGAGATCGGCCCACTGAGGTTGTTCAGTTTCACATCACCGG
TGATCAATTTTCCCAGCATACTGACCGTCAGCTTCATCAGCTGCCACGTTTTGTCCGTGG
CTTCGACGATGGCGTTGAACGGCCCATACTGGCGTACAACTTTATACTCATCTGGCAAAG
GAATGACTTTCGGCTCAATACCGACAAAACCAATCGCTTTACCATTACCCGGTTTACTCT
CCGGGATTAATGTCAAAGACAAGGGACTCCCCTGCCTTTCGATTTCTAACGCTAAGGATT
TACCCGGGTTATCCCGGACAAGCATCACAAAGGTCACCCACTGCGTTAAGGGCTGACCAT
CGACTTTAACGATCCTGTCGCCTGCTTGCAAACCTGCCTTGCTTGCCGCCGAGTTTGGCT
GCACATTTTCCAGTACAGGTTCAATTTGCGGTCCACGAGGACGAATCCCCAGCGAAGATA
CCGGATCTTCTTTATCAGGCTCAAACGCCCAGTGACGTAAATCGAGCTTTACATCCCGCC
GTTGGTCGCTGCCAAATGGCGCTACTGTAATGGTGGTGCTTTCATCGCCAATTTTATCGA
CCAACTGCAAACGCACAGCATCCCAATCAGGCGTTTCGATACCATCTACGGCTTTTAGTT
CCGTACCTGGTGCAATTTGTGCTTCCGCAGCTATCGAATTGGCTGCTATTTCGCCAACCA
CCGGACGTACGCCAGGCACACCAATAATAAAAACCAGCCAGTAGGCAAAGATAGCAAAAA
TGAAGTTTGCAACCGGACCTGCGGCAATAATCGCCGCTCGTTGGCCGACAGATTTATTAT
TGAAGGCATGGTGGCGGAGTTCCGGAACGACCGGTTCTGCGCGCTCATCCAGCATTTTGA
CATAACCGCCCAGCGGGATCAGGGCGATAACATATTCGGTACCGAGCTTATCAGTTCGCC
GCCAGAGCGCCTTACCAAACCCTATTGAGAAACGCTCAACGCGAACACCACAACGCCGGG
CAACCCAGAAATGACCAAATTCATGCACGGTGATAAGTACACCCAGTGCAACGATGAACG
AAGCCAAATCCCAGAGAAAACTCAGCATATTACCTTCCGTTAAAGCGTCCTGAATACCAG
TAACAACAAGCAAGCAAAGACCGGTACCGCAGCCGTCAGGCTATCAATACGATCTAAAAT
ACCACCGTGTCCTGGAATTAAATGACCGCTGTCCTTAATTCCTGCTTCACGCTTAAACAT
ACTCTCGGTCAGATCGCCGAGCACTGAGGCTAACGCTGCGACAATAGAGCAAATGAGTAA
GGTGACGGGAGCGACGTCGAGATTCGCCCACATGCCATAACCCCATGAGATTACCGCTGC
GGTCGCTAGTCCACCTATAAAGCCTTGCCAGGTTTTACCCGGAGAAACCTTCGGTGCCAG
CTTATGTTTACCAAACAATTTGCCAAACATATATGCGCCAGAGTCAGCGCCCCATACCAG
GATCATGACATAGAGCAGCCATATTGCGCCACTGTAATGATTCTCGTCGTAGTGCCAGGC
CCGTAACGCCAGCATGCCCCAGAAGAAGGGAACAATGGTTAGCACGCCAAAAATAAGGCG
CAATGTTTTAGAGTTACGCCAGATTGCTGCGGAATCTGGGTAAAACAGCACCAGCAATAG
CGCGACAATCCACCAACCCAACGAAGCCCAAAGTGAGATTTCAACCAGCGGTTGATGAAT
ATTTCGGTGATATTCCGGCAACAGAAAAAGCATCAGCGCCAACAATAACCCGCATAACAC
CGCCAACCATACTCGCTGCGAACGAGTGGTAAAACCGCTAAGCTGTCCCCATTCCCACGC
TGCCAGCATGCAGACCACCAGCGTTACAATGGCGAACCCCACCGGCGGCAACAGAAACAA
CGCCGCGATGACGACGGGTATTAACACAAAAGCAGATATCAGGCGATACTTCAGCAAAAG
CGACCCCCATCAGGCTGTTTCATCACCGGGCTCGGTGCCGCCGAAACGACGCTCTCGATT
AGCAAAGGCATTTAACGCCCCTTCAAAGTCTTGTTCATCGAAATCGGGCCAGAGAACATC
TGTAAAGTAAAGTTCGGCATAGGCAATTTGCCAAAGCAAAAAGTTACTAATGCGATGCTC
CCCCCCAGTCCTAATTACTAAATCTACAGGGGCCAGTTCATGCATACAGACATGCTGGTT
TAGCATCTCTTCATCTATCTGATCTGGTTGCAGGTTTCCTTGCTGCACCTTTTCAGCCAG
TTGCCTGACTCCCTGGACTATATCCCAACGTCCACCGTAGTTCGCCGCAATATTCAGCGT
CAGACCGGTATTCCCGGCTGTTAGCGCTTCAGATTTACGAATACGTTCTTGCAAACGCGA
GTTAAAGCGACTGGTATCGCCAATAATACGCAGACGCACGTTATGTCGGTGCAGACTTTT
TACTTCGCTATCGAGCGCCCACACAAACAGTTCCATTAACGCACTGACTTCCTGCGCTGG
TCGGTTCCAGTTTTCACTACTAAAGGCATACAGCGTTAACGCCTCAATACCGTTGTTGGC
CGCAAAAGAGACAGCCCGGCGGACGGATTTTGCCCCGGCTTTATGCCCAAAGGCACGAAT
CTTCCCTTGCTTTTTTGCCCAGCGACCATTGCCGTCCATAATGATCGCAACATGACGGCA
GCCATGCGCTGGCAATTTTTCGCTAAGTGGTTGAGTAGCAGACAACATCACGCGTTTTTT
ATTCCCTGACAGGGTTTACGGTACTCAGGAATACTGAAGCCTATACAAAAAAAAGCCGTG
TAAAACCACGGCATACCTGACCTTATAAAGCCAACTACTTACGATCAGATGGCGCAGACT
ATATCACTGAAGCCCTACGCTAACAAATAGCGCGACTCTCTGTAGCCGGATTATCCTCAG
CTTGCGAGACGCATCACCTCTTTTCTGGCGACTTCACGCGCGTTCGCATCAACAGATAAC
ACATCGTCCACACATTGTGGTTCGCGCATATCCATTTTTTCCAGTACGGATAAATTCAAC
GCAGCGATATCCGTAAAGCGGATTTGTTGCGCAAGAAAAGCAGCAACGGTGATTTCGTTT
GCGGCATTCAATGCTGTCGTCGCTGCCTGACCTTGTTCGAACGCCTCCATCGCCAGTTTC
AGGCATGGATAACGATCATAATCCGGTGCGGCAAATGTCAACGCACTGAGTTTGCAAAAA
TCGAGCGGCTTCACGCCAGAGTTCACGCGATTCGGCCATGCCATGGTGTGGGCAATTGGC
GTACGCATATCCGGTTCCCCCAGCTGCGCCAGAACACTGCCGTCCTGATAGCGCACCATT
GAGTGAATCACTGACTGCGGGTGAATCAGCACTTCCATCTGGCTGGCGCTGGCGTTAAAC
AGCCAACGCGCTTCAATGTATTCCAGACCTTTGTTCATCATGGTAGCCGAATCGACAGAA
ATTTTACGTCCCATCGACCAGTTCGGATGACGGCAGGCTTGATGGGGCGTCATTGTTGCC
AAATCGCGCAATGGCGTCTCACGGAAAGGGCCACCAGACCCGGTAAGTAAAATGGACACC
ACGCCATTTTGCTCAAGGTCAGCGTATCCCAGATTATGCTGGATAGGTTGCGGTAAACTC
TGAAAAATAGCGTTATGTTCGCTATCGACCGGTAACAATTGCGCTTTGCTCTGCTTTACG
GCGTCCATAAACAGACGTCCGCAGGTAACCAGTGATTCTTTATTGGCCAGCAAAATGGTT
TTACCCGCGCGGATCGCAGCAAGCGTAGGTAACAGCCCAGCAGCACCAACAATGGCTGCC
ATCACCTGATCAACCTCCTCAAGCGCTGCCATATCGCAAGCGGCTTGTTGCCCACTTAAG
ACTTCGGTGCGGCTCCCCTGTTGCTGTAGCATCGTTTTAAGAAGTTTCGCACTCGCTTCA
TCGTCCATTACGGCATAGCGGGGAGAGAATTCCAGGCACTGTTCTACCATGCGAGTGACA
TTTTTGCCTGCCACCAGCGCAACTACGCGGAAGTGTTCGGGATTATGGCGCACCACGTCC
AGCGTGCTGCAACCAATCGAGCCGGTCGAGCCCAGAATGGTGAGTTGCTTCATGAAACAT
CCAGAGTTGAGACAGAATAAAAAGCAAAACGCCGCCAGCCGATCCGCAAGGATCTACTAA
GCGGCGTTTTTGTCGTTCAAGAAATCAGAACTGCATCAGTTCTGCTTCTTTGTCTGCCAG
CGCCGCTTCAATTTTCTTGATTGCAGCATCAGTCAGTTTCTGTACATCGTCCTGAGAACG
GCGATCGTCGTCTTCGCTGATCTCTTTATCTTTCAACAGTGCTTTCACTTTGTCGTTCGC
GTCACGACGCACGTTACGTACTGCAACACGCGCTTGTTCTGCTTCACCACGAACGATTTT
GGTCAGATCTTTACGACGTTCTTCCGTCAGCGGCGGCAGCGGAACACGGATGTCGCTACC
CGCAGAGTTCGGGTTCAGGCCAAGATCGGACGCCATAATCGCTTTTTCAACGGCCGGAGA
CATTGAACGATCAAACACGTTGATTTTCAGAGTACGGGAATCTTCTACCGTTACGCTTGC
CAGCTGACGCAGCGGCGTCGGCGTGCCGTAATATTCCACGACAATGCCATCCAGCAGGCT
GGGAGAAGCACGACCCGTGCGTATTTTGCTGATTTGGGTTTTGAACGCTTCTACGCATTT
GTCCATGCGTACTTCAGCATCTTTTCTGATATCGCTAATCACGTTACGAATCCTTGAAAA
CTTGTCTCAGTCAGACCAGACAGTCACACACAGTGGAAGTGTGCTAAGTATAGCCCTGAT
TAAACATATTACGGGTAATCGTCTGGATTATTAGGCTATTTTATTTGCCATTTTGGCCCC
GGGCAGTGCTCGCCATCCTCACGTACTTTTGTACGCTCCGGTTGCTGCGCGCTGGCCGTG
ACCAAACTGCCTGCAACAATAACGCCTTATAACCAGACTTACGCCCCCGCGATACTTATG
CGGAATCTTACCCTTATTTATCCATCACGGGAATTATTCCGTGATTAAAGTCCCTTCTTT
TTCACCCATTACCACACGGCGCAGCGCACCCGGTTTGTTCATGTTGAAAACACGAATCGG
TAATTTATGGTCACGAGCCAGCGTGAAGGCCGCCAGGTCCATGACTTTCAGCTCTTTTTC
CAGCACTTCGCTGTAAGTCAGTTGCTCGTACATGGTTGCAGTTGGATCTTTCGCCGGATC
AGCAGTAAACACGCCGTCAACTTTGGTTGCTTTCAGCACCACATCGGCTTCAATTTCGAT
ACCACGCAGGCAAGCTGCTGAGTCGGTGGTAAAGAACGGGTTACCTGTACCGGCGGAGAG
GATCACCACACGGTTGTTGCGCAACAGGCTGATAGCTTCTGCCCAACTGTAGCTGTCGCA
CACGCCATTCAATGGAATAGCGGACATCAGGCGAGCGTTCACATAGGCGCGGTGCAGTGC
ATCACGCATTGCCAGGCCGTTCATTACGGTCGCCAGCATCCCCATGTGGTCGCCCACAAC
GCGGTTCATACCCGCTTTCGCCAGACCAGCGCCACGGAACAGGTTACCCCCACCAATCAC
CACACCAACCTGAATACCCAGTTCAACCAGTTCTTTGATTTCCTGAGCCATGCGATCCAG
TATGCTTGCATCAATACCGAAGCCTTCAGTGCCCTGCAGAGCTTCGCCACTCAACTTAAG
CAGAATGCGTTTATAGACGGGTTTTGCATTGGTAGCCATGTTTCTTTCCTGAGACTGTCA
ACGATTGAAATGAATTAATACTAGCGACATTGTACGTCGCTATTCAGCGCAGCCCCACAA
GGGTTAGCTGAATTTACAAGATGGGCACAAAAAGAAGCCGCCCTCAGGCGGCTCCTTTTC
GATGATTAAGACTGCTTGGACATCGCAGCAACTTCTGCTGCAAAGTCAGTCTCAACTTTC
TCGATGCCTTCACCTACTTCGAAGCGGATGAAGCCAGTCACTTCAGCGTTATGCTCTTTC
AGCAGCTGACCAACAGTTTTTGCCGGTTCCATAACGAACGGCTGACCAGTCAGAGAAACT
TCGCCGGTGAATTTCTTCATGCGGCCTTCAACCATTTTCTCTGCGATTTCTTTCGGCTTA
CCAGACTGCATCGCGATATCCAGCTGTACCTGGTATTCTTTTTCTACCACTTCAGCGGAT
ACGTCTTCTGGTTTGATGAATTCTGGCTTGCTTGCAGCAACGTGCATAGCGATGTGTTTA
ACCAGCTCTTCGTCAGCGCCTTTAGCAGCAACCAGAACGCCGATACGCGCACCGTGCTGA
TAAGAACCCAGAACGTCGCCTTCCAGCGCAGCAACGCGGCGAATGTTGATGTTTTCACCA
ATTTTCGCTACCAGCGCAACACGTTCTTCTTCGAACTGTGCTTTCAGAACTTCAACGTCA
GTGATTTTGCCAGCAACAGCTGCGTCCAGAACTTTGTCTGCGAACGCCTGGAAACCAGCG
TCTTTTGCAACGAAGTCAGTCTGGCAGTTAACTTCCAGAATGATGCCGTAGTTGCCGTCG
ATTTTGGTTTTGATCACGCCGTCAGCAGCAACGTTGCCTGCTTTTTTCGCTGCTTTAATA
GCACCGGACTTACGCATGTTTTCGATTGCCAGCTCGATGTCGCCGTTAGCTTCAGTCAGT
GCTTTTTTGCAATCCATCATGCCTGCGCCAGTACGCTCACGCAGCTCTTTTACCAGGGAT
GCGGTAATTTCAGCCATTCTAAAATCCTCGGAGATGTGATCTGCCCGGCATTAAACCGCA
CAGATATAAAAGTGAAAAAGGGGGCCATATGCAGGCCCCCTAACCAAACGTGTACTACCT
GGTCTATAAGGGCTCTCCCCCTTCATATTTCGCGCCGCAGATGCGTTGTCTTCGCTCGCT
CATCCCGGTCACTTACTGATGTAAGCTCCCGGGAATTCTCGAGCTTGCCGCCTTTCTGCA
ACTCGAACTATTTTGGGGGAGTTATCAAGCCTTATTACTCAGCTTCTACGAAGCTTTCTT
CCGCCTGGGAAGCCAGATCCTGAGAACGGCCTTCACGTACGGTTGCAGCAACAGCGCCCA
GGTACAGGGTCACAGCACGGATTGCGTCGTCGTTACCCGGGATAACGAAGTCAACACCGT
CCGGATCAGAGTTGGTATCAACGATAGCAAATACCGGAATACCCAGGTTGTTTGCTTCTT
TGATAGCAATGTGTTCGTGGTCAGCATCGATTACAAACAGAGCGTCCGGCAGACCGCCCA
TGTCTTTGATACCGCCCAGGCTGTTTTCCAGTTTCTCCAGCTCACGAGTGCGCATCAGCG
CTTCTTTCTTGGTCAGCTTGTCGAAAGTACCGTCCTGAGACTGAGTTTCCAGGTCTTTCA
GACGTTTGATGGACTGACGAACGGTTTTCCAGTTAGTCAGCATACCGCCCAGCCAGCGAT
GGTTCACGAAGAACTGGTCGCAGCTCAGAGCAGCGTCTTTCACCGCTTCGCTTGCAGCGC
GTTTAGTACCAACGAAAAGGATTTTACCTTTGCGAGAAGCAATCTTGTTCAGTTCAGCCA
GAGCTTCGTTGAACATCGGTACAGTTTTCTCAAGGTTGATGATGTGAACTTTGTTACGCG
CACCGAAGATGAACGGCTTCATTTTCGGGTTCCAGTAACGGGTCTGGTGACCGAAGTGAA
CACCAGCCTTGAGCATGTCGCGCATGGAAACAGTTGCCATGATTAAAACCTCTATATAAA
AGTTGGGGTTATGCCTCCACGTATCCCATATTACCGACCCCAAAGGGCACCCCGGAATAT
GTGCCGATACGTGTGTGTTGTTACACAAAGTGAGATTGTCGCTTCCGTCCAGTCTGTGTA
TACGAAATGGATCGGAAGTCCGGCGCGCTTTATACCACAAATACGTCTGGGACACCAATA
ATTGTTGGCGCTGTGTACAGCATCAGACGTCGAATTTTCTATTATAGAAAACCTTCAGTG
GCACGTTTGGCGAAATTCAGAATGATTCTCAATTTGCCCGGGTGTGATACCATTGACGGC
ACTTACATATATATTGTCGGTATCACCGACGCTGATGGACAGAATTAATGGCTATCTCAA
TCAAGACCCCAGAAGATATCGAAAAAATGCGCGTCGCTGGCCGACTGGCTGCCGAAGTGC
TGGAGATGATCGAACCGTATGTTAAACCGGGCGTCAGCACCGGCGAGCTGGATCGCATCT
GTAATGATTACATTGTTAATGAACAACACGCGGTTTCTGCCTGCCTCGGCTATCACGGTT
ATCCGAAATCCGTTTGCATCTCAATTAATGAAGTGGTGTGCCACGGTATTCCGGACGATG
CTAAGCTGCTGAAAGATGGCGATATCGTTAACATTGATGTCACCGTAATCAAAGATGGTT
TCCACGGCGATACCTCGAAAATGTTTATCGTCGGTAAGCCGACCATCATGGGCGAACGTC
TGTGCCGTATCACGCAAGAAAGCCTGTACCTGGCGCTACGCATGGTAAAACCAGGCATTA
ATCTGCGCGAAATCGGTGCGGCGATTCAGAAATTTGTCGAAGCAGAAGGCTTCTCCGTCG
TTCGTGAATATTGCGGACACGGTATTGGTCGCGGCTTCCATGAAGAACCGCAGGTGCTGC
ACTATGACTCCCGTGAAACCAACGTCGTACTGAAACCTGGGATGACGTTCACCATCGAGC
CAATGGTCAACGCGGGTAAAAAAGAGATCCGCACCATGAAAGATGGCTGGACGGTAAAAA
CCAAAGATCGCAGCTTGTCTGCACAATATGAGCATACTATTGTGGTGACTGATAACGGCT
GTGAAATTCTGACGCTACGCAAGGATGACACCATCCCGGCGATAATCTCGCACGACGAAT
AAAATGAAGCCGGCGAATGCCGGCTTTTTTAATGCGATAATTTAATCTTATGGGTGGCGC
ACAATGAATACCCTTCCAGAACAGTACGCAAACACCGCTCTCCCCACCCTGCCCGGTCAA
CCGCAAAATCCATGCGCCTGGCCCCGTGATGAATTAACCGTCGGTGGGATAAAAGCCCAT
ATCGATACTTTCCAGCGTTGGCTGGGTGATGCCTTTGACAATGGTATCTCCGCAGAACAG
TTGATTGAGGCGCGTACCGAGTTTATCGACCAGCTCCTGCAACGATTATGGATTGAAGCG
GGATTCAGCCAGATTGCCGACCTGGCATTGGTCGCCGTCGGTGGCTACGGTCGTGGCGAG
CTGCATCCACTTTCAGACGTCGATTTACTGATTTTAAGCCGTAAAAAGCTCCCGGACGAT
CAAGCGCAAAAAGTGGGCGAGCTGTTAACGCTGCTCTGGGATGTAAAGCTGGAAGTCGGT
CATAGTGTGCGCACGCTTGAAGAGTGCATGCTGGAAGGGTTATCGGATTTAACCGTCGCC
ACCAATTTAATCGAATCCCGCTTATTAATTGGCGATGTTGCGCTGTTCCTCGAACTGCAA
AAACATATTTTCAGCGAAGGATTCTGGCCTTCCGACAAGTTCTACGCGGCGAAAGTTGAA
GAACAGAACCAGCGCCATCAGCGTTACCATGGCACCAGCTACAACCTTGAACCAGACATC
AAAAGCAGCCCTGGCGGCTTGCGCGATATCCACACTCTGCAATGGGTGGCCCGCCGTCAT
TTTGGCGCAACATCGCTGGATGAAATGGTCGGGTTTGGCTTCTTAACCTCAGCGGAGCGG
GCGGAATTAAACGAATGTCTGCATATATTGTGGCGTATTCGCTTTGCCCTGCATCTGGTC
GTCAGCCGTTACGATAATCGCCTGTTATTCGATCGCCAGCTTAGCGTCGCCCAGCGTCTG
AATTACAGTGGCGAAGGTAACGAACCGGTCGAGCGGATGATGAAGGATTACTTCCGCGTG
ACACGCCGCGTCAGTGAACTCAACCAGATGCTGCTGCAACTGTTCGATGAAGCGATCCTC
GCCCTTCCCGCCGACGAAAAACCCCGTCCAATCGACGATGAGTTTCAGCTACGCGGTACG
CTAATCGACCTGCGTGATGAAACACTATTTATGCGCCAGCCGGAAGCCATCTTGCGTATG
TTCTACACCATGGTGCGCAACAGTGCGATCACCGGCATTTACTCCACCACACTGCGCCAG
TTACGCCATGCCCGTCGCCATCTGCAACAACCGCTGTGTAATATTCCGGAAGCACGAAAA
CTGTTTTTGAGCATTCTGCGTCACCCCGGAGCGGTGCGGCGCGGGCTATTGCCAATGCAT
CGCCATAGCGTGCTCGGCGCGTATATGCCGCAATGGTCGCATATCGTCGGGCAGATGCAG
TTTGATCTGTTCCACGCCTACACGGTGGATGAACATACTATCCGCGTGATGCTGAAACTG
GAGAGTTTTGCCAGTGAAGAAACGCGCCAGCGCCATCCGTTGTGTGTGGACGTCTGGCCG
CGTCTACCGTCAACTGAGCTGATTTTCATCGCCGCGCTGTTTCACGATATCGCCAAAGGA
CGCGGCGGCGACCATTCCATTCTCGGTGCTCAGGATGTAGTGCATTTTACCGAACTCCAC
GGGCTGAACTCACGCGAAACACAGCTGGTCGCCTGGCTGGTTCGCCAGCACTTGCTGATG
TCGGTGACAGCTCAGCGTCGCGATATTCAGGACCCGGAAGTCATCAAGCAGTTTGCCGAA
GAAGTTCAAACGGAAAATCGTCTGCGCTATCTGGTATGCCTGACAGTGGCTGACATTTGC
GCCACCAACGAAACGCTGTGGAATAGCTGGAAGCAAAGTCTGTTGCGCGAACTCTATTTT
GCCACCGAAAAACAGCTACGACGCGGAATGCAAAACACGCCGGATATGCGCGAACGGGTT
CGCCATCACCAACTCCAGGCGCTGGCACTGCTGCGCATGGATAACATCGACGAAGAGGCG
CTGCACCAAATTTGGTCACGCTGTCGTGCTAACTATTTTGTCCGCCATAGCCCAAATCAA
CTGGCCTGGCATGCGCGCCATTTATTACAGCATGATTTAAGCAAACCGCTGGTATTGCTT
AGTCCGCAGGCTACGCGTGGAGGCACCGAGATTTTTATCTGGAGCCCGGACCGCCCCTAT
CTGTTTGCCGCCGTCTGTGCCGAATTAGACCGCCGCAATTTAAGTGTTCACGACGCACAA
ATTTTCACCACTCGCGACGGTATGGCGATGGATACCTTTATCGTGCTGGAACCCGATGGT
AGCCCGCTATCCGCAGATCGCCATGAGGTTATTCGGTTTGGTCTGGAGCAAGTACTGACA
CAAAGTAGCTGGCAGCCACCACAGCCGCGTCGTCAACCGGCTAAACTACGTCACTTTACT
GTTGAAACCGAAGTGACGTTTTTGCCTACCCATACCGACCGAAAATCATTCCTTGAGCTT
ATCGCGCTCGACCAGCCAGGACTGCTGGCGAGAGTCGGGAAAATTTTTGCCGATCTGGGA
ATTTCGCTTCATGGCGCCCGAATTACAACCATTGGCGAGCGAGTAGAAGATTTATTCATA
ATTGCCACCGCTGACCGGCGTGCACTTAATAACGAGTTGCAGCAGGAAGTGCATCAGCGG
TTGACAGAGGCCCTCAATCCAAACGATAAAGGGTGATGTGTTTACTGATATGAAAAGAGT
TTAACAATGCAGCAGTTACAGAACATTATTGAAACCGCTTTTGAACGCCGTGCCGAGATC
ACGCCAGCCAATGCAGACACCGTTACCCGCGAAGCGGTAAATCAGGTGATCACCCTGCTG
GATTCCGGCGCACTGCGTGTAGCGGAAAAAATTGACGGTCAGTGGGTGACGCATCAGTGG
TTAAAAAAAGCGGTGCTGCTCTCTTTCCGTATTAATGATAATCAGGTGATCGAAGGGGCA
GAAAGCCGCTACTTCGACAAAGTGCCGATGAAATTCGCCGACTACGACGAAGCACGTTTC
CAGAAAGAAGGCTTCCGCGTTGTACCACCAGCGGCGGTACGTCAGGGTGCGTTTATTGCC
CGTAACACCGTGCTGATGCCGTCTTACGTCAACATCGGCGCATATGTTGATGAAGGCACG
ATGGTTGATACCTGGGCGACCGTCGGTTCTTGTGCGCAGATTGGTAAAAACGTCCACCTT
TCCGGTGGCGTGGGCATCGGCGGCGTGCTGGAGCCGCTGCAGGCTAACCCGACCATTATT
GAAGATAACTGCTTCATTGGCGCACGCTCTGAAGTGGTTGAAGGGGTGATTGTCGAAGAA
GGTTCCGTCATCTCTATGGGCGTATACATTGGTCAGAGCACCCGTATTTACGACCGTGAA
ACCGGCGAAATCCACTACGGTCGCGTTCCGGCGGGGTCTGTGGTTGTTTCAGGTAATCTG
CCGTCAAAAGATGGCAAATACAGCCTCTACTGTGCGGTTATCGTTAAGAAAGTTGACGCG
AAAACTCGCGGTAAAGTTGGTATTAACGAACTGCTGCGTACCATCGACTAAAAGTATGTA
CACGGGCAGCACGACGCTGCCCGATTGCTTTCTGGTTCAGAATAATTCGTCCTACTCATT
CTTCCTCCCCCTTTTTTAAATACTTTTTCATCTTGTTTCGGACTGTCATGTAATTCGCAA
AACGAAGATAAATGTGCTAATCCATCCCATGGAATATCGCCACAATAAAGCAGGTAATTT
TTTGATTTTTACGCCATGATAGAAGTCTGGAAGAAAAAGGCTTTCTGCGATCACAGTCGA
GCCGGGCGGGCCAGGCCAAATGCTAAAATAAGCACAATTTACTGACTCATTTTGAGGTAA
CGCTATGTACGACAATCTGAAAAGTCTGGGTATTACCAATCCTGAAGAAATTGATCGTTA
CAGCCTCCGGCAGGAAGCCAACAACGATATTCTGAAAATCTATTTCCAGAAAGACAAAGG
CGAGTTTTTCGCCAAGAGCGTGAAGTTTAAATATCCGCGTCAGCGTAAAACGGTCGTCGC
TGATGGTGTGGGTCAGGGTTATAAAGAAGTCCAGGAAATCAGCCCGAATCTACGGTATAT
CATTGATGAGCTTGATCAAATCTGCCAGCATGACCGCAGCGAAGTTGATCTTAAGCGTAA
GATCCTCGACGACTTACGTCACCTGGAGTCAGTCGTAACCAATAAGATCAGCGAGATTGA
AGCCGATCTGGAAAAACTAACGCGTAAATAATCCCGAACTGACGGTTAACTCGGGCATTC
CCCTCTCCCCTTCGGGCTGAGGGGAATGAGCCAGCGCCGCCTCAACCTTAACGCATAACC
TACCGCTCTTCATCCAGTTGTAACGCCACATACAGCAGCAACCTGTCATCAAAATTGCCC
AAATCAAGCCCGGTCAGTTCCGATATACGATTAAGCCGATACTCCAGAGTATTACGATGA
ATAAACAACGCCTTTGACGTTGCCAGCGGTTGCACATTGTGACGAAACCACGCCGCCAGC
GTTCGCCGCAGCAAGCCGTTATTGTCCATCGCTTTCAGCCGCGCCAGCGGTCGCGCCAGT
TCGTTGGCCTGCCAGTCGCCACGCAAACTGTCGAGTAACACAGGTAACATCAGATCCTGA
TAAAAATAGCAGCGACTTTCTGGCATCCGCTGTTTACCCACCACCATCGTCGTTTTCGCC
GTACGATAGGATCGGGCAATACTGCCAGGACCAGTAAAATAGTTGCCCAGCGAAACGCGA
AAACGCAGCTGGCCGTACTCTTTCATGCGGGTAATCAGTTGTTCAACTCGCTTACGATGA
TCTTCTGCATCCCAGCGCCCAAAAGAGTTCAACGCCGGTTTCAACACCACCATTTCGGTT
AGCGAGACAATCGCCACCAGATTATTACGCTCGGGCGTAGTCAGCGCATTTTGCAGTTGT
TGTAACTCCGCCATTGCGCTGTCCACGCCAAGCTGACCGCTGTCGACCTCAACAATAGCC
ACTACTCGCGGTTGATTGAGATCGATCCCCAGCCGTTGCGCCCATTCAGTAAGTGCGGGA
GTATTCTCCTCAGCCTGAATCAGGTTCATCACCAGTTCTTCCCGCAAACGGCTATCCTGC
GCCAACAGGTGCATCAACCGCGACTGTTCCAGCATCATTTCAGCCGTCATGCAGACCAGT
TCGCCATATTTACGCAGGTTCTCTGGTTCACCTGTCAGGCCAATTACGCCGACAATTTCA
CCTTCCAGCCGTAACGGTAGATTAATCCCCTGCCGCACACCGTGCAGATGACGTGCCACC
GCGTCATCGATATCGACGACTCGTCCCTGTGAAAGTACCAGCAATGCACCTTCGTGCAAT
TCACCAATACGCTCACGATCGCCGCTGCCGATAATTCGCCCGCGGGCATCCATTACGTTG
ATATTGGTATCGATGATGCGCATGGTACGTGCCACGATATCCTGCGCCATTTTGGTATCA
AGATGCCAGCCAGCCATAAGTCCTCCGTTATGCACGGCTTAGCATAAGGAAGTACGTAAC
GTACGGCATTGTGCAAATGCCTAAAGGATGATGAAGATGTATGGAGTTGTGGTGAAGTTC
ACAGATTGTAAGGAGAACCCCTTCCCGTTTTCAGGAAGGGGTTGAGGGAGATTACTGCAT
TAACAGGTAGATGGTGCTGTCGCCGCGCTGAATGTTCAGTGCCAGCACAGACGGTTTGCT
GTCGAGAACTTTACGCAGTTCAGCGATGTTTTTCACTGCCTGCTGGTTCGCGCCAATAAT
CACATCACCTTTCTTCAGGCCGATCTGCGCAGCCGGAGTGCCCGTTTTCACGTTGTTCAC
TACCACGCCCTGATCTTTGCCTTTGTTGCTCATCTCAGCACCTTCAATGCCGTTGAAGAT
GGAGCTGGAATCAACCTGATTCTGGCTGCTCTGCTGCAGTTCCAGATTCACGTTGACCTG
CTTACCGTCGCGCAGCAAGCCCAGGGTCAGTTTGCTGCCCACCGGCATAGTACCCACCTG
AGCACGCAGTGCGGCAAAGCTGCTGATCGGCTTACCGTTCAGTGAGGTGATCACATCACC
CGCTTTAATGCCCGCTTTTGCAGCGGAGGAATTAGGCAGAACCTGGCTTACGAAAGCACC
GCGCTGGGCGTCAACTTTCATCGCTTTCGCCAGTTCGGAATTCAGCTCAGTCCCCATAAT
ACCCAGCTCACCGCGTTTCACCTGGCCGTATTCCACCATCTGCGAGGTCAGGTTTTTCAC
CATGTTGCTCGGGATAGCAAAACCGATACCGATGTTGCCGCCGTCCGGTGCGAGGATCGC
GGTGTTGATACCGATCAGTTCGCCGTTCAGGTTAACCAGCGCACCACCGGAGTTACCACG
GTTGATCGCTGCATCGGTCTGGATGAAGTTTTCGTAGTTTTCGGCATTCAGGCCGCTACG
CCCCAGCGCAGAGACAATCCCGGAAGTTACCGTCTCGCCCAGACCAAACGGGTTACCAAT
CGCTACGGTGTAATCACCCACGCGCAGTGCATCAGAATCCGCCATCTTAATTGCGGTCAG
GTTTTTCGGATTCTGGATTTGGATCAGCGCGATATCAGAGCGCGGATCTTTGCCAACCAT
CTTCGCGTCGAACTTACGGCCATCGCTCAGTTGAACTTTAATGACCGTCGCGTTATCAAC
AACGTGGTTGTTGGTGACGACATAGCCTTTATCGGCATCAATGATGACGCCGGAACCCAG
CGCCATGAATTTCTGTTGCTGGCCGCCACCATTACCGCCCTGGCCACCCTGGCAGAACGG
AGAGCTCTGGAACGGAGAACCTTCCTGGCAGAACGGAGAATCATCACCGAAGAACTGCTG
GAAATTACGCGGCATACGCGGCGTATTAACGGTTGTGCTACCTTCTACGTTAATGCTGAC
CACTGAAGGCATCACCTTTTCGAGCATCGGTGCAAGGCTTGGCATCTGCTGGGCTGTCGT
TGCTGAAGAAGTCTCAGCCGCCGTTGCAGAGAGCGGAGATAACGCCAAACCTAAACTCAG
AGCCAGTGCACTCAGTGCTAATGTGGTTTTTTTCATGTATTTCAGTCTCGATTAACAGAT
AACGCAAAATTGCTGTGTTCTTCAGATTCGTTTTATAGCGCGAAGTTCCGAACTAAAGTT
TCTGCAAAAGGTAAAAATTTATTGTTCGTCTTTACAAAAGCCTGGTTATTGTTCTACGGC
CATCAGACGTCGGTATTCATCCCACGCATAGAGGTCGGTCATACCGCTGATATAATCATG
CAGCAGGCGGCAACGGTAATAATATTCCCATAGCGGAAACTCAGGAGAATCTGACGGTAA
TTTACTGACAGCTTCGACATAGGCCAGCCGATGGCGCGTCGAGAGTTTGTGGAATAAGCG
CGATTCAATAGGGAAACGTTTCACCCGTTCTTTTTCTACCAGTTCAGTAAAGTCTGATAA
CGACAGGCTTAATAAAGGACGATAAATCTCTAATAATCCGCTAATGACCCGATAGCCCTG
CAATTCAAGCTGCTCGACATCTGGATGGCTAAACACATGTTTTACAGCGACATTTTTATA
TAGCTTAAGAAGATCGCTGCATTCGCTGGCATCTTCCAATAATGCATGATTAAACGTTCC
GGCGAAAATCGCAGGCAGATTATCAATAAATCGTTGTGCCGCGTAGGGTACCAGTTTATT
TAGGGTATTTACCCGTAAATACATAAAAAACTGATCTTCCGTACTGCGGCTTAAACTATT
TGAGCGTGATTTTTCCCAGGCATTTTCAACCACTAGCGAAAAGAGCGAACCTTTCTCATG
CTGACCCCACGCCTCGTGCAAATGATGATAAAGCTGCTCAACGGTAAATATTCTTTTCTC
TACCGCATCTTCAAGGTCTGCCACACAATAGGAGATGTCGTCGGCAGCTTCCATAATCCA
CGTTAATGGAAAACGACTGTAAAGCGCCAAATTAAGTTCTTTACGCAACCGGGCAATATA
GGCTTCTTCAGAAAGATAATAACCCGGCTTTTTCATTAAATAGTGATGTGTCTCAGGCGT
TTCGCCACGCCACCACGCCGGACGGGTATATTTTAAAATACCGCCAACCTGTGCCCAGGT
GAGATTCATCCTCATCAATGTATGCACCAGACGAATGCCTTGTGCATTCCCCTCAAAATG
ACATAAGTCCTGACGAATCTTGCGCCGCAGCTCGTTAAGCGGTTCTTCCCCGTCCCGTAA
ACGTAGTGCTGCCACGCTGCAGCGATCGTCAGTCAGAGGCTGGCTTTCGGCATCTTCCGG
GTATAAACGCTGGCGAAACCAGTCATTTATCGCCGCTTCGCCAAAATGACCAAACGGCGG
ATTGCCGATATCGTGCATCAGGCATGACATCTCAACAATGCTTTCAAAAGGTCCGGTCAG
TTCATCCAGGCCGTATGCTTCCAGCAATTTAAGCTCTTTCAGACGGCTTAAAATTTCTTT
GGCGATGTAGCGCCCCACCTGCTGGACTTCCATCGAGTGGGTAAGACGCGTGCGCACGGC
GGCATTGCGCTCCAGTGGAAAAACCTGGGTCTTTTGTTGCAGACGACGAATTGCCGGAGA
GTTGATGATACGCCCGCGATCGCTCTCGAAGATCCGCAGGATCTCATGTTCGGTTTTAAC
GCCCTGCGGTGAACGGTAACGACGATGCCAGTTTATTTTTTTTCGGAAATCAATCTGTGC
CATGTCCTCTCCCGCGTGAGAAATACGCTTCCCCGTAAGCGCATGGTAAACTATGCCTTC
AAATCGGGCTTATCGCGAGTAAATCTATGAAAATCGGCATCATTGGTGCAATGGAAGAAG
AAGTTACGCTACTGCGTGACAAAATCGAAAACCGTCAAACTATCAGTCTCGGCGGTTGCG
AAATCTATACCGGCCAACTGAATGGAACCGAGGTTGCGCTTCTGAAATCGGGCATCGGTA
AAGTCGCTGCGGCGCTGGGTGCCACTTTGCTGTTGGAACACTGCAAGCCAGATGTGATTA
TTAACACCGGTTCTGCCGGTGGCCTGGCACCAACGTTGAAAGTGGGCGATATCGTTGTCT
CGGACGAAGCACGTTATCACGACGCGGATGTCACGGCATTTGGTTATGAATACGGTCAGT
TACCAGGCTGTCCGGCAGGCTTTAAAGCTGACGATAAACTGATCGCTGCCGCTGAGGCCT
GCATTGCCGAACTGAATCTTAACGCTGTACGTGGCCTGATTGTTAGCGGCGACGCTTTCA
TCAACGGTTCTGTTGGTCTGGCGAAAATCCGCCACAACTTCCCACAGGCCATTGCTGTAG
AGATGGAAGCGACGGCAATCGCCCATGTCTGCCACAATTTCAACGTCCCGTTTGTTGTCG
TACGCGCCATCTCCGACGTGGCCGATCAACAGTCTCATCTTAGCTTCGATGAGTTCCTGG
CTGTTGCCGCTAAACAGTCCAGCCTGATGGTTGAGTCACTGGTGCAGAAACTGGCACATG
GCTAAGTCACTGTTCAGGGCGCTGGTCGCCCTGTCTTTTCTCGCGCCACTGTGGCTCAAC
GCGGCACCGCGCGTCATCACGCTTTCTCCCGCCAACACTGAACTTGCCTTTGCCGCCGGG
ATCACGCCGGTTGGGGTCAGCAGCTATTCCGACTATCCTCCACAAGCGCAAAAGATTGAG
CAGGTTTCCACCTGGCAGGGGATGAATCTGGAACGCATTGTCGCGCTGAAACCCGATCTG
GTGATTGCCTGGCGTGGAGGTAATGCCGAGCGGCAGGTTGACCAGCTGGCTTCGCTGGGA
ATAAAAGTGATGTGGGTCGATGCGACAAGCATTGAACAAATTGCCAATGCGTTACGTCAA
CTGGCCCCCTGGAGTCCGCAACCGGATAAGGCCGAACAAGCCGCGCAATCCCTGCTGGAT
CAGTACGCGCAATTGAAAGCGCAATATGCTGATAAACCTAAAAAACGTGTTTTTCTGCAA
TTCGGCATTAATCCGCCATTTACCAGTGGAAAAGAGTCGATTCAGAACCAGGTACTCGAA
GTTTGTGGCGGAGAAAACATCTTTAAAGACAGCCGGGTTCCCTGGCCGCAAGTTAGCCGC
GAACAGGTGTTAGCACGCTCGCCACAGGCGATTGTCATTACAGGCGGACCGGACCAAATT
CCTAAAATCAAACAATACTGGGGTGAACAGCTCAAAATTCCCGTTATTCCTCTCACGAGT
GACTGGTTTGAACGTGCAAGCCCACGTATTATCCTCGCTGCACAACAGCTCTGTAATGCG
CTTTCACAGGTAGATTAGTGCCTGACCTTTTCAGGTGCTCAGTGGGGATTGAACAATGCT
CGTCTATTGGCTGGATATAGTCGGCACAGCGGTATTTGCCATCTCCGGCGTTTTGTTAGC
CGGAAAATTGCGTATGGACCCTTTTGGTGTTCTGGTATTGGGCGTGGTTACCGCAGTAGG
CGGCGGGACAATTCGCGACATGGCGCTGGATCACGGCCCGGTATTTTGGGTGAAAGATCC
CACCGATCTGGTCGTTGCAATGGTCACCAGCATGCTGACCATCGTGCTGGTGCGCCAGCC
AAGACGCTTACCAAAATGGATGTTGCCGGTGCTGGACGCCGTTGGTCTGGCGGTGTTTGT
CGGCATTGGCGTGAATAAAGCCTTTAATGCGGAAGCCGGTCCGTTAATCGCGGTTTGCAT
GGGCGTCATTACTGGCGTTGGCGGCGGGATTATTCGTGATGTACTGGCCCGCGAGATCCC
CATGATTTTACGTACAGAAATCTACGCAACAGCCTGTATTATCGGCGGTATTGTCCACGC
TACGGCTTATTACACATTTTCCGTACCACTGGAAACAGCCAGTATGATGGGCATGGTCGT
GACGCTATTGATTCGGCTGGCGGCTATTCGTTGGCATCTTAAGCTACCGACGTTTGCGCT
GGATGAGAATGGGCGTTGAAGAGAGAAGATGTGCCGGATAGTTTATCCGGCACATGAACA
ACAGATTAGATGCTAAAGGAAGAACCGCAACCGCAGGTGCTTTTCGCGTTCGGGTTGGTC
ACGATGAAACGAGAACCTTCCAGTCCTTCGGTGTAGTCAACGGAACCGCCGACCAGATAT
TGCAGGCTCATCGGATCAACCACCAGGCCAACGCCCTGTTTTTCGATGGTCATATCGCCT
TCGTTCACCTGATCATCAAAGGTGAAACCATACTGGAAGCCGCTGCAACCGCCACCGGTG
ATATACACGCGTAATTTCAGATTCGGGTTATCTTCGTCAGCGATCAGGCTTTTAACTTTG
TTGGCTGCTGCGTCGGTAAACTCCAGCGGCAGTGCTACGTCATCACTCATATTTTGCTCC
AAACGACATCGGCAATTGGGCAAATTCTAACCCAATAATAATCGCCATTATCTAATACCC
TGGTATTTCGTTCAAGTATTCTCGCTGGCTGATGCGGCCTTGCTTCGCGCCAGTTGCTCA
GCTTCCTGTTTTGCCAGCGTGCGCGCAAGAATCGCCGAGTATAGCGGTTTCCCACCGGTA
AATTGCGCTAATAGTGTTGCGCCAAGACCGGTAATAATCATTGGCAAAATGAGCTGGTAG
TTATCGGTCATCTCCAGAACCAGAATGATCCCCGTTAACGGCGCGCGAATAGATGCCGCC
AGTAACGCCCCCATTCCGGCAATAGCAAATGTCCCCGCCTCAAGGTGATATTGCGGAAAC
AGCTCAACGGCAACCATTCCGAAAGCGGTTCCCAGCACAGTACCCAGCGCCAGCATCGGG
GCAAAAATACCGCCCGGCGCGCCGGAAGAGAAGCACAGTAAAGTGGTAATGACCCGCGCG
ACGAAGATAAACACCAGCATTCCCATGCTGAAATTCCCCGCGGTAGCGATAGGAATCAGG
TTAAAACCGCCGCCCGACGTTGCTGGTGCCACAAACCCCAGCAATCCACACAGACCGCCA
ATCGCACCACCCATCAGTACCCATTTGGTAATATTGCCGCCGTGCACACGGTGCAGCAAA
TCCTGCATTCCCAGCACCCATTTATTAAAAATAGGGCCGAAAATGCCAAAAATAATACCG
AGGATCAGATAAAGCCACAGCGTATTAAGCGGCGCATCAGAAAGTTTACCGACGTCAATC
AACGCAACTTCATGATTAAAAATCCGGTACATAATGGTCGACATAATGACACCAATAAAT
ACCGCTTTAATCGAAATTAACGTATAGCGAAACTGCGGACGCATCTCTTCGATAATAAAC
AAAATACCCGCCAGCGGCGCGTTAAAGGCCGCCGCCAGCCCCGCAGCAGCACCGGTTGCC
AGCAGCGTATGCCGAGCTTCATCACCTTTCAGGCGGAAAACATCGAGTACCATCCGCCCG
ATATTGCCGCCGATCTGCACGGTTGGCCCTTCGCGCCCCAACACCATGCCTCCGCCGAGC
GTCCCCAGCCCGCCAAAGAATTTCACCGGCAATACACGCCACCAGCGAACGGGACGTTGA
TCTTCCAGCGCCCCTTCAATTTCCGGGATCCCCGAACCCCCTGCTTCCGGCGCGTATTTG
CGCACCAAAAAGTAGCCGAACATCGCCAGCAGCGCCGAACAGAGAAAAGCGACGGTTAAC
AGAAGCGGATAATTATCAGCAGTATGTACCAGCGCCCCCATACGTTGGTTCTGCAACCAG
GCGACACCTTTGTCAAAAGCAACCGCTGCCAGCCCGACAAGCGTGCCGACGACTGCCGCC
ATAAACAAAATGGCTAACGGGGTTTTATCGCGCTCAAGAAGTTGGCGAATCAGTTGTCTG
CGTCGCAGGCGCGCGGCCTGCGGTGTTTCTAAAGAGGGAGTATCAGTTTTCATCCAATGA
TCACTTATTGGTCATACAAATAAGATGACGGCATTTTACTCGCACGTTCCATGAAAATCC
TTTGCAAAGCGTAATGTTTCAAATGCACAAAACTTTTATACTCTAAGAACTCAGGATTGC
ACCAGTACAAGCAGCCTGATGTTTGACGAGTATTTAACTTGTTATGAATAACATAGAATA
GCAGCCATTCACTTTTTCTACGAATCAGGAACCCTCCATGAGTAAGTCTGAAAATCTTTA
CAGCGCAGCGCGCGAGCTGATCCCTGGCGGTGTGAACTCCCCTGTTCGCGCCTTTACTGG
CGTGGGCGGCACTCCACTGTTTATCGAAAAAGCGGACGGCGCTTATCTGTACGATGTTGA
TGGCAAAGCCTATATCGATTATGTCGGTTCCTGGGGGCCGATGGTGCTGGGCCATAACCA
TCCGGCGATCCGCAATGCCGTGATTGAAGCCGCCGAGCGTGGTTTAAGCTTTGGTGCACC
GACCGAAATGGAAGTGAGAATGGCGCAACTGGTGACCGAACTGGTCCCGACCATGGATAT
GGTGCGCATGGTGAACTCCGGCACCGAGGCGACCATGAGCGCCATCCGCCTGGCCCGTGG
TTTTACCGGTCGCGACAAAATTATTAAATTTGAAGGTTGTTACCACGGTCACGCTGACTG
CCTGCTGGTAAAAGCCGGTTCTGGCGCACTCACGTTAGGCCAGCCAAACTCGCCGGGCGT
TCCGGCAGATTTCGCCAAACATACCTTAACCTGTACTTATAACGATCTGGCTTCTGTACG
CGCCGCGTTTGAGCAATACCCGCAAGAGATTGCCTGTATTATCGTCGAGCCGGTGGCAGG
CAATATGAACTGTGTTCCGCCGCTGCCAGAGTTCCTGCCAGGTCTGCGTGCGCTGTGTGA
CGAATTTGGCGCGTTGCTGATCATCGATGAAGTGATGACCGGTTTCCGCGTAGCGCTAGC
TGGCGCACAGGATTATTACGGCGTAGTGCCAGATTTAACCTGCCTCGGAAAAATCATCGG
CGGTGGAATGCCGGTAGGCGCATTCGGTGGTCGTCGTGATGTAATGGATGCGCTGGCCCC
GACGGGTCCGGTCTATCAGGCGGGTACGCTTTCCGGTAACCCAATTGCGATGGCAGCCGG
TTTCGCCTGTCTGAATGAAGTCGCGCAGCCGGGCGTTCACGAAACGCTGGATGAGCTGAC
AACACGTCTGGCAGAAGGTCTGCTGGAAGCGGCAGAAGAAGCCGGAATTCCGCTGGTCGT
TAACCACGTCGGTGGTATGTTCGGTATCTTCTTTACCGACGCCGGGTCCGTGACGTGCTA
TCAGGATGTGATGGCCTGTGACGTCGAGCGCTTTAAGCGTTTCTTCCATATGATGCTGGA
TGAAGGTGTTTACCTGGCACCGTCAGCGTTTGAAGCGGGCTTTATGTCTGTGGCGCACAG
CATGGAAGATATCAATAACACCATCGATGCTGCACGTCGGGTGTTTGCGAAGTTGTGATG
ATTTTGCCTCGCCCACCGGGCGAGGCATTCTATTAACGGCTCTGCTTTCTCAACAAATAG
ATAAAATATGGCGCGCCGATAAAGGTCGACAGCAGCCCCGCCGGGATCTGGAATGGAAAC
AGCACCATCCGCCCACACCAGTCAGCGAATACCAGCAGTAAACCACCCACCAGCGCCGAA
ATTACGATGTGTGGCATCGTCCGTCGAAAACCCATCATCCGCGCAATATGCGGTGCCATT
AAACCAACAAAACTCAACGGTCCAATAGTCATCGTCGCGGTCGCCGTCAGGCAAGCCGCT
AACAGCAGCAGCGCAATTCGCGTCGGCGTCAGCGCCATTCCTACGGCTCGGGCGGTATCA
CCACCCAGCGGTAAAATGGTCAGCCAGCGGCGGCACAGCGGGGTAATCGCCAGCAAAATC
ACCATCACAATTCCGGTGCGCCAGACCTGCGCATCGGTCGCGTTGTAGGTCGAACCGGAA
ATCCAGGTCAGCACTTGCGCCATTCGCGGGTCACCGCTCGCCTGCAACATCATCAAAAGC
ATGGTGAATGCGGTACTTAACGCCATCCCCGCCAGTAACATACGGTGTGGGGAAAATCCA
CCGCGTCCGGCGGTGATCATAATGATCAACAGCGTCACCGCCGCCCCGAGACTGCCTGCG
GGTAACAGCCAGCCAAAGGCATTACCCGGTACCAGAAACAGCATTAACACCACGCCAAAC
GCCGCGCCGGAGCTAATCCCCAGCACTTCCGGGCTTGCCATCGGGTTTCCGGTCAGCCGC
TGAATAATACAGCCCGCCACCGCCAGCATGACGCCCGCAAACAGCGCCGCCATAATTCGC
GGCCAGCGCCAGGGCATTAAATCATCGAGCAACGCCCCGCTCGCCCACGTCCAGCCGTGC
GCATCACGACCAAACGACAGCGCCACCACCACAGCCATCAACAGCAGCACGCCGCCCGCG
AGGGCAAACGCCAGCACATGTTGGCGTTCAGCCGCGACACGATCGTTGACCTTCATATCC
GGCGCGCTAATGCTGCGTAAACGCGGCAACAGCCACAGTAGCAGCGGCGCACCGATCAAC
GCAGTGACCGAACCGGTGGACACTTCCATCCACACACGAGTCAGCCAGAGGATGATTTGA
TCGGAAAGCCAGAGGATCAGCGCCCCAATCAGCGACGCCAGCATCAACCGTGGCAGCAGA
CGCCGCGCCCCCAGCATTTTTGCCAGCAGCGGCGCGAACAACCCGATAAAGCCGATAATC
CCTACCGCATTCACCAGCAGCGCACTGATGACAATCGCCAGCGACAGCGCCGCCAGACGC
GCGAGCGACAAGGCCAGCCCGAGATTGCGCGCCACGCCATCATCAAGCCCCATCAGGGTT
AACGGGCGAAGTAGCAATAACGTCAGCATCACGCCGCCCAGCAGCTGCGGCCATAAACGC
TCAACGCCGCCCCAGTCGGTTTGCGTCAGCGTTCCAGTGCTCCACAGAAACATGCTTTGC
AACTGGTCATGATGGAAGATAACCAGTAATTGATTGATTGCCCCACAATAAAGGCTCACT
ACCAGCCCCGCGAGAATCAGCGTTACCGGCGACAGCCGTTTCCCCCACGCGACGCCAAAG
ACAATTAAGCCAACAACACAAGCCCCTGCCAGCGCAGCAAACTGGCTCGCCATCGCACCA
GGGATCGCCCAGAGCGTCGTGACGGTAATCCCCAGTTGCGCGCCTGTAGCAACGCCCAAC
GTCGTCGGTTCCGCCAGCGGGTTACGCAGCACTTGCTGAAACAGCACGCCCACCAGCCCC
AGGCCCGCGCCCACCAGCAGCGAAATCGCCAGACGCGGCAACAAGCTGTAGTGAAAAATC
ATCTGCTCGATGACGTCAATATCCGGCGACCAGGCAGCCTGCGCCCACTGGCTACGCGGC
AGCGCCTGCGAGAAGTTCATCCAGGTGAGCGCCGTAGCGACAATCACTAACAGCGCCAGC
AATAACGCCGGGAAAAGCGCAATTCGTTTACTCACGCTTTACCTCCGATGGCGTTATCCA
GAATACGCACAAAGTGCATTGCCGAGAGCGTCGCACCATAAAACCAGACTGCAGGTACGC
GCTGAAAGCGCCCTGTACGGACAAACGGCATGGCCTGCCACAGCGGGGTTGCCATTAGCG
CATCCATGTCTTTGCTGTTGTCGTGATCAAAACAGAGCACATCAACATCTTTATACGCCG
CCAGACGATCGATACTGACGGCGGTGCTGCCCCAGAAGTTGGTTTCCCCTTGCCAGGCAT
TTGGGATGCCGTACTCATCGAGAATTTCCTGGAACAAGCTGTTTGGCCCGAAGACCAACA
TATGGCGCGGATCGATAAGCGTCGTCAGCAATAACGGGCGTGCACCACGCTTCACAAAGC
GGGGTTTCATGCTGCGGATAAAGTCTTCGTATTGCGCTAAATGCGTTTCCGCTGCGCTTT
GCAGGTTAAGTAAATCTGCCATTTCCGTCAGTGATTTACGCGCCATCGCCAGCGGCTGTT
TGCCGTCGCTGAAGTTAAATCCGCGCCCCGGCGCAATACGAGCCAGCATTTCTGGTGAAG
GGCCATATCCTGCCGACCAGACCATAAACGACGGTTTCATTTCGGTCAGCAGTTCAAGGT
TAGGTTCTGTGCGCAAACCGACGTCAATCACCGATTCAGGTAACGGTGGTTCGCTAACCC
ACAGGCGATAGTTGATGGTGTCCGCCACGCCATAAGGCACGATGCCGAGCGCCAGCAGTA
ATTCCACCGGCAACCACTCCAGCGCCACAATACGATTGGGATCAATAGCCGCCGCGTGGG
CGGCATTCATCTGCCATAACAACGGAGAAAGCGCCATCGCCGTTAACAGTCGACGGCGCG
AAATAAGAGGTAAGCCGCTCATCAATAAACAAAACTCACAGGTGCAGCACCCGCCGGATG
CGGCAAAATACCCATCGGGATGCCATAAATCATTTCGAGGGTTTCGCCGCGCATAATTTC
CGCAGGCGTTCCCTGAGCAATCATTTCACCGCCGCGCAGGGCGACCAGATAATCACAGTA
GCGTGCCGCCATATTGATATCGTGCAGCACGGCAATGACCGTCAGACCACGTTCCTGACT
TAAACGGTGCACCAGCGCCAGCACATCAACCTGGTGGGCGATATCCAACGCCGAGGTCGG
TTCGTCGAGCAACAGACAACGGCTATCCTGCGCCACCAGCATGGCGATCCACGCCCGCTG
ACGCTCACCGCCAGAGAGACTATCGACCAGCCGATGCGCCAGCGGTTTTAAGCCAACCAG
CGAGATAGCTTCCTCAACTTTTTCGCGATCTGCCGCACCAAAGCGCCCCAGCGCGCCATG
CCACGGGTAACGACCAATCGCCACCAGTTCACGCACGGTCATCCCTTCTGCCGGAGGAAG
CTGCTGCGGCAAATAAGCCACTTTGCGGGCGAATGCTTTGCTACTCCAGCTTTCCAGCGG
CTGGGCATCAAGAAGAATTTCACCTTCTGACGGCGGCTGATGACGGCCCAACATTTTTAA
CAGCGTGGATTTACCAGAACCGTTGTGACCAATCAAACCAGTCACTTTTCCGGCAGGAAA
GGTTAACGACAGCGGATGCAAAAGCGTGCGCCCTGGCACACGAAAGGAGATATTACGCAG
TGCAAAAGTGGTATCGGAATGATTCGTGTATTCCTGCATAACAGCCAACTTGTGAAACGG
GCACGGAAATCCGTGCCCCAAAAGAGAAATTAGAAACGGAAGGTTGCGGTTGCAACGACC
TGACGTTCTGCGCCCCAGAAGCAGCCATAAGTGTTAAAGCAGCTGGCGACGTATTCACGA
TCGAACAGGTTGTTAACATGCAGCGCCACGTTGGAGCCAGCCATGCCGACTCGCGCCAGA
TCATAACGCACTAACGCATCCACGACCGTATAACTTCCCACTTTAAAGGAGTTAGCCGGA
TCACCATAGCTGGAGCCAGTATAACGACCACCGGTGCCCAGCGTCAGACCTGAAAGCGGA
CCGTCAAAGAAGGTATAGTCAGCCCACAGCGAAGCCATGTGTTTTGGCACCTGTGCCGGC
GTATTGCCTTTGTAGTTGGTGTCAGTGGTGTATTCCGCGTCGGTGTAGGTGTAAGAACCA
ACTAAGTTAACACTCGCCGATAGTGCCGCTTTCGCTTCCAGCTCTACGCCACGCGCACGA
ATCTCACCGCCTTCAACCGAGAACAGTGAACCGTTCGGATCCGCCATCAGGTTATTAGTT
TTGGTAAGCTGATACAGTGCGCCAGTCACCACAATTGGGCGATCTTCTGGCACATATTTC
ACGCCGACTTCATACTGTTTGCCTTTCGAAGGTGCAAACAGATCGCCGTTTGCATCGGTC
TGCGAAGCGGGTTCAAACGATTCACTGTAGCTGAAATAAGGCGTTACGCCGTTGTCGAAC
AGATAGTTAACACCGCCACGCCAGGTGAACTGTTTATCATCGCGATCGGATTTATTACCG
TAATCACGGTTGAAAGATGACTGATCGGCCCAGTCATAGCGACCGCCAAGCGTAACCAGC
ACTTTATCCCACTGCGCCTGATCCTGAACATACAGACCGGTTTGTTTCTGTTTCAGCAGA
ACGCGGTATGGACCAGACGGATTTGGGTGAGCGCCAAAATCAAAGTCACTACGGTCTAAA
TTATAGATATCAGATGGTGCAACTGAACCGGCATATCCGAACCAGGAGTCGATGTCATTA
CGCATACGCATAAAGTCAACGCCAGTCAGCAGAGTGTGATCCACTGAACCGGTTGCGAAT
TTGCTTTGCAACTGAGTATCAACAGAGAAGTTTTCTAACTTCTCATTATCGATAACGTAC
TGACGAGTCAGTGTATGGCCCCATTGAGACTGCGGCACGTTGGCACATGGACTCGAAGAG
GGGTTTGAGGAATAGAGAGGATCTGAACACATGCCGTAGCCATATACGCTCTTTTGCGAA
ACTTTATTTTGCGCAAAGCGAAGGTTCTGACGTACGGTAAAGGTGTCGTTAAATTCGTGG
TCGAAGCTATAGCCAATCATCTTCTCATTACGAGAATAGGTGTTGTTCTTCGCCCCTTCG
TTAAAGTCTGTCGGCAGACGCTTACCGTTCGGCAGCGGCTCAACGGTTCCCTCTTTCGGC
AACCAGCCGTAATAACCGGTTTCCGGCTCGTTCTGGAAGTAAGAGAGGAAGGTGAAATTG
GTTTTATCGTCCGGACGCCAGGTGAACGCTGGCGCAATGGCATAACGCTGCTCTTCCGCG
CCCTTTTGCTGGGCATTGGCAGAGCGCGCAAGACCGGTCAGACGATAAGAGTAAACGCCG
TCATCATCCAGCGCATCGCTGAAGTCAAAACCGGTCTGGAACAGGCTGTCAGTACCGGCC
TTAAACTGAACTTCTTTCAACGGTTCAGTGGTCGGGCGCTTGCTGACCATGTTCAACAGG
CCACCTGGGCTGCTTTTCCCATACAGCACGGAAACCGGGCCACGCATGATTTCAGCGCGC
TCCAGCATATATGGGTCAATAACCGCATCGTTATAGAAGTTGCCCTGCATCTTCAGGCCA
TTCAGATAGTTGTTCTGGCTTTGGCCGTCAGCGGCAAATCCGCGGATGATCAGGTAATCG
TAAGTGTTGGATGCGCCACGAGTTCCCACGGCAACGCCAGGAGTGTAGCTAAGCGCTTCT
TTTACCGACTTCGGCTGATGCAGCGCCATCTCTTCGGCGGTCACAACAGAAATAGACTGT
GGCACTTTTTGAATCGGCGTATCGGTTTTAGTGCCGGTAGCTGACTGTCGCGCCGCAATA
GTTGCAGCAGGCCCCCATGCGCTTTCTTGCGGCGCAGGTGCAGCGGTAACGGTGATAGTG
TCTTCTTTCGGTTCAACCGCTGCCTGTGCATAAACAGACATGCCGCTAACCGCTGTGGCT
ACTACAACTGCGATTTTACGCAGTGAGTGTTTTGGCTGAGCAGTTTTGGAACGCGCCATT
GGTATATCTCTGATGTAAAGTGAATGATAACGTAAACGAGAATGATTATTATAAAGATAA
GATAATATTCGAAACGCTGGCGGGTTCGCAAGCGGTACGCAATCTGAGCGTTCCTGAAGG
GTTAATAAACAACCAGATGAAAAGAAAGGGTTAATACTTTAGGTGGGATGTTATTTTACC
GGATGGCAACTCGCCATCCGGTATGTCACGTTTAGACGTTAATTACTACCAAACATATCC
TTGATCCAACCGGCTACACCGTCGCTGTCTTTCTGCTCTTGCTGAGCAGGTTGCTGTTGC
GGCTGTTGCTGCGGCTGAGAAGACTGATCAAACGGATTGCCTGACGGCTGCTGCTGCATC
TCACTCTGCTGGCACAGCGATTGCGGATCGCTGGTCCAGACCGGCAAGACACGCATGCCA
CCGCTGCAAACAAAGTTGCCGTCGTAGTCCACGCCCATATCTGCAATATCTTCTGGCGGA
ACAAGATTCAGCGGCGTTGGCGTCTGGTTTGCCAGATAACGCTGATAAATCGACATTGCC
CCGCTGGCACCATACAGTTTGGTCGGCTGGTTGTTATCACGGCCGACCCAGGTGATGGTC
ACCGTGCTGCCGTCAATGCCCGCAAACCAGGTATCTACGTTATTGTTGGTAGTCCCTGTT
TTCCCTGCCAGATGCAGGTTCGGGTATTTCGCCCCAAGCTGACGACCCGTACCGCGTTGT
ACAACCTGCTGCATGGTCCATAGTGTCAGATACGCCGCCTGCGCCGGAACAGCGCGTTCC
GCCTGCGGGAAGCTCTGATACAGCACTTTGCCATCTTCCGCGATTACCGAACGCAGCGCA
GAAAGCGGTGCACGGTTACCACCGCTGGCGATGGTCTGGAATGCCTGCGCCACTTCGATT
GGCGTTAAGTTCAACGCCCCCAGCAGCATTGCCGGAACCGGATGCAACTGATCTTTCGGT
ACGCCCAGTTTAATCCAAGTATCCGTAACCGCAGGCAGCCCCAGCGCCATCCCCAGATTT
ACCGTCGGCACGTTCATCGAACGGGTCAACGCATCCACCAGCATCACTCTGCCGCTTTCG
CTATAACGACGGTCATCATTCTGCGGTGACCAGACCTGGCCATTCGGCTGACGCAGCGCA
ATTGGCGCATCCGCAATCCACGTATTCAGACGATAGATTTTCGGCTGGCTTAAGGCCGTC
AGATAAGTCGCTGGTTTTGCAAGGGAACCAATCGAACGACGCGCCTGCATCGCACGGTTG
TAGCCCGCAAACTGCGGCTCAGAACCTCCGACCATCGCACGAACTTCACCACTAAAGCGG
TCGACGACCACAATCGCGGTTTCCAGATCGCTCAGCTTACGCTGTTTCTTCAGTGCCGGA
ATGCCTTCCACGGCGGCTTTTTCTGCCGCGTCCTGGGCCACCGAGTCAAAGGTAGTGAAG
ATCTTCACGCCGGAGAGATCTTTTACCTTATCGCCTAATTTAGCCTGAAGCTCCTGACGC
ACCAGTTGCATAAAGGCTGGCTGAGGAGAGATCACCCCACCGCGCGGCTGAACACCCAGC
GAACGCGCACTCAACATGTCATAGAGTTCTTGATCAATAATCTGTTGCTGTTGCAGCAGA
CGCAGTACCAGATTACGTCGCTCCAGCGCCAGTTTCGGGTTACGCCACGGGTTGTAGATG
GACGCTCCTTTCACCATACCGACTAACAGCGCCTGCTGATCGAGGCTCAATTCTTCTACC
GGGCGACCAAAGTAATACAAGCTCGCCAGCGGGAAGCCACGGATTTCGTTGTCGCCACTC
TGACCGAGATACACCTCGTTCATATACAGCTCAAGAATACGGTCTTTGCTGTAACGCGCG
TCCATGATCAGCGCCATGTAGGCTTCATTCGCTTTACGCCAGTAAGAGCGCTCGCTGGAG
AGGAACAGGTTTTTCACCAGCTGTTGCGTCAGCGTACTCGCTCCCTGCACCGTGCGTCCG
GCGGTCAGGTTTGCCAGCACCGCACGTCCGATTGAGTAGAGACTGATCCCATCATGCTCG
TAGAAATGACGGTCTTCTGTCGCCAGCAAAGTATCCACCAGCAAATCCGGGAAACCACTG
CGCGGCACAAACAAACGCTGCTCACCGTTTGGTGAGGAGATCATGGTGATCAGACGCGGA
TCAAGACGGAAGAAACCGAACTGACGGTTGTTCTCCATATTGACGATCGTCGCCAGATGA
TCGCCATCAAAGGTCAGACGCGCACGCACCTGCCCTTCTTTGCTGTCCGGAAAATCAAAC
GGACGGCGGATCATCTCAATGCTGTTAGCCTGCACAGTAAATTCGCCAGGACGGGTCATT
TTCGACACCTGACGATACTGTGTTGCCTCCAGCAGCTTCACCATCTCGTTCTTGCTGATG
GTCATGTCTGGCTCAAGGTTGACCATTCGACCATAAACTGCCGCAGGCAGTTGCCAGACC
TTGCCATCAATACGGCTACGAATTTTTTGATCGAGATAAACGCCGTAAATGGCGATCAGC
ACGGCAAAAACGATAGCCAGTTTTAACAGCAGCCATAGCCAGCCGCGTTTGCCACGAGGC
TTACGCCCTTTGCCTTTGCCCTTACCTTTGCGCGGCATCGGTTCTTCATCCTCATAGTCA
TCATAATCGTCGTAATCATCGTCATCTTCGTAACGACGACGGCTTACCTTTTGTTTGACC
GGACGCGTCGGTTTCCCTTTGCGTCCAATTGGCTCGCGGTCATTCCCGGCCATGCTTTTT
CTCCGCAATATTCAGGCGCAAAAGCCCGATTTTCTGTTCTTCTGTTACAAGACAGAAGAA
GATATCTCTCAAAATTTGTGCTCGATCGGTCCCCTCTCCCTTGAGGGTGAGGGTGAACGT
ACGCGCTGATGCCCTCACCCCGGCCCTCTCCCACAGGGAGAGGGAGAAAACCAACCTTAC
GAATACTTTTTCGTCCGTCGCGTCGGTGCCGTGTTTGCCGGGTCGTCCGGCCAGACGTGT
TTGGGATAACGCCCTTTCATCTCTTTTTGCACCTCACGATACGCCCCTTTCCAGAAGGCC
CCCAAATCACGCGTGATTTGCAGCGGCCTTTGGGCAGGGGAAAGCAACTCCAGCACCAGC
GGCACGCGCCCCTGAGCGATCGTCGGATTGGTGGCCTCACCAAACATCTCCTGCATTCTC
ACCGCCAGCGCGGGCGGGTTATCTTCATGATAACGAATGGCGATCCGGCTTCCCGTCGGC
ACAGTGTAATGCGCAGGCAATTCACTATCCAGACGTTGCTGCATTCCCCAATCAAGTAAT
CCGCGTAGTGCCTGATAAATGTCGAGTGATTTCAGGCCGCGTAGTGAATGTACACCGGCC
ATATGTGGCAGCAGCCACGTTTCCAGCGTCGCCAACAAACTTTCATCATCAACCGCTGGC
CAGTCATATTCTGGCAACCACTTTCCGGCGCATAACAAACGCAAGCGTAGCTGTTCCGCT
TCCGCCGTCCAGTTGAGCACGCTTAAACCTTTATCACGGATGCCGTTAAGCATCGCCTGA
TGCAACTCGTCTTCTGACGGTTTCGCCAACGGCTGCACTTTCACCGTCAACTGACCGATT
TGCAGCCGACGCCAGGCTTTCAGCGTACCTTGCGCGTCATCCCATTCCACGGTGTCAGAT
TGCTGCACCAGCTGCGGACAGCGTCGCACTAATTCATCAATATCGACCGGTAGCGCCAGT
AAAATCCGCGCATCCGGCGAGGCGCTGCCCTGCAATAATAACGGTGCGATCAACCATTCG
TGGCGGCTTAGCGCGTCGTCGGCATCGAGCATCGCTCCCATGCCGTTTGCCAGTTGATAG
CGTCCATCTTGCCCACGGCGGCGAGCAATGCGATCGGCAAACGCCCCGGCAAGTAGCAGC
GCGATAAGCGAACTGTCTGCCTCACCGCCGTATACGTTTAAGCGTTTTAACAGTTGCTGA
CTACGTTGCTGCCAGGCTGGCTGATTGCGCGAAAACACCACGCCCAGGTCACTATTGCCC
ATCCGTGGCGGCTCTTCGAGAATGGCGGCAATTTTTGCCGCGGTAGCAGCTTCGTCGTCG
CTCTTTGCGCTAACCAGCATTGCCGCTAAACGCGGATCGTTACCCAGCGCTGCCATTTTT
TGCCCCTGCGCACTAAGCCGTTCACCGTCCAGCGCCCCCAGCATCCGTAACAGGCGTTTC
GCGGCCAGTAGATTCACCGTTGGCGGTTGATCCAGCCAGCTCATCTGCGCCGGATCGCTG
CATCCCCATTGCAGTAATTCCATCAGCAAACCGGAAAGATCGCTTTGTAATATTTCCGGT
TCACTTTGCGCCGCGGCGCGTTCTGCTTGTTCCTTGGCGATTAAATGCAGGCAGATACCC
GGCTCCAGACGCCCGGCGCGCCCGGCACGCTGCGTCATCGACGCCTGACTGATTCGCTGA
GTAATTAGTCGCGTAAGCCCTGTTCGCGGATCAAAACGCGCCACCCTTTCCTGGGCGCAA
TCCACCACCAGACGAATACCTTCGATAGTTAAACTGGTTTCAGCAATATTGGTCGCCAGC
ACGACTTTGCGCATCCCTTGCGGTGCCGGGAGGATCGCTTTTCGCTGATCGTTCAGCGAC
AACGCGCCATACAGCGGGCAGAGCAACACATCACTGCCGATACGCGAAGCCAGTTGTTCC
TGCACACGCTGAATTTCTCCGACGCCCGGTAAAAATAACAGTAATGATCCACTTTCCTGA
CGCAGCATTTCGGCGGTCGCAACCGCGACGGCTTCGTCAAAACGCTGATGGGCGGGCAGC
GGTAAATAACGGCGTTCAACCGGAAACGAGCGCCCTTCTGAGATGACGACGGGCGCTTCT
GGTAGCATTTGTTGCAAGCGGTCGTTGTCCAGCGTAGCCGACATAATCAGCAGTTTAAGG
TCATCACGCAGACCTTGTTGCACATCGAGTAACAGCGCCAACGCCAAATCCGCCTGCAAG
CTACGCTCATGAAATTCATCAAGGATCACCAATCCAACACCGCTCAACTCCGGGTCACGC
TGGATCATCCGCGTCAGCACGCCTTCGGTAACCACTTCCAGGCGGGTATTCGGCCCGACG
CAGTTTTGCGCACGCATCCGGTAGCCAACGGTATCGCCTGGCTTTTCGTTAAGCAGCTCC
GCCAGCCGTTGCGCGACGTTACGCGCCGCCAGACGCCGTGGCTCCAACAGGATAATTTTC
CCGTTAATGCCGGGATGCGCCAGCAGTTGCAGCGGCAGCCAGGTTGATTTCCCGGCCCCG
GTCGGCGCACTTAATAATACCTGCGGCGCACAATCGAGAGCGGTAAGTAATTCAGGTAAG
ACGGCAGCAACGGGCAACGACGACACAAAACGCTCCAGAGGGTTAACATTCTTCGCGCCA
CATTGTAGCATCGCGGTAATTCATAACCGAGTGCCTCACATGTCTGAACCGCAACGTCTG
TTCTTTGCTATCGACTTACCTGCAGAAATCCGCGAACAGATTATCCACTGGCGCGCCACA
CACTTCCCACTTGAGGCGGGACGTCCGGTCGCCGCCGATAATTTGCATCTGACTCTGGCA
TTTTTAGGCGAAGTGAGCGCCGAGAAAGAGAAGGCGCTTTCTCTTTTAGCCGGACGGATT
CGTCAACCTGGTTTCACACTCACGCTTGATGACGCCGGACAATGGCTGCGTTCGCGTGTG
GTGTGGTTAGGGATGCGTCAGCCTCCACGCGGCTTAATCCAGCTGGCGAATATGCTCCGT
TCACAGGCTGCCCGCAGCGGTTGTTTTCAAAGCAATCGTCCGTTTCATCCACATATTACC
TTATTGCGCGACGCCAGCGAGGCGGTGACAATCCCGCCGCCAGGTTTTAACTGGTCGTAT
GCGGTGACGGAGTTCACCCTTTACGCCTCCTCGTTTGCCCGTGGACGCACACGCTACACG
CTGCTAAAACGCTGGGCGCTAACGCAATAACAAGGATTGTCGCAATGGAATTTTCTCCCC
CTCTACAGCGCGCGACGCTAATTCAGCGTTACAAACGTTTTTTAGCCGATGTGATCACAC
CCGATGGTCGCGAATTAACGCTACACTGCCCGAATACGGGTGCGATGACCGGTTGTGCAA
CGCCTGGCGATACCGTCTGGTATTCGACTTCAGACAACACCAAACGGAAATACCCACACA
CCTGGGAATTAACTCAAAGCCAGAGTGGCGCATTTATTTGCGTCAACACGCTTTGGGCTA
ACAGGTTGACGAAAGAGGCTATCCTTAATGAATCAATTTCAGAACTGTCAGGCTATAGCT
CGCTGAAAAGCGAAGTAAAATACGGCGCAGAACGCAGCCGTATTGACTTTATGTTGCAGG
CGGATTCGCGTCCAGACTGCTATATTGAAGTGAAATCGGTTACGTTAGCGGAGAACGAAC
AGGGATATTTTCCCGATGCGGTCACTGAACGAGGTCAGAAACACCTTCGGGAGTTGATGA
GCGTAGCGGCTGAAGGCCAGCGTGCGGTTATCTTTTTCGCCGTGCTGCATTCAGCCATTA
CACGGTTTTCACCCGCGCGCCACATCGATGAGAAATACGCGCAACTATTGTCAGAAGCTC
AACAGAGGGGGGTAGAAATTCTGGCTTACAAAGCGGAAATTTCTGCTGAAGGCATGGCTC
TTAAAAAATCACTGCCGGTTACATTGTAGTAAAGTAAGTAACTGGTTAATTTACATTCTG
GTCGCGTGCGCAAATACGCTTTTCCTCACACAGTTGTCAAGTGTTACGTTTAGATAATTG
CTATCCGGAAAAGCATCTGCTATTTATAGCGGCCTCATTTTTCCCCCGAACATGGGGATC
GATAGTGCGTGTTAAGGAGAAGCAACATGCAAGAAGGGCAAAACCGTAAAACATCGTCCC
TGAGTATTCTCGCCATCGCTGGGGTGGAACCATATCAGGAGAAGCCGGGCGAAGAGTATA
TGAATGAAGCCCAGCTGGCGCACTTCCGTCGTATTCTGGAAGCATGGCGTAATCAACTCA
GGGATGAAGTCGATCGCACCGTTACACATATGCAGGATGAAGCAGCCAACTTCCCGGACC
CGGTAGACCGTGCAGCCCAGGAAGAAGAGTTCAGCCTCGAACTGCGTAACCGCGATCGCG
AGCGTAAGCTGATCAAAAAGATCGAGAAGACGCTGAAAAAAGTGGAAGACGAAGATTTCG
GCTACTGCGAATCCTGCGGTGTTGAAATTGGTATTCGCCGTCTGGAAGCGCGCCCGACAG
CCGATCTGTGTATCGACTGCAAAACGCTGGCTGAAATTCGCGAAAAACAGATGGCTGGCT
AATTACAGCCGTTCCATCACGTTTACCACAGGCGGGAAATGCTCCCGCCTTATTTTTTGT
TCAAAGAGATGACAGACACACACTATATTGGCCGCTTCGCCCCCTCTCCTTCCGGCGAGC
TTCATTTTGGTTCTCTGATTGCTGCGCTTGGCAGCTATTTGCAGGCTCACGCCCGGCAAG
GTCGCTGGCTGGTACGTATAGAAGATATCGACCCGCCTCGTGAAGTTCCCGGTGCCGCAG
AAACTATCCTGCGCCAGCTGGAACATTACGGCCTGCACTGGGACGGCGATGTTCTCTGGC
AATCGCAACGTCACCACGCCTATCGCGAAGCACTCGCCTGGTTACATGAGCAAGGACTAA
GTTATTACTGCACCTGCACGCGTGCACGTATTCAAAGCATTGGCGGTATTTACGACGGTC
ATTGCCGGGAATTGCATCATGGACCAGACAACGCCGCAGTGCGTATCCGCCAGCAGCATC
CGGTCACCCAGTTTACTGACCTGCTGCGAGGCATTATTCACGCCGACGAAAAACTGGCAC
GGGAAGATTTTATTATTCATCGCCGTGATGGTTTGTTTGCCTATAACCTGGCGGTGGTGG
TGGATGATCACTTCCAGGGTGTGAGCGAAATTGTCCGCGGGGCAGATTTGATCGAACCGA
CAGTGCGGCAAATCTCGCTGTACCAGCTTTTTGGCTGGAAAGTGCCAGATTACATTCATC
TGCCGCTGGCGCTTAATCCACAAGGCGCTAAACTTTCCAAGCAGAATCATGCGCCTGCGT
TGCCGAAAGGCGATCCACGCCCGGTACTAATCGCGGCACTTCAATTTCTGGGGCAGCAGG
CAGAAGCACACTGGCAGGATTTCAGCGTCGAGCAAATCCTTCAGTCAGCCGTCAAAAACT
GGACGCTGACCGCCGTGCCTGAGTCGGCAATTGTAAATTCAACATTCTCAAATGCGTCAT
GCTGAGCTATGATTAGCCGCTATTTTTTTGTCCTGAATGATGTTTGACACTACCGAGGTG
TACTATTTTTACCCGAGTCGCTAATTTTTGCCGCAAGGTGCTAAGCCGCGAGGAAAGCGA
GGCTGAACAGGCAGTCGCCCGTCCACAGGTGACGGTGATCCCGCGTGAGCAGCATGCTAT
TTCCCGCAAAGATATCAGTGAAAATGCCCTGAAGGTAATGTACAGGCTCAATAAAGCGGG
ATACGAAGCCTGGCTGGTTGGCGGCGGCGTGCGCGACCTGTTACTCGGCAAAAAGCCGAA
AGATTTTGACGTAACCACTAACGCCACGCCTGAGCAGGTGCGCAAACTGTTCCGTAACTG
CCGCCTGGTGGGTCGCCGTTTCCGTCTGGCTCATGTGATGTTTGGCCCGGAGATTATCGA
AGTTGCGACCTTCCGTGGACACCACGAAGGTAACGTCAGCGACCGCACGACTTCCCAACG
CGGGCAAAACGGCATGTTGCTGCGCGACAACATTTTCGGCTCCATCGAAGAAGACGCCCA
GCGCCGCGATTTTACTATCAACAGCCTGTATTACAGCGTAGCGGATTTTACCGTCCGTGA
TTACGTTGGCGGTATGAAGGATCTGAAGGACGGTGTTATCCGTCTGATTGGTAACCCGGA
AACGCGCTACCGTGAAGATCCGGTACGTATGCTGCGCGCGGTACGTTTTGCCGCCAAATT
GGGTATGCGCATCAGCCCGGAAACCGCAGAACCGATCCCTCGCCTCGCTACCCTGCTGAA
CGATATCCCACCAGCACGCCTGTTTGAAGAATCGCTTAAACTGCTACAAGCGGGCTACGG
TTACGAAACCTATAAGCTGCTGTGTGAATATCATCTGTTCCAGCCGCTGTTCCCGACCAT
TACCCGCTACTTCACGGAAAATGGCGACAGCCCGATGGAGCGGATCATTGAACAGGTGCT
GAAGAATACCGATACGCGTATCCATAACGATATGCGCGTGAACCCGGCGTTCCTGTTTGC
CGCCATGTTCTGGTACCCACTGCTGGAGACGGCACAGAAGATCGCCCAGGAAAGCGGCCT
GACCTATCACGACGCTTTCGCGCTGGCGATGAACGACGTGCTGGACGAAGCCTGCCGTTC
ACTGGCAATCCCGAAACGCCTGACGACGTTAACCCGCGATATCTGGCAGTTGCAATTGCG
TATGTCCCGACGTCAGGGTAAACGCGCATGGAAACTGCTGGAGCATCCTAAGTTCCGTGC
GGCTTATGACCTGTTGGCCTTGCGAGCTGAAGTTGAACGTAACGCTGAATTGCAGCGTCT
GGTGAAATGGTGGGGTGAGTTCCAGGTTTCCGCGCCACCAGACCAAAAAGGGATGCTCAA
CGAGCTGGATGAAGAACCGTCACCGCGTCGTCGTACTCGTCGTCCACGCAAACGCGCACC
ACGTCGTGAGGGTACCGCATGACAGTGGCGTATATTGCCATAGGCAGCAATCTGGCCTCT
CCGCTGGAGCAGGTCAATGCTGCCTTGAAAGCATTAGGCGATATCCCTGAAAGCCACATT
CTTGCCGTTTCTTCGTTTTACCGCACCCCACCGCTGGGGCCGCAAGATCAACCCGATTAC
TTAAACGCAGCCGTGGCGCTGAAAACCTCTCTTGCACCTGAAGAGTTACTCAATCACACT
CGGCGTATTGAATTGCAGCAAGGTCGCGTCCGTAAAGCTGAACGCTGGGGACCGCGCACA
CTCGATCTTGATATCATGTTGTTTGGTAATGAAACCATTAATACCGAACGACTCACCGTT
CCGCATTATGATATGAAGAATCGCGGCTTTATGCTGTGGCCGCTGTTTGAGATTGCCCCG
GAACTCGTGTTTCCTGATGGGGAGACATTACGTGAAATACTCACTTCGCTAGCAGTACCA
CAACCTGCCATCTGGTAATAGCTGTATTATTTTATTTTCTTGACGAGAGGAATACAAAAT
GATACGGCTATTTCATCCACCAAGAAAAAATTATTTTCTTATCTTACTCCTCACTTCCCC
CCTTACATATTAAATATACTTAATTTACATTTTAGTTTTTTTTAATTCATTCATGAAATA
GCACTTCATGCAAATAAATTAGGCATTTTTTGTTTAAACAACCTAAAATAACAACAATTC
AATACACCACATAAATATATTCACATCCGTGATAACTCACCCCTATTACATCCTCCAAAA
ACTTTGAGTAATATCCGCTCGCAATATTAATTTCATATAATTTTTGTAAGGATGCATGTA
ATGAAAAAAGCACTTCTCGCAGCCGTTCTGGTTATGGCTTCTGGTTCCGCCCTGGCTGTA
GATGGTGGTCATATCGACTTTAACGGTATGGTACAGTCCGGTACCTGTAAAGTGGGTGTG
GTAGATACCGGTATGCACGGCATCAGCACTGATGGCGTGGTTACCCTGGATACTGCAAAT
GTTACTGATAACTTTGCTGAAGTAAGCGCTGCTGCTGTTGGTTTACTGCCGAAAGAGTTC
ATGATTTCTGTGGATTGCGAACCGGGTAAAACAACTGCCCAGTTGACCATGGGTTCTGCA
AGCTACGCGAACACCAGCGGCACCCTGAACAACAATACCAATATCACGATTAACGGTATT
CAACCGGCTCAGAACGTGAACATTGCTGTTCATAACATGAAAAACAAAGCTGGCGCTGCT
GAAATTAAGCAGGTCCATATGAACAATTCTTCTGAAATCCAGGAATTGACATTAGACGCA
CAAGGCAACGGTCAGTATGTGTTTAACGCATCTTACGTTAAAGCACCGAACAGCCAGGCT
GTTACTGCTGGTCACGTTACCACTAACGCACTGTACACCATTACTTATCAGTAATTGATG
GCGAATTGAGTATAGGGTTTGTCATCAGGCAAACCTTATTTTCGCTAATTTTATCTCAAC
ACAGACAGCAAGGAGTGCTTATGTTTCCCTTGGTTAAAAAAACGGTTAGTGCATTATTTG
TGAGTACTCTGTTAGCCAGTACGCCAGCATTCGCTGACATTATTATTTCCGGGACTCGTA
TCATTTATAACGCTGATAAAAAAGATGTTAACGTTCGTCTGGAAAATAAAGGGAATCGCC
CCTTACTGATTCAGAACTGGTTGGACACCGGCAATGACAATGTCGACCCCAGCCAGATCA
AAGTGCCCTTTACCTCTACGCCCCCCGTTTCACGCGTGGAGCCAAAACGCGGGCAAACCG
TAAAAGTAATGTATACCGGTGCAACAGCCCTACCTAAAGACCGGGAAAGTGTCTACTGGT
TTAACGTGCTGGAAGTGCCGCCAAAGCCGAAAGATGCCCAGGCTGACAAAAACTTACTAC
AACTGGCTTTCCGCACGCGCATCAAACTTTTTTATCGCCCGAGCGGTTTGCAGGGTGAAC
CTGCTGAAGCGCCAGCAAAAATCACCTGGAAGTTGAACAACACGCAATTGCAGGCGAATA
ACCCAACGCCTTATTACGTGTCATTCAATGACGTCAAACTGGAAAGCGGCGGCAAAAGCT
ACAAAGTCGATTCCAGCATGATCGCGCCGTTCAGTCAGGCAAGCTTTAGCGTAACGGGTC
TGTCAGGTGGCGTTTCATCGGGCAAAGTCGTGTTCCAGGCCATAAATGACTTTGGCGGCA
ATATCGATGGTTCAGCAACATTCTAAAAAATAAACGGATTCTTTTAACATCGCCAGGAAT
GCAACCTTGTACCAGTTTACTCATCACAAAAGTCGTACACCGAAAAAAACGCTACTTGCG
GCCTGTTGCGCCCTCCTTTATAGCAGCAACGGTGCTGCGGCAGACACGGTGGAATATGAC
AGTTCCTTCTTAATGGGAACTGGCTCATCAACCATTGATGTTAAACGCTATGCTCAAGGT
AACCCGACACCGCCGGGTCTTTATAATGTCCGCGTGTTTGTAAACGGTCAGGCCACCTCC
AGTTTAGAAATTCCGTTTGTGGATATTGGTGAAAACAGCGCGGCGGCCTGTATTACCCGC
AAAAACCTGGCGCAGTTACACATTAAACAATCCGAACAGCTTGTGACCCTACTCGCCAGA
GAAGGTGAAGAAGAAGACTGTCTTGATCTGGCAAAGTCATACGATCAGGCCGAAGTTCAA
TTTGATGGCAGTGACCAGTATCTCGATCTGACCATTCCTCAGGCCTATGTCCTGAAGAGC
TATGGCGGCTACGTTGATCCTTCCTTATGGGAGTCGGGAATTAACGCTGCCACGCTGTCG
TATTCCTTGAACGCGTATCACACAAGTTCAGAAGACAACAATAACGATAGTGTCTATGGC
GCATTTAACTCAGGTATCAATTTAGGTGCCTGGCATTTCCGTGCGCGCGGCAACTATAAC
TGGACAACAGATAGCGGCAGTGATTTCGATTTCCAGGATCGTTACCTACAGCGTGATATT
CCGGCAATACGTTCACAGATAATCATGGGTGATGCCTACACCACCGGTGAAACGTTTGAC
TCTGTCAACGTCCGGGGTGTTCGCCTGTACAGTGACAGCCGTATGCTGCCTTCTGCGTTA
GCCAGCTACGCCCCGACCATTCGTGGTGTGGCAAACTCTAACGCCAAAGTTACCGTGACG
CAGAACGGCTATAAAATCTATGAAACCACCGTTCCGCCAGGTGAGTTTGTTATTGATGAC
ATCAGCCCTTCCGGATTTGGTAGCGAACTGGTTATTACCATTGAAGAAGCGGATGGTTCC
AAACGTTCCTTTACGCAGCCCTTCTCCTCCGTCGTGCAGATGCAGCGTCCTGGCGTGGGT
CGTTGGGATTTCAGTGCCGGTAAAGTTATTGATGACAGCCTGCGATCCGAACCTAATATG
GGGCAAGCCTCTTATTACTATGGTCTGAATAACCTCTTCACGGGTTACACCGGCATTCAG
TTCACCGACAACAACTATCTTGCCGGACTGTTAGGTGTGGGTATTAACACCAGCATCGGT
GCTTTTGCGATGGACGTTACCCATTCCCGCGCTGAAATTCCGGATGATAAAACCTACCAG
GGGCAAAGTTATCGCGTAACCTGGAACAAACTTTTCCAGGATACCGGAACATCATTTAAC
CTGGCGGCTTACCGCTATTCCACCCAGGATTACCTGGGCCTGCATGACGCGTTAGTCCTC
ATTGACGACGCGAAACATATGTCTGCCGATGAAGACAAAAACACCATGCAGACATACTCA
CGCATGAAAAACCAGTTTACCGTCAGCATCAACCAACCGTTGAACATCGCCTATGTCGAT
TACGGTTCGCTGTTTATTTCCGGTAGCTGGACGGACTACTGGGCGGCGAACAATAGCAGG
ACTGAATATAACGTCGGTTACAGTAAAAGCGTTTCGTGGGGTAGCTTCAGCGTTAACCTG
CAACGTAGCTGGAATGAAGATGGCGATAAAGATGACGCAATGTATGTCAGCGTTAGCGTG
CCTTTTGAGAATATTTTCGGTGGCAAACGCAAGACTTCCGGTTTCCGTAATTTAAATACT
CAGCTCAATACCGATTTTGATGGTTCACACCAGTTGAATATGAACAGTTCCGGTAGCAAT
GAAAGCGGCCAGGTGAACTATAGCGTCAACACAGGTTATAGCATGGATAAAAATTACGGC
GATCTAGCTTCTGTTGGCGGTTATCTCAACTATGAATCTGGGTTAGGCGGTATTTCCGCT
TCGGCCTCTGCCTCTTCTGATAATAGCCAACAGTACTCCATCTCAACCGATGGCGGCTTT
GTGTTACACAGCGGTGGTCTGACATTTACCAATAACAGTTTCAGCAGTAACGATACGCTG
GTGTTAGTCAATGCCCCAGGCGCTAAAGGCGCACGAGTCAATAACAGTAATAACGAAATC
GATCGCTGGGGATATGCCGTAACGTCCGCTGTCAGCCCATACCGTGAAAACCGCGTAGGC
CTGAACATTGAGTCGCTGGAAAACGACGTAGAACTGAAAAGTACCAGCGCCACCACCGTA
CCACGTAGCGGGTCCGTTGTTTTGACCCGTTTTGAAACTGACGAAGGGCGTTCTGCCGTG
CTGAATATTACCTCCAACACTGACAAACCGATTCCGTTTGCTGCGGAGGTTTACCAGGAT
GAAGTCATGATCGGCAGTATGGGCCAGGGCGGTCAGGCATTTGTGCGTGGTATTAACGAC
AGTGGGGAATTAACCGTGCGCTGGTTTGAAAACAACCAAACCGTGGACTGTAAGTTGCAT
TACCAGTTCCCGGCCCAGCCACAAACTCTGGGAAGCACTAACACCTTATTACTTAACAAT
CTTACCTGTCAGGTAGCAAAACATTAATATGGAAAATTCTATGAAAAGGATACTACTAAC
ATCCGCGTTAATAGGCCTGGGTTTACCGGCAGTTGGCTCTGCAACAGATCTCAAAGTCGA
TTTTACGGCCACTGTACTCGCCACCACCTGTACGATAACCATTGAACAAGATGGTGGCCC
CGTGGTGACCAGTAGCGGTAACGATGAATACAGCCTGACCATTCCTGATGTTGGCCTGGA
CAAAGTTGTCACTGGTGATGTTGCAGCGCAAGCCAACTTTAAATTAAAGGCTAAAGATTG
CAGCGATGGTTACTCAAAAATTTTTACCACACTTACAGGAACGTCTGTTTCAGGCAAGTT
GATTGTCAATGAAGCAAGCTCTGGCGCTGCTGGTGTGGGTATGGGTATTAAGCGTAGAGA
TGCCGCAGACTCGGCTTTCTTCACGCCCAATAATACTGACAAATTTGAATGGTCTTCCGA
TGAGAAAACTAACGGTGTGCCTCTGACCGTTGCACTGCGCGAAACCACGGCGGGAGCGGG
ACGCACCGGTGCGTTTCAGGCAAAAGCCACCTTTAACTTCACCTACGAATAACAGGGACA
GCCACCATGAAATTAAAAGTCATCGCCACACTGATTGCTACTGTTGCCGTAGGTGCAAGC
TTTAATTCAAATCTCGCCTATGCGAGTACTACTTCTGCATCTTTAACCGTAAACAGTAAC
CTGACTATGGGTACCTGTAGTGCTCAGGTTCTGGATTCCAGCAATAAAGCGACAGATACT
GTTGCCCTGGGCAATGTTTATATTTCTGAGTTAGCGGCAAAAAGCAAAGTGCAACCATTC
AAAATCCGCTTCAGTGATTGTGCCGGTCTTCCAGGGAAGAGTGCTCAACTCGTTTTAGCG
CCCAGGCCTGGTACGGGTTGCGCTGGCGGTCAGTCTAACACTGCCGGCTTTGCAAATTCA
ATTTCCTCCGGCGCTGGTGGTTCAAGCAGAGCAGCGGTCGAAGTATGGACGACTACGACC
CCCGAGGGAAGCGGCAGTCAGCAACTCAGTTGTGTTCAACGAAACGTCATCACGGTTGAT
CTTTCTAATGCCAGTACAACACAGCCTTATGATTACGATTTAAGTGCGCGGATGATTATC
GCCGATGGAAGAACGGTTAATGATGTATTACCGGGCGAGTTTCTTTCTCCCACCACCTTC
ACTATCACTTATCAGTAATAGCAGATAAGGATATTAGAATGCTATGCAGGCATCATAAAT
TTGTATGTTTTTTGGGGCTGGCAACAGCCCTCATAACGCCTTTTGCCTATGCTGGTCAGG
ATGTGAATCTCACCGCGCAGATTGTCGCCAGTACCTGTCAGGTTGAAGTGAGTAATAATG
GCGTGGTGGATCTCGGCAGTGTGACCCTGGACTATTTTGCCGACAACGTAACTCCAACAA
CGGATTATGCGGGTGGCAAGACGTTTAATGTTAACGTGGTCGCCTGCGATAATATTCAAA
CGACCCAGTCGCAAATGAAATTAAATTTTCAGCCGCAGGCAGGTTCGCTTGCGCAGGTGA
ATAATCAAATTTTTAGTAATGAATATGAACAGCAGGCTACCGGGGCAAAAAACGTCGGCA
TTGTAATATTTTCGGCACAGCCGAATCAGCAGACCTTTAACGTGCGGGGAACGGACGGTT
CCTCAACGGCGATTTATTCTGTCGCTCCAGGCAATGCTGTTCCGTCAACCTGGACCTTTT
ATTCCCGTATGCAACGGGTGAATAATGCTCTCCCACCCGAGTCGGGGATGGTGAGAAGCC
AGGTTATTGTTAATGTTTCTTACGAATAATAAGGATAATTATGCAAAGGAAAGGCAATAA
ACTGTTACGACAGTTATGCAGTGCAATACTGTTATTTTTTATGTGCTCCTTGTCTGCATC
TGCGATGGAATGTTATATAGAAAAATGGGCGGGGGGAACTTATGACATGGTCATAAACCC
TGAGGTTGAAAGTATAACAACGCAAATGGTATCTTCGCCACAAGAAATAAGCGACATGGT
TCATGATACAAATATTAAACTTAAGGACAGGAACGGTGAGACGATTGGATGTAAGTCCGA
TATAGGGGGTACTACTTCAGTACACTTTCTTAACACTGCGGATGCAGGTTTGTTATCAAC
CTATGTTTCGAAAGATAATGGCGCATTATTAAAAACAACAGTTCCTGGTATTGTCTACTC
CGTAGAATTGGTATGTATAAGCTGTGGTGCTGCAGATGAACTTGATTTAGTTTTACCTGC
ACAAAGCGGCGCAGATAACTTCATACCGGCCAGCGATACCAAGTGGGCTTATGAATACAG
TGACAACGACTGGTATTTGCGTTTTCGTTTTTACTGGACGCCGGAATTTAAACCTCAAAA
TGGGGTTTTCGAAGGATATGCCTTGCCAGGAAAAATTGCTTCCTGGTATATAGGTGATAA
TACCCAGGCATGGGTAAACTTTACTGTTCAGGATAGTGCCGTTCACTTTTACGTTGACCA
ACCAACCTGTTCAATGATTACCCTGGATCAGGACAAAGGCAATGTGAGTGGCACAGAAAT
CCAGTTAGGTAACAGTTACGTATCCGAAGTTAAAAATGGTCTTACCCGAGAAGTTCCCTT
TGCTATCCGTGGTGAGTATTGTTATGCCAGCAAGATTACGGTTAAGCTGACGGCTGCAAA
TGCAGCCACTGACAAAAATCTGGTGGGTAAAACAACTGGCTCTGCCACAGGCGTGGCTGT
AAGAGTTAATTCAACTTATAATGATAGCAAAGTGTTATTAAAACCAGATGGCGTTGCTTC
CATTGATTATAACTTCCCTGTCTGGTCGAATAACTTGTTGTCATTCCCTTTTACAGCACA
ACTCGTCCCCGATGGCAGTGGTAAACCTATCGGAACAGGAACATTCTCCGGTAACGCGAC
CTTCTCCTTTACCTACGAATAAGTAAAACGTTATTCCCTCCTCATCGCACCAGAGTTCTG
CTCTGGTGCGAACGTTTTCCCCACACTAAAAACCATTGCCCCCCTGATTTCGGCTGTTAG
AATGCGAACAGATCTGACTTTAGCCATCAGGACACGTTATGAAACCGACCACCATTGCTT
CATTGCAAAAATGCAAACAGGAAAAAAAACGTTTCGCGACCATCACCGCTTACGACTATA
GCTTCGCCAAACTCTTTACCGATGAAGGACTTAACGTCATGCTGGTAGGCGACTCGCTGG
GCATGACGGTTCAGGGGCACGACTCCACCCTGCCAGTTACCGTTGCTGATATCGCCTACC
ACACTGCCGCCGTACGTCGTGGCGCGCCAAACTGCCTGTTGTTGGCTGACCTGCCGTTTA
TGGCGTATGCCACGCCGGAACAGGCCTTTGAAAATGCCGCCACAGTAATGCGTGCCGGAG
CCAATATGGTCAAAATCGAAGGTGGCGCATGGCTGGTGGAAACCGTGCAGATGCTGACTG
AACGCGCGGTTCCGGTATGTGGTCATTTAGGTTTAACGCCGCAGTCAGTGAACATTTTCG
GCGGCTACAAAGTACAAGGGCGTGGCGAGGCAGGCGATCAACTGCTCAGCGATGCATTAG
CCTTAGAAGCCGCTGGTGCACAGTTGCTGGTGCTGGAATGCGTACCAGTTGAACTGGCAA
AACGTATTACCGAGGCGCTGGCTATTCCGGTTATCGGTATCGGCGCAGGTAACGTCACCG
ACGGGCAGATCCTCGTCATGCACGACGCCTTCGGTATTACTGGCGGTCATATCCCTAAAT
TTGCCAAAAATTTCCTTGCTGAAACGGGCGACATCCGCGCGGCTGTGCGGCAGTATATGG
CTGAAGTGGAGTCCGGCGTATATCCGGGCGAAGAACACAGTTTCCATTAAGGAGTCACGT
TGTGTTAATTATCGAAACCCTGCCGCTGCTGCGTCAGCAAATTCGCCGCCTGCGTATGGA
AGGCAAGCGCGTGGCGCTGGTGCCTACTATGGGTAACCTGCACGATGGCCATATGAAGCT
GGTCGACGAAGCCAAAGCCCGCGCCGATGTGGTCGTCGTCAGTATTTTCGTTAACCCAAT
GCAGTTTGACCGCCCGGAAGATCTGGCACGTTATCCACGGACCTTGCAGGAAGACTGCGA
AAAGCTAAACAAACGTAAAGTGGATTTAGTTTTCGCCCCTTCGGTAAAAGAGATCTACCC
GAACGGTACTGAAACCCACACTTACGTTGACGTTCCTGGTCTTTCCACCATGCTGGAAGG
TGCCAGCCGTCCTGGCCATTTTCGCGGCGTTTCGACTATTGTCAGCAAGCTGTTCAACCT
GGTCCAGCCGGACATCGCCTGCTTCGGTGAAAAAGATTTTCAGCAACTGGCGCTGATCCG
CAAAATGGTTGCTGATATGGGCTTTGATATTGAGATTGTCGGTGTGCCAATTATGCGCGC
CAAAGACGGTCTGGCGCTGAGTTCCCGTAACGGTTATCTGACAGCGGAACAACGCAAAAT
TGCGCCCGGTCTGTACAAAGTTTTAAGTTCAATTGCCGACAAATTGCAGGCTGGCGAACG
GGATCTCGATGAAATTATTGCTATTGCCGGGCAAGAACTGAATGAAAAAGGCTTCCGCGC
CGATGATATTCAGATTCGCGATGCCGACACGTTGCTGGAAGTCTCTGAAACCAGCAAACG
AGCTGTGATTCTGGTAGCCGCCTGGCTTGGCGATGCCCGCCTGATCGACAACAAAATGGT
CGAACTGGCGTAATACTTAACTGGCGCTACGGCTGATGGCGCCAGTTATTAATTTGCCCT
ACGTCATGGCGATGACGTCTGTAAGTGATTATTCATATCGCTGGCAATTTAGTTAGAGTT
AATTAGCTTATCAATCTCTGTAAGAGGTAAAGTTGTCACCTCTGCAACGTCTTCCCGAGA
CATCCCTTTACTTAGAAAACGCTGGGCGAATTCCTGTCTTACCTTCTGGAGTTCCTCTTG
ATATCCCTTCTGAAATCCCTTCTCTTCAAACCACTGCGCCAACGTCTGCCTGGTTTCTCT
CCGTGTCTTTATTTCCATAGGTTCCCTTAATTATCTGGTCAGTTAACAATAACAATTATC
TGGCTATAACTGATGATGCAGACAACTTAGTTAATCAGCTTATCAATCTCGGCAAGGGGT
AAATTTGCCATCTCTGCAACGTCTTCCCGAGACATTCCTTTATTCAGAAGACGCAGGACG
AATTCTTGCCTTTCCTCCTGTCTTCCCCTCTCTTCAAACCACTGCGCCAGCGTCATCATA
GACTCCCCTCCCGTTTCCCTGTCTCTCAGCACACCATAAAACAAATCCGCTTGTTCAGTA
TGACCGCGTTGCAGCATATAGTTTTGCATGGCAACTAACTGACTTCCGCTAGTGTACCCT
TCGTCAATCAGCGTGACCAGTTGCTCCAGCAATAACATTAAGTCGCGCTGGCGAATATGT
TTTTGCAGTAGTTCGAGAATCGCAATCCGCCGATGTTGCATGATTTCGTCATCCGGTGTG
ATGGTGATATCCACCAGCGGGAAAGGACTGTTATAGACGCGTCGCGCCAGCTCCGGAGAG
TAAAACATATCAAACCAGCACATTGAGAGCGGATAAGGTGTGGCCTCGCCCTGATAAAAG
AGAATCGGCACTACCAGCGGTAGTTTGTCGTGATCCGCCTCCAGATGCCGATGCATGGCG
GCTATAGAATAACGCATCATGCGAAAGGCCATTTTCTTATCCGGCTTGCTTTGGTGTTCA
ATCACAACATGCAGATAACCGGGATTGCCCTGCATTTGCACGGAATAGAGCACGTCCGTG
CTGTGTCCTTTCAGGCTCTCTTCAATGAAACTCCCCGACTCTAAATGAAGCGTGTTGAGG
TCACAAAGTTCGCGTAATTCCACTGGCAAATGTATCTCCAGAAAGTCGCGAGCCGTCTCC
GCATGCATTAAAAATTGTTTAAATACCGCGTCATGCGGTGTAGTACTCGGTGCATCCATC
TTCCCTGTCTTCCGTGTTGTCTTGCGTGAAGGCAGTATCCAGCCAAGGCGCGCCGTCGTC
AGCCACCTCTTTATTGTTTACCGAGCAGCGTTCAGAGAAATATCAATTCGTTACAGGCGA
TACATGGCACACTTCGGCGCGGTACGCAAACTGCTGATGCAAATGCCGTCAGATGAGTAG
ACACTAAACAAAAATCGGGCAATACTGCGTGAGAATTTCCTCAAAGCAGGCACCGCCTGC
TTCGTTAACGACAGGGTAGAAAGGTAGAAGTTATGATTCGCACGATGCTGCAGGGCAAAC
TCCACCGCGTGAAAGTGACTCATGCGGACCTGCACTATGAAGGTTCTTGCGCCATTGACC
AGGATTTTCTTGACGCAGCCGGTATTCTCGAAAACGAAGCCATTGATATCTGGAATGTCA
CCAACGGCAAGCGTTTCTCCACTTATGCCATCGCGGCAGAACGCGGTTCGAGAATTATTT
CTGTTAACGGTGCGGCGGCCCACTGCGCCAGTGTCGGCGATATTGTCATCATCGCTAGCT
TCGTTACCATGCCAGATGAAGAAGCTCGCACCTGGCGACCCAACGTCGCCTATTTTGAAG
GCGACAATGAAATGAAACGTACCGCGAAAGCGATTCCGGTACAGGTTGCTTGATTGTTAT
CCCTGCGGCTGGTTACTCACCAGCCGCGACATCGTCTCGAGCGAATCCGTTCTTAAGATA
TAAAGTCGTTTTAGTAACAACGGATTATCCCCCGGTTTTACTTTGCCTTTCATGGTTGTC
ACCGCCAAGTGAAATCCGGCATCGTTTGCTGCCTTCACGGCTTTGTCATTAAATCCGCCA
AACGGATACGAAAGATACCAGACATGCGGATTAAATTGCGCCAGAGCGCGGCGTGAACGT
GCAAAATCAAACAGAATATTGTGCTCACTACGACTCAGTAATATGGGGCGGCGATAGCCA
TCCACCCGATGCAAAAAATGGGTATGTGACTGAAAATCAAAAACATCGCGAATTTCGTTA
AGCTCAGAAACGCTCATAAATTGCAGCGATTTTGGGTTCCACTTCTGCGGGTGACGTTTG
ATGCGTGAGGTAACAATAAACGCCGTCGCCTTCATGCCATATTGTTTCAACACAGGATAC
GCATAGCGGCTCACCGACTTGAGGCCATCATCAAAGGTAATCACCACCGCTCGCGCAGGG
AGATTGATCTTATTCTTCACGTAGCCTTCCAGCTGCACCATGCTCAGTGTCGCGTATCCC
CTGTCGCGCAGCCAGGCCATCTGGTTATTGAAAGCGCGTACCGAGGTGGTCGTCGAAGTG
TGGCGAAAACGGGTGTTTTCTTCGTCGCGCAGAATATGATGATAGGTTAGCACCGGAAGG
CCATTATCGGGTTGGGCATCCAGCGCGCTGATATAGGCCAGTCGATCGCCAATACGGACC
TGATACCAGGTTTGATTTAACCTGTCTTTCAGTTTATGCAAAATCGGGTAGCGCAAATTG
TCCGCCAGTACCCCAAATGGCGCACTGCCCACACTCGGCGCGTTATAGACCGGCGTATCT
TTCCAGGTAACTAAGTTCTGATTACTCAGCGGCTTGTTGAGGTCACCCAAACCGTCTTCA
ACTTTTTGTCGCCCCTGAACCGGCTCGAGATGCCCTTTATCGATAAACCCTTTACCAAAG
CCAAAATTAAATGCGTAATAACTTGCGGCAGTGGGCTCCACGGCAATGATTTGTCCGGCC
CGAATATTCCCCACGGTCACCATCTTGTCGCCAATTTGCGCCCAGACCGCAGCATTTTCG
ATGGTTTGCATATAACGGGCAGGTAACGCGGCACTGACACTTGCGGTAAACAGCATCAGC
AGGAGAATAACAGCTTGTTTGTACATGAAAAAATAACCGAGGGTGAAACAACGCTTTTAT
TGTAGCAAAAGCGCTATAAGAATCGTGGGTTAATACTCATACAAATTATGTTTGAGGACG
AAAGGTGGATTTTTTTGTTGTTGGTGCCAAAGACTACTCACCTCCGGCCCACCCAGTTCG
ACAATACGCTCGCGAAACTCTGAACTGGTCATGGTTTCACGGCAAGCCATCATCTGTTCA
ATTAACGGTAACGTGACACCAGAAATCACTTCGCAACGGGAGTGTTTGTGGCTTAATAAT
GAAGCCACGCGGTACGGTGGCGCTCCGGCTATATCGGTTAAGAAGATGACACCCTCACCA
GAGTCCGCTTCATGCAGAGCATCGCACATCATGCGGCTGAGCATATTAGAGCTTAACCCA
CGCCAGAAATTCACGGCCCGGCACTGAAGAAGTGCCCCATGTTTTTTCTCCAGCGCATCC
AGTATCTCTTGCGCCCGGTCATCGTGACAGGTAATTACCCAACCTAACATCGCCTTCCTC
CTTAGCCGAAAATCAGTCTACCCTGACCATTGTTGATAAAGGGTGATAGCCGTCAAAACT
CCTCTCCCCCAAATCCAGAGGAGAGGAAATAGCCTTAGCTACGCAAACCACGTCCACGTT
GGATCAGCGACCAACAGATCAAATAAAACGCCACAATAAAGACCACCAGTACGCCAAAGG
TAGTGACCAGCGGAACATCATTGATACCGAGGAAGCCGTAGCGGAAACCACTGATCATAT
AAACGATTGGGTTCAGGTGCGACAGCCCTTGCCAGAACGGCGGCAACAAAGTCAGTGAGT
AAAAGACCCCACCCAAATACGTGAGTGGCGTTAACACAAAGGTTGGCACCAGGCTGATGT
CATCGAACGTTTTGGCAAACACACCGTTCAGCAAACCCGCAAGGGAGAACAACACCGCCG
TGAGCACCAGGGTTAAGGCAACGAATACCCATGAATGCACCTGAAACGGCACAAAAAACA
GTGAAATTGCCGTCACCAGAATGCCAACAAACAGACCACGCGCCACGCCACCGCCGACAT
ATCCGGCAATAATGACGTGAGTCGGAACCGGCGCTACCAGCAGCTCTTCAATATTACGCT
GGAATTTGGCACCAAAAAATGATGACGCGACGTTAGCGTAGGCGTTGGTGATCACCGACA
TCATGATCAGCCCCGGTACGATGAACTGCATGTAGCTGAAGCCATGCATATCGCCAATAC
GCGAACCAATCAGGTTACCGAAGATAATAAAGTAAAGGGTCATGGTGATGACTGGCGGCA
CCAGCGTCTGCACCCAGATACGCATAAAGCGATGGATCTCTTTCGCCCAGATGCTTTTTA
GCGCCACCCAGTAAAGATGCATCATGCGCGATCTCCTTGTTTTTCATTAACCAGTGAAAC
AAACAGCTCTTCCAGACGGTTAGCTTTGTTACGCATACTTAATACCTGAATGCCCTGCTC
ACTTAACTGCGTAAATACGCTGTTGATCCCCTGCTCACGCAGCACTTCAACTTCCAGCGT
CGCGGTATCGACCAGTCGATACTGATAGCCATCGAGCTTCGGTAACGGACTTTTCGGTGC
GAGATCGAGAATAAAGGTTTCCGATTTCAGCTTCGCCAGCAGCGCCTTCATCGAGGTATT
TTCCACCAGCTCACCATGTTGAATAATGCCGATATTGCGGCACAGCATTTCTGCTTCTTC
CAGGTAGTGTGTGGTGAGAATGATGGTGGTGCCTTTGTCGTTTAAATCCTTCAAAAAGCC
CCACATTGAGCGGCGAAGCTCAATATCCACGCCTGCCGTTGGCTCGTCGAGAATCAGCAG
TTTAGGTTCATGCATTAACGCACGGGCAATCATTAAACGACGCTTCATCCCGCCCGATAA
CATGCGCGCACGTTCGTTGCGTTTTCCCCATAAATCGAGCTGCTTAAGATACTTTTCGCT
GCGGATGTACGCTTCTTTGCGCTCCACGCCGTAGTACCCTGCCTGATTCACCACAATTTG
CTGCACGGTTTCAAACGGGTTGAAGTTAAATTCCTGCGGCACCAGTCCCAACTGACGTTT
AGCGTTCACGACATCCTTCTCGAGATCGTAACCAAATACGCTGACCCGCCCGGAGGTTTT
ATTTACCAGAGAGCTGATAATACCGATAGTGGTCGATTTCCCGGCCCCGTTCGGCCCGAG
AAGCGCATAAAAATCACCCGCTTCGACCTGCAAATCTATTCCACGAAGCGCCTGAACGCC
GCCTGGATAGGTTTTTTTAAGCTGTTGAAGTTCCAGTGCAATGGTCATAAATTTTTACTT
ACCTTACGTTCTTACACTTTATCTGTGGTTTAAATCGTCCCGGAGTTGCCCTATATTAGC
CAAACGTAATTATTTGGTTACAGGTCGTTAACCTCCATGAAAGACATAGATACACTCATC
AGCAACAATGCACTATGGTCAAAAATGCTGGTGGAAGAGGATCCCGGGTTTTTTGAGAAA
CTGGCACAAGCGCAAAAACCGCGCTTTCTATGGATTGGATGTTCCGACAGTCGCGTTCCT
GCAGAACGTTTAACCGGTCTTGAGCCGGGCGAACTCTTTGTTCACCGTAATGTTGCTAAC
CTGGTCATTCACACCGACCTGAACTGCCTTTCCGTGGTTCAGTATGCAGTGGATGTACTC
GAAGTTGAACACATTATTATCTGTGGCCACTACGGTTGCGGCGGCGTACAAGCCGCAGTT
GAAAACCCGGAACTGGGGCTTATCAACAACTGGCTGCTGCATATCCGCGATATCTGGTTC
AAACATAGCTCATTGCTCGGCGAAATGCCGCAAGAGCGCCGTCTGGATACCTTGTGTGAA
CTGAACGTCATGGAACAGGTGTATAACCTGGGCCACTCCACCATTATGCAATCAGCGTGG
AAACGCGGGCAGAAAGTTACCATTCACGGCTGGGCCTACGGTATTCACGACGGCTTGCTG
CGTGATCTGGATGTCACAGCGACCAACCGCGAAACCCTTGAGCAACGTTACCGTCATGGG
ATTTCCAACCTCAAGCTGAAACACGCCAACCACAAATAAAAATGCCATGCCGGATGCAAC
ACATCCGGCAACTTCACACTTACTCGTCCAGCAGAATCACTTTGCCGATATACGGCAGAT
GACGGTAACGCTGTGCGTAATCAATGCCGTAACCCACCACAAACTCATCCGGGATCGAGA
AACCGATAAATTCTACCGGGACGTTCACTTCACGACGGGACGGTTTATCCAGCAGCGTAC
AAATCGCCAGCGACTTCGGTTCGCGCAGGCTTAAGATCTCACGCACTTTCGACAGTGTAT
TCCCCGAGTCGATGATATCTTCAACAATCAGCACGTCCTTGCCACGGATATCTTCATCCA
GATCTTTGAGGATTTTCACATCACGGGTGGTGGACATGCCGCTACCGTAGCTGGAGGCGG
TCATAAAGTCGACTTCATGAGATACCTGAACTTCACGGCACAGGTCCGCCATAAACATAA
ATGAGCCACGCAGCAGACCCACCAGCACCATATCGCTGCCGCTGTCTTTGTAACGCTCAG
TAATCTGACGACCCAGTTCGGCGATACGCGCTTTAATCTCCGCTTCGGGGATCATTACTT
CTACAGTATGTTTCATATCTCTAACCATATGATTTAAAAACAAATCACTTCGCACGGGCA
GGTTTTGGCACCGCAACAAAGCGCAAGACACGCAGTATACCAGTAAAACTATTCATTCGC
GGAATCTGTTAATAAAGCTCGAATTGTGATGACGGTCACACATGTTAAAACCTATAATTA
ATTGCTACTAAAATATTAATGAATTGAAATGGTGTCTCTTTATGGCAATTAACAATACAG
GCTCGCGACGATTACTCGTCACGCTAACAGCCCTTTTTGCAGCGCTTTGCGGGCTGTATC
TACTCATTGGCGGAGGCTGGCTGGTCGCGATTGGCGGCTCCTGGTACTACCCTATCGCTG
GCCTTGTGATGCTCGGCGTCGCCTGGATGCTGTGGCGCAGTAAACGTGCCGCGCTTTGGC
TATACGCCGCCCTGCTGCTCGGCACCATGATTTGGGGCGTCTGGGAAGTTGGTTTCGACT
TCTGGGCGCTGACTCCGCGCAGCGATATTCTGGTCTTCTTCGGCATCTGGCTGATCCTGC
CGTTTGTCTGGCGTCGCCTGGTCATTCCTGCCAGCGGCGCAGTTGCCGCACTGGTGGTGG
CACTGCTGATTAGCGGTAGTATCCTGACCTGGGCCGGATTTAACGATCCGCAGGAAATCA
ACGGCACCTTAAGCGCCGATGCCACACCTGCGGAAGCTATCTCACCCGTTGCCGATCAGG
ACTGGCCTGCCTATGGTCGCAATCAGGAAGGTCAACGCTTTTCACCTCTGAAACAAATTA
ACGCCGATAACGTCCATAATCTGAAAGAAGCCTGGGTGTTCCGTACTGGCGATGTGAAGC
AGCCGAACGATCCGGGCGAAATCACCAATGAAGTGACGCCGATTAAAGTGGGCGACACCC
TTTACCTGTGTACCGCTCACCAGCGCCTGTTTGCGCTCGATGCCGCCAGCGGCAAAGAGA
AATGGCATTACGATCCTGAGCTGAAAACTAACGAGTCTTTCCAGCACGTAACCTGCCGTG
GCGTCTCTTATCATGAAGCCAAAGCAGAAACGGCTTCGCCGGAAGTGATGGCGGATTGCC
CGCGTCGTATCATTCTTCCGGTCAATGATGGTCGACTGATTGCGATTAACGCTGAAAACG
GCAAACTGTGCGAAACCTTCGCCAATAAAGGCGTGCTCAATCTGCAAAGCAATATGCCAG
ACACCAAACCGGGTCTGTATGAACCGACTTCGCCACCGATTATCACCGATAAAACCATCG
TGATGGCAGGTTCAGTTACCGATAACTTCTCAACCCGCGAAACGTCTGGTGTGATCCGTG
GTTTTGATGTCAACACCGGGGAGCTGCTGTGGGCTTTTGATCCGGGCGCGAAAGATCCGA
ACGCAATCCCGTCTGACGAACACACCTTTACCTTTAACTCGCCAAACTCGTGGGCACCAG
CGGCCTATGACGCGAAGCTGGATCTGGTGTATCTGCCGATGGGCGTGACCACGCCGGATA
TCTGGGGCGGTAACCGCACACCGGAACAGGAACGTTATGCCAGCTCGATTCTGGCGCTGA
ATGCCACAACCGGGAAATTGGCGTGGAGCTACCAGACCGTTCACCACGACCTGTGGGATA
TGGATCTTCCGGCACAGCCGACGCTGGCGGACATCACCGTTAATGGTCAGAAAGTGCCAG
TTATTTACGCTCCGGCGAAAACCGGCAACATTTTTGTGCTCGATCGTCGCAATGGTGAAC
TGGTGGTTCCTGCCCCGGAAAAACCGGTTCCCCAAGGCGCTGCCAAAGGCGATTACGTAA
CCCCAACTCAACCGTTTTCTGAACTGAGCTTCCGTCCGACGAAAGATTTGAGCGGAGCGG
ATATGTGGGGCGCCACCATGTTTGACCAACTGGTGTGCCGCGTGATGTTCCACCAGATGC
GCTATGAAGGCATTTTCACGCCGCCATCTGAACAGGGTACGCTGGTCTTCCCTGGTAACC
TGGGGATGTTCGAATGGGGCGGGATTTCTGTCGATCCGAATCGTGAAGTAGCAATTGCCA
ACCCAATGGCGCTGCCGTTTGTTTCGAAACTGATCCCTCGCGGTCCGGGTAACCCAATGG
AGCAGCCGAAAGATGCCAAAGGCACGGGTACGGAATCCGGCATTCAGCCACAGTACGGTG
TACCGTATGGTGTCACGCTCAACCCGTTCCTCTCACCATTTGGTCTGCCATGTAAACAGC
CAGCATGGGGTTATATCTCGGCGCTGGATCTGAAAACTAATGAAGTGGTGTGGAAGAAAC
GTATTGGTACGCCGCAGGACAGTATGCCGTTCCCGATGCCTGTACCGGTGCCGTTCAATA
TGGGTATGCCGATGCTGGGCGGGCCAATCTCCACGGCGGGTAACGTGCTGTTTATCGCCG
CTACGGCAGATAACTACCTGCGCGCTTACAACATGAGCAACGGTGAAAAACTGTGGCAAG
GTCGTTTACCAGCGGGTGGTCAGGCGACGCCAATGACCTATGAAGTGAATGGTAAGCAGT
ATGTGGTGATCTCCGCAGGCGGTCACGGTTCATTTGGTACGAAGATGGGCGACTATATTG
TGGCTTATGCGCTGCCGGATGATGTGAAGTAAGACTTGCTCAGATTGCTGACAACGTGCG
CGTTGTTCATGCCGGATGCGGCGTGAACGCCTTATCCAGCCTACAAAATTGTGCAAAATC
AATGGATTGCACAGGTAGCGTAGGCCTGATAAGCGTAGCGCATCAGGCAGATTTGCGTTT
GTCATCAGTTTAATGCCCGGAGAGATCCGGGCATATTCCCGAATACGGTCTTTTTATACC
GTAAACCCTAACATCATCCCCGTATCTTCATGCTCCAGCAGATGGCAGTGCGCCATATAA
GCATGTTCTTTCGGTGCGTCGTGATTAAACTTCACCAGCACTTCGCTGACATTACCTTCT
ACCTTAACGGTATCTTTCCAGCCCGCGCGATGCGTCGCTGGCGGTTTGCCATTTTCTGAC
AAGATACGGAACTGCGTGCCGTGAATATGGAACGGATGCAGCATCATGTCGCCCACGCCA
GAGATAACCCAACGTTCGTACTGCCCTTTCGCCGCCGCAAACATCGGCTTATTCATATCA
AACGCCTGACCGTTGATTTTATTGGCATGGTGGAAATCGAACTTCCCGCCGTGGTTCATA
TGATTCATATTGCCGTGCCCCATATGGCCCATCATCTGGCTGTGATCCATTCCGGCCATC
GCCTGATCGCCATATTTCTCCATTAGCATCTGCATCCCCATCATATCTAGCATCGGGTCC
ATAGAAAGTTGCAGCTTGCGTACCGTCAGCCCTTCCAGCGAAGGTAACGCAGGCAGGCTA
CTTAATGTGTCTGGCAAAGCACCGGAGGCACTAATAGCAATCGGCTGAATCCGCATTACC
GGATGCGGCTTGTCAAACGGCGCAATCGCCATCCCCATCTGGCTGACCGGCAGCGTCACC
AGGTCAAAGGGTTTGTTGTCGTTAACCTCCACCAGCACTTCAAAACGCTCGCCCATCAGC
ACCGGCAGCTCGTTCACCTTCACCGGTTCAGGTAGCAGACCACCGTCGCTGGCAATCACA
TAAAGCGGGCGATTGTCGCTGGTGGCGAAATTGAGCGAGCGGGCATTACAGCCATTGAGC
AAACGCAGGCGCAGCCAACCACGCGGGGCAGCGTGTTGCGGGTAGATTGCACCGTTGGTC
AGCAACGTATCGCCAAACCAGCCCACGGCGGCGGTCATCACATCCAGTTGATAATCAATC
TGCCCGTCGGCGCTAAATTTCTTATCCTGAACGATCACCGGAACATCATCGATACCCCAC
TGTTTTGGCAGCATTAATTTCAGGATCTCGTCATCTTCAATTACCACCAGACCAGCCAGC
CCCATCGCCACCTGTCGCCCGGTCTTGCCATGTTGATGTGGATGGAACCAGCAGGTAGCG
GCAGGTTGATCAACGTTCAACGTCACCGAGCGCTTGCCACCTGGCGGAATAATTCCCTGT
GGGCCGCCGTCGACTTCACCCGGTACTTCCAGCCCGTGCCAGTGCAACGTCGTCTCTTCC
GTCAGTTGGTTATAGATATCAACCGTTACCGCTTTGCCGCGCTGTAATTTCACCGCCGGC
CCCAACAGATTGCCGTTATAGCCCCAGGTAGTTGCAGTTTTCTCGCCAAAGGTAGACTGA
CCTGCGCCAATAGTTAACTGAATGCGATTACGGGCATCGGTCGTGAGCAAATCAGGGATC
GGTAACGTTGGGCGTTCCGCCGCAAAAACTGCACGGCTCCACAGTGGCAAGGCTGAAGCC
ACACCCAGTGCGACGGAATATTTCAAGAAATCACGACGTTGCATAGTTATTTCCTTATTC
TTAAGCAGGCGAAACAAAATCAAACGTTGAGCATAGTCCTTCCCCTTACGGGAAGGTCAA
GCCGCAGACACAATTTAATCGACAATAATGGTCGTCGCCTCGCTCGCAGTGTGCTAACGT
TTATCTTCTTTAAGCCCCTGGTAGAAGCAATGAAGACGTTTTTCAGAACAGTGTTATTCG
GCAGCCTGATGGCCGTTTGCGCAAACAGTTACGCGCTCAGCGAGTCTGAAGCCGAAGATA
TGGCCGATTTAACGGCAGTTTTTGTCTTTCTGAAGAACGATTGTGGTTACCAGAACTTAC
CTAACGGGCAAATTCGTCGCGCACTGGTCTTTTTCGCCCAGCAAAACCAGTGGGATCTCA
GTAATTACGACACCTTCGACATGAAAGCTCTCGGTGAAGACAGCTACCGCGATCTCAGCG
GCATTGGCATTCCCGTCGCTAAAAAATGCAAAGCCCTGGCCCGCGATTCCTTAAGCCTGC
TTGCCTACGTCAAATAATCCCTGATACCTTTTTGTAGAAATATTGACCGTGCATCCGCGG
TCAATGTTAGCTATTATGTTGCGCCCTTTTTTTACGGGTGTTAACAAAGGAGGTATCAAC
CCATGGCCGAAAAAAAACAGTGGCATGAAACGCTACACGACCAGTTTGGGCAGTACTTTG
CAGTAGATAACGTTCTGTATCATGAAAAGACCGATCACCAGGATTTGATCATTTTTGAGA
ACGCTGCATTTGGTCGCGTAATGGCGCTGGATGGCGTAGTACAAACCACCGAACGCGACG
AGTTTATCTATCATGAGATGATGACCCATGTTCCGCTACTGGCCCACGGTCACGCGAAAC
ATGTGCTGATTATCGGCGGCGGCGACGGCGCCATGCTGCGTGAAGTGACCCGACATAAAA
ACGTTGAGTCAATCACGATGGTGGAAATCGATGCGGGTGTCGTGTCGTTCTGCCGTCAAT
ATCTGCCCAACCATAACGCCGGTAGCTACGACGATCCGCGCTTTAAGCTGGTGATCGACG
ATGGCGTCAATTTCGTTAATCAAACCAGCCAGACCTTTGATGTTATTATCTCCGACTGCA
CCGATCCTATCGGGCCCGGCGAAAGCCTTTTCACTTCGGCATTTTATGAAGGCTGCAAAC
GTTGCCTGAATCCTGGCGGTATCTTCGTCGCACAAAACGGCGTCTGCTTTTTACAGCAGG
AAGAAGCCATCGACAGCCATCGCAAACTCAGCCATTACTTCAGCGACGTTGGCTTTTATC
AGGCGGCGATCCCGACCTATTACGGCGGTATCATGACTTTTGCATGGGCGACAGATAACG
ACGCCTTACGCCATCTCTCAACCGAAATTATTCAGGCGCGTTTTCTCGCCTCTGGCCTGA
AATGCCGTTATTACAATCCGGCAGTCCATACGGCAGCTTTTGCCTTACCCCAGTATCTGC
AAGACGCACTGGCTTCACAGCCGTCCTAAGGAGAAGATAAGAAATTGAAAAAACTGAAAC
TGCATGGCTTTAATAATCTGACCAAAAGTCTGAGTTTTTGTATTTACGATATCTGCTACG
CCAAAACTGCCGAAGAGCGCGACGGTTATATTGCTTATATCGATGAACTCTATAATGCCA
ACCGTCTGACCGAAATCCTGTCAGAAACCTGTTCCATTATCGGGGCTAATATTCTTAACA
TCGCCCGCCAGGATTACGAACCACAGGGTGCCAGCGTCACTATTCTGGTGAGTGAAGAAC
CGGTTGACCCGAAACTCATCGACAAAACAGAACACCCCGGCCCACTGCCAGAAACGGTCG
TTGCCCATCTCGATAAAAGTCATATTTGCGTACATACCTACCCGGAAAGTCATCCTGAAG
GCGGTTTATGTACCTTCCGCGCCGATATTGAAGTCTCTACCTGCGGCGTGATTTCTCCGC
TGAAGGCGCTGAATTACCTGATCCACCAGCTTGAGTCCGATATCGTAACCATTGATTATC
GCGTGCGCGGTTTTACCCGCGACATTAACGGTATGAAGCACTTTATCGACCATGAGATTA
ATTCGATTCAGAACTTTATGTCTGACGATATGAAGGCGCTGTATGACATGGTGGATGTAA
ACGTCTATCAGGAAAATATCTTCCATACCAAGATGTTGCTTAAAGAGTTCGACCTTAAGC
ACTACATGTTCCACACCAAACCGGAAGATTTAACCGACAGCGAGCGCCAGGAAATTACCG
CTGCGCTGTGGAAAGAGATGCGCGAGATTTATTACGGGCGCAATATGCCAGCTGTTTAAC
GGCTCTGGCGGAGCTCCCAGGCTCCGCCAGATTTATTTACTTCTGCTGCACGAAATTACG
GTAAGCCGCCACCACCTGCAGAAAATCCTCAACGCCGCATAGCGACAGGCTTTCTTCGTC
GTAGTAGTTCATCCCCTCTTCCATTTCATCGCCAGCGAATTCCAGTTGATTGGCGCGAAC
CATCACCTCTTCACCGTCCATCCACAGGGTGTATTCGTGCCCTGCCCGTTGCCAGGACCG
TTCGCTACCTTTCAGTGCGTGCGCTGCTTGTTCCACTTCATCAAGCAAGGCCAGGTTTTC
TTTCACCTCTTCATTAAACCAGTGCCCGACCACTTCATGCCCCATGGACATACGCACCTT
TACCACTCCGGTAATATCGCGCAGAAATTCGTAATCCATAGTGTGTTCCTCTGCTCCCGG
CAATGCGCCGAAATCGCATTGCGCCATTGATGTAATTATCGCAGCCTTACCGGAGAAAAA
CAGCGGAACGGCGATGGTTTAGAAATAAAAAATGCCCGGGAATCTCATTCACCGGGCATT
GTGTCGTTTATGCGCAGCGCGTGCGCTGACTTTTTAAACTGCAGTCTGGAAAATCACACC
ATCGGCTTTTTCAGTGTACTGAGAAAGCTGGTTGAAGTTCAGGTAACGGTAAGTATCAAC
GGCAGTTTTATCCACCTGCGCCACGTAGGTCTGGTACTCTTCCGGCGTCGGCAGTTTGCC
AATCAGCGCCGCAACAGCAGCCAGTTCCGCAGAAGCCAGGAAGACATTCGCGCCAGTCCC
[truncated: 5,029,929 more chars]
