# Supplementary material for: Escherichia coli ST302: Genomic Analysis of Virulence Potential and Antimicrobial Resistance Mediated by Mobile Genetic Elements
Source: Front Microbiol. 2020 Jan 21;10:3098. doi: 10.3389/fmicb.2019.03098 (PMC6985150; doi:10.3389/fmicb.2019.03098)
Supplement: DATA S2 — ST302 SNP analysis. [file Data_Sheet_2.ZIP › SNP_Analysis/ST302_SNP/SNP_analysis/snippyout/ST302/CA0191-ND-ST302.out/snps.consensus.fa]

>EA2454
ACTTAGGATAGCCAACCATCAGATGCTGCATTTGCATAGTGCAATCTCCCCTTACTTATC
CGGAGGCAATTGCAATATCTCTGTGAACTTACACAGGGGGAGCTTTTACCTGAAATACGC
CACGGAGGCGGGTATGAAACTGGCAGTCGTCACTGGACAAATTGTTTGTACCGTACGCCA
TCACGGACTGGCGCATGACAAATTGCTGATGGTGGAAATGATTGATCCACAAGGTAATCC
TGACGGGCAATGCGCCGTCGCCATCGACAATATTGGCGCGGGAACCGGGGAGTGGGTGTT
ACTGGTGAGTGGCAGTTCCGCCCGCCAGGCGCATAAAAGCGAAACGTCACCGGTCGATCT
GTGCGTGATTGGCATTGTCGATGAGGTGGTGTCTGGCGGTCAGGTAATTTTCCACAAATA
AGGCAGAACATCATGAATCAACAGGATATTGAACAGGTGGTGAAAGCGGTACTGCTGAAA
ATGCAAAGCAGTGACACGCCGCCCGCCGCCGTTCATGAGATGGGCGTTTTCGCGTCCCTG
GATGACGCCGTTGCGGCAGCCAAAGTCGCCCAGCAAGGGTTAAAGAGCGTGGCAATGCGC
CAGTTAGCCATTGCTGCCATTCGTGAAGCAGGCGAAAAACACGCCAGAGATTTAGCGGAA
CTTGCCGTCAGTGAAACCGGCATGGGGCGCGTTGAAGATAAATTTGCAAAAAACGTCGCT
CAGGCGCGCGGCACACCAGGCGTTGAGTACCTCTCTCCGCAAGTGCTGACTGGCGACAAC
GGCCTGACCCTAATTGAAAACGCACCCTGGGGCGTGGTGGCTTCGGTGACGCCGTCCACT
AACCCGGCGGCAACCGTAATTAACAACGCCATCAGCCTGATTGCCGCGGGCAACAGCGTC
ATTTTTGCCCCGCATCCGGCGGCGAAAAAAGTCTCCCAGCGGGCGATTACGCTGCTCAAC
CAGGCGATTGTTGCCGCAGGTGGGCCGGAAAACTTACTGGTTACTGTGGCAAATCCGGAT
ATCGAAACCGCGCAACGCTTGTTCAAGTTTCCGGGCATCGGCCTGCTGGTGGTGACCGGC
GGCGAAGCGGTAGTAGAAGCGGCGCGTAAACACACCAATAAACGTCTGATTGCCGCAGGC
GCTGGCAACCCGCCGGTAGTGGTGGATGAAACCGCTGACCTCGCCCGTGCTGCTCAGTCC
ATCGTTAAAGGCGCGTCTTTCGATAACAACATCATTTGTGCCGACGAAAAGGTACTGATT
GTTGTTGATAGCGTAGCCGATGAACTGATGCGTCTGATGGAAGGCCAGCACGCGGTGAAA
CTGACCGCAGAGCAGGCGCAGCAATTGCAACCGGTGTTGCTGAAAAATATCGACGAGCGC
GGAAAAGGTACCGTCAGCCGTGACTGGGTAGGTCGCGATGCAGGCAAAATCGCGGCGGCA
ATCGGCCTTAAAGTTCCGGAACAAACGCGATTGCTGTTTGTAGAAACCACCGCAGAACAT
CCGTTTGCCGTGACTGAACTGATGATGCCGGTGTTGCCCGTCGTGCGCGTCGCCAACGTG
GCGGATGCCATTGCGCTGGCGGTGAAACTGGAAGGCGGTTGCCACCACACGGCGGCAATG
CACTCGCGCAATATCGAGAACATGAACCAGATGGCGAATGCCATTGATACCAGCATTTTC
GTTAAGAACGGACCGTGCATTGCCGGGCTGGGGCTGGGCGGGGAAGGCTGGACCACCATG
ACCATCACCACGCCAACCGGTGAAGGGGTAACCAGCGCGCGTACGTTTGTCCGTCTGCGT
CGCTGTGTATTAGTCGATGCGTTTCGCATTGTTTAAGGAGTAACAGATGGCGCACGACGA
ACAATGGCTCACCCCACGTCTGCAAACGGCGGCAACGCTGTGTAACCAGACGCCCGCCGC
GACGGAATCTCCGCTGTGGCTGGGGGTGGATCTGGGCACCTGCGATGTGGTGTCGATGGT
TGTCGACCGCGACGGTCAGCCGGTGGCGGTATGCCTCGACTGGGCCGATGTGGTCCGCGA
CGGCATCGTCTGGGATTTCTTCGGCGCGGTCACCATTGTTCGTCGCCATCTCGACACGCT
CGAGCAGCAATTCGGTCGTCGTTTTAGCCATGCGGCGACTTCATTTCCTCCAGGTACGGA
CCCGCGTATTTCCATCAACGTGCTGGAGTCTGCCGGGCTGGAAGTGAGCCATGTGCTGGA
TGAGCCAACCGCAGTCGCGGATCTACTGCAACTGGATAACGCAGGCGTAGTGGATATCGG
CGGTGGCACTACCGGCATTGCCATCGTGAAAAAGGGCAAAGTGACGTACTCGGCGGATGA
AGCCACCGGCGGACATCACATCTCTCTGACTCTCGCCGGAAATCGCCGTATTTCGCTGGA
AGAGGCGGAGCAGTACAAGCGCGGTCACGGTGAAGAGATTTGGCCTGCGGTGAAACCGGT
GTACGAAAAAATGGCGGACATTGTCGCCCGGCATATTGAAGGGCAGGGCATTACTGATTT
ATGGCTGGCGGGCGGCTCTTGTATGCAACCGGGCGTGGCGGAACTGTTTCGCAAACAATT
CCCGGCGTTACAGGTGCATTTACCGCAGCACAGTTTGTTTATGACCCCGCTGGCAATCGC
CAGTAGTGGGCGAGAGAAAGCGGAGGGGCTATATGCAAAATGAATTGCAGACCGCGCTCT
TTCAGGCGTTCGATACCCTGAATCTGCAACGGGTAAAAACATTTAGCGTTCCACCGGTGA
CGCTTTGCGGTCCGGGCTCGGTGAGCAGTTGCGGACAGCAAGCGCAAACGCGTGGGCTGA
AACATCTGTTCGTGATGGCAGACAGCTTTTTGCATCAGGCAGGGATGACCGCCGGGCTGA
CGCGTAGCCTGGCCGTTAAAGGTATCGCCATGACGCTCTGGCCATGTCCGGTGGGCGAAC
CGTGCATTACCGACGTGTGTGCAGCCGTGGCGCAGTTGCGTGAGTCAGGTTGTGACGGGG
TGATCGCATTTGGCGGCGGCTCGGTGCTGGATGCGGCGAAAGCCGTGGCGTTGCTGGTGA
CGAACCCGGATAGCACGCTGGCAGAGATGTCAGAAACCAGCGTTCTGCAACCGCGCTTGC
CGCTGATTGCCATTCCAACTACCGCCGGAACCGGCTCTGAAACCACCAATGTAACGGTGA
TTATCGACGCGGTGAGCGGGCGCAAGCAGGTGTTAGCCCATGCCTCGCTGATGCCGGATG
TGGCGATCCTCGACGCCGCATTGACCGAAGGTGTGCCGTCGCATGTCACGGCGATGACCG
GCATTGATGCGTTAACCCATGCCATTGAAGCATACAGCGCCCTGAACGCTACACCGTTTA
CCGACAGTCTGGCGATTGGTGCCATTGCGATGATTGGCAAATCGCTGCCGAAAGCGGTGG
GCTACGGTCACGACCTTGCCGCGCGCGAGAGCATGTTGCTGGCTTCATGTATGGCGGGAA
TGGCGTTTTCCAGTGCGGGTCTTGGGTTGTGCCACGCGATGGCGCATCAGCCGGGCGCGG
CGCTGCATATTCCGCACGGTCTGGCGAACGCTATGTTGCTGCCAACGGTGATGGAGTTTA
ACCGGATGGTATGTCGCGAACGCTTTAGTCAGATTGGTCGGGCACTGCGAACTAAAAAAT
CCGACGATCGTGACGCTATTAACGCGGTAAGTGAGCTGATTGCGGAAGTTGGGATTGGTA
AACGACTGGGCGATGTTGGCGCGACATCTGCGCATTACGGTGCATGGGCGCAGGCCGCGC
AGGAAGATATTTGTCTGCGCAGCAACCCGCGTACCGCCAGCCTGGAACAGATTGTCGGCC
TGTACGCGGCGGCGCAATAAATGCCGCGTCTTATCCGGTCTGTGGGATTGCACATGTAGT
GCGGATAAGGCTTCACGCAGCATCCGCTAATAAATAACAACTAACAGGGAGTAAAGGCGA
TGGGAATTAACGAAATCATCATGTACATCATGATGTTCTTTATGCTGATAGCTGCCGTAG
ACAGGATCCTGTCACAGTTCGGCGGTTCTGCTCGTTTCCTCGGTAAGTTCGGTAAAAGTA
TCGAAGGATCAGGCGGTCAGTTCGAAGAAGGCTTTATGGCAATGGGCGCTCTGGGTCTGG
CGATGGTCGGTATGACCGCGCTGGCACCGGTACTGGCTCACGTACTCGGGCCGGTAATTA
TCCCGGTTTACGAAATGCTCGGCGCAAACCCGTCAATGTTCGCCGGAACGCTGCTGGCGT
GCGATATGGGCGGCTTCTTCCTCGCCAAAGAGCTGGCGGGCGGCGACGTAGCAGCGTGGC
TATACTCTGGGTTAATTCTCGGGTCGATGATGGGGCCAACGATTGTGTTTTCCATTCCGG
TGGCGCTCGGCATTATCGAACCTTCTGACCGTCGTTATCTGGCGCTCGGCGTGCTGGCGG
GCATTGTGACCATTCCGATTGGTTGTATCGCTGGTGGTCTGGTAGCTATGTACTCCGGTG
TTCAGATCAACGGCCAGCCGGTGGAATTCACTTTCGCCCTGATCCTGATGAACATGATCC
CGGTGATCATTGTTGCGATTCTGGTGGCGCTGGGGCTGAAATTCATCCCGGAAAAAATGA
TCAACGGCTTCCAGATCTTCGCCAAATTCCTCGTTGCATTGATCACCCTCGGTCTTGCCG
CTGCGGTAGTGAAATTCCTGCTTGGCTGGGAACTGATCCCCGGTCTGGATCCTATCTTTA
TGGCCCCTGGCGATAAACCCGGTGAGGTGATGCGCGCCATTGAAGTTATCGGTTCTATCT
CCTGCGTTCTGTTAGGGGCGTATCCAATGGTGCTGCTGCTGACCCGCTGGTTTGAAAAAC
CGCTGATGAGCGTCGGTAAAGTGCTGAATATGAACAACATTGCGGCAGCCGGCATGGTGG
CAACGCTTGCCAACAACATCCCGATGTTCGGCATGATGAAGCAGATGGATACCCGCGGCA
AAGTCATCAACTGCGCCTTCGCCGTTTCCGCTGCTTTCGCCCTGGGCGACCACTTAGGCT
TCGCCGCTGCCAACATGAATGCCATGATCTTCCCGATGATTGTCGGCAAGTTGATCGGCG
GCGTAACGGCGATTGGCGTGGCGATGATGCTGGTGCCAAAAGACGACGCGACCGCGGCTA
AAACCGAAGCGGAGGCACAATCGTGAACACTCGCCAGCTACTGAGCGTCGGTATCGATAT
CGGCACCACCACCACCCAGGTGATTTTCTCCCACCTGGAACTGGTTAACCGTGCGGCGGT
GTCGCAGGTGCCGCGCTACGAATTCATCAAACGCGAAATTAGCTGGCAAAGCCCGGTGTT
CTTTACCCCTGTCGATAAACAGGGTGGTTTAAAAGAAGCGGAACTGAAATCGCTGATTTT
AGAGCAATATCAGGCTGCGGGCATTGCGCCGGAAAGCGTTGATTCTGGTGCCATCATCAT
CACCGGTGAAAGCGCGAAAACCCGCAATGCTCGCCCGGCGGTGATGGCGCTCTCTCAGTC
GCTGGGCGATTTTGTCGTCGCCAGCGCCGGGCCGCACCTCGAATCCGTGATCGCCGGTCA
CGGTGCCGGGGCGCAAACCCTTTCTGAACAACGGCTGTGTCGGGTACTGAATATCGACAT
CGGCGGTGGCACCGCGAACTACGCCCTGTTCGATGCCGGAAAAATCAGCGGCACTGCCTG
CCTCAACGTCGGTGGTCGCCTGCTGGAAACCGACAGCCAGGGGCGCGTGGTTTACGCTCA
TAAACCGGGGCAGATGATTGTGGATGAGTGCTTCGGCGCAGGCACCGACGCCCGTTCGCT
GACCGGCGCGCAGCTGGTGCAGGTTACCCGGCGGATGGCAGAGCTGATTGTCGAAGTGAT
TGACGGAACGCTTTCGCCGCTCGCGCAGGCATTAATGCAAACCGGTTTGCTGCCCGCAGG
TGTTACGCCCGAAATCATTACGCTTTCTGGCGGCGTGGGCGAATGTTATCGCCACCAGCC
CGCCGACCCGTTCTGTTTTGCCGATATTGGCCCGCTTCTGGCAACGGCGCTGCATGACCA
TCCGCGCCTGCGTGAGATGAACGTGCAGTTTCCGGCGCAAACCGTACGCGCCACGGTGAT
TGGCGCGGGTGCACATACCCTTTCGCTCTCTGGCAGCACAATCTGGCTGGAGGGCGTACA
ACTGCCGCTGCGCAATTTGCCGGTGGCGATCCCGATTGATGAAACGGATCTGGTGAGTGC
CTGGCAACAGGCGCTGATTCAGCTGGATCTTGATCCCAAAACTGACGCGTACGTGCTGGC
GCTTCCCGCCTCGCTGCCTGTGCGTTACGCCGCGGTACTGACGGTCATCAACGCGTTGGT
CGATTTCGTCGCGCGTTTTCCGAATCCGCATCCCCTGCTGGTGGTGGCCGGGCAGGACTT
TGGTAAAGCTCTGGGCATGTTGTTGCGCCCACAGCTACAACAACTCCCGTTGGCAGTCAT
TGACGAAGTGATTGTCCGCGCGGGGGACTATATCGACATTGGTACGCCTCTTTTTGGCGG
ATCGGTTGTGCCGGTGACGGTGAAATCACTCGCATTTCCTTCCTGAGGGAACGACTTATG
AAACTAAAGACCACATTGTTCGGCAATGTATATCAGTTTAAGGATGTAAAAGAGGTGCTG
GCTAAAGCCAACGAACTGCGTTCGGGGGATGTGCTGGCGGGCGTTGCAGCGGCAAGCTCA
CAGGAGCGCGTGGCAGCAAAGCAGGTGTTGTCGGAAATGACCGTAGCGGACATCCGCAAT
AATCCGGTGATTGCCTATGAAGATGACTGCGTGACGCGGCTGATTCAGGACGATGTTAAC
GAAACGGCCTACAACCAGATTAAAAACTGGAGCATCAGCGAACTGCGTGAGTATGTGCTG
AGCGATGAAACCAGCGTGGACGACATTGCCTTTACCCGCAAAGGGCTGACCTCGGAAGTG
GTCGCGGCGGTAGCGAAGATTTGCTCCAACGCGGACCTGATCTACGGCGCGAAGAAAATG
CCGGTAATCAAAAAGGCCAATACCACCATCGGTATTCCGGGCACCTTTAGCGCCCGTTTG
CAGCCAAATGACACCCGTGACGACGTGCAAAGTATCGCCGCGCAAATCTACGAAGGGCTT
TCCTTCGGGGTGGGCGATGCGGTGATCGGCGTCAACCCGGTAACTGACGACGTGGAAAAC
TTAAGCCGCGTGCTGGACACCATCTATGGCGTGATCGACAAATTCAACATCCCAACTCAG
GGCTGCGTACTGGCGCACGTCACCACCCAGATCGAAGCGATTCGTCGTGGCGCACCAGGC
GGGCTGATTTTCCAGAGTATCTGTGGCAGTGAAAAAGGGCTGAAAGAGTTTGGCGTGGAA
CTGGCGATGCTCGACGAAGCGCGCGCAGTGGGTGCAGAGTTCAACCGTATCGCCGGGGAA
AACTGCCTCTACTTCGAAACCGGGCAAGGTTCGGCGCTGTCGGCGGGTGCCAACTACGGC
GCAGACCAGGTGACCATGGAAGCGCGTAACTACGGGCTGGCGCGTCATTACGATCCGTTT
ATCGTCAACACCGTGGTCGGCTTTATTGGGCCGGAGTATCTCTACAATGACCGCCAGATT
ATTCGTGCGGGCTTAGAAGATCACTTTATGGGCAAGCTGAGCGGCATCTCTATGGGCTGT
GACTGCTGTTACACCAACCACGCTGACGCTGACCAGAACCTCAACGAAAACCTGATGATC
CTGCTCGCCACCGCAGGCTGCAACTACATCATGGGGATGCCGCTGGGTGATGACATCATG
CTCAATTACCAGACCACCGCATTCCACGATACCGCCACTGTGCGTCAGTTACTCAACCTG
CGCCCGTCACCGGAGTTTGAACGCTGGCTGGAAAGCATGGGCATTATGGCAAACGGTCGC
CTGACCAAACGGGCGGGCGATCCGTCACTGTTCTTCTGATGACGCGGAGATAACACATCA
TGGATCAAAAACAGATTGAAGAAATTGTACGCAGCGTGATGGCGTCAATGGGACAAACGG
CCCCCGCGCCGTCAGAAGCAAAGTGCGCCACTACCACCTGTGCGGCACCGGTGACCTCGG
AAAGCTGTGCGCTGGATTTAGGTTCCGCTGAAGCAAAAGCGTGGATTGGTGTTGAAAACC
CGCATCGCGCAGACGTATTAACAGAACTGCGCCGCAGCACCGTGGCCCGCGTTTGTACCG
GTCGTGCCGGTCCGCGTCCGCGTACCCAGGCGCTGCTGCGTTTCCTGGCCGATCACTCTC
GTTCGAAAGATACCGTACTGAAAGAAGTGCCGGAAGAGTGGGTGAAAGCGCAGGGCTTGC
TGGAAGTACGCTCCGAAATTAGCGACAAAAATCTCTACCTGACTCGCCCGGATATGGGCC
GCCGCCTGTGTGCAGAAGCTGTTGAAGCGCTGAAAGCACAGTGTGTTGCTAATCCGGACG
TACAGGTCGTTATTTCTGATGGCCTGTCAACTGATGCGATCACCGTGAACTACGAAGAGA
TCCTGCCACCGCTGATGGCGGGCCTGAAACAGGCCGGGCTGAAAGTCGGTACACCATTCT
TTGTTCGTTATGGTCGCGTGAAGATTGAAGATCAGATCGGTGAGATCCTCGGCGCGAAAG
TAGTGATCCTGCTGGTGGGCGAACGTCCGGGGTTGGGTCAGTCAGAAAGCCTCTCCTGCT
ACGCCGTTTACTCGCCGCGTATGGCGACCACCGTTGAGGCCGATCGCACCTGTATCTCTA
ACATTCACCAGGGCGGCACGCCGCCGGTTGAAGCCGCAGCCGTCATTGTGGATTTGGCGA
AACGTATGCTGGAGCAGAAAGCATCCGGCATCAACATGACCCGATAAGGAGGCATCATGC
CAGCTTTAGATTTGATTCGACCGTCGGTAACCGCCATGCGGGTGATTGCCTCCGTTAACG
CCGAATTTGCGCGTGAACTGAAATTGCCGCCGCATATTCGTAGCCTCGGGCTGATTTCTG
CTGATTCCGATGACGTCACCTACATTGCCGCTGATGAAGCAACCAAACAGGCGATGGTCG
AAGTGGTGTATGGCCGCTCGCTGTATGCGGGCGCTGCACACGGCCCGTCACCGACTGCCG
GTGAAGTGCTGATTATGCTTGGTGGGCCAAACCCGGCGGAAGTGCGTGCAGGTCTGGATG
CGATGGTTGCGCATATTGAAAATGGCGCTGCTTTCCAGTGGGCTAATGATGCGCAAGATA
CGGCATTCCTGGCACATGTAGTTTCGCGTACCGGTTCTTATCTCTCATCAACCGCCGGGA
TCACGCTTGGCGATCCGATGGCGTATCTGGTGGCACCGCCGCTGGAAGCGACCTACGGCA
TTGATGCAGCGTTGAAATCTGCCGACGTACAGCTGGTGACCTATGTCCCGCCACCGTCTG
AAACTAACTACTCGGCAGCATTTTTAACCGGTAGCCAGGCAGCGTGTAAAGCGGCCTGTA
ACGCCTTTACCGATGCAGTGCTGGAAATCGCGCGTAATCCAATCCAGCGTGCGTAATGGA
GGTTGCCGATGATCAATGCACTGGGATTGCTGGAAGTGGACGGCATGGTCGCTGCGATAG
ATGCAGCGGATGCCATGCTCAAAGCAGCTAACGTTCGTCTGCTCAGTCACGAAGTGCTTG
ACCCTGGTCGCTTAACGCTGGTGGTGGAAGGCGATCTGGCGGCGTGTCGTGCTGCGCTGG
ACGCAGGTTGTGCTGCCGCGATGCGTACCGGGCGTGTCATCAGCCGTAAGGAGATCGGTC
GGCCAGACGATGACACCCAGTGGCTGGTTACTGGCTTTAACCGCCAGCCGAAGCAACCCG
TACAGGAACCCGACGCGCCAGTTATCGTCGCGGAATCTGCTGACGAGTTGTTGGCGCTGT
TAACATCAGTACGTCAGGGAATGACGGCAGGAGAAGTGGCTGCCCACTTTGGCTGGCCGC
TGGAAAAAGCCAGAAATGCGCTCGAACAGCTCTTTTCTGCCGGGACGTTACGTAAACGCA
GTAGTCGTTATCGTCTCAAGCCCCATTAACCTGTCGGAGGTGCCGGGTGTCCTACAACAC
CCGGCATTAACATCATGAAAAAGACCCGTACAGCCAATTTGCACCATCTTTATCATGAAC
CCTTACCCGAAAACCTGAAGCTCACGCCGAAGGTCGAAGTGGATAATGTTCATCAACGAC
AGACAACGGATGTCTATGAACATGCTTTAACGATTACCGCCTGGCAGCAGATTTACGATC
AGCTGCATCCGGGCAAGTTTCATGGTGAATTTACGGAAATTCTACTCGATGATATTCAGG
TTTTTCGTGAATACACCGGTCTGGCGCTGCGTCAGTCGTGTCTGGTCTGGCCGAACTCGT
TCTGGTTTGGCATTCCGGCGACGCGCGGTGAGCAGGGATTTATCGGTTCGCAATGTCTGG
GAAGCGCAGAAATAGCGACGCGCCCTGGTGGAACCGAGTTTGAATTAAGTACGCCGGACG
ATTACACGATCCTGGGCGTAGTGCTTTCTGAAGATGTCATCACCCGTCAGGCTAACTTTT
TGCATAATCCGGATCGGGTATTACATATGTTGCGTAGCCAGTCGGCGCTGGAAGTGAAAG
AGCAGCATAAAGCCGCGCTGTGGGGCTTTGTCCAACAGGCGCTGGCGACGTTTTGCGAGA
ACCCGGAAAATCTTCATCAGCCTGCAGTGCGAAAAGTGCTGGGGGATAATTTGCTAATGG
CGATGGGGGCGATGCTGGAAGAAGCGCAACCAATGGTGACGGCGGAAAGCATCAGTCATC
AGAGTTACCGTAGATTACTTTCCCGCGCCCGTGAATATGTGCTGGAAAACATGTCCGAAC
CGGTGACGGTGCTGGAGTTGTGTAATCAACTGCATGTCAGCCGCCGCACGCTACAAAACG
CGTTTCACGCTATTTTAGGCATTGGCCCAAACGCGTGGCTGAAACGCATTCGCCTGAACG
CCGTACGCCGCGAACTGATAAGCCCGTGGTCGCAAAGCACAACGGTAAAAGACGCCGCCA
TGCAGTGGGGATTCTGGCATCTGGGGCAATTTGCCACGGATTACCAGCAGCTGTTTGCCG
AGAAGCCGTCGTTGACGTTGCATCAGCGGATGCGGGAATGGGGGTGAGGGAGTTACACCC
AATCCCTGACCTTAATAAACTCACTTAACGCCGCTTCTGGGCTGCCATCTTTTGGCTGAT
AATCATACTCCCAGCGTACCAGTGGCGGCATTGACATCAGGATCGACTCGGTGCGCCCGC
CAGTTTGCAGGCCAAACAGAGTGCCGCGATCCCAGACCAGATTGAACTCGACATAACGAC
CGCGACGGTAGAGCTGAAAATTGCGCTCGCGCTCGCCGTAGGCCATCGCTTTCCGTCGCT
CTACAATTGGTAAATAAGCGTCGGTGTAGCCTTTGCCTACCGCCTGCATAAAGGCAAAAC
AGTGGTCGAAATCTGGCGTGTTCAGATCATCAAAGAACAGCCCGCCAATACCGCGCTGTT
CGTTGCGATGTTTGAGGTAGAAGTAATCGTCGCACCATTTTTTGTAACGGGGATAAACGT
CTTCACCAAATGGCAGGCACAGGTCACGGGCGGTTCGGTGCCAGTGAATGGCATCTTCTT
CAAAACCATAGAAAGGGGTTAAATCGAAGCCGCCGCCAAACCACCAGACTGGCTCTGCAC
CCGGTTTTTCGGCAATAAAAAAGCGCACATTCGCGTGGCTGGTGGGAACATACGGGTTAT
GCGGATGCACTACCAGTGAAACGCCCATCGCCTCGAAACTGCGCCCGGCAAGTTCCGGGC
GATGAGCGGTGGCGGAAGCAGGCATCACCTCACCATGGACATGTGAAAAGTTGACGCCCG
CCTGTTCGAAAACACCACCATTACGCAACACCCGGCTACGTCCGCCGCCGCCAGCTTCGC
GCTGCCAGCTATCTTCGACAAATTCTGTGCCATCGACGGCGGTCAGCTGCTGACAAATCG
TATCCTGAAGGTTGAGCAGAAACTGTTTAACCTGGTGTGCGTCGGGTTTCATAACTTATC
GCTTTTTCGAATGTGCTTTCTGGTTGTCGAACCAGTGGAAATAACTGATCACGCCTTCAG
CAATCGCTGTGGCGATTTTCTGACGAAACGCCGCCGTGCCTAACAGTCGCTCTTCTTCTG
GGTTGGTGATAAACGAGGTTTCCACCAGCACCGAAGGAACCGACGGCGATTTCAACACCA
CAAACGCGGCTTGTTCGGTGTTGCGGCTGTGCAGTTTATGCACCGGCTTAATCTTTTTCA
GAATATGCGAGCCGAGCGTCAGGCTGTTTTTAATAGTATCGGTTTGCACCAGATCAAACA
GCACTTGCTGCAATAGGTGATCCTTGTCAGTCGCCTTTTTACCGGCAACTTCATCGGCGC
GGTTTTCGCGTTCAGACAGGTATTTCGCCATTGCGCTACTTGCCCCACGGTTAGAGAGGG
CAAATACCGAAGCACCGGCAGCTTTCGGGTTGGTAAAGCCATCGGCATGAATTGACATAA
ACAGATCTGCGCCATGTTTATGGGCGATTTCAACGCGATCGTAAAGTGGGATAAACGTAT
CGCCAGAACGCGTTAAACGCGCATCAATCCCATGATTACGCAAAATGGAACGGACGTTTT
TAGCAATCGCCAGCACCACATGTTTTTCTTTCGAACCGTTGCGCCCGATCGCTCCGGTAT
CAATTCCGCCGTGGCCTGGATCGAGAACAACGACACGTTTGCCGCCAGATTTTTTGGCTT
TCGGCTTGCTGTGTCCGTTGCTGGTTTTTAAAGGTTCGTCTTTGGCGATGGCTTGCGACA
TTCCTGACAACGTCAGGGCAGCCAAACCGGCTTTCAGCACCTGGCGGCGCGAAGTGAGTG
TTTTTAGTGGTTTAAAAGTGCTCATACGGCCTGAGTTGTAATAATAAAGTTCCAGATGTT
ATATCGTATCGCGTAATCCGTTACGACCGTTTGCTGTTGAGAATTGTTTTACTTTTCATT
TCAATAGTTGACAACTCCCCATTATGCCACTTTTTCAACCGATTTTCGTCAGATATTGGC
TAATTCGACCGTTCACGCCATAATCAGCCTTTTAACCCGCAAAAAGGTAACGAATACCAT
GGAGATACGCGTATTTCGCCAGGAAGATTTCGAAGAGGTCATCACCCTTTGGGAGCGTTG
CGACTTGCTGCGTCCGTGGAACGATCCGGAAATGGACATCGAGCGTAAGATGAACCATGA
CGTCAGTTTGTTTCTGGTCGCTGAGGTGAACGGTGAAGTGGTCGGAACGGTGATGGGCGG
TTATGACGGGCATCGCGGGTCTGCTTATTATCTTGGCGTGCATCCAGAGTTTCGTGGGCG
TGGAATTGCCAATGCGTTGCTTAACCGGCTGGAGAAAAAGCTGATTGCTCGCGGCTGCCC
GAAAATTCAGATCAACGTGCCGGAAGATAACGACATGGTGCTCGGAATGTATGAACGCCT
GGGATATGAACACGCCGACGTGCTGAGTCTGGGTAAGCGTTTGATTGAAGATGAAGAGTA
CTGAGTTTCATCCTGTCCATTATGATGCGCACGGTCGCCTGCGTTTACCCTTGCTCTTCT
GGCTTGTGCTATTGCTTCAGGCGCGAACCTGGGTGCTGTTTGTTATTGCCGGTGCGTCGC
GCGAGCAGGGTACTGCGCTGCTAAATCTGTTTTATCCCGATCACGATAATTTCTGGCTGG
GGCTGATTCCTGGCATTCCGGCGGTGCTGGCGTTTTTGCTGAGTGGTCGGCGGGCTTCGT
TTCCCCGTATCTGGCATGTGCTCTATTTTCTGTTGCTGTTGGCGCAAGTGGTTTTACTTT
GCTGGCAACCGTGGCTGTGGCTGAACGGTGAATCCGTTAGCGGTTTCGGTCTGGCGCTGG
TAGTGGCGGATATTGTGGCATTAATCTGGCTGCTGACCAATCGACGTTTACGCGCTTGTT
TTAATGAAGTAAAAGAATAACGGCACTTTTTGGTGAATTTGCACTCCAAGCAACGTTATT
GAATAACCAAAGGAAGTGACATGAAATCGCTGCGTTTAATGTTATGCGCTATGCCATTGA
TGCTGACCGGCTGTTCCACGATGTCGTCAGTTAACTGGTCTGCCGCTAACCCGTGGAACT
GGTTTGGGTCGTCCACCAAAGTGAGCGAGCAGGGCGTTGGTGAATTAACGGCGTCCACAC
CACTGCAAGAACAAGCCATTGCCGATGCGCTTGATGGCGATTATCGCCTGCGCAGCGGAA
TGAAAACCGCGAACGGCAACGTGGTGCGCTTTTTTGAAGTGATGAAGGGCGACAACGTGG
CGATGGTGATTAACGGCGATCAAGGCACGATCAGTCGCATTGACGTGCTGGATAGCGATA
TTCCTGCTGACACCGGTGTTAAAATCGGTACACCGTTTAGCGACCTTTACAGCAAAGCAT
TTGGCAATTGCCAAAAAGCTGATGGTGATGATAATCGTGCCGTCGAATGTAAAGCCGAAG
GCAGTCAACATATTAGCTACCAGTTCAGCGGGGAATGGAGTGGTCCTGAAGGGTTAATGC
CTTCGGACGATACCCTGAAAAACTGGAAAGTCAGTAAAATTATCTGGCGGCGTTAATTTG
CGTCTGAACAAACCGCCGCCGCGAAAAAACACGTAAAATAGCGCTCAACAATGCCACGGA
TTGCGTGGCATTATTATTTTCAGGAGGAACAATGTCTCAGGTTCAGAGTGGCATTTTGCC
AGAACATTGCCGCGCGGCGATTTGGATCGAAGCCAACGTGAAAGGGGAAGTTGACGCCCT
GCGTGCGGCCAGTAAAACATTTGCCGACAAACTGGCAACTTTTGAAGCGAAATTCCCGGA
CGCGCATCTTGGTGCGGTGGTTGCCTTTGGTAACAACACCTGGCGCGCTCTGAGCGGCGG
CGTTGGGGCAGAAGAGCTGAAAGATTTTCCGGGCTACGGTAAAGGCCTTGCGCCGACCAC
CCAGTTCGATGTGTTGATCCACATTCTTTCTCTGCGTCACGACGTAAACTTCTCTGTCGC
CCAGGCGGCGATGGAAGCCTTTGGTGACTGCATTGAAGTGAAAGAAGAGATCCACGGCTT
CCGTTGGGTGGAAGAGCGTGACCTGAGCGGCTTTGTTGACGGTACAGAAAACCCGGCGGG
TGAAGAGACGCGTCGCGAAGTGGCGGTTATCAAAGACGGCGTGGATGCCGGCGGCAGCTA
TGTGTTTGTGCAGCGTTGGGAGCACAACCTGAAGCAGCTCAACCGGATGAGCGTTCACGA
TCAGGAGATGATGATCGGGCGCACCAAAGAGGCCAACGAAGAGATTGACGGCGACGAACG
TCCGGAAACCTCTCACCTCACCCGCGTTGATCTGAAAGAAGATGGCAAAGGGCTGAAGAT
TGTTCGCCAGAGCCTGCCGTACGGCACCGCCAGTGGCACTCACGGTCTGTACTTCTGCGC
CTACTGCGCGCGTCTGCATAACATTGAGCAGCAACTGCTGAGCATGTTTGGCGATACCGA
TGGTAAGCGTGATGCGATGTTGCGTTTCACCAAACCGGTAACCGGCGGCTATTATTTCGC
ACCGTCGCTGGACAAGTTGATGGCGCTGTAAGCGTTTCTGATTCATTGATTAAAGGCCAG
GCAGTAACATTACTGACTGGCCTTTTTATTACTTTTGCTTTAACGCCGCATACACCTGAT
CAACTACCCAACCATACGTTGCAATCGGCAGCTGACCGCTTTCGAACATATTGGGATTCT
TTTGCGGATCGGCAACCGGCGAATGTGGCTTGTTGCTTAACATCACAATCGCCATATGAT
TCACCGGATCGATAACGGTCACCGTTCCGGTCCAGCCAGTGTGACCGTAGGTTTGCGGGC
TTGCCAGCGTGCCAAACGTCGGCGTCATGGTGGCATTACCATTCACGCGCCAGCCGAGGC
CAAAAGTGGCATCTTCCTTAGAGCTGGTGGTGAACATCTTCACCGTTTCCGCACTGAACA
GCTGCACATCGCCATAGCCCCCGCCGTTCAGCATCGTTTGCATTAACACCGCAATATCGC
CGGTATTGGAAAACAAACCTGCGTGCCCGGAAACGCCGCCCATCGAATAAAAGGCTTTTT
CATCGTGCACCTGACCCCAGAGAGTGGAGGTGCGGATATTCGGGAAGTGGATCACTCCAT
CGCGGGTATTGCCGTTCAATTCCGTGGCGGCAATTTGTTGCGGTTTAAAGCCTTTCAGCA
GCGGGTTAAATACCGTATGTGTCAGGCCGAGCGGGCGATAAATCGACTCTTCAACATAGC
GGTCAAGCGGCTGACCGGTGACCGACTCGACGATAAATCCAAGCAGCATATAATCGACAT
CACTGTAAATATGCTTGCTGCCGGGCTGATACTCTAGCGGCGTGCGCTTGATCATCTCCA
GCGTCTGGCCTTTATCCTGGGAATATAACGCGCCCGCGACCGCTTTATTCGGATATTGTG
GGTCCGCCGGGAAACCGCCGCTGTGATGCAGCAGGTCAGAAATCCGCAGCGTGTTTTTGC
CTTTGATGGTGTCATTTGGACTATCGGCAAACCCCGAAATATATTTCGCAATCCGATCGT
CAGGATGCAGCTTGCCTTCGCTCATTAGCTTTTGCAGAGCAAAGTTAGTGGCGTACATTT
TGGTATTGGAAGCCAGGTCATACAGCGTCCCGGTGGTGGCTTTGACAGGCTGTTCCATCA
ATACGCTGCCATCGTACTTTTTCGCCGCTCCCCAGGCTTTGCGATACACAATCTGATTAT
CTTTTATAATCAGCAGGTTTACGCCGGGATAACCGGCGTCCACTTGCTGGCTAATCCAGC
GATCCATCTGGTTAAGCCGTTCGACGTTGAACCCTGCTTTCTCTGGCGAACTTTCTGTCA
GAACAGGGTATTTTGCGGCGCTGACGCTACAACTGACAGCCAGCAGAGAAAGATAGAGCA
TTGTCCGTTTCATAATATCAGTCCAGATTGACGTTACGGCAGCCAAAGAGCGTGGTGAAA
ATAAACCCGCAAACCCATGCCACCAGAATCCCACCTGCATATACCGCCATGGCCGGAAGG
ATGCCTTGCGCGGATGTCATCAGCGGCAGCGCCACCAGACCAGACGGCCCAAAGGCGCTG
TTTAAGCCCATCGGCAGACCCCACCAGGCTATCAGCCCGATAAACAAACCGCCCGCTGCG
CCGCCTAAACAGGCGGTAATAAACGGTTTCATGCGGGGCAGGGTGACGCCGTAAATCAGC
GGTTCGCCAACGCCCAGCAGACCAGGAATAATCGCCCCGCGTACCTGACTGCGTAATGCA
CTGTGCGGTTGCGCCCGCCAGTAGAGTGCCAGCGCCGCGCCCACCTGGCCCGCGCCTGCC
ATTGAAAGGATGGGAAATAAGCTGTTGAATCCCTGGCTGTCCATTAACGCGAGGTAAACA
GGAATAAAGCCCTGATGCACGCCAAATACCACGGCGATCAGGAACAGCCCGGCTAAAACC
GCACAACCGAGCGGATTACTGTTCAGGTGCATAAACAGCCACGACATACCTTCGAATAAC
CAGCCGCCCAGCGGCATAATGATCAGGTAGGCCAGCGTAGCGGTGATCAGTAGGGTGATT
AACGAGGTCAGCAGCATGTCGAGATCGTCCGGCATAAAGCGGCGCACCATGCCTTCAATG
CGAGCGCAGGCCCATGCGGCAATCAACACGCCGATAATATTGCCGCGCGGATCGATGGGC
AGACCAAAGAAATCGTGAAAACCGGCGTAGTAACCGGTGGTTGCAGCGGGGTTATAACCG
AGCAAAAAGAGTGCGGCAATAATTGCGCCATTGACGCCCGTGCCGCCAAATGCCTGGGCG
GCGTTATAGCCCACCAGAATCACCAGGAAGGTGAACAAACCTTTGCTGAACACCTTCATA
AAATTCAGCGCGTCGGGTAGCGTGCCCTGAGCATCTGCCGGAACGTGCATCACCGTGGCA
AATAACGTCGCTATCCCCAGCAGCAGACCGGCGGCAATAAAACCGGGGATAAGCGGCGTA
AAGATGGTGGCGAATTTAGCGAGAAATTGTTGCACGCCGGAGGTTTGTTTGGCTTTTAAC
TGACGTTTGTTCTGGGCGGCGATTTCTGCGGCATCCTGTACCGGTGCTTCTCCCAGCAGC
TCGCTCATCGCTTTTGCGGCACGATGCGCTTTACCAGGCCCAAAAACGACCTGCACCTGG
TCGCTGGTCAAAATGACGCCCTTCACGCCTTCCAGCGTTTTGATATTGGGATCAACCAGT
GAACTGTCATGTACACCCAGACGCAGGCGCGTCATACAGTTACCACAACTGGCGATATTT
CCCGGTCCGCCGACACGGGTAAGAATGGTGTTCAGAAGTTCACTGCTGATCTCTTTGACC
ATGGGTTATTCCTTGTCTAAAACCTGACGAATAAAGCCGCCGTGTTGATCCAGGCGTTTT
TTAGCTTCTGTGGCATCGAGATTTTTCAGCACCATCACAATGGCCGTTTTACAGTTGCGC
TCGCAGGCAATTAACGCCGCTTCCGCTTGTTCGGCATTACATCCGGTGGCGTTTTTAACG
ATATTGACCTGGCGCACATGCAGTTTTTCGTTGGTGGCGACCACATCGACCATCAGGTTG
CCGAACACTTTGCCGGATTTAATCATCAGCCCGGTGGAGAGCATATTGAGCACCAGTTTC
TGCGCTGTACCTGCTTTCATCCGCGAAGAACCGGTAACCACTTCGGCACCTACAATCGGT
GTAATGGCAAACTCTGCGGTGGTTGAAACGGCGCTCCCCGGATTACAGGAAATTCCCACT
GTGCGGCAGCCGAGCTGGCGTGCGTATTCCAGTCCGGCAATTACATACGGCGTGCGACCA
CTGGCCGCAATACCAACCACCACATCCTGTGCCGTTAAATTAATATTTTTCAGATCGTTA
ACACCACCTTCCCGGCTATCTTCAGCGCCTTCCACCGCGTGCTGAATGGCATATTCGCCT
CCAGCAATCAAACCAACTACCAGACCCGGTTTCACGCCGTAGGTGGGCGGACATTCGCTG
GCATCCAGAATCCCCAGACGACCGGATGTTCCCGCACCGAGATAAATCAGACGACCGCCG
CCGCTTACCTGGGCGTGGATAACATCGATCGCCGCGGCGATATCCGGCAGTACGCGCTCA
ACGGCAAGCGGTACGGTTTTATCTTCATCGTTGATAATCCGGCACATTTCCAGCGTTGAT
ACGCGGTCAATTTCAGCCGAGGCGGCGTTCGAGCCTTCGGTAATCATCTTTTCAAGTTGC
ATCGGTGGTGACCTTACTATTTACGATCAAATAATTGCAGATGTATGGAATCATATATCC
CGAATTGACAGACTTAAAGGAATCATTGAGTCTACACTCGCAGAGTGTGAAGAGCGTCAT
AAGAACTTAAGCGGAATTTTTGCTGCCAGCCCAGGAGAGTGGAAGATGTTGTACCTGACG
AAAATACGCAATGCGGAAAGTGAATTTACCGAGAACGAGCAAAAAATTGCTGACTTTCTG
CGGGCCAACGTGAGTGAGCTGAAATCCGTCTCTTCGCGCAAGATGGCGAAACAGCTCGGC
ATCAGCCAGTCGAGTATTGTGAAATTTGCCCAGAAGCTCGGCGCGCAAGGATTTACTGAA
TTGCGTATGGCGTTAATTGGCGAATACAGTGCCAGCCGGGAGAAAACGAATGCCACGGCG
CTGCACCTGCACAGTTCGATTACCAGTGATGATTCGCTGGAAGTGATTGCCCGCAAATTG
AATCGCGAAAAAGAGCTGGCGCTGGATCAAACCTGTGCGTTGTTCGACTACGCGCGGATG
CAAAAAATCATTGAGGTCATCAGTAAAGCACCGTTTATCCAGATAACGGGCCTGGGCGGA
TCGGCGCTGGTGGGGCGCGATCTGTCGTTCAAACTGATGAAAATTGGCTATCGCGTGGCC
TGCGAAGCCGACACGCACGTACAAGCTACCGTTTCCCAGGCGTTGAAAAAAGGCGATGTA
CAAATCGCTATCTCTTACAGCGGCAGTAAAAAAGAGATTGTCTTGTGCGCAGAAGCGGCA
CGAAAGCAGGGGGCAACGGTGATTGCCATTACTTCTCTGGCTGACTCTCCGCTGCGGCGG
CTGGCGCATTTCACGCTCGATACCGTTTCCGGTGAAACCGAATGGCGTAGCTCGTCGATG
TCTACCCGCACGGCGCAAAATTCTGTTACCGATTTACTGTTTGTTGGTCTTGTGCAACTC
AATGATGTGGAGTCATTGAAAATGATTCAGCGCAGCAGTGAGCTAACACAACGCCTGAAA
TGATGCATAAAGCAGCGACTGGATTGAGATTTTCCTGAATTAGTGAGCTGATCCGCAGCA
ATATTTTGTTTATCCTGTATTTTCAGAGGGAATGGAGTGTAACGCTCTGTATTAACAAGG
AGAGCATTAAAATGGGTAAACTCACGGGCAAGACAGCACTGATTACGGGCGCATTGCAGG
GAATTGGCGAAGGAATTGCCAGAACTTTTGCGCGTCATGGCGCAAACCTAATCTTGCTGG
ATATCTCCCCTGAGATCGAAAAGCTGGCGGACGAACTGTGTGGTCGTGGTCATCGCTGTA
CGGCGGTTGTCGCCGATGTGCGTGACCCGGCGTCGGTAGCCGCAGCTATCAAACGCGCGA
AGGAAAAAGAAGGGCGCATTGATATCCTGGTGAATAACGCAGGCGTTTGTCGTCTGGGCA
GTTTCCTCGATATGAGCGATGACGATCGCGATTTCCATATTGATATCAATATTAAAGGCG
TATGGAACGTCACGAAGGCGGTGTTGCCGGAGATGATTGCCCGCAAAGATGGTCGCATTG
TGATGATGTCTTCAGTCACTGGCGATATGGTGGCCGATCCGGGTGAAACGGCGTATGCCT
TAACGAAAGCGGCGATTGTTGGCCTGACTAAATCGCTGGCGGTGGAGTACGCGCAGTCTG
GTATTCGCGTTAACGCCATCTGCCCGGGATACGTTCGCACGCCAATGGCGGAAAGCATTG
CCCGCCAGTCGAACCCGGAAGATCCAGAATCGGTGCTGACTGAAATGGCAAAAGCAATCC
CGCTGCGTCGCCTCGCCGATCCGCTGGAAGTCGGCGAACTGGCAGCCTTCCTCGCATCGG
ATGAATCAAGTTATTTAACCGGTACACAGAATGTGATTGATGGCGGCAGCACACTGCCGG
AGACGGTTAGCGTCGGCATCTGATTCACCTCTGTTTCCTCCCTGCATGTGTGGGGAGGAT
TTCGTCTTATTCCCTTTTCAACTTCCAAATCACCAAACGGTATATAAAACCGTTACTCCT
TTCACGTCCGTTATAAATATGATGGCTATTAGAAAGTCATTAAATTTATAAGGGTGCGCA
ATGGCCGTTAACTTACTGAAAAAGAACTCACTCGCGCTGGTCGCTTCTCTGCTGCTGGCG
GGCCATGTACAGGCAACGGAACTGCTGAACAGTTCTTATGACGTCTCCCGCGAGCTGTTT
GCCGCCCTGAACCCGCCGTTTGAGCAACAATGGGCCAAAGATAACGGCGGCGACAAACTG
ACGATAAAACAATCTCATGCCGGGTCATCAAAACAGGCGCTGGCAATTTTGCAGGGCTTA
AAAGCCGACGTTGTCACTTATAACCAGGTGACCGACGTACAAATTCTGCACGATAAAGGC
AAGCTTATCCCGGCGGACTGGCAGTCGCGCCTGCCGAATAATAGCTCGCCGTTCTACTCC
ACCATGGGCTTCCTGGTGCGTAAGGGCAACCCGAAGAATATCCACGACTGGAACGACCTG
GTGCGCTCCGACGTGAAGCTGATTTTCCCGAACCCGAAAACGTCGGGTAACGCGCGTTAT
ACCTATCTGGCGGCATGGGGCGCAGCGGATAAAGCTGACGGTGGCGACAAAGCCAAAACC
GAACAGTTTATGACCCAGTTCCTGAAAAACGTTGAAGTGTTCGATACTGGCGGTCGTGGC
GCGACCACCACTTTTGCCGAGCGCGGCCTGGGCGATGTGCTGATCAGCTTCGAGTCGGAA
GTGAACAACATCCGCAAACAGTATGAAGCGCAGGGCTTTGAAGTGGTGATTCCGAAAACC
AACATTCTGGCGGAATTCCCGGTGGCGTGGGTCGATAAAAACGTGCAGGCCAACGGTACG
GAAAAAGCAGCAAAAGCCTACCTGAACTGGCTCTACAGCCCGCAGGCGCAGACCATCATC
ACCGACTATTACTACCGCGTAAATAACCCGGAAGTCATGGACAAACTGAAAGATAAATTC
CCGCAGACCGAACTGTTCCGCGTGGAAGACAAATTTGGCTCCTGGCCGGAAGTGATGAAA
ACCCACTTCACCAGCGGCGGCGAGTTAGACAAGCTGTTAGCGGCGGGGCGTAACTGATGT
TTGCAGTTTCATCAAGACGCGTGCTGCCGGGCTTTACCTTAAGCCTCGGCACCAGTCTGC
TGTTTGTTTGCCTGATTTTGCTCCTGCCACTCTCCGCGCTGGTGATGCAGCTGGCCCAGA
TGAGCTGGGCGCAGTACTGGGAGGTGATCACCAACCCGCAGGTGGTCGCAGCCTACAAAG
TGACGCTGCTGTCGGCGTTTGTGGCATCGATTTTTAACGGCGTTTTCGGCCTGCTGATGG
CGTGGATCTTAACTCGTTATCGCTTCCCTGGCCGCACGCTGCTTGATGCGCTGATGGATT
TACCCTTTGCGCTGCCAACGGCAGTCGCCGGTTTAACGCTGGCCTCGCTCTTTTCCGTGA
ACGGTTTTTACGGTGAATGGCTGGCGAAGTTTGATATCAAAGTCACCTACACCTGGCTTG
GGATTGCGGTGGCGATGGCCTTTACCAGCATTCCGTTTGTGGTGCGTACCGTGCAGCCGG
TGCTGGAAGAGTTAGGCCCGGAATATGAAGAAGCGGCGGAAACGCTTGGTGCAACGCGCT
GGCAGAGTTTCTGCAAAGTGGTGCTGCCGGAACTTTCTCCGGCGCTGGTGGCGGGCGTGG
CGTTGTCGTTTACCCGTAGTCTTGGTGAGTTTGGCGCGGTGATATTTATCGCCGGGAACA
TCGCCTGGAAGACGGAAGTGACGTCGCTGATGATTTTTGTGCGCTTGCAGGAGTTTGATT
ACCCGGCAGCGAGCGCGATTGCTTCGGTGATCCTCGCGGCATCTCTGCTGCTGCTGTTCT
CAATTAACACTCTGCAAAGTCGCTTTGGTCGGCGTGTGGTAGGTCATTAATGGCGGAAGT
TACCCAATTGAAGCGTTATGACGCGCGCCCGATTAACTGGGGCAAATGGTTTCTGATTGG
CATCGGGATGCTGGTATCGGCGTTCATCCTGCTGGTGCCGATGATTTATATCTTCGTACA
GGCGTTCAGCAAAGGGCTGATGCCGGTTTTACAGAATCTGGCCGATCCGGATATGCTGCA
CGCCATCTGGCTGACGGTGATGATCGCGCTGATTGCCGTACCGGTAAACCTGGTGTTCGG
CATTCTGCTGGCCTGGCTGGTGACGCGCTTTAACTTCCCTGGACGCCAGTTACTGCTGAC
GCTACTGGACATTCCGTTTGCCGTATCGCCGGTGGTTGCCGGTCTGGTGTATCTGCTGTT
CTACGGCTCTAACGGCCCGCTCGGCGGCTGGCTGGATGAACATAATCTGCAAATTATGTT
CTCCTGGCCGGGAATGGTGCTGGTCACCATCTTTGTGACATGTCCGTTTGTGGTGCGCGA
GCTGGTGCCGGTGATGTTAAGCCAGGGCAGCCAGGAAGACGAAGCGGCGATTTTGCTTGG
CGCGTCTGGCTGGCAGATGTTCCGCCGTGTCACATTGCCGAACATCCGCTGGGCGCTGCT
TTATGGCGTAGTGCTGACCAACGCCCGCGCGATTGGCGAGTTTGGCGCGGTGTCGGTGGT
TTCCGGCTCGATTCGCGGCGAAACACTTTCGCTGCCGTTACAGATTGAATTGCTGGAGCA
GGACTACAACACCGTCGGCTCCTTTACCGCCGCCGCGCTGTTGACGCTGATGGCGATTAT
CACCCTGTTTTTAAAGAGTATGTTGCAGTGGCGTCTGGAGAATCAGGAAAAACGCGCGCA
GCAGGAGGAGCATCATGAGCATTGAGATTGCCAATATTAAGAAGTCTTTTGGTCGCACCC
AGGTGCTGAACGATATCTCACTGGATATTCCTTCAGGTCAGATGGTCGCGTTGCTGGGGC
CGTCCGGTTCCGGGAAAACCACGCTGCTGCGCATTATCGCCGGGCTGGAGCATCAAACCA
GCGGGCATATTCGCTTCCACGGCACCGACGTGAGCCGCCTGCACGCACGTGATCGTAAAG
TCGGTTTCGTGTTCCAGCATTACGCGCTGTTCCGCCATATGACGGTGTTCGACAATATCT
CTTTTGGCCTGACGGTGCTGCCGCGTCGCGAGCGCCCGAATGCCGCAGCCATCAAAGCGA
AAGTGACAAAATTGCTGGAAATGGTCCAGCTTGCCCATCTGGCGGATCGTTATCCGGCGC
AGCTTTCCGGCGGCCAGAAACAGCGCGTGGCGCTGGCGCGCGCGCTGGCTGTGGAACCGC
AAATTCTGCTGCTTGATGAACCGTTTGGCGCGCTGGATGCGCAGGTGCGTAAAGAGCTGC
GTCGCTGGCTGCGTCAACTCCATGAAGAACTAAAATTCACCAGCGTTTTTGTGACCCACG
ATCAGGAAGAAGCGACCGAAGTAGCTGATCGTGTAGTTGTGATGAGCCAGGGCAATATTG
AACAGGCTGACGCGCCGGATCAGGTATGGCGCGAACCGGCGACCCGTTTTGTGCTCGAAT
TTATGGGCGAAGTGAACCGCCTGCAGGGAACCATTCGCGGCGGGCAGTTCCATGTTGGCG
CGCATCGCTGGCCGCTGGGCTACACACCTGCATATCAGGGGCCGGTGGATCTCTTCCTGC
GCCCTTGGGAAGTGGATATCAGCCGCCGTACCAGCCTCGATTCGCCGCTGCCGGTACAGG
TACTGGAAGCCAGCCCGAAAGGTCACTACACCCAATTAGTGGTGCAGCCGCTGGGGTGGT
ACAACGAACCGCTGACGGTCGTGATGCATGGCGACGATGCCCCGCAGCGTGGCGAGCGTT
TATTCGTTGGTCTGCAACATGCGCGGCTGTATAACGGCGACGAGCGTATCGAAACCCGAG
ATGAGGAACTTGCTCTCGCACAAAGCGCCTGATAGGTTGAGTGAATGTTAAACGCCCGGA
GGCGCTTCCCGCGATCCGGGCTTTTTAATGGCAAGGTTTGTAACCTGTAGGCCTGATAAG
ACGCGCAAGCGTCGCATCAGGCAACACCACGTATGGATAGAGATCGTGAGTACATTAGAA
CAAACAATTGGCAATACACCTCTGGTGAAGTTGCAGCGAATGGGGCCGAATAACGGCAGT
GAAGTGTGGTTGAAACTGGAAGGCAATAACCCGGCAGGTTCGGTAAAAGATCGTGCGGCG
CTTTCGATGATCGTCGAGGCGGAAAAGCGCGGGGAAATTAAACCGGGTGATGTGTTAATC
GAAGCCACCAGTGGTAACACCGGCATTGCGCTGGCAATGATTGCCGCGCTTAAAGGCTAT
CGCATGAAATTGCTGATGCCCGACAACATGAGCCAGGAACGCCGTGCGGCGATGCGTGCT
TATGGTGCGGAACTGATTCTTGTCACCAAAGAGCAGGGCATGGAAGGTGCGCGCGATCTG
GCGCTGGAGATGGCGAATCGTGGTGAAGGAAAGCTGCTCGATCAGTTCAATAATCCCGAT
AACCCTTACGCCCATTACACCACTACCGGGCCGGAAATCTGGCAGCAAACTGGCGGGCGC
ATTACCCATTTTGTCTCCAGCATGGGAACAACCGGCACTATCACCGGCGTGTCACGCTTT
ATGCGCGAACAATCCAAACCGGTGACCATTGTCGGCCTGCAACCGGAAGAGGGCAGCAGC
ATTCCCGGCATTCGCCGCTGGCCTGCGGAATATCTGCCGGGGATTTTCAACGCTTCGCTG
ATGGATGAGGTGCTGGATATTCATCAGCGCGATGCGGAAAACACCATGCGCGAACTGGCA
GTGCGGGAAGGAATATTCTGTGGCGTCAGCTCCGGCGGCGCGGTTGCTGGAGCACTGCGG
GTGGCAAAAGCTAACCCTGGTGCGGTGGTGGTAGCGATCATCTGCGATCGTGGCGATCGC
TACCTTTCCACCGGGGTGTTTGGGGAAGAGCATTTTAGTCAGGGGGCGGGGATTTAAGAT
TATTGCGCAGGCACCGTTTTATCCGTCTGCGCAATTAACGCATGTAAAAAAGGCTGTGCA
TTCTCATCGCTCTTACCGGGCATCTTCACGATATACGGCTTCCCGGTAATCGATGATGAC
GAAGCAACCTTATCAATAAACTGCTCGGCAGTGTTAATGCGGTTACGGGTATTGCCGAGC
TTCAGACGCAGATGAGAAACCGCTTCATCGCAGGTATGTTCATCACCGTTGCGCACAAAT
ATCAAATCCTTTTTCTGTGCTAATCCCTCCAGCATGGCGTTGATGCGGGCTTCTTCATGG
GCAGTTAACTTCGCGTAAGCGGGGAGTGTCATTAGTAGTGTAATGACCAGACAAATGATT
TTCTTCATTGAATTACCTTATCCTTGTTTTGTGATAGCCGATTTGACTGCCAGAATCAGG
TAAAGTTTCGGTTGGAATACGATGAGGATCATCGGCAAGGAGAAAAAATTAAATGAGTAG
TTTGTTGTTGTTTAACGATAAGAGCAGGGCACTGCAGGCGGATATCGTCGCCGTGCAGTC
GCAGGTAGTGTACGGCAGCGTAGGCAACAGCATTGCGGTGCCTGCTATCAAACAGAACGG
TCTGAATGTCTTTGCCGTGCCGACGGTATTGCTGAGCAATACGCCGCATTATGACACTTT
CTACGGTGGTGCGATTCCGGACGAATGGTTTAGCGGCTATTTGCGTGCGCTTCAGGAGCG
TGATGCGCTGCGCCAACTTCGAGCTGTAACCACGGGCTATATGGGAACGGCATCGCAAAT
CAAAATCCTTGCCGAGTGGCTGACTGCGCTACGCAAAGACCATCCTGACCTATTGATCAT
GGTCGATCCGGTGATTGGCGATATTGATAGCGGAATTTATGTCAAACCTGACCTTCCCGA
GGCGTATCGACAATATTTACTGCCACTAGCGCAGGGAATTACCCCCAATATCTTTGAGCT
GGAAATCCTGACCGGTAAAAATTGCCGCGATCTCGACAGTGCCATTGCTGCCGCAAAAAG
TCTGCTTTCAGACACATTAAAATGGGTGGTGATTACCAGCGCCTCCGGTAATGAAGAAAA
TCAGGAGATGCAGGTGGTGGTGGTCACTGCCGACAGCGTGAATGTCATTTCCCATTCACG
GGTAAAAACCGACCTGAAAGGGACTGGCGACCTGTTTTGTGCTCAGCTTATCAGTGGTTT
GCTGAAAGGGAAGGCGTTAACCGATGCAGTGCACCGAGCGGGGTTGCGCGTACTGGAAGT
GATGCGCTACACCCAGCAGCATGAGAGCGATGAATTGATTTTGCCGCCGCTGGCGGAAGC
ATAAAAAAATGGCGCCGATGGGCGCCATTTTTCACTGCGGCAAGAATTACTTCTTGATGC
GGATAACCGGGGTTTCACCCACGGTTACGCTACCGGACAGTTTGATCAGTTCTTTGATTT
CGTCCATGTTGGAGATAACAACCGGAGTCAGGGTAGACTTGGCTTTCTCTTCCAGCAGCG
GCAGATCAAATTCAATGACAGTATCGCCAACTTTCACGCGCTGACCTTCTTCAGCAATAC
GCTTGAAGCCTTCGCCTTTCAGTTCAACGGTGTCGATACCGAAGTGGACGAACAGTTCAA
CGCCGCTATCAGATTCGATAGAGAATGCGTGGTTGGTTTCAAAGATTTTACCAATGGTAC
CGTCTACAGGCGCGACCATTTTGTTACCCGTTGGTTTGATAGCAATACCATCACCAACGA
TTTTTTCCGCAAAAACGACATCCGGCACGTCTTCGATATTGACGATCTCGCCAGAGAGCG
GAGCAATGATCTCAATAGTTCCGGTATCCTTCTTGTCGTCGGAAACCAGAGATTTCAGTT
TATCGAACAAACCCATGATCTTCTCCTAAGCAGTAAATTGGGCCGCATCTCGTGGATTAG
CAGATTGTTTTTTCTTCAATGAACTTGTTAACCAGCGTCATTAACTCGTCCGTTGTCGGT
TGAGCAAGAGCCTGCTCTGCTAACACCTTCGCATCTTCGAAGTTCGTGTTACGGATAATC
TTCTTAATGCGCGGGATAGAAATGGCGCTCATAGAGAATTCGTCCAGACCCATCCCCAGC
AACAGAAGTGTAGCACGTTCATCGCCAGCAAGCTCACCACACATGCCAGTCCATTTGCCT
TCAGCATGAGAAGCATCAATAACTTGCTTGATCAAGTTCAGCACGGACGGTGACATTGGC
TGGTAAAGGTGTGAAATCATATCATTACCACGGTCAACTGCCAGAGTGTACTGCGTTAAA
TCATTGGTGCCGATACTAAAGAAATCAACTTCTTTGGCTAAATGACGTGCAATTGTTGCG
GCAGCCGGTGTTTCCACCATTACGCCGATTTCAATTGACTCGTCAAACGCTTTACCTTCG
TCGCGCAGTTCCTGTTTGTAGATTTCGATCTCTTTGCGCAGTGCACGCACTTCTTCAACA
GAGATGATCATCGGGAACATAATGCGCAATTTACCGAAAGCCGAGGCACGCAGGATAGCG
CGGAGCTGATCGCGCAGGATCTCTTTACGATCCATTGCGATACGGATAGCGCGCCAGCCG
AGGAACGGGTTCTCTTCTTTCGGGAAGTTCATGTATGGCAGCTCTTTGTCGCCGCCGATG
TCCATGGTACGAACGATAACCGCCTGCGAGCCACACGCTTCAGCCACTGCTTTGTAAGCA
GCAAACTGTTCTTCTTCAGTGGGCAGCGCGTCGCGGTCCATGAACAGGAACTCAGTACGA
TACAGACCAACGCCTTCAGCGCCGTTACGCTCTGCACCTTCAACGTCACGAACCGTACCA
ATGTTAGCGCATACTTCTACCTGGTGACCGTCCAGCGTAATAGCTGGCAGATCTTTCAGT
TTAGCAAGCTCTGCTTTTTCAGAAGCCACTTGCTCCTGAACAGCGCGCATTTTATCAATA
ACTTCGTTGGTTGGATTGACGTAAACCTGATTATTTACGGCATCCAGAATCAGATAGTCG
TCATTTTTCACCTGAGAGGTGACGCTACCGGTACCCACGATAGCAGGTAGTTCCAGAGAA
CGCGCCATGATAGAGGTGTGGGAAGTACGGCCACCCGCGTCGGTGATGAAACCCAGCACC
TTCTTCAGGTTCAGCTGTGCGGTTTCGGACGGCGTCAGGTCAGCGGCAACCAGAATGACT
TCATCCTGAATGGCGCTCAGGTCGATAATCTTCAGGCCCAGGATGTTGCGCAGCAGGCGC
TTACCGATATCACGTACGTCAGCCGCACGTTCTTTCAGGTATTCATCATCCAGCTCTTCC
AGGGCAGAAGCCTGACCTTCGATAACTTCATGAGCAGCTGCGTCAGCTGTCATGTGCTTA
TCTTTAATCAGGGCTATGATTTCCTGCTCCAGCTCCTCATCTTCGAGCAGCATAATATGC
CCTTCAAAGATGGCTTCTTTTTCTTCACCGAACGTTTCACCAGCTTTCGTTTTGATCGTT
TCCAGCTGGGCTGATGCCTTGGCACGACCGCTCAGAAAACGTTCAACTTCCTGATCAACC
TGGTCGGCAGAAATTTTTTTCCGGTCAATGACAATTTCGTCTTCTTTCAGAAGCAGAGCT
TTACCGAAAGCGATACCCGGGGATGCTAAAATGCCTGAAATCATAACCCTACCTTACTTG
TGACTGATTTTTAAAAGAACCCGGGAAATTACTCGAGTTCCGCCATCAGTTTAACCAGAT
GTTCAACCGCTTTCTGCTCGTCTTCGCCTTCTGCGGAGATAGTCACAACGGTACCTTGAG
TCAGGCCCAGAGTCTGCAGTTTAAACAGGCTTTTCGCGCTGGCGCTTTTGCCGTTGGAAG
TCACAGTAATTTCAGAAGTGAAGCCCTTAGCTTCTTTTACAAACTGGGCAGCAGGGCGGG
TGTGCAGACCGTTCGGAGCGGTAATGGTAACTTCTTGCTGGAACATTGTATTTCCCCAAC
TTATAGGTTTAGTGTTGTGGAACTAAAGTCTAGCCTGGCGGTTCGACTTTAGCCTGTATT
GTTAGCGCCAGTTTTTAACAGACGCGACGCACGAAGAGCGCAATACAGTCCATTGCTGGC
GGGTGTTGACCGCTGACGTTTCGTACGTCATTAAACATTATGCCGCTAAAGGAAGAATTG
AACCAAATCATAAAATCGATTCAGCTTTGGCTTTTCCTGTAACGATTAATTTCGCGCATC
AAAATAATTAGTCTGGTTAAATACCAGTTCCGACAGGCTGAATCAATGCCAGGAGGGGCG
AAAGTTTGAAGCAGGCCACAAAAAAGCACCTAAAAAGGTGCTTTTTTACGCATTTTTAAC
AAGCTGGCATTACTGTTGCAGTTCTTTCTCAGTGAAGAGATCGGCAAACAATGCGGTGCT
TAAATAACGCTCACCCGATGACGGTAGAATAACCACAATATTCTTGTTGGTAAAGCTTTC
ATCTTCTTGTAGTTTCAACGCCGCAGCAACAGCTGCTCCAGAAGAGATACCTGCAAGAAT
ACCTTCTTCTTCCATCAGACGACGCGCGGTAGAAATGGCTTCTTCATTGGTAATGCCAAT
GACTTTATCGATCAGCTTGAGATCGAGGTTAGCCGGGATAAAACCAGCGCCAATACCCTG
AATTTTATGCGGGCCAGGTTTAATCTCTTCACCTGCCAGCGCCTGGGCGATAACTGGAGA
ATCGGTTGGCTCAACGGCGACAGAGATAAGATCGGTCTTGCCTTTGGTGCCTTTAATGTA
GCGGCTGACGCCGGTCAGCGTACCGCCAGTCCCAACGCCAGCAATAAATACATCAACCTG
ACCGTCGGTATCTTCCCAGATCTCCGGACCGGTGGTTTTTTCGTGAATTTCAGGGTTTGC
CGGATTGCTGAATTGTTGCAGCAGCAGGTATTTCTCTGGATTGCTGGCGACAATTTCTTC
TGCTTTTTGGATTGCGCCTTTCATGCCTTTAGCACCTTCGGTCAGCACCAGGTTTGCACC
TAACGCTTTCAGCAGCTTGCGGCGTTCAATACTCATGGTTTCTGGCATGGTCAGGGTGAG
TTTGTAACCGCGAGCGGCAGCTACATAGGCCAGTGCAATCCCGGTATTACCGCTGGTCGG
TTCAACCAGTTCAACGCCTGGTTTCAGCACGCCGCGCTTTTCGGCATCCCAAATCATGTT
GGCACCGATACGGCACTTAACGCTGAAGCTGGGGTTACGAGATTCCACCTTCGCCAGAAT
GCGTCCGTTACCGATGCGATTCAGGCGAACCAGCGGCGTGTGACCGATAGTCAGCGAGTT
ATCTTCAAAAATCTTACTCATGGCCTGTCCTTAACTGTATGAAATTGGGATACAACAGGT
AGCATACCCGCTCAGAGAATATGCGGAAGTAAGGATTTAGCATATCTATATACAGAAGGG
AAATAATGACATGCAAGATGGAATAAGGGGCGGCATAAGCCACCCCTGTTTCACACAAAC
GGTTTACAAAATAACCGGTAGATTGTTACCGCCACATCGCGTGTTTATCGCGATAGCAAT
CGACCCACATCGCCGTCGCGCCACAAACGGCAACGGGCATGATGAACAGATTAAGCAGCG
GGATCATCGTAAACAGGCTGGTTAAAGCACCAAACTGCATATTGGTGATTTTGCGTGTGC
GCAGGGCGGTGCGCATCTCTTTAAACGGCACTTTGTGGTTATCGAAGGGGTAATCGCAAT
ACTGGATGGCTAACATCCAGGCGCTAAACAGGAACCACAGTACCGGCGCGACGGTTTGCC
CAATACCAGGGATGAAGTAAAGAATTAGTAATACAATTGCGCGCGGCAGATACCAGGCAA
ATTTTTGCCATTCGCGTTTCATGATTCGCGGCACATCTTTCATGATACCGAAAATCCCGG
TATCTGGCGGTGTAGCGCCAGTCAATCGTGCTTCCAGTTGTTCAGCCAATAAACCGTTAA
ACGGAGCGGCAATCCAGTTAGCAATCGTGGAGAAGAAATAGCCAAACACTAACAGCACAG
AGATGACAGCCAGAGGCCACAACAGATAGCTCAGCCATTGTAACCAGTCCGGAACATAAC
TCATGAGAGTCGGGATCCAGACATCGAGTTGCGTAAAGAGCCACCAGAATGCGCCCCCCA
TCAACAAAATATTGACCAGCAGCGGTAAAATAACGAAACGCCGAATCCCAGGTTGCGAGA
CGAGCTTCCAGCCTTGCGCAAAATAGTAAAAACCGCTGCGTGGGGCAGATGTGAATGATG
AAACCATAATCAGGATGAGCTCCTTTTGACCAATCCCAGGAAAATTGTGCGTATTTTACC
GGGTAATTGCGCAATGGACAGTTAGGATATGTTCGAAAAAACAGCAAAAAGCACGATTTC
ATCTATCTTTGTGCTGTGAAAGTTAATAGTGCACTTGCACTTGAGGTAATCGGCAAATAC
TCTTAGTGAGTAAATGTTTGCCGTGGTGGCAAGGTGTTAGAACAACAGAGAATATAATGA
TGCAGGATTTGCGTCTGATATTAATCATTGTTGGCGCGATCGCCATAATCGCTTTACTGG
TACATGGTTTCTGGACCAGCCGTAAAGAACGATCTTCTATGTTCCGCGATCGGCCATTAA
AACGAATGAAGTCAAAACGTGACGACGATTCTTATGACGAGGATGTCGAAGATGATGAGG
GCGTTGGTGAGGTTCGTGTTCACCGCGTGAATCATGCCCCGGCTAACGCCCAGGAGCATG
AGGCTGCTCGTCCGTCGCCGCAACACCAGTACCAACCGCCTTATGCGTCTGCGCAGCCGC
GTCAACCGGTCCAGCAGCCGCCTGAAGCGCAGGTACCGCCGCAACATGCTCCGCGTCCAG
CGCAGCCGGTGCAGCAACCCGTGCAGCAGCCTGCCTATCAGCCGCAGCCTGAACAGCCGT
TGCAGCAGCCAGTTTCGCCACAGGTCGCGCCAGCGCCGCAGCCAGTGCATTCAGCACCGC
AACCGGCACAACAGGCTTTCCAGCCTGCAGAACCCGTAGCGGCACCACAGCCTGAGCCTG
TAGCGGAACCGGCTCCAGTTATGGATAAACCGAAGCGCAAAGAAGCGGTGATTATCATGA
ACGTCGCGGCGCATCACGGTAGCGAGCTAAACGGTGAACTGCTTCTTAACAGCATTCAAC
AAGCGGGCTTCATTTTTGGCGATATGAATATTTACCATCGTCATCTTAGCCCGGATGGCA
GCGGCCCGGCGTTATTCAGCCTGGCGAATATGGTGAAACCGGGAACCTTTGATCCTGAAA
TGAAGGATTTCACTACTCCGGGTGTCACTATCTTTATGCAGGTACCGTCTTACGGTGACG
AGCTGCAGAACTTCAAGCTGATGCTGCAATCTGCGCAGCATATTGCCGATGAAGTGGGCG
GTGTCGTGCTTGACGATCAGCGCCGTATGATGACTCCGCAGAAATTGCGCGAGTACCAGG
ACATCATCCGCGAAGTCAAAGACGCCAACGCCTGATACACTTAAGGCAAATTAACTCCTC
TTCGAACCCCCGCTTGTCGGGGGTTTTTAGCATTGATGGTGCGATATGGAATCAATCGAA
CAACAACTGACAGAACTGCGAACGACGCTTCGCCATCATGAATATCTTTATCATGTGATG
GATGCGCCGGAAATTCCCGACGCTGAATACGACAGGCTGATGCGCGAACTGCGCGAGCTG
GAAACCAAACATCCAGAACTGATTACGCCTGATTCGCCTACCCAACGTGTAGGTGCTGCG
CCGCTGGCGGCTTTCAGCCAGATTCGCCATGAAGTGCCAATGCTGTCGCTGGATAACGTT
TTTGATGAAGAAAGCTTTCTTGCTTTCAACAAACGTGTGCAGGACCGTCTGAAAAGCAAC
GAGAAAGTCACCTGGTGCTGTGAGCTGAAGCTGGATGGCCTTGCCGTCAGTATTCTGTAT
GAAAATGGCGTTTTAGTCAGTGCCGCGACCCGTGGCGATGGCACCACCGGGGAAGATATC
ACGTCTAATGTGCGTACTATTCGCGCCATTCCGCTGAAGCTGCACGGAGAGAATATCCCG
GCGCGTCTGGAAGTGCGTGGTGAAGTGTTCCTGCCGCAGGCGGGGTTCGAAAAGATTAAC
GAAGATGCGCGACGCACGGGCGGGAAAGTGTTTGCTAACCCACGTAATGCGGCAGCTGGT
TCACTGCGTCAGCTTGATCCGCGTATTACAGCGAAGCGACCGCTCACTTTTTTCTGCTAT
GGCGTTGGTGTTCTGGAAGGTGGCGAGCTGCCGGATACTCATCTTGGCCGTTTACTGCAA
TTTAAAAAGTGGGGGTTGCCGGTCAGCGATCGGGTAACGCTTTGTGAATCGGCGGAAGAA
GTGCTGGCGTTCTATCACAAAGTGGAAGAAGACCGCCCGACGCTGGGCTTTGATATCGAC
GGCGTGGTGATTAAGGTCAACTCACTGGAACAGCAGGAGCAGCTTGGCTTTGTCGCGCGT
GCCCCGCGCTGGGCGGTAGCGTTTAAATTCCCGGCGCAGGAGCAGATGACCTTTGTGCGT
GACGTCGAGTTTCAGGTTGGGCGTACTGGCGCGATTACGCCTGTTGCGCGTCTGGAACCT
GTCCATGTTGCTGGCGTGCTGGTGAGTAACGCAACCTTACACAATGCGGATGAAATCGAA
CGTCTTGGTTTACGCATTGGCGATAAAGTGGTGATTCGCCGCGCTGGCGACGTGATCCCG
CAGGTGGTTAACGTCGTGCTTTCTGAACGCCCGGAAGATACCCGTGAGGTTGTATTCCCG
ACGCATTGTCCGGTATGTGGTTCTGACGTTGAGCGTGTGGAAGGTGAAGCTGTTGCCCGC
TGTACCGGTGGCCTGATTTGCGGTGCGCAGCGTAAAGAGTCGCTGAAACACTTTGTTTCC
CGCCGTGCGATGGATGTTGACGGAATGGGCGACAAAATCATCGATCAGCTGGTTGAAAAA
GAATATGTCCACACTCCGGCGGATCTGTTCAAACTCACCGCAGGCAAACTTACCGGACTG
GAGCGTATGGGGCCAAAATCGGCACAAAACGTGGTTAACGCGCTGGAAAAAGCGAAAGAA
ACCACCTTTGCTCGCTTCCTCTATGCACTTGGCATCCGTGAAGTCGGCGAGGCCACCGCA
GCAGGTCTGGCGGCATATTTCGGCACGCTGGAAGCGCTGGAAGCCGCTTCGATTGAAGAA
CTGCAAAAGGTGCCTGATGTTGGCATTGTCGTTGCATCCCACGTTCACAACTTCTTTGCC
GAAGAAAGCAACCGCAATGTCATCAGCGAGCTGTTGGCGGAAGGTGTTCACTGGCCTGCG
CCGATCGTTATCAACGCGGAAGAGATTGACAGCCCGTTTGCTGGTAAAACCGTGGTGCTT
ACGGGCAGCTTAAGCCAGATGTCGCGTGATGACGCTAAAGCTCGACTGGTCGAACTGGGC
GCGAAAGTCGCGGGCAGCGTGTCGAAGAAAACCGATCTGGTGATAGCGGGTGAAGCTGCA
GGATCTAAACTGGCGAAGGCGCAGGAACTGGGCATTGAAGTCATCGACGAAGCGGAAATG
CTGCGTTTGCTGGGTAGCTGAGATGGAAAAAGAGCAGCTGATTGAAATAGCCAATACGAT
AATGCCGTTTGGCAAATACAAAGGGCGTCGCTTAATCGACCTGCCGGAGGAGTATCTGCT
GTGGTTTGCCCGCAAAGATGAGTTCCCGGCAGGGAAGCTCGGTGAGCTAATGCAAATCAC
GCTGCTGATTAAAACCGAGGGGCTGACGCAACTGGTCCAGCCCCTGAAGCGTCCGCTTTA
AGCTTTATCGGTGCTGCTTTCCTGCTGTGCCTGTAACTGTTCGGTCTGGCGTTTGTATCG
CCGCGCCAGCACCGCACAGACCATCAATTGGATCTGATGGAAAATCATCAGGGGCAGCAC
CATCATACCGATCACCGATGTGGGGAACAGAATGTTTGCCATCGGGATGCCATTTGCCAG
ACTCTTTTTCGAACCACAAAAGACGATAGTAATTTCATCTGCTTTATTGAAGCCTAGTCG
GCGTGCCATAAAGACGTTAACTACAATCACGATAGCCAGAAGAACGCAGCTGACCACCAC
GATAAACAGCAATGATCCCCAGCCAACTTTATGCCAGATACCATTAACGACGGCTTCGCT
GAACGCTGTATAAACCACCAACAGAATGGACGTCTGGTCAGTTTTCGCAATCCATTTTTT
ATTGCGCGACACCCAGTCACCAATCCACGGCCGGGAAAGATGCCCCAACACAAACGGCAG
CAACAGTTGCAGCATAATTTTACCGACCTGCTCAAGGCTGCCCCCTGCACCGTGAACATT
CATCACCAGGCCAACCAGCAATGGTGAAAGGAAAATCCCCAGCAGGCTGGATGCCGACGC
AGAACAAACCGCCGCCGCGACGTTACCGCCCGCCATTGACGTGAAGGCGATTGCAGACTG
CACGGTAGCCGGGAGAATGCACAAGTAGAGAAAACCGGAGTAGAGCATCGGGTCGACATT
TACCGGTTTCCACCAGGCAAACAGTACACCCAGAATCGGAAACAGCACGAAGGTGCTGCA
CATTACCCACAAATGCAGTCGCCAGTGACCACCGCCAGCAATAATCGCCTCACGCGACAA
CTTCGCGCCGTGCATAAAGAACAGCAGGGCAATAGCTGCGGTGGTCAGATTTTCAAAGAA
GGGGACGAAATCGCCTCTGGCCGGAAAGAAAGAGGCCAGCAACACCACCGTGATCAGGGT
TAAGGTGAAAGGATCGAGGATACGAAAAAGTTTCATAAAGACTCCAGATGATCGATGGTT
CTATTGTGCTTCTTCCAGTTTGAGAAATAAAATTGATTTATTGCATCCATTCATGAAGAA
AACAGATGAATTATTCTTTAAAACAGTTAAAGGTTTTCGTCACAGTAGCGCAGGAGAAAA
GTTTTAGTCGTGCAGGAGAGCGTATCGGCCTGAGCCAGTCGGCAGTAAGTCACAGTGTGA
AGGAGCTGGAAAATCATACAGGTGTTCGCCTGCTGGACAGAACCACGCGTGAAGTGGTAC
TTACAGATGCAGGGCAGCAGTTGGCTTTGCGTCTTGAGCGACTGCTGGATGAACTTAACA
GCACGTTGCGCGATACCGGGCGTATGGGGCAACAACTGAGCGGAAAAGTTCGGGTCGCTG
CCAGCCAGACCATTTCCGCGCATCTTATTCCGCAATGCATTGCTGAAAGCCATCGCCGCT
ATCCAGATATTCAGTTTGTCCTGCACGATCGTCCGCAGCAGTGGGTGATGGAAAGTATTC
GCCAGGGAGATGTCGACTTTGGCATCGTCATAGATCCAGGCCCAGTGGGCGATCTGCAAT
GTGAAGCGATTCTTTCCGAGCCTTTCTTTCTGCTTTGCCATCGCGATAGCGCTTTGGCCG
TGGAAGATTATGTACCCTGGCAGGCATTACAGGGAGCGAAATTGGTGTTGCAGGATTACG
CGTCAGGCAGCCGACCGCTGATTGACGCAGCGCTGGCGCGCAATGGTATTCAGGCGAATA
TTGTGCAGGAGATTGGACATCCGGCGACGCTGTTCCCGATGGTAGCCGCAGGCATCGGCA
TCAGTATTCTTCCCGCACTGGCGCTACCATTGCCTGAAGGTAGCCCACTGGTGGTAAAGC
GCATTACGCCGGTGGTGGAACGCCAGTTGATGCTGGTGCGCAGGAAAAACCGTTCACTTT
CCACCGCCGCTGAAGCGTTATGGGACGTGGTACGAGACCAGGGCAATACGCTAATGGCTG
GGCGGGAAGGGGATCCGTTGTATCAGATATAGATATCGATATGAGTCGTATTTTCAACAG
GATTTAGAAGGGATACATTCAGAGACAAACGCTGCTCTTTCTCCTGCGCCTTTTCTGCCT
GCTGTCTCTGCAACTGCGCCAGTTGTGTTTCCAGTAGGGTGATTTGCTGTTGAATCAATT
CGGCCTGTTTTTGCTTGTCTTCAGCACTGCCGCTAGTGTCTACAATCTCTTTAATTTGTT
GAGTGAGTTTGATGATTTGCTGACTTATCCGCGCGATTTGTGAAGCAACATCGCTACCTT
GTGATGCCCTGTTACTACTCTGTGTTTGTATGGAAGGAATTGAAGTTGAAGAGATAGTGG
CCATTGTTCAGTCCTCGTCACTGTACGAGGTAATATCGGTAGAAGAACAAGGAACTTGAG
AAGAAAAATCAATCTTACAAATCGCAGATAGCAAAAAAGCGCCTTTAGGGCGCTTTTTTA
CATTGGTGGGTCGTGCAGGATGACTCGCTTCGCTCGCCCTTCGGGCCGTCGCCGCGAGCG
GCTCCGTTGTTTCGCTGCGCTCAACTCGAACCTGCTGCAGGTTCGAATCTTTGAGTATCG
CAGATAGCAAAAAAGCGCCTTTAGGGCGCCTTTTTAAATTGGTGGGTCGTGCAGGATTCG
AACCTGCGACCAATTGATTAAAAGTCAACTGCTCTACCAACTGAGCTAACGACCCGAAGT
GGTGGGTGATGACGGGATCGAACCGCCGACCCCCTCCTTGTAAGGGAGGTGCTCTCCCAG
CTGAGCTAATCACCCACTTCTCAATTTCTTGCTACACGGCGGAGACTACATAAAGTAGTT
GGTGGGTGATGACGGGATCGAACCGCCGACCCCCTCCTTGTAAGGGAGGTGCTCTCCCAG
CTGAGCTAATCACCCCCGCTGTGTGGAGTCGCATTATAGGGAGAGTTCAAAATGAGTCAA
CGCATTTTCTAAAGAAATTGTTCGTTCGTCGTAAATTTAAGCAAGATGATCGCAAAACAG
ACCGTGTTGCGCAATTTGTCAACGAAAACAATAATGCGTAAGGTTGCAACCCGAACTACA
TTGAGGAATCAGGCGGGAGTGATAGAATATCGCCCACTCAATTTTTCCAGGATTTGCCGG
TTGTCGGCATCTTTCTAAACGTAAGGCCATTTCATGAAAATCAAAACTCGCTTCGCGCCA
AGCCCAACAGGCTATCTGCACGTTGGCGGCGCGCGTACTGCTCTTTACTCCTGGCTTTTT
GCACGTAATCACGGCGGTGAGTTCGTGCTGCGTATTGAAGACACCGATCTTGAGCGTTCC
ACGCCGGAAGCTATCGAAGCCATTATGGATGGCATGAACTGGCTGAGCCTGGAGTGGGAT
GAAGGTCCGTACTTCCAGACCAAACGTTTTGATCGCTACAACGCGGTGATCGATCAGATG
CTGGAAGAGGGCACAGCTTATAAATGCTATTGCTCTAAAGAGCGCCTGGAAGCGCTGCGC
GAAGAGCAAATGGCGAAAGGTGAGAAGCCGCGTTATGACGGTCGCTGCCGCCACAGTCAT
GAGCATCACGCTGATGATGAGCCGTGTGTCGTACGTTTTGCTAACCCGCAGGAAGGTTCT
GTTGTTTTTGACGATCAGATCCGTGGTCCGATCGAGTTCAGCAACCAGGAACTGGACGAT
CTTATTATCCGCCGTACCGATGGTTCCCCAACCTATAACTTCTGTGTGGTTGTCGATGAC
TGGGATATGGAAATCACCCACGTTATCCGTGGCGAAGACCATATCAACAACACGCCACGC
CAGATCAACCTTCTTAAGGCCCTGAAAGCGCCGGTGCCGGTTTACGCGCACGTTTCTATG
ATCAACGGCGATGACGGTAAAAAACTGTCCAAACGTCACGGGGCGGTCAGCGTAATGCAG
TATCGTGACGACGGTTATTTGCCAGAAGCACTGCTGAACTATCTGGTGCGTCTGGGCTGG
TCCCACGGCGATCAGGAAATCTTCACTCGTGAAGAGATGATCAAATACTTCACCCTGAAT
GCCGTCAGCAAATCTGCCAGTGCGTTCAACACCGACAAGCTGCTGTGGCTGAACCATCAC
TACATTAACGCGCTGCCGCCGGAGTATGTTGCTACTCACTTACAGTGGCACATTGAGCAG
GAAAATATCGATACCCGTAACGGCCCGCAGCTGGCTGATCTGGTGAAACTGCTGGGCGAA
CGCTGCAAGACGCTGAAAGAGATGGCACAGAGCTGCCGTTATTTCTACGAAGATTTTGCA
GAGTTCGATGCCGACGCCGCGAAAAAACATCTGCGTCCGGTAGCGCGTCAGCCGCTGGAA
GTGGTTCGTGACAAACTGGCCGCGATTACTGACTGGACCGCTGAAAACGTTCATCACGCT
ATTCAGGCGACGGCGGATGAGCTGGAAGTGGGTATGGGTAAAGTTGGTATGCCGCTGCGT
GTCGCCGTAACCGGTGCGGGGCAGTCTCCAGCACTGGATGTTACCGTTCACGCGATCGGT
AAGACACGTAGCATTGAGCGTATCAACAAAGCGCTGGCTTTTATTGCTGAACGCGAAAAT
CAGCAGTAATTAGCGCATAAAAGACAAACGGCAGGAGAGAAACCCCTGCCGTTTTTTATT
TATGCTGATTCATTTATGTCGAGACGAGCCAGGAAATTACGAATTCCTTCGCGTGACAAA
AATTGCGCAACTTTTTCCTGCTCACTGTGAGTCATGTTGTCTATTGCGCTTATGATTTGT
CGATAAGCAGGAGTGCGAATCCCCGGTGCGTATTCGGCAAGGGGTTCTTCGGCTTCCAGA
AGCATCGGTGTGTTATGGAAGGCTGGCGTGTTCTGAATAAACTCGCAAACTTGCGTATCG
ACCAGAATAAGTCTGGCACGACCGCCTTTCACGCCGGGAAATTTTTCCGTTTTCCAGCCT
TTTTCTCTGATCCAACGGTTAACAGTTTGTTTAGCCACACCGAGGCATTCAGCCAGTTCT
TCGGTGGTCATTTTGTTGCGTAATCTTTTCATATTATTTGCTATCGCGAATCCCTAAGCG
TTGTAACAATCCGATAATCCCTTCCCGCAGAAGCAAGGATGTAAACTGTTTTTGTTCAAC
TGGCGTCATCTCTTTCGCCAGTGTCACCAGCAATACTTCAAGCGGCGCATCACCAGAAAG
GGCAGGCGCTTCTCCCTGACCTTCTGGACGTTCAGCATTACGAATATATTCACGAACCTG
TTCATTGACGTGAACCAGTCGGGCTTTGCCACCCTGGACGCCTGGTTTTGGTGACGTCGT
CCAGCCTTCCTTGCGTACCCATTTATTAATGGTCTGGCGGCTATAGCCGGTCAGTCTGGC
AAGTTCATCTGGTGTCATCCTCTCCTTGAACATAACAATTCCCTGAATGTATGTGGGTCT
ATTAGTAGTTCATTTTATAGCACCACTTTACAGGAAACCGTGACATGAATAACTACTGAA
TGCGAGCGGTTTTCCAAAATTGTTCATTTGCCTGATTTTTCAGCGATTGAAACTACACGT
TGCAATTTGCCGTTGACACATTCGGGCGGAATTCATATGATGCCGCCCGTCAACTCGACA
AGCTTTACGTGACGGGGCTATAGCTCAGCTGGGAGAGCGCTTGCATGGCATGCAAGAGGT
CAGCGGTTCGATCCCGCTTAGCTCCACCAAATTTTGCACCCAGCAAATTTGGTACGTAAA
CGCATCGTGGGGCTATAGCTCAGCTGGGAGAGCGCTTGCATGGCATGCAAGAGGTCAGCG
GTTCGATCCCGCTTAGCTCCACCAAATTTCCAACCCTCGCTGCAAAGCGGGGGTTTTTTG
TCTCTGCTTTTTGCCGCTTTTGTAATACAGTCTACGTCCGGGTTAGTGCCGCCTGGTGAA
AGCATCATTGGATGAAAAATCGGCAACAGGCTGGCCCCTGTTTGCTTCGCGATGCGAATA
AACTTATTATTTGTGTGCCTGAAAACCCCGATCAGTGAGAGTAGTGTACTCATGTTTGTG
GAGCATAACCTGATAAAAAATATCAAGATATTCACACTAGCGTTTACGCTCACCGTGGTA
CTTATTCAGCTATCCCGTTTTATTTCGCCACTTGCCATTATCCATTCCAGTTATATCTTT
CTGGCGTGGATGCCACTGTGCGTAATGCTGTCAATCTTGTTTATCTTTGGCTGGCGCGGT
GTCGTTCCCGTTTTATGCGGGATGTTTTGCACCAATCTGTGGAACTTTCATCTCTCTTTT
TTACAGACTGCGGTCATGCTCGGCAGCCAGACGTTTGTCGTGTTGTGTGCCTGCGCAATA
TTACGCTGGCAGCTGGGGACGCGTTGGCGTTATGGATTGACCAGCCGATATGTCTGGCAA
CGTCTGTTCTGGCTTGGTTTGGTGACGCCGATCGGCATCAAATGCAGCATGTATTTTGTG
GGGAGCTTCTTTGATTTCCCGCTAAAGATATCCACCTTTTTCGGCGATGCGGATGCCATT
TTCACGGTTGTTGATTTACTAAGCCTTTTCACCGCTGTGCTGATTTACAACATGCTTTTC
TACTATCTCACTCGCATGATTGTAAGTCCCCACTTTGCGCAGATATTGTGGCGCAGGGAT
ATCGCTCCGTCGTTGGGCAAAGAGAAACGCGCATTTACCTTAAGCTGGCTGGCAGCGTTA
AGCGTGCTGCTACTTCTGTTGTGCACACCTTATGAAAACGACTTTATTGCCGGTTACCTG
GTACCCGTTTTCTTCATCATCTTTACCCTCGGGGTCGGTAAGCTTCGCTATCCGTTTTTA
AATCTCACCTGGGCTGTTTCAACGCTTTGCCTGCTGAATTACAACCAGAACTTTTTGCAA
GGGGTGGAAACCGAATATTCGCTGGCATTTATTCTTGCGGTGCTGATTTCCTTTAGCGTT
TGCCTGCTCTATATGGTGCGCATTTATCATCGCAGTGAATGGCTTAATCGACGCTGGCAT
TTGCAGGCGCTGACCGATCCGTTAACGCTCCTACCCAATTTTCGTGCGTTGGAACAAGCG
CCGGAGCAAGAGGCGGGCAAGAGTTTTTGCTGCCTGCGCATTGATAATCTTGAGTTTATG
AGTCGTCATTACGGGTTAATGATGCGCGTTCACTGTATCCGATCAATTTACCGTACGCTG
CTGCCGTTGATGCAGGAAAACGAAAAGTTGTATCAATTGCCGGGTAGTGAACTGCTGTTA
GTGCTGAGCGGGCCGGAAACGGAAGGGCGACTCCAGCATATGGTTAACATCCTGAATAGT
CGGCAAATTCACTGGAACAATACCGGGCTGGATATGGGCTATGGTGCTGCCTGGGGGCGT
TTTGATGGAAATCAGGAAACCCTGCAACCCTTGTTGGGGCAGTTAAGCTGGCTGGCGGAG
CAATCCTGCGCACATCATCATGTGCTGGCGCTGGATAGCAGAGAGGAGATGGTTTCCGGG
CAGACCACTAAACAAGTGCTATTGCTGAATACCATTCGCACGGCGTTAGATCAGGGTGAT
TTGCTGCTCTACGCCCAGCCAATTCGCAACAAAGAGGGTGAAGGTTATGATGAGATCCTC
GCGCGACTGAAGTATGACGGCGGCATTATGACCCCGGATAAGTTTCTGCCCCTTATTGCT
CAGTTTAACCTTAGCGCGCGTTTTGATTTGCAAGTGCTGGAATCCTTGTTGAAGTGGCTG
GCAACACACCCTTGCGACAAAAAAGGCCCGCGCTTTTCAGTTAATTTAATGCCGCTCACG
CTGCTACAAAAGAATATTGCCGGGCGGATTATTCGTCTGTTTAAGCGTTATCACATCTCC
CCGCAGGCGGTCATTCTTGAGATCACCGAGGAGCAGGCGTTTTCTAACGCAGAAAGCAGC
ATGTACAACATCGAGCAACTGCATAAGTTTGGCTTCCGGATTGCGATTGATGACTTTGGC
ACCGGCTATGCCAACTACGAACGGTTAAAGCGTTTGCAGGCTGATATCATCAAAATTGAT
GGTGTCTTTGTGAAAGATATCGTCACGAATACGCTGGATGCGATGATTGTGAGATCAATT
ACCGATCTGGCGAAAGCGAAGTCATTGAGTGTGGTTGCGGAGTTTGTCGAGACGCAACAG
CAGCAGGCGTTATTGCATAAGCTCGGGGTGCAATATCTGCAAGGGTATTTGATTGGTCGC
CCGCAGCCATTAGCTGATTAACAGGCGTAAAAAAACCGGGGAATTATCCCCGGCTTTTTT
ATGTATGGTCTTACAGCACCAGTGCTGCGATTGACGCAGACAGCACACTCACCAGGGTAG
AGCCGTAAACCAGTTTCAGACCGAAGCGAGAAACCACGTTACCTTGCTCTTCATTCAGAC
CCTTAACTGCACCTGCGATAATCCCGATTGAAGAGAAGTTAGCGAAGGAAACCAGGAACA
CAGAGATGATGCCTTCAGCACGCGGAGAGAGCGTGGAAGCAATTTTCTGCAGATCCATCA
TCGCAACGAACTCGTTGGAAACCAGTTTGGTCGCCATGATACTGCCCACTTGCAGTGCTT
CGCTGGACGGAACACCCATCACCCATGCAATCGGATAGAAGATGTAGCCCAGGATGCCCT
GGAAGGAGATGCTGTAGCCAAACCAGCCAGTCACGGTGGCAAACAGTGCGTTCAACGCGG
CGATCAGGGCGATAAAGCCGATCAGCATCGCGGCAACGATAATGGCAACTTTGAAACCTG
CCAGAATGTATTCACCCAGCATTTCGAAGAAGCTCTGACCTTCGTGCAGGTTGGACATCT
GAATGTTTTCTTCACTGGCATCAACACGGTAAGGGTTGATCAGCGACAGCACGATAAAGG
TGCTGAACATGTTCAGTACCAGCGCCGCAACGACATATTTCGGCTCCAGCATGGTCATGT
ATGCACCAACGATGGACATAGATACGGTGGACATCGCCGTTGCTGCCATGGTGTACATAC
GATTGCGGGAGATTTTGCCGAGGATATCTTTATAGGCAATAAAGTTTTCAGACTGACCCA
GAATCAGAGAGCTGACGGCGTTAAAGGATTCCAGTTTGCCCATGCCGTTGACTTTGGAGA
GCAGGAAACCAATTGCGCGGATAATCACCGGCAACACGCGAATGTGCTGGAGAATACCGA
TCAGTGCAGAGATAAAGACGATTGGGCACAGCACTTTCAGGAAGAAGAATGCCAGGCCTT
GATCATTCATGCTACCAAAGACGAAGTTAGTCCCTTCGTTGGCAAATCCGAGCAGTTTTT
CGAACATTTCGGAGAAGCCTTTCACGAAGCCTAAACCAACGTCGGAGTTCAGGAAGAACC
ACGCCAGTAACACTTCGATAACAAGCAGTTGAATAACATAACGGATACGAATTTTTTTGC
GGTCGCTGCTTACCAGCAGTGCGAGAATCGCAACAACGGCAAGTGCCAGTACAAAATGAA
GGACGCGGTCCATATTTGCTCCAAATATGAGGCAGGTTAAATTTCCGTGCACATTCTATG
TAACATGGTTAAGGAAAACGAGATCTGACACACACTATAATGACGTCCTGTGACAAGCTT
CAAAAATAGTGAGCTGTCATACATTTCTGCTATGTTGTGTATGGAAGCTGAAAGTTATGT
AAATGTGCTAACATTAAACATAACCATAACATTCAAGTCATCAATCTTTTCGTAGTCATA
ATCCTGGTCTATCAGAGAAATCACCACAACCCATTTAAATGAATTTGATAATCATTCTCG
TTTGGCATAGCATGAAACATAGCAAAGGCTATGTTTTAGAGGCACAAGATGACGAACTAT
CGCGTTGAGAGTAGCAGCGGACGGGCGGCGCGCAAGATGAGGCTCGCATTAATGGGACCT
GCGTTCATTGCGGCGATTGGTTATATCGATCCCGGTAACTTTGCGACCAATATTCAGGCG
GGTGCCAGCTTCGGCTATCAGCTACTGTGGGTTGTCGTTTGGGCCAACCTGATGGCGATG
CTGATTCAGATCCTCTCTGCCAAACTAGGGATTGCCACCGGTAAAAATCTGGCGGAGCAG
ATTCGCGATCACTATCCGCGTCCCGTAGTGTGGTTCTATTGGGTTCAGGCAGAAATTATT
GCGATGGCAACCGACCTGGCGGAATTTATTGGTGCGGCGATCGGTTTTAAACTCATTCTT
GGTGTTTCGTTGTTGCAGGGCGCGGTGCTGACGGGGATCGCGACTTTCCTGATTTTAATG
CTGCAACGTCGCGGGCAAAAACCGCTGGAGAAAGTGATTGGCGGGTTACTGTTGTTTGTT
GCCGCGGCTTACATCGTCGAGTTGATTTTCTCCCAGCCTAACCTGGCGCAGCTGGGTAAA
GGAATGGTGATCCCGAGTTTACCTACTTCGGAGGCGGTCTTCCTGGCAGCAGGCGTGTTA
GGGGCGACGATTATGCCGCATGTGATTTATTTGCACTCTTCGCTCACTCAGCATTTACAT
GGCGGTTCGCGTCAACAACGTTATTCCGCCACCAAATGGGATGTGGCTATCGCCATGACT
ATTGCCGGTTTTGTCAATCTGGCGATGATGGCTACAGCTGCGGCGGCGTTCCACTTTTCT
GGTCATACTGGTGTTGCCGATCTTGATGAGGCTTATCTGACGCTGCAACCGCTGTTAAGC
CATGCTGCGGCAACGGTCTTTGGATTAAGCCTGGTTGCTGCCGGACTGTCCTCAACGGTG
GTGGGGACACTGGCGGGGCAGGTGGTGATGCAGGGCTTCATTCGCTTCCATATCCCGCTG
TGGGTGCGTCGTACAGTCACCATGTTGCCATCATTTATTGTCATTCTGATGGGATTAGAT
CCGACACGGATTCTGGTTATGAGTCAGGTACTGTTAAGTTTTGGCATCGCCCTGGCGCTG
GTTCCACTGCTGATTTTCACCAGTGACAGCAAGTTGATGGGCGATCTGGTGAACAGCAAA
CGCGTAAAACAGACAGGCTGGGTGATTGTAGTGCTGGTCGTGGCGCTGAATATCTGGTTG
TTGGTGGGGACGGCGCTGGGATTGTAGTTGAATGAGCGTCGCATCTGGCACTATTGGCGG
ATGCGGCGTAAACGCCTTATCCGCCTTACGCGTTAAAGAGCCGGTTTGTAGGCCTGATAA
GACGCACTAGCGTCGCATCAGGCCTTGTGCTCCATTGGCAAATGTGTTTAATGGCGGTGC
CCATGTCCGCGGCCTTTTCCGCGATGATCGTCACGATCGCGCCAGCCTTCACGATAGCCA
CGCTCATACGCTTTACGCTTATCCCAGCCACGATGATAGCCATTATCATGACGCCACCAG
CGGTTTTTGCGCCACTCATAATTGCGATGCCAGTAATCACGATCTCGCCAGTGACCACCG
TCCCAGTAATTACCGTAATGATCGCGATCGCCAATTTGTAATTTGATTGATGGCAGTAGG
GTGATTTCACCTGCGTTTGCTGCAAGCGGGGTAAATGCCATCAGGGCGGCCGCCAGAAAC
AGTGACCTGAACATTGTTATTCTCCTTCACGATCGAAGCCGTCAGCGGCCTGTTAACGCA
ATATTACGGGGAGGTAAAGCCCCGTATCATCGCCATAACTCTTAAATCATAAAGGAGAGC
ATTTTTTGTTAAACGTTATCGTGGGGTGGCTGTTGCTTCGGACGATTGACCATCATCATC
GGCTTACCTGCTAATAACAGCCATGCCGGAAGCATGACGATACAGAGCAGCGGTAGCAAT
GTGGTATTGGGTACAACGACTGCCGCCATAAAAAGACTTAACCAGCCATCGCGTGTTACC
ACCAGCACGATGCCGAGAATAGCGCAGGAAACGGTTATTGCCGCTGGAACGGCGGGGACG
TGCTCATGCAGCATCAACCCTAATGCCACGCCGACGAACACTGCCGGGAAAATTCGTCCA
CCGCGAAAGCCACTGGCGGCAGCAACGACCAGGGCGGTAAGTTTAATCACCGCCAGTAAA
AAGTAATCGCTGGTGCTGAAAGCCTGATTTGCCACCATCTGCTGCATCTCATCCAGTCCT
TTAAACAGCGAAACTGGTCCACCAATAACCCCCAGAATACCGAGAATAAATCCGCCAATA
CCCAGCACGAGCACCGGATTTTTCATTTGATGCATCATCGCGTGCAACCGTGGTAAGCAC
CATACGGCGCCCATCCCTGCTGCGATGGCAATCGCCGCGACAATTGCACCGCTGAGAATA
TCGGTCATTTCCATCTGTCCGTAATGCGCAATGGGCAGTGAAAAATGGGGATGGAAAAAT
AATCCGGTAGTAAGTGCACCAGCTGCTGCCGCCATTAACGGCGCAAAAAGACGATCCCAT
AGCGGAACTTCACTACTGCCATTTAAGGTTTGCGAAAATATCAACGCCGCCGCAACAGGT
GTACCAAACAGCGCGCCGATGGTTCCGGCAGAGGCTAAAATAGTCCACTCCATTCGGTTG
ACGCGCGGTAACAGACGAGCGCCAATGGCAACCGCAAGGGCGATATTGACGGTCATGATC
GGATGTTCCGGCCCCAGGCTGACGCCGCCAGCAAGACCGAGAATTAATGCTACGATAAGT
CCTGGTAGCGCAGAGGGCGGAACCGGTGCGCCGATCAGCGGTTCACAGGCGGGGTCTGGT
CCGGCATGACCCTGGCTGAAACGGATAACCAACCCCACTGCAATACCCGTTAACGTTAAT
ACACCGATGATCCAGAGAGGTGAATCCTGGGCTATCCCCAGAGTTCCCGGCAGTCGTTGC
CAGAGCAAATTCTGTAATGCCGAGGCGATTTTCATCACCACAATCAGAATAAGACTGGAC
GCAATCCCAATTGCCACGGCGGGGAGCGATAATAACAACATGGTTCTGGCTCGCGGATGG
AGCATGTTCTATTCCTTATGCGGGGTCAGATACTTAGTTTGCCCAGCTTGCAAAAAGGCA
TCGCTGCAATTGGTGCTGAAACGATAAAGTAATTGTGTGACCCAGATCGATATTTACAGG
GAGCCTGCCTTTCCGGCGTTGTTGTTATGCCCCCAGGTATTTACAGTGTGAGAAAGAATT
ATTTTGACTTTAGCGGAGCAGTTGAAGAATGACAAAGTATGCATTAGTCGGTGATGTGGG
CGGCACCAACGCACGTCTTGCTCTGTGTGATATTGCCAGTGGTGAAATCTCTCAGGCTAA
GACCTATTCAGGGCTTGATTACCCCAGCCTCGAAGCGGTCATTCGCGTTTATCTTGAAGA
ACATAAGGTCGAGGTGAAAGACGGCTGTATTGCCATCGCTTGCCCGATTACCGGAGACTG
GGTGGCAATGACCAACCATACCTGGGCGTTCTCAATTGCCGAAATGAAAAAGAATCTCGG
TTTTAGCCATCTGGAAATTATTAACGATTTTACCGCTGTATCGATGGCGATTCCGATGCT
GAAAAAAGAGCATCTGATTCAGTTTGGTGGCGCAGAACCGGTAGAAGGTAAACCTATTGC
GGTTTACGGTGCCGGAACGGGGCTTGGGGTTGCGCATCTGGTCCATGTCGATAAGCGTTG
GGTAAGCTTGCCGGGCGAAGGCGGTCACGTTGATTTTGCGCCGAATAGTGAAGAAGAGGC
CATTATCCTCGAAATATTGCGTGCGGAAATTGGCCATGTTTCGGCGGAACGCGTGCTTTC
TGGCCCTGGGCTGGTGAATTTGTATCGCGCAATTGTGAAAGCTGACAACCGCCTGCCAGA
AAATCTCAAGCCAAAAGATATTACCGAACGCGCGCTGGCTGACAGCTGCACCGATTGCCG
CCGTGCGTTGTCGCTGTTTTGCGTCATTATGGGCCGTTTTGGCGGCAATCTGGCGCTCAA
TCTCGGGACATTTGGGGGCGTGTTTATTGCGGGCGGTATCGTGCCGCGCTTCCTTGAGTT
CTTCAAAGCCTCTGGTTTCCGTGCCGCATTTGAAGATAAAGGGCGCTTTAAAGAATATGT
CCATGATATTCCGGTGTATCTCATCGTCCATGACAATCCGGGTCTTCTCGGTTCCGGTGC
ACATTTACGCCAGACCTTAGGTCACATTCTGTAAATCCTTCCTGTTATATCGGGAGGTAA
CTCTCCCGATAATCTTTTAAATCATACAGTTAATTCAATTTTTCTTTGTGTCCCCTCACA
AGGCCGACCTGCGTCACACTTCCGTACAGCGGGATTAATTCTCCAGTAAATGCATTATTT
GTCTGGTAACGGCGATTTGTTTTGCACGTTCATAATTTCACTCGTCAACTATCACTGAAC
GAGGAATTAACGATGAGTAAGAAACTGATTGCATTATGTGCCTGCCCAATGGGCCTGGCT
CACACTTTTATGGCCGCTCAGGCGCTGGAAGAAGCGGCGGTAGAAGCCGGTTATGAAGTG
AAAATTGAAACCCAGGGCGCGGACGGTATCCAGAATCGCCTGACGGCGCAGGATATCGCC
GAAGCGACCATCATCATCCACTCCGTGGCAGTTACCCCGGAAGATAACGAACGTTTCGAA
TCACGCGACGTTTATGAAATCACTTTGCAGGACGCAATTAAAAACGCTGCGGGCATCATC
AAAGAAATCGAAGAGATGATTGCCTCTGAACAACAGTAATATTCGACAGGGATAATTGTT
ATGGCCATTAAAAAACGCAGTGCAACCGTTGTGCCTGGCGCATCCGGTGCGGCAGCGGCA
GTTAAGAATCCGCAGGCCTCTAAAAGCAGCTTCTGGGGTGAACTCCCGCAGCATGTGATG
TCAGGGATTTCACGCATGGTGCCGACCTTAATTATGGGCGGTGTGATCCTCGCTTTCAGC
CAGCTGATTGCTTATAGCTGGCTTAAAATTACTGCTGATATCGGCATCATGGATGCTCTT
AATAGCGGGAAATTCTCCGGTTTCGACCTCTCCTTACTGAAATTTGCCTGGTTGTCGCAG
TCCTTCGGCGGCGTGTTGTTTGGTTTTGCCATTCCGATGTTTGCTGCTTTTGTGGCGAAC
TCTATCGGTGGCAAACTGGCGTTTCCGGCTGGTTTTATCGGCGGCTTGATGTCTACCCAG
CCGACGCAACTGCTGAACTTCGATCCCAGCACTATGCAATGGGCGACCTCTTCGCCGGTG
CCGTCCACCTTCATTGGTGCGCTGATTATTTCTATCGTTGCCGGTTACCTTGTGAAATGG
ATGAACCAGAAAATCCAGTTACCGGATTTCCTGTTAGCGTTCAAAACCACATTTTTGCTC
CCGATTCTTTCCGCCATTTTTGTCATGCTGGCGATGTACTACGTGATCACCCCCTTTGGC
GGCTGGATCAACGGTGGTATCCGTACCGTGCTGACTGCCGCAGGTGAGAAGGGCGCGCTA
ATGTATGCGATGGGGATCGCCGCGGCGACAGCAATCGACCTTGGTGGCCCGATCAACAAA
GCCGCAGGTTTCGTTGCCTTCAGCTTTACCACTGACCACGTATTACCGGTCACCGCACGT
TCTATCGCAATCGTTATTCCGCCGATTGGTCTGGGGCTGGCGACCATTATCGACCGTCGT
TTAACCGGCAAACGCCTGTTCAACGCTCAACTTTATCCGCAGGGTAAGACCGCCATGTTC
CTGGCGTTTATGGGGATTAGTGAGGGTGCGATTCCGTTTGCGCTGGAAAGCCCCATCACC
GCCATTCCGTCGTATATGGTCGGCGCGATTGTCGGCTCAACCGCCGCTGTCTGGCTGGGC
GCAGTGCAATGGTTCCCGGAATCCGCTATCTGGGCATGGCCGCTGGTCACTAACCTCGGC
GTCTACATGGCGGGGATCGCGCTGGGGGCAGTCATTACTGCGCTGATGGTGGTGTTCCTG
CGTCTGATGATGTTCCGTAAAGGCAAATTGTTAATCGATAGCCTGTAAGAAGGAAAATCC
AGATGACATTACTCGCTTCGCTGCGTGACTGGCTTAAGGCGCAACAACTGGATGCGGTGC
TTCTCTCCTCACGGCAGAACAAACAGCCGCATCTGGGGATCTCCACCGGATCAGGCTATG
TGCTGATTAGCCGTGAAAGTGCGCACATTCTGGTGGACTCGCGCTATTACGCGGATGTAG
AAGCCCGCACGCAAGGTTACCAGCTGCATTTGCTTGACGCGACGCACACGCTTACAACCA
TCGCCAGGCAAATCATTGCCGATGAGCAGTTGCAAACGCTCGGTTTTGAAGGCCAGCAGG
TGAGTTGGGAAACCGCGCACCGCTGGCAGTCTGAACTCAATGCGAAACTGGTTAGCGCCA
CGCCGGATGTGCTGCGGCAAATCAAAACGCCAGAGGAGGTGGAGAAAATCCGCCTTGCCT
GTGGGATTGCCGATCGCGGTGCAGAGCATATTCGCCGCTTTATTCAGGCGGGGATGAGCG
AGCGCGAGATAGCCGCTGAACTGGAGTGGTTTATGCGTCAGCCAGGCGCGGAAAAAGCCT
CTTTTGACACCATTGTCGCCAGTGGCTGGCGTGGGGCGCTGCCGCACGGCAAAGCCAGCG
ACAAGATTGTTGCAGCGGGCGAGTTTGTCACTCTCGATTTCGGTGCGCTGTATCAGGGCT
ACTGCTCTGATATGACGCGCACCTTGCTGGTGAATGGCGAAGGGGTGAGCGCCGAATCTC
ATCCGCTGTTTAACGTCTATCAGATTGTTTTGCAGGCACAGCTCGCAGCAATCTCTGCAA
TTCGCCCCGGCGTGCGCTGCCAGCAGGTTGACGACGCCGCGCGCCGGGTCATTACAGAAG
CCGGTTATGGCGACTATTTCGGTCATAACACCGGTCATGCTATCGGCATTGAAGTACACG
AAGATCCGCGCTTTTCACCGCGGGACACCACGACGCTACAGCCAGGCATGTTACTGACCG
TGGAGCCGGGGATTTATTTGCCAGGGCAAGGGGGCGTGCGCATCGAGGATGTTGTGCTGG
TCACCCCGCAAGGCGCAGAAGTGCTCTACGCCATGCCGAAAACAGTGTTGCTCACGGGAG
AGGCATAATGGATTTATCGCTATTGAAAGCGTTGAGCGAGGCAGATGCGATCGCCTCCTC
GGAACAGGAAGTGCGGCAGATCCTGCTGGAAGAAGCGGATCGCCTGCAAAAAGAAGTGCG
ATTTGATGGGCTGGGATCGGTGCTGATCCGCCTCAATGAATCGACAGGTCCGAAAGCGAT
GATCTGTGCGCATATGGACGAAGTTGGATTTATGGTGCGCAGTATCTCCCGCGAAGGCGC
AATTGATGTGCTGCCGGTTGGCAACGTGCGCATGGCTGCCCGCCAGCTGCAGCCGGTGCG
CATCACCACCCGTGAAGAGTGCAAAATTCCAGGCCTGCTTGACGGCGACCGGCAGGGGAA
TGACGTCAGCGCCATGCGCGTGGATATTGGCGCGCGCTCGTATGACGAAGTGATGCAGGC
GGGAATTCGTCCAGGCGATCGCGTCACGTTCGATACCACTTTTCAGGTTCTCCCCCACCA
GCGAGTGATGGGGAAAGCCTTTGATGACCGCCTTGGTTGCTATCTGCTGGTGACGTTACT
ATGTGAGCTGCACGACGCCGAACTGCCTGCGGAAGTGTGGCTGGTGGCAAGTTCCAGCGA
AGAGGTGGGATTACGCGGCGGGCAAACTGCCACCCGCGCGGTGTCGCCGGACGTCGCCAT
TGTGCTTGATACCGCCTGCTGGGCGAAAAACTTTGATTATGGCGCGGCTAACCATCGCCA
GATTGGTAACGGCCCGATGCTGGTGTTAAGCGACAAGTCGCTGATTGCGCCGCCAAAACT
TACCGCCTGGGTCGAAACCGTGGCGGCAGAAATTGGCGTGCCGTTGCAGGCAGATATGTT
CAGCAACGGCGGCACGGACGGCGGGGCGGTGCACTTAACCGGCACCGGCGTGCCCACAGT
GGTGATGGGGCCAGCAACCCGCCATGGACATTGCGCCGCATCGATTGCCGATTGCCGCGA
CATTTTGCAGATGCAGCAACTTTTATCTGCCCTGATTCAACGTCTTACGCGTGAGACGGT
TGTTCAACTGACGGATTTCAGATGATCTCCTGATTAACCCGGAGCGGTTATGCTAACGAT
TCAATTTCTCTGTCCTTTGCCTAACGGTCTTCATGCCCGTCCGGCGTGGGAACTTAAAGA
ACAGTGCAGCCAGTGGCAAAGCGAAATCACCTTCATCAACCATCGCCAGAACGCAAAGGC
CGATGCCAAAAGCTCGCTGGCGCTGATTGGCACCGGCACCTTATTTAATGACAGTTGCAG
CCTGAACATTAGCGGCAGCGATGAAGAGCAGGCGCGGCGCGTGCTGGAAGAGTACATCCA
GGTGTGCTTTATTGACAGCGACAGCGTTCAGCCAACGCAGGCAGAACTGACGGCGCATCC
GCTGCCGCGTTCATTAAGCCGCCTTAACCCGGATTTACTGTACGGCAATGTGCTGGCAAG
CGGCGTCGGCGTGGGTACGCTGACCCTGTTACAAAGCGACAGCCTCGACAGTTATCGGGC
AATCCCCGCCAGTGCGCAAGACTCCACCCGGCTGGAGCACAGCCTGGCAACGCTTGCCGA
GCAACTGAACCAGCAATTGCGTGAGCGTGACGGCGAAAGCAAAACTATCCTCAGCGCCCA
TTTGTCGCTGATTCAGGATGATGAGTTCGCGGGCAATATCCGTCGCCTGATGACAGAACA
GCATCAGGGGCTGGGGGCGGCGATCATCAGCAATATGGAGCAGGTTTGCGCCAAACTATC
TGCTTCTGCCAGCGATTATCTGCGCGAGCGGGTTAGCGACATTCGCGATATCAGCGAACA
GTTGCTGCATATCACCTGGCCGGAACTGAAGCCGCGCAACAATCTGGTGCTTGAAAAACC
GACCATTCTGGTGGCTGAAGATTTAACCCCAAGCCAGTTTTTGAGCCTTGATTTGAAAAA
TCTTGCGGGCATGATTCTGGAGAAAACCGGGCGCACCTCGCATACCCTGATTCTGGCCCG
CGCCTCGGCGATCCCGGTACTGAGCGGCCTGTCGCTGGATGCGATTGCCCGTTATGCCGG
GCAACCTGCAGTGCTTGACGCCCAGTGCGGCGTGCTGGCGATTAACCCGAATGACGCGGT
GAGCGGTTATTATCAGGTCGCGCAGACGCTGGCGGATAAACGCCAAAAACAACAGGCGCA
GGCTGCCGCGCAGCTGGCTTATTCCCGTGATAACAAGCGTATTGATATCGCGGCGAATAT
TGGCACCGCTCTGGAAGCGCCTGGCGCGTTTGCCAACGGCGCGGAAGGCGTCGGGCTGTT
CCGTACCGAAATGCTCTATATGGATCGCGACAGCGCGCCGGACGAGCAGGAGCAATTTGA
AGCCTACCAGCAGGTGCTACTGGCAGCGGGCGATAAGCCGATTATCTTCCGCACAATGGA
CATCGGAGGCGATAAAAGCATTCCTTATCTGAATATTCCCCAGGAAGAGAACCCGTTCCT
CGGCTATCGCGCGGTACGTATTTACCCGGAATTTGCTGGCCTGTTCCGCACTCAACTGCG
GGCCATTTTGCGCGCCGCCAGTTTCGGCAACGCCCAGTTGATGATCCCGATGGTCCACAG
CCTCGATCAGATCTTATGGGTGAAGGGCGAGATCCAAAAAGCGATCGTTGAGCTTAAGCG
CGATGGCCTGCGTCATGCAGAGACGATTACGCTGGGTATCATGGTGGAAGTGCCGTCGGT
GTGCTACATCATCGATCACTTCTGCGATGAGGTCGATTTCTTCAGTATCGGCTCCAACGA
TATGACCCAGTATCTTTATGCGGTCGATCGTAATAACCCGCGCGTATCGCCGCTATATAA
CCCGATTACGCCATCGTTCCTGCGCATGTTGCAGCAAATAGTTACCACTGCGCATCAGCG
GGGCAAATGGGTAGGCATTTGCGGTGAACTGGGAGGCGAAAGTCGTTACCTGCCGCTACT
GCTTGGGCTGGGCCTGGATGAGCTGAGTATGAGTAGCCCGCGCATTCCGGCGGTGAAAAG
CCAGCTTCGTCAACTGGATAGCGAGGCGTGTCGGGAACTGGCACGTCAGGCGTGTGAATG
TCGCAGCGCGCAGGAAATTGAAGCGTTACTCACCGCCTTTACGCCGGAAGAAGACGTTCG
CCCGCTGCTGGCGCTGGAGAATATCTTCGTTGATCAGGCCTTTAGCAATAAAGAGCAGGC
GATCCAGTTCCTGTGCGGTAACCTCGGCGTTAACGGGCGCACTGAACATCCGTTCGAGCT
GGAAGAGGATGTCTGGCAGCGGGAAGAGATTGTCACTACTGGCGTTGGTTTTGGCGTGGC
GATCCCGCACACCAAATCGCAGTGGATCCGTCATTCCAGTATCAGCATTGCCCGGCTGGT
GAAACCGGTTGACTGGCAGTCAGAAATGGGCGAAGTCGAACTGGTGATCATGCTGACGCT
GGGCGCTAACGAAGGGATGAATCATGTGAAAGTCTTCTCGCAGCTGGCGCGTAAACTGGT
GAATAAAAACTTCCGCCAGTCGTTGTTTGCCGCGCAAGATGCACAAAGTATCCTGACGCT
GCTGGAAACAGAATTAACCTTCTGACGTTAGCCCTGAAAACGGGCGCTGTACTCTCCCGG
CGTCAGACCAAACTGACGCCGGAAAACGCGACAAAAATAGTCGCTATCCGGAAAACCGCA
ACGCTGTGCCACTTCATGAATTGACAGATGATATTTCTGCAAAATCATCCTCGCCTTCGC
CATTCGCACCCAACGCACATACTCGATAAAACGCATCGTTCCATGCTGAGCAAACAGTTT
TGACAGATGATTGGGCGTGATATTAAAAAACTGCGCCACGCTCTCGCGGGTGAGCGGCTG
GGCATAATTATCCTGAACCCAGTTACAAATGCTGTGATAGAGAAAATCGCCGCGCGGCTG
CGAATTGCCCGGCGGCATATTCACCACGTTACGGCAAAGATGCAGCAAACTTAACACCAG
CGGCTGAATGATATTTTGCTCCAGCGGCGAACGGCTAAGATGGGTGAGGGCGGTAAGCAT
CGCTTCACCTTCACCGCGTTGCAGGCTGGGAAGCTGGATCTGGCGAGCAGGATGCAACAA
CGACGTGGTGCGGCTATCGTAAAACGATAACCCAAGCCAGGTCGGAGCGAACACCAGGCT
TAACAGCATCACCGGTTTGTTGTTGACCGGTAAATTAGCCGCGCGCGCCGGAATAAACAG
CATTTCTCCTTCCACCAAACGTTGCTGCTTTGCTTCCAGCAGATTGCCGTATTCGCCGCG
CAGCACGATATCCAGACGGGGAAAATCAATACATAAACTGCCCACCGGCAACGAGGCAGG
CTGGCTGGCAAAACAGACGCGCCCCAGTAGTTGCGGGTTAAGCACCAGGCCGCTGAACAG
ATCGGCGAAAAATTGTTGATCGGCGGGCAAGCCTGGTGCTTTCATGAAAGTTCCCGATTA
AAGATGCATTAACTGGCGAAATTCTTTTACTTTGCTGCGGCTGACTGGCACTTCAAAATC
CAGATCTTTCAGCCGCAGAATATAGGTGTTATTAAACCACGGTTCGATTTCGCGGATTTT
GTTCAGATTGACACAAAATGAGCGATGGCAGCGGAAAAAATGCGACGGCGGCAGTTTGCT
GCAAAATTCGGTAATGTTCATCGGCATTACGTAGGATTCACGCCGCGTATAGACAAAGGT
CATTTTCTCGTGCGCTTCGGCGTAATAGATATCGTTAATTGGCGTGACGATTATTCGCTC
ATCTTTCACCAGATTAATGGTGTCATTCTCACGCGTTACCGTCGCGGCAGGCGTGCTGCT
GGTCTGCTGTTGCTGCCAGGCCGCTTCCAGTTTTTGCAGCATCCCGGTAATGCGAGACTC
CTGATACGGTTTGAGAATGTAGTCAAACGCCTCAAGTTCAAACGCTTCTACCGCATGTTC
TTTCCACGCGGTGATGAACACAATAAACGGTTTATGGGCGAACTGGCTGATGTTTTGCGC
CAGCAACACACCATCCAGCGACGGAATATTGATATCCAGAAAAATGGCGTCGACGCGGTT
ATGCTGCAAAAACTTCAACACGTCCAGACCGTCGTCAAAGGTGCCGACAATCTCCATCTG
GCTGTGCTCTTTAATTAGCCAGCTCAGTTCCTGTTGTGCCAGGAATTCGTCTTCAACAAT
GATGACTTTCACAATATCACTCCGGCTCAAAGCAATAACGTAGCCTGTGAGGCGACTGGG
GTGCGTTGGTTAGGAATGTAAAACGCAATTTCCGTTCCTGGTTCCAGGCGGCGGATATGC
AGCCCCTCGCCATACAATAACTTCACGCGATGATGAACATTCAGCAGGCCAATTTTATTG
CCCGGCATTTCATTCGCTTCGACCCGCTCAATCACCTTTGGATCGATGCCGTGCCCGGTA
TCCCGCACCGCAATGCGTACCCGATTGCCGCACTCTGCAACGCTGATGGTGACAACGCCT
TTACCTTTGCAAGGCTGGATACCGTGGACAATGGCATTCTCCACCAACGGCTGGATCAGC
AGGCTGGGAATGCAGCAATTCACCTCTTCATCAATATCATAGATAACCGTCAGCTTGTCG
CCAAAGCGGGCCTGCTCAATGGCAATATAGTCTTTAATTTGATACAGCTCTTTTTTGATA
TCGATTTGCTCATCGTCTTTTAATTCAATGTTATAGCGCAGATAACGCGACAGATTAAAG
ATCAGCTGGCGAGCGGTATCCGGATTCAGACGGATCGACGATGAAATAGCGTTCAAAGCG
TTAAACAGGAAATGGGGATTAATTTTGCTTTGCAGGGCGCGAAGCTCTGCCTTATTTGCC
ATTTCACGTAGCTGCTCGGCGCGTGAAACCTCCAGTTGCGTGGAGATGATTTGCGACAGA
CCAACCGCCATTTCCTGTAATGACGAGGTTATCTGATGCGCGTGGCAGTAGTAAATTTTC
AGCGTTCCGGTCACAACGCCTTTCTCCCACAATGGGATCACCAGCATGGAATGAATCTCT
GGTGTGCGGTGGGCTTCATCATTGTTTTTAATGATGATTTTTCCGTAATTCATCGCCTGA
CGGGTAGTCGGGCTAATGAAGTCATCGCCATTCTGATAGTTATGTTCACCCACGCCAACA
TAGGCCAGCACATGATCGGTATTGGTAATCGCCACCGCATCGGCGTGAATGTCATCGCGA
ATAATTTCACAAACTTTGCGTAATGACTCGCTATTGACATGGCGAAACAGAGGTAGCGTT
TTGTTGGCGATATCCAGCGCCAACTTGGCCTGCCGCGCGGCGCTGGCCTCTTTTTCGCCC
TCAACGCTTTGCACCAGAAGCACAATAAAGCCGATACAGACGCTGCCGAGGATCATTGGA
ATCCCGATTTTAGAGACGATATCGATCCCCAACGCGGTAGTTGGTGCCCAGACAATCACC
AGAATCATGGTCAACGTTTCACACAACATGCCGCCGAGAATACCGACGCGCCAGCGCTGT
GCTTTGGGGATTTTCAGGTTGATCCAGCCCGATATACAACCAGCCAGAATGCTGGTGATA
AAGCAGGGGATCGCCGTCACGCCGCCGATATCAATTAAATAACGATGAATACCCGCAATC
ACGCCGGTAATGATGCCCACCCACGGGCCAAACAGAATCCCGCCGGACATCACCGCGATA
ATACGTACGTTCACCAGCGAGCCTTCTACGGGAACGCCGGACCAGGTGCTGAACAGGGCG
AACAGCGAGAAAATGGCGGTAACGGCGAGCAACTCTTTCGGTGAGTGTGCCGACTTGTGC
AACAGTTCGCGAAACAGGCGGATACGGATGAGAAAGAACAGGCAGATAAGCATTAACGCT
GCCCGATCGAAGACCGCCAGCAGCATGTTGAATATTTCGTGCACGGGTGACTCTGAATAA
GGATTAAACCTCTATGATAGGTAACCTGAAGGCTGATGACCAGCAGGCCGTTTTTGAGGA
AAAACCACAATTTTAAAAGGGGATTGATAGATAAATGGTGTATTAGCAATGCATCTCTTG
ATAATGCACTTCTGGTTAGTAAATTTATTGAAATTATTATGTTAATAAAATGAGTGGTAA
TTTTCTTGTTAGCGCAGATAAATTTCCTGTTTTTAAAGCAGAGTTCCTCATTTAACGTCA
TTAATAAAAATGTTCTAAAACGCTGGACAGACAGAAATTAATCAGGCTATTTTCAAAACA
GCCACCATCGTGGCAGCGTCGCTCGGACGGTCCGGGCGCTAACGTTAATCTGAGGAAATT
ATGGCTGACACTCGCCCTGAACGTCGCTTTACGCGCATTGATCGTCTCCCGCCCTATGTT
TTTAACATTACCGCTGAACTGAAAATGGCTGCGCGTCGGCGCGGCGAAGATATTATCGAT
TTCAGTATGGGTAACCCGGACGGTGCGACTCCGCCGCATATCGTCGAAAAATTATGTACT
GTGGCCCAGCGCCCGGACACGCATGGTTACTCCACTTCACGCGGTATTCCGCGGCTACGT
CGCGCCATTTCCCGCTGGTATCAGGATCGCTACGACGTTGAAATCGACCCGGAATCAGAA
GCCATCGTCACTATTGGTTCGAAAGAGGGCCTGGCGCATCTGATGCTGGCGACACTGGAT
CACGGTGACACAGTGCTGGTGCCGAATCCAAGTTACCCCATTCATATTTACGGCGCGGTG
ATTGCCGGGGCTCAGGTACGCTCAGTGCCGCTGGTGGAAGGTGTCGATTTCTTCAACGAA
CTGGAGCGCGCCATTCGTGAAAGTTATCCGAAACCGAAGATGATGATCCTCGGCTTCCCG
TCGAACCCAACCGCGCAATGCGTGGAACTGGAGTTCTTCGAAAAGGTTGTGGCGCTGGCG
AAACGCTACGATGTGCTGGTGGTCCATGACTTGGCCTATGCCGATATCGTCTACGATGGC
TGGAAAGCGCCGTCAATCATGCAGGTGCCGGGTGCACGCGATGTGGCGGTCGAGTTCTTT
ACGCTGTCGAAAAGCTACAACATGGCGGGCTGGCGTATCGGCTTTATGGTTGGCAACAAA
ACGCTGGTCAGCGCCCTGGCACGTATTAAAAGCTATCACGATTACGGCACCTTTACGCCG
TTGCAGGTGGCGGCGATTGCGGCACTCGAGGGCGATCAACAGTGCGTGCGCGACATTGCC
GAACAGTACAAACGCCGCCGTGATGTATTGGTTAAAGGGCTGCATGAAGCGGGCTGGATG
GTCGAAATGCCGAAGGCTTCGATGTATGTCTGGGCGAAAATCCCTGAACCTTACGCTGCC
ATGGGCTCGCTGGAGTTTGCCAAGAAATTACTTAACGAAGCGAAGGTTTGTGTCTCGCCG
GGGATCGGCTTTGGCGACTATGGTGATACGCATGTGCGCTTTGCACTGATTGAAAACCGC
GACCGTATTCGTCAGGCGATTCGTGGGATTAAAGCGATGTTCCGTGCCGACGGTTTACTA
CCCGCCAGCAGCAAACATATTCACGAAAACGCGGAATAAACACCGACCTCAGAAATGCAA
ACAGGAGCCTGATGGCTCCTGTTTTTCATTGCACAGTTTGCTTTTAGATCATCAGGGCAA
AAGTACCGGCCCAAACGATGACCATAAAAGAAATGCCCATAAAGAAATATTTCACTTTAC
ATCTCTCCGCGTAATTGCTGTTACGCCTGAATGACTTCATTACACCTGATACAGTGAGTT
GACACCGGGCAAAACGACCTTAAAAGTCCTGTATTTTACCGTGGGCATCACCCCAGAATT
CTGAGCTAAACTGCTCGAGACGGCGCTAATGTACGCCTAAAACTGAAACGAGACAAGAGG
CATTTTCTTATTTACTTTTAGTAACTTACAGGTGTCTCATATCGGCGACAGTTTAATTTC
TGACGGTAATAATTAGATATTCAGCGAAGGAAAAAACCTTAAGAAAAAAGCCATAAAAAC
CATGAGGTTATTATGGCTTATGTGAGGAGGTAAAGAGTCAGAGCAGTTTGTTAAATGTAT
AACGACGATTCTCCCACCGGGCGCGTTTTAAAGCGACGGTGGATCCAGAGGTACTGCTCC
GGTGCGCGCATGATCTCTTTCTCGATAATCTTGTTCATATAGGCAGCGGCTTGATTTTCA
TCTGTCGGGTAGCCTTCCATCTCTGGGGTGATGAACAAACGATATCCGCTGTAATCCGCT
TTTCTTACCATCGTTACGGTCAACATGGCTGCGCCAGAGAGACGGGAGAGAACATAGGTG
CCATTGGTTGTGGCGACATTTTCTACCGCAAAGAACGGCGCGAAGGAGCTGCCTTTACGA
CCATAATCCTGATCGGGAGCAAACCATACCGCTTCACCTTTCTTCAGTGCACTGACAATG
CCGCGCAGATTATTTCTGCCGATCATCGCTTTGTTAGAGCGCATGCGACCACGGGTCTGC
ACCCATTCCATCAGCTGATTATTATGTGGACGATAGGTAGCCATCATTGGCTGACAAAGT
CCCATCACGCGGCCGCCCAGTTCCAGCGACATAAAATGGACGCCGACAACCATTACGCCG
CGATTTTGCATTTGTGCGCGTTTAAGGTTATCCAGCCCTTCAACATCAAACCATTTACGT
ACGCGACTGTCGGGCCAGAACCACGCCATGCCGGTTTCTACCAGCGCCATGCCGAGTGAA
CGAAAGTTTTCGGCAATCATCTTCTCGCGTTCTTCCGCAGAATGCTGCGGGAAGCAAAGT
TCCAGGTTTTTACGGGCGATAGATTCACGCCGTTTCAGGAATGGTCGCGCCATTGCGCCA
ATACGCGTGCCGAGAAAGCAGAGAACAGGATAAGGAAGCTGTACCCAAAGCCAGAGTACA
CCAAGCCCAAACCATGTGAGCCAGTAGCGAGGATGCAGAAACTCGCGGGAAAATTTGCAT
TGTGGAAACATAGTTACCTTCTGTAGATACGAATTGTTGTATCGCAGAAGATTCCATGTC
GACAGCGGTACACTCAATTGGTTGGGCCATCATGTACGACAATGGTTCCTGTAAAGAGTG
TAAAGACTAGTCAGGACATAACCACGAGGAGCATGAATGCGGTGGCTCTACTTTATCACT
GGCTGACTGCTTTCAGCTACTGATTATTAATCGTGCAAAGTAAAAAATTTTCCGCATGCA
ATAGTGTTGCATTTAACATGCTGTTTTCATTGATGCTTAGCAAAAATTGCCAGAGGGTAA
GGATTGTCTTACTATTAAAGTGACTGAAGTTACAGGTTTTTTAGCGCGGCAGGAGGTTGA
GCTATGATTTATTTATGGATGTTTCTCGCCCTGTGTATTGTCTGCGTAAGCGGATACATC
GGTCAGGTACTGAACGTGGTATCGGCGGTCTCTTCTTTCTTCGGCATGGTGATCCTCGCT
GCACTCATTTATTACTTCACCATGTGGTTAACTGGCGGTAATGAACTGGTGACGGGGATA
TTTATGTTTCTTGCCCCGGCTTGTGGCTTGATGATTCGCTTTATGGTGGGGTATGGCAGG
CGATAGTGGGTCAGGATGGCTCATTTGGGCAGGTGTTCACATCAGCATCAGACATGATTG
TTCACCTGCCAGGTGACAGACGCTATCGCACAGGATGAATAAGATAATTCGCCTTTGTCG
GAAAAGGGGGCGTGGTTTCTTCTGTGAGGTTTAATGGTGGCGCATCTTCTCTCATCTTAA
ACAAAATTGCCTGTGATGGCTGAATTTTTGTAGAGTGAGTTGTCGTCATCGCTGATGTTT
TTTCCGTCTCTTTATAGCTCCTCTCACTTCCACCACCAGAAATGGAAAATGCAAAAACAT
TGCATGCCATAATAGAGACCAATAAAAATAAGCTAAAAAGTATTAAGTTTACTTTCATAG
AAAGTTATCCTGAAAATGGTTCACTGAGAATGTACGATGTTATGGCTGTATTTACATATA
ATTAATCAATATTTACATCGATATAATAAATGACATCTCTTTGTGGTACATAAGAATAGT
TCTCTGTGACAGGAAGCATATTCCTACAATTGTAAGACTAAAATACTTCTTGCGATAATA
ACTACAACTGTAAGATAACCCTTTCAAAATGACCGTTGCTCTCTGATTTCTCATTTCATG
CTCACCCAATATGATGGCGGCGTTTTCTAAAACTGTTAAAGAATGAGGTAAGTATGAAAC
GTTTAATTATGGCCACGATGGTCACAGCAATTCTGGCATCTTCAACTGTATGGGCTGCTG
ATAATGCTCCGGTAGCGGCACAACAGCAAACTCAGCAAGTTCAGCAAACCCAGAAAACGG
CAGCGGCAGCAGAGCGTATCTCTGAACAAGGTTTATATGCGATGCGTGACGTGCAGGTAG
CGCGCCTGGCTCTGTTTCATGGCGATCCGGAAAAGGCAAAAGAACTGACCAATGAAGCTT
CCGCTTTGTTGTCAGATGACAGTACCGAATGGGCAAAGTTCGCTAAGCCAGGTAAAAAGA
CCAATCTCAATGATGACCAATATATTGTCATTAATGCATCTGTCGGAATTTCTGAGAGTT
ATGTAGCAACACCCGAAAAAGAAGCCGCGATAAAAATTGCCAATGAAAAAATGGCGAAAG
GGGATAAAAAGGGCGCAATGGAAGAGCTTCGCCTGGCCGGTGTTGGCGTAATGGAAAACC
AATATCTGATGCCGCTTAAACAGACTCGTAATGCACTTGCTGATGCGCAGAAACTACTTG
ATAAAAAGCAATACTACGAGGCAAACCTGGCGCTTAAAGGTGCGGAAGATGGAATCATCG
TCGATAGCGAAGCACTGTTTGTGAACTAATGCTGACAGGCAGTATATTGAGGTAAAGGAT
TTAACTCCCTCCAGCCGACAATTTTTTATGACCACAATACGACAGGTTGTGGTCATAAAA
TTATTTGGCGCTCGCGGTTCTATAAACTCGCATTTTATATTCCTCAAAGTAAACCGCAAT
AATCCCGTGTCATCACAAATCATTTAATATGTTATATTTTATGGTACGCTTTAAAAAGCG
TAATCATACCCTTACTTGTAAATCACCGGCGCTTCTTACAGTTGTAAGAATAACATCACA
AATGTCGCGACTCTCTCTGATTACCACGAACCAATATTTATCATATTCTTCTTTTCGTCC
TCACTACTTACCATGCAGAAAGGAATTGGAAGTAGCGATGAAATGATTTTCAGTACTTGA
TACAGGAATGTGAAAATATCGAGTGCAGCTACGACGATATTTTGCGGATTATTTATAGAG
GCGTTATGCCTTAAATAAACGCTAAATTAACACATATTTAATTAACTAATAGGTATTGCT
ATGTCAACTCCACTTCAAGGAATTAAAGTTCTCGATTTCACCGGTGTGCAATCTGGCCCA
TCTTGTACTCAAATGCTGGCCTGGTTTGGCGCTGACGTCATTAAAATTGAACGCCCCGGC
GTTGGTGACGTAACGCGTCACCAGCTGCGAGATATTCCTGATATCGATGCGCTTTACTTC
ACCATGCTTAACAGTAACAAACGTTCTATTGAATTAAATACCAAAACAGCGGAAGGCAAA
GAGGTAATGGAAAAGCTGATCCGCGAAGCTGATATCTTAGTCGAGAACTTTCATCCAGGG
GCCATTGATCATATGGGCTTCACTTGGGAGCATATTCAAGAAATCAATCCACGTCTGATT
TTTGGTTCGATCAAAGGGTTTGATGAGTGTTCGCCTTATGTGAATGTAAAAGCCTATGAA
AACGTTGCTCAGGCAGCGGGTGGCGCGGCATCTACTACGGGTTTTTGGGACGGTCCGCCG
CTGGTAAGCGCTGCAGCGTTGGGTGACAGCAACACCGGAATGCATTTACTGATCGGTTTA
CTTGCTGCTTTGCTGCATCGAGAAAAAACGGGGCGTGGGCAACGAGTCACCATGTCAATG
CAGGATGCCGTATTGAACCTTTGCCGCGTGAAATTACGCGACCAGCAGCGTCTCGATAAA
TTGGGTTATCTGGAAGAATACCCGCAGTATCCGAATGGCACATTTGGTGATGCAGTTCCC
CGCGGTGGTAATGCGGGTGGTGGCGGTCAGCCTGGCTGGATCCTGAAATGTAAAGGCTGG
GAAACAGATCCTAACGCCTATATTTATTTCACTATTCAGGAGCAAAACTGGGAAAACACC
TGTAAAGCCATCGGCAAACCAGATTGGATTACCGATCCGGCATACAGTACAGCCCATGCC
CGACAGCCACATATTTTCGATATTTTTGCTGAAATCGAAAAATACACTGTCACTATTGAT
AAACATGAAGCGGTGGCCTATTTGACTCAGTTTGATATTCCTTGTGCACCGGTTTTAAGT
ATGAAAGAAATTTCACTTGATCCCTCTTTACGCCAAAGTGGCAGTGTTGTCGAAGTGGAA
CAACCGTTGCGTGGAAAATATCTGACAGTTGGTTGTCCAATGAAATTCTCTGCCTTTACG
CCAGATATTAAAGCTGCGCCGCTATTAGGTGAACATACCGCTGCTGTATTGCAGGAGCTG
GGTTATAGCGACGATGAAATTGCTGCAATGAAGCAAAACCACGCCATCTGATATTAACGG
GGGCTTCTGGCTCCCAATTTATAAAAATTTCGAGGTTATTAATCATGTCAGATCAACTTC
AAATGACAGATGGTATGCATATCATCGTTGAAGCATTAAAACAGAATAATATTGACACTA
TTTATGGTGTTGTAGGTATTCCTGTGACGGATATGGCGCGCCATGCCCAGGCGGAAGGCA
TTCGTTATATTGGTTTTCGTCATGAGCAGTCGGCAGGCTATGCCGCTGCGGCAAGCGGTT
TTCTTACCCAAAAACCAGGGATCTGCCTGACAGTGTCTGCGCCAGGATTCCTCAATGGTT
TGACCGCATTGGCCAACGCAACGGTAAATGGTTTTCCGATGATCATGATTAGCGGCTCCA
GCGACCGCGCGATCGTCGACCTACAGCAAGGTGATTATGAAGAGCTGGACCAAATGAATG
CGGCAAAACCGTATGCCAAAGCAGCATTTCGCGTTAATCAGCCGCAGGATCTTGGCATTG
CATTGGCACGCGCTATCCGGGTCTCGATATCGGGTCGCCCTGGCGGAGTTTATCTTGATT
TGCCAGCAAATGTCCTGGCCGCGACGATGGAAAAAGACGAAGCGTTAACCACGATTGTAA
AAGTTGAAAATCCGTCGCCAGCATTATTGCCATGCCCGAAGTCAGTCGCTAGCGCAATTT
CGCTTTTAGCAAAAGCTGAACGACCATTAGTTATCCTTGGCAAAGGCGCGGCGTATTCAC
AAGCTGATGAACAGCTTCGTGAATTTATTGAAAGTGCCCAGATTCCATTCCTGCCAATGT
CTATGGCGAAAGGGATCCTCGAAGATACGCATCCACTTTCTGCGGCAGCTGCGCGTTCGT
TTGCCCTGGCAAATGCTGACGTTGTCATGCTTGTTGGTGCACGACTGAATTGGTTACTGG
CACACGGTAAAAAAGGATGGGCGGCAGATACACAGTTTATTCAACTGGATATTGAACCGC
AGGAAATTGACAGCAACCGCCCCATTGCTGTGCCAGTCGTTGGTGATATTGCATCCAGTA
TGCAAGGTATGCTGGCAGAACTGAAACAAAACACATTTACGACTCCACTGGTATGGCGCG
ATATTTTAAATATCCACAAGCAGCAAAATGCACAAAAAATGCATGAAAAATTAAGTACAG
ATACCCAACCATTAAATTACTTTAATGCATTAAGTGCTGTGCGCGATGTATTGCGCGAGA
ACCAGGATATTTATTTAGTTAATGAAGGGGCAAATACCCTGGATAATGCACGAAATATTA
TTGATATGTATAAACCACGTCGTCGTCTGGATTGTGGTACCTGGGGTGTCATGGGCATCG
GTATGGGCTATGCCATCGGTGCTAGCGTGACTTCTGGTTCTCCGGTTGTCGCCATTGAAG
GTGATAGTGCTTTTGGTTTCAGTGGGATGGAAATTGAAACGATTTGTCGATATAACCTGC
CGGTAACGATCGTTATTTTTAATAATGGCGGCATCTACAGAGGAGACGGTGTTGATCTCA
GTGGCGCTGGTGCACCATCACCAACAGATCTGTTGCACCATGCAAGGTATGACAAATTAA
TGGATGCGTTTCGTGGCGTTGGCTATAACGTCACCACGACAGATGAACTTCGTCATGCTT
TAACCACCGGTATTCAGTCGCGCAAACCGACCATTATTAATATGGTCATCGACCCTGCAG
CAGGAACTGAAAGTGGCCATATTACCAAACTGAACCCAAAACAAGTCGCTGGTAATTAAA
TACTGACATCGTCTCCTCTTGCCAACTCATTATGCGATGGTGAGGGGACCCTTATCGGAA
ATACTATTATGCTAACATTTTTTATTGGCGATTTATTGCCTATTATCGTAATCATGCTGT
TGGGTTATTTTAGCGGCAGACGAGAAACATTTTCAGAAGATCAAGCTCGGGCATTTAATA
AACTGGTATTAAACTACGCGCTTCCTGCGGCTCTATTTGTATCTATTACCCGGGCAAACA
GGGAAATGATTTTTGCGGACACTCGTCTGACCCTTGTATCACTTGTGGTTATTGTCGGAT
GTTTCTTTTTCTCCTGGTTCGGTTGCTACAAATTTTTTAAACGTACTCATGCAGAAGCAG
CTGTATGTGCATTAATTGCAGGTTCACCTACCATTGGATTCCTGGGGTTTGCAGTTCTCG
ATCCTATTTATGGTGATTCCGTATCAACAGGTTTAGTGGTAGCAATTATTTCTATTATTG
TTAACGCAATTACTATTCCTATTGGTCTGTATTTGCTGAATCCTTCCTCAGGAGCGGATG
GTAAGAAGAATAGTAATCTGAGCGCATTAATTTCTGCGGCAAAGGAGCCAGTTGTATGGG
CACCTGTTCTGGCAACGATCCTGGTGTTGGTTGGGGTAAAAATTCCGGCAGCATGGGACC
CAACCTTTAATCTGATTGCGAAGGCTAACTCAGGGGTAGCGGTATTCGCTGCGGGGTTGA
CTCTGGCTGCACATAAATTCGAGTTCAGTGCCGAAATTGCTTATAACACCTTCCTGAAGC
TGATTCTGATGCCACTGGCGCTGCTTCTCGTTGGTATGGCATGTCATTTGAACAGCGAAC
ATTTGCAGATGATGGTACTGGCAGGCGCATTACCGCCGGCATTCTCCGGAATCATTATTG
CCAGCCGGTTTAATGTCTACACCCGCACTGGTACAGCGTCATTGGCTGTGAGCGTACTGG
GCTTTGTCGTCACGGCTCCCTTGTGGATTTATGTCAGTCGACTGGTTTCATAATTAATCA
TGTTATTGATTTTACATAAATGCCGAAGTGTCTTTTCACCTTCGGCTTTTTTCAAGGCAT
AAGCAAATGACAAATAATGAAAGCAAAGGGCCGTTTGAAGGCTTATTAGTTATCGATATG
ACACATGTCCTTAATGGACCTTTCGGAACTCAACTTCTTTGTAATATGGGCGCAAGGGTA
ATTAAAGTTGAGCCGCCGGGCCATGGTGATGATACCCGCACATTTGGTCCCTATGTGGAT
GGACAGTCACTCTATTACAGTTTTATTAATCATGGCAAAGAGAGTGTGGTTCTTGATTTA
AAGAATGATCACGATAAAAGTATATTTATAAATATGCTTAAACAAGCTGATGTATTAGCT
GAGAATTTTCGCCCAGGTACAATGGAAAAACTAGGGTTTTCATGGGAAAGGTTACAAGAA
ATCAACCCGCGCCTCATATATGCTTCATCGTCAGGTTTCGGACATACCGGTCCGCTAAAA
GATGCTCCTGCCTACGATACCATCATTCAGGCAATGAGCGGGATAATGATGGAAACAGGG
TACCCTGATGCTCCGCCAGTGCGTGTTGGTACCTCTCTTGCGGATCTATGCGGCGGTGTC
TATTTATTCAGCGGAATAGTGAGTGCACTTTATGGCCGCGAAAAGAGCCAGAGAGGGGCG
CATGTCGATATAGCGATGTTTGATGCTACTCTGAGTTTTCTGGAGCACGGGCTGATGGCA
TATATCGCGACTGGGAAGTCACCACAACGTTTGGGAAATCGCCACCCCTACATGGCACCT
TTTGATGTTTTCGATACTCAGGATAAGCCGATTACGATTTGTTGTGGTAATGACAAGCTT
TTCTCTGCGTTATGCCAGGCACTGGAGCTTACGGAACTGGTTAATGATCCCAGATTTAGC
AGCAATATTTTACGCGTACAAAACCAGGCTATTCTTAAACAATATATTGAGCGGACGTTA
AAAACGCAGGCAGCTGAAGTTTGGTTAGCCAAAATACATGAAGTTGGTGTGCCCGTCGCG
CCGTTATTAAGTGTGGCTGAGGCCATTAATTTGCCACAAACTCAGGCGAGAAATATGTTG
ATTGAAGCCGGAGGAATAATGATGCCAGGTAATCCGATAAAAATCAGCGGCTGCGCGGAC
CCGCATGTTATGCCGGGAGCGGCAATGCTCGACCAGCATGGGGAACAAATTCGCCAGGAG
TTCTCATCATAAATGTAAGATGTGCTGGTAAATAGCTCCCACATTTGAACATTGTGGGAG
CCACTATTTAGTTATTTTGTTGACAGAAAACAGCAATCTCCTGGTCCAGCTCTGCAATGT
GTTCTTTTACAGAGTTCAGCAACTGAAGAATTTCAGGCTTACTGTCATCTGAAACAGGTG
TTATTTCTAACTGATGGCTAATATTAATCAACTTTTGCAAATTCAGGATGTTAGCCGCAC
CGTGGATGCGATGAATACATTGATGGAAAGTTCTGTTATCGCCAGCTTCTAGTGCATGAA
ACGCAGCGGGTAGATCTTTATGCGTTTCATGCTGGAAAGTCATGAGAATCTCCTGCATCA
GTTGTAGATCGTTCGCCGTATTATTTTTCAGGGCTTCGATATCAAGGTGGCGATACTGAG
GTGCAATATGCGCAACCTGGTGTAACTGACTTAAATGTGTTTTCAGTACATCCAGGGTCA
ACGGTTTGAACAAACATAAGTTCATGCCGCAATTTAACCCTTTTTCACGTTCGTTAGCCT
GTGCGTTGGCTGTAAGCCCCCAGATGGGTAAGGAAGAATTTTGCTCACGGAGTTTGCGAG
TCAACTCAAAACCATCCATATTCGGCATATTAACGTCAGTAATAAGCAGATCATAATGTT
GCATACTGACTTTGTGTAGCGCTTGCACACCATCAGTGGCTTCATCAACATCATATCCTA
ATAGATTTAGCTGGCGTTTGAGTAATAGCCTGTTGGTCGGATGATCATCCGCGATTAATA
TGCTCAACTTTTCAGGTAGTGTGATGGGTTGTTCTGCTTTTGCCTCGACAGTCGCCACTT
GTTGGATAATTTCTACCGGGATTGTGATCGTAAATGTTGTTCCTATGCCTGGATGACTTT
CTAATGACAAATCACCCTGCATGTTTTTAATTAATTCTTTGCAGATCATTAAGCCTAAAC
CAGAACCTGTTTGCTGACGACCTGCACTTGTTTGGCTATAGCGTTTAAACAGTTGTTGTT
GTTCTTCCTGCGATAATCCACTTCCAGAATCCATAATCGTCATTTTGATTACAGCGTGGT
TGTCATCAATGTGAACCAGGGAGGTCGTAATTTTTACTGCCCCCTCGGTGGTAAATTTGA
GAGCATTACTCAGTAAATTTGATAAGACCTGCTTAAACGCCTGAGGGTCGATCTTAACCA
GGTAATGTTCAGGAAACGTACTGCTGCAACTTAATGCGATCGATTTGCTTGCAGCAATCG
CACCGAAAGAGTGACAAGTGTTCTGGACTAAAGTAGGGATATCGACCCATTGTGGTTGAA
GTTGATAGTTACCCGATTCAATTTTGTCGACATCAAGGATTTCACCAATTAAGCCGAGGA
GTGATTGTCCGGTGGCGTAGGCAAGTGAAATCGCCTCCACCCGTTGCTCCTTGCTAAGAC
CAGAACCCGACAGAAGTTCCAGGAAGCCCATAATGGAGCTTATTGGTGTTCTTATTTCGT
GACTCATTGTTGCCAGAAACTGACTTTTTGCGACAGTTGCATTGATCGCTTTATTTCTCT
CTACTTCGAGTGCATGAATTAAATCACGCGTCTCGGTAATATCTTGCCAACCACAAATAT
AAACAGCATGATCGCTGGCTGGCAGATTGCATAATGTATGCCAGTGATTAATGCATCTTT
TCTCGATGCCATTATCAATTTCAAATACCTGTGTGTATATTGTTCGATTTTCTTTCGTTT
CTGCTGTGACTTCATGCGCATTAGAAAAAACATCTTTAAAGGGTGAGTCACTGTTTTCTA
ATGGTAACATTGCATTTTTGTAGTAATCAGCAGTGAAATAATGTTCAAATGCACTATTGT
GACTAATGACATTACCTTGCCAGTTTACAACATAAGTTGGATTCGGTAAGGAGTCCGAGA
GCGCTTTCCGGAATGATATTTGGTTTTCTAAATCACCCTGAATGACTTTACGACGACGAA
CTGAGCGTAACAGGTAGAATCCCCATAAAAGGCTACTGCCAACTAATAAAACGGATAATG
TCGTAACAATATAAAATTGCTCGCTATAGAGGTCCCATGTGTCAATGGTCACATTGGGCA
TTTTAATCCATTTTTCGGTCAGGCGCAGAACTTCGCTTGGGGGGATTGCATTCAGTGCTT
TATTAATAATATCCTTAAGTTCCGGTTCTCCGCGAGGAAAAGCGAACGAAAGCGATGCAT
TCGGAACGCCGGGAATAAGAAAATGATACAGTTCATTAGGATAGTAATGGTCGATCATGT
AACGCGAATTTAACTGTGTCGCGACCAGAGCATCAAGTTCACCTTCCTTGACCTTGTGAA
ATGCAGCGCTGGCGTTATCGACTTTTATCCACTCTACCTCCGGATACATCTCTTTTAATT
GCGAATGCAGCTCATAATAATATGGAATGGCAACTTTCATTCCTTTTTTTAATGTTTGTT
CACTGTCAGGCGCTTTTTGCATGACAAAAACGTAAGGCGTTGTTATGAAGGCTTCAGCAA
ATAAAACATTATTTTCTCTATCTTCACTATAAATAGCACCGGGTAATATATCCCATCCGC
CGGGATTCAGCTGTGTTCCAGCATGGATATTGTGTGAAACGGTGATCGGAGAAAAATTTA
AACCTGTTTGCAAAGTAATAATATTAAGAATATCCCCCATAACGCCCCGAACCGAGCCAT
TTTCATCCGTCATAGAATAGGGAGGGGAGTAAGGATTTTCCAGCACCTTTAAATCGGGAT
GCTGCTTAATCCATTGTTTTTCATGTTCAGTGAGTTCTAATGGTTTGTTCAGAAAGGCCA
GGTTTCCTGTATCAAGCCAATTTTGTGATACTTCATAGCGAACTTCATTTGTCAAAGCAT
CAACAAATCGATTGAGTACTTCATTAAGAACGACAGATTCTTTTCTGGTCAAGAAAAAAT
TATATTGACGCGGTGAGTTATAATATTTCACTACATTTAAGGAGTGAGTGAAATAGCGGG
AAATCATACTGCTGGTAATGATGTTACTACCAATAAAGTAATCATTCTGTCCGGCTGAGA
CGGATGCTAATGCCTGATATAAATTTGTAAAAGAGATAATTGTTGCTTTTGGAAATGATT
GATGAATTACCTCGTCAGGGGGATAATTTGCTACTCGAGCAATATTTACTGGTTTTGATG
AGGTAAGCGGTCGCATTGAATCGTGAAGGGTGGTGACGAGCGCCGGAAAGGTAATTATCA
GTGGTTTGGTTGCAGCAATGTCATCATTAAGAGGCGGCGAAGCAACTAAATGTGATAACA
CTATATCGACTTCACCTTCTTCCAGCGCGTCCATTGCTTTTTGATGATCGGCGTATTCCC
GGAGTGTTAGTTTGATATTTAACGCTCTTTTTAAAAGATTTAAATAATCAGCATTAATAC
CACGAACCCGTTGCTGCGAATCGGTATGCAACAACGTAGCCGTTTGGGACTTGTGTACTG
CAATCACAAGATTTTTTTTGCTCGCTAACCAACGTAATTCCTTGTTGCTCAGACGTAGTG
GATCAAGTGTGACACGGTTGTTACTACTGATGCCACGATATTCGATGTAATCTTCGTCTG
CGAAACTTATGGTCGACCAAAGACCACAACAGAGAAGAAAAATATAGGGTAAAAACTTCA
TGTGGTTAGCCGATTTTGTTACGTTGTGCGAATGTGTAAAGATCCATCAGTGATTTACAT
TCTAATTTTTCCATCAGGCGACTTTTATAAGTGCTGACAGTTTTGTTGCTGATGAACATT
TTTTCAGCAATGTCATTATTATCCTTGCCATCAAGAATATAGCGCATGACACTAATTTCT
TGTTTCGATAAGGAGTCGAGTTTTTGCTGGTCGGACGTTAAACTTCCAACAAACCGGTTG
AGAGAGAAGGGGAAATAGCAGTAGCCATTTTTTGCAGCTTCAATAGCCGCAATGATATTG
TTCATGCCTTCTTTTTTACTCACGAAACCATTAGCGCCAGCATCAGCACAATGTTTCCCG
TAAAAATGGTCATTTTTAGCGGAGACGATAATAATAATTCCGCTATATTGGCGCTTCCTC
AGCGTTTCTAACACCTGGATACCGTTAACTCCGGGGATATCGACATCAATGATGACGATA
TCAGGCTTAAGTGTTTCCACCCGCTGAACGACACTTCCGCCTTCAGTCAACTCTGCTAAG
ATTTCAATATCGTTTTTGATCAATAAATTACGAATTGCTGCGATAGCAAGAGGATGGTCA
TCAATAATTATTGCGTTCATAGATTATTCCCTTTGCAATGAAGCATCTCCCTTCTCCCTG
TAGTAATACAGACATAAGGCATCATCTCATTTTCTCAATAAAAATAAGAAAATTTGAGCT
TCCTTTAAGATAATTCGACAAGTATACCATATAAATAGTCGGCATATATGAAATGTCAAC
AATAAAATCAGTGATTGTACCGATGATTTATAGTTTCACATTAGCACTATAAGTCTTCTC
ACTAATCCTACAGGCGTAAGAATTGTATTGCAAAAGCCACGGTTTAGTCCTCTGTTGTTT
TTTTTGCACCTCATTTAAATTAGGCCTCCAACGTTCCTGGGATAATGTGCAACACATGCA
CTGTGTTTGATATGAAGAATGAATACTCTTTTCATTCAATTCATAAATTTCATCTATGCG
AAATGAGAGATAAAAGTGGAACAGATTAATTCAAATAAAAAACATTCTAACAGAAGAAAA
TACTTTTCTTTATTGGCGGTAGTTTTATTTATTGCGTTTTCAGGTGCCTATGCCTATTGG
TCAATGGAATTAGAAGACATGATTAGTACAGATGACGCCTATGTCACGGGGAATGCAGAT
CCAATTTCTGCACAAGTCTCAGGTAGTGTCACTGTAGTTAATCATAAAGATACGAACTAC
GTTCGACAAGGTGACATTTTAGTTTCACTGGATAAAACTGATGCCACTATCGCACTCAAT
AAAGCTAAAAATAATCTGGCAAATATTGTTCGGCAAACGAATAAACTATACTTACAGGAT
AAACAATACAGTGCCGAAGTCGCTTCAGCGCGTATTCAGTATCAACAATCTTTAGAAGAT
TATAACCGTCGAGTGCCGTTAGCGAAGCAGGGGGTTATTTCAAAAGAAACGCTGGAGCAT
ACCAAAGATACGTTAATAAGTAGCAAAGCGGCATTGAATGCCGCTATCCAGGCTTATAAA
GCGAATAAAGCTTTAGTAATGAACACACCATTAAACCGTCAGCCACAAGTCGTTGAAGCG
GCGGATGCAACTAAAGAAGCCTGGTTGGCGCTTAAACGTACGGATATTAAGAGTCCGGTT
ACCGGCTATATTGCCCAGAGAAGTGTTCAGGTCGGCGAAACAGTGAGCCCCGGACAATCG
TTAATGGCTGTCGTACCGGCACGTCAAATGTGGGTTAATGCCAACTTTAAAGAAACACAA
CTCACGGATGTACGGATTGGTCAATCGGTCAATATTATCAGCGATCTTTATGGTGAAAAT
GTTGTGTTTCATGGTCGGGTGACAGGGATCAATATGGGAACCGGCAATGCGTTCTCCTTA
TTACCTGCACAAAATGCGACAGGGAACTGGATCAAAATCGTTCAGCGTGTACCGGTTGAA
GTTTCTCTGGATCCAAAAGAACTCATGGAACACCCCTTGCGCATTGGTTTATCGATGACT
GCAACTATTGATACCAGGAACGAAGACATTGCTGAGATGCCTGATCTGGCTTCAACCGTG
ACCTCCATGCCTGCTTATACCAGTAAGGCTTTAGTTATCGATACCAGTCCGATAGAAAAA
GAAATTAGCAACATTATTTCGCATAATGGACAACTTTAATGGCAATCACTAAATCAACTC
CGGCACCATTAACCGGTGGGACGTTATGGTGCGTCACTATTGCATTGTCATTAGCGACAT
TTATGCAAATGTTGGATTCCACTATTTCTAACGTCGCAATACCGACAATATCTGGCTTTC
TGGGAGCATCAACAGACGAAGGTACCTGGGTTATCACCTCGTTTGGCGTAGCAAATGCCA
TTGCGATCCCTGTTACCGGCAGGCTGGCACAAAGAATAGGCGAATTAAGGTTATTTTTAC
TTTCAGTCACTTTTTTTTCGCTGTCTTCCTTAATGTGTAGTTTATCGACCAATCTTGATG
TGCTGATATTTTTTAGAGTCGTTCAGGGGTTAATGGCAGGGCCGTTAATTCCACTGTCAC
AGAGTTTATTATTAAGGAATTATCCACCAGAAAAAAGAACATTTGCTCTGGCATTATGGT
CAATGACCGTGATTATCGCTCCGATATGTGGGCCGATATTGGGCGGTTATATTTGTGATA
ACTTTAGCTGGGGTTGGATATTTTTAATCAATGTCCCTATGGGGGTTATCGTCCTGACAT
TATGCTTAACCTTACTTAAAGGAAGAGAAACTGAGACTTCACCGGTCAAAATGAATCTAC
CAGGACTGACCCTGTTAGTGCTTGGTGTTGGTGGCTTGCAAATTATGCTTGATAAAGGGC
GCGATCTGGATTGGTTCAACTCGAGTACAATAATAATATTAACAGTAGTATCAGTTATTT
CTCTGATCTCTTTAGTCATTTGGGAGTCAACCTCAGAGAACCCGATTCTTGATCTCAGTT
TGTTTAAGTCCCGTAATTTCACCATTGGTATTGTGAGTATCACATGCGCGTATTTATTTT
ACTCTGGAGCGATAGTCCTTATGCCGCAGTTACTCCAGGAAACAATGGGGTATAATGCGA
TTTGGGCTGGGCTTGCTTATGCGCCCATCGGCATCATGCCACTATTAATTTCACCTTTGA
TAGGACGTTATGGCAACAAAATAGACATGCGGTTGTTAGTGACATTTAGTTTTTTGATGT
ATGCGGTTTGCTATTACTGGCGTTCTGTGACATTTATGCCAATGATTGATTTTACAGGCA
TCATTTTGCCACAGTTTTTCCAGGGATTCGCCGTTGCCTGTTTCTTTTTACCCTTAACAA
CGATTTCGTTTTCAGGGTTGCCAGATAATAAATTTGCCAATGCCTCGAGTATGAGTAATT
TTTTTCGTACCTTGTCAGGATCAGTTGGTACGTCGTTGACAATGACGCTGTGGGGACGAC
GCGAATCGTTACACCATAGTCAGTTGACAGCAACCATCGATCAATTTAACCCCGTGTTTA
ATTCATCGTCACAAATTATGGATAAATACTATGGTTCGCTTTCAGGAGTTCTTAATGAAA
TTAATAATGAAATAACCCAGCAGTCACTTTCTATTTCTGCAAATGAGATTTTCCGTATGG
CGGCTATTGCTTTTATCTTACTTACGGTTTTGGTTTGGTTTGCGAAACCGCCGTTTACAG
CGAAAGGCGTTGGGTGATGGTAAAAGCAGGGGGTTATAGCGGGTAAGACCGGGGATCTTA
AGTCTGCGCCATCGGCAGCATCGCTCATCCAGGGAAAGGATGGCGATGCTGAATTGAAAA
TTAATTAGCGGCCTTTTGCCAGATATTGCTACATCTCTTCTTCCGGCACCATTCCACCTC
CCGTCGCCCACACCAGATGAGTGGCATTACGCAGTTGTTCTGCGCTGCAACCGTGCATCT
GTTGGTAACTTACTGATGCGCACACGCGCTGAGGCCCGGCCATACCCGCCAGTGCCGAAG
GTTCAAGACGAATGCCTTCTTCCTGCGCCAGCCAGCCAAGCATGTTATACATGGTTTGAT
CGCTAAGGGTATAGAAGCCATCCAGTAGACGCTCCATTGCCCGCCCGACAAAGCCTGATG
CGCGACCAACTGCAAGGCCATCCGCTGCGGTAAGGTTGTCGATACCAATATCCTGAACAG
AAATCTGATCGTGTAATCCTGTATGGACGCCTAACAGCATACAAGGGGAGTGCGTTGGTT
CGGCAAAAAAGCAGTGAACATGATCGCCAAACGCCAGTTTAAGCCCGAATGCGACGCCAC
CAGGACCACCGCCAACACCACACGGCAGATAGACAAACAGAGGGTTATCAGCATCGACAA
TACGACCTTGCTCGGCAAATTGCGCTTTAAGACGCTGGCCAGCGACGGAATACCCAAGGA
ACAACGTACGGGAATTTTCGTCATCAATAAAGAAACAGTTCGGGTCAGACTGCGCTGCTC
TACGTCCTTCCTCGACGGCAACACCATAATCTTGCTCATATTCCACGACCGTAACGCCAT
GGCTGCGCAGTTTCGCTTTTTTCCATGCCCGGGCATCAGCAGACATATGCACTGTCACCT
TAAAGCCAATGCGGGCGCTCATAATGCCGATTGATAACCCCAGATTTCCGGTTGAGCCCA
CAGCAATGCTGTATTGGCTAAAGAACTGTTTAAACTCCGGAGAAAGCAGTTTGCTGTAGT
CATCATCAAGCGTCAGCAACCCCGCTTCCAGAGCCAGTTTTTCTGCGTGTGCCAGGACTT
CATAAATCCCGCCGCGTGCTTTTATGGAGCCGGAAATGGGCAAATGGCTATCTTTTTTCA
GTAACAGTTGCCCGCTGATCGGTTGTTGATATTCCTTTTCCAGCCGTTTTTGCATAGCCG
GAATGGCAACCAGTTCTGATTCAATAATCCCCCCAGTGGCAGCAGTTTCAGGAAATGCTT
TTGTCAGATAGGGTGCAAAACGGGATAAGCGCGCATGGGCGTCCTGAACATCCTGTTCGG
TCAGGCCAACATAAGGTAAACCTTCAGCCAATGAGGTCGTGCCAGGATTAAACCAGGTGG
TTTCTTTAAGAGCAACCAGATCCTTTACCAACGGATACTGGGCGATGAGCGAGTTCATTT
TAGCGTTTTCCATAGTACGTCTCTTTGCGCTTAGATGATAAATGACAGCAGGAATGTGCC
CGCCAGAGCGACGACTGAAGCGATAAATGTCGCTGTCGTATAGTATTTAAATGTTTCATT
GAGCGTAGCGCCGCAATATTGCTTCACCAGCCAGAAAAGCGAGTCCGTAACGATAGTGCA
GCCAATTGCACCTGAACCGATAGCAATCGCAATAATTTCCGGGCTGATGTCGGGATACAG
CGGCAGCACAATGATCCATATTTATATTTTCTTCTCCAGGTTGGCGATGCCAGTTGGCAT
GTTTTACTTACTTGCCTATATGGTTACTCGTTGGCGAGAACAGAGGCGGAATTGGGGACA
ATTGGCCGGGAATTATTGTTATTTTTTATTGTATTGCCGTGTCAGGTGATAGGGCGTTGG
ATCTCGCCAGTGACGTCTGTTTCTGCTACAGTGCCCGTTTTACGACAAACGGCTTGGGTA
TGGCTTCATTAAAGGATGTCGCACGCCTGGCGGGAGTGTCGATGATGACAGTCTCCCGGG
TGATGCATAATGCAGAATCTGTGCGTCCTGCAACGCGTGACCGCGTATTGCAGGCAATCC
AGACCCTGAATTATGTTCCTGATCTTTCCGCCCGTAAGATGCGCGCTCAAGGACGTAAGC
CGTCGACTCTCGCCGTGCTGGCGCAGGACACTGCTACCACTCCTTTCTCTGTTGATATTC
TGCTTGCCATTGAGCAAACCGCCAGCGAGTTCGGCTGGAATAGTTTTTTAATCAATATTT
TTTCTGAAGATGACGCTGCCCGCGCGGCACGTCAGCTGCTTGCCCACCGTCCGGATGGCA
TTATCTATACTACAATGGGGCTGCGACATATCACGCTGCCTGAGTCTCTGTATGGTGAAA
ATATTGTATTGGCGAACTGTGTGGCGGATGACCCAGCGTTACCCAGTTATATCCCTGATG
ATTACACTGCACAATATGAATCAACACAGCATTTGCTCGCGGCGGGCTATCGTCAACCGT
TATGCTTCTGGCTACCGGAAAGTGCGTTGGCAACAGGGTATCGTCGGCAGGGATTTGAGC
AGGCCTGGCGTGATGCTGGACGAGATCTGGCTGAGGTGAAACAATTTCACATGGCAACAG
GTGATGATCACTACACCGATCTCGCAAGTTTACTCAATGACCACTTCAAATCGGGCAAAC
CAGATTTTGATGTTCTGATATGTGGTAACGATCGCGCAGCCTTTGTGGCTTATCAGGTTC
TCCTGGCGAAGGGGGTACGTATCCCGCAGGATGTCGCCGTAATGGGCTTTGATAATCTGG
TTGGCGTCGGGCATCTGTTTTTACCGCCGCTGACCACAATTCAGCTTCCACATGACATTA
TCGGGCGGGAAGCTGCATTGCATATTATTGAAGGTCGTGAAGGGGGAAGTGTGACGCGGA
TCCCTTGCCCGCTGTTGATCCGTTGTTCCACCTGATATTATGCTAACCCAGTTGCCAGAG
TGCTCCATGTTGCACCACAGCCACTCCGTGGGAGGCATAAAGCGACAGTTCCCGTTCTTC
TGGCTGCGGATAGATTCGACTACTCATCACCGCTTCCCCGTCGTTAATAAATACTTCCAC
GGATGATGTATCGATAAATATCCTTAGGGCGAGCGTCTCACCCTGCGGGAGGGGAATACT
ACGGTAGCCGTCTAAATTCTCGTGTGGGTAATACCGCCACAAAACAAGTCGCTCAGATTG
GTTATCAATATACAGCCGCATTCCAGTGCCGAGCTGTAATCCGTAATGTTCGGCATCACT
GTTCTTCAGCGCCCACTGCAACTGAATCTCAACTGCTTGCGCGTTTTCCTGCAAAACATA
TTTATTGCTGATTGTGCGGGGAGAGATAGATTGATGCTGCTGGCGTAACGACTCAGCTTC
GTGTACCGGGCGTTGTAGGAGTTTGCCATTGCTCTCTGATAGCTCGCGCGCCAGCGTCAT
GCAGCCTGCCCAGCCTTCACGTTTTGAGGGCATTGGCGATTCCCACATATCCATCCAGCC
GATAACAATACGCCGACCATCCTTCGCTACAAAGCTTTGTGGTGCATAAAAGTCATGCCC
GTTATCAAGTTCAGTAAAATGCCCGGATTGTGCAAAAAGTCGTCCTGGCGACCACATTCC
GGGTATTACGCCACTTTGAAAGCGATTTCGGTAACTGTATCCCTCGGCATTCATTCCCTG
CGGGGAAAACATCAGATAATGCTGATCGCCAAGGCTGAAAAAGTCCGGACATTCCCACAT
ATAGCTTTCACCCGCATCAGCGTGGGCCAGTACGCGATCGAAAGTCCATTCACGTAATGA
ACTGCCGCGATAAAGCAGGATCTGCCCCGTGTTGCCTGGGTCTTTCGCCCCGACTACCAT
CCACCATGAGTCGGCTTCACGCCACACTTTAGGATCGCGGAAGTGCATGATTCCTTCTGG
TGGAGTGAGGATCACACCCTGTTTCTCGAAATGAATACCATCCCGACTGGTAGCCAGACA
TTGTACTTCGCGAATTGCATCGTCATTACCTGCACCATCGAGCCAGACGTGTCCGGTGTA
GATAAGTGAGAGGACACCATTGTCATCGACAGCACTACCTGAAAAACACCCGTCTTTGTC
ATTATCGTCTCCTGGCGCTAGCGCAATAGGCTCATGCTGCCAGTGGATCATATCGTCGCT
GGTGGCATGTCCCCAGTGCATTGGCCCCCAGTGTTCGCTCATCGGGTGATGTTGATAAAA
CGCGTGATAACGATCGTTAAACCAGATCAGGCCGTTTGGATCGTTCATCCACCCGGCAGG
AGGCGCGAGGTGAAAATGGGGATAGAAAGTGTTACCCCGGTGCTCATGAAGTTTTGCTAG
TGCGTTTTGCGCCGCATGCAATCGAGATTGCGTCATTTTAATCATCCTGGTTAAGCAAAT
TTGGTGAATTGTTAACGTTAACTTTTATAAAAATAAAGTCCCTTACTTTCATAAATGCGA
TGAATATCACAAATGTTAACGTTAACTATGACATTTTGTGATCGAATATGCATGTTTTAG
TAAATCCATGACGATTTTGCGAAAAAGAGGTTTATCACTATGCGTAAGTCAGATGAATTT
AAGGGAAAAAAATGTCAGCCAAAGTATGGGTTTTAGGGGATGCGGTAGTAGATCTCTTGC
CAGAATCAGACGGGCGCCTACTGCCTTGTCCTGGCGGCGCGCCAGCTAACGTTGCGGTGG
GAATCGCCAGATTAGGCGGAATAAGTGGGTTTATAGGTCGGGTCGGTGATGATCCTTTTG
GTGCGTTAATGCAAAGAACTCTGCTAACTGAGGGAGTCGATATCACGTATCTGAAGCAAG
ATGAATGGCACCGGACATCCACGGTGCTTGTCGATCTGAACGATCAAGGGGAACGTTCAT
TTACGTTTATGGTTCGCCCCAGTGCCGATCTTTTTTTAGAGACGACAGACTTGCCCTGCT
GGCGACATGGCGAATGGTTACATCTCTGTTCAATTGCGTTGTCTGCCGAGCCTTCGCGTA
CCAGCGCATTTACTGCGATGACGGCGATCCGGCATGCCGGAGGTTTTGTCAGCTTCGATC
CCAATATTCGTGAAGATCTATGGCAAGACGAGCATTTGCTCCGCTTGTGTTTGCGGCAGG
CGCTACAACTGGCGGATGTCGTCAAGCTCTCGGAAGAAGAATGGCGACTTATCAGTGGAA
AAACACAGAACGATCGGGATATATGCGCCCTGGCAAAAGAGTATGAGATCGCCATGCTGT
TGGTGACTAAAGGTGCAGAAGGGGTGGTGGTCTGTTATCGAGGACAAGTTCACCATTTTG
CTGGAATGTCTGTGAATTGTGTCGATAGCACGGGGGCGGGAGATGCGTTCGTTGCCGGGT
TACTCACAGGTCTGTCCTCTACGGGATTATCTACAGATGAGAGAGAAATGCGACGAATTA
TCGATCTCGCTCAACGTTGCGGAGCGCTTGCAGTAACGGCGAAAGGGGCAATGACAGCGC
TGCCATGTCGACAAGAACTGGAATAGTGAGAAGTAAACGGCGAAGTCGCTCTTATCTCTA
AATAGGACGTGAATTTTTTAACGACAGGCAGGTAATTATGGCACTGAATATTCCATTCAG
AAATGCGTACTATCGTTTTGCATCCAGTTACTCATTTCTCTTTTTTATTTCCTGGTCGCT
GTGGTGGTCGTTATACGCTATTTGGCTGAAAGGACATCTAGGGTTGACAGGGACGGAATT
AGGTACACTTTATTCGGTCAACCAGTTTACCAGCATTCTATTTATGATGTTCTACGGCAT
CGTTCAGGATAAACTCGGTCTGAAGAAACCGCTCATCTGGTGTATGAGTTTCATCCTGGT
CTTGACCGGACCGTTTATGATTTACGTTTATGAACCGTTACTGCAAAGCAATTTTTCTGT
AGGTCTAATTCTGGGGGCGCTCTTTTTTGGCTTGGGGTATCTGGCGGGATGCGGTTTGCT
TGACAGCTTCACCGAAAAAATGGCGCGAAATTTTCATTTCGAATATGGAACAGCGCGCGC
CTGGGGATCTTTTGGCTATGCTATTGGCGCGTTCTTTGCCGGCATATTTTTTAGTATCAG
TCCCCATATCAACTTCTGGTTGGTCTCGCTATTTGGCGCTGTATTTATGATGATCAACAT
GTGTTTTAAAGACCAGGATCACCAGTGCGTAGCGGCGGATGCGGGAGGGGTAAAAAAAGA
GGATTTTATCGCAGTTTTCAAGGATCGAAACTTCTGGGTTTTCGTCATATTTATTGTGGG
GACGTGGTCTTTCTATAACATTTTTGATCAACAACTCTTTCCAGTCTTTTATGCAGGTTT
ATTCGAATCACACGATGTAGGAACGCGCCTGTATGGTTATCTCAACTCATTCCAGGTGGT
ACTCGAAGCGCTGTGCATGGCGATTATTCCTTTCTTTGTGAATCGGGTAGGGCCAAAAAA
TGCATTACTTATCGGTGTTGTGATTATGGCGTTGCGTATCCTTTCCTGCGCGCTGTTCGT
TAACCCCTGGATTATTTCATTAGTGAAGTTGTTACATGCCATTGAGGTTCCACTTTGTGT
CATATCCGTCTTCAAATACAGCGTGGCAAACTTTGATAAGCGCCTGTCGTCGACGATCTT
TCTGATTGGTTTTCAAATTGCCAGTTCGCTTGGGATTGTGCTGCTTTCAACGCCGACTGG
GATACTCTTTGACCACGCAGGCTACCAGACAGTTTTCTTCGCAATTTCGGGTATTGTCTG
CCTGATGTTGCTATTTGGTATTTTCTTCTTGAGTAAAAAACGCGAGCAAATAGTTATGGA
AACGCCTGTACCTTCAGCAATATAGACATAAACTTTTTCCGGTTGTTGTCGATATCTCCA
TATCCCTCAACCGGAAAATAATAATACTAAAATGCTTAGGCCTGCTAATAATCGCCTAAT
CCAAACACCTCATTCATGTTCTGGTACAGTCGCTCAAATGTACTCCGGATACACGGTTCG
CTGATTTCCAGGACATTGTCGTCATTCAGCGACCTGTCCCGTGTATTACGGGCCTGCGAA
TTCATCAAGGAATGCATTGCGGAGTGAAGTATCGAGTCACGCCATATTTCGCTATCAGGA
TTCTGTGTGATGGTTACATCGCCCGGCCCAGGGCTGTTTAGTCATCAGCGCTTTCTGACA
GTGCTGAGATTTCAACCTGTTGCAGTAAAAATGAGTAGATATAGGGCAAGTGTGCTGCCA
AACCCATCTTTTACGGGGTGAAGGTAGATTTGGTTTGAAGGGTATCTGGTGTCCCCTGCA
GGAATCGAACCTGCAATTAGCCCTTAGGAGGGGCTCGTTATATCCATTTAACTAAGAGGA
CAATGCGGCATGAGTATACCCGCTAATGGACTGCGGGGTAAGTACGCTGCCGCTCGATTG
CTTAAACCCTCGCCATTTATGCCGGGTTTTTATCATTTTTCTTAATGTTTTCCGCACGTT
CTGCTTTTTGGCGTGCTTCTGCTTTGCGCTTGTTGCTCATGTCGTTACGGATCTGTGCAT
GACTCATTAACGCGAAGATAAAGGTGCCGCCGCAGATGTTCCCCGCTAAAGTAGGTAGTG
CGAAGGGCCAGATGAAATCGCTCCAGTGCAGCGTGCCGTTAAACACCAGATAGAGGATTT
CAACAGAACCGACAACGATGTGGGTGGTGTCACCCAGGGCAATAAGCCAGGTCATCAATA
TAATCACCACAATCTTTGCCGCACCCGCTGCAGGAAACATCCATACCATAGTGGCGATCA
GCCAGCCGGAAATGATCGCGTTGGCAAACATCTCGCTGGGGGTGTTCTTCATCACATCCA
TGCCGATATTGACAAATGCATCGCGAGTTTCTTCATTGAAGATTGGCATATATTCAAATG
CCCACGCCGCAATACCTGTCCCGAGAATATTACCCAGCAGCACGACGCCCCATAACCGCA
TAAGTAAGCCAACGTTGCTCATTGTCGGTTTTTGCATGACGGGTAGTACCGCAGTCACGG
TGTTTTCGGTAAATAATTGCTGGCGGGCCATAATGACGATAATAAAACCAAAGGTATAAC
CGAGATTCTCCAGCAAGAAGCTGCCCGGCACACCTTCCAGTTCGACATGAAATATCCCTT
TTGCCAGTAATGAAGCGCCCATCGACAGACCCGCCGCAATGGCTGACCACAGTAGTGCCA
TTGCGTCGCGTTCCAGCTCTTTTTCACCATCCTGGCGGATATGCTCATGAATTGCCATCG
CCCGGGAGGGGAGTCGATCTTCATCTATTTCTATTTTTTTGCCACGCTCTTTTTCTTCGC
TCTCAACTTCAATTTCGTCGCTGTGTTGATCAATTTTGTCGTTGTCCATGGTCTCTTCTC
TTGAATTAGCACGTATAGCTAAAGCGTAGCGGCTTTTTTGCTCGCAACTGGCGGGAGTTA
CTCTGAAAATGTAGAAAAGGCCGCGTTTGCCTTTTTCTGTTTCCATAGAATCAAGTAGCC
TACAGGGCGGCGATTACCAGGCTATGATCAAATCAGCAAATCAGGGCGTCTGGACATCAG
TTGACGTGCTGTTACAATCGCCCACACCTAAACAGGCGGATACGGTATCGTTCCGTCATG
GATGGCAAACTGCATAAGCCATAAAAAAACAGGGAGACATTTATGAAGCTTCGCCTGTCG
GCGCTTGCTCTGGGAACTACGCTTCTGGTGGGGTGTGCGAGTTCCGGTACAGATCAGCAA
GGGCGTTCTGACCCGTTAGAAGGGTTCAACCGCACCATGTACAACTTCAACTTCAACGTA
CTAGACCCGTATATTGTTCGACCGGTCGCTGTCGCCTGGCGTGATTATGTTCCGCAACCG
GCGCGTAACGGTTTGAGCAACTTTACCGGCAACCTTGAAGAACCTGCGGTGATGGTTAAC
TACTTCTTGCAGGGCGACCCTTATCAGGGGATGGTCCACTTTACCCGCTTTTTCCTGAAC
ACCATTTTGGGGATGGGCGGCTTTATTGATGTTGCAGGGATGGCGAACCCGAAACTGCAA
CGGACTGAACCTCACCGCTTCGGTAGTACGCTTGGTCATTATGGCGTGGGTTATGGGCCG
TACGTTCAGTTACCATTCTACGGTAGCTTCACGCTGCGTGATGACGGTGGTGATATGGCG
GATGGTCTTTACCCGGTTCTTTCCTGGTTGACCTGGCCGATGTCTGTGGGTAAATGGACG
CTTGAAGGGATCGAAACCCGCGCTCAGCTGCTGGATTCCGACGGTCTGCTGCGTCAGTCG
TCCGATCCTTATATTATGGTGCGCGAAGCGTACTTCCAGCGTCATGATTTCATCGCTAAT
GGCGGCGAACTCAAACCGCAGGAAAATCCGAACGCGCAAGCGATTCAGGATGATTTAAAA
GATATCGATTCTGAATAAGAAACAAATAAAAAAGGTGAGTCGCAAAACTCACCTTTTTTG
TTGTTATCCCTCAATTACCACAAGTAAAAGGAGATAAACCGACAATGACCCGGACGTAAT
GATGTAAAAATACTGATGTTCGTCACTGACTATTTCCGATATTCAGGCGTTAAAAAATCA
AAAAACTGGAAAAATAATTTTAAATATCATCAAAATTAACACCTGGCGCATATAGTTGAT
TAATTTCATTTTGATATTCCGTCTGGCGATTTTGAAGCCTTTCTTCAATTTTACCTTCGA
GTTCCTTATAGTGCATATATATATTTTGAGAATGGTCAACGTTAACTTCGTTACCGAATA
AAGTAGAAACTATTTCTTTTGTATTCTTAAGTGTATATTTTCTATCATCCTCTTAATATT
CATATCCTCTTGCTAGATTTGAAGGATTAAAAGCTTCGTTAGGTTCTCTCAGTCTTTCCC
CTTTGAGTTCGTTTACAACTTGATGATCGGGACCTGTTGCAAATGATTCTGCGATGATTG
CTTTACTGTGTTCAAACCACGCAGAAGCACTCCTGGCTTTTTTACTACAATATTGGGTGA
GATTATCACCATCAATACGAAATCCTTTTTGAATGTGGTAGCCATCCTGATCGTAGTAAC
CGAGAGATAAGTAATCATTTCCATTTTTATTTTTTATTACAATAGCGAGAGAGTCGCCTT
TTTTATCTTTACCGTACCAGGTAAATAAGCACGTTGGTTCGCTTTTCCCGCTCTCATCGA
ATTCCGTTACCGTATGTCTGAGTTTGTGTGATATTTTATCGAAGATAAAACTTGGATTTT
CATCATATATTTCTTTTATTGCGCTGAAGATCATTTTCTTGTTATTGATATCATGAGTAT
TCTCTACTATGTTTTCATTGATGATGGTTTGACCGACTTTTTTGTTTTCATCGTTCGCGG
GTGATTTTGTTGGTTCTTGATTTTCAATATCAATATCAATATCAATATCAATATCAATAT
CAAAAGTAATATCGTTTGTATCATTGGAGTCAATACCAATATCACTACGATCATCAATAC
CACTAATAATAATACCATCAGTAAATTCAGCATTATTTATATCATCATGAGTCTTCTCAA
CTATGTTGTCATTAATGATAGTACGGACGAGTTCTTTGTCTTTATAACTCGCAGGTAATT
TTATTGGTTCTTGGTTGTCGATACCAATAGTAATATGGTCTGTATCATTGGAACCAATAT
TAATATAAGTAACTGAAGAATTATTGATATTTATTCTATCAGGATCGTCGTTTCCTCGTA
TGGCGTTTTTTATAAGCTCAAGTAGATGTTTAATACAGGTGCTTATTCCTTCCTTACCAT
TAAAAAGGTTTTTGAACTCTTGTACTAATCCATTAACTTCATCATTGTTATTTTCATTGA
TGGATTCTGGGTAAGCTGCGCTGGTATTGTTGATTGAAATAGTTGGTAGCATGATTTTAT
TCCATGTTGATTGATTTGTTACAAATATATATTACCTAATGAAATAGACTATCAAAAAAC
GCTCATTTATTTAGACCCTATCTTTAATTTGAGTGTATGAGCGCACAATAGCCAGGGTGG
TTTGAGTATCCTGGAAATTCAGAAAAGTAAACTCTTTGAGAAAGACGAGCAGAACGCCTG
AAAATATGCCTTTCCCTTCAGGTTTGTCTGTGGATACCACTTAATGATTTGAAAGGGCAA
GCTACCATCAGGCTGTTTGCAAAACTCAGGAGGCAAGCAATGAGGACACTACTTTCGGTG
AAGTGGGGAAGTTAAAGTCACCTGCATAGCAGGTGACTTTAACCAGGCGAACGCGTTATC
AGAACGCGTAGTTAAAGTTAGTACCGAACAGCCAGGCTTTACCTTCAGATTTAAAGGTAT
ATGCTGCTGGCCCTTCACCTTCAGTAAACTTCACATTCTGACCGTGCATATAAGATGCAC
CAACGTCAATGGATGCATCTTCATTAAATGCATAAGTCGCACCTGCACTTAACCACAGAC
GATCCTGATCTGGGATAGAGATAGAACGTTTATCTGCCGGAACCGGGCTGTCATCGAATG
CAATACCCGTACGGAAGGTCCAGTTTTTATCGTGGTAGTAGGTTGTACCTAACGCGATAC
GGTAAGCATCCCGGAAACCTTCGTCTTTATAGAACAGCGTTTGACCAGAGTCTCCTTTCG
CTTTCAGTTCCTGGAATTGACTCCAACTGGTATACGCCAGACTATAGTGGATAGCCCATT
GTGGTGCGACACGGTTATAGCCAGAAATTTCCCACATCTCAGGTAAATTCAGCGTTAAGG
ACCCATTTTGGGTTGCACCCATTGTGCCATATGGTAAACCCATGCTACCCAAGATGTTGT
TCAGATTTGGGTTGATGGAGCTTTTGTAATCTCCTTCAAAGTCAATTTTCACTTCTGAAC
GATAGGTTAGGCCCCAACGGTTATCTTTATCCAGTTCATAAAGAATACCGGCGTTCCAGC
CGAATCCCCATTCATCACCCTTGAGATGAGCAATTTGCGAATCCGGTGTATTGATGCCGT
TTGTCCAACTTTGTGGCACGCCTTGCGCTATCAGTTGTTGGGAAAGCAATGGACCGAGTG
AACCGGCAGTACGCTCAATTTTTGCCTTAGCGTATACAGCATCAAAACCAAGACCAAAAC
TCCAGCTATTGTTAAGGCGGTAGGCTCCGCTAAGGTTAAGGTTGATCGTCTGCAGATCGG
TTTTACCGCCATAGATTCCAGCAGCGTAGTTATCATTAAATTCCGTGGCCAGACCATAGT
TCGAGGTAATAGAAGCCCCCCAACCAAACTGATCGTTAATAGGTGCTACGAAATGTAGGT
TAGGCACCCACGCAGTTGGTGCAATATTATCTGCATCAGCACGCTGGCCCGTTAAATCGG
AACGCCCAGAAATATCTACATCCGGGTCAATATAAACCGCACCCGCAGAAAATGTCGGGC
GGTCAAACATGGTAATCAATGCGGGGTTACGGCTGACGTTACCTGCATCATCGGCAATTG
CGCCTTCCCCTGAATAAGCCCGGCCCAGGCCAGAGGAAGAAAATTCGTTTAACTGAAAGC
CTGCCGACCAGGCCTGGGTGGAGATAAGTGCCACTGCGACTGCGAGAGCAGACTTTGTAA
ACAGGGTTTTCTGGCTCATGACCATAACCTCAATGATTTATTTTTATACAAACTATGTTA
CGTGCTGTAACAGGAGCGCGAAGTGTAGGGTCTGAGGTACATCTTAGAAATCAGACCAGT
GGCGAGAGTATAGGTCGGACCAGCTGGAATGTTGCAAGTATGTTTCTATCTTTTTTCAAA
TATGATCTAAGAAACGCGATCCAGCTGGCAAAATTTGGAGGTGGCGCACTCATGGATTCG
GGTGAATTTTGTTTTAGATCATTTTTAAGTGTGATTTCGGTCACTTATCCGATTTTGCAG
AATTAACAACTGGAGCAGCACTTTCCGGAAGCGTAAAATATCCACAACGTTTATCTGGCA
CCTTGGGTGCACATACAGAGGAAATCAACGATGAGTAAATGTAGTGCTGATGAAACCCCG
GTTTGCTGCTGTATGGATGTTGGCACCATTATGGACAACTCCGACTGCACCGCGTCTTAC
AGCCGCGTGTTTGCAAACCGCGCAGAAGCAGAACAAACGCTGGCGGCACTGACTGAGAAA
GCCCGTAGCGTGGAATCCGAACCGTGCAAAATCTCCCCGACTTTCACTGAAGAGTCTGAT
GGTGTGCGCCTGGATATCGATTTCACTTTTGCCTGCGAAGCTGAAATGCTGATCTTCCAG
CTGGGTCTGCGTTAATTCCTCTCGGGTACGTACGCCCCTGTCAGTTGCTGGCAGGGGCGT
TTTCTTTTCTCTTCTTCTTTTCTCTCTGTGTCATAGCTCCCACTTTCCCTTTTCTCCGCT
TGGCTAAATGTAAAAAAATGGTTAAGACTATGATCAGGTCAGACCACTTTATTTATTTTT
TTACAGGGGAGTGTTATGGGTCAGGTTTTACCGCTGGTTACCCGCCAGGGCGATCGTATC
GCCATTGTTAGCGGTTTACGTACGCCTTTTGCCCGCCAGGCGACGGCTTTTCATGGCATT
CCCGCGGTTGATTTAGGGAAGATGGTGGTAGGCGAACTGCTGGCACGCAGCGAGATCCCC
GCCGAAGTGATTGAACAACTGGTCTTTGGTCAGGTCGTACAAATGCCTGAAGCTCCCAAC
ATTGCGCGTGAAATTGTTCTCGGTACTGGAATGAATGTGCATACCGATGCTTACAGCGTC
AGCCGCGCTTGCGCTACCAGTTTCCAGGCGGTTGCAAACGTCGCAGAAAGCCTGATGGCG
GGGACTATCCGAGCGGGGATTGCCGGTGGGGCAGATTCCTCTTCGGTATTGCCAATTGGC
GTCAGTAAAAAACTGGCGCGCGTGCTGGTTGATGTCAACAAAGCCCGCACAATGAGCCAG
CGTCTGAAACTCTTCTCTCGCCTGCGTTTGCGCGACTTAATGCCCGTACCACCTGCGGTA
GCAGAATATTCTACCGGCTTGCGGATGGGCGACACTGCAGAGCAAATGGCGAAAACCTAC
GGCATCACCCGAGAACAGCAAGATGCATTAGCGCACCGTTCGCATCAGCGTGCCGCTCAG
GCATGGTCAGACGGAAAACTCAAAGAAGAGGTGATGACTGCCTTTATCCCTCCTTATAAA
CAACTGCTCGCGGAAGACAACAATATTCGCGGTAATTCCTCGCTTGCTGATTACGCAAAG
CTGCGTCCGGCGTTTGATCGTAAACACGGAACGGTAACGGCGGCGAACAGTACGCCGCTG
ACCGATGGCGCAGCGGCGGTGATCCTGATGACTGAATCCCGGGCGAAAGAATTAGGGCTG
GTACCGCTGGGATATCTGCGCAGCTACGCATTTACCGCTATCGATGTCTGGCAGGACATG
TTGCTCGGTCCAGCCTGGTCAACACCGCTGGCGCTGGAGCGTGCCGGTTTGACGATGAGC
GATCTGACATTGATCGATATGCACGAAGCCTTTGCAGCTCAGACACTGGCGAATATTCAG
TTGCTGGGTAGTGAACGTTTTGCTCGTGAAGCACTGGGGCGTGCACATGCCACTGGCGAA
GTGGACGATAGCAAATTTAACGTGCTTGGCGGTTCGATTGCTTACGGGCATCCCTTCGCG
GCGACCGGCGCGCGGATGATTACCCAGACATTGCATGAACTTCGCCGTCGCGGCGGTGGA
TTTGGTTTAGTTACCGCCTGTGCTGCTGGTGGGCTTGGCGCGGCAATGGTTCTGGAGGCG
GAATAATGGAAATGACATCAGCGTTTACCCTTAATGTTCGTCTGGACAACATTGCCGTTA
TCACCATCGACGTACCGGGTGAGAAAATGAATACCCTGAAGGCGGAGTTTGCCTCGCAGG
TGCGCGCCATTATTAAGCAACTCCGTGAAAACAAAGAGTTGCGAGGCGTGGTGTTTGTCT
CCGCTAAACCGGACAACTTCATTGCTGGCGCAGACATCAACATGATCGGCAATTGCAAAA
CGGCGCAAGAAGCGGAAGCTCTGGCGCGGCAGGGCCAACAGTTGATGGCGGAGATTCATG
CTTTGCCCATTCAGGTTATCGCGGCTATTCATGGCGCTTGCCTGGGTGGTGGGCTGGAGT
TGGCGCTGGCGTGCCACGGTCGCGTTTGTACTGACGATCCTAAAACGGTGCTCGGTTTGC
CTGAAGTACAACTTGGATTGTTACCCGGTTCAGGCGGCACCCAGCGTTTACCGCGTCTGA
TAGGCGTCAGCACAGCATTAGAGATGATCCTCACCGGAAAACAACTTCGGGCGAAACAGG
CATTAAAGCTGGGGCTGGTGGATGATGTTGTTCCGCACTCCATTCTGCTGGAAGCCGCTG
TTGAGCTGGTAAAGAAGGATCGCCCATCTTCCCGCCCTCTACCTGTACGCGAGCGTATTC
TGGCGGGGCCGTTAGGTCGTGCGCTGCTGTTCAAAATGGTCGGCAAGAAAACAGAACACA
AAACTCAAGGCAATTATCCGGCGACAGAACGCATCCTGGAGGTTGTTGAAACGGGATTAG
CGCAGGGCACCAGCAGTGGCTATGACGCTGAAGCACGGGCGTTTGGCGAACTGGCGATGA
CGCCACAATCGCAAGCTTTGCGTAGTATCTTTTTTGCCAGTACGGAAGTGAAGAAAGATC
CCGGCAGTGATGCGCCGCCTGCGCCATTAAACAGCGTGGGGATTTTAGGTGGTGGCTTGA
TGGGCGGCGGTATTGCTTATGTCACTGCTTGTAAAGCGGGGATTCCGGTCAGAATTAAAG
ATATCAACCCGCAGGGCATAAATCATGCGCTGAAGTACAGTTGGGATCAGCTGGAGGGCA
AAGTTCGCCGTCGTCATCTCAAAGCCAGCGAACGTGACAAACAGCTGGCATTAATCTCCG
GAACGACGGACTATCGCGGCTTTGCCCATCGCGATCTGATTATTGAAGCGGTGTTTGAAA
ATCTCGAATTGAAACAACAGATGGTGGCGGAAGTTGAGCAAAATTGCGCCGCTCATACCA
TCTTTGCTTCGAATACGTCATCTTTACCGATTGGTGATATCGCCGCTCACGCCACGCGAC
CTGAGCAAGTTATCGGCCTGCATTTCTTCAGTCCGGTGGAAAAAATGCCGCTGGTGGAGA
TTATTCCTCATGCGGGTACATCAGCGCAAACCATCGCCACTACGGTAAAACTGGCGAAAA
AACAGGGCAAAACGCCCATTGTCGTGCGTGACAAAGCCGGGTTTTACGTCAATCGCATCT
TAGCGCCTTACATTAATGAAGCTATCCGCATGCTGACCGAAGGTGAACGGGTAGAGCACA
TTGATGCCGCGCTAGTGAAATTTGGTTTTCCGGTAGGTCCAATCCAACTTTTGGATGAGG
TAGGAATCGACACCGGGACTAAAATTATTCCTGTACTGGAAGCTGCTTATGGAGAACGTT
TTAGCGCGCCTGCAAATGTTGTTTCTTCAATTTTGAACGACGATCGCAAAGGCAGAAAAA
ATGGTCGGGGTTTCTATCTTTATGGTCAGAAAGGGCGTAAAAGCAAAAAACAGGTCGATC
CTGCCATTTACCCGCTCATTGGCGCACAAGGGCAGGGGCGACTCTCCGCACCGCAGGTTG
CTGAACGGTGTGTGATGTTGATGCTGAATGAAGCAGTACGTTGTGTTGATGAGCAGGTTA
TCCGTAGCGTGCGTGACGGGGATATTGGTGCGGTATTTGGCATTGGTTTTCCGCCATTTC
TCGGTGGACCGTTCCGCTATATCGATTCTCTCGGCGCGGGCGAAGTGGTTGCAATAATGC
AACGACTTGCCACGCAGTATGGTTCCCGTTTTACCCCCTGTGAGCGTTTGGTCGAGATGG
GCGAGCGTGGGGAAAGTTTTTGGAAAACAACTGCAACTGACCTGCAATAAGAAGGTCAAA
GCTATATGAATCCGCGCTGAATGGCGGATAGTTGGTCAAAATGTAAACACATATTGACTA
TACTTACGCCATTGAGGTAAAAAAACAGCGTTTCATTCGGTGAATGGATAAGGCACAATG
CCGGCCACCGTTTTCTTTCTCTGGTTTCAGATGAAAGAAAACGGGCGAATCTGGTTAACA
AAAGCGGTGCAATATGCAAGTTTTTATCATGCGTCACGGCGACGCAGCCCTCGATGCCGC
CAGTGATTCGGTTCGTCCTCTGACTACTAATGGTTGTGACGAATCTCGCCTGATGGCGAA
CTGGCTGAAAGGTCAAAAAGTGGAAATCGAACGCGTTCTGGTGAGCCCGTTCCTGCGAGC
CGAGCAAACACTGGAGGAAGTAGGGGATTGTCTGAACCTGCCTTCCAGTGCAGAAGTTCT
GCCGGAGTTAACGCCCTGCGGCGATGTTGGTCTGGTCAGTGCCTATTTGCAGGCGTTGAC
CAATGAAGGTGTTGCTTCGGTGTTGGTTATCTCCCACTTACCGTTAGTTGGGTATCTGGT
CGCCGAGTTATGTCCGGGCGAAACGCCGCCTATGTTTACCACCTCGGCCATTGCCAGCGT
CACGCTTGATGAAAGCGGAAACGGCACATTCAACTGGCAGATGAGCCCGTGTAATCTGAA
GATGGCGAAAGCTATCTGATTTGTTTGAAAAAATGCCCGATGTAAGCTGTACATCGGGCA
TTTGTCTTTTTGCAATAGTATAAATTCACTCAAAACCCTTCACGGAGTTGGTATGCTGCG
ATGATGATTTCATCGCACTCTTTCCTCTGCTTCCCTATTAATTTCTGATGAAATGAGACT
AAGTTGTAATATATTTTTACAAATTATAAAACTAATGGAACAATTAACAGTAAAAAAGAA
ATGATATTTTTGTGTCTTGATTTAATATTATTTGTGATGCTTTAATATTATATCTTCAAA
AAATACAATTTCAAAATTAATCTAAGATCGTCTTTTTTGTATACATTTCCCATAAATTTT
AATTATGTAAAAGATGTTTTCTAAGCATTTTATTTGTTTTTTATAAGTAAACTCTCAAAA
TTTCACCTTTTTGATTATATGTTAAGTGCTCCTTAATTTACTGTTAAGTAAATATAAATT
GAAACAATAAAGACAAAACATCACCATCCACCCACACCAAAGAATATCTTCTTATGCGAC
CTATTTTCTTGTTAGTTAGATCGGATAGCTTATTCAATGGCTGAGTATAAATAATTGCTA
TTGACTGAATCAATGTATTGCAATGTTTATATTTTTAATTATTTATGGTTTAAGGACAAA
TAATGAGTAAGTTTGTAAAAACAGCTATTGCTGCAACAATGGTAATGGGTGCGTTCGCTT
CTACTTCAACAATCGCCGCTGGCAACAACGGTACAGCTCGTTTTTACGGCACCATTGAAG
ATTCCCCGTGCTCCATCGTTCCTGATGATCACAAACTGGAAGTGGATATGGGTGACATTG
GTTCGGGGATCCTGAAAAATAACGGGACCTCCACGCCGAAAGCTTTCCAGATCCATCTGC
AAGACTGCGTGTTTGACACCCAGACAACCATGACAACGACCTTCACCGGTAACGCGTCCG
CTACCAACAGCGGCAATTACTACACCATTTACAATACCGACACCGGCGCGGCATTTAACA
ATGTCAGCCTGGCGATTGGTGATGCTCAGGGGACCTCTTACAAAAGCGGTACGGGCATCA
ACCAGACAATTGTAAAAGATACTGCCACCAACAAAGGCAAAGCGAAGCAGACGCTGGACT
TTAAAGCCTGGCTGGTGGGCGCTGCTGATGCGCCAGATTTGGGTAACTTCGAAGCCAACA
CGACTTTCCAGATTACTTATCTCTAAGTGATATCCCCATAGCCTTCGGCTATGGGGTTTT
TTAAATGGAATTTGCGCAAATTATAATAATTACGGATGGATACGTGCATGCCTGACGATT
CTCTTTTCCGACTGCGGGTGCTTCCCTGCTGCATTGCGCTGGCAATGTCAGGGTGTTATG
TCAATGCCTGGGCTGAAGATGAAATTCAGTTTGATTCCCGTTTCCTGGAGTTAAAAGGCG
ACACAAAAATCGATCTGAAGCGATTTTCCAGCCAGGGATATGTCGAACCTGGTAAATACA
ATTTACAGGTTCAACTAAATAAACAGCCGCTGGCGGAAGAATACGATATTTACTGGTACG
CCTCTGAGAACGATGCCAGTAAAACCTATGCCTGCCTGACACCTGAACTGGTCGCTCAGT
TTGGTTTAAAAGAGGATGCGGCAAAAAACCTGCAATGGATCCACGACGGCAAATGTTTGA
AACCCGGCCAGCTGGAAGGCATTGATATTAAAGCTGACCTGAGTCAGTCAGCGTTAGTCA
TTTCATTACCCCAGGCTTACCTTGAATATACCGACACCGACTGGGACCCACCTTCACGCT
GGGATGACGGTATTTCTGGTTTAATTGCTGACTACAGTATTACCGCCCAGACACGACATG
AAGAAAATGGCGGGGATGACAGCAATGAAATTAGCGGCAACGGAACGGTTGGGGTTAACC
TCGGCGCATGGCGTCTGCGAGCCGACTGGCAGACCGACTACCAGCACAGCAAAAGCAATG
ATGAAGATGTTATCAACGGTGATGACACGCAAAAAAACTGGGAGTGGAGCCGCTACTACG
CCTGGCGGGCTTTACCGTCGCTAAAAGCCAAACTTGGCCTTGGCGAAGACTACCTTAATT
CTGATATTTTCGACGGCTTTAACTACGTGGGTGGCAGTATCAGCACCGACGATCAAATGT
TGCCGCCGAATCTGCGCGGCTATGCGCCGGATATCTCCGGCGTGGCGCACACCACCGCGA
AAGTGACCGTCAGCCAGATGGGCCGCGTGATTTACGAAACGCAGGTTCCGGCGGGGCCGT
TCCGCATCCAGGATCTTGGCGATTCTGTCTCCGGTACACTGCACATCCGCATTGAAGAAC
AGAACGGCCAGGTGCAGGAATATGACATCAACACCGCCTCGATGCCGTTCCTGACCCGCC
CCGGCCAGGTGCGCTATAAGCTGATGATGGGCCGCCCGCAGGAGTGGGGGCATCATGTTG
AAGGTGGTTTCTTCTCCGGCGGCGAAGCTTCATGGGGGATTGCCAACGGCTGGTCGCTCT
ACGGCGGAGCGCTGGCAGATGAACACTATCAGTCGGCGGCGCTTGGCGTCGGTCGCGACC
TGTCTGTCTTTGGCGCAGTCGCCTTTGATATCACCCACTCGCATACCCGCCTGGATAAAG
AGACCGCCTACGGTAAAGGTTCACTGGACGGTAACTCGTTTCGCGTGAGCTATTCCAAAG
ACTTCGATGAACTGAACAGCCGCGTCACTTTTGCCGGATACCGCTTCTCGGAAGAGAACT
TCATGACCATGAGCGAGTATCTCGATGCCAGCGACAGCGAAATGGTGCGCACTGGCAACG
ACAAAGAGATGTACACCGCCACCTACAACCAGAACTTCAGGGATGCCGGTGTGTCTGTTT
ATCTAAACTACACCCGCCATACCTACTGGGATCGCGACGAACAGACCAACTACAACGTCA
TGCTCTCGCACTACTTCAACCTGGGCAGTATCCGCAATATGAGTATTTCCATGACCGGAT
ACCGCTACGAATATGACAACCGCGCCGATAAAGGTGTGTACATATCGCTCAGTATGCCGT
GGGGCGACAGCAGCACCATCAGCTATAACGGTAACTACGGCAGCGGTGCGGACAGCAGCC
AGGTGGGGTATTTCAGCCGTGTCGATGACGCAACCCACTACCAGTTGAACGTGGGAACCA
GTGACAAACACTCCAGCGTTGACGGCTATTACAGCCACGATGGTTCGCTGGCGCAGGTCG
ATCTCAGCGCCAACTACCATGAAGGGCAGTACACCTCGGCGGGCATTTCCTTACAGGGCG
GCGCGACGCTCACCGCACAAGGTGGCGCGCTTCACCGTACCCAGAATATGGGCGGCACGC
GTCTGCTGATTGATGCCGACGGCGTGGCTGGTGTTCCGGTAGAAGGAAATGGTGCGGCGG
TTTACACCAATATGTTCGGTAAGGCCGTGGTGGCAGACGTCAACAACTACTACCGCAACC
AGGCGTATATCGACCTTAACAACCTGCCGGAAAACGCCGAAGCCACCCAGTCCGTGGTGC
AGGCGACGCTTACCGAAGGAGCCATTGGCTACCGTAAGTTTTCGGTTATCAGCGGGCAAA
AAGTGATGGCGGTATTGCGCCTGCAAGATGGCAGTCATCCGCCGTTTGGCGCGGAAGTGA
AAAATGACAACGCGCAGAACGTCGGTCTGGTTGATGATGATGGCAACGTCTACCTCGCGG
GTGTGAAACCTGGCGAGCATATGACCGTTTCATGGGGCGGCGTGGCCCACTGTGATATTC
ATCTGCCGGACCCACTGCCTGCCGATCTGTTCAATGGCCTGTTATTGCCATGTCAGCAAA
CAGGGCCGATATCTCCTTCGATGCCCAATGAAATTAAGCCGGTGATCCAGGAGCAGACCC
AGCAGGTGATGCCAACGGAAGCGCCGGTATCGGTATCCGCCAATTAACAACGTGATTAAG
GAATGATCCATGACGAATCTATTTTGCTCTGCCAGAACGGCCGCAACGACGCTGGCGTTA
CTGATAACTGCCGCCAGCCTGTCAGCACAGGCCTCTGTCACGCCGGACCGTACACGCCTG
ATTTTTAACGAAAGTGATAAATCAATCAGTGTCACGCTGCGCAATAACGACCCGAAAATG
CCGTATCTGGCACAAAGCTGGATGGAAGATGAACAGGGTAACAAGATTAGCTCGCCACTG
ACGGTACTGCCGCCGGTGCAGCGCATCGATTCCATGATGAACGGTCAGGTGAAGGTACAG
GGCATGCCGGATATCAACAAGCTGCCTGCCGACCGCGAGAGCGTGTTCTATTTCAACGTG
CGTGAGATCCCGCCGAAATCGAACAAACCCAACACGTTACAGATTGCGCTGCAAACGCGC
ATCAAGCTGTTCTGGCGACCAAAGGCGCTGGAAAACGTCAGCATGAAAAATCCATGGCAG
CATAAGGTGACCTTAACCCGCAGCGGCCAGGAGTTTACTGTCAATAACCCGACGCCGTAC
TTCGTGGTTATCAGTAACGCCAGCGCGCAGAAAAACGGCAATCCGGCAGCGGGATTTTCT
CCCATGGTGATATCGCCAAAAACCTCCGTGCCGCTGAATGTCAAAATGGATAGCGTCCCG
GTGCTGACCTACGTCAACGACTATGGCGCGCGGATGCCGCTGTATTTTAAATGTGGTGGC
GATACCTGCCAGGTGGACGCAGAGCAGAGCCGCAAAGGCTGATGCCGGGAGAGCCATATG
AAAATAATTTATCTGGCGGTGTCGGGCATTGCGCTGCTGGCCTGGAATGTCGCCAGTGCA
GAAACGAAACCCGTCAACCTGGAACTCAGAGTCCTGGTGGATGCGCCGCCGCCCTGTACC
GTGACCGGTAGTGCAGTGGAGTTTGGCGATGTGCTGATCGCCAGTATCGATGGCAACAAT
TACCGCCAGAACGCGGGCTATACCCTCGATTGTTCGGGGCGTCTGGCAGACGATCTGCGG
ATGCAACTGAAGGGCACCACCACAACCGTGAACGGTGAAACTGTGCTGGATGCAGGCATT
GCCGGGTTTGGCATCCGCATCGAAAACGCCGCCGATAACTCGCTGTTTTCCATTGGTGAA
AATAACTGGACGCCTTTTGCATTTAACTCTCTGCCGCAACTGAAGGCTGTGCCGGTAAAA
CAGAAGGGCGTGCAGCTCGCGCCAACGGAATTTAACGCCAGTATGACCATGGTGGTGGAT
TACCAATGAAACGACTCGCACTTTTCCTGATTTGGGGTGCCTGCGGGGGCGCTCTGGCCT
CACCGGATATCACCTTTCACGGCACGCTGGTGTCGCCGCCTGCCTGCACCATCAACGAAG
GCCAGACCATTGAACTGGAGTTTCGCGATGTACTTATCGACAGCATTGATGGCAACTACG
CCCGCCAGGAGGTGCCGTACACCATCAAATGTGACTCCGACGTTCGCAATGAGGCCTGGC
AGATGACGCTCACCTGGACCGGGACGCAAACCAGCTACAACGATGCGGCAATCGAAACCG
ATGTTCCGGGATTCGGGATTCAGCTTTTGCAAAACGGGCAACGTTTTCAGCTTAATACCC
CACTGACCATCAATGCCACGGATTTGACACAAAAACCGAAGCTTGAGGCCGTTCCGGTTA
AAGCGAGTGACGCTGTTTTAAACGACGGCACGTTTTCAGCGTACGCAACATTACGGGTGG
AATATCAATGAAGACAAATACCGGATGTGTGCTTCTGGCAAGCCTGATGCTCACCGCCAG
CGGAACCACGTTGGCGGCGGACAACCTGCATTTTTACGGCAACTTGTTAAGTAAATCCTG
CACGCTGGTGGTGGATGGTGAAGTGCTGGCGGAAGTGCATTTCCCGACCATCAGCAACCA
GGATTTAACGGTGGCGGGCCAGTCTTCCAGGGTGCAGGTGGTCTTTAAGTTGAAAGATTG
CAAAGGCCCGGCGGATTACCAGGTCAAAGTCACGCTGACCGGTACGGAAGATAGCGAACA
GCCAGGTTTTCTGGCGCTTGACCCGGCATCCAGCGCGCAAGGGGTAGGGATTGGTATGGA
AAAGTCAGACGGTACCTGGGTGCCGCTTAACGATTCTGCCGGTGCCACCTTTAACCTCAC
TAACGGCGCGAATAACCTCAATTTTAATGCCTGGTTGCAGGCGAAAAGCGGTCGTGAAGT
GACTTCTGGTGACTTCACCGCCAGCCTGACTGCCACTTTTGAGTATATTTAAGATGAAGA
TAATACGAAACTTTTTGGGGCTGTTGACGCTGATGGTGTTGAGCCTGACGGCTCAGGCAC
AGACATTTCAGATGTATACCCCTATGGGTGTACCAGGCGCTTTAGCCAGGATAATATTTA
CTCTGGAAGTTGTTACCCCTGCAGGCGTTTATACAGGTACATATCAGTCGCGCGATCCCA
GGATGCTTCTCGTTGGCAATTTAACATTGTTAAGCTGGAATGGTCCATCTTCAATTCCTG
CGCCAACTATTTATCTGGATCATTCGAACGAAATAAATATGTCAAATTGTCCCGGTCTTG
CTGGCGTTCCCTCCACCAACGGCAAAGGATGGGATTGTTATGCTGCTGATTTAAAAGTCA
CGGTAACAGGGGACGTGCAGGGGTGTCCATGGCTGGTTTCAACCCAGATTACCACTACGG
ACCTGGGAGATGTGGGGGCTACCTATGTAGGTCCTAAATACAATAACTCCACCTGTCCAT
CAATCCCACTGACGACATATGATGTTTCCTGGGATGAGAATACGGTGATTCATAAAAAAA
CATTGAATCTGAAATCAACAGACGCCGTAGGGGGAATCATCGAGAAAACCCTGTCGACCT
ATTTAATGGAAAGTGAGAGGCTGTGTGATGGTAGCCAGTTTGATCCTCGCGGGGCAAATT
GCCGTTTTGTTTCGCAGATGATCACTTTTACAGCATCAGGCTGCGACGATGCCAAAGTGA
CGGTGACGCCGGTTCCGCATCCGATTACTGACAGGCAACTGCATGATATTGTGGTGCGCG
TCGATGCCAGCGCATTGCAGCCTATTGATTCAACGTGTCGCTTCCAGTATGTGTTGAATA
TGTTCTAGCACATACCAGCCTGGTGACAGGAGTTTACCAGGCTTTTTTTCTCTCATATTG
GATAATTTGCCCTACCTGAACACATTTAGGCCGGATAAGGCGTTTACCCCGCATCCGGCA
TTCGATACCAGCATTCAGGGCGAAATGGCAAAACGCATCCGCCCCTAATATTCACGGTAA
CTCCGGCGGCAGCCACTCTTCCACTTCAATCAACACTAACAACGCTGCATCTCCGCCGTA
CTCTTTCGGTGCCTGGTGAAATGCCATTACATGCGGATGTTGCGCCAGCCACAGCGGCGT
TTGCTGTTTCAAAATATGCTTCCCGTGCCCGTGCATTACGCATGCGCAAAACACATGTTC
ACGGCGGCAGGCGGCAATCAACGCCCCCAGTTCCTGCTTGGCCTGCATTTGCGTCAAACC
ATGTAAATCGAGGAAAAGCTCCGGTGAATAATCGCCGCGTCGCAACTTCTTCGCCTCAAA
ATGACTCACATCCGGGCGGACATATTTCACCGGGCCTTCGGTATTCAATAACGGCTGAAA
CTCATCTGAGAAATAATGGCTGGCATCGGCCTGCTCCTGAATCAACCGTTTCACCGGCAC
TTCGCTGATTTTCTTACGCTGCGGTCGGTGGACAATCGTGTCCTGCTTAATCTTGCGAGT
CCCCGCCATCAACTGGCGAAACAGAGCCTGGTCCTCCTCGCTAAGTGTTGTTTTCTTTTT
CATTTATCTGTCTCTATTTCTAATTTTCCTACAGTTTACCCGACTCGTAGCGCAATCGAT
CGTTTTAAACGTATTTTTCCTCACTCACCGCGCGTGAATGCTGATTTATCGTCATCTTCG
TGGCAAACTAGCCGCCGAAATTATTGCGATCATGCCCTGGAGGAATACGTGGATAAAATT
TTCGTTGATGAAGCAGTTAATGAGCTGCAAACCATTCAGGACATGTTGCGCTGGTCGGTT
AGCCGCTTCAGCGCGGCAAATATCTGGTACGGTCACGGCACCGATAACCCGTGGGATGAA
GCGGTACAATTGGTGTTGCCGTCGCTCTACCTGCCGCTGGATATTCCGGAAGATATGCGC
ACCGCGCGTCTGACCTCCAGCGAAAAACATCGTATTGTTGAGCGCGTGATCCGCCGCGTC
AACGAACGCATTCCGGTGGCTTACCTGACCAATAAAGCATGGTTCTGCGGTCATGAATTT
TACGTCGATGAACGTGTGCTGGTGCCGCGCTCGCCGATTGGTGAACTGATCAACAATAAA
TTTGCCGGGCTAATCAGCAAGCAACCGCAGCATATTTTAGATATGTGTACCGGTAGCGGC
TGCATTGCCATTGCCTGTGCTTATGCCTTCCCGGAAGCGGAAGTCGATGCGGTAGATATC
TCTCCCGACGCGCTGGCGGTTGCCGAACAGAACATCGAAGAACACGGTCTGATCCACAAT
GTCATACCGATTCGTTCCGATCTGTTCCGTGATTTGCCGAAAGTGCAGTACGACTTGATC
GTCACTAACCCGCCGTATGTCGATGCGGAAGATATGTCCGACCTGCCAAACGAATACCGT
CACGAGCCAGAACTGGGCCTGGCATCTGGCACTGACGGCCTGAAACTGACGCGTCGCATT
CTCGGTAACGCGGCAGATTACCTTGCTGATGATGGTGTGCTGATTTGTGAAGTCGGCAAC
AGCATGGTACATCTTATGGAACAATATCCGGATGTTCCGTTCACCTGGCTGGAGTTTGAT
AACGGCGGCGATGGTGTGTTTATGCTCACCAAAGAGCAGCTGCTGGCGGCCCGTGAACAT
TTCGCGATTTATAAAGATTAAGTAAACACGCAAACACAACAATAACGGAGCCGTGATGGC
TGGAAACACAATTGGACAACTCTTTCGCGTAACCACCTTCGGCGAATCGCACGGGCTGGC
GCTTGGCTGCATCGTCGATGGTGTTCCGCCAGGCATTCCGCTGACGGAAGCGGACCTGCA
ACATGACCTTGATCGTCGTCGCCCTGGGACATCGCGCTATACCACCCAGCGTCGTGAGCC
AGATCAGGTCAAAATTCTCTCCGGTGTTTTTGAAGGTGTTACTACCGGCACCAGCATTGG
TTTGTTGATCGAAAATACCGATCAGCGTTCTCAGGATTATAGTGCGATTAAGGACGTTTT
CCGTCCTGGCCATGCCGATTACACCTACGAACAAAAATACGGTCTGCGCGATTATCGCGG
CGGTGGACGTTCTTCCGCCCGCGAAACCGCCATGCGCGTGGCGGCAGGGGCGATTGCCAA
AAAATATCTCGCCGAGAAATTTGGTATTGAAATCCGCGGCTGCCTGACCCAGATGGGCGA
CATTCCGCTGGAAATCAAAGACTGGTCGCAGGTTGAACAAAATCCGTTCTTCTGCCCGGA
CCCGGACAAAATCGACGCGTTAGATGAACTGATGCGCGCGCTGAAAAAAGAGGGCGACTC
CATCGGCGCGAAAGTCACCGTTGTAGCCAGTGGTGTCCCCGCCGGACTTGGCGAGCCGGT
CTTTGACCGCCTGGATGCCGACATCGCCCATGCGCTGATGAGCATCAACGCGGTGAAAGG
CGTGGAAATTGGCGACGGTTTTGACGTAGTGGCGCTGCGCGGCAGCCAGAATCGCGACGA
AATCACCAAAGACGGTTTCCAGAGCAACCATGCGGGCGGCATTCTTGGCGGTATCAGCAG
CGGGCAGCAAATCATTGCCCATATGGCGCTGAAACCGACCTCCAGCATTACCGTGCCGGG
GCGCACCATTAACCGCTTTGGCGAAGAAGTTGAGATGATCACCAAAGGCCGTCACGATCC
TTGTGTCGGGATCCGCGCGGTGCCGATCGCTGAAGCGATGCTGGCGATCGTTTTAATGGA
TCACCTGCTACGGCAGCGGGCGCAAAATGCCGATGTGAAGACTGATATTCCACGCTGGTA
AAAAATGAACAAAACCGCGATTGCGCTGCTGGCCCTGCTTGCCAGTAGCGCCAGCCTGGC
AGCGACGCCGTGGCAAAAAATAACCCAACCTGTGCCGGGTAGCGCACAATCGATAGGCAG
TTTTTCTAATGGCTGTATCGTCGGCGCTGACACGCTGCCGATACAGTCCGAACATTATCA
GGTCATGCGTACCGATCAGCGTCGCTATTTCGGTCACCCGGACCTGGTGATGTTTATCCA
GCGTCTGAGTAGCCAGGTGAGCAATCTGGGCATGGGTACGGTGCTGATTGGCGATATGGG
GATGCCCGCTGGTGGGCGTTTCAACGGCGGTCATGCCAGCCACCAGACCGGACTGGATGT
CGATATCTTTCTGCAACTGCCGAAAACACGCTGGACCTCCGCGCAGCTCTTGCGCCCGCA
AGCACTGGACTTAGTTTCCCGCGACGGTAAACACGTTGTCCCCACGCTGTGGAAGCCAGA
AATTTTCAGCTTGATCAAACTCGCCGCCCAGGACAAAGACGTCACACGCATTTTTGTTAA
TCCGGCGATTAAACAACAACTTTGCCTTGATGCGGGCACCGATCGCGACTGGTTGCGCAA
AGTGCGACCCTGGTTCCAGCATCGCGCGCATATGCATGTACGATTACGTTGTCCTGCCGA
TAGTCTGGAGTGTGAAGATCAACCTTTACCGCCACCAGGCGATGGTTGCGGGGCAGAACT
GCAAAGCTGGTTTGAACCTCCAAAACCGGGAACAACAAAGCCTGAGAAGAAGACACCGCC
TCCGTTGCCGCCTTCCTGCCAGGCGCTACTGGATGAGCACGTGATCTAATGGAAACGTTT
AATAGCCTGTTTATGGTTTCCCCGCTGTTGCTGGGAGTTCTCTTTTTTGTCGCCATGCTG
GCGGGATTTATCGACTCGATTGCCGGTGGTGGTGGGTTACTCACGATTCCGGCATTAATG
GCTGCGGGGATGTCTCCCGCTAATGCGCTGGCAACCAATAAACTGCAAGCCTGCGGCGGC
TCTATTTCCGCCACTATCTACTTTATTCGCCGCAAAGTGGTTAGTTTAAGCGATCAGAAA
CTCAATATCGCCATGACCTTTATCGGCTCAATGAGCGGCGCACTGCTGGTGCAATACGTT
CAGGCTGATGTCTTACGGCAGATTTTGCCCATTCTGGTGATTTGTATCGGCCTCTATTTC
TTGCTGATGCCAAAGCTGGGTGAAGAAGATCGCCAGCGCCGGATGTACGGTTTACCCTTC
GCGTTAATTGCCGGTGGCTGCGTCGGTTTTTACGACGGATTCTTTGGTCCGGCAGCCGGA
TCGTTTTACGCGCTGGCCTTTGTTACGCTGTGCGGATTCAACCTCGCCAAAGCCACGGCT
CACGCCAAATTACTTAACGCAACGTCAAACATCGGCGGTTTGCTGCTGTTTATTCTCGGC
GGCAAAGTGATTTGGGCGACGGGCTTTGTGATGCTGGTGGGGCAGTTCCTCGGCGCGCGC
ATGGGTTCAAGACTGGTGTTGAGCAAAGGACAAAAGCTGATCCGCCCGATGATTGTTATC
GTCTCGGCGGTGATGAGTGCCAAATTACTTTACGATAGCCATGGACAGGAGATCCTCCAC
TGGTTGGGGATGAACTAATGAACAGTACACACCACTATGAGCAGTTGATTGAAATTTTTA
ATAGCTGCTTTGCCGATGATTTTAATACCCGTCTGATTAAAGGCGACGACGAACCGATCT
ATCTTCCCGCTGAAGCGGAAGTACCGTATAACCGAATCGTCTTTGCTCATGGCTTTTATG
CCAGCGCAATTCATGAGATTTCGCACTGGTGTATTGCCGGAAAAGCGCGCCGTAAGCTGG
TTGATTTCGGCTACTGGTATTGCCCGGACGGACGCGATGCCCAAACGCAAAGCCAGTTTG
AAGATGTTGAAGTGAAGCCGCAGGCGCTCGACTGGTTGTTCTGCGTGGCGGCGGGATATC
CGTTTAACGTCAGTTGCGACAATCTGGAAGGGGATTTCGAACCGGACCGCGTGGTGTTTT
AACGGCGGGTACATGCGCAGGTGATGGATTATCTGGCAAATGGCATTCCGGAACGCCCGG
CACGTTTCATTAAAGCACTACAAAATTATTATCACACGCCGGAACTTACGGCGGAACAGT
TCCCGTGGCCGGAAGCGCTAAACTAAAGCCAGTGCCACGTTTTACAATGAGGAAAGAAGA
TGATCGCGGAGTTTGAATCACGCATTCTGGCATTAATCGACGGTATGGTTGACCATGCCA
GTGATGATGAGTTGTTTGCCAGTGGGTATTTGCGTGGCCACCTGACATTAGCCATCGCAG
AACTGGAAAGTGGTGATGACCACTCCGCTCAGGCGGTGCATACGACCGTTAGCCAGAGTC
TGGAAAAAGCCATTGGTGCTGGTGAATTGTCGCCGCGTGACCAGGCGCTGGTGACCGATA
TGTGGGAAAACCTGTTTCAGCAGGCATCACAGCAGTAAGTTGCGGCGTCTGGAGCACCAT
GCCTGATGCGACGCTTATCGCGTCTTATCAGGCCTACACGTCACACGTAGGTCGGATAAG
GCGTTCACGCCGCATCCGACAAACAATGCCAAAGCTGGTTACCCAGCCTTAACTGCTTTA
CCCTTCAACAATTTCCGCACCCATAACCGATTCGGATTTAACGCCGCCAGCGTACTGGCA
TCCATCGGAATCGGTTCTTCACTCATCTGTGCCGCCAGAATCTCTGCGCACAGTGGGGCA
GAACACAAACCACGCGAACCCAAAGCAGCAAGCATAAAGAGATCGTCATAAACCGGCGCG
CTTACCGCCTTATCTTTCTGCTCCGCCAGCGACGCATATTCCACAAGTGTTGCCTCATAA
TCGGGAACATTACCTACCATTGGTAGATGATCGCGGGTGGCACAACGCACACCGCAGCGC
GCCTCTTTCTCACTGATATCAACCTCTTTTGCCCACTGTGCCTGCGGGAAACAATCAATC
AACCGCTGGCGATTCTGCTGCTGATCTTCATCACTGTACGTCGTATCTTCGCTGCCGCGA
TGATAACTGGCACCAATACAATGATGCTGATTCGCCGGATTTTGTGGCGTGAGATAACCG
TCATAGCACAGCACCTGCTTCAGTTTTGCCAGTTCCGGTGTCGTCGGAATATGGCTGACC
TGACCGGCAACCGAATATACTGGCAGAGATGATGTTTGGCTGAAACGGCTGATTTGATGC
CCGTTCGCCAGTACCACTACGCTGTGTGTTGCTTGCTGATCTCCTGCAAAATTCAACAAC
CAACAGTCATCCTTACGGGATAAATCCTGTAACTGATATTGATAATAAATCTGCAACCCC
TGCTGTTGCGCCAGTTCCAGCACATTACGGGTCAGTTCTGCTGGGCACAGCCAACCACCT
TGCGGATAAGTAATGCCGCTGCAATTTGTCGCAACGCCCGTAATTTGTTCAACCGCATTT
GCCTCAACGGCTACAGCCAGTTCTTCGGGTAAATCCATTGACAACATCTGTGCGATTTTA
TGCTGGCTTTTCTCATCCCAGCCTAACTGCGTGACGCCGCACCAGTCATGATCAAATTTA
ACGGGTAATTGGTCGTAAAACCGACGAGCAAAAGTAAACGCATTAGAGAAAAAGCGGTTT
AGCGCCTCATCGTGTTTGCTTAATAACGGATACAACGCCCCCTGGCGATTGCCGGAAGCA
CCCAGCGCGGGGGCTTCATCCGCGCAATAAAGCGTTACCTGCCAGCCGCGGCGTAATAAC
GCCAGCGACAACAACGCGCTGGCAATACCACCGCCGATAATCGCCGCTTCCAGTTTGCTG
CTGCCCGTACGATTAAACCACGGCGTGGAGCAGGGGAGTGGTAATGTCTGTTCCATCACC
CCACAAAGCATTTCCCGTTTGCGCCCAAAGCCCTTACGTTTTTGCATCGTGAATCCGGCT
TCCTGCAAACCGCGGCGGACAAAACCGGCAGACGTAAATGTCGCCAGCGTGCCGCCTGGA
CGCGCCAACCTTGCCATGGCGTTAAACAGATTTTGCGTCCACATATCCGGGTTTTTAGCT
GGCGCAAAGCCGTCCAGAAACCAGGCATCTACTTTTTGATTTAGAGAATCGTCCAGTTGG
CTGGTCAGTTCATTAATATCGCCAAACCATAAATCCAGCGTCACGCGGCCTTCATCGAGT
AATAAACGATGGCAACCGGGCAAGGGCATTGGCCACTGCGCCTGAAGTTGTTCTGCCCAC
GGAGTCAGTTCCGGCCAGTGTTGATGCGCTAAGGCTAAATCCGCACGGGTGAGGGGAAAT
TTCTCAAAACTAATGAAATGTAAGCGTTGTAATTGCGCTTGCGGATGCGCTTCGCGAAAC
TGATCAAATGCCTGCCATAGCGTCAGGAAGTTTAATCCGGTGCCGAAGCCGCTCTCTGCT
ACCACAAACAGAGGATGTGGATGTTCAGGAAAGCGTGCCTCTAATTGGTTACCTCCCAGA
AAAACATAACGCGTCTCTTCCAGCCCGTTATCGTTGGAAAAATAGACATCGTCAAAATCT
CGGGAAACAGGTGTACCCTCAGCATTAAATTCGAGGTTGGCAGGTTGTATGGAGTAGTGT
TTCACGTAAGTTACTCGTCTTACAGGCGGTGGCTCGATCTTAGCGATGTGTGTAAGGCTG
CGCAAATTTCTCTATTAATTGGCTGATCGGACTTGTTCGGCGTACAAGTGTACGCTATTG
TGCATTCGAAACTTACTCTATGTGCGACTTACAGAGGTATTGAATGAAACGTGCAGTGAT
TACTGGCCTGGGCATTGTTTCCAGCATCGGTAATAACCAGCAGGAAGTCCTGGCATCTCT
GCGTGAAGGACGTTCAGGGATCACTTTCTCTCAGGAGCTGAAGGATTCCGGCATGCGTAG
CCACGTCTGGGGCAACGTAAAACTGGATACCACTGGCCTCATTGACCGCAAAGTTGTGCG
CTTTATGAGCGACGCATCCATTTATGCATTCCTTTCTATGGAGCAGGCAATCGCTGATGC
GGGCCTCTCTCCGGAAGCTTACCAGAATAACCCGCGCGTTGGCCTGATTGCAGGTTCCGG
CGGCGGCTCCCCGCGTTTCCAGGTGTTCGGCGCTGACGCAATGCGCGGCCCGCGCGGCCT
GAAAGCGGTTGGCCCGTATGTGGTCACCAAAGCGATGGCATCCGGCGTTTCTGCCTGCCT
CGCCACCCCGTTTAAAATTCATGGCGTTAACTACTCCATCAGCTCCGCGTGTGCGACTTC
CGCACACTGTATCGGTAACGCAGTAGAGCAGATCCAACTGGGCAAACAGGACATCGTGTT
TGCTGGCGGCGGCGAAGAGCTGTGCTGGGAAATGGCTTGCGAATTCGACGCGATGGGTGC
GCTGTCTACTAAATACAACGACACCCCGGAAAAAGCCTCCCGTACTTACGATGCTCACCG
TGACGGTTTTGTTATCGCTGGCGGCGGCGGTATGGTTGTGGTCGAAGAACTGGAACACGC
GTTGGCACGTGGTGCTCATATCTACGCTGAAATCGTTGGCTACGGCGCAACGTCTGATGG
CGCAGACATGGTTGCTCCATCTGGCGAAGGCGCAGTGCGCTGCATGAAGATGGCGATGCA
CGGTGTTGATACGCCAATCGACTACCTGAACTCCCACGGTACTTCGACTCCGGTTGGCGA
CGTGAAAGAGCTGGCTGCTATCCGTGAAGTGTTCGGCGATAAGAGCCCGGCGATTTCTGC
AACCAAAGCCATGACCGGTCACTCTCTGGGCGCTGCTGGCGTACAGGAAGCTATCTACTC
TCTGCTGATGCTGGAACACGGCTTTATCGCCCCGAGCATCAACATTGAAGAGCTGGACGA
GCAGGCTGCGGGTCTGAATATCGTGACCGAAACGACCGATCGCGAACTGACCACCGTTAT
GTCTAACAGCTTCGGCTTCGGCGGCACCAACGCCACGCTGGTAATGCGCAAGCTGAAAGA
TTAATTCGGAGTAGGTCGGAGTAGGTCGGATAAGACGCGCCAGCGTCGCATCCGACGTTA
CGCGCCAATGCGGCATTCGGCACTAACGCCAAAGGGAACCCGATGGTTCCCTTTTTCACA
TCATTGACAATCGCCGCCTGTTCCAGGCAAACTTCCCGCTTTGTCGATTTCCTTCTGAAA
AGACGTACGCGTTAATTCCTGCCAACGCACCGTAACCCTGAAACCAGAGAGATGAGACGG
GGATACTCCTCGCCTTGCGCTGCATTCTGGAGTAATGCATGACTGCTGTAAGCCAAACCG
AAACACGATCTTCTGCCAATTTTTCGCTCTTCCGCATCGCTTTTGCGGTTTTTCTCACCT
ACATGACCGTAGGGCTGCCGTTGCCGGTTATCCCGCTGTTTGTTCATCATGAACTGGGCT
ATGGCAATACCATGGTCGGCATTGCCGTCGGGATTCAGTTTCTGGCTACGGTGCTGACGC
GTGGCTATGCCGGGCGACTGGCCGATCAATATGGCGCAAAACGTTCGGCGCTTCAGGGGA
TGTTAGCTTGTGGTCTGGCGGGGGGCGCGTTGCTGCTGGCGGCGATTTTGCCCGTCTCCG
CACCGTTCAAATTTGCCCTGTTGGTCGTCGGGCGTTTGATTCTTGGCTTTGGTGAAAGCC
AGTTACTGACAGGCGCTCTGACCTGGGGATTAGGCATCGTAGGGCCAAAACACTCTGGCA
AAGTAATGTCATGGAACGGAATGGCGATTTACGGTGCCCTCGCTGTTGGTGCACCGCTTG
GCCTGTTGATTCATAGCCATTACGGTTTTGCCGCACTGGCGATCACCACAATGGCATTAC
CCTTACTGGCGTGGGCCTGTAACGGCACAGTGCGCAAAGTACCGGCCCTGGCGGGAGAAC
GTCCATCGCTGTGGAGCGTTGTCGGGCTTATCTGGAAACCAGGGTTAGGTCTGGCACTAC
AAGGCGTTGGTTTTGCGGTTATCGGGACTTTCGTTTCGCTCTACTTTGCCAGCAAAGGAT
GGGCGATGGCGGGCTTTACTCTTACCGCGTTTGGCGGGGCATTTGTCGTGATGCGCGTCA
TGTTTGGCTGGATGCCGGACCGTTTTGGCGGCGTGAAAGTGGCGATAGTCTCTCTGCTTG
TAGAAACGGTGGGCTTGTTGCTGCTCTGGCAAGCCCCGGGTGCGTGGGTCGCATTAGCGG
GCGCGGCGTTAACCGGAGCCGGATGTTCGCTTATCTTTCCTGCGCTGGGCGTGGAGGTGG
TTAAACGCGTCCCCTCACAAGTTCGCGGCACCGCACTGGGCGGTTACGCCGCGTTTCAGG
ATATCGCCCTCGGCGTCTCCGGGCCGCTGGCGGGAATGCTGGCGACCACGTTTGGTTACT
CTTCGGTATTTCTTGCCGGGGCGATCTCTGCAGTGCTGGGAATTATTGTCACGATACTGT
CATTTCGTCGGGGCTAACGAACCAGCCAGACCAGCATCAGGATAATCGCGACTAACAGTA
TCCACAGCGCGGGACGCGTTGCCATATTTTGCAACGTGTCCATCATCGGTGGAAAAGGAT
TAAGCAGCGGTTGCATATCACGCGGATCAATCCCTTTAACCCGCCGTTGATAAAGCTGAT
TAAGAATATCCTCGGCCTGGGCAGAAGAAAGCGATGATTGCGCAGAAAGGCCATATTTTT
GCTGGATATATGCCGATAACGCCGCCAGTTCACTGGCATCTAAAGGTTGTTTTAGCGCCA
TCTGTAGTGATTCCAGCGTCGGCGTATTTTGCTGGCTTAGCGTCTGACGCGCCTGTAGCC
AGGTCACCAGATGGTTAAACAGTTTCGCTGGAATTAACTCGCCATCTTTCACCCCGGAAA
GTTCCAGCATCGATTGCCAGATCTGTTTGCTGGGTTCCCCCGTTGCCGCCGCAAGTTTGG
TCACCAGCTGTTTGAGCGCATTGTGCTCCGCCGGTAATAAAGGACGATCGGTCGCCTCGC
GCTGCTGCGGTTGCGGAATAACCATCTTCCCTTCCTGCAACAGGGTTAGAATGGTTTTTA
ATTGCTCCGGTGAGAGCTGATTCAGCGGCGTCTGACCAAAGTTATGACGGATATAATCCG
TGACCGCCTGACGATTATTCCCCAGACGTAAATACTCCCCTAATTGCGCTAAAAGCTGGC
GGGCAGAATGGCTTTTTTGCGCGGCCAGCAGACGTTGCGCCAGATTATGCTCAGCGGCAG
GGAAGTGACGCGAAAGCAGCGGTGAATCTCCCGACAGACCAATATCGTGCCTGATACCCG
CCCACAGTTCTGCTCTTTGCTGTTGCGTCAGTGAGGTCACTTTCGTCATTAAGCTTTCCA
GCGAAGTACGTTGCTGACTGGATAAAGGCTGATTGCCCGCGCCAGACGGCAGGTTATCTC
CCTGACCTGGTGGTTGCCCAGGAGGAGGGCCGGAAATAGGTTGTATCATTACGTATCCTT
ATACCTGAAATCTTCGCAAGTATGCCTGGCCGCGAGATTATGGCACACTTGTCCGGTTAA
CTCTCGTCTCATACAGGTAACACAAACGTGAAAATCCTTGTTGATGAAAATATGCCTTAT
GCCCGCGACTTATTTAGCCGTTTGGGTGAGGTGACCGCGGTTCCCGGGCGTCCAATCCCC
GTCGCTCAACTGGCAGACGCGGATGCGCTGATGGTGCGTTCGGTCACGAAAGTGAATGAA
TCTTTGCTGGCAGGAAAACCCATTAAATTTGTTGGCACTGCCACTGCGGGGACCGACCAT
GTCGATGAAGCATGGTTGAAGCAGGCGGGAATTGGTTTTTCCGCTGCACCTGGCTGTAAT
GCGATTGCGGTGGTGGAATATGTTTTCTCCTCCCTGCTGATGCTTGCCGAACGCGATGGA
TTTTCACTGCACGAGCGTACCGTGGGGATCGTGGGCGTTGGTAACGTTGGACGTCGATTG
CAGGCGCGACTGGAAGCGTTAGGGATTAAAACCTTGCTTTGCGATCCGCCTCGCGCTGAC
CGTGGGGATGAGGGTGATTTCCGCTCGCTGGATGAGTTAGTCCAGCGCGCGGATATTCTG
ACTTTCCATACGCCACTCTTTAAAGATGGTCCGTACAAAACGCTACATCTGGCGGATGAA
AAACTGATCCGTAGCCTGAAGCCGGGAGCGATTCTGATTAACGCCTGCCGTGGCGCAGTC
GTCGATAATACCGCGCTGCTGACCTGCCTGAATGAAGGCCAGAAGTTAAGCGTGGTGCTG
GATGTCTGGGAAGGCGAGCCGGAACTTAATGTGGAATTGCTGACAAAAGTGGATATCGGC
ACGCCGCATATTGCAGGCTATACCCTGGAAGGTAAAGCACGCGGTACTACGCAAGTGTTT
GAAGCCTATAGCAAGTTTATTGGGCATGAACAGCACGTTGCGCTGGATACATTACTGCCC
GCGCCAGAGTTTGGTCGCATTACGCTGCATGGCCCGCTCGATCAACCGACGCTGAAAAGG
CTGGTGCATTTGGTGTATGATGTGCGCCGCGATGACGCACCGCTGCGTAAAGTCGCCGGG
ATACCGGGTGAGTTCGATAAACTGCGCAAAAACTATCTTGAGCGCCGTGAATGGTCATCT
CTGTATGTAATTTGTGATGACGCCAGTGCGGCATCATTGCTGTGTAAACTGGGTTTTAAC
GCCGTTCATCATCCGGCACGTTAATCTCTTCTTCATGCTCTCTGCTGTAACATTGGCAGG
GAGCTTTGCTATTTCTGGAGTAAACCACCATGTCTGAAGGCTGGAACATTGCCGTCCTGG
GCGCAACTGGCGCTGTGGGCGAAGCCCTGCTTGAAACGCTGGCTGAACGTCAGTTCCCGG
TTGGGGAAATTTATGCACTGGCACGTAACGAAAGCGCAGGCGAACAACTGCGCTTTGGTG
GTAAAACAATCACCGTGCAGGATGCCGCTGAATTCGACTGGACGCAGGCGCAGCTGGCAT
TTTTTGTCGCAGGCAAAGAAGCTACCGCTGCCTGGGTTGAAGAAGCGACCAACTCAGGTT
GCCTGGTGATCGACAGCAGCGGACTGTTTGCTCTCGAACCAGACGTACCGCTGGTGGTGC
CGGAAGTAAACCCGTTTGTACTGACCGATTACCGCAACCGGAATGTCATCGCCGTACCGG
ACAGTCTGACCAGCCAGTTGCTGGCGGCACTGAAACCGTTAATCGATCAGGGCGGTTTAT
CACGTATCAGCGTTACCAGCCTGATTTCAGCCTCCGCCCAGGGCAAAAAAGCGGTCGATG
CGTTAGCGGGGCAGAGTGCGAAATTGCTCAACGGCATTCCGATTGACGAAGAAGATTTCT
TCGGGCGTCAGCTGGCGTTCAACATGCTGCCGTTACTGCCGGATAGCGAAGGTAGCGTGC
GTGAAGAACGTCGTATCGTTGACGAAGTACGCAAAATCCTGCAGGACGAAGGGCTGATGA
TTTCGGCAAGCGTCGTCCAGGCACCGGTATTCTACGGTCATGCCCAGATGGTCAACTTTG
AAGCACTGCGTCCGCTGGCGGCAGAAGAAGCGCGTGATGCGTTTGCTCAGGGCGAAGATA
TTGTGCTCTCTGAAGAGAACGAATTCCCGACTCAGGTAGGGGATGCTTCTGGTACGCCGC
ATCTTTCTGTTGGCTGCGTGCGTAATGACTACGGTATGCCGGAGCAAGTCCAGTTCTGGT
CGGTGGCCGATAACGTTCGCTTTGGCGGCGCGCTGATGGCAGTAAAAATCGCCGAGAAAC
TGGTGCAGGAGTATCTGTACTAATGTCCGACCAGCAACAACCGCCAGTTTATAAAATTGC
GCTGGGCATTGAGTACGACGGCAGTAAGTATTACGGCTGGCAACGGCAGAACGAAGTTCG
CAGTGTGCAGGAGAAGCTGGAAAAGGCGCTCTCCCAGGTGGCGAACGAACCCATCACCGT
CTTCTGCGCCGGGCGTACTGACGCAGGGGTACACGGTACCGGGCAGGTTGTGCATTTCGA
AACAACCGCGCAGCGCAAAGACGCTGCGTGGACGTTGGGCGTAAATGCGAATTTACCTGG
TGACATCGCCGTGCGTTGGGTTAAAGCTGTACCTGATGATTTTCATGCCCGATTTAGCGC
CACGGCTCGCCGTTATCGCTACATCATCTACAATCATCGGCTGCGCCCGGCGGTACTGAG
TAAAGGGGTAACCCATTTTTACGAACCGCTGGACGCTGAACGGATGCATCGGGCTGCGCA
ATGCTTGCTGGGCGAGAATGATTTCACCTCGTTCCGTGCGGTGCAGTGCCAGTCCCGAAC
CCCGTGGCGCAACGTTATGCATATTAATGTCACGCGTCACGGTCCTTATGTGGTGGTAGA
TATCAAAGCGAATGCCTTTGTACATCATATGGTCAGGAATATTGTCGGCAGCCTGATGGA
AGTCGGTGCCCACAACCAGCCGGAGAGCTGGATAGCAGAGTTGCTGGCGGCAAAGGACAG
AACGCTGGCGGCAGCAACGGCAAAAGCGGAAGGGCTGTATCTGGTCGCGGTGGATTACCC
TGACCGGTATGATCTTCCAAAACCGCCAATGGGCCCGCTATTTCTGGCGGACTAACGAGA
ATAACGCTCGTAACATTTCAGGCTGTAGCCAACGTAGTTACAGCCTGAAAGATGACGAGT
ACAAGGCATAGGCAAATATGGACCTGATTTATTTCCTCATCGATTTTATCCTGCACATTG
ACGTGCATCTGGCAGAGCTGGTCGCGGAGTACGGCGTCTGGGTTTATGCCATTTTGTTCT
TAATTTTGTTCTGTGAAACCGGTCTGGTGGTAACGCCGTTTTTACCGGGTGATTCATTGC
TGTTTGTTGCCGGTGCGTTGGCATCACTGGAAACCAACGATCTCAACGTCCATATGATGG
TGGTGCTGATGCTGATCGCCGCGATTGTGGGTGACGCGGTCAATTACACTATCGGGCGGT
TGTTCGGTGAAAAGTTATTCAGTAATCCCAATTCGAAAATTTTCCGTCGCAGTTATCTCG
ACAAAACCCATCAGTTTTATGAGAAACATGGCGGCAAAACGATTATTCTCGCCCGTTTTG
TGCCGATCGTCAGAACGTTCGCCCCGTTTGTTGCGGGAATGGGCCACATGTCGTACCGTC
ATTTCGCTGCTTATAACGTGATCGGCGCACTGTTGTGGGTACTGCTTTTTACCTACGCAG
GCTATTTCTTCGGTACAATCCCGATGGTTCAGGATAACCTTAAGCTGCTGATCGTCGGGA
TTATTGTGGTTTCTATTTTGCCGGGCGTCATCGAAATAATCCGTCACAAACGCGCTGCGG
CACGCGCCGCAAAATAAAAAGTAACTCAGCGGTTCGACCACTTTTTTATCCAAAGTTTCG
GGCTGTTATGTTTTAATGTGCAACATTCATGGTCTGTTGGGGGCAAAAATGGCATTATGC
GTCCCCAAAGATAAAACTGGCATCGAACCAGGTTCAGACAGAAAGGTCCCTAATGAGCTG
GATTGAACGAATTAAAAGCAACATTACTCCCACCCGCAAGGCGAGCATTCCTGAAGGGGT
GTGGACTAAGTGTGATAGCTGCGGTCAGGTTTTATACCGCGCTGAGCTGGAACGTAATCT
TGAGGTCTGTCCGAAGTGTGACCATCACATGCGTATGACAGCGCGTAATCGCCTGCATAG
CCTGTTAGATGAAGGAAGCCTTGTGGAGCTGGGTAGCGAGCTTGAGCCGAAAGATGTGCT
GAAGTTTCGTGACTCCAAGAAGTATAAAGACCGTCTGGCATCTGCGCAGAAAGAAACCGG
CGAAAAAGATGCGCTGGTGGTGATGAAAGGCACTCTGTATGGAATGCCGGTTGTCGCTGC
GGCATTCGAGTTCGCCTTTATGGGCGGTTCAATGGGGTCTGTTGTGGGTGCACGTTTCGT
GCGTGCCGTTGAGCAGGCGCTGGAAGATAACTGCCCGCTGATCTGCTTCTCCGCCTCTGG
TGGCGCACGTATGCAGGAAGCACTGATGTCGCTGATGCAGATGGCGAAAACCTCTGCGGC
ACTGGCAAAAATGCAGGAGCGCGGCTTGCCGTACATCTCCGTGCTGACCGACCCGACGAT
GGGCGGTGTTTCTGCAAGTTTCGCCATGCTGGGCGATCTCAACATCGCTGAACCGAAAGC
GTTAATCGGCTTTGCCGGTCCGCGTGTTATCGAACAGACCGTTCGCGAAAAACTGCCGCC
AGGATTCCAGCGCAGTGAATTCCTGATCGAGAAAGGCGCGATCGACATGATCGTCCGTCG
TCCGGAAATGCGCCTGAAACTGGCGAGCATTCTGGCGAAGTTGATGAATCTGCCTGCGCC
GAATCCTGAAGCGCCGCGTGAAGGCGTAGTGGTACCCCCGGTACCGGATCAGGAACCTGA
GGCCTGATAACTGATAAGGGCAGGGCCACTGGCTCTGCCCTTTTGCTATTCTCACCGTAA
CGAATCAGCGGATACCATGATTATCAAACGCACTCCTCAAGCCGCGTCGCCTCTGGCTTC
GTGGCTTTCTTATCTGGAAAACCTGCACAGTAAAACTATCGATCTCGGCCTTGAGCGCGT
GAGCCAGGTCGCGGCGCGTCTTGGCGTTCTGAAACCAGCGCCATTTGTGTTTACCGTTGC
GGGTACGAATGGCAAAGGCACCACCTGCCGTACGCTGGAGTCGATTCTGATGGCGGCAGG
GTACAAAGTGGGCGTCTACAGTTCGCCTCATCTGGTGCGTTATACCGAGCGCGTACGTGT
GCAGGGTCAGGAATTGCCGGAATCGGCCCACACCGCCTCTTTTGCGGAGATTGAATCGGC
ACGCGGTGATATTTCCCTGACCTATTTCGAGTACGGTACGCTGTCGGCGTTGTGGCTGTT
CAAACAGGCACAACTTGACGTGGTGATTCTGGAAGTAGGGCTGGGCGGTCGTCTGGACGC
AACCAATATTGTCGACGCCGATGTCGCGGTAGTAACCAGTATTGCGCTGGATCATACCGA
CTGGCTGGGGCCAGATCGCGAAAGTATTGGTCGCGAGAAAGCAGGCATCTTCCGCAGCGA
AAAACCGGCAATTGTCGGTGAGCCGGAAATGCCTTCTACCATTGCTGATGTGGCGCAGGA
AAAAGGTGCACTGTTACAACGTCGGGGCGTTGAGTGGAACTATTCCGTCACCGATCATTA
CTGGGCGTTTAGCGATGCTCACGGCACGCTGGAAAATCTGCCGTTGCCGCTTGTCCCGCA
ACCGAATGCCGCAACGGCGCTGGCGGCACTGCGTGCCAGCGGGCTGGAGGTCAGTGAAAA
TGCCATTCGCGACGGGATTGCCAGCGCAATTTTGCCGGGACGTTTCCAGATTGTGAGCGA
GTCGCCACGCGTTATTTTTGATGTCGCGCATAATCCACATGCGGCGGAATATCTCACCGG
GCGTATGAAAGCGCTACCGAAAAACGGGCGCGTGCTGGCGGTTATCGGTATGCTACATGA
TAAAGATATTGCCGGAACTCTGGCCTGGTTGAAAAGCGTGGTTGATGACTGGTATTGTGC
GCCACTGGAAGGGCCGCGCGGTGCCACGGCAGAACAACTGCTTGAGCATTTGGGTAACGG
CAAATCATTTGATAGCGTTGCGCAGGCATGGGATGCCGCAATGGCGGACGCTAAAGCGGA
AGACACCGTGCTGGTGTGTGGTTCTTTCCACACGGTCGCACATGTCATGGAAGTGATTGA
CGCGAGGAGAAGCGGTGGCAAGTAAGTTTCAGAATCGGTTAGTGGGCACGATCGTGCTGG
TGGCGCTGGGGGTGATTGTACTTCCAGGGCTGCTGGACGGGCAGAAAAAACATTATCAGG
ATGAGTTTGCGGCTATCCCGCTGGTTCCAAAAGCGGGCGATCGCGATGAGCCTGATATGA
TGCCAGCCGCCACCCAGGCGTTGCCGACGCAGCCGCCGGAAGGCGCAGCGGAAGAGGTGC
GGGCAGGTGATGCCGCAGCACCGTCGCTCGATCCGGCCACTATTGCAGCCAATAACACCG
AGTTTGAACCGGAACCTGCACCGGTCGCGCCACCGAAGCCGAAACCGGTGGAGCCGCCTA
AACCAAAGGTTGAAGCACCACCTGCGCCGAAGCCAGAACCGAAGCCGGTCGTGGAAGAAA
AAGCTGCACCGACGGGTAAAGCCTATGTTGTGCAACTGGGTGCGCTGAAAAATGCCGATA
AAGTGAATGAAATTGTCGGTAAGCTGCGCGGTGCCGGTTATCGGGTTTATACGTCGCCAT
CCACGCCAGTGCAGGGTAAAATTACCCGTATTCTGGTTGGGCCGGATGCCTCGAAAGATA
AGCTGAAAGGTTCGCTGGGTGAGTTGAAGCAACTTTCTGGCTTAAGTGGCGTGGTAATGG
GCTATACGCCGAATTAATACGGTCTTGCCTGATGCGACGCTGGCGCGTCTTATCAGGCCT
ACGCAGGGGTAGAACCGTAGGTTGGATAAGGCGTTTACGCCGCATCCGACACGCATTGCA
CGATGCCGCAAAGGCATAAAAAGTCGATGGCGTTGAATATTTTTTCAGCGCCATTTTTAT
TGATGCGCGGGAAGGAAATCCCTACGCAAACGTTTTCTTTTTCTGTTAGAATGCGCCCCG
AACAGGATGACAGGGCGTAAAATCGTAGGACACATATGGTCTGGATTGATTACGCCATAA
TCGCGGTGATTGCTTTTTCCTCTCTGGTTAGCCTGATCCGCGGCTTTGTTCGTGAAGCGT
TATCGCTGGTGACATGGGGTTGTGCTTTCTTTGTTGCCAGTCATTACTACACTTACCTGT
CAGTCTGGTTTACGGGCTTTGAAGACGAACTGGTTCGAAATGGGATTGCCATCGCGGTAC
TGTTTATCGCTACCCTGATCGTTGGTGCTATCGTGAACTTCGTGATAGGCCAGTTGGTGG
AGAAAACGGGGTTGTCAGGCACCGATCGGGTGCTGGGCGTCTGTTTCGGTGCGTTGCGCG
GTGTGTTGATTGTTGCCGCCATTCTCTTCTTTCTCGACTCCTTTACCGGGGTGTCGAAAA
GCGAAGACTGGAGCAAATCACAGCTGATCCCGCAGTTCAGTTTTATCATCAGATGGTTTT
TTGATTATCTGCAAAGCTCGTCAAGTTTCTTGCCCAGAGCGTAAGTGCTCTGAGATGTGG
CTTAACGAGGAAAAAGACGTATGTGCGGTATTGTCGGTATCGCCGGTGTTATGCCGGTTA
ACCAGTCGATTTATGATGCCTTAACGGTGCTTCAGCATCGCGGTCAGGATGCCGCCGGCA
TCATCACCATAGATGCCAATAACTGCTTCCGTTTGCGTAAAGCGAACGGGCTGGTGAGCG
ATGTATTTGAAGCTCGCCATATGCAGCGTTTGCAGGGCAATATGGGCATTGGTCATGTGC
GTTACCCCACGGCTGGCAGCTCCAGCGCCTCTGAAGCGCAGCCGTTTTACGTTAACTCTC
CGTATGGCATTACGCTTGCCCACAACGGCAATCTGACCAACGCTCACGAGTTGCGTAAAA
AACTGTTTGAAGAAAAACGCCGCCACATCAACACCACTTCCGACTCGGAAATTCTGCTTA
ATATCTTCGCCAGCGAGCTGGACAACTTCCGCCACTACCCGCTGGAAGCCGACAACATTT
TCGCCGCCATCGCTGCTACAAACCGCTTAATCCGCGGCGCGTATGCCTGTGTGGCGATGA
TTATCGGCCACGGTATGGTTGCTTTCCGCGATCCTAACGGTATTCGTCCGCTGGTACTGG
GAAAACGTGATATTGACGAGAACCGCACAGAATATATGGTCGCTTCCGAAAGCGTTGCGC
TCGATACACTGGGCTTTGATTTCCTGCGTGACGTCGCGCCTGGCGAAGCGATTTACATCA
CTGAAGAAGGGCAGTTGTTTACCCGTCAATGTGCTGACAATCCGGTCAGCAATCCGTGCC
TGTTTGAGTATGTATACTTTGCTCGCCCGGACTCGTTCATCGACAAAATTTCCGTTTACA
GCGCGCGTGTGAATATGGGCACGAAGCTGGGCGAGAAAATTGCCCGCGAATGGGAAGATC
TGGATATCGACGTGGTGATCCCGATCCCGGAAACCTCGTGTGATATCGCGCTGGAAATTG
CGCGTATTCTGGGCAAACCGTACCGCCAGGGCTTCGTTAAAAACCGCTATGTTGGCCGCA
CCTTCATCATGCCGGGCCAGCAGCTGCGTCGTAAGTCCGTGCGCCGTAAACTGAACGCCA
ACCGCGCCGAGTTCCGCGATAAAAACGTCCTGCTGGTCGACGACTCCATCGTCCGTGGCA
CCACTTCTGAGCAGATTATCGAGATGGCACGCGAAGCCGGAGCGAAGAAAGTGTACCTCG
CTTCTGCGGCACCGGAAATTCGCTTCCCGAACGTTTACGGTATCGATATGCCGAGCGCTA
CGGAACTGATCGCTCACGGTCGCGAAGTAGATGAAATTCGCCAGATCATCGGTGCTGACG
GGTTGATTTTCCAGGATCTGAACGATCTGATCGAAGCCGTTCGCGCTGAAAACCCGGATA
TCCAGCAGTTTGAATGCTCGGTGTTCAACGGCGTCTACGTCACCAAAGATGTTGATCAGG
GCTACCTCGATTTCCTCGATACTTTACGTAATGACGACGCCAAAGCAGTGCAACGTCAGA
ACGAAGTGGAAAATCTCGAAATGCATAACGAAGGATGATGCCTTCGCTCAGGGTGCCGAT
CTGGCACCCTGACTTGCAACTCCCGCCGAAATCCTGCAAAGTCTGCCTGCAAGTCTGACA
GGGCAACTATTTATGAAACGACTTATTGTGGGCATCAGCGGTGCCAGCGGCGCGATTTAT
GGCGTGCGTTTATTACAGGTTCTGCGCGATGTCACAGATATCGAAACGCATCTGGTAATG
AGCCAGGCGGCGCGCCAGACCTTATCCCTCGAAACGGATTTTTCCCTGCGCGAAGTGCAG
GCGTTAGCCGATGTCACGCACGATGCGCGCGATATTGCCGCCAGCATCTCTTCCGGTTCT
TTCCAGACGTTGGGGATGGTGATTTTACCCTGTTCAATCAAAACCCTGTCCGGCATTGTC
CATAGCTATACTGATGGCTTACTGACCCGTGCGGCAGATGTTGTGCTGAAAGAGCGTCGC
CCGTTGGTGCTCTGCGTGCGTGAAACACCATTGCACTTAGGCCATCTGCGTTTAATGACG
CAGGCAGCAGAAATCGGTGCGGTGATTATGCCTCCCGTTCCGGCGTTTTATCATCGCCCG
CAATCCCTTGATGATGTGATAAATCAGACGGTTAATCGTGTTCTTGACCAGTTTGCGATA
ACCCTTCCTGAAGATCTCTTTGCCCGCTGGCAGGGCGCATAACTCCGCTGTTGCCCTGTT
TCAGGGCAATTTTGCAACCGCGATCAAATCCTCGACATTTTGTTTCTGCCATTCAATCGA
AACGCTGCGATTCAACCGCTATACCTGCTATCTTCAACTTTAGGACAATAATGCAACGTC
TTATTAACATATTTAACGTTGAATGTTATTGTTGTCGTCAAGATGGCATAAGACCTGCAT
GAAAGAGCCTGCAAACACACAACACAATACACAACATAAAAAGCCATTTTTACTTGAGGG
TTATGTATGAAGAAGTCGATTCTCGCTCTGTCTTTGTTAGTCGGTCTCTCCGCAGCGGCT
TCCAGCTATGCGGCGCTACCGGAGACGGTACGTATCGGAACCGATACCACCTATGCGCCG
TTCTCGTCGAAAGATGCTAAAGGTGATTTTGTTGGCTTTGATATCGATCTCGGTAACGAG
ATGTGCAAACGGATGCAGGTGAAATGTACCTGGGTTGCCAGTGACTTTGACGCGCTGATC
CCCTCACTGAAAGCGAAAAAAATCGACGCCATTATTTCGTCGCTCTCCATTACCGATAAA
CGTCAGCAGGAGATTGCTTTCTCCGACAAGTTGTACGCCGCAGATTCTCGTTTGATTGCC
GCCAAAGGTTCGCCGATTCAGCCAACGCTGGATTCACTGAAAGGTAAACATGTTGGTGTG
CTGCAGGGATCAACCCAGGAAGCTTACGCTAACGAGACCTGGCGTAGCAAAGGTGTGGAT
GTGGTGGCCTATGCCAACCAGGATTTGGTCTATTCCGATCTGGCTGCAGGACGTCTGGAT
GCTGCACTGCAGGATGAAGTTGCTGCCAGCGAAGGATTCCTCAAGCAACCTGCTGGTAAA
GACTTCGCCTTTGCTGGCTCATCAGTGAAAGACAAAAAATACTTCGGTGACGGCACCGGT
GTAGGGCTACGTAAAGATGATGCTGAACTGACGGCTGCCTTCAATAAGGCGCTTGGCGAG
CTGCGTCAGGACGGCACCTACGACAAGATGGCGAAAAAGTATTTTGACTTTAATGTCTAC
GGTGACTGATACGTCGCAAGGAAGCTGTACCTGATGGAATGATCATCATGGTGCACGCCA
GGTTTGTTGCACTATTGTGGTGCATTGAAATGCATACTTAAGCATTTTTAATGAAAAATA
ATACGTCTAACGGGGCGGGATATTTTGCCTTGATGGTCAATTTTATGGCACGATAAGTGT
AACAAACCTGTAAATATTCCCTATAAAAAGACTGTCAGTTGAGGACATTATGAAAAAACT
GGTGCTATCGCTCTCTCTGGTTCTGGCCTTCTCCAGCGCAACTGCGGCATTTGCTGCGAT
TCCGCAAAACATCCGCATCGGTACCGACCCGACCTATGCGCCATTTGAATCAAAAAATTC
ACAAGGCGAACTGGTTGGCTTCGATATCGATCTGGCAAAGGAATTATGCAAACGCATCAA
TACGCAATGTACGTTTGTCGAAAATCCGCTGGATGCGTTAATCCCGTCCTTAAAAGCGAA
GAAGATTGACGCCATCATGTCATCGCTTTCCATTACGGAAAAACGTCAGCAAGAAATAGC
CTTCACCGACAAACTGTACGCTGCCGATTCTCGTCTGGTGGTGGCGAAAAATTCTGACAT
TCAGCCGACAGTCGAGTCGCTGAAAGGCAAACGGGTAGGCGTATTGCAGGGCACCACCCA
GGAGACGTTCGGTAACGAACACTGGGCACCAAAAGGCATTGAAATCGTCTCGTATCAGGG
GCAGGACAACATTTATTCTGACCTGACTGCCGGACGTATTGATGCCGCGTTCCAGGATGA
GGTCGCTGCCAGCGAAGGTTTCCTTAAACAACCTGTCGGTAAAGATTACAAATTCGGTGG
CCCGTCTGTTAAAGATGAAAAACTGTTTGGCGTAGGGACCGGCATGGGCCTACGTAAAGA
AGATAACGAACTGCGCGAGGCACTGAACAAAGCCTTTGCCGAAATGCGCGCTGACGGTAC
TTACGAGAAATTAGCGAAAAAGTACTTCGATTTTGATGTTTATGGTGGCTAATCGCCATC
GGTGAAAGAAAGCCCGCTCCCTTCGGGTAACCGGAGGGAGACAAGAGGCGGTAATTCACC
ACACACGACAGGACAGGCTGCATGTTGTATGGGTTTTCAGGTGTTATTTTACAGGGTGCG
CTCGTCACGCTGGAGCTGGCTATCAGCTCTGTAGTGCTCGCTGTAATCATCGGTTTAATT
GGCGCTGGCGGTAAGCTCTCTCAAAATCGGCTTTCGGGGCTGATTTTCGAAGGGTACACC
ACGCTGATTCGTGGCGTGCCGGACTTAGTGTTGATGCTGCTGATTTTCTACGGTTTGCAG
ATTGCGCTAAACACGGTGACGGAGGCGATGGGCGTCGGGCAGATTGATATCGATCCGATG
GTCGCTGGTATTATCACTCTCGGTTTTATCTACGGTGCTTATTTTACCGAAACGTTCCGT
GGTGCTTTTATGGCAGTGCCGAAAGGACATATAGAGGCGGCGACGGCGTTCGGTTTTACT
CGTGGGCAAGTGTTTCGGCGGATCATGTTTCCGGCGATGATGCGTTACGCCCTGCCAGGC
ATTGGCAACAACTGGCAGGTGATCCTCAAATCTACCGCACTGGTTTCGTTACTCGGCCTG
GAAGATGTGGTCAAAGCCACGCAGCTGGCAGGCAAAAGTACCTGGGAACCGTTCTATTTC
GCCATCGTCTGTGGCGTAATTTACCTGATTTTCACCACCGTTTCCAATGGTGTGCTGCTG
TTCCTTGAGCGCCGCTACTCCGTGGGTGTGAAGAGGGCTGACCTGTGATCGAAATCTTAC
ATGAATACTGGAAACCGCTGCTGTGGACCGACGGTTATCGCTTTACTGGTGTGGCGATCA
CTCTGTGGCTGCTTATTTTGTCGGTAGTGATAGGCGGAGTCCTGGCGCTGTTTCTGGCGA
TTGGTCGTGTCTCCAGTAATAAATACATCCAGTTTCCAATCTGGTTATTTACCTATATTT
TTCGCGGTACGCCGCTGTATGTTCAGTTGCTGGTGTTCTATTCCGGCATGTATACGCTGG
AGATTGTTAAGGGGACCGAGTTTCTTAACGCCTTTTTCCGCAGTGGCCTGAACTGTACCG
TGCTGGCGCTGACGCTTAACACCTGCGCTTACACTACCGAGATTTTTGCTGGGGCAATCC
GTTCGGTTCCGCATGGGGAAATTGAAGCCGCCAGAGCCTATGGCTTCTCGACTTTTAAAA
TGTATCGCTGCATTATTTTGCCTTCTGCGCTGCGTATTGCGTTACCGGCATACAGCAACG
AAGTGATCCTGATGCTGCACTCTACTGCGTTGGCATTTACTGCCACGGTGCCGGATCTGC
TGAAAATAGCCCGCGATATTAACGCCGCCACGTATCAACCTTTTACCGCCTTCGGCATTG
CCGCGGTGCTCTATTTAATCATCTCTTATGTCCTGATCAGCCTCTTTCGCAGAGCGGAAA
AACGCTGGTTGCAGCATGTGAAACCTTCTTCAACGCACTGAGAATACGATGTCCGAGAAT
AAATTAAACGTTATCGATTTGCACAAACGCTATGGCGAACACGAAGTGCTGAAAGGGGTG
TCACTGCAAGCGAATGCCGGAGATGTCATAAGCATCATCGGATCGTCGGGATCGGGGAAA
AGTACCTTTCTGCGCTGCATTAACTTCCTCGAAAAACCGAGTGAAGGGTCGATCGTGGTC
AATGGCCAGACGATCAATCTGGTGCGCGGCAAAGACGGTCAACTCAAAGTCGCCGATAAA
AATCAACTGCGCTTACTGCGCACACGCCTGACGATGGTATTCCAGCACTTCAATCTCTGG
AGCCATATGACGGTGCTGGAAAACGTCATGGAAGCGCCGATTCAGGTGTTGGGCCTGAGC
AAGCAGGAAGCGCGCGAGCGGGCGGTGAAGTATCTGGCAAAAGTTGGGATAGACGAACGT
GCACAGGGGAAATATCCGGTGCATCTTTCCGGCGGTCAGCAACAGCGTGTTTCTATCGCG
CGGGCGCTGGCGATGGAACCGGAAGTTTTACTGTTTGATGAACCTACCTCGGCGCTCGAT
CCTGAACTGGTAGGCGAAGTGTTGCGCATTATGCAGCAACTGGCAGAAGAGGGGAAAACC
ATGGTGGTTGTGACTCACGAAATGGGCTTTGCTCGTCATGTTTCTACTCACGTCATTTTC
CTCCATCAGGGGAAAATAGAGGAAGAAGGCGCGCCGGAGCAGTTATTTGGCAACCCGCAA
AGCCCTCGTCTGCAACAGTTCCTTAAAGGTTCGCTGAAATAATTGCCTCTCCGGTGGCTA
ACGCTGCCGGAGTATTTTCAAGGGGAATTTGCGAGTCAGCTTCCGCTGAAATGTAAAAGT
TGCAGTCCGCTAAAAATACTTCTGAATTCGCTGTCCAAAGATAAAAACTGCCTGCTGCAT
TGGGTGTTAATCGTGGTTATTGTCGCGTCATCTTAAATTTGAGGGGTGACGGAACGCCAT
GACAATATCGACAACTTCCACGCCGCATGATGCGGTATTTAAATCTTTTTTACGCCATCC
AGACACCGCGCGGGATTTTATTGATATTCATCTTCCCGCGCCGCTGCGCAAACTGTGAGA
TTTAACGACGCTTAAACTGGAACCAAACAGTTTTATTGATGAAGACCTGCGGCAATATTA
TTCCGACCTCTTATGGTCTGTGAAAACGCAGGAGGGAGTGGGTTATATTTATGTAGTGAT
AGAGCACCAAAGTAAGCCGGAAGAATTAATGGCTTTTCGCATGATGCGTTATTCCATTGC
GGCAATGCAAAACCATCTTGATGCGGGCTATAAAGAGCTTCCATTGGTGATCCCGATGCT
GTTTTATCATGGTTGCAGAAGTCCTTATCCTTATTCACTCTGCTGGCTTGATGAATTTGC
CGAGCCTGCGATTGCCCGTAAAATATATTCATCGGCTTTTCCGTTGGTGGATATTACCGT
GGTGCCGGATGACGAGATTATGCAACATCGCAAAATGGCGCTGTTGGAGTTAATTCAGAA
ACATATTCGTCAGCGCGATCTGTTGGGATTAGTCGACCAAATTGTTTCGCTGCTAGTTAC
AGGGAACACTAATGACAGACAGCTAAAAGCCCTGTTTAATTATGTATTACAAACGGGAGA
TGCCCAGCGTTTCCGTGCATTTATTGGTGAGATAGCAGAACGCGCACCACAGGAAAAGGA
GAAACTGATGACCATTGCTGACAGATTACGTGAAGAAGGGCGGAATGATGGATTAATTCT
TGGCAAACGCGAAGAAGCCCTGCGTATTGCTCAGGAGATGCTGGATAGAGGTTTAGACCG
AGAGTTAGTTATGATGGTGACCCGACTTTCACCAGACGATCTTATCGCGCAAAGCCACTA
ACCCTGTAACACCGGGAGTTAACTGGCGGATGTTTGCAGTAAACCACATCAGCGAACGAC
ATCCGCCAGCGCCTCTTCTAAATCGTACCAACGAAACGCAAAACCCGCTTCTTCCAGCCG
TTTAGGCAGCGCGCGTTGTCCACCTAATACCAGTACTGAAGATTCGCCCATTAACAGCCG
AATGGCGGTTGCGGGGACGCGCAAAATAGCCGGGCGATGCAGCGCATGACCGAGCGCATG
GGCAAATTGTTCATTGCGTATCGGGTAGGGCGAAACCATATTAAATGGCCCGCGCAGCTC
GTTATCCAGCAGCCAGAGAATGCCGTTGACCATATCATCGATATGAATCCAGGCCAGATA
CTGCCGACCGGAACCAATCGGCCCGCCCAGGCCAAGACGAAACGGCGGCAGCATTTTACC
GAGAATACCGCCATCCGGTGCCAGCACTACGCCGGTACGCAGCAGGCACACTCGCGTTTT
GTCACTTTGCGCCCGGCAGGCAATTTCTTCCCAGCGGGCGCAGAGTTTATGGGTAAATTC
GTTATGCGGCGGTTCCTCTTCGGTAACCACCACTTCACCTAAGTCGCCATAATAGCCCGT
TGCCGAGCCGGAAATGAGTACCGACGGTGGCGTGTCGCTGGCATTAATCAAATCGACCAG
TTTTTGCGTGATATTCCAGCGGCTTTGGCAGAGACGCTCTTTTTGCTCGTGAGTCCAGCG
TTTATCAGCAATCGGTTCTCCGGCGAGGTTGATTACCGCATCAACGCCGTTGAGGTTGCT
TTGATCGGCAAGCCCTTGCCATAGCGTCACCTGCGGCCCGAGCACGGAACTGGCTTTCTG
CGGGTTACGCGTCATTACCGTGATTTGATGGCCCAGCTCCAGCAAACGTGGAATCAAATG
GCGACCAATTAATCCCGTCCCTCCGGTGATCACTATGTTCATGCAGCCTCCCGATATGGC
GGTTAACGCTGCCAGCTTAAGGTCATGGATACCGAATCGGCGTAGCGCAGCGCGTGCAGT
TTATCGATCTCCACTTCAGCATACGTCACCCAGTGATGTTCACGTGCGATATCGAGCACA
TCCTGAGTTAATTTTTCCAGCAAAGAGAAACGGTTATTCTCTACATGCTGAATAATGTTT
TTCGTTACGGTGCGATAATTCAGCGCATCGTTGATATCTTCGCTGGTGCGCGCTTTATCG
GCGGGGTAGTGGATCGTCACATTGATAACAATATCCTGACGGTTGTTAATTTCTTCTTCC
TTAATTCCGATAAATGTACGTAAACGAAGGTTCTTTATACGAATAATAGCGGCAGGTTGT
GCCATTGCAGGTTCTCCGTTGTTTTACTTAGGATGAAATAATACACGAGAACCTGTTTCT
GTTAACTATCCGAACGCTCATCACCGAGTTGTGCTTTTAGCAGTGCCTGCCCAGTGGCAG
GGCGCGAACGGATCCGCTCATGCCAGTTCTTGACTGCCGGATACATTGCGAGGTCAATTC
GCTGGCGAGTCCAGGCATTAACCCACGGCCAGCAGGCAATATCCGCAATGCTGTAGTTCT
CACCTCCCAGCCAGGGCGAGTTTTCCAGCCGCTTGTTCAGTACATGGTACAGGCGCTGAG
TTTCAACCTGATAACGTTCAATAGCGTAAGGAATGGTTTGGGGGGCTGCGTGATTAAAAT
GATGATTTTGCCCAAGCATCGGCCCCAGTCCGCCTACCTGCCAGAATAACCACTGTAATG
TGGCGGCGCGCTCACGCGTTTCATGACTCAAAAAGAGTCCTGTTTTCTCAGCCAGATACA
ACAAAATGGCACCAGATTCAAAGAGGCTTAGCGGTTCGCCGCCATCGGCTGGAGAATGAT
CAACAATTGCCGGAATTTTGTTGTTAGGCGAAATGCGCAAAAATTCCGGGCGAAACTGAC
CGCCTTTCCCCAGGTCTACCTTTATCAAGCGATAATCCAGCCCTGCTTCTTCGAGAAACA
GCGTAATTTTGTGGCCATTGGGTGTCGGGGCGAAATAGAGATCGATCATTGCAGCTCCGG
TTGTCTAATCATCTGAACACCACAAGTATAGAAAGCGCGGCGACTTGCGTGAGTATTCGT
CACGTGACAGTGACAAAAAGGCTCTATAGTTTGATAGCCAGCCCCCTTTATTGCCGAGGA
CATAATGAGTAAACCCGCTATCACGCTTTGGTCAGATGCCCATTTTTTCTCCCCTTATGT
GTTATCCGCCTGGGTGGCGTTGCAGGAAAAAGGCCTGTCGTTTCATATCAAGACCATCGA
CCTCGACAGCGGTGAACATTTGCAACCGACGTGGCAAGGTTACGGTCAGACACGCCGTGT
GCCGTTATTACAAATCGATGATTTTGAGTTGAGTGAATCTTCTGCCATTGCGGAGTATCT
GGAAGATCGATTTGCGCCACCGACCTGGGAACGTATTTATCCGCTTGATTTAGAAAATCG
TGCGCGTGCACGACAGATTCGGGCCTGGCTGCGCAGCGATCTGATGCCCATTCGCGAAGA
GCGTCCGACGGATGTTGTCTTTGCGGGGGCGAAAAAAGCGCCACTAACGGCCGAGGGAAA
AGCCAGTGCAGAGAAACTGTTCGCGATGGCAGAACATTTGTTAGTACTGGGTCAGCCGAA
TTTATTTGGTGAATGGTGCATTGCTGATACTGATCTGGCGCTAATGATTAACCGCCTGGT
ACTACATGGCGATGAGGTGCCAGAACGCCTGGTGGATTATGCGACATTCCAGTGGCAGCG
AGCGTCTGTCCAGCGTTTTATTGCACTTTCAGCGAAGCAATCTGGCTGATAGCAACGACA
GAATCCAGTATCATAGCTTACGTTTTTTCGACGAGGAGTGAGTGATGAAACTGATGTTTG
CATCGGACATTCATGGGTCGTTACCGGCGACGGAACGTGTTCTGGAGTTGTTTGCCCAAA
GCGGTGCCCAGTGGCTGGTGATCCTTGGCGACGTGTTGAATCACGGCCCGCGTAATGCTT
TACCGGAGGGTTACGCGCCAGCCAAAGTCGCTGAACGGCTTAATGAAGTGGCACATAAGG
TTATCGCTGTGCGCGGCAACTGCGACAGCGAAGTGGATCAAATGCTGCTGCATTTCCCGA
TAACCGCGCCGTGGCAACAGGTATTACTGGAAAAACAACGTCTGTTTTTGACGCATGGTC
ATCTTTTTGGCCCGGAAAATCTGCCTGCTTTAAACCAGAACGATGTGCTGGTTTACGGTC
ATACCCATCTGCCAGTAGCAGAACAGCGGGGGGAGATTTTCCACTTCAACCCCGGCTCGG
TGAGTATTCCGAAAGGCGGTAATCCGGCGAGTTATGGCATGCTGGATAATGACGTACTTA
GTGTAATCGCACTCAATGATCAAAGTATCATTGCGCAGGTCGCGATTAATCCGTAATTTA
CCCACAACTCAAAATGCGCCGTAAGAGCGCCAGAAAAAGAAGGTTTCCTGATAATGGAAC
AGCGTCGTTTGGCAAGTACTGAATGGGTGGATATTGTCAATGAAGAGAACGAAGTCATTG
CACAAGCCAGCCGGGAGCAAATGCGGGCACAGTGTCTGCGTCATCGTGCAACTTACATCG
TCGTGCATGATGGCATGGGCAAAATTCTGGTCCAGCGTCGTACCGAGACAAAAGACTTTT
TACCCGGCATGTTAGATGCGACCGCAGGCGGTGTGGTTCAGGCCGATGAGCAACTGCTGG
AATCCGCGCGTCGCGAAGCGGAAGAAGAGTTGGGCATTGCCGGTGTCCCCTTTGCCGAGC
ACGGGCAGTTCTATTTCGAAGATAAAAATTGCCGTGTCTGGGGCGCATTGTTCAGCTGCG
TCTCTCACGGTCCCTTCGCCCTACAGGAAGATGAAGTCAGTGAAGTTTGCTGGCTGACGC
CGGAAGAAATCACCGCACGCTGCGATGAGTTCACTCCAGACTCGCTGAAAGCGCTAGCGT
TGTGGATGAAGCGCAATGCCAAAAATGAAGCCGTAGAGACTGAAACGGCAGAATGAAAAA
AGAGCCGCAATTGCGGCTCTTAACATTTTTAGTGGTAGCCCATCAACTGAGCGCCGATCA
CTACGACGCTGGACATAATAAACAGCAGTCCAAGTAGGGTCGCGCCCACCTTCAGCCAGT
TACGGAAGTCCACCCTGCACACACCGAGCGTTGCCATTAACGAAGCTGAGGTTGGGTAAA
TGATGTGACTGAAGCCATCACCAAACTGGAACGCCAGCACGGTAACCTGACGGTTAACAC
CGACCAGATCGCCAAGCGGTGCCAGTAACGGCATGGTTAACGCCGCCTGACCAGAACCGG
ACGTCACGAAGAAATTAAATACCGCCTGGAAGAGCAACATAAACCAGGCCGCGACCGCGT
TGTCCAGACCGCTAATGGCATTGGCAATGCTGTTGAGGATAGTATTTAACACGCTGGCCT
CACCTGCTTCACCATTACCAACCAGCAGCAAAATCCCTTTGGCGAAACCCACCAGCAGGG
CAGGGGCGATCATCATTCGCGCCCCTTCGGTAAAGGATGAAGCCATGGTATTAACCGTCA
TGCCGTTAAGGCGGAAAACAACGCCGATGATGCCAATCACCAGACCCATGGTGAAGAACT
GGCTGGCAATTTCTGGAATAAACCAGGCATTAACGATCACGCCCCAAATCACCCAGACCA
TTACGGCGGTCAGGACAATCAATACCAGCCAGTCACCAAAGGTAAACGGACGTTGTTCAA
CATCCGCCTGCTTTTCACGAAAGAAGCGGTCGGACTCATGCACGCGTGACAGAAGAGGAT
TCTTTTTCACTCGTGAGGCGTAGACCATGGTAAAGATCAGGCCAATCAGAGTGGCGATAA
CCCACACCACGATGCGCAACCCGGAGCCAGAAAGCACCGGAACGCCGGCAATCCCCTGAG
CAACGACCACACAAAACGGGTTCATCCACGAACTGGCAAAACCGATTTGCGTGGCAATAT
AGGTCACCAGGACGGTGGTAATACTGTCATAGCCCAGCCGGACCATTAGCGGTGCGATGA
TAATGGCAAAGGCGACGGCCTCTTCTCCCATACCAAATACCGCGCCGCCAAGTGAAAACA
GAATAAACAGCGCAGGAATAAAGAGAATTTCATTCCCGCGGGTATGGCGAATAAGCGCCA
GGATACCGTTATCAATGGTTCCTGTACGCATCACAATGCCAAACGCGCCGCCAATCACCA
GCATAAACATGATGATGCCAACGGCTGTCCCGTATTTCGATCCTGAGGTTAACCCTTCAA
ACGGGAAGTTCATCAGGCCCGGGCGTTCATCGCCCGTCGTGAACAGCTGTACGCGGTGAT
ACTCAGGTTCGCCTGCTTCGTTAGTCAGAATGCGAAATGAGTGTGGATCTACGACTTTGC
GTGTTTTTGTTTGACCATCAACCTGATACTGCACTTCCTGACTGTCAAACATCCCCACCG
GAACTACCCAGGTGGCAAGGCTGGTTAAAATAGCAACAAAAAAGATAATCACCAACGTAT
CGGGCATTGCCCATCTTCTTGTTGGTTTGGATTCAGTGATTGCGGACATAGCGCAAATAT
TCCCTTGCACAAAACAAAGTGGTAAGTATGCAAAGTGAGATGGCGCAATTCATTGATGCA
GAGCAGTTAAGCAAGATAATCAGAAAGGATTAATGCAAATTAAGAGAATAAAAAACCGGA
AATAGTGACTATTTCCGGTTCAGATATCCGCAGCGCAAAGCTGCGGATGATGACGAGGTT
ACTGCTGCTGTGCAGACTGAATCGCAGTCAGCGCGATAGTGTAGACGATATCGTCAACCA
GTGCGCCACGGGACAGGTCGTTAACCGGCTTGCGCATACCCTGCAGCATCGGCCCGATGG
AGATCAGGTCGGCAGAACGCTGTACCGCTTTGTAGGTGGTGTTACCGGTGTTCAGATCCG
GGAAGATGAACACGGTAGCGCGACCTGCAACCGGAGAGTTCGGCGCTTTGGATTTCGCAA
CGTCAGCCATTACCGCAGCGTCGTACTGCAGCGGACCGTCGATCATCAGGTCAGGACGTT
TTTCCTGCGCCAGACGAGTTGCTTCGCGAACTTTTTCTACGTCGCTACCTGCACCAGAAG
TACCGGTGGAGTAGGAGAGCATAGCAACGCGCGGTTCGATACCGAAGGCTGCAGCGGAAT
CAGCGGACTGAATCGCGATTTCTGCCAGCTGTTCTGCGGTCGGATCCGGGTTGATCGCAC
AGTCACCGTAAACGTAAACCTGTTCCGGCAGCAGCATGAAGAACACGGAAGATACCAGGG
AGCTGCCCGGTGCAGTTTTGATCAGCTGCAGCGGCGGACGGATGGTGTTTGCGGTAGTGT
GAACAGCACCGGAAACCAGACCATCAACTTCATCCTGTTCCAGCATCAGCGTACCGAGCA
CCACGTTGTCTTCCAGCTGTTCGCGGGCAACGGTTTCGGTCATGCCTTTGTTCTTACGCA
GCTCGACCAGACGACCAACATAGCTTTCGCGAACCACTTCTGGATCAACGATTTCAATGC
CTGCACCCAGTTCTACACCCTGAGACGCTGCAACACGGTTGATCTCTGCCGGATTACCCA
GCAGTACGCAAGTTGCGATACCACGTTCAGCACAGATAGCGGCTGCTTTAACGGTACGCG
GTTCGTCACCTTCCGGCAGTACGATACGTTTGCCCGCTTTGCGCGCAAGTTCAGTCAGCT
GATAACGGAACGCTGGCGGAGACAGACGACGGCTGCGCTCAGAAGTGGCAGTCAGAGAAT
CGATCCAGTCAGCGTTGATGTAGTTAGCAACGTATTCCTGAACTTTCTCGATACGCTCGT
GATCGTCAACTGGAACTTCCAGGTTGAAGCTCTGCAGGCTCAGAGAAGTCTGCCAGGTGT
TGGTGTTCACCATAAATACCGGCAGGCCGGTAGCGAAAGCACGTTCGCACAGTTTAGAAA
TGCGCGCGTCCATTTCGTAGCCGCCAGTCAGCAGCAGGGCACCGATTTCTACGCCGTTCA
TGGCAGCCAGGCAAGCGGCAACCAGCACGTCAGGACGGTCTGCGGAAGTCACCAGCAGAG
AACCGGCACGGAAGTGCTCCAGCATGTGCGGAATGCTGCGTGCGCAGAAAGTGACGGATT
TAACGCGGCGAGTATTGATGTCGCCTTCGTTGATGATGGTCGCATTCAGGTGGCGAGCCA
TATCGATCGCACGAGTCGCGATCAGGTCAAAGCTCCACGGCACAGCGCCGAGAACCGGCA
GCGGGCTGGATTCTTGCAGCTTCGCCGGATCAACATTGTTTACTTTAGCTTTGGAAGAGT
CGTCGAAAATCTCGGACAGATCCGGGCGAGTACGACCCTGTTCATCAACCGGTGCGTTCA
GTTTGTTAACGATAACGCCGGTGATGTTGGTGTTTTTGGCACCGCCGAAGCTGTTGCGGG
TCAGTTCGATACGCTCTTTCAGCTGTTCCGGGGTGTCAGTGCCCTGAGACATAACGAAGA
CGATTTCCGCATTCAGCGTTTTAGCGATTTCGTAGTTCAGAGACTGGGCAAACTGGTGCT
TACGTGTCGGGACCAGACCTTCAACCAGAACGACTTCAGCGTCTTTGGTGTTAGCGTGGT
AGTTTGCGACGATCTCTTCCATCAGCACATCTTTCTGATTGCTGGAAAGCAGACCTTCAA
CGTAGCTCATTTTCAGCGGTTCAGCGGCCGTCGTGGTGGAAGAGTTCGCACGCACGATAG
TCGTAGTCTGATCGGGCGCATCGCCACCGGTACGCGGCTGAGCGATAGGTTTGAAAACGC
TCAGACGAACGCCTTTGCGTTCCATTGCACGGATCACGCCAAGGCTGACGCTGGTCAGAC
CGACGCTGGTTCCGGTAGGGATCAGCATAATAATACGGGACACGGTTTATCCTCTTTCGT
TACCGCCGATTTGGCGGGTTACAAAACAGCACCGCCAGCTGAGCTGGCGGTGTGAAATCA
GGCAGTCAGGCGGCTCGCGTCTTGCGCGATAACCAGTTCTTCGTTGGTTGGGATAACCAC
CGCAGGACGGGTACCTTCTTTGTTGATGAAACCAGATTTGCCGAAACGTGCAGCCAGGTT
GCGTTCATGATCAACTTCAAAGCCCAGCACGCCCAGTTTGCCCAGAGACAGTTCACGAAC
CATCGCGGCATTTTCACCGATACCACCGGTGAATACAACAGCGTCCAGACGACCATCCAT
CAGCGCAGTGTAGGCACCGATGTATTTCGCCAGGCGGTGGCAGTAAACGTCCATTGCGCG
CTTCGCGTCTTCTTTCGTCGCGTAGTTGTCTTCAACATAGCGGCAGTCGCTGGTCACTTC
GGTCAGACCCAGCAGGCCAGACTCTTTGGTCAGCAGTTTGTTGATTGCGTCAACGCTCAT
GCCCAGGGTGTCGTGCAGGTGGAAGATGATCGCCGGATCGATATCACCAGAACGGGTACC
CATGACCAGACCTTCCAGCGGGGTCAGGCCCATAGAGGTGTCAACGCATTTACCGTTGCG
GATAGCAGAAACGGAACCACCGTTGCCCAGGTGGCAGGTGATGATGTTCAGTTCTTCTAC
CGGTTTGTTCAGCATTTTTGCCGCTTCCTGGGTTACATAGAAGTGGCTGGTGCCGTGCGC
GCCGTAACGACGGATGCCGTGCTCTTTGTACAGGTTGTACGGCAGGGCGTAGAGGTAAGA
CTCTTCCGGCATAGTCTGGTGGAACGCGGTGTCAAATACAGCAACGTTTTTGTCTTTCAG
CTGTGGGAAAGATTTCAGAGCTTCTTCGATACCGATCAGGTGAGCCGGGTTGTGCAGCGG
TGCAAAAGAAGCTGCATCTTTGATACCCTGAATAACAGACTCATCGATCACTACGGAGCT
GGTATACTTTTCGCCGCCGTGTACGATACGGTGACCGATAGCAGTCAGCTGCGCAGACAG
TTCTGGTTTTTGTGCCAGAATAGTATTAACGATAAAGTTGAGCGCTTCGCTGTGAGCGGC
GCCTGCACCTAAAGCCGCTTCCTGTTTATTGCCGTCCATTTTCCATTTGATACGTGCTTC
GGGCAGGTGGAAACATTCGGCTAAACCAGAAAGGTACTCTTCACCATTTACTGCATCGAT
GATGGCAAATTTCAGTGAAGAACTACCGCAGTTCAGAACCAGTACTAACTTACTCGACAT
GGAAGTACCTATAATTGATACGTGGCTAAAAAAACGTCAGGGAGCCATAGAGCGTAGCGC
ATGATGACACCGACATTTATGATTAACATCATGCACTGCAAATTTTTTTTGCATGATGGA
AGAAATATCTTGAGTCTATGCCATTTTGCGTAATTTTCAGCCAATGGCATAATGTATATG
AATTTGACGACTCAATGAATATGTACTACTTAGGCCTTCAGGCTGCTAAAGGATACCTGA
TAGTGGGTATGGAAGACAAAATGTTTTGAACGTTGTCCCGCTGAGTTGTGAATTTGCACA
AATTTTTGAATCTTTATATGTGAAGTTGAGGTGAAGCATGTCAACGCCGGATAATCGTTC
TGTTAATTTTTTTAGCTTGTTTCGCCGGGGACAGCATTACTCAAAGACGTGGCCGCTGGA
AAAACGCCTTGCCCCGGTCTTTGTCGAAAATCGCGTTATCAAGATGACGCGTTATGCGAT
CCGTTTTATGCCGCCGATCGCCGTATTTACTCTCTGCTGGCAGATTGCCCTGGGCGGTCA
GCTTGGGCCGGCAGTTGCCACCGCCCTGTTCGCCTTAAGTTTACCCATGCAGGGATTGTG
GTGGCTGGGCAAGCGTTCTGTCACGCCATTACCCCCTGCAATCCTCAACTGGTTTTATGA
AGTTCGCGGTAAATTGCAGGAGTCTGGACAGGTGTTGGCACCCGTTGAAGGCAAGCCTGA
TTACCAGGCATTAGCTGACACGCTTAAGCGCGCCTTCAAACAACTGGATAAAACTTTCCT
TGATGATTTGTAATTGACCCCTGATTACGCATATAAAAGAAAGCATACTCAGCCTTCTTT
TTTTTCACCGTAATAGAGTGATACAGGAGTCAACAATGGAAATGACCAACGCGCAACGTC
TTATTTTGTCTAATCAGTACAAGATGATGACTATGCTCGATCCGGCAAATGCTGAACGTT
ACCGTCGCCTGCAAACAATTATTGAGCGTGGTTATGGATTACAGATGCGTGAACTGGATC
GCGAGTTTGGCGAGCTGAAAGAAGAAACCTGCCGCACTATCATCGACATTATGGAGATGT
ATCATGCGTTGCATGTTTCCTGGTCTAATTTGCAGGACCAGCAATCCATCGATGAACGTC
GTGTCACCTTCCTCGGCTTTGACGCCGCCACTGAAGCACGTTACCTCGGTTATGTCCGCT
TTATGGTTAATGTGGAAGGGCGCTATACCCATTTTGACGCCGGAACTCACGGTTTTAACG
CCCAGACGCCAATGTGGGAAAAATATCAGCGCATGCTTAATGTGTGGCATGCCTGCCCGC
GTCAGTACCATTTGAGCGCCAACGAAATTAATCAAATTATCAACGCCTGAGGAGGCCCGC
GTGCGGTGCAAAGGTTTTCTGTTTGATCTTGATGGAACGCTGGTGGATTCCCTGCCTGCG
GTAGAACGGGCGTGGAGCAACTGGGCCAGACGTCATGGGTTAGCGCCGGAAGAGGTGCTG
GCTTTCATTCACGGTAAACAGGCGATCACCTCTCTGCGCCATTTTATGGCGGGCAAATCC
GAGGCTGATATTGCCGCCGAGTTTACGCGTCTGGAGCAAATCGAGGCCACGGAAACCGAA
GGTATTACCGCGCTTCCGGGGGCAATCGCCTTACTCAATCATTTGAATAAAGCAGGTATT
CCGTGGGCCATTGTGACTTCTGGCTCCATGCCGGTAGCGCGAGCGCGCCATAAAATAGCT
GGGCTTCCCGCACCAGAGGTGTTTGTAACCGCTGAGCGAGTGAAGCGCGGAAAACCAGAA
CCTGATGCGTATCTGTTAGGTGCGCAGCTGCTGGGGCTTGCGCCGCAGGAGTGTGTGGTG
GTGGAAGATGCTCCCGCTGGCGTGCTTTCTGGCCTGGCGGCGGGTTGCCATGTCATTGCG
GTTAACGCTCCGGCAGATACCCCGCGCCTGAATGAGGTCGATTTGGTCCTCCACAGTCTG
GAGCAAATTACTGTGACTAAACAGCCAAATGGCGATGTTATTATTCAGTGAAACACCTGA
TCATGATTTAGCCCCGTCTCGTCGGGGCTTTTTTATGGCAGAATCAAGTCATCCCCCTCA
ATTAACAAGGATAAGTTGTGAACGGTGAATTGATTTGGGTTCTTTCATTACTGGCCGTTG
CCATCGTCTTGTTTGCGACGGGCAGAGTGCGTATGGATGCGGTCGCTTTGTTTGTTATTG
TCGCGTTTGCATTAAGCGGAACGCTGACAGTCCCAGAAGTATTTTCCGGCTTTTCTGATC
CTAACGTTGTCCTGATTGCCGCCTTGTTTATTATTGGCGATGGTTTGGTCCGTACCGGTG
TTGCCACCGTAATGGGAACATGGCTGGTCAAAGTTGCGGGCAACAGTGAAATCAAAATGT
TGGTTTTGTTGATGCTGACCGTCGCGGGGCTTGGCGCGTTTATGAGTTCAACCGGTGTTG
TCGCTATCTTTATTCCCGTGGTGTTAAGCGTTGCCATGCGTATGCAAACGTCGCCGTCAC
GTCTGATGATGCCGTTAAGTTTTGCCGGGCTGATTAGCGGCATGATGACGCTGGTGGCGA
CGCCGCCGAACCTGGTAGTCAACAGTGAATTGCTGCGTGAAGGCTATCACGGCTTCAGTT
TCTTTAGCGTAACACCTATTGGCCTGGTCGTGCTGGTGCTGGGTATTTTGTATATGTTAG
TGATGCGTTTCATGCTGAAAGGGGATACCCAGACCCCGCAGCGCGAAGGCTGGACGCGTC
GAACCTTTCGCGATCTTATCCGTGAATATCGACTGACCGGGCGTGCGCGACGTCTGGCTA
TTCGCCCCGGATCGCCAATGATTGGTCAACGGCTGGATGATCTCAAATTACGTGAGCGTT
ATGGCGCTAACGTCATCGGTGTTGAACGCTGGCGGCGTTTTCGTCGCGTTATCGTGAACG
TTAATGGGGTTTCTGAATTTCGCGCGCGTGACGTTTTGCTTATTGATATGTCTGCGGCTG
ATGTCGATCTCCGGCAATTTTGTAGTGAGCAATTGCTGGAGCCGATGGTACTGCGCGGCG
AGTATTTTTCTGACCAGGCCCTTGATGTGGGCATGGCAGAGATTTCATTAATTCCTGAGT
CAGAACTGATTGGTAAATCGGTGCGCGAAATTGGTTTTCGTACACGCTACGGACTGAATG
TGGTGGGGCTAAAGCGCAATGGCGTGGCGCTGGAAGGTTCGCTGGCGGATGAGCCTCTGC
TGCTGGGCGATATCATTCTGGTTGTGGGTAACTGGAAACTGATCGGTATGCTGGCCAAAC
AGGGCCGCGACTTCGTAGCGCTGAACTTACCGGAAGAGGTGAGTGAAGCATCGCCCGCGC
ACAGCCAGGCACCCCATGCCATTTTCTGTCTGGTGCTAATGGTGGCGTTAATGCTGACAG
ATGAAATTCCTAATCCTGTTGCCGCTATCATCGCCTGCCTGCTGATGGGGAAATTCCGCT
GTATAGATGCTGAAAGCGCCTATAAATCCATTCACTGGCCGAGCATTATTTTGATCGTTG
GGATGATGCCGTTTGCTGTGGCATTACAGAAAACGGGAGGTGTCGCGCTGGCGGTGAAAG
GGCTGATGGACATTGGCGGTGGTTACGGGCCACATATGATGCTGGGTTGTTTGTTTGTCT
TGTCGGCGGTTATTGGGCTATTTATCTCTAATACCGCGACGGCGGTGTTGATGGCTCCGA
TTGCGCTGGCTGCTGCCAAAACGATGGGGGTGTCGCCTTATCCATTCGCGATGGTCGTGG
CGATGGCAGCATCCGCCGCCTTTATGACACCGGTTTCTTCACCGGTTAACACCCTGGTTT
TAGGTCCGGGAAATTACAGCTTCAGTGACTTTGTGAAGTTGGGGGTACCGTTCACCATTA
TCGTGATGGCGGTTTGTGTGGTGATGATCCCGATGCTGTTTCCGTTTTGACAAGAGCCTG
ATGTCGCATCCGGCGCTTATTGCCTGATGCGACGCAGACTCCAGCTGCTTACAGCGGTGA
ATCCTGGCTAATCTCATCGAGCGAAAGATGGAAGCTGGGAACAAATACTTCCATGAAGTA
GTCCATCTCCTGGCTGCGGCGCGCTTCAAGCGTCGCTTCCAGTCGCGTTTTTGCCAGCAA
GAATTCATTATTTCCGGCCGCGAGTTCTTCCAGACATTTCAGATATGCACACAGTGCATC
TGCCTGTTTCACCAACGATTTTTCTTCATCGCTATATGCATGCTCGTCAATTAACGGCGC
AAAGATATCCCGCAGCTCTTCCGGAACCATATCGACCAGTTTTTGCTGAGCGATTTTTTC
AATAGCCTTGTATTCCTGAGCGATTTGCGAATTGAAGTATTTCACCGGAGTAGGGAGATC
GCCGGTGAGCACTTCTGAGGCATCGTGGTACATCGCCAGTAAAGCGATACGTTCGGCGTT
GACATTACCGCCAAATTTCCGATTTTTGATAGCTGCCAGCGCATGGGCGACCATCGCTAC
CTGCAAACTGTGTTCGGACACATTTTCCGTCCGCACGTTGCGCATGAGCGGCCAGCGGTT
AATGAGTTTCAGGCGGGAGAGATGGGCAAAAAAATGGCTCTGTTTCATAGTGACCTTACG
TATGATGACATCATCAGGTCATTGTGGCGGGATAACACTGCCGGATGCAATCTCCGGCAG
TGAAATTAAGATTACAGCTGATGATAACCAGAAAGGAAACGCGCGAACTTGCTCAAAGAC
AGCTCGATATCATCGACACGCGGTAGCGTGACAATGCGGAAGTGATCCGGCCACGGCCAG
TTGAATGCCGTCCCTTGCACCAACAGAACTTTTTCCTGCAACAGGAAATCCAGCACCATT
TTCTGATCGTCGTGAATGTTAAAGCGTTTGGCGTCGATTTTCGGGAACATGTACAGCGCA
CCACGAGGTTTCACGCAGGAAACGCCCGGAATATCGTTGATCAATTCCCACGCGCGGTTA
CGCTGCTCATAAAGACGACCGCCAGGGGTAATAAATTCACTGATGCTCTGATAACCACCC
AGCGCGGTCTGAATGGCGTGTTGCGCAGGAACGTTAGCACACAGGCGCATTGAAGCCAGC
ATTTCCAGACCTTCGATGTAGCCTTTGGCGTGTTTTTTCGGCCCGTTCAACACCATCCAC
CCCTGACGGAAGCCTGCAACGCGGTACGTTTTCGACAGTCCATTAAAGGTAATGGTCAGC
AGGTCAGGTGCCAGCGGCGCAATTGAGTGATGCTCAGCGTCGTCGTAGAGAATTTTGTCA
TAAATTTCATCGGCGAAGATAATGAGATTATGCTGACGTGCAATCTCCACAATCTCCATT
AAAAGCTCTTTGGAATATACCGCGCCGGTTGGGTTATTTGGGTTGATAATAACGATCCCA
CGCGTACGAGGCGTAATTTTAGCGCGAATATCATCGAGGTCCGGGAACCAGTCAGAGGAT
TCATCGCAAAGATAATGCACCGCTTTACCGCTGGAAAGCGAAACCGCCGCGGTCCATAGT
GGGTAATCTGGTGCAGGAACCAACATTTCGTCCCCGCTGTTCAGCAATGCCTGCATTGCC
TGAACGATAAGCTCCGATACACCATTGCCGATGTAAATATCTTCCACGGTAACATCACGC
ATGCCACGAGCCTGGTAGTGCTGCATGATGGCTTTACGCGCAGAGTAAAGACCTTTGGAA
TCGCAATACCCTTGAGCTGTAGGCAGGTTGCGTATCACGTCAACGAGAATTTCATCTGGC
GCGTCAAAACCGAACGGGGCTGGGTTGCCGATGTTCAGTTTCAGTACCTTGTTACCTTCT
TCTTCCAGTCGTTTTGCTTCTTTCAGCACCGGACCACGGATGTCATAACAGACATTCTCT
AATTTGCTGGATTTTTCAATGGGGGACATGAATCTTGACCTTTTTTGCTGTTATCGCCAC
TCCCTGCCGTGGAAGTCAGCTTAGAACAATGTACTCCCCCAGGACGGTGTTTTGAAGGTC
TGCAGAATAAGATTTTGCCAGAGGGGAAGGCTCGATTGTGCTGTTAATAACTTAATAATG
ACAAAATAATGAGGCGTATATGCTTTACATACAATGTTATATAGTGAATTGTTCTGATTC
TTAATTGTAAGTCTGGTTTTTTTATCTGTAAGATAATTGTGTGAAAATGCCTCATTTAAG
AATTCACTAATGAAACGCGATGATGATATTTCCGCATTACGGAGAGTTTAACAGCGTGAT
GATTTCCGAGGTGTCGCAATGGGGGCAAGGTGTGAAACTATTGTTAAGCGGAATTAATGA
ATGAGGATGATGCTAATTAATTATTATTTAATATTCAAAAAGGTTTTGATGTGCTTATTA
ATAATAGAAGATTACTTTGCCTAACATAACATAACTTTGCATCAGATAATTCGCAATGAC
CCTTATAAATAAAAGGTTTTTGGGGTAAAATGCTCGCATAAATGACGGATCCCTGCTCTT
GATGCCGCCTCACCATTGCTGTTTGTACGTGTTCGCGTATGACCAGCGATGCTGCACGAG
AGTGGAACAAGGACTCACATTTACATTTATACAAACACGCGCATGTCATAAATAGAAAAG
AGTGAGTAACTTAATAGATATGCGATCCCTGAAGATATATTCTGTGATCTACTTCAGGCA
TTATAACGGAACAATGTGAGTCGCTTTTTTAGTGCAACTCATATGCATTTTTACTTTCGT
CCGGGTTCCGGATGAAACTGCCAGGGAGGCACATTACAAATGGAATTGCTTGTTTGTGTG
TGCACAGCATTAACCAGCTCAGTATGAGCCGCCAGTAAGTGATAATATATGATAAGTGCA
AATCGTCCGATAATTAACCTCGACCTCGATCTGCTGAGAACATTTGTTGCTGTTGCCGAT
CTGAACACTTTTGCTGCCGCAGCTGCCGCTGTGTGTCGTACTCAGTCCGCCGTAAGTCAG
CAAATGCAGCGTCTGGAACAACTCGTTGGGAAAGAACTGTTCGCTCGTCACGGTCGCAAC
AAACTGTTAACTGAACATGGCATTCAACTTCTTGGTTACGCTAGGAAAATCCTGCGTTTT
AATGATGAGGCCTGCTCATCATTAATGTTCAGTAATCTTCAGGGCGTGTTAACTATCGGT
GCTTCAGATGAATCTGCCGATACGATCTTACCTTTCCTGTTAAATCGCGTGAGTTCGGTT
TATCCGAAATTAGCGCTGGATGTCCGCGTTAAACGTAATGCCTATATGGCAGAAATGCTG
GAATCCCAGGAAGTGGATTTGATGGTAACCACCCATCGTCCTTCAGCGTTTAAGGCATTG
AACCTGCGTACCTCGCCAACACACTGGTACTGCGCAGCGGAATACGTATTGCAAAAAGGT
GAGCCGATCCCTCTTGTATTGCTGGATGATCCAAGTCCGTTTCGCGATATGGTGCTGGCG
ACGCTTAATAAAGCAGATATTCCCTGGCGACTGGCTTATGTCGCCTCGACGCTTCCGGCC
GTTCGTGCGGCAGTGAAAGCTGGTCTTGGCGTGACGGCAAGGCCGGTCGAGATGATGAGT
CCGGACTTGCGTGTGCTGAGTGGAGTAGATGGCTTACCGCCGCTACCTGATACCGAATAT
TTGCTGTGCTATGACCCGTCCAGTAATAATGAGCTGGCCCAGGTGATCTATCAGGCGATG
GAGAGCTACCATAATCCGTGGCAATACAGCCCAATATCTGCTCCGGAAGGGGATGATTCA
TTGTTGATTGAAAGGGATATCGAGTAATCGACGGACGATAGATAATTCCTGAGACAATAG
TGTAAAAAACGAGCCGCTGGGGGTGTTTTAAACCCCAGCGGCTTTTTTTTAGTAAAGAAC
CTTCTTCACATCGTGCAGAACGTACAAAACTGTTCATTTTTCAATCGCCAGAGATTCACG
CCCCGTACGCACAAATAATCGCCTGAAAAAAATCACCTGCTACAATGATGTTAAAAAATA
CGTAAATTTGTTGCTGCGTTTTTGTTATGGAATGACAAAAGCGTGTCACAGATCAAGAAA
ATACTCTCTTTTGGGGGGAGGAATCGACACAAATTCCTGTCAAAATAGACCCGTATTTTT
TCCATTGCTTCACAACGGACACGATTCAACAACATCTAATTATCCTGGAGTCGTCAAGGA
TCTGGGGTGAAAGGGCATTAAATGCTAATGGTGTTGATATTATGTAAACTAATGTGAAGA
AACTTTTGTTAAAGTTGACAAAAGGTTATAGAAAGGAGTAAAAGACCACATCAATTAGCT
GTATAAAAGAATTTCTACAGTGATTGTAAGGTTTTTTTTATTCCTCCCCATGAATCGATG
TGGCGTCCATCTGCCGTGAAGAGCAGTGAATCTGGCGCTACTTTTGATGAGTAAGCAATG
AGTATGTCAACATCCACTGAAGTCATCGCTCATCACTGGGCATTCGCTATCTTTCTTATC
GTTGCCATTGGCCTGTGTTGCCTGATGCTGGTAGGCGGTTGGTTTTTAGGCGGTCGCGCA
CGCGCGAGGTCGAAAAACGTGCCGTTTGAATCCGGTATCGACTCGGTCGGCTCCGCCCGC
TTACGCCTGTCCGCCAAGTTTTATCTGGTGGCCATGTTCTTCGTTATCTTCGACGTTGAA
GCGCTGTATCTGTTCGCATGGTCAACCTCTATCCGCGAAAGCGGCTGGGTAGGCTTTGTG
GAAGCTGCAATTTTTATTTTTGTGTTACTGGCAGGTCTGGTTTATCTGGTGCGTATTGGC
GCGCTGGACTGGACGCCCGCGCGTTCACGCCGCGAGCGTATGAACCCGGAAACGAACAGT
ATCGCTAATCGTCAACGCTAACCGCGAGGCATTAAGATGGATTATACGCTCACCCGCATA
GATCCCAACGGTGAGAACGACCGTTACCCCCTGCAAAAGCAGGAGATCGTAACCGACCCT
CTGGAGCAAGAAGTTAACAAAAACGTGTTTATGGGCAAGCTCAATGACATGGTTAACTGG
GGTCGTAAAAACTCAATTTGGCCGTATAACTTCGGTCTTTCCTGCTGTTACGTTGAGATG
GTGACTTCGTTTACCGCGGTGCATGACGTGGCGCGTTTTGGCGCAGAAGTATTGCGTGCT
TCGCCGCGTCAGGCTGACCTGATGGTGGTTGCAGGAACCTGCTTTACCAAAATGGCACCG
GTTATTCAGCGTCTGTATGACCAGATGCTGGAACCAAAATGGGTTATCTCAATGGGTGCC
TGTGCCAACTCTGGTGGTATGTACGATATTTATTCCGTTGTGCAGGGCGTCGATAAATTC
ATCCCGGTTGATGTGTATATCCCGGGCTGCCCGCCGCGTCCTGAAGCGTACATGCAGGCA
CTGATGCTGTTGCAGGAATCTATCGGCAAAGAACGTCGTCCGCTCTCCTGGGTGGTTGGC
GATCAGGGCGTTTATCGCGCCAATATGCAATCAGAGCGCGAACGCAAGCGCGGTGAACGC
ATTGCCGTAACCAACCTGCGTACACCTGACGAGATTTAATTTGCGCCTGTCGGCAAAGGG
ATTTTTCTTCGCTTATTCCTAAATCTATTTCGCGAAGCTTACTGCGCCGACAGTCACCAC
GGACCATTTGCAATGGTGAACAATATGACCGACTTAACCGCGCAAGAACCCGCCTGGCAG
ACCCGCGATCATCTTGATGATCCGGTAATTGGCGAACTGCGCAACCGTTTTGGGCCGGAT
GCCTTTACTGTTCAGGCGACTCGCACCGGGGTTCCCGTTGTGTGGATCAAGCGTGAACAA
TTACTGGAAGTTGGCGATTTCTTAAAGAAACTGCCGAAACCTTACGTCATGCTGTTTGAC
TTACACGGCATGGACGAACGTCTGCGCACACACCGCGAAGGGTTACCTGCCGCGGATTTT
TCCGTTTTCTACCATCTGATTTCTATCGATCGTAACCGCGACATCATGCTGAAGGTGGCG
TTGGCAGAAAACGACCTGCACGTACCGACCTTCACCAAACTGTTCCCGAACGCTAACTGG
TATGAGCGTGAAACCTGGGATCTGTTTGGCATTACATTCGACGGTCACCCGAACCTGCGC
CGCATCATGATGCCGCAAACCTGGAAAGGTCACCCGCTGCGTAAAGATTACCCGGCGCGC
GCTACCGAATTCTCGCCGTTTGAGCTGACCAAAGCCAAACAGGATCTGGAGATGGAAGCC
CTGACCTTCAAACCGGAAGAGTGGGGGATGAAGCGCGGCACCGAAAACGAGGACTTCATG
TTCCTCAACCTCGGCCCGAACCACCCGTCGGCGCACGGTGCTTTCCGTATCGTTTTGCAG
CTTGATGGCGAAGAGATTGTCGACTGCGTACCAGACATCGGTTACCACCACCGTGGTGCG
GAGAAAATGGGCGAACGCCAGTCCTGGCACAGCTACATTCCGTATACCGACCGTATCGAA
TACCTCGGCGGCTGCGTTAACGAAATGCCTTACGTGCTGGCGGTAGAGAAACTGGCCGGG
ATCACCGTGCCGGATCGCGTTAACGTCATTCGCGTAATGCTCTCCGAACTGTTCCGCATC
AACAGCCACCTGCTGTATATCTCGACCTTTATTCAGGACGTCGGCGCAATGACGCCCGTG
TTCTTCGCCTTTACCGATCGTCAGAAAATTTACGATCTGGTGGAAGCGATCACGGGTTTC
CGTATGCACCCGGCGTGGTTCCGTATTGGCGGCGTAGCGCACGACCTGCCGCGCGGCTGG
GATCGCCTGCTGCGTGAGTTCCTCGACTGGATGCCGAAACGTCTGGCGTCTTACGAGAAA
GCGGCGCTGCAAAATACCATTCTGAAAGGTCGTTCCCAGGGCGTTGCCGCCTATGGCGCG
AAAGAGGCGCTGGAGTGGGGCACCACTGGCGCGGGCCTGCGTGCTACCGGGATTGACTTC
GACGTGCGTAAGGCGCGTCCTTATTCTGGCTATGAAAACTTCGACTTTGAAATCCCGGTT
GGTGGTGGTGTTTCTGACTGCTACACCCGCGTAATGCTGAAAGTGGAAGAGCTGCGCCAG
AGTCTGCGCATTCTTGAGCAGTGCCTCAACAACATGCCGGAAGGCCCGTTCAAAGCGGAT
CACCCGCTGACCACGCCACCGCCGAAAGAGCGCACGCTGCAACATATCGAAACCCTGATC
ACCCACTTCCTGCAAGTGTCGTGGGGGCCGGTGATGCCTGCCAATGAATCTTTCCAGATG
ATTGAGGCGACCAAGGGGATCAACAGTTACTACCTGACCAGCGACGGTAGCACCATGAGT
TATCGCACTCGTATCCGCACGCCGAGTTATGCGCATTTGCAGCAAATTCCGGCGGCGATC
CGCGGCAGCCTGGTGTCTGACCTGATTGTTTATCTGGGCAGTATCGATTTTGTTATGTCA
GATGTGGACCGCTAATTATGCACGAGAATCAACAACCACAAACCGAGGCTTTTGAGCTGA
GTGCGGCAGAGCGTGAAGCGATTGAGCACGAGATGCACCACTACGAAGACCCGCGTGCGG
CGTCCATTGAAGCGCTGAAAATCGTTCAGAAGCAGCGTGGCTGGGTGCCGGATGGCGCGA
TCCACGCGATCGCCGATGTGCTGGGTATTCCGGCGAGCGACGTCGAAGGCGTGGCAACGT
TCTACAGCCAGATCTTCCGCCAGCCGGTTGGCCGCCATGTGATCCGTTATTGCGACAGCG
TGGTCTGTCATATCAACGGTTACCAGGGTATTCAGGCGGCGCTCGAGAAAAAGCTAAACA
TCAAACCAGGGCAAACGACATTTGACGGTCGCTTTACGCTGCTGCCAACTTGCTGCCTGG
GGAACTGTGATAAAGGGCCAAACATGATGATCGATGAGGACACTCACGCGCATCTGACCC
CGGAAGCGATCCCTGAACTGCTGGAGCGGTATAAATGAAAAACATTATCCGTACTCCCGA
AACGCATCCGCTGACCTGGCGTCTGCGCGATGACAAACAGCCAGTGTGGCTGGACGAATA
CCGCAGCAAAAACGGTTACGAAGGCGCGCGTAAGGCGCTGACCGGGCTGTCTCCGGACGA
AATCGTTAATCAGGTAAAAGACGCTGGTCTGAAAGGGCGTGGCGGCGCGGGTTTCTCGAC
TGGCCTGAAATGGAGCCTGATGCCGAAAGACGAATCCATGAACATCCGTTACCTGCTGTG
TAACGCCGATGAAATGGAGCCAGGCACCTATAAAGACCGCCTGCTGATGGAGCAACTGCC
GCACCTGCTGGTGGAAGGCATGCTCATCTCCGCGTTTGCGCTGAAAGCTTACCGTGGCTA
TATCTTCCTGCGCGGCGAATATATCGAAGCGGCAGTGAATCTACGCCGTGCCATTGCCGA
AGCGACTGAAGCGGGCTTGCTTGGCAAAAACATTATGGGAACAGGTTTCGACTTCGAACT
GTTCGTCCATACCGGGGCAGGGCGCTACATCTGCGGGGAAGAAACAGCGTTAATCAACTC
CCTGGAAGGGCGTCGTGCTAACCCGCGCTCGAAGCCTCCATTCCCGGCGACCTCCGGCGC
ATGGGGTAAACCGACCTGTGTCAACAACGTCGAAACCCTGTGTAACGTTCCGGCGATCCT
CGCTAACGGCGTGGAGTGGTATCAGAACATCTCGAAAAGTAAAGATGCTGGCACCAAGCT
GATGGGCTTCTCCGGTCGGGTGAAAAATCCGGGCCTGTGGGAACTGCCGTTTGGTACTAC
CGCGCGCGAGATCCTCGAAGATTACGCCGGTGGTATGCGTGACGGTCTGAAATTCAAAGC
CTGGCAGCCAGGCGGCGCGGGCACCGACTTCCTGACCGAAGCGCACCTTGACCTGCCGAT
GGAATTCGAAAGTATCGGTAAAGCGGGAAGCCGTCTGGGTACGGCGCTGGCGATGGCGGT
TGACCATGAGATCAACATGGTGTCGCTGGTGCGTAACCTGGAAGAGTTTTTCGCCCGTGA
GTCCTGCGGCTGGTGTACGCCGTGCCGCGACGGTCTGCCGTGGAGCGTGAAAATTCTGCG
TGCGCTGGAGCGTGGTGAAGGTCAGCCGGGCGATATCGAAACACTTGAGCAACTGTGTCG
ATTCTTAGGCCCGGGTAAAACTTTCTGTGCCCACGCACCTGGTGCAGTGGAGCCGTTACA
GAGCGCCATCAAATATTTCCGCGAAGAATTTGAGGCGGGGATCAAACAGCCGTTCAGCAA
TACCCATTTGATTAATGGGATTCAGCCGAACCTGCTGAAAGAGCGCTGGTAACCGAATTT
CGATTAACGCTCAGTCTCTGACTGAGAAAACTGGAAGCATGCTAATGGCTACAATTCATG
TAGACGGCAAAGAATACGAGGTCAACGGAGCGGACAACCTGCTGGAAGCTTGTCTGTCTC
TTGGCCTTGATATTCCTTACTTTTGCTGGCATCCGGCGCTGGGAAGCGTCGGTGCTTGCC
GCCAGTGTGCGGTGAAGCAATACCAAAACGCGGAAGACACGCGTGGTCGCCTGGTGATGT
CCTGTATGACACCGGCTTCCGATGGCACCTTTATTTCCATTGACGACGAAGAAGCGAAAC
AGTTCCGTGAAAGTGTGGTCGAGTGGTTAATGACCAACCACCCGCACGACTGTCCGGTAT
GTGAAGAAGGCGGTAACTGCCATCTTCAGGATATGACCGTGATGACCGGACACAGCTTCC
GTCGCTACCGTTTCACCAAACGTACCCACCGTAATCAGGATTTGGGACCGTTCATCTCTC
ACGAAATGAACCGCTGCATCGCCTGCTACCGCTGCGTGCGTTACTACAAAGATTACGCTG
ACGGTACAGATCTGGGCGTTTATGGCGCGCACGACAACGTCTACTTCGGTCGCCCGGAAG
ACGGCACGCTGGAAAGCGAATTTTCCGGTAACCTGGTCGAAATTTGCCCGACTGGCGTAT
TTACCGACAAAACGCACTCCGAGCGTTACAACCGTAAATGGGATATGCAGTTTGCGCCGA
GCATCTGCCAGCAATGTTCCATCGGCTGTAACATCAGCCCCGGTGAACGTTATGGCGAAC
TGCGTCGTATCGAAAACCGTTACAACGGTACGGTAAACCACTACTTCCTCTGCGACCGTG
GTCGTTTCGGTTACGGTTACGTCAACCTGAAGGATCGTCCGCGTCAGCCAGTACAGCGTC
GTGGCGATGATTTCATTACCCTCAACGCCGAACAGGCAATGCAGGGCGCGGCAGATATTC
TGCGTCAGTCGAAGAAAGTGATCGGTATTGGTTCTCCGCGTGCCAGCGTGGAAAGCAACT
TTGCGCTGCGTGAACTGGTGGGCGAAGAAAACTTCTACACCGGTATCGCTCACGGTGAGC
AGGAACGTCTGCAACTGGCGCTGAAAGTGCTGCGTGAAGGCGGCATTTATACTCCGGCTC
TGCGCGAAATCGAATCTTACGATGCGGTACTGGTGCTGGGCGAAGACGTTACCCAGACCG
GCGCGCGCGTCGCGCTGGCAGTGCGTCAGGCGGTGAAAGGTAAAGCGCGCGAAATGGCGG
CAGCACAGAAAGTGGCTGACTGGCAGATTGCGGCAATCCTCAACATCGGTCAACGTGCGA
AGCATCCGCTGTTTGTTACCAACGTTGATGACACCCGTCTGGATGATATCGCGGCGTGGA
CTTACCGCGCACCGGTTGAAGATCAGGCGCGTTTAGGTTTTGCCATCGCCCATGCGCTGG
ATAACTCTGCACCAGCGGTTGACGGTATCGAACCTGAGCTGCAAAGCAAAATCGACGTCA
TCGTGCAGGCACTGGCAGGTGCGAAGAAACCGTTGATTATCTCCGGGACGAACGCCGGTA
GCGCTGAAGTAATTCAGGCTGCGGCTAACGTCGCGAAAGCCCTGAAAGGTCGCGGCGCTG
ACGTCGGTATCACCATGATTGCCCGTTCCGTCAACAGCATGGGGCTGGGCATTATGGGCG
GTGGATCGCTTGAAGAAGCGTTAACCGAACTGGAAACCGGACGCGCCGACGCGGTGGTGG
TGCTGGAGAACGATCTGCATCGTCACGCATCCGCTACCCGCGTGAATGCTGCGCTGGCTA
AAGCGCCGCTGGTGATGGTGGTTGACCATCAACGCACAGCGATCATGGAAAACGCCCATC
TGGTGCTTTCCGCCGCCAGCTTTGCTGAAAGCGACGGTACAGTGATCAACAACGAAGGCC
GCGCCCAACGTTTCTTCCAGGTTTACGATCCGGCTTATTACGACAGCAAAACTGTCATGC
TGGAAAGCTGGCGCTGGTTACACTCGCTGCACAGCACTCTGCTGAGCCGTGAAGTGGACT
GGACGCAGCTCGACCATGTGATTGACGCTGTTGTGGCGAAAATCCCGGAACTGGCAGGTA
TCAAAGATGCTGCGCCGGATGCGACATTCCGTATTCGTGGGCAGAAACTGGCCCGTGAAC
CGCACCGTTACAGCGGTCGTACCGCCATGCGCGCCAATATCAGCGTTCATGAGCCGCGTC
AGCCGCAGGATATTGACACCATGTTCACCTTCTCGATGGAAGGTAACAACCAGCCGACCG
CGCATCGTTCGCAAGTGCCGTTTGCCTGGGCTCCGGGCTGGAACTCCCCGCAGGCGTGGA
ACAAATTCCAGGACGAAGTGGGCGGCAAACTGCGCTTTGGCGATCCGGGCGTGCGTCTGT
TTGAAACCAGCGAAAATGGTCTGGATTACTTCACCAGCGTACCGGCACGCTTCCAGCCGC
AGGACGGGAAATGGCGTATCGCGCCGTATTACCACCTGTTTGGCAGTGATGAATTGTCAC
AGCGTGCTCCGGTCTTCCAGAGCCGTATGCCGCAGCCGTACATCAAACTCAACCCGGCAG
ATGCCGCGAAGTTGGGTGTGAATGCAGGTACACGCGTCTCCTTTAGTTACGATGGCAACA
CGGTCACGCTGCCGGTTGAAATCGCCGAAGGGCTGACGGCAGGGCAGGTGGGCTTGCCGA
TGGGTATGTCCGGCATTGCTCCGGTGCTGGCTGGCGCGCATCTTGAGGATCTCAAGGAGG
CACAACAATGAGTTGGATATCACCGGAACTGATTGAGATCCTGCTGACCATCCTCAAAGC
GGTGGTGATCCTGCTGGTGGTTGTCACCTGCGGGGCATTCATGAGCTTTGGCGAACGTCG
CCTGCTGGGTCTGTTCCAGAACCGTTACGGACCTAACCGTGTTGGCTGGGGCGGTTCGCT
CCAGCTGGTTGCGGACATGATCAAAATGTTCTTTAAAGAAGACTGGATCCCGAAATTCTC
GGATCGCGTCATCTTTACCCTGGCACCGATGATTGCCTTTACCTCGTTGCTGCTGGCCTT
TGCGATTGTGCCAGTCAGCCCGGGTTGGGTGGTTGCCGACCTGAACATCGGGATTTTGTT
CTTCCTGATGATGGCTGGTCTGGCGGTTTACGCGGTGCTGTTTGCGGGCTGGTCAAGTAA
CAACAAATACTCGCTGCTGGGTGCGATGCGTGCTTCTGCACAGACCCTGAGCTACGAAGT
GTTCCTCGGGCTTTCTCTGATGGGCGTGGTGGCGCAGGCCGGTTCATTCAACATGACCGA
CATCGTCAACAGCCAGGCGCATGTGTGGAACGTCATCCCGCAATTCTTTGGTTTTATTAC
CTTTGCCATCGCGGGTGTGGCGGTGTGTCACCGTCACCCGTTTGACCAGCCGGAAGCCGA
GCAGGAACTGGCGGATGGTTACCACATTGAATACTCCGGCATGAAGTTCGGTCTGTTCTT
CGTGGGTGAGTACATCGGGATTGTGACCATCTCTGCATTGATGGTGACGCTGTTCTTCGG
TGGCTGGCAAGGCCCGTTGTTACCGCCATTCATCTGGTTCGCGCTGAAAACCGCGTTCTT
TATGATGATGTTCATTTTGATTCGTGCGTCGTTACCGCGTCCGCGTTATGACCAGGTAAT
GTCCTTCGGCTGGAAAATCTGCCTGCCGCTGACGCTGATCAACTTGCTGGTAACGGCGGC
TGTCATTCTCTGGCAGGCGCAATAAGGGGCAATAAGACCATGACCTTAAAAGAATTGTTA
GTAGGTTTCGGCACCCAGGTTCGTAGTATCTGGATGATCGGCCTGCACGCGTTCGCCAAA
CGCGAAACGCGAATGTACCCGGAAGAGCCGGTCTATCTGCCGCCCCGTTATCGTGGTCGT
ATCGTTCTGACCCGCGACCCGGACGGCGAAGAGCGTTGCGTAGCCTGTAACCTCTGTGCG
GTAGCCTGCCCGGTCGGCTGTATCTCGCTGCAAAAAGCAGAAACCAAAGACGGTCGCTGG
TATCCGGAATTTTTCCGCATCAACTTCTCACGCTGCATTTTCTGTGGTCTGTGCGAAGAA
GCCTGTCCGACCACGGCGATTCAGTTAACCCCGGATTTCGAAATGGGGGAATACAAGCGC
CAGGATCTGGTTTACGAGAAAGAGGATCTGCTGATCTCCGGTCCGGGCAAATACCCGGAA
TATAACTTCTACCGGATGGCAGGTATGGCAATCGACGGCAAAGATAAGGGCGAAGCAGAG
AACGAAGCCAAGCCTATCGACGTCAAGAGCCTGTTACCGTAAGGAGAGGAGCAATGGAGT
TCGCTTTTTATATCTGTGGCCTGATAGCCATACTTGCGACCTTGCGAGTGATCACCCATA
CCAATCCGGTACACGCACTGCTGTACCTGATTATTTCGCTGCTGGCGATTTCTGGGGTGT
TCTTCTCACTGGGCGCTTACTTCGCCGGTGCGCTGGAAATTATCGTCTACGCGGGTGCCA
TTATGGTGCTGTTCGTGTTCGTGGTGATGATGCTCAACCTGGGCGGTTCAGAAATCGAAC
AGGAACGCCAGTGGCTGAAACCGCAGGTGTGGATTGGTCCGGCAATTTTGTCGGCCATCA
TGCTGGTGGTGATTGTTTACGCCATCCTCGGTGTTAACGATCAGGGTATCGACGGTACGC
CAATCAGTGCTAAAGCAGTGGGTATTACGCTGTTCGGGCCTTACGTACTGGCGGTGGAAC
TGGCTTCTATGCTGCTGCTCGCGGGTCTGGTTGTGGCCTTCCACGTCGGTCGTGAAGAGC
GTGCGGGTGAAGTGCTGAGCAATCGTAAAGACGACAGCGCGAAAAGAAAAACGGAGGAGC
ACGCATGATCCCCTTACAACATGGACTGATCCTCGCGGCAATCTTATTCGTTCTTGGCTT
AACCGGTCTGGTTATCCGTCGCAATCTGCTGTTTATGCTGATTGGTCTGGAAATCATGAT
TAACGCCTCCGCGCTGGCCTTTGTGGTCGCCGGAAGCTACTGGGGCCAGACCGACGGTCA
GGTGATGTACATTCTCGCCATCAGCCTCGCGGCGGCAGAAGCGAGTATCGGCCTTGCGCT
GCTGCTGCAACTTCACCGTCGTCGCCAGAACCTGAACATCGATTCAGTAAGTGAGATGCG
CGGATGAACATGCTTGCCTTAACCATTATTTTGCCATTGATTGGCTTCGTCCTGCTGGCG
TTCTCCCGTGGGCGCTGGTCTGAAAACGTTTCGGCGATCGTCGGCGTTGGCTCTGTGGGC
CTGGCGGCGCTGGTAACCGCCTTTATCGGCGTTGATTTCTTCGCTAACGGCGAGCAGGCA
TACAGCCAGCCGCTGTGGACGTGGATGTCGGTAGGCGACTTTAACATCGGTTTTAACCTG
GTGCTGGACGGCCTGTCGCTGACCATGCTCTCGGTGGTCACTGGTGTGGGTTTCCTGATC
CACATGTACGCCTCCTGGTATATGCGTGGTGAAGAGGGCTACTCTCGCTTCTTCGCCTAC
ACCAACCTGTTCATCGCCAGCATGGTGGTTCTGGTGCTTGCCGATAACCTGCTGTTGATG
TACCTCGGCTGGGAAGGCGTGGGCCTGTGCTCCTATCTGCTGATCGGTTTCTATTACACC
GATCCGAAGAATGGCGCAGCGGCAATGAAAGCGTTCGTCGTGACCCGTGTGGGTGACGTG
TTCCTCGCTTTCGCGCTGTTCATTCTTTACAACGAACTGGGCACCCTGAACTTCCGCGAA
ATGGTGGAACTGGCACCAGCGCACTTTGCTGACGGCAATAACATGCTGATGTGGGCGACG
CTGATGCTGCTGGGCGGTGCGGTCGGTAAATCTGCGCAGTTGCCGTTGCAGACATGGCTT
GCCGACGCGATGGCGGGCCCGACGCCTGTCTCCGCGCTGATCCACGCCGCAACGATGGTA
ACCGCGGGTGTCTACCTGATCGCCCGTACCCACGGCCTGTTCCTGATGACCCCGGAAGTT
CTGCATCTGGTGGGTATTGTCGGGGCAGTTACGCTGCTGCTGGCCGGTTTTGCCGCGCTG
GTACAGACCGACATCAAACGTGTTCTCGCTTACTCTACCATGAGCCAGATTGGCTACATG
TTCCTCGCGCTTGGCGTGCAGGCATGGGATGCGGCGATTTTCCACTTGATGACTCACGCG
TTCTTTAAAGCGCTGCTGTTCCTGGCATCCGGTTCCGTCATTCTGGCCTGCCATCACGAA
CAGAACATCTTCAAGATGGGCGGTCTGCGTAAATCTATTCCGCTGGTTTATCTCTGCTTC
CTGGTGGGTGGTGCAGCACTGTCGGCACTGCCGCTGGTCACTGCGGGCTTCTTCAGTAAG
GATGAGATCCTCGCGGGTGCGATGGCGAATGGTCATATCAATCTGATGGTGGCAGGTCTG
GTCGGTACGTTTATGACCTCGCTCTACACCTTCCGTATGATTTTCATCGTCTTCCACGGA
AAAGAACAAATTCACGCTCACGCCGTGAAAGGGGTAACTCACAGCCTGCCGCTGATTGTG
CTGCTGATCCTTTCCACCTTCGTTGGCGCACTGATTGTACCGCCGCTGCAGGGCGTGCTT
CCGCAAACGACGGAGCTGGCGCACGGCAGCATGTTGACCCTGGAAATTACCTCTGGCGTG
GTCGCGGTGGTCGGCATTCTGCTGGCTGCCTGGCTGTGGCTGGGTAAACGTACTCTGGTG
ACCTCCATCGCCAACAGTGCGCCGGGCCGTCTGCTGGGCACCTGGTGGTACAACGCCTGG
GGCTTTGACTGGCTGTACGACAAAGTGTTCGTCAAGCCGTTCTTGGGTATTGCCTGGTTG
CTGAAACGCGATCCGCTGAACGCAATGATGAACATTCCGGCGGTTCTTTCCCGCTTTGCA
GGTAAAGGTCTGCTGTTAAGCGAGAACGGCTATCTGCGCTGGTATGTGGCATCCATGAGC
ATCGGTGCGGTCGTGGTGCTGGCACTGTTGATGGTACTGCGTTGAGTTAAGGATTGTGGG
ATTGCCCCTGGGCATATAAGAACGTAGGTCGGATAAGCCTCCTTCGCGGTGCATCCGACA
CTACCCCCAGTCCGAAGAGAATTTTCTGTCGTGAGAATTCGTTGAAAATCCGGTCCTGAC
GGGACTTTTACAAGGAATAAAGATCGCCATGTTACTACCCTGGCTAATATTAATTCCCTT
TATCGGCGGCTTCCTGTGCTGGCAGACCGAACGCTTTGGCGTCAAGGTGCCGCGCTGGAT
CGCGCTGATCACCATGGGATTGACGCTGGCGCTGTCGCTGCAACTGTGGTTGCAGGGCGG
TTATTCACTGACGCAATCCGCCGGAATTCCGCAGTGGCAGTCTGAATTCGACATGCCGTG
GATCCCGCGTTTTGGTATCTCTATTCATCTCGCCATTGACGGGCTGTCGCTGCTGATGGT
CGTGCTGACCGGTCTGCTCGGTGTGCTGGCGGTACTCTGTTCGTGGAAAGAGATCGAAAA
ATATCAGGGCTTCTTCCACCTCAACCTGATGTGGATCCTGGGCGGCGTTATCGGCGTGTT
CCTTGCCATCGACATGTTCCTGTTCTTCTTCTTCTGGGAAATGATGCTGGTGCCGATGTA
CTTCCTGATCGCACTGTGGGGGCATAAAGCCTCTGACGGTAAAACGCGTATCACGGCGGC
AACCAAGTTCTTCATTTACACCCAGGCGAGTGGTCTTGTGATGTTGATCGCCATCCTGGC
GCTGGTTTTTGTTCACTACAATGCGACCGGCGTCTGGACCTTCAACTATGAAGAGCTGCT
GAATACGCCAATGTCCAGTGGTGTGGAATATCTGTTGATGCTGGGCTTCTTCATCGCCTT
CGCAGTCAAAATGCCGGTGGTTCCGCTGCATGGCTGGCTGCCGGATGCGCACTCCCAGGC
TCCGACCGCCGGTTCCGTTGACCTCGCGGGGATCTTGCTGAAAACTGCCGCTTACGGTTT
GCTGCGTTTCTCCCTGCCGCTGTTCCCAAATGCGTCGGCAGAGTTCGCGCCAATCGCTAT
GTGGCTGGGTGTTATCGGCATCTTTTACGGTGCGTGGATGGCCTTCGCCCAGACCGATAT
CAAACGTCTGATCGCCTACACCTCGGTTTCCCACATGGGCTTCGTGCTGATTGCTATCTA
CACCGGCAGCCAGTTGGCCTACCAGGGCGCGGTAATCCAGATGATTGCGCACGGCTTGTC
GGCGGCGGGTCTGTTTATTCTCTGCGGTCAGCTTTATGAACGTATCCATACCCGCGACAT
GCGCATGATGGGCGGTCTGTGGAGCAAGATGAAATGGCTGCCAGCACTGTCGCTGTTCTT
TGCGGTGGCAACGCTTGGGATGCCTGGCACCGGTAACTTCGTCGGCGAATTTATGATTCT
GTTCGGCAGCTTCCAGGTTGTCCCGGTGATTACCGTTATTTCTACCTTTGGGCTGGTCTT
TGCATCTGTTTATTCGCTGGCGATGTTGCATCGTGCTTACTTCGGTAAAGCGAAAAGCCA
GATTGCCAGCCAGGAACTGCCAGGGATGTCGCTGCGTGAGCTGTTTATGATCCTGTTGCT
GGTGGTGCTGCTGGTACTGCTGGGCTTCTATCCGCAGCCGATTCTGGATACCTCGCACTC
CGCGATTGGCAATATCCAGCAGTGGTTTGTTAATTCCGTTACTACTACAAGGCCGTAAAT
CGCCATGACAATAACTCCACAAAACCTGATCGCACTGCTACCGTTGCTGATCGTCGGCTT
GACGGTGGTGGTTGTGATGCTCTCCATTGCGTGGCGACGCAATCATTTCCTCAACGCTAC
GCTCTCGGTTATTGGGCTTAACGCGGCGCTGGTTTCGCTCTGGTTTGTCGGCCAGGCGGG
CGCTATGGATGTTACGCCGCTGATGCGCGTTGATGGTTTCGCCATGCTTTACACCGGGCT
GGTCCTGCTGGCGAGCCTCGCCACCTGTACTTTCGCCTACCCGTGGCTTGAAGGCTATAA
CGACAACAAGGATGAGTTCTACCTGTTGGTGTTAATTGCCGCGCTGGGCGGGATCCTGCT
GGCGAATGCCAACCATCTGGCGTCTCTGTTCCTCGGTATCGAACTGATCTCTTTGCCGCT
GTTTGGCCTGGTCGGTTACGCTTTCCGCCAGAAACGTTCGCTGGAAGCCAGTATCAAATA
CACCATCCTTTCTGCCGCAGCGTCTTCTTTCCTGCTGTTTGGTATGGCGCTGGTGTATGC
GCAGTCTGGCGACCTGTCGTTTGTCGCGTTGGGTAAAAACCTTGGCGACGGTATGCTCAA
CGAGCCGCTGTTGCTGGCAGGTTTCGGCCTGATGATTGTTGGCCTCGGCTTCAAACTCTC
TCTGGTGCCGTTCCACCTGTGGACGCCAGACGTATACCAGGGCGCGCCTGCGCCGGTTTC
CACTTTCCTGGCGACGGCGAGCAAAATCGCTATCTTCGGTGTGGTGATGCGTCTGTTCCT
CTACGCACCGGTGGGTGACAGCGAAGCGATTCGCGTAGTACTGGCGATTATCGCCTTTGC
CTCCATCATCTTCGGTAACCTGATGGCGTTGAGCCAGACCAACATCAAACGTCTGCTCGG
TTACTCATCTATCTCTCACCTCGGCTATCTGCTGGTGGCGCTGATTGCGCTGCAAACCGG
CGAGATGTCGATGGAAGCGGTAGGGGTTTACCTGGCCGGTTATCTGTTCAGCAGCCTCGG
CGCGTTCGGCGTGGTCAGCCTGATGTCCAGCCCGTATCGTGGCCCGGATGCTGATTCCCT
GTTCTCTTACCGCGGTCTGTTCTGGCATCGTCCGATCCTCGCGGCAGTGATGACGGTGAT
GATGCTGTCTCTGGCCGGTATCCCGATGACGCTGGGCTTTATCGGTAAGTTCTACGTGCT
GGCGGTCGGTGTCCAGGCTCACTTGTGGTGGCTGGTGGGTGCCGTGGTTGTCGGTTCGGC
AATCGGCCTTTACTACTACCTGCGCGTGGCGGTGAGTCTGTACCTGCACGCACCGGAACA
ACCGGGTCGCGATGCACCGTCAAACTGGCAGTACAGCGCGGGCGGTATCGTGGTGCTGAT
TTCTGCACTGTTGGTACTGGTGCTGGGTGTATGGCCACAACCGCTGATTAGCATTGTGCG
TTTGGCAATGCCGCTGATGTAATCTGTTAGTTTGTAAGTCAGAAAGCCGCCGACATGCTC
GGCGGTTTTTTTTGGCGCTCTGACACCATCACCCAACAATAACCGTCAGCGCATGATTCC
CTTGTCGCAGCATACGTCGATACGCGCTAATCAGCTTTTCCATATCAAGCATGATCGAGG
CAAAGAGTTGCCCCTCTAACTCTTCTGAAAAGGTCACTCCCGGATAAATCTCCATTTCAT
TGAGTCGCTTAATGGAAAACTGTTTACGCAGCTCACTTCGATCCAGTGATTCCAGTCGGT
CGATTGTCGCGGCTAACTCCTGATTCCAGGTCAATCCCAGGAAGCCATCTATGCCATCTT
CGAGGCTGTGTTCACCAAGCACGGCACGACTCAGCGGATCATTCTTCGCGGGATCAAAAG
CAGAGGTGCCTGTCAGCCCAAAGTGTAAAAAATCCCAGCGTTTATCAATATCCAGTCGGC
GTAATCCTGAAAGCGTGTCATGTATATTATCCATCAAAGGTTTTTCAGTAGACTCAAGCA
GTTGGTTAATCTTTTCTGAGTCAATTTCTGCAAAATAACCAATCATTCCCATTTATTTTT
CCTCCATTGAATTTCATGTTTCGCATCTTAAAACAGACGAGGGAAAATAAAATGTGCATG
TCGCTTTTTCTGGACCCGCCTCGAGAAATTTTTATTATTTACTGTTGTATAACAAATTTA
TAACACCATCCACCACCTGAGCCATTTTCTGATAATTCAATCTGTCTGCGGTATCACCGG
GCAAGTGGTATTGTTTATTACGATAAAAAGCGGTGTCAGTAATCATTACGGCGGGAATAT
CGTGTTGCCAATAATTCAGGTGGTCAGAGAAATCAATACCGGGAATAAACCCTGGGGCAT
TCATAGAATAAACAGATAAATCCCGGGATGACAACAATGCCGCTTTTACCTGACGAACGG
CGTTGATATCCTGTATTCTGCCGACCAGGCAATAAAGTCCCCCCGATCGGGATAAAGCCA
GGACATTGCGGGTAAGGGTAATCCTGGCTACCAGGCGCAGAGTCGTAATAGCCAATCGGG
GACGCCCTGCGCGGTAACTCTGGCACCGCTACTGACAAAGACCTCTTTTATATACTCTAC
GGACCTATTCAGATTATCAATATTGTCGGCATTACGTGGATGCACAGCTTGTGTAAGATA
ACGAACTTTTTTTTCTAATTGCTCAGGAATTACGTGTCGGGGCGTTGGCGATAATGCAGT
GACCCAGGGTTGGTAAAAATAATCAGAGGGAGTGAAAACAGAAATAATATAACAAAAGGA
AAATTTTTTCATATGTAAATTATCAATAAAAGGCGTTATTTCATTATTATTTATAATGAA
TTATGAGCGTTTATTTTATTACACTTGGTAGAGATATACAAAAAGTGTTTTTTACAGTGG
GTTCGCTATTTTTAAAAAGGAATTTCTGTGAGGAATAAAAATATAATTATGTTATTTATT
GGCAGATTGAATTGACAAGTGGGGCAGAAATCTGAGGGTAAGAAAAGTCAGCAACTACAA
TCCACTACATCAACAGACCAGCAATCGCGTGCCGAGATACGCTGGAAATACCCGAAGATT
GAACTGCAGGGTGGTGTGACTGACATCAGTCAGTGATGACTTTTTAGCAAACTATGTTCG
ACCAGTCAGCATATTTGCTGACTGGTCGAATTAATTAACAATGATGTTAACTTACTCTTT
TGCCTGATGCTCTATTTTGGGGTTGTGAGTGTTTTATTTCTAAGTCTCTATAATAATCAT
TGATATTTGCATCGCCATATTTATCTAAATAACAATTTCTGTTTACCAGTCGATGTTGAA
AATCAATTTCGTACTGCTCTTCTGCTGAATATTTTTTAAATCTGTCAGCATAGTTTTTTA
ATAACGTATAGGGGGCGCTGTCAGAATTACTTTCCCTTTGTTCAATCACTTCCTGGGCTG
CCATGCACACAAATGCACCGCAACTTTGGCTTAAGTATTGCTGAAGATCGGTATGTAAAA
ATATTATCTCGGGTTCAGTTAAATGAACTTTTATATTATTATTCGACATTTCTCCCATGA
GTTCAGAATTAAAACTATTAATGACACGCTTAAGTGAATTTTCTTTATCATGGCCTAGTG
CGCGCAATGAGTTGAATATGACGCATTTTATTTGTTGTGTATTATTTTTTTCATTTACTA
TTTTCTGTAGCGAAACTAATATCCAGTGTCCGCCAGTATTTATGGGGAATAACTGGACTT
CATTCGGCCATGATGGATCGCTCTTAATATTTTCATTGAGAGCGTCTTCCAGGTGAGTTC
TGGTGGAGTAGGGGACGTAGAGACCAGTAGGATAATTGACTTCAGTATTTTTTGCATTAG
CGGCGATCTTCTGAAGATAGCAATCTATTTCATCTGTGGTTAATTGACGATTTTTATCCC
AGAAGTTTGTACCATCGCTCAGTTCATTATTCTCATCATTTAAAAGCACCTTCGAAAGCG
ACTGTTTTTCAGATATAAGAGGAATTTCATCACCGATAATTGTCATTAATTTCGAAGGGG
AGAATAGCTTTTTGAACAGGAGAACATCTGAATTATCCGGACCAGTTGGTTTAAGGTGGG
AGTTGGTTGCGGTATGTGCCAAATTATATAATTTTAAACAGGCATTTTTAATAAGTCGGA
TAATCGATAGGGTCTCATTTGTTGGGTTTCTAACAATATGGTAAAGAATATCTTCAGCTT
TTTTTCCAAATTCATCATAACCTAACGCAATATTATGCAGTAACTCAATACTTTCTTCAT
CTCCGGATAACGCTGTTTTTTTTAAAGACTGCAGTAATTCCTCGGTCACAGTAAATTTTT
CTGCAAATGTCTGACTGAGTTGGGTTTGAGATAATTGACAATAATTGCTGACAACTGTAA
CCATCATATGCTCCTTTTAGTTGCAAAGGTTGTGCTGAATGAAGATAAAAAGAGGCAACT
TATTGCTCTGAATATAGTGCGTAAGGAGATGAATAAATATCAAAAATCGCTCAATATGCC
CGTGTGGGTGGATATATGTAGCGCGGGTTGCGATAACAGGGCAAGTTTCGCCCTGTTTTT
AATAATAAGCAGAGTTAAACGTTAAACACGGTGAAATCATTCGCTAGTTCAGTCGCCGGG
AAAATTGACCTGCATTCACGTAACAGGTGCTGACAACCTTTGTCATCATAGCGCGAGCTG
ACGTGGGTAATGATTAGCTTACCGACTCCAGCCTCACGGGCCAGTGTCGCAGCCTGGCGT
GTAGAGCTATGACCGCGACTATTGGCTTTGGCTTCCATGGTTATATCCAGCGTCGCTTCG
TGTACCATGACATCGACACCTTTAGCCAGGTCAAGTGCGGCATCGCAGGGGCCGGTATCG
CCGAAAATAGCGAGCGCTTTACCTGGCACTGGAGCAGCTAAGTAATCTGCGCCGTTAATC
TGCCTTCCATCTTCCAGCATGATTGTTTTGCCCGCTTTTAATTCCTGAAACAGTGGGCCA
GGCGGTACGCCAGCAGCTTTTAATGCCTGGGCATTTAATGCACCCGGTTTATCATGTTCT
TCAATACGATAGCCATAACATTCCAGTGGGTGTTCCATTGGATAAGCGGTCACTTTGCGC
AGGCCATCATCGAGAATTTCGCCAGCGCCAATTTCGACAATTTCCAGCGGATAATCGGTC
CATGAGCCGCTAATCCGCAGCGCGGTCTCCACAAATTCACGGATACCTTGCGGACCATAA
ATCGTTAAGGGTTGGACAATACCAGACATAGAACGACTGCACAGCAAGCCGGGTAAACCA
AAGAGATGATCGCCATGAAGGTGACTAATAAAAATCTTGTCCAGTTTTCCAGGGTTAAAG
GCGGTATGCAGTAGCTGATGCTGGGTGCCTTCACCGCAGTCAAACAACCAAAGACCGCTC
TGGGTCGGATGTTGCAGGTTAAGCAATATTGCCGTGACATTGCGCGTACGGGTTGGCACA
CCGGCTGAAGTACCTAAAAAAATTAATTCCATGAGTTCATCACGTTTCAAAAAATATTCC
GGCTAGTATAAGGCATACATCTAAAAGGAGAGCATTATGATTGAATGGCAAGATCTGCAT
CACTCTGAATTATCGGTTTCCCAGCTTTATGCCTTATTACAACTGCGTTGCGCGGTGTTT
GTTGTCGAGCAGAATTGCCCTTATCAGGATATCGATGGTGATGATTTGACGGGGGATAAT
CGCCATATTCTCGGTTGGAAAAATGATGAACTGGTGGCATATGCGAGGATTCTGAAAAGT
GATGATGATCTTGAGCCGGTCGTTATAGGTCGGGTGATTGTCAGTGAAGCGTTGCGTGGC
GAAAAAGTGGGGCAGCAACTGATGAGTAAAACCCTCGACACATGCACGCATCACTGGCCT
GATAAGCCTGTTTACCTTGGGGCGCAGGCGCATCTGCAAAACTTCTACCAGAGTTTCGGT
TTTATCCCTGTGACGGAGATCTATGAAGAAGATGGTATCCCACACATTGGGATGGCACGC
GAGGTAATTCAGGCGTAATCAATAACCCTTGTCTATAGTTAGTGACAGGTTTTACGCAAA
TGGAGAACGAGAATGTCTAATCAGTTTGGTGATACACGTATCGATGACGACCTGACGCTG
CTTAGTGAAACACTGGAAGAGGTGCTCCGCTCCTCTGGCGATCCCGCCGATCAGAAATAT
GTTGAGCTGAAAGCGCGTGCAGAAAAAGCGCTGGATGATGTGAAAAAACGGGTTAGCCAG
GCTTCAGACAGTTATTACTATCGGGCGAAGCAGGCTGTTTATCGTGCTGATGACTACGTC
CACGAAAAACCCTGGCAGGGAATTGGTGTGGGTGCGGCCGTTGGGCTGGTACTAGGACTG
TTGCTGGCACGCCGTTAAAACCTCCCTACACCGGGGTACTGCATTTTTTTTGTAGTACCC
CGTATAATGTGAGGCTTTTAACAGGGAGAGGTCCGCGTGCAATCACTTACTACGGCGCTG
GAAAATCTACTGCGCCATTTGTCGCAAGAGATTCCGGTGACACCCGGCATTCGGGTTATC
GATATTCCTTTCCCTCTCAAAGACGCTTTTGATGCCTTGAGCTGGCTGGCCAGTCAGCAA
ACGTACCCGCAATTCTACTGGCAACAACGTAATGGTGATGAAGAAGCTGCCGTCCTGGGC
GCGATTACCCGTTTTACGTCGTTGGACCAGGCACAACGTTTTCTTCGCCAGCACCCGGAA
CACGCCGACTTACGCATTTGGGGGCTGAATGCGTTCGACCCGTCGCAGGGCAATTTACTT
TTACCACGCCTGGAATGGCGACGCTGTGGCGGTAAAGCCACGCTGCGGCTGACGCTATTC
AGCGAAAGCTCCCTTCAGCACGATGCGATTAAGGCAAGAGAATTTATCGCCACACTGGTG
AGTATCAAGCCCTTGCCTGGGTTACATTTAACCACTACGCGAGAACAACACTGGCCGGAC
AAAACGGGCTGGACGCAATTAATCGAACTGGCAACGAAAACCATCGCCGAAGGGGAGCTC
GACAAAGTGGTGCTTGCTCGGGCAACTGACCTGCATTTCGCAAGTCCGGTCAATGCGGCG
GCGATGATGGCTGCCAGTCGTCGACTGAATCTCAATTGCTACCATTTTTACATGGCCTTT
GATGGCGAAAATGCTTTTCTTGGCTCTTCACCGGAACGGTTATGGCGGCGGCGTGACAAA
GCGCTGCGTACTGAAGCGCTGGCGGGAACAGTAGCAAATCATCCTGATGATAAGCAGGCG
CAGCAGTTAGGAGAGTGGCTGATGGCGGATGATAAAAACCAGCGCGAGAACATGCTGGTG
GTGGAAGATATCTGCCAACGATTACAGGCCGATACCCAGACGCTGGATGTTTTACCGCCG
CAGGTACTGCGTCTGCGTAAAGTGCAGCATCTTCGCCGCTGTATCTGGACTTCACTCAAC
AAAGCGGATGATGTGATCTGTTTACATCAGTTGCAGCCAACGGCAGCAGTTGCTGGCTTA
CCGCGCGATCTGGCGCGACAGTTTATCGCCCGTCACGAACCGTTCACCCGAGAATGGTAC
GCCGGTTCTGCGGGCTATCTCTCATTACAACAAAGCGAATTCTGCGTTTCCCTGCGCTCA
GCAAAAATTAGCGGCAATGTCGTGCGATTATATGCTGGCGCGGGCATTGTCCGTGGTTCC
GACCCCGAGCAAGAGTGGCAGGAAATCGACAACAAAGCGGCAGGGCTGCGTACTTTATTA
CAGATGGAATAGTAATGAGTCGCATCATTACCGATTCATATCAATAATCTATTTTTGTAG
CTCCTTATACTTAGCCGCAATATTGATACCGGACAAACTCATGTCAGTAAGCGCATTTAA
CCGACGCTGGGCGGCGGTCATTCTGGAAGCATTAACGCGTCACGGCGTCAGACACATCTG
TATCGCCCCAGGCTCGCGTTCTACACCGTTAACGTTAGCGGCGGCGGAGAATTCCGCATT
CATTCACCACACCCATTTCGATGAGCGTGGACTGGGGCATCTGGCGCTGGGGCTGGCGAA
AGTCAGCAAGCAGCCGGTGGCGGTGATTGTGACCTCCGGCACGGCGGTAGCAAATCTCTA
TCCTGCACTGATTGAAGCTGGGTTAACCGGAGAAAAACTGATCCTGTTAACCGCCGATCG
CCCGCCGGAGCTAATTGACTGCGGCGCGAATCAGGCGATTCGTCAGCCGGGAATGTTCGC
CTCTCACCCCACGCACAGTATTTCATTGCCGCGCCCGACCCAGGATATCCCCGCAAGTTG
GCTGGTTTCTACCATCGACCATGCTCTCGGTACGCTTCATGCGGGCGGAGTCCATATCAA
CTGCCCGTTTGCTGAACCGCTGTATGGCGAGATGGACGACACTGGGCTTAGCTGGCAACA
GCGTCTGGGTGACTGGTGGCAGGATGATAAGCCGTGGCTGCGTGAAGCGCCTCGTCTGGA
AAGTGAAAAACAGCGCGACTGGTTCTTCTGGCGGCAAAAACGCGGCGTGGTGGTTGCCGG
GCGCATGAGTGCGGAAGAGGGCAAAAAAGTTGCACTGTGGGCGCAAACTCTTGGCTGGCC
GCTGATTGGCGACGTGCTGTCGCAAACCGGACAGCCGCTGCCGTGTGCCGATCTTTGGTT
AGGCAATGCCAAAGCGACCAGCGAACTGCAACAGGCACAGATTGTGGTGCAACTGGGCAG
CAGCCTGACGGGCAAACGGCTCCTGCAATGGCAGGCAAGCTGTGAACCCGAAGAGTACTG
GATTGTGGATGACATCGAAGGGCGACTTGATCCGGCACACCATCGTGGACGCCGCTTAAT
TGCCAATATTGCCGACTGGCTGGAGCTGCATCCGGCAGAAAAACGCCAGCCCTGGTGCGT
TGAAATCCCGCGCCTGGCAGAACAGGCAATGCAGGCGGTTATTGCCCGTCGCGATGCGTT
TGGCGAAGCGCAACTGGCGCATCGCATCAGCGACTATCTGCCTGAACAGGGGCAATTGTT
TGTTGGTAACAGCCTGGTGGTACGTCTGATTGATGCGCTTTCGCAACTTCCAGCAGGTTA
CCTGGTGTACAGCAACCGTGGGGCCAGCGGTATCGACGGACTGCTTTCTACTGCCGCCGG
CGTTCAGCGTGCCAGTGGCAAACCGACGCTGGCGATTGTGGGCGATCTCTCCGCACTTTA
CGATCTCAACGCGCTGGCGTTATTGCGTCAGGTTTCCGCGCCGCTGGTATTAATTGTGGT
GAATAACAACGGCGGGCAAATTTTTTCGCTGTTGCCAACGCCGCAAAGCGAGCGCGAACG
TTTCTATCTGATGCCGCAAAACGTTCATTTTGAGCACGCCGCCGCGATGTTCGAGCTGAA
ATATCATCGTCCGCAAAACTGGCAGGAACTTGAAACGGCACTTGCCGATGCCTGGCGCAC
GCCAACCACCACGGTAATTGAAATGGTGGTTAACGACACCGATGGTGCGCAAACGCTCCA
GCAACTTCTGGCGCAGGTAAGCCATTTATGATCCTGCACGCGCAGGCAAAACACGGCAAA
CCAGGTTTACCCTGGCTGGTGTTTTTGCACGGTTTTTCCGGCGATTGCCACGAATGGCAA
GAAGTGGGCGAGGCGTTTGCCGACTACTCACGGTTGTATGTTGATCTTCCCGGGCACGGT
GGTTCGGCGGCGATTAGCGTCGATGGATTTGATGATGTCACCGACTTACTGCGTAAAACC
CTGGTTAGTTACAACATCCTTAACTTCTGGCTGGTGGGGTACTCGCTTGGCGGACGGGTG
GCGATGATGGCCGCTTGCCAGGGGCTGGCGGGGCTTTGTGGGGTTATTGTCGAAGGCGGG
CATCCGGGGCTGCAAAATGCTGAACAACGTGCGGAACGTCAGCGTTCCGATCGCCAATGG
GCGCAGCGTTTTCGCACAGAACCGTTAACGGCGGTATTTGCCGACTGGTATCAACAGTCT
GTTTTTGCCTCGCTCAATGACGATCAACGCCGGGAGCTGGTGGCGCTGCGCAGCAACAAT
AATGGCGCAACCCTTGCCGCCATGCTGGAGGCGACTTCTCTCGCCGTCCAGCCTGATTTA
CGTGCTAACCTTAGCGCCCGCACATTTGCGTTTTATTATTTATGTGGTGAACGTGACAGC
AAATTCCGCGCTCTGGCGGCGGAACTGGCTGCCGACTGCCATGTCATTCCTCGCGCCGGA
CATAACGCGCATCGGGAAAATCCCGCTGGCGTTATCGCAAGTCTGGCGCAGATCTTGCGT
TTCTGACTAAAGGACACAATATGATTTATCCTGATGAAGCAATGCTTTACGCACCGGTTG
AATGGCACGACTGCTCCGAAGGTTTCGAGGACATTCGTTATGAAAAATCCACCGACGGTA
TCGCAAAAATCACCATTAATCGTCCGCAGGTGCGCAATGCCTTCCGTCCTCTGACGGTAA
AAGAGATGATCCAGGCACTGGCAGATGCGCGTTATGACGACAATATCGGCGTGATCATTC
TGACTGGCGCAGGCGATAAAGCGTTCTGCTCCGGTGGTGACCAGAAAGTGCGTGGTGATT
ACGGCGGCTATAAAGATGATTCCGGCGTACATCACCTGAACGTGCTGGACTTCCAGCGTC
AGATCCGTACCTGTCCGAAACCGGTTGTCGCGATGGTGGCTGGCTACTCCATCGGCGGTG
GTCACGTTCTGCACATGATGTGCGACCTGACTATCGCGGCAGATAATGCCATCTTCGGTC
AGACTGGCCCGAAAGTCGGTTCCTTCGACGGCGGCTGGGGCGCTTCCTACATGGCTCGTA
TCGTCGGGCAGAAAAAAGCGCGTGAAATCTGGTTCCTGTGCCGTCAGTACGACGCAAAAC
AGGCGCTGGATATGGGCCTTGTGAACACCGTGGTACCGCTGGCGGATCTGGAAAAAGAAA
CCGTCCGTTGGTGCCGCGAAATGCTGCAAAACAGCCCGATGGCGCTGCGCTGCCTGAAAG
CTGCACTGAACGCCGACTGTGACGGTCAGGCAGGTCTGCAGGAGCTGGCGGGCAACGCCA
CCATGCTGTTCTACATGACGGAAGAAGGTCAGGAAGGTCGCAACGCCTTCAACCAGAAAC
GTCAGCCTGATTTCAGCAAATTTAAACGGAATCCGTAATGCGTAGCGCGCAGGTATACCG
CTGGCAGATCCCCATGGACGCGGGGGTGGTTCTGCGCGACAGGCGGTTAAAAACCCGCGA
CGGGCTGTATGTTTGCCTGCGTGAAGGCGAGCGCGAAGGGTGGGGGGAGATCTCCCCACT
GCCGGGCTTCAGTCAGGAAACCTGGGAAGAGGCGCAAAGTGTGCTGCTTGCCTGGGTAAA
TAACTGGCTGGCAGGCGATTGCGAATTACCGCAGCTGCCTTCCGTCGCCTTTGGCGTAAG
CTGTGCATTGGCGGAGCTGGCAGATACGCTCCCGCAGGCGGCCAATTACCGTGCGGCACC
ACTGTGTAATGGCGATCCTGACGATCTGATCCTCAAACTTGCTGATATGCCAGGCGAGAA
AGTGGCGAAGGTCAAAGTGGGATTGTACGAAGCCGTGCGCGACGGCATGGTGGTGAATCT
GTTGCTGGAGGCAATTCCGGATCTGCATTTGCGTCTTGACGCGAATCGCGCCTGGACACC
GCTGAAAGGCCAGCAGTTTGCCAAATATGTTAACCCGGATTATCGCCACCGCATCGCGTT
TCTCGAAGAGCCGTGCAAAACCCGCGATGATTCGCGAGCGTTTGCCCGTGAAACCGGCAT
TGCCATTGCCTGGGATGAAAGCTTGCGCGAGCCGGATTTTGCCTTTGTGGCTGAAGAGGG
CGTGCGCGCGGTAGTTATCAAACCCACGCTCACGGGCAGTCTGGAGAAAGTACGCGAGCA
GGTACAGGCGGCGCACGCGCTGGGGCTGACGGCGGTGATCAGTTCTTCCATTGAATCGAG
CTTAGGCTTAACGCAACTGGCGCGGATTGCCGCCTGGTTAACGCCGGACACCATTCCAGG
GCTGGACACGCTGGATCTAATGCAGGCGCAGCAGGTACGTCGCTGGCCGGGTAGCACGCT
GCCTGTCGTGGAAGTTGATGCACTGGAGCGGTTGTTATGATCTTCTCTGACTGGCCGTGG
CGTCACTGGCGGCAAGTGCGGGGAGAAGCCATCGCCTTACGTCTTAATGACGAGCAACTC
AACTGGCGCGAGCTTTGTGCTCGCGTCGATGAATTAGCCTCCGGCTTTGCGGCGCAGGGC
GTAGTTGAGGGCAGCGGCGTGATGTTGCGGGCGTGGAATACGCCGCAAACGCTGCTCGCC
TGGCTGGCGTTACTGCAATGCGGGGCGCGGGTGTTGCCCGTGAACCCTCAGCTGCCGCAA
CCGTTGCTTGAAGAATTGCTGCCCAATCTTACGCTGCAATTTGCGCTGGTGCCGGAAGGG
GAAAACACGTTTCCGGCGTTAGCGTCGCTGCACATTCAGCGGGTTGAAGGCGCACATGCC
GCTGCGTGGCAGCCGACGCGTCTGTGCTCAATGACGTTAACCTCTGGGTCCACTGGCTTG
CCGAAAGCCGCTGTTCATAATTACCAGGCTCATCTTGCCAGCGCCGAAGGGGTGTTATCG
CTGATTCCGTTTGGCGATCACGATGATTGGTTGCTCTCTTTACCGCTGTTTCACGTCTCC
GGTCAGGGAATTATGTGGCGCTGGTTATACGCTGGTGCGCGGATGACGGTACGTGATAAA
CAGCCATTGGAGCAAATGCTGGCAGGCTGTACTCACGCTTCACTGGTGCCAACACAACTC
TGGCGTTTGCTGGTTAACCGCAGTTCCGTTTCCCTGAAAGCGGTGTTACTTGGCGGCGCG
GCTATCCCGGTCGAGTTGACGGAACAGGCGCGCGAGCAGGGGATTCGTTGCTTTTGCGGC
TATGGTCTGACCGAGTTTGCCTCCACGGTGTGTGCGAAAGAAGCCGACGGCCTGGCAGAC
GTTGGTTCGCCGCTGCCGGGTCGGGAAGTGAAAATCGTTAATAATGAAGTGTGGCTGCGG
GCTGCCAGTATGGCAGAAGGTTACTGGCGTAACGGGCAACTGGTTTCACTGGTTAATGAC
GAAGGCTGGTACGCTACGCGCGATCGCGGTGAGATGCATAATGGCAAGCTGACCATTGTC
GGACGTTTAGACAATCTATTCTTCAGTGGCGGAGAGGGTATTCAGCCGGAAGAAGTCGAG
CGCGTAATTGCTGCACATCCTGCGGTTTTGCAGGTGTTTATCGTCCCCGTTGCCGACAAG
GAGTTTGGTCATCGACCGGTGGCGGTGATGGAGTATGACCACGAGAGCGTTGATCTTAGT
GAATGGGTGAAAGATAAGCTGGCCCGTTTTCAGCAACCGGTGCGTTGGTTAACGTTGCCG
CCTGAACTGAAAAACGGCGGTATTAAAATTTCACGTCAGGCGCTAAAAGAGTGGGTGCAA
CGTCAGCAATAATTAACCCTCCGTTTCACTTCTCATTTCTGCCATTCCATTGCCGTTGAT
AAAGAGTTTATCTGTTAATCTGTAAATTGATGTGAAAACTCTTAGCAAACAGGATAATGC
AATGGAATGGCTGGTCAAAAAATCGTGCTGCAATAAACAAGATAACAGACATGTACTTAT
GCTCTGCGATGCTGGCGGCGCGATAAAAATGATCGCCGAAGTGAAGAGTGACTTCGCCGT
GAAAGTGGGGGATTTACTCTCGCCTTTGCAGAATGCGCTTTATTGTATTAATCGTGAAAA
GCTGCATACGGTGAAAGTCCTCTCGGCAAGCAGTTATAGCCCCGATGAGTGGGAACGGCA
GTGTAAAGCGGCAGGGAAAACTCAGTAACGTTGTTTTGTCGTGGGCAGGAAAATCAGCAT
CAACCCGCTCATAATACAGGCTACTCCCAGTAGTGCTTTCAGCGAAAAAGTCCCTTCCCA
GCCGGGAAGTACCATTGAAGCAATCCATACCAGCACATAACTCATACTGAGCAAGGCATA
GGCTTTGCTTAGCGCAAGTATATGTAGCGTTTTATACCAACAAAAAACGGAAAGCAGATA
ACCCAGCAGCCCGAGTAACAGTATCCGGGCATCCAGGCCAAAAGCTAACAGCGTCGCGAT
AAAATCCCATAAGTGCGTCATCGGCGGCAGATGACTCGCCGCAAAACCCAGGCTTAATTG
CGCAGCTGAGGCAATAATGACGCTGAATAATCCCCACATCAGGCCCATTACACCGTACTC
CCGAGGATCACAATGCCACCAATAATGAACGCCACCCCACACCAGTGACGCGGCGATACC
GGTTCGTGCCACAGTTTTACTGCAGCCAGCGTCACCCAGACAAAATTCAGACTTAACATC
GGGTAGGCAATGCCTACCGGTACGTTCTGCAAGACCAGCAGCCAGAGCACCATGGCAAGA
CCAAGACAAGCCAGCGCCAGTCCCAGCCACAGCACGATATGTTTGCGCCGTTTGTTTATC
GCCACAAAGCAGGTTGCCTGTTTCTGACACAACTGCCCGGCAACGCTAAGCAAGCTGGCA
AAGACTAATGTTAGCCAGATCATTTGGGACGATACTGAATCAGCACCAGACGCTCCTGAC
GATCGATGGCATCTGCGGGCGGAATGGCGAGACTGTTGATATCTTCATCGCGGTCAACCG
AAAGCACGAGTGTAATAATCCCCTCCTGACGATGTTGATTAAGCCAGTTTGCGAACTCAT
CACCGCTGACAAATCTCCCTTTCGCATCCGGATAATTAAGGCCGTATTTCAACTCACCTG
TCTGGCGATACATGATGATGTCATCGCGTTGCAGGCTCCATGCCAGACCTGCGGCAACAC
CGACGCTATCAGTAAGAATATAGCGGCTTGGCTGAAGTGATTCTTGTGTCATCTCGACAA
AAAATTGCGGATGTTTTCCTTCCATGACTCTGTCAGGAATTGAAAATCCTACCAGCAACG
CCAGCCCCAGCGGGCAAAGCGCGGCAAAAGACCAGGTCTTTTCGACGTTTGTTAAGGTGT
ACCAGCCGAAAAATGCCCATAGTGAAAAAATCGACCAGGCACAAAAGACTTTATAGCTCT
CGAAGGTTTGCCACACCGGCGTGTTCATTGGTCCCCAGGGGGAGACCACAAATGTGGCAA
TAATGCCAGTGACGCCAAAAGCGATGTTAATCCAGCCATTAATCCGCAACGCCAGAGGAT
TATTTTTTGCTGCCAGCAAAGCGTAATGCGCCATCAGCATTGCCAGAGGTGCAAAGCAGG
AAAGAATATAGGTGGGCAATTTACCTTTAGCGACGGAGAAAAACAGCAGCGGCATTATCG
TCCAGCTCAACAAATAGACGGTTGCGGAATGCTTGCGGTTTTTCCAGCCTGCGTACAGTG
CACCGGGGAGTAATCCCAGCCACGGCAGGCTACCGGCAATGATGACCGGCACGTAGTACC
AGAACGGAGCTCTATGTTGGGCATCATCCAGTGCAAAGCGTTGAATATGCTCAACCCAGA
AAAAATAGTGCCAGAAGTCAGGCTCCCGCTGCGCTATCGCCAGTCCCCAGGGGAGAACCG
TCAGTACGCAACTGATAACCGCCAGCCAGCCGTAAATAAAGAGATCTTTCCAGCGTTTTT
GCGTCGCTACCCATGGCAGTACGCTTAATACCGGCACGGCAAGGGCGAGAAAACCTTTGG
TCATCACCCCCATGCCGCAGGTGATTCCCAGCAGTAAAAATCCTGCGCTTTTGCCTTTCC
ACGTCTGTGCCTGCATTGCCAGCCAGAAGCTGCACATTCCCGCCACCAGCCAGAATGCAA
TAAACGGATCGAGCACGGCATAAGTGCCGATGGCATAGACAATAAACAATGAGAGATAAA
TTACTGTGGCGAGTAGAGCCAGACGTTTATCGCGCCATAAGCGCAGAGTAAACCAGGTCA
CCAGCGCGGCAGTTAACAGGGTCGCAAAGATAACGCCTGCCCGCACACCAAAGTTATTCG
CACCAAATAGCCATTGCCCAATGCTGTTAATCCAGTATCCAGCAATGGGTTTTTCAAAAT
AACGTAGCCCTAACAGATGGGGCACAATCCAGTCGCCGGATGCCAGCATTTCCCGACTGA
TTTCCGCATAACGCGTTTCATCGGGTTGCCAGAGCAGACGCGTGCTGATCGGTAACAGGT
AATAGCAGGCAATAAACGCGAAGAGGCCGATAAGGTAACGTACCGATTTCATCAGCGACT
ACCCGCAATTTGTTGGCAACCCAGCCAGCCTTCACGTCCGGCAATATTTCCGCGAACAAC
TTGTCCGAGCGGCAACGTCTCTGATAACAGTTCGCTTAAAGGGCAAAATGTCACGCCTTC
CTGAGCTGCGCGTTTGAGGAGATCCACAAAATTATGCTGATAAGCGCAGCCTTCAACTTC
TGCATGAATGGTATAAACCGGCGTGCCTTTATCTCGCAGGATGCGGTTGAGTAACCAACC
GTTAAAATCTTCTGCTTTCACATCCCGACCAATCACTTCATCCCAGGTGGGTAAGGTCAC
CGGAATTTGCGCAGTGCCAGGGTTTCCTGATTCGAGCAGTGGACGGAACGGCATGGCCCC
ACGACAATCGCTGTTGTAGCGCAAATGGAACGCTTCTTTTGCTTCGATCACCTGCTGGTC
GGCACGCCAGCCCGCAGCGGCAGAACAGGTTACCGGTTGACCGATAATCTCTTCCAGGGT
GCGAAGGCCGAGTGCAATATCGTCGATCATTGTTTGCCGATCCCAGTTACCGCTATGGGC
TTGCCAGGCATGGTGATCCCAGGCGTGCAGGCCGACTTCGTGATGTTTAGCCGCTTCACG
AATGATATCGGCATTGGCAGGACCAATCTCTTTACCTGGCCAGGCCGTACCTGCCAGTAA
AATATCCCAGCCATAAAGCGATGCCGCGTTTGAGCGCAGCATCTTCCACAAAAACTGTGG
CTTCACCAGTCGCCAGAGATGGCGGCCCATATTGTCCGGGCCGACGCTGAAAAAAATGCT
GGCCTGAATATTATGCTTACTCAAGATTTCCAGCAGACGCGGCACGCCTTCACGGGTGCC
ACGAAAGGTATCGACATCAATGCGTAAGCCTACTTTGGTCATGATGGTTTATCCGTAAGA
TCAACGGTGCGCAGGAAGAAATCCAGCGTTTCGTCGATGGTTTCCTGCATATCAATTTTC
GGCTCCCAGTCCAGGCAGCGGTGGGCATTGCGGATGCTCGGTTTACGATGCTCTACGTCC
TGATATCCTTTGCCGTAGTAGCTGCTACTTTCGACAACGCGAAAGCCCGCAAACGGTGGG
AAGTGATGGCGCAGCGGATGTTTTTCGAAGCTCGCCAGCAGCATCTCGCCCAGTTCCTCA
ATGCTCGCTTCGTTCTCAGGATTGCCAATGTTGATAATTTCGCCGTCGCAGCGATTTCCC
ACATTTTCGATAATGCGGTACAACGCCTCGATACCATCCCGGATATCAGTAAAGCAGCGT
TTTTGTTTTCCGCCATCAATCAGCTTAATCGGTGAACCTTCTACCAGATTGAGAATGAGT
TGCGTAATAGCGCGGGAGCTGCCGATTCGTGCCGCATTAAGGTTATCCAGTCGTGGTCCC
ATCCAGTTAAACGGGCGGAAGAGGGTGAACTGTAAACCCTCTTTTTCGCCATAGGCCCAG
ATAACCCGATCAAGTAATTGTTTTGACACCGAATAAATCCAGCGTGGTTTATTCACCGGG
CCGACGATTAAATTAGAATGGTCCTCATCGAAGTATTTATCGCTACACATCCCATAAACT
TCTGAAGTTGACGGGAAGATGATTCGCTTACGGTACTTCACGCAGTAGCGGATAATGCGC
AGATTCTCTTCAAAATCGAGTTCAAATACGCGCAGCGGGTTGCGGGTATATTCAATCGGC
GTGGCTATCGCCACCAGCGGCAAGACGACATCACATTTTTTGACGTGATATTCAATCCAT
TCGGAATGAATACTGATATCGCCTTCGACAAAGTGAAAATGCGGATGATTCAGAAAACGG
CTTATCGCATCGCTGCCAATATCCAGACCGTAAACTTCATAATGATCTTCGCGCAGCAGG
CGTTCTGTCAGATGGTTGCCAATAAAGCCATTCACCCCGAGGATGAGTACCCGGGTACGG
CGTCGGGCGGCACAGGCAGGCTGGCTATTCAAGCGTGAACCTTGCACCAGGCCCAGCGTC
TGCGCTAATTGCGAGCCCTGCATAGTAATGCCGTCGCCCGCCTGTCCGGTGACGATTTCC
AGCGCGCCATCGCCACAGGCAATCAGCAGTGGCGCAACAGAAATCACGCTCCCCGGCTGC
GCTGCGGATGTATGAGGATGTACGCGTGACGACCAGACGGTGAATTTCTGATTGCCAGCA
TAGCTGAAGGCACCCGGCCACGGATCGGCAACGGCGCGGACCATGTTATGCAATACGGCT
GCCGGTTTGTGCCACTCGAGGAAGCTATCTTCTGGTGTTCTGCGACCAAAACAGGTGGCT
TCGTTCTCGCGTTGGGCGATTTCCAGAATATTACCGTGTTTAATGGCGGGTAATGTCTGT
TCCAGTAGCTGGCGCGCGGCATGGCACAATTTATGATGCAGCGTAATAGCGATATCGTCT
GGCGCAATGGCAATGCGCAGTTGCGCCACAATGGCCCCGGCATCGGCACGTTTCACCATT
CGGTGCAATGTAACGCCAGTTTCCGTTTCACCGTTGACCAGCACCCAGTTCAGCGGCGCG
CGACCACGATATTTTGGTAACAGCGAACCATGCAGATTAAATGCACCTGCGGGAGCGAGC
TGCAAAATTTCGTCGCAAATAAGATGGCGATAATAAAAAGAGAAAATCACCTCTGGTGAT
AGTTGGGCAATGCGTTCCACCCACAGCGGATGATTAACGTTATCCGGCGCATAAACCGGA
ATGCCTCTTTCCGCTGCCAGACGAGCCACCGAACCATAAAAGGCTTTTTCACCGGGATTA
TCAGTATGGGTAAAAATGGCGCTAATTTCGTAACCGGTAGCCAGCAGGGCTTCAATACCG
AGGCATCCCATATCGTGGTAGGCAAAAACGACGGTTTTCATTATTCATTTTCCTTGCTGG
ATGGACGGATAACTTGCTGAACAAAATAGCGGGGGCGGGCGCGGACATCGGTGTAGATCC
TGCCGATATATTCACCGAGTAATCCCATGCCGATAAACTGAGCGCCAATAAAAGTAAACA
GCACGGCAAATAGCATAAAGACGCCTTCTGCCGCCCATTGTGGTCCGAAGGTCAGGCGTA
AAATCACCAGCAGCACCGCAATGCTAAAACCTCCAATCGCAATAATGCTGCCGAGCAGAC
TCAGCATACGTAGCGGCGTTGTGGTAAGGCAGGTCACCAGGTCGTACATCAAATTAATCA
GGCGCATAAAACTGTATTTGGATTCACCAAACTCACGCTCGGCATGATGCACTGGAATTT
CAATGGCACGGCGGGCGAAGATATTCGCCAGAATCGGGATAAAGGTGCTGCGTTCATGGC
AGTGCAACATCGCATCGACAATATGACGGCGATAGGCGCGCAGCATACAACCGTAGTCAC
CCATCGCTTTGCCGGTGGTGCGCTGAATAAGCCGGTTAATCATCTTCGAAGCGGTTTTAC
GAAACCAGCTGTCCTGGCGGTTCTGGCGTACAGTCCCTACCACGTCGTAACCTTCATCGG
CTTTTGCCACCAGGCGGGGGATTTCTTCTGGCGGATTCTGGAGATCGGCATCAAGGGTAA
TAATTAAGTCGCCAGTAACGTGACTGAATCCCGCCATAATCGCTGAATGTTGCCCGTAAT
TGCGGTTAAGCAAAATAGACACAATATGGCTGTTCTCCGCTTGTGAGGCTTCGACCAGCA
TATGCGCGGAATTATCGCTACTGCCGTCATCAATCAGCAGGATCTCATACTCTTTCCCCA
GTGATTCACAGGCTGTGGTGGTGCGCCTGATTAATTCCGGTAAGCTTTCCTGCTCGTTAT
AAACGGGAATAACCACCGAGACTTTCTTAACAGGGTGGATTTCAAACATGGCTTATTGTC
CTGCGAGTTGCTGAAGGGCTGTGATGACGCGGTCGGCATCGGCGGTGGTCATATCCGGGA
ACAGCGGCAACGAACAGATGCGTTCGCTATTCCATTCGCTATTCGGTAACGACAGCGTGG
GAAAACGCTCGCGATAATATTTTTGTGTGTGAGCGGCGCGGAAATGTAACCCGGTACCAA
TACCTCTTTCTTTTAACGCTTCCATCAACGCATCGCGACTGATACCACAACGTTGTTCAT
CGACACGAATAATAAACAGATGCCAGGCGTGAACGTGCGGCCAGGCGGGAAGGCTTAATG
GCTGAAAGGGGAGAGCTGCCAGTGCTTGCTGATATTGCTGGGCAATTTCGCGCCGACGGG
TGTTGAGGTGCTCTAATTTGACTAACTGTGTCAGGGCAATCGCGGCGTTAATATCGGTCA
GATTGTACTTATAGCCCGGCGTTAAGACTTCAGCCTGCGGTACACGGCCCCAGGTTTGTC
TGTCATAGGCATCGACACCCAGACCGTGAAATTTCAGCATCCGTAGCTGGCGGGCAAGGT
TTTCATTATCAGTTACAATCAGGCCACCTTCAGCACAGGTAATATTTTTAATGGCATGAA
ATGAAAAAATAGCGGTACCTTTTGCGCCAATATGTCGCCCTTTGTAATACGTACCTACGG
CATGGGCAGCATCTTCGATAACTGCGATGCCGTAACGTTCGCCAATGGCGCGAATGGCGT
CAATATCTGCTGGCGCACCGGCATAATGCACCGGAATGATGGCTTTAGTGCGTGGCGTAA
TGGCTGACTCGATAGCTTCAGGCGTGACCATCAGCGTATCGCGGTCGACATCCACCATTA
CCGGCGTTGCACCCAACAAGGAAATCATATTGAGGGTTGAAACCCAGGTCAGGGAAGGCG
TAATCACTTCATCGCCCTTGCCAATTTCCAACGCCATTAGCGTGATATGCATTCCGGCGG
TGGCTGAACTGACCGCGATGGCATGCTGATTTCCCGTCAACTGGCAAAAGGCTTGCTCAA
GCGCCTGATTCTTCGGACCGGTTGTGATCCAACCGGATTCGAGAACCTCTTTAACTGCAG
CGAGTTCCTCCACGCCCATTGCTGGTCGCGAAAAAGGCAAAAATTCTGACATTGCTTTTC
CTTCCGCCATTGAATACCTGTCCACTTATATTTGCTATAAAGAGTGTTGTGTATATTTTG
CCATTTGGAGCGAAATTTTAAGGATAGAATATTAACTTAACCTTAAGAAACTAATATTAG
ACGTAAATATTGAAATTTTTATATTTTTTCTTATTTAGGCTTTGCATTTGGCAAAATTTT
GAGGCATTTTGCCGGCATCGCAGGATTTTTAATATTACACCAACTGCTAATTATCGCCAG
AAATGTCGCTCAATTTCACGGTAATTGTCTGGTTGCGCTTGTCTATAGGTGGAGTTTACG
TGTTAGCTTTTTGCCGCTCTTCGTTGAAGTCAAAAAAATATTTCATCATTTTACTGGCGC
TCGCTGCAATTGCCGGACTGGGTACTCATGCTGCCTAGAGTAGCAATGGTTTGCCACGTA
TCGACAATAAAACACTGGCCAGACTGGCACAGCAGCACCCGGTTGTCGTTTTGTTTCGCC
ATGCTGAACGTTGCGATCGTTCAACCAATCAATGCTTGTCAGATAAAACAGGTATTACGG
TCAAAGGTACCCAGGATGCCCGAGAACTGGGCAACGCTTTTAGTGCTGATATCCCTGATT
TCGATCTCTATTCCAGTAATACCGTCCGGACCATTCAGTCGGCGACCTGGTTTTCAGCGG
GTAAAAAATTGACGGTAGATAAACGACTTCTTCAGTGCGGTAATGAGATTTATAGTGCAA
TTAAGGACTTACAAAGCAAAGCGCCTGATAAAAATATCGTTATTTTCACCCATAATCATT
GCCTGACATATATTGCTAAAGATAAGCGTGATGCGACATTTAAACCTGATTATCTGGATG
GTTTAGTCATGCATGTGGAAAAAGGCAAAGTTTATCTGGATGGGGAATTCGTTAACCACT
AAATTTTCAATCTGACAGCCAGTGATGGCTGTCATCATTGTTAAAGAAGACCTTTCAAAC
GTAACGTTTTTCGGGTGGCAACATTCAAATCATAATGCACCAGATCTTCAGGTTTTACCC
TCGCGTAGTCCTGAAACTCTTCGTTTATTTTCACTTCTCGGTTGGCAGAAACGCAGTCAA
AAATCAGGTAAATCATATAAATCTCTTCCTTGCGACCATCTGCATACGTCTTGGTGCGAA
TATCATCGCTGAAGGTCCACGGCGTGATTTCTGTCAAAAGCAGCTGTTCTCCCAGTTCTT
CGCGAATTTCGCGGCGTAGTGCCTCTTCAATTCGTTCGCCGGGCTCCACGCCGCCACCCG
AAAGCGCCCATTGACCGGGGAAAACGCCGCGATCGTCGGCCATTTTACACAGCAAATAAG
CACCATCATTTTGAATCAAAGGGCATACAATAGTCCGTTGTCGCACAGGGGTATTCCTTA
TAAATAAAAAGAAACCATGAGAATACGGTAACTCAGAAATATGTGAAAGTGACAGTAATC
TCTTTTGCGATGATAACTGCACTTATTATTATTTTTGTGTGTATCGGTAAACTGTGTTTA
TTTTTTCGGCGTTTAATTATTTAAGAAGTATTTAGTTACAATAAGTGACTAGATCCCTTT
TTTCGCTCATTGAATCCTCTGCGCCAGGCAGTACAATCCCGCAGCTTTGGGAATTTTGAT
TAATTGCTTGTGGGAAAGGGGATAATGAAAAAAATTGCGCTAGCAGGTCTGGCCGGAATG
CTGTTGGTTTCTGCATCGGTCAATGCAATGAGCATCAGCGGCCAGGCGGGTAAAGAATAC
ACCAATATTGGTGTCGGTTTTGGGACTGAATCGACGGGCCTGGCTTTAAGCGGTAACTGG
ACACATAACGACGACGACGGTGACGTCGCGGGCGTGGGGCTGGGGTTGAATCTGCCTCTC
GGGCCGTTAATGGCGACCGTTGGCGGAAAAGGCGTTTACACCAACCCGAATTACGGCGAT
GAAGGTTATGCCGCAGCGGTAGGAGGTGGTTTGCAGTGGAAAATTGGCAACAGCTTCCGT
TTGTTTGGCGAGTATTACTACTCTCCGGATTCGCTCTCCAGCGGTATTCAAAGTTATGAG
GAAGCGAATGCTGGCGCGCGTTACACCATTATGCGTCCAGTCAGTATTGAGGCGGGTTAT
CGCTACCTGAATCTGTCGGGTAAAGACGGCAACCGCGACAACGCCGTGGCTGACGGCCCG
TATGTTGGGGTTAACGCCAGTTTCTGATCCCTTCCGGCGCGGCATTCTGCCGCGCCATTC
AGTTTCTTACTACGCCTTATCTCCCTTTGCGTTATAGTGATTCGATAACAAAAGCAGGAG
ATAACCATGTTAAAAGTGGAAATGCTATCCACCGGGGATGAAGTGTTACACGGGCAAATC
GTTGACACTAACGCTGCCTGGCTGGCCGATTTTTTCTTTCATCAGGGGTTGCCATTATCT
CGCCGCAATACGGTGGGGGATAACCTTGATGACTTAGTCACCATTCTTCGCGAACGTAGT
CAGCACGCCGATGTGCTGATCGTTAACGGCGGGCTGGGACCGACCAGCGATGATTTAAGC
GCACTCGCCGCTGCGACAGCAAAAGGTGAAGGCCTGGTGTTGCATGAAGCCTGGCTCAAA
GAGATGGAACGCTATTTCCACGAACGTGGACGAGTAATGGCACCGAGCAACCGTAAACAA
GCGGAGCTTCCTGCCAGTGCTGAATTTATCAATAACCCGGTAGGCACCGCCTGTGGTTTT
GCCGTGCAGCTTAATCGTTGCCTGATGTTCTTTACCCCCGGCGTACCGTCAGAATTTAAG
GTGATGGTCGAGCACGAAATCCTGCCGCGCCTGCGCGAGCGTTTTTCTTTACCACAGCCG
CCGGTTTGCCTGCGTTTGACTACCTTTGGTCGTTCGGAAAGCGATCTGGCACAAAGCCTG
GACACTCTACAACTGCCGCCGGGCGTAACAATGGGCTATCGCTCCTCAATGCCGATCATC
GAACTGAAACTCACCGGACCGGCAAGCGAGCAACAGGCGATGGAAAAACTGTGGCTGGAC
GTTAAACGTGTTGCCGGACAGAGCGTGATTTTCGAAGGCACCGAAGGACTGCCCGCGCAA
ATCAGTCGCGAATTGCAAAACCGCCAGTTCAGCCTGACGTTGAGCGAGCAATTCACCGGT
GGTTTATTGGCTTTGCAACTTTCTCGCGCAGGTGCTCCATTGCTGGCGTGTGAAGTGGTT
CCTTCACAGGAAGAAACCCTGGCGCAAACTGCGCACTGGATTACAGAACGGCGGGCCAAC
CATTTTGCCGGGCTGGCACTGGCTGTTTCGGGTTTCGAGAACGAGCATCTCAACTTTGCG
CTAGCCACGCCAGATGGCACTTTCGCTCTGCGTGTGCGTTTCAGCACTACACGCTATAGC
CTGGCTATCCGTCAGGAAGTGTGCGCAATGATGGCACTGAATATGCTACGCCGTTGGTTA
AACGGCCAGGACATTGCCAGTGAGCATGGCTGGATTGAGGTTGTTGAGTCGTTGATGCTG
TCGCCACAGGGGGCATGAAAGAGGCGCGCCGGGGAGAAGGCTTTTACCCGGCACGTTGTC
GCATTCATTGCAGGCTTAATGGAGCGAGATCGGCCTCGGTTAGCTGGGTTGTTGCCAGCA
CCAGGTCAAGATCGATACCCTGCTCCAGCATGCGCAAGGCAATTTTAATGGCTTGTTCAT
GCATGCCTTGCTGCAAACCTTCTAATTTACCTTCCTGCCAGCCAATTTGATGCCCTTCCT
GCCTCAGCCGTTCAGCAATAGTCATTAATCTCTCCTTTTGTAGTGGTGAACGTTCGGCAA
TCTCCTGAATAAAACGGGTGAAACGGGAGGTATCGCCGCATTGCAGCAGATAATTAAACA
GTGTTTGTAGCTGGCTGTCATTAGTGAAGCCTCTAACCAAAAGCGTGGTGATCCTGTCGA
CCATACCGATTAAATCGCGGTCGCGAATATGCTTTTGAATCAGTTCAAGCAGAGCTATAC
GCCGATGTTGCATGATCTCATCGTCAGGTACGATGGTGATATCCACCAACGGAAAAGCTT
CGGTGTACAACTGCCGGGCAAGTTGCGGACCGTCAAACTCATCCAGCCAGTTGAGTGAGT
ACGGGTAGGGCGAGGTTTCGCCATGATAAAACAGCAACGGCACCACCAGCGGGACTCTGT
CATAGCCTTTGTCCAGGTGACGCTGCATGGCGGCAGTGGCATAGCGCATTAGCCGAAAAG
CCATATTCTTTTCTGCAGAGCTTTGATGTTCAATCACGCAGTAGATATAGCCGTCACCGT
CGCTGGTTTCCACGGACCACAAAACATCCGAGTAGTAAGCGCGTAAACTTTTTTCAATAA
AACTAGTGGGTTCCAGGCGTAAGGTTTGCAGGTTGCAAAGCTTGCGCAGTGGTTCTGGTA
AATGTATTTCGAGAAAATCCCGTGCGGTTTCGGGTGTGAACATAAAGGTTTTAAATACTG
CATCATGCGGGGAGGAGGTTGTTGATTCGGTCATGGTTGTCCGTCACCTGATATTTATGA
TGACGCGACATTACGGTTATCCCAGGCCTTTGACATCTGCCAGTTTCAGCCTTTGCGAGA
CGTTTTCAGAGGAATTTTCACTGCGTTGCAACGCATACATTGGGCACGGAATCGTGTACG
CAAAAATGCCCGGTAACCACATGCTTACCGGGCATCAGAAAGGAGTTTAAGCCAGCGCCT
GGGCCAGTAGCGTAATCGGATGTTCGCAGCGAAGACTTGTGGACATCTCAATCTGCCATT
TACAGGTTTCGCAGTCGGTGACCACCAGATCTGCGCCGCTTTCTTCTATCTGGCGGAACA
GTGGTGCGCCGATGGCTTGTGAGGTGGGGTAGTTCTCTTTTTTGAAACCGTAAGTACCCG
CAATACCGCAGCACTGGGAATCCAGCACCGTTAACTCAAGCCCCGGGATGTTACGCAACA
GCTCCAGGGTGTAGAGCGTCCAGCCCATTTTTTCCATATGGCACGGAGTGTGATAAACCA
CTTTCAGCGGCAGCGGTTTCAGCGGTAACGTTTTGCCTTCGTCCAGCTTGCGCCACAACC
AGCGGGTCGCCAGTTCGATATGATCGCGCAAGCCTTTGTTGTCGACATTCAGCACTTCCG
GGTATTCGTCGCGCAGGGCAAATGTACAGGTTGAGGAGGTGGCAATCACCGGAATGCCTT
TTACTCCCACAGCTTCGCGGATCGACTCTACATTCGTAATTGCCTGTTTGCGTGCTTTAT
CGGTAAAGCCGTTGGCGATCAGCGGTACGCCGCAGCATTTTTCTTTGCTGAGCAGTTGTA
CACCGGTACCCATTGCGTTGAGCACTTTAATTAAATCTTTACCTAACTGCGGATGGTTGT
AGTTAACGAAGCAGCCGTGAAAGAAAGCGACCTGGTCTTTATACTGCGCTTGCTGAGCCG
CCACGCTGCGATACCAGCGACGAAACGTGCCGAAGGAGTATTTCGGTAGCGTGCGGCGAT
GATCGATTTTTAACGCCGCATCAAGCAACTGCCGCACCGGTTTCAGCGAGGTAGCGGTGT
TGACGATTGGTGCGAACGGCGTGGAAACGCTACCCATCAGGTCGGTATGACTCAACACAA
AATTACGCAGCGACGGGCGCGTGGTGTCATATTTCGCCCGCGCGCGCTGGATGATATCGC
CAATCTTCACATCGGACGGGCAGGCGACTTCACAACGTTTGCAGTTGATACAATATTTCA
GCGCCTCGTCATACAGTGCGCCATCTTTTAAACGCAGACGCTCGCCATCCGGCCCGGCTT
GTTTTGGCCCTGGATAACCGGGATTCACCCGGCTCACTGGGCAGGCGGTGGTGCAGACGG
TGCACTTAATGCAGTTTTCGAAGCTGGTGTCATTCATTGTTGGCCTCCTGCGCGTTGGGC
AATCTGTTGAGCGGCATGTAAAGCACTGACGGCACAAACACCGCCGCCGCATCCCTGGGC
GATGGGATCAAATCCGCCCAGCACCGAACCGATGGCAAACAGGTTCTCAATGGTTTGCCC
TGCCTGTGATGGGCGTAGCGTCTTATCAGTGGTTACACCGAACTGCTGCCACGGTTGCGG
CGCAAAAAAATCTCCCTTATACCATTCACCCCGCGTGGCGGTTTGTAGCACATCAAGGCC
GAGAATCGGCTCTCGAATGCCGTTACGTTCCGCTACCAGTCCGCCACTAAAGAAACTGCC
GCTGGCGAGAACCGCGAAACGTGGACGTAGCGGGATATCGGCGTGATTGCGGGTCCAGAT
TTCATTCACTACGCCATTTTTACAGGTCACTTTTTTCACTTCATCGCCCGGCATCCACAC
GCCACCCTGGCGTACAAACTGGCGCTGTAACTGGTTTTGCAGACGAATGCCCAGCACGGA
AGGCGGCAGCGTTGGCAAAAGCATCAGTGAACAAGGTAGTTTTTCATTCAACCAACGCCA
CAGTTTGTCATCGACCAGGCCGAAGCAGGCGGGCATCAGGATCATTTCGCAGGTATTGGC
GACAGGAATAAGCGCATCAAGTAACAGCGACCAGTTTTCTTCATTATCAAGGAAACGGGC
GATATTCACCGCGCGGAACTCGGTGGCGTTATTGCGCAGGACATCCAGTTCCGGCAGCTC
TATTTCTGCGGTTTCAACCGAAAGATCCAGTTCACGCAACGAAGCTGCCGCAAGGTGCGC
CTGAAAATCCATCAGCCCGCTTATCCCCACTACACATATCTTCTTCGCGGGTAGCGGCCA
GACGGGGACTTCTGGCGAACTTAACCAGGTTGCACGCAAAGTGCCGAGCGGGGTAACGCG
CTGATGGGCCAGTTCCACGCTGCCCTGCAATTGCGCACCGCTTTCAGCGATTAATGCCTG
CGCCTGGCAAGCGAGATCGAGCACGCGTTGTGGCCCGAGAAGAGAGTAAGGATGTGCAGG
TGCCTGCTGACGCAAAGATTCCAGTCCACTGTGAATGTCTGTCACCGCTTGACCATCTGG
CAGATGGCTCAGCAAATCCAGCGAACCGGATGAGAAATGCAGCGCGCTTTGACCACGCGT
GACAATGGCACAGCGCAGGCCGTGTTTTTGCAGTTGCAGGCCACAGAGTAATCCGGCGAG
GCCGCCGCCCATAATGACAGTATCAAAGCGCATCTTTCTGCTCCTTCTCCAGACCACACA
GTCCCTGATAAACCCAGCGGGTAAATTCGCTTTCGCGCAGTGCATCTCCCCAGGCGATGG
GTTGCACGCCTTTCCAGCGTTCGTTAAGGAAGGTGGAAAGTTGCTCGATAGATTGCGCGG
ACGTCGTGACGTTAAAACGTTGCAGCAGTCCGGCAGCGCGGCAGGCGCAGAGTTCGCCCT
GGCAGGTACCCATCCCCACACGGGTACGACGGCGTAAATCCAGCAGGCTATTAACGTTTA
AATTTTCTACCGCGTACTGCACTTCACCCGCAGTTACCGCTTCGCACTCACATACCAGGC
TACGGTGCAGACGGCCTTCGCTCAGCCAGGCAGGCGTGCGATCGCCATGACGATAAACCG
CAGAACCGCGCAGCGGGGCAGGCAGGGAGATGACTTTACGTAAGGTAACTTCAGCGGGTT
CTTGTGAACCAGGCAGTGCCAGATCGGCAGTCGTACAGGGGCGCGTGTTGCCCAGTTTGC
GGCATACCGCGTCGGTAGCCCATTCAGCCATCAGCCGATAGGTCATCAGTTTGCCACCGG
TGATGGTGATAAATCCGTCCAGACCATCGCGTTCAGCATGGTCGAGCAGCACGATGCCAC
GGCTGACGTTACGTCCGCTCGGGTCGTCATCGCTGGCAACCAGCGGGCGCACGCCAGAAT
AGGCCCGCAAAATGCGCGTTTTCGCCATCACGGGGGCCAGTTTTTCCCCTTCACGCAGCA
GAATATCAACCTCTTCTGCCGTCACTCGATTATCGTCAATCTCGTTGTAATCAATACGTA
AAGAGGTGGTGCCAATCAGCGAAATGGTATCGCCAGGCACCAGAATATCGGCGTCGGAAG
GTTTACGGCAGCGGTTGATCACATGCTGGTTAATGCGGTGATCCATGATCAGCAGCGATC
CTTTCGCCGGGAACATGCGAATGCGCAGATCGGCATATTCGGCAATGTGTTGCCCCCAGA
TCCCAGCGGCATTAACCACGACAGGTGCATGAAGGGCCTGAGTTTCGCCGGTGAGATGGT
TACGTACACGAACACCGCACACCGTCGCGCCTTCACGAATCAGTCCCGTGACTTCATGAG
CGGTAAGGATAACGGCACCGTGTTCTTTGGCATCCAGCATGTTTGCTGCGGTCAGACGAA
ATGGATCAACGGTGCCATCCGGAACTTTCACCGCGCCAATCAGTGCCGGGTTAACGGCAG
GTTCGATAATGCGCGCTTGCTGCGGGTCTATAGCTTCTGCGCTGATCCCTGCTTCTTCGC
AGGCGCGAATAAAAGTGGCCTGGAAGGAGAGGTCATCTTCCGGCAGGGTGATAAACAGGC
CGTTGGTTGGTTCAACGCAGTGACGTGCAATGCGTTTCAGGATCTGGTTTTCACTAATGC
ATTCGCGGGCCGATTCCGCATCGGTTACCGCATAGCGCGCACCGCTGTGCAGCAGGCCGT
GGTTACGCCCGGTGGCACCGGTTGCGATGTCGTGGCGCTCAACCAAAATCACGCGCAGCC
CGCGCAGGGCACAGTCGCGGGCAATCCCGGCTCCCGTTGCGCCGCCGCCAATGATAATCA
CGTCACTTGATTGCGAGTCGCGAGTTTTCATTGTTATCCCTCTGAAGTTCGTTTTTTACC
ATTTAGCCATAGTAAAAACATGAATTGTTTGATTTCGCGCATATTCGCTCATAATTCGAA
AGTGAAACGTGATTTCATGCGTCATTTTGAACATTTTGTAAATCTTATTTAATAATGTGT
GCGGCAATTCACATTTAATTTATGAATGTTTTCTTAACATCGCGGCAACTCAAGAAACGG
CAGGTTCTCTCACTGAATCAGGCTGTTAATCATAAATAAGACCACGGGCCACGGAGGCTA
TCAATGTTGAGTATTTTTAAACCAGCGCCACACAAAGCGCGCTTACCTGCCGCGGAGATC
GATCCGACTTATCGTCGATTGCGCTGGCAAATTTTCCTGGGGATATTCTTTGGCTATGCT
GCTTACTATTTGGTTCGTAAGAACTTTGCGCTTGCTATGCCTTATCTGGTTGAGCAGGGA
TTCTCACGCGGTGATTTAGGTTTTGCCCTTTCGGGGATCTCGATTGCTTATGGATTTTCG
AAATTCATCATGGGTTCGGTATCGGATCGCTCGAATCCGCGCGTTTTCCTGCCCGCAGGT
TTGATTCTGGCGGCGGCAGTGATGTTGTTTATGGGCTTTGTGCCATGGGCGACGTCGAGC
ATTGCGGTGATGTTTGTACTGTTGTTCCTCTGCGGTTGGTTCCAGGGGATGGGGTGGCCG
CCGTGTGGTCGTACTATGGTGCACTGGTGGTCGCAGAAAGAACGTGGCGGCATTGTGTCA
GTGTGGAACTGTGCGCACAACGTCGGTGGTGGTATTCCGCCGCTGCTGTTCCTGCTGGGG
ATGGCCTGGTTCAATGACTGGCACGCGGCGCTCTATATGCCCGCTTTTTGCGCCATTCTG
GTGGCATTATTCGCCTTTGCGATGATGCGCGATACCCCGCAATCCTGTGGCTTGCCGCCG
ATCGAAGAGTACAAAAATGATTATCCGGACGACTATAACGAAAAAGCGGAACAGGAGCTG
ACCGCGAAGCAAATCTTCATGCAGTACGTGCTGCCGAACAAACTGCTGTGGTACATCGCC
ATCGCCAACGTGTTCGTTTATCTGCTGCGTTACGGCATCCTCGACTGGTCACCGACTTAT
CTGAAAGAGGTTAAGCATTTCGCGCTGGATAAATCCTCCTGGGCCTACTTCTTCTATGAG
TATGCGGGTATTCCGGGCACCCTGCTGTGCGGCTGGATGTCGGACAAAGTCTTCCGCGGT
AACCGTGGGGCAACCGGCGTCTTCTTTATGACACTGGTGACCATCGCGACTATCGTTTAC
TGGATGAACCCGGCAGGTAACCCAACCGTCGATATGATTTGTATGATTGTTATCGGCTTC
CTGATCTACGGCCCTGTGATGCTGATCGGTCTGCATGCGCTGGAACTGGCACCGAAAAAA
GCGGCAGGAACGGCAGCGGGCTTTACCGGTCTGTTTGGTTACCTGGGCGGTTCGGTGGCG
GCGAGCGCGATTGTTGGCTACACCGTGGACTTCTTCGGCTGGGATGGCGGCTTTATGGTA
ATGATTGGCGGCAGCATTCTGGCGGTTATCTTGTTGATTGTTGTGATGATTGGCGAAAAA
CGTCGCCATCAGGAATTACTGCAAAAACGCAACGGAGGCTAATGGCATGAAATTGACGCT
GAAAAACCTTAGCATGGCGATCATGATGAGCACTATAGTCATGGGAAGCAGTGCAATGGC
GGCGAACAGCAACGAAAAAATAGTCATCGCCCATCGCGGTGCCAGTGGATATTTGCCGGA
GCATACGCTGCCAGCAAAAGCGATGGCGTATGCGCAGGGAGCGGATTATCTGGAACAGGA
TTTGGTGATGACCAAAGACGACCATCTGGTTGTTCTGCATGACCATTACCTCGATCGTGT
TACTGATGTTGCCGATCGTTTCCCGGATCGGGCGCGCAAAGACGGTCGTTACTACGCGAT
AGATTTCACGCTGGATGAAATTAAGTCGCTGAAATTTACCGAAGGTTTCGATATTGAAAA
CGGTAAAAAAGTGCAGACTTATCCGGGGCGTTTCCCAATGGGTAAGTCCGACTTCCGGGT
GCACTCCTTTGAAGAAGAGATTGAATTTGTTCAGGGGTTAAATCACTCTACCGGGAAAAA
TATCGGTATCTATCCAGAAATTAAAGCGCCGTGGTTCCATCATCAGGAAGGGAAGGATAT
TGCGGCAAAAACGCTGGAAGTGCTGAAGAAATATGGTTACACCGGTAAGGACGACAAAGT
TTATCTGCAATGCTTTGATGCTGATGAACTGAAGCGTATTAAGAATGAGCTGGAACCTAA
AATGGGTATGGACCTCAACCTGGTACAGCTGATTGCCTATACCGACTGGAACGAAACTCA
GCAGAAACAACCGGACGGAAGCTGGGTTAATTACAGCTATGACTGGATGTTTAAGCCGGG
TGCCATGAAACAGGTGGCGGAATATGCTGATGGTATTGGCCCAGATTACCATATGTTGAT
TGAGGAGACATCGCAGCCGGGTAATATCAAACTCACTGGCATGGTGCAAGATGCTCAGCA
GAATAAACTGGTAGTGCATCCTTATACCGTGCGGTCAGATAAACTGCCTGAATACACTAC
TGATGTGAATCAGTTATATGATGTTCTGTATAACAAAGCGGGTGTAAATGGGCTGTTTAC
TGATTTCCCTGATAAGGCAGTAAAATTCCTTAATAAAGAGTAATGCTACTGCAGGATGGC
GTTCATGCGCCATCCTCAGCTAAAGCGAAATAATGCTACTACCGGTTATTCTATTCATTC
ACCTGAGCATCCTGTTAAAAAAGATGCCAACATATTTGCGTAAAACTCATTTGTTAGGAA
AGCTAACACTGGGTATTGTTATTCTTTAAACAGTATGAATAGGGCTCAATAATAAATTGT
AATGTAGTTTATAATATACAGTATTATTCGCATTTCGGGAAAGTAAAGAAAATATTAATG
TATCTTATTAATTTATCATATTGTTCTTGGGTGAATGCTGTTTGCACACCTTCAGGACAA
TACTCACCAGTAATAATCAGTTGCCCATTGCTGTGTTGTACCATTAAACCTTTTTTTTCC
TTTGGATCTTCAAACTTAGAATTATCAAACGTGAAGATGTTATTTTCCTGTTTTGAGTAA
GCAAAGAAATCTCGTGTATAGCTGAAACTATCATTTATTAATGGTGCTAACTTTTTGTCG
GCGATATCGATAAGCTCACCACCTAATTTATTGATATATTTCATTTGGTTCAGTTTTTTC
TGCGCTTGTACAATTTGCTTGTAGGTGTTTTTAATTTCCTTAGAAGAATTCTTGAATTTA
TCATAGCGTTCCTCGGAGGATGCGTATTTGTACCATTCTGTATTTTTCTCAGAATGTTGT
AGCAGGTCTGCATATTTTTTTTGATCGCTGTAAAGTTGACTTTTAATACTTTCCTCACTG
CTGGTTTTATAAGGCTTATCAGAGCTGTTTATTTTTGAAATGTCTTTTTCTGTCAGTGAC
TGGACCGTGTTGTGGGTATTTTCTTTTGCAACATGCTCATTGATGATGTTAATTGCAGTT
TCATATTCATTTAAGTTTATTGTTCTTTGTGAAATAGACCCTTCTTTGCTTTCGATACTC
AAAACACCTTCGTTGTTTTCACCTCGGGTAAAGGTAAGGGTATAGGGTTCATAATCCGCT
GCAAATTCATTTTTATACGTTATGACATGCTCGACAAAATGTCTTATTGGTACGAAACCA
TAACTGTGAACGTCAATTTTTTGGGTCTTGATACTATCAATTTCATCTGAGGCTTTCGTG
AAAAAAGCCAATAAATTAGCTATGTTGTCTGCTGAGGTTGATAACCCGAATCTACTTTGA
GATATTTTTAGAAACTCATTGCAAAAAATCTCAAGTTTCGCGGTTTGTTGTGATTCTTTG
TAAATTTCTGCTGTTTGCAATTTATTATTTTGTAAAAGATTACAGCGAGATAATTGAATA
GATGTATTTGGCATAAATGATTCCTTGTATTGTGAGTTAACAAGATACAATTTAATCTTT
GCAGAATATATTCACTATCAAATTTAGCTCATTTTATTACGAAGACCTTTACGCATGTTA
GAAAGTATCATTATTGTTAATAAACACGGTAATAAGTAACAAACAGATATTGATAACTTC
CCTGACAAGTTATTAGGTATCCCACTTGAAGATTGAGAGTGGCTCCAGAGTAAACTGTGT
ACTGTTCGCCGGAGTGTCATTACTCTCAACAATCGGTTTTGACAGTGAGTCGGGCGCTTC
ATACTGGTTTCTACCTGGAGTCATTGTCACTTCCCTAAACTGGATAAATATATATCGCTA
ATTCACAAAGTGGACCAAAATCAGGTGAAAACGAATTATTACGCCTGGTAAAGACTACAG
GCCAACTAAGTGTGGCGAATCAGGCAATCTTACATTTGTCATCAATCTCATGTCTTACAT
CAAATTTTTCCACTCACCACGAGTTGTTCCGTACACATTTGTAGTAAAAACAGTGGACTG
CCTTCTACCGGCTTTTCTTTAGCCAGCAACGAAATCTGTCGATAGAAGGTTGGTTCGAGA
GGAACGGAACACAATTCATCTGCAATGGTTTTCAGCGTTAACTCTGGTAATAAGGCGATG
CCTAATCCCTGTCGAATAAAACTGATCGCTGTATCCGGGTGATTAAATTCATATTTTATC
TGTGGGGTAATATTCTTTTCTTTAAATAGTGCCATAATGCTTAATTCATAGCGTCCTTTA
CTAATGATTAATGGTTCACCCATTAATTCTTCCACTGTAATAGTGCTGTTTTTTGCCAGA
GCATGGTTGGGCGGTAACACTACGGTGAATTTATCCTGATAAATGGGCACGGAGTACATT
CCGCTCACCGGAAAATGAACAAAACCGGCATCAATGGATTCATTCTGAAGCGAATCAATA
ATCGCTGTGCTATTTTCCTCAAAAGGAATAATTTTTATATTCGGATGATGAATTTCAAAG
TAGCGAATCACAACCGGTAAGATACAGGCGCAGACGCTGGGGAAACAACCAAGTCTCAGC
GTTCTTTGAGGGTTCTGCTTTTCCTGCTCGGCTATCTCTTTTACTGCGTTAACTTCCCGA
TTAATGGCGCGCAGATGTTGCACAATGCGATGACCTGCTGTGGTCAGTTGTATAGCTTTA
CGGCGATCGCGTAACAGTATATTCACACCAAGTTCTTGTTCGAGGGCAGCAATTGCCTGA
CTTACCGCCGACTGCGTCATGAACAATCGCTTGCTGGCTTCAGTAAAGCCACCGTAATCC
AGCACGGCGAGTAAAGAATTTATTTGGGTAAGAGTCATTAGAGTTTGCTAATCAATAATA
TTAAAACGATTAATTTCTCTAATAGCATGCCGCCATTTATACTTCTGTTCTGCAAAGTAC
ATCACAATTTGACGCAACCGCAGTAACGGGAGTGTTGTCTGCGTGCGTCATCCTGACAGG
CGGTAGGGTATGAAAGAGAAGTTATGGACGAAGGATTTTTGGGCAATAACCATCATCAGC
TTTATTATTTTCTTCGTCTTTTATGTTTTACTAACATTGTTGCCAATTTATATCTCTGAC
CGCTTGCATGCCTCTCCTGATAAAGCTGGTCTGCTGGTGACATTATTTTTAATTGCGGCG
ATTGTTATTCGACCCTTTGCCGGGCAATGGGTGGGTAAATATTCGAATAAAACTATTCTG
GTGCTCTCTTCTCTGGCCTTTTTGGTGGTCACTGCGCTGTATCCTTTTTGCCACTCAATA
GAATCACTGCTTTTTATTAGGGTGCTTCATGGTATTACCTTCGGGGTTATCACAACGGTA
AAGGGAACGATTTCCGCGCGGCTGATCCCGGCCTCCCGACGTGGGGAGGGCATCAGTTTT
TTCTCTCTGGCAATGGGGCTGGCAATGGTGGTCGGGCCGTGGATTGGCCTGAATATGGCG
CGCTGGGAGGCCTTTAATATGGCTTTCTGGTTATGTACTGGCGTTGCGGCGGTGGGGATT
ATCCTGTCGCTGATTATGACCGTGCCGCCGGTTATCAGCCATGCCGACGGTTCAAAGCCA
AAGATGGGCTTCGCCGCCATGTTCGATCGCGCGGCATTGCCGTTTGCCATGGTTACATTC
TTTATGACCTTTTCGTATGCCGGGGTTTCTGCCTTTCTGGCGCTTTACGCCCGCGAACTT
AATCTGATGTCGGCGGCCAGTAATTTCCTGCTTTGCTACGCCATCTTCCTGATGATCTGC
CGTACCTTTACCGGCAATGTCTGCGACAAAAAAGGACCGAAATATGTGGTTTACCCTTGC
CTTGTGTTCTTTACGGTAGGACTGGTGGTTCTCGGCTACACCCAGGGAAGCATAATGATG
GTTGTTTCTGGCGCGTTGATTGGTATCGGGTATGGTTCCGTGACGCCAGTTTTTCAGACG
CAGATTATCAGTTCAGTGGAACCGCATAAAATCGGTGTCGCAAACTCCCTCTTCTTCAAT
GCGATGGATGCAGGCCTGGCGCTGGGAGCCTGTGTGATGGGGATGATGGTTGCACATACT
GGCTACCGAATGATTTATCTGCTGGGCGCACTATTAGTGGTAGTGGCTGGTGGAGTCTAT
GCGCTGCAAATGAAGGGTAAAAGCGGTGTCGCGCTAGTAGTGGCAAAAGAAATTCATTAA
TACGACACGTTTCATTAAGATTTTTCGCAGGTAACCACCTATAGTCATTGTCGTTAATAA
AAAATGACAGGCGATAGGGTATGGCAGTTTCAGCAAAGCACGACGAATTTAATCACTGGT
GGGCAACAGAGGGCGACTGGGTTGAAGAGCCTAACTATCGCCGTAATGGTATGAGCGGGG
TGCAATGCGTCGAGCGCAACGGCAAAAAGCTATATGTAAAGCGCATGACGCATCATCTGT
TTCATTCCGTACGTTATCCTTTCGGCCGACCAACGATTGTCCGTGAGGTTGCGGTAATTA
AAGAACTGGAACGGGCCGGTGTCATCGTGCCGAAGATCGTTTTTGGTGAAGCGGTGAAAA
TTGAGGGTGAATGGCGAGCGTTGCTGGTGACTGAAGATATGGCGGGGTTCATCAGCATTG
CTGACTGGTATGCCCAGCATGCAGTATCGCCTTATTCTGACGAAGTACGGCAAGCCATGT
TGAAAGCAGTGGCGCTGGCGTTTAAGAAAATGCATAGCATTAATCGTCAGCATGGCTGTT
GTTATGTTCGCCATATCTATGTGAAAACAGAAGGTAAGGCAGAAGCTGGTTTTCTTGACC
TGGAGAAAAGTCGTCGCCGCTTGCGTCGCGATAAAGCGATTAATCATGACTTCCGCCAGC
TGGAAAAATATCTGGAGCCAATTCCCAAAGCGGACTGGGAGCAGGTGAAAGCGTATTACT
ACGCCATGTAATCGTTGTAGGCCAGATAAGACGCATAAGCGTCGTATCTGGCACTACAAC
CAATTCACATCTCGATTTCAATATCGCCTTTTGCCCGGCAACAACAGGGCAAAATTTCCC
CCGGCTGAATAAAGGCTAACGGTTCGGCAATCCAGTCCACCTGACCTGCGACCAGTCGGG
TGCGACAGGAGCCGCAGTAACCTTCGCGGCACTGGTACTCAACCGCCACATTGTGGGATT
CCAGCGCCGCCAGAAGGGAAGGGTGTTCATCCTGGCACAGCAGTTGTGTGCCAGTGATGC
GCAGGGTAACGCGAGCCATCAGAGCTGGAAGTTACTCAAATCGTCGGTGTCCACTTCCGA
GTCAATCTGCCCGACCAGATAAGAACTGACTTCCACTTCCTGCGGAGCAACCTGCACGTT
ATCAGACACCAGCCAGGTGTTGATCCACGGGATCGGGTTGGAGCGCGTCTGGAACGGCAG
ATCCAAACCGACTGCCTGCATGCGGATATTGGTGATGTATTCAACGTACTGGCAGAGAAT
GTCTTTATTCAGACCAATCATCGAACCGTCACGGAACAGATAATCCGCCCAGTCTTTCTC
TTGCTGTGCCGCCTGGACAAACAGGTCATAGCACTCCTGCTTACATTCTTCGGCAATTTC
CGCCATCTCCGGATCATCCGCACCGCTGCGCAGCAGATTCAGCATATGCTGAGTACCGGT
CAGGTGCAGGGCTTCGTCGCGGGCAATCAGGCGAATAATTTTGGCGTTACCTTCCATCAG
CTCACGTTCAGCGAATGCGAAAGAGCAGGCAAAGCTGACGTAGAAACGAATCGCTTCCAG
CGCGTTAACGCTCATCAGGCAGAGATACAGTTTTTTCTTCAGCTCGCGCAGGCTAACGGT
CACGGTTTTACCGTTAACGGTGTGGGTGCCTTCGCCCAGCAGATGCCAGTAGCTGGTCAT
TTCGATCAGCTCATCGTAATAGCTGGAGATCCCTTCCGCACGTTTCTGGATCTGCTCGTT
GGTGACGATATCGTCAAACACAACAGACGGATCGTTAACGATATTACGAATGATATGAGT
ATAGGAACGGGAATGAATCGTTTCTGAGAACGCCCAGGTTTCGACCCAGGTTTCCAGTTC
CGGAATAGAAATAAGCGGCAATAGCGCCACGTTCGGGCTACGACCCTGAATGGAATCCAG
CAGCGTCTGATATTTCAGGTTGCTGATAAAGATGTGTTTTTCGTGTTCAGGCAATGCCTG
GTAATCAATACGGTCACGAGAAACGTCAACTTCTTCCGGACGCCAGAAGAAAGAGAGCTG
CTTTTCGATCAGCTTTTCGAAGATGTCATATTTTTGCTGATCGTAGCGAGCCACGTTGAC
CGGCTGACCAAAGAACATCGGTTCTTTGAGCTGATCATTTTTCGTCTGTGAAAAGGTGGT
ATATGCCATGAGTGTGTCCTGTTGGGAGTTTAATGCCGGATAAGGCATTTTACGCCGCAT
CCTGTGCCTGATGCGACGCTGGCGCGTCTTATCAGGCCTACAAATCCGAGCCGTAGGCCG
GATAAGGCGTTCACGCTGCATCCGGCACCCGGAGCCTGATGCGACGCTGGCGCGTCTTAT
CAGGCCTACAAACCGAGCCGTAGGCCGGATAAGGCGTTTACGCCGCATCCGGCATCTCAA
TATCAGATCTTACATGCGCCGCTTTCGCAGCCATCGTCCTGGATTGACGGCACCAGATCG
TCCTGCGCGTCTTCAGCGCCGTCACGGGTGTTCTGATAATACAGCGTTTTGACCCCGAAT
TTGTAGGCGGTGAGCAGGTCTTTCAGCAACTGCTGCATCGGCACTTTTCCTGACGGGAAA
CGTGACGGATCGTAGTTGGTGTTAGCAGAGATCGACTGATCGATAAATTTCTGCATGATA
CCCACCAGTTGCAGGTAGCCATCGTTACCCGGCATTTCCCACAGCAGCTCATAGGCGTCG
TGCAGATGCTCGTAGTCCGGCACCACCTGGCGCAGAATACCGTCTTTCGACGCTTTGATG
CTGACGTAACCGCGCGGCGGTTCAATACCGTTAGTGGCGTTAGAGATCTGCGAAGAAGTC
TCGGACGGCATCAGAGCAGAAAGCGTGGAGTTACGCAGGCCGTGCGTTTTGATTGACTCA
CGCAGAGCTTCCCAGTCGTAATGCAGCGGCTCATTAGCGATGGTATCCAGATCTTTCTTA
TAGGTATCGATCGGCAGGATCCCTTTCGCGTAAGTGGTTTCGTTAAACCACGGGCACGCG
CCTTGCTCTTTCGCCAGCTCATTAGACGCTTTCAGCAGGTAATACTGAATCGCTTCGAAG
GTTTTATGCGTCAGGTTGTTGGCGCTGCCGTCGGAGTAGCGTTTACCATGCTTCGCCAGG
TAGTAAGCGAAGTTGATCACACCAATACCCAGCGTACGACGACCCATCGCTCCACGTTTG
GCGGCCGGGATCGGGTAATCCTGATAATCCAGCAGCGCGTCAAGTGCACGAACCGCCAGA
ATTGCCAGCTCTTCCAGTTCATCCAGGCTATTAATTGCGCCCAGGTTGAAAGCAGACAGC
GTACACAGCGCGATTTCACCGTTCTCGTCGTTGACGTCGTTCAGCGGTTTGGTCGGCAGG
GCTATCTCCAGGCACAGGTTAGACTGACGCACTGGCGCGATGGCCGGATCAAACGGGCTA
TGGGTATTGCAGTGGTCAACGTTCTGAATATAGATACGACCGGTAGACGCACGTTCCTGC
ATCATCAGCGAGAACAGCTCAACGGCTTTCACACGCTGCTTGCGGATGCTGTCGTCTTTC
TCATATTTGGTATACAGACGTTCAAACTCTTCCTGATCGGCGAAGAATGCGTCGTACAGC
CCCGGTACGTCGGACGGGCTGAACAGGGTGATATCTTCACCTTTCAGCAGGCGGGTATAC
ATCAGTTTGTTGATCTGTACCCCGTAGTCCATATGGCGCACGCGGTTGCCTTCCACACCA
CGGTTGTTTTTCAACACCAGCAGGCTTTCCACTTCCAGATGCCACATCGGGTAGAACAGC
GTTGCCGCACCGCCGCGCACACCGCCCTGAGAGCAGGATTTCACCGCAGTCTGGAAATGT
TTGTAGAACGGAATGCAGCCGGTATGGAACGCTTCGCCACCGCGAATCGGGCTACCCAGC
GCACGAATACGCCCGGCGTTGATGCCGATCCCGGCACGCTGGGAAACATATTTCACAATC
GCGCTGGAGGTGGCGTTGATGGAATCCAGGCTGTCGCCGCACTCGATCAGTACGCAGGAG
CTGAACTGACGAGTCGGGGTACGCACGCCGGACATGATTGGCGTCGGCAGCGAAATTTTA
AATGTGGAAACCGCGTCGTAAAAACGCTTCACATATTGCAGGCGCGTTTCACGCGGGTAG
TTCGAGAACAGGCACGCGGCAACCAGAATATAAAGGAACTGGGCGCTTTCGTAGATTTCG
CCGGTCACGCGGTTCTGTACCAGATATTTGCCTTCCAGTTGCTTAACGGCAGCATAAGAG
AAGGTCATATCACGGTCGTGATCGATAAACGTGTCCATCTGCTTGAACTCTTCTTCCGTG
TAGTCTTCCAGCAGATGATTATCGTATTTGCCCATCTCGACCATTTTCACCACGTGGTCG
TACAGCGCAGGCGGCTCAAACTGGCCGTAGGCTTTTTTACGCAGGTGGAAGATCGCCAGG
CGCGCGGCGAGATACTGATAATCCGGCGCATCACGGGAGATCAGGTCTGCGGCAGCCTTG
ATAATAGTTTCGTGGATGTCAGAGGTCTTGATACCGTCATAAAACTGAATGTGGGAGCGC
AGCTCGACCTGGGAAATCGAAACGTTATGCAGTCCTTCTGCCGCCCAATCCAGAACGCGA
TGGATTTTGTCGAGATTGATGCGCTCTGTGCTACCGTCGCGCTTTGTCACCAGCAGATTC
TGATTCATGTATGTCGTACCTGTTTTTGGAATTCTTTCCGCAATAGTTTCGTGCAGACTA
CCTGTAGTACGGGAAGCTGCTTAGAACACTATATATAGGGGGTATGTTTGGGATTCACTG
CAAGATAGTGTGAAAATGGCCCTCTTGCAAGTGCATAACTTTGTGGATAACTCAGGAAGG
AAAAAGTGGCTTTCGCGCACCTTAGGTCAGACAAGGTGTCCGGGAAAGTCAATGGGAAGA
GAAAAATTTGTTAAAAATAACTGTTCGGCGATTTCTTGAACGGCAGAATAGGTTGGATAA
ATTGATATAGATGGTTTATTAATCTTTTTGCTAATGATTGCAAAAATTGATCTAAGCACG
AGTCATCACATAATCTGATGTATCAGTTGTGGTCAATATATAAGCGAATGTAAGCGATTG
TTGATGTCGAAATGGTTGTTTTCTATTCGGTTATTGTTAAATGCGAAGCCATTTTGTTAA
TTTACCTTATATTATAAGAAAATTATTCATTACTTTAATTTAGTTTAAATATAACTGGTA
TCCCTTAAGGTTATTAACTTGAATTATGACGCACTGATACTATTCATCAAATAATAACAA
AATAGCTATTGCATCGGGTTGGACAATTTACAAAAGAAAGATAACCCATATTGTATAATG
CGTTTAAATATGCCGTCTTATATAAAATGATGGTCAGATTAATATGCGAATTATTTTTCT
ACGCAAGGAGTATCTATCTTTACTCCCGTCAATGATTGCGTCTCTCTTCTCTGCTAATGG
CATTGCGGCAGTCACTGATTCATGCCAGGGATATGATATCAAAGCGAGTTGCCAGGCCAG
CAGGCAAAGCCTTGCAGGCATTACGCAGGACTGGAGCATCGCCGATGGGCAATGGCTGGT
TTTTTCGGATATGACCAATAATGCCAGCGGTGGGGCCGTATTTTTGCAACAAGGAGCGGA
ATTTACATTATCACCAGAAAATGAAACTGGAATGACTCTGTTTGCCAATAACACCGTTTC
AGGAGAATATAATAACGGCGGGGCAATATTTGCTAAAGAAAACTCAACGCTGAATCTTAC
GGATGTTATTTTTTCTGGTAACGTCGCAGGCGGCTATGGTGGCGCAATCTATTCTTCTGG
TACTAACGATACCGGTGCCATCGATTTACGTGTCACTAACGCCGTGTTTCGCAATAACAT
CGCTAATGACGGCAAAGGTGGTGCAATTTATACCATCAATAATGATATCTATTTAAGTGA
TGATGTTTTTAACAATAACCAGGCATATACATCAACAAGTTACAGTGATGGCGATGGCGG
CGCAATCGATGTCACAGATAATAATAGCGACAGCAAGCATCCTTCAGGTTATACGATAAT
AAATAACACTGCCTTTACAAATAACACTGCCGAAGGTTATGGCGGGGCGATATATACCAA
TAGCGCGACGGCTCCCTATCTTATTGATATTTCTGTTGATGACAGCTACAGCCAGAACGG
AGGCGTGTTAGTCGATGAGAACAATAGCGCAGCAGGCTATGGAGATGGTCCTTCCTCTGC
GGCGGGTGGCTTTATGTATCTCGGCTTAAGTGAAGTTACATTTGATATTGCCGACGGAAA
AACGCTGGTTATTGGCAATACAGAGAATGACGGAGCTGTTGACTCTATTGCTGGTACCGG
GTTAATCACCAAAACAGGTTCCGGCGATCTGGTACTTAATGCAGATAACAATGACTTTAC
TGGTGAGATGCAGATTGAAAACGGTGAAGTTACCCTGGGCCGCAGCAACTCCCTGATGAA
TGTCGGCGATACGCATTGCCAGGACGATCCGCAAGACTGCTACGGTCTGACGATAGGGAG
TATTGATAAGTACCAGAATCAGGCAGAGCTAAATGTTGGCTCCACCCAACAAACCTTTGT
GCACTCATTGACGGGCTTTCAGAATGGCACTTTAAATATCGATGCTGGTGGCAATGTTAC
TGTTAATGAAGGCAGTTTTGCTGGCACCATCGAAGGTGCTGGTCAGCTCACCATTGCGCA
AAACGGCAGCTATGTGCTGGCGGGAGCGTCGTCGATGGCGCTAACCGGCGATATAGTCGT
TGATGATGGTGCGGTGCTTTCGCTGGAAGGCGACGCGGCAGATCTTGCCGCTCTCCAGGA
CGATCCGCAGTCGATCGTGTTAAACGGCGGTGTGCTCGATCTCTCTGATTTCTCCACCTG
GCAGAGCGGTACATCATACAAAGATGGCCTTGAAGTCAGCGGCAGCAGCGGAACGGTTAT
CGGCAGTCAGGATGTGGTAGATCTTGCAGGCGGAAACGATATGCATATCGGCGGTGACGG
GAAAGATGGCGTCTACGTGGTGATCGATGCGGGTGACGGGCAGGTCCGCCTGGCAAATGA
CAATCAATACCTCGGCACAACGCAAATCGCCTCCGGTACGCTGATGGTGAGCGACAACTC
GCAGCTTGGAGATACCCATTACAACCGCCAGGTTATCTTTACCGATAATCAACAAGAAAG
CGTGATGGAGATTACTGCCAATGTCGATACTCGCTCTACAACGACTGAGCATGGGCGTGA
TATTGAAATGCGCGCCGACGGTGAAGTGGCAGTTGATGCGGGGGTAGACACGCAGTGGGG
CGCACTGATGGCTGACAGCAGCGGGCAGCATCAGGATGAGGGTAGCACATTGACGAAAAC
GGGGGCGGGTACGCTGGAGCTGACCGCCAGCGGTACAACGCAGTCGGCGGTACGTGTCGA
AGAAGGCACCCTGAAAGGTGATGTTGCTGATATCCTTCCTTATGCTTCGTCACTGTGGGT
TGGTGATGGGGCAACGTTCGTTACTGGCGCGGATCAGGATATTCAGTCAATTGATGCTAT
TTCCAGCGGCACTATTGACATCAGCGATGGTACGGTTTTGCGCCTGACCGGGCAGGATAC
TTCCGTCGCCCTTAATGCCTCACTGTTTAACGGCGATGGGACGCTGGTGAATGCCACCGA
TGGTGTGACGTTGACAGGTGAGCTTAATACCAACCTTGAAACTGACAGCCTGACTTATCT
TTCCAACGTGACGGTTAATGGCAATCTGACCAATACGTCCGGTGCGGTTAGCCTGCAAAA
TGGCGTCGCTGGCGATACGCTGACGGTAAACGGTGATTATACCGGCGGCGGTACGCTACT
GCTCGATAGCGAATTAAACGGCGATGACTCGGTAAGCGATCAATTGGTGATGAACGGTAA
TACTGCTGGCAACACAACTGTGGTGGTTAACTCCATTACAGGGATTGGTGAGCCGACATC
GACAGGCATTAAAGTGGTTGATTTCGCAGCTGATCCCACGCAGTTTCAAAACAATGCGCA
GTTCAGTCTGGCAGGCAGTGGCTACGTCAACATGGGAGCGTATGACTACACGCTGGTGGA
AGATAACAACGACTGGTATCTGCGATCGCAAGAAGTAACGCCGCCATCGCCACCTGATCC
AGACCCGGACCCAACCCCCGATCCTGACCCAACACCCGATCCAATCCCCGCTTACCAGCC
GGTGCTGAATGCCAAAGTTGGCGGTTATCTCAATAACCTGCGGGCGGCAAATCAGGCGTT
TGTGATGGAGCGACGCGATCACGCTGGTGGCGATGGTCAGACGCTGAATTTACGTGTTAT
CGGCGGACGTTATCATTACACGGCGGCAGGGCAACTGGCTCAGCATGAAGACACTTCTAC
GGTGCAGCTAAGCGGCGATCTGTTTAGCGGGCGCTGGGGCGATGATGGCGAGTGGATGCT
TGGGATTGTAGGTGGCTACAGCGATAACCAGGGCGACAGCCGCTCGAATCTGACCGGAAC
TCGCGCCGATAACCAGAACCACGGTTATGCCGTTGGGCTAACCTCAAGCTGGTTTCAGCA
CGGTAATCAGAAGCAGGGGGCCTGGCTGGATAACTGGCTGCAATACGCGTGGTTTAACAA
TGATGTTTCCGAACAAGACGATGGCGCGGATCATTACCATTCGTCGGGGATTATCGCCTC
GCTGGAAGCCGGGTATCAATGGTTACCGGGGCGTGGTGTGGTGATTGAACCGCAGGCGCA
GGTGATTTATCAGGGCGTGCAGCAGGATGATTTTACCGCCGCTAACCGTGCGCGCGTGTC
ACAATCGCAGGGTGATGATATTCAGACGCGGCTGGGTTTACACAGCGAATGGCGTACCGC
TGTTCATGTCATACCAACATTAGATCTGAATTATTATCACGATCCCCATTCGACGGAAAT
TGAAGAGGATGGCAGCACTATCAGTGACGATGCGGTGAAGCAACGGGGTGAAATAAAAGT
GGGAGTCACGGGCAATATCAGTCAGCGAGTGTCCCTGCGCGGCAGCGTGGCGTGGCAGAA
AGGGAGTGATGATTTTGCCCAGACGGCAGGATTTTTGTCGATGACGGTGAAATGGTAATC
GCTGTCTGACCATCACTATTGCCGGATGCGGCGTAAACGCCTTATCTGGCCTACGGAGAG
CATTTGTAGGCCTGATAAGACGCGGCAAGCGTCGCATCAGGCATTGGCGCGGTTGCCGGA
TGAATCCAAACAACAACCTCACTTATTCTGCGTGTGCAGCATATAGTTCACATCCACGCC
GGGGCCGAGTTTAAAAGAATTAGTGATCGGGTTGTAATGTAGCCCGGTTATATGTCGCTC
TTTAAGGCTTGTCTGATCTACCCAGCCAAGCAGCTCTGCCGGTTTAATAAACTTCTTCAC
ATCATGCGTGCCTTTGGGCACCATGCGCAAAATATATTCCGCGCCAACCACCGCCATCAG
CCATGACTTGCCGTTGCGGTTAAGCGTCGAGAAAAAGACATCGCCGCCCGGTTTCACCAG
TTGCGCACAGGCTCTGACTACTGACTGCGGATCGGGGACGTGCTCCAGCATCTCCATGCA
GGTCACCACATCATACTGCCCGGCATGTTTTGCCGCGTGCTCTTCCACGGTTTCCTGCAC
GTAATCCACCTGAATGCCGCTTTCCAGCGCGTGCAGCTTTGCCACCTGCAATGGCTCAAA
GCCCATATCCAGACCGGTCACCGTCGCGCCTTCGCGCGCCATACTCTCGGCCAGAATGCC
GCCGCCACAACCGACATCGAGCACCTTTTTGCCAAATAAACCGCCAGCACGCTCGGCAAT
ATAGCCCAGACGTAGCGGATTAATGCGGTGCAACGGTTTGAACTCACCTTCAAGATCCCA
CCAGCGGGAGGCGACGGCTTCAAATTTAGCGATCTCTTCGTGGTCTACGTTATGGTTTAC
CGGCGATTTTTCGGCATTCATTGGCACTTCTACTCCGTAATTGGCAAGACAAACGAGTAT
ATCAGGCATTGGATGTGAATAAAGCGTATAGGTTTACCTCAAACTGCGCGGCTGTGTTAT
AATTTGCGACCTTTGAATCCGGGATACAGTAGAGGGATAGCGGTTAGATGAGCGACCTTG
CGAGAGAAATTACACCGGTCAACATTGAGGAAGAGCTGAAGAGCTCCTATCTGGATTATG
CGATGTCGGTCATTGTTGGCCGTGCGCTGCCAGATGTCCGAGATGGCCTGAAACCGGTAC
ACCGTCGCGTACTTTACGCCATGAACGTACTAGGCAATGACTGGAACAAAGCCTATAAAA
AATCTGCCCGTGTCGTTGGTGACGTAATCGGTAAATACCATCCCCATGGTGACTCGGCGG
TTTATGACACGATCGTCCGTATGGCGCAGCCATTCTCGCTGCGTTACATGCTGGTAGACG
GTCAGGGTAACTTCGGTTCCATCGACGGCGACTCTGCGGCGGCAATGCGTTATACGGAAA
TCCGTCTGGCGAAAATTGCCCATGAACTGATGGCCGATCTCGAAAAAGAGACGGTCGATT
TCGTTGATAACTATGACGGCACGGAAAAAATTCCGGACGTCATGCCAACCAAAATTCCTA
ACCTGCTGGTGAACGGTTCTTCCGGTATCGCCGTAGGTATGGCAACCAACATCCCGCCGC
ACAACCTGACGGAAGTCATCAACGGTTGTCTGGCGTATATCGATGATGAAGACATCAGCA
TTGAAGGGCTGATGGAATACATCCCGGGGCCGGACTTCCCGACGGCGGCAATCATTAACG
GTCGTCGCGGTATTGAAGAAGCTTACCGTACCGGTCGCGGCAAGGTATATATCCGCGCCC
GTGCTGAAGTGGAAGTTGACGCCAAAACCGGACGTGAAACCATTATCGTCCACGAAATTC
CGTATCAGGTAAACAAAGCGCGCCTGATCGAGAAGATTGCGGAACTGGTAAAAGAAAAAC
GCGTGGAAGGCATCAGCGCGCTGCGTGACGAGTCTGACAAAGACGGTATGCGCATCGTGA
TTGAAGTGAAACGCGATGCGGTCGGTGAAGTTGTGCTCAACAACCTCTACTCCCAGACCC
AGTTGCAGGTTTCTTTCGGTATCAACATGGTGGCATTGCACCATGGTCAGCCGAAGATCA
TGAACCTGAAAGACATCATCGCGGCGTTTGTTCGTCACCGCCGTGAAGTGGTGACCCGTC
GTACTATTTTCGAACTGCGTAAAGCTCGCGATCGTGCTCATATCCTTGAAGCATTAGCCG
TGGCGCTGGCGAACATCGACCCGATCATCGAACTGATCCGTCATGCGCCGACGCCTGCAG
AAGCGAAAACTGCGCTGGTTGCTAATCCGTGGCAGCTGGGCAACGTTGCCGCGATGCTCG
AACGTGCTGGCGACGATGCTGCGCGTCCGGAATGGCTGGAGCCAGAGTTCGGCGTGCGTG
ATGGTCTGTACTACCTGACCGAACAGCAAGCTCAGGCGATTCTGGATCTGCGTTTGCAGA
AACTGACCGGCCTTGAGCACGAAAAACTGCTCGACGAATACAAAGAGCTGCTGGATCAGA
TCGCGGAACTGCTGCGTATTCTTGGTAGCGCCGATCGTCTGATGGAAGTGATCCGTGAAG
AGCTGGAGCTGGTTCGTGAACAGTTCGGTGACAAACGTCGTACTGAAATCACCGCCAACA
GCGCAGACATCAACCTGGAAGATCTGATCACCCAGGAAGATGTGGTCGTGACGCTCTCTC
ACCAGGGCTACGTTAAATATCAGCCGCTTTCTGAATACGAAGCGCAGCGTCGTGGCGGGA
AAGGTAAATCTGCCGCACGTATTAAAGAAGAAGACTTTATCGACCGACTGCTGGTGGCGA
ACACGCACGACCATATTCTGTGCTTCTCCAGCCGTGGTCGCGTCTATTCGATGAAAGTTT
ACCAGTTGCCGGAGGCCACTCGTGGCGCGCGCGGTCGTCCGATCGTCAACCTGCTGCCGC
TGGAGCAGGACGAACGTATCACCGCGATCCTGCCGGTGACCGAGTTTGAAGAAGGCGTGA
AAGTCTTCATGGCGACCGCTAACGGTACTGTGAAGAAAACCGTCCTCACCGAGTTCAACC
GTCTGCGTACCGCCGGTAAAGTGGCGATCAAACTGGTTGAAGGCGATGAGCTGATCGGCG
TTGACCTGACCAGCGGCGAAGACGAAGTAATGCTGTTCTCCGCCGAAGGTAAAGTGGTGC
GCTTTAAAGAGTCTTCTGTCCGTGCGATGGGCTGCAACACCACCGGTGTTCGCGGTATTC
GTTTAGGCGAAGGTGATAAAGTCGTCTCTCTGATCGTGCCTCGTGGCGATGGCGCAATCC
TCACCGCAACGCAGAACGGTTATGGTAAACGTACCGCAGTGGCGGAATACCCGACTAAGT
CGCGTGCGACGAAAGGGGTTATCTCCATCAAGGTTACCGAACGTAACGGTTTAGTGGTTG
GCGCGGTGCAGGTAGATGATTGCGATCAGATCATGATGATCACCGACGCCGGTACGCTGG
TACGTACTCGCGTTTCAGAAATCAGCATCGTGGGCCGTAACACCCAGGGCGTGATCCTCA
TCCGTACTGCGGAAGATGAAAACGTAGTGGGTCTGCAACGTGTTGCTGAACCGGTTGACG
AGGAAGATCTGGACACCATCGACGGCAGTGCCGCGGAAGGGGACGATGAAATCGCTCCGG
AAGTGGACGTTGACGACGAGCCAGAAGAAGAATAATTTTACTTCTTCATGCCAAAAGGGA
GCTATCTCCCTTGTTTGAATTGAAAAGTCCAGGCTGCAAAGTCTGGGCTTTTGTCGTATT
AGGGCACGGTAAAGTTTGGCTGTGCCCGTAAAAAATGGCTGGCTATACACAAGGAATGTG
GCAATGAGTGGTGAAAAAAAGGCGAAAGGCTGGCGGTTCTATGGTCTTGTAGGTTTTGGC
GCAATAGCACTGCTTTCCGCTGGCGTCTGGGCGTTGCAATATGCTGGCAGTGGGCCAGAA
AAAACGTTGTCGCCGCTGGTGGTGCACAACAATCTGCAAATCGATCTCAATGAGCCGGAC
CTCTTTCTCGACAGCGACTCTCTGAGCCAGCTTCCCAAAGATCTCCTCACCATTCCGTTT
CTCCACGATGTTCTGAGTGAAGATTTCGTTTTCTATTATCAGAATCATGCCGATCGTCTG
GGCATTGAAGGCAGCATTCGCCGCATTGTCTATGAACACGATCTCACGCTGAAAGATAAG
CTCTTTTCGTCACTCTTAGATCAGCCCGCGCAGGCGGCGCTATGGCACGATAAACAAGGC
CATCTTTCACATTACATAGTGCTGATCCAGCGCAGTGGTTTAAGCAAACTGCTGGAGCCA
TTGTTGTTTGCCGCTACCAGCGACAGCCAGTTAAGCAAAACGGAAATCAGTAGCATCAAG
ATAAATAGTGAAACTATTCCTGTTTATCAGTTGCGCTATAACGGTAATAACGCCCTGATG
TTCGCGACATATCAGGACAAGATGCTGGTGTTTTCCAGCACGGATATGCTGTTTAAAGAT
GATCAGCAGGATACCGAAGCCACGGCGATCGCAAGTGATTTGTTGAGCGGCAAAAAACGC
TGGCAAGCCAGCTTTGGCCTGGAAGAGCGTGCTGCCGAAAAAACGCCAGTACGCCAGCGC
ATCGTGGCCAGCGCCAGGTTGCTGGGTTTTGGCTACCAGCGGTTAATGCCTTCTTTTGCT
GGCGTACGCTTCGAAATGGGTAACGACGGCTGGCACAGTTTTGTGGCGTTAAATGATGAA
TCCGCCAGCGTAGATGCCAGTTTCGATTTTACGCCGGTCTGGAACAGTATGCCTGCCGGG
GCCAGCTTCTGTGTGGCGGTGCCGTATTCACACGGTATTGCCGAAGAGATGCTTTCGCAC
ATCAGCCAGGAAAACGATAAGCTGAATGGGGCGTTAGACGGTGCCGCGGGGCTGTGCTGG
TATGAAGACTCAAAATTGCAAACCCCGCTGTTTGTCGGTCAGTTTGATGGCACTGCCGAA
CAGGCGCAATTGCCAGGGAAACTGTTTACGCAAAATATTGGTGCGCACGAAAGCAAAGCG
CCAGAAGGTGTTTTGCCGGTAAGCCAGACTCAGCAGGGCGAAGCGCAAATCTGGCGTCGC
GAAGTGAGTTCCCGATACGGTCAGTATCTGAAAGCGCAGGCGGCGCAACCCGATCAATTA
ATGTCGGATTATTTTTTCCGCGTGTCGCTGGCGATGCAAAACAAAACGCTGCTTTTCTCC
CTCGATGACACGCTGGTTAATAACGCCCTGCAAACACTGAATAAAACCCGCCCGGCAATG
GTAGATGTAATACCCACTGATGGCATCGTTCCGCTCTATATCAATCCACAAGGAATGGCG
AAACTGCTGCGTAACGAAACGCTGACCAGTCTGCCGAAGAATCTCGAACCGGTTTTTTAT
AACGCCGCACAAACTTTATTAATGCCGAAGCTGGACGCTTTATCTCAACAACCGCGTTAT
GTCATGAAGCTGGCCCAGATGGAACCCGGTGTCGCCTGGCAGTGGCTACCCATAACCTGG
CAGCCGCTATGAGGCACGGGCTGCTGGCGCTGATTTGCTGGCTGTGTTGTGTTGTTGCCC
ATAGCGAAATGCTGAATGTCGAACAATCCGGGCTGTTTCGCGCCTGGTTTGTACGCATTG
CACAGGAACAGCTCCGCCAGGGGCCAAGTCCACGCTGGTATCAGCAGGATTGTGCGGGCC
TGGTGCGATTTGCAGCGAACGAGGCGCTGAAAGTTCACGACAGTAAATGGCTAAAAAGTA
ACGGGTTATCTAACCAGTATTTGCCGCCAGAGATGTCGCTAACACCTGAACAGCGTCAAC
TGGCGCAAAACTGGAATCAGGGGAACGGGAAAACCGGCCCCTACGTGACCGCGATTAATT
TGATTCAGTACAACAGCCAGTTTATTGGCCAGGACATAAACCAGGCGCTGCCTGGCGATA
TGATTTTTTTCGATCAGGGCGATGCCCAGCACTTAATGGTCTGGATGGGGCGTTACGTCA
TCTACCACACCGGAAGCGCCACGAAAACTGACAACGGAATGCGCGCAGTCAGTCTGCAAC
AACTTATGACATGGAAGGACACCCGATGGATACCCAACGATTCCAATCCCAATTTCATTG
GCATTTATCGTTTAAATTTTCTGGCGCGATAGCAGCGTGCTTGTCCCTGTCTCTTGTGGG
AACAGGGCTTGCTAATGCTGATGATTCGCTTCCTTCCAGTAACTATGCGCCGCCCGCAGG
GGGAACATTCTTTTTGCTTGCTGACAGCAGTTTTAGCAGCAGTGAAGAGGCGAAAGTGCG
ACTGGAAGCGCCGGGGCGTGATTATCGGCGCTATCAGATGGAAGAGTACGGCGGTGTGGA
CGTTCGCCTGTATCGTATTCCTGACCCGATGGCATTTTTGCGCCAGCAGAAAAACCTGCA
TCGCATTGTGGTGCAACCGCAATATCTGGGCGACGGGCTGAACAATACGCTGACCTGGCT
GTGGGATAACTGGTACGGCAAATCTCGCCGCGTGATGCAGCGTACTTTCTCTTCTCAGTC
ACGGCAGAATGTGACTCAGGCATTACCCGAATTACATCTCGGCAATGCCATTATTAAACC
TTCCCGTTATGTACAGAACAACCAGTTTTCCCCGCTGAAAAAATATCCCCTGGTGGAACA
GTTCCGTTATCCACTATGGCAGGCTAAACCGGTCGAGCCGCAGCAAGGGGTAAAACTGGA
AGGCGCATCCAGCAATTTCATCTCGCCGCAGCCGGGTAACATTTATATTCCTCTCGGCCA
ACAAGAGCCGGGACTGTACCTCGTCGAGGCGATGGTTGGTGGGTATCGGGCGACGACGGT
GGTGTTTGTTTCCGATACCGTGGCGCTTAGCAAAGTGTCAGGCAAAGAGCTTCTGGTGTG
GACCGCGGGTAAAAAACAGGGTGAAGCGAAGCCAGGCTCAGAGATCTTGTGGACTGACGG
TCTTGGCGTGATGACCCGCGGTGTGACCGATGACAGCGGTACCTTGCAGTTACAACATAT
ATCGCCAGAACGTTCATACATTCTGGGTAAGGATGCCGAAGGCGGCGTTTTTGTCTCCGA
GAACTTCTTCTACGAAAGCGAAATCTACAACACCCGCTTGTATATTTTTACCGATCGCCC
GCTATATCGCGCAGGCGATCGTGTCGATGTTAAAGTGATGGGCCGCGAGTTCCACGATCC
GTTGCATTCATCCCCCATCGTCAGCGCCCCGGCGAAGCTTTCGGTGCTGGACGCCAACGG
CAGTCTGTTGCAAACCGTCGATGTCACGCTGGATGCGCGCAATGGCGGGCAGGGAAGTTT
CCGCCTGCCAGAAAATGCCATTGCCGGAGGTTATGAGTTACGTCTTGCTTACCGCAATCA
GGTCTATAGCAGTAGTTTTCGCGTAGCCAACTATATCAAGCCACATTTCGAGATTGGTTT
AGCTCTCGACAAAAAAGAGTTCAAAACTGGCGAAGCGGTCAGCGGCAAACTGCAACTGCT
CTACCCGGATGGTGAGCCGGTAAAAGATGCCCGCGTGCAGTTAAGTTTGCGCGCTCAGCA
ATTATCAATGGTCGGTAACGATTTGCGTTATGCCGGACGTTTCCCCGTGTCGCTGGAAGG
CAGTGAAACGGTGTCCGACGATAGCGGTCATGTGGCGTTAAATCTCCCCGCCGCCGATAA
ACCAAGCCGCTATTTGTTAACCGTCTCCGCCAGTGACGGCGCGGCGTATCGCGTCACCAC
CACCAAAGAGATCCTCATTGAACGCGGCCTGGCGCATTACTCTTTAAGTACCGCCGCACA
ATACAGTAATAGCGGCGAGTCGGTTGTGTTCCGTTATGCCGCGCTGGAATCTTCAAAACA
GGTTCCTGTTACGTATGAATGGTTGCGTCTCGAAGACCGCACGAGCCATAGCGGAGAGCT
ACCGTCAGGCGGCAAATCCTTTACCGTCAATTTCGCTAAACCTGGCAACTACAATCTGAC
ATTACGCGATAAAGACGGCTTAATTCTCGCTGGGTTAAGTCATGCCGTCAGCGGTAAGGG
CAGCATGTCGCATACTGGTACGGTAGATATCGTGGCAGATAAAACGCTGTACCAGCCTGG
CGAAACCGCGAAGATGCTGATTACCTTTCCGGAGCCAATTGATGAAGCATTATTGACGCT
GGAACGCGATCGCGTGGAACAGCAGTCGCTGCTTTCGCATCCGGCAAACTGGCTAACGCT
ACAACGTTTAAACGATACCCAGTATGAAGCCCGGGTTCCAGTGAGCAATTCCTTTGCGCC
TAACATCACTTTTTCGGTGCTGTATACCCGTAACGGTCAGTACAGTTTTCAGAATGCCGG
GATCAAAGTTGCCGTTCCCCAGCTGGATATCCGGGTGAAAACGGACAAAACCCATTACCA
GCCTGGTGAACTGGTCAATGTCGAATTAACCTCGTCGCTGAAAGGTAAACCTGTTTCTGC
GCAGCTAACGGTAGGCGTGGTCGATGAAATGATCTACGCGCTGCAACCAGAAATCGCGCC
GAATATCGGCAAATTTTTCTATCCGCTGGGGCGTAACAATGTGCGTACCAGCTCCAGTCT
GTCGTTTATCAGCTACGACCAGGCGCTCTCCAACGAGCCGGTTGCGCCTGGCGCAACTAA
CCGCAGCGAGCGGCGAGTAAAAATGCTTGAACGTCCACGGCGTGAAGAGGTGGATACCGC
GGCATGGATGCCGTCACTCACAACCGATAAACAAGGCAAAGCGTATTTCACGTTCCTGAT
GCCTGATTCGTTAACCCGCTGGCGTATCACCGCGCGTGGGATGAACGGCGACGGGCTGGT
CGGGCAGGGGCGTGCTTATCTGCGTTCGGAAAAAAATCTCTACATGAAGTGGAGTATGCC
AACGGTGTATCGCGTGGGCGACAAACCGGCGGCAGGACTGTTTATCTTCAGTCAGCAGGA
TAACGAACCGGTGGCGCTGGTGACTAAATTTGCAGGCGCTGAGATGCGCCAGACGCTGAC
GCTGCACAAAGGGGCGAATTATATTTCGCTGACGCAGAATATTCAGCAATCTGGCTTGTT
AAGTGCAGAACTGCAACAAAATGGGCAAGTGCAGGACAGCATTAGCACAAAACTGTCTTT
TGTGGATAACAGCTGGCCCGTTGAACAGCAGAAAAATATCATGCTCGGTGGTGGCGATAA
CGCGCTGATGTTGCCCGAGCAGGCGAGCAATATCCGGCTACAAAGTAGTGAAACGCCGCA
GGAGATTTTCCGCAACAATCTTGATGCGTTAGTCGATGAACCGTGGGGTGGGGTGATCAA
CACCGGTAGCCGTCTGATCCCGCTCAGTCTCGCCTGGCGTTCGCTTGCCGATCATCAAAG
TGCCGCCGCTAACGACATTCGTCAGATGATTCAGGATAACCGTCTGCGGCTGATGCAACT
GGCGGGGCCCGGAGCGCGCTTTACCTGGTGGGGTGAAGATGGCAATGGTGACGCCTTCCT
TACGGCATGGGCATGGTACGCCGACTGGCAGGCCAGCCAGGCGCTCGGCGTAACGCAACA
ACCGGAATACTGGCAGCATATGCTCGACAGTTATGCCGAGCAGGCAGATAACATGCCGTT
ATTGCATCGGGCGCTGGTGCTGGCGTGGGCACAGGAGATGAATCTGCCGTGCAAAACGTT
GTTGAAAGGGTTGGATGAAGCTATCGCCCGGCGCGGAACTAAAACTGAAGATTTCTCTGA
GGAAGCCCCCCGCGATATCAATGACAGCCTGATCCTCGATACACCGGAATCTCCACTGGC
AGATGCGGTGGCAAACGTCTTAACCATGACGTTGCTGAAAAAAGCGCAGTTGAAGTCCAC
GGTGATGCCACAGGTTCAGCAATATGCGTGGGATAAAGCGGCAAACAGCAATCAGCCGCT
GGCGCACACGGTTGTGCTGCTCAATAGCGGGGGCGACGCTACCCAGGCGGCTGCTATTTT
AAGTGGTTTGACCGCTGAGCAATCTACTATTGAGCGCGCGCTGGCCATGAACTGGCTGGC
GAAATATATGGCGACAATGCCTCCAGTTGTTTTGCCTGCGCCTGCGGGCGCATGGGCCAA
ACATAAGTTAACTGGAGGGGGCGAATACTGGCGTTGGGTTGGTCAGGGCGTGCCGGACAT
TCTCTCTTTTGGTGACGAATTATCGCCGCAAAATGTGCAGGTCCGCTGGCATGAACCGGC
AAAAACGGCTCAACAAAGTAACATTCCGGTGACCGTTGAACGCCAGTTGTATCGGCTTAT
CCCCGGTGAAGAAGAGATGAGCTTTACTCTGCAGCCGGTGACCAGCAATGAGATTGACAG
CGATGCGCTGTATCTCGATGAAATTACGCTTACCAGCGAGCAGGATGCAGTTCTGCGCTA
TGGTCAGGTGGAAGTACCGCTCCCGCCGGGAGCCGACGTTGAGCGCACAACATGGGGCAT
TTCAGTCAATAAACCCAACGCCGCGAAACAGCAGGGGCAATTGCTGGAAAAAGCGCGTAA
TGAAATGGGCGAACTGGCCTATATGGTGCCGGTGAAAGAACTGACGGGAACGGTCACTTT
CCGCCATTTGCTGCGCTTCTCGCAAAAAGGGCAATTCGTTCTGCCTCCTGCTCGTTATGT
GCGTTCCTATGCACCTGCGCAGCAAAGTGTTGCGGCAGGGAGCGAATGGCCCGGGATGCA
GGTGAAATAAGTGAACTGGCGCAGAATCGTCTGGCTATTGGCGTTGGTTACTCTGCCAAC
GCTTGCGGAGGAGACGCCGTTACAACTGGCACTGCGTGGTGCGCAGCACGATCAACTGTA
TCAGCTGTCGTCATCAGGCGTGACCAAAGCCTCGACATTACCTGACTCGCTCACCACGCC
GTTAGGGAGTTTGTGGAAACTGTATGTTTACGCCTGGCTGGAGGATACCCATCAACCGGA
GCAGCCCTACCAGTGTCGCGGAAACTCCCCGGAAGAGGTTTATTGTTGTCAGGCTGGGGA
GAGCATAACGCGCGATACCGCGCTGGTACGTTCCTGTGGGCTCTATTTTGCGCCGCAGCG
GTTGCATATTGGCGCAGATGTGTGGGGGCAATACTGGCAACAGCGTCAGGCACCTGCGTG
GTTAGCGTCTCTTACTACGCTGAAGCCAGAAACCTCGGTAACGGTTAAATCGCTGCTTGA
TTCATTAGCGACGTTACCTGCGCAAAACAAAGCTCAGGAAGTCTTACTGGAAGTGGTGCT
GGACGAGGCGAAAATCGGTGTCGCATCCATGCTCGGTAGTCGGGTTCGGGTGAAAACCTG
GAGCTGGTTTGCCGATGATAAACAGGAAATCCGTCAGGGTGGTTTTGCCGGCTGGTTAAC
CGATGGTACACCGCTGTGGGTTACTGGCAGTGGCACCAGCAAAACGGTACTGACCCGTTA
TGCGACGGTGCTTAATCGGGTTTTGCCAGTGCCGACACAAGTTGCCAGTGGGCAATGTGT
AGAGGTGGAGCTATTTGCCCGCTATCCGCTGAAGAAAATCACAGCGGAAAAGAGTACGAC
GTCAGTAAAACCCGGCGTACTTAATGGGCGCTATCGTGTGACATTTGCCAATGGTAACCA
CATTACGTTTGTCAGCCACGGTGAGACGACCTTACTGACCGAAAAGGGCAAACTGAAATT
GCAGTCGCATCTCGATCGTGAAGAGTACGTTGCCAGAGTTCTGGATCGCGAGGCGAAAAG
TACGCCACCTGAGGCAGCGAAAGCCATGACCGTGGCGATACGCACTTTTTTACAGCAAAA
CGCCAATCGGGAAGGCGATTGCCTGACCATCCCCGACAGCAGCGCCACGCAGCGTGTTTC
TGCTTCGCCAGCGACCACGGGGGCGCGAACGATGACCGCCTGGACGCAGGATCTCATCTA
TGCGGGCGATCCGGTTCATTATCACGGCAGTCGCGCTACCGAAGGGACGCTTTCCTGGCG
GCAAGCCATGGCCCAGGCCGGGCAGGGAGAGCGTTACGACCAGATACTCGCGTTTGCTTA
TCCCGACAACAGCCTTAGCCGCTGGGGAGCGCCACGCTCAACCTGTCAGTTATTACCCAA
AGCGAAAGCCTGGCTGGCGAAAAAAATGCCGCAGTGGCGGCGTATATTAGAAGGCGAGAC
GGGGTACAACGAACCAGACGTGTTTGCGGTCTGTCGTTTAGTCTCAGGTTTCCCCTATAC
CGATCGGCAGCAGAAACGGCTGTTTATTCGTAACTTCTTTACGCTTCAGGATCGGCTGGA
TTTAACCCATGAGTATCTGCACCTGGCCTTTGATGGTTATCCCACCGGGCTTGATGAGAA
CTATATCGAAACGCTGACCCGACAATTATTAATGGACTAATGCTATGCGAAAGATTTTTC
TTCCGTTGTTACTGGTGGCACTTTCGCCTGTCGCTCACAGTGAAGGTGTGCAGGAAGTCG
AGATTGACGCACCGCTCTCTGGCTGGCATCCGGCAGAGGGCGAAGATGCCAGTTTTTCAC
AATCGATCAATTACCCGGCGTCGTCCGTCAACATGGCAGATGATCAAAATATCTCAGCGC
AGATCCGCGGCAAAATAAAGAATTATGCTGCGGCGGGTAAAGTTCAGCAGGGCCGGCTGG
TGGTCAACGGTGCCAGTATGCCGCAGAGAGTTGAATCCGATGGTTCATTTGCACGCCCTT
ATATTTTCACTGAAGGCAGCAACAGCGTGCAGGTCATCAGCCCGGATGGGCAAAGCCGAC
AAAAAATGCAGTTTTACTCAACGCCGGGTACAGGAACGATTCGTGCACGTTTACGGCTGG
TTCTCTCGTGGGATACGGACAATACCGATCTCGATCTCCATGTTGTCACGCCCGATGGAG
AACACGCCTGGTACGGTAACACCGTGCTGAAAAACAGTGGTGCACTGGATATGGATGTCA
CGACGGGGTATGGACCCGAGATTTTCGCCATGCCAGCACCAGTTCACGGGCGCTATCAGG
TGTATATCAACTACTATGGTGGGCGCAGCGAAACGGAATTGACGACCGCCCAACTGACGC
TGATTACCGATGAAGGATCGGTCAATGAGAAACAGGAAACATTTATTGTACCGATGCGTA
ATGCTGGCGAGCTGACGCTGGTGAAAAGTTTTGACTGGTGATTAATGGGGTTACCTTCGC
CGTCGATGTTCAAGAAAACACCCGATAACTTTCGCTATCGGGTGTTTTTATTGATTAATT
CAACCGTTCAATCACCATCGCAATTCCCTGGCCGCCACCAATGCACAGTGTTGCCAGCCC
CAGCGTTTTATCGCGTGCCTGCATGGCATGTAATAGTGTGACCAGAATACGAGCACCACT
GGCACCGATAGGATGCCCGAGCGCGATGGCCCCGCCGTTGACATTCACTTTCTCAGAATC
AAAGCCCAGGGTTTTCCCAACGGCAAGGAACTGTGCAGCAAATGCTTCATTAGCCTCAAT
GAGATCAATATCCGCCAGTTGCAGCCCCGCCAGTTGTAACGCTTTTTGCGTGGCAGGTAC
TGGACCCATACCCATCAATGCGGGGGGCACGCCACCGCTGGCATAACTTTTAATGCGAGC
CAGGGGGGTAAGGCCTGCTGCCAGCGCCGCAGATTCTTCCATAATCACCAGAGCGGCAGC
ACCGTCGTTAATACCAGACGCGTTCCCGGCGGTGACTGTTCCTGCTTTATCGAAGGCCGG
GCGCAATGCGCCTAACGCTTCAGTCGTAGAATCCGCTTTCGGGAATTCGTCTTGACTGAA
GACGAAGGTTTTCTTCCGAGTGACAACATTTACCGGGACGATTTCGGCTGTAAAAGCACC
GGACTCAATTGCGGCTGCCGCTTTACGCTGTGAATGCAGCGCCAGTTCATCCTGCATTTC
TCGGGTAATTCCGTACTCTTTGGCCACGTTCTCGGCGGTAATCCCCATATGATAACCATG
GGTGGCGCACATCAGACCATCGCGCAGGATTACGTCATAAACCTGTCCGTCTCCAAGACG
ATAACCAGAGCGTGCTTTTGCATCGAGTAAGTAGGGCGCTAAACTCATATTTTCCATACC
CCCCGCCACAATGCTTTGCGCCTGACCTGCCTGAATTGCCTGGGCGGCAAGCGCCACACT
TTTAAGACCCGAACCACACACTTTATTGACCGTGAATCCGCACACCGTTTCTGCCAGCCC
GCTTTTTAACAGTGCCTGACGTGCCGGATTTTGCCCCAACCCGGCTTGCAACACGTTACC
CATAATCACTTCATCAATGTGTAGTGAATCGATTTTTGCACGTTCAATGGCGGCTTTAAT
TACTGTCGCCCCCAGGTCGATGGCGCTGGTGGAAGCGAGTGAACCGTTAAAACTACCGAT
AGCAGTACGTACCGCACTGACGATGACACAATTTTTCATTTTTTATTCCTTCTGTCTGTA
GGGGTGCCGTCAGAACAGCGTTAAACCAATGACGAAAATGACGCCGGAGAAGAGCAGGGC
AGTGATGCAATAGCCCATGATGTCGCGGACACCGAGTCCGGCGATTGCCAGTGCTGGCAG
CGCCCAGAATGGTTGTGCCATGTTCATCCATTGCTCGCCGTAGGCGATCGCCATTACCGA
TTTACCGAGATCAGCGCCCAGCGCCTGGGCTGCGGGTATCACGAAAGGTCCCTGAATAAC
CCAGTGACCGCCGCCAGACGGAACGGCGAAGTTAATCAGTGCAGAACTAAAAAAGGTCAT
TACCGGGAAGGTGTCTTTGTTCGCAACATTGATGAAGAATTCGGTAATGAGTCCGCCCAG
ACCGGAATGCTCCATCATCAGTTGGATCCCAGCGTAGAAGGGGAATTGCACCAGAATACC
GGCGGTACTGCGTGCTGCCGCGCTGATAGCACGCATATAAGCCATTGGCGTTTTATGTAG
CAGCAGACCCGCAATCATAAACATCAGGTTGACGGTATTGATGGTGATGTTGAAGCCATG
TTCGCTGAAGTACATCGCCAGGTAAGCGATACCGAGTGCGCCGATGATCAACGTCAGAAT
GCGGCTTTCTTCCAGTCGCTCGGACGGTGGAGCATCTTTCGGTAGCTGCTTTTGAAAATC
AGCCTCTTCCATGAGTAGTTTTGGATCGATACTCACCACGTCAGACGGTTTTGGCATCAT
CATGCGGGTGATAAATGGCATCACCACAATCAACGCCACAGTGATGAAAATGTTAAAACC
ACTGAACAGAGTATCGCCCACCGGGATCAGCCCGGCGATATGCTCAACCGGGTTGCCCGG
TGTTGCAGCCAACAGAGGCATTGATCCAGAGAAGCCGCCACCCCAGGTGAGAAAACCAAT
GTAGGCGCAGGCAATGAGCAACGGATAATCAGAACCGGGGACTCGCCGGGCGACTTCACG
GGCAAACATTGCGCCGACAACCAAACCAAATCCCCAGTTGATGACACAAGCGACTGAACC
GAAGAAAGTGACCAGCATGACGCCCTGTACGGGCGTCTTTGCGGCGGAGGCGGCAGTACG
CAGCAAACTTTTCACCGGAGCAGAGCTGGCAAGGGCATGACCGGTAACGATGATAAGCGC
CATCTGCATACCAAACGCCAGCAAGTTCCAGAAACCGTCACCCCACATTTTCACCATGCT
GATCGGCGTTTGTGGTGTTAACCAAAGCGCGATCACGAATGTTAGCAATGTCAGCAACAT
GGCAAAGATCAGTGGATCGGGAAGCCACCGGCTGACAAAACGCGTCATAAAACGCGATAT
GCGACCAATCATAAATCACCCCGTTGCGTATTCAGATCGGCGGCGACTTCAAACCGAGCT
TCTGTTTTGGCACGCACGGTAGCTAAATCACACCCGTCGGCAATTTCGGTGAGCCACATT
TTGCCGTCAATAAAACGAAAGACAGCCAGTTCAGTAACCAGCATATGCACCGCATGTTGC
GCAGTGAGTGGCATGGTGCAGCGGCGCAAAATTTTTGCTGAACCATCTTTGGCGCAATGT
TCCATGGCGATGATCACTTTGCGCGACCCGGTCACCAGATCCATCGCGCCACCCATACCG
GGCACCATTTTCCCAGGCACTACCCAGTTCGCGAGGTTTGCTTCTTCGTCTACTTGCAAA
CCGCCGAGCACGCAGGCATCAATATGACCGCCGCGGATTAGCGCAAATGACATGGCGCTA
TCAAACATGGCTGCACCGGGTAAAATACCGCACGGTTGTCCGCCAGCGTTCACCAGATCT
GGATGCGCTGTCGTGACCGGGCCTAAACCGAGGAAGCCGTTTTCCGATTGCAGAGTGATA
TGAATACCCTCCGGTAAATAATTGGCGACCATTGTGGGTAAACCGATCCCTAAGTTAACG
ATGTCACCATCACGAAGCTCTTGCGCCACACGGCGCGCAATACGTTGTTTCGCATCCATT
ATTTGCTCTCCTGTGAAACGATGATGTGGTCGATAACGGCACCAGGGGTGACAATATGGT
CAGGTTGCAGCTCGCCGGTTTCGACAAGTTCATCTGGCTCTACCAGCGTGATATCAGCCG
CAAGGGCTATCAGGGGGTTAAAGTTGCGGGCGCTAAGTTGATAGGTCAGGTTGCCAAGTG
TGTCGCAACGATGAGCGCGAATTAGCGCCAGGTCGGCGCGCAGTGGGCGTTCGAGCAGCC
AGGTTTTACCGTCGAGTGTCAGTGTCTGTTTGCCTTCCTCTACGACGGTGCCGACACCCG
TTGGGGTGAGAAAACCACCAAGTCCAGCTCCACCACAGCGAATTTGCTCGATTAGCGTAC
CTTGCGGCACCAGAACGACGTCCATCTCACCAGATATCATGCGCCGACCTGTTTCCGGGT
TGGTGCCGATATGTGAAGCAATCACTTTGCGGACTCGACCATTGACGATGAGCGGACCGA
TGCCGGTATCAACAAACGCGGTATCATTGGCTATCAATGTCAGGTCGCGAACACCAGATT
CCAGTAATGCTTCAACCAGGCGGGATGGAGTGCCAATCCCCATAAATCCGCCCACCATGA
TGGTCATGCCGTCACGAAAGAAGCCGGTGGCGTCTTGTAATGTCATCAATTTTGTTTTCA
TTTTTTATCCCTCTTGCATACACCGTTGTGGGTACAGTCAGGGAATAGCAAGGGGAGTGC
CAGAATGAGATTATTGGATGTTTTTATTTAACTAATTGAATAGAAAGGGATAAATTAGAT
GGGGATTCATAAGGAGAATGAGCTGCTATGCAGAAAATTGCGCACTGTGCAAATTTCTGC
ATAGCAAGTTTTGGTGTTATACATCCGCCGGATCGATACCGTATTCCTGGAGTTTATACA
TCAATGCACGGCGACTGATGCCCAGCATTAAAGCAGTGCGGGTTCGGTTTCCTTCTTGTT
GTTCCAGCACTTCCATAATGATGCGTTTTTCGACGCGTTTAATTTCCTCTTTTAAATTAC
GCTCTCCGACAGGGGCTGTTTTTACCTCGCCAGCATTACAGACTGGCTGACGAATCTGCG
GCGGAAGATCCTCAGAAAAAATGATCGGGCCTGAATTCATCACGACGGCGCGTTCAATAA
CGTTGGAAAGCTCTCGAATATTTCCCGGCCATGACCAGGCGGTAAGCAGTGACATTGCCA
TCGGATCGATGTCGATAATATCGCGCTGATTCTCACTACTGAATTTTTGCAAAAAGTGAT
TAGCTAACAGGGAAATATCTTCCCGGCGATCGCGCAGAGGCGGCAGTATTAAATGAATAA
CGTTAAGGCGATAAAAGAGATCTTCACGGAAGGTGCCTTCTTTTACCATTGCCTGCAAGT
CGCGGTTGGTGGCAGCAATGATGCGGATATCAACTTTTATGGTCTGATGGCCGCCAATCC
GTTCAAATTCCCGTTCCTGCAGAATGCGTAGTAATTTGGCTTGCAGTACCAGCGGCATTT
CGCCAATTTCGTCGAGGAGCAGAGTACCTTCGTTGGCACGTTCAAATAATCCCTGACGCA
AGGTTTGTGCACCAGTAAATGCACCTTTTTCATGACCAAACAGTTCACTTTCGAGCAACG
ATTCCGGCAGCGCCGCGCAGTTGACTTTAATGAACGGCCCCTTTGCCCGCCGCGAATTGT
AGTGAATCGCTCTGGCAATCAACTCTTTCCCGGTGCCGCTTTCACCGCTAATCAAGACGC
TGGCCTGAGAAAGGGCAATTTTGGCGGTGTCTTTGCAGATATCCATCATCGCCGGGCTGT
TGGTGAGAATGTGCCCCCATTGCCAGCTGGTGCTCAGTGCCTGGTGCAGATGACGGATCT
CTTTTTTCATTGACTGGAGTTGTAAAGCGCGCTGAACGATTAAATTCAACTCATCGAGAT
CAAACGGTTTAATAACATAGTCGAAGGCCCCGCAGCGTAGCGCTTCGACGGCGGTTTCCA
CTTCAGCATAGGCCGTCATCAGAATAACGGGTGTCCGGGTCTCATTACTGCGCATCTCCT
TTAGTGCCTTGATGCCGTCCATCTCTGGCATGCGGATATCCATCAACACCACGTCAGGGT
GAATATCAGCAAACAGGTGTAATGCTGTGCGTCCGTTGTTCGCACAATGTGTTTCGAAAC
CTTGTAGTGCAAAAGCGGTGCTCAGCATACGGCGAACATTATCTTCATCATCCACAATAA
GGATGCGATTAATAGCAGTCATACAGTCTGATTTCCCTGCGGGTTGATTGGTAAAATAAG
CGTGAAGGTTGCGCCGTAGCCCGGCAAACTGGCGACGCGAATATCACCCTGATGGGCATT
AATGATGCGTTGACTTAACGCCAGACCAAGCCCGGTTCCTGAGGCTTTGGTGGTGAAAAA
GGGATCGAAGATCTTTTTTTGCAGCGAGAGATCAATGCCACAGCCGTTGTCCTCTATCGA
AATGGCCTGTTGTGAGTCGCTGTATTGCCAGGTTTGAATGCGAATTTTCCCTCGTGCGCT
GATAGCCTGGACGGCATTGATCAGGATATTCAGTAGTACCTGTTTGAGCAGTTCACGATC
GGCGTTAATCGGGTTTAATTCATTATCCAGTTCGCTTATGAAGTCGACCCGCGCTTGTAC
GCCGGCGGTTTGTACCAGTACCAGAGTTTCTTCAACCAATGCATTGAGACTGACTTGTTG
CCATTGACTGTGGCGTGGACGTGAAAATTCGAGCAATTGCTGAATAACTTTGTTAATTGA
ATCGATTTCTTTGAGTACTACGGACAGATATTCCTGATGTATTAGGTCGCTGGTTTGTTG
GCGCAAGATCTGTACATAACCACGAATAGCCGTTAGCGGATTACGTACTTCATGCGCGAC
GCCAGCCATCAGCTCACCCAGTGTGGCGAGGCGTTCTGCTTGCGCCATGCGGCGCTGGGT
TTCTTTGCGGGCAGTTAAATCAGAGAAAATAACCAAAGCACCTATCATTTCACCATGCGT
GTTATGAATACGACTGGTAGTGACACTGAGTTCAATGGTGCGGTCACGGCCTGGAAAACT
GATCTCCAGCGCTACATGTTCGGTGCCATGTTCCAGCGTATCCAGTACTGGACTGTAGAA
CTGAGTATTGTCGAACAACATGGAGTAAGGCTGCCCTACCAGTTCATGACGTTGATAGCC
AGTGATGACTTCTGCTGCCGGGTTCATGGTGGTTACATCACCCTGGCGGTCAATGGCAAT
GACGCCATCGGCAGCGTTTTCAATAATCAGATCGTTAAGTGTCCGCGTTTCACGCAGTGC
CTGGGCGAGGTTGTTAACACTCTGACTGATTTGCCCCATTTCACCGGGCAATTGTGGTAA
TCGAGTGGGAATATTTTGTGCCAGAGTCGAGAGGCCATCGGTGATGATATCAATATTGGC
GCTCAGGCGACGGGAGAAAAGGACAATCAACAGCAGGCTTATCAGCAAACCGGCGGTGAG
CACAATGATAATCCTCACATCCATTTTCCAGGCCTGGCGGCGAATATCTTCGGTTAATTC
ATTGGCCCAGATATAGCCGAGAATTTCACCATTACGCTCAATGGGGATCATTGAATTCAA
AATATCGCCGCGCACCTGCCTGCCTGAATAAACCAAAGGGGTATTTGTACGCATGACTTC
GCGACCAGGGTGATCTGCGGCAATGGTAACGCCCACATTATTCTGATATAGCGCTGAAGG
CGCGTAGGTGATTATCGCATCCAGCGTTTTGTTGTAATAACCAGCGCCGATGCCAGGGAA
GGCGTGAGTGATATTTTCGGTAATGGGGGCAAGTTCTGCATTTAATGCGCGGATACGCTC
CTCACGTGGTAAGTCGATGTAGAGATCATAGCGATCGCCTAGTGCCTGATTAAGCAGGTT
GACCACGGCAGAAAGTTTTTTCTCTTTTTCAGATAAGACTGCTGAACGTCCTTCCGTTTC
TACGATATAACCAATAGTAAGCGTTGGGACAATGACCATCAGGATTGCCATCAGGATCAT
TTGATTGCGTAAGCGGCGTGGATAAATCCACTTCATATAATGCATGCTGAAATCCACTAG
TCTTGTCCGGTATATGACGATTATCAGAGGTTAAGGTGATGATTTCTCGGCGGTGTATCA
TATTCCAGAGAAGAGAGAACATTGCGGTAACACGCTTTTACCGCTACCTTAACCACACTC
CATCGGTCACCTGAGGCGGAGCTTCGCCCCTTTGAAATACCTTGCTTCTTTTCGTACAAC
CCTGAAAGCCTCGCGCTACATGTTCAGAGCATTGGCGTTAGTGCTCTGGCTGTTGATTGC
TTTTTCATCCGTTTTTTACATCGTTAATGCGTTACATCAGCGAGAATCGGAAATTCGTCA
GGAATTTAATCTGAGTTCCGATCAGGCTCAGCGCTTTATTCAACGCACCTCTGATGTGAT
GAAAGAGCTGAAGTACATCGCTGAAAATCGCTTATCGGCAGAAAACGGTGTGCTTTCCCC
GCGTGGACGAGAAACGCAGGCGGATGTGCCTGCGTTTGAACCGCTGTTTGCCGACTCCGA
TTGTTCCGCAATGAGTAACACCTGGCGAGGTTCTCTGGAGTCATTGGCGTGGTTTATGCG
CTACTGGCGCGATAATTTTTCTGCGGCTTACGATCTCAACCGGGTATTTTTAATCGGCAG
CGATAACCTCTGCATGGCCAATTTCGGTCTGCGTGATATGCCAGTGGAACGCGATACCGC
GTTGAAAGCTTTGCATGAACGCATCAATAAATATCGAAATGCACCACAAGATGATAGCGG
CAGTAACCTCTACTGGATCAGCGAAGGTCCGCGCCCTGGCGTCGGGTATTTTTACGCGTT
GACGCCAGTTTATCTGGCGAACCGGTTGCAGGCGCTTTTGGGTGTCGAGCAGACCATCCG
GATGGAGAACTTTTTCTTACCTGGTACGTTGCCGATGGGGGTTACCATTCTTGATGAAAA
TGGTCATACCCTGATTTCGCTTACCGGACCAGAAAGTAAAATTAAGGGCGATCCTCGCTG
GATGCAGGAACGCTCCTGGTTTGGCTATACGGAAGGGTTCCGGGAGCTGGTGCTGAAGAA
AAATCTGCCACCCTCATCGCTAAGCATCGTGTATTCGGTGCCGGTTGATAAGGTGCTGGA
ACGCATTCGCATGTTGATCCTTAACGCAATTTTGCTGAATGTGCTTGCTGGAGCTGCATT
GTTTACTCTCGCGCGGATGTACGAGCGGCGTATTTTCATTCCGGCGGAAAGCGACGCCCT
GAGACTGGAAGAACATGAGCAGTTTAACCGCAAGATTGTCGCCTCCGCGCCAGTGGGTAT
CTGTATTTTGCGTACCGCAGATGGCGTCAATATTTTAAGTAACGAACTGGCGCATACCTA
TCTCAATATGCTTACGCATGAGGATCGCCAACGGCTGACACAAATTATCTGTGGGCAGCA
GGTCAATTTTGTTGATGTCCTGACCAGCAACAATACCAATCTGCAAATCAGCTTCGTCCA
TTCGCGCTATCGTAATGAAAACGTGGCCATTTGTGTGCTGGTGGATGTTTCTTCGCGCGT
GAAGATGGAAGAGTCGTTGCAGGAGATGGCACAAGCAGCGGAACAGGCGAGCCAGTCAAA
ATCGATGTTCCTTGCCACCGTCAGTCATGAGCTGCGAACGCCGCTGTATGGCATTATCGG
TAACCTGGATCTGTTGCAAACCAAAGAGTTACCGAAAGGCGTCGATCGTCTGGTGACGGC
AATGAACAACTCTTCCAGCCTGTTGTTGAAAATTATCAGCGATATTCTCGATTTCTCGAA
GATTGAATCGGAACAGTTGAAGATCGAACCGCGTGAGTTTTCACCGCGTGAAGTGATGAA
CCACATCACCGCCAACTATTTACCGCTGGTGGTACGCAAGCAGTTAGGCTTGTACTGCTT
TATTGAACCGGATGTGCCAGTGGCCTTAAATGGCGACCCGATGCGTTTACAGCAGGTCAT
CTCCAATCTGTTGAGTAACGCCATAAAATTCACCGATACCGGCTGTATAGTTTTGCATGT
TCGCGCTGATGGCGATTATCTCTCTATCCGTGTTCGCGATACCGGCGTGGGGATTCCGGC
GAAAGAAGTGGTGCGCTTGTTTGATCCCTTCTTCCAGGTCGGAACGGGCGTACAGCGAAA
CTTCCAGGGGACCGGTCTGGGTCTGGCGATTTGTGAAAAACTGATCAGCATGATGGACGG
CGATATCTCGGTAGATTCAGAACCGGGAATGGGCAGCCAGTTTACCGTGCGTATTCCGTT
GTACGGCGCTCAGTACCCGCAGAAAAAAGGCGTGGAAGGGTTGAGTGGTAAACGCTGCTG
GCTGGCGGTCCGCAATGCGTCGCTCTGTCAGTTCCTGGAAACCAGTTTGCAGCGCAGCGG
CATCGTCGTAACAACATACGAAGGGCAGGAACCGACTCCCGAAGATGTGTTAATCACTGA
CGAGGTAGTGAGTAAAAAATGGCAGGGCAGAGCGGTAGTGACCTTCTGTCGTCGACATAT
TGGTATTCCGCTGGAGAAAGCGCCAGGGGAGTGGGTACACAGTGTGGCTGCCCCGCATGA
GCTACCGGCATTGTTGGCGCGTATTTATTTGATCGAGATGGAGAGCGACGATCCTGCTAA
CGCTCTGCCGTCGACGGACAAAGCGGTCAGCGATAATGACGATATGATGATTCTGGTCGT
GGATGATCATCCGATTAACCGACGTCTGCTGGCAGATCAGTTGGGATCGTTGGGCTATCA
ATGTAAAACCGCGAATGATGGCGTCGATGCGCTTAATGTACTTAGCAAGAATCATATTGA
TATCGTGCTTAGCGACGTCAACATGCCAAATATGGATGGTTACCGCTTGACGCAACGCAT
TCGTCAGTTGGGACTGACGTTGCCGGTAATCGGAGTAACTGCTAATGCGTTGGCTGAAGA
GAAGCAGCGGTGTCTGGAGTCCGGTATGGACAGCTGCCTGTCGAAGCCGGTAACGCTGGA
TGTAATAAAACAGACGCTGACGGTATATGCCGAGAGGGTCAGGAAATCGCGGGAATCGTA
GGACGGATAAGGCGTTTACGCCGCATCTGGCATTCAGTGCAAATGCCAGATGCGACGCTG
ACGCCTCTTATCTGGCCTACTTTAATGTAATCTGTTGAAATAATGGGAATCGTAGGCCGG
ATAAGGCGTTTACGCCGCATCCGGCAATCGGTGCAAATGCCAGATAAGACACTAACGCGT
CTTATCTGGCCTACAGATGATTAGTCTTTATCTGCCGGACTTAAGGTCACAGAAGAGAGA
TAATTCAGCAGGGCGATATCGTTCTCGACACCCAGCTTCATCATCGCAGATTTCTTCTGG
CTACTGATGGTTTTAATACTGCGGTTCAGCTTTTTAGCGATCTCGGTCACCAGGAAGCCT
TCCGCAAACAGGCGCAGAACTTCACTCTCTTTTGGCGAGAGACGCTTGTCACCGTAACCA
CCAGCACTGATTTTTTCCAACAGGCGAGAAACGCTTTCCGGGGTAAATTTCTTCCCTTTC
TGCAGCGCGGCGAGAGCTTTCGGCAGATCGGTCGGTGCACCTTGTTTCAGCACGATCCCT
TCGATATCCAGATCCAATACCGCACTAAGAATCGCCGGGTTGTTGTTCATAGTCAGAACA
ATGATCGACAGGCTTGGGAAATGGCGCTTGATGTACTTGATTAAGGTAATGCCATCGCCG
TACTTATCGCCAGGCATGGAGAGATCGGTAATCAACACATGCGCATCCAGTTTCGGCAGG
TTGTTGATCAGTGCTGTAGAGTCTTCAAATTCGCCGACAACATTCACCCACTCAATTTGC
TCAAGTGATTTGCGAATACCGAACAAGACTATCGGATGGTCATCGGCAATAATTACGTTC
ATATTGTTCATGTAATAGGCTACCTTGCTACAGCAAGCTCTTGACATAACTGTCAATGTC
GCTGATGTATTTTTCTATTCCTGGAACATCCTTCTCACGAATCAGATGTTCCAGCGTTTC
ACATAACTGCTTGCCGGGTACCAGATTTAGCATGGCAAATACGCCTTTAAGACGATGAGC
CGTTTGGGCTAACGCAGCAAAGTCACTGGTTGCTGCTTCAGTATACAGCCTCTTAACATC
ATCCGGTACTGTGTCTACAAAGAGCGCATAATAGCCGCTGGCATGGAGTTGCGCATTTTC
ATCTCCGCCCAGAGGCGATTCTGTCACCTCTTCCTGCGCCAGTTGCACTTCAATTAATTG
TAAGACCGCTTCCTGCATAGCGTTGCTCATATTGAAGTTGACGCACAATTGACCAGGCCC
AATTTCCCGTACGCCAGACTCATCATCGCTTAAAAGCAAGCCAGAGGCAGTAAGATTAGA
CGGATTATCCGTTAAAAAGATATCATAATCTTGACTAATTAATCTTTCATCGGGTGTGAT
ACAGGTTGCACCCCAATTTTCTAACTGGCGAGTGACAATATTCCGAATTTCTGCCGAAGT
AACATCCACCATTACGCAGACATCATCCAGTAAACGCTCTTCTTCCTCTTCAACTTCCGG
GTCAGCTGCGAGCATTTTGATATGCACAGAGTAGCGTGTACCAAGCCCATCCCGCGTTTT
GATGTTTAAATGACCGCCCAGTTTACGTGCCAGTTGATCGCTCAGCCAGAATGCCAGCGG
GTCCGCCTTGCCATAGCGATCGTTTTGGGTCTGGTTGATAAACGGGAAGTGCAAATTATC
CATTTCATGAATGCTTACGCCTTCTCCGGTGTCCAGAATGCGGAACGTCAGGCGGTCTTC
GGAGGACTCATCCTGATCAACCTCAAGGGTGATTTTTCCCAATTGCGTTGAGGTCACGGC
ATATTGCATCAGTAGCAGCAAAATACGTCGTAAGGCATCGCGATCGCCACGGCGCATATC
GTGTGCTTTCAGATGATTGTTAATCAGCAGTTGCAGACCTTTACGCTTGATGGCAGGCAA
CACTGAAGGCACAACTTCATCAATTAAATCCTGCACGGAGAACAGCACCGTCTCACTTTT
CCAGCTATCGTCCGCAAGCATGTTCGCTAACTGTATTTCATCGACCAGCCGCACCAGCAC
ATCTGCCTGATTCGCCAGTTGTTTGCTTTCCGGGGCGTTGAGTTTAGCCGCGCTCTCCGC
CAGGGACTGTGCAGGTTCTTTCAGCGCATCGCCAATGTTTTTCATAAAGGTCATCCGCCC
CTGCTGGTTTTTCTCATACAGACGCTGCGCCTGCTTGAGTTTCTTGTTTACCAGCACTTC
GCGATCCTGATCGCGAATAATGAAAATTTGTGTGCGCGGCGCGACCTGGCTGCGGAACAT
GCGGATCTCATACAGCTCGTTATTGATCGTCGCCTGAATAATCCCCTGATGCTGTTCCGC
CATGGTGGTGATGTTTTGCAGATTCAAATGCGGCAGCAAATGATCGGCAATTTTGTTACT
TATGACAGTGCGGTTCGATTCCTGATCGTGAACCAGCAGGCCGAGCGGCAGCAGTGAGAC
TATCTCTTCATTGATTGCCCGTAAAATGCGCAATTCGTTATTGACCGCCGTGTTGGGTAG
ACTTTCTGTACTGCGACTGGAGAAATGGCGAAATGTGGTATAGCCAAATAACGCCAGCGC
CAGCAAACCGATGTTCAGCAGCAGTGGCAGCAGAATGTTTTGCAACGTATCCAGCAATAA
GGTGCCATAAGGAACCTGCCAGACCAGGCGCATATCAGTAGAGTTGAGTGCCGAGGAGAT
TTCAATCTTCGTACTGTTAAAGTGGATACTGACGCTATCCGTCCCTTCTTTCTCATTATC
ATTGTTTCCCGTTGCCGTCGCGTCTGGCTCAAGGCGGAAACTGTCCAGCGGCATACCCGG
TGGGATCAAATCATTAATCGGCAGATCAAAAGCCACGACCGTTGCCAGATGTCCTGGCTG
GTTAAAGGTAGTACGCAAGGTAAAGTAATGACCGTTCTGCCAGGCCAGGCGGCGCATGTT
AGAAAAACTTTCGCGTTCATCGAGGGCGTTGGCCTGTTGCAACATCTCTGCACGACGTGA
ATCAACAATGTCACTGACGGTCGATTCTTTAAATCCGGAGGTGAGATCTTTGAGGGGCAG
GGTTGAGATCAGTACCAGACTGTTATCCTGACCATTCAGGTAATACATTGACCACGGTAC
ATTTTCTGCGCCCCACAATGTATCCAGATAAGTGGACATCCGTTGAGTCATCTCAAGCGT
TGAGTTGTCGTGAGAGCCAAAGATTAACGCTTCCGTTTTGCGGCGCGGTTTTTCCAGATA
GTAGACATCCTGTTTCAGGCGCGTCTCTTGTAAACCTTCGCCGGAGGAGGGGGAGGTCGT
CGCGGCAATGTTGTCGTAGATCTGCCAGGTCACGTAACGCCAGGTATCGACGCGCTTTTG
GATTGCGTGGGTAATGTCGACAATCTGGTAACTTTTATCTTTCAGCCAGGCGTTAACGGC
GCTTTGTACCATTACACCCATCGTCACCAGTAACACAATGATCAACAGTAAAAAGAAGCG
GGTAATGCTCCCGGGTAGGAGTGAAAAGCGGGTCGTGGCCGTTGTCTCTTTCTGACGCAT
TCGTGTTTATGACCTGTTAAAACTTCGCGAAGTGATAGGGCAGTATAAAGGGTACAGTGT
GAAATTCCAGACTCTTACCTGATTGATGATTCTCTATTCTCCTGTGATATTTATCATCCT
GTATGGGGGGAAATAGATGTACAAGCGCCATTTTGCTGTACAAATAACCTACGAAAAGCC
CAACGAAATTAATTGCAAATAAACGAAAATTGCTGGAAATTATGCTGATGTTAATTATTT
GTGAAATAGTTAACAAGCGTTATAGTTTTTCTCTGGTAGCACAGAATAATGAAAAGTGTG
TAAAGAAGGGTAAAAAAAACCGGATGCGAGGCATCCGGTTGAAATAGGGGTAAACAGACA
TTCAGAAATGAATGACGGTAATAAATAAAGTTAATGATGATAGCGGGAGTTATTCTAGTT
GCGAGTGAAGGTTTTGTTTTGACATTCAGTGCTGTCAAATACTTAAGAATAAGTTATTGA
TTTTAACCTTGAATTATTATTGCTTGATGTTAGGTGCTTATTTCGCCATTCCGCAATAAT
CTTAAAAAGTTCCCTTGCATTTACATTTTGAAACATCTATAGCGATAAATGAAACATCTT
AAAAGTTTTAGTATCATATTCGTGTTGGATTATTCTGCATTTTTGGGGAGAATGGACTTG
CCGACTGATTAATGAGGGTTAATCAGTATGCAGTGGCATAAAAAAGCAAATAAAGGCATA
TAACAGAGGGTTAATAACATGAAAGTTAAAGTACTGTCCCTCCTGGTCCCAGCTCTGCTG
GTAGCAGGCGCAGCAAACGCTGCTGAAGTTTACAACAAAGACGGCAACAAATTAGATCTG
TACGGTAAAGTAGACGGCCTGCACTATTTCTCTGACAACAAGTCAGAAGACGGCGACCAG
ACCTATGTACGTCTTGGTTTCAAAGGCGAAACTCAGGTTACTGACCAGCTGACCGGTTAC
GGCCAGTGGGAATATCAGATCCAGGGCAATACCTCTGAAGACAACAAAGAAAACTCCTGG
ACCCGTGTGGCATTCGCAGGTCTGAAATTCCAGGATGTTGGTTCTTTCGACTACGGTCGT
AACTACGGCGTTGTTTACGACGTAACTTCCTGGACCGACGTACTGCCAGAATTCGGTGGT
GACACTTACGGTTCTGACAACTTCATGCAGCAGCGTGGTAACGGCTTCGCGACCTACCGT
AACACTGACTTCTTCGGGCTGGTTGATGGCCTGAACTTTGCTGTTCAGTACCAGGGCAAA
AATGGTAGCGTAAGCGGCGAAGGCATGACCAACAATGGTCGTGGTGCTCTGCGTCAGAAT
GGCGACGGTGTCGGCGGATCTATCACTTATGATTACGAAGGCTTCGGTATCGGTGCTGCA
GTTTCCAGCTCCAAACGTACTGATGCTCAGAACACCGCTGCTTACATCGGTAACGGCGAC
CGTGCTGAAACCTACACTGGTGGTCTGAAATACGATGCTAACAACATCTACCTGGCTGCT
CAGTACACCCAGACCTACAACGCAACTCGCGTAGGTTCCCTGGGTTGGGCGAACAAAGCA
CAGAACTTCGAAGCTGTTGCTCAGTACCAGTTCGACTTCGGTCTGCGCCCGTCTGTAGCA
TACCTGCAGTCTAAAGGTAAAAACCTGGGCACCATCGGTACTCGTAACTACGACGACGAA
GATATCCTGAAATATGTTGATGTTGGTGCAACCTACTACTTCAACAAAAACATGTCCACC
TACGTTGACTACAAAATCAACCTGCTGGACGACAACCAGTTCACTCGTGACGCTGGCATC
AACACTGATAACATCGTAGCTCTGGGTCTGGTTTACCAGTTCTAATCTCGATTGATATCG
AACAAAGGGCCTGCGGGCCCTTTTTTCATTGTTTTCAGCGTACAAACTCAGTTTTTTGGT
GTACTCTTGCGACCGTTCGCATGAGGATAATCACGTATGGAAATAAGCTTTACCCGCGTG
GCACTGCTGGCTGCCGCGCTCTTCTTTGTTGGTTGCGATCAAAAACCACAACCCGCCAAA
ACCCACGCTACTGAAGTTACCGTTCTTGAAGGCAAAACCATGGGTACCTTCTGGCGTGCC
AGCATCCCGGGCATTGATGCCAAACGCAGTGCCGAACTTAAAGAAAAGATTCAGACCCAG
CTGGACGCCGACGATCAGCTGCTTTCGACCTATAAAAAAGATTCCGCGCTGATGCGCTTT
AACGACTCGCAAAGTTTGTCGCCGTGGCCGGTAAGTGAAGCGATGGCCGATATCGTCACC
ACCTCGCTGCGCATTGGCGCAAGGACCGATGGTGCGATGGATATAACCGTCGGGCCGCTG
GTGAATCTGTGGGGCTTTGGCCCGGAACAACAGCCGGTTCAAATTCCGAGCCAGGAACAG
ATCGATGCGATGAAAGCCAAAACCGGCTTACAGCACCTGACGGTCATTAATCAGTCGCAT
CAGCAATATCTGCAAAAAGACCTGCCGGATTTATATGTCGATCTCTCCACCGTCGGTGAA
GGTTATGCGGCGGATCACCTGGCACGCTTGATGGAGCAGGAAGGGATTTCCCGCTATCTG
GTGTCGGTGGGCGGCGCGCTGAACAGCCGTGGTATGAACGGTGAAGGCCTGCCGTGGCGG
GTAGCGATTCAAAAACCAACCGATAAAGAAAACGCGGTTCAGGCTGTGGTGGATATCAAC
GGTCATGGGATTAGCACCTCTGGCAGCTACCGTAACTATTACGAATTGGACGGCAAACGT
CTTTCCCATGTTATCGATCCGCAAACCGGGCGTCCCATCGAACACAATCTGGTATCCGTG
ACGGTGATTGCTCCGACGGCGCTGGAAGCCGATGCCTGGGATACTGGCTTGATGGTACTC
GGGCCGGAGAAAGCCAAAGAGGTTGTTCGCCGGGAAGGGCTGGCGGTTTATATGATCACC
AAAGAAGGCGATAGCTTTAAAACCTGGATGTCACCACAGTTTAAAAGCTTCCTTGTCAGC
GAAAAAAATTAAAGCGCAAGATTGTTGGTTTTTGCGTGATGGTGACCGGGCAGACTAAAG
GCTATCCTTAACCAGGGAGCTGATTATGAAAAACGCCACATGCTTAACTGACGATCAACG
CTGGCAATCTGTCTTAGCCCGCGACCCGAATGCCGACGGCGAATTCGTTTTCGCCGTGCG
CACCACAGGCATCTTTTGCCGTCCGTCTTGCCGCGCCAGACATGCCTTGCGGGAAAATGT
CTCCTTCTACGCAAATGCCAGCGAGGCACTCGCCGCCGGATTTCGCCCCTGCAAACGCTG
CCAACCTGATAAAGCCAATGCCCAGCAACATCGGTTGGATAAAATCACCCACGCGTGTCG
ACTGCTGGAACAGGAAACGCCTGTAACGTTGGAAGCCTTAGCTGACCAGGTGGCGATGAG
TCCATTTCATCTACATCGGTTGTTTAAAGCGACTACCGGAATGACGCCTAAAGCCTGGCA
ACAGGCCTGGCGCGCTCGCCGTTTGCGCGAATCGCTGGCGAAAGGGGAGAGCGTGACGAC
GTCTATTCTTAACGCCGGATTCCCCGACAGCAGCAGTTACTACCGCAAAGCTGACGAAAC
GCTGGGCATGACGGCTAAACAATTCCGTCACGGTGGCGAAAATCTGGCGGTGCGTTACGC
GCTGGCTGATTGTGAGCTGGGTCGTTGCCTGGTGGCAGAAAGCGAGCGGGGGATTTGCGC
GATATTGCTGGGCGATGATGACGCGACATTAATCAGCGAGTTGCAGCAGATGTTTCCCGC
TGCCGACAACGCGCCTGCCGATCTGATGTTTCAGCAACATGTGCGTGAAGTGATCGCCAG
CCTCAATCAACGCGATACGCCGCTGACGTTACCGCTGGATATTCGCGGCACTGCTTTTCA
GCAACAAGTCTGGCAGGCACTGCGCACGATACCTTGCGGTGAAACCGTCAGTTATCAGCA
ACTGGCTAACGCCATCGGCAAACCGAAAGCGGTACGGGCCGTTGCAAGTGCCTGTGCCGC
CAACAAGCTGGCTATCGTTATACCCTGTCATCGGGTAGTACGCGGTGATGGATCGCTTTC
AGGTTACCGCTGGGGCGCGTCGCGCAAAGCGCAACTGCTGCGCCGCGAAGCTGAGAATGA
GGAGAGGTAATGTTGGATCTGTTTGCCGATGCTGAACCGTGGCAAGAGCCACTGGCGGCT
GGTGCGGTAATTTTACGGCGTTTTGCTTTTAATGCTGCGGAGCAACTGATCCGCGATATT
AATGACGTTGCCAGCCAGTCGCCGTTTCGCCAGATGGTCACCCCCGGGGGATATACCATG
TCGGTGGCGATGACCAACTGTGGGCATCTGGGCTGGACGACCCATCGGCAAGGTTATCTC
TATTCGCCCATTGATCCGCAAACAAATAAACCGTGGCCCGCCATGCCGCAGAGTTTTCAT
AATTTATGTCAACGTGCGGCTACGGCGGCGGGCTATCCAGATTTCCAGCCAGATGCTTGT
CTTATCAACCGCTACGCTCCTGGCGCGAAACTGTCGCTGCATCAGGATAAAGACGAACCG
GATCTGCGCGCGCCAATTGTTTCTGTTTCTCTGGGCTTACCCGCTATTTTTCAATTTGGC
GGCCTGAAACGAAATGATCCGCTAAAACGATTGTTGTTGGAACATGGCGATGTGGTGGTA
TGGGGCGGTGAATCGCGGCTGTTTTATCACGGCATTCAACCGCTGAAAGCGGGGTTTCAT
CCACTCACCGGCGACTGCCGTTACAACCTGACATTCCGTCAGGCAGGTAAAAAAGAATAA
AAATAAGAATTATTATTGCTGTGCGCGCGAAGATGTTTAAACTGCGGGCTGTAATTCATT
GTCCGGGTTTTCTGCATGGAACTTCTTGTACTTGTCTGGCGGCAGTATCGCTGGCCATTT
ATCAGTGTGATGGCGCTAAGCCTCGCCAGTGCGGCTTTAGGCATTGGCTTAATTGCTTTT
ATCAATCAGCGCCTTATCGAAACGGCGGATACCAGTCTGCTGGTGTTGCCGGAGTTTCTG
GGATTATTGCTGCTGTTGATGGCAGTCACTCTCGGATCGCAACTGGCGCTCACCACTTTG
GGGCATCACTTCGTTTACCGACTGCGTAGTGAATTTATCAAGCGGATTCTGGATACCCAC
GTCGAGCGCATTGAACAACTCGGTAGCGCCTCGTTGCTGGCGGGATTAACCAGCGATGTG
CGCAATATCACCATTGCTTTTGTGCGTCTGCCGGAACTGGTGCAGGGGATCATTCTCACT
ATCGGTTCCGCGGCGTATCTGTGGATGCTGTCGGGCAAAATGTTGCTGGTAACGGCTATC
TGGATGGCAGTCACCATCTGGGGCGGTTTTGTGCTGGTGGCGCGGGTGTACAAACATATG
GCGACCCTGCGTGAAACCGAAGACAAGCTGTACACGGATTTTCAAACCGTACTCGAAGGG
CGCAAAGAGCTGACTCTGAACCGGGAACGCGCCGAGTATGTGTTTAACAACCTCTACATT
CCTGATGCGCAAGAGTATCGCCATCATATTATTCGCGCAGACACCTTCCATCTTAGTGCC
GTGAACTGGTCAAACATCATGATGCTGGGCGCAATCGGTCTGGTGTTCTGGATGGCGAAC
AGTCTCGGTTGGGCTGATACCAACGTTGCCGCGACCTATTCGTTGACGTTGTTATTCCTG
CGTACGCCGCTGCTTTCGGCGGTTGGCGCATTGCCGACGCTGCTGACGGCGCAGGTGGCG
TTTAACAAGCTGAACAAATTCGCGCTCGCGCCTTTCAAAGCAGAGTTTCCGCGCCCGCAG
GCGTTTCCCAACTGGCAAACGCTGGAGCTGCGTAACGTGATGTTTGCTTATCAGGATAAC
GCGTTTTCCGTTGGTCCGATTAATCTCACCATCAAACGTGGCGAGCTGCTGTTTCTGATT
GGCGGCAACGGTAGCGGAAAATCGACGCTGGCGATGTTGTTGACGGGCTTGTATCAGCCA
CAAAGCGGCGAAATCTTGCTGGATGGCAAACCTGTCAGCGGCGAACAACCGGAAGATTAT
CGCAAACTGTTTTCGGCAGTGTTTACCGATGTCTGGCTGTTTGATCAACTGCTGGGGCCG
GAGGGTAAACCCGCTAACCCGCAACTGGTTGAGAAGTGGCTGGCGCAGCTGAAAATGGCT
CATAAGCTTGAGTTAAGCAACGGGCGTATTGTTAACCTGAAGTTATCAAAAGGGCAGAAA
AAACGCGTGGCGCTGTTGCTGGCGCTGGCAGAAGAACGCGATATTATCCTGCTGGATGAA
TGGGCGGCGGATCAGGATCCACACTTCCGTCGTGAGTTTTATCAGGTGTTGCTGCCGCTG
ATGCAGGAGATGGGTAAAACTATTTTCGCCATCAGTCATGATGATCATTACTTTATCCAC
GCCGACCGCCTGCTGGAGATGCGCAACGGGCAACTTAGCGAGCTGACGGGCGAAGAGCGC
GATGCCGCTTCGCGTGATGCCGTTGCCCGGACGGCATAATATTACGACGCTGACCTGGCG
GACTGCTGCCGCCAGGTCAATATGCTAAAAATCCCTTCATTTCTAATAACCCTATAATTA
ATCAACGAAATTATAATGTTTCTAAAATTAGAATATAATTTATAAACATTATTTAAATGT
TGTTACTTAAGTGTTACCGTTGATGCCGCGCAAATCTCACCTGCAATAAAGCGACTAAAA
GTAAGGCATTAACAAGATGAAAAAAGTGACTGCCATGCTCTTCTCGATGGCCGTGGGGCT
TAATGCCGTTTCGATGGCGGCAAAAGCGAAAGCGTCCGAGGAGCAGGAAACTGATGTACT
GTTGATTGGCGGCGGCATTATGAGCGCCACGTTGGGGACCTATTTACGCGAGCTGGAGCC
TGAATGGTCGATGACCATGGTGGAGCGCCTGGAGGGTGTCGCGCAGGAGAGTTCGAACGG
CTGGAATAACGCCGGAACCGGGCATTCTGCACTGATGGAACTGAACTACACCCCGCAAAA
CGCCGATGGCAGCATCAGTATTGAAAAAGCAGTCGCCATTAACGAAGCATTTCAGATTTC
CCGCCAGTTCTGGGCGCACCAGGTCGAGCGCGGCGTGCTGCGTACTCCGCGTTCATTTAT
CAATACCGTTCCGCATATGAGCTTTGTCTGGGGCGAGGATAACGTTAATTTCCTGCGCGC
CCGTTACGCCGCGTTGCAACAAAGCTCGCTGTTTCGCGGTATGCGTTACTCTGAAGATCA
CGCGCAGATCAAAGAGTGGGCACCGTTAGTGATGGAAGGGCGCGATCCGCAACAGAAAGT
GGCAGCCACGCGTACGGAAATTGGTACCGATGTGAACTACGGCGAGATCACCCGCCAGTT
AATTGCTTCCTTGCAGAAGAAATCTAACTTCTCGCTGCAACTCAGCAGCGAAGTCCGCGC
CCTAAAGCGTAATGACGATAACACCTGGACCGTTACCGTTGCCGATCTGAAAAATGGCAC
TGCACAGAACATCCGTGCGAAATTTGTCTTTATCGGCGCGGGCGGTGCGGCACTGAAGCT
GTTACAGGAATCGGGGATTCCGGAAGCGAAAGACTACGCCGGTTTCCCGGTGGGCGGTCA
GTTCCTTGTTTCGGAAAACCCGGACGTGGTTAATCACCATCTGGCGAAGGTTTACGGTAA
AGCATCCGTTGGCGCACCACCGATGTCGGTTCCGCATATCGATACCCGTGTTCTGGACGG
TAAACGCGTAGTGCTGTTTGGGCCATTTGCCACCTTCTCAACCAAATTCCTCAAAAACGG
TTCATTGTGGGATCTGATGAGTTCCACCACCACCTCTAACGTGATGCCGATGATGCACGT
CGGGCTGGATAATTTCGATCTGGTGAAATATCTGGTGAGTCAGGTGATGTTGAGTGAAGA
GGATCGTTTTGAAGCGTTGAAAGAGTACTATCCGCAAGCGAAAAAAGAGGACTGGCGTTT
GTGGCAAGCGGGGCAGCGTGTGCAGATTATCAAGCGTGATGCCGATAAAGGTGGTGTACT
GCGTCTGGGTACTGAAGTGGTCAGTGACCAGCAAGGAACCATTGCCGCGCTCCTGGGGGC
ATCGCCAGGGGCGTCAACCGCCGCGCCGATTATGTTGAATCTGCTGGAAAAAGTATTTGG
CGATCGCGTTTCCAGCCCGCAATGGCAGGCTACGTTGAAAGCGATCGTTCCGTCTTATGG
ACGCAAGCTGAACGGTGATGTAGCGGCAACAGAACGCGAGTTGCAGTACACCAGCGAAGT
GCTGGGGCTGAAATACGACAAACCGCAAGCAGCAGATAGTACGCCGAAACCGCAGCTGAA
ACCGCAACCCGTTCAAAAAGAAGTGGCGGATATTGCGTTGTAATGATGTGCCACATCCGG
CATGGTATGCCGGATGTGGCGTATGCTGATAAGACGCGCCAGCGTCGCATCAGGCAACCG
GCTCGGGCGTTAGATGTTGGATGCGGCGTAACCGCCTTATCCAACCTACGGGGTGGAGCA
CTTCACAGCGGTGTAGGCCTGATAAGACGCGTCAGCGTCGCATCAGGCAACCGGCTCGGA
CGTTGGATGTTGGATGCGGCGTAACCGCCTTATCCGACCTACGGGGTGGAGCACTTCACA
GCGGTGTAGGCCTGATAAGACGCGCCAGCGTCGCATCAGGCAACCGGCTCGGGCGTTAGA
TGTCGGATGCGGCGTGACCGCTTTATCCAACCTACGGGGTGCCGCACTTCACGGCAGTTT
AGCGAACTACCGCGTTGTCAATCTTCTCTTCCGCCTTCCAGACGCGGTACTTCACATCTA
CATTGTCTGGCGTATACACCACGATCGGCAGCTTGCTGTTGTAACGCAGCATTCCAGCAT
CACCCAGATACGCGGTGACAAATTTCTTCTCTTTTTTGCCATCCGGGCAGGCCATCATCG
TCGAAACCGGGGAACTGACTTTATCAAAGACATAATAATCATAGCCCCAGCCTTCCAGCG
TTTTGCTTTCCAGCTTCCCGCCGAGACGATGCAAATTGCAATCGACTTCCAGCGTCTGAC
CGATTAACAGTTCTACTTTCAGGGTAGATTCCTCTTCTTGCGGGGTTAACTGAATCACCT
GACGCTTCATGCCTTTTTCAGCTTGTGGATAAGGCGCGATTTTTTCCAGTGGCTGGACGC
TCTCTGCCGCCCAGGCGGAAGTGGTGGCGAAAGCGGCAAACAATACTGCAGGTAGAATGG
TCTTCATTTTTTGCTTTCCTTCTTCATTTATAGGTTTGCACCGATGATGTCGCTGAAGGT
TAACATATTCATCAGATTTATTAATTTGCTTTATGAATAACTTAAAGAATATTCAGACAA
TTTTACCTGCTCTTTTAGTGTTAAATTCTGATGAGAGAGCAAACCAGCAGAAATATCTCT
GGTGAATTAATCGCTATATAAATATATTTATAACCATTTGAAATGTGAGCAAAAGCCCGT
TTTTGCCACGCTTCCCGCCACTCTTTTGATCCTGCTACAGGTTTTACCTCGATCGGGGTA
TGCATCTTTGACACATCCTTTAATATCTTAGCGGCTATAAAAATGGCTTATTAATTATGC
GGTTTATTTGGTCGCTCTCAATTTTCAGAGCGCGTTAATGATGGAAGGTCAATGTGAAGA
TTGATGCATCCCGTCGGGGCATACTCACTGGTCGCTGGCGCAAAGCCAGTAACGGTATCC
GTCCGCCCTGGTCCGGTGATGAATCTCATTTTCTGACCCATTGCACCCGCTGCGACGCTT
GTATTAATGCTTGTGAAAACAACATTCTGCAACGCGGCGCGGGCGGCTATCCGAGCGTTA
ATTTCAAAAATAACGAGTGCAGCTTCTGTTACGCCTGCGCGCAGGCTTGCCCCGAATCGC
TATTTTCTCCGCGCCACACCAGGGCCTGGGATTTGCAGTTCACCATTGGGGACGCGTGCC
TGGCGTATCTGTCAGTTGAATGCCGCCGCTGTCAGGATAGCTGTGAGCCAATGGCAATTA
TCTTTCGCCCGACGCTCTCCGGGATCTACCAGCCGCAACTTAATAGCCAACTTTGCAACG
GATGTGGAGCATGTGCAGCCAGCTGTCCGGTATCAGCCATAACTGCGGAGTATCTCCATG
CACACTAACTGGCAAGTTTGCAGCCTGGTCGTGCAGGCCAAAAGCGAACGAATTTCAGAC
ATCAGCACCCAACTGAACGCCTTTCCCGGCTGTGAAGTTGCTGTCAGCGACGCGCCGAGC
GGTCAGTTGATTGTGGTGGTGGAAGCAGAAGACAGCGAAACGCTGATCCAAACCATTGAG
TCAGTACGCAACGTAGAGGGCGTGCTGGCGGTGTCGCTGGTTTATCACCAGCAGGAAGAG
CAAGGTGAGGAAACACCATGAAACTCAGTCGTCGTAGCTTTATGAAAGCTAACGCCGTTG
CGGCCGCTGCGGCGGCTGCCGGTCTCAGCGTGCCGGGCGTTGCCCGCGCCGTTGTTGGTC
AGCAGGAAGCCATCAAATGGGATAAAGCGCCGTGCCGTTTCTGCGGTACTGGTTGCGGCG
TTCTGGTCGGAACGCAGCAGGGGCGTGTGGTGGCCTGTCAGGGCGACCCGGACGCACCGG
TTAACCGTGGCCTGAACTGCATTAAGGGCTATTTCCTGCCCAAGATCATGTACGGTAAAG
ACCGTTTGACGCAGCCGCTGCTGCGTATGAAAAACGGTAAATATGACAAAGAAGGCGAAT
TTACCCCAATCACCTGGGATCAGGCCTTCGATGTGATGGAAGAGAAATTCAAAACCGCCC
TGAAAGAAAAAGGGCCGGAATCGATCGGTATGTTCGGTTCTGGTCAGTGGACTATCTGGG
AAGGTTATGCCGCGTCCAAGCTGTTTAAAGCGGGCTTCCGTTCGAACAACATCGACCCGA
ACGCGCGTCACTGTATGGCGTCGGCAGTAGTTGGCTTTATGCGTACCTTTGGTATGGATG
AGCCGATGGGCTGCTATGACGACATCGAGCAGGCTGACGCGTTTGTGCTGTGGGGCGCAA
ACATGGCGGAAATGCACCCGATCCTCTGGTCGCGCATCACTAACCGTCGTCTCTCTAACC
AGAACGTCACCGTGGCGGTGCTTTCTACCTACCAGCATCGTAGCTTCGAGCTGGCGGATA
ACGGCATCATCTTTACTCCGCAATCTGACCTGGTGATCCTGAACTACATCGCCAACTATA
TCATTCAAAACAATGCGATAAATCAGGACTTCTTCAGCAAGCACGTCAACCTGCGCAAAG
GTGCGACGGACATCGGCTACGGTTTACGTCCGACCCATCCGCTGGAAAAAGCAGCGAAGA
ATCCGGGTTCTGATGCTTCCGAACCGATGAGCTTTGAAGATTACAAAGCCTTCGTTGCTG
AGTATACGCTGGAAAAAACCGCTGAAATGACCGGCGTGCCGAAAGACCAGTTAGAACAAC
TGGCGCAGCTGTATGCCGATCCGAACAAGAAAGTCATCTCCTACTGGACGATGGGCTTCA
ACCAGCATACCCGTGGTGTGTGGGCCAACAACCTGGTCTACAACCTGCACCTGCTGACCG
GCAAAATTTCCCAGCCGGGTTGCGGTCCGTTCTCCCTGACCGGGCAGCCTTCCGCGTGTG
GTACTGCGCGTGAAGTGGGCACCTTTGCCCACCGTCTGCCTGCGGACATGGTGGTGACTA
ACGAGAAACACCGTGATATCTGCGAGAAGAAGTGGAATATCCCGAGCGGCACCATTCCGG
CGAAAATCGGTCTGCACGCGGTGGCACAAGACCGTGCGCTGAAAGACGGCAAGCTGAATG
TTTACTGGACTATGTGTACCAACAACATGCAGGCCGGGCCGAACATCAATGAAGAGCGTA
TGCCGGGCTGGCGCGATCCGCGCAACTTCATCATCGTCTCCGATCCGTATCCGACAGTCA
GTGCGCTGGCCGCCGACTTGATCCTGCCGACCGCAATGTGGGTAGAGAAAGAGGGCGCTT
ACGGTAACGCCGAACGCCGTACTCAGTTCTGGCGTCAGCAGGTACAGGCACCGGGCGAAG
CGAAATCGGATCTCTGGCAGTTAGTCCAGTTCTCCCGCCGCTTCAAAACTGAAGAAGTAT
GGCCGGAAGAGCTGCTGGCGAAGAAACCGGAACTGCGTGGCAAAACGCTGTACGAAGTTC
TGTATGCCACCCCCGAAGTGAGCAAATTCCCGGTATCCGAACTGGCGGAAGATCAGCTGA
ACGATGAATCCCGCGAGCTGGGCTTCTATCTGCAAAAAGGGTTGTTCGAAGAGTACGCAT
GGTTTGGTCGCGGTCACGGTCACGATCTCGCGCCGTTCGATGACTACCACAAAGCGCGCG
GTCTGCGCTGGCCGGTGGTGAACGGTAAAGAAACGCAGTGGCGTTACAGCGAAGGTAACG
ACCCGTACGTGAAAGCGGGCGAAGGCTATAAGTTCTACGGTAAACCGGATGGTAAAGCGG
TGATCTTCGCGCTGCCGTTCGAACCGGCGGCGGAAGCACCGGATGAAGAGTACGACCTGT
GGCTCTCTACCGGACGCGTCCTGGAGCACTGGCACACCGGCAGTATGACTCGCCGTGTGC
CGGAACTGCACCGTGCCTTCCCGGAAGCGGTCCTGTTTATTCACCCGTTGGATGCGAAAG
CGCGCGATCTGCGCCGTGGCGACAAAGTGAAAGTGGTTTCTCGCCGTGGCGAAGTGATCT
CGATTGTCGAAACGCGCGGTCGTAACCGTCCGCCGCAGGGCCTGGTGTACATGCCGTTCT
TCGACGCCGCACAGCTGGTTAACAAACTAACGCTGGACGCGACCGATCCGCTCTCGAAAG
AGACGGACTTCAAGAAGTGCGCGGTCAAACTGGAGAAGGTGTAAGCCATTATGTCCCGGT
CAGCGAAACCTCAAAATGGTCGCCGCCGCTTTCTGCGCGATGTCGTTCGCACAGCAGGCG
GGCTGGCTGCCGTGGGTGTGGCGCTGGGGTTACAACAGCAAACCGCACGCGCATCTGGCG
TGCGGTTGCGCCCGCCCGGAGCCATAAACGAGAACGCCTTTGCCAGTGCCTGTGTGCGTT
GCGGTCAGTGTGTTCAGGCTTGCCCTTACGACACCTTAAAACTGGCGACGCTGGCCTCTG
GCCTGTCGGCGGGCACGCCATATTTTGTCGCACGGGATATTCCTTGCGAAATGTGTGAGG
GCATTCCGTGCGCCAAAGTGTGCCCGAGCGGTGCGCTGGATCGTGAGATTGAATCGATCG
ACGACGCGCGGATGGGGCTGGCGGTACTGGTGGACCAGGAAAACTGTCTCAACTTTCAGG
GGCTGCGCTGCGATGTTTGTTATCGCGAATGCCCGAAAATTGATGAGGCCATCACCCTGG
AGCTGGAGCGCAACACGCGTACCGGTAAGCACGCCCGCTTTCTGCCGACGGTTCACAGCG
ACGCCTGTACCGGTTGCGGTAAGTGCGAAAAAGTGTGCGTGCTGGAACAACCGGCAATCA
AGGTGTTACCGCTGTCACTGGCGAAAGGGGAGTTAGGTCACCATTACCGCTTCGGCTGGC
TGGAGGGGAACAATGGCAAATCGTAAACGTGACGCCGGGCGCGAGGCGCTGGAGAAAAAA
GGCTGGTGGCGCAGTCACCGTTGGCTGGTGTTACGTCGCCTTTGTCAGTTCTTCGTGCTG
GGGATGTTTTTGAGCGGTCCGTGGTTTGGTGTGTGGATCTTGCACGGCAACTACAGCAGT
AGCCTGTTATTCGACACCGTTCCGCTGACCGATCCGCTGATGACGCTGCAAAGTCTTGCC
AGCGGTCATCTGCCTGCCACGGTGGCGTTGACCGGTGCGGTGATTATCACCGTGCTCTAC
GCTCTGGCAGGAAAGCGATTATTTTGCAGCTGGGTCTGCCCGCTGAACCCGATTACCGAC
TTAGCGAACTGGTTACGCAGGCGCTTTGACCTCAATCAGTCTGCGACGATCCCTCGCCAC
ATTCGCTACGTACTGTTGGTGGTCATTCTGCTGGGATCGGCCTTAACTGGCACGCTCATC
TGGGAATGGATCAACCCCGTTTCTCTGATGGGGCGTAGCCTGGTAATGGGCTTCGGCAGC
GGCGCGCTGCTTATTGTCGCGCTGTTTTTATTTGATCTACTGGTCGTTGAACACGGCTGG
TGCGGGCACATTTGTCCGGTTGGCGCGCTGTATGGCGTGCTGGGTAGCAAAGGTGTGATT
ACCGTTGCGGCCAGCGATCGGCAGAAATGTAACCGCTGTATGGATTGTTTTCATGTTTGC
CCGGAACCGCATGTGCTACGTGCCCCGGTGCTGGATGAACAAAGCCCGGTGCAGGTCACC
AGCCGCGATTGCATGACGTGCGGTCGCTGCGTGGATGTCTGTTCTGAGGATGTATTTACA
ATAACTACACGATGGAGTTCGGGAGCGAAATCATGAAAAGCCATGACCTGAAGAAAGCGC
TGTGTCAATGGACGGCGATGCTGGCCCTGGTGGTAAGCGGCGCGGTTTGGGCGGCTAATG
GCGTCGATTTTAGCCAGTCGCCGGAAGTATCCGGGACGCAGGAAGGGGCCATTCGGATGC
CAAAAGAGCAGGATCGGATGCCGCTGAACTATGTGAATCAGCCGCCAATGATCCCGCATA
GCGTTGAAGGTTATCAGGTAACGACCAATACCAACCGCTGCTTGCAGTGCCACGGTGTCG
AAAGCTATCGCACCACTGGCGCGCCGCGTATCAGTCCTACTCACTTTATGGACAGCGACG
GCAAAGTGGGCGCGGAAGTGGCTCCGCGTCGTTATTTCTGTCTGCAATGTCACGTACCGC
AGGCCGATACCGCGCCAATCGTGGGGAATACCTTTACCCCATCAAAAGGTTACGGGAAAT
AAGAGGTTATTATGGGAAATTCTGACCGTAAGCCTGGTCTGATTAAGCGCCTGTGGAAAT
GGTGGCGTACCCCCAGCCGTCTGGCGCTGGGGACGCTGCTGTTGATCGGTTTTGTCGGCG
GCATCGTCTTCTGGGGCGGCTTTAACACCGGAATGGAAAAAGCCAATACCGAGGAGTTCT
GCATTAGCTGCCACGAAATGCGTAACACGGTGTATCAGGAATACATGGATTCCGTGCACT
ACAACAACCGTAGCGGCGTCCGTGCGACCTGTCCGGATTGTCACGTTCCGCACGAGTTTG
TGCCGAAGATGATACGCAAGCTCAAAGCAAGTAAAGAGCTGTATGGTAAAATTTTTGGCG
TTATTGACACGCCGCAGAAATTTGAAGCTCATCGCCTGACGATGGCACAGAATGAGTGGC
GGCGCATGAAGGACAATAACTCGCAGGAGTGCCGTAACTGTCACAACTTCGAGTATATGG
ATACAACCGCCCAGAAATCGGTTGCCGCGAAGATGCATGACCAGGCGGTGAAAGATGGGC
AAACCTGTATTGATTGCCATAAAGGGATAGCGCACAAGCTGCCCGATATGCGTGAAGTCG
AGCTAGGTTTTTAACAGGGTTATTGCGTGGGTATGCTTGAAGCCAGAGAGTTACTTTGTG
AGCGGGATGAACGAACCTTATTTAGTGGCTTGTCATTTACGCTGAACGCAGGAGAGTGGG
TACAAATCACCGGTAGCAACGGCGCGGGGAAGACAACGCTTCTCCGTTTGCTGACGGGGT
TGTCTCGCCCTGACGCAGGCGAGGTTCTCTGGCAAGGGCAGCCCTTGCATCAGGTACGCG
ACAGCTACCATCAAAACCTGTTATGGATAGGCCATCAGCCGGGGATCAAAACCCGGCTGA
CGGCGTTAGAAAATCTGCACTTTTATCATCGCGATGGCGATACCGCACAATGTCTGGAAG
CCCTGGCGCAGGCCGGGCTTGCCGGATTCGAAGATATTCCGGTAAATCAACTTTCTGCCG
GGCAACAACGCCGCGTCGCTTTAGCGCGTCTGTGGCTGACCCGTGCCACGTTATGGATCC
TCGACGAGCCTTTTACCGCGATTGACGTCAACGGCGTCGATCGTCTGACCCAGCGTATGG
CGCAGCATACGGAGCAGGGGGGGATTGTGATTCTGACTACCCACCAGCCGCTCAACGTTG
CTGAAAGTAAAATTCGCCGCATTTCACTGACGCAAACGAGGGCCGTATGATGTTCTGGCG
CATTTTCCGTCTTGAGCTGCGCGTAGCGTTTCGCCATAGCGCCGAAATCGCCAACCCGCT
GTGGTTCTTCCTGATTGTAATTACCCTTTTTCCGCTCAGTATCGGTCCGGAGCCGCAACT
GCTGGCGCGTATTGCACCGGGCATTATCTGGGTTGCAGCCCTGCTTTCATCCTTGCTGGC
GCTGGAACGACTGTTCCGTGACGATTTGCAGGACGGCAGTCTTGAACAATTGATGTTGTT
GCCGTTACCCTTGCCCGCCGTTGTGCTGGCGAAGGTGATGGCGCACTGGATGGTAACCGG
TCTGCCGTTACTCATCCTTTCGCCACTGGTAGCAATGCTACTGGGAATGGATGTTTATGG
CTGGCAAGTGATGGCGCTGACGCTGCTGCTGGGAACGCCTACGCTTGGCTTTCTCGGTGC
ACCGGGCGTGGCGCTGACAGTGGGACTTAAACGCGGTGGTGTGCTGCTCAGCATACTGGT
GTTACCGCTGACTATCCCATTACTCATCTTTGCCACCGCCGCGATGGACGCGGCTTCCAT
GCATTTGCCCGTTGACGGGTATCTGGCAATTTTAGGCGCGTTGCTGGCAGGCACCGCGAC
ATTAAGTCCTTTTGCGACGGCGGCAGCGTTACGAATCAGCATTCAATAACGCTGGATTAC
TGATTTTTGTTCGAGTCTGGTATCGAAACTATGTGGAAAACACTGCATCAACTGGCGATC
CCACCACGGCTGTATCAAATCTGTGGCTGGTTTATACCGTGGCTGGCAATTGCCAGTGTG
GTCGTGCTTACCGTCGGCTGGATCTGGGGATTCGGCTTTGCTCCGGCTGATTATCAACAG
GGAAATAGCTACCGCATTATTTACCTGCATGTGCCTGCGGCGATCTGGTCGATGGGCATT
TATGCATCAATGGCGGTGGCGGCGTTTATTGGCCTTGTCTGGCAGATGAAAATGGCCAAC
CTGGCGGTGGCGGCGATGGCCCCCATTGGTGCCGTGTTTACCTTTATTGCCCTGGTTACC
GGCTCTGCATGGGGAAAACCGATGTGGGGCACCTGGTGGGTATGGGATGCACGTCTGACT
TCTGAACTGGTGCTGCTGTTTTTGTATGTGGGTGTGATTGCCCTGTGGCACGCCTTCGAC
GACCGCCGTCTGGCGGGCCGTGCGGCAGGTATCCTGGTGCTGATTGGCGTGGTGAATCTG
CCGATTATTCATTACTCCGTTGAGTGGTGGAACACCCTGCATCAGGGATCAACGCGGATG
CAGCAAAGTATCGATCCGGCGATGCGTTCGCCGCTGCGCTGGTCGATTTTTGGCTTCCTG
CTCCTGTCTGCCACGCTGACGCTGATGCGGATGCGGAATTTGATTTTGCTGATGGAAAAA
CGCCGTCCGTGGGTGAGTGAACTGATACTGAAAAGAGGCCGTAAATGACCCCTGCATTTG
CTTCCTGGAATGAATTTTTCGCAATGGGCGGTTACGCCTTTTTTGTCTGGCTGGCGGTGG
TGATGACCGTTATTCCGCTGGTGGTTTTGGTCGTGCACTCGGTGATGCAGCATCGCGCAA
TTCTGCGTGGTGTGGCGCAACAGCGGGCGCGTGAGGCGCGTTTACGTGCTGCGCAACAGC
AGGAGGCTGCATGAATATTCGCCGTAAAAACCGCTTGTGGATTGCCTGTGCCGTGTTGGC
AGGGCTGGCGCTGACTATCGGTCTGGTGCTATATGCGCTGCGCTCGAATATCGATCTCTT
TTATACGCCGGGGGAAATTCTCTACGGCAAGCGTGAAACTCAGCAGATGCCGGAAGTCGG
TCAGCGTCTGCGCGTTGGCGGGATGGTGATGCCGGGTAGCGTGCAGCGCGATCCCAATTC
GCTGAAAGTGACCTTCACCATTTACGATGCTGAAGGCTCAGTGGATGTCTCTTACGAAGG
CATTTTGCCGGATCTGTTCCGTGAAGGGCAGGGCGTTGTGGTGCAGGGCGAGCTGGAAAA
AGGCAATCATATCCTCGCAAAAGAAGTGCTGGCGAAACATGATGAAAACTACACGCCGCC
AGAAGTTGAGAAAGCGATGGAAGCTAACCACCGTCGCCCGGCGAGTGTTTATAAGGACCC
AGCATCATGATGCCGGAAATTGGTAACGGGCTGCTGTGCCTGGCGTTAGGGATTGCGCTG
CTGCTGTCCGTGTATCCGCTATGGGGCGTGGCGCGCGGAGATGCGCGCATGATGGCGTCT
TCCCGCTTGTTTGCCTGGCTGCTGTTTATGTCTGTGGCTGGCGCATTTCTGGTGCTGGTC
AATGCTTTCGTGGTCAACGACTTTACCGTCACCTATGTTGCCAGCAACTCCAATACCCAG
CTTCCGGTGTGGTATCGCGTGGCGGCTACCTGGGGCGCACATGAAGGCTCACTGCTGCTG
TGGGTGCTGCTGATGAGCGGCTGGACCTTTGCGGTGGCGATTTTTAGTCAGCGTATTCCG
CTGGATATTGTGGCCCGCGTACTGGCGATAATGGGGATGGTCAGCGTCGGCTTTTTGCTG
TTCATTCTCTTTACCTCTAACCCATTCTCACGCACGCTGCCGAACTTCCCGATTGAAGGG
CGCGATCTTAACCCGCTGTTACAGGATCCGGGGCTGATCTTCCATCCGCCTCTGCTTTAT
ATGGGGTACGTGGGTTTCTCGGTGGCGTTTGCTTTTGCCATTGCTTCTTTGCTGAGCGGG
CGTCTGGACAGCACTTATGCGCGTTTTACTCGTCCGTGGACGCTGGCGGCGTGGATTTTC
CTGACGCTCGGCATTGTGCTCGGTTCCGCATGGGCCTATTACGAACTCGGCTGGGGTGGC
TGGTGGTTCTGGGATCCGGTAGAAAACGCCTCGTTTATGCCGTGGCTGGTGGGGACTGCG
CTGATGCACTCACTGGCGGTCACTGAACAACGCGCCAGCTTCAAAGCGTGGACATTACTG
CTGGCAATCAGTGCCTTCTCGTTGTGTCTGTTGGGGACTTTCCTCGTGCGTTCCGGCGTG
CTGGTATCGGTACACGCGTTTGCGTCTGATCCGGCGCGCGGTATGTTTATCCTCGCCTTT
ATGGTGCTGGTGATTGGCGGTTCGCTGCTGCTGTTTGCCGCGCGTGGACACAAAGTTCGC
TCACGCGTAAACAATGCGCTGTGGTCGCGGGAATCTTTGCTGTTAGCGAACAACGTTTTG
CTGGTCGCCGCGATGCTGGTAGTGTTGCTGGGGACGCTGCTGCCGCTGGTGCACAAGCAA
CTGGGACTGGGCAGTATTTCGATTGGCGAACCGTTCTTCAACACCATGTTTACCTGGCTG
ATGGTGCCGTTTGCGCTACTGCTTGGTGTCGGTCCTCTGGTGCGCTGGGGGCGCGATCGC
CCACGTAAAATCCGCAATTTATTGATTATCGCCTTCATCTCTACGCTGGTGCTGTCTCTG
CTGCTGCCGTGGCTGTTCGAAAGCAAAGTTGTGGCGATGACGGTGCTCGGCCTGGCAATG
GCCTGCTGGATTGCGGTGCTGGCAATTGCGGAAGCTGTGCTGCGTATTTCACGCGGCACG
AAAACCACCTTCAGTTATTGGGGGATGGTGGCGGCTCACCTGGGGCTGGCAGTGACAATT
GTTGGCATTGCCTTTAGTCAGAACTACAGTGTTGAGCGTGATGTGCGCATGAAGTCCGGC
GATAGCGTCGATATTCATGAATATCGCTTCACCTTCCGTGATGTCAAAGAGGTGACTGGC
CCGAACTGGCGTGGCGGTGTGGCGACTATCGGCGTAACGCGAGAGGGTAAACCGGAAACA
GTGCTGTATGCGGAAAAACGTTATTACAACACTGCCGGGTCGATGATGACCGAAGCGGCG
ATTGACGGTGGCATCACGCGTGACCTGTACGCCGCGCTCGGTGAAGAGCTGGAAAACGGC
GCGTGGGCTGTGCGTCTTTACTACAAACCGTTTGTTCGCTGGATTTGGGCGGGCGGGCTG
ATGATGGCGTTGGGCGGACTGCTGTGTCTGTTTGATCCTCGCTATCGTAAGCGCGTAAGT
CCGCAAAAAACTGCGCCGGAGGCTGTATGAAGCGCAAAGTATTGTTAATTCCGTTGATTA
TCTTCCTGGCGATTGCCGCGGCGCTGCTGTGGCAGCTGGCGCGTAATGCCGAAGGGGATG
ATCCGACCAATCTGGAATCGGCGCTCATTGGCAAGCCAGTGCCGAAGTTTCGCCTCGAAT
CACTGGACAATCCGGGGCAGTTTTATCAGGCGGATGTGCTGACTCAGGGCAAACCAGTGC
TGCTTAACGTCTGGGCGACCTGGTGTCCGACCTGCCGTGCGGAACATCAATATCTGAATC
AGCTTTCTGCGCAGGGCATCCGCGTGGTCGGCATGAACTATAAAGACGATCGCCAGAAGG
CAATCAGCTGGCTGAAAGAGCTGGGCAATCCTTACGCGCTAAGCCTGTTTGATGGCGATG
GCATGTTAGGGCTGGATCTCGGTGTCTATGGCGCGCCAGAAACGTTCCTTATTGACGGCA
ACGGCATCATTCGCTATCGCCATGCGGGCGATCTCAATCCTCGCGTCTGGGAGGAAGAGA
TCAAGCCGCTGTGGGAGAAATACAGTAAGGAGGCCGCACAATGAGGTTTTTATTGGGCGT
GCTGATGCTGATGATCTCCGGCTCAGCGCTGGCGACCATCGACGTGTTGCAGTTTAAAGA
TGAAGCACAGGAACAACAGTTCCGTCAGCTCACTGAAGAACTGCGCTGCCCGAAATGCCA
GAACAACAGCATTGCCGATTCCAACTCGATGATTGCCACCGACCTGCGTCAGAAAGTGTA
TGAACTGATGCAGGAAGGTAAAAGTAAAAAAGAGATTGTCGATTATATGGTGGCACGTTA
CGGCAACTTCGTCACTTACGATCCGCCGTTAACGCCGCTGACCGTGCTGCTGTGGGTGCT
GCCAGTAGTGGCTATTGGCATTGGCGGTTGGGTCATATACGCCCGCTCGCGGCGTCGGGT
ACGCGTGGTGCCGGAAGCGTTTCCTGAACAAAGCGTGCCGGAAGGTAAGCGTGCCGGATA
TGTTGTTTATCTGCCGGGTATTGTGGTGGCGTTAATTGTGGCTGGCGTCAGCTACTACCA
GACTGGCAATTATCAGCAGGTGAAAATCTGGCAGCAGGCCACGGCACAGGCTCCGGCGTT
GCTGGACAGGGCGCTGGATCCGAAAGCCGATCCGCTCAACGAAGAAGAGATGTCGCGTCT
TGCGCTGGGGATGCGTACTCAACTGCAAAAAAATCCGGGAGATATAGAAGGCTGGATTAT
GTTGGGCCGCGTTGGCATGGCGCTGGGTAACGCCAGTATCGCCACCGATGCATACGCCAC
TGCGTATCGCCTCGATCCGAAGAATAGCGATGCCGCACTGGGATACGCTGAAGCGTTGAC
ACGTTCATCTGATCCCAACGACAACCGCCTCGGCGGCGAACTGCTGCGCCAGTTGGTGAG
AAGCGACCACAGCAATATCCGTGTGTTAAGCATGTATGCGTTTAATGCCTTTGAGCAGCA
GCGATTTGGCGAAGCCGTTGCCGCGTGGGAGATGATGTTGAAACTCTTACCTGCCAACGA
TACTCGCCGTGCGGTGATTGAACGTAGTATCGCGCAGGCGATGCAACATTTGTCGCCGCA
GGAGAGTAAATAAAAAGTGGCCCGATGGTGATGCCATCAGGCCAGACTGATGACAAAGTG
CGCTTAGTTTATGCCGGATGCGGCGTGAACGCCTTATCCGGCCTACAAAATCGTGTGAAT
TCAATAAATTGATCGATCCGCGTAGGCCTGATAAGCGTAGCGCATCAGGCAGTTTTGCGT
TTGTCATAAATCTCAGCCCGATGATAAATCCATCGGGCTATTTTTATTGTGCCCCGCGTT
GTTGCAGGAACAGAATGGTGGCCGCCACGCGTGAGCGGACATTGAGTTTACGCAGCAGAT
TGCGAATATGTACTTTTACTGTCTGCTCGGAAATATTCAATACCGAGGCAATCTGTTTAT
TTGACAGCCCCTGTGCCAGCTCGTGCAGAACATCCAGCTCGCGCTCCGTCAGCACGCTGA
AGGGATCTTCTTCCGCGCCAAACATTTCACGTTCACGTAAGTACTGATTGACGCGTTCGC
TAAAGACTTTGCTGCCTTTCGCTCCGGCACGAATCGCTTCCAGCAATACTTCCGGGTCGC
TGTCTTTCAACAGATAACCGTCTGCGCCTGCGTCTATCAGCGCAAAGACATCGCTGGAGG
CATCGGATACGGTCAGGATAATAATTTGCGCGGTAACGCCATCCCTGCGCAAGGCATTGA
GGGTATCCAGGCCACTCATACCTTTCATATTGAGATCCAGCAAGATCACGTCGATATCCA
GTCTATTCGCCAGATCGATAGCGCTCGCGCCGTCGCCCGCTTCGGCGACCACTTCAAAGC
CAGGATCAAGCTCCAGTAACTGACGAACACCGCGTCGCATAAGTGGATGATCATCCACAA
TCATCACCTGAAAAGGCGTTGCTTCAGGCATAGTAGTCTCCTGAGGTTTTATTAGAATCA
TTATGTTTGAGCGTAGCGTTGGTAACGCTACCAGGCGCGTGAATGTTACCCCATTTTATG
TATGGACATGTAGTGAAAACTACAACCTTGTCCTTCGCTTTGGCATCATTTTCATTATAA
AGACGGAATTTTGCATCAGCTTCTCATCAAGAAAAACAACTAAAAAATCAATCACAATAC
TTGTGCATTTCTTTAAACAGTTTTTAAAAACTGACTCCGGGTATGGAGCTATGGGTATTT
TCTGTACCCAATGCTTTTAACAGCAATTAATTTCATAGGATGAAAGCTCAATGCATCAAT
CTGGTTCTGTTTCTCTTTGTCGTTCCGCAATATCTGTTCTGGTGGCTACAGCGTTATATT
CACCCATAGCATTGGCATCAACAGTTGAGTATGGTGAGACAGTTGATGGTGTTGTCCTGG
AAAAAGATATCCAGCTGGTTTATGGGATCGCCAATAATACGAAAATCAATCCTGGCGGAG
AACAGCATATTAAAGAATTTGGTGTAAGTAATAATACTGAAATTAACGGAGGGTATCAGT
ACATTGAAATGAATGGCGCCGCAGAATACTCAGTATTAAATGACGGTTATCAAATTGTTC
AAATGGGTGGCGCGGCAAACCAGACTACGCTCAATAATGGTGTGCTACAGGTTTATGGCG
CAGCGAATGATCCCACGATTAAAGGCGGGCGCTTAATCGTTGAAAAAGATGGGGGGGCCG
TCTTTGTCGCTATCGAAAAGGGAGGACTACTGGAGGTTAAAGAGGGGGGATTTGCATTTG
CGGTAGATCAGAAAGCAGGCGGTGCTATTAAAACAACCACGCGGGCCATGGAGGTATTCG
GAACAAACCGTCTCGGTCAGTTCGATATCAAGAATGGTATTGCTAATAATATGTTGTTGG
AAAACGGCGGAAGTTTGCGAGTTGAAGAAAATGACTTCGCTTATAATACCACTGTGGATA
GTGGCGGCTTACTGGAGGTTATGGATGGCGGGACTGCAACTGGCGTTGATAAAAAAGCAG
GCGGGAAATTAATTGTCTCAACGAATGCGCTGGAAGTGAGTGGTACAAACAGTAAAGGCC
AATTTAGTATAAAAGATGGTGTGTCAAAAAATTATGAACTGGATGATGGTTCCGGGCTCA
TTGTTATGGAGGACACGCAGGCCATTGACACTATCCTTGATGAGCATGCCACTATGCAAT
CGCTGGGAAAGGATACTGGTACGAAAGTGCAGGCAAATGCGGTATATGATCTCGGTCGAT
CAGACCAGAATGGAAGTATCACGTATTCCTCAAAAGCCATCTCTGAAAATATGGTAATCA
ACAATGGCCGCGCTAATGTCTGGGCTGGCACAATGGTTAACGTGTCAGTCAGAGGGAATG
ATGGCATTCTTGAGGTCATGAAGCCGCAAATAAATTATGCACCTGCTATGTTGGTGGGTA
AGGTAGTGGTTTCTGAGGGCGCTTCTTTTAGAACGCATGGTGCCGTGGATACCAGCAAAG
CGGACGTTTCGCTCGAAAATAGCGCATGGACCATCATTGCCGATATCACTACGACGAACC
AAAACACCCGCCTCAACTTAGCCAACCTTGTGATGTCTGGCGCAAATGTGATTATGATGG
CTGAGACAGTGACTCGTTCATCTGTGACAGCAAGTGCGGAAAATTTCATAACGTTGACCA
CCAATACCCTGTCGGGAAACGGCAATTTTTATATGCGTACCGATATGGCCAATCATCAGA
GCGATCAGCTTAACGTCACTGGCCAGGCAACAGGTGATTTCAAAATATTTGTGACGGACA
CGGGGGCCAGCCCGGCAGCAGGTGATAGCCTTACACTGGTAACAACGGGCGGCGGTGATG
CTGCATTTACGTTGGGCAATGCCGGAGGCGTTGTTGATATCGGTACGTATGAATATACCT
TGCTGGATAATGGCAACCATAGCTGGAGCCTCGCAGAGAATCGCGCGCAAATTACCCCTT
CAACCACTGATGTGCTGAACATGGCAGCAGCACAACCGCTGGTATTTGATGCAGAACTGG
ACACCGTGCGTGAGCGTCTTGGTAGCGTAAAAGGCGTTAATTACGATACGGCGATGTGGA
GTTCGGCAATTAACACCCGCAACAACGTGACCACTGATGCGGGAGCTGGCTTTGAGCAAA
CATTGACGGGGCTGACGCTCGGTATCGATAGCCGTTTCTCCCGTGAAGAAAGCAGCACAA
TTCGCGGCTTGTTCTTTGGTTACTCTCATTCTGATATTGGTTTTGATCGCGGCGGCAAAG
GTAATGTCGATAGCTATACCCTGGGGGCTTATGCCGGTTGGGAGCATCAGAACGGTGCCT
ATGTTGATGGAGTGGTGAAAGTTGATCGTTTTGCCAACACCATCCATGGCAAGATGAGTA
ATGGGGCAACAGCGTTTGGCGATTACAGTAGTAACGGCGCGGGTGCTCATGTCGAGAGCG
GGTTCCGTTGGGTTGACGGATTGTGGAGTGTTAGACCCTATCTGGCCTTTACCGGCTTTA
CCACAGATGGTCAGGACTACACGTTATCAAACGGCATGCGCGCTGATGTGGGAAATACCC
GGATATTACGCGCTGAAGCGGGAACGGCGGTAAGCTATCACATGGACCTGCAAAATGGTA
CGACGCTGGAACCCTGGCTGAAAGCCGCCGTACGTCAGGAATACGCCGATTCTAACCAGG
TGAAAGTTAATGACGATGGCAAATTTAATAATGATGTGGCTGGAACCCGTGGCGTTTATC
AGGCTGGGATAAGGTCATCGTTTACCCCGACGTTAAGCGGTCATTTGTCAGTCAGCTATG
GCAATGGCGCAGGGGTAGAATCGCCGTGGAATACTCAGGCGGGAGTGGTCTGGACGTTCT
GATAACAGAAAATAAACAGGCCGTGATGTGTCGCGGTCTGTTTATCTAATTAATTGCAGA
TATAAAAAAAAACCAACCGTAAAGGTTGGTTTTTTCTTGGGATTTTTGGTCGGCACGAGA
GGATTTGAACCTCCGACCCCCGACACCCCATGACGGTGCGCTACCAGGCTGCGCTACGTG
CCGACTCGTGGCTGCTAATACTACCGTTTTCCACACCGATTGCAAGTAAGATATTTTGCT
AACTGATTTATAATTAATCAGTTAGCGATAAAACGCTTCTCGTCTGTCAGTACTTGCAAT
AACAAACTTAACTGTGGTTTTTCATCTTTCACTCTTTCACCACGTAAGTTGTAAGTGCGG
TATTTACCGTTATTGTTCAGCACCAGCGTCTTTTTCGGGGTGGTTATTGCCAGCGTATCG
TTATCCGCTGCGGTTACCCAGTAATGACGGCGTTGAGGGTTGAACAAATCCTGACCTTGC
GAATATTCGCTGGCAGGTGTGCTGACATGTAGCAGGCGTTGCATCAGCGTCGTCATCAGA
TCGGTATGATCAGTCAGCGCATTAATACGCTGCGCCGGCGTGCCTGGCCAGTGAATCACT
AATGGCACCTGCAGATGACCGTGGGACCAGTCAAAGGTTTCTTCCTCTTCGCTCAGTGGA
ATACCCCGACCGGCAGTGATAATTACAACCGTATTGTCCAGTTTGCCAGAATCACGCAGT
GCATTGAGCACGCGGTTGATCTGGTCATCGACATTGCCTGCCGCCCGGCTATATTTCCGT
GCAAATGCCTGCTGATTGCTGTCGTCAATGTTAGTACCATTGAAAGAAACCCACGAGAAC
CAGCGGTTATCTTCTTGTGCGTAGCGTCCCAGCCAGTTGATCCACTGCGTGGCGGTCTGC
TCGTCGGATTGGGTGCGTACGCTCGGCATCGAGAAGTCTGACAACAATGCCTGGCGATAC
AGCGGGCTGGTAAAGCCATCTGATGAGAATAACCCCAGCTGATAGCCTTGCTGATTAAGC
GCAGTAATTAATGCCGCAGGCGTACGGGTCGACAGAATGCCGTCCATATAGCTCGGCGAG
ATGCCATAGAACAGGCCAAAGATGCCGTTGTCTGTAGTGTTGCCGGAGCTCATATGGCGC
GTGAACGAAATATTTTGCTCAGCAAAACCTGCCAGCGCAGGCATCTGCTTCTCGAAGCGT
GAGTAGTTCAGGCCATCGACAGTAATCAACAGCACATTCTGCCCGGTGCCCATATCGCGA
TAGCGCAGTTCGCTTAACGGATACTGAACGGAAACGGCGTCTGGATTACCTTGCTCAATA
AGACGGCGTTGATACTCCTGCGCATCAAGCAGACCATGCTTCTCAAGAAAACGTCGCGCC
GTCATCGGGTACGAAAGCGGCAGGTTAGCGCGCTGCATGGTGATCGGGCGATAGAAGTTG
GCATCGGCCCAGATATACACCACATGCGAGGCGATAAAGGCGATAAATAAGAATGCGGCC
AGCGGACGCGCGAAGCGCCGACGACGCGTCAGGCTGCGCAGCTTTTGCCAGCTCCACGTC
GCAAACACCAGTTCAAGCAATAAAATAACCGGCACGCTAATGAACATCAGCTGCCAGTCG
CGCGCCATCTCATTTTCGTCTGGATTAATAACCAGTTGCCAGACGATGGGATTAAGATGG
AGATGGAAACGAGTAAAGACTTCGCTATCGATCAGTAATAGCGTCATTCCCGCCGTTGCC
AGAATGACGGACAAAAACCTCATCAGCCTCTGGGAGCCGACGATAAAGGTCAGCGGGAAG
AGGATCAGCAAATAGGTGGCGAAGACCAGGAAGCTGAAATGGCCGATAATGCTTACGTAG
GAATAAATGCGACCAGCAAGCGTTGTCGGCCAGTCGGCGATAAACAGGTAACGGCTGCCA
ATGACGAGCGAAAGCAGAATATTGAACAGTGCAAACCAGTGCCCCCAACTGACCATTTGG
GAGACTTTTTCACGGTAGCGCTGACGATGAGTTACCATAACCTGTTATCTGTTTCCCTTA
GTGCGCTTTTTCTTCGTTGATAGAGGACTGTAAGGCGCGGGCAAAAGAGTTGGCAATTGC
CTGGCGTTGGGCCGGGGCAATGCTGGTGTTGATAAGGTTAGTGACCATGTTGCCTAACAC
CATCAGGGAAAGGTCGGTCGGAGCCTTATGTTTTTCCAGTACGTTGAGCAGCTCTGCGAG
CAATTGTTCAACCTGTTCATCACTGTAGCGGGAAATTTGTGGCATAAATCGAAATCAGTT
AGTTGATGAAAGGGCAACATATTACCGTAGCAACGGTTTTTTTTCTGCTTTTTTATGCGT
TAAATCATTCTCGTTACGCTGCCTTCTGTAAAATGACCGCCATCTTTTATTGCGTCGCTT
AACCGGCGGTGGTTGAATACCGCCCGGTCTTAAAGGAGAGTTTATCATGAGTCTGGATAT
CAACCAGATTGCTCTGCACCAGCTTATCAAGCGTGATGAGCAGAACCTTGAGCTGGTGTT
GCGCGATTCATTGCTGGAACCGACAGAAACCGTCGTTGAGATGGTGGCAGAACTGCATCG
GGTCTATAGCGCCAAAAATAAAGCTTACGGCTTGTTTAGCGAAGAGAGTGAACTGGCGCA
GACGCTGCGCTTACAGCGTCAGGGCGAAGAGGACTTTCTGGCATTTAGCCGCGCGGCAAC
CGGCCGCCTGCGTGACGAATTAGCGAAATATCCTTTTGCTGACGGTGGATTCGTGCTGTT
TTGCCACTACCGTTATCTGGCGGTGGAGTATCTGCTGGTGGCAGTCCTGAGCAACCTGAG
CAGTATGCGCGTTAACGAAAATCTCGACATCAACCCAACCCATTATCTTGATATCAATCA
TGCGGATATTGTTGCGCGTATCGATTTAACCGAATGGGAAACCAATCCAGAGTCGACCCG
CTATCTCACTTTCCTGAAAGGGAGAGTAGGGCGCAAAGTGGCGGATTTCTTTATGGATTT
CCTCGGGGCCAGCGAAGGATTGAACGCGAAAGCGCAAAACCGTGGGCTGTTGCAAGCGGT
TGATGATTTCACTGCCGAAGCACAACTGGATAAAGCAGAGCGACAGAACGTGCGCCAGCA
GGTTTATAGCTACTGTAATGAGCAGCTGCAGGCAGGCGAAGAGATTGAACTGGAATCGCT
GTCGAAAGAGCTGGCAGGCGTAAGCGAAGTGAGCTTCACGGAGTTTGCGGCTGAAAAAGG
CTACGAACTGGAAGAGAGCTTCCCGGCAGACCGTAGCACACTGCGTCAGTTGACAAAGTT
TGCCGGTAGCGGCGGTGGCTTGACTATTAACTTTGATGCGATGCTGTTAGGTGCGCGGAT
TTTCTGGGATCCAGCAACCGATACCCTGACCATTAAAGGCACGCCGCCGAATTTGCGCGA
CCAATTGCAGCGCCGGACGTCTGGCGGCAATTAATCGGTTTTGTGTTCTGAATGCCAGAT
GCGGCGTGAACGCCTTATCTGGCCTGCAAAAAATAGCAATACCGTAATCAGGCATAATCT
GCAGATACAAAAAACCCCGCCGGAGCGGGGTTTTTTACAACTTATTCAGCAATTAAGCGC
GAACGAAGTCGATGTGCTGCAGCTTCGGTTTGTACGGGTGACGCTGTACGTCCTGAGCTT
TAACTTTGATTTCTTTACCGTCAACAACGATGGTCAGAACTTCGCTGTAGAATTCAGCTT
TAGCTTGCATGTTCATGACTTTGTCGTGATCCAGCTCGATAGCCAGCGGTGCTTCTTTGC
CACCGTAGATGATTGCCGGGAACTTGTTAGCGGCACGCAGGCGGCGGCTCGCACCCTTAC
CCTGCTCTTTACGTACTTCTGCGTTGATAGTAAACATTTCTTTCTCTCTTAAATTAATCC
TGCTACAGGCGACCCAGCAACAGGTAAGTGATCTGCTTTGCGTATGCAAAAGCGGGCGAG
ATTCTATACTCAATCGCCTTATACATCAATCAAAACTACCATTAACCGCGTAATTCGTGC
GCCCGACGAAAACGACCTTCGTAATCGAACACTTTTTCACGCACTTGCCAGTACTGACCT
TTCATGCGGGCGACGACAAAATCCGGATGTCGCAGTAAGGCTTGCTGGGCGAGGATATCG
GCGGCGGTGATCCAGCGCAGAGGGATGCCCGGTGTGCGCGTATGCGGGCGGATAAAAAGC
TGCTCGAAAGCAGTTCGCTGGGCGGGCGTTTGCAGACGGAAACGCTCACTCACATCCGCG
CCGTCTTCATCGTAATAGGTGATTTTCAACCATTCGCCTTTCTCGTCGTGCCCATGCTGC
AAAGACATGCCGCTACAGCGTAATACCAGCGCATCTTTCAGTCGTAGCGCCGCTTTTAAC
ATATCATCCGGATCAACCAGTACCGTGTCACATTCGCGGCAGCGGCGAGCGGCAATATCA
TTTTCTGCGTTACATTGCGGGCAATTTTTAAAACGGAAACGGAAGTCACACTGTTCGCGA
TGACCGTCGTCATCTTCAAACCATCCCTGACAGCGGCGACCAAAGTGTTCAATCAATGTC
CCGTCGGCGGTCGTTTTCCCCCAAAAGGTGTTGGCAAAACCGCAGGCAGGGCAGAAAACC
TGTACCGGAACGTTGTCACTTTTGCCTTTCGGTGTACCAACTTCCGGCGCGTAGAGATCG
TGAGGATTACCCGCATAATCAAGAATTAAACAATCAGTCTTGCCCGGAGCGAGACGCAGA
CCGCGCCCGACAATTTGTTGGTAAAGACTCACTGATTCGGTAGGGCGCAGAATGGCGATA
AGATCGACGTGCGGGGCGTCAAATCCGGTGGTCAGTACCGCGACGTTGACCAGATAGCGA
AAACGCTGGGCTTTAAAATCTTCAATTAACACATCGCGCTCAGCGCCGGGGGTGTCGCCA
GTAATCAGTGCAGCATCTTCGGCGGGTAGTAATCCCACAATCTCTTTTGCGTGTTCAACG
GTGGCGGCGAAAATCATCACCCCTTTGCGCGTTGCAGCAAACTCCATAATCTGGCTGATG
ATGTGCGGGGTAATACGTTGTTGTTTTTTTAGCTCGCGGTTGAGATCGGCTTCGCTGAAC
AGCCCATTACTCTGTGCCTGCAAGCGGCTGAAATCGTATTGCACTACTGGCATATCCAGT
CGTTCTGGCGGCGTCAGATAGCCGTGTTTAATCATATAACGCAGCGGCAGTTCATAAATG
CAGTCACGGAAAAGGGCTTTCTCATCGCCGCGTACCATGCCGTGATAATGGAACTGGTAG
ATCCAGCCTTTGCCCAGTCGAAAAGGCGTGGCAGTCAGCCCCAGCAGGCGTAAGTGGGGA
TTCACTTTTGTCAGGTGAGTGAGGATTTGCTGATACTGGCTCTCTTCATCGTCACCAATA
CGGTGACATTCATCGACAATCAACAGCGAAAATTCACCCTGAAAGGCATCAAGATTACGG
GCGACCGACTGCACGCTGCCAAATACCACTTTACCGTGGCTCTCTTTGCGCTTTAGCCCG
GCGGCAAAAATATCGGCTTCCAGCCCCAGCGCCTGATACTTTGCATGGTTTTGCGCCACC
AGTTCTTTAACGTGTGCCAGCACCAGCACGCGACCACGAGCCAGCCGCGCAAGTTCCGCT
ATCACCAGGCTTTTACCTGCACCGGTGGGCAGCACGATAACGGCAGGGGTTTTATGACGA
CGAAAATGGTTGAGCGTGGCATCCACGGCTTCTTGCTGATATGGGCGGAGTGTAAAAATC
ATGGTCTCGCGTAGGTAGATTATTCTGCTAATAGTATGCCACGGTTCTTTTTCCCTTGAG
GGAAGTTATTAGACCGCTATACTGGGCAGACAACAGTTCAGATTTTCGGGTCAATGCCCG
ACCTCCGTTTTTACAGGCAAAATCACACACATGCGACTTGATAAATTTATCGCACAGCAA
CTCGGCGTTAGCCGTGCTATTGCCGGGCGTGAAATCCGCGGCAATCGTGTCACCGTCGAT
GGCGAAATCGTCCGTAATGCAGCGTTCAAACTGCTTCCTGAACATGATGTCGCTTACGAT
GGCAACCCACTGGCGCAGCAACACGGTCCACGTTACTTCATGCTCAATAAGCCTCAGGGC
TATGTTTGCTCCACGGACGACCCTGATCACCCAACGGTGCTCTATTTTCTAGATGAACCA
GTGGCGTGGAAACTGCACGCCGCAGGGCGGCTGGATATCGATACCACCGGTCTGGTACTA
ATGACAGATGATGGTCAGTGGTCACACCGCATTACTTCTCCGCGCCATCATTGCGAGAAG
ACTTATCTGGTGACGCTGGAATCACCCGTAGCTGACGATACGGCAGAGCAATTTGCTAAA
GGCGTGCAGCTGCATAACGAAAAAGATCTCACTAAGCCGGCGGTGCTGGAAGTGATTACC
CCAACGCAGGTTCGTCTGACCATCAGCGAAGGGCGTTATCATCAGGTGAAACGCATGTTC
GCCGCCGTGGGTAACCATGTGGTTGAGCTGCATCGTGAACGTATTGGCGGCATTACGCTG
GATGCTGATTTAGCCCCCGGTGAATATCGTCCGTTAACTGAAGAAGAAATTGCCAGCGTC
GTCTAACTTTTCAATGACTTTCAGGAGCCCGTTGTGACCACCCGACAGCATTCGTCGTTT
GCTATTGTTTTTATCCTTGGCCTGCTGGCCATGTTGATGCCGCTGTCGATTGATATGTAT
CTGCCCGCGCTACCGGTAATTTCAGCGCAGTTTGGCGTACCGGCGGGCAGTACGCAGATG
ACCCTCAGTACTTATATTCTGGGCTTTGCGTTGGGGCAGTTAATCTACGGGCCGATGGCA
GACAGCTTCGGGCGTAAGCCGGTGGTTCTTGGCGGTACGCTGGTGTTTGCCGCCGCCGCG
GTGGCGTGTGCGTTGGCACAAACCATCGATCAGCTGATTGTGATGCGTTTCTTCCACGGG
CTGGCGGCGGCTGCGGCCAGCGTGGTTATCAACGCCTTGATGCGTGATATCTACCCGAAA
GAAGAGTTCTCGCGGATGATGTCGTTTGTCATGCTGGTGACAACCATTGCACCGCTGATG
GCACCGATAGTTGGCGGCTGGGTGCTGGTGTGGCTGAGCTGGCATTACATCTTCTGGATC
CTCGCCGTGGCGGCGATTCTGGCTTCGGCAATGATCTTCTTTCTGATCAAAGAAACCTTA
CCACCGGAGCGTCGCCAGCCTTTTCACATTCGTACCACTATTGGTAACTTTGCGGCGCTG
TTCCGTCATAAGCGTGTCCTGAGTTATATGCTGGCCAGTGGTTTCAGCTTTGCCGGGATG
TTCTCGTTCTTAAGCGCCGGACCGTTTGTCTACATTGAAATTAACCACGTCGCGCCGGAA
AACTTTGGTTATTACTTTGCACTAAACATTGTTTTCCTGTTCGTGATGACCATCTTTAAT
AGCCGCTTCGTCCGCCGTATTGGCGCGTTAAATATGTTCCGCTCGGGGTTGTGGATACAA
TTTATTATGGCAGCGTGGATGGTCATCAGTGCGCTGCTGGGGCTGGGATTTTGGTCGCTG
GTGGTTGGCGTTGCGGCGTTTGTGGGCTGCGTGTCGATGGTGTCATCCAATGCGATGGCG
GTCATTCTTGATGAGTTTCCCCATATGGCGGGAACGGCATCTTCACTGGCAGGAACCTTC
CGTTTTGGCATAGGGGCAATTGTTGGCGCATTGCTTTCTCTTGCGACCTTTAACTCTGCA
TGGCCGATGATTTGGTCAATTGCATTCTGCGCAACCAGCTCCATTCTCTTCTGTCTGTAC
GCCAGTCTGCCGAAAAAACGGTGATCTATTGCACAACGAGGAAGCTAAAAGGCTTCCTTT
GTTGATGCATGTCAACCACAAATCTATCATTCCCCCGATATATGTTTATTTTATGTAAAA
TCAATTTATGTAAAAAGTCACATCATTGTAGTTAAAAAGGTTGAGTTAGATCGCAGAAAC
GGGTACATATAGCCCCGCAAACGTGACCACGCCCGCAGATATTACTTAAATCAGAGCCAT
AGAGGCCACGCAGGCGAGGCATCAATCTTTACGATCTGTATAAAGACGGATTGTTGATGA
TGTGTTAAAATTGATGTAAACAAATTGTGAAGTAAATGTGCTTCCGGGGAAAATAAGTGA
CTTCATTACAACTCTCAATCGTCCATCGACTGCCGCAGAACTATCGCTGGTCTGCTGGTT
TCGCAGGTTCGAAGGTTGAACCGATTCCGCAAAATGGACCGTGCGGTGACAACAGCCTGG
TGGCGCTTAAATTGCTTAGCCCGGATGGTGATAATGCATGGTCGGTGATGTATAAACTAA
GCCAGGCGTTAAGCGACATCGAAGTTCCATGTTCGGTGCTGGAGTGTGAAGGTGAGCCGT
GCCTGTTTGTAAATCGCCAGGACGAGTTTGCTGCAACATGCCGATTGAAAAATTTTGGTG
TGGCAATTGCCGAACCCTTTTCAAACTACAATCCTTTTTAAGCGTCAGCTCAACGCCAGT
AGCTGACGCGTATACTCCTGCTGCGGTGTGGCAAACACGCGCGCGCACGGTCCTTGTTCC
ACTACTTCCCCTTGTCGCAGTACGATAACCTGATGACATAACGCGCGGACAACGTGCAAA
TCATGGCTGATAAACAAATAGGCCAGTTGATGCTTTTGTTGCAATGATTTCAATAGCGTC
AATATTTGCGCCTGTACCGTTTTGTCGAGTGATGATGTCGGTTCATCAAGTATGATCAGC
GAGGGCTTAAGAATTAATGCCCTGGCAATCGCAATACGTTGTCGCTGACCACCAGAGAAC
TCCGCCGGATAACGGTGGCGTGTTTCAGGATCTAATCCCACTTCATGCATCACGGCTATC
ACTTGTTGTTCGCGTTGTGCGGCAGAAAGCGTCGGCTGGTGAACCCGTAAGCCTTCCTCA
ATAATCTGCAAAACGTTGAGTCGTGGGTTGAGCGAGGAGTTTGGATCCTGAAATACCACC
TGAATGCGATGACGAATAGGTAACAGCTGGCGGCGATTTAAATTTTGCAGTGGCTGACCG
TCAAAGACGATGCTGCCCTGAGAATTAATCAGTCGCAGCAGCGCCAGTCCCGTCGTGCTT
TTCCCGGAACCGGACTCGCCCACTAAACCCAGTGTTTCACCCGCCCGTAGCGTAAAACTG
ATGTTTTTCACCACCACATTATGATCCACAATGCGCTTCAAGATCCCTTTGCGAATGGGG
AAGGCAACCTGAAGCTGTTCAACATCCAGCAACGTTGAGGCAGGTTCTGGCAACGGCACC
GGGTCGCCTGACGGTTCACTGTTGAGTAGCTTTTGTGTGTAAGGATGAGTGGGTGAGGCA
AATAGCGTAGCGGCGTTATTTTGCTCGACACAGCGACCATTTTGCATTACCGCCACGCGG
TGGGCCAGTTTTCTGACAATGCTGAGGTTATGAGTAATAAACAGCATGCCCATATTCAGC
TCGCCTTGCAGTTCGCGCAACAGCTGTAAAATCTGCGCCTGGACAGAGACGTCCAGTGCG
GTGGTTGGTTCATCGGCAATTAATAATTCCGGTCGCGTTAACAGCGCCATCGCAATCATC
ACCCGCTGGCGTTCGCCGCCGGAGAGCTGATGCGGATAATCTGTCAGCCGTTTTGCCGCC
TGGCGGATACCGACGCGATCAAGGCAGTTAAGAATTTCGCCACGAGCCGCTTCCCGACGC
ATCCCGCGGTGGAGTGAAAGCACTTCATAAAGCTGTTTTTCCAGGGTATGCAATGGATTT
AACGACACCATCGGCTCCTGAAAAATCATGGCGATCTTATTACCGCGTACACCGCGCAAC
GTTTGATCGCTGGCATGAAGCAGCGATTCGCCATGAAAACGAATATCGCCGGAGAGATAT
TCAACCGGCGGGGAAGGGAGCAGACGTAAAATTGACAGCGCGGTAACGCTTTTGCCAGAA
CCTGACTCACCCACCAGCGCCAGCGTTTCGCCAGCCTCAATCTGTAGTGAAACATCATTG
ACTACTGTACGTACGGTTTGCTGATGGCGAAAACCCACCGACAAATTTTCAATCGCTAAC
AGAGTTTGCGTCATGCTACACCGCCTTATTAGGATCAAATGCGTCGCGGACGGCTTCACC
AATAAAGATCAGCAAAGACAATAATATCGCCACCGACAAGAAGGCGGTGATCCCAAGCCA
CGGAGCCTGAAGGTTATTTTTCCCTTGTAACAGCAGTTCACCGAGTGACGGTGAACCGAG
CGGCAGACCGAAGCCGAGGAAATCGAGTGAGGTCAGGGTGGTTATCGAACTACATAAAAT
AAACGGTAAAAAGGTGAGCGTAGCGACCATGGCATTAGGCAACATATGACGCAGGATGAT
ACTGCGATCGCTGACGCCAAGCGCCTGCGCCGCACGAATGTAGTCGAAATTACGGGTACG
TAAAAACTCCGCCCGCACCACGCCGACCAGACTCATCCAGCCAAACAAGACAGTAATTGC
CAGCAGCCACCAGAAGTTAGGCTGTACGACGCTGGAAAGTAAAATAATCAAAAACAGCGT
CGGCATCCCCGACCATACTTCAATAAAGCGTTGCCCCCAGAGATCGACTTTACCGCCGTA
ATAGCCTTGTAGCGCCCCCGCCAGCACGCCCATCACGCTGGAACAGAGAGTCAGCATCAG
GCCAAACAGAACCGAGATCCGCGTGCCATAGAGAATACGTGCCAGCACATCGCCGCCGTT
GGCATCCGTTCCCAGCCAGTTTTGCCGGGAGGGTGGAGAAGGGAAGGGCTTATCGGTAGC
AAAGTTGATACTGGTAGCACCAAAGCGAATCGGTGCCCACAGTACCCAGCCATTATTTTC
CAGCCGTTGTTTCAGCCACGGGTCCTGATAATCAGCCTGACTTGCCAGCGGGCCGCCAAA
ATCGCTTTCGCTGTAGTTTTTCAATAACGGGAAATACCAACTGCCGTCATAACGTACCAG
CAACGGTTTATCGTTGGCGATAAGCTCAGAACACAAACTCAAACCAAACAAGACGAGGAA
AATCCATAACGACCAGTAGCCGCGACGGTTATGACGAAAACGCGCCCAACGGGCCTGATT
GACGGGGCTGAGTCGCGACATTAACGTCCCTCAAAATCTATACGCGGATCGACCAGCGTA
TAGCTGATATCACTGACAATATTCAGCAGCAGGCCAATCAGGGTGAAAATATACAAGGTA
CCAAACATTACAGGATAATCGCGCGAGACGGTCGCTTCGTAGCCCAGTAAGCCAAGACCA
TTGAGTGAAAACATCACCTCAATCAGCAGCGAGCCGGTAAAAAACATGCTGATAAACGTC
GCCGGAAAACCAGCAATCACCAGCAGCATGGCGTTGCGGAACACATGTTTCCAGAGAATG
TTTTTCTCACTTACCCCTTTCGCACGCGCGGTCACCACGTATTGCTTGCGCACTTCATCA
AGGAATGAGTTTTTGGTCAGCATGGTCAGCGCCGCAAAGCCACCAATCACCGTCGCCAGC
ACCGGCAGCGTGATATGCCATAGATAATCGGTGATTTTCTGATACCACGGCAGCGAATCA
AAGTTAGCGGAAACCAGGCCGCGTAGAGGGAACAGGTCGAAATAGCTGCCGCCTGCGAAG
AAGACAATCAGCAGGATGGCAAACAAAAAGGCCGGAATGGCGTAGCCGATGATGATAAAT
GCGCTACTCCAGACGTCAAAGCGGCTCCCATTATAAACAGCTTTGCGAATGCCTAACGGA
ATCGACACCAGATAGATAATCAGCGTGCTCCACAATCCGAGGGTGATGGAAACCGGCAGA
CTGTCTTTAATCAGCGTCAGCACCGAGGCGCTGCGAAACAGGCTATCGCCAAAATCAAAG
CGGATGTAGTCCCAGAGCATTTTGAAGTAACGTTCGTGGATCGGCTTATCGAAACCGTAG
CGATGAGTGATCTCGGCGATCACTTCTGGATCTAATCCGCGTCCGCCACGGTAATTACTG
TCGCTGATATTACCGACGCCCGTTTGCGCATGGCTGGCGCGAACGCCTTCACCGCCTGCG
CCGGGTAATACTCCGGCATTACCAAACTCAATGGCGGCGATGGCCTGGTCGACCGGACCG
CCAGGCGCAATTTGCACGATGAAAAAGTTGATAGTGATAATCGCCCATAACGTTGGGATC
ACCAGCAACAGACGGCGAATCAGATATGCGCCCATCTACTCTCCCTGTTGTCTGGCTGAC
GGCAGTTTGGCCGCTTTATTAACGTCATACCACCAGGTATCGATACCCAGGCTGTAAACA
GGGCGTACAGCGGGTTGGGAGAATTTATCCCACCAGGCGAGACGGTCTTCCGCCATGTAC
CACATTGGCAGCATGTAATAATTCCACGTTAATACGCGATCCAGTGCTCGCCCTAACGGC
AGTAATTTTTCTTTATTTCCCTGCGCGGCAATAATTTGGTTGATCAGCGAGTCGATAACC
GGGCTTTGCACGCCGGGGGCATTATAAGTGGAATTGATATATTCCGATGACCAGGAAATC
TGTAAATCGGAACTGGGCCACGGCATCGCCCGCCATACGCGCGGCATCATGTCATAGTCG
CGACTGCGCATGCGGTTGGTGATTTGCGAGTTATCCACCTTGCGAATGTCCATGTTGATA
CCCAGCCGTTGCAGGCTGTGCTGGAACGGCAATACCCACTGACTATTGCTGCTTGCGGGA
AGCAATAATTCAAAGCTGAGTGGCTGACCCGTTGTGGCATTAACGCGTTGCTGACCCTTC
AGCACCCAGCCCGCTTCGTTGAGAAGTTTGTCGGCTTTTAACAGGTTGTCACGATCGTAG
CCATCGCCTTTAGATACCGGCGGCTGGTAGATTTGTGTGAAGACTTCTGACGGTAGATCT
TTTTTCATTGGTGCCAGAAGCACCAGCTCCGCGGCGTCGGGGTAATTTCTGGCCGCGTAT
TCGGTATTCTGAAAATAACTGTTCGTGCGACTCCAGGCATTGTAAAACAACGCCTTGTTC
ATCCATTCAAAGTCAAAGGCGAGAGTGATCGCTTCCCGGACCCGGCGATCGCTGAATACC
GGACGTTGGATATTAAACGCCAGCCAGCGCGTATCCTGGGCTGATTCGTTCTTTTGCTCA
TCTTTGATGATGTATTTTTTATCGAAATTTTTACCGGTATAACGCGTGGCCCAGTTTTTA
GCGTCGTTTTCCATACGCAAATCAAAGGCACCTGCTTTAAACGCTTCAAAGGCGACGTTA
TCATCGAGGTAATAATCGTAGCGAATGGTGTCGAAATTCCAGCGTCCACGGTTTACCGGT
AAGTTTGCTGCCCAGTAATCTTTCACGCGGGAATAGACAATATTTTGCCCCATTTTCCAG
GACGTAATGCGGTACGGACCACTGGCAAGCGGAGGCGTGGCGAGCGGATCGCTAAGTTTG
TGATCCTTCCAGTACTTTTCTGGAAATACCGGCAGCGAAAACAGACTCAACATATCTTCT
TTGCCGGGTTTAGCTAACTCAATGCGCACGGTTAACGGCGCAATGGCTTTGACGGTGGTG
CCTTTGTAGACCAGACGAAATTGCGGCACGCCTTCGGTCATAAATTTTTGAAAAGTAAAC
TCTACATCGCGGGCAGTAATGGGCGAACCATCATGAAAACGGGCGCGCGGATTAATAGCG
ACCTCCACCCAGGAATAATCGTCAGCATAGCGTGCACTTTCAGCAATCAGCGGGTAATAA
CTGCCTGGTTCGTCATCGGAAGTCGTAAATAGCGTGTCGTACAACTGCTCGGTGCGTGCG
CCCGGGTTGCCGCGCAGTGCATAGCGGTTGAAATTATCGAAGGTGCCGAGGGCTGACAAC
GTTATCTGCCCACCTTTTGGCGCGGCGGGGTTCACATAATCAAAATGGTTGAAATTAAAC
GCGTACCGGGGTTCGCCCAGCACGGCAAAGGCATAGCTTTCCTTGATAGCCTGCGCCTGC
GCACCGAAGGTGAACAGAGCGATAAACAGCAGCAGTATGCGCACAATCATCTGCAACGGA
TTTCCTTTTACTCATCATTAGCCGCAAACCGGCATGCTTTCACTATGAATAATAAGGGAC
GTAAGCACACCTTACCACTGCGGCCTATACGGTTTCTTCAGCCAGCGAACAAAATCGTCC
AGCGGTAACGGGCGACTAATCCAGTAGCCTTGCATGAAATTAACGCCGCGTTCGCTTAGC
CATCGCGCTTGTTCCGGCGTTTCGACCCCTTCAGCAACTGTCAGCATATTGAGACGTTTC
GCCAGCGTCAGCACCGCGTCAAGTACGGGTGAAGTGATCGTTTCCGTACCGATGGCGTTG
ATAAATCCACGGTCAATTTTCAGATAATCGAGCGTAAAACGCTCAAGATAGATAAGCGCG
CTGTGCCCGGTGCCGAAGTCATCAATAGCAATTTCTATGCCGACCGAGTGCAGCCAGGCG
AAGAGTTGTGTGGCTTCTTGCTCTTTCAGCATATCGCGCTCGGTAATTTCCAGCACAATC
TGGAAATGGTGTGCGGGTAGGGAGGTGAGCAGTTTCTGGATATCTGCTTTAAAGCTTTCG
CTGTGCAGATGGTCCGGCGCAATGTTAATGCCAAATTTGACGCCTACCGGCAGCACTTTT
TCTAATTCTGCGGCATCGCGGGCAATTAACTCAAACAGGTGCTGAGTCAGCGGTACAATC
ATCTTTTGCGATTCGGCAAAGTTAATGAAGGCATCCGGGGGAATTTCTCCCGCGACAGGA
TGCCGCCAGCGTAGCAGTACTTCCAGGCCCGTTACTCGCAAAGCTTGTGTATCCACCACC
GGTTGATACGCCACGTAAAATTGTTCGCGCTTGATGGCGGTCATGATTTCTCTGCCGGGG
CGCATACGTACGCTCATCAGGTAATAGCAGAGCAGGCCAACGACAGTTCCACTCATGCCG
CCCAGTAAAAATGCGTACCACACATCGTTCCATGTCCAGTCATCTGCATAAAGCCGAACG
GTCAGAGGAATGCCCGCAATTTTAGTTTCACGGACTGGCATGTCGGTTAATTCGTTAACG
TTCATCAAACGTGAAGAAAAGGTAGATAGCGCAGTATTGCCAATAATGAGGGCGACGCCA
TCGTAATCTTCCTGCCGTGAACTATAAAAGAGTGAAGGCGTCAGGTTGAGATTCAGAGCG
GCAAAGACGCCGCTATTTTTCAGCAAAGGGTTGCGATACCAGATGACGATTGCGGGTTTG
TTCGGCACCATCGGCGTGCCGGGTAAGATCGCCATATCGACATTTTTATTAATGTCGAGC
GCCGGAATCAATTCATTGAGTGGAATGTCCATCTCACCGGTCGCAGATGAACAGAATGTT
TTTTTATCTTTCACCAGCACAAACGTTCGGACATTCATGCTAAACGCCGCGCGGGCGGTC
AGTTCGGGGTTAGCTTGCTGGCAGGTATCTAAGGTCAGCGGCTGGAGCCGGTCAGTAGTG
GATTTCAGGTCGGCAAAATAGGTATCGAGATACTTTTGTACGTCGGTAATCAGTGTGTCG
TATTTGACTTCGTGCTTATGCCAGGCCACTAAAAACTGAAGGCAACTCACCAGTATCGCA
ATCATTACGCCTGCAACAATGCAGGTAAGCAGGAGCTTACGTCCAGAATTGGGAGCGCGT
ATGAACATGATTCCGTTAATTTCCTGAAATTACGACAACATTTAAAAGATAACAATGACC
GGACTATAGCCTGGATCAAGACGCGGAAACATCATTTTCTCTGATGAATGAAAACAAAAA
AGCACTGCCTAAGCAGTGCTTTCAGTTAACTCGTCAGGATAGCCAAGGGATTGCATCCAA
ACGGTTTATTAGCTGCGGCTGAGAACCCGGCGTGCTTCGTTGTAACGCTTCTTCCAGTAC
GGTTCATTCATGCTGGAAATAATAACACCACTGCTGGTGGAAGCATGGACAAACTGATTG
TTGCCGATATAAATACCGACATGGCGTCCCGTTGAACCGGCACGGAACAGAACTAAATCA
CCCGTACGCAAATTACTGCGGGAAACAGATTTACCCATTTCCTGCTGTTCGTAAGTCGAA
CGCGGAAGTTCTAAGCCAAATTGCTCACGGAATGTACGCTGTACGAAACCAGAACAATCG
ATACCTTTTTTAGTGCTGCCGCCCAGACGATAACGTACGCCTTTCCAGTCAGCATACTGA
TCCATAATTCGCGATTTTACGTCGACATTACGAACCAGGTTTTCAAATTCATCCTGAGAA
GCTTGCAGTGATGATGTTTCACTACCCACTGCACGTGTCTCAGGATGCATATTCTTTGCG
GTGTTATTTGCACTACATGCAGAAAGCAGAACCGCTACTGCAATCGCGGGGATCCCGCGC
AAGATATATCTCAAAATCGGTTGAGATTTGACCATGTTGTTTGTTTTCCCTTGAAGTCCT
TAACGACAAATATCGTTATAAAAAAATGCCAAGCGACACGAGACTAATTACCTGGGCATG
TTGAAACAATTCCTTAAGGCCAAATCTGTGGACTAACGCACAAAATTATATGCTGTGAGG
ATAATCTACCGCCGAGGCAAAACGAGTTCGAGATTACCCGATTGGTGCGGTCTTGGCGAG
CGGTTTTACATGATTTTTTATAAGAAAAAGTGATACAGAAAGTTAATAAGCGGGATTGCT
CAATTAAAGTACGATTGAGTGAAACGCATGCAATCCATTCATTTACTTAGAGAATGATTT
TTGCTTTCGATGCATGAAAGCACGGTGCGCATCATCAGGATTATCCTCACTATAAAAATA
AACCTGATGATGTTAATTACTGTGAGTTATTTGTTTTGGAAATGTTTGTTTTTTCCCGGT
AGTGATTTGTCAAAAAAGGTGATTAATCGATCACTTAATGGCGTCAGCAACACCCAGGGC
AAACCGATCAATATCACGGTCATCGAACCGACAATGATGTCAGTAAACCAGTGTGCGCCA
ATCATTACTCTGGGAAACGCAAAAACCACAAAAATAATAAGGGCGATAAGACCTGCAACT
TTGCCGAAATAGCGCCACATGAATGCCGAAAAAATAAGCAGCATCATGCCGTGATCGCCG
GGAAAGCTATCTCGTGAGGCATCTTTCGTGGGGACAGAGAGCAGCAGTTCGCTGACGCGG
TTAATATCGGTAAAAGTCAATGTTGGGCTGGCCCGTTTTACAGGAATTAATGCCTGACCC
AGCTGGTTTAATACCACTGCAGTTAATAGCATGACCAGACCAATAATCACGATACGTCGT
CTGCCTGGGGCGTTTTCTTTCAGCCAGAAACTCAGCATCAACATTCCCATCGCCAGCAGT
GAACAACCGTCGAAAGCGCGATTGTTGGTCAATGCAACCAGCCACAAAAAGGCCTTACTT
TCGACCAGTTTCTGATTAAAGAAATAAAAAATATCCGCATCAATCGGCAACCAGAATCCA
TGATTAACGGGAATATACCAGGAAAGAAACAGCGCGAGGCCGACAATATTCAACAACACT
ATTTGCGGCAAATTTTTAATCATATTTTCTCTAATTATCTTACTGAAAAACGCAGGCAAC
CTTACGCGGTAGTCGCTAAACGAAGCTTCAACAGCGCGCTCTGCAAGGCATTCCAGTCAG
CTTCGCTGCTGGAAATCAGCTCAATACGGCTGTCCGGTGGCGCAACGTTTTGCGTTTCAA
TGTGCAGGTCATCGCCCTGACGGTTGATTCGCACCAGCCCTTCGGGAATACGCAGCACGC
CTTTGACGCGTTCCACCGGTGCAAGTCGCGCCCATTCCAGAATGCCAATGGTGTCGAATA
CCGTATCAGCGTCGAATATCCAGCCGCAGGCCTGATATCCTTGCCCGCTGTTCAGACTGC
GACGCCAGCGTTGATGCTCTGGCAGGCTTAACGCTGCTAACCCTTTTTTCACGACATGCT
GATGAGAATGCGCGGCGCTGGCGGGCAACTCGGCTAAATTGCGACGCGGCAAATCCAGAA
GATGACCGTCAACTTTCCCATGCTCACTGTGAATTAATTGCCGATCGCCACCATTTTGCT
GCCACCAGCGCTGTAGCGCTTGCTCGCTTTCAGGTGTCGCACGGTCGGATTTATTGGCGA
CAATGATGTCTGCGGCAGCCAGCTGGTCACGGAAGTTTTCATTGCTGGCGCTTTTTTCGT
CCAGCAGCAGGCGTGGATCGAGAATGCACAACGTGGCGCGCAGATCTATCCACGGTTCAT
AGACTGGTGCGGTTAACAGATCGAGGATCTGTTTCGGATGGCCCAGCCCGGTCGGCTCTA
TCAACAAGCGGTCTGGTTTTCCCTGACGCAGTAAGGTATTCAACCCTACCTGCATGGGTA
AACCATTAACGCAGCACATGCAGCCGCCGGGGATCTCTTTCAGCAATGCGCCGCTATCGG
CGAGCAAAGCACCATCAATTCCGACTTCCCCAAATTCATTAACCAGTACCGCCCATTTTT
CGTTGGGATCTTTATGGGCTAACAGATGAAGAATCGACGTAGTTTTCCCGCTGCCGAGAA
AACCGGTGATGAGGTTGGTCCTGGTCACAACGGCTCCGCAATACTCTGATAAGTTAACTG
AGCGTTAATCCTGGCTAAAAACGGCAGAAAAGAGAAGGGGAGAGCGGACGAAGGTGAGCT
TCATCCGCTTTAACCGCAGAAATCGTTAAATTTTGAGGGTGTTTAATAGCGCCTGATGCG
CGCCGAATTGTGCGATTTGTTGCCAGGCTTGTTCGATGGCCTGCACAAAATGCGGGTTAT
CTGGCAGATCATCACCGAAAACTTCACGCAGGGAAAGCAGGGCGGTGACGCGTTGCTCAC
TGCTGCTGCCCGCAACAAGATCGCGAATTTTATCGCTAAGCGGATCGCGAACATCAATGG
CATTTCCGGCATCATCAACGCCGCTGACGTAACGCATCCAGCCTGCAACGCCTAATGCCA
GCAACGACCAGTCCGTTTCGCGCCCCAGATGTATGCGAATACCTGCCAGCATACGTTGCG
GTAATTTCTGGCTGCCATCCATCGCGATTTGCCAGGTCTTATGTTTCAGCGCCGGATTAG
CAAAACGTGCAATTAACTTATCCGCATATTGTGTTAAATCGACATCTTTAATTTGCAGTG
TCGGCGCTTGCTCATCCAGCATTAATGTTCTGGCAGCATGGCGAAATGCGCGATCCTGCA
TGCAATCACTGATATGGGCGAATCCTGAGAGGTAACCCAGATAAGCGAGAAAAGAGTGGC
TGCCATTAAGCATACGCAGTTTCATCTCTTCCCATGGCAGGACATCATTCACCATTTGTA
CACCTGCGACTTCCCAGGCAGGACGCCCAGCGACGAAGTTATCTTCCACCACCCACTGGA
TAAACGGTTCGCAGCTAATCGCGCAGGGATCATTTACCCCCAGATGCTGGCTGATTTCTG
CCAGTGATTCGTCGGTTGCAGCCGGAACAATGCGGTCGACCATGGTTCCCGGAAAACTGA
CGTGTTCTTTTATCCACCCGGCGAGTTCTGGCGAACGTTTTTCTGCCATTCCCAGCACCG
CGTTTTTCACCACATGGCCATTGTCGGGAATATTGTCGCAGGAGAGCACGGTAAACGGTG
TAAGGCCGCGCTCACGGCGGCGTTTCAGTGCTTCGACGAGAATACCTGGCGCGGAGTGAG
GTTCTTCAGGGTTTTGTAGATCGTGAATAATCCGCGGATTGCTGGTGTCGAGTGCACCGG
TGGCCGGGTCAATACAATAGCCTTTTTCGGTAATCGTCAGGGAAACAATTGCCACCTGTG
GCTCGCAAAATTTCTCAATAATTGCCGCTAAGGAATCCAGTTTTGCATTCAGGCATTCGT
GAACGGCACCGACAATTATCGCCTGATTGCCGTCCGCCCCTTTCTCCAGCACGGTGTATA
AATGGTTCTGTGCGCGGAGCTGGCTCATCAGTTGATCACCGCTGAACAAGCTGATTTCAC
AGATCCCCCAGTCACCGCCCTGGGCATTCAGCACACGATCGGTCAGTAACGCCTGATGTG
CGCGGTGAAAGGCTCCAAAGCCAAAATGAACGATACGTGATTGCAACTGCTGGCGATCGT
AGCGTGGAGCGTGTACATGATGCGGGAGCGTAACGGAGGCGATTGTATTCATAGGAGTCA
CGTCTTAGTAACGATTAATTAACAATGACAGTGTAAAGTTATATGACAGCAATTGAAATT
GGTCTGGATTGTTAATGCGATGAAGTGTGAGGGCGATCAATCAACGAGTGAAAATTGAGG
GCGTAAGGTGTTCAGGAAGCACAAAATAGAAGATTGGTATAATAAATTAAAAAAGGGACA
GCCTGAGCTATCCCTTTTCTGCATGCGGCTGAAGTTAGTCAGCACGACCCATATAACGGC
GTTCTTCGATATGGATACGAATTTTTTCGCCCGGGCTTAAGTATTCTGGTACCTGAATCA
CCAGACCAGTGCTCAATGTCGCCGGTTTGTTACGGGCGCTGGCAGATGCCCCTTTGATGC
CTGGTGCAGTTTCAACGATTTCCAGATCAACGGTCTGCGGCAGCTCAAGCGCCAGCAGTT
GACCGTCCCAGGTCAGCACCTGCATGTCCGGCATGCCGCCCTCTGGCATAAACAGCAACT
CTTCTTCAATCTGATCTTTGGTGAAGGTATACGGGGTATAGTCTTCTTTATCCATAAAGA
CATATTCGTTGCCATCGACATAGGAGAAGTCAACGTAACGGCGGGTCAGCGTCACGGTGT
CAACGATATCATCTCCTTTGAAACGCTCTTCTACTTTCAGCCCGGTACGGACATCAGAAA
AACGCATTTTGTACAGCGTAGCGGCACCGCGGGCAGTGGGCGACTGAATATCAATGTCCT
TAACCAGCAGCAGTTTGCCGTTGTAATTCAGTACCATACCTTTTTTAATTTCGTTCGCTC
TTGGCATCGAAAAATTCCTGTAGTCGAAAATGTCAAAAATATCGCGACAAAGTACTCGCG
ACGGGCCTTTCGGGCAAGTGGTATTCGCACTTTTGCTAGTGCAAAAAAGGTGGTACTGTG
CGCGCTCATCAATCCGGTGGTTAACCTTAAGAGAACAACGTATGGAATGCCGTCCGGGTT
GCGGGGCGTGTTGCACTGCCCCTTCAATTTCCAGCCCTATTCCCGGTATGCCAGATGGCA
AGCCCGCCAATACGCCCTGCATTCAGCTTGATGAACAGCAACGCTGTAAAATTTTCACCT
CGCCACTGCGACCGAAAGTCTGTGCAGGCTTACAAGCCAGCGCTGAAATGTGTGGTAACT
CGCGTCAGCAGGCCATGACCTGGCTTATCGATCTGGAAATGTTGACCGCGCCTTAAACAT
CTTTAATCCGCAGTAAGCAAAACAGAGTGGCGATAATCATCACCATCGCAAACCAGAACA
CAGCGTGATAATTCCAGATCTCGGCGACGATGCCCGCCACTGATCCTGCGATGATCCAGC
CCACGCGCGACGTGTTGGTATAGAGCGTGGTGGCTGAACCTGCCTGACCGGGCATCAAAT
CCTGAAAATAGAGCATCCCGATGCCGCCCAGAATGCCAATAAAAATAGCATTTAGCAGCT
GCAAGCCCAACAGAATGATAGGTGAATGCGCCATCAGCATTCCTGCGTAAAAACAGACGC
CACCCACGGCAGCAACGCGCATTAAGAAACGCTTACCCAGACGTTTGGCGAAATATCCGG
CAATCAACATCGTCGGGATTTCCAGCCCGGCGGCGGTCCCCATCATCACACCGGCCAGTT
TCTCGGGAAGATGCAGTTCGTTGATAATAAATAGCGGCATGTTGATGATGTACAGACTGT
TCGAGCCCCACATCAATGTACAAATGACAAACAGCAGCAGCGTATCGCGACGGTTACGGC
GCGGCGCTTCAACCGTGCCGGTCGCCAACGGAAGCTCTTTTTGCATCGACGGTAAAAACA
GCCACACCATCACGCCGCAAACAATAAATGCTACCGCTGCGCTCAGATACATTACCGTAA
AGCTGAAACCCATCGCTAAGGCATAAGCCAGCGGTGGGCCAATGACCCATGCCAGTGAAA
CCTGAGCGCGTAAAAAAGAGCTGAACATCACCGCCTCACGTCCGGTTTTGTCGGCATGTT
CACGGGCAAGGGCAAACATTTGCGGGTTAGCGGTCGAGCCAAAGCTGCTAAGAAAGACGC
CAACGAATAGCAACACAAAGTAGTTGCGATTCCAGGCAAAAAGGGTGCAGGCCAGCACGC
CTAACAGGCAGCAAAAGACAATCAGCGATTTGCGATCGCCGCGCTTATCAGAGCGCCCGG
CGAGAAACTGACTCACCAGAATCCCAATGACAGCGCTGCCGGTAAAGAAGAATCCCACCA
TCGCCGGACGGGCATGTACTTCATCGGTAAGAAAAATACTGAGTGTCGGGGTTTGCAGAG
CGCCCGCAATACCGGTGAGAAAGGCAACGATTAAAAACGCCGTCGAGGTCAGGTCAAACG
ATTTCGCGCTGGAGACTGCGGGGGAGTTATGCATGCTGGTCGATCATTGGAAGAGGAAGA
CGCGGAGTTTACGCTGCTTGTCAGAAAATAAACAGACAGCGAAATCAAAAGCGCCACGAA
TAATCAAAATGCCATTTCACTGTTGCTGATTGGCTGCTGACGCTGCTGAAATGAAATTGC
TGATAACGGATTTTTCCATCAGCAGTTCGGAAAAATGACAAAAAATTGTGCAGCACATCA
AACTTTTGCTCATAACTTTACGGCTTTCCTTGCGTGCTGAAACAGAAGTATTATGCTTTC
TTGAAACGTTTCAGCGCGATCTTGTCTTTAACCCTAAGCCAGGTTGGCGCTTTTTTTCTC
ATAGAAGCTGAATCGTTTCAATTCAGCAAGAGAGGAGAACTATGTTCCAGTTATCCGTAC
AGGACATCCATCCGGGCGAAAAGGCCGGAGACAAAGAAGAGGCGATTCGCCAGGTCGCTG
CGGCGCTGGTGCAGGCCGGTAATGTAGCAGAAGGCTACGTCAATGGCATGCTGGCGCGCG
AACAGCAAACCTCAACGTTCCTCGGCAATGGTATTGCTATTCCACACGGCACTACCGACA
CCCGCGATCAGGTGCTGAAAACCGGCGTTCAGGTATTTCAGTTCCCGGAAGGCGTCACTT
GGGGTGACGGTCAGGTAGCGTACGTAGCGATCGGTATTGCTGCCAGCTCGGATGAGCATC
TGGGCCTGCTACGCCAGCTGACCCACGTACTGAGCGATGATTCCGTTGCTGAACAACTGA
AGTCAGCAACAACAGCAGAAGAACTTCGCGCATTGCTGATGGGCGAAAAGCAGAGTGAGC
AGCTGAAGCTCGACAACGAAATGCTGACACTGGATATCGTCGCCAGCGATCTGCTGACTC
TTCAGGCGCTGAACGCTGCGCGTCTGAAAGAAGCGGGGGCAGTTGACGCCACTTTCGTCA
CCAAAGCCATCAATGAACAACCGCTGAACCTCGGACAGGGCATCTGGCTGAGCGATAGCG
CCGAAGGCAATTTGCGTAGCGCGATTGCGGTAAGCCGTGCGGCAAATGCTTTTGATGTGG
ACGGCGAAACGGCAGCCATGCTGGTGAGTGTGGCGATGAATGACGATCAGCCCATTGCGG
TTCTTAAGCGTCTCGCTGATTTGTTGCTCGACAATAAAGCTGACCGCTTGCTGAAAGCGG
ATGCGGCAACGTTGCTGGCGCTGCTGACCAGCGATGATGCGCCGACCGACGACGTGTTAA
GCGCGGAGTTTGTGGTGCGCAATGAACACGGCCTGCATGCTCGTCCAGGTACCATGCTGG
TCAACACCATTAAACAATTTAACAGTGATATTACCGTGACAAACCTTGATGGTACCGGCA
AACCGGCAAACGGACGTAGTCTGATGAAAGTTGTGGCACTTGGCGTTAAGAAAGGTCATC
GCCTACGCTTTACCGCCCAGGGTGCAGATGCTGAACAGGCGCTGAAAGCAATCGGCGACG
CTATCGCTGCTGGTCTTGGGGAGGGCGCATAATGAGCAGACGTGTTGCTACTATCACCCT
TAATCCGGCTTATGACCTTGTTGGTTTCTGCCCGGAAATTGAACGCGGCGAAGTGAACCT
GGTGAAAACCACCGGTCTGCATGCGGCGGGTAAAGGCATCAACGTGGCCAAAGTATTAAA
AGACCTGGGAATTGATGTCACCGTTGGCGGCTTCCTCGGTAAAGACAATCAGGATGGTTT
TCAGCAACTGTTCAGCGAGCTGGGCATTGCCAACCGTTTCCAGGTTGTACAGGGGCGCAC
CCGAATTAACGTTAAGCTGACGGAAAAAGACGGCGAAGTGACTGACTTCAACTTCTCGGG
TTTTGAAGTCACTCCCGCCGACTGGGAACGCTTTGTGACTGATTCTCTGAGCTGGCTCGG
TCAGTTCGATATGGTCTGTGTCAGCGGAAGCTTACCGTCAGGCGTCAGCCCGGAAGCGTT
CACCGACTGGATGACTCGCCTGCGTAGTCAGTGTCCTTGCATTATCTTTGATAGTAGCCG
TGAAGCGTTAGTAGCAGGTTTGAAAGCGGCACCGTGGCTGGTGAAACCTAACCGCCGCGA
GCTGGAAATCTGGGCAGGCCGTAAACTGCCTGAAATGAAAGATGTGATTGAAGCTGCGCA
TGCGCTGCGTGAACAAGGTATTGCGCATGTCGTTATTTCACTGGGTGCCGAAGGCGCGCT
TTGGGTTAATGCCTCCGGCGAATGGATCGCCAAACCACCGTCAGTCGATGTCGTAAGCAC
CGTTGGCGCAGGGGATTCTATGGTTGGTGGCCTGATTTATGGCTTGCTAATGCGTGAATC
CAGTGAACACACACTGCGTCTGGCGACTGCTGTTGCAGCCCTGGCGGTAAGTCAAAGCAA
TGTGGGTATTACCGATCGTCCGCAGTTGGCCGCAATGATGGCGCGCGTCGACTTACAACC
TTTTAACTGACAGCAGGAGAGGCATAATGAAAACGCTGCTGATTATTGACGCTAATCTCG
GTCAGGCACGCGCCTATATGGCGAAGACCCTGCTGGGCGCGGCGGCGCGAAAAGCAAAAC
TGGAAATCATCGACAATCCGAACGACGCAGAAATGGCGATTGTTCTCGGTGATTCCATCC
CGAATGACAGCGCGCTGAACGGTAAAAATGTCTGGCTGGGCGATATTTCCCGGGCAGTTG
CGCACCCTGAGCTGTTCCTGAGTGAAGCCAAAGGCCATGCGAAACCTTACACTGCGCCGG
TCGCTGCGACAGCACCGGTTGCCGCCAGCGGTCCGAAACGCGTAGTTGCGGTGACTGCTT
GCCCGACTGGCGTAGCACACACCTTTATGGCGGCTGAAGCCATTGAAACCGAAGCGAAAA
AACGTGGCTGGTGGGTGAAAGTTGAAACCCGTGGTTCTGTTGGTGCGGGTAATGCAATCA
CCCCCGAAGAAGTAGCCGCAGCGGATCTGGTGATTGTGGCGGCAGATATCGAAGTGGATC
TGGCGAAATTTGCGGGTAAACCGATGTATCGCACCTCTACCGGTCTGGCGCTGAAGAAAA
CCGCGCAGGAACTGGATAAAGCGATTGCTGAAGCAACGCCGTATGAACCGGCGGGCAAAG
CTCAAACGGCGACCACTGAAGGTAAGAAAGAGAGTGCAGGCGCTTATCGTCACTTGCTGA
CGGGCGTCTCTTACATGCTGCCGATGGTCGTTGCAGGTGGTCTGTGTATCGCGCTTTCTT
TTGCTTTTGGTATCGAAGCGTTTAAAGAGCCGGGTACGTTGGCAGCGGCGCTGATGCAGA
TTGGTGGTGGTTCAGCCTTTGCGCTGATGGTGCCGGTACTGGCAGGTTACATTGCCTTCT
CCATTGCCGATCGTCCGGGTCTCACGCCGGGTCTGATTGGCGGTATGCTGGCGGTCAGCA
CCGGTTCTGGCTTCATTGGCGGTATTATTGCGGGCTTCCTGGCTGGTTACATTGCGAAGT
TAATCAGTACGCAACTGAAACTGCCACAGAGTATGGAGGCGCTGAAACCGATCCTGATCA
TTCCGCTAATTTCCAGTCTGGTGGTCGGTCTGGCGATGATCTACCTGATCGGTAAACCGG
TTGCTGGCATTCTCGAAGGGTTGACTCACTGGCTGCAGACCATGGGGACTGCGAATGCGG
TTCTGCTGGGGGCGATCCTCGGTGGCATGATGTGTACTGACATGGGCGGTCCGGTAAATA
AAGCAGCGTACGCATTCGGTGTGGGTCTGCTGAGTACTCAAACCTATGGCCCGATGGCGG
CGATTATGGCGGCAGGTATGGTGCCACCGCTGGCAATGGGCCTGGCAACAATGGTGGCGC
GTCGCAAATTCGACAAAGCGCAGCAGGAAGGTGGCAAAGCCGCTCTGGTACTGGGACTGT
GCTTTATTTCGGAAGGTGCAATTCCGTTTGCTGCTCGTGATCCGATGCGTGTGCTGCCGT
GCTGTATCGTGGGTGGGGCGCTGACTGGCGCAATCTCAATGGCGATTGGTGCGAAACTGA
TGGCACCGCACGGTGGTCTGTTTGTTCTGCTGATCCCTGGCGCTATTACGCCGGTACTGG
GTTACCTGGTAGCAATTATTGCCGGTACGCTGGTGGCGGGTTTGGCCTATGCCTTCCTGA
AACGTCCGGAAGTGGACGCAGTAGCGAAAGCCGCGTAATAAAAGGTGTGTTACAGGGCAG
AAATTTACTGCCCTGTATCATTGGATGAGCGCAAAGAGAATGACCGGTTTGTGAATGTAA
TTTTATGAATTTAAATGGTTTTATCTTTCAGTAGAAACCTGAAACGTTCATCAAATACTA
AGGTTATTTCCTCAAGGGCAGATTCTTTTCTGCCCTTTTTTAGTGTTCATGTTCTGTGCA
TCCCGTCACAAATTCCTCGCTTTTGTAATTCAGGCATTTAATCGCATTTTGTGAGCCTGC
TCAAATCTGCCTATTTTGCCTCTCTGGCGGTAATTTACTTTACGTAAAACATGCATACTA
TGAGCACATGTTTAAATATGAACACATGTTTAAACCGTCTTTGCAGTATCTATATTCTTG
TGGATTGACAGGGTTGGTAATTTTTTACCAGAGGACGTGCTATGCGCGAAAAGGATTATG
TCGTAATTATAGGTTCGGCGAATATTGATGTCGCCGGATATTCACATGAATCATTAAATT
ATGCGGATTCAAATCCAGGTAAAATAAAATTTACGCCTGGTGGAGTAGGGCGCAATATTG
CACAAAACCTGGCGTTGCTGGGTAACAAAGCCTGGCTACTGAGCGCCGTAGGCAGTGATT
TTTATGGTCAATCGCTGCTAACGCAAACCAATCAATCAGGCGTTTATGTCGATAAATGCC
TGATTGTGCCGGGAGAAAATACGTCGAGTTATTTATCATTACTCGATAATACCGGTGAAA
TGCTGGTTGCTATAAATGACATGAATATTAGCAACGCTATTACAGCTGAATATCTCGCAC
AGCACCGTGAATTTATTCAGAGGGCAAAGGTCATTGTCGCGGACTGTAATATCAGTGAAG
AGGCACTGGCATGGATTCTGGATAATGCCGCCAACGTACCTGTATTTGTCGATCCGGTTT
CCGCGTGGAAATGTGTCAAAGTGCACGACCGTCTAAATCAGATCCACACTCTCAAGCCAA
ACCGCCTTGAAGCGGAAACCCTGAGTGGGATTGCGCTGTCAGGGCGTGAAGATGTGGCAA
AAGTTGCTGCCTGGTTCCATCAACATGGCCTGAACCGACTGGTATTGAGCATGGGCGGCG
ATGGCGTTTATTACAGTGATATCAGCGGTGAAAGTGGCTGGTCTGCCCCGATCAAAACCA
ATGTTATTAATGTTACCGGAGCGGGCGATGCCATGATGGCGGGACTTGCTTCGTGTTGGG
TAGACGGAATGCCGTTTGCCGAATCTGTTCGTTTCGCACAGGGATGTTCGTCAATGGCGC
TCTCCTGTGAATACACCAATAACCCCGATTTATCGATTGCCAACGTTATATCGTTAGTGG
AGAACGCAGAATGTCTGAATTAAAAATTTCCCCTGAATTATTACAAATTTCCCCGGAAGT
GCAGGACGCTTTAAAAAACAAAAAACCGGTTGTGGCGCTGGAATCGACCATTATTTCTCA
CGGGATGCCGTTCCCACAAAATGCCCAGACCGCAATTGAAGTTGAAGAAACTATTCGTAA
ACAGGGCGCTGTACCTGCCACTATCGCCATTATTGGCGGCGTGATGAAAGTGGGTTTAAG
CAAAGAAGAAATTGAATTACTGGGTCGTGAAGGGCATAACGTGACCAAAGTTAGTCGTCG
CGATTTACCTTTTGTTGTTGCCGCCGGAAAAAATGGCGCAACCACTGTGGCTTCAACGAT
GATTATTGCGGCGCTTGCCGGAATTAAAGTATTTGCCACCGGGGGAATTGGTGGTGTGCA
TCGCGGGGCGGAACATACCTTCGATATTTCTGCCGATTTGCAAGAACTGGCAAATACTAA
TGTCACCGTTGTTTGTGCCGGGGCGAAATCTATTCTCGATTTAGGATTAACCACTGAGTA
TTTAGAAACCTTCGGTGTGCCGTTAATTGGCTATCAGACTAAAGCGCTGCCTGCGTTTTT
CTGCCGTACCAGCCCGTTTGACGTCAGCATTCGTCTCGACAGCGCCTGTGAAATTGCCCG
TGCAATGGCGGTGAAATGGCAAAGCGGGCTGAACGGTGGCCTCGTGGTAGCGAACCCGAT
CCCGGAACAGTTTGCGATGCCAGAACACACTATCAATGCGGCGATCGATCAGGCGGTAGC
TGAAGCTGAAGCGCAGGGTGTTATTGGTAAAGAAAGTACGCCATTCCTGCTGGCGCGCGT
TGCTGAACTGACCGGCGGTGACAGCCTGAAATCCAACATCCAACTGGTGTTCAACAACGC
CATTCTGGCGAGTGAAATTGCCAAAGAATACCAGCGTCTCGCGGGTTAATTTCTGACGGG
CAGAAAGCCGTCGCCCGTACTCATCAAACATACCAAAACCTGGCGCTGACGCCGGGTTTA
CTGGCATGAAGGGAAAATCATTATGGACATAATGAGAAGTGTTGTGGGGATGGTGGTGTT
ACTGGCAATAGCATTTCTGTTGTCAGTGAATAAAAAGAGCATCAGTTTGCGTACGGTTGG
AGCCGCACTACTGCTGCAAATTGCTATTGGTGGCATCATGCTCTATTTTCCGCCGGGAAA
GTGGGCTGTAGAACAGGCGGCATTAGGCGTTCATAAAGTGATGTCTTACAGTGATGCCGG
TAGCGCCTTCATTTTTGGTTCGCTGGTCGGGCCGAAAATGGATGTCCTCTTTGACGGTGC
GGGTTTTATCTTCGCCTTTCGCGTACTCCCGGCGATTATCTTCGTCACTGCGCTCATTAG
TCTGCTGTACTACATTGGCGTGATGGGGCTGCTGATTCGCATCCTTGGCAGCATTTTCCA
GAAAGCCCTCAACATCAGCAAAATCGAATCTTTTGTTGCGGTTACCACTATTTTCCTCGG
GCAAAATGAGATCCCGGCGATCGTTAAACCGTTTATCGATCGCATGAATCGCAACGAGTT
GTTTACCGCAATTTGTAGCGGGATGGCGTCCATTGCGGGTTCGATGATGATTGGTTATGC
CGGAATGGGCGTACCAATTGACTACCTGTTGGCGGCATCGCTGATGGCGATCCCCGGCGG
TATTTTGTTTGCACGTATTCTTAGTCCGGCAACCGAGCCTTCGCAGGTCACATTTGAAAA
TCTGTCGTTCAGTGAAACGCCGCCAAAAAGCTTTATCGAAGCGGCGGCGAGCGGTGCGAT
GACCGGGTTGAAAATCGCCGCCGGTGTGGCGACGGTGGTAATGGCGTTTGTCGCAATTAT
TGCGCTGATTAATGGCATTATCGGCGGAATTGGCGGCTGGTTTGGTTTTACCAATGCTTC
TCTGGAAAGTATTTTTGGCTATGTGCTGGCACCGCTGGCGTGGATCATGGGTGTGGACTG
GAGTGATGCTAACCTTGCGGGTAGCCTGATTGGGCAGAAACTGGCGATTAACGAATTCGT
CGCTTACCTGAGTTTCTCCCCATACCTGCAAACGGGCGGCACGCTGGGAGTGAAAACCAT
TGCGATTATCTCCTTTGCGCTTTGTGGTTTTGCTAACTTTGGTTCTATCGGTGTTGTCGT
TGGCGCATTTTCGGCTATTTCGCCAAAACGTGCACCGGAAATCGCCCAGCTTGGTTTACG
GGCGCTGGCAGCAGCAACGCTTTCCAACCTGATGAGCGCGACCATTGCCGGGTTCTTTAT
TGGTTTAGCTTGAGTTTCATTGCCGGATGTACTCGCTTATTAAGCGTTGCATCCGGCAAT
CGCGCTATTGCAAATAATTTTTACTGCATCATCCCGGAGAATTTATTCTCCGGGTCCATC
TCCAGCGCCAGTCCTGACAACTGCCTTTTGTTTTTAATGAGATACCCTTTCTTGCTTTTA
ATTAATAAACCGTCGTGAATGAATTGCGCGAGAACATATAAAAGATGTCGATAAGAAACG
CCTAAATACTCTGCCGCTTGCGTATGCTTTTCGTGATAAAGATCACCTTCTTGTGAGAGT
AATATAAATGCTGCCAGGCGATTCACTAACGGAAATGATTGGTTCTGAGTTAAAGAAACA
ATATTACGATAATTTTTATGACTTAAGGTGACGCAAAGTTTTCGTAAAAATAGGGTGTCG
TTTAATAACAGCGGACGGTAATGTTTCATAGGGAGCGCAAGGCACCAACACTCTTCAATC
GCCTGTACTGCACGTGGTTCATGGTCTTTATCGATTAACTCAATCTCGCCAATAAAACAG
GGGGCGGCAAAGAAATCGATCAGCGACACGCGACCATTAGCTAGCGTGGCGTAAAGCCTG
GCGCGGCCTCGCGTCAGGTAAAACAGCCAGGACGGCTGTTGCCCTTCCTGCACAATGTAG
TCACGCGCTAAAAAATGAAACAGCCGCGTATCGGCTGAAACATCCGTTAAAAAGCAATCC
TTAAACGCGGATTCACTCATCAATTGCAGCTTAAGATCATTATTGTGGATTTCTTTCACG
ATGTTTATCCGCTGTGAGATTTCTCATATTTAGCATACGTACGCTGTTGTTAAGATTCAA
TCATCGGCCCGGTCGAAATTTCTTTGCTGTAGAAAAAAATAACGCAACTGGAAACAGAGG
AAATAAACAATGGAAAAGAGAAAAATTATTCTGGATTGTGATCCGGGTCATGATGATGCT
ATTGCTATAATGATGGCGGCGAAACATCCGGCGATTGATTTATTAGGTATCACCATTGTT
GCGGGTAATCAGACGCTTGATAAAACATTAATTAATGGCCTGAATGTTTGCCAGAAACTG
GAGATTAATGTTCCGGTTTATGCGGGGATGCCGCAACCCATTATGCGTCAACAAATCGTT
GCCGATAATATTCACGGTGAAACCGGACTGGATGGCCCGGTATTCGAGCCGCTGACCCGC
CAGGCAGAAAGTACCCACGCGGTGAAATACATCATTGATACCCTGATGGCAAGCGATGGC
GATATCACTCTGGTGCCGGTTGGTCCGTTGTCAAATATCGCGGTGGCAATGCGTATGCAA
CCCGCAATCCTGCCCAAAATCCGTGAAATTGTGCTAATGGGCGGCTCTTACGGTACAGGC
AACTTCACGCCATCTGCCGAGTTCAACATCTTTGCTGACCCGGAAGCCGCACGCGTGGTG
TTCACCTCTGGCGTTCCATTAGTGATGATGGGCCTCGATCTCACCAACCAGACCGTTTGC
ACCCCGGACGTGATTGCACGAATGGAAAGGGCAGGCGGCCCTGCCGGAGAGCTGTTCAGC
GACATCATGAACTTCACTCTCAAAACCCAGTTCGAAAACTACGGCCTGGCTGGCGGCCCG
GTGCACGACGCCACCTGCATCGGTTATCTGATTAACCCTGATGGCATTAAAACCCAGGAG
ATGTACGTCGAAGTGGACGTCAACAGTGGCCCTTGCTATGGGCGTACCGTCTGCGACGAG
CTGGGCGTTCTTGGCAAGCCCGCTAATACCAAAGTCGGCATCACTATTGATACCGACTGG
TTCTGGGGCTTAGTCGAAGAGTGCGTGCGCGGCTACATCAAAACCCATTAAGTGTTGATA
ACAAGCCGGGTCAGTATCGCAAGATGCAGGCCCGGCTATTTCTGAGGGGCAGAAAGCCGT
CGCCCAATATGACATGAAGAGATAATAACTATGGATGTCATGAGAAGTGTTCTGGGAATG
GTGGTATTGCTGACGATTGCGTTTTTACTGTCAGTAAACAAGAAGAAGATCAGCCTGCGT
ACCGTTGGCGCGGCGTTAGTGTTACAGGTTGTGATTGGCGGGATTATGCTTTGGTTACCG
CCAGGGCGTTGGGTCGCTGAAAAAGTCGCTTTTGGCGTGCATAAAGTGATGGCGTACAGC
GACGCGGGTAGCGCATTTATCTTCGGTTCGCTGGTCGGGCCGAAAATGGACACGCTGTTT
GATGGCGCAGGATTTATCTTTGGTTTCAGGGTGTTACCGGCAATTATCTTCGTCACCGCG
CTGGTGAGTATTCTCTATTACATCGGTGTGATGGGGATCTTAATTCGCATTCTCGGCGGT
ATATTCCAGAAAGCATTAAATATCAGCAAGATCGAGTCATTCGTCGCGGTCACTACCATT
TTCCTCGGGCAAAACGAAATTCCGGCGATCGTCAAACCCTTTATCGATCGTCTGAATCGC
AATGAATTATTTACAGCGATTTGTAGTGGCATGGCCTCGATTGCTGGTTCGACAATGATT
GGTTACGCCGCACTGGGCGTACCTGTGGAATATTTGCTGGCGGCATCGTTAATGGCGATC
CCCGGCGGGATCTTGTTTGCCCGCATGCTAAGCCCGGCTACGGAATCTTCACAGGTTTCC
TTTAATAACCTCTCTTTCACCGAAACACCGCCAAAAAGCATTATTGAAGCGGCAGCGACA
GGGGCGATGACCGGGCTGAAAATCGCTGCGGGTGTGGCAACAGTGGTGATGGCATTTGTT
GCCATCATTGCGTTAATTAACGGTATTATCGGCGGCGTAGGCGGCTGGTTTGGTTTTGAA
CATGCCTCGCTGGAGTCCATTTTAGGTTACCTGCTGGCCCCACTGGCGTGGGTAATGGGT
GTTGACTGGAGTGATGCGAATCTTGCCGGGAGTTTGATTGGACAGAAACTGGCAATAAAT
GAATTTGTCGCTTATCTCAATTTCTCACCCTATCTGCAAACGGCTGACACGCTGGATGCT
AAAACCGTGGCGATTATTTCCTTCGCGTTGTGCGGTTTCGCTAACTTTGGTTCTATCGGG
GTGGTGGTGGGGGCGTTTTCTGCGGTTGCGCCACACCGTGCGCCGGAAATCGCCCAGCTT
GGTTTACGCGCGCTGGCGGCGGCGACACTTTCTAACCTGATGAGTGCCACCATTGCCGGG
TTCTTTATTGGTTTAGCGTAGTGTGCGATTTATGAGCCGGATTAGATGCGGTCAAGCGTC
GAATCCGGCAACATTGTTACACCATTGGCACTAATGACAGCGCGTTATCGGCAGACAGGG
TAGGGTTGTTTAAGCTGCCGCTGGCGCGTGAAATTGCCGCGCAGGCCATCGCAAAACGGG
CGCTGTCACGGAAATTGTTTCCCTCCAGAAAGCTATATACCAGGCCCGCCATAAAACCAT
CGTCAGCACCAAAACTGTCTACTGTCGTATGCGCTGGTGCGGTCAGCAAAAATTGTTCAC
CATCCTTTTCGCTGCAATAAACTGACTCATCGGGCAAATAAACAAACAGTTGCTGAACAC
CTTGCTGATGCAACGCATTCACTGCGGCATTACGGTCAGCATCGCTGGTGATCGCCTGTC
CCCATAAAATTTCCAGCTCCGGTAAAGTGGGTTTCAGGGTGTGAATATGCGCCAGCCAGG
GTTTGATTTTGCCCGCTTTGAATTCTGAAACGGTATCGACAAACACCGGGATTTGATCAG
CGAGGGTAAAGACCCATTCCAGCGCCTCGGCTGTCAGGTTGCAATCAGCCAGTACCACGC
CCGCATGACGAAGTAAATCGCGCGACCCGTTCAGTAGTTGCGGTGTCAACTGTTCCAGCA
GATGGGTATCGTTAATCGCCAGCACGGTTTGATCGTCTCGATTGGCAATTGCCAGATACG
TCGATGTGCTTTGACCATGTAAACGAACGCAGCCGGAGACATTCACGCCGGCACGGCGCG
TTTCTTCCAGGAGCATTTCGCCATAAAAGTCATCGCCAATCACTGAAAGCAAATGGACGT
CGCGGCCTAACAGCGCCAGATTGTGGGCGATATTGCGTCCAACGCCGCCTGCCGAGCAAT
GAATTGTACCGGGATGAGAAGCCGCTTGCGGGTAACGGATATCCGCCATCCCGCGAATAT
CCATATTGATTGTCCCCACCACTACGCAGTATTCCTGCTCGGTGAGAATGTAACCTTTGC
CTTTAATCCGCCCTTTGCGCATTAAATCCATAATATGCGCCGCAACGCGCGAACGACTGA
TTTGCAGCATGTCCGCAATTTCGTTCTGCTGAATCAGCGGGTTACGCCGTAAAATTGCAA
GGATCTCCTTTTCCCGGTTATTCATCTTCAGGCAACCGCTTTTTCAGTTTGTTGCGCTTT
CAGCCAGGCGATCTCTTCTGCCCAGATATCCGGGTTAATGGTTTCAAGGATCAGCGGAAT
GCCGTCGAAACGGTCGTCCTGCATGATCCAGCGGAACGCATCATGACCGATATTGCCTTC
ACCGAGGCTATGATGGCGGTCAACGCGGCTGCCAAAGGTGCTTTTCGCATCGTTAAGGTG
CATCCCGCGCAGATACTTAAAGCCGACAATACGGGCAAAATCAGCGAACGTTTTCTCGCA
TTCGGCTGGAGTACGCAAATCATACCCGGCAGCGAAAGCATGGCAGGTATCAATGCAGAT
GCCGACACGGGATTTATCTTCCACGCCGTCGATAATCGCCGCGAGATGTTCGAATTTAAA
CCCTAAGTTACTGCCCTGACCGGCGGTGTTTTCAATCACCGCGGTCACACCTTGAGTTTT
ATCCAGCGCAATGTTGATGGATTCGGCAATACGCGCAAGGCAATCCTCTTCTGAAATCTG
CATCAGATGGCTGCCAGGGTGGAAGTTGAGCAAAGAAAGCCCCAGTTGTTCGCAACGCTG
CATTTCATCTATAAAGGCATCGCGCGATTTTTCCAGAGCTTCAGTGACCGGATGTCCGAG
GTTAATCAGATAGCTGTCGTGGGGAAGAATTTGCGCCGATGTGTAGTGATATTTTTCACA
GGCGGCTTTGAATTCATCGATGGTTTGCGTCGTGAGCGGTGCGGCACGCCACTGACGTTG
GTTTTTGGTGAACAAGGCAAACGCGGTTGCGTCGATTTCGGCGGCGCGAATTGCGGCATT
TGCCAGACCGCCAGCAGCACTAACGTGCGCTCCAATGTATTTCATGCGAGGACTCCTGTT
AAACCCGCTGGAGGAAAACGGTAATGATAGCGGGTTAACAGGAGCAAGATGTAGTGGTTT
ATGCGATGACGCTTTGAATCACATAGTTAATCGCACCACCACCAACAATCAGCCAGGCAA
ACAGTACCAGTGCCATCAGCAGAGGTTTCGCCCCAGCTTTTTTCAGCGCGCTGACGTGAG
TGGTCAGACCCAGCGCCGCCATCGCCATTGCCAGCAGGAAGGTATCCAGCGTTACCAGCA
TGTTCACCACGCTCTGCGGTAACAGGTGGAACGAGTTAAAGATGGCAACTACGATGAACA
AGATGGCAAACCACGGAATAGTGATTTTGCTTTTCTCGCCGCTGTTCGCCCCAGACAGCT
GTTTAACACGCGCCGCCAGCAGGATGAGGAACGGAGCCAGCATCATCACGCGCAGCATTT
TGGAAATAACTGCTGCGTTTTCCGCATCCGGGCTGATGGCATGACCTGCCGCCACCACCT
GCGCCACTTCGTGCACAGTAGAACCAATGTAGATACCGAAAGTTTCCGGACTAAACCATT
GAGACATCAGCGGATATATCGCCGGGTAGAGGAAAATCGCGACGGTCCCGAAGATAACAA
CGGTTGCAACAGCCACGGTTACTTTACTGGCTTCCGCTTTCACTACCGGCTCAGTCGCCA
GTACCGCGGCAGCACCACAGATACTGCTACCGGCACCGATCAACCAGCTGGTGTGCTTAT
CCAGACCAAACACTTTCTGCCCCAGGAAGCAAGCCAGCAGGAAGGTACTGGACAGCGTCA
ACACGTCAATGATGATCCCACTGATACCGACATCGGCAATTTGCGAGAACGTCAGACGGA
AGCCATAAAGAATGATACCCAGACGTAATAAATATTGCTTGGCAAACAGCACACCACCGT
CACAGCTTTTCCAGATGTGCGGATAGATGGTGTTGCCTAAAACCATCCCCAACAAGATTG
CGAGGGTGAGGGCACTAAACCCGGCACCCGCAACCGCGGGAATGGAACCACCCCACAGGG
CGACCCCGGTGATAACTGCACTCAGGGCTAACCCCGGAATAAAATGCCACAGTGTACGAT
GTTGTTTCTGTAAGGTGATATTCGTCATAACCCTCTCCTTTAACCGGGCATAAGGTTACG
ACTAACTGGTTTAAAAATAAAATTGATTATATATTTATAATTAATCTTTATAAGTGGTAA
GCGACTATGCACATCACCCTCCGGCAGTTGGAAGTTTTTGCAGAAGTATTGAAAAGTGGA
TCAACCACCCAGGCGTCGGTGATGCTGGCGTTGTCGCAATCAGCAGTGAGCGCAGCCTTG
ACCGACCTGGAAGGGCAGCTTGGCGTTCAACTGTTTGATCGCGTGGGGAAAAGACTGGTT
GTTAATGAACACGGGCGGCTGCTCTATCCGCGTGCGTTGGCATTGCTTGAACAGGCGGTT
GAAATCGAACAACTGTTTCGCGAAGACAACGGCGCGATTCGTATCTATGCCAGTAGTACC
ATCGGTAACTACATTCTGCCTGCAGTTATCGCCCGTTATCGCCATGATTATCCGCAGTTG
CCGATTGAACTTAGCGTTGGGAACAGCCAGGACGTGATGCAAGCGGTGCTGGATTTCCGC
GTTGATATTGGCTTTATTGAAGGACCGTGCCACAGCACTGAAATCATTTCTGAACCGTGG
CTGGAAGACGAGCTGGTGGTTTTCGCCGCGCCGACTTCGCCGTTGGCCCGTGGTCCGGTC
ACCTTAGAACAGCTGGCCGCTGCGCCGTGGATCCTGCGTGAACGCGGTTCCGGCACGCGG
GAGATTGTCGATTATCTGTTGCTGTCACATTTACCGAAGTTTGAGATGGCGATGGAATTA
GGTAACTCCGAGGCAATCAAACATGCGGTGCGTCATGGGTTGGGAATTAGTTGCCTGTCG
CGACGGGTGATTGAAGACCAATTGCAGGCAGGCACATTAAGTGAAGTTGCGGTCCCTCTG
CCGCGCCTGATGCGTACGTTGTGGCGTATACATCATCGGCAAAAACACCTTTCCAACGCG
CTACGGCGCTTTCTGGACTATTGCGATCCCGCAAATGTGCCGCGTTAAGTTGCTGTACAA
GAACATGCTGGTGCTGTGTCGATTTCGTGACGCAGCGCCTTCAGCATGCATTCGCCAGAA
AAGAGATTGGCTGCTTTACTTATAATCCCTGGGCGATCATGAAGGTGTCTTATAACCGTG
TATTTCTGCCGGAAGGATTGCCAATCGTCTGCTACAATCGCGCCTCATTTTTTAGATGGA
TAGCATTTTTGTATGGTTTCCGAAACTAAAACCACAGAAGCGCCGGGCTTACGCCGTGAA
TTAAAGGCGCGTCACCTGACGATGATTGCCATTGGCGGTTCCATCGGTACAGGTCTTTTT
GTTGCCTCTGGCGCAACGATTTCTCAGGCAGGTCCGGGCGGGGCATTGCTCTCGTATATG
CTGATTGGCCTGATGGTTTACTTCCTGATGACCAGTCTCGGTGAACTGGCTGCATATATG
CCGGTTTCCGGTTCGTTTGCCACTTACGGTCAGAACTATGTTGAAGAAGGCTTTGGCTTC
GCGCTGGGCTGGAACTACTGGTACAACTGGGCGGTGACTATCGCCGTTGACCTGGTTGCA
GCTCAGCTGGTCATGAGCTGGTGGTTCCCGGATACACCGGGCTGGATCTGGAGTGCGTTG
TTCCTCGGCGTTATCTTCCTGCTGAACTACATCTCTGTTCGCGGCTTTGGTGAAGCGGAA
TACTGGTTCTCACTGATCAAAGTCACGACAGTTATTGTCTTTATCATCGTTGGCGTGCTG
ATGATTATCGGTATCTTCAAAGGCGCGCAGCCTGCGGGCTGGAGCAACTGGACAATCGGC
GAAGCGCCGTTTGCTGGTGGTTTTGCGGCGATGATCGGCGTAGCTATGATTGTCGGCTTC
TCTTTCCAGGGAACCGAGCTGATCGGTATTGCTGCAGGCGAGTCCGAAGATCCGGCGAAA
AACATTCCACGCGCGGTACGTCAGGTGTTCTGGCGAATCCTGTTGTTCTATGTGTTCGCG
ATTCTGATTATCAGCCTGATTATTCCGTACACCGATCCGAGCCTGCTGCGTAACGATGTT
AAAGACATCAGCGTTAGTCCGTTCACCCTGGTGTTCCAGCATGCGGGTCTGCTCTCTGCG
GCGGCGGTGATGAACGCAGTTATTCTGACGGCGGTGCTGTCAGCGGGTAACTCCGGTATG
TATGCGTCTACTCGTATGCTGTACACCCTGGCGTGTGACGGTAAAGCGCCGCGCATTTTC
GCTAAACTGTCGCGTGGTGGCGTGCCGCGTAATGCGCTGTATGCGACGACGGTGATTGCC
GGTCTGTGCTTCCTGACCTCCATGTTTGGCAACCAGACGGTATACCTGTGGCTGCTGAAT
ACCTCCGGGATGACCGGTTTTATCGCCTGGCTGGGGATTGCCATTAGCCACTATCGCTTC
CGTCGCGGTTACGTATTGCAGGGACACGACATTAACGATCTGCCGTACCGTTCAGGTTTC
TTCCCATTGGGGCCGATCTTCGCATTCATTCTGTGTCTGATTATCACTTTGGGCCAGAAC
TACGAAGCGTTCCTGAAAGATACCATTGACTGGGGCGGCGTAGCGGCAACGTATATTGGT
ATTCCGCTGTTCCTGATTATTTGGTTCGGCTACAAGCTGATTAAAGGAACTCACTTCGTA
CGCTACAGCGAAATGAAGTTCCCGCAGAACGATAAGAAATAAGTTTCCTCCCTTCCTTGC
TAAGCCCTCTCAACCGAGAGGGCTTTTTCAATTCCATTTCCCTGACAAATCATGCGGATA
TAAAATTTAACATTTGGATTGATAATTGTTATCGTTTGCATTATCGTTACGCCGCAATCA
AAAAAGGCTGACAAATCAGAGGCTGTTCCGGCTTTCTGGGATGATCACCTGCATACAAAT
AAGTCCACCGCGATGCTGCCGTACGCAAGGGGACGTGAAGAAGATGTGAGCGATAACCCA
TTTTATTTTCGTAGTTACCTCATGGAGATATGGAATGTTTAGGTTGAACCCTTTCGTACG
GGTCGGGCTGTGTTTGTCCGCTATTTCTTGTGCATGGCCTGTGTTAGCGGTCGATGATGA
TGGCGAAACGATGGTTGTCACTGCATCTTCCGTTGAACAAAACCTTAAAGATGCACCCGC
CAGTATCAGCGTCATTACCCAGGAAGACCTGCAGCGAAAACCGGTACAGAATCTGAAGGA
TGTCCTCAAAGAAGTGCCTGGCGTACAACTGACGAACGAAGGGGATAACCGTAAGGGCGT
TAGTATTCGTGGTCTGGACAGCAGCTACACCCTGATTCTTGTCGACGGTAAACGCGTTAA
CTCCCGCAATGCCGTCTTCCGCCACAATGATTTCGATCTGAACTGGATCCCGGTCGATTC
CATCGAACGTATTGAAGTGGTCCGTGGCCCGATGTCGTCGCTGTACGGTTCCGATGCGCT
CGGCGGTGTAGTGAATATCATCACCAAAAAAATCGGTCAGAAATGGTCGGGTACCGTTAC
CGTCGATACCACCATTCAGGAACATCGCGATCGCGGTGATACCTATAACGGTCAGTTCTT
TACCAGTGGACCATTAATTGATGGTGTGCTGGGAATGAAAGCTTACGGCAGCCTGGCAAA
ACGTGAAAAGGATGACCCGCAAAACTCAACGACCACCGATACCGGAGAAACGCCGCGTAT
TGAAGGATTCTCCAGCCGCGACGGCAATGTCGAATTTGCCTGGACACCGAATCAAAATCA
CGATTTTACTGCCGGATACGGTTTCGACCGTCAGGATCGTGATTCCGACTCGCTGGACAA
AAACCGCCTGGAACGCCAGAACTACTCCGTCAGCCATAATGGGCGTTGGGATTACGGCAC
CAGCGAACTGAAATACTACGGTGAGAAAGTCGAGAACAAAAACCCTGGCAACAGCAGCCC
GATAACTTCCGAAAGCAATACGGTCGACGGCAAATACACGTTGCCGCTGACGGCGATTAA
TCAGTTTCTCACGGTTGGCGGTGAATGGCGTCACGACAAACTTAGCGATGCGGTGAACCT
GACCGGGGGAACCAGCTCCAAAACGTCTGCCAGCCAGTACGCGCTGTTTGTGGAAGATGA
ATGGCGGATCTTCGAGCCGCTGGCGCTGACGACCGGCGTGCGTATGGACGATCACGAAAC
CTACGGTGAACACTGGAGTCCGCGTGCCTACCTGGTTTATAACGCCACCGACACCGTAAC
GGTGAAAGGGGGCTGGGCGACGGCATTTAAAGCGCCTTCTCTGTTGCAACTTAGCCCTGA
CTGGACGAGCAATTCCTGCCGTGGCGCATGTAAGATTGTAGGTAGCCCGGATCTGAAACC
AGAAACCAGCGAAAGTTGGGAGCTGGGGCTGTACTACATGGGTGAAGAAGGCTGGCTGGA
AGGGGTTGAATCCAGCGTTACCGTTTTCCGTAACGATGTGAAAGATCGCATCAGCATCAG
CCGTACGTCTGACGTCAATGCTGCACCGGGCTACCAAAACTTTGTCGGTTTTGAGACGGG
CGCTAACGGACGGCGCATACCGGTATTTAGCTACTACAACGTTAACAAAGCTCGTATTCA
GGGCGTGGAAACCGAACTGAAAATTCCGTTCAACGATGAATGGAAACTGTCACTCAACTA
CACCTATAACGATGGTCGTGATGTCAGCAACGGCGAAAACAAACCGCTATCCGATCTGCC
GTTCCATACCGCTAACGGTACGCTGGACTGGAAACCGCTGGCGCTGGAAGACTGGTCATT
CTATGTTTCTGGTCACTATACCGGGCAGAAACGAGCCGACAGCGCGACGGCTAAAACACC
GGGCGGTTATACCATCTGGAATACCGGCGCGGCCTGGCAGGTGACTAAAGACGTCAAACT
GCGCGCAGGTGTGCTGAACCTTGGCGACAAGGATCTCAGTCGTGACGACTACAGCTATAA
CGAAGACGGACGTCGTTACTTTATGGCAGTGGATTATCGCTTCTGATGAGAAGATGCCCG
GCGAACCGGGCGGACTTTCACTTCAGTAAATACTGCGCATGGAAGCGCAGGTGATCCTCT
ATAAAAGAGGCGATGAAGTAGTAACTGTGATCATATCCCGGCTGAATACGCAGCGTCATC
GGCCATGCTTTCTGGCGCGCGGCTTCTGCAAGTACTGCAGGTTGCAGTTGGTCAGCAAGA
AACTGATCGTTATCACCCTGATCGATAAGCGTCGGGATCGCATCCTGCGCGTTACTGGCA
TACATCAGCGCGCAACTGTCCCATTCCAGCCATGCATTTTTGTCCTCACCTAAATAGCGG
CTAAACGCTTTGATTCCCCACGGGACGCTGCACGGATTCACAATTGGCGCAAAGGCGGAA
ACGCTGGCGTATTTGCCCGGGTTTTTCAGCGCCATAATCAGCGCACCGTGACCACCCATT
GAATGACCGCTAATGGCGCAGCGGTCGCTGACATTAAATTGCGACTGAATCAGCGCCGGT
AATTCATCGCGCAGATAATCATACATCCGGTAATGCGTCGCCCACGGCGGTTGCGTGGCG
TTAAGATAAAAGCCCGCGCCCTGGCCTAAATCGTAGCCATCGTCGTTGGCAACCTGTTCA
CCGCGCGGGCTGGTGTCTGGCATCACCAGTACAATCCCCAGTTCCGCCGCCACGCGCTGG
GCACCCGCCTTGGTGGTGAAGTTCTCGTCATTGCAGGTTAATCCGGAAAGCCAGTACAGC
ACTGGTGGCGGGGTGTGATCACGAGGGGGGGGGAGAAAGATACTGAACGTCATCGGGCAG
TTTAAGGTACTGGAGTAGTGTCGCCAGCGTTGCTGCCAGCCTTCAAAACAGCGGTGCTCT
TCGAGCATTTCCATGCGTGGCTCCTTGTTGTGTTGTTTGCAATTTCTTCATCATACCGTT
TATTCAATGTGCTGTGAGTAACTTTCACTTCCGTATTTGCATAACGATGTTTTAACATCT
GCTGATGAAAGGCAGCGGCAATTACAATAATTATCGCTGTGAATACTGGATTATGTGCGC
CGCCTCACGCACAATAATCAGGCTGTAAATCAGCTTAATAACTTTGCCCCCACGCAGGGC
GGAGGCGTCACACCTGCAGGAGAAATCATAAATGCCATCACTCAGTAAAGAAGCGGCCCT
GGTTCATGAAGCGTTAGTTGCGCGAGGACTGGAAACACCGCTGCGCCCGCCCGTGCATGA
AATGGATAACGAAACGCGCAAAAGCCTTATTGCTGGTCATATGACCGAAATCATGCAGCT
GCTGAATCTCGACCTGGCTGATGACAGTTTGATGGAAACGCCGCATCGCATCGCTAAAAT
GTATGTCGATGAAATTTTCTCCGGTCTGGATTACGCCAATTTCCCGAAAATCACCCTCAT
TGAAAACAAAATGAAGGTCGATGAAATGGTCACCGTGCGCGATATCACTCTGACCAGTAC
CTGTGAACACCATTTTGTTACCATCGATGGCAAAGCGACGGTGGCTTATATCCCGAAAGA
TTCGGTGATCGGTCTGTCAAAAATTAACCGTATCGTGCAGTTCTTTGCCCAGCGTCCGCA
GGTGCAGGAACGTCTGACGCAGCAAATTCTCATTGCGCTACAAACGCTGTTGGGCACCAA
TAACGTGGCTGTTTCTATCGACGCGGTGCATTACTGCGTGAAGGCGCGTGGCATCCGCGA
TGCAACCAGTGCCACGACAACGACCTCTCTTGGTGGATTGTTCAAATCCAGTCAGAATAC
GCGCCACGAGTTTCTGCGCGCTGTGCGTCATCACAACTGATTAAAAGGCAGGAACCATGG
AGCGCAACGTCACGCTCGATTTTGTTCGCGGCGTCGCCATTCTGGGGATCCTGCTATTAA
ACATCAGCGCCTTTGGGCTACCAAAGGCGGCTTATCTTAATCCCGCCTGGTACGGCGCTA
TTACGCCGCAGGATGCATGGACCTGGGCATTTCTCGATCTCATCGGCCAGGTGAAATTCC
TCACGCTTTTTGCGCTGCTGTTTGGTGCTGGCCTGCAAATGTTGCTGCCCCGTGGCAGAC
GCTGGATCCAGTCGCGGTTAACGCTGTTAGTCTTGCTGGGCTTTATTCACGGTTTATTGT
TCTGGGACGGCGATATTCTGCTGGCTTACGGGCTGGTGGGCTTAATCTGCTGGCGGCTGG
TGCGCGATGCGCCATCGGTAAAAAGCCTGTTTAATACAGGCGTCATGCTTTATCTGGTGG
GGCTTGGCGTTTTGCTGTTATTGGGGTTGATTTCCGATACCCAGACCAGCCGCGCCTGGA
CGCCGGATGCATCGGCTATTTTGTATGAAAAATACTGGAAGCTTCACGGCGGCGTTGAAG
CGATCAGTAATCGTGCCGATGGTGTTGGGAACAGTTTACTGGCACTGGGCGCACAGTATG
GCTGGCAACTGGCTGGGATGATGCTCATTGGTGCGGCGCTGATGCGCAGCGGCTGGCTGA
AAGGGCAGTTCAGCTTACGTCACTATCGTCGTACTGGTTTTGTGCTGGTGGCGATTGGGG
TGATCATTAACCTTCCTGCCATCGCCCTGCAATGGCGGCTGGACTGGGCATATCGCTGGT
GCGCCTTCTTACTTCAGATGCCGCGGGAACTGAGTGCACCGTTTCAGGCGATTGGCTATG
CGTCGCTGTTTTATGGTTTCTGGCCGCAATTGAGCCGCTTTAAGCTGGTGCTTGCGATCG
CCTGCGTCGGACGGATGGCGCTGACCAACTATCTATTGCAAACGCTGATTTGTACCACGC
TTTTTTATCACCTCGGTTTGTTTATGCAGTTTGACCGTCTGGGATTGCTGGCGTTTGTTA
TTCCGGTATGGCTGGCGAATATCCTCTTCTCTGTTATCTGGCTGCGTTACTTCCGCCAGG
GGCCGGTGGAATGGCTCTGGCGTCAGTTAACTTTGCGTGCTGCCGGACCGGCAATATCTA
AAACATCAAGATAACGATCTGGATCACATTCGTTAACAAAACGGCTGTAACCGTTTCCAT
TGCTGTGACTCGATTCACGAAGTCCTGTATTCAGTGCTGACAAAATAGCCGCCAGCAAGC
AGTCATTTACTGCAATCTCATAACAGGTAGTGAATATGATCACCATTCGTGATGTAGCGC
GTCAGGCTGGCGTCTCTGTGGCAACGGTTTCCCGGGTGCTCAATAACAGCACGCTGGTCA
GTGCCGACACGCGTGAAGCAGTAATGAAAGCCGTGAGTGAGCTGGATTATCGGCCAAACG
CCAATGCCCAGGCGCTGGCAACTCAGGTTAGCGACACCATTGGCGTGGTGGTGATGGACG
TTTCTGATGCGTTTTTCGGCGCGCTGGTAAAAGCGGTGGATCTGGTCGCCCAGCAGCATC
AGAAATACGTGCTAATCGGCAATAGCTATCATGAAGCGGAAAAAGAACGTCACGCCATTG
AGGTGTTAATTCGCCAGCGTTGTAATGCATTGATTGTTCACTCAAAAGCATTGAGTGACG
ATGAACTGGCGCAATTTATGGATAACATTCCCGGTATGGTGTTAATCAACCGCGTTGTGC
CGGGGTACGCCCATCGTTGCGTTTGCCTGGATAATCTCAGCGGTGCCCGAATGGCGACGC
GCATGTTGCTGAATAACGGTCATCAACGTATTGGTTATCTTTCTTCCAGCCACGGCATTG
AAGATGACGCCATGCGTAAAGCAGGCTGGATGAGTGCGTTGAAAGAGCAGGATATTATTC
CGCCGGAAAGCTGGATTGGCACTGGTACGCCGGACATGCCGGGCGGTGAGGCGGCGATGG
TTGAACTGCTGGGGCGCAATCTACAACTTACCGCTGTATTTGCTTATAACGACAATATGG
CTGCTGGCGCACTGACAGCATTAAAAGATAATGGTATTGCGATTCCGTTACATCTCTCAA
TCATCGGTTTCGATGATATTCCCATCGCCCGTTACACCGACCCGCAATTAACGACCGTGC
GTTATCCCATTGCTTCAATGGCTAAATTAGCCACCGAACTGGCCTTGCAGGGGGCAGCAG
GCAATATTGATCCTCGTGCCAGCCACTGTTTTATGCCGACGTTAGTGCGTCGTCATTCTG
TCGCAACGCGCCAGAATGCGGCGGCGATCACTAACTCAACAAATCAGGCGATGTAACCGC
TTTCAATCTGTGAGTGATTTCACAGTATCTTAACAATGTGATAGCTATGATTGCACCGTT
TTAACGTTGTAACCCGTATGTAACAGTGAATAATCACTTTCACCGAGGTAATAGCGTCAT
AACAACAATTAAAGCCGTTTTCTGGAGCGTTACCGGGCACTGATGAATCCCCTAATGATT
TTGGTAAAAATCATTAAGTTAAGGTGGATACACATCTTGTCATATGATCAAATGGTTTCG
CGAAAAATCAACTTGAGACTTGGTATTCATTTTTCGTCTTGCGACGTTAAGAATCCGTAT
CTTCGAGTGCCCACACAGATTGTCTGATAAATTGTTAAAGAGCAGTTGCGACGCGGCTTT
CAGCTCACTGTCGCGAGGTGGCGTATATTACGCTTTCCTCTTTCAGAGTCAACCCTGAAT
TTCAGGATTTTTCTCTTCAACCGAACAGGCTGTTTGTGTGAAGTGATTCACATCCGCCGT
GTCGATGGAGGCGCATTATAGGGAGTCGGCTCAGGAAGACAAGCGGAAAAATGCATTTTT
ATTTCAACCGCTCATCTTTTAATCATTACGCCGGTTTTTGCTGCTTTTTTATCGCTTGCG
GCAGGTCTGCCAGGCTATTTAACACCCAATCTGCCGCGTTTTCTGCTTCAGGTGTAATAG
GTTTACCCGTACGCACCAGCACTTTTGTTCCCACGTTCGCCGCAGCCGCTGCCTGCATAT
CTTCTAATTTATCGCCCACCATATAAGAGGCGGCCATATCAATATGCAAATAATCGCGTG
CTGACAAAAGCATCCCCGGATGTGGTTTGCGGCAATCGCAGACCTGGCGAAACTCTTCAA
CACTACCCTGCGGATGATGCGGGCAATAATAGATACCATCCAGATCGACATCGCGGTCCG
CCAGCGACCAGTCCATCCACTCGGTCAGCGTTTCAAACTGTGCTTCAGTAAATTTACCGC
GAGCAATGCCAGACTGGTTGGTTACTATCACCAGCGCAAAGCCCATTTTTTTCAGCTCGC
GCATGGCGTCAATAACACCGTCGATAAATTCAAAGTTGTCGATCTCATGGACATAGCCGT
GATCGACATTAATGGTGCCATCACGGTCAAGAAAAATTGCGGGTACGCTCTTCGCCACCT
TTTATAGCTCCTTAATAAGGCATGTGGCGCTAGTATCGCATGTTTCGACCTGCAAGAAAG
TGCTCTTCGCATAAACCTGATTGATTTAGACGTCTGGATGCCTTAACATCCATTTCATTG
ACGGCGTTGCCCGTTTCAGGCATTCGAAATGCCACGACTAACTTAATGACGATAATAAAT
ATTCAATGATAAAACTTTCGAATATCACCAAAGTGTTCCACCAGGGCACCCGCACCATCC
AGGCGTTGAACAACGTCAGCCTGCATGTGCCAACTGGACAAATTTATGGCGTTATCGGGG
CCTCAGGCGCGGGTAAGAGTACGCTTATACGTTGTGTAAACCTGCTGGAGCGCCCAACCG
AGGGTAGCGTGCTGGTCGATGGACAGGAACTGACCACGCTGTCAGAATCCGAGTTGACCA
AAGCTCGCCGCCAGATTGGTATGATTTTCCAGCATTTTAACCTGCTCTCTTCGCGTACTG
TTTTTGGCAACGTGGCTCTGCCGCTGGAGCTGGACAACACACCGAAAGACGAGATCAAAC
GTCGCGTGACGGAATTGCTGTCATTGGTTGGTCTTGGCGATAAGCATGATAGCTACCCGT
CGAATCTTTCCGGTGGGCAGAAACAACGTGTGGCGATTGCCCGTGCATTAGCCAGCAATC
CCAAAGTATTGCTGTGTGATGAAGCCACCAGCGCGCTGGACCCGGCAACGACACGTTCTA
TTCTCGAACTGCTGAAAGACATCAACCGCCGTCTGGGTTTGACGATTCTGTTGATCACTC
ACGAAATGGACGTTGTGAAGCGCATTTGTGATTGCGTGGCGGTCATCAGCAATGGCGAAC
TGATCGAGCAGGACACGGTAAGTGAAGTGTTCTCACATCCGAAAACGCCGCTGGCGCAGA
AGTTTATTCAGTCAACCCTGCATCTGGATATCCCGGAAGATTACCAAGAACGTCTGCAAG
CGGAGCCATTCACTGACTGCGTGCCGATGCTGCGTCTGGAGTTTACCGGTCAATCGGTCG
ATGCCCCACTGCTTTCTGAAACCGCGCGTCGTTTTAACGTCAACAACAACATTATTAGCG
CGCAGATGGATTACGCCGGTGGCGTTAAGTTCGGCATCATGCTGACTGAAATGCATGGCA
CACAACAAGATACGCAAGCCGCCATTGCCTGGCTGCAGGAACACCATGTAAAAGTAGAGG
TACTGGGTTATGTCTGAGCCGATGATGTGGCTGCTGGTTCGTGGCGTATGGGAAACGCTG
GCAATGACCTTCGTATCCGGATTTTTTGGGTTTGTGATTGGTCTGCCGGTTGGCGTCCTG
CTTTATGTCACGCGTCCGGGGCAAATTATTGCTAACGCGAAGCTGTATCGTACCGTTTCT
GCGATTGTGAACATTTTCCGTTCCATCCCGTTCATTATCTTGCTGGTATGGATGATTCCG
TTTACCCGCGTTATTGTCGGTACATCGATTGGTTTGCAGGCAGCGATTGTTCCGTTAACC
GTTGGCGCAGCGCCGTTTATTGCCCGTATGGTCGAGAACGCTCTTCTGGAGATCCCAACC
GGGTTAATTGAAGCTTCCCGCGCAATGGGTGCCACTCCAATGCAGATCGTCCGTAAGGTG
CTGTTACCGGAAGCGTTGCCGGGTCTGGTGAATGCGGCAACTATCACCCTGATTACCCTG
GTCGGTTATTCCGCGATGGGTGGTGCAGTCGGTGCCGGTGGTTTAGGTCAGATTGGCTAT
CAGTATGGCTACATCGGCTACAACGCGACGGTTATGAATACGGTACTGGTATTGCTGGTC
ATTCTGGTTTATTTAATTCAGTTCGCAGGCGACCGCATCGTCCGGGCTGTCACTCGCAAG
TAACGTTCAACACAACATAAATAATTGAAGAAGGAATAAGGTATGGCGTTCAAATTCAAA
ACCTTTGCGGCAGTGGGAGCCCTGATCGGATCACTGGCACTGGTAGGCTGCGGTCAGGAT
GAAAAAGATCCAAACCACATTAAAGTCGGCGTGATTGTTGGTGCCGAACAGCAGGTTGCA
GAAGTCGCGCAGAAAGTTGCGAAAGACAAATATGGCCTGGACGTTGAGCTGGTAACCTTC
AACGACTATGTTCTGCCAAACGAAGCATTGAGCAAAGGCGATATCGACGCCAACGCCTTC
CAGCATAAACCGTACCTTGATCAGCAACTGAAAGATCGTGGCTACAAACTGGTCGCAGTA
GGCAACACTTTTGTTTATCCGATTGCTGGTTACTCCAAGAAAATCAAATCACTGGATGAA
CTGCAGGATGGTTCGCAGGTTGCCGTGCCAAACGACCCAACTAACCTTGGTCGTTCACTG
CTGCTGCTGCAAAAAGTGGGCTTGATCAAACTGAAAGATGGCGTTGGCCTGCTGTCGACC
GTACTTGATGTTGTTGAGAACCCAAAAAATCTGAAAATTGTTGAGCTGGAAGCACCGCAG
CTGCCTCGCTCTCTGGACGACGCGCAAATCGCTCTGGCAGTTATCAATACCACCTATGCC
AGCCAGATTGGCCTGACTCCAGCGAAAGACGGTATCTTTGTCGAAGATAAAGACTCCCCG
TACGTAAACCTGATCGTGACGCGTGAAGATAACAAAGACGCCGAGAACGTGAAGAAATTC
GTCCAGGCTTATCAGTCTGACGAAGTTTACGAAGCAGCAAACAAAGTGTTTAACGGCGGC
GCTGTTAAAGGCTGGTAATTTTTAGGCTGTTTCCACAATTTGTAATATCATTCAGGACGG
GCGCTTGCCCGTCTTGTCATTTTTACAAGCTCCTGATTCAATATTGACGTTTTGATCATA
CATTGAGGAAATACTATGCGTGCTTTACCGATCTGTTTAGTAGCACTCATGCTAAGCGGC
TGTTCCATGTTAAGCAGATCCCCTGTCGAACCCGTTCAAAGCACTGCACCCCAGCCGAAA
GCGGAGCCTGCAAAACCGAAAGCGCCGCGCGCCACGCCGGTCCGAATTTATACCAATGCA
GAAGAATTAGTCGGCAAACCGTTCCGCGATCTCGGTGAAGTCAGTGGCGACTCTTGCCAG
GCCTCTAATCAGGACTCTCCGCCGAGCATTCCAACCGCACGTAAGCGGATGCAAATCAAC
GCCTCTAAAATGAAAGCCAATGCTGTATTACTGCATAGCTGCGAAGTCACCAGCGGTACG
CCGGGCTGCTATCGTCAGGCTGTATGTATCGGCTCTGCGCTTAACATTACGGCGAAATGA
GCAGTTTCCAGTTCGAGCAAATAGGCGTTATTCGCTCGCCCTATAAAGAAAAATTCGCCG
TTCCGCGCCAGCCTGGTCTGGTAAAAAGCGCCAACGGCGAACTGCATCTCATTGCTCCCT
ACAACCAGGCCGACGCCGTTCGCGGCCTGGAAGCATTCAGCCATTTATGGATCCTTTTCG
TCTTTCATCAAACGATGGAAGGCGGCTGGCGTCCGACTGTGCGTCCGCCTCGTCTTGGCG
GTAATGCCAGAATGGGTGTTTTCGCTACGCGTTCCACTTTTCGCCCTAACCCAATTGGTA
TGTCGTTGGTAGAGCTGAAAGAGGTTGTTTGCCATAAAGACAGCGTGATTCTGAAGCTCG
GCAGTATGGATCTGGTCGATGGTACGCCGGTAGTGGATATCAAACCGTATCTCCCCTTTG
CTGAATCGCTTCCCGATGCCTGTGCCAGCTATGCGCAAAGTGCGCCAGCGGCAGAGATGA
CGGTGAGTTTTACCGCAGAGGTCGAAAAGCAGCTTTTGACGCTGGAGAAGCGTTATCCGC
AGTTAACCCTGTTTATCCGCGAAGTACTGGCGCAAGACCCACGCCCGGCCTATCGTAAAG
GTGAGGAAACGGGTAAAACCTATGCCGTCTGGCTACATGATTTTAACGTTCGCTGGCGCG
TCACCGACGCAGGTTTTGAAGTCTTTGCGCTGGAACCGCGTTAAATTCACGCCCTTCTCT
TTTGACATTTCTTTTGCACTGGTAAACTAAATCACTTTTTTTGTCCCAGGCTCGCCTTGA
GCCTGTTCTACCTTCCAACTGGAACCGTAACAACATGCGTACTAGCCAATACCTGCTCTC
CACTCTCAAGGAGACACCTGCCGACGCCGAGGTGATCAGCCATCAGCTGATGCTGCGCGC
CGGGATGATCCGCAAGCTGGCCTCCGGGTTATATACCTGGCTGCCGACCGGCGTGCGCGT
TCTGAAAAAAGTCGAAAACATCGTGCGTGAAGAGATGAACAACGCCGGTGCAATCGAGGT
GTCGATGCCGGTGGTTCAGCCAGCCGATTTGTGGCAAGAGAGTGGTCGTTGGGAACAGTA
CGGTCCGGAACTGCTGCGTTTTGTTGACCGTGGCGAGCGTCCGTTCGTACTCGGCCCAAC
TCATGAAGAAGTTATCACTGACCTGATTCGTAACGAGCTTAGCTCTTACAAACAGCTGCC
GCTGAACTTCTATCAGATCCAGACCAAGTTCCGCGACGAAGTGCGTCCGCGTTTCGGCGT
CATGCGTTCCCGCGAATTCCTGATGAAAGATGCTTACTCTTTCCATACTTCTCAGGAATC
CCTGCAGGAAACCTACGATGCAATGTATGCGGCCTACAGCAAAATCTTCAGCCGCATGGG
GCTGGATTTCCGCGCCGTACAGGCCGACACCGGTTCTATCGGCGGCAGCGCCTCTCACGA
ATTCCAGGTGCTGGCGCAGAGCGGTGAAGACGATGTGGTCTTCTCCGACACCTCTGACTA
TGCAGCGAACATTGAACTGGCAGAAGCTATCGCGCCGAAAGAACCGCGCGCTGCTGCTAC
CCAGGAAATGACGCTGGTTGATACGCCGAACGCGAAAACCATCGCGGAACTGGTTGAACA
GTTCAATCTGCCGATTAAGAAAACGGTTAAGACTCTGCTGGTTAAAGCGGTTGAAGGCAG
TAGCTTCCCGCTGGTTGCGCTGCTGGTGCGCGGTGATCACGAGCTGAACGAAGTTAAAGC
AGAAAAACTGCCGCAGGTTGCAAGCCCGCTGACTTTCGCGACCGAAGAAGAAATTCGTGC
CGTGGTTAAAGCCGGTCCGGGTTCACTGGGTCCAGTAAACATGCCGATTCCGGTGGTGAT
TGACCGTACCGTTGCGGCGATGAGTGATTTCGCTGCTGGTGCTAACATCGATGGTAAACA
CTACTTCGGTATCAACTGGGATCGCGATGTCGCTACCCCAGAAATTGCTGATATCCGCAA
CGTGGTGGCGGGCGATCCAAGCCCGGATGGTCAGGGTACGCTGCTGATCAAACGTGGTAT
CGAAGTCGGTCACATCTTCCAGCTGGGTACCAAGTACTCCGAAGCACTGAAAGCCTCCGT
ACAGGGTGAAGATGGCCGTAACCAAATCCTGACTATGGGTTGCTACGGTATCGGCGTAAC
GCGCGTAGTAGCTGCAGCAATTGAGCAGAACTACGACGAACGCGGCATCGTATGGCCTGA
CGCGATCGCACCGTTCCAGGTAGCGATTCTGCCTATGAATATGCACAAGTCCTTCCGTGT
ACAAGAGCTGGCCGAGAAGCTGTACAGCGAACTGCGTGCACAAGGTATCGAAGTCCTGCT
GGATGACCGCAAAGAGCGTCCGGGCGTGATGTTTGCTGATATGGAACTGATCGGTATTCC
GCACACTATTGTGCTGGGCGACCGTAACCTCGACAACGACGATATCGAATACAAATACCG
TCGTAACGGCGAGAAACAGTTAATTAAGACCGGTGACATCGTCGATTATCTGGTGAAACA
GATTAAAGGCTGATGCCAGAAAGGGTCCTGAATTTCAGGACCCTTTTTTACAGGGATTGT
ATAAAATGGATAAACCAAAGGCATACTGCCGCCTGCTTCTCCCCTGCTTTCTTTTACTTT
CGGCCTGTACCGTTGATATCAGCCAGCCAGACTCCTCAGCCACAGCGATAGATACCGAGG
CGAAAACATGGGCTGTCAAATTCCAGCATCAAAGCTCTTTCACCGAACAATCAATAAAAG
AAATAACAGAACCTGACCTCAAACCCGGCGATTTGCTGTTCTCCTCAAGTCTTGGGGTAA
CCTCATTTGGTATCCGCGTCTTCAGCACTTCCTCAGTGAGTCACGTTGCAATCTATCTGG
GTGATAACAACGTTGCAGAAGCGACAGGGGCTGGCGTCCAGATTGTTTCCCTTAAAAAAG
CGATGAAGCATAGCGATAAGCTTTTCGTCTTACGAGTCCCGGATCTTACCCCGCAACAAG
CCACAGAAATCACCGCGTTCGCCAACAAAATTAAAGATAGCGGTTACAACTATCGCGGCA
TTGTCGAATTTATTCCCTTTATGGTGACTCGCCAGATGTGCTCACTGAATCCGTTCTCCG
AGGATTTTCGCCAACAGTGCGTCAGCGGCCTGGCGAAAGCGCAGTTAAGCAGTGTGGGCG
AAGGAGACAAAAAGTCGTGGTTTTGTTCGGAATTTGTCACTGATGCATTTGCCAAAGCCG
GGCATCCGCTTACGCTGGCGCAATCGGGCTGGATTAGCCCTGCCGATCTGATGCATATGC
GTATTGGTGATGTCTCTGCGTTTAAGCCAGAAACGCAGTTACAGTATGTTGGGCACCTGA
AGCCAGGGATTTATATCAAGGCGGGTCGCTTTGTTGGTTTGACTCAGTGATAAAGCCAGC
CTCGTGCACAAAATGCCGGATGCGGCGTGAACGCCTTATCCGGCCTACAAAATCGTGCTA
ATTCAAAATGTTGCATTATATGCTGTAGGCCTGATAAGCGCAGCGCATCAGGCAATTTTG
CGTTTGTTTCTGCCTTAAGCAGGTTTACTGCCCCAAACTACTGCAATCCTGGTTCGGATA
AAATTTACCCGCCGTATCGGGCGCTAATACTTTGGTCGGCGCACCGGTATCCGGATTAGC
CTCAAGCGTAAAGTGACCTTCTACTGACAGTAACACCGGTTTTTCACTGTGCCCGCGCGC
AGCCAGGTAGCCACGCTCCAGCTCTGCGTTATTCGCTACCATGAAACGTTTTCCGGTCGC
GCAATCAGTGAAGGTCGCCGCATCAGCCATATAAAAATACATGCCCCGCAGAGTCATCGG
CGTCATGGGTAAACTGGATTGTGCCGCTTCCAGCGTATAGTTGAACTGCGATTCAATCGG
TTTACCTTCACGATCGAGCATCTCCAGCGCATCGCCTTTCGCCCGATAATATGACTTTTC
ACCTTTGCTGTCGGTTAATACCAGCTTGTCAGCGGTTCGCGCCCATGTACCGTAGGAAGC
GAAGGAGGAAGGTTCTTCACGAGCACCGAGATAACGCTCATTCATCACCCATGTTCCGTC
TTTTTCGAGGAACAGAGAGGTTTCGATTCCTTCGCAATCGGCACACGGCAGCACGCCGCG
CCAACTTTGCGGCATCGGTTTCAGTTCGGCTGCCTGCGCCGGAGAAAGCGTATCGACTTC
GGCCCGATTATTACAACCCATCAGAGTAAAGAGGCTGATTACAGCCATCGCTGTCACTAT
CGCTTTTTTCACCATCCATTCCTTCTTTTTATTCCCGACCGCTGCGCACTTTGCCGCGCA
TCGCCTTCACGCTTGATTTTTGTGCTTTCGATGCCAGCCTGCGCTCTTTCGATGCACGGG
TGGGCCGCGTGGGTCGTCGGGCTTTTTGTTCTGTTGTTAATTCTTTAATCACAGCCACCA
GCCGGGCCAGAGCTGCTTCGCGGTTCAGTTCCTGACTGCGGTATTCCTGTGCCTTAATGA
CAATCACGCCATCACTGCTGATCAAATGATGGCTGGCGGCGAGCAGACGCTCTTTGTAAT
ACTCTGGCAGGCTGGACGCCCGAATGTCAAAACGCAGATGAATAGCCGTTGAGGTCTTAT
TAACATGCTGCCCGCCCGCGCCCTGCGCACGAATGGCGGTGATCTCAAGCTCACCATCGG
GAATAGCAACATGTCGGGAAATCACAATCATGAAGGTTGTTGCCAGGCGGTTAAGTTCAC
TTCCAGATTATTCTTATCATCCGATAACCAGATCACGCCATCCTGAATCGTTGCCTGCAG
CGTCATGGTACGATCGGCAAAGGCGCTTACTTTCGCCAGTTGTTCATCGTCCAGATACCA
GACGGAAAGATTGGCAAACTGCACACATTTGCTCTGATTTTGCTGCCACCAGATTTGCGC
CGCCCGACTATTATAGGTAAACAGCGCCACTTCTGCGGCCTGGGTGCAGGCTTTCTTAAT
CCGCCGCTCATCCGGCAGCCCCAGCTCAATCCACAAATCAATGCCCAGGTGATCGTTACG
CAGCCACGCTTCCGGCTCATCATCGGCACACAAACCACGGGTAAATTGCAGACGTTCATC
AGCATATTTCAGCCACGCCAGCAAGCGCAGCATCATACGCTCCTGGGTTTCTGAAGGGTG
GCGCGCCAGCGTCAGAGAGGCATCGAGAAACTGGTTGCGGTCGAGATCGGCCACATTAAC
CGTCGCTTTATAAATTGTCGCTTTAAGCGCCATAAGAAAACTCCTTTCGAATCAGGAGGC
CATTGTAACGGAATACGTGCAGTTGCGGCGCTGATATTGCAGAAATGAGTGTGGTATAGT
CACCTTGCGAAACAGAGTTTATCTTCGTAGGCTTAGACTTGCATCCACGGTTAAGTCAGA
GTGCTGACAGGAGGGCATGTGGAAAAATATTGTGAGTTAATACGCAAGCGGTACGCGGAA
ATCGCCAGCGGAGACTTAGGATACGTTCCGGACGCGCTGGGCTGCGTTTTGAAAGTGCTG
AATGAAATGGCTGCCGACGACGCCCTTTCTGAGGCTGTCAGGGAAAAAGCAGCATACGCT
GCGGCAAACTTACTGGTGAGCGATTATGTCAATGAATGATACGTATCAACCAATCAATTG
TGATGATTACGATAATCTTGAGCTCGCCTGCCAGCATCATTTAATGCTGACACTTGAGCT
GAAAGATGGCGAAAAATTGCAGGCAAAAGCCAGCGATTTAGTCTCCCGCAAAAATGTGGA
GTATCTGGTCGTCGAGGCCGCTGGCGAAACCCGTGAGCTACGTCTGGATAAAATTACCAG
CTTTAGCCACCCGGAAATCGGTACGGTGGTGGTGAGCGAGTCCTGATTGACTTTCGCCGG
ATGCGACGCTTAATGCGTCATATCCGGCCTTCACTTAACTAAGCGTTTCGCTGCCAGACA
AAACTTATGCCATTCTCACCTTCAGCCACACCTTCTTGCGTCACAAATACCCCTGCCGCC
GCAATCAGCGTTTCGCCATAAAACAGCAGTGGCGTGGTGTCACGTAGCCACGGCGGCACG
CCCAGCTCTTGCCAGATTTTCTTTAGCTTACGTCCGCCGTTACGCCCGACAATATGCAGC
AATCCTGGCGCTTTGAAACGCACGCTGACCGCTTCGTCTGCACGCGGAGGGCGAATATCG
CCTCCCGCATTAAGCTGTACACTTCCCAGCCCCGCCGGTAATTCCAGCGGTTGAAGCCAC
GTCTGCCACGGCACAATGTTTTCGCTTTGCCCGGTGACGGATTTAATCCACCACAGTTGC
GACTGATAGCGTCGGATTTCAAACGCGCCCAAACGTAAACAGGGGGAGGCATCTTCCCGC
GCCAGCGCCACTTCCTGCCAGATCCGCCCCAACGCGTCGCGGGAAGGCATCGGTGCATTC
TGCCCTGCAAGCCAGCGGCGGATAATCGCCGCGCGGCGGGCATCACTCATCGCCAGCATT
GGCGCAATCTGCAGCGTCCTCTGCGGCGATTGACAGTGTGCTAAATCATCCGCCAGCAGT
TCATCCAACAGGCTCTCTTGTTCAGCGCAAAGTGCGGCGCTGCGGGCTGTTGCTTCGGCA
AAATGCGGCCAACGCTGCTGCAATAACGGCACTACGCGCAGGCGCAGAAAGTTACGATCG
TATGAGTCGTCCTGATTACTTTCGTCTTCAATCCAGCGTAAACCATGCGCCAATGCCCAC
TGCGCCAGTTCCCCCCGCGTGCGGGCAAGCAACGGGCGGATAAGCCGTGTTCCGGCAAAC
TCCGAAACTTCCGCCATAGCCGAAAGCCCGGCAGGGCCGCTACCGCGTTTTAGCGCCAGC
AGAAAAGTTTCACATTGATCGTCGAGATGTTGCGCGGTGACCAGCACTTCACCGGGCAAC
AAGGTGCGGGCAAATGCCTGATAACGCGCCTGCCGCGCCTGGGCCTCAATGCCCAGTCCT
TCTTGCGCAAGTTGCACGCGCTCGACCACCAGCGGCACCTGCCACTGTTGGCAGATGTTC
TCGCAATGCCTAACCCAGGCATCGGCATTGGCACTTAAACCGTGATGCACATGAATAGCG
CGCAGAGTGACGCCCGGATTTTCCGCCCGCCACTGCACCAACTGATGCAGCAGAACGGTG
GAGTCAAGCCCGCCGCTAAAGGCCACCAGAATCTGGCGTGAGGTGAGAAGTTGTCTATTG
AGCGTGAGTGTCATGATGGTGCGATTTTACAGTAGCAATGCCCGGCACGTTACCGGGCAA
ATGCGGCGATGACAAGCCTTACTGCTCATACAGTTCCAACGGCAGCCCGTCCGGATCGTT
AAAGAACGTGAAGCGTTTTTGCGTGTATGGATCGACACGGATGGTTTCACACTTCACGTT
ATGGCTTTCAAGGTGCGCCACTGCCGCATCGATATCATCAACGCTAAAAGCCAGATGACG
CAGGCCGCAAGCTTCCGGTCGGCTGGGGCGCTCCGGCGGGAACGGAAATGAGAAAAGCTC
AATCACATATTGCCCATTAAGCGCCAAATCCCCTTTCCACGAGTCGCGCGCTTCGCGATA
GACTTCGCTTTGCAGCGTGAAACCAAGAATATCGCAGTAGAAAGCTTTGCTCACCGCATA
ATCCGTCGCAATAATCGCAATATGGTGAACCTGTTTTAAACCCAGCATAACGTCTCCTTT
ATTTGTTAACAGCACGTTACTCGCCCGGAAGCCGCTCTGGCAAGTTATCCCGCCATTTTT
AGGACTCGTACGCGGTAAACGCCGTCTTCGTCCTGTTTCGCGCCGTGAATATCCGTTTCA
AAACCGGGGTAATGTTGCCCTACGGAACAAAGCATCAGTAGAAAATCGAGTACTGTGCGG
CTCTCTTTGGTCAGCATTTCTCCAGGCATCAACAGCGGTACGCCCGGTGGATAAGGCAGG
ATCATATTTGCCGATACTCTACCGACCAGTTGTTCCAGCGCAATGGTTTCTACTTCACCT
TTAATCTGTCTCTGCCATGCCTGATGTGGCGTCATGATCATTTCCGGCAAAGTATCGAAT
GCCCGCAACATCAAACCGGGAAGATCGTGTTTACGAATCAGCTTATGGATCCCTTGCGCC
AGATCCTGAATACGCATATTGCGGTAGAAATCGGGATCTTCAGCATAGAGATCGGGTAGC
ATATTTTTGATCCGCAGGTTGAGATCGTAAGAGCGCTTAAATTCCGTCAGCCCACGCAAT
AATCCCATTGCTTTGGTTTTATCAATGCCAATACTAAAGAGAAACAGCAGGTTATAAGGG
CCGGTTTTCTCTACTACGATCCCACGTTCGTCGAGGAATTTTGCCACCAGCGCCGCCGGG
ATCCCCTCCTCACTCATATTGCCCTGTTCGTCCATCCCCGGTGTCAAAATAGTGACTTTA
ACCGGATCGAGAAACATATGATCGGCATCCGCATCGTTAAAGCCGTGCCACTGTTCGCCA
GGCGCAACGGGCCAGCATTCGGCTTCATCCACCTGCGGCGGTTGCCAGATATCGAAAAAC
CAACCGTCAGACTCTTCCCGCAACCGCTGGACCTCTTTGCGAAAATGCAGAGCTCGTTCT
ACTGAACGATTAATCAGCCGTTTGCCCGGATTACCACGCAGCATCGCCGCCGCCGTCTCA
ACCGAAGCAACAATGGGATAACTGGGCGAGGTGGTGGTATGCATCATAAAGGCTTCGTTA
AAGGCCTCTTCGTCATACTCGCCTTTAATGTGGATCAGCGAAGCCTGCGATAACGCCGCC
AGCATTTTGTGGGTCGATTGCGTTTCGAAGATCACTTTTCCCGCAACACGCTCGCCGCTC
ATACCACTTTTACCCTGGTAGATCGGATGAAAATGGGTGTACGGCACCCAGGCGGAATCG
AAGTGGATCGAGGGGACATCCAGCGTCTGTTTGATCCAGTCGGTGTTGTAGAGCAAGCCA
TCATAGGTGGAGTTGGTGATCACCGCATGAACCGGCCATTGTGCCTGCGTGGTGGCAGCG
ACTTTCTCTTCGATGCTGTCGCGAGTAAATTCACGGCGCGGGATCCCACCAAGAATCCCC
AACGCATTACGCGTCGGTTTCAGCCAGACTGGCACTACATCGTTCATCATCAACAGATGC
GCCAGCGATTTATGACAATTGCGGTCGATCAACAGCGTGCTGCCGGATGGCGCGGCGTAC
ATACCCACAATTTTGTTCGACGTCGATGTTCCGTTGGTAACGATATAACTCTGTTCCGCG
CCAAAAGTCCGCGCGATGTACTCTTCCGCTTCCAGATGTGGCCCGGTGTGGTCGAGCAAC
GAACCAAGCTCGGTGACCGAAATAGAGACATCAGCCTTAAGGGTATTCCCGCCGAAAAAA
TCATAAAACAGACAGCCAACCGGGCTTTTTTGATATGCGGTGCCGCCCATATGACCCGGC
GTACAAAAGGTGTACTTCCGCTCTTTGACGTAGGTAAACAAGGCTTTCGTGAACGGTGGG
GTAATGTTATCAAGATATTCGTTGGTGTACTGACGCATACGAATAGCGATATCTTCCGCC
TGCCCCAGCGCATATTCAAAAAACCAGAGCGCCATCCGCATATCCTGCACGCTGACATCC
ATCGTCGAGTGGGTGTTGATGAAGGCATAAAGCGGGAGATATTCATTAAGCTGATTGATA
TCGCTACATAAATCGAGACTGTACTCATCCCAGTCAAAAATCACGCCGCAAATTCGTGGG
TTATGTTCGATAAACTTCAGCAAATCAACGCTGTTTTGTGGCCAGATAATCTGAAAGCCT
TGCGCCACCAGCGCCGACTCCAGTTCTTTGATGGGCTCACCTTTATAAAAGACGCCATGC
GGTCCCATAATGGCAATGATGTTCATGTGTTCCTCCTGGAAAATCCTTCCTTAATCATAG
CCTGCTCAAACCGTGGCGATAAAAAAGGGCCACCGAAGTGACCCTTTTTCAGAACTTTTG
CGAATTACGCGTAACCGTAGCTCATCAGGCGCTGATAACGACGATTTTTTAAATCTTCAG
TGCTTAACACGTCGAGATCGGCCAGATCCGCCAGCAGTTGCGCTTTCAACGATGCCGCCA
TCGCTTCCGGGTTACGGTGAGCACCACCCAGCGGTTCCGGGATGATGGAGTCGATCAGTT
TTAGTTCTTTCAGACGCGGAGCGATGATACCCATCGCTTCAGCTGCCAGCGGTGCTTTGT
CGGCGCTCTTCCACAGAATGGACGCACAACCTTCCGGCGAGATAACGGAATAGGTGCTGT
ATTGCAGCATATTCACTTTATCGCCCACGCCAATCGCCAGCGCGCCGCCAGAACCACCTT
CACCGATAACCGTACAAACTACCGGTACACCGAGGCGAGACATTTCACGCAGGTTGCGTG
CAATAGCTTCAGACTGACCGCGTTCTTCTGCGCCCACGCCCGGATAAGCCCCCGGGGTGT
CGATAAAGGTGATGATTGGCATCTTAAAGCGTTCAGCCATTTGCATCAGACGCAGTGCTT
TGCGGTAACCTTCTGGCGCTGGCATACCAAAGTTACGGCGAATTTTTTCTTTGGTTTCAC
GACCTTTTTGATGACCAATGATCATCACCGGACGACCATCGAGACGGGCGATACCACCGA
CGATAGCTTTATCGTCTGCATACGCGCGGTCGCCAGCCAGTTCGTCAAATTCATCAAATG
CCAGGCGAACGTAATCCAGGGTATAAGGACGCTGTGGATGGCGTGCCAGTTGCGCAATCT
GCCATGCACCGAGATCGGCGAAGATTTTACGCGTCAGTTCTACGCTTTTTTCACGCAGAC
GATGCACTTCTTCATCGATGTTAATATCCAGTTTCTCATCCTGACGGCTAACCGCAGTCA
GAGAATCGATTTTCGCTTCCAGCTCTGCAATCGGCTGTTCAAAATCAAGGAAATTCAGAC
TCATAGTATTCCTGTATTAGTCAAACTCCAGTTCCACCTGCTCCGAACCAATGAGGCCAC
GGAGATCGTTTAATAAACGATCGCTCGGAGAGACACGCCACGTCGCGCCAAAACGCAACC
GCGCGCGTGCATCCGCCCTCTGATAGTAGAGATGTACTGGAATTGTCCCAGAGCGGTGGG
GTTCCAGAGACTGACGGAGTCGGTTTAAAAGCTGGTCATCAATTTGCCTGTCCGTCAGCG
AGATAGCAAGCCCGCGAGCATATTTTTCCCGGGCTTCGTCAATATCCATCACTTCGCGAG
CGGTCATTTTAAGCCCACCGCTGAAGTCATCAAAGCTGACCTGTCCGCTGACGATAAGTA
TGCGGTCTTTTTCCAGCAATTGCTGGTATTTATCCAGGGCGTCAGTAAACAACATCACTT
CCAGCCGCCCGGAACGGTCATCCAGCGTGCAGATACCGATACGATTGCCGCGCTTGGTGA
CCATAACCCGCGCGGCAACAACGAGCCCCGCAGCCGTGATGACTTTACCACGTTCTGTCG
GGTGCATGTCTTTCAGCCTTACGCCTCCGACATAACGCTCAATCTCTTTTAAATACTGGT
TGATAGGGTGTCCGGTCAGGTACAGGCCTAACGTTTCACGTTCCCCATCTAATACCACCT
GCTCCGGCCACGGTTGGCAGCTGGCGTAGGATTGTTCAATTTGTTCCGGTTCTTCGGCCA
GCACGCCGAACATATCGGCCTGACCGATAGCTTCCGCTTTCGCGTGTTGATCTGCCGCTT
TTAACGCATCACCCAGCGAGTTCATCAGTGCCGCGCGGTGTGGCCCAAGACGGTCAAACG
CCCCGGACATGATCAGTTTTTCCAGCACCCGCCGGTTTAACTTTTTGGTGTCGGTTCGGG
CGCAGAGATCAAACAGTTCGCGGAAGTAGCCGCCTTTATTACGGGCTTCGATGATCGCCT
CAATCGGACCTTCACCGACCCCTTTGATCGCGCCAATACCATACACGATTTCGCCGTCGT
CGTTGACGTGGAAATGGTAAAGACCGGAGTTTATATCTGGTGGCAGGATTTTCAGCCCCA
TCCGCCAGCACTCATCCACCAGGCCCACCACCTTCTCGGTGTTGTCCATATCGGCGGTCA
TTACCGCCGCCATAAACTCTGCCGGATAGTGCGCTTTCAGCCATAATGTTTGATATGACA
CCAAAGCATAGGCCGCAGAGTGCGATTTGTTAAATCCGTAACCAGCGAATTTCTCCACCA
GGTCGAAGATTTTCATCGCCAGTTCGGCGTTGATTCCGTTCTTTTCTGCACCTTCAGCAA
ATACAGAACGCTGCTTAGCCATCTCTTCCGGCTTTTTCTTACCCATCGCACGACGCAGCA
TATCCGCGCCACCGAGGGTATAACCAGAGAGCACCTGCGCAATCTGCATGACCTGTTCCT
GATACAGGATAATGCCGTAGGTTGGCTCCAGTACTGGTTTCAGGCTTTCATGCTGCCACT
GCACGTCCGGGTAGGAAATCTCTTCGCGACCATGTTTACGGTCGATAAAGTTATCCACCA
TCCCTGATTGCAACGGACCAGGGCGGAACAGTGCCACCAGTGCGATCATATCTTCGAAGC
AGTCAGGTTGCAGACGCTTGATCAGGTCCTTCATGCCGCGCGATTCAAGCTGGAATACCG
CCGTGGTTTCCGAGCGTTGCAGCATGTCGAAGCTTTTCTTGTCATCCAGCGGGATCGCGG
CGATATCCAGCGGCGGCTCGCCATTCTTCGCCCGCCGCTTGTTGATCATCTCCAGCGCCC
AGTTGATGATGGTGAGCGTACGTAAACCAAGGAAGTCGAACTTCACCAGTCCGGCATATT
CAACGTCGCTTTTATCAAACTGGGTGACCGGATGTTTGCCCTCTTCATCGCAATAAAGCG
GCGCAAAATCGGTAATTTTGGTCGGCGCGATAACCACTCCACCGGCGTGCTTACCGGCGT
TACGGGTGACCCCTTCCAGTTTGCGCGCCATGTCGATCAGCGCCTTAACTTCTTCATCCG
CTTCGTAGATTTCCGGCAGCTGCGGCTCGGCTTCAAACGCTTTCGCCAGCGTCATGCCCG
GATCGGGCGGGATCAGTTTCGAGATACGGTCGACAAAGCCGTACGGATGCCCCAGCACGC
GGCCTACGTCGCGGATCACCGCTTTCGCCGCCATCGTACCGAAGGTGATAATCTGCGATA
CCGCATCACGACCGTACATGTCCGCTACGTGCTCGATAACCTGGTCGCGTTTCTCCATAC
AGAAGTCAACGTCGAAGTCAGGCATGGAGACACGTTCCGGGTTAAGGAAACGTTCGAACA
GCAGGTCAAATTCCAGCGGATCGAGGTCGGTGATTTTCAGCGCGTAGGCCACCAGTGAAC
CCGCACCGGAGCCACGGCCTGGCCCTACCGGTACGCCGTTATCTTTCGACCACTGGATAA
ATTCCATAACGATGAGGAAGTAGCCCGGGAAGCCCATCTGGTTGATAACCTGAAGTTCAG
TCTCCAGACGTTCGTCATATTCCGGGCGGCGCTTAAGACGTTCTTCCTCATCAGGGAATA
AAAAGGCCAGACGCTCTTCCAGGCCTTCTTTTGCACGCTTGACCAGATAATCTTCGGTGC
TCATGTCCCCGGTCGGGAACTGCGGCAGGAAGTATTCACCCAGACGCACAGTTACGTTAC
AACGTTTGGCGATCTCAACGGTGTTGGCAAGGGCTTCGGGGATGTCGGCAAACAGCTCGC
ACATCTCCTCTTCGCTACGCATATATTGCTGCGGCGAATAGTTACGCGGGCGTTTAGGAT
CGTCGAGGGTAAAGCCGTCGTGGATCGCGACGCGGATTTCGTGTGCGTCAAAGTCGCTGC
TGTCGATAAAGCGCACATCGTTAGTCGCCACGACGGGCAAACCGCGCGCTTCCGCCAGTT
CCACCGCCGCGTGCAGATAGCTTTCTTCATCCGGCCTGCCGGTGCGGATCAGCTCGAGAA
AATAGCGATCCGGGAAGTGTTCTTCATAAAACGCGACACACTCATCTACCAGCGCGCTGT
TGCCACGCAAAAGACTGCGTCCGACGTCGCCCATGCGCCCGCCGGAAAGAAGGATCAACC
CTTCGTTTAATTCGATAAGCCAGTCGCGATCGATGATCGGCCCGGCGGCACCGTACCCGC
GCTGATACGCTTTTGAGATCAGCAACGTCAGATTCTGATAGCCGGTATTGTTCGCCGCCA
GTACCGTCAGGTGGGTTAACTCATCACCCAGCAGGTCGCACTGGACGTTAAAATCTGCCC
CGACGATAGGCTTAATCCCTGCGCCATGTCCCGCTCCGTAGAACTTCACCAGACCGCAAA
GGTTGGTGAAATCGGTGATCGCCAGTGCTGGCATACCCAACGCCGCCGCCTTTTTTACCA
GCGGTGCGGTTTTGGCCAGGCCATCGATCATCGAGTAGTCGCTGTGCACCCGCAGGTGTA
CGAAACGTGGTTCAGACATCTTCAGATTCCGGTTTACTTAATCTCGACACAAGAATCAGG
ACGCAAGTCCCAGTGCTCGTTTGACAGGCCCAAAGCTGCGACGATGATGTTCAGTCGCGC
CATATTCAGCCAGTTTTTCCAGATGAAAAGCGGTTGGATACCCTTTGTGTTGGGCAAAAC
CATATTGCGGGAAAACAATATCCAGCGCCGCCATTTCGGCGTCACGCGTCACTTTCGCCA
GGATAGACGCGGCACTGATTTCCGGTACGCGGCTATCGCCTTTCACCACTGCCATCGAAG
GCATCGGTAATTTCGGGCAGCGGTTACCATCAATCAACACATATTCCGGCGCAATATGCA
GCCCAGCAACGGCACGCTGCATCGCCAGCATGGTCGCATGTAAAATATTCAGTTCATCGA
TTTCGTGAGGTTCCGCGCGGCCCAGACTCCAGCTCAACGCTTTCTCTTTGATCTCTTCAC
AGAGCGCCAGACGACGTTTTTCGCTCAGCTTTTTGGAATCATTCAGCCCGGCAATCGGGC
GCGCCGGGTCGAGAATCACCGCAGCGGTGACGACCGCGCCAACTAACGGCCCGCGTCCGG
CTTCATCCACACCCGCAACCAGCTGCGTGTGCGGATAGACAAATTCGATCATTGTGCTAA
CTCCAGAACGGCTTGTGCCGCCTGCTCATCGGCATTGCAGCGGATCTGCTGATGCAGTTC
ACGGAAGGTATCGTGCATCGCGTGGCTGGTTTTCCCGTTCGCCAACAGCGGTAACAGCGC
CGCAGCCAGTTTTTGCGGCTCACACTCTTCCTGCAATAACTCTTTGACTAACTCTCTGCC
CGCCAGCAGATTTGGCAGCGAGACATAATCAGTTTTCACCAGACGCTTCGCCAACCAGAA
AGTGAAAGGCTTCATGCGATACCCCACCACCATCGGGCATTTCGCCAGCATACACTCCAG
TGCTGCCGTACCCGACGCCAGTAGCGCCGCATCGCTGGCAACCATCGCCTCACGGCCCAT
TCCATCCAGCAAATGAACCGACAGGTCTGGCGCGACTGCAGCTTTGATGCGTTCAAACTG
CTCGCGGCGTTTGGCATTCACCAGCGGCACCACGATTTCGAGATCTGGATATGTCTGGCG
CAAAAGCTGGGCCGTTTTCAGGAAATCGGCACTAAGCATTTCGACTTCTGCACCACGGCT
GCCCGGCAACAATGCCAGACAGTGGGCATCGTAAGGGATCCCCAGCACATCACGGGCACC
ATTTTTATCTGGATCTAATGGCATGGCATCAGCCATGGTATGACCGATAAAGCGGCACGG
TACGTTGTATTTGTCATAAAACGCTTTTTCGAAAGGCAGAAATGCGAGCACCAGATCGGT
GGCTCTGCCTATTTTGAAAACGCGTTTCTGTCGCCACGCCCAGACGGACGGACTGACGTA
ATGAATGGTTTTGATACCCTGCTTTTTGAGGTTACCTTCAAGAGTAATATTGAAGTCAGG
CGCATCAATACCGACAAAAACATCTGGCTTCAGTTCGCCAAAACGCTTTGTCAGATCGGC
ACGAATATGCAGTAAGCGACGCAGACGACCGAGCACTTCAACAATGCCCATTACCGCCAG
TTCTTCCATTTCGTACCAGGCTTCGCAGCCTTCAGCTTGCATTCGTGGCCCGGCAACACC
AACAAAGCGGGCGTTGGGCACACGTTCTTTCAGAGCGCGGATTAAACCGGCCCCCAGGAT
ATCGCCGGAGGTTTCTCCGGCGACCAGGGCAATCGTTAATGGACGCTGTTCAGTCATTAA
CGAATCAGACCGCGCGTTGAGCGTGCAAAGAAATCGGTAAAGGCTTTCACTTCCGGATAT
GTTTCCGCCAGTTCAGCAATTTCCGGTTTCACTTCATCGAGCGTTTTACCGCTACGATAA
ATCAGCTTATACGCATTGCGGATAGCGGTAATCGCCTCACGGCTGAATCCGCGGCGCTTC
AGCCCTTCGATATTGACACCGAACGGCGTTGCGTGGTTACCCTGCGCAATGACATAAGGA
GGGACGTCCTGCGCCACACCGGAGCAGCCGCCAACCATCACATGCGCACCAATGATGCAG
AACTGATGGACTGCGGTCATGCCGCCGATGATCGCGAAGTCGTCAACCGATACGTGACCC
GCCAGCGTTGCGTTGTTGGCGAGAATACAGCGGTTACCTACCGTACAATCGTGCGCAATG
TGCGCGTTGATCATCAGTAAGTTGTCGCTGCCCACCTTCGTCAATCCACCGCCCTGGACT
GTGCCACGATGAATGGTGACGCTTTCGCGAATGCGGTTACGATCGCCGATTTCCACACGG
GTCGGTTCGCCAGCATATTTCAAATCCTGGTTAACTTCGCCGATGGAGGCGAACTGATAA
ATCTCATTATCGCGGCCAATTTTAGTATGACCATTCACGACAACGTGAGATTTCAGTACG
GTACCCTCACCAATTTCGACATGGGATCCAACGATACAAAAAGGACCAATGTGTGCGTTC
GCGCCAATCGACGCGCCCTCTTCCACAATGGCGGTTGGATGCACAAAGGCGGATTTATCA
ATCACGTATCAGGCCTCCCGGCTACGAGCACACATCATCGTTGCTTCGCAAACTACTTTA
CCGTCGACCAGAGCAACCCCTTTAAAACGGGTCAGGCCGCGGCGCGTTTTTTCGAAAGTG
ACTTCCATGATCATTTGATCGCCAGGCACGACCGGGCGCTTGAAGCGCGCTTCGTCAATA
CCGGCGAAGTAGTACAGCTCACCCGGTTCCAGTTTTCCTACGCTTTTAAACGCCAGAATA
CCTGTTGCCTGTGCCATTGCTTCCAGAATCAGCACACCCGGGAAAATCGGTTTTCCAGGG
AAATGGCCCTGGAAGAATGGCTCATTGACAGAGACATTTTTTACTGCGCGCAGAAAACGA
CCTTCTTCAAAATCCAGCACGCGATCCACCAGTAAGAACGGGAAACGGTGCGGCAGAAGT
TCTAAAATCTCTTCAATCTGCAGAGTATGAGTGTTAGTAGTCAAGATACTCTTCCTGTCA
AAATATAAGAAACGACAATAATAACACGGCCTGCCGCAATCGTAAGAATGAGACAGGCCG
TAAAGTTTGGCGAACAAAAGATGGAACGTTAGTCTTGTTGATTAACCTTGCGCTCAAGCG
ATTTCAGACGCTTGCTCATGTCATCAATGTTCATCACCAGTGCAGCGGTTTTGCGCCAGA
CTTTGTTGGGTTGCAGCGGAATGCCTGAGGAATAGACGCCTGGTTCAGTGATGGGACGCA
TCACCATACCCATGCCCGTAACCGTCACTTTGTCGCATATTTCCATATGCCCGTTGATTA
CGCTGGCTCCGCCGATCATGCAGTAACGACCAATTTTCAGGCTGCCCGCCATAATGACGC
CACCGGCAACCGCCGTATTGTCGCCAATCACGACGTTATGTGCAATCTGGCACTGGTTAT
CAATGATCACGCCATTGCCAATAACCGTGTCATCCAGCGCGCCGCGATCGATGGTAGTGC
AGGCACCGATCTCCACGCGATCGCCAATAATTACGCGACCAATCTGTGGGATCTTCACCC
AGTTACCACGATCGTTGGCATAACCAAAGCCGTCTGCGCCTACCACTGTTCCGGACTGGA
TCAGGCAATTCTGACCGATCTGGATCTCATGGTAAATGGTTACATTCGCCCAGAGACGCG
AACCTGCACCGATTTTGCTGTTTTTACCTACGAAGCAACCGGCACCGATAATCACGTTAT
CGCCCAGTTCAACGCCGGACTCAATCACCGCGTTAGCGCCAATCGATACGTTGTTACCCA
GCTTCGCCGTCGCGTCGATCACTGCACTGGGTGCAATATTCTGCGCGGGCTGCGGCGTGG
TATCTAAAATTTGCGCCATGCGCGCGTAAGTCAGGTAGGGATTCTTCACTACCAGCGCGG
CACTTTTCGCGAAAGGAAGATCGTCCTGGGTCATGACAACCGCGGATGCCTGGCACAAGC
CTAAATGCTCACGGTATTTTGGGTTAACCATGAACGTAATGTGACCTGTTTGTGCAGATT
GCATGGACGCAACGCCGGTGATGACGATATCGCCATCACCGTGTAGTTCTGCATCCAACT
GCTGCGCTAAATCAGCCAGTCGAATTGAAGGCATTACTTATTTAACCTGTTTCAGTACGT
CGGCAGTGATGTCTTTTACATCGCTGCTGTTGTAAGCAACGGCGTTTGCATCAACAACCA
GATCGATATCCTGGCTGTTGGCAACGGATTTCACAGCAGTCTGGATACGAGTAACCAGTT
TGCCGCGTTCTTCGTTGGAACGACGTGCGCGATCCTGCTCAAAAGCCTGCGCTTTCTGAG
CAAAAGTCTGGCGCTGAGCCATCACGTCTTTTTCCAGCTTAGTGCGATCGCTGCCCGCTT
TCATGGACTGCAGCTTTTTCATTTTAGCCTGCAGATCGGTTTCCATACGCTGCAGTTCGC
TGGCACGGCCTTTGAACTCATTTTCCAGCGTGTTAGAAACACCGGTTTTCTGCGCTACCT
GCTGGAACAGGCTGCCCATGTTGACGATTGCAATTTTGTCAGCCGCCTGAGCAGATGTTG
CCAGTGCTAAACCGAGACCTGCAGCTAATAACCACTTTTTCACAATAAACTCCTTACCAT
CCCATTTGCACCGGAGGGTGCAGTTCTTTGCGTGGCCCGGCGATCTTATATTGATCGCCT
AAAGTCATCGCTACACTACCACTACATTCCTTTGTGGAGAACACTTACCAAGTTTTACCG
ATGTTAAACTGGAACTGTTCTGCCTTGTCTCCATCGTACTTTTTGAACGGCTGGGCGTAG
GAGAACACCAACGGCCCCAATGGGGACATCCATTGTAATGCGATACCCGCAGACATACGG
ATATTGCTTGGATCACTATAGTCCGGATATCCAGAATATTGGCTGGAATCCCAGTTTGTA
TCCCAAACGGTACCCATATCCCAGAAGAAGGAAGTACGAACCGAGTTAGCATACTTATCG
CTAATAAACGGAGTCGGGGTTATGAACTCGAGGCTGGCAACCGCCATGGCGTTACCGCCT
ACAGCATCATCCGATTTACACAGGTCTTTCGCGCCGTCCTGAGTCGCACATTCGTAATCA
TAGTCCGGATCATAATTACTGGCCTGATGCGGGAAGTAAACTGCTTTCGGACCAATGGTA
TTGGACTGGAAGCCACGGACGGTGCTGGAACCACCGGCATAGAAGTTCTCGTAGAACGGC
ATCTCTTTGCCGCCTAAACCATCACCATAACCCCAGCGGGTACGACCCAGAACAACCCAT
TTGTGATCGTCATCGATCGGCACATAAGTCGCCGTGTCTAACGTCACTTTGTAGTATTCG
TTATCCGATCCCGGAATGGTCACTTTACCGGTCAGGTTGACACGTGAACCATCTGTCGGG
AAGTAACCACGGTCAAGCTTGTTATAGGTCCAACCATAGTTGAACGTGAAGTCGTCTGTT
TTGAAGCTGTTATCCTGATCAGAGGTGCTCGGATGTTCACCCATAGAGTACAGATAACGC
CACATCGCAACCTGAGGCTGCATGTTGGACAGGGAGTTATGTACATAACCCAGACCTGCA
CGCAGCGAGTTATATTCGTTAATCGGGAAGCCCAACGTCACGTCTGTACCATAACTCTTG
TTGGTATAGTCGGACAGGTCGGCGTCATCTGCCTGGAAGTCATTATAGAAGAGACGACCA
CCGAGGCTTACGCCATCTACGGTGAAGTACGGGTTGGTTACCGACAGTTCAGCATAGGTC
TGGTAATCGTTTTTGGTCCCGTTGATACCAACAGCATAACCTGTACCTAACCAGTTATCC
TGTTGCACACCAGCCTGGAAGCTCACGCCACTTTCAGTACCGTAACCAATACCAAAGTTG
AAGCTACCGGTGTTGCGCTCTTTTACCTTGTAGACTACATCAACCTGGTCCGGGCTACCC
GGAACACGTTGGGTATCGGTATCGACAGTTTCAAAGAAGCCCAGACGATTCAGACGCTCC
TTACCCTGATCGACCAGATCGCTCCCCAGCCATGCACCTTCCATCTGACGCATTTCGCGA
CGCAGGACGGCATCTTTCGAGGTATCGTTACCTTCAAAACGGATCTTACGCACGTAGAAA
CGGTTACCCGCATCAACGTTCACACGTAATTTAACGGTTTTGTCGGCATCGTTAATTTCG
GGCATGGACTGTACGCGCGGATAGGCATAACCATAGCGACCGAGAAGCTTTTTAATGTCA
TCTTCCATCTTGGTCACTTTGGTGCCGTTATACAGCTCACCCGGCTCGATCTTAGTCAGC
TGCTCAATTTCAGCGGAGTGCCCGGCAAGGTTGCCGCTCACTTCAACGCCAGAAAGCTTG
TACTGATCGCCTTCGGTGATGTTCACCGTGACGTAAATACCTTTTTTATCTGGCGTCAGA
CTGACCTGGGTAGAGTCGATGTTGAAACGGGCATAACCGCGGTCCAGATAGTAGCTGCGC
AGGGTTTCAAGGTCGCCCGCCAGTTTCTGTTTCTGGTATTTACGATCGCCTACCACGTTC
CACCACGGCACTTCGTCACGCAGTTGGAAATGAGAGATCAGTTCGTCGGTGGTGAAAGCA
TGGTTACCAACAATGTTAATTTGCTGGATTTCAGCTGACACACCTTCCTGGAACACCAGT
TTTAGGTCAACACGGTTGCGCGGCAGCGGGGTCACGACAGCTTTAACGCTGGCGCTATAT
TTACCGACGCTGTAGTAGAAGTCTTCCAGACCTTTCTCGATATCGGCAATGGTGGTGCGA
TCGAGGGATTCGCCCACACGCACACCAGAAGCCTCGAGGTTTTGCTTCAGCATGTCATCT
TTCACCGATTTGTTACCGGAGAAAGTAATGCTGGCAATGGTCGGACGTTCTTTTACCTGA
ACCAGAAGGGTATCACCATCACGAAGGACGCGAACATCCTCAAAGTTGCCGGTAGCAAAC
AGAGCGCGAATGGTATTACTGATATCTTCATCATTAACCGTGTCGCCTGTGCGCACCGGC
ATACTGAGGAGGGCCGCACCAACGGCGACACGCTGAAGGCCTTCGAAATGAATATCTTTC
ACTACGAACCCTTCAGCACCGTATACGGTGGCGCTGCTAAACAGCAGCGACGCTATGAGC
AACTTTTTCATCGCCATCGTTATTATGCGTTCTTCCTAACTAACTCTCATAACCGAGAGA
AATCATTGAAAAGTGCAAGCCCCATTAACAGCACCAGCAGAATCGAGCCAATGCGATAAC
AAAAGTCTTGAACCCGCTCGGATACCGGTCCGCCCTTGATCTTTTCGATCGCAAGGAACA
GCAGATGCCCCCCGTCAAGTACGGGCAACGGAAACAGGTTAATTATCCCTAAGTTCACGC
TAATAAGCGCAAGAAACGGCAGGTAATAAACTACCCCGAGTTCCGCTGTCATCCCAGCCC
CCTTGGCGATAGAGATCGGCCCACTGAGGTTGTTCAGTTTCACATCACCGGTGATCAATT
TTCCCAGCATACTGACCGTCAGCTTCATCAGCTGCCACGTTTTGTCCGTGGCTTCGACGA
TGGCGTTGAACGGCCCATACTGGCGTACAACTTTATACTCATCTGGCAAAGGAATGACTT
TCGGCTCAATACCGACAAAACCAATCGCTTTACCATTACCCGGTTTACTCTCCGGGATTA
ATGTCAAAGACAAGGGACTCCCCTGCCTTTCGATTTCTAACGCTAAGGATTTACCCGGGT
TATCCCGGACAAGCATCACAAAGGTCACCCACTGCGTTAAGGGCTGACCATCGACTTTAA
CGATCCTGTCGCCTGCTTGCAAACCTGCCTTGCTTGCCGCCGAGTTTGGCTGCACATTTT
CCAGTACAGGTTCAATTTGCGGTCCACGAGGACGAATCCCCAGCGAAGATACCGGATCTT
CTTTATCAGGCTCAAACGCCCAGTGACGTAAATCGAGCTTTACATCCCGCCGTTGGTCGC
TGCCAAATGGCGCTACTGTAATGGTGGTGCTTTCATCGCCAATTTTATCGACCAACTGCA
AACGCACAGCATCCCAATCAGGCGTTTCGATACCATCTACGGCTTTTAGTTCCGTACCTG
GTGCAATTTGTGCTTCCGCAGCTATCGAATTGGCTGCTATTTCGCCAACCACCGGACGTA
CGCCAGGCACACCAATAATAAAAACCAGCCAGTAGGCAAAGATAGCAAAAATGAAGTTTG
CAACCGGACCTGCGGCAATAATCGCCGCTCGTTGGCCGACAGATTTATTATTGAAGGCAT
GGTGGCGGAGTTCCGGAACGACCGGTTCTGCGCGCTCATCCAGCATTTTGACATAACCGC
CCAGCGGGATCAGGGCGATAACATATTCGGTACCGAGCTTATCAGTTCGCCGCCAGAGCG
CCTTACCAAACCCTATTGAGAAACGCTCAACGCGAACACCACAACGCCGGGCAACCCAGA
AATGACCAAATTCATGCACGGTGATAAGTACACCCAGTGCAACGATGAACGAAGCCAAAT
CCCAGAGAAAACTCAGCATATTACCTTCCGTTAAAGCGTCCTGAATACCAGTAACAACAA
GCAAGCAAAGACCGGTACCGCAGCCGTCAGGCTATCAATACGATCTAAAATACCACCGTG
TCCTGGAATTAAATGACCGCTGTCCTTAATTCCTGCTTCACGCTTAAACATACTCTCGGT
CAGATCGCCGAGCACTGAGGCTAACGCTGCGACAATAGAGCAAATGAGTAAGGTGACGGG
AGCGACGTCGAGATTCGCCCACATGCCATAACCCCATGAGATTACCGCTGCGGTCGCTAG
TCCACCTATAAAGCCTTGCCAGGTTTTACCCGGAGAAACCTTCGGTGCCAGCTTATGTTT
ACCAAACAATTTGCCAAACATATATGCGCCAGAGTCAGCGCCCCATACCAGGATCATGAC
ATAGAGCAGCCATATTGCGCCACTGTAATGATTCTCGTCGTAGTGCCAGGCCCGTAACGC
CAGCATGCCCCAGAAGAAGGGAACAATGGTTAGCACGCCAAAAATAAGGCGCAATGTTTT
AGAGTTACGCCAGATTGCTGCGGAATCTGGGTAAAACAGCACCAGCAATAGCGCGACAAT
CCACCAACCCAACGAAGCCCAAAGTGAGATTTCAACCAGCGGTTGATGAATATTTCGGTG
ATATTCCGGCAACAGAAAAAGCATCAGCGCCAACAATAACCCGCATAACACCGCCAACCA
TACTCGCTGCGAACGAGTGGTAAAACCGCTAAGCTGTCCCCATTCCCACGCTGCCAGCAT
GCAGACCACCAGCGTTACAATGGCGAACCCCACCGGCGGCAACAGAAACAACGCCGCGAT
GACGACGGGTATTAACACAAAAGCAGATATCAGGCGATACTTCAGCAAAAGCGACCCCCA
TCAGGCTGTTTCATCACCGGGCTCGGTGCCGCCGAAACGACGCTCTCGATTAGCAAAGGC
ATTTAACGCCCCTTCAAAGTCTTGTTCATCGAAATCGGGCCAGAGAACATCTGTAAAGTA
AAGTTCGGCATAGGCAATTTGCCAAAGCAAAAAGTTACTAATGCGATGCTCCCCCCCAGT
CCTAATTACTAAATCTACAGGGGCCAGTTCATGCATACAGACATGCTGGTTTAGCATCTC
TTCATCTATCTGATCTGGTTGCAGGTTTCCTTGCTGCACCTTTTCAGCCAGTTGCCTGAC
TCCCTGGACTATATCCCAACGTCCACCGTAGTTCGCCGCAATATTCAGCGTCAGACCGGT
ATTCCCGGCTGTTAGCGCTTCAGATTTACGAATACGTTCTTGCAAACGCGAGTTAAAGCG
ACTGGTATCGCCAATAATACGCAGACGCACGTTATGTCGGTGCAGACTTTTTACTTCGCT
ATCGAGCGCCCACACAAACAGTTCCATTAACGCACTGACTTCCTGCGCTGGTCGGTTCCA
GTTTTCACTACTAAAGGCATACAGCGTTAACGCCTCAATACCGTTGTTGGCCGCAAAAGA
GACAGCCCGGCGGACGGATTTTGCCCCGGCTTTATGCCCAAAGGCACGAATCTTCCCTTG
CTTTTTTGCCCAGCGACCATTGCCGTCCATAATGATCGCAACATGACGGCAGCCATGCGC
TGGCAATTTTTCGCTAAGTGGTTGAGTAGCAGACAACATCACGCGTTTTTTATTCCCTGA
CAGGGTTTACGGTACTCAGGAATACTGAAGCCTATACAAAAAAAAGCCGTGTAAAACCAC
GGCATACCTGACCTTATAAAGCCAACTACTTACGATCAGATGGCGCAGACTATATCACTG
AAGCCCTACGCTAACAAATAGCGCGACTCTCTGTAGCCGGATTATCCTCAGCTTGCGAGA
CGCATCACCTCTTTTCTGGCGACTTCACGCGCGTTCGCATCAACAGATAACACATCGTCC
ACACATTGTGGTTCGCGCATATCCATTTTTTCCAGTACGGATAAATTCAACGCAGCGATA
TCCGTAAAGCGGATTTGTTGCGCAAGAAAAGCAGCAACGGTGATTTCGTTTGCGGCATTC
AATGCTGTCGTCGCTGCCTGACCTTGTTCGAACGCCTCCATCGCCAGTTTCAGGCATGGA
TAACGATCATAATCCGGTGCGGCAAATGTCAACGCACTTAGTTTGCAAAAATCGAGCGGC
TTCACGCCAGAGTTCACGCGATTCGGCCATGCCATGGTGTGGGCAATTGGCGTACGCATA
TCCGGTTCCCCCAGCTGCGCCAGAACACTGCCGTCCTGATAGCGCACCATTGAGTGAATC
ACTGACTGCGGGTGAATCAGCACTTCCATCTGGCTGGCGCTGGCGTTAAACAGCCAACGC
GCTTCAATGTATTCCAGACCTTTGTTCATCATGGTAGCCGAATCGACAGAAATTTTACGT
CCCATCGACCAGTTCGGATGACGGCAGGCTTGATGGGGCGTCATTGTTGCCAAATCACGC
AATGGCGTCTCACGGAAAGGGCCACCAGACCCGGTAAGTAAAATGGACACCACGCCATTT
TGCTCAAGGTCAGCGTATCCCAGATTATGCTGGATAGGTTGCGGTAAACTCTGAAAAATA
GCGTTATGTTCGCTATCGACCGGTAACAATTGCGCTTTGCTCTGCTTTACGGCGTCCATA
AACAGACGTCCGCAGGTAACCAGTGATTCTTTATTGGCCAGCAAAATGGTTTTACCCGCG
CGGATCGCAGCAAGCGTAGGTAACAGCCCAGCAGCACCAACAATGGCTGCCATCACCTGA
TCAACCTCCTCAAGCGCTGCCATATCGCAAGCGGCTTGTTGCCCACTTAAGACTTCGGTG
CGGCTCCCCTGTTGCTGTAGCATCGTTTTAAGAAGTTTCGCACTCGCTTCATCGTCCATT
ACGGCATAGCGGGGAGAGAATTCCAGGCACTGTTCTACCATGCGAGTGACATTTTTGCCT
GCCACCAGCGCAACTACGCGGAAGTGTTCGGGATTATGGCGCACCACGTCCAGCGTGCTG
CAACCAATCGAGCCGGTCGAGCCCAGAATGGTGAGTTGCTTCATGAAACATCCAGAGTTG
AGACAGAATAAAAAGCAAAACGCCGCCAGCCGATCCGCAAGGATCTACTAAGCGGCGTTT
TTGTCGTTCAAGAAATCAGAACTGCATCAGTTCTGCTTCTTTGTCTGCCAGCGCCGCTTC
AATTTTCTTGATTGCAGCATCAGTCAGTTTCTGTACATCGTCCTGAGAACGGCGATCGTC
GTCTTCGCTGATCTCTTTATCTTTCAACAGTGCTTTCACTTTGTCGTTCGCGTCACGACG
CACGTTACGTACTGCAACACGCGCTTGTTCTGCTTCACCACGAACGATTTTGGTCAGATC
TTTACGACGTTCTTCCGTCAGCGGCGGCAGCGGAACACGGATGTCGCTACCCGCAGAGTT
CGGGTTCAGGCCAAGATCGGACGCCATAATCGCTTTTTCAACGGCCGGAGACATTGAACG
ATCAAACACGTTGATTTTCAGAGTACGGGAATCTTCTACCGTTACGCTTGCCAGCTGACG
CAGCGGCGTCGGCGTGCCGTAATATTCCACGACAATGCCATCCAGCAGGCTGGGAGAAGC
ACGACCCGTGCGTATTTTGCTGATTTGGGTTTTGAACGCTTCTACGCATTTGTCCATGCG
TACTTCAGCATCTTTTCTGATATCGCTAATCACGTTACGAATCCTTGAAAACTTGTCTCA
GTCAGACCAGACAGTCACACACAGTGGAAGTGTGCTAAGTATAGCCCTGATTAAACATAT
TACGGGTAATCGTCTGGATTATTAGGCTATTTTATTTGCCATTTTGGCCCCGGGCAGTGC
TCGCCATCCTCACGTACTTTTGTACGCTCCGGTTGCTGCGCGCTGGCCGTGACCAAACTG
CCTGCAACAATAACGCCTTATAACCAGACTTACGCCCCCGCGATACTTATGCGGAATCTT
ACCCTTATTTATCCATCACGGGAATTATTCCGTGATTAAAGTCCCTTCTTTTTCACCCAT
TACCACACGGCGCAGCGCACCCGGTTTGTTCATGTTGAAAACACGAATCGGTAATTTATG
GTCACGAGCCAGCGTGAAGGCCGCCAGGTCCATGACTTTCAGCTCTTTTTCCAGCACTTC
GCTGTAAGTCAGTTGCTCGTACATGGTTGCAGTTGGATCTTTCGCCGGATCAGCAGTAAA
CACGCCGTCAACTTTGGTTGCTTTCAGCACCACATCGGCTTCAATTTCGATACCACGCAG
GCAAGCTGCTGAGTCGGTGGTAAAGAACGGGTTACCTGTACCGGCGGAGAGGATCACCAC
ACGGTTGTTGCGCAACAGGCTGATAGCTTCTGCCCAACTGTAGCTGTCGCACACGCCATT
CAATGGAATAGCGGACATCAGGCGAGCGTTCACATAGGCGCGGTGCAGTGCATCACGCAT
TGCCAGGCCGTTCATTACGGTCGCCAGCATCCCCATGTGGTCGCCCACAACGCGGTTCAT
ACCCGCTTTCGCCAGACCAGCGCCACGGAACAGGTTACCCCCACCAATCACCACACCAAC
CTGAATACCCAGTTCAACCAGTTCTTTGATTTCCTGAGCCATGCGATCCAGTATGCTTGC
ATCAATACCGAAGCCTTCAGTGCCCTGCAGAGCTTCGCCACTCAACTTAAGCAGAATGCG
TTTATAGACGGGTTTTGCATTGGTAGCCATGTTTCTTTCCTGAGACTGTCAACGATTGAA
ATGAATTAATACTAGCGACATTGTACGTCGCTATTCAGCGCAGCCCCACAAGGGTTAGCT
GAATTTACAAGATGGGCACAAAAAGAAGCCGCCCTCAGGCGGCTCCTTTTCGATGATTAA
GACTGCTTGGACATCGCAGCAACTTCTGCTGCAAAGTCAGTCTCAACTTTCTCGATGCCT
TCACCTACTTCGAAGCGGATGAAGCCAGTCACTTCAGCGTTATGCTCTTTCAGCAGCTGA
CCAACAGTTTTTGCCGGTTCCATAACGAACGGCTGACCAGTCAGAGAAACTTCGCCGGTG
AATTTCTTCATGCGGCCTTCAACCATTTTCTCTGCGATTTCTTTCGGCTTACCAGACTGC
ATCGCGATATCCAGCTGTACCTGGTATTCTTTTTCTACCACTTCAGCGGATACGTCTTCT
GGTTTGATGAATTCTGGCTTGCTTGCAGCAACGTGCATAGCGATGTGTTTAACCAGCTCT
TCGTCAGCGCCTTTAGCAGCAACCAGAACGCCGATACGCGCACCGTGCTGATAAGAACCC
AGAACGTCGCCTTCCAGCGCAGCAACGCGGCGAATGTTGATGTTTTCACCAATTTTCGCT
ACCAGCGCAACACGTTCTTCTTCGAACTGTGCTTTCAGAACTTCAACGTCAGTGATTTTG
CCAGCAACAGCTGCGTCCAGAACTTTGTCTGCGAACGCCTGGAAACCAGCGTCTTTTGCA
ACGAAGTCAGTCTGACAGTTAACTTCCAGAATGATGCCGTAGTTGCCGTCGATTTTGGTT
TTGATCACGCCGTCAGCAGCAACGTTGCCTGCTTTTTTCGCTGCTTTAATAGCACCGGAC
TTACGCATGTTTTCGATTGCCAGCTCGATGTCGCCGTTAGCTTCAGTCAGTGCTTTTTTG
CAATCCATCATGCCTGCGCCAGTACGCTCACGCAGCTCTTTTACCAGGGATGCGGTAATT
TCAGCCATTCTAAAATCCTCGGAGATGTGATCTGCCCGGCATTAAACCGCACAGATATAA
AAGTGAAAAAGGGGGCCATATGCAGGCCCCCTAACCAAACGTGTACTACCTGGTCTATAA
GGGCTCTCCCCCTTCATATTTCGCGCCGCAGATGCGTTGTCTTCGCTCGCTCATCCCGGT
CACTTACTGATGTAAGCTCCCGGGAATTCTCGAGCTTGCCGCCTTTCTGCAACTCGAACT
ATTTTGGGGGAGTTATCAAGCCTTATTACTCAGCTTCTACGAAGCTTTCTTCCGCCTGGG
AAGCCAGATCCTGAGAACGGCCTTCACGTACGGTTGCAGCAACAGCGCCCAGGTACAGGG
TCACAGCACGGATTGCGTCGTCGTTACCCGGGATAACGAAGTCAACACCGTCCGGATCAG
AGTTGGTATCAACGATAGCAAATACCGGAATACCCAGGTTGTTTGCTTCTTTGATAGCAA
TGTGTTCGTGGTCAGCATCGATTACAAACAGAGCGTCCGGCAGACCGCCCATGTCTTTGA
TACCGCCCAGGCTGTTTTCCAGTTTCTCCAGCTCACGAGTGCGCATCAGCGCTTCTTTCT
TGGTCAGCTTGTCGAAAGTACCGTCCTGAGACTGAGTTTCCAGGTCTTTCAGACGTTTGA
TGGACTGACGAACGGTTTTCCAGTTAGTCAGCATACCGCCCAGCCAGCGATGGTTCACGA
AGAACTGGTCGCAGCTCAGAGCAGCGTCTTTCACCGCTTCGCTTGCAGCGCGTTTAGTAC
CAACGAAAAGGATTTTACCTTTGCGAGAAGCAATCTTGTTCAGTTCAGCCAGAGCTTCGT
TGAACATCGGTACAGTTTTCTCAAGGTTGATGATGTGAACTTTGTTACGCGCACCGAAGA
TGAACGGCTTCATTTTCGGGTTCCAGTAACGGGTCTGGTGACCGAAGTGAACACCAGCCT
TGAGCATGTCGCGCATGGAAACAGTTGCCATGATTAAAACCTCTATATAAAAGTTGGGGT
TATGCCTCCACGTATCCCATATTACCGACCCCAAAGGGCACCCCGGAATATGTGCCGATA
CGTGTGTGTTGTTACACAAAGTGAGATTGTCGCTTCCGTCCAGTCTGTGTATACGAAATG
GATCGGAAGTCCGGCGCGCTTTATACCACAAATACGTCTGGGACACCAATAATTGTTGGC
GCTGTGTACAGCATCAGACGTCGAATTTTCTATTATAGAAAACCTTCAGTGGCACGTTTG
GCGAAATTCAGAATGATTCTCAATTTGCCCGGGTGTGATACCATTGACGGCACTTACATA
TATATTGTCGGTATCACCGACGCTGATGGACAGAATTAATGGCTATCTCAATCAAGACCC
CAGAAGATATCGAAAAAATGCGCGTCGCTGGCCGACTGGCTGCCGAAGTGCTGGAGATGA
TCGAACCGTATGTTAAACCGGGCGTCAGCACCGGCGAGCTGGATCGCATCTGTAATGATT
ACATTGTTAATGAACAACACGCGGTTTCTGCCTGCCTCGGCTATCACGGTTATCCGAAAT
CCGTTTGCATCTCAATTAATGAAGTGGTGTGCCACGGTATTCCGGACGATGCTAAGCTGC
TGAAAGATGGCGATATCGTTAACATTGATGTCACCGTAATCAAAGATGGTTTCCACGGCG
ATACCTCGAAAATGTTTATCGTCGGTAAGCCGACCATCATGGGCGAACGTCTGTGCCGTA
TCACGCAAGAAAGCCTGTACCTGGCGCTACGCATGGTAAAACCAGGCATTAATCTGCGCG
AAATCGGTGCGGCGATTCAGAAATTTGTCGAAGCAGAAGGCTTCTCCGTCGTTCGTGAAT
ATTGCGGACACGGTATTGGTCGCGGCTTCCATGAAGAACCGCAGGTGCTGCACTATGACT
CCCGTGAAACCAACGTCGTACTGAAACCTGGGATGACGTTCACCATCGAGCCAATGGTCA
ACGCGGGTAAAAAAGAGATCCGCACCATGAAAGATGGCTGGACGGTAAAAACCAAAGATC
GCAGCTTGTCTGCACAATATGAGCATACTATTGTGGTGACTGATAACGGCTGCGAAATTC
TGACGCTACGCAAGGATGACACCATCCCGGCGATAATCTCGCACGACGAATAAAATGAAG
CCGGCGAATGCCGGCTTTTTTAATGCGATAATTTAATCTTATGGGTGGCGCACAATGAAT
ACCCTTCCAGAACAGTACGCAAACACCGCTCTCCCCACCCTGCCCGGTCAACCGCAAAAT
CCATGCGCCTGGCCCCGTGATGAATTAACCGTCGGTGGGATAAAAGCCCATATCGATACT
TTCCAGCGTTGGCTGGGTGATGCCTTTGACAATGGTATCTCCGCAGAACAGTTGATTGAG
GCGCGTACCGAGTTTATCGACCAGCTCCTGCAACGATTATGGATTGAAGCGGGATTCAGC
CAGATTGCCGACCTGGCATTGGTCGCCGTCGGTGGCTACGGTCGTGGCGAGCTGCATCCA
CTTTCAGACGTCGATTTACTGATTTTAAGCCGTAAAAAGCTCCCGGACGATCAAGCGCAA
AAAGTGGGCGAGCTGTTAACGCTGCTCTGGGATGTAAAGCTGGAAGTCGGTCATAGTGTG
CGCACGCTTGAAGAGTGCATGCTGGAAGGGTTATCGGATTTAACCGTCGCCACCAATTTA
ATCGAATCCCGCTTATTAATTGGCGATGTTGCGCTGTTCCTCGAACTGCAAAAACATATT
TTCAGCGAAGGATTCTGGCCTTCCGACAAGTTCTACGCGGCGAAAGTTGAAGAACAGAAC
CAGCGCCATCAGCGTTACCATGGCACCAGCTACAACCTTGAACCAGACATCAAAAGCAGC
CCTGGCGGCTTGCGCGATATCCACACTCTGCAATGGGTGGCCCGCCGTCATTTTGGCGCA
ACATCGCTGGATGAAATGGTCGGGTTTGGCTTCTTAACCTCAGCGGAGCGGGCGGAATTA
AACGAATGTCTGCATATATTGTGGCGTATTCGCTTTGCCCTGCATCTGGTCGTCAGCCGT
TACGATAATCGCCTGTTATTCGATCGCCAGCTTAGCGTCGCCCAGCGTCTGAATTACAGT
GGCGAAGGTAACGAACCGGTCGAGCGGATGATGAAGGATTACTTCCGCGTGACACGCCGC
GTCAGTGAACTCAACCAGATGCTGCTGCAACTGTTCGATGAAGCGATCCTCGCCCTTCCC
GCCGACGAAAAACCCCGTCCAATCGACGATGAGTTTCAGCTACGCGGTACGCTAATCGAC
CTGCGTGATGAAACACTATTTATGCGCCAGCCGGAAGCCATCTTGCGTATGTTCTACACC
ATGGTGCGCAACAGTGCGATCACCGGCATTTACTCCACCACACTGCGCCAGTTACGCCAT
GCCCGTCGCCATCTGCAACAACCGCTGTGTAATATTCCGGAAGCACGAAAACTGTTTTTG
AGCATTCTGCGTCACCCCGGAGCGGTGCGGCGCGGGCTATTGCCAATGCATCGCCATAGC
GTGCTCGGCGCGTATATGCCGCAATGGTCGCATATCGTCGGGCAGATGCAGTTTGATCTG
TTCCACGCCTACACGGTGGATGAACATACTATCCGCGTGATGCTGAAACTGGAGAGTTTT
GCCAGTGAAGAAACGCGCCAGCGCCATCCGTTGTGTGTGGACGTCTGGCCGCGCCTACCG
TCAACTGAGCTGATTTTCATCGCCGCGCTGTTTCACGATATCGCCAAAGGACGCGGCGGC
GACCATTCCATTCTCGGTGCTCAGGATGTAGTGCATTTTACCGAACTCCACGGGCTGAAC
TCACGCGAAACACAGCTGGTCGCCTGGCTGGTTCGCCAGCACTTGCTGATGTCGGTGACA
GCTCAGCGTCGCGATATTCAGGACCCGGAAGTCATCAAGCAGTTTGCCGAAGAAGTTCAA
ACGGAAAATCGTCTGCGCTATCTGGTATGCCTGACAGTGGCTGACATTTGCGCCACCAAC
GAAACGCTGTGGAATAGCTGGAAGCAAAGTCTGTTGCGCGAACTCTATTTTGCCACCGAA
AAACAGCTACGACGCGGAATGCAAAACACGCCGGATATGCGCGAACGGGTTCGCCATCAC
CAACTCCAGGCGCTGGCACTGCTGCGCATGGATAACATCGACGAAGAGGCGCTGCACCAA
ATTTGGTCACGCTGTCGTGCTAACTATTTTGTCCGCCATAGCCCAAATCAACTGGCCTGG
CATGCGCGCCATTTATTACAGCATGATTTAAGCAAACCGCTGGTATTGCTTAGTCCGCAG
GCTACGCGTGGAGGCACCGAGATTTTTATCTGGAGCCCGGACCGCCCCTATCTGTTTGCC
GCCGTCTGTGCCGAATTAGACCGCCGCAATTTAAGTGTTCACGACGCACAAATTTTCACC
ACTCGCGACGGTATGGCGATGGATACCTTTATCGTGCTGGAACCCGATGGTAGCCCGCTA
TCCGCAGATCGCCATGAGGTTATTCGGTTTGGTCTGGAGCAAGTACTGACACAAAGTAGC
TGGCAGCCACCACAGCCGCGTCGTCAACCGGCTAAACTACGTCACTTTACTGTTGAAACC
GAAGTGACGTTTTTGCCTACCCATACCGACCGAAAATCATTCCTTGAGCTTATCGCGCTC
GACCAGCCAGGACTGCTGGCGAGAGTCGGGAAAATTTTTGCCGATCTGGGAATTTCGCTT
CATGGCGCCCGAATTACAACCATTGGCGAGCGAGTAGAAGATTTATTCATAATTGCCACC
GCTGACCGGCGTGCACTTAATAACGAGTTGCAGCAGGAAGTGCATCAGCGGTTGACAGAG
GCCCTCAATCCAAACGATAAAGGGTGATGTGTTTACTGATATGAAAAGAGTTTAACAATG
CAGCAGTTACAGAACATTATTGAAACCGCTTTTGAACGCCGTGCCGAGATCACGCCAGCC
AATGCAGACACCGTTACCCGCGAAGCGGTAAATCAGGTGATCACCCTGCTGGATTCCGGC
GCACTGCGTGTAGCGGAAAAAATTGACGGTCAGTGGGTGACGCATCAGTGGTTAAAAAAA
GCGGTGCTGCTCTCTTTCCGTATTAATGATAATCAGGTGATCGAAGGGGCAGAAAGCCGC
TACTTCGACAAAGTGCCGATGAAATTCGCCGACTACGACGAAGCACGTTTCCAGAAAGAA
GGCTTCCGCGTTGTACCACCAGCGGCGGTACGTCAGGGTGCGTTTATTGCCCGTAACACC
GTGCTGATGCCGTCTTACGTCAACATCGGCGCATATGTTGATGAAGGCACGATGGTTGAT
ACCTGGGCGACCGTCGGTTCTTGTGCGCAGATTGGTAAAAACGTCCACCTTTCCGGTGGC
GTGGGCATCGGCGGCGTGCTGGAGCCGCTGCAGGCTAACCCGACCATTATTGAAGATAAC
TGCTTCATTGGCGCACGCTCTGAAGTGGTTGAAGGGGTGATTGTCGAAGAAGGTTCCGTC
ATCTCTATGGGCGTATACATTGGTCAGAGCACCCGTATTTACGACCGTGAAACCGGCGAA
ATCCACTACGGTCGCGTTCCGGCGGGGTCTGTGGTTGTTTCAGGTAATCTGCCGTCAAAA
GATGGCAAATACAGCCTCTACTGTGCGGTTATCGTTAAGAAAGTTGACGCGAAAACTCGC
GGTAAAGTTGGTATTAACGAACTGCTGCGTACCATCGACTAAAAGTATGTACACGGGCAG
CACGACGCTGCCCGATTGCTTTCTGGTTCAGAATAATTAGTCCTACTCATTCTTCCTCCC
CCTTTTTTAAATACTTTTTCATCTTGTTTCGGACTGTCATGTAATTCGCAAAACGAAGAT
AAATGTGCTAATCCATCCCATGGAATATCGCCACAATAAAGCAGGTAATTTTTTGATTTT
TACGCCATGATAGAAGTCTGGAAGAAAAAGGCTTTCTGCGATCACAGTCGAGCCGGGCGG
GCCAGGCCAAATGCTAAAATAAGCACAATTTACTGACTCATTTTGAGGTAACGCTATGTA
CGACAATCTGAAAAGTCTGGGTATTACCAATCCTGAAGAAATTGATCGTTACAGCCTCCG
GCAGGAAGCCAACAACGATATTCTGAAAATCTATTTCCAGAAAGACAAAGGCGAGTTTTT
CGCCAAGAGCGTGAAGTTTAAATATCCGCGTCAGCGTAAAACGGTCGTCGCTGATGGTGT
GGGTCAGGGTTATAAAGAAGTCCAGGAAATCAGCCCGAATCTACGGTATATCATTGATGA
GCTTGATCAAATCTGCCAGCGTGACCGCAGCGAAGTTGATCTTAAGCGTAAGATCCTCGA
CGACTTACGTCACCTGGAGTCAGTCGTAACCAATAAGATCAGCGAGATTGAAGCCGATCT
GGAAAAACTAACGCGTAAATAATCCCGAACTGACGGTTAACTCGGGCATTCCCCTCTCCC
CTTCGGGCTGAGGGGAATGAGCCAGCGCCGCCTCAACCTTAACGCATAACCTACCGCTCT
TCATCCAGTTGTAACGCCACATACAGCAGCAACCTGTCATCAAAATTGCCCAAATCAAGC
CCGGTCAGTTCCGATATACGATTAAGCCGATACTCCAGAGTATTACGATGAATAAACAAC
GCCTTTGACGTTGCCAGCGGTTGCACATTGTGACGAAACCACGCCGCCAGCGTTCGCCGC
AGCAAGCCGTTATTGTCCATCGCTTTCAGCCGCGCCAGCGGTCGCGCCAGTTCGTTGGCC
TGCCAGTCGCCACGCAAACTGTCGAGTAACACAGGTAACATCAGATCCTGATAAAAATAG
CAGCGACTTTCTGGCATCCGCTGTTTACCCACCACCATCGTCGTTTTCGCCGTACGATAG
GATCGGGCAATACTGCCAGGACCAGTAAAATAGTTGCCCAGCGAAACGCGAAAACGCAGC
TGGCCGTACTCTTTCATGCGGGTAATCAGTTGTTCAACTCGCTTACGATGATCTTCTGCA
TCCCAGCGCCCAAAAGAGTTCAACGCCGGTTTCAACACCACCATTTCGGTTAGCGAGACA
ATCGCCACCAGATTATTACGCTCGGGCGTAGTCAGCGCATTTTGCAGTTGTTGTAACTCC
GCCATTGCGCTGTCCACGCCAAGCTGACCGCTGTCGACCTCAACAATAGCCACTACTCGC
GGTTGATTGAGATCGATCCCCAGCCGTTGCGCCCATTCAGTAAGTGCGGGAGTATTCTCC
TCAGCCTGAATCAGGTTCATCACCAGTTCTTCCCGCAAACGGCTATCCTGCGCCAACAGG
TGCATCAACCGCGACTGTTCCAGCATCATTTCAGCCGTCATGCAGACCAGTTCGCCATAT
TTACGCAGGTTCTCTGGTTCACCTGTCAGGCCAATTACGCCGACAATTTCACCTTCCAGC
CGTAACGGTAGATTAATCCCCTGCCGCACACCGTGCAGATGACGTGCCACCGCGTCATCG
ATATCGACGACTCGTCCCTGTGAAAGTACCAGCAATGCACCTTCGTGCAATTCACCAATA
CGCTCACGATCGCCGCTGCCGATAATTCGCCCGCGGGCATCCATTACGTTGATATTGGTA
TCGATGATGCGCATGGTATGTGCCACGATATCCTGCGCCATTTTGGTATCAAGATGCCAG
CCAGCCATAAGTCCTCCGTTATGCACGGCTTAGCATAAGGAAGTACGTAACGTACGGCAT
TGTGCAAATGCCTAAAGGATGATGAAGATGTATGGAGTTGTGGTGAAGTTCACAGATTGT
AAGGAGAACCCCTTCCCGTTTTCAGGAAGGGGTTGAGGGAGATTACTGCATTAACAGGTA
GATGGTGCTGTCGCCGCGCTGAATGTTCAGTGCCAGCACAGACGGTTTGCTGTCGAGAAC
TTTACGCAGTTCAGCGATGTTTTTCACTGCCTGCTGGTTCGCGCCAATAATCACATCACC
TTTCTTCAGGCCGATCTGCGCAGCCGGAGTGCCCGTTTTCACGTTGTTCACTACCACGCC
CTGATCTTTGCCTTTGTTGCTCATCTCAGCACCTTCAATGCCGTTGAAGATGGAGCTGGA
ATCAACCTGATTCTGGCTGCTCTGCTGCAGTTCCAGATTCACGTTGACCTGCTTACCGTC
GCGCAGCAAGCCCAGGGTCAGTTTGCTGCCCACCGGCATAGTACCCACCTGAGCACGCAG
TGCGGCAAAGCTGCTGATCGGCTTACCGTTCAGTGAGGTGATCACATCACCCGCTTTAAT
GCCCGCTTTTGCAGCGGAGGAATTAGGCAGAACCTGGCTTACGAAAGCACCGCGCTGGGC
GTCAACTTTCATCGCTTTCGCCAGTTCGGAATTCAGCTCAGTCCCCATAATACCCAGCTC
ACCGCGTTTCACCTGGCCGTATTCCACCATCTGCGAGGTCAGGTTTTTCACCATGTTGCT
CGGGATAGCAAAACCGATACCGATGTTGCCGCCGTCCGGTGCGAGGATCGCGGTGTTGAT
ACCGATCAGTTCGCCGTTCAGGTTAACCAGCGCACCACCGGAGTTACCACGGTTGATCGC
TGCATCGGTCTGGATGAAGTTTTCGTAGTTTTCGGCATTCAGGCCGCTACGCCCCAGCGC
AGAGACAATCCCGGAAGTTACCGTCTCGCCCAGACCAAACGGGTTACCAATCGCTACGGT
GTAATCACCCACGCGCAGTGCATCAGAATCCGCCATCTTAATTGCGGTCAGGTTTTTCGG
ATTCTGGATTTGGATCAGCGCGATATCAGAGCGCGGATCTTTGCCAACCATCTTCGCGTC
GAACTTACGGCCATCGCTCAGTTGAACTTTAATGACCGTCGCGTTATCAACAACGTGGTT
GTTGGTGACGACATAGCCTTTATCGGCATCAATGATGACGCCGGAACCCAGCGCCATGAA
TTTCTGTTGCTGGCCGCCACCATTACCGCCCTGGCCACCCTGGCAGAACGGAGAGCTCTG
GAACGGAGAACCTTCCTGGCAGAACGGAGAATCATCACCGAAGAACTGCTGGAAATTACG
CGGCATACGCGGCGTATTAACGGTTGTGCTACCTTCTACGTTAATGCTGACCACTGAAGG
CATCACCTTTTCGAGCATCGGTGCAAGGCTTGGCATCTGCTGGGCTGTCGTTGCTGAAGA
AGTCTCAGCCGCCGTTGCAGAGAGCGGAGATAACGCCAAACCTAAACTCAGAGCCAGTGC
ACTCAGTGCTAATGTGGTTTTTTTCATGTATTTCAGTCTCGATTAACAGATAACGCAAAA
TTGCTGTGTTCTTCAGATTCGTTTTATAGCGCGAAGTTCCGAACTAAAGTTTCTGCAAAA
GGTAAAAATTTATTGTTCGTCTTTACAAAAGCCTGGTTATTGTTCTACGGCCATCAGACG
TCGGTATTCATCCCACGCATAGAGGTCGGTCATACCGCTGATATAATCATGCAGCAGGCG
GCAACGGTAATAATATTCCCATAGCGGAAACTCAGGAGAATCTGACGGTAATTTACTGAC
AGCTTCGACATAGGCCAGCCGATGGCGCGTCGAGAGTTTGTGGAATAAGCGCGATTCAAT
AGGGAAACGTTTCACCCGTTCTTTTTCTACCAGTTCAGTAAAGTCTGATAACGACAGGCT
TAATAAAGGACGATAAATCTCTAATAATCCGCTAATGACCCGATAGCCCTGCAATTCAAG
CTGCTCGACATCTGGATGGCTAAACACATGTTTTACAGCGACATTTTTATATAGCTTAAG
AAGATCGCTGCATTCGCTGGCATCTTCCAATAATGCATGATTAAACGTTCCGGCGAAAAT
CGCAGGCAGATTATCAATAAATCGTTGTGCCGCGTAGGGTACCAGTTTATTTAGGGTATT
TACCCGTAAATACATAAAAAACTGATCTTCCGTACTGCGGCTTAAACTATTTGAGCGTGA
TTTTTCCCAGGCATTTTCAACCACTAGCGAAAAGAGCGAACCTTTCTCATGCTGACCCCA
CGCCTCGTGCAAATGATGATAAAGCTGCTCAACGGTAAATATTCTTTTCTCTACCGCATC
TTCAAGGTCTGCCACACAATAGGAGATGTCGTCGGCAGCTTCCATAATCCACGTTAATGG
AAAACGACTGTAAAGCGCCAAATTAAGTTCTTTACGCAACCGGGCAATATAGGCTTCTTC
AGAAAGATAATAACCCGGCTTTTTCATTAAATAGTGATGTGTCTCAGGCGTTTCGCCACG
CCACCACGCCGGACGGGTATATTTTAAAATACCGCCAACCTGTGCCCAGGTGAGATTCAT
CCTCATCAATGTATGCACCAGACGAATGCCTTGTGCATTCCCCTCAAAATGACATAAGTC
CTGACGAATCTTGCGCCGCAGCTCGTTAAGCGGTTCTTCCCCGTCCCGTAAACGTAGTGC
TGCCACGCTGCAGCGATCGTCAGTCAGAGGCTGGCTTTCGGCATCTTCCGGGTATAAACG
CTGGCGAAACCAGTCATTTATCGCCGCTTCGCCAAAATGACCAAACGGCGGATTGCCGAT
ATCGTGCATCAGGCATGACATCTCAACAATGCTTTCAAAAGGTCCGGTCAGTTCATCCAG
GCCGTATGCTTCCAGCAATTTAAGCTCTTTCAGACGGCTTAAAATTTCTTTGGCGATGTA
GCGCCCCACCTGCTGGACTTCCATCGAGTGGGTAAGACGCGTGCGCACGGCGGCATTGCG
CTCCAGTGGAAAAACCTGGGTCTTTTGTTGCAGACGACGAATTGCCGGAGAGTTGATGAT
ACGCCCGCGATCGCTCTCGAAGATCCGCAGGATCTCATGTTCGGTTTTAACGCCCTGCGG
TGAACGGTAACGACGATGCCAGTTTATTTTTTTTCGGAAATCAATCTGTGCCATGTCCTC
TCCCGCGTGAGAAATACGCTTCCCCGTAAGCGCATGGTAAACTATGCCTTCAAATCGGGC
TTATCGCGAGTAAATCTATGAAAATCGGCATCATTGGTGCAATGGAAGAAGAAGTTACGC
TACTGCGTGACAAAATCGAAAACCGTCAAACTATCAGTCTCGGCGGTTGCGAAATCTATA
CCGGCCAACTGAATGGAACCGAGGTTGCGCTTCTGAAATCGGGCATCGGTAAAGTCGCTG
CGGCGCTGGGTGCCACTTTGCTGTTGGAACACTGCAAGCCAGATGTGATTATTAACACCG
GTTCTGCCGGTGGCCTGGCACCAACGTTGAAAGTGGGCGATATCGTTGTCTCGGACGAAG
CACGTTATCACGACGCGGATGTCACGGCATTTGGTTATGAATACGGTCAGTTACCAGGCT
GTCCGGCAGGCTTTAAAGCTGACGATAAACTGATCGCTGCCGCTGAGGCCTGCATTGCCG
AACTGAATCTTAACGCTGTACGTGGCCTGATTGTTAGCGGCGACGCTTTCATCAACGGTT
CTGTTGGTCTGGCGAAAATCCGCCACAACTTCCCACAGGCCATTGCTGTAGAGATGGAAG
CGACGGCAATCGCCCATGTCTGCCACAATTTCAACGTCCCGTTTGTTGTCGTACGCGCCA
TCTCCGACGTGGCCGATCAACAGTCTCATCTTAGCTTCGATGAGTTCCTGGCTGTTGCCG
CTAAACAGTCCAGCCTGATGGTTGAGTCACTGGTGCAGAAACTGGCACATGGCTAAGTCA
CTGTTCAGGGCGCTGGTCGCCCTGTCTTTTCTCGCGCCACTGTGGCTCAACGCGGCACCG
CGCGTCATCACGCTTTCTCCCGCCAACACTGAACTTGCCTTTGCCGCCGGGATCACGCCG
GTTGGGGTCAGCAGCTATTCCGACTATCCTCCACAAGCGCAAAAGATTGAGCAGGTTTCC
ACCTGGCAGGGGATGAATCTGGAACGCATTGTCGCGCTGAAACCCGATCTGGTGATTGCC
TGGCGTGGAGGTAATGCCGAGCGGCAGGTTGACCAGCTGGCTTCGCTGGGAATAAAAGTG
ATGTGGGTCGATGCGACAAGCATTGAACAAATTGCCAATGCGTTACGTCAACTGGCCCCC
TGGAGTCCGCAACCGGATAAGGCCGAACAAGCCGCGCAATCCCTGCTGGATCAGTACGCG
CAATTGAAAGCGCAATATGCTGATAAACCTAAAAAACGTGTTTTTCTGCAATTCGGCATT
AATCCGCCATTTACCAGTGGAAAAGAGTCGATTCAGAACCAGGTACTCGAAGTTTGTGGC
GGAGAAAACATCTTTAAAGACAGCCGGGTTCCCTGGCCGCAAGTTAGCCGCGAACAGGTG
TTAGCACGCTCGCCACAGGCGATTGTCATTACAGGCGGACCGGACCAAATTCCTAAAATC
AAACAATACTGGGGTGAACAGCTCAAAATTCCCGTTATTCCTCTCACGAGTGACTGGTTT
GAACGTGCAAGCCCACGTATTATCCTCGCTGCACAACAGCTCTGTAATGCGCTTTCACAG
GTAGATTAGTGCCTGACCTTTTCAGGTGCTCAGTGGGGATTGAACAATGCTCGTCTATTG
GCTGGATATAGTCGGCACAGCGGTATTTGCCATCTCCGGCGTTTTGTTAGCCGGAAAATT
GCGTATGGACCCTTTTGGTGTTCTGGTATTGGGCGTGGTTACCGCAGTAGGCGGCGGGAC
AATTCGCGACATGGCGCTGGATCACGGCCCGGTATTTTGGGTGAAAGATCCCACCGATCT
GGTCGTTGCAATGGTCACCAGCATGCTGACCATCGTGCTGGTGCGCCAGCCAAGACGCTT
ACCAAAATGGATGTTGCCGGTGCTGGACGCCGTTGGTCTGGCGGTGTTTGTCGGCATTGG
CGTGAATAAAGCCTTTAATGCGGAAGCCGGTCCGTTAATCGCGGTTTGCATGGGCGTCAT
TACTGGCGTTGGCGGCGGGATTATTCGTGATGTACTGGCCCGCGAGATCCCCATGATTTT
ACGTACAGAAATCTACGCAACAGCCTGTATTATCGGCGGTATTGTCCACGCTACGGCTTA
TTACACATTTTCCGTACCACTGGAAACAGCCAGTATGATGGGCATGGTCGTGACGCTATT
GATTCGGCTGGCGGCTATTCGTTGGCATCTTAAGCTACCGACGTTTGCGCTGGATGAGAA
TGGGCGTTGAAGAGAGAAGATGTGCCGGATAGTTTATCCGGCACATGAACAACAGATTAG
ATGCTAAAGGAAGAACCGCAACCGCAGGTGCTTTTCGCGTTCGGGTTGGTCACGATGAAA
CGAGAACCTTCCAGTCCTTCGGTGTAGTCAACGGAACCGCCGACCAGATATTGCAGGCTC
ATCGGATCAACCACCAGGCCAACGCCCTGTTTTTCGATGGTCATATCGCCTTCGTTCACC
TGATCATCAAAGGTGAAACCATACTGGAAGCCGCTGCAACCGCCACCGGTGATATACACG
CGTAATTTCAGATTCGGGTTATCTTCGTCAGCGATCAGGCTTTTAACTTTGTTGGCTGCT
GCGTCGGTAAACTCCAGCGGCAGTGCTACGTCATCACTCATATTTTGCTCCAAACGACAT
CGGCAATTGGGCAAATTCTAACCCAATAATAATCGCCATTATCTAATACCCTGGTATTTC
GTTCAAGTATTCTCGCTGGCTGATGCGGCCTTGCTTCGCGCCAGTTGCTCAGCTTCCTGT
TTTGCCAGCGTGCGCGCAAGAATCGCCGAGTATAGCGGTTTCCCACCGGTAAATTGCGCT
AATAGTGTTGCGCCAAGACCGGTAATAATCATTGGCAAAATGAGCTGGTAGTTATCGGTC
ATCTCCAGAACCAGAATGATCCCCGTTAACGGCGCGCGAATAGATGCCGCCAGTAACGCC
CCCATTCCGGCAATAGCAAATGTCCCCGCCTCAAGGTGATATTGCGGAAACAGCTCAACG
GCAACCATTCCGAAAGCGGTTCCCAGCACAGTACCCAGCGCCAGCATCGGGGCAAAAATA
CCGCCCGGCGCGCCGGAAGAGAAGCACAGTAAAGTGGTAATGACCCGCGCGACGAAGATA
AACACCAGCATTCCCATGCTGAAATTCCCCGCGGTAGCGATAGGAATCAGGTTAAAACCG
CCGCCCGACGTTGCTGGTGCCACAAACCCCAGCAATCCACACAGACCGCCAATCGCACCA
CCCATCAGTACCCATTTGGTAATATTGCCGCCGTGCACACGGTGCAGCAAATCCTGCATT
CCCAGCACCCATTTATTAAAAATAGGGCCGAAAATGCCAAAAATAATACCGAGGATCAGA
TAAAGCCACAGCGTATTAAGCGGCGCATCAGAAAGTTTACCGACGTCAATCAACGCAACT
TCATGATTAAAAATCCGGTACATAATGGTCGACATAATGACACCAATAAATACCGCTTTA
ATCGAAATTAACGTATAGCGAAACTGCGGACGCATCTCTTCGATAATAAACAAAATACCC
GCCAGCGGCGCGTTAAAGGCCGCCGCCAGCCCCGCAGCAGCACCGGTTGCCAGCAGCGTA
TGGCGAGCTTCATCACCTTTCAGGCGGAAAACATCGAGTACCATCCGCCCGATATTGCCG
CCGATCTGCACGGTTGGCCCTTCGCGCCCCAACACCATGCCTCCGCCGAGCGTCCCCAGC
CCGCCAAAGAATTTCACCGGCAATACACGCCACCAGCGAACGGGACGTTGATCTTCCAGC
GCCCCTTCAATTTCCGGGATCCCCGACCCCCCTGCTTCCGGCGCGTATTTGCGCACCAAA
AAGTAGCCGAACATCGCCAGCAGCGCCGAACAGAGAAAAGCGACGGTTAACAGAAGCGGA
TAATTATCAGCAGTATGTACCAGCGCCCCCATACGTTGGTTCTGCAACCAGGCGACACCT
TTGTCAAAAGCAACCGCTGCCAGCCCGACAAGCGTGCCGACGACTGCCGCCATAAACAAA
ATGGCTAACGGGGTTTTATCGCGCTCAAGAAGTTGGCGAATCAGTTGTCTGCGTCGCAGG
CGCGCGGCCTGCGGTGTTTCTAAAGAGGGAGTATCAGTTTTCATCCAATGATCACTTATT
GGTCATACAAATAAGATGACGGCATTTTACTCGCACGTTCCATGAAAATCCTTTGCAAAG
CGTAATGTTTCAAATGCACAAAACTTTTATACTCTAAGAAATCAGGATTGCACCAGTACA
AGCAGCCTGATGTTTGACGAGTATTTAACTTGTTATGAATAACATAGAATAGCAGCCATT
CACTTTTTCTACGAATCAGGAACCCTCCATGAGTAAGTCTGAAAATCTTTACAGCGCAGC
GCGCGAGCTGATCCCTGGCGGTGTGAACTCCCCTGTTCGCGCCTTTACTGGCGTGGGCGG
CACTCCACTGTTTATCGAAAAAGCGGACGGCGCTTATCTGTACGATGTTGATGGCAAAGC
CTATATCGATTATGTCGGTTCCTGGGGGCCGATGGTGCTGGGCCATAACCATCCGGCGAT
CCGCAATGCCGTGATTGAAGCCGCCGAGCGTGGTTTAAGCTTTGGTGCACCGACCGAAAT
GGAAGTGAGAATGGCGCAACTGGTGACCGAACTGGTCCCGACCATGGATATGGTGCGCAT
GGTGAACTCCGGCACCGAGGCGACCATGAGCGCCATCCGCCTGGCCCGTGGTTTTACCGG
TCGCGACAAAATTATTAAATTTGAAGGTTGTTACCACGGTCACGCTGACTGCCTGCTGGT
AAAAGCCGGTTCTGGCGCACTCACGTTAGGCCAGCCAAACTCGCCGGGCGTTCCGGCAGA
TTTCGCCAAACATACCTTAACCTGTACTTATAACGATCTGGCTTCTGTACGCGCCGCGTT
TGAGCAATACCCGCAAGAGATTGCCTGTATTATCGTCGAGCCGGTGGCAGGCAATATGAA
CTGTGTTCCGCCGCTGCCAGAGTTCCTGCCAGGTCTGCGTGCGCTGTGTGACGAATTTGG
CGCGTTGCTGATCATCGATGAAGTGATGACCGGTTTCCGCGTAGCGCTAGCTGGCGCACA
GGATTATTACGGCGTAGTGCCAGATTTAACCTGCCTCGGAAAAATCATCGGCGGTGGAAT
GCCGGTAGGCGCATTCGGTGGTCGTCGTGATGTAATGGATGCGCTGGCCCCGACGGGTCC
GGTCTATCAGGCGGGTACGCTTTCCGGTAACCCAATTGCGATGGCAGCCGGTTTCGCCTG
TCTGAATGAAGTCGCGCAGCCGGGCGTTCACGAAACGCTGGATGAGCTGACAACACGTCT
GGCAGAAGGTCTGCTGGAAGCGGCAGAAGAAGCCGGAATTCCGCTGGTCGTTAACCACGT
CGGTGGTATGTTCGGTATCTTCTTTACCGACGCCGGGTCCGTGACGTGCTATCAGGATGT
GATGGCCTGTGACGTCGAGCGCTTTAAGCGTTTCTTCCATATGATGCTGGATGAAGGTGT
TTACCTGGCACCGTCAGCGTTTGAAGCGGGCTTTATGTCTGTGGCGCACAGCATGGAAGA
TATCAATAACACCATCGATGCTGCACGTCGGGTGTTTGCGAAGTTGTGATGATTTTGCCT
CGCCCACCGGGCGAGGCATTCTATTAACGGCTCTGCTTTCTCAACAAATAGATAAAATAT
GGCGCGCCGATAAAGGTCGACAGCAGCCCCGCCGGGATCTGGAATGGAAACAGCACCATC
CGCCCACACCAGTCAGCGAATACCAGCAGTAAACCACCCACCAGCGCCGAAATTACGATG
TGTGGCATCGTCCGTCGAAAACCCATCATCCGCGCAATATGCGGTGCCATTAAACCAACA
AAACTCAACGGTCCAATAGTCATCGTCGCGGTCGCCGTCAGGCAAGCCGCTAACAGCAGC
AGCGCAATTCGCGTCGGCGTCAGCGCCATTCCTACGGCTCGGGCGGTATCACCACCCAGC
GGTAAAATGGTCAGCCAGCGGCGGCACAGCGGGGTAATCGCCAGCAAAATCACCATCACA
ATTCCGGTGCGCCAGACCTGCGCATCGGTCGCGTTGTAGGTCGAACCGGAAATCCAGGTC
AGCACTTGCGCCATTCGCGGGTCACCGCTCGCCTGCAACATCATCAAAAGCATGGTGAAT
GCGGTACTTAACGCCATCCCCGCCAGTAACATACGGTGTGGGGAAAATCCACCGCGTCCG
GCGGCGATCATAATGATCAACAGCGTCACCGCCGCCCCGAGACTGCCTGCGGGTAACAGC
CAGCCAAAGGCATTACCCGGTACCAGAAACAGCATTAACACCACGCCAAACGCCGCGCCG
GAGCTAATCCCCAGCACTTCCGGGCTTGCCATCGGGTTTCCGGTCAGCCGCTGAATAATA
CAGCCCGCCACCGCCAGCATGACGCCCGCAAACAGCGCCGCCATAATTCGCGGCCAGCGC
CAGGGCATTAAATCATCGAGCAACGCCCCGCTCGCCCACGTCCAGCCGTGCGCATCACGA
CCAAACGACAGCGCCACCACCACAGCCATCAACAGCAGCACGCCGCCCGCGAGGGCAAAC
GCCAGCACATGTTGGCGTTCAGCCGCGACACGATCGTTGACCTTCATATCCGGCGCGCTA
ATGCTGCGTAAACGCGGCAACAGCCACAGTAGCAGCGGCGCACCGATCAACGCAGTGACC
GAACCGGTGGACACTTCCATCCACACACGAGTCAGCCAGAGGATGATTTGATCGGAAAGC
CAGAGGATCAGCGCCCCAATCAGCGACGCCAGCATCAACCGTGGCAGCAGACGCCGCGCC
CCCAGCATTTTTGCCAGCAGCGGCGCGAACAACCCGATAAAGCCGATAATCCCTACCGCA
TTCACCAGCAGCGCACTGATGACAATCGCCAGCGACAGCGCCGCCAGACGCGCGAGCGAC
AAGGCCAGCCCGAGATTGCGCGCCACGCCATCATCAAGCCCCATCAGGGTTAACGGGCGA
AGTAGCAATAACGTCAGCATCACGCCGCCCAGCAGCTGCGGCCATAAACGCTCAACGCCG
CCCCAGTCGGTTTGCGTCAGCGTTCCAGTGCTCCACAGAAACATGCTTTGCAACTGGTCA
TGATGGAAGATAACCAGTAATTGATTGATTGCCCCACAATAAAGGCTCACTACCAGCCCC
GCGAGAATCAGCGTTACCGGCGACAGCCGTTTCCCCCACGCGACGCCAAAGACAATTAAG
CCAACAACACAAGCCCCTGCCAGCGCAGCAAACTGGCTCGCCATCGCACCAGGGATCGCC
CAGAGCGTCGTGACGGTAATCCCCAGTTGCGCGCCTGTAGCAACGCCCAACGTCGTCGGT
TCCGCCAGCGGGTTACGCAGCACTTGCTGAAACAGCACGCCCACCAGCCCCAGGCCCGCG
CCCACCAGCAGCGAAATCGCCAGACGCGGCAACAAGCTGTAGTGAAAAATCATCTGCTCG
ATGACGTCAATATCCGGCGACCAGGCAGCCTGCGCCCACTGGCTACGCGGCAGCGCCTGC
GAGAAGTTCATCCAGGTGAGCGCCGTAGCGACAATCACTAACAGCGCCAGCAATAACGCC
GGGAAAAGCGCAATTCGTTTACTCACGCTTTACCTCCGATGGCGTTATCCAGAATACGCA
CAAAGTGCATTGCCGAGAGCGTCGCACCATAAAACCAGACTGCAGGTACGCGCTGAAAGC
GCCCTGTACGGACAAACGGCATGGCCTGCCACAGCGGGGTTGCCATTAGCGCATCCATGT
CTTTGCTGTTGTCGTGATCAAAACAGAGCACATCAACATCTTTATACGCCGCCAGACGAT
CGATACTGACGGCGGTGCTGCCCCAGAAGTTGGTTTCCCCTTGCCAGGCATTTGGGATGC
CGTACTCATCGAGAATTTCCTGGAACAAGCTGTTTGGCCCGAAGACCAACATATGGCGCG
GATCGATAAGCGTCGTCAGCAATAACGGGCGTGCACCACGCTTCACAAAGTGGGGTTTCA
TGCTGCGGATAAAGTCTTCGTATTGCGCTAAATGCGTTTCCGCTGCGCTTTGCAGGTTAA
GTAAATCTGCCATTTCCGTCAGTGATTTACGCGCCATCGCCAGCGGCTGTTTGCCGTCGC
TGAAGTTAAATCCGCGCCCCGGCGCAATACGAGCCAGCATTTCTGGTGAAGGGCCATATC
CTGCCGACCAGACCATAAACGACGGTTTCATTTCGGTCAGCAGTTCAAGGTTAGGTTCTG
TGCGCAAACCGACGTCAATCACCGATTCAGGTAACGGTGGTTCGCTAACCCACAGGCGAT
AGTTGATGGTGTCCGCCACGCCATAAGGCACGATGCCGAGCGCCAGCAGTAATTCCACCG
GCAACCACTCCAGCGCCACAATACGATTGGGATCAATAGCCGCCGCGTGGGCGGCATTCA
TCTGCCATAACAACGGAGAAAGCGCCATCGCCGTTAACAGTCGACGGCGCGAAATAAGAG
GTAAGCCGCTCATCAATAAACAAAACTCACAGGTGCAGCACCCGCCGGATGCGGCAAAAT
ACCCATCGGGATGCCATAAATCATTTCGAGGGTTTCGCCGCGCATAATTTCCGCAGGCGT
TCCCTGAGCAATCATTTCACCGCCGCGCAGGGCGACCAGATAATCACAGTAGCGTGCCGC
CATATTGATATCGTGCAGCACGGCAATGACCGTCAGACCACGTTCCTGACTTAAACGGTG
CACCAGCGCCAGCACATCAACCTGGTGGGCGATATCCAACGCCGAGGTCGGTTCGTCGAG
CAACAGACAACGGCTATCCTGCGCCACCAGCATGGCGATCCACGCCCGCTGACGCTCACC
GCCAGAGAGACTATCGACCAGCCGATGCGCCAGCGGTTTTAAGCCAACCAGCGAGATAGC
TTCCTCAACTTTTTCGCGATCTGCCGCACCAAAGCGCCCCAGCGCGCCATGCCACGGGTA
ACGACCAATCGCCACCAGTTCACGCACGGTCATCCCTTCTGCCGGAGGAAGCTGCTGCGG
CAAATAAGCCACTTTGCGGGCGAATGCTTTGCTACTCCAGCTTTCCAGCGGCTGGGCATC
AAGAAGAATTTCACCTTCTGACGGCGGCTGATGACGGCCCAACATTTTTAACAGCGTGGA
TTTACCAGAACCGTTGTGACCAATCAAACCAGTCACTTTTCCGGCAGGAAAGGTTAACGA
CAGCGGATGCAAAAGCGTGCGCCCTGGCACACGAAAGGAGATATTACGCAGTGCAAAAGT
GGTATCGGAATGATTCGTGTATTCCTGCATAACAGCCAACTTGTGAAACGGGCACGGAAA
TCCGTGCCCCAAAAGAGAAATTAGAAACGGAAGGTTGCGGTTGCAACGACCTGACGTTCT
GCGCCCCAGAAGCAGCCATAAGTGTTAAAGCAGCTGGCGACGTATTCACGATCGAACAGG
TTGTTAACATGCAGCGCCACGTTGGAGCCAGCCATGCCGACTCGCGCCAGATCATAACGC
ACTAACGCATCCACGACCGTATAACTTCCCACTTTAAAGGAGTTAGCCGGATCACCATAG
CTGGAGCCAGTATAACGACCACCGGTGCCCAGCGTCAGACCTGAAAGCGGACCGTCAAAG
AAGGTATAGTCAGCCCACAGCGAAGCCATGTGTTTTGGCACCTGTGCCGGCGTATTGCCT
TTGTAGTTGGTGTCAGTGGTGTATTCCGCGTCGGTGTAGGTGTAAGAACCAACTAAGTTA
ACACTCGCCGATAGTGCCGCTTTCGCTTCCAGCTCTACGCCACGCGCACGAATCTCACCG
CCTTCAACCGAGAACAGTGAACCGTTCGGATCCGCCATCAGGTTATTAGTTTTGGTAAGC
TGATACAGTGCGCCAGTCACCACAATTGGGCGATCTTCTGGCACATATTTCACGCCGACT
TCATACTGTTTGCCTTTCGAAGGTGCAAACAGATCGCCGTTTGCATCGGTCTGCGAAGCG
GGTTCAAACGATTCACTGTAGCTGAAATAAGGCGTTACGCCGTTGTCGAACAGATAGTTA
ACACCGCCACGCCAGGTGAACTGTTTATCATCGCGATCGGATTTATTACCGTAATCACGG
TTGAAAGATGACTGATCGGCCCAGTCATAGCGACCGCCAAGCGTAACCAGCACTTTATCC
CACTGCGCCTGATCCTGAACATACAGACCGGTTTGTTTCTGTTTCAGCAGAACGCGGTAT
GGACCAGACGGATTTGGGTGAGCGCCAAAATCAAAGTCACTACGGTCTAAATTATAGATA
TCAGATGGTGCAACTGAACCGGCATATCCGAACCAGGAGTCGATGTCATTACGCATACGC
ATAAAGTCAACGCCAGTCAGCAGAGTGTGATCCACTGAACCGGTTGCGAATTTGCTTTGC
AACTGAGTATCAACAGAGAAGTTTTCTAACTTCTCATTATCGATAACGTACTGACGAGTC
AGTGTATGGCCCCATTGAGACTGCGGCACGTTGGCACATGGACTCGAAGAGGGGTTTGAG
GAATAGAGAGGATCTGAACACATGCCGTAGCCATATACGCTCTTTTGCGAAACTTTATTT
TGCGCAAAGCGAAGGTTCTGACGTACGGTAAAGGTGTCGTTAAATTCGTGGTCGAAGCTA
TAGCCAATCATCTTCTCATTACGAGAATAGGTGTTGTTCTTCGCCCCTTCGTTAAAGTCT
GTCGGCAGACGCTTACCGTTCGGCAGCGGCTCAACGGTTCCCTCTTTCGGCAACCAGCCG
TAATAACCGGTTTCCGGCTCGTTCTGGAAGTAAGAGAGGAAGGTGAAATTGGTTTTATCG
TCCGGACGCCAGGTGAACGCTGGCGCAATGGCATAACGCTGCTCTTCCGCGCCCTTTTGC
TGGGCATTGGCAGAGCGCGCAAGACCGGTCAGACGATAAGAGTAAACGCCGTCATCATCC
AGCGCATCGCTGAAGTCAAAACCGGTCTGGAACAGGCTGTCAGTACCGACCTTAAACTGA
ACTTCTTTCAACGGTTCAGTGGTCGGGCGCTTGCTGACCATGTTCAACAGGCCACCTGGG
CTGCTTTTCCCATACAGCACGGAAACTGGGCCACGCATGATTTCAGCGCGCTCCAGCATA
TATGGGTCAATAACCGCATCGTTATAGAAGTTGCCCTGCATCTTCAGGCCATTCAGATAG
TTGTTCTGGCTTTGGCCGTCAGCGGCGAATCCGCGGATGATCAGGTAATCGTAAGTGTTG
GATGCGCCACGAGTTCCCACGGCAACGCCAGGAGTGTAGCTAAGCGCTTCTTTTACCGAC
TTCGGCTGATGCAGCGCCATCTCTTCGGCGGTCACAACAGAAATAGACTGTGGCACTTTT
TGAATCGGCGTATCGGTTTTAGTGCCGGTAGCTGACTGTCGCGCCGCAATAGTTGCAGCA
GGCCCCCATGCGCTTTCTTGCGGCGCAGGTGCAGCGGTAACGGTGATAGTGTCTTCTTTC
GGTTCAACCGCTGCCTGTGCATAAACAGACATGCCGCTAACCGCTGTGGCTACTACAACT
GAGATTTTACGCAGTGAGTGTTTTGGCTGAGCAGTTTTGGAACGCGCCATTGGTATATCT
CTGATGTAAAGTGAATGATAACGTAAACGAGAATGATTATTATAAAGATAAGATAATATT
CGAAACGCTGGCGGGTTCGCAAGCGGTACGCAATCTGAGCGTTCCTGAAGGGTTAATAAA
CAACCAGATGAAAAGAAAGGGTTAATACTTTAGGTGGGATGTTATTTTACCGGATGGCAA
CTCGCCATCCGGTATGTCACGTTTAGACGTTAATTACTACCAAACATATCCTTGATCCAA
CCGGCTACACCGTCGCTGTCTTTCTGCTCTTGCTGAGCAGGTTGCTGTTGCGGCTGTTGC
TGCGGCTGAGAAGACTGATCAAACGGATTGCCTGACGGCTGCTGCTGCATCTCACTCTGC
TGGCACAGCGATTGCGGATCGCTGGTCCAGACCGGCAAGACACGCATGCCACCGCTGCAA
ACAAAGTTGCCGTCGTAGTCCACGCCCATATCTGCAATATCTTCTGGCGGAACAAGATTC
AGCGGCGTTGGCGTCTGGTTTGCCAGATAACGCTGATAAATCGACATTGCCCCGCTGGCA
CCATACAGTTTGGTCGGCTGGTTGTTATCACGGCCGACCCAGGTGATGGTCACCGTGCTG
CCGTCAATGCCCGCAAACCAGGTATCTACGTTATTGTTGGTAGTCCCTGTTTTCCCTGCC
AGATGCAGGTTCGGGTATTTCGCCCCAAGCTGACGACCCGTACCGCGTTGTACAACCTGC
TGCATGGTCCATAGTGTCAGATACGCCGCCTGCGCCGGAACAGCGCGTTCCGCCTGCGGG
AAGCTCTGATACAGCACTTTGCCATCTTCCGCGATTACCGAACGCAGCGCAGAAAGCGGT
GCACGGTTACCACCGCTGGCGATGGTCTGGAATGCCTGCGCCACTTCGATTGGCGTTAAG
TTCAACGCCCCCAGCAGCATTGCCGGAACCGGATGCAACTGATCTTTCGGTACGCCCAGT
TTAATCCAGGTATCCGTAACCGCAGGCAGCCCCAGCGCCATCCCCAGATTTACCGTCGGC
ACGTTCATCGAACGGGTCAACGCATCCACCAGCATCACTCTGCCGCTTTCGCTATAACGA
CGGTCATCATTCTGCGGTGACCAGACCTGGCCATTCGGCTGACGCAGCGCAATTGGCGCA
TCCGCAATCCACGTATTCAGACGATAGATTTTCGGCTGGCTTAAGGCCGTCAGATAAGTC
GCTGGTTTTGCAAGGGAACCAATCGAACGACGCGCCTGCATCGCACGGTTGTAGCCCGCA
AACTGCGGCTCAGAACCTCCGACCATCGCACGAACTTCACCACTAAAGCGGTCGACGACC
ACAATCGCGGTTTCCAGATCGCTCAGCTTACGCTGTTTCTTCAGTGCCGGAATGCCTTCC
ACGGCGGCTTTTTCTGCCGCGTCCTGGGCCACCGAGTCAAAGGTAGTGAAGATCTTCACG
CCGGAGAGATCTTTTACCTTATCGCCTAATTTAGCCTGAAGCTCCTGACGCACCAGTTGC
ATAAAGGCTGGCTGAGGAGAGATCACCCCACCGCGCGGCTGAACACCCAGCGGACGCGCA
CTCAACATGTCATAGAGTTCTTGATCAATAATCTGTTGCTGTTGCAGCAGACGCAGTACC
AGATTACGTCGCTCCAGCGCCAGTTTCGGGTTACGCCACGGGTTGTAGATGGACGCTCCT
TTCACCATACCGACTAACAGCGCCTGCTGATCGAGGCTCAATTCTTCTACCGGGCGACCA
AAGTAATACAAGCTCGCCAGCGGGAAGCCACGGATTTCGTTGTCGCCACTCTGACCGAGA
TACACCTCGTTCATATACAGCTCAAGAATACGGTCTTTGCTGTAACGCGCGTCCATGATC
AGCGCCATGTAGGCTTCATTCGCTTTACGCCAGTAAGAGCGCTCGCTGGAGAGGAACAGG
TTTTTCACCAGCTGTTGCGTCAGCGTACTCGCTCCCTGCACCGTGCGTCCGGCGGTCAGG
TTTGCCAGCACCGCACGTCCGATTGAGTAGAGACTGATCCCATCATGCTCGTAGAAATGA
CGGTCTTCTGTCGCCAGCAAAGTATCCACCAGCAAATCCGGGAAACCACTGCGCGGCACA
AACAAACGCTGCTCACCGTTTGGTGAGGAGATCATGGTGATCAGACGCGGATCAAGACGG
AAGAAACCGAACTGACGGTTGTTCTCCATATTGACGATCGTCGCCAGATGATCGCCATCA
AAGGTCAGACGCGCACGCACCTGCCCTTCTTTGCTGTCCGGAAAATCAAACGGACGGCGG
ATCATCTCAATGCTGTTAGCCTGCACAGTAAATTCGCCAGGACGGGTCATTTTCGACACC
TGACGATACTGTGTTGCCTCCAGCAGCTTCACCATCTCGTTCTTGCTGATGGTCATGTCT
GGCTCAAGGTTGACCATTCGACCATAAACTGCCGCAGGCAGTTGCCAGACCTTGCCATCA
ATACGGCTACGAATTTTTTGATCGAGATAAACGCCGTAAATGGCGATCAGCACGGCAAAA
ACGATAGCCAGTTTTAACAGCAGCCATAGCCAGCCGCGTTTGCCACGAGGCTTACGCCCT
TTGCCTTTGCCCTTACCTTTGCGCGGCATCGGTTCTTCATCCTCATAGTCATCATAATCG
TCGTAATCATCGTCATCTTCGTAACGACGACGGCTTACCTTTTGTTTGACCGGACGCGTC
GGTTTCCCTTTGCGTCCAATTGGCTCGCGGTCATTCCCGGCCATGCTTTTTCTCCGCAAT
ATTCAGGCGCAAAAGCCCGATTTTCTGTTCTTCTGTTACAAGACAGAAGAAGATATCTCT
CAAAATTTGTGCTCGATCGGTCCCCTCTCCCTTGAGGGTGAGGGTGAACGTACGCGCTGA
TGCCCTCACCCCGGCCCTCTCCCACAGGGAGAGGGAGAAAACCAACCTTACGAATACTTT
TTCGTCCGTCGCGTCGGTGCCGTGTTTGCCGGGTCGTCCGGCCAGACGTGTTTGGGATAA
CGCCCTTTCATCTCTTTTTGCACCTCACGATACGCCCCTTTCCAGAAGGCCCCCAAATCA
CGCGTGATTTGCAGCGGCCTTTGGGCAGGGGAAAGCAACTCCAGCACCAGCGGCACGCGC
CCCTGAGCGATCGTCGGATTGGTGGCCTCACCAAACATCTCCTGCATTCTCACCGCCAGC
GCGGGCGGGTTATCTTCATGATAACGAATGGCGATCCGGCTTCCCGTCGGCACAGTGTAA
TGCGCAGGCAATTCACTATCCAGACGTTGCTGCATTCCCCAATCAAGTAATCCGCGTAGT
GCCTGATAAATGTCGAGTGATTTCAGGCCGCGTAGTGAATGTACACCGGCCATATGTGGC
AGCAGCCACGTTTCCAGCGTCGCCAACAAACTTTCATCATCAACCGCTGGCCAGTCATAT
TCTGGCAACCACTTTCCGGCGCATAACAAACGCAAGCGTAGCTGTTCCGCTTCCGCCGTC
CAGTTGAGCACGCTTAAACCTTTATCACGGATGCCGTTAAGCATCGCCTGATGCAACTCG
TCTTCTGACGGTTTCGCCAACGGCTGCACTTTCACCGTCAACTGACCGATTTGCAGCCGA
CGCCAGGCTTTCAGCGTACCTTGCGCGTCATCCCATTCCACGGTGTCAGATTGCTGCACC
AGCTGCGGACAGCGTCGCACTAATTCATCAATATCGACCGGTAGCGCCAGTAAAATCCGC
GCATCCGGCGAGGCGCTGCCCTGCAATAATAACGGTGCGATCAACCATTCGTGGCGGCTT
AGCGCGTCGTCGGCATCGAGCATCGCTCCCATGCCGTTTGCCAGTTGATAGCGTCCATCT
TGCCCACGGCGGCGAGCAATGCGATCGGCAAACGCCCCGGCAAGTAGCAGCGCGATAAGC
GAACTGTCTGCCTCACCGCCGTATACGTTTAAGCGTTTTAACAGTTGCTGACTACGTTGC
TGCCAGGCTGGCTGATTGCGCGAAAACACCACGCCCAGGTCACTATTGCCCATCCGTGGC
GGCTCTTCGAGAATGGCGGCAATTTTTGCCGCGGTAGCAGCTTCGTCGTCGCTCTTTGCG
CTAACCAGCATTGCCGCTAAACGCGGATCGTTACCCAGCGCTGCCATTTTTTGCCCCTGC
GCACTAAGCCGTTCACCGTCCAGCGCCCCCAGCATCCGTAACAGGCGTTTCGCGGCCAGT
AGATTCACCGTTGGCGGTTGATCCAGCCAGCTCATCTGCGCCGGATCGCTGCATCCCCAT
TGCAGTAATTCCATCAGCAAACCGGAAAGATCGCTTTGTAATATTTCCGGTTCACTTTGC
GCCGCGGCGCGTTCTGCTTGTTCCTTGGCGATTAAATGCAGGCAGATACCCGGCTCCAGA
CGCCCGGCGCGCCCGGCACGCTGCGTCATCGACGCCTGACTGATTCGCTGAGTAATTAGT
CGCGTAAGCCCTGTTCGCGGATCAAAACGCGCCACCCTTTCCTGGGCGCAATCCACCACC
AGACGAATACCTTCGATAGTTAAACTGGTTTCAGCAATATTGGTCGCCAGCACGACTTTG
CGCATCCCTTGCGGTGCCGGGAGGATCGCTTTTCGCTGATCGTTCAGCGACAACGCGCCA
TACAGCGGGCAGAGCAACACATCACTGCCGATACGCGAAGCCAGTTGTTCCTGCACACGC
TGAATTTCTCCGACGCCCGGTAAAAATAACAGTAATGATCCACTTTCCTGACGCAGCATT
TCGGCGGTCGCAACCGCGACGGCTTCGTCAAAACGCTGATGGGCGGGCAGCGGTAAATAA
CGGCGTTCAACCGGAAACGAGCGCCCTTCTGAGATGACGACGGGCGCTTCTGGTAGCATT
TGTTGCAAGCGGTCGTTGTCCAGCGTAGCCGACATAATCAGCAGTTTAAGGTCATCACGC
AGACCTTGTTGCACATCGAGTAACAGCGCCAACGCCAAATCCGCCTGCAAGCTACGCTCA
TGAAATTCATCAAGGATCACCAATCCAACACCGCTCAACTCCGGGTCACGCTGGATCATC
CGCGTCAGCACGCCTTCGGTAACCACTTCCAGGCGGGTATTCGGCCCGACGCAGTTTTGC
GCACGCATCCGGTAGCCAACGGTATCGCCTGGCTTTTCGTTAAGCAGCTCCGCCAGCCGT
TGCGCGACGTTACGCGCCGCCAGACGCCGTGGCTCCAACAGGATAATTTTCCCGTTAATG
CCGGGATGCGCCAGCAGTTGCAGCGGCAGCCAGGTTGATTTCCCGGCCCCGGTCGGCGCA
CTTAATAATACCTGCGGCGCACAATCGAGAGCGGTAAGTAATTCAGGTAAGACGGCAGCA
ACGGGCAACGACGACACAAAACGCTCCAGAGGGTTAACATTCTTCGCGCCACATTGTAGC
ATCGCGGTAATTCATAACCGAGTGCCTCACATGTCTGAACCGCAACGTCTGTTCTTTGCT
ATCGACTTACCTGCAGAAATCCGCGAACAGATTATCCACTGGCGCGCCACACACTTCCCA
CTTGAGGCGGGACGTCCGGTCGCCGCCGATAATTTGCATCTGACTCTGGCATTTTTAGGC
GAAGTGAGCGCCGAGAAAGAGAAGGCGCTTTCTCTTTTAGCCGGACGGATTCGTCAACCT
GGTTTCACACTCACGCTTGATGACGCCGGACAATGGCTGCGTTCGCGTGTGGTGTGGTTA
GGGATGCGTCAGCCTCCACGCGGCTTAATCCAGCTGGCGAATATGCTCCGTTCACAGGCT
GCCCGCAGCGGTTGTTTTCAAAGCAATCGTCCGTTTCATCCACATATTACCTTATTGCGC
GACGCCAGCGAGGCGGTGACAATCCCGCCGCCAGGTTTTAACTGGTCGTATGCGGTGACG
GAGTTCACCCTTTACGCCTCCTCGTTTGCCCGTGGACGCACACGCTACACGCCGCTAAAA
CGCTGGGCGCTAACGCAATAACAAGGATTGTCGCAATGGAATTTTCTCCCCCTCTACAGC
GCGCGACGCTAATTCAGCGTTACAAACGTTTTTTAGCCGATGTGATCACACCCGATGGTC
GCGAATTAACGCTACACTGCCCGAATACGGGTGCGATGACCGGTTGTGCAACGCCTGGCG
ATACCGTCTGGTATTCGACTTCAGACAACACCAAACGGAAATACCCACACACCTGGGAAT
TAACTCAAAGCCAGAGTGGCGCATTTATTTGCGTCAACACGCTTTGGGCTAACAGGTTGA
CGAAAGAGGCTATCCTTAATGAATCAATTTCAGAACTGTCAGGCTATAGCTCGCTGAAAA
GCGAAGTAAAATACGGCGCAGAACGCAGCCGTATTGACTTTATGTTGCAGGCGGATTCGC
GTCCAGACTGCTATATTGAAGTGAAATCGGTTACGTTAGCGGAGAACGAACAGGGATATT
TTCCCGATGCGGTCACTGAACGAGGTCAGAAACACCTTCGGGAGTTGATGAGCGTAGCGG
CTGAAGGCCAGCGTGCGGTTATCTTTTTCGCCGTGCTGCATTCAGCCATTACACGGTTTT
CACCCGCGCGCCACATCGATGAGAAATACGCGCAACTATTGTCAGAAGCTCAACAGAGGG
GGGTAGAAATTCTGGCTTACAAAGCGGAAATTTCTGCTGAAGGCATGGCTCTTAAAAAAT
CACTGCCGGTTACATTGTAGTAAAGTAAGTAACTGGTTAATTTACATTCTGGTCGCGTGC
GCAAATACGCTTTTCCTCACACAGTTGTCAAGTGTTACGTTTAGATAATTGCTATCCGGA
AAAGCATCTGCTATTTATAGCGGCCTCATTTTTCCCCCGAACATGGGGATCGATAGTGCG
TGTTAAGGAGAAGCAACATGCAAGAAGGGCAAAACCGTAAAACATCGTCCCTGAGTATTC
TCGCCATCGCTGGGGTGGAACCATATCAGGAGAAGCCGGGCGAAGAGTATATGAATGAAG
CCCAGCTGGCGCACTTCCGTCGTATTCTGGAAGCATGGCGTAATCAACTCAGGGATGAAG
TCGATCGCACCGTTACACATATGCAGGATGAAGCAGCCAACTTCCCGGACCCGGTAGACC
GTGCAGCCCAGGAAGAAGAGTTCAGCCTCGAACTGCGTAACCGCGATCGCGAGCGTAAGC
TGATCAAAAAGATCGAGAAGACGCTGAAAAAAGTGGAAGACGAAGATTTCGGCTACTGCG
AATCCTGCGGTGTTGAAATTGGTATTCGCCGTCTGGAAGCGCGCCCGACAGCCGATCTGT
GCATCGACTGCAAAACGCTGGCTGAAATTCGCGAAAAACAGATGGCTGGCTAATTACAGC
CGTTCCATCACGTTTACCACAGGCGGGAAATGCTCCCGCCTTATTTTTTGTTCAAAGAGA
TGACAGACACACACTATATTGGCCGCTTCGCCCCCTCTCCTTCCGGCGAGCTTCATTTTG
GTTCTCTGATTGCTGCGCTTGGCAGCTATTTGCAGGCTCACGCCCGGCAAGGTCGCTGGC
TGGTACGTATAGAAGATATCGACCCGCCTCGTGAAGTTCCCGGTGCCGCAGAAACTATCC
TGCGCCAGCTGGAACATTACGGCCTGCACTGGGACGGCGATGTTCTCTGGCAATCGCAAC
GTCACCACGCCTATCGCGAAGCACTCGCCTGGTTACATGAGCAAGGACTAAGTTATTACT
GCACCTGCACGCGTGCACGTATTCAAAGCATTGGCGGTATTTACGACGGTCATTGCCGGG
AATTGCATCATGGACCAGACAACGCCGCAGTGCGTATCCGCCAGCAGCATCCGGTCACCC
AGTTTACTGACCTGCTGCGAGGCATTATTCACGCCGACGAAAAACTGGCACGGGAAGATT
TTATTATTCATCGCCGTGATGGTTTGTTTGCCTATAACCTGGCGGTGGTGGTGGATGATC
ACTTCCAGGGTGTGAGCGAAATTGTCCGCGGGGCAGATTTGATCGAACCGACAGTGCGGC
AAATCTCGCTGTACCAGCTTTTTGGCTGGAAAGTGCCAGATTACATTCATCTGCCGCTGG
CGCTTAATCCACAAGGCGCTAAACTTTCCAAGCAGAATCATGCGCCTGCGTTGCCGAAAG
GCGATCCACGCCCGGTACTAATCGCGGCACTTCAATTTCTGGGGCAGCAGGCAGAAGCAC
ACTGGCAGGATTTCAGCGTCGAGCAAATCCTTCAGTCAGCCGTCAAAAACTGGACGCTGA
CCGCCGTGCCTGAGTCGGCAATTGTAAATTCAACATTCTCAAATGCGTCATGCTGAGCTA
TGATTAGCCGCTATTTTTTTGTCCTGAATGATGTTTGACACTACCGAGGTGTACTATTTT
TACCCGAGTCGCTAATTTTTGCCGCAAGGTGCTAAGCCGCGAGGAAAGCGAGGCTGAACA
GGCAGTCGCCCGTCCACAGGTGACGGTGATCCCGCGTGAGCAGCATGCTATTTCCCGCAA
AGATATCAGTGAAAATGCCCTGAAGGTAATGTACAGGCTCAATAAAGCGGGATACGAAGC
CTGGCTGGTTGGCGGCGGCGTGCGCGACCTGTTACTCGGCAAAAAGCCGAAAGATTTTGA
CGTAACCACTAACGCCACGCCTGAGCAGGTGCGCAAACTGTTCCGTAACTGCCGCCTGGT
GGGTCGCCGTTTCCGTCTGGCTCATGTGATGTTTGGCCCGGAGATTATCGAAGTTGCGAC
CTTCCGTGGACACCACGAAGGTAACGTCAGCGACCGCACGACTTCCCAACGCGGGCAAAA
CGGCATGTTGCTGCGCGACAACATTTTCGGCTCCATCGAAGAAGACGCCCAGCGCCGCGA
TTTTACTATCAACAGCCTGTATTACAGCGTAGCGGATTTTACCGTCCGTGATTACGTTGG
CGGTATGAAGGATCTGAAGGACGGTGTTATCCGTCTGATTGGTAACCCGGAAACGCGCTA
CCGTGAAGATCCGGTACGTATGCTGCGCGCGGTACGTTTTGCCGCCAAATTGGGTATGCG
CATCAGCCCGGAAACCGCAGAACCGATCCCTCGCCTCGCTACCCTGCTGAACGATATCCC
ACCAGCACGCCTGTTTGAAGAATCGCTTAAACTGCTACAAGCGGGCTACGGTTACGAAAC
CTATAAGCTGCTGTGTGAATATCATCTGTTCCAGCCGCTGTTCCCGACCATTACCCGCTA
CTTCACGGAAAATGGCGACAGCCCGATGGAGCGGATCATTGAACAGGTGCTGAAGAATAC
CGATACGCGTATCCATAACGATATGCGCGTGAACCCGGCGTTCCTGTTTGCCGCCATGTT
CTGGTACCCACTGCTGGAGACGGCACAGAAGATCGCCCAGGAAAGCGGCCTGACCTATCA
CGACGCTTTCGCGCTGGCGATGAACGACGTGCTGGACGAAGCCTGCCGTTCACTGGCAAT
CCCGAAACGCCTGACGACGTTAACCCGCGATATCTGGCAGTTGCAATTGCGTATGTCCCG
ACGTCAGGGTAAACGCGCATGGAAACTGCTGGAGCATCCTAAGTTCCGTGCGGCTTATGA
CTTGTTGGCCTTGCGAGCTGAAGTTGAACGTAACGCTGAATTGCAGCGTCTGGTGAAATG
GTGGGGTGAGTTCCAGGTTTCCGCGCCACCAGACCAAAAAGGGATGCTCAACGAGCTGGA
TGAAGAACCGTCACCGCGTCGTCGTACTCGTCGTCCACGCAAACGCGCACCACGTCGTGA
GGGTACCGCATGACAGTGGCGTATATTGCCATAGGCAGCAATCTGGCCTCTCCGCTGGAG
CAGGTCAATGCTGCCTTGAAAGCATTAGGCGATATCCCTGAAAGCCACATTCTTGCCGTT
TCTTCGTTTTACCGCACCTCACCGCTGGGGCCGCAAGATCAACCCGATTACTTAAACGCA
GCCGTGGCGCTGAAAACCTCTCTTGCACCTGAAGAGTTACTCAATCACACTCAGCGTATT
GAATTGCAGCAAGGTCGCGTCCGTAAAGCTGAACGCTGGGGACCGCGCACACTCGATCTT
GATATCATGTTGTTTGGTAATGAAACCATTAATACCGAACGACTCACCGTTCCGCATTAT
GATATGAAGAATCGCGGCTTTATGCTGTGGCCGCTGTTTGAGATTGCCCCGGAACTCGTG
TTTCCTGATGGGGAGACATTACGTGAAATACTCACTTCGCTAGCAGTACCACAACCTGCC
ATCTGGTAATAGCTGTATTATTTTATTTTCTTGACGAGAGGAATACAAAATGATACGGCT
ATTTCATCCACCAAGAAAAAATTATTTTCTTATCTTACTCCTCACTTCCCCCCTTACATA
TTAAATATACTTAATTTACATTTTAGTTTTTTTTAATTCATTCATGAAATAGCACTTCAT
GCAAATAAATTAGGCATTTTTTGTTTAAACAACCTAAAATAACAACAATTCAATACACCA
CATAAATATATTCACATCCGTGATAACTCACCCCTATTACATCCTCCAAAAACTTTGAGT
AATATCCGCTCGCAATATTAATTTCATATAATTTTTGTAAGGATGCATGTAATGAAAAAA
GCACTTCTCGCAGCCGTTCTGGTTATGGCTTCTGGTTCCGCCCTGGCTGTAGATGGTGGT
CATATCGACTTTAACGGTATGGTACAGTCCGGTACCTGTAAAGTGGGTGTGGTAGATACC
GGTATGCACGGCATCAGCACTGATGGCGTGGTTACCCTGGATACTGCAAATGTTACTGAT
AACTTTGCTGAAGTAAGCGCTGCTGCTGTTGGTTTACTGCCGAAAGAGTTCATGATTTCT
GTGGATTGCGAACCGGGTAAAACAACTGCCCAGTTGACCATGGGTTCTGCAAGCTACGCG
AACACCAGCGGCACCCTGAACAACAATACCAATATCACGATTAACGGTATTCAACCGGCT
CAGAACGTGAACATTGCTGTTCATAACATGAAAAACAAAGCTGGCGCTGCTGAAATTAAG
CAGGTCCATATGAACAATTCTTCTGAAATCCAGGAATTGACATTAGACGCACAAGGCAAC
GGTCAGTATGTGTTTAACGCATCTTACGTTAAAGCACCGAACAGCCAGGCTGTTACTGCT
GGTCACGTTACCACTAACGCACTGTACACCATTACTTATCAGTAATTGATAGCGAATTGA
GTATAGGGTTTGTCATCAGGCAAACCTTATTTTCGCTAATTTTATCTCAACACAGACAGC
AAGGAGTGCTTATGTTTCCCTTGGTTAAAAAAACGGTTAGTGCATTATTTGTGAGTACTC
TGTTAGCCAGTACGCCAGCATTCGCTGACATTATTATTTCCGGGACTCGTATCATTTATA
ACGCTGATAAAAAAGATGTTAACGTTCGTCTGGAAAATAAAGGGAATCGCCCCTTACTGA
TTCAGAACTGGTTGGACACCGGCAATGACAATGTCGACCCCAGCCAGATCAAAGTGCCCT
TTACCTCTACGCCCCCCGTTTCACGCGTGGAGCCAAAACGCGGGCAAACCGTAAAAGTAA
TGTATACCGGTGCAACAGCCCTACCTAAAGACCGGGAAAGTGTCTACTGGTTTAACGTGC
TGGAAGTGCCGCCAAAGCCGAAAGATGCCCAGGCTGACAAAAACTTACTACAACTGGCTT
TCCGCACGCGCATCAAACTTTTTTATCGCCCGAGCGGTTTGCAGGGTGAACCTGCTGAAG
CGCCAGCAAAAATCACCTGGAAGTTGAACAACACGCAATTGCAGGCGAATAACCCAACGC
CTTATTACGTGTCATTCAATGACGTCAAACTGGAAAGCGGCGGCAAAAGCTACAAAGTCG
ATTCCAGCATGATCGCGCCGTTCAGTCAGGCAAGCTTTAGCGTAACGGGTCTGTCAGGTG
GCGTTTCATCGGGCAAAGTCGTGTTCCAGGCCATAAATGACTTTGGCGGCAATATCGATG
GTTCAGCAACATTCTAAAAAATAAACGGATTCTTTTAACATCGCCAGGAATGCAACCTTG
TACCAGTTTACTCATCACAAAAGTCGTACACCGAAAAAAACGCTACTTGCGGCCTGTTGC
GCCCTCCTTTATAGCAGCAACGGTGCTGCGGCAGACACGGTGGAATATGACAGTTCCTTC
TTAATGGGAACTGGCTCATCAACCATTGATGTTAAACGCTATGCTCAAGGTAACCCGACA
CCGCCGGGTCTTTATAATGTCCGCGTGTTTGTAAACGGTCAGGCCACCTCCAGTTTAGAA
ATTCCGTTTGTGGATATTGGTGAAAACAGCGCGGCGGCCTGTATTACCCGCAAAAACCTG
GCGCAGTTACACATTAAACAATCCGAACAGCTTGTGACCCTACTCGCCAGAGAAGGTGAA
GAAGAAGACTGTCTTGATCTGGCAAAGTCATACGATCAGGCCGAAGTTCAATTTGATGGC
AGTGACCAGTATCTCGATCTGACCATTCCTCAGGCCTATGTCCTGAAGAGCTATGGCGGC
TACGTTGATCCTTCCTTATGGGAGTCGGGAATTAACGCTGCCACGCTGTCGTATTCCTTG
AACGCGTATCACACAAGTTCAGAAGACAACAATAACGATAGTGTCTATGGCGCATTTAAC
TCAGGTATCAATTTAGGTGCCTGGCATTTCCGTGCGCGCGGCAACTATAACTGGACAACA
GATAGCGGCAGTGATTTCGATTTCCAGGATCGTTACCTACAGCGTGATATTCCGGCAATA
CGTTCACAGATAATCATGGGTGATGCCTACACCACCGGTGAAACGTTTGACTCTGTCAAC
GTCCGGGGTGTTCGCCTGTACAGTGACAGCCGTATGCTGCCTTCTGCGTTAGCCAGCTAC
GCCCCGACCATTCGTGGTGTGGCAAACTCTAACGCCAAAGTTACCGTGACGCAGAACGGC
TATAAAATCTATGAAACCACCGTTCCGCCAGGTGAGTTTGTTATTGATGACATCAGCCCT
TCCGGATTTGGTAGCGAACTGGTTATTACCATTGAAGAAGCGGATGGTTCCAAACGTTCC
TTTACGCAGCCCTTCTCCTCCGTCGTGCAGATGCAGCGTCCTGGCGTGGGTCGTTGGGAT
TTCAGTGCCGGTAAAGTTATTGATGACAGCCTGCGATCCGAACCTAATATGGGGCAAGCC
TCTTATTACTATGGTCTGAATAACCTCTTCACGGGTTACACCGGCATTCAGTTCACCGAC
AACAACTATCTTGCCGGACTGTTAGGTGTGGGTATTAACACCAGCATCGGTGCTTTTGCG
ATGGACGTTACCCATTCCCGCGCTGAAATTCCGGATGATAAAACCTACCAGGGGCAAAGT
TATCGCGTAACCTGGAACAAACTTTTCCAGGATACCGGAACATCATTTAACCTGGCGGCT
TACCGCTATTCCACCCAGGATTACCTGGGCCTGCATGACGCGTTAGTCCTCATTGACGAC
GCGAAACATATGTCTGCCGATGAAGACAAAAACACCATGCAGACATACTCACGCATGAAA
AACCAGTTTACCGTCAGCATCAACCAACCGTTGAACATCGCCTATGTCGATTACGGTTCG
CTGTTTATTTCCGGTAGCTGGACGGACTACTGGGCGGCGAACAATAGCAGGACTGAATAT
AACGTCGGTTACAGTAAAAGCGTTTCGTGGGGTAGCTTCAGCGTTAACCTGCAACGTAGC
TGGAATGAAGATGGCGATAAAGATGACGCAATGTATGTCAGCGTTAGCGTGCCTTTTGAG
AATATTTTCGGTGGCAAACGCAAGACTTCCGGTTTCCGTAATTTAAATACTCAGCTCAAT
ACCGATTTTGATGGTTCACACCAGTTGAATATGAACAGTTCCGGTAGCAATGAAAGCGGC
CAGGTGAACTATAGCGTCAACACAGGTTATAGCATGGATAAAAATTACGGCGATCTAGCT
TCTGTTGGCGGTTATCTCAACTATGAATCTGGGTTAGGCGGTATTTCCGCTTCGGCCTCT
GCCTCTTCTGATAATAGCCAACAGTACTCCATCTCAACCGATGGCGGCTTTGTGTTACAC
AGCGGTGGTCTGACATTTACCAATAACAGTTTCAGCAGTAACGATACGCTGGTGTTAGTC
AATGCCCCAGGCGCTAAAGGCGCACGAGTCAATAACAGTAATAACGAAATCGATCGCTGG
GGATATGCCGTAACGTCCGCTGTCAGCCCATACCGTGAAAACCGCGTAGGCCTGAACATT
GAGTCGCTGGAAAACGACGTAGAACTGAAAAGTACCAGCGCCACCACCGTACCACGTAGC
GGGTCCGTTGTTTTGACCCGTTTTGAAACTGACGAAGGGCGTTCTGCCGTGCTGAATATT
ACCTCCAACACTGACAAACCGATTCCGTTTGCTGCGGAGGTTTACCAGGATGAAGTCATG
ATCGGCAGTATGGGCCAGGGCGGTCAGGCATTTGTGCGTGGTATTAACGACAGTGGGGAA
TTAACCGTGCGCTGGTTTGAAAACAACCAAACCGTGGACTGTAAGTTGCATTACCAGTTC
CCGGCCCAGCCACAAACTCTGGGAAGCACTAACACCTTATTACTTAACAATCTTACCTGT
CAGGTAGCAAAACATTAATATGGAAAATTCTATGAAAAGGATACTACTAACATCCGCGTT
AATAGGCCTGGGTTTACCGGCAGTTGGCTCTGCAACAGATCTCAAAGTCGATTTTACGGC
CACTGTACTCGCCACCACCTGTACGATAACCATTGAACAAGATGGTGGCCCCGTGGTGAC
CAGTAGCGGTAACGATGAATACAGCCTGACCATTCCTGATGTTGGCCTGGACAAAGTTGT
CACTGGTGATGTTGCAGCGCAAGCCAACTTTAAATTAAAGGCTAAAGATTGCAGCGATGG
TTACTCAAAAATTTTTACCACACTTACAGGAACGTCTGTTTCAGGCAAGTTGATTGTCAA
TGAAGCAAGCTCTGGCGCTGCTGGTGTGGGTATGGGTATTAAGCGTAGAGATGCCGCAGA
CTCGGCTTTCTTCACGCCCAATAATACTGACAAATTTGAATGGTCTTCCGATGAGAAAAC
TAACGGTGTGCCTCTGACCGTTGCACTGCGCGAAACCACGGCGGGAGCGGGACGCACCGG
TGCGTTTCAGGCAAAAGCCACCTTTAACTTCACCTACGAATAACAGGGACAGCCACCATG
AAATTAAAAGTCATCGCCACACTGATTGCTACTGTTGCCGTAGGTGCAAGCTTTAATTCA
AATCTCGCCTATGCGAGTACTACTTCTGCATCTTTAACCGTAAACAGTAACCTGACTATG
GGTACCTGTAGTGCTCAGGTTCTGGATTCCAGCAATAAAGCGACAGATACTGTTGCCCTG
GGCAATGTTTATATTTCTGAGTTAGCGGCAAAAAGCAAAGTGCAACCATTCAAAATCCGC
TTCAGTGATTGTGCCGGTCTTCCAGGGAAGAGTGCTCAACTCGTTTTAGCGCCCAGGCCT
GGTACGGGTTGCGCTGGCGGTCAGTCTAACACTGCCGGCTTTGCAAATTCAATTTCCTCC
GGCGCTGGTGGTTCAAGCAGAGCAGCGGTCGAAGTATGGACGACTACGACCCCCGAGGGA
AGCGGCAGTCAGCAACTCAGTTGTGTTCAACGAAACGTCATCACGGTTGATCTTTCTAAT
GCCAGTACAACACAGCCTTATGATTACGATTTAAGTGCGCGGATGATTATCGCCGATGGA
AGAACGGTTAATGATGTATTACCGGGCGAGTTTCTTTCTCCCACCACCTTCACTATCACT
TATCAGTAATAGCAGATAAGGATATTAGAATGCTATGCAGGCATCATAAATTTGTATGTT
TTTTGGGGCTGGCAACAGCCCTCATAACGCCTTTTGCCTATGCTGGTCAGGATGTGAATC
TCACCGCGCAGATTGTCGCCAGTACCTGTCAGGTTGAAGTGAGTAATAATGGCGTGGTGG
ATCTCGGCAGTGTGACCCTGGACTATTTTGCCGACAACGTAACTCCAACAACGGATTATG
CGGGTGGCAAGACGTTTAATGTTAACGTGGTCGCCTGCGATAATATTCAAACGACCCAGT
CGCAAATGAAATTAGATTTTCAGCCGCAGGCAGGTTCGCTTGCGCAGGTGAATAATCAAA
TTTTTAGTAATGAATATGAACAGCAGGCTACCGGGGCAAAAAACGTCGGCATTGTAATAT
TTTCGGCACAGCCGAATCAGCAGACCTTTAACGTGCGGGGAACGGACGGTTCCTCAACGG
CGATTTATTCTGTCGCTCCAGGCAATGCTGTTCCGTCAACCTGGACCTTTTATTCCCGTA
TGCAACGGGTGAATAATGCTCTCCCACCCGAGTCGGGGATGGTGAGAAGCCAGGTTATTG
TTAATGTTTCTTACGAATAATAAGGATAATTATGCAAAGGAAAGGCAATAAACTGTTACG
ACAGTTATGCAGTGCAATACTGTTATTTTTTATGTGCTCCTTGTCTGCATCTGCGATGGA
ATGTTATATAGAAAAATGGGCGGGGGGAACTTATGACATGGTCATAAACCCTGAGGTTGA
AAGTATAACAACGCAAATGGTATCTTCGCCACAAGAAATAAGCGACATGGTTCATGATAC
AAATATTAAACTTAAGGACAGGAACGGTGAGACGATTGGATGTAAGTCCGATATAGGGGG
TACTACTTCAGTACACTTTCTTAACACTGCGGATGCAGGTTTGTTATCAACCTATGTTTC
GAAAGATAATGGCGCATTATTAAAAACAACAGTTCCTGGTATTGTCTACTCCGTAGAATT
GGTATGTATAAGCTGTGGTGCTGCAGATGAACTTGATTTAGTTTTACCTGCACAAAGCGG
CGCAGATAACTTCATACCGGCCAGCGATACCAAGTGGGCTTATGAATACAGTGACAACGA
CTGGTATTTGCGTTTTCGTTTTTACTGGACGCCGGAATTTAAACCTCAAAATGGGGTTTT
CGAAGGATATGCCTTGCCAGGAAAAATTGCTTCCTAGTATATAGGTGATAATACCCAGGC
ATGGGTAAACTTTACTGTTCAGGATAGTGCCGTTCACTTTTACGTTGACCAACCAACCTG
TTCAATGATTACCCTGGATCAGGACAAAGGCAATGTGAGTGGCACAGAAATCCAGTTAGG
TAACAGTTACGTATCCGAAGTTAAAAATGGTCTTACCCGAGAAGTTCCCTTTGCTATCCG
TGGTGAGTATTGTTATGCCAGCAAGATTACGGTTAAGCTGACGGCTGCAAATGCAGCCAC
TGACAAAAATCTGGTGGGTAAAACAACTGGCTCTGCCACAGGCGTGGCTGTAAGAGTTAA
TTCAACTTATAATGATAGCAAAGTGTTATTAAAACCAGATGGCGTTGCTTCCATTGATTA
TAACTTCCCTGTCTGGTCGAATAACTTGTTGTCATTCCCTTTTACAGCACAACTCGTCCC
CGATGGCAGTGGTAAACCTATCGGAACAGGAACATTCTCCGGTAACGCGACCTTCTCCTT
TACCTACGAATAAGTAAAACGTTATTCCCTCCTCATCGCACCAGAGTTCTGCTCTGGTGC
GAACGTTTTCCCCACACTAAAAACCATTGCCCCCCTGATTTCGGCTGTTAGAATGCGAAC
AGATCTGACTTTAGCCATCAGGACACGTTATGAAACCGACCACCATTGCTTCATTGCAAA
AATGCAAACAGGAAAAAAAACGTTTCGCGACCATCACCGCTTACGACTATAGCTTCGCCA
AACTCTTTACCGATGAAGGACTTAACGTCATGCTGGTAGGCGACTCGCTGGGCATGACGG
TTCAGGGGCACGACTCCACCCTGCCAGTTACCGTTGCTGATATCGCCTACCACACTGCCG
CCGTACGTCGTGGCGCGCCAAACTGCCTGTTGTTGGCTGACCTGCCGTTTATGGCGTATG
CCACGCCGGAACAGGCCTTTGAAAATGCCGCCACAGTAATGCGTGCCGGAGCCAATATGG
TCAAAATCGAAGGTGGCGCATGGCTGGTGGAAACCGTGCAGATGCTGACTGAACGCGCGG
TTCCGGTATGTGGTCATTTAGGTTTAACGCCGCAGTCAGTGAACATTTTCGGCGGCTACA
AAGTACAAGGGCGTGGCGAGGCAGGCGATCAACTGCTCAGCGATGCATTAGCCTTAGAAG
CCGCTGGTGCACAGTTGCTGGTGCTGGAATGCGTACCAGTTGAACTGGCAAAACGTATTA
CCGAGGCGCTGGCTATTCCGGTTATCGGTATCGGCGCAGGTAACGTCACCGACGGGCAGA
TCCTCGTCATGCACGACGCCTTCGGTATTACTGGCGGTCATATCCCTAAATTTGCCAAAA
ATTTCCTTGCTGAAACGGGCGACATCCGCGCGGCTGTGCGGCAGTATATGGCTGAAGTGG
AGTCCGGCGTATATCCGGGCGAAGAACACAGTTTCCATTAAGGAGTCACGTTGTGTTAAT
TATCGAAACCCTGCCGCTGCTGCGTCAGCAAATTCGCCGCCTGCGTATGGAAGGCAAGCG
CGTGGCGCTGGTGCCTACTATGGGTAACCTGCACGATGGCCATATGAAGCTGGTCGACGA
AGCCAAAGCCCGCGCCGATGTGGTCGTCGTCAGTATTTTCGTTAACCCAATGCAGTTTGA
CCGCCCGGAAGATCTGGCACGTTATCCACGGACCTTGCAGGAAGACTGCGAAAAGCTAAA
CAAACGTAAAGTGGATTTAGTTTTCGCCCCTTCGGTAAAAGAGATCTACCCGAACGGTAC
TGAAACCCACACTTACGTTGACGTTCCTGGTCTTTCCACCATGCTGGAAGGTGCCAGCCG
TCCTGGCCATTTTCGCGGCGTTTCGACTATTGTCAGCAAGCTGTTCAACCTGGTCCAGCC
GGACATCGCCTGCTTCGGTGAAAAAGATTTTCAGCAACTGGCGCTGATCCGCAAAATGGT
TGCTGATATGGGCTTTGATATTGAGATTGTCGGTGTGCCAATTATGCGCGCCAAAGACGG
TCTGGCGCTGAGTTCCCGTAACGGTTATCTGACAGCGGAACAACGCAAAATTGCGCCCGG
TCTGTACAAAGTTTTAAGTTCAATTGCCGACAAATTGCAGGCTGGCGAACGGGATCTCGA
TGAAATTATTGCTATTGCCGGGCAAGAACTGAATGAAAAAGGCTTCCGCGCCGATGATAT
TCAGATTCGCGATGCCGACACGTTGCTGGAAGTCTCTGAAACCAGCAAACGAGCTGTGAT
TCTGGTAGCCGCCTGGCTTGGCGATGCCCGCCTGATCGACAACAAAATGGTCGAACTGGC
GTAATACTTAACTGGCGCTACGGCTGATGGCGCCAGTTATTAATTTGCCCTACGTCATGG
CGATGACGTCTGTAAGTGATTATTCATATCGCTGGCAATTTAGTTAGAGTTAATTAGCTT
ATCAATCTCTGTAAGAGGTAAAGTTGTCACCTCTGCAACGTCTTCCCGAGACATCCCTTT
ACTTAGAAAACGCTGGGCGAATTCCTGTCTTACCTTCTGGAGTTCCTCTTGATATCCCTT
CTGAAATCCCTTCTCTTCAAACCACTGCGCCAACGTCTGCCTGGTTTCTCTCCGTGTCTT
TATTTCCATAGGTTCCCTTAATTATCTGGTCAGTTAACAATAACAATTATCTGGCTATAA
CTGATGATGCAGACAACTTAGTTAATCAGCTTATCAATCTCGGCAAGGGGTAAATTTGCC
ATCTCTGCAACGTCTTCCCGAGACATTCCTTTATTCAGAAGACGCAGGACGAATTCTTGC
CTTTCCTCCTGTCTTCCCCTCTCTTCAAACCACTGCGCCAGCGTCATCATAGACTCCCCT
CCCGTTTCCCTGTCTCTCAGCACACCATAAAACAAATCCGCTTGTTCAGTATGACCGCGT
TGCAGCATATAGTTTTGCATGGCAACTAACTGACTTCCGCTAGTGTACCCTTCGTCAATC
AGCGTGACCAGTTGCTCCAGCAATAACATTAAGTCGCGCTGGCGAATATGTTTTTGCAGT
AGTTCGAGAATCGCAATCCGCCGATGTTGCATGATTTCGTCATCCGGTGTGATGGTGATA
TCCACCAGCGGGAAAGGACTGTTATAGACGCGTCGCGCCAGCTCCGGAGAGTAAAACATA
TCAAACCAGCACATTGAGAGCGGATAAGGTGTGGCCTCGCCCTGATAAAAGAGAATCGGC
ACTACCAGCGGTAGTTTGTCGTGATCCGCCTCCAGATGCCGATGCATGGCGGCTATAGAA
TAACGCATCATGCGAAAGGCCATTTTCTTATCCGGCTTGCTTTGGTGTTCAATCACAACA
TGCAGATAACCGGGATTGCCCTGCATTTGCACGGAATAGAGCACGTCCGTGCTGTGTCCT
TTCAGGCTCTCTTCAATGAAACTCCCCGACTCTAAATGAAGCGTGTTGAGGTCACAAAGT
TCGCGTAATTCCACTGGCAAATGTATCTCCAGAAAGTCGCGAGCCGTCTCCGCATGCATT
AAAAATTGTTTAAATACCGCGTCATGCGGTGTAGTACTCGGTGCATCCATCTTCCCTGTC
TTCCGTGTTGTCTTGCGTGAAGGCAGTATCCAGCCAAGGCGCGCCGTCGTCAGCCACCTC
TTTATTGTTTACCGAGCAGCGTTCAGAGAAATATCAATTCGTTACAGGCGATACATGGCA
CACTTCGGCGCGGTACGCAAACTGCTGATGCAAATGCCGTCAGATGAGTAGACACTAAAC
AAAAATCGGGCAATACTGCGTGAGAATTTCCTCAAAGCAGGCACCGCCTGCTTCGTTAAC
GACAGGGTAGAAAGGTAGAAGTTATGATTCGCACGATGCTGCAGGGCAAACTCCACCGCG
TGAAAGTGACTCATGCGGACCTGCACTATGAAGGTTCTTGCGCCATTGACCAGGATTTTC
TTGACGCAGCCGGTATTCTCGAAAACGAAGCCATTGATATCTGGAATGTCACCAACGGCA
AGCGTTTCTCCACTTATGCCATCGCGGCAGAACGCGGTTCGAGAATTATTTCTGTTAACG
GTGCGGCGGCCCACTGCGCCAGTGTCGGCGATATTGTCATCATCGCTAGCTTCGTTACCA
TGCCAGATGAAGAAGCTCGCACCTGGCGACCCAACGTCGCCTATTTTGAAGGCGACAATG
AAATGAAACGTACCGCGAAAGCGATTCCGGTACAGGTTGCTTGATTGTTATCCCTGCGGC
TGGTTACTCACCAGCCGCGACATCGTCTCGAGCGAATCCGTTCTTAAGATATAAAGTCGT
TTTAGTAACAACGGATTATCCCCCGGTTTTACTTTGCCTTTCATGGTTGTCACCGCCAAG
TGAAATCCGGCATCGTTTGCTGCCTTCACGGCTTTGTCATTAAATCCGCCAAACGGATAC
GAAAGATACCAGACATGCGGATTAAATTGCGCCAGAGCGCGGCGTGAACGTGCAAAATCA
AACAGAATATTGTGCTCACTACGACTCAGTAATATGGGGCGGCGATAGCCATCCACCCGA
TGCAAAAAATGGGTATGTGACTGAAAATCAAAAACATCGCGAATTTCGTTAAGCTCAGAA
ACGCTCATAAATTGCAGCGATTTTGGGTTCCACTTCTGCGGGTGACGTTTGATGCGTGAG
GTAACAATAAACGCCGTCGCCTTCATGCCATATTGTTTCAACACAGGATACGCATAGCGG
CTCACCGACTTGAGGCCATCATCAAAGGTAATCACCACCGCTCGCGCAGGGAGATTGATC
TTATTCTTCACGTAGCCTTCCAGCTGCACCATGCTCAGTGTCGCGTATCCCCTGTCGCGC
AGCCAGGCCATCTGGTTATTGAAAGCGCGTACCGAGGTGGTCGTCGAAGTGTGGCGAAAA
CGGGTGTTTTCTTCGTCGCGCAGAATATGATGATAGGTTAGCACCGGAAGGCCATTATCG
GGTTGGGCATCCAGCGCGCTGATATAGGCCAGTCGATCGCCAATACGGACCTGATACCAG
GTTTGATTTAACCTGTCTTTCAGTTTATGCAAAATCGGGTAGCGCAAATTGTCCGCCAGT
ACCCCAAATGGCGCACTGCCCACACTCGGCGCGTTATAGACCGGCGTATCTTTCCAGGTA
ACTAAGTTCTGATTACTCAGCGGCTTGTTGAGGTCACCCAAACCGTCTTCAACTTTTTGT
CGCCCCTGAACCGGCTCGAGATGCCCTTTATCGATAAACCCTTTACCAAAGCCAAAATTA
AATGCGTAATAACTTGCGGCAGTGGGCTCCACGGCAATGATTTGTCCGGCCCGAATATTC
CCCACGGTCACCATCTTGTCGCCAATTTGCGCCCAGACCGCAGCATTTTCGATGGTTTGC
ATATAACGGGCAGGTAACGCGGCACTGACACTTGCGGTAAACAGCATCAGCAGGAGAATA
ACAGCTTGTTTGTACATGAAAAAATAACCGAGGGTGAAACAACGCTTTTATTGTAGCAAA
AGCGCTATAAGAATCGTGGGTTAATACTCATACAAATTATGTTTGAGGACGAAAGGTGGA
TTTTTTTGTTGTTGGTGCCAAAGACTACTCACCTCCGGCCCACCCAGTTCGACAATACGC
TCGCGAAACTCTGAACTGGTCATGGTTTCACGGCAAGCCATCATCTGTTCAATTAACGGT
AACGTGACACCAGAAATCACTTCGCAACGGGAGTGTTTGTGGCTTAATAATGAAGCCACG
CGGTACGGTGGCGCTCCGGCTATATCGGTTAAGAAGATGACACCCTCACCAGAGTCCGCT
TCATGCAGAGCATCGCACATCATGCGGCTGAGCATATTAGAGCTTAACCCACGCCAGAAA
TTCACGGCCCGGCACTGAAGAAGTGCCCCATGTTTTTTCTCCAGCGCATCCAGTATCTCT
TGCGCCCGGTCATCGTGACAGGTAATTACCCAACCTAACATCGCCTTCCTCCTTAGCCGA
AAATCAGTCTACCCTGACCATTGTTGATAAAGGGTGATAGCCGTCAAAACTCCTCTCCCC
CAAATCCAGAGGAGAGGAAATAGCCTTAGCTACGCAAACCACGTCCACGTTGGATCAGCG
ACCAACAGATCAAATAAAACGCCACAATAAAGACCACCAGTACGCCAAAGGTAGTGACCA
GCGGAACATCATTGATACCGAGGAAGCCGTAGCGGAAACCACTGATCATATAAACGATTG
GGTTCAGGTGCGACAGCCCTTGCCAGAACGGCGGCAACAAAGTCAGTGAGTAAAAGACCC
CACCCAAATACGTGAGTGGCGTTAACACAAAGGTTGGCACCAGGCTGATGTCATCGAACG
TTTTGGCAAACACACCGTTCAGCAAACCCGCAAGGGAGAACAACACCGCCGTGAGCACCA
GGGTTAAGGCAACGAATACCCATGAATGCACCTGAAACGGCACAAAAAACAGTGAAATTG
CCGTCACCAGAATGCCAACAAACAGACCACGCGCCACGCCACCGCCGACATATCCGGCAA
TAATGACGTGAGTCGGAACCGGCGCTACCAGCAGCTCTTCAATATTACGCTGGAATTTGG
CACCAAAAAATGATGACGCGACGTTAGCGTAGGCGTTGGTGATCACCGACATCATGATCA
GCCCCGGTACGATGAACTGCATGTAGCTGAAGCCATGCATATCGCCAATACGCGAACCAA
TCAGGTTACCGAAGATAATAAAGTAAAGGGTCATGGTGATGACTGGCGGCACCAGCGTCT
GCACCCAGATACGCATAAAGCGATGGATCTCTTTCGCCCAGATGCTTTTTAGCGCCACCC
AGTAAAGATGCATCATGCGCGATCTCCTTGTTTTTCATTAACCAGTGAAACAAACAGCTC
TTCCAGACGGTTAGCTTTGTTACGCATACTTAATACCTGAATGCCCTGCTCACTTAACTG
CGTAAATACGCTGTTGATCCCCTGCTCACGCAGCACTTCAACTTCCAGCGTCGCGGTATC
GACCAGTCGATACTGATAGCCATCGAGCTTCGGTAACGGACTTTTCGGTGCGAGATCGAG
AATAAAGGTTTCCGATTTCAGCTTCGCCAGCAGCGCCTTCATCGAGGTATTTTCCACCAG
CTCACCATGTTGAATAATGCCGATATTGCGGCACAGCATTTCTGCTTCTTCCAGGTAGTG
TGTGGTGAGAATGATGGTGGTGCCTTTGTCGTTTAAATCCTTCAAAAAGCCCCACATTGA
GCGGCGAAGCTCAATATCCACGCCTGCCGTTGGCTCGTCGAGAATCAGCAGTTTAGGTTC
ATGCATTAACGCACGGGCAATCATTAAACGACGCTTCATCCCGCCCGATAACATGCGCGC
ACGTTCGTTGCGTTTTCCCCATAAATCGAGCTGCTTAAGATACTTTTCGCTGCGGATGTA
CGCTTCTTTGCGCTCCACGCCGTAGTACCCTGCCTGATTCACCACAATTTGCTGCACGGT
TTCAAACGGGTTGAAGTTAAATTCCTGCGGCACCAGTCCCAACTGACGTTTAGCGTTCAC
GACATCCTTCTCGAGATCGTAACCAAATACGCTGACCCGCCCGGAGGTTTTATTTACCAG
AGAGCTGATAATACCGATAGTGGTCGATTTCCCGGCCCCGTTCGGCCCGAGAAGCGCATA
AAAATCACCCGCTTCGACCTGCAAATCTATTCCACGAAGCGCCTGAACGCCGCCTGGATA
GGTTTTTTTAAGCTGTTGAAGTTCCAGTGCAATGGTCATAAATTTTTACTTACCTTACGT
TCTTACACTTTATCTGTGGTTTAAATCGTCCCGGAGTTGCCCTATATTAGCCAAACGTAA
TTATTTGGTTACAGGTCGTTAACCTCCATGAAAGACATAGATACACTCATCAGCAACAAT
GCACTATGGTCAAAAATGCTGGTGGAAGAGGATCCCGGGTTTTTTGAGAAACTGGCACAA
GCGCAAAAACCGCGCTTTCTATGGATTGGATGTTCCGACAGTCGCGTTCCTGCAGAACGT
TTAACCGGTCTTGAGCCGGGCGAACTCTTTGTTCACCGTAATGTTGCTAACCTGGTCATT
CACACCGACCTGAACTGCCTTTCCGTGGTTCAGTATGCAGTGGATGTACTCGAAGTTGAA
CACATTATTATCTGTGGCCACTACGGTTGCGGCGGCGTACAAGCCGCAGTTGAAAACCCG
GAACTGGGGCTTATCAACAACTGGCTGCTGCATATCCGCGATATCTGGTTCAAACATAGC
TCATTGCTCGGCGAAATGCCGCAAGAGCGCCGTCTGGATACCTTGTGTGAACTGAACGTC
ATGGAACAGGTGTATAACCTGGGCCACTCCACCATTATGCAATCAGCGTGGAAACGCGGG
CAGAAAGTTACCATTCACGGCTGGGCCTACGGTATTCACGACGGCTTGCTGCGTGATCTG
GATGTCACAGCGACCAACCGCGAAACCCTTGAGCAACGTTACCGTCATGGGATTTCCAAC
CTCAAGCTGAAACACGCCAACCACAAATAAAAATGCCATGCCGGATGCAACACATCCGGC
AACTTCACACTTACTCGTCCAGCAGAATCACTTTGCCGATATACGGCAGATGACGGTAAC
GCTGTGCGTAATCAATGCCGTAACCCACCACAAACTCATCCGGGATCGAGAAACCGATAA
ATTCTACCGGGACGTTCACTTCACGACGGGACGGTTTATCCAGCAGCGTACAAATCGCCA
GCGACTTCGGTTCGCGCAGGCTTAAGATCTCACGCACTTTCGACAGTGTATTCCCCGAGT
CGATGATATCTTCAACAATCAGCACGTCCTTGCCACGGATATCTTCATCCAGATCTTTGA
GGATTTTCACATCACGGGTGGTGGACATGCCGCTACCGTAGCTGGAGGCGGTCATAAAGT
CGACTTCATGAGATACCTGAACTTCACGGCACAGGTCCGCCATAAACATAAATGAGCCAC
GCAGCAGACCCACCAGCACCATATCGCTGCCGCTGTCTTTGTAACGCTCAGTAATCTGAC
GACCCAGTTCGGCGATACGCGCTTTAATCTCCGCTTCGGGGATCATTACTTCTACAGTAT
GTTTCATATCTCTAACCATATGATTTAAAAACAAATCACTTCGCACGGGCAGGTTTTGGC
ACCGCAACAAAGCGCAAGACACGCAGTATACCAGTAAAACTATTCATTCGCGGAATCTGT
TAATAAAGCTCGAATTGTGATGACGGTCACACATGTTAAAACCTATAATTAATTGCTACT
AAAATATTAATGAATTGAAATGGTGTCTCTTTATGGCAATTAACAATACAGGCTCGCGAC
GATTACTCGTCACGCTAACAGCCCTTTTTGCAGCGCTTTGCGGGCTGTATCTACTCATTG
GCGGAGGCTGGCTGGTCGCGATTGGCGGCTCCTGGTACTACCCTATCGCTGGCCTTGTGA
TGCTCGGCGTCGCCTGGATGCTGTGGCGCAGTAAACGTGCCGCGCTTTGGCTATACGCAG
CCCTGCTGCTCGGCACCATGATTTGGGGCGTCTGGGAAGTTGGTTTCGACTTCTGGGCGC
TGACTCCGCGCAGCGATATTCTGGTCTTCTTCGGCATCTGGCTGATCCTGCCGTTTGTCT
GGCGTCGCCTGGTCATTCCTGCCAGCGGCGCAGTTGCCGCACTGGTGGTGGCACTGCTGA
TTAGCGGTAGTATCCTGACCTGGGCCGGATTTAACGATCCGCAGGAAATCAACGGCACCT
TAAGCGCCGATGCCACACCTGCGGAAGCTATCTCACCCGTTGCCGATCAGGACTGGCCTG
CCTATGGTCGCAATCAGGAAGGTCAACGCTTTTCACCTCTGAAACAAATTAACGCCGATA
ACGTCCATAATCTGAAAGAAGCCTGGGTGTTCCGTACTGGCGATGTGAAGCAGCCGAACG
ATCCGGGCGAAATCACCAATGAAGTGACGCCGATTAAAGTGGGCGACACCCTTTACCTGT
GTACCGCTCACCAGCGCCTGTTTGCGCTCGATGCCGCCAGCGGCAAAGAGAAATGGCATT
ACGATCCTGAGCTGAAAACTAACGAGTCTTTCCAGCACGTAACCTGCCGTGGCGTCTCTT
ATCATGAAGCCAAAGCAGAAACGGCTTCGCCGGAAGTGATGGCGGATTGCCCGCGTCGTA
TCATTCTTCCGGTCAATGATGGTCGACTGATTGCGATTAACGCTGAAAACGGCAAACTGT
GCGAAACCTTCGCCAATAAAGGCGTGCTCAATCTGCAAAGCAATATGCCAGACACCAAAC
CGGGTCTGTATGAACCGACTTCGCCACCGATTATCACCGATAAAACCATCGTGATGGCAG
GTTCAGTTACCGATAACTTCTCAACCCGCGAAACGTCTGGTGTGATCCGTGGTTTTGATG
TCAACACCGGGGAGCTGCTGTGGGCTTTTGATCCGGGCGCGAAAGATCCGAACGCAATCC
CGTCTGACGAACACACCTTTACCTTTAACTCGCCAAACTCGTGGGCACCAGCGGCCTATG
ACGCGAAGCTGGATCTGGTGTATCTGCCGATGGGCGTGACCACGCCGGATATCTGGGGCG
GTAACCGCACACCGGAACAGGAACGTTATGCCAGCTCGATTCTGGCGCTGAATGCCACAA
CCGGGAAATTGGCGTGGAGCTACCAGACCGTTCACCACGACCTGTGGGATATGGATCTTC
CGGCACAGCCGACGCTGGCGGACATCACCGTTAATGGTCAGAAAGTGCCAGTTATTTACG
CTCCGGCGAAAACCGGCAACATTTTTGTGCTCGATCGTCGCAATGGTGAACTGGTGGTTC
CTGCCCCGGAAAAACCGGTTCCCCAAGGCGCTGCCAAAGGCGATTACGTAACCCCAACTC
AACCGTTTTCTGAACTGAGCTTCCGTCCGACGAAAGATTTGAGCGGAGCGGATATGTGGG
GCGCCACCATGTTTGACCAACTGGTGTGCCGCGTGATGTTCCACCAGATGCGCTATGAAG
GCATTTTCACGCCGCCATCTGAACAGGGTACGCTGGTCTTCCCTGGTAACCTGGGGATGT
TCGAATGGGGCGGGATTTCTGTCGATCCGAATCGTGAAGTAGCAATTGCCAACCCAATGG
CGCTGCCGTTTGTTTCGAAACTGATCCCTCGCGGTCCGGGTAACCCAATGGAGCAGCCGA
AAGATGCCAAAGGCACGGGTACGGAATCCGGCATTCAGCCACAGTACGGTGTACCGTATG
GTGTCACGCTCAACCCGTTCCTCTCACCATTTGGTCTGCCATGTAAACAGCCAGCATGGG
GTTATATCTCGGCGCTGGATCTGAAAACTAATGAAGTGGTGTGGAAGAAACGTATTGGTA
CGCCGCAGGACAGTATGCCGTTCCCGATGCCTGTACCGGTGCCGTTCAATATGGGTATGC
CGATGCTGGGCGGGCCAATCTCCACGGCGGGTAACGTGCTGTTTATCGCCGCTACGGCAG
ATAACTACCTGCGCGCTTACAACATGAGCAACGGTGAAAAACTGTGGCAAGGTCGTTTAC
CAGCGGGTGGTCAGGCGACGCCAATGACCTATGAAGTGAATGGTAAGCAGTATGTGGTGA
TCTCCGCAGGCGGTCACGGTTCATTTGGTACGAAGATGGGCGACTATATTGTGGCTTATG
CGCTGCCGGATGATGTGAAGTAAGACTTGCTCAGATTGCTGACAACGTGCGCGTTGTTCA
TGCCGGATGCGGCGTGAACGCCTTATCCAGCCTACAAAATTGTGCAAAATCAATGGATTG
CACAGGTAGCGTAGGCCTGATAAGCGTAGCGCATCAGGCAGATTTGCGTTTGTCATCAGT
TTAATGCCCGGAGAGATCCGGGCATATTCCCGAATACGGTCTTTTTATACCGTAAACCCT
AACATCATCCCCGTATCTTCATGCTCCAGCAGATGGCAGTGCGCCATATAAGCATGTTCT
TTCGGTGCGTCGTGATTAAACTTCACCAGCACTTCGCTGACATTACCTTCGACCTTAACG
GTATCTTTCCAGCCCGCGCGATGCGTCGCTGGCGGTTTGCCATTTTCTGACAAGATACGG
AACTGCGTGCCGTGAATATGGAACGGATGCAGCATCATGTCGCCCACGCCAGAGATAACC
CAACGTTCGTACTGCCCTTTCGCCGCCGCAAACATCGGCTTATTCATATCAAACGCCTGA
CCGTTGATTTTATTGGCATGGTGGAAATCGAACTTCCCGCCGTGGTTCATATGATTCATA
TTGCCGTGCCCCATATGGCCCATCATCTGGCTGTGATCCATTCCGGCCATCGCCTGATCG
CCATATTTCTCCATTAGCATCTGCATCCCCATCATATCTAGCATCGGGTCCATAGAAAGT
TGCAGCTTGCGTACCGTCAGCCCTTCCAGCGAAGGTAACGCAGGCAGGCTACTTAATGTG
TCTGGCAAAGCACCGGAGGCACTAATAGCAATCGGCTGAATCCGCATTACCGGATGCGGC
TTGTCAAACGGCGCAATCGCCATCCCCATCTGGCTGACCGGCAGCGTCACCAGGTCAAAG
GGTTTGTTGTCGTTAACCTCCACCAGCACTTCAAAACGCTCGCCCATCAGCACCGGCAGC
TCGTTCACCTTCACCGGTTCAGGTAGCAGACCACCGTCGCTGGCAATCACATAAAGCGGG
CGATTGTCGCTGGTGGCGAAATTGAGCGAGCGGGCATTACAGCCATTGAGCAAACGCAGG
CGCAGCCAACCACGCGGGGCAGCGTGTTGCGGGTAGATTGCACCGTTGGTCAGCAACGTA
TCGCCAAACCAGCCCACGGCGGCGGTCATCACATCCAGTTGATAATCAATCTGCCCGTCG
GCGCTAAATTTCTTATCCTGAACGATCACCGGAACATCATCGATACCCCACTGTTTTGGC
AGCATTAATTTCAGGATCTCGTCATCTTCAATTACCACCAGACCAGCCAGCCCCATCGCC
ACCTGTCGCCCGGTCTTGCCATGTTGATGTGGATGGAACCAGCAGGTAGCGGCAGGTTGA
TCAACGTTCAACGTCACCGAGCGCTTGCCACCTGGCGGAATAATTCCCTGTGGGCCGCCG
TCGACTTCACCCGGTACTTCCAGCCCGTGCCAGTGCAACGTCGTCTCTTCCGTCAGTTGG
TTATAGATATCAACCGTTACCGCTTTGCCGCGCTGTAATTTCACCGCCGGCCCCAACAGA
TTGCCGTTATAGCCCCAGGTAGTTGCAGTTTTCTCGCCAAAGGTAGACTGACCTGCGCCA
ATAGTTAACTGAATGCGATTACGGGCATCGGTCGTGAGCAAATCAGGGATCGGTAACGTT
GGGCGTTCCGCCGCAAAAACTGCACGGCTCCACAGTGGCAAGGCTGAAGCCACACCCAGT
GCGACGGAATATTTCAAGAAATCACGACGTTGCATAGTTATTTCCTTATTCTTAAGCAGG
CGAAACAAAATCAAACGTTGAGCATAGTCCTTCCCCTTACGGGAAGGTCAAGCCGCAGAC
ACAATTTAATCGACAATAATGGTCGTCGCCTCGCTCGCAGTGTGCTAACGTTTATCTTCT
TTAAGCCCCTGGTAGAAGCAATGAAGACGTTTTTCAGAACAGTGTTATTCGGCAGCCTGA
TGGCCGTTTGCGCAAACAGTTACGCGCTCAGCGAGTCTGAAGCCGAAGATATGGCCGATT
TAACGGCAGTTTTTGTCTTTCTGAAGAACGATTGTGGTTACCAGAACTTACCTAACGGGC
AAATTCGTCGCGCACTGGTCTTTTTCGCCCAGCAAAACCAGTGGGATCTCAGTAATTACG
ACACCTTCGACATGAAAGCTCTCGGTGAAGACAGCTACCGCGATCTCAGCGGCATTGGCA
TTCCCGTCGCTAAAAAATGCAAAGCCCTGGCCCGCGATTCCTTAAGCCTGCTTGCCTACG
TCAAATAATCCCTGATACCTTTTTGTAGAAATATTGACCGTGCATCCGCGGTCAATGTTA
GCTATTATGTTGCGCCCTTTTTTTACGGGTGTTAACAAAGGAGGTATCAACCCATGGCCG
AAAAAAAACAGTGGCATGAAACGCTACACGACCAGTTTGGGCAGTACTTTGCAGTAGATA
ACGTTCTGTATCATGAAAAGACCGATCACCAGGATTTGATCATTTTTGAGAACGCTGCAT
TTGGTCGCGTAATGGCGCTGGATGGCGTAGTACAAACCACCGAACGCGACGAGTTTATCT
ATCATGAGATGATGACCCATGTTCCGCTACTGGCCCACGGTCACGCGAAACATGTGCTGA
TTATCGGCGGCGGCGACGGCGCCATGCTGCGTGAAGTGACCCGACATAAAAACGTTGAGT
CAATCACGATGGTGGAAATCGATGCGGGTGTCGTGTCGTTCTGCCGTCAATATCTGCCCA
ACCATAACGCCGGTAGCTACGACGATCCGCGCTTTAAGCTGGTGATCGACGATGGCGTCA
ATTTCGTTAATCAAACCAGCCAGACCTTTGATGTTATTATCTCCGACTGCACCGATCCTA
TCGGGCCCGGCGAAAGCCTTTTCACTTCGGCATTTTATGAAGGCTGCAAACGTTGCCTGA
ATCCTGGCGGTATCTTCGTCGCACAAAACGGCGTCTGCTTTTTACAGCAGGAAGAAGCCA
TCGACAGCCATCGCAAACTCAGCCATTACTTCAGCGACGTTGGCTTTTATCAGGCGGCGA
TCCCGACCTATTACGGCGGTATCATGACTTTTGCATGGGCGACAGATAACGACGCCTTAC
GCCATCTCTCAACCGAAATTATTCAGGCGCGTTTTCTCGCCTCTGGCCTGAAATGCCGTT
ATTACAATCCGGCAGTCCATACGGCAGCTTTTGCCTTACCCCAGTATCTGCAAGACGCAC
TGGCTTCACAGCCGTCCTAAGGAGAAGATAAGAAATTGAAAAAACTGAAACTGCATGGCT
TTAATAATCTGACCAAAAGTCTGAGTTTTTGTATTTACGATATCTGCTACGCCAAAACTG
CCGAAGAGCGCGACGGTTATATTGCTTATATCGATGAACTCTATAATGCCAACCGTCTGA
CCGAAATCCTGTCAGAAACCTGTTCCATTATCGGGGCTAATATTCTTAACATCGCCCGCC
AGGATTACGAACCACAGGGTGCCAGCGTCACTATTCTGGTGAGTGAAGAACCGGTTGACC
CGAAACTCATCGACAAAACAGAACACCCCGGCCCACTGCCAGAAACGGTCGTTGCCCATC
TCGATAAAAGTCATATTTGCGTACATACCTACCCGGAAAGTCATCCTGAAGGCGGTTTAT
GTACCTTCCGCGCCGATATTGAAGTCTCTACCTGCGGCGTGATTTCTCCGCTGAAGGCGC
TGAATTACCTGATCCACCAGCTTGAGTCCGATATCGTAACCATTGATTATCGCGTGCGCG
GTTTTACCCGCGACATTAACGGTATGAAGCACTTTATCGACCATGAGATTAATTCGATTC
AGAACTTTATGTCTGACGATATGAAGGCGCTGTATGACATGGTGGATGTAAACGTCTATC
AGGAAAATATCTTCCATACCAAGATGTTGCTTAAAGAGTTCGATCTTAAGCACTACATGT
TCCACACCAAACCGGAAGATTTAACCGACAGCGAGCGCCAGGAAATTACCGCTGCGCTGT
GGAAAGAGATGCGCGAGATTTATTACGGGCGCAATATGCCAGCTGTTTAACGGCTCTGGC
GGAGCTCCCAGGCTCCGCCAGATTTATTTACTTCTGCTGCACGAAATTACGGTAAGCCGC
CACCACCTGCAGAAAATCCTCAACGCCGCATAGCGACAGGCTTTCTTCGTCGTAGTAGTT
CATCCCCTCTTCCATTTCATCGCCAGCGAATTCCAGTTGATTGGCGCGAACCATCACCTC
TTCACCGTCCATCCACAGGGTGTATTCGTGCCCTGCCCGTTGCCAGGACCGTTCGCTACC
TTTCAGTGCGTGCGCTGCTTGTTCCACTTCATCAAGCAAGGCCAGGTTTTCTTTCACCTC
TTCATTAAACCAGTGCCCGACCACTTCATGCCCCATGGACATACGCACCTTTACCACTCC
GGTAATATCGCGCAGAAATTCGTAATCCATAGTGTGTTCCTCTGCTCCCGGCAATGCGCC
GAAATCGCATTGCGCCATTGATGTAATTATCGCAGCCTTACCGGAGAAAAACAGCGGAAC
GGCGATGGTTTAGAAATAAAAAATGCCCGGGAATCTCATTCACCGGGCATTGTGTCGTTT
ATGCGCAGCGCGTGCGCTGACTTTTTAAACTGCAGTCTGGAAAATCACACCATCGGCTTT
TTCAGTGTACTGAGAAAGCTGGTTGAAGTTCAGGTAACGGTAAGTATCAACGGCAGTTTT
ATCCACCTGCGCCACGTAGGTCTGGTACTCTTCCGGCGTCGGCAGTTTGCCAATCAGCGC
CGCAACAGCAGCCAGTTCCGCAGAAGCCAGGAAGACATTCGCGCCAGTCCCCAGACGGTT
[truncated: 5,029,922 more chars]
