# Supplementary material for: Escherichia coli ST302: Genomic Analysis of Virulence Potential and Antimicrobial Resistance Mediated by Mobile Genetic Elements
Source: Front Microbiol. 2020 Jan 21;10:3098. doi: 10.3389/fmicb.2019.03098 (PMC6985150; doi:10.3389/fmicb.2019.03098)
Supplement: DATA S2 — ST302 SNP analysis. [file Data_Sheet_2.ZIP › SNP_Analysis/ST302_SNP/SNP_analysis/snippyout/ST302/CA0191-ND-ST302.out/snps.csv]

CHROM	POS	TYPE	REF	ALT	EVIDENCE	FTYPE	STRAND	NT_POS	AA_POS	EFFECT	LOCUS_TAG	GENE	PRODUCT
EA2454	977	snp	T	C	C:85 T:0
EA2454	10877	snp	T	G	G:118 T:0
EA2454	11382	snp	A	G	G:97 A:0
EA2454	11847	snp	G	A	A:69 G:0
EA2454	25719	snp	T	C	C:88 T:0
EA2454	34494	snp	T	C	C:101 T:0
EA2454	36375	snp	C	A	A:120 C:0
EA2454	37987	snp	T	C	C:108 T:0
EA2454	39850	snp	A	C	C:102 A:0
EA2454	52423	snp	A	C	C:88 A:0
EA2454	56257	snp	C	T	T:127 C:0
EA2454	56628	snp	A	C	C:123 A:0
EA2454	58152	snp	T	C	C:104 T:0
EA2454	60871	snp	C	T	T:105 C:0
EA2454	64676	snp	G	A	A:115 G:0
EA2454	67315	snp	A	C	C:98 A:0
EA2454	69595	snp	A	G	G:85 A:0
EA2454	74952	snp	G	T	T:111 G:0
EA2454	77443	snp	C	T	T:114 C:1
EA2454	78031	snp	C	A	A:89 C:0
EA2454	78608	snp	G	A	A:143 G:1
EA2454	84163	snp	T	A	A:99 T:0
EA2454	84557	snp	T	G	G:103 T:0
EA2454	88223	del	TTCAATA	T	T:43 TTCAATA:0
EA2454	88729	snp	A	T	T:94 A:0
EA2454	94795	snp	G	A	A:116 G:1
EA2454	94824	ins	T	TA	TA:100 T:1
EA2454	95737	del	CT	C	C:34 CT:1
EA2454	99010	snp	C	T	T:99 C:0
EA2454	100572	snp	C	G	G:120 C:0
EA2454	107466	snp	C	T	T:57 C:0
EA2454	111773	snp	C	G	G:96 C:0
EA2454	124825	snp	G	A	A:112 G:0
EA2454	124865	snp	T	C	C:126 T:0
EA2454	126514	snp	G	A	A:107 G:0
EA2454	131613	snp	A	G	G:121 A:0
EA2454	140951	snp	T	G	G:97 T:0
EA2454	145887	snp	C	T	T:92 C:0
EA2454	146087	snp	A	C	C:105 A:0
EA2454	158053	snp	G	A	A:77 G:0
EA2454	158449	snp	C	T	T:105 C:0
EA2454	162974	snp	G	T	T:98 G:0
EA2454	163970	del	AT	A	A:71 AT:0
EA2454	164371	snp	T	A	A:106 T:0
EA2454	169390	snp	C	T	T:94 C:0
EA2454	174420	snp	A	G	G:99 A:0
EA2454	178258	snp	C	T	T:123 C:0
EA2454	181904	snp	G	A	A:84 G:0
EA2454	186550	snp	T	C	C:98 T:0
EA2454	187820	snp	C	T	T:86 C:1
EA2454	190313	snp	T	C	C:115 T:0
EA2454	193500	snp	A	G	G:111 A:1
EA2454	220577	snp	G	A	A:87 G:0
EA2454	223134	snp	A	G	G:108 A:0
EA2454	227792	snp	C	T	T:102 C:0
EA2454	239221	snp	A	G	G:102 A:0
EA2454	245301	snp	C	T	T:83 C:0
EA2454	246188	snp	A	G	G:74 A:0
EA2454	261901	snp	A	C	C:95 A:0
EA2454	266355	snp	G	T	T:118 G:1
EA2454	277907	snp	G	T	T:95 G:0
EA2454	285627	ins	A	AT	AT:89 A:2
EA2454	290212	snp	G	T	T:102 G:3
EA2454	298286	snp	T	C	C:60 T:0
EA2454	300876	snp	T	G	G:99 T:0
EA2454	304693	del	AT	A	A:20 AT:0
EA2454	306354	snp	G	A	A:103 G:0
EA2454	307802	snp	C	T	T:137 C:1
EA2454	313034	snp	A	G	G:115 A:0
EA2454	316012	snp	C	T	T:78 C:1
EA2454	317106	snp	T	C	C:103 T:0
EA2454	318467	snp	T	C	C:106 T:0
EA2454	325533	snp	G	A	A:96 G:0
EA2454	334084	snp	G	A	A:108 G:1
EA2454	337102	snp	G	A	A:118 G:1
EA2454	343126	snp	C	A	A:119 C:0
EA2454	350969	snp	A	G	G:122 A:0
EA2454	356278	snp	C	T	T:116 C:0
EA2454	359276	snp	G	A	A:105 G:0
EA2454	359374	snp	C	T	T:102 C:0
EA2454	359829	snp	C	A	A:98 C:1
EA2454	369746	snp	C	T	T:109 C:0
EA2454	371150	snp	T	C	C:115 T:0
EA2454	376903	snp	G	A	A:102 G:0
EA2454	386406	snp	C	A	A:93 C:0
EA2454	388918	snp	T	G	G:107 T:1
EA2454	393575	snp	A	G	G:99 A:0
EA2454	393743	snp	A	G	G:100 A:0
EA2454	397444	snp	C	G	G:111 C:0
EA2454	407113	snp	A	G	G:100 A:0
EA2454	407887	snp	C	G	G:100 C:0
EA2454	418125	snp	G	A	A:117 G:1
EA2454	437474	snp	A	G	G:94 A:0
EA2454	440837	snp	C	A	A:101 C:0
EA2454	443213	complex	ACT	GC	GC:40 ACT:0
EA2454	445363	snp	C	A	A:116 C:1
EA2454	447459	snp	A	G	G:95 A:0
EA2454	448711	snp	A	G	G:83 A:0
EA2454	454771	snp	C	T	T:100 C:0
EA2454	454890	snp	C	T	T:85 C:0
EA2454	457082	snp	C	T	T:103 C:0
EA2454	465826	snp	A	T	T:113 A:0
EA2454	470437	snp	C	T	T:106 C:0
EA2454	472911	snp	T	C	C:105 T:0
EA2454	476124	snp	C	T	T:113 C:0
EA2454	478727	snp	C	A	A:101 C:0
EA2454	483805	snp	G	A	A:103 G:0
EA2454	485246	snp	C	T	T:125 C:1
EA2454	485779	snp	C	G	G:106 C:0
EA2454	488244	snp	G	A	A:108 G:0
EA2454	489901	snp	G	T	T:99 G:2
EA2454	497460	snp	T	G	G:92 T:0
EA2454	506278	del	ATAAAT	A	A:46 ATAAAT:0
EA2454	506352	snp	T	G	G:77 T:0
EA2454	507555	snp	G	A	A:103 G:1
EA2454	510992	snp	C	T	T:114 C:0
EA2454	519195	snp	G	A	A:119 G:0
EA2454	519811	snp	A	C	C:106 A:0
EA2454	527024	snp	T	C	C:111 T:0
EA2454	528123	snp	A	T	T:100 A:0
EA2454	531907	snp	T	C	C:91 T:0
EA2454	534151	snp	A	G	G:110 A:0
EA2454	537287	snp	G	C	C:128 G:0
EA2454	539426	snp	T	C	C:110 T:0
EA2454	546428	snp	A	C	C:102 A:0
EA2454	550000	snp	G	A	A:96 G:1
EA2454	556318	snp	G	A	A:97 G:0
EA2454	559017	snp	A	G	G:90 A:0
EA2454	561226	snp	G	A	A:46 G:0
EA2454	561259	snp	C	A	A:12 C:0
EA2454	562933	snp	T	C	C:121 T:0
EA2454	569363	ins	T	TCC	TCC:41 T:0
EA2454	580598	ins	T	TA	TA:95 T:0
EA2454	588217	snp	T	G	G:109 T:0
EA2454	590181	ins	T	TA	TA:79 T:1
EA2454	595652	snp	A	G	G:92 A:2
EA2454	597386	snp	A	G	G:118 A:0
EA2454	606088	ins	G	GA	GA:94 G:1
EA2454	611222	del	TGCATA	T	T:80 TGCATA:0
EA2454	611872	snp	A	G	G:104 A:0
EA2454	612726	snp	A	G	G:124 A:0
EA2454	613906	snp	C	A	A:94 C:0
EA2454	615269	snp	C	T	T:104 C:0
EA2454	626310	snp	G	A	A:104 G:0
EA2454	632908	snp	C	T	T:87 C:0
EA2454	642337	snp	A	G	G:107 A:0
EA2454	658975	snp	A	G	G:104 A:0
EA2454	669330	snp	A	G	G:110 A:0
EA2454	670594	snp	C	A	A:119 C:1
EA2454	677980	snp	G	A	A:89 G:0
EA2454	683177	snp	T	G	G:106 T:0
EA2454	686003	snp	A	G	G:112 A:0
EA2454	686104	snp	G	C	C:108 G:0
EA2454	686327	ins	C	CCTGGGAACGCTGGGAACG	CCTGGGAACGCTGGGAACG:24 C:0
EA2454	687410	snp	A	G	G:80 A:0
EA2454	688399	snp	C	T	T:99 C:0
EA2454	688812	snp	A	G	G:104 A:0
EA2454	690408	snp	A	G	G:104 A:0
EA2454	690611	snp	T	C	C:100 T:1
EA2454	705263	snp	C	A	A:130 C:1
EA2454	709632	snp	T	C	C:97 T:0
EA2454	710977	snp	A	G	G:126 A:0
EA2454	713766	snp	C	T	T:104 C:2
EA2454	715370	snp	C	T	T:103 C:0
EA2454	718995	ins	T	TTAGTC	TTAGTC:77 T:6
EA2454	719734	snp	C	T	T:103 C:0
EA2454	731219	snp	T	G	G:108 T:0
EA2454	731329	snp	G	A	A:108 G:0
EA2454	743375	snp	T	A	A:105 T:0
EA2454	751046	snp	G	A	A:115 G:0
EA2454	751386	snp	G	A	A:105 G:1
EA2454	755366	snp	A	G	G:109 A:0
EA2454	756040	snp	T	G	G:103 T:0
EA2454	758394	snp	C	T	T:118 C:0
EA2454	759638	del	TG	T	T:76 TG:0
EA2454	765032	snp	T	C	C:112 T:0
EA2454	769424	snp	G	A	A:67 G:0
EA2454	773288	snp	G	T	T:101 G:1
EA2454	774531	snp	A	C	C:119 A:1
EA2454	775463	snp	C	T	T:122 C:0
EA2454	779769	del	TA	T	T:52 TA:0
EA2454	785375	snp	T	C	C:89 T:1
EA2454	788461	snp	G	T	T:94 G:0
EA2454	789146	snp	C	T	T:100 C:0
EA2454	789417	snp	A	C	C:99 A:1
EA2454	796935	snp	C	G	G:97 C:0
EA2454	802567	snp	G	A	A:83 G:0
EA2454	805481	snp	A	G	G:117 A:0
EA2454	808146	snp	G	A	A:110 G:1
EA2454	815252	snp	C	T	T:115 C:0
EA2454	815610	snp	T	A	A:108 T:0
EA2454	817027	ins	C	CA	CA:73 C:1
EA2454	817985	snp	T	G	G:96 T:0
EA2454	818649	snp	A	C	C:89 A:0
EA2454	822614	snp	C	T	T:91 C:0
EA2454	828744	snp	A	G	G:103 A:0
EA2454	828805	ins	A	AT	AT:86 A:0
EA2454	831520	snp	G	T	T:100 G:0
EA2454	832258	del	CG	C	C:84 CG:0
EA2454	835799	snp	C	T	T:90 C:0
EA2454	839497	snp	T	A	A:83 T:0
EA2454	841024	snp	G	A	A:102 G:0
EA2454	848779	snp	G	T	T:86 G:0
EA2454	850726	complex	TGT	CAG	CAG:79 TGT:0
EA2454	851976	snp	T	A	A:114 T:0
EA2454	852695	snp	A	G	G:92 A:0
EA2454	859445	snp	A	T	T:113 A:0
EA2454	860226	snp	C	A	A:93 C:0
EA2454	861738	snp	C	T	T:84 C:0
EA2454	862033	snp	G	A	A:101 G:0
EA2454	876176	snp	G	A	A:74 G:0
EA2454	877031	snp	G	A	A:102 G:0
EA2454	879699	snp	G	A	A:79 G:0
EA2454	881396	snp	A	G	G:112 A:0
EA2454	894538	snp	C	T	T:109 C:0
EA2454	897780	snp	C	A	A:99 C:0
EA2454	904220	snp	T	C	C:81 T:0
EA2454	904482	snp	A	G	G:90 A:0
EA2454	904788	snp	C	T	T:94 C:0
EA2454	907528	snp	G	T	T:90 G:0
EA2454	910148	snp	T	C	C:117 T:0
EA2454	923353	snp	G	A	A:128 G:0
EA2454	923875	snp	T	A	A:105 T:0
EA2454	924579	snp	T	C	C:108 T:0
EA2454	930102	snp	A	G	G:96 A:0
EA2454	934663	snp	G	A	A:101 G:0
EA2454	936615	snp	C	A	A:98 C:0
EA2454	938004	snp	C	T	T:112 C:1
EA2454	938615	snp	G	A	A:93 G:0
EA2454	940518	snp	G	A	A:116 G:0
EA2454	945162	snp	A	G	G:109 A:1
EA2454	946875	snp	T	C	C:93 T:0
EA2454	948397	del	TTTTAGCTCACCTGCA	T	T:50 TTTTAGCTCACCTGCA:0
EA2454	949610	snp	C	A	A:18 C:0
EA2454	949618	snp	C	T	T:20 C:0
EA2454	949633	del	TCGCAATTGTTTC	T	T:23 TCGCAATTGTTTC:0
EA2454	951474	snp	A	C	C:17 A:0
EA2454	951627	snp	C	T	T:10 C:0
EA2454	951639	snp	A	T	T:15 A:0
EA2454	951648	snp	G	A	A:15 G:0
EA2454	951662	mnp	GA	TG	TG:15 GA:0
EA2454	952341	snp	T	G	G:110 T:0
EA2454	953284	snp	T	A	A:50 T:0
EA2454	953324	snp	G	A	A:83 G:0
EA2454	953435	snp	G	A	A:19 G:0
EA2454	953462	complex	CCAG	ACAA	ACAA:22 CCAG:0
EA2454	953500	snp	A	G	G:56 A:0
EA2454	953509	complex	AGAGG	GAGGC	GAGGC:53 AGAGG:0
EA2454	953576	snp	T	C	C:13 T:0
EA2454	953593	ins	T	TC	TC:10 T:0
EA2454	953802	snp	A	T	T:18 A:0
EA2454	964566	snp	C	A	A:14 C:0
EA2454	964577	snp	A	G	G:88 A:0
EA2454	964586	snp	A	G	G:116 A:0
EA2454	964604	snp	T	G	G:188 T:1
EA2454	964625	complex	TCCT	CCCA	CCCA:278 TCCT:0
EA2454	964667	complex	AAACA	CAACG	CAACG:253 AAACA:0
EA2454	964703	complex	TG	CA	CA:97 TG:0
EA2454	964710	snp	T	C	C:90 T:0
EA2454	976647	snp	T	C	C:50 T:0
EA2454	976652	snp	A	G	G:51 A:0
EA2454	976692	snp	G	A	A:51 G:0
EA2454	976704	complex	AACA	TACT	TACT:50 AACA:0
EA2454	976731	snp	A	G	G:11 A:0
EA2454	980657	complex	CC	AA	AA:14 CC:0
EA2454	980670	snp	A	G	G:40 A:0
EA2454	980709	snp	G	C	C:70 G:0
EA2454	980743	complex	GGAGT	AGAGC	AGAGC:94 GGAGT:0
EA2454	980785	complex	GCATGCCGC	CCATACTGT	CCATACTGT:77 GCATGCCGC:0
EA2454	980809	snp	C	T	T:92 C:0
EA2454	980815	snp	C	T	T:97 C:0
EA2454	980830	snp	A	G	G:89 A:0
EA2454	980837	del	ATAC	A	A:73 ATAC:0
EA2454	980872	snp	G	A	A:79 G:0
EA2454	980882	snp	T	A	A:84 T:0
EA2454	980891	complex	ATA	GTG	GTG:82 ATA:0
EA2454	980903	snp	T	C	C:91 T:1
EA2454	980914	snp	T	G	G:84 T:0
EA2454	980923	complex	AAAT	GAAC	GAAC:79 AAAT:0
EA2454	980935	snp	C	T	T:83 C:0
EA2454	980942	snp	A	C	C:92 A:0
EA2454	980952	snp	C	A	A:93 C:0
EA2454	980975	complex	CCCT	TCCC	TCCC:92 CCCT:0
EA2454	980983	snp	G	A	A:94 G:0
EA2454	980991	complex	ATTACCTC	GTTATCTT	GTTATCTT:89 ATTACCTC:0
EA2454	981031	snp	C	T	T:106 C:0
EA2454	981055	snp	G	A	A:100 G:1
EA2454	981063	snp	G	A	A:107 G:0
EA2454	981095	snp	A	G	G:98 A:0
EA2454	981118	snp	C	T	T:114 C:0
EA2454	981160	complex	TGTTCCG	CGTGCCC	CGTGCCC:77 TGTTCCG:0
EA2454	981179	snp	A	G	G:90 A:0
EA2454	981187	snp	C	T	T:87 C:0
EA2454	981193	complex	GTCT	CTCC	CTCC:80 GTCT:0
EA2454	981206	snp	G	C	C:89 G:0
EA2454	981230	snp	C	T	T:83 C:0
EA2454	981236	snp	G	A	A:82 G:0
EA2454	981254	snp	A	C	C:83 A:0
EA2454	981271	snp	T	C	C:85 T:0
EA2454	981351	snp	C	A	A:112 C:0
EA2454	981381	snp	C	T	T:114 C:0
EA2454	981387	snp	T	C	C:119 T:0
EA2454	981442	snp	A	G	G:127 A:0
EA2454	981491	snp	C	T	T:129 C:0
EA2454	981592	snp	G	A	A:124 G:0
EA2454	981614	snp	C	T	T:131 C:0
EA2454	981732	snp	G	A	A:70 G:0
EA2454	986640	snp	G	A	A:120 G:0
EA2454	990058	snp	G	T	T:140 G:0
EA2454	990308	snp	G	A	A:110 G:0
EA2454	990374	snp	C	A	A:87 C:1
EA2454	1002794	snp	T	C	C:79 T:0
EA2454	1002926	snp	T	C	C:81 T:1
EA2454	1003603	snp	A	G	G:115 A:0
EA2454	1003611	snp	C	A	A:112 C:0
EA2454	1010019	snp	A	G	G:116 A:1
EA2454	1014541	snp	T	C	C:115 T:0
EA2454	1026843	snp	T	C	C:91 T:1
EA2454	1036957	snp	T	G	G:104 T:0
EA2454	1039930	del	ATTACTGCATAGCACTTT	A	A:51 ATTACTGCATAGCACTTT:0
EA2454	1044678	snp	T	C	C:110 T:2
EA2454	1044717	snp	G	A	A:120 G:0
EA2454	1046210	snp	G	A	A:108 G:2
EA2454	1049442	snp	G	A	A:126 G:0
EA2454	1051108	snp	G	A	A:91 G:1
EA2454	1052010	snp	G	A	A:123 G:1
EA2454	1052435	snp	C	T	T:105 C:0
EA2454	1055114	snp	T	G	G:97 T:0
EA2454	1066461	snp	C	T	T:96 C:2
EA2454	1067401	snp	C	A	A:116 C:0
EA2454	1073767	snp	A	G	G:113 A:0
EA2454	1079000	snp	T	C	C:103 T:0
EA2454	1082762	snp	G	A	A:117 G:0
EA2454	1092459	snp	G	T	T:128 G:0
EA2454	1093309	snp	A	G	G:77 A:0
EA2454	1109296	snp	C	T	T:106 C:0
EA2454	1109567	snp	G	A	A:118 G:0
EA2454	1110696	snp	C	T	T:114 C:0
EA2454	1126572	snp	C	T	T:117 C:2
EA2454	1126887	snp	G	A	A:122 G:0
EA2454	1127119	snp	T	G	G:117 T:0
EA2454	1127224	snp	G	C	C:103 G:2
EA2454	1127311	snp	C	G	G:110 C:0
EA2454	1128458	snp	T	C	C:91 T:0
EA2454	1131065	snp	A	G	G:128 A:0
EA2454	1138215	snp	T	C	C:86 T:0
EA2454	1144904	snp	C	T	T:99 C:0
EA2454	1144975	snp	T	C	C:73 T:0
EA2454	1147548	snp	T	G	G:103 T:0
EA2454	1160665	snp	A	C	C:108 A:2
EA2454	1160822	snp	A	T	T:106 A:0
EA2454	1165050	snp	G	A	A:96 G:0
EA2454	1167666	snp	T	C	C:124 T:0
EA2454	1174352	snp	T	C	C:109 T:0
EA2454	1177501	snp	C	T	T:102 C:0
EA2454	1186746	snp	T	C	C:121 T:0
EA2454	1190353	snp	G	T	T:123 G:1
EA2454	1201358	snp	C	T	T:90 C:1
EA2454	1211256	snp	T	C	C:101 T:0
EA2454	1215720	snp	C	T	T:91 C:0
EA2454	1216578	snp	C	T	T:121 C:0
EA2454	1218789	snp	A	G	G:83 A:0
EA2454	1223130	del	AC	A	A:75 AC:0
EA2454	1225308	snp	C	A	A:89 C:1
EA2454	1236723	snp	T	C	C:115 T:0
EA2454	1240486	snp	G	T	T:94 G:0
EA2454	1243573	snp	C	T	T:104 C:0
EA2454	1251478	snp	T	G	G:110 T:0
EA2454	1253669	snp	C	T	T:106 C:0
EA2454	1260696	snp	T	C	C:113 T:1
EA2454	1261876	snp	A	C	C:108 A:0
EA2454	1264081	snp	A	G	G:96 A:0
EA2454	1271559	snp	T	G	G:92 T:0
EA2454	1274674	del	GA	G	G:104 GA:0
EA2454	1280254	snp	G	A	A:101 G:1
EA2454	1280572	snp	C	A	A:99 C:0
EA2454	1299878	snp	C	T	T:98 C:2
EA2454	1300511	del	GC	G	G:21 GC:0
EA2454	1317400	snp	G	A	A:71 G:5
EA2454	1320805	snp	A	G	G:103 A:0
EA2454	1321341	snp	G	A	A:104 G:0
EA2454	1322163	snp	T	C	C:91 T:0
EA2454	1322665	snp	T	C	C:94 T:0
EA2454	1331179	snp	T	G	G:110 T:1
EA2454	1334209	snp	C	T	T:114 C:0
EA2454	1340886	snp	A	C	C:98 A:0
EA2454	1345147	snp	T	A	A:90 T:1
EA2454	1358384	snp	A	G	G:96 A:0
EA2454	1360577	snp	A	G	G:108 A:0
EA2454	1371250	snp	T	C	C:93 T:0
EA2454	1372740	snp	C	T	T:105 C:0
EA2454	1373417	snp	G	A	A:75 G:0
EA2454	1373493	snp	C	T	T:88 C:0
EA2454	1384155	snp	C	T	T:105 C:0
EA2454	1385530	snp	C	T	T:103 C:0
EA2454	1385945	snp	T	G	G:103 T:2
EA2454	1392683	snp	C	T	T:102 C:0
EA2454	1394505	snp	A	G	G:80 A:0
EA2454	1396366	snp	C	T	T:127 C:0
EA2454	1401264	snp	A	G	G:96 A:0
EA2454	1403190	snp	G	T	T:116 G:0
EA2454	1407225	snp	G	A	A:85 G:1
EA2454	1413295	snp	T	C	C:114 T:0
EA2454	1415150	snp	G	A	A:65 G:1
EA2454	1416501	snp	A	C	C:88 A:0
EA2454	1424948	snp	C	T	T:78 C:0
EA2454	1425068	snp	T	G	G:103 T:2
EA2454	1426621	snp	T	G	G:91 T:1
EA2454	1434922	snp	T	G	G:108 T:0
EA2454	1435223	snp	G	A	A:96 G:0
EA2454	1437134	snp	C	T	T:114 C:0
EA2454	1437179	snp	G	A	A:83 G:0
EA2454	1437764	snp	G	A	A:80 G:0
EA2454	1443281	snp	G	A	A:113 G:0
EA2454	1443339	snp	C	T	T:112 C:0
EA2454	1444940	snp	C	T	T:94 C:0
EA2454	1445575	snp	T	G	G:112 T:1
EA2454	1445619	snp	G	A	A:110 G:0
EA2454	1445708	snp	G	A	A:112 G:0
EA2454	1455169	snp	G	A	A:95 G:0
EA2454	1461457	snp	T	G	G:111 T:0
EA2454	1461819	snp	A	G	G:105 A:2
EA2454	1464871	snp	C	A	A:81 C:1
EA2454	1471260	snp	C	T	T:79 C:0
EA2454	1480341	snp	A	G	G:94 A:0
EA2454	1480708	snp	T	G	G:129 T:0
EA2454	1483405	snp	G	A	A:88 G:0
EA2454	1492527	ins	C	CA	CA:81 C:0
EA2454	1493228	snp	C	T	T:98 C:0
EA2454	1495581	snp	T	A	A:92 T:0
EA2454	1496904	snp	G	A	A:111 G:0
EA2454	1508681	snp	C	G	G:89 C:1
EA2454	1514530	snp	G	A	A:83 G:0
EA2454	1518455	snp	G	A	A:91 G:0
EA2454	1521195	snp	C	T	T:109 C:0
EA2454	1525679	snp	C	T	T:96 C:0
EA2454	1533339	snp	A	G	G:88 A:0
EA2454	1534292	snp	A	G	G:99 A:0
EA2454	1547465	snp	G	T	T:93 G:0
EA2454	1547975	snp	G	A	A:105 G:3
EA2454	1548562	del	TG	T	T:70 TG:0
EA2454	1549417	snp	C	T	T:89 C:0
EA2454	1549828	snp	T	C	C:102 T:0
EA2454	1557966	snp	A	G	G:118 A:0
EA2454	1559295	snp	T	G	G:91 T:1
EA2454	1559508	del	AG	A	A:73 AG:0
EA2454	1560679	snp	G	A	A:92 G:0
EA2454	1570233	snp	A	G	G:75 A:0
EA2454	1577742	snp	G	A	A:105 G:1
EA2454	1578837	snp	T	C	C:77 T:0
EA2454	1580066	snp	G	T	T:80 G:0
EA2454	1582061	snp	A	G	G:108 A:0
EA2454	1582869	snp	C	T	T:99 C:0
EA2454	1584311	snp	C	T	T:103 C:0
EA2454	1587710	snp	C	A	A:94 C:0
EA2454	1587792	snp	A	C	C:90 A:0
EA2454	1588489	snp	G	A	A:106 G:0
EA2454	1592505	snp	T	C	C:107 T:0
EA2454	1597496	snp	T	C	C:96 T:0
EA2454	1598348	snp	G	A	A:95 G:0
EA2454	1599906	snp	T	C	C:96 T:0
EA2454	1600199	snp	C	T	T:107 C:0
EA2454	1600919	snp	A	G	G:107 A:0
EA2454	1607862	snp	A	T	T:95 A:0
EA2454	1610106	snp	G	A	A:90 G:2
EA2454	1610112	snp	C	A	A:98 C:1
EA2454	1612435	snp	G	A	A:110 G:0
EA2454	1613406	snp	T	A	A:95 T:0
EA2454	1613463	snp	A	G	G:78 A:0
EA2454	1616033	snp	G	A	A:108 G:0
EA2454	1619172	snp	G	A	A:37 G:0
EA2454	1619178	complex	TACA	AACG	AACG:40 TACA:0
EA2454	1620184	snp	T	A	A:19 T:0
EA2454	1620876	complex	ACCA	GCCG	GCCG:13 ACCA:0
EA2454	1620891	snp	T	C	C:29 T:0
EA2454	1620915	snp	A	T	T:44 A:0
EA2454	1620945	snp	C	T	T:71 C:0
EA2454	1621020	snp	C	A	A:96 C:0
EA2454	1621049	snp	G	A	A:99 G:0
EA2454	1621074	snp	T	A	A:93 T:0
EA2454	1621137	snp	T	A	A:89 T:0
EA2454	1621185	complex	TGCGTTAGCG	GGCATTGGCT	GGCATTGGCT:81 TGCGTTAGCG:0
EA2454	1621200	snp	C	T	T:80 C:0
EA2454	1621221	snp	C	T	T:66 C:0
EA2454	1621227	snp	T	A	A:60 T:0
EA2454	1621255	snp	C	T	T:30 C:0
EA2454	1624032	snp	A	T	T:32 A:0
EA2454	1624047	snp	C	T	T:40 C:0
EA2454	1624053	snp	C	T	T:46 C:0
EA2454	1624069	complex	GAAGGT	AACGGC	AACGGC:60 GAAGGT:0
EA2454	1624086	snp	C	T	T:79 C:0
EA2454	1624128	complex	TAG	AAA	AAA:85 TAG:0
EA2454	1624137	snp	T	C	C:101 T:0
EA2454	1624153	snp	T	A	A:97 T:0
EA2454	1624217	snp	A	G	G:88 A:0
EA2454	1624254	snp	A	G	G:89 A:0
EA2454	1624263	complex	ATTG	GTTA	GTTA:88 ATTG:0
EA2454	1624280	snp	T	C	C:93 T:0
EA2454	1624351	mnp	GT	TA	TA:88 GT:0
EA2454	1624401	snp	C	G	G:43 C:0
EA2454	1625151	snp	G	T	T:36 G:0
EA2454	1625175	complex	TCCG	CCCA	CCCA:60 TCCG:0
EA2454	1625193	snp	G	A	A:84 G:0
EA2454	1625205	snp	C	T	T:94 C:0
EA2454	1625235	snp	A	G	G:116 A:0
EA2454	1625258	complex	AACTA	GACTC	GACTC:103 AACTA:0
EA2454	1625280	snp	A	T	T:102 A:0
EA2454	1625298	snp	A	G	G:101 A:0
EA2454	1625376	snp	G	T	T:101 G:0
EA2454	1625382	snp	T	C	C:101 T:0
EA2454	1625390	snp	G	A	A:97 G:0
EA2454	1625406	complex	AGGC	TGGT	TGGT:88 AGGC:0
EA2454	1625417	snp	G	A	A:89 G:0
EA2454	1625424	snp	G	A	A:96 G:0
EA2454	1625430	snp	G	A	A:98 G:0
EA2454	1625455	snp	G	A	A:102 G:0
EA2454	1625460	snp	A	T	T:94 A:0
EA2454	1625475	complex	CGGT	AGGA	AGGA:87 CGGT:0
EA2454	1625505	snp	A	T	T:81 A:1
EA2454	1625519	snp	G	A	A:91 G:0
EA2454	1625559	snp	G	A	A:92 G:0
EA2454	1625589	snp	C	A	A:97 C:0
EA2454	1625637	snp	T	C	C:110 T:0
EA2454	1625649	complex	CG	TC	TC:97 CG:0
EA2454	1625658	snp	T	C	C:105 T:0
EA2454	1625688	complex	TGTC	CATT	CATT:85 TGTC:0
EA2454	1625826	snp	T	C	C:79 T:0
EA2454	1625835	snp	A	G	G:79 A:0
EA2454	1625853	snp	T	G	G:84 T:0
EA2454	1625874	snp	T	C	C:90 T:0
EA2454	1625895	snp	A	G	G:91 A:0
EA2454	1625922	snp	T	C	C:80 T:0
EA2454	1625946	snp	T	A	A:62 T:0
EA2454	1625960	snp	A	G	G:65 A:0
EA2454	1625984	snp	T	C	C:69 T:0
EA2454	1625995	complex	TGCGCAAT	GGAACAAC	GGAACAAC:48 TGCGCAAT:0
EA2454	1626008	snp	A	T	T:50 A:0
EA2454	1626017	complex	CAAC	GAGA	GAGA:50 CAAC:0
EA2454	1626031	snp	G	A	A:71 G:0
EA2454	1626042	snp	T	C	C:68 T:0
EA2454	1626118	snp	A	G	G:57 A:0
EA2454	1626136	snp	T	C	C:42 T:0
EA2454	1626159	complex	GCCCC	ATCAA	ATCAA:16 GCCCC:0
EA2454	1626543	snp	G	T	T:20 G:0
EA2454	1626549	snp	C	T	T:25 C:0
EA2454	1626559	snp	A	G	G:37 A:0
EA2454	1626568	complex	TGC	CGT	CGT:41 TGC:0
EA2454	1626586	snp	G	A	A:61 G:0
EA2454	1626595	complex	ACGA	GCGT	GCGT:63 ACGA:0
EA2454	1626603	snp	A	T	T:66 A:0
EA2454	1626611	snp	T	C	C:77 T:0
EA2454	1626705	snp	A	G	G:116 A:0
EA2454	1626723	snp	C	T	T:120 C:0
EA2454	1626772	mnp	GG	AA	AA:114 GG:0
EA2454	1626790	snp	T	C	C:129 T:0
EA2454	1626807	snp	T	C	C:121 T:0
EA2454	1626849	snp	G	A	A:141 G:0
EA2454	1626896	snp	A	G	G:128 A:0
EA2454	1627011	snp	G	T	T:130 G:0
EA2454	1627061	snp	A	T	T:108 A:0
EA2454	1627068	snp	C	T	T:109 C:0
EA2454	1627153	snp	C	T	T:105 C:0
EA2454	1627159	snp	G	A	A:111 G:0
EA2454	1627168	snp	A	G	G:109 A:0
EA2454	1627173	snp	A	G	G:109 A:0
EA2454	1627182	snp	C	T	T:101 C:0
EA2454	1627188	snp	G	T	T:106 G:0
EA2454	1627206	snp	T	C	C:96 T:0
EA2454	1627314	snp	T	A	A:119 T:0
EA2454	1627320	snp	A	G	G:110 A:0
EA2454	1627350	snp	C	T	T:120 C:0
EA2454	1627377	snp	T	G	G:128 T:0
EA2454	1627407	snp	T	G	G:122 T:0
EA2454	1627560	snp	C	T	T:107 C:0
EA2454	1627605	snp	G	T	T:109 G:0
EA2454	1627656	snp	A	C	C:111 A:0
EA2454	1627737	snp	C	A	A:97 C:0
EA2454	1627800	snp	A	C	C:99 A:1
EA2454	1627809	snp	T	C	C:94 T:0
EA2454	1627815	snp	T	C	C:96 T:0
EA2454	1628278	snp	A	G	G:80 A:0
EA2454	1628285	snp	G	A	A:76 G:0
EA2454	1628345	snp	C	T	T:84 C:0
EA2454	1628366	complex	AGAGAGCAAG	CGAAAGTAAA	CGAAAGTAAA:73 AGAGAGCAAG:0
EA2454	1628390	snp	G	A	A:92 G:0
EA2454	1628427	snp	T	C	C:71 T:0
EA2454	1628438	snp	T	C	C:72 T:0
EA2454	1628465	complex	GGCT	AGCG	AGCG:71 GGCT:0
EA2454	1628498	snp	T	C	C:57 T:0
EA2454	1628523	snp	C	A	A:53 C:0
EA2454	1628540	snp	A	G	G:49 A:0
EA2454	1628585	snp	A	T	T:73 A:0
EA2454	1628591	snp	C	T	T:74 C:0
EA2454	1628597	snp	T	C	C:80 T:0
EA2454	1628627	snp	A	G	G:88 A:0
EA2454	1628649	mnp	AG	GA	GA:94 AG:0
EA2454	1628690	snp	A	G	G:115 A:0
EA2454	1628750	complex	CACA	TACG	TACG:106 CACA:0
EA2454	1628810	snp	T	C	C:103 T:0
EA2454	1628831	snp	G	A	A:93 G:0
EA2454	1628837	snp	A	T	T:103 A:0
EA2454	1628869	snp	T	C	C:95 T:0
EA2454	1628897	complex	ACGA	CCGG	CCGG:85 ACGA:0
EA2454	1628912	snp	A	T	T:89 A:0
EA2454	1628980	complex	TACTA	GACTT	GACTT:81 TACTA:0
EA2454	1629008	snp	A	C	C:83 A:0
EA2454	1629015	snp	C	T	T:87 C:0
EA2454	1629065	complex	TCCG	CCCT	CCCT:78 TCCG:0
EA2454	1629122	snp	A	G	G:93 A:0
EA2454	1629149	snp	T	C	C:112 T:0
EA2454	1629156	snp	A	G	G:117 A:0
EA2454	1629183	snp	A	C	C:112 A:0
EA2454	1629200	snp	T	C	C:119 T:0
EA2454	1629240	snp	T	C	C:112 T:0
EA2454	1629375	snp	G	A	A:83 G:0
EA2454	1629397	complex	AAG	CAA	CAA:61 AAG:0
EA2454	1629404	snp	T	A	A:58 T:0
EA2454	1629415	snp	G	A	A:50 G:0
EA2454	1629423	complex	ATATA	GTATT	GTATT:39 ATATA:0
EA2454	1629435	snp	G	A	A:34 G:0
EA2454	1629457	snp	A	T	T:12 A:0
EA2454	1630981	snp	A	G	G:23 A:0
EA2454	1630990	snp	T	C	C:35 T:0
EA2454	1634228	snp	A	G	G:100 A:0
EA2454	1637885	snp	C	A	A:104 C:0
EA2454	1639734	snp	C	T	T:97 C:0
EA2454	1642336	snp	A	G	G:91 A:0
EA2454	1648224	snp	C	T	T:95 C:1
EA2454	1652374	snp	G	A	A:90 G:0
EA2454	1666138	snp	C	T	T:85 C:0
EA2454	1682457	snp	A	G	G:102 A:0
EA2454	1682580	snp	G	T	T:96 G:1
EA2454	1685481	snp	G	A	A:99 G:1
EA2454	1701919	snp	A	G	G:88 A:0
EA2454	1704841	snp	T	C	C:101 T:0
EA2454	1714697	snp	T	C	C:128 T:0
EA2454	1717745	snp	A	C	C:79 A:1
EA2454	1719803	snp	C	T	T:100 C:0
EA2454	1728257	snp	G	T	T:109 G:0
EA2454	1730329	snp	T	C	C:86 T:0
EA2454	1732313	snp	G	C	C:130 G:0
EA2454	1735083	snp	T	A	A:98 T:0
EA2454	1737561	snp	A	G	G:86 A:0
EA2454	1745576	snp	T	C	C:102 T:0
EA2454	1748585	snp	A	C	C:106 A:0
EA2454	1761551	snp	T	G	G:103 T:0
EA2454	1763293	snp	T	C	C:103 T:0
EA2454	1765356	snp	C	T	T:106 C:0
EA2454	1769468	snp	C	T	T:79 C:0
EA2454	1770797	snp	C	T	T:101 C:2
EA2454	1777403	snp	C	T	T:95 C:1
EA2454	1777866	snp	G	A	A:96 G:1
EA2454	1778707	snp	A	G	G:103 A:0
EA2454	1788556	snp	C	A	A:95 C:0
EA2454	1795161	snp	A	G	G:88 A:0
EA2454	1799132	snp	G	A	A:106 G:0
EA2454	1803610	snp	C	A	A:112 C:1
EA2454	1803664	snp	T	C	C:100 T:0
EA2454	1807396	snp	C	T	T:126 C:0
EA2454	1813440	snp	G	T	T:109 G:0
EA2454	1815466	snp	A	G	G:102 A:1
EA2454	1820083	snp	T	C	C:104 T:0
EA2454	1822025	snp	C	T	T:78 C:0
EA2454	1824156	snp	T	C	C:126 T:0
EA2454	1824499	snp	T	C	C:91 T:0
EA2454	1825274	del	GT	G	G:75 GT:0
EA2454	1846876	snp	G	A	A:86 G:0
EA2454	1860665	snp	T	C	C:115 T:0
EA2454	1864496	snp	C	A	A:124 C:0
EA2454	1867566	snp	G	A	A:122 G:0
EA2454	1875721	snp	G	T	T:204 G:0
EA2454	1876080	snp	G	A	A:107 G:0
EA2454	1881660	snp	G	A	A:92 G:0
EA2454	1886109	snp	A	C	C:114 A:0
EA2454	1887544	snp	A	G	G:123 A:0
EA2454	1890553	snp	C	A	A:95 C:0
EA2454	1893896	snp	G	A	A:83 G:0
EA2454	1906815	snp	A	T	T:101 A:0
EA2454	1909088	snp	T	C	C:131 T:0
EA2454	1911530	snp	C	T	T:136 C:0
EA2454	1911898	snp	G	A	A:105 G:0
EA2454	1918520	snp	C	T	T:104 C:0
EA2454	1927337	snp	G	A	A:118 G:1
EA2454	1929193	ins	T	TTTA	TTTA:100 T:0
EA2454	1932774	snp	G	A	A:118 G:0
EA2454	1945608	snp	T	C	C:112 T:0
EA2454	1950298	snp	T	G	G:130 T:0
EA2454	1954729	snp	C	T	T:103 C:0
EA2454	1958733	snp	T	C	C:122 T:0
EA2454	1959695	snp	G	A	A:89 G:0
EA2454	1965637	snp	G	A	A:116 G:0
EA2454	1970914	snp	A	T	T:22 A:0
EA2454	1970924	complex	CAA	ATC	ATC:25 CAA:0
EA2454	1970935	snp	C	A	A:47 C:0
EA2454	1979564	snp	A	G	G:111 A:0
EA2454	1980186	snp	C	T	T:99 C:0
EA2454	1982000	snp	G	A	A:105 G:0
EA2454	1989495	snp	G	A	A:109 G:0
EA2454	1994897	snp	G	T	T:98 G:0
EA2454	1995211	snp	T	C	C:94 T:0
EA2454	1997936	snp	C	T	T:96 C:0
EA2454	2000203	snp	C	T	T:116 C:2
EA2454	2006271	snp	G	A	A:115 G:0
EA2454	2010104	snp	T	G	G:99 T:1
EA2454	2013249	snp	G	A	A:87 G:0
EA2454	2023004	snp	A	C	C:35 A:0
EA2454	2023016	snp	T	G	G:32 T:0
EA2454	2038279	ins	A	AAC	AAC:97 A:1
EA2454	2038309	snp	T	C	C:109 T:0
EA2454	2039026	snp	C	T	T:95 C:0
EA2454	2041023	snp	G	A	A:82 G:0
EA2454	2045488	snp	T	C	C:100 T:1
EA2454	2051294	snp	A	C	C:114 A:0
EA2454	2054229	snp	C	T	T:118 C:0
EA2454	2057141	snp	A	C	C:100 A:0
EA2454	2057842	snp	G	A	A:111 G:0
EA2454	2062156	snp	T	C	C:98 T:0
EA2454	2063839	snp	T	C	C:96 T:0
EA2454	2068297	snp	T	G	G:116 T:0
EA2454	2070162	snp	T	C	C:115 T:0
EA2454	2079477	snp	A	G	G:131 A:0
EA2454	2079523	snp	A	G	G:120 A:0
EA2454	2082060	snp	G	A	A:109 G:1
EA2454	2091780	snp	T	C	C:87 T:0
EA2454	2094829	snp	T	C	C:100 T:0
EA2454	2096088	snp	A	G	G:84 A:0
EA2454	2099145	snp	G	A	A:98 G:0
EA2454	2104321	snp	A	G	G:110 A:0
EA2454	2105174	snp	C	T	T:91 C:0
EA2454	2108261	snp	G	A	A:97 G:1
EA2454	2110373	snp	G	A	A:96 G:0
EA2454	2110900	snp	G	A	A:105 G:0
EA2454	2116312	snp	T	G	G:95 T:0
EA2454	2119193	snp	C	A	A:119 C:0
EA2454	2119312	snp	C	T	T:111 C:0
EA2454	2119737	snp	T	C	C:101 T:0
EA2454	2121149	snp	C	A	A:123 C:1
EA2454	2127237	snp	G	A	A:104 G:0
EA2454	2129490	snp	G	A	A:95 G:2
EA2454	2141700	snp	C	T	T:102 C:1
EA2454	2145694	snp	G	A	A:103 G:0
EA2454	2149404	snp	G	A	A:64 G:0
EA2454	2149498	snp	G	T	T:88 G:0
EA2454	2154303	snp	G	A	A:95 G:0
EA2454	2158854	snp	G	A	A:108 G:0
EA2454	2165658	snp	T	G	G:95 T:0
EA2454	2171889	snp	A	G	G:102 A:0
EA2454	2178210	snp	G	A	A:105 G:0
EA2454	2181710	snp	T	C	C:120 T:0
EA2454	2183355	snp	T	C	C:105 T:0
EA2454	2184161	snp	G	A	A:100 G:0
EA2454	2190122	snp	C	G	G:32 C:0
EA2454	2190131	snp	T	C	C:46 T:0
EA2454	2190182	snp	T	C	C:117 T:0
EA2454	2190227	snp	A	G	G:155 A:0
EA2454	2190283	mnp	GA	TG	TG:115 GA:0
EA2454	2190317	snp	C	T	T:75 C:0
EA2454	2190326	snp	C	T	T:60 C:0
EA2454	2190350	complex	CCTT	TCGG	TCGG:11 CCTT:0
EA2454	2191495	snp	C	T	T:13 C:0
EA2454	2191524	snp	G	C	C:25 G:0
EA2454	2191532	complex	TG	CT	CT:26 TG:0
EA2454	2191594	snp	T	C	C:21 T:0
EA2454	2191615	complex	TTCG	ATCA	ATCA:11 TTCG:0
EA2454	2194894	snp	C	T	T:112 C:1
EA2454	2195062	snp	T	C	C:98 T:0
EA2454	2208512	snp	C	T	T:96 C:0
EA2454	2217598	snp	A	G	G:102 A:0
EA2454	2219268	snp	G	A	A:112 G:0
EA2454	2221270	snp	C	T	T:91 C:1
EA2454	2228600	snp	T	C	C:112 T:0
EA2454	2232376	snp	A	G	G:121 A:0
EA2454	2253986	snp	C	T	T:90 C:0
EA2454	2256445	snp	G	A	A:122 G:0
EA2454	2259197	snp	G	A	A:111 G:0
EA2454	2266366	snp	T	C	C:139 T:0
EA2454	2268389	snp	G	C	C:108 G:0
EA2454	2280726	snp	C	T	T:19 C:1
EA2454	2280732	snp	T	C	C:27 T:1
EA2454	2283117	snp	T	C	C:108 T:0
EA2454	2283286	snp	T	G	G:122 T:0
EA2454	2283880	snp	A	G	G:107 A:0
EA2454	2289041	snp	T	C	C:92 T:0
EA2454	2291863	snp	T	C	C:116 T:0
EA2454	2300618	snp	C	T	T:116 C:1
EA2454	2320690	snp	C	A	A:109 C:0
EA2454	2338673	snp	G	A	A:96 G:0
EA2454	2345580	snp	G	T	T:85 G:0
EA2454	2347262	snp	G	T	T:109 G:2
EA2454	2350339	snp	T	C	C:96 T:0
EA2454	2354351	snp	A	G	G:113 A:0
EA2454	2359024	snp	A	G	G:96 A:0
EA2454	2359142	snp	C	T	T:110 C:2
EA2454	2359298	snp	C	A	A:98 C:2
EA2454	2364340	snp	T	G	G:121 T:0
EA2454	2365736	snp	C	A	A:110 C:1
EA2454	2366037	snp	G	T	T:56 G:5
EA2454	2371672	snp	T	C	C:92 T:0
EA2454	2373982	snp	A	G	G:106 A:0
EA2454	2374664	snp	G	T	T:90 G:1
EA2454	2377172	snp	C	T	T:117 C:0
EA2454	2382535	complex	TGCC	GGT	GGT:19 TGCC:0
EA2454	2393017	snp	G	A	A:106 G:0
EA2454	2395392	snp	C	T	T:102 C:0
EA2454	2397308	snp	A	T	T:97 A:0
EA2454	2403442	snp	T	C	C:96 T:0
EA2454	2406285	ins	G	GT	GT:95 G:2
EA2454	2407449	snp	A	G	G:103 A:0
EA2454	2413656	snp	G	A	A:102 G:0
EA2454	2419574	del	CT	C	C:21 CT:0
EA2454	2421636	snp	A	C	C:97 A:0
EA2454	2428433	snp	A	G	G:62 A:0
EA2454	2436152	snp	T	C	C:83 T:0
EA2454	2451759	snp	C	T	T:104 C:1
EA2454	2456090	snp	T	A	A:109 T:0
EA2454	2461974	snp	A	G	G:136 A:0
EA2454	2479440	snp	T	C	C:15 T:0
EA2454	2484408	snp	T	A	A:99 T:0
EA2454	2486361	snp	C	T	T:96 C:1
EA2454	2511434	snp	G	A	A:96 G:1
EA2454	2518321	del	AT	A	A:100 AT:0
EA2454	2518906	snp	A	C	C:103 A:0
EA2454	2521382	snp	C	T	T:100 C:0
EA2454	2528246	snp	T	C	C:94 T:0
EA2454	2538679	snp	T	C	C:85 T:0
EA2454	2542915	snp	C	T	T:106 C:0
EA2454	2555441	snp	A	G	G:93 A:0
EA2454	2558104	snp	T	A	A:101 T:0
EA2454	2559290	snp	C	A	A:125 C:0
EA2454	2561644	snp	T	A	A:85 T:0
EA2454	2561674	ins	G	GT	GT:50 G:0
EA2454	2582378	snp	A	T	T:86 A:1
EA2454	2586095	snp	C	T	T:91 C:0
EA2454	2588052	snp	C	T	T:117 C:0
EA2454	2588422	snp	A	G	G:128 A:0
EA2454	2589008	snp	T	C	C:100 T:0
EA2454	2589519	snp	G	A	A:95 G:0
EA2454	2596899	snp	G	A	A:126 G:0
EA2454	2597428	snp	T	C	C:94 T:0
EA2454	2598908	snp	T	C	C:94 T:0
EA2454	2607401	snp	A	T	T:99 A:0
EA2454	2612078	snp	T	C	C:83 T:0
EA2454	2612793	snp	C	T	T:95 C:1
EA2454	2631943	snp	A	G	G:93 A:0
EA2454	2632096	snp	G	C	C:107 G:0
EA2454	2635922	snp	G	A	A:93 G:0
EA2454	2639012	snp	C	T	T:100 C:0
EA2454	2641059	snp	T	C	C:101 T:0
EA2454	2644202	snp	T	G	G:121 T:0
EA2454	2647391	snp	G	A	A:104 G:0
EA2454	2648560	snp	T	G	G:107 T:0
EA2454	2650066	snp	C	T	T:93 C:0
EA2454	2654466	snp	C	T	T:117 C:0
EA2454	2655978	ins	A	AT	AT:25 A:0
EA2454	2656923	snp	T	G	G:107 T:1
EA2454	2658667	snp	A	C	C:107 A:0
EA2454	2660000	snp	A	G	G:115 A:0
EA2454	2664103	snp	G	A	A:110 G:0
EA2454	2666737	snp	C	T	T:101 C:0
EA2454	2677237	snp	G	A	A:96 G:0
EA2454	2681454	snp	G	A	A:106 G:1
EA2454	2704134	snp	T	G	G:108 T:0
EA2454	2706402	snp	A	G	G:96 A:0
EA2454	2708222	ins	A	AT	AT:100 A:0
EA2454	2712673	snp	G	A	A:98 G:0
EA2454	2718692	snp	A	C	C:81 A:1
EA2454	2722619	snp	A	G	G:99 A:0
EA2454	2736003	snp	G	A	A:102 G:0
EA2454	2743080	snp	T	G	G:96 T:0
EA2454	2748849	del	GT	G	G:32 GT:0
EA2454	2753130	snp	G	A	A:127 G:0
EA2454	2755025	snp	C	T	T:104 C:0
EA2454	2755245	snp	G	C	C:131 G:0
EA2454	2760352	snp	A	G	G:82 A:0
EA2454	2761696	ins	G	GCT	GCT:85 G:0
EA2454	2762805	snp	G	A	A:99 G:0
EA2454	2763065	snp	A	G	G:89 A:0
EA2454	2771595	snp	T	A	A:106 T:0
EA2454	2773210	del	TA	T	T:97 TA:0
EA2454	2774852	snp	A	G	G:113 A:0
EA2454	2775069	snp	A	G	G:96 A:0
EA2454	2777153	snp	T	G	G:112 T:1
EA2454	2779731	snp	T	A	A:115 T:0
EA2454	2780258	snp	G	A	A:85 G:0
EA2454	2782946	snp	C	T	T:95 C:0
EA2454	2789135	snp	T	G	G:73 T:0
EA2454	2789598	snp	G	A	A:103 G:0
EA2454	2793323	snp	T	C	C:132 T:0
EA2454	2805951	snp	C	T	T:98 C:0
EA2454	2808846	snp	C	T	T:58 C:0
EA2454	2809435	snp	G	C	C:121 G:0
EA2454	2811556	snp	C	T	T:133 C:0
EA2454	2815762	snp	A	G	G:98 A:0
EA2454	2816107	snp	C	A	A:132 C:0
EA2454	2824621	ins	G	GT	GT:89 G:1
EA2454	2829690	snp	G	C	C:114 G:0
EA2454	2832637	snp	C	T	T:85 C:0
EA2454	2837636	snp	T	C	C:83 T:0
EA2454	2838863	snp	C	T	T:101 C:0
EA2454	2843028	snp	C	G	G:90 C:0
EA2454	2847080	snp	T	C	C:116 T:0
EA2454	2850370	snp	A	C	C:87 A:0
EA2454	2851743	snp	T	A	A:96 T:0
EA2454	2853536	snp	C	T	T:95 C:0
EA2454	2860024	snp	T	G	G:102 T:0
EA2454	2863806	snp	C	T	T:97 C:0
EA2454	2865701	snp	T	C	C:103 T:0
EA2454	2872360	snp	A	G	G:102 A:0
EA2454	2874118	snp	G	A	A:77 G:0
EA2454	2876151	snp	T	C	C:101 T:0
EA2454	2881008	snp	G	C	C:92 G:0
EA2454	2883184	snp	T	C	C:119 T:0
EA2454	2885769	snp	G	A	A:83 G:0
EA2454	2897200	snp	G	A	A:97 G:0
EA2454	2901111	snp	A	G	G:83 A:0
EA2454	2903547	snp	C	A	A:98 C:1
EA2454	2915687	snp	G	A	A:91 G:0
EA2454	2927920	snp	T	C	C:113 T:0
EA2454	2929028	snp	G	A	A:122 G:2
EA2454	2931389	snp	T	G	G:118 T:0
EA2454	2934279	snp	A	G	G:87 A:0
EA2454	2937585	snp	A	G	G:89 A:0
EA2454	2939135	ins	A	AT	AT:86 A:0
EA2454	2941498	snp	G	A	A:86 G:0
EA2454	2945610	snp	G	A	A:103 G:0
EA2454	2954325	snp	C	A	A:11 C:0
EA2454	2954331	snp	T	C	C:13 T:0
EA2454	2954356	snp	T	A	A:20 T:0
EA2454	2954364	snp	A	T	T:22 A:0
EA2454	2954372	complex	GAA	TAG	TAG:22 GAA:0
EA2454	2954402	snp	C	T	T:30 C:0
EA2454	2954425	snp	A	G	G:22 A:0
EA2454	2954433	snp	G	C	C:18 G:0
EA2454	2954439	snp	A	G	G:16 A:0
EA2454	2954451	complex	GCCG	ATCT	ATCT:11 GCCG:0
EA2454	2954460	snp	G	A	A:11 G:0
EA2454	2954754	snp	T	G	G:40 T:0
EA2454	2954772	complex	CGGTT	TGACC	TGACC:49 CGGTT:0
EA2454	2954847	snp	A	G	G:96 A:0
EA2454	2954880	snp	T	A	A:97 T:0
EA2454	2954885	snp	T	A	A:100 T:0
EA2454	2954897	snp	T	C	C:104 T:1
EA2454	2954976	snp	C	T	T:102 C:1
EA2454	2954993	snp	T	C	C:94 T:0
EA2454	2955083	snp	T	C	C:83 T:0
EA2454	2959641	snp	T	C	C:82 T:0
EA2454	2961144	snp	G	A	A:98 G:0
EA2454	2963100	snp	G	A	A:77 G:0
EA2454	2965650	snp	G	A	A:97 G:0
EA2454	2966386	snp	G	A	A:77 G:0
EA2454	2967930	snp	A	G	G:85 A:0
EA2454	2973098	snp	T	C	C:102 T:1
EA2454	2982932	snp	A	T	T:82 A:0
EA2454	2985776	snp	A	G	G:104 A:0
EA2454	2988598	snp	A	T	T:98 A:0
EA2454	2995599	snp	T	C	C:96 T:0
EA2454	2998717	snp	A	G	G:97 A:0
EA2454	3004965	snp	C	A	A:119 C:0
EA2454	3011392	snp	G	A	A:102 G:0
EA2454	3017377	snp	G	A	A:102 G:1
EA2454	3018368	snp	T	C	C:12 T:1
EA2454	3018380	snp	G	T	T:15 G:1
EA2454	3018481	snp	A	G	G:11 A:1
EA2454	3028291	snp	A	G	G:97 A:0
EA2454	3029086	snp	C	T	T:94 C:0
EA2454	3041125	snp	T	G	G:97 T:0
EA2454	3045127	snp	G	A	A:116 G:0
EA2454	3052455	snp	G	A	A:109 G:0
EA2454	3052992	snp	G	C	C:95 G:0
EA2454	3055255	snp	G	A	A:98 G:0
EA2454	3057242	snp	A	G	G:117 A:0
EA2454	3082171	snp	C	T	T:103 C:0
EA2454	3089610	snp	C	T	T:58 C:0
EA2454	3091335	snp	T	C	C:114 T:0
EA2454	3092041	snp	T	C	C:95 T:0
EA2454	3093850	snp	T	C	C:105 T:0
EA2454	3099129	snp	T	C	C:108 T:0
EA2454	3101851	snp	A	G	G:112 A:0
EA2454	3104888	snp	C	T	T:94 C:0
EA2454	3112595	ins	C	CG	CG:91 C:0
EA2454	3112890	snp	A	G	G:90 A:0
EA2454	3115749	snp	T	A	A:122 T:0
EA2454	3117020	snp	C	G	G:119 C:0
EA2454	3121622	snp	T	A	A:84 T:0
EA2454	3123709	snp	A	G	G:112 A:1
EA2454	3125212	snp	A	G	G:126 A:0
EA2454	3133556	snp	G	T	T:91 G:0
EA2454	3135617	snp	A	C	C:114 A:0
EA2454	3145979	snp	C	T	T:108 C:1
EA2454	3149583	snp	G	A	A:96 G:0
EA2454	3153411	snp	A	C	C:97 A:0
EA2454	3175254	snp	T	C	C:114 T:0
EA2454	3177688	snp	C	T	T:108 C:0
EA2454	3179306	snp	G	A	A:127 G:0
EA2454	3184883	del	CA	C	C:76 CA:0
EA2454	3188469	snp	T	C	C:104 T:0
EA2454	3188675	snp	T	A	A:130 T:0
EA2454	3193765	ins	G	GA	GA:69 G:0
EA2454	3196063	snp	T	C	C:126 T:0
EA2454	3197243	snp	T	C	C:104 T:0
EA2454	3199166	snp	T	C	C:107 T:0
EA2454	3211809	snp	T	C	C:87 T:0
EA2454	3213292	snp	A	C	C:106 A:0
EA2454	3218193	snp	T	G	G:81 T:0
EA2454	3221164	snp	C	T	T:95 C:0
EA2454	3224798	snp	A	G	G:128 A:0
EA2454	3249895	snp	C	A	A:115 C:0
EA2454	3258466	snp	C	T	T:119 C:0
EA2454	3259703	snp	G	A	A:109 G:0
EA2454	3263384	snp	T	C	C:102 T:0
EA2454	3268326	snp	G	A	A:112 G:0
EA2454	3268759	snp	C	T	T:98 C:0
EA2454	3271358	snp	T	C	C:110 T:0
EA2454	3272561	snp	G	T	T:106 G:0
EA2454	3277906	snp	G	A	A:92 G:0
EA2454	3279388	snp	C	T	T:97 C:2
EA2454	3281767	ins	G	GC	GC:85 G:0
EA2454	3283909	snp	G	A	A:114 G:1
EA2454	3290202	snp	C	A	A:101 C:0
EA2454	3291020	snp	C	T	T:114 C:1
EA2454	3305295	snp	A	G	G:83 A:0
EA2454	3305988	snp	G	C	C:109 G:0
EA2454	3307663	snp	C	T	T:87 C:0
EA2454	3310578	snp	A	G	G:25 A:0
EA2454	3312869	snp	C	T	T:130 C:0
EA2454	3321158	snp	C	T	T:96 C:1
EA2454	3324781	snp	G	T	T:108 G:0
EA2454	3333536	snp	C	T	T:98 C:1
EA2454	3339497	snp	C	T	T:169 C:0
EA2454	3339812	snp	G	T	T:297 G:1
EA2454	3339848	complex	AATCACA	GATGACG	GATGACG:28 AATCACA:2
EA2454	3357780	snp	T	C	C:14 T:0
EA2454	3357862	complex	CCACCG	TCAGCA	TCAGCA:10 CCACCG:0
EA2454	3358100	snp	T	C	C:91 T:0
EA2454	3358126	del	GGAATTACA	G	G:58 GGAATTACA:0
EA2454	3358268	snp	G	A	A:88 G:0
EA2454	3358394	del	AC	A	A:51 AC:2
EA2454	3358578	snp	G	A	A:101 G:0
EA2454	3358644	snp	A	G	G:86 A:0
EA2454	3358666	snp	A	G	G:99 A:0
EA2454	3358759	snp	A	G	G:91 A:0
EA2454	3358764	snp	A	G	G:89 A:0
EA2454	3358796	snp	A	G	G:88 A:0
EA2454	3358845	snp	C	A	A:84 C:0
EA2454	3358856	complex	CCGGCGTATC	TCGGTATATT	TCGGTATATT:78 CCGGCGTATC:0
EA2454	3358892	complex	ACTG	GCTA	GCTA:96 ACTG:0
EA2454	3358908	complex	GCA	ACG	ACG:93 GCA:0
EA2454	3358934	snp	T	C	C:114 T:0
EA2454	3358967	complex	CGG	TGA	TGA:116 CGG:0
EA2454	3358986	snp	G	T	T:111 G:0
EA2454	3359024	snp	C	T	T:99 C:0
EA2454	3359034	snp	G	A	A:95 G:0
EA2454	3359100	snp	G	A	A:104 G:0
EA2454	3359133	snp	G	A	A:115 G:1
EA2454	3359170	snp	C	A	A:122 C:0
EA2454	3359209	snp	G	T	T:125 G:0
EA2454	3359238	snp	C	A	A:120 C:0
EA2454	3359275	snp	A	C	C:104 A:0
EA2454	3359302	snp	T	C	C:100 T:0
EA2454	3359308	del	CT	C	C:94 CT:0
EA2454	3359322	snp	T	G	G:96 T:0
EA2454	3359342	snp	A	C	C:91 A:1
EA2454	3359385	snp	T	A	A:93 T:0
EA2454	3359408	complex	AAA	GAC	GAC:81 AAA:0
EA2454	3359433	snp	C	T	T:82 C:0
EA2454	3359456	complex	CAAAATCA	ACAACC	ACAACC:61 CAAAATCA:0
EA2454	3359485	snp	A	G	G:82 A:0
EA2454	3359528	snp	C	A	A:93 C:0
EA2454	3359549	complex	TCAAC	CCTACTCA	CCTACTCA:73 TCAAC:0
EA2454	3359593	complex	GGTGCGTCG	AGTCGT	AGTCGT:81 GGTGCGTCG:0
EA2454	3359658	snp	G	T	T:91 G:0
EA2454	3359742	snp	T	C	C:103 T:0
EA2454	3359754	snp	A	G	G:112 A:0
EA2454	3359862	snp	A	C	C:94 A:0
EA2454	3359869	complex	GTTAT	ATTAC	ATTAC:89 GTTAT:0
EA2454	3359918	snp	C	T	T:103 C:0
EA2454	3359924	complex	CGTG	TGTA	TGTA:98 CGTG:0
EA2454	3359980	complex	AATTCAGT	CACCCAGC	CACCCAGC:99 AATTCAGT:0
EA2454	3360091	snp	A	G	G:92 A:0
EA2454	3360208	snp	C	T	T:98 C:0
EA2454	3360229	snp	G	A	A:91 G:0
EA2454	3360238	snp	T	C	C:92 T:0
EA2454	3360244	complex	CGGC	TGGT	TGGT:80 CGGC:0
EA2454	3360262	snp	G	A	A:92 G:0
EA2454	3360322	complex	CGAA	TGAC	TGAC:78 CGAA:0
EA2454	3360346	snp	G	C	C:80 G:0
EA2454	3360379	snp	T	C	C:39 T:0
EA2454	3360631	snp	C	T	T:10 C:0
EA2454	3360650	snp	C	T	T:23 C:0
EA2454	3360669	complex	ATTGC	TATATTGT	TATATTGT:30 ATTGC:0
EA2454	3360686	complex	GATGC	CATGG	CATGG:66 GATGC:0
EA2454	3360696	complex	TACA	CACG	CACG:69 TACA:0
EA2454	3360708	complex	GGTTATTT	AGTGATTG	AGTGATTG:68 GGTTATTT:0
EA2454	3360743	snp	C	T	T:79 C:0
EA2454	3360786	snp	T	C	C:62 T:0
EA2454	3360799	snp	T	A	A:55 T:0
EA2454	3360805	complex	TGACACT	AGCCCC	AGCCCC:37 TGACACT:0
EA2454	3360816	complex	TCCCG	ACCCA	ACCCA:41 TCCCG:0
EA2454	3360834	snp	A	G	G:61 A:0
EA2454	3360858	snp	C	T	T:68 C:0
EA2454	3360882	snp	G	A	A:69 G:0
EA2454	3360905	del	AC	A	A:92 AC:0
EA2454	3360911	snp	G	A	A:103 G:0
EA2454	3360927	snp	C	T	T:98 C:0
EA2454	3360936	complex	GGA	AGG	AGG:100 GGA:1
EA2454	3360943	snp	T	A	A:106 T:0
EA2454	3360982	snp	C	T	T:107 C:0
EA2454	3360994	snp	C	T	T:96 C:0
EA2454	3360999	snp	A	C	C:83 A:0
EA2454	3361005	snp	A	C	C:80 A:0
EA2454	3361013	complex	CAGTCATCAAC	TAG	TAG:57 CAGTCATCAAC:0
EA2454	3361046	snp	C	T	T:64 C:0
EA2454	3361083	complex	CA	TC	TC:47 CA:0
EA2454	3361090	snp	C	A	A:54 C:0
EA2454	3361101	snp	C	A	A:64 C:0
EA2454	3361107	snp	A	G	G:70 A:0
EA2454	3361117	snp	G	A	A:75 G:0
EA2454	3361132	snp	G	A	A:83 G:0
EA2454	3361141	snp	C	T	T:82 C:0
EA2454	3361156	snp	C	T	T:89 C:0
EA2454	3361196	snp	C	T	T:96 C:0
EA2454	3361204	snp	G	A	A:93 G:0
EA2454	3361214	complex	TATTT	AATTC	AATTC:85 TATTT:0
EA2454	3361226	complex	TAACAT	AAA	AAA:72 TAACAT:0
EA2454	3361248	snp	C	T	T:84 C:0
EA2454	3361256	snp	G	A	A:80 G:0
EA2454	3361276	snp	A	G	G:90 A:0
EA2454	3361292	snp	A	G	G:98 A:0
EA2454	3361321	snp	G	A	A:106 G:0
EA2454	3361337	complex	TAC	CAT	CAT:114 TAC:0
EA2454	3361402	snp	C	T	T:106 C:0
EA2454	3361442	snp	G	A	A:100 G:0
EA2454	3361451	snp	T	C	C:94 T:0
EA2454	3361456	snp	G	A	A:98 G:0
EA2454	3361464	snp	T	G	G:94 T:0
EA2454	3361481	snp	C	T	T:93 C:0
EA2454	3361488	snp	A	G	G:96 A:0
EA2454	3361499	snp	G	T	T:103 G:0
EA2454	3361541	snp	T	G	G:97 T:0
EA2454	3361552	snp	G	A	A:101 G:0
EA2454	3361762	snp	C	T	T:75 C:0
EA2454	3361780	complex	ATGCCAG	GCACCAA	GCACCAA:55 ATGCCAG:0
EA2454	3361807	snp	A	G	G:64 A:0
EA2454	3361817	snp	G	C	C:69 G:0
EA2454	3361830	snp	C	G	G:78 C:0
EA2454	3361859	ins	G	GC	GC:73 G:0
EA2454	3361881	snp	A	C	C:85 A:0
EA2454	3361889	snp	G	A	A:85 G:0
EA2454	3361900	snp	T	C	C:86 T:0
EA2454	3361907	snp	A	T	T:85 A:0
EA2454	3361929	snp	G	T	T:81 G:0
EA2454	3361942	snp	C	T	T:82 C:0
EA2454	3361950	snp	T	C	C:86 T:0
EA2454	3361957	snp	A	G	G:89 A:0
EA2454	3361986	snp	G	C	C:87 G:0
EA2454	3361992	complex	GA	AG	AG:78 GA:0
EA2454	3362001	snp	C	A	A:96 C:0
EA2454	3362009	snp	G	A	A:103 G:0
EA2454	3362083	complex	CGA	TGC	TGC:117 CGA:0
EA2454	3362159	snp	C	T	T:113 C:0
EA2454	3362241	snp	T	G	G:117 T:0
EA2454	3362263	complex	ATAAAG	GTAATA	GTAATA:110 ATAAAG:0
EA2454	3362313	snp	A	G	G:131 A:0
EA2454	3362450	snp	T	C	C:103 T:0
EA2454	3362465	complex	TA	GG	GG:84 TA:0
EA2454	3362489	snp	A	G	G:91 A:0
EA2454	3362518	snp	T	G	G:99 T:0
EA2454	3362546	snp	C	T	T:113 C:0
EA2454	3362624	snp	C	T	T:113 C:0
EA2454	3362630	snp	C	T	T:117 C:0
EA2454	3362685	snp	G	A	A:112 G:0
EA2454	3362699	snp	G	T	T:105 G:0
EA2454	3362867	snp	T	C	C:119 T:0
EA2454	3362891	complex	AGCG	GGCA	GGCA:104 AGCG:0
EA2454	3362924	snp	A	C	C:121 A:0
EA2454	3362945	snp	G	A	A:120 G:0
EA2454	3362957	snp	G	A	A:116 G:0
EA2454	3362966	snp	T	C	C:112 T:0
EA2454	3362987	snp	C	T	T:117 C:1
EA2454	3363013	snp	T	C	C:119 T:1
EA2454	3363032	snp	G	A	A:117 G:0
EA2454	3363089	snp	G	A	A:112 G:0
EA2454	3374533	snp	G	T	T:113 G:0
EA2454	3378213	snp	G	A	A:101 G:0
EA2454	3381441	snp	A	G	G:89 A:0
EA2454	3385780	snp	C	T	T:110 C:0
EA2454	3387556	snp	T	A	A:106 T:0
EA2454	3389622	snp	A	C	C:103 A:0
EA2454	3392987	snp	C	A	A:107 C:0
EA2454	3395362	snp	A	C	C:104 A:0
EA2454	3400480	del	TGAAGCTGGA	T	T:43 TGAAGCTGGA:0
EA2454	3405179	snp	T	G	G:100 T:0
EA2454	3411636	snp	C	A	A:110 C:0
EA2454	3426445	snp	T	C	C:131 T:0
EA2454	3434181	snp	A	G	G:109 A:0
EA2454	3440338	snp	C	T	T:98 C:0
EA2454	3441887	snp	T	C	C:107 T:0
EA2454	3441936	snp	A	G	G:117 A:0
EA2454	3448725	snp	C	T	T:121 C:1
EA2454	3451003	snp	C	T	T:101 C:1
EA2454	3456004	snp	T	C	C:101 T:0
EA2454	3462462	snp	T	C	C:101 T:0
EA2454	3462699	snp	A	G	G:83 A:0
EA2454	3468830	snp	A	T	T:10 A:0
EA2454	3468841	complex	GCCGGT	CCCAGG	CCCAGG:16 GCCGGT:0
EA2454	3468859	snp	G	A	A:23 G:0
EA2454	3468865	snp	A	G	G:26 A:0
EA2454	3468880	snp	G	T	T:35 G:0
EA2454	3468957	snp	T	A	A:16 T:0
EA2454	3483880	complex	GTTGATC	ATTAATG	ATTAATG:13 GTTGATC:0
EA2454	3483894	complex	AG	GT	GT:15 AG:0
EA2454	3483907	snp	G	A	A:32 G:0
EA2454	3483931	snp	A	G	G:45 A:1
EA2454	3483943	snp	G	A	A:48 G:0
EA2454	3483949	snp	A	G	G:46 A:0
EA2454	3483976	complex	AGCA	GGCG	GGCG:47 AGCA:0
EA2454	3484008	snp	G	A	A:45 G:0
EA2454	3484018	complex	CTCT	TTCC	TTCC:38 CTCT:0
EA2454	3484027	complex	ACGT	GCGC	GCGC:33 ACGT:0
EA2454	3484036	complex	GACCTCTTGC	TACTTCCTGT	TACTTCCTGT:30 GACCTCTTGC:0
EA2454	3484060	complex	TTTT	CTTC	CTTC:39 TTTT:0
EA2454	3484084	snp	G	A	A:39 G:0
EA2454	3484090	snp	A	G	G:38 A:0
EA2454	3484096	snp	A	G	G:34 A:0
EA2454	3484102	snp	T	G	G:38 T:0
EA2454	3484114	complex	TTCT	CTCC	CTCC:42 TTCT:0
EA2454	3484126	snp	T	C	C:50 T:0
EA2454	3484132	snp	A	T	T:49 A:0
EA2454	3484138	snp	G	A	A:53 G:0
EA2454	3484144	snp	C	T	T:58 C:0
EA2454	3484153	snp	G	A	A:57 G:0
EA2454	3484159	snp	T	G	G:59 T:0
EA2454	3484172	snp	T	G	G:50 T:0
EA2454	3484198	snp	A	C	C:38 A:0
EA2454	3484203	complex	AT	GC	GC:34 AT:0
EA2454	3484210	snp	T	C	C:33 T:0
EA2454	3484216	snp	A	G	G:31 A:0
EA2454	3484234	snp	G	A	A:21 G:0
EA2454	3520064	snp	G	A	A:18 G:0
EA2454	3520070	snp	A	C	C:22 A:0
EA2454	3520077	complex	GATGCA	AACGCC	AACGCC:23 GATGCA:0
EA2454	3520088	snp	G	T	T:34 G:0
EA2454	3520103	snp	A	T	T:48 A:0
EA2454	3520161	snp	G	T	T:92 G:0
EA2454	3520451	snp	G	A	A:92 G:0
EA2454	3520616	snp	C	A	A:20 C:0
EA2454	3521364	snp	A	G	G:86 A:0
EA2454	3521717	snp	C	G	G:87 C:0
EA2454	3524247	snp	G	A	A:101 G:0
EA2454	3525653	snp	G	A	A:98 G:0
EA2454	3527982	ins	G	GA	GA:101 G:1
EA2454	3528331	snp	C	A	A:99 C:1
EA2454	3536376	snp	T	C	C:104 T:0
EA2454	3539749	snp	T	C	C:110 T:0
EA2454	3540229	snp	T	C	C:100 T:0
EA2454	3541891	snp	A	G	G:111 A:0
EA2454	3542579	snp	G	T	T:103 G:2
EA2454	3547948	snp	T	C	C:112 T:1
EA2454	3548625	snp	G	C	C:107 G:0
EA2454	3549873	snp	T	G	G:102 T:0
EA2454	3554302	snp	G	T	T:62 G:0
EA2454	3556473	snp	G	A	A:97 G:1
EA2454	3566015	snp	T	C	C:100 T:0
EA2454	3569782	snp	C	T	T:102 C:0
EA2454	3581189	snp	G	A	A:111 G:1
EA2454	3585949	ins	T	TA	TA:43 T:0
EA2454	3586272	snp	C	T	T:119 C:0
EA2454	3586487	snp	T	C	C:113 T:0
EA2454	3589714	del	GA	G	G:60 GA:0
EA2454	3590214	snp	T	C	C:116 T:0
EA2454	3590259	snp	C	T	T:116 C:1
EA2454	3595770	snp	T	G	G:111 T:0
EA2454	3599844	snp	C	T	T:113 C:0
EA2454	3600559	snp	C	T	T:109 C:1
EA2454	3602569	snp	C	A	A:83 C:0
EA2454	3613661	snp	G	A	A:113 G:0
EA2454	3613761	snp	T	C	C:95 T:1
EA2454	3615292	snp	T	G	G:87 T:0
EA2454	3615330	snp	A	C	C:94 A:0
EA2454	3628517	snp	A	G	G:121 A:0
EA2454	3629418	snp	C	T	T:109 C:0
EA2454	3632526	snp	C	A	A:117 C:0
EA2454	3634246	snp	A	T	T:113 A:0
EA2454	3634651	snp	C	T	T:122 C:0
EA2454	3634750	snp	C	T	T:120 C:0
EA2454	3640661	snp	A	G	G:100 A:0
EA2454	3645952	snp	G	A	A:89 G:0
EA2454	3657942	snp	T	G	G:109 T:0
EA2454	3662284	snp	A	G	G:120 A:0
EA2454	3662817	snp	G	A	A:56 G:0
EA2454	3665048	snp	T	C	C:93 T:0
EA2454	3665749	snp	G	A	A:102 G:0
EA2454	3666055	snp	C	T	T:103 C:0
EA2454	3676873	snp	G	A	A:106 G:1
EA2454	3677442	snp	G	A	A:100 G:1
EA2454	3682843	snp	T	G	G:102 T:0
EA2454	3688394	snp	G	A	A:106 G:0
EA2454	3690835	snp	T	G	G:99 T:0
EA2454	3691180	snp	T	C	C:138 T:0
EA2454	3695043	snp	G	A	A:100 G:0
EA2454	3700305	snp	G	A	A:85 G:0
EA2454	3701518	snp	C	T	T:88 C:0
EA2454	3701572	snp	G	A	A:93 G:0
EA2454	3701756	snp	A	G	G:80 A:0
EA2454	3705284	snp	A	G	G:114 A:1
EA2454	3705638	snp	G	A	A:112 G:0
EA2454	3709916	snp	G	A	A:116 G:0
EA2454	3712427	snp	C	T	T:99 C:0
EA2454	3714902	snp	C	A	A:129 C:0
EA2454	3715219	snp	C	A	A:88 C:0
EA2454	3730425	snp	G	A	A:74 G:1
EA2454	3731404	snp	G	A	A:95 G:0
EA2454	3734092	snp	G	A	A:94 G:0
EA2454	3739482	snp	A	G	G:111 A:0
EA2454	3743568	snp	T	C	C:112 T:0
EA2454	3746088	snp	C	T	T:94 C:0
EA2454	3750262	del	GAA	G	G:57 GAA:0
EA2454	3751756	snp	C	T	T:113 C:0
EA2454	3756054	snp	T	C	C:103 T:0
EA2454	3763561	ins	A	AC	AC:90 A:0
EA2454	3763988	snp	A	G	G:93 A:0
EA2454	3766011	snp	A	C	C:89 A:0
EA2454	3766157	snp	G	A	A:102 G:0
EA2454	3766510	snp	C	T	T:103 C:0
EA2454	3770391	snp	C	T	T:90 C:0
EA2454	3772277	snp	T	A	A:87 T:0
EA2454	3777410	snp	C	T	T:100 C:0
EA2454	3779368	snp	C	T	T:110 C:2
EA2454	3786514	snp	C	T	T:92 C:0
EA2454	3795140	snp	T	C	C:91 T:0
EA2454	3807575	snp	A	G	G:91 A:0
EA2454	3808964	snp	C	T	T:113 C:0
EA2454	3811052	snp	G	A	A:130 G:1
EA2454	3815430	snp	T	C	C:144 T:0
EA2454	3837457	snp	C	A	A:134 C:0
EA2454	3840206	snp	C	T	T:94 C:0
EA2454	3842198	ins	C	CT	CT:84 C:0
EA2454	3844395	snp	T	C	C:98 T:0
EA2454	3845268	snp	G	T	T:93 G:1
EA2454	3851565	complex	TAAACA	CAGATG	CAGATG:29 TAAACA:0
EA2454	3851580	complex	AC	TT	TT:58 AC:0
EA2454	3851623	snp	C	T	T:152 C:0
EA2454	3851632	complex	GAAG	AAAA	AAAA:165 GAAG:0
EA2454	3851667	snp	A	G	G:205 A:0
EA2454	3851703	snp	A	G	G:196 A:1
EA2454	3851770	complex	TAGCC	CAGCG	CAGCG:190 TAGCC:0
EA2454	3851842	snp	C	T	T:167 C:0
EA2454	3851858	complex	CCC	TCT	TCT:157 CCC:0
EA2454	3851865	complex	CCAGT	GCAGC	GCAGC:160 CCAGT:0
EA2454	3851884	complex	CTT	ACCC	ACCC:140 CTT:0
EA2454	3851901	snp	C	T	T:193 C:0
EA2454	3851915	complex	TAATCA	CAACCAG	CAACCAG:135 TAATCA:0
EA2454	3851938	del	GA	G	G:170 GA:0
EA2454	3851976	snp	T	G	G:245 T:0
EA2454	3852061	snp	G	C	C:214 G:0
EA2454	3852067	complex	GCCG	TCCA	TCCA:193 GCCG:0
EA2454	3852076	snp	T	C	C:211 T:0
EA2454	3852124	snp	T	C	C:233 T:0
EA2454	3852262	complex	CGGGCAG	TGGGAAA	TGGGAAA:187 CGGGCAG:0
EA2454	3852286	snp	C	T	T:229 C:0
EA2454	3852395	snp	C	A	A:238 C:0
EA2454	3852453	snp	G	A	A:249 G:0
EA2454	3852559	snp	A	G	G:215 A:1
EA2454	3852607	complex	CCGTT	TCGTC	TCGTC:222 CCGTT:0
EA2454	3852640	snp	A	G	G:249 A:0
EA2454	3852680	snp	T	C	C:250 T:0
EA2454	3852688	complex	GCG	AAA	AAA:209 GCG:0
EA2454	3852712	complex	CAGA	AAGG	AAGG:238 CAGA:0
EA2454	3852799	snp	A	G	G:256 A:0
EA2454	3852830	snp	T	A	A:262 T:0
EA2454	3852950	snp	G	T	T:254 G:0
EA2454	3852999	snp	T	C	C:282 T:0
EA2454	3853020	snp	C	T	T:285 C:0
EA2454	3854136	complex	GAACT	CAACA	CAACA:18 GAACT:0
EA2454	3854159	snp	T	C	C:53 T:0
EA2454	3854170	snp	C	T	T:65 C:0
EA2454	3854179	complex	TGCA	GGCT	GGCT:67 TGCA:0
EA2454	3854206	snp	G	A	A:78 G:0
EA2454	3854212	snp	C	T	T:86 C:0
EA2454	3854218	snp	A	T	T:96 A:0
EA2454	3854231	complex	CTT	TTG	TTG:87 CTT:0
EA2454	3854245	snp	T	C	C:92 T:0
EA2454	3854260	complex	GTCAACGGTGGCAAAG	ATCATCAGTAGCGAAA	ATCATCAGTAGCGAAA:70 GTCAACGGTGGCAAAG:0
EA2454	3854281	snp	A	G	G:82 A:0
EA2454	3854310	snp	T	C	C:77 T:0
EA2454	3854317	complex	CCCG	TCCA	TCCA:72 CCCG:0
EA2454	3854337	snp	G	A	A:61 G:0
EA2454	3854347	snp	C	A	A:48 C:0
EA2454	3854356	snp	A	G	G:44 A:0
EA2454	3854362	complex	AGTGTCTGT	GGTATCATC	GGTATCATC:32 AGTGTCTGT:0
EA2454	3854380	complex	CCGG	ACGA	ACGA:53 CCGG:0
EA2454	3854412	snp	T	A	A:70 T:0
EA2454	3854416	del	AATGAAG	A	A:59 AATGAAG:0
EA2454	3854428	complex	GTTG	CTTC	CTTC:72 GTTG:0
EA2454	3854442	complex	AAGAA	CAGAG	CAGAG:97 AAGAA:0
EA2454	3854458	snp	C	T	T:125 C:0
EA2454	3854465	snp	A	G	G:129 A:0
EA2454	3854471	snp	A	G	G:122 A:0
EA2454	3854476	mnp	TC	AA	AA:113 TC:0
EA2454	3854521	snp	A	T	T:105 A:0
EA2454	3854527	complex	AC	TT	TT:91 AC:0
EA2454	3854551	complex	GTCTGAA	TTCTCTC	TTCTCTC:38 GTCTGAA:0
EA2454	3854563	snp	T	C	C:41 T:0
EA2454	3855683	complex	CA	TG	TG:47 CA:0
EA2454	3855692	snp	G	A	A:73 G:0
EA2454	3855752	snp	G	T	T:65 G:0
EA2454	3855788	complex	GA	AC	AC:10 GA:0
EA2454	3855822	complex	GCA	CAG	CAG:35 GCA:0
EA2454	3855834	complex	AA	TC	TC:60 AA:0
EA2454	3855884	snp	C	T	T:162 C:0
EA2454	3855899	snp	T	C	C:189 T:0
EA2454	3856015	ins	T	TA	TA:185 T:0
EA2454	3856047	complex	AAAG	GAAA	GAAA:180 AAAG:0
EA2454	3856122	snp	A	C	C:164 A:0
EA2454	3856149	snp	T	A	A:180 T:0
EA2454	3856155	snp	G	A	A:185 G:0
EA2454	3856242	snp	T	A	A:246 T:1
EA2454	3856458	snp	A	G	G:252 A:0
EA2454	3856521	snp	T	C	C:247 T:0
EA2454	3856982	complex	CTGG	ATGT	ATGT:245 CTGG:0
EA2454	3857194	snp	A	G	G:260 A:1
EA2454	3857206	snp	T	C	C:256 T:0
EA2454	3857236	snp	C	T	T:243 C:0
EA2454	3857347	snp	C	T	T:256 C:0
EA2454	3857368	snp	C	T	T:240 C:0
EA2454	3857386	complex	CCCG	TCCT	TCCT:232 CCCG:0
EA2454	3857455	snp	G	A	A:220 G:0
EA2454	3857766	snp	C	G	G:206 C:0
EA2454	3857781	complex	ACCC	GCCT	GCCT:196 ACCC:0
EA2454	3857904	complex	CGAG	TGAA	TGAA:222 CGAG:0
EA2454	3857976	snp	C	T	T:203 C:0
EA2454	3857994	snp	G	A	A:205 G:0
EA2454	3858009	snp	T	A	A:189 T:0
EA2454	3858021	snp	G	C	C:196 G:1
EA2454	3858047	complex	TGCCT	CGCCA	CGCCA:185 TGCCT:0
EA2454	3858066	snp	C	G	G:179 C:1
EA2454	3858264	snp	A	G	G:226 A:0
EA2454	3858330	complex	GTCG	CTCA	CTCA:217 GTCG:0
EA2454	3858381	snp	C	T	T:231 C:0
EA2454	3858405	snp	A	G	G:262 A:0
EA2454	3858465	snp	G	A	A:229 G:0
EA2454	3858471	snp	C	T	T:226 C:0
EA2454	3858477	snp	A	T	T:231 A:0
EA2454	3858486	snp	C	T	T:215 C:1
EA2454	3858505	complex	GAC	AAT	AAT:186 GAC:0
EA2454	3858690	complex	AGCC	CGCT	CGCT:183 AGCC:0
EA2454	3858705	complex	TGGT	CGGC	CGGC:175 TGGT:0
EA2454	3858717	snp	G	T	T:187 G:1
EA2454	3858981	snp	C	T	T:246 C:0
EA2454	3859719	snp	G	A	A:242 G:0
EA2454	3859941	snp	T	C	C:260 T:0
EA2454	3860187	snp	T	C	C:267 T:0
EA2454	3860215	snp	A	G	G:276 A:0
EA2454	3860282	snp	A	G	G:244 A:0
EA2454	3860759	complex	CGTTGTGC	TGTTATGT	TGTTATGT:227 CGTTGTGC:0
EA2454	3861129	snp	G	A	A:250 G:0
EA2454	3861180	snp	C	T	T:232 C:0
EA2454	3861192	snp	G	T	T:236 G:0
EA2454	3861216	snp	C	T	T:225 C:0
EA2454	3861225	snp	C	T	T:230 C:0
EA2454	3861405	complex	AC	GT	GT:197 AC:0
EA2454	3861522	snp	G	A	A:249 G:0
EA2454	3861702	snp	C	T	T:215 C:0
EA2454	3861708	snp	A	G	G:223 A:0
EA2454	3861717	snp	T	G	G:216 T:0
EA2454	3861762	snp	G	A	A:205 G:0
EA2454	3861768	snp	C	T	T:177 C:0
EA2454	3861828	snp	C	T	T:206 C:0
EA2454	3861873	snp	A	G	G:219 A:0
EA2454	3861891	snp	T	A	A:222 T:0
EA2454	3861906	snp	C	T	T:226 C:0
EA2454	3861957	snp	G	A	A:180 G:0
EA2454	3861993	complex	AGTTGAAAAGGAGGCG	CGTGGAGAAAGAAGCT	CGTGGAGAAAGAAGCT:127 AGTTGAAAAGGAGGCG:0
EA2454	3862023	snp	G	A	A:168 G:0
EA2454	3862086	snp	C	A	A:177 C:0
EA2454	3862113	snp	A	G	G:199 A:0
EA2454	3862197	snp	T	C	C:213 T:0
EA2454	3862329	snp	A	G	G:199 A:0
EA2454	3862338	snp	C	T	T:160 C:0
EA2454	3862353	snp	T	C	C:205 T:0
EA2454	3862431	complex	CACC	AACA	AACA:210 CACC:0
EA2454	3862456	snp	T	C	C:228 T:0
EA2454	3862476	snp	T	C	C:230 T:0
EA2454	3862536	snp	C	T	T:241 C:0
EA2454	3862584	snp	T	C	C:209 T:0
EA2454	3862608	snp	C	T	T:196 C:0
EA2454	3862614	snp	C	T	T:192 C:0
EA2454	3862638	snp	C	T	T:191 C:0
EA2454	3862695	complex	TCTGC	CCTGT	CCTGT:198 TCTGC:0
EA2454	3862715	snp	A	G	G:209 A:0
EA2454	3862731	snp	C	T	T:196 C:0
EA2454	3862740	snp	T	G	G:196 T:0
EA2454	3862765	snp	A	G	G:205 A:0
EA2454	3862783	snp	A	C	C:179 A:0
EA2454	3862788	complex	CAGCGAG	TAACGAC	TAACGAC:163 CAGCGAG:0
EA2454	3862802	snp	C	T	T:208 C:0
EA2454	3862833	snp	T	C	C:200 T:0
EA2454	3862902	snp	G	A	A:192 G:0
EA2454	3862947	complex	GGGA	TGGG	TGGG:166 GGGA:0
EA2454	3862974	snp	T	G	G:160 T:0
EA2454	3862990	complex	TCCCTGATTATC	AGCCTTATCATT	AGCCTTATCATT:138 TCCCTGATTATC:0
EA2454	3863014	snp	A	C	C:174 A:0
EA2454	3863036	mnp	CT	AC	AC:167 CT:0
EA2454	3863043	snp	A	G	G:186 A:0
EA2454	3863055	snp	C	T	T:199 C:0
EA2454	3863100	snp	C	T	T:237 C:0
EA2454	3863139	snp	C	T	T:229 C:0
EA2454	3863199	snp	C	A	A:238 C:0
EA2454	3863208	snp	T	A	A:249 T:0
EA2454	3863298	snp	C	T	T:236 C:0
EA2454	3863319	snp	G	C	C:259 G:0
EA2454	3863331	snp	C	T	T:253 C:0
EA2454	3863346	snp	T	C	C:248 T:0
EA2454	3863406	snp	T	C	C:240 T:0
EA2454	3863481	complex	CAGG	TAAA	TAAA:194 CAGG:0
EA2454	3863490	snp	C	G	G:235 C:0
EA2454	3863532	complex	ATCG	GTCA	GTCA:232 ATCG:0
EA2454	3863559	snp	G	A	A:246 G:0
EA2454	3863700	snp	G	A	A:223 G:0
EA2454	3863732	snp	A	G	G:226 A:0
EA2454	3863740	snp	T	C	C:223 T:1
EA2454	3863840	snp	T	C	C:211 T:0
EA2454	3863865	complex	ACG	GCA	GCA:208 ACG:0
EA2454	3863900	snp	T	G	G:218 T:0
EA2454	3863924	snp	A	T	T:202 A:0
EA2454	3863957	snp	T	C	C:220 T:0
EA2454	3863966	snp	G	A	A:215 G:0
EA2454	3864034	snp	A	C	C:228 A:0
EA2454	3864046	snp	C	T	T:225 C:0
EA2454	3864070	mnp	GC	AA	AA:213 GC:0
EA2454	3864181	snp	C	T	T:206 C:1
EA2454	3864199	complex	TCCTGGA	GCCCGGT	GCCCGGT:197 TCCTGGA:0
EA2454	3864220	snp	A	G	G:218 A:0
EA2454	3864227	snp	A	G	G:228 A:0
EA2454	3864307	snp	A	T	T:199 A:0
EA2454	3864690	snp	G	A	A:230 G:1
EA2454	3865077	snp	T	G	G:205 T:0
EA2454	3865110	snp	T	C	C:226 T:0
EA2454	3865119	snp	A	C	C:229 A:0
EA2454	3865284	snp	C	T	T:244 C:0
EA2454	3865473	snp	C	T	T:201 C:0
EA2454	3865485	snp	A	G	G:198 A:0
EA2454	3865509	snp	T	C	C:205 T:0
EA2454	3865545	snp	T	C	C:134 T:0
EA2454	3865593	snp	C	A	A:36 C:0
EA2454	3865886	complex	TC	CG	CG:24 TC:0
EA2454	3865910	snp	T	A	A:64 T:0
EA2454	3865931	snp	A	G	G:102 A:0
EA2454	3865940	snp	C	A	A:114 C:0
EA2454	3865979	snp	C	T	T:126 C:0
EA2454	3865988	complex	TAAT	CAAC	CAAC:133 TAAT:0
EA2454	3866000	complex	GA	AG	AG:125 GA:0
EA2454	3866006	snp	C	G	G:131 C:0
EA2454	3866015	snp	C	A	A:140 C:1
EA2454	3866024	snp	C	T	T:140 C:0
EA2454	3866039	complex	CGCAACT	TGCGACC	TGCGACC:115 CGCAACT:0
EA2454	3866060	snp	C	T	T:128 C:0
EA2454	3866096	complex	TGTA	CGTG	CGTG:144 TGTA:0
EA2454	3866105	snp	A	T	T:157 A:0
EA2454	3866123	snp	T	C	C:160 T:0
EA2454	3866129	complex	AT	GC	GC:142 AT:0
EA2454	3866150	snp	C	T	T:115 C:0
EA2454	3866156	complex	GGTCG	CGTCA	CGTCA:102 GGTCG:0
EA2454	3866184	snp	A	G	G:64 A:0
EA2454	3866189	complex	GGGG	AGGA	AGGA:48 GGGG:0
EA2454	3866250	snp	C	G	G:15 C:0
EA2454	3866260	complex	CGGG	AGGC	AGGC:23 CGGG:0
EA2454	3866269	snp	T	C	C:36 T:0
EA2454	3866278	snp	T	C	C:55 T:0
EA2454	3866284	snp	G	C	C:62 G:0
EA2454	3866302	snp	T	C	C:81 T:0
EA2454	3866312	snp	A	G	G:99 A:1
EA2454	3866320	complex	CTTC	ATTT	ATTT:117 CTTC:0
EA2454	3866335	snp	T	G	G:137 T:0
EA2454	3866352	snp	G	T	T:152 G:0
EA2454	3866365	snp	C	A	A:152 C:0
EA2454	3866373	complex	TT	CG	CG:142 TT:0
EA2454	3866383	snp	T	C	C:170 T:0
EA2454	3866395	snp	C	T	T:180 C:0
EA2454	3866419	snp	T	G	G:196 T:0
EA2454	3866489	snp	G	A	A:137 G:0
EA2454	3866503	snp	G	T	T:119 G:0
EA2454	3866512	complex	CTGTTTCA	TTGCTTCC	TTGCTTCC:79 CTGTTTCA:0
EA2454	3866530	complex	CGATGC	TGAAGG	TGAAGG:38 CGATGC:0
EA2454	3866543	snp	T	C	C:30 T:0
EA2454	3866552	snp	A	C	C:18 A:0
EA2454	3866560	snp	T	C	C:10 T:0
EA2454	3866993	snp	T	G	G:32 T:0
EA2454	3867008	complex	TCAC	CCGT	CCGT:32 TCAC:0
EA2454	3867017	complex	CAAAGGA	TCAGGGG	TCAGGGG:31 CAAAGGA:0
EA2454	3867029	complex	AAGCA	TACAG	TACAG:32 AAGCA:0
EA2454	3867113	snp	C	T	T:190 C:0
EA2454	3867122	snp	C	T	T:207 C:0
EA2454	3867188	snp	C	T	T:225 C:0
EA2454	3867227	snp	T	G	G:242 T:0
EA2454	3867239	snp	A	G	G:232 A:0
EA2454	3867296	snp	C	T	T:231 C:0
EA2454	3867326	complex	TAGCCGG	AAACCGC	AAACCGC:219 TAGCCGG:0
EA2454	3867905	snp	T	G	G:228 T:1
EA2454	3868706	snp	T	C	C:279 T:0
EA2454	3868760	snp	A	G	G:302 A:0
EA2454	3868774	complex	AAAAT	GAAAC	GAAAC:280 AAAAT:0
EA2454	3868787	snp	A	G	G:288 A:0
EA2454	3868798	snp	A	G	G:277 A:1
EA2454	3869010	del	CTGA	C	C:180 CTGA:0
EA2454	3869252	snp	T	C	C:252 T:0
EA2454	3869489	snp	T	C	C:221 T:0
EA2454	3869682	snp	G	A	A:217 G:0
EA2454	3871624	snp	C	T	T:255 C:0
EA2454	3871816	snp	A	G	G:239 A:0
EA2454	3871828	snp	C	T	T:237 C:0
EA2454	3871837	snp	C	T	T:233 C:0
EA2454	3871864	snp	G	A	A:215 G:0
EA2454	3871945	snp	G	T	T:218 G:0
EA2454	3871957	snp	T	C	C:243 T:0
EA2454	3872008	snp	C	T	T:241 C:0
EA2454	3872110	snp	T	C	C:228 T:0
EA2454	3872128	mnp	CT	GC	GC:199 CT:0
EA2454	3872134	snp	A	G	G:209 A:0
EA2454	3872167	snp	C	T	T:231 C:0
EA2454	3872518	snp	A	G	G:250 A:1
EA2454	3872560	snp	C	T	T:255 C:1
EA2454	3872599	snp	G	A	A:264 G:0
EA2454	3872721	mnp	TG	CA	CA:224 TG:0
EA2454	3872778	snp	C	T	T:267 C:0
EA2454	3872799	complex	AACCA	GACCC	GACCC:248 AACCA:0
EA2454	3872862	snp	G	A	A:247 G:0
EA2454	3873006	snp	A	G	G:224 A:0
EA2454	3873171	snp	C	T	T:236 C:0
EA2454	3873180	snp	A	G	G:230 A:0
EA2454	3873261	snp	G	A	A:221 G:0
EA2454	3873282	snp	C	T	T:229 C:0
EA2454	3873309	snp	C	T	T:205 C:0
EA2454	3873396	snp	T	C	C:228 T:0
EA2454	3873417	snp	C	A	A:243 C:0
EA2454	3873594	snp	G	A	A:242 G:0
EA2454	3873609	snp	A	G	G:238 A:0
EA2454	3873636	snp	G	A	A:240 G:0
EA2454	3873750	snp	T	C	C:244 T:0
EA2454	3874008	snp	A	G	G:194 A:0
EA2454	3874017	snp	C	A	A:201 C:0
EA2454	3874068	snp	T	C	C:210 T:0
EA2454	3874077	snp	G	A	A:219 G:0
EA2454	3874083	snp	T	C	C:216 T:0
EA2454	3874128	snp	A	G	G:212 A:0
EA2454	3874140	snp	A	C	C:204 A:0
EA2454	3874221	snp	T	C	C:220 T:0
EA2454	3874248	snp	G	A	A:235 G:0
EA2454	3874254	complex	GGCG	AGCT	AGCT:219 GGCG:0
EA2454	3874266	snp	T	G	G:226 T:0
EA2454	3874278	snp	T	C	C:227 T:0
EA2454	3874305	snp	G	A	A:228 G:0
EA2454	3874321	snp	G	T	T:222 G:0
EA2454	3874329	complex	GGCG	AGCA	AGCA:208 GGCG:0
EA2454	3874350	snp	C	T	T:215 C:0
EA2454	3874393	snp	T	A	A:210 T:0
EA2454	3874440	snp	C	A	A:192 C:0
EA2454	3874458	snp	G	C	C:180 G:0
EA2454	3874500	snp	C	T	T:149 C:0
EA2454	3874566	snp	A	G	G:32 A:0
EA2454	3874719	snp	C	T	T:25 C:0
EA2454	3874744	snp	A	G	G:57 A:0
EA2454	3874749	snp	C	T	T:66 C:0
EA2454	3874767	snp	G	A	A:98 G:0
EA2454	3874809	snp	T	C	C:158 T:0
EA2454	3874815	snp	G	A	A:158 G:0
EA2454	3874839	snp	G	T	T:183 G:0
EA2454	3874860	snp	T	C	C:189 T:1
EA2454	3874893	snp	A	G	G:198 A:0
EA2454	3874995	snp	C	T	T:258 C:0
EA2454	3875034	snp	G	A	A:252 G:0
EA2454	3875073	snp	C	A	A:237 C:0
EA2454	3875094	snp	T	C	C:222 T:0
EA2454	3875100	snp	T	G	G:223 T:0
EA2454	3875118	snp	T	G	G:210 T:0
EA2454	3875169	complex	GGACATC	CGATATT	CGATATT:158 GGACATC:0
EA2454	3875205	complex	GGGG	TGGT	TGGT:181 GGGG:0
EA2454	3875232	snp	T	C	C:203 T:0
EA2454	3875259	snp	G	T	T:152 G:0
EA2454	3875286	snp	T	G	G:109 T:0
EA2454	3875328	complex	CCGAGGC	TAAAGGG	TAAAGGG:57 CCGAGGC:0
EA2454	3875340	complex	CGGA	AGGT	AGGT:64 CGGA:0
EA2454	3875354	complex	GCAGCATA	ACAGTATC	ACAGTATC:81 GCAGCATA:0
EA2454	3875370	snp	A	G	G:111 A:0
EA2454	3875383	complex	GGAAGA	AGAGGG	AGAGGG:97 GGAAGA:0
EA2454	3875412	snp	C	T	T:73 C:0
EA2454	3875424	snp	G	A	A:65 G:0
EA2454	3875431	snp	T	A	A:63 T:0
EA2454	3876094	snp	T	A	A:11 T:0
EA2454	3876112	complex	TTG	CTA	CTA:59 TTG:0
EA2454	3876119	snp	C	T	T:69 C:0
EA2454	3876146	snp	C	T	T:119 C:0
EA2454	3877140	snp	A	G	G:232 A:0
EA2454	3877447	snp	G	A	A:219 G:0
EA2454	3877989	snp	T	C	C:287 T:0
EA2454	3880970	snp	A	C	C:238 A:0
EA2454	3881115	snp	C	T	T:203 C:0
EA2454	3881300	complex	CGGTGCA	GGGAGCC	GGGAGCC:170 CGGTGCA:0
EA2454	3881684	snp	A	C	C:212 A:0
EA2454	3881743	snp	T	C	C:230 T:1
EA2454	3882296	snp	T	C	C:202 T:0
EA2454	3882404	snp	C	T	T:259 C:1
EA2454	3883346	snp	T	C	C:197 T:0
EA2454	3883477	snp	T	A	A:225 T:0
EA2454	3883492	snp	C	T	T:203 C:1
EA2454	3883505	snp	C	T	T:205 C:0
EA2454	3883535	snp	A	G	G:221 A:0
EA2454	3883550	snp	G	A	A:206 G:0
EA2454	3883557	snp	A	G	G:208 A:0
EA2454	3883565	complex	GCT	ACA	ACA:188 GCT:0
EA2454	3883583	snp	C	T	T:228 C:0
EA2454	3883592	snp	C	T	T:226 C:0
EA2454	3883637	snp	G	A	A:234 G:0
EA2454	3883670	snp	C	T	T:244 C:0
EA2454	3883685	complex	GGACC	AGACA	AGACA:219 GGACC:0
EA2454	3883800	snp	C	T	T:240 C:0
EA2454	3883826	snp	A	T	T:271 A:0
EA2454	3883843	snp	C	T	T:257 C:0
EA2454	3883883	snp	C	T	T:257 C:0
EA2454	3883908	snp	C	G	G:238 C:0
EA2454	3883927	snp	T	C	C:233 T:0
EA2454	3883964	snp	C	T	T:213 C:0
EA2454	3883987	mnp	CC	AA	AA:197 CC:0
EA2454	3884000	snp	A	G	G:231 A:0
EA2454	3884042	snp	C	T	T:215 C:0
EA2454	3884078	snp	A	G	G:230 A:0
EA2454	3884150	snp	A	C	C:224 A:0
EA2454	3884201	snp	T	G	G:201 T:0
EA2454	3884222	snp	C	T	T:211 C:0
EA2454	3884254	snp	T	A	A:193 T:0
EA2454	3884321	complex	TGATG	CGATA	CGATA:181 TGATG:0
EA2454	3884351	snp	C	T	T:207 C:0
EA2454	3884372	snp	G	A	A:215 G:0
EA2454	3884444	snp	A	G	G:225 A:0
EA2454	3884483	snp	T	C	C:224 T:0
EA2454	3884495	snp	G	A	A:210 G:0
EA2454	3884537	complex	ACGT	GCGC	GCGC:207 ACGT:0
EA2454	3884549	complex	ACAG	GCAA	GCAA:211 ACAG:0
EA2454	3884573	snp	G	T	T:218 G:0
EA2454	3884591	complex	ATCA	GTCC	GTCC:193 ATCA:0
EA2454	3884622	snp	T	A	A:223 T:0
EA2454	3884654	snp	T	C	C:209 T:0
EA2454	3884663	complex	CCGTGTG	TCGGGTA	TCGGGTA:191 CCGTGTG:0
EA2454	3884741	snp	T	C	C:208 T:0
EA2454	3884753	snp	T	C	C:201 T:0
EA2454	3884783	snp	T	C	C:207 T:0
EA2454	3884795	snp	A	G	G:223 A:0
EA2454	3884888	snp	A	G	G:152 A:0
EA2454	3884900	complex	CGAG	TGAA	TGAA:129 CGAG:0
EA2454	3884909	complex	CACGGCAGAGGTA	TACAGCTGAAGTG	TACAGCTGAAGTG:122 CACGGCAGAGGTA:0
EA2454	3884948	snp	T	C	C:158 T:0
EA2454	3884969	complex	CCGTGCG	TCGCGCA	TCGCGCA:136 CCGTGCG:0
EA2454	3884985	snp	A	G	G:172 A:0
EA2454	3885023	snp	C	T	T:206 C:1
EA2454	3885050	snp	A	G	G:217 A:0
EA2454	3885345	snp	G	T	T:163 G:0
EA2454	3885384	snp	C	G	G:86 C:0
EA2454	3885390	snp	T	A	A:75 T:0
EA2454	3885480	snp	T	G	G:88 T:0
EA2454	3885531	complex	GGA	ACC	ACC:129 GGA:0
EA2454	3885560	complex	CGGTG	GGATT	GGATT:115 CGGTG:0
EA2454	3885579	snp	A	G	G:133 A:0
EA2454	3885591	snp	C	A	A:116 C:0
EA2454	3885600	snp	C	G	G:109 C:0
EA2454	3885654	snp	A	G	G:35 A:0
EA2454	3885723	snp	C	G	G:31 C:0
EA2454	3885730	snp	A	T	T:39 A:0
EA2454	3885775	snp	A	C	C:117 A:0
EA2454	3885800	snp	T	C	C:143 T:0
EA2454	3885819	complex	CGCC	TGCA	TGCA:133 CGCC:0
EA2454	3885859	snp	A	G	G:125 A:0
EA2454	3885869	mnp	TG	CC	CC:97 TG:0
EA2454	3885876	complex	TGTAGCTGGT	GGTGGCCGGC	GGTGGCCGGC:91 TGTAGCTGGT:0
EA2454	3885906	snp	T	C	C:123 T:0
EA2454	3885921	snp	G	C	C:140 G:0
EA2454	3885930	snp	A	G	G:141 A:0
EA2454	3885970	complex	ACG	GTA	GTA:153 ACG:0
EA2454	3885978	snp	T	C	C:181 T:0
EA2454	3886011	complex	ACT	GCC	GCC:167 ACT:0
EA2454	3886019	snp	G	A	A:183 G:0
EA2454	3886035	complex	GCCGCAAG	ACCGTAAC	ACCGTAAC:160 GCCGCAAG:0
EA2454	3886122	complex	AGA	GGG	GGG:205 AGA:0
EA2454	3886197	snp	A	G	G:225 A:0
EA2454	3886209	complex	AGCG	GGCT	GGCT:212 AGCG:0
EA2454	3886285	complex	TCA	ACG	ACG:193 TCA:0
EA2454	3886305	snp	T	C	C:216 T:0
EA2454	3886328	complex	AATTA	GATTG	GATTG:200 AATTA:0
EA2454	3886473	complex	GTGT	TGGC	TGGC:187 GTGT:0
EA2454	3886835	complex	TATT	CAGC	CAGC:217 TATT:0
EA2454	3888966	snp	A	C	C:206 A:0
EA2454	3889072	snp	A	G	G:107 A:0
EA2454	3889411	snp	G	A	A:51 G:0
EA2454	3889426	snp	G	A	A:47 G:0
EA2454	3889459	snp	T	G	G:52 T:0
EA2454	3889477	complex	CA	TG	TG:36 CA:0
EA2454	3889529	complex	TAACAAG	CATCTAA	CATCTAA:27 TAACAAG:0
EA2454	3889577	snp	C	T	T:124 C:0
EA2454	3889615	snp	G	A	A:155 G:1
EA2454	3889625	snp	C	T	T:170 C:0
EA2454	3889814	snp	G	T	T:222 G:0
EA2454	3889838	snp	G	A	A:210 G:0
EA2454	3889844	snp	A	G	G:227 A:0
EA2454	3889859	snp	C	T	T:223 C:0
EA2454	3889901	snp	G	A	A:211 G:0
EA2454	3889922	snp	C	T	T:211 C:0
EA2454	3889961	snp	G	A	A:203 G:0
EA2454	3889967	complex	TGCTGCC	CGGTGCA	CGGTGCA:173 TGCTGCC:0
EA2454	3890249	snp	G	C	C:210 G:0
EA2454	3890291	snp	T	G	G:214 T:0
EA2454	3890300	snp	A	G	G:221 A:0
EA2454	3890393	snp	C	T	T:154 C:0
EA2454	3890399	complex	TGCT	AGCC	AGCC:158 TGCT:0
EA2454	3890414	snp	A	G	G:174 A:0
EA2454	3890444	snp	G	A	A:190 G:0
EA2454	3890498	snp	C	T	T:178 C:0
EA2454	3890560	complex	TCT	CCC	CCC:192 TCT:0
EA2454	3890570	snp	A	C	C:213 A:0
EA2454	3890579	snp	G	T	T:212 G:0
EA2454	3890586	snp	T	C	C:233 T:0
EA2454	3890602	snp	T	C	C:240 T:0
EA2454	3890732	snp	T	C	C:222 T:0
EA2454	3890749	snp	A	C	C:227 A:0
EA2454	3890754	snp	C	G	G:220 C:0
EA2454	3890901	complex	GGAGCCA	AGAAACT	AGAAACT:84 GGAGCCA:0
EA2454	3890922	complex	TG	CT	CT:87 TG:0
EA2454	3890928	complex	AACAGCCC	TACAACCA	TACAACCA:87 AACAGCCC:0
EA2454	3890942	snp	A	G	G:86 A:0
EA2454	3890950	complex	GTCCA	ATCCC	ATCCC:80 GTCCA:0
EA2454	3890980	ins	C	CT	CT:52 C:2
EA2454	3890999	complex	AGG	GCC	GCC:23 AGG:0
EA2454	3891009	snp	C	G	G:23 C:0
EA2454	3891014	complex	AAA	TTC	TTC:22 AAA:0
EA2454	3891021	snp	G	C	C:23 G:0
EA2454	3891028	mnp	ACA	GAG	GAG:22 ACA:0
EA2454	3891062	mnp	TA	CG	CG:72 TA:0
EA2454	3891090	complex	TGTT	AGTC	AGTC:129 TGTT:0
EA2454	3891274	snp	G	T	T:204 G:0
EA2454	3891344	snp	T	C	C:173 T:0
EA2454	3891353	snp	C	T	T:184 C:0
EA2454	3891366	snp	A	G	G:194 A:0
EA2454	3891377	complex	CAC	TAT	TAT:169 CAC:0
EA2454	3891387	ins	G	GTA	GTA:180 G:0
EA2454	3891433	complex	AC	GT	GT:158 AC:0
EA2454	3891444	snp	A	G	G:146 A:0
EA2454	3891453	complex	ATAAAGA	CTGAAGG	CTGAAGG:101 ATAAAGA:0
EA2454	3891475	snp	T	C	C:126 T:0
EA2454	3891492	complex	TGTA	CGTAATGGCTCCCAGTT	CGTAATGGCTCCCAGTT:57 TGTA:0
EA2454	3891503	snp	T	G	G:57 T:0
EA2454	3891524	snp	A	G	G:54 A:0
EA2454	3891535	snp	C	T	T:49 C:0
EA2454	3891545	snp	C	T	T:25 C:0
EA2454	3893449	snp	T	C	C:91 T:0
EA2454	3894008	del	GA	G	G:81 GA:0
EA2454	3894436	complex	TA	CC	CC:25 TA:0
EA2454	3894443	snp	A	G	G:23 A:0
EA2454	3894452	snp	T	C	C:14 T:0
EA2454	3894927	snp	G	A	A:86 G:0
EA2454	3895094	snp	A	T	T:51 A:0
EA2454	3895125	snp	G	C	C:45 G:0
EA2454	3897276	snp	A	G	G:102 A:0
EA2454	3898242	snp	A	G	G:109 A:0
EA2454	3898302	snp	G	A	A:116 G:0
EA2454	3899159	snp	C	T	T:99 C:1
EA2454	3900076	snp	G	T	T:87 G:0
EA2454	3900532	snp	G	A	A:104 G:0
EA2454	3900788	snp	T	C	C:105 T:0
EA2454	3901046	snp	T	G	G:91 T:0
EA2454	3901448	snp	G	A	A:108 G:0
EA2454	3901468	snp	A	G	G:109 A:0
EA2454	3901670	snp	A	C	C:112 A:0
EA2454	3902889	snp	G	C	C:105 G:0
EA2454	3903505	snp	G	A	A:115 G:0
EA2454	3904266	snp	T	C	C:125 T:0
EA2454	3904888	snp	C	T	T:107 C:0
EA2454	3904915	snp	A	T	T:107 A:0
EA2454	3905020	snp	A	C	C:94 A:0
EA2454	3905071	snp	C	T	T:109 C:0
EA2454	3905167	snp	C	A	A:81 C:2
EA2454	3905252	snp	G	A	A:97 G:0
EA2454	3906148	del	CTCCTTTGTA	C	C:93 CTCCTTTGTA:1
EA2454	3906820	snp	G	A	A:108 G:0
EA2454	3906853	snp	G	A	A:108 G:0
EA2454	3906884	complex	TACACATCAG	ATACACATCAA	ATACACATCAA:80 TACACATCAG:0
EA2454	3906959	snp	G	A	A:91 G:0
EA2454	3907031	del	CT	C	C:39 CT:0
EA2454	3908657	complex	TAAGG	CAAGT	CAAGT:112 TAAGG:0
EA2454	3908840	snp	C	A	A:115 C:0
EA2454	3909285	snp	G	A	A:139 G:0
EA2454	3909320	snp	T	C	C:122 T:0
EA2454	3909916	snp	T	G	G:110 T:0
EA2454	3910184	snp	C	T	T:90 C:0
EA2454	3912716	snp	G	A	A:115 G:0
EA2454	3914479	snp	T	C	C:103 T:1
EA2454	3914657	snp	A	G	G:82 A:0
EA2454	3914694	snp	G	T	T:120 G:0
EA2454	3915502	complex	TTTG	CTTA	CTTA:93 TTTG:0
EA2454	3916927	snp	A	C	C:101 A:0
EA2454	3918637	ins	T	TG	TG:101 T:0
EA2454	3918830	snp	A	G	G:103 A:0
EA2454	3918863	snp	C	T	T:89 C:0
EA2454	3919379	snp	C	T	T:62 C:0
EA2454	3919412	snp	C	T	T:74 C:0
EA2454	3919614	snp	A	C	C:123 A:0
EA2454	3919962	snp	A	G	G:100 A:0
EA2454	3920864	snp	A	G	G:89 A:0
EA2454	3920963	snp	C	T	T:114 C:0
EA2454	3922597	snp	G	T	T:111 G:0
EA2454	3923073	snp	C	A	A:76 C:0
EA2454	3923719	snp	G	A	A:74 G:0
EA2454	3924830	snp	G	A	A:108 G:0
EA2454	3925423	del	TC	T	T:85 TC:1
EA2454	3925471	snp	A	G	G:105 A:2
EA2454	3925516	snp	C	T	T:110 C:0
EA2454	3925556	snp	T	C	C:102 T:0
EA2454	3926469	snp	C	A	A:103 C:0
EA2454	3927800	snp	G	A	A:130 G:1
EA2454	3927872	snp	A	G	G:115 A:1
EA2454	3928725	snp	G	A	A:96 G:0
EA2454	3928796	snp	A	T	T:119 A:0
EA2454	3929569	snp	T	A	A:107 T:0
EA2454	3929824	snp	G	T	T:107 G:0
EA2454	3930273	snp	A	G	G:129 A:0
EA2454	3930584	snp	T	C	C:107 T:0
EA2454	3931130	snp	T	C	C:106 T:0
EA2454	3932233	snp	G	A	A:93 G:0
EA2454	3935425	snp	G	A	A:107 G:0
EA2454	3935774	snp	A	G	G:115 A:0
EA2454	3937328	snp	G	A	A:104 G:0
EA2454	3937931	snp	A	T	T:99 A:0
EA2454	3938055	snp	T	C	C:104 T:0
EA2454	3939722	snp	A	C	C:84 A:1
EA2454	3944749	snp	A	C	C:79 A:0
EA2454	3956459	del	GC	G	G:67 GC:0
EA2454	3962501	snp	G	A	A:97 G:0
EA2454	3985793	snp	T	A	A:109 T:0
EA2454	3997451	snp	G	A	A:101 G:0
EA2454	4004474	snp	A	G	G:112 A:0
EA2454	4004676	snp	C	T	T:114 C:0
EA2454	4004935	snp	G	A	A:117 G:0
EA2454	4008915	snp	G	A	A:99 G:0
EA2454	4011845	snp	A	G	G:92 A:0
EA2454	4014768	snp	T	C	C:126 T:0
EA2454	4016930	snp	T	A	A:98 T:0
EA2454	4021182	snp	C	T	T:101 C:0
EA2454	4022634	snp	A	G	G:83 A:0
EA2454	4023082	snp	C	T	T:95 C:0
EA2454	4026172	snp	T	G	G:108 T:0
EA2454	4030733	snp	A	G	G:106 A:0
EA2454	4030798	snp	G	T	T:103 G:0
EA2454	4035304	snp	C	T	T:86 C:0
EA2454	4036181	snp	A	G	G:102 A:0
EA2454	4036304	snp	T	C	C:84 T:0
EA2454	4041761	snp	T	C	C:115 T:0
EA2454	4046742	snp	G	A	A:117 G:0
EA2454	4051339	snp	C	A	A:108 C:0
EA2454	4058462	snp	T	G	G:91 T:0
EA2454	4062557	snp	A	C	C:96 A:0
EA2454	4071332	snp	A	G	G:107 A:0
EA2454	4098708	snp	T	C	C:38 T:0
EA2454	4098756	snp	A	G	G:115 A:0
EA2454	4098787	snp	A	G	G:162 A:1
EA2454	4098812	complex	CTC	AATT	AATT:139 CTC:0
EA2454	4098849	ins	G	GT	GT:137 G:0
EA2454	4098875	snp	C	T	T:129 C:0
EA2454	4098932	snp	G	A	A:34 G:0
EA2454	4114751	complex	TT	CC	CC:13 TT:0
EA2454	4114842	snp	G	A	A:65 G:0
EA2454	4114856	snp	T	C	C:66 T:0
EA2454	4114915	snp	C	A	A:12 C:0
EA2454	4120562	snp	C	T	T:114 C:0
EA2454	4141091	snp	A	G	G:104 A:0
EA2454	4149346	snp	G	A	A:106 G:0
EA2454	4151201	snp	A	G	G:108 A:1
EA2454	4159942	snp	T	G	G:102 T:0
EA2454	4165788	snp	C	A	A:111 C:0
EA2454	4167220	snp	G	T	T:98 G:3
EA2454	4175937	snp	G	A	A:84 G:0
EA2454	4176057	snp	C	T	T:93 C:1
EA2454	4200656	snp	A	G	G:104 A:0
EA2454	4201309	snp	C	T	T:125 C:0
EA2454	4201996	snp	A	G	G:91 A:0
EA2454	4207947	snp	T	G	G:87 T:0
EA2454	4208099	snp	C	T	T:112 C:0
EA2454	4208280	snp	G	T	T:113 G:0
EA2454	4210117	del	CAGCTCACCA	C	C:70 CAGCTCACCA:0
EA2454	4212664	snp	T	A	A:98 T:0
EA2454	4213426	del	GA	G	G:81 GA:0
EA2454	4214026	snp	C	T	T:111 C:0
EA2454	4215133	snp	C	T	T:105 C:0
EA2454	4216725	del	CTTTT	C	C:80 CTTTT:0
EA2454	4227994	snp	G	T	T:114 G:0
EA2454	4231555	snp	C	T	T:88 C:1
EA2454	4231669	snp	C	T	T:104 C:0
EA2454	4234319	snp	A	G	G:108 A:0
EA2454	4235320	snp	A	G	G:84 A:0
EA2454	4236400	snp	C	T	T:117 C:0
EA2454	4240327	snp	G	A	A:126 G:0
EA2454	4246114	snp	C	A	A:116 C:1
EA2454	4247151	del	GGCTGCCGGACTCATTCGCAGTGGACAAATTTT	G	G:24 GGCTGCCGGACTCATTCGCAGTGGACAAATTTT:0
[truncated: 1,694 more rows]
