# Supplementary material for: Escherichia coli ST302: Genomic Analysis of Virulence Potential and Antimicrobial Resistance Mediated by Mobile Genetic Elements
Source: Front Microbiol. 2020 Jan 21;10:3098. doi: 10.3389/fmicb.2019.03098 (PMC6985150; doi:10.3389/fmicb.2019.03098)
Supplement: DATA S2 — ST302 SNP analysis. [file Data_Sheet_2.ZIP › SNP_Analysis/ST302_SNP/SNP_analysis/snippyout/ST302/CA0191-ND-ST302.out/snps.gff]

##gff-version 3
EA2454	snippy:4.3.6	variation	977	977	.	.	0	note=snp T=>C C:85 T:0
EA2454	snippy:4.3.6	variation	10877	10877	.	.	0	note=snp T=>G G:118 T:0
EA2454	snippy:4.3.6	variation	11382	11382	.	.	0	note=snp A=>G G:97 A:0
EA2454	snippy:4.3.6	variation	11847	11847	.	.	0	note=snp G=>A A:69 G:0
EA2454	snippy:4.3.6	variation	25719	25719	.	.	0	note=snp T=>C C:88 T:0
EA2454	snippy:4.3.6	variation	34494	34494	.	.	0	note=snp T=>C C:101 T:0
EA2454	snippy:4.3.6	variation	36375	36375	.	.	0	note=snp C=>A A:120 C:0
EA2454	snippy:4.3.6	variation	37987	37987	.	.	0	note=snp T=>C C:108 T:0
EA2454	snippy:4.3.6	variation	39850	39850	.	.	0	note=snp A=>C C:102 A:0
EA2454	snippy:4.3.6	variation	52423	52423	.	.	0	note=snp A=>C C:88 A:0
EA2454	snippy:4.3.6	variation	56257	56257	.	.	0	note=snp C=>T T:127 C:0
EA2454	snippy:4.3.6	variation	56628	56628	.	.	0	note=snp A=>C C:123 A:0
EA2454	snippy:4.3.6	variation	58152	58152	.	.	0	note=snp T=>C C:104 T:0
EA2454	snippy:4.3.6	variation	60871	60871	.	.	0	note=snp C=>T T:105 C:0
EA2454	snippy:4.3.6	variation	64676	64676	.	.	0	note=snp G=>A A:115 G:0
EA2454	snippy:4.3.6	variation	67315	67315	.	.	0	note=snp A=>C C:98 A:0
EA2454	snippy:4.3.6	variation	69595	69595	.	.	0	note=snp A=>G G:85 A:0
EA2454	snippy:4.3.6	variation	74952	74952	.	.	0	note=snp G=>T T:111 G:0
EA2454	snippy:4.3.6	variation	77443	77443	.	.	0	note=snp C=>T T:114 C:1
EA2454	snippy:4.3.6	variation	78031	78031	.	.	0	note=snp C=>A A:89 C:0
EA2454	snippy:4.3.6	variation	78608	78608	.	.	0	note=snp G=>A A:143 G:1
EA2454	snippy:4.3.6	variation	84163	84163	.	.	0	note=snp T=>A A:99 T:0
EA2454	snippy:4.3.6	variation	84557	84557	.	.	0	note=snp T=>G G:103 T:0
EA2454	snippy:4.3.6	variation	88223	88223	.	.	0	note=del TTCAATA=>T T:43 TTCAATA:0
EA2454	snippy:4.3.6	variation	88729	88729	.	.	0	note=snp A=>T T:94 A:0
EA2454	snippy:4.3.6	variation	94795	94795	.	.	0	note=snp G=>A A:116 G:1
EA2454	snippy:4.3.6	variation	94824	94824	.	.	0	note=ins T=>TA TA:100 T:1
EA2454	snippy:4.3.6	variation	95737	95737	.	.	0	note=del CT=>C C:34 CT:1
EA2454	snippy:4.3.6	variation	99010	99010	.	.	0	note=snp C=>T T:99 C:0
EA2454	snippy:4.3.6	variation	100572	100572	.	.	0	note=snp C=>G G:120 C:0
EA2454	snippy:4.3.6	variation	107466	107466	.	.	0	note=snp C=>T T:57 C:0
EA2454	snippy:4.3.6	variation	111773	111773	.	.	0	note=snp C=>G G:96 C:0
EA2454	snippy:4.3.6	variation	124825	124825	.	.	0	note=snp G=>A A:112 G:0
EA2454	snippy:4.3.6	variation	124865	124865	.	.	0	note=snp T=>C C:126 T:0
EA2454	snippy:4.3.6	variation	126514	126514	.	.	0	note=snp G=>A A:107 G:0
EA2454	snippy:4.3.6	variation	131613	131613	.	.	0	note=snp A=>G G:121 A:0
EA2454	snippy:4.3.6	variation	140951	140951	.	.	0	note=snp T=>G G:97 T:0
EA2454	snippy:4.3.6	variation	145887	145887	.	.	0	note=snp C=>T T:92 C:0
EA2454	snippy:4.3.6	variation	146087	146087	.	.	0	note=snp A=>C C:105 A:0
EA2454	snippy:4.3.6	variation	158053	158053	.	.	0	note=snp G=>A A:77 G:0
EA2454	snippy:4.3.6	variation	158449	158449	.	.	0	note=snp C=>T T:105 C:0
EA2454	snippy:4.3.6	variation	162974	162974	.	.	0	note=snp G=>T T:98 G:0
EA2454	snippy:4.3.6	variation	163970	163970	.	.	0	note=del AT=>A A:71 AT:0
EA2454	snippy:4.3.6	variation	164371	164371	.	.	0	note=snp T=>A A:106 T:0
EA2454	snippy:4.3.6	variation	169390	169390	.	.	0	note=snp C=>T T:94 C:0
EA2454	snippy:4.3.6	variation	174420	174420	.	.	0	note=snp A=>G G:99 A:0
EA2454	snippy:4.3.6	variation	178258	178258	.	.	0	note=snp C=>T T:123 C:0
EA2454	snippy:4.3.6	variation	181904	181904	.	.	0	note=snp G=>A A:84 G:0
EA2454	snippy:4.3.6	variation	186550	186550	.	.	0	note=snp T=>C C:98 T:0
EA2454	snippy:4.3.6	variation	187820	187820	.	.	0	note=snp C=>T T:86 C:1
EA2454	snippy:4.3.6	variation	190313	190313	.	.	0	note=snp T=>C C:115 T:0
EA2454	snippy:4.3.6	variation	193500	193500	.	.	0	note=snp A=>G G:111 A:1
EA2454	snippy:4.3.6	variation	220577	220577	.	.	0	note=snp G=>A A:87 G:0
EA2454	snippy:4.3.6	variation	223134	223134	.	.	0	note=snp A=>G G:108 A:0
EA2454	snippy:4.3.6	variation	227792	227792	.	.	0	note=snp C=>T T:102 C:0
EA2454	snippy:4.3.6	variation	239221	239221	.	.	0	note=snp A=>G G:102 A:0
EA2454	snippy:4.3.6	variation	245301	245301	.	.	0	note=snp C=>T T:83 C:0
EA2454	snippy:4.3.6	variation	246188	246188	.	.	0	note=snp A=>G G:74 A:0
EA2454	snippy:4.3.6	variation	261901	261901	.	.	0	note=snp A=>C C:95 A:0
EA2454	snippy:4.3.6	variation	266355	266355	.	.	0	note=snp G=>T T:118 G:1
EA2454	snippy:4.3.6	variation	277907	277907	.	.	0	note=snp G=>T T:95 G:0
EA2454	snippy:4.3.6	variation	285627	285627	.	.	0	note=ins A=>AT AT:89 A:2
EA2454	snippy:4.3.6	variation	290212	290212	.	.	0	note=snp G=>T T:102 G:3
EA2454	snippy:4.3.6	variation	298286	298286	.	.	0	note=snp T=>C C:60 T:0
EA2454	snippy:4.3.6	variation	300876	300876	.	.	0	note=snp T=>G G:99 T:0
EA2454	snippy:4.3.6	variation	304693	304693	.	.	0	note=del AT=>A A:20 AT:0
EA2454	snippy:4.3.6	variation	306354	306354	.	.	0	note=snp G=>A A:103 G:0
EA2454	snippy:4.3.6	variation	307802	307802	.	.	0	note=snp C=>T T:137 C:1
EA2454	snippy:4.3.6	variation	313034	313034	.	.	0	note=snp A=>G G:115 A:0
EA2454	snippy:4.3.6	variation	316012	316012	.	.	0	note=snp C=>T T:78 C:1
EA2454	snippy:4.3.6	variation	317106	317106	.	.	0	note=snp T=>C C:103 T:0
EA2454	snippy:4.3.6	variation	318467	318467	.	.	0	note=snp T=>C C:106 T:0
EA2454	snippy:4.3.6	variation	325533	325533	.	.	0	note=snp G=>A A:96 G:0
EA2454	snippy:4.3.6	variation	334084	334084	.	.	0	note=snp G=>A A:108 G:1
EA2454	snippy:4.3.6	variation	337102	337102	.	.	0	note=snp G=>A A:118 G:1
EA2454	snippy:4.3.6	variation	343126	343126	.	.	0	note=snp C=>A A:119 C:0
EA2454	snippy:4.3.6	variation	350969	350969	.	.	0	note=snp A=>G G:122 A:0
EA2454	snippy:4.3.6	variation	356278	356278	.	.	0	note=snp C=>T T:116 C:0
EA2454	snippy:4.3.6	variation	359276	359276	.	.	0	note=snp G=>A A:105 G:0
EA2454	snippy:4.3.6	variation	359374	359374	.	.	0	note=snp C=>T T:102 C:0
EA2454	snippy:4.3.6	variation	359829	359829	.	.	0	note=snp C=>A A:98 C:1
EA2454	snippy:4.3.6	variation	369746	369746	.	.	0	note=snp C=>T T:109 C:0
EA2454	snippy:4.3.6	variation	371150	371150	.	.	0	note=snp T=>C C:115 T:0
EA2454	snippy:4.3.6	variation	376903	376903	.	.	0	note=snp G=>A A:102 G:0
EA2454	snippy:4.3.6	variation	386406	386406	.	.	0	note=snp C=>A A:93 C:0
EA2454	snippy:4.3.6	variation	388918	388918	.	.	0	note=snp T=>G G:107 T:1
EA2454	snippy:4.3.6	variation	393575	393575	.	.	0	note=snp A=>G G:99 A:0
EA2454	snippy:4.3.6	variation	393743	393743	.	.	0	note=snp A=>G G:100 A:0
EA2454	snippy:4.3.6	variation	397444	397444	.	.	0	note=snp C=>G G:111 C:0
EA2454	snippy:4.3.6	variation	407113	407113	.	.	0	note=snp A=>G G:100 A:0
EA2454	snippy:4.3.6	variation	407887	407887	.	.	0	note=snp C=>G G:100 C:0
EA2454	snippy:4.3.6	variation	418125	418125	.	.	0	note=snp G=>A A:117 G:1
EA2454	snippy:4.3.6	variation	437474	437474	.	.	0	note=snp A=>G G:94 A:0
EA2454	snippy:4.3.6	variation	440837	440837	.	.	0	note=snp C=>A A:101 C:0
EA2454	snippy:4.3.6	variation	443213	443213	.	.	0	note=complex ACT=>GC GC:40 ACT:0
EA2454	snippy:4.3.6	variation	445363	445363	.	.	0	note=snp C=>A A:116 C:1
EA2454	snippy:4.3.6	variation	447459	447459	.	.	0	note=snp A=>G G:95 A:0
EA2454	snippy:4.3.6	variation	448711	448711	.	.	0	note=snp A=>G G:83 A:0
EA2454	snippy:4.3.6	variation	454771	454771	.	.	0	note=snp C=>T T:100 C:0
EA2454	snippy:4.3.6	variation	454890	454890	.	.	0	note=snp C=>T T:85 C:0
EA2454	snippy:4.3.6	variation	457082	457082	.	.	0	note=snp C=>T T:103 C:0
EA2454	snippy:4.3.6	variation	465826	465826	.	.	0	note=snp A=>T T:113 A:0
EA2454	snippy:4.3.6	variation	470437	470437	.	.	0	note=snp C=>T T:106 C:0
EA2454	snippy:4.3.6	variation	472911	472911	.	.	0	note=snp T=>C C:105 T:0
EA2454	snippy:4.3.6	variation	476124	476124	.	.	0	note=snp C=>T T:113 C:0
EA2454	snippy:4.3.6	variation	478727	478727	.	.	0	note=snp C=>A A:101 C:0
EA2454	snippy:4.3.6	variation	483805	483805	.	.	0	note=snp G=>A A:103 G:0
EA2454	snippy:4.3.6	variation	485246	485246	.	.	0	note=snp C=>T T:125 C:1
EA2454	snippy:4.3.6	variation	485779	485779	.	.	0	note=snp C=>G G:106 C:0
EA2454	snippy:4.3.6	variation	488244	488244	.	.	0	note=snp G=>A A:108 G:0
EA2454	snippy:4.3.6	variation	489901	489901	.	.	0	note=snp G=>T T:99 G:2
EA2454	snippy:4.3.6	variation	497460	497460	.	.	0	note=snp T=>G G:92 T:0
EA2454	snippy:4.3.6	variation	506278	506278	.	.	0	note=del ATAAAT=>A A:46 ATAAAT:0
EA2454	snippy:4.3.6	variation	506352	506352	.	.	0	note=snp T=>G G:77 T:0
EA2454	snippy:4.3.6	variation	507555	507555	.	.	0	note=snp G=>A A:103 G:1
EA2454	snippy:4.3.6	variation	510992	510992	.	.	0	note=snp C=>T T:114 C:0
EA2454	snippy:4.3.6	variation	519195	519195	.	.	0	note=snp G=>A A:119 G:0
EA2454	snippy:4.3.6	variation	519811	519811	.	.	0	note=snp A=>C C:106 A:0
EA2454	snippy:4.3.6	variation	527024	527024	.	.	0	note=snp T=>C C:111 T:0
EA2454	snippy:4.3.6	variation	528123	528123	.	.	0	note=snp A=>T T:100 A:0
EA2454	snippy:4.3.6	variation	531907	531907	.	.	0	note=snp T=>C C:91 T:0
EA2454	snippy:4.3.6	variation	534151	534151	.	.	0	note=snp A=>G G:110 A:0
EA2454	snippy:4.3.6	variation	537287	537287	.	.	0	note=snp G=>C C:128 G:0
EA2454	snippy:4.3.6	variation	539426	539426	.	.	0	note=snp T=>C C:110 T:0
EA2454	snippy:4.3.6	variation	546428	546428	.	.	0	note=snp A=>C C:102 A:0
EA2454	snippy:4.3.6	variation	550000	550000	.	.	0	note=snp G=>A A:96 G:1
EA2454	snippy:4.3.6	variation	556318	556318	.	.	0	note=snp G=>A A:97 G:0
EA2454	snippy:4.3.6	variation	559017	559017	.	.	0	note=snp A=>G G:90 A:0
EA2454	snippy:4.3.6	variation	561226	561226	.	.	0	note=snp G=>A A:46 G:0
EA2454	snippy:4.3.6	variation	561259	561259	.	.	0	note=snp C=>A A:12 C:0
EA2454	snippy:4.3.6	variation	562933	562933	.	.	0	note=snp T=>C C:121 T:0
EA2454	snippy:4.3.6	variation	569363	569363	.	.	0	note=ins T=>TCC TCC:41 T:0
EA2454	snippy:4.3.6	variation	580598	580598	.	.	0	note=ins T=>TA TA:95 T:0
EA2454	snippy:4.3.6	variation	588217	588217	.	.	0	note=snp T=>G G:109 T:0
EA2454	snippy:4.3.6	variation	590181	590181	.	.	0	note=ins T=>TA TA:79 T:1
EA2454	snippy:4.3.6	variation	595652	595652	.	.	0	note=snp A=>G G:92 A:2
EA2454	snippy:4.3.6	variation	597386	597386	.	.	0	note=snp A=>G G:118 A:0
EA2454	snippy:4.3.6	variation	606088	606088	.	.	0	note=ins G=>GA GA:94 G:1
EA2454	snippy:4.3.6	variation	611222	611222	.	.	0	note=del TGCATA=>T T:80 TGCATA:0
EA2454	snippy:4.3.6	variation	611872	611872	.	.	0	note=snp A=>G G:104 A:0
EA2454	snippy:4.3.6	variation	612726	612726	.	.	0	note=snp A=>G G:124 A:0
EA2454	snippy:4.3.6	variation	613906	613906	.	.	0	note=snp C=>A A:94 C:0
EA2454	snippy:4.3.6	variation	615269	615269	.	.	0	note=snp C=>T T:104 C:0
EA2454	snippy:4.3.6	variation	626310	626310	.	.	0	note=snp G=>A A:104 G:0
EA2454	snippy:4.3.6	variation	632908	632908	.	.	0	note=snp C=>T T:87 C:0
EA2454	snippy:4.3.6	variation	642337	642337	.	.	0	note=snp A=>G G:107 A:0
EA2454	snippy:4.3.6	variation	658975	658975	.	.	0	note=snp A=>G G:104 A:0
EA2454	snippy:4.3.6	variation	669330	669330	.	.	0	note=snp A=>G G:110 A:0
EA2454	snippy:4.3.6	variation	670594	670594	.	.	0	note=snp C=>A A:119 C:1
EA2454	snippy:4.3.6	variation	677980	677980	.	.	0	note=snp G=>A A:89 G:0
EA2454	snippy:4.3.6	variation	683177	683177	.	.	0	note=snp T=>G G:106 T:0
EA2454	snippy:4.3.6	variation	686003	686003	.	.	0	note=snp A=>G G:112 A:0
EA2454	snippy:4.3.6	variation	686104	686104	.	.	0	note=snp G=>C C:108 G:0
EA2454	snippy:4.3.6	variation	686327	686327	.	.	0	note=ins C=>CCTGGGAACGCTGGGAACG CCTGGGAACGCTGGGAACG:24 C:0
EA2454	snippy:4.3.6	variation	687410	687410	.	.	0	note=snp A=>G G:80 A:0
EA2454	snippy:4.3.6	variation	688399	688399	.	.	0	note=snp C=>T T:99 C:0
EA2454	snippy:4.3.6	variation	688812	688812	.	.	0	note=snp A=>G G:104 A:0
EA2454	snippy:4.3.6	variation	690408	690408	.	.	0	note=snp A=>G G:104 A:0
EA2454	snippy:4.3.6	variation	690611	690611	.	.	0	note=snp T=>C C:100 T:1
EA2454	snippy:4.3.6	variation	705263	705263	.	.	0	note=snp C=>A A:130 C:1
EA2454	snippy:4.3.6	variation	709632	709632	.	.	0	note=snp T=>C C:97 T:0
EA2454	snippy:4.3.6	variation	710977	710977	.	.	0	note=snp A=>G G:126 A:0
EA2454	snippy:4.3.6	variation	713766	713766	.	.	0	note=snp C=>T T:104 C:2
EA2454	snippy:4.3.6	variation	715370	715370	.	.	0	note=snp C=>T T:103 C:0
EA2454	snippy:4.3.6	variation	718995	718995	.	.	0	note=ins T=>TTAGTC TTAGTC:77 T:6
EA2454	snippy:4.3.6	variation	719734	719734	.	.	0	note=snp C=>T T:103 C:0
EA2454	snippy:4.3.6	variation	731219	731219	.	.	0	note=snp T=>G G:108 T:0
EA2454	snippy:4.3.6	variation	731329	731329	.	.	0	note=snp G=>A A:108 G:0
EA2454	snippy:4.3.6	variation	743375	743375	.	.	0	note=snp T=>A A:105 T:0
EA2454	snippy:4.3.6	variation	751046	751046	.	.	0	note=snp G=>A A:115 G:0
EA2454	snippy:4.3.6	variation	751386	751386	.	.	0	note=snp G=>A A:105 G:1
EA2454	snippy:4.3.6	variation	755366	755366	.	.	0	note=snp A=>G G:109 A:0
EA2454	snippy:4.3.6	variation	756040	756040	.	.	0	note=snp T=>G G:103 T:0
EA2454	snippy:4.3.6	variation	758394	758394	.	.	0	note=snp C=>T T:118 C:0
EA2454	snippy:4.3.6	variation	759638	759638	.	.	0	note=del TG=>T T:76 TG:0
EA2454	snippy:4.3.6	variation	765032	765032	.	.	0	note=snp T=>C C:112 T:0
EA2454	snippy:4.3.6	variation	769424	769424	.	.	0	note=snp G=>A A:67 G:0
EA2454	snippy:4.3.6	variation	773288	773288	.	.	0	note=snp G=>T T:101 G:1
EA2454	snippy:4.3.6	variation	774531	774531	.	.	0	note=snp A=>C C:119 A:1
EA2454	snippy:4.3.6	variation	775463	775463	.	.	0	note=snp C=>T T:122 C:0
EA2454	snippy:4.3.6	variation	779769	779769	.	.	0	note=del TA=>T T:52 TA:0
EA2454	snippy:4.3.6	variation	785375	785375	.	.	0	note=snp T=>C C:89 T:1
EA2454	snippy:4.3.6	variation	788461	788461	.	.	0	note=snp G=>T T:94 G:0
EA2454	snippy:4.3.6	variation	789146	789146	.	.	0	note=snp C=>T T:100 C:0
EA2454	snippy:4.3.6	variation	789417	789417	.	.	0	note=snp A=>C C:99 A:1
EA2454	snippy:4.3.6	variation	796935	796935	.	.	0	note=snp C=>G G:97 C:0
EA2454	snippy:4.3.6	variation	802567	802567	.	.	0	note=snp G=>A A:83 G:0
EA2454	snippy:4.3.6	variation	805481	805481	.	.	0	note=snp A=>G G:117 A:0
EA2454	snippy:4.3.6	variation	808146	808146	.	.	0	note=snp G=>A A:110 G:1
EA2454	snippy:4.3.6	variation	815252	815252	.	.	0	note=snp C=>T T:115 C:0
EA2454	snippy:4.3.6	variation	815610	815610	.	.	0	note=snp T=>A A:108 T:0
EA2454	snippy:4.3.6	variation	817027	817027	.	.	0	note=ins C=>CA CA:73 C:1
EA2454	snippy:4.3.6	variation	817985	817985	.	.	0	note=snp T=>G G:96 T:0
EA2454	snippy:4.3.6	variation	818649	818649	.	.	0	note=snp A=>C C:89 A:0
EA2454	snippy:4.3.6	variation	822614	822614	.	.	0	note=snp C=>T T:91 C:0
EA2454	snippy:4.3.6	variation	828744	828744	.	.	0	note=snp A=>G G:103 A:0
EA2454	snippy:4.3.6	variation	828805	828805	.	.	0	note=ins A=>AT AT:86 A:0
EA2454	snippy:4.3.6	variation	831520	831520	.	.	0	note=snp G=>T T:100 G:0
EA2454	snippy:4.3.6	variation	832258	832258	.	.	0	note=del CG=>C C:84 CG:0
EA2454	snippy:4.3.6	variation	835799	835799	.	.	0	note=snp C=>T T:90 C:0
EA2454	snippy:4.3.6	variation	839497	839497	.	.	0	note=snp T=>A A:83 T:0
EA2454	snippy:4.3.6	variation	841024	841024	.	.	0	note=snp G=>A A:102 G:0
EA2454	snippy:4.3.6	variation	848779	848779	.	.	0	note=snp G=>T T:86 G:0
EA2454	snippy:4.3.6	variation	850726	850726	.	.	0	note=complex TGT=>CAG CAG:79 TGT:0
EA2454	snippy:4.3.6	variation	851976	851976	.	.	0	note=snp T=>A A:114 T:0
EA2454	snippy:4.3.6	variation	852695	852695	.	.	0	note=snp A=>G G:92 A:0
EA2454	snippy:4.3.6	variation	859445	859445	.	.	0	note=snp A=>T T:113 A:0
EA2454	snippy:4.3.6	variation	860226	860226	.	.	0	note=snp C=>A A:93 C:0
EA2454	snippy:4.3.6	variation	861738	861738	.	.	0	note=snp C=>T T:84 C:0
EA2454	snippy:4.3.6	variation	862033	862033	.	.	0	note=snp G=>A A:101 G:0
EA2454	snippy:4.3.6	variation	876176	876176	.	.	0	note=snp G=>A A:74 G:0
EA2454	snippy:4.3.6	variation	877031	877031	.	.	0	note=snp G=>A A:102 G:0
EA2454	snippy:4.3.6	variation	879699	879699	.	.	0	note=snp G=>A A:79 G:0
EA2454	snippy:4.3.6	variation	881396	881396	.	.	0	note=snp A=>G G:112 A:0
EA2454	snippy:4.3.6	variation	894538	894538	.	.	0	note=snp C=>T T:109 C:0
EA2454	snippy:4.3.6	variation	897780	897780	.	.	0	note=snp C=>A A:99 C:0
EA2454	snippy:4.3.6	variation	904220	904220	.	.	0	note=snp T=>C C:81 T:0
EA2454	snippy:4.3.6	variation	904482	904482	.	.	0	note=snp A=>G G:90 A:0
EA2454	snippy:4.3.6	variation	904788	904788	.	.	0	note=snp C=>T T:94 C:0
EA2454	snippy:4.3.6	variation	907528	907528	.	.	0	note=snp G=>T T:90 G:0
EA2454	snippy:4.3.6	variation	910148	910148	.	.	0	note=snp T=>C C:117 T:0
EA2454	snippy:4.3.6	variation	923353	923353	.	.	0	note=snp G=>A A:128 G:0
EA2454	snippy:4.3.6	variation	923875	923875	.	.	0	note=snp T=>A A:105 T:0
EA2454	snippy:4.3.6	variation	924579	924579	.	.	0	note=snp T=>C C:108 T:0
EA2454	snippy:4.3.6	variation	930102	930102	.	.	0	note=snp A=>G G:96 A:0
EA2454	snippy:4.3.6	variation	934663	934663	.	.	0	note=snp G=>A A:101 G:0
EA2454	snippy:4.3.6	variation	936615	936615	.	.	0	note=snp C=>A A:98 C:0
EA2454	snippy:4.3.6	variation	938004	938004	.	.	0	note=snp C=>T T:112 C:1
EA2454	snippy:4.3.6	variation	938615	938615	.	.	0	note=snp G=>A A:93 G:0
EA2454	snippy:4.3.6	variation	940518	940518	.	.	0	note=snp G=>A A:116 G:0
EA2454	snippy:4.3.6	variation	945162	945162	.	.	0	note=snp A=>G G:109 A:1
EA2454	snippy:4.3.6	variation	946875	946875	.	.	0	note=snp T=>C C:93 T:0
EA2454	snippy:4.3.6	variation	948397	948397	.	.	0	note=del TTTTAGCTCACCTGCA=>T T:50 TTTTAGCTCACCTGCA:0
EA2454	snippy:4.3.6	variation	949610	949610	.	.	0	note=snp C=>A A:18 C:0
EA2454	snippy:4.3.6	variation	949618	949618	.	.	0	note=snp C=>T T:20 C:0
EA2454	snippy:4.3.6	variation	949633	949633	.	.	0	note=del TCGCAATTGTTTC=>T T:23 TCGCAATTGTTTC:0
EA2454	snippy:4.3.6	variation	951474	951474	.	.	0	note=snp A=>C C:17 A:0
EA2454	snippy:4.3.6	variation	951627	951627	.	.	0	note=snp C=>T T:10 C:0
EA2454	snippy:4.3.6	variation	951639	951639	.	.	0	note=snp A=>T T:15 A:0
EA2454	snippy:4.3.6	variation	951648	951648	.	.	0	note=snp G=>A A:15 G:0
EA2454	snippy:4.3.6	variation	951662	951662	.	.	0	note=mnp GA=>TG TG:15 GA:0
EA2454	snippy:4.3.6	variation	952341	952341	.	.	0	note=snp T=>G G:110 T:0
EA2454	snippy:4.3.6	variation	953284	953284	.	.	0	note=snp T=>A A:50 T:0
EA2454	snippy:4.3.6	variation	953324	953324	.	.	0	note=snp G=>A A:83 G:0
EA2454	snippy:4.3.6	variation	953435	953435	.	.	0	note=snp G=>A A:19 G:0
EA2454	snippy:4.3.6	variation	953462	953462	.	.	0	note=complex CCAG=>ACAA ACAA:22 CCAG:0
EA2454	snippy:4.3.6	variation	953500	953500	.	.	0	note=snp A=>G G:56 A:0
EA2454	snippy:4.3.6	variation	953509	953509	.	.	0	note=complex AGAGG=>GAGGC GAGGC:53 AGAGG:0
EA2454	snippy:4.3.6	variation	953576	953576	.	.	0	note=snp T=>C C:13 T:0
EA2454	snippy:4.3.6	variation	953593	953593	.	.	0	note=ins T=>TC TC:10 T:0
EA2454	snippy:4.3.6	variation	953802	953802	.	.	0	note=snp A=>T T:18 A:0
EA2454	snippy:4.3.6	variation	964566	964566	.	.	0	note=snp C=>A A:14 C:0
EA2454	snippy:4.3.6	variation	964577	964577	.	.	0	note=snp A=>G G:88 A:0
EA2454	snippy:4.3.6	variation	964586	964586	.	.	0	note=snp A=>G G:116 A:0
EA2454	snippy:4.3.6	variation	964604	964604	.	.	0	note=snp T=>G G:188 T:1
EA2454	snippy:4.3.6	variation	964625	964625	.	.	0	note=complex TCCT=>CCCA CCCA:278 TCCT:0
EA2454	snippy:4.3.6	variation	964667	964667	.	.	0	note=complex AAACA=>CAACG CAACG:253 AAACA:0
EA2454	snippy:4.3.6	variation	964703	964703	.	.	0	note=complex TG=>CA CA:97 TG:0
EA2454	snippy:4.3.6	variation	964710	964710	.	.	0	note=snp T=>C C:90 T:0
EA2454	snippy:4.3.6	variation	976647	976647	.	.	0	note=snp T=>C C:50 T:0
EA2454	snippy:4.3.6	variation	976652	976652	.	.	0	note=snp A=>G G:51 A:0
EA2454	snippy:4.3.6	variation	976692	976692	.	.	0	note=snp G=>A A:51 G:0
EA2454	snippy:4.3.6	variation	976704	976704	.	.	0	note=complex AACA=>TACT TACT:50 AACA:0
EA2454	snippy:4.3.6	variation	976731	976731	.	.	0	note=snp A=>G G:11 A:0
EA2454	snippy:4.3.6	variation	980657	980657	.	.	0	note=complex CC=>AA AA:14 CC:0
EA2454	snippy:4.3.6	variation	980670	980670	.	.	0	note=snp A=>G G:40 A:0
EA2454	snippy:4.3.6	variation	980709	980709	.	.	0	note=snp G=>C C:70 G:0
EA2454	snippy:4.3.6	variation	980743	980743	.	.	0	note=complex GGAGT=>AGAGC AGAGC:94 GGAGT:0
EA2454	snippy:4.3.6	variation	980785	980785	.	.	0	note=complex GCATGCCGC=>CCATACTGT CCATACTGT:77 GCATGCCGC:0
EA2454	snippy:4.3.6	variation	980809	980809	.	.	0	note=snp C=>T T:92 C:0
EA2454	snippy:4.3.6	variation	980815	980815	.	.	0	note=snp C=>T T:97 C:0
EA2454	snippy:4.3.6	variation	980830	980830	.	.	0	note=snp A=>G G:89 A:0
EA2454	snippy:4.3.6	variation	980837	980837	.	.	0	note=del ATAC=>A A:73 ATAC:0
EA2454	snippy:4.3.6	variation	980872	980872	.	.	0	note=snp G=>A A:79 G:0
EA2454	snippy:4.3.6	variation	980882	980882	.	.	0	note=snp T=>A A:84 T:0
EA2454	snippy:4.3.6	variation	980891	980891	.	.	0	note=complex ATA=>GTG GTG:82 ATA:0
EA2454	snippy:4.3.6	variation	980903	980903	.	.	0	note=snp T=>C C:91 T:1
EA2454	snippy:4.3.6	variation	980914	980914	.	.	0	note=snp T=>G G:84 T:0
EA2454	snippy:4.3.6	variation	980923	980923	.	.	0	note=complex AAAT=>GAAC GAAC:79 AAAT:0
EA2454	snippy:4.3.6	variation	980935	980935	.	.	0	note=snp C=>T T:83 C:0
EA2454	snippy:4.3.6	variation	980942	980942	.	.	0	note=snp A=>C C:92 A:0
EA2454	snippy:4.3.6	variation	980952	980952	.	.	0	note=snp C=>A A:93 C:0
EA2454	snippy:4.3.6	variation	980975	980975	.	.	0	note=complex CCCT=>TCCC TCCC:92 CCCT:0
EA2454	snippy:4.3.6	variation	980983	980983	.	.	0	note=snp G=>A A:94 G:0
EA2454	snippy:4.3.6	variation	980991	980991	.	.	0	note=complex ATTACCTC=>GTTATCTT GTTATCTT:89 ATTACCTC:0
EA2454	snippy:4.3.6	variation	981031	981031	.	.	0	note=snp C=>T T:106 C:0
EA2454	snippy:4.3.6	variation	981055	981055	.	.	0	note=snp G=>A A:100 G:1
EA2454	snippy:4.3.6	variation	981063	981063	.	.	0	note=snp G=>A A:107 G:0
EA2454	snippy:4.3.6	variation	981095	981095	.	.	0	note=snp A=>G G:98 A:0
EA2454	snippy:4.3.6	variation	981118	981118	.	.	0	note=snp C=>T T:114 C:0
EA2454	snippy:4.3.6	variation	981160	981160	.	.	0	note=complex TGTTCCG=>CGTGCCC CGTGCCC:77 TGTTCCG:0
EA2454	snippy:4.3.6	variation	981179	981179	.	.	0	note=snp A=>G G:90 A:0
EA2454	snippy:4.3.6	variation	981187	981187	.	.	0	note=snp C=>T T:87 C:0
EA2454	snippy:4.3.6	variation	981193	981193	.	.	0	note=complex GTCT=>CTCC CTCC:80 GTCT:0
EA2454	snippy:4.3.6	variation	981206	981206	.	.	0	note=snp G=>C C:89 G:0
EA2454	snippy:4.3.6	variation	981230	981230	.	.	0	note=snp C=>T T:83 C:0
EA2454	snippy:4.3.6	variation	981236	981236	.	.	0	note=snp G=>A A:82 G:0
EA2454	snippy:4.3.6	variation	981254	981254	.	.	0	note=snp A=>C C:83 A:0
EA2454	snippy:4.3.6	variation	981271	981271	.	.	0	note=snp T=>C C:85 T:0
EA2454	snippy:4.3.6	variation	981351	981351	.	.	0	note=snp C=>A A:112 C:0
EA2454	snippy:4.3.6	variation	981381	981381	.	.	0	note=snp C=>T T:114 C:0
EA2454	snippy:4.3.6	variation	981387	981387	.	.	0	note=snp T=>C C:119 T:0
EA2454	snippy:4.3.6	variation	981442	981442	.	.	0	note=snp A=>G G:127 A:0
EA2454	snippy:4.3.6	variation	981491	981491	.	.	0	note=snp C=>T T:129 C:0
EA2454	snippy:4.3.6	variation	981592	981592	.	.	0	note=snp G=>A A:124 G:0
EA2454	snippy:4.3.6	variation	981614	981614	.	.	0	note=snp C=>T T:131 C:0
EA2454	snippy:4.3.6	variation	981732	981732	.	.	0	note=snp G=>A A:70 G:0
EA2454	snippy:4.3.6	variation	986640	986640	.	.	0	note=snp G=>A A:120 G:0
EA2454	snippy:4.3.6	variation	990058	990058	.	.	0	note=snp G=>T T:140 G:0
EA2454	snippy:4.3.6	variation	990308	990308	.	.	0	note=snp G=>A A:110 G:0
EA2454	snippy:4.3.6	variation	990374	990374	.	.	0	note=snp C=>A A:87 C:1
EA2454	snippy:4.3.6	variation	1002794	1002794	.	.	0	note=snp T=>C C:79 T:0
EA2454	snippy:4.3.6	variation	1002926	1002926	.	.	0	note=snp T=>C C:81 T:1
EA2454	snippy:4.3.6	variation	1003603	1003603	.	.	0	note=snp A=>G G:115 A:0
EA2454	snippy:4.3.6	variation	1003611	1003611	.	.	0	note=snp C=>A A:112 C:0
EA2454	snippy:4.3.6	variation	1010019	1010019	.	.	0	note=snp A=>G G:116 A:1
EA2454	snippy:4.3.6	variation	1014541	1014541	.	.	0	note=snp T=>C C:115 T:0
EA2454	snippy:4.3.6	variation	1026843	1026843	.	.	0	note=snp T=>C C:91 T:1
EA2454	snippy:4.3.6	variation	1036957	1036957	.	.	0	note=snp T=>G G:104 T:0
EA2454	snippy:4.3.6	variation	1039930	1039930	.	.	0	note=del ATTACTGCATAGCACTTT=>A A:51 ATTACTGCATAGCACTTT:0
EA2454	snippy:4.3.6	variation	1044678	1044678	.	.	0	note=snp T=>C C:110 T:2
EA2454	snippy:4.3.6	variation	1044717	1044717	.	.	0	note=snp G=>A A:120 G:0
EA2454	snippy:4.3.6	variation	1046210	1046210	.	.	0	note=snp G=>A A:108 G:2
EA2454	snippy:4.3.6	variation	1049442	1049442	.	.	0	note=snp G=>A A:126 G:0
EA2454	snippy:4.3.6	variation	1051108	1051108	.	.	0	note=snp G=>A A:91 G:1
EA2454	snippy:4.3.6	variation	1052010	1052010	.	.	0	note=snp G=>A A:123 G:1
EA2454	snippy:4.3.6	variation	1052435	1052435	.	.	0	note=snp C=>T T:105 C:0
EA2454	snippy:4.3.6	variation	1055114	1055114	.	.	0	note=snp T=>G G:97 T:0
EA2454	snippy:4.3.6	variation	1066461	1066461	.	.	0	note=snp C=>T T:96 C:2
EA2454	snippy:4.3.6	variation	1067401	1067401	.	.	0	note=snp C=>A A:116 C:0
EA2454	snippy:4.3.6	variation	1073767	1073767	.	.	0	note=snp A=>G G:113 A:0
EA2454	snippy:4.3.6	variation	1079000	1079000	.	.	0	note=snp T=>C C:103 T:0
EA2454	snippy:4.3.6	variation	1082762	1082762	.	.	0	note=snp G=>A A:117 G:0
EA2454	snippy:4.3.6	variation	1092459	1092459	.	.	0	note=snp G=>T T:128 G:0
EA2454	snippy:4.3.6	variation	1093309	1093309	.	.	0	note=snp A=>G G:77 A:0
EA2454	snippy:4.3.6	variation	1109296	1109296	.	.	0	note=snp C=>T T:106 C:0
EA2454	snippy:4.3.6	variation	1109567	1109567	.	.	0	note=snp G=>A A:118 G:0
EA2454	snippy:4.3.6	variation	1110696	1110696	.	.	0	note=snp C=>T T:114 C:0
EA2454	snippy:4.3.6	variation	1126572	1126572	.	.	0	note=snp C=>T T:117 C:2
EA2454	snippy:4.3.6	variation	1126887	1126887	.	.	0	note=snp G=>A A:122 G:0
EA2454	snippy:4.3.6	variation	1127119	1127119	.	.	0	note=snp T=>G G:117 T:0
EA2454	snippy:4.3.6	variation	1127224	1127224	.	.	0	note=snp G=>C C:103 G:2
EA2454	snippy:4.3.6	variation	1127311	1127311	.	.	0	note=snp C=>G G:110 C:0
EA2454	snippy:4.3.6	variation	1128458	1128458	.	.	0	note=snp T=>C C:91 T:0
EA2454	snippy:4.3.6	variation	1131065	1131065	.	.	0	note=snp A=>G G:128 A:0
EA2454	snippy:4.3.6	variation	1138215	1138215	.	.	0	note=snp T=>C C:86 T:0
EA2454	snippy:4.3.6	variation	1144904	1144904	.	.	0	note=snp C=>T T:99 C:0
EA2454	snippy:4.3.6	variation	1144975	1144975	.	.	0	note=snp T=>C C:73 T:0
EA2454	snippy:4.3.6	variation	1147548	1147548	.	.	0	note=snp T=>G G:103 T:0
EA2454	snippy:4.3.6	variation	1160665	1160665	.	.	0	note=snp A=>C C:108 A:2
EA2454	snippy:4.3.6	variation	1160822	1160822	.	.	0	note=snp A=>T T:106 A:0
EA2454	snippy:4.3.6	variation	1165050	1165050	.	.	0	note=snp G=>A A:96 G:0
EA2454	snippy:4.3.6	variation	1167666	1167666	.	.	0	note=snp T=>C C:124 T:0
EA2454	snippy:4.3.6	variation	1174352	1174352	.	.	0	note=snp T=>C C:109 T:0
EA2454	snippy:4.3.6	variation	1177501	1177501	.	.	0	note=snp C=>T T:102 C:0
EA2454	snippy:4.3.6	variation	1186746	1186746	.	.	0	note=snp T=>C C:121 T:0
EA2454	snippy:4.3.6	variation	1190353	1190353	.	.	0	note=snp G=>T T:123 G:1
EA2454	snippy:4.3.6	variation	1201358	1201358	.	.	0	note=snp C=>T T:90 C:1
EA2454	snippy:4.3.6	variation	1211256	1211256	.	.	0	note=snp T=>C C:101 T:0
EA2454	snippy:4.3.6	variation	1215720	1215720	.	.	0	note=snp C=>T T:91 C:0
EA2454	snippy:4.3.6	variation	1216578	1216578	.	.	0	note=snp C=>T T:121 C:0
EA2454	snippy:4.3.6	variation	1218789	1218789	.	.	0	note=snp A=>G G:83 A:0
EA2454	snippy:4.3.6	variation	1223130	1223130	.	.	0	note=del AC=>A A:75 AC:0
EA2454	snippy:4.3.6	variation	1225308	1225308	.	.	0	note=snp C=>A A:89 C:1
EA2454	snippy:4.3.6	variation	1236723	1236723	.	.	0	note=snp T=>C C:115 T:0
EA2454	snippy:4.3.6	variation	1240486	1240486	.	.	0	note=snp G=>T T:94 G:0
EA2454	snippy:4.3.6	variation	1243573	1243573	.	.	0	note=snp C=>T T:104 C:0
EA2454	snippy:4.3.6	variation	1251478	1251478	.	.	0	note=snp T=>G G:110 T:0
EA2454	snippy:4.3.6	variation	1253669	1253669	.	.	0	note=snp C=>T T:106 C:0
EA2454	snippy:4.3.6	variation	1260696	1260696	.	.	0	note=snp T=>C C:113 T:1
EA2454	snippy:4.3.6	variation	1261876	1261876	.	.	0	note=snp A=>C C:108 A:0
EA2454	snippy:4.3.6	variation	1264081	1264081	.	.	0	note=snp A=>G G:96 A:0
EA2454	snippy:4.3.6	variation	1271559	1271559	.	.	0	note=snp T=>G G:92 T:0
EA2454	snippy:4.3.6	variation	1274674	1274674	.	.	0	note=del GA=>G G:104 GA:0
EA2454	snippy:4.3.6	variation	1280254	1280254	.	.	0	note=snp G=>A A:101 G:1
EA2454	snippy:4.3.6	variation	1280572	1280572	.	.	0	note=snp C=>A A:99 C:0
EA2454	snippy:4.3.6	variation	1299878	1299878	.	.	0	note=snp C=>T T:98 C:2
EA2454	snippy:4.3.6	variation	1300511	1300511	.	.	0	note=del GC=>G G:21 GC:0
EA2454	snippy:4.3.6	variation	1317400	1317400	.	.	0	note=snp G=>A A:71 G:5
EA2454	snippy:4.3.6	variation	1320805	1320805	.	.	0	note=snp A=>G G:103 A:0
EA2454	snippy:4.3.6	variation	1321341	1321341	.	.	0	note=snp G=>A A:104 G:0
EA2454	snippy:4.3.6	variation	1322163	1322163	.	.	0	note=snp T=>C C:91 T:0
EA2454	snippy:4.3.6	variation	1322665	1322665	.	.	0	note=snp T=>C C:94 T:0
EA2454	snippy:4.3.6	variation	1331179	1331179	.	.	0	note=snp T=>G G:110 T:1
EA2454	snippy:4.3.6	variation	1334209	1334209	.	.	0	note=snp C=>T T:114 C:0
EA2454	snippy:4.3.6	variation	1340886	1340886	.	.	0	note=snp A=>C C:98 A:0
EA2454	snippy:4.3.6	variation	1345147	1345147	.	.	0	note=snp T=>A A:90 T:1
EA2454	snippy:4.3.6	variation	1358384	1358384	.	.	0	note=snp A=>G G:96 A:0
EA2454	snippy:4.3.6	variation	1360577	1360577	.	.	0	note=snp A=>G G:108 A:0
EA2454	snippy:4.3.6	variation	1371250	1371250	.	.	0	note=snp T=>C C:93 T:0
EA2454	snippy:4.3.6	variation	1372740	1372740	.	.	0	note=snp C=>T T:105 C:0
EA2454	snippy:4.3.6	variation	1373417	1373417	.	.	0	note=snp G=>A A:75 G:0
EA2454	snippy:4.3.6	variation	1373493	1373493	.	.	0	note=snp C=>T T:88 C:0
EA2454	snippy:4.3.6	variation	1384155	1384155	.	.	0	note=snp C=>T T:105 C:0
EA2454	snippy:4.3.6	variation	1385530	1385530	.	.	0	note=snp C=>T T:103 C:0
EA2454	snippy:4.3.6	variation	1385945	1385945	.	.	0	note=snp T=>G G:103 T:2
EA2454	snippy:4.3.6	variation	1392683	1392683	.	.	0	note=snp C=>T T:102 C:0
EA2454	snippy:4.3.6	variation	1394505	1394505	.	.	0	note=snp A=>G G:80 A:0
EA2454	snippy:4.3.6	variation	1396366	1396366	.	.	0	note=snp C=>T T:127 C:0
EA2454	snippy:4.3.6	variation	1401264	1401264	.	.	0	note=snp A=>G G:96 A:0
EA2454	snippy:4.3.6	variation	1403190	1403190	.	.	0	note=snp G=>T T:116 G:0
EA2454	snippy:4.3.6	variation	1407225	1407225	.	.	0	note=snp G=>A A:85 G:1
EA2454	snippy:4.3.6	variation	1413295	1413295	.	.	0	note=snp T=>C C:114 T:0
EA2454	snippy:4.3.6	variation	1415150	1415150	.	.	0	note=snp G=>A A:65 G:1
EA2454	snippy:4.3.6	variation	1416501	1416501	.	.	0	note=snp A=>C C:88 A:0
EA2454	snippy:4.3.6	variation	1424948	1424948	.	.	0	note=snp C=>T T:78 C:0
EA2454	snippy:4.3.6	variation	1425068	1425068	.	.	0	note=snp T=>G G:103 T:2
EA2454	snippy:4.3.6	variation	1426621	1426621	.	.	0	note=snp T=>G G:91 T:1
EA2454	snippy:4.3.6	variation	1434922	1434922	.	.	0	note=snp T=>G G:108 T:0
EA2454	snippy:4.3.6	variation	1435223	1435223	.	.	0	note=snp G=>A A:96 G:0
EA2454	snippy:4.3.6	variation	1437134	1437134	.	.	0	note=snp C=>T T:114 C:0
EA2454	snippy:4.3.6	variation	1437179	1437179	.	.	0	note=snp G=>A A:83 G:0
EA2454	snippy:4.3.6	variation	1437764	1437764	.	.	0	note=snp G=>A A:80 G:0
EA2454	snippy:4.3.6	variation	1443281	1443281	.	.	0	note=snp G=>A A:113 G:0
EA2454	snippy:4.3.6	variation	1443339	1443339	.	.	0	note=snp C=>T T:112 C:0
EA2454	snippy:4.3.6	variation	1444940	1444940	.	.	0	note=snp C=>T T:94 C:0
EA2454	snippy:4.3.6	variation	1445575	1445575	.	.	0	note=snp T=>G G:112 T:1
EA2454	snippy:4.3.6	variation	1445619	1445619	.	.	0	note=snp G=>A A:110 G:0
EA2454	snippy:4.3.6	variation	1445708	1445708	.	.	0	note=snp G=>A A:112 G:0
EA2454	snippy:4.3.6	variation	1455169	1455169	.	.	0	note=snp G=>A A:95 G:0
EA2454	snippy:4.3.6	variation	1461457	1461457	.	.	0	note=snp T=>G G:111 T:0
EA2454	snippy:4.3.6	variation	1461819	1461819	.	.	0	note=snp A=>G G:105 A:2
EA2454	snippy:4.3.6	variation	1464871	1464871	.	.	0	note=snp C=>A A:81 C:1
EA2454	snippy:4.3.6	variation	1471260	1471260	.	.	0	note=snp C=>T T:79 C:0
EA2454	snippy:4.3.6	variation	1480341	1480341	.	.	0	note=snp A=>G G:94 A:0
EA2454	snippy:4.3.6	variation	1480708	1480708	.	.	0	note=snp T=>G G:129 T:0
EA2454	snippy:4.3.6	variation	1483405	1483405	.	.	0	note=snp G=>A A:88 G:0
EA2454	snippy:4.3.6	variation	1492527	1492527	.	.	0	note=ins C=>CA CA:81 C:0
EA2454	snippy:4.3.6	variation	1493228	1493228	.	.	0	note=snp C=>T T:98 C:0
EA2454	snippy:4.3.6	variation	1495581	1495581	.	.	0	note=snp T=>A A:92 T:0
EA2454	snippy:4.3.6	variation	1496904	1496904	.	.	0	note=snp G=>A A:111 G:0
EA2454	snippy:4.3.6	variation	1508681	1508681	.	.	0	note=snp C=>G G:89 C:1
EA2454	snippy:4.3.6	variation	1514530	1514530	.	.	0	note=snp G=>A A:83 G:0
EA2454	snippy:4.3.6	variation	1518455	1518455	.	.	0	note=snp G=>A A:91 G:0
EA2454	snippy:4.3.6	variation	1521195	1521195	.	.	0	note=snp C=>T T:109 C:0
EA2454	snippy:4.3.6	variation	1525679	1525679	.	.	0	note=snp C=>T T:96 C:0
EA2454	snippy:4.3.6	variation	1533339	1533339	.	.	0	note=snp A=>G G:88 A:0
EA2454	snippy:4.3.6	variation	1534292	1534292	.	.	0	note=snp A=>G G:99 A:0
EA2454	snippy:4.3.6	variation	1547465	1547465	.	.	0	note=snp G=>T T:93 G:0
EA2454	snippy:4.3.6	variation	1547975	1547975	.	.	0	note=snp G=>A A:105 G:3
EA2454	snippy:4.3.6	variation	1548562	1548562	.	.	0	note=del TG=>T T:70 TG:0
EA2454	snippy:4.3.6	variation	1549417	1549417	.	.	0	note=snp C=>T T:89 C:0
EA2454	snippy:4.3.6	variation	1549828	1549828	.	.	0	note=snp T=>C C:102 T:0
EA2454	snippy:4.3.6	variation	1557966	1557966	.	.	0	note=snp A=>G G:118 A:0
EA2454	snippy:4.3.6	variation	1559295	1559295	.	.	0	note=snp T=>G G:91 T:1
EA2454	snippy:4.3.6	variation	1559508	1559508	.	.	0	note=del AG=>A A:73 AG:0
EA2454	snippy:4.3.6	variation	1560679	1560679	.	.	0	note=snp G=>A A:92 G:0
EA2454	snippy:4.3.6	variation	1570233	1570233	.	.	0	note=snp A=>G G:75 A:0
EA2454	snippy:4.3.6	variation	1577742	1577742	.	.	0	note=snp G=>A A:105 G:1
EA2454	snippy:4.3.6	variation	1578837	1578837	.	.	0	note=snp T=>C C:77 T:0
EA2454	snippy:4.3.6	variation	1580066	1580066	.	.	0	note=snp G=>T T:80 G:0
EA2454	snippy:4.3.6	variation	1582061	1582061	.	.	0	note=snp A=>G G:108 A:0
EA2454	snippy:4.3.6	variation	1582869	1582869	.	.	0	note=snp C=>T T:99 C:0
EA2454	snippy:4.3.6	variation	1584311	1584311	.	.	0	note=snp C=>T T:103 C:0
EA2454	snippy:4.3.6	variation	1587710	1587710	.	.	0	note=snp C=>A A:94 C:0
EA2454	snippy:4.3.6	variation	1587792	1587792	.	.	0	note=snp A=>C C:90 A:0
EA2454	snippy:4.3.6	variation	1588489	1588489	.	.	0	note=snp G=>A A:106 G:0
EA2454	snippy:4.3.6	variation	1592505	1592505	.	.	0	note=snp T=>C C:107 T:0
EA2454	snippy:4.3.6	variation	1597496	1597496	.	.	0	note=snp T=>C C:96 T:0
EA2454	snippy:4.3.6	variation	1598348	1598348	.	.	0	note=snp G=>A A:95 G:0
EA2454	snippy:4.3.6	variation	1599906	1599906	.	.	0	note=snp T=>C C:96 T:0
EA2454	snippy:4.3.6	variation	1600199	1600199	.	.	0	note=snp C=>T T:107 C:0
EA2454	snippy:4.3.6	variation	1600919	1600919	.	.	0	note=snp A=>G G:107 A:0
EA2454	snippy:4.3.6	variation	1607862	1607862	.	.	0	note=snp A=>T T:95 A:0
EA2454	snippy:4.3.6	variation	1610106	1610106	.	.	0	note=snp G=>A A:90 G:2
EA2454	snippy:4.3.6	variation	1610112	1610112	.	.	0	note=snp C=>A A:98 C:1
EA2454	snippy:4.3.6	variation	1612435	1612435	.	.	0	note=snp G=>A A:110 G:0
EA2454	snippy:4.3.6	variation	1613406	1613406	.	.	0	note=snp T=>A A:95 T:0
EA2454	snippy:4.3.6	variation	1613463	1613463	.	.	0	note=snp A=>G G:78 A:0
EA2454	snippy:4.3.6	variation	1616033	1616033	.	.	0	note=snp G=>A A:108 G:0
EA2454	snippy:4.3.6	variation	1619172	1619172	.	.	0	note=snp G=>A A:37 G:0
EA2454	snippy:4.3.6	variation	1619178	1619178	.	.	0	note=complex TACA=>AACG AACG:40 TACA:0
EA2454	snippy:4.3.6	variation	1620184	1620184	.	.	0	note=snp T=>A A:19 T:0
EA2454	snippy:4.3.6	variation	1620876	1620876	.	.	0	note=complex ACCA=>GCCG GCCG:13 ACCA:0
EA2454	snippy:4.3.6	variation	1620891	1620891	.	.	0	note=snp T=>C C:29 T:0
EA2454	snippy:4.3.6	variation	1620915	1620915	.	.	0	note=snp A=>T T:44 A:0
EA2454	snippy:4.3.6	variation	1620945	1620945	.	.	0	note=snp C=>T T:71 C:0
EA2454	snippy:4.3.6	variation	1621020	1621020	.	.	0	note=snp C=>A A:96 C:0
EA2454	snippy:4.3.6	variation	1621049	1621049	.	.	0	note=snp G=>A A:99 G:0
EA2454	snippy:4.3.6	variation	1621074	1621074	.	.	0	note=snp T=>A A:93 T:0
EA2454	snippy:4.3.6	variation	1621137	1621137	.	.	0	note=snp T=>A A:89 T:0
EA2454	snippy:4.3.6	variation	1621185	1621185	.	.	0	note=complex TGCGTTAGCG=>GGCATTGGCT GGCATTGGCT:81 TGCGTTAGCG:0
EA2454	snippy:4.3.6	variation	1621200	1621200	.	.	0	note=snp C=>T T:80 C:0
EA2454	snippy:4.3.6	variation	1621221	1621221	.	.	0	note=snp C=>T T:66 C:0
EA2454	snippy:4.3.6	variation	1621227	1621227	.	.	0	note=snp T=>A A:60 T:0
EA2454	snippy:4.3.6	variation	1621255	1621255	.	.	0	note=snp C=>T T:30 C:0
EA2454	snippy:4.3.6	variation	1624032	1624032	.	.	0	note=snp A=>T T:32 A:0
EA2454	snippy:4.3.6	variation	1624047	1624047	.	.	0	note=snp C=>T T:40 C:0
EA2454	snippy:4.3.6	variation	1624053	1624053	.	.	0	note=snp C=>T T:46 C:0
EA2454	snippy:4.3.6	variation	1624069	1624069	.	.	0	note=complex GAAGGT=>AACGGC AACGGC:60 GAAGGT:0
EA2454	snippy:4.3.6	variation	1624086	1624086	.	.	0	note=snp C=>T T:79 C:0
EA2454	snippy:4.3.6	variation	1624128	1624128	.	.	0	note=complex TAG=>AAA AAA:85 TAG:0
EA2454	snippy:4.3.6	variation	1624137	1624137	.	.	0	note=snp T=>C C:101 T:0
EA2454	snippy:4.3.6	variation	1624153	1624153	.	.	0	note=snp T=>A A:97 T:0
EA2454	snippy:4.3.6	variation	1624217	1624217	.	.	0	note=snp A=>G G:88 A:0
EA2454	snippy:4.3.6	variation	1624254	1624254	.	.	0	note=snp A=>G G:89 A:0
EA2454	snippy:4.3.6	variation	1624263	1624263	.	.	0	note=complex ATTG=>GTTA GTTA:88 ATTG:0
EA2454	snippy:4.3.6	variation	1624280	1624280	.	.	0	note=snp T=>C C:93 T:0
EA2454	snippy:4.3.6	variation	1624351	1624351	.	.	0	note=mnp GT=>TA TA:88 GT:0
EA2454	snippy:4.3.6	variation	1624401	1624401	.	.	0	note=snp C=>G G:43 C:0
EA2454	snippy:4.3.6	variation	1625151	1625151	.	.	0	note=snp G=>T T:36 G:0
EA2454	snippy:4.3.6	variation	1625175	1625175	.	.	0	note=complex TCCG=>CCCA CCCA:60 TCCG:0
EA2454	snippy:4.3.6	variation	1625193	1625193	.	.	0	note=snp G=>A A:84 G:0
EA2454	snippy:4.3.6	variation	1625205	1625205	.	.	0	note=snp C=>T T:94 C:0
EA2454	snippy:4.3.6	variation	1625235	1625235	.	.	0	note=snp A=>G G:116 A:0
EA2454	snippy:4.3.6	variation	1625258	1625258	.	.	0	note=complex AACTA=>GACTC GACTC:103 AACTA:0
EA2454	snippy:4.3.6	variation	1625280	1625280	.	.	0	note=snp A=>T T:102 A:0
EA2454	snippy:4.3.6	variation	1625298	1625298	.	.	0	note=snp A=>G G:101 A:0
EA2454	snippy:4.3.6	variation	1625376	1625376	.	.	0	note=snp G=>T T:101 G:0
EA2454	snippy:4.3.6	variation	1625382	1625382	.	.	0	note=snp T=>C C:101 T:0
EA2454	snippy:4.3.6	variation	1625390	1625390	.	.	0	note=snp G=>A A:97 G:0
EA2454	snippy:4.3.6	variation	1625406	1625406	.	.	0	note=complex AGGC=>TGGT TGGT:88 AGGC:0
EA2454	snippy:4.3.6	variation	1625417	1625417	.	.	0	note=snp G=>A A:89 G:0
EA2454	snippy:4.3.6	variation	1625424	1625424	.	.	0	note=snp G=>A A:96 G:0
EA2454	snippy:4.3.6	variation	1625430	1625430	.	.	0	note=snp G=>A A:98 G:0
EA2454	snippy:4.3.6	variation	1625455	1625455	.	.	0	note=snp G=>A A:102 G:0
EA2454	snippy:4.3.6	variation	1625460	1625460	.	.	0	note=snp A=>T T:94 A:0
EA2454	snippy:4.3.6	variation	1625475	1625475	.	.	0	note=complex CGGT=>AGGA AGGA:87 CGGT:0
EA2454	snippy:4.3.6	variation	1625505	1625505	.	.	0	note=snp A=>T T:81 A:1
EA2454	snippy:4.3.6	variation	1625519	1625519	.	.	0	note=snp G=>A A:91 G:0
EA2454	snippy:4.3.6	variation	1625559	1625559	.	.	0	note=snp G=>A A:92 G:0
EA2454	snippy:4.3.6	variation	1625589	1625589	.	.	0	note=snp C=>A A:97 C:0
EA2454	snippy:4.3.6	variation	1625637	1625637	.	.	0	note=snp T=>C C:110 T:0
EA2454	snippy:4.3.6	variation	1625649	1625649	.	.	0	note=complex CG=>TC TC:97 CG:0
EA2454	snippy:4.3.6	variation	1625658	1625658	.	.	0	note=snp T=>C C:105 T:0
EA2454	snippy:4.3.6	variation	1625688	1625688	.	.	0	note=complex TGTC=>CATT CATT:85 TGTC:0
EA2454	snippy:4.3.6	variation	1625826	1625826	.	.	0	note=snp T=>C C:79 T:0
EA2454	snippy:4.3.6	variation	1625835	1625835	.	.	0	note=snp A=>G G:79 A:0
EA2454	snippy:4.3.6	variation	1625853	1625853	.	.	0	note=snp T=>G G:84 T:0
EA2454	snippy:4.3.6	variation	1625874	1625874	.	.	0	note=snp T=>C C:90 T:0
EA2454	snippy:4.3.6	variation	1625895	1625895	.	.	0	note=snp A=>G G:91 A:0
EA2454	snippy:4.3.6	variation	1625922	1625922	.	.	0	note=snp T=>C C:80 T:0
EA2454	snippy:4.3.6	variation	1625946	1625946	.	.	0	note=snp T=>A A:62 T:0
EA2454	snippy:4.3.6	variation	1625960	1625960	.	.	0	note=snp A=>G G:65 A:0
EA2454	snippy:4.3.6	variation	1625984	1625984	.	.	0	note=snp T=>C C:69 T:0
EA2454	snippy:4.3.6	variation	1625995	1625995	.	.	0	note=complex TGCGCAAT=>GGAACAAC GGAACAAC:48 TGCGCAAT:0
EA2454	snippy:4.3.6	variation	1626008	1626008	.	.	0	note=snp A=>T T:50 A:0
EA2454	snippy:4.3.6	variation	1626017	1626017	.	.	0	note=complex CAAC=>GAGA GAGA:50 CAAC:0
EA2454	snippy:4.3.6	variation	1626031	1626031	.	.	0	note=snp G=>A A:71 G:0
EA2454	snippy:4.3.6	variation	1626042	1626042	.	.	0	note=snp T=>C C:68 T:0
EA2454	snippy:4.3.6	variation	1626118	1626118	.	.	0	note=snp A=>G G:57 A:0
EA2454	snippy:4.3.6	variation	1626136	1626136	.	.	0	note=snp T=>C C:42 T:0
EA2454	snippy:4.3.6	variation	1626159	1626159	.	.	0	note=complex GCCCC=>ATCAA ATCAA:16 GCCCC:0
EA2454	snippy:4.3.6	variation	1626543	1626543	.	.	0	note=snp G=>T T:20 G:0
EA2454	snippy:4.3.6	variation	1626549	1626549	.	.	0	note=snp C=>T T:25 C:0
EA2454	snippy:4.3.6	variation	1626559	1626559	.	.	0	note=snp A=>G G:37 A:0
EA2454	snippy:4.3.6	variation	1626568	1626568	.	.	0	note=complex TGC=>CGT CGT:41 TGC:0
EA2454	snippy:4.3.6	variation	1626586	1626586	.	.	0	note=snp G=>A A:61 G:0
EA2454	snippy:4.3.6	variation	1626595	1626595	.	.	0	note=complex ACGA=>GCGT GCGT:63 ACGA:0
EA2454	snippy:4.3.6	variation	1626603	1626603	.	.	0	note=snp A=>T T:66 A:0
EA2454	snippy:4.3.6	variation	1626611	1626611	.	.	0	note=snp T=>C C:77 T:0
EA2454	snippy:4.3.6	variation	1626705	1626705	.	.	0	note=snp A=>G G:116 A:0
EA2454	snippy:4.3.6	variation	1626723	1626723	.	.	0	note=snp C=>T T:120 C:0
EA2454	snippy:4.3.6	variation	1626772	1626772	.	.	0	note=mnp GG=>AA AA:114 GG:0
EA2454	snippy:4.3.6	variation	1626790	1626790	.	.	0	note=snp T=>C C:129 T:0
EA2454	snippy:4.3.6	variation	1626807	1626807	.	.	0	note=snp T=>C C:121 T:0
EA2454	snippy:4.3.6	variation	1626849	1626849	.	.	0	note=snp G=>A A:141 G:0
EA2454	snippy:4.3.6	variation	1626896	1626896	.	.	0	note=snp A=>G G:128 A:0
EA2454	snippy:4.3.6	variation	1627011	1627011	.	.	0	note=snp G=>T T:130 G:0
EA2454	snippy:4.3.6	variation	1627061	1627061	.	.	0	note=snp A=>T T:108 A:0
EA2454	snippy:4.3.6	variation	1627068	1627068	.	.	0	note=snp C=>T T:109 C:0
EA2454	snippy:4.3.6	variation	1627153	1627153	.	.	0	note=snp C=>T T:105 C:0
EA2454	snippy:4.3.6	variation	1627159	1627159	.	.	0	note=snp G=>A A:111 G:0
EA2454	snippy:4.3.6	variation	1627168	1627168	.	.	0	note=snp A=>G G:109 A:0
EA2454	snippy:4.3.6	variation	1627173	1627173	.	.	0	note=snp A=>G G:109 A:0
EA2454	snippy:4.3.6	variation	1627182	1627182	.	.	0	note=snp C=>T T:101 C:0
EA2454	snippy:4.3.6	variation	1627188	1627188	.	.	0	note=snp G=>T T:106 G:0
EA2454	snippy:4.3.6	variation	1627206	1627206	.	.	0	note=snp T=>C C:96 T:0
EA2454	snippy:4.3.6	variation	1627314	1627314	.	.	0	note=snp T=>A A:119 T:0
EA2454	snippy:4.3.6	variation	1627320	1627320	.	.	0	note=snp A=>G G:110 A:0
EA2454	snippy:4.3.6	variation	1627350	1627350	.	.	0	note=snp C=>T T:120 C:0
EA2454	snippy:4.3.6	variation	1627377	1627377	.	.	0	note=snp T=>G G:128 T:0
EA2454	snippy:4.3.6	variation	1627407	1627407	.	.	0	note=snp T=>G G:122 T:0
EA2454	snippy:4.3.6	variation	1627560	1627560	.	.	0	note=snp C=>T T:107 C:0
EA2454	snippy:4.3.6	variation	1627605	1627605	.	.	0	note=snp G=>T T:109 G:0
EA2454	snippy:4.3.6	variation	1627656	1627656	.	.	0	note=snp A=>C C:111 A:0
EA2454	snippy:4.3.6	variation	1627737	1627737	.	.	0	note=snp C=>A A:97 C:0
EA2454	snippy:4.3.6	variation	1627800	1627800	.	.	0	note=snp A=>C C:99 A:1
EA2454	snippy:4.3.6	variation	1627809	1627809	.	.	0	note=snp T=>C C:94 T:0
EA2454	snippy:4.3.6	variation	1627815	1627815	.	.	0	note=snp T=>C C:96 T:0
EA2454	snippy:4.3.6	variation	1628278	1628278	.	.	0	note=snp A=>G G:80 A:0
EA2454	snippy:4.3.6	variation	1628285	1628285	.	.	0	note=snp G=>A A:76 G:0
EA2454	snippy:4.3.6	variation	1628345	1628345	.	.	0	note=snp C=>T T:84 C:0
EA2454	snippy:4.3.6	variation	1628366	1628366	.	.	0	note=complex AGAGAGCAAG=>CGAAAGTAAA CGAAAGTAAA:73 AGAGAGCAAG:0
EA2454	snippy:4.3.6	variation	1628390	1628390	.	.	0	note=snp G=>A A:92 G:0
EA2454	snippy:4.3.6	variation	1628427	1628427	.	.	0	note=snp T=>C C:71 T:0
EA2454	snippy:4.3.6	variation	1628438	1628438	.	.	0	note=snp T=>C C:72 T:0
EA2454	snippy:4.3.6	variation	1628465	1628465	.	.	0	note=complex GGCT=>AGCG AGCG:71 GGCT:0
EA2454	snippy:4.3.6	variation	1628498	1628498	.	.	0	note=snp T=>C C:57 T:0
EA2454	snippy:4.3.6	variation	1628523	1628523	.	.	0	note=snp C=>A A:53 C:0
EA2454	snippy:4.3.6	variation	1628540	1628540	.	.	0	note=snp A=>G G:49 A:0
EA2454	snippy:4.3.6	variation	1628585	1628585	.	.	0	note=snp A=>T T:73 A:0
EA2454	snippy:4.3.6	variation	1628591	1628591	.	.	0	note=snp C=>T T:74 C:0
EA2454	snippy:4.3.6	variation	1628597	1628597	.	.	0	note=snp T=>C C:80 T:0
EA2454	snippy:4.3.6	variation	1628627	1628627	.	.	0	note=snp A=>G G:88 A:0
EA2454	snippy:4.3.6	variation	1628649	1628649	.	.	0	note=mnp AG=>GA GA:94 AG:0
EA2454	snippy:4.3.6	variation	1628690	1628690	.	.	0	note=snp A=>G G:115 A:0
EA2454	snippy:4.3.6	variation	1628750	1628750	.	.	0	note=complex CACA=>TACG TACG:106 CACA:0
EA2454	snippy:4.3.6	variation	1628810	1628810	.	.	0	note=snp T=>C C:103 T:0
EA2454	snippy:4.3.6	variation	1628831	1628831	.	.	0	note=snp G=>A A:93 G:0
EA2454	snippy:4.3.6	variation	1628837	1628837	.	.	0	note=snp A=>T T:103 A:0
EA2454	snippy:4.3.6	variation	1628869	1628869	.	.	0	note=snp T=>C C:95 T:0
EA2454	snippy:4.3.6	variation	1628897	1628897	.	.	0	note=complex ACGA=>CCGG CCGG:85 ACGA:0
EA2454	snippy:4.3.6	variation	1628912	1628912	.	.	0	note=snp A=>T T:89 A:0
EA2454	snippy:4.3.6	variation	1628980	1628980	.	.	0	note=complex TACTA=>GACTT GACTT:81 TACTA:0
EA2454	snippy:4.3.6	variation	1629008	1629008	.	.	0	note=snp A=>C C:83 A:0
EA2454	snippy:4.3.6	variation	1629015	1629015	.	.	0	note=snp C=>T T:87 C:0
EA2454	snippy:4.3.6	variation	1629065	1629065	.	.	0	note=complex TCCG=>CCCT CCCT:78 TCCG:0
EA2454	snippy:4.3.6	variation	1629122	1629122	.	.	0	note=snp A=>G G:93 A:0
EA2454	snippy:4.3.6	variation	1629149	1629149	.	.	0	note=snp T=>C C:112 T:0
EA2454	snippy:4.3.6	variation	1629156	1629156	.	.	0	note=snp A=>G G:117 A:0
EA2454	snippy:4.3.6	variation	1629183	1629183	.	.	0	note=snp A=>C C:112 A:0
EA2454	snippy:4.3.6	variation	1629200	1629200	.	.	0	note=snp T=>C C:119 T:0
EA2454	snippy:4.3.6	variation	1629240	1629240	.	.	0	note=snp T=>C C:112 T:0
EA2454	snippy:4.3.6	variation	1629375	1629375	.	.	0	note=snp G=>A A:83 G:0
EA2454	snippy:4.3.6	variation	1629397	1629397	.	.	0	note=complex AAG=>CAA CAA:61 AAG:0
EA2454	snippy:4.3.6	variation	1629404	1629404	.	.	0	note=snp T=>A A:58 T:0
EA2454	snippy:4.3.6	variation	1629415	1629415	.	.	0	note=snp G=>A A:50 G:0
EA2454	snippy:4.3.6	variation	1629423	1629423	.	.	0	note=complex ATATA=>GTATT GTATT:39 ATATA:0
EA2454	snippy:4.3.6	variation	1629435	1629435	.	.	0	note=snp G=>A A:34 G:0
EA2454	snippy:4.3.6	variation	1629457	1629457	.	.	0	note=snp A=>T T:12 A:0
EA2454	snippy:4.3.6	variation	1630981	1630981	.	.	0	note=snp A=>G G:23 A:0
EA2454	snippy:4.3.6	variation	1630990	1630990	.	.	0	note=snp T=>C C:35 T:0
EA2454	snippy:4.3.6	variation	1634228	1634228	.	.	0	note=snp A=>G G:100 A:0
EA2454	snippy:4.3.6	variation	1637885	1637885	.	.	0	note=snp C=>A A:104 C:0
EA2454	snippy:4.3.6	variation	1639734	1639734	.	.	0	note=snp C=>T T:97 C:0
EA2454	snippy:4.3.6	variation	1642336	1642336	.	.	0	note=snp A=>G G:91 A:0
EA2454	snippy:4.3.6	variation	1648224	1648224	.	.	0	note=snp C=>T T:95 C:1
EA2454	snippy:4.3.6	variation	1652374	1652374	.	.	0	note=snp G=>A A:90 G:0
EA2454	snippy:4.3.6	variation	1666138	1666138	.	.	0	note=snp C=>T T:85 C:0
EA2454	snippy:4.3.6	variation	1682457	1682457	.	.	0	note=snp A=>G G:102 A:0
EA2454	snippy:4.3.6	variation	1682580	1682580	.	.	0	note=snp G=>T T:96 G:1
EA2454	snippy:4.3.6	variation	1685481	1685481	.	.	0	note=snp G=>A A:99 G:1
EA2454	snippy:4.3.6	variation	1701919	1701919	.	.	0	note=snp A=>G G:88 A:0
EA2454	snippy:4.3.6	variation	1704841	1704841	.	.	0	note=snp T=>C C:101 T:0
EA2454	snippy:4.3.6	variation	1714697	1714697	.	.	0	note=snp T=>C C:128 T:0
EA2454	snippy:4.3.6	variation	1717745	1717745	.	.	0	note=snp A=>C C:79 A:1
EA2454	snippy:4.3.6	variation	1719803	1719803	.	.	0	note=snp C=>T T:100 C:0
EA2454	snippy:4.3.6	variation	1728257	1728257	.	.	0	note=snp G=>T T:109 G:0
EA2454	snippy:4.3.6	variation	1730329	1730329	.	.	0	note=snp T=>C C:86 T:0
EA2454	snippy:4.3.6	variation	1732313	1732313	.	.	0	note=snp G=>C C:130 G:0
EA2454	snippy:4.3.6	variation	1735083	1735083	.	.	0	note=snp T=>A A:98 T:0
EA2454	snippy:4.3.6	variation	1737561	1737561	.	.	0	note=snp A=>G G:86 A:0
EA2454	snippy:4.3.6	variation	1745576	1745576	.	.	0	note=snp T=>C C:102 T:0
EA2454	snippy:4.3.6	variation	1748585	1748585	.	.	0	note=snp A=>C C:106 A:0
EA2454	snippy:4.3.6	variation	1761551	1761551	.	.	0	note=snp T=>G G:103 T:0
EA2454	snippy:4.3.6	variation	1763293	1763293	.	.	0	note=snp T=>C C:103 T:0
EA2454	snippy:4.3.6	variation	1765356	1765356	.	.	0	note=snp C=>T T:106 C:0
EA2454	snippy:4.3.6	variation	1769468	1769468	.	.	0	note=snp C=>T T:79 C:0
EA2454	snippy:4.3.6	variation	1770797	1770797	.	.	0	note=snp C=>T T:101 C:2
EA2454	snippy:4.3.6	variation	1777403	1777403	.	.	0	note=snp C=>T T:95 C:1
EA2454	snippy:4.3.6	variation	1777866	1777866	.	.	0	note=snp G=>A A:96 G:1
EA2454	snippy:4.3.6	variation	1778707	1778707	.	.	0	note=snp A=>G G:103 A:0
EA2454	snippy:4.3.6	variation	1788556	1788556	.	.	0	note=snp C=>A A:95 C:0
EA2454	snippy:4.3.6	variation	1795161	1795161	.	.	0	note=snp A=>G G:88 A:0
EA2454	snippy:4.3.6	variation	1799132	1799132	.	.	0	note=snp G=>A A:106 G:0
EA2454	snippy:4.3.6	variation	1803610	1803610	.	.	0	note=snp C=>A A:112 C:1
EA2454	snippy:4.3.6	variation	1803664	1803664	.	.	0	note=snp T=>C C:100 T:0
EA2454	snippy:4.3.6	variation	1807396	1807396	.	.	0	note=snp C=>T T:126 C:0
EA2454	snippy:4.3.6	variation	1813440	1813440	.	.	0	note=snp G=>T T:109 G:0
EA2454	snippy:4.3.6	variation	1815466	1815466	.	.	0	note=snp A=>G G:102 A:1
EA2454	snippy:4.3.6	variation	1820083	1820083	.	.	0	note=snp T=>C C:104 T:0
EA2454	snippy:4.3.6	variation	1822025	1822025	.	.	0	note=snp C=>T T:78 C:0
EA2454	snippy:4.3.6	variation	1824156	1824156	.	.	0	note=snp T=>C C:126 T:0
EA2454	snippy:4.3.6	variation	1824499	1824499	.	.	0	note=snp T=>C C:91 T:0
EA2454	snippy:4.3.6	variation	1825274	1825274	.	.	0	note=del GT=>G G:75 GT:0
EA2454	snippy:4.3.6	variation	1846876	1846876	.	.	0	note=snp G=>A A:86 G:0
EA2454	snippy:4.3.6	variation	1860665	1860665	.	.	0	note=snp T=>C C:115 T:0
EA2454	snippy:4.3.6	variation	1864496	1864496	.	.	0	note=snp C=>A A:124 C:0
EA2454	snippy:4.3.6	variation	1867566	1867566	.	.	0	note=snp G=>A A:122 G:0
EA2454	snippy:4.3.6	variation	1875721	1875721	.	.	0	note=snp G=>T T:204 G:0
EA2454	snippy:4.3.6	variation	1876080	1876080	.	.	0	note=snp G=>A A:107 G:0
EA2454	snippy:4.3.6	variation	1881660	1881660	.	.	0	note=snp G=>A A:92 G:0
EA2454	snippy:4.3.6	variation	1886109	1886109	.	.	0	note=snp A=>C C:114 A:0
EA2454	snippy:4.3.6	variation	1887544	1887544	.	.	0	note=snp A=>G G:123 A:0
EA2454	snippy:4.3.6	variation	1890553	1890553	.	.	0	note=snp C=>A A:95 C:0
EA2454	snippy:4.3.6	variation	1893896	1893896	.	.	0	note=snp G=>A A:83 G:0
EA2454	snippy:4.3.6	variation	1906815	1906815	.	.	0	note=snp A=>T T:101 A:0
EA2454	snippy:4.3.6	variation	1909088	1909088	.	.	0	note=snp T=>C C:131 T:0
EA2454	snippy:4.3.6	variation	1911530	1911530	.	.	0	note=snp C=>T T:136 C:0
EA2454	snippy:4.3.6	variation	1911898	1911898	.	.	0	note=snp G=>A A:105 G:0
EA2454	snippy:4.3.6	variation	1918520	1918520	.	.	0	note=snp C=>T T:104 C:0
EA2454	snippy:4.3.6	variation	1927337	1927337	.	.	0	note=snp G=>A A:118 G:1
EA2454	snippy:4.3.6	variation	1929193	1929193	.	.	0	note=ins T=>TTTA TTTA:100 T:0
EA2454	snippy:4.3.6	variation	1932774	1932774	.	.	0	note=snp G=>A A:118 G:0
EA2454	snippy:4.3.6	variation	1945608	1945608	.	.	0	note=snp T=>C C:112 T:0
EA2454	snippy:4.3.6	variation	1950298	1950298	.	.	0	note=snp T=>G G:130 T:0
EA2454	snippy:4.3.6	variation	1954729	1954729	.	.	0	note=snp C=>T T:103 C:0
EA2454	snippy:4.3.6	variation	1958733	1958733	.	.	0	note=snp T=>C C:122 T:0
EA2454	snippy:4.3.6	variation	1959695	1959695	.	.	0	note=snp G=>A A:89 G:0
EA2454	snippy:4.3.6	variation	1965637	1965637	.	.	0	note=snp G=>A A:116 G:0
EA2454	snippy:4.3.6	variation	1970914	1970914	.	.	0	note=snp A=>T T:22 A:0
EA2454	snippy:4.3.6	variation	1970924	1970924	.	.	0	note=complex CAA=>ATC ATC:25 CAA:0
EA2454	snippy:4.3.6	variation	1970935	1970935	.	.	0	note=snp C=>A A:47 C:0
EA2454	snippy:4.3.6	variation	1979564	1979564	.	.	0	note=snp A=>G G:111 A:0
EA2454	snippy:4.3.6	variation	1980186	1980186	.	.	0	note=snp C=>T T:99 C:0
EA2454	snippy:4.3.6	variation	1982000	1982000	.	.	0	note=snp G=>A A:105 G:0
EA2454	snippy:4.3.6	variation	1989495	1989495	.	.	0	note=snp G=>A A:109 G:0
EA2454	snippy:4.3.6	variation	1994897	1994897	.	.	0	note=snp G=>T T:98 G:0
EA2454	snippy:4.3.6	variation	1995211	1995211	.	.	0	note=snp T=>C C:94 T:0
EA2454	snippy:4.3.6	variation	1997936	1997936	.	.	0	note=snp C=>T T:96 C:0
EA2454	snippy:4.3.6	variation	2000203	2000203	.	.	0	note=snp C=>T T:116 C:2
EA2454	snippy:4.3.6	variation	2006271	2006271	.	.	0	note=snp G=>A A:115 G:0
EA2454	snippy:4.3.6	variation	2010104	2010104	.	.	0	note=snp T=>G G:99 T:1
EA2454	snippy:4.3.6	variation	2013249	2013249	.	.	0	note=snp G=>A A:87 G:0
EA2454	snippy:4.3.6	variation	2023004	2023004	.	.	0	note=snp A=>C C:35 A:0
EA2454	snippy:4.3.6	variation	2023016	2023016	.	.	0	note=snp T=>G G:32 T:0
EA2454	snippy:4.3.6	variation	2038279	2038279	.	.	0	note=ins A=>AAC AAC:97 A:1
EA2454	snippy:4.3.6	variation	2038309	2038309	.	.	0	note=snp T=>C C:109 T:0
EA2454	snippy:4.3.6	variation	2039026	2039026	.	.	0	note=snp C=>T T:95 C:0
EA2454	snippy:4.3.6	variation	2041023	2041023	.	.	0	note=snp G=>A A:82 G:0
EA2454	snippy:4.3.6	variation	2045488	2045488	.	.	0	note=snp T=>C C:100 T:1
EA2454	snippy:4.3.6	variation	2051294	2051294	.	.	0	note=snp A=>C C:114 A:0
EA2454	snippy:4.3.6	variation	2054229	2054229	.	.	0	note=snp C=>T T:118 C:0
EA2454	snippy:4.3.6	variation	2057141	2057141	.	.	0	note=snp A=>C C:100 A:0
EA2454	snippy:4.3.6	variation	2057842	2057842	.	.	0	note=snp G=>A A:111 G:0
EA2454	snippy:4.3.6	variation	2062156	2062156	.	.	0	note=snp T=>C C:98 T:0
EA2454	snippy:4.3.6	variation	2063839	2063839	.	.	0	note=snp T=>C C:96 T:0
EA2454	snippy:4.3.6	variation	2068297	2068297	.	.	0	note=snp T=>G G:116 T:0
EA2454	snippy:4.3.6	variation	2070162	2070162	.	.	0	note=snp T=>C C:115 T:0
EA2454	snippy:4.3.6	variation	2079477	2079477	.	.	0	note=snp A=>G G:131 A:0
EA2454	snippy:4.3.6	variation	2079523	2079523	.	.	0	note=snp A=>G G:120 A:0
EA2454	snippy:4.3.6	variation	2082060	2082060	.	.	0	note=snp G=>A A:109 G:1
EA2454	snippy:4.3.6	variation	2091780	2091780	.	.	0	note=snp T=>C C:87 T:0
EA2454	snippy:4.3.6	variation	2094829	2094829	.	.	0	note=snp T=>C C:100 T:0
EA2454	snippy:4.3.6	variation	2096088	2096088	.	.	0	note=snp A=>G G:84 A:0
EA2454	snippy:4.3.6	variation	2099145	2099145	.	.	0	note=snp G=>A A:98 G:0
EA2454	snippy:4.3.6	variation	2104321	2104321	.	.	0	note=snp A=>G G:110 A:0
EA2454	snippy:4.3.6	variation	2105174	2105174	.	.	0	note=snp C=>T T:91 C:0
EA2454	snippy:4.3.6	variation	2108261	2108261	.	.	0	note=snp G=>A A:97 G:1
EA2454	snippy:4.3.6	variation	2110373	2110373	.	.	0	note=snp G=>A A:96 G:0
EA2454	snippy:4.3.6	variation	2110900	2110900	.	.	0	note=snp G=>A A:105 G:0
EA2454	snippy:4.3.6	variation	2116312	2116312	.	.	0	note=snp T=>G G:95 T:0
EA2454	snippy:4.3.6	variation	2119193	2119193	.	.	0	note=snp C=>A A:119 C:0
EA2454	snippy:4.3.6	variation	2119312	2119312	.	.	0	note=snp C=>T T:111 C:0
EA2454	snippy:4.3.6	variation	2119737	2119737	.	.	0	note=snp T=>C C:101 T:0
EA2454	snippy:4.3.6	variation	2121149	2121149	.	.	0	note=snp C=>A A:123 C:1
EA2454	snippy:4.3.6	variation	2127237	2127237	.	.	0	note=snp G=>A A:104 G:0
EA2454	snippy:4.3.6	variation	2129490	2129490	.	.	0	note=snp G=>A A:95 G:2
EA2454	snippy:4.3.6	variation	2141700	2141700	.	.	0	note=snp C=>T T:102 C:1
EA2454	snippy:4.3.6	variation	2145694	2145694	.	.	0	note=snp G=>A A:103 G:0
EA2454	snippy:4.3.6	variation	2149404	2149404	.	.	0	note=snp G=>A A:64 G:0
EA2454	snippy:4.3.6	variation	2149498	2149498	.	.	0	note=snp G=>T T:88 G:0
EA2454	snippy:4.3.6	variation	2154303	2154303	.	.	0	note=snp G=>A A:95 G:0
EA2454	snippy:4.3.6	variation	2158854	2158854	.	.	0	note=snp G=>A A:108 G:0
EA2454	snippy:4.3.6	variation	2165658	2165658	.	.	0	note=snp T=>G G:95 T:0
EA2454	snippy:4.3.6	variation	2171889	2171889	.	.	0	note=snp A=>G G:102 A:0
EA2454	snippy:4.3.6	variation	2178210	2178210	.	.	0	note=snp G=>A A:105 G:0
EA2454	snippy:4.3.6	variation	2181710	2181710	.	.	0	note=snp T=>C C:120 T:0
EA2454	snippy:4.3.6	variation	2183355	2183355	.	.	0	note=snp T=>C C:105 T:0
EA2454	snippy:4.3.6	variation	2184161	2184161	.	.	0	note=snp G=>A A:100 G:0
EA2454	snippy:4.3.6	variation	2190122	2190122	.	.	0	note=snp C=>G G:32 C:0
EA2454	snippy:4.3.6	variation	2190131	2190131	.	.	0	note=snp T=>C C:46 T:0
EA2454	snippy:4.3.6	variation	2190182	2190182	.	.	0	note=snp T=>C C:117 T:0
EA2454	snippy:4.3.6	variation	2190227	2190227	.	.	0	note=snp A=>G G:155 A:0
EA2454	snippy:4.3.6	variation	2190283	2190283	.	.	0	note=mnp GA=>TG TG:115 GA:0
EA2454	snippy:4.3.6	variation	2190317	2190317	.	.	0	note=snp C=>T T:75 C:0
EA2454	snippy:4.3.6	variation	2190326	2190326	.	.	0	note=snp C=>T T:60 C:0
EA2454	snippy:4.3.6	variation	2190350	2190350	.	.	0	note=complex CCTT=>TCGG TCGG:11 CCTT:0
EA2454	snippy:4.3.6	variation	2191495	2191495	.	.	0	note=snp C=>T T:13 C:0
EA2454	snippy:4.3.6	variation	2191524	2191524	.	.	0	note=snp G=>C C:25 G:0
EA2454	snippy:4.3.6	variation	2191532	2191532	.	.	0	note=complex TG=>CT CT:26 TG:0
EA2454	snippy:4.3.6	variation	2191594	2191594	.	.	0	note=snp T=>C C:21 T:0
EA2454	snippy:4.3.6	variation	2191615	2191615	.	.	0	note=complex TTCG=>ATCA ATCA:11 TTCG:0
EA2454	snippy:4.3.6	variation	2194894	2194894	.	.	0	note=snp C=>T T:112 C:1
EA2454	snippy:4.3.6	variation	2195062	2195062	.	.	0	note=snp T=>C C:98 T:0
EA2454	snippy:4.3.6	variation	2208512	2208512	.	.	0	note=snp C=>T T:96 C:0
EA2454	snippy:4.3.6	variation	2217598	2217598	.	.	0	note=snp A=>G G:102 A:0
EA2454	snippy:4.3.6	variation	2219268	2219268	.	.	0	note=snp G=>A A:112 G:0
EA2454	snippy:4.3.6	variation	2221270	2221270	.	.	0	note=snp C=>T T:91 C:1
EA2454	snippy:4.3.6	variation	2228600	2228600	.	.	0	note=snp T=>C C:112 T:0
EA2454	snippy:4.3.6	variation	2232376	2232376	.	.	0	note=snp A=>G G:121 A:0
EA2454	snippy:4.3.6	variation	2253986	2253986	.	.	0	note=snp C=>T T:90 C:0
EA2454	snippy:4.3.6	variation	2256445	2256445	.	.	0	note=snp G=>A A:122 G:0
EA2454	snippy:4.3.6	variation	2259197	2259197	.	.	0	note=snp G=>A A:111 G:0
EA2454	snippy:4.3.6	variation	2266366	2266366	.	.	0	note=snp T=>C C:139 T:0
EA2454	snippy:4.3.6	variation	2268389	2268389	.	.	0	note=snp G=>C C:108 G:0
EA2454	snippy:4.3.6	variation	2280726	2280726	.	.	0	note=snp C=>T T:19 C:1
EA2454	snippy:4.3.6	variation	2280732	2280732	.	.	0	note=snp T=>C C:27 T:1
EA2454	snippy:4.3.6	variation	2283117	2283117	.	.	0	note=snp T=>C C:108 T:0
EA2454	snippy:4.3.6	variation	2283286	2283286	.	.	0	note=snp T=>G G:122 T:0
EA2454	snippy:4.3.6	variation	2283880	2283880	.	.	0	note=snp A=>G G:107 A:0
EA2454	snippy:4.3.6	variation	2289041	2289041	.	.	0	note=snp T=>C C:92 T:0
EA2454	snippy:4.3.6	variation	2291863	2291863	.	.	0	note=snp T=>C C:116 T:0
EA2454	snippy:4.3.6	variation	2300618	2300618	.	.	0	note=snp C=>T T:116 C:1
EA2454	snippy:4.3.6	variation	2320690	2320690	.	.	0	note=snp C=>A A:109 C:0
EA2454	snippy:4.3.6	variation	2338673	2338673	.	.	0	note=snp G=>A A:96 G:0
EA2454	snippy:4.3.6	variation	2345580	2345580	.	.	0	note=snp G=>T T:85 G:0
EA2454	snippy:4.3.6	variation	2347262	2347262	.	.	0	note=snp G=>T T:109 G:2
EA2454	snippy:4.3.6	variation	2350339	2350339	.	.	0	note=snp T=>C C:96 T:0
EA2454	snippy:4.3.6	variation	2354351	2354351	.	.	0	note=snp A=>G G:113 A:0
EA2454	snippy:4.3.6	variation	2359024	2359024	.	.	0	note=snp A=>G G:96 A:0
EA2454	snippy:4.3.6	variation	2359142	2359142	.	.	0	note=snp C=>T T:110 C:2
EA2454	snippy:4.3.6	variation	2359298	2359298	.	.	0	note=snp C=>A A:98 C:2
EA2454	snippy:4.3.6	variation	2364340	2364340	.	.	0	note=snp T=>G G:121 T:0
EA2454	snippy:4.3.6	variation	2365736	2365736	.	.	0	note=snp C=>A A:110 C:1
EA2454	snippy:4.3.6	variation	2366037	2366037	.	.	0	note=snp G=>T T:56 G:5
EA2454	snippy:4.3.6	variation	2371672	2371672	.	.	0	note=snp T=>C C:92 T:0
EA2454	snippy:4.3.6	variation	2373982	2373982	.	.	0	note=snp A=>G G:106 A:0
EA2454	snippy:4.3.6	variation	2374664	2374664	.	.	0	note=snp G=>T T:90 G:1
EA2454	snippy:4.3.6	variation	2377172	2377172	.	.	0	note=snp C=>T T:117 C:0
EA2454	snippy:4.3.6	variation	2382535	2382535	.	.	0	note=complex TGCC=>GGT GGT:19 TGCC:0
EA2454	snippy:4.3.6	variation	2393017	2393017	.	.	0	note=snp G=>A A:106 G:0
EA2454	snippy:4.3.6	variation	2395392	2395392	.	.	0	note=snp C=>T T:102 C:0
EA2454	snippy:4.3.6	variation	2397308	2397308	.	.	0	note=snp A=>T T:97 A:0
EA2454	snippy:4.3.6	variation	2403442	2403442	.	.	0	note=snp T=>C C:96 T:0
EA2454	snippy:4.3.6	variation	2406285	2406285	.	.	0	note=ins G=>GT GT:95 G:2
EA2454	snippy:4.3.6	variation	2407449	2407449	.	.	0	note=snp A=>G G:103 A:0
EA2454	snippy:4.3.6	variation	2413656	2413656	.	.	0	note=snp G=>A A:102 G:0
EA2454	snippy:4.3.6	variation	2419574	2419574	.	.	0	note=del CT=>C C:21 CT:0
EA2454	snippy:4.3.6	variation	2421636	2421636	.	.	0	note=snp A=>C C:97 A:0
EA2454	snippy:4.3.6	variation	2428433	2428433	.	.	0	note=snp A=>G G:62 A:0
EA2454	snippy:4.3.6	variation	2436152	2436152	.	.	0	note=snp T=>C C:83 T:0
EA2454	snippy:4.3.6	variation	2451759	2451759	.	.	0	note=snp C=>T T:104 C:1
EA2454	snippy:4.3.6	variation	2456090	2456090	.	.	0	note=snp T=>A A:109 T:0
EA2454	snippy:4.3.6	variation	2461974	2461974	.	.	0	note=snp A=>G G:136 A:0
EA2454	snippy:4.3.6	variation	2479440	2479440	.	.	0	note=snp T=>C C:15 T:0
EA2454	snippy:4.3.6	variation	2484408	2484408	.	.	0	note=snp T=>A A:99 T:0
EA2454	snippy:4.3.6	variation	2486361	2486361	.	.	0	note=snp C=>T T:96 C:1
EA2454	snippy:4.3.6	variation	2511434	2511434	.	.	0	note=snp G=>A A:96 G:1
EA2454	snippy:4.3.6	variation	2518321	2518321	.	.	0	note=del AT=>A A:100 AT:0
EA2454	snippy:4.3.6	variation	2518906	2518906	.	.	0	note=snp A=>C C:103 A:0
EA2454	snippy:4.3.6	variation	2521382	2521382	.	.	0	note=snp C=>T T:100 C:0
EA2454	snippy:4.3.6	variation	2528246	2528246	.	.	0	note=snp T=>C C:94 T:0
EA2454	snippy:4.3.6	variation	2538679	2538679	.	.	0	note=snp T=>C C:85 T:0
EA2454	snippy:4.3.6	variation	2542915	2542915	.	.	0	note=snp C=>T T:106 C:0
EA2454	snippy:4.3.6	variation	2555441	2555441	.	.	0	note=snp A=>G G:93 A:0
EA2454	snippy:4.3.6	variation	2558104	2558104	.	.	0	note=snp T=>A A:101 T:0
EA2454	snippy:4.3.6	variation	2559290	2559290	.	.	0	note=snp C=>A A:125 C:0
EA2454	snippy:4.3.6	variation	2561644	2561644	.	.	0	note=snp T=>A A:85 T:0
EA2454	snippy:4.3.6	variation	2561674	2561674	.	.	0	note=ins G=>GT GT:50 G:0
EA2454	snippy:4.3.6	variation	2582378	2582378	.	.	0	note=snp A=>T T:86 A:1
EA2454	snippy:4.3.6	variation	2586095	2586095	.	.	0	note=snp C=>T T:91 C:0
EA2454	snippy:4.3.6	variation	2588052	2588052	.	.	0	note=snp C=>T T:117 C:0
EA2454	snippy:4.3.6	variation	2588422	2588422	.	.	0	note=snp A=>G G:128 A:0
EA2454	snippy:4.3.6	variation	2589008	2589008	.	.	0	note=snp T=>C C:100 T:0
EA2454	snippy:4.3.6	variation	2589519	2589519	.	.	0	note=snp G=>A A:95 G:0
EA2454	snippy:4.3.6	variation	2596899	2596899	.	.	0	note=snp G=>A A:126 G:0
EA2454	snippy:4.3.6	variation	2597428	2597428	.	.	0	note=snp T=>C C:94 T:0
EA2454	snippy:4.3.6	variation	2598908	2598908	.	.	0	note=snp T=>C C:94 T:0
EA2454	snippy:4.3.6	variation	2607401	2607401	.	.	0	note=snp A=>T T:99 A:0
EA2454	snippy:4.3.6	variation	2612078	2612078	.	.	0	note=snp T=>C C:83 T:0
EA2454	snippy:4.3.6	variation	2612793	2612793	.	.	0	note=snp C=>T T:95 C:1
EA2454	snippy:4.3.6	variation	2631943	2631943	.	.	0	note=snp A=>G G:93 A:0
EA2454	snippy:4.3.6	variation	2632096	2632096	.	.	0	note=snp G=>C C:107 G:0
EA2454	snippy:4.3.6	variation	2635922	2635922	.	.	0	note=snp G=>A A:93 G:0
EA2454	snippy:4.3.6	variation	2639012	2639012	.	.	0	note=snp C=>T T:100 C:0
EA2454	snippy:4.3.6	variation	2641059	2641059	.	.	0	note=snp T=>C C:101 T:0
EA2454	snippy:4.3.6	variation	2644202	2644202	.	.	0	note=snp T=>G G:121 T:0
EA2454	snippy:4.3.6	variation	2647391	2647391	.	.	0	note=snp G=>A A:104 G:0
EA2454	snippy:4.3.6	variation	2648560	2648560	.	.	0	note=snp T=>G G:107 T:0
EA2454	snippy:4.3.6	variation	2650066	2650066	.	.	0	note=snp C=>T T:93 C:0
EA2454	snippy:4.3.6	variation	2654466	2654466	.	.	0	note=snp C=>T T:117 C:0
EA2454	snippy:4.3.6	variation	2655978	2655978	.	.	0	note=ins A=>AT AT:25 A:0
EA2454	snippy:4.3.6	variation	2656923	2656923	.	.	0	note=snp T=>G G:107 T:1
EA2454	snippy:4.3.6	variation	2658667	2658667	.	.	0	note=snp A=>C C:107 A:0
EA2454	snippy:4.3.6	variation	2660000	2660000	.	.	0	note=snp A=>G G:115 A:0
EA2454	snippy:4.3.6	variation	2664103	2664103	.	.	0	note=snp G=>A A:110 G:0
EA2454	snippy:4.3.6	variation	2666737	2666737	.	.	0	note=snp C=>T T:101 C:0
EA2454	snippy:4.3.6	variation	2677237	2677237	.	.	0	note=snp G=>A A:96 G:0
EA2454	snippy:4.3.6	variation	2681454	2681454	.	.	0	note=snp G=>A A:106 G:1
EA2454	snippy:4.3.6	variation	2704134	2704134	.	.	0	note=snp T=>G G:108 T:0
EA2454	snippy:4.3.6	variation	2706402	2706402	.	.	0	note=snp A=>G G:96 A:0
EA2454	snippy:4.3.6	variation	2708222	2708222	.	.	0	note=ins A=>AT AT:100 A:0
EA2454	snippy:4.3.6	variation	2712673	2712673	.	.	0	note=snp G=>A A:98 G:0
EA2454	snippy:4.3.6	variation	2718692	2718692	.	.	0	note=snp A=>C C:81 A:1
EA2454	snippy:4.3.6	variation	2722619	2722619	.	.	0	note=snp A=>G G:99 A:0
EA2454	snippy:4.3.6	variation	2736003	2736003	.	.	0	note=snp G=>A A:102 G:0
EA2454	snippy:4.3.6	variation	2743080	2743080	.	.	0	note=snp T=>G G:96 T:0
EA2454	snippy:4.3.6	variation	2748849	2748849	.	.	0	note=del GT=>G G:32 GT:0
EA2454	snippy:4.3.6	variation	2753130	2753130	.	.	0	note=snp G=>A A:127 G:0
EA2454	snippy:4.3.6	variation	2755025	2755025	.	.	0	note=snp C=>T T:104 C:0
EA2454	snippy:4.3.6	variation	2755245	2755245	.	.	0	note=snp G=>C C:131 G:0
EA2454	snippy:4.3.6	variation	2760352	2760352	.	.	0	note=snp A=>G G:82 A:0
EA2454	snippy:4.3.6	variation	2761696	2761696	.	.	0	note=ins G=>GCT GCT:85 G:0
EA2454	snippy:4.3.6	variation	2762805	2762805	.	.	0	note=snp G=>A A:99 G:0
EA2454	snippy:4.3.6	variation	2763065	2763065	.	.	0	note=snp A=>G G:89 A:0
EA2454	snippy:4.3.6	variation	2771595	2771595	.	.	0	note=snp T=>A A:106 T:0
EA2454	snippy:4.3.6	variation	2773210	2773210	.	.	0	note=del TA=>T T:97 TA:0
EA2454	snippy:4.3.6	variation	2774852	2774852	.	.	0	note=snp A=>G G:113 A:0
EA2454	snippy:4.3.6	variation	2775069	2775069	.	.	0	note=snp A=>G G:96 A:0
EA2454	snippy:4.3.6	variation	2777153	2777153	.	.	0	note=snp T=>G G:112 T:1
EA2454	snippy:4.3.6	variation	2779731	2779731	.	.	0	note=snp T=>A A:115 T:0
EA2454	snippy:4.3.6	variation	2780258	2780258	.	.	0	note=snp G=>A A:85 G:0
EA2454	snippy:4.3.6	variation	2782946	2782946	.	.	0	note=snp C=>T T:95 C:0
EA2454	snippy:4.3.6	variation	2789135	2789135	.	.	0	note=snp T=>G G:73 T:0
EA2454	snippy:4.3.6	variation	2789598	2789598	.	.	0	note=snp G=>A A:103 G:0
EA2454	snippy:4.3.6	variation	2793323	2793323	.	.	0	note=snp T=>C C:132 T:0
EA2454	snippy:4.3.6	variation	2805951	2805951	.	.	0	note=snp C=>T T:98 C:0
EA2454	snippy:4.3.6	variation	2808846	2808846	.	.	0	note=snp C=>T T:58 C:0
EA2454	snippy:4.3.6	variation	2809435	2809435	.	.	0	note=snp G=>C C:121 G:0
EA2454	snippy:4.3.6	variation	2811556	2811556	.	.	0	note=snp C=>T T:133 C:0
EA2454	snippy:4.3.6	variation	2815762	2815762	.	.	0	note=snp A=>G G:98 A:0
EA2454	snippy:4.3.6	variation	2816107	2816107	.	.	0	note=snp C=>A A:132 C:0
EA2454	snippy:4.3.6	variation	2824621	2824621	.	.	0	note=ins G=>GT GT:89 G:1
EA2454	snippy:4.3.6	variation	2829690	2829690	.	.	0	note=snp G=>C C:114 G:0
EA2454	snippy:4.3.6	variation	2832637	2832637	.	.	0	note=snp C=>T T:85 C:0
EA2454	snippy:4.3.6	variation	2837636	2837636	.	.	0	note=snp T=>C C:83 T:0
EA2454	snippy:4.3.6	variation	2838863	2838863	.	.	0	note=snp C=>T T:101 C:0
EA2454	snippy:4.3.6	variation	2843028	2843028	.	.	0	note=snp C=>G G:90 C:0
EA2454	snippy:4.3.6	variation	2847080	2847080	.	.	0	note=snp T=>C C:116 T:0
EA2454	snippy:4.3.6	variation	2850370	2850370	.	.	0	note=snp A=>C C:87 A:0
EA2454	snippy:4.3.6	variation	2851743	2851743	.	.	0	note=snp T=>A A:96 T:0
EA2454	snippy:4.3.6	variation	2853536	2853536	.	.	0	note=snp C=>T T:95 C:0
EA2454	snippy:4.3.6	variation	2860024	2860024	.	.	0	note=snp T=>G G:102 T:0
EA2454	snippy:4.3.6	variation	2863806	2863806	.	.	0	note=snp C=>T T:97 C:0
EA2454	snippy:4.3.6	variation	2865701	2865701	.	.	0	note=snp T=>C C:103 T:0
EA2454	snippy:4.3.6	variation	2872360	2872360	.	.	0	note=snp A=>G G:102 A:0
EA2454	snippy:4.3.6	variation	2874118	2874118	.	.	0	note=snp G=>A A:77 G:0
EA2454	snippy:4.3.6	variation	2876151	2876151	.	.	0	note=snp T=>C C:101 T:0
EA2454	snippy:4.3.6	variation	2881008	2881008	.	.	0	note=snp G=>C C:92 G:0
EA2454	snippy:4.3.6	variation	2883184	2883184	.	.	0	note=snp T=>C C:119 T:0
EA2454	snippy:4.3.6	variation	2885769	2885769	.	.	0	note=snp G=>A A:83 G:0
EA2454	snippy:4.3.6	variation	2897200	2897200	.	.	0	note=snp G=>A A:97 G:0
EA2454	snippy:4.3.6	variation	2901111	2901111	.	.	0	note=snp A=>G G:83 A:0
EA2454	snippy:4.3.6	variation	2903547	2903547	.	.	0	note=snp C=>A A:98 C:1
EA2454	snippy:4.3.6	variation	2915687	2915687	.	.	0	note=snp G=>A A:91 G:0
EA2454	snippy:4.3.6	variation	2927920	2927920	.	.	0	note=snp T=>C C:113 T:0
EA2454	snippy:4.3.6	variation	2929028	2929028	.	.	0	note=snp G=>A A:122 G:2
EA2454	snippy:4.3.6	variation	2931389	2931389	.	.	0	note=snp T=>G G:118 T:0
EA2454	snippy:4.3.6	variation	2934279	2934279	.	.	0	note=snp A=>G G:87 A:0
EA2454	snippy:4.3.6	variation	2937585	2937585	.	.	0	note=snp A=>G G:89 A:0
EA2454	snippy:4.3.6	variation	2939135	2939135	.	.	0	note=ins A=>AT AT:86 A:0
EA2454	snippy:4.3.6	variation	2941498	2941498	.	.	0	note=snp G=>A A:86 G:0
EA2454	snippy:4.3.6	variation	2945610	2945610	.	.	0	note=snp G=>A A:103 G:0
EA2454	snippy:4.3.6	variation	2954325	2954325	.	.	0	note=snp C=>A A:11 C:0
EA2454	snippy:4.3.6	variation	2954331	2954331	.	.	0	note=snp T=>C C:13 T:0
EA2454	snippy:4.3.6	variation	2954356	2954356	.	.	0	note=snp T=>A A:20 T:0
EA2454	snippy:4.3.6	variation	2954364	2954364	.	.	0	note=snp A=>T T:22 A:0
EA2454	snippy:4.3.6	variation	2954372	2954372	.	.	0	note=complex GAA=>TAG TAG:22 GAA:0
EA2454	snippy:4.3.6	variation	2954402	2954402	.	.	0	note=snp C=>T T:30 C:0
EA2454	snippy:4.3.6	variation	2954425	2954425	.	.	0	note=snp A=>G G:22 A:0
EA2454	snippy:4.3.6	variation	2954433	2954433	.	.	0	note=snp G=>C C:18 G:0
EA2454	snippy:4.3.6	variation	2954439	2954439	.	.	0	note=snp A=>G G:16 A:0
EA2454	snippy:4.3.6	variation	2954451	2954451	.	.	0	note=complex GCCG=>ATCT ATCT:11 GCCG:0
EA2454	snippy:4.3.6	variation	2954460	2954460	.	.	0	note=snp G=>A A:11 G:0
EA2454	snippy:4.3.6	variation	2954754	2954754	.	.	0	note=snp T=>G G:40 T:0
EA2454	snippy:4.3.6	variation	2954772	2954772	.	.	0	note=complex CGGTT=>TGACC TGACC:49 CGGTT:0
EA2454	snippy:4.3.6	variation	2954847	2954847	.	.	0	note=snp A=>G G:96 A:0
EA2454	snippy:4.3.6	variation	2954880	2954880	.	.	0	note=snp T=>A A:97 T:0
EA2454	snippy:4.3.6	variation	2954885	2954885	.	.	0	note=snp T=>A A:100 T:0
EA2454	snippy:4.3.6	variation	2954897	2954897	.	.	0	note=snp T=>C C:104 T:1
EA2454	snippy:4.3.6	variation	2954976	2954976	.	.	0	note=snp C=>T T:102 C:1
EA2454	snippy:4.3.6	variation	2954993	2954993	.	.	0	note=snp T=>C C:94 T:0
EA2454	snippy:4.3.6	variation	2955083	2955083	.	.	0	note=snp T=>C C:83 T:0
EA2454	snippy:4.3.6	variation	2959641	2959641	.	.	0	note=snp T=>C C:82 T:0
EA2454	snippy:4.3.6	variation	2961144	2961144	.	.	0	note=snp G=>A A:98 G:0
EA2454	snippy:4.3.6	variation	2963100	2963100	.	.	0	note=snp G=>A A:77 G:0
EA2454	snippy:4.3.6	variation	2965650	2965650	.	.	0	note=snp G=>A A:97 G:0
EA2454	snippy:4.3.6	variation	2966386	2966386	.	.	0	note=snp G=>A A:77 G:0
EA2454	snippy:4.3.6	variation	2967930	2967930	.	.	0	note=snp A=>G G:85 A:0
EA2454	snippy:4.3.6	variation	2973098	2973098	.	.	0	note=snp T=>C C:102 T:1
EA2454	snippy:4.3.6	variation	2982932	2982932	.	.	0	note=snp A=>T T:82 A:0
EA2454	snippy:4.3.6	variation	2985776	2985776	.	.	0	note=snp A=>G G:104 A:0
EA2454	snippy:4.3.6	variation	2988598	2988598	.	.	0	note=snp A=>T T:98 A:0
EA2454	snippy:4.3.6	variation	2995599	2995599	.	.	0	note=snp T=>C C:96 T:0
EA2454	snippy:4.3.6	variation	2998717	2998717	.	.	0	note=snp A=>G G:97 A:0
EA2454	snippy:4.3.6	variation	3004965	3004965	.	.	0	note=snp C=>A A:119 C:0
EA2454	snippy:4.3.6	variation	3011392	3011392	.	.	0	note=snp G=>A A:102 G:0
EA2454	snippy:4.3.6	variation	3017377	3017377	.	.	0	note=snp G=>A A:102 G:1
EA2454	snippy:4.3.6	variation	3018368	3018368	.	.	0	note=snp T=>C C:12 T:1
EA2454	snippy:4.3.6	variation	3018380	3018380	.	.	0	note=snp G=>T T:15 G:1
EA2454	snippy:4.3.6	variation	3018481	3018481	.	.	0	note=snp A=>G G:11 A:1
EA2454	snippy:4.3.6	variation	3028291	3028291	.	.	0	note=snp A=>G G:97 A:0
EA2454	snippy:4.3.6	variation	3029086	3029086	.	.	0	note=snp C=>T T:94 C:0
EA2454	snippy:4.3.6	variation	3041125	3041125	.	.	0	note=snp T=>G G:97 T:0
EA2454	snippy:4.3.6	variation	3045127	3045127	.	.	0	note=snp G=>A A:116 G:0
EA2454	snippy:4.3.6	variation	3052455	3052455	.	.	0	note=snp G=>A A:109 G:0
EA2454	snippy:4.3.6	variation	3052992	3052992	.	.	0	note=snp G=>C C:95 G:0
EA2454	snippy:4.3.6	variation	3055255	3055255	.	.	0	note=snp G=>A A:98 G:0
EA2454	snippy:4.3.6	variation	3057242	3057242	.	.	0	note=snp A=>G G:117 A:0
EA2454	snippy:4.3.6	variation	3082171	3082171	.	.	0	note=snp C=>T T:103 C:0
EA2454	snippy:4.3.6	variation	3089610	3089610	.	.	0	note=snp C=>T T:58 C:0
EA2454	snippy:4.3.6	variation	3091335	3091335	.	.	0	note=snp T=>C C:114 T:0
EA2454	snippy:4.3.6	variation	3092041	3092041	.	.	0	note=snp T=>C C:95 T:0
EA2454	snippy:4.3.6	variation	3093850	3093850	.	.	0	note=snp T=>C C:105 T:0
EA2454	snippy:4.3.6	variation	3099129	3099129	.	.	0	note=snp T=>C C:108 T:0
EA2454	snippy:4.3.6	variation	3101851	3101851	.	.	0	note=snp A=>G G:112 A:0
EA2454	snippy:4.3.6	variation	3104888	3104888	.	.	0	note=snp C=>T T:94 C:0
EA2454	snippy:4.3.6	variation	3112595	3112595	.	.	0	note=ins C=>CG CG:91 C:0
EA2454	snippy:4.3.6	variation	3112890	3112890	.	.	0	note=snp A=>G G:90 A:0
EA2454	snippy:4.3.6	variation	3115749	3115749	.	.	0	note=snp T=>A A:122 T:0
EA2454	snippy:4.3.6	variation	3117020	3117020	.	.	0	note=snp C=>G G:119 C:0
EA2454	snippy:4.3.6	variation	3121622	3121622	.	.	0	note=snp T=>A A:84 T:0
EA2454	snippy:4.3.6	variation	3123709	3123709	.	.	0	note=snp A=>G G:112 A:1
EA2454	snippy:4.3.6	variation	3125212	3125212	.	.	0	note=snp A=>G G:126 A:0
EA2454	snippy:4.3.6	variation	3133556	3133556	.	.	0	note=snp G=>T T:91 G:0
EA2454	snippy:4.3.6	variation	3135617	3135617	.	.	0	note=snp A=>C C:114 A:0
EA2454	snippy:4.3.6	variation	3145979	3145979	.	.	0	note=snp C=>T T:108 C:1
EA2454	snippy:4.3.6	variation	3149583	3149583	.	.	0	note=snp G=>A A:96 G:0
EA2454	snippy:4.3.6	variation	3153411	3153411	.	.	0	note=snp A=>C C:97 A:0
EA2454	snippy:4.3.6	variation	3175254	3175254	.	.	0	note=snp T=>C C:114 T:0
EA2454	snippy:4.3.6	variation	3177688	3177688	.	.	0	note=snp C=>T T:108 C:0
EA2454	snippy:4.3.6	variation	3179306	3179306	.	.	0	note=snp G=>A A:127 G:0
EA2454	snippy:4.3.6	variation	3184883	3184883	.	.	0	note=del CA=>C C:76 CA:0
EA2454	snippy:4.3.6	variation	3188469	3188469	.	.	0	note=snp T=>C C:104 T:0
EA2454	snippy:4.3.6	variation	3188675	3188675	.	.	0	note=snp T=>A A:130 T:0
EA2454	snippy:4.3.6	variation	3193765	3193765	.	.	0	note=ins G=>GA GA:69 G:0
EA2454	snippy:4.3.6	variation	3196063	3196063	.	.	0	note=snp T=>C C:126 T:0
EA2454	snippy:4.3.6	variation	3197243	3197243	.	.	0	note=snp T=>C C:104 T:0
EA2454	snippy:4.3.6	variation	3199166	3199166	.	.	0	note=snp T=>C C:107 T:0
EA2454	snippy:4.3.6	variation	3211809	3211809	.	.	0	note=snp T=>C C:87 T:0
EA2454	snippy:4.3.6	variation	3213292	3213292	.	.	0	note=snp A=>C C:106 A:0
EA2454	snippy:4.3.6	variation	3218193	3218193	.	.	0	note=snp T=>G G:81 T:0
EA2454	snippy:4.3.6	variation	3221164	3221164	.	.	0	note=snp C=>T T:95 C:0
EA2454	snippy:4.3.6	variation	3224798	3224798	.	.	0	note=snp A=>G G:128 A:0
EA2454	snippy:4.3.6	variation	3249895	3249895	.	.	0	note=snp C=>A A:115 C:0
EA2454	snippy:4.3.6	variation	3258466	3258466	.	.	0	note=snp C=>T T:119 C:0
EA2454	snippy:4.3.6	variation	3259703	3259703	.	.	0	note=snp G=>A A:109 G:0
EA2454	snippy:4.3.6	variation	3263384	3263384	.	.	0	note=snp T=>C C:102 T:0
EA2454	snippy:4.3.6	variation	3268326	3268326	.	.	0	note=snp G=>A A:112 G:0
EA2454	snippy:4.3.6	variation	3268759	3268759	.	.	0	note=snp C=>T T:98 C:0
EA2454	snippy:4.3.6	variation	3271358	3271358	.	.	0	note=snp T=>C C:110 T:0
EA2454	snippy:4.3.6	variation	3272561	3272561	.	.	0	note=snp G=>T T:106 G:0
EA2454	snippy:4.3.6	variation	3277906	3277906	.	.	0	note=snp G=>A A:92 G:0
EA2454	snippy:4.3.6	variation	3279388	3279388	.	.	0	note=snp C=>T T:97 C:2
EA2454	snippy:4.3.6	variation	3281767	3281767	.	.	0	note=ins G=>GC GC:85 G:0
EA2454	snippy:4.3.6	variation	3283909	3283909	.	.	0	note=snp G=>A A:114 G:1
EA2454	snippy:4.3.6	variation	3290202	3290202	.	.	0	note=snp C=>A A:101 C:0
EA2454	snippy:4.3.6	variation	3291020	3291020	.	.	0	note=snp C=>T T:114 C:1
EA2454	snippy:4.3.6	variation	3305295	3305295	.	.	0	note=snp A=>G G:83 A:0
EA2454	snippy:4.3.6	variation	3305988	3305988	.	.	0	note=snp G=>C C:109 G:0
EA2454	snippy:4.3.6	variation	3307663	3307663	.	.	0	note=snp C=>T T:87 C:0
EA2454	snippy:4.3.6	variation	3310578	3310578	.	.	0	note=snp A=>G G:25 A:0
EA2454	snippy:4.3.6	variation	3312869	3312869	.	.	0	note=snp C=>T T:130 C:0
EA2454	snippy:4.3.6	variation	3321158	3321158	.	.	0	note=snp C=>T T:96 C:1
EA2454	snippy:4.3.6	variation	3324781	3324781	.	.	0	note=snp G=>T T:108 G:0
EA2454	snippy:4.3.6	variation	3333536	3333536	.	.	0	note=snp C=>T T:98 C:1
EA2454	snippy:4.3.6	variation	3339497	3339497	.	.	0	note=snp C=>T T:169 C:0
EA2454	snippy:4.3.6	variation	3339812	3339812	.	.	0	note=snp G=>T T:297 G:1
EA2454	snippy:4.3.6	variation	3339848	3339848	.	.	0	note=complex AATCACA=>GATGACG GATGACG:28 AATCACA:2
EA2454	snippy:4.3.6	variation	3357780	3357780	.	.	0	note=snp T=>C C:14 T:0
EA2454	snippy:4.3.6	variation	3357862	3357862	.	.	0	note=complex CCACCG=>TCAGCA TCAGCA:10 CCACCG:0
EA2454	snippy:4.3.6	variation	3358100	3358100	.	.	0	note=snp T=>C C:91 T:0
EA2454	snippy:4.3.6	variation	3358126	3358126	.	.	0	note=del GGAATTACA=>G G:58 GGAATTACA:0
EA2454	snippy:4.3.6	variation	3358268	3358268	.	.	0	note=snp G=>A A:88 G:0
EA2454	snippy:4.3.6	variation	3358394	3358394	.	.	0	note=del AC=>A A:51 AC:2
EA2454	snippy:4.3.6	variation	3358578	3358578	.	.	0	note=snp G=>A A:101 G:0
EA2454	snippy:4.3.6	variation	3358644	3358644	.	.	0	note=snp A=>G G:86 A:0
EA2454	snippy:4.3.6	variation	3358666	3358666	.	.	0	note=snp A=>G G:99 A:0
EA2454	snippy:4.3.6	variation	3358759	3358759	.	.	0	note=snp A=>G G:91 A:0
EA2454	snippy:4.3.6	variation	3358764	3358764	.	.	0	note=snp A=>G G:89 A:0
EA2454	snippy:4.3.6	variation	3358796	3358796	.	.	0	note=snp A=>G G:88 A:0
EA2454	snippy:4.3.6	variation	3358845	3358845	.	.	0	note=snp C=>A A:84 C:0
EA2454	snippy:4.3.6	variation	3358856	3358856	.	.	0	note=complex CCGGCGTATC=>TCGGTATATT TCGGTATATT:78 CCGGCGTATC:0
EA2454	snippy:4.3.6	variation	3358892	3358892	.	.	0	note=complex ACTG=>GCTA GCTA:96 ACTG:0
EA2454	snippy:4.3.6	variation	3358908	3358908	.	.	0	note=complex GCA=>ACG ACG:93 GCA:0
EA2454	snippy:4.3.6	variation	3358934	3358934	.	.	0	note=snp T=>C C:114 T:0
EA2454	snippy:4.3.6	variation	3358967	3358967	.	.	0	note=complex CGG=>TGA TGA:116 CGG:0
EA2454	snippy:4.3.6	variation	3358986	3358986	.	.	0	note=snp G=>T T:111 G:0
EA2454	snippy:4.3.6	variation	3359024	3359024	.	.	0	note=snp C=>T T:99 C:0
EA2454	snippy:4.3.6	variation	3359034	3359034	.	.	0	note=snp G=>A A:95 G:0
EA2454	snippy:4.3.6	variation	3359100	3359100	.	.	0	note=snp G=>A A:104 G:0
EA2454	snippy:4.3.6	variation	3359133	3359133	.	.	0	note=snp G=>A A:115 G:1
EA2454	snippy:4.3.6	variation	3359170	3359170	.	.	0	note=snp C=>A A:122 C:0
EA2454	snippy:4.3.6	variation	3359209	3359209	.	.	0	note=snp G=>T T:125 G:0
EA2454	snippy:4.3.6	variation	3359238	3359238	.	.	0	note=snp C=>A A:120 C:0
EA2454	snippy:4.3.6	variation	3359275	3359275	.	.	0	note=snp A=>C C:104 A:0
EA2454	snippy:4.3.6	variation	3359302	3359302	.	.	0	note=snp T=>C C:100 T:0
EA2454	snippy:4.3.6	variation	3359308	3359308	.	.	0	note=del CT=>C C:94 CT:0
EA2454	snippy:4.3.6	variation	3359322	3359322	.	.	0	note=snp T=>G G:96 T:0
EA2454	snippy:4.3.6	variation	3359342	3359342	.	.	0	note=snp A=>C C:91 A:1
EA2454	snippy:4.3.6	variation	3359385	3359385	.	.	0	note=snp T=>A A:93 T:0
EA2454	snippy:4.3.6	variation	3359408	3359408	.	.	0	note=complex AAA=>GAC GAC:81 AAA:0
EA2454	snippy:4.3.6	variation	3359433	3359433	.	.	0	note=snp C=>T T:82 C:0
EA2454	snippy:4.3.6	variation	3359456	3359456	.	.	0	note=complex CAAAATCA=>ACAACC ACAACC:61 CAAAATCA:0
EA2454	snippy:4.3.6	variation	3359485	3359485	.	.	0	note=snp A=>G G:82 A:0
EA2454	snippy:4.3.6	variation	3359528	3359528	.	.	0	note=snp C=>A A:93 C:0
EA2454	snippy:4.3.6	variation	3359549	3359549	.	.	0	note=complex TCAAC=>CCTACTCA CCTACTCA:73 TCAAC:0
EA2454	snippy:4.3.6	variation	3359593	3359593	.	.	0	note=complex GGTGCGTCG=>AGTCGT AGTCGT:81 GGTGCGTCG:0
EA2454	snippy:4.3.6	variation	3359658	3359658	.	.	0	note=snp G=>T T:91 G:0
EA2454	snippy:4.3.6	variation	3359742	3359742	.	.	0	note=snp T=>C C:103 T:0
EA2454	snippy:4.3.6	variation	3359754	3359754	.	.	0	note=snp A=>G G:112 A:0
EA2454	snippy:4.3.6	variation	3359862	3359862	.	.	0	note=snp A=>C C:94 A:0
EA2454	snippy:4.3.6	variation	3359869	3359869	.	.	0	note=complex GTTAT=>ATTAC ATTAC:89 GTTAT:0
EA2454	snippy:4.3.6	variation	3359918	3359918	.	.	0	note=snp C=>T T:103 C:0
EA2454	snippy:4.3.6	variation	3359924	3359924	.	.	0	note=complex CGTG=>TGTA TGTA:98 CGTG:0
EA2454	snippy:4.3.6	variation	3359980	3359980	.	.	0	note=complex AATTCAGT=>CACCCAGC CACCCAGC:99 AATTCAGT:0
EA2454	snippy:4.3.6	variation	3360091	3360091	.	.	0	note=snp A=>G G:92 A:0
EA2454	snippy:4.3.6	variation	3360208	3360208	.	.	0	note=snp C=>T T:98 C:0
EA2454	snippy:4.3.6	variation	3360229	3360229	.	.	0	note=snp G=>A A:91 G:0
EA2454	snippy:4.3.6	variation	3360238	3360238	.	.	0	note=snp T=>C C:92 T:0
EA2454	snippy:4.3.6	variation	3360244	3360244	.	.	0	note=complex CGGC=>TGGT TGGT:80 CGGC:0
EA2454	snippy:4.3.6	variation	3360262	3360262	.	.	0	note=snp G=>A A:92 G:0
EA2454	snippy:4.3.6	variation	3360322	3360322	.	.	0	note=complex CGAA=>TGAC TGAC:78 CGAA:0
EA2454	snippy:4.3.6	variation	3360346	3360346	.	.	0	note=snp G=>C C:80 G:0
EA2454	snippy:4.3.6	variation	3360379	3360379	.	.	0	note=snp T=>C C:39 T:0
EA2454	snippy:4.3.6	variation	3360631	3360631	.	.	0	note=snp C=>T T:10 C:0
EA2454	snippy:4.3.6	variation	3360650	3360650	.	.	0	note=snp C=>T T:23 C:0
EA2454	snippy:4.3.6	variation	3360669	3360669	.	.	0	note=complex ATTGC=>TATATTGT TATATTGT:30 ATTGC:0
EA2454	snippy:4.3.6	variation	3360686	3360686	.	.	0	note=complex GATGC=>CATGG CATGG:66 GATGC:0
EA2454	snippy:4.3.6	variation	3360696	3360696	.	.	0	note=complex TACA=>CACG CACG:69 TACA:0
EA2454	snippy:4.3.6	variation	3360708	3360708	.	.	0	note=complex GGTTATTT=>AGTGATTG AGTGATTG:68 GGTTATTT:0
EA2454	snippy:4.3.6	variation	3360743	3360743	.	.	0	note=snp C=>T T:79 C:0
EA2454	snippy:4.3.6	variation	3360786	3360786	.	.	0	note=snp T=>C C:62 T:0
EA2454	snippy:4.3.6	variation	3360799	3360799	.	.	0	note=snp T=>A A:55 T:0
EA2454	snippy:4.3.6	variation	3360805	3360805	.	.	0	note=complex TGACACT=>AGCCCC AGCCCC:37 TGACACT:0
EA2454	snippy:4.3.6	variation	3360816	3360816	.	.	0	note=complex TCCCG=>ACCCA ACCCA:41 TCCCG:0
EA2454	snippy:4.3.6	variation	3360834	3360834	.	.	0	note=snp A=>G G:61 A:0
EA2454	snippy:4.3.6	variation	3360858	3360858	.	.	0	note=snp C=>T T:68 C:0
EA2454	snippy:4.3.6	variation	3360882	3360882	.	.	0	note=snp G=>A A:69 G:0
EA2454	snippy:4.3.6	variation	3360905	3360905	.	.	0	note=del AC=>A A:92 AC:0
EA2454	snippy:4.3.6	variation	3360911	3360911	.	.	0	note=snp G=>A A:103 G:0
EA2454	snippy:4.3.6	variation	3360927	3360927	.	.	0	note=snp C=>T T:98 C:0
EA2454	snippy:4.3.6	variation	3360936	3360936	.	.	0	note=complex GGA=>AGG AGG:100 GGA:1
EA2454	snippy:4.3.6	variation	3360943	3360943	.	.	0	note=snp T=>A A:106 T:0
EA2454	snippy:4.3.6	variation	3360982	3360982	.	.	0	note=snp C=>T T:107 C:0
EA2454	snippy:4.3.6	variation	3360994	3360994	.	.	0	note=snp C=>T T:96 C:0
EA2454	snippy:4.3.6	variation	3360999	3360999	.	.	0	note=snp A=>C C:83 A:0
EA2454	snippy:4.3.6	variation	3361005	3361005	.	.	0	note=snp A=>C C:80 A:0
EA2454	snippy:4.3.6	variation	3361013	3361013	.	.	0	note=complex CAGTCATCAAC=>TAG TAG:57 CAGTCATCAAC:0
EA2454	snippy:4.3.6	variation	3361046	3361046	.	.	0	note=snp C=>T T:64 C:0
EA2454	snippy:4.3.6	variation	3361083	3361083	.	.	0	note=complex CA=>TC TC:47 CA:0
EA2454	snippy:4.3.6	variation	3361090	3361090	.	.	0	note=snp C=>A A:54 C:0
EA2454	snippy:4.3.6	variation	3361101	3361101	.	.	0	note=snp C=>A A:64 C:0
EA2454	snippy:4.3.6	variation	3361107	3361107	.	.	0	note=snp A=>G G:70 A:0
EA2454	snippy:4.3.6	variation	3361117	3361117	.	.	0	note=snp G=>A A:75 G:0
EA2454	snippy:4.3.6	variation	3361132	3361132	.	.	0	note=snp G=>A A:83 G:0
EA2454	snippy:4.3.6	variation	3361141	3361141	.	.	0	note=snp C=>T T:82 C:0
EA2454	snippy:4.3.6	variation	3361156	3361156	.	.	0	note=snp C=>T T:89 C:0
EA2454	snippy:4.3.6	variation	3361196	3361196	.	.	0	note=snp C=>T T:96 C:0
EA2454	snippy:4.3.6	variation	3361204	3361204	.	.	0	note=snp G=>A A:93 G:0
EA2454	snippy:4.3.6	variation	3361214	3361214	.	.	0	note=complex TATTT=>AATTC AATTC:85 TATTT:0
EA2454	snippy:4.3.6	variation	3361226	3361226	.	.	0	note=complex TAACAT=>AAA AAA:72 TAACAT:0
EA2454	snippy:4.3.6	variation	3361248	3361248	.	.	0	note=snp C=>T T:84 C:0
EA2454	snippy:4.3.6	variation	3361256	3361256	.	.	0	note=snp G=>A A:80 G:0
EA2454	snippy:4.3.6	variation	3361276	3361276	.	.	0	note=snp A=>G G:90 A:0
EA2454	snippy:4.3.6	variation	3361292	3361292	.	.	0	note=snp A=>G G:98 A:0
EA2454	snippy:4.3.6	variation	3361321	3361321	.	.	0	note=snp G=>A A:106 G:0
EA2454	snippy:4.3.6	variation	3361337	3361337	.	.	0	note=complex TAC=>CAT CAT:114 TAC:0
EA2454	snippy:4.3.6	variation	3361402	3361402	.	.	0	note=snp C=>T T:106 C:0
EA2454	snippy:4.3.6	variation	3361442	3361442	.	.	0	note=snp G=>A A:100 G:0
EA2454	snippy:4.3.6	variation	3361451	3361451	.	.	0	note=snp T=>C C:94 T:0
EA2454	snippy:4.3.6	variation	3361456	3361456	.	.	0	note=snp G=>A A:98 G:0
EA2454	snippy:4.3.6	variation	3361464	3361464	.	.	0	note=snp T=>G G:94 T:0
EA2454	snippy:4.3.6	variation	3361481	3361481	.	.	0	note=snp C=>T T:93 C:0
EA2454	snippy:4.3.6	variation	3361488	3361488	.	.	0	note=snp A=>G G:96 A:0
EA2454	snippy:4.3.6	variation	3361499	3361499	.	.	0	note=snp G=>T T:103 G:0
EA2454	snippy:4.3.6	variation	3361541	3361541	.	.	0	note=snp T=>G G:97 T:0
EA2454	snippy:4.3.6	variation	3361552	3361552	.	.	0	note=snp G=>A A:101 G:0
EA2454	snippy:4.3.6	variation	3361762	3361762	.	.	0	note=snp C=>T T:75 C:0
EA2454	snippy:4.3.6	variation	3361780	3361780	.	.	0	note=complex ATGCCAG=>GCACCAA GCACCAA:55 ATGCCAG:0
EA2454	snippy:4.3.6	variation	3361807	3361807	.	.	0	note=snp A=>G G:64 A:0
EA2454	snippy:4.3.6	variation	3361817	3361817	.	.	0	note=snp G=>C C:69 G:0
EA2454	snippy:4.3.6	variation	3361830	3361830	.	.	0	note=snp C=>G G:78 C:0
EA2454	snippy:4.3.6	variation	3361859	3361859	.	.	0	note=ins G=>GC GC:73 G:0
EA2454	snippy:4.3.6	variation	3361881	3361881	.	.	0	note=snp A=>C C:85 A:0
EA2454	snippy:4.3.6	variation	3361889	3361889	.	.	0	note=snp G=>A A:85 G:0
EA2454	snippy:4.3.6	variation	3361900	3361900	.	.	0	note=snp T=>C C:86 T:0
EA2454	snippy:4.3.6	variation	3361907	3361907	.	.	0	note=snp A=>T T:85 A:0
EA2454	snippy:4.3.6	variation	3361929	3361929	.	.	0	note=snp G=>T T:81 G:0
EA2454	snippy:4.3.6	variation	3361942	3361942	.	.	0	note=snp C=>T T:82 C:0
EA2454	snippy:4.3.6	variation	3361950	3361950	.	.	0	note=snp T=>C C:86 T:0
EA2454	snippy:4.3.6	variation	3361957	3361957	.	.	0	note=snp A=>G G:89 A:0
EA2454	snippy:4.3.6	variation	3361986	3361986	.	.	0	note=snp G=>C C:87 G:0
EA2454	snippy:4.3.6	variation	3361992	3361992	.	.	0	note=complex GA=>AG AG:78 GA:0
EA2454	snippy:4.3.6	variation	3362001	3362001	.	.	0	note=snp C=>A A:96 C:0
EA2454	snippy:4.3.6	variation	3362009	3362009	.	.	0	note=snp G=>A A:103 G:0
EA2454	snippy:4.3.6	variation	3362083	3362083	.	.	0	note=complex CGA=>TGC TGC:117 CGA:0
EA2454	snippy:4.3.6	variation	3362159	3362159	.	.	0	note=snp C=>T T:113 C:0
EA2454	snippy:4.3.6	variation	3362241	3362241	.	.	0	note=snp T=>G G:117 T:0
EA2454	snippy:4.3.6	variation	3362263	3362263	.	.	0	note=complex ATAAAG=>GTAATA GTAATA:110 ATAAAG:0
EA2454	snippy:4.3.6	variation	3362313	3362313	.	.	0	note=snp A=>G G:131 A:0
EA2454	snippy:4.3.6	variation	3362450	3362450	.	.	0	note=snp T=>C C:103 T:0
EA2454	snippy:4.3.6	variation	3362465	3362465	.	.	0	note=complex TA=>GG GG:84 TA:0
EA2454	snippy:4.3.6	variation	3362489	3362489	.	.	0	note=snp A=>G G:91 A:0
EA2454	snippy:4.3.6	variation	3362518	3362518	.	.	0	note=snp T=>G G:99 T:0
EA2454	snippy:4.3.6	variation	3362546	3362546	.	.	0	note=snp C=>T T:113 C:0
EA2454	snippy:4.3.6	variation	3362624	3362624	.	.	0	note=snp C=>T T:113 C:0
EA2454	snippy:4.3.6	variation	3362630	3362630	.	.	0	note=snp C=>T T:117 C:0
EA2454	snippy:4.3.6	variation	3362685	3362685	.	.	0	note=snp G=>A A:112 G:0
EA2454	snippy:4.3.6	variation	3362699	3362699	.	.	0	note=snp G=>T T:105 G:0
EA2454	snippy:4.3.6	variation	3362867	3362867	.	.	0	note=snp T=>C C:119 T:0
EA2454	snippy:4.3.6	variation	3362891	3362891	.	.	0	note=complex AGCG=>GGCA GGCA:104 AGCG:0
EA2454	snippy:4.3.6	variation	3362924	3362924	.	.	0	note=snp A=>C C:121 A:0
EA2454	snippy:4.3.6	variation	3362945	3362945	.	.	0	note=snp G=>A A:120 G:0
EA2454	snippy:4.3.6	variation	3362957	3362957	.	.	0	note=snp G=>A A:116 G:0
EA2454	snippy:4.3.6	variation	3362966	3362966	.	.	0	note=snp T=>C C:112 T:0
EA2454	snippy:4.3.6	variation	3362987	3362987	.	.	0	note=snp C=>T T:117 C:1
EA2454	snippy:4.3.6	variation	3363013	3363013	.	.	0	note=snp T=>C C:119 T:1
EA2454	snippy:4.3.6	variation	3363032	3363032	.	.	0	note=snp G=>A A:117 G:0
EA2454	snippy:4.3.6	variation	3363089	3363089	.	.	0	note=snp G=>A A:112 G:0
EA2454	snippy:4.3.6	variation	3374533	3374533	.	.	0	note=snp G=>T T:113 G:0
EA2454	snippy:4.3.6	variation	3378213	3378213	.	.	0	note=snp G=>A A:101 G:0
EA2454	snippy:4.3.6	variation	3381441	3381441	.	.	0	note=snp A=>G G:89 A:0
EA2454	snippy:4.3.6	variation	3385780	3385780	.	.	0	note=snp C=>T T:110 C:0
EA2454	snippy:4.3.6	variation	3387556	3387556	.	.	0	note=snp T=>A A:106 T:0
EA2454	snippy:4.3.6	variation	3389622	3389622	.	.	0	note=snp A=>C C:103 A:0
EA2454	snippy:4.3.6	variation	3392987	3392987	.	.	0	note=snp C=>A A:107 C:0
EA2454	snippy:4.3.6	variation	3395362	3395362	.	.	0	note=snp A=>C C:104 A:0
EA2454	snippy:4.3.6	variation	3400480	3400480	.	.	0	note=del TGAAGCTGGA=>T T:43 TGAAGCTGGA:0
EA2454	snippy:4.3.6	variation	3405179	3405179	.	.	0	note=snp T=>G G:100 T:0
EA2454	snippy:4.3.6	variation	3411636	3411636	.	.	0	note=snp C=>A A:110 C:0
EA2454	snippy:4.3.6	variation	3426445	3426445	.	.	0	note=snp T=>C C:131 T:0
EA2454	snippy:4.3.6	variation	3434181	3434181	.	.	0	note=snp A=>G G:109 A:0
EA2454	snippy:4.3.6	variation	3440338	3440338	.	.	0	note=snp C=>T T:98 C:0
EA2454	snippy:4.3.6	variation	3441887	3441887	.	.	0	note=snp T=>C C:107 T:0
EA2454	snippy:4.3.6	variation	3441936	3441936	.	.	0	note=snp A=>G G:117 A:0
EA2454	snippy:4.3.6	variation	3448725	3448725	.	.	0	note=snp C=>T T:121 C:1
EA2454	snippy:4.3.6	variation	3451003	3451003	.	.	0	note=snp C=>T T:101 C:1
EA2454	snippy:4.3.6	variation	3456004	3456004	.	.	0	note=snp T=>C C:101 T:0
EA2454	snippy:4.3.6	variation	3462462	3462462	.	.	0	note=snp T=>C C:101 T:0
EA2454	snippy:4.3.6	variation	3462699	3462699	.	.	0	note=snp A=>G G:83 A:0
EA2454	snippy:4.3.6	variation	3468830	3468830	.	.	0	note=snp A=>T T:10 A:0
EA2454	snippy:4.3.6	variation	3468841	3468841	.	.	0	note=complex GCCGGT=>CCCAGG CCCAGG:16 GCCGGT:0
EA2454	snippy:4.3.6	variation	3468859	3468859	.	.	0	note=snp G=>A A:23 G:0
EA2454	snippy:4.3.6	variation	3468865	3468865	.	.	0	note=snp A=>G G:26 A:0
EA2454	snippy:4.3.6	variation	3468880	3468880	.	.	0	note=snp G=>T T:35 G:0
EA2454	snippy:4.3.6	variation	3468957	3468957	.	.	0	note=snp T=>A A:16 T:0
EA2454	snippy:4.3.6	variation	3483880	3483880	.	.	0	note=complex GTTGATC=>ATTAATG ATTAATG:13 GTTGATC:0
EA2454	snippy:4.3.6	variation	3483894	3483894	.	.	0	note=complex AG=>GT GT:15 AG:0
EA2454	snippy:4.3.6	variation	3483907	3483907	.	.	0	note=snp G=>A A:32 G:0
EA2454	snippy:4.3.6	variation	3483931	3483931	.	.	0	note=snp A=>G G:45 A:1
EA2454	snippy:4.3.6	variation	3483943	3483943	.	.	0	note=snp G=>A A:48 G:0
EA2454	snippy:4.3.6	variation	3483949	3483949	.	.	0	note=snp A=>G G:46 A:0
EA2454	snippy:4.3.6	variation	3483976	3483976	.	.	0	note=complex AGCA=>GGCG GGCG:47 AGCA:0
EA2454	snippy:4.3.6	variation	3484008	3484008	.	.	0	note=snp G=>A A:45 G:0
EA2454	snippy:4.3.6	variation	3484018	3484018	.	.	0	note=complex CTCT=>TTCC TTCC:38 CTCT:0
EA2454	snippy:4.3.6	variation	3484027	3484027	.	.	0	note=complex ACGT=>GCGC GCGC:33 ACGT:0
EA2454	snippy:4.3.6	variation	3484036	3484036	.	.	0	note=complex GACCTCTTGC=>TACTTCCTGT TACTTCCTGT:30 GACCTCTTGC:0
EA2454	snippy:4.3.6	variation	3484060	3484060	.	.	0	note=complex TTTT=>CTTC CTTC:39 TTTT:0
EA2454	snippy:4.3.6	variation	3484084	3484084	.	.	0	note=snp G=>A A:39 G:0
EA2454	snippy:4.3.6	variation	3484090	3484090	.	.	0	note=snp A=>G G:38 A:0
EA2454	snippy:4.3.6	variation	3484096	3484096	.	.	0	note=snp A=>G G:34 A:0
EA2454	snippy:4.3.6	variation	3484102	3484102	.	.	0	note=snp T=>G G:38 T:0
EA2454	snippy:4.3.6	variation	3484114	3484114	.	.	0	note=complex TTCT=>CTCC CTCC:42 TTCT:0
EA2454	snippy:4.3.6	variation	3484126	3484126	.	.	0	note=snp T=>C C:50 T:0
EA2454	snippy:4.3.6	variation	3484132	3484132	.	.	0	note=snp A=>T T:49 A:0
EA2454	snippy:4.3.6	variation	3484138	3484138	.	.	0	note=snp G=>A A:53 G:0
EA2454	snippy:4.3.6	variation	3484144	3484144	.	.	0	note=snp C=>T T:58 C:0
EA2454	snippy:4.3.6	variation	3484153	3484153	.	.	0	note=snp G=>A A:57 G:0
EA2454	snippy:4.3.6	variation	3484159	3484159	.	.	0	note=snp T=>G G:59 T:0
EA2454	snippy:4.3.6	variation	3484172	3484172	.	.	0	note=snp T=>G G:50 T:0
EA2454	snippy:4.3.6	variation	3484198	3484198	.	.	0	note=snp A=>C C:38 A:0
EA2454	snippy:4.3.6	variation	3484203	3484203	.	.	0	note=complex AT=>GC GC:34 AT:0
EA2454	snippy:4.3.6	variation	3484210	3484210	.	.	0	note=snp T=>C C:33 T:0
EA2454	snippy:4.3.6	variation	3484216	3484216	.	.	0	note=snp A=>G G:31 A:0
EA2454	snippy:4.3.6	variation	3484234	3484234	.	.	0	note=snp G=>A A:21 G:0
EA2454	snippy:4.3.6	variation	3520064	3520064	.	.	0	note=snp G=>A A:18 G:0
EA2454	snippy:4.3.6	variation	3520070	3520070	.	.	0	note=snp A=>C C:22 A:0
EA2454	snippy:4.3.6	variation	3520077	3520077	.	.	0	note=complex GATGCA=>AACGCC AACGCC:23 GATGCA:0
EA2454	snippy:4.3.6	variation	3520088	3520088	.	.	0	note=snp G=>T T:34 G:0
EA2454	snippy:4.3.6	variation	3520103	3520103	.	.	0	note=snp A=>T T:48 A:0
EA2454	snippy:4.3.6	variation	3520161	3520161	.	.	0	note=snp G=>T T:92 G:0
EA2454	snippy:4.3.6	variation	3520451	3520451	.	.	0	note=snp G=>A A:92 G:0
EA2454	snippy:4.3.6	variation	3520616	3520616	.	.	0	note=snp C=>A A:20 C:0
EA2454	snippy:4.3.6	variation	3521364	3521364	.	.	0	note=snp A=>G G:86 A:0
EA2454	snippy:4.3.6	variation	3521717	3521717	.	.	0	note=snp C=>G G:87 C:0
EA2454	snippy:4.3.6	variation	3524247	3524247	.	.	0	note=snp G=>A A:101 G:0
EA2454	snippy:4.3.6	variation	3525653	3525653	.	.	0	note=snp G=>A A:98 G:0
EA2454	snippy:4.3.6	variation	3527982	3527982	.	.	0	note=ins G=>GA GA:101 G:1
EA2454	snippy:4.3.6	variation	3528331	3528331	.	.	0	note=snp C=>A A:99 C:1
EA2454	snippy:4.3.6	variation	3536376	3536376	.	.	0	note=snp T=>C C:104 T:0
EA2454	snippy:4.3.6	variation	3539749	3539749	.	.	0	note=snp T=>C C:110 T:0
EA2454	snippy:4.3.6	variation	3540229	3540229	.	.	0	note=snp T=>C C:100 T:0
EA2454	snippy:4.3.6	variation	3541891	3541891	.	.	0	note=snp A=>G G:111 A:0
EA2454	snippy:4.3.6	variation	3542579	3542579	.	.	0	note=snp G=>T T:103 G:2
EA2454	snippy:4.3.6	variation	3547948	3547948	.	.	0	note=snp T=>C C:112 T:1
EA2454	snippy:4.3.6	variation	3548625	3548625	.	.	0	note=snp G=>C C:107 G:0
EA2454	snippy:4.3.6	variation	3549873	3549873	.	.	0	note=snp T=>G G:102 T:0
EA2454	snippy:4.3.6	variation	3554302	3554302	.	.	0	note=snp G=>T T:62 G:0
EA2454	snippy:4.3.6	variation	3556473	3556473	.	.	0	note=snp G=>A A:97 G:1
EA2454	snippy:4.3.6	variation	3566015	3566015	.	.	0	note=snp T=>C C:100 T:0
EA2454	snippy:4.3.6	variation	3569782	3569782	.	.	0	note=snp C=>T T:102 C:0
EA2454	snippy:4.3.6	variation	3581189	3581189	.	.	0	note=snp G=>A A:111 G:1
EA2454	snippy:4.3.6	variation	3585949	3585949	.	.	0	note=ins T=>TA TA:43 T:0
EA2454	snippy:4.3.6	variation	3586272	3586272	.	.	0	note=snp C=>T T:119 C:0
EA2454	snippy:4.3.6	variation	3586487	3586487	.	.	0	note=snp T=>C C:113 T:0
EA2454	snippy:4.3.6	variation	3589714	3589714	.	.	0	note=del GA=>G G:60 GA:0
EA2454	snippy:4.3.6	variation	3590214	3590214	.	.	0	note=snp T=>C C:116 T:0
EA2454	snippy:4.3.6	variation	3590259	3590259	.	.	0	note=snp C=>T T:116 C:1
EA2454	snippy:4.3.6	variation	3595770	3595770	.	.	0	note=snp T=>G G:111 T:0
EA2454	snippy:4.3.6	variation	3599844	3599844	.	.	0	note=snp C=>T T:113 C:0
EA2454	snippy:4.3.6	variation	3600559	3600559	.	.	0	note=snp C=>T T:109 C:1
EA2454	snippy:4.3.6	variation	3602569	3602569	.	.	0	note=snp C=>A A:83 C:0
EA2454	snippy:4.3.6	variation	3613661	3613661	.	.	0	note=snp G=>A A:113 G:0
EA2454	snippy:4.3.6	variation	3613761	3613761	.	.	0	note=snp T=>C C:95 T:1
EA2454	snippy:4.3.6	variation	3615292	3615292	.	.	0	note=snp T=>G G:87 T:0
EA2454	snippy:4.3.6	variation	3615330	3615330	.	.	0	note=snp A=>C C:94 A:0
EA2454	snippy:4.3.6	variation	3628517	3628517	.	.	0	note=snp A=>G G:121 A:0
EA2454	snippy:4.3.6	variation	3629418	3629418	.	.	0	note=snp C=>T T:109 C:0
EA2454	snippy:4.3.6	variation	3632526	3632526	.	.	0	note=snp C=>A A:117 C:0
EA2454	snippy:4.3.6	variation	3634246	3634246	.	.	0	note=snp A=>T T:113 A:0
EA2454	snippy:4.3.6	variation	3634651	3634651	.	.	0	note=snp C=>T T:122 C:0
EA2454	snippy:4.3.6	variation	3634750	3634750	.	.	0	note=snp C=>T T:120 C:0
EA2454	snippy:4.3.6	variation	3640661	3640661	.	.	0	note=snp A=>G G:100 A:0
EA2454	snippy:4.3.6	variation	3645952	3645952	.	.	0	note=snp G=>A A:89 G:0
EA2454	snippy:4.3.6	variation	3657942	3657942	.	.	0	note=snp T=>G G:109 T:0
EA2454	snippy:4.3.6	variation	3662284	3662284	.	.	0	note=snp A=>G G:120 A:0
EA2454	snippy:4.3.6	variation	3662817	3662817	.	.	0	note=snp G=>A A:56 G:0
EA2454	snippy:4.3.6	variation	3665048	3665048	.	.	0	note=snp T=>C C:93 T:0
EA2454	snippy:4.3.6	variation	3665749	3665749	.	.	0	note=snp G=>A A:102 G:0
EA2454	snippy:4.3.6	variation	3666055	3666055	.	.	0	note=snp C=>T T:103 C:0
EA2454	snippy:4.3.6	variation	3676873	3676873	.	.	0	note=snp G=>A A:106 G:1
EA2454	snippy:4.3.6	variation	3677442	3677442	.	.	0	note=snp G=>A A:100 G:1
EA2454	snippy:4.3.6	variation	3682843	3682843	.	.	0	note=snp T=>G G:102 T:0
EA2454	snippy:4.3.6	variation	3688394	3688394	.	.	0	note=snp G=>A A:106 G:0
EA2454	snippy:4.3.6	variation	3690835	3690835	.	.	0	note=snp T=>G G:99 T:0
EA2454	snippy:4.3.6	variation	3691180	3691180	.	.	0	note=snp T=>C C:138 T:0
EA2454	snippy:4.3.6	variation	3695043	3695043	.	.	0	note=snp G=>A A:100 G:0
EA2454	snippy:4.3.6	variation	3700305	3700305	.	.	0	note=snp G=>A A:85 G:0
EA2454	snippy:4.3.6	variation	3701518	3701518	.	.	0	note=snp C=>T T:88 C:0
EA2454	snippy:4.3.6	variation	3701572	3701572	.	.	0	note=snp G=>A A:93 G:0
EA2454	snippy:4.3.6	variation	3701756	3701756	.	.	0	note=snp A=>G G:80 A:0
EA2454	snippy:4.3.6	variation	3705284	3705284	.	.	0	note=snp A=>G G:114 A:1
EA2454	snippy:4.3.6	variation	3705638	3705638	.	.	0	note=snp G=>A A:112 G:0
EA2454	snippy:4.3.6	variation	3709916	3709916	.	.	0	note=snp G=>A A:116 G:0
EA2454	snippy:4.3.6	variation	3712427	3712427	.	.	0	note=snp C=>T T:99 C:0
EA2454	snippy:4.3.6	variation	3714902	3714902	.	.	0	note=snp C=>A A:129 C:0
EA2454	snippy:4.3.6	variation	3715219	3715219	.	.	0	note=snp C=>A A:88 C:0
EA2454	snippy:4.3.6	variation	3730425	3730425	.	.	0	note=snp G=>A A:74 G:1
EA2454	snippy:4.3.6	variation	3731404	3731404	.	.	0	note=snp G=>A A:95 G:0
EA2454	snippy:4.3.6	variation	3734092	3734092	.	.	0	note=snp G=>A A:94 G:0
EA2454	snippy:4.3.6	variation	3739482	3739482	.	.	0	note=snp A=>G G:111 A:0
EA2454	snippy:4.3.6	variation	3743568	3743568	.	.	0	note=snp T=>C C:112 T:0
EA2454	snippy:4.3.6	variation	3746088	3746088	.	.	0	note=snp C=>T T:94 C:0
EA2454	snippy:4.3.6	variation	3750262	3750262	.	.	0	note=del GAA=>G G:57 GAA:0
EA2454	snippy:4.3.6	variation	3751756	3751756	.	.	0	note=snp C=>T T:113 C:0
EA2454	snippy:4.3.6	variation	3756054	3756054	.	.	0	note=snp T=>C C:103 T:0
EA2454	snippy:4.3.6	variation	3763561	3763561	.	.	0	note=ins A=>AC AC:90 A:0
EA2454	snippy:4.3.6	variation	3763988	3763988	.	.	0	note=snp A=>G G:93 A:0
EA2454	snippy:4.3.6	variation	3766011	3766011	.	.	0	note=snp A=>C C:89 A:0
EA2454	snippy:4.3.6	variation	3766157	3766157	.	.	0	note=snp G=>A A:102 G:0
EA2454	snippy:4.3.6	variation	3766510	3766510	.	.	0	note=snp C=>T T:103 C:0
EA2454	snippy:4.3.6	variation	3770391	3770391	.	.	0	note=snp C=>T T:90 C:0
EA2454	snippy:4.3.6	variation	3772277	3772277	.	.	0	note=snp T=>A A:87 T:0
EA2454	snippy:4.3.6	variation	3777410	3777410	.	.	0	note=snp C=>T T:100 C:0
EA2454	snippy:4.3.6	variation	3779368	3779368	.	.	0	note=snp C=>T T:110 C:2
EA2454	snippy:4.3.6	variation	3786514	3786514	.	.	0	note=snp C=>T T:92 C:0
EA2454	snippy:4.3.6	variation	3795140	3795140	.	.	0	note=snp T=>C C:91 T:0
EA2454	snippy:4.3.6	variation	3807575	3807575	.	.	0	note=snp A=>G G:91 A:0
EA2454	snippy:4.3.6	variation	3808964	3808964	.	.	0	note=snp C=>T T:113 C:0
EA2454	snippy:4.3.6	variation	3811052	3811052	.	.	0	note=snp G=>A A:130 G:1
EA2454	snippy:4.3.6	variation	3815430	3815430	.	.	0	note=snp T=>C C:144 T:0
EA2454	snippy:4.3.6	variation	3837457	3837457	.	.	0	note=snp C=>A A:134 C:0
EA2454	snippy:4.3.6	variation	3840206	3840206	.	.	0	note=snp C=>T T:94 C:0
EA2454	snippy:4.3.6	variation	3842198	3842198	.	.	0	note=ins C=>CT CT:84 C:0
EA2454	snippy:4.3.6	variation	3844395	3844395	.	.	0	note=snp T=>C C:98 T:0
EA2454	snippy:4.3.6	variation	3845268	3845268	.	.	0	note=snp G=>T T:93 G:1
EA2454	snippy:4.3.6	variation	3851565	3851565	.	.	0	note=complex TAAACA=>CAGATG CAGATG:29 TAAACA:0
EA2454	snippy:4.3.6	variation	3851580	3851580	.	.	0	note=complex AC=>TT TT:58 AC:0
EA2454	snippy:4.3.6	variation	3851623	3851623	.	.	0	note=snp C=>T T:152 C:0
EA2454	snippy:4.3.6	variation	3851632	3851632	.	.	0	note=complex GAAG=>AAAA AAAA:165 GAAG:0
EA2454	snippy:4.3.6	variation	3851667	3851667	.	.	0	note=snp A=>G G:205 A:0
EA2454	snippy:4.3.6	variation	3851703	3851703	.	.	0	note=snp A=>G G:196 A:1
EA2454	snippy:4.3.6	variation	3851770	3851770	.	.	0	note=complex TAGCC=>CAGCG CAGCG:190 TAGCC:0
EA2454	snippy:4.3.6	variation	3851842	3851842	.	.	0	note=snp C=>T T:167 C:0
EA2454	snippy:4.3.6	variation	3851858	3851858	.	.	0	note=complex CCC=>TCT TCT:157 CCC:0
EA2454	snippy:4.3.6	variation	3851865	3851865	.	.	0	note=complex CCAGT=>GCAGC GCAGC:160 CCAGT:0
EA2454	snippy:4.3.6	variation	3851884	3851884	.	.	0	note=complex CTT=>ACCC ACCC:140 CTT:0
EA2454	snippy:4.3.6	variation	3851901	3851901	.	.	0	note=snp C=>T T:193 C:0
EA2454	snippy:4.3.6	variation	3851915	3851915	.	.	0	note=complex TAATCA=>CAACCAG CAACCAG:135 TAATCA:0
EA2454	snippy:4.3.6	variation	3851938	3851938	.	.	0	note=del GA=>G G:170 GA:0
EA2454	snippy:4.3.6	variation	3851976	3851976	.	.	0	note=snp T=>G G:245 T:0
EA2454	snippy:4.3.6	variation	3852061	3852061	.	.	0	note=snp G=>C C:214 G:0
EA2454	snippy:4.3.6	variation	3852067	3852067	.	.	0	note=complex GCCG=>TCCA TCCA:193 GCCG:0
EA2454	snippy:4.3.6	variation	3852076	3852076	.	.	0	note=snp T=>C C:211 T:0
EA2454	snippy:4.3.6	variation	3852124	3852124	.	.	0	note=snp T=>C C:233 T:0
EA2454	snippy:4.3.6	variation	3852262	3852262	.	.	0	note=complex CGGGCAG=>TGGGAAA TGGGAAA:187 CGGGCAG:0
EA2454	snippy:4.3.6	variation	3852286	3852286	.	.	0	note=snp C=>T T:229 C:0
EA2454	snippy:4.3.6	variation	3852395	3852395	.	.	0	note=snp C=>A A:238 C:0
EA2454	snippy:4.3.6	variation	3852453	3852453	.	.	0	note=snp G=>A A:249 G:0
EA2454	snippy:4.3.6	variation	3852559	3852559	.	.	0	note=snp A=>G G:215 A:1
EA2454	snippy:4.3.6	variation	3852607	3852607	.	.	0	note=complex CCGTT=>TCGTC TCGTC:222 CCGTT:0
EA2454	snippy:4.3.6	variation	3852640	3852640	.	.	0	note=snp A=>G G:249 A:0
EA2454	snippy:4.3.6	variation	3852680	3852680	.	.	0	note=snp T=>C C:250 T:0
EA2454	snippy:4.3.6	variation	3852688	3852688	.	.	0	note=complex GCG=>AAA AAA:209 GCG:0
EA2454	snippy:4.3.6	variation	3852712	3852712	.	.	0	note=complex CAGA=>AAGG AAGG:238 CAGA:0
EA2454	snippy:4.3.6	variation	3852799	3852799	.	.	0	note=snp A=>G G:256 A:0
EA2454	snippy:4.3.6	variation	3852830	3852830	.	.	0	note=snp T=>A A:262 T:0
EA2454	snippy:4.3.6	variation	3852950	3852950	.	.	0	note=snp G=>T T:254 G:0
EA2454	snippy:4.3.6	variation	3852999	3852999	.	.	0	note=snp T=>C C:282 T:0
EA2454	snippy:4.3.6	variation	3853020	3853020	.	.	0	note=snp C=>T T:285 C:0
EA2454	snippy:4.3.6	variation	3854136	3854136	.	.	0	note=complex GAACT=>CAACA CAACA:18 GAACT:0
EA2454	snippy:4.3.6	variation	3854159	3854159	.	.	0	note=snp T=>C C:53 T:0
EA2454	snippy:4.3.6	variation	3854170	3854170	.	.	0	note=snp C=>T T:65 C:0
EA2454	snippy:4.3.6	variation	3854179	3854179	.	.	0	note=complex TGCA=>GGCT GGCT:67 TGCA:0
EA2454	snippy:4.3.6	variation	3854206	3854206	.	.	0	note=snp G=>A A:78 G:0
EA2454	snippy:4.3.6	variation	3854212	3854212	.	.	0	note=snp C=>T T:86 C:0
EA2454	snippy:4.3.6	variation	3854218	3854218	.	.	0	note=snp A=>T T:96 A:0
EA2454	snippy:4.3.6	variation	3854231	3854231	.	.	0	note=complex CTT=>TTG TTG:87 CTT:0
EA2454	snippy:4.3.6	variation	3854245	3854245	.	.	0	note=snp T=>C C:92 T:0
EA2454	snippy:4.3.6	variation	3854260	3854260	.	.	0	note=complex GTCAACGGTGGCAAAG=>ATCATCAGTAGCGAAA ATCATCAGTAGCGAAA:70 GTCAACGGTGGCAAAG:0
EA2454	snippy:4.3.6	variation	3854281	3854281	.	.	0	note=snp A=>G G:82 A:0
EA2454	snippy:4.3.6	variation	3854310	3854310	.	.	0	note=snp T=>C C:77 T:0
EA2454	snippy:4.3.6	variation	3854317	3854317	.	.	0	note=complex CCCG=>TCCA TCCA:72 CCCG:0
EA2454	snippy:4.3.6	variation	3854337	3854337	.	.	0	note=snp G=>A A:61 G:0
EA2454	snippy:4.3.6	variation	3854347	3854347	.	.	0	note=snp C=>A A:48 C:0
EA2454	snippy:4.3.6	variation	3854356	3854356	.	.	0	note=snp A=>G G:44 A:0
EA2454	snippy:4.3.6	variation	3854362	3854362	.	.	0	note=complex AGTGTCTGT=>GGTATCATC GGTATCATC:32 AGTGTCTGT:0
EA2454	snippy:4.3.6	variation	3854380	3854380	.	.	0	note=complex CCGG=>ACGA ACGA:53 CCGG:0
EA2454	snippy:4.3.6	variation	3854412	3854412	.	.	0	note=snp T=>A A:70 T:0
EA2454	snippy:4.3.6	variation	3854416	3854416	.	.	0	note=del AATGAAG=>A A:59 AATGAAG:0
EA2454	snippy:4.3.6	variation	3854428	3854428	.	.	0	note=complex GTTG=>CTTC CTTC:72 GTTG:0
EA2454	snippy:4.3.6	variation	3854442	3854442	.	.	0	note=complex AAGAA=>CAGAG CAGAG:97 AAGAA:0
EA2454	snippy:4.3.6	variation	3854458	3854458	.	.	0	note=snp C=>T T:125 C:0
EA2454	snippy:4.3.6	variation	3854465	3854465	.	.	0	note=snp A=>G G:129 A:0
EA2454	snippy:4.3.6	variation	3854471	3854471	.	.	0	note=snp A=>G G:122 A:0
EA2454	snippy:4.3.6	variation	3854476	3854476	.	.	0	note=mnp TC=>AA AA:113 TC:0
EA2454	snippy:4.3.6	variation	3854521	3854521	.	.	0	note=snp A=>T T:105 A:0
EA2454	snippy:4.3.6	variation	3854527	3854527	.	.	0	note=complex AC=>TT TT:91 AC:0
EA2454	snippy:4.3.6	variation	3854551	3854551	.	.	0	note=complex GTCTGAA=>TTCTCTC TTCTCTC:38 GTCTGAA:0
EA2454	snippy:4.3.6	variation	3854563	3854563	.	.	0	note=snp T=>C C:41 T:0
EA2454	snippy:4.3.6	variation	3855683	3855683	.	.	0	note=complex CA=>TG TG:47 CA:0
EA2454	snippy:4.3.6	variation	3855692	3855692	.	.	0	note=snp G=>A A:73 G:0
EA2454	snippy:4.3.6	variation	3855752	3855752	.	.	0	note=snp G=>T T:65 G:0
EA2454	snippy:4.3.6	variation	3855788	3855788	.	.	0	note=complex GA=>AC AC:10 GA:0
EA2454	snippy:4.3.6	variation	3855822	3855822	.	.	0	note=complex GCA=>CAG CAG:35 GCA:0
EA2454	snippy:4.3.6	variation	3855834	3855834	.	.	0	note=complex AA=>TC TC:60 AA:0
EA2454	snippy:4.3.6	variation	3855884	3855884	.	.	0	note=snp C=>T T:162 C:0
EA2454	snippy:4.3.6	variation	3855899	3855899	.	.	0	note=snp T=>C C:189 T:0
EA2454	snippy:4.3.6	variation	3856015	3856015	.	.	0	note=ins T=>TA TA:185 T:0
EA2454	snippy:4.3.6	variation	3856047	3856047	.	.	0	note=complex AAAG=>GAAA GAAA:180 AAAG:0
EA2454	snippy:4.3.6	variation	3856122	3856122	.	.	0	note=snp A=>C C:164 A:0
EA2454	snippy:4.3.6	variation	3856149	3856149	.	.	0	note=snp T=>A A:180 T:0
EA2454	snippy:4.3.6	variation	3856155	3856155	.	.	0	note=snp G=>A A:185 G:0
EA2454	snippy:4.3.6	variation	3856242	3856242	.	.	0	note=snp T=>A A:246 T:1
EA2454	snippy:4.3.6	variation	3856458	3856458	.	.	0	note=snp A=>G G:252 A:0
EA2454	snippy:4.3.6	variation	3856521	3856521	.	.	0	note=snp T=>C C:247 T:0
EA2454	snippy:4.3.6	variation	3856982	3856982	.	.	0	note=complex CTGG=>ATGT ATGT:245 CTGG:0
EA2454	snippy:4.3.6	variation	3857194	3857194	.	.	0	note=snp A=>G G:260 A:1
EA2454	snippy:4.3.6	variation	3857206	3857206	.	.	0	note=snp T=>C C:256 T:0
EA2454	snippy:4.3.6	variation	3857236	3857236	.	.	0	note=snp C=>T T:243 C:0
EA2454	snippy:4.3.6	variation	3857347	3857347	.	.	0	note=snp C=>T T:256 C:0
EA2454	snippy:4.3.6	variation	3857368	3857368	.	.	0	note=snp C=>T T:240 C:0
EA2454	snippy:4.3.6	variation	3857386	3857386	.	.	0	note=complex CCCG=>TCCT TCCT:232 CCCG:0
EA2454	snippy:4.3.6	variation	3857455	3857455	.	.	0	note=snp G=>A A:220 G:0
EA2454	snippy:4.3.6	variation	3857766	3857766	.	.	0	note=snp C=>G G:206 C:0
EA2454	snippy:4.3.6	variation	3857781	3857781	.	.	0	note=complex ACCC=>GCCT GCCT:196 ACCC:0
EA2454	snippy:4.3.6	variation	3857904	3857904	.	.	0	note=complex CGAG=>TGAA TGAA:222 CGAG:0
EA2454	snippy:4.3.6	variation	3857976	3857976	.	.	0	note=snp C=>T T:203 C:0
EA2454	snippy:4.3.6	variation	3857994	3857994	.	.	0	note=snp G=>A A:205 G:0
EA2454	snippy:4.3.6	variation	3858009	3858009	.	.	0	note=snp T=>A A:189 T:0
EA2454	snippy:4.3.6	variation	3858021	3858021	.	.	0	note=snp G=>C C:196 G:1
EA2454	snippy:4.3.6	variation	3858047	3858047	.	.	0	note=complex TGCCT=>CGCCA CGCCA:185 TGCCT:0
EA2454	snippy:4.3.6	variation	3858066	3858066	.	.	0	note=snp C=>G G:179 C:1
EA2454	snippy:4.3.6	variation	3858264	3858264	.	.	0	note=snp A=>G G:226 A:0
EA2454	snippy:4.3.6	variation	3858330	3858330	.	.	0	note=complex GTCG=>CTCA CTCA:217 GTCG:0
EA2454	snippy:4.3.6	variation	3858381	3858381	.	.	0	note=snp C=>T T:231 C:0
EA2454	snippy:4.3.6	variation	3858405	3858405	.	.	0	note=snp A=>G G:262 A:0
EA2454	snippy:4.3.6	variation	3858465	3858465	.	.	0	note=snp G=>A A:229 G:0
EA2454	snippy:4.3.6	variation	3858471	3858471	.	.	0	note=snp C=>T T:226 C:0
EA2454	snippy:4.3.6	variation	3858477	3858477	.	.	0	note=snp A=>T T:231 A:0
EA2454	snippy:4.3.6	variation	3858486	3858486	.	.	0	note=snp C=>T T:215 C:1
EA2454	snippy:4.3.6	variation	3858505	3858505	.	.	0	note=complex GAC=>AAT AAT:186 GAC:0
EA2454	snippy:4.3.6	variation	3858690	3858690	.	.	0	note=complex AGCC=>CGCT CGCT:183 AGCC:0
EA2454	snippy:4.3.6	variation	3858705	3858705	.	.	0	note=complex TGGT=>CGGC CGGC:175 TGGT:0
EA2454	snippy:4.3.6	variation	3858717	3858717	.	.	0	note=snp G=>T T:187 G:1
EA2454	snippy:4.3.6	variation	3858981	3858981	.	.	0	note=snp C=>T T:246 C:0
EA2454	snippy:4.3.6	variation	3859719	3859719	.	.	0	note=snp G=>A A:242 G:0
EA2454	snippy:4.3.6	variation	3859941	3859941	.	.	0	note=snp T=>C C:260 T:0
EA2454	snippy:4.3.6	variation	3860187	3860187	.	.	0	note=snp T=>C C:267 T:0
EA2454	snippy:4.3.6	variation	3860215	3860215	.	.	0	note=snp A=>G G:276 A:0
EA2454	snippy:4.3.6	variation	3860282	3860282	.	.	0	note=snp A=>G G:244 A:0
EA2454	snippy:4.3.6	variation	3860759	3860759	.	.	0	note=complex CGTTGTGC=>TGTTATGT TGTTATGT:227 CGTTGTGC:0
EA2454	snippy:4.3.6	variation	3861129	3861129	.	.	0	note=snp G=>A A:250 G:0
EA2454	snippy:4.3.6	variation	3861180	3861180	.	.	0	note=snp C=>T T:232 C:0
EA2454	snippy:4.3.6	variation	3861192	3861192	.	.	0	note=snp G=>T T:236 G:0
EA2454	snippy:4.3.6	variation	3861216	3861216	.	.	0	note=snp C=>T T:225 C:0
EA2454	snippy:4.3.6	variation	3861225	3861225	.	.	0	note=snp C=>T T:230 C:0
EA2454	snippy:4.3.6	variation	3861405	3861405	.	.	0	note=complex AC=>GT GT:197 AC:0
EA2454	snippy:4.3.6	variation	3861522	3861522	.	.	0	note=snp G=>A A:249 G:0
EA2454	snippy:4.3.6	variation	3861702	3861702	.	.	0	note=snp C=>T T:215 C:0
EA2454	snippy:4.3.6	variation	3861708	3861708	.	.	0	note=snp A=>G G:223 A:0
EA2454	snippy:4.3.6	variation	3861717	3861717	.	.	0	note=snp T=>G G:216 T:0
EA2454	snippy:4.3.6	variation	3861762	3861762	.	.	0	note=snp G=>A A:205 G:0
EA2454	snippy:4.3.6	variation	3861768	3861768	.	.	0	note=snp C=>T T:177 C:0
EA2454	snippy:4.3.6	variation	3861828	3861828	.	.	0	note=snp C=>T T:206 C:0
EA2454	snippy:4.3.6	variation	3861873	3861873	.	.	0	note=snp A=>G G:219 A:0
EA2454	snippy:4.3.6	variation	3861891	3861891	.	.	0	note=snp T=>A A:222 T:0
EA2454	snippy:4.3.6	variation	3861906	3861906	.	.	0	note=snp C=>T T:226 C:0
EA2454	snippy:4.3.6	variation	3861957	3861957	.	.	0	note=snp G=>A A:180 G:0
EA2454	snippy:4.3.6	variation	3861993	3861993	.	.	0	note=complex AGTTGAAAAGGAGGCG=>CGTGGAGAAAGAAGCT CGTGGAGAAAGAAGCT:127 AGTTGAAAAGGAGGCG:0
EA2454	snippy:4.3.6	variation	3862023	3862023	.	.	0	note=snp G=>A A:168 G:0
EA2454	snippy:4.3.6	variation	3862086	3862086	.	.	0	note=snp C=>A A:177 C:0
EA2454	snippy:4.3.6	variation	3862113	3862113	.	.	0	note=snp A=>G G:199 A:0
EA2454	snippy:4.3.6	variation	3862197	3862197	.	.	0	note=snp T=>C C:213 T:0
EA2454	snippy:4.3.6	variation	3862329	3862329	.	.	0	note=snp A=>G G:199 A:0
EA2454	snippy:4.3.6	variation	3862338	3862338	.	.	0	note=snp C=>T T:160 C:0
EA2454	snippy:4.3.6	variation	3862353	3862353	.	.	0	note=snp T=>C C:205 T:0
EA2454	snippy:4.3.6	variation	3862431	3862431	.	.	0	note=complex CACC=>AACA AACA:210 CACC:0
EA2454	snippy:4.3.6	variation	3862456	3862456	.	.	0	note=snp T=>C C:228 T:0
EA2454	snippy:4.3.6	variation	3862476	3862476	.	.	0	note=snp T=>C C:230 T:0
EA2454	snippy:4.3.6	variation	3862536	3862536	.	.	0	note=snp C=>T T:241 C:0
EA2454	snippy:4.3.6	variation	3862584	3862584	.	.	0	note=snp T=>C C:209 T:0
EA2454	snippy:4.3.6	variation	3862608	3862608	.	.	0	note=snp C=>T T:196 C:0
EA2454	snippy:4.3.6	variation	3862614	3862614	.	.	0	note=snp C=>T T:192 C:0
EA2454	snippy:4.3.6	variation	3862638	3862638	.	.	0	note=snp C=>T T:191 C:0
EA2454	snippy:4.3.6	variation	3862695	3862695	.	.	0	note=complex TCTGC=>CCTGT CCTGT:198 TCTGC:0
EA2454	snippy:4.3.6	variation	3862715	3862715	.	.	0	note=snp A=>G G:209 A:0
EA2454	snippy:4.3.6	variation	3862731	3862731	.	.	0	note=snp C=>T T:196 C:0
EA2454	snippy:4.3.6	variation	3862740	3862740	.	.	0	note=snp T=>G G:196 T:0
EA2454	snippy:4.3.6	variation	3862765	3862765	.	.	0	note=snp A=>G G:205 A:0
EA2454	snippy:4.3.6	variation	3862783	3862783	.	.	0	note=snp A=>C C:179 A:0
EA2454	snippy:4.3.6	variation	3862788	3862788	.	.	0	note=complex CAGCGAG=>TAACGAC TAACGAC:163 CAGCGAG:0
EA2454	snippy:4.3.6	variation	3862802	3862802	.	.	0	note=snp C=>T T:208 C:0
EA2454	snippy:4.3.6	variation	3862833	3862833	.	.	0	note=snp T=>C C:200 T:0
EA2454	snippy:4.3.6	variation	3862902	3862902	.	.	0	note=snp G=>A A:192 G:0
EA2454	snippy:4.3.6	variation	3862947	3862947	.	.	0	note=complex GGGA=>TGGG TGGG:166 GGGA:0
EA2454	snippy:4.3.6	variation	3862974	3862974	.	.	0	note=snp T=>G G:160 T:0
EA2454	snippy:4.3.6	variation	3862990	3862990	.	.	0	note=complex TCCCTGATTATC=>AGCCTTATCATT AGCCTTATCATT:138 TCCCTGATTATC:0
EA2454	snippy:4.3.6	variation	3863014	3863014	.	.	0	note=snp A=>C C:174 A:0
EA2454	snippy:4.3.6	variation	3863036	3863036	.	.	0	note=mnp CT=>AC AC:167 CT:0
EA2454	snippy:4.3.6	variation	3863043	3863043	.	.	0	note=snp A=>G G:186 A:0
EA2454	snippy:4.3.6	variation	3863055	3863055	.	.	0	note=snp C=>T T:199 C:0
EA2454	snippy:4.3.6	variation	3863100	3863100	.	.	0	note=snp C=>T T:237 C:0
EA2454	snippy:4.3.6	variation	3863139	3863139	.	.	0	note=snp C=>T T:229 C:0
EA2454	snippy:4.3.6	variation	3863199	3863199	.	.	0	note=snp C=>A A:238 C:0
EA2454	snippy:4.3.6	variation	3863208	3863208	.	.	0	note=snp T=>A A:249 T:0
EA2454	snippy:4.3.6	variation	3863298	3863298	.	.	0	note=snp C=>T T:236 C:0
EA2454	snippy:4.3.6	variation	3863319	3863319	.	.	0	note=snp G=>C C:259 G:0
EA2454	snippy:4.3.6	variation	3863331	3863331	.	.	0	note=snp C=>T T:253 C:0
EA2454	snippy:4.3.6	variation	3863346	3863346	.	.	0	note=snp T=>C C:248 T:0
EA2454	snippy:4.3.6	variation	3863406	3863406	.	.	0	note=snp T=>C C:240 T:0
EA2454	snippy:4.3.6	variation	3863481	3863481	.	.	0	note=complex CAGG=>TAAA TAAA:194 CAGG:0
EA2454	snippy:4.3.6	variation	3863490	3863490	.	.	0	note=snp C=>G G:235 C:0
EA2454	snippy:4.3.6	variation	3863532	3863532	.	.	0	note=complex ATCG=>GTCA GTCA:232 ATCG:0
EA2454	snippy:4.3.6	variation	3863559	3863559	.	.	0	note=snp G=>A A:246 G:0
EA2454	snippy:4.3.6	variation	3863700	3863700	.	.	0	note=snp G=>A A:223 G:0
EA2454	snippy:4.3.6	variation	3863732	3863732	.	.	0	note=snp A=>G G:226 A:0
EA2454	snippy:4.3.6	variation	3863740	3863740	.	.	0	note=snp T=>C C:223 T:1
EA2454	snippy:4.3.6	variation	3863840	3863840	.	.	0	note=snp T=>C C:211 T:0
EA2454	snippy:4.3.6	variation	3863865	3863865	.	.	0	note=complex ACG=>GCA GCA:208 ACG:0
EA2454	snippy:4.3.6	variation	3863900	3863900	.	.	0	note=snp T=>G G:218 T:0
EA2454	snippy:4.3.6	variation	3863924	3863924	.	.	0	note=snp A=>T T:202 A:0
EA2454	snippy:4.3.6	variation	3863957	3863957	.	.	0	note=snp T=>C C:220 T:0
EA2454	snippy:4.3.6	variation	3863966	3863966	.	.	0	note=snp G=>A A:215 G:0
EA2454	snippy:4.3.6	variation	3864034	3864034	.	.	0	note=snp A=>C C:228 A:0
EA2454	snippy:4.3.6	variation	3864046	3864046	.	.	0	note=snp C=>T T:225 C:0
EA2454	snippy:4.3.6	variation	3864070	3864070	.	.	0	note=mnp GC=>AA AA:213 GC:0
EA2454	snippy:4.3.6	variation	3864181	3864181	.	.	0	note=snp C=>T T:206 C:1
EA2454	snippy:4.3.6	variation	3864199	3864199	.	.	0	note=complex TCCTGGA=>GCCCGGT GCCCGGT:197 TCCTGGA:0
EA2454	snippy:4.3.6	variation	3864220	3864220	.	.	0	note=snp A=>G G:218 A:0
EA2454	snippy:4.3.6	variation	3864227	3864227	.	.	0	note=snp A=>G G:228 A:0
EA2454	snippy:4.3.6	variation	3864307	3864307	.	.	0	note=snp A=>T T:199 A:0
EA2454	snippy:4.3.6	variation	3864690	3864690	.	.	0	note=snp G=>A A:230 G:1
EA2454	snippy:4.3.6	variation	3865077	3865077	.	.	0	note=snp T=>G G:205 T:0
EA2454	snippy:4.3.6	variation	3865110	3865110	.	.	0	note=snp T=>C C:226 T:0
EA2454	snippy:4.3.6	variation	3865119	3865119	.	.	0	note=snp A=>C C:229 A:0
EA2454	snippy:4.3.6	variation	3865284	3865284	.	.	0	note=snp C=>T T:244 C:0
EA2454	snippy:4.3.6	variation	3865473	3865473	.	.	0	note=snp C=>T T:201 C:0
EA2454	snippy:4.3.6	variation	3865485	3865485	.	.	0	note=snp A=>G G:198 A:0
EA2454	snippy:4.3.6	variation	3865509	3865509	.	.	0	note=snp T=>C C:205 T:0
EA2454	snippy:4.3.6	variation	3865545	3865545	.	.	0	note=snp T=>C C:134 T:0
EA2454	snippy:4.3.6	variation	3865593	3865593	.	.	0	note=snp C=>A A:36 C:0
EA2454	snippy:4.3.6	variation	3865886	3865886	.	.	0	note=complex TC=>CG CG:24 TC:0
EA2454	snippy:4.3.6	variation	3865910	3865910	.	.	0	note=snp T=>A A:64 T:0
EA2454	snippy:4.3.6	variation	3865931	3865931	.	.	0	note=snp A=>G G:102 A:0
EA2454	snippy:4.3.6	variation	3865940	3865940	.	.	0	note=snp C=>A A:114 C:0
EA2454	snippy:4.3.6	variation	3865979	3865979	.	.	0	note=snp C=>T T:126 C:0
EA2454	snippy:4.3.6	variation	3865988	3865988	.	.	0	note=complex TAAT=>CAAC CAAC:133 TAAT:0
EA2454	snippy:4.3.6	variation	3866000	3866000	.	.	0	note=complex GA=>AG AG:125 GA:0
EA2454	snippy:4.3.6	variation	3866006	3866006	.	.	0	note=snp C=>G G:131 C:0
EA2454	snippy:4.3.6	variation	3866015	3866015	.	.	0	note=snp C=>A A:140 C:1
EA2454	snippy:4.3.6	variation	3866024	3866024	.	.	0	note=snp C=>T T:140 C:0
EA2454	snippy:4.3.6	variation	3866039	3866039	.	.	0	note=complex CGCAACT=>TGCGACC TGCGACC:115 CGCAACT:0
EA2454	snippy:4.3.6	variation	3866060	3866060	.	.	0	note=snp C=>T T:128 C:0
EA2454	snippy:4.3.6	variation	3866096	3866096	.	.	0	note=complex TGTA=>CGTG CGTG:144 TGTA:0
EA2454	snippy:4.3.6	variation	3866105	3866105	.	.	0	note=snp A=>T T:157 A:0
EA2454	snippy:4.3.6	variation	3866123	3866123	.	.	0	note=snp T=>C C:160 T:0
EA2454	snippy:4.3.6	variation	3866129	3866129	.	.	0	note=complex AT=>GC GC:142 AT:0
EA2454	snippy:4.3.6	variation	3866150	3866150	.	.	0	note=snp C=>T T:115 C:0
EA2454	snippy:4.3.6	variation	3866156	3866156	.	.	0	note=complex GGTCG=>CGTCA CGTCA:102 GGTCG:0
EA2454	snippy:4.3.6	variation	3866184	3866184	.	.	0	note=snp A=>G G:64 A:0
EA2454	snippy:4.3.6	variation	3866189	3866189	.	.	0	note=complex GGGG=>AGGA AGGA:48 GGGG:0
EA2454	snippy:4.3.6	variation	3866250	3866250	.	.	0	note=snp C=>G G:15 C:0
EA2454	snippy:4.3.6	variation	3866260	3866260	.	.	0	note=complex CGGG=>AGGC AGGC:23 CGGG:0
EA2454	snippy:4.3.6	variation	3866269	3866269	.	.	0	note=snp T=>C C:36 T:0
EA2454	snippy:4.3.6	variation	3866278	3866278	.	.	0	note=snp T=>C C:55 T:0
EA2454	snippy:4.3.6	variation	3866284	3866284	.	.	0	note=snp G=>C C:62 G:0
EA2454	snippy:4.3.6	variation	3866302	3866302	.	.	0	note=snp T=>C C:81 T:0
EA2454	snippy:4.3.6	variation	3866312	3866312	.	.	0	note=snp A=>G G:99 A:1
EA2454	snippy:4.3.6	variation	3866320	3866320	.	.	0	note=complex CTTC=>ATTT ATTT:117 CTTC:0
EA2454	snippy:4.3.6	variation	3866335	3866335	.	.	0	note=snp T=>G G:137 T:0
EA2454	snippy:4.3.6	variation	3866352	3866352	.	.	0	note=snp G=>T T:152 G:0
EA2454	snippy:4.3.6	variation	3866365	3866365	.	.	0	note=snp C=>A A:152 C:0
EA2454	snippy:4.3.6	variation	3866373	3866373	.	.	0	note=complex TT=>CG CG:142 TT:0
EA2454	snippy:4.3.6	variation	3866383	3866383	.	.	0	note=snp T=>C C:170 T:0
EA2454	snippy:4.3.6	variation	3866395	3866395	.	.	0	note=snp C=>T T:180 C:0
EA2454	snippy:4.3.6	variation	3866419	3866419	.	.	0	note=snp T=>G G:196 T:0
EA2454	snippy:4.3.6	variation	3866489	3866489	.	.	0	note=snp G=>A A:137 G:0
EA2454	snippy:4.3.6	variation	3866503	3866503	.	.	0	note=snp G=>T T:119 G:0
EA2454	snippy:4.3.6	variation	3866512	3866512	.	.	0	note=complex CTGTTTCA=>TTGCTTCC TTGCTTCC:79 CTGTTTCA:0
EA2454	snippy:4.3.6	variation	3866530	3866530	.	.	0	note=complex CGATGC=>TGAAGG TGAAGG:38 CGATGC:0
EA2454	snippy:4.3.6	variation	3866543	3866543	.	.	0	note=snp T=>C C:30 T:0
EA2454	snippy:4.3.6	variation	3866552	3866552	.	.	0	note=snp A=>C C:18 A:0
EA2454	snippy:4.3.6	variation	3866560	3866560	.	.	0	note=snp T=>C C:10 T:0
EA2454	snippy:4.3.6	variation	3866993	3866993	.	.	0	note=snp T=>G G:32 T:0
EA2454	snippy:4.3.6	variation	3867008	3867008	.	.	0	note=complex TCAC=>CCGT CCGT:32 TCAC:0
EA2454	snippy:4.3.6	variation	3867017	3867017	.	.	0	note=complex CAAAGGA=>TCAGGGG TCAGGGG:31 CAAAGGA:0
EA2454	snippy:4.3.6	variation	3867029	3867029	.	.	0	note=complex AAGCA=>TACAG TACAG:32 AAGCA:0
EA2454	snippy:4.3.6	variation	3867113	3867113	.	.	0	note=snp C=>T T:190 C:0
EA2454	snippy:4.3.6	variation	3867122	3867122	.	.	0	note=snp C=>T T:207 C:0
EA2454	snippy:4.3.6	variation	3867188	3867188	.	.	0	note=snp C=>T T:225 C:0
EA2454	snippy:4.3.6	variation	3867227	3867227	.	.	0	note=snp T=>G G:242 T:0
EA2454	snippy:4.3.6	variation	3867239	3867239	.	.	0	note=snp A=>G G:232 A:0
EA2454	snippy:4.3.6	variation	3867296	3867296	.	.	0	note=snp C=>T T:231 C:0
EA2454	snippy:4.3.6	variation	3867326	3867326	.	.	0	note=complex TAGCCGG=>AAACCGC AAACCGC:219 TAGCCGG:0
EA2454	snippy:4.3.6	variation	3867905	3867905	.	.	0	note=snp T=>G G:228 T:1
EA2454	snippy:4.3.6	variation	3868706	3868706	.	.	0	note=snp T=>C C:279 T:0
EA2454	snippy:4.3.6	variation	3868760	3868760	.	.	0	note=snp A=>G G:302 A:0
EA2454	snippy:4.3.6	variation	3868774	3868774	.	.	0	note=complex AAAAT=>GAAAC GAAAC:280 AAAAT:0
EA2454	snippy:4.3.6	variation	3868787	3868787	.	.	0	note=snp A=>G G:288 A:0
EA2454	snippy:4.3.6	variation	3868798	3868798	.	.	0	note=snp A=>G G:277 A:1
EA2454	snippy:4.3.6	variation	3869010	3869010	.	.	0	note=del CTGA=>C C:180 CTGA:0
EA2454	snippy:4.3.6	variation	3869252	3869252	.	.	0	note=snp T=>C C:252 T:0
EA2454	snippy:4.3.6	variation	3869489	3869489	.	.	0	note=snp T=>C C:221 T:0
EA2454	snippy:4.3.6	variation	3869682	3869682	.	.	0	note=snp G=>A A:217 G:0
EA2454	snippy:4.3.6	variation	3871624	3871624	.	.	0	note=snp C=>T T:255 C:0
EA2454	snippy:4.3.6	variation	3871816	3871816	.	.	0	note=snp A=>G G:239 A:0
EA2454	snippy:4.3.6	variation	3871828	3871828	.	.	0	note=snp C=>T T:237 C:0
EA2454	snippy:4.3.6	variation	3871837	3871837	.	.	0	note=snp C=>T T:233 C:0
EA2454	snippy:4.3.6	variation	3871864	3871864	.	.	0	note=snp G=>A A:215 G:0
EA2454	snippy:4.3.6	variation	3871945	3871945	.	.	0	note=snp G=>T T:218 G:0
EA2454	snippy:4.3.6	variation	3871957	3871957	.	.	0	note=snp T=>C C:243 T:0
EA2454	snippy:4.3.6	variation	3872008	3872008	.	.	0	note=snp C=>T T:241 C:0
EA2454	snippy:4.3.6	variation	3872110	3872110	.	.	0	note=snp T=>C C:228 T:0
EA2454	snippy:4.3.6	variation	3872128	3872128	.	.	0	note=mnp CT=>GC GC:199 CT:0
EA2454	snippy:4.3.6	variation	3872134	3872134	.	.	0	note=snp A=>G G:209 A:0
EA2454	snippy:4.3.6	variation	3872167	3872167	.	.	0	note=snp C=>T T:231 C:0
EA2454	snippy:4.3.6	variation	3872518	3872518	.	.	0	note=snp A=>G G:250 A:1
EA2454	snippy:4.3.6	variation	3872560	3872560	.	.	0	note=snp C=>T T:255 C:1
EA2454	snippy:4.3.6	variation	3872599	3872599	.	.	0	note=snp G=>A A:264 G:0
EA2454	snippy:4.3.6	variation	3872721	3872721	.	.	0	note=mnp TG=>CA CA:224 TG:0
EA2454	snippy:4.3.6	variation	3872778	3872778	.	.	0	note=snp C=>T T:267 C:0
EA2454	snippy:4.3.6	variation	3872799	3872799	.	.	0	note=complex AACCA=>GACCC GACCC:248 AACCA:0
EA2454	snippy:4.3.6	variation	3872862	3872862	.	.	0	note=snp G=>A A:247 G:0
EA2454	snippy:4.3.6	variation	3873006	3873006	.	.	0	note=snp A=>G G:224 A:0
EA2454	snippy:4.3.6	variation	3873171	3873171	.	.	0	note=snp C=>T T:236 C:0
EA2454	snippy:4.3.6	variation	3873180	3873180	.	.	0	note=snp A=>G G:230 A:0
EA2454	snippy:4.3.6	variation	3873261	3873261	.	.	0	note=snp G=>A A:221 G:0
EA2454	snippy:4.3.6	variation	3873282	3873282	.	.	0	note=snp C=>T T:229 C:0
EA2454	snippy:4.3.6	variation	3873309	3873309	.	.	0	note=snp C=>T T:205 C:0
EA2454	snippy:4.3.6	variation	3873396	3873396	.	.	0	note=snp T=>C C:228 T:0
EA2454	snippy:4.3.6	variation	3873417	3873417	.	.	0	note=snp C=>A A:243 C:0
EA2454	snippy:4.3.6	variation	3873594	3873594	.	.	0	note=snp G=>A A:242 G:0
EA2454	snippy:4.3.6	variation	3873609	3873609	.	.	0	note=snp A=>G G:238 A:0
EA2454	snippy:4.3.6	variation	3873636	3873636	.	.	0	note=snp G=>A A:240 G:0
EA2454	snippy:4.3.6	variation	3873750	3873750	.	.	0	note=snp T=>C C:244 T:0
EA2454	snippy:4.3.6	variation	3874008	3874008	.	.	0	note=snp A=>G G:194 A:0
EA2454	snippy:4.3.6	variation	3874017	3874017	.	.	0	note=snp C=>A A:201 C:0
EA2454	snippy:4.3.6	variation	3874068	3874068	.	.	0	note=snp T=>C C:210 T:0
EA2454	snippy:4.3.6	variation	3874077	3874077	.	.	0	note=snp G=>A A:219 G:0
EA2454	snippy:4.3.6	variation	3874083	3874083	.	.	0	note=snp T=>C C:216 T:0
EA2454	snippy:4.3.6	variation	3874128	3874128	.	.	0	note=snp A=>G G:212 A:0
EA2454	snippy:4.3.6	variation	3874140	3874140	.	.	0	note=snp A=>C C:204 A:0
EA2454	snippy:4.3.6	variation	3874221	3874221	.	.	0	note=snp T=>C C:220 T:0
EA2454	snippy:4.3.6	variation	3874248	3874248	.	.	0	note=snp G=>A A:235 G:0
EA2454	snippy:4.3.6	variation	3874254	3874254	.	.	0	note=complex GGCG=>AGCT AGCT:219 GGCG:0
EA2454	snippy:4.3.6	variation	3874266	3874266	.	.	0	note=snp T=>G G:226 T:0
EA2454	snippy:4.3.6	variation	3874278	3874278	.	.	0	note=snp T=>C C:227 T:0
EA2454	snippy:4.3.6	variation	3874305	3874305	.	.	0	note=snp G=>A A:228 G:0
EA2454	snippy:4.3.6	variation	3874321	3874321	.	.	0	note=snp G=>T T:222 G:0
EA2454	snippy:4.3.6	variation	3874329	3874329	.	.	0	note=complex GGCG=>AGCA AGCA:208 GGCG:0
EA2454	snippy:4.3.6	variation	3874350	3874350	.	.	0	note=snp C=>T T:215 C:0
EA2454	snippy:4.3.6	variation	3874393	3874393	.	.	0	note=snp T=>A A:210 T:0
EA2454	snippy:4.3.6	variation	3874440	3874440	.	.	0	note=snp C=>A A:192 C:0
EA2454	snippy:4.3.6	variation	3874458	3874458	.	.	0	note=snp G=>C C:180 G:0
EA2454	snippy:4.3.6	variation	3874500	3874500	.	.	0	note=snp C=>T T:149 C:0
EA2454	snippy:4.3.6	variation	3874566	3874566	.	.	0	note=snp A=>G G:32 A:0
EA2454	snippy:4.3.6	variation	3874719	3874719	.	.	0	note=snp C=>T T:25 C:0
EA2454	snippy:4.3.6	variation	3874744	3874744	.	.	0	note=snp A=>G G:57 A:0
EA2454	snippy:4.3.6	variation	3874749	3874749	.	.	0	note=snp C=>T T:66 C:0
EA2454	snippy:4.3.6	variation	3874767	3874767	.	.	0	note=snp G=>A A:98 G:0
EA2454	snippy:4.3.6	variation	3874809	3874809	.	.	0	note=snp T=>C C:158 T:0
EA2454	snippy:4.3.6	variation	3874815	3874815	.	.	0	note=snp G=>A A:158 G:0
EA2454	snippy:4.3.6	variation	3874839	3874839	.	.	0	note=snp G=>T T:183 G:0
EA2454	snippy:4.3.6	variation	3874860	3874860	.	.	0	note=snp T=>C C:189 T:1
EA2454	snippy:4.3.6	variation	3874893	3874893	.	.	0	note=snp A=>G G:198 A:0
EA2454	snippy:4.3.6	variation	3874995	3874995	.	.	0	note=snp C=>T T:258 C:0
EA2454	snippy:4.3.6	variation	3875034	3875034	.	.	0	note=snp G=>A A:252 G:0
EA2454	snippy:4.3.6	variation	3875073	3875073	.	.	0	note=snp C=>A A:237 C:0
EA2454	snippy:4.3.6	variation	3875094	3875094	.	.	0	note=snp T=>C C:222 T:0
EA2454	snippy:4.3.6	variation	3875100	3875100	.	.	0	note=snp T=>G G:223 T:0
EA2454	snippy:4.3.6	variation	3875118	3875118	.	.	0	note=snp T=>G G:210 T:0
EA2454	snippy:4.3.6	variation	3875169	3875169	.	.	0	note=complex GGACATC=>CGATATT CGATATT:158 GGACATC:0
EA2454	snippy:4.3.6	variation	3875205	3875205	.	.	0	note=complex GGGG=>TGGT TGGT:181 GGGG:0
EA2454	snippy:4.3.6	variation	3875232	3875232	.	.	0	note=snp T=>C C:203 T:0
EA2454	snippy:4.3.6	variation	3875259	3875259	.	.	0	note=snp G=>T T:152 G:0
EA2454	snippy:4.3.6	variation	3875286	3875286	.	.	0	note=snp T=>G G:109 T:0
EA2454	snippy:4.3.6	variation	3875328	3875328	.	.	0	note=complex CCGAGGC=>TAAAGGG TAAAGGG:57 CCGAGGC:0
EA2454	snippy:4.3.6	variation	3875340	3875340	.	.	0	note=complex CGGA=>AGGT AGGT:64 CGGA:0
EA2454	snippy:4.3.6	variation	3875354	3875354	.	.	0	note=complex GCAGCATA=>ACAGTATC ACAGTATC:81 GCAGCATA:0
EA2454	snippy:4.3.6	variation	3875370	3875370	.	.	0	note=snp A=>G G:111 A:0
EA2454	snippy:4.3.6	variation	3875383	3875383	.	.	0	note=complex GGAAGA=>AGAGGG AGAGGG:97 GGAAGA:0
EA2454	snippy:4.3.6	variation	3875412	3875412	.	.	0	note=snp C=>T T:73 C:0
EA2454	snippy:4.3.6	variation	3875424	3875424	.	.	0	note=snp G=>A A:65 G:0
EA2454	snippy:4.3.6	variation	3875431	3875431	.	.	0	note=snp T=>A A:63 T:0
EA2454	snippy:4.3.6	variation	3876094	3876094	.	.	0	note=snp T=>A A:11 T:0
EA2454	snippy:4.3.6	variation	3876112	3876112	.	.	0	note=complex TTG=>CTA CTA:59 TTG:0
EA2454	snippy:4.3.6	variation	3876119	3876119	.	.	0	note=snp C=>T T:69 C:0
EA2454	snippy:4.3.6	variation	3876146	3876146	.	.	0	note=snp C=>T T:119 C:0
EA2454	snippy:4.3.6	variation	3877140	3877140	.	.	0	note=snp A=>G G:232 A:0
EA2454	snippy:4.3.6	variation	3877447	3877447	.	.	0	note=snp G=>A A:219 G:0
EA2454	snippy:4.3.6	variation	3877989	3877989	.	.	0	note=snp T=>C C:287 T:0
EA2454	snippy:4.3.6	variation	3880970	3880970	.	.	0	note=snp A=>C C:238 A:0
EA2454	snippy:4.3.6	variation	3881115	3881115	.	.	0	note=snp C=>T T:203 C:0
EA2454	snippy:4.3.6	variation	3881300	3881300	.	.	0	note=complex CGGTGCA=>GGGAGCC GGGAGCC:170 CGGTGCA:0
EA2454	snippy:4.3.6	variation	3881684	3881684	.	.	0	note=snp A=>C C:212 A:0
EA2454	snippy:4.3.6	variation	3881743	3881743	.	.	0	note=snp T=>C C:230 T:1
EA2454	snippy:4.3.6	variation	3882296	3882296	.	.	0	note=snp T=>C C:202 T:0
EA2454	snippy:4.3.6	variation	3882404	3882404	.	.	0	note=snp C=>T T:259 C:1
EA2454	snippy:4.3.6	variation	3883346	3883346	.	.	0	note=snp T=>C C:197 T:0
EA2454	snippy:4.3.6	variation	3883477	3883477	.	.	0	note=snp T=>A A:225 T:0
EA2454	snippy:4.3.6	variation	3883492	3883492	.	.	0	note=snp C=>T T:203 C:1
EA2454	snippy:4.3.6	variation	3883505	3883505	.	.	0	note=snp C=>T T:205 C:0
EA2454	snippy:4.3.6	variation	3883535	3883535	.	.	0	note=snp A=>G G:221 A:0
EA2454	snippy:4.3.6	variation	3883550	3883550	.	.	0	note=snp G=>A A:206 G:0
EA2454	snippy:4.3.6	variation	3883557	3883557	.	.	0	note=snp A=>G G:208 A:0
EA2454	snippy:4.3.6	variation	3883565	3883565	.	.	0	note=complex GCT=>ACA ACA:188 GCT:0
EA2454	snippy:4.3.6	variation	3883583	3883583	.	.	0	note=snp C=>T T:228 C:0
EA2454	snippy:4.3.6	variation	3883592	3883592	.	.	0	note=snp C=>T T:226 C:0
EA2454	snippy:4.3.6	variation	3883637	3883637	.	.	0	note=snp G=>A A:234 G:0
EA2454	snippy:4.3.6	variation	3883670	3883670	.	.	0	note=snp C=>T T:244 C:0
EA2454	snippy:4.3.6	variation	3883685	3883685	.	.	0	note=complex GGACC=>AGACA AGACA:219 GGACC:0
EA2454	snippy:4.3.6	variation	3883800	3883800	.	.	0	note=snp C=>T T:240 C:0
EA2454	snippy:4.3.6	variation	3883826	3883826	.	.	0	note=snp A=>T T:271 A:0
EA2454	snippy:4.3.6	variation	3883843	3883843	.	.	0	note=snp C=>T T:257 C:0
EA2454	snippy:4.3.6	variation	3883883	3883883	.	.	0	note=snp C=>T T:257 C:0
EA2454	snippy:4.3.6	variation	3883908	3883908	.	.	0	note=snp C=>G G:238 C:0
EA2454	snippy:4.3.6	variation	3883927	3883927	.	.	0	note=snp T=>C C:233 T:0
EA2454	snippy:4.3.6	variation	3883964	3883964	.	.	0	note=snp C=>T T:213 C:0
EA2454	snippy:4.3.6	variation	3883987	3883987	.	.	0	note=mnp CC=>AA AA:197 CC:0
EA2454	snippy:4.3.6	variation	3884000	3884000	.	.	0	note=snp A=>G G:231 A:0
EA2454	snippy:4.3.6	variation	3884042	3884042	.	.	0	note=snp C=>T T:215 C:0
EA2454	snippy:4.3.6	variation	3884078	3884078	.	.	0	note=snp A=>G G:230 A:0
EA2454	snippy:4.3.6	variation	3884150	3884150	.	.	0	note=snp A=>C C:224 A:0
EA2454	snippy:4.3.6	variation	3884201	3884201	.	.	0	note=snp T=>G G:201 T:0
EA2454	snippy:4.3.6	variation	3884222	3884222	.	.	0	note=snp C=>T T:211 C:0
EA2454	snippy:4.3.6	variation	3884254	3884254	.	.	0	note=snp T=>A A:193 T:0
EA2454	snippy:4.3.6	variation	3884321	3884321	.	.	0	note=complex TGATG=>CGATA CGATA:181 TGATG:0
EA2454	snippy:4.3.6	variation	3884351	3884351	.	.	0	note=snp C=>T T:207 C:0
EA2454	snippy:4.3.6	variation	3884372	3884372	.	.	0	note=snp G=>A A:215 G:0
EA2454	snippy:4.3.6	variation	3884444	3884444	.	.	0	note=snp A=>G G:225 A:0
EA2454	snippy:4.3.6	variation	3884483	3884483	.	.	0	note=snp T=>C C:224 T:0
EA2454	snippy:4.3.6	variation	3884495	3884495	.	.	0	note=snp G=>A A:210 G:0
EA2454	snippy:4.3.6	variation	3884537	3884537	.	.	0	note=complex ACGT=>GCGC GCGC:207 ACGT:0
EA2454	snippy:4.3.6	variation	3884549	3884549	.	.	0	note=complex ACAG=>GCAA GCAA:211 ACAG:0
EA2454	snippy:4.3.6	variation	3884573	3884573	.	.	0	note=snp G=>T T:218 G:0
EA2454	snippy:4.3.6	variation	3884591	3884591	.	.	0	note=complex ATCA=>GTCC GTCC:193 ATCA:0
EA2454	snippy:4.3.6	variation	3884622	3884622	.	.	0	note=snp T=>A A:223 T:0
EA2454	snippy:4.3.6	variation	3884654	3884654	.	.	0	note=snp T=>C C:209 T:0
EA2454	snippy:4.3.6	variation	3884663	3884663	.	.	0	note=complex CCGTGTG=>TCGGGTA TCGGGTA:191 CCGTGTG:0
EA2454	snippy:4.3.6	variation	3884741	3884741	.	.	0	note=snp T=>C C:208 T:0
EA2454	snippy:4.3.6	variation	3884753	3884753	.	.	0	note=snp T=>C C:201 T:0
EA2454	snippy:4.3.6	variation	3884783	3884783	.	.	0	note=snp T=>C C:207 T:0
EA2454	snippy:4.3.6	variation	3884795	3884795	.	.	0	note=snp A=>G G:223 A:0
EA2454	snippy:4.3.6	variation	3884888	3884888	.	.	0	note=snp A=>G G:152 A:0
EA2454	snippy:4.3.6	variation	3884900	3884900	.	.	0	note=complex CGAG=>TGAA TGAA:129 CGAG:0
EA2454	snippy:4.3.6	variation	3884909	3884909	.	.	0	note=complex CACGGCAGAGGTA=>TACAGCTGAAGTG TACAGCTGAAGTG:122 CACGGCAGAGGTA:0
EA2454	snippy:4.3.6	variation	3884948	3884948	.	.	0	note=snp T=>C C:158 T:0
EA2454	snippy:4.3.6	variation	3884969	3884969	.	.	0	note=complex CCGTGCG=>TCGCGCA TCGCGCA:136 CCGTGCG:0
EA2454	snippy:4.3.6	variation	3884985	3884985	.	.	0	note=snp A=>G G:172 A:0
EA2454	snippy:4.3.6	variation	3885023	3885023	.	.	0	note=snp C=>T T:206 C:1
EA2454	snippy:4.3.6	variation	3885050	3885050	.	.	0	note=snp A=>G G:217 A:0
EA2454	snippy:4.3.6	variation	3885345	3885345	.	.	0	note=snp G=>T T:163 G:0
EA2454	snippy:4.3.6	variation	3885384	3885384	.	.	0	note=snp C=>G G:86 C:0
EA2454	snippy:4.3.6	variation	3885390	3885390	.	.	0	note=snp T=>A A:75 T:0
EA2454	snippy:4.3.6	variation	3885480	3885480	.	.	0	note=snp T=>G G:88 T:0
EA2454	snippy:4.3.6	variation	3885531	3885531	.	.	0	note=complex GGA=>ACC ACC:129 GGA:0
EA2454	snippy:4.3.6	variation	3885560	3885560	.	.	0	note=complex CGGTG=>GGATT GGATT:115 CGGTG:0
EA2454	snippy:4.3.6	variation	3885579	3885579	.	.	0	note=snp A=>G G:133 A:0
EA2454	snippy:4.3.6	variation	3885591	3885591	.	.	0	note=snp C=>A A:116 C:0
EA2454	snippy:4.3.6	variation	3885600	3885600	.	.	0	note=snp C=>G G:109 C:0
EA2454	snippy:4.3.6	variation	3885654	3885654	.	.	0	note=snp A=>G G:35 A:0
EA2454	snippy:4.3.6	variation	3885723	3885723	.	.	0	note=snp C=>G G:31 C:0
EA2454	snippy:4.3.6	variation	3885730	3885730	.	.	0	note=snp A=>T T:39 A:0
EA2454	snippy:4.3.6	variation	3885775	3885775	.	.	0	note=snp A=>C C:117 A:0
EA2454	snippy:4.3.6	variation	3885800	3885800	.	.	0	note=snp T=>C C:143 T:0
EA2454	snippy:4.3.6	variation	3885819	3885819	.	.	0	note=complex CGCC=>TGCA TGCA:133 CGCC:0
EA2454	snippy:4.3.6	variation	3885859	3885859	.	.	0	note=snp A=>G G:125 A:0
EA2454	snippy:4.3.6	variation	3885869	3885869	.	.	0	note=mnp TG=>CC CC:97 TG:0
EA2454	snippy:4.3.6	variation	3885876	3885876	.	.	0	note=complex TGTAGCTGGT=>GGTGGCCGGC GGTGGCCGGC:91 TGTAGCTGGT:0
EA2454	snippy:4.3.6	variation	3885906	3885906	.	.	0	note=snp T=>C C:123 T:0
EA2454	snippy:4.3.6	variation	3885921	3885921	.	.	0	note=snp G=>C C:140 G:0
EA2454	snippy:4.3.6	variation	3885930	3885930	.	.	0	note=snp A=>G G:141 A:0
EA2454	snippy:4.3.6	variation	3885970	3885970	.	.	0	note=complex ACG=>GTA GTA:153 ACG:0
EA2454	snippy:4.3.6	variation	3885978	3885978	.	.	0	note=snp T=>C C:181 T:0
EA2454	snippy:4.3.6	variation	3886011	3886011	.	.	0	note=complex ACT=>GCC GCC:167 ACT:0
EA2454	snippy:4.3.6	variation	3886019	3886019	.	.	0	note=snp G=>A A:183 G:0
EA2454	snippy:4.3.6	variation	3886035	3886035	.	.	0	note=complex GCCGCAAG=>ACCGTAAC ACCGTAAC:160 GCCGCAAG:0
EA2454	snippy:4.3.6	variation	3886122	3886122	.	.	0	note=complex AGA=>GGG GGG:205 AGA:0
EA2454	snippy:4.3.6	variation	3886197	3886197	.	.	0	note=snp A=>G G:225 A:0
EA2454	snippy:4.3.6	variation	3886209	3886209	.	.	0	note=complex AGCG=>GGCT GGCT:212 AGCG:0
EA2454	snippy:4.3.6	variation	3886285	3886285	.	.	0	note=complex TCA=>ACG ACG:193 TCA:0
EA2454	snippy:4.3.6	variation	3886305	3886305	.	.	0	note=snp T=>C C:216 T:0
EA2454	snippy:4.3.6	variation	3886328	3886328	.	.	0	note=complex AATTA=>GATTG GATTG:200 AATTA:0
EA2454	snippy:4.3.6	variation	3886473	3886473	.	.	0	note=complex GTGT=>TGGC TGGC:187 GTGT:0
EA2454	snippy:4.3.6	variation	3886835	3886835	.	.	0	note=complex TATT=>CAGC CAGC:217 TATT:0
EA2454	snippy:4.3.6	variation	3888966	3888966	.	.	0	note=snp A=>C C:206 A:0
EA2454	snippy:4.3.6	variation	3889072	3889072	.	.	0	note=snp A=>G G:107 A:0
EA2454	snippy:4.3.6	variation	3889411	3889411	.	.	0	note=snp G=>A A:51 G:0
EA2454	snippy:4.3.6	variation	3889426	3889426	.	.	0	note=snp G=>A A:47 G:0
EA2454	snippy:4.3.6	variation	3889459	3889459	.	.	0	note=snp T=>G G:52 T:0
EA2454	snippy:4.3.6	variation	3889477	3889477	.	.	0	note=complex CA=>TG TG:36 CA:0
EA2454	snippy:4.3.6	variation	3889529	3889529	.	.	0	note=complex TAACAAG=>CATCTAA CATCTAA:27 TAACAAG:0
EA2454	snippy:4.3.6	variation	3889577	3889577	.	.	0	note=snp C=>T T:124 C:0
EA2454	snippy:4.3.6	variation	3889615	3889615	.	.	0	note=snp G=>A A:155 G:1
EA2454	snippy:4.3.6	variation	3889625	3889625	.	.	0	note=snp C=>T T:170 C:0
EA2454	snippy:4.3.6	variation	3889814	3889814	.	.	0	note=snp G=>T T:222 G:0
EA2454	snippy:4.3.6	variation	3889838	3889838	.	.	0	note=snp G=>A A:210 G:0
EA2454	snippy:4.3.6	variation	3889844	3889844	.	.	0	note=snp A=>G G:227 A:0
EA2454	snippy:4.3.6	variation	3889859	3889859	.	.	0	note=snp C=>T T:223 C:0
EA2454	snippy:4.3.6	variation	3889901	3889901	.	.	0	note=snp G=>A A:211 G:0
EA2454	snippy:4.3.6	variation	3889922	3889922	.	.	0	note=snp C=>T T:211 C:0
EA2454	snippy:4.3.6	variation	3889961	3889961	.	.	0	note=snp G=>A A:203 G:0
EA2454	snippy:4.3.6	variation	3889967	3889967	.	.	0	note=complex TGCTGCC=>CGGTGCA CGGTGCA:173 TGCTGCC:0
EA2454	snippy:4.3.6	variation	3890249	3890249	.	.	0	note=snp G=>C C:210 G:0
EA2454	snippy:4.3.6	variation	3890291	3890291	.	.	0	note=snp T=>G G:214 T:0
EA2454	snippy:4.3.6	variation	3890300	3890300	.	.	0	note=snp A=>G G:221 A:0
EA2454	snippy:4.3.6	variation	3890393	3890393	.	.	0	note=snp C=>T T:154 C:0
EA2454	snippy:4.3.6	variation	3890399	3890399	.	.	0	note=complex TGCT=>AGCC AGCC:158 TGCT:0
EA2454	snippy:4.3.6	variation	3890414	3890414	.	.	0	note=snp A=>G G:174 A:0
EA2454	snippy:4.3.6	variation	3890444	3890444	.	.	0	note=snp G=>A A:190 G:0
EA2454	snippy:4.3.6	variation	3890498	3890498	.	.	0	note=snp C=>T T:178 C:0
EA2454	snippy:4.3.6	variation	3890560	3890560	.	.	0	note=complex TCT=>CCC CCC:192 TCT:0
EA2454	snippy:4.3.6	variation	3890570	3890570	.	.	0	note=snp A=>C C:213 A:0
EA2454	snippy:4.3.6	variation	3890579	3890579	.	.	0	note=snp G=>T T:212 G:0
EA2454	snippy:4.3.6	variation	3890586	3890586	.	.	0	note=snp T=>C C:233 T:0
EA2454	snippy:4.3.6	variation	3890602	3890602	.	.	0	note=snp T=>C C:240 T:0
EA2454	snippy:4.3.6	variation	3890732	3890732	.	.	0	note=snp T=>C C:222 T:0
EA2454	snippy:4.3.6	variation	3890749	3890749	.	.	0	note=snp A=>C C:227 A:0
EA2454	snippy:4.3.6	variation	3890754	3890754	.	.	0	note=snp C=>G G:220 C:0
EA2454	snippy:4.3.6	variation	3890901	3890901	.	.	0	note=complex GGAGCCA=>AGAAACT AGAAACT:84 GGAGCCA:0
EA2454	snippy:4.3.6	variation	3890922	3890922	.	.	0	note=complex TG=>CT CT:87 TG:0
EA2454	snippy:4.3.6	variation	3890928	3890928	.	.	0	note=complex AACAGCCC=>TACAACCA TACAACCA:87 AACAGCCC:0
EA2454	snippy:4.3.6	variation	3890942	3890942	.	.	0	note=snp A=>G G:86 A:0
EA2454	snippy:4.3.6	variation	3890950	3890950	.	.	0	note=complex GTCCA=>ATCCC ATCCC:80 GTCCA:0
EA2454	snippy:4.3.6	variation	3890980	3890980	.	.	0	note=ins C=>CT CT:52 C:2
EA2454	snippy:4.3.6	variation	3890999	3890999	.	.	0	note=complex AGG=>GCC GCC:23 AGG:0
EA2454	snippy:4.3.6	variation	3891009	3891009	.	.	0	note=snp C=>G G:23 C:0
EA2454	snippy:4.3.6	variation	3891014	3891014	.	.	0	note=complex AAA=>TTC TTC:22 AAA:0
EA2454	snippy:4.3.6	variation	3891021	3891021	.	.	0	note=snp G=>C C:23 G:0
EA2454	snippy:4.3.6	variation	3891028	3891028	.	.	0	note=mnp ACA=>GAG GAG:22 ACA:0
EA2454	snippy:4.3.6	variation	3891062	3891062	.	.	0	note=mnp TA=>CG CG:72 TA:0
EA2454	snippy:4.3.6	variation	3891090	3891090	.	.	0	note=complex TGTT=>AGTC AGTC:129 TGTT:0
EA2454	snippy:4.3.6	variation	3891274	3891274	.	.	0	note=snp G=>T T:204 G:0
EA2454	snippy:4.3.6	variation	3891344	3891344	.	.	0	note=snp T=>C C:173 T:0
EA2454	snippy:4.3.6	variation	3891353	3891353	.	.	0	note=snp C=>T T:184 C:0
EA2454	snippy:4.3.6	variation	3891366	3891366	.	.	0	note=snp A=>G G:194 A:0
EA2454	snippy:4.3.6	variation	3891377	3891377	.	.	0	note=complex CAC=>TAT TAT:169 CAC:0
EA2454	snippy:4.3.6	variation	3891387	3891387	.	.	0	note=ins G=>GTA GTA:180 G:0
EA2454	snippy:4.3.6	variation	3891433	3891433	.	.	0	note=complex AC=>GT GT:158 AC:0
EA2454	snippy:4.3.6	variation	3891444	3891444	.	.	0	note=snp A=>G G:146 A:0
EA2454	snippy:4.3.6	variation	3891453	3891453	.	.	0	note=complex ATAAAGA=>CTGAAGG CTGAAGG:101 ATAAAGA:0
EA2454	snippy:4.3.6	variation	3891475	3891475	.	.	0	note=snp T=>C C:126 T:0
EA2454	snippy:4.3.6	variation	3891492	3891492	.	.	0	note=complex TGTA=>CGTAATGGCTCCCAGTT CGTAATGGCTCCCAGTT:57 TGTA:0
EA2454	snippy:4.3.6	variation	3891503	3891503	.	.	0	note=snp T=>G G:57 T:0
EA2454	snippy:4.3.6	variation	3891524	3891524	.	.	0	note=snp A=>G G:54 A:0
EA2454	snippy:4.3.6	variation	3891535	3891535	.	.	0	note=snp C=>T T:49 C:0
EA2454	snippy:4.3.6	variation	3891545	3891545	.	.	0	note=snp C=>T T:25 C:0
EA2454	snippy:4.3.6	variation	3893449	3893449	.	.	0	note=snp T=>C C:91 T:0
EA2454	snippy:4.3.6	variation	3894008	3894008	.	.	0	note=del GA=>G G:81 GA:0
EA2454	snippy:4.3.6	variation	3894436	3894436	.	.	0	note=complex TA=>CC CC:25 TA:0
EA2454	snippy:4.3.6	variation	3894443	3894443	.	.	0	note=snp A=>G G:23 A:0
EA2454	snippy:4.3.6	variation	3894452	3894452	.	.	0	note=snp T=>C C:14 T:0
EA2454	snippy:4.3.6	variation	3894927	3894927	.	.	0	note=snp G=>A A:86 G:0
EA2454	snippy:4.3.6	variation	3895094	3895094	.	.	0	note=snp A=>T T:51 A:0
EA2454	snippy:4.3.6	variation	3895125	3895125	.	.	0	note=snp G=>C C:45 G:0
EA2454	snippy:4.3.6	variation	3897276	3897276	.	.	0	note=snp A=>G G:102 A:0
EA2454	snippy:4.3.6	variation	3898242	3898242	.	.	0	note=snp A=>G G:109 A:0
EA2454	snippy:4.3.6	variation	3898302	3898302	.	.	0	note=snp G=>A A:116 G:0
EA2454	snippy:4.3.6	variation	3899159	3899159	.	.	0	note=snp C=>T T:99 C:1
EA2454	snippy:4.3.6	variation	3900076	3900076	.	.	0	note=snp G=>T T:87 G:0
EA2454	snippy:4.3.6	variation	3900532	3900532	.	.	0	note=snp G=>A A:104 G:0
EA2454	snippy:4.3.6	variation	3900788	3900788	.	.	0	note=snp T=>C C:105 T:0
EA2454	snippy:4.3.6	variation	3901046	3901046	.	.	0	note=snp T=>G G:91 T:0
EA2454	snippy:4.3.6	variation	3901448	3901448	.	.	0	note=snp G=>A A:108 G:0
EA2454	snippy:4.3.6	variation	3901468	3901468	.	.	0	note=snp A=>G G:109 A:0
EA2454	snippy:4.3.6	variation	3901670	3901670	.	.	0	note=snp A=>C C:112 A:0
EA2454	snippy:4.3.6	variation	3902889	3902889	.	.	0	note=snp G=>C C:105 G:0
EA2454	snippy:4.3.6	variation	3903505	3903505	.	.	0	note=snp G=>A A:115 G:0
EA2454	snippy:4.3.6	variation	3904266	3904266	.	.	0	note=snp T=>C C:125 T:0
EA2454	snippy:4.3.6	variation	3904888	3904888	.	.	0	note=snp C=>T T:107 C:0
EA2454	snippy:4.3.6	variation	3904915	3904915	.	.	0	note=snp A=>T T:107 A:0
EA2454	snippy:4.3.6	variation	3905020	3905020	.	.	0	note=snp A=>C C:94 A:0
EA2454	snippy:4.3.6	variation	3905071	3905071	.	.	0	note=snp C=>T T:109 C:0
EA2454	snippy:4.3.6	variation	3905167	3905167	.	.	0	note=snp C=>A A:81 C:2
EA2454	snippy:4.3.6	variation	3905252	3905252	.	.	0	note=snp G=>A A:97 G:0
EA2454	snippy:4.3.6	variation	3906148	3906148	.	.	0	note=del CTCCTTTGTA=>C C:93 CTCCTTTGTA:1
EA2454	snippy:4.3.6	variation	3906820	3906820	.	.	0	note=snp G=>A A:108 G:0
EA2454	snippy:4.3.6	variation	3906853	3906853	.	.	0	note=snp G=>A A:108 G:0
EA2454	snippy:4.3.6	variation	3906884	3906884	.	.	0	note=complex TACACATCAG=>ATACACATCAA ATACACATCAA:80 TACACATCAG:0
EA2454	snippy:4.3.6	variation	3906959	3906959	.	.	0	note=snp G=>A A:91 G:0
EA2454	snippy:4.3.6	variation	3907031	3907031	.	.	0	note=del CT=>C C:39 CT:0
EA2454	snippy:4.3.6	variation	3908657	3908657	.	.	0	note=complex TAAGG=>CAAGT CAAGT:112 TAAGG:0
EA2454	snippy:4.3.6	variation	3908840	3908840	.	.	0	note=snp C=>A A:115 C:0
EA2454	snippy:4.3.6	variation	3909285	3909285	.	.	0	note=snp G=>A A:139 G:0
EA2454	snippy:4.3.6	variation	3909320	3909320	.	.	0	note=snp T=>C C:122 T:0
EA2454	snippy:4.3.6	variation	3909916	3909916	.	.	0	note=snp T=>G G:110 T:0
EA2454	snippy:4.3.6	variation	3910184	3910184	.	.	0	note=snp C=>T T:90 C:0
EA2454	snippy:4.3.6	variation	3912716	3912716	.	.	0	note=snp G=>A A:115 G:0
EA2454	snippy:4.3.6	variation	3914479	3914479	.	.	0	note=snp T=>C C:103 T:1
EA2454	snippy:4.3.6	variation	3914657	3914657	.	.	0	note=snp A=>G G:82 A:0
EA2454	snippy:4.3.6	variation	3914694	3914694	.	.	0	note=snp G=>T T:120 G:0
EA2454	snippy:4.3.6	variation	3915502	3915502	.	.	0	note=complex TTTG=>CTTA CTTA:93 TTTG:0
EA2454	snippy:4.3.6	variation	3916927	3916927	.	.	0	note=snp A=>C C:101 A:0
EA2454	snippy:4.3.6	variation	3918637	3918637	.	.	0	note=ins T=>TG TG:101 T:0
EA2454	snippy:4.3.6	variation	3918830	3918830	.	.	0	note=snp A=>G G:103 A:0
EA2454	snippy:4.3.6	variation	3918863	3918863	.	.	0	note=snp C=>T T:89 C:0
EA2454	snippy:4.3.6	variation	3919379	3919379	.	.	0	note=snp C=>T T:62 C:0
EA2454	snippy:4.3.6	variation	3919412	3919412	.	.	0	note=snp C=>T T:74 C:0
EA2454	snippy:4.3.6	variation	3919614	3919614	.	.	0	note=snp A=>C C:123 A:0
EA2454	snippy:4.3.6	variation	3919962	3919962	.	.	0	note=snp A=>G G:100 A:0
EA2454	snippy:4.3.6	variation	3920864	3920864	.	.	0	note=snp A=>G G:89 A:0
EA2454	snippy:4.3.6	variation	3920963	3920963	.	.	0	note=snp C=>T T:114 C:0
EA2454	snippy:4.3.6	variation	3922597	3922597	.	.	0	note=snp G=>T T:111 G:0
EA2454	snippy:4.3.6	variation	3923073	3923073	.	.	0	note=snp C=>A A:76 C:0
EA2454	snippy:4.3.6	variation	3923719	3923719	.	.	0	note=snp G=>A A:74 G:0
EA2454	snippy:4.3.6	variation	3924830	3924830	.	.	0	note=snp G=>A A:108 G:0
EA2454	snippy:4.3.6	variation	3925423	3925423	.	.	0	note=del TC=>T T:85 TC:1
EA2454	snippy:4.3.6	variation	3925471	3925471	.	.	0	note=snp A=>G G:105 A:2
EA2454	snippy:4.3.6	variation	3925516	3925516	.	.	0	note=snp C=>T T:110 C:0
EA2454	snippy:4.3.6	variation	3925556	3925556	.	.	0	note=snp T=>C C:102 T:0
EA2454	snippy:4.3.6	variation	3926469	3926469	.	.	0	note=snp C=>A A:103 C:0
EA2454	snippy:4.3.6	variation	3927800	3927800	.	.	0	note=snp G=>A A:130 G:1
EA2454	snippy:4.3.6	variation	3927872	3927872	.	.	0	note=snp A=>G G:115 A:1
EA2454	snippy:4.3.6	variation	3928725	3928725	.	.	0	note=snp G=>A A:96 G:0
EA2454	snippy:4.3.6	variation	3928796	3928796	.	.	0	note=snp A=>T T:119 A:0
EA2454	snippy:4.3.6	variation	3929569	3929569	.	.	0	note=snp T=>A A:107 T:0
EA2454	snippy:4.3.6	variation	3929824	3929824	.	.	0	note=snp G=>T T:107 G:0
EA2454	snippy:4.3.6	variation	3930273	3930273	.	.	0	note=snp A=>G G:129 A:0
EA2454	snippy:4.3.6	variation	3930584	3930584	.	.	0	note=snp T=>C C:107 T:0
EA2454	snippy:4.3.6	variation	3931130	3931130	.	.	0	note=snp T=>C C:106 T:0
EA2454	snippy:4.3.6	variation	3932233	3932233	.	.	0	note=snp G=>A A:93 G:0
EA2454	snippy:4.3.6	variation	3935425	3935425	.	.	0	note=snp G=>A A:107 G:0
EA2454	snippy:4.3.6	variation	3935774	3935774	.	.	0	note=snp A=>G G:115 A:0
EA2454	snippy:4.3.6	variation	3937328	3937328	.	.	0	note=snp G=>A A:104 G:0
EA2454	snippy:4.3.6	variation	3937931	3937931	.	.	0	note=snp A=>T T:99 A:0
EA2454	snippy:4.3.6	variation	3938055	3938055	.	.	0	note=snp T=>C C:104 T:0
EA2454	snippy:4.3.6	variation	3939722	3939722	.	.	0	note=snp A=>C C:84 A:1
EA2454	snippy:4.3.6	variation	3944749	3944749	.	.	0	note=snp A=>C C:79 A:0
EA2454	snippy:4.3.6	variation	3956459	3956459	.	.	0	note=del GC=>G G:67 GC:0
EA2454	snippy:4.3.6	variation	3962501	3962501	.	.	0	note=snp G=>A A:97 G:0
EA2454	snippy:4.3.6	variation	3985793	3985793	.	.	0	note=snp T=>A A:109 T:0
EA2454	snippy:4.3.6	variation	3997451	3997451	.	.	0	note=snp G=>A A:101 G:0
EA2454	snippy:4.3.6	variation	4004474	4004474	.	.	0	note=snp A=>G G:112 A:0
EA2454	snippy:4.3.6	variation	4004676	4004676	.	.	0	note=snp C=>T T:114 C:0
EA2454	snippy:4.3.6	variation	4004935	4004935	.	.	0	note=snp G=>A A:117 G:0
EA2454	snippy:4.3.6	variation	4008915	4008915	.	.	0	note=snp G=>A A:99 G:0
EA2454	snippy:4.3.6	variation	4011845	4011845	.	.	0	note=snp A=>G G:92 A:0
EA2454	snippy:4.3.6	variation	4014768	4014768	.	.	0	note=snp T=>C C:126 T:0
EA2454	snippy:4.3.6	variation	4016930	4016930	.	.	0	note=snp T=>A A:98 T:0
EA2454	snippy:4.3.6	variation	4021182	4021182	.	.	0	note=snp C=>T T:101 C:0
EA2454	snippy:4.3.6	variation	4022634	4022634	.	.	0	note=snp A=>G G:83 A:0
EA2454	snippy:4.3.6	variation	4023082	4023082	.	.	0	note=snp C=>T T:95 C:0
EA2454	snippy:4.3.6	variation	4026172	4026172	.	.	0	note=snp T=>G G:108 T:0
EA2454	snippy:4.3.6	variation	4030733	4030733	.	.	0	note=snp A=>G G:106 A:0
EA2454	snippy:4.3.6	variation	4030798	4030798	.	.	0	note=snp G=>T T:103 G:0
EA2454	snippy:4.3.6	variation	4035304	4035304	.	.	0	note=snp C=>T T:86 C:0
EA2454	snippy:4.3.6	variation	4036181	4036181	.	.	0	note=snp A=>G G:102 A:0
EA2454	snippy:4.3.6	variation	4036304	4036304	.	.	0	note=snp T=>C C:84 T:0
EA2454	snippy:4.3.6	variation	4041761	4041761	.	.	0	note=snp T=>C C:115 T:0
EA2454	snippy:4.3.6	variation	4046742	4046742	.	.	0	note=snp G=>A A:117 G:0
EA2454	snippy:4.3.6	variation	4051339	4051339	.	.	0	note=snp C=>A A:108 C:0
EA2454	snippy:4.3.6	variation	4058462	4058462	.	.	0	note=snp T=>G G:91 T:0
EA2454	snippy:4.3.6	variation	4062557	4062557	.	.	0	note=snp A=>C C:96 A:0
EA2454	snippy:4.3.6	variation	4071332	4071332	.	.	0	note=snp A=>G G:107 A:0
EA2454	snippy:4.3.6	variation	4098708	4098708	.	.	0	note=snp T=>C C:38 T:0
EA2454	snippy:4.3.6	variation	4098756	4098756	.	.	0	note=snp A=>G G:115 A:0
EA2454	snippy:4.3.6	variation	4098787	4098787	.	.	0	note=snp A=>G G:162 A:1
EA2454	snippy:4.3.6	variation	4098812	4098812	.	.	0	note=complex CTC=>AATT AATT:139 CTC:0
EA2454	snippy:4.3.6	variation	4098849	4098849	.	.	0	note=ins G=>GT GT:137 G:0
EA2454	snippy:4.3.6	variation	4098875	4098875	.	.	0	note=snp C=>T T:129 C:0
EA2454	snippy:4.3.6	variation	4098932	4098932	.	.	0	note=snp G=>A A:34 G:0
EA2454	snippy:4.3.6	variation	4114751	4114751	.	.	0	note=complex TT=>CC CC:13 TT:0
EA2454	snippy:4.3.6	variation	4114842	4114842	.	.	0	note=snp G=>A A:65 G:0
EA2454	snippy:4.3.6	variation	4114856	4114856	.	.	0	note=snp T=>C C:66 T:0
EA2454	snippy:4.3.6	variation	4114915	4114915	.	.	0	note=snp C=>A A:12 C:0
EA2454	snippy:4.3.6	variation	4120562	4120562	.	.	0	note=snp C=>T T:114 C:0
EA2454	snippy:4.3.6	variation	4141091	4141091	.	.	0	note=snp A=>G G:104 A:0
EA2454	snippy:4.3.6	variation	4149346	4149346	.	.	0	note=snp G=>A A:106 G:0
EA2454	snippy:4.3.6	variation	4151201	4151201	.	.	0	note=snp A=>G G:108 A:1
EA2454	snippy:4.3.6	variation	4159942	4159942	.	.	0	note=snp T=>G G:102 T:0
EA2454	snippy:4.3.6	variation	4165788	4165788	.	.	0	note=snp C=>A A:111 C:0
EA2454	snippy:4.3.6	variation	4167220	4167220	.	.	0	note=snp G=>T T:98 G:3
EA2454	snippy:4.3.6	variation	4175937	4175937	.	.	0	note=snp G=>A A:84 G:0
EA2454	snippy:4.3.6	variation	4176057	4176057	.	.	0	note=snp C=>T T:93 C:1
EA2454	snippy:4.3.6	variation	4200656	4200656	.	.	0	note=snp A=>G G:104 A:0
EA2454	snippy:4.3.6	variation	4201309	4201309	.	.	0	note=snp C=>T T:125 C:0
EA2454	snippy:4.3.6	variation	4201996	4201996	.	.	0	note=snp A=>G G:91 A:0
EA2454	snippy:4.3.6	variation	4207947	4207947	.	.	0	note=snp T=>G G:87 T:0
EA2454	snippy:4.3.6	variation	4208099	4208099	.	.	0	note=snp C=>T T:112 C:0
EA2454	snippy:4.3.6	variation	4208280	4208280	.	.	0	note=snp G=>T T:113 G:0
EA2454	snippy:4.3.6	variation	4210117	4210117	.	.	0	note=del CAGCTCACCA=>C C:70 CAGCTCACCA:0
EA2454	snippy:4.3.6	variation	4212664	4212664	.	.	0	note=snp T=>A A:98 T:0
EA2454	snippy:4.3.6	variation	4213426	4213426	.	.	0	note=del GA=>G G:81 GA:0
EA2454	snippy:4.3.6	variation	4214026	4214026	.	.	0	note=snp C=>T T:111 C:0
EA2454	snippy:4.3.6	variation	4215133	4215133	.	.	0	note=snp C=>T T:105 C:0
EA2454	snippy:4.3.6	variation	4216725	4216725	.	.	0	note=del CTTTT=>C C:80 CTTTT:0
EA2454	snippy:4.3.6	variation	4227994	4227994	.	.	0	note=snp G=>T T:114 G:0
EA2454	snippy:4.3.6	variation	4231555	4231555	.	.	0	note=snp C=>T T:88 C:1
EA2454	snippy:4.3.6	variation	4231669	4231669	.	.	0	note=snp C=>T T:104 C:0
EA2454	snippy:4.3.6	variation	4234319	4234319	.	.	0	note=snp A=>G G:108 A:0
EA2454	snippy:4.3.6	variation	4235320	4235320	.	.	0	note=snp A=>G G:84 A:0
EA2454	snippy:4.3.6	variation	4236400	4236400	.	.	0	note=snp C=>T T:117 C:0
EA2454	snippy:4.3.6	variation	4240327	4240327	.	.	0	note=snp G=>A A:126 G:0
EA2454	snippy:4.3.6	variation	4246114	4246114	.	.	0	note=snp C=>A A:116 C:1
EA2454	snippy:4.3.6	variation	4247151	4247151	.	.	0	note=del GGCTGCCGGACTCATTCGCAGTGGACAAATTTT=>G G:24 GGCTGCCGGACTCATTCGCAGTGGACAAATTTT:0
[truncated: 1,694 more rows]
