# Supplementary material for: Escherichia coli ST302: Genomic Analysis of Virulence Potential and Antimicrobial Resistance Mediated by Mobile Genetic Elements
Source: Front Microbiol. 2020 Jan 21;10:3098. doi: 10.3389/fmicb.2019.03098 (PMC6985150; doi:10.3389/fmicb.2019.03098)
Supplement: DATA S2 — ST302 SNP analysis. [file Data_Sheet_2.ZIP › SNP_Analysis/ST302_SNP/SNP_analysis/snippyout/ST302/CA0229-ND-ST302.out/snps.consensus.fa]

>EA2454
ACTTAGGATAGCCAACCATCAGATGCTGCATTTGCATAGTGCAATCTCCCCTTACTTATC
CGGAGGCAATTGCAATATCTCTGTGAACTTACACAGGGGGAGCTTTTACCTGAAATACGC
CACGGAGGCGGGTATGAAACTGGCAGTCGTCACTGGACAAATTGTTTGTACCGTACGCCA
TCACGGACTGGCGCATGACAAATTGCTGATGGTGGAAATGATTGATCCACAAGGTAATCC
TGACGGGCAATGCGCCGTCGCCATCGACAATATTGGCGCGGGAACCGGGGAGTGGGTGTT
ACTGGTGAGTGGCAGTTCCGCCCGCCAGGCGCATAAAAGCGAAACGTCACCGGTCGATCT
GTGCGTGATTGGCATTGTCGATGAGGTGGTGTCTGGCGGTCAGGTAATTTTCCACAAATA
AGGCAGAACATCATGAATCAACAGGATATTGAACAGGTGGTGAAAGCGGTACTGCTGAAA
ATGCAAAGCAGTGACACGCCGCCCGCCGCCGTTCATGAGATGGGCGTTTTCGCGTCCCTG
GATGACGCCGTTGCGGCAGCCAAAGTCGCCCAGCAAGGGTTAAAGAGCGTGGCAATGCGC
CAGTTAGCCATTGCTGCCATTCGTGAAGCAGGCGAAAAACACGCCAGAGATTTAGCGGAA
CTTGCCGTCAGTGAAACCGGCATGGGGCGCGTTGAAGATAAATTTGCAAAAAACGTCGCT
CAGGCGCGCGGCACACCAGGCGTTGAGTACCTCTCTCCGCAAGTGCTGACTGGCGACAAC
GGCCTGACCCTAATTGAAAACGCACCCTGGGGCGTGGTGGCTTCGGTGACGCCGTCCACT
AACCCGGCGGCAACCGTAATTAACAACGCCATCAGCCTGATTGCCGCGGGCAACAGCGTC
ATTTTTGCCCCGCATCCGGCGGCGAAAAAAGTCTCCCAGCGGGCGATTACGCTGCTCAAC
CAGGCGATTGTTGCCGCAGGTGGGCCGGAAAACTTACTGGTTACTGTGGCAAATCCGGAT
ATCGAAACCGCGCAACGCTTGTTCAAGTTTCCGGGCATCGGCCTGCTGGTGGTGACCGGC
GGCGAAGCGGTAGTAGAAGCGGCGCGTAAACACACCAATAAACGTCTGATTGCCGCAGGC
GCTGGCAACCCGCCGGTAGTGGTGGATGAAACCGCTGACCTCGCCCGTGCTGCTCAGTCC
ATCGTTAAAGGCGCGTCTTTCGATAACAACATCATTTGTGCCGACGAAAAGGTACTGATT
GTTGTTGATAGCGTAGCCGATGAACTGATGCGTCTGATGGAAGGCCAGCACGCGGTGAAA
CTGACCGCAGAGCAGGCGCAGCAATTGCAACCGGTGTTGCTGAAAAATATCGACGAGCGC
GGAAAAGGTACCGTCAGCCGTGACTGGGTAGGTCGCGATGCAGGCAAAATCGCGGCGGCA
ATCGGCCTTAAAGTTCCGGAACAAACGCGATTGCTGTTTGTAGAAACCACCGCAGAACAT
CCGTTTGCCGTGACTGAACTGATGATGCCGGTGTTGCCCGTCGTGCGCGTCGCCAACGTG
GCGGATGCCATTGCGCTGGCGGTGAAACTGGAAGGCGGTTGCCACCACACGGCGGCAATG
CACTCGCGCAATATCGAGAACATGAACCAGATGGCGAATGCCATTGATACCAGCATTTTC
GTTAAGAACGGACCGTGCATTGCCGGGCTGGGGCTGGGCGGGGAAGGCTGGACCACCATG
ACCATCACCACGCCAACCGGTGAAGGGGTAACCAGCGCGCGTACGTTTGTCCGTCTGCGT
CGCTGTGTATTAGTCGATGCGTTTCGCATTGTTTAAGGAGTAACAGATGGCGCACGACGA
ACAATGGCTCACCCCACGTCTGCAAACGGCGGCAACGCTGTGTAACCAGACGCCCGCCGC
GACGGAATCTCCGCTGTGGCTGGGGGTGGATCTGGGCACCTGCGATGTGGTGTCGATGGT
TGTCGACCGCGACGGTCAGCCGGTGGCGGTATGCCTCGACTGGGCCGATGTGGTCCGCGA
CGGCATCGTCTGGGATTTCTTCGGCGCGGTCACCATTGTTCGTCGCCATCTCGACACGCT
CGAGCAGCAATTCGGTCGTCGTTTTAGCCATGCGGCGACTTCATTTCCTCCAGGTACGGA
CCCGCGTATTTCCATCAACGTGCTGGAGTCTGCCGGGCTGGAAGTGAGCCATGTGCTGGA
TGAGCCAACCGCAGTCGCGGATCTACTGCAACTGGATAACGCAGGCGTAGTGGATATCGG
CGGTGGCACTACCGGCATTGCCATCGTGAAAAAGGGCAAAGTGACGTACTCGGCGGATGA
AGCCACCGGCGGACATCACATCTCTCTGACTCTCGCCGGAAATCGCCGTATTTCGCTGGA
AGAGGCGGAGCAGTACAAGCGCGGTCACGGTGAAGAGATTTGGCCTGCGGTGAAACCGGT
GTACGAAAAAATGGCGGACATTGTCGCCCGGCATATTGAAGGGCAGGGCATTACTGATTT
ATGGCTGGCGGGCGGCTCTTGTATGCAACCGGGCGTGGCGGAACTGTTTCGCAAACAATT
CCCGGCGTTACAGGTGCATTTACCGCAGCACAGTTTGTTTATGACCCCGCTGGCAATCGC
CAGTAGTGGGCGAGAGAAAGCGGAGGGGCTATATGCAAAATGAATTGCAGACCGCGCTCT
TTCAGGCGTTCGATACCCTGAATCTGCAACGGGTAAAAACATTTAGCGTTCCACCGGTGA
CGCTTTGCGGTCCGGGCTCGGTGAGCAGTTGCGGACAGCAAGCGCAAACGCGTGGGCTGA
AACATCTGTTCGTGATGGCAGACAGCTTTTTGCATCAGGCAGGGATGACCGCCGGGCTGA
CGCGTAGCCTGGCCGTTAAAGGTATCGCCATGACGCTCTGGCCATGTCCGGTGGGCGAAC
CGTGCATTACCGACGTGTGTGCAGCCGTGGCGCAGTTGCGTGAGTCAGGTTGTGACGGGG
TGATCGCATTTGGCGGCGGCTCGGTGCTGGATGCGGCGAAAGCCGTGGCGTTGCTGGTGA
CGAACCCGGATAGCACGCTGGCAGAGATGTCAGAAACCAGCGTTCTGCAACCGCGCTTGC
CGCTGATTGCCATTCCAACTACCGCCGGAACCGGCTCTGAAACCACCAATGTAACGGTGA
TTATCGACGCGGTGAGCGGGCGCAAGCAGGTGTTAGCCCATGCCTCGCTGATGCCGGATG
TGGCGATCCTCGACGCCGCATTGACCGAAGGTGTGCCGTCGCATGTCACGGCGATGACCG
GCATTGATGCGTTAACCCATGCCATTGAAGCATACAGCGCCCTGAACGCTACACCGTTTA
CCGACAGTCTGGCGATTGGTGCCATTGCGATGATTGGCAAATCGCTGCCGAAAGCGGTGG
GCTACGGTCACGACCTTGCCGCGCGCGAGAGCATGTTGCTGGCTTCATGTATGGCGGGAA
TGGCGTTTTCCAGTGCGGGTCTTGGGTTGTGCCACGCGATGGCGCATCAGCCGGGCGCGG
CGCTGCATATTCCGCACGGTCTGGCGAACGCTATGTTGCTGCCAACGGTGATGGAGTTTA
ACCGGATGGTATGTCGCGAACGCTTTAGTCAGATTGGTCGGGCACTGCGAACTAAAAAAT
CCGACGATCGTGACGCTATTAACGCGGTAAGTGAGCTGATTGCGGAAGTTGGGATTGGTA
AACGACTGGGCGATGTTGGCGCGACATCTGCGCATTACGGTGCATGGGCGCAGGCCGCGC
AGGAAGATATTTGTCTGCGCAGCAACCCGCGTACCGCCAGCCTGGAACAGATTGTCGGCC
TGTACGCGGCGGCGCAATAAATGCCGCGTCTTATCCGGTCTGTGGGATTGCACATGTAGT
GCGGATAAGGCTTCACGCAGCATCCGCTAATAAATAACAACTAACAGGGAGTAAAGGCGA
TGGGAATTAACGAAATCATCATGTACATCATGATGTTCTTTATGCTGATAGCTGCCGTAG
ACAGGATCCTGTCACAGTTCGGCGGTTCTGCTCGTTTCCTCGGTAAGTTCGGTAAAAGTA
TCGAAGGATCAGGCGGTCAGTTCGAAGAAGGCTTTATGGCAATGGGCGCTCTGGGTCTGG
CGATGGTCGGTATGACCGCGCTGGCACCGGTACTGGCTCACGTACTCGGGCCGGTAATTA
TCCCGGTTTACGAAATGCTCGGCGCAAACCCGTCAATGTTCGCCGGAACGCTGCTGGCGT
GCGATATGGGCGGCTTCTTCCTCGCCAAAGAGCTGGCGGGCGGCGACGTAGCAGCGTGGC
TATACTCTGGGTTAATTCTCGGGTCGATGATGGGGCCAACGATTGTGTTTTCCATTCCGG
TGGCGCTCGGCATTATCGAACCTTCTGACCGTCGTTATCTGGCGCTCGGCGTGCTGGCGG
GCATTGTGACCATTCCGATTGGTTGTATCGCTGGTGGTCTGGTAGCTATGTACTCCGGTG
TTCAGATCAACGGCCAGCCGGTGGAATTCACTTTCGCCCTGATCCTGATGAACATGATCC
CGGTGATCATTGTTGCGATTCTGGTGGCGCTGGGGCTGAAATTCATCCCGGAAAAAATGA
TCAACGGCTTCCAGATCTTCGCCAAATTCCTCGTTGCATTGATCACCCTCGGTCTTGCCG
CTGCGGTAGTGAAATTCCTGCTTGGCTGGGAACTGATCCCCGGTCTGGATCCTATCTTTA
TGGCCCCTGGCGATAAACCCGGTGAGGTGATGCGCGCCATTGAAGTTATCGGTTCTATCT
CCTGCGTTCTGTTAGGGGCGTATCCAATGGTGCTGCTGCTGACCCGCTGGTTTGAAAAAC
CGCTGATGAGCGTCGGTAAAGTGCTGAATATGAACAACATTGCGGCAGCCGGCATGGTGG
CAACGCTTGCCAACAACATCCCGATGTTCGGCATGATGAAGCAGATGGATACCCGCGGCA
AAGTCATCAACTGCGCCTTCGCCGTTTCCGCTGCTTTCGCCCTGGGCGACCACTTAGGCT
TCGCCGCTGCCAACATGAATGCCATGATCTTCCCGATGATTGTCGGCAAGTTGATCGGCG
GCGTAACGGCGATTGGCGTGGCGATGATGCTGGTGCCAAAAGACGACGCGACCGCGGCTA
AAACCGAAGCGGAGGCACAATCGTGAACACTCGCCAGCTACTGAGCGTCGGTATCGATAT
CGGCACCACCACCACCCAGGTGATTTTCTCCCACCTGGAACTGGTTAACCGTGCGGCGGT
GTCGCAGGTGCCGCGCTACGAATTCATCAAACGCGAAATTAGCTGGCAAAGCCCGGTGTT
CTTTACCCCTGTCGATAAACAGGGTGGTTTAAAAGAAGCGGAACTGAAATCGCTGATTTT
AGAGCAATATCAGGCTGCGGGCATTGCGCCGGAAAGCGTTGATTCTGGTGCCATCATCAT
CACCGGTGAAAGCGCGAAAACCCGCAATGCTCGCCCGGCGGTGATGGCGCTCTCTCAGTC
GCTGGGCGATTTTGTCGTCGCCAGCGCCGGGCCGCACCTCGAATCCGTGATCGCCGGTCA
CGGTGCCGGGGCGCAAACCCTTTCTGAACAACGGCTGTGTCGGGTACTGAATATCGACAT
CGGCGGTGGCACCGCGAACTACGCCCTGTTCGATGCCGGAAAAATCAGCGGCACTGCCTG
CCTCAACGTCGGTGGTCGCCTGCTGGAAACCGACAGCCAGGGGCGCGTGGTTTACGCTCA
TAAACCGGGGCAGATGATTGTGGATGAGTGCTTCGGCGCAGGCACCGACGCCCGTTCGCT
GACCGGCGCGCAGCTGGTGCAGGTTACCCGGCGGATGGCAGAGCTGATTGTCGAAGTGAT
TGACGGAACGCTTTCGCCGCTCGCGCAGGCATTAATGCAAACCGGTTTGCTGCCCGCAGG
TGTTACGCCCGAAATCATTACGCTTTCTGGCGGCGTGGGCGAATGTTATCGCCACCAGCC
CGCCGACCCGTTCTGTTTTGCCGATATTGGCCCGCTTCTGGCAACGGCGCTGCATGACCA
TCCGCGCCTGCGTGAGATGAACGTGCAGTTTCCGGCGCAAACCGTACGCGCCACGGTGAT
TGGCGCGGGTGCACATACCCTTTCGCTCTCTGGCAGCACAATCTGGCTGGAGGGCGTACA
ACTGCCGCTGCGCAATTTGCCGGTGGCGATCCCGATTGATGAAACGGATCTGGTGAGTGC
CTGGCAACAGGCGCTGATTCAGCTGGATCTTGATCCCAAAACTGACGCGTACGTGCTGGC
GCTTCCCGCCTCGCTGCCTGTGCGTTACGCCGCGGTACTGACGGTCATCAACGCGTTGGT
CGATTTCGTCGCGCGTTTTCCGAATCCGCATCCCCTGCTGGTGGTGGCCGGGCAGGACTT
TGGTAAAGCTCTGGGCATGTTGTTGCGCCCACAGCTACAACAACTCCCGTTGGCAGTCAT
TGACGAAGTGATTGTCCGCGCGGGGGACTATATCGACATTGGTACGCCTCTTTTTGGCGG
ATCGGTTGTGCCGGTGACGGTGAAATCACTCGCATTTCCTTCCTGAGGGAACGACTTATG
AAACTAAAGACCACATTGTTCGGCAATGTATATCAGTTTAAGGATGTAAAAGAGGTGCTG
GCTAAAGCCAACGAACTGCGTTCGGGGGATGTGCTGGCGGGCGTTGCAGCGGCAAGCTCA
CAGGAGCGCGTGGCAGCAAAGCAGGTGTTGTCGGAAATGACCGTAGCGGACATCCGCAAT
AATCCGGTGATTGCCTATGAAGATGACTGCGTGACGCGGCTGATTCAGGACGATGTTAAC
GAAACGGCCTACAACCAGATTAAAAACTGGAGCATCAGCGAACTGCGTGAGTATGTGCTG
AGCGATGAAACCAGCGTGGACGACATTGCCTTTACCCGCAAAGGGCTGACCTCGGAAGTG
GTCGCGGCGGTAGCGAAGATTTGCTCCAACGCGGACCTGATCTACGGCGCGAAGAAAATG
CCGGTAATCAAAAAGGCCAATACCACCATCGGTATTCCGGGCACCTTTAGCGCCCGTTTG
CAGCCAAATGACACCCGTGACGACGTGCAAAGTATCGCCGCGCAAATCTACGAAGGGCTT
TCCTTCGGGGTGGGCGATGCGGTGATCGGCGTCAACCCGGTAACTGACGACGTGGAAAAC
TTAAGCCGCGTGCTGGACACCATCTATGGCGTGATCGACAAATTCAACATCCCAACTCAG
GGCTGCGTACTGGCGCACGTCACCACCCAGATCGAAGCGATTCGTCGTGGCGCACCAGGC
GGGCTGATTTTCCAGAGTATCTGTGGCAGTGAAAAAGGGCTGAAAGAGTTTGGCGTGGAA
CTGGCGATGCTCGACGAAGCGCGCGCAGTGGGTGCAGAGTTCAACCGTATCGCCGGGGAA
AACTGCCTCTACTTCGAAACCGGGCAAGGTTCGGCGCTGTCGGCGGGTGCCAACTACGGC
GCAGACCAGGTGACCATGGAAGCGCGTAACTACGGGCTGGCGCGTCATTACGATCCGTTT
ATCGTCAACACCGTGGTCGGCTTTATTGGGCCGGAGTATCTCTACAATGACCGCCAGATT
ATTCGTGCGGGCTTAGAAGATCACTTTATGGGCAAGCTGAGCGGCATCTCTATGGGCTGT
GACTGCTGTTACACCAACCACGCTGACGCTGACCAGAACCTCAACGAAAACCTGATGATC
CTGCTCGCCACCGCAGGCTGCAACTACATCATGGGGATGCCGCTGGGTGATGACATCATG
CTCAATTACCAGACCACCGCATTCCACGATACCGCCACTGTGCGTCAGTTACTCAACCTG
CGCCCGTCACCGGAGTTTGAACGCTGGCTGGAAAGCATGGGCATTATGGCAAACGGTCGC
CTGACCAAACGGGCGGGCGATCCGTCACTGTTCTTCTGATGACGCGGAGATAACACATCA
TGGATCAAAAACAGATTGAAGAAATTGTACGCAGCGTGATGGCGTCAATGGGACAAACGG
CCCCCGCGCCGTCAGAAGCAAAGTGCGCCACTACCACCTGTGCGGCACCGGTGACCTCGG
AAAGCTGTGCGCTGGATTTAGGTTCCGCTGAAGCAAAAGCGTGGATTGGTGTTGAAAACC
CGCATCGCGCAGACGTATTAACAGAACTGCGCCGCAGCACCGTGGCCCGCGTTTGTACCG
GTCGTGCCGGTCCGCGTCCGCGTACCCAGGCGCTGCTGCGTTTCCTGGCCGATCACTCTC
GTTCGAAAGATACCGTACTGAAAGAAGTGCCGGAAGAGTGGGTGAAAGCGCAGGGCTTGC
TGGAAGTACGCTCCGAAATTAGCGACAAAAATCTCTACCTGACTCGCCCGGATATGGGCC
GCCGCCTGTGTGCAGAAGCTGTTGAAGCGCTGAAAGCACAGTGTGTTGCTAATCCGGACG
TACAGGTCGTTATTTCTGATGGCCTGTCAACTGATGCGATCACCGTGAACTACGAAGAGA
TCCTGCCACCGCTGATGGCGGGCCTGAAACAGGCCGGGCTGAAAGTCGGTACACCATTCT
TTGTTCGTTATGGTCGCGTGAAGATTGAAGATCAGATCGGTGAGATCCTCGGCGCGAAAG
TAGTGATCCTGCTGGTGGGCGAACGTCCGGGGTTGGGTCAGTCAGAAAGCCTCTCCTGCT
ACGCCGTTTACTCGCCGCGTATGGCGACCACCGTTGAGGCCGATCGCACCTGTATCTCTA
ACATTCACCAGGGCGGCACGCCGCCGGTTGAAGCCGCAGCCGTCATTGTGGATTTGGCGA
AACGTATGCTGGAGCAGAAAGCATCCGGCATCAACATGACCCGATAAGGAGGCATCATGC
CAGCTTTAGATTTGATTCGACCGTCGGTAACCGCCATGCGGGTGATTGCCTCCGTTAACG
CCGAATTTGCGCGTGAACTGAAATTGCCGCCGCATATTCGTAGCCTCGGGCTGATTTCTG
CTGATTCCGATGACGTCACCTACATTGCCGCTGATGAAGCAACCAAACAGGCGATGGTCG
AAGTGGTGTATGGCCGCTCGCTGTATGCGGGCGCTGCACACGGCCCGTCACCGACTGCCG
GTGAAGTGCTGATTATGCTTGGTGGGCCAAACCCGGCGGAAGTGCGTGCAGGTCTGGATG
CGATGGTTGCGCATATTGAAAATGGCGCTGCTTTCCAGTGGGCTAATGATGCGCAAGATA
CGGCATTCCTGGCACATGTAGTTTCGCGTACCGGTTCTTATCTCTCATCAACCGCCGGGA
TCACGCTTGGCGATCCGATGGCGTATCTGGTGGCACCGCCGCTGGAAGCGACCTACGGCA
TTGATGCAGCGTTGAAATCTGCCGACGTACAGCTGGTGACCTATGTCCCGCCACCGTCTG
AAACTAACTACTCGGCAGCATTTTTAACCGGTAGCCAGGCAGCGTGTAAAGCGGCCTGTA
ACGCCTTTACCGATGCAGTGCTGGAAATCGCGCGTAATCCAATCCAGCGTGCGTAATGGA
GGTTGCCGATGATCAATGCACTGGGATTGCTGGAAGTGGACGGCATGGTCGCTGCGATAG
ATGCAGCGGATGCCATGCTCAAAGCAGCTAACGTTCGTCTGCTCAGTCACGAAGTGCTTG
ACCCTGGTCGCTTAACGCTGGTGGTGGAAGGCGATCTGGCGGCGTGTCGTGCTGCGCTGG
ACGCAGGTTGTGCTGCCGCGATGCGTACCGGGCGTGTCATCAGCCGTAAGGAGATCGGTC
GGCCAGACGATGACACCCAGTGGCTGGTTACTGGCTTTAACCGCCAGCCGAAGCAACCCG
TACAGGAACCCGACGCGCCAGTTATCGTCGCGGAATCTGCTGACGAGTTGTTGGCGCTGT
TAACATCAGTACGTCAGGGAATGACGGCAGGAGAAGTGGCTGCCCACTTTGGCTGGCCGC
TGGAAAAAGCCAGAAATGCGCTCGAACAGCTCTTTTCTGCCGGGACGTTACGTAAACGCA
GTAGTCGTTATCGTCTCAAGCCCCATTAACCTGTCGGAGGTGCCGGGTGTCCTACAACAC
CCGGCATTAACATCATGAAAAAGACCCGTACAGCCAATTTGCACCATCTTTATCATGAAC
CCTTACCCGAAAACCTGAAGCTCACGCCGAAGGTCGAAGTGGATAATGTTCATCAACGAC
AGACAACGGATGTCTATGAACATGCTTTAACGATTACCGCCTGGCAGCAGATTTACGATC
AGCTGCATCCGGGCAAGTTTCATGGTGAATTTACGGAAATTCTACTCGATGATATTCAGG
TTTTTCGTGAATACACCGGTCTGGCGCTGCGTCAGTCGTGTCTGGTCTGGCCGAACTCGT
TCTGGTTTGGCATTCCGGCGACGCGCGGTGAGCAGGGATTTATCGGTTCGCAATGTCTGG
GAAGCGCAGAAATAGCGACGCGCCCTGGTGGAACCGAGTTTGAATTAAGTACGCCGGACG
ATTACACGATCCTGGGCGTAGTGCTTTCTGAAGATGTCATCACCCGTCAGGCTAACTTTT
TGCATAATCCGGATCGGGTATTACATATGTTGCGTAGCCAGTCGGCGCTGGAAGTGAAAG
AGCAGCATAAAGCCGCGCTGTGGGGCTTTGTCCAACAGGCGCTGGCGACGTTTTGCGAGA
ACCCGGAAAATCTTCATCAGCCTGCAGTGCGAAAAGTGCTGGGGGATAATTTGCTAATGG
CGATGGGGGCGATGCTGGAAGAAGCGCAACCAATGGTGACGGCGGAAAGCATCAGTCATC
AGAGTTACCGTAGATTACTTTCCCGCGCCCGTGAATATGTGCTGGAAAACATGTCCGAAC
CGGTGACGGTGCTGGATTTGTGTAATCAACTGCATGTCAGCCGCCGCACGCTACAAAACG
CGTTTCACGCTATTTTAGGCATTGGCCCAAACGCGTGGCTGAAACGCATTCGCCTGAACG
CCGTACGCCGCGAACTGATAAGCCCGTGGTCGCAAAGCACAACGGTAAAAGACGCCGCCA
TGCAGTGGGGATTCTGGCATCTGGGGCAATTTGCCACGGATTACCAGCAGCTGTTTGCCG
AGAAGCCGTCGTTGACGTTGCATCAGCGGATGCGGGAATGGGGGTGAGGGAGTTACACCC
AATCCCTGACCTTAATAAACTCACTTAACGCCGCTTCTGGGCTGCCATCTTTTGGCTGAT
AATCATACTCCCAGCGTACCAGTGGCGGCATTGACATCAGGATCGACTCGGTGCGCCCGC
CAGTTTGCAGGCCAAACAGAGTGCCGCGATCCCAGACCAGATTGAACTCGACATAACGAC
CGCGACGGTAGAGCTGAAAATTGCGCTCGCGCTCGCCGTAGGCCATCGCTTTCCGTCGCT
CTACAATTGGTAAATAAGCGTCGGTGTAGCCTTTGCCTACCGCCTGCATAAAGGCAAAAC
AGTGGTCGAAATCTGGCGTGTTCAGATCATCAAAGAACAGCCCGCCAATACCGCGCTGTT
CGTTGCGATGTTTGAGGTAGAAGTAATCGTCGCACCATTTTTTGTAACGGGGATAAACGT
CTTCACCAAATGGCAGGCACAGGTCACGGGCGGTTCGGTGCCAGTGAATGGCATCTTCTT
CAAAACCATAGAAAGGGGTTAAATCGAAGCCGCCGCCAAACCACCAGACTGGCTCTGCAC
CCGGTTTTTCGGCAATAAAAAAGCGCACATTCGCGTGGCTGGTGGGAACATACGGGTTAT
GCGGATGCACTACCAGTGAAACGCCCATCGCCTCGAAACTGCGCCCGGCAAGTTCCGGGC
GATGAGCGGTGGCGGAAGCAGGCATCGCCTCACCATGGACATGTGAAAAGTTGACGCCCG
CCTGTTCGAAAACACCACCATTACGCAACACCCGGCTACGTCCGCCGCCGCCAGCTTCGC
GCTGCCAGCTATCTTCGACAAATTCTGTGCCATCGACGGCGGTCAGCTGCTGACAAATCG
TATCCTGAAGGTTGAGCAGAAACTGTTTAACCTGGTGTGCGTCGGGTTTCATAACTTATC
GCTTTTTCGAATGTGCTTTCTGGTTGTCGAACCAGTGGAAATAACTGATCACGCCTTCAG
CAATCGCTGTGGCGATTTTCTGACGAAACGCCGCCGTGCCTAACAGTCGCTCTTCTTCTG
GGTTGGTGATAAACGAGGTTTCCACCAGCACCGAAGGAACCGACGGCGATTTCAACACCA
CAAACGCGGCTTGTTCGGTGTTGCGGCTGTGCAGTTTATGCACCGGCTTAATCTTTTTCA
GAATATGCGAGCCGAGCGTCAGGCTGTTTTTAATAGTATCGGTTTGCACCAGATCAAACA
GCACTTGCTGCAATAGGTGATCCTTGTCAGTCGCCTTTTTACCGGCAACTTCATCGGCGC
GGTTTTCGCGTTCAGACAGGTATTTCGCCATTGCGCTACTTGCCCCACGGTTAGAGAGGG
CAAATACCGAAGCACCGGCAGCTTTCGGGTTGGTAAAGCCATCGGCATGAATTGACATAA
ACAGATCTGCGCCATGTTTATGGGCGATTTCAACGCGATCGTAAAGTGGGATAAACGTAT
CGCCAGAACGCGTTAAACGCGCATCAATCCCATGATTACGCAAAATGGAACGGACGTTTT
TAGCAATCGCCAGCACCACATGTTTTTCTTTCGAACCGTTGCGCCCGATCGCTCCGGTAT
CAATTCCGCCGTGGCCTGGATCGAGAACAACGACACGTTTGCCGCCAGATTTTTTGGCTT
TCGGCTTGCTGTGTCCGTTGCTGGTTTTTAAAGGTTCGTCTTTGGCGATGGCTTGCGACA
TTCCTGACAACGTCAGGGCAGCCAAACCGGCTTTCAGCACCTGGCGGCGCGAAGTGAGTG
TTTTTAGTGGTTTAAAAGTGCTCATACGGCCTGAGTTGTAATAATAAAGTTCCAGATGTT
ATATCGTATCGCGTAATCCGTTACGACCGTTTGCTGTTGAGAATTGTTTTACTTTTCATT
TCAATAGTTGACAACTCCCCATTATGCCACTTTTTCAACCGATTTTCGTCAGATATTGGC
TAATTCGACCGTTCACGCCATAATCAGCCTTTTAACCCGCAAAAAGGTAACGAATACCAT
GGAGATACGCGTATTTCGCCAGGAAGATTTCGAAGAGGTCATCACCCTTTGGGAGCGTTG
CGACTTGCTGCGTCCGTGGAACGATCCGGAAATGGACATCGAGCGTAAGATGAACCATGA
CGTCAGTTTGTTTCTGGTCGCTGAGGTGAACGGTGAAGTGGTCGGAACGGTGATGGGCGG
TTATGACGGGCATCGCGGGTCTGCTTATTATCTTGGCGTGCATCCAGAGTTTCGTGGGCG
TGGAATTGCCAATGCGTTGCTTAACCGGCTGGAGAAAAAGCTGATTGCTCGCGGCTGCCC
GAAAATTCAGATCAACGTGCCGGAAGATAACGACATGGTGCTCGGAATGTATGAACGCCT
GGGATATGAACACGCCGACGTGCTGAGTCTGGGTAAGCGTTTGATTGAAGATGAAGAGTA
CTGAGTTTCATCCTGTCCATTATGATGCGCACGGTCGCCTGCGTTTACCCTTGCTCTTCT
GGCTTGTGCTATTGCTTCAGGCGCGAACCTGGGTGCTGTTTGTTATTGCCGGTGCGTCGC
GCGAGCAGGGTACTGCGCTGCTAAATCTGTTTTATCCCGATCACGATAATTTCTGGCTGG
GGCTGATTCCTGGCATTCCGGCGGTGCTGGCGTTTTTGCTGAGTGGTCGGCGGGCTTCGT
TTCCCCGTATCTGGCATGTGCTCTATTTTCTGTTGCTGTTGGCGCAAGTGGTTTTACTTT
GCTGGCAACCGTGGCTGTGGCTGAACGGTGAATCCGTTAGCGGTTTCGGTCTGGCGCTGG
TAGTGGCGGATATTGTGGCATTAATCTGGCTGCTGACCAATCGACGTTTACGCGCTTGTT
TTAATGAAGTAAAAGAATAACGGCACTTTTTGGTGAATTTGCACTCCAAGCAACGTTATT
GAATAACCAAAGGAAGTGACATGAAATCGCTGCGTTTAATGTTATGCGCTATGCCATTGA
TGCTGACCGGCTGTTCCACGATGTCGTCAGTTAACTGGTCTGCCGCTAACCCGTGGAACT
GGTTTGGGTCGTCCACCAAAGTGAGCGAGCAGGGCGTTGGTGAATTAACGGCGTCCACAC
CACTGCAAGAACAAGCCATTGCCGATGCGCTTGATGGCGATTATCGCCTGCGCAGCGGAA
TGAAAACCGCGAACGGCAACGTGGTGCGCTTTTTTGAAGTGATGAAGGGCGACAACGTGG
CGATGGTGATTAACGGCGATCAAGGCACGATCAGTCGCATTGACGTGCTGGATAGCGATA
TTCCTGCTGACACCGGTGTTAAAATCGGTACACCGTTTAGCGACCTTTACAGCAAAGCAT
TTGGCAATTGCCAAAAAGCTGATGGTGATGATAATCGTGCCGTCGAATGTAAAGCCGAAG
GCAGTCAACATATTAGCTACCAGTTCAGCGGGGAATGGAGTGGTCCTGAAGGGTTAATGC
CTTCGGACGATACCCTGAAAAACTGGAAAGTCAGTAAAATTATCTGGCGGCGTTAATTTG
CGTCTGAACAAACCGCCGCCGCGAAAAAACACGTAAAATAGCGCTCAACAATGCCACGGA
TTGCGTGGCATTATTATTTTCAGGAGGAACAATGTCTCAGGTTCAGAGTGGCATTTTGCC
AGAACATTGCCGCGCGGCGATTTGGATCGAAGCCAACGTGAAAGGGGAAGTTGACGCCCT
GCGTGCGGCCAGTAAAACATTTGCCGACAAACTGGCAACTTTTGAAGCGAAATTCCCGGA
CGCGCATCTTGGTGCGGTGGTTGCCTTTGGTAACAACACCTGGCGCGCTCTGAGCGGCGG
CGTTGGGGCAGAAGAGCTGAAAGATTTTCCGGGCTACGGTAAAGGCCTTGCGCCGACCAC
CCAGTTCGATGTGTTGATCCACATTCTTTCTCTGCGTCACGACGTAAACTTCTCTGTCGC
CCAGGCGGCGATGGAAGCCTTTGGTGACTGCATTGAAGTGAAAGAAGAGATCCACGGCTT
CCGTTGGGTGGAAGAGCGTGACCTGAGCGGCTTTGTTGACGGTACAGAAAACCCGGCGGG
TGAAGAGACGCGTCGCGAAGTGGCGGTTATCAAAGACGGCGTGGATGCCGGCGGCAGCTA
TGTGTTTGTGCAGCGTTGGGAGCACAACCTGAAGCAGCTCAACCGGATGAGCGTTCACGA
TCAGGAGATGATGATCGGGCGCACCAAAGAGGCCAACGAAGAGATTGACGGCGACGAACG
TCCGGAAACCTCTCACCTCACCCGCGTTGATCTGAAAGAAGATGGCAAAGGGCTGAAGAT
TGTTCGCCAGAGCCTGCCGTACGGCACCGCCAGTGGCACTCACGGTCTGTACTTCTGCGC
CTACTGCGCGCGTCTGCATAACATTGAGCAGCAACTGCTGAGCATGTTTGGCGATACCGA
TGGTAAGCGTGATGCGATGTTGCGTTTCACCAAACCGGTAACCGGCGGCTATTATTTCGC
ACCGTCGCTGGACAAGTTGATGGCGCTGTAAGCGTTTCTGATTCATTGATTAAAGGCCAG
GCAGTAACATTACTGACTGGCCTTTTTATTACTTTTGCTTTAACGCCGCATACACCTGAT
CAACTACCCAACCATACGTTGCAATCGGCAGCTGACCGCTTTCGAACATATTGGGATTCT
TTTGCGGATCGGCAACCGGCGAATGTGGCTTGTTGCTTAACATCACAATCGCCATATGAT
TCACCGGATCGATAACGGTCACCGTTCCGGTCCAGCCAGTGTGACCGTAGGTTTGCGGGC
TTGCCAGCGTGCCAAACGTCGGCGTCATGGTGGCATTACCATTCACGCGCCAGCCGAGGC
CAAAAGTGGCATCTTCCTTAGAGCTGGTGGTGAACATCTTCACCGTTTCCGCACTGAACA
GCTGCACATCGCCATAGCCCCCGCCGTTCAGCATCGTTTGCATTAACACCGCAATATCGC
CGGTATTGGAAAACAAACCTGCGTGCCCGGAAACGCCGCCCATCGAATAAAAGGCTTTTT
CATCGTGCACCTGACCCCAGAGAGTGGAGGTGCGGATATTCGGGAAGTGGATCACTCCAT
CGCGGGTATTGCCGTTCAATTCCGTGGCGGCAATTTGTTGCGGTTTAAAGCCTTTCAGCA
GCGGGTTAAATACCGTATGTGTCAGGCCGAGCGGGCGATAAATCGACTCTTCAACATAGC
GGTCAAGCGGCTGACCGGTGACCGACTCGACGATAAATCCAAGCAGCATATAATCGACAT
CACTGTAAATATGCTTGCTGCCGGGCTGATACTCTAGCGGCGTGCGCTTGATCATCTCCA
GCGTCTGGCCTTTATCCTGGGAATATAACGCGCCCGCGACCGCTTTATTCGGATATTGTG
GGTCCGCCGGGAAACCGCCGCTGTGATGCAGCAGGTCAGAAATCCGCAGCGTGTTTTTGC
CTTTGATGGTGTCATTTGGACTATCGGCAAACCCCGAAATATATTTCGCAATCCGATCGT
CAGGATGCAGCTTGCCTTCGCTCATTAGCTTTTGCAGAGCAAAGTTAGTGGCGTACATTT
TGGTATTGGAAGCCAGGTCATACAGCGTCCCGGTGGTGGCTTTGACAGGCTGTTCCATCA
ATACGCTGCCATCGTACTTTTTCGCCGCTCCCCAGGCTTTGCGATACACAATCTGATTAT
CTTTTATAATCAGCAGGTTTACGCCGGGATAACCGGCGTCCACTTGCTGGCTAATCCAGC
GATCCATCTGGTTAAGCCGTTCGACGTTGAACCCTGCTTTCTCTGGCGAACTTTCTGTCA
GAACAGGGTATTTTGCGGCGCTGACGCTACAACTGACAGCCAGCAGAGAAAGATAGAGCA
TTGTCCGTTTCATAATATCAGTCCAGATTGACGTTACGGCAGCCAAAGAGCGTGGTGAAA
ATAAACCCGCAAACCCATGCCACCAGAATCCCACCTGCATATACCGCCATGGCCGGAAGG
ATGCCTTGCGCGGATGTCATCAGCGGCAGCGCCACCAGACCAGACGGCCCAAAGGCGCTG
TTTAAGCCCATCGGCAGACCCCACCAGGCTATCAGCCCGATAAACAAACCGCCCGCTGCG
CCGCCTAAACAGGCGGTAATAAACGGTTTCATGCGGGGCAGGGTGACGCCGTAAATCAGC
GGTTCGCCAACGCCCAGCAGACCAGGAATAATCGCCCCGCGTACCTGACTGCGTAATGCA
CTGTGCGGTTGCGCCCGCCAGTAGAGTGCCAGCGCCGCGCCCACCTGGCCCGCGCCTGCC
ATTGAAAGGATGGGAAATAAGCTGTTGAATCCCTGGCTGTCCATTAACGCGAGGTAAACA
GGAATAAAGCCCTGATGCACGCCAAATACCACGGCGATCAGGAACAGCCCGGCTAAAACC
GCACAACCGAGCGGATTACTGTTCAGGTGCATAAACAGCCACGACATACCTTCGAATAAC
CAGCCGCCCAGCGGCATAATGATCAGGTAGGCCAGCGTAGCGGTGATCAGTAGGGTGATT
AACGAGGTCAGCAGCATGTCGAGATCGTCCGGCATAAAGCGGCGCACCATGCCTTCAATG
CGAGCGCAGGCCCATGCGGCAATCAACACGCCGATAATATTGCCGCGCGGATCGATGGGC
AGACCAAAGAAATCGTGAAAACCGGCGTAGTAACCGGTGGTTGCAGCGGGGTTATAACCG
AGCAAAAAGAGTGCGGCAATAATTGCGCCATTGACGCCCGTGCCGCCAAATGCCTGGGCG
GCGTTATAGCCCACCAGAATCACCAGGAAGGTGAACAAACCTTTGCTGAACACCTTCATA
AAATTCAGCGCGTCGGGTAGCGTGCCCTGAGCATCTGCCGGAACGTGCATCACCGTGGCA
AATAACGTCGCTATCCCCAGCAGCAGACCGGCGGCAATAAAACCGGGGATAAGCGGCGTA
AAGATGGTGGCGAATTTAGCGAGAAATTGTTGCACGCCGGAGGTTTGTTTGGCTTTTAAC
TGACGTTTGTTCTGGGCGGCGATTTCTGCGGCATCCTGTACCGGTGCTTCTCCCAGCAGC
TCGCTCATCGCTTTTGCGGCACGATGCGCTTTACCAGGCCCAAAAACGACCTGCACCTGG
TCGCTGGTCAAAATGACGCCCTTCACGCCTTCCAGCGTTTTGATATTGGGATCAACCAGT
GAACTGTCATGTACACCCAGACGCAGGCGCGTCATACAGTTACCACAACTGGCGATATTT
CCCGGTCCGCCGACACGGGTAAGAATGGTGTTCAGAAGTTCACTGCTGATCTCTTTGACC
ATGGGTTATTCCTTGTCTAAAACCTGACGAATAAAGCCGCCGTGTTGATCCAGGCGTTTT
TTAGCTTCTGTGGCATCGAGATTTTTCAGCACCATCACAATGGCCGTTTTACAGTTGCGC
TCGCAGGCAATTAACGCCGCTTCCGCTTGTTCGGCATTACATCCGGTGGCGTTTTTAACG
ATATTGACCTGGCGCACATGCAGTTTTTCGTTGGTGGCGACCACATCGACCATCAGGTTG
CCGAACACTTTGCCGGATTTAATCATCAGCCCGGTGGAGAGCATATTGAGCACCAGTTTC
TGCGCTGTACCTGCTTTCATCCGCGAAGAACCGGTAACCACTTCGGCACCTACAATCGGT
GTAATGGCAAACTCTGCGGTGGTTGAAACGGCGCTCCCCGGATTACAGGAAATTCCCACT
GTGCGGCAGCCGAGCTGGCGTGCGTATTCCAGTCCGGCAATTACATACGGCGTGCGACCA
CTGGCCGCAATACCAACCACCACATCCTGTGCCGTTAAATTAATATTTTTCAGATCGTTA
ACACCACCTTCCCGGCTATCTTCAGCGCCTTCCACCGCGTGCTGAATGGCATATTCGCCT
CCAGCAATCAAACCAACTACCAGACCCGGTTTCACGCCGTAGGTGGGCGGACATTCGCTG
GCATCCAGAATCCCCAGACGACCGGATGTTCCCGCACCGAGATAAATCAGACGACCGCCG
CCGCTTACCTGGGCGTGGATAACATCGATCGCCGCGGCGATATCCGGCAGTACGCGCTCA
ACGGCAAGCGGTACGGTTTTATCTTCATCGTTGATAATCCGGCACATTTCCAGCGTTGAT
ACGCGGTCAATTTCAGCCGAGGCGGCGTTCGAGCCTTCGGTAATCATCTTTTCAAGTTGC
ATCGGTGGTGACCTTACTATTTACGATCAAATAATTGCAGATGTATGGAATCATATATCC
CGAATTGACAGACTTAAAGGAATCATTGAGTCTACACTCGCAGAGTGTGAAGAGCGTCAT
AAGAACTTAAGCGGAATTTTTGCTGCCAGCCCAGGAGAGTGGAAGATGTTGTACCTGACG
AAAATACGCAATGCGGAAAGTGAATTTACCGAGAACGAGCAAAAAATTGCTGACTTTCTG
CGGGCCAACGTGAGTGAGCTGAAATCCGTCTCTTCGCGCAAGATGGCGAAACAGCTCGGC
ATCAGCCAGTCGAGTATTGTGAAATTTGCCCAGAAGCTCGGCGCGCAAGGATTTACTGAA
TTGCGTATGGCGTTAATTGGCGAATACAGTGCCAGCCGGGAGAAAACGAATGCCACGGCG
CTGCACCTGCACAGTTCGATTACCAGTGATGATTCGCTGGAAGTGATTGCCCGCAAATTG
AATCGCGAAAAAGAGCTGGCGCTGGATCAAACCTGTGCGTTGTTCGACTACGCGCGGATG
CAAAAAATCATTGAGGTCATCAGTAAAGCACCGTTTATCCAGATAACGGGCCTGGGCGGA
TCGGCGCTGGTGGGGCGCGATCTGTCGTTCAAACTGATGAAAATTGGCTATCGCGTGGCC
TGCGAAGCCGACACGCACGTACAAGCTACCGTTTCCCAGGCGTTGAAAAAAGGCGATGTA
CAAATCGCTATCTCTTACAGCGGCAGTAAAAAAGAGATTGTCTTGTGCGCAGAAGCGGCA
CGAAAGCAGGGGGCAACGGTGATTGCCATTACTTCTCTGGCTGACTCTCCGCTGCGGCGG
CTGGCGCATTTCACGCTCGATACCGTTTCCGGTGAAACCGAATGGCGTAGCTCGTCGATG
TCTACCCGCACGGCGCAAAATTCTGTTACCGATTTACTGTTTGTTGGTCTTGTGCAACTC
AATGATGTGGAGTCATTGAAAATGATTCAGCGCAGCAGTGAGCTAACACAACGCCTGAAA
TGATGCATAAAGCAGCGACTGGATTGAGATTTTCCTGAATTAGTGAGCTGATCCGCAGCA
ATATTTTGTTTATCCTGTATTTTCAGAGGGAATGGAGTGTAACGCTCTGTATTAACAAGG
AGAGCATTAAAATGGGTAAACTCACGGGCAAGACAGCACTGATTACGGGCGCATTGCAGG
GAATTGGCGAAGGAATTGCCAGAACTTTTGCGCGTCATGGCGCAAACCTAATCTTGCTGG
ATATCTCCCCTGAGATCGAAAAGCTGGCGGACGAACTGTGTGGTCGTGGTCATCGCTGTA
CGGCGGTTGTCGCCGATGTGCGTGACCCGGCGTCGGTAGCCGCAGCTATCAAACGCGCGA
AGGAAAAAGAAGGGCGCATTGATATCCTGGTGAATAACGCAGGCGTTTGTCGTCTGGGCA
GTTTCCTCGATATGAGCGATGACGATCGCGATTTCCATATTGATATCAATATTAAAGGCG
TATGGAACGTCACGAAGGCGGTGTTGCCGGAGATGATTGCCCGCAAAGATGGTCGCATTG
TGATGATGTCTTCAGTCACTGGCGATATGGTGGCCGATCCGGGTGAAACGGCGTATGCCT
TAACGAAAGCGGCGATTGTTGGCCTGACTAAATCGCTGGCGGTGGAGTACGCGCAGTCTG
GTATTCGCGTTAACGCCATCTGCCCGGGATACGTTCGCACGCCAATGGCGGAAAGCATTG
CCCGCCAGTCGAACCCGGAAGATCCAGAATCGGTGCTGACTGAAATGGCAAAAGCAATCC
CGCTGCGTCGCCTCGCCGATCCGCTGGAAGTCGGCGAACTGGCAGCCTTCCTCGCATCGG
ATGAATCAAGTTATTTAACCGGTACACAGAATGTGATTGATGGCGGCAGCACACTGCCGG
AGACGGTTAGCGTCGGCATCTGATTCACCTCTGTTTCCTCCCTGCATGTGTGGGGAGGAT
TTCGTCTTATTCCCTTTTCAACTTCCAAATCACCAAACGGTATATAAAACCGTTACTCCT
TTCACGTCCGTTATAAATATGATGGCTATTAGAAAGTCATTAAATTTATAAGGGTGCGCA
ATGGCCGTTAACTTACTGAAAAAGAACTCACTCGCGCTGGTCGCTTCTCTGCTGCTGGCG
GGCCATGTACAGGCAACGGAACTGCTGAACAGTTCTTATGACGTCTCCCGCGAGCTGTTT
GCCGCCCTGAACCCGCCGTTTGAGCAACAATGGGCCAAAGATAACGGCGGCGACAAACTG
ACGATAAAACAATCTCATGCCGGGTCATCAAAACAGGCGCTGGCAATTTTGCAGGGCTTA
AAAGCCGACGTTGTCACTTATAACCAGGTGACCGACGTACAAATTCTGCACGATAAAGGC
AAGCTTATCCCGGCGGACTGGCAGTCGCGCCTGCCGAATAATAGCTCGCCGTTCTACTCC
ACCATGGGCTTCCTGGTGCGTAAGGGCAACCCGAAGAATATCCACGACTGGAACGACCTG
GTGCGCTCCGACGTGAAGCTGATTTTCCCGAACCCGAAAACGTCGGGTAACGCGCGTTAT
ACCTATCTGGCGGCATGGGGCGCAGCGGATAAAGCTGACGGTGGCGACAAAGCCAAAACC
GAACAGTTTATGACCCAGTTCCTGAAAAACGTTGAAGTGTTCGATACTGGCGGTCGTGGC
GCGACCACCACTTTTGCCGAGCGCGGCCTGGGCGATGTGCTGATCAGCTTCGAGTCGGAA
GTGAACAACATCCGCAAACAGTATGAAGCGCAGGGCTTTGAAGTGGTGATTCCGAAAACC
AACATTCTGGCGGAATTCCCGGTGGCGTGGGTCGATAAAAACGTGCAGGCCAACGGTACG
GAAAAAGCAGCAAAAGCCTACCTGAACTGGCTCTACAGCCCGCAGGCGCAGACCATCATC
ACCGACTATTACTACCGCGTAAATAACCCGGAAGTCATGGACAAACTGAAAGATAAATTC
CCGCAGACCGAACTGTTCCGCGTGGAAGACAAATTTGGCTCCTGGCCGGAAGTGATGAAA
ACCCACTTCACCAGCGGCGGCGAGTTAGACAAGCTGTTAGCGGCGGGGCGTAACTGATGT
TTGCAGTTTCATCAAGACGCGTGCTGCCGGGCTTTACCTTAAGCCTCGGCACCAGTCTGC
TGTTTGTTTGCCTGATTTTGCTCCTGCCACTCTCCGCGCTGGTGATGCAGCTGGCCCAGA
TGAGCTGGGCGCAGTACTGGGAGGTGATCACCAACCCGCAGGTGGTCGCAGCCTACAAAG
TGACGCTGCTGTCGGCGTTTGTGGCATCGATTTTTAACGGCGTTTTCGGCCTGCTGATGG
CGTGGATCTTAACTCGTTATCGCTTCCCTGGCCGCACGCTGCTTGATGCGCTGATGGATT
TACCCTTTGCGCTGCCAACGGCAGTCGCCGGTTTAACGCTGGCCTCGCTCTTTTCCGTGA
ACGGTTTTTACGGTGAATGGCTGGCGAAGTTTGATATCAAAGTCACCTACACCTGGCTTG
GGATTGCGGTGGCGATGGCCTTTACCAGCATTCCGTTTGTGGTGCGTACCGTGCAGCCGG
TGCTGGAAGAGTTAGGCCCGGAATATGAAGAAGCGGCGGAAACGCTTGGTGCAACGCGCT
GGCAGAGTTTCTGCAAAGTGGTGCTGCCGGAACTTTCTCCGGCGCTGGTGGCGGGCGTGG
CGTTGTCGTTTACCCGTAGTCTTGGTGAGTTTGGCGCGGTGATATTTATCGCCGGGAACA
TCGCCTGGAAGACGGAAGTGACGTCGCTGATGATTTTTGTGCGCTTGCAGGAGTTTGATT
ACCCGGCAGCGAGCGCGATTGCTTCGGTGATCCTCGCGGCATCTCTGCTGCTGCTGTTCT
CAATTAACACTCTGCAAAGTCGCTTTGGTCGGCGTGTGGTAGGTCATTAATGGCGGAAGT
TACCCAATTGAAGCGTTATGACGCGCGCCCGATTAACTGGGGCAAATGGTTTCTGATTGG
CATCGGGATGCTGGTATCGGCGTTCATCCTGCTGGTGCCGATGATTTATATCTTCGTACA
GGCGTTCAGCAAAGGGCTGATGCCGGTTTTACAGAATCTGGCCGATCCGGATATGCTGCA
CGCCATCTGGCTGACGGTGATGATCGCGCTGATTGCCGTACCGGTAAACCTGGTGTTCGG
CATTCTGCTGGCCTGGCTGGTGACGCGCTTTAACTTCCCTGGACGCCAGTTACTGCTGAC
GCTACTGGACATTCCGTTTGCCGTATCGCCGGTGGTTGCCGGTCTGGTGTATCTGCTGTT
CTACGGCTCTAACGGCCCGCTCGGCGGCTGGCTGGATGAACATAATCTGCAAATTATGTT
CTCCTGGCCGGGAATGGTGCTGGTCACCATCTTTGTGACATGTCCGTTTGTGGTGCGCGA
GCTGGTGCCGGTGATGTTAAGCCAGGGCAGCCAGGAAGACGAAGCGGCGATTTTGCTTGG
CGCGTCTGGCTGGCAGATGTTCCGCCGTGTCACATTGCCGAACATCCGCTGGGCGCTGCT
TTATGGCGTAGTGCTGACCAACGCCCGCGCGATTGGCGAGTTTGGCGCGGTGTCGGTGGT
TTCCGGCTCGATTCGCGGCGAAACACTTTCGCTGCCGTTACAGATTGAATTGCTGGAGCA
GGACTACAACACCGTCGGCTCCTTTACCGCCGCCGCGCTGTTGACGCTGATGGCGATTAT
CACCCTGTTTTTAAAGAGTATGTTGCAGTGGCGTCTGGAGAATCAGGAAAAACGCGCGCA
GCAGGAGGAGCATCATGAGCATTGAGATTGCCAATATTAAGAAGTCTTTTGGTCGCACCC
AGGTGCTGAACGATATCTCACTGGATATTCCTTCAGGTCAGATGGTCGCGTTGCTGGGGC
CGTCCGGTTCCGGGAAAACCACGCTGCTGCGCATTATCGCCGGGCTGGAGCATCAAACCA
GCGGGCATATTCGCTTCCACGGCACCGACGTGAGCCGCCTGCACGCACGTGATCGTAAAG
TCGGTTTCGTGTTCCAGCATTACGCGCTGTTCCGCCATATGACGGTGTTCGACAATATCT
CTTTTGGCCTGACGGTGCTGCCGCGTCGCGAGCGCCCGAATGCCGCAGCCATCAAAGCGA
AAGTGACAAAATTGCTGGAAATGGTCCAGCTTGCCCATCTGGCGGATCGTTATCCGGCGC
AGCTTTCCGGCGGCCAGAAACAGCGCGTGGCGCTGGCGCGCGCGCTGGCTGTGGAACCGC
AAATTCTGCTGCTTGATGAACCGTTTGGCGCGCTGGATGCGCAGGTGCGTAAAGAGCTGC
GTCGCTGGCTGCGTCAACTCCATGAAGAACTAAAATTCACCAGCGTTTTTGTGACCCACG
ATCAGGAAGAAGCGACCGAAGTAGCTGATCGTGTAGTTGTGATGAGCCAGGGCAATATTG
AACAGGCTGACGCGCCGGATCAGGTATGGCGCGAACCGGCGACCCGTTTTGTGCTCGAAT
TTATGGGCGAAGTGAACCGCCTGCAGGGAACCATTCGCGGCGGGCAGTTCCATGTTGGCG
CGCATCGCTGGCCGCTGGGCTACACACCTGCATATCAGGGGCCGGTGGATCTCTTCCTGC
GCCCTTGGGAAGTGGATATCAGCCGCCGTACCAGCCTCGATTCGCCGCTGCCGGTACAGG
TACTGGAAGCCAGCCCGAAAGGTCACTACACCCAATTAGTGGTGCAGCCGCTGGGGTGGT
ACAACGAACCGCTGACGGTCGTGATGCATGGCGACGATGCCCCGCAGCGTGGCGAGCGTT
TATTCGTTGGTCTGCAACATGCGCGGCTGTATAACGGCGACGAGCGTATCGAAACCCGAG
ATGAGGAACTTGCTCTCGCACAAAGCGCCTGATAGGTTGAGTGAATGTTAAACGCCCGGA
GGCGCTTCCCGCGATCCGGGCTTTTTAATGGCAAGGTTTGTAACCTGTAGGCCTGATAAG
ACGCGCAAGCGTCGCATCAGGCAACACCACGTATGGATAGAGATCGTGAGTACATTAGAA
CAAACAATTGGCAATACACCTCTGGTGAAGTTGCAGCGAATGGGGCCGAATAACGGCAGT
GAAGTGTGGTTGAAACTGGAAGGCAATAACCCGGCAGGTTCGGTAAAAGATCGTGCGGCG
CTTTCGATGATCGTCGAGGCGGAAAAGCGCGGGGAAATTAAACCGGGTGATGTGTTAATC
GAAGCCACCAGTGGTAACACCGGCATTGCGCTGGCAATGATTGCCGCGCTTAAAGGCTAT
CGCATGAAATTGCTGATGCCCGACAACATGAGCCAGGAACGCCGTGCGGCGATGCGTGCT
TATGGTGCGGAACTGATTCTTGTCACCAAAGAGCAGGGCATGGAAGGTGCGCGCGATCTG
GCGCTGGAGATGGCGAATCGTGGTGAAGGAAAGCTGCTCGATCAGTTCAATAATCCCGAT
AACCCTTACGCCCATTACACCACTACCGGGCCGGAAATCTGGCAGCAAACTGGCGGGCGC
ATTACCCATTTTGTCTCCAGCATGGGAACAACCGGCACTATCACCGGCGTGTCACGCTTT
ATGCGCGAACAATCCAAACCGGTGACCATTGTCGGCCTGCAACCGGAAGAGGGCAGCAGC
ATTCCCGGCATTCGCCGCTGGCCTGCGGAATATCTGCCGGGGATTTTCAACGCTTCGCTG
ATGGATGAGGTGCTGGATATTCATCAGCGCGATGCGGAAAACACCATGCGCGAACTGGCA
GTGCGGGAAGGAATATTCTGTGGCGTCAGCTCCGGCGGCGCGGTTGCTGGAGCACTGCGG
GTGGCAAAAGCTAACCCTGGTGCGGTGGTGGTAGCGATCATCTGCGATCGTGGCGATCGC
TACCTTTCCACCGGGGTGTTTGGGGAAGAGCATTTTAGTCAGGGGGCGGGGATTTAAGAT
TATTGCGCAGGCACCGTTTTATCCGTCTGCGCAATTAACGCATGTAAAAAAGGCTGTGCA
TTCTCATCGCTCTTACCGGGCATCTTCACGATATACGGCTTCCCGGTAATCGATGATGAC
GAAGCAACCTTATCAATAAACTGCTCGGCAGTGTTAATGCGGTTACGGGTATTGCCGAGC
TTCAGACGCAGATGAGAAACCGCTTCATCGCAGGTATGTTCATCACCGTTGCGCACAAAT
ATCAAATCCTTTTTCTGTGCTAATCCCTCCAGCATGGCGTTGATGCGGGCTTCTTCATGG
GCAGTTAACTTCGCGTAAGCGGGGAGTGTCATTAGTAGTGTAATGACCAGACAAATGATT
TTCTTCATTGAATTACCTTATCCTTGTTTTGTGATAGCCGATTTGACTGCCAGAATCAGG
TAAAGTTTCGGTTGGAATACGATGAGGATCATCGGCAAGGAGAAAAAATTAAATGAGTAG
TTTGTTGTTGTTTAACGATAAGAGCAGGGCACTGCAGGCGGATATCGTCGCCGTGCAGTC
GCAGGTAGTGTACGGCAGCGTAGGCAACAGCATTGCGGTGCCTGCTATCAAACAGAACGG
TCTGAATGTCTTTGCCGTGCCGACGGTATTGCTGAGCAATACGCCGCATTATGACACTTT
CTACGGTGGTGCGATTCCGGACGAATGGTTTAGCGGCTATTTGCGTGCGCTTCAGGAGCG
TGATGCGCTGCGCCAACTTCGAGCTGTAACCACGGGCTATATGGGAACGGCATCGCAAAT
CAAAATCCTTGCCGAGTGGCTGACTGCGCTACGCAAAGACCATCCTGACCTATTGATCAT
GGTCGATCCGGTGATTGGCGATATTGATAGCGGAATTTATGTCAAACCTGACCTTCCCGA
GGCGTATCGACAATATTTACTGCCACTAGCGCAGGGAATTACCCCCAATATCTTTGAGCT
GGAAATCCTGACCGGTAAAAATTGCCGCGATCTCGACAGTGCCATTGCTGCCGCAAAAAG
TCTGCTTTCAGACACATTAAAATGGGTGGTGATTACCAGCGCCTCCGGTAATGAAGAAAA
TCAGGAGATGCAGGTGGTGGTGGTCACTGCCGACAGCGTGAATGTCATTTCCCATTCACG
GGTAAAAACCGACCTGAAAGGGACTGGCGACCTGTTTTGTGCTCAGCTTATCAGTGGTTT
GCTGAAAGGGAAGGCGTTAACCGATGCAGTGCACCGAGCGGGGTTGCGCGTACTGGAAGT
GATGCGCTACACCCAGCAGCATGAGAGCGATGAATTGATTTTGCCGCCGCTGGCGGAAGC
ATAAAAAAATGGCGCCGATGGGCGCCATTTTTCACTGCGGCAAGAATTACTTCTTGATGC
GGATAACCGGGGTTTCACCCACGGTTACGCTACCGGACAGTTTGATCAGTTCTTTGATTT
CGTCCATGTTGGAGATAACAACCGGAGTCAGGGTAGACTTGGCTTTCTCTTCCAGCAGCG
GCAGATCAAATTCAATGACAGTATCGCCAACTTTCACGCGCTGACCTTCTTCAGCAATAC
GCTTGAAGCCTTCGCCTTTCAGTTCAACGGTGTCGATACCGAAGTGGACGAACAGTTCAA
CGCCGCTATCAGATTCGATAGAGAATGCGTGGTTGGTTTCAAAGATTTTACCAATGGTAC
CGTCTACAGGCGCGACCATTTTGTTACCCGTTGGTTTGATAGCAATACCATCACCAACGA
TTTTTTCCGCAAAAACGACATCCGGCACGTCTTCGATATTGACGATCTCGCCAGAGAGCG
GAGCAATGATCTCAATAGTTCCGGTATCCTTCTTGTCGTCGGAAACCAGAGATTTCAGTT
TATCGAACAAACCCATGATCTTCTCCTAAGCAGTAAATTGGGCCGCATCTCGTGGATTAG
CAGATTGTTTTTTCTTCAATGAACTTGTTAACCAGCGTCATTAACTCGTCCGTTGTCGGT
TGAGCAAGAGCCTGCTCTGCTAACACCTTCGCATCTTCGAAGTTCGTGTTACGGATAATC
TTCTTAATGCGCGGGATAGAAATGGCGCTCATAGAGAATTCGTCCAGACCCATCCCCAGC
AACAGAAGTGTAGCACGTTCATCGCCAGCAAGCTCACCACACATGCCAGTCCATTTGCCT
TCAGCATGAGAAGCATCAATAACTTGCTTGATCAAGTTCAGCACGGACGGTGACATTGGC
TGGTAAAGGTGTGAAATCATATCATTACCACGGTCAACTGCCAGAGTGTACTGCGTTAAA
TCATTGGTGCCGATACTAAAGAAATCAACTTCTTTGGCTAAATGACGTGCAATTGTTGCG
GCAGCCGGTGTTTCCACCATTACGCCGATTTCAATTGACTCGTCAAACGCTTTACCTTCG
TCGCGCAGTTCCTGTTTGTAGATTTCGATCTCTTTGCGCAGTGCACGCACTTCTTCAACA
GAGATGATCATCGGGAACATAATGCGCAATTTACCGAAAGCCGAGGCACGCAGGATAGCG
CGGAGCTGATCGCGCAGGATCTCTTTACGATCCATTGCGATACGGATAGCGCGCCAGCCG
AGGAACGGGTTCTCTTCTTTCGGGAAGTTCATGTATGGCAGCTCTTTGTCGCCGCCGATG
TCCATGGTACGAACGATAACCGCCTGCGAGCCACACGCTTCAGCCACTGCTTTGTAAGCA
GCAAACTGTTCTTCTTCAGTGGGCAGCGCGTCGCGGTCCATGAACAGGAACTCAGTACGA
TACAGACCAACGCCTTCAGCGCCGTTACGCTCTGCACCTTCAACGTCACGAACCGTACCA
ATGTTAGCGCATACTTCTACCTGGTGACCGTCCAGCGTAATAGCTGGCAGATCTTTCAGT
TTAGCAAGCTCTGCTTTTTCAGAAGCCACTTGCTCCTGAACAGCGCGCATTTTATCAATA
ACTTCGTTGGTTGGATTGACGTAAACCTGATTATTTACGGCATCCAGAATCAGATAGTCG
TCATTTTTCACCTGAGAGGTGACGCTACCGGTACCCACGATAGCAGGTAGTTCCAGAGAA
CGCGCCATGATAGAGGTGTGGGAAGTACGGCCACCCGCGTCGGTGATGAAACCCAGCACC
TTCTTCAGGTTCAGCTGTGCGGTTTCGGACGGCGTCAGGTCAGCGGCAACCAGAATGACT
TCATCCTGAATGGCGCTCAGGTCGATAATCTTCAGGCCCAGGATGTTGCGCAGCAGGCGC
TTACCGATATCACGTACGTCAGCCGCACGTTCTTTCAGGTATTCATCATCCAGCTCTTCC
AGGGCAGAAGCCTGACCTTCGATAACTTCATGAGCAGCTGCGTCAGCTGTCATGTGCTTA
TCTTTAATCAGGGCTATGATTTCCTGCTCCAGCTCCTCATCTTCGAGCAGCATAATATGC
CCTTCAAAGATGGCTTCTTTTTCTTCACCGAACGTTTCACCAGCTTTCGTTTTGATCGTT
TCCAGCTGGGCTGATGCCTTGGCACGACCGCTCAGAAAACGTTCAACTTCCTGATCAACC
TGGTCGGCAGAAATTTTTTTCCGGTCAATGACAATTTCGTCTTCTTTCAGAAGCAGAGCT
TTACCGAAAGCGATACCCGGGGATGCTAAAATGCCTGAAATCATAACCCTACCTTACTTG
TGACTGATTTTTAAAAGAACCCGGGAAATTACTCGAGTTCCGCCATCAGTTTAACCAGAT
GTTCAACCGCTTTCTGCTCGTCTTCGCCTTCTGCGGAGATAGTCACAACGGTACCTTGAG
TCAGGCCCAGAGTCTGCAGTTTAAACAGGCTTTTCGCGCTGGCGCTTTTGCCGTTGGAAG
TCACAGTAATTTCAGAAGTGAAGCCCTTAGCTTCTTTTACAAACTGGGCAGCAGGGCGGG
TGTGCAGACCGTTCGGAGCGGTAATGGTAACTTCTTGCTGGAACATTGTATTTCCCCAAC
TTATAGGTTTAGTGTTGTGGAACTAAAGTCTAGCCTGGCGGTTCGACTTTAGCCTGTATT
GTTAGCGCCAGTTTTTAACAGACGCGACGCACGAAGAGCGCAATACAGTCCATTGCTGGC
GGGTGTTGACCGCTGACGTTTCGTACGTCATTAAACATTATGCCGCTAAAGGAAGAATTG
AACCAAATCATAAAATCGATTCAGCTTTGGCTTTTCCTGTAACGATTAATTTCGCGCATC
AAAATAATTAGTCTGGTTAAATACCAGTTCCGACAGGCTGAATCAATGCCAGGAGGGGCG
AAAGTTTGAAGCAGGCCACAAAAAAGCACCTAAAAAGGTGCTTTTTTACGCATTTTTAAC
AAGCTGGCATTACTGTTGCAGTTCTTTCTCAGTGAAGAGATCGGCAAACAATGCGGTGCT
TAAATAACGCTCACCCGATGACGGTAGAATAACCACAATATTCTTGTTGGTAAAGCTTTC
ATCTTCTTGTAGTTTCAACGCCGCAGCAACAGCTGCTCCAGAAGAGATACCTGCAAGAAT
ACCTTCTTCTTCCATCAGACGACGCGCGGTAGAAATGGCTTCTTCATTGGTAATGCCAAT
GACTTTATCGATCAGCTTGAGATCGAGGTTAGCCGGGATAAAACCAGCGCCAATACCCTG
AATTTTATGCGGGCCAGGTTTAATCTCTTCACCTGCCAGCGCCTGGGCGATAACTGGAGA
ATCGGTTGGCTCAACGGCGACAGAGATAAGATCGGTCTTGCCTTTGGTGCCTTTAATGTA
GCGGCTGACGCCGGTCAGCGTACCGCCAGTCCCAACGCCAGCAATAAATACATCAACCTG
ACCGTCGGTATCTTCCCAGATCTCCGGACCGGTGGTTTTTTCGTGAATTTCAGGGTTTGC
CGGATTGCTGAATTGTTGCAGCAGCAGGTATTTCTCTGGATTGCTGGCGACAATTTCTTC
TGCTTTTTGGATTGCGCCTTTCATGCCTTTAGCACCTTCGGTCAGCACCAGGTTTGCACC
TAACGCTTTCAGCAGCTTGCGGCGTTCAATACTCATGGTTTCTGGCATGGTCAGGGTGAG
TTTGTAACCGCGAGCGGCAGCTACATAGGCCAGTGCAATCCCGGTATTACCGCTGGTCGG
TTCAACCAGTTCAACGCCTGGTTTCAGCACGCCGCGCTTTTCGGCATCCCAAATCATGTT
GGCACCGATACGGCACTTAACGCTGAAGCTGGGGTTACGAGATTCCACCTTCGCCAGAAT
GCGTCCGTTACCGATGCGATTCAGGCGAACCAGCGGCGTGTGACCGATAGTCAGCGAGTT
ATCTTCAAAAATCTTACTCATGGCCTGTCCTTAACTGTATGAAATTGGGATACAACAGGT
AGCATACCCGCTCAGAGAATATGCGGAAGTAAGGATTTAGCATATCTATATACAGAAGGG
AAATAATGACATGCAAGATGGAATAAGGGGCGGCATAAGCCACCCCTGTTTCACACAAAC
GGTTTACAAAATAACCGGTAGATTGTTACCGCCACATCGCGTGTTTATCGCGATAGCAAT
CGACCCACATCGCCGTCGCGCCACAAACGGCAACGGGCATGATGAACAGATTAAGCAGCG
GGATCATCGTAAACAGGCTGGTTAAAGCACCAAACTGCATATTGGTGATTTTGCGTGTGC
GCAGGGCGGTGCGCATCTCTTTAAACGGCACTTTGTGGTTATCGAAGGGGTAATCGCAAT
ACTGGATGGCTAACATCCAGGCGCTAAACAGGAACCACAGTACCGGCGCGACGGTTTGCC
CAATACCAGGGATGAAGTAAAGAATTAGTAATACAATTGCGCGCGGCAGATACCAGGCAA
ATTTTTGCCATTCGCGTTTCATGATTCGCGGCACATCTTTCATGATACCGAAAATCCCGG
TATCTGGCGGTGTAGCGCCAGTCAATCGTGCTTCCAGTTGTTCAGCCAATAAACCGTTAA
ACGGAGCGGCAATCCAGTTAGCAATCGTGGAGAAGAAATAGCCAAACACTAACAGCACAG
AGATGACAGCCAGAGGCCACAACAGATAGCTCAGCCATTGTAACCAGTCCGGAACATAAC
TCATGAGAGTCGGGATCCAGACATCGAGTTGCGTAAAGAGCCACCAGAATGCGCCCCCCA
TCAACAAAATATTGACCAGCAGCGGTAAAATAACGAAACGCCGAATCCCAGGTTGCGAGA
CGAGCTTCCAGCCTTGCGCAAAATAGTAAAAACCGCTGCGTGGGGCAGATGTGAATGATG
AAACCATAATCAGGATGAGCTCCTTTTGACCAATCCCAGGAAAATTGTGCGTATTTTACC
GGGTAATTGCGCAATGGACAGTTAGGATATGTTCGAAAAAACAGCAAAAAGCACGATTTC
ATCTATCTTTGTGCTGTGAAAGTTAATAGTGCACTTGCACTTGAGGTAATCGGCAAATAC
TCTTAGTGAGTAAATGTTTGCCGTGGTGGCAAGGTGTTAGAACAACAGAGAATATAATGA
TGCAGGATTTGCGTCTGATATTAATCATTGTTGGCGCGATCGCCATAATCGCTTTACTGG
TACATGGTTTCTGGACCAGCCGTAAAGAACGATCTTCTATGTTCCGCGATCGGCCATTAA
AACGAATGAAGTCAAAACGTGACGACGATTCTTATGACGAGGATGTCGAAGATGATGAGG
GCGTTGGTGAGGTTCGTGTTCACCGCGTGAATCATGCCCCGGCTAACGCCCAGGAGCATG
AGGCTGCTCGTCCGTCGCCGCAACACCAGTACCAACCGCCTTATGCGTCTGCGCAGCCGC
GTCAACCGGTCCAGCAGCCGCCTGAAGCGCAGGTACCGCCGCAACATGCTCCGCGTCCAG
CGCAGCCGGTGCAGCAACCCGTGCAGCAGCCTGCCTATCAGCCGCAGCCTGAACAGCCGT
TGCAGCAGCCAGTTTCGCCACAGGTCGCGCCAGCGCCGCAGCCAGTGCATTCAGCACCGC
AACCGGCACAACAGGCTTTCCAGCCTGCAGAACCCGTAGCGGCACCACAGCCTGAGCCTG
TAGCGGAACCGGCTCCAGTTATGGATAAACCGAAGCGCAAAGAAGCGGTGATTATCATGA
ACGTCGCGGCGCATCACGGTAGCGAGCTAAACGGTGAACTGCTTCTTAACAGCATTCAAC
AAGCGGGCTTCATTTTTGGCGATATGAATATTTACCATCGTCATCTTAGCCCGGATGGCA
GCGGCCCGGCGTTATTCAGCCTGGCGAATATGGTGAAACCGGGAACCTTTGATCCTGAAA
TGAAGGATTTCACTACTCCGGGTGTCACTATCTTTATGCAGGTACCGTCTTACGGTGACG
AGCTGCAGAACTTCAAGCTGATGCTGCAATCTGCGCAGCATATTGCCGATGAAGTGGGCG
GTGTCGTGCTTGACGATCAGCGCCGTATGATGACTCCGCAGAAATTGCGCGAGTACCAGG
ACATCATCCGCGAAGTCAAAGACGCCAACGCCTGATACACTTAAGGCAAATTAACTCCTC
TTCGAACCCCCGCTTGTCGGGGGTTTTTAGCATTGATGGTGCGATATGGAATCAATCGAA
CAACAACTGACAGAACTGCGAACGACGCTTCGCCATCATGAATATCTTTATCATGTGATG
GATGCGCCGGAAATTCCCGACGCTGAATACGACAGGCTGATGCGCGAACTGCGCGAGCTG
GAAACCAAACATCCAGAACTGATTACGCCTGATTCGCCTACCCAACGTGTAGGTGCTGCG
CCGCTGGCGGCTTTCAGCCAGATTCGCCATGAAGTGCCAATGCTGTCGCTGGATAACGTT
TTTGATGAAGAAAGCTTTCTTGCTTTCAACAAACGTGTGCAGGACCGTCTGAAAAGCAAC
GAGAAAGTCACCTGGTGCTGTGAGCTGAAGCTGGATGGCCTTGCCGTCAGTATTCTGTAT
GAAAATGGCGTTTTAGTCAGTGCCGCGACCCGTGGCGATGGCACCACCGGGGAAGATATC
ACGTCTAATGTGCGTACTATTCGCGCCATTCCGCTGAAGCTGCACGGAGAGAATATCCCG
GCGCGTCTGGAAGTGCGTGGTGAAGTGTTCCTGCCGCAGGCGGGGTTCGAAAAGATTAAC
GAAGATGCGCGACGCACGGGCGGGAAAGTGTTTGCTAACCCACGTAATGCGGCAGCTGGT
TCACTGCGTCAGCTTGATCCGCGTATTACAGCGAAGCGACCGCTCACTTTTTTCTGCTAT
GGCGTTGGTGTTCTGGAAGGTGGCGAGCTGCCGGATACTCATCTTGGCCGTTTACTGCAA
TTTAAAAAGTGGGGGTTGCCGGTCAGCGATCGGGTAACGCTTTGTGAATCGGCGGAAGAA
GTGCTGGCGTTCTATCACAAAGTGGAAGAAGACCGCCCGACGCTGGGCTTTGATATCGAC
GGCGTGGTGATTAAGGTCAACTCACTGGAACAGCAGGAGCAGCTTGGCTTTGTCGCGCGT
GCCCCGCGCTGGGCGGTAGCGTTTAAATTCCCGGCGCAGGAGCAGATGACCTTTGTGCGT
GACGTCGAGTTTCAGGTTGGGCGTACTGGCGCGATTACGCCTGTTGCGCGTCTGGAACCT
GTCCATGTTGCTGGCGTGCTGGTGAGTAACGCAACCTTACACAATGCGGATGAAATCGAA
CGTCTTGGTTTACGCATTGGCGATAAAGTGGTGATTCGCCGCGCTGGCGACGTGATCCCG
CAGGTGGTTAACGTCGTGCTTTCTGAACGCCCGGAAGATACCCGTGAGGTTGTATTCCCG
ACGCATTGTCCGGTATGTGGTTCTGACGTTGAGCGTGTGGAAGGTGAAGCTGTTGCCCGC
TGTACCGGTGGCCTGATTTGCGGTGCGCAGCGTAAAGAGTCGCTGAAACACTTTGTTTCC
CGCCGTGCGATGGATGTTGACGGAATGGGCGACAAAATCATCGATCAGCTGGTTGAAAAA
GAATATGTCCACACTCCGGCGGATCTGTTCAAACTCACCGCAGGCAAACTTACCGGACTG
GAGCGTATGGGGCCAAAATCGGCACAAAACGTGGTTAACGCGCTGGAAAAAGCGAAAGAA
ACCACCTTTGCTCGCTTCCTCTATGCACTTGGCATCCGTGAAGTCGGCGAGGCCACCGCA
GCAGGTCTGGCGGCATATTTCGGCACGCTGGAAGCGCTGGAAGCCGCTTCGATTGAAGAA
CTGCAAAAGGTGCCTGATGTTGGCATTGTCGTTGCATCCCACGTTCACAACTTCTTTGCC
GAAGAAAGCAACCGCAATGTCATCAGCGAGCTGTTGGCGGAAGGTGTTCACTGGCCTGCG
CCGATCGTTATCAACGCGGAAGAGATTGACAGCCCGTTTGCTGGTAAAACCGTGGTGCTT
ACGGGCAGCTTAAGCCAGATGTCGCGTGATGACGCTAAAGCTCGACTGGTCGAACTGGGC
GCGAAAGTCGCGGGCAGCGTGTCGAAGAAAACCGATCTGGTGATAGCGGGTGAAGCTGCA
GGATCTAAACTGGCGAAGGCGCAGGAACTGGGCATTGAAGTCATCGACGAAGCGGAAATG
CTGCGTTTGCTGGGTAGCTGAGATGGAAAAAGAGCAGCTGATTGAAATAGCCAATACGAT
AATGCCGTTTGGCAAATACAAAGGGCGTCGCTTAATCGACCTGCCGGAGGAGTATCTGCT
GTGGTTTGCCCGCAAAGATGAGTTCCCGGCAGGGAAGCTCGGTGAGCTAATGCAAATCAC
GCTGCTGATTAAAACCGAGGGGCTGACGCAACTGGTCCAGCCCCTGAAGCGTCCGCTTTA
AGCTTTATCGGTGCTGCTTTCCTGCTGTGCCTGTAACTGTTCGGTCTGGCGTTTGTATCG
CCGCGCCAGCACCGCACAGACCATCAATTGGATCTGATGGAAAATCATCAGGGGCAGCAC
CATCATACCGATCACCGATGTGGGGAACAGAATGTTTGCCATCGGGATGCCATTTGCCAG
ACTCTTTTTCGAACCACAAAAGACGATAGTAATTTCATCTGCTTTATTGAAGCCTAGTCG
GCGTGCCATAAAGACGTTAACTACAATCACGATAGCCAGAAGAACGCAGCTGACCACCAC
GATAAACAGCAATGATCCCCAGCCAACTTTATGCCAGATACCATTAACGACGGCTTCGCT
GAACGCTGTATAAACCACCAACAGAATGGACGTCTGGTCAGTTTTCGCAATCCATTTTTT
ATTGCGCGACACCCAGTCACCAATCCACGGCCGGGAAAGATGCCCCAACACAAACGGCAG
CAACAGTTGCAGCATAATTTTACCGACCTGCTCAAGGCTGCCCCCTGCACCGTGAACATT
CATCACCAGGCCAACCAGCAATGGTGAAAGGAAAATCCCCAGCAGGCTGGATGCCGACGC
AGAACAAACCGCCGCCGCGACGTTACCGCCCGCCATTGACGTGAAGGCGATTGCAGACTG
CACGGTAGCCGGGAGAATGCACAAGTAGAGAAAACCGGAGTAGAGCATCGGGTCGACATT
TACCGGTTTCCACCAGGCAAACAGTACACCCAGAATCGGAAACAGCACGAAGGTGCTGCA
CATTACCCACAAATGCAGTCGCCAGTGACCACCGCCAGCAATAATCGCCTCACGCGACAA
CTTCGCGCCGTGCATAAAGAACAGCAGGGCAATAGCTGCGGTGGTCAGATTTTCAAAGAA
GGGGACGAAATCGCCTCTGGCCGGAAAGAAAGAGGCCAGCAACACCACCGTGATCAGGGT
TAAGGTGAAAGGATCGAGGATACGAAAAAGTTTCATAAAGACTCCAGATGATCGATGGTT
CTATTGTGCTTCTTCCAGTTTGAGAAATAAAATTGATTTATTGCATCCATTCATGAAGAA
AACAGATGAATTATTCTTTAAAACAGTTAAAGGTTTTCGTCACAGTAGCGCAGGAGAAAA
GTTTTAGTCGTGCAGGAGAGCGTATCGGCCTGAGCCAGTCGGCAGTAAGTCACAGTGTGA
AGGAGCTGGAAAATCATACAGGTGTTCGCCTGCTGGACAGAACCACGCGTGAAGTGGTAC
TTACAGATGCAGGGCAGCAGTTGGCTTTGCGTCTTGAGCGACTGCTGGATGAACTTAACA
GCACGTTGCGCGATACCGGGCGTATGGGGCAACAACTGAGCGGAAAAGTTCGGGTCGCTG
CCAGCCAGACCATTTCCGCGCATCTTATTCCGCAATGCATTGCTGAAAGCCATCGCCGCT
ATCCAGATATTCAGTTTGTCCTGCACGATCGTCCGCAGCAGTGGGTGATGGAAAGTATTC
GCCAGGGAGATGTCGACTTTGGCATCGTCATAGATCCAGGCCCAGTGGGCGATCTGCAAT
GTGAAGCGATTCTTTCCGAGCCTTTCTTTCTGCTTTGCCATCGCGATAGCGCTTTGGCCG
TGGAAGATTATGTACCCTGGCAGGCATTACAGGGAGCGAAATTGGTGTTGCAGGATTACG
CGTCAGGCAGCCGACCGCTGATTGACGCAGCGCTGGCGCGCAATGGTATTCAGGCGAATA
TTGTGCAGGAGATTGGACATCCGGCGACGCTGTTCCCGATGGTAGCCGCAGGCATCGGCA
TCAGTATTCTTCCCGCACTGGCGCTACCATTGCCTGAAGGTAGCCCACTGGTGGTAAAGC
GCATTACGCCGGTGGTGGAACGCCAGTTGATGCTGGTGCGCAGGAAAAACCGTTCACTTT
CCACCGCCGCTGAAGCGTTATGGGACGTGGTACGAGACCAGGGCAATACGCTAATGGCTG
GGCGGGAAGGGGATCCGTTGTATCAGATATAGATATCGATATGAGTCGTATTTTCAACAG
GATTTAGAAGGGATACATTCAGAGACAAACGCTGCTCTTTCTCCTGCGCCTTTTCTGCCT
GCTGTCTCTGCAACTGCGCCAGTTGTGTTTCCAGTAGGGTGATTTGCTGTTGAATCAATT
CGGCCTGTTTTTGCTTGTCTTCAGCACTGCCGCTAGTGTCTACAATCTCTTTAATTTGTT
GAGTGAGTTTGATGATTTGCTGACTTATCCGCGCGATTTGTGAAGCAACATCGCTACCTT
GTGATGCCCTGTTACTACTCTGTGTTTGTATGGAAGGAATTGAAGTTGAAGAGATAGTGG
CCATTGTTCAGTCCTCGTCACTGTACGAGGTAATATCGGTAGAAGAACAAGGAACTTGAG
AAGAAAAATCAATCTTACAAATCGCAGATAGCAAAAAAGCGCCTTTAGGGCGCTTTTTTA
CATTGGTGGGTCGTGCAGGATGACTCGCTTCGCTCGCCCTTCGGGCCGTCGCCGCGAGCG
GCTCCGTTGTTTCGCTGCGCTCAACTCGAACCTGCTGCAGGTTCGAATCTTTGAGTATCG
CAGATAGCAAAAAAGCGCCTTTAGGGCGCCTTTTTAAATTGGTGGGTCGTGCAGGATTCG
AACCTGCGACCAATTGATTAAAAGTCAACTGCTCTACCAACTGAGCTAACGACCCGAAGT
GGTGGGTGATGACGGGATCGAACCGCCGACCCCCTCCTTGTAAGGGAGGTGCTCTCCCAG
CTGAGCTAATCACCCACTTCTCAATTTCTTGCTACACGGCGGAGACTACATAAAGTAGTT
GGTGGGTGATGACGGGATCGAACCGCCGACCCCCTCCTTGTAAGGGAGGTGCTCTCCCAG
CTGAGCTAATCACCCCCGCTGTGTGGAGTCGCATTATAGGGAGAGTTCAAAATGAGTCAA
CGCATTTTCTAAAGAAATTGTTCGTTCGTCGTAAATTTAAGCAAGATGATCGCAAAACAG
ACCGCGTTGCGCAATTTGTCAACGAAAACAATAATGCGTAAGGTTGCAACCCGAACTACA
TTGAGGAATCAGGCGGGAGTGATAGAATATCGCCCACTCAATTTTTCCAGGATTTGCCGG
TTGTCGGCATCTTTCTAAACGTAAGGCCATTTCATGAAAATCAAAACTCGCTTCGCGCCA
AGCCCAACAGGCTATCTGCACGTTGGCGGCGCGCGTACTGCTCTTTACTCCTGGCTTTTT
GCACGTAATCACGGCGGTGAGTTCGTGCTGCGTATTGAAGACACCGATCTTGAGCGTTCC
ACGCCGGAAGCTATCGAAGCCATTATGGATGGCATGAACTGGCTGAGCCTGGAGTGGGAT
GAAGGTCCGTACTTCCAGACCAAACGTTTTGATCGCTACAACGCGGTGATCGATCAGATG
CTGGAAGAGGGCACAGCTTATAAATGCTATTGCTCTAAAGAGCGCCTGGAAGCGCTGCGC
GAAGAGCAAATGGCGAAAGGTGAGAAGCCGCGTTATGACGGTCGCTGCCGCCACAGTCAT
GAGCATCACGCTGATGATGAGCCGTGTGTCGTACGTTTTGCTAACCCGCAGGAAGGTTCT
GTTGTTTTTGACGATCAGATCCGTGGTCCGATCGAGTTCAGCAACCAGGAACTGGACGAT
CTTATTATCCGCCGTACCGATGGTTCCCCAACCTATAACTTCTGTGTGGTTGTCGATGAC
TGGGATATGGAAATCACCCACGTTATCCGTGGCGAAGACCATATCAACAACACGCCACGC
CAGATCAACATTCTTAAGGCCCTGAAAGCGCCGGTGCCGGTTTACGCGCACGTTTCTATG
ATCAACGGCGATGACGGTAAAAAACTGTCCAAACGTCACGGGGCGGTCAGCGTAATGCAG
TATCGTGACGACGGTTATTTGCCAGAAGCACTGCTGAACTATCTGGTGCGTCTGGGCTGG
TCCCACGGCGATCAGGAAATCTTCACTCGTGAAGAGATGATCAAATACTTCACCCTGAAT
GCCGTCAGCAAATCTGCCAGTGCGTTCAACACCGACAAGCTGCTGTGGCTGAACCATCAC
TACATTAACGCGCTGCCGCCGGAGTATGTTGCTACTCACTTACAGTGGCACATTGAGCAG
GAAAATATCGATACCCGTAACGGCCCGCAGCTGGCTGATCTGGTGAAACTGCTGGGCGAA
CGCTGCAAGACGCTGAAAGAGATGGCACAGAGCTGCCGTTATTTCTACGAAGATTTTGCA
GAGTTCGATGCCGACGCCGCGAAAAAACATCTGCGTCCGGTAGCGCGTCAGCCGCTGGAA
GTGGTTCGTGACAAACTGGCCGCGATTACTGACTGGACCGCTGAAAACGTTCATCACGCT
ATTCAGGCGACGGCGGATGAGCTGGAAGTGGGTATGGGTAAAGTTGGTATGCCGCTGCGT
GTCGCCGTAACCGGTGCGGGGCAGTCTCCAGCACTGGATGTTACCGTTCACGCGATCGGT
AAGACACGTAGCATTGAGCGTATCAACAAAGCGCTGGCTTTTATTGCTGAACGCGAAAAT
CAGCAGTAATTAGCGCATAAAAGACAAACGGCAGGAGAGAAACCCCTGCCGTTTTTTATT
TATGCTGATTCATTTATGTCGAGACGAGCCAGGAAATTACGAATTCCTTCGCGTGACAAA
AATTGCGCAACTTTTTCCTGCTCACTGTGAGTCATGTTGTCTATTGCGCTTATGATTTGT
CGATAAGCAGGAGTGCGAATCCCCGGTGCGTATTCGGCAAGGGGTTCTTCGGCTTCCAGA
AGCATCGGTGTGTTATGGAAGGCTGGCGTGTTCTGAATAAACTCGCAAACTTGCGTATCG
ACCAGAATAAGTCTGGCACGACCGCCTTTCACGCCGGGAAATTTTTCCGTTTTCCAGCCT
TTTTCTCTGATCCAACGGTTAACAGTTTGTTTAGCCACACCGAGGCATTCAGCCAGTTCT
TCGGTGGTCATTTTGTTGCGTAATCTTTTCATATTATTTGCTATCGCGAATCCCTAAGCG
TTGTAACAATCCGATAATCCCTTCCCGCAGAAGCAAGGATGTAAACTGTTTTTGTTCAAC
TGGCGTCATCTCTTTCGCCAGTGTCACCAGCAATACTTCAAGCGGCGCATCACCAGAAAG
GGCAGGCGCTTCTCCCTGACCTTCTGGACGTTCAGCATTACGAATATATTCACGAACCTG
TTCATTGACGTGAACCAGTCGGGCTTTGCCACCCTGGACGCCTGGTTTTGGTGACGTCGT
CCAGCCTTCCTTGCGTACCCATTTATTAATGGTCTGGCGGCTATAGCCGGTCAGTCTGGC
AAGTTCATCTGGTGTCATCCTCTCCTTGAACATAACAATTCCCTGAATGTATGTGGGTCT
ATTAGTAGTTCATTTTATAGCACCACTTTACAGGAAACCGTGACATGAATAACTACTGAA
TGCGAGCGGTTTTCCAAAATTGTTCATTTGCCTGATTTTTCAGCGATTGAAACTACACGT
TGCAATTTGCCGTTGACACATTCGGGCGGAATTCATATGATGCCGCCCGTCAACTCGACA
AGCTTTACGTGACGGGGCTATAGCTCAGCTGGGAGAGCGCTTGCATGGCATGCAAGAGGT
CAGCGGTTCGATCCCGCTTAGCTCCACCAAATTTTGCACCCAGCAAATTTGGTACGTAAA
CGCATCGTGGGGCTATAGCTCAGCTGGGAGAGCGCTTGCATGGCATGCAAGAGGTCAGCG
GTTCGATCCCGCTTAGCTCCACCAAATTTCCAACCCTCGCTGCAAAGCGGGGGTTTTTTG
TCTCTGCTTTTTGCCGCTTTTGTAATACAGTCTACGTCCGGGTTAGTGCCGCCTGGTGAA
AGCATCATTGGATGAAAAATCGGCAACAGGCTGGCCCCTGTTTGCTTCGCGATGCGAATA
AACTTATTATTTGTGTGCCTGAAAACCCCGATCAGTGAGAGTAGTGTACTCATGTTTGTG
GAGCATAACCTGATAAAAAATATCAAGATATTCACACTAGCGTTTACGCTCACCGTGGTA
CTTATTCAGCTATCCCGTTTTATTTCGCCACTTGCCATTATCCATTCCAGTTATATCTTT
CTGGCGTGGATGCCACTGTGCGTAATGCTGTCAATCTTGTTTATCTTTGGCTGGCGCGGT
GTCGTTCCCGTTTTATGCGGGATGTTTTGCACCAATCTGTGGAACTTTCATCTCTCTTTT
TTACAGACTGCGGTCATGCTCGGCAGCCAGACGTTTGTCGTGTTGTGTGCCTGCGCAATA
TTACGCTGGCAGCTGGGGACGCGTTGGCGTTATGGATTGACCAGCCGATATGTCTGGCAA
CGTCTGTTCTGGCTTGGTTTGGTGACGCCGATCGGCATCAAATGCAGCATGTATTTTGTG
GGGAGCTTCTTTGATTTCCCGCTAAAGATATCCACCTTTTTCGGCGATGCGGATGCCATT
TTCACGGTTGTTGATTTACTAAGCCTTTTCACCGCTGTGCTGATTTACAACATGCTTTTC
TACTATCTCACTCGCATGATTGTAAGTCCCCACTTTGCGCAGATATTGTGGCGCAGGGAT
ATCGCTCCGTCGTTGGGCAAAGAGAAACGCGCATTTACCTTAAGCTGGCTGGCAGCGTTA
AGCGTGCTGCTACTTCTGTTGTGCACACCTTATGAAAACGACTTTATTGCCGGTTACCTG
GTACCCGTTTTCTTCATCATCTTTACCCTCGGGGTCGGTAAGCTTCGCTATCCGTTTTTA
AATCTCACCTGGGCTGTTTCAACGCTTTGCCTGCTGAATTACAACCAGAACTTTTTGCAA
GGGGTGGAAACCGAATATTCGCTGGCATTTATTCTTGCGGTGCTGATTTCCTTTAGCGTT
TGCCTGCTCTATATGGTGCGCATTTATCATCGCAGTGAATGGCTTAATCGACGCTGGCAT
TTGCAGGCGCTGACCGATCCGTTAACGCTCCTACCCAATTTTCGTGCGTTGGAACAAGCG
CCGGAGCAAGAGGCGGGCAAGAGTTTTTGCTGCCTGCGCATTGATAATCTTGAGTTTATG
AGTCGTCATTACGGGTTAATGATGCGCGTTCACTGTATCCGATCAATTTACCGTACGCTG
CTGCCGTTGATGCAGGAAAACGAAAAGTTGTATCAATTGCCGGGTAGTGAACTGCTGTTA
GTGCTGAGCGGGCCGGAAACGGAAGGGCGACTCCAGCATATGGTTAACATCCTGAATAGT
CGGCAAATTCACTGGAACAATACCGGGCTGGATATGGGCTATGGTGCTGCCTGGGGGCGT
TTTGATGGAAATCAGGAAACCCTGCAACCCTTGTTGGGGCAGTTAAGCTGGCTGGCGGAG
CAATCCTGCGCACATCATCATGTGCTGGCGCTGGATAGCAGAGAGGAGATGGTTTCCGGG
CAGACCACTAAACAAGTGCTATTGCTGAATACCATTCGCACGGCGTTAGATCAGGGTGAT
TTGCTGCTCTACGCCCAGCCAATTCGCAACAAAGAGGGTGAAGGTTATGATGAGATCCTC
GCGCGACTGAAGTATGACGGCGGCATTATGACCCCGGATAAGTTTCTGCCCCTTATTGCT
CAGTTTAACCTTAGCGCGCGTTTTGATTTGCAAGTGCTGGAATCCTTGTTGAAGTGGCTG
GCAACACACCCTTGCGACAAAAAAGGCCCGCGCTTTTCAGTTAATTTAATGCCGCTCACG
CTGCTACAAAAGAATATTGCCGGGCGGATTATTCGTCTGTTTAAGCGTTATCACATCTCC
CCGCAGGCGGTCATTCTTGAGATCACCGAGGAGCAGGCGTTTTCTAACGCAGAAAGCAGC
ATGTACAACATCGAGCAACTGCATAAGTTTGGCTTCCGGATTGCGATTGATGACTTTGGC
ACCGGCTATGCCAACTACGAACGGTTAAAGCGTTTGCAGGCTGATATCATCAAAATTGAT
GGTGTCTTTGTGAAAGATATCGTCACGAATACGCTGGATGCGATGATTGTGAGATCAATT
ACCGATCTGGCGAAAGCGAAGTCATTGAGTGTGGTTGCGGAGTTTGTCGAGACGCAACAG
CAGCAGGCGTTATTGCATAAGCTCGGGGTGCAATATCTGCAAGGGTATTTGATTGGTCGC
CCGCAGCCATTAGCTGATTAACAGGCGTAAAAAAACCGGGGAATTATCCCCGGCTTTTTT
ATGTATGGTCTTACAGCACCAGTGCTGCGATTGACGCAGACAGCACACTCACCAGGGTAG
AGCCGTAAACCAGTTTCAGACCGAAGCGAGAAACCACGTTACCTTGCTCTTCATTCAGAC
CCTTAACTGCACCTGCGATAATCCCGATTGAAGAGAAGTTAGCGAAGGAAACCAGGAACA
CAGAGATGATGCCTTCAGCACGCGGAGAGAGCGTGGAAGCAATTTTCTGCAGATCCATCA
TCGCAACGAACTCGTTGGAAACCAGTTTGGTCGCCATGATACTGCCCACTTGCAGTGCTT
CGCTGGACGGAACACCCATCACCCATGCAATCGGATAGAAGATGTAGCCCAGGATGCCCT
GGAAGGAGATGCTGTAGCCAAACCAGCCAGTCACGGTGGCAAACAGTGCGTTCAACGCGG
CGATCAGGGCGATAAAGCCGATCAGCATCGCGGCAACGATAATGGCAACTTTGAAACCTG
CCAGAATGTATTCACCCAGCATTTCGAAGAAGCTCTGACCTTCGTGCAGGTTGGACATCT
GAATGTTTTCTTCACTGGCATCAACACGGTAAGGGTTGATCAGCGACAGCACGATAAAGG
TGCTGAACATGTTCAGTACCAGCGCCGCAACGACATATTTCGGCTCCAGCATGGTCATGT
ATGCACCAACGATGGACATAGATACGGTGGACATCGCCGTTGCTGCCATGGTGTACATAC
GATTGCGGGAGATTTTGCCGAGGATATCTTTATAGGCAATAAAGTTTTCAGACTGACCCA
GAATCAGAGAGCTGACGGCGTTAAAGGATTCCAGTTTGCCCATGCCGTTGACTTTGGAGA
GCAGGAAACCAATTGCGCGGATAATCACCGGCAACACGCGAATGTGCTGGAGAATACCGA
TCAGTGCAGAGATAAAGACGATTGGGCACAGCACTTTCAGGAAGAAGAATGCCAGGCCTT
GATCATTCATGCTACCAAAGACGAAGTTAGTCCCTTCGTTGGCAAATCCGAGCAGTTTTT
CGAACATTTCGGAGAAGCCTTTCACGAAGCCTAAACCAACGTCGGAGTTCAGGAAGAACC
ACGCCAGTAACACTTCGATAACAAGCAGTTGAATAACATAACGGATACGAATTTTTTTGC
GGTCGCTGCTTACCAGCAGTGCGAGAATCGCAACAACGGCAAGTGCCAGTACAAAATGAA
GGACGCGGTCCATATTTGCTCCAAATATGAGGCAGGTTAAATTTCCGTGCACATTCTATG
TAACATGGTTAAGGAAAACGAGATCTGACACACACTATAATGACGTCCTGTGACAAGCTT
CAAAAATAGTGAGCTGTCATACATTTCTGCTATGTTGTGTATGGAAGCTGAAAGTTATGT
AAATGTGCTAACATTAAACATAACCATAACATTCAAGTCATCAATCTTTTCGTAGTCATA
ATCCTGGTCTATCAGAGAAATCACCACAACCCATTTAAATGAATTTGATAATTATTCTCG
TTTGGCATAGCATGAAACATAGCAAAGGCTATGTTTTAGAGGCACAAGATGACGAACTAT
CGCGTTGAGAGTAGCAGCGGACGGGCGGCGCGCAAGATGAGGCTCGCATTAATGGGACCT
GCGTTCATTGCGGCGATTGGTTATATCGATCCCGGTAACTTTGCGACCAATATTCAGGCG
GGTGCCAGCTTCGGCTATCAGCTACTGTGGGTTGTCGTTTGGGCCAACCTGATGGCGATG
CTGATTCAGATCCTCTCTGCCAAACTAGGGATTGCCACCGGTAAAAATCTGGCGGAGCAG
ATTCGCGATCACTATCCGCGTCCCGTAGTGTGGTTCTATTGGGTTCAGGCAGAAATTATT
GCGATGGCAACCGACCTGGCGGAATTTATTGGTGCGGCGATCGGTTTTAAACTCATTCTT
GGTGTTTCGTTGTTGCAGGGCGCGGTGCTGACGGGGATCGCGACTTTCCTGATTTTAATG
CTGCAACGTCGCGGGCAAAAACCGCTGGAGAAAGTGATTGGCGGGTTACTGTTGTTTGTT
GCCGCGGCTTACATCGTCGAGTTGATTTTCTCCCAGCCTAACCTGGCGCAGCTGGGTAAA
GGAATGGTGATCCCGAGTTTACCTACTTCGGAGGCGGTCTTCCTGGCAGCAGGCGTGTTA
GGGGCGACGATTATGCCGCATGTGATTTATTTGCACTCTTCGCTCACTCAGCATTTACAT
GGCGGTTCGCGTCAACAACGTTATTCCGCCACCAAATGGGATGTGGCTATCGCCATGACT
ATTGCCGGTTTTGTCAATCTGGCGATGATGGCTACAGCTGCGGCGGCGTTCCACTTTTCT
GGTCATACTGGTGTTGCCGATCTTGATGAGGCTTATCTGACGCTGCAACCGCTGTTAAGC
CATGCTGCGGCAACGGTCTTTGGATTAAGCCTGGTTGCTGCCGGACTGTCCTCAACGGTG
GTGGGGACACTGGCGGGGCAGGTGGTGATGCAGGGCTTCATTCGCTTCCATATCCCGCTG
TGGGTGCGTCGTACAGTCACCATGTTGCCATCATTTATTGTCATTCTGATGGGATTAGAT
CCGACACGGATTCTGGTTATGAGTCAGGTACTGTTAAGTTTTGGCATCGCCCTGGCGCTG
GTTCCACTGCTGATTTTCACCAGTGACAGCAAGTTGATGGGCGATCTGGTGAACAGCAAA
CGCGTAAAACAGACAGGCTGGGTGATTGTAGTGCTGGTCGTGGCGCTGAATATCTGGTTG
TTGGTGGGGACGGCGCTGGGATTGTAGTTGAATGAGCGTCGCATCTGGCACTATTGGCGG
ATGCGGCGTAAACGCCTTATCCGCCTTACGCGTTAAAGAGCCGGTTTGTAGGCCTGATAA
GACGCACTAGCGTCGCATCAGGCCTTGTGCTCCATTGGCAAATGTGTTTAATGGCGGTGC
CCATGTCCGCGGCCTTTTCCGCGATGATCGTCACGATCGCGCCAGCCTTCACGATAGCCA
CGCTCATACGCTTTACGCTTATCCCAGCCACGATGATAGCCATTATCATGACGCCACCAG
CGGTTTTTGCGCCACTCATAATTGCGATGCCAGTAATCACGATCTCGCCAGTGACCACCG
TCCCAGTAATTACCGTAATGATCGCGATCGCCAATTTGTAATTTGATTGATGGCAGTAGG
GTGATTTCACCTGCGTTTGCTGCAAGCGGGGTAAATGCCATCAGGGCGGCCGCCAGAAAC
AGTGACCTGAACATTGTTATTCTCCTTCACGATCGAAGCCGTCAGCGGCCTGTTAACGCA
ATATTACGGGGAGGTAAAGCCCCGTATCATCGCCATAACTCTTAAATCATAAAGGAGAGC
ATTTTTTGTTAAACGTTATCGTGGGGTGGCTGTTGCTTCGGACGATTGACCATCATCATC
GGCTTACCTGCTAATAACAGCCATGCCGGAAGCATGACGATACAGAGCAGCGGTAGCAAT
GTGGTATTGGGTACAACGACTGCCGCCATAAAAAGACTTAACCAGCCATCGCGTGTTACC
ACCAGCACGATGCCGAGAATAGCGCAGGAAACGGTTATTGCCGCTGGAACGGCGGGGACG
TGCTCATGCAGCATCAACCCTAATGCCACGCCGACGAACACTGCCGGGAAAATTCGTCCA
CCGCGAAAGCCACTGGCGGCAGCAACGACCAGGGCGGTAAGTTTAATCACCGCCAGTAAA
AAGTAATCGCTGGTGCTGAAAGCCTGATTTGCCACCATCTGCTGCATCTCATCCAGTCCT
TTAAACAGCGAAACTGGTCCACCAATAACCCCCAGAATACCGAGAATAAATCCGCCAATA
CCCAGCACGAGCACCGGATTTTTCATTTGATGCATCATCGCGTGCAACCGTGGTAAGCAC
CATACGGCGCCCATCCCTGCTGCGATGGCAATCGCCGCGACAATTGCACCGCTGAGAATA
TCGGTCATTTCCATCTGTCCGTAATGCGCAATGGGCAGTGAAAAATGGGGATGGAAAAAT
AATCCGGTAGTAAGTGCACCAGCTGCTGCCGCCATTAACGGCGCAAAAAGACGATCCCAT
AGCGGAACTTCACTACTGCCATTTAAGGTTTGCGAAAATATCAACGCCGCCGCAACAGGT
GTACCAAACAGCGCGCCGATGGTTCCGGCAGAGGCTAAAATAGTCCACTCCATTCGGTTG
ACGCGCGGTAACAGACGAGCGCCAATGGCAACCGCAAGGGCGATATTGACGGTCATGATC
GGATGTTCCGGCCCCAGGCTGACGCCGCCAGCAAGACCGAGAATTAATGCTACGATAAGT
CCTGGTAGCGCAGAGGGCGGAACCGGTGCGCCGATCAGCGGTTCACAGGCGGGGTCTGGT
CCGGCATGACCCTGGCTGAAACGGATAACCAACCCCACTGCAATACCCGTTAACGTTAAT
ACACCGATGATCCAGAGAGGTGAATCCTGGGCTATCCCCAGAGTTCCCGGCAGTCGTTGC
CAGAGCAAATTCTGTAATGCCGAGGCGATTTTCATCACCACAATCAGAATAAGACTGGAC
GCAATCCCAATTGCCACGGCGGGGAGCGATAATAACAACATGGTTCTGGCTCGCGGATGG
AGCATGTTCTATTCCTTATGCGGGGTCAGATACTTAGTTTGCCCAGCTTGCAAAAAGGCA
TCGCTGCAATTGGTGCTGAAACGATAAAGTAATTGTGTGACCCAGATCGATATTTACAGG
GAGCCTGCCTTTCCGGCGTTGTTGTTATGCCCCCAGGTATTTACAGTGTGAGAAAGAATT
ATTTTGACTTTAGCGGAGCAGTTGAAGAATGACAAAGTATGCATTAGTCGGTGATGTGGG
CGGCACCAACGCACGTCTTGCTCTGTGTGATATTGCCAGTGGTGAAATCTCTCAGGCTAA
GACCTATTCAGGGCTTGATTACCCCAGCCTCGAAGCGGTCATTCGCGTTTATCTTGAAGA
ACATAAGGTCGAGGTGAAAGACGGCTGTATTGCCATCGCTTGCCCGATTACCGGAGACTG
GGTGGCAATGACCAACCATACCTGGGCGTTCTCAATTGCCGAAATGAAAAAGAATCTCGG
TTTTAGCCATCTGGAAATTATTAACGATTTTACCGCTGTATCGATGGCGATTCCGATGCT
GAAAAAAGAGCATCTGATTCAGTTTGGTGGCGCAGAACCGGTAGAAGGTAAACCTATTGC
GGTTTACGGTGCCGGAACGGGGCTTGGGGTTGCGCATCTGGTCCATGTCGATAAGCGTTG
GGTAAGCTTGCCGGGCGAAGGCGGTCACGTTGATTTTGCGCCGAATAGTGAAGAAGAGGC
CATTATCCTCGAAATATTGCGTGCGGAAATTGGCCATGTTTCGGCGGAACGCGTGCTTTC
TGGCCCTGGGCTGGTGAATTTGTATCGCGCAATTGTGAAAGCTGACAACCGCCTGCCAGA
AAATCTCAAGCCAAAAGATATTACCGAACGCGCGCTGGCTGACAGCTGCACCGATTGCCG
CCGTGCGTTGTCGCTGTTTTGCGTCATTATGGGCCGTTTTGGCGGCAATCTGGCGCTCAA
TCTCGGGACATTTGGGGGCGTGTTTATTGCGGGCGGTATCGTGCCGCGCTTCCTTGAGTT
CTTCAAAGCCTCTGGTTTCCGTGCCGCATTTGAAGATAAAGGGCGCTTTAAAGAATATGT
CCATGATATTCCGGTGTATCTCATCGTCCATGACAATCCGGGTCTTCTCGGTTCCGGTGC
ACATTTACGCCAGACCTTAGGTCACATTCTGTAAATCCTTCCTGTTATATCGGGAGGTAA
CTCTCCCGATAATCTTTTAAATCATACAGTTAATTCAATTTTTCTTTGTGTCCCCTCACA
AGGCCGACCTGCGTCACACTTCCGTACAGCGGGATTAATTCTCCAGTAAATGCATTATTT
GTCTGGTAACGGCGATTTGTTTTGCACGTTCATAATTTCACTCGTCAACTATCACTGAAC
GAGGAATTAACGATGAGTAAGAAACTGATTGCATTATGTGCCTGCCCAATGGGCCTGGCT
CACACTTTTATGGCCGCTCAGGCGCTGGAAGAAGCGGCGGTAGAAGCCGGTTATGAAGTG
AAAATTGAAACCCAGGGCGCGGACGGTATCCAGAATCGCCTGACGGCGCAGGATATCGCC
GAAGCGACCATCATCATCCACTCCGTGGCAGTTACCCCGGAAGATAACGAACGTTTCGAA
TCACGCGACGTTTATGAAATCACTTTGCAGGACGCAATTAAAAACGCTGCGGGCATCATC
AAAGAAATCGAAGAGATGATTGCCTCTGAACAACAGTAATATTCGACAGGGATAATTGTT
ATGGCCATTAAAAAACGCAGTGCAACCGTTGTGCCTGGCGCATCCGGTGCGGCAGCGGCA
GTTAAGAATCCGCAGGCCTCTAAAAGCAGCTTCTGGGGTGAACTCCCGCAGCATGTGATG
TCAGGGATTTCACGCATGGTGCCGACCTTAATTATGGGCGGTGTGATCCTCGCTTTCAGC
CAGCTGATTGCTTATAGCTGGCTTAAAATTACTGCTGATATCGGCATCATGGATGCTCTT
AATAGCGGGAAATTCTCCGGTTTCGACCTCTCCTTACTGAAATTTGCCTGGTTGTCGCAG
TCCTTCGGCGGCGTGTTGTTTGGTTTTGCCATTCCGATGTTTGCTGCTTTTGTGGCGAAC
TCTATCGGTGGCAAACTGGCGTTTCCGGCTGGTTTTATCGGCGGCTTGATGTCTACCCAG
CCGACGCAACTGCTGAACTTCGATCCCAGCACTATGCAATGGGCGACCTCTTCGCCGGTG
CCGTCCACCTTCATTGGTGCGCTGATTATTTCTATCGTTGCCGGTTACCTTGTGAAATGG
ATGAACCAGAAAATCCAGTTACCGGATTTCCTGTTAGCGTTCAAAACCACATTTTTGCTC
CCGATTCTTTCCGCCATTTTTGTCATGCTGGCGATGTACTACGTGATCACCCCCTTTGGC
GGCTGGATCAACGGTGGTATCCGTACCGTGCTGACTGCCGCAGGTGAGAAGGGCGCGCTA
ATGTATGCGATGGGGATCGCCGCGGCGACAGCAATCGACCTTGGTGGCCCGATCAACAAA
GCCGCAGGTTTCGTTGCCTTCAGCTTTACCACTGACCACGTATTACCGGTCACCGCACGT
TCTATCGCAATCGTTATTCCGCCGATTGGTCTGGGGCTGGCGACCATTATCGACCGTCGT
TTAACCGGCAAACGCCTGTTCAACGCTCAACTTTATCCGCAGGGTAAGACCGCCATGTTC
CTGGCGTTTATGGGGATTAGTGAGGGTGCGATTCCGTTTGCGCTGGAAAGCCCCATCACC
GCCATTCCGTCGTATATGGTCGGCGCGATTGTCGGCTCAACCGCCGCTGTCTGGCTGGGC
GCAGTGCAATGGTTCCCGGAATCCGCTATCTGGGCATGGCCGCTGGTCACTAACCTCGGC
GTCTACATGGCGGGGATCGCGCTGGGGGCAGTCATTACTGCGCTGATGGTGGTGTTCCTG
CGTCTGATGATGTTCCGTAAAGGCAAATTGTTAATCGATAGCCTGTAAGAAGGAAAATCC
AGATGACATTACTCGCTTCGCTGCGTGACTGGCTTAAGGCGCAACAACTGGATGCGGTGC
TTCTCTCCTCACGGCAGAACAAACAGCCGCATCTGGGGATCTCCACCGGATCAGGCTATG
TGCTGATTAGCCGTGAAAGTGCGCACATTCTGGTGGACTCGCGCTATTACGCGGATGTAG
AAGCCCGCACGCAAGGTTACCAGCTGCATTTGCTTGACGCGACGCACACGCTTACAACCA
TCGCCAGGCAAATCATTGCCGATGAGCAGTTGCAAACGCTCGGTTTTGAAGGCCAGCAGG
TGAGTTGGGAAACCGCGCACCGCTGGCAGTCTGAACTCAATGCGAAACTGGTTAGCGCCA
CGCCGGATGTGCTGCGGCAAATCAAAACGCCAGAGGAGGTGGAGAAAATCCGCCTTGCCT
GTGGGATTGCCGATCGCGGTGCAGAGCATATTCGCCGCTTTATTCAGGCGGGGATGAGCG
AGCGCGAGATAGCCGCTGAACTGGAGTGGTTTATGCGTCAGCCAGGCGCGGAAAAAGCCT
CTTTTGACACCATTGTCGCCAGTGGCTGGCGTGGGGCGCTGCCGCACGGCAAAGCCAGCG
ACAAGATTGTTGCAGCGGGCGAGTTTGTCACTCTCGATTTCGGTGCGCTGTATCAGGGCT
ACTGCTCTGATATGACGCGCACCTTGCTGGTGAATGGCGAAGGGGTGAGCGCCGAATCTC
ATCCGCTGTTTAACGTCTATCAGATTGTTTTGCAGGCACAGCTCGCAGCAATCTCTGCAA
TTCGCCCCGGCGTGCGCTGCCAGCAGGTTGACGACGCCGCGCGCCGGGTCATTACAGAAG
CCGGTTATGGCGACTATTTCGGTCATAACACCGGTCATGCTATCGGCATTGAAGTACACG
AAGATCCGCGCTTTTCACCGCGGGACACCACGACGCTACAGCCAGGCATGTTACTGACCG
TGGAGCCGGGGATTTATTTGCCAGGGCAAGGGGGCGTGCGCATCGAGGATGTTGTGCTGG
TCACCCCGCAAGGCGCAGAAGTGCTCTACGCCATGCCGAAAACAGTGTTGCTCACGGGAG
AGGCATAATGGATTTATCGCTATTGAAAGCGTTGAGCGAGGCAGATGCGATCGCCTCCTC
GGAACAGGAAGTGCGGCAGATCCTGCTGGAAGAAGCGGATCGCCTGCAAAAAGAAGTGCG
ATTTGATGGGCTGGGATCGGTGCTGATCCGCCTCAATGAATCGACAGGTCCGAAAGCGAT
GATCTGTGCGCATATGGACGAAGTTGGATTTATGGTGCGCAGTATCTCCCGCGAAGGCGC
AATTGATGTGCTGCCGGTTGGCAACGTGCGCATGGCTGCCCGCCAGCTGCAGCCGGTGCG
CATCACCACCCGTGAAGAGTGCAAAATTCCAGGCCTGCTTGACGGCGACCGGCAGGGGAA
TGACGTCAGCGCCATGCGCGTGGATATTGGCGCGCGCTCGTATGACGAAGTGATGCAGGC
GGGAATTCGTCCAGGCGATCGCGTCACGTTCGATACCACTTTTCAGGTTCTCCCCCACCA
GCGAGTGATGGGGAAAGCCTTTGATGACCGCCTTGGTTGCTATCTGCTGGTGACGTTACT
ATGTGAGCTGCACGACGCCGAACTGCCTGCGGAAGTGTGGCTGGTGGCAAGTTCCAGCGA
AGAGGTGGGATTACGCGGCGGGCAAACTGCCACCCGCGCGGTGTCGCCGGACGTCGCCAT
TGTGCTTGATACCGCCTGCTGGGCGAAAAACTTTGATTATGGCGCGGCTAACCATCGCCA
GATTGGTAACGGCCCGATGCTGGTGTTAAGCGACAAGTCGCTGATTGCGCCGCCAAAACT
TACCGCCTGGGTCGAAACCGTGGCGGCAGAAATTGGCGTGCCGTTGCAGGCAGATATGTT
CAGCAACGGCGGCACGGACGGCGGGGCGGTGCACTTAACCGGCACCGGCGTGCCCACAGT
GGTGATGGGGCCAGCAACCCGCCATGGACATTGCGCCGCATCGATTGCCGATTGCCGCGA
CATTTTGCAGATGCAGCAACTTTTATCTGCCCTGATTCAACGTCTTACGCGTGAGACGGT
TGTTCAACTGACGGATTTCAGATGATCTCCTGATTAACCCGGAGCGGTTATGCTAACGAT
TCAATTTCTCTGTCCTTTGCCTAACGGTCTTCATGCCCGTCCGGCGTGGGAACTTAAAGA
ACAGTGCAGCCAGTGGCAAAGCGAAATCACCTTCATCAACCATCGCCAGAACGCAAAGGC
CGATGCCAAAAGCTCGCTGGCGCTGATTGGCACCGGCACCTTATTTAATGACAGTTGCAG
CCTGAACATTAGCGGCAGCGATGAAGAGCAGGCGCGGCGCGTGCTGGAAGAGTACATCCA
GGTGTGCTTTATTGACAGCGACAGCGTTCAGCCAACGCAGGCAGAACTGACGGCGCATCC
GCTGCCGCGTTCATTAAGCCGCCTTAACCCGGATTTACTGTACGGCAATGTGCTGGCAAG
CGGCGTCGGCGTGGGTACGCTGACCCTGTTACAAAGCGACAGCCTCGACAGTTATCGGGC
AATCCCCGCCAGTGCGCAAGACTCCACCCGGCTGGAGCACAGCCTGGCAACGCTTGCCGA
GCAACTGAACCAGCAATTGCGTGAGCGTGACGGCGAAAGCAAAACTATCCTCAGCGCCCA
TTTGTCGCTGATTCAGGATGATGAGTTCGCGGGCAATATCCGTCGCCTGATGACAGAACA
GCATCAGGGGCTGGGGGCGGCGATCATCAGCAATATGGAGCAGGTTTGCGCCAAACTATC
TGCTTCTGCCAGCGATTATCTGCGCGAGCGGGTTAGCGACATTCGCGATATCAGCGAACA
GTTGCTGCATATCACCTGGCCGGAACTGAAGCCGCGCAACAATCTGGTGCTTGAAAAACC
GACCATTCTGGTGGCTGAAGATTTAACCCCAAGCCAGTTTTTGAGCCTTGATTTGAAAAA
TCTTGCGGGCATGATTCTGGAGAAAACCGGGCGCACCTCGCATACCCTGATTCTGGCCCG
CGCCTCGGCGATCCCGGTACTGAGCGGCCTGTCGCTGGATGCGATTGCCCGTTATGCCGG
GCAACCTGCAGTGCTTGACGCCCAGTGCGGCGTGCTGGCGATTAACCCGAATGACGCGGT
GAGCGGTTATTATCAGGTCGCGCAGACGCTGGCGGATAAACGCCAAAAACAACAGGCGCA
GGCTGCCGCGCAGCTGGCTTATTCCCGTGATAACAAGCGTATTGATATCGCGGCGAATAT
TGGCACCGCTCTGGAAGCGCCTGGCGCGTTTGCCAACGGCGCGGAAGGCGTCGGGCTGTT
CCGTACCGAAATGCTCTATATGGATCGCGACAGCGCGCCGGACGAGCAGGAGCAATTTGA
AGCCTACCAGCAGGTGCTACTGGCAGCGGGCGATAAGCCGATTATCTTCCGCACAATGGA
CATCGGAGGCGATAAAAGCATTCCTTATCTGAATATTCCCCAGGAAGAGAACCCGTTCCT
CGGCTATCGCGCGGTACGTATTTACCCGGAATTTGCTGGCCTGTTCCGCACTCAACTGCG
GGCCATTTTGCGCGCCGCCAGTTTCGGCAACGCCCAGTTGATGATCCCGATGGTCCACAG
CCTCGATCAGATCTTATGGGTGAAGGGCGAGATCCAAAAAGCGATCGTTGAGCTTAAGCG
CGATGGCCTGCGTCATGCAGAGACGATTACGCTGGGTATCATGGTGGAAGTGCCGTCGGT
GTGCTACATCATCGATCACTTCTGCGATGAGGTCGATTTCTTCAGTATCGGCTCCAACGA
TATGACCCAGTATCTTTATGCGGTCGATCGTAATAACCCGCGCGTATCGCCGCTATATAA
CCCGATTACGCCATCGTTCCTGCGCATGTTGCAGCAAATAGTTACCACTGCGCATCAGCG
GGGCAAATGGGTAGGCATTTGCGGTGAACTGGGAGGCGAAAGTCGTTACCTGCCGCTACT
GCTTGGGCTGGGCCTGGATGAGCTGAGTATGAGTAGCCCGCGCATTCCGGCGGTGAAAAG
CCAGCTTCGTCAACTGGATAGCGAGGCGTGTCGGGAACTGGCACGTCAGGCGTGTGAATG
TCGCAGCGCGCAGGAAATTGAAGCGTTACTCACCGCCTTTACGCCGGAAGAAGACGTTCG
CCCGCTGCTGGCGCTGGAGAATATCTTCGTTGATCAGGCCTTTAGCAATAAAGAGCAGGC
GATCCAGTTCCTGTGCGGTAACCTCGGCGTTAACGGGCGCACTGAACATCCGTTCGAGCT
GGAAGAGGATGTCTGGCAGCGGGAAGAGATTGTCACCACTGGCGTTGGTTTTGGCGTGGC
GATCCCGCACACCAAATCGCAGTGGATCCGTCATTCCAGTATCAGCATTGCCCGGCTGGT
GAAACCGGTTGACTGGCAGTCAGAAATGGGCGAAGTCGAACTGGTGATCATGCTGACGCT
GGGCGCTAACGAAGGGATGAATCATGTGAAAGTCTTCTCGCAGCTGGCGCGTAAACTGGT
GAATAAAAACTTCCGCCAGTCGTTGTTTGCCGCGCAAGATGCACAAAGTATCCTGACGCT
GCTGGAAACAGAATTAACCTTCTGACGTTAGCCCTGAAAACGGGCGCTGTACTCTCCCGG
CGTCAGACCAAACTGACGCCGGAAAACGCGACAAAAATAGTCGCTATCCGGAAAACCGCA
ACGCTGTGCCACTTCATGAATTGACAGATGATATTTCTGCAAAATCATCCTCGCCTTCGC
CATTCGCACCCAACGCACATACTCGATAAAACGCATCGTTCCATGCTGAGCAAACAGTTT
TGACAGATGATTGGGCGTGATATTAAAAAACTGCGCCACGCTCTCGCGGGTGAGCGGCTG
GGCATAATTATCCTGAACCCAGTTACAAATGCTGTGATAGAGAAAATCGCCGCGCGGCTG
CGAATTGCCCGGCGGCATATTCACCACGTTACGGCAAAGATGCAGCAAACTTAACACCAG
CGGCTGAATGATATTTTGCTCCAGCGGCGAACGGCTAAGATGGGTGAGGGCGGTAAGCAT
CGCTTCACCTTCACCGCGTTGCAGGCTGGGAAGCTGGATCTGGCGAGCAGGATGCAACAA
CGACGTGGTGCGGCTATCGTAAAACGATAACCCAAGCCAGGTCGGAGCGAACACCTGGCT
TAACAGCATCACCGGTTTGTTGTTGACCGGTAAATTAGCCGCGCGCGCCGGAATAAACAG
CATTTCTCCTTCCACCAAACGTTGCTGCTTTGCTTCCAGCAGATTGCCGTATTCGCCGCG
CAGCACGATATCCAGACGGGGAAAATCAATACATAAACTGCCCACCGGCAACGAGGCAGG
CTGGCTGGCAAAACAGACGCGCCCCAGTAGTTGCGGGTTAAGCACCAGGCCGCTGAACAG
ATCGGCGAAAAATTGTTGATCGGCGGGCAAGCCTGGTGCTTTCATGAAAGTTCCCGATTA
AAGATGCATTAACTGGCGAAATTCTTTTACTTTGCTGCGGCTGACTGGCACTTCAAAATC
CAGATCTTTCAGCCGCAGAATATAGGTGTTATTAAACCACGGTTCGATTTCGCGGATTTT
GTTCAGATTGACACAAAATGAGCGATGGCAGCGGAAAAAATGCGACGGCGGCAGTTTGCT
GCAAAATTCGGTAATGTTCATCGGCATTACGTAGGATTCACGCCGCGTATAGACAAAGGT
CATTTTCTCGTGCGCTTCGGCGTAATAGATATCGTTAATTGGCGTGACGATTATTCGCTC
ATCTTTCACCAGATTAATGGTGTCATTCTCACGCGTTACCGTCGCGGCAGGCGTGCTGCT
GGTCTGCTGTTGCTGCCAGGCCGCTTCCAGTTTTTGCAGCATCCCGGTAATGCGAGACTC
CTGATACGGTTTGAGAATGTAGTCAAACGCCTCAAGTTCAAACGCTTCTACCGCATGTTC
TTTCCACGCGGTGATGAACACAATAAACGGTTTATGGGCGAACTGGCTGATGTTTTGCGC
CAGCAACACACCATCCAGCGACGGAATATTGATATCCAGAAAAATGGCGTCGACGCGGTT
ATGCTGCAAAAACTTCAACACGTCCAGACCGTCGTCAAAGGTGCCGACAATCTCCATCTG
GCTGTGCTCTTTAATTAGCCAGCTCAGTTCCTGTTGTGCCAGGAATTCGTCTTCAACAAT
GATGACTTTCACAATATCACTCCGGCTCAAAGCAATAACGTAGCCTGTGAGGCGACTGGG
GTGCGTTGGTTAGGAATGTAAAACGCAATTTCCGTTCCTGGTTCCAGGCGGCGGATATGC
AGCCCCTCGCCATACAATAACTTCACGCGATGATGAACATTCAGCAGGCCAATTTTATTG
CCCGGCATTTCATTCGCTTCGACCCGCTCAATCACCTTTGGATCGATGCCGTGCCCGGTA
TCCCGCACCGCAATGCGTACCCGATTGCCGCACTCTGCAACGCTGATGGTGACAACGCCT
TTACCTTTGCAAGGCTGGATACCGTGGACAATGGCATTCTCCACCAACGGCTGGATCAGC
AGGCTGGGAATGCAGCAATTCACCTCTTCATCAATATCATAGATAACCGTCAGCTTGTCG
CCAAAGCGGGCCTGCTCAATGGCAATATAGTCTTTAATTTGATACAGCTCTTTTTTGATA
TCGATTTGCTCATCGTCTTTTAATTCAATGTTATAGCGCAGATAACGCGACAGATTAAAG
ATCAGCTGGCGAGCGGTATCCGGATTCAGACGGATCGACGATGAAATAGCGTTCAAAGCG
TTAAACAGGAAATGGGGATTAATTTTGCTTTGCAGGGCGCGAAGCTCTGCCTTATTTGCC
ATTTCACGTAGCTGCTCGGCGCGTGAAACCTCCAGTTGCGTGGAGATGATTTGCGACAGA
CCAACCGCCATTTCCTGTAATGACGAGGTTATCTGATGCGCGTGGCAGTAGTAAATTTTC
AGCGTTCCGGTCACAACGCCTTTCTCCCACAATGGGATCACCAGCATGGAATGAATCTCT
GGTGTGCGGTGGGCTTCATCATTGTTTTTAATGATGATTTTTCCGTAATTCATCGCCTGA
CGGGTAGTCGGGCTAATGAAGTCATCGCCATTCTGATAGTTATGTTCACCCACGCCAACA
TAGGCCAGCACATGATCGGTATTGGTAATCGCCACCGCATCGGCGTGAATGTCATCGCGA
ATAATTTCACAAACTTTGCGTAATGACTCGCTATTGACATGGCGAAACAGAGGTAGCGTT
TTGTTGGCGATATCCAGCGCCAACTTGGCCTGCCGCGCGGCGCTGGCCTCTTTTTCGCCC
TCAACGCTTTGCACCAGAAGCACAATAAAGCCGATACAGACGCTGCCGAGGATCATTGGA
ATCCCGATTTTAGAGACGATATCGATCCCCAACGCGGTAGTTGGTGCCCAGACAATCACC
AGAATCATGGTCAACGTTTCACACAACATGCCGCCGAGAATACCGACGCGCCAGCGCTGT
GCTTTGGGGATTTTCAGGTTGATCCAGCCCGATATACAACCAGCCAGAATGCTGGTGATA
AAGCAGGGGATCGCCGTCACGCCGCCGATATCAATTAAATAACGATGAATACCCGCAATC
ACGCCGGTAATGATGCCCACCCACGGGCCAAACAGAATCCCGCCGGACATCACCGCGATA
ATACGTACGTTCACCAGCGAGCCTTCTACGGGAACGCCGGACCAGGTGCTGAACAGGGCG
AACAGCGAGAAAATGGCGGTAACGGCGAGCAACTCTTTCGGTGAGTGTGCCGACTTGTGC
AACAGTTCGCGAAACAGGCGGATACGGATGAGAAAGAACAGGCAGATAAGCATTAACGCT
GCCCGATCGAAGACCGCCAGCAGCATGTTGAATATTTCGTGCACGGGTGACTCTGAATAA
GGATTAAACCTCTATGATAGGTAACCTGAAGGCTGATGACCAGCAGGCCGTTTTTGAGGA
AAAACCACAATTTTAAAAGGGGATTGATAGATAAATGGTGTATTAGCAATGCATCTCTTG
ATAATGCACTTCTGGTTAGTAAATTTATTGAAATTATTATGTTAATAAAATGAGTGGTAA
TTTTCTTGTTAGCGCAGATAAATTTCCTGTTTTTAAAGCAGAGTTCCTCATTTAACGTCA
TTAATAAAAATGTTCTAAAACGCTGGACAGACAGAAATTAATCAGGCTATTTTCAAAACA
GCCACCATCGTGGCAGCGTCGCTCGGACGGTCCGGGCGCTAACGTTAATCTGAGGAAATT
ATGGCTGACACTCGCCCTGAACGTCGCTTTACGCGCATTGATCGTCTCCCGCCCTATGTT
TTTAACATTACCGCTGAACTGAAAATGGCTGCGCGTCGGCGCGGCGAAGATATTATCGAT
TTCAGTATGGGTAACCCGGACGGTGCGACTCCGCCGCATATCGTCGAAAAATTATGTACT
GTGGCCCAGCGCCCGGACACGCATGGTTACTCCACTTCACGCGGTATTCCGCGGCTACGT
CGCGCCATTTCCCGCTGGTATCAGGATCGCTACGACGTTGAAATCGACCCGGAATCAGAA
GCCATCGTCACTATTGGTTCGAAAGAGGGCCTGGCGCATCTGATGCTGGCGACACTGGAT
CACGGTGACACAGTGCTGGTGCCGAATCCAAGTTACCCCATTCATATTTACGGCGCGGTG
ATTGCCGGGGCTCAGGTACGCTCAGTGCCGCTGGTGGAAGGTGTCGATTTCTTCAACGAA
CTGGAGCGCGCCATTCGTGAAAGTTATCCGAAACCGAAGATGATGATCCTCGGCTTCCCG
TCGAACCCAACCGCGCAATGCGTGGAACTGGAGTTCTTCGAAAAGGTTGTGGCGCTGGCG
AAACGCTACGATGTGCTGGTGGTCCATGACCTGGCCTATGCCGATATCGTCTACGATGGC
TGGAAAGCGCCGTCAATCATGCAGGTGCCGGGTGCACGCGATGTGGCGGTCGAGTTCTTT
ACGCTGTCGAAAAGCTACAACATGGCGGGCTGGCGTATCGGCTTTATGGTTGGCAACAAA
ACGCTGGTCAGCGCCCTGGCACGTATTAAAAGCTATCACGATTACGGCACCTTTACGCCG
TTGCAGGTGGCGGCGATTGCGGCACTCGAGGGCGATCAACAGTGCGTGCGCGACATTGCC
GAACAGTACAAACGCCGCCGTGATGTATTGGTTAAAGGGCTGCATGAAGCGGGCTGGATG
GTCGAAATGCCGAAGGCTTCGATGTATGTCTGGGCGAAAATCCCTGAACCTTACGCTGCC
ATGGGCTCGCTGGAGTTTGCCAAGAAATTACTTAACGAAGCGAAGGTTTGTGTCTCGCCG
GGGATCGGCTTTGGCGACTATGGTGATACGCATGTGCGCTTTGCACTGATTGAAAACCGC
GACCGTATTCGTCAGGCGATTCGTGGGATTAAAGCGATGTTCCGTGCCGACGGTTTACTA
CCCGCCAGCAGCAAACATATTCACGAAAACGCGGAATAAACACCGACCTCAGAAATGCAA
ACAGGAGCCTGATGGCTCCTGTTTTTCATTGCACAGTTTGCTTTTAGATCATCAGGGCAA
AAGTACCGGCCCAAACGATGACCATAAAAGAAATGCCCATAAAGAAATATTTCACTTTAC
ATCTCTCCGCGTAATTGCTGTTACGCCTGAATGACTTCATTACACCTGATACAGTGAGTT
GACACCGGGCAAAACGACCTTAAAAGTCCTGTATTTTACCGTGGGCATCACCCCAGAATT
CTGAGCTAAACTGCTCGAGACGGCGCTAATGTACGCCTAAAACTGAAACGAGACAAGAGG
CATTTTCTTATTTACTTTTAGTAACTTACAGGTGTCTCATATCGGCGACAGTTTAATTTC
TGACGGTAATAATTAGATATTCAGCGAAGGAAAAAACCTTAAGAAAAAAGCCATAAAAAC
CATGAGGTTATTATGGCTTATGTGAGGAGGTAAAGAGTCAGAGCAGTTTGTTAAATGTAT
AACGACGATTCTCCCACCGGGCGCGTTTTAAAGCGACGGTGGATCCAGAGGTACTGCTCC
GGTGCGCGCATGATCTCTTTCTCGATAATCTTGTTCATATAGGCAGCGGCTTGATTTTCA
TCTGTCGGGTAGCCTTCCATCTCTGGGGTGATGAACAAACGATATCCGCTGTAATCCGCT
TTTCTTACCATCGTTACGGTCAACATGGCTGCGCCAGAGAGACGGGAGAGAACATAGGTG
CCATTGGTTGTGGCGACATTTTCTACCGCAAAGAACGGCGCGAAGGAGCTGCCTTTACGA
CCATAATCCTGATCGGGAGCAAACCATACCGCTTCACCTTTCTTCAGTGCACTGACAATG
CCGCGCAGATTATTTCTGCCGATCATCGCTTTGTTAGAGCGCATGCGACCACGGGTCTGC
ACCCATTCCATCAGCTGATTATTATGTGGACGATAGGTAGCCATCATTGGCTGACAAAGT
CCCATCACGCGGCCGCCCAGTTCCAGCGACATAAAATGGACGCCGACAACCATTACGCCG
CGATTTTGCATTTGTGCGCGTTTAAGGTTATCCAGCCCTTCAACATCAAACCATTTACGT
ACGCGACTGTCGGGCCAGAACCACGCCATGCCGGTTTCTACCAGCGCCATGCCGAGTGAA
CGAAAGTTTTCGGCAATCATCTTCTCGCGTTCTTCCGCAGAATGCTGCGGGAAGCAAAGT
TCCAGGTTTTTACGGGCGATAGATTCACGCCGTTTCAGGAATGGTCGCGCCATTGCGCCA
ATACGCGTGCCGAGAAAGCAGAGAACAGGATAAGGAAGCTGTACCCAAAGCCAGAGTACA
CCAAGCCCAAACCATGTGAGCCAGTAGCGAGGATGCAGAAACTCGCGGGAAAATTTGCAT
TGTGGAAACATAGTTACCTTCTGTAGATACGAATTGTTGTATCGCAGAAGATTCCATGTC
GACAGCGGTACACTCAATTGGTTGGGCCATCATGTACGACAATGGTTCCTGTAAAGAGTG
TAAAGACTAGTCAGGACATAACCACGAGGAGCATGAATGCGGTGGCTCTACTTTATCACT
GGCTGACTGCTTTCAGCTACTGATTATTAATCGTGCAAAGTAAAAAATTTTCCGCATGCA
ATAGTGTTGCATTTAACATGCTGTTTTCATTGATGCTTAGCAAAAATTGCCAGAGGGTAA
GGATTGTCTTACTATTAAAGTGACTGAAGTTACAGGTTTTTTAGCGCGGCAGGAGGTTGA
GCTATGATTTATTTATGGATGTTTCTCGCCCTGTGTATTGTCTGCGTAAGCGGATACATC
GGTCAGGTACTGAACGTGGTATCGGCGGTCTCTTCTTTCTTCGGCATGGTGATCCTCGCT
GCACTCATTTATTACTTCACCATGTGGTTAACTGGCGGTAATGAACTGGTGACGGGGATA
TTTATGTTTCTTGCCCCGGCTTGTGGCTTGATGATTCGCTTTATGGTGGGGTATGGCAGG
CGATAGTGGGTCAGGATGGCTCATTTGGGCAGGTGTTCACATCAGCATCAGACATGATTG
TTCACCTGCCAGGTGACAGACGCTATCGCACAGGATGAATAAGATAATTCGCCTTTGTCG
GAAAAGGGGGCGTGGTTTCTTCTGTGAGGTTTAATGGTGGCGCATCTTCTCTCATCTTAA
ACAAAATTGCCTGTGATGGCTGAATTTTTGTAGAGTGAGTTGTCGTCATCGCTGATGTTT
TTTCCGTCTCTTTATAGCTCCTCTCACTTCCACCACCAGAAATGGAAAATGCAAAAACAT
TGCATGCCATAATAGAGACCAATAAAAATAAGCTAAAAAGTATTAAGTTTACTTTCATAG
AAAGTTATCCTGAAAATGGTTCACTGAGAATGTACGATGTTATGGCTGTATTTACATATA
ATTAATCAATATTTACATCGATATAATAAATGACATCTCTTTGTGGTACATAAGAATAGT
TCTCTGTGACAGGAAGCATATTCCTACAATTGTAAGACTAAAATACTTCTTGCGATAATA
ACTACAACTGTAAGATAACCCTTTCAAAATGACCGTTGCTCTCTGATTTCTCATTTCATG
CTCACCCAATATGATGGCGGCGTTTTCTAAAACTGTTAAAGAATGAGGTAAGTATGAAAC
GTTTAATTATGGCCACGATGGTCACAGCAATTCTGGCATCTTCAACTGTATGGGCTGCTG
ATAATGCTCCGGTAGCGGCACAACAGCAAACTCAGCAAGTTCAGCAAACCCAGAAAACGG
CAGCGGCAGCAGAGCGTATCTCTGAACAAGGTTTATATGCGATGCGTGACGTGCAGGTAG
CGCGCCTGGCTCTGTTTCATGGCGATCCGGAAAAGGCAAAAGAACTGACCAATGAAGCTT
CCGCTTTGTTGTCAGATGACAGTACCGAATGGGCAAAGTTCGCTAAGCCAGGTAAAAAGA
CCAATCTCAATGATGACCAATATATTGTCATTAATGCATCTGTCGGAATTTCTGAGAGTT
ATGTAGCAACACCCGAAAAAGAAGCCGCGATAAAAATTGCCAATGAAAAAATGGCGAAAG
GGGATAAAAAGGGCGCAATGGAAGAGCTTCGCCTGGCCGGTGTTGGCGTAATGGAAAACC
AATATCTGATGCCGCTTAAACAGACTCGTAATGCACTTGCTGATGCGCAGAAACTGCTTG
ATAAAAAGCAATACTACGAGGCAAACCTGGCGCTTAAAGGTGCGGAAGATGGAATCATCG
TCGATAGCGAAGCACTGTTTGTGAACTAATGCTGACAGGCAGTATATTGAGGTAAAGGAT
TTAACTCCCTCCAGCCGACAATTTTTTATGACCACAATACGACAGGTTGTGGTCATAAAA
TTATTTGGCGCTCGCGGTTCTATAAACTCGCATTTTATATTCCTCAAAGTAAACCGCAAT
AATCCCGTGTCATCACAAATCATTTAATATGTTATATTTTATGGTACGCTTTAAAAAGCG
TAATCATACCCTTACTTGTAAATCACCGGCGCTTCTTACAGTTGTAAGAATAACATCACA
AATGTCGCGACTCTCTCTGATTACCACGAACCAATATTTATCATATTCTTCTTTTCGTCC
TCACTACTTACCATGCAGAAAGGAATTGGAAGTAGCGATGAAATGATTTTCAGTACTTGA
TACAGGAATGTGAAAATATCGAGTGCAGCTACGACGATATTTTGCGGATTATTTATAGAG
GCGTTATGCCTTAAATAAACGCTAAATTAACACATATTTAATTAACTAATAGGTATTGCT
ATGTCAACTCCACTTCAAGGAATTAAAGTTCTCGATTTCACCGGTGTGCAATCTGGCCCA
TCTTGTACTCAAATGCTGGCCTGGTTTGGCGCTGACGTCATTAAAATTGAACGCCCCGGC
GTTGGTGACGTAACGCGTCACCAGCTGCGAGATATTCCTGATATCGATGCGCTTTACTTC
ACCATGCTTAACAGTAACAAACGTTCTATTGAATTAAATACCAAAACAGCGGAAGGCAAA
GAGGTAATGGAAAAGCTGATCCGCGAAGCTGATATCTTAGTCGAGAACTTTCATCCAGGG
GCCATTGATCATATGGGCTTCACTTGGGAGCATATTCAAGAAATCAATCCACGTCTGATT
TTTGGTTCGATCAAAGGGTTTGATGAGTGTTCGCCTTATGTGAATGTAAAAGCCTATGAA
AACGTTGCTCAGGCAGCGGGTGGCGCGGCATCTACTACGGGTTTTTGGGACGGTCCGCCG
CTGGTAAGCGCTGCAGCGTTGGGTGACAGCAACACCGGAATGCATTTACTGATCGGTTTA
CTTGCTGCTTTGCTGCATCGAGAAAAAACGGGGCGTGGGCAACGAGTCACCATGTCAATG
CAGGATGCCGTATTGAACCTTTGCCGCGTGAAATTACGCGACCAGCAGCGTCTCGATAAA
TTGGGTTATCTGGAAGAATACCCGCAGTATCCGAATGGCACATTTGGTGATGCAGTTCCC
CGCGGTGGTAATGCGGGTGGTGGCGGTCAGCCTGGCTGGATCCTGAAATGTAAAGGCTGG
GAAACAGATCCTAACGCCTATATTTATTTCACTATTCAGGAGCAAAACTGGGAAAACACC
TGTAAAGCCATCGGCAAACCAGATTGGATTACCGATCCGGCATACAGTACAGCCCATGCC
CGACAGCCACATATTTTCGATATTTTTGCTGAAATCGAAAAATACACTGTCACTATTGAT
AAACATGAAGCGGTGGCCTATTTGACTCAGTTTGATATTCCTTGTGCACCGGTTTTAAGT
ATGAAAGAAATTTCACTTGATCCCTCTTTACGCCAAAGTGGCAGTGTTGTCGAAGTGGAA
CAACCGTTGCGTGGAAAATATCTGACAGTTGGTTGTCCAATGAAATTCTCTGCCTTTACG
CCAGATATTAAAGCTGCGCCGCTATTAGGTGAACATACCGCTGCTGTATTGCAGGAGCTG
GGTTATAGCGACGATGAAATTGCTGCAATGAAGCAAAACCACGCCATCTGATATTAACGG
GGGCTTCTGGCTCCCAATTTATAAAAATTTCGAGGTTATTAATCATGTCAGATCAACTTC
AAATGACAGATGGTATGCATATCATCGTTGAAGCATTAAAACAGAATAATATTGACACTA
TTTATGGTGTTGTAGGTATTCCTGTGACGGATATGGCGCGCCATGCCCAGGCGGAAGGCA
TTCGTTATATTGGTTTTCGTCATGAGCAGTCGGCAGGCTATGCCGCTGCGGCAAGCGGTT
TTCTTACCCAAAAACCAGGGATCTGCCTGACAGTGTCTGCGCCAGGATTCCTCAATGGTT
TGACCGCATTGGCCAACGCAACGGTAAATGGTTTTCCGATGATCATGATTAGCGGCTCCA
GCGACCGCGCGATCGTCGACCTACAGCAAGGTGATTATGAAGAGCTGGACCAAATGAATG
CGGCAAAACCGTATGCCAAAGCAGCATTTCGCGTTAATCAGCCGCAGGATCTTGGCATTG
CATTGGCACGCGCTATCCGGGTCTCGATATCGGGTCGCCCTGGCGGAGTTTATCTTGATT
TGCCAGCAAATGTCCTGGCCGCGACGATGGAAAAAGACGAAGCGTTAACCACGATTGTAA
AAGTTGAAAATCCGTCGCCAGCATTATTGCCATGCCCGAAGTCAGTCGCTAGCGCAATTT
CGCTTTTAGCAAAAGCTGAACGACCATTAGTTATCCTTGGCAAAGGCGCGGCGTATTCAC
AAGCTGATGAACAGCTTCGTGAATTTATTGAAAGTGCCCAGATTCCATTCCTGCCAATGT
CTATGGCGAAAGGGATCCTCGAAGATACGCATCCACTTTCTGCGGCAGCTGCGCGTTCGT
TTGCCCTGGCAAATGCTGACGTTGTCATGCTTGTTGGTGCACGACTGAATTGGTTACTGG
CACACGGTAAAAAAGGATGGGCGGCAGATACACAGTTTATTCAACTGGATATTGAACCGC
AGGAAATTGACAGCAACCGCCCCATTGCTGTGCCAGTCGTTGGTGATATTGCATCCAGTA
TGCAAGGTATGCTGGCAGAACTGAAACAAAACACATTTACGACTCCACTGGTATGGCGCG
ATATTTTAAATATCCACAAGCAGCAAAATGCACAAAAAATGCATGAAAAATTAAGTACAG
ATACCCAACCATTAAATTACTTTAATGCATTAAGTGCTGTGCGCGATGTATTGCGCGAGA
ACCAGGATATTTATTTAGTTAATGAAGGGGCAAATACCCTGGATAATGCACGAAATATTA
TTGATATGTATAAACCACGTCGTCGTCTGGATTGTGGTACCTGGGGTGTCATGGGCATCG
GTATGGGCTATGCCATCGGTGCTAGCGTGACTTCTGGTTCTCCGGTTGTCGCCATTGAAG
GTGATAGTGCTTTTGGTTTCAGTGGGATGGAAATTGAAACGATTTGTCGATATAACCTGC
CGGTAACGATCGTTATTTTTAATAATGGCGGCATCTACAGAGGAGACGGTGTTGATCTCA
GTGGCGCTGGTGCACCATCACCAACAGATCTGTTGCACCATGCAAGGTATGACAAATTAA
TGGATGCGTTTCGTGGCGTTGGCTATAACGTCACCACGACAGATGAACTTCGTCATGCTT
TAACCACCGGTATTCAGTCGCGCAAACCGACCATTATTAATATGGTCATCGACCCTGCAG
CAGGAACTGAAAGTGGCCATATTACCAAACTGAACCCAAAACAAGTCGCTGGTAATTAAA
TACTGACATCGTCTCCTCTTGCCAACTCATTATGCGATGGTGAGGGGACCCTTATCGGAA
ATACTATTATGCTAACATTTTTTATTGGCGATTTATTGCCTATTATCGTAATCATGCTGT
TGGGTTATTTTAGCGGCAGACGAGAAACATTTTCAGAAGATCAAGCTCGGGCATTTAATA
AACTGGTATTAAACTACGCGCTTCCTGCGGCTCTATTTGTATCTATTACCCGGGCAAACA
GGGAAATGATTTTTGCGGACACTCGTCTGACCCTTGTATCACTTGTGGTTATTGTCGGAT
GTTTCTTTTTCTCCTGGTTCGGTTGCTACAAATTTTTTAAACGTACTCATGCAGAAGCAG
CTGTATGTGCATTAATTGCAGGTTCACCTACCATTGGATTCCTGGGGTTTGCAGTTCTCG
ATCCTATTTATGGTGATTCCGTATCAACAGGTTTAGTGGTAGCAATTATTTCTATTATTG
TTAACGCAATTACTATTCCTATTGGTCTGTATTTGCTGAATCCTTCCTCAGGAGCGGATG
GTAAGAAGAATAGTAATCTGAGCGCATTAATTTCTGCGGCAAAGGAGCCAGTTGTATGGG
CACCTGTTCTGGCAACGATCCTGGTGTTGGTTGGGGTAAAAATTCCGGCAGCATGGAACC
CAACCTTTAATCTGATTGCGAAGGCTAACTCAGGGGTAGCGGTATTCGCTGCGGGGTTGA
CTCTGGCTGCACATAAATTCGAGTTCAGTGCCGAAATTGCTTATAACACCTTCCTGAAGC
TGATTCTGATGCCACTGGCGCTGCTTCTCGTTGGTATGGCATGTCATTTGAACAGCGAAC
ATTTGCAGATGATGGTACTGGCAGGCGCATTACCGCCGGCATTCTCCGGAATCATTATTG
CCAGCCGGTTTAATGTCTACACCCGCACTGGTACAGCGTCATTGGCTGTGAGCGTACTGG
GCTTTGTCGTCACGGCTCCCTTGTGGATTTATGTCAGTCGACTGGTTTCATAATTAATCA
TGTTATTGATTTTACATAAATGCCGAAGTGTCTTTTCACCTTCGGCTTTTTTCAAGGCAT
AAGCAAATGACAAATAATGAAAGCAAAGGGCCGTTTGAAGGCTTATTAGTTATCGATATG
ACACATGTCCTTAATGGACCTTTCGGAACTCAACTTCTTTGTAATATGGGCGCAAGGGTA
ATTAAAGTTGAGCCGCCGGGCCATGGTGATGATACCCGCACATTTGGTCCCTATGTGGAT
GGACAGTCACTCTATTACAGTTTTATTAATCATGGCAAAGAGAGTGTGGTTCTTGATTTA
AAGAATGATCACGATAAAAGTATATTTATAAATATGCTTAAACAAGCTGATGTATTAGCT
GAGAATTTTCGCCCAGGTACAATGGAAAAACTAGGGTTTTCATGGGAAAGGTTACAAGAA
ATCAACCCGCGCCTCATATATGCTTCATCGTCAGGTTTCGGACATACCGGTCCGCTAAAA
GATGCTCCTGCCTACGATACCATCATTCAGGCAATGAGCGGGATAATGATGGAAACAGGG
TACCCTGATGCTCCGCCAGTGCGTGTTGGTACCTCTCTTGCGGATCTATGCGGCGGTGTC
TATTTATTCAGCGGAATAGTGAGTGCACTTTATGGCCGCGAAAAGAGCCAGAGAGGGGCG
CATGTCGATATAGCGATGTTTGATGCTACTCTGAGTTTTCTGGAGCACGGGCTGATGGCA
TATATCGCGACTGGGAAGTCACCACAACGTTTGGGAAATCGCCACCCCTACATGGCACCT
TTTGATGTTTTCGATACTCAGGATAAGCCGATTACGATTTGTTGTGGTAATGACAAGCTT
TTCTCTGCGTTATGCCAGGCACTGGAGCTTACGGAACTGGTTAATGATCCCAGATTTAGC
AGCAATATTTTACGCGTACAAAACCAGGCTATTCTTAAACAATATATTGAGCGGACGTTA
AAAACGCAGGCAGCTGAAGTTTGGTTAGCCAAAATACATGAAGTTGGTGTGCCCGTCGCG
CCGTTATTAAGTGTGGCTGAGGCCATTAATTTGCCACAAACTCAGGCGAGAAATATGTTG
ATTGAAGCCGGAGGAATAATGATGCCAGGTAATCCGATAAAAATCAGCGGCTGCGCGGAC
CCGCATGTTATGCCGGGAGCGGCAATGCTCGACCAGCATGGGGAACAAATTCGCCAGGAG
TTCTCATCATAAATGTAAGATGTGCTGGTAAATAGCTCCCACATTTGAACATTGTGGGAG
CCACTATTTAGTTATTTTGTTGACAGAAAACAGCAATCTCCTGGTCCAGCTCTGCAATGT
GTTCTTTTACAGAGTTCAGCAACTGAAGAATTTCAGGCTTACTGTCATCTGAAACAGGTG
TTATTTCTAACTGATGGCTAATATTAATCAACTTTTGCAAATTCAGGATGTTAGCCGCAC
CGTGGATGCGATGAATACATTGATGGAAAGTTCTGTTATCGCCAGCTTCTAGTGCATGAA
ACGCAGCGGGTAGATCTTTATGCGTTTCATGCTGGAAAGTCATGAGAATCTCCTGCATCA
GTTGTAGATCGTTCGCCGTATTATTTTTCAGGGCTTCGATATCAAGGTGGCGATACTGAG
GTGCAATATGCGCAACCTGGTGTAACTGACTTAAATGTGTTTTCAGTACATCCAGGGTCA
ACGGTTTGAACAAACATAAGTTCATGCCGCAATTTAACCCTTTTTCACGTTCGTTAGCCT
GTGCGTTGGCTGTAAGCCCCCAGATGGGTAAGGAAGAATTTTGCTCACGGAGTTTGCGAG
TCAACTCAAAACCATCCATATTCGGCATATTAACGTCAGTAATAAGCAGATCATAATGTT
GCATACTGACTTTGTGTAGCGCTTGCACACCATCAGTGGCTTCATCAACATCATATCCTA
ATAGATTTAGCTGGCGTTTGAGTAATAGCCTGTTGGTCGGATGATCATCCGCGATTAATA
TGCTCAACTTTTCAGGTAGTGTGATGGGTTGTTCTGCTTTTGCCTCGACAGTCGCCACTT
GTTGGATAATTTCTACCGGGATTGTGATCGTAAATGTTGTTCCTATGCCTGGATGACTTT
CTAATGACAAATCACCCTGCATGTTTTTAATTAATTCTTTGCAGATCATTAAGCCTAAAC
CAGAACCTGTTTGCTGACGACCTGCACTTGTTTGGCTATAGCGTTTAAACAGTTGTTGTT
GTTCTTCCTGCGATAATCCACTTCCAGAATCCATAATCGTCATTTTGATTACAGCGTGGT
TGTCATCAATGTGAACCAGGGAGGTCGTAATTTTTACTGCCCCCTCGGTGGTAAATTTGA
GAGCATTACTCAGTAAATTTGATAAGACCTGCTTAAACGCCTGAGGGTCGATCTTAACCA
GGTAATGTTCAGGAAACGTACTGCTGCAACTTAATGCGATCGATTTGCTTGCAGCAATCG
CACCGAAAGAGTGACAAGTGTTCTGGACTAAAGTAGGGATATCGACCCATTGTGGTTGAA
GTTGATAGTTACCCGATTCAATTTTGTCGACATCAAGGATTTCACCAATTAAGCCGAGGA
GTGATTGTCCGGTGGCGTAGGCAAGTGAAATCGCCTCCACCCGTTGCTCCTTGCTAAGAC
CAGAACCCGACAGAAGTTCCAGGAAGCCCATAATGGAGCTTATTGGTGTTCTTATTTCGT
GACTCATTGTTGCCAGAAACTGACTTTTTGCGACAGTTGCATTGATCGCTTTATTTCTCT
CTACTTCGAGTGCATGAATTAAATCACGCGTCTCGGTAATATCTTGCCAACCACAAATAT
AAACAGCATGATCGCTGGCTGGCAGATTGCATAATGTATGCCAGTGATTAATGCATCTTT
TCTCGATGCCATTATCAATTTCAAATACCTGTGTGTATATTGTTCGATTTTCTTTCGTTT
CTGCTGTGACTTCATGCGCATTAGAAAAAACATCTTTAAAGGGTGAGTCACTGTTTTCTA
ATGGTAACATTGCATTTTTGTAGTAATCAGCAGTGAAATAATGTTCAAATGCACTATTGT
GACTAATGACATTACCTTGCCAGTTTACAACATAAGTTGGATTCGGTAAGGAGTCCGAGA
GCGCTTTCCGGAATGATATTTGGTTTTCTAAATCACCCTGAATGACTTTACGACGACGAA
CTGAGCGTAACAGGTAGAATCCCCATAAAAGGCTACTGCCAACTAATAAAACGGATAATG
TCGTAACAATATAAAATTGCTCGCTATAGAGGTCCCATGTGTCAATGGTCACATTGGGCA
TTTTAATCCATTTTTCGGTCAGGCGCAGAACTTCGCTTGGGGGGATTGCATTCAGTGCTT
TATTAATAATATCCTTAAGTTCCGGTTCTCCGCGAGGAAAAGCGAACGAAAGCGATGCAT
TCGGAACGCCGGGAATAAGAAAATGATACAGTTCATTAGGATAGTAATGGTCGATCATGT
AACGCGAATTTAACTGTGTCGCGACCAGAGCATCAAGTTCACCTTCCTTGACCTTGTGAA
ATGCAGCGCTGGCGTTATCGACTTTTATCCACTCTACCTCCGGATACATCTCTTTTAATT
GCGAATGCAGCTCATAATAATATGGAATGGCAACTTTCATTCCTTTTTTTAATGTTTGTT
CACTGTCAGGCGCTTTTTGCATGACAAAAACGTAAGGCGTTGTTATGAAGGCTTCAGCAA
ATAAAACATTATTTTCTCTATCTTCACTATAAATAGCACCGGGTAATATATCCCATCCGC
CGGGATTCAGCTGTGTTCCAGCATGGATATTGTGTGAAACGGTGATCGGAGAAAAATTTA
AACCTGTTTGCAAAGTAATAATATTAAGAATATCCCCCATAACGCCCCGAACCGAGCCAT
TTTCATCCGTCATAGAATAGGGAGGGGAGTAAGGATTTTCCAGCACCTTTAAATCGGGAT
GCTGCTTAATCCATTGTTTTTCATGTTCAGTGAGTTCTAATGGTTTGTTCAGAAAGGCCA
GGTTTCCTGTATCAAGCCAATTTTGTGATACTTCATAGCGAACTTCATTTGTCAAAGCAT
CAACAAATCGATTGAGTACTTCATTAAGAACGACAGATTCTTTTCTGGTCAAGAAAAAAT
TATATTGACGCGGTGAGTTATAATATTTCACTACATTTAAGGAGTGAGTGAAATAGCGGG
AAATCATACTGCTGGTAATGATGTTACTACCAATAAAGTAATCATTCTGTCCGGCTGAGA
CGGATGCTAATGCCTGATATAAATTTGTAAAAGAGATAATTGTTGCTTTTGGAAATGATT
GATGAATTACCTCGTCAGGGGGATAATTTGCTACTCGAGCAATATTTACTGGTTTTGATG
AGGTAAGCGGTCGCATTGAATCGTGAAGGGTGGTGACGAGCGCCGGAAAGGTAATTATCA
GTGGTTTGGTTGCAGCAATGTCATCATTAAGAGGCGGCGAAGCAACTAAATGTGATAACA
CTATATCGACTTCACCTTCTTCCAGCGCGTCCATTGCTTTTTGATGATCGGCGTATTCCC
GGAGTGTTAGTTTGATATTTAACGCTCTTTTTAAAAGATTTAAATAATCAGCATTAATAC
CACGAACCCGTTGCTGCGAATCGGTATGCAACAACGTAGCCGTTTGGGACTTGTGTACTG
CAATCACAAGATTTTTTTTGCTCGCTAACCAACGTAATTCCTTGTTGCTCAGACGTAGTG
GATCAAGTGTGACACGGTTGTTACTACTGATGCCACGATATTCGATGTAATCTTCGTCTG
CGAAACTTATGGTCGACCAAAGACCACAACAGAGAAGAAAAATATAGGGTAAAAACTTCA
TGTGGTTAGCCGATTTTGTTACGTTGTGCGAATGTGTAAAGATCCATCAGTGATTTACAT
TCTAATTTTTCCATCAGGCGACTTTTATAAGTGCTGACAGTTTTGTTGCTGATGAACATT
TTTTCAGCAATGTCATTATTATCCTTGCCATCAAGAATATAGCGCATGACACTAATTTCT
TGTTTCGATAAGGAGTCGAGTTTTTGCTGGTCGGACGTTAAACTTCCAACAAACCGGTTG
AGAGAGAAGGGGAAATAGCAGTAGCCATTTTTTGCAGCTTCAATAGCCGCAATGATATTG
TTCATGCCTTCTTTTTTACTCACGAAACCATTAGCGCCAGCATCAGCACAATGTTTCCCG
TAAAAATGGTCATTTTTAGCGGAGACGATAATAATAATTCCGCTATATTGGCGCTTCCTC
AGCGTTTCTAACACCTGGATACCGTTAACTCCGGGGATATCGACATCAATGATGACGATA
TCAGGCTTAAGTGTTTCCACCCGCTGAACGACACTTCCGCCTTCAGTCAACTCTGCTAAG
ATTTCAATATCGTTTTTGATCAATAAATTACGAATTGCTGCGATAGCAAGAGGATGGTCA
TCAATAATTATTGCGTTCATAGATTATTCCCTTTGCAATGAAGCATCTCCCTTCTCCCTG
TAGTAATACAGACATAAGGCATCATCTCATTTTCTCAATAAAAATAAGAAAATTTGAGCT
TCCTTTAAGATAATTCGACAAGTATACCATATAAATAGTCGGCATATATGAAATGTCAAC
AATAAAATCAGTGATTGTACCGATGATTTATAGTTTCACATTAGCACTATAAGTCTTCTC
ACTAATCCTACAGGCGTAAGAATTGTATTGCAAAAGCCACGGTTTAGTCCTCTGTTGTTT
TTTTTGCACCTCATTTAAATTAGGCCTCCAACGTTCCTGGGATAATGTGCAACACATGCA
CTGTGTTTGATATGAAGAATGAATACTCTTTTCATTCAATTCATAAATTTCATCTATGCG
AAATGAGAGATAAAAGTGGAACAGATTAATTCAAATAAAAAACATTCTAACAGAAGAAAA
TACTTTTCTTTATTGGCGGTAGTTTTATTTATTGCGTTTTCAGGTGCCTATGCCTATTGG
TCAATGGAATTAGAAGACATGATTAGTACAGATGACGCCTATGTCACGGGGAATGCAGAT
CCAATTTCTGCACAAGTCTCAGGTAGTGTCACTGTAGTTAATCATAAAGATACGAACTAC
GTTCGACAAGGTGACATTTTAGTTTCACTGGATAAAACTGATGCCACTATCGCACTCAAT
AAAGCTAAAAATAATCTGGCAAATATTGTTCGGCAAACGAATAAACTATACTTACAGGAT
AAACAATACAGTGCCGAAGTCGCTTCAGCGCGTATTCAGTATCAACAATCTTTAGAAGAT
TATAACCGTCGAGTGCCGTTAGCGAAGCAGGGGGTTATTTCAAAAGAAACGCTGGAGCAT
ACCAAAGATACGTTAATAAGTAGCAAAGCGGCATTGAATGCCGCTATCCAGGCTTATAAA
GCGAATAAAGCTTTAGTAATGAACACACCATTAAACCGTCAGCCACAAGTCGTTGAAGCG
GCGGATGCAACTAAAGAAGCCTGGTTGGCGCTTAAACGTACGGATATTAAGAGTCCGGTT
ACCGGCTATATTGCCCAGAGAAGTGTTCAGGTCGGCGAAACAGTGAGCCCCGGACAATCG
TTAATGGCTGTCGTACCGGCACGTCAAATGTGGGTTAATGCCAACTTTAAAGAAACACAA
CTCACGGATGTACGGATTGGTCAATCGGTCAATATTATCAGCGATCTTTATGGTGAAAAT
GTTGTGTTTCATGGTCGGGTGACAGGGATCAATATGGGAACCGGCAATGCGTTCTCCTTA
TTACCTGCACAAAATGCGACAGGGAACTGGATCAAAATCGTTCAGCGTGTACCGGTTGAA
GTTTCTCTGGATCCAAAAGAACTCATGGAACACCCCTTGCGCATTGGTTTATCGATGACT
GCAACTATTGATACCAGGAACGAAGACATTGCTGAGATGCCTGATCTGGCTTCAACCGTG
ACCTCCATGCCTGCTTATACCAGTAAGGCTTTAGTTATCGATACCAGTCCGATAGAAAAA
GAAATTAGCAACATTATTTCGCATAATGGACAACTTTAATGGCAATCACTAAATCAACTC
CGGCACCATTAACCGGTGGGACGTTATGGTGCGTCACTATTGCATTGTCATTAGCGACAT
TTATGCAAATGTTGGATTCCACTATTTCTAACGTCGCAATACCGACAATATCTGGCTTTC
TGGGAGCATCAACAGACGAAGGTACCTGGGTTATCACCTCGTTTGGCGTAGCAAATGCCA
TTGCGATCCCTGTTACCGGCAGGCTGGCACAAAGAATAGGCGAATTAAGGTTATTTTTAC
TTTCAGTCACTTTTTTTTCGCTGTCTTCCTTAATGTGTAGTTTATCGACCAATCTTGATG
TGCTGATATTTTTTAGAGTCGTTCAGGGGTTAATGGCAGGGCCGTTAATTCCACTGTCAC
AGAGTTTATTATTAAGGAATTATCCACCAGAAAAAAGAACATTTGCTCTGGCATTATGGT
CAATGACCGTGATTATCGCTCCGATATGTGGGCCGATATTGGGCGGTTATATTTGTGATA
ACTTTAGCTGGGGTTGGATATTTTTAATCAATGTCCCTATGGGGGTTATCGTCCTGACAT
TATGCTTAACCTTACTTAAAGGAAGAGAAACTGAGACTTCACCGGTCAAAATGAATCTAC
CAGGACTGACCCTGTTAGTGCTTGGTGTTGGTGGCTTGCAAATTATGCTTGATAAAGGGC
GCGATCTGGATTGGTTCAACTCGAGTACAATAATAATATTAACAGTAGTATCAGTTATTT
CTCTGATCTCTTTAGTCATTTGGGAGTCAACCTCAGAGAACCCGATTCTTGATCTCAGTT
TGTTTAAGTCCCGTAATTTCACCATTGGTATTGTGAGTATCACATGCGCGTATTTATTTT
ACTCTGGAGCGATAGTCCTTATGCCGCAGTTACTCCAGGAAACAATGGGGTATAATGCGA
TTTGGGCTGGGCTTGCTTATGCGCCCATCGGCATCATGCCACTATTAATTTCACCTTTGA
TAGGACGTTATGGCAACAAAATAGACATGCGGTTGTTAGTGACATTTAGTTTTTTGATGT
ATGCGGTTTGCTATTACTGGCGTTCTGTGACATTTATGCCAACGATTGATTTTACAGGCA
TCATTTTGCCACAGTTTTTCCAGGGATTCGCCGTTGCCTGTTTCTTTTTACCCTTAACAA
CGATTTCGTTTTCAGGGTTGCCAGATAATAAATTTGCCAATGCCTCGAGTATGAGTAATT
TTTTTCGTACCTTGTCAGGATCAGTTGGTACGTCGTTGACAATGACGCTGTGGGGACGAC
GCGAATCGTTACACCATAGTCAGTTGACAGCAACCATCGATCAATTTAACCCCGTGTTTA
ATTCATCGTCACAAATTATGGATAAATACTATGGTTCGCTTTCAGGAGTTCTTAATGAAA
TTAATAATGAAATAACCCAGCAGTCACTTTCTATTTCTGCAAATGAGATTTTCCGTATGG
CGGCTATTGCTTTTATCTTACTTACGGTTTTGGTTTGGTTTGCGAAACCGCCGTTTACAG
CGAAAGGCGTTGGGTGATGGTAAAAGCAGGGGGTTATAGCGGGTAAGACCGGGGATCTTA
AGTCTGCGCCATCGGCAGCATCGCTCATCCAGGGAAAGGATGGCGATGCTGAATTGAAAA
TTAATTAGCGGCCTTTTGCCAGATATTGCTCCATCTCTTCTTCCGGCACCATTCCACCTC
CCGTCGCCCACACCAGATGAGTGGCATTACGCAGTTGTTCTGCGCTGCAACCGTGCATCT
GTTGGTAACTTACTGATGCGCACACGCGCTGAGGCCCGGCCATACCCGCCAGTGCCGAAG
GTTCAAGACGAATGCCTTCTTCCTGCGCCAGCCAGCCAAGCATGTTATACATGGTTTGAT
CGCTAAGGGTATAGAAGCCATCCAGTAGACGCTCCATTGCCCGCCCGACAAAGCCTGATG
CGCGACCAACTGCAAGGCCATCCGCTGCGGTAAGGTTGTCGATACCAATATCCTGAACAG
AAATCTGATCGTGTAATCCTGTATGGACGCCTAACAGCATACAAGGGGAGTGCGTTGGTT
CGGCAAAAAAGCAGTGAACATGATCGCCAAACGCCAGTTTAAGCCCGAATGCGACGCCAC
CAGGACCACCGCCAACACCACACGGCAGATAGACAAACAGAGGGTTATCAGCATCGACAA
TACGACCTTGCTCGGCAAATTGCGCTTTAAGACGCTGGCCAGCGACGGAATACCCAAGGA
ACAACGTGCGGGAATTTTCGTCATCAATAAAGAAACAGTTCGGGTCAGACTGCGCTGCTC
TACGTCCTTCCTCGACGGCAACACCATAATCTTGCTCATATTCCACGACCGTAACGCCAT
GGCTGCGCAGTTTCGCTTTTTTCCATGCCCGGGCATCAGCAGACATATGCACTGTCACCT
TAAAGCCAATGCGGGCGCTCATAATGCCGATTGATAACCCCAGATTTCCGGTTGAGCCCA
CAGCAATGCTGTATTGGCTAAAGAACTGTTTAAACTCCGGAGAAAGCAGTTTGCTGTAGT
CATCATCAAGCGTCAGCAACCCCGCTTCCAGAGCCAGTTTTTCTGCGTGTGCCAGGACTT
CATAAATCCCGCCGCGTGCTTTTATGGAGCCGGAAATGGGCAAATGGCTATCTTTTTTCA
GTAACAGTTGCCCGCTGATCGGTTGTTGATATTCCTTTTCCAGCCGTTTTTGCATAGCCG
GAATGGCAACCAGTTCTGATTCAATAATCCCCCCAGTGGCAGCAGTTTCAGGAAATGCTT
TTGTCAGATAGGGTGCAAAACGGGATAAGCGCGCATGGGCGTCCTGAACATCCTGTTCGG
TCAGGCCAACATAAGGTAAACCTTCAGCCAATGAGGTCGTGCCAGGATTAAACCAGGTGG
TTTCTTTAAGAGCAACCAGATCCTTTACCAACGGATACTGGGCGATGAGCGAGTTCATTT
TAGCGTTTTCCATAGTACGTCTCTTTGCGCTTAGATGATAAATGACAGCAGGAATGTGCC
CGCCAGAGCGACGACTGAAGCGATAAATGTCGCTGTCGTATAGTATTTAAATGTTTCATT
GAGCGTAGCGCCGCAATATTGCTTCACCAGCCAGAAAAGCGAGTCCGTAACGATAGTGCA
GCCAATTGCACCTGAACCGATAGCAATCGCAATAATTTCCGGGCTGATGTCGGGATACAG
CGGCAGCACAATGATCCATATTTATATTTTCTTCTCCAGGTTGGCGATGCCAGTTGGCAT
GTTTTACTTACTTGCCTATATGGTTACTCGTTGGCGAGAACAGAGGCGGAATTGGGGACA
ATTGGCCGGGAATTATTGTTATTTTTTATTGTATTGCCGTGTCAGGTGATAGGGCGTTGG
ATCTCGCCAGTGACGTCTGTTTCTGCTACAGTGCCCGTTTTACGACAAACGGCTTGGGTA
TGGCTTCATTAAAGGATGTCGCACGCCTGGCGGGAGTGTCGATGATGACAGTCTCCCGGG
TGATGCATAATGCAGAATCTGTGCGTCCTGCAACGCGTGACCGCGTATTGCAGGCAATCC
AGACCCTGAATTATGTTCCTGATCTTTCCGCCCGTAAGATGCGCGCTCAAGGACGTAAGC
CGTCGACTCTCGCCGTGCTGGCGCAGGACACTGCTACCACTCCTTTCTCTGTTGATATTC
TGCTTGCCATTGAGCAAACCGCCAGCGAGTTCGGCTGGAATAGTTTTTTAATCAATATTT
TTTCTGAAGATGACGCTGCCCGCGCGGCACGTCAGCTGCTTGCCCACCGTCCGGATGGCA
TTATCTATACTACAATGGGGCTGCGACATATCACGCTGCCTGAGTCTCTGTATGGTGAAA
ATATTGTATTGGCGAACTGTGTGGCGGATGACCCAGCGTTACCCAGTTATATCCCTGATG
ATTACACTGCACAATATGAATCAACACAGCATTTGCTCGCGGCGGGCTATCGTCAACCGT
TATGCTTCTGGCTACCGGAAAGTGCGTTGGCAACAGGGTATCGTCGGCAGGGATTTGAGC
AGGCCTGGCGTGATGCTGGACGAGATCTGGCTGAGGTGAAACAATTTCACATGGCAACAG
GTGATGATCACTACACCGATCTCGCAAGTTTACTCAATGACCACTTCAAATCGGGCAAAC
CAGATTTTGATGTTCTGATATGTGGTAACGATCGCGCAGCCTTTGTGGCTTATCAGGTTC
TCCTGGCGAAGGGGGTACGTATCCCGCAGGATGTCGCCGTAATGGGCTTTGATAATCTGG
TTGGCGTCGGGCATCTGTTTTTACCGCCGCTGACCACAATTCAGCTTCCACATGACATTA
TCGGGCGGGAAGCTGCATTGCATATTATTGAAGGTCGTGAAGGGGGAAGTGTGACGCGGA
TCCCTTGCCCGCTGTTGATCCGTTGTTCCACCTGATATTATGCTAACCCAGTTGCCAGAG
TGCTCCATGTTGCACCACAGCCACTCCGTGGGAGGCATAAAGCGACAGTTCCCGTTCTTC
TGGCTGCGGATAGATTCGACTACTCATCACCGCTTCCCCGTCGTTAATAAATACTTCCAC
GGATGATGTATCGATAAATATCCTTAGGGCGAGCGTCTCACCCTGCGGGAGGGGAATACT
ACGGTAGCCGTCTAAATTCTCGTGTGGGTAATACCGCCACAAAACAAGTCGCTCAGATTG
GTTATCAATATACAGCCGCATTCCAGTGCCGAGCTGTAATCCGTAATGTTCGGCATCACT
GTTCTTCAGCGCCCACTGCAACTGAATCTCAACTGCTTGCGCGTTTTCCTGCAAAACATA
TTTATTGCTGATTGTGCGGGGAGAGATAGATTGATGCTGCTGGCGTAACGACTCAGCTTC
GTGTACCGGGCGTTGTAGGAGTTTGCCATTGCTCTCTGATAGCTCGCGCGCCAGCGTCAT
GCAGCCTGCCCAGCCTTCACGTTTTGAGGGCATTGGCGATTCCCACATATCCATCCAGCC
GATAACAATACGCCGACCATCCTTCGCTACAAAGCTTTGTGGTGCATAAAAGTCATGCCC
GTTATCAAGTTCAGTAAAATGCCCGGATTGTGCAAAAAGTCGTCCTGGCGACCACATTCC
GGGTATTACGCCACTTTGAAAGCGATTTCGGTAACTGTATCCCTCGGCATTCATTCCCTG
CGGGGAAAACATCAGATAATGCTGATCGCCAAGGCTGAAAAAGTCCGGACATTCCCACAT
ATAGCTTTCACCCGCATCAGCGTGGGCCAGTACGCGATCGAAAGTCCATTCACGTAATGA
ACTGCCGCGATAAAGCAGGATCTGCCCCGTGTTGCCTGGGTCTTTCGCCCCGACTACCAT
CCACCATGAGTCGGCTTCACGCCACACTTTAGGATCGCGGAAGTGCATGATTCCTTCTGG
TGGAGTGAGGATCACACCCTGTTTCTCGAAATGAATACCATCCCGACTGGTAGCCAGACA
TTGTACTTCGCGAATTGCATCGTCATTACCTGCACCATCGAGCCAGACGTGTCCGGTGTA
GATAAGTGAGAGGACACCATTGTCATCGACAGCACTACCTGAAAAACACCCGTCTTTGTC
ATTATCGTCTCCTGGCGCTAGCGCAATAGGCTCATGCTGCCAGTGGATCATATCGTCGCT
GGTGGCATGTCCCCAGTGCATTGGCCCCCAGTGTTCGCTCATCGGGTGATGTTGATAAAA
CGCGTGATAACGATCGTTAAACCAGATCAGGCCGTTTGGATCGTTCATCCACCCGGCAGG
AGGCGCGAGGTGAAAATGGGGATAGAAAGTGTTACCCCGGTGCTCATGAAGTTTTGCTAG
TGCGTTTTGCGCCGCATGCAATCGAGATTGCGTCATTTTAATCATCCTGGTTAAGCAAAT
TTGGTGAATTGTTAACGTTAACTTTTATAAAAATAAAGTCCCTTACTTTCATAAATGCGA
TGAATATCACAAATGTTAACGTTAACTATGACATTTTGTGATCGAATATGCATGTTTTAG
TAAATCCATGACGATTTTGCGAAAAAGAGGTTTATCACTATGCGTAAGTCAGATGAATTT
AAGGGAAAAAAATGTCAGCCAAAGTATGGGTTTTAGGGGATGCGGTAGTAGATCTCTTGC
CAGAATCAGACGGGCGCCTACTGCCTTGTCCTGGCGGCGCGCCAGCTAACGTTGCGGTGG
GAATCGCCAGATTAGGCGGAATAAGTGGGTTTATAGGTCGGGTCGGTGATGATCCTTTTG
GTGCGTTAATGCAAAGAACTCTGCTAACTGAGGGAGTCGATATCACGTATCTGAAGCAAG
ATGAATGGCACCGGACATCCACGGTGCTTGTCGATCTGAACGATCAAGGGGAACGTTCAT
TTACGTTTATGGTTCGCCCCAGTGCCGATCTTTTTTTAGAGACGACAGACTTGCCCTGCT
GGCGACATGGCGAATGGTTACATCTCTGTTCAATTGCGTTGTCTGCCGAGCCTTCGCGTA
CCAGCGCATTTACTGCGATGACGGCGATCCGGCATGCCGGAGGTTTTGTCAGCTTCGATC
CCAATATTCGTGAAGATCTATGGCAAGACGAGCATTTGCTCCGCTTGTGTTTGCGGCAGG
CGCTACAACTGGCGGATGTCGTCAAGCTCTCGGAAGAAGAATGGCGACTTATCAGTGGAA
AAACACAGAACGATCGGGATATATGCGCCCTGGCAAAAGAGTATGAGATCGCCATGCTGT
TGGTGACTAAAGGTGCAGAAGGGGTGGTGGTCTGTTATCGAGGACAAGTTCACCATTTTG
CTGGAATGTCTGTGAATTGTGTCGATAGCACGGGGGCGGGAGATGCGTTCGTTGCCGGGT
TACTCACAGGTCTGTCCTCTACGGGATTATCTACAGATGAGAGAGAAATGCGACGAATTA
TCGATCTCGCTCAACGTTGCGGAGCGCTTGCAGTAACGGCGAAAGGGGCAATGACAGCGC
TGCCATGTCGACAAGAACTGGAATAGTGAGAAGTAAACGGCGAAGTCGCTCTTATCTCTA
AATAGGACGTGAATTTTTTAACGACAGGCAGGTAATTATGGCACTGAATATTCCATTCAG
AAATGCGTACTATCGTTTTGCATCCAGTTACTCATTTCTCTTTTTTATTTCCTGGTCGCT
GTGGTGGTCGTTATACGCTATTTGGCTGAAAGGACATCTAGGGTTGACAGGGACGGAATT
AGGTACACTTTATTCGGTCAACCAGTTTACCAGCATTCTATTTATGATGTTCTACGGCAT
CGTTCAGGATAAACTCGGTCTGAAGAAACCGCTCATCTGGTGTATGAGTTTCATCCTGGT
CTTGACCGGACCGTTTATGATTTACGTTTATGAACCGTTACTGCAAAGCAATTTTTCTGT
AGGTCTAATTCTGGGGGCGCTCTTTTTTGGCTTGGGGTATCTGGCGGGATGCGGTTTGCT
TGACAGCTTCACCGAAAAAATGGCGCGAAATTTTCATTTCGAATATGGAACAGCGCGCGC
CTGGGGATCTTTTGGCTATGCTATTGGCGCGTTCTTTGCCGGCATATTTTTTAGTATCAG
TCCCCATATCAACTTCTGGTTGGTCTCGCTATTTGGCGCTGTATTTATGATGATCAACAT
GTGTTTTAAAGACCAGGATCACCAGTGCGTAGCGGCGGATGCGGGAGGGGTAAAAAAAGA
GGATTTTATCGCAGTTTTCAAGGATCGAAACTTCTGGGTTTTCGTCATATTTATTGTGGG
GACGTGGTCTTTCTATAACATTTTTGATCAACAACTCTTTCCTGTCTTTTATGCAGGTTT
ATTCGAATCACACGATGTAGGAACGCGCCTGTATGGTTATCTCAACTCATTCCAGGTGGT
ACTCGAAGCGCTGTGCATGGCGATTATTCCTTTCTTTGTGAATCGGGTAGGGCCAAAAAA
TGCATTACTTATCGGTGTTGTGATTATGGCGTTGCGTATCCTTTCCTGCGCGCTGTTCGT
TAACCCCTGGATTATTTCATTAGTGAAGTTGTTACATGCCATTGAGGTTCCACTTTGTGT
CATATCCGTCTTCAAATACAGCGTGGCAAACTTTGATAAGCGCCTGTCGTCGACGATCTT
TCTGATTGGTTTTCAAATTGCCAGTTCGCTTGGGATTGTGCTGCTTTCAACGCCGACTGG
GATACTCTTTGACCACGCAGGCTACCAGACAGTTTTCTTCGCAATTTCGGGTATTGTCTG
CCTGATGTTGCTATTTGGTATTTTCTTCTTGAGTAAAAAACGCGAGCAAATAGTTATGGA
AACGCCTGTACCTTCAGCAATATAGACATAAACTTTTTCCGGTTGTTGTCGATATCTCCA
TATCCCTCAACCGGAAAATAATAATACTAAAATGCTTAGGCCTGCTAATAATCGCCTAAT
CCAAACACCTCATTCATGTTCTGGTACAGTCGCTCAAATGTACTCCGGATACACGGTTCG
CTGATTTCCAGGACATTGTCGTCATTCAGCGACCTGTCCCGTGTATTACGGGCCTGCGAA
TTCATCAAGGAATGCATTGCGGAGTGAAGTATCGAGTCACGCCATATTTCGCTATCAGGA
TTCTGTGTGATGGTTACATCGCCCGGCCCAGGGCTGTTTAGTCATCAGCGCTTTCTGACA
GTGCTGAGATTTCAACCTGTTGCAGTAAAAATGAGTAGATATAGGGCAAGTGTGCTGCCA
AACCCATCTTTTACGGGGTGAAGGTAGATTTGGTTTGAAGGGTATCTGGTGTCCCCTGCA
GGAATCGAACCTGCAATTAGCCCTTAGGAGGGGCTCGTTATATCCATTTAACTAAGAGGA
CAATGCGGCATGAGTATACCCGCTAATGGACTGCGGGGTAAGTACGCTGCCGCTCGATTG
CTTAAACCCTCGCCATTTATGCCGGGTTTTTATCATTTTTCTTAATGTTTTCCGCACGTT
CTGCTTTTTGGCGTGCTTCTGCTTTGCGCTTGTTGCTCATGTCGTTACGGATCTGTGCAT
GACTCATTAACGCGAAGATAAAGGTGCCGCCGCAGATGTTCCCCGCTAAAGTAGGTAGTG
CGAAGGGCCAGATGAAATCGCTCCAGTGCAGCGTGCCGTTAAACACCAGATAGAGGATTT
CAACAGAACCGACAACGATGTGGGTGGTGTCACCCAAGGCAATAAGCCAGGTCATCAATA
TAATCACCACAATCTTTGCCGCACCCGCTGCAGGAAACATCCATACCATAGTGGCGATCA
GCCAGCCGGAAATGATCGCGTTGGCAAACATCTCGCTGGGGGTGTTCTTCATCACATCCA
TGCCGATATTGACAAATGCATCGCGAGTTTCTTCATTGAAGATTGGCATATATTCAAATG
CCCACGCCGCAATACCTGTCCCGAGAATATTACCCAGCAGCACGACGCCCCATAACCGCA
TAAGTAAGCCAACGTTGCTCATTGTCGGTTTTTGCATGACGGGTAGTACCGCAGTCACGG
TGTTTTCGGTAAATAATTGCTGGCGGGCCATAATGACGATAATAAAACCAAAGGTATAAC
CGAGATTCTCCAGCAAGAAGCTGCCCGGCACACCTTCCAGTTCGACATGAAATATCCCTT
TTGCCAGTAATGAAGCGCCCATCGACAGACCCGCCGCAATGGCTGACCACAGTAGTGCCA
TTGCGTCGCGTTCCAGCTCTTTTTCACCATCCTGGCGGATATGCTCATGAATTGCCATCG
CCCGGGAGGGGAGTCGATCTTCATCTATTTCTATTTTTTTGCCACGCTCTTTTTCTTCGC
TCTCAACTTCAATTTCGTCGCTGTGTTGATCAATTTTGTCGTTGTCCATGGTCTCTTCTC
TTGAATTAGCACGTATAGCTAAAGCGTAGCGGCTTTTTTGCTCGCAACTGGCGGGAGTTA
CTCTGAAAATGTAGAAAAGGCCGCGTTTGCCTTTTTCTGTTTCCATAGAATCAAGTAGCC
TACAGGGCGGCGATTACCAGGCTATGATCAAATCAGCAAATCAGGGCGTCTGGACATCAG
TTGACGTGCTGTTACAATCGCCCACACCTAAACAGGCGGATACGGTATCGTTCCGTCATG
GATGGCAAACTGCATAAGCCATAAAAAAACAGGGAGACATTTATGAAGCTTCGCCTGTCG
GCGCTTGCTCTGGGAACTACGCTTCTGGTGGGGTGTGCGAGTTCCGGTACAGATCAGCAA
GGGCGTTCTGACCCGTTAGAAGGGTTCAACCGCACCATGTACAACTTCAACTTCAACGTA
CTAGACCCGTATATTGTTCGACCGGTCGCTGTCGCCTGGCGTGATTATGTTCCGCAACCG
GCGCGTAACGGTTTGAGCAACTTTACCGGCAACCTTGAAGAACCTGCGGTGATGGTTAAC
TACTTCTTGCAGGGCGACCCTTATCAGGGGATGGTCCACTTTACCCGCTTTTTCCTGAAC
ACCATTTTGGGGATGGGCGGCTTTATTGATGTTGCAGGGATGGCGAACCCGAAACTGCAA
CGGACTGAACCTCACCGCTTCGGTAGTACGCTTGGTCATTATGGCGTGGGTTATGGGCCG
TACGTTCAGTTACCATTCTACGGTAGCTTCACGCTGCGTGATGACGGTGGTGATATGGCG
GATGGTCTTTACCCGGTTCTTTCCTGGTTGACCTGGCCGATGTCTGTGGGTAAATGGACG
CTTGAAGGGATCGAAACCCGCGCTCAGCTGCTGGATTCCGACGGTCTGCTGCGTCAGTCG
TCCGATCCTTATATTATGGTGCGCGAAGCGTACTTCCAGCGTCATGATTTCATCGCTAAT
GGCGGCGAACTCAAACCGCAGGAAAATCCGAACGCGCAAGCGATTCAGGATGATTTAAAA
GATATCGATTCTGAATAAGAAACAAATAAAAAAGGTGAGTCGCAAAACTCACCTTTTTTG
TTGTTATCCCTCAATTACCACAAGTAAAAGGAGATAAACCGACAATGACCCGGACGTAAT
GATGTAAAAATACTGATGTTCGTCACTGACTATTTCCGATATTCAGGCGTTAAAAAATCA
AAAAACTGGAAAAATAATTTTAAATATCATCAAAATTAACACCTGGCGCATATAGTTGAT
TAATTTCATTTTGATATTCCGTCTGGCGATTTTGAAGCCTTTCTTCAATTTTACCTTCGA
GTTCCTTATAGTGCATATATATATTTTGAGAATGGTCAACGTTAACTTCGTTACCGAATA
AAGTAGAAACTATTTCTTTTGTATTCTTAAGTGTATATTTTCTATCATCCTCTTAATATT
CATATCCTCTTGCTAGATTTGAAGGATTAAAAGCTTCGTTAGGTTCTCTCAGTCTTCCCC
TTTGAGTTCGTTTACAACTTGATGATCGGGACCTGTTGCAAATGATTCTGCGATGATTGC
TTTACTGTGTTCAAACCACGCAGAAGCACTCCTGGCTTTTTTACTACAATATTGGGTGAG
ATTATCACCATCAATACGAAATCCTTTTTGAATGTGGTAGCCATCCTGATCGTAGTAACC
GAGAGATAAGTAATCATTTCCATTTTTATTTTTTATTACAATAGCGAGAGAGTCGCCTTT
TTTATCTTTACCGTACCAGGTAAATAAGCACGTTGGTTCGCTTTTCCCGCTCTCATCGAA
TTCCGTTACCGTATGTCTGAGTTTGTGTGATATTTTATCGAAGATAAAACTTGGATTTTC
ATCATATATTTCTTTTATTGCGCTGAAGATCATTTTCTTGTTATTGATATCATGAGTATT
CTCTACTATGTTTTCATTGATGATGGTTTGACCGACTTTTTTGTTTTCATCGTTCGCGGG
TGATTTTGTTGGTTCTTGATTTTCAATATCAATATCAATATCAATATCAATATCAAAAGT
AATATCGTTTGTATCATTGGAGTCAATACCAATATCACTACGATCATCAATACCACTAAT
AATAATACCATCAGTAAATTCAGCATTATTTATATCATCATGAGTCTTCTCAACTATGTT
GTCATTAATGATAGTACGGACGAGTTCTTTGTCTTTATAACTCGCAGGTAATTTTATTGG
TTCTTGGTTGTCGATACCAATAGTAATATGGTCTGTATCATTGGAACCAATATTAATATA
AGTAACTGAAGAATTATTGATATTTATTCTATCAGGATCGTCGTTTCCTCGTATGGCGTT
TTTTATAAGCTCAAGTAGATGTTTAATACAGGTGCTTATTCCTTCCTTACCATTAAAAAG
GTTTTTGAACTCTTGTACTAATCCATTAACTTCATCATTGTTATTTTCATTGATGGATTC
TGGGTAAGCTGCGCTGGTATTGTTGATTGAAATAGATGGTAGCATGATTTTATTCCATGT
TGATTGATTTGTTACAAATATATATTACCTAATGAAATAGACTATCAAAAAACGCTCATT
TATTTAGACCCTATCTTTAATTTGAGTGTATGAGCGCACAATAGCCAGGGTGGTTTGAGT
ATCCTGGAAATTCAGAAAAGTAAACTCTTTGAGAAAGACGAGCAGAACGCCTGAAAATAT
GCCTTTCCCTTCAGGTTTGTCTGTGGATACCACTTAATGATTTGAAAGGGCAAGCTACCA
TCAGGCTGTTTGCAAAACTCAGGAGGCAAGCAATGAGGACACTACTTTCGGTGAAGTGGG
GAAGTTAAAGTCACCTGCATAGCAGGTGACTTTAACCAGGCGAACGCGTTATCAGAACGC
GTAGTTAAAGTTAGTACCGAACAGCCAGGCTTTACCTTCAGATTTAAAGGTATATGCTGC
TGGCCCTTCACCTTCAGTAAACTTCACATTCTGACCGTGCATATAAGATGCACCAACGTC
AATGGATGCATCTTCATTAAATGCATAAGTCGCACCTGCACTTAACCACAGACGATCCTG
ATCTGGGATAGAGATAGAACGTTTATCTGCCGGAACCGGGCTGTCATCGAATGCAATACC
CGTACGGAAGGTCCAGTTTTTATCGTGGTAGTAGGTTGTACCTAACGCGATACGGTAAGC
ATCCCGGAAACCTTCGTCTTTATAGAACAGCGTTTGACCAGAGTCTCCTTTCGCTTTCAG
TTCCTGGAATTGACTCCAACTGGTATACGCCAGACTATAGTGGATAGCCCATTGTGGTGC
GACACGGTTATAGCCAGAAATTTCCCACATCTCAGGTAAATTCAGCGTTAAGGACCCATT
TTGGGTTGCACCCATTGTGCCATATGGTAAACCCATGCTACCCAAGATGTTGTTCAGATT
TGGGTTGATGGAGCTTTTGTAATCTCCTTCAAAGTCAATTTTCACTTCTGAACGATAGGT
TAGGCCCCAACGGTTATCTTTATCCAGTTCATAAAGAATACCGGCGTTCCAGCCGAATCC
CCATTCATCACCCTTGAGATGAGCAATTTGCGAATCCGGTGTATTGATGCCGTTTGTCCA
ACTTTGTGGCACGCCTTGCGCTATCAGTTGTTGGGAAAGCAATGGACCGAGTGAACCGGC
AGTACGCTCAATTTTTGCCTTAGCGTATACAGCATCAAAACCAAGACCAAAACTCCAGCT
ATTGTTAAGGCGGTAGGCTCCGCTAAGGTTAAGGTTGATCGTCTGCAGATCGGTTTTACC
GCCATAGATTCCAGCAGCGTAGTTATCATTAAATTCCGTGGCCAGACCATAGTTCGAGGT
AATAGAAGCCCCCCAACCAAACTGATCGTTAATAGGTGCTACGAAATGTAGGTTAGGCAC
CCACGCAGTTGGTGCAATATTATCTGCATCAGCACGCTGGCCCGTTAAATCGGAACGCCC
AGAAATATCTACATCCGGGTCAATATAAACCGCACCCGCAGAAAATGTCGGGCGGTCAAA
CATGGTAATCAATGCGGGGTTACGGCTGACGTTACCTGCATCATCGGCAATTGCGCCTTC
CCCTGAATAAGCCCGGCCCAGGCCAGAGGAAGAAAATTCGTTTAACTGAAAGCCTGCCGA
CCAGGCCTGGGTGGAGATAAGTGCCACTGCGACTGCGAGAGCAGACTTTGTAAACAGGGT
TTTCTGGCTCATGACCATAACCTCAATGATTTATTTTTATACAAACTATGTTACGTGCTG
TAACAGGAGCGCGAAGTGTAGGGTCTGAGGTACATCTTAGAAATCAGACCAGTGGCGAGA
GTATAGGTCGGACCAGCTGGAATGTTGCAAGTATGTTTCTATCTTTTTTCAAATATGATC
TAAGAAACGCGATCCAGCTGGCAAAATTTGGAGGTGGCGCACTCATGGATTCGGGTGAAT
TTTGTTTTAGATCATTTTTAAGTGTGATTTCGGTCACTTATCCGATTTTGCAGAATTAAC
AACTGGAGCAGCACTTTCCGGAAGCGTAAAATATCCACAACGTTTATCTGGCACCTTGGG
TGCACATACAGAGGAAATCAACGATGAGTAAATGTAGTGCTGATGAAACCCCGGTTTGCT
GCTGTATGGATGTTGGCACCATTATGGACAACTCCGACTGCACCGCGTCTTACAGCCGCG
TGTTTGCAAACCGCGCAGAAGCAGAACAAACGCTGGCGGCACTGACTGAGAAAGCCCGTA
GCGTGGAATCCGAACCGTGCAAAATCTCCCCGACTTTCACTGAAGAGTCTGATGGTGTGC
GCCTGGATATCGATTTCACTTTTGCCTGCGAAGCTGAAATGCTGATCTTCCAGCTGGGTC
TGCGTTAATTCCTCTCGGGTACGTACGCCCCTGTCAGTTGCTGGCAGGGGCGTTTTCTTT
TCTCTTCTTCTTTTCTCTCTGTGTCATAGCTCCCACTTTCCCTTTTCTCCGCTTGGCTAA
ATGTAAAAAAATGGTTAAGACTATGATCAGGTCAGACCACTTTATTTATTTTTTTACAGG
GGAGTGTTATGGGTCAGGTTTTACCGCTGGTTACCCGCCAGGGCGATCGTATCGCCATTG
TTAGCGGTTTACGTACGCCTTTTGCCCGCCAGGCGACGGCTTTTCATGGCATTCCCGCGG
TTGATTTAGGGAAGATGGTGGTAGGCGAACTGCTGGCACGCAGCGAGATCCCCGCCGAAG
TGATTGAACAACTGGTCTTTGGTCAGGTCGTACAAATGCCTGAAGCTCCCAACATTGCGC
GTGAAATTGTTCTCGGTACTGGAATGAATGTGCATACCGATGCTTACAGCGTCAGCCGCG
CTTGCGCTACCAGTTTCCAGGCGGTTGCAAACGTCGCAGAAAGCCTGATGGCGGGGACTA
TCCGAGCGGGGATTGCCGGTGGGGCAGATTCCTCTTCGGTATTGCCAATTGGCGTCAGTA
AAAAACTGGCGCGCGTGCTGGTTGATGTCAACAAAGCCCGCACAATGAGCCAGCGTCTGA
AACTCTTCTCTCGCCTGCGTTTGCGCGACTTAATGCCCGTACCACCTGCGGTAGCAGAAT
ATTCTACCGGCTTGCGGATGGGCGACACTGCAGAGCAAATGGCGAAAACCTACGGCATCA
CCCGAGAACAGCAAGATGCATTAGCGCACCGTTCGCATCAGCGTGCCGCTCAGGCATGGT
CAGACGGAAAACTCAAAGAAGAGGTGATGACTGCCTTTATCCCTCCTTATAAACAACTGC
TCGCGGAAGACAACAATATTCGCGGTAATTCCTCGCTTGCTGATTACGCAAAGCTGCGTC
CGGCGTTTGATCGTAAACACGGAACGGTAACGGCGGCGAACAGTACGCCGCTGACCGATG
GCGCAGCGGCGGTGATCCTGATGACTGAATCCCGGGCGAAAGAATTAGGGCTGGTACCGC
TGGGATATCTGCGCAGCTACGCATTTACCGCTATCGATGTCTGGCAGGACATGTTGCTCG
GTCCAGCCTGGTCAACACCGCTGGCGCTGGAGCGTGCCGGTTTGACGATGAGCGATCTGA
CATTGATCGATATGCACGAAGCCTTTGCAGCTCAGACACTGGCGAATATTCAGTTGCTGG
GTAGTGAACGTTTTGCTCGTGAAGCACTGGGGCGTGCACATGCCACTGGCGAAGTGGACG
ATAGCAAATTTAACGTGCTTGGCGGTTCGATTGCTTACGGGCATCCCTTCGCGGCGACCG
GCGCGCGGATGATTACCCAGACATTGCATGAACTTCGCCGTCGCGGCGGTGGATTTGGTT
TAGTTACCGCCTGTGCTGCTGGTGGGCTTGGCGCGGCAATGGTTCTGGAGGCGGAATAAT
GGAAATGACATCAGCGTTTACCCTTAATGTTCGTCTGGACAACATTGCCGTTATCACCAT
CGACGTACCGGGTGAGAAAATGAATACCCTGAAGGCGGAGTTTGCCTCGCAGGTGCGCGC
CATTATTAAGCAACTCCGTGAAAACAAAGAGTTGCGAGGCGTGGTGTTTGTCTCCGCTAA
ACCGGACAACTTCATTGCTGGCGCAGACATCAACATGATCGGCAATTGCAAAACGGCGCA
AGAAGCGGAAGCTCTGGCGCGGCAGGGCCAACAGTTGATGGCGGAGATTCATGCTTTGCC
CATTCAGGTTATCGCGGCTATTCATGGCGCTTGCCTGGGTGGTGGGCTGGAGTTGGCGCT
GGCGTGCCACGGTCGCGTTTGTACTGACGATCCTAAAACGGTGCTCGGTTTGCCTGAAGT
ACAACTTGGATTGTTACCCGGTTCAGGCGGCACCCAGCGTTTACCGCGTCTGATAGGCGT
CAGCACAGCATTAGAGATGATCCTCACCGGAAAACAACTTCGGGCGAAACAGGCATTAAA
GCTGGGGCTGGTGGATGATGTTGTTCCGCACTCCATTCTGCTGGAAGCCGCTGTTGAGCT
GGTAAAGAAGGATCGCCCATCTTCCCGCCCTCTACCTGTACGCGAGCGTATTCTGGCGGG
GCCGTTAGGTCGTGCGCTGCTGTTCAAAATGGTCGGCAAGAAAACAGAACACAAAACTCA
AGGCAATTATCCGGCGACAGAACGCATCCTGGAGGTTGTTGAAACGGGATTAGCGCAGGG
CACCAGCAGTGGCTATGACGCTGAAGCACGGGCGTTTGGCGAACTGGCGATGACGCCACA
ATCGCAAGCTTTGCGTAGTATCTTTTTTGCCAGTACGGAAGTGAAGAAAGATCCCGGCAG
TGATGCGCCGCCTGCGCCATTAAACAGCGTGGGGATTTTAGGTGGTGGCTTGATGGGCGG
CGGTATTGCTTATGTCACTGCTTGTAAAGCGGGGATTCCGGTCAGAATTAAAGATATCAA
CCCGCAGGGCATAAATCATGCGCTGAAGTACAGTTGGGATCAGCTGGAGGGCAAAGTTCG
CCGTCGTCATCTCAAAGCCAGCGAACGTGACAAACAGCTGGCATTAATCTCCGGAACGAC
GGACTATCGCGGCTTTGCCCATCGCGATCTGATTATTGAAGCGGTGTTTGAAAATCTCGA
ATTGAAACAACAGATGGTGGCGGAAGTTGAGCAAAATTGCGCCGCTCATACCATCTTTGC
TTCGAATACGTCATCTTTACCGATTGGTGATATCGCCGCTCACGCCACGCGACCTGAGCA
AGTTATCGGCCTGCATTTCTTCAGTCCGGTGGAAAAAATGCCGCTGGTGGAGATTATTCC
TCATGCGGGTACATCAGCGCAAACCATCGCCACTACGGTAAAACTGGCGAAAAAACAGGG
CAAAACGCCCATTGTCGTGCGTGACAAAGCCGGGTTTTACGTCAATCGCATCTTAGCGCC
TTACATTAATGAAGCTATCCGCATGCTGACCGAAGGTGAACGGGTAGAGCACATTGATGC
CGCGCTAGTGAAATTTGGTTTTCCGGTAGGTCCAATCCAACTTTTGGATGAGGTAGGAAT
CGACACCGGGACTAAAATTATTCCTGTACTGGAAGCTGCTTATGGAGAACGTTTTAGCGC
GCCTGCAAATGTTGTTTCTTCAATTTTGAACGACGATCGCAAAGGCAGAAAAAATGGTCG
GGGTTTCTATCTTTATGGTCAGAAAGGGCGTAAAAGCAAAAAACAGGTCGATCCTGCCAT
TTACCCGCTCATTGGCGCACAAGGGCAGGGGCGACTCTCCGCACCGCAGGTTGCTGAACG
GTGTGTGATGTTGATGCTGAATGAAGCAGTACGTTGTGTTGATGAGCAGGTTATCCGTAG
CGTGCGTGACGGGGATATTGGTGCGGTATTTGGCATTGGTTTTCCGCCATTTCTCGGTGG
ACCGTTCCGCTATATCGATTCTCTCGGCGCGGGCGAAGTGGTTGCAATAATGCAACGACT
TGCCACGCAGTATGGTTCCCGTTTTACCCCCTGTGAGCGTTTGGTCGAGATGGGCGAGCG
TGGGGAAAGTTTTTGGAAAACAACTGCAACTGACCTGCAATAAGAAGGTCAAAGCTATAT
GAATCCGCGCTGAATGGCGGATAGTTGGTCAAAATGTAAACGCATATTGACTATACTTAC
GCCATTGAGGTAAAAAACAGCGTTTCATTCGGTGAATGGATAAGGCACAATGCCGGCCAC
CGTTTTCTTTCTCTGGTTTCAGATGAAAGAAAACGGGCGAATCTGGTTAACAAAAGCGGT
GCAATATGCAAGTTTTTATCATGCGTCACGGCGACGCAGCCCTCGATGCCGCCAGTGATT
CGGTTCGTCCTCTGACTACTAATGGTTGTGACGAATCTCGCCTGATGGCGAACTGGCTGA
AAGGTCAAAAAGTGGAAATCGAACGCGTTCTGGTGAGCCCGTTCCTGCGAGCCGAGCAAA
CACTGGAGGAAGTAGGGGATTGTCTGAACCTGCCTTCCAGTGCAGAAGTTCTGCCGGAGT
TAACGCCCTGCGGCGATGTTGGTCTGGTCAGTGCCTATTTGCAGGCGTTGACCAATGAAG
GTGTTGCTTCGGTGTTGGTTATCTCCCACTTACCGTTAGTTGGGTATCTGGTCGCCGAGT
TATGTCCGGGCGAAACGCCGCCTATGTTTACCACCTCGGCCATTGCCAGCGTCACGCTTG
ATGAAAGCGGAAACGGCACATTCAACTGGCAGATGAGCCCGTGTAATCTGAAGATGGCGA
AAGCTATCTGATTTGTTTGAAAAAATGCCCGATGTAAGCTGTACATCGGGCATTTGTCTT
TTTGCAATAGTATAAATTCACTCAAAACCCTTCACGGAGTTGGTATGCTGCGATGATGAT
TTCATCGCACTCTTTCCTCTGCTTCCCTATTAATTTCTGATGAAATGAGACTAAGTTGTA
ATATATTTTTACAAATTATAAAACTAATGGAACAATTAACAGTAAAAAAGAAATGATATT
TTTGTGTCTTGATTTAATATTATTTGTGATGCTTTAATATTATATCTTCAAAAAATACAA
TTTCAAAATTAATCTAAGATCGTCTTTTTTGTATACATTTCCCATAAATTTTAATTATGT
AAAAGATGTTTTCTAAGCATTTTATTTGTTTTTTATAAGTAAACTCTCAAAATTTCACCT
TTTTGATTATATGTTAAGTGCTCCTTAATTTACTGTTAAGTAAATATAAATTGAAACAAT
AAAGACAAAACATCACCATCCACCCACACCAAAGAATATCTTCTTATGCGACCTATTTTC
TTGTTAGTTAGATCGGATAGCTTATTCAATGGCTGAGTATAAATAATTGCTATTGACTGA
ATCAATGTATTGCAATGTTTATATTTTTAATTATTTATGGTTTAAGGACAAATAATGAGT
AAGTTTGTAAAAACAGCTATTGCTGCAACAATGGTAATGGGTGCGTTCGCTTCTACTTCA
ACAATCGCCGCTGGCAACAACGGTACAGCTCGTTTTTACGGCACCATTGAAGATTCCCCG
TGCTCCATCGTTCCTGATGATCACAAACTGGAAGTGGATATGGGTGACATTGGTTCGGGG
ATCCTGAAAAATAACGGGACCTCCACGCCGAAAGCTTTCCAGATCCATCTGCAAGACTGC
GTGTTTGACACCCAGACAACCATGACAACGACCTTCACCGGTAACGCGTCCGCTACCAAC
AGCGGCAATTACTACACCATTTACAATACCGACACCGGCGCGGCATTTAACAATGTCAGC
CTGGCGATTGGTGATGCTCAGGGGACCTCTTACAAAAGCGGTACGGGCATCAACCAGACA
ATTGTAAAAGATACTGCCACCAACAAAGGCAAAGCGAAGCAGACGCTGGACTTTAAAGCC
TGGCTGGTGGGCGCTGCTGATGCGCCAGATTTGGGTAACTTCGAAGCCAACACGACTTTC
CAGATTACTTATCTCTAAGTGATATCCCCATAGCCTTCGGCTATGGGGTTTTTTAAATGG
AATTTGCGCAAATTATAATAATTACGGATGGATACGTGCATGCCTGACGATTCTCTTTTC
CGACTGCGGGTGCTTCCCTGCTGCATTGCGCTGGCAATGTCAGGGTGTTATGTCAATGCC
TGGGCTGAAGATGAAATTCAGTTTGATTCCCGTTTCCTGGAGTTAAAAGGCGACACAAAA
ATCGATCTGAAGCGATTTTCCAGCCAGGGATATGTCGAACCTGGTAAATACAATTTACAG
GTTCAACTAAATAAACAGCCGCTGGCGGAAGAATACGATATTTACTGGTACGCCTCTGAG
AACGATGCCAGTAAAACCTATGCCTGCCTGACACCTGAACTGGTCGCTCAGTTTGGTTTA
AAAGAGGATGCGGCAAAAAACCTGCAATGGATCCACGACGGCAAATGTTTGAAACCCGGC
CAGCTGGAAGGCATTGATATTAAAGCTGACCTGAGTCAGTCAGCGTTAGTCATTTCATTA
CCCCAGGCTTACCTTGAATATACCGACACCGACTGGGACCCACCTTCACGCTGGGATGAC
GGTATTTCTGGTTTAATTGCTGACTACAGTATTACCGCCCAGACACGACATGAAGAAAAT
GGCGGGGATGACAGCAATGAAATTAGCGGCAACGGAACGGTTGGGGTTAACCTCGGCGCA
TGGCGTCTGCGAGCCGACTGGCAGACCGACTACCAGCACAGCAAAAGCAATGATGAAGAT
GTTATCAACGGTGATGACACGCAAAAAAACTGGGAGTGGAGCCGCTACTACGCCTGGCGG
GCTTTACCGTCGCTAAAAGCCAAACTTGGCCTTGGCGAAGACTACCTTAATTCTGATATT
TTCGACGGCTTTAACTACGTGGGTGGCAGTATCAGCACCGACGATCAAATGTTGCCGCCG
AATCTGCGCGGCTATGCGCCGGATATCTCCGGCGTGGCGCACACCACCGCGAAAGTGACC
GTCAGCCAGATGGGCCGCGTGATTTACGAAACGCAGGTTCCGGCGGGGCCGTTCCGCATC
CAGGATCTTGGCGATTCTGTCTCCGGTACACTGCACATCCGCATTGAAGAACAGAACGGC
CAGGTGCAGGAATATGACATCAACACCGCCTCGATGCCGTTCCTGACCCGCCCCGGCCAG
GTGCGCTATAAGCTGATGATGGGCCGCCCGCAGGAGTGGGGGCATCATGTTGAAGGTGGT
TTCTTCTCCGGCGGCGAAGCTTCATGGGGGATTGCCAACGGCTGGTCGCTCTACGGCGGA
GCGCTGGCAGATGAACACTATCAGTCGGCGGCGCTTGGCGTCGGTCGCGACCTGTCTGTC
TTTGGCGCAGTCGCCTTTGATATCACCCACTCGCATACCCGCCTGGATAAAGAGACCGCC
TACGGTAAAGGTTCACTGGACGGTAACTCGTTTCGCGTGAGCTATTCCAAAGACTTCGAT
GAACTGAACAGCCGCGTCACTTTTGCCGGATACCGCTTCTCGGAAGAGAACTTCATGACC
ATGAGCGAGTATCTCGATGCCAGCGACAGCGAAATGGTGCGCACTGGCAACGACAAAGAG
ATGTACACCGCCACCTACAACCAGAACTTCAGGGATGCCGGTGTGTCTGTTTATCTAAAC
TACACCCGCCATACCTACTGGGATCGCGACGAACAGACCAACTACAACGTCATGCTCTCG
CACTACTTCAACCTGGGCAGTATCCGCAATATGAGTATTTCCATGACCGGATACCGCTAC
GAATATGACAACCGCGCCGATAAAGGTGTGTACATATCGCTCAGTATGCCGTGGGGCGAC
AGCAGCACCATCAGCTATAACGGTAACTACGGCAGCGGTGCGGACAGCAGCCAGGTGGGG
TATTTCAGCCGTGTCGATGACGCAACCCACTACCAGTTGAACGTGGGAACCAGTGACAAA
CACTCCAGCGTTGACGGCTATTACAGCCACGATGGTTCGCTGGCGCAGGTCGATCTCAGC
GCCAACTACCATGAAGGGCAGTACACCTCGGCGGGCATTTCCTTACAGGGCGGCGCGACG
CTCACCGCACAAGGTGGCGCGCTTCACCGTACCCAGAATATGGGCGGCACGCGTCTGCTG
ATTGATGCCGACGGCGTGGCTGGTGTTCCGGTAGAAGGAAATGGTGCGGCGGTTTACACC
AATATGTTCGGTAAGGCCGTGGTGGCAGACGTCAACAACTACTACCGCAACCAGGCGTAT
ATCGACCTTAACAACCTGCCGGAAAACGCCGAAGCCACCCAGTCCGTGGTGCAGGCGACG
CTTACCGAAGGAGCCATTGGCTACCGTAAGTTTTCGGTTATCAGCGGGCAAAAAGCGATG
GCGGTATTGCGCCTGCAAGATGGCAGTCATCCGCCGTTTGGCGCGGAAGTGAAAAATGAC
AACGCGCAGAACGTCGGTCTGGTTGATGATGATGGCAACGTCTACCTCGCGGGTGTGAAA
CCTGGCGAGCATATGACCGTTTCATGGGGCGGCGTGGCCCACTGTGATATTCATCTGCCG
GACCCACTGCCTGCCGATCTGTTCAATGGCCTGTTATTGCCATGTCAGCAAACAGGGCCG
ATATCTCCTTCGATGCCCAATGAAATTAAGCCGGTGATCCAGGAGCAGACCCAGCAGGTG
ATGCCAACGGAAGCGCCGGTATCGGTATCCGCCAATTAACAACGTGATTAAGGAATGATC
CATGACGAATCTATTTTGCTCTGCCAGAACGGCCGCAACGACGCTGGCGTTACTGATAAC
TGCCGCCAGCCTGTCAGCACAGGCCTCTGTCACGCCGGACCGTACACGCCTGATTTTTAA
CGAAAGTGATAAATCAATCAGTGTCACGCTGCGCAATAACGACCCGAAAATGCCGTATCT
GGCACAAAGCTGGATGGAAGATGAACAGGGTAACAAGATTAGCTCGCCACTGACGGTACT
GCCGCCGGTGCAGCGCATCGATTCCATGATGAACGGTCAGGTGAAGGTACAGGGCATGCC
GGATATCAACAAGCTGCCTGCCGACCGCGAGAGCGTGTTCTATTTCAACGTGCGTGAGAT
CCCGCCGAAATCGAACAAACCCAACACGTTACAGATTGCGCTGCAAACGCGCATCAAGCT
GTTCTGGCGACCAAAGGCGCTGGAAAACGTCAGCATGAAAAATCCATGGCAGCATAAGGT
GACCTTAACCCGCAGCGGCCAGGAGTTTACTGTCAATAACCCGACGCCGTACTTCGTGGT
TATCAGTAACGCCAGCGCGCAGAAAAACGGCAATCCGGCAGCGGGATTTTCTCCCATGGT
GATATCGCCAAAAACCTCCGTGCCGCTGAATGTCAAAATGGATAGCGTCCCGGTGCTGAC
CTACGTCAACGACTATGGCGCGCGGATGCCGCTGTATTTTAAATGTGGTGGCGATACCTG
CCAGGTGGACGCAGAGCAGAGCCGCAAAGGCTGATGCCGGGAGAGCCATATGAAAATAAT
TTATCTGGCGGTGTCGGGCATTGCGCTGCTGGCCTGGAATGTCGCCAGTGCAGAAACGAA
ACCCGTCAACCTGGAACTCAGAGTCCTGGTGGATGCGCCGCCGCCCTGTACCGTGACCGG
TAGTGCAGTGGAGTTTGGCGATGTGCTGATCGCCAGTATCGATGGCAACAATTACCGCCA
GAACGCGGGCTATACCCTCGATTGTTCGGGGCGTCTGGCAGACGATCTGCGGATGCAACT
GAAGGGCACCACCACAACCGTGAACGGTGAAACTGTGCTGGATGCAGGCATTGCCGGGTT
TGGCATCCGCATCGAAAACGCCGCCGATAACTCGCTGTTTTCCATTGGTGAAAATAACTG
GACGCCTTTTGCATTTAACTCTCTGCCGCAACTGAAGGCTGTGCCGGTAAAACAGAACGG
CGTGCAGCTCGCGCCAACGGAATTTAACGCCAGTATGACCATGGTGGTGGATTACCAATG
AAACGACTCGCACTTTTCCTGATTTGGGGTGCCTGCGGGGGCGCTCTGGCCTCACCGGAT
ATCACCTTTCACGGCACGCTGGTGTCGCCGCCTGCCTGCACCATCAACGAAGGCCAGACC
ATTGAACTGGAGTTTCGCGATGTACTTATCGACAGCATTGATGGCAACTACGCCCGCCAG
GAGGTGCCGTACACCATCAAATGTGACTCCGACGTTCGCAATGAGGCCTGGCAGATGACG
CTCACCTGGACCGGGACGCAAACCAGCTACAACGATGCGGCAATCGAAACCGATGTTCCG
GGATTCGGGATTCAGCTTTTGCAAAACGGGCAACGTTTTCAGCTTAATACCCCACTGACC
ATCAATGCCACGGATTTGACACAAAAACCGAAGCTTGAGGCCGTTCCGGTTAAAGCGAGT
GACGCTGTTTTAAACGACGGCACGTTTTCAGCGTACGCAACATTACGGGTGGAATATCAA
TGAAGACAAATACCGGATGTGTGCTTCTGGCAAGCCTGATGCTCACCGCCAGCGGAACCA
CGTTGGCGGCGGACAACCTGCATTTTTACGGCAACTTGTTAAGTAAATCCTGCACGCTGG
TGGTGGATGGTGAAGTGCTGGCGGAAGTGCATTTCCCGACCATCAGCAACCAGGATTTAA
CGGTGGCGGGCCAGTCTTCCAGGGTGCAGGTGGTCTTTAAGTTGAAAGATTGCAAAGGCC
CGGCGGATTACCAGGTCAAAGTCACGCTGACCGGTACGGAAGATAGCGAACAGCCAGGTT
TTCTGGCGCTTGACCCGGCATCCAGCGCGCAAGGGGTAGGGATTGGTATGGAAAAGTCAG
ACGGTACCTGGGTGCCGCTTAACGATTCTGCCGGTGCCACCTTTAACCTCACTAACGGCG
CGAATAACCTCAATTTTAATGCCTGGTTGCAGGCGAAAAGCGGTCGTGAAGTGACTTCTG
GTGACTTCACCGCCAGCCTGACTGCCACTTTTGAGTATATTTAAGATGAAGATAATACGA
AACTTTTTGGGGCTGTTGACGCTGATGGTGTTGAGCCTGACGGCTCAGGCACAGACATTT
CAGATGTATACCCCTATGGGTGTACCAGGCGCTTTAGCCAGGATAATATTTACTCTGGAA
GTTGTTACCCCTGCAGGCGTTTATACAGGTACATATCAGTCGCGCGATCCCAGGATGCTT
CTCGTTGGCAATTTAACATTGTTAAGCTGGAATGGTCCATCTTCAATTCCTGCGCCAACT
ATTTATCTGGATCATTCGAACGAAATAAATATGTCAAATTGTCCCGGTCTTGCTGGCGTT
CCCTCCACCAACGGCAAAGGATGGGATTGTTATGCTGCTGATTTAAAAGTCACGGTAACT
GGGGACGTGCAGGGGTGTCCATGGCTGGTTTCAACCCAGATTACCACTACGGACCTGGGA
GATGTGGGGGCTACCTATGTAGGTCCTAAATACAATAACTCCACCTGTCCATCAATCCCA
CTGACGACATATGATGTTTCCTGGGATGAGAATACGGTGATTCATAAAAAAACATTGAAT
CTGAAATCAACAGACGCCGTAGGGGGAATCATCGAGAAAACCCTGTCGACCTATTTAATG
GAAAGTGAGAGGCTGTGTGATGGTAGCCAGTTTGATCCTCGCGGGGCAAATTGCCGTTTT
GTTTCGCAGATGATCACTTTTACAGCATCAGGCTGCGACGATGCCAAAGTGACGGTGACG
CCGGTTCCGCATCCGATTACTGACAGGCAACTGCATGATATTGTGGTGCGCGTCGATGCC
AGCGCATTGCAGCCTATTGATTCAACGTGTCGCTTCCAGTATGTGTTGAATATGTTCTAG
CACATACCAGCCTGGTGACAGGAGTTTACCAGGCTTTTTTTCTCTCATATTGGATAATTT
GCCCTACCTGAACACATTTAGGCCGGATAAGGCGTTTACCCCGCATCCGGCATTCGATAC
CAGCATTCAGGGCGAAATGGCAAAACGCATCCGCCCCTAATATTCACGGTAACTCCGGCG
GCAGCCACTCTTCCACTTCAATCAACACTAACAACGCTGCATCTCCGCCGTACTCTTTCG
GTGCCTGGTGAAATGCCATTACATGCGGATGTTGCGCCAGCCACAGCGGCGTTTGCTGTT
TCAAAATATGCTTCCCGTGCCCGTGCATTACGCATGCGCAAAACACATGTTCACGGCGGC
AGGCGGCAATCAACGCCCCCAGTTCCTGCTTGGCCTGCATTTGCGTCAAACCATGTAAAT
CGAGGAAAAGCTCCGGTGAATAATCGCCGCGTCGCAACTTCTTCGCCTCAAAATGACTCA
CATCCGGGCGGACATATTTCACCGGGCCTTCGGTATTCAATAACGGCTGAAACTCATCTG
AGAAATAATGGCTGGCATCGGCCTGCTCCTGAATCAACCGTTTCACCGGCACTTCGCTGA
TTTTCTTACGCTGCGGTCGGTGGACAATCGTGTCCTGCTTAATCTTGCGAGTCCCCGCCA
TCAACTGGCGAAACAGAGCCTGGTCCTCCTCGCTAAGTGTTGTTTTCTTTTTCATTTATC
TGTCTCTATTTCTAATTTTCCTACAGTTTACCCGACTCGTAGCGCAATCGATCGTTTTAA
ACGTATTTTTCCTCACTCACCGCGCGTGAATGCTGATTTATCGTCATCTTCGTGGCAAAC
TAGCCGCCGAAATTATTGCGATCATGCCCTGGAGGAATACGTGGATAAAATTTTCGTTGA
TGAAGCAGTTAATGAGCTGCAAACCATTCAGGACATGTTGCGCTGGTCGGTTAGCCGCTT
CAGCGCGGCAAATATCTGGTACGGTCACGGCACCGATAACCCGTGGGATGAAGCGGTACA
ATTGGTGTTGCCGTCGCTCTACCTGCCGCTGGATATTCCGGAAGATATGCGCACCGCGCG
TCTGACCTCCAGCGAAAAACATCGTATTGTTGAGCGCGTGATCCGCCGCGTCAACGAACG
CATTCCGGTGGCTTACCTGACCAATAAAGCATGGTTCTGCGGTCATGAATTTTACGTCGA
TGAACGTGTGCTGGTGCCGCGCTCGCCGATTGGTGAACTGATCAACAATAAATTTGCCGG
GCTAATCAGCAAGCAACCGCAGCATATTTTAGATATGTGTACCGGTAGCGGCTGCATTGC
CATTGCCTGTGCTTATGCCTTCCCGGAAGCGGAAGTCGATGCGGTAGATATCTCTCCCGA
CGCGCTGGCGGTTGCCGAACAGAACATCGAAGAACACGGTCTGATCCACAATGTCATACC
GATTCGTTCCGATCTGTTCCGTGATTTGCCGAAAGTGCAGTACGACTTGATCGTCACTAA
CCCGCCGTATGTCGATGCGGAAGATATGTCCGACCTGCCAAACGAATACCGTCACGAGCC
AGAACTGGGCCTGGCATCTGGCACTGACGGCCTGAAACTGACGCGTCGCATTCTCGGTAA
CGCGGCAGATTACCTTGCTGATGATGGTGTGCTGATTTGTGAAGTCGGCAACAGCATGGT
ACATCTTATGGAACAATATCCGGATGTTCCGTTCACCTGGCTGGAGTTTGATAACGGCGG
CGATGGTGTGTTTATGCTCACCAAAGAGCAGCTGCTGGCGGCCCGTGAACATTTCGCGAT
TTATAAAGATTAAGTAAACACGCAAACACAACAATAACGGAGCCGTGATGGCTGGAAACA
CAATTGGACAACTCTTTCGCGTAACCACCTTCGGCGAATCGCACGGGCTGGCGCTTGGCT
GCATCGTCGATGGTGTTCCGCCAGGCATTCCGCTGACGGAAGCGGACCTGCAACATGACC
TTGATCGTCGTCGCCCTGGGACATCGCGCTATACCACCCAGCGTCGTGAGCCAGATCAGG
TCAAAATTCTCTCCGGTGTTTTTGAAGGTGTTACTACCGGCACCAGCATTGGTTTGTTGA
TCGAAAATACCGATCAGCGTTCTCAGGATTATAGTGCGATTAAGGACGTTTTCCGTCCTG
GCCATGCCGATTACACCTACGAACAAAAATACGGTCTGCGCGATTATCGCGGCGGTGGAC
GTTCTTCCGCCCGCGAAACCGCCATGCGCGTGGCGGCAGGGGCGATTGCCAAAAAATATC
TCGCCGAGAAATTTGGTATTGAAATCCGCGGCTGCCTGACCCAGATGGGCGACATTCCGC
TGGAAATCAAAGACTGGTCGCAGGTTGAACAAAATCCGTTCTTCTGCCCGGACCCGGACA
AAATCGACGCGTTAGATGAACTGATGCGCGCGCTGAAAAAAGAGGGCGACTCCATCGGCG
CGAAAGTCACCGTTGTAGCCAGTGGTGTCCCCGCCGGACTTGGCGAGCCGGTCTTTGACC
GCCTGGATGCCGACATCGCCCATGCGCTGATGAGCATCAACGCGGTGAAAGGCGTGGAAA
TTGGCGACGGTTTTGACGTAGTGGCGCTGCGCGGCAGCCAGAATCGCGACGAAATCACCA
AAGACGGTTTCCAGAGCAACCATGCGGGCGGCATTCTTGGCGGTATCAGCAGCGGGCAGC
AAATCATTGCCCATATGGCGCTGAAACCGACCTCCAGCATTACCGTGCCGGGGCGCACCA
TTAACCGCTTTGGCGAAGAAGTTGAGATGATCACCAAAGGCCGTCACGATCCTTGTGTCG
GGATCCGCGCGGTGCCGATCGCTGAAGCGATGCTGGCGATCGTTTTAATGGATCACCTGC
TACGGCAGCGGGCGCAAAATGCCGATGTGAAGACTGATATTCCACGCTGGTAAAAAATGA
ACAAAACCGCGATTGCGCTGCTGGCCCTGCTTGCCAGTAGCGCCAGCCTGGCAGCGACGC
CGTGGCAAAAAATAACCCAACCTGTGCCGGGTAGCGCACAATCGATAGGCAGTTTTTCTA
ATGGCTGTATCGTCGGCGCTGACACGCTGCCGATACAGTCCGAACATTATCAGGTCATGC
GTACCGATCAGCGTCGCTATTTCGGTCACCCGGACCTGGTGATGTTTATCCAGCGTCTGA
GTAGCCAGGTGAGCAATCTGGGCATGGGTACGGTGCTGATTGGCGATATGGGGATGCCCG
CTGGTGGGCGTTTCAACGGCGGTCATGCCAGCCACCAGACCGGACTGGATGTCGATATCT
TTCTGCAACTGCCGAAAACACGCTGGACCTCCGCGCAGCTCTTGCGCCCGCAAGCACTGG
ACTTAGTTTCCCGCGACGGTAAACACGTTGTCCCCACGCTGTGGAAGCCAGAAATTTTCA
GCTTGATCAAACTCGCCGCCCAGGACAAAGACGTCACACGCATTTTTGTTAATCCGGCGA
TTAAACAACAACTTTGCCTTGATGCGGGCACCGATCGCGACTGGTTGCGCAAAGTGCGAC
CCTGGTTCCAGCATCGCGCGCATATGCATGTACGATTACGTTGTCCTGCCGATAGTCTGG
AGTGTGAAGATCAACCTTTACCGCCACCAGGCGATGGTTGCGGGGCAGAACTGCAAAGCT
GGTTTGAACCTCCAAAACCGGGAACAACAAAGCCTGAGAAGAAGACACCGCCTCCGTTGC
CGCCTTCCTGCCAGGCGCTACTGGATGAGCACGTGATCTAATGGAAACGTTTAATAGCCT
GTTTATGGTTTCCCCGCTGTTGCTGGGAGTTCTCTTTTTTGTCGCCATGCTGGCGGGATT
TATCGACTCGATTGCCGGTGGTGGTGGGTTACTCACGATTCCGGCATTAATGGCTGCGGG
GATGTCTCCCGCTAATGCGCTGGCAACCAATAAACTGCAAGCCTGCGGCGGCTCTATTTC
CGCCACTATCTACTTTATTCGCCGCAAAGTGGTTAGTTTAAGCGATCAGAAACTCAATAT
CGCCATGACCTTTATCGGCTCAATGAGCGGCGCACTGCTGGTGCAATACGTTCAGGCTGA
TGTCTTACGGCAGATTTTGCCCATTCTGGTGATTTGTATCGGCCTCTATTTCTTGCTGAT
GCCAAAGCTGGGTGAAGAAGATCGCCAGCGCCGGATGTACGGTTTACCCTTCGCGTTAAT
TGCCGGTGGCTGCGTCGGTTTTTACGACGGATTCTTTGGTCCGGCAGCCGGATCGTTTTA
CGCGCTGGCCTTTGTTACGCTGTGCGGATTCAACCTCGCCAAAGCCACGGCTCACGCCAA
ATTACTTAACGCAACGTCAAACATCGGCGGTTTGCTGCTGTTTATTCTCGGCGGCAAAGT
GATTTGGGCGACGGGCTTTGTGATGCTGGTGGGGCAGTTCCTCGGCGCGCGCATGGGTTC
AAGACTGGTGTTGAGCAAAGGACAAAAGCTGATCCGCCCGATGATTGTTATCGTCTCGGC
GGTGATGAGTGCCAAATTACTTTACGATAGCCATGGACAGGAGATCCTCCACTGGTTGGG
GATGAACTAATGAACAGTACACACCACTATGAGCAGTTGATTGAAATTTTTAATAGCTGC
TTTGCCGATGATTTTAATACCCGTCTGATTAAAGGCGACGACGAACCGATCTATCTTCCC
GCTGAAGCGGAAGTACCGTATAACCGAATCGTCTTTGCTCATGGCTTTTATGCCAGCGCA
ATTCATGAGATTTCGCACTGGTGTATTGCCGGAAAAGCGCGCCGTAAGCTGGTTGATTTC
GGCTACTGGTATTGCCCGGACGGACGCGATGCCCAAACGCAAAGCCAGTTTGAAGATGTT
GAAGTGAAGCCGCAGGCGCTCGACTGGTTGTTCTGCGTGGCGGCGGGATATCCGTTTAAC
GTCAGTTGCGACAATCTGGAAGGGGATTTCGAACCGGACCGAGTGGTGTTTCAACGGCGG
GTACATGCGCAGGTGATGGATTATCTGGCAAATGGCATTCCGGAACGCCCGGCACGTTTC
ATTAAAGCACTACAAAATTATTATCACACGCCGGAACTTACGGCGGAACAGTTCCCGTGG
CCGGAAGCGCTAAACTAAAGCCAGTGCCACGTTTTACAATGAGGAAAGAAGATGATCGCG
GAGTTTGAATCACGCATTCTGGCATTAATCGACGGTATGGTTGACCATGCCAGTGATGAT
GAGTTGTTTGCCAGTGGGTATTTGCGTGGCCACCTGACATTAGCCATCGCAGAACTGGAA
AGTGGTGATGACCACTCCGCTCAGGCGGTGCATACGACCGTTAGCCAGAGTCTGGAAAAA
GCCATTGGTGCTGGTGAATTGTCGCCGCGTGACCAGGCGCTGGTGACCGATATGTGGGAA
AACCTGTTTCAGCAGGCATCACAGCAGTAAGTTGCGGCGTCTGGAGCACCATGCCTGATG
CGACGCTTATCGCGTCTTATCAGGCCTACACGTCACACGTAGGTCGGATAAGGCGTTCAC
GCCGCATCCGACAAACAATGCCAAAGCTGGTTACCCAGCCTTAACTGCTTTACCCTTCAA
CAATTTCCGCACCCATAACCGATTCGGATTTAACGCCGCCAGCGTACTGGCATCCATCGG
AATCGGTTCTTCACTCATCTGTGCCGCCAGAATCTCTGCGCACAGTGGGGCAGAACACAA
ACCACGCGAACCCAAAGCAGCAAGCATAAAGAGATCGTCATAAACCGGCGCGCTTACCGC
CTTATCTTTCTGCTCCGCCAGCGACGCATATTCCACAAGTGTTGCCTCATAATCGGGAAC
ATTACCTACCATTGGTAGATGATCGCGGGTGGCACAACGTACACCGCAGCGCGCCTCTTT
CTCACTGATATCAACCTCTTTTGCCCACTGTGCCTGCGGGAAACAATCAATCAACCGCTG
GCGATTCTGCTGCTGATCTTCATCACTGTACGTCGTATCTTCGCTGCCGCGATGATAACT
GGCACCAATACAATGATGCTGATTCGCCGGATTTTGTGGCGTGAGATAACCGTCATAGCA
CAGCACCTGCTTCAGTTTTGCCAGTTCCGGTGTCGTCGGAATATGGCTGACCTGACCGGC
AACCGAATATACTGGCAGAGATGATGTTTGGCTGAAACGGCTGATTTGATGCCCGTTCGC
CAGTACCACTACGCTGTGTGTTGCTTGCTGATCTCCTGCAAAATTTAACAACCAACAGTC
ATCCTTACGGGATAAATCCTGTAACTGATATTGATAATAAATCTGCAACCCCTGCTGTTG
CGCCAGTTCCAGCACATTACGGGTCAGTTCTGCTGGGCACAGCCAACCACCTTGCGGATA
AGTAATGCCGCTGCAATTTGTCGCAACGCCCGTAATTTGTTCAACCGCATTTGCCTCAAC
GGCTACAGCCAGTTCTTCGGGTAAATCCATTGACAACATCTGTGCGATTTTATGCTGGCT
TTTCTCATCCCAGCCTAACTGCGTGACGCCGCACCAGTCATGATCAAATTTAACGGGTAA
TTGGTCGTAAAACCGACGAGCAAAAGTAAACGCATTAGAGAAAAAGCGGTTTAGCGCCTC
ATCGTGTTTGCTTAATAACGGATACAACGCCCCCTGGCGATTGCCGGAAGCACCCAGCGC
GGGGGCTTCATCCGCGCAATAAAGCGTTACCTGCCAGCCGCGGCGTAATAACGCCAGCGA
CAACAACGCGCTGGCAATACCACCGCCGATAATCGCCGCTTCCAGTTTGCTGCTGCCCGT
ACGATTAAACCACGGCGTGGAGCAGGGGAGTGGTAATGTCTGTTCCATCACCCCACAAAG
CATTTCCCGTTTGCGCCCAAAGCCCTTACGTTTTTGCATCGTGAATCCGGCTTCCTGCAA
ACCGCGGCGGACAAAACCGGCAGACGTAAATGTCGCCAGCGTGCCGCCTGGACGCGCCAA
CCTTGCCATGGCGTTAAACAGATTTTGCGTCCACATATCCGGGTTTTTAGCTGGCGCAAA
GCCGTCCAGAAACCAGGCATCTACTTTTTGATTTAGAGAATCGTCCAGTTGGCTGGTCAG
TTCATTAATATCGCCAAACCATAAATCCAGCGTCACGCGGCCTTCATCGAGTAATAAACG
ATGGCAACCGGGCAAGGGCATTGGCCACTGCGCCTGAAGTTGTTCTGCCCACGGAGTCAG
TTCCGGCCAGTGTTGATGCGCTAAGGCTAAATCCGCACGGGTGAGGGGAAATTTCTCAAA
ACTAATGAAATGTAAGCGTTGTAATTGCGCTTGCGGATGCGCTTCGCGAAACTGATCAAA
TGCCTGCCATAGCGTCAGGAAGTTTAATCCGGTGCCGAAGCCGCTCTCTGCTACCACAAA
CAGAGGATGTGGATGTTCAGGAAAGCGTGCCTCTAATTGGTTACCTCCCAGAAAAACATA
ACGCGTCTCTTCCAGCCCGTTATCGTTGGAAAAATAGACATCGTCAAAATCTCGGGAAAC
AGGTGTACCCTCAGCATTAAATTCGAGGTTGGCAGGTTGTATGGAGTAGTGTTTCACGTA
AGTTACTCGTCTTACAGGCGGTGGCTCGATCTTAGCGATGTGTGTAAGGCTGCGCAAATT
TCTCTATTAATTGGCTGATCGGACTTGTTCGGCGTACAAGTGTACGCTATTGTGCATTCG
AAACTTACTCTATGTGCGACTTACAGAGGTATTGAATGAAACGTGCAGTGATTACTGGCC
TGGGCATTGTTTCCAGCATCGGTAATAACCAGCAGGAAGTCCTGGCATCTCTGCGTGAAG
GACGTTCAGGGATCACTTTCTCTCAGGAGCTGAAGGATTCCGGCATGCGTAGCCACGTCT
GGGGCAACGTAAAACTGGATACCACTGGCCTCATTGACCGCAAAGTTGTGCGCTTTATGA
GCGACGCATCCATTTATGCATTCCTTTCTATGGAGCAGGCAATCGCTGATGCGGGCCTCT
CTCCGGAAGCTTACCAGAATAACCCGCGCGTTGGCCTGATTGCAGGTTCCGGCGGCGGCT
CCCCGCGTTTCCAGGTGTTCGGCGCTGACGCAATGCGCGGCCCGCGCGGCCTGAAAGCGG
TTGGCCCGTATGTGGTCACCAAAGCGATGGCATCCGGCGTTTCTGCCTGCCTCGCCACCC
CGTTTAAAATTCATGGCGTTAACTACTCCATCAGCTCCGCGTGTGCGACTTCCGCACACT
GTATCGGTAACGCAGTAGAGCAGATCCAACTGGGCAAACAGGACATCGTGTTTGCTGGCG
GCGGCGAAGAGCTGTGCTGGGAAATGGCTTGCGAATTCGACGCGATGGGTGCGCTGTCTA
CTAAATACAACGACACCCCGGAAAAAGCCTCCCGTACTTACGATGCTCACCGTGACGGTT
TTGTTATCGCTGGCGGCGGCGGTATGGTTGTGGTCGAAGAACTGGAACACGCGTTGGCAC
GTGGTGCTCATATCTACGCTGAAATCGTTGGCTACGGCGCAACGTCTGATGGCGCAGACA
TGGTTGCTCCATCTGGCGAAGGCGCAGTGCGCTGCATGAAGATGGCGATGCACGGTGTTG
ATACGCCAATCGACTACCTGAACTCCCACGGTACTTCGACTCCGGTTGGCGACGTGAAAG
AGCTGGCTGCTATCCGTGAAGTGTTCGGCGATAAGAGCCCGGCGATTTCTGCAACCAAAG
CCATGACCGGTCACTCTCTGGGCGCTGCTGGCGTACAGGAAGCTATCTACTCTCTGCTGA
TGCTGGAACACGGCTTTATCGCCCCGAGCATCAACATTGAAGAGCTGGACGAGCAGGCTG
CGGGTCTGAATATCGTGACCGAAACGACCGATCGCGAACTGACCACCGTTATGTCTAACA
GCTTCGGCTTCGGCGGCACCAACGCCACGCTGGTAATGCGCAAGCTGAAAGATTAATTCG
GAGTAGGTCGGAGTAGGTCGGATAAGACGCGCCAGCGTCGCATCCGACGTTACGCGCCAA
TGCGGCATTCGGCACTAACGCCAAAGGGAACCCGATGGTTCCCTTTTTCACATCATTGAC
AATCGCCGCCTGTTCCAGGCAAACTTCCCGCTTTGTCGATTTCCTTCTGAAAAGACGTAC
GCGTTAATTCCTGCCAACGCACCGTAACCCTGAAACCAGAGAGATGAGACGGGGATACTC
CTCGCCTTGCGCTGCATTCTGGAGTAATGCATGACTGCTGTAAGCCAAACCGAAACACGA
TCTTCTGCCAATTTTTCGCTCTTCCGCATCGCTTTTGCGGTTTTTCTCACCTACATGACC
GTAGGGCTGCCGTTGCCGGTTATCCCGCTGTTTGTTCATCATGAACTGGGCTATGGCAAT
ACCATGGTCGGCATTGCCGTCGGGATTCAGTTTCTGGCTACGGTGCTGACGCGTGGCTAT
GCCGGGCGACTGGCCGATCAATATGGCGCAAAACGTTCGGCGCTTCAGGGGATGTTAGCT
TGTGGTCTGGCGGGGGGCGCGTTGCTGCTGGCGGCGATTTTGCCCGTCTCCGCACCGTTC
AAATTTGCCCTGTTGGTCGTCGGGCGTTTGATTCTTGGCTTTGGTGAAAGCCAGTTACTG
ACAGGCGCTCTGACCTGGGGATTAGGCATCGTAGGGCCAAAACACTCTGGCAAAGTAATG
TCATGGAACGGAATGGCGATTTACGGTGCCCTCGCTGTTGGTGCACCGCTTGGCCTGTTG
ATTCATAGCCATTACGGTTTTGCCGCACTGGCGATCACCACAATGGCATTACCCTTACTG
GCGTGGGCCTGTAACGGCACAGTGCGCAAAGTACCGGCCCTGGCGGGAGAACGTCCATCG
CTGTGGAGCGTTGTCGGGCTTATCTGGAAACCAGGGTTAGGTCTGGCACTACAAGGCGTT
GGTTTTGCGGTTATCGGGACTTTCGTTTCGCTCTACTTTGCCAGCAAAGGATGGGCGATG
GCGGGCTTTACTCTTACCGCGTTTGGCGGGGCATTTGTCGTGATGCGCGTCATGTTTGGC
TGGATGCCGGACCGTTTTGGCGGCGTGAAAGTGGCGATAGTCTCTCTGCTTGTAGAAACG
GTGGGCTTGTTGCTGCTCTGGCAAGCCCCGGGTGCGTGGGTCGCATTAGCGGGCGCGGCG
TTAACCGGAGCCGGATGTTCGCTTATCTTTCCTGCGCTGGGCGTGGAGGTGGTTAAACGC
GTCCCCTCACAAGTTCGCGGCACCGCACTGGGCGGTTACGCCGCGTTTCAGGATATCGCC
CTCGGCGTCTCCGGGCCGCTGGCGGGAATGCTGGCGACCACGTTTGGTTACTCTTCGGTA
TTTCTTGCCGGGGCGATCTCTGCAGTGCTGGGAATTATTGTCACGATACTGTCATTTCGT
CGGGGCTAACGAACCAGCCAGACCAGCATCAGGATAATCGCGACTAACAGTATCCACAGC
GCGGGACGCGTTGCCATATTTTGCAACGTGTCCATCATCGGTGGAAAAGGATTAAGCAGC
GGTTGCATATCACGCGGATCAATCCCTTTAACCCGCCGTTGATAAAGCTGATTAAGAATA
TCCTCGGCCTGGGCAGAAGAAAGCGATGATTGCGCAGAAAGGCCATATTTTTGCTGGATA
TATGCCGATAACGCCGCCAGTTCACTGGCATCTAAAGGTTGTTTTAGCGCCATCTGTAGT
GATTCCAGCGTCGGCGTATTTTGCTGGCTTAGCGTCTGACGCGCCTGTAGCCAGGTCACC
AGATGGTTAAACAGTTTCGCTGGAATTAACTCGCCATCTTTCACCCCGGAAAGTTCCAGC
ATCGATTGCCAGATCTGTTTGCTGGGTTCCCCCGTTGCCGCCGCAAGTTTGGTCACCAGC
TGTTTGAGCGCATTGTGCTCCGCCGGTAATAAAGGACGATCGGTCGCCTCGCGCTGCTGC
GGTTGCGGAATAACCATCTTCCCTTCCTGCAACAGGGTTAGAATGGTTTTTAATTGCTCC
GGTGAGAGCTGATTCAGCGGCGTCTGACCAAAGTTATGACGGATATAATCCGTGACCGCC
TGACGATTATTCCCCAGACGTAAATACTCCCCTAATTGCGCTAAAAGCTGGCGGGCAGAA
TGGCTTTTTTGCGCGGCCAGCAGACGTTGCGCCAGATTATGCTCAGCGGCAGGGAAGTGA
CGCGAAAGCAGCGGTGAATCTCCCGACAGACCAATATCGTGCCTGATACCCGCCCACAGT
TCTGCTCTTTGCTGTTGCGTCAGTGAGGTCACTTTCGTCATTAAGCTTTCCAGCGAAGTA
CGTTGCTGACTGGATAAAGGCTGATTGCCCGCGCCAGACGGCAGGTTATCTCCCTGACCT
GGTGGTTGCCCAGGAGGAGGGCCGGAAATAGGTTGTATCATTACGTATCCTTATACCTGA
AATCTTCGCAAGTATGCCTGGCCGCGAGATTATGGCACACTTGTCCGGTTAACTCTCGTC
TCATACAGGTAACACAAACGTGAAAATCCTTGTTGATGAAAATATGCCTTATGCCCGCGA
CTTATTTAGCCGTTTGGGTGAGGTGACCGCGGTTCCCGGGCGTCCAATCCCCGTCGCTCA
ACTGGCAGACGCGGATGCGCTGATGGTGCGTTCGGTCACGAAAGTGAATGAATCTTTGCT
GGCAGGAAAACCCATTAAATTTGTTGGCACTGCCACTGCGGGGACCGACCATGTCGATGA
AGCATGGTTGAAGCAGGCGGGAATTGGTTTTTCCGCTGCACCTGGCTGTAATGCGATTGC
GGTGGTGGAATATGTTTTCTCCTCCCTGCTGATGCTTGCCGAACGCGATGGATTTTCACT
GCACGAGCGTACCGTGGGGATCGTGGGCGTTGGTAACGTTGGACGTCGATTGCAGGCGCG
ACTGGAAGCGTTAGGGATTAAAACCTTGCTTTGCGATCCGCCTCGCGCTGACCGTGGGGA
TGAGGGTGATTTCCGCTCGCTGGATGAGTTAGTCCAGCGCGCGGATATTCTGACTTTCCA
TACGCCACTCTTTAAAGATGGTCCGTACAAAACGCTACATCTGGCGGATGAAAAACTGAT
CCGTAGCCTGAAGCCGGGAGCGATTCTGATTAACGCCTGCCGTGGCGCAGTCGTCGATAA
TACCGCGCTGCTGACCTGCCTGAATGAAGGCCAGAAGTTAAGCGTGGTGCTGGATGTCTG
GGAAGGCGAGCCGGAACTTAATGTGGAATTGCTGACAAAAGTGGATATCGGCACGCCGCA
TATTGCAGGCTATACCCTGGAAGGTAAAGCACGCGGTACTACGCAAGTGTTTGAAGCCTA
TAGCAAGTTTATTGGGCATGAACAGCACGTTGCGCTGGATACATTACTGCCCGCGCCAGA
GTTTGGTCGCATTACGCTGCATGGCCCGCTCGATCAACCGACGCTGAAAAGGCTGGTGCA
TTTGGTGTATGATGTGCGCCGCGATGACGCACCGCTGCGTAAAGTCGCCGGGATACCGGG
TGAGTTCGATAAACTGCGCAAAAACTATCTTGAGCGCCGTGAATGGTCATCTCTGTATGT
AATTTGTGATGACGCCAGTGCGGCATCATTGCTGTGTAAACTGGGTTTTAACGCCGTTCA
TCATCCGGCACGTTAATCTCTTCTTCATGCTCTCTGCTGTAACATTGGCAGGGAGCTTTG
CTATTTCTGGAGTAAACCACCATGTCTGAAGGCTGGAACATTGCCGTCCTGGGCGCAACT
GGCGCTGTGGGCGAAGCCCTGCTTGAAACGCTGGCTGAACGTCAGTTCCCGGTTGGGGAA
ATTTATGCACTGGCACGTAACGAAAGCGCAGGCGAACAACTGCGCTTTGGTGGTAAAACA
ATCACCGTGCAGGATGCCGCTGAATTCGACTGGACGCAGGCGCAGCTGGCATTTTTTGTC
GCAGGCAAAGAAGCTACCGCTGCCTGGGTTGAAGAAGCGACCAACTCAGGTTGCCTGGTG
ATCGACAGCAGCGGACTGTTTGCTCTCGAACCAGACGTACCGCTGGTGGTGCCGGAAGTA
AACCCGTTTGTACTGACCGATTACCGCAACCGGAATGTCATCGCCGTACCGGACAGTCTG
ACCAGCCAGTTGCTGGCGGCACTGAAACCGTTAATCGATCAGGGCGGTTTATCACGTATC
AGCGTTACCAGCCTGATTTCAGCCTCCGCCCAGGGCAAAAAAGCGGTCGATGCGTTAGCG
GGGCAGAGTGCGAAATTGCTCAACGGCATTCCGATTGACGAAGAAGATTTCTTCGGGCGT
CAGCTGGCGTTCAACATGCTGCCGTTACTGCCGGATAGCGAAGGTAGCGTGCGTGAAGAA
CGTCGTATCGTTGACGAAGTACGCAAAATCCTGCAGGACGAAGGGCTGATGATTTCGGCA
AGCGTCGTCCAGGCACCGGTATTCTACGGTCATGCCCAGATGGTCAACTTTGAAGCACTG
CGTCCGCTGGCGGCAGAAGAAGCGCGTGATGCGTTTGCTCAGGGCGAAGATATTGTGCTC
TCTGAAGAGAACGAATTCCCGACTCAGGTAGGGGATGCTTCTGGTACGCCGCATCTTTCT
GTTGGCTGCGTGCGTAATGACTACGGTATGCCGGAGCAAGTCCAGTTCTGGTCGGTGGCC
GATAACGTTCGCTTTGGCGGCGCGCTGATGGCAGTAAAAATCGCCGAGAAACTGGTGCAG
GAGTATCTGTACTAATGTCCGACCAGCAACAACCGCCAGTTTATAAAATTGCGCTGGGCA
TTGAGTACGACGGCAGTAAGTATTACGGCTGGCAACGGCAGAACGAAGTTCGCAGTGTGC
AGGAGAAGCTGGAAAAGGCGCTCTCCCAGGTGGCGAACGAACCCATCACCGTCTTCTGCG
CCGGGCGTACTGACGCAGGGGTACACGGTACCGGGCAGGTTGTGCATTTCGAAACAACCG
CGCAGCGCAAAGACGCTGCGTGGACGTTGGGCGTAAATGCGAATTTACCTGGTGACATCG
CCGTGCGTTGGGTTAAAGCTGTACCTGATGATTTTCATGCCCGATTTAGCGCCACGGCTC
GCCGTTATCGCTACATCATCTACAATCATCGGCTGCGCCCGGCGGTACTGAGTAAAGGGG
TAACCCATTTTTACGAACCGCTGGACGCTGAACGGATGCATCGGGCTGCGCAATGCTTGC
TGGGCGAGAATGATTTCACCTCGTTCCGTGCGGTGCAGTGCCAGTCCCGAACCCCGTGGC
GCAACGTTATGCATATTAATGTCACGCGTCACGGTCCTTATGTGGTGGTAGATATCAAAG
CGAATGCCTTTGTACATCATATGGTCAGGAATATTGTCGGCAGCCTGATGGAAGTCGGTG
CCCACAACCAGCCGGAGAGCTGGATAGCAGAGTTGCTGGCGGCAAAGGACAGAACGCTGG
CGGCAGCAACGGCAAAAGCGGAAGGGCTGTATCTGGTCGCGGTGGATTACCCTGACCGGT
ATGATCTTCCAAAACCGCCAATGGGCCCGCTATTTCTGGCGGACTAACGAGAATAACGCT
CGTAACATTTCAGGCTGTAGCCAACGTAGTTACAGCCTGAAAGATGACGAGTACAAGGCA
TAGGCAAATATGGACCTGATTTATTTCCTCATCGATTTTATCCTGCACATTGACGTGCAT
CTGGCAGAGCTGGTCGCGGAGTACGGCGTCTGGGTTTATGCCATTTTGTTCTTAATTTTG
TTCTGTGAAACCGGTCTGGTGGTAACGCCGTTTTTACCGGGTGATTCATTGCTGTTTGTT
GCCGGTGCGTTGGCATCACTGGAAACCAACGATCTCAACGTCCATATGATGGTGGTGCTG
ATGCTGATCGCCGCGATTGTGGGTGACGCGGTCAATTACACTATCGGGCGGTTGTTCGGT
GAAAAGTTATTCAGTAATCCCAATTCGAAAATTTTCCGTCGCAGTTATCTCGACAAAACC
CATCAGTTTTATGAGAAACATGGCGGCAAAACGATTATTCTCGCCCGTTTTGTGCCGATC
GTCAGAACGTTCGCCCCGTTTGTTGCGGGAATGGGCCACATGTCGTACCGTCATTTCGCT
GCTTATAACGTGATCGGCGCACTGTTGTGGGTACTGCTTTTTACCTACGCAGGCTATTTC
TTCGGTACAATCCCGATGGTTCAGGATAACCTTAAGCTGCTGATCGTCGGGATTATTGTG
GTTTCTATTTTGCCGGGCGTCATCGAAATAATCCGTCACAAACGCGCTGCGGCACGCGCC
GCAAAATAAAAAGTAACTCAGCGGTTCGACCACTTTTTTATCCAAAGTTTCGGGCTGTTA
TGTTTTAATGTGCAACATTCATGGTCTGTTGGGGGCAAAAATGGCATTATGCGTCCCCAA
AGATAAAACTGGCATCGAACCAGGTTCAGACAGAAAGGTCCCTAATGAGCTGGATTGAAC
GAATTAAAAGCAACATTACTCCCACCCGCAAGGCGAGCATTCCTGAAGGGGTGTGGACTA
AGTGTGATAGCTGCGGTCAGGTTTTATACCGCGCTGAGCTGGAACGTAATCTTGAGGTCT
GTCCGAAGTGTGACCATCACATGCGTATGACAGCGCGTAATCGCCTGCATAGCCTGTTAG
ATGAAGGAAGCCTTGTGGAGCTGGGTAGCGAGCTTGAGCCGAAAGATGTGCTGAAGTTTC
GTGACTCCAAGAAGTATAAAGACCGTCTGGCATCTGCGCAGAAAGAAACCGGCGAAAAAG
ATGCGCTGGTGGTGATGAAAGGCACTCTGTATGGAATGCCGGTTGTCGCTGCGGCATTCG
AGTTCGCCTTTATGGGCGGTTCAATGGGGTCTGTTGTGGGTGCACGTTTCGTGCGTGCCG
TTGAGCAGGCGCTGGAAGATAACTGCCCGCTGATCTGCTTCTCCGCCTCTGGTGGCGCAC
GTATGCAGGAAGCACTGATGTCGCTGATGCAGATGGCGAAAACCTCTGCGGCACTGGCAA
AAATGCAGGAGCGCGGCTTGCCGTACATCTCCGTGCTGACCGACCCGACGATGGGCGGTG
TTTCTGCAAGTTTCGCCATGCTGGGCGATCTCAACATCGCTGAACCGAAAGCGTTAATCG
GCTTTGCCGGTCCGCGTGTTATCGAACAGACCGTTCGCGAAAAACTGCCGCCAGGATTCC
AGCGCAGTGAATTCCTGATCGAGAAAGGCGCGATCGACATGATCGTCCGTCGTCCGGAAA
TGCGCCTGAAACTGGCGAGCATTCTGGCGAAGTTGATGAATCTGCCTGCGCCGAATCCTG
AAGCGCCGCGTGAAGGCGTAGTGGTACCCCCGGTACCGGATCAGGAACCTGAGGCCTGAT
AACTGATAAGGGCAGGGCCACTGGCTCTGCCCTTTTGCTATTCTCACCGTAACGAATCAG
CGGATACCATGATTATCAAACGCACTCCTCAAGCCGCGTCGCCTCTGGCTTCGTGGCTTT
CTTATCTGGAAAACCTGCACAGTAAAACTATCGATCTCGGCCTTGAGCGCGTGAGCCAGG
TCGCGGCGCGTCTTGGCGTTCTGAAACCAGCGCCATTTGTGTTTACCGTTGCGGGTACGA
ATGGCAAAGGCACCACCTGCCGTACGCTGGAGTCGATTCTGATGGCGGCAGGGTACAAAG
TGGGCGTCTACAGTTCGCCTCATCTGGTGCGTTATACCGAGCGCGTACGTGTGCAGGGTC
AGGAATTGCCGGAATCGGCCCACACCGCCTCTTTTGCGGAGATTGAATCGGCACGCGGTG
ATATTTCCCTGACCTATTTCGAGTACGGTACGCTGTCGGCGTTGTGGCTGTTCAAACAGG
CACAACTTGACGTGGTGATTCTGGAAGTAGGGCTGGGCGGTCGTCTGGACGCAACCAATA
TTGTCGACGCCGATGTCGCGGTAGTAACCAGTATTGCGCTGGATCATACCGACTGGCTGG
GGCCAGATCGCGAAAGTATTGGTCGCGAGAAAGCAGGCATCTTCCGCAGCGAAAAACCGG
CAATTGTCGGTGAGCCGGAAATGCCTTCTACCATTGCTGATGTGGCGCAGGAAAAAGGTG
CACTGTTACAACGTCGGGGCGTTGAGTGGAACTATTCCGTCACCGATCATTACTGGGCGT
TTAGCGATGCTCACGGCACGCTGGAAAATCTGCCGTTGCCGCTTGTCCCGCAACCGAATG
CCGCAACGGCGCTGGCGGCACTGCGTGCCAGCGGGCTGGAGGTCAGTGAAAATGCCATTC
GCGACGGGATTGCCAGCGCAATTTTGCCGGGACGTTTCCAGATTGTGAGCGAGTCGCCAC
GCGTTATTTTTGATGTCGCGCATAATCCACATGCGGCGGAATATCTCACCGGGCGTATGA
AAGCGCTACCGAAAAACGGGCGCGTGCTGGCGGTTATCGGTATGCTACATGATAAAGATA
TTGCCGGAACTCTGGCCTGGTTGAAAAGCGTGGTTGATGACTGGTATTGTGCGCCACTGG
AAGGGCCGCGCGGTGCCACGGCAGAACAACTGCTTGAGCATTTGGGTAACGGCAAATCAT
TTGATAGCGTTGCGCAGGCATGGGATGCCGCAATGGCGGACGCTAAAGCGGAAGACACCG
TGCTGGTGTGTGGTTCTTTCCACACGGTCGCACATGTCATGGAAGTGATTGACGCGAGGA
GAAGCGGTGGCAAGTAAGTTTCAGAATCGGTTAGTGGGCACGATCGTGCTGGTGGCGCTG
GGGGTGATTGTACTTCCAGGGCTGCTGGACGGGCAGAAAAAACATTATCAGGATGAGTTT
GCGGCTATCCCGCTGGTTCCAAAAGCGGGCGATCGCGATGAGCCTGATATGATGCCAGCC
GCCACCCAGGCGTTGCCGACGCAGCCGCCGGAAGGCGCAGCGGAAGAGGTGCGGGCAGGT
GATGCCGCAGCACCGTCGCTCGATCCGGCCACTATTGCAGCCAATAACACCGAGTTTGAA
CCGGAACCTGCACCGGTCGCGCCACCGAAGCCGAAACCGGTGGAGCCGCCTAAACCAAAG
GTTGAAGCACCACCTGCGCCGAAGCCAGAACCGAAGCCGGTCGTGGAAGAAAAAGCTGCA
CCGACGGGTAAAGCCTATGTTGTGCAACTGGGTGCGCTGAAAAATGCCGATAAAGTGAAT
GAAATTGTCGGTAAGCTGCGCGGTGCCGGTTATCGGGTTTATACGTCGCCATCCACGCCA
GTGCAGGGTAAAATTACCCGTATTCTGGTTGGGCCGGATGCCTCGAAAGATAAGCTGAAA
GGTTCGCTGGGTGAGTTGAAGCAACTTTCTGGCTTAAGTGGCGTGGTAATGGGCTATACG
CCGAATTAATACGGTCTTGCCTGATGCGACGCTGGCGCGTCTTATCAGGCCTACGCAGGG
GTAGAACCGTAGGTTGGATAAGGCGTTTACGCCGCATCCGACACGCATTGCACGATGCCG
CAAAGGCATAAAAAGTCGATGGCGTTGAATATTTTTTCAGCGCCATTTTTATTGATGCGC
GGGAAGGAAATCCCTACGCAAACGTTTTCTTTTTCTGTTAGAATGCGCCCCGAACAGGAT
GACAGGGCGTAAAATCGTAGGACACATATGGTCTGGATTGATTACGCCATAATCGCGGTG
ATTGCTTTTTCCTCTCTGGTTAGCCTGATCCGCGGCTTTGTTCGTGAAGCGTTATCGCTG
GTGACATGGGGTTGTGCTTTCTTTGTTGCCAGTCATTACTACACTTACCTGTCAGTCTGG
TTTACGGGCTTTGAAGACGAACTGGTTCGAAATGGGATTGCCATCGCGGTACTGTTTATC
GCTACCCTGATCGTTGGTGCTATCGTGAACTTCGTGATAGGCCAGTTGGTGGAGAAAACG
GGGTTGTCAGGCACCGATCGGGTGCTGGGCGTCTGTTTCGGTGCGTTGCGCGGTGTGTTG
ATTGTTGCCGCCATTCTCTTCTTTCTCGACTCCTTTACCGGGGTGTCGAAAAGCGAAGAC
TGGAGCAAATCACAGCTGATCCCGCAGTTCAGTTTTATCATCAGATGGTTTTTTGATTAT
CTGCAAAGCTCGTCAAGTTTCTTGCCCAGAGCGTAAGTGCTCTGAGATGTGGCTTAACGA
GGAAAAAGACGTATGTGCGGTATTGTCGGTATCGCCGGTGTTATGCCGGTTAACCAGTCG
ATTTATGATGCCTTAACGGTGCTTCAGCATCGCGGTCAGGATGCCGCCGGCATCATCACC
ATAGATGCCAATAACTGCTTCCGTTTGCGTAAAGCGAACGGGCTGGTGAGCGATGTATTT
GAAGCTCGCCATATGCAGCGTTTGCAGGGCAATATGGGCATTGGTCATGTGCGTTACCCC
ACGGCTGGCAGCTCCAGCGCCTCTGAAGCGCAGCCGTTTTACGTTAACTCTCCGTATGGC
ATTACGCTTGCCCACAACGGCAATCTGACCAACGCTCACGAGTTGCGTAAAAAACTGTTT
GAAGAAAAACGCCGCCACATCAACACCACTTCCGACTCGGAAATTCTGCTTAATATCTTC
GCCAGCGAGCTGGACAACTTCCGCCACTACCCGCTGGAAGCCGACAACATTTTCGCCGCC
ATCGCTGCTACAAACCGCTTAATCCGCGGCGCGTATGCCTGTGTGGCGATGATTATCGGC
CACGGTATGGTTGCTTTCCGCGATCCTAACGGTATTCGTCCGCTGGTACTGGGAAAACGT
GATATTGACGAGAACCGCACAGAATATATGGTCGCTTCCGAAAGCGTTGCGCTCGATACA
CTGGGCTTTGATTTCCTGCGTGACGTCGCGCCTGGCGAAGCGATTTACATCACTGAAGAA
GGGCAGTTGTTTACCCGTCAATGTGCTGACAATCCGGTCAGCAATCCGTGCCTGTTTGAG
TATGTATACTTTGCTCGCCCGGACTCGTTCATCGACAAAATTTCCGTTTACAGCGCGCGT
GTGAATATGGGCACGAAGCTGGGCGAGAAAATTGCCCGCGAATGGGAAGATCTGGATATC
GACGTGGTGATCCCGATCCCGGAAACCTCGTGTGATATCGCGCTGGAAATTGCGCGTATT
CTGGGCAAACCGTACCGCCAGGGCTTCGTTAAAAACCGCTATGTTGGCCGCACCTTCATC
ATGCCGGGCCAGCAGCTGCGTCGTAAGTCCGTGCGCCGTAAACTGAACGCCAACCGCGCC
GAGTTCCGCGATAAAAACGTCCTGCTGGTCGACGACTCCATCGTCCGTGGCACCACTTCT
GAGCAGATTATCGAGATGGCACGCGAAGCCGGAGCGAAGAAAGTGTACCTCGCTTCTGCG
GCACCGGAAATTCGCTTCCCGAACGTTTACGGTATCGATATGCCGAGCGCTACGGAACTG
ATCGCTCACGGTCGCGAAGTAGATGAAATTCGCCAGATCATCGGTGCTGACGGGTTGATT
TTCCAGGATCTGAACGATCTGATCGAAGCCGTTCGCGCTGAAAACCCGGATATCCAGCAG
TTTGAATGCTCGGTGTTCAACGGCGTCTACGTCACCAAAGATGTTGATCAGGGCTACCTC
GATTTCCTCGATACTTTACGTAATGACGACGCCAAAGCAGTGCAACGTCAGAACGAAGTG
GAAAATCTCGAAATGCATAACGAAGGATGATGCCTTCGCTCAGGGTGCCGATCTGGCACC
CTGACTTGCAACTCCCGCCGAAATCCTGCAAAGTCTGCCTGCAAGTCTGACAGGGCAACT
ATTTATGAAACGACTTATTGTGGGCATCAGCGGTGCCAGCGGCGCGATTTATGGCGTGCG
TTTATTACAGGTTCTGCGCGATGTCACAGATATCGAAACGCATCTGGTAATGAGCCAGGC
GGCGCGCCAGACCTTATCCCTCGAAACGGATTTTTCCCTGCGCGAAGTGCAGGCGTTAGC
CGATGTCACGCACGATGCGCGCGATATTGCCGCCAGCATCTCTTCCGGTTCTTTCCAGAC
GTTGGGGATGGTGATTTTACCCTGTTCAATCAAAACCCTGTCCGGCATTGTCCATAGCTA
TACTGATGGCTTACTGACCCGTGCGGCAGATGTTGTGCTGAAAGAGCGTCGCCCGTTGGT
GCTCTGCGTGCGTGAAACACCATTGCACTTAGGCCATCTGCGTTTAATGACGCAGGCAGC
AGAAATCGGTGCGGTGATTATGCCTCCCGTTCCGGCGTTTTATCATCGCCCGCAATCCCT
TGATGATGTGATAAATCAGACGGTTAATCGTGTTCTTGACCAGTTTGCGATAACCCTTCC
TGAAGATCTCTTTGCCCGCTGGCAGGGCGCATAACTCCGCTGTTGCCCTGTTTCAGGGCA
ATTTTGCAACCGCGATCAAATCCTCGACATTTTGTTTCTGCCATTCAATCGAAACGCTGC
GATTCAACCGCTATACCTGCTATCTTCAACTTTAGGACAATAATGCAACGTCTTATTAAC
ATATTTAACGTTGAATGTTATTGTTGTCGTCAAGATGGCATAAGACCTGCATGAAAGAGC
CTGCAAACACACAACACAATACACAACATAAAAAGCCATTTTTACTTGAGGGTTATGTAT
GAAGAAGTCGATTCTCGCTCTGTCTTTGTTAGTCGGTCTCTCCGCAGCGGCTTCCAGCTA
TGCGGCGCTACCGGAGACGGTACGTATCGGAACCGATACCACCTATGCGCCGTTCTCGTC
GAAAGATGCTAAAGGTGATTTTGTTGGCTTTGATATCGATCTCGGTAACGAGATGTGCAA
ACGGATGCAGGTGAAATGTACCTGGGTTGCCAGTGACTTTGACGCGCTGATCCCCTCACT
GAAAGCGAAAAAAATCGACGCCATTATTTCGTCGCTCTCCATTACCGATAAACGTCAGCA
GGAGATTGCTTTCTCCGACAAGTTGTACGCCGCAGATTCTCGTTTGATTGCCGCCAAAGG
TTCGCCGATTCAGCCAACGCTGGATTCACTGAAAGGTAAACATGTTGGTGTGCTGCAGGG
ATCAACCCAGGAAGCTTACGCTAACGAGACCTGGCGTAGCAAAGGTGTGGATGTGGTGGC
CTATGCCAACCAGGATTTGGTCTATTCCGATCTGGCTGCAGGACGTCTGGATGCTGCACT
GCAGGATGAAGTTGCTGCCAGCGAAGGATTCCTCAAGCAACCTGCTGGTAAAGACTTCGC
CTTTGCTGGCTCATCAGTGAAAGACAAAAAATACTTCGGTGACGGCACCGGTGTAGGGCT
ACGTAAAGATGATGCTGAACTGACGGCTGCCTTCAATAAGGCGCTTGGCGAGCTGCGTCA
GGACGGCACCTACGACAAGATGGCGAAAAAGTATTTTGACTTTAATGTCTACGGTGACTG
ATACGTCGCAGGGAAGCTGTACCTGATGGAATGATCATCATGGTGCACGCCAGGTTTGTT
GCACTATTGTGGTGCATTGAAATGCATACTTAAGCATTTTTAATGAAAAATAATACGTCT
AACGGGGCGGGATATTTTGCCTTGATGGTCAATTTTATGGCACGATAAGTGTAACAAACC
TGTAAATATTCCCTATAAAAAGACTGTCAGTTGAGGACATTATGAAAAAACTGGTGCTAT
CGCTCTCTCTGGTTCTGGCCTTCTCCAGCGCAACTGCGGCATTTGCTGCGATTCCGCAAA
ACATCCGCATCGGTACCGACCCGACCTATGCGCCATTTGAATCAAAAAATTCACAAGGCG
AACTGGTTGGCTTCGATATCGATCTGGCAAAGGAATTATGCAAACGCATCAATACGCAAT
GTACGTTTGTCGAAAATCCGCTGGATGCGTTAATCCCGTCCTTAAAAGCGAAGAAGATTG
ACGCCATCATGTCATCGCTTTCCATTACGGAAAAACGTCAGCAAGAAATAGCCTTCACCG
ACAAACTGTACGCTGCCGATTCTCGTCTGGTGGTGGCGAAAAATTCTGACATTCAGCCGA
CAGTCGAGTCGCTGAAAGGCAAACGGGTAGGCGTATTGCAGGGCACCACCCAGGAGACGT
TCGGTAACGAACACTGGGCACCAAAAGGCATTGAAATCGTCTCGTATCAGGGGCAGGACA
ACATTTATTCTGACCTGACTGCCGGACGTATTGATGCCGCGTTCCAGGATGAGGTCGCTG
CCAGCGAAGGTTTCCTTAAACAACCTGTCGGTAAAGATTACAAATTCGGTGGCCCGTCTG
TTAAAGATGAAAAACTGTTTGGCGTAGGGACCGGCATGGGCCTACGTAAAGAAGATAACG
AACTGCGCGAGGCACTGAACAAAGCCTTTGCCGAAATGCGCGCTGACGGTACTTACGAGA
AATTAGCGAAAAAGTACTTCGATTTTGATGTTTATGGTGGCTAATCGCCATCGGTGAAAG
AAAGCCCGCTCCCTTCGGGTAACCGGAGGGAGACAAGAGGCGGTAATTCACCACACACGA
CAGGACAGGCTGCATGTTGTATGGGTTTTCAGGTGTTATTTTACAGGGTGCGCTCGTCAC
GCTGGAGCTGGCTATCAGCTCTGTAGTGCTCGCTGTAATCATCGGTTTAATTGGCGCTGG
CGGTAAGCTCTCTCAAAATCGGCTTTCGGGGCTGATTTTCGAAGGGTACACCACGCTGAT
TCGTGGCGTGCCGGACTTAGTGTTGATGCTGCTGATTTTCTACGGTTTGCAGATTGCGCT
AAACACGGTGACGGAGGCGATGGGCGTCGGGCAGATTGATATCGATCCGATGGTCGCTGG
TATTATCACTCTCGGTTTTATCTACGGTGCTTATTTTACCGAAACGTTCCGTGGTGCTTT
TATGGCAGTGCCGAAAGGACATATAGAGGCGGCGACGGCGTTCGGTTTTACTCGTGGGCA
AGTGTTTCGGCGGATCATGTTTCCGGCGATGATGCGTTACGCCCTGCCAGGCATTGGCAA
CAACTGGCAGGTGATCCTCAAATCTACCGCACTGGTTTCGTTACTCGGCCTGGAAGATGT
GGTCAAAGCCACGCAGCTGGCAGGCAAAAGTACCTGGGAACCGTTCTATTTCGCCATCGT
CTGTGGCGTAATTTACCTGGTTTTCACCACCGTTTCCAATGGTGTGCTGCTGTTCCTTGA
GCGCCGCTACTCCGTGGGTGTGAAGAGGGCTGACCTGTGATCGAAATCTTACATGAATAC
TGGAAACCGCTGCTGTGGACCGACGGTTATCGCTTTACTGGTGTGGCGATCACTCTGTGG
CTGCTTATTTTGTCGGTAGTGATAGGCGGAGTCCTGGCGCTGTTTCTGGCGATTGGTCGT
GTCTCCAGTAATAAATACATCCAGTTTCCAATCTGGTTATTTACCTATATTTTTCGCGGT
ACGCCGCTGTATGTTCAGTTGCTGGTGTTCTATTCCGGCATGTATACGCTGGAGATTGTT
AAGGGGACCGAGTTTCTTAACGCCTTTTTCCGCAGTGGCCTGAACTGTACCGTGCTGGCG
CTGACGCTTAACACCTGCGCTTACACTACCGAGATTTTTGCTGGGGCAATCCGTTCGGTT
CCGCATGGGGAAATTGAAGCCGCCAGAGCCTATGGCTTCTCGACTTTTAAAATGTATCGC
TGCATTATTTTGCCTTCTGCGCTGCGTATTGCGTTACCGGCATACAGCAACGAAGTGATC
CTGATGCTGCACTCTACTGCGTTGGCATTTACTGCCACGGTGCCGGATCTGCTGAAAATA
GCCCGCGATATTAACGCCGCCACGTATCAACCTTTTACCGCCTTCGGCATTGCCGCGGTG
CTCTATTTAATCATCTCTTATGTCCTGATCAGCCTCTTTCGCAGAGCGGAAAAACGCTGG
TTGCAGCATGTGAAACCTTCTTCAACGCACTGAGAATACGATGTCCGAGAATAAATTAAA
CGTTATCGATTTGCACAAACGCTATGGCGAACACGAAGTGCTGAAAGGGGTGTCACTGCA
AGCGAATGCCGGAGATGTCATAAGCATCATCGGATCGTCGGGATCGGGGAAAAGTACCTT
TCTGCGCTGCATTAACTTCCTCGAAAAACCGAGTGAAGGGTCGATCGTGGTCAATGGCCA
GACGATCAATCTGGTGCGCGGCAAAGACGGTCAACTCAAAGTCGCCGATAAAAATCAACT
GCGCTTACTGCGCACACGCCTGACGATGGTATTCCAGCACTTCAATCTCTGGAGCCATAT
GACGGTGCTGGAAAACGTCATGGAAGCGCCGATTCAGGTGTTGGGCCTGAGCAAGCAGGA
AGCGCGCGAGCGGGCGGTGAAGTATCTGGCAAAAGTTGGGATAGACGAACGTGCACAGGG
GAAATATCCGGTGCATCTTTCCGGCGGTCAGCAACAGCGTGTTTCTATCGCGCGGGCGCT
GGCGATGGAACCGGAAGTTTTACTGTTTGATGAACCTACCTCGGCGCTCGATCCTGAACT
GGTAGGCGAAGTGTTGCGCATTATGCAGCAACTGGCAGAAGAGGGGAAAACCATGGTGGT
TGTGACTCACGAAATGGGCTTTGCTCGTCATGTTTCTACTCACGTCATTTTCCTCCATCA
GGGGAAAATAGAGGAAGAAGGCGCGCCGGAGCAGTTATTTGGCAACCCGCAAAGCCCTCG
TCTGCAACAGTTCCTTAAAGGTTCGCTGAAATAATTGCCTCTCCGGTGGCTAACGCTGCC
GGAGTATTTTCAAGGGGAATTTGCGAGTCAGCTTCCGCTGAAATGTAAAAGTTGCAGTCC
GCTAAAAATACTTCTGAATTCGCTGTCCAAAGATAAAAACTGCCTGCTGCATTGGGTGTT
AATCGTGGTTATTGTCGCGTCATCTTAAATTTGAGGGGTGACGGAACGCCATGACAATAT
CGACAACTTCCACGCCGCATGATGCGGTATTTAAATCTTTTTTACGCCATCCAGACACCG
CGCGGGATTTTATTGATATTCATCTTCCCGCGCCGCTGCGCAAACTGTGAGATTTAACGA
CGCTTAAACTGGAACCAAACAGTTTTATTGATGAAGACCTGCGGCAATATTATTCCGACC
TCTTATGGTCTGTGAAAACGCAGGAGGGAGTGGGTTATATTTATGTAGTGATAGAGCACC
AAAGTAAGCCGGAAGAATTAATGGCTTTTCGCATGATGCGTTATTCCATTGCGGCAATGC
AAAACCATCTTGATGCGGGCTATAAAGAGCTTCCATTGGTGATCCCGATGCTGTTTTATC
ATGGTTGCAGAAGTCCTTATCCTTATTCACTCTGCTGGCTTGATGAATTTGCCGAGCCTG
CGATTGCCCGTAAAATATATTCATCGGCTTTTCCGTTGGTGGATATTACCGTGGTGCCGG
ATGACGAGATTATGCAACATCGCAAAATGGCGCTGTTGGAGTTAATTCAGAAACATATTC
GTCAGCGCGATCTGTTGGGATTAGTCGACCAAATTGTTTCGCTGCTAGTTACAGGGAACA
CTAATGACAGACAGCTAAAAGCCCTGTTTAATTATGTATTACAAACGGGAGATGCCCAGC
GTTTCCGTGCATTTATTGGTGAGATAGCAGAACGCGCACCACAGGAAAAGGAGAAACTGA
TGACCATTGCTGACAGATTACGTGAAGAAGGGCGGAATGATGGATTAATTCTTGGCAAAC
GCGAAGAAGCCCTGCGTATTGCTCAGGAGATGCTGGATAGAGGTTTAGACCGAGAGTTAG
TTATGATGGTGACCCGACTTTCACCAGACGATCTTATCGCGCAAAGCCACTAACCCTGTA
ACACCGGGAGTTAACTGGCGGATGTTTGCAGTAAACCACATCAGCGAACGACATCCGCCA
GCGCCTCTTCTAAATCGTACCAACGAAACGCAAAACCCGCTTCTTCCAGCCGTTTAGGCA
GCGCGCGTTGTCCACCTAATACCAGTACTGAAGATTCGCCCATTAACAGCCGAATGGCGG
TTGCGGGGACGCGCAAAATAGCCGGGCGATGCAGCGCATGACCGAGCGCATGGGCAAATT
GTTCATTGCGTATCGGGTAGGGCGAAACCATATTAAATGGCCCGCGCAGCTCGTTATCCA
GCAGCCAGAGAATGCCGTTGACCATATCATCGATATGAATCCAGGCCAGATACTGCCGAC
CGGAACCAATCGGCCCGCCCAGGCCAAGACGAAACGGCGGCAGCATTTTACCGAGAATAC
CGCCATCCGGTGCCAGCACTACGCCGGTACGCAGCAGGCACACTCGCGTTTTGTCACTTT
GCGCCCGGCAGGCAATTTCTTCCCAGCGGGCGCAGAGTTTATGGGTAAATTCGTTATGCG
GCGGTTCCTCTTCGGTAACCACCACTTCACCTAAGTCGCCATAATAGCCCGTTGCCGAGC
CGGAAATGAGTACCGACGGTGGCGTGTCGCTGGCATTAATCAAATCGACCAGTTTTTGCG
TGATATTCCAGCGGCTTTGGCAGAGACGCTCTTTTTGCTCGTGAGTCCAGCGTTTATCAG
CAATCGGTTCTCCGGCGAGGTTGATTACCGCATCAACGCCGTTGAGGTTGCTTTGATCGG
CAAGCCCTTGCCATAGCGTCACCTGCGGCCCGAGCACGGAACTGGCTTTCTGCGGGTTAC
GCGTCATTACCGTGATTTGATGGCCCAGCTCCAGCAAACGTGGAATCAAATGGCGACCAA
TTAATCCCGTCCCTCCGGTGATCACTATGTTCATGCAGCCTCCCGATATGGCGGTTAACG
CTGCCAGCTTAAGGTCATGGATACCGAATCGGCGTAGCGCAGCGCGTGCAGTTTATCGAT
CTCCACTTCAGCATACGTCACCCAGTGATGTTCACGTGCGATATCGAGCACATCCTGAGT
TAATTTTTCCAGCAAAGAGAAACGGTTATTCTCTACATGCTGAATAATGTTTTTCGTTAC
GGTGCGATAATTCAGCGCATCGTTGATATCTTCGCTGGTGCGCGCTTTATCGGCGGGGTA
GTGGATCGTCACATTGATAACAATATCCTGACGGTTGTTAATTTCTTCTTCCTTAATTCC
GATAAATGTACGTAAACGAAGGTTCTTTATACGAATAATAGCGGCAGGTTGTGCCATTGC
AGGTTCTCCGTTGTTTTACTTAGGATGAAATAATACACGAGAACCTGTTTCTGTTAACTA
TCCGAACGCTCATCACCGAGTTGTGCTTTTAGCAGTGCCTGCCCAGTGGCAGGGCGCGAA
CGGATCCGCTCATGCCAGTTCTTGACTGCCGGATACATTGCGAGGTCAATTCGCTGGCGA
GTCCAGGCATTAACCCACGGCCAGCAGGCAATATCCGCAATGCTGTAGTTCTCACCTCCC
AGCCAGGGCGAGTTTTCCAGCCGCTTGTTCAGTACATGGTACAGGCGCTGAGTTTCAACC
TGATAACGTTCAATAGCGTAAGGAATGGTTTGGGGGGCTGCGTGATTAAAATGATGATTT
TGCCCAAGCATCGGCCCCAGTCCGCCTACCTGCCAGAATAACCACTGTAATGTGGCGGCG
CGCTCACGCGTTTCATGACTCAAAAAGAGTCCTGTTTTCTCAGCCAGATACAACAAAATG
GCACCAGATTCAAAGAGGCTTAGCGGTTCGCCGCCATCGGCTGGAGAATGATCAACAATT
GCCGGAATTTTGTTGTTAGGCGAAATGCGCAAAAATTCCGGGCGAAACTGACCGCCTTTC
CCCAGGTCTACCTTTATCAAGCGATAATCCAGCCCTGCTTCTTCGAGAAACAGCGTAATT
TTGTGGCCATTGGGTGTCGGGGCGAAATAGAGATCGATCATTGCAGCTCCGGTTGTCTAA
TCATCTGAACACCACAAGTATAGAAAGCGCGGCGACTTGCGTGAGTATTCGTCACGTGAC
AGTGACAAAAAGGCTCTATAGTTTGATAGCCAGCCCCCTTTATTGCCGAGGACATAATGA
GTAAACCCGCTATCACGCTTTGGTCAGATGCCCATTTTTTCTCCCCTTATGTGTTATCCG
CCTGGGTGGCGTTGCAGGAAAAAGGCCTGTCGTTTCATATCAAGACCATCGACCTCGACA
GCGGTGAACATTTGCAACCGACGTGGCAAGGTTACGGTCAGACACGCCGTGTGCCGTTAT
TACAAATCGATGATTTTGAGTTGAGTGAATCTTCTGCCATTGCGGAGTATCTGGAAGATC
GATTTGCGCCACCGACCTGGGAACGTATTTATCCGCTTGATTTAGAAAATCGTGCGCGTG
CACGACAGATTCGGGCCTGGCTGCGCAGCGATCTGATGCCCATTCGCGAAGAGCGTCCGA
CGGATGTTGTCTTTGCGGGGGCGAAAAAAGCGCCACTAACGGCCGAGGGAAAAGCCAGTG
CAGAGAAACTGTTCGCGATGGCAGAACATTTGTTAGTACTGGGTCAGCCGAATTTATTTG
GTGAATGGTGCATTGCTGATACTGATCTGGCGCTAATGATTAACCGCCTGGTACTACATG
GCGATGAGGTGCCAGAACGCCTGGTGGATTATGCGACATTCCAGTGGCAGCGAGCGTCTG
TCCAGCGTTTTATTGCACTTTCAGCGAAGCAATCTGGCTGATAGCAACGACAGAATCCAG
TATCATAGCTTACGTTTTTTCGACGAGGAGTGAGTGATGAAACTGATGTTTGCATCGGAC
ATTCATGGGTCGTTACCGGCGACGGAACGTGTTCTGGAGTTGTTTGCCCAAAGCGGTGCC
CAGTGGCTGGTGATCCTTGGCGACGTGTTGAATCACGGCCCGCGTAATGCTTTACCGGAG
GGTTACGCGCCAGCCAAAGTCGCTGAACGGCTTAATGAAGTGGCACATAAGGTTATCGCT
GTGCGCGGCAACTGCGACAGCGAAGTGGATCAAATGCTGCTGCATTTCCCGATAACCGCG
CCGTGGCAACAGGTATTACTGGAAAAACAACGTCTGTTTTTGACGCATGGTCATCTTTTT
GGCCCGGAAAATCTGCCTGCTTTAAACCAGAACGATGTGCTGGTTTACGGTCATACCCAT
CTGCCAGTAGCAGAACAGCGGGGGGAGATTTTCCACTTCAACCCCGGCTCGGTGAGTATT
CCGAAAGGCGGTAATCCGGCGAGTTATGGCATGCTGGATAATGACGTACTTAGTGTAATC
GCACTCAATGATCAAAGTATCATTGCGCAGGTCGCGATTAATCCGTAATTTACCCACAAC
TCAAAATGCGCCGTAAGAGCGCCAGAAAAAGAAGGTTTCCTGATAATGGAACAGCGTCGT
TTGGCAAGTACTGAATGGGTGGATATTGTCAATGAAGAGAACGAAGTCATTGCACAAGCC
AGCCGGGAGCAAATGCGGGCACAGTGTCTGCGTCATCGTGCAACTTACATCGTCGTGCAT
GATGGCATGGGCAAAATTCTGGTCCAGCGTCGTACCGAGACAAAAGACTTTTTACCCGGC
ATGTTAGATGCGACCGCAGGCGGTGTGGTTCAGGCCGATGAGCAACTGCTGGAATCCGCG
CGTCGCGAAGCGGAAGAAGAGTTGGGCATTGCCGGTGTCCCCTTTGCCGAGCACGGGCAG
TTCTATTTCGAAGATAAAAATTGCCGTGTCTGGGGCGCATTGTTCAGCTGCGTCTCTCAC
GGTCCCTTCGCCCTACAGGAAGATGAAGTCAGTGAAGTTTGCTGGCTGACGCCGGAAGAA
ATCACCGCACGCTGCGATGAGTTCACTCCAGACTCGCTGAAAGCGCTAGCGTTGTGGATG
AAGCGCAATGCCAAAAATGAAGCCGTAGAGACTGAAACGGCAGAATGAAAAAAGAGCCGC
AATTGCGGCTCTTAACATTTTTAGTGGTAGCCCATCAACTGAGCGCCGATCACTACGACG
CTGGACATAATAAACAGCAGTCCAAGTAGGGTCGCGCCCACCTTCAGCCAGTTACGGAAG
TCCACCCTGCACACACCGAGCGTTGCCATTAACGAAGCTGAGGTTGGGTAAATGATGTGA
CTGAAGCCATCACCAAACTGGAACGCCAGCACGGTAACCTGACGGTTAACACCGACCAGA
TCGCCAAGCGGTGCCAGTAACGGCATGGTTAACGCCGCCTGACCAGAACCGGACGTCACG
AAGAAATTAAATACCGCCTGGAAGAGCAACATAAACCAGGCCGCGACCGCGTTGTCCAGA
CCGCTAATGGCATTGGCAATGCTGTTGAGGATAGTATTTAACACGCTGGCCTCACCTGCT
TCACCATTACCAACCAGCAGCAAAATCCCTTTGGCGAAACCCACCAGCAGGGCAGGGGCG
ATCATCATTCGCGCCCCTTCGGTAAAGGATGAAGCCATGGTATTAACCGTCATGCCGTTA
AGGCGGAAAACAACGCCGATGATGCCAATCACCAGACCCATGGTGAAGAACTGGCTGGCA
ATTTCTGGAATAAACCAGGCATTAACGATCACGCCCCAAATCACCCAGACCATTACGGCG
GTCAGGACAATCAATACCAGCCAGTCACCAAAGGTAAACGGACGTTGTTCAACATCCGCC
TGCTTTTCACGAAAGAAGCGGTCGGACTCATGCACGCGTGACAGAAGAGGATTCTTTTTC
ACTCGTGAGGCGTAGACCATGGTAAAGATCAGGCCAATCAGAGTGGCGATAACCCACACC
ACGATGCGCAACCCGGAGCCAGAAAGCACCGGAACGCCGGCAATCCCCTGAGCAACGACC
ACACAAAACGGGTTCATCCACGAACTGGCAAAACCGATTTGCGTGGCAATATAGGTCACC
AGGACGGTGGTAATACTGTCATAGCCCAGCCGGACCATTAGCGGTGCGATGATAATGGCA
AAGGCGACGGCCTCTTCTCCCATACCAAATACCGCGCCGCCAAGTGAAAACAGAATAAAC
AGCGCAGGAATAAAGAGAATTTCATTCCCGCGGGTATGGCGAATAAGCGCCAGGATACCG
TTATCAATGGTTCCTGTACGCATCACAATGCCAAACGCGCCGCCAATCACCAGCATAAAC
ATGATGATGCCAACGGCTGTCCCGTATTTCGATCCTGAGGTTAACCCTTCAAACGGGAAG
TTCATCAGGCCCGGGCGTTCATCGCCCGTCGTGAACAGCTGTACGCGGTGATACTCAGGT
TCGCCTGCTTCGTTAGTCAGAATGCGAAATGAGTGTGGATCTACGACTTTGCGTGTTTTT
GTTTGACCATCAACCTGATACTGCACTTCCTGACTGTCAAACATCCCCACCGGAACTACC
CAGGTGGCAAGGCTGGTTAAAATAGCAACAAAAAAGATAATCACCAACGTATCGGGCATT
GCCCATCTTCTTGTTGGTTTGGATTCAGTGATTGCGGACATAGCGCAAATATTCCCTTGC
ACAAAACAAAGTGGTAAGTATGCAAAGTGAGATGGCGCAATTCATTGATGCAGAGCAGTT
AAGCAAGATAATCAGAAAGGATTAATGCAAATTAAGAGAATAAAAAACCGGAAATAGTGA
CTATTTCCGGTTCAGATATCCGCAGCGCAAAGCTGCGGATGATGACGAGGTTACTGCTGC
TGTGCAGACTGAATCGCAGTCAGCGCGATAGTGTAGACGATATCGTCAACCAGTGCGCCA
CGGGACAGGTCGTTAACCGGCTTGCGCATACCCTGCAGCATCGGCCCGATGGAGATCAGG
TCGGCAGAACGCTGTACCGCTTTGTAGGTGGTGTTACCGGTGTTCAGATCCGGGAAGATG
AACACGGTAGCGCGACCTGCAACCGGAGAGTTCGGCGCTTTGGATTTCGCAACGTCAGCC
ATTACCGCAGCGTCGTACTGCAGCGGACCGTCGATCATCAGGTCAGGACGTTTTTCCTGC
GCCAGACGAGTTGCTTCGCGAACTTTTTCTACGTCGCTACCTGCACCAGAAGTACCGGTG
GAGTAGGAGAGCATAGCAACGCGCGGTTCGATACCGAAGGCTGCAGCGGAATCAGCGGAC
TGAATCGCGATTTCTGCCAGCTGTTCTGCGGTCGGATCCGGGTTGATCGCACAGTCACCG
TAAACGTAAACCTGTTCCGGCAGCAGCATGAAGAACACGGAAGATACCAGGGAGCTGCCC
GGTGCAGTTTTGATCAGCTGCAGCGGCGGACGGATGGTGTTTGCGGTAGTGTGAACAGCA
CCGGAAACCAGACCATCAACTTCATCCTGTTCCAGCATCAGCGTACCGAGCACCACGTTG
TCTTCCAGCTGTTCGCGGGCAACGGTTTCGGTCATGCCTTTGTTCTTACGCAGCTCGACC
AGACGACCAACATAGCTTTCGCGAACCACTTCTGGATCAACGATTTCAATGCCTGCACCC
AGTTCTACACCCTGAGACGCTGCAACACGGTTGATCTCTGCCGGATTACCCAGCAGTACG
CAAGTTGCGATACCACGTTCAGCACAGATAGCGGCTGCTTTAACGGTACGCGGTTCGTCA
CCTTCCGGCAGTACGATACGTTTGCCCGCTTTGCGCGCAAGTTCAGTCAGCTGATAACGG
AACGCTGGCGGAGACAGACGACGGCTGCGCTCAGAAGTGGCAGTCAGAGAATCGATCCAG
TCAGCGTTGATGTAGTTAGCAACGTATTCCTGAACTTTCTCGATACGCTCGTGATCGTCA
ACTGGAACTTCCAGGTTGAAGCTCTGCAGGCTCAGAGAAGTCTGCCAGGTGTTGGTGTTC
ACCATAAATACCGGCAGGCCGGTAGCGAAAGCACGTTCGCACAGTTTAGAAATGCGCGCG
TCCATTTCGTAGCCGCCAGTCAGCAGCAGGGCACCGATTTCTACGCCGTTCATGGCAGCC
AGGCAAGCGGCAACCAGCACGTCAGGACGGTCTGCGGAAGTCACCAGCAGAGAACCGGCA
CGGAAGTGCTCCAGCATGTGCGGAATGCTGCGTGCGCAGAAAGTGACGGATTTAACGCGG
CGAGTATTGATGTCGCCTTCGTTGATGATGGTCGCATTCAGGTGGCGAGCCATATCGATC
GCACGAGTCGCGATCAGGTCAAAGCTCCACGGCACAGCGCCGAGAACCGGCAGCGGGCTG
GATTCTTGCAGCTTCGCCGGATCAACATTGTTTACTTTAGCTTTGGAAGAGTCGTCGAAA
ATCTCGGACAGATCCGGGCGAGTACGACCCTGTTCATCAACCGGTGCGTTCAGTTTGTTA
ACGATAACGCCGGTGATGTTGGTGTTTTTGGCACCGCCGAAGCTGTTGCGGGTCAGTTCG
ATACGCTCTTTCAGCTGTTCCGGGGTGTCAGTGCCCTGAGACATAACGAAGACGATTTCC
GCATTCAGCGTTTTAGCGATTTCGTAGTTCAGAGACTGGGCAAACTGGTGCTTACGTGTC
GGGACCAGACCTTCAACCAGAACGACTTCAGCGTCTTTGGTGTTAGCGTGGTAGTTTGCG
ACGATCTCTTCCATCAGCACATCTTTCTGATTGCTGGAAAGCAGACCTTCAACGTAGCTC
ATTTTCAGCGGTTCAGCGGCCGTCGTGGTGGAAGAGTTCGCACGCACGATAGTCGTAGTC
TGATCGGGCGCATCGCCACCGGTACGCGGCTGAGCGATAGGTTTGAAAACGCTCAGACGA
ACGCCTTTGCGTTCCATTGCACGGATCACGCCAAGGCTGACGCTGGTCAGACCGACGCTG
GTTCCGGTAGGGATCAGCATAATAATACGGGACACGGTTTATCCTCTTTCGTTACCGCCG
ATTTGGCGGGTTACAAAACAGCACCGCCAGCTGAGCTGGCGGTGTGAAATCAGGCAGTCA
GGCGGCTCGCGTCTTGCGCGATAACCAGTTCTTCGTTGGTTGGGATAACCACCGCAGGAC
GGGTACCTTCTTTGTTGATGAAACCAGATTTGCCGAAACGTGCAGCCAGGTTGCGTTCAT
GATCAACTTCAAAGCCCAGCACGCCCAGTTTGCCCAGAGACAGTTCACGAACCATCGCGG
CATTTTCACCGATACCACCGGTGAATACAACAGCGTCCAGACGACCATCCATCAGCGCAG
TGTAGGCACCGATGTATTTCGCCAGGCGGTGGCAGTAAACGTCCATTGCGCGCTTCGCGT
CTTCTTTCGTCGCGTAGTTGTCTTCAACATAGCGGCAGTCGCTGGTCACTTCGGTCAGAC
CCAGCAGGCCAGACTCTTTGGTCAGCAGTTTGTTGATTGCGTCAACGCTCATGCCCAGGG
TGTCGTGCAGGTGGAAGATGATCGCCGGATCGATATCACCAGAACGGGTACCCATGACCA
GACCTTCCAGCGGGGTCAGGCCCATAGAGGTGTCAACGCATTTACCGTTGCGGATAGCAG
AAACGGAACCACCGTTGCCCAGGTGGCAGGTGATGATGTTCAGTTCTTCTACCGGTTTGT
TCAGCATTTTTGCCGCTTCCTGGGTTACATAGAAGTGGCTGGTGCCGTGCGCGCCGTAAC
GACGGATGCCGTGCTCTTTGTACAGGTTGTACGGCAGGGCGTAGAGGTAAGACTCTTCCG
GCATAGTCTGGTGGAACGCGGTGTCAAATACAGCAACGTTTTTGTCTTTCAGCTGTGGGA
AAGATTTCAGAGCTTCTTCGATACCGATCAGGTGAGCCGGGTTGTGCAGCGGTGCAAAAG
AAGCTGCATCTTTGATACCCTGAATAACAGACTCATCGATCACTACGGAGCTGGTATACT
TTTCGCCGCCGTGTACGATACGGTGACCGATAGCAGTCAGCTGCGCAGACAGTTCTGGTT
TTTGTGCCAGAATAGTATTAACGATAAAGTTGAGCGCTTCGCTGTGAGCGGCGCCTGCAC
CTAAAGCCGCTTCCTGTTTATTGCCGTCCATTTTCCATTTGATACGTGCTTCGGGCAGGT
GGAAACATTCGGCTAAACCAGAAAGGTACTCTTCACCATTTACTGCATCGATGATGGCAA
ATTTCAGTGAAGAACTACCGCAGTTCAGAACCAGTACTAACTTACTCGACATGGAAGTAC
CTATAATTGATACGTGGCTAAAAAAACGTCAGGGAGCCATAGAGCGTAGCGCATGATGAC
ACCGACATTTATGATTAACATCATGCACTGCAAATTTTTTTTGCATGATGGAAGAAATAT
CTTGAGTCTATGCCATTTTGCGTAATTTTCAGCCAATGGCATAATGTATATGAATTTGAC
GACTCAATGAATATGTACTACTTAGGCCTTCAGGCTGCTAAAGGATACCTGATAGTGGGT
ATGGAAGACAAAATGTTTTGAACGTTGTCCCGCTGAGTTGTGAATTTGCACAAATTTTTG
AATCTTTATATGTGAAGTTGAGGTGAAGCATGTCAACGCCGGATAATCGTTCTGTTAATT
TTTTTAGCTTGTTTCGCCGGGGACAGCATTACTCAAAGACGTGGCCGCTGGAAAAACGCC
TTGCCCCGGTCTTTGTCGAAAATCGCGTTATCAAGATGACGCGTTATGCGATCCGTTTTA
TGCCGCCGATCGCCGTATTTACTCTCTGCTGGCAGATTGCCCTGGGCGGTCAGCTTGGGC
CGGCAGTTGCCACCGCCCTGTTCGCCTTAAGTTTACCCATGCAGGGATTGTGGTGGCTGG
GCAAGCGTTCTGTCACGCCATTACCCCCTGCAATCCTCAACTGGTTTTATGAAGTTCGCG
GTAAATTGCAGGAGTCTGGACAGGTGTTGGCACCCGTTGAAGGCAAGCCTGATTACCAGG
CATTAGCTGACACGCTTAAGCGCGCCTTCAAACAACTGGATAAAACTTTCCTTGATGATT
TGTAATTGACCCCTGATTACGCATATAAAAGAAAGCATACTCAGCCTTCTTTTTTTTCAC
CGTAATAGAGTGATACAGGAGTCAACAATGGAAATGACCAACGCGCAACGTCTTATTTTG
TCTAATCAGTACAAGATGATGACTATGCTCGATCCGGCAAATGCTGAACGTTACCGTCGC
CTGCAAACAATTATTGAGCGTGGTTATGGATTACAGATGCGTGAACTGGATCGCGAGTTT
GGCGAGCTGAAAGAAGAAACCTGCCGCACTATCATCGACATTATGGAGATGTATCATGCG
TTGCATGTTTCCTGGTCTAATTTGCAGGACCAGCAATCCATCGATGAACGTCGTGTCACC
TTCCTCGGCTTTGACGCCGCCACTGAAGCACGTTACCTCGGTTATGTCCGCTTTATGGTT
AATGTGGAAGGGCGCTATACCCATTTTGACGCCGGAACTCACGGTTTTAACGCCCAGACG
CCAATGTGGGAAAAATATCAGCGCATGCTTAATGTGTGGCATGCCTGCCCGCGTCAGTAC
CATTTGAGCGCCAACGAAATTAATCAAATTATCAACGCCTGAGGAGGCCCGCGTGCGGTG
CAAAGGTTTTCTGTTTGATCTTGATGGAACGCTGGTGGATTCCCTGCCTGCGGTAGAACG
GGCGTGGAGCAACTGGGCCAGACGTCATGGGTTAGCGCCGGAAGAGGTGCTGGCTTTCAT
TCACGGTAAACAGGCGATCACCTCTCTGCGCCATTTTATGGCGGGCAAATCCGAGGCTGA
TATTGCCGCCGAGTTTACGCGTCTGGAGCAAATCGAGGCCACGGAAACCGAAGGTATTAC
CGCGCTTCCGGGGGCAATCGCCTTACTCAATCATTTGAATAAAGCAGGTATTCCGTGGGC
CATTGTGACTTCTGGCTCCATGCCGGTAGCGCGAGCGCGCCATAAAATAGCTGGGCTTCC
CGCACCAGAGGTGTTTGTAACCGCTGAGCGAGTGAAGCGCGGAAAACCAGAACCTGATGC
GTATCTGTTAGGTGCGCAGCTGCTGGGGCTTGCGCCGCAGGAGTGTGTGGTGGTGGAAGA
TGCTCCCGCTGGCGTGCTTTCTGGCCTGGCGGCGGGTTGCCATGTCATTGCGGTTAACGC
TCCGGCAGATACCCCGCGCCTGAATGAGGTCGATTTGGTCCTCCACAGCCTGGAGCAAAT
TACTGTGACTAAACAGCCAAATGGCGATGTTATTATTCAGTGAAACACCTGATCATGATT
TAGCCCCGTCTCGTCGGGGCTTTTTTATGGCAGAATCAAGTCATCCCCCTCAATTAACAA
GGATAAGTTGTGAACGGTGAATTGATTTGGGTTCTTTCATTACTGGCCGTTGCCATCGTC
TTGTTTGCGACGGGCAGAGTGCGTATGGATGCGGTCGCTTTGTTTGTTATTGTCGCGTTT
GCATTAAGCGGAACGCTGACAGTCCCAGAAGTATTTTCCGGCTTTTCTGATCCTAACGTT
GTCCTGATTGCCGCCTTGTTTATTATTGGCGATGGTTTGGTCCGTACCGGTGTTGCCACC
GTAATGGGAACATGGCTGGTCAAAGTTGCGGGCAACAGTGAAATCAAAATGTTGGTTTTG
TTGATGCTGACCGTCGCGGGGCTTGGCGCGTTTATGAGTTCAACCGGTGTTGTCGCTATC
TTTATTCCCGTGGTGTTAAGCGTTGCCATGCGTATGCAAACGTCGCCGTCACGTCTGATG
ATGCCGTTAAGTTTTGCCGGGCTGATTAGCGGCATGATGACGCTGGTGGCGACGCCGCCG
AACCTGGTAGTCAACAGTGAATTGCTGCGTGAAGGCTATCACGGCTTCAGTTTCTTTAGC
GTAACACCTATTGGCCTGGTCGTGCTGGTGCTGGGTATTTTGTATATGTTAGTGATGCGT
TTCATGCTGAAAGGGGATACCCAGACCCCGCAGCGCGAAGGCTGGACGCGTCGAACCTTT
CGCGATCTTATCCGTGAATATCGACTGACCGGGCGTGCGCGACGTCTGGCTATTCGCCCC
GGATCGCCAATGATTGGTCAACGGCTGGATGATCTCAAATTACGTGAGCGTTATGGCGCT
AACGTCATCGGTGTTGAACGCTGGCGGCGTTTTCGTCGCGTTATCGTGAACGTTAATGGG
GTTTCTGAATTTCGCGCGCGTGACGTTTTGCTTATTGATATGTCTGCGGCTGATGTCGAT
CTCCGGCAATTTTGTAGTGAGCAATTGCTGGAGCCGATGGTACTGCGCGGCGAGTATTTT
TCTGACCAGGCCCTTGATGTGGGCATGGCAGAGATTTCATTAATTCCTGAGTCAGAACTG
ATTGGTAAATCGGTGCGCGAAATTGGTTTTCGTACACGCTACGGACTGAATGTGGTGGGG
CTAAAGCGCAATGGCGTGGCGCTGGAAGGTTCGCTGGCGGATGAGCCTCTGCTGCTGGGC
GATATCATTCTGGTTGTGGGTAACTGGAAACTGATCGGTATGCTGGCCAAACAGGGCCGC
GACTTCGTAGCGCTGAACTTACCGGAAGAGGTGAGTGAAGCATCGCCCGCGCACAGCCAG
GCACCCCATGCCATTTTCTGTCTGGTGCTAATGGTGGCGTTAATGCTGACAGATGAAATT
CCTAATCCTGTTGCCGCTATCATCGCCTGCCTGCTGATGGGGAAATTCCGCTGTATAGAT
GCTGAAAGCGCCTATAAATCCATTCACTGGCCGAGCATTATTTTGATCGTTGGGATGATG
CCGTTTGCTGTGGCATTACAGAAAACGGGAGGTGTCGCGCTGGCGGTGAAAGGGCTGATG
GACATTGGCGGTGGTTACGGGCCACATATGATGCTGGGTTGTTTGTTTGTCTTGTCGGCG
GTTATTGGGCTATTTATCTCTAATACCGCGACGGCGGTGTTGATGGCTCCGATTGCGCTG
GCTGCTGCCAAAACGATGGGGGTGTCGCCTTATCCATTCGCGATGGTCGTGGCGATGGCA
GCATCCGCCGCCTTTATGACACCGGTTTCTTCACCGGTTAACACCCTGGTTTTAGGTCCG
GGAAATTACAGCTTCAGTGACTTTGTGAAGTTGGGGGTACCGTTCACCATTATCGTGATG
GCGGTTTGTGTGGTGATGATCCCGATGCTGTTTCCGTTTTGACAAGAGCCTGATGTCGCA
TCCGGCGCTTATTGCCTGATGCGACGCAGACTCCAGCTGCTTACAGCGGTGAATCCTGGC
TAATCTCATCGAGCGAAAGATGGAAGCTGGGAACAAATACTTCCATGAAGTAGTCCATCT
CCTGGCTGCGGCGCGCTTCAAGCGTCGCTTCCAGTCGCGTTTTTGCCAGCAAGAATTCAT
TATTTCCGGCCGCGAGTTCTTCCAGACATTTCAGATATGCACACAGTGCATCTGCCTGTT
TCACCAACGATTTTTCTTCATCGCTATATGCATGCTCGTCAATTAACGGCGCAAAGATAT
CCCGCAGCTCTTCCGGAACCATATCGACCAGTTTTTGCTGAGCGATTTTTTCAATAGCCT
TGTATTCCTGAGCGATTTGCGAATTGAAGTATTTCACCGGAGTAGGGAGATCGCCGGTGA
GCACTTCTGAGGCATCGTGGTACATCGCCAGTAAAGCGATACGTTCGGCGTTGACATTAC
CGCCAAATTTCCGATTTTTGATAGCTGCCAGCGCATGGGCGACCATCGCTACCTGCAAAC
TGTGTTCGGACACATTTTCCGTCCGCACGTTGCGCATGAGCGGCCAGCGGTTAATGAGTT
TCAGGCGGGAGAGATGGGCAAAAAAATGGCTCTGTTTCATAGTGACCTTACGTATGATGA
CATCATCAGGTCATTGTGGCGGGATAACACTGCCGGATGCAATCTCCGGCAGTGAAATTA
AGATTACAGCTGATGATAACCAGAAAGGAAACGCGCGAACTTGCTCAAAGACAGCTCGAT
ATCATCGACACGCGGTAGCGTGACAATGCGGAAGTGATCCGGCCACGGCCAGTTGAATGC
CGTCCCTTGCACCAACAGAACTTTTTCCTGCAACAGGAAATCCAGCACCATTTTCTGATC
GTCGTGAATGTTAAAGCGTTTGGCGTCGATTTTCGGGAACATGTACAGCGCACCACGAGG
TTTCACGCAGGAAACGCCCGGAATATCGTTGATCAATTCCCACGCGCGGTTACGCTGCTC
ATAAAGACGACCGCCAGGGGTAATAAATTCACTGATGCTCTGATAACCACCCAGCGCGGT
CTGAATGGCGTGTTGCGCAGGAACGTTAGCACACAGGCGCATTGAAGCCAGCATTTCCAG
ACCTTCGATGTAGCCTTTGGCGTGTTTTTTCGGCCCGTTCAACACCATCCACCCCTGACG
GAAGCCTGCAACGCGGTACGTTTTCGACAGTCCATTAAAGGTAATGGTCAGCAGGTCAGG
TGCCAGCGGCGCAATTGAGTGATGCTCAGCGTCGTCGTAGAGAATTTTGTCATAAATTTC
ATCGGCGAAGATAATGAGATTATGCTGACGTGCAATCTCCACAATCTCCATTAAAAGCTC
TTTGGAATATACCGCGCCGGTTGGGTTATTTGGGTTGATAATAACGATCCCACGCGTACG
AGGCGTAATTTTAGCGCGAATATCATCGAGGTCCGGGAACCAGTCAGAGGATTCATCGCA
AAGATAATGCACCGCTTTACCGCTGGAAAGCGAAACCGCCGCGGTCCATAGTGGGTAATC
TGGTGCAGGAACCAACATTTCGTCCCCGCTGTTCAGCAATGCCTGCATTGCCTGAACGAT
AAGCTCCGATACACCATTGCCGATGTAAATATCTTCCACGGTAACATCACGCATGCCACG
AGCCTGGTAGTGCTGCATGATGGCTTTACGCGCAGAGTAAAGACCTTTGGAATCGCAATA
CCCTTGAGCTGTAGGCAGGTTGCGTATCACGTCAACGAGAATTTCATCTGGCGCGTCAAA
ACCGAACGGGGCTGGGTTGCCGATGTTCAGTTTCAGTACCTTGTTACCTTCTTCTTCCAG
TCGTTTTGCTTCTTTCAGCACCGGACCACGGATGTCATAACAGACATTCTCTAATTTGCT
GGATTTTTCAATGGGGGACATGAATCTTGACCTTTTTTGCTGTTATCGCCACTCCCTGCC
GTGGAAGTCAGCTTAGAACAATGTACTCCCCCAGGACGGTGTTTTGAAGGTCTGCAGAAT
AAGATTTTGCCAGAGGGGAAGGCTCGATTGTGCTGTTAATAACTTAATAATGACAAAATA
ATGAGGCGTATATGCTTTACATACAATGTTATATAGTGAATTGTTCTGATTCTTAATTGT
AAGTCTGGTTTTTTTATCTGTAAGATAATTGTGTGAAAATGCCTCATTTAAGAATTCACT
AATGAAACGCGATGATGATATTTCCGCATTACGGAGAGTTTAACAGCGTGATGATTTCCG
AGGTGTCGCAATGGGGGCAAGGTGTGAAACTATTGTTAAGCGGAATTAATGAATGAGGAT
GATGCTAATTAATTATTATTTAATATTCAAAAAGGTTTTGATGTGCTTATTAATAATAGA
AGATTACTTTGCCTAACATAACATAACTTTGCATCAGATAATTCGCAATGACCCTTATAA
ATAAAAGGTTTTTGGGGTAAAATGCTCGCATAAATGACGGATCCCTGCTCTTGATGCCGC
CTCACCATTGCTGTTTGTACGTGTTCGCGTATGACCAGCGATGCTGCACGAGAGTGGAAC
AAGGACTCACATTTACATTTATACAAACACGCGCATGTCATAAATAGAAAAGAGTGAGTA
ACTTAATAGATATGCGATCCCTGAAGATATATTCTGTGATCTACTTCAGGCATTATAACG
GAACAATGTGAGTCGCTTTTTTAGTGCAACTCATATGCATTTTTACTTTCGTCCGGGTTC
CGGATGAAACTGCCAGGGAGGCACATTACAAATGGAATTGCTTGTTTGTGTGTGCACAGC
ATTAACCAGCTCAGTATGAGCCGCCAGTAAGTGATAATATATGATAAGTGCAAATCGTCC
GATAATTAACCTCGACCTCGATCTGCTGAGAACATTTGTTGCTGTTGCCGATCTGAACAC
TTTTGCTGCCGCAGCTGCCGCTGTGTGTCGTACTCAGTCCGCCGTAAGTCAGCAAATGCA
GCGTCTGGAACAACTCGTTGGGAAAGAACTGTTCGCTCGTCACGGTCGCAACAAACTGTT
AACTGAACATGGCATTCAACTTCTTGGTTACGCTAGGAAAATCCTGCGTTTTAATGATGA
GGCCTGCTCATCATTAATGTTCAGTAATCTTCAGGGCGTGTTAACTATCGGTGCTTCAGA
TGAATCTGCCGATACGATCTTACCTTTCCTGTTAAATCGCGTGAGTTCGGTTTATCCGAA
ATTAGCGCTGGATGTCCGCGTTAAACGTAATGCCTATATGGCAGAAATGCTGGAATCCCA
GGAAGTGGATTTGATGGTAACCACCCATCGTCCTTCAGCGTTTAAGGCATTGAACCTGCG
TACCTCGCCAACACACTGGTACTGCGCAGCGGAATACGTATTGCAAAAAGGTGAGCCGAT
CCCTCTTGTATTGCTGGATGATCCAAGTCCGTTTCGCGATATGGTGCTGGCGACGCTTAA
TAAAGCAGATATTCCCTGGCGACTGGCTTATGTCGCCTCGACGCTTCCGGCCGTTCGTGC
GGCAGTGAAAGCCGGTCTTGGCGTGACGGCAAGGCCGGTCGAGATGATGAGTCCGGACTT
GCGTGTGCTGAGTGGAGTAGATGGCTTACCGCCGCTACCTGATACCGAATATTTGCTGTG
CTATGACCCGTCCAGTAATAATGAGCTGGCCCAGGTGATCTATCAGGCGATGGAGAGCTA
CCATAATCCGTGGCAATACAGCCCAATATCTGCTCCGGAAGGGGATGATTCATTGTTGAT
TGAAAGGGATATCGAGTAATCGACGGACGATAGATAATTCCTGAGACAATAGTGTAAAAA
ACGAGCCGCTGGGGGTGTTTTAAACCCCAGCGGCTTTTTTTTAGTAAAGAACCTTCTTCA
CATCGTGCAGAACGTACAAAACTGTTCATTTTTCAATCGCCAGAGATTCACGCCCCGTAC
GCACAAATAATCGCCTGAAAAAAATCACCTGCTACAATGATGTTAAAAAATACGTAAATT
TGTTGCTGCGTTTTTGTTATGGAATGACAAAAGCGTGTCACAGATCAAGAAAATACTCTC
TTTTGGGGGGAGGAATCGACACAAATTCCTGTCAAAATAGACCCGTATTTTTTCCATTGC
TTCACAACGGACACGATTCAACAACATCTAATTATCCTGGAGTCGTCAAGGATCTGGGGT
GAAAGGGCATTAAATGCTAATGGTGTTGATATTATGTAAACTAATGTGAAGAAACTTTTG
TTAAAGTTGACAAAAGGTTATAGAAAGGAGTAAAAGACCACATCAATTAGCTGTATAAAA
GAATTTCTACAGTGATTGTAAGGTTTTTTTTATTCCTCCCCATGAATCGATGTGGCGTCC
ATCTGCCGTGAAGAGCAGTGAATCTGGCGCTACTTTTGATGAGTAAGCAATGAGTATGTC
AACATCCACTGAAGTCATCGCTCATCACTGGGCATTCGCTATCTTTCTTATCGTTGCCAT
TGGCCTGTGTTGCCTGATGCTGGTAGGCGGTTGGTTTTTAGGCGGTCGCGCACGCGCGAG
GTCGAAAAACGTGCCGTTTGAATCCGGTATCGACTCGGTCGGCTCCGCCCGCTTACGCCT
GTCCGCCAAGTTTTATCTGGTGGCCATGTTCTTCGTTATCTTCGACGTTGAAGCGCTGTA
TCTGTTCGCATGGTCAACCTCTATCCGCGAAAGCGGCTGGGTAGGCTTTGTGGAAGCTGC
AATTTTTATTTTTGTGTTACTGGCAGGTCTGGTTTATCTGGTGCGTATTGGCGCGCTGGA
CTGGACGCCCGCGCGTTCACGCCGCGAGCGTATGAACCCGGAAACGAACAGTATCGCTAA
TCGTCAACGCTAACCGCGAGGCATTAAGATGGATTATACGCTCACCCGCATAGATCCCAA
CGGTGAGAACGACCGTTACCCCCTGCAAAAGCAGGAGATCGTAACCGACCCTCTGGAGCA
AGAAGTTAACAAAAACGTGTTTATGGGCAAGCTCAATGACATGGTTAACTGGGGTCGTAA
AAACTCAATTTGGCCGTATAACTTCGGTCTTTCCTGCTGTTACGTTGAGATGGTGACTTC
GTTTACCGCGGTGCATGACGTGGCGCGTTTTGGCGCAGAAGTATTGCGTGCTTCGCCGCG
TCAGGCTGACCTGATGGTGGTTGCAGGAACCTGCTTTACCAAAATGGCACCGGTTATTCA
GCGTCTGTATGACCAGATGCTGGAACCAAAATGGGTTATCTCAATGGGTGCCTGTGCCAA
CTCTGGTGGTATGTACGATATTTATTCCGTTGTGCAGGGCGTCGATAAATTCATCCCGGT
TGATGTGTATATCCCGGGCTGCCCGCCGCGTCCTGAAGCGTACATGCAGGCACTGATGCT
GTTGCAGGAATCTATCGGCAAAGAACGTCGTCCGCTCTCCTGGGTGGTTGGCGATCAGGG
CGTTTATCGCGCCAATATGCAATCAGAGCGCGAACGCAAGCGCGGTGAACGCATTGCCGT
AACCAACCTGCGTACACCTGACGAGATTTAATTTGCGCCTGTCGGCAAAGGGATTTTTCT
TCGCTTATTCCTAAATCTATTTCGCGAAGCTTACTGCGCCGACAGTCACCACGGACCATT
TGCAATGGTGAACAATATGACCGACTTAACCGCGCAAGAACCCGCCTGGCAGACCCGCGA
TCATCTTGATGATCCGGTAATTGGCGAACTGCGCAACCGTTTTGGGCCGGATGCCTTTAC
TGTTCAGGCGACTCGCACCGGGGTTCCCGTTGTGTGGATCAAGCGTGAACAATTACTGGA
AGTTGGCGATTTCTTAAAGAAACTGCCGAAACCTTACGTCATGCTGTTTGACTTACACGG
CATGGACGAACGTCTGCGCACACACCGCGAAGGGTTACCTGCCGCGGATTTTTCCGTTTT
CTACCATCTGATTTCTATCGATCGTAACCGCGACATCATGCTGAAGGTGGCGTTGGCAGA
AAACGACCTGCACGTACCGACCTTCACCAAACTGTTCCCGAACGCTAACTGGTATGAGCG
TGAAACCTGGGATCTGTTTGGCATTACATTCGACGGTCACCCGAACCTGCGCCGCATCAT
GATGCCGCAAACCTGGAAAGGTCACCCGCTGCGTAAAGATTACCCGGCGCGCGCTACCGA
ATTCTCGCCGTTTGAGCTGACCAAAGCCAAACAGGATCTGGAGATGGAAGCCCTGACCTT
CAAACCGGAAGAGTGGGGGATGAAGCGCGGCACCGAAAACGAGGACTTCATGTTCCTCAA
CCTCGGCCCGAACCACCCGTCGGCGCACGGTGCTTTCCGTATCGTTTTGCAGCTTGATGG
CGAAGAGATTGTCGACTGCGTACCAGACATCGGTTACCACCACCGTGGTGCGGAGAAAAT
GGGCGAACGCCAGTCCTGGCACAGCTACATTCCGTATACCGACCGTATCGAATACCTCGG
CGGCTGCGTTAACGAAATGCCTTACGTGCTGGCGGTAGAGAAACTGGCCGGGATCACCGT
GCCGGATCGCGTTAACGTCATTCGCGTAATGCTCTCCGAACTGTTCCGCATCAACAGCCA
CCTGCTGTATATCTCGACCTTTATTCAGGACGTCGGCGCAATGACGCCCGTGTTCTTCGC
CTTTACCGATCGTCAGAAAATTTACGATCTGGTGGAAGCGATCACGGGTTTCCGTATGCA
CCCGGCGTGGTTCCGTATTGGCGGCGTAGCGCACGACCTGCCGCGCGGCTGGGATCGCCT
GCTGCGTGAGTTCCTCGACTGGATGCCGAAACGTCTGGCGTCTTACGAGAAAGCGGCGCT
GCAAAATACCATTCTGAAAGGTCGTTCCCAGGGCGTTGCCGCCTATGGCGCGAAAGAGGC
GCTGGAGTGGGGCACCACTGGCGCGGGCCTGCGTGCTACCGGGATTGACTTCGACGTGCG
TAAGGCGCGTCCTTATTCTGGCTATGAAAACTTCGACTTTGAAATCCCGGTTGGTGGTGG
TGTTTCTGACTGCTACACCCGCGTAATGCTGAAAGTGGAAGAGCTGCGCCAGAGTCTGCG
CATTCTTGAGCAGTGCCTCAACAACATGCCGGAAGGCCCGTTCAAAGCGGATCACCCGCT
GACCACGCCACCGCCGAAAGAGCGCACGCTGCAACATATCGAAACCCTGATCACCCACTT
CCTGCAAGTGTCGTGGGGGCCGGTGATGCCTGCCAATGAATCTTTCCAGATGATTGAGGC
GACCAAGGGGATCAACAGTTACTACCTGACCAGCGACGGTAGCACCATGAGTTATCGCAC
TCGTATCCGCACGCCGAGTTATGCGCATTTGCAGCAAATTCCGGCGGCGATCCGCGGCAG
CCTGGTGTCTGACCTGATTGTTTATCTGGGCAGTATCGATTTTGTTATGTCAGATGTGGA
CCGCTAATTATGCACGAGAATCAACAACCACAAACCGAGGCTTTTGAGCTGAGTGCGGCA
GAGCGTGAAGCGATTGAGCACGAGATGCACCACTACGAAGACCCGCGTGCGGCGTCCATT
GAAGCGCTGAAAATCGTTCAGAAGCAGCGTGGCTGGGTGCCGGATGGCGCGATCCACGCG
ATCGCCGATGTGCTGGGTATTCCGGCGAGCGACGTCGAAGGCGTGGCAACGTTCTACAGC
CAGATCTTCCGCCAGCCGGTTGGCCGCCATGTGATCCGTTATTGCGACAGCGTGGTCTGT
CATATCAACGGTTACCAGGGTATTCAGGCGGCGCTCGAGAAAAAGCTAAACATCAAACCA
GGGCAAACGACATTTGACGGTCGCTTTACGCTGCTGCCAACTTGCTGCCTGGGGAACTGT
GATAAAGGGCCAAACATGATGATCGATGAGGACACTCACGCGCATCTGACCCCGGAAGCG
ATCCCTGAACTGCTGGAGCGGTATAAATGAAAAACATTATCCGTACTCCCGAAACGCATC
CGCTGACCTGGCGTCTGCGCGATGACAAACAGCCAGTGTGGCTGGACGAATACCGCAGCA
AAAACGGTTACGAAGGCGCGCGTAAGGCGCTGACCGGGCTGTCTCCGGACGAAATCGTTA
ATCAGGTAAAAGACGCTGGTCTGAAAGGGCGTGGCGGCGCGGGTTTCTCGACTGGCCTGA
AATGGAGCCTGATGCCGAAAGACGAATCCATGAACATCCGTTACCTGCTGTGTAACGCCG
ATGAAATGGAGCCAGGCACCTATAAAGACCGCCTGCTGATGGAGCAACTGCCGCACCTGC
TGGTGGAAGGCATGCTCATCTCCGCGTTTGCGCTGAAAGCTTACCGTGGCTATATCTTCC
TGCGCGGCGAATATATCGAAGCGGCAGTGAATCTACGCCGTGCCATTGCCGAAGCGACTG
AAGCGGGCTTGCTTGGCAAAAACATTATGGGAACAGGTTTCGACTTCGAACTGTTCGTCC
ATACCGGGGCAGGGCGCTACATCTGCGGGGAAGAAACAGCGTTAATCAACTCCCTGGAAG
GGCGTCGTGCTAACCCGCGCTCGAAGCCTCCATTCCCGGCGACCTCCGGCGCATGGGGTA
AACCGACCTGTGTCAACAACGTCGAAACCCTGTGTAACGTTCCGGCGATCCTCGCTAACG
GCGTGGAGTGGTATCAGAACATCTCGAAAAGTAAAGATGCTGGCACCAAGCTGATGGGCT
TCTCCGGTCGGGTGAAAAATCCGGGCCTGTGGGAACTGCCGTTTGGTACTACCGCGCGCG
AGATCCTCGAAGATTACGCCGGTGGTATGCGTGACGGTCTGAAATTCAAAGCCTGGCAGC
CAGGCGGCGCGGGCACCGACTTCCTGACCGAAGCGCACCTTGACCTGCCGATGGAATTCG
AAAGTATCGGTAAAGCGGGAAGCCGTCTGGGTACGGCGCTGGCGATGGCGGTTGACCATG
AGATCAACATGGTGTCGCTGGTGCGTAACCTGGAAGAGTTTTTCGCCCGTGAGTCCTGCG
GCTGGTGTACGCCGTGCCGCGACGGTCTGCCGTGGAGCGTGAAAATTCTGCGTGCGCTGG
AGCGTGGTGAAGGTCAGCCGGGCGATATCGAAACACTTGAGCAACTGTGTCGATTCTTAG
GCCCGGGTAAAACTTTCTGTGCCCACGCACCTGGTGCAGTGGAGCCGTTACAGAGCGCCA
TCAAATATTTCCGCGAAGAATTTGAGGCGGGGATCAAACAGCCGTTCAGCAATACCCATT
TGATTAATGGGATTCAGCCGAACCTGCTGAAAGAGCGCTGGTAACCGAATTTCGATTAAC
GCTCAGTCTCTGACTGAGAAAACTGGAAGCATGCTAATGGCTACAATTCATGTAGACGGC
AAAGAATACGAGGTCAACGGAGCGGACAACCTGCTGGAAGCTTGTCTGTCTCTTGGCCTT
GATATTCCTTACTTTTGCTGGCATCCGGCGCTGGGAAGCGTCGGTGCTTGCCGCCAGTGT
GCGGTGAAGCAATACCAAAACGCGGAAGACACGCGTGGTCGCCTGGTGATGTCCTGTATG
ACACCGGCTTCCGATGGCACCTTTATTTCCATTGACGACGAAGAAGCGAAACAGTTCCGT
GAAAGTGTGGTCGAGTGGTTAATGACCAACCACCCGCACGACTGTCCGGTATGTGAAGAA
GGCGGTAACTGCCATCTTCAGGATATGACCGTGATGACCGGACACAGCTTCCGTCGCTAC
CGTTTCACCAAACGTACCCACCGTAATCAGGATTTGGGACCGTTCATCTCTCACGAAATG
AACCGCTGCATCGCCTGCTACCGCTGCGTGCGTTACTACAAAGATTACGCTGACGGTACA
GATCTGGGCGTTTATGGCGCGCACGACAACGTCTACTTCGGTCGCCCGGAAGACGGCACG
CTGGAAAGCGAATTTTCCGGTAACCTGGTCGAAATTTGCCCGACTGGCGTATTTACCGAC
AAAACGCACTCCGAGCGTTACAACCGTAAATGGGATATGCAGTTTGCGCCGAGCATCTGC
CAGCAATGTTCCATCGGCTGTAACATCAGCCCCGGTGAACGTTATGGCGAACTGCGTCGT
ATCGAAAACCGTTACAACGGTACGGTAAACCACTACTTCCTCTGCGACCGTGGTCGTTTC
GGTTACGGTTACGTCAACCTGAAGGATCGTCCGCGTCAGCCAGTACAGCGTCGTGGCGAT
GATTTCATTACCCTCAACGCCGAACAGGCAATGCAGGGCGCGGCAGATATTCTGCGTCAG
TCGAAGAAAGTGATCGGTATTGGTTCTCCGCGTGCCAGCGTGGAAAGCAACTTTGCGCTG
CGTGAACTGGTGGGCGAAGAAAACTTCTACACCGGTATCGCTCACGGTGAGCAGGAACGT
CTGCAACTGGCGCTGAAAGTGCTGCGTGAAGGCGGCATTTATACTCCGGCTCTGCGCGAA
ATCGAATCTTACGATGCGGTACTGGTGCTGGGCGAAGACGTTACCCAGACCGGCGCGCGC
GTCGCGCTGGCAGTGCGTCAGGCGGTGAAAGGTAAAGCGCGCGAAATGGCGGCAGCACAG
AAAGTGGCTGACTGGCAGATTGCGGCAATCCTCAACATCGGTCAACGTGCGAAGCATCCG
CTGTTTGTTACCAACGTTGATGACACCCGTCTGGATGATATCGCGGCGTGGACTTACCGC
GCACCGGTTGAAGATCAGGCGCGTTTAGGTTTTGCCATCGCCCATGCGCTGGATAACTCT
GCACCAGCGGTTGACGGTATCGAACCTGAGCTGCAAAGCAAAATCGACGTCATCGTGCAG
GCACTGGCAGGTGCGAAGAAACCGTTGATTATCTCCGGGACGAACGCCGGTAGCGCTGAA
GTAATTCAGGCTGCGGCTAACGTCGCGAAAGCCCTGAAAGGTCGCGGCGCTGACGTCGGT
ATCACCATGATTGCCCGTTCCGTCAACAGCATGGGGCTGGGCATTATGGGCGGTGGATCG
CTTGAAGAAGCGTTAACCGAACTGGAAACCGGACGCGCCGACGCGGTGGTGGTGCTGGAG
AACGATCTGCATCGTCACGCATCCGCTACCCGCGTGAATGCTGCGCTGGCTAAAGCGCCG
CTGGTGATGGTGGTTGACCATCAACGCACAGCGATCATGGAAAACGCCCATCTGGTGCTT
TCCGCCGCCAGCTTTGCTGAAAGCGACGGTACAGTGATCAACAACGAAGGCCGCGCCCAA
CGTTTCTTCCAGGTTTACGATCCGGCTTATTACGACAGCAAAACTGTCATGCTGGAAAGC
TGGCGCTGGTTACACTCGCTGCACAGCACTCTGCTGAGCCGTGAAGTGGACTGGACGCAG
CTCGACCATGTGATTGACGCTGTTGTGGCGAAAATCCCGGAACTGGCAGGTATCAAAGAT
GCTGCGCCGGATGCGACATTCCGTATTCGTGGGCAGAAACTGGCCCGTGAACCGCACCGT
TACAGCGGTCGTACCGCCATGCGCGCCAATATCAGCGTTCATGAGCCGCGTCAGCCGCAG
GATATTGACACCATGTTCACCTTCTCGATGGAAGGTAACAACCAGCCGACCGCGCATCGT
TCGCAAGTGCCGTTTGCCTGGGCTCCGGGCTGGAACTCCCCGCAGGCGTGGAACAAATTC
CAGGACGAAGTGGGCGGCAAACTGCGCTTTGGCGATCCGGGCGTGCGTCTGTTTGAAACC
AGCGAAAATGGTCTGGATTACTTCACCAGCGTACCGGCACGCTTCCAGCCGCAGGACGGG
AAATGGCGTATCGCGCCGTATTACCACCTGTTTGGCAGTGATGAATTGTCACAGCGTGCT
CCGGTCTTCCAGAGCCGTATGCCGCAGCCGTACATCAAACTCAACCCGGCAGATGCCGCG
AAGTTGGGTGTGAATGCAGGTACACGCGTCTCCTTTAGTTACGATGGCAACACGGTCACG
CTGCCGGTTGAAATCGCCGAAGGGCTGACGGCAGGGCAGGTGGGCTTGCCGATGGGTATG
TCCGGCATTGCTCCGGTGCTGGCTGGCGCGCATCTTGAGGATCTCAAGGAGGCACAACAA
TGAGTTGGATATCACCGGAACTGATTGAGATCCTGCTGACCATCCTCAAAGCGGTGGTGA
TCCTGCTGGTGGTTGTCACCTGCGGGGCATTCATGAGCTTTGGCGAACGTCGCCTGCTGG
GTCTGTTCCAGAACCGTTACGGACCTAACCGTGTTGGCTGGGGCGGTTCGCTCCAGCTGG
TTGCGGACATGATCAAAATGTTCTTTAAAGAAGACTGGATCCCGAAATTCTCGGATCGCG
TCATCTTTACCCTGGCACCGATGATTGCCTTTACCTCGTTGCTGCTGGCCTTTGCGATTG
TGCCAGTCAGCCCGGGTTGGGTGGTTGCCGACCTGAACATCGGGATTTTGTTCTTCCTGA
TGATGGCTGGTCTGGCGGTTTACGCGGTGCTGTTTGCGGGCTGGTCAAGTAACAACAAAT
ACTCGCTGCTGGGTGCGATGCGTGCTTCTGCACAGACCCTGAGCTACGAAGTGTTCCTCG
GGCTTTCTCTGATGGGCGTGGTGGCGCAGGCCGGTTCATTCAACATGACCGACATCGTCA
ACAGCCAGGCGCATGTGTGGAACGTCATCCCGCAATTCTTTGGTTTTATTACCTTTGCCA
TCGCGGGTGTGGCGGTGTGTCACCGTCACCCGTTTGACCAGCCGGAAGCCGAGCAGGAAC
TGGCGGATGGTTACCACATTGAATACTCCGGCATGAAGTTCGGTCTGTTCTTCGTGGGTG
AGTACATCGGGATTGTGACCATCTCTGCATTGATGGTGACGCTGTTCTTCGGTGGCTGGC
AAGGCCCGTTGTTACCGCCATTCATCTGGTTCGCGCTGAAAACCGCGTTCTTTATGATGA
TGTTCATTTTGATTCGTGCGTCGTTACCGCGTCCGCGTTATGACCAGGTAATGTCCTTCG
GCTGGAAAATCTGCCTGCCGCTGACGCTGATCAACTTGCTGGTAACGGCGGCTGTCATTC
TCTGGCAGGCGCAATAAGGGGCAATAAGACCATGACCTTAAAAGAATTGTTAGTAGGTTT
CGGCACCCAGGTTCGTAGTATCTGGATGATCGGCCTGCACGCGTTCGCCAAACGCGAAAC
GCGAATGTACCCGGAAGAGCCGGTCTATCTGCCGCCCCGTTATCGTGGTCGTATCGTTCT
GACCCGCGACCCGGACGGCGAAGAGCGTTGCGTAGCCTGTAACCTCTGTGCGGTAGCCTG
CCCGGTCGGCTGTATCTCGCTGCAAAAAGCAGAAACCAAAGACGGTCGCTGGTATCCGGA
ATTTTTCCGCATCAACTTCTCACGCTGCATTTTCTGTGGTCTGTGCGAAGAAGCCTGTCC
GACCACGGCGATTCAGTTAACCCCGGATTTCGAAATGGGGGAATACAAGCGCCAGGATCT
GGTTTACGAGAAAGAGGATCTGCTGATCTCCGGTCCGGGCAAATACCCGGAATATAACTT
CTACCGGATGGCAGGTATGGCAATCGACGGCAAAGATAAGGGCGAAGCAGAGAACGAAGC
CAAGCCTATCGACGTCAAGAGCCTGTTACCGTAAGGAGAGGAGCAATGGAGTTCGCTTTT
TATATCTGTGGCCTGATAGCCATACTTGCGACCTTGCGAGTGATCACCCATACCAATCCG
GTACACGCACTGCTGTACCTGATTATTTCGCTGCTGGCGATTTCTGGGGTGTTCTTCTCA
CTGGGCGCTTACTTCGCCGGTGCGCTGGAAATTATCGTCTACGCGGGTGCCATTATGGTG
CTGTTCGTGTTCGTGGTGATGATGCTCAACCTGGGCGGTTCAGAAATCGAACAGGAACGC
CAGTGGCTGAAACCGCAGGTGTGGATTGGTCCGGCAATTTTGTCGGCCATCATGCTGGTG
GTGATTGTTTACGCCATCCTCGGTGTTAACGATCAGGGTATCGACGGTACGCCAATCAGT
GCTAAAGCAGTGGGTATTACGCTGTTCGGGCCTTACGTACTGGCGGTGGAACTGGCTTCT
ATGCTGCTGCTCGCGGGTCTGGTTGTGGCCTTCCACGTCGGTCGTGAAGAGCGTGCGGGT
GAAGTGCTGAGCAATCGTAAAGACGACAGCGCGAAAAGAAAAACGGAGGAGCACGCATGA
TCCCCTTACAACATGGACTGATCCTCGCGGCAATCTTATTCGTTCTTGGCTTAACCGGTC
TGGTTATCCGTCGCAATCTGCTGTTTATGCTGATTGGTCTGGAAATCATGATTAACGCCT
CCGCGCTGGCCTTTGTGGTCGCCGGAAGCTACTGGGGCCAGACCGACGGTCAGGTGATGT
ACATTCTCGCCATCAGCCTCGCGGCGGCAGAAGCGAGTATCGGCCTTGCGCTGCTGCTGC
AACTTCACCGTCGTCGCCAGAACCTGAACATCGATTCAGTAAGTGAGATGCGCGGATGAA
CATGCTTGCCTTAACCATTATTTTGCCATTGATTGGCTTCGTCCTGCTGGCGTTCTCCCG
TGGGCGCTGGTCTGAAAACGTTTCGGCGATCGTCGGCGTTGGCTCTGTGGGCCTGGCGGC
GCTGGTAACCGCCTTTATCGGCGTTGATTTCTTCGCTAACGGCGAGCAGGCATACAGCCA
GCCGCTGTGGACGTGGATGTCGGTAGGCGACTTTAACATCGGTTTTAACCTGGTGCTGGA
CGGCCTGTCGCTGACCATGCTCTCGGTGGTCACTGGTGTGGGTTTCCTGATCCACATGTA
CGCCTCCTGGTATATGCGTGGTGAAGAGGGCTACTCTCGCTTCTTCGCCTACACCAACCT
GTTCATCGCCAGCATGGTGGTTCTGGTGCTTGCCGATAACCTGCTGTTGATGTACCTCGG
CTGGGAAGGCGTGGGCCTGTGCTCCTATCTGCTGATCGGTTTCTATTACACCGATCCGAA
GAATGGCGCAGCGGCAATGAAAGCGTTCGTCGTGACCCGTGTGGGTGACGTGTTCCTCGC
TTTCGCGCTGTTCATTCTTTACAACGAACTGGGCACCCTGAACTTCCGCGAAATGGTGGA
ACTGGCACCAGCGCACTTTGCTGACGGCAATAACATGCTGATGTGGGCGACGCTGATGCT
GCTGGGCGGTGCGGTCGGTAAATCTGCGCAGTTGCCGTTGCAGACATGGCTTGCCGACGC
GATGGCGGGCCCGACGCCTGTCTCCGCGCTGATCCACGCCGCAACGATGGTAACCGCGGG
TGTCTACCTGATCGCCCGTACCCACGGCCTGTTCCTGATGACCCCGGAAGTTCTGCATCT
GGTGGGTATTGTCGGGGCAGTTACGCTGCTGCTGGCCGGTTTTGCCGCGCTGGTACAGAC
CGACATCAAACGTGTTCTCGCTTACTCTACCATGAGCCAGATTGGCTACATGTTCCTCGC
GCTTGGCGTGCAGGCATGGGATGCGGCGATTTTCCACTTGATGACTCACGCGTTCTTTAA
AGCGCTGCTGTTCCTGGCATCCGGTTCCGTCATTCTGGCCTGCCATCACGAACAGAACAT
CTTCAAGATGGGCGGTCTGCGTAAATCTATTCCGCTGGTTTATCTCTGCTTCCTGGTGGG
TGGTGCAGCACTGTCGGCACTGCCGCTGGTCACTGCGGGCTTCTTCAGTAAGGATGAGAT
CCTCGCGGGTGCGATGGCGAATGGTCATATCAATCTGATGGTGGCAGGTCTGGTCGGTGC
GTTTATGACCTCGCTCTACACCTTCCGTATGATTTTCATCGTCTTCCACGGAAAAGAACA
AATTCACGCTCACGCCGTGAAAGGGGTAACTCACAGCCTGCCGCTGATTGTGCTGCTGAT
CCTTTCCACCTTCGTTGGCGCACTGATTGTACCGCCGCTGCAGGGCGTGCTTCCGCAAAC
GACGGAGCTGGCGCACGGCAGCATGTTGACCCTGGAAATTACCTCTGGCGTGGTCGCGGT
GGTCGGCATTCTGCTGGCTGCCTGGCTGTGGCTGGGTAAACGTACTCTGGTGACCTCCAT
CGCCAACAGTGCGCCGGGCCGTCTGCTGGGCACCTGGTGGTACAACGCCTGGGGCTTTGA
CTGGCTGTACGACAAAGTGTTCGTCAAGCCGTTCCTGGGTATTGCCTGGTTGCTGAAACG
CGATCCGCTGAACGCAATGATGAACATTCCGGCGGTTCTTTCCCGCTTTGCAGGTAAAGG
TCTGCTGTTAAGCGAGAACGGCTATCTGCGCTGGTATGTGGCATCCATGAGCATCGGTGC
GGTCGTGGTGCTGGCACTGTTGATGGTACTGCGTTGAGTTAAGGATTGTGGGATTGCCCC
TGGGCATATAAGAACGTAGGTCGGATAAGCCTCCTTCGCGGTGCATCCGACACTACCCCC
AGTCCGAAGAGAATTTTCTGTCGTGAGAATTCGTTGAAAATCCGGTCCTGACGGGACTTT
TACAAGGAATAAAGATCGCCATGTTACTACCCTGGCTAATATTAATTCCCTTTATCGGCG
GCTTCCTGTGCTGGCAGACCGAACGCTTTGGCGTCAAGGTGCCGCGCTGGATCGCGCTGA
TCACCATGGGATTGACGCTGGCGCTGTCGCTGCAACTGTGGTTGCAGGGCGGTTATTCAC
TGACGCAATCCGCCGGAATTCCGCAGTGGCAGTCTGAATTCGACATGCCGTGGATCCCGC
GTTTTGGTATCTCTATTCATCTCGCCATTGACGGGCTGTCGCTGCTGATGGTCGTGCTGA
CCGGTCTGCTCGGTGTGCTGGCGGTACTCTGTTCGTGGAAAGAGATCGAAAAATATCAGG
GCTTCTTCCACCTCAACCTGATGTGGATCCTGGGCGGCGTTATCGGCGTGTTCCTTGCCA
TCGACATGTTCCTGTTCTTCTTCTTCTGGGAAATGATGCTGGTGCCGATGTACTTCCTGA
TCGCACTGTGGGGGCATAAAGCCTCTGACGGTAAAACGCGTATCACGGCGGCAACCAAGT
TCTTCATTTACACCCAGGCGAGTGGTCTTGTGATGTTGATCGCCATCCTGGCGCTGGTTT
TTGTTCACTACAATGCGACCGGCGTCTGGACCTTCAACTATGAAGAGCTGCTGAATACGC
CAATGTCCAGTGGTGTGGAATATCTGTTGATGCTGGGCTTCTTCATCGCCTTCGCAGTCA
AAATGCCGGTGGTTCCGCTGCATGGCTGGCTGCCGGATGCGCACTCCCAGGCTCCGACCG
CCGGTTCCGTTGACCTCGCGGGGATCTTGCTGAAAACTGCCGCTTACGGTTTGCTGCGTT
TCTCCCTGCCGCTGTTCCCAAATGCGTCGGCAGAGTTCGCGCCAATCGCTATGTGGCTGG
GTGTTATCGGCATCTTTTACGGTGCGTGGATGGCCTTCGCCCAGACCGATATCAAACGTC
TGATCGCCTACACCTCGGTTTCCCACATGGGCTTCGTGCTGATTGCTATCTACACCGGCA
GCCAGTTGGCCTACCAGGGCGCGGTAATCCAGATGATTGCGCACGGCTTGTCGGCGGCGG
GTCTGTTTATTCTCTGCGGTCAGCTTTATGAACGTATCCATACCCGCGACATGCGCATGA
TGGGCGGTCTGTGGAGCAAGATGAAATGGCTGCCAGCACTGTCGCTGTTCTTTGCGGTGG
CAACGCTTGGGATGCCTGGCACCGGTAACTTCGTCGGCGAATTTATGATTCTGTTCGGCA
GCTTCCAGGTTGTCCCGGTGATTACCGTTATTTCTACCTTTGGGCTGGTCTTTGCATCTG
TTTATTCGCTGGCGATGTTGCATCGTGCTTACTTCGGTAAAGCGAAAAGCCAGATTGCCA
GCCAGGAACTGCCAGGGATGTCGCTGCGTGAGCTGTTTATGATCCTGTTGCTGGTGGTGC
TGCTGGTACTGCTGGGCTTCTATCCGCAGCCGATTCTGGATACCTCGCACTCCGCGATTG
GCAATATCCAGCAGTGGTTTGTTAATTCCGTTACTACTACAAGGCCGTAAATCGCCATGA
CAATAACTCCACAAAACCTGATCGCACTGCTACCGTTGCTGATCGTCGGCTTGACGGTGG
TGGTTGTGATGCTCTCCATTGCGTGGCGACGCAATCATTTCCTCAACGCTACGCTCTCGG
TTATTGGGCTTAACGCGGCGCTGGTTTCGCTCTGGTTTGTCGGCCAGGCGGGCGCTATGG
ATGTTACGCCGCTGATGCGCGTTGATGGTTTCGCCATGCTTTACACCGGGCTGGTCCTGC
TGGCGAGCCTCGCCACCTGTACTTTCGCCTACCCGTGGCTTGAAGGCTATAACGACAACA
AGGATGAGTTCTACCTGTTGGTGTTAATTGCCGCGCTGGGCGGGATCCTGCTGGCGAATG
CCAACCATCTGGCGTCTCTGTTCCTCGGTATCGAACTGATCTCTTTGCCGCTGTTTGGCC
TGGTCGGTTACGCTTTCCGCCAGAAACGTTCGCTGGAAGCCAGTATCAAATACACCATCC
TTTCTGCCGCAGCGTCTTCTTTCCTGCTGTTTGGTATGGCGCTGGTGTATGCGCAGTCTG
GCGACCTGTCGTTTGTCGCGTTGGGTAAAAACCTTGGCGACGGTATGCTCAACGAGCCGC
TGTTGCTGGCAGGTTTCGGCCTGATGATTGTTGGCCTCGGCTTCAAACTCTCTCTGGTGC
CGTTCCACCTGTGGACGCCAGACGTATACCAGGGCGCGCCTGCGCCGGTTTCCACTTTCC
TGGCGACGGCGAGCAAAATCGCTATCTTCGGTGTGGTGATGCGTCTGTTCCTCTACGCAC
CGGTGGGTGACAGCGAAGCGATTCGCGTAGTACTGGCGATTATCGCCTTTGCCTCCATCA
TCTTCGGTAACCTGATGGCGTTGAGCCAGACCAACATCAAACGTCTGCTCGGTTACTCAT
CTATCTCTCACCTCGGCTATCTGCTGGTGGCGCTGATTGCGCTGCAAACCGGCGAGATGT
CGATGGAAGCGGTAGGGGTTTACCTGGCCGGTTATCTGTTCAGCAGCCTCGGCGCGTTCG
GCGTGGTCAGCCTGATGTCCAGCCCGTATCGTGGCCCGGATGCTGATTCCCTGTTCTCTT
ACCGCGGTCTGTTCTGGCATCGTCCGATCCTCGCGGCAGTGATGACGGTGATGATGCTGT
CTCTGGCCGGTATCCCGATGACGCTGGGCTTTATCGGTAAGTTCTACGTGCTGGCGGTCG
GTGTCCAGGCTCACTTGTGGTGGCTGGTGGGTGCCGTGGTTGTCGGTTCGGCAATCGGCC
TTTACTACTACCTGCGCGTGGCGGTGAGTCTGTACCTGCACGCACCGGAACAACCGGGTC
GCGATGCACCGTCAAACTGGCAGTACAGCGCGGGCGGTATCGTGGTGCTGATTTCTGCAC
TGTTGGTACTGGTGCTGGGTGTATGGCCACAACCGCTGATTAGCATTGTGCGTTTGGCAA
TGCCGCTGATGTAATCTGTTAGTTTGTAAGTCAGAAAGCCGCCGACATGCTCGGCGGTTT
TTTTTGGCGCTCTGACACCATCACCCAACAATAACCGTCAGCGCATGATTCCCTTGTCGC
AGCATACGTCGATACGCGCTAATCAGCTTTTCCATATCAAGCATGATCGAGGCAAAGAGT
TGCCCCTCTAACTCTTCTGAAAAGGTCACTCCCGGATAAATCTCCATTTCATTGAGTCGC
TTAATGGAAAACTGTTTACGCAGCTCACTTCGATCCAGTGATTCCAGTCGGTCGATTGTC
GCGGCTAACTCCTGATTCCAGGTCAATCCCAGGAAGCCATCTATGCCATCTTCGAGGCTG
TGTTCACCAAGCACGGCACGACTCAGCGGATCATTCTTCGCGGGATCAAAAGCAGAGGTG
CCTGTCAGCCCAAAGTGTAAAAAATCCCAGCGTTTATCAATATCCAGTCGGCGTAATCCT
GAAAGCGTGTCATGTATATTATCCATCAAAGGTTTTTCAGTAGACTCAAGCAGTTGGTTA
ATCTTTTCTGAGTCAATTTCTGCAAAATAACCAATCATTCCCATTTATTTTTCCTCCATT
GAATTTCATGTTTCGCATCTTAAAACAGACGAGGGAAAATAAAATGTGCATGTCGCTTTT
TCTGGACCCGCCTCGAGAAATTTTTATTATTTACTGTTGTATAACAAATTTATAACACCA
TCCACCACCTGAGCCATTTTCTGATAATTCAATCTGTCTGCGGTATCACCGGGCAAGTGG
TATTGTTTATTACGATAAAAAGCGGTGTCAGTAATCATTACGGCGGGAATATCGTGTTGC
CAATAATTCAGGTGGTCAGAGAAATCAATACCGGGAATAAACCCTGGGGCATTCATAGAA
TAAACAGATAAATCCCGGGATGACAACAATGCCGCTTTTACCTGACGAACGGCGTTGATA
TCCTGTATTCTGCCGACCAGGCAATAAAGTCCCCCCGATCGGGATAAAGCCAGGACATTG
CGGGTAAGGGTAATCCTGGCTACCAGGCGCAGAGTCGTAATAGCCAATCGGGGACGCCCT
GCGCGGTAACTCTGGCACCGCTACTGACAAAGACCTCTTTTATATACTCTACGGACCTAT
TCAGATTATCAATATTGTCGGCATTACGTGGATGCACAGCTTGTGTAAGATAACGAACTT
TTTTTTCTAATTGCTCAGGAATTACGTGTCGGGGCGTTGGCGATAATGCAGTGACCCAGG
GTTGGTAAAAATAATCAGAGGGAGTGAAAACAGAAATAATATAACAAAAGGAAAATTTTT
TCATATGTAAATTATCAATAAAAGGCGTTATTTCATTATTATTTATAATGAATTATGAGC
GTTTATTTTATTACACTTGGTAGAGATATACAAAAAGTGTTTTTTACAGTGGGTTCGCTA
TTTTTAAAAAGGAATTTCTGTGAGGAATAAAAATATAATTATGTTATTTATTGGCAGATT
GAATTGACAAGTGGGGCAGAAATCTGAGGGTAAGAAAAGTCAGCAACTACAATCCACTAC
ATCAACAGACCAGCAATCGCGTGCCGAGATACGCTGGAAATACCCGAAGATTGAACTGCA
GGGTGGTGTGACTGACATCAGTCAGTGATGACTTTTTAGCAAACTATGTTCGACCAGTCA
GCATATTTGCTGACTGGTCGAATTAATTAACAATGATGTTAACTTACTCTTTTGCCTGAT
GCTCTATTTTGGGGTTGTGAGTGTTTTATTTCTAAGTCTCTATAATAATCATTGATATTT
GCATCGCCATATTTATCTAAATAACAATTTCTGTTTACCAGTCGATGTTGAAAATCAATT
TCGTACTGCTCTTCTGCTGAATATTTTTTAAATCTGTCAGCATAGTTTTTTAATAACGTA
TAGGGGGCGCTGTCAGAATTACTTTCCCTTTGTTCAATCACTTCCTGGGCTGCCATGCAC
ACAAATGCACCGCAACTTTGGCTTAAGTATTGCTGAAGATCGGTATGTAAAAATATTATC
TCGGGTTCAGTTAAATGAACTTTTATATTATTATTCGACATTTCTCCCATGAGTTCAGAA
TTAAAACTATTAATGACACGCTTAAGTGAATTTTCTTTATCATGGCCTAGTGCGCGCAAT
GAGTTGAATATGACGCATTTTATTTGTTGTGTATTATTTTTTTCATTTACTATTTTCTGT
AGCGAAACTAATATCCAGTGTCCGCCAGTATTTATGGGGAATAACTGGACTTCATTCGGC
CATGATGGATCGCTCTTAATATTTTCATTGAGAGCGTCTTCCAGGTGAGTTCTGGTGGAG
TAGGGGACGTAGAGACCAGTAGGATAATTGACTTCAGTATTTTTTGCATTAGCGGCGATC
TTCTGAAGATAGCAATCTATTTCATCTGTGGTTAATTGACGATTTTTATCCCAGAAGTTT
GTACCATCGCTCAGTTCATTATTCTCATCATTTAAAAGCACCTTCGAAAGCGACTGTTTT
TCAGATATAAGAGGAATTTCATCACCGATAATTGTCATTAATTTCGAAGGGGAGAATAGC
TTTTTGAACAGGAGAACATCTGAATTATCCGGACCAGTTGGTTTAAGGTGGGAGTTGGTT
GCGGTATGTGCCAAATTATATAATTTTAAACAGGCATTTTTAATAAGTCGGATAATCGAT
AGGGTCTCATTTGTTGGGTTTCTAACAATATGGTAAAGAATATCTTCAGCTTTTTTTCCA
AATTCATCATAACCTAACGCAATATTATGCAGTAACTCAATACTTTCTTCATCTCCGGAT
AACGCTGTTTTTTTTAAAGACTGCAGTAATTCCTCGGTCACAGTAAATTTTTCTGCAAAT
GTCTGACTGAGTTGGGTTTGAGATAATTGACAATAATTGCTGACAACTGTAACCATCATA
TGCTCCTTTTAGTTGCAAAGGTTGTGCTGAATGAAGATAAAAAGAGGCAACTTATTGCTC
TGAATATAGTGCGTAAGGAGATGAATAAATATCAAAAATCGCTCAATATGCCCGTGTGGG
TGGATATATGTAGCGCGGGTTGCGATAACAGGGCAAGTTTCGCCCTGTTTTTAATAATAA
GCAGAGTTAAACGTTAAACACGGTGAAATCATTCGCTAGTTCAGTCGCCGGGAAAATTGA
CCTGCATTCACGTAACAGGTGCTGACAACCTTTGTCATCATAGCGCGAGCTGACGTGGGT
AATGATTAGCTTACCGACTCCAGCCTCACGGGCCAGTGTCGCAGCCTGGCGTGTAGAGCT
ATGACCGCGACTATTGGCTTTGGCTTCCATGGTTATATCCAGCGTCGCTTCGTGTACCAT
GACATCGACACCTTTAGCCAGGTCAAGTGCGGCATCGCAGGGGCCGGTATCGCCGAAAAT
AGCGAGCGCTTTACCTGGCACTGGAGCAGCTAAGTAATCTGCGCCGTTAATCTGCCTTCC
ATCTTCCAGCATGATTGTTTTGCCCGCTTTTAATTCCTGAAACAGTGGGCCAGGCGGTAC
GCCAGCAGCTTTTAATGCCTGGGCATTTAATGCACCCGGTTTATCATGTTCTTCAATACG
ATAGCCATAACATTCCAGTGGGTGTTCCATTGGATAAGCGGTCACTTTGCGCAGGCCATC
ATCGAGAATTTCGCCAGCGCCAATTTCGACAATTTCCAGCGGATAATCGGTCCATGAGCC
GCTAATCCGCAGCGCGGTCTCCACAAATTCACGGATACCTTGCGGACCATAAATCGTTAA
GGGTTGGACAATACCAGACATAGAACGACTGCACAGCAAGCCGGGTAAACCAAAGAGATG
ATCGCCATGAAGGTGACTAATAAAAATCTTGTCCAGTTTTCCAGGGTTAAAGGCGGTATG
CAGTAGCTGATGCTGGGTGCCTTCACCGCAGTCAAACAACCAAAGACCGCTCTGGGTCGG
ATGTTGCAGGTTAAGCAATATTGCCGTGACATTGCGCGTACGGGTTGGCACACCGGCTGA
AGTACCTAAAAAAATTAATTCCATGAGTTCATCACGTTTCAAAAAATATTCCGGCTAGTA
TAAGGCATACATCTAAAAGGAGAGCATTATGATTGAATGGCAAGATCTGCATCACTCTGA
ATTATCGGTTTCCCAGCTTTATGCCTTATTACAACTGCGTTGCGCGGTGTTTGTTGTCGA
GCAGAATTGCCCTTATCAGGATATCGATGGTGATGATTTGACGGGGGATAATCGCCATAT
TCTCGGTTGGAAAAATGATGAACTGGTGGCATATGCGAGGATTCTGAAAAGTGATGATGA
TCTTGAGCCGGTCGTTATAGGTCGGGTGATTGTCAGTGAAGCGTTGCGTGGCGAAAAAGT
GGGGCAGCAACTGATGAGTAAAACCCTCGACACATGCACGCATCACTGGCCTGATAAGCC
TGTTTACCTTGGGGCGCAGGCGCATCTGCAAAACTTCTACCAGAGTTTCGGTTTTATCCC
TGTGACGGAGATCTATGAAGAAGATGGTATCCCACACATTGGGATGGCACGCGAGGTAAT
TCAGGCGTAATCAATAACCCTTGTCTATAGTTAGTGACAGGTTTTACGCAAATGGAGAAC
GAGAATGTCTAATCAGTTTGGTGATACACGTATCGATGACGACCTGACGCTGCTTAGTGA
AACACTGGAAGAGGTGCTCCGCTCCTCTGGCGATCCCGCCGATCAGAAATATGTTGAGCT
GAAAGCGCGTGCAGAAAAAGCGCTGGATGATGTGAAAAAACGGGTTAGCCAGGCTTCAGA
CAGTTATTACTATCGGGCGAAGCAGGCTGTTTATCGTGCTGATGACTACGTCCACGAAAA
ACCCTGGCAGGGAATTGGTGTGGGTGCGGCCGTTGGGCTGGTACTAGGACTGTTGCTGGC
ACGCCGTTAAAACCTCCCTACACCGGGGTACTGCATTTTTTTTGTAGTACCCCGTATAAT
GTGAGGCTTTTAACAGGGAGAGGTCCGCGTGCAATCACTTACTACGGCGCTGGAAAATCT
ACTGCGCCATTTGTCGCAAGAGATTCCGGTGACACCCGGCATTCGGGTTATCGATATTCC
TTTCCCTCTCAAAGACGCTTTTGATGCCTTGAGCTGGCTGGCCAGTCAGCAAACGTACCC
GCAATTCTACTGGCAACAACGTAATGGTGATGAAGAAGCTGCCGTCCTGGGCGCGATTAC
CCGTTTTACGTCGTTGGACCAGGCACAACGTTTTCTTCGCCAGCACCCGGAACACGCCGA
CTTACGCATTTGGGGGCTGAATGCGTTCGACCCGTCGCAGGGCAATTTACTTTTACCACG
CCTGGAATGGCGACGCTGTGGCGGTAAAGCCACGCTGCGGCTGACGCTATTCAGCGAAAG
CTCCCTTCAGCACGATGCGATTAAGGCAAGAGAATTTATCGCCACACTGGTGAGTATCAA
GCCCTTGCCTGGGTTACATTTAACCACTACGCGAGAACAACACTGGCCGGACAAAACGGG
CTGGACGCAATTAATCGAACTGGCAACGAAAACCATCGCCGAAGGGGAGCTCGACAAAGT
GGTGCTTGCTCGGGCAACTGACCTGCATTTCGCAAGTCCGGTCAATGCGGCGGCGATGAT
GGCTGCCAGTCGTCGACTGAATCTCAATTGCTACCATTTTTACATGGCCTTTGATGGCGA
AAATGCTTTTCTTGGCTCTTCACCGGAACGGTTATGGCGGCGGCGTGACAAAGCGCTGCG
TACTGAAGCGCTGGCGGGAACAGTAGCAAATCATCCTGATGATAAGCAGGCGCAGCAGTT
AGGAGAGTGGCTGATGGCGGATGATAAAAACCAGCGCGAGAACATGCTGGTGGTGGAAGA
TATCTGCCAACGATTACAGGCCGATACCCAGACGCTGGATGTTTTACCGCCGCAGGTACT
GCGTCTGCGTAAAGTGCAGCATCTTCGCCGCTGTATCTGGACTTCACTCAACAAAGCGGA
TGATGTGATCTGTTTACATCAGTTGCAGCCAACGGCAGCAGTTGCTGGCTTACCGCGCGA
TCTGGCGCGACAGTTTATCGCCCGTCACGAACCGTTCACCCGAGAATGGTACGCCGGTTC
TGCGGGCTATCTCTCATTACAACAAAGCGAATTCTGCGTTTCCCTGCGCTCAGCAAAAAT
TAGCGGCAATGTCGTGCGATTATATGCTGGCGCGGGCATTGTCCGTGGTTCCGACCCCGA
GCAAGAGTGGCAGGAAATCGACAACAAAGCGGCAGGGCTGCGTACTTTATTACAGATGGA
ATAGTAATGAGTCGCATCATTACCGATTCATATCAATAATCTATTTTTGTAGCTCCTTAT
ACTTAGCCGCAATATTGATACCGGACAAACTCATGTCAGTAAGCGCATTTAACCGACGCT
GGGCGGCGGTCATTCTGGAAGCATTAACGCGTCACGGCGTCAGACACATCTGTATCGCCC
CAGGCTCGCGTTCTACACCGTTAACGTTAGCGGCGGCGGAGAATTCCGCATTCATTCACC
ACACCCATTTCGATGAGCGTGGACTGGGGCATCTGGCGCTGGGGCTGGCGAAAGTCAGCA
AGCAGCCGGTGGCGGTGATTGTGACCTCCGGCACGGCGGTAGCAAATCTCTATCCTGCAC
TGATTGAAGCTGGGTTAACCGGAGAAAAACTGATCCTGTTAACCGCCGATCGCCCGCCGG
AGCTAATTGACTGCGGCGCGAATCAGGCGATTCGTCAGCCGGGAATGTTCGCCTCTCACC
CCACGCACAGTATTTCATTGCCGCGCCCGACCCAGGATATCCCCGCAAGTTGGCTGGTTT
CTACCATCGACCATGCTCTCGGTACGCTTCATGCGGGCGGAGTCCATATCAACTGCCCGT
TTGCTGAACCGCTGTATGGCGAGATGGACGACACTGGGCTTAGCTGGCAACAGCGTCTGG
GTGACTGGTGGCAGGATGATAAGCCGTGGCTGCGTGAAGCGCCTCGTCTGGAAAGTGAAA
AACAGCGCGACTGGTTCTTCTGGCGGCAAAAACGCGGCGTGGTGGTTGCCGGGCGCATGA
GTGCGGAAGAGGGCAAAAAAGTTGCACTGTGGGCGCAAACTCTTGGCTGGCCGCTGATTG
GCGACGTGCTGTCGCAAACCGGACAGCCGCTGCCGTGTGCCGATCTTTGGTTAGGCAATG
CCAAAGCGACCAGCGAACTGCAACAGGCACAGATTGTGGTGCAACTGGGCAGCAGCCTGA
CGGGCAAACGGCTCCTGCAATGGCAGGCAAGCTGTGAACCCGAAGAGTACTGGATTGTGG
ATGACATCGAAGGGCGACTTGATCCGGCACACCATCGTGGACGCCGCTTAATTGCCAATA
TTGCCGACTGGCTGGAGCTGCATCCGGCAGAAAAACGCCAGCCCTGGTGCGTTGAAATCC
CGCGCCTGGCAGAACAGGCAATGCAGGCGGTTATTGCCCGTCGCGATGCGTTTGGCGAAG
CGCAACTGGCGCATCGCATCAGCGACTATCTGCCTGAACAGGGGCAATTGTTTGTTGGTA
ACAGCCTGGTGGTACGTCTGATTGATGCGCTTTCGCAACTTCCAGCAGGTTACCCGGTGT
ACAGCAACCGTGGGGCCAGCGGTATCGACGGACTGCTTTCTACTGCCGCCGGCGTTCAGC
GTGCCAGTGGCAAACCGACGCTGGCGATTGTGGGCGATCTCTCCGCACTTTACGATCTCA
ACGCGCTGGCGTTATTGCGTCAGGTTTCCGCGCCGCTGGTATTAATTGTGGTGAATAACA
ACGGCGGGCAAATTTTTTCGCTGTTGCCAACGCCGCAAAGCGAGCGCGAACGTTTCTATC
TGATGCCGCAAAACGTTCATTTTGAGCACGCCGCCGCGATGTTCGAGCTGAAATATCATC
GTCCGCAAAACTGGCAGGAACTTGAAACGGCACTTGCCGATGCCTGGCGCACGCCAACCA
CCACGGTAATTGAAATGGTGGTTAACGACACCGATGGTGCGCAAACGCTCCAGCAACTTC
TGGCGCAGGTAAGCCATTTATGATCCTGCACGCGCAGGCAAAACACGGCAAACCAGGTTT
ACCCTGGCTGGTGTTTTTGCACGGTTTTTCCGGCGATTGCCACGAATGGCAAGAAGTGGG
CGAGGCGTTTGCCGACTACTCACGGTTGTATGTTGATCTTCCCGGGCACGGTGGTTCGGC
GGCGATTAGCGTCGATGGATTTGATGATGTCACCGACTTACTGCGTAAAACCCTGGTTAG
TTACAACATCCTTAACTTCTGGCTGGTGGGGTACTCGCTTGGCGGACGGGTGGCGATGAT
GGCCGCTTGCCAGGGGCTGGCGGGGCTTTGTGGGGTTATTGTCGAAGGCGGGCATCCGGG
GCTGCAAAATGCTGAACAACGTGCGGAACGTCAGCGTTCCGATCGCCAATGGGCGCAGCG
TTTTCGCACAGAACCGTTAACGGCGGTATTTGCCGACTGGTATCAACAGTCTGTTTTTGC
CTCGCTCAATGACGATCAACGCCGGGAGCTGGTGGCGCTGCGCAGCAACAATAATGGCGC
AACCCTTGCCGCCATGCTGGAGGCGACTTCTCTCGCCGTCCAGCCTGATTTACGTGCTAA
CCTTAGCGCCCGCACATTTGCGTTTTATTATTTATGTGGTGAACGTGACAGCAAATTCCG
CGCTCTGGCGGCGGAACTGGCTGCCGACTGCCATGTCATTCCTCGCGCCGGACATAACGC
GCATCGGGAAAATCCCGCTGGCGTTATCGCAAGTCTGGCGCAGATCTTGCGTTTCTGACT
AAAGGACACAATATGATTTATCCTGATGAAGCAATGCTTTACGCACCGGTTGAATGGCAC
GACTGCTCCGAAGGTTTCGAGGACATTCGTTATGAAAAATCCACCGACGGTATCGCAAAA
ATCACCATTAATCGTCCGCAGGTGCGCAATGCCTTCCGTCCTCTGACGGTAAAAGAGATG
ATCCAGGCACTGGCAGATGCGCGTTATGACGACAATATCGGCGTGATCATTCTGACTGGC
GCAGGCGATAAAGCGTTCTGCTCCGGTGGTGACCAGAAAGTGCGTGGTGATTACGGCGGC
TATAAAGATGATTCCGGCGTACATCACCTGAACGTGCTGGACTTCCAGCGTCAGATCCGT
ACCTGTCCGAAACCGGTTGTCGCGATGGTGGCTGGCTACTCCATCGGCGGTGGTCACGTT
CTGCACATGATGTGCGACCTGACTATCGCGGCAGATAATGCCATCTTCGGTCAGACTGGC
CCGAAAGTCGGTTCCTTCGACGGCGGCTGGGGCGCTTCCTACATGGCTCGTATCGTCGGG
CAGAAAAAAGCGCGTGAAATCTGGTTCCTGTGCCGTCAGTACGACGCAAAACAGGCGCTG
GATATGGGCCTTGTGAACACCGTGGTACCGCTGGCGGATCTGGAAAAAGAAACCGTCCGT
TGGTGCCGCGAAATGCTGCAAAACAGCCCGATGGCGCTGCGCTGCCTGAAAGCTGCACTG
AACGCCGACTGTGACGGTCAGGCAGGTCTGCAGGAGCTGGCGGGCAACGCCACCATGCTG
TTCTACATGACGGAAGAAGGTCAGGAAGGTCGCAACGCCTTCAACCAGAAACGTCAGCCT
GATTTCAGCAAATTTAAACGGAATCCGTAATGCGTAGCGCGCAGGTATACCGCTGGCAGA
TCCCCATGGACGCGGGGGTGGTTCTGCGCGACAGGCGGTTAAAAACCCGCGACGGGCTGT
ATGTTTGCCTGCGTGAAGGCGAGCGCGAAGGGTGGGGGGAGATCTCCCCACTGCCGGGCT
TCAGTCAGGAAACCTGGGAAGAGGCGCAAAGTGTGCTGCTTGCCTGGGTAAATAACTGGC
TGGCAGGCGATTGCGAATTACCGCAGCTGCCTTCCGTCGCCTTTGGCGTAAGCTGTGCAT
TGGCGGAGCTGGCAGATACGCTCCCGCAGGCGGCCAATTACCGTGCGGCACCACTGTGTA
ATGGCGATCCTGACGATCTGATCCTCAAACTTGCTGATATGCCAGGCGAGAAAGTGGCGA
AGGTCAAAGTGGGATTGTACGAAGCCGTGCGCGACGGCATGGTGGTGAATCTGTTGCTGG
AGGCAATTCCGGATCTGCATTTGCGTCTTGACGCGAATCGCGCCTGGACACCGCTGAAAG
GCCAGCAGTTTGCCAAATATGTTAACCCGGATTATCGCCACCGCATCGCGTTTCTCGAAG
AGCCGTGCAAAACCCGCGATGATTCGCGAGCGTTTGCCCGTGAAACCGGCATTGCCATTG
CCTGGGATGAAAGCTTGCGCGAGCCGGATTTTGCCTTTGTGGCTGAAGAGGGCGTGCGCG
CGGTAGTTATCAAACCCACGCTCACGGGCAGTCTGGAGAAAGTACGCGAGCAGGTACAGG
CGGCGCACGCGCTGGGGCTGACGGCGGTGATCAGTTCTTCCATTGAATCGAGCTTAGGCT
TAACGCAACTGGCGCGGATTGCCGCCTGGTTAACGCCGGACACCATTCCAGGGCTGGACA
CGCTGGATCTAATGCAGGCGCAGCAGGTACGTCGCTGGCCGGGTAGCACGCTGCCTGTCG
TGGAAGTTGATGCACTGGAGCGGTTGTTATGATCTTCTCTGACTGGCCGTGGCGTCACTG
GCGGCAAGTGCGGGGAGAAGCCATCGCCTTACGTCTTAATGACGAGCAACTCAACTGGCG
CGAGCTTTGTGCTCGCGTCGATGAATTAGCCTCCGGCTTTGCGGCGCAGGGCGTAGTTGA
GGGCAGCGGCGTGATGTTGCGGGCGTGGAATACGCCGCAAACGCTGCTCGCCTGGCTGGC
GTTACTGCAATGCGGGGCGCGGGTGTTGCCCGTGAACCCTCAGCTGCCGCAACCGTTGCT
TGAAGAATTGCTGCCCAATCTTACGCTGCAATTTGCGCTGGTGCCGGAAGGGGAAAACAC
GTTTCCGGCGTTAGCGTCGCTGCACATTCAGCGGGTTGAAGGCGCACATGCCGCTGCGTG
GCAGCCGACGCGTCTGTGCTCAATGACGTTAACCTCTGGGTCCACTGGCTTGCCGAAAGC
CGCTGTTCATAATTACCAGGCTCATCTTGCCAGCGCCGAAGGGGTGTTATCGCTGATTCC
GTTTGGCGATCACGATGATTGGTTGCTCTCTTTACCGCTGTTTCACGTCTCCGGTCAGGG
AATTATGTGGCGCTGGTTATACGCTGGTGCGCGGATGACGGTACGTGATAAACAGCCATT
GGAGCAAATGCTGGCAGGCTGTACTCACGCTTCACTGGTGCCAACACAACTCTGGCGTTT
GCTGGTTAACCGCAGTTCCGTTTCCCTGAAAGCGGTGTTACTTGGCGGCGCGGCTATCCC
GGTCGAGTTGACGGAACAGGCGCGCGAGCAGGGGATTCGTTGCTTTTGCGGCTATGGTCT
GACCGAGTTTGCCTCCACGGTGTGTGCGAAAGAAGCCGACGGCCTGGCAGACGTTGGTTC
GCCGCTGCCGGGTCGGGAAGTGAAAATCGTTAATAATGAAGTGTGGCTGCGGGCTGCCAG
TATGGCAGAAGGTTACTGGCGTAACGGGCAACTGGTTTCACTGGTTAATGACGAAGGCTG
GTACGCTACGCGCGATCGCGGTGAGATGCATAATGGCAAGCTGACCATTGTCGGACGTTT
AGACAATCTATTCTTCAGTGGCGGAGAGGGTATTCAGCCGGAAGAAGTCGAGCGCGTAAT
TGCTGCACATCCTGCGGTTTTGCAGGTGTTTATCGTCCCCGTTGCCGACAAGGAGTTTGG
TCATCGACCGGTGGCGGTGATGGAGTATGACCACGAGAGCGTTGATCTTAGTGAATGGGT
GAAAGATAAGCTGGCCCGTTTTCAGCAACCGGTGCGTTGGTTAACGTTGCCGCCTGAACT
GAAAAACGGCGGTATTAAAATTTCACGTCAGGCGCTAAAAGAGTGGGTGCAACGTCAGCA
ATAATTAACCCTCCGTTTCACTTCTCATTTCTGCCATTCCATTGCCGTTGATAAAGAGTT
TATCTGTTAATCTGTAAATTGATGTGAAAACTCTTAGCAAACAGGATAATGCAATGGAAT
GGCTGGTCAAAAAATCGTGCTGCAATAAACAAGATAACAGACATGTACTTATGCTCTGCG
ATGCTGGCGGCGCGATAAAAATGATCGCCGAAGTGAAGAGTGACTTCGCCGTGAAAGTGG
GGGATTTACTCTCGCCTTTGCAGAATGCGCTTTATTGTATTAATCGTGAAAAGCTGCATA
CGGTGAAAGTCCTCTCGGCAAGCAGTTATAGCCCCGATGAGTGGGAACGGCAGTGTAAAG
CGGCAGGGAAAACTCAGTAACGTTGTTTTGTCGTGGGCAGGAAAATCAGCATCAACCCGC
TCATAATACAGGCTACTCCCAGTAGTGCTTTCAGCGAAAAAGTCCCTTCCCAGCCGGGAA
GTACCATTGAAGCAATCCATACCAGCACATAACTCATACTGAGCAAGGCATAGGCTTTGC
TTAGCGCAAGTATATGTAGCGTTTTATACCAACAAAAAACGGAAAGCAGATAACCCAGCA
GCCCGAGTAACAGTATCCGGGCATCCAGGCCAAAAGCTAACAGCGTCGCGATAAAATCCC
ATAAGTGCGTCATCGGCGGCAGATGACTCGCCGCAAAACCCAGGCTTAATTGCGCAGCTG
AGGCAATAATGACGCTGAATAATCCCCACATCAGGCCCATTACACCGTACTCCCGAGGAT
CACAATGCCACCAATAATGAACGCCACCCCACACCAGTGACGCGGCGATACCGGTTCGTG
CCACAGTTTTACTGCAGCCAGCGTCACCCAGACAAAATTCAGACTTAACATCGGGTAGGC
AATGCCTACCGGTACGTTCTGCAAGACCAGCAGCCAGAGCACCATGGCAAGACCAAGACA
AGCCAGCGCCAGTCCCAGCCACAGCACGATATGTTTGCGCCGTTTGTTTATCGCCACAAA
GCAGGTTGCCTGTTTCTGACACAACTGCCCGGCAACGCTAAGCAAGCTGGCAAAGACTAA
TGTTAGCCAGATCATTTGGGACGATACTGAATCAGCACCAGACGCTCCTGACGATCGATG
GCATCTGCGGGCGGAATGGCGAGACTGTTGATATCTTCATCGCGGTCAACCGAAAGCACG
AGTGTAATAATCCCCTCCTGACGATGTTGATTAAGCCAGTTTGCGAACTCATCACCGCTG
ACAAATCTCCCTTTCGCATCCGGATAATTAAGGCCGTATTTCAACTCACCTGTCTGGCGA
TACATGATGATGTCATCGCGTTGCAGGCTCCATGCCAGACCTGCGGCAACACCGACGCTA
TCAGTAAGAATATAGCGGCTTGGCTGAAGTGATTCTTGTGTCATCTCGACAAAAAATTGC
GGATGTTTTCCTTCCATGACTCTGTCAGGAATTGAAAATCCTACCAGCAACGCCAGCCCC
AGCGGGCAAAGCGCGGCAAAAGACCAGGTCTTTTCGACGTTTGTTAAGGTGTACCAGCCG
AAAAATGCCCATAGTGAAAAAATCGACCAGGCACAAAAGACTTTATAGCTCTCGAAGGTT
TGCCACACCGGCGTGTTCATTGGTCCCCAGGGGGAGACCACAAATGTGGCAATAATGCCA
GTGACGCCAAAAGCGATGTTAATCCAGCCATTAATCCGCAACGCCAGAGGATTATTTTTT
GCTGCCAGCAAAGCGTAATGCGCCATCAGCATTGCCAGAGGTGCAAAGCAGGAAAGAATA
TAGGTGGGCAATTTACCTTTAGCGACGGAGAAAAACAGCAGCGGCATTATCGTCCAGCTC
AACAAATAGACGGTTGCGGAATGCTTGCGGTTTTTCCAGCCTGCGTACAGTGCACCGGGG
AGTAATCCCAGCCACGGCAGGCTACCGGCAATGATGACCGGCACGTAGTACCAGAACGGA
GCTCTATGTTGGGCATCATCCAGTGCAAAGCGTTGAATATGCTCAACCCAGAAAAAATAG
TGCCAGAAGTCAGGCTCCCGCTGCGCTATCGCCAGTCCCCAGGGGAGAACCGTCAGTACG
CAACTGATAACCGCCAGCCAGCCGTAAATAAAGAGATCTTTCCAGCGTTTTTGCGTCGCT
ACCCATGGCAGTACGCTTAATACCGGCACGGCAAGGGCGAGAAAACCTTTGGTCATCACC
CCCATGCCGCAGGTGATTCCCAGCAGTAAAAATCCTGCGCTTTTGCCTTTCCACGTCTGT
GCCTGCATTGCCAGCCAGAAGCTGCACATTCCCGCCACCAGCCAGAATGCAATAAACGGA
TCGAGCACGGCATAAGTGCCGATGGCATAGACAATAAACAATGAGAGATAAATTACTGTG
GCGAGTAGAGCCAGACGTTTATCGCGCCATAAGCGCAGAGTAAACCAGGTCACCAGCGCG
GCAGTTAACAGGGTCGCAAAGATAACGCCTGCCCGCACACCAAAGTTATTCGCACCAAAT
AGCCATTGCCCAATGCTGTTAATCCAGTATCCAGCAATGGGTTTTTCAAAATAACGTAGC
CCTAACAGATGGGGCACAATCCAGTCGCCGGATGCCAGCATTTCCCGACTGATTTCCGCA
TAACGCGTTTCATCGGGTTGCCAGAGCAGACGCGTGCTGATCGGTAACAGGTAATAGCAG
GCAATAAACGCGAAGAGGCCGATAAGGTAACGTACCGATTTCATCAGCGACTACCCGCAA
TTTGTTGGCAACCCAGCCAGCCTTCACGTCCGGCAATATTTCCGCGAACAACTTGTCCGA
GCGGCAACGTCTCTGATAACAGTTCGCTTAAAGGGCAAAATGTCACGCCTTCCTGAGCTG
CGCGTTTGAGGAGATCCACAAAATTATGCTGATAAGCGCAGCCTTCAACTTCTGCATGAA
TGGTATAAACCGGCGTGCCTTTATCTCGCAGGATGCGGTTGAGTAACCAACCGTTAAAAT
CTTCTGCTTTCACATCCCGACCAATCACTTCATCCCAGGTGGGTAAGGTCACCGGAATTT
GCGCAGTGCCAGGGTTTCCTGATTCGAGCAGTGGACGGAACGGCATGGCCCCACGACAAT
CGCTGTTGTAGCGCAAATGGAACGCTTCTTTTGCTTCGATCACCTGCTGGTCGGCACGCC
AGCCCGCAGCGGCAGAACAGGTTACCGGTTGACCGATAATCTCTTCCAGGGTGCGAAGGC
CGAGTGCAATATCGTCGATCATTGTTTGCCGATCCCAGTTACCGCTATGGGCTTGCCAGG
CATGGTGATCCCAGGCGTGCAGGCCGACTTCGTGATGTTTAGCCGCTTCACGAATGATAT
CGGCATTGGCAGGACCAATCTCTTTACCTGGCCAGGCCGTACCTGCCAGTAAAATATCCC
AGCCATAAAGCGATGCCGCGTTTGAGCGCAGCATCTTCCACAAAAACTGTGGCTTCACCA
GTCGCCAGAGATGGCGGCCCATATTGTCCGGGCCGACGCTGAAAAAAATGCTGGCCTGAA
TATTATGCTTACTCAAGATTTCCAGCAGACGCGGCACGCCTTCACGGGTGCCACGAAAGG
TATCGACATCAATGCGTAAGCCTACTTTGGTCATGATGGTTTATCCGTAAGATCAACGGT
GCGCAGGAAGAAATCCAGCGTTTCGTCGATGGTTTCCTGCATATCAATTTTCGGCTCCCA
GTCCAGGCAGCGGTGGGCATTGCGGATGCTCGGTTTACGATGCTCTACGTCCTGATATCC
TTTGCCGTAGTAGCTGCTACTTTCGACAACGCGAAAGCCCGCAAACGGTGGGAAGTGATG
GCGCAGCGGATGTTTTTCGAAGCTCGCCAGCAGCATCTCGCCCAGTTCCTCAATGCTCGC
TTCGTTCTCAGGATTGCCAATGTTGATAATTTCGCCGTCGCAGCGATTTCCCACATTTTC
GATAATGCGGTACAACGCCTCGATACCATCCCGGATATCAGTAAAGCAGCGTTTTTGTTT
TCCGCCATCAATCAGCTTAATCGGTGAACCTTCTACCAGATTGAGAATGAGTTGCGTAAT
AGCGCGGGAGCTGCCGATTCGTGCCGCATTAAGGTTATCCAGTCGTGGTCCCATCCAGTT
AAACGGGCGGAAGAGGGTGAACTGTAAACCCTCTTTTTCGCCATAGGCCCAGATAACCCG
ATCAAGTAATTGTTTTGACACCGAATAAATCCAGCGTGGTTTATTCACCGGGCCGACGAT
TAAATTAGAATGGTCCTCATCGAAGTATTTATCGCTACACATCCCATAAACTTCTGAAGT
TGACGGGAAGATGATTCGCTTACGGTACTTCACGCAGTAGCGGATAATGCGCAGATTCTC
TTCAAAATCGAGTTCAAATACGCGCAGCGGGTTGCGGGTATATTCAATCGGCGTGGCTAT
CGCCACCAGCGGCAAGACGACATCACATTTTTTGACGTGATACTCAATCCATTCGGAATG
AATACTGATATCGCCTTCGACAAAGTGAAAATGCGGATGATTCAGAAAACGGCTTATCGC
ATCGCTGCCAATATCCAGACCGTAAACTTCATAATGATCTTCGCGCAGCAGGCGTTCTGT
CAGATGGTTGCCAATAAAGCCATTCACCCCGAGGATGAGTACCCGGGTACGGCGTCGGGC
GGCACAGGCAGGCTGGCTATTCAAGCGTGAACCTTGCACCAGGCCCAGCGTCTGCGCTAA
TTGCGAGCCCTGCATAGTAATGCCGTCGCCCGCCTGTCCGGTGACGATTTCCAGCGCGCC
ATCGCCACAGGCAATCAGCAGTGGCGCAACAGAAATCACGCTCCCCGGCTGCGCTGCGGA
TGTATGAGGATGTACGCGTGACGACCAGACGGTGAATTTCTGATTGCCAGCATAGCTGAA
GGCACCCGGCCACGGATCGGCAACGGCGCGGACCATGTTATGCAATACGGCTGCCGGTTT
GTGCCACTCGAGGAAGCTATCTTCTGGTGTTCTGCGACCAAAACAGGTGGCTTCGTTCTC
GCGTTGGGCGATTTCCAGAATATTACCGTGTTTAATGGCGGGTAATGTCTGTTCCAGTAG
CTGGCGCGCGGCATGGCACAATTTATGATGCAGCGTAATAGCGATATCGTCTGGCGCAAT
GGCAATGCGCAGTTGCGCCACAATGGCCCCGGCATCGGCACGTTTCACCATTCGGTGCAA
TGTAACGCCAGTTTCCGTTTCACCGTTGACCAGCACCCAGTTCAGCGGCGCGCGACCACG
ATATTTTGGTAACAGCGAACCATGCAGATTAAATGCACCTGCGGGAGCGAGCTGCAAAAT
TTCGTCGCAAATAAGATGGCGATAATAAAAAGAGAAAATCACCTCTGGTGATAGTTGGGC
AATGCGTTCCACCCACAGCGGATGATTAACGTTATCCGGCGCATAAACCGGAATGCCTCT
TTCCGCTGCCAGACGAGCCACCGAACCATAAAAGGCTTTTTCACCGGGATTATCAGTATG
GGTAAAAATGGCGCTAATTTCGTAACCGGTAGCCAGCAGGGCTTCAATACCGAGGCATCC
CATATCGTGGTAGGCAAAAACGACGGTTTTCATTATTCATTTTCCTTGCTGGATGGACGG
ATAACTTGCTGAACAAAATAGCGGGGGCGGGCGCGGACATCGGTGTAGATCCTGCCGATA
TATTCACCGAGTAATCCCATGCCGATAAACTGAGCGCCAATAAAAGTAAACAGCACGGCA
AATAGCATAAAGACGCCTTCTGCCGCCCATTGTGGTCCGAAGGTCAGGCGTAAAATCACC
AGCAGCACCGCAATGCTAAAACCTCCAATCGCAATAATGCTGCCGAGCAGACTCAGCATA
CGTAGCGGCGTTGTGGTAAGGCAGGTCACCAGGTCGTACATCAAATTAATCAGGCGCATA
AAACTGTATTTGGATTCACCAAACTCACGCTCGGCATGATGCACTGGAATTTCAATGGCA
CGGCGGGCGAAGATATTCGCCAGAATCGGGATAAAGGTGCTGCGTTCATGGCAGTGCAAC
ATCGCATCGACAATATGACGGCGATAGGCGCGCAGCATACAACCGTAGTCACCCATCGCT
TTGCCGGTGGTGCGCTGAATAAGCCGGTTAATCATCTTCGAAGCGGTTTTACGAAACCAG
CTGTCCTGGCGGTTCTGGCGTACAGTCCCTACCACGTCGTAACCTTCATCGGCTTTTGCC
ACCAGGCGGGGGATTTCTTCTGGCGGATTCTGGAGATCGGCATCAAGGGTAATAATTAAG
TCGCCAGTAACGTGACTGAATCCCGCCATAATCGCTGAATGTTGCCCGTAATTGCGGTTA
AGCAAAATAGACACAATATGGCTGTTCTCCGCTTGTGAGGCTTCGACCAGCATATGCGCG
GAATTATCGCTACTGCCGTCATCAATCAGCAGGATCTCATACTCTTTCCCCAGTGATTCA
CAGGCTGTGGTGGTGCGCCTGATTAATTCCGGTAAGCTTTCCTGCTCGTTATAAACGGGA
ATAACCACCGAGACTTTCTTAACAGGGTGGATTTCAAACATGGCTTATTGTCCTGCGAGT
TGCTGAAGGGCTGTGATGACGCGGTCGGCATCGGCGGTGGTCATATCCGGGAACAGCGGC
AACGAACAGATGCGTTCGCTATTCCATTCGCTATTCGGTAACGACAGCGTGGGAAAACGC
TCGCGATAATATTTTTGTGTGTGAGCGGCGCGGAAATGTAACCCGGTACCAATACCTCTT
TCTTTTAACGCTTCCATCAACGCATCGCGACTGATACCACAACGTTGTTCATCGACACGA
ATAATAAACAGATGCCAGGCGTGAACGTGCGGCCAGGCGGGAAGGCTTAATGGCTGAAAG
GGGAGAGCTGCCAGTGCTTGCTGATATTGCTGGGCAATTTCGCGCCGACGGGTGTTGAGG
TGCTCTAATTTGACTAACTGTGTCAGGGCAATCGCGGCGTTAATATCGGTCAGATTGTAC
TTATAGCCCGGCGTTAAGACTTCAGCCTGCGGTACACGGCCCCAGGTTTGTCTGTCATAG
GCATCGACACCCAGACCGTGAAATTTCAGCATCCGTAGCTGGCGGGCAAGGTTTTCATTA
TCAGTTACAATCAGGCCACCTTCAGCACAGGTAATATTTTTAATGGCATGAAATGAAAAA
ATAGCGGTACCTTTTGCGCCAATATGTCGCCCTTTGTAATACGTACCTACGGCATGGGCA
GCATCTTCGATAACTGCGATGCCGTAACGTTCGCCAATGGCGCGAATGGCGTCAATATCT
GCTGGCGCACCGGCATAATGCACCGGAATGATGGCTTTAGTGCGTGGCGTAATGGCTGAC
TCGATAGCTTCAGGCGTGACCATCAGCGTATCGCGGTCGACATCCACCATTACCGGCGTT
GCACCCAACAAGGAAATCATATTGAGGGTTGAAACCCAGGTCAGGGAAGGCGTAATCACT
TCATCGCCCTTGCCAATTTCCAACGCCATTAGCGTGATATGCATTCCGGCGGTGGCTGAA
CTGACCGCGATGGCATGCTGATTTCCCGTCAACTGGCAAAAGGCTTGCTCAAGCGCCTGA
TTCTTCGGACCGGTTGTGATCCAACCGGATTCGAGAACCTCTTTAACTGCAGCGAGTTCC
TCCACGCCCATTGCTGGTCGCGAAAAAGGCAAAAATTCTGACATTGCTTTTCCTTCCGCC
ATTGAATACCTGTCCACTTATATTTGCTATAAAGAGTGTTGTGTATATTTTGCCATTTGG
AGCGAAATTTTAAGGATAGAATATTAACTTAACCTTAAGAAACTAATATTAGACGTAAAT
ATTGAAATTTTTATATTTTTTCTTATTTAGGCTTTGCATTTGGCAAAATTTTGAGGCATT
TTGCCGGCATCGCAGGATTTTTAATATTACACCAACTGCTAATTATCGCCAGAAATGTCG
CTCAATTTCACGGTAATTGTCTGGTTGCGCTTGTCTATAGGTGGAGTTTACGTGTTAGCT
TTTTGCCGCTCTTCGTTGAAGTCAAAAAAATATTTCATCATTTTACTGGCGCTCGCTGCA
ATTGCCGGACTGGGTACTCATGCTGCCTGGAGTAGCAATGGTTTGCCACGTATCGACAAT
AAAACACTGGCCAGACTGGCACAGCAGCACCCGGTTGTCGTTTTGTTTCGCCATGCTGAA
CGTTGCGATCGTTCAACCAATCAATGCTTGTCAGATAAAACAGGTATTACGGTCAAAGGT
ACCCAGGATGCCCGAGAACTGGGCAACGCTTTTAGTGCTGATATCCCTGATTTCGATCTC
TATTCCAGTAATACCGTCCGGACCATTCAGTCGGCGACCTGGTTTTCAGCGGGTAAAAAA
TTGACGGTAGATAAACGACTTCTTCAGTGCGGTAATGAGATTTATAGTGCAATTAAGGAC
TTACAAAGCAAAGCGCCTGATAAAAATATCGTTATTTTCACCCATAATCATTGCCTGACA
TATATTGCTAAAGATAAGCGTGATGCGACATTTAAACCTGATTATCTGGATGGTTTAGTC
ATGCATGTGGAAAAAGGCAAAGTTTATCTGGATGGGGAATTCGTTAACCACTAAATTTTC
AATCTGACAGCCAGTGATGGCTGTCATCATTGTTAAAGAAGACCTTTCAAACGTAACGTT
TTTCGGGTGGCAACATTCAAATCATAATGCACCAGATCTTCAGGTTTTACCCTCGCGTAG
TCCTGAAACTCTTCGTTTATTTTCACTTCTCGGTTGGCAGAAACGCAGTCAAAAATCAGG
TAAATCATATAAATCTCTTCCTTGCGACCATCTGCATACGTCTTGGTGCGAATATCATCG
CTGAAGGTCCACGGCGTGATTTCTGTCAAAAGCAGCTGTTCTCCCAGTTCTTCGCGAATT
TCGCGGCGTAGTGCCTCTTCAATTCGTTCGCCGGGCTCCACGCCGCCACCCGAAAGCGCC
CATTGACCGGGGAAAACGCCGCGATCGTCGGCCATTTTACACAGCAAATAAGCACCATCA
TTTTGAATCAAAGGGCATACAATAGTCCGTTGTCGCACAGGGGTATTCCTTATAAATAAA
AAGAAACCATGAGAATACGGTAACTCAGAAATATGTGAAAGTGACAGTAATCTCTTTTGC
GATGATAACTGCACTTATTATTATTTTTGTGTGTATCGGTAAACTGTGTTTATTTTTTCG
GCGTTTAATTATTTAAGAAGTATTTAGTTACAATAAGTGACTAGATCCCTTTTTTCGCTC
ATTGAATCCTCTGCGCCAGGCAGTACAATCCCGCAGCTTTGGGAATTTTGATTAATTGCT
TGTGGGAAAGGGGATAATGAAAAAAATTGCGCTAGCAGGTCTGGCCGGAATGCTGTTGGT
TTCTGCATCGGTCAATGCAATGAGCATCAGCGGCCAGGCGGGTAAAGAATACACCAATAT
TGGTGTCGGTTTTGGGACTGAATCGACGGGCCTGGCTTTAAGCGGTAACTGGACACATAA
CGACGACGACGGTGACGTCGCGGGCGTGGGGCTGGGGTTGAATCTGCCTCTCGGGCCGTT
AATGGCGACCGTTGGCGGAAAAGGCGTTTACACCAACCCGAATTACGGCGATGAAGGTTA
TGCCGCAGCGGTAGGAGGTGGTTTGCAGTGGAAAATTGGCAACAGCTTCCGTTTGTTTGG
CGAGTATTACTACTCTCCGGATTCGCTCTCCAGCGGTATTCAAAGTTATGAGGAAGCGAA
TGCTGGCGCGCGTTACACCATTATGCGTCCAGTCAGTATTGAGGCGGGTTATCGCTACCT
GAATCTGTCGGGTAAAGACGGCAACCGCGACAACGCCGTGGCTGACGGCCCGTATGTTGG
GGTTAACGCCAGTTTCTGATCCCTTCCGGCGCGGCATTCTGCCGCGCCATTCAGTTTCTT
ACTACGCCTTATCTCCCTTTGCGTTATAGTGATTCGATAACAAAAGCAGGAGATAACCAT
GTTAAAAGTGGAAATGCTATCCACCGGGGATGAAGTGTTACACGGGCAAATCGTTGACAC
TAACGCTGCCTGGCTGGCCGATTTTTTCTTTCATCAGGGGTTGCCATTATCTCGCCGCAA
TACGGTGGGGGATAACCTTGATGACTTAGTCACCATTCTTCGCGAACGTAGTCAGCACGC
CGATGTGCTGATCGTTAACGGCGGGCTGGGACCGACCAGCGATGATTTAAGCGCACTCGC
CGCTGCGACAGCAAAAGGTGAAGGCCTGGTGTTGCATGAAGCCTGGCTCAAAGAGATGGA
ACGCTATTTCCACGAACGTGGACGAGTAATGGCACCGAGCAACCGTAAACAAGCGGAGCT
TCCTGCCAGTGCTGAATTTATCAATAACCCGGTAGGCACCGCCTGTGGTTTTGCCGTGCA
GCTTAATCGTTGCCTGATGTTCTTTACCCCCGGCGTACCGTCAGAATTTAAGGTGATGGT
CGAGCACGAAATCCTGCCGCGCCTGCGCGAGCGTTTTTCTTTACCACAGCCGCCGGTTTG
CCTGCGTTTGACTACCTTTGGTCGTTCGGAAAGCGATCTGGCACAAAGCCTGGACACTCT
ACAACTGCCGCCGGGCGTAACAATGGGCTATCGCTCCTCAATGCCGATCATCGAACTGAA
ACTCACCGGACCGGCAAGCGAGCAACAGGCGATGGAAAAACTGTGGCTGGACGTTAAACG
TGTTGCCGGACAGAGCGTGATTTTCGAAGGCACCGAAGGACTGCCCGCGCAAATCAGTCG
CGAATTGCAAAACCGCCAGTTCAGCCTGACGTTGAGCGAGCAATTCACCGGTGGTTTATT
GGCTTTGCAACTTTCTCGCGCAGGTGCTCCATTGCTGGCGTGTGAAGTGGTTCCTTCACA
GGAAGAAACCCTGGCGCAAACTGCGCACTGGATTACAGAACGGCGGGCCAACCATTTTGC
CGGGCTGGCACTGGCTGTTTCGGGTTTCGAGAACGAGCATCTCAACTTTGCGCTAGCCAC
GCCAGATGGCACTTTCGCTCTGCGTGTGCGTTTCAGCACTACACGCTATAGCCTGGCTAT
CCGTCAGGAAGTGTGCGCAATGATGGCACTGAATATGCTACGCCGTTGGTTAAACGGCCA
GGACATTGCCAGTGAGCATGGCTGGATTGAGGTTGTTGAGTCGTTGATGCTGTCGCCACA
GGGGGCATGAAAGAGGCGCGCCGGGGAGAAGGCTTTTACCCGGCACGTTGTCGCATTCAT
TGCAGGCTTAATGGAGCGAGATCGGCCTCGGTTAGCTGGGTTGTTGCCAGCACCAGGTCA
AGATCGATACCCTGCTCCAGCATGCGCAAGGCAATTTTAATGGCTTGTTCATGCATGCCT
TGCTGCAAACCTTCTAATTTACCTTCCTGCCAGCCAATTTGATGCCCTTCCTGCCTCAGC
CGTTCAGCAATAGTCATTAATCTCTCCTTTTGTAGTGGTGAACGTTCGGCAATCTCCTGA
ATAAAACGGGTGAAACGGGAGGTATCGCCGCATTGCAGCAGATAATTAAACAGTGTTTGT
AGCTGGCTGTCATTAGTGAAGCCTCTAACCAAAAGCGTGGTGATCCTGTCGACCATACCG
ATTAAATCGCGGTCGCGAATATGCTTTTGAATCAGTTCAAGCAGAGCTATACGCCGATGT
TGCATGATCTCATCGTCAGGTACGATGGTGATATCCACCAACGGAAAAGCTTCGGTGTAC
AACTGCCGGGCAAGTTGCGGACCGTCAAACTCATCCAGCCAGTTGAGTGAGTACGGGTAG
GGCGAGGTTTCGCCATGATAAAACAGCAACGGCACCACCAGCGGGACTCTGTCATAGCCT
TTGTCCAGGTGACGCTGCATGGCGGCAGTGGCATAGCGCATTAGCCGAAAAGCCATATTC
TTTTCTGCAGAGCTTTGATGTTCAATCACGCAGTAGATATAGCCGTCACCGTCGCTGGTT
TCCACGGACCACAAAACATCCGAGTAGTAAGCGCGTAAACTTTTTTCAATAAAACTAGTG
GGTTCCAGGCGTAAGGTTTGCAGGTTGCAAAGCTTGCGCAGTGGTTCTGGTAAATGTATT
TCGAGAAAATCCCGTGCGGTTTCGGGTGTGAACATAAAGGTTTTAAATACTGCATCATGC
GGGGAGGAGGTTGTTGATTCGGTCATGGTTGTCCGTCACCTGATATTTATGATGACGCGA
CATTACGGTTATCCCAGGCCTTTGACATCTGCCAGTTTCAGCCTTTGCGAGACGTTTTCA
GAGGAATTTTCACTGCGTTGCAACGCATACATTGGGCACGGAATCGTGTACGCAAAAATG
CCCGGTAACCACATGCTTACCGGGCATCAGAAAGGAGTTTAAGCCAGCGCCTGGGCCAGT
AGCGTAATCGGATGTTCGCAGCGAAGACTTGTGGACATCTCAATCTGCCATTTACAGGTT
TCGCAGTCGGTGACCACCAGATCTGCGCCGCTTTCTTCTATCTGGCGGAACAGTGGTGCG
CCGATGGCTTGTGAGGTGGGGTAGTTCTCTTTTTTGAAACCGTAAGTACCCGCAATACCG
CAGCACTGGGAATCCAGCACCGTTAACTCAAGCCCCGGGATGTTACGCAACAGCTCCAGG
GTGTAGAGCGTCCAGCCCATTTTTTCCATATGGCACGGAGTGTGATAAACCACTTTCAGC
GGCAGCGGTTTCAGCGGTAACGTTTTGCCTTCGTCCAGCTTGCGCCACAACCAGCGGGTC
GCCAGTTCGATATGATCGCGCAAGCCTTTGTTGTCGACATTCAGCACTTCCGGGTATTCG
TCGCGCAGGGCAAATGTACAGGTTGAGGAGGTGGCAATCACCGGAATGCCTTTTACTCCC
ACAGCTTCGCGGATCGACTCTACATTCGTAATTGCCTGTTTGCGTGCTTTATCGGTAAAG
CCGTTGGCGATCAGCGGTACGCCGCAGCATTTTTCTTTGCTGAGCAGTTGTACACCGGTA
CCCATTGCGTTGAGCACTTTAATTAAATCTTTACCTAACTGCGGATGGTTGTAGTTAACG
AAGCAGCCGTGAAAGAAAGCGACCTGGTCTTTATACTGCGCTTGCTGAGCCGCCACGCTG
CGATACCAGCGACGAAACGTGCCGAAGGAGTATTTCGGTAGCGTGCGGCGATGATCGATT
TTTAACGCCGCATCAAGCAACTGCCGCACCGGTTTCAGCGAGGTAGCGGTGTTGACGATT
GGTGCGAACGGCGTGGAAACGCTACCCATCAGGTCGGTATGACTCAACACAAAATTACGC
AGCGACGGGCGCGTGGTGTCATATTTCGCCCGCGCGCGCTGGATGATATCGCCAATCTTC
ACATCGGACGGGCAGGCGACTTCACAACGTTTGCAGTTGATACAATATTTCAGCGCCTCG
TCATACAGTGCGCCATCTTTTAAACGCAGACGCTCGCCATCCGGCCCGGCTTGTTTTGGC
CCTGGATAACCGGGATTCACCCGGCTCACTGGGCAGGCGGTGGTGCAGACGGTGCACTTA
ATGCAGTTTTCGAAGCTGGTGTCATTCATTGTTGGCCTCCTGCGCGTTGGGCAATCTGTT
GAGCGGCATGTAAAGCACTGACGGCACAAACACCGCCGCCGCATCCCTGGGCGATGGGAT
CAAATCCGCCCAGCACCGAACCGATGGCAAACAGGTTCTCAATGGTTTGCCCTGCCTGTG
ATGGGCGTAGCGTCTTATCAGTGGTTACACCGAACTGCTGCCACGGTTGCGGCGCAAAAA
AATCTCCCTTATACCATTCACCCCGCGTGGCGGTTTGTAGCACATCAAGGCCGAGAATCG
GCTCTCGAATGCCGTTACGTTCCGCTACCAGTCCGCCACTAAAGAAACTGCCGCTGGCGA
GAACCGCGAAACGTGGACGTAGCGGGATATCGGCGTGATTGCGGGTCCAGATTTCATTCA
CTACGCCATTTTTACAGGTCACTTTTTTCACTTCATCGCCCGGCATCCACACGCCACCCT
GGCGCACAAACTGGCGCTGTAACTGGTTTTGCAGACGAATGCCCAGCACGGAAGGCGGCA
GCGTTGGCAAAAGCATCAGTGAACAAGGTAGTTTTTCATTCAACCAACGCCACAGTTTGT
CATCGACCAGGCCGAAGCAGGCGGGCATCAGGATCATTTCGCAGGTATTGGCGACAGGAA
TAAGCGCATCAAGTAACAGCGACCAGTTTTCTTCATTATCAAGGAAACGGGCGATATTCA
CCGCGCGGAACTCGGTGGCGTTATTGCGCAGGACATCCAGTTCCGGCAGCTCTATTTCTG
CGGTTTCAACCGAAAGATCCAGTTCACGCAACGAAGCTGCCGCAAGGTGCGCCTGAAAAT
CCATCAGCCCGCTTATCCCCACTACACATATCTTCTTCGCGGGTAGCGGCCAGACGGGGA
CTTCTGGCGAACTTAACCAGGTTGCACGCAAAGTGCCGAGCGGGGTAACGCGCTGATGGG
CCAGTTCCACGCTGCCCTGCAATTGCGCACCGCTTTCAGCGATTAATGCCTGCGCCTGGC
AAGCGAGATCGAGCACGCGTTGTGGCCCGAGAAGAGAGTAAGGATGTGCAGGTGCCTGCT
GACGCAAAGATTCCAGTCCACTGTGAATGTCTGTCACCGCTTGACCATCTGGCAGATGGC
TCAGCAAATCCAGCGAACCGGATGAGAAATGCAGCGCGCTTTGACCACGCGTGACAATGG
CACAGCGCAGGCCGTGTTTTTGCAGTTGCAGGCCACAGAGTAATCCGGCGAGGCCGCCGC
CCATAATGACAGTATCAAAGCGCATCTTTCTGCTCCTTCTCCAGACCACACAGTCCCTGA
TAAACCCAGCGGGTAAATTCGCTTTCGCGCAGTGCATCTCCCCAGGCGATGGGTTGCACG
CCTTTCCAGCGTTCGTTAAGGAAGGTGGAAAGTTGCTCGATAGATTGCGCGGACGTCGTG
ACGTTAAAACGTTGCAGCAGTCCGGCAGCGCGGCAGGCGCAGAGTTCGCCCTGGCAGGTA
CCCATCCCCACACGGGTACGACGGCGTAAATCCAGCAGGCTATTAACGTTTAAATTTTCT
ACCGCGTACTGCACTTCACCCGCAGTTACCGCTTCGCACTCACATACCAGGCTACGGTGC
AGACGGCCTTCGCTCAGCCAGGCAGGCGTGCGATCGCCATGACGATAAACCGCAGAACCG
CGCAGCGGGGCAGGCAGGGAGATGACTTTACGTAAGGTAACTTCAGCGGGTTCTTGTGAA
CCAGGCAGTGCCAGATCGGCAGTCGTACAGGGGCGCGTGTTGCCCAGTTTGCGGCATACC
GCGTCGGTAGCCCATTCAGCCATCAGCCGATAGGTCATCAGTTTGCCACCGGTGATGGTG
ATAAATCCGTCCAGACCATCGCGTTCAGCATGGTCGAGCAGCACGATGCCACGGCTGACG
TTACGTCCGCTCGGGTCGTCATCGCTGGCAACCAGCGGGCGCACGCCAGAATAGGCCCGC
AAAATGCGCGTTTTCGCCATCACGGGGGCCAGTTTTTCCCCTTCACGCAGCAGAATATCA
ACCTCTTCTGCCGTCACTCGATTATCGTCAATCTCGTTGTAATCAATACGTAAAGAGGTG
GTGCCAATCAGCGAAATGGTATCGCCAGGCACCAGAATATCGGCGTCGGAAGGTTTACGG
CAGCGGTTGATCACATGCTGGTTAATGCGGTGATCCATGATCAGCAGCGATCCTTTCGCC
GGGAACATGCGAATGCGCAGATCGGCATATTCGGCAATGTGTTGCCCCCAGATCCCAGCG
GCATTAACCACGACAGGTGCATGAAGGGCCTGAGTTTCGCCGGTGAGATGGTTACGTACA
CGAACACCGCACACCGTCGCGCCTTCACGAATCAGTCCCGTGACTTCATGAGCGGTAAGG
ATAACGGCACCGTGTTCTTTGGCATCCAGCATGTTTGCTGCGGTCAGACGAAATGGATCA
ACGGTGCCATCCGGAACTTTCACCGCGCCAATCAGTGCCGGGTTAACGGCAGGTTCGATA
ATGCGCGCTTGCTGCGGGTCTATAGCTTCTGCGCTGATCCCTGCTTCTTCGCAGGCGCGA
ATAAAAGTGGCCTGGAAGGAGAGGTCATCTTCCGGCAGGGTGATAAACAGGCCGTTGGTT
GGTTCAACGCAGTGACGTGCAATGCGTTTCAGGATCTGGTTTTCACTAATGCATTCGCGG
GCCGATTCCGCATCGGTTACCGCATAGCGCGCACCGCTGTGCAGCAGGCCGTGGTTACGC
CCGGTGGCACCGGTTGCGATGTCGTGGCGCTCAACCAAAATCACGCGCAGCCCGCGCAGG
GCACAGTCGCGGGCAATCCCGGCTCCCGTTGCGCCGCCGCCAATGATAATCACGTCACTT
GATTGCGAGTCGCGAGTTTTCATTGTTATCCCTCTGAAGTTCGTTTTTTACCATTTAGCC
ATAGTAAAAACATGAATTGTTTGATTTCGCGCATATTCGCTCATAATTCGAAAGTGAAAC
GTGATTTCATGCGTCATTTTGAACATTTTGTAAATCTTATTTAATAATGTGTGCGGCAAT
TCACATTTAATTTATGAATGTTTTCTTAACATCGCGGCAACTCAAGAAACGGCAGGTTCT
CTCACTGAATCAGGCTGTTAATCATAAATAAGACCACGGGCCACGGAGGCTATCAATGTT
GAGTATTTTTAAACCAGCGCCACACAAAGCGCGCTTACCTGCCGCGGAGATCGATCCGAC
TTATCGTCGATTGCGCTGGCAAATTTTCCTGGGGATATTCTTTGGCTATGCTGCTTACTA
TTTGGTTCGTAAGAACTTTGCGCTTGCTATGCCTTATCTGGTTGAGCAGGGATTCTCACG
CGGTGATTTAGGTTTTGCCCTTTCGGGGATCTCGATTGCTTATGGATTTTCGAAATTCAT
CATGGGTTCGGTATCGGATCGCTCGAATCCGCGCGTTTTCCTGCCCGCAGGTTTGATTCT
GGCGGCGGCAGTGATGTTGTTTATGGGCTTTGTGCCATGGGCGACGTCGAGCATTGCGGT
GATGTTTGTACTGTTGTTCCTCTGCGGTTGGTTCCAGGGGATGGGGTGGCCGCCGTGTGG
TCGTACTATGGTGCACTGGTGGTCGCAGAAAGAACGTGGCGGCATTGTGTCAGTGTGGAA
CTGTGCGCACAACGTCGGTGGTGGTATTCCGCCGCTGCTGTTCCTGCTGGGGATGGCCTG
GTTCAATGACTGGCACGCGGCGCTCTATATGCCCGCTTTTTGCGCCATTCTGGTGGCATT
ATTCGCCTTTGCGATGATGCGCGATACCCCGCAATCCTGTGGCTTGCCGCCGATCGAAGA
GTACAAAAATGATTATCCGGACGACTATAACGAAAAAGCGGAACAGGAGCTGACCGCGAA
GCAAATCTTCATGCAGTACGTGCTGCCGAACAAACTGCTGTGGTACATCGCCATCGCCAA
CGTGTTCGTTTATCTGCTGCGTTACGGCATCCTCGACTGGTCACCGACTTATCTGAAAGA
GGTTAAGCATTTCGCGCTGGATAAATCCTCCTGGGCCTACTTCTTCTATGAGTATGCGGG
TATTCCGGGCACCCTGCTGTGCGGCTGGATGTCGGACAAAGTCTTCCGCGGTAACCGTGG
GGCAACCGGCGTCTTCTTTATGACACTGGTGACCATCGCGACTATCGTTTACTGGATGAA
CCCGGCAGGTAACCCAACCGTCGATATGATTTGTATGATTGTTATCGGCTTCCTGATCTA
CGGCCCTGTGATGCTGATCGGTCTGCATGCGCTGGAACTGGCACCGAAAAAAGCGGCAGG
AACGGCAGCGGGCTTTACCGGTCTGTTTGGTTACCTGGGCGGTTCGGTGGCGGCGAGCGC
GATTGTTGGCTACACCGTGGACTTCTTCGGCTGGGATGGCGGCTTTATGGTAATGATTGG
CGGCAGCATTCTGGCGGTTATCTTGTTGATTGTTGTGATGATTGGCGAAAAACGTCGCCA
TCAGGAATTACTGCAAAAACGCAACGGAGGCTAATGGCATGAAATTGACGCTGAAAAACC
TTAGCATGGCGATCATGATGAGCACTATAGTCATGGGAAGCAGTGCAATGGCGGCGAACA
GCAACGAAAAAATAGTCATCGCCCATCGCGGTGCCAGTGGATATTTGCCGGAGCATACGC
TGCCAGCAAAAGCGATGGCGTATGCGCAGGGAGCGGATTATCTGGAACAGGATTTGGTGA
TGACCAAAGACGACCATCTGGTTGTTCTGCATGACCATTACCTCGATCGTGTTACTGATG
TTGCCGATCGTTTCCCGGATCGGGCGCGCAAAGACGGTCGTTACTACGCGATAGATTTCA
CGCTGGATGAAATTAAGTCGCTGAAATTTACCGAAGGTTTCGATATTGAAAACGGTAAAA
AAGTGCAGACTTATCCGGGGCGTTTCCCAATGGGTAAGTCCGACTTCCGGGTGCACTCCT
TTGAAGAAGAGATTGAATTTGTTCAGGGGTTAAATCACTCTACCGGGAAAAATATCGGTA
TCTATCCAGAAATTAAAGCGCCGTGGTTCCATCATCAGGAAGGGAAGGATATTGCGGCAA
AAACGCTGGAAGTGCTGAAGAAATATGGTTACACCGGTAAGGACGACAAAGTTTATCTGC
AATGCTTTGATGCTGATGAACTGAAGCGTATTAAGAATGAGCTGGAACCTAAAATGGGTA
TGGACCTCAACCTGGTACAGCTGATTGCCTATACCGACTGGAACGAAACTCAGCAGAAAC
AACCGGACGGAAGCTGGGTTAATTACAGCTATGACTGGATGTTTAAGCCGGGTGCCATGA
AACAGGTGGCGGAATATGCTGATGGTATTGGCCCAGATTACCATATGTTGATTGAGGAGA
CATCGCAGCCGGGTAATATCAAACTCACTGGCATGGTGCAAGATGCTCAGCAGAATAAAC
TGGTAGTGCATCCTTATACCGTGCGGTCAGATAAACTGCCTGAATACACTACTGATGTGA
ATCAGTTATATGATGTTCTGTATAACAAAGCGGGTGTAAATGGGCTGTTTACTGATTTCC
CTGATAAGGCAGTAAAATTCCTTAATAAAGAGTAATGCTACTGCAGGATGGCGTTCATGC
GCCATCCTCAGCTAAAGCGAAATAATGCTACTACCGGTTATTCTATTCATTCACCTGAGC
ATCCTGTTAAAAAAGATGCCAACATATTTGCGTAAAACTCATTTGTTAGGAAAGCTAACA
CTGGGTATTGTTATTCTTTAAACAGTATGAATAGGGCTCAATAATAAATTGTAATGTAGT
TTATAATATACAGTATTATTCGCATTTCGGGAAAGTAAAGAAAATATTAATGTATCTTAT
TAATTTATCATATTGTTCTTGGGTGAATGCTGTTTGCACACCTTCAGGACAATACTCACC
AGTAATAATCAGTTGCCCATTGCTGTGTTGTACCATTAAACCTTTTTTTTCCTTTGGATC
TTCAAACTTAGAATTATCAAACGTGAAGATGTTATTTTCCTGTTTTGAGTAAGCAAAGAA
ATCTCGTGTATAGCTGAAACTATCATTTATTAATGGTGCTAACTTTTTGTCGGCGATATC
GATAAGCTCACCACCTAATTTATTGATATATTTCATTTGGTTCAATTTTTTCTGCGCTTG
TACAATTTGCTTGTAGGTGTTTTTAATTTCCTTAGAAGAATTCTTGAATTTATCATAGCG
TTCCTCGGAGGATGCGTATTTGTACCATTCTGTATTTTTCTCAGAATGTTGTAGCAGGTC
TGCATATTTTTTTTGATCGCTGTAAAGTTGACTTTTAATACTTTCCTCACTGCTGGTTTT
ATAAGGCTTATCAGAGCTGTTTATTTTTGAAATGTCTTTTTCTGTCAGTGACTGGACCGT
GTTGTGGGTATTTTCTTTTGCAACATGCTCATTGATGATGTTAATTGCAGTTTCATATTC
ATTTAAGTTTATTGTTCTTTGTGAAATAGACCCTTCTTTGCTTTCGATACTCAAAACACC
TTCGTTGTTTTCACCTCGGGTAAAGGTAAGGGTATAGGGTTCATAATCCGCTGCAAATTC
ATTTTTATACGTTATGACATGCTCGACAAAATGTCTTATTGGTACGAAACCATAACTGTG
AACGTCAATTTTTTGGGTCTTGATACTATCAATTTCATCTGAGGCTTTCGTGAAAAAAGC
CAATAAATTAGCTATGTTGTCTGCTGAGGTTGATAACCCGAATCTACTTTGAGATATTTT
TAGAAACTCATTGCAAAAAATCTCAAGTTTCGCGGTTTGTTGTGATTCTTTGTAAATTTC
TGCTGTTTGCAATTTATTATTTTGTAAAAGATTACAGCGAGATAATTGAATAGATGTATT
TGGCATAAATGATTCCTTGTATTGTGAGTTAACAAGATACAATTTAATCTTTGCAGAATA
TATTCACTATCAAATTTAGCTCATTTTATTACGAAGACCTTTACGCATGTTAGAAAGTAT
CATTATTGTTAATAAACACGGTAATAAGTAACAAACAGATATTGATAACTTCCCTGACAA
GTTATTAGGTATCCCACTTGAAGATTGAGAGTGGCTCCAGAGTAAACTGTGTACTGTTCG
CCGGAGTGTCATTACTCTCAACAATCGGTTTTGACAGTGAGTCGGGCGCTTCATACTGGT
TTCTACCTGGAGTCATTGTCACTTCCCTAAACTGGATAAATATATATCGCTAATTCACAA
AGTGGACCAAAATCAGGTGAAAACGAATTATTACGCCTGGTAAAGACTACAGGCCAACTA
AGTGTGGCGAATCAGGCAATCTTACATTTGTCATCAATCTCATGTCTTACATCAAATTTT
TCCACTCACCACGAGTTGTTCCGTACACATTTGTAGTAAAAACAGTGGACTGCCTTCTAC
CGGCTTTTCTTTAGCCAGCAACGAAATCTGTCGATAGAAGGTTGGTTCGAGAGGAACGGA
ACACAATTCATCTGCAATGGTTTTCAGCGTTAACTCTGGTAATAAGGCGATGCCTAATCC
CTGTCGAATAAAACTGATCGCTGTATCCGGGTGATTAAATTCATATTTTATCTGTGGGGT
AATATTCTTTTCTTTAAATAGTGCCATAATGCTTAATTCATAGCGTCCTTTACTAATGAT
TAATGGTTCACCCATTAATTCTTCCACTGTAATAGTGCTGTTTTTTGCCAGAGCATGGTT
GGGCGGTAACACTACGGTGAATTTATCCTGATAAATGGGCACGGAGTACATTCCGCTCAC
CGGAAAATGAACAAAACCGGCATCAATGGATTCATTCTGAAGCGAATCAATAATCGCTGT
GCTATTTTCCTCAAAAGGAATAATTTTTATATTCGGATGATGAATTTCAAAGTAGCGAAT
CACAACCGGTAAGATACAGGCGCAGACGCTGGGGAAACAACCAAGTCTCAGCGTTCTTTG
AGGGTTCTGCTTTTCCTGCTCGGCTATCTCTTTTACTGCGTTAACTTCCCGATTAATGGC
GCGCAGATGTTGCACAATGCGATGACCTGCTGTGGTCAGTTGTATAGCTTTACGGCGATC
GCGTAACAGTATATTCACACCAAGTTCTTGTTCGAGGGCAGCAATTGCCTGACTTACCGC
CGACTGCGTCATGAACAATCGCTTGCTGGCTTCAGTAAAGCCACCGTAATCCAGCACGGC
GAGTAAAGAATTTATTTGGGTAAGAGTCATTAGAGTTTGCTAATCAATAATATTAAAACG
ATTAATTTCTCTAATAGCATGCCGCCATTTATACTTCTGTTCTGCAAAGTACATCACAAT
TTGACGCAACCGCAGTAACGGGAGTGTTGTCTGCGTGCGTCATCCTGACAGGCGGTAGGG
TATGAAAGAGAAGTTATGGACGAAGGATTTTTGGGCAATAACCATCATCAGCTTTATTAT
TTTCTTCGTCTTTTATGTTTTACTAACATTGTTGCCAATTTATATCTCTGACCGCTTGCA
TGCCTCTCCTGATAAAGCTGGTCTGCTGGTGACATTATTTTTAATTGCGGCGATTGTTAT
TCGACCCTTTGCCGGGCAATGGGTGGGTAAATATTCGAATAAAACTATTCTGGTGCTCTC
TTCTCTGGCCTTTTTGGTGGTCACTGCGCTGTATCCTTTTTGCCACTCAATAGAATCACT
GCTTTTTATTAGGGTGCTTCATGGTATTACCTTCGGGGTTATCACAACGGTAAAGGGAAC
GATTTCCGCGCGGCTGATCCCGGCCTCCCGACGTGGGGAGGGCATCAGTTTTTTCTCTCT
GGCAATGGGGCTGGCAATGGTGGTCGGGCCGTGGATTGGCCTGAATATGGCGCGCTGGGA
GGCCTTTAATATGGCTTTCTGGTTATGTACTGGCGTTGCGGCGGTGGGGATTATCCTGTC
GCTGATTATGACCGTGCCGCCGGTTATCAGCCATGCCGACGGTTCAAAGCCAAAGATGGG
CTTCGCCGCCATGTTCGATCGCGCGGCATTGCCGTTTGCCATGGTTACATTCTTTATGAC
CTTTTCGTATGCCGGGGTTTCTGCCTTTCTGGCGCTTTACGCCCGCGAACTTAATCTGAT
GTCGGCGGCCAGTAATTTCCTGCTTTGCTACGCCATCTTCCTGATGATCTGCCGTACCTT
TACCGGCAATGTCTGCGACAAAAAAGGACCGAAATATGTGGTTTACCCTTGCCTTGTGTT
CTTTACGGTAGGACTGGTGGTTCTCGGCTACACCCAGGGAAGCATAATGATGGTTGTTTC
TGGCGCGTTGATTGGTATCGGGTATGGTTCCGTGACGCCAGTTTTTCAGACGCAGATTAT
CAGTTCAGTGGAACCGCATAAAATCGGTGTCGCAAACTCCCTCTTCTTCAATGCGATGGA
TGCAGGCCTGGCGCTGGGAGCCTGTGTGATGGGGATGATGGTTGCACATACTGGCTACCG
AATGATTTATCTGCTGGGCGCACTATTAGTGGTAGTGGCTGGTGGAGTCTATGCGCTGCA
AATGAAGGGTAAAAGCGGTGTCGCGCTAGTAGTGGCAAAAGAAATTCATTAATACGACAC
GTTTCATTAAGATTTTTCGCAGGTAACCACCTATAGTCATTGTCGTTAATAAAAAATGAC
AGGCGATAGGGTATGGCAGTTTCAGCAAAGCACGACGAATTTAATCACTGGTGGGCAACA
GAGGGCGACTGGGTTGAAGAGCCTAACTATCGCCGTAATGGTATGAGCGGGGTGCAATGC
GTCGAGCGCAACGGCAAAAAGCTATATGTAAAGCGCATGACGCATCATCTGTTTCATTCC
GTACGTTATCCTTTCGGCCGACCAACGATTGTCCGTGAGGTTGCGGTAATTAAAGAACTG
GAACGGGCCGGTGTCATCGTGCCGAAGATCGTTTTTGGTGAAGCGGTGAAAATTGAGGGT
GAATGGCGAGCGTTGCTGGTGACTGAAGATATGGCGGGGTTCATCAGCATTGCTGACTGG
TATGCCCAGCATGCAGTATCGCCTTATTCTGACGAAGTACGGCAAGCCATGTTGAAAGCA
GTGGCGCTGGCGTTTAAGAAAATGCATAGCATTAATCGTCAGCATGGCTGTTGTTATGTT
CGCCATATCTATGTGAAAACAGAAGGTAAGGCAGAAGCTGGTTTTCTTGACCTGGAGAAA
AGTCGTCGCCGCTTGCGTCGCGATAAAGCGATTAATCATGACTTCCGCCAGCTGGAAAAA
TATCTGGAGCCAATTCCCAAAGCGGACTGGGAGCAGGTGAAAGCGTATTACTACGCCATG
TAATCGTTGTAGGCCAGATAAGACGCATAAGCGTCGTATCTGGCACTACAACCAATTCAC
ATCTCGATTTCAATATCGCCTTTTGCCCGGCAACAACAGGGCAAAATTTCCCCCGGCTGA
ATAAAGGCTAACGGTTCGGCAATCCAGTCCACCTGACCTGCGACCAGTCGGGTGCGACAG
GAGCCGCAGTAACCTTCGCGGCACTGGTACTCAACCGCCACATTGTGGGATTCCAGCGCC
GCCAGAAGGGAAGGGTGTTCATCCTGGCACAGCAGTTGTGTGCCAGTGATGCGCAGGGTA
ACGCGAGCCATCAGAGCTGGAAGTTACTCAAATCGTCGGTGTCCACTTCCGAGTCAATCT
GCCCGACCAGATAAGAACTGACTTCCACTTCCTGCGGAGCAACCTGCACGTTATCAGACA
CCAGCCAGGTGTTGATCCACGGGATCGGGTTGGAGCGCGTCTGGAACGGCAGATCCAAAC
CGACTGCCTGCATGCGGATATTGGTGATGTATTCAACGTACTGGCAGAGAATGTCTTTAT
TCAGACCAATCATCGAACCGTCACGGAACAGATAATCCGCCCAGTCTTTCTCTTGCTGTG
CCGCCTGGACAAACAGGTCATAGCACTCCTGCTTACATTCTTCGGCAATTTCCGCCATCT
CCGGATCATCCGCACCGCTGCGCAGCAGATTCAGCATATGCTGAGTACCGGTCAGGTGCA
GGGCTTCGTCGCGGGCAATCAGGCGAATAATTTTGGCGTTACCTTCCATCAGCTCACGTT
CAGCGAATGCGAAAGAGCAGGCAAAGCTGACGTAGAAACGAATCGCTTCCAGCGCGTTAA
CGCTCATCAGGCAGAGATACAGTTTTTTCTTCAGCTCGCGCAGGCTAACGGTCACGGTTT
TACCGTTAACGGTGTGGGTGCCTTCGCCCAGCAGATGCCAGTAGCTGGTCATTTCGATCA
GCTCATCGTAATAGCTGGAGATCCCTTCCGCACGTTTCTGGATCTGCTCGTTGGTGACGA
TATCGTCAAACACAACAGACGGATCGTTAACGATATTACGAATGATATGAGTATAGGAAC
GGGAATGAATCGTTTCTGAGAACGCCCAGGTTTCGACCCAGGTTTCCAGTTCCGGAATAG
AAATAAGCGGCAATAGCGCCACGTTCGGGCTACGACCCTGAATGGAATCCAGCAGCGTCT
GATATTTCAGGTTGCTGATAAAGATGTGTTTTTCGTGTTCAGGCAATGCCTGGTAATCAA
TACGGTCACGAGAAACGTCAACTTCTTCCGGACGCCAGAAGAAAGAGAGCTGCTTTTCGA
TCAGCTTTTCGAAGATGTCATATTTTTGCTGATCGTAGCGAGCCACGTTGACCGGCTGAC
CAAAGAACATCGGTTCTTTGAGCTGATCATTTTTCGTCTGTGAAAAGGTGGTATATGCCA
TGAGTGTGTCCTGTTGGGAGTTTAATGCCGGATAAGGCATTTTACGCCGCATCCTGTGCC
TGATGCGACGCTGGCGCGTCTTATCAGGCCTACAAATCCGAGCCGTAGGCCGGATAAGGC
GTTCACGCTGCATCCGGCACCCGGAGCCTGATGCGACGCTGGCGCGTCTTATCAGGCCTA
CAAACCGAGCCGTAGGCCGGATAAGGCGTTTACGCCGCATCCGGCATCTCAATATCAGAT
CTTACATGCGCCGCTTTCGCAGCCATCGTCCTGGATTGACGGCACCAGATCGTCCTGCGC
GTCTTCAGCGCCGTCACGGGTGTTCTGATAATACAGCGTTTTGACCCCGAATTTGTAGGC
GGTGAGCAGGTCTTTCAGCAACTGCTGCATCGGCACTTTTCCTGACGGGAAACGTGACGG
ATCGTAGTTGGTGTTAGCAGAGATCGACTGATCGATAAATTTCTGCATGATACCCACCAG
TTGCAGGTAGCCATCGTTACCCGGCATTTCCCACAGCAGCTCATAGGCGTCGTGCAGATG
CTCGTAGTCCGGCACCACCTGGCGCAGAATACCGTCTTTCGACGCTTTGATGCTGACGTA
ACCGCGCGGCGGTTCAATACCGTTAGTGGCGTTAGAGATCTGCGAAGAAGTCTCGGACGG
CATCAGAGCAGAAAGCGTGGAGTTACGCAGGCCGTGCGTTTTGATTGACTCACGCAGAGC
TTCCCAGTCGTAATGCAGCGGCTCATTAGCGATGGTATCCAGATCTTTCTTATAGGTATC
GATCGGCAGGATCCCTTTCGCGTAAGTGGTTTCGTTAAACCACGGGCACGCGCCTTGCTC
TTTCGCCAGCTCATTAGACGCTTTCAGCAGGTAATACTGAATCGCTTCGAAGGTTTTATG
CGTCAGGTTGTTGGCGCTGCCGTCGGAGTAGCGTTTACCATGCTTCGCCAGGTAGTAAGC
GAAGTTGATCACACCAATACCCAGCGTACGACGACCCATCGCTCCACGTTTGGCGGCCGG
GATCGGGTAATCCTGATAATCCAGCAGCGCGTCAAGTGCACGAACCGCCAGAATTGCCAG
CTCTTCCAGTTCATCCAGGCTATTAATTGCGCCCAGGTTGAAAGCAGACAGCGTACACAG
CGCGATTTCACCGTTCTCGTCGTTGACGTCGTTCAGCGGTTTGGTCGGCAGGGCTATCTC
CAGGCACAGGTTAGACTGACGCACTGGCGCGATGGCCGGATCAAACGGGCTATGGGTATT
GCAGTGGTCAACGTTCTGAATATAGATACGACCGGTAGACGCACGTTCCTGCATCATCAG
CGAGAACAGCTCAACGGCTTTCACACGCTGCTTGCGGATGCTGTCGTCTTTCTCATATTT
GGTATACAGACGTTCAAACTCTTCCTGATCGGCGAAGAATGCGTCGTACAGCCCCGGTAC
GTCGGACGGGCTGAACAGGGTGATATCTTCACCTTTCAGCAGGCGGGTATACATCAGTTT
GTTGATCTGTACCCCGTAGTCCATATGGCGCACGCGGTTGCCTTCCACACCACGGTTGTT
TTTCAACACCAGCAGGCTTTCCACTTCCAGATGCCACATCGGGTAGAACAGCGTTGCCGC
ACCGCCGCGCACACCGCCCTGAGAGCAGGATTTCACCGCAGTCTGGAAATGTTTGTAGAA
CGGAATGCAGCCGGTATGGAACGCTTCGCCACCGCGAATCGGGCTACCCAGCGCACGAAT
ACGCCCGGCGTTGATGCCGATCCCGGCACGCTGGGAAACATATTTCACAATCGCGCTGGA
GGTGGCGTTGATGGAATCCAGGCTGTCGCCGCACTCGATCAGTACGCAGGAGCTGAACTG
ACGAGTCGGGGTACGCACGCCGGACATGATTGGCGTCGGCAGCGAAATTTTAAATGTGGA
AACCGCGTCGTAAAAACGCTTCACATATTGCAGGCGCGTTTCACGCGGGTAGTTCGAGAA
CAGGCACGCGGCAACCAGAATATAAAGGAACTGGGCGCTTTCGTAGATTTCGCCGGTCAC
GCGGTTCTGTACCAGATATTTGCCTTCCAGTTGCTTAACGGCAGCATAAGAGAAGGTCAT
ATCACGGTCGTGATCGATAAACGTGTCCATCTGCTTGAACTCTTCTTCCGTGTAGTCTTC
CAGCAGATGATTATCGTATTTGCCCATCTCGACCATTTTCACCACGTGGTCGTACAGCGC
AGGCGGCTCAAACTGGCCGTAGGCTTTTTTACGCAGGTGGAAGATCGCCAGGCGCGCGGC
GAGATACTGATAATCCGGCGCATCACGGGAGATCAGGTCTGCGGCAGCCTTGATAATAGT
TTCGTGGATGTCAGAGGTCTTGATACCGTCATAAAACTGAATGTGGGAGCGCAGCTCGAC
CTGGGAAATCGAAACGTTATGCAGTCCTTCTGCCGCCCAATCCAGAACGCGATGGATTTT
GTCGAGATTGATGCGCTCTGTGCTACCGTCGCGCTTTGTCACCAGCAGATTCTGATTCAT
GTATGTCGTACCTGTTTTTGGAATTCTTTCCGCAATAGTTTCGTGCAGACTACCTGTAGT
ACGGGAAGCTGCTTAGAACACTATATATAGGGGGTATGTTTGGGATTCACTGCAAGATAG
TGTGAAAATGGCCCTCTTGCAAGTGCATAACTTTGTGGATAACTCAGGAAGGAAAAAGTG
GCTTTCGCGCACCTTAGGTCAGACAAGGTGTCCGGGAAAGTCAATGGGAAGAGAAAAATT
TGTTAAAAATAACTGTTCGGCGATTTCTTGAACGGCAGAATAGGTTGGATAAATTGATAT
AGATGGTTTATTAATCTTTTTGCTAATGATTGCAAAAATTGATCTAAGCACGAGTCATCA
CATAATCTGATGTATCAGTTGTGGTCAATATATAAGCGAATGTAAGCGATTGTTGATGTC
GAAATGGTTGTTTTCTATTCGGTTATTGTTAAATGCGAAGCCATTTTGTTAATTTACCTT
ATATTATAAGAAAATTATTCATTACTTTAATTTAGTTTAAATATAACTGGTATCCCTTAA
GGTTATTAACTTGAATTATGACGCACTGATACTATTCATCAAATAATAACAAAATAGCTA
TTGCATCGGGTTGGACAATTTACAAAAGAAAGATAACCCATATTGTATAATGCGTTTAAA
TATGCCGTCTTATATAAAATGATGGTCAGATTAATATGCGAATTATTTTTCTACGCAAGG
AGTATCTATCTTTACTCCCGTCAATGATTGCGTCTCTCTTCTCTGCTAATGGCATTGCGG
CAGTCACTGATTCATGCCAGGGATATGATATCAAAGCGAGTTGCCAGGCCAGCAGGCAAA
GCCTTGCAGGCATTACGCAGGACTGGAGCATCGCCGATGGGCAATGGCTGGTTTTTTCGG
ATATGACCAATAATGCCAGCGGTGGGGCCGTATTTTTGCAACAAGGAGCGGAATTTACAT
TATCACCAGAAAATGAAACTGGAATGACTCTGTTTGCCAATAACACCGTTTCAGGAGAAT
ATAATAACGGCGGGGCAATATTTGCTAAAGAAAACTCAACGCTGAATCTTACGGATGTTA
TTTTTTCTGGTAACGTCGCAGGCGGCTATGGTGGCGCAATCTATTCTTCTGGTACTAACG
ATACCGGTGCCATCGATTTACGTGTCACTAACGCCGTGTTTCGCAATAACATCGCTAATG
ACGGCAAAGGTGGTGCAATTTATACCATCAATAATGATATCTATTTAAGTGATGATGTTT
TTAACAATAACCAGGCATATACATCAACAAGTTACAGTGATGGCGATGGCGGCGCAATCG
ATGTCACAGATAATAATAGCGACAGCAAGCATCCTTCAGGTTATACGATAATAAATAACA
CTGCCTTTACAAATAACACTGCCGAAGGTTATGGCGGGGCGATATATACCAATAGCGCGA
CGGCTCCCTATCTTATTGATATTTCTGTTGATGACAGCTACAGCCAGAACGGAGGCGTGT
TAGTCGATGAGAACAATAGCGCAGCAGGCTATGGAGATGGTCCTTCCTCTGCGGCGGGTG
GCTTTATGTATCTCGGCTTAAGTGAAGTTACATTTGATATTGCCGACGGAAAAACGCTGG
TTATTGGCAATACAGAGAATGACGGAGCTGTTGACTCTATTGCTGGTACCGGGTTAATCA
CCAAAACAGGTTCCGGCGATCTGGTACTTAATGCAGATAACAATGACTTTACTGGTGAGA
TGCAGATTGAAAACGGTGAAGTTACCCTGGGCCGCAGCAACTCCCTGATGAATGTCGGCG
ATACGCATTGCCAGGACGATCCGCAAGACTGCTACGGTCTGACGATAGGGAGTATTGATA
AGTACCAGAATCAGGCAGAGCTAAATGTTGGCTCCACCCAACAAACCTTTGTGCACTCAT
TGACGGGCTTTCAGAATGGCACTTTAAATATCGATGCTGGTGGCAATGTTACTGTTAATG
AAGGCAGTTTTGCTGGCACCATCGAAGGTGCTGGTCAGCTCACCATTGCGCAAAACGGCA
GCTATGTGCTGGCGGGAGCGTCGTCGATGGCGCTAACCGGCGATATAGTCGTTGATGATG
GTGCGGTGCTTTCGCTGGAAGGCGACGCGGCAGATCTTGCCGCTCTCCAGGACGATCCGC
AGTCGATCGTGTTAAACGGCGGTGTGCTCGATCTCTCTGATTTCTCCACCTGGCAGAGCG
GTACATCATACAAAGATGGCCTTGAAGTCAGCGGCAGCAGCGGAACGGTTATCGGCAGTC
AGGATGTGGTAGATCTTGCAGGCGGAAACGATATGCATATCGGCGGTGACGGGAAAGATG
GCGTCTACGTGGTGATCGATGCGGGTGACGGGCAGGTCCGCCTGGCAAATGACAATCAAT
ACCTCGGCACAACGCAAATCGCCTCCGGTACGCTGATGGTGAGCGACAACTCGCAGCTTG
GAGATACCCATTACAACCGCCAGGTTATCTTTACCGATAATCAACAAGAAAGCGTGATGG
AGATTACTGCCAATGTCGATACTCGCTCTACAACGACTGAGCATGGGCGTGATATTGAAA
TGCGCGCCGACGGTGAAGTGGCAGTTGATGCGGGGGTAGACACGCAGTGGGGCGCACTGA
TGGCTGACAGCAGCGGGCAGCATCAGGATGAGGGTAGCACATTGACGAAAACGGGGGCGG
GTACGCTGGAGCTGACCGCCAGCGGTACAACGCAGTCGGCGGTACGTGTCGAAGAAGGCA
CCCTGAAAGGTGATGTTGCTGATATCCTTCCTTATGCTTCGTCACTGTGGGTTGGTGATG
GGGCAACGTTCGTTACTGGCGCGGATCAGGATATTCAGTCAATTGATGCTATTTCCAGCG
GCACTATTGACATCAGCGATGGTACGGTTTTGCGCCTGACCGGGCAGGATACTTCCGTCG
CCCTTAATGCCTCACTGTTTAACGGCGATGGGACGCTGGTGAATGCCACCGATGGTGTGA
CGTTGACAGGTGAGCTTAATACCAACCTTGAAACTGACAGCCTGACTTATCTTTCCAACG
TGACGGTTAATGGCAATCTGACCAATACGTCCGGTGCGGTTAGCCTGCAAAATGGCGTCG
CTGGCGATACGCTGACGGTAAACGGTGATTATACCGGCGGCGGTACGCTACTGCTCGATA
GCGAATTAAACGGCGATGACTCGGTAAGCGATCAATTGGTGATGAACGGTAATACTGCTG
GCAACACAACTGTGGTGGTTAACTCCATTACAGGGATTGGTGAGCCGACATCGACAGGCA
TTAAAGTGGTTGATTTCGCAGCTGATCCCACGCAGTTTCAAAACAATGCGCAGTTCAGTC
TGGCAGGCAGTGGCTACGTCAACATGGGAGCGTATGACTACACGCTGGTGGAAGATAACA
ACGACTGGTATCTGCGATCGCAAGAAGTAACGCCGCCATCGCCACCTGATCCAGACCCGG
ACCCAACCCCCGATCCTGACCCAACACCCGATCCAATCCCCGCTTACCAGCCGGTGCTGA
ATGCCAAAGTTGGCGGTTATCTCAATAACCTGCGGGCGGCAAATCAGGCGTTTGTGATGG
AGCGACGCGATCACGCTGGTGGCGATGGTCAGACGCTGAATTTACGTGTTATCGGCGGAC
GTTATCATTACACGGCGGCAGGGCAACTGGCTCAGCATGAAGACACTTCTACGGTGCAGC
TAAGCGGCGATCTGTTTAGCGGGCGCTGGGGCGATGATGGCGAGTGGATGCTTGGGATTG
TAGGTGGCTACAGCGATAACCAGGGCGACAGCCGCTCGAATCTGACCGGAACTCGCGCCG
ATAACCAGAACCACGGTTATGCCGTTGGGCTAACCTCAAGCTGGTTTCAGCACGGTAATC
AGAAGCAGGGGGCCTGGCTGGATAACTGGCTGCAATACGCGTGGTTTAACAATGATGTTT
CCGAACAAGACGATGGCGCGGATCATTACCATTCGTCGGGGATTATCGCCTCGCTGGAAG
CCGGGTATCAATGGTTACCGGGGCGTGGTGTGGTGATTGAACCGCAGGCGCAGGTGATTT
ATCAGGGCGTGCAGCAGGATGATTTTACCGCCGCTAACCGTGCGCGCGTGTCACAATCGC
AGGGTGATGATATTCAGACGCGGCTGGGTTTACACAGCGAATGGCGTACCGCTGTTCATG
TCATACCAACATTAGATCTGAATTATTATCACGATCCCCATTCGACGGAAATTGAAGAGG
ATGGCAGCACTATCAGTGACGATGCGGTGAAGCAACGGGGTGAAATAAAAGTGGGAGTCA
CGGGCAATATCAGTCAGCGAGTGTCCCTGCGCGGCAGCGTGGCGTGGCAGAAAGGGAGTG
ATGATTTTGCCCAGACGGCAGGATTTTTGTCGATGACGGTGAAATGGTAATCGCTGTCTG
ACCATCACTATTGCCGGATGCGGCGTAAACGCCTTATCTGGCCTACGGAGAGCATTTGTA
GGCCTGATAAGACGCGGCAAGCGTCGCATCAGGCATTGGCGCGGTTGCCGGATGAATCCA
AACAACAACCTCACTTATTCTGCGTGTGCAGCATATAGTTCACATCCACGCCGGGGCCGA
GTTTAAAAGAATTAGTGATCGGGTTGTAATGTAGCCCGGTTATATGTCGCTCTTTAAGGC
TTGTCTGATCTACCCAGCCAAGCAGCTCTGCCGGTTTAATAAACTTCTTCACATCATGCG
TGCCTTTGGGCACCATGCGCAAAATATATTCCGCGCCAACCACCGCCATCAGCCATGACT
TGCCGTTGCGGTTAAGCGTCGAGAAAAAGACATCGCCGCCCGGTTTCACCAGTTGCGCAC
AGGCTCTGACTACTGACTGCGGATCGGGGACGTGCTCCAGCATCTCCATGCAGGTCACCA
CATCATACTGCCCGGCATGTTTTGCCGCGTGCTCTTCCACGGTTTCCTGCACGTAATCCA
CCTGAATGCCGCTTTCCAGCGCGTGCAGCTTTGCCACCTGCAATGGCTCAAAGCCCATAT
CCAGACCGGTCACCGTCGCGCCTTCGCGCGCCATACTCTCGGCCAGAATGCCGCCGCCAC
AACCGACATCGAGCACCTTTTTGCCAAATAAACCGCCAGCACGCTCGGCAATATAGCCCA
GACGTAGCGGATTAATGCGGTGCAACGGTTTGAACTCACCTTCAAGATCCCACCAGCGGG
AGGCGACGGCTTCAAATTTAGCGATCTCTTCGTGGTCTACGTTATGGTTTACCGGCGATT
TTTCGGCATTCATTGGCACTTCTACTCCGTAATTGGCAAGACAAACGAGTATATCAGGCA
TTGGATGTGAATAAAGCGTATAGGTTTACCTCAAACTGCGCGGCTGTGTTATAATTTGCG
ACCTTTGAATCCGGGATACAGTAGAGGGATAGCGGTTAGATGAGCGACCTTGCGAGAGAA
ATTACACCGGTCAACATTGAGGAAGAGCTGAAGAGCTCCTATCTGGATTATGCGATGTCG
GTCATTGTTGGCCGTGCGCTGCCAGATGTCCGAGATGGCCTGAAACCGGTACACCGTCGC
GTACTTTACGCCATGAACGTACTAGGCAATGACTGGAACAAAGCCTATAAAAAATCTGCC
CGTGTCGTTGGTGACGTAATCGGTAAATACCATCCCCATGGTGACTCGGCGGTTTATGAC
ACGATCGTCCGTATGGCGCAGCCATTCTCGCTGCGTTACATGCTGGTAGACGGTCAGGGT
AACTTCGGTTCCATCGACGGCGACTCTGCGGCGGCAATGCGTTATACGGAAATCCGTCTG
GCGAAAATTGCCCATGAACTGATGGCCGATCTCGAAAAAGAGACGGTCGATTTCGTTGAT
AACTATGACGGCACGGAAAAAATTCCGGACGTCATGCCAACCAAAATTCCTAACCTGCTG
GTGAACGGTTCTTCCGGTATCGCCGTAGGTATGGCAACCAACATCCCGCCGCACAACCTG
ACGGAAGTCATCAACGGTTGTCTGGCGTATATCGATGATGAAGACATCAGCATTGAAGGG
CTGATGGAATACATCCCGGGGCCGGACTTCCCGACGGCGGCAATCATTAACGGTCGTCGC
GGTATTGAAGAAGCTTACCGTACCGGTCGCGGCAAGGTATATATCCGCGCCCGTGCTGAA
GTGGAAGTTGACGCCAAAACCGGACGTGAAACCATTATCGTCCACGAAATTCCGTATCAG
GTAAACAAAGCGCGCCTGATCGAGAAGATTGCGGAACTGGTAAAAGAAAAACGCGTGGAA
GGCATCAGCGCGCTGCGTGACGAGTCTGACAAAGACGGTATGCGCATCGTGATTGAAGTG
AAACGCGATGCGGTCGGTGAAGTTGTGCTCAACAACCTCTACTCCCAGACCCAGTTGCAG
GTTTCTTTCGGTATCAACATGGTGGCATTGCACCATGGTCAGCCGAAGATCATGAACCTG
AAAGACATCATCGCGGCGTTTGTTCGTCACCGCCGTGAAGTGGTGACCCGTCGTACTATT
TTCGAACTGCGTAAAGCTCGCGATCGTGCTCATATCCTTGAAGCATTAGCCGTGGCGCTG
GCGAACATCGACCCGATCATCGAACTGATCCGTCATGCGCCGACGCCTGCAGAAGCGAAA
ACTGCGCTGGTTGCTAATCCGTGGCAGCTGGGCAACGTTGCCGCGATGCTCGAACGTGCT
GGCGACGATGCTGCGCGTCCGGAATGGCTGGAGCCAGAGTTCGGCGTGCGTGATGGTCTG
TACTACCTGACCGAACAGCAAGCTCAGGCGATTCTGGATCTGCGTTTGCAGAAACTGACC
GGCCTTGAGCACGAAAAACTGCTCGACGAATACAAAGAGCTGCTGGATCAGATCGCGGAA
CTGCTGCGTATTCTTGGTAGCGCCGATCGTCTGATGGAAGTGATCCGTGAAGAGCTGGAG
CTGGTTCGTGAACAGTTCGGTGACAAACGTCGTACTGAAATCACCGCCAACAGCGCAGAC
ATCAACCTGGAAGATCTGATCACCCAGGAAGATGTGGTCGTGACGCTCTCTCACCAGGGC
TACGTTAAATATCAGCCGCTTTCTGAATACGAAGCGCAGCGTCGTGGCGGGAAAGGTAAA
TCTGCCGCACGTATTAAAGAAGAAGACTTTATCGACCGACTGCTGGTGGCGAACACGCAC
GACCATATTCTGTGCTTCTCCAGCCGTGGTCGCGTCTATTCGATGAAAGTTTACCAGTTG
CCGGAGGCCACTCGTGGCGCGCGCGGTCGTCCGATCGTCAACCTGCTGCCGCTGGAGCAG
GACGAACGTATCACCGCGATCCTGCCGGTGACCGAGTTTGAAGAAGGCGTGAAAGTCTTC
ATGGCGACCGCTAACGGTACTGTGAAGAAAACCGTCCTCACCGAGTTCAACCGTCTGCGT
ACCGCCGGTAAAGTGGCGATCAAACTGGTTGAAGGCGATGAGCTGATCGGCGTTGACCTG
ACCAGCGGCGAAGACGAAGTAATGCTGTTCTCCGCCGAAGGTAAAGTGGTGCGCTTTAAA
GAGTCTTCTGTCCGTGCGATGGGCTGCAACACCACCGGTGTTCGCGGTATTCGTTTAGGC
GAAGGTGATAAAGTCGTCTCTCTGATCGTGCCTCGTGGCGATGGCGCAATCCTCACCGCA
ACGCAGAACGGTTATGGTAAACGTACCGCAGTGGCGGAATACCCGACTAAGTCGCGTGCG
ACGAAAGGGGTTATCTCCATCAAGGTTACCGAACGTAACGGTTTAGTGGTTGGCGCGGTG
CAGGTAGATGATTGCGATCAGATCATGATGATCACCGACGCCGGTACGCTGGTACGTACT
CGCGTTTCAGAAATCAGCATCGTGGGCCGTAACACCCAGGGCGTGATCCTCATCCGTACT
GCGGAAGATGAAAACGTAGTGGGTCTGCAACGTGTTGCTGAACCGGTTGACGAGGAAGAT
CTGGACACCATCGACGGCAGTGCCGCGGAAGGGGACGATGAAATCGCTCCGGAAGTGGAC
GTTGACGACGAGCCAGAAGAAGAATAATTTTACTTCTTCATGCCAAAAGGGAGCTATCTC
CCTTGTTTGAATTGAAAAGTCCAGGCTGCAAAGTCTGGGCTTTTGTCGTATTAGGGCACG
GTAAAGTTTGGCTGTGCCCGTAAAAAATGGCTGGCTATACACAAGGAATGTGGCAATGAG
TGGTGAAAAAAAGGCGAAAGGCTGGCGGTTCTATGGTCTTGTAGGTTTTGGCGCAATAGC
ACTGCTTTCCGCTGGCGTCTGGGCGTTGCAATATGCTGGCAGTGGGCCAGAAAAAACGTT
GTCGCCGCTGGTGGTGCACAACAATCTGCAAATCGATCTCAATGAGCCGGACCTCTTTCT
CGACAGCGACTCTCTGAGCCAGCTTCCCAAAGATCTCCTCACCATTCCGTTTCTCCACGA
TGTTCTGAGTGAAGATTTCGTTTTCTATTATCAGAATCATGCCGATCGTCTGGGCATTGA
AGGCAGCATTCGCCGCATTGTCTATGAACACGATCTCACGCTGAAAGATAAGCTCTTTTC
GTCACTCTTAGATCAGCCCGCGCAGGCGGCGCTATGGCACGATAAACAAGGCCATCTTTC
ACATTACATAGTGCTGATCCAGCGCAGTGGTTTAAGCAAACTGCTGGAGCCATTGTTGTT
TGCCGCTACCAGCGACAGCCAGTTAAGCAAAACGGAAATCAGTAGCATCAAGATAAATAG
TGAAACTATTCCTGTTTATCAGTTGCGCTATAACGGTAATAACGCCCTGATGTTCGCGAC
ATATCAGGACAAGATGCTGGTGTTTTCCAGCACGGATATGCTGTTTAAAGATGATCAGCA
GGATACCGAAGCCACGGCGATCGCAAGTGATTTGTTGAGCGGCAAAAAACGCTGGCAAGC
CAGCTTTGGCCTGGAAGAGCGTGCTGCCGAAAAAACGCCAGTACGCCAGCGCATCGTGGC
CAGCGCCAGGTTGCTGGGTTTTGGCTACCAGCGGTTAATGCCTTCTTTTGCTGGCGTACG
CTTCGAAATGGGTAACGACGGCTGGCACAGTTTTGTGGCGTTAAATGATGAATCCGCCAG
CGTAGATGCCAGTTTCGATTTTACGCCGGTCTGGAACAGTATGCCTGCCGGGGCCAGCTT
CTGTGTGGCGGTGCCGTATTCACACGGTATTGCCGAAGAGATGCTTTCGCACATCAGCCA
GGAAAACGATAAGCTGAATGGGGCGTTAGACGGTGCCGCGGGGCTGTGCTGGTATGAAGA
CTCAAAATTGCAAACCCCGCTGTTTGTCGGTCAGTTTGATGGCACTGCCGAACAGGCGCA
ATTGCCAGGGAAACTGTTTACGCAAAATATTGGTGCGCACGAAAGCAAAGCGCCAGAAGG
TGTTTTGCCGGTAAGCCAGACTCAGCAGGGCGAAGCGCAAATCTGGCGTCGCGAAGTGAG
TTCCCGATACGGTCAGTATCTGAAAGCGCAGGCGGCGCAACCCGATCAATTAATGTCGGA
TTATTTTTTCCGCGTGTCGCTGGCGATGCAAAACAAAACGCTGCTTTTCTCCCTCGATGA
CACGCTGGTTAATAACGCCCTGCAAACACTGAATAAAACCCGCCCGGCAATGGTAGATGT
AATACCCACTGATGGCATCGTTCCGCTCTATATCAATCCACAAGGAATGGCGAAACTGCT
GCGTAACGAAACGCTGACCAGTCTGCCGAAGAATCTCGAACCGGTTTTTTATAACGCCGC
ACAAACTTTATTAATGCCGAAGCTGGACGCTTTATCTCAACAACCGCGTTATGTCATGAA
GCTGGCCCAGATGGAACCCGGTGTCGCCTGGCAGTGGCTACCCATAACCTGGCAGCCGCT
ATGAGGCACGGGCTGCTGGCGCTGATTTGCTGGCTGTGTTGTGTTGTTGCCCATAGCGAA
ATGCTGAATGTCGAACAATCCGGGCTGTTTCGCGCCTGGTTTGTACGCATTGCACAGGAA
CAGCTCCGCCAGGGGCCAAGTCCACGCTGGTATCAGCAGGATTGTGCGGGCCTGGTGCGA
TTTGCAGCGAACGAGGCGCTGAAAGTTCACGACAGTAAATGGCTAAAAAGTAACGGGTTA
TCTAACCAGTATTTGCCGCCAGAGATGTCGCTAACACCTGAACAGCGTCAACTGGCGCAA
AACTGGAATCAGGGGAACGGGAAAACCGGCCCCTACGTGACCGCGATTAATTTGATTCAG
TACAACAGCCAGTTTATTGGCCAGGACATAAACCAGGCGCTGCCTGGCGATATGATTTTT
TTCGATCAGGGCGATGCCCAGCACTTAATGGTCTGGATGGGGCGTTACGTCATCTACCAC
ACCGGAAGCGCCACGAAAACTGACAACGGAATGCGCGCAGTCAGTCTGCAACAACTTATG
ACATGGAAGGACACCCGATGGATACCCAACGATTCCAATCCCAATTTCATTGGCATTTAT
CGTTTAAATTTTCTGGCGCGATAGCAGCGTGCTTGTCCCTGTCTCTTGTGGGAACAGGGC
TTGCTAATGCTGATGATTCGCTTCCTTCCAGTAACTATGCGCCGCCCGCAGGGGGAACAT
TCTTTTTGCTTGCTGACAGCAGTTTTAGCAGCAGTGAAGAGGCGAAAGTGCGACTGGAAG
CGCCGGGGCGTGATTATCGGCGCTATCAGATGGAAGAGTACGGCGGTGTGGACGTTCGCC
TGTATCGTATTCCTGACCCGATGGCATTTTTGCGCCAGCAGAAAAACCTGCATCGCATTG
TGGTGCAACCGCAATATCTGGGCGACGGGCTGAACAATACGCTGACCTGGCTGTGGGATA
ACTGGTACGGCAAATCTCGCCGCGTGATGCAGCGTACTTTCTCTTCTCAGTCACGGCAGA
ATGTGACTCAGGCATTACCCGAATTACATCTCGGCAATGCCATTATTAAACCTTCCCGTT
ATGTACAGAACAACCAGTTTTCCCCGCTGAAAAAATATCCCCTGGTGGAACAGTTCCGTT
ATCCACTATGGCAGGCTAAACCGGTCGAGCCGCAGCAAGGGGTAAAACTGGAAGGCGCAT
CCAGCAATTTCATCTCGCCGCAGCCGGGTAACATTTATATTCCTCTCGGCCAACAAGAGC
CGGGACTGTACCTCGTCGAGGCGATGGTTGGTGGGTATCGGGCGACGACGGTGGTGTTTG
TTTCCGATACCGTGGCGCTTAGCAAAGTGTCAGGCAAAGAGCTTCTGGTGTGGACCGCGG
GTAAAAAACAGGGTGAAGCGAAGCCAGGCTCAGAGATCTTGTGGACTGACGGTCTTGGCG
TGATGACCCGCGGTGTGACCGATGACAGCGGTACCTTGCAGTTACAACATATATCGCCAG
AACGTTCATACATTCTGGGTAAGGATGCCGAAGGCGGCGTTTTTGTCTCCGAGAACTTCT
TCTACGAAAGCGAAATCTACAACACCCGCTTGTATATTTTTACCGATCGCCCGCTATATC
GCGCAGGCGATCGTGTCGATGTTAAAGTGATGGGCCGCGAGTTCCACGATCCGTTGCATT
CATCCCCCATCGTCAGCGCCCCGGCGAAGCTTTCGGTGCTGGACGCCAACGGCAGTCTGT
TGCAAACCGTCGATGTCACGCTGGATGCGCGCAATGGCGGGCAGGGAAGTTTCCGCCTGC
CAGAAAATGCCATTGCCGGAGGTTATGAGTTACGTCTTGCTTACCGCAATCAGGTCTATA
GCAGTAGTTTTCGCGTAGCCAACTATATCAAGCCACATTTCGAGATTGGTTTAGCTCTCG
ACAAAAAAGAGTTCAAAACTGGCGAAGCGGTCAGCGGCAAACTGCAACTGCTCTACCCGG
ATGGTGAGCCGGTAAAAGATGCCCGCGTGCAGTTAAGTTTGCGCGCTCAGCAATTATCAA
TGGTCGGTAACGATTTGCGTTATGCCGGACGTTTCCCCGTGTCGCTGGAAGGCAGTGAAA
CGGTGTCCGACGATAGCGGTCATGTGGCGTTAAATCTCCCCGCCGCCGATAAACCAAGCC
GCTATTTGTTAACCGTCTCCGCCAGTGACGGCGCGGCGTATCGCGTCACCACCACCAAAG
AGATCCTCATTGAACGCGGCCTGGCGCATTACTCTTTAAGTACCGCCGCACAATACAGTA
ATAGCGGCGAGTCGGTTGTGTTCCGTTATGCCGCGCTGGAATCTTCAAAACAGGTTCCTG
TTACGTATGAATGGTTGCGTCTCGAAGACCGCACGAGCCATAGCGGAGAGCTACCGTCAG
GCGGCAAATCCTTTACCGTCAATTTCGCTAAACCTGGCAACTACAATCTGACATTACGCG
ATAAAGACGGCTTAATTCTCGCTGGGTTAAGTCATGCCGTCAGCGGTAAGGGCAGCATGT
CGCATACTGGTACGGTAGATATCGTGGCAGATAAAACGCTGTACCAGCCTGGCGAAACCG
CGAAGATGCTGATTACCTTTCCGGAGCCAATTGATGAAGCATTATTGACGCTGGAACGCG
ATCGCGTGGAACAGCAGTCGCTGCTTTCGCATCCGGCAAACTGGCTAACGCTACAACGTT
TAAACGATACCCAGTATGAAGCCCGGGTTCCAGTGAGCAATTCCTTTGCGCCTAACATCA
CTTTTTCGGTGCTGTATACCCGTAACGGTCAGTACAGTTTTCAGAATGCCGGGATCAAAG
TTGCCGTTCCCCAGCTGGATATCCGGGTGAAAACGGACAAAACCCATTACCAGCCTGGTG
AACTGGTCAATGTCGAATTAACCTCGTCGCTGAAAGGTAAACCTGTTTCTGCGCAGCTAA
CGGTAGGCGTGGTCGATGAAATGATCTACGCGCTGCAACCAGAAATCGCGCCGAATATCG
GCAAATTTTTCTATCCGCTGGGGCGTAACAATGTGCGTACCAGCTCCAGTCTGTCGTTTA
TCAGCTACGACCAGGCGCTCTCCAACGAGCCGGTTGCGCCTGGCGCAACTAACCGCAGCG
AGCGGCGAGTAAAAATGCTTGAACGTCCACGGCGTGAAGAGGTGGATACCGCGGCATGGA
TGCCGTCACTCACAACCGATAAACAAGGCAAAGCGTATTTCACGTTCCTGATGCCTGATT
CGTTAACCCGCTGGCGTATCACCGCGCGTGGGATGAACGGCGACGGGCTGGTCGGGCAGG
GGCGTGCTTATCTGCGTTCGGAAAAAAATCTCTACATGAAGTGGAGTATGCCAACGGTGT
ATCGCGTGGGCGACAAACCGGCGGCAGGACTGTTTATCTTCAGTCAGCAGGATAACGAAC
CGGTGGCGCTGGTGACTAAATTTGCAGGCGCTGAGATGCGCCAGACGCTGACGCTGCACA
AAGGGGCGAATTATATTTCGCTGACGCAGAATATTCAGCAATCTGGCTTGTTAAGTGCAG
AACTGCAACAAAATGGGCAAGTGCAGGACAGCATTAGCACAAAACTGTCTTTTGTGGATA
ACAGCTGGCCCGTTGAACAGCAGAAAAATATCATGCTCGGTGGTGGCGATAACGCGCTGA
TGTTGCCCGAGCAGGCGAGCAATATCCGGCTACAAAGTAGTGAAACGCCGCAGGAGATTT
TCCGCAACAATCTTGATGCGTTAGTCGATGAACCGTGGGGTGGGGTGATCAACACCGGTA
GCCGTCTGATCCCGCTCAGTCTCGCCTGGCGTTCGCTTGCCGATCATCAAAGTGCCGCCG
CTAACGACATTCGTCAGATGATTCAGGATAACCGTCTGCGGCTGATGCAACTGGCGGGGC
CCGGAGCGCGCTTTACCTGGTGGGGTGAAGATGGCAATGGTGACGCCTTCCTTACGGCAT
GGGCATGGTACGCCGACTGGCAGGCCAGCCAGGCGCTCGGCGTAACGCAACAACCGGAAT
ACTGGCAGCATATGCTCGACAGTTATGCCGAGCAGGCAGATAACATGCCGTTATTGCATC
GGGCGCTGGTGCTGGCGTGGGCACAGGAGATGAATCTGCCGTGCAAAACGTTGTTGAAAG
GGTTGGATGAAGCTATCGCCCGGCGCGGAACTAAAACTGAAGATTTCTCTGAGGAAGCCC
CCCGCGATATCAATGACAGCCTGATCCTCGATACACCGGAATCTCCACTGGCAGATGCGG
TGGCAAACGTCTTAACCATGACGTTGCTGAAAAAAGCGCAGTTGAAGTCCACGGTGATGC
CACAGGTTCAGCAATATGCGTGGGATAAAGCGGCAAACAGCAATCAGCCGCTGGCGCACA
CGGTTGTGCTGCTCAATAGCGGGGGCGACGCTACCCAGGCGGCTGCTATTTTAAGTGGTT
TGACCGCTGAGCAATCTACTATTGAGCGCGCGCTGGCCATGAACTGGCTGGCGAAATATA
TGGCGACAATGCCTCCAGTTGTTTTGCCTGCGCCTGCGGGCGCATGGGCCAAACATAAGT
TAACTGGAGGGGGCGAATACTGGCGTTGGGTTGGTCAGGGCGTGCCGGACATTCTCTCTT
TTGGTGACGAATTATCGCCGCAAAATGTGCAGGTCCGCTGGCATGAACCGGCAAAAACGG
CTCAACAAAGTAACATTCCGGTGACCGTTGAACGCCAGTTGTATCGGCTTATCCCCGGTG
AAGAAGAGATGAGCTTTACTCTGCAGCCGGTGACCAGCAATGAGATTGACAGCGATGCGC
TGTATCTCGATGAAATTACGCTTACCAGCGAGCAGGATGCAGTTCTGCGCTATGGTCAGG
TGGAAGTACCGCTCCCGCCGGGAGCCGACGTTGAGCGCACAACATGGGGCATTTCAGTCA
ATAAACCCAACGCCGCGAAACAGCAGGGGCAATTGCTGGAAAAAGCGCGTAATGAAATGG
GCGAACTGGCCTATATGGTGCCGGTGAAAGAACTGACGGGAACGGTCACTTTCCGCCATT
TGCTGCGCTTCTCGCAAAAAGGGCAATTCGTTCTGCCTCCTGCTCGTTATGTGCGTTCCT
ATGCACCTGCGCAGCAAAGTGTTGCGGCAGGGAGCGAATGGCCCGGGATGCAGGTGAAAT
AAGTGAACTGGCGCAGAATCGTCTGGCTATTGGCGTTGGTTACTCTGCCAACGCTTGCGG
AGGAGACGCCGTTACAACTGGCACTGCGTGGTGCGCAGCACGATCAACTGTATCAGCTGT
CGTCATCAGGCGTGACCAAAGCCTCGACATTACCTGACTCGCTCACCACGCCGTTAGGGA
GTTTGTGGAAACTGTATGTTTACGCCTGGCTGGAGGATACCCATCAACCGGAGCAGCCCT
ACCAGTGTCGCGGAAACTCCCCGGAAGAGGTTTATTGTTGTCAGGCTGGGGAGAGCATAA
CGCGCGATACCGCGCTGGTACGTTCCTGTGGGCTCTATTTTGCGCCGCAGCGGTTGCATA
TTGGCGCAGATGTGTGGGGGCAATACTGGCAACAGCGTCAGGCACCTGCGTGGTTAGCGT
CTCTTACTACGCTGAAGCCAGAAACCTCGGTAACGGTTAAATCGCTGCTTGATTCATTAG
CGACGTTACCTGCGCAAAACAAAGCTCAGGAAGTCTTACTGGAAGTGGTGCTGGACGAGG
CGAAAATCGGTGTCGCATCCATGCTCGGTAGTCGGGTTCGGGTGAAAACCTGGAGCTGGT
TTGCCGATGATAAACAGGAAATCCGTCAGGGTGGTTTTGCCGGCTGGTTAACCGATGGTA
CACCGCTGTGGGTTACTGGCAGTGGCACCAGCAAAACGGTACTGACCCGTTATGCGACGG
TGCTTAATCGGGTTTTGCCAGTGCCGACACAAGTTGCCAGTGGGCAATGTGTAGAGGTGG
AGCTATTTGCCCGCTATCCGCTGAAGAAAATCACAGCGGAAAAGAGTACGACGTCAGTAA
AACCCGGCGTACTTAATGGGCGCTATCGTGTGACATTTGCCAATGGTAACCACATTACGT
TTGTCAGCCACGGTGAGACGACCTTACTGACCGAAAAGGGCAAACTGAAATTGCAGTCGC
ATCTCGATCGTGAAGAGTACGTTGCCAGAGTTCTGGATCGCGAGGCGAAAAGTACGCCAC
CTGAGGCAGCGAAAGCCATGACCGTGGCGATACGCACTTTTTTACAGCAAAACGCCAATC
GGGAAGGCGATTGCCTGACCATCCCCGACAGCAGCGCCACGCAGCGTGTTTCTGCTTCGC
CAGCGACCACGGGGGCGCGAACGATGACCGCCTGGACGCAGGATCTCATCTATGCGGGCG
ATCCGGTTCATTATCACGGCAGTCGCGCTACCGAAGGGACGCTTTCCTGGCGGCAAGCCA
TGGCCCAGGCCGGGCAGGGAGAGCGTTACGACCAGATACTCGCGTTTGCTTATCCCGACA
ACAGCCTTAGCCGCTGGGGAGCGCCACGCTCAACCTGTCAGTTATTACCCAAAGCGAAAG
CCTGGCTGGCGAAAAAAATGCCGCAGTGGCGGCGTATATTAGAAGGCGAGACGGGGTACA
ACGAACCAGACGTGTTTGCGGTCTGTCGTTTAGTCTCAGGTTTCCCCTATACCGATCGGC
AGCAGAAACGGCTGTTTATTCGTAACTTCTTTACGCTTCAGGATCGGCTGGATTTAACCC
ATGAGTATCTGCACCTGGCCTTTGATGGTTATCCCACCGGGCTTGATGAGAACTATATCG
AAACGCTGACCCGACAATTATTAATGGACTAATGCTATGCGAAAGATTTTTCTTCCGTTG
TTACTGGTGGCACTTTCGCCTGTCGCTCACAGTGAAGGTGTGCAGGAAGTCGAGATTGAC
GCACCGCTCTCTGGCTGGCATCCGGCAGAGGGCGAAGATGCCAGTTTTTCACAATCGATC
AATTACCCGGCGTCGTCCGTCAACATGGCAGATGATCAAAATATCTCAGCGCAGATCCGC
GGCAAAATAAAGAATTATGCTGCGGCGGGTAAAGTTCAGCAGGGCCGGCTGGTGGTCAAC
GGTGCCAGTATGCCGCAGAGAGTTGAATCCGATGGTTCATTTGCACGCCCTTATATTTTC
ACTGAAGGCAGCAACAGCGTGCAGGTCATCAGCCCGGATGGGCAAAGCCGACAAAAAATG
CAGTTTTACTCAACGCCGGGTACAGGAACGATTCGTGCACGTTTACGGCTGGTTCTCTCG
TGGGATACGGACAATACCGATCTCGATCTCCATGTTGTCACGCCCGATGGAGAACACGCC
TGGTACGGTAACACCGTGCTGAAAAACAGTGGTGCACTGGATATGGATGTCACGACGGGG
TATGGACCCGAGATTTTCGCCATGCCAGCACCAGTTCACGGGCGCTATCAGGTGTATATC
AACTACTATGGTGGGCGCAGCGAAACGGAATTGACGACCGCCCAACTGACGCTGATTACC
GATGAAGGATCGGTCAATGAGAAACAGGAAACATTTATTGTACCGATGCGTAATGCTGGC
GAGCTGACGCTGGTGAAAAGTTTTGACTGGTGATTAATGGGGTTACCTTCGCCGTCGATG
TTCAAGAAAACACCCGATAACTTTCGCTATCGGGTGTTTTTATTGATTAATTCAACCGTT
CAATCACCATCGCAATTCCCTGGCCGCCACCAATGCACAGTGTTGCCAGCCCCAGCGTTT
TATCGCGTGCCTGCATGGCATGTAATAGTGTGACCAGAATACGAGCACCACTGGCACCGA
TAGGATGCCCGAGCGCGATGGCCCCGCCGTTGACATTCACTTTCTCAGAATCAAAGCCCA
GGGTTTTCCCAACGGCAAGGAACTGTGCAGCAAATGCTTCATTAGCCTCAATGAGATCAA
TATCCGCCAGTTGCAGCCCCGCCAGTTGTAACGCTTTTTGCGTGGCAGGTACTGGACCCA
TACCCATCAATGCGGGGGGCACGCCACCGCTGGCATAACTTTTAATGCGAGCCAGGGGGG
TAAGGCCTGCTGCCAGCGCCGCAGATTCTTCCATAATCACCAGAGCGGCAGCACCGTCGT
TAATACCAGACGCGTTCCCGGCGGTGACTGTTCCTGCTTTATCGAAGGCCGGGCGCAATG
CGCCTAACGCTTCAGTCGTAGAATCCGCTTTCGGGAATTCGTCTTGACTGAAGACGAAGG
TTTTCTTCCGAGTGACAACATTTACCGGGACGATTTCGGCTGTAAAAGCACCGGACTCAA
TTGCGGCTGCCGCTTTACGCTGTGAATGCAGCGCCAGTTCATCCTGCATTTCTCGGGTAA
TTCCGTACTCTTTGGCCACGTTCTCGGCGGTAATCCCCATATGATAACCATGGGTGGCGC
ACATCAGACCATCGCGCAGGATTACGTCATAAACCTGTCCGTCTCCAAGACGATAACCAG
AGCGTGCTTTTGCATCGAGTAAGTAGGGCGCTAAACTCATATTTTCCATACCCCCCGCCA
CAATGCTTTGCGCCTGACCTGCCTGAATTGCCTGGGCGGCAAGCGCCACACTTTTAAGAC
CCGAACCACACACTTTATTGACCGTGAATCCGCACACCGTTTCTGCCAGCCCGCTTTTTA
ACAGTGCCTGACGTGCCGGATTTTGCCCCAACCCGGCTTGCAACACGTTACCCATAATCA
CTTCATCAATGTGTAGTGAATCGATTTTTGCACGTTCAATGGCGGCTTTAATTACTGTCG
CCCCCAGGTCGATGGCGCTGGTGGAAGCGAGTGAACCGTTAAAACTACCGATAGCAGTAC
GTACCGCACTGACGATGACACAATTTTTCATTTTTTATTCCTTCTGTCTGTAGGGGTGCC
GTCAGAACAGCGTTAAACCAATGATGAAAATGACGCCGGAGAAGAGCAGGGCAGTGATGC
AATAGCCCATGATGTCGCGGACACCGAGTCCGGCGATTGCCAGTGCTGGCAGCGCCCAGA
ATGGTTGTGCCATGTTCATCCATTGCTCGCCGTAGGCGATCGCCATTACCGATTTACCGA
GATCAGCGCCCAGCGCCTGGGCTGCGGGTATCACGAAAGGTCCCTGAATAACCCAGTGAC
CGCCGCCAGACGGAACGGCGAAGTTAATCAGTGCAGAACTAAAAAAGGTCATTACCGGGA
AGGTGTCTTTGTTCGCAACATTGATGAAGAATTCGGTAATGAGTCCGCCCAGACCGGAAT
GCTCCATCATCAGTTGGATCCCAGCGTAGAAGGGGAATTGCACCAGAATACCGGCGGTAC
TGCGTGCTGCCGCGCTGATAGCACGCATATAAGCCATTGGCGTTTTATGTAGCAGCAGAC
CCGCAATCATAAACATCAGGTTGACGGTATTGATGGTGATGTTGAAGCCATGTTCGCTGA
AGTACATCGCCAGGTAAGCGATACCGAGTGCGCCGATGATCAACGTCAGAATGCGGCTTT
CTTCCAGTCGCTCGGACGGTGGAGCATCTTTCGGTAGCTGCTTTTGAAAATCAGCCTCTT
CCATGAGTAGTTTTGGATCGATACTCACCACGTCAGACGGTTTTGGCATCATCATGCGGG
TGATAAATGGCATCACCACAATCAACGCCACAGTGATGAAAATGTTAAAACCACTGAACA
GAGTATCGCCCACCGGGATCAGCCCGGCGATATGCTCAACCGGGTTGCCCGGTGTTGCAG
CCAACAGAGGCATTGATCCAGAGAAGCCGCCACCCCAGGTGAGAAAACCAATGTAGGCGC
AGGCAATGAGCAACGGATAATCAGAACCGGGGACTCGCCGGGCGACTTCACGGGCAAACA
TTGCGCCGACAACCAAACCAAATCCCCAGTTGATGACACAAGCGACTGAACCGAAGAAAG
TGACCAGCATGACGCCCTGTACGGGCGTCTTTGCGGCGGAGGCGGCAGTACGCAGCAAAC
TTTTCACCGGAGCAGAGCTGGCAAGGGCATGACCGGTAACGATGATAAGCGCCATCTGCA
TACCAAACGCCAGCAAGTTCCAGAAACCGTCACCCCACATTTTCACCATGCTGATCGGCG
TTTGTGGTGTTAACCAAAGCGCGATCACGAATGTTAGCAATGTCAGCAACATGGCAAAGA
TCAGTGGATCGGGAAGCCACCGGCTGACAAAACGCGTCATAAAACGCGATATGCGACCAA
TCATAAATCACCCCGTTGCGTATTCAGATCGGCGGCGACTTCAAACCGAGCTTCTGTTTT
GGCACGCACGGTAGCTAAATCACACCCGTCGGCAATTTCGGTGAGCCACATTTTGCCGTC
AATAAAACGAAAGACAGCCAGTTCAGTAACCAGCATATGCACCGCATGTTGCGCAGTGAG
TGGCATGGTGCAGCGGCGCAAAATTTTTGCTGAACCATCTTTGGCGCAATGTTCCATGGC
GATGATCACTTTGCGCGACCCGGTCACCAGATCCATCGCGCCACCCATACCGGGCACCAT
TTTCCCAGGCACTACCCAGTTCGCGAGGTTTGCTTCTTCGTCTACTTGCAAACCGCCGAG
CACGCAGGCATCAATATGACCGCCGCGGATTAGCGCAAATGACATGGCGCTATCAAACAT
GGCTGCACCGGGTAAAATACCGCACGGTTGTCCGCCAGCGTTCACCAGATCTGGATGCGC
TGTCGTGACCGGGCCTAAACCGAGGAAGCCGTTTTCCGATTGCAGAGTGATATGAATACC
CTCCGGTAAATAATTGGCGACCATTGTGGGTAAACCGATCCCTAAGTTAACGATGTCACC
ATCACGAAGCTCTTGCGCCACACGGCGCGCAATACGTTGTTTCGCATCCATTATTTGCTC
TCCTGTGAAACGATGATGTGGTCGATAACGGCACCAGGGGTGACAATATGGTCAGGTTGC
AGCTCGCCGGTTTCGACAAGTTCATCTGGCTCTACCAGCGTGATATCAGCCGCAAGGGCT
ATCAGGGGGTTAAAGTTGCGGGCGCTAAGTTGATAGGTCAGGTTGCCAAGTGTGTCGCAA
CGATGAGCGCGAATTAGCGCCAGGTCGGCGCGCAGTGGGCGTTCGAGCAGCCAGGTTTTA
CCGTCGAGTGTCAGTGTCTGTTTGCCTTCCTCTACGACGGTGCCGACACCCGTTGGGGTG
AGAAAACCACCAAGTCCAGCTCCACCACAGCGAATTTGCTCGATTAGCGTACCTTGCGGC
ACCAGAACGACGTCCATCTCACCAGATATCATGCGCCGACCTGTTTCCGGGTTGGTGCCG
ATATGTGAAGCAATCACTTTGCGGACTCGACCATTGACGATGAGCGGACCGATGCCGGTA
TCAACAAACGCGGTATCATTGGCTATCAATGTCAGGTCGCGAACACCAGATTCCAGTAAT
GCTTCAACCAGGCGGGATGGAGTGCCAATCCCCATAAATCCGCCCACCATGATGGTCATG
CCGTCACGAAAGAAGCCGGTGGCGTCTTGTAATGTCATCAATTTTGTTTTCATTTTTTAT
CCCTCTTGCATACACCGTTGTGGGTACAGTCAGGGAATAGCAAGGGGAGTGCCAGAATGA
GATTATTGGATGTTTTTATTTAACTAATTGAATAGAAAAGGATAAATTAGATGGGGATTC
ATAAGGAGAATGAGCTGCTATGCAGAAAATTGCGCACTGTGCAAATTTCTGCATAGCAAG
TTTTGGTGTTATACATCCGCCGGATCGATACCGTATTCCTGGAGTTTATACATCAATGCA
CGGCGACTGATGCCCAGCATTAAAGCAGTGCGGGTTCGGTTTCCTTCTTGTTGTTCCAGC
ACTTCCATAATGATGCGTTTTTCGACGCGTTTAATTTCCTCTTTTAAATTACGCTCTCCG
ACAGGGGCTGTTTTTACCTCGCCAGCATTACAGACTGGCTGACGAATCTGCGGCGGAAGA
TCCTCAGAAAAAATGATCGGGCCTGAATTCATCACGACGGCGCGTTCAATAACGTTGGAA
AGCTCTCGAATATTTCCCGGCCATGACCAGGCGGTAAGCAGTGACATTGCCATCGGATCG
ATGTCGATAATATCGCGCTGATTCTCACTACTGAATTTTTGCAAAAAGTGATTAGCTAAC
AGGGAAATATCTTCCCGGTGATCGCGCAGAGGCGGCAGTATTAAATGAATAACGTTAAGG
CGATAAAAGAGATCTTCACGGAAGGTGCCTTCTTTTACCATTGCCTGCAAGTCGCGGTTG
GTGGCAGCAATGATGCGGATATCAACTTTTATGGTCTGATGGCCGCCAATCCGTTCAAAT
TCCCGTTCCTGCAGAATGCGTAGTAATTTGGCTTGCAGTACCAGCGGCATTTCGCCAATT
TCGTCGAGGAGCAGAGTACCTTCGTTGGCACGTTCAAATAATCCCTGACGCAAGGTTTGT
GCACCAGTAAATGCACCTTTTTCATGACCAAACAGTTCACTTTCGAGCAACGATTCCGGC
AGCGCCGCGCAGTTGACTTTAATGAACGGCCCCTTTGCCCGCCGCGAATTGTAGTGAATC
GCTCTGGCAATCAACTCTTTCCCGGTGCCGCTTTCACCGCTAATCAAGACGCTGGCCTGA
GAAAGGGCAATTTTGGCGGTGTCTTTGCAGATATCCATCATCGCCGGGCTGTTGGTGAGA
ATGTGCCCCCATTGCCAGCTGGTGCTCAGTGCCTGGTGCAGATGACGGATCTCTTTTTTC
ATTGACTGGAGTTGTAAAGCGCGCTGAACGATTAAATTCAACTCATCGAGATCAAACGGT
TTAATAACATAGTCGAAGGCCCCGCAGCGTAGCGCTTCGACGGCGGTTTCCACTTCAGCA
TAGGCCGTCATCAGAATAACGGGTGTCCGGGTCTCATTACTGCGCATCTCCTTTAGTGCC
TTGATGCCGTCCATCTCTGGCATGCGGATATCCATCAACACCACGTCAGGGTGAATATCA
GCAAACAGGTGTAATGCTGTGCGTCCGTTGTTCGCACAATGTGTTTCGAAACCTTGTAGT
GCAAAAGCGGTGCTCAGCATACGGCGAACATTATCTTCATCATCCACAATAAGGATGCGA
TTAATAGCAGTCATACAGTCTGATTTCCCTGCGGGTTGATTGGTAAAATAAGCGTGAAGG
TTGCGCCGTAGCCCGGCAAACTGGCGACGCGAATATCACCCTGATGGGCATTAATGATGC
GTTGACTTAACGCCAGACCAAGCCCGGTTCCTGAGGCTTTGGTGGTGAAAAAGGGATCGA
AGATCTTTTTTTGCAGCGAGAGATCAATGCCACAGCCGTTGTCCTCTATCGAAATGGCCT
GTTGTGAGTCGCTGTATTGCCAGGTTTGAATGCGAATTTTCCCTCGTGCGCTGATAGCCT
GGACGGCATTGATCAGGATATTCAGTAGTACCTGTTTGAGCAGTTCACGATCGGCGTTAA
TCGGGTTTAATTCATTATCCAGTTCGCTTATGAAGTCGACCCGCGCTTGTACGCCGGCGG
TTTGTACCAGTACCAGAGTTTCTTCAACCAATGCATTGAGACTGACTTGTTGCCATTGAC
TGTGGCGTGGACGTGAAAATTCGAGCAATTGCTGAATAACTTTGTTAATTGAATCGATTT
CTTTGAGTACTACGGACAGATATTCCTGATGTATTAGGTCGCTGGTTTGTTGGCGCAAGA
TCTGTACATAACCACGAATAGCCGTTAGCGGATTACGTACTTCATGCGCGACGCCAGCCA
TCAGCTCACCCAGTGTGGCGAGGCGTTCTGCTTGCGCCATGCGGCGCTGGGTTTCTTTGC
GGGCAGTTAAATCAGAGAAAATAACCAAAGCACCTATCATTTCACCATGCGTGTTATGAA
TACGACTGGTAGTGACACTGAGTTCAATGGTGCGGTCACGGCCTGGAAAACTGATCTCCA
GCGCTACATGTTCGGTGCCATGTTCCAGCGTATCCAGTACTGGACTGTAGAACTGAGTAT
TGTCGAACAACATGGAGTAAGGCTGCCCTACCAGTTCATGACGTTGATAGCCAGTGATGA
CTTCTGCTGCCGGGTTCATGGTGGTTACATCACCCTGGCGGTCAATGGCAATGACGCCAT
CGGCAGCGTTTTCAATAATCAGATCGTTAAGTGTCCGCGTTTCACGCAGTGCCTGGGCGA
GGTTGTTAACACTCTGACTGATTTGCCCCATTTCACCGGGCAATTGTGGTAATCGAGTGG
GAATATTTTGTGCCAGAGTCGAGAGGCCATCGGTGATGATATCAATATTGGCGCTCAGGC
GACGGGAGAAAAGGACAATCAACAGCAGGCTTATCAGCAAACCGGCGGTGAGCACAATGA
TAATCCTCACATCCATTTTCCAGGCCTGGCGGCGAATATCTTCGGTTAATTCATTGGCCC
AGATATAGCCGAGAATTTCACCATTACGCTCAATGGGGATCATTGAATTCAAAATATCGC
CGCGCACCTGCCTGCCTGAATAAACCAAAGGGGTATTTGTACGCATGACTTCGCGACCAG
GGTGATCTGCGGCAATGGTAACGCCCACATTATTCTGATATAGCGCTGAAGGCGCGTAGG
TGATTATCGCATCCAGCGTTTTGTTGTAATAACCAGCGCCGATGCCAGGGAAGGCGTGAG
TGATATTTTCGGTAATGGGGGCAAGTTCTGCATTTAATGCGCGGATACGCTCCTCACGTG
GTAAGTCGATGTAGAGATCATAGCGATCGCCTAGTGCCTGATTAAGCAGGTTGACCACGG
CAGAAAGTTTTTTCTCTTTTTCAGATAAGACTGCTGAACGTCCTTCCGTTTCTACGATAT
AACCAATAGTAAGCGTTGGGACAATGACCATCAGGATTGCCATCAGGATCATTTGATTGC
GTAAGCGGCGTGGATAAATCCACTTCATATAATGCATGCTGAAATCCACTAGTCTTGTCC
GGTATATGACGATTATCAGAGGTTAAGGTGATGATTTCTCGGCGGTGTATCATATTCCAG
AGAAGAGAGAACATTGCGGTAACACGCTTTTACCGCTACCTTAACCACACTCCATCGGTC
ACCTGAGGCGGAGCTTCGCCCCTTTGAAATACCTTGCTTCTTTTCGTACAACCCTGAAAG
CCTCGCGCTACATGTTCAGAGCATTGGCGTTAGTGCTCTGGCTGTTGATTGCTTTTTCAT
CCGTTTTTTACATCGTTAATGCGTTACATCAGCGAGAATCGGAAATTCGTCAGGAATTTA
ATCTGAGTTCCGATCAGGCTCAGCGCTTTATTCAACGCACCTCTGATGTGATGAAAGAGC
TGAAGTACATCGCTGAAAATCGCTTATCGGCAGAAAACGGTGTGCTTTCCCCGCGTGGAC
GAGAAACGCAGGCGGATGTGCCTGCGTTTGAACCGCTGTTTGCCGACTCCGATTGTTCCG
CAATGAGTAACACCTGGCGAGGTTCTCTGGAGTCATTGGCGTGGTTTATGCGCTACTGGC
GCGATAATTTTTCTGCGGCTTACGATCTCAACCGGGTATTTTTAATCGGCAGCGATAACC
TCTGCATGGCCAATTTCGGTCTGCGTGATATGCCAGTGGAACGCGATACCGCGTTGAAAG
CTTTGCATGAACGCATCAATAAATATCGAAATGCACCACAAGATGATAGCGGCAGTAACC
TCTACTGGATCAGCGAAGGTCCGCGCCCTGGCGTCGGGTATTTTTACGCGTTGACGCCAG
TTTATCTGGCGAACCGGTTGCAGGCGCTTTTGGGTGTCGAGCAGACCATCCGGATGGAGA
ACTTTTTCTTACCTGGTACGTTGCCGATGGGGGTTACCATTCTTGATGAAAATGGTCATA
CCCTGATTTCGCTTACCGGACCAGAAAGTAAAATTAAGGGCGATCCTCGCTGGATGCAGG
AACGCTCCTGGTTTGGCTATACGGAAGGGTTCCGGGAGCTGGTGCTGAAGAAAAATCTGC
CACCCTCATCGCTAAGCATCGTGTATTCGGTGCCGGTTGATAAGGTGCTGGAACGCATTC
GCATGTTGATCCTTAACGCAATTTTGCTGAATGTGCTTGCTGGAGCTGCATTGTTTACTC
TCGCGCGGATGTACGAGCGGCGTATTTTCATTCCGGCGGAAAGCGACGCCCTGAGACTGG
AAGAACATGAGCAGTTTAACCGCAAGATTGTCGCCTCCGCGCCAGTGGGTATCTGTATTT
TGCGTACCGCAGATGGCGTCAATATTTTAAGTAACGAACTGGCGCATACCTATCTCAATA
TGCTTACGCATGAGGACCGCCAACGGCTGACACAAATTATCTGTGGGCAGCAGGTCAATT
TTGTTGATGTCCTGACCAGCAACAATACCAATCTGCAAATCAGCTTCGTCCATTCGCGCT
ATCGTAATGAAAACGTGGCCATTTGTGTGCTGGTGGATGTTTCTTCGCGCGTGAAGATGG
AAGAGTCGTTGCAGGAGATGGCACAAGCAGCGGAACAGGCGAGCCAGTCAAAATCGATGT
TCCTTGCCACCGTCAGTCATGAGCTGCGAACGCCGCTGTATGGCATTATCGGTAACCTGG
ATCTGTTGCAAACCAAAGAGTTACCGAAAGGCGTCGATCGTCTGGTGACGGCAATGAACA
ACTCTTCCAGCCTGTTGTTGAAAATTATCAGCGATATTCTCGATTTCTCGAAGATTGAAT
CGGAACAGTTGAAGATCGAACCGCGTGAGTTTTCACCGCGTGAAGTGATGAACCACATCA
CCGCCAACTATTTACCGCTGGTGGTACGCAAGCAGTTAGGCTTGTACTGCTTTATTGAAC
CGGATGTGCCAGTGGCCTTAAATGGCGACCCGATGCGTTTACAGCAGGTCATCTCCAATC
TGTTGAGTAACGCCATAAAATTCACCGATACCGGCTGTATAGTTTTGCATGTTCGCGCTG
ATGGCGATTATCTCTCTATCCGTGTTCGCGATACCGGCGTGGGGATTCCGGCGAAAGAAG
TGGTGCGCTTGTTTGATCCCTTCTTCCAGGTCGGAACGGGCGTACAGCGAAACTTCCAGG
GGACCGGTCTGGGTCTGGCGATTTGTGAAAAACTGATCAGCATGATGGACGGCGATATCT
CGGTAGATTCAGAACCGGGAATGGGCAGCCAGTTTACCGTGCGTATTCCGTTGTACGGCG
CTCAGTACCCGCAGAAAAAAGGCGTGGAAGGGTTGAGTGGTAAACGCTGCTGGCTGGCGG
TCCGCAATGCGTCGCTCTGTCAGTTCCTGGAAACCAGTTTGCAGCGCAGCGGCATCGTCG
TAACAACATACGAAGGGCAGGAACCGACTCCCGAAGATGTGTTAATCACTGACGAGGTAG
TGAGTAAAAAATGGCAGGGCAGAGCGGTAGTGACCTTCTGTCGTCGACATATTGGTATTC
CGCTGGAGAAAGCGCCAGGGGAGTGGGTACACAGTGTGGCTGCCCCGCATGAGCTACCGG
CATTGTTGGCGCGTATTTATTTGATCGAGATGGAGAGCGACGATCCTGCTAACGCTCTGC
CGTCGACGGACAAAGCGGTCAGCGATAATGACGATATGATGATTCTGGTCGTGGATGATC
ATCCGATTAACCGACGTCTGCTGGCAGATCAGTTGGGATCGTTGGGCTATCAATGTAAAA
CCGCGAATGATGGCGTCGATGCGCTTAATGTACTTAGCAAGAATCATATTGATATCGTGC
TTAGCGACGTCAACATGCCAAATATGGATGGTTACCGCTTGACGCAACGCATTCGTCAGT
TGGGACTGACGTTGCCGGTAATCGGAGTAACTGCTAATGCGTTGGCTGAAGAGAAGCAGC
GGTGTCTGGAGTCCGGTATGGACAGCTGCCTGTCGAAGCCGGTAACGCTGGATGTAATAA
AACAGACGCTGACGGTATATGCCGAGAGGGTCAGGAAATCGCGGGAATCGTAGGACGGAT
AAGGCGTTTACGCCGCATCTGGCATTCAGTGCAAATGCCAGATGCGACGCTGACGCCTCT
TATCTGGCCTACTTTAATGTAATCTGTTGAAATAATGGGAATCGTAGGCCGGATAAGGCG
TTTACGCCGCATCCGGCAATCGGTGCAAATGCCAGATAAGACACTAACGCGTCTTATCTG
GCCTACAGATGATTAGTCTTTATCTGCCGGACTTAAGGTCACAGAAGAGAGATAATTCAG
CAGGGCGATATCGTTCTCGACACCCAGCTTCATCATCGCAGATTTCTTCTGGCTACTGAT
GGTTTTAATACTGCGGTTCAGCTTTTTAGCGATCTCGGTCACCAGGAAGCCTTCCGCAAA
CAGGCGCAGAACTTCACTCTCTTTTGGCGAGAGACGCTTGTCACCGTAACCACCAGCACT
GATTTTTTCCAACAGGCGAGAAACGCTTTCCGGGGTAAATTTCTTCCCTTTCTGCAGCGC
GGCGAGAGCTTTCGGCAGATCGGTCGGTGCACCTTGTTTCAGCACGATCCCTTCGATATC
CAGATCCAATACCGCACTAAGAATCGCCGGGTTGTTGTTCATAGTCAGAACAATGATCGA
CAGGCTTGGGAAATGGCGCTTGATGTACTTGATTAAGGTAATGCCATCGCCGTACTTATC
GCCAGGCATGGAGAGATCGGTAATCAACACATGCGCATCCAGTTTCGGCAGGTTGTTGAT
CAGTGCTGTAGAGTCTTCAAATTCGCCGACAACATTCACCCACTCAATTTGCTCAAGTGA
TTTGCGAATACCGAACAAGACTATCGGATGGTCATCGGCAATAATTACGTTCATATTGTT
CATGTAATAGGCTACCTTGCTACAGCAAGCTCTTGACATAACTGTCAATGTCGCTGATGT
ATTTTTCTATTCCTGGAACATCCTTCTCACGAATCAGATGTTCCAGCGTTTCACATAACT
GCTTGCCGGGTACCAGATTTAGCATGGCAAATACGCCTTTAAGACGATGAGCCGTTTGGG
CTAACGCAGCAAAGTCACTGGTTGCTGCTTCAGTATACAGCCTCTTAACATCATCCGGTA
CTGTGTCTACAAAGAGCGCATAATAGCCGCTGGCATGGAGTTGCGCATTTTCATCTCCGC
CCAGAGGCGATTCTGTCACCTCTTCCTGCGCCAGTTGCACTTCAATTAATTGTAAGACCG
CTTCCTGCATAGCGTTGCTCATATTGAAGTTGACGCACAATTGACCAGGCCCAATTTCCC
GTACGCCAGACTCATCATCGCTTAAAAGCAAGCCAGAGGCAGTAAGATTAGACGGATTAT
CCGTTAAAAAGATATCATAATCTTGACTAATTAATCTTTCATCGGGTGTGATACAGGTTG
CACCCCAATTTTCTAACTGGCGAGTGACAATATTCCGAATTTCTGCCGAAGTAACATCCA
CCATTACGCAGACATCATCCAGTAAACGCTCTTCTTCCTCTTCAACTTCCGGGTCAGCTG
CGAGCATTTTGATATGCACAGAGTAGCGTGTACCAAGCCCATCCCGCGTTTTGATGTTTA
AATGACCGCCCAGTTTACGTGCCAGTTGATCGCTCAGCCAGAATGCCAGCGGGTCCGCCT
TGCCATAGCGATCGTTTTGGGTCTGGTTGATAAACGGGAAGTGCAAATTATCCATTTCAT
GAATGCTTACGCCTTCTCCGGTGTCCAGAATGCGGAACGTCAGGCGGTCTTCGGAGGACT
CATCCTGATCAACCTCAAGGGTGATTTTTCCCAATTGCGTTGAGGTCACGGCATATTGCA
TCAGTAGCAGCAAAATACGTCGTAAGGCATCGCGATCGCCACGGCGCATATCGTGTGCTT
TCAGATGATTGTTAATCAGCAGTTGCAGACCTTTACGCTTGATGGCAGGCAACACTGAAG
GCACAACTTCATCAATTAAATCCTGCACGGAGAACAGCACCGTCTCACTTTTCCAGCTAT
CGTCCGCAAGCATGTTCGCTAACTGTATTTCATCGACCAGCCGCACCAGCACATCTGCCT
GATTCGCCAGTTGTTTGCTTTCCGGGGCGTTGAGTTTAGCCGCGCTCTCCGCCAGGGACT
GTGCAGGTTCTTTCAGCGCATCGCCAATGTTTTTCATAAAGGTCATCCGCCCCTGCTGGT
TTTTCTCATACAGACGCTGCGCCTGCTTGAGTTTCTTGTTTACCAGCACTTCGCGATCCT
GATCGCGAATAATGAAAATTTGTGTGCGCGGCGCGACCTGGCTGCGGAACATGCGGATCT
CATACAGCTCGTTATTGATCGTCGCCTGAATAATCCCCTGATGCTGTTCCGCCATGGTGG
TGATGTTTTGCAGATTCAAATGCGGCAGCAAATGATCGGCAATTTTGTTACTTATGACAG
TGCGGTTCGATTCCTGATCGTGAACCAGCAGGCCGAGCGGCAGCAGTGAGACTATCTCTT
CATTGATTGCCCGTAAAATGCGCAATTCGTTATTGACCGCCGTGTTGGGTAGACTTTCTG
TACTGCGACTGGAGAAATGGCGAAATGTGGTATAGCCAAATAACGCCAGCGCCAGCAAAC
CGATGTTCAGCAGCAGTGGCAGCAGAATGTTTTGCAACGTATCCAGCAATAAGGTGCCAT
AAGGAACCTGCCAGACCAGGCGCATATCAGTAGAGTTGAGTGCCGAGGAGATTTCAATCT
TCGTACTGTTAAAGTGGATACTGACGCTATCCGTCCCTTCTTTCTCATTATCATTGTTTC
CCGTTGCCGTCGCGTCTGGCTCAAGGCGGAAACTGTCCAGCGGCATACCCGGTGGGATCA
AATCATTAATCGGCAGATCAAAAGCCACGACCGTTGCCAGATGTCCTGGCTGGTTAAAGG
TAGTACGCAAGGTAAAGTAATGACCGTTCTGCCAGGCCAGGCGGCGCATGTTAGAAAAAC
TTTCGCGTTCATCGAGGGCGTTGGCCTGTTGCAACATCTCTGCACGACGTGAATCAACAA
TGTCACTGACGGTCGATTCTTTAAATCCGGAGGTGAGATCTTTGAGGGGCAGGGTTGAGA
TCAGTACCAGACTGTTATCCTGACCATTCAGGTAATACATTGACCACGGTACATTTTCTG
CGCCCCACAATGTATCCAGATAAGTGGACATCCGTTGAGTCATCTCAAGCGTTGAGTTGT
CGTGAGAGCCAAAGATTAACGCTTCCGTTTTGCGGCGCGGTTTTTCCAGATAGTAGACAT
CCTGTTTCAGGCGCGTCTCTTGTAAACCTTCGCCGGAGGAGGGGGAGGTCGTCGCGGCAA
TGTTGTCGTAGATCTGCCAGGTCACGTAACGCCAGGTATCGACGCGCTTTTGGATTGCGT
GGGTAATGTCGACAATCTGGTAACTTTTATCTTTCAGCCAGGCGTTAACGGCGCTTTGTA
CCATTACACCCATCGTCACCAGTAACACAATGATCAACAGTAAAAAGAAGCGGGTAATGC
TCCCGGGTAGGAGTGAAAAGCGGGTCGTGGCCGTTGTCTCTTTCTGACGCATTCGTGTTT
ATGACCTGTTAAAACTTCGCGAAGTGATAGGGCAGTATAAAGGGTACAGTGTGAAATTCC
AGACTCTTACCTGATTGATGATTCTCTATTCTCCTGTGATATTTATCATCCTGTATGGGG
GGAAATAGATGTACAAGCGCCATTTTGCTGTACAAATAACCTACGAAAAGCCCAACGAAA
TTAATTGCAAATAAACGAAAATTGCTGGAAATTATGCTGATGTTAATTATTTGTGAAATA
GTTAACAAGCGTTATAGTTTTTCTCTGGTAGCACAGAATAATGAAAAGTGTGTAAAGAAG
GGTAAAAAAAACCGGATGCGAGGCATCCGGTTGAAATAGGGGTAAACAGACATTCAGAAA
TGAATGACGGTAATAAATAAAGTTAATGATGATAGCGGGAGTTATTCTAGTTGCGAGTGA
AGGTTTTGTTTTGACATTCAGTGCTGTCAAATACTTAAGAATAAGTTATTGATTTTAACC
TTGAATTATTATTGCTTGATGTTAGGTGCTTATTTCGCCATTCCGCAATAATCTTAAAAA
GTTCCCTTGCATTTACATTTTGAAACATCTATAGCGATAAATGAAACATCTTAAAAGTTT
TAGTATCATATTCGTGTTGGATTATTCTGCATTTTTGGGGAGAATGGACTTGCCGACTGA
TTAATGAGGGTTAATCAGTATGCAGTGGCATAAAAAAGCAAATAAAGGCATATAACAGAG
GGTTAATAACATGAAAGTTAAAGTACTGTCCCTCCTGGTCCCAGCTCTGCTGGTAGCAGG
CGCAGCAAACGCTGCTGAAGTTTACAACAAAGACGGCAACAAATTAGATCTGTACGGTAA
AGTAGACGGCCTGCACTATTTCTCTGACAACAAGTCAGAAGACGGCGACCAGACCTATGT
ACGTCTTGGTTTCAAAGGCGAAACTCAGGTTACTGACCAGCTGACCGGTTACGGCCAGTG
GGAATATCAGATCCAGGGCAATACCTCTGAAGACAACAAAGAAAACTCCTGGACCCGTGT
GGCATTCGCAGGTCTGAAATTCCAGGATGTTGGTTCTTTCGACTACGGTCGTAACTACGG
CGTTGTTTACGACGTAACTTCCTGGACCGACGTACTGCCAGAATTCGGTGGTGACACTTA
CGGTTCTGACAACTTCATGCAGCAGCGTGGTAACGGCTTCGCGACCTACCGTAACACTGA
CTTCTTCGGGCTGGTTGATGGCCTGAACTTTGCTGTTCAGTACCAGGGCAAAAATGGTAG
CGTAAGCGGCGAAGGCATGACCAACAATGGTCGTGGTGCTCTGCGTCAGAATGGCGACGG
TGTCGGCGGATCTATCACTTATGATTACGAAGGCTTCGGTATCGGTGCTGCAGTTTCCAG
CTCCAAACGTACTGATGCTCAGAACACCGCTGCTTACATCGGTAACGGCGACCGTGCTGA
AACCTACACTGGTGGTCTGAAATACGATGCTAACAACATCTACCTGGCTGCTCAGTACAC
CCAGACCTACAACGCAACTCGCGTAGGTTCCCTGGGTTGGGCGAACAAAGCACAGAACTT
CGAAGCTGTTGCTCAGTACCAGTTCGACTTCGGTCTGCGCCCGTCTGTAGCATACCTGCA
GTCTAAAGGTAAAAACCTGGGCACCATCGGTACTCGTAACTACGACGACGAAGATATCCT
GAAATATGTTGATGTTGGTGCAACCTACTACTTCAACAAAAACATGTCCACCTACGTTGA
CTACAAAATCAACCTGCTGGACGACAACCAGTTCACTCGTGACGCTGGCATCAACACTGA
TAACATCGTAGCTCTGGGTCTGGTTTACCAGTTCTAATCTCGATTGATATCGAACAAAGG
GCCTGCGGGCCCTTTTTTCATTGTTTTCAGCGTACAAACTCAGTTTTTTGGTGTACTCTT
GCGACCGTTCGCATGAGGATAATCACGTATGGAAATAAGCTTTACCCGCGTGGCACTGCT
GGCTGCCGCGCTCTTCTTTGTTGGTTGCGATCAAAAACCACAACCCGCCAAAACCCACGC
TACTGAAGTTACCGTTCTTGAAGGCAAAACCATGGGTACCTTCTGGCGTGCCAGCATCCC
GGGCATTGATGCCAAACGCAGTGCCGAACTTAAAGAAAAGATTCAGACCCAGCTGGACGC
CGACGATCAGCTGCTTTCGACCTATAAAAAAGATTCCGCGCTGATGCGCTTTAACGACTC
GCAAAGTTTGTCGCCGTGGCCGGTAAGTGAAGCGATGGCCGATATCGTCACCACCTCGCT
GCGCATTGGCGCAAGGACCGATGGTGCGATGGATATAACCGTCGGGCCGCTGGTGAATCT
GTGGGGCTTTGGCCCGGAACAACAGCCGGTTCAAATTCCGAGCCAGGAACAGATCGATGC
GATGAAAGCCAAAACCGGCTTACAGCACCTGACGGTCATTAATCAGTCGCATCAGCAATA
TCTGCAAAAAGACCTGCCGGATTTATATGTCGATCTCTCCACCGTCGGTGAAGGTTATGC
GGCGGATCACCTGGCACGCTTGATGGAGCAGGAAGGGATTTCCCGCTATCTGGTGTCGGT
GGGCGGCGCGCTGAACAGCCGTGGTATGAACGGTGAAGGCCTGCCGTGGCGGGTAGCGAT
TCAAAAACCAACCGATAAAGAAAACGCGGTTCAGGCTGTGGTGGATATCAACGGTCATGG
GATTAGCACCTCTGGCAGCTACCGTAACTATTACGAATTGGACGGCAAACGTCTTTCCCA
TGTTATCGATCCGCAAACCGGGCGTCCCATCGAACACAATCTGGTATCCGTGACGGTGAT
TGCTCCGACGGCGCTGGAAGCCGATGCCTGGGATACTGGCTTGATGGTACTCGGGCCGGA
GAAAGCCAAAGAGGTTGTTCGCCGGGAAGGGCTGGCGGTTTATATGATCACCAAAGAAGG
CGATAGCTTTAAAACCTGGATGTCACCACAGTTTAAAAGCTTCCTTGTCAGCGAAAAAAA
TTAAAGCGCAAGATTGTTGGTTTTTGCGTGATGGTGACCGGGCAGACTAAAGGCTATCCT
TAACCAGGGAGCTGATTATGAAAAACGCCACATGCTTAACTGACGATCAACGCTGGCAAT
CTGTCTTAGCCCGCGACCCGAATGCCGACGGCGAATTCGTTTTCGCCGTGCGCACCACAG
GCATCTTTTGCCGTCCGTCTTGCCGCGCCAGACATGCCTTGCGGGAAAATGTCTCCTTCT
ACGCAAATGCCAGCGAGGCACTCGCCGCCGGATTTCGCCCCTGCAAACGCTGCCAACCTG
ATAAAGCCAATGCCCAGCAACATCGGTTGGATAAAATCACCCACGCGTGTCGACTGCTGG
AACAGGAAACGCCTGTAACGTTGGAAGCCTTAGCTGACCAGGTGGCGATGAGTCCATTTC
ATCTACATCGGTTGTTTAAAGCGACTACCGGAATGACGCCTAAAGCCTGGCAACAGGCCT
GGCGCGCTCGCCGTTTGCGCGAATCGCTGGCGAAAGGGGAGAGCGTGACGACGTCTATTC
TTAACGCCGGATTCCCCGACAGCAGCAGTTACTACCGCAAAGCTGACGAAACGCTGGGCA
TGACGGCTAAACAATTCCGTCACGGTGGCGAAAATCTGGCGGTGCGTTACGCGCTGGCTG
ATTGTGAGCTGGGTCGTTGCCTGGTGGCAGAAAGCGAGCGGGGGATTTGCGCGATATTGC
TGGGCGATGATGACGCGACATTAATCAGCGAGTTGCAGCAGATGTTTCCCGCTGCCGACA
ACGCGCCTGCCGATCTGATGTTTCAGCAACATGTGCGTGAAGTGATCGCCAGCCTCAATC
AACGCGATACGCCGCTGACGTTACCGCTGGATATTCGCGGCACTGCTTTTCAGCAACAAG
TCTGGCAGGCACTGCGCACGATACCTTGCGGTGAAACCGTCAGTTATCAGCAACTGGCTA
ACGCCATCGGCAAACCGAAAGCGGTACGGGCCGTTGCAAGTGCCTGTGCCGCCAACAAGC
TGGCTATCGTTATACCCTGTCATCGGGTAGTACGCGGTGATGGATCGCTTTCAGGTTACC
GCTGGGGCGCGTCGCGCAAAGCGCAACTGCTGCGCCGCGAAGCTGAGAATGAGGAGAGGT
AATGTTGGATCTGTTTGCCGATGCTGAACCGTGGCAAGAGCCACTGGCGGCTGGTGCGGT
AATTTTACGGCGTTTTGCTTTTAATGCTGCGGAGCAACTGATCCGCGATATTAATGACGT
TGCCAGCCAGTCGCCGTTTCGCCAGATGGTCACCCCCGGGGGATATACCATGTCGGTGGC
GATGACCAACTGTGGGCATCTGGGCTGGACGACCCATCGGCAAGGTTATCTCTATTCGCC
CATTGATCCGCAAACAAATAAACCGTGGCCCGCCATGCCGCAGAGTTTTCATAATTTATG
TCAACGTGCGGCTACGGCGGCGGGCTATCCAGATTTCCAGCCAGATGCTTGTCTTATCAA
CCGCTACGCTCCTGGCGCGAAACTGTCGCTGCATCAGGATAAAGACGAACCGGATCTGCG
CGCGCCAATTGTTTCTGTTTCTCTGGGCTTACCCGCTATTTTTCAATTTGGCGGCCTGAA
ACGAAATGATCCGCTAAAACGATTGTTGTTGGAACATGGCGATGTGGTGGTATGGGGCGG
TGAATCGCGGCTGTTTTATCACGGCATTCAACCGCTGAAAGCGGGGTTTCATCCACTCAC
CGGCGACTGCCGTTACAACCTGACATTCCGTCAGGCAGGTAAAAAAGAATAAAAATAAGA
ATTATTATTGCTGTGCGCGCGAAGATGTTTAAACTGCGGGCTGTAATTCATTGTCCGGGT
TTTCTGCATGGAACTTCTTGTACTTGTCTGGCGGCAGTATCGCTGGCCATTTATCAGTGT
GATGGCGCTAAGCCTCGCCAGTGCGGCTTTAGGCATTGGCTTAATTGCTTTTATCAATCA
GCGCCTTATCGAAACGGCGGATACCAGTCTGCTGGTGTTGCCGGAGTTTCTGGGATTATT
GCTGCTGTTGATGGCAGTCACTCTCGGATCGCAACTGGCGCTCACCACTTTGGGGCATCA
CTTCGTTTACCGACTGCGTAGTGAATTTATCAAGCGGATTCTGGATACCCACGTCGAGCG
CATTGAACAACTCGGTAGCGCCTCGTTGCTGGCGGGATTAACCAGCGATGTGCGCAATAT
CACCATTGCTTTTGTGCGTCTGCCGGAACTGGTGCAGGGGATCATTCTCACTATCGGTTC
CGCGGCGTATCTGTGGATGCTGTCGGGCAAAATGTTGCTGGTAACGGCTATCTGGATGGC
AGTCACCATCTGGGGCGGTTTTGTGCTGGTGGCGCGGGTGTACAAACATATGGCGACCCT
GCGTGAAACCGAAGACAAGCTGTACACGGATTTTCAAACCGTACTCGAAGGGCGCAAAGA
GCTGACTCTGAACCGGGAACGCGCCGAGTATGTGTTTAACAACCTCTACATTCCTGATGC
GCAAGAGTATCGCCATCATATTATTCGCGCAGACACCTTCCATCTTAGTGCCGTGAACTG
GTCAAACATCATGATGCTGGGCGCAATCGGTCTGGTGTTCTGGATGGCGAACAGTCTCGG
TTGGGCTGATACCAACGTTGCCGCGACCTATTCGTTGACGTTGTTATTCCTGCGTACGCC
GCTGCTTTCGGCGGTTGGCGCATTGCCGACGCTGCTGACGGCGCAGGTGGCGTTTAACAA
GCTGAACAAATTCGCGCTCGCGCCTTTCAAAGCAGAGTTTCCGCGCCCGCAGGCGTTTCC
CAACTGGCAAACGCTGGAGCTGCGTAACGTGATGTTTGCTTATCAGGATAACGCGTTTTC
CGTTGGTCCGATTAATCTCACCATCAAACGTGGCGAGCTGCTGTTTCTGATTGGCGGCAA
CGGTAGCGGAAAATCGACGCTGGCGATGTTGTTGACGGGCTTGTATCAGCCACAAAGCGG
CGAAATCTTGCTGGATGGCAAACCTGTCAGCGGCGAACAACCGGAAGATTATCGCAAACT
GTTTTCGGCAGTGTTTACCGATGTCTGGCTGTTTGATCAACTGCTGGGGCCGGAGGGTAA
ACCCGCTAACCCGCAACTGGTTGAGAAGTGGCTGGCGCAGCTGAAAATGGCTCATAAGCT
TGAGTTAAGCAACGGGCGTATTGTTAACCTGAAGTTATCAAAAGGGCAGAAAAAACGCGT
GGCGCTGTTGCTGGCGCTGGCAGAAGAACGCGATATTATCCTGCTGGATGAATGGGCGGC
GGATCAGGATCCACACTTCCGTCGTGAGTTTTATCAGGTGTTGCTGCCGCTGATGCAGGA
GATGGGTAAAACTATTTTCGCCATCAGTCATGATGATCATTACTTTATCCACGCCGACCG
CCTGCTGGAGATGCGCAACGGGCAACTTAGCGAGCTGACGGGCGAAGAGCGCGATGCCGC
TTCGCGTGATGCCGTTGCCCGGACGGCATAATATTACGACGCTGACCTGGCGGACTGCTG
CCGCCAGGTCAATATGCTAAAAATCCCTTCATTTCTAATAACCCTATAATTAATCAACGA
AATTATAATGTTTCTAAAATTAGAATATAATTTATAAACATTATTTAAATGTTGTTACTT
AAGTGTTACCGTTGATGCCGCGCAAATCTCACCTGCAATAAAGCGACTAAAAGTAAGGCA
TTAACAAGATGAAAAAAGTGACTGCCATGCTCTTCTCGATGGCCGTGGGGCTTAATGCCG
TTTCGATGGCGGCAAAAGCGAAAGCGTCCGAGGAGCAGGAAACTGATGTACTGTTGATTG
GCGGCGGCATTATGAGCGCCACGTTGGGGACCTATTTACGCGAGCTGGAGCCTGAATGGT
CGATGACCATGGTGGAGCGCCTGGAGGGTGTCGCGCAGGAGAGTTCGAACGGCTGGAATA
ACGCCGGAACCGGGCATTCTGCACTGATGGAACTGAACTACACCCCGCAAAACGCCGATG
GCAGCATCAGTATTGAAAAAGCAGTCGCCATTAACGAAGCATTTCAGATTTCCCGCCAGT
TCTGGGCGCACCAGGTCGAGCGCGGCGTGCTGCGTACTCCGCGTTCATTTATCAATACCG
TTCCGCATATGAGCTTTGTCTGGGGCGAGGATAACGTTAATTTCCTGCGCGCCCGTTACG
CCGCGTTGCAACAAAGCTCGCTGTTTCGCGGTATGCGTTACTCTGAAGATCACGCGCAGA
TCAAAGAGTGGGCACCGTTAGTGATGGAAGGGCGCGATCCGCAACAGAAAGTGGCAGCCA
CGCGTACGGAAATTGGTACCGATGTGAACTACGGCGAGATCACCCGCCAGTTAATTGCTT
CCTTGCAGAAGAAATCTAACTTCTCGCTGCAACTCAGCAGCGAAGTCCGCGCCCTAAAGC
GTAATGACGATAACACCTGGACCGTTACCGTTGCCGATCTGAAAAATGGCACTGCACAGA
ACATCCGTGCGAAATTTGTCTTTATCGGCGCGGGCGGTGCGGCACTGAAGCTGTTACAGG
AATCGGGGATTCCGGAAGCGAAAGACTACGCCGGTTTCCCGGTGGGCGGTCAGTTCCTTG
TTTCGGAAAACCCGGACGTGGTTAATCACCATCTGGCGAAGGTTTACGGTAAAGCATCCG
TTGGCGCACCACCGATGTCGGTTCCGCATATCGATACCCGTGTTCTGGACGGTAAACGCG
TAGTGCTGTTTGGGCCATTTGCCACCTTCTCAACCAAATTCCTCAAAAACGGTTCATTGT
GGGATCTGATGAGTTCCACCACCACCTCTAACGTGATGCCGATGATGCACGTCGGGCTGG
ATAATTTCGATCTGGTGAAATATCTGGTGAGTCAGGTGATGTTGAGTGAAGAGGATCGTT
TTGAAGCGTTGAAAGAGTACTATCCGCAAGCGAAAAAAGAGGACTGGCGTTTGTGGCAAG
CGGGGCAGCGTGTGCAGATTATCAAGCGTGATGCCGATAAAGGTGGTGTACTGCGTCTGG
GTACTGAAGTGGTCAGTGACCAGCAAGGAACCATTGCCGCGCTCCTGGGGGCATCGCCAG
GGGCGTCAACCGCCGCGCCGATTATGTTGAATCTGCTGGAAAAAGTATTTGGCGATCGCG
TTTCCAGCCCGCAATGGCAGGCTACGTTGAAAGCGATCGTTCCGTCTTATGGACGCAAGC
TGAACGGTGATGTAGCGGCAACAGAACGCGAGTTGCAGTACACCAGCGAAGTGCTGGGGC
TGAAATACGACAAACCGCAAGCAGCAGATAGTACGCCGAAACCGCAGCTGAAACCGCAAC
CCGTTCAAAAAGAAGTGGCGGATATTGCGTTGTAATGATGTGCCACATCCGGCATGGTAT
GCCGGATGTGGCGTATGCTGATAAGACGCGCCAGCGTCGCATCAGGCAACCGGCTCGGGC
GTTAGATGTTGGATGCGGCGTAACCGCCTTATCCAACCTACGGGGTGGAGCACTTCACAG
CGGTGTAGGCCTGATAAGACGCGTCAGCGTCGCATCAGGCAACCGGCTCGGACGTTGGAT
GTTGGATGCGGCGTAACCGCCTTATCCGACCTACGGGGTGGAGCACTTCACAGCGGTGTA
GGCCTGATAAGACGCGCCAGCGTCGCATCAGGCAACCGGCTCGGGCGTTAGATGTCGGAT
GCGGCGTGACCGCTTTATCCAACCTACGGGGTGCCGCACTTCACGGCAGTTTAGCGAACT
ACCGCGTTGTCAATCTTCTCTTCCGCCTTCCAGACGCGGTACTTCACATCTACATTGTCT
GGCGTATACACCACGATCGGCAGCTTGCTGTTGTAACGCAGCATTCCAGCATCACCCAGA
TACGCGGTGACAAATTTCTTCTCTTTTTTGCCATCCGGGCAGGCCATCATCGTCGAAACC
GGGGAACTGACTTTATCAAAGACATAATAATCATAGCCCCAGCCTTCCAGCGTTTTGCTT
TCCAGCTTCCCGCCGAGACGATGCAAATTGCAATCGACTTCCAGCGTCTGACCGATTAAC
AGTTCTACTTTCAGGGTAGATTCCTCTTCTTGCGGGGTTAACTGAATCACCTGACGCTTC
ATGCCTTTTTCAGCTTGTGGATAAGGCGCGATTTTTTCCAGTGGCTGGACGCTCTCTGCC
GCCCAGGCGGAAGTGGTGGCGAAAGCGGCAAACAATACTGCAGGTAGAATGGTCTTCATT
TTTTGCTTTCCTTCTTCATTTATAGGTTTGCACCGATGATGTCGCTGAAGGTTAACATAT
TCATCAGATTTATTAATTTGCTTTATGAATAACTTAAAGAATATTCAGACAATTTTACCT
GCTCTTTTAGTGTTAAATTCTGATGAGAGAGCAAACCAGCAGAAATATCTCTGGTGAATT
AATCGCTATATAAATATATTTATAACCATTTGAAATGTGAGCAAAAGCCCGTTTTTGCCA
CGCTTCCCGCCACTCTTTTGATCCTGCTACAGGTTTTACCTCGATCGGGGTATGCATCTT
TGACACATCCTTTAATATCTTAGCGGCTATAAAAATGGCTTATTAATTATGCGGTTTATT
TGGTCGCTCTCAATTTTCAGAGCGCGTTAATGATGGAAGGTCAATGTGAAGATTGATGCA
TCCCGTCGGGGCATACTCACTGGTCGCTGGCGCAAAGCCAGTAACGGTATCCGTCCGCCC
TGGTCCGGTGATGAATCTCATTTTCTGACCCATTGCACCCGCTGCGACGCTTGTATTAAT
GCTTGTGAAAACAACATTCTGCAACGCGGCGCGGGCGGCTATCCGAGCGTTAATTTCAAA
AATAACGAGTGCAGCTTCTGTTACGCCTGCGCGCAGGCTTGCCCCGAATCGCTATTTTCT
CCGCGCCACACCAGGGCCTGGGATTTGCAGTTCACCATTGGGGACGCGTGCCTGGCGTAT
CTGTCAGTTGAATGCCGCCGCTGTCAGGATAGCTGTGAGCCAATGGCAATTATCTTTCGC
CCGACGCTCTCCGGGATCTACCAGCCGCAACTTAATAGCCAACTTTGCAACGGATGTGGA
GCATGTGCAGCCAGCTGTCCGGTATCAGCCATAACTGCGGAGTATCTCCATGCACACTAA
CTGGCAAGTTTGCAGCCTGGTCGTGCAGGCCAAAAGCGAACGAATTTCAGACATCAGCAC
CCAACTGAACGCCTTTCCCGGCTGTGAAGTTGCTGTCAGCGACGCGCCGAGCGGTCAGTT
GATTGTGGTGGTGGAAGCAGAAGACAGCGAAACGCTGATCCAAACCATTGAGTCAGTACG
CAACGTAGAGGGCGTGCTGGCGGTGTCGCTGGTTTATCACCAGCAGGAAGAGCAAGGTGA
GGAAACACCATGAAACTCAGTCGTCGTAGCTTTATGAAAGCTAACGCCGTTGCGGCCGCT
GCGGCGGCTGCCGGTCTCAGCGTGCCGGGCGTTGCCCGCGCCGTTGTTGGTCAGCAGGAA
GCCATCAAATGGGATAAAGCGCCGTGCCGTTTCTGCGGTACTGGTTGCGGCGTTCTGGTC
GGAACGCAGCAGGGGCGTGTGGTGGCCTGTCAGGGCGACCCGGACGCACCGGTTAACCGT
GGCCTGAACTGCATTAAGGGCTATTTCCTGCCCAAGATCATGTACGGTAAAGACCGTTTG
ACGCAGCCGCTGCTGCGTATGAAAAACGGTAAATATGACAAAGAAGGCGAATTTACCCCA
ATCACCTGGGATCAGGCCTTCGATGTGATGGAAGAGAAATTCAAAACCGCCCTGAAAGAA
AAAGGGCCGGAATCGATCGGTATGTTCGGTTCTGGTCAGTGGACTATCTGGGAAGGTTAT
GCCGCGTCCAAGCTGTTTAAAGCGGGCTTCCGTTCGAACAACATCGACCCGAACGCGCGT
CACTGTATGGCGTCGGCAGTAGTTGGCTTTATGCGTACCTTTGGTATGGATGAGCCGATG
GGCTGCTATGACGACATCGAGCAGGCTGACGCGTTTGTGCTGTGGGGCGCAAACATGGCG
GAAATGCACCCGATCCTCTGGTCGCGCATCACTAACCGTCGTCTCTCTAACCAGAACGTC
ACCGTGGCGGTGCTTTCTACCTACCAGCATCGTAGCTTCGAGCTGGCGGATAACGGCATC
ATCTTTACTCCGCAATCTGACCTGGTGATCCTGAACTACATCGCCAACTATATCATTCAA
AACAATGCGATAAATCAGGACTTCTTCAGCAAGCACGTCAACCTGCGCAAAGGTGCGACG
GACATCGGCTACGGTTTACGTCCGACCCATCCGCTGGAAAAAGCAGCGAAGAATCCGGGT
TCTGATGCTTCCGAACCGATGAGCTTTGAAGATTACAAAGCCTTCGTTGCTGAGTATACG
CTGGAAAAAACCGCTGAAATGACCGGCGTGCCGAAAGACCAGTTAGAACAACTGGCGCAG
CTGTATGCCGATCCGAACAAGAAAGTCATCTCCTACTGGACGATGGGCTTCAACCAGCAT
ACCCGTGGTGTGTGGGCCAACAACCTGGTCTACAACCTGCACCTGCTGACCGGCAAAATT
TCCCAGCCGGGTTGCGGTCCGTTCTCCCTGACCGGGCAGCCTTCCGCGTGTGGTACTGCG
CGTGAAGTGGGCACCTTTGCCCACCGTCTGCCTGCGGACATGGTGGTGACTAACGAGAAA
CACCGTGATATCTGCGAGAAGAAGTGGAATATCCCGAGCGGCACCATTCCGGCGAAAATC
GGTCTGCACGCGGTGGCACAAGACCGTGCGCTGAAAGACGGCAAGCTGAATGTTTACTGG
ACTATGTGTACCAACAACATGCAGGCCGGGCCGAACATCAATGAAGAGCGTATGCCGGGC
TGGCGCGATCCGCGCAACTTCATCATCGTCTCCGATCCGTATCCGACAGTCAGTGCGCTG
GCCGCCGACTTGATCCTGCCGACCGCAATGTGGGTAGAGAAAGAGGGCGCTTACGGTAAC
GCCGAACGCCGTACTCAGTTCTGGCGTCAGCAGGTACAGGCACCGGGCGAAGCGAAATCG
GATCTCTGGCAGTTAGTCCAGTTCTCCCGCCGCTTCAAAACTGAAGAAGTATGGCCGGAA
GAGCTGCTGGCGAAGAAACCGGAACTGCGTGGCAAAACGCTGTACGAAGTTCTGTATGCC
ACCCCCGAAGTGAGCAAATTCCCGGTATCCGAACTGGCGGAAGATCAGCTGAACGATGAA
TCCCGCGAGCTGGGCTTCTATCTGCAAAAAGGGTTGTTCGAAGAGTACGCATGGTTTGGT
CGCGGTCACGGTCACGATCTCGCGCCGTTCGATGACTACCACAAAGCGCGCGGTCTGCGC
TGGCCGGTGGTGAACGGTAAAGAAACGCAGTGGCGTTACAGCGAAGGTAACGACCCGTAC
GTGAAAGCGGGCGAAGGCTATAAGTTCTACGGTAAACCGGATGGTAAAGCGGTGATCTTC
GCGCTGCCGTTCGAACCGGCGGCGGAAGCACCGGATGAAGAGTACGACCTGTGGCTCTCT
ACCGGACGCGTCCTGGAGCACTGGCACACCGGCAGTATGACTCGCCGTGTGCCGGAACTG
CACCGTGCCTTCCCGGAAGCGGTCCTGTTTATTCACCCGTTGGATGCGAAAGCGCGCGAT
CTGCGCCGTGGCGACAAAGTGAAAGTGGTTTCTCGCCGTGGCGAAGTGATCTCGATTGTC
GAAACGCGCGGTCGTAACCGTCCGCCGCAGGGCCTGGTGTACATGCCGTTCTTCGACGCC
GCACAGCTGGTTAACAAACTAACGCTGGACGCGACCGATCCGCTCTCGAAAGAGACGGAC
TTCAAGAAGTGCGCGGTCAAACTGGAGAAGGTGTAAGCCATTATGTCCCGGTCAGCGAAA
CCTCAAAATGGTCGCCGCCGCTTTCTGCGCGATGTCGTTCGCACAGCAGGCGGGCTGGCT
GCCGTGGGTGTGGCGCTGGGGTTACAACAGCAAACCGCACGCGCATCTGGCGTGCGGTTG
CGCCCGCCCGGAGCCATAAACGAGAACGCCTTTGCCAGTGCCTGTGTGCGTTGCGGTCAG
TGTGTTCAGGCTTGCCCTTACGACACCTTAAAACTGGCGACGCTGGCCTCTGGCCTGTCG
GCGGGCACGCCATATTTTGTCGCACGGGATATTCCTTGCGAAATGTGTGAGGACATTCCG
TGCGCCAAAGTGTGCCCGAGCGGTGCGCTGGATCGTGAGATTGAATCGATCGACGACGCG
CGGATGGGGCTGGCGGTACTGGTGGACCAGGAAAACTGTCTCAACTTTCAGGGGCTGCGC
TGCGATGTTTGTTATCGCGAATGCCCGAAAATTGATGAGGCCATCACCCTGGAGCTGGAG
CGCAACACGCGTACCGGTAAGCACGCCCGCTTTCTGCCGACGGTTCACAGCGACGCCTGT
ACCGGTTGCGGTAAGTGCGAAAAAGTGTGCGTGCTGGAACAACCGGCAATCAAGGTGTTA
CCGCTGTCACTGGCGAAAGGGGAGTTAGGTCACCATTACCGCTTCGGCTGGCTGGAGGGG
AACAATGGCAAATCGTAAACGTGACGCCGGGCGCGAGGCGCTGGAGAAAAAAGGCTGGTG
GCGCAGTCACCGTTGGCTGGTGTTACGTCGCCTTTGTCAGTTCTTCGTGCTGGGGATGTT
TTTGAGCGGTCCGTGGTTTGGTGTGTGGATCTTGCACGGCAACTACAGCAGTAGCCTGTT
ATTCGACACCGTTCCGCTGACCGATCCGCTGATGACGCTGCAAAGTCTTGCCAGCGGTCA
TCTGCCTGCCACGGTGGCGTTGACCGGTGCGGTGATTATCACCGTGCTCTACGCTCTGGC
AGGAAAGCGATTATTTTGCAGCTGGGTCTGCCCGCTGAACCCGATTACCGACTTAGCGAA
CTGGTTACGCAGGCGCTTTGACCTCAATCAGTCTGCGACGATCCCTCGCCACATTCGCTA
CGTACTGTTGGTGGTCATTCTGCTGGGATCGGCCTTAACTGGCACGCTCATCTGGGAATG
GATCAACCCCGTTTCTCTGATGGGGCGTAGCCTGGTAATGGGCTTCGGCAGCGGCGCGCT
GCTTATTGTCGCGCTGTTTTTATTTGATCTACTGGTCGTTGAACACGGCTGGTGCGGGCA
CATTTGTCCGGTTGGCGCGCTGTATGGCGTGCTGGGTAGCAAAGGTGTGATTACCGTTGC
GGCCAGCGATCGGCAGAAATGTAACCGCTGTATGGATTGTTTTCATGTTTGCCCGGAACC
GCATGTGCTACGTGCCCCGGTGCTGGATGAACAAAGCCCGGTGCAGGTCACCAGCCGCGA
TTGCATGACGTGCGGTCGCTGCGTGGATGTCTGTTCTGAGGATGTATTTACAATAACTAC
ACGATGGAGTTCGGGAGCGAAATCATGAAAAGCCATGACCTGAAGAAAGCGCTGTGTCAA
TGGACGGCGATGCTGGCCCTGGTGGTAAGCGGCGCGGTTTGGGCGGCTAATGGCGTCGAT
TTTAGCCAGTCGCCGGAAGTATCCGGGACGCAGGAAGGGGCCATTCGGATGCCAAAAGAG
CAGGATCGGATGCCGCTGAACTATGTGAATCAGCCGCCAATGATCCCGCATAGCGTTGAA
GGTTATCAGGTAACGACCAATACCAACCGCTGCTTGCAGTGCCACGGTGTCGAAAGCTAT
CGCACCACTGGCGCGCCGCGTATCAGTCCTACTCACTTTATGGACAGCGACGGCAAAGTG
GGCGCGGAAGTGGCTCCGCGTCGTTATTTCTGTCTGCAATGTCACGTACCGCAGGCCGAT
ACCGCGCCAATCGTGGGGAATACCTTTACCCCATCAAAAGGTTACGGGAAATAAGAGGTT
ATTATGGGAAATTCTGACCGTAAGCCTGGTCTGATTAAGCGCCTGTGGAAATGGTGGCGT
ACCCCCAGCCGTCTGGCGCTGGGGACGCTGCTGTTGATCGGTTTTGTCGGCGGCATCGTC
TTCTGGGGCGGCTTTAACACCGGAATGGAAAAAGCCAATACCGAGGAGTTCTGCATTAGC
TGCCACGAAATGCGTAACACGGTGTATCAGGAATACATGGATTCCGTGCACTACAACAAC
CGTAGCGGCGTCCGTGCGACCTGTCCGGATTGTCACGTTCCGCACGAGTTTGTGCCGAAG
ATGATACGCAAGCTCAAAGCAAGTAAAGAGCTGTATGGTAAAATTTTTGGCGTTATTGAC
ACGCCGCAGAAATTTGAAGCTCATCGCCTGACGATGGCACAGAATGAGTGGCGGCGCATG
AAGGACAATAACTCGCAGGAGTGCCGTAACTGTCACAACTTCGAGTATATGGATACAACC
GCCCAGAAATCGGTTGCCGCGAAGATGCATGACCAGGCGGTGAAAGATGGGCAAACCTGT
ATTGATTGCCATAAAGGGATAGCGCACAAGCTGCCCGATATGCGTGAAGTCGAGCTAGGT
TTTTAACAGGGTTATTGCGTGGGTATGCTTGAAGCCAGAGAGTTACTTTGTGAGCGGGAT
GAACGAACCTTATTTAGTGGCTTGTCATTTACGCTGAACGCAGGAGAGTGGGTACAAATC
ACCGGTAGCAACGGCGCGGGGAAGACAACGCTTCTCCGTTTGCTGACGGGGTTGTCTCGC
CCTGACGCAGGCGAGGTTCTCTGGCAAGGGCAGCCCTTGCATCAGGTACGCGACAGCTAC
CATCAAAACCTGTTATGGATAGGCCATCAGCCGGGGATCAAAACCCGGCTGACGGCGTTA
GAAAATCTGCACTTTTATCATCGCGATGGCGATACCGCACAATGTCTGGAAGCCCTGGCG
CAGGCCGGGCTTGCCGGATTCGAAGATATTCCGGTAAATCAACTTTCTGCCGGGCAACAA
CGCCGCGTCGCTTTAGCGCGTCTGTGGCTGACCCGTGCCACGTTATGGATCCTCGACGAG
CCTTTTACCGCGATTGACGTCAACGGCGTCGATCGTCTGACCCAGCGTATGGCGCAGCAT
ACGGAGCAGGGGGGGATTGTGATTCTGACTACCCACCAGCCGCTCAACGTTGCTGAAAGT
AAAATTCGCCGCATTTCACTGACGCAAACGAGGGCCGTATGATGTTCTGGCGCATTTTCC
GTCTTGAGCTGCGCGTAGCGTTTCGCCATAGCGCCGAAATCGCCAACCCGCTGTGGTTCT
TCCTGATTGTAATTACCCTTTTTCCGCTCAGTATCGGTCCGGAGCCGCAACTGCTGGCGC
GTATTGCACCGGGCATTATCTGGGTTGCAGCCCTGCTTTCATCCTTGCTGGCGCTGGAAC
GACTGTTCCGTGACGATTTGCAGGACGGCAGTCTTGAACAATTGATGTTGTTGCCGTTAC
CCTTGCCCGCCGTTGTGCTGGCGAAGGTGATGGCGCACTGGATGGTAACCGGTCTGCCGT
TACTCATCCTTTCGCCACTGGTAGCAATGCTACTGGGAATGGATGTTTATGGCTGGCAAG
TGATGGCGCTGACGCTGCTGCTGGGAACGCCTACGCTTGGCTTTCTCGGTGCACCGGGCG
TGGCGCTGACAGTGGGACTTAAACGCGGTGGTGTGCTGCTCAGCATACTGGTGTTACCGC
TGACTATCCCATTACTCATCTTTGCCACCGCCGCGATGGACGCGGCTTCCATGCATTTGC
CCGTTGACGGGTATCTGGCAATTTTAGGCGCGTTGCTGGCAGGCACCGCGACATTAAGTC
CTTTTGCGACGGCGGCAGCGTTACGAATCAGCATTCAATAACGCTGGATTACTGATTTTT
GTTCGAGTCTGGTATCGAAACTATGTGGAAAACACTGCATCAACTGGCGATCCCACCACG
GCTGTATCAAATCTGTGGCTGGTTTATACCGTGGCTGGCAATTGCCAGTGTGGTCGTGCT
TACCGTCGGCTGGATCTGGGGATTCGGCTTTGCTCCGGCTGATTATCAACAGGGAAATAG
CTACCGCATTATTTACCTGCATGTGCCTGCGGCGATCTGGTCGATGGGCATTTATGCATC
AATGGCGGTGGCGGCGTTTATTGGCCTTGTCTGGCAGATGAAAATGGCCAACCTGGCGGT
GGCGGCGATGGCCCCCATTGGTGCCGTGTTTACCTTTATTGCCCTGGTTACCGGCTCTGC
ATGGGGAAAACCGATGTGGGGCACCTGGTGGGTATGGGATGCACGTCTGACTTCTGAACT
GGTGCTGCTGTTTTTGTATGTGGGTGTGATTGCCCTGTGGCACGCCTTCGACGACCGCCG
TCTGGCGGGCCGTGCGGCAGGTATCCTGGTGCTGATTGGCGTGGTGAATCTGCCGATTAT
TCATTACTCCGTTGAGTGGTGGAACACCCTGCATCAGGGATCAACGCGGATGCAGCAAAG
TATCGATCCGGCGATGCGTTCGCCGCTGCGCTGGTCGATTTTTGGCTTCCTGCTCCTGTC
TGCCACGCTGACGCTGATGCGGATGCGGAATTTGATTTTGCTGATGGAAAAACGCCGTCC
GTGGGTGAGTGAACTGATACTGAAAAGAGGCCGTAAATGACCCCTGCATTTGCTTCCTGG
AATGAATTTTTCGCAATGGGCGGTTACGCCTTTTTTGTCTGGCTGGCGGTGGTGATGACC
GTTATTCCGCTGGTGGTTTTGGTCGTGCACTCGGTGATGCAGCATCGCGCAATTCTGCGT
GGTGTGGCGCAACAGCGGGCGCGTGAGGCGCGTTTACGTGCTGCGCAACAGCAGGAGGCT
GCATGAATATTCGCCGTAAAAACCGCTTGTGGATTGCCTGTGCCGTGTTGGCAGGGCTGG
CGCTGACTATCGGTCTGGTGCTATATGCGCTGCGCTCGAATATCGATCTCTTTTATACGC
CGGGGGAAATTCTCTACGGCAAGCGTGAAACTCAGCAGATGCCGGAAGTCGGTCAGCGTC
TGCGCGTTGGCGGGATGGTGATGCCGGGTAGCGTGCAGCGCGATCCCAATTCGCTGAAAG
TGACCTTCACCATTTACGATGCTGAAGGCTCAGTGGATGTCTCTTACGAAGGCATTTTGC
CGGATCTGTTCCGTGAAGGGCAGGGCGTTGTGGTGCAGGGCGAGCTGGAAAAAGGCAATC
ATATCCTCGCAAAAGAAGTGCTGGCGAAACATGATGAAAACTACACGCCGCCAGAAGTTG
AGAAAGCGATGGAAGCTAACCACCGTCGCCCGGCGAGTGTTTATAAGGACCCAGCATCAT
GATGCCGGAAATTGGTAACGGGCTGCTGTGCCTGGCGTTAGGGATTGCGCTGCTGCTGTC
CGTGTATCCGCTATGGGGCGTGGCGCGCGGAGATGCGCGCATGATGGCGTCTTCCCGCTT
GTTTGCCTGGCTGCTGTTTATGTCTGTGGCTGGCGCATTTCTGGTGCTGGTCAATGCTTT
CGTGGTCAACGACTTTACCGTCACCTATGTTGCCAGCAACTCCAATACCCAGCTTCCGGT
GTGGTATCGCGTGGCGGCTACCTGGGGCGCACATGAAGGCTCACTGCTGCTGTGGGTGCT
GCTGATGAGCGGCTGGACCTTTGCGGTGGCGATTTTTAGTCAGCGTATTCCGCTGGATAT
TGTGGCCCGCGTACTGGCGATAATGGGGATGGTCAGCGTCGGCTTTTTGCTGTTCATTCT
CTTTACCTCTAACCCATTCTCACGCACGCTGCCGAACTTCCCGATTGAAGGGCGCGATCT
TAACCCGCTGTTACAGGATCCGGGGCTGATCTTCCATCCGCCTCTGCTTTATATGGGGTA
CGTGGGTTTCTCGGTGGCGTTTGCTTTTGCCATTGCTTCTTTGCTGAGCGGGCGTCTGGA
CAGCACTTATGCGCGTTTTACTCGTCCGTGGACGCTGGCGGCGTGGATTTTCCTGACGCT
CGGCATTGTGCTCGGTTCCGCATGGGCCTATTACGAACTCGGCTGGGGTGGCTGGTGGTT
CTGGGATCCGGTAGAAAACGCCTCGTTTATGCCGTGGCTGGTGGGGACTGCGCTGATGCA
CTCACTGGCGGTCACTGAACAACGCGCCAGCTTCAAAGCGTGGACATTACTGCTGGCAAT
CAGTGCCTTCTCGTTGTGTCTGTTGGGGACTTTCCTCGTGCGTTCCGGCGTGCTGGTATC
GGTACACGCGTTTGCGTCTGATCCGGCGCGCGGTATGTTTATCCTCGCCTTTATGGTGCT
GGTGATTGGCGGTTCGCTGCTGCTGTTTGCCGCGCGTGGACACAAAGTTCGCTCACGCGT
AAACAATGCGCTGTGGTCGCGGGAATCTTTGCTGTTAGCGAACAACGTTTTGCTGGTCGC
CGCGATGCTGGTAGTGTTGCTGGGGACGCTGCTGCCGCTGGTGCACAAGCAACTGGGACT
GGGCAGTATTTCGATTGGCGAACCGTTCTTCAACACCATGTTTACCTGGCTGATGGTGCC
GTTTGCGCTACTGCTTGGTGTCGGTCCTCTGGTGCGCTGGGGGCGCGATCGCCCACGTAA
AATCCGCAATTTATTGATTATCGCCTTCATCTCTACGCTGGTGCTGTCTCTGCTGCTGCC
GTGGCTGTTCGAAAGCAAAGTTGTGGCGATGACGGTGCTCGGCCTGGCAATGGCCTGCTG
GATTGCGGTGCTGGCAATTGCGGAAGCTGTGCTGCGTATTTCACGCGGCACGAAAACCAC
CTTCAGTTATTGGGGGATGGTGGCGGCTCACCTGGGGCTGGCAGTGACAATTGTTGGCAT
TGCCTTTAGTCAGAACTACAGTGTTGAGCGTGATGTGCGCATGAAGTCCGGCGATAGCGT
CGATATTCATGAATATCGCTTCACCTTCCGTGATGTCAAAGAGGTGACTGGCCCGAACTG
GCGTGGCGGTGTGGCGACTATCGGCGTAACGCGAGAGGGTAAACCGGAAACAGTGCTGTA
TGCGGAAAAACGTTATTACAACACTGCCGGGTCGATGATGACCGAAGCGGCGATTGACGG
TGGCATCACGCGTGACCTGTACGCCGCGCTCGGTGAAGAGCTGGAAAACGGCGCGTGGGC
TGTGCGTCTTTACTACAAACCGTTTGTTCGCTGGATTTGGGCGGGCGGGCTGATGATGGC
GTTGGGCGGACTGCTGTGTCTGTTTGATCCTCGCTATCGTAAGCGCGTAAGTCCGCAAAA
AACTGCGCCGGAGGCTGTATGAAGCGCAAAGTATTGTTAATTCCGTTGATTATCTTCCTG
GCGATTGCCGCGGCGCTGCTGTGGCAGCTGGCGCGTAATGCCGAAGGGGATGATCCGACC
AATCTGGAATCGGCGCTCATTGGCAAGCCAGTGCCGAAGTTTCGCCTCGAATCACTGGAC
AATCCGGGGCAGTTTTATCAGGCGGATGTGCTGACTCAGGGCAAACCAGTGCTGCTTAAC
GTCTGGGCGACCTGGTGTCCGACCTGCCGTGCGGAACATCAATATCTGAATCAGCTTTCT
GCGCAGGGCATCCGCGTGGTCGGCATGAACTATAAAGACGATCGCCAGAAGGCAATCAGC
TGGCTGAAAGAGCTGGGCAATCCTTACGCGCTAAGCCTGTTTGATGGCGATGGCATGTTA
GGGCTGGATCTCGGTGTCTATGGCGCGCCAGAAACGTTCCTTATTGACGGCAACGGCATC
ATTCGCTATCGCCATGCGGGCGATCTCAATCCTCGCGTCTGGGAGGAAGAGATCAAGCCG
CTGTGGGAGAAATACAGTAAGGAGGCCGCACAATGAGGTTTTTATTGGGCGTGCTGATGC
TGATGATCTCCGGCTCAGCGCTGGCGACCATCGACGTGTTGCAGTTTAAAGATGAAGCAC
AGGAACAACAGTTCCGTCAGCTCACTGAAGAACTGCGCTGCCCGAAATGCCAGAACAACA
GCATTGCCGATTCCAACTCGATGATTGCCACCGACCTGCGTCAGAAAGTGTATGAACTGA
TGCAGGAAGGTAAAAGTAAAAAAGAGATTGTCGATTATATGGTGGCACGTTACGGCAACT
TCGTCACTTACGATCCGCCGTTAACGCCGCTGACCGTGCTGCTGTGGGTGCTGCCAGTAG
TGGCTATTGGCATTGGCGGTTGGGTCATATACGCCCGCTCGCGGCGTCGGGTACGCGTGG
TGCCGGAAGCGTTTCCTGAACAAAGCGTGCCGGAAGGTAAGCGTGCCGGATATGTTGTTT
ATCTGCCGGGTATTGTGGTGGCGTTAATTGTGGCTGGCGTCAGCTACTACCAGACTGGCA
ATTATCAGCAGGTGAAAATCTGGCAGCAGGCCACGGCACAGGCTCCGGCGTTGCTGGACA
GGGCGCTGGATCCGAAAGCCGATCCGCTCAACGAAGAAGAGATGTCGCGTCTTGCGCTGG
GGATGCGTACTCAACTGCAAAAAAATCCGGGAGATATAGAAGGCTGGATTATGTTGGGCC
GCGTTGGCATGGCGCTGGGTAACGCCAGTATCGCCACCGATGCATACGCCACTGCGTATC
GCCTCGATCCGAAGAATAGCGATGCCGCACTGGGATACGCTGAAGCGTTGACACGTTCAT
CTGATCCCAACGACAACCGCCTCGGCGGCGAACTGCTGCGCCAGTTGGTGAGAAGCGACC
ACAGCAATATCCGTGTGTTAAGCATGTATGCGTTTAATGCCTTTGAGCAGCAGCGATTTG
GCGAAGCCGTTGCCGCGTGGGAGATGATGTTGAAACTCTTACCTGCCAACGATACTCGCC
GTGCGGTGATTGAACGTAGTATCGCGCAGGCGATGCAACATTTGTCGCCGCAGGAGAGTA
AATAAAAAGTGGCCCGATGGTGATGCCATCAGGCCAGACTGATGACAAAGTGCGCTTAGT
TTATGCCGGATGCGGCGTGAACGCCTTATCCGGCCTACAAAATCGTGTGAATTCAATAAA
TTGATCGATCCGCGTAGGCCTGATAAGCGTAGCGCATCAGGCAGTTTTGCGTTTGTCATA
AATCTCAGCCCGATGATAAATCCATCGGGCTATTTTTATTGTGCCCCGCGTTGTTGCAGG
AACAGAATGGTGGCCGCCACGCGTGAGCGGACATTGAGTTTACGCAGCAGATTGCGAATA
TGTACTTTTACTGTCTGCTCGGAAATATTCAATACCGAGGCAATCTGTTTATTTGACAGC
CCCTGTGCCAGCTCGTGCAGAACATCCAGCTCGCGCTCCGTCAGCACGCTGAAGGGATCT
TCTTCCGCGCCAAACATTTCACGTTCACGTAAGTACTGATTGACGCGTTCGCTAAAGACT
TTGCTGCCTTTCGCTCCGGCACGAATCGCTTCCAGCAATACTTCCGGGTCGCTGTCTTTC
AACAGATAACCGTCTGCGCCTGCGTCTATCAGCGCAAAGACATCGCTGGAGGCATCGGAT
ACGGTCAGGATAATAATTTGCGCGGTAACGCCATCCCTGCGCAAGGCATTGAGGGTATCC
AGGCCACTCATACCTTTCATATTGAGATCCAGCAAGATCACGTCGATATCCAGTCTATTC
GCCAGATCGATAGCGCTCGCGCCGTCGCCCGCTTCGGCGACCACTTCAAAGCCAGGATCA
AGCTCCAGTAACTGACGAACACCGCGTCGCATAAGTGGATGATCATCCACAATCATCACC
TGAAAAGGCGTTGCTTCAGGCATAGTAGTCTCCTGAGGTTTTATTAGAATCATTATGTTT
GAGCGTAGCGTTGGTAACGCTACCAGGCGCGTGAATGTTACCCCATTTTATGTATGGACA
TGTAGTGAAAACTACAACCTTGTCCTTCGCTTTGGCATCATTTTCATTATAAAGACGGAA
TTTTGCATCAGCTTCTCATCAAGAAAAACAACTAAAAAATCAATCACAATACTTGTGCAT
TTCTTTAAACAGTTTTTAAAAACTGACTCCGGGTATGGAGCTATGGGTATTTTCTGTACC
CAATGCTTTTAACAGCAATTAATTTCATAGGATGAAAGCTCAATGCATCAATCTGGTTCT
GTTTCTCTTTGTCGTTCCGCAATATCTGTTCTGGTGGCTACAGCGTTATATTCACCCATA
GCATTGGCATCAACAGTTGAGTATGGTGAGACAGTTGATGGTGTTGTCCTGGAAAAAGAT
ATCCAGCTGGTTTATGGGATCGCCAATAATACGAAAATCAATCCTGGCGGAGAACAGCAT
ATTAAAGAATTTGGTGTAAGTAATAATACTGAAATTAACGGAGGGTATCAGTACATTGAA
ATGAATGGCGCCGCAGAATACTCAGTATTAAATGACGGTTATCAAATTGTTCAAATGGGT
GGCGCGGCAAACCAGACTACGCTCAATAATGGTGTGCTACAGGTTTATGGCGCAGCGAAT
GATCCCACGATTAAAGGCGGGCGCTTAATCGTTGAAAAAGATGGGGGGGCCGTCTTTGTC
GCTATCGAAAAGGGAGGACTACTGGAGGTTAAAGAGGGGGGATTTGCATTTGCGGTAGAT
CAGAAAGCAGGCGGTGCTATTAAAACAACCACGCGGGCCATGGAGGTATTCGGAACAAAC
CGTCTCGGTCAGTTCGATATCAAGAATGGTATTGCTAATAATATGTTGTTGGAAAACGGC
GGAAGTTTGCGAGTTGAAGAAAATGACTTCGCTTATAATACCACTGTGGATAGTGGCGGC
TTACTGGAGGTTATGGATGGCGGGACTGCAACTGGCGTTGATAAAAAAGCAGGCGGGAAA
TTAATTGTCTCAACGAATGCGCTGGAAGTGAGTGGTACAAACAGTAAAGGCCAATTTAGT
ATAAAAGATGGTGTGTCAAAAAATTATGAACTGGATGATGGTTCCGGGCTCATTGTTATG
GAGGACACGCAGGCCATTGACACTATCCTTGATGAGCATGCCACTATGCAATCGCTGGGA
AAGGATACTGGTACGAAAGTGCAGGCAAATGCGGTATATGATCTCGGTCGATCAGACCAG
AATGGAAGTATCACGTATTCCTCAAAAGCCATCTCTGAAAATATGGTAATCAACAATGGC
CGCGCTAATGTCTGGGCTGGCACAATGGTTAACGTGTCAGTCAGAGGGAATGATGGCATT
CTTGAGGTCATGAAGCCGCAAATAAATTATGCACCTGCTATGTTGGTGGGTAAGGTAGTG
GTTTCTGAGGGCGCTTCTTTTAGAACGCATGGTGCCGTGGATACCAGCAAAGCGGACGTT
TCGCTCGAAAATAGCGCATGGACCATCATTGCCGATATCACTACGACGAACCAAAACACC
CGCCTCAACTTAGCCAACCTTGTGATGTCTGGCGCAAATGTGATTATGATGGCTGAGACA
GTGACTCGTTCATCTGTGACAGCAAGTGCGGAAAATTTCATAACGTTGACCACCAATACC
CTGTCGGGAAACGGCAATTTTTATATGCGTACCGATATGGCCAATCATCAGAGCGATCAG
CTTAACGTCACTGGCCAGGCAACAGGTGATTTCAAAATATTTGTGACGGACACGGGGGCC
AGCCCGGCAGCAGGTGATAGCCTTACACTGGTAACAACGGGCGGCGGTGATGCTGCATTT
ACGTTGGGCAATGCCGGAGGCGTTGTTGATATCGGTACGTATGAATATACCTTGCTGGAT
AATGGCAACCATAGCTGGAGCCTCGCAGAGAATCGCGCGCAAATTACCCCTTCAACCACT
GATGTGCTGAACATGGCAGCAGCACAACCGCTGGTATTTGATGCAGAACTGGACACCGTG
CGTGAGCGTCTTGGTAGCGTAAAAGGCGTTAATTACGATACGGCGATGTGGAGTTCGGCA
ATTAACACCCGCAACAACGTGACCACTGATGCGGGAGCTGGCTTTGAGCAAACATTGACG
GGGCTGACGCTCGGTATCGATAGCCGTTTCTCCCGTGAAGAAAGCAGCACAATTCGCGGC
TTGTTCTTTGGTTACTCTCATTCTGATATTGGTTTTGATCGCGGCGGCAAAGGTAATGTC
GATAGCTATACCCTGGGGGCTTATGCCGGTTGGGAGCATCAGAACGGTGCCTATGTTGAT
GGAGTGGTGAAAGTTGATCGTTTTGCCAACACCATCCATGGCAAGATGAGTAATGGGGCA
ACAGCGTTTGGCGATTACAGTAGTAACGGCGCGGGTGCTCATGTCGAGAGCGGGTTCCGT
TGGGTTGACGGATTGTGGAGTGTTAGACCCTATCTGGCCTTTACCGGCTTTACCACAGAT
GGTCAGGACTACACGTTATCAAACGGCATGCGCGCTGATGTGGGAAATACCCGGATATTA
CGCGCTGAAGCGGGAACGGCGGTAAGCTATCACATGGACCTGCAAAATGGTACGACGCTG
GAACCCTGGCTGAAAGCCGCCGTACGTCAGGAATACGCCGATTCTAACCAGGTGAAAGTT
AATGACGATGGCAAATTTAATAATGATGTGGCTGGAACCCGTGGCGTTTATCAGGCTGGG
ATAAGGTCATCGTTTACCCCGACGTTAAGCGGTCATTTGTCAGTCAGCTATGGCAATGGC
GCAGGGGTAGAATCGCCGTGGAATACTCAGGCGGGAGTGGTCTGGACGTTCTGATAACAG
AAAATAAACAGGCCGTGATGTGTCGCGGTCTGTTTATCTAATTAATTGCAGATATAAAAA
AAAACCAACCGTAAAGGTTGGTTTTTTCTTGGGATTTTTGGTCGGCACGAGAGGATTTGA
ACCTCCGACCCCCGACACCCCATGACGGTGCGCTACCAGGCTGCGCTACGTGCCGACTCG
TGGCTGCTAATACTACCGTTTTCCACACCGATTGCAAGTAAGATATTTTGCTAACTGATT
TATAATTAATCAGTTAGCGATAAAACGCTTCTCGTCTGTCAGTACTTGCAATAACAAACT
TAACTGTGGTTTTTCATCTTTCACTCTTTCACCACGTAAGTTGTAAGTGCGGTATTTACC
GTTATTGTTCAGCACCAGCGTCTTTTTCGGGGTGGTTATTGCCAGCGTATCGTTATCCGC
TGCGGTTACCCAGTAATGACGGCGTTGAGGGTTGAACAAATCCTGACCTTGCGAATATTC
GCTGGCAGGTGTGCTGACATGTAGCAGGCGTTGCATCAGCGTCGTCATCAGATCGGTATG
ATCAGTCAGCGCATTAATACGCTGCGCCGGCGTGCCTGGCCAGTGAATCACTAATGGCAC
CTGCAGATGACCGTGGGACCAGTCAAAGGTTTCTTCCTCTTCGCTCAGTGGAATACCCCG
ACCGGCAGTGATAATTACAACCGTATTGTCCAGTTTGCCAGAATCACGCAGTGCATTGAG
CACGCGGTTGATCTGGTCATCGACATTGCCTGCCGCCCGGCTATATTTCCGTGCAAATGC
CTGCTGATTGCTGTCGTCAATGTTAGTACCATTGAAAGAAACCCACGAGAACCAGCGGTT
ATCTTCTTGTGCGTAGCGTCCCAGCCAGTTGATCCACTGCGTGGCGGTCTGCTCGTCGGA
TTGGGTGCGTACGCTCGGCATCGAGAAGTCTGACAACAATGCCTGGCGATACAGCGGGCT
GGTAAAGCCATCTGATGAGAATAACCCCAGCTGATAGCCTTGCTGATTAAGCGCAGTAAT
TAATGCCGCAGGCGTACGGGTCGACAGAATGCCGTCCATATAGCTCGGCGAGATGCCATA
GAACAGGCCAAAGATGCCGTTGTCTGTAGTGTTGCCGGAGCTCATATGGCGCGTGAACGA
AATATTTTGCTCAGCAAAACCTGCCAGCGCAGGCATCTGCTTCTCGAAGCGTGAGTAGTT
CAGGCCATCGACAGTAATCAACAGCACATTCTGCCCGGTGCCCATATCGCGATAGCGCAG
TTCGCTTAACGGATACTGAACGGAAACGGCGTCTGGATTACCTTGCTCAATAAGACGGCG
TTGATACTCCTGCGCATCAAGCAGACCATGCTTCTCAAGAAAACGTCGCGCCGTCATCGG
GTACGAAAGCGGCAGGTTAGCGCGCTGCATGGTGATCGGGCGATAGAAGTTGGCATCGGC
CCAGATATACACCACATGCGAGGCGATAAAGGCGATAAATAAGAATGCGGCCAGCGGACG
CGCGAAGCGCCGACGACGCGTCAGGCTGCGCAGCTTTTGCCAGCTCCACGTCGCAAACAC
CAGTTCAAGCAATAAAATAACCGGCACGCTAATGAACATCAGCTGCCAGTCGCGCGCCAT
CTCATTTTCGTCTGGATTAATAACCAGTTGCCAGACGATGGGATTAAGATGGAGATGGAA
ACGAGTAAAGACTTCGCTATCGATCAGTAATAGCGTCATTCCCGCCGTTGCCAGAATGAC
GGACAAAAACCTCATCAGCCTCTGGGAGCCGACGATAAAGGTCAGCGGGAAGAGGATCAG
CAAATAGGTGGCGAAGACCAGGAAGCTGAAATGGCCGATAATGCTTACGTAGGAATAAAT
GCGACCAGCAAGCGTTGTCGGCCAGTCGGCGATAAACAGGTAACGGCTGCCAATGACGAG
CGAAAGCAGAATATTGAACAGTGCAAACCAGTGCCCCCAACTGACCATTTGGGAGACTTT
TTCACGGTAGCGCTGACGATGAGTTACCATAACCTGTTATCTGTTTCCCTTAGTGCGCTT
TTTCTTCGTTGATAGAGGACTGTAAGGCGCGGGCAAAAGAGTTGGCAATTGCCTGGCGTT
GGGCCGGGGCAATGCTGGTGTTGATAAGGTTAGTGACCATGTTGCCTAACACCATCAGGG
AAAGGTCGGTCGGAGCCTTATGTTTTTCCAGTACGTTGAGCAGCTCTGCGAGCAATTGTT
CAACCTGTTCATCACTGTAGCGGGAAATTTGTGGCATAAATCGAAATCAGTTAGTTGATG
AAAGGGCAACATATTACCGTAGCAACGGTTTTTTTTCTGCTTTTTTATGCGTTAAATCAT
TCTCGTTACGCTGCCTTCTGTAAAATGACCGCCATCTTTTATTGCGTCGCTTAACCGGCG
GTGGTTGAATACCGCCCGGTCTTAAAGGAGAGTTTATCATGAGTCTGGATATCAACCAGA
TTGCTCTGCACCAGCTTATCAAGCGTGATGAGCAGAACCTTGAGCTGGTGTTGCGCGATT
CATTGCTGGAACCGACAGAAACCGTCGTTGAGATGGTGGCAGAACTGCATCGGGTCTATA
GCGCCAAAAATAAAGCTTACGGCTTGTTTAGCGAAGAGAGTGAACTGGCGCAGACGCTGC
GCTTACAGCGTCAGGGCGAAGAGGACTTTCTGGCATTTAGCCGCGCGGCAACCGGCCGCC
TGCGTGACGAATTAGCGAAATATCCTTTTGCTGACGGTGGATTCGTGCTGTTTTGCCACT
ACCGTTATCTGGCGGTGGAGTATCTGCTGGTGGCAGTCCTGAGCAACCTGAGCAGTATGC
GCGTTAACGAAAATCTCGACATCAACCCAACCCATTATCTTGATATCAATCATGCGGATA
TTGTTGCGCGTATCGATTTAACCGAATGGGAAACCAATCCAGAGTCGACCCGCTATCTCA
CTTTCCTGAAAGGGAGAGTAGGGCGCAAAGTGGCGGATTTCTTTATGGATTTCCTCGGGG
CCAGCGAAGGATTGAACGCGAAAGCGCAAAACCGTGGGCTGTTGCAAGCGGTTGATGATT
TCACTGCCGAAGCACAACTGGATAAAGCAGAGCGACAGAACGTGCGCCAGCAGGTTTATA
GCTACTGTAATGAGCAGCTGCAGGCAGGCGAAGAGATTGAACTGGAATCGCTGTCGAAAG
AGCTGGCAGGCGTAAGCGAAGTGAGCTTCACGGAGTTTGCGGCTGAAAAAGGCTACGAAC
TGGAAGAGAGCTTCCCGGCAGACCGTAGCACACTGCGTCAGTTGACAAAGTTTGCCGGTA
GCGGCGGTGGCTTGACTATTAACTTTGATGCGATGCTGTTAGGTGAGCGGATTTTCTGGG
ATCCAGCAACCGATACCCTGACCATTAAAGGCACGCCGCCGAATTTGCGCGACCAATTGC
AGCGCCGGACGTCTGGCGGCAATTAATCGGTTTTGTGTTCTGAATGCCAGATGCGGCGTG
AACGCCTTATCTGGCCTGCAAAAAATAGCAATACCGTAATCAGGCATAATCTGCAGATAC
AAAAAACCCCGCCGGAGCGGGGTTTTTTACAACTTATTCAGCAATTAAGCGCGAACGAAG
TCGATGTGCTGCAGCTTCGGTTTGTACGGGTGACGCTGTACGTCCTGAGCTTTAACTTTG
ATTTCTTTACCGTCAACAACGATGGTCAGAACTTCGCTGTAGAATTCAGCTTTAGCTTGC
ATGTTCATGACTTTGTCGTGATCCAGCTCGATAGCCAGCGGTGCTTCTTTGCCACCGTAG
ATGATTGCCGGGAACTTGTTAGCGGCACGCAGGCGGCGGCTCGCACCCTTACCCTGCTCT
TTACGTACTTCTGCGTTGATAGTAAACATTTCTTTCTCTCTTAAATTAATCCTGCTACAG
GCGACCCAGCAACAGGTAAGTGATCTGCTTTGCGTATGCAAAAGCGGGCGAGATTCTATA
CTCAATCGCCTTATACATCAATCAAAACTACCATTAACCGCGTAATTCGTGCGCCCGACG
AAAACGACCTTCGTAATCGAACACTTTTTCACGCACTTGCCAGTACTGACCTTTCATGCG
GGCGACGACAAAATCCGGATGTCGCAGTAAGGCTTGCTGGGCGAGGATATCGGCGGCGGT
GATCCAGCGCAGAGGGATGCCCGGTGTGCGCGTATGCGGGCGGATAAAAAGCTGCTCGAA
AGCAGTTCGCTGGGCGGGCGTTTGCAGACGGAAACGCTCACTCACATCCGCGCCGTCTTC
ATCGTAATAGGTGATTTTCAACCATTCGCCTTTCTCGTCGTGCCCATGCTGCAAAGACAT
GCCGCTACAGCGTAATACCAGCGCATCTTTCAGTCGTAGCGCCGCTTTTAACATATCATC
CGGATCAACCAGTACCGTGTCACATTCGCGGCAGCGGCGAGCGGCAATATCATTTTCTGC
GTTACATTGCGGGCAATTTTTAAAACGGAAACGGAAGTCACACTGTTCGCGATGACCGTC
GTCATCTTCAAACCATCCCTGACAGCGGCGACCAAAGTGTTCAATCAATGTCCCGTCGGC
GGTCGTTTTCCCCCAAAAGGTGTTGGCAAAACCGCAGGCAGGGCAGAAAACCTGTACCGG
AACGTTGTCACTTTTGCCTTTCGGTGTACCAACTTCCGGCGCGTAGAGATCGTGAGGATT
ACCCGCATAATCAAGAATTAAACAATCAGTCTTGCCCGGAGCGAGACGCAGACCGCGCCC
GACAATTTGTTGGTAAAGACTCACTGATTCGGTAGGGCGCAGAATGGCGATAAGATCGAC
GTGCGGGGCGTCAAATCCGGTGGTCAGTACCGCGACGTTGACCAGATAGCGAAAACGCTG
GGCTTTAAAATCTTCAATTAACACATCGCGCTCAGCGCCGGGGGTGTCGCCAGTAATCAG
TGCAGCATCTTCGGCGGGTAGTAATCCCACAATCTCTTTTGCGTGTTCAACGGTGGCGGC
GAAAATCATCACCCCTTTGCGCGTTGCAGCAAACTCCATAATCTGGCTGATGATGTGCGG
GGTAATACGTTGTTGTTTTTTTAGCTCGCGGTTGAGATCGGCTTCGCTGAACAGCCCATT
ACTCTGTGCCTGCAAGCGGCTGAAATCGTATTGCACTACTGGCATATCCAGTCGTTCTGG
CGGCGTCAGATAGCCGTGTTTAATCATATAACGCAGCGGCAGTTCATAAATGCAGTCACG
GAAAAGGGCTTTCTCATCGCCGCGTACCATGCCGTGATAATGGAACTGGTAGATCCAGCC
TTTGCCCAGTCGAAAAGGCGTGGCAGTCAGCCCCAGCAGGCGTAAGTGGGGATTCACTTT
TGTCAGGTGAGTGAGGATTTGCTGATACTGGCTCTCTTCATCGTCACCAATACGGTGACA
TTCATCGACAATCAACAGCGAAAATTCACCCTGAAAGGCATCAAGATTACGGGCGACCGA
CTGCACGCTGCCAAATACCACTTTACCGTGGCTCTCTTTGCGCTTTAGCCCGGCGGCAAA
AATATCGGCTTCCAGCCCCAGCGCCTGATACTTTGCATGGTTTTGCGCCACCAGTTCTTT
AACGTGTGCCAGCACCAGCACGCGACCACGAGCCAGCCGCGCAAGTTCCGCTATCACCAG
GCTTTTACCTGCACCGGTGGGCAGCACGATAACGGCAGGGGTTTTATGACGACGAAAATG
GTTGAGCGTGGCATCCACGGCTTCTTGCTGATATGGGCGGAGTGTAAAAATCATGGTCTC
GCGTAGGTAGATTATTCTGCTAATAGTATGCCACGGTTCTTTTTCCCTTGAGGGAAGTTA
TTAGACCGCTATACTGGGCAGACAACAGTTCAGATTTTCGGGTCAATGCCCGACCTCCGT
TTTTACAGGCAAAATCACACATATGCGACTTGATAAATTTATCGCACAGCAACTCGGCGT
TAGCCGTGCTATTGCCGGGCGTGAAATCCGCGGCAATCGTGTCACCGTCGATGGCGAAAT
CGTCCGTAATGCAGCGTTCAAACTGCTTCCTGAACATGATGTCGCTTACGATGGCAACCC
ACTGGCGCAGCAACACGGTCCACGTTACTTCATGCTCAATAAGCCTCAGGGCTATGTTTG
CTCCACGGACGACCCTGATCACCCAACGGTGCTCTATTTTCTAGATGAACCAGTGGCGTG
GAAACTGCACGCCGCAGGGCGGCTGGATATCGATACCACCGGTCTGGTACTAATGACAGA
TGATGGTCAGTGGTCACACCGCATTACTTCTCCGCGCCATCATTGCGAGAAGACTTATCT
GGTGACGCTGGAATCACCCGTAGCTGACGATACGGCAGAGCAATTTGCTAAAGGCGTGCA
GCTGCATAACGAAAAAGATCTCACTAAGCCGGCGGTGCTGGAAGTGATTACCCCAACGCA
GGTTCGTCTGACCATCAGCGAAGGGCGTTATCATCAGGTGAAACGCATGTTCGCCGCCGT
GGGTAACCATGTGGTTGAGCTGCATCGTGAACGTATTGGCGGCATTACGCTGGATGCTGA
TTTAGCCCCCGGTGAATATCGTCCGTTAACTGAAGAAGAAATTGCCAGCGTCGTCTAACT
TTTCAATGACTTTCAGGAGCCCGTTGTGACCACCCGACAGCATTCGTCGTTTGCTATTGT
TTTTATCCTTGGCCTGCTGGCCATGTTGATGCCGCTGTCGATTGATATGTATCTGCCCGC
GCTACCGGTAATTTCAGCGCAGTTTGGCGTACCGGCGGGCAGTACGCAGATGACCCTCAG
TACTTATATTCTGGGCTTTGCGTTGGGGCAGTTAATCTACGGGCCGATGGCAGACAGCTT
CGGGCGTAAGCCGGTGGTTCTTGGCGGTACGCTGGTGTTTGCCGCCGCCGCGGTGGCGTG
TGCGTTGGCACAAACCATCGATCAGCTGATTGTGATGCGTTTCTTCCACGGGCTGGCGGC
GGCTGCGGCCAGCGTGGTTATCAACGCCTTGATGCGTGATATCTACCCGAAAGAAGAGTT
CTCGCGGATGATGTCGTTTGTCATGCTGGTGACAACCATTGCACCGCTGATGGCACCGAT
AGTTGGCGGCTGGGTGCTGGTGTGGCTGAGCTGGCATTACATCTTCTGGATCCTCGCCGT
GGCGGCGATTCTGGCTTCGGCAATGATCTTCTTTCTGATCAAAGAAACCTTACCACCGGA
GCGTCGCCAGCCTTTTCACATTCGTACCACTATTGGTAACTTTGCGGCGCTGTTCCGTCA
TAAGCGTGTCCTGAGTTATATGCTGGCCAGTGGTTTCAGCTTTGCCGGGATGTTCTCGTT
CTTAAGCGCCGGACCGTTTGTCTACATTGAAATTAACCACGTCGCGCCGGAAAACTTTGG
TTATTACTTTGCACTAAACATTGTTTTCCTGTTCGTGATGACCATCTTTAATAGCCGCTT
CGTCCGCCGTATTGGCGCGTTAAATATGTTCCGCTCGGGGTTGTGGATACAATTTATTAT
GGCAGCGTGGATGGTCATCAGTGCGCTGCTGGGGCTGGGATTTTGGTCGCTGGTGGTTGG
CGTTGCGGCGTTTGTGGGCTGCGTGTCGATGGTGTCATCCAATGCGATGGCGGTCATTCT
TGATGAGTTTCCCCATATGGCGGGAACGGCATCTTCACTGGCAGGAACCTTCCGTTTTGG
CATAGGGGCAATTGTTGGCGCATTGCTTTCTCTTGCGACCTTTAACTCTGCATGGCCGAT
GATTTGGTCAATTGCATTCTGCGCAACCAGCTCCATTCTCTTCTGTCTGTACGCCAGTCG
GCCGAAAAAACGGTGATCTATTGCACAACGAGGAAGCTAAAAGGCTTCCTTTGTTGATGC
ATGTCAACCACAAATCTATCATTCCCCCGATATATGTTTATTTTATGTAAAATCAATTTA
TGTAAAAAGTCACATCATTGTAGTTAAAAAGGTTGAGTTAGATCGCAGAAACGGGTACAT
ATAGCCCCGCAAACGTGACCACGCCCGCAGATATTACTTAAATCAGAGCCATAGAGGCCA
CGCAGGCGAGGCATCAATCTTTACGATCTGTATAAAGACGGATTGTTGATGATGTGTTAA
AATTGATGTAAACAAATTGTGAAGTAAATGTGCTTCCGGGGAAAATAAGTGACTTCATTA
CAACTCTCAATCGTCCATCGACTGCCGCAGAACTATCGCTGGTCTGCTGGTTTCGCAGGT
TCGAAGGTTGAACCGATTCCGCAAAATGGACCGTGCGGTGACAACAGCCTGGTGGCGCTT
AAATTGCTTAGCCCGGATGGTGATAATGCATGGTCGGTGATGTATAAACTAAGCCAGGCG
TTAAGCGACATCGAAGTTCCATGTTCGGTGCTGGAGTGTGAAGGTGAGCCGTGCCTGTTT
GTAAATCGCCAGGACGAGTTTGCTGCAACATGCCGATTGAAAAATTTTGGTGTGGCAATT
GCCGAACCCTTTTCAAACTACAATCCTTTTTAAGCGTCAGCTCAACGCCAGTAGCTGACG
CGTATACTCCTGCTGCGGTGTGGCAAACACGCGCGCGCACGGTCCTTGTTCCACTACTTC
CCCTTGTCGCAGTACGATAACCTGATGACATAACGCGCGGACAACGTGCAAATCATGGCT
GATAAACAAATAGGCCAGTTGATGCTTTTGTTGCAATGATTTCAATAGCGTCAATATTTG
CGCCTGTACCGTTTTGTCGAGTGATGATGTCGGTTCATCAAGTATGATCAGCGAGGGCTT
AAGAATTAATGCCCTGGCAATCGCAATACGTTGTCGCTGACCACCAGAGAACTCCGCCGG
ATAACGGTGGCGTGTTTCAGGATCTAATCCCACTTCATGCATCACGGCTATCACTTGTTG
TTCGCGTTGTGCGGCAGAAAGCGTCGGCTGGTGAACCCGTAAGCCTTCCTCAATAATCTG
CAAAACGTTGAGTCGTGGGTTGAGCGAGGAGTTTGGATCCTGAAATACCACCTGAATGCG
ATGACGAATAGGTAACAGCTGGCGGCGATTTAAATTTTGCAGTGGCTGACCGTCAAAGAC
GATGCTGCCCTGAGAATTAATCAGTCGCAGCAGCGCCAGTCCCGTCGTGCTTTTCCCGGA
ACCGGACTCGCCCACTAAACCCAGTGTTTCACCCGCCCGTAGCGTAAAACTGATGTTTTT
CACCACCACATTATGATCCACAATGCGCTTCAAGATCCCTTTGCGAATGGGGAAGGCAAC
CTGAAGCTGTTCAACATCCAGCAACGTTGAGGCAGGTTCTGGCAACGGCACCGGGTCGCC
TGACGGTTCACTGTTGAGTAGCTTTTGTGTGTAAGGATGAGTGGGTGAGGCAAATAGCGT
AGCGGCGTTATTTTGCTCGACACAGCGACCATTTTGCATTACCGCCACGCGGTGGGCCAG
TTTTCTGACAATGCTGAGGTTATGAGTAATAAACAGCATGCCCATATTCAGCTCGCCTTG
CAGTTCGCGCAACAGCTGTAAAATCTGCGCCTGGACAGAGACGTCCAGTGCGGTGGTTGG
TTCATCGGCAATTAATAATTCCGGTCGCGTTAACAGCGCCATCGCAATCATCACCCGCTG
GCGTTCGCCGCCGGAGAGCTGATGCGGATAATCTGTCAGCCGTTTTGCCGCTTGGCGGAT
ACCGACGCGATCAAGGCAGTTAAGAATTTCGCCACGAGCCGCTTCCCGACGCATCCCGCG
GTGGAGTGAAAGCACTTCATAAAGCTGTTTTTCCAGGGTATGCAATGGATTTAACGACAC
CATCGGCTCCTGAAAAATCATGGCGATCTTATTACCGCGTACACCGCGCAACGTTTGATC
GCTGGCATGAAGCAGCGATTCGCCATGAAAACGAATATCGCCGGAGAGATATTCAACCGG
CGGGGAAGGGAGCAGACGTAAAATTGACAGCGCGGTAACGCTTTTGCCAGAACCTGACTC
ACCCACCAGCGCCAGCGTTTCGCCAGCCTCAATCTGTAGTGAAACATCATTGACTACTGT
ACGTACGGTTTGCTGATGGCGAAAACCCACCGACAAATTTTCAATCGCTAACAGAGTTTG
CGTCATGCTACACCGCCTTATTAGGATCAAATGCGTCGCGGACGGCTTCACCAATAAAGA
TCAGCAAAGACAATAATATCGCCACCGACAAGAAGGCGGTGATCCCAAGCCACGGAGCCT
GAAGGTTATTTTTCCCTTGTAACAGCAGTTCACCGAGTGACGGTGAACCGAGCGGCAGAC
CGAAGCCGAGGAAATCGAGTGAGGTCAGGGTGGTTATCGAACTACATAAAATAAACGGTA
AAAAGGTGAGCGTAGCGACCATGGCATTAGGCAACATATGACGCAGGATGATACTGCGAT
CGCTGACGCCAAGCGCCTGCGCCGCACGAATGTAGTCGAAATTACGGGTACGTAAAAACT
CCGCCCGCACCACGCCGACCAGACTCATCCAGCCAAACAAGACAGTAATTGCCAGCAGCC
ACCAGAAGTTAGGCTGTACGACGCTGGAAAGTAAAATAATCAAAAACAGCGTCGGCATCC
CCGACCATACTTCAATAAAGCGTTGCCCCCAGAGATCGACTTTACCGCCGTAATAGCCTT
GTAGCGCCCCCGCCAGCACGCCCATCACGCTGGAACAGAGAGTCAGCATCAGGCCAAACA
GAACCGAGATCCGCGTGCCATAGAGAATACGTGCCAGCACATCGCCGCCGTTGGCATCCG
TTCCCAGCCAGTTTTGCCGGGAGGGTGGAGAAGGGAAGGGCTTATCGGTAGCAAAGTTGA
TACTGGTAGCACCAAAGCGAATCGGTGCCCACAGTACCCAGCCATTATTTTCCAGCCGTT
GTTTCAGCCACGGGTCCTGATAATCAGCCTGACTTGCCAGCGGGCCGCCAAAATCGCTTT
CGCTGTAGTTTTTCAATAACGGGAAATACCAACTGCCGTCATAACGTACCAGCAACGGTT
TATCGTTGGCGATAAGCTCAGAACACAAACTCAAACCAAACAAGACGAGGAAAATCCATA
ACGACCAGTAGCCGCGACGGTTATGACGAAAACGCGCCCAACGGGCCTGATTGACGGGGC
TGAGTCGCGACATTAACGTCCCTCAAAATCTATACGCGGATCGACCAGCGTATAGCTGAT
ATCACTGACAATATTCAGCAGCAGGCCAATCAGGGTGAAAATATACAAGGTACCAAACAT
TACAGGATAATCGCGCGAGACGGTCGCTTCGTAGCCCAGTAAGCCAAGACCATTGAGTGA
AAACATCACCTCAATCAGCAGCGAGCCGGTAAAAAACATGCTGATAAACGTCGCCGGAAA
ACCAGCAATCACCAGCAGCATGGCGTTGCGGAACACATGTTTCCAGAGAATGTTTTTCTC
ACTTACCCCTTTCGCACGCGCGGTCACCACGTATTGCTTGCGCACTTCATCAAGGAATGA
GTTTTTGGTCAGCATGGTCAGCGCCGCAAAGCCACCAATCACCGTCGCCAGCACCGGCAG
CGTGATATGCCATAGATAATCGGTGATTTTCTGATACCACGGCAGCGAATCAAAGTTAGC
GGAAACCAGGCCGCGTAGAGGGAACAGGTCGAAATAGCTGCCGCCTGCGAAGAAGACAAT
CAGCAGGATGGCAAACAAAAAGGCCGGAATGGCGTAGCCGATGATGATAAATGCGCTACT
CCAGACGTCAAAGCGGCTCCCATTATAAACAGCTTTGCGAATGCCTAACGGAATCGACAC
CAGATAGATAATCAGCGTGCTCCACAATCCGAGGGTGATGGAAACCGGCAGACTGTCTTT
AATCAGCGTCAGCACCGAGGCGCTGCGAAACAGGCTATCGCCAAAATCAAAGCGGATGTA
GTCCCAGAGCATTTTGAAGTAACGTTCGTGGATCGGCTTATCGAAACCGTAGCGATGAGT
GATCTCGGCGATCACTTCTGGATCTAATCCGCGTCCGCCACGGTAATTACTGTCGCTGAT
ATTACCGACGCCCGTTTGCGCATGGCTGGCGCGAACGCCTTCACCGCCTGCGCCGGGTAA
TACTCCGGCATTACCAAACTCAATGGCGGCGATGGCCTGGTCGACCGGACCGCCAGGCGC
AATTTGCACGATGAAAAAGTTGATAGTGATAATCGCCCATAACGTTGGGATCACCAGCAA
CAGACGGCGAATCAGATATGCGCCCATCTACTCTCCCTGTTGTCTGGCTGACGGCAGTTT
GGCCGCTTTATTAACGTCATACCACCAGGTATCGATACCCAGGCTGTAAACAGGGCGTAC
AGCGGGTTGGGAGAATTTATCCCACCAGGCGAGACGGTCTTCCGCCATGTACCACATTGG
CAGCATGTAATAATTCCACGTTAATACGCGATCCAGTGCTCGCCCTAACGGCAGTAATTT
TTCTTTATTTCCCTGCGCGGCAATAATTTGGTTGATCAGCGAGTCGATAACCGGGCTTTG
CACGCCGGGGGCATTATAAGTGGAATTGATATATTCCGATGACCAGGAAATCTGTAAATC
GGAACTGGGCCACGGCATCGCCCGCCATACGCGCGGCATCATGTCATAGTCGCGACTGCG
CATGCGGTTGGTGATTTGCGAGTTATCCACCTTGCGAATGTCCATGTTGATACCCAGCCG
TTGCAGGCTGTGCTGGAACGGCAATACCCACTGACTATTGCTGCTTGCGGGAAGCAATAA
TTCAAAGCTGAGTGGCTGACCCGTTGTGGCATTAACGCGTTGCTGACCCTTCAGCACCCA
GCCCGCTTCGTTGAGAAGTTTGTCGGCTTTTAACAGGTTGTCACGATCGTAGCCATCGCC
TTTAGATACCGGCGGCTGGTAGATTTGTGTGAAGACTTCTGACGGTAGATCTTTTTTCAT
TGGTGCCAGAAGCACCAGCTCCGCGGCGTCGGGGTAATTTCTGGCCGCGTATTCGGTATT
CTGAAAATAACTGTTCGTGCGACTCCAGGCATTGTAAAACAACGCCTTGTTCATCCATTC
AAAGTCAAAGGCGAGAGTGATCGCTTCCCGGACCCGGCGATCGCTGAATACCGGACGTTG
GATATTAAACGCCAGCCAGCGCGTATCCTGGGCTGATTCGTTCTTTTGCTCATCTTTGAT
GATGTATTTTTTATCGAAATTTTTACCGGTATAACGCGTGGCCCAGTTTTTAGCGTCGTT
TTCCATACGCAAATCAAAGGCACCTGCTTTAAACGCTTCAAAGGCGACGTTATCATCGAG
GTAATAATCGTAGCGAATGGTGTCGAAATTCCAGCGTCCACGGTTTACCGGTAAGTTTGC
TGCCCAGTAATCTTTCACGCGGGAATAGACAATATTTTGCCCCATTTTCCAGGACGTAAT
GCGGTACGGACCACTGGCAAGCGGAGGCGTGGCGAGCGGATCGCTAAGTTTGTGATCCTT
CCAGTACTTTTCTGGAAATACCGGCAGCGAAAACAGACTCAACATATCTTCTTTGCCGGG
TTTAGCTAACTCAATGCGCACGGTTAACGGCGCAATGGCTTTGACGGTGGTGCCTTTGTA
GACCAGACGAAATTGCGGCACGCCTTCGGTCATAAATTTTTGAAAAGTAAACTCTACATC
GCGGGCAGTAATGGGCGAACCATCATGAAAACGGGCGCGCGGATTAATAGCGACCTCCAC
CCAGGAATAATCGTCAGCATAGCGTGCACTTTCAGCAATCAGCGGGTAATAACTGCCTGG
TTCGTCATCGGAAGTCGTAAATAGCGTGTCGTACAACTGCTCGGTGCGTGCGCCCGGGTT
GCCGCGCAGTGCATAGCGGTTGAAATTATCGAAGGTGCCGAGGGCTGACAACGTTATCTG
CCCACCTTTTGGCGCGGCGGGGTTCACATAATCAAAATGGTTGAAATTAAACGCGTACCG
GGGTTCGCCCAGCACGGCAAAGGCATAGCTTTCCTTGATAGCCTGCGCCTGCGCACCGAA
GGTGAACAGAGCGATAAACAGCAGCAGTATGCGCACAATCATCTGCAACGGATTTCCTTT
TACTCATCATTAGCCGCAAACCGGCATGCTTTCACTATGAATAATAAGGGACGTAAGCAC
ACCTTACCACTGCGGCCTATACGGTTTCTTCAGCCAGCGAACAAAATCGTCCAGCGGTAA
CGGGCGACTAATCCAGTAGCCTTGCATGAAATTAACGCCGCGTTCGCTTAGCCATCGCGC
TTGTTCCGGCGTTTCGACCCCTTCAGCAACTGTCAGCATATTGAGACGTTTCGCCAGCGT
CAGCACCGCGTCAAGTACGGGTGAAGTGATCGTTTCCGTACCGATGGCGTTGATAAATCC
ACGGTCAATTTTCAGATAATCGAGCGTAAAACGCTCAAGATAGATAAGCGCGCTGTGCCC
GGTGCCGAAGTCATCAATAGCAATTTCTATGCCGACCGAGTGCAGCCAGGCGAAGAGTTG
TGTGGCTTCTTGCTCTTTCAGCATATCGCGCTCGGTAATTTCCAGCACAATCTGGAAATG
GTGTGCGGGTAGGGAGGTGAGCAGTTTCTGGATATCTGCTTTAAAGCTTTCGCTGTGCAG
ATGGTCCGGCGCAATGTTAATGCCAAATTTGACGCCTACCGGCAGCACTTTTTCTAATTC
TGCGGCATCGCGGGCAATTAACTCAAACAGGTGCTGAGTCAGCGGTACAATCATCTTTTG
CGATTCGGCAAAGTTAATGAAGGCATCCGGGGGAATTTCTCCCGCGACAGGATGCCGCCA
GCGTAGCAGTACTTCCAGGCCCGTTACTCGCAAAGCTTGTGTATCCACCACCGGTTGATA
CGCCACGTAAAATTGTTCGCGCTTGATGGCGGTCATGATTTCTCTGCCGGGGCGCATACG
TACGCTCATCAGGTAATAGCAGAGCAGGCCAACGACAGTTCCACTCATGCCGCCCAGTAA
AAATGCGTACCACACATCGTTCCATGTCCAGTCATCTGCATAAAGCCGAACGGTCAGAGG
AATGCCCGCAATTTTAGTTTCACGGACTGGCATGTCGGTTAATTCGTTAACGTTCATCAA
ACGTGAAGAAAAGGTAGATAGCGCAGTATTGCCAATAATGAGGGCGACGCCATCGTAATC
TTCCTGCCGTGAACTATAAAAGAGTGAAGGCGTCAGGTTGAGATTCAGAGCGGCAAAGAC
GCCGCTATTTTTCAGCAAAGGGTTGCGATACCAGATGACGATTGCGGGTTTGTTCGGCAC
CATCGGCGTGCCGGGTAAGATCGCCATATCGACATTTTTATTAATGTCGAGCGCCGGAAT
CAATTCATTGAGTGGAATGTCCATCTCACCGGTCGCAGATGAACAGAATGTTTTTTTATC
TTTCACCAGCACAAACGTTCGGACATTCATGCTAAACGCCGCGCGGGCGGTCAGTTCGGG
GTTAGCTTGCTGGCAGGTATCTAAGGTCAGCGGCTGGAGCCGGTCAGTAGTGGATTTCAG
GTCGGCAAAATAGGTATCGAGATACTTTTGTACGTCGGTAATCAGTGTGTCGTATTTGAC
TTCGTGCTTATGCCAGGCCACTAAAAACTGAAGGCAACTCACCAGTATCGCAATCATTAC
GCCTGCAACAATGCAGGTAAGCAGGAGCTTACGTCCAGAATTGGGAGCGCGTATGAACAT
GATTCCGTTAATTTCCTGAAATTACGACAACATTTAAAAGATAACAATGACCGGACTATA
GCCTGGATCAAGACGCGGAAACATCATTTTCTCTGATGAATGAAAACAAAAAAGCACTGC
CTAAGCAGTGCTTTCAGTTAACTCGTCAGGATAGCCAAGGGATTGCATCCAAACGGTTTA
TTAGCTGCGGCTGAGAACCCGGCGTGCTTCGTTGTAACGCTTCTTCCAGTACGGTTCATT
CATGCTGGAAATAATAACACCACTGCTGGTGGAAGCATGGACAAACTGATTGTTGCCGAT
ATAAATACCGACATGGCGTCCCGTTGAACCGGCACGGAACAGAACTAAATCACCCGTACG
CAAATTACTGCGGGAAACAGATTTACCCATTTCCTGCTGTTCGTAAGTCGAACGCGGAAG
TTCTAAGCCAAATTGCTCACGGAATGTACGCTGTACGAAACCAGAACAATCGATACCTTT
TTTAGTGCTGCCGCCCAGACGATAACGTACGCCTTTCCAGTCAGCATACTGATCCATAAT
TCGCGATTTTACGTCGACATTACGAACCAGGTTTTCAAATTCATCCTGAGAAGCTTGCAG
TGATGATGTTTCACTACCCACTGCACGTGTCTCAGGATGCATATTCTTTGCGGTGTTATT
TGCACTACATGCAGAAAGCAGAACCGCTACTGCAATCGCGGGGATCCCGCGCAAGATATA
TCTCAAAATCGGTTGAGATTTGACCATGTTGTTTGTTTTCCCTTGAAGTCCTTAACGACA
AATATCGTTATAAAAAAATGCCAAGCGACACGAGACTAATTACCTGGGCATGTTGAAACA
ATTCCTTAAGGCCAAATCTGTGGACTAACGCACAAAATTATATGCTGTGAGGATAATCTA
CCGCCGAGGCAAAACGAGTTCGAGATTACCCGATTGGTGCGGTCTTGGCGAGCGGTTTTA
CATGATTTTTTATAAGAAAAAGTGATACAGAAAGTTAATAAGCGGGATTGCTCAATTAAA
GTACGATTGAGTGAAACGCATGCAATCCATTCATTTACTTAGAGAATGATTTTTGCTTTC
GATGCATGAAAGCACGGTGCGCATCATCAGGATTATCCTCACTATAAAAATAAACCTGAT
GATGTTAATTACTGTGAGTTATTTGTTTTGGAAATGTTTGTTTTTTCCCGGTAGTGATTT
GTCAAAAAAGGTGATTAATCGATCACTTAATGGCGTCAGCAACACCCAGGGCAAACCGAT
CAATATCACGGTCATCGAACCGACAATGATGTCAGTAAACCAGTGTGCGCCAATCATTAC
TCTGGGAAACGCAAAAACCACAAAAATAATAAGGGCGATAAGACCTGCAACTTTGCCGAA
ATAGCGCCACATGAATGCCGAAAAAATAAGCAGCATCATGCCGTGATCGCCGGGAAAGCT
ATCTCGTGAGGCATCTTTCGTGGGGACAGAGAGCAGCAGTTCGCTGACGCGGTTAATATC
GGTAAAAGTCAATGTTGGGCTGGCCCGTTTTACAGGAATTAATGCCTGACCCAGCTGGTT
TAATACCACTGCAGTTAATAGCATGACCAGACCAATAATCACGATACGTCGTCTGCCTGG
GGCGTTTTCTTTCAGCCAGAAACTCAGCATCAACATTCCCATCGCCAGCAGTGAACAACC
GTCGAAAGCGCGATTGTTGGTCAATGCAACCAGCCACAAAAAGGCCTTACTTTCGACCAG
TTTCTGATTAAAGAAATAAAAAATATCCGCATCAATCGGCAACCAGAATCCATGATTAAC
GGGAATATACCAGGAAAGAAACAGCGCGAGGCCGACAATATTCAACAACACTATTTGCGG
CAAATTTTTAATCATATTTTCTCTAATTATCTTACTGAAAAACGCAGGCAACCTTACGCG
GTAGTCGCTAAACGAAGCTTCAACAGCGCGCTCTGCAAGGCATTCCAGTCAGCTTCGCTG
CTGGAAATCAGCTCAATACGGCTGTCCGGTGGCGCAACGTTTTGCGTTTCAATGTGCAGG
TCATCGCCCTGACGGTTGATTCGCACCAGCCCTTCGGGAATACGCAGCACGCCTTTGACG
CGTTCCACCGGTGCAAGTCGCGCCCATTCCAGAATGCCAATGGTGTCGAATACCGTATCA
GCGTCGAATATCCAGCCGCAGGCCTGATATCCTTGCCCGCTGTTCAGACTGCGACGCCAG
CGTTGATGCTCTGGCAGGCTTAACGCTGCTAACCCTTTTTTCACGACATGCTGATGAGAA
TGCGCGGCGCTGGCGGGCAACTCGGCTAAATTGCGACGCGGCAAATCCAGAAGATGACCG
TCAACTTTCCCATGCTCACTGTGAATTAATTGCCGATCGCCACCATTTTGCTGCCACCAG
CGCTGTAGCGCTTGCTCGCTTTCAGGTGTCGCACGGTCGGATTTATTGGCGACAATGATG
TCTGCGGCAGCCAGCTGGTCACGGAAGTTTTCATTGCTGGCGCTTTTTTCGTCCAGCAGC
AGGCGTGGATCGAGAATGCACAACGTGGCGCGCAGATCTATCCACGGTTCATAGACTGGT
GCGGTTAACAGATCGAGGATCTGTTTCGGATGGCCCAGCCCGGTCGGCTCTATCAACAAG
CGGTCTGGTTTTCCCTGACGCAGTAAGGTATTCAACCCTACCTGCATGGGTAAACCATTA
ACGCAGCACATGCAGCCGCCGGGGATCTCTTTCAGCAATGCGCCGCTATCGGCGAGCAAA
GCACCATCAATTCCGACTTCCCCAAATTCATTAACCAGTACCGCCCATTTTTCGTTGGGA
TCTTTATGGGCTAACAGATGAAGAATCGACGTAGTTTTCCCGCTGCCGAGAAAACCGGTG
ATGAGGTTGGTCCTGGTCACAACGGCTCCGCAATACTCTGATAAGTTAACTGAGCGTTAA
TCCTGGCTAAAAACGGCAGAAAAGAGAAGGGGAGAGCGGACGAAGGTGAGCTTCATCCGC
TTTAACCGCAGAAATCGTTAAATTTTGAGGGTGTTTAATAGCGCCTGATGCGCGCCGAAT
TGTGCGATTTGTTGCCAGGCTTGTTCGATGGCCTGCACAAAATGCGGGTTATCTGGCAGA
TCATCACCGAAAACTTCACGCAGGGAAAGCAGGGCGGTGACGCGTTGCTCACTGCTGCTG
CCCGCAACAAGATCGCGAATTTTATCGCTAAGCGGATCGCGAACATCAATGGCATTTCCG
GCATCATCAACGCCGCTGACGTAACGCATCCAGCCTGCAACGCCTAATGCCAGCAACGAC
CAGTCCGTTTCGCGCCCCAGATGTATGCGAATACCTGCCAGCATACGTTGCGGTAATTTC
TGGCTGCCATCCATCGCGATTTGCCAGGTCTTATGTTTCAGCGCCGGATTAGCAAAACGT
GCAATTAACTTATCCGCATATTGTGTTAAATCGACATCTTTAATTTGCAGTGTCGGCGCT
TGCTCATCCAGCATTAATGTTCTGGCAGCATGGCGAAATGCGCGATCCTGCATGCAATCA
CTGATATGGGCGAATCCTGAGAGGTAACCCAGATAAGCGAGAAAAGAGTGGCTGCCATTA
AGCATACGCAGTTTCATCTCTTCCCATGGCAGGACATCATTCACCATTTGTACACCTGCG
ACTTCCCAGGCAGGACGCCCAGCGACGAAGTTATCTTCCACCACCCACTGGATAAACGGT
TCGCAGCTAATCGCGCAGGGATCATTTACCCCCAGATGCTGGCTGATTTCTGCCAGTGAT
TCGTCGGTTGCAGCCGGAACAATGCGGTCGACCATGGTTCCCGGAAAACTGACGTGTTCT
TTTATCCACCCGGCGAGTTCTGGCGAACGTTTTTCTGCCATTCCCAGCACCGCGTTTTTC
ACCACATGGCCATTGTCGGGAATATTGTCGCAGGAGAGCACGGTAAACGGTGTAAGGCCG
CGCTCACGGCGGCGTTTCAGTGCTTCGACGAGAATACCTGGCGCGGAGTGAGGTTCTTCA
GGGTTTTGTAGATCGTGAATAATCCGCGGATTGCTGGTGTCGAGTGCACCGGTGGCCGGG
TCAATACAATAGCCTTTTTCGGTAATCGTCAGGGAAACAATTGCCACCTGTGGCTCGCAA
AATTTCTCAATAATTGCCGCTAAGGAATCCAGTTTTGCATTCAGGCATTCGTGAACGGCA
CCGACAATTATCGCCTGATTGCCGTCCGCCCCTTTCTCCAGCACGGTGTATAAATGGTTC
TGTGCGCGGAGCTGGCTCATCAGTTGATCACCGCTGAACAAGCTGATTTCACAGATCCCC
CAGTCACCGCCCTGGGCATTCAGCACACGATCGGTCAGTAACGCCTGATGTGCGCGGTGA
AAGGCTCCAAAGCCAAAATGAACGATACGTGATTGCAACTGCTGGCGATCGTAGCGTGGA
GCGTGTACATGATGCGGGAGCGTAACGGAGGCGATTGTATTCATAGGAGTCACGTCTTAG
TAACGATTAATTAACAATGACAGTGTAAAGTTATATGACAGCAATTGAAATTGGTCTGGA
TTGTTAATGCGATGAAGTGTGAGGGCGATCAATCAACGAGTGAAAATTGAGGGCGTAAGG
TGTTCAGGAAGCACAAAATAGAAGATTGGTATAATAAATTAAAAAAGGGACAGCCTGAGC
TATCCCTTTTCTGCATGCGGCTGAAGTTAGTCAGCACGACCCATATAACGGCGTTCTTCG
ATATGGATACGAATTTTTTCGCCCGGGCTTAAGTATTCTGGTACCTGAATCACCAGACCA
GTGCTCAATGTCGCCGGTTTGTTACGGGCGCTGGCAGATGCCCCTTTGATGCCTGGTGCA
GTTTCAACGATTTCCAGATCAACGGTCTGCGGCAGCTCAAGCGCCAGCAGTTGACCGTCC
CAGGTCAGCACCTGCATGTCCGGCATGCCGCCCTCTGGCATAAACAGCAACTCTTCTTCA
ATCTGATCTTTGGTGAAGGTATACGGGGTATAGTCTTCTTTATCCATAAAGACATATTCG
TTGCCATCGACATAGGAGAAGTCAACGTAACGGCGGGTCAGCGTCACGGTGTCAACGATA
TCATCTCCTTTGAAACGCTCTTCTACTTTCAGCCCGGTACGGACATCAGAAAAACGCATT
TTGTACAGCGTAGCGGCACCGCGGGCAGTGGGCGACTGAATATCAATGTCCTTAACCAGC
AGCAGTTTGCCGTTGTAATTCAGTACCATACCTTTTTTAATTTCGTTCGCTCTTGGCATC
GAAAAATTCCTGTAGTCGAAAATGTCAAAAATATCGCGACAAAGTACTCGCGACGGGCCT
TTCGGGCAAGTGGTATTCGCACTTTTGCTAGTGCAAAAAAGGTGGTACTGTGCGCGCTCA
TCAATCCGGTGGTTAACCTTAAGAGAACAACGTATGGAATGCCGTCCGGGTTGCGGGGCG
TGTTGCACTGCCCCTTCAATTTCCAGCCCTATTCCCGGTATGCCAGATGGCAAGCCCGCC
AATACGCCCTGCATTCAGCTTGATGAACAGCAACGCTGTAAAATTTTCACCTCGCCACTG
CGACCGAAAGTCTGTGCAGGCTTACAAGCCAGCGCTGAAATGTGTGGTAACTCGCGTCAG
CAGGCCATGACCTGGCTTATCGATCTGGAAATGTTGACCGCGCCTTAAACATCTTTAATC
CGCAGTAAGCAAAACAGAGTGGCGATAATCATCACCATCGCAAACCAGAACACAGCGTGA
TAATTCCAGATCTCGGCGACGATGCCCGCCACTGATCCTGCGATGATCCAGCCCACGCGC
GACGTGTTGGTATAGAGCGTGGTGGCTGAACCTGCCTGACCGGGCATCAAATCCTGAAAA
TAGAGCATCCCGATGCCGCCCAGAATGCCAATAAAAATAGCATTTAGCAGCTGCAAGCCC
AACAGAATGATAGGTGAATGCGCCATCAGCATTCCTGCGTAAAAACAGACGCCACCCACG
GCAGCAACGCGCATTAAGAAACGCTTACCCAGACGTTTGGCGAAATATCCGGCAATCAAC
ATCGTCGGGATTTCCAGCCCGGCGGCGGTCCCCATCATCACACCGGCCAGTTTCTCGGGA
AGATGCAGTTCGTTGATAATAAATAGCGGCATGTTGATGATGTACAGACTGTTCGAGCCC
CACATCAATGTACAAATGACAAACAGCAGCAGCGTATCGCGACGGTTACGGCGCGGCGCT
TCAACCGTGCCGGTCGCCAACGGAAGCTCTTTTTGCATCGACGGTAAAAACAGCCACACC
ATCACGCCGCAAACAATAAATGCTACCGCTGCGCTCAGATACATTACCGTAAAGCTGAAA
CCCATCGCTAAGGCATAAGCCAGCGGTGGGCCAATGACCCATGCCAGTGAAACCTGAGCG
CGTAAAAAAGAGCTGAACATCACCGCCTCACGTCCGGTTTTGTCGGCATGTTCACGGGCA
AGGGCAAACATTTGCGGGTTAGCGGTCGAGCCAAAGCTGCTAAGAAAGACGCCAACGAAT
AGCAACACAAAGTAGTTGCGATTCCAGGCAAAAAGGGTGCAGGCCAGCACGCCTAACAGG
CAGCAAAAGACAATCAGCGATTTGCGATCGCCGCGCTTATCAGAGCGCCCGGCGAGAAAC
TGACTCACCAGAATCCCAATGACAGCGCTGCCGGTAAAGAAGAATCCCACCATCGCCGGA
CGGGCATGTACTTCATCGGTAAGAAAAATACTGAGTGTCGGGGTTTGCAGAGCGCCCGCA
ATACCGGTGAGAAAGGCAACGATTAAAAACGCCGTCGAGGTCAGGTCAAACGATTTCGCG
CTGGAGACTGCGGGGGAGTTATGCATGCTGGTCGATCATTGGAAGAGGAAGACGCGGAGT
TTACGCTGCTTGTCAGAAAATAAACAGACAGCGAAATCAAAAGCGCCACGAATAATCAAA
ATGCCATTTCACTGTTGCTGATTGGCTGCTGACGCTGCTGAAATGAAATTGCTGATAACG
GATTTTTCCATCAGCAGTTCGGAAAAATGACAAAAAATTGTGCAGCACATCAAACTTTTG
CTCATAACTTTACGGCTTTCCTTGCGTGCTGAAACAGAAGTATTATGCTTTCTTGAAACG
TTTCAGCGCGATCTTGTCTTTAACCCTAAGCCAGGTTGGCGCTTTTTTTCTCATAGAAGC
TGAATCGTTTCAATTCAGCAAGAGAGGAGAACTATGTTCCAGTTATCCGTACAGGACATC
CATCCGGGCGAAAAGGCCGGAGACAAAGAAGAGGCGATTCGCCAGGTCGCTGCGGCGCTG
GTGCAGGCCGGTAATGTAGCAGAAGGCTACGTCAATGGCATGCTGGCGCGCGAACAGCAA
ACCTCAACGTTCCTCGGCAATGGTATTGCTATTCCACACGGCACTACCGACACCCGCGAT
CAGGTGCTGAAAACCGGCGTTCAGGTATTTCAGTTCCCGGAAGGCGTCACTTGGGGTGAC
GGTCAGGTAGCGTACGTAGCGATCGGTATTGCTGCCAGCTCGGATGAGCATCTGGGCCTG
CTACGCCAGCTGACCCACGTACTGAGCGATGATTCCGTTGCTGAACAACTGAAGTCAGCA
ACAACAGCAGAAGAACTTCGCGCATTGCTGATGGGCGAAAAGCAGAGTGAGCAGCTGAAG
CTCGACAACGAAATGCTGACACTGGATATCGTCGCCAGCGATCTGCTGACTCTTCAGGCG
CTGAACGCTGCGCGTCTGAAAGAAGCGGGGGCAGTTGACGCCACTTTCGTCACCAAAGCC
ATCAATGAACAACCGCTGAACCTCGGACAGGGCATCTGGCTGAGCGATAGCGCCGAAGGC
AATTTGCGTAGCGCGATTGCGGTAAGCCGTGCGGCAAATGCTTTTGATGTGGACGGCGAA
ACGGCAGCCATGCTGGTGAGTGTGGCGATGAATGACGATCAGCCCATTGCGGTTCTTAAG
CGTCTCGCTGATTTGTTGCTCGACAATAAAGCTGACCGCTTGCTGAAAGCGGATGCGGCA
ACGTTGCTGGCGCTGCTGACCAGCGATGATGCGCCGACCGACGACGTGTTAAGCGCGGAG
TTTGTGGTGCGCAATGAACACGGCCTGCATGCTCGTCCAGGTACCATGCTGGTCAACACC
ATTAAACAATTTAACAGTGATATTACCGTGACAAACCTTGATGGTACCGGCAAACCGGCA
AACGGACGTAGTCTGATGAAAGTTGTGGCACTTGGCGTTAAGAAAGGTCATCGCCTACGC
TTTACCGCCCAGGGTGCAGATGCTGAACAGGCGCTGAAAGCAATCGGCGACGCTATCGCT
GCTGGTCTTGGGGAGGGCGCATAATGAGCAGACGTGTTGCTACTATCACCCTTAATCCGG
CTTATGACCTTGTTGGTTTCTGCCCGGAAATTGAACGCGGCGAAGTGAACCTGGTGAAAA
CCACCGGTCTGCATGCGGCGGGTAAAGGCATCAACGTGGCCAAAGTATTAAAAGACCTGG
GAATTGATGTCACCGTTGGCGGCTTCCTCGGTAAAGACAATCAGGATGGTTTTCAGCAAC
TGTTCAGCGAGCTGGGCATTGCCAACCGTTTCCAGGTTGTACAGGGGCGCACCCGAATTA
ACGTTAAGCTGACGGAAAAAGACGGCGAAGTGACTGACTTCAACTTCTCGGGTTTTGAAG
TCACTCCCGCCGACTGGGAACGCTTTGTGACTGATTCTCTGAGCTGGCTCGGTCAGTTCG
ATATGGTCTGTGTCAGCGGAAGCTTACCGTCAGGCGTCAGCCCGGAAGCGTTCACCGACT
GGATGACTCGCCTGCGTAGTCAGTGTCCTTGCATTATCTTTGATAGTAGCCGTGAAGCGT
TAGTAGCAGGTTTGAAAGCGGCACCGTGGCTGGTGAAACCTAACCGCCGCGAGCTGGAAA
TCTGGGCAGGCCGTAAACTGCCTGAAATGAAAGATGTGATTGAAGCTGCGCATGCGCTGC
GTGAACAAGGTATTGCGCATGTCGTTATTTCACTGGGTGCCGAAGGCGCGCTTTGGGTTA
ATGCCTCCGGCGAATGGATCGCCAAACCACCGTCAGTCGATGTCGTAAGCACCGTTGGCG
CAGGGGATTCTATGGTTGGTGGCCTGATTTATGGCTTGCTAATGCGTGAATCCAGTGAAC
ACACACTGCGTCTGGCGACTGCTGTTGCAGCCCTGGCGGTAAGTCAAAGCAATGTGGGTA
TTACCGATCGTCCGCAGTTGGCCGCAATGATGGCGCGCGTCGACTTACAACCTTTTAACT
GACAGCAGGAGAGGCATAATGAAAACGCTGCTGATTATTGACGCTAATCTCGGTCAGGCA
CGCGCCTATATGGCGAAGACCCTGCTGGGCGCGGCGGCGCGAAAAGCAAAACTGGAAATC
ATCGACAATCCGAACGACGCAGAAATGGCGATTGTTCTCGGTGATTCCATCCCGAATGAC
AGCGCGCTGAACGGTAAAAATGTCTGGCTGGGCGATATTTCCCGGGCAGTTGCGCACCCT
GAGCTGTTCCTGAGTGAAGCCAAAGGCCATGCGAAACCTTACACTGCGCCGGTCGCTGCG
ACAGCACCGGTTGCCGCCAGCGGTCCGAAACGCGTAGTTGCGGTGACTGCTTGCCCGACT
GGCGTAGCACACACCTTTATGGCGGCTGAAGCCATTGAAACCGAAGCGAAAAAACGTGGC
TGGTGGGTGAAAGTTGAAACCCGTGGTTCTGTTGGTGCGGGTAATGCAATCACCCCCGAA
GAAGTAGCCGCAGCGGATCTGGTGATTGTGGCGGCAGATATCGAAGTGGATCTGGCGAAA
TTTGCGGGTAAACCGATGTATCGCACCTCTACCGGTCTGGCGCTGAAGAAAACCGCGCAG
GAACTGGATAAAGCGATTGCTGAAGCAACGCCGTATGAACCGGCGGGCAAAGCTCAAACG
GCGACCACTGAAGGTAAGAAAGAGAGTGCAGGCGCTTATCGTCACTTGCTGACGGGCGTC
TCTTACATGCTGCCGATGGTCGTTGCAGGTGGTCTGTGTATCGCGCTTTCTTTTGCTTTT
GGTATCGAAGCGTTTAAAGAGCCGGGTACGTTGGCAGCGGCGCTGATGCAGATTGGTGGT
GGTTCAGCCTTTGCGCTGATGGTGCCGGTACTGGCAGGTTACATTGCCTTCTCCATTGCC
GATCGTCCGGGTCTCACGCCGGGTCTGATTGGCGGTATGCTGGCGGTCAGCACCGGTTCT
GGCTTCATTGGCGGTATTATTGCGGGCTTCCTGGCTGGTTACATTGCGAAGTTAATCAGT
ACGCAACTGAAACTGCCACAGAGTATGGAGGCGCTGAAACCGATCCTGATCATTCCGCTA
ATTTCCAGTCTGGTGGTCGGTCTGGCGATGATCTACCTGATCGGTAAACCGGTTGCTGGC
ATTCTCGAAGGGTTGACTCACTGGCTGCAGACCATGGGGACTGCGAATGCGGTTCTGCTG
GGGGCGATCCTCGGTGGCATGATGTGTACTGACATGGGCGGTCCGGTAAATAAAGCAGCG
TACGCATTCGGTGTGGGTCTGCTGAGTACTCAAACCTATGGCCCGATGGCGGCGATTATG
GCGGCAGGTATGGTGCCACCGCTGGCAATGGGCCTGGCAACAATGGTGGCGCGTCGCAAA
TTCGACAAAGCGCAGCAGGAAGGTGGCAAAGCCGCTCTGGTACTGGGACTGTGCTTTATT
TCGGAAGGTGCAATTCCGTTTGCTGCTCGTGATCCGATGCGTGTGCTGCCGTGCTGTATC
GTGGGTGGGGCGCTGACTGGCGCAATCTCAATGGCGATTGGTGCGAAACTGATGGCACCG
CACGGTGGTCTGTTTGTTCTGCTGATCCCTGGCGCTATTACGCCGGTACTGGGTTACCTG
GTAGCAATTATTGCCGGTACGCTGGTGGCGGGTTTGGCCTATGCCTTCCTGAAACGTCCG
GAAGTGGACGCAGTAGCGAAAGCCGCGTAATAAAAGGTGTGTTACAGGGCAGAAATTTAC
TGCCCTGTATCATTGGATGAGCGCAAAGAGAATGACCGGTTTGTGAATGTAATTTTATGA
ATTTAAATGGTTTTATCTTTCAGTAGAAACCTGAAACGTTCATCAAATACTAAGGTTATT
TCCTCAAGGGCAGATTCTTTTCTGCCCTTTTTTAGTGTTCATGTTCTGTGCATCCCGTCA
CAAATTCCTCGCTTTTGTAATTCAGGCATTTAATCGCATTTTGTGAGCCTGCTCAAATCT
GCCTATTTTGCCTCTCTGGCGGTAATTTACTTTACGTAAAACATGCATACTATGAGCACA
TGTTTAAATATGAACACATGTTTAAACCGTCTTTGCAGTATCTATATTCTTGTGGATTGA
CAGGGTTGGTAATTTTTTACCAGAGGACGTGCTATGCGCGAAAAGGATTATGTCGTAATT
ATAGGTTCGGCGAATATTGATGTCGCCGGATATTCACATGAATCATTAAATTATGCGGAT
TCAAATCCAGGTAAAATAAAATTTACGCCTGGTGGAGTAGGGCGCAATATTGCACAAAAC
CTGGCGTTGCTGGGTAACAAAGCCTGGCTACTGAGCGCCGTAGGCAGTGATTTTTATGGT
CAATCGCTGCTAACGCAAACCAATCAATCAGGCGTTTATGTCGATAAATGCCTGATTGTG
CCGGGAGAAAATACGTCGAGTTATTTATCATTACTCGATAATACCGGTGAAATGCTGGTT
GCTATAAATGACATGAATATTAGCAACGCTATTACAGCTGAATATCTCGCACAGCACCGT
GAATTTATTCAGAGGGCAAAGGTCATTGTCGCGGACTGTAATATCAGTGAAGAGGCACTG
GCATGGATTCTGGATAATGCCGCCAACGTACCTGTATTTGTCGATCCGGTTTCCGCGTGG
AAATGTGTCAAAGTGCACGACCGTCTAAATCAGATCCACACTCTCAAGCCAAACCGCCTT
GAAGCGGAAACCCTGAGTGGGATTGCGCTGTCAGGGCGTGAAGATGTGGCAAAAGTTGCT
GCCTGGTTCCATCAACATGGCCTGAACCGACTGGTATTGAGCATGGGCGGCGATGGCGTT
TATTACAGTGATATCAGCGGTGAAAGTGGCTGGTCTGCCCCGATCAAAACCAATGTTATT
AATGTTACCGGAGCGGGCGATGCCATGATGGCGGGACTTGCTTCGTGTTGGGTAGACGGA
ATGCCGTTTGCCGAATCTGTTCGTTTCGCACAGGGATGTTCGTCAATGGCGCTCTCCTGT
GAATACACCAATAACCCCGATTTATCGATTGCCAACGTTATATCGTTAGTGGAGAACGCA
GAATGTCTGAATTAAAAATTTCCCCTGAATTATTACAAATTTCCCCGGAAGTGCAGGACG
CTTTAAAAAACAAAAAACCGGTTGTGGCGCTGGAATCGACCATTATTTCTCACGGGATGC
CGTTCCCACAAAATGCCCAGACCGCAATTGAAGTTGAAGAAACTATTCGTAAACAGGGCG
CTGTACCTGCCACTATCGCCATTATTGGCGGCGTGATGAAAGTGGGTTTAAGCAAAGAAG
AAATTGAATTACTGGGTCGTGAAGGGCATAACGTGACCAAAGTTAGTCGTCGCGATTTAC
CTTTTGTTGTTGCCGCCGGAAAAAATGGCGCAACCACTGTGGCTTCAACGATGATTATTG
CGGCGCTTGCCGGAATTAAAGTATTTGCCACCGGGGGAATTGGTGGTGTGCATCGCGGGG
CGGAACATACCTTCGATATTTCTGCCGATTTGCAAGAACTGGCAAATACTAATGTCACCG
TTGTTTGTGCCGGGGCGAAATCTATTCTCGATTTAGGATTAACCACTGAGTATTTAGAAA
CCTTCGGTGTGCCGTTAATTGGCTATCAGACTAAAGCGCTGCCTGCGTTTTTCTGCCGTA
CCAGCCCGTTTGACGTCAGCATTCGTCTCGACAGCGCCTGTGAAATTGCCCGTGCAATGG
CGGTGAAATGGCAAAGCGGGCTGAACGGTGGCCTCGTGGTAGCGAACCCGATCCCGGAAC
AGTTTGCGATGCCAGAACACACTATCAATGCGGCGATCGATCAGGCGGTAGCTGAAGCTG
AAGCGCAGGGTGTTATTGGTAAAGAAAGTACGCCATTCCTGCTGGCGCGCGTTGCTGAAC
TGACCGGCGGTGACAGCCTGAAATCCAACATCCAACTGGTGTTCAACAACGCCATTCTGG
CGAGTGAAATTGCCAAAGAATACCAGCGTCTCGCGGGTTAATTTCTGACGGGCAGAAAGC
CGTCGCCCGTACTCATCAAACATACCAAAACCTGGCGCTGACGCCGGGTTTACTGGCATG
AAGGGAAAATCATTATGGACATAATGAGAAGTGTTGTGGGGATGGTGGTGTTACTGGCAA
TAGCATTTCTGTTGTCAGTGAATAAAAAGAGCATCAGTTTGCGTACGGTTGGAGCCGCAC
TACTGCTGCAAATTGCTATTGGTGGCATCATGCTCTATTTTCCGCCGGGAAAGTGGGCTG
TAGAACAGGCGGCATTAGGCGTTCATAAAGTGATGTCTTACAGTGATGCCGGTAGCGCCT
TCATTTTTGGTTCGCTGGTCGGGCCGAAAATGGATGTCCTCTTTGACGGTGCGGGTTTTA
TCTTCGCCTTTCGCGTACTCCCGGCGATTATCTTCGTCACTGCGCTCATTAGTCTGCTGT
ACTACATTGGCGTGATGGGGCTGCTGATTCGCATCCTTGGCAGCATTTTCCAGAAAGCCC
TCAACATCAGCAAAATCGAATCTTTTGTTGCGGTTACCACTATTTTCCTCGGGCAAAATG
AGATCCCGGCGATCGTTAAACCGTTTATCGATCGCATGAATCGCAACGAGTTGTTTACCG
CAATTTGTAGCGGGATGGCGTCCATTGCGGGTTCGATGATGATTGGTTATGCCGGAATGG
GCGTACCAATTGACTACCTGTTGGCGGCATCGCTGATGGCGATCCCCGGCGGTATTTTGT
TTGCACGTATTCTTAGTCCGGCAACCGAGCCTTCGCAGGTCACATTTGAAAATCTGTCGT
TCAGTGAAACGCCGCCAAAAAGCTTTATCGAAGCGGCGGCGAGCGGTGCGATGACCGGGT
TGAAAATCGCCGCCGGTGTGGCGACGGTGGTAATGGCGTTTGTCGCAATTATTGCGCTGA
TTAATGGCATTATCGGCGGAATTGGCGGCTGGTTTGGTTTTACCAATGCTTCTCTGGAAA
GTATTTTTGGCTATGTGCTGGCACCGCTGGCGTGGATCATGGGTGTGGACTGGAGTGATG
CTAACCTTGCGGGTAGCCTGATTGGGCAGAAACTGGCGATTAACGAATTCGTCGCTTACC
TGAGTTTCTCCCCATACCTGCAAACGGGCGGCACGCTGGGAGTGAAAACCATTGCGATTA
TCTCCTTTGCGCTTTGTGGTTTTGCTAACTTTGGTTCTATCGGTGTTGTCGTTGGCGCAT
TTTCGGCTATTTCGCCAAAACGTGCACCGGAAATCGCCCAGCTTGGTTTACGGGCGCTGG
CAGCAGCAACGCTTTCCAACCTGATGAGCGCGACCATTGCCGGGTTCTTTATTGGTTTAG
CTTGAGTTTCATTGCCGGATGTACTCGCTTATTAAGCGTTGCATCCGGCAATCGCGCTAT
TGCAAATAATTTTTACTGCATCATCCCGGAGAATTTATTCTCCGGGTCCATCTCCAGCGC
CAGTCCTGACAACTGCCTTTTGTTTTTAATGAGATACCCTTTCTTGCTTTTAATTAATAA
ACCGTCGTGAATGAATTGCGCGAGAACATATAAAAGATGTCGATAAGAAACGCCTAAATA
CTCTGCCGCTTGCGTATGCTTTTCGTGATAAAGATCACCTTCTTGTGAGAGTAATATAAA
TGCTGCCAGGCGATTCACTAACGGAAATGATTGGTTCTGAGTTAAAGAAACAATATTACG
ATAATTTTTATGACTTAAGGTGACGCAAAGTTTTCGTAAAAATAGGGTGTCGTTTAATAA
CAGCGGACGGTAATGTTTCATAGGGAGCGCAAGGCACCAACACTCTTCAATCGCCTGTAC
TGCACGTGGTTCATGGTCTTTATCGATTAACTCAATCTCGCCAATAAAACAGGGGGCGGC
AAAGAAATCGATCAGCGACACGCGACCATTAGCTAGCGTGGCGTAAAGCCTGGCGCGGCC
TCGCGTCAGGTAAAACAGCCAGGACGGCTGTTGCCCTTCCTGCACAATGTAGTCACGCGC
TAAAAAATGAAACAGCCGCGTATCGGCTGAAACATCCGTTAAAAAGCAATCCTTAAACGC
GGATTCACTCATCAATTGCAGCTTAAGATCATTATTGTGGATTTCTTTCACGATGTTTAT
CCGCTGTGAGATTTCTCATATTTAGCATACGTACGCTGTTGTTAAGATTCAATCATCGGC
CCGGTCGAAATTTCTTTGCTGTAGAAAAAAATAACGCAACTGGAAACAGAGGAAATAAAC
AATGGAAAAGAGAAAAATTATTCTGGATTGTGATCCGGGTCATGATGATGCTATTGCTAT
AATGATGGCGGCGAAACATCCGGCGATTGATTTATTAGGTATCACCATTGTTGCGGGTAA
TCAGACGCTTGATAAAACATTAATTAATGGCCTGAATGTTTGCCAGAAACTGGAGATTAA
TGTTCCGGTTTATGCGGGGATGCCGCAACCCATTATGCGTCAACAAATCGTTGCCGATAA
TATTCACGGTGAAACCGGACTGGATGGCCCGGTATTCGAGCCGCTGACCCGCCAGGCAGA
AAGTACCCACGCGGTGAAATACATCATTGATACCCTGATGGCAAGCGATGGCGATATCAC
TCTGGTGCCGGTTGGTCCGTTGTCAAATATCGCGGTGGCAATGCGTATGCAACCCGCAAT
CCTGCCCAAAATCCGTGAAATTGTGCTAATGGGCGGCGCTTACGGTACAGGCAACTTCAC
GCCATCTGCCGAGTTCAACATCTTTGCTGACCCGGAAGCCGCACGCGTGGTGTTCACCTC
TGGCGTTCCATTAGTGATGATGGGCCTCGATCTCACCAACCAGACCGTTTGCACCCCGGA
CGTGATTGCACGAATGGAAAGGGCAGGCGGCCCTGCCGGAGAGCTGTTCAGCGACATCAT
GAACTTCACTCTCAAAACCCAGTTCGAAAACTACGGCCTGGCTGGCGGCCCGGTGCACGA
CGCCACCTGCATCGGTTATCTGATTAACCCTGATGGCATTAAAACCCAGGAGATGTACGT
CGAAGTGGACGTCAACAGTGGCCCTTGCTATGGGCGTACCGTCTGCGACGAGCTGGGCGT
TCTTGGCAAGCCCGCTAATACCAAAGTCGGCATCACTATTGATACCGACTGGTTCTGGGG
CTTAGTCGAAGAGTGCGTGCGCGGCTACATCAAAACCCATTAAGTGTTGATAACAAGCCG
GGTCAGTATCGCAAGATGCAGGCCCGGCTATTTCTGAGGGGCAGAAAGCCGTCGCCCAAT
ATGACATGAAGAGATAATAACTATGGATGTCATGAGAAGTGTTCTGGGAATGGTGGTATT
GCTGACGATTGCGTTTTTACTGTCAGTAAACAAGAAGAAGATCAGCCTGCGTACCGTTGG
CGCGGCGTTAGTGTTACAGGTTGTGATTGGCGGGATTATGCTTTGGTTACCGCCAGGGCG
TTGGGTCGCTGAAAAAGTCGCTTTTGGCGTGCATAAAGTGATGGCGTACAGCGACGCGGG
TAGCGCATTTATCTTCGGTTCGCTGGTCGGGCCGAAAATGGACACGCTGTTTGATGGCGC
AGGATTTATCTTTGGTTTCAGGGTGTTACCGGCAATTATCTTCGTCACCGCGCTGGTGAG
TATTCTCTATTACATCGGTGTGATGGGGATCTTAATTCGCATTCTCGGCGGTATATTCCA
GAAAGCATTAAATATCAGCAAGATCGAGTCATTCGTCGCGGTCACTACCATTTTCCTCGG
GCAAAACGAAATTCCGGCGATCGTCAAACCCTTTATCGATCGTCTGAATCGCAATGAATT
ATTTACAGCGATTTGTAGTGGCATGGCCTCGATTGCTGGTTCGACAATGATTGGTTACGC
CGCACTGGGCGTACCTGTGGAATATTTGCTGGCGGCATCGTTAATGGCGATCCCCGGCGG
GATCTTGTTTGCCCGCATGCTAAGCCCGGCTACGGAATCTTCACAGGTTTCCTTTAATAA
CCTCTCTTTCACCGAAACACCGCCAAAAAGCATTATTGAAGCGGCAGCGACAGGGGCGAT
GACCGGGCTGAAAATCGCTGCGGGTGTGGCAACAGTGGTGATGGCATTTGTTGCCATCAT
TGCGTTAATTAACGGTATTATCGGCGGCGTAGGCGGCTGGTTTGGTTTTGAACATGCCTC
GCTGGAGTCCATTTTAGGTTACCTGCTGGCCCCACTGGCGTGGGTAATGGGTGTTGACTG
GAGTGATGCGAATCTTGCCGGGAGTTTGATTGGACAGAAACTGGCAATAAATGAATTTGT
CGCTTATCTCAATTTCTCACCCTATCTGCAAACGGCTGACACGCTGGATGCTAAAACCGT
GGCGATTATTTCCTTCGCGTTGTGCGGTTTCGCTAACTTTGGTTCTATCGGGGTGGTGGT
GGGGGCGTTTTCTGCGGTTGCGCCACACCGTGCGCCGGAAATCGCCCAGCTTGGTTTACG
CGCGCTGGCGGCGGCGACACTTTCTAACCTGATGAGTGCCACCATTGCCGGGTTCTTTAT
TGGTTTAGCGTAGTGTGCGATTTATGAGCCGGATTAGATGCGGTCAAGCGTCGAATCCGG
CAACATTGTTACACCATTGGCACTAATGACAGCGCGTTATCGGCAGACAGGGTAGGGTTG
TTTAAGCTGCCGCTGGCGCGTGAAATTGCCGCGCAGGCCATCGCAAAACGGGCGCTGTCA
CGGAAATTGTTTCCCTCCAGAAAGCTATATACCAGGCCCGCCATAAAACCATCGTCAGCA
CCAAAACTGTCTACTGTCGTATGCGCTGGTGCGGTCAGCAAAAATTGTTCACCATCCTTT
TCGCTGCAATAAACTGACTCATCGGGCAAATAAACAAACAGTTGCTGAACACCTTGCTGA
TGCAACGCATTCACTGCGGCATTACGGTCAGCATCGCTGGTGATCGCCTGTCCCCATAAA
ATTTCCAGCTCCGGTAAAGTGGGTTTCAGGGTGTGAATATGCGCCAGCCAGGGTTTGATT
TTGCCCGCTTTGAATTCTGAAACGGTATCGACAAACACCGGGATTTGATCAGCGAGGGTA
AAGACCCATTCCAGCGCCTCGGCTGTCAGGTTGCAATCAGCCAGTACCACGCCCGCATGA
CGAAGTAAATCGCGCGACCCGTTCAGTAGTTGCGGTGTCAACTGTTCCAGCAGATGGGTA
TCGTTAATCGCCAGCACGGTTTGATCGTCTCGATTGGCAATTGCCAGATACGTCGATGTG
CTTTGACCATGTAAACGAACGCAGCCGGAGACATTCACGCCGGCACGGCGCGTTTCTTCC
AGGAGCATTTCGCCATAAAAGTCATCGCCAATCACTGAAAGCAAATGGACGTCGCGGCCT
AACAGCGCCAGATTGTGGGCGATATTGCGTCCAACGCCGCCTGCCGAGCAATGAATTGTA
CCGGGATGAGAAGCCGCTTGCGGGTAACGGATATCCGCCATCCCGCGAATATCCATATTG
ATTGTCCCCACCACTACGCAGTATTCCTGCTCGGTGAGAATGTAACCTTTGCCTTTAATC
CGCCCTTTGCGCATTAAATCCATAATATGCGCCGCAACGCGCGAACGACTGATTTGCAGC
ATGTCCGCAATTTCGTTCTGCTGAATCAGCGGGTTACGCCGTAAAATTGCAAGGATCTCC
TTTTCCCGGTTATTCATCTTCAGGCAACCGCTTTTTCAGTTTGTTGCGCTTTCAGCCAGG
CGATCTCTTCTGCCCAGATATCCGGGTTAATGGTTTCAAGGATCAGCGGAATGCCGTCGA
AACGGTCGTCCTGCATGATCCAGCGGAACGCATCATGACCGATATTGCCTTCACCGAGGC
TATGATGGCGGTCAACGCGGCTGCCAAAGGTGCTTTTCGCATCGTTAAGGTGCATCCCGC
GCAGATACTTAAAGCCGACAATACGGGCAAAATCAGCGAACGTTTTCTCGCATTCGGCTG
GAGTACGCAAATCATACCCGGCAGCGAAAGCATGGCAGGTATCAATGCAGATGCCGACAC
GGGATTTATCTTCCACGCCGTCGATAATCGCCGCGAGATGTTCGAATTTAAACCCTAAGT
TACTGCCCTGACCGGCGGTGTTTTCAATCACCGCGGTCACACCTTGAGTTTTATCCAGCG
CAATGTTGATGGATTCGGCAATACGCGCAAGGCAATCCTCTTCTGAAATCTGCATCAGAT
GGCTGCCAGGGTGGAAGTTGAGCAAAGAAAGCCCCAGTTGTTCGCAACGCTGCATTTCAT
CTATAAAGGCATCGCGCGATTTTTCCAGAGCTTCAGTGACCGGATGTCCGAGGTTAATCA
GATAGCTGTCGTGGGGAAGAATTTGCGCCGATGTGTAGTGATATTTTTCACAGGCGGCTT
TGAATTCATCGATGGTTTGCGTCGTGAGCGGTGCGGCACGCCACTGACGTTGGTTTTTGG
TGAACAAGGCAAACGCGGTTGCGTCGATTTCGGCGGCGCGAATTGCGGCATTTGCCAGAC
CGCCAGCAGCACTAACGTGCGCTCCAATGTATTTCATGCGAGGACTCCTGTTAAACCCGC
TGGAGGAAAACGGTAATGATAGCGGGTTAACAGGAGCAAGATGTAGTGGTTTATGCGATG
ACGCTTTGAATCACATAGTTAATCGCACCACCACCAACAATCAGCCAGGCAAACAGTACC
AGTGCCATCAGCAGAGGTTTCGCCCCAGCTTTTTTCAGCGCGCTGACGTGAGTGGTCAGA
CCCAGCGCCGCCATCGCCATTGCCAGCAGGAAGGTATCCAGCGTTACCAGCATGTTCACC
ACGCTCTGCGGTAACAGGTGGAACGAGTTAAAGATGGCAACTACGATGAACAAGATGGCA
AACCACGGAATAGTGATTTTGCTTTTCTCGCCGCTGTTCGCCCCAGACAGCTGTTTAACA
CGCGCCGCCAGCAGGATGAGGAACGGAGCCAGCATCATCACGCGCAGCATTTTGGAAATA
ACTGCTGCGTTTTCCGCATCCGGGCTGATGGCATGACCTGCCGCCACCACCTGCGCCACT
TCGTGCACAGTAGAACCAATGTAGATACCGAAAGTTTCCGGACTAAACCATTGAGACATC
AGCGGATATATCGCCGGGTAGAGGAAAATCGCGACGGTCCCGAAGATAACAACGGTTGCA
ACAGCCACGGTTACTTTACTGGCTTCCGCTTTCACTACCGGCTCAGTCGCCAGTACCGCG
GCAGCACCACAGATACTGCTACCGGCACCGATCAACCAGCTGGTGTGCTTATCCAGACCA
AACACTTTCTGCCCCAGGAAGCAAGCCAGCAGGAAGGTACTGGACAGCGTCAACACGTCA
ATGATGATCCCACTGATACCGACATCGGCAATTTGCGAGAACGTCAGACGGAAGCCATAA
AGAATGATACCCAGACGTAATAAATATTGCTTGGCAAACAGCACACCACCGTCACAGCTT
TTCCAGATGTGCGGATAGATGGTGTTGCCTAAAACCATCCCCAACAAGATTGCGAGGGTG
AGGGCACTAAACCCGGCACCCGCAACCGCGGGAATGGAACCACCCCACAGGGCGACCCCG
GTGATAACTGCACTCAGGGCTAACCCCGGAATAAAATGCCACAGTGTACGATGTTGTTTC
TGTAAGGTGATATTCGTCATAACCCTCTCCTTTAACCGGGCATAAGGTTACGACTAACTG
GTTTAAAAATAAAATTGATTATATATTTATAATTAATCTTTATAAGTGGTAAGCGACTAT
GCACATCACCCTCCGGCAGTTGGAAGTTTTTGCAGAAGTATTGAAAAGTGGATCAACCAC
CCAGGCGTCGGTGATGCTGGCGTTGTCGCAATCAGCAGTGAGCGCAGCCTTGACCGACCT
GGAAGGGCAGCTTGGCGTTCAACTGTTTGATCGCGTGGGGAAAAGACTGGTTGTTAATGA
ACACGGGCGGCTGCTCTATCCGCGTGCGTTGGCATTGCTTGAACAGGCGGTTGAAATCGA
ACAACTGTTTCGCGAAGACAACGGCGCGATTCGTATCTATGCCAGTAGTACCATCGGTAA
CTACATTCTGCCTGCAGTTATCGCCCGTTATCGCCATGATTATCCGCAGTTGCCGATTGA
ACTTAGCGTTGGGAACAGCCAGGACGTGATGCAAGCGGTGCTGGATTTCCGCGTTGATAT
TGGCTTTATTGAAGGACCGTGCCACAGCACTGAAATCATTTCTGAACCGTGGCTGGAAGA
CGAGCTGGTGGTTTTCGCCGCGCCGACTTCGCCGTTGGCCCGTGGTCCGGTCACCTTAGA
ACAGCTGGCCGCTGCGCCGTGGATCCTGCGTGAACGCGGTTCCGGCACGCGGGAGATTGT
CGATTATCTGTTGCTGTCACATTTACCGAAGTTTGAGATGGCGATGGAATTAGGTAACTC
CGAGGCAATCAAACATGCGGTGCGTCATGGGTTGGGAATTAGTTGCCTGTCGCGACGGGT
GATTGAAGACCAATTGCAGGCAGGCACATTAAGTGAAGTTGCGGTCCCTCTGCCGCGCCT
GATGCGTACGTTGTGGCGTATACATCATCGGCAAAAACACCTTTCCAACGCGCTACGGCG
CTTTCTGGACTATTGCGATCCCGCAAATGTGCCGCGTTAAGTTGCTGTACAAGAACATGC
TGGTGCTGTGTCGATTTCGTGACGCAGCGCCTTCAGCATGCATTCGCCAGAAAAGAGATT
GGCTGCTTTACTTATAATCCCTGGGCGATCATGAAGGTGTCTTATAACCGTGTATTTCTG
CCGGAAGGATTGCCAATCGTCTGCTACAATCGCGCCTCATTTTTTAGATGGATAGCATTT
TTGTATGGTTTCCGAAACTAAAACCACAGAAGCGCCGGGCTTACGCCGTGAATTAAAGGC
GCGTCACCTGACGATGATTGCCATTGGCGGTTCCATCGGTACAGGTCTTTTTGTTGCCTC
TGGCGCAACGATTTCTCAGGCAGGTCCGGGCGGGGCATTGCTCTCGTATATGCTGATTGG
CCTGATGGTTTACTTCCTGATGACCAGTCTCGGTGAACTGGCTGCATATATGCCGGTTTC
CGGTTCGTTTGCCACTTACGGTCAGAACTATGTTGAAGAAGGCTTTGGCTTCGCGCTGGG
CTGGAACTACTGGTACAACTGGGCGGTGACTATCGCCGTTGACCTGGTTGCAGCTCAGCT
GGTCATGAGCTGGTGGTTCCCGGATACACCGGGCTGGATCTGGAGTGCGTTGTTCCTCGG
CGTTATCTTCCTGCTGAACTACATCTCTGTTCGCGGCTTTGGTGAAGCGGAATACTGGTT
CTCACTGATCAAAGTCACGACAGTTATTGTCTTTATCATCGTTGGCGTGCTGATGATTAT
CGGTATCTTCAAAGGCGCGCAGCCTGCGGGCTGGAGCAACTGGACAATCGGCGAAGCGCC
GTTTGCTGGTGGTTTTGCGGCGATGATCGGCGTAGCTATGATTGTCGGCTTCTCTTTCCA
GGGAACCGAGCTGATCGGTATTGCTGCAGGCGAGTCCGAAGATCCGGCGAAAAACATTCC
ACGCGCGGTACGTCAGGTGTTCTGGCGAATCCTGTTGTTCTATGTGTTCGCGATTCTGAT
TATCAGCCTGATTATTCCGTACACCGATCCGAGCCTGCTGCGTAACGATGTTAAAGACAT
CAGCGTTAGTCCGTTCACCCTGGTGTTCCAGCATGCGGGTCTGCTCTCTGCGGCGGCGGT
GATGAACGCAGTTATTCTGACGGCGGTGCTGTCAGCGGGTAACTCCGGTATGTATGCGTC
TACTCGTATGCTGTACACCCTGGCGTGTGACGGTAAAGCGCCGCGCATTTTCGCTAAACT
GTCGCGTGGTGGCGTGCCGCGTAATGCGCTGTATGCGACGACGGTGATTGCCGGTCTGTG
CTTCCTGACCTCCATGTTTGGCAACCAGACGGTATACCTGTGGCTGCTGAATACCTCCGG
GATGACCGGTTTTATCGCCTGGCTGGGGATTGCCATTAGCCACTATCGCTTCCGTCGCGG
TTACGTATTGCAGGGACACGACATTAACGATCTGCCGTACCGTTCAGGTTTCTTCCCATT
GGGGCCGATCTTCGCATTCATTCTGTGTCTGATTATCACTTTGGGCCAGAACTACGAAGC
GTTCCTGAAAGATACCATTGACTGGGGCGGCGTAGCGGCAACGTATATTGGTATTCCGCT
GTTCCTGATTATTTGGTTCGGCTACAAGCTGATTAAAGGAACTCACTTCGTACGCTACAG
CGAAATGAAGTTCCCGCAGAACGATAAGAAATAAGTTTCCTCCCTTCCTTGCTAAGCCCT
CTCAACCGAGAGGGCTTTTTCAATTCCATTTCCCTGACAAATCATGCGGATATAAAATTT
AACATTTGGATTGATAATTGTTATCGTTTGCATTATCGTTACGCCGCAATCAAAAAAGGC
TGACAAATCAGAGGCTGTTCCGGCTTTCTGGGATGATCACCTGCATACAAATAAGTCCAC
CGCGATGCTGCCGTACGCAAGGGGACGTGAAGAAGATGTGAGCGATAACCCATTTTATTT
TCGTAGTTACCTCATGGAGATATGGAATGTTTAGGTTGAACCCTTTCGTACGGGTCGGGC
TGTGTTTGTCCGCTATTTCTTGTGCATGGCCTGTGTTAGCGGTCGATGATGATGGCGAAA
CGATGGTTGTCACTGCATCTTCCGTTGAACAAAACCTTAAAGATGCACCCGCCAGTATCA
GCGTCATTACCCAGGAAGACCTGCAGCGAAAACCGGTACAGAATCTGAAGGATGTCCTCA
AAGAAGTGCCTGGCGTACAACTGACGAACGAAGGGGATAACCGTAAGGGCGTTAGTATTC
GTGGTCTGGACAGCAGCTACACCCTGATTCTTGTCGACGGTAAACGCGTTAACTCCCGCA
ATGCCGTCTTCCGCCACAATGATTTCGATCTGAACTGGATCCCGGTCGATTCCATCGAAC
GTATTGAAGTGGTCCGTGGCCCGATGTCGTCGCTGTACGGTTCCGATGCGCTCGGCGGTG
TAGTGAATATCATCACCAAAAAAATCGGTCAGAAATGGTCGGGTACCGTTACCGTCGATA
CCACCATTCAGGAACATCGCGATCGCGGTGATACCTATAACGGTCAGTTCTTTACCAGTG
GACCATTAATTGATGGTGTGCTGGGAATGAAAGCTTACGGCAGCCTGGCAAAACGTGAAA
AGGATGACCCGCAAAACTCAACGACCACCGATACCGGAGAAACGCCGCGTATTGAAGGAT
TCTCCAGCCGCGACGGCAATGTCGAATTTGCCTGGACACCGAATCAAAATCACGATTTTA
CTGCCGGATACGGTTTCGACCGTCAGGATCGTGATTCCGACTCGCTGGACAAAAACCGCC
TGGAACGCCAGAACTACTCCGTCAGCCATAATGGGCGTTGGGATTACGGCACCAGCGAAC
TGAAATACTACGGTGAGAAAGTCGAGAACAAAAACCCTGGCAACAGCAGCCCGATAACTT
CCGAAAGCAATACGGTCGACGGCAAATACACGTTGCCGCTGACGGCGATTAATCAGTTTC
TCACGGTTGGCGGTGAATGGCGTCACGACAAACTTAGCGATGCGGTGAACCTGACCGGGG
GAACCAGCTCCAAAACGTCTGCCAGCCAGTACGCGCTGTTTGTGGAAGATGAATGGCGGA
TCTTCGAGCCGCTGGCGCTGACGACCGGCGTGCGTATGGACGATCACGAAACCTACGGTG
AACACTGGAGTCCGCGTGCCTACCTGGTTTATAACGCCACCGACACCGTAACGGTGAAAG
GGGGCTGGGCGACGGCATTTAAAGCGCCTTCTCTGTTGCAACTTAGCCCTGACTGGACGA
GCAATTCCTGCCGTGGCGCATGTAAGATTGTAGGTAGCCCGGATCTGAAACCAGAAACCA
GCGAAAGTTGGGAGCTGGGGCTGTACTACATGGGTGAAGAAGGCTGGCTGGAAGGGGTTG
AATCCAGCGTTACCGTTTTCCGTAACGATGTGAAAGATCGCATCAGCATCAGCCGTACGT
CTGACGTCAATGCTGCACCGGGCTACCAAAACTTTGTCGGTTTTGAGACGGGCGCTAACG
GACGGCGCATACCGGTATTTAGCTACTACAACGTTAACAAAGCTCGTATTCAGGGCGTGG
AAACCGAACTGAAAATTCCGTTCAACGATGAATGGAAACTGTCACTCAACTACACCTATA
ACGATGGTCGTGATGTCAGCAACGGCGAAAACAAACCGCTATCCGATCTGCCGTTCCATA
CCGCTAACGGTACGCTGGACTGGAAACCGCTGGCGCTGGAAGACTGGTCATTCTATGTTT
CTGGTCACTATACCGGGCAGAAACGAGCCGACAGCGCGACGGCTAAAACACCGGGCGGTT
ATACCATCTGGAATACCGGCGCGGCCTGGCAGGTGACTAAAGACGTCAAACTGCGCGCAG
GTGTGCTGAACCTTGGCGACAAGGATCTCAGTCGTGACGACTACAGCTATAACGAAGACG
GACGTCGTTACTTTATGGCAGTGGATTATCGCTTCTGATGAGAAGATGCCCGGCGAACCG
GGCGGACTTTCACTTCAGTAAATACTGCGCATGGAAGCGCAGGTGATCCTCTATAAAAGA
GGCGATGAAGTAGTAACTGTGATCATATCCCGGCTGAATACGCAGCGTCATCGGCCATGC
TTTCTGGCGCGCGGCTTCTGCAAGTACTGCAGGTTGCAGTTGGTCAGCAAGAAACTGATC
GTTATCACCCTGATCGATAAGCGTCGGGATCGCATCCTGCGCGTTACTGGCATACATCAG
CGCGCAACTGTCCCATTCCAGCCATGCATTTTTGTCCTCACCTAAATAGCGGCTAAACGC
TTTGATTCCCCACGGGACGCTGCACGGATTCACAATTGGCGCAAAGGCGGAAACGCTGGC
GTATTTGCCCGGGTTTTTCAGCGCCATAATCAGCGCACCGTGACCACCCATTGAATGACC
GCTAATGGCGCAGCGGTCGCTGACATTAAATTGCGACTGAATCAGCGCCGGTAATTCATC
GCGCAGATAATCATACATCCGGTAATGCGTCGCCCACGGCGGTTGCGTGGCGTTAAGATA
AAAGCCCGCGCCCTGGCCTAAATCGTAGCCATCGTCGTTGGCAACCTGTTCACCGCGCGG
GCTGGTGTCTGGCATCACCAGTACAATCCCCAGTTCCGCCGCCACGCGCTGGGCACCCGC
CTTGGTGGTGAAGTTCTCGTCATTGCAGGTTAATCCGGAAAGCCAGTACAGCACTGGTGG
CGGGGTGTGATCACGAGGGGGTGGGAGAAAGATACTGAACGTCATCGGGCAGTTTAAGGT
ACTGGAGTAGTGTCGCCAGCGTTGCTGCCAGCCTTCAAAACAGCGGTGCTCTTCGAGCAT
TTCCATGCGTGGCTCCTTGTTGTGTTGTTTGCAATTTCTTCATCATACCGTTTATTCAAT
GTGCTGTGAGTAACTTTCACTTCCGTATTTGCATAACGATGTTTTAACATCTGCTGATGA
AAGGCAGCGGCAATTACAATAATTATCGCTGTGAATACTGGATTATGTGCGCCGCCTCAC
GCACAATAATCAGGCTGTAAATCAGCTTAATAACTTTGCCCCCACGCAGGGCGGAGGCGT
CACACCTGCAGGAGAAATCATAAATGCCATCACTCAGTAAAGAAGCGGCCCTGGTTCATG
AAGCGTTAGTTGCGCGAGGACTGGAAACACCGCTGCGCCCGCCCGTGCATGAAATGGATA
ACGAAACGCGCAAAAGCCTTATTGCTGGTCATATGACCGAAATCATGCAGCTGCTGAATC
TCGACCTGGCTGATGACAGTTTGATGGAAACGCCGCATCGCATCGCTAAAATGTATGTCG
ATGAAATTTTCTCCGGTCTGGATTACGCCAATTTCCCGAAAATCACCCTCATTGAAAACA
AAATGAAGGTCGATGAAATGGTCACCGTGCGCGATATCACTCTGACCAGTACCTGTGAAC
ACCATTTTGTTACCATCGATGGCAAAGCGACGGTGGCTTATATCCCGAAAGATTCGGTGA
TCGGTCTGTCAAAAATTAACCGTATCGTGCAGTTCTTTGCCCAGCGTCCGCAGGTGCAGG
AACGTCTGACGCAGCAAATTCTCATTGCGCTACAAACGCTGTTGGGCACCAATAACGTGG
CTGTTTCTATCGACGCGGTGCATTACTGCGTGAAGGCGCGTGGCATCCGCGATGCAACCA
GTGCCACGACAACGACCTCTCTTGGTGGATTGTTCAAATCCAGTCAGAATACGCGCCACG
AGTTTCTGCGCGCTGTGCGTCATCACAACTGATTAAAAGGCAGGAACCATGGAGCGCAAC
GTCACGCTCGATTTTGTTCGCGGCGTCGCCATTCTGGGGATCCTGCTATTAAACATCAGC
GCCTTTGGGCTACCAAAGGCGGCTTATCTTAATCCCGCCTGGTACGGCGCTATTACGCCG
CAGGATGCATGGACCTGGGCATTTCTCGATCTCATCGGCCAGGTGAAATTCCTCACGCTT
TTTGCGCTGCTGTTTGGTGCTGGCCTGCAAATGTTGCTGCCCCGTGGCAGACGCTGGATC
CAGTCGCGGTTAACGCTGTTAGTCTTGCTGGGCTTTATTCACGGTTTATTGTTCTGGGAC
GGCGATATTCTGCTGGCTTACGGGCTGGTGGGCTTAATCTGCTGGCGGCTGGTGCGCGAT
GCGCCATCGGTAAAAAGCCTGTTTAATACAGGCGTCATGCTTTATCTGGTGGGGCTTGGC
GTTTTGCTGTTATTGGGGTTGATTTCCGATACCCAGACCAGCCGCGCCTGGACGCCGGAT
GCATCGGCTATTTTGTATGAAAAATACTGGAAGCTTCACGGCGGCGTTGAAGCGATCAGT
AATCGTGCCGATGGTGTTGGGAACAGTTTACTGGCACTGGGCGCACAGTATGGCTGGCAA
CTGGCTGGGATGATGCTCATTGGTGCGGCGCTGATGCGCAGCGGCTGGCTGAAAGGGCAG
TTCAGCTTACGTCACTATCGTCGTACTGGTTTTGTGCTGGTGGCGATTGGGGTGATCATT
AACCTTCCTGCCATCGCCCTGCAATGGCGGCTGGACTGGGCATATCGCTGGTGCGCCTTC
TTACTTCAGATGCCGCGGGAACTGAGTGCACCGTTTCAGGCGATTGGCTATGCGTCGCTG
TTTTATGGTTTCTGGCCGCAATTGAGCCGCTTTAAGCTGGTGCTTGCGATCGCCTGCGTC
GGACGGATGGCGCTGACCAACTATCTATTGCAAACGCTGATTTGTACCACGCTTTTTTAT
CACCTCGGTTTGTTTATGCAGTTTGACCGTCTGGGATTGCTGGCGTTTGTTATTCCGGTA
TGGCTGGCGAATATCCTCTTCTCTGTTATCTGGCTGCGTTACTTCCGCCAGGGGCCGGTG
GAATGGCTCTGGCGTCAGTTAACTTTGCGTGCTGCCGGACCGGCAATATCTAAAACATCA
AGATAACGATCTGGATCACATTCGTTAACAAAACGGCTGTAACCGTTTCCATTGCTGTGA
CTCGATTCACGAAGTCCTGTATTCAGTGCTGACAAAATAGCCGCCAGCAAGCAGTCATTT
ACTGCAATCTCATAACAGGTAGTGAATATGATCACCATTCGTGATGTAGCGCGTCAGGCT
GGCGTCTCTGTGGCAACGGTTTCCCGGGTGCTCAATAACAGCACGCTGGTCAGTGCCGAC
ACGCGTGAAGCAGTAATGAAAGCCGTGAGTGAGCTGGATTATCGGCCAAACGCCAATGCC
CAGGCGCTGGCAACTCAGGTTAGCGACACCATTGGCGTGGTGGTGATGGACGTTTCTGAT
GCGTTTTTCGGCGCGCTGGTAAAAGCGGTGGATCTGGTCGCCCAGCAGCATCAGAAATAC
GTGCTAATCGGCAATAGCTATCATGAAGCGGAAAAAGAACGTCACGCCATTGAGGTGTTA
ATTCGCCAGCGTTGTAATGCATTGATTGTTCACTCAAAAGCATTGAGTGACGATGAACTG
GCGCAATTTATGGATAACATTCCCGGTATGGTGTTAATCAACCGCGTTGTGCCGGGGTAC
GCCCATCGTTGCGTTTGCCTGGATAATCTCAGCGGTGCCCGAATGGCGACGCGCATGTTG
CTGAATAACGGTCATCAACGTATTGGTTATCTTTCTTCCAGCCACGGCATTGAAGATGAC
GCCATGCGTAAAGCAGGCTGGATGAGTGCGTTGAAAGAGCAGGATATTATTCCGCCGGAA
AGCTGGATTGGCACTGGTACGCCGGACATGCCGGGCGGTGAGGCGGCGATGGTTGAACTG
CTGGGGCGCAATCTACAACTTACCGCTGTATTTGCTTATAACGACAATATGGCTGCTGGC
GCACTGACAGCATTAAAAGATAATGGTATTGCGATTCCGTTACATCTCTCAATCATCGGT
TTCGATGATATTCCCATCGCCCGTTACACCGACCCGCAATTAACGACCGTGCGTTATCCC
ATTGCTTCAATGGCTAAATTAGCCACCGAACTGGCCTTGCAGGGGGCAGCAGGCAATATT
GATCCTCGTGCCAGCCACTGTTTTATGCCGACGTTAGTGCGTCGTCATTCTGTCGCAACG
CGCCAGAATGCGGCGGCGATCACTAACTCAACAAATCAGGCGATGTAACCGCTTTCAATC
TGTGAGTGATTTCACAGTATCTTAACAATGTGATAGCTATGATTGCACCGTTTTAACGTT
GTAACCCGTATGTAACAGTGAATAATCACTTTCACCGAGGTAATAGCGTCATAACAACAA
TTAAAGCCGTTTTCTGGAGCGTTACCGGGCACTGATGAATCCCCTAATGATTTTGGTAAA
AATCATTAAGTTAAGGTGGATACACATCTTGTCATATGATCAAATGGTTTCGCGAAAAAT
CAACTTGAGACTTGGTATTCATTTTTCGTCTTGCGACGTTAAGAATCCGTATCTTCGAGT
GCCCACACAGATTGTCTGATAAATTGTTAAAGAGCAGTTGCGACGCGGCTTTCAGCTCAC
TGTCGCGAGGTGGCGTATATTACGCTTTCCTCTTTCAGAGTCAACCCTGAATTTCAGGAT
TTTTCTCTTCAACCGAACAGGCTGTTTGTGTGAAGTGATTCACATCCGCCGTGTCGATGG
AGGCGCATTATAGGGAGTCGGCTCAGGAAGACAAGCGGAAAAATGCATTTTTATTTCAAC
CGCTCATCTTTTAATCATTACGCCGGTTTTTGCTGCTTTTTTATCGCTTGCGGCAGGTCT
GCCAGGCTATTTAACACCCAATCTGCCGCGTTTTCTGCTTCAGGTGTAATAGGTTTACCC
GTACGCACCAGCACTTTTGTTCCCACGTTCGCCGCAGCCGCTGCCTGCATATCTTCTAAT
TTATCGCCCACCATATAAGAGGCGGCCATATCAATATGCAAATAATCGCGTGCTGACAAA
AGCATCCCCGGATGTGGTTTGCGGCAATCGCAGACCTGGCGAAACTCTTCAACACTACCC
TGCGGATGATGCGGGCAATAATAGATACCATCCAGATCGACATCGCGGTCCGCCAGCGAC
CAGTCCATCCACTCGGTCAGCGTTTCAAACTGTGCTTCAGTAAATTTACCGCGAGCAATG
CCAGACTGGTTGGTTACTATCACCAGCGCAAAGCCCATTTTTTTCAGCTCGCGCATGGCG
TCAATAACACCGTCGATAAATTCAAAGTTGTCGATCTCATGGACATAGCCGTGATCGACA
TTAATGGTGCCATCACGGTCAAGAAAAATTGCGGGTACGCTCTTCGCCACCTTTTATAGC
TCCTTAATAAGGCATGTGGCGCTAGTATCGCATGTTTCGACCTGCAAGAAAGTGCTCTTC
GCATAAACCTGATTGATTTAGACGTCTGGATGCCTTAACATCCATTTCATTGACGGCGTT
GCCCGTTTCAGGCATTCGAAATGCCACGACTAACTTAATGACGATAATAAATATTCAATG
ATAAAACTTTCGAATATCACCAAAGTGTTCCACCAGGGCACCCGCACCATCCAGGCGTTG
AACAACGTCAGCCTGCATGTGCCAACTGGACAAATTTATGGCGTTATCGGGGCCTCAGGC
GCGGGTAAGAGTACGCTTATACGTTGTGTAAACCTGCTGGAGCGCCCAACCGAGGGTAGC
GTGCTGGTCGATGGACAGGAACTGACCACGCTGTCAGAATCCGAGTTGACCAAAGCTCGC
CGCCAGATTGGTATGATTTTCCAGCATTTTAACCTGCTCTCTTCGCGTACTGTTTTTGGC
AACGTGGCTCTGCCGCTGGAGCTGGACAACACACCGAAAGACGAGATCAAACGTCGCGTG
ACGGAATTGCTGTCATTGGTTGGTCTTGGCGATAAGCATGATAGCTACCCGTCGAATCTT
TCCGGTGGGCAGAAACAACGTGTGGCGATTGCCCGTGCATTAGCCAGCAATCCCAAAGTA
TTGCTGTGTGATGAAGCCACCAGCGCGCTGGACCCGGCAACGACACGTTCTATTCTCGAA
CTGCTGAAAGACATCAACCGCCGTCTGGGTTTGACGATTCTGTTGATCACTCACGAAATG
GACGTTGTGAAGCGCATTTGTGATTGCGTGGCGGTCATCAGCAATGGCGAACTGATCGAG
CAGGACACGGTAAGTGAAGTGTTCTCACATCCGAAAACGCCGCTGGCGCAGAAGTTTATT
CAGTCAACCCTGCATCTGGATATCCCGGAAGATTACCAGGAACGTCTGCAAGCGGAGCCA
TTCACTGACTGCGTGCCGATGCTGCGTCTGGAGTTTACCGGTCAATCGGTCGATGCCCCA
CTGCTTTCTGAAACCGCGCGTCGTTTTAACGTCAACAACAACATTATTAGCGCGCAGATG
GATTACGCCGGTGGCGTTAAGTTCGGCATCATGCTGACTGAAATGCATGGCACACAACAA
GATACGCAAGCCGCCATTGCCTGGCTGCAGGAACACCATGTAAAAGTAGAGGTACTGGGT
TATGTCTGAGCCGATGATGTGGCTGCTGGTTCGTGGCGTATGGGAAACGCTGGCAATGAC
CTTCGTATCCGGATTTTTTGGGTTTGTGATTGGTCTGCCGGTTGGCGTCCTGCTTTATGT
CACGCGTCCGGGGCAAATTATTGCTAACGCGAAGCTGTATCGTACCGTTTCTGCGATTGT
GAACATTTTCCGTTCCATCCCGTTCATTATCTTGCTGGTATGGATGATTCCGTTTACCCG
CGTTATTGTCGGTACATCGATTGGTTTGCAGGCAGCGATTGTTCCGTTAACCGTTGGCGC
AGCGCCGTTTATTGCCCGTATGGTCGAGAACGCTCTTCTGGAGATCCCAACCGGGTTAAT
TGAAGCTTCCCGCGCAATGGGTGCCACTCCAATGCAGATCGTCCGTAAGGTGCTGTTACC
GGAAGCGTTGCCGGGTCTGGTGAATGCGGCAACTATCACCCTGATTACCCTGGTCGGTTA
TTCCGCGATGGGTGGTGCAGTCGGTGCCGGTGGTTTAGGTCAGATTGGCTATCAGTATGG
CTACATCGGCTACAACGCGACGGTTATGAATACGGTACTGGTATTGCTGGTCATTCTGGT
TTATTTAATTCAGTTCGCAGGCGACCGCATCGTCCGGGCTGTCACTCGCAAGTAACGTTC
AACACAACATAAATAATTGAAGAAGGAATAAGGTATGGCGTTCAAATTCAAAACCTTTGC
GGCAGTGGGAGCCCTGATCGGATCACTGGCACTGGTAGGCTGCGGTCAGGATGAAAAAGA
TCCAAACCACATTAAAGTCGGCGTGATTGTTGGTGCCGAACAGCAGGTTGCAGAAGTCGC
GCAGAAAGTTGCGAAAGACAAATATGGCCTGGACGTTGAGCTGGTAACCTTCAACGACTA
TGTTCTGCCAAACGAAGCATTGAGCAAAGGCGATATCGACGCCAACGCCTTCCAGCATAA
ACCGTACCTTGATCAGCAACTGAAAGATCGTGGCTACAAACTGGTCGCAGTAGGCAACAC
TTTTGTTTATCCGATTGCTGGTTACTCCAAGAAAATCAAATCACTGGATGAACTGCAGGA
TGGTTCGCAGGTTGCCGTGCCAAACGACCCAACTAACCTTGGTCGTTCACTGCTGCTGCT
GCAAAAAGTGGGCTTGATCAAACTGAAAGATGGCGTTGGCCTGCTGCCGACCGTACTTGA
TGTTGTTGAGAACCCAAAAAATCTGAAAATTGTTGAGCTGGAAGCACCGCAGCTGCCTCG
CTCTCTGGACGACGCGCAAATCGCTCTGGCAGTTATCAATACCACCTATGCCAGCCAGAT
TGGCCTGACTCCAGCGAAAGACGGTATCTTTGTCGAAGATAAAGACTCCCCGTACGTAAA
CCTGATCGTGACGCGTGAAGATAACAAAGACGCCGAGAACGTGAAGAAATTCGTCCAGGC
TTATCAGTCTGACGAAGTTTACGAAGCAGCAAACAAAGTGTTTAACGGCGGCGCTGTTAA
AGGCTGGTAATTTTTAGGCTGTTTCCACAATTTGTAATATCATTCAGGACGGGCGCTTGC
CCGTCTTGTCATTTTTACAAGCTCCTGATTCAATATTGACGTTTTGATCATACATTGAGG
AAATACTATGCGTGCTTTACCGATCTGTTTAGTAGCACTCATGCTAAGCGGCTGTTCCAT
GTTAAGCAGATCCCCTGTCGAACCCGTTCAAAGCACTGCACCCCAGCCGAAAGCGGAGCC
TGCAAAACCGAAAGCGCCGCGCGCCACGCCGGTCCGAATTTATACCAATGCAGAAGAATT
AGTCGGCAAACCGTTCCGCGATCTCGGTGAAGTCAGTGGCGACTCTTGCCAGGCCTCTAA
TCAGGACTCTCCGCCGAGCATTCCAACCGCACGTAAGCGGATGCAAATCAACGCCTCTAA
AATGAAAGCCAATGCTGTATTACTGCATAGCTGCGAAGTCACCAGCGGTACGCCGGGCTG
CTATCGTCAGGCTGTATGTATCGGCTCTGCGCTTAACATTACGGCGAAATGAGCAGTTTC
CAGTTCGAGCAAATAGGCGTTATTCGCTCGCCCTATAAAGAAAAATTCGCCGTTCCGCGC
CAGCCTGGTCTGGTAAAAAGCGCCAACGGCGAACTGCATCTCATTGCTCCCTACAACCAG
GCCGACGCCGTTCGCGGCCTGGAAGCATTCAGCCATTTATGGATCCTTTTCGTCTTTCAT
CAAACGATGGAAGGCGGCTGGCGTCCGACTGTGCGTCCGCCTCGTCTTGGCGGTAATGCC
AGAATGGGTGTTTTCGCTACGCGTTCCACTTTTCGCCCTAACCCAATTGGTATGTCGTTG
GTAGAGCTGAAAGAGGTTGTTTGCCATAAAGACAGCGTGATTCTGAAGCTCGGCAGTATG
GATCTGGTCGATGGTACGCCGGTAGTGGATATCAAACCGTATCTCCCCTTTGCTGAATCG
CTTCCCGATGCCTGTGCCAGCTATGCGCAAAGTGCGCCAGCGGCAGAGATGACGGTGAGT
TTTACCGCAGAGGTCGAAAAGCAGCTTTTGACGCTGGAGAAGCGTTATCCGCAGTTAACC
CTGTTTATCCGCGAAGTACTGGCGCAAGACCCACGCCCGGCCTATCGTAAAGGTGAGGAA
ACGGGTAAAACCTATGCCGTCTGGCTACATGATTTTAACGTTCGCTGGCGCGTCACCGAC
GCAGGTTTTGAAGTCTTTGCGCTGGAACCGCGTTAAATTCACGCCCTTCTCTTTTGACAT
TTCTTTTGCACTGGTAAACTAAATCACTTTTTTTGTCCCAGGCTCGCCTTGAGCCTGTTC
TACCTTCCAACTGGAACCGTAACAACATGCGTACTAGCCAATACCTGCTCTCCACTCTCA
AGGAGACACCTGCCGACGCCGAGGTGATCAGCCATCAGCTGATGCTGCGCGCCGGGATGA
TCCGCAAGCTGGCCTCCGGGTTATATACCTGGCTGCCGACCGGCGTGCGCGTTCTGAAAA
AAGTCGAAAACATCGTGCGTGAAGAGATGAACAACGCCGGTGCAATCGAGGTGTCGATGC
CGGTGGTTCAGCCAGCCGATTTGTGGCAAGAGAGTGGTCGTTGGGAACAGTACGGTCCGG
AACTGCTGCGTTTTGTTGACCGTGGCGAGCGTCCGTTCGTACTCGGCCCAACTCATGAAG
AAGTTATCACTGACCTGATTCGTAACGAGCTTAGCTCTTACAAACAGCTGCCGCTGAACT
TCTATCAGATCCAGACCAAGTTCCGCGACGAAGTGCGTCCGCGTTTCGGCGTCATGCGTT
CCCGCGAATTCCTGATGAAAGATGCTTACTCTTTCCATACTTCTCAGGAATCCCTGCAGG
AAACCTACGATGCAATGTATGCGGCCTACAGCAAAATCTTCAGCCGCATGGGGCTGGATT
TCCGCGCCGTACAGGCCGACACCGGTTCTATCGGCGGCAGCGCCTCTCACGAATTCCAGG
TGCTGGCGCAGAGCGGTGAAGACGATGTGGTCTTCTCCGACACCTCTGACTATGCAGCGA
ACATTGAACTGGCAGAAGCTATCGCGCCGAAAGAACCGCGCGCTGCTGCTACCCAGGAAA
TGACGCTGGTTGATACGCCGAACGCGAAAACCATCGCGGAACTGGTTGAACAGTTCAATC
TGCCGATTAAGAAAACGGTTAAGACTCTGCTGGTTAAAGCGGTTGAAGGCAGTAGCTTCC
CGCTGGTTGCGCTGCTGGTGCGCGGTGATCACGAGCTGAACGAAGTTAAAGCAGAAAAAC
TGCCGCAGGTTGCAAGCCCGCTGACTTTCGCGACCGAAGAAGAAATTCGTGCCGTGGTTA
AAGCCGGTCCGGGTTCACTGGGTCCAGTAAACATGCCGATTCCGGTGGTGATTGACCGTA
CCGTTGCGGCGATGAGTGATTTCGCTGCTGGTGCTAACATCGATGGTAAACACTACTTCG
GTATCAACTGGGATCGCGATGTCGCTACCCCAGAAATTGCTGATATCCGCAACGTGGTGG
CGGGCGATCCAAGCCCGGATGGTCAGGGTACGCTGCTGATCAAACGTGGTATCGAAGTCG
GTCACATCTTCCAGCTGGGTACCAAGTACTCCGAAGCACTGAAAGCCTCCGTACAGGGTG
AAGATGGCCGTAACCAAATCCTGACTATGGGTTGCTACGGTATCGGCGTAACGCGCGTAG
TAGCTGCAGCAATTGAGCAGAACTACGACGAACGCGGCATCGTATGGCCTGACGCGATCG
CACCGTTCCAGGTAGCGATTCTGCCTATGAATATGCACAAGTCCTTCCGTGTACAAGAGC
TGGCCGAGAAGCTGTACAGCGAACTGCGTGCACAAGGTATCGAAGTCCTGCTGGATGACC
GCAAAGAGCGTCCGGGCGTGATGTTTGCTGATATGGAACTGATCGGTATTCCGCACACTA
TTGTGCTGGGCGACCGTAACCTCGACAACGACGATATCGAATACAAATACCGTCGTAACG
GCGAGAAACAGTTAATTAAGACCGGTGACATCGTCGATTATCTGGTGAAACAGATTAAAG
GCTGATGCCAGAAAGGGTCCTGAATTTCAGGACCCTTTTTTACAGGGATTGTATAAAATG
GATAAACCAAAGGCATACTGCCGCCTGCTTCTCCCCTGCTTTCTTTTACTTTCGGCCTGT
ACCGTTGATATCAGCCAGCCAGACTCCTCAGCCACAGCGATAGATACCGAGGCGAAAACA
TGGGCTGTCAAATTCCAGCATCAAAGCTCTTTCACCGAACAATCAATAAAAGAAATAACA
GAACCTGACCTCAAACCCGGCGATTTGCTGTTCTCCTCAAGTCTTGGGGTAACCTCATTT
GGTATCCGCGTCTTCAGCACTTCCTCAGTGAGTCACGTTGCAATCTATCTGGGTGATAAC
AACGTTGCAGAAGCGACAGGGGCTGGCGTCCAGATTGTTTCCCTTAAAAAAGCGATGAAG
CATAGCGATAAGCTTTTCGTCTTACGAGTCCCGGATCTTACCCCGCAACAAGCCACAGAA
ATCACCGCGTTCGCCAACAAAATTAAAGATAGCGGTTACAACTATCGCGGCATTGTCGAA
TTTATTCCCTTTATGGTGACTCGCCAGATGTGCTCACTGAATCCGTTCTCCGAGGATTTT
CGCCAACAGTGCGTCAGCGGCCTGGCGAAAGCGCAGTTAAGCAGTGTGGGCGAAGGAGAC
AAAAAGTCGTGGTTTTGTTCGGAATTTGTCACTGATGCATTTGCCAAAGCCGGGCATCCG
CTTACGCTGGCGCAATCGGGCTGGATTAGCCCTGCCGATCTGATGTATATGCGTATTGGT
GATGTCTCTGCGTTTAAGCCAGAAACGCAGTTACAGTATGTTGGGCACCTGAAGCCAGGG
ATTTATATCAAGGCGGGTCGCTTTGTTGGTTTGACTCAGTGATAAAGCCAGCCTCGTGCA
CAAAATGCCGGATGCGGCGTGAACGCCTTATCCGGCCTACAAAATCGTGCTAATTCAAAA
TGTTGCATTATATGCTGTAGGCCTGATAAGCGCAGCGCATCAGGCAATTTTGCGTTTGTT
TCTGCCTTAAGCAGGTTTACTGCCCCAAACTACTGCAATCCTGGTTCGGATAAAATTTAC
CCGCCGTATCGGGCGCTAATACTTTGGTCGGCGCACCGGTATCCGGATTAGCCTCAAGCG
TAAAGTGACCTTCTACTGACAGTAACACCGGTTTTTCACTGTGCCCGCGCGCAGCCAGGT
AGCCACGCTCCAGCTCTGCGTTATTCGCTACCATGAAACGTTTTCCGGTCGCGCAATCAG
TGAAGGTCGCCGCATCAGCCATATAAAAATACATGCCCCGCAGAGTCATCGGCGTCATGG
GTAAACTGGATTGTGCCGCTTCCAGCGTATAGTTGAACTGCGATTCAATCGGTTTACCTT
CACGATCGAGCATCTCCAGCGCATCGCCTTTCGCCCGATAATATGACTTTTCACCTTTGC
TGTCGGTTAATACCAGCTTGTCAGCGGTTCGCGCCCATGTACCGTAGGAAGCGAAGGAGG
AAGGTTCTTCACGAGCACCGAGATAACGCTCATTCATCACCCATGTTCCGTCTTTTTCGA
GGAACAGAGAGGTTTCGATTCCTTCGCAATCGGCACACGGCAGCACGCCGCGCCAACTTT
GCGGCATCGGTTTCAGTTCGGCTGCCTGCGCCGGAGAAAGCGTATCGACTTCGGCCCGAT
TATTACAACCCATCAGAGTAAAGAGGCTGATTACAGCCATCGCTGTCACTATCGCTTTTT
TCACCATCCATTCCTTCTTTTTATTCCCGACCGCTGCGCACTTTGCCGCGCATCGCCTTC
ACGCTTGATTTTTGTGCTTTCGATGCCAGCCTGCGCTCTTTCGATGCACGGGTGGGCCGC
GTGGGTCGTCGGGCTTTTTGTTCTGTTGTTAATTCTTTAATCACAGCCACCAGCCGGGCC
AGAGCTGCTTCGCGGTTCAGTTCCTGACTGCGGTATTCCTGTGCCTTAATGACAATCACG
CCATCACTGCTGATCAAATGATGGCTGGCGGCGAGCAGACGCTCTTTGTAATACTCTGGC
AGGCTGGACGCCCGAATGTCAAAACGCAGATGAATAGCCGTTGAGGTCTTATTAACATGC
TGCCCGCCCGCGCCCTGCGCACGAATGGCGGTGATCTCAAGCTCACCATCGGGAATAGCA
ACATGTCGGGAAATCACAATCATGAAGGTTGTTGCCAGGCGGTTAAGTTCACTTCCAGAT
TATTCTTATCATCCGATAACCAGATCACGCCATCCTGAATCGTTGCCTGCAGCGTCATGG
TACGATCGGCAAAGGCGCTTACTTTCGCCAGTTGTTCATCGTCCAGATACCAGACGGAAA
GATTGGCAAACTGCACACATTTGCTCTGATTTTGCTGCCACCAGATTTGCGCCGCCCGAC
TATTATAGGTAAACAGCGCCACTTCTGCGGCCTGGGTGCAGGCTTTCTTAATCCGCCGCT
CATCCGGCAGCCCCAGCTCAATCCACAAATCAATGCCCAGGTGATCGTTACGCAGCCACG
CTTCCGGCTCATCATCGGCACACAAACCACGGGTAAATTGCAGACGTTCATCAGCATATT
TCAGCCACGCCAGCAAGCGCAGCATCATACGCTCCTGGGTTTCTGAAGGGTGGCGCGCCA
GCGTCAGAGAGGCATCGAGAAACTGGTTGCGGTCGAGATCGGCCACATTAACCGTCGCTT
TATAAATTGTCGCTTTAAGCGCCATAAGAAAACTCCTTTCGAATCAGGAGGCCATTGTAA
CGGAATACGTGCAGTTGCGGCGCTGATATTGCAGAAATGAGTGTGGTATAGTCACCTTGC
GAAACAGAGTTTATCTTCGTAGGCTTAGACTTGCATCCACGGTTAAGTCAGAGTGCTGAC
AGGAGGGCATGTGGAAAAATATTGTGAGTTAATACGCAAGCGGTACGCGGAAATCGCCAG
CGGAGACTTAGGATACGTTCCGGACGCGCTGGGCTGCGTTTTGAAAGTGCTGAATGAAAT
GGCTGCCGACGACGCCCTTTCTGAGGCTGTCAGGGAAAAAGCAGCATACGCTGCGGCAAA
CTTACTGGTGAGCGATTATGTCAATGAATGATACGTATCAACCAATCAATTGTGATGATT
ACGATAATCTTGAGCTCGCCTGCCAGCATCATTTAATGCTGACACTTGAGCTGAAAGATG
GCGAAAAATTGCAGGCAAAAGCCAGCGATTTAGTCTCCCGCAAAAATGTGGAGTATCTGG
TCGTCGAGGCCGCTGGCGAAACCCGTGAGCTACGTCTGGATAAAATTACCAGCTTTAGCC
ACCCGGAAATCGGTACGGTGGTGGTGAGCGAGTCCTGATTGACTTTCGCCGGATGCGACG
CTTAATGCGTCATATCCGGCCTTCACTTAACTAAGCGTTTCGCTGCCAGACAAAACTTAT
GCCATTCTCACCTTCAGCCACACCTTCTTGCGTCACAAATACCCCTGCCGCCGCAATCAG
CGTTTCGCCATAAAACAGCAGTGGCGTGGTGTCACGTAGCCACGGCGGCACGCCCAGCTC
TTGCCAGATTTTCTTTAGCTTACGTCCGCCGTTACGCCCGACAATATGCAGCAATCCTGG
CGCTTTGAAACGCACGCTGACCGCTTCGTCTGCACGCGGAGGGCGAATATCGCCTCCCGC
ATTAAGCTGTACACTTCCCAGCCCCGCCGGTAATTCCAGCGGTTGAAGCCACGTCTGCCA
CGGCACAATGTTTTCGCTTTGCCCGGTGACGGATTTAATCCACCACAGTTGCGACTGATA
GCGTCGGATTTCAAACGCGCCCAAACGTAAACAGGGGGAGGCATCTTCCCGCGCCAGCGC
CACTTCCTGCCAGATCCGCCCCAACGCGTCGCGGGAAGGCATCGGTGCATTCTGCCCTGC
AAGCCAGCGGCGGATAATCGCCGCGCGGCGGGCATCACTCATCGCCAGCATTGGCGCAAT
CTGCAGCGTCCTCTGCGGCGATTGACAGTGTGCTAAATCATCCGCCAGCAGTTCATCCAA
CAGGCTCTCTTGTTCAGCGCAAAGTGCGGCGCTGCGGGCTGTTGCTTCGGCAAAATGCGG
CCAACGCTGCTGCAATAACGGCACTACGCGCAGGCGCAGAAAGTTACGATCGTATGAGTC
GTCCTGATTACTTTCGTCTTCAATCCAGCGTAAACCATGCGCCAATGCCCACTGCGCCAG
TTCCCCCCGCGTGCGGGCAAGCAACGGGCGGATAAGCCGTGTTCCGGCAAACTCCGAAAC
TTCCGCCATAGCCGAAAGCCCGGCAGGGCCGCTACCGCGTTTTAGCGCCAGCAGAAAAGT
TTCACATTGATCGTCGAGATGTTGCGCGGTGACCAGCACTTCACCGGGCAACAAGGTGCG
GGCAAATGCCTGATAACGCGCCTGCCGCGCCTGGGCCTCAATGCCCAGTCCTTCTTGCGC
AAGTTGCACGCGCTCGACCACCAGCGGCACCTGCCACTGTTGGCAGATGTTCTCGCAATG
CCTAACCCAGGCATCGGCATTGGCACTTAAACCGTGATGCACATGAATAGCGCGCAGAGT
GACGCCCGGATTTTCCGCCCGCCACTGCACCAACTGATGCAGCAGAACGGTGGAGTCAAG
CCCGCCGCTAAAGGCCACCAGAATCTGGCGTGAGGTGAGAAGTTGTCTATTGAGCGTGAG
TGTCATGATGGTGCGATTTTACAGTAGCAATGCCCGGCACGTTACCGGGCAAATGCGGCG
ATGACAAGCCTTACTGCTCATACAGTTCCAACGGCAGCCCGTCCGGATCGTTAAAGAACG
TGAAGCGTTTTTGCGTGTATGGATCGACACGGATGGCTTCACACTTCACGTTATGGCTTT
CAAGGTGCGCCACTGCCGCATCGATATCATCAACGCTAAAAGCCAGATGACGCAGGCCGC
AAGCTTCCGGTCGGCTGGGGCGCTCCGGCGGGAACGGAAATGAGAAAAGCTCAATCACAT
ATTGCCCATTAAGCGCCAAATCCCCTTTCCACGAGTCGCGCGCTTCGCGATAGACTTCGC
TTTGCAGCGTGAAACCAAGAATATCGCAGTAGAAAGCTTTGCTCACCGCATAATCCGTCG
CAATAATCGCAATATGGTGAACCTGTTTTAAACCCAGCATAACGTCTCCTTTATTTGTTA
ACAGCACGTTACTCGCCCGGAAGCCGCTCTGGCAAGTTATCCCGCCATTTTTAGGACTCG
TACGCGGTAAACGCCGTCTTCGTCCTGTTTCGCGCCGTGAATATCCGTTTCAAAACCGGG
GTAATGTTGCCCTACGGAACAAAGCATCAGTAGAAAATCGAGTACTGTGCGGCTCTCTTT
GGTCAGCATTTCTCCAGGCATCAACAGCGGTACGCCCGGTGGATAAGGCAGGATCATATT
TGCCGATACTCTACCGACCAGTTGTTCCAGCGCAATGGTTTCTACTTCACCTTTAATCTG
TCTCTGCCATGCCTGATGTGGCGTCATGATCATTTCCGGCAAAGTATCGAATGCCCGCAA
CATCAAACCGGGAAGATCGTGTTTACGAATCAGCTTATGGATCCCTTGCGCCAGATCCTG
AATACGCATATTGCGGTAGAAATCGGGATCTTCAGCATAGAGATCGGGTAGCATATTTTT
GATCCGCAGGTTGAGATCGTAAGAGCGCTTAAATTCCGTCAGCCCACGCAATAATCCCAT
TGCTTTGGTTTTATCAATGCCAATACTAAAGAGAAACAGCAGGTTATAAGGGCCGGTTTT
CTCTACTACGATCCCACGTTCGTCGAGGAATTTTGCCACCAGCGCCGCCGGGATCCCCTC
CTCACTCATATTGCCCTGTTCGTCCATCCCCGGTGTCAAAATAGTGACTTTAACCGGATC
GAGAAACATATGATCGGCATCCGCATCGTTAAAGCCGTGCCACTGTTCGCCAGGCGCAAC
GGGCCAGCATTCGGCTTCATCCACCTGCGGCGGTTGCCAGATATCGAAAAACCAACCGTC
AGACTCTTCCCGCAACCGCTGGACCTCTTTGCGAAAATGCAGAGCTCGTTCTACTGAACG
ATTAATCAGCCGTTTGCCCGGATTACCACGCAGCATCGCCGCCGCCGTCTCAACCGAAGC
AACAATGGGATAACTGGGCGAGGTGGTGGTATGCATCATAAAGGCTTCGTTAAAGGCCTC
TTCGTCATACTCGCCTTTAATGTGGATCAGCGAAGCCTGCGATAACGCCGCCAGCATTTT
GTGGGTCGATTGCGTTTCGAAGATCACTTTTCCCGCAACACGCTCGCCGCTCATACCACT
TTTACCCTGGTAGATCGGATGAAAATGGGTGTACGGCACCCAGGCGGAATCGAAGTGGAT
CGAGGGGACATCCAGCGTCTGTTTGATCCAGTCGGTGTTGTAGAGCAAGCCATCATAGGT
GGAGTTGGTGATCACCGCATGAACCGGCCATTGTGCCTGCGTGGTGGCAGCGACTTTCTC
TTCGATGCTGTCGCGAGTAAATTCACGGCGCGGGATCCCACCAAGAATCCCCAACGCATT
ACGCGTCGGTTTCAGCCAGACTGGCACTACATCGTTCATCATCAACAGATGCGCCAGCGA
TTTATGACAATTGCGGTCGATCAACAGCGTGCTGCCGGATGGCGCGGCGTACATACCCAC
AATTTTGTTCGACGTCGATGTTCCGTTGGTAACGATATAACTCTGTTCCGCGCCAAAAGT
CCGCGCGATGTACTCTTCCGCTTCCAGATGTGGCCCGGTGTGGTCGAGCAACGAACCAAG
CTCGGTGACCGAAATAGAGACATCAGCCTTAAGGGTATTCCCGCCGAAAAAATCATAAAA
CAGACAGCCAACCGGGCTTTTTTGATATGCGGTGCCGCCCATATGACCCGGCGTACAAAA
GGTGTACTTCCGCTCTTTGACGTAGGTAAACAAGGCTTTCGTGAACGGTGGGGTAATGTT
ATCAAGATATTCGTTGGTGTACTGACGCATACGAATAGCGATATCTTCCGCCTGCCCCAG
CGCATATTCAAAAAACCAGAGCGCCATCCGCATATCCTGCACGCTGACATCCATCGTCGA
GTGGGTGTTGATGAAGGCATAAAGCGGGAGATATTCATTAAGCTGATTGATATCGCTACA
TAAATCGAGACTGTACTCATCCCAGTCAAAAATCACGCCGCAAATTCGTGGGTTATGTTC
GATAAACTTCAGCAAATCAACGCTGTTTTGTGGCCAGATAATCTGAAAGCCTTGCGCCAC
CAGCGCCGACTCCAGTTCTTTGATGGGCTCACCTTTATAAAAGACGCCATGCGGTCCCAT
AATGGCAATGATGTTCATGTGTTCCTCCTGGAAAATCCTTCCTTAATCATAGCCTGCTCA
AACCGTGGCGATAAAAAAGGGCCACCGAAGTGACCCTTTTTCAGAACTTTTGCGAATTAC
GCGTAACCGTAGCTCATCAGGCGCTGATAACGACGATTTTTTAAATCTTCAGTGCTTAAC
ACGTCGAGATCGGCCAGATCCGCCAGCAGTTGCGCTTTCAACGATGCCGCCATCGCTTCC
GGGTTACGGTGAGCACCACCCAGCGGTTCCGGGATGATGGAGTCGATCAGTTTTAGTTCT
TTCAGACGCGGAGCGATGATACCCATCGCTTCAGCTGCCAGCGGTGCTTTGTCGGCGCTC
TTCCACAGAATGGACGCACAACCTTCCGGCGAGATAACGGAATAGGTGCTGTATTGCAGC
ATATTCACTTTATCGCCCACGCCAATCGCCAGCGCGCCGCCAGAACCACCTTCACCGATA
ACCGTACAAACTACCGGTACACCGAGGCGAGACATTTCACGCAGGTTGCGTGCAATAGCT
TCAGACTGACCGCGTTCTTCTGCGCCCACGCCCGGATAAGCCCCCGGGGTGTCGATAAAG
GTGATGATTGGCATCTTAAAGCGTTCAGCCATTTGCATCAGACGCAGTGCTTTGCGGTAA
CCTTCTGGCGCTGGCATACCAAAGTTACGGCGAATTTTTTCTTTGGTTTCACGACCTTTT
TGATGACCAATGATCATCACCGGACGACCATCGAGACGGGCGATACCACCGACGATAGCT
TTATCGTCTGCATACGCGCGGTCGCCAGCCAGTTCGTCAAATTCATCAAATGCCAGGCGA
ACGTAATCCAGGGTATAAGGACGCTGTGGATGGCGTGCCAGTTGCGCAATCTGCCATGCA
CCGAGATCGGCGAAGATTTTACGCGTCAGTTCTACGCTTTTTTCACGCAGACGATGCACT
TCTTCATCGATGTTAATATCCAGTTTCTCATCCTGACGGCTAACCGCAGTCAGAGAATCG
ATTTTCGCTTCCAGCTCTGCAATCGGCTGTTCAAAATCAAGGAAATTCAGACTCATAGTA
TTCCTGTATTAGTCAAACTCCAGTTCCACCTGCTCCGAACCAATGAGGCCACGGAGATCG
TTTAATAAACGATCGCTCGGAGAGACACGCCACGTCGCGCCAAAACGCAACCGCGCGCGT
GCATCCGCCCTCTGATAGTAGAGATGTACTGGAATTGTCCCAGAGCGGTGGGGTTCCAGA
GACTGACGGAGTCGGTTTAAAAGCTGGTCATCAATTTGCCTGTCCGTCAGCGAGATAGCA
AGCCCGCGAGCATATTTTTCCCGGGCTTCGTCAATATCCATCACTTCGCGAGCGGTCATT
TTAAGCCCACCGCTGAAGTCATCAAAGCTGACCTGTCCGCTGACGATAAGTATGCGGTCT
TTTTCCAGCAATTGCTGGTATTTATCCAGGGCGTCAGTAAACAACATCACTTCCAGCCGC
CCGGAACGGTCATCCAGCGTGCAGATACCGATACGATTGCCGCGCTTGGTGACCATAACC
CGCGCGGCAACAACGAGCCCCGCAGCCGTGATGACTTTACCACGTTCTGTCGGGTGCATG
TCTTTCAGCCTTACGCCTCCGACATAACGCTCAATCTCTTTTAAATACTGGTTGATAGGG
TGTCCGGTCAGGTACAGGCCTAACGTTTCACGTTCCCCATCTAATACCACCTGCTCCGGC
CACGGTTGGCAGCTGGCGTAGGATTGTTCAATTTGTTCCGGTTCTTCGGCCAGCACGCCG
AACATATCGGCCTGACCGATAGCTTCCGCTTTCGCGTGTTGATCTGCCGCTTTTAACGCA
TCACCCAGCGAGTTCATCAGTGCCGCGCGGTGTGGCCCAAGACGGTCAAACGCCCCGGAC
ATGATCAGTTTTTCCAGCACCCGCCGGTTTAACTTTTTGGTGTCGGTTCGGGCGCAGAGA
TCAAACAGTTCGCGGAAGTAGCCGCCTTTATTACGGGCTTCGATGATCGCCTCAATCGGA
CCTTCACCGACCCCTTTGATCGCGCCAATACCATACACGATTTCGCCGTCGTCGTTGACG
TGGAAATGGTAAAGACCGGAGTTTATATCTGGTGGCAGGATTTTCAGCCCCATCCGCCAG
CACTCATCCACCAGGCCCACCACCTTCTCGGTGTTGTCCATATCGGCGGTCATTACCGCC
GCCATAAACTCTGCCGGATAGTGCGCTTTCAGCCATAATGTTTGATATGACACCAAAGCA
TAGGCCGCAGAGTGCGATTTGTTAAATCCGTAACCAGCGAATTTCTCCACCAGGTCGAAG
ATTTTCATCGCCAGTTCGGCGTTGATTCCGTTCTTTTCTGCACCTTCAGCAAATACAGAA
CGCTGCTTAGCCATCTCTTCCGGCTTTTTCTTACCCATCGCACGACGCAGCATATCCGCG
CCACCGAGGGTATAACCAGAGAGCACCTGCGCAATCTGCATGACCTGTTCCTGATACAGG
ATAATGCCGTAGGTTGGCTCCAGTACTGGTTTCAGGCTTTCATGCTGCCACTGCACGTCC
GGGTAGGAAATCTCTTCGCGACCATGTTTACGGTCGATAAAGTTATCCACCATCCCTGAT
TGCAACGGACCAGGGCGGAACAGTGCCACCAGTGCGATCATATCTTCGAAGCAGTCAGGT
TGCAGACGCTTGATCAGGTCCTTCATGCCGCGCGATTCAAGCTGGAATACCGCCGTGGTT
TCCGAGCGTTGCAGCATGTCGAAGCTTTTCTTGTCATCCAGCGGGATCGCGGCGATATCC
AGCGGCGGCTCGCCATTCTTCGCCCGCCGCTTGTTGATCATCTCCAGCGCCCAGTTGATG
ATGGTGAGCGTACGTAAACCAAGGAAGTCGAACTTCACCAGTCCGGCATATTCAACGTCG
CTTTTATCAAACTGGGTGACCGGATGTTTGCCCTCTTCATCGCAATAAAGCGGCGCAAAA
TCGGTAATTTTGGTCGGCGCGATAACCACTCCACCGGCGTGCTTACCGGCGTTACGGGTG
ACCCCTTCCAGTTTGCGCGCCATGTCGATCAGCGCCTTAACTTCTTCATCCGCTTCGTAG
ATTTCCGGCAGCTGCGGCTCGGCTTCAAACGCTTTCGCCAGCGTCATGCCCGGATCGGGC
GGGATCAGTTTCGAGATACGGTCGACAAAGCCGTACGGATGCCCCAGCACGCGGCCTACG
TCGCGGATCACCGCTTTCGCCGCCATCGTACCGAAGGTGATAATCTGCGATACCGCATCA
CGACCGTACATGTCCGCTACGTGCTCGATAACCTGGTCGCGTTTCTCCATACAGAAGTCA
ACGTCGAAGTCAGGCATGGAGACACGTTCCGGGTTAAGGAAACGTTCGAACAGCAGGTCA
AATTCCAGCGGATCGAGGTCGGTGATTTTCAGCGCGTAGGCCACCAGTGAACCCGCACCG
GAGCCACGGCCTGGCCCTACCGGTACGCCGTTATCTTTCGACCACTGGATAAATTCCATA
ACGATGAGGAAGTAGCCCGGGAAGCCCATCTGGTTGATAACCTGAAGTTCAGTCTCCAGA
CGTTCGTCATATTCCGGGCGGCGCTTAAGACGTTCTTCCTCATCAGGGAATAAAAAGGCC
AGACGCTCTTCCAGGCCTTCTTTTGCACGCTTGACCAGATAATCTTCGGTGCTCATGTCC
CCGGTCGGGAACTGCGGCAGGAAGTATTCACCCAGACGCACAGTTACGTTACAACGTTTG
GCGATCTCAACGGTGTTGGCAAGGGCTTCGGGGATGTCGGCAAACAGCTCGCACATCTCC
TCTTCGCTACGCATATATTGCTGCGGCGAATAGTTACGCGGGCGTTTAGGATCGTCGAGG
GTAAAGCCGTCGTGGATCGCGACGCGGATTTCGTGTGCGTCAAAGTCGCTGCTGTCGATA
AAGCGCACATCGTTAGTCGCCACGACGGGCAAACCGCGCGCTTCCGCCAGTTCCACCGCC
GCGTGCAGATAGCTTTCTTCATCCGGCCTGCCGGTGCGGATCAGCTCGAGAAAATAGCGA
TCCGGGAAGTGTTCTTCATAAAACGCGACACACTCATCTACCAGCGCGCTGTTGCCACGC
AAAAGACTGCGTCCGACGTCGCCCATGCGCCCGCCGGAAAGAAGGATCAACCCTTCGTTT
AATTCGATAAGCCAGTCGCGATCGATGATCGGCCCGGCGGCACCGTACCCGCGCTGATAC
GCTTTTGAGATCAGCAACGTCAGATTCTGATAGCCGGTATTGTTCGCCGCCAGTACCGTC
AGGTGGGTTAACTCATCACCCAGCAGGTCGCACTGGACGTTAAAATCTGCCCCGACGATA
GGCTTAATCCCTGCGCCATGTCCCGCTCCGTAGAACTTCACCAGACCGCAAAGGTTGGTG
AAATCGGTGATCGCCAGTGCTGGCATACCCAACGCCGCCGCCTTTTTTACCAGCGGTGCG
GTTTTGGCCAGGCCATCGATCATCGAGTAGTCGCTGTGCACCCGCAGGTGTACGAAACGT
GGTTCAGACATCTTCAGATTCCGGTTTACTTAATCTCGACACAAGAATCAGGACGCAAGT
CCCAGTGCTCGTTTGACAGGCCCAAAGCTGCGACGATGATGTTCAGTCGCGCCATATTCA
GCCAGTTTTTCCAGATGAAAAGCGGTTGGATACCCTTTGTGTTGGGCAAAACCATATTGC
GGGAAAACAATATCCAGCGCCGCCATTTCGGCGTCACGCGTCACTTTCGCCAGGATAGAC
GCGGCACTGATTTCCGGTACGCGGCTATCGCCTTTCACCACTGCCATCGAAGGCATCGGT
AATTTCGGGCAGCGGTTACCATCAATCAACACATATTCCGGCGCAATATGCAGCCCAGCA
ACGGCACGCTGCATCGCCAGCATGGTCGCATGTAAAATATTCAGTTCATCGATTTCGTGA
GGTTCCGCGCGGCCCAGACTCCAGCTCAACGCTTTCTCTTTGATCTCTTCACAGAGCGCC
AGACGACGTTTTTCGCTCAGCTTTTTGGAATCATTCAGCCCGGCAATCGGGCGCGCCGGG
TCGAGAATCACCGCAGCGGTGACGACCGCGCCAACTAACGGCCCGCGTCCGGCTTCATCC
ACACCCGCAACCAGCTGCGTGTGCGGATAGACAAATTCGATCATTGTGCTAACTCCAGAA
CGGCTTGTGCCGCCTGCTCATCGGCATTGCAGCGGATCTGCTGATGCAGTTCACGGAAGG
TATCGTGCATCGCGTGGCTGGTTTTCCCGTTCGCCAACAGCGGTAACAGCGCCGCAGCCA
GTTTTTGCGGCTCACACTCTTCCTGCAATAACTCTTTGACTAACTCTCTGCCCGCCAGCA
GATTTGGCAGCGAGACATAATCAGTTTTCACCAGACGCTTCGCCAACCAGAAAGTGAAAG
GCTTCATGCGATACCCCACCACCATCGGGCATTTCGCCAGCATACACTCCAGTGCTGCCG
TACCCGACGCCAGTAGCGCCGCATCGCTGGCAACCATCGCCTCACGGCCCATTCCATCCA
GCAAATGAACCGACAGGTCTGGCGCGACTGCAGCTTTGATGCGTTCAAACTGCTCGCGGC
GTTTGGCATTCACCAGCGGCACCACGATTTCGAGATCTGGATATGTCTGGCGCAAAAGCT
GGGCCGTTTTCAGGAAATCGGCACTAAGCATTTCGACTTCTGCACCACGGCTGCCCGGCA
ACAATGCCAGACAGTGGGCATCGTAAGGGATCCCCAGCACATCACGGGCACCATTTTTAT
CTGGATCTAATGGCATGGCATCAGCCATGGTATGACCGATAAAGCGGCACGGTACGTTGT
ATTTGTCATAAAACGCTTTTTCGAAAGGCAGAAATGCGAGCACCAGATCGGTGGCTCTGC
CTATTTTGAAAACGCGTTTCTGTCGCCACGCCCAGACGGACGGACTGACGTAATGAATGG
TTTTGATACCCTGCTTTTTGAGGTTACCTTCAAGAGTAATATTGAAGTCAGGCGCATCAA
TACCGACAAAAACATCTGGCTTCAGTTCGCCAAAACGCTTTGTCAGATCGGCACGAATAT
GCAGTAAGCGACGCAGACGACCGAGCACTTCAACAATGCCCATTACCGCCAGTTCTTCCA
TTTCGTACCAGGCTTCGCAGCCTTCAGCTTGCATTCGTGGCCCGGCAACACCAACAAAGC
GGGCGTTGGGCACACGTTCTTTCAGAGCGCGGATTAAACCGGCCCCCAGGATATCGCCGG
AGGTTTCTCCGGCGACCAGGGCAATCGTTAATGGACGCTGTTCAGTCATTAACGAATCAG
ACCGCGCGTTGAGCGTGCAAAGAAATCGGTAAAGGCTTTCACTTCCGGATATGTTTCCGC
CAGTTCAGCAATTTCCGGTTTCACTTCATCGAGCGTTTTACCGCTACGATAAATCAGCTT
ATACGCATTGCGGATAGCGGTAATCGCCTCACGGCTGAATCCGCGGCGCTTCAGCCCTTC
GATATTGACACCGAACGGCGTTGCGTGGTTACCCTGCGCAATGACATAAGGAGGGACGTC
CTGCGCCACACCGGAGCAGCCGCCAACCATCACATGCGCACCAATGATGCAGAACTGATG
GACTGCGGTCATGCCGCCGATGATCGCGAAGTCGTCAACCGATACGTGACCCGCCAGCGT
TGCGTTGTTGGCGAGAATACAGCGGTTACCTACCGTACAATCGTGCGCAATGTGCGCGTT
GATCATCAGTAAGTTGTCGCTGCCCACCTTCGTCAATCCACCGCCCTGGACTGTGCCACG
ATGAATGGTGACGCTTTCGCGAATGCGGTTACGATCGCCGATTTCCACACGGGTCGGTTC
GCCAGCATATTTCAAATCCTGGTTAACTTCGCCGATGGAGGCGAACTGATAAATCTCATT
ATCGCGGCCAATTTTAGTATGACCATTCACGACAACGTGAGATTTCAGTACGGTACCCTC
ACCAATTTCGACATGGGGTCCAACGATACAAAAAGGACCAATGTGTGCGTTCGCGCCAAT
CGACGCGCCCTCTTCCACAATGGCGGTTGGATGCACAAAGGCGGATTTATCAATCACGTA
TCAGGCCTCCCGGCTACGAGCACACATCATCGTTGCTTCGCAAACTACTTTACCGTCGAC
CAGAGCAACCCCTTTAAAACGGGTCAGGCCGCGGCGCGTTTTTTCGAAAGTGACTTCCAT
GATCATTTGATCGCCAGGCACGACCGGGCGCTTGAAGCGCGCTTCGTCAATACCGGCGAA
GTAGTACAGCTCACCCGGTTCCAGTTTTCCTACGCTTTTAAACGCCAGAATACCTGTTGC
CTGTGCCATTGCTTCCAGAATCAGCACACCCGGGAAAATCGGTTTTCCAGGGAAATGGCC
CTGGAAGAATGGCTCATTGACAGAGACATTTTTTACTGCGCGCAGAAAACGACCTTCTTC
AAAATCCAGCACGCGATCCACCAGTAAGAACGGGAAACGGTGCGGCAGAAGTTCTAAAAT
CTCTTCAATCTGCAGAGTATGAGTGTTAGTAGTCAAGATACTCTTCCTGTCAAAATATAA
GAAACGACAATAATAACACGGCCTGCCGCAATCGTAAGAATGAGACAGGCCGTAAAGTTT
GGCGAACAAAAGATGGAACGTTAGTCTTGTTGATTAACCTTGCGCTCAAGCGATTTCAGA
CGCTTGCTCATGTCATCAATGTTCATCACCAGTGCAGCGGTTTTGCGCCAGACTTTGTTG
GGTTGCAGCGGAATGCCTGAGGAATAGACGCCTGGTTCAGTGATGGGACGCATCACCATA
CCCATGCCCGTAACCGTCACTTTGTCGCATATTTCCATATGCCCGTTGATTACGCTGGCT
CCGCCGATCATGCAGTAACGACCAATTTTCAGGCTGCCCGCCATAATGACGCCACCGGCA
ACCGCCGTATTGTCGCCAATCACGACGTTATGTGCAATCTGGCACTGGTTATCAATGATC
ACGCCATTGCCAATAACCGTGTCATCCAGCGCGCCGCGATCGATGGTAGTGCAGGCACCG
ATCTCCACGCGATCGCCAATAATTACGCGACCAATCTGTGGGATCTTCACCCAGTTACCA
CGATCGTTGGCATAACCAAAGCCGTCTGCGCCTACCACTGTTCCGGACTGGATCAGGCAA
TTCTGACCGATCTGGATCTCATGGTAAATGGTTACATTCGCCCAGAGACGCGAACCTGCA
CCGATTTTGCTGTTTTTACCTACGAAGCAACCGGCACCGATAATCACGTTATCGCCCAGT
TCAACGCCGGACTCAATCACCGCGTTAGCGCCAATCGATACGTTGTTACCCAGCTTCGCC
GTCGCGTCGATCACTGCACTGGGTGCAATATTCTGCGCGGGCTGCGGCGTGGTATCTAAA
ATTTGCGCCATGCGCGCGTAAGTCAGGTAGGGATTCTTCACTACCAGCGCGGCACTTTTC
GCGAAAGGAAGATCGTCCTGGGTCATGACAACCGCGGATGCCTGGCACAAGCCTAAATGC
TCACGGTATTTTGGGTTAACCATGAACGTAATGTGACCTGTTTGTGCAGATTGCATGGAC
GCAACGCCGGTGATGACGATATCGCCATCACCGTGTAGTTCTGCATCCAACTGCTGCGCT
AAATCAGCCAGTCGAATTGAAGGCATTACTTATTTAACCTGTTTCAGTACGTCGGCAGTG
ATGTCTTTTACATCGCTGCTGTTGTAAGCAACGGCGTTTGCATCAACAACCAGATCGATA
TCCTGGCTGTTGGCAACGGATTTCACAGCAGTCTGGATACGAGTAACCAGTTTGCCGCGT
TCTTCGTTGGAACGACGTGCGCGATCCTGCTCAAAAGCCTGCGCTTTCTGAGCAAAAGTC
TGGCGCTGAGCCATCACGTCTTTTTCCAGCTTAGTGCGATCGCTGCCCGCTTTCATGGAC
TGCAGCTTTTTCATTTTAGCCTGCAGATCGGTTTCCATACGCTGCAGTTCGCTGGCACGG
CCTTTGAACTCATTTTCCAGCGTGTTAGAAACACCGGTTTTCTGCGCTACCTGCTGGAAC
AGGCTGCCCATGTTGACGATTGCAATTTTGTCAGCCGCCTGAGCAGATGTTGCCAGTGCT
AAACCGAGACCTGCAGCTAATAACCACTTTTTCACAATAAACTCCTTACCATCCCATTTG
CACCGGAGGGTGCAGTTCTTTGCGTGGCCCGGCGATCTTATATTGATCGCCTAAAGTCAT
CGCTACACTACCACTACATTCCTTTGTGGAGAACACTTACCAAGTTTTACCGATGTTAAA
CTGGAACTGTTCTGCCTTGTCTCCATCGTACTTTTTGAACGGCTGGGCGTAGGAGAACAC
CAACGGCCCCAATGGGGACATCCATTGTAATGCGATACCCGCAGACATACGGATATTGCT
TGGATCACTATAGTCCGGATATCCAGAATATTGGCTGGAATCCCAGTTTGTATCCCAAAC
GGTACCCATATCCCAGAAGAAGGAAGTACGAACCGAGTTAGCATACTTATCGCTAATAAA
CGGAGTCGGGGTTATGAACTCGAGGCTGGCAACCGCCATGGCGTTACCGCCTACAGCATC
ATCCGATTTACACAGGTCTTTCGCGCCGTCCTGAGTCGCACATTCGTAATCATAGTCCGG
ATCATAATTACTGGCCTGATGCGGGAAGTAAACTGCTTTCGGACCAATGGTATTGGACTG
GAAGCCACGGACGGTGCTGGAACCACCGGCATAGAAGTTCTCGTAGAACGGCATCTCTTT
GCCGCCTAAACCATCACCATAACCCCAGCGGGTACGACCCAGAACAACCCATTTGTGATC
GTCATCGATCGGCACATAAGTCGCCGTGTCTAACGTCACTTTGTAGTATTCGTTATCCGA
TCCCGGAATGGTCACTTTACCGGTCAGGTTGACACGTGAACCATCTGTCGGGAAGTAACC
ACGGTCAAGCTTGTTATAGGTCCAACCATAGTTGAACGTGAAGTCGTCTGTTTTGAAGCT
GTTATCCTGATCAGAGGTGCTCGGATGTTCACCCATAGAGTACAGATAACGCCACATCGC
AACCTGAGGCTGCATGTTGGACAGGGAGTTATGTACATAACCCAGACCTGCACGCAGCGA
GTTATATTCGTTAATCGGGAAGCCCAACGTCACGTCTGTACCATAACTCTTGTTGGTATA
GTCGGACAGGTCGGCGTCATCTGCCTGGAAGTCATTATAGAAGAGACGACCACCGAGGCT
TACGCCATCTACGGTGAAGTACGGGTTGGTTACCGACAGTTCAGCATAGGTCTGGTAATC
GTTTTTGGTCCCGTTGATACCAACAGCATAACCTGTACCTAACCAGTTATCCTGTTGCAC
ACCAGCCTGGAAGCTCACGCCACTTTCAGTACCGTAACCAATACCAAAGTTGAAGCTACC
GGTGTTGCGCTCTTTTACCTTGTAGACTACATCAACCTGGTCCGGGCTACCCGGAACACG
TTGGGTATCGGTATCGACAGTTTCAAAGAAGCCCAGACGATTCAGACGCTCCTTACCCTG
ATCGACCAGATCGCTCCCCAGCCATGCACCTTCCATCTGACGCATTTCGCGACGCAGGAC
GGCATCTTTCGAGGTATCGTTACCTTCAAAACGGATCTTACGCACGTAGAAACGGTTACC
CGCATCAACGTTCACACGTAATTTAACGGTTTTGTCGGCATCGTTAATTTCGGGCATGGA
CTGTACGCGCGGATAGGCATAACCATAGCGACCGAGAAGCTTTTTAATGTCATCTTCCAT
CTTGGTCACTTTGGTGCCGTTATACAGCTCACCCGGCTCGATCTTAGTCAGCTGCTCAAT
TTCAGCGGAGTGCCCGGCAAGGTTGCCGCTCACTTCAACGCCAGAAAGCTTGTACTGATC
GCCTTCGGTGATGTTCACCGTGACGTAAATACCTTTTTTATCTGGCGTCAGACTGACCTG
GGTAGAGTCGATGTTGAAACGGGCATAACCGCGGTCCAGATAGTAGCTGCGCAGGGTTTC
AAGGTCGCCCGCCAGTTTCTGTTTCTGGTATTTACGATCGCCTACCACGTTCCACCACGG
CACTTCGTCACGCAGTTGGAAATGAGAGATCAGTTCGTCGGTGGTGAAAGCATGGTTACC
AACAATGTTAATTTGCTGGATTTCAGCTGACACACCTTCCTGGAACACCAGTTTTAGGTC
AACACGGTTGCGCGGCAGCGGGGTCACGACAGCTTTAACGCTGGCGCTATATTTACCGAC
GCTGTAGTAGAAGTCTTCCAGACCTTTCTCGATATCGGCAATGGTGGTGCGATCGAGGGA
TTCGCCCACACGCACACCAGAAGCCTCGAGGTTTTGCTTCAGCATGTCATCTTTCACCGA
TTTGTTACCGGAGAAAGTAATGCTGGCAATGGTCGGACGTTCTTTTACCTGAACCAGAAG
GGTATCACCATCACGAAGGACGCGAACATCCTCAAAGTTGCCGGTAGCAAACAGAGCGCG
AATGGTATTACTGATATCTTCATCATTAACCGTGTCGCCTGTGCGCACCGGCATACTGAG
GAGGGCCGCACCAACGGCGACACGCTGAAGGCCTTCGAAATGAATATCTTTCACTACGAA
CCCTTCAGCACCGTATACGGTGGCGCTGCTAAACAGCAGCGACGCTATGAGCAACTTTTT
CATCGCCATCGTTATTATGCGTTCTTCCTAACTAACTCTCATAACCGAGAGAAATCATTG
AAAAGTGCAAGCCCCATTAACAGCACCAGCAGAATCGAGCCAATGCGATAACAAAAGTCT
TGAACCCGCTCGGATACCGGTCCGCCCTTGATCTTTTCGATCGCAAGGAACAGCAGATGC
CCCCCGTCAAGTACGGGCAACGGAAACAGGTTAATTATCCCTAAGTTCACGCTAATAAGC
GCAAGAAACGGCAGGTAATAAACTACCCCGAGTTCCGCTGTCATCCCAGCCCCCTTGGCG
ATAGAGATCGGCCCACTGAGGTTGTTCAGTTTCACATCACCGGTGATCAATTTTCCCAGC
ATACTGACCGTCAGCTTCATCAGCTGCCACGTTTTGTCCGTGGCTTCGACGATGGCGTTG
AACGGCCCATACTGGCGTACAACTTTATACTCATCTGGCAAAGGAATGACTTTCGGCTCA
ATACCGACAAAACCAATCGCTTTACCATTACCCGGTTTACTCTCCGGGATTAATGTCAAA
GACAAGGGACTCCCCTGCCTTTCGATTTCTAACGCTAAGGATTTACCCGGGTTATCCCGG
ACAAGCATCACAAAGGTCACCCACTGCGTTAAGGGCTGACCATCGACTTTAACGATCCTG
TCGCCTGCTTGCAAACCTGCCTTGCTTGCCGCCGAGTTTGGCTGCACATTTTCCAGTACA
GGTTCAATTTGCGGTCCACGAGGACGAATCCCCAGCGAAGATACCGGATCTTCTTTATCA
GGCTCAAACGCCCAGTGACGTAAATCGAGCTTTACATCCCGCCGTTGGTCGCTGCCAAAT
GGCGCTACTGTAATGGTGGTGCTTTCATCGCCAATTTTATCGACCAACTGCAAACGCACA
GCATCCCAATCAGGCGTTTCGATACCATCTACGGCTTTTAGTTCCGTACCTGGTGCAATT
TGTGCTTCCGCAGCTATCGAATTGGCTGCTATTTCGCCAACCACCGGACGTACGCCAGGC
ACACCAATAATAAAAACCAGCCAGTAGGCAAAGATAGCAAAAATGAAGTTTGCAACCGGA
CCTGCGGCAATAATCGCCGCTCGTTGGCCGACAGATTTATTATTGAAGGCATGGTGGCGG
AGTTCCGGAACGACCGGTTCTGCGCGCTCATCCAGCATTTTGACATAACCGCCCAGCGGG
ATCAGGGCGATAACATATTCGGTACCGAGCTTATCAGTTCGCCGCCAGAGCGCCTTACCA
AACCCTATTGAGAAACGCTCAACGCGAACACCACAACGCCGGGCAACCCAGAAATGACCA
AATTCATGCACGGTGATAAGTACACCCAGTGCAACGATGAACGAAGCCAAATCCCAGAGA
AAACTCAGCATATTACCTTCCGTTAAAGCGTCCTGAATACCAGTAACAACAAGCAAGCAA
AGACCGGTACCGCAGCCGTCAGGCTATCAATACGATCTAAAATACCACCGTGTCCTGGAA
TTAAATGACCGCTGTCCTTAATTCCTGCTTCACGCTTAAACATACTCTCGGTCAGATCGC
CGAGCACTGAGGCTAACGCTGCGACAATAGAGCAAATGAGTAAGGTGACGGGAGCGACGT
CGAGATTCGCCCACATGCCATAACCCCATGAGATTACCGCTGCGGTCGCTAGTCCACCTA
TAAAGCCTTGCCAGGTTTTACCCGGAGAAACCTTCGGTGCCAGCTTATGTTTACCAAACA
ATTTGCCAAACATATATGCGCCAGAGTCAGCGCCCCATACCAGGATCATGACATAGAGCA
GCCATATTGCGCCACTGTAATGATTCTCGTCGTAGTGCCAGGCCCGTAACGCCAGCATGC
CCCAGAAGAAGGGAACAATGGTTAGCACGCCAAAAATAAGGCGCAATGTTTTAGAGTTAC
GCCAGATTGCTGCGGAATCTGGGTAAAACAGCACCAGCAATAGCGCGACAATCCACCAAC
CCAACGAAGCCCAAAGTGAGATTTCAACCAGCGGTTGATGAATATTTCGGTGATATTCCG
GCAACAGAAAAAGCATCAGCGCCAACAATAACCCGCATAACACCGCCAACCATACTCGCT
GCGAACGAGTGGTAAAACCGCTAAGCTGTCCCCATTCCCACGCTGCCAGCATGCAGACCA
CCAGCGTTACAATGGCGAACCCCACCGGCGGCAACAGAAACAACGCCGCGATGACGACGG
GTATTAACACAAAAGCAGATATCAGGCGATACTTCAGCAAAAGCGACCCCCATCAGGCTG
TTTCATCACCGGGCTCGGTGCCGCCGAAACGACGCTCTCGATTAGCAAAGGCATTTAACG
CCCCTTCAAAGTCTTGTTCATCGAAATCGGGCCAGAGAACATCTGTAAAGTAAAGTTCGG
CATAGGCAATTTGCCAAAGCAAAAAGTTACTAATGCGATGCTCCCCCCCAGTCCTAATTA
CTAAATCTACAGGGGCCAGTTCATGCATACAGACATGCTGGTTTAGCATCTCTTCATCTA
TCTGATCTGGTTGCAGGTTTCCTTGCTGCACCTTTTCAGCCAGTTGCCTGACTCCCTGGA
CTATATCCCAACGTCCACCGTAGTTCGCCGCAATATTCAGCGTCAGACCGGTATTCCCGG
CTGTTAGCGCTTCAGATTTACGAATACGTTCTTGCAAACGCGAGTTAAAGCGACTGGTAT
CGCCAATAATACGCAGACGCACGTTATGTCGGTGCAGACTTTTTACTTCGCTATCGAGCG
CCCACACAAACAGTTCCATTAACGCACTGACTTCCTGCGCTGGTCGGTTCCAGTTTTCAC
TACTAAAGGCATACAGCGTTAACGCCTCAATACCGTTGTTGGCCGCAAAAGAGACAGCCC
GGCGGACGGATTTTGCCCCTGCTTTATGCCCAAAGGCACGAATCTTCCCTTGCTTTTTTG
CCCAGCGACCATTGCCGTCCATAATGATCGCAACATGACGGCAGCCATGCGCTGGCAATT
TTTCGCTAAGTGGTTGAGTAGCAGACAACATCACGCGTTTTTTATTCCCTGACAGGGTTT
ACGGTACTCAGGAATACTGAAGCCTATACAAAAAAAAGCCGTGTAAAACCACGGCATACC
TGACCTTATAAAGCCAACTACTTACGATCAGATGGCGCAGACTATATCACTGAAGCCCTA
CGCTAACAAATAGCGCGACTCTCTGTAGCCGGATTATCCTCAGCTTGCGAGACGCATCAC
CTCTTTTCTGGCGACTTCACGCGCGTTCGCATCAACAGATAACACATCGTCCACACATTG
TGGTTCGCGCATATCCATTTTTTCCAGTACGGATAAATTCAACGCAGCGATATCCGTAAA
GCGGATTTGTTGCGCAAGAAAAGCAGCAACGGTGATTTCGTTTGCGGCATTCAATGCTGT
CGTCGCTGCCTGACCTTGTTCGAACGCCTCCATCGCCAGTTTCAGGCATGGATAACGATC
ATAATCCGGTGCGGCAAATGTCAACGCACTTAGTTTGCAAAAATCGAGCGGCTTCACGCC
AGAGTTCACGCGATTCGGCCATGCCATGGTGTGGGCAATTGGCGTACGCATATCCGGTTC
CCCCAGCTGCGCCAGAACACTGCCGTCCTGATAGCGCACCATTGAGTGAATCACTGACTG
CGGGTGAATCAGCACTTCCATCTGGCTGGCGCTGGCGTTAAACAGCCAACGCGCTTCAAT
GTATTCCAGACCTTTGTTCATCATGGTAGCCGAATCGACAGAAATTTTACGTCCCATCGA
CCAGTTCGGATGACGGCAGGCTTGATGGGGCGTCATTGTTGCCAAATCACGCAATGGCGT
CTCACGGAAAGGGCCACCAGACCCGGTAAGTAAAATGGACACCACGCCATTTTGCTCAAG
GTCAGCGTATCCCAGATTATGCTGGATAGGTTGCGGTAAACTCTGAAAAATAGCGTTATG
TTCGCTATCGACCGGTAACAATTGCGCTTTGCTCTGCTTTACGGCGTCCATAAACAGACG
TCCGCAGGTAACCAGTGATTCTTTATTGGCCAGCAAAATGGTTTTACCCGCGCGGATCGC
AGCAAGCGTAGGTAACAGCCCAGCAGCACCAACAATGGCTGCCATCACCTGATCAACCTC
CTCAAGCGCTGCCATATCGCAAGCGGCTTGTTGCCCACTTAAGACTTCGGTGCGGCTCCC
CTGTTGCTGTAGCATCGTTTTAAGAAGTTTCGCACTCGCTTCATCGTCCATTACGGCATA
GCGGGGAGAGAATTCCAGGCACTGTTCTACCATGCGAGTGACATTTTTGCCTGCCACCAG
CGCAACTACGCGGAAGTGTTCGGGATTATGGCGCACCACGTCCAGCGTGCTGCAACCAAT
CGAGCCGGTCGAGCCCAGAATGGTGAGTTGCTTCATGAAACATCCAGAGTTGAGACAGAA
TAAAAAGCAAAACGCCGCCAGCCGATCCGCAAGGATCTACTAAGCGGCGTTTTTGTCGTT
CAAGAAATCAGAACTGCATCAGTTCTGCTTCTTTGTCTGCCAGCGCCGCTTCAATTTTCT
TGATTGCAGCATCAGTCAGTTTCTGTACATCGTCCTGAGAACGGCGATCGTCGTCTTCGC
TGATCTCTTTATCTTTCAACAGTGCTTTCACTTTGTCGTTCGCGTCACGACGCACGTTAC
GTACTGCAACACGCGCTTGTTCTGCTTCACCACGAACGATTTTGGTCAGATCTTTACGAC
GTTCTTCCGTCAGCGGCGGCAGCGGAACACGGATGTCGCTACCCGCAGAGTTCGGGTTCA
GGCCAAGATCGGACGCCATAATCGCTTTTTCAACGGCCGGAGACATTGAACGATCAAACA
CGTTGATTTTCAGAGTACGGGAATCTTCTACCGTTACGCTTGCCAGCTGACGCAGCGGCG
TCGGCGTGCCGTAATATTCCACGACAATGCCATCCAGCAGGCTGGGAGAAGCACGACCCG
TGCGTATTTTGCTGATTTGGGTTTTGAACGCTTCTACGCATTTGTCCATGCGTACTTCAG
CATCTTTTCTGATATCGCTAATCACGTTACGAATCCTTGAAAACTTGTCTCAGTCAGACC
AGACAGTCACACACAGTGGAAGTGTGCTAAGTATAGCCCTGATTAAACATATTACGGGTA
ATCGTCTGGATTATTAGGCTATTTTATTTGCCATTTTGGCCCCGGGCAGTGCTCGCCATC
CTCACGTACTTTTGTACGCTCCGGTTGCTGCGCGCTGGCCGTGACCAAACTGCCTGCAAC
AATAACGCCTTATAACCAGACTTACGCCCCCGCGATACTTATGCGGAATCTTACCCTTAT
TTATCCATCACGGGAATTATTCCGTGATTAAAGTCCCTTCTTTTTCACCCATTACCACAC
GGCGCAGCGCACCCGGTTTGTTCATGTTGAAAACACGAATCGGTAATTTATGGTCACGAG
CCAGCGTGAAGGCCGCCAGGTCCATGACTTTCAGCTCTTTTTCCAGCACTTCGCTGTAAG
TCAGTTGCTCGTACATGGTTGCAGTTGGATCTTTCGCCGGATCAGCAGTAAACACGCCGT
CAACTTTGGTTGCTTTCAGCACCACATCGGCTTCAATTTCGATACCACGCAGGCAAGCTG
CTGAGTCGGTGGTAAAGAACGGGTTACCTGTACCGGCGGAGAGGATCACCACACGGTTGT
TGCGCAACAGGCTGATAGCTTCTGCCCAACTGTAGCTGTCGCACACGCCATTCAATGGAA
TAGCGGACATCAGGCGAGCGTTCACATAGGCGCGGTGCAGTGCATCACGCATTGCCAGGC
CGTTCATTACGGTCGCCAGCATCCCCATGTGGTCGCCCACAACGCGGTTCATACCCGCTT
TCGCCAGACCAGCGCCACGGAACAGGTTACCCCCACCAATCACCACACCAACCTGAATAC
CCAGTTCAACCAGTTCTTTGATTTCCTGAGCCATGCGATCCAGTATGCTTGCATCAATAC
CGAAGCCTTCAGTGCCCTGCAGAGCTTCGCCACTCAACTTAAGCAGAATGCGTTTATAGA
CGGGTTTTGCATTGGTAGCCATGTTTCTTTCCTGAGACTGTCAACGATTGAAATGAATTA
ATACTAGCGACATTGTACGTCGCTATTCAGCGCAGCCCCACAAGGGTTAGCTGAATTTAC
AAGATGGGCACAAAAAGAAGCCGCCCTCAGGCGGCTCCTTTTCGATGATTAAGACTGCTT
GGACATCGCAGCAACTTCTGCTGCAAAGTCAGTCTCAACTTTCTCGATGCCTTCACCTAC
TTCGAAGCGGATGAAGCCAGTCACTTCAGCGTTATGCTCTTTCAGCAGCTGACCAACAGT
TTTTGCCGGTTCCATAACGAACGGCTGACCAGTCAGAGAAACTTCGCCGGTGAATTTCTT
CATGCGGCCTTCAACCATTTTCTCTGCGATTTCTTTCGGCTTACCAGACTGCATCGCGAT
ATCCAGCTGTACCTGGTATTCTTTTTCTACCACTTCAGCGGATACGTCTTCTGGTTTGAT
GAATTCTGGCTTGCTTGCAGCAACGTGCATAGCGATGTGTTTAACCAGCTCTTCGTCAGC
GCCTTTAGCAGCAACCAGAACGCCGATACGCGCACCGTGCTGATAAGAACCCAGAACGTC
GCCTTCCAGCGCAGCAACGCGGCGAATGTTGATGTTTTCACCAATTTTCGCTACCAGCGC
AACACGTTCTTCTTCGAACTGTGCTTTCAGAACTTCAACGTCAGTGATTTTGCCAGCAAC
AGCTGCGTCCAGAACTTTGTCTGCGAACGCCTGGAAACCAGCGTCTTTTGCAACGAAGTC
AGTCTGACAGTTAACTTCCAGAATGATGCCGTAGTTGCCGTCGATTTTGGTTTTGATCAC
GCCGTCAGCAGCAACGTTGCCTGCTTTTTTCGCTGCTTTAATAGCACCGGACTTACGCAT
GTTTTCGATTGCCAGCTCGATGTCGCCGTTAGCTTCAGTCAGTGCTTTTTTGCAATCCAT
CATGCCTGCGCCAGTACGCTCACGCAGCTCTTTTACCAGGGATGCGGTAATTTCAGCCAT
TCTAAAATCCTCGGAGATGTGATCTGCCCGGCATTAAACCGCACAGATATAAAAGTGAAA
AAGGGGGCCATATGCAGGCCCCCTAACCAAACGTGTACTACCTGGTCTATAAGGGCTCTC
CCCCTTCATATTTCGCGCCGCAGATGCGTTGTCTTCGCTCGCTCATCCCGGTCACTTACT
GATGTAAGCTCCCGGGAATTCTCGAGCTTGCCGCCTTTCTGCAACTCGAACTATTTTGGG
GGAGTTATCAAGCCTTATTACTCAGCTTCTACGAAGCTTTCTTCCGCCTGGGAAGCCAGA
TCCTGAGAACGGCCTTCACGTACGGTTGCAGCAACAGCGCCCAGGTACAGGGTCACAGCA
CGGATTGCGTCGTCGTTACCCGGGATAACGAAGTCAACACCGTCCGGATCAGAGTTGGTA
TCAACGATAGCAAATACCGGAATACCCAGGTTGTTTGCTTCTTTGATAGCAATGTGTTCG
TGGTCAGCATCGATTACAAACAGAGCGTCCGGCAGACCGCCCATGTCTTTGATACCGCCC
AGGCTGTTTTCCAGTTTCTCCAGCTCACGAGTGCGCATCAGCGCTTCTTTCTTGGTCAGC
TTGTCGAAAGTACCGTCCTGAGACTGAGTTTCCAGGTCTTTCAGACGTTTGATGGACTGA
CGAACGGTTTTCCAGTTAGTCAGCATACCGCCCAGCCAGCGATGGTTCACGAAGAACTGG
TCGCAGCTCAGAGCAGCGTCTTTCACCGCTTCGCTTGCAGCGCGTTTAGTACCAACGAAA
AGGATTTTACCTTTGCGAGAAGCAATCTTGTTCAGTTCAGCCAGAGCTTCGTTGAACATC
GGTACAGTTTTCTCAAGGTTGATGATGTGAACTTTGTTACGCGCACCGAAGATGAACGGC
TTCATTTTCGGGTTCCAGTAACGGGTCTGGTGACCGAAGTGAACACCAGCCTTGAGCATG
TCGCGCATGGAAACAGTTGCCATGATTAAAACCTCTATATAAAAGTTGGGGTTATGCCTC
CACGTATCCCATATTACCGACCCCAAAGGGCACCCCGGAATATGTGCCGATACGTGTGTG
TTGTTACACAAAGTGAGATTGTCGCTTCCGTCCAGTCTGTGTATACGAAATGGATCGGAA
GTCCGGCGCGCTTTATACCACAAATACGTCTGGGACACCAATAATTGTTGGCGCTGTGTA
CAGCATCAGACGTCGAATTTTCTATTATAGAAAACCTTCAGTGGCACGTTTGGCGAAATT
CAGAATGATTCTCAATTTGCCCGGGTGTGATACCATTGACGGCACTTACATATATATTGT
CGGTATCACCGACGCTGATGGACAGAATTAATGGCTATCTCAATCAAGACCCCAGAAGAT
ATCGAAAAAATGCGCGTCGCTGGCCGACTGGCTGCCGAAGTGCTGGAGATGATCGAACCG
TATGTTAAACCGGGCGTCAGCACCGGCGAGCTGGATCGCATCTGTAATGATTACATTGTT
AATGAACAACACGCGGTTTCTGCCTGCCTCGGCTATCACGGTTATCCGAAATCCGTTTGC
ATCTCAATTAATGAAGTGGTGTGCCACGGTATTCCGGACGATGCTAAGCTGCTGAAAGAT
GGCGATATCGTTAACATTGATGTCACCGTAATCAAAGATGGTTTCCACGGCGATACCTCG
AAAATGTTTATCGTCGGTAAGCCGACCATCATGGGCGAACGTCTGTGCCGTATCACGCAA
GAAAGCCTGTACCTGGCGCTACGCATGGTAAAACCAGGCATTAATCTGCGCGAAATCGGT
GCGGCGATTCAGAAATTTGTCGAAGCAGAAGGCTTCTCCGTCGTTCGTGAATATTGCGGA
CACGGTATTGGTCGCGGCTTCCATGAAGAACCGCAGGTGCTGCACTATGACTCCCGTGAA
ACCAACGTCGTACTGAAACCTGGGATGACGTTCACCATCGAGCCAATGGTCAACGCGGGT
AAAAAAGAGATCCGCACCATGAAAGATGGCTGGACGGTAAAAACCAAAGATCGCAGCTTG
TCTGCACAATATGAGCATACTATTGTGGTGACTGATAACGGCTGCGAAATTCTGACGCTA
CGCAAGGATGACACCATCCCGGCGATAATCTCGCACGACGAATAAAATGAAGCCGGCGAA
TGCCGGCTTTTTTAATGCGATAATTTAATCTTATGGGTGGCGCACAATGAATACCCTTCC
AGAACAGTACGCAAACACCGCTCTCCCCACCCTGCCCGGTCAACCGCAAAATCCATGCGC
CTGGCCCCGTGATGAATTAACCGTCGGTGGGATAAAAGCCCATATCGATACTTTCCAGCG
TTGGCTGGGTGATGCCTTTGACAATGGTATCTCCGCAGAACAGTTGATTGAGGCGCGTAC
CGAGTTTATCGACCAGCTCCTGCAACGATTATGGATTGAAGCGGGATTCAGCCAGATTGC
CGACCTGGCATTGGTCGCCGTCGGTGGCTACGGTCGTGGCGAGCTGCATCCACTTTCAGA
CGTCGATTTACTGATTTTAAGCCGTAAAAAGCTCCCGGACGATCAAGCGCAAAAAGTGGG
CGAGCTGTTAACGCTGCTCTGGGATGTAAAGCTGGAAGTCGGTCATAGTGTGCGCACGCT
TGAAGAGTGCATGCTGGAAGGGTTATCGGATTTAACCGTCGCCACCAATTTAATCGAATC
CCGCTTATTAATTGGCGATGTTGCGCTGTTCCTCGAACTGCAAAAACATATTTTCAGCGA
AGGATTCTGGCCTTCCGACAAGTTCTACGCGGCGAAAGTTGAAGAACAGAACCAGCGCCA
TCAGCGTTACCATGGCACCAGCTACAACCTTGAACCAGACATCAAAAGCAGCCCTGGCGG
CTTGCGCGATATCCACACTCTGCAATGGGTGGCCCGCCGTCATTTTGGCGCAACATCGCT
GGATGAAATGGTCGGGTTTGGCTTCTTAACCTCAGCGGAGCGGGCGGAATTAAACGAATG
TCTGCATATATTGTGGCGTATTCGCTTTGCCCTGCATCTGGTCGTCAGCCGTTACGATAA
TCGCCTGTTATTCGATCGCCAGCTTAGCGTCGCCCAGCGTCTGAATTACAGTGGCGAAGG
TAACGAACCGGTCGAGCGGATGATGAAGGATTACTTCCGCGTGACACGCCGCGTCAGTGA
ACTCAACCAGATGCTGCTGCAACTGTTCGATGAAGCGATCCTCGCCCTTCCCGCCGACGA
AAAACCCCGTCCAATCGACGATGAGTTTCAGCTACGCGGTACGCTAATCGACCTGCGTGA
TGAAACACTATTTATGCGCCAGCCGGAAGCCATCTTGCGTATGTTCTACACCATGGTGCG
CAACAGTGCGATCACCGGCATTTACTCCACCACACTGCGCCAGTTACGCCATGCCCGTCG
CCATCTGCAACAACCGCTGTGTAATATTCCGGAAGCACGAAAACTGTTTTTGAGCATTCT
GCGTCACCCCGGAGCGGTGCGGCGCGGGCTATTGCCAATGCATCGCCATAGCGTGCTCGG
CGCGTATATGCCGCAATGGTCGCATATCGTCGGGCAGATGCAGTTTGATCTGTTCCACGC
CTACACGGTGGATGAACATACTATCCGCGTGATGCTGAAACTGGAGAGTTTTGCCAGTGA
AGAAACGCGCCAGCGCCATCCGTTGTGTGTGGACGTCTGGCCGCGCCTACCGTCAACTGA
GCTGATTTTCATCGCCGCGCTGTTTCACGATATCGCCAAAGGACGCGGCGGCGACCATTC
CATTCTCGGTGCTCAGGATGTAGTGCATTTTACCGAACTCCACGGGCTGAACTCACGCGA
AACACAGCTGGTCGCCTGGCTGGTTCGCCAGCACTTGCTGATGTCGGTGACAGCTCAGCG
TCGCGATATTCAGGACCCGGAAGTCATCAAGCAGTTTGCCGAAGAAGTTCAAACGGAAAA
TCGTCTGCGCTATCTGGTATGCCTGACAGTGGCTGACATTTGCGCCACCAACGAAACGCT
GTGGAATAGCTGGAAGCAAAGTCTGTTGCGCGAACTCTATTTTGCCACCGAAAAACAGCT
ACGACGCGGAATGCAAAACACGCCGGATATGCGCGAACGGGTTCGCCATCACCAACTCCA
GGCGCTGGCACTGCTGCGCATGGATAACATCGACGAAGAGGCGCTGCACCAAATTTGGTC
ACGCTGTCGTGCTAACTATTTTGTCCGCCATAGCCCAAATCAACTGGCCTGGCATGCGCG
CCATTTATTACAGCATGATTTAAGCAAACCGCTGGTATTGCTTAGTCCGCAGGCTACGCG
TGGAGGCACCGAGATTTTTATCTGGAGCCCGGACCGCCCCTATCTGTTTGCCGCCGTCTG
TGCCGAATTAGACCGCCGCAATTTAAGTGTTCACGACGCACAAATTTTCACCACTCGCGA
CGGTATGGCGATGGATACCTTTATCGTGCTGGAACCCGATGGTAGCCCGCTATCCGCAGA
TCGCCATGAGGTTATTCGGTTTGGTCTGGAGCAAGTACTGACACAAAGTAGCTGGCAGCC
ACCACAGCCGCGTCGTCAACCGGCTAAACTACGTCACTTTACTGTTGAAACCGAAGTGAC
GTTTTTGCCTACCCATACCGACCGAAAATCATTCCTTGAGCTTATCGCGCTCGACCAGCC
AGGACTGCTGGCGAGAGTCGGGAAAATTTTTGCCGATCTGGGAATTTCGCTTCATGGCGC
CCGAATTACAACCATTGGCGAGCGAGTAGAAGATTTATTCATAATTGCCACCGCTGACCG
GCGTGCACTTAATAACGAGTTGCAGCAGGAAGTGCATCAGCGGTTGACAGAGACCCTCAA
TCCAAACGATAAAGGGTGATGTGTTTACTGATATGAAAAGAGTTTAACAATGCAGCAGTT
ACAGAACATTATTGAAACCGCTTTTGAACGCCGTGCCGAGATCACGCCAGCCAATGCAGA
CACCGTTACCCGCGAAGCGGTAAATCAGGTGATCACCCTGCTGGATTCCGGCGCACTGCG
TGTAGCGGAAAAAATTGACGGTCAGTGGGTGACGCATCAGTGGTTAAAAAAAGCGGTGCT
GCTCTCTTTCCGTATTAATGATAATCAGGTGATCGAAGGGGCAGAAAGCCGCTACTTCGA
CAAAGTGCCGATGAAATTCGCCGACTACGACGAAGCACGTTTCCAGAAAGAAGGCTTCCG
CGTTGTACCACCAGCGGCGGTACGTCAGGGTGCGTTTATTGCCCGTAACACCGTGCTGAT
GCCGTCTTACGTCAACATCGGCGCATATGTTGATGAAGGCACGATGGTTGATACCTGGGC
GACCGTCGGTTCTTGTGCGCAGATTGGTAAAAACGTCCACCTTTCCGGTGGCGTGGGCAT
CGGCGGCGTGCTGGAGCCGCTGCAGGCTAACCCGACCATTATTGAAGATAACTGCTTCAT
TGGCGCACGCTCTGAAGTGGTTGAAGGGGTGATTGTCGAAGAAGGTTCCGTCATCTCTAT
GGGCGTATACATTGGTCAGAGCACCCGTATTTACGACCGTGAAACCGGCGAAATCCACTA
CGGTCGCGTTCCGGCGGGGTCTGTGGTTGTTTCAGGTAATCTGCCGTCAAAAGATGGCAA
ATACAGCCTCTACTGTGCGGTTATCGTTAAGAAAGTTGACGCGAAAACTCGCGGTAAAGT
TGGTATTAACGAACTGCTGCGTACCATCGACTAAAAGTATGTACACGGGCAGCACGACGC
TGCCCGATTGCTTTCTGGTTCAGAATAATTCGTCCTACTCATTCTTCCTCCCCCTTTTTT
AAATACTTTTTCATCTTGTTTCGGACTGTCATGTAATTCGCAAAACGAAGATAAATGTGC
TAATCCATCCCATGGAATATCGCCACAATAAAGCAGGTAATTTTTTGATTTTTACGCCAT
GATAGAAGTCTGGAAGAAAAAGGCTTTCTGCGATCACAGTCGAGCCGGGCGGGCCAGGCC
AAATGCTAAAATAAGCACAATTTACTGACTCATTTTGAGGTAACGCTATGTACGACAATC
TGAAAAGTCTGGGTATTACCAATCCTGAAGAAATTGATCGTTACAGCCTCCGGCAGGAAG
CCAACAACGATATTCTGAAAATCTATTTCCAGAAAGACAAAGGCGAGTTTTTCGCCAAGA
GCGTGAAGTTTAAATATCCGCGTCAGCGTAAAACGGTCGTCGCTGATGGTGTGGGTCAGG
GTTATAAAGAAGTCCAGGAAATCAGCCCGAATCTACGGTATATCATTGATGAGCTTGATC
AAATCTGCCAGCGTGACCGCAGCGAAGTTGATCTTAAGCGTAAGATCCTCGACGACTTAC
GTCACCTGGAGTCAGTCGTAACCAATAAGATCAGCGAGATTGAAGCCGATCTGGAAAAAC
TAACGCGTAAATAATCCCGAACTGACGGTTAACTCGGGCATTCCCCTCTCCCCTTCGGGC
TGAGGGGAATGAGCCAGCGCCGCCTCAACCTTAACGCATAACCTACCGCTCTTCATCCAG
TTGTAACGCCACATACAGCAGCAACCTGTCATCAAAATTGCCCAAATCAAGCCCGGTCAG
TTCCGATATACGATTAAGCCGATACTCCAGAGTATTACGATGAATAAACAACGCCTTTGA
CGTTGCCAGCGGTTGCACATTGTGACGAAACCACGCCGCCAGCGTTCGCCGCAGCAAGCC
GTTATTGTCCATCGCTTTCAGCCGCGCCAGCGGTCGCGCCAGTTCGTTGGCCTGCCAGTC
GCCACGCAAACTGTCGAGTAACACAGGTAACATCAGATCCTGATAAAAATAGCAGCGACT
TTCTGGCATCCGCTGTTTACCCACCACCATCGTCGTTTTCGCCGTACGATAGGATCGGGC
AATACTGCCAGGACCAGTAAAATAGTTGCCCAGCGAAACGCGAAAACGCAGCTGGCCGTA
CTCTTTCATGCGGGTAATCAGTTGTTCAACTCGCTTACGATGATCTTCTGCATCCCAGCG
CCCAAAAGAGTTCAACGCCGGTTTCAACACCACCATTTCGGTTAGCGAGACAATCGCCAC
CAGATTATTACGCTCGGGCGTAGTCAGCGCATTTTGCAGTTGTTGTAACTCCGCCATTGC
GCTGTCCACGCCAAGCTGACCGCTGTCGACCTCAACAATAGCCACTACTCGCGGTTGATT
GAGATCGATCCCCAGCCGTTGCGCCCATTCAGTAAGTGCGGGAGTATTCTCCTCAGCCTG
AATCAGGTTCATCACCAGTTCTTCCCGCAAACGGCTATCCTGCGCCAACAGGTGCATCAA
CCGCGACTGTTCCAGCATCATTTCAGCCGTCATGCAGACCAGTTCGCCATATTTACGCAG
GTTCTCTGGTTCACCTGTCAGGCCAATTACGCCGACAATTTCACCTTCCAGCCGTAACGG
TAGATTAATCCCCTGCCGCACACCGTGCAGATGACGTGCCACCGCGTCATCGATATCGAC
GACTCGTCCCTGTGAAAGTACCAGCAATGCACCTTCGTGCAATTCACCAATACGCTCACG
ATCGCCGCTGCCGATAATTCGCCCGCGGGCATCCATTACGTTGATATTGGTATCGATGAT
GCGCATGGTATGTGCCACGATATCCTGCGCCATTTTGGTATCAAGATGCCAGCCAGCCAT
AAGTCCTCCGTTATGCACGGCTTAGCATAAGGAAGTACGTAACGTACGGCATTGTGCAAA
TGCCTAAAGGATGATGAAGATGTATGGAGTTGTGGTGAAGTTCACAGATTGTAAGGAGAA
CCCCTTCCCGTTTTCAGGAAGGGGTTGAGGGAGATTACTGCATTAACAGGTAGATGGTGC
TGTCGCCGCGCTGAATGTTCAGTGCCAGCACAGACGGTTTGCTGTCGAGAACTTTACGCA
GTTCAGCGATGTTTTTCACTGCCTGCTGGTTCGCGCCAATAATCACATCACCTTTCTTCA
GGCCGATCTGCGCAGCCGGAGTGCCCGTTTTCACGTTGTTCACTACCACGCCCTGATCTT
TGCCTTTGTTGCTCATCTCAGCACCTTCAATGCCGTTGAAGATGGAGCTGGAATCAACCT
GATTCTGGCTGCTCTGCTGCAGTTCCAGATTCACGTTGACCTGCTTACCGTCGCGCAGCA
AGCCCAGGGTCAGTTTGCTGCCCACCGGCATAGTACCCACCTGAGCACGCAGTGCGGCAA
AGCTGCTGATCGGCTTACCGTTCAGTGAGGTGATCACATCACCCGCTTTAATGCCCGCTT
TTGCAGCGGAGGAATTAGGCAGAACCTGGCTTACGAAAGCACCGCGCTGGGCGTCAACTT
TCATCGCTTTCGCCAGTTCGGAATTCAGCTCAGTCCCCATAATACCCAGCTCACCGCGTT
TCACCTGGCCGTATTCCACCATCTGCGAGGTCAGGTTTTTCACCATGTTGCTCGGGATAG
CAAAACCGATACCGATGTTGCCGCCGTCCGGTGCGAGGATCGCGGTGTTGATACCGATCA
GTTCGCCGTTCAGGTTAACCAGCGCACCACCGGAGTTACCACGGTTGATCGCTGCATCGG
TCTGGATGAAGTTTTCGTAGTTTTCGGCATTCAGGCCGCTACGCCCCAGCGCAGAGACAA
TCCCGGAAGTTACCGTCTCGCCCAGACCAAACGGGTTACCAATCGCTACGGTGTAATCAC
CCACGCGCAGTGCATCAGAATCCGCCATCTTAATTGCGGTCAGGTTTTTCGGATTCTGGA
TTTGGATCAGCGCGATATCAGAGCGCGGATCTTTGCCAACCATCTTCGCGTCGAACTTAC
GGCCATCGCTCAGTTGAACTTTAATGACCGTCGCGTTATCAACAACGTGGTTGTTGGTGA
CGACATAGCCTTTATCGGCATCAATGATGACGCCGGAACCCAGCGCCATGAATTTCTGTT
GCTGGCCGCCACCATTACCGCCCTGGCCACCCTGGCAGAACGGAGAGCTCTGGAACGGAG
AACCTTCCTGGCAGAACGGAGAATCATCACCGAAGAACTGCTGGAAATTACGCGGCATAC
GCGGCGTATTAACGGTTGTGCTACCTTCTACGTTAATGCTGACCACTGAAGGCATCACCT
TTTCGAGCATCGGTGCAAGGCTTGGCATCTGCTGGGCTGTCGTTGCTGAAGAAGTCTCAG
CCGCCGTTGCAGAGAGCGGAGATAACGCCAAACCTAAACTCAGAGCCAGTGCACTCAGTG
CTAATGTGGTTTTTTTCATGTATTTCAGTCTCGATTAACAGATAACGCAAAATTGCTGTG
TTCTTCAGATTCGTTTTATAGCGCGAAGTTCCGAACTAAAGTTTCTGCAAAAGGTAAAAA
TTTATTGTTCGTCTTTACAAAAGACTGGTTATTGTTCTACGGCCATCAGACGTCGGTATT
CATCCCACGCATAGAGGTCGGTCATACCGCTGATATAATCATGCAGCAGGCGGCAACGGT
AATAATATTCCCATAGCGGAAACTCAGGAGAATCTGACGGTAATTTACTGACAGCTTCGA
CATAGGCCAGCCGATGGCGCGTCGAGAGTTTGTGGAATAAGCGCGATTCAATAGGGAAAC
GTTTCACCCGTTCTTTTTCTACCAGTTCAGTAAAGTCTGATAACGACAGGCTTAATAAAG
GACGATAAATCTCTAATAATCCGCTAATGACCCGATAGCCCTGCAATTCAAGCTGCTCGA
CATCTGGATGGCTAAACACATGTTTTACAGCGACATTTTTATATAGCTTAAGAAGATCGC
TGCATTCGCTGGCATCTTCCAATAATGCATGATTAAACGTTCCGGCGAAAATCGCAGGCA
GATTATCAATAAATCGTTGTGCCGCGTAGGGTACCAGTTTATTTAGGGTATTTACCCGTA
AATACATAAAAAACTGATCTTCCGTACTGCGGCTTAAACTATTTGAGCGTGATTTTTCCC
AGGCATTTTCAACCACTAGCGAAAAGAGCGAACCTTTCTCATGCTGACCCCACGCCTCGT
GCAAATGATGATAAAGCTGCTCAACGGTAAATATTCTTTTCTCTACCGCATCTTCAAGGT
CTGCCACACAATAGGAGATGTCGTCGGCAGCTTCCATAATCCACGTTAATGGAAAACGAC
TGTAAAGCGCCAAATTAAGTTCTTTACGCAACCGGGCAATATAGGCTTCTTCAGAAAGAT
AATAACCCGGCTTTTTCATTAAATAGTGATGTGTCTCAGGCGTTTCGCCACGCCACCACG
CCGGACGGGTATATTTTAAAATACCGCCAACCTGTGCCCAGGTGAGATTCATCCTCATCA
ATGTATGCACCAGACGAATGCCTTGTGCATTCCCCTCAAAATGACATAAGTCCTGACGAA
TCTTGCGCCGCAGCTCGTTAAGCGGTTCTTCCCCGTCCCGTAAACGTAGTGCTGCCACGC
TGCAGCGATCGTCAGTCAGAGGCTGGCTTTCGGCATCTTCCGGGTATAAACGCTGGCGAA
ACCAGTCATTTATCGCCGCTTCGCCAAAATGACCAAACGGCGGATTGCCGATATCGTGCA
TCAGGCATGACATCTCAACAATGCTTTCAAAAGGTCCGGTCAGTTCATCCAGGCCGTATG
CTTCCAGCAATTTAAGCTCTTTCAGACGGCTTAAAATTTCTTTGGCGATGTAGCGCCCCA
CCTGCTGGACTTCCATCGAGTGGGTAAGACGCGTGCGCACGGCGGCATTGCGCTCCAGTG
GAAAAACCTGGGTCTTTTGTTGCAGACGACGAATTGCCGGAGAGTTGATGATACGCCCGC
GATCGCTCTCGAAGATCCGCAGGATCTCATGTTCGGTTTTAACGCCCTGCGGTGAACGGT
AACGACGATGCCAGTTTATTTTTTTTCGGAAATCAATCTGTGCCATGTCCTCTCCCGCGT
GAGAAATACGCTTCCCCGTAAGCGCATGGTAAACTATGCCTTCAAATCGGGCTTATCGCG
AGTAAATCTATGAAAATCGGCATCATTGGTGCAATGGAAGAAGAAGTTACGCTACTGCGT
GACAAAATCGAAAACCGTCAAACTATCAGTCTCGGCGGTTGCGAAATCTATACCGGCCAA
CTGAATGGAACCGAGGTTGCGCTTCTGAAATCGGGCATCGGTAAAGTCGCTGCGGCGCTG
GGTGCCACTTTGCTGTTGGAACACTGCAAGCCAGATGTGATTATTAACACCGGTTCTGCC
GGTGGCCTGGCACCAACGTTGAAAGTGGGCGATATCGTTGTCTCGGACGAAGCACGTTAT
CACGACGCGGATGTCACGGCATTTGGTTATGAATACGGTCAGTTACCAGGCTGTCCGGCA
GGCTTTAAAGCTGACGATAAACTGATCGCTGCCGCTGAGGCCTGCATTGCCGAACTGAAT
CTTAACGCTGTACGTGGCCTGATTGTTAGCGGCGACGCTTTCATCAACGGTTCTGTTGGT
CTGGCGAAAATCCGCCACAACTTCCCACAGGCCATTGCTGTAGAGATGGAAGCGACGGCA
ATCGCCCATGTCTGCCACAATTTCAACGTCCCGTTTGTTGTCGTACGCGCCATCTCCGAC
GTGGCCGATCAACAGTCTCATCTTAGCTTCGATGAGTTCCTGGCTGTTGCCGCTAAACAG
TCCAGCCTGATGGTTGAGTCACTGGTGCAGAAACTGGCACATGGCTAAGTCACTGTTCAG
GGCGCTGGTCGCCCTGTCTTTTCTCGCGCCACTGTGGCTCAACGCGGCACCGCGCGTCAT
CACGCTTTCTCCCGCCAACACTGAACTTGCCTTTGCCGCCGGGATCACGCCGGTTGGGGT
CAGCAGCTATTCCGACTATCCTCCACAAGCGCAAAAGATTGAGCAGGTTTCCACCTGGCA
GGGGATGAATCTGGAACGCATTGTCGCGCTGAAACCCGATCTGGTGATTGCCTGGCGTGG
AGGTAATGCCGAGCGGCAGGTTGACCAGCTGGCTTCGCTGGGAATAAAAGTGATGTGGGT
CGATGCGACAAGCATTGAACAAATTGCCAATGCGTTACGTCAACTGGCCCCCTGGAGTCC
GCAACCGGATAAGGCCGAACAAGCCGCGCAATCCCTGCTGGATCAGTACGCGCAATTGAA
AGCGCAATATGCTGATAAACCTAAAAAACGTGTTTTTCTGCAATTCGGCATTAATCCGCC
ATTTACCAGTGGAAAAGAGTCGATTCAGAACCAGGTACTCGAAGTTTGTGGCGGAGAAAA
CATCTTTAAAGACAGCCGGGTTCCCTGGCCGCAAGTTAGCCGCGAACAGGTGTTAGCACG
CTCGCCACAGGCGATTGTCATTACAGGCGGACCGGACCAAATTCCTAAAATCAAACAATA
CTGGGGTGAACAGCTCAAAATTCCCGTTATTCCTCTCACGAGTGACTGGTTTGAACGTGC
AAGCCCACGTATTATCCTCGCTGCACAACAGCTCTGTAATGCGCTTTCACAGGTAGATTA
GTGCCTGACCTTTTCAGGTGCTCAGTGGGGATTGAACAATGCTCGTCTATTGGCTGGATA
TAGTCGGCACAGCGGTATTTGCCATCTCCGGCGTTTTGTTAGCCGGAAAATTGCGTATGG
ACCCTTTTGGTGTTCTGGTATTGGGCGTGGTTACCGCAGTAGGCGGCGGGACAATTCGCG
ACATGGCGCTGGATCACGGCCCGGTATTTTGGGTGAAAGATCCCACCGATCTGGTCGTTG
CAATGGTCACCAGCATGCTGACCATCGTGCTGGTGCGCCAGCCAAGACGCTTACCAAAAT
GGATGTTGCCGGTGCTGGACGCCGTTGGTCTGGCGGTGTTTGTCGGCATTGGCGTGAATA
AAGCCTTTAATGCGGAAGCCGGTCCGTTAATCGCGGTTTGCATGGGCGTCATTACTGGCG
TTGGCGGCGGGATTATTCGTGATGTACTGGCCCGCGAGATCCCCATGATTTTACGTACAG
AAATCTACGCAACAGCCTGTATTATCGGCGGTATTGTCCACGCTACGGCTTATTACACAT
TTTCCGTACCACTGGAAACAGCCAGTATGATGGGCATGGTCGTGACGCTATTGATTCGGC
TGGCGGCTATTCGTTGGCATCTTAAGCTACCGACGTTTGCGCTGGATGAGAATGGGCGTT
GAAGAGAGAAGATGTGCCGGATAGTTTATCCGGCACATGAACAACAGATTAGATGCTAAA
GGAAGAACCGCAACCGCAGGTGCTTTTCGCGTTCGGGTTGGTCACGATGAAACGAGAACC
TTCCAGTCCTTCGGTGTAGTCAACGGAACCGCCGACCAGATATTGCAGGCTCATCGGATC
AACCACCAGGCCAACGCCCTGTTTTTCGATGGTCATATCGCCTTCGTTCACCTGATCATC
AAAGGTGAAACCATACTGGAAGCCGCTGCAACCGCCACCGGTGATATACACGCGTAATTT
CAGATTCGGGTTATCTTCGTCAGCGATCAGGCTTTTAACTTTGTTGGCTGCTGCGTCGGT
AAACTCCAGCGGCAGTGCTACGTCATCACTCATATTTTGCTCCAAACGACATCGGCAATT
GGGCAAATTCTAACCCAATAATAATCGCCATTATCTAATACCCTGGTATTTCGTTCAAGT
ATTCTCGCTGGCTGATGCGGCCTTGCTTCGCGCCAGTTGCTCAGCTTCCTGTTTTGCCAG
CGTGCGCGCAAGAATCGCCGAGTATAGCGGTTTCCCACCGGTAAATTGCGCTAATAGTGT
TGCGCCAAGACCGGTAATAATCATTGGCAAAATGAGCTGGTAGTTATCGGTCATCTCCAG
AACCAGAATGATCCCCGTTAACGGCGCGCGAATAGATGCCGCCAGTAACGCCCCCATTCC
GGCAATAGCAAATGTCCCCGCCTCAAGGTGATATTGCGGAAACAGCTCAACGGCAACCAT
TCCGAAAGCGGTTCCCAGCACAGTACCCAGCGCCAGCATCGGGGCAAAAATACCGCCCGG
CGCGCCGGAAGAGAAGCACAGTAAAGTGGTAATGACCCGCGCGACGAAGATAAACACCAG
CATTCCCATGCTGAAATTCCCCGCGGTAGCGATAGGAATCAGGTTAAAACCGCCGCCCGA
CGTTGCTGGTGCCACAAACCCCAGCAATCCACACAGACCGCCAATCGCACCACCCATCAG
TACCCATTTGGTAATATTGCCGCCGTGCACACGGTGCAGCAAATCCTGCATTCCCAGCAC
CCATTTATTAAAAATAGGGCCGAAAATGCCAAAAATAATACCGAGGATCAGATAAAGCCA
CAGCGTATTAAGCGGCGCATCAGAAAGTTTACCGACGTCAATCAACGCAACTTCATGATT
AAAAATCCGGTACATAATGGTCGACATAATGACACCAATAAATACCGCTTTAATCGAAAT
TAACGTATAGCGAAACTGCGGACGCATCTCTTCGATAATAAACAAAATACCCGCCAGCGG
CGCGTTAAAGGCCGCCGCCAGCCCCGCAGCAGCACCGGTTGCCAGCAGCGTATGGCGAGC
TTCATCACCTTTCAGGCGGAAAACATCGAGTACCATCCGCCCGATATTGCCGCCGATCTG
CACGGTTGGCCCTTCGCGCCCCAACACCATGCCTCCGCCGAGCGTCCCCAGCCCGCCAAA
GAATTTCACCGGCAATACACGCCACCAGCGAACGGGACGTTGATCTTCCAGCGCCCCTTC
AATTTCCGGGATCCCCGACCCCCCTGCTTCCGGCGCGTATTTGCGCACCAAAAAGTAGCC
GAACATCGCCAGCAGCGCCGAACAGAGAAAAGCGACGGTTAACAGAAGCGGATAATTATC
AGCAGTATGTACCAGCGCCCCCATACGTTGGTTCTGCAACCAGGCGACACCTTTGTCAAA
AGCAACCGCTGCCAGCCCGACAAGCGTGCCGACGACTGCCGCCATAAACAAAATGGCTAA
CGGGGTTTTATCGCGCTCAAGAAGTTGGCGAATCAGTTGTCTGCGTCGCAGGCGCGCGGC
CTGCGGTGTTTCTAAAGAGGGAGTATCAGTTTTCATCCAATGATCACTTATTGGTCATAC
AAATAAGATGACGGCATTTTACTCGCACGTTCCATGAAAATCCTTTGCAAAGCGTAATGT
TTCAAATGCACAAAACTTTTATACTCTAAGAAATCAGGATTGCACCAGTACAAGCAGCCT
GATGTTTGACGAGTATTTAACTTGTTATGAATAACATAGAATAGCAGCCATTCACTTTTT
CTACGAATCAGGAACCCTCCATGAGTAAGTCTGAAAATCTTTACAGCGCAGCGCGCGAGC
TGATCCCTGGCGGTGTGAACTCCCCTGTTCGCGCCTTTACTGGCGTGGGCGGCACTCCAC
TGTTTATCGAAAAAGCGGACGGCGCTTATCTGTACGATGTTGATGGCAAAGCCTATATCG
ATTATGTCGGTTCCTGGGGGCCGATGGTGCTGGGCCATAACCATCCGGCGATCCGCAATG
CCGTGATTGAAGCCGCCGAGCGTGGTTTAAGCTTTGGTGCACCGACCGAAATGGAAGTGA
GAATGGCGCAACTGGTGACCGAACTGGTCCCGACCATGGATATGGTGCGCATGGTGAACT
CCGGCACCGAGGCGACCATGAGCGCCATCCGCCTGGCCCGTGGTTTTACCGGTCGCGACA
AAATTATTAAATTTGAAGGTTGTTACCACGGTCACGCTGACTGCCTGCTGGTAAAAGCCG
GTTCTGGCGCACTCACGTTAGGCCAGCCAAACTCGCCGGGCGTTCCGGCAGATTTCGCCA
AACATACCTTAACCTGTACTTATAACGATCTGGCTTCTGTACGCGCCGCGTTTGAGCAAT
ACCCGCAAGAGATTGCCTGTATTATCGTCGAGCCGGTGGCAGGCAATATGAACTGTGTTC
CGCCGCTGCCAGAGTTCCTGCCAGGTCTGCGTGCGCTGTGTGACGAATTTGGCGCGTTGC
TGATCATCGATGAAGTGATGACCGGTTTCCGCGTAGCGCTAGCTGGCGCACAGGATTATT
ACGGCGTAGTGCCAGATTTAACCTGCCTCGGAAAAATCATCGGCGGTGGAATGCCGGTAG
GCGCATTCGGTGGTCGTCGTGATGTAATGGATGCGCTGGCCCCGACGGGTCCGGTCTATC
AGGCGGGTACGCTTTCCGGTAACCCAATTGCGATGGCAGCCGGTTTCGCCTGTCTGAATG
AAGTCGCGCAGCCGGGCGTTCACGAAACGCTGGATGAGCTGACAACACGTCTGGCAGAAG
GTCTGCTGGAAGCGGCAGAAGAAGCCGGAATTCCGCTGGTCGTTAACCACGTCGGTGGTA
TGTTCGGTATCTTCTTTACCGACGCCGGGTCCGTGACGTGCTATCAGGATGTGATGGCCT
GTGACGTCGAGCGCTTTAAGCGTTTCTTCCATATGATGCTGGATGAAGGTGTTTACCTGG
CACCGTCAGCGTTTGAAGCGGGCTTTATGTCTGTGGCGCACAGCATGGAAGATATCAATA
ACACCATCGATGCTGCACGTCGGGTGTTTGCGAAATTGTGATGATTTTGCCTCGCCCACC
GGGCGAGGCATTCTATTAACGGCTCTGCTTTCTCAACAAATAGATAAAATATGGCGCGCC
GATAAAGGTCGACAGCAGCCCCGCCGGGATCTGGAATGGAAACAGCACCATCCGCCCACA
CCAGTCAGCGAATACCAGCAGTAAACCACCCACCAGCGCCGAAATTACGATGTGTGGCAT
CGTCCGTCGAAAACCCATCATCCGCGCAATATGCGGTGCCATTAAACCAACAAAACTCAA
CGGTCCAATAGTCATCGTCGCGGTCGCCGTCAGGCAAGCCGCTAACAGCAGCAGCGCAAT
TCGCGTCGGCGTCAGCGCCATTCCTACGGCTCGGGCGGTATCACCACCCAGCGGTAAAAT
GGTCAGCCAGCGGCGGCACAGCGGGGTAATCGCCAGCAAAATCACCATCACAATTCCGGT
GCGCCAGACCTGCGCATCGGTCGCGTTGTAGGTCGAACCGGAAATCCAGGTCAGCACTTG
CGCCATTCGCGGGTCACCGCTCGCCTGCAACATCATCAAAAGCATGGTGAATGCGGTACT
TAACGCCATCCCCGCCAGTAACATACGGTGTGGGGAAAATCCACCGCGTCCGGCGGCGAT
CATAATGATCAACAGCGTCACCGCCGCCCCGAGACTGCCTGCGGGTAACAGCCAGCCAAA
GGCATTACCCGGTACCAGAAACAGCATTAACACCACGCCAAACGCCGCGCCGGAGCTAAT
CCCCAGCACTTCCGGGCTTGCCATCGGGTTTCCGGTCAGCCGCTGAATAATACAGCCCGC
CACCGCCAGCATGACGCCCGCAAACAGCGCCGCCATAATTCGCGGCCAGCGCCAGGGCAT
TAAATCATCGAGCAACGCCCCGCTCGCCCACGTCCAGCCGTGCGCATCACGACCAAACGA
CAGCGCCACCACCACAGCCATCAACAGCAGCACGCCGCCCGCGAGGGCAAACGCCAGCAC
ATGTTGGCGTTCAGCCGCGACACGATCGTTGACCTTCATATCCGGCGCGCTAATGCTGCG
TAAACGCGGCAACAGCCACAGTAGCAGCGGCGCACCGATCAACGCAGTGACCGAACCGGT
GGACACTTCCATCCACACACGAGTCAGCCAGAGGATGATTTGATCGGAAAGCCAGAGGAT
CAGCGCCCCAATCAGCGACGCCAGCATCAACCGTGGCAGCAGACGCCGCGCCCCCAGCAT
TTTTGCCAGCAGCGGCGCGAACAACCCGATAAAGCCGATAATCCCTACCGCATTCACCAG
CAGCGCACTGATGACAATCGCCAGCGACAGCGCCGCCAGACGCGCGAGCGACAAGGCCAG
CCCGAGATTGCGCGCCACGCCATCATCAAGCCCCATCAGGGTTAACGGGCGAAGTAGCAA
TAACGTCAGCATCACGCCGCCCAGCAGCTGCGGCCATAAACGCTCAACGCCGCCCCAGTC
GGTTTGCGTCAGCGTTCCAGTGCTCCACAGAAACATGCTTTGCAACTGGTCATGATGGAA
GATAACCAGTAATTGATTGATTGCCCCACAATAAAGGCTCACTACCAGCCCCGCGAGAAT
CAGCGTTACCGGCGACAGCCGTTTCCCCCACGCGACGCCAAAGACAATTAAGCCAACAAC
ACAAGCCCCTGCCAGCGCAGCAAACTGGCTCGCCATCGCACCAGGGATCGCCCAGAGCGT
CGTGACGGTAATCCCCAGTTGCGCGCCTGTAGCAACGCCCAACGTCGTCGGTTCCGCCAG
CGGGTTACGCAGCACTTGCTGAAACAGCACGCCCACCAGCCCCAGGCCCGCGCCCACCAG
CAGCGAAATCGCCAGACGCGGCAACAAGCTGTAGTGAAAAATCATCTGCTCGATGACGTC
AATATCCGGCGACCAGGCAGCCTGCGCCCACTGGCTACGCGGCAGCGCCTGCGAGAAGTT
CATCCAGGTGAGCGCCGTAGCGACAATCACTAACAGCGCCAGCAATAACGCCGGGAAAAG
CGCAATTCGTTTACTCACGCTTTACCTCCGATGGCGTTATCCAGAATACGCACAAAGTGC
ATTGCCGAGAGCGTCGCACCATAAAACCAGACTGCAGGTACGCGCTGAAAGCGCCCTGTA
CGGACAAACGGCATGGCCTGCCACAGCGGGGTTGCCATTAGCGCATCCATGTCTTTGCTG
TTGTCGTGATCAAAACAGAGCACATCAACATCTTTATACGCCGCCAGACGATCGATACTG
ACGGCGGTGCTGCCCCAGAAGTTGGTTTCCCCTTGCCAGGCATTTGGGATGCCGTACTCA
TCGAGAATTTCCTGGAACAAGCTGTTTGGCCCGAAGACCAACATATGGCGCGGATCGATA
AGCGTCGTCAGCAATAACGGGCGTGCACCACGCTTCACAAAGCGGGGTTTCATGCTGCGG
ATAAAGTCTTCGTATTGCGCTAAATGCGTTTCCGCTGCGCTTTGCAGGTTAAGTAAATCT
GCCATTTCCGTCAGTGATTTACGCGCCATCGCCAGCGGCTGTTTGCCGTCGCTGAAGTTA
AATCCGCGCCCCGGCGCAATACGAGCCAGCATTTCTGGTGAAGGGCCATATCCTGCCGAC
CAGACCATAAACGACGGTTTCATTTCGGTCAGCAGTTCAAGGTTAGGTTCTGTGCGCAAA
CCGACGTCAATCACCGATTCAGGTAACGGTGGTTCGCTAACCCACAGGCGATAGTTGATG
GTGTCCGCCACGCCATAAGGCACGATGCCGAGCGCCAGCAGTAATTCCACCGGCAACCAC
TCCAGCGCCACAATACGATTGGGATCAATAGCCGCCGCGTGGGCGGCATTCATCTGCCAT
AACAACGGAGAAAGCGCCATCGCCGTTAACAGTCGACGGCGCGAAATAAGAGGTAAGCCG
CTCATCAATAAACAAAACTCACAGGTGCAGCACCCGCCGGATGCGGCAAAATACCCATCG
GGATGCCATAAATCATTTCGAGGGTTTCGCCGCGCATAATTTCCGCAGGCGTTCCCTGAG
CAATCATTTCACCGCCGCGCAGGGCGACCAGATAATCACAGTAGCGTGCCGCCATATTGA
TATCGTGCAGCACGGCAATGACCGTCAGACCACGTTCCTGACTTAAACGGTGCACCAGCG
CCAGCACATCAACCTGGTGGGCGATATCCAACGCCGAGGTCGGTTCGTCGAGCAACAGAC
AACGGCTATCCTGCGCCACCAGCATGGCGATCCACGCCCGCTGACGCTCACCGCCAGAGA
GACTATCGACCAGCCGATGCGCCAGCAGTTTTAAGCCAACCAGCGAGATAGCTTCCTCAA
CTTTTTCGCGATCTGCCGCACCAAAGCGCCCCAGCGCGCCATGCCACGGGTAACGACCAA
TCGCCACCAGTTCACGCACGGTCATCCCTTCTGCCGGAGGAAGCTGCTGCGGCAAATAAG
CCACTTTGCGGGCGAATGCTTTGCTACTCCAGCTTTCCAGCGGCTGGGCATCAAGAAGAA
TTTCACCTTCTGACGGCGGCTGATGACGGCCCAACATTTTTAACAGCGTGGATTTACCAG
AACCGTTGTGACCAATCAAACCAGTCACTTTTCCGGCAGGAAAGGTTAACGACAGCGGAT
GCAAAAGCGTGCGCCCTGGCACACGAAAGGAGATATTACGCAGTGCAAAAGTGGTATCGG
AATGATTCGTGTATTCCTGCATAACAGCCAACTTGTGAAACGGGCACGGAAATCCGTGCC
CCAAAAGAGAAATTAGAAACGGAAGGTTGCGGTTGCAACGACCTGACGTTCTGCGCCCCA
GAAGCAGCCATAAGTGTTAAAGCAGCTGGCGACGTATTCACGATCGAACAGGTTGTTAAC
ATGCAGCGCCACGTTGGAGCCAGCCATGCCGACTCGCGCCAGATCATAACGCACTAACGC
ATCCACGACCGTATAACTTCCCACTTTAAAGGAGTTAGCCGGATCACCATAGCTGGAGCC
AGTATAACGACCACCGGTGCCCAGCGTCAGACCTGAAAGCGGACCGTCAAAGAAGGTATA
GTCAGCCCACAGCGAAGCCATGTGTTTTGGCACCTGTGCCGGCGTATTGCCTTTGTAGTT
GGTGTCAGTGGTGTATTCCGCGTCGGTGTAGGTGTAAGAACCAACTAAGTTAACACTCGC
CGATAGTGCCGCTTTCGCTTCCAGCTCTACGCCACGCGCACGAATCTCACCGCCTTCAAC
CGAGAACAGTGAACCGTTCGGATCCGCCATCAGGTTATTAGTTTTGGTAAGCTGATACAG
TGCGCCAGTCACCACAATTGGGCGATCTTCTGGCACATATTTCACGCCGACTTCATACTG
TTTGCCTTTCGAAGGTGCAAACAGATCGCCGTTTGCATCGGTCTGCGAAGCGGGTTCAAA
CGATTCACTGTAGCTGAAATAAGGCGTTACGCCGTTGTCGAACAGATAGTTAACACCGCC
ACGCCAGGTGAACTGTTTATCATCGCGATCGGATTTATTACCGTAATCACGGTTGAAAGA
TGACTGATCGGCCCAGTCATAGCGACCGCCAAGCGTAACCAGCACTTTATCCCACTGCGC
CTGATCCTGAACATACAGACCGGTTTGTTTCTGTTTCAGCAGAACGCGGTATGGACCAGA
CGGATTTGGGTGAGCGCCAAAATCAAAGTCACTACGGTCTAAATTATAGATATCAGATGG
TGCAACTGAACCGGCATATCCGAACCAGGAGTCGATGTCATTACGCATACGCATAAAGTC
AACGCCAGTCAGCAGAGTGTGATCCACTGAACCGGTTGCGAATTTGCTTTGCAACTGAGT
ATCAACAGAGAAGTTTTCTAACTTCTCATTATCGATAACGTACTGACGAGTCAGTGTATG
GCCCCATTGAGACTGCGGCACGTTGGCACATGGACTCGAAGAGGGGTTTGAGGAATAGAG
AGGATCTGAACACATGCCGTAGCCATATACGCTCTTTTGCGAAACTTTATTTTGCGCAAA
GCGAAGGTTCTGACGTACGGTAAAGGTGTCGTTAAATTCGTGGTCGAAGCTATAGCCAAT
CATCTTCTCATTACGAGAATAGGTGTTGTTCTTCGCCCCTTCGTTAAAGTCTGTCGGCAG
ACGCTTACCGTTCGGCAGCGGCTCAACGGTTCCCTCTTTCGGCAACCAGCCGTAATAACC
GGTTTCCGGCTCGTTCTGGAAGTAAGAGAGGAAGGTGAAATTGGTTTTATCGTCCGGACG
CCAGGTGAACGCTGGCGCAATGGCATAACGCTGCTCTTCCGCGCCCTTTTGCTGGGCATT
GGCAGAGCGCGCAAGACCGGTCAGACGATAAGAGTAAACGCCGTCATCATCCAGCGCATC
GCTGAAGTCAAAACCGGTCTGGAACAGGCTGTCAGTACCGGCCTTAAACTGAACTTCTTT
CAACGGTTCAGTGGTCGGGCGCTTGCTGACCATGTTCAACAGGCCACCTGGGCTGCTTTT
CCCATACAGCACGGAAACTGGGCCACGCATGATTTCAGCGCGCTCCAGCATATATGGGTC
AATAACCGCATCGTTATAGAAGTTGCCCTGCATCTTCAGGCCATTCAGATAGTTGTTCTG
GCTTTGGCCGTCAGCGGCGAATCCGCGGATGATCAGGTAATCGTAAGTGTTGGATGCGCC
ACGAGTTCCCACGGCAACGCCAGGAGTGTAGCTAAGCGCTTCTTTTACCGACTTCGGCTG
ATGCAGCGCCATCTCTTCGGCGGTCACAACAGAAATAGACTGTGGCACTTTTTGAATCGG
CGTATCGGTTTTAGTGCCGGTAGCTGACTGTCGCGCCGCAATAGTTGCAGCAGGCCCCCA
TGCGCTTTCTTGCGGCGCAGGTGCAGCGGTAACGGTGATAGTGTCTTCTTTCGGTTCAAC
CGCTGCCTGTGCATAAACAGACATGCCGCTAACCGCTGTGGCTACTACAACTGCGATTTT
ACGCAGTGAGTGTTTTGGCTGAGCAGTTTTGGAACGCGCCATTGGTATATCTCTGATGTA
AAGTGAATGATAACGTAAACGAGAATGATTATTATAAAGATAAGATAATATTCGAAACGC
TGGCGGGTTCGCAAGCGGTACGCAATCTGAGCGTTCCTGAAGGGTTAATAAACAACCAGA
TGAAAAGAAAGGGTTAATACTTTAGGTGGGATGTTATTTTACCGGATGGCAACTCGCCAT
CCGGTATGTCACGTTTAGACGTTAATTACTACCAAACATATCCTTGATCCAACCGGCTAC
ACCGTCGCTGTCTTTCTGCTCTTGCTGAGCAGGTTGCTGTTGCGGCTGTTGCTGCGGCTG
AGAAGACTGATCAAACGGATTGCCTGACGGCTGCTGCTGCATCTCACTCTGCTGGCACAG
CGATTGCGGATCGCTGGTCCAGACCGGCAAGACACGCATGCCACCGCTGCAAACAAAGTT
GCCGTCGTAGTCCACGCCCATATCTGCAATATCTTCTGGCGGAACAAGATTCAGCGGCGT
TGGCGTCTGGTTTGCCAGATAACGCTGATAAATCGACATTGCCCCGCTGGCACCATACAG
TTTGGTCGGCTGGTTGTTATCACGGCCGACCCAGGTGATGGTCACCGTGCTGCCGTCAAT
GCCCGCAAACCAGGTATCTACGTTATTGTTGGTAGTCCCTGTTTTCCCTGCCAGATGCAG
GTTCGGGTATTTCGCCCCAAGCTGACGACCCGTACCGCGTTGTACAACCTGCTGCATGGT
CCATAGTGTCAGATACGCCGCCTGCGCCGGAACAGCGCGTTCCGCCTGCGGGAAGCTCTG
ATACAGCACTTTGCCATCTTCCGCGATTACCGAACGCAGCGCAGAAAGCGGTGCACGGTT
ACCACCGCTGGCGATGGTCTGGAATGCCTGCGCCACTTCGATTGGCGTTAAGTTCAACGC
CCCCAGCAGCATTGCCGGAACCGGATGCAACTGATCTTTCGGTACGCCCAGTTTAATCCA
GGTATCCGTAACCGCAGGCAGCCCCAGCGCCATCCCCAGATTTACCGTCGGCACGTTCAT
CGAACGGGTCAACGCATCCACCAGCATCACTCTGCCGCTTTCGCTATAACGACGGTCATC
ATTCTGCGGTGACCAGACCTGGCCATTCGGCTGACGCAGCGCAATTGGCGCATCCGCAAT
CCACGTATTCAGACGATAGATTTTCGGCTGGCTTAAGGCCGTCAGATAAGTCGCTGGTTT
TGCAAGGGAACCAATCGAACGACGCGCCTGCATCGCACGGTTGTAGCCCGCAAACTGCGG
CTCAGAACCTCCGACCATCGCACGAACTTCACCACTAAAGCGGTCGACGACCACAATCGC
GGTTTCCAGATCGCTCAGCTTACGCTGTTTCTTCAGTGCCGGAATGCCTTCCACGGCGGC
TTTTTCTGCCGCGTCCTGGGCCACCGAGTCAAAGGTAGTGAAGATCTTCACGCCGGAGAG
ATCTTTTACCTTATCGCCTAATTTAGCCTGAAGCTCCTGACGCACCAGTTGCATAAAGGC
TGGCTGAGGAGAGATCACCCCACCGCGCGGCTGAACACCCAGCGGACGCGCACTCAACAT
GTCATAGAGTTCTTGATCAATAATCTGTTGCTGTTGCAGCAGACGCAGTACCAGATTACG
TCGCTCCAGCGCCAGTTTCGGGTTACGCCACGGGTTGTAGATGGACGCTCCTTTCACCAT
ACCGACTAACAGCGCCTGCTGATCGAGGCTCAATTCTTCTACCGGGCGACCAAAGTAATA
CAAGCTCGCCAGCGGGAAGCCACGGATTTCGTTGTCGCCACTCTGACCGAGATACACCTC
GTTCATATACAGCTCAAGAATACGGTCTTTGCTGTAACGCGCGTCCATGATCAGCGCCAT
GTAGGCTTCATTCGCTTTACGCCAGTAAGAGCGCTCGCTGGAGAGGAACAGGTTTTTCAC
CAGCTGTTGCGTCAGCGTACTCGCTCCCTGCACCGTGCGTCCGGCGGTCAGGTTTGCCAG
CACCGCACGTCCGATTGAGTAGAGACTGATCCCATCATGCTCGTAGAAATGACGGTCTTC
TGTCGCCAGCAAAGTATCCACCAGCAAATCCGGGAAACCACTGCGCGGCACAAACAAACG
CTGCTCACCGTTTGGTGAGGAGATCATGGTGATCAGACGCGGATCAAGACGGAAGAAACC
GAACTGACGGTTGTTCTCCATATTGACGATCGTCGCCAGATGATCGCCATCAAAGGTCAG
ACGCGCACGCACCTGCCCTTCTTTGCTGTCCGGAAAATCAAACGGACGGCGGATCATCTC
AATGCTGTTAGCCTGCACAGTAAATTCGCCAGGACGGGTCATTTTCGACACCTGACGATA
CTGTGTTGCCTCCAGCAGCTTCACCATCTCGTTCTTGCTGATGGTCATGTCTGGCTCAAG
GTTGACCATTCGACCATAAACTGCCGCAGGCAGTTGCCAGACCTTGCCATCAATACGGCT
ACGAATTTTTTGATCGAGATAAACGCCGTAAATGGCGATCAGCACGGCAAAAACGATAGC
CAGTTTTAACAGCAGCCATAGCCAGCCGCGTTTGCCACGAGGCTTACGCCCTTTGCCTTT
GCCCTTACCTTTGCGCGGCATCGGTTCTTCATCCTCATAGTCATCATAATCGTCGTAATC
ATCGTCATCTTCGTAACGACGACGGCTTACCTTTTGTTTGACCGGACGCGTCGGTTTCCC
TTTGCGTCCAATTGGCTCGCGGTCATTCCCGGCCATGCTTTTTCTCCGCAATATTCAGGC
GCAAAAGCCCGATTTTCTGTTCTTCTGTTACAAGACAGAAGAAGATATCTCTCAAAATTT
GTGCTCGATCGGTCCCCTCTCCCTTGAGGGTGAGGGTGAACGTACGCGCTGATGCCCTCA
CCCCGGCCCTCTCCCACAGGGAGAGGGAGAAAACCAACCTTACGAATACTTTTTCGTCCG
TCGCGTCGGTGCCGTGTTTGCCGGGTCGTCCGGCCAGACGTGTTTGGGATAACGCCCTTT
CATCTCTTTTTGCACCTCACGATACGCCCCTTTCCAGAAGGCCCCCAAATCACGCGTGAT
TTGCAGCGGCCTTTGGGCAGGGGAAAGCAACTCCAGCACCAGCGGCACGCGCCCCTGAGC
GATCGTCGGATTGGTGGCCTCACCAAACATCTCCTGCATTCTCACCGCCAGCGCGGGCGG
GTTATCTTCATGATAACGAATGGCGATCCGGCTTCCCGTCGGCACAGTGTAATGCGCAGG
CAATTCACTATCCAGACGTTGCTGCATTCCCCAATCAAGTAATCCGCGTAGTGCCTGATA
AATGTCGAGTGATTTCAGGCCGCGTAGTGAATGTACACCGGCCATATGTGGCAGCAGCCA
CGTTTCCAGCGTCGCCAACAAACTTTCATCATCAACCGCTGGCCAGTCATATTCTGGCAA
CCACTTTCCGGCGCATAACAAACGCAAGCGTAGCTGTTCCGCTTCCGCCGTCCAGTTGAG
CACGCTTAAACCTTTATCACGGATGCCGTTAAGCATCGCCTGATGCAACTCGTCTTCTGA
CGGTTTCGCCAACGGCTGCACTTTCACCGTCAACTGACCGATTTGCAGCCGACGCCAGGC
TTTCAGCGTACCTTGCGCGTCATCCCATTCCACGGTGTCAGATTGCTGCACCAGCTGCGG
ACAGCGTCGCACTAATTCATCAATATCGACCGGTAGCGCCAGTAAAATCCGCGCATCCGG
CGAGGCGCTGCCCTGCAATAATAACGGTGCGATCAACCATTCGTGGCGGCTTAGCGCGTC
GTCGGCATCGAGCATCGCTCCCATGCCGTTTGCCAGTTGATAGCGTCCATCTTGCCCACG
GCGGCGAGCAATGCGATCGGCAAACGCCCCGGCAAGTAGCAGCGCGATAAGCGAACTGTC
TGCCTCACCGCCGTATACGTTTAAGCGTTTTAACAGTTGCTGACTACGTTGCTGCCAGGC
TGGCTGATTGCGCGAAAACACCACGCCCAGGTCACTATTGCCCATCCGTGGCGGCTCTTC
GAGAATGGCGGCAATTTTTGCCGCGGTAGCAGCTTCGTCGTCGCTCTTTGCGCTAACCAG
CATTGCCGCTAAACGCGGATCGTTACCCAGCGCTGCCATTTTTTGCCCCTGCGCACTAAG
CCGTTCACCGTCCAGCGCCCCCAGCATCCGTAACAGGCGTTTCGCGGCCAGTAGATTCAC
CGTTGGCGGTTGATCCAGCCAGCTCATCTGCGCCGGATCGCTGCATCCCCATTGCAGTAA
TTCCATCAGCAAACCGGAAAGATCGCTTTGTAATATTTCCGGTTCACTTTGCGCCGCGGC
GCGTTCTGCTTGTTCCTTGGCGATTAAATGCAGGCAGATACCCGGCTCCAGACGCCCGGC
GCGCCCGGCACGCTGCGTCATCGACGCCTGACTGATTCGCTGAGTAATTAGTCGCGTAAG
CCCTGTTCGCGGATCAAAACGCGCCACCCTTTCCTGGGCGCAATCCACCACCAGACGAAT
ACCTTCGATAGTTAAACTGGTTTCAGCAATATTGGTCGCCAGCACGACTTTGCGCATCCC
TTGCGGTGCCGGGAGGATCGCTTTTCGCTGATCGTTCAGCGACAACGCGCCATACAGCGG
GCAGAGCAACACATCACTGCCGATACGCGAAGCCAGTTGTTCCTGCACACGCTGAATTTC
TCCGACGCCCGGTAAAAATAACAGTAATGATCCACTTTCCTGACGCAGCATTTCGGCGGT
CGCAACCGCGACGGCTTCGTCAAAACGCTGATGGGCGGGCAGCGGTAAATAACGGCGTTC
AACCGGAAACGAGCGCCCTTCTGAGATGACGACGGGCGCTTCTGGTAGCATTTGTTGCAA
GCGGTCGTTGTCCAGCGTAGCCGACATAATCAGCAGTTTAAGGTCATCACGCAGACCTTG
TTGCACATCGAGTAACAGCGCCAACGCCAAATCCGCCTGCAAGCTACGCTCATGAAATTC
ATCAAGGATCACCAATCCAACACCGCTCAACTCCGGGTCACGCTGGATCATCCGCGTCAG
CACGCCTTCGGTAACCACTTCCAGGCGGGTATTCGGCCCGACGCAGTTTTGCGCACGCAT
CCGGTAGCCAACGGTATCGCCTGGCTTTTCGTTAAGCAGCTCCGCCAGCCGTTGCGCGAC
GTTACGCGCCGCCAGACGCCGTGGCTCCAACAGGATAATTTTCCCGTTAATGCCGGGATG
CGCCAGCAGTTGCAGCGGCAGCCAGGTTGATTTCCCGGCCCCGGTCGGCGCACTTAATAA
TACCTGCGGCGCACAATCGAGAGCGGTAAGTAATTCAGGTAAGACGGCAGCAACGGGCAA
CGACGACACAAAACGCTCCAGAGGGTTAACATTCTTCGCGCCACATTGTAGCATCGCGGT
AATTCATAACCGAGTGCCTCACATGTCTGAACCGCAACGTCTGTTCTTTGCTATCGACTT
ACCTGCAGAAATCCGCGAACAGATTATCCACTGGCGCGCCACACACTTCCCACTTGAGGC
GGGACGTCCGGTCGCCGCCGATAATTTGCATCTGACTCTGGCATTTTTAGGCGAAGTGAG
CGCCGAGAAAGAGAAGGCGCTTTCTCTTTTAGCCGGACGGATTCGTCAACCTGGTTTCAC
ACTCACGCTTGATGACGCCGGACAATGGCTGCGTTCGCGTGTGGTGTGGTTAGGGATGCG
TCAGCCTCCACGCGGCTTAATCCAGCTGGCGAATATGCTCCGTTCACAGGCTGCCCGCAG
CGGTTGTTTTCAAAGCAATCGTCCGTTTCATCCACATATTACCTTATTGCGCGACGCCAG
CGAGGCGGTGACAATCCCGCCGCCAGGTTTTAACTGGTCGTATGCGGTGACGGAGTTCAC
CCTTTACGCCTCCTCGTTTGCCCGTGGACGCACACGCTACACGCCGCTAAAACGCTGGGC
GCTAACGCAATAACAAGGATTGTCGCAATGGAATTTTCTCCCCCTCTACAGCGCGCGACG
CTAATTCAGCGTTACAAACGTTTTTTAGCCGATGTGATCACACCCGATGGTCGCGAATTA
ACGCTACACTGCCCGAATACGGGTGCGATGACCGGTTGTGCAACGCCTGGCGATACCGTC
TGGTATTCGACTTCAGACAACACCAAACGGAAATACCCACACACCTGGGAATTAACTCAA
AGCCAGAGTGGCGCATTTATTTGCGTCAACACGCTTTGGGCTAACAGGTTGACGAAAGAG
GCTATCCTTAATGAATCAATTTCAGAACTGTCAGGCTATAGCTCGCTGAAAAGCGAAGTA
AAATACGGCGCAGAACGCAGCCGTATTGACTTTATGTTGCAGGCGGATTCGCGTCCAGAC
TGCTATATTGAAGTGAAATCGGTTACGTTAGCGGAGAACGAACAGGGATATTTTCCCGAT
GCGGTCACTGAACGAGGTCAGAAACACCTTCGGGAGTTGATGAGCGTAGCGGCTGAAGGC
CAGCGTGCGGTTATCTTTTTCGCCGTGCTGCATTCAGCCATTACACGGTTTTCACCCGCG
CGCCACATCGATGAGAAATACGCGCAACTATTGTCAGAAGCTCAACAGAGGGGGGTAGAA
ATTCTGGCTTACAAAGCGGAAATTTCTGCTGAAGGCATGGCTCTTAAAAAATCACTGCCG
GTTACATTGTAGTAAAGTAAGTAACTGGTTAATTTACATTCTGGTCGCGTGCGCAAATAC
GCTTTTCCTCACACAGTTGTCAAGTGTTACGTTTAGATAATTGCTATCCGGAAAAGCATC
TGCTATTTATAGCGGCCTCATTTTTCCCCCGAACATGGGGATCGATAGTGCGTGTTAAGG
AGAAGCAACATGCAAGAAGGGCAAAACCGTAAAACATCGTCCCTGAGTATTCTCGCCATC
GCTGGGGTGGAACCATATCAGGAGAAGCCGGGCGAAGAGTATATGAATGAAGCCCAGCTG
GCGCACTTCCGTCGTATTCTGGAAGCATGGCGTAATCAACTCAGGGATGAAGTCGATCGC
ACCGTTACACATATGCAGGATGAAGCAGCCAACTTCCCGGACCCGGTAGACCGTGCAGCC
CAGGAAGAAGAGTTCAGCCTCGAACTGCGTAACCGCGATCGCGAGCGTAAGCTGATCAAA
AAGATCGAGAAGACGCTGAAAAAAGTGGAAGACGAAGATTTCGGCTACTGCGAATCCTGC
GGTGTTGAAATTGGTATTCGCCGTCTGGAAGCGCGCCCGACAGCCGATCTGTGCATCGAC
TGCAAAACGCTGGCTGAAATTCGCGAAAAACAGATGGCTGGCTAATTACAGCCGTTCCAT
CACGTTTACCACAGGCGGGAAATGCTCCCGCCTTATTTTTTGTTCAAAGAGATGACAGAC
ACACACTATATTGGCCGCTTCGCCCCCTCTCCTTCCGGCGAGCTTCATTTTGGTTCTCTG
ATTGCTGCGCTTGGCAGCTATTTGCAGGCTCACGCCCGGCAAGGTCGCTGGCTGGTACGT
ATAGAAGATATCGACCCGCCTCGTGAAGTTCCCGGTGCCGCAGAAACTATCCTGCGCCAG
CTGGAACATTACGGCCTGCACTGGGACGGCGATGTTCTCTGGCAATCGCAACGTCACCAC
GCCTATCGCGAAGCACTCGCCTGGTTACATGAGCAAGGACTAAGTTATTACTGCACCTGC
ACGCGTGCACGTATTCAAAGCATTGGCGGTATTTACGACGGTCATTGCCGGGAATTGCAT
CATGGACCAGACAACGCCGCAGTGCGTATCCGCCAGCAGCATCCGGTCACCCAGTTTACT
GACCTGCTGCGAGGCATTATTCACGCCGACGAAAAACTGGCACGGGAAGATTTTATTATT
CATCGCCGTGATGGTTTGTTTGCCTATAACCTGGCGGTGGTGGTGGATGATCACTTCCAG
GGTGTGAGCGAAATTGTCCGCGGGGCAGATTTGATCGAACCGACAGTGCGGCAAATCTCG
CTGTACCAGCTTTTTGGCTGGAAAGTGCCAGATTACATTCATCTGCCGCTGGCGCTTAAT
CCACAAGGCGCTAAACTTTCCAAGCAGAATCATGCGCCTGCGTTGCCGAAAGGCGATCCA
CGCCCGGTACTAATCGCGGCACTTCAATTTCTGGGGCAGCAGGCAGAAGCACACTGGCAG
GATTTCAGCGTCGAGCAAATCCTTCAGTCAGCCGTCAAAAACTGGACGCTGACCGCCGTG
CCTGAGTCGGCAATTGTAAATTCAACATTCTCAAATGCGTCATGCTGAGCTATGATTAGC
CGCTATTTTTTTGTCCTGAATGATGTTTGACACTACCGAGGTGTACTATTTTTACCCGAG
TCGCTAATTTTTGCCGCAAGGTGCTAAGCCGCGAGGAAAGCGAGGCTGAACAGGCAGTCG
CCCGTCCACAGGTGACGGTGATCCCGCGTGAGCAGCATGCTATTTCCCGCAAAGATATCA
GTGAAAATGCCCTGAAGGTAATGTACAGGCTCAATAAAGCGGGATACGAAGCCTGGCTGG
TTGGCGGCGGCGTGCGCGACCTGTTACTCGGCAAAAAGCCGAAAGATTTTGACGTAACCA
CTAACGCCACGCCTGAGCAGGTGCGCAAACTGTTCCGTAACTGCCGCCTGGTGGGTCGCC
GTTTCCGTCTGGCTCATGTGATGTTTGGCCCGGAGATTATCGAAGTTGCGACCTTCCGTG
GACACCACGAAGGTAACGTCAGCGACCGCACGACTTCCCAACGCGGGCAAAACGGCATGT
TGCTGCGCGACAACATTTTCGGCTCCATCGAAGAAGACGCCCAGCGCCGCGATTTTACTA
TCAACAGCCTGTATTACAGCGTAGCGGATTTTACCGTCCGTGATTACGTTGGCGGTATGA
AGGATCTGAAGGACGGTGTTATCCGTCTGATTGGTAACCCGGAAACGCGCTACCGTGAAG
ATCCGGTACGTATGCTGCGCGCGGTACGTTTTGCCGCCAAATTGGGTATGCGCATCAGCC
CGGAAACCGCAGAACCGATCCCTCGCCTCGCTACCCTGCTGAACGATATCCCACCAGCAC
GCCTGTTTGAAGAATCGCTTAAACTGCTACAAGCGGGCTACGGTTACGAAACCTATAAGC
TGCTGTGTGAATATCATCTGTTCCAGCCGCTGTTCCCGACCATTACCCGCTACTTCACGG
AAAATGGCGACAGCCCGATGGAGCGGATCATTGAACAGGTGCTGAAGAATACCGATACGC
GTATCCATAACGATATGCGCGTGAACCCGGCGTTCCTGTTTGCCGCCATGTTCTGGTACC
CACTGCTGGAGACGGCACAGAAGATCGCCCAGGAAAGCGGCCTGACCTATCACGACGCTT
TCGCGCTGGCGATGAACGACGTGCTGGACGAAGCCTGCCGTTCACTGGCAATCCCGAAAC
GCCTGACGACGTTAACCCGCGATATCTGGCAGTTGCAATTGCGTATGTCCCGACGTCAGG
GTAAACGCGCATGGAAACTGCTGGAGCATCCTAAGTTCCGTGCGGCTTATGACTTGTTGG
CCTTGCGAGCTGAAGTTGAACGTAACGCTGAATTGCAGCGTCTGGTGAAATGGTGGGGTG
AGTTCCAGGTTTCCGCGCCACCAGACCAAAAAGGGATGCTCAACGAGCTGGATGAAGAAC
CGTCACCGCGTCGTCGTACTCGTCGTCCACGCAAACGCGCACCACGTCGTGAGGGTACCG
CATGACAGTGGCGTATATTGCCATAGGCAGCAATCTGGCCTCTCCGCTGGAGCAGGTCAA
TGCTGCCTTGAAAGCATTAGGCGATATCCCTGAAAGCCACATTCTTGCCGTTTCTTCGTT
TTACCGCACCCCACCGCTGGGGCCGCAAGATCAACCCGATTACTTAAACGCAGCCGTGGC
GCTGAAAACCTCTCTTGCACCTGAAGAGTTACTCAATCACACTCAGCGTATTGAATTGCA
GCAAGGTCGCGTCCGTAAAGCTGAACGCTGGGGACCGCGCACACTCGATCTTGATATCAT
GTTGTTTGGTAATGAAACCATTAATACCGAACGACTCACCGTTCCGCATTATGATATGAA
GAATCGCGGCTTTATGCTGTGGCCGCTGTTTGAGATTGCCCCGGAACTCGTGTTTCCTGA
TGGGGAGACATTACGTGAAATACTCACTTCGCTAGCAGTACCACAACCTGCCATCTGGTA
ATAGCTGTATTATTTTATTTTCTTGACGAGAGGAATACAAAATGATACGGCTATTTCATC
CACCAAGAAAAAATTATTTTCTTATCTTACTCCTCACTTCCCCCCTTACATATTAAATAT
ACTTAATTTACATTTTAGTTTTTTTTAATTCATTCATGAAATAGCACTTCATGCAAATAA
ATTAGGCATTTTTTGTTTAAACAACCTAAAATAACAACAATTCAATACACCACATAAATA
TATTCACATCCGTGATAACTCACCCCTATTACATCCTCCAAAAACTTTGAGTAATATCCG
CTCGCAATATTAATTTCATATAATTTTTGTAAGGATGCATGTAATGAAAAAAGCACTTCT
CGCAGCCGTTCTGGTTATGGCTTCTGGTTCCGCCCTGGCTGTAGATGGTGGTCATATCGA
CTTTAACGGTATGGTACAGTCCGGTACCTGTAAAGTGGGTGTGGTAGATACCGGTATGCA
CGGCATCAGCACTGATGGCGTGGTTACCCTGGATACTGCAAATGTTACTGATAACTTTGC
TGAAGTAAGCGCTGCTGCTGTTGGTTTACTGCCGAAAGAGTTCATGATTTCTGTGGATTG
CGAACCGGGTAAAACAACTGCCCAGTTGACCATGGGTTCTGCAAGCTACGCGAACACCAG
CGGCACCCTGAACAACAATACCAATATCACGATTAACGGTATTCAACCGGCTCAGAACGT
GAACATTGCTGTTCATAACATGAAAAACAAAGCTGGCGCTGCTGAAATTAAGCAGGTCCA
TATGAACAATTCTTCTGAAATCCAGGAATTGACATTAGACGCACAAGGCAACGGTCAGTA
TGTGTTTAACGCATCTTACGTTAAAGCACCGAACAGCCAGGCTGTTACTGCTGGTCACGT
TACCACTAACGCACTGTACACCATTACTTATCAGTAATTGATAGCGAATTGAGTATAGGG
TTTGTCATCAGGCAAACCTTATTTTCGCTAATTTTATCTCAACACAGACAGCAAGGAGTG
CTTATGTTTCCCTTGGTTAAAAAAACGGTTAGTGCATTATTTGTGAGTACTCTGTTAGCC
AGTACGCCAGCATTCGCTGACATTATTATTTCCGGGACTCGTATCATTTATAACGCTGAT
AAAAAAGATGTTAACGTTCGTCTGGAAAATAAAGGGAATCGCCCCTTACTGATTCAGAAC
TGGTTGGACACCGGCAATGACAATGTCGACCCCAGCCAGATCAAAGTGCCCTTTACCTCT
ACGCCCCCCGTTTCACGCGTGGAGCCAAAACGCGGGCAAACCGTAAAAGTAATGTATACC
GGTGCAACAGCCCTACCTAAAGACCGGGAAAGTGTCTACTGGTTTAACGTGCTGGAAGTG
CCGCCAAAGCCGAAAGATGCCCAGGCTGACAAAAACTTACTACAACTGGCTTTCCGCACG
CGCATCAAACTTTTTTATCGCCCGAGCGGTTTGCAGGGTGAACCTGCTGAAGCGCCAGCA
AAAATCACCTGGAAGTTGAACAACACGCAATTGCAGGCGAATAACCCAACGCCTTATTAC
GTGTCATTCAATGACGTCAAACTGGAAAGCGGCGGCAAAAGCTACAAAGTCGATTCCAGC
ATGATCGCGCCGTTCAGTCAGGCAAGCTTTAGCGTAACGGGTCTGTCAGGTGGCGTTTCA
TCGGGCAAAGTCGTGTTCCAGGCCATAAATGACTTTGGCGGCAATATCGATGGTTCAGCA
ACATTCTAAAAAATAAACGGATTCTTTTAACATCGCCAGGAATGCAACCTTGTACCAGTT
TACTCATCACAAAAGTCGTACACCGAAAAAAACGCTACTTGCGGCCTGTTGCGCCCTCCT
TTATAGCAGCAACGGTGCTGCGGCAGACACGGTGGAATATGACAGTTCCTTCTTAATGGG
AACTGGCTCATCAACCATTGATGTTAAACGCTATGCTCAAGGTAACCCGACACCGCCGGG
TCTTTATAATGTCCGCGTGTTTGTAAACGGTCAGGCCACCTCCAGTTTAGAAATTCCGTT
TGTGGATATTGGTGAAAACAGCGCGGCGGCCTGTATTACCCGCAAAAACCTGGCGCAGTT
ACACATTAAACAATCCGAACAGCTTGTGACCCTACTCGCCAGAGAAGGTGAAGAAGAAGA
CTGTCTTGATCTGGCAAAGTCATACGATCAGGCCGAAGTTCAATTTGATGGCAGTGACCA
GTATCTCGATCTGACCATTCCTCAGGCCTATGTCCTGAAGAGCTATGGCGGCTACGTTGA
TCCTTCCTTATGGGAGTCGGGAATTAACGCTGCCACGCTGTCGTATTCCTTGAACGCGTA
TCACACAAGTTCAGAAGACAACAATAACGATAGTGTCTATGGCGCATTTAACTCAGGTAT
CAATTTAGGTGCCTGGCATTTCCGTGCGCGCGGCAACTATAACTGGACAACAGATAGCGG
CAGTGATTTCGATTTCCAGGATCGTTACCTACAGCGTGATATTCCGGCAATACGTTCACA
GATAATCATGGGTGATGCCTACACCACCGGTGAAACGTTTGACTCTGTCAACGTCCGGGG
TGTTCGCCTGTACAGTGACAGCCGTATGCTGCCTTCTGCGTTAGCCAGCTACGCCCCGAC
CATTCGTGGTGTGGCAAACTCTAACGCCAAAGTTACCGTGACGCAGAACGGCTATAAAAT
CTATGAAACCACCGTTCCGCCAGGTGAGTTTGTTATTGATGACATCAGCCCTTCCGGATT
TGGTAGCGAACTGGTTATTACCATTGAAGAAGCGGATGGTTCCAAACGTTCCTTTACGCA
GCCCTTCTCCTCCGTCGTGCAGATGCAGCGTCCTGGCGTGGGTCGTTGGGATTTCAGTGC
CGGTAAAGTTATTGATGACAGCCTGCGATCCGAACCTAATATGGGGCAAGCCTCTTATTA
CTATGGTCTGAATAACCTCTTCACGGGTTACACCGGCATTCAGTTCACCGACAACAACTA
TCTTGCCGGACTGTTAGGTGTGGGTATTAACACCAGCATCGGTGCTTTTGCGATGGACGT
TACCCATTCCCGCGCTGAAATTCCGGATGATAAAACCTACCAGGGGCAAAGTTATCGCGT
AACCTGGAACAAACTTTTCCAGGATACCGGAACATCATTTAACCTGGCGGCTTACCGCTA
TTCCACCCAGGATTACCTGGGCCTGCATGACGCGTTAGTCCTCATTGACGACGCGAAACA
TATGTCTGCCGATGAAGACAAAAACACCATGCAGACATACTCACGCATGAAAAACCAGTT
TACCGTCAGCATCAACCAACCGTTGAACATCGCCTATGTCGATTACGGTTCGCTGTTTAT
TTCCGGTAGCTGGACGGACTACTGGGCGGCGAACAATAGCAGGACTGAATATAACGTCGG
TTACAGTAAAAGCGTTTCGTGGGGTAGCTTCAGCGTTAACCTGCAACGTAGCTGGAATGA
AGATGGCGATAAAGATGACGCAATGTATGTCAGCGTTAGCGTGCCTTTTGAGAATATTTT
CGGTGGCAAACGCAAGACTTCCGGTTTCCGTAATTTAAATACTCAGCTCAATACCGATTT
TGATGGTTCACACCAGTTGAATATGAACAGTTCCGGTAGCAATGAAAGCGGCCAGGTGAA
CTATAGCGTCAACACAGGTTATAGCATGGATAAAAATTACGGCGATCTAGCTTCTGTTGG
CGGTTATCTCAACTATGAATCTGGGTTAGGCGGTATTTCCGCTTCGGCCTCTGCCTCTTC
TGATAATAGCCAACAGTACTCCATCTCAACCGATGGCGGCTTTGTGTTACACAGCGGTGG
TCTGACATTTACCAATAACAGTTTCAGCAGTAACGATACGCTGGTGTTAGTCAATGCCCC
AGGCGCTAAAGGCGCACGAGTCAATAACAGTAATAACGAAATCGATCGCTGGGGATATGC
CGTAACGTCCGCTGTCAGCCCATACCGTGAAAACCGCGTAGGCCTGAACATTGAGTCGCT
GGAAAACGACGTAGAACTGAAAAGTACCAGCGCCACCACCGTACCACGTAGCGGGTCCGT
TGTTTTGACCCGTTTTGAAACTGACGAAGGGCGTTCTGCCGTGCTGAATATTACCTCCAA
CACTGACAAACCGATTCCGTTTGCTGCGGAGGTTTACCAGGATGAAGTCATGATCGGCAG
TATGGGCCAGGGCGGTCAGGCATTTGTGCGTGGTATTAACGACAGTGGGGAATTAACCGT
GCGCTGGTTTGAAAACAACCAAACCGTGGACTGTAAGTTGCATTACCAGTTCCCGGCCCA
GCCACAAACTCTGGGAAGCACTAACACCTTATTACTTAACAATCTTACCTGTCAGGTAGC
AAAACATTAATATGGAAAATTCTATGAAAAGGATACTACTAACATCCGCGTTAATAGGCC
TGGGTTTACCGGCAGTTGGCTCTGCAACAGATCTCAAAGTCGATTTTACGGCCACTGTAC
TCGCCACCACCTGTACGATAACCATTGAACAAGATGGTGGCCCCGTGGTGACCAGTAGCG
GTAACGATGAATACAGCCTGACCATTCCTGATGTTGGCCTGGACAAAGTTGTCACTGGTG
ATGTTGCAGCGCAAGCCAACTTTAAATTAAAGGCTAAAGATTGCAGCGATGGTTACTCAA
AAATTTTTACCACACTTACAGGAACGTCTGTTTCAGGCAAGTTGATTGTCAATGAAGCAA
GCTCTGGCGCTGCTGGTGTGGGTATGGGTATTAAGCGTAGAGATGCCGCAGACTCGGCTT
TCTTCACGCCCAATAATACTGACAAATTTGAATGGTCTTCCGATGAGAAAACTAACGGTG
TGCCTCTGACCGTTGCACTGCGCGAAACCACGGCGGGAGCGGGACGCACCGGTGCGTTTC
AGGCAAAAGCCACCTTTAACTTCACCTACGAATAACAGGGACAGCCACCATGAAATTAAA
AGTCATCGCCACACTGATTGCTACTGTTGCCGTAGGTGCAAGCTTTAATTCAAATCTCGC
CTATGCGAGTACTACTTCTGCATCTTTAACCGTAAACAGTAACCTGACTATGGGTACCTG
TAGTGCTCAGGTTCTGGATTCCAGCAATAAAGCGACAGATACTGTTGCCCTGGGCAATGT
TTATATTTCTGAGTTAGCGGCAAAAAGCAAAGTGCAACCATTCAAAATCCGCTTCAGTGA
TTGTGCCGGTCTTCCAGGGAAGAGTGCTCAACTCGTTTTAGCGCCCAGGCCTGGTACGGG
TTGCGCTGGCGGTCAGTCTAACACTGCCGGCTTTGCAAATTCAATTTCCTCCGGCGCTGG
TGGTTCAAGCAGAGCAGCGGTCGAAGTATGGACGACTACGACCCCCGAGGGAAGCGGCAG
TCAGCAACTCAGTTGTGTTCAACGAAACGTCATCACGGTTGATCTTTCTAATGCCAGTAC
AACACAGCCTTATGATTACGATTTAAGTGCGCGGATGATTATCGCCGATGGAAGAACGGT
TAATGATGTATTACCGGGCGAGTTTCTTTCTCCCACCACCTTCACTATCACTTATCAGTA
ATAGCAGATAAGGATATTAGAATGCTATGCAGGCATCATAAATTTGTATGTTTTTTGGGG
CTGGCAACAGCCCTCATAACGCCTTTTGCCTATGCTGGTCAGGATGTGAATCTCACCGCG
CAGATTGTCGCCAGTACCTGTCAGGTTGAAGTGAGTAATAATGGCGTGGTGGATCTCGGC
AGTGTGACCCTGGACTATTTTGCCGACAACGTAACTCCAACAACGGATTATGCGGGTGGC
AAGACGTTTAATGTTAACGTGGTCGCCTGCGATAATATTCAAACGACCCAGTCGCAAATG
AAATTAGATTTTCAGCCGCAGGCAGGTTCGCTTGCGCAGGTGAATAATCAAATTTTTAGT
AATGAATATGAACAGCAGGCTACCGGGGCAAAAAACGTCGGCATTGTAATATTTTCGGCA
CAGCCGAATCAGCAGACCTTTAACGTGCGGGGAACGGACGGTTCCTCAACGGCGATTTAT
TCTGTCGCTCCAGGCAATGCTGTTCCGTCAACCTGGACCTTTTATTCCCGTATGCAACGG
GTGAATAATGCTCTCCCACCCGAGTCGGGGATGGTGAGAAGCCAGGTTATTGTTAATGTT
TCTTACGAATAATAAGGATAATTATGCAAAGGAAAGGCAATAAACTGTTACGACAGTTAT
GCAGTGCAATACTGTTATTTTTTATGTGCTCCTTGTCTGCATCTGCGATGGAATGTTATA
TAGAAAAATGGGCGGGGGGAACTTATGACATGGTCATAAACCCTGAGGTTGAAAGTATAA
CAACGCAAATGGTATCTTCGCCACAAGAAATAAGCGACATGGTTCATGATACAAATATTA
AACTTAAGGACAGGAACGGTGAGACGATTGGATGTAAGTCCGATATAGGGGGTACTACTT
CAGTACACTTTCTTAACACTGCGGATGCAGGTTTGTTATCAACCTATGTTTCGAAAGATA
ATGGCGCATTATTAAAAACAACAGTTCCTGGTATTGTCTACTCCGTAGAATTGGTATGTA
TAAGCTGTGGTGCTGCAGATGAACTTGATTTAGTTTTACCTGCACAAAGCGGCGCAGATA
ACTTCATACCGGCCAGCGATACCAAGTGGGCTTATGAATACAGTGACAACGACTGGTATT
TGCGTTTTCGTTTTTACTGGACGCCGGAATTTAAACCTCAAAATGGGGTTTTCGAAGGAT
ATGCCTTGCCAGGAAAAATTGCTTCCTAGTATATAGGTGATAATACCCAGGCATGGGTAA
ACTTTACTGTTCAGGATAGTGCCGTTCACTTTTACGTTGACCAACCAACCTGTTCAATGA
TTACCCTGGATCAGGACAAAGGCAATGTGAGTGGCACAGAAATCCAGTTAGGTAACAGTT
ACGTATCCGAAGTTAAAAATGGTCTTACCCGAGAAGTTCCCTTTGCTATCCGTGGTGAGT
ATTGTTATGCCAGCAAGATTACGGTTAAGCTGACGGCTGCAAATGCAGCCACTGACAAAA
ATCTGGTGGGTAAAACAACTGGCTCTGCCACAGGCGTGGCTGTAAGAGTTAATTCAACTT
ATAATGATAGCAAAGTGTTATTAAAACCAGATGGCGTTGCTTCCATTGATTATAACTTCC
CTGTCTGGTCGAATAACTTGTTGTCATTCCCTTTTACAGCACAACTCGTCCCCGATGGCA
GTGGTAAACCTATCGGAACAGGAACATTCTCCGGTAACGCGACCTTCTCCTTTACCTACG
AATAAGTAAAACGTTATTCCCTCCTCATCGCACCAGAGTTCTGCTCTGGTGCGAACGTTT
TCCCCACACTAAAAACCATTGCCCCCCTGATTTCGGCTGTTAGAATGCGAACAGATCTGA
CTTTAGCCATCAGGACACGTTATGAAACCGACCACCATTGCTTCATTGCAAAAATGCAAA
CAGGAAAAAAAACGTTTCGCGACCATCACCGCTTACGACTATAGCTTCGCCAAACTCTTT
ACCGATGAAGGACTTAACGTCATGCTGGTAGGCGACTCGCTGGGCATGACGGTTCAGGGG
CACGACTCCACCCTGCCAGTTACCGTTGCTGATATCGCCTACCACACTGCCGCCGTACGT
CGTGGCGCGCCAAACTGCCTGTTGTTGGCTGACCTGCCGTTTATGGCGTATGCCACGCCG
GAACAGGCCTTTGAAAATGCCGCCACAGTAATGCGTGCCGGAGCCAATATGGTCAAAATC
GAAGGTGGCGCATGGCTGGTGGAAACCGTGCAGATGCTGACTGAACGCGCGGTTCCGGTA
TGTGGTCATTTAGGTTTAACGCCGCAGTCAGTGAACATTTTCGGCGGCTACAAAGTACAA
GGGCGTGGCGAGGCAGGCGATCAACTGCTCAGCGATGCATTAGCCTTAGAAGCCGCTGGT
GCACAGTTGCTGGTGCTGGAATGCGTACCAGTTGAACTGGCAAAACGTATTACCGAGGCG
CTGGCTATTCCGGTTATCGGTATCGGCGCAGGTAACGTCACCGACGGGCAGATCCTCGTC
ATGCACGACGCCTTCGGTATTACTGGCGGTCATATCCCTAAATTTGCCAAAAATTTCCTT
GCTGAAACGGGCGACATCCGCGCGGCTGTGCGGCAGTATATGGCTGAAGTGGAGTCCGGC
GTATATCCGGGCGAAGAACACAGTTTCCATTAAGGAGTCACGTTGTGTTAATTATCGAAA
CCCTGCCGCTGCTGCGTCAGCAAATTCGCCGCCTGCGTATGGAAGGCAAGCGCGTGGCGC
TGGTGCCTACTATGGGTAACCTGCACGATGGCCATATGAAGCTGGTCGACGAAGCCAAAG
CCCGCGCCGATGTGGTCGTCGTCAGTATTTTCGTTAACCCAATGCAGTTTGACCGCCCGG
AAGATCTGGCACGTTATCCACGGACCTTGCAGGAAGACTGCGAAAAGCTAAACAAACGTA
AAGTGGATTTAGTTTTCGCCCCTTCGGTAAAAGAGATCTACCCGAACGGTACTGAAACCC
ACACTTACGTTGACGTTCCTGGTCTTTCCACCATGCTGGAAGGTGCCAGCCGTCCTGGCC
ATTTTCGCGGCGTTTCGACTATTGTCAGCAAGCTGTTCAACCTGGTCCAGCCGGACATCG
CCTGCTTCGGTGAAAAAGATTTTCAGCAACTGGCGCTGATCCGCAAAATGGTTGCTGATA
TGGGCTTTGATATTGAGATTGTCGGTGTGCCAATTATGCGCGCCAAAGACGGTCTGGCGC
TGAGTTCCCGTAACGGTTATCTGACAGCGGAACAACGCAAAATTGCGCCCGGTCTGTACA
AAGTTTTAAGTTCAATTGCCGACAAATTGCAGGCTGGCGAACGGGATCTCGATGAAATTA
TTGCTATTGCCGGGCAAGAACTGAATGAAAAAGGCTTCCGCGCCGATGATATTCAGATTC
GCGATGCCGACACGTTGCTGGAAGTCTCTGAAACCAGCAAACGAGCTGTGATTCTGGTAG
CCGCCTGGCTTGGCGATGCCCGCCTGATCGACAACAAAATGGTCGAACTGGCGTAATACT
TAACTGGCGCTACGGCTGATGGCGCCAGTTATTAATTTGCCCTACGTCATGGCGATGACG
TCTGTAAGTGATTATTCATATCGCTGGCAATTTAGTTAGAGTTAATTAGCTTATCAATCT
CTGTAAGAGGTAAAGTTGTCACCTCTGCAACGTCTTCCCGAGACATCCCTTTACTTAGAA
AACGCTGGGCGAATTCCTGTCTTACCTTCTGGAGTTCCTCTTGATATCCCTTCTGAAATC
CCTTCTCTTCAAACCACTGCGCCAACGTCTGCCTGGTTTCTCTCCGTGTCTTTATTTCCA
TAGGTTCCCTTAATTATCTGGTCAGTTAACAATAACAATTATCTGGCTATAACTGATGAT
GCAGACAACTTAGTTAATCAGCTTATCAATCTCGGCAAGGGGTAAATTTGCCATCTCTGC
AACGTCTTCCCGAGACATTCCTTTATTCAGAAGACGCAGGACGAATTCTTGCCTTTCCTC
CTGTCTTCCCCTCTCTTCAAACCACTGCGCCAGCGTCATCATAGACTCCCCTCCCGTTTC
CCTGTCTCTCAGCACACCATAAAACAAATCCGCTTGTTCAGTATGACCGCGTTGCAGCAT
ATAGTTTTGCATGGCAACTAACTGACTTCCGCTAGTGTACCCTTCGTCAATCAGCGTGAC
CAGTTGCTCCAGCAATAACATTAAGTCGCGCTGGCGAATATGTTTTTGCAGTAGTTCGAG
AATCGCAATCCGCCGATGTTGCATGATTTCGTCATCCGGTGTGATGGTGATATCCACCAG
CGGGAAAGGACTGTTATAGACGCGTCGCGCCAGCTCCGGAGAGTAAAACATATCAAACCA
GCACATTGAGAGCGGATAAGGTGTGGCCTCGCCCTGATAAAAGAGAATCGGCACTACCAG
CGGTAGTTTGTCGTGATCCGCCTCCAGATGCCGATGCATGGCGGCTATAGAATAACGCAT
CATGCGAAAGGCCATTTTCTTATCCGGCTTGCTTTGGTGTTCAATCACAACATGCAGATA
ACCGGGATTGCCCTGCATTTGCACGGAATAGAGCACGTCCGTGCTGTGTCCTTTCAGGCT
CTCTTCAATGAAACTCCCCGACTCTAAATGAAGCGTGTTGAGGTCACAAAGTTCGCGTAA
TTCCACTGGCAAATGTATCTCCAGAAAGTCGCGAGCCGTCTCCGCATGCATTAAAAATTG
TTTAAATACCGCGTCATGCGGTGTAGTACTCGGTGCATCCATCTTCCCTGTCTTCCGTGT
TGTCTTGCGTGAAGGCAGTATCCAGCCAAGGCGCGCCGTCGTCAGCCACCTCTTTATTGT
TTACCGAGCAGCGTTCAGAGAAATATCAATTCGTTACAGGCGATACATGGCACACTTCGG
CGCGGTACGCAAACTGCTGATGCAAATGCCGTCAGATGAGTAGACACTAAACAAAAATCG
GGCAATACTGCGTGAGAATTTCCTCAAAGCAGGCACCGCCTGCTTCGTTAACGACAGGGT
AGAAAGGTAGAAGTTATGATTCGCACGATGCTGCAGGGCAAACTCCACCGCGTGAAAGTG
ACTCATGCGGACCTGCACTATGAAGGTTCTTGCGCCATTGACCAGGATTTTCTTGACGCA
GCCGGTATTCTCGAAAACGAAGCCATTGATATCTGGAATGTCACCAACGGCAAGCGTTTC
TCCACTTATGCCATCGCGGCAGAACGCGGTTCGAGAATTATTTCTGTTAACGGTGCGGCG
GCCCACTGCGCCAGTGTCGGCGATATTGTCATCATCGCTAGCTTCGTTACCATGCCAGAT
GAAGAAGCTCGCACCTGGCGACCCAACGTCGCCTATTTTGAAGGCGACAATGAAATGAAA
CGTACCGCGAAAGCGATTCCGGTACAGGTTGCTTGATTGTTATCCCTGCGGCTGGTTACT
CACCAGCCGCGACATCGTCTCGAGCGAATCCGTTCTTAAGATATAAAGTCGTTTTAGTAA
CAACGGATTATCCCCCGGTTTTACTTTGCCTTTCATGGTTGTCACCGCCAAGTGAAATCC
GGCATCGTTTGCTGCCTTCACGGCTTTGTCATTAAATCCGCCAAACGGATACGAAAGATA
CCAGACATGCGGATTAAATTGCGCCAGAGCGCGGCGTGAACGTGCAAAATCAAACAGAAT
ATTGTGCTCACTACGACTCAGTAATATGGGGCGGCGATAGCCATCCACCCGATGCAAAAA
ATGGGTATGTGACTGAAAATCAAAAACATCGCGAATTTCGTTAAGCTCAGAAACGCTCAT
AAATTGCAGCGATTTTGGGTTCCACTTCTGCGGGTGACGTTTGATGCGTGAGGTAACAAT
AAACGCCGTCGCCTTCATGCCATATTGTTTCAACACAGGATACGCATAGCGGCTCACCGA
CTTGAGGCCATCATCAAAGGTAATCACCACCGCTCGCGCAGGGAGATTGATCTTATTCTT
CACGTAGCCTTCCAGCTGCACCATGCTCAGTGTCGCGTATCCCCTGTCGCGCAGCCAGGC
CATCTGGTTATTGAAAGCGCGTACCGAGGTGGTCGTCGAAGTGTGGCGAAAACGGGTGTT
TTCTTCGTCGCGCAGAATATGATGATAGGTTAGCACCGGAAGGCCATTATCGGGTTGGGC
ATCCAGCGCGCTGATATAGGCCAGTCGATCGCCAATACGGACCTGATACCAGGTTTGATT
TAACCTGTCTTTCAGTTTATGCAAAATCGGGTAGCGCAAATTGTCCGCCAGTACCCCAAA
TGGCGCACTGCCCACACTCGGCGCGTTATAGACCGGCGTATCTTTCCAGGTAACTAAGTT
CTGATTACTCAGCGGCTTGTTGAGGTCACCCAAACCGTCTTCAACTTTTTGTCGCCCCTG
AACCGGCTCGAGATGCCCTTTATCGATAAACCCTTTACCAAAGCCAAAATTAAATGCGTA
ATAACTTGCGGCAGTGGGCTCCACGGCAATGATTTGTCCGGCCCGAATATTCCCCACGGT
CACCATCTTGTCGCCAATTTGCGCCCAGACCGCAGCATTTTCGATGGTTTGCATATAACG
GGCAGGTAACGCGGCACTGACACTTGCGGTAAACAGCATCAGCAGGAGAATAACAGCTTG
TTTGTACATGAAAAAATAACCGAGGGTGAAACAACGCTTTTATTGTAGCAAAAGCGCTAT
AAGAATCGTGGGTTAATACTCATACAAATTATGTTTGAGGACGAAAGGTGGATTTTTTTG
TTGTTGGTGCCAAAGACTACTCACCTCCGGCCCACCCAGTTCGACAATACGCTCGCGAAA
CTCTGAACTGGTCATGGTTTCACGGCAAGCCATCATCTGTTCAATTAACGGTAACGTGAC
ACCAGAAATCACTTCGCAACGGGAGTGTTTGTGGCTTAATAATGAAGCCACGCGGTACGG
TGGCGCTCCGGCTATATCGGTTAAGAAGATGACACCCTCACCAGAGTCCGCTTCATGCAG
AGCATCGCACATCATGCGGCTGAGCATATTAGAGCTTAACCCACGCCAGAAATTCACGGC
CCGGCACTGAAGAAGTGCCCCATGTTTTTTCTCCAGCGCATCCAGTATCTCTTGCGCCCG
GTCATCGTGACAGGTAATTACCCAACCTAACATCGCCTTCCTCCTTAGCCGAAAATCAGT
CTACCCTGACCATTGTTGATAAAGGGTGATAGCCGTCAAAACTCCTCTCCCCCAAATCCA
GAGGAGAGGAAATAGCCTTAGCTACGCAAACCACGTCCACGTTGGATCAGCGACCAACAG
ATCAAATAAAACGCCACAATAAAGACCACCAGTACGCCAAAGGTAGTGACCAGCGGAACA
TCATTGATACCGAGGAAGCCGTAGCGGAAACCACTGATCATATAAACGATTGGGTTCAGG
TGCGACAGCCCTTGCCAGAACGGCGGCAACAAAGTCAGTGAGTAAAAGACCCCACCCAAA
TACGTGAGTGGCGTTAACACAAAGGTTGGCACCAGGCTGATGTCATCGAACGTTTTGGCA
AACACACCGTTCAGCAAACCCGCAAGGGAGAACAACACCGCCGTGAGCACCAGGGTTAAG
GCAACGAATACCCATGAATGCACCTGAAACGGCACAAAAAACAGTGAAATTGCCGTCACC
AGAATGCCAACAAACAGACCACGCGCCACGCCACCGCCGACATATCCGGCAATAATGACG
TGAGTCGGAACCGGCGCTACCAGCAGCTCTTCAATATTACGCTGGAATTTGGCACCAAAA
AATGATGACGCGACGTTAGCGTAGGCGTTGGTGATCACCGACATCATGATCAGCCCCGGT
ACGATGAACTGCATGTAGCTGAAGCCATGCATATCGCCAATACGCGAACCAATCAGGTTA
CCGAAGATAATAAAGTAAAGGGTCATGGTGATGACTGGCGGCACCAGCGTCTGCACCCAG
ATACGCATAAAGCGATGGATCTCTTTCGCCCAGATGCTTTTTAGCGCCACCCAGTAAAGA
TGCATCATGCGCGATCTCCTTGTTTTTCATTAACCAGTGAAACAAACAGCTCTTCCAGAC
GGTTAGCTTTGTTACGCATACTTAATACCTGAATGCCCTGCTCACTTAACTGCGTAAATA
CGCTGTTGATCCCCTGCTCACGCAGCACTTCAACTTCCAGCGTCGCGGTATCGACCAGTC
GATACTGATAGCCATCGAGCTTCGGTAACGGACTTTTCGGTGCGAGATCGAGAATAAAGG
TTTCCGATTTCAGCTTCGCCAGCAGCGCCTTCATCGAGGTATTTTCCACCAGCTCACCAT
GTTGAATAATGCCGATATTGCGGCACAGCATTTCTGCTTCTTCCAGGTAGTGTGTGGTGA
GAATGATGGTGGTGCCTTTGTCGTTTAAATCCTTCAAAAAGCCCCACATTGAGCGGCGAA
GCTCAATATCCACGCCTGCCGTTGGCTCGTCGAGAATCAGCAGTTTAGGTTCATGCATTA
ACGCACGGGCAATCATTAAACGACGCTTCATCCCGCCCGATAACATGCGCGCACGTTCGT
TGCGTTTTCCCCATAAATCGAGCTGCTTAAGATACTTTTCGCTGCGGATGTACGCTTCTT
TGCGCTCCACGCCGTAGTACCCTGCCTGATTCACCACAATTTGCTGCACGGTTTCAAACG
GGTTGAAGTTAAATTCCTGCGGCACCAGTCCCAACTGACGTTTAGCGTTCACGACATCCT
TCTCGAGATCGTAACCAAATACGCTGACCCGCCCGGAGGTTTTATTTACCAGAGAGCTGA
TAATACCGATAGTGGTCGATTTCCCGGCCCCGTTCGGCCCGAGAAGCGCATAAAAATCAC
CCGCTTCGACCTGCAAATCTATTCCACGAAGCGCCTGAACGCCGCCTGGATAGGTTTTTT
TAAGCTGTTGAAGTTCCAGTGCAATGGTCATAAATTTTTACTTACCTTACGTTCTTACAC
TTTATCTGTGGTTTAAATCGTCCCGGAGTTGCCCTATATTAGCCAAACGTAATTATTTGG
TTACAGGTCGTTAACCTCCATGAAAGACATAGATACACTCATCAGCAACAATGCACTATG
GTCAAAAATGCTGGTGGAAGAGGATCCCGGGTTTTTTGAGAAACTGGCACAAGCGCAAAA
ACCGCGCTTTCTATGGATTGGATGTTCCGACAGTCGCGTTCCTGCAGAACGTTTAACCGG
TCTTGAGCCGGGCGAACTCTTTGTTCACCGTAATGTTGCTAACCTGGTCATTCACACCGA
CCTGAACTGCCTTTCCGTGGTTCAGTATGCAGTGGATGTACTCGAAGTTGAACACATTAT
TATCTGTGGCCACTACGGTTGCGGCGGCGTACAAGCCGCAGTTGAAAACCCGGAACTGGG
GCTTATCAACAACTGGCTGCTGCATATCCGCGATATCTGGTTCAAACATAGCTCATTGCT
CGGCGAAATGCCGCAAGAGCGCCGTCTGGATACCTTGTGTGAACTGAACGTCATGGAACA
GGTGTATAACCTGGGCCACTCCACCATTATGCAATCAGCGTGGAAACGCGGGCAGAAAGT
TACCATTCACGGCTGGGCCTACGGTATTCACGACGGCTTGCTGCGTGATCTGGATGTCAC
AGCGACCAACCGCGAAACCCTTGAGCAACGTTACCGTCATGGGATTTCCAACCTCAAGCT
GAAACACGCCAACCACAAATAAAAATGCCATGCCGGATGCAACACATCCGGCAACTTCAC
ACTTACTCGTCCAGCAGAATCACTTTGCCGATATACGGCAGATGACGGTAACGCTGTGCG
TAATCAATGCCGTAACCCACCACAAACTCATCCGGGATCGAGAAACCGATAAATTCTACC
GGGACGTTCACTTCACGACGGGACGGTTTATCCAGCAGCGTACAAATCGCCAGCGACTTC
GGTTCGCGCAGGCTTAAGATCTCACGCACTTTCGACAGTGTATTCCCCGAGTCGATGATA
TCTTCAACAATCAGCACGTCCTTGCCACGGATATCTTCATCCAGATCTTTGAGGATTTTC
ACATCACGGGTGGTGGACATGCCGCTACCGTAGCTGGAGGCGGTCATAAAGTCGACTTCA
TGAGATACCTGAACTTCACGGCACAGGTCCGCCATAAACATAAATGAGCCACGCAGCAGA
CCCACCAGCACCATATCGCTGCCGCTGTCTTTGTAACGCTCAGTAATCTGACGACCCAGT
TCGGCGATACGCGCTTTAATCTCCGCTTCGGGGATCATTACTTCTACAGTATGTTTCATA
TCTCTAACCATATGATTTAAAAACAAATCACTTCGCACGGGCAGGTTTTGGCACCGCAAC
AAAGCGCAAGACACGCAGTATACCAGTAAAACTATTCATTCGCGGAATCTGTTAATAAAG
CTCGAATTGTGATGACGGTCACACATGTTAAAACCTATAATTAATTGCTACTAAAATATT
AATGAATTGAAATGGTGTCTCTTTATGGCAATTAACAATACAGGCTCGCGACGATTACTC
GTCACGCTAACAGCCCTTTTTGCAGCGCTTTGCGGGCTGTATCTACTCATTGGCGGAGGC
TGGCTGGTCGCGATTGGCGGCTCCTGGTACTACCCTATCGCTGGCCTTGTGATGCTCGGC
GTCGCCTGGATGCTGTGGCGCAGTAAACGTGCCGCGCTTTGGCTATACGCCGCCCTGCTG
CTCGGCACCATGATTTGGGGCGTCTGGGAAGTTGGTTTCGACTTCTGGGCGCTGACTCCG
CGCAGCGATATTCTGGTCTTCTTCGGCATCTGGCTGATCCTGCCGTTTGTCTGGCGTCGC
CTGGTCATTCCTGCCAGCGGCGCAGTTGCCGCACTGGTGGTGGCACTGCTGATTAGCGGT
AGTATCCTGACCTGGGCCGGATTTAACGATCCGCAGGAAATCAACGGCACCTTAAGCGCC
GATGCCACACCTGCGGAAGCTATCTCACCCGTTGCCGATCAGGACTGGCCTGCCTATGGT
CGCAATCAGGAAGGTCAACGCTTTTCACCTCTGAAACAAATTAACGCCGATAACGTCCAT
AATCTGAAAGAAGCCTGGGTGTTCCGTACTGGCGATGTGAAGCAGCCGAACGATCCGGGC
GAAATCACCAATGAAGTGACGCCGATTAAAGTGGGCGACACCCTTTACCTGTGTACCGCT
CACCAGCGCCTGTTTGCGCTCGATGCCGCCAGCGGCAAAGAGAAATGGCATTACGATCCT
GAGCTGAAAACTAACGAGTCTTTCCAGCACGTAACCTGCCGTGGCGTCTCTTATCATGAA
GCCAAAGCAGAAACGGCTTCGCCGGAAGTGATGGCGGATTGCCCGCGTCGTATCATTCTT
CCGGTCAATGATGGTCGACTGATTGCGATTAACGCTGAAAACGGCAAACTGTGCGAAACC
TTCGCCAATAAAGGCGTGCTCAATCTGCAAAGCAATATGCCAGACACCAAACCGGGTCTG
TATGAACCGACTTCGCCACCGATTATCACCGATAAAACCATCGTGATGGCAGGTTCAGTT
ACCGATAACTTCTCAACCCGCGAAACGTCTGGTGTGATCCGTGGTTTTGATGTCAACACC
GGGGAGCTGCTGTGGGCTTTTGATCCGGGCGCGAAAGATCCGAACGCAATCCCGTCTGAC
GAACACACCTTTACCTTTAACTCGCCAAACTCGTGGGCACCAGCGGCCTATGACGCGAAG
CTGGATCTGGTGTATCTGCCGATGGGCGTGACCACGCCGGATATCTGGGGCGGTAACCGC
ACACCGGAACAGGAACGTTATGCCAGCTCGATTCTGGCGCTGAATGCCACAACCGGGAAA
TTGGCGTGGAGCTACCAGACCGTTCACCACGACCTGTGGGATATGGATCTTCCGGCACAG
CCGACGCTGGCGGACATCACCGTTAATGGTCAGAAAGTGCCAGTTATTTACGCTCCGGCG
AAAACCGGCAACATTTTTGTGCTCGATCGTCGCAATGGTGAACTGGTGGTTCCTGCCCCG
GAAAAACCGGTTCCCCAAGGCGCTGCCAAAGGCGATTACGTAACCCCAACTCAACCGTTT
TCTGAACTGAGCTTCCGTCCGACGAAAGATTTGAGCGGAGCGGATATGTGGGGCGCCACC
ATGTTTGACCAACTGGTGTGCCGCGTGATGTTCCACCAGATGCGCTATGAAGGCATTTTC
ACGCCGCCATCTGAACAGGGTACGCTGGTCTTCCCTGGTAACCTGGGGATGTTCGAATGG
GGCGGGATTTCTGTCGATCCGAATCGTGAAGTAGCAATTGCCAACCCAATGGCGCTGCCG
TTTGTTTCGAAACTGATCCCTCGCGGTCCGGGTAACCCAATGGAGCAGCCGAAAGATGCC
AAAGGCACGGGTACGGAATCCGGCATTCAGCCACAGTACGGTGTACCGTATGGTGTCACG
CTCAACCCGTTCCTCTCACCATTTGGTCTGCCATGTAAACAGCCAGCATGGGGTTATATC
TCGGCGCTGGATCTGAAAACTAATGAAGTGGTGTGGAAGAAACGTATTGGTACGCCGCAG
GACAGTATGCCGTTCCCGATGCCTGTACCGGTGCCGTTCAATATGGGTATGCCGATGCTG
GGCGGGCCAATCTCCACGGCGGGTAACGTGCTGTTTATCGCCGCTACGGCAGATAACTAC
CTGCGCGCTTACAACATGAGCAACGGTGAAAAACTGTGGCAAGGTCGTTTACCAGCGGGT
GGTCAGGCGACGCCAATGACCTATGAAGTGAATGGTAAGCAGTATGTGGTGATCTCCGCA
GGCGGTCACGGTTCATTTGGTACGAAGATGGGCGACTATATTGTGGCTTATGCGCTGCCG
GATGATGTGAAGTAAGACTTGCTCAGATTGCTGACAACGTGCGCGTTGTTCATGCCGGAT
GCGGCGTGAACGCCTTATCCAGCCTACAAAATTGTGCAAAATCAATGGATTGCACAGGTA
GCGTAGGCCTGATAAGCGTAGCGCATCAGGCAGATTTGCGTTTGTCATCAGTTTAATGCC
CGGAGAGATCCGGGCATATTCCCGAATACGGTCTTTTTATACCGTAAACCCTAACATCAT
CCCCGTATCTTCATGCTCCAGCAGATGGCAGTGCGCCATATAAGCATGTTCTTTCGGTGC
GTCGTGATTAAACTTCACCAGCACTTCGCTGACATTACCTTCGACCTTAACGGTATCTTT
CCAGCCCGCGCGATGCGTCGCTGGCGGTTTGCCATTTTCTGACAAGATACGGAACTGCGT
GCCGTGAATATGGAACGGATGCAGCATCATGTCGCCCACGCCAGAGATAACCCAACGTTC
GTACTGCCCTTTCGCCGCCGCAAACATCGGCTTATTCATATCAAACGCCTGACCGTTGAT
TTTATTGGCATGGTGGAAATCGAACTTCCCGCCGTGGTTCATATGATTCATATTGCCGTG
CCCCATATGGCCCATCATCTGGCTGTGATCCATTCCGGCCATCGCCTGATCGCCATATTT
CTCCATTAGCATCTGCATCCCCATCATATCTAGCATCGGGTCCATAGAAAGTTGCAGCTT
GCGTACCGTCAGCCCTTCCAGCGAAGGTAACGCAGGCAGGCTACTTAATGTGTCTGGCAA
AGCACCGGAGGCACTAATAGCAATCGGCTGAATCCGCATTACCGGATGCGGCTTGTCAAA
CGGCGCAATCGCCATCCCCATCTGGCTGACCGGCAGCGTCACCAGGTCAAAGGGTTTGTT
GTCGTTAACCTCCACCAGCACTTCAAAACGCTCGCCCATCAGCACCGGCAGCTCGTTCAC
CTTCACCGGTTCAGGTAGCAGACCACCGTCGCTGGCAATCACATAAAGCGGGCGATTGTC
GCTGGTGGCGAAATTGAGCGAGCGGGCATTACAGCCATTGAGCAAACGCAGGCGCAGCCA
ACCACGCGGGGCAGCGTGTTGCGGGTAGATTGCACCGTTGGTCAGCAACGTATCGCCAAA
CCAGCCCACGGCGGCGGTCATCACATCCAGTTGATAATCAATCTGCCCGTCGGCGCTAAA
TTTCTTATCCTGAACGATCACCGGAACATCATCGATACCCCACTGTTTTGGCAGCATTAA
TTTCAGGATCTCGTCATCTTCAATTACCACCAGACCAGCCAGCCCCATCGCCACCTGTCG
CCCGGTCTTGCCATGTTGATGTGGATGGAACCAGCAGGTAGCGGCAGGTTGATCAACGTT
CAACGTCACCGAGCGCTTGCCACCTGGCGGAATAATTCCCTGTGGGCCGCCGTCGACTTC
ACCCGGTACTTCCAGCCCGTGCCAGTGCAACGTCGTCTCTTCCGTCAGTTGGTTATAGAT
ATCAACCGTTACCGCTTTGCCGCGCTGTAATTTCACCGCCGGCCCCAACAGATTGCCGTT
ATAGCCCCAGGTAGTTGCAGTTTTCTCGCCAAAGGTAGACTGACCTGCGCCAATAGTTAA
CTGAATGCGATTACGGGCATCGGTCGTGAGCAAATCAGGGATCGGTAACGTTGGGCGTTC
CGCCGCAAAAACTGCACGGCTCCACAGTGGCAAGGCTGAAGCCACACCCAGTGCGACGGA
ATATTTCAAGAAATCACGACGTTGCATAGTTATTTCCTTATTCTTAAGCAGGCGAAACAA
AATCAAACGTTGAGCATAGTCCTTCCCCTTACGGGAAGGTCAAGCCGCAGACACAATTTA
ATCGACAATAATGGTCGTCGCCTCGCTCGCAGTGTGCTAACGTTTATCTTCTTTAAGCCC
CTGGTAGAAGCAATGAAGACGTTTTTCAGAACAGTGTTATTCGGCAGCCTGATGGCCGTT
TGCGCAAACAGTTACGCGCTCAGCGAGTCTGAAGCCGAAGATATGGCCGATTTAACGGCA
GTTTTTGTCTTTCTGAAGAACGATTGTGGTTACCAGAACTTACCTAACGGGCAAATTCGT
CGCGCACTGGTCTTTTTCGCCCAGCAAAACCAGTGGGATCTCAGTAATTACGACACCTTC
GACATGAAAGCTCTCGGTGAAGACAGCTACCGCGATCTCAGCGGCATTGGCATTCCCGTC
GCTAAAAAATGCAAAGCCCTGGCCCGCGATTCCTTAAGCCTGCTTGCCTACGTCAAATAA
TCCCTGATACCTTTTTGTAGAAATATTGACCGTGCATCCGCGGTCAATGTTAGCTATTAT
GTTGCGCCCTTTTTTTACGGGTGTTAACAAAGGAGGTATCAACCCATGGCCGAAAAAAAA
CAGTGGCATGAAACGCTACACGACCAGTTTGGGCAGTACTTTGCAGTAGATAACGTTCTG
TATCATGAAAAGACCGATCACCAGGATTTGATCATTTTTGAGAACGCTGCATTTGGTCGC
GTAATGGCGCTGGATGGCGTAGTACAAACCACCGAACGCGACGAGTTTATCTATCATGAG
ATGATGACCCATGTTCCGCTACTGGCCCACGGTCACGCGAAACATGTGCTGATTATCGGC
GGCGGCGACGGCGCCATGCTGCGTGAAGTGACCCGACATAAAAACGTTGAGTCAATCACG
ATGGTGGAAATCGATGCGGGTGTCGTGTCGTTCTGCCGTCAATATCTGCCCAACCATAAC
GCCGGTAGCTACGACGATCCGCGCTTTAAGCTGGTGATCGACGATGGCGTCAATTTCGTT
AATCAAACCAGCCAGACCTTTGATGTTATTATCTCCGACTGCACCGATCCTATCGGGCCC
GGCGAAAGCCTTTTCACTTCGGCATTTTATGAAGGCTGCAAACGTTGCCTGAATCCTGGC
GGTATCTTCGTCGCACAAAACGGCGTCTGCTTTTTACAGCAGGAAGAAGCCATCGACAGC
CATCGCAAACTCAGCCATTACTTCAGCGACGTTGGCTTTTATCAGGCGGCGATCCCGACC
TATTACGGCGGTATCATGACTTTTGCATGGGCGACAGATAACGACGCCTTACGCCATCTC
TCAACCGAAATTATTCAGGCGCGTTTTCTCGCCTCTGGCCTGAAATGCCGTTATTACAAT
CCGGCAGTCCATACGGCAGCTTTTGCCTTACCCCAGTATCTGCAAGACGCACTGGCTTCA
CAGCCGTCCTAAGGAGAAGATAAGAAATTGAAAAAACTGAAACTGCATGGCTTTAATAAT
CTGACCAAAAGTCTGAGTTTTTGTATTTACGATATCTGCTACGCCAAAACTGCCGAAGAG
CGCGACGGTTATATTGCTTATATCGATGAACTCTATAATGCCAACCGTCTGACCGAAATC
CTGTCAGAAACCTGTTCCATTATCGGGGCTAATATTCTTAACATCGCCCGCCAGGATTAC
GAACCACAGGGTGCCAGCGTCACTATTCTGGTGAGTGAAGAACCGGTTGACCCGAAACTC
ATCGACAAAACAGAACACCCCGGCCCACTGCCAGAAACGGTCGTTGCCCATCTCGATAAA
AGTCATATTTGCGTACATACCTACCCGGAAAGTCATCCTGAAGGCGGTTTATGTACCTTC
CGCGCCGATATTGAAGTCTCTACCTGCGGCGTGATTTCTCCGCTGAAGGCGCTGAATTAC
CTGATCCACCAGCTTGAGTCCGATATCGTAACCATTGATTATCGCGTGCGCGGTTTTACC
CGCGACATTAACGGTATGAAGCACTTTATCGACCATGAGATTAATTCGATTCAGAACTTT
ATGTCTGACGATATGAAGGCGCTGTATGACATGGTGGATGTAAACGTCTATCAGGAAAAT
ATCTTCCATACCAAGATGTTGCTTAAAGAGTTCGATCTTAAGCACTACATGTTCCACACC
AAACCGGAAGATTTAACCGACAGCGAGCGCCAGGAAATTACCGCTGCGCTGTGGAAAGAG
ATGCGCGAGATTTATTACGGGCGCAATATGCCAGCTGTTTAACGGCTCTGGCGGAGCTCC
CAGGCTCCGCCAGATTTATTTACTTCTGCTGCACGAAATTACGGTAAGCCGCCACCACCT
GCAGAAAATCCTCAACGCCGCATAGCGACAGGCTTTCTTCGTCGTAGTAGTTCATCCCCT
CTTCCATTTCATCGCCAGCGAATTCCAGTTGATTGGCGCGAACCATCACCTCTTCACCGT
CCATCCACAGGGTGTATTCGTGCCCTGCCCGTTGCCAGGACCGTTCGCTACCTTTCAGTG
CGTGCGCTGCTTGTTCCACTTCATCAAGCAAGGCCAGGTTTTCTTTCACCTCTTCATTAA
ACCAGTGCCCGACCACTTCATGCCCCATGGACATACGCACCTTTACCACTCCGGTAATAT
CGCGCAGAAATTCGTAATCCATAGTGTGTTCCTCTGCTCCCGGCAATGCGCCGAAATCGC
ATTGCGCCATTGATGTAATTATCGCAGCCTTACCGGAGAAAAACAGCGGAACGGCGATGG
TTTAGAAATAAAAAATGCCCGGGAATCTCATTCACCGGGCATTGTGTCGTTTATGCGCAG
CGCGTGCGCTGACTTTTTAAACTGCAGTCTGGAAAATCACACCATCGGCTTTTTCAGTGT
ACTGAGAAAGCTGGTTGAAGTTCAGGTAACGGTAAGTATCAACGGCAGTTTTATCCACCT
GCGCCACGTAGGTCTGGTACTCTTCCGGCGTCGGCAGTTTGCCAATCAGCGCCGCAACAG
CAGCCAGTTCCGCAGAAGCCAGGAAGACATTCGCGCCAGTCCCCAGACGGTTCGGGAAGT
[truncated: 5,029,977 more chars]
