# Supplementary material for: Escherichia coli ST302: Genomic Analysis of Virulence Potential and Antimicrobial Resistance Mediated by Mobile Genetic Elements
Source: Front Microbiol. 2020 Jan 21;10:3098. doi: 10.3389/fmicb.2019.03098 (PMC6985150; doi:10.3389/fmicb.2019.03098)
Supplement: DATA S2 — ST302 SNP analysis. [file Data_Sheet_2.ZIP › SNP_Analysis/ST302_SNP/SNP_analysis/snippyout/ST302/CA0229-ND-ST302.out/snps.csv]

CHROM	POS	TYPE	REF	ALT	EVIDENCE	FTYPE	STRAND	NT_POS	AA_POS	EFFECT	LOCUS_TAG	GENE	PRODUCT
EA2454	977	snp	T	C	C:117 T:0
EA2454	11382	snp	A	G	G:107 A:0
EA2454	25719	snp	T	C	C:133 T:0
EA2454	34494	snp	T	C	C:109 T:0
EA2454	36375	snp	C	A	A:118 C:0
EA2454	37987	snp	T	C	C:124 T:0
EA2454	39065	snp	T	C	C:138 T:3
EA2454	45773	snp	C	T	T:124 C:1
EA2454	52423	snp	A	C	C:114 A:1
EA2454	56628	snp	A	C	C:120 A:0
EA2454	57116	snp	A	T	T:96 A:2
EA2454	58152	snp	T	C	C:132 T:0
EA2454	67315	snp	A	C	C:124 A:0
EA2454	68937	snp	G	A	A:113 G:0
EA2454	69595	snp	A	G	G:137 A:0
EA2454	74952	snp	G	T	T:128 G:3
EA2454	84557	snp	T	G	G:118 T:0
EA2454	85537	snp	G	A	A:109 G:1
EA2454	87714	del	CT	C	C:106 CT:0
EA2454	88223	del	TTCAATATCAATA	T	T:49 TTCAATATCAATA:0
EA2454	95737	del	CT	C	C:109 CT:0
EA2454	102014	snp	A	T	T:111 A:0
EA2454	107456	snp	C	A	A:104 C:0
EA2454	108354	snp	C	T	T:103 C:2
EA2454	108720	snp	C	T	T:127 C:3
EA2454	111773	snp	C	G	G:124 C:0
EA2454	124865	snp	T	C	C:103 T:0
EA2454	131613	snp	A	G	G:96 A:0
EA2454	140343	snp	T	C	C:129 T:1
EA2454	140951	snp	T	G	G:126 T:0
EA2454	146087	snp	A	C	C:153 A:0
EA2454	162974	snp	G	T	T:154 G:1
EA2454	163970	del	AT	A	A:71 AT:0
EA2454	164371	snp	T	A	A:136 T:0
EA2454	174420	snp	A	G	G:108 A:0
EA2454	186550	snp	T	C	C:120 T:1
EA2454	190313	snp	T	C	C:138 T:0
EA2454	220420	snp	C	T	T:115 C:1
EA2454	220577	snp	G	A	A:117 G:0
EA2454	223654	snp	C	T	T:105 C:2
EA2454	239221	snp	A	G	G:110 A:0
EA2454	245301	snp	C	T	T:101 C:0
EA2454	264457	snp	C	T	T:107 C:2
EA2454	268207	snp	C	T	T:103 C:2
EA2454	277907	snp	G	T	T:116 G:0
EA2454	285627	ins	A	AT	AT:118 A:0
EA2454	298286	snp	T	C	C:60 T:0
EA2454	304693	del	AT	A	A:28 AT:0
EA2454	311941	snp	C	T	T:119 C:3
EA2454	313034	snp	A	G	G:141 A:0
EA2454	317106	snp	T	C	C:133 T:0
EA2454	318467	snp	T	C	C:133 T:0
EA2454	333155	snp	G	T	T:106 G:5
EA2454	334084	snp	G	A	A:116 G:2
EA2454	337102	snp	G	A	A:105 G:1
EA2454	342188	snp	G	A	A:139 G:6
EA2454	346719	snp	C	A	A:114 C:3
EA2454	350969	snp	A	G	G:130 A:0
EA2454	353870	snp	G	A	A:134 G:1
EA2454	357162	snp	G	A	A:147 G:3
EA2454	359374	snp	C	T	T:108 C:3
EA2454	371150	snp	T	C	C:122 T:0
EA2454	376903	snp	G	A	A:131 G:0
EA2454	388918	snp	T	G	G:129 T:1
EA2454	393575	snp	A	G	G:141 A:0
EA2454	393743	snp	A	G	G:130 A:2
EA2454	397444	snp	C	G	G:115 C:0
EA2454	406821	snp	G	A	A:130 G:0
EA2454	407113	snp	A	G	G:123 A:0
EA2454	407887	snp	C	G	G:132 C:0
EA2454	412458	snp	G	A	A:136 G:1
EA2454	415473	snp	T	C	C:138 T:5
EA2454	437474	snp	A	G	G:115 A:0
EA2454	440837	snp	C	A	A:142 C:2
EA2454	443213	snp	A	G	G:146 A:0
EA2454	443244	snp	G	A	A:145 G:2
EA2454	447459	snp	A	G	G:129 A:0
EA2454	448711	snp	A	G	G:150 A:0
EA2454	450076	snp	G	A	A:144 G:2
EA2454	454890	snp	C	T	T:124 C:5
EA2454	457082	snp	C	T	T:130 C:0
EA2454	465826	snp	A	T	T:142 A:0
EA2454	470437	snp	C	T	T:149 C:4
EA2454	472911	snp	T	C	C:129 T:0
EA2454	478727	snp	C	A	A:108 C:0
EA2454	482022	snp	T	G	G:114 T:3
EA2454	483790	snp	C	T	T:138 C:2
EA2454	485246	snp	C	T	T:119 C:0
EA2454	485779	snp	C	G	G:123 C:0
EA2454	485955	snp	G	T	T:125 G:2
EA2454	497460	snp	T	G	G:141 T:0
EA2454	499783	snp	C	T	T:113 C:7
EA2454	506352	snp	T	G	G:147 T:0
EA2454	508293	snp	C	T	T:142 C:0
EA2454	510992	snp	C	T	T:128 C:2
EA2454	519195	snp	G	A	A:149 G:0
EA2454	519811	snp	A	C	C:138 A:0
EA2454	523962	snp	C	T	T:122 C:2
EA2454	528123	snp	A	T	T:148 A:0
EA2454	534151	snp	A	G	G:118 A:0
EA2454	537287	snp	G	C	C:147 G:0
EA2454	537585	snp	G	A	A:141 G:4
EA2454	539426	snp	T	C	C:146 T:0
EA2454	546428	snp	A	C	C:137 A:0
EA2454	546813	snp	C	T	T:129 C:0
EA2454	550000	snp	G	A	A:116 G:2
EA2454	559017	snp	A	G	G:137 A:0
EA2454	561226	snp	G	A	A:62 G:0
EA2454	561259	snp	C	A	A:17 C:0
EA2454	562933	snp	T	C	C:160 T:0
EA2454	569666	snp	T	C	C:132 T:4
EA2454	573038	snp	C	T	T:63 C:0
EA2454	578357	snp	C	T	T:130 C:3
EA2454	590181	ins	T	TA	TA:119 T:0
EA2454	595632	snp	G	C	C:122 G:1
EA2454	597386	snp	A	G	G:172 A:0
EA2454	606088	ins	G	GA	GA:132 G:0
EA2454	611222	del	TGCATA	T	T:137 TGCATA:1
EA2454	611872	snp	A	G	G:139 A:0
EA2454	612726	snp	A	G	G:169 A:0
EA2454	613906	snp	C	A	A:165 C:0
EA2454	618990	snp	C	T	T:158 C:1
EA2454	623874	snp	G	A	A:137 G:4
EA2454	638418	snp	C	T	T:143 C:3
EA2454	639428	snp	C	G	G:138 C:5
EA2454	642011	snp	G	C	C:167 G:0
EA2454	642337	snp	A	G	G:130 A:0
EA2454	669330	snp	A	G	G:152 A:0
EA2454	670594	snp	C	A	A:156 C:2
EA2454	680620	snp	C	T	T:156 C:3
EA2454	683177	snp	T	G	G:124 T:0
EA2454	686003	snp	A	G	G:145 A:0
EA2454	686104	snp	G	C	C:137 G:0
EA2454	687410	snp	A	G	G:127 A:0
EA2454	690408	snp	A	G	G:141 A:1
EA2454	690611	snp	T	C	C:151 T:0
EA2454	705263	snp	C	A	A:165 C:0
EA2454	709632	snp	T	C	C:130 T:1
EA2454	710977	snp	A	G	G:143 A:0
EA2454	715370	snp	C	T	T:128 C:3
EA2454	719734	snp	C	T	T:138 C:4
EA2454	723869	snp	C	T	T:124 C:3
EA2454	731219	snp	T	G	G:126 T:0
EA2454	731329	snp	G	A	A:145 G:0
EA2454	738321	snp	C	T	T:132 C:0
EA2454	743375	snp	T	A	A:147 T:3
EA2454	751386	snp	G	A	A:152 G:6
EA2454	753604	snp	C	T	T:128 C:1
EA2454	755366	snp	A	G	G:128 A:3
EA2454	756040	snp	T	G	G:142 T:0
EA2454	758394	snp	C	T	T:152 C:0
EA2454	765032	snp	T	C	C:130 T:0
EA2454	777744	snp	A	T	T:133 A:0
EA2454	779769	del	TA	T	T:73 TA:0
EA2454	785375	snp	T	C	C:153 T:3
EA2454	788461	snp	G	T	T:95 G:0
EA2454	789417	snp	A	C	C:128 A:0
EA2454	803220	snp	G	A	A:135 G:2
EA2454	805481	snp	A	G	G:130 A:0
EA2454	815610	snp	T	A	A:121 T:1
EA2454	817985	snp	T	G	G:114 T:0
EA2454	818649	snp	A	C	C:131 A:0
EA2454	821289	snp	C	T	T:133 C:1
EA2454	824349	snp	T	C	C:119 T:2
EA2454	829606	snp	G	A	A:135 G:2
EA2454	831520	snp	G	T	T:111 G:1
EA2454	839497	snp	T	A	A:97 T:0
EA2454	842890	snp	G	A	A:128 G:3
EA2454	852695	snp	A	G	G:108 A:0
EA2454	860226	snp	C	A	A:131 C:2
EA2454	861549	snp	G	A	A:121 G:1
EA2454	891641	snp	G	A	A:122 G:2
EA2454	894538	snp	C	T	T:122 C:0
EA2454	904482	snp	A	G	G:110 A:0
EA2454	923875	snp	T	A	A:120 T:3
EA2454	924579	snp	T	C	C:127 T:0
EA2454	926548	snp	G	A	A:103 G:1
EA2454	930102	snp	A	G	G:128 A:0
EA2454	934663	snp	G	A	A:132 G:1
EA2454	935073	ins	C	CAAAA	CAAAA:51 C:0
EA2454	938891	snp	T	C	C:111 T:0
EA2454	945162	snp	A	G	G:156 A:0
EA2454	946875	snp	T	C	C:106 T:0
EA2454	949222	snp	C	T	T:134 C:2
EA2454	949641	ins	G	GTTTCCGCAATTT	GTTTCCGCAATTT:50 G:3
EA2454	951474	snp	A	C	C:20 A:0
EA2454	954055	complex	CCGG	GCAC	GCAC:43 CCGG:0
EA2454	954067	snp	G	C	C:62 G:0
EA2454	954136	snp	A	C	C:113 A:0
EA2454	986640	snp	G	A	A:140 G:0
EA2454	988307	snp	G	T	T:130 G:0
EA2454	990058	snp	G	T	T:155 G:0
EA2454	990374	snp	C	A	A:134 C:1
EA2454	990708	snp	G	A	A:114 G:2
EA2454	1003603	snp	A	G	G:107 A:0
EA2454	1003611	snp	C	A	A:98 C:0
EA2454	1003715	snp	T	C	C:32 T:0
EA2454	1003721	snp	G	T	T:44 G:0
EA2454	1014160	snp	A	G	G:124 A:4
EA2454	1026843	snp	T	C	C:136 T:0
EA2454	1041958	snp	G	T	T:134 G:2
EA2454	1044717	snp	G	A	A:163 G:0
EA2454	1046210	snp	G	A	A:153 G:2
EA2454	1049442	snp	G	A	A:147 G:2
EA2454	1052435	snp	C	T	T:142 C:0
EA2454	1055114	snp	T	G	G:125 T:1
EA2454	1067401	snp	C	A	A:130 C:0
EA2454	1073767	snp	A	G	G:128 A:0
EA2454	1077182	ins	G	GA	GA:140 G:6
EA2454	1079000	snp	T	C	C:128 T:0
EA2454	1082762	snp	G	A	A:135 G:2
EA2454	1088754	snp	G	A	A:128 G:0
EA2454	1090049	snp	T	C	C:141 T:3
EA2454	1093309	snp	A	G	G:120 A:0
EA2454	1098037	snp	T	G	G:141 T:0
EA2454	1117455	snp	G	T	T:143 G:3
EA2454	1128458	snp	T	C	C:142 T:0
EA2454	1129150	snp	T	C	C:135 T:0
EA2454	1138215	snp	T	C	C:143 T:0
EA2454	1139565	del	CT	C	C:109 CT:1
EA2454	1144904	snp	C	T	T:157 C:2
EA2454	1144975	snp	T	C	C:172 T:0
EA2454	1148345	snp	T	C	C:118 T:0
EA2454	1160822	snp	A	T	T:132 A:0
EA2454	1167666	snp	T	C	C:135 T:0
EA2454	1168565	snp	A	T	T:155 A:4
EA2454	1174352	snp	T	C	C:137 T:0
EA2454	1185904	snp	G	T	T:126 G:2
EA2454	1186746	snp	T	C	C:110 T:0
EA2454	1190353	snp	G	T	T:119 G:0
EA2454	1194501	snp	C	A	A:146 C:0
EA2454	1194697	snp	C	T	T:128 C:3
EA2454	1211256	snp	T	C	C:119 T:0
EA2454	1218789	snp	A	G	G:154 A:0
EA2454	1225308	snp	C	A	A:154 C:3
EA2454	1228038	snp	C	T	T:135 C:0
EA2454	1236723	snp	T	C	C:130 T:0
EA2454	1246399	snp	C	T	T:132 C:0
EA2454	1253669	snp	C	T	T:121 C:3
EA2454	1261876	snp	A	C	C:125 A:0
EA2454	1264081	snp	A	G	G:129 A:1
EA2454	1268846	snp	G	T	T:171 G:0
EA2454	1280572	snp	C	A	A:126 C:0
EA2454	1289894	snp	A	G	G:133 A:0
EA2454	1299878	snp	C	T	T:123 C:1
EA2454	1301017	snp	G	A	A:145 G:0
EA2454	1311735	snp	G	A	A:87 G:2
EA2454	1317400	snp	G	A	A:80 G:5
EA2454	1320805	snp	A	G	G:128 A:0
EA2454	1322163	snp	T	C	C:112 T:0
EA2454	1322665	snp	T	C	C:116 T:0
EA2454	1331179	snp	T	G	G:128 T:0
EA2454	1340886	snp	A	C	C:127 A:0
EA2454	1352004	del	GT	G	G:63 GT:0
EA2454	1354737	snp	C	T	T:116 C:0
EA2454	1358384	snp	A	G	G:112 A:0
EA2454	1360577	snp	A	G	G:125 A:0
EA2454	1360982	snp	T	A	A:109 T:0
EA2454	1371250	snp	T	C	C:109 T:1
EA2454	1392683	snp	C	T	T:101 C:0
EA2454	1394505	snp	A	G	G:108 A:0
EA2454	1401264	snp	A	G	G:101 A:0
EA2454	1407932	snp	C	T	T:130 C:1
EA2454	1413295	snp	T	C	C:108 T:0
EA2454	1416501	snp	A	C	C:73 A:0
EA2454	1426621	snp	T	G	G:126 T:0
EA2454	1435223	snp	G	A	A:115 G:0
EA2454	1442459	snp	G	A	A:98 G:0
EA2454	1443237	snp	T	C	C:113 T:0
EA2454	1443281	snp	G	A	A:106 G:1
EA2454	1443339	snp	C	T	T:119 C:0
EA2454	1445619	snp	G	A	A:96 G:0
EA2454	1445708	snp	G	A	A:97 G:1
EA2454	1455169	snp	G	A	A:111 G:0
EA2454	1461457	snp	T	G	G:116 T:1
EA2454	1461781	snp	A	G	G:103 A:0
EA2454	1467906	snp	C	T	T:118 C:2
EA2454	1471260	snp	C	T	T:79 C:2
EA2454	1475610	snp	C	T	T:105 C:0
EA2454	1480708	snp	T	G	G:96 T:0
EA2454	1492527	ins	C	CA	CA:90 C:0
EA2454	1495581	snp	T	A	A:110 T:0
EA2454	1496904	snp	G	A	A:109 G:1
EA2454	1512622	snp	C	T	T:116 C:0
EA2454	1518455	snp	G	A	A:103 G:0
EA2454	1525679	snp	C	T	T:99 C:0
EA2454	1533339	snp	A	G	G:89 A:0
EA2454	1534292	snp	A	G	G:87 A:0
EA2454	1535476	snp	C	T	T:98 C:4
EA2454	1546476	snp	C	T	T:85 C:1
EA2454	1547465	snp	G	T	T:89 G:0
EA2454	1549828	snp	T	C	C:102 T:0
EA2454	1557966	snp	A	G	G:93 A:0
EA2454	1560679	snp	G	A	A:115 G:0
EA2454	1570233	snp	A	G	G:76 A:0
EA2454	1577742	snp	G	A	A:95 G:2
EA2454	1578064	snp	C	A	A:90 C:0
EA2454	1587710	snp	C	A	A:103 C:2
EA2454	1587792	snp	A	C	C:103 A:0
EA2454	1588489	snp	G	A	A:100 G:2
EA2454	1592505	snp	T	C	C:92 T:0
EA2454	1597094	snp	C	T	T:90 C:1
EA2454	1597496	snp	T	C	C:125 T:0
EA2454	1599906	snp	T	C	C:117 T:0
EA2454	1600199	snp	C	T	T:86 C:4
EA2454	1600919	snp	A	G	G:89 A:0
EA2454	1612435	snp	G	A	A:91 G:0
EA2454	1613406	snp	T	A	A:109 T:0
EA2454	1613463	snp	A	G	G:105 A:0
EA2454	1616033	snp	G	A	A:105 G:2
EA2454	1616446	snp	C	T	T:106 C:1
EA2454	1619172	snp	G	A	A:46 G:0
EA2454	1619178	complex	TACA	AACG	AACG:49 TACA:0
EA2454	1620184	snp	T	A	A:21 T:0
EA2454	1620891	snp	T	C	C:17 T:0
EA2454	1620915	snp	A	T	T:39 A:0
EA2454	1620945	snp	C	T	T:66 C:0
EA2454	1621020	snp	C	A	A:94 C:0
EA2454	1621049	snp	G	A	A:101 G:0
EA2454	1621074	snp	T	A	A:92 T:0
EA2454	1621137	snp	T	A	A:74 T:0
EA2454	1621185	complex	TGCGTTAGCG	GGCATTGGCT	GGCATTGGCT:63 TGCGTTAGCG:1
EA2454	1621200	snp	C	T	T:63 C:1
EA2454	1621221	snp	C	T	T:54 C:0
EA2454	1621227	snp	T	A	A:46 T:1
EA2454	1621255	snp	C	T	T:20 C:1
EA2454	1624032	snp	A	T	T:34 A:0
EA2454	1624047	snp	C	T	T:44 C:0
EA2454	1624053	snp	C	T	T:51 C:0
EA2454	1624069	complex	GAAGGT	AACGGC	AACGGC:58 GAAGGT:0
EA2454	1624086	snp	C	T	T:74 C:0
EA2454	1624128	complex	TAG	AAA	AAA:70 TAG:0
EA2454	1624137	snp	T	C	C:80 T:0
EA2454	1624153	snp	T	A	A:84 T:0
EA2454	1624217	snp	A	G	G:106 A:0
EA2454	1624254	snp	A	G	G:104 A:0
EA2454	1624263	complex	ATTG	GTTA	GTTA:91 ATTG:0
EA2454	1624280	snp	T	C	C:90 T:0
EA2454	1624351	mnp	GT	TA	TA:82 GT:0
EA2454	1624401	snp	C	G	G:49 C:0
EA2454	1625151	snp	G	T	T:27 G:0
EA2454	1625175	complex	TCCG	CCCA	CCCA:48 TCCG:0
EA2454	1625193	snp	G	A	A:74 G:0
EA2454	1625205	snp	C	T	T:86 C:0
EA2454	1625235	snp	A	G	G:93 A:0
EA2454	1625258	complex	AACTA	GACTC	GACTC:88 AACTA:0
EA2454	1625280	snp	A	T	T:83 A:0
EA2454	1625298	snp	A	G	G:75 A:0
EA2454	1625376	snp	G	T	T:102 G:0
EA2454	1625382	snp	T	C	C:101 T:0
EA2454	1625390	snp	G	A	A:99 G:0
EA2454	1625406	complex	AGGC	TGGT	TGGT:92 AGGC:0
EA2454	1625417	snp	G	A	A:96 G:0
EA2454	1625424	snp	G	A	A:91 G:0
EA2454	1625430	snp	G	A	A:94 G:0
EA2454	1625455	snp	G	A	A:90 G:0
EA2454	1625460	snp	A	T	T:88 A:0
EA2454	1625475	complex	CGGT	AGGA	AGGA:78 CGGT:0
EA2454	1625505	snp	A	T	T:82 A:0
EA2454	1625519	mnp	GC	AT	AT:82 GC:0
EA2454	1625559	snp	G	A	A:94 G:0
EA2454	1625589	snp	C	A	A:84 C:0
EA2454	1625637	snp	T	C	C:84 T:1
EA2454	1625649	mnp	CG	TC	TC:70 CG:1
EA2454	1625658	snp	T	C	C:82 T:1
EA2454	1625688	complex	TGTC	CATT	CATT:67 TGTC:0
EA2454	1625826	snp	T	C	C:87 T:0
EA2454	1625835	snp	A	G	G:85 A:0
EA2454	1625853	snp	T	G	G:88 T:0
EA2454	1625874	snp	T	C	C:97 T:0
EA2454	1625895	snp	A	G	G:94 A:0
EA2454	1625922	snp	T	C	C:78 T:0
EA2454	1625946	snp	T	A	A:65 T:0
EA2454	1625960	snp	A	G	G:61 A:0
EA2454	1625984	snp	T	C	C:48 T:0
EA2454	1625995	complex	TGCGCAAT	GGAACAAC	GGAACAAC:37 TGCGCAAT:0
EA2454	1626008	snp	A	T	T:43 A:0
EA2454	1626017	complex	CAAC	GAGA	GAGA:42 CAAC:0
EA2454	1626031	snp	G	A	A:57 G:0
EA2454	1626042	snp	T	C	C:61 T:0
EA2454	1626118	snp	A	G	G:55 A:0
EA2454	1626136	snp	T	C	C:43 T:0
EA2454	1626159	complex	GCCCC	ATCAA	ATCAA:13 GCCCC:0
EA2454	1626543	snp	G	T	T:20 G:0
EA2454	1626549	snp	C	T	T:25 C:0
EA2454	1626559	snp	A	G	G:34 A:0
EA2454	1626568	complex	TGC	CGT	CGT:38 TGC:0
EA2454	1626586	snp	G	A	A:65 G:0
EA2454	1626595	complex	ACGA	GCGT	GCGT:68 ACGA:0
EA2454	1626603	snp	A	T	T:75 A:0
EA2454	1626611	snp	T	C	C:82 T:0
EA2454	1626705	snp	A	G	G:98 A:2
EA2454	1626723	snp	C	T	T:108 C:3
EA2454	1626772	complex	GG	AA	AA:105 GG:0
EA2454	1626790	snp	T	C	C:118 T:0
EA2454	1626807	snp	T	C	C:126 T:0
EA2454	1626849	snp	G	A	A:107 G:0
EA2454	1626896	snp	A	G	G:103 A:1
EA2454	1627011	snp	G	T	T:96 G:1
EA2454	1627061	snp	A	T	T:87 A:1
EA2454	1627068	snp	C	T	T:92 C:0
EA2454	1627153	snp	C	T	T:100 C:0
EA2454	1627159	snp	G	A	A:102 G:0
EA2454	1627168	snp	A	G	G:99 A:0
EA2454	1627173	snp	A	G	G:99 A:0
EA2454	1627182	snp	C	T	T:102 C:0
EA2454	1627188	snp	G	T	T:98 G:0
EA2454	1627206	snp	T	C	C:98 T:0
EA2454	1627314	snp	T	A	A:133 T:0
EA2454	1627320	snp	A	G	G:129 A:0
EA2454	1627350	snp	C	T	T:109 C:0
EA2454	1627377	snp	T	G	G:107 T:0
EA2454	1627407	snp	T	G	G:113 T:0
EA2454	1627560	snp	C	T	T:111 C:0
EA2454	1627605	snp	G	T	T:107 G:0
EA2454	1627656	snp	A	C	C:124 A:0
EA2454	1627737	snp	C	A	A:114 C:0
EA2454	1627800	snp	A	C	C:79 A:0
EA2454	1627809	snp	T	C	C:81 T:0
EA2454	1627815	snp	T	C	C:79 T:0
EA2454	1628278	snp	A	G	G:82 A:0
EA2454	1628285	snp	G	A	A:81 G:0
EA2454	1628345	snp	C	T	T:93 C:0
EA2454	1628361	snp	C	T	T:76 C:0
EA2454	1628366	complex	AGAGAGCAAG	CGAAAGTAAA	CGAAAGTAAA:70 AGAGAGCAAG:0
EA2454	1628390	snp	G	A	A:84 G:0
EA2454	1628427	snp	T	C	C:86 T:0
EA2454	1628438	snp	T	C	C:99 T:0
EA2454	1628465	complex	GGCT	AGCG	AGCG:103 GGCT:0
EA2454	1628498	snp	T	C	C:92 T:0
EA2454	1628523	snp	C	A	A:78 C:0
EA2454	1628540	snp	A	G	G:67 A:0
EA2454	1628585	snp	A	T	T:94 A:0
EA2454	1628591	snp	C	T	T:94 C:1
EA2454	1628597	snp	T	C	C:96 T:1
EA2454	1628627	snp	A	G	G:112 A:0
EA2454	1628649	complex	AG	GA	GA:102 AG:1
EA2454	1628690	snp	A	G	G:100 A:1
EA2454	1628750	complex	CACA	TACG	TACG:114 CACA:0
EA2454	1628810	snp	T	C	C:115 T:0
EA2454	1628831	snp	G	A	A:115 G:0
EA2454	1628837	snp	A	T	T:116 A:0
EA2454	1628869	snp	T	C	C:123 T:0
EA2454	1628897	complex	ACGA	CCGG	CCGG:117 ACGA:0
EA2454	1628912	snp	A	T	T:122 A:0
EA2454	1628980	complex	TACTA	GACTT	GACTT:116 TACTA:0
EA2454	1629008	snp	A	C	C:130 A:0
EA2454	1629015	snp	C	T	T:128 C:0
EA2454	1629065	complex	TCCG	CCCT	CCCT:93 TCCG:0
EA2454	1629122	snp	A	G	G:96 A:0
EA2454	1629149	snp	T	C	C:103 T:0
EA2454	1629156	snp	A	G	G:100 A:0
EA2454	1629183	snp	A	C	C:108 A:0
EA2454	1629200	snp	T	C	C:103 T:0
EA2454	1629240	snp	T	C	C:95 T:0
EA2454	1629375	snp	G	A	A:105 G:0
EA2454	1629397	complex	AAG	CAA	CAA:86 AAG:0
EA2454	1629404	snp	T	A	A:82 T:0
EA2454	1629415	snp	G	A	A:73 G:0
EA2454	1629423	complex	ATATA	GTATT	GTATT:58 ATATA:0
EA2454	1629435	snp	G	A	A:46 G:0
EA2454	1629457	snp	A	T	T:22 A:0
EA2454	1630981	snp	A	G	G:19 A:0
EA2454	1630990	snp	T	C	C:31 T:0
EA2454	1631639	snp	C	T	T:125 C:4
EA2454	1634228	snp	A	G	G:100 A:0
EA2454	1639700	snp	T	C	C:109 T:1
EA2454	1641193	snp	G	A	A:85 G:3
EA2454	1642336	snp	A	G	G:103 A:0
EA2454	1648224	snp	C	T	T:100 C:1
EA2454	1650521	snp	G	A	A:119 G:0
EA2454	1650551	snp	C	T	T:110 C:0
EA2454	1650976	snp	C	G	G:89 C:1
EA2454	1652374	snp	G	A	A:107 G:0
EA2454	1657963	snp	C	T	T:97 C:1
EA2454	1682457	snp	A	G	G:92 A:0
EA2454	1682580	snp	G	T	T:96 G:4
EA2454	1691645	snp	C	T	T:110 C:4
EA2454	1694320	snp	A	C	C:113 A:2
EA2454	1695587	snp	T	G	G:120 T:1
EA2454	1701919	snp	A	G	G:127 A:0
EA2454	1711079	snp	C	T	T:107 C:1
EA2454	1714697	snp	T	C	C:116 T:0
EA2454	1725397	snp	C	T	T:112 C:0
EA2454	1727498	snp	G	A	A:98 G:1
EA2454	1728257	snp	G	T	T:110 G:6
EA2454	1730329	snp	T	C	C:104 T:1
EA2454	1732462	snp	A	G	G:116 A:4
EA2454	1737561	snp	A	G	G:113 A:0
EA2454	1737883	snp	C	T	T:83 C:2
EA2454	1740180	snp	T	A	A:107 T:2
EA2454	1745576	snp	T	C	C:121 T:0
EA2454	1748003	snp	C	T	T:109 C:2
EA2454	1748585	snp	A	C	C:105 A:0
EA2454	1761551	snp	T	G	G:112 T:1
EA2454	1763293	snp	T	C	C:104 T:0
EA2454	1770797	snp	C	T	T:120 C:3
EA2454	1795161	snp	A	G	G:121 A:1
EA2454	1799132	snp	G	A	A:130 G:0
EA2454	1803610	snp	C	A	A:123 C:1
EA2454	1803664	snp	T	C	C:138 T:0
EA2454	1813827	snp	T	G	G:123 T:1
EA2454	1815466	snp	A	G	G:139 A:2
EA2454	1817358	snp	A	C	C:113 A:3
EA2454	1820083	snp	T	C	C:137 T:0
EA2454	1824156	snp	T	C	C:124 T:0
EA2454	1824499	snp	T	C	C:109 T:0
EA2454	1825274	del	GTT	G	G:108 GTT:0
EA2454	1850317	snp	G	A	A:99 G:0
EA2454	1854519	snp	C	T	T:126 C:0
EA2454	1857866	snp	C	T	T:134 C:0
EA2454	1860665	snp	T	C	C:125 T:2
EA2454	1868550	snp	G	A	A:135 G:3
EA2454	1875721	snp	G	T	T:233 G:0
EA2454	1887544	snp	A	G	G:132 A:0
EA2454	1888871	snp	G	A	A:155 G:2
EA2454	1906815	snp	A	T	T:139 A:4
EA2454	1909088	snp	T	C	C:152 T:0
EA2454	1914715	snp	G	C	C:134 G:2
EA2454	1917947	snp	A	G	G:154 A:0
EA2454	1929193	ins	T	TTTA	TTTA:125 T:0
EA2454	1945608	snp	T	C	C:149 T:0
EA2454	1950298	snp	T	G	G:138 T:0
EA2454	1958733	snp	T	C	C:138 T:0
EA2454	1965637	snp	G	A	A:152 G:0
EA2454	1970894	complex	GCCCCCCCCCGA	CCCACCCGCCTC	CCCACCCGCCTC:10 GCCCCCCCCCGA:0
EA2454	1970914	snp	A	T	T:31 A:0
EA2454	1970924	complex	CAA	ATC	ATC:33 CAA:0
EA2454	1970935	snp	C	A	A:55 C:0
EA2454	1976927	snp	C	T	T:125 C:1
EA2454	1979564	snp	A	G	G:128 A:0
EA2454	1980186	snp	C	T	T:140 C:0
EA2454	1990268	snp	G	A	A:115 G:3
EA2454	1994897	snp	G	T	T:143 G:1
EA2454	1995211	snp	T	C	C:130 T:0
EA2454	1997936	snp	C	T	T:110 C:0
EA2454	2004990	del	TA	T	T:95 TA:0
EA2454	2006271	snp	G	A	A:132 G:3
EA2454	2010464	snp	C	T	T:123 C:0
EA2454	2038279	ins	A	AAC	AAC:102 A:0
EA2454	2038420	snp	A	G	G:128 A:1
EA2454	2041023	snp	G	A	A:121 G:3
EA2454	2044963	snp	A	T	T:143 A:2
EA2454	2062100	snp	C	T	T:149 C:2
EA2454	2062156	snp	T	C	C:139 T:0
EA2454	2063839	snp	T	C	C:128 T:0
EA2454	2068297	snp	T	G	G:146 T:0
EA2454	2070162	snp	T	C	C:138 T:0
EA2454	2079477	snp	A	G	G:151 A:1
EA2454	2079621	ins	C	CA	CA:100 C:0
EA2454	2079736	snp	T	C	C:130 T:0
EA2454	2085136	snp	T	C	C:106 T:0
EA2454	2088165	snp	G	C	C:114 G:0
EA2454	2091780	snp	T	C	C:108 T:0
EA2454	2093351	snp	C	A	A:125 C:2
EA2454	2094829	snp	T	C	C:94 T:0
EA2454	2096088	snp	A	G	G:116 A:0
EA2454	2099145	snp	G	A	A:82 G:1
EA2454	2104281	snp	A	C	C:93 A:0
EA2454	2110900	snp	G	A	A:95 G:1
EA2454	2119737	snp	T	C	C:103 T:1
EA2454	2135177	snp	G	A	A:95 G:1
EA2454	2136250	snp	C	T	T:107 C:2
EA2454	2141700	snp	C	T	T:94 C:2
EA2454	2158854	snp	G	A	A:97 G:1
EA2454	2159363	snp	C	T	T:88 C:1
EA2454	2171889	snp	A	G	G:121 A:0
EA2454	2177184	snp	G	A	A:102 G:2
EA2454	2181710	snp	T	C	C:100 T:2
EA2454	2183355	snp	T	C	C:103 T:0
EA2454	2195062	snp	T	C	C:135 T:0
EA2454	2217598	snp	A	G	G:139 A:4
EA2454	2228600	snp	T	C	C:111 T:0
EA2454	2232376	snp	A	G	G:148 A:1
EA2454	2233442	snp	A	T	T:120 A:2
EA2454	2238644	snp	T	C	C:169 T:1
EA2454	2253986	snp	C	T	T:135 C:0
EA2454	2256445	snp	G	A	A:163 G:0
EA2454	2259197	snp	G	A	A:139 G:0
EA2454	2266327	snp	C	T	T:167 C:1
EA2454	2268389	snp	G	C	C:128 G:0
EA2454	2283117	snp	T	C	C:152 T:0
EA2454	2283880	snp	A	G	G:145 A:0
EA2454	2289041	snp	T	C	C:107 T:0
EA2454	2291863	snp	T	C	C:135 T:0
EA2454	2313744	snp	C	T	T:155 C:0
EA2454	2331237	snp	A	G	G:135 A:4
EA2454	2338673	snp	G	A	A:152 G:0
EA2454	2344716	snp	C	G	G:109 C:2
EA2454	2350339	snp	T	C	C:131 T:1
EA2454	2353313	snp	C	T	T:168 C:4
EA2454	2354351	snp	A	G	G:130 A:0
EA2454	2359024	snp	A	G	G:149 A:0
EA2454	2364340	snp	T	G	G:133 T:0
EA2454	2371672	snp	T	C	C:169 T:0
EA2454	2403442	snp	T	C	C:170 T:0
EA2454	2407449	snp	A	G	G:139 A:0
EA2454	2408553	snp	A	G	G:135 A:2
EA2454	2413493	snp	G	A	A:125 G:3
EA2454	2461974	snp	A	G	G:160 A:0
EA2454	2464536	snp	T	C	C:162 T:0
EA2454	2498138	snp	C	T	T:136 C:2
EA2454	2500507	ins	C	CA	CA:90 C:1
EA2454	2518906	snp	A	C	C:129 A:0
EA2454	2521382	snp	C	T	T:121 C:0
EA2454	2528246	snp	T	C	C:133 T:0
EA2454	2538679	snp	T	C	C:93 T:0
EA2454	2550710	snp	G	T	T:114 G:2
EA2454	2555441	snp	A	G	G:113 A:0
EA2454	2559290	snp	C	A	A:132 C:0
EA2454	2561644	snp	T	A	A:123 T:1
EA2454	2561970	snp	T	C	C:108 T:0
EA2454	2586095	snp	C	T	T:108 C:0
EA2454	2589008	snp	T	C	C:127 T:0
EA2454	2590108	del	GAAAGTGCATCAACATCAAAT	G	G:37 GAAAGTGCATCAACATCAAAT:0
EA2454	2596899	snp	G	A	A:127 G:1
EA2454	2597428	snp	T	C	C:133 T:0
EA2454	2598908	snp	T	C	C:120 T:0
EA2454	2607401	snp	A	T	T:130 A:0
EA2454	2631943	snp	A	G	G:127 A:0
EA2454	2632096	snp	G	C	C:117 G:0
EA2454	2639012	snp	C	T	T:115 C:2
EA2454	2641059	snp	T	C	C:129 T:0
EA2454	2644202	snp	T	G	G:135 T:0
EA2454	2654470	del	AT	A	A:140 AT:0
EA2454	2658667	snp	A	C	C:159 A:0
EA2454	2660000	snp	A	G	G:151 A:0
EA2454	2660854	snp	C	T	T:98 C:2
EA2454	2664103	snp	G	A	A:112 G:3
EA2454	2666737	snp	C	T	T:128 C:1
EA2454	2670543	snp	C	T	T:137 C:4
EA2454	2672475	ins	G	GCAAGACAT	GCAAGACAT:72 G:0
EA2454	2718692	snp	A	C	C:154 A:5
EA2454	2722619	snp	A	G	G:149 A:0
EA2454	2743080	snp	T	G	G:136 T:0
EA2454	2748849	del	GT	G	G:62 GT:0
EA2454	2755025	snp	C	T	T:130 C:0
EA2454	2755245	snp	G	C	C:143 G:0
EA2454	2760352	snp	A	G	G:151 A:1
EA2454	2763065	snp	A	G	G:129 A:0
EA2454	2771595	snp	T	A	A:120 T:0
EA2454	2774852	snp	A	G	G:150 A:0
EA2454	2775069	snp	A	G	G:138 A:0
EA2454	2777153	snp	T	G	G:145 T:3
EA2454	2778154	snp	G	A	A:122 G:1
EA2454	2782946	snp	C	T	T:135 C:1
EA2454	2785945	snp	T	A	A:126 T:0
EA2454	2793323	snp	T	C	C:132 T:0
EA2454	2796233	snp	G	A	A:123 G:3
EA2454	2807474	snp	C	T	T:158 C:0
EA2454	2809435	snp	G	C	C:149 G:0
EA2454	2815762	snp	A	G	G:112 A:0
EA2454	2816107	snp	C	A	A:144 C:0
EA2454	2824057	snp	A	C	C:118 A:0
EA2454	2824579	ins	C	CT	CT:104 C:0
EA2454	2829690	snp	G	C	C:129 G:0
EA2454	2832637	snp	C	T	T:112 C:3
EA2454	2837636	snp	T	C	C:127 T:0
EA2454	2843028	snp	C	G	G:103 C:0
EA2454	2847080	snp	T	C	C:118 T:0
EA2454	2850370	snp	A	C	C:114 A:0
EA2454	2851743	snp	T	A	A:123 T:0
EA2454	2860024	snp	T	G	G:104 T:0
EA2454	2865701	snp	T	C	C:133 T:0
EA2454	2872360	snp	A	G	G:126 A:0
EA2454	2876151	snp	T	C	C:143 T:0
EA2454	2881008	snp	G	C	C:110 G:0
EA2454	2883184	snp	T	C	C:99 T:0
EA2454	2885511	snp	C	T	T:85 C:2
EA2454	2895771	snp	A	T	T:117 A:2
EA2454	2897200	snp	G	A	A:124 G:3
EA2454	2901111	snp	A	G	G:117 A:0
EA2454	2903547	snp	C	A	A:98 C:0
EA2454	2905448	snp	C	T	T:94 C:3
EA2454	2927920	snp	T	C	C:110 T:0
EA2454	2931389	snp	T	G	G:129 T:0
EA2454	2934279	snp	A	G	G:108 A:0
EA2454	2937585	snp	A	G	G:107 A:0
EA2454	2939135	ins	A	AT	AT:78 A:3
EA2454	2941498	snp	G	A	A:103 G:0
EA2454	2945610	snp	G	A	A:103 G:0
EA2454	2959641	snp	T	C	C:115 T:0
EA2454	2960351	del	GT	G	G:99 GT:3
EA2454	2963100	snp	G	A	A:110 G:0
EA2454	2965650	snp	G	A	A:102 G:1
EA2454	2967930	snp	A	G	G:131 A:0
EA2454	2987057	snp	G	A	A:99 G:0
EA2454	2988598	snp	A	T	T:119 A:0
EA2454	2995599	snp	T	C	C:107 T:0
EA2454	2998717	snp	A	G	G:90 A:0
EA2454	3002295	snp	C	T	T:87 C:2
EA2454	3012249	snp	C	T	T:120 C:3
EA2454	3041125	snp	T	G	G:120 T:0
EA2454	3041182	snp	G	A	A:102 G:1
EA2454	3052076	snp	A	C	C:94 A:1
EA2454	3052455	snp	G	A	A:87 G:1
EA2454	3052992	snp	G	C	C:101 G:0
EA2454	3055255	snp	G	A	A:84 G:1
EA2454	3055930	snp	G	A	A:110 G:1
EA2454	3057242	snp	A	G	G:104 A:0
EA2454	3070440	snp	A	G	G:84 A:0
EA2454	3091335	snp	T	C	C:149 T:0
EA2454	3093850	snp	T	C	C:128 T:0
EA2454	3099129	snp	T	C	C:159 T:0
EA2454	3101851	snp	A	G	G:123 A:0
EA2454	3104888	snp	C	T	T:116 C:1
EA2454	3112595	ins	C	CG	CG:125 C:0
EA2454	3112890	snp	A	G	G:141 A:0
EA2454	3115749	snp	T	A	A:130 T:0
EA2454	3117020	snp	C	G	G:147 C:1
EA2454	3125212	snp	A	G	G:126 A:0
EA2454	3133556	snp	G	T	T:125 G:1
EA2454	3135617	snp	A	C	C:110 A:0
EA2454	3149583	snp	G	A	A:148 G:4
EA2454	3155483	snp	G	A	A:106 G:1
EA2454	3161111	snp	G	A	A:121 G:2
EA2454	3175254	snp	T	C	C:159 T:0
EA2454	3180750	snp	C	T	T:124 C:1
EA2454	3188469	snp	T	C	C:140 T:0
EA2454	3188675	snp	T	A	A:155 T:0
EA2454	3192856	snp	C	T	T:130 C:0
EA2454	3196063	snp	T	C	C:163 T:0
EA2454	3197243	snp	T	C	C:148 T:0
EA2454	3211809	snp	T	C	C:123 T:0
EA2454	3213292	snp	A	C	C:125 A:0
EA2454	3218193	snp	T	G	G:134 T:0
EA2454	3222542	snp	T	A	A:127 T:1
EA2454	3224798	snp	A	G	G:114 A:0
EA2454	3230201	snp	G	A	A:122 G:2
EA2454	3252906	snp	G	A	A:135 G:0
EA2454	3254909	snp	C	G	G:116 C:0
EA2454	3258454	snp	T	A	A:120 T:3
EA2454	3258466	snp	C	T	T:119 C:3
EA2454	3263384	snp	T	C	C:125 T:0
EA2454	3263948	snp	C	T	T:120 C:0
EA2454	3268326	snp	G	A	A:112 G:0
EA2454	3271358	snp	T	C	C:142 T:0
EA2454	3272561	snp	G	T	T:111 G:0
EA2454	3281767	ins	G	GC	GC:86 G:0
EA2454	3305295	snp	A	G	G:129 A:0
EA2454	3305988	snp	G	C	C:112 G:0
EA2454	3307663	snp	C	T	T:117 C:1
EA2454	3308869	snp	A	T	T:18 A:1
EA2454	3310727	snp	G	T	T:30 G:0
EA2454	3373456	snp	A	G	G:112 A:1
EA2454	3374533	snp	G	T	T:109 G:0
EA2454	3381441	snp	A	G	G:88 A:0
EA2454	3387556	snp	T	A	A:124 T:0
EA2454	3395362	snp	A	C	C:106 A:2
EA2454	3405179	snp	T	G	G:107 T:1
EA2454	3426445	snp	T	C	C:115 T:0
EA2454	3440338	snp	C	T	T:138 C:0
EA2454	3441887	snp	T	C	C:115 T:0
EA2454	3441936	snp	A	G	G:108 A:0
EA2454	3448725	snp	C	T	T:116 C:1
EA2454	3451003	snp	C	T	T:127 C:2
EA2454	3462462	snp	T	C	C:105 T:0
EA2454	3462699	snp	A	G	G:105 A:0
EA2454	3466406	snp	C	T	T:131 C:0
EA2454	3521717	snp	C	G	G:102 C:0
EA2454	3527982	ins	G	GA	GA:100 G:0
EA2454	3536376	snp	T	C	C:98 T:0
EA2454	3539749	snp	T	C	C:107 T:0
EA2454	3540229	snp	T	C	C:99 T:4
EA2454	3547948	snp	T	C	C:115 T:0
EA2454	3548625	snp	G	C	C:113 G:0
EA2454	3554302	snp	G	T	T:89 G:0
EA2454	3556473	snp	G	A	A:110 G:2
EA2454	3566015	snp	T	C	C:101 T:0
EA2454	3569782	snp	C	T	T:119 C:2
EA2454	3586272	snp	C	T	T:107 C:1
EA2454	3590214	snp	T	C	C:94 T:0
EA2454	3590259	snp	C	T	T:91 C:3
EA2454	3594055	snp	T	C	C:105 T:5
EA2454	3595770	snp	T	G	G:105 T:0
EA2454	3599925	ins	C	CA	CA:90 C:1
EA2454	3600939	snp	G	C	C:85 G:0
EA2454	3602569	snp	C	A	A:112 C:0
EA2454	3613661	snp	G	A	A:116 G:0
EA2454	3613761	snp	T	C	C:97 T:0
EA2454	3615292	snp	T	G	G:96 T:0
EA2454	3615330	snp	A	C	C:91 A:0
EA2454	3624754	snp	A	T	T:17 A:1
EA2454	3628517	snp	A	G	G:112 A:0
EA2454	3632526	snp	C	A	A:123 C:0
EA2454	3634246	snp	A	T	T:117 A:0
EA2454	3634750	snp	C	T	T:108 C:0
EA2454	3640661	snp	A	G	G:110 A:0
EA2454	3645807	snp	G	A	A:104 G:4
EA2454	3645952	snp	G	A	A:107 G:0
EA2454	3651299	snp	G	T	T:128 G:1
EA2454	3657942	snp	T	G	G:94 T:0
EA2454	3662284	snp	A	G	G:102 A:0
EA2454	3665749	snp	G	A	A:109 G:0
EA2454	3666055	snp	C	T	T:124 C:2
EA2454	3666547	snp	G	A	A:111 G:1
EA2454	3671688	snp	C	T	T:124 C:1
EA2454	3682843	snp	T	G	G:144 T:0
EA2454	3690835	snp	T	G	G:130 T:1
EA2454	3695368	snp	A	T	T:133 A:4
EA2454	3701518	snp	C	T	T:144 C:0
EA2454	3701756	snp	A	G	G:131 A:0
EA2454	3705284	snp	A	G	G:118 A:1
EA2454	3709916	snp	G	A	A:131 G:1
EA2454	3717429	snp	A	G	G:141 A:1
EA2454	3719971	snp	G	A	A:107 G:3
EA2454	3731404	snp	G	A	A:116 G:1
EA2454	3731422	snp	C	A	A:118 C:1
EA2454	3739482	snp	A	G	G:105 A:0
EA2454	3750262	del	GAA	G	G:97 GAA:0
EA2454	3751756	snp	C	T	T:136 C:0
EA2454	3756054	snp	T	C	C:110 T:0
EA2454	3763988	snp	A	G	G:117 A:2
EA2454	3766157	snp	G	A	A:102 G:0
EA2454	3772277	snp	T	A	A:124 T:0
EA2454	3779368	snp	C	T	T:104 C:0
EA2454	3780370	del	CAGGCCA	C	C:86 CAGGCCA:3
EA2454	3783734	snp	G	T	T:113 G:3
EA2454	3784069	snp	C	T	T:117 C:4
EA2454	3795140	snp	T	C	C:118 T:0
EA2454	3807575	snp	A	G	G:113 A:0
EA2454	3808964	snp	C	T	T:122 C:1
EA2454	3815430	snp	T	C	C:147 T:0
EA2454	3837457	snp	C	A	A:157 C:0
EA2454	3837930	snp	G	T	T:153 G:2
EA2454	3840206	snp	C	T	T:125 C:0
EA2454	3842198	ins	C	CT	CT:87 C:0
EA2454	3844395	snp	T	C	C:147 T:0
EA2454	3844972	snp	C	T	T:104 C:0
EA2454	3848791	snp	T	A	A:124 T:1
EA2454	3852049	snp	C	T	T:13 C:0
EA2454	3852064	snp	T	C	C:30 T:0
EA2454	3852070	complex	GTCTGTT	TTCGGTA	TTCGGTA:33 GTCTGTT:0
EA2454	3852082	snp	T	C	C:49 T:0
EA2454	3852097	snp	A	G	G:70 A:0
EA2454	3852109	snp	G	A	A:87 G:0
EA2454	3852118	snp	A	G	G:107 A:0
EA2454	3852130	snp	C	A	A:115 C:0
EA2454	3852172	snp	G	A	A:135 G:0
EA2454	3852208	snp	G	A	A:132 G:0
EA2454	3852373	snp	G	A	A:151 G:0
EA2454	3852385	snp	T	C	C:145 T:0
EA2454	3852395	snp	C	G	G:159 C:0
EA2454	3852400	snp	G	A	A:159 G:0
EA2454	3852409	snp	C	T	T:158 C:0
EA2454	3852439	snp	A	G	G:172 A:0
EA2454	3852448	snp	G	A	A:174 G:1
EA2454	3852535	snp	G	A	A:163 G:0
EA2454	3852592	snp	A	G	G:178 A:0
EA2454	3852607	complex	CCGTT	TCGTC	TCGTC:174 CCGTT:0
EA2454	3852703	snp	T	G	G:158 T:0
EA2454	3852711	complex	CCAGA	TCAGG	TCAGG:147 CCAGA:0
EA2454	3852733	snp	C	T	T:159 C:0
EA2454	3852748	complex	CC	AA	AA:140 CC:0
EA2454	3852760	complex	AGCA	GGCG	GGCG:150 AGCA:0
EA2454	3852770	snp	A	G	G:155 A:0
EA2454	3852790	complex	GG	AA	AA:141 GG:0
EA2454	3852799	snp	A	G	G:153 A:0
EA2454	3852828	del	AAT	A	A:149 AAT:0
EA2454	3852862	snp	G	T	T:177 G:0
EA2454	3852869	snp	T	C	C:169 T:1
EA2454	3852887	snp	G	A	A:166 G:0
EA2454	3852902	snp	A	G	G:170 A:1
EA2454	3852916	snp	C	T	T:150 C:0
EA2454	3852935	snp	C	T	T:132 C:2
EA2454	3852974	snp	A	G	G:120 A:0
EA2454	3852999	snp	T	C	C:134 T:0
EA2454	3853019	complex	ACATTA	GTTTTG	GTTTTG:94 ACATTA:0
EA2454	3853066	complex	GTC	TTT	TTT:110 GTC:0
EA2454	3853085	complex	TTGAT	CTGAC	CTGAC:107 TTGAT:0
EA2454	3853095	complex	ATACAAT	CTGTAAG	CTGTAAG:92 ATACAAT:0
EA2454	3853129	mnp	GG	CC	CC:125 GG:0
EA2454	3853150	snp	T	C	C:129 T:0
EA2454	3853156	complex	CCT	TCC	TCC:111 CCT:0
EA2454	3853163	snp	G	A	A:110 G:0
EA2454	3853175	snp	C	T	T:97 C:0
EA2454	3853190	snp	G	A	A:111 G:0
EA2454	3853202	snp	G	C	C:92 G:0
EA2454	3853211	snp	A	G	G:77 A:0
EA2454	3853223	complex	CCTCC	TCTCT	TCTCT:53 CCTCC:0
EA2454	3853241	complex	ACTCTTTT	GGATTTCC	GGATTTCC:32 ACTCTTTT:0
EA2454	3853256	snp	G	T	T:63 G:1
EA2454	3853277	snp	T	C	C:97 T:0
EA2454	3853285	complex	AT	TG	TG:84 AT:0
EA2454	3853322	snp	G	A	A:140 G:0
EA2454	3853328	snp	T	G	G:155 T:0
EA2454	3853367	snp	T	C	C:166 T:0
EA2454	3853379	snp	G	A	A:163 G:0
EA2454	3853409	snp	G	A	A:167 G:0
EA2454	3853415	snp	T	C	C:161 T:0
EA2454	3853423	snp	A	G	G:160 A:0
EA2454	3853457	snp	A	G	G:168 A:0
EA2454	3853496	snp	C	T	T:126 C:1
EA2454	3853511	complex	CGGG	AGGA	AGGA:130 CGGG:0
EA2454	3853547	snp	A	G	G:130 A:0
EA2454	3853553	complex	GGCGGCTTC	AGTGGCATG	AGTGGCATG:110 GGCGGCTTC:0
EA2454	3853569	complex	CCAC	TCAT	TCAT:131 CCAC:0
EA2454	3853592	snp	T	G	G:137 T:0
EA2454	3853604	snp	C	T	T:145 C:0
EA2454	3853617	snp	T	C	C:130 T:0
EA2454	3853631	snp	A	T	T:130 A:0
EA2454	3853639	snp	G	T	T:130 G:0
EA2454	3853653	snp	T	C	C:150 T:0
EA2454	3853661	complex	TAT	AAA	AAA:142 TAT:0
EA2454	3853674	mnp	TA	AG	AG:149 TA:0
EA2454	3853708	complex	ACT	CCC	CCC:182 ACT:0
EA2454	3853754	snp	C	T	T:193 C:0
EA2454	3853764	snp	T	A	A:190 T:0
EA2454	3853804	snp	T	G	G:165 T:1
EA2454	3853810	del	ACGACCCTATGG	A	A:106 ACGACCCTATGG:0
EA2454	3853883	snp	A	G	G:148 A:3
EA2454	3853929	snp	A	C	C:145 A:0
EA2454	3854000	snp	A	G	G:163 A:2
EA2454	3854060	snp	G	A	A:177 G:4
EA2454	3854310	snp	T	C	C:153 T:0
EA2454	3854630	snp	A	G	G:172 A:0
EA2454	3854838	snp	C	T	T:183 C:0
EA2454	3855001	snp	A	G	G:192 A:0
EA2454	3855008	snp	A	T	T:183 A:0
EA2454	3855032	snp	C	T	T:172 C:0
EA2454	3855138	snp	A	G	G:171 A:0
EA2454	3855170	snp	C	T	T:178 C:0
EA2454	3855180	snp	G	A	A:179 G:0
EA2454	3855300	snp	A	G	G:174 A:0
EA2454	3855315	snp	C	A	A:171 C:0
EA2454	3855345	snp	T	C	C:167 T:0
EA2454	3855404	snp	A	C	C:156 A:0
EA2454	3855627	snp	T	A	A:176 T:0
EA2454	3855798	snp	A	G	G:154 A:0
EA2454	3855827	snp	T	C	C:149 T:0
EA2454	3855835	snp	A	C	C:151 A:0
EA2454	3855884	snp	C	T	T:140 C:0
EA2454	3856015	ins	T	TA	TA:138 T:0
EA2454	3856047	complex	AAAG	GAAA	GAAA:143 AAAG:0
EA2454	3856149	snp	T	A	A:157 T:0
EA2454	3856413	snp	G	A	A:192 G:2
EA2454	3856458	snp	A	G	G:174 A:0
EA2454	3856542	snp	C	T	T:164 C:2
EA2454	3857721	snp	T	G	G:141 T:0
EA2454	3857763	complex	GG	AA	AA:119 GG:0
EA2454	3857781	complex	ACCC	GCCT	GCCT:116 ACCC:0
EA2454	3857844	snp	C	T	T:129 C:0
EA2454	3857904	snp	C	T	T:142 C:0
EA2454	3857916	snp	C	T	T:139 C:0
EA2454	3857970	snp	T	C	C:135 T:0
EA2454	3857994	snp	G	A	A:134 G:0
EA2454	3858006	snp	T	G	G:143 T:0
EA2454	3858264	complex	AC	GT	GT:131 AC:1
EA2454	3858330	complex	GTCG	CTCA	CTCA:139 GTCG:0
EA2454	3858366	snp	G	A	A:140 G:2
EA2454	3858456	snp	C	G	G:141 C:0
EA2454	3858465	snp	G	A	A:135 G:3
EA2454	3858516	snp	C	T	T:150 C:0
EA2454	3858690	complex	AGCC	TGCT	TGCT:132 AGCC:0
EA2454	3858705	complex	TGGT	CGGC	CGGC:132 TGGT:1
EA2454	3858717	snp	G	T	T:145 G:2
EA2454	3858948	snp	G	A	A:137 G:2
EA2454	3859035	snp	C	T	T:46 C:1
EA2454	3859050	snp	C	T	T:27 C:1
EA2454	3859159	snp	G	A	A:30 G:0
EA2454	3859174	complex	TCTGC	CCTGA	CCTGA:31 TCTGC:0
EA2454	3859183	complex	GTTACTG	TCTGTTT	TCTGTTT:31 GTTACTG:0
EA2454	3859216	complex	GGGG	AGGA	AGGA:21 GGGG:0
EA2454	3859225	snp	G	A	A:17 G:0
EA2454	3859414	snp	A	C	C:11 A:0
EA2454	3859432	snp	G	T	T:11 G:0
EA2454	3859462	snp	A	G	G:13 A:0
EA2454	3859472	snp	A	G	G:23 A:0
EA2454	3859501	complex	GGTC	TGTG	TGTG:43 GGTC:0
EA2454	3859510	snp	T	A	A:47 T:0
EA2454	3859519	complex	ACA	GCG	GCG:52 ACA:2
EA2454	3859538	complex	ACG	GCA	GCA:67 ACG:2
EA2454	3859546	complex	TG	CA	CA:70 TG:0
EA2454	3859560	snp	A	G	G:89 A:0
EA2454	3859571	snp	A	G	G:83 A:2
EA2454	3859591	snp	T	C	C:73 T:2
EA2454	3859598	snp	C	A	A:74 C:0
EA2454	3859605	snp	A	T	T:72 A:2
EA2454	3859611	snp	G	A	A:76 G:0
EA2454	3859619	del	GAT	G	G:59 GAT:2
EA2454	3859647	snp	A	G	G:73 A:0
EA2454	3859655	complex	TGCACGC	AGCCCTT	AGCCCTT:48 TGCACGC:0
EA2454	3859667	snp	A	G	G:68 A:0
EA2454	3859672	snp	A	G	G:71 A:0
EA2454	3859678	complex	GCGTA	CCGTG	CCGTG:76 GCGTA:0
EA2454	3859698	snp	A	C	C:88 A:0
EA2454	3859719	snp	G	A	A:86 G:3
EA2454	3859733	snp	A	C	C:93 A:2
EA2454	3859744	snp	T	C	C:98 T:0
EA2454	3859755	snp	G	A	A:110 G:2
EA2454	3859790	snp	A	T	T:77 A:0
EA2454	3859809	snp	A	G	G:53 A:0
EA2454	3859814	snp	T	A	A:47 T:0
EA2454	3859824	complex	AGC	CGT	CGT:30 AGC:0
EA2454	3859949	snp	A	C	C:22 A:0
EA2454	3859981	snp	G	C	C:61 G:0
EA2454	3859993	snp	T	C	C:74 T:0
EA2454	3860008	complex	TAA	CAG	CAG:89 TAA:0
EA2454	3860041	snp	A	C	C:120 A:0
EA2454	3860187	snp	T	C	C:144 T:0
EA2454	3860245	snp	T	A	A:126 T:2
EA2454	3860250	snp	C	T	T:129 C:1
EA2454	3860282	complex	ATT	GTC	GTC:125 ATT:0
EA2454	3860303	complex	ACG	GCA	GCA:135 ACG:0
EA2454	3860310	snp	T	G	G:141 T:0
EA2454	3860320	snp	T	C	C:147 T:0
EA2454	3860443	snp	A	G	G:161 A:1
EA2454	3860473	snp	G	A	A:142 G:2
EA2454	3860490	snp	G	A	A:143 G:2
EA2454	3860719	snp	C	T	T:149 C:0
EA2454	3860763	complex	GTGC	ATGT	ATGT:86 GTGC:2
EA2454	3860792	snp	G	A	A:45 G:3
EA2454	3861015	snp	C	T	T:52 C:4
EA2454	3861033	snp	A	G	G:68 A:3
EA2454	3861045	snp	A	G	G:85 A:3
EA2454	3861064	complex	GTT	ATA	ATA:98 GTT:4
EA2454	3861072	snp	C	T	T:117 C:4
EA2454	3861081	snp	C	T	T:126 C:4
EA2454	3861129	snp	G	A	A:151 G:0
EA2454	3861157	snp	A	C	C:148 A:2
EA2454	3861180	snp	C	T	T:141 C:1
EA2454	3861186	snp	C	T	T:138 C:0
EA2454	3861216	snp	C	G	G:132 C:1
EA2454	3861222	snp	T	C	C:128 T:1
EA2454	3861234	snp	C	T	T:123 C:1
EA2454	3861369	snp	T	G	G:145 T:0
EA2454	3861402	complex	CCCA	TCCG	TCCG:138 CCCA:0
EA2454	3861417	snp	G	A	A:146 G:1
EA2454	3861495	snp	T	C	C:85 T:0
EA2454	3861516	snp	T	C	C:62 T:0
EA2454	3861534	complex	TGCC	GGCG	GGCG:48 TGCC:0
EA2454	3861543	complex	TCACGGCGCAAAA	ACAGGGGGCCAGT	ACAGGGGGCCAGT:32 TCACGGCGCAAAA:0
EA2454	3861567	complex	GACA	AACG	AACG:58 GACA:0
EA2454	3861585	complex	TTTC	CTTT	CTTT:77 TTTC:0
EA2454	3861594	snp	G	T	T:88 G:0
EA2454	3861621	snp	T	C	C:111 T:0
EA2454	3861630	snp	T	C	C:127 T:0
EA2454	3861636	snp	C	T	T:130 C:2
EA2454	3861690	snp	G	A	A:160 G:0
EA2454	3861702	snp	C	T	T:166 C:0
EA2454	3861746	snp	A	G	G:174 A:0
EA2454	3861759	snp	C	T	T:123 C:0
EA2454	3861840	snp	T	C	C:137 T:0
EA2454	3861856	snp	A	C	C:146 A:0
EA2454	3861864	snp	T	C	C:141 T:0
EA2454	3861870	complex	CCCA	TCCG	TCCG:130 CCCA:0
EA2454	3861957	snp	G	A	A:131 G:0
EA2454	3861993	complex	AGTTGAAAAG	CGTGGAGAAA	CGTGGAGAAA:120 AGTTGAAAAG:0
EA2454	3862023	snp	G	A	A:151 G:0
EA2454	3862029	snp	C	T	T:140 C:0
EA2454	3862053	complex	TTCTGTC	CTCCGTG	CTCCGTG:119 TTCTGTC:1
EA2454	3862086	snp	C	A	A:148 C:0
EA2454	3862110	complex	GGCA	TGCG	TGCG:136 GGCA:0
EA2454	3862134	snp	C	T	T:171 C:1
EA2454	3862146	snp	C	T	T:166 C:1
EA2454	3862353	snp	T	C	C:160 T:0
EA2454	3862431	complex	CACC	AACA	AACA:160 CACC:3
EA2454	3862455	snp	A	G	G:171 A:0
EA2454	3862476	snp	T	C	C:180 T:0
EA2454	3862536	complex	CC	TT	TT:123 CC:1
EA2454	3862584	snp	T	C	C:135 T:0
EA2454	3862608	snp	C	T	T:150 C:0
EA2454	3862614	snp	C	T	T:152 C:0
EA2454	3862638	snp	C	T	T:152 C:0
EA2454	3862699	snp	C	T	T:124 C:0
EA2454	3862715	snp	A	G	G:121 A:0
EA2454	3862731	snp	C	T	T:114 C:0
EA2454	3862740	snp	T	G	G:120 T:0
EA2454	3862765	snp	A	G	G:133 A:0
EA2454	3862783	snp	A	C	C:117 A:0
EA2454	3862788	complex	CAGCGAG	TAACGAC	TAACGAC:114 CAGCGAG:0
EA2454	3862802	snp	C	T	T:134 C:0
EA2454	3862833	snp	T	C	C:135 T:0
EA2454	3862878	snp	T	C	C:136 T:0
EA2454	3862902	snp	G	A	A:141 G:0
EA2454	3862947	complex	GGGA	TGGG	TGGG:121 GGGA:0
EA2454	3862968	snp	C	A	A:129 C:0
EA2454	3862974	snp	T	G	G:127 T:0
EA2454	3862990	complex	TCCCTGATTATC	AGCCTTATCATT	AGCCTTATCATT:92 TCCCTGATTATC:1
EA2454	3863014	snp	A	C	C:132 A:1
EA2454	3863036	complex	CT	AC	AC:120 CT:0
EA2454	3863043	snp	A	G	G:134 A:0
EA2454	3863100	snp	C	T	T:147 C:0
EA2454	3863139	snp	C	T	T:134 C:0
EA2454	3863199	snp	C	A	A:144 C:2
EA2454	3863205	complex	TGCT	CGCA	CGCA:141 TGCT:2
EA2454	3863214	snp	T	C	C:147 T:0
EA2454	3863280	snp	T	C	C:135 T:0
EA2454	3863286	complex	GTTATTC	ATTGTAT	ATTGTAT:109 GTTATTC:0
EA2454	3863319	snp	G	C	C:135 G:0
EA2454	3863331	snp	C	T	T:131 C:0
EA2454	3863346	snp	T	C	C:124 T:0
EA2454	3863406	snp	T	C	C:136 T:1
EA2454	3863481	complex	CAGG	TAAA	TAAA:115 CAGG:0
EA2454	3863490	snp	C	G	G:146 C:0
EA2454	3863532	complex	ATCG	GTCA	GTCA:163 ATCG:0
EA2454	3863559	snp	G	A	A:189 G:0
EA2454	3863700	snp	G	A	A:147 G:1
EA2454	3863732	snp	A	G	G:151 A:0
EA2454	3863740	snp	T	C	C:149 T:2
EA2454	3863840	snp	T	C	C:143 T:0
EA2454	3863865	complex	ACG	GCA	GCA:134 ACG:0
EA2454	3863900	snp	T	G	G:130 T:0
EA2454	3863924	snp	A	T	T:127 A:0
EA2454	3863957	snp	T	C	C:121 T:1
EA2454	3863966	snp	G	A	A:133 G:0
EA2454	3864034	snp	A	C	C:142 A:0
EA2454	3864046	snp	C	T	T:141 C:0
EA2454	3864070	mnp	GC	AA	AA:135 GC:0
EA2454	3864181	snp	C	T	T:167 C:1
EA2454	3864199	complex	TCCTGGA	GCCCGGT	GCCCGGT:144 TCCTGGA:0
EA2454	3864220	snp	A	G	G:168 A:0
EA2454	3864227	snp	A	G	G:168 A:0
EA2454	3864307	snp	A	T	T:148 A:0
EA2454	3864744	snp	C	T	T:145 C:2
EA2454	3864841	snp	T	A	A:129 T:0
EA2454	3864918	snp	G	T	T:162 G:0
EA2454	3864975	snp	G	A	A:163 G:0
EA2454	3865044	snp	G	T	T:155 G:0
EA2454	3865110	snp	T	C	C:160 T:1
EA2454	3865119	snp	A	C	C:158 A:0
EA2454	3865404	snp	C	T	T:123 C:2
EA2454	3865509	snp	T	C	C:124 T:1
EA2454	3865545	snp	T	C	C:84 T:0
EA2454	3865593	snp	C	A	A:28 C:1
EA2454	3865682	snp	C	T	T:28 C:1
EA2454	3865691	snp	T	A	A:39 T:0
EA2454	3865745	complex	TGAA	AGAG	AGAG:120 TGAA:0
EA2454	3865854	snp	A	G	G:135 A:0
EA2454	3865988	snp	T	C	C:127 T:1
EA2454	3866042	snp	A	G	G:126 A:1
EA2454	3866066	snp	G	A	A:125 G:0
EA2454	3866103	snp	G	A	A:125 G:0
EA2454	3866162	snp	A	C	C:73 A:0
EA2454	3866184	snp	A	G	G:47 A:0
EA2454	3866192	snp	G	T	T:32 G:1
EA2454	3866993	snp	T	C	C:56 T:0
EA2454	3867084	snp	A	C	C:139 A:2
EA2454	3867200	snp	A	C	C:150 A:0
EA2454	3867245	complex	TATC	CATT	CATT:131 TATC:0
EA2454	3867299	complex	CGGG	AGGC	AGGC:114 CGGG:0
EA2454	3867311	snp	C	T	T:113 C:1
EA2454	3867317	complex	GCAGG	ACAGC	ACAGC:102 GCAGG:1
EA2454	3867326	complex	TAGCCGG	AAACCGC	AAACCGC:95 TAGCCGG:1
EA2454	3867359	snp	G	A	A:112 G:1
EA2454	3867383	snp	C	T	T:129 C:0
EA2454	3867401	snp	T	G	G:137 T:0
EA2454	3867410	snp	G	A	A:136 G:0
EA2454	3867425	snp	G	A	A:157 G:0
EA2454	3867572	snp	T	C	C:163 T:0
EA2454	3867642	snp	T	C	C:149 T:0
EA2454	3867674	snp	G	A	A:136 G:0
EA2454	3867683	snp	A	T	T:141 A:0
EA2454	3867761	snp	A	G	G:138 A:0
EA2454	3867785	snp	G	A	A:141 G:0
EA2454	3867884	snp	T	C	C:127 T:0
EA2454	3867917	complex	CGGA	TGGT	TGGT:143 CGGA:0
EA2454	3867956	snp	A	G	G:151 A:0
EA2454	3867986	snp	T	A	A:145 T:0
EA2454	3868001	complex	CGGC	TGGT	TGGT:156 CGGC:0
EA2454	3868106	snp	T	C	C:163 T:0
EA2454	3868187	snp	A	G	G:165 A:1
EA2454	3868201	snp	G	A	A:166 G:0
EA2454	3868216	complex	AGGCA	CAGCC	CAGCC:136 AGGCA:0
EA2454	3868247	complex	CGCA	TGCT	TGCT:134 CGCA:0
EA2454	3868298	snp	G	C	C:120 G:0
EA2454	3868379	snp	G	T	T:164 G:0
EA2454	3868391	snp	C	T	T:160 C:0
EA2454	3868409	snp	A	G	G:155 A:0
EA2454	3868448	snp	G	T	T:132 G:0
EA2454	3868472	complex	GCTGGGC	ACTCGGT	ACTCGGT:104 GCTGGGC:0
EA2454	3868523	snp	G	A	A:131 G:0
EA2454	3868563	snp	T	C	C:87 T:0
EA2454	3868652	snp	T	C	C:25 T:0
EA2454	3868730	snp	G	A	A:122 G:1
EA2454	3868769	complex	TAT	CAG	CAG:116 TAT:1
EA2454	3868798	snp	A	G	G:127 A:1
EA2454	3868810	complex	GTCGAACCGTTTTA	TTCTAATCGTATTG	TTCTAATCGTATTG:108 GTCGAACCGTTTTA:1
EA2454	3868832	snp	C	A	A:114 C:1
EA2454	3868909	complex	TGCAGGTGAGATA	GGTGGACGGGATG	GGTGGACGGGATG:59 TGCAGGTGAGATA:0
EA2454	3868927	snp	T	C	C:74 T:0
EA2454	3868942	complex	TT	CC	CC:95 TT:0
EA2454	3869010	del	CTGA	C	C:107 CTGA:0
EA2454	3869028	snp	G	A	A:138 G:3
EA2454	3869102	snp	A	G	G:163 A:1
EA2454	3869165	snp	A	T	T:190 A:1
EA2454	3869177	snp	C	A	A:186 C:2
EA2454	3869189	snp	G	A	A:200 G:1
EA2454	3869195	snp	C	T	T:204 C:1
EA2454	3869216	snp	A	G	G:200 A:0
EA2454	3869300	snp	G	A	A:167 G:1
EA2454	3869344	complex	AAAAA	GAAAG	GAAAG:170 AAAAA:1
EA2454	3869360	snp	G	A	A:179 G:0
EA2454	3869366	snp	C	T	T:175 C:0
EA2454	3869402	snp	C	T	T:167 C:1
EA2454	3869411	snp	C	A	A:159 C:0
EA2454	3869426	snp	G	A	A:159 G:0
EA2454	3869513	snp	C	T	T:150 C:1
EA2454	3869523	snp	C	T	T:150 C:0
EA2454	3869547	snp	A	C	C:142 A:1
EA2454	3869555	snp	C	G	G:144 C:1
EA2454	3869591	snp	T	C	C:124 T:0
EA2454	3869603	snp	G	A	A:121 G:1
EA2454	3869705	snp	T	C	C:137 T:0
EA2454	3869804	snp	C	T	T:128 C:0
EA2454	3869835	snp	C	T	T:135 C:0
EA2454	3869920	snp	A	T	T:141 A:0
EA2454	3869970	snp	G	T	T:114 G:0
EA2454	3870037	complex	TTG	CTT	CTT:88 TTG:0
EA2454	3870051	complex	CCTT	TCTC	TCTC:85 CCTT:2
EA2454	3870152	complex	CAGA	AAGG	AAGG:64 CAGA:2
EA2454	3870169	snp	G	A	A:51 G:2
EA2454	3870183	snp	C	T	T:27 C:2
EA2454	3870274	snp	T	C	C:78 T:0
EA2454	3870306	complex	ACACA	GCACG	GCACG:131 ACACA:2
EA2454	3870331	complex	GGCT	AGCC	AGCC:131 GGCT:2
EA2454	3870424	snp	C	T	T:136 C:1
EA2454	3870448	snp	G	A	A:137 G:1
EA2454	3870469	snp	C	T	T:142 C:1
EA2454	3870509	snp	A	T	T:163 A:1
EA2454	3870523	snp	A	G	G:168 A:1
EA2454	3870529	snp	A	G	G:165 A:1
EA2454	3870796	snp	G	A	A:153 G:0
EA2454	3870904	snp	T	C	C:57 T:0
EA2454	3870931	snp	T	G	G:12 T:0
EA2454	3871295	snp	T	G	G:44 T:0
EA2454	3871306	snp	C	T	T:60 C:0
EA2454	3871487	snp	T	C	C:152 T:0
EA2454	3872518	snp	A	G	G:142 A:0
EA2454	3872599	snp	G	A	A:142 G:0
EA2454	3872637	snp	A	C	C:124 A:0
EA2454	3872721	snp	T	C	C:147 T:0
EA2454	3873108	snp	C	T	T:147 C:1
EA2454	3873264	snp	G	T	T:172 G:1
EA2454	3873309	snp	C	T	T:164 C:0
EA2454	3873315	snp	G	A	A:161 G:0
EA2454	3873348	snp	G	A	A:163 G:0
EA2454	3873396	snp	T	C	C:173 T:0
EA2454	3873417	complex	CTGGC	ATGGT	ATGGT:162 CTGGC:2
EA2454	3873594	snp	G	A	A:138 G:0
EA2454	3873609	snp	A	G	G:127 A:0
EA2454	3873636	snp	G	A	A:142 G:0
EA2454	3873750	snp	T	C	C:181 T:0
EA2454	3874017	snp	C	A	A:148 C:0
EA2454	3874062	snp	C	T	T:147 C:0
EA2454	3874068	snp	T	C	C:153 T:0
EA2454	3874077	snp	G	A	A:145 G:0
EA2454	3874083	snp	T	C	C:150 T:0
EA2454	3874221	snp	T	C	C:149 T:0
EA2454	3874302	snp	G	A	A:140 G:1
EA2454	3874324	snp	C	A	A:140 C:1
EA2454	3874329	complex	GGCG	AGCA	AGCA:131 GGCG:0
EA2454	3874393	snp	T	A	A:146 T:0
EA2454	3874445	snp	G	A	A:131 G:2
EA2454	3874455	snp	C	T	T:124 C:0
EA2454	3874464	snp	C	T	T:119 C:0
EA2454	3874500	snp	C	T	T:98 C:0
EA2454	3874551	mnp	AAGA	TCAG	TCAG:91 AAGA:0
EA2454	3874566	snp	A	C	C:109 A:0
EA2454	3874580	snp	G	C	C:118 G:0
EA2454	3874587	snp	G	C	C:117 G:0
EA2454	3874599	snp	C	A	A:103 C:0
EA2454	3874650	complex	TGGCG	CGGCT	CGGCT:35 TGGCG:0
EA2454	3874664	snp	G	A	A:27 G:0
EA2454	3874741	complex	GATA	AATG	AATG:10 GATA:0
EA2454	3874749	snp	C	T	T:22 C:0
EA2454	3874767	snp	G	A	A:49 G:1
EA2454	3874824	snp	A	G	G:106 A:0
EA2454	3874839	complex	GGAC	TGAT	TGAT:109 GGAC:0
EA2454	3874851	snp	C	T	T:123 C:0
EA2454	3874866	complex	CCAGC	TCAGT	TCAGT:112 CCAGC:0
EA2454	3874887	snp	C	T	T:122 C:0
EA2454	3874893	complex	AAAA	GAAG	GAAG:113 AAAA:0
EA2454	3874913	snp	A	T	T:127 A:1
EA2454	3874996	snp	C	T	T:155 C:1
EA2454	3875022	snp	G	A	A:156 G:0
EA2454	3875037	snp	G	A	A:152 G:0
EA2454	3875046	snp	C	A	A:153 C:0
EA2454	3875073	snp	C	A	A:140 C:0
EA2454	3875091	snp	C	T	T:135 C:1
EA2454	3875100	snp	T	G	G:139 T:0
EA2454	3875106	snp	G	C	C:134 G:0
EA2454	3875118	snp	T	G	G:144 T:1
EA2454	3875157	snp	T	G	G:140 T:2
EA2454	3875169	complex	GGACATC	CGATATT	CGATATT:121 GGACATC:0
EA2454	3875205	complex	GGGG	TGGT	TGGT:133 GGGG:0
EA2454	3875214	snp	C	T	T:131 C:3
EA2454	3875232	snp	T	C	C:139 T:0
EA2454	3875241	snp	G	A	A:132 G:1
EA2454	3875328	complex	CCGAGGC	TAAAGGG	TAAAGGG:79 CCGAGGC:1
EA2454	3875340	complex	CGGA	AGGT	AGGT:84 CGGA:0
EA2454	3875354	snp	G	A	A:103 G:2
EA2454	3875370	snp	A	G	G:105 A:2
EA2454	3875383	complex	GGAA	AGAG	AGAG:83 GGAA:2
EA2454	3875403	complex	ACAA	GCAG	GCAG:92 ACAA:2
EA2454	3875412	snp	C	T	T:108 C:3
EA2454	3875437	snp	A	G	G:131 A:2
EA2454	3875460	snp	A	G	G:144 A:0
EA2454	3875465	snp	G	C	C:133 G:0
EA2454	3875478	snp	G	T	T:125 G:1
EA2454	3875505	snp	G	T	T:82 G:1
EA2454	3875514	snp	A	G	G:63 A:1
EA2454	3875523	snp	G	A	A:52 G:0
EA2454	3875536	complex	CAC	TAT	TAT:28 CAC:0
EA2454	3875597	snp	G	A	A:26 G:0
EA2454	3875612	complex	CATT	TATC	TATC:37 CATT:0
EA2454	3875632	snp	A	G	G:76 A:0
EA2454	3875641	snp	G	A	A:86 G:0
EA2454	3875652	snp	G	A	A:96 G:0
EA2454	3875660	snp	C	G	G:99 C:0
EA2454	3875665	complex	GCTTTATT	TCTTCATA	TCTTCATA:101 GCTTTATT:0
EA2454	3875688	snp	T	C	C:106 T:0
EA2454	3875702	complex	ATTT	GTTC	GTTC:101 ATTT:0
EA2454	3875727	snp	C	A	A:107 C:0
EA2454	3875747	complex	ATTC	GTTT	GTTT:86 ATTC:0
EA2454	3875772	complex	CT	AC	AC:87 CT:0
EA2454	3875801	snp	G	A	A:96 G:0
EA2454	3875811	snp	C	T	T:99 C:0
EA2454	3875853	snp	A	G	G:102 A:0
EA2454	3876104	complex	CA	TG	TG:26 CA:0
EA2454	3876119	snp	C	T	T:53 C:0
EA2454	3876420	snp	A	G	G:149 A:0
EA2454	3876503	snp	G	A	A:167 G:0
EA2454	3876795	snp	C	T	T:153 C:0
EA2454	3876860	snp	C	T	T:172 C:0
EA2454	3876929	snp	A	G	G:162 A:0
EA2454	3877010	complex	GAT	AAG	AAG:133 GAT:0
EA2454	3877128	snp	T	C	C:195 T:0
EA2454	3877139	complex	GAC	CAT	CAT:177 GAC:0
EA2454	3877161	complex	TTGATA	ATATTGATG	ATATTGATG:131 TTGATA:0
EA2454	3877178	snp	G	A	A:166 G:0
EA2454	3877196	snp	A	G	G:164 A:1
EA2454	3877223	snp	A	G	G:174 A:0
EA2454	3877229	snp	T	C	C:171 T:0
EA2454	3877240	snp	T	C	C:166 T:0
EA2454	3877276	snp	A	G	G:166 A:0
EA2454	3877308	complex	ATTCGC	GTCCGG	GTCCGG:132 ATTCGC:0
EA2454	3877336	snp	T	C	C:147 T:0
EA2454	3877374	snp	T	G	G:128 T:0
EA2454	3877383	snp	G	A	A:131 G:0
EA2454	3877417	complex	GGCGAGTGCGCAG	ATCCGGCGCACAC	ATCCGGCGCACAC:93 GGCGAGTGCGCAG:0
EA2454	3877438	snp	A	C	C:119 A:0
EA2454	3877471	snp	C	T	T:132 C:0
EA2454	3877567	complex	CCGTT	TCTGC	TCTGC:92 CCGTT:0
EA2454	3877585	snp	C	T	T:137 C:0
EA2454	3877600	snp	C	T	T:141 C:0
EA2454	3877606	snp	G	A	A:148 G:0
EA2454	3877622	snp	G	A	A:150 G:0
EA2454	3877709	snp	G	A	A:176 G:0
EA2454	3877726	snp	C	T	T:167 C:0
EA2454	3877769	snp	C	T	T:150 C:0
EA2454	3877798	snp	A	C	C:149 A:0
EA2454	3877935	snp	C	A	A:164 C:0
EA2454	3877950	snp	C	T	T:167 C:0
EA2454	3877981	complex	ATC	GTG	GTG:151 ATC:0
EA2454	3877989	snp	T	C	C:161 T:0
EA2454	3878007	snp	C	T	T:156 C:0
EA2454	3878037	complex	AAAA	CAAG	CAAG:135 AAAA:0
EA2454	3878052	snp	C	A	A:137 C:0
EA2454	3878094	snp	G	T	T:113 G:0
EA2454	3878112	snp	A	T	T:115 A:0
EA2454	3878148	snp	T	C	C:120 T:0
EA2454	3878163	complex	GTCTGTC	TACAGTT	TACAGTT:105 GTCTGTC:0
EA2454	3878175	snp	C	A	A:127 C:0
EA2454	3878208	snp	T	C	C:136 T:0
EA2454	3878277	complex	AGACAAT	GGAGAAC	GGAGAAC:114 AGACAAT:0
EA2454	3878292	snp	T	C	C:143 T:0
EA2454	3878334	snp	C	A	A:141 C:0
EA2454	3878397	snp	A	G	G:143 A:0
EA2454	3878418	snp	G	A	A:157 G:0
EA2454	3878454	complex	CGGT	TGGA	TGGA:145 CGGT:0
EA2454	3878526	complex	AATC	GATA	GATA:144 AATC:1
EA2454	3878559	snp	A	C	C:160 A:1
EA2454	3878568	snp	G	A	A:169 G:1
EA2454	3878580	snp	C	T	T:171 C:1
EA2454	3878607	complex	CGCGAACACG	GGCAAATACC	GGCAAATACC:120 CGCGAACACG:1
EA2454	3878625	snp	T	G	G:160 T:0
EA2454	3878631	snp	T	C	C:161 T:1
EA2454	3878658	snp	G	T	T:150 G:2
EA2454	3878793	snp	A	G	G:166 A:0
EA2454	3878931	snp	T	G	G:175 T:2
EA2454	3879093	complex	CGAGT	TGAGC	TGAGC:155 CGAGT:0
EA2454	3879225	snp	G	T	T:158 G:0
EA2454	3879252	snp	C	T	T:166 C:0
EA2454	3879306	snp	A	G	G:171 A:1
EA2454	3879360	snp	C	T	T:167 C:0
EA2454	3879462	snp	T	C	C:161 T:0
EA2454	3879486	snp	C	A	A:145 C:0
EA2454	3879495	snp	T	A	A:148 T:0
EA2454	3879528	complex	GGAG	TGAA	TGAA:129 GGAG:0
EA2454	3879609	snp	C	T	T:89 C:1
EA2454	3879636	complex	GGT	TG	TG:42 GGT:0
EA2454	3879642	ins	C	CGGAAGTTGTT	CGGAAGTTGTT:39 C:0
EA2454	3879653	snp	G	A	A:49 G:0
EA2454	3879664	snp	G	A	A:58 G:0
EA2454	3879675	snp	A	G	G:64 A:0
EA2454	3879684	snp	A	G	G:63 A:0
EA2454	3879693	snp	A	G	G:63 A:0
EA2454	3879702	snp	A	G	G:62 A:0
EA2454	3879709	complex	TCTGTCATCAAT	CCTGCCATAAAC	CCTGCCATAAAC:63 TCTGTCATCAAT:0
EA2454	3879736	snp	G	T	T:93 G:0
EA2454	3879746	snp	G	A	A:103 G:0
EA2454	3879864	snp	A	G	G:138 A:0
EA2454	3879883	snp	T	C	C:130 T:0
EA2454	3879984	snp	T	A	A:63 T:0
EA2454	3879990	complex	TTCAGCGTTGTTAA	ATCGCGCAGGTCAG	ATCGCGCAGGTCAG:39 TTCAGCGTTGTTAA:0
EA2454	3880010	complex	AGGC	CGGA	CGGA:46 AGGC:0
EA2454	3880022	snp	A	T	T:60 A:0
EA2454	3880031	snp	C	T	T:74 C:0
EA2454	3880082	complex	TGGTCA	CGGCAG	CGGCAG:99 TGGTCA:0
EA2454	3880103	complex	TGGG	GGGA	GGGA:119 TGGG:0
EA2454	3880118	snp	C	T	T:120 C:0
EA2454	3880154	snp	C	A	A:111 C:1
EA2454	3880169	snp	G	A	A:111 G:1
EA2454	3880176	snp	T	C	C:119 T:1
EA2454	3880202	complex	TAA	CAG	CAG:93 TAA:1
EA2454	3880266	complex	CTCGGGGGG	TTAGGTGGC	TTAGGTGGC:80 CTCGGGGGG:4
EA2454	3880280	complex	ACGTCTT	GCGCCTG	GCGCCTG:80 ACGTCTT:6
EA2454	3880313	snp	T	C	C:102 T:5
EA2454	3880322	snp	C	T	T:98 C:3
EA2454	3880343	snp	T	C	C:105 T:1
EA2454	3880418	snp	T	C	C:123 T:0
EA2454	3880439	snp	C	A	A:128 C:0
EA2454	3880459	snp	T	C	C:108 T:0
EA2454	3880490	snp	C	T	T:65 C:2
EA2454	3880616	snp	T	C	C:27 T:0
EA2454	3880634	snp	C	G	G:49 C:0
EA2454	3880686	complex	AGTCGT	GGACGC	GGACGC:93 AGTCGT:0
EA2454	3880704	snp	A	C	C:107 A:0
EA2454	3880718	snp	T	G	G:104 T:0
EA2454	3880724	snp	C	T	T:106 C:1
EA2454	3880754	snp	G	A	A:110 G:0
EA2454	3880790	complex	GGAAA	TGAAG	TGAAG:124 GGAAA:0
EA2454	3880838	snp	C	T	T:155 C:0
EA2454	3880882	snp	T	C	C:149 T:0
EA2454	3880902	complex	CCTGC	GCTGT	GCTGT:143 CCTGC:0
EA2454	3880916	snp	C	G	G:148 C:0
EA2454	3880949	snp	C	G	G:150 C:0
EA2454	3880982	snp	C	T	T:154 C:0
EA2454	3880988	snp	T	C	C:159 T:0
EA2454	3881006	snp	G	A	A:157 G:0
EA2454	3881015	snp	C	T	T:164 C:0
EA2454	3881066	snp	T	C	C:157 T:1
EA2454	3881087	complex	GCTT	ACTC	ACTC:136 GCTT:1
EA2454	3881099	complex	CGAT	TGAC	TGAC:129 CGAT:0
EA2454	3881147	snp	G	A	A:143 G:1
EA2454	3881171	complex	TGAC	CGAT	CGAT:133 TGAC:0
EA2454	3881231	complex	TGGT	CGGC	CGGC:153 TGGT:3
EA2454	3881267	complex	TCGC	CCGT	CCGT:165 TCGC:0
EA2454	3881461	snp	T	C	C:186 T:1
EA2454	3881492	snp	C	T	T:175 C:0
EA2454	3881501	snp	C	T	T:174 C:0
EA2454	3881618	snp	A	G	G:155 A:0
EA2454	3881672	snp	G	A	A:154 G:0
EA2454	3881684	snp	A	C	C:151 A:0
EA2454	3881735	snp	G	A	A:170 G:0
EA2454	3881743	snp	T	C	C:169 T:0
EA2454	3881813	snp	G	A	A:140 G:0
EA2454	3881857	complex	AT	TC	TC:127 AT:1
EA2454	3881876	complex	GGCACTG	TGCCCTT	TGCCCTT:118 GGCACTG:1
EA2454	3881990	complex	GATA	TATC	TATC:146 GATA:0
EA2454	3882005	snp	A	G	G:149 A:0
EA2454	3882037	snp	T	C	C:152 T:0
EA2454	3882044	snp	C	T	T:143 C:0
EA2454	3882143	snp	C	A	A:125 C:0
EA2454	3882211	snp	T	C	C:154 T:0
EA2454	3882296	snp	T	C	C:146 T:0
EA2454	3882377	snp	G	C	C:155 G:0
EA2454	3882428	snp	C	T	T:153 C:1
EA2454	3882473	snp	G	C	C:120 G:1
EA2454	3882509	snp	G	T	T:122 G:1
EA2454	3882523	snp	C	T	T:117 C:0
EA2454	3882533	snp	G	C	C:108 G:0
EA2454	3882544	complex	AT	TG	TG:72 AT:0
EA2454	3882551	complex	GTCCGCACTTA	AGCCGGGCTTC	AGCCGGGCTTC:70 GTCCGCACTTA:0
EA2454	3882590	snp	T	G	G:101 T:0
EA2454	3882599	complex	GGTGG	TGTGC	TGTGC:92 GGTGG:0
EA2454	3882617	snp	C	A	A:102 C:0
EA2454	3882630	mnp	CAT	ATG	ATG:97 CAT:0
EA2454	3882638	snp	C	T	T:117 C:4
EA2454	3882653	snp	A	G	G:140 A:1
EA2454	3882678	snp	A	G	G:130 A:3
EA2454	3882684	snp	G	A	A:128 G:0
EA2454	3882689	snp	C	A	A:119 C:0
EA2454	3882695	mnp	GC	AG	AG:105 GC:0
EA2454	3882722	complex	GGGCGAT	CGGTGAC	CGGTGAC:119 GGGCGAT:0
EA2454	3882735	snp	C	T	T:140 C:0
EA2454	3882755	snp	T	C	C:149 T:0
EA2454	3882766	snp	A	G	G:152 A:1
EA2454	3882797	snp	T	A	A:139 T:1
EA2454	3882803	snp	A	G	G:128 A:0
EA2454	3882830	snp	T	C	C:114 T:2
EA2454	3882866	snp	T	C	C:107 T:3
EA2454	3882883	complex	AACTGACATCA	CGTTAACGTCG	CGTTAACGTCG:82 AACTGACATCA:3
EA2454	3882902	snp	C	T	T:116 C:0
EA2454	3882914	snp	C	T	T:130 C:3
EA2454	3882930	snp	C	T	T:127 C:0
EA2454	3882950	snp	G	A	A:126 G:2
EA2454	3882956	snp	C	G	G:123 C:1
EA2454	3883040	complex	CGTT	TGTG	TGTG:143 CGTT:1
EA2454	3883052	snp	C	G	G:160 C:1
EA2454	3883073	snp	G	T	T:164 G:4
EA2454	3883106	snp	A	G	G:166 A:3
EA2454	3883133	snp	A	G	G:162 A:0
EA2454	3883253	snp	T	C	C:161 T:0
EA2454	3883262	snp	C	T	T:151 C:2
EA2454	3883351	snp	C	T	T:147 C:0
EA2454	3883535	snp	A	G	G:153 A:0
EA2454	3883692	snp	C	T	T:147 C:2
EA2454	3883697	snp	G	A	A:152 G:0
EA2454	3883745	snp	A	G	G:159 A:0
EA2454	3883790	snp	C	T	T:184 C:0
EA2454	3883796	complex	GGAG	AGAA	AGAA:171 GGAG:0
EA2454	3883811	snp	C	T	T:170 C:0
EA2454	3883883	snp	C	T	T:132 C:0
EA2454	3883908	snp	C	G	G:136 C:0
EA2454	3883927	snp	T	C	C:146 T:0
EA2454	3883979	snp	C	T	T:150 C:0
EA2454	3884078	snp	A	G	G:154 A:0
EA2454	3884115	snp	C	A	A:167 C:0
EA2454	3884138	snp	C	T	T:160 C:0
EA2454	3884186	snp	C	T	T:156 C:0
EA2454	3884201	complex	TGCG	GGCA	GGCA:152 TGCG:0
EA2454	3884321	complex	TGATG	CGATA	CGATA:164 TGATG:0
EA2454	3884342	snp	G	T	T:168 G:1
EA2454	3884351	snp	C	T	T:159 C:0
EA2454	3884372	snp	G	A	A:148 G:0
EA2454	3884388	complex	CTG	TTT	TTT:132 CTG:0
EA2454	3884400	complex	GCT	CCG	CCG:123 GCT:0
EA2454	3884418	snp	A	C	C:137 A:1
EA2454	3884430	snp	T	C	C:138 T:0
EA2454	3884444	snp	A	G	G:137 A:0
EA2454	3884450	snp	A	G	G:132 A:0
EA2454	3884458	snp	A	G	G:127 A:1
EA2454	3884471	snp	G	C	C:123 G:1
EA2454	3884537	complex	ACGT	GCGC	GCGC:136 ACGT:0
EA2454	3884549	snp	A	G	G:142 A:0
EA2454	3884591	snp	A	G	G:153 A:0
EA2454	3884597	snp	C	A	A:156 C:0
EA2454	3884615	snp	G	A	A:153 G:1
EA2454	3884622	snp	T	A	A:161 T:0
EA2454	3884663	complex	CCGT	ACGG	ACGG:146 CCGT:0
EA2454	3884753	snp	T	C	C:145 T:2
EA2454	3884846	snp	C	T	T:137 C:0
EA2454	3884872	snp	A	G	G:132 A:2
EA2454	3884888	snp	A	T	T:115 A:2
EA2454	3884897	complex	TGGC	CGGT	CGGT:118 TGGC:3
EA2454	3884948	snp	T	C	C:116 T:0
EA2454	3884985	snp	A	G	G:138 A:0
EA2454	3885028	snp	G	A	A:159 G:0
EA2454	3885050	snp	A	G	G:159 A:0
EA2454	3885059	snp	G	A	A:153 G:1
EA2454	3885075	snp	G	T	T:146 G:0
EA2454	3885084	snp	A	T	T:147 A:0
EA2454	3885116	snp	G	A	A:139 G:0
EA2454	3885126	snp	T	C	C:140 T:0
EA2454	3885136	snp	A	T	T:131 A:0
EA2454	3885262	snp	C	T	T:150 C:0
EA2454	3885267	snp	A	G	G:155 A:0
EA2454	3885276	snp	A	G	G:157 A:1
EA2454	3885318	snp	C	A	A:145 C:1
EA2454	3885384	snp	C	G	G:150 C:0
EA2454	3885390	snp	T	A	A:139 T:0
EA2454	3885435	snp	G	T	T:139 G:3
EA2454	3885462	complex	GCGTGGAGCC	ACGCGGTGCT	ACGCGGTGCT:115 GCGTGGAGCC:0
EA2454	3885480	snp	T	G	G:140 T:0
EA2454	3885517	snp	G	A	A:149 G:0
EA2454	3885531	snp	G	A	A:151 G:3
EA2454	3885636	snp	G	T	T:148 G:0
EA2454	3885811	snp	G	A	A:101 G:0
EA2454	3885869	complex	TG	CA	CA:100 TG:0
EA2454	3885876	complex	TGTAGCTGGT	GGTGGCCGGC	GGTGGCCGGC:94 TGTAGCTGGT:0
EA2454	3886347	snp	G	C	C:172 G:1
EA2454	3886583	snp	G	A	A:146 G:1
EA2454	3886645	complex	ATC	CTCAG	CTCAG:55 ATC:0
EA2454	3886691	complex	GTA	ATG	ATG:26 GTA:1
EA2454	3886844	snp	A	G	G:113 A:0
EA2454	3886893	snp	A	G	G:119 A:0
EA2454	3886901	snp	A	G	G:116 A:0
EA2454	3886942	snp	A	C	C:139 A:0
EA2454	3886972	snp	T	G	G:107 T:0
EA2454	3887005	complex	TAT	AG	AG:54 TAT:0
EA2454	3888283	snp	C	T	T:31 C:0
EA2454	3888595	snp	A	G	G:165 A:0
EA2454	3888922	snp	C	T	T:145 C:1
EA2454	3888966	snp	A	C	C:133 A:0
EA2454	3889072	snp	A	G	G:87 A:0
EA2454	3889577	snp	C	T	T:76 C:0
EA2454	3889661	snp	A	C	C:152 A:0
EA2454	3889703	complex	TACA	CACT	CACT:134 TACA:0
EA2454	3889713	snp	A	G	G:147 A:0
EA2454	3889814	snp	G	C	C:163 G:2
EA2454	3889829	snp	A	G	G:168 A:0
EA2454	3889838	snp	G	A	A:172 G:0
EA2454	3889844	snp	A	G	G:175 A:2
EA2454	3889859	snp	C	T	T:171 C:2
EA2454	3889922	snp	C	T	T:166 C:1
EA2454	3889961	snp	G	A	A:155 G:0
EA2454	3889967	complex	TGCTGCC	CGGTGCA	CGGTGCA:130 TGCTGCC:0
EA2454	3890075	snp	C	T	T:156 C:3
EA2454	3890101	snp	C	T	T:160 C:2
EA2454	3890179	snp	G	A	A:166 G:2
EA2454	3890325	snp	G	A	A:156 G:0
EA2454	3890330	snp	G	A	A:158 G:0
EA2454	3890345	snp	T	C	C:152 T:0
EA2454	3890375	snp	C	T	T:156 C:0
EA2454	3890391	snp	C	A	A:164 C:1
EA2454	3890402	complex	TAA	CAG	CAG:146 TAA:0
EA2454	3890414	snp	A	G	G:151 A:0
EA2454	3890423	snp	C	T	T:149 C:1
EA2454	3890471	snp	T	C	C:143 T:1
EA2454	3890515	complex	CTCA	TTCT	TTCT:150 CTCA:0
EA2454	3890534	mnp	CG	AA	AA:151 CG:0
EA2454	3890560	complex	TCTGT	CCTGC	CCTGC:144 TCTGT:0
EA2454	3890579	snp	G	T	T:121 G:0
EA2454	3890586	snp	T	C	C:105 T:0
EA2454	3890602	snp	T	C	C:96 T:0
EA2454	3890630	snp	G	C	C:84 G:0
EA2454	3890645	complex	AATA	GATG	GATG:60 AATA:0
EA2454	3890654	complex	TGCGCCTCAGC	CACCTCCCACA	CACCTCCCACA:56 TGCGCCTCAGC:0
EA2454	3890671	snp	G	T	T:75 G:1
EA2454	3890745	complex	GCCGACAGC	TCCGCCAGT	TCCGCCAGT:135 GCCGACAGC:0
EA2454	3890785	snp	A	T	T:151 A:0
EA2454	3890808	snp	C	T	T:145 C:0
EA2454	3890842	complex	GTGT	CTGC	CTGC:118 GTGT:0
EA2454	3890866	snp	T	C	C:102 T:0
EA2454	3890897	snp	G	A	A:84 G:0
EA2454	3890908	snp	A	T	T:77 A:0
EA2454	3890922	complex	TG	CT	CT:51 TG:0
EA2454	3890928	complex	AACAGCCCCCGGA	TACAACCACCAGG	TACAACCACCAGG:51 AACAGCCCCCGGA:0
EA2454	3890964	snp	T	C	C:72 T:0
EA2454	3890979	ins	C	CCT	CCT:61 C:1
EA2454	3890999	complex	AGG	GCC	GCC:66 AGG:0
EA2454	3891274	snp	G	T	T:171 G:0
EA2454	3891344	snp	T	C	C:91 T:0
EA2454	3891353	snp	C	T	T:88 C:0
EA2454	3891366	snp	A	G	G:89 A:0
EA2454	3891377	complex	CAC	TAT	TAT:80 CAC:0
EA2454	3891387	ins	G	GTA	GTA:82 G:0
EA2454	3891433	complex	AC	GT	GT:75 AC:0
EA2454	3891444	snp	A	G	G:69 A:0
EA2454	3891453	complex	ATAAAGA	CTGAAGG	CTGAAGG:54 ATAAAGA:0
EA2454	3891475	snp	T	C	C:56 T:0
EA2454	3891492	complex	TGTA	CGTAATGGCTCCCAGTT	CGTAATGGCTCCCAGTT:23 TGTA:0
EA2454	3891503	snp	T	G	G:23 T:0
EA2454	3891524	snp	A	G	G:20 A:0
EA2454	3891535	snp	C	T	T:18 C:0
EA2454	3898998	snp	T	C	C:132 T:0
EA2454	3902332	snp	C	T	T:114 C:0
EA2454	3904266	snp	T	C	C:156 T:0
EA2454	3904915	snp	A	T	T:140 A:0
EA2454	3905020	snp	A	C	C:172 A:0
EA2454	3905167	snp	C	A	A:124 C:3
EA2454	3908657	snp	T	C	C:143 T:0
EA2454	3908840	snp	C	A	A:144 C:0
EA2454	3929224	snp	C	T	T:161 C:0
EA2454	3931051	snp	C	T	T:135 C:0
EA2454	3935774	snp	A	G	G:103 A:0
EA2454	3937328	snp	G	A	A:135 G:0
EA2454	3939722	snp	A	C	C:118 A:1
EA2454	3944749	snp	A	C	C:107 A:0
EA2454	3970007	snp	G	C	C:30 G:0
EA2454	3995997	snp	C	T	T:122 C:1
EA2454	4004474	snp	A	G	G:94 A:0
EA2454	4004676	snp	C	T	T:106 C:2
EA2454	4004935	snp	G	A	A:98 G:3
EA2454	4006309	snp	C	T	T:108 C:0
EA2454	4008915	snp	G	A	A:114 G:4
EA2454	4014768	snp	T	C	C:104 T:0
EA2454	4016930	snp	T	A	A:117 T:0
EA2454	4020647	snp	C	T	T:99 C:0
EA2454	4026172	snp	T	G	G:120 T:0
EA2454	4030798	snp	G	T	T:110 G:0
EA2454	4036181	snp	A	G	G:111 A:0
EA2454	4036304	snp	T	C	C:119 T:0
EA2454	4041761	snp	T	C	C:105 T:1
EA2454	4046742	snp	G	A	A:120 G:4
EA2454	4058462	snp	T	G	G:107 T:0
EA2454	4062557	snp	A	C	C:85 A:0
EA2454	4116563	snp	G	A	A:147 G:2
EA2454	4124353	snp	C	T	T:135 C:4
EA2454	4141091	snp	A	G	G:142 A:0
EA2454	4141431	snp	C	A	A:153 C:0
EA2454	4148761	snp	T	G	G:138 T:1
EA2454	4168245	snp	C	T	T:133 C:3
EA2454	4168585	snp	G	T	T:141 G:2
EA2454	4169457	snp	C	T	T:128 C:3
EA2454	4174762	snp	G	T	T:141 G:3
EA2454	4190304	snp	C	T	T:109 C:0
EA2454	4192189	snp	G	A	A:121 G:3
EA2454	4200656	snp	A	G	G:93 A:0
EA2454	4201996	snp	A	G	G:130 A:0
EA2454	4204476	snp	G	T	T:126 G:2
EA2454	4205428	snp	A	G	G:107 A:2
EA2454	4208099	snp	C	T	T:114 C:0
EA2454	4208280	snp	G	T	T:113 G:0
EA2454	4212664	snp	T	A	A:114 T:0
EA2454	4216725	del	CTTTT	C	C:80 CTTTT:0
EA2454	4220410	snp	G	A	A:106 G:2
EA2454	4227994	snp	G	T	T:102 G:0
EA2454	4231555	snp	C	T	T:139 C:1
EA2454	4231669	snp	C	T	T:137 C:0
EA2454	4234319	snp	A	G	G:115 A:0
EA2454	4235320	snp	A	G	G:117 A:0
EA2454	4235599	snp	C	T	T:126 C:0
EA2454	4236400	snp	C	T	T:138 C:0
EA2454	4240327	snp	G	A	A:107 G:0
EA2454	4247151	del	GGCTGCCGGACTCATTCGCAGTGGACAAATTTT	G	G:29 GGCTGCCGGACTCATTCGCAGTGGACAAATTTT:0
EA2454	4257673	snp	C	T	T:123 C:2
EA2454	4259428	snp	A	G	G:105 A:0
EA2454	4267142	snp	A	G	G:125 A:0
EA2454	4272983	snp	A	G	G:112 A:0
EA2454	4273176	snp	C	T	T:121 C:0
EA2454	4281791	snp	G	A	A:123 G:0
EA2454	4282555	snp	G	A	A:101 G:5
EA2454	4283531	snp	A	T	T:99 A:0
EA2454	4285277	snp	C	T	T:121 C:0
EA2454	4290073	del	AGGAT	A	A:87 AGGAT:0
EA2454	4293633	del	AC	A	A:18 AC:0
EA2454	4318390	snp	A	G	G:115 A:0
EA2454	4321572	snp	T	C	C:15 T:0
EA2454	4321596	snp	G	T	T:40 G:0
EA2454	4322514	snp	A	G	G:155 A:1
EA2454	4323585	snp	G	A	A:128 G:2
EA2454	4325610	snp	G	T	T:143 G:1
EA2454	4326301	snp	A	G	G:152 A:0
EA2454	4351324	snp	G	A	A:152 G:0
EA2454	4357863	del	AT	A	A:62 AT:0
EA2454	4380080	snp	A	C	C:98 A:2
EA2454	4394302	snp	C	T	T:145 C:2
EA2454	4394869	snp	T	C	C:129 T:0
EA2454	4395064	snp	C	T	T:100 C:1
EA2454	4396058	snp	C	T	T:100 C:1
EA2454	4414071	snp	G	T	T:118 G:0
EA2454	4414845	snp	G	T	T:183 G:0
EA2454	4416190	snp	A	G	G:137 A:0
EA2454	4419628	snp	T	C	C:130 T:0
EA2454	4420363	snp	A	G	G:124 A:0
EA2454	4425949	snp	A	G	G:50 A:0
EA2454	4425971	snp	C	T	T:68 C:0
EA2454	4426004	snp	C	T	T:102 C:0
EA2454	4426020	complex	GTT	ATA	ATA:97 GTT:0
EA2454	4426268	snp	A	G	G:113 A:0
EA2454	4426346	snp	A	C	C:112 A:0
EA2454	4426449	snp	T	C	C:93 T:0
EA2454	4426552	complex	GCGG	ACGA	ACGA:27 GCGG:0
EA2454	4426565	snp	A	G	G:46 A:0
EA2454	4426570	snp	G	A	A:54 G:0
EA2454	4426578	snp	C	T	T:66 C:0
EA2454	4426585	complex	GGTG	AGTT	AGTT:71 GGTG:0
EA2454	4426615	snp	G	A	A:78 G:0
EA2454	4426633	snp	A	G	G:68 A:0
EA2454	4426654	complex	GCAAG	TCAAT	TCAAT:44 GCAAG:0
EA2454	4449842	snp	C	T	T:35 C:0
EA2454	4449848	complex	CGGA	TGGT	TGGT:40 CGGA:0
EA2454	4449881	snp	T	C	C:67 T:0
EA2454	4449908	snp	C	T	T:77 C:0
EA2454	4449923	complex	TGAT	AGAC	AGAC:73 TGAT:0
EA2454	4449935	complex	CGTT	TGTG	TGTG:71 CGTT:0
EA2454	4449956	snp	T	C	C:69 T:0
EA2454	4449974	snp	T	C	C:67 T:0
EA2454	4449983	snp	C	G	G:69 C:0
EA2454	4450022	snp	T	G	G:69 T:0
EA2454	4450067	snp	C	T	T:69 C:0
EA2454	4450115	snp	G	T	T:65 G:1
EA2454	4450151	snp	A	G	G:56 A:0
EA2454	4450286	snp	C	G	G:74 C:1
EA2454	4450294	snp	T	A	A:69 T:0
EA2454	4450348	complex	TCCGT	ACCGA	ACCGA:62 TCCGT:1
EA2454	4450358	snp	C	T	T:63 C:0
EA2454	4450366	complex	TGGAGGAA	CGGAACAG	CGGAACAG:50 TGGAGGAA:0
EA2454	4450397	snp	G	A	A:69 G:0
EA2454	4450432	snp	A	G	G:73 A:0
EA2454	4450441	snp	C	G	G:73 C:1
EA2454	4450451	complex	CAG	ACC	ACC:73 CAG:1
EA2454	4450462	snp	C	T	T:89 C:1
EA2454	4450481	snp	A	G	G:83 A:0
EA2454	4450486	snp	C	G	G:82 C:0
EA2454	4450539	complex	TAAAG	CAAAA	CAAAA:79 TAAAG:1
EA2454	4450561	snp	A	G	G:79 A:0
EA2454	4450579	snp	G	A	A:81 G:0
EA2454	4450589	snp	T	C	C:87 T:0
EA2454	4450648	snp	C	T	T:90 C:0
EA2454	4450666	complex	TACG	CACA	CACA:91 TACG:0
EA2454	4450690	complex	AGGT	GGGA	GGGA:85 AGGT:0
EA2454	4450699	snp	A	G	G:92 A:0
EA2454	4450713	snp	A	G	G:91 A:0
EA2454	4450722	snp	C	A	A:93 C:0
EA2454	4450731	snp	G	A	A:93 G:0
EA2454	4450747	snp	A	G	G:80 A:0
EA2454	4450776	snp	A	C	C:77 A:0
EA2454	4450785	snp	C	T	T:86 C:0
EA2454	4450815	complex	CGGTAAGACG	TGGCAGGTCA	TGGCAGGTCA:57 CGGTAAGACG:0
EA2454	4450836	complex	TAAC	CAAT	CAAT:76 TAAC:0
EA2454	4450846	snp	C	T	T:81 C:0
EA2454	4450861	snp	T	C	C:80 T:1
EA2454	4450878	snp	C	T	T:81 C:1
EA2454	4450914	complex	GGATAAAAT	AGAGAAAGC	AGAGAAAGC:67 GGATAAAAT:0
EA2454	4450956	snp	T	C	C:85 T:1
EA2454	4450970	snp	C	G	G:85 C:0
EA2454	4451046	snp	T	A	A:93 T:0
EA2454	4451056	complex	AGTGTC	TGCATT	TGCATT:77 AGTGTC:0
EA2454	4451073	snp	G	C	C:89 G:1
EA2454	4451118	snp	G	A	A:86 G:1
EA2454	4451130	complex	TCCT	CCCA	CCCA:78 TCCT:0
EA2454	4451160	complex	GCGA	ACGG	ACGG:78 GCGA:0
EA2454	4451178	complex	GGCA	AGCT	AGCT:76 GGCA:0
EA2454	4451195	snp	T	C	C:73 T:0
EA2454	4451214	snp	A	T	T:67 A:0
EA2454	4451227	complex	CAA	GAG	GAG:53 CAA:0
EA2454	4451235	snp	A	G	G:48 A:0
EA2454	4451245	snp	T	C	C:41 T:0
EA2454	4451251	snp	C	T	T:31 C:1
EA2454	4451269	complex	CGG	TGC	TGC:19 CGG:0
EA2454	4478572	snp	A	T	T:118 A:0
EA2454	4491535	snp	T	C	C:99 T:3
EA2454	4505570	ins	A	AG	AG:95 A:0
EA2454	4509771	snp	G	A	A:122 G:0
EA2454	4510584	del	GT	G	G:101 GT:0
EA2454	4515568	snp	T	C	C:103 T:0
EA2454	4522911	ins	C	CG	CG:26 C:0
EA2454	4524700	snp	T	C	C:87 T:0
EA2454	4526687	snp	C	A	A:117 C:0
EA2454	4533515	snp	A	G	G:143 A:0
EA2454	4537931	snp	T	G	G:114 T:0
EA2454	4544866	snp	T	C	C:112 T:0
EA2454	4559006	snp	C	A	A:102 C:0
EA2454	4565157	snp	C	T	T:100 C:3
EA2454	4568271	snp	A	G	G:116 A:0
EA2454	4568846	snp	G	T	T:116 G:0
EA2454	4578784	snp	A	G	G:122 A:0
EA2454	4586361	snp	T	C	C:101 T:0
EA2454	4588946	snp	A	G	G:115 A:0
EA2454	4593973	snp	A	C	C:117 A:0
EA2454	4595613	snp	A	G	G:131 A:0
EA2454	4600416	snp	G	A	A:149 G:1
EA2454	4603502	mnp	CA	TC	TC:144 CA:0
EA2454	4613336	snp	C	A	A:143 C:2
EA2454	4613663	snp	G	T	T:176 G:0
EA2454	4616724	snp	A	G	G:139 A:0
EA2454	4617046	snp	T	C	C:154 T:3
EA2454	4617581	snp	A	G	G:132 A:0
EA2454	4617743	snp	T	A	A:161 T:0
EA2454	4619923	snp	T	C	C:147 T:0
EA2454	4626629	snp	A	G	G:145 A:0
EA2454	4638132	snp	G	A	A:150 G:3
EA2454	4640298	snp	C	T	T:157 C:0
EA2454	4652543	snp	C	T	T:108 C:0
EA2454	4653396	snp	C	T	T:96 C:1
EA2454	4660745	snp	G	A	A:114 G:0
EA2454	4661591	snp	A	G	G:91 A:0
EA2454	4664714	snp	C	A	A:121 C:0
EA2454	4665829	snp	G	A	A:102 G:1
EA2454	4665968	snp	G	A	A:88 G:1
EA2454	4670848	complex	TGCG	CGCA	CGCA:142 TGCG:0
EA2454	4670861	snp	T	C	C:153 T:0
EA2454	4670947	snp	T	C	C:176 T:0
EA2454	4676005	snp	C	T	T:19 C:0
EA2454	4676024	complex	TGAG	GGAT	GGAT:24 TGAG:0
EA2454	4676032	del	CA	C	C:29 CA:0
EA2454	4676043	snp	G	T	T:38 G:1
EA2454	4676049	snp	T	G	G:45 T:0
EA2454	4676060	snp	G	T	T:57 G:1
EA2454	4676065	snp	T	A	A:71 T:0
EA2454	4676075	complex	GATG	TATT	TATT:85 GATG:1
EA2454	4676096	complex	GAA	CAG	CAG:83 GAA:1
EA2454	4676103	complex	GGGT	TGAC	TGAC:83 GGGT:1
EA2454	4676406	snp	G	C	C:143 G:0
EA2454	4676421	snp	G	A	A:143 G:2
EA2454	4676505	snp	C	G	G:125 C:2
EA2454	4676553	snp	C	T	T:147 C:0
EA2454	4676559	snp	T	C	C:152 T:0
EA2454	4676571	complex	TGTC	AGTG	AGTG:146 TGTC:0
EA2454	4676635	snp	C	A	A:160 C:0
EA2454	4676734	snp	C	G	G:149 C:0
EA2454	4676748	snp	A	G	G:152 A:0
EA2454	4676766	snp	T	C	C:146 T:0
EA2454	4676781	snp	A	G	G:150 A:0
EA2454	4676961	complex	ATC	GTT	GTT:63 ATC:0
EA2454	4676980	snp	A	C	C:45 A:0
EA2454	4696797	snp	G	C	C:11 G:0
EA2454	4696803	complex	TACC	CACG	CACG:16 TACC:0
EA2454	4696815	snp	T	G	G:22 T:0
EA2454	4696830	snp	C	T	T:24 C:0
EA2454	4696839	snp	T	C	C:31 T:0
EA2454	4696851	snp	T	C	C:38 T:0
EA2454	4696857	snp	T	A	A:44 T:0
EA2454	4696869	snp	G	C	C:50 G:0
EA2454	4696890	snp	C	T	T:46 C:0
EA2454	4696896	complex	GATTAGTTCGACA	CATCAGCTCAACG	CATCAGCTCAACG:30 GATTAGTTCGACA:0
EA2454	4696914	snp	G	C	C:48 G:0
EA2454	4696932	complex	GCTC	ACTG	ACTG:54 GCTC:0
EA2454	4696944	complex	AGCAA	TGCAC	TGCAC:58 AGCAA:0
EA2454	4696954	snp	A	C	C:68 A:0
EA2454	4696967	snp	C	T	T:75 C:2
EA2454	4697007	complex	ACAC	GCAG	GCAG:100 ACAC:2
EA2454	4697017	complex	GTCACAAA	ATCATAAG	ATCATAAG:85 GTCACAAA:0
EA2454	4697052	snp	A	G	G:63 A:0
EA2454	4697058	snp	G	A	A:57 G:0
EA2454	4702030	snp	C	T	T:130 C:2
EA2454	4702096	snp	T	C	C:145 T:0
EA2454	4702109	snp	C	T	T:125 C:0
EA2454	4702176	snp	T	C	C:77 T:1
EA2454	4702184	complex	AATATCCGCTCTGAGCA	GATGTGCAGTTTGAACC	GATGTGCAGTTTGAACC:52 AATATCCGCTCTGAGCA:0
EA2454	4702211	snp	G	C	C:79 G:1
EA2454	4702233	snp	C	T	T:95 C:0
EA2454	4702241	snp	A	C	C:103 A:0
EA2454	4702246	snp	A	G	G:104 A:0
EA2454	4702261	snp	C	A	A:105 C:0
EA2454	4702285	snp	C	T	T:148 C:0
EA2454	4702291	complex	ACTG	GCTA	GCTA:151 ACTG:0
EA2454	4702303	snp	G	A	A:162 G:1
EA2454	4702347	complex	TTGGCCG	CTGGACA	CTGGACA:124 TTGGCCG:0
EA2454	4702364	snp	A	G	G:146 A:0
EA2454	4702378	snp	T	C	C:147 T:2
EA2454	4702390	snp	A	T	T:124 A:2
EA2454	4702399	complex	TGTGCA	CGCACT	CGCACT:102 TGTGCA:0
EA2454	4702434	complex	ACA	GCT	GCT:118 ACA:0
EA2454	4702442	complex	GGTAG	AGTAA	AGTAA:117 GGTAG:0
EA2454	4702490	snp	G	C	C:126 G:1
EA2454	4702534	snp	G	C	C:129 G:1
EA2454	4702558	snp	C	T	T:118 C:0
EA2454	4702612	snp	A	G	G:136 A:0
EA2454	4702617	snp	G	A	A:138 G:0
EA2454	4702637	mnp	TGT	GTG	GTG:113 TGT:6
EA2454	4702648	mnp	CC	GG	GG:121 CC:0
EA2454	4702687	snp	G	T	T:139 G:1
EA2454	4702727	snp	G	A	A:120 G:0
EA2454	4702734	snp	C	A	A:130 C:0
EA2454	4702751	snp	G	A	A:137 G:0
EA2454	4702774	snp	C	T	T:125 C:0
EA2454	4702789	complex	CA	TG	TG:115 CA:0
EA2454	4702893	snp	T	C	C:126 T:1
EA2454	4703028	snp	T	C	C:135 T:0
EA2454	4703139	snp	C	G	G:146 C:0
EA2454	4703323	snp	G	C	C:131 G:0
EA2454	4703373	snp	C	T	T:91 C:2
EA2454	4703412	complex	GTAC	ATAT	ATAT:72 GTAC:0
EA2454	4703427	snp	T	C	C:74 T:2
EA2454	4703437	complex	CAG	TCC	TCC:55 CAG:1
EA2454	4703445	snp	T	C	C:73 T:1
EA2454	4703451	snp	T	C	C:78 T:0
EA2454	4703472	snp	A	G	G:91 A:2
EA2454	4703496	snp	T	A	A:116 T:0
EA2454	4703501	snp	A	T	T:117 A:4
EA2454	4703508	complex	ACTC	GCTG	GCTG:106 ACTC:0
EA2454	4703541	snp	T	C	C:132 T:4
EA2454	4703550	snp	T	C	C:127 T:0
EA2454	4703562	snp	T	C	C:119 T:0
EA2454	4703569	complex	TCT	GCC	GCC:104 TCT:0
EA2454	4703634	complex	GAAGGCCGCA	CAAATCTGCG	CAAATCTGCG:10 GAAGGCCGCA:0
EA2454	4703649	complex	GGGCTATCGC	CGCGTACCGT	CGCGTACCGT:10 GGGCTATCGC:0
EA2454	4703670	snp	C	T	T:15 C:0
EA2454	4703688	snp	C	A	A:11 C:0
EA2454	4703718	snp	G	C	C:10 G:0
EA2454	4703748	complex	TCGT	CCGC	CCGC:49 TCGT:0
EA2454	4703772	snp	T	C	C:86 T:0
EA2454	4703793	snp	C	G	G:106 C:0
EA2454	4703811	snp	T	C	C:121 T:0
EA2454	4703856	snp	A	C	C:117 A:0
EA2454	4703886	snp	G	C	C:112 G:1
EA2454	4703910	snp	A	G	G:121 A:0
EA2454	4704003	snp	G	T	T:130 G:0
EA2454	4704045	snp	A	C	C:130 A:0
EA2454	4704180	snp	C	T	T:139 C:0
EA2454	4704188	complex	CA	TG	TG:123 CA:0
EA2454	4704233	complex	GAGAGAGAGT	AAGGAGACGAGA	AAGGAGACGAGA:105 GAGAGAGAGT:0
EA2454	4704274	snp	A	C	C:133 A:2
EA2454	4704300	snp	A	G	G:125 A:2
EA2454	4704305	snp	A	G	G:127 A:0
EA2454	4704326	snp	T	C	C:120 T:3
EA2454	4704335	snp	T	A	A:134 T:0
EA2454	4704344	complex	ACTG	CCTC	CCTC:116 ACTG:1
EA2454	4704356	snp	T	A	A:136 T:1
EA2454	4704362	snp	A	T	T:143 A:1
EA2454	4704368	complex	TCTGA	CCTGT	CCTGT:130 TCTGA:1
EA2454	4704405	snp	A	C	C:142 A:1
EA2454	4704433	complex	CTGAA	TTGAG	TTGAG:129 CTGAA:1
EA2454	4704454	complex	CCGCGGT	GCGTGGC	GCGTGGC:97 CCGCGGT:1
EA2454	4704470	snp	T	C	C:96 T:2
EA2454	4704475	mnp	GC	AT	AT:86 GC:2
EA2454	4704485	snp	C	A	A:112 C:1
EA2454	4704542	snp	T	C	C:113 T:1
EA2454	4704608	snp	T	C	C:126 T:0
EA2454	4704617	snp	T	A	A:140 T:0
EA2454	4704642	snp	A	G	G:125 A:1
EA2454	4704664	snp	A	G	G:109 A:1
EA2454	4704672	snp	A	G	G:109 A:1
EA2454	4704688	del	GCCTGC	G	G:74 GCCTGC:1
EA2454	4704709	snp	A	T	T:88 A:1
EA2454	4704718	complex	ACGCTT	CCATG	CCATG:54 ACGCTT:1
EA2454	4704736	del	AAACAGC	A	A:71 AAACAGC:0
EA2454	4704751	snp	C	T	T:99 C:0
EA2454	4704766	snp	T	C	C:108 T:0
EA2454	4704874	snp	G	A	A:91 G:2
EA2454	4704895	complex	TATC	CGTT	CGTT:78 TATC:3
EA2454	4704904	snp	T	C	C:83 T:1
EA2454	4704909	complex	GC	AT	AT:83 GC:3
EA2454	4704916	snp	A	G	G:96 A:3
[truncated: 1,086 more rows]
