# Supplementary material for: Escherichia coli ST302: Genomic Analysis of Virulence Potential and Antimicrobial Resistance Mediated by Mobile Genetic Elements
Source: Front Microbiol. 2020 Jan 21;10:3098. doi: 10.3389/fmicb.2019.03098 (PMC6985150; doi:10.3389/fmicb.2019.03098)
Supplement: DATA S2 — ST302 SNP analysis. [file Data_Sheet_2.ZIP › SNP_Analysis/ST302_SNP/SNP_analysis/snippyout/ST302/CA0229-ND-ST302.out/snps.gff]

##gff-version 3
EA2454	snippy:4.3.6	variation	977	977	.	.	0	note=snp T=>C C:117 T:0
EA2454	snippy:4.3.6	variation	11382	11382	.	.	0	note=snp A=>G G:107 A:0
EA2454	snippy:4.3.6	variation	25719	25719	.	.	0	note=snp T=>C C:133 T:0
EA2454	snippy:4.3.6	variation	34494	34494	.	.	0	note=snp T=>C C:109 T:0
EA2454	snippy:4.3.6	variation	36375	36375	.	.	0	note=snp C=>A A:118 C:0
EA2454	snippy:4.3.6	variation	37987	37987	.	.	0	note=snp T=>C C:124 T:0
EA2454	snippy:4.3.6	variation	39065	39065	.	.	0	note=snp T=>C C:138 T:3
EA2454	snippy:4.3.6	variation	45773	45773	.	.	0	note=snp C=>T T:124 C:1
EA2454	snippy:4.3.6	variation	52423	52423	.	.	0	note=snp A=>C C:114 A:1
EA2454	snippy:4.3.6	variation	56628	56628	.	.	0	note=snp A=>C C:120 A:0
EA2454	snippy:4.3.6	variation	57116	57116	.	.	0	note=snp A=>T T:96 A:2
EA2454	snippy:4.3.6	variation	58152	58152	.	.	0	note=snp T=>C C:132 T:0
EA2454	snippy:4.3.6	variation	67315	67315	.	.	0	note=snp A=>C C:124 A:0
EA2454	snippy:4.3.6	variation	68937	68937	.	.	0	note=snp G=>A A:113 G:0
EA2454	snippy:4.3.6	variation	69595	69595	.	.	0	note=snp A=>G G:137 A:0
EA2454	snippy:4.3.6	variation	74952	74952	.	.	0	note=snp G=>T T:128 G:3
EA2454	snippy:4.3.6	variation	84557	84557	.	.	0	note=snp T=>G G:118 T:0
EA2454	snippy:4.3.6	variation	85537	85537	.	.	0	note=snp G=>A A:109 G:1
EA2454	snippy:4.3.6	variation	87714	87714	.	.	0	note=del CT=>C C:106 CT:0
EA2454	snippy:4.3.6	variation	88223	88223	.	.	0	note=del TTCAATATCAATA=>T T:49 TTCAATATCAATA:0
EA2454	snippy:4.3.6	variation	95737	95737	.	.	0	note=del CT=>C C:109 CT:0
EA2454	snippy:4.3.6	variation	102014	102014	.	.	0	note=snp A=>T T:111 A:0
EA2454	snippy:4.3.6	variation	107456	107456	.	.	0	note=snp C=>A A:104 C:0
EA2454	snippy:4.3.6	variation	108354	108354	.	.	0	note=snp C=>T T:103 C:2
EA2454	snippy:4.3.6	variation	108720	108720	.	.	0	note=snp C=>T T:127 C:3
EA2454	snippy:4.3.6	variation	111773	111773	.	.	0	note=snp C=>G G:124 C:0
EA2454	snippy:4.3.6	variation	124865	124865	.	.	0	note=snp T=>C C:103 T:0
EA2454	snippy:4.3.6	variation	131613	131613	.	.	0	note=snp A=>G G:96 A:0
EA2454	snippy:4.3.6	variation	140343	140343	.	.	0	note=snp T=>C C:129 T:1
EA2454	snippy:4.3.6	variation	140951	140951	.	.	0	note=snp T=>G G:126 T:0
EA2454	snippy:4.3.6	variation	146087	146087	.	.	0	note=snp A=>C C:153 A:0
EA2454	snippy:4.3.6	variation	162974	162974	.	.	0	note=snp G=>T T:154 G:1
EA2454	snippy:4.3.6	variation	163970	163970	.	.	0	note=del AT=>A A:71 AT:0
EA2454	snippy:4.3.6	variation	164371	164371	.	.	0	note=snp T=>A A:136 T:0
EA2454	snippy:4.3.6	variation	174420	174420	.	.	0	note=snp A=>G G:108 A:0
EA2454	snippy:4.3.6	variation	186550	186550	.	.	0	note=snp T=>C C:120 T:1
EA2454	snippy:4.3.6	variation	190313	190313	.	.	0	note=snp T=>C C:138 T:0
EA2454	snippy:4.3.6	variation	220420	220420	.	.	0	note=snp C=>T T:115 C:1
EA2454	snippy:4.3.6	variation	220577	220577	.	.	0	note=snp G=>A A:117 G:0
EA2454	snippy:4.3.6	variation	223654	223654	.	.	0	note=snp C=>T T:105 C:2
EA2454	snippy:4.3.6	variation	239221	239221	.	.	0	note=snp A=>G G:110 A:0
EA2454	snippy:4.3.6	variation	245301	245301	.	.	0	note=snp C=>T T:101 C:0
EA2454	snippy:4.3.6	variation	264457	264457	.	.	0	note=snp C=>T T:107 C:2
EA2454	snippy:4.3.6	variation	268207	268207	.	.	0	note=snp C=>T T:103 C:2
EA2454	snippy:4.3.6	variation	277907	277907	.	.	0	note=snp G=>T T:116 G:0
EA2454	snippy:4.3.6	variation	285627	285627	.	.	0	note=ins A=>AT AT:118 A:0
EA2454	snippy:4.3.6	variation	298286	298286	.	.	0	note=snp T=>C C:60 T:0
EA2454	snippy:4.3.6	variation	304693	304693	.	.	0	note=del AT=>A A:28 AT:0
EA2454	snippy:4.3.6	variation	311941	311941	.	.	0	note=snp C=>T T:119 C:3
EA2454	snippy:4.3.6	variation	313034	313034	.	.	0	note=snp A=>G G:141 A:0
EA2454	snippy:4.3.6	variation	317106	317106	.	.	0	note=snp T=>C C:133 T:0
EA2454	snippy:4.3.6	variation	318467	318467	.	.	0	note=snp T=>C C:133 T:0
EA2454	snippy:4.3.6	variation	333155	333155	.	.	0	note=snp G=>T T:106 G:5
EA2454	snippy:4.3.6	variation	334084	334084	.	.	0	note=snp G=>A A:116 G:2
EA2454	snippy:4.3.6	variation	337102	337102	.	.	0	note=snp G=>A A:105 G:1
EA2454	snippy:4.3.6	variation	342188	342188	.	.	0	note=snp G=>A A:139 G:6
EA2454	snippy:4.3.6	variation	346719	346719	.	.	0	note=snp C=>A A:114 C:3
EA2454	snippy:4.3.6	variation	350969	350969	.	.	0	note=snp A=>G G:130 A:0
EA2454	snippy:4.3.6	variation	353870	353870	.	.	0	note=snp G=>A A:134 G:1
EA2454	snippy:4.3.6	variation	357162	357162	.	.	0	note=snp G=>A A:147 G:3
EA2454	snippy:4.3.6	variation	359374	359374	.	.	0	note=snp C=>T T:108 C:3
EA2454	snippy:4.3.6	variation	371150	371150	.	.	0	note=snp T=>C C:122 T:0
EA2454	snippy:4.3.6	variation	376903	376903	.	.	0	note=snp G=>A A:131 G:0
EA2454	snippy:4.3.6	variation	388918	388918	.	.	0	note=snp T=>G G:129 T:1
EA2454	snippy:4.3.6	variation	393575	393575	.	.	0	note=snp A=>G G:141 A:0
EA2454	snippy:4.3.6	variation	393743	393743	.	.	0	note=snp A=>G G:130 A:2
EA2454	snippy:4.3.6	variation	397444	397444	.	.	0	note=snp C=>G G:115 C:0
EA2454	snippy:4.3.6	variation	406821	406821	.	.	0	note=snp G=>A A:130 G:0
EA2454	snippy:4.3.6	variation	407113	407113	.	.	0	note=snp A=>G G:123 A:0
EA2454	snippy:4.3.6	variation	407887	407887	.	.	0	note=snp C=>G G:132 C:0
EA2454	snippy:4.3.6	variation	412458	412458	.	.	0	note=snp G=>A A:136 G:1
EA2454	snippy:4.3.6	variation	415473	415473	.	.	0	note=snp T=>C C:138 T:5
EA2454	snippy:4.3.6	variation	437474	437474	.	.	0	note=snp A=>G G:115 A:0
EA2454	snippy:4.3.6	variation	440837	440837	.	.	0	note=snp C=>A A:142 C:2
EA2454	snippy:4.3.6	variation	443213	443213	.	.	0	note=snp A=>G G:146 A:0
EA2454	snippy:4.3.6	variation	443244	443244	.	.	0	note=snp G=>A A:145 G:2
EA2454	snippy:4.3.6	variation	447459	447459	.	.	0	note=snp A=>G G:129 A:0
EA2454	snippy:4.3.6	variation	448711	448711	.	.	0	note=snp A=>G G:150 A:0
EA2454	snippy:4.3.6	variation	450076	450076	.	.	0	note=snp G=>A A:144 G:2
EA2454	snippy:4.3.6	variation	454890	454890	.	.	0	note=snp C=>T T:124 C:5
EA2454	snippy:4.3.6	variation	457082	457082	.	.	0	note=snp C=>T T:130 C:0
EA2454	snippy:4.3.6	variation	465826	465826	.	.	0	note=snp A=>T T:142 A:0
EA2454	snippy:4.3.6	variation	470437	470437	.	.	0	note=snp C=>T T:149 C:4
EA2454	snippy:4.3.6	variation	472911	472911	.	.	0	note=snp T=>C C:129 T:0
EA2454	snippy:4.3.6	variation	478727	478727	.	.	0	note=snp C=>A A:108 C:0
EA2454	snippy:4.3.6	variation	482022	482022	.	.	0	note=snp T=>G G:114 T:3
EA2454	snippy:4.3.6	variation	483790	483790	.	.	0	note=snp C=>T T:138 C:2
EA2454	snippy:4.3.6	variation	485246	485246	.	.	0	note=snp C=>T T:119 C:0
EA2454	snippy:4.3.6	variation	485779	485779	.	.	0	note=snp C=>G G:123 C:0
EA2454	snippy:4.3.6	variation	485955	485955	.	.	0	note=snp G=>T T:125 G:2
EA2454	snippy:4.3.6	variation	497460	497460	.	.	0	note=snp T=>G G:141 T:0
EA2454	snippy:4.3.6	variation	499783	499783	.	.	0	note=snp C=>T T:113 C:7
EA2454	snippy:4.3.6	variation	506352	506352	.	.	0	note=snp T=>G G:147 T:0
EA2454	snippy:4.3.6	variation	508293	508293	.	.	0	note=snp C=>T T:142 C:0
EA2454	snippy:4.3.6	variation	510992	510992	.	.	0	note=snp C=>T T:128 C:2
EA2454	snippy:4.3.6	variation	519195	519195	.	.	0	note=snp G=>A A:149 G:0
EA2454	snippy:4.3.6	variation	519811	519811	.	.	0	note=snp A=>C C:138 A:0
EA2454	snippy:4.3.6	variation	523962	523962	.	.	0	note=snp C=>T T:122 C:2
EA2454	snippy:4.3.6	variation	528123	528123	.	.	0	note=snp A=>T T:148 A:0
EA2454	snippy:4.3.6	variation	534151	534151	.	.	0	note=snp A=>G G:118 A:0
EA2454	snippy:4.3.6	variation	537287	537287	.	.	0	note=snp G=>C C:147 G:0
EA2454	snippy:4.3.6	variation	537585	537585	.	.	0	note=snp G=>A A:141 G:4
EA2454	snippy:4.3.6	variation	539426	539426	.	.	0	note=snp T=>C C:146 T:0
EA2454	snippy:4.3.6	variation	546428	546428	.	.	0	note=snp A=>C C:137 A:0
EA2454	snippy:4.3.6	variation	546813	546813	.	.	0	note=snp C=>T T:129 C:0
EA2454	snippy:4.3.6	variation	550000	550000	.	.	0	note=snp G=>A A:116 G:2
EA2454	snippy:4.3.6	variation	559017	559017	.	.	0	note=snp A=>G G:137 A:0
EA2454	snippy:4.3.6	variation	561226	561226	.	.	0	note=snp G=>A A:62 G:0
EA2454	snippy:4.3.6	variation	561259	561259	.	.	0	note=snp C=>A A:17 C:0
EA2454	snippy:4.3.6	variation	562933	562933	.	.	0	note=snp T=>C C:160 T:0
EA2454	snippy:4.3.6	variation	569666	569666	.	.	0	note=snp T=>C C:132 T:4
EA2454	snippy:4.3.6	variation	573038	573038	.	.	0	note=snp C=>T T:63 C:0
EA2454	snippy:4.3.6	variation	578357	578357	.	.	0	note=snp C=>T T:130 C:3
EA2454	snippy:4.3.6	variation	590181	590181	.	.	0	note=ins T=>TA TA:119 T:0
EA2454	snippy:4.3.6	variation	595632	595632	.	.	0	note=snp G=>C C:122 G:1
EA2454	snippy:4.3.6	variation	597386	597386	.	.	0	note=snp A=>G G:172 A:0
EA2454	snippy:4.3.6	variation	606088	606088	.	.	0	note=ins G=>GA GA:132 G:0
EA2454	snippy:4.3.6	variation	611222	611222	.	.	0	note=del TGCATA=>T T:137 TGCATA:1
EA2454	snippy:4.3.6	variation	611872	611872	.	.	0	note=snp A=>G G:139 A:0
EA2454	snippy:4.3.6	variation	612726	612726	.	.	0	note=snp A=>G G:169 A:0
EA2454	snippy:4.3.6	variation	613906	613906	.	.	0	note=snp C=>A A:165 C:0
EA2454	snippy:4.3.6	variation	618990	618990	.	.	0	note=snp C=>T T:158 C:1
EA2454	snippy:4.3.6	variation	623874	623874	.	.	0	note=snp G=>A A:137 G:4
EA2454	snippy:4.3.6	variation	638418	638418	.	.	0	note=snp C=>T T:143 C:3
EA2454	snippy:4.3.6	variation	639428	639428	.	.	0	note=snp C=>G G:138 C:5
EA2454	snippy:4.3.6	variation	642011	642011	.	.	0	note=snp G=>C C:167 G:0
EA2454	snippy:4.3.6	variation	642337	642337	.	.	0	note=snp A=>G G:130 A:0
EA2454	snippy:4.3.6	variation	669330	669330	.	.	0	note=snp A=>G G:152 A:0
EA2454	snippy:4.3.6	variation	670594	670594	.	.	0	note=snp C=>A A:156 C:2
EA2454	snippy:4.3.6	variation	680620	680620	.	.	0	note=snp C=>T T:156 C:3
EA2454	snippy:4.3.6	variation	683177	683177	.	.	0	note=snp T=>G G:124 T:0
EA2454	snippy:4.3.6	variation	686003	686003	.	.	0	note=snp A=>G G:145 A:0
EA2454	snippy:4.3.6	variation	686104	686104	.	.	0	note=snp G=>C C:137 G:0
EA2454	snippy:4.3.6	variation	687410	687410	.	.	0	note=snp A=>G G:127 A:0
EA2454	snippy:4.3.6	variation	690408	690408	.	.	0	note=snp A=>G G:141 A:1
EA2454	snippy:4.3.6	variation	690611	690611	.	.	0	note=snp T=>C C:151 T:0
EA2454	snippy:4.3.6	variation	705263	705263	.	.	0	note=snp C=>A A:165 C:0
EA2454	snippy:4.3.6	variation	709632	709632	.	.	0	note=snp T=>C C:130 T:1
EA2454	snippy:4.3.6	variation	710977	710977	.	.	0	note=snp A=>G G:143 A:0
EA2454	snippy:4.3.6	variation	715370	715370	.	.	0	note=snp C=>T T:128 C:3
EA2454	snippy:4.3.6	variation	719734	719734	.	.	0	note=snp C=>T T:138 C:4
EA2454	snippy:4.3.6	variation	723869	723869	.	.	0	note=snp C=>T T:124 C:3
EA2454	snippy:4.3.6	variation	731219	731219	.	.	0	note=snp T=>G G:126 T:0
EA2454	snippy:4.3.6	variation	731329	731329	.	.	0	note=snp G=>A A:145 G:0
EA2454	snippy:4.3.6	variation	738321	738321	.	.	0	note=snp C=>T T:132 C:0
EA2454	snippy:4.3.6	variation	743375	743375	.	.	0	note=snp T=>A A:147 T:3
EA2454	snippy:4.3.6	variation	751386	751386	.	.	0	note=snp G=>A A:152 G:6
EA2454	snippy:4.3.6	variation	753604	753604	.	.	0	note=snp C=>T T:128 C:1
EA2454	snippy:4.3.6	variation	755366	755366	.	.	0	note=snp A=>G G:128 A:3
EA2454	snippy:4.3.6	variation	756040	756040	.	.	0	note=snp T=>G G:142 T:0
EA2454	snippy:4.3.6	variation	758394	758394	.	.	0	note=snp C=>T T:152 C:0
EA2454	snippy:4.3.6	variation	765032	765032	.	.	0	note=snp T=>C C:130 T:0
EA2454	snippy:4.3.6	variation	777744	777744	.	.	0	note=snp A=>T T:133 A:0
EA2454	snippy:4.3.6	variation	779769	779769	.	.	0	note=del TA=>T T:73 TA:0
EA2454	snippy:4.3.6	variation	785375	785375	.	.	0	note=snp T=>C C:153 T:3
EA2454	snippy:4.3.6	variation	788461	788461	.	.	0	note=snp G=>T T:95 G:0
EA2454	snippy:4.3.6	variation	789417	789417	.	.	0	note=snp A=>C C:128 A:0
EA2454	snippy:4.3.6	variation	803220	803220	.	.	0	note=snp G=>A A:135 G:2
EA2454	snippy:4.3.6	variation	805481	805481	.	.	0	note=snp A=>G G:130 A:0
EA2454	snippy:4.3.6	variation	815610	815610	.	.	0	note=snp T=>A A:121 T:1
EA2454	snippy:4.3.6	variation	817985	817985	.	.	0	note=snp T=>G G:114 T:0
EA2454	snippy:4.3.6	variation	818649	818649	.	.	0	note=snp A=>C C:131 A:0
EA2454	snippy:4.3.6	variation	821289	821289	.	.	0	note=snp C=>T T:133 C:1
EA2454	snippy:4.3.6	variation	824349	824349	.	.	0	note=snp T=>C C:119 T:2
EA2454	snippy:4.3.6	variation	829606	829606	.	.	0	note=snp G=>A A:135 G:2
EA2454	snippy:4.3.6	variation	831520	831520	.	.	0	note=snp G=>T T:111 G:1
EA2454	snippy:4.3.6	variation	839497	839497	.	.	0	note=snp T=>A A:97 T:0
EA2454	snippy:4.3.6	variation	842890	842890	.	.	0	note=snp G=>A A:128 G:3
EA2454	snippy:4.3.6	variation	852695	852695	.	.	0	note=snp A=>G G:108 A:0
EA2454	snippy:4.3.6	variation	860226	860226	.	.	0	note=snp C=>A A:131 C:2
EA2454	snippy:4.3.6	variation	861549	861549	.	.	0	note=snp G=>A A:121 G:1
EA2454	snippy:4.3.6	variation	891641	891641	.	.	0	note=snp G=>A A:122 G:2
EA2454	snippy:4.3.6	variation	894538	894538	.	.	0	note=snp C=>T T:122 C:0
EA2454	snippy:4.3.6	variation	904482	904482	.	.	0	note=snp A=>G G:110 A:0
EA2454	snippy:4.3.6	variation	923875	923875	.	.	0	note=snp T=>A A:120 T:3
EA2454	snippy:4.3.6	variation	924579	924579	.	.	0	note=snp T=>C C:127 T:0
EA2454	snippy:4.3.6	variation	926548	926548	.	.	0	note=snp G=>A A:103 G:1
EA2454	snippy:4.3.6	variation	930102	930102	.	.	0	note=snp A=>G G:128 A:0
EA2454	snippy:4.3.6	variation	934663	934663	.	.	0	note=snp G=>A A:132 G:1
EA2454	snippy:4.3.6	variation	935073	935073	.	.	0	note=ins C=>CAAAA CAAAA:51 C:0
EA2454	snippy:4.3.6	variation	938891	938891	.	.	0	note=snp T=>C C:111 T:0
EA2454	snippy:4.3.6	variation	945162	945162	.	.	0	note=snp A=>G G:156 A:0
EA2454	snippy:4.3.6	variation	946875	946875	.	.	0	note=snp T=>C C:106 T:0
EA2454	snippy:4.3.6	variation	949222	949222	.	.	0	note=snp C=>T T:134 C:2
EA2454	snippy:4.3.6	variation	949641	949641	.	.	0	note=ins G=>GTTTCCGCAATTT GTTTCCGCAATTT:50 G:3
EA2454	snippy:4.3.6	variation	951474	951474	.	.	0	note=snp A=>C C:20 A:0
EA2454	snippy:4.3.6	variation	954055	954055	.	.	0	note=complex CCGG=>GCAC GCAC:43 CCGG:0
EA2454	snippy:4.3.6	variation	954067	954067	.	.	0	note=snp G=>C C:62 G:0
EA2454	snippy:4.3.6	variation	954136	954136	.	.	0	note=snp A=>C C:113 A:0
EA2454	snippy:4.3.6	variation	986640	986640	.	.	0	note=snp G=>A A:140 G:0
EA2454	snippy:4.3.6	variation	988307	988307	.	.	0	note=snp G=>T T:130 G:0
EA2454	snippy:4.3.6	variation	990058	990058	.	.	0	note=snp G=>T T:155 G:0
EA2454	snippy:4.3.6	variation	990374	990374	.	.	0	note=snp C=>A A:134 C:1
EA2454	snippy:4.3.6	variation	990708	990708	.	.	0	note=snp G=>A A:114 G:2
EA2454	snippy:4.3.6	variation	1003603	1003603	.	.	0	note=snp A=>G G:107 A:0
EA2454	snippy:4.3.6	variation	1003611	1003611	.	.	0	note=snp C=>A A:98 C:0
EA2454	snippy:4.3.6	variation	1003715	1003715	.	.	0	note=snp T=>C C:32 T:0
EA2454	snippy:4.3.6	variation	1003721	1003721	.	.	0	note=snp G=>T T:44 G:0
EA2454	snippy:4.3.6	variation	1014160	1014160	.	.	0	note=snp A=>G G:124 A:4
EA2454	snippy:4.3.6	variation	1026843	1026843	.	.	0	note=snp T=>C C:136 T:0
EA2454	snippy:4.3.6	variation	1041958	1041958	.	.	0	note=snp G=>T T:134 G:2
EA2454	snippy:4.3.6	variation	1044717	1044717	.	.	0	note=snp G=>A A:163 G:0
EA2454	snippy:4.3.6	variation	1046210	1046210	.	.	0	note=snp G=>A A:153 G:2
EA2454	snippy:4.3.6	variation	1049442	1049442	.	.	0	note=snp G=>A A:147 G:2
EA2454	snippy:4.3.6	variation	1052435	1052435	.	.	0	note=snp C=>T T:142 C:0
EA2454	snippy:4.3.6	variation	1055114	1055114	.	.	0	note=snp T=>G G:125 T:1
EA2454	snippy:4.3.6	variation	1067401	1067401	.	.	0	note=snp C=>A A:130 C:0
EA2454	snippy:4.3.6	variation	1073767	1073767	.	.	0	note=snp A=>G G:128 A:0
EA2454	snippy:4.3.6	variation	1077182	1077182	.	.	0	note=ins G=>GA GA:140 G:6
EA2454	snippy:4.3.6	variation	1079000	1079000	.	.	0	note=snp T=>C C:128 T:0
EA2454	snippy:4.3.6	variation	1082762	1082762	.	.	0	note=snp G=>A A:135 G:2
EA2454	snippy:4.3.6	variation	1088754	1088754	.	.	0	note=snp G=>A A:128 G:0
EA2454	snippy:4.3.6	variation	1090049	1090049	.	.	0	note=snp T=>C C:141 T:3
EA2454	snippy:4.3.6	variation	1093309	1093309	.	.	0	note=snp A=>G G:120 A:0
EA2454	snippy:4.3.6	variation	1098037	1098037	.	.	0	note=snp T=>G G:141 T:0
EA2454	snippy:4.3.6	variation	1117455	1117455	.	.	0	note=snp G=>T T:143 G:3
EA2454	snippy:4.3.6	variation	1128458	1128458	.	.	0	note=snp T=>C C:142 T:0
EA2454	snippy:4.3.6	variation	1129150	1129150	.	.	0	note=snp T=>C C:135 T:0
EA2454	snippy:4.3.6	variation	1138215	1138215	.	.	0	note=snp T=>C C:143 T:0
EA2454	snippy:4.3.6	variation	1139565	1139565	.	.	0	note=del CT=>C C:109 CT:1
EA2454	snippy:4.3.6	variation	1144904	1144904	.	.	0	note=snp C=>T T:157 C:2
EA2454	snippy:4.3.6	variation	1144975	1144975	.	.	0	note=snp T=>C C:172 T:0
EA2454	snippy:4.3.6	variation	1148345	1148345	.	.	0	note=snp T=>C C:118 T:0
EA2454	snippy:4.3.6	variation	1160822	1160822	.	.	0	note=snp A=>T T:132 A:0
EA2454	snippy:4.3.6	variation	1167666	1167666	.	.	0	note=snp T=>C C:135 T:0
EA2454	snippy:4.3.6	variation	1168565	1168565	.	.	0	note=snp A=>T T:155 A:4
EA2454	snippy:4.3.6	variation	1174352	1174352	.	.	0	note=snp T=>C C:137 T:0
EA2454	snippy:4.3.6	variation	1185904	1185904	.	.	0	note=snp G=>T T:126 G:2
EA2454	snippy:4.3.6	variation	1186746	1186746	.	.	0	note=snp T=>C C:110 T:0
EA2454	snippy:4.3.6	variation	1190353	1190353	.	.	0	note=snp G=>T T:119 G:0
EA2454	snippy:4.3.6	variation	1194501	1194501	.	.	0	note=snp C=>A A:146 C:0
EA2454	snippy:4.3.6	variation	1194697	1194697	.	.	0	note=snp C=>T T:128 C:3
EA2454	snippy:4.3.6	variation	1211256	1211256	.	.	0	note=snp T=>C C:119 T:0
EA2454	snippy:4.3.6	variation	1218789	1218789	.	.	0	note=snp A=>G G:154 A:0
EA2454	snippy:4.3.6	variation	1225308	1225308	.	.	0	note=snp C=>A A:154 C:3
EA2454	snippy:4.3.6	variation	1228038	1228038	.	.	0	note=snp C=>T T:135 C:0
EA2454	snippy:4.3.6	variation	1236723	1236723	.	.	0	note=snp T=>C C:130 T:0
EA2454	snippy:4.3.6	variation	1246399	1246399	.	.	0	note=snp C=>T T:132 C:0
EA2454	snippy:4.3.6	variation	1253669	1253669	.	.	0	note=snp C=>T T:121 C:3
EA2454	snippy:4.3.6	variation	1261876	1261876	.	.	0	note=snp A=>C C:125 A:0
EA2454	snippy:4.3.6	variation	1264081	1264081	.	.	0	note=snp A=>G G:129 A:1
EA2454	snippy:4.3.6	variation	1268846	1268846	.	.	0	note=snp G=>T T:171 G:0
EA2454	snippy:4.3.6	variation	1280572	1280572	.	.	0	note=snp C=>A A:126 C:0
EA2454	snippy:4.3.6	variation	1289894	1289894	.	.	0	note=snp A=>G G:133 A:0
EA2454	snippy:4.3.6	variation	1299878	1299878	.	.	0	note=snp C=>T T:123 C:1
EA2454	snippy:4.3.6	variation	1301017	1301017	.	.	0	note=snp G=>A A:145 G:0
EA2454	snippy:4.3.6	variation	1311735	1311735	.	.	0	note=snp G=>A A:87 G:2
EA2454	snippy:4.3.6	variation	1317400	1317400	.	.	0	note=snp G=>A A:80 G:5
EA2454	snippy:4.3.6	variation	1320805	1320805	.	.	0	note=snp A=>G G:128 A:0
EA2454	snippy:4.3.6	variation	1322163	1322163	.	.	0	note=snp T=>C C:112 T:0
EA2454	snippy:4.3.6	variation	1322665	1322665	.	.	0	note=snp T=>C C:116 T:0
EA2454	snippy:4.3.6	variation	1331179	1331179	.	.	0	note=snp T=>G G:128 T:0
EA2454	snippy:4.3.6	variation	1340886	1340886	.	.	0	note=snp A=>C C:127 A:0
EA2454	snippy:4.3.6	variation	1352004	1352004	.	.	0	note=del GT=>G G:63 GT:0
EA2454	snippy:4.3.6	variation	1354737	1354737	.	.	0	note=snp C=>T T:116 C:0
EA2454	snippy:4.3.6	variation	1358384	1358384	.	.	0	note=snp A=>G G:112 A:0
EA2454	snippy:4.3.6	variation	1360577	1360577	.	.	0	note=snp A=>G G:125 A:0
EA2454	snippy:4.3.6	variation	1360982	1360982	.	.	0	note=snp T=>A A:109 T:0
EA2454	snippy:4.3.6	variation	1371250	1371250	.	.	0	note=snp T=>C C:109 T:1
EA2454	snippy:4.3.6	variation	1392683	1392683	.	.	0	note=snp C=>T T:101 C:0
EA2454	snippy:4.3.6	variation	1394505	1394505	.	.	0	note=snp A=>G G:108 A:0
EA2454	snippy:4.3.6	variation	1401264	1401264	.	.	0	note=snp A=>G G:101 A:0
EA2454	snippy:4.3.6	variation	1407932	1407932	.	.	0	note=snp C=>T T:130 C:1
EA2454	snippy:4.3.6	variation	1413295	1413295	.	.	0	note=snp T=>C C:108 T:0
EA2454	snippy:4.3.6	variation	1416501	1416501	.	.	0	note=snp A=>C C:73 A:0
EA2454	snippy:4.3.6	variation	1426621	1426621	.	.	0	note=snp T=>G G:126 T:0
EA2454	snippy:4.3.6	variation	1435223	1435223	.	.	0	note=snp G=>A A:115 G:0
EA2454	snippy:4.3.6	variation	1442459	1442459	.	.	0	note=snp G=>A A:98 G:0
EA2454	snippy:4.3.6	variation	1443237	1443237	.	.	0	note=snp T=>C C:113 T:0
EA2454	snippy:4.3.6	variation	1443281	1443281	.	.	0	note=snp G=>A A:106 G:1
EA2454	snippy:4.3.6	variation	1443339	1443339	.	.	0	note=snp C=>T T:119 C:0
EA2454	snippy:4.3.6	variation	1445619	1445619	.	.	0	note=snp G=>A A:96 G:0
EA2454	snippy:4.3.6	variation	1445708	1445708	.	.	0	note=snp G=>A A:97 G:1
EA2454	snippy:4.3.6	variation	1455169	1455169	.	.	0	note=snp G=>A A:111 G:0
EA2454	snippy:4.3.6	variation	1461457	1461457	.	.	0	note=snp T=>G G:116 T:1
EA2454	snippy:4.3.6	variation	1461781	1461781	.	.	0	note=snp A=>G G:103 A:0
EA2454	snippy:4.3.6	variation	1467906	1467906	.	.	0	note=snp C=>T T:118 C:2
EA2454	snippy:4.3.6	variation	1471260	1471260	.	.	0	note=snp C=>T T:79 C:2
EA2454	snippy:4.3.6	variation	1475610	1475610	.	.	0	note=snp C=>T T:105 C:0
EA2454	snippy:4.3.6	variation	1480708	1480708	.	.	0	note=snp T=>G G:96 T:0
EA2454	snippy:4.3.6	variation	1492527	1492527	.	.	0	note=ins C=>CA CA:90 C:0
EA2454	snippy:4.3.6	variation	1495581	1495581	.	.	0	note=snp T=>A A:110 T:0
EA2454	snippy:4.3.6	variation	1496904	1496904	.	.	0	note=snp G=>A A:109 G:1
EA2454	snippy:4.3.6	variation	1512622	1512622	.	.	0	note=snp C=>T T:116 C:0
EA2454	snippy:4.3.6	variation	1518455	1518455	.	.	0	note=snp G=>A A:103 G:0
EA2454	snippy:4.3.6	variation	1525679	1525679	.	.	0	note=snp C=>T T:99 C:0
EA2454	snippy:4.3.6	variation	1533339	1533339	.	.	0	note=snp A=>G G:89 A:0
EA2454	snippy:4.3.6	variation	1534292	1534292	.	.	0	note=snp A=>G G:87 A:0
EA2454	snippy:4.3.6	variation	1535476	1535476	.	.	0	note=snp C=>T T:98 C:4
EA2454	snippy:4.3.6	variation	1546476	1546476	.	.	0	note=snp C=>T T:85 C:1
EA2454	snippy:4.3.6	variation	1547465	1547465	.	.	0	note=snp G=>T T:89 G:0
EA2454	snippy:4.3.6	variation	1549828	1549828	.	.	0	note=snp T=>C C:102 T:0
EA2454	snippy:4.3.6	variation	1557966	1557966	.	.	0	note=snp A=>G G:93 A:0
EA2454	snippy:4.3.6	variation	1560679	1560679	.	.	0	note=snp G=>A A:115 G:0
EA2454	snippy:4.3.6	variation	1570233	1570233	.	.	0	note=snp A=>G G:76 A:0
EA2454	snippy:4.3.6	variation	1577742	1577742	.	.	0	note=snp G=>A A:95 G:2
EA2454	snippy:4.3.6	variation	1578064	1578064	.	.	0	note=snp C=>A A:90 C:0
EA2454	snippy:4.3.6	variation	1587710	1587710	.	.	0	note=snp C=>A A:103 C:2
EA2454	snippy:4.3.6	variation	1587792	1587792	.	.	0	note=snp A=>C C:103 A:0
EA2454	snippy:4.3.6	variation	1588489	1588489	.	.	0	note=snp G=>A A:100 G:2
EA2454	snippy:4.3.6	variation	1592505	1592505	.	.	0	note=snp T=>C C:92 T:0
EA2454	snippy:4.3.6	variation	1597094	1597094	.	.	0	note=snp C=>T T:90 C:1
EA2454	snippy:4.3.6	variation	1597496	1597496	.	.	0	note=snp T=>C C:125 T:0
EA2454	snippy:4.3.6	variation	1599906	1599906	.	.	0	note=snp T=>C C:117 T:0
EA2454	snippy:4.3.6	variation	1600199	1600199	.	.	0	note=snp C=>T T:86 C:4
EA2454	snippy:4.3.6	variation	1600919	1600919	.	.	0	note=snp A=>G G:89 A:0
EA2454	snippy:4.3.6	variation	1612435	1612435	.	.	0	note=snp G=>A A:91 G:0
EA2454	snippy:4.3.6	variation	1613406	1613406	.	.	0	note=snp T=>A A:109 T:0
EA2454	snippy:4.3.6	variation	1613463	1613463	.	.	0	note=snp A=>G G:105 A:0
EA2454	snippy:4.3.6	variation	1616033	1616033	.	.	0	note=snp G=>A A:105 G:2
EA2454	snippy:4.3.6	variation	1616446	1616446	.	.	0	note=snp C=>T T:106 C:1
EA2454	snippy:4.3.6	variation	1619172	1619172	.	.	0	note=snp G=>A A:46 G:0
EA2454	snippy:4.3.6	variation	1619178	1619178	.	.	0	note=complex TACA=>AACG AACG:49 TACA:0
EA2454	snippy:4.3.6	variation	1620184	1620184	.	.	0	note=snp T=>A A:21 T:0
EA2454	snippy:4.3.6	variation	1620891	1620891	.	.	0	note=snp T=>C C:17 T:0
EA2454	snippy:4.3.6	variation	1620915	1620915	.	.	0	note=snp A=>T T:39 A:0
EA2454	snippy:4.3.6	variation	1620945	1620945	.	.	0	note=snp C=>T T:66 C:0
EA2454	snippy:4.3.6	variation	1621020	1621020	.	.	0	note=snp C=>A A:94 C:0
EA2454	snippy:4.3.6	variation	1621049	1621049	.	.	0	note=snp G=>A A:101 G:0
EA2454	snippy:4.3.6	variation	1621074	1621074	.	.	0	note=snp T=>A A:92 T:0
EA2454	snippy:4.3.6	variation	1621137	1621137	.	.	0	note=snp T=>A A:74 T:0
EA2454	snippy:4.3.6	variation	1621185	1621185	.	.	0	note=complex TGCGTTAGCG=>GGCATTGGCT GGCATTGGCT:63 TGCGTTAGCG:1
EA2454	snippy:4.3.6	variation	1621200	1621200	.	.	0	note=snp C=>T T:63 C:1
EA2454	snippy:4.3.6	variation	1621221	1621221	.	.	0	note=snp C=>T T:54 C:0
EA2454	snippy:4.3.6	variation	1621227	1621227	.	.	0	note=snp T=>A A:46 T:1
EA2454	snippy:4.3.6	variation	1621255	1621255	.	.	0	note=snp C=>T T:20 C:1
EA2454	snippy:4.3.6	variation	1624032	1624032	.	.	0	note=snp A=>T T:34 A:0
EA2454	snippy:4.3.6	variation	1624047	1624047	.	.	0	note=snp C=>T T:44 C:0
EA2454	snippy:4.3.6	variation	1624053	1624053	.	.	0	note=snp C=>T T:51 C:0
EA2454	snippy:4.3.6	variation	1624069	1624069	.	.	0	note=complex GAAGGT=>AACGGC AACGGC:58 GAAGGT:0
EA2454	snippy:4.3.6	variation	1624086	1624086	.	.	0	note=snp C=>T T:74 C:0
EA2454	snippy:4.3.6	variation	1624128	1624128	.	.	0	note=complex TAG=>AAA AAA:70 TAG:0
EA2454	snippy:4.3.6	variation	1624137	1624137	.	.	0	note=snp T=>C C:80 T:0
EA2454	snippy:4.3.6	variation	1624153	1624153	.	.	0	note=snp T=>A A:84 T:0
EA2454	snippy:4.3.6	variation	1624217	1624217	.	.	0	note=snp A=>G G:106 A:0
EA2454	snippy:4.3.6	variation	1624254	1624254	.	.	0	note=snp A=>G G:104 A:0
EA2454	snippy:4.3.6	variation	1624263	1624263	.	.	0	note=complex ATTG=>GTTA GTTA:91 ATTG:0
EA2454	snippy:4.3.6	variation	1624280	1624280	.	.	0	note=snp T=>C C:90 T:0
EA2454	snippy:4.3.6	variation	1624351	1624351	.	.	0	note=mnp GT=>TA TA:82 GT:0
EA2454	snippy:4.3.6	variation	1624401	1624401	.	.	0	note=snp C=>G G:49 C:0
EA2454	snippy:4.3.6	variation	1625151	1625151	.	.	0	note=snp G=>T T:27 G:0
EA2454	snippy:4.3.6	variation	1625175	1625175	.	.	0	note=complex TCCG=>CCCA CCCA:48 TCCG:0
EA2454	snippy:4.3.6	variation	1625193	1625193	.	.	0	note=snp G=>A A:74 G:0
EA2454	snippy:4.3.6	variation	1625205	1625205	.	.	0	note=snp C=>T T:86 C:0
EA2454	snippy:4.3.6	variation	1625235	1625235	.	.	0	note=snp A=>G G:93 A:0
EA2454	snippy:4.3.6	variation	1625258	1625258	.	.	0	note=complex AACTA=>GACTC GACTC:88 AACTA:0
EA2454	snippy:4.3.6	variation	1625280	1625280	.	.	0	note=snp A=>T T:83 A:0
EA2454	snippy:4.3.6	variation	1625298	1625298	.	.	0	note=snp A=>G G:75 A:0
EA2454	snippy:4.3.6	variation	1625376	1625376	.	.	0	note=snp G=>T T:102 G:0
EA2454	snippy:4.3.6	variation	1625382	1625382	.	.	0	note=snp T=>C C:101 T:0
EA2454	snippy:4.3.6	variation	1625390	1625390	.	.	0	note=snp G=>A A:99 G:0
EA2454	snippy:4.3.6	variation	1625406	1625406	.	.	0	note=complex AGGC=>TGGT TGGT:92 AGGC:0
EA2454	snippy:4.3.6	variation	1625417	1625417	.	.	0	note=snp G=>A A:96 G:0
EA2454	snippy:4.3.6	variation	1625424	1625424	.	.	0	note=snp G=>A A:91 G:0
EA2454	snippy:4.3.6	variation	1625430	1625430	.	.	0	note=snp G=>A A:94 G:0
EA2454	snippy:4.3.6	variation	1625455	1625455	.	.	0	note=snp G=>A A:90 G:0
EA2454	snippy:4.3.6	variation	1625460	1625460	.	.	0	note=snp A=>T T:88 A:0
EA2454	snippy:4.3.6	variation	1625475	1625475	.	.	0	note=complex CGGT=>AGGA AGGA:78 CGGT:0
EA2454	snippy:4.3.6	variation	1625505	1625505	.	.	0	note=snp A=>T T:82 A:0
EA2454	snippy:4.3.6	variation	1625519	1625519	.	.	0	note=mnp GC=>AT AT:82 GC:0
EA2454	snippy:4.3.6	variation	1625559	1625559	.	.	0	note=snp G=>A A:94 G:0
EA2454	snippy:4.3.6	variation	1625589	1625589	.	.	0	note=snp C=>A A:84 C:0
EA2454	snippy:4.3.6	variation	1625637	1625637	.	.	0	note=snp T=>C C:84 T:1
EA2454	snippy:4.3.6	variation	1625649	1625649	.	.	0	note=mnp CG=>TC TC:70 CG:1
EA2454	snippy:4.3.6	variation	1625658	1625658	.	.	0	note=snp T=>C C:82 T:1
EA2454	snippy:4.3.6	variation	1625688	1625688	.	.	0	note=complex TGTC=>CATT CATT:67 TGTC:0
EA2454	snippy:4.3.6	variation	1625826	1625826	.	.	0	note=snp T=>C C:87 T:0
EA2454	snippy:4.3.6	variation	1625835	1625835	.	.	0	note=snp A=>G G:85 A:0
EA2454	snippy:4.3.6	variation	1625853	1625853	.	.	0	note=snp T=>G G:88 T:0
EA2454	snippy:4.3.6	variation	1625874	1625874	.	.	0	note=snp T=>C C:97 T:0
EA2454	snippy:4.3.6	variation	1625895	1625895	.	.	0	note=snp A=>G G:94 A:0
EA2454	snippy:4.3.6	variation	1625922	1625922	.	.	0	note=snp T=>C C:78 T:0
EA2454	snippy:4.3.6	variation	1625946	1625946	.	.	0	note=snp T=>A A:65 T:0
EA2454	snippy:4.3.6	variation	1625960	1625960	.	.	0	note=snp A=>G G:61 A:0
EA2454	snippy:4.3.6	variation	1625984	1625984	.	.	0	note=snp T=>C C:48 T:0
EA2454	snippy:4.3.6	variation	1625995	1625995	.	.	0	note=complex TGCGCAAT=>GGAACAAC GGAACAAC:37 TGCGCAAT:0
EA2454	snippy:4.3.6	variation	1626008	1626008	.	.	0	note=snp A=>T T:43 A:0
EA2454	snippy:4.3.6	variation	1626017	1626017	.	.	0	note=complex CAAC=>GAGA GAGA:42 CAAC:0
EA2454	snippy:4.3.6	variation	1626031	1626031	.	.	0	note=snp G=>A A:57 G:0
EA2454	snippy:4.3.6	variation	1626042	1626042	.	.	0	note=snp T=>C C:61 T:0
EA2454	snippy:4.3.6	variation	1626118	1626118	.	.	0	note=snp A=>G G:55 A:0
EA2454	snippy:4.3.6	variation	1626136	1626136	.	.	0	note=snp T=>C C:43 T:0
EA2454	snippy:4.3.6	variation	1626159	1626159	.	.	0	note=complex GCCCC=>ATCAA ATCAA:13 GCCCC:0
EA2454	snippy:4.3.6	variation	1626543	1626543	.	.	0	note=snp G=>T T:20 G:0
EA2454	snippy:4.3.6	variation	1626549	1626549	.	.	0	note=snp C=>T T:25 C:0
EA2454	snippy:4.3.6	variation	1626559	1626559	.	.	0	note=snp A=>G G:34 A:0
EA2454	snippy:4.3.6	variation	1626568	1626568	.	.	0	note=complex TGC=>CGT CGT:38 TGC:0
EA2454	snippy:4.3.6	variation	1626586	1626586	.	.	0	note=snp G=>A A:65 G:0
EA2454	snippy:4.3.6	variation	1626595	1626595	.	.	0	note=complex ACGA=>GCGT GCGT:68 ACGA:0
EA2454	snippy:4.3.6	variation	1626603	1626603	.	.	0	note=snp A=>T T:75 A:0
EA2454	snippy:4.3.6	variation	1626611	1626611	.	.	0	note=snp T=>C C:82 T:0
EA2454	snippy:4.3.6	variation	1626705	1626705	.	.	0	note=snp A=>G G:98 A:2
EA2454	snippy:4.3.6	variation	1626723	1626723	.	.	0	note=snp C=>T T:108 C:3
EA2454	snippy:4.3.6	variation	1626772	1626772	.	.	0	note=complex GG=>AA AA:105 GG:0
EA2454	snippy:4.3.6	variation	1626790	1626790	.	.	0	note=snp T=>C C:118 T:0
EA2454	snippy:4.3.6	variation	1626807	1626807	.	.	0	note=snp T=>C C:126 T:0
EA2454	snippy:4.3.6	variation	1626849	1626849	.	.	0	note=snp G=>A A:107 G:0
EA2454	snippy:4.3.6	variation	1626896	1626896	.	.	0	note=snp A=>G G:103 A:1
EA2454	snippy:4.3.6	variation	1627011	1627011	.	.	0	note=snp G=>T T:96 G:1
EA2454	snippy:4.3.6	variation	1627061	1627061	.	.	0	note=snp A=>T T:87 A:1
EA2454	snippy:4.3.6	variation	1627068	1627068	.	.	0	note=snp C=>T T:92 C:0
EA2454	snippy:4.3.6	variation	1627153	1627153	.	.	0	note=snp C=>T T:100 C:0
EA2454	snippy:4.3.6	variation	1627159	1627159	.	.	0	note=snp G=>A A:102 G:0
EA2454	snippy:4.3.6	variation	1627168	1627168	.	.	0	note=snp A=>G G:99 A:0
EA2454	snippy:4.3.6	variation	1627173	1627173	.	.	0	note=snp A=>G G:99 A:0
EA2454	snippy:4.3.6	variation	1627182	1627182	.	.	0	note=snp C=>T T:102 C:0
EA2454	snippy:4.3.6	variation	1627188	1627188	.	.	0	note=snp G=>T T:98 G:0
EA2454	snippy:4.3.6	variation	1627206	1627206	.	.	0	note=snp T=>C C:98 T:0
EA2454	snippy:4.3.6	variation	1627314	1627314	.	.	0	note=snp T=>A A:133 T:0
EA2454	snippy:4.3.6	variation	1627320	1627320	.	.	0	note=snp A=>G G:129 A:0
EA2454	snippy:4.3.6	variation	1627350	1627350	.	.	0	note=snp C=>T T:109 C:0
EA2454	snippy:4.3.6	variation	1627377	1627377	.	.	0	note=snp T=>G G:107 T:0
EA2454	snippy:4.3.6	variation	1627407	1627407	.	.	0	note=snp T=>G G:113 T:0
EA2454	snippy:4.3.6	variation	1627560	1627560	.	.	0	note=snp C=>T T:111 C:0
EA2454	snippy:4.3.6	variation	1627605	1627605	.	.	0	note=snp G=>T T:107 G:0
EA2454	snippy:4.3.6	variation	1627656	1627656	.	.	0	note=snp A=>C C:124 A:0
EA2454	snippy:4.3.6	variation	1627737	1627737	.	.	0	note=snp C=>A A:114 C:0
EA2454	snippy:4.3.6	variation	1627800	1627800	.	.	0	note=snp A=>C C:79 A:0
EA2454	snippy:4.3.6	variation	1627809	1627809	.	.	0	note=snp T=>C C:81 T:0
EA2454	snippy:4.3.6	variation	1627815	1627815	.	.	0	note=snp T=>C C:79 T:0
EA2454	snippy:4.3.6	variation	1628278	1628278	.	.	0	note=snp A=>G G:82 A:0
EA2454	snippy:4.3.6	variation	1628285	1628285	.	.	0	note=snp G=>A A:81 G:0
EA2454	snippy:4.3.6	variation	1628345	1628345	.	.	0	note=snp C=>T T:93 C:0
EA2454	snippy:4.3.6	variation	1628361	1628361	.	.	0	note=snp C=>T T:76 C:0
EA2454	snippy:4.3.6	variation	1628366	1628366	.	.	0	note=complex AGAGAGCAAG=>CGAAAGTAAA CGAAAGTAAA:70 AGAGAGCAAG:0
EA2454	snippy:4.3.6	variation	1628390	1628390	.	.	0	note=snp G=>A A:84 G:0
EA2454	snippy:4.3.6	variation	1628427	1628427	.	.	0	note=snp T=>C C:86 T:0
EA2454	snippy:4.3.6	variation	1628438	1628438	.	.	0	note=snp T=>C C:99 T:0
EA2454	snippy:4.3.6	variation	1628465	1628465	.	.	0	note=complex GGCT=>AGCG AGCG:103 GGCT:0
EA2454	snippy:4.3.6	variation	1628498	1628498	.	.	0	note=snp T=>C C:92 T:0
EA2454	snippy:4.3.6	variation	1628523	1628523	.	.	0	note=snp C=>A A:78 C:0
EA2454	snippy:4.3.6	variation	1628540	1628540	.	.	0	note=snp A=>G G:67 A:0
EA2454	snippy:4.3.6	variation	1628585	1628585	.	.	0	note=snp A=>T T:94 A:0
EA2454	snippy:4.3.6	variation	1628591	1628591	.	.	0	note=snp C=>T T:94 C:1
EA2454	snippy:4.3.6	variation	1628597	1628597	.	.	0	note=snp T=>C C:96 T:1
EA2454	snippy:4.3.6	variation	1628627	1628627	.	.	0	note=snp A=>G G:112 A:0
EA2454	snippy:4.3.6	variation	1628649	1628649	.	.	0	note=complex AG=>GA GA:102 AG:1
EA2454	snippy:4.3.6	variation	1628690	1628690	.	.	0	note=snp A=>G G:100 A:1
EA2454	snippy:4.3.6	variation	1628750	1628750	.	.	0	note=complex CACA=>TACG TACG:114 CACA:0
EA2454	snippy:4.3.6	variation	1628810	1628810	.	.	0	note=snp T=>C C:115 T:0
EA2454	snippy:4.3.6	variation	1628831	1628831	.	.	0	note=snp G=>A A:115 G:0
EA2454	snippy:4.3.6	variation	1628837	1628837	.	.	0	note=snp A=>T T:116 A:0
EA2454	snippy:4.3.6	variation	1628869	1628869	.	.	0	note=snp T=>C C:123 T:0
EA2454	snippy:4.3.6	variation	1628897	1628897	.	.	0	note=complex ACGA=>CCGG CCGG:117 ACGA:0
EA2454	snippy:4.3.6	variation	1628912	1628912	.	.	0	note=snp A=>T T:122 A:0
EA2454	snippy:4.3.6	variation	1628980	1628980	.	.	0	note=complex TACTA=>GACTT GACTT:116 TACTA:0
EA2454	snippy:4.3.6	variation	1629008	1629008	.	.	0	note=snp A=>C C:130 A:0
EA2454	snippy:4.3.6	variation	1629015	1629015	.	.	0	note=snp C=>T T:128 C:0
EA2454	snippy:4.3.6	variation	1629065	1629065	.	.	0	note=complex TCCG=>CCCT CCCT:93 TCCG:0
EA2454	snippy:4.3.6	variation	1629122	1629122	.	.	0	note=snp A=>G G:96 A:0
EA2454	snippy:4.3.6	variation	1629149	1629149	.	.	0	note=snp T=>C C:103 T:0
EA2454	snippy:4.3.6	variation	1629156	1629156	.	.	0	note=snp A=>G G:100 A:0
EA2454	snippy:4.3.6	variation	1629183	1629183	.	.	0	note=snp A=>C C:108 A:0
EA2454	snippy:4.3.6	variation	1629200	1629200	.	.	0	note=snp T=>C C:103 T:0
EA2454	snippy:4.3.6	variation	1629240	1629240	.	.	0	note=snp T=>C C:95 T:0
EA2454	snippy:4.3.6	variation	1629375	1629375	.	.	0	note=snp G=>A A:105 G:0
EA2454	snippy:4.3.6	variation	1629397	1629397	.	.	0	note=complex AAG=>CAA CAA:86 AAG:0
EA2454	snippy:4.3.6	variation	1629404	1629404	.	.	0	note=snp T=>A A:82 T:0
EA2454	snippy:4.3.6	variation	1629415	1629415	.	.	0	note=snp G=>A A:73 G:0
EA2454	snippy:4.3.6	variation	1629423	1629423	.	.	0	note=complex ATATA=>GTATT GTATT:58 ATATA:0
EA2454	snippy:4.3.6	variation	1629435	1629435	.	.	0	note=snp G=>A A:46 G:0
EA2454	snippy:4.3.6	variation	1629457	1629457	.	.	0	note=snp A=>T T:22 A:0
EA2454	snippy:4.3.6	variation	1630981	1630981	.	.	0	note=snp A=>G G:19 A:0
EA2454	snippy:4.3.6	variation	1630990	1630990	.	.	0	note=snp T=>C C:31 T:0
EA2454	snippy:4.3.6	variation	1631639	1631639	.	.	0	note=snp C=>T T:125 C:4
EA2454	snippy:4.3.6	variation	1634228	1634228	.	.	0	note=snp A=>G G:100 A:0
EA2454	snippy:4.3.6	variation	1639700	1639700	.	.	0	note=snp T=>C C:109 T:1
EA2454	snippy:4.3.6	variation	1641193	1641193	.	.	0	note=snp G=>A A:85 G:3
EA2454	snippy:4.3.6	variation	1642336	1642336	.	.	0	note=snp A=>G G:103 A:0
EA2454	snippy:4.3.6	variation	1648224	1648224	.	.	0	note=snp C=>T T:100 C:1
EA2454	snippy:4.3.6	variation	1650521	1650521	.	.	0	note=snp G=>A A:119 G:0
EA2454	snippy:4.3.6	variation	1650551	1650551	.	.	0	note=snp C=>T T:110 C:0
EA2454	snippy:4.3.6	variation	1650976	1650976	.	.	0	note=snp C=>G G:89 C:1
EA2454	snippy:4.3.6	variation	1652374	1652374	.	.	0	note=snp G=>A A:107 G:0
EA2454	snippy:4.3.6	variation	1657963	1657963	.	.	0	note=snp C=>T T:97 C:1
EA2454	snippy:4.3.6	variation	1682457	1682457	.	.	0	note=snp A=>G G:92 A:0
EA2454	snippy:4.3.6	variation	1682580	1682580	.	.	0	note=snp G=>T T:96 G:4
EA2454	snippy:4.3.6	variation	1691645	1691645	.	.	0	note=snp C=>T T:110 C:4
EA2454	snippy:4.3.6	variation	1694320	1694320	.	.	0	note=snp A=>C C:113 A:2
EA2454	snippy:4.3.6	variation	1695587	1695587	.	.	0	note=snp T=>G G:120 T:1
EA2454	snippy:4.3.6	variation	1701919	1701919	.	.	0	note=snp A=>G G:127 A:0
EA2454	snippy:4.3.6	variation	1711079	1711079	.	.	0	note=snp C=>T T:107 C:1
EA2454	snippy:4.3.6	variation	1714697	1714697	.	.	0	note=snp T=>C C:116 T:0
EA2454	snippy:4.3.6	variation	1725397	1725397	.	.	0	note=snp C=>T T:112 C:0
EA2454	snippy:4.3.6	variation	1727498	1727498	.	.	0	note=snp G=>A A:98 G:1
EA2454	snippy:4.3.6	variation	1728257	1728257	.	.	0	note=snp G=>T T:110 G:6
EA2454	snippy:4.3.6	variation	1730329	1730329	.	.	0	note=snp T=>C C:104 T:1
EA2454	snippy:4.3.6	variation	1732462	1732462	.	.	0	note=snp A=>G G:116 A:4
EA2454	snippy:4.3.6	variation	1737561	1737561	.	.	0	note=snp A=>G G:113 A:0
EA2454	snippy:4.3.6	variation	1737883	1737883	.	.	0	note=snp C=>T T:83 C:2
EA2454	snippy:4.3.6	variation	1740180	1740180	.	.	0	note=snp T=>A A:107 T:2
EA2454	snippy:4.3.6	variation	1745576	1745576	.	.	0	note=snp T=>C C:121 T:0
EA2454	snippy:4.3.6	variation	1748003	1748003	.	.	0	note=snp C=>T T:109 C:2
EA2454	snippy:4.3.6	variation	1748585	1748585	.	.	0	note=snp A=>C C:105 A:0
EA2454	snippy:4.3.6	variation	1761551	1761551	.	.	0	note=snp T=>G G:112 T:1
EA2454	snippy:4.3.6	variation	1763293	1763293	.	.	0	note=snp T=>C C:104 T:0
EA2454	snippy:4.3.6	variation	1770797	1770797	.	.	0	note=snp C=>T T:120 C:3
EA2454	snippy:4.3.6	variation	1795161	1795161	.	.	0	note=snp A=>G G:121 A:1
EA2454	snippy:4.3.6	variation	1799132	1799132	.	.	0	note=snp G=>A A:130 G:0
EA2454	snippy:4.3.6	variation	1803610	1803610	.	.	0	note=snp C=>A A:123 C:1
EA2454	snippy:4.3.6	variation	1803664	1803664	.	.	0	note=snp T=>C C:138 T:0
EA2454	snippy:4.3.6	variation	1813827	1813827	.	.	0	note=snp T=>G G:123 T:1
EA2454	snippy:4.3.6	variation	1815466	1815466	.	.	0	note=snp A=>G G:139 A:2
EA2454	snippy:4.3.6	variation	1817358	1817358	.	.	0	note=snp A=>C C:113 A:3
EA2454	snippy:4.3.6	variation	1820083	1820083	.	.	0	note=snp T=>C C:137 T:0
EA2454	snippy:4.3.6	variation	1824156	1824156	.	.	0	note=snp T=>C C:124 T:0
EA2454	snippy:4.3.6	variation	1824499	1824499	.	.	0	note=snp T=>C C:109 T:0
EA2454	snippy:4.3.6	variation	1825274	1825274	.	.	0	note=del GTT=>G G:108 GTT:0
EA2454	snippy:4.3.6	variation	1850317	1850317	.	.	0	note=snp G=>A A:99 G:0
EA2454	snippy:4.3.6	variation	1854519	1854519	.	.	0	note=snp C=>T T:126 C:0
EA2454	snippy:4.3.6	variation	1857866	1857866	.	.	0	note=snp C=>T T:134 C:0
EA2454	snippy:4.3.6	variation	1860665	1860665	.	.	0	note=snp T=>C C:125 T:2
EA2454	snippy:4.3.6	variation	1868550	1868550	.	.	0	note=snp G=>A A:135 G:3
EA2454	snippy:4.3.6	variation	1875721	1875721	.	.	0	note=snp G=>T T:233 G:0
EA2454	snippy:4.3.6	variation	1887544	1887544	.	.	0	note=snp A=>G G:132 A:0
EA2454	snippy:4.3.6	variation	1888871	1888871	.	.	0	note=snp G=>A A:155 G:2
EA2454	snippy:4.3.6	variation	1906815	1906815	.	.	0	note=snp A=>T T:139 A:4
EA2454	snippy:4.3.6	variation	1909088	1909088	.	.	0	note=snp T=>C C:152 T:0
EA2454	snippy:4.3.6	variation	1914715	1914715	.	.	0	note=snp G=>C C:134 G:2
EA2454	snippy:4.3.6	variation	1917947	1917947	.	.	0	note=snp A=>G G:154 A:0
EA2454	snippy:4.3.6	variation	1929193	1929193	.	.	0	note=ins T=>TTTA TTTA:125 T:0
EA2454	snippy:4.3.6	variation	1945608	1945608	.	.	0	note=snp T=>C C:149 T:0
EA2454	snippy:4.3.6	variation	1950298	1950298	.	.	0	note=snp T=>G G:138 T:0
EA2454	snippy:4.3.6	variation	1958733	1958733	.	.	0	note=snp T=>C C:138 T:0
EA2454	snippy:4.3.6	variation	1965637	1965637	.	.	0	note=snp G=>A A:152 G:0
EA2454	snippy:4.3.6	variation	1970894	1970894	.	.	0	note=complex GCCCCCCCCCGA=>CCCACCCGCCTC CCCACCCGCCTC:10 GCCCCCCCCCGA:0
EA2454	snippy:4.3.6	variation	1970914	1970914	.	.	0	note=snp A=>T T:31 A:0
EA2454	snippy:4.3.6	variation	1970924	1970924	.	.	0	note=complex CAA=>ATC ATC:33 CAA:0
EA2454	snippy:4.3.6	variation	1970935	1970935	.	.	0	note=snp C=>A A:55 C:0
EA2454	snippy:4.3.6	variation	1976927	1976927	.	.	0	note=snp C=>T T:125 C:1
EA2454	snippy:4.3.6	variation	1979564	1979564	.	.	0	note=snp A=>G G:128 A:0
EA2454	snippy:4.3.6	variation	1980186	1980186	.	.	0	note=snp C=>T T:140 C:0
EA2454	snippy:4.3.6	variation	1990268	1990268	.	.	0	note=snp G=>A A:115 G:3
EA2454	snippy:4.3.6	variation	1994897	1994897	.	.	0	note=snp G=>T T:143 G:1
EA2454	snippy:4.3.6	variation	1995211	1995211	.	.	0	note=snp T=>C C:130 T:0
EA2454	snippy:4.3.6	variation	1997936	1997936	.	.	0	note=snp C=>T T:110 C:0
EA2454	snippy:4.3.6	variation	2004990	2004990	.	.	0	note=del TA=>T T:95 TA:0
EA2454	snippy:4.3.6	variation	2006271	2006271	.	.	0	note=snp G=>A A:132 G:3
EA2454	snippy:4.3.6	variation	2010464	2010464	.	.	0	note=snp C=>T T:123 C:0
EA2454	snippy:4.3.6	variation	2038279	2038279	.	.	0	note=ins A=>AAC AAC:102 A:0
EA2454	snippy:4.3.6	variation	2038420	2038420	.	.	0	note=snp A=>G G:128 A:1
EA2454	snippy:4.3.6	variation	2041023	2041023	.	.	0	note=snp G=>A A:121 G:3
EA2454	snippy:4.3.6	variation	2044963	2044963	.	.	0	note=snp A=>T T:143 A:2
EA2454	snippy:4.3.6	variation	2062100	2062100	.	.	0	note=snp C=>T T:149 C:2
EA2454	snippy:4.3.6	variation	2062156	2062156	.	.	0	note=snp T=>C C:139 T:0
EA2454	snippy:4.3.6	variation	2063839	2063839	.	.	0	note=snp T=>C C:128 T:0
EA2454	snippy:4.3.6	variation	2068297	2068297	.	.	0	note=snp T=>G G:146 T:0
EA2454	snippy:4.3.6	variation	2070162	2070162	.	.	0	note=snp T=>C C:138 T:0
EA2454	snippy:4.3.6	variation	2079477	2079477	.	.	0	note=snp A=>G G:151 A:1
EA2454	snippy:4.3.6	variation	2079621	2079621	.	.	0	note=ins C=>CA CA:100 C:0
EA2454	snippy:4.3.6	variation	2079736	2079736	.	.	0	note=snp T=>C C:130 T:0
EA2454	snippy:4.3.6	variation	2085136	2085136	.	.	0	note=snp T=>C C:106 T:0
EA2454	snippy:4.3.6	variation	2088165	2088165	.	.	0	note=snp G=>C C:114 G:0
EA2454	snippy:4.3.6	variation	2091780	2091780	.	.	0	note=snp T=>C C:108 T:0
EA2454	snippy:4.3.6	variation	2093351	2093351	.	.	0	note=snp C=>A A:125 C:2
EA2454	snippy:4.3.6	variation	2094829	2094829	.	.	0	note=snp T=>C C:94 T:0
EA2454	snippy:4.3.6	variation	2096088	2096088	.	.	0	note=snp A=>G G:116 A:0
EA2454	snippy:4.3.6	variation	2099145	2099145	.	.	0	note=snp G=>A A:82 G:1
EA2454	snippy:4.3.6	variation	2104281	2104281	.	.	0	note=snp A=>C C:93 A:0
EA2454	snippy:4.3.6	variation	2110900	2110900	.	.	0	note=snp G=>A A:95 G:1
EA2454	snippy:4.3.6	variation	2119737	2119737	.	.	0	note=snp T=>C C:103 T:1
EA2454	snippy:4.3.6	variation	2135177	2135177	.	.	0	note=snp G=>A A:95 G:1
EA2454	snippy:4.3.6	variation	2136250	2136250	.	.	0	note=snp C=>T T:107 C:2
EA2454	snippy:4.3.6	variation	2141700	2141700	.	.	0	note=snp C=>T T:94 C:2
EA2454	snippy:4.3.6	variation	2158854	2158854	.	.	0	note=snp G=>A A:97 G:1
EA2454	snippy:4.3.6	variation	2159363	2159363	.	.	0	note=snp C=>T T:88 C:1
EA2454	snippy:4.3.6	variation	2171889	2171889	.	.	0	note=snp A=>G G:121 A:0
EA2454	snippy:4.3.6	variation	2177184	2177184	.	.	0	note=snp G=>A A:102 G:2
EA2454	snippy:4.3.6	variation	2181710	2181710	.	.	0	note=snp T=>C C:100 T:2
EA2454	snippy:4.3.6	variation	2183355	2183355	.	.	0	note=snp T=>C C:103 T:0
EA2454	snippy:4.3.6	variation	2195062	2195062	.	.	0	note=snp T=>C C:135 T:0
EA2454	snippy:4.3.6	variation	2217598	2217598	.	.	0	note=snp A=>G G:139 A:4
EA2454	snippy:4.3.6	variation	2228600	2228600	.	.	0	note=snp T=>C C:111 T:0
EA2454	snippy:4.3.6	variation	2232376	2232376	.	.	0	note=snp A=>G G:148 A:1
EA2454	snippy:4.3.6	variation	2233442	2233442	.	.	0	note=snp A=>T T:120 A:2
EA2454	snippy:4.3.6	variation	2238644	2238644	.	.	0	note=snp T=>C C:169 T:1
EA2454	snippy:4.3.6	variation	2253986	2253986	.	.	0	note=snp C=>T T:135 C:0
EA2454	snippy:4.3.6	variation	2256445	2256445	.	.	0	note=snp G=>A A:163 G:0
EA2454	snippy:4.3.6	variation	2259197	2259197	.	.	0	note=snp G=>A A:139 G:0
EA2454	snippy:4.3.6	variation	2266327	2266327	.	.	0	note=snp C=>T T:167 C:1
EA2454	snippy:4.3.6	variation	2268389	2268389	.	.	0	note=snp G=>C C:128 G:0
EA2454	snippy:4.3.6	variation	2283117	2283117	.	.	0	note=snp T=>C C:152 T:0
EA2454	snippy:4.3.6	variation	2283880	2283880	.	.	0	note=snp A=>G G:145 A:0
EA2454	snippy:4.3.6	variation	2289041	2289041	.	.	0	note=snp T=>C C:107 T:0
EA2454	snippy:4.3.6	variation	2291863	2291863	.	.	0	note=snp T=>C C:135 T:0
EA2454	snippy:4.3.6	variation	2313744	2313744	.	.	0	note=snp C=>T T:155 C:0
EA2454	snippy:4.3.6	variation	2331237	2331237	.	.	0	note=snp A=>G G:135 A:4
EA2454	snippy:4.3.6	variation	2338673	2338673	.	.	0	note=snp G=>A A:152 G:0
EA2454	snippy:4.3.6	variation	2344716	2344716	.	.	0	note=snp C=>G G:109 C:2
EA2454	snippy:4.3.6	variation	2350339	2350339	.	.	0	note=snp T=>C C:131 T:1
EA2454	snippy:4.3.6	variation	2353313	2353313	.	.	0	note=snp C=>T T:168 C:4
EA2454	snippy:4.3.6	variation	2354351	2354351	.	.	0	note=snp A=>G G:130 A:0
EA2454	snippy:4.3.6	variation	2359024	2359024	.	.	0	note=snp A=>G G:149 A:0
EA2454	snippy:4.3.6	variation	2364340	2364340	.	.	0	note=snp T=>G G:133 T:0
EA2454	snippy:4.3.6	variation	2371672	2371672	.	.	0	note=snp T=>C C:169 T:0
EA2454	snippy:4.3.6	variation	2403442	2403442	.	.	0	note=snp T=>C C:170 T:0
EA2454	snippy:4.3.6	variation	2407449	2407449	.	.	0	note=snp A=>G G:139 A:0
EA2454	snippy:4.3.6	variation	2408553	2408553	.	.	0	note=snp A=>G G:135 A:2
EA2454	snippy:4.3.6	variation	2413493	2413493	.	.	0	note=snp G=>A A:125 G:3
EA2454	snippy:4.3.6	variation	2461974	2461974	.	.	0	note=snp A=>G G:160 A:0
EA2454	snippy:4.3.6	variation	2464536	2464536	.	.	0	note=snp T=>C C:162 T:0
EA2454	snippy:4.3.6	variation	2498138	2498138	.	.	0	note=snp C=>T T:136 C:2
EA2454	snippy:4.3.6	variation	2500507	2500507	.	.	0	note=ins C=>CA CA:90 C:1
EA2454	snippy:4.3.6	variation	2518906	2518906	.	.	0	note=snp A=>C C:129 A:0
EA2454	snippy:4.3.6	variation	2521382	2521382	.	.	0	note=snp C=>T T:121 C:0
EA2454	snippy:4.3.6	variation	2528246	2528246	.	.	0	note=snp T=>C C:133 T:0
EA2454	snippy:4.3.6	variation	2538679	2538679	.	.	0	note=snp T=>C C:93 T:0
EA2454	snippy:4.3.6	variation	2550710	2550710	.	.	0	note=snp G=>T T:114 G:2
EA2454	snippy:4.3.6	variation	2555441	2555441	.	.	0	note=snp A=>G G:113 A:0
EA2454	snippy:4.3.6	variation	2559290	2559290	.	.	0	note=snp C=>A A:132 C:0
EA2454	snippy:4.3.6	variation	2561644	2561644	.	.	0	note=snp T=>A A:123 T:1
EA2454	snippy:4.3.6	variation	2561970	2561970	.	.	0	note=snp T=>C C:108 T:0
EA2454	snippy:4.3.6	variation	2586095	2586095	.	.	0	note=snp C=>T T:108 C:0
EA2454	snippy:4.3.6	variation	2589008	2589008	.	.	0	note=snp T=>C C:127 T:0
EA2454	snippy:4.3.6	variation	2590108	2590108	.	.	0	note=del GAAAGTGCATCAACATCAAAT=>G G:37 GAAAGTGCATCAACATCAAAT:0
EA2454	snippy:4.3.6	variation	2596899	2596899	.	.	0	note=snp G=>A A:127 G:1
EA2454	snippy:4.3.6	variation	2597428	2597428	.	.	0	note=snp T=>C C:133 T:0
EA2454	snippy:4.3.6	variation	2598908	2598908	.	.	0	note=snp T=>C C:120 T:0
EA2454	snippy:4.3.6	variation	2607401	2607401	.	.	0	note=snp A=>T T:130 A:0
EA2454	snippy:4.3.6	variation	2631943	2631943	.	.	0	note=snp A=>G G:127 A:0
EA2454	snippy:4.3.6	variation	2632096	2632096	.	.	0	note=snp G=>C C:117 G:0
EA2454	snippy:4.3.6	variation	2639012	2639012	.	.	0	note=snp C=>T T:115 C:2
EA2454	snippy:4.3.6	variation	2641059	2641059	.	.	0	note=snp T=>C C:129 T:0
EA2454	snippy:4.3.6	variation	2644202	2644202	.	.	0	note=snp T=>G G:135 T:0
EA2454	snippy:4.3.6	variation	2654470	2654470	.	.	0	note=del AT=>A A:140 AT:0
EA2454	snippy:4.3.6	variation	2658667	2658667	.	.	0	note=snp A=>C C:159 A:0
EA2454	snippy:4.3.6	variation	2660000	2660000	.	.	0	note=snp A=>G G:151 A:0
EA2454	snippy:4.3.6	variation	2660854	2660854	.	.	0	note=snp C=>T T:98 C:2
EA2454	snippy:4.3.6	variation	2664103	2664103	.	.	0	note=snp G=>A A:112 G:3
EA2454	snippy:4.3.6	variation	2666737	2666737	.	.	0	note=snp C=>T T:128 C:1
EA2454	snippy:4.3.6	variation	2670543	2670543	.	.	0	note=snp C=>T T:137 C:4
EA2454	snippy:4.3.6	variation	2672475	2672475	.	.	0	note=ins G=>GCAAGACAT GCAAGACAT:72 G:0
EA2454	snippy:4.3.6	variation	2718692	2718692	.	.	0	note=snp A=>C C:154 A:5
EA2454	snippy:4.3.6	variation	2722619	2722619	.	.	0	note=snp A=>G G:149 A:0
EA2454	snippy:4.3.6	variation	2743080	2743080	.	.	0	note=snp T=>G G:136 T:0
EA2454	snippy:4.3.6	variation	2748849	2748849	.	.	0	note=del GT=>G G:62 GT:0
EA2454	snippy:4.3.6	variation	2755025	2755025	.	.	0	note=snp C=>T T:130 C:0
EA2454	snippy:4.3.6	variation	2755245	2755245	.	.	0	note=snp G=>C C:143 G:0
EA2454	snippy:4.3.6	variation	2760352	2760352	.	.	0	note=snp A=>G G:151 A:1
EA2454	snippy:4.3.6	variation	2763065	2763065	.	.	0	note=snp A=>G G:129 A:0
EA2454	snippy:4.3.6	variation	2771595	2771595	.	.	0	note=snp T=>A A:120 T:0
EA2454	snippy:4.3.6	variation	2774852	2774852	.	.	0	note=snp A=>G G:150 A:0
EA2454	snippy:4.3.6	variation	2775069	2775069	.	.	0	note=snp A=>G G:138 A:0
EA2454	snippy:4.3.6	variation	2777153	2777153	.	.	0	note=snp T=>G G:145 T:3
EA2454	snippy:4.3.6	variation	2778154	2778154	.	.	0	note=snp G=>A A:122 G:1
EA2454	snippy:4.3.6	variation	2782946	2782946	.	.	0	note=snp C=>T T:135 C:1
EA2454	snippy:4.3.6	variation	2785945	2785945	.	.	0	note=snp T=>A A:126 T:0
EA2454	snippy:4.3.6	variation	2793323	2793323	.	.	0	note=snp T=>C C:132 T:0
EA2454	snippy:4.3.6	variation	2796233	2796233	.	.	0	note=snp G=>A A:123 G:3
EA2454	snippy:4.3.6	variation	2807474	2807474	.	.	0	note=snp C=>T T:158 C:0
EA2454	snippy:4.3.6	variation	2809435	2809435	.	.	0	note=snp G=>C C:149 G:0
EA2454	snippy:4.3.6	variation	2815762	2815762	.	.	0	note=snp A=>G G:112 A:0
EA2454	snippy:4.3.6	variation	2816107	2816107	.	.	0	note=snp C=>A A:144 C:0
EA2454	snippy:4.3.6	variation	2824057	2824057	.	.	0	note=snp A=>C C:118 A:0
EA2454	snippy:4.3.6	variation	2824579	2824579	.	.	0	note=ins C=>CT CT:104 C:0
EA2454	snippy:4.3.6	variation	2829690	2829690	.	.	0	note=snp G=>C C:129 G:0
EA2454	snippy:4.3.6	variation	2832637	2832637	.	.	0	note=snp C=>T T:112 C:3
EA2454	snippy:4.3.6	variation	2837636	2837636	.	.	0	note=snp T=>C C:127 T:0
EA2454	snippy:4.3.6	variation	2843028	2843028	.	.	0	note=snp C=>G G:103 C:0
EA2454	snippy:4.3.6	variation	2847080	2847080	.	.	0	note=snp T=>C C:118 T:0
EA2454	snippy:4.3.6	variation	2850370	2850370	.	.	0	note=snp A=>C C:114 A:0
EA2454	snippy:4.3.6	variation	2851743	2851743	.	.	0	note=snp T=>A A:123 T:0
EA2454	snippy:4.3.6	variation	2860024	2860024	.	.	0	note=snp T=>G G:104 T:0
EA2454	snippy:4.3.6	variation	2865701	2865701	.	.	0	note=snp T=>C C:133 T:0
EA2454	snippy:4.3.6	variation	2872360	2872360	.	.	0	note=snp A=>G G:126 A:0
EA2454	snippy:4.3.6	variation	2876151	2876151	.	.	0	note=snp T=>C C:143 T:0
EA2454	snippy:4.3.6	variation	2881008	2881008	.	.	0	note=snp G=>C C:110 G:0
EA2454	snippy:4.3.6	variation	2883184	2883184	.	.	0	note=snp T=>C C:99 T:0
EA2454	snippy:4.3.6	variation	2885511	2885511	.	.	0	note=snp C=>T T:85 C:2
EA2454	snippy:4.3.6	variation	2895771	2895771	.	.	0	note=snp A=>T T:117 A:2
EA2454	snippy:4.3.6	variation	2897200	2897200	.	.	0	note=snp G=>A A:124 G:3
EA2454	snippy:4.3.6	variation	2901111	2901111	.	.	0	note=snp A=>G G:117 A:0
EA2454	snippy:4.3.6	variation	2903547	2903547	.	.	0	note=snp C=>A A:98 C:0
EA2454	snippy:4.3.6	variation	2905448	2905448	.	.	0	note=snp C=>T T:94 C:3
EA2454	snippy:4.3.6	variation	2927920	2927920	.	.	0	note=snp T=>C C:110 T:0
EA2454	snippy:4.3.6	variation	2931389	2931389	.	.	0	note=snp T=>G G:129 T:0
EA2454	snippy:4.3.6	variation	2934279	2934279	.	.	0	note=snp A=>G G:108 A:0
EA2454	snippy:4.3.6	variation	2937585	2937585	.	.	0	note=snp A=>G G:107 A:0
EA2454	snippy:4.3.6	variation	2939135	2939135	.	.	0	note=ins A=>AT AT:78 A:3
EA2454	snippy:4.3.6	variation	2941498	2941498	.	.	0	note=snp G=>A A:103 G:0
EA2454	snippy:4.3.6	variation	2945610	2945610	.	.	0	note=snp G=>A A:103 G:0
EA2454	snippy:4.3.6	variation	2959641	2959641	.	.	0	note=snp T=>C C:115 T:0
EA2454	snippy:4.3.6	variation	2960351	2960351	.	.	0	note=del GT=>G G:99 GT:3
EA2454	snippy:4.3.6	variation	2963100	2963100	.	.	0	note=snp G=>A A:110 G:0
EA2454	snippy:4.3.6	variation	2965650	2965650	.	.	0	note=snp G=>A A:102 G:1
EA2454	snippy:4.3.6	variation	2967930	2967930	.	.	0	note=snp A=>G G:131 A:0
EA2454	snippy:4.3.6	variation	2987057	2987057	.	.	0	note=snp G=>A A:99 G:0
EA2454	snippy:4.3.6	variation	2988598	2988598	.	.	0	note=snp A=>T T:119 A:0
EA2454	snippy:4.3.6	variation	2995599	2995599	.	.	0	note=snp T=>C C:107 T:0
EA2454	snippy:4.3.6	variation	2998717	2998717	.	.	0	note=snp A=>G G:90 A:0
EA2454	snippy:4.3.6	variation	3002295	3002295	.	.	0	note=snp C=>T T:87 C:2
EA2454	snippy:4.3.6	variation	3012249	3012249	.	.	0	note=snp C=>T T:120 C:3
EA2454	snippy:4.3.6	variation	3041125	3041125	.	.	0	note=snp T=>G G:120 T:0
EA2454	snippy:4.3.6	variation	3041182	3041182	.	.	0	note=snp G=>A A:102 G:1
EA2454	snippy:4.3.6	variation	3052076	3052076	.	.	0	note=snp A=>C C:94 A:1
EA2454	snippy:4.3.6	variation	3052455	3052455	.	.	0	note=snp G=>A A:87 G:1
EA2454	snippy:4.3.6	variation	3052992	3052992	.	.	0	note=snp G=>C C:101 G:0
EA2454	snippy:4.3.6	variation	3055255	3055255	.	.	0	note=snp G=>A A:84 G:1
EA2454	snippy:4.3.6	variation	3055930	3055930	.	.	0	note=snp G=>A A:110 G:1
EA2454	snippy:4.3.6	variation	3057242	3057242	.	.	0	note=snp A=>G G:104 A:0
EA2454	snippy:4.3.6	variation	3070440	3070440	.	.	0	note=snp A=>G G:84 A:0
EA2454	snippy:4.3.6	variation	3091335	3091335	.	.	0	note=snp T=>C C:149 T:0
EA2454	snippy:4.3.6	variation	3093850	3093850	.	.	0	note=snp T=>C C:128 T:0
EA2454	snippy:4.3.6	variation	3099129	3099129	.	.	0	note=snp T=>C C:159 T:0
EA2454	snippy:4.3.6	variation	3101851	3101851	.	.	0	note=snp A=>G G:123 A:0
EA2454	snippy:4.3.6	variation	3104888	3104888	.	.	0	note=snp C=>T T:116 C:1
EA2454	snippy:4.3.6	variation	3112595	3112595	.	.	0	note=ins C=>CG CG:125 C:0
EA2454	snippy:4.3.6	variation	3112890	3112890	.	.	0	note=snp A=>G G:141 A:0
EA2454	snippy:4.3.6	variation	3115749	3115749	.	.	0	note=snp T=>A A:130 T:0
EA2454	snippy:4.3.6	variation	3117020	3117020	.	.	0	note=snp C=>G G:147 C:1
EA2454	snippy:4.3.6	variation	3125212	3125212	.	.	0	note=snp A=>G G:126 A:0
EA2454	snippy:4.3.6	variation	3133556	3133556	.	.	0	note=snp G=>T T:125 G:1
EA2454	snippy:4.3.6	variation	3135617	3135617	.	.	0	note=snp A=>C C:110 A:0
EA2454	snippy:4.3.6	variation	3149583	3149583	.	.	0	note=snp G=>A A:148 G:4
EA2454	snippy:4.3.6	variation	3155483	3155483	.	.	0	note=snp G=>A A:106 G:1
EA2454	snippy:4.3.6	variation	3161111	3161111	.	.	0	note=snp G=>A A:121 G:2
EA2454	snippy:4.3.6	variation	3175254	3175254	.	.	0	note=snp T=>C C:159 T:0
EA2454	snippy:4.3.6	variation	3180750	3180750	.	.	0	note=snp C=>T T:124 C:1
EA2454	snippy:4.3.6	variation	3188469	3188469	.	.	0	note=snp T=>C C:140 T:0
EA2454	snippy:4.3.6	variation	3188675	3188675	.	.	0	note=snp T=>A A:155 T:0
EA2454	snippy:4.3.6	variation	3192856	3192856	.	.	0	note=snp C=>T T:130 C:0
EA2454	snippy:4.3.6	variation	3196063	3196063	.	.	0	note=snp T=>C C:163 T:0
EA2454	snippy:4.3.6	variation	3197243	3197243	.	.	0	note=snp T=>C C:148 T:0
EA2454	snippy:4.3.6	variation	3211809	3211809	.	.	0	note=snp T=>C C:123 T:0
EA2454	snippy:4.3.6	variation	3213292	3213292	.	.	0	note=snp A=>C C:125 A:0
EA2454	snippy:4.3.6	variation	3218193	3218193	.	.	0	note=snp T=>G G:134 T:0
EA2454	snippy:4.3.6	variation	3222542	3222542	.	.	0	note=snp T=>A A:127 T:1
EA2454	snippy:4.3.6	variation	3224798	3224798	.	.	0	note=snp A=>G G:114 A:0
EA2454	snippy:4.3.6	variation	3230201	3230201	.	.	0	note=snp G=>A A:122 G:2
EA2454	snippy:4.3.6	variation	3252906	3252906	.	.	0	note=snp G=>A A:135 G:0
EA2454	snippy:4.3.6	variation	3254909	3254909	.	.	0	note=snp C=>G G:116 C:0
EA2454	snippy:4.3.6	variation	3258454	3258454	.	.	0	note=snp T=>A A:120 T:3
EA2454	snippy:4.3.6	variation	3258466	3258466	.	.	0	note=snp C=>T T:119 C:3
EA2454	snippy:4.3.6	variation	3263384	3263384	.	.	0	note=snp T=>C C:125 T:0
EA2454	snippy:4.3.6	variation	3263948	3263948	.	.	0	note=snp C=>T T:120 C:0
EA2454	snippy:4.3.6	variation	3268326	3268326	.	.	0	note=snp G=>A A:112 G:0
EA2454	snippy:4.3.6	variation	3271358	3271358	.	.	0	note=snp T=>C C:142 T:0
EA2454	snippy:4.3.6	variation	3272561	3272561	.	.	0	note=snp G=>T T:111 G:0
EA2454	snippy:4.3.6	variation	3281767	3281767	.	.	0	note=ins G=>GC GC:86 G:0
EA2454	snippy:4.3.6	variation	3305295	3305295	.	.	0	note=snp A=>G G:129 A:0
EA2454	snippy:4.3.6	variation	3305988	3305988	.	.	0	note=snp G=>C C:112 G:0
EA2454	snippy:4.3.6	variation	3307663	3307663	.	.	0	note=snp C=>T T:117 C:1
EA2454	snippy:4.3.6	variation	3308869	3308869	.	.	0	note=snp A=>T T:18 A:1
EA2454	snippy:4.3.6	variation	3310727	3310727	.	.	0	note=snp G=>T T:30 G:0
EA2454	snippy:4.3.6	variation	3373456	3373456	.	.	0	note=snp A=>G G:112 A:1
EA2454	snippy:4.3.6	variation	3374533	3374533	.	.	0	note=snp G=>T T:109 G:0
EA2454	snippy:4.3.6	variation	3381441	3381441	.	.	0	note=snp A=>G G:88 A:0
EA2454	snippy:4.3.6	variation	3387556	3387556	.	.	0	note=snp T=>A A:124 T:0
EA2454	snippy:4.3.6	variation	3395362	3395362	.	.	0	note=snp A=>C C:106 A:2
EA2454	snippy:4.3.6	variation	3405179	3405179	.	.	0	note=snp T=>G G:107 T:1
EA2454	snippy:4.3.6	variation	3426445	3426445	.	.	0	note=snp T=>C C:115 T:0
EA2454	snippy:4.3.6	variation	3440338	3440338	.	.	0	note=snp C=>T T:138 C:0
EA2454	snippy:4.3.6	variation	3441887	3441887	.	.	0	note=snp T=>C C:115 T:0
EA2454	snippy:4.3.6	variation	3441936	3441936	.	.	0	note=snp A=>G G:108 A:0
EA2454	snippy:4.3.6	variation	3448725	3448725	.	.	0	note=snp C=>T T:116 C:1
EA2454	snippy:4.3.6	variation	3451003	3451003	.	.	0	note=snp C=>T T:127 C:2
EA2454	snippy:4.3.6	variation	3462462	3462462	.	.	0	note=snp T=>C C:105 T:0
EA2454	snippy:4.3.6	variation	3462699	3462699	.	.	0	note=snp A=>G G:105 A:0
EA2454	snippy:4.3.6	variation	3466406	3466406	.	.	0	note=snp C=>T T:131 C:0
EA2454	snippy:4.3.6	variation	3521717	3521717	.	.	0	note=snp C=>G G:102 C:0
EA2454	snippy:4.3.6	variation	3527982	3527982	.	.	0	note=ins G=>GA GA:100 G:0
EA2454	snippy:4.3.6	variation	3536376	3536376	.	.	0	note=snp T=>C C:98 T:0
EA2454	snippy:4.3.6	variation	3539749	3539749	.	.	0	note=snp T=>C C:107 T:0
EA2454	snippy:4.3.6	variation	3540229	3540229	.	.	0	note=snp T=>C C:99 T:4
EA2454	snippy:4.3.6	variation	3547948	3547948	.	.	0	note=snp T=>C C:115 T:0
EA2454	snippy:4.3.6	variation	3548625	3548625	.	.	0	note=snp G=>C C:113 G:0
EA2454	snippy:4.3.6	variation	3554302	3554302	.	.	0	note=snp G=>T T:89 G:0
EA2454	snippy:4.3.6	variation	3556473	3556473	.	.	0	note=snp G=>A A:110 G:2
EA2454	snippy:4.3.6	variation	3566015	3566015	.	.	0	note=snp T=>C C:101 T:0
EA2454	snippy:4.3.6	variation	3569782	3569782	.	.	0	note=snp C=>T T:119 C:2
EA2454	snippy:4.3.6	variation	3586272	3586272	.	.	0	note=snp C=>T T:107 C:1
EA2454	snippy:4.3.6	variation	3590214	3590214	.	.	0	note=snp T=>C C:94 T:0
EA2454	snippy:4.3.6	variation	3590259	3590259	.	.	0	note=snp C=>T T:91 C:3
EA2454	snippy:4.3.6	variation	3594055	3594055	.	.	0	note=snp T=>C C:105 T:5
EA2454	snippy:4.3.6	variation	3595770	3595770	.	.	0	note=snp T=>G G:105 T:0
EA2454	snippy:4.3.6	variation	3599925	3599925	.	.	0	note=ins C=>CA CA:90 C:1
EA2454	snippy:4.3.6	variation	3600939	3600939	.	.	0	note=snp G=>C C:85 G:0
EA2454	snippy:4.3.6	variation	3602569	3602569	.	.	0	note=snp C=>A A:112 C:0
EA2454	snippy:4.3.6	variation	3613661	3613661	.	.	0	note=snp G=>A A:116 G:0
EA2454	snippy:4.3.6	variation	3613761	3613761	.	.	0	note=snp T=>C C:97 T:0
EA2454	snippy:4.3.6	variation	3615292	3615292	.	.	0	note=snp T=>G G:96 T:0
EA2454	snippy:4.3.6	variation	3615330	3615330	.	.	0	note=snp A=>C C:91 A:0
EA2454	snippy:4.3.6	variation	3624754	3624754	.	.	0	note=snp A=>T T:17 A:1
EA2454	snippy:4.3.6	variation	3628517	3628517	.	.	0	note=snp A=>G G:112 A:0
EA2454	snippy:4.3.6	variation	3632526	3632526	.	.	0	note=snp C=>A A:123 C:0
EA2454	snippy:4.3.6	variation	3634246	3634246	.	.	0	note=snp A=>T T:117 A:0
EA2454	snippy:4.3.6	variation	3634750	3634750	.	.	0	note=snp C=>T T:108 C:0
EA2454	snippy:4.3.6	variation	3640661	3640661	.	.	0	note=snp A=>G G:110 A:0
EA2454	snippy:4.3.6	variation	3645807	3645807	.	.	0	note=snp G=>A A:104 G:4
EA2454	snippy:4.3.6	variation	3645952	3645952	.	.	0	note=snp G=>A A:107 G:0
EA2454	snippy:4.3.6	variation	3651299	3651299	.	.	0	note=snp G=>T T:128 G:1
EA2454	snippy:4.3.6	variation	3657942	3657942	.	.	0	note=snp T=>G G:94 T:0
EA2454	snippy:4.3.6	variation	3662284	3662284	.	.	0	note=snp A=>G G:102 A:0
EA2454	snippy:4.3.6	variation	3665749	3665749	.	.	0	note=snp G=>A A:109 G:0
EA2454	snippy:4.3.6	variation	3666055	3666055	.	.	0	note=snp C=>T T:124 C:2
EA2454	snippy:4.3.6	variation	3666547	3666547	.	.	0	note=snp G=>A A:111 G:1
EA2454	snippy:4.3.6	variation	3671688	3671688	.	.	0	note=snp C=>T T:124 C:1
EA2454	snippy:4.3.6	variation	3682843	3682843	.	.	0	note=snp T=>G G:144 T:0
EA2454	snippy:4.3.6	variation	3690835	3690835	.	.	0	note=snp T=>G G:130 T:1
EA2454	snippy:4.3.6	variation	3695368	3695368	.	.	0	note=snp A=>T T:133 A:4
EA2454	snippy:4.3.6	variation	3701518	3701518	.	.	0	note=snp C=>T T:144 C:0
EA2454	snippy:4.3.6	variation	3701756	3701756	.	.	0	note=snp A=>G G:131 A:0
EA2454	snippy:4.3.6	variation	3705284	3705284	.	.	0	note=snp A=>G G:118 A:1
EA2454	snippy:4.3.6	variation	3709916	3709916	.	.	0	note=snp G=>A A:131 G:1
EA2454	snippy:4.3.6	variation	3717429	3717429	.	.	0	note=snp A=>G G:141 A:1
EA2454	snippy:4.3.6	variation	3719971	3719971	.	.	0	note=snp G=>A A:107 G:3
EA2454	snippy:4.3.6	variation	3731404	3731404	.	.	0	note=snp G=>A A:116 G:1
EA2454	snippy:4.3.6	variation	3731422	3731422	.	.	0	note=snp C=>A A:118 C:1
EA2454	snippy:4.3.6	variation	3739482	3739482	.	.	0	note=snp A=>G G:105 A:0
EA2454	snippy:4.3.6	variation	3750262	3750262	.	.	0	note=del GAA=>G G:97 GAA:0
EA2454	snippy:4.3.6	variation	3751756	3751756	.	.	0	note=snp C=>T T:136 C:0
EA2454	snippy:4.3.6	variation	3756054	3756054	.	.	0	note=snp T=>C C:110 T:0
EA2454	snippy:4.3.6	variation	3763988	3763988	.	.	0	note=snp A=>G G:117 A:2
EA2454	snippy:4.3.6	variation	3766157	3766157	.	.	0	note=snp G=>A A:102 G:0
EA2454	snippy:4.3.6	variation	3772277	3772277	.	.	0	note=snp T=>A A:124 T:0
EA2454	snippy:4.3.6	variation	3779368	3779368	.	.	0	note=snp C=>T T:104 C:0
EA2454	snippy:4.3.6	variation	3780370	3780370	.	.	0	note=del CAGGCCA=>C C:86 CAGGCCA:3
EA2454	snippy:4.3.6	variation	3783734	3783734	.	.	0	note=snp G=>T T:113 G:3
EA2454	snippy:4.3.6	variation	3784069	3784069	.	.	0	note=snp C=>T T:117 C:4
EA2454	snippy:4.3.6	variation	3795140	3795140	.	.	0	note=snp T=>C C:118 T:0
EA2454	snippy:4.3.6	variation	3807575	3807575	.	.	0	note=snp A=>G G:113 A:0
EA2454	snippy:4.3.6	variation	3808964	3808964	.	.	0	note=snp C=>T T:122 C:1
EA2454	snippy:4.3.6	variation	3815430	3815430	.	.	0	note=snp T=>C C:147 T:0
EA2454	snippy:4.3.6	variation	3837457	3837457	.	.	0	note=snp C=>A A:157 C:0
EA2454	snippy:4.3.6	variation	3837930	3837930	.	.	0	note=snp G=>T T:153 G:2
EA2454	snippy:4.3.6	variation	3840206	3840206	.	.	0	note=snp C=>T T:125 C:0
EA2454	snippy:4.3.6	variation	3842198	3842198	.	.	0	note=ins C=>CT CT:87 C:0
EA2454	snippy:4.3.6	variation	3844395	3844395	.	.	0	note=snp T=>C C:147 T:0
EA2454	snippy:4.3.6	variation	3844972	3844972	.	.	0	note=snp C=>T T:104 C:0
EA2454	snippy:4.3.6	variation	3848791	3848791	.	.	0	note=snp T=>A A:124 T:1
EA2454	snippy:4.3.6	variation	3852049	3852049	.	.	0	note=snp C=>T T:13 C:0
EA2454	snippy:4.3.6	variation	3852064	3852064	.	.	0	note=snp T=>C C:30 T:0
EA2454	snippy:4.3.6	variation	3852070	3852070	.	.	0	note=complex GTCTGTT=>TTCGGTA TTCGGTA:33 GTCTGTT:0
EA2454	snippy:4.3.6	variation	3852082	3852082	.	.	0	note=snp T=>C C:49 T:0
EA2454	snippy:4.3.6	variation	3852097	3852097	.	.	0	note=snp A=>G G:70 A:0
EA2454	snippy:4.3.6	variation	3852109	3852109	.	.	0	note=snp G=>A A:87 G:0
EA2454	snippy:4.3.6	variation	3852118	3852118	.	.	0	note=snp A=>G G:107 A:0
EA2454	snippy:4.3.6	variation	3852130	3852130	.	.	0	note=snp C=>A A:115 C:0
EA2454	snippy:4.3.6	variation	3852172	3852172	.	.	0	note=snp G=>A A:135 G:0
EA2454	snippy:4.3.6	variation	3852208	3852208	.	.	0	note=snp G=>A A:132 G:0
EA2454	snippy:4.3.6	variation	3852373	3852373	.	.	0	note=snp G=>A A:151 G:0
EA2454	snippy:4.3.6	variation	3852385	3852385	.	.	0	note=snp T=>C C:145 T:0
EA2454	snippy:4.3.6	variation	3852395	3852395	.	.	0	note=snp C=>G G:159 C:0
EA2454	snippy:4.3.6	variation	3852400	3852400	.	.	0	note=snp G=>A A:159 G:0
EA2454	snippy:4.3.6	variation	3852409	3852409	.	.	0	note=snp C=>T T:158 C:0
EA2454	snippy:4.3.6	variation	3852439	3852439	.	.	0	note=snp A=>G G:172 A:0
EA2454	snippy:4.3.6	variation	3852448	3852448	.	.	0	note=snp G=>A A:174 G:1
EA2454	snippy:4.3.6	variation	3852535	3852535	.	.	0	note=snp G=>A A:163 G:0
EA2454	snippy:4.3.6	variation	3852592	3852592	.	.	0	note=snp A=>G G:178 A:0
EA2454	snippy:4.3.6	variation	3852607	3852607	.	.	0	note=complex CCGTT=>TCGTC TCGTC:174 CCGTT:0
EA2454	snippy:4.3.6	variation	3852703	3852703	.	.	0	note=snp T=>G G:158 T:0
EA2454	snippy:4.3.6	variation	3852711	3852711	.	.	0	note=complex CCAGA=>TCAGG TCAGG:147 CCAGA:0
EA2454	snippy:4.3.6	variation	3852733	3852733	.	.	0	note=snp C=>T T:159 C:0
EA2454	snippy:4.3.6	variation	3852748	3852748	.	.	0	note=complex CC=>AA AA:140 CC:0
EA2454	snippy:4.3.6	variation	3852760	3852760	.	.	0	note=complex AGCA=>GGCG GGCG:150 AGCA:0
EA2454	snippy:4.3.6	variation	3852770	3852770	.	.	0	note=snp A=>G G:155 A:0
EA2454	snippy:4.3.6	variation	3852790	3852790	.	.	0	note=complex GG=>AA AA:141 GG:0
EA2454	snippy:4.3.6	variation	3852799	3852799	.	.	0	note=snp A=>G G:153 A:0
EA2454	snippy:4.3.6	variation	3852828	3852828	.	.	0	note=del AAT=>A A:149 AAT:0
EA2454	snippy:4.3.6	variation	3852862	3852862	.	.	0	note=snp G=>T T:177 G:0
EA2454	snippy:4.3.6	variation	3852869	3852869	.	.	0	note=snp T=>C C:169 T:1
EA2454	snippy:4.3.6	variation	3852887	3852887	.	.	0	note=snp G=>A A:166 G:0
EA2454	snippy:4.3.6	variation	3852902	3852902	.	.	0	note=snp A=>G G:170 A:1
EA2454	snippy:4.3.6	variation	3852916	3852916	.	.	0	note=snp C=>T T:150 C:0
EA2454	snippy:4.3.6	variation	3852935	3852935	.	.	0	note=snp C=>T T:132 C:2
EA2454	snippy:4.3.6	variation	3852974	3852974	.	.	0	note=snp A=>G G:120 A:0
EA2454	snippy:4.3.6	variation	3852999	3852999	.	.	0	note=snp T=>C C:134 T:0
EA2454	snippy:4.3.6	variation	3853019	3853019	.	.	0	note=complex ACATTA=>GTTTTG GTTTTG:94 ACATTA:0
EA2454	snippy:4.3.6	variation	3853066	3853066	.	.	0	note=complex GTC=>TTT TTT:110 GTC:0
EA2454	snippy:4.3.6	variation	3853085	3853085	.	.	0	note=complex TTGAT=>CTGAC CTGAC:107 TTGAT:0
EA2454	snippy:4.3.6	variation	3853095	3853095	.	.	0	note=complex ATACAAT=>CTGTAAG CTGTAAG:92 ATACAAT:0
EA2454	snippy:4.3.6	variation	3853129	3853129	.	.	0	note=mnp GG=>CC CC:125 GG:0
EA2454	snippy:4.3.6	variation	3853150	3853150	.	.	0	note=snp T=>C C:129 T:0
EA2454	snippy:4.3.6	variation	3853156	3853156	.	.	0	note=complex CCT=>TCC TCC:111 CCT:0
EA2454	snippy:4.3.6	variation	3853163	3853163	.	.	0	note=snp G=>A A:110 G:0
EA2454	snippy:4.3.6	variation	3853175	3853175	.	.	0	note=snp C=>T T:97 C:0
EA2454	snippy:4.3.6	variation	3853190	3853190	.	.	0	note=snp G=>A A:111 G:0
EA2454	snippy:4.3.6	variation	3853202	3853202	.	.	0	note=snp G=>C C:92 G:0
EA2454	snippy:4.3.6	variation	3853211	3853211	.	.	0	note=snp A=>G G:77 A:0
EA2454	snippy:4.3.6	variation	3853223	3853223	.	.	0	note=complex CCTCC=>TCTCT TCTCT:53 CCTCC:0
EA2454	snippy:4.3.6	variation	3853241	3853241	.	.	0	note=complex ACTCTTTT=>GGATTTCC GGATTTCC:32 ACTCTTTT:0
EA2454	snippy:4.3.6	variation	3853256	3853256	.	.	0	note=snp G=>T T:63 G:1
EA2454	snippy:4.3.6	variation	3853277	3853277	.	.	0	note=snp T=>C C:97 T:0
EA2454	snippy:4.3.6	variation	3853285	3853285	.	.	0	note=complex AT=>TG TG:84 AT:0
EA2454	snippy:4.3.6	variation	3853322	3853322	.	.	0	note=snp G=>A A:140 G:0
EA2454	snippy:4.3.6	variation	3853328	3853328	.	.	0	note=snp T=>G G:155 T:0
EA2454	snippy:4.3.6	variation	3853367	3853367	.	.	0	note=snp T=>C C:166 T:0
EA2454	snippy:4.3.6	variation	3853379	3853379	.	.	0	note=snp G=>A A:163 G:0
EA2454	snippy:4.3.6	variation	3853409	3853409	.	.	0	note=snp G=>A A:167 G:0
EA2454	snippy:4.3.6	variation	3853415	3853415	.	.	0	note=snp T=>C C:161 T:0
EA2454	snippy:4.3.6	variation	3853423	3853423	.	.	0	note=snp A=>G G:160 A:0
EA2454	snippy:4.3.6	variation	3853457	3853457	.	.	0	note=snp A=>G G:168 A:0
EA2454	snippy:4.3.6	variation	3853496	3853496	.	.	0	note=snp C=>T T:126 C:1
EA2454	snippy:4.3.6	variation	3853511	3853511	.	.	0	note=complex CGGG=>AGGA AGGA:130 CGGG:0
EA2454	snippy:4.3.6	variation	3853547	3853547	.	.	0	note=snp A=>G G:130 A:0
EA2454	snippy:4.3.6	variation	3853553	3853553	.	.	0	note=complex GGCGGCTTC=>AGTGGCATG AGTGGCATG:110 GGCGGCTTC:0
EA2454	snippy:4.3.6	variation	3853569	3853569	.	.	0	note=complex CCAC=>TCAT TCAT:131 CCAC:0
EA2454	snippy:4.3.6	variation	3853592	3853592	.	.	0	note=snp T=>G G:137 T:0
EA2454	snippy:4.3.6	variation	3853604	3853604	.	.	0	note=snp C=>T T:145 C:0
EA2454	snippy:4.3.6	variation	3853617	3853617	.	.	0	note=snp T=>C C:130 T:0
EA2454	snippy:4.3.6	variation	3853631	3853631	.	.	0	note=snp A=>T T:130 A:0
EA2454	snippy:4.3.6	variation	3853639	3853639	.	.	0	note=snp G=>T T:130 G:0
EA2454	snippy:4.3.6	variation	3853653	3853653	.	.	0	note=snp T=>C C:150 T:0
EA2454	snippy:4.3.6	variation	3853661	3853661	.	.	0	note=complex TAT=>AAA AAA:142 TAT:0
EA2454	snippy:4.3.6	variation	3853674	3853674	.	.	0	note=mnp TA=>AG AG:149 TA:0
EA2454	snippy:4.3.6	variation	3853708	3853708	.	.	0	note=complex ACT=>CCC CCC:182 ACT:0
EA2454	snippy:4.3.6	variation	3853754	3853754	.	.	0	note=snp C=>T T:193 C:0
EA2454	snippy:4.3.6	variation	3853764	3853764	.	.	0	note=snp T=>A A:190 T:0
EA2454	snippy:4.3.6	variation	3853804	3853804	.	.	0	note=snp T=>G G:165 T:1
EA2454	snippy:4.3.6	variation	3853810	3853810	.	.	0	note=del ACGACCCTATGG=>A A:106 ACGACCCTATGG:0
EA2454	snippy:4.3.6	variation	3853883	3853883	.	.	0	note=snp A=>G G:148 A:3
EA2454	snippy:4.3.6	variation	3853929	3853929	.	.	0	note=snp A=>C C:145 A:0
EA2454	snippy:4.3.6	variation	3854000	3854000	.	.	0	note=snp A=>G G:163 A:2
EA2454	snippy:4.3.6	variation	3854060	3854060	.	.	0	note=snp G=>A A:177 G:4
EA2454	snippy:4.3.6	variation	3854310	3854310	.	.	0	note=snp T=>C C:153 T:0
EA2454	snippy:4.3.6	variation	3854630	3854630	.	.	0	note=snp A=>G G:172 A:0
EA2454	snippy:4.3.6	variation	3854838	3854838	.	.	0	note=snp C=>T T:183 C:0
EA2454	snippy:4.3.6	variation	3855001	3855001	.	.	0	note=snp A=>G G:192 A:0
EA2454	snippy:4.3.6	variation	3855008	3855008	.	.	0	note=snp A=>T T:183 A:0
EA2454	snippy:4.3.6	variation	3855032	3855032	.	.	0	note=snp C=>T T:172 C:0
EA2454	snippy:4.3.6	variation	3855138	3855138	.	.	0	note=snp A=>G G:171 A:0
EA2454	snippy:4.3.6	variation	3855170	3855170	.	.	0	note=snp C=>T T:178 C:0
EA2454	snippy:4.3.6	variation	3855180	3855180	.	.	0	note=snp G=>A A:179 G:0
EA2454	snippy:4.3.6	variation	3855300	3855300	.	.	0	note=snp A=>G G:174 A:0
EA2454	snippy:4.3.6	variation	3855315	3855315	.	.	0	note=snp C=>A A:171 C:0
EA2454	snippy:4.3.6	variation	3855345	3855345	.	.	0	note=snp T=>C C:167 T:0
EA2454	snippy:4.3.6	variation	3855404	3855404	.	.	0	note=snp A=>C C:156 A:0
EA2454	snippy:4.3.6	variation	3855627	3855627	.	.	0	note=snp T=>A A:176 T:0
EA2454	snippy:4.3.6	variation	3855798	3855798	.	.	0	note=snp A=>G G:154 A:0
EA2454	snippy:4.3.6	variation	3855827	3855827	.	.	0	note=snp T=>C C:149 T:0
EA2454	snippy:4.3.6	variation	3855835	3855835	.	.	0	note=snp A=>C C:151 A:0
EA2454	snippy:4.3.6	variation	3855884	3855884	.	.	0	note=snp C=>T T:140 C:0
EA2454	snippy:4.3.6	variation	3856015	3856015	.	.	0	note=ins T=>TA TA:138 T:0
EA2454	snippy:4.3.6	variation	3856047	3856047	.	.	0	note=complex AAAG=>GAAA GAAA:143 AAAG:0
EA2454	snippy:4.3.6	variation	3856149	3856149	.	.	0	note=snp T=>A A:157 T:0
EA2454	snippy:4.3.6	variation	3856413	3856413	.	.	0	note=snp G=>A A:192 G:2
EA2454	snippy:4.3.6	variation	3856458	3856458	.	.	0	note=snp A=>G G:174 A:0
EA2454	snippy:4.3.6	variation	3856542	3856542	.	.	0	note=snp C=>T T:164 C:2
EA2454	snippy:4.3.6	variation	3857721	3857721	.	.	0	note=snp T=>G G:141 T:0
EA2454	snippy:4.3.6	variation	3857763	3857763	.	.	0	note=complex GG=>AA AA:119 GG:0
EA2454	snippy:4.3.6	variation	3857781	3857781	.	.	0	note=complex ACCC=>GCCT GCCT:116 ACCC:0
EA2454	snippy:4.3.6	variation	3857844	3857844	.	.	0	note=snp C=>T T:129 C:0
EA2454	snippy:4.3.6	variation	3857904	3857904	.	.	0	note=snp C=>T T:142 C:0
EA2454	snippy:4.3.6	variation	3857916	3857916	.	.	0	note=snp C=>T T:139 C:0
EA2454	snippy:4.3.6	variation	3857970	3857970	.	.	0	note=snp T=>C C:135 T:0
EA2454	snippy:4.3.6	variation	3857994	3857994	.	.	0	note=snp G=>A A:134 G:0
EA2454	snippy:4.3.6	variation	3858006	3858006	.	.	0	note=snp T=>G G:143 T:0
EA2454	snippy:4.3.6	variation	3858264	3858264	.	.	0	note=complex AC=>GT GT:131 AC:1
EA2454	snippy:4.3.6	variation	3858330	3858330	.	.	0	note=complex GTCG=>CTCA CTCA:139 GTCG:0
EA2454	snippy:4.3.6	variation	3858366	3858366	.	.	0	note=snp G=>A A:140 G:2
EA2454	snippy:4.3.6	variation	3858456	3858456	.	.	0	note=snp C=>G G:141 C:0
EA2454	snippy:4.3.6	variation	3858465	3858465	.	.	0	note=snp G=>A A:135 G:3
EA2454	snippy:4.3.6	variation	3858516	3858516	.	.	0	note=snp C=>T T:150 C:0
EA2454	snippy:4.3.6	variation	3858690	3858690	.	.	0	note=complex AGCC=>TGCT TGCT:132 AGCC:0
EA2454	snippy:4.3.6	variation	3858705	3858705	.	.	0	note=complex TGGT=>CGGC CGGC:132 TGGT:1
EA2454	snippy:4.3.6	variation	3858717	3858717	.	.	0	note=snp G=>T T:145 G:2
EA2454	snippy:4.3.6	variation	3858948	3858948	.	.	0	note=snp G=>A A:137 G:2
EA2454	snippy:4.3.6	variation	3859035	3859035	.	.	0	note=snp C=>T T:46 C:1
EA2454	snippy:4.3.6	variation	3859050	3859050	.	.	0	note=snp C=>T T:27 C:1
EA2454	snippy:4.3.6	variation	3859159	3859159	.	.	0	note=snp G=>A A:30 G:0
EA2454	snippy:4.3.6	variation	3859174	3859174	.	.	0	note=complex TCTGC=>CCTGA CCTGA:31 TCTGC:0
EA2454	snippy:4.3.6	variation	3859183	3859183	.	.	0	note=complex GTTACTG=>TCTGTTT TCTGTTT:31 GTTACTG:0
EA2454	snippy:4.3.6	variation	3859216	3859216	.	.	0	note=complex GGGG=>AGGA AGGA:21 GGGG:0
EA2454	snippy:4.3.6	variation	3859225	3859225	.	.	0	note=snp G=>A A:17 G:0
EA2454	snippy:4.3.6	variation	3859414	3859414	.	.	0	note=snp A=>C C:11 A:0
EA2454	snippy:4.3.6	variation	3859432	3859432	.	.	0	note=snp G=>T T:11 G:0
EA2454	snippy:4.3.6	variation	3859462	3859462	.	.	0	note=snp A=>G G:13 A:0
EA2454	snippy:4.3.6	variation	3859472	3859472	.	.	0	note=snp A=>G G:23 A:0
EA2454	snippy:4.3.6	variation	3859501	3859501	.	.	0	note=complex GGTC=>TGTG TGTG:43 GGTC:0
EA2454	snippy:4.3.6	variation	3859510	3859510	.	.	0	note=snp T=>A A:47 T:0
EA2454	snippy:4.3.6	variation	3859519	3859519	.	.	0	note=complex ACA=>GCG GCG:52 ACA:2
EA2454	snippy:4.3.6	variation	3859538	3859538	.	.	0	note=complex ACG=>GCA GCA:67 ACG:2
EA2454	snippy:4.3.6	variation	3859546	3859546	.	.	0	note=complex TG=>CA CA:70 TG:0
EA2454	snippy:4.3.6	variation	3859560	3859560	.	.	0	note=snp A=>G G:89 A:0
EA2454	snippy:4.3.6	variation	3859571	3859571	.	.	0	note=snp A=>G G:83 A:2
EA2454	snippy:4.3.6	variation	3859591	3859591	.	.	0	note=snp T=>C C:73 T:2
EA2454	snippy:4.3.6	variation	3859598	3859598	.	.	0	note=snp C=>A A:74 C:0
EA2454	snippy:4.3.6	variation	3859605	3859605	.	.	0	note=snp A=>T T:72 A:2
EA2454	snippy:4.3.6	variation	3859611	3859611	.	.	0	note=snp G=>A A:76 G:0
EA2454	snippy:4.3.6	variation	3859619	3859619	.	.	0	note=del GAT=>G G:59 GAT:2
EA2454	snippy:4.3.6	variation	3859647	3859647	.	.	0	note=snp A=>G G:73 A:0
EA2454	snippy:4.3.6	variation	3859655	3859655	.	.	0	note=complex TGCACGC=>AGCCCTT AGCCCTT:48 TGCACGC:0
EA2454	snippy:4.3.6	variation	3859667	3859667	.	.	0	note=snp A=>G G:68 A:0
EA2454	snippy:4.3.6	variation	3859672	3859672	.	.	0	note=snp A=>G G:71 A:0
EA2454	snippy:4.3.6	variation	3859678	3859678	.	.	0	note=complex GCGTA=>CCGTG CCGTG:76 GCGTA:0
EA2454	snippy:4.3.6	variation	3859698	3859698	.	.	0	note=snp A=>C C:88 A:0
EA2454	snippy:4.3.6	variation	3859719	3859719	.	.	0	note=snp G=>A A:86 G:3
EA2454	snippy:4.3.6	variation	3859733	3859733	.	.	0	note=snp A=>C C:93 A:2
EA2454	snippy:4.3.6	variation	3859744	3859744	.	.	0	note=snp T=>C C:98 T:0
EA2454	snippy:4.3.6	variation	3859755	3859755	.	.	0	note=snp G=>A A:110 G:2
EA2454	snippy:4.3.6	variation	3859790	3859790	.	.	0	note=snp A=>T T:77 A:0
EA2454	snippy:4.3.6	variation	3859809	3859809	.	.	0	note=snp A=>G G:53 A:0
EA2454	snippy:4.3.6	variation	3859814	3859814	.	.	0	note=snp T=>A A:47 T:0
EA2454	snippy:4.3.6	variation	3859824	3859824	.	.	0	note=complex AGC=>CGT CGT:30 AGC:0
EA2454	snippy:4.3.6	variation	3859949	3859949	.	.	0	note=snp A=>C C:22 A:0
EA2454	snippy:4.3.6	variation	3859981	3859981	.	.	0	note=snp G=>C C:61 G:0
EA2454	snippy:4.3.6	variation	3859993	3859993	.	.	0	note=snp T=>C C:74 T:0
EA2454	snippy:4.3.6	variation	3860008	3860008	.	.	0	note=complex TAA=>CAG CAG:89 TAA:0
EA2454	snippy:4.3.6	variation	3860041	3860041	.	.	0	note=snp A=>C C:120 A:0
EA2454	snippy:4.3.6	variation	3860187	3860187	.	.	0	note=snp T=>C C:144 T:0
EA2454	snippy:4.3.6	variation	3860245	3860245	.	.	0	note=snp T=>A A:126 T:2
EA2454	snippy:4.3.6	variation	3860250	3860250	.	.	0	note=snp C=>T T:129 C:1
EA2454	snippy:4.3.6	variation	3860282	3860282	.	.	0	note=complex ATT=>GTC GTC:125 ATT:0
EA2454	snippy:4.3.6	variation	3860303	3860303	.	.	0	note=complex ACG=>GCA GCA:135 ACG:0
EA2454	snippy:4.3.6	variation	3860310	3860310	.	.	0	note=snp T=>G G:141 T:0
EA2454	snippy:4.3.6	variation	3860320	3860320	.	.	0	note=snp T=>C C:147 T:0
EA2454	snippy:4.3.6	variation	3860443	3860443	.	.	0	note=snp A=>G G:161 A:1
EA2454	snippy:4.3.6	variation	3860473	3860473	.	.	0	note=snp G=>A A:142 G:2
EA2454	snippy:4.3.6	variation	3860490	3860490	.	.	0	note=snp G=>A A:143 G:2
EA2454	snippy:4.3.6	variation	3860719	3860719	.	.	0	note=snp C=>T T:149 C:0
EA2454	snippy:4.3.6	variation	3860763	3860763	.	.	0	note=complex GTGC=>ATGT ATGT:86 GTGC:2
EA2454	snippy:4.3.6	variation	3860792	3860792	.	.	0	note=snp G=>A A:45 G:3
EA2454	snippy:4.3.6	variation	3861015	3861015	.	.	0	note=snp C=>T T:52 C:4
EA2454	snippy:4.3.6	variation	3861033	3861033	.	.	0	note=snp A=>G G:68 A:3
EA2454	snippy:4.3.6	variation	3861045	3861045	.	.	0	note=snp A=>G G:85 A:3
EA2454	snippy:4.3.6	variation	3861064	3861064	.	.	0	note=complex GTT=>ATA ATA:98 GTT:4
EA2454	snippy:4.3.6	variation	3861072	3861072	.	.	0	note=snp C=>T T:117 C:4
EA2454	snippy:4.3.6	variation	3861081	3861081	.	.	0	note=snp C=>T T:126 C:4
EA2454	snippy:4.3.6	variation	3861129	3861129	.	.	0	note=snp G=>A A:151 G:0
EA2454	snippy:4.3.6	variation	3861157	3861157	.	.	0	note=snp A=>C C:148 A:2
EA2454	snippy:4.3.6	variation	3861180	3861180	.	.	0	note=snp C=>T T:141 C:1
EA2454	snippy:4.3.6	variation	3861186	3861186	.	.	0	note=snp C=>T T:138 C:0
EA2454	snippy:4.3.6	variation	3861216	3861216	.	.	0	note=snp C=>G G:132 C:1
EA2454	snippy:4.3.6	variation	3861222	3861222	.	.	0	note=snp T=>C C:128 T:1
EA2454	snippy:4.3.6	variation	3861234	3861234	.	.	0	note=snp C=>T T:123 C:1
EA2454	snippy:4.3.6	variation	3861369	3861369	.	.	0	note=snp T=>G G:145 T:0
EA2454	snippy:4.3.6	variation	3861402	3861402	.	.	0	note=complex CCCA=>TCCG TCCG:138 CCCA:0
EA2454	snippy:4.3.6	variation	3861417	3861417	.	.	0	note=snp G=>A A:146 G:1
EA2454	snippy:4.3.6	variation	3861495	3861495	.	.	0	note=snp T=>C C:85 T:0
EA2454	snippy:4.3.6	variation	3861516	3861516	.	.	0	note=snp T=>C C:62 T:0
EA2454	snippy:4.3.6	variation	3861534	3861534	.	.	0	note=complex TGCC=>GGCG GGCG:48 TGCC:0
EA2454	snippy:4.3.6	variation	3861543	3861543	.	.	0	note=complex TCACGGCGCAAAA=>ACAGGGGGCCAGT ACAGGGGGCCAGT:32 TCACGGCGCAAAA:0
EA2454	snippy:4.3.6	variation	3861567	3861567	.	.	0	note=complex GACA=>AACG AACG:58 GACA:0
EA2454	snippy:4.3.6	variation	3861585	3861585	.	.	0	note=complex TTTC=>CTTT CTTT:77 TTTC:0
EA2454	snippy:4.3.6	variation	3861594	3861594	.	.	0	note=snp G=>T T:88 G:0
EA2454	snippy:4.3.6	variation	3861621	3861621	.	.	0	note=snp T=>C C:111 T:0
EA2454	snippy:4.3.6	variation	3861630	3861630	.	.	0	note=snp T=>C C:127 T:0
EA2454	snippy:4.3.6	variation	3861636	3861636	.	.	0	note=snp C=>T T:130 C:2
EA2454	snippy:4.3.6	variation	3861690	3861690	.	.	0	note=snp G=>A A:160 G:0
EA2454	snippy:4.3.6	variation	3861702	3861702	.	.	0	note=snp C=>T T:166 C:0
EA2454	snippy:4.3.6	variation	3861746	3861746	.	.	0	note=snp A=>G G:174 A:0
EA2454	snippy:4.3.6	variation	3861759	3861759	.	.	0	note=snp C=>T T:123 C:0
EA2454	snippy:4.3.6	variation	3861840	3861840	.	.	0	note=snp T=>C C:137 T:0
EA2454	snippy:4.3.6	variation	3861856	3861856	.	.	0	note=snp A=>C C:146 A:0
EA2454	snippy:4.3.6	variation	3861864	3861864	.	.	0	note=snp T=>C C:141 T:0
EA2454	snippy:4.3.6	variation	3861870	3861870	.	.	0	note=complex CCCA=>TCCG TCCG:130 CCCA:0
EA2454	snippy:4.3.6	variation	3861957	3861957	.	.	0	note=snp G=>A A:131 G:0
EA2454	snippy:4.3.6	variation	3861993	3861993	.	.	0	note=complex AGTTGAAAAG=>CGTGGAGAAA CGTGGAGAAA:120 AGTTGAAAAG:0
EA2454	snippy:4.3.6	variation	3862023	3862023	.	.	0	note=snp G=>A A:151 G:0
EA2454	snippy:4.3.6	variation	3862029	3862029	.	.	0	note=snp C=>T T:140 C:0
EA2454	snippy:4.3.6	variation	3862053	3862053	.	.	0	note=complex TTCTGTC=>CTCCGTG CTCCGTG:119 TTCTGTC:1
EA2454	snippy:4.3.6	variation	3862086	3862086	.	.	0	note=snp C=>A A:148 C:0
EA2454	snippy:4.3.6	variation	3862110	3862110	.	.	0	note=complex GGCA=>TGCG TGCG:136 GGCA:0
EA2454	snippy:4.3.6	variation	3862134	3862134	.	.	0	note=snp C=>T T:171 C:1
EA2454	snippy:4.3.6	variation	3862146	3862146	.	.	0	note=snp C=>T T:166 C:1
EA2454	snippy:4.3.6	variation	3862353	3862353	.	.	0	note=snp T=>C C:160 T:0
EA2454	snippy:4.3.6	variation	3862431	3862431	.	.	0	note=complex CACC=>AACA AACA:160 CACC:3
EA2454	snippy:4.3.6	variation	3862455	3862455	.	.	0	note=snp A=>G G:171 A:0
EA2454	snippy:4.3.6	variation	3862476	3862476	.	.	0	note=snp T=>C C:180 T:0
EA2454	snippy:4.3.6	variation	3862536	3862536	.	.	0	note=complex CC=>TT TT:123 CC:1
EA2454	snippy:4.3.6	variation	3862584	3862584	.	.	0	note=snp T=>C C:135 T:0
EA2454	snippy:4.3.6	variation	3862608	3862608	.	.	0	note=snp C=>T T:150 C:0
EA2454	snippy:4.3.6	variation	3862614	3862614	.	.	0	note=snp C=>T T:152 C:0
EA2454	snippy:4.3.6	variation	3862638	3862638	.	.	0	note=snp C=>T T:152 C:0
EA2454	snippy:4.3.6	variation	3862699	3862699	.	.	0	note=snp C=>T T:124 C:0
EA2454	snippy:4.3.6	variation	3862715	3862715	.	.	0	note=snp A=>G G:121 A:0
EA2454	snippy:4.3.6	variation	3862731	3862731	.	.	0	note=snp C=>T T:114 C:0
EA2454	snippy:4.3.6	variation	3862740	3862740	.	.	0	note=snp T=>G G:120 T:0
EA2454	snippy:4.3.6	variation	3862765	3862765	.	.	0	note=snp A=>G G:133 A:0
EA2454	snippy:4.3.6	variation	3862783	3862783	.	.	0	note=snp A=>C C:117 A:0
EA2454	snippy:4.3.6	variation	3862788	3862788	.	.	0	note=complex CAGCGAG=>TAACGAC TAACGAC:114 CAGCGAG:0
EA2454	snippy:4.3.6	variation	3862802	3862802	.	.	0	note=snp C=>T T:134 C:0
EA2454	snippy:4.3.6	variation	3862833	3862833	.	.	0	note=snp T=>C C:135 T:0
EA2454	snippy:4.3.6	variation	3862878	3862878	.	.	0	note=snp T=>C C:136 T:0
EA2454	snippy:4.3.6	variation	3862902	3862902	.	.	0	note=snp G=>A A:141 G:0
EA2454	snippy:4.3.6	variation	3862947	3862947	.	.	0	note=complex GGGA=>TGGG TGGG:121 GGGA:0
EA2454	snippy:4.3.6	variation	3862968	3862968	.	.	0	note=snp C=>A A:129 C:0
EA2454	snippy:4.3.6	variation	3862974	3862974	.	.	0	note=snp T=>G G:127 T:0
EA2454	snippy:4.3.6	variation	3862990	3862990	.	.	0	note=complex TCCCTGATTATC=>AGCCTTATCATT AGCCTTATCATT:92 TCCCTGATTATC:1
EA2454	snippy:4.3.6	variation	3863014	3863014	.	.	0	note=snp A=>C C:132 A:1
EA2454	snippy:4.3.6	variation	3863036	3863036	.	.	0	note=complex CT=>AC AC:120 CT:0
EA2454	snippy:4.3.6	variation	3863043	3863043	.	.	0	note=snp A=>G G:134 A:0
EA2454	snippy:4.3.6	variation	3863100	3863100	.	.	0	note=snp C=>T T:147 C:0
EA2454	snippy:4.3.6	variation	3863139	3863139	.	.	0	note=snp C=>T T:134 C:0
EA2454	snippy:4.3.6	variation	3863199	3863199	.	.	0	note=snp C=>A A:144 C:2
EA2454	snippy:4.3.6	variation	3863205	3863205	.	.	0	note=complex TGCT=>CGCA CGCA:141 TGCT:2
EA2454	snippy:4.3.6	variation	3863214	3863214	.	.	0	note=snp T=>C C:147 T:0
EA2454	snippy:4.3.6	variation	3863280	3863280	.	.	0	note=snp T=>C C:135 T:0
EA2454	snippy:4.3.6	variation	3863286	3863286	.	.	0	note=complex GTTATTC=>ATTGTAT ATTGTAT:109 GTTATTC:0
EA2454	snippy:4.3.6	variation	3863319	3863319	.	.	0	note=snp G=>C C:135 G:0
EA2454	snippy:4.3.6	variation	3863331	3863331	.	.	0	note=snp C=>T T:131 C:0
EA2454	snippy:4.3.6	variation	3863346	3863346	.	.	0	note=snp T=>C C:124 T:0
EA2454	snippy:4.3.6	variation	3863406	3863406	.	.	0	note=snp T=>C C:136 T:1
EA2454	snippy:4.3.6	variation	3863481	3863481	.	.	0	note=complex CAGG=>TAAA TAAA:115 CAGG:0
EA2454	snippy:4.3.6	variation	3863490	3863490	.	.	0	note=snp C=>G G:146 C:0
EA2454	snippy:4.3.6	variation	3863532	3863532	.	.	0	note=complex ATCG=>GTCA GTCA:163 ATCG:0
EA2454	snippy:4.3.6	variation	3863559	3863559	.	.	0	note=snp G=>A A:189 G:0
EA2454	snippy:4.3.6	variation	3863700	3863700	.	.	0	note=snp G=>A A:147 G:1
EA2454	snippy:4.3.6	variation	3863732	3863732	.	.	0	note=snp A=>G G:151 A:0
EA2454	snippy:4.3.6	variation	3863740	3863740	.	.	0	note=snp T=>C C:149 T:2
EA2454	snippy:4.3.6	variation	3863840	3863840	.	.	0	note=snp T=>C C:143 T:0
EA2454	snippy:4.3.6	variation	3863865	3863865	.	.	0	note=complex ACG=>GCA GCA:134 ACG:0
EA2454	snippy:4.3.6	variation	3863900	3863900	.	.	0	note=snp T=>G G:130 T:0
EA2454	snippy:4.3.6	variation	3863924	3863924	.	.	0	note=snp A=>T T:127 A:0
EA2454	snippy:4.3.6	variation	3863957	3863957	.	.	0	note=snp T=>C C:121 T:1
EA2454	snippy:4.3.6	variation	3863966	3863966	.	.	0	note=snp G=>A A:133 G:0
EA2454	snippy:4.3.6	variation	3864034	3864034	.	.	0	note=snp A=>C C:142 A:0
EA2454	snippy:4.3.6	variation	3864046	3864046	.	.	0	note=snp C=>T T:141 C:0
EA2454	snippy:4.3.6	variation	3864070	3864070	.	.	0	note=mnp GC=>AA AA:135 GC:0
EA2454	snippy:4.3.6	variation	3864181	3864181	.	.	0	note=snp C=>T T:167 C:1
EA2454	snippy:4.3.6	variation	3864199	3864199	.	.	0	note=complex TCCTGGA=>GCCCGGT GCCCGGT:144 TCCTGGA:0
EA2454	snippy:4.3.6	variation	3864220	3864220	.	.	0	note=snp A=>G G:168 A:0
EA2454	snippy:4.3.6	variation	3864227	3864227	.	.	0	note=snp A=>G G:168 A:0
EA2454	snippy:4.3.6	variation	3864307	3864307	.	.	0	note=snp A=>T T:148 A:0
EA2454	snippy:4.3.6	variation	3864744	3864744	.	.	0	note=snp C=>T T:145 C:2
EA2454	snippy:4.3.6	variation	3864841	3864841	.	.	0	note=snp T=>A A:129 T:0
EA2454	snippy:4.3.6	variation	3864918	3864918	.	.	0	note=snp G=>T T:162 G:0
EA2454	snippy:4.3.6	variation	3864975	3864975	.	.	0	note=snp G=>A A:163 G:0
EA2454	snippy:4.3.6	variation	3865044	3865044	.	.	0	note=snp G=>T T:155 G:0
EA2454	snippy:4.3.6	variation	3865110	3865110	.	.	0	note=snp T=>C C:160 T:1
EA2454	snippy:4.3.6	variation	3865119	3865119	.	.	0	note=snp A=>C C:158 A:0
EA2454	snippy:4.3.6	variation	3865404	3865404	.	.	0	note=snp C=>T T:123 C:2
EA2454	snippy:4.3.6	variation	3865509	3865509	.	.	0	note=snp T=>C C:124 T:1
EA2454	snippy:4.3.6	variation	3865545	3865545	.	.	0	note=snp T=>C C:84 T:0
EA2454	snippy:4.3.6	variation	3865593	3865593	.	.	0	note=snp C=>A A:28 C:1
EA2454	snippy:4.3.6	variation	3865682	3865682	.	.	0	note=snp C=>T T:28 C:1
EA2454	snippy:4.3.6	variation	3865691	3865691	.	.	0	note=snp T=>A A:39 T:0
EA2454	snippy:4.3.6	variation	3865745	3865745	.	.	0	note=complex TGAA=>AGAG AGAG:120 TGAA:0
EA2454	snippy:4.3.6	variation	3865854	3865854	.	.	0	note=snp A=>G G:135 A:0
EA2454	snippy:4.3.6	variation	3865988	3865988	.	.	0	note=snp T=>C C:127 T:1
EA2454	snippy:4.3.6	variation	3866042	3866042	.	.	0	note=snp A=>G G:126 A:1
EA2454	snippy:4.3.6	variation	3866066	3866066	.	.	0	note=snp G=>A A:125 G:0
EA2454	snippy:4.3.6	variation	3866103	3866103	.	.	0	note=snp G=>A A:125 G:0
EA2454	snippy:4.3.6	variation	3866162	3866162	.	.	0	note=snp A=>C C:73 A:0
EA2454	snippy:4.3.6	variation	3866184	3866184	.	.	0	note=snp A=>G G:47 A:0
EA2454	snippy:4.3.6	variation	3866192	3866192	.	.	0	note=snp G=>T T:32 G:1
EA2454	snippy:4.3.6	variation	3866993	3866993	.	.	0	note=snp T=>C C:56 T:0
EA2454	snippy:4.3.6	variation	3867084	3867084	.	.	0	note=snp A=>C C:139 A:2
EA2454	snippy:4.3.6	variation	3867200	3867200	.	.	0	note=snp A=>C C:150 A:0
EA2454	snippy:4.3.6	variation	3867245	3867245	.	.	0	note=complex TATC=>CATT CATT:131 TATC:0
EA2454	snippy:4.3.6	variation	3867299	3867299	.	.	0	note=complex CGGG=>AGGC AGGC:114 CGGG:0
EA2454	snippy:4.3.6	variation	3867311	3867311	.	.	0	note=snp C=>T T:113 C:1
EA2454	snippy:4.3.6	variation	3867317	3867317	.	.	0	note=complex GCAGG=>ACAGC ACAGC:102 GCAGG:1
EA2454	snippy:4.3.6	variation	3867326	3867326	.	.	0	note=complex TAGCCGG=>AAACCGC AAACCGC:95 TAGCCGG:1
EA2454	snippy:4.3.6	variation	3867359	3867359	.	.	0	note=snp G=>A A:112 G:1
EA2454	snippy:4.3.6	variation	3867383	3867383	.	.	0	note=snp C=>T T:129 C:0
EA2454	snippy:4.3.6	variation	3867401	3867401	.	.	0	note=snp T=>G G:137 T:0
EA2454	snippy:4.3.6	variation	3867410	3867410	.	.	0	note=snp G=>A A:136 G:0
EA2454	snippy:4.3.6	variation	3867425	3867425	.	.	0	note=snp G=>A A:157 G:0
EA2454	snippy:4.3.6	variation	3867572	3867572	.	.	0	note=snp T=>C C:163 T:0
EA2454	snippy:4.3.6	variation	3867642	3867642	.	.	0	note=snp T=>C C:149 T:0
EA2454	snippy:4.3.6	variation	3867674	3867674	.	.	0	note=snp G=>A A:136 G:0
EA2454	snippy:4.3.6	variation	3867683	3867683	.	.	0	note=snp A=>T T:141 A:0
EA2454	snippy:4.3.6	variation	3867761	3867761	.	.	0	note=snp A=>G G:138 A:0
EA2454	snippy:4.3.6	variation	3867785	3867785	.	.	0	note=snp G=>A A:141 G:0
EA2454	snippy:4.3.6	variation	3867884	3867884	.	.	0	note=snp T=>C C:127 T:0
EA2454	snippy:4.3.6	variation	3867917	3867917	.	.	0	note=complex CGGA=>TGGT TGGT:143 CGGA:0
EA2454	snippy:4.3.6	variation	3867956	3867956	.	.	0	note=snp A=>G G:151 A:0
EA2454	snippy:4.3.6	variation	3867986	3867986	.	.	0	note=snp T=>A A:145 T:0
EA2454	snippy:4.3.6	variation	3868001	3868001	.	.	0	note=complex CGGC=>TGGT TGGT:156 CGGC:0
EA2454	snippy:4.3.6	variation	3868106	3868106	.	.	0	note=snp T=>C C:163 T:0
EA2454	snippy:4.3.6	variation	3868187	3868187	.	.	0	note=snp A=>G G:165 A:1
EA2454	snippy:4.3.6	variation	3868201	3868201	.	.	0	note=snp G=>A A:166 G:0
EA2454	snippy:4.3.6	variation	3868216	3868216	.	.	0	note=complex AGGCA=>CAGCC CAGCC:136 AGGCA:0
EA2454	snippy:4.3.6	variation	3868247	3868247	.	.	0	note=complex CGCA=>TGCT TGCT:134 CGCA:0
EA2454	snippy:4.3.6	variation	3868298	3868298	.	.	0	note=snp G=>C C:120 G:0
EA2454	snippy:4.3.6	variation	3868379	3868379	.	.	0	note=snp G=>T T:164 G:0
EA2454	snippy:4.3.6	variation	3868391	3868391	.	.	0	note=snp C=>T T:160 C:0
EA2454	snippy:4.3.6	variation	3868409	3868409	.	.	0	note=snp A=>G G:155 A:0
EA2454	snippy:4.3.6	variation	3868448	3868448	.	.	0	note=snp G=>T T:132 G:0
EA2454	snippy:4.3.6	variation	3868472	3868472	.	.	0	note=complex GCTGGGC=>ACTCGGT ACTCGGT:104 GCTGGGC:0
EA2454	snippy:4.3.6	variation	3868523	3868523	.	.	0	note=snp G=>A A:131 G:0
EA2454	snippy:4.3.6	variation	3868563	3868563	.	.	0	note=snp T=>C C:87 T:0
EA2454	snippy:4.3.6	variation	3868652	3868652	.	.	0	note=snp T=>C C:25 T:0
EA2454	snippy:4.3.6	variation	3868730	3868730	.	.	0	note=snp G=>A A:122 G:1
EA2454	snippy:4.3.6	variation	3868769	3868769	.	.	0	note=complex TAT=>CAG CAG:116 TAT:1
EA2454	snippy:4.3.6	variation	3868798	3868798	.	.	0	note=snp A=>G G:127 A:1
EA2454	snippy:4.3.6	variation	3868810	3868810	.	.	0	note=complex GTCGAACCGTTTTA=>TTCTAATCGTATTG TTCTAATCGTATTG:108 GTCGAACCGTTTTA:1
EA2454	snippy:4.3.6	variation	3868832	3868832	.	.	0	note=snp C=>A A:114 C:1
EA2454	snippy:4.3.6	variation	3868909	3868909	.	.	0	note=complex TGCAGGTGAGATA=>GGTGGACGGGATG GGTGGACGGGATG:59 TGCAGGTGAGATA:0
EA2454	snippy:4.3.6	variation	3868927	3868927	.	.	0	note=snp T=>C C:74 T:0
EA2454	snippy:4.3.6	variation	3868942	3868942	.	.	0	note=complex TT=>CC CC:95 TT:0
EA2454	snippy:4.3.6	variation	3869010	3869010	.	.	0	note=del CTGA=>C C:107 CTGA:0
EA2454	snippy:4.3.6	variation	3869028	3869028	.	.	0	note=snp G=>A A:138 G:3
EA2454	snippy:4.3.6	variation	3869102	3869102	.	.	0	note=snp A=>G G:163 A:1
EA2454	snippy:4.3.6	variation	3869165	3869165	.	.	0	note=snp A=>T T:190 A:1
EA2454	snippy:4.3.6	variation	3869177	3869177	.	.	0	note=snp C=>A A:186 C:2
EA2454	snippy:4.3.6	variation	3869189	3869189	.	.	0	note=snp G=>A A:200 G:1
EA2454	snippy:4.3.6	variation	3869195	3869195	.	.	0	note=snp C=>T T:204 C:1
EA2454	snippy:4.3.6	variation	3869216	3869216	.	.	0	note=snp A=>G G:200 A:0
EA2454	snippy:4.3.6	variation	3869300	3869300	.	.	0	note=snp G=>A A:167 G:1
EA2454	snippy:4.3.6	variation	3869344	3869344	.	.	0	note=complex AAAAA=>GAAAG GAAAG:170 AAAAA:1
EA2454	snippy:4.3.6	variation	3869360	3869360	.	.	0	note=snp G=>A A:179 G:0
EA2454	snippy:4.3.6	variation	3869366	3869366	.	.	0	note=snp C=>T T:175 C:0
EA2454	snippy:4.3.6	variation	3869402	3869402	.	.	0	note=snp C=>T T:167 C:1
EA2454	snippy:4.3.6	variation	3869411	3869411	.	.	0	note=snp C=>A A:159 C:0
EA2454	snippy:4.3.6	variation	3869426	3869426	.	.	0	note=snp G=>A A:159 G:0
EA2454	snippy:4.3.6	variation	3869513	3869513	.	.	0	note=snp C=>T T:150 C:1
EA2454	snippy:4.3.6	variation	3869523	3869523	.	.	0	note=snp C=>T T:150 C:0
EA2454	snippy:4.3.6	variation	3869547	3869547	.	.	0	note=snp A=>C C:142 A:1
EA2454	snippy:4.3.6	variation	3869555	3869555	.	.	0	note=snp C=>G G:144 C:1
EA2454	snippy:4.3.6	variation	3869591	3869591	.	.	0	note=snp T=>C C:124 T:0
EA2454	snippy:4.3.6	variation	3869603	3869603	.	.	0	note=snp G=>A A:121 G:1
EA2454	snippy:4.3.6	variation	3869705	3869705	.	.	0	note=snp T=>C C:137 T:0
EA2454	snippy:4.3.6	variation	3869804	3869804	.	.	0	note=snp C=>T T:128 C:0
EA2454	snippy:4.3.6	variation	3869835	3869835	.	.	0	note=snp C=>T T:135 C:0
EA2454	snippy:4.3.6	variation	3869920	3869920	.	.	0	note=snp A=>T T:141 A:0
EA2454	snippy:4.3.6	variation	3869970	3869970	.	.	0	note=snp G=>T T:114 G:0
EA2454	snippy:4.3.6	variation	3870037	3870037	.	.	0	note=complex TTG=>CTT CTT:88 TTG:0
EA2454	snippy:4.3.6	variation	3870051	3870051	.	.	0	note=complex CCTT=>TCTC TCTC:85 CCTT:2
EA2454	snippy:4.3.6	variation	3870152	3870152	.	.	0	note=complex CAGA=>AAGG AAGG:64 CAGA:2
EA2454	snippy:4.3.6	variation	3870169	3870169	.	.	0	note=snp G=>A A:51 G:2
EA2454	snippy:4.3.6	variation	3870183	3870183	.	.	0	note=snp C=>T T:27 C:2
EA2454	snippy:4.3.6	variation	3870274	3870274	.	.	0	note=snp T=>C C:78 T:0
EA2454	snippy:4.3.6	variation	3870306	3870306	.	.	0	note=complex ACACA=>GCACG GCACG:131 ACACA:2
EA2454	snippy:4.3.6	variation	3870331	3870331	.	.	0	note=complex GGCT=>AGCC AGCC:131 GGCT:2
EA2454	snippy:4.3.6	variation	3870424	3870424	.	.	0	note=snp C=>T T:136 C:1
EA2454	snippy:4.3.6	variation	3870448	3870448	.	.	0	note=snp G=>A A:137 G:1
EA2454	snippy:4.3.6	variation	3870469	3870469	.	.	0	note=snp C=>T T:142 C:1
EA2454	snippy:4.3.6	variation	3870509	3870509	.	.	0	note=snp A=>T T:163 A:1
EA2454	snippy:4.3.6	variation	3870523	3870523	.	.	0	note=snp A=>G G:168 A:1
EA2454	snippy:4.3.6	variation	3870529	3870529	.	.	0	note=snp A=>G G:165 A:1
EA2454	snippy:4.3.6	variation	3870796	3870796	.	.	0	note=snp G=>A A:153 G:0
EA2454	snippy:4.3.6	variation	3870904	3870904	.	.	0	note=snp T=>C C:57 T:0
EA2454	snippy:4.3.6	variation	3870931	3870931	.	.	0	note=snp T=>G G:12 T:0
EA2454	snippy:4.3.6	variation	3871295	3871295	.	.	0	note=snp T=>G G:44 T:0
EA2454	snippy:4.3.6	variation	3871306	3871306	.	.	0	note=snp C=>T T:60 C:0
EA2454	snippy:4.3.6	variation	3871487	3871487	.	.	0	note=snp T=>C C:152 T:0
EA2454	snippy:4.3.6	variation	3872518	3872518	.	.	0	note=snp A=>G G:142 A:0
EA2454	snippy:4.3.6	variation	3872599	3872599	.	.	0	note=snp G=>A A:142 G:0
EA2454	snippy:4.3.6	variation	3872637	3872637	.	.	0	note=snp A=>C C:124 A:0
EA2454	snippy:4.3.6	variation	3872721	3872721	.	.	0	note=snp T=>C C:147 T:0
EA2454	snippy:4.3.6	variation	3873108	3873108	.	.	0	note=snp C=>T T:147 C:1
EA2454	snippy:4.3.6	variation	3873264	3873264	.	.	0	note=snp G=>T T:172 G:1
EA2454	snippy:4.3.6	variation	3873309	3873309	.	.	0	note=snp C=>T T:164 C:0
EA2454	snippy:4.3.6	variation	3873315	3873315	.	.	0	note=snp G=>A A:161 G:0
EA2454	snippy:4.3.6	variation	3873348	3873348	.	.	0	note=snp G=>A A:163 G:0
EA2454	snippy:4.3.6	variation	3873396	3873396	.	.	0	note=snp T=>C C:173 T:0
EA2454	snippy:4.3.6	variation	3873417	3873417	.	.	0	note=complex CTGGC=>ATGGT ATGGT:162 CTGGC:2
EA2454	snippy:4.3.6	variation	3873594	3873594	.	.	0	note=snp G=>A A:138 G:0
EA2454	snippy:4.3.6	variation	3873609	3873609	.	.	0	note=snp A=>G G:127 A:0
EA2454	snippy:4.3.6	variation	3873636	3873636	.	.	0	note=snp G=>A A:142 G:0
EA2454	snippy:4.3.6	variation	3873750	3873750	.	.	0	note=snp T=>C C:181 T:0
EA2454	snippy:4.3.6	variation	3874017	3874017	.	.	0	note=snp C=>A A:148 C:0
EA2454	snippy:4.3.6	variation	3874062	3874062	.	.	0	note=snp C=>T T:147 C:0
EA2454	snippy:4.3.6	variation	3874068	3874068	.	.	0	note=snp T=>C C:153 T:0
EA2454	snippy:4.3.6	variation	3874077	3874077	.	.	0	note=snp G=>A A:145 G:0
EA2454	snippy:4.3.6	variation	3874083	3874083	.	.	0	note=snp T=>C C:150 T:0
EA2454	snippy:4.3.6	variation	3874221	3874221	.	.	0	note=snp T=>C C:149 T:0
EA2454	snippy:4.3.6	variation	3874302	3874302	.	.	0	note=snp G=>A A:140 G:1
EA2454	snippy:4.3.6	variation	3874324	3874324	.	.	0	note=snp C=>A A:140 C:1
EA2454	snippy:4.3.6	variation	3874329	3874329	.	.	0	note=complex GGCG=>AGCA AGCA:131 GGCG:0
EA2454	snippy:4.3.6	variation	3874393	3874393	.	.	0	note=snp T=>A A:146 T:0
EA2454	snippy:4.3.6	variation	3874445	3874445	.	.	0	note=snp G=>A A:131 G:2
EA2454	snippy:4.3.6	variation	3874455	3874455	.	.	0	note=snp C=>T T:124 C:0
EA2454	snippy:4.3.6	variation	3874464	3874464	.	.	0	note=snp C=>T T:119 C:0
EA2454	snippy:4.3.6	variation	3874500	3874500	.	.	0	note=snp C=>T T:98 C:0
EA2454	snippy:4.3.6	variation	3874551	3874551	.	.	0	note=mnp AAGA=>TCAG TCAG:91 AAGA:0
EA2454	snippy:4.3.6	variation	3874566	3874566	.	.	0	note=snp A=>C C:109 A:0
EA2454	snippy:4.3.6	variation	3874580	3874580	.	.	0	note=snp G=>C C:118 G:0
EA2454	snippy:4.3.6	variation	3874587	3874587	.	.	0	note=snp G=>C C:117 G:0
EA2454	snippy:4.3.6	variation	3874599	3874599	.	.	0	note=snp C=>A A:103 C:0
EA2454	snippy:4.3.6	variation	3874650	3874650	.	.	0	note=complex TGGCG=>CGGCT CGGCT:35 TGGCG:0
EA2454	snippy:4.3.6	variation	3874664	3874664	.	.	0	note=snp G=>A A:27 G:0
EA2454	snippy:4.3.6	variation	3874741	3874741	.	.	0	note=complex GATA=>AATG AATG:10 GATA:0
EA2454	snippy:4.3.6	variation	3874749	3874749	.	.	0	note=snp C=>T T:22 C:0
EA2454	snippy:4.3.6	variation	3874767	3874767	.	.	0	note=snp G=>A A:49 G:1
EA2454	snippy:4.3.6	variation	3874824	3874824	.	.	0	note=snp A=>G G:106 A:0
EA2454	snippy:4.3.6	variation	3874839	3874839	.	.	0	note=complex GGAC=>TGAT TGAT:109 GGAC:0
EA2454	snippy:4.3.6	variation	3874851	3874851	.	.	0	note=snp C=>T T:123 C:0
EA2454	snippy:4.3.6	variation	3874866	3874866	.	.	0	note=complex CCAGC=>TCAGT TCAGT:112 CCAGC:0
EA2454	snippy:4.3.6	variation	3874887	3874887	.	.	0	note=snp C=>T T:122 C:0
EA2454	snippy:4.3.6	variation	3874893	3874893	.	.	0	note=complex AAAA=>GAAG GAAG:113 AAAA:0
EA2454	snippy:4.3.6	variation	3874913	3874913	.	.	0	note=snp A=>T T:127 A:1
EA2454	snippy:4.3.6	variation	3874996	3874996	.	.	0	note=snp C=>T T:155 C:1
EA2454	snippy:4.3.6	variation	3875022	3875022	.	.	0	note=snp G=>A A:156 G:0
EA2454	snippy:4.3.6	variation	3875037	3875037	.	.	0	note=snp G=>A A:152 G:0
EA2454	snippy:4.3.6	variation	3875046	3875046	.	.	0	note=snp C=>A A:153 C:0
EA2454	snippy:4.3.6	variation	3875073	3875073	.	.	0	note=snp C=>A A:140 C:0
EA2454	snippy:4.3.6	variation	3875091	3875091	.	.	0	note=snp C=>T T:135 C:1
EA2454	snippy:4.3.6	variation	3875100	3875100	.	.	0	note=snp T=>G G:139 T:0
EA2454	snippy:4.3.6	variation	3875106	3875106	.	.	0	note=snp G=>C C:134 G:0
EA2454	snippy:4.3.6	variation	3875118	3875118	.	.	0	note=snp T=>G G:144 T:1
EA2454	snippy:4.3.6	variation	3875157	3875157	.	.	0	note=snp T=>G G:140 T:2
EA2454	snippy:4.3.6	variation	3875169	3875169	.	.	0	note=complex GGACATC=>CGATATT CGATATT:121 GGACATC:0
EA2454	snippy:4.3.6	variation	3875205	3875205	.	.	0	note=complex GGGG=>TGGT TGGT:133 GGGG:0
EA2454	snippy:4.3.6	variation	3875214	3875214	.	.	0	note=snp C=>T T:131 C:3
EA2454	snippy:4.3.6	variation	3875232	3875232	.	.	0	note=snp T=>C C:139 T:0
EA2454	snippy:4.3.6	variation	3875241	3875241	.	.	0	note=snp G=>A A:132 G:1
EA2454	snippy:4.3.6	variation	3875328	3875328	.	.	0	note=complex CCGAGGC=>TAAAGGG TAAAGGG:79 CCGAGGC:1
EA2454	snippy:4.3.6	variation	3875340	3875340	.	.	0	note=complex CGGA=>AGGT AGGT:84 CGGA:0
EA2454	snippy:4.3.6	variation	3875354	3875354	.	.	0	note=snp G=>A A:103 G:2
EA2454	snippy:4.3.6	variation	3875370	3875370	.	.	0	note=snp A=>G G:105 A:2
EA2454	snippy:4.3.6	variation	3875383	3875383	.	.	0	note=complex GGAA=>AGAG AGAG:83 GGAA:2
EA2454	snippy:4.3.6	variation	3875403	3875403	.	.	0	note=complex ACAA=>GCAG GCAG:92 ACAA:2
EA2454	snippy:4.3.6	variation	3875412	3875412	.	.	0	note=snp C=>T T:108 C:3
EA2454	snippy:4.3.6	variation	3875437	3875437	.	.	0	note=snp A=>G G:131 A:2
EA2454	snippy:4.3.6	variation	3875460	3875460	.	.	0	note=snp A=>G G:144 A:0
EA2454	snippy:4.3.6	variation	3875465	3875465	.	.	0	note=snp G=>C C:133 G:0
EA2454	snippy:4.3.6	variation	3875478	3875478	.	.	0	note=snp G=>T T:125 G:1
EA2454	snippy:4.3.6	variation	3875505	3875505	.	.	0	note=snp G=>T T:82 G:1
EA2454	snippy:4.3.6	variation	3875514	3875514	.	.	0	note=snp A=>G G:63 A:1
EA2454	snippy:4.3.6	variation	3875523	3875523	.	.	0	note=snp G=>A A:52 G:0
EA2454	snippy:4.3.6	variation	3875536	3875536	.	.	0	note=complex CAC=>TAT TAT:28 CAC:0
EA2454	snippy:4.3.6	variation	3875597	3875597	.	.	0	note=snp G=>A A:26 G:0
EA2454	snippy:4.3.6	variation	3875612	3875612	.	.	0	note=complex CATT=>TATC TATC:37 CATT:0
EA2454	snippy:4.3.6	variation	3875632	3875632	.	.	0	note=snp A=>G G:76 A:0
EA2454	snippy:4.3.6	variation	3875641	3875641	.	.	0	note=snp G=>A A:86 G:0
EA2454	snippy:4.3.6	variation	3875652	3875652	.	.	0	note=snp G=>A A:96 G:0
EA2454	snippy:4.3.6	variation	3875660	3875660	.	.	0	note=snp C=>G G:99 C:0
EA2454	snippy:4.3.6	variation	3875665	3875665	.	.	0	note=complex GCTTTATT=>TCTTCATA TCTTCATA:101 GCTTTATT:0
EA2454	snippy:4.3.6	variation	3875688	3875688	.	.	0	note=snp T=>C C:106 T:0
EA2454	snippy:4.3.6	variation	3875702	3875702	.	.	0	note=complex ATTT=>GTTC GTTC:101 ATTT:0
EA2454	snippy:4.3.6	variation	3875727	3875727	.	.	0	note=snp C=>A A:107 C:0
EA2454	snippy:4.3.6	variation	3875747	3875747	.	.	0	note=complex ATTC=>GTTT GTTT:86 ATTC:0
EA2454	snippy:4.3.6	variation	3875772	3875772	.	.	0	note=complex CT=>AC AC:87 CT:0
EA2454	snippy:4.3.6	variation	3875801	3875801	.	.	0	note=snp G=>A A:96 G:0
EA2454	snippy:4.3.6	variation	3875811	3875811	.	.	0	note=snp C=>T T:99 C:0
EA2454	snippy:4.3.6	variation	3875853	3875853	.	.	0	note=snp A=>G G:102 A:0
EA2454	snippy:4.3.6	variation	3876104	3876104	.	.	0	note=complex CA=>TG TG:26 CA:0
EA2454	snippy:4.3.6	variation	3876119	3876119	.	.	0	note=snp C=>T T:53 C:0
EA2454	snippy:4.3.6	variation	3876420	3876420	.	.	0	note=snp A=>G G:149 A:0
EA2454	snippy:4.3.6	variation	3876503	3876503	.	.	0	note=snp G=>A A:167 G:0
EA2454	snippy:4.3.6	variation	3876795	3876795	.	.	0	note=snp C=>T T:153 C:0
EA2454	snippy:4.3.6	variation	3876860	3876860	.	.	0	note=snp C=>T T:172 C:0
EA2454	snippy:4.3.6	variation	3876929	3876929	.	.	0	note=snp A=>G G:162 A:0
EA2454	snippy:4.3.6	variation	3877010	3877010	.	.	0	note=complex GAT=>AAG AAG:133 GAT:0
EA2454	snippy:4.3.6	variation	3877128	3877128	.	.	0	note=snp T=>C C:195 T:0
EA2454	snippy:4.3.6	variation	3877139	3877139	.	.	0	note=complex GAC=>CAT CAT:177 GAC:0
EA2454	snippy:4.3.6	variation	3877161	3877161	.	.	0	note=complex TTGATA=>ATATTGATG ATATTGATG:131 TTGATA:0
EA2454	snippy:4.3.6	variation	3877178	3877178	.	.	0	note=snp G=>A A:166 G:0
EA2454	snippy:4.3.6	variation	3877196	3877196	.	.	0	note=snp A=>G G:164 A:1
EA2454	snippy:4.3.6	variation	3877223	3877223	.	.	0	note=snp A=>G G:174 A:0
EA2454	snippy:4.3.6	variation	3877229	3877229	.	.	0	note=snp T=>C C:171 T:0
EA2454	snippy:4.3.6	variation	3877240	3877240	.	.	0	note=snp T=>C C:166 T:0
EA2454	snippy:4.3.6	variation	3877276	3877276	.	.	0	note=snp A=>G G:166 A:0
EA2454	snippy:4.3.6	variation	3877308	3877308	.	.	0	note=complex ATTCGC=>GTCCGG GTCCGG:132 ATTCGC:0
EA2454	snippy:4.3.6	variation	3877336	3877336	.	.	0	note=snp T=>C C:147 T:0
EA2454	snippy:4.3.6	variation	3877374	3877374	.	.	0	note=snp T=>G G:128 T:0
EA2454	snippy:4.3.6	variation	3877383	3877383	.	.	0	note=snp G=>A A:131 G:0
EA2454	snippy:4.3.6	variation	3877417	3877417	.	.	0	note=complex GGCGAGTGCGCAG=>ATCCGGCGCACAC ATCCGGCGCACAC:93 GGCGAGTGCGCAG:0
EA2454	snippy:4.3.6	variation	3877438	3877438	.	.	0	note=snp A=>C C:119 A:0
EA2454	snippy:4.3.6	variation	3877471	3877471	.	.	0	note=snp C=>T T:132 C:0
EA2454	snippy:4.3.6	variation	3877567	3877567	.	.	0	note=complex CCGTT=>TCTGC TCTGC:92 CCGTT:0
EA2454	snippy:4.3.6	variation	3877585	3877585	.	.	0	note=snp C=>T T:137 C:0
EA2454	snippy:4.3.6	variation	3877600	3877600	.	.	0	note=snp C=>T T:141 C:0
EA2454	snippy:4.3.6	variation	3877606	3877606	.	.	0	note=snp G=>A A:148 G:0
EA2454	snippy:4.3.6	variation	3877622	3877622	.	.	0	note=snp G=>A A:150 G:0
EA2454	snippy:4.3.6	variation	3877709	3877709	.	.	0	note=snp G=>A A:176 G:0
EA2454	snippy:4.3.6	variation	3877726	3877726	.	.	0	note=snp C=>T T:167 C:0
EA2454	snippy:4.3.6	variation	3877769	3877769	.	.	0	note=snp C=>T T:150 C:0
EA2454	snippy:4.3.6	variation	3877798	3877798	.	.	0	note=snp A=>C C:149 A:0
EA2454	snippy:4.3.6	variation	3877935	3877935	.	.	0	note=snp C=>A A:164 C:0
EA2454	snippy:4.3.6	variation	3877950	3877950	.	.	0	note=snp C=>T T:167 C:0
EA2454	snippy:4.3.6	variation	3877981	3877981	.	.	0	note=complex ATC=>GTG GTG:151 ATC:0
EA2454	snippy:4.3.6	variation	3877989	3877989	.	.	0	note=snp T=>C C:161 T:0
EA2454	snippy:4.3.6	variation	3878007	3878007	.	.	0	note=snp C=>T T:156 C:0
EA2454	snippy:4.3.6	variation	3878037	3878037	.	.	0	note=complex AAAA=>CAAG CAAG:135 AAAA:0
EA2454	snippy:4.3.6	variation	3878052	3878052	.	.	0	note=snp C=>A A:137 C:0
EA2454	snippy:4.3.6	variation	3878094	3878094	.	.	0	note=snp G=>T T:113 G:0
EA2454	snippy:4.3.6	variation	3878112	3878112	.	.	0	note=snp A=>T T:115 A:0
EA2454	snippy:4.3.6	variation	3878148	3878148	.	.	0	note=snp T=>C C:120 T:0
EA2454	snippy:4.3.6	variation	3878163	3878163	.	.	0	note=complex GTCTGTC=>TACAGTT TACAGTT:105 GTCTGTC:0
EA2454	snippy:4.3.6	variation	3878175	3878175	.	.	0	note=snp C=>A A:127 C:0
EA2454	snippy:4.3.6	variation	3878208	3878208	.	.	0	note=snp T=>C C:136 T:0
EA2454	snippy:4.3.6	variation	3878277	3878277	.	.	0	note=complex AGACAAT=>GGAGAAC GGAGAAC:114 AGACAAT:0
EA2454	snippy:4.3.6	variation	3878292	3878292	.	.	0	note=snp T=>C C:143 T:0
EA2454	snippy:4.3.6	variation	3878334	3878334	.	.	0	note=snp C=>A A:141 C:0
EA2454	snippy:4.3.6	variation	3878397	3878397	.	.	0	note=snp A=>G G:143 A:0
EA2454	snippy:4.3.6	variation	3878418	3878418	.	.	0	note=snp G=>A A:157 G:0
EA2454	snippy:4.3.6	variation	3878454	3878454	.	.	0	note=complex CGGT=>TGGA TGGA:145 CGGT:0
EA2454	snippy:4.3.6	variation	3878526	3878526	.	.	0	note=complex AATC=>GATA GATA:144 AATC:1
EA2454	snippy:4.3.6	variation	3878559	3878559	.	.	0	note=snp A=>C C:160 A:1
EA2454	snippy:4.3.6	variation	3878568	3878568	.	.	0	note=snp G=>A A:169 G:1
EA2454	snippy:4.3.6	variation	3878580	3878580	.	.	0	note=snp C=>T T:171 C:1
EA2454	snippy:4.3.6	variation	3878607	3878607	.	.	0	note=complex CGCGAACACG=>GGCAAATACC GGCAAATACC:120 CGCGAACACG:1
EA2454	snippy:4.3.6	variation	3878625	3878625	.	.	0	note=snp T=>G G:160 T:0
EA2454	snippy:4.3.6	variation	3878631	3878631	.	.	0	note=snp T=>C C:161 T:1
EA2454	snippy:4.3.6	variation	3878658	3878658	.	.	0	note=snp G=>T T:150 G:2
EA2454	snippy:4.3.6	variation	3878793	3878793	.	.	0	note=snp A=>G G:166 A:0
EA2454	snippy:4.3.6	variation	3878931	3878931	.	.	0	note=snp T=>G G:175 T:2
EA2454	snippy:4.3.6	variation	3879093	3879093	.	.	0	note=complex CGAGT=>TGAGC TGAGC:155 CGAGT:0
EA2454	snippy:4.3.6	variation	3879225	3879225	.	.	0	note=snp G=>T T:158 G:0
EA2454	snippy:4.3.6	variation	3879252	3879252	.	.	0	note=snp C=>T T:166 C:0
EA2454	snippy:4.3.6	variation	3879306	3879306	.	.	0	note=snp A=>G G:171 A:1
EA2454	snippy:4.3.6	variation	3879360	3879360	.	.	0	note=snp C=>T T:167 C:0
EA2454	snippy:4.3.6	variation	3879462	3879462	.	.	0	note=snp T=>C C:161 T:0
EA2454	snippy:4.3.6	variation	3879486	3879486	.	.	0	note=snp C=>A A:145 C:0
EA2454	snippy:4.3.6	variation	3879495	3879495	.	.	0	note=snp T=>A A:148 T:0
EA2454	snippy:4.3.6	variation	3879528	3879528	.	.	0	note=complex GGAG=>TGAA TGAA:129 GGAG:0
EA2454	snippy:4.3.6	variation	3879609	3879609	.	.	0	note=snp C=>T T:89 C:1
EA2454	snippy:4.3.6	variation	3879636	3879636	.	.	0	note=complex GGT=>TG TG:42 GGT:0
EA2454	snippy:4.3.6	variation	3879642	3879642	.	.	0	note=ins C=>CGGAAGTTGTT CGGAAGTTGTT:39 C:0
EA2454	snippy:4.3.6	variation	3879653	3879653	.	.	0	note=snp G=>A A:49 G:0
EA2454	snippy:4.3.6	variation	3879664	3879664	.	.	0	note=snp G=>A A:58 G:0
EA2454	snippy:4.3.6	variation	3879675	3879675	.	.	0	note=snp A=>G G:64 A:0
EA2454	snippy:4.3.6	variation	3879684	3879684	.	.	0	note=snp A=>G G:63 A:0
EA2454	snippy:4.3.6	variation	3879693	3879693	.	.	0	note=snp A=>G G:63 A:0
EA2454	snippy:4.3.6	variation	3879702	3879702	.	.	0	note=snp A=>G G:62 A:0
EA2454	snippy:4.3.6	variation	3879709	3879709	.	.	0	note=complex TCTGTCATCAAT=>CCTGCCATAAAC CCTGCCATAAAC:63 TCTGTCATCAAT:0
EA2454	snippy:4.3.6	variation	3879736	3879736	.	.	0	note=snp G=>T T:93 G:0
EA2454	snippy:4.3.6	variation	3879746	3879746	.	.	0	note=snp G=>A A:103 G:0
EA2454	snippy:4.3.6	variation	3879864	3879864	.	.	0	note=snp A=>G G:138 A:0
EA2454	snippy:4.3.6	variation	3879883	3879883	.	.	0	note=snp T=>C C:130 T:0
EA2454	snippy:4.3.6	variation	3879984	3879984	.	.	0	note=snp T=>A A:63 T:0
EA2454	snippy:4.3.6	variation	3879990	3879990	.	.	0	note=complex TTCAGCGTTGTTAA=>ATCGCGCAGGTCAG ATCGCGCAGGTCAG:39 TTCAGCGTTGTTAA:0
EA2454	snippy:4.3.6	variation	3880010	3880010	.	.	0	note=complex AGGC=>CGGA CGGA:46 AGGC:0
EA2454	snippy:4.3.6	variation	3880022	3880022	.	.	0	note=snp A=>T T:60 A:0
EA2454	snippy:4.3.6	variation	3880031	3880031	.	.	0	note=snp C=>T T:74 C:0
EA2454	snippy:4.3.6	variation	3880082	3880082	.	.	0	note=complex TGGTCA=>CGGCAG CGGCAG:99 TGGTCA:0
EA2454	snippy:4.3.6	variation	3880103	3880103	.	.	0	note=complex TGGG=>GGGA GGGA:119 TGGG:0
EA2454	snippy:4.3.6	variation	3880118	3880118	.	.	0	note=snp C=>T T:120 C:0
EA2454	snippy:4.3.6	variation	3880154	3880154	.	.	0	note=snp C=>A A:111 C:1
EA2454	snippy:4.3.6	variation	3880169	3880169	.	.	0	note=snp G=>A A:111 G:1
EA2454	snippy:4.3.6	variation	3880176	3880176	.	.	0	note=snp T=>C C:119 T:1
EA2454	snippy:4.3.6	variation	3880202	3880202	.	.	0	note=complex TAA=>CAG CAG:93 TAA:1
EA2454	snippy:4.3.6	variation	3880266	3880266	.	.	0	note=complex CTCGGGGGG=>TTAGGTGGC TTAGGTGGC:80 CTCGGGGGG:4
EA2454	snippy:4.3.6	variation	3880280	3880280	.	.	0	note=complex ACGTCTT=>GCGCCTG GCGCCTG:80 ACGTCTT:6
EA2454	snippy:4.3.6	variation	3880313	3880313	.	.	0	note=snp T=>C C:102 T:5
EA2454	snippy:4.3.6	variation	3880322	3880322	.	.	0	note=snp C=>T T:98 C:3
EA2454	snippy:4.3.6	variation	3880343	3880343	.	.	0	note=snp T=>C C:105 T:1
EA2454	snippy:4.3.6	variation	3880418	3880418	.	.	0	note=snp T=>C C:123 T:0
EA2454	snippy:4.3.6	variation	3880439	3880439	.	.	0	note=snp C=>A A:128 C:0
EA2454	snippy:4.3.6	variation	3880459	3880459	.	.	0	note=snp T=>C C:108 T:0
EA2454	snippy:4.3.6	variation	3880490	3880490	.	.	0	note=snp C=>T T:65 C:2
EA2454	snippy:4.3.6	variation	3880616	3880616	.	.	0	note=snp T=>C C:27 T:0
EA2454	snippy:4.3.6	variation	3880634	3880634	.	.	0	note=snp C=>G G:49 C:0
EA2454	snippy:4.3.6	variation	3880686	3880686	.	.	0	note=complex AGTCGT=>GGACGC GGACGC:93 AGTCGT:0
EA2454	snippy:4.3.6	variation	3880704	3880704	.	.	0	note=snp A=>C C:107 A:0
EA2454	snippy:4.3.6	variation	3880718	3880718	.	.	0	note=snp T=>G G:104 T:0
EA2454	snippy:4.3.6	variation	3880724	3880724	.	.	0	note=snp C=>T T:106 C:1
EA2454	snippy:4.3.6	variation	3880754	3880754	.	.	0	note=snp G=>A A:110 G:0
EA2454	snippy:4.3.6	variation	3880790	3880790	.	.	0	note=complex GGAAA=>TGAAG TGAAG:124 GGAAA:0
EA2454	snippy:4.3.6	variation	3880838	3880838	.	.	0	note=snp C=>T T:155 C:0
EA2454	snippy:4.3.6	variation	3880882	3880882	.	.	0	note=snp T=>C C:149 T:0
EA2454	snippy:4.3.6	variation	3880902	3880902	.	.	0	note=complex CCTGC=>GCTGT GCTGT:143 CCTGC:0
EA2454	snippy:4.3.6	variation	3880916	3880916	.	.	0	note=snp C=>G G:148 C:0
EA2454	snippy:4.3.6	variation	3880949	3880949	.	.	0	note=snp C=>G G:150 C:0
EA2454	snippy:4.3.6	variation	3880982	3880982	.	.	0	note=snp C=>T T:154 C:0
EA2454	snippy:4.3.6	variation	3880988	3880988	.	.	0	note=snp T=>C C:159 T:0
EA2454	snippy:4.3.6	variation	3881006	3881006	.	.	0	note=snp G=>A A:157 G:0
EA2454	snippy:4.3.6	variation	3881015	3881015	.	.	0	note=snp C=>T T:164 C:0
EA2454	snippy:4.3.6	variation	3881066	3881066	.	.	0	note=snp T=>C C:157 T:1
EA2454	snippy:4.3.6	variation	3881087	3881087	.	.	0	note=complex GCTT=>ACTC ACTC:136 GCTT:1
EA2454	snippy:4.3.6	variation	3881099	3881099	.	.	0	note=complex CGAT=>TGAC TGAC:129 CGAT:0
EA2454	snippy:4.3.6	variation	3881147	3881147	.	.	0	note=snp G=>A A:143 G:1
EA2454	snippy:4.3.6	variation	3881171	3881171	.	.	0	note=complex TGAC=>CGAT CGAT:133 TGAC:0
EA2454	snippy:4.3.6	variation	3881231	3881231	.	.	0	note=complex TGGT=>CGGC CGGC:153 TGGT:3
EA2454	snippy:4.3.6	variation	3881267	3881267	.	.	0	note=complex TCGC=>CCGT CCGT:165 TCGC:0
EA2454	snippy:4.3.6	variation	3881461	3881461	.	.	0	note=snp T=>C C:186 T:1
EA2454	snippy:4.3.6	variation	3881492	3881492	.	.	0	note=snp C=>T T:175 C:0
EA2454	snippy:4.3.6	variation	3881501	3881501	.	.	0	note=snp C=>T T:174 C:0
EA2454	snippy:4.3.6	variation	3881618	3881618	.	.	0	note=snp A=>G G:155 A:0
EA2454	snippy:4.3.6	variation	3881672	3881672	.	.	0	note=snp G=>A A:154 G:0
EA2454	snippy:4.3.6	variation	3881684	3881684	.	.	0	note=snp A=>C C:151 A:0
EA2454	snippy:4.3.6	variation	3881735	3881735	.	.	0	note=snp G=>A A:170 G:0
EA2454	snippy:4.3.6	variation	3881743	3881743	.	.	0	note=snp T=>C C:169 T:0
EA2454	snippy:4.3.6	variation	3881813	3881813	.	.	0	note=snp G=>A A:140 G:0
EA2454	snippy:4.3.6	variation	3881857	3881857	.	.	0	note=complex AT=>TC TC:127 AT:1
EA2454	snippy:4.3.6	variation	3881876	3881876	.	.	0	note=complex GGCACTG=>TGCCCTT TGCCCTT:118 GGCACTG:1
EA2454	snippy:4.3.6	variation	3881990	3881990	.	.	0	note=complex GATA=>TATC TATC:146 GATA:0
EA2454	snippy:4.3.6	variation	3882005	3882005	.	.	0	note=snp A=>G G:149 A:0
EA2454	snippy:4.3.6	variation	3882037	3882037	.	.	0	note=snp T=>C C:152 T:0
EA2454	snippy:4.3.6	variation	3882044	3882044	.	.	0	note=snp C=>T T:143 C:0
EA2454	snippy:4.3.6	variation	3882143	3882143	.	.	0	note=snp C=>A A:125 C:0
EA2454	snippy:4.3.6	variation	3882211	3882211	.	.	0	note=snp T=>C C:154 T:0
EA2454	snippy:4.3.6	variation	3882296	3882296	.	.	0	note=snp T=>C C:146 T:0
EA2454	snippy:4.3.6	variation	3882377	3882377	.	.	0	note=snp G=>C C:155 G:0
EA2454	snippy:4.3.6	variation	3882428	3882428	.	.	0	note=snp C=>T T:153 C:1
EA2454	snippy:4.3.6	variation	3882473	3882473	.	.	0	note=snp G=>C C:120 G:1
EA2454	snippy:4.3.6	variation	3882509	3882509	.	.	0	note=snp G=>T T:122 G:1
EA2454	snippy:4.3.6	variation	3882523	3882523	.	.	0	note=snp C=>T T:117 C:0
EA2454	snippy:4.3.6	variation	3882533	3882533	.	.	0	note=snp G=>C C:108 G:0
EA2454	snippy:4.3.6	variation	3882544	3882544	.	.	0	note=complex AT=>TG TG:72 AT:0
EA2454	snippy:4.3.6	variation	3882551	3882551	.	.	0	note=complex GTCCGCACTTA=>AGCCGGGCTTC AGCCGGGCTTC:70 GTCCGCACTTA:0
EA2454	snippy:4.3.6	variation	3882590	3882590	.	.	0	note=snp T=>G G:101 T:0
EA2454	snippy:4.3.6	variation	3882599	3882599	.	.	0	note=complex GGTGG=>TGTGC TGTGC:92 GGTGG:0
EA2454	snippy:4.3.6	variation	3882617	3882617	.	.	0	note=snp C=>A A:102 C:0
EA2454	snippy:4.3.6	variation	3882630	3882630	.	.	0	note=mnp CAT=>ATG ATG:97 CAT:0
EA2454	snippy:4.3.6	variation	3882638	3882638	.	.	0	note=snp C=>T T:117 C:4
EA2454	snippy:4.3.6	variation	3882653	3882653	.	.	0	note=snp A=>G G:140 A:1
EA2454	snippy:4.3.6	variation	3882678	3882678	.	.	0	note=snp A=>G G:130 A:3
EA2454	snippy:4.3.6	variation	3882684	3882684	.	.	0	note=snp G=>A A:128 G:0
EA2454	snippy:4.3.6	variation	3882689	3882689	.	.	0	note=snp C=>A A:119 C:0
EA2454	snippy:4.3.6	variation	3882695	3882695	.	.	0	note=mnp GC=>AG AG:105 GC:0
EA2454	snippy:4.3.6	variation	3882722	3882722	.	.	0	note=complex GGGCGAT=>CGGTGAC CGGTGAC:119 GGGCGAT:0
EA2454	snippy:4.3.6	variation	3882735	3882735	.	.	0	note=snp C=>T T:140 C:0
EA2454	snippy:4.3.6	variation	3882755	3882755	.	.	0	note=snp T=>C C:149 T:0
EA2454	snippy:4.3.6	variation	3882766	3882766	.	.	0	note=snp A=>G G:152 A:1
EA2454	snippy:4.3.6	variation	3882797	3882797	.	.	0	note=snp T=>A A:139 T:1
EA2454	snippy:4.3.6	variation	3882803	3882803	.	.	0	note=snp A=>G G:128 A:0
EA2454	snippy:4.3.6	variation	3882830	3882830	.	.	0	note=snp T=>C C:114 T:2
EA2454	snippy:4.3.6	variation	3882866	3882866	.	.	0	note=snp T=>C C:107 T:3
EA2454	snippy:4.3.6	variation	3882883	3882883	.	.	0	note=complex AACTGACATCA=>CGTTAACGTCG CGTTAACGTCG:82 AACTGACATCA:3
EA2454	snippy:4.3.6	variation	3882902	3882902	.	.	0	note=snp C=>T T:116 C:0
EA2454	snippy:4.3.6	variation	3882914	3882914	.	.	0	note=snp C=>T T:130 C:3
EA2454	snippy:4.3.6	variation	3882930	3882930	.	.	0	note=snp C=>T T:127 C:0
EA2454	snippy:4.3.6	variation	3882950	3882950	.	.	0	note=snp G=>A A:126 G:2
EA2454	snippy:4.3.6	variation	3882956	3882956	.	.	0	note=snp C=>G G:123 C:1
EA2454	snippy:4.3.6	variation	3883040	3883040	.	.	0	note=complex CGTT=>TGTG TGTG:143 CGTT:1
EA2454	snippy:4.3.6	variation	3883052	3883052	.	.	0	note=snp C=>G G:160 C:1
EA2454	snippy:4.3.6	variation	3883073	3883073	.	.	0	note=snp G=>T T:164 G:4
EA2454	snippy:4.3.6	variation	3883106	3883106	.	.	0	note=snp A=>G G:166 A:3
EA2454	snippy:4.3.6	variation	3883133	3883133	.	.	0	note=snp A=>G G:162 A:0
EA2454	snippy:4.3.6	variation	3883253	3883253	.	.	0	note=snp T=>C C:161 T:0
EA2454	snippy:4.3.6	variation	3883262	3883262	.	.	0	note=snp C=>T T:151 C:2
EA2454	snippy:4.3.6	variation	3883351	3883351	.	.	0	note=snp C=>T T:147 C:0
EA2454	snippy:4.3.6	variation	3883535	3883535	.	.	0	note=snp A=>G G:153 A:0
EA2454	snippy:4.3.6	variation	3883692	3883692	.	.	0	note=snp C=>T T:147 C:2
EA2454	snippy:4.3.6	variation	3883697	3883697	.	.	0	note=snp G=>A A:152 G:0
EA2454	snippy:4.3.6	variation	3883745	3883745	.	.	0	note=snp A=>G G:159 A:0
EA2454	snippy:4.3.6	variation	3883790	3883790	.	.	0	note=snp C=>T T:184 C:0
EA2454	snippy:4.3.6	variation	3883796	3883796	.	.	0	note=complex GGAG=>AGAA AGAA:171 GGAG:0
EA2454	snippy:4.3.6	variation	3883811	3883811	.	.	0	note=snp C=>T T:170 C:0
EA2454	snippy:4.3.6	variation	3883883	3883883	.	.	0	note=snp C=>T T:132 C:0
EA2454	snippy:4.3.6	variation	3883908	3883908	.	.	0	note=snp C=>G G:136 C:0
EA2454	snippy:4.3.6	variation	3883927	3883927	.	.	0	note=snp T=>C C:146 T:0
EA2454	snippy:4.3.6	variation	3883979	3883979	.	.	0	note=snp C=>T T:150 C:0
EA2454	snippy:4.3.6	variation	3884078	3884078	.	.	0	note=snp A=>G G:154 A:0
EA2454	snippy:4.3.6	variation	3884115	3884115	.	.	0	note=snp C=>A A:167 C:0
EA2454	snippy:4.3.6	variation	3884138	3884138	.	.	0	note=snp C=>T T:160 C:0
EA2454	snippy:4.3.6	variation	3884186	3884186	.	.	0	note=snp C=>T T:156 C:0
EA2454	snippy:4.3.6	variation	3884201	3884201	.	.	0	note=complex TGCG=>GGCA GGCA:152 TGCG:0
EA2454	snippy:4.3.6	variation	3884321	3884321	.	.	0	note=complex TGATG=>CGATA CGATA:164 TGATG:0
EA2454	snippy:4.3.6	variation	3884342	3884342	.	.	0	note=snp G=>T T:168 G:1
EA2454	snippy:4.3.6	variation	3884351	3884351	.	.	0	note=snp C=>T T:159 C:0
EA2454	snippy:4.3.6	variation	3884372	3884372	.	.	0	note=snp G=>A A:148 G:0
EA2454	snippy:4.3.6	variation	3884388	3884388	.	.	0	note=complex CTG=>TTT TTT:132 CTG:0
EA2454	snippy:4.3.6	variation	3884400	3884400	.	.	0	note=complex GCT=>CCG CCG:123 GCT:0
EA2454	snippy:4.3.6	variation	3884418	3884418	.	.	0	note=snp A=>C C:137 A:1
EA2454	snippy:4.3.6	variation	3884430	3884430	.	.	0	note=snp T=>C C:138 T:0
EA2454	snippy:4.3.6	variation	3884444	3884444	.	.	0	note=snp A=>G G:137 A:0
EA2454	snippy:4.3.6	variation	3884450	3884450	.	.	0	note=snp A=>G G:132 A:0
EA2454	snippy:4.3.6	variation	3884458	3884458	.	.	0	note=snp A=>G G:127 A:1
EA2454	snippy:4.3.6	variation	3884471	3884471	.	.	0	note=snp G=>C C:123 G:1
EA2454	snippy:4.3.6	variation	3884537	3884537	.	.	0	note=complex ACGT=>GCGC GCGC:136 ACGT:0
EA2454	snippy:4.3.6	variation	3884549	3884549	.	.	0	note=snp A=>G G:142 A:0
EA2454	snippy:4.3.6	variation	3884591	3884591	.	.	0	note=snp A=>G G:153 A:0
EA2454	snippy:4.3.6	variation	3884597	3884597	.	.	0	note=snp C=>A A:156 C:0
EA2454	snippy:4.3.6	variation	3884615	3884615	.	.	0	note=snp G=>A A:153 G:1
EA2454	snippy:4.3.6	variation	3884622	3884622	.	.	0	note=snp T=>A A:161 T:0
EA2454	snippy:4.3.6	variation	3884663	3884663	.	.	0	note=complex CCGT=>ACGG ACGG:146 CCGT:0
EA2454	snippy:4.3.6	variation	3884753	3884753	.	.	0	note=snp T=>C C:145 T:2
EA2454	snippy:4.3.6	variation	3884846	3884846	.	.	0	note=snp C=>T T:137 C:0
EA2454	snippy:4.3.6	variation	3884872	3884872	.	.	0	note=snp A=>G G:132 A:2
EA2454	snippy:4.3.6	variation	3884888	3884888	.	.	0	note=snp A=>T T:115 A:2
EA2454	snippy:4.3.6	variation	3884897	3884897	.	.	0	note=complex TGGC=>CGGT CGGT:118 TGGC:3
EA2454	snippy:4.3.6	variation	3884948	3884948	.	.	0	note=snp T=>C C:116 T:0
EA2454	snippy:4.3.6	variation	3884985	3884985	.	.	0	note=snp A=>G G:138 A:0
EA2454	snippy:4.3.6	variation	3885028	3885028	.	.	0	note=snp G=>A A:159 G:0
EA2454	snippy:4.3.6	variation	3885050	3885050	.	.	0	note=snp A=>G G:159 A:0
EA2454	snippy:4.3.6	variation	3885059	3885059	.	.	0	note=snp G=>A A:153 G:1
EA2454	snippy:4.3.6	variation	3885075	3885075	.	.	0	note=snp G=>T T:146 G:0
EA2454	snippy:4.3.6	variation	3885084	3885084	.	.	0	note=snp A=>T T:147 A:0
EA2454	snippy:4.3.6	variation	3885116	3885116	.	.	0	note=snp G=>A A:139 G:0
EA2454	snippy:4.3.6	variation	3885126	3885126	.	.	0	note=snp T=>C C:140 T:0
EA2454	snippy:4.3.6	variation	3885136	3885136	.	.	0	note=snp A=>T T:131 A:0
EA2454	snippy:4.3.6	variation	3885262	3885262	.	.	0	note=snp C=>T T:150 C:0
EA2454	snippy:4.3.6	variation	3885267	3885267	.	.	0	note=snp A=>G G:155 A:0
EA2454	snippy:4.3.6	variation	3885276	3885276	.	.	0	note=snp A=>G G:157 A:1
EA2454	snippy:4.3.6	variation	3885318	3885318	.	.	0	note=snp C=>A A:145 C:1
EA2454	snippy:4.3.6	variation	3885384	3885384	.	.	0	note=snp C=>G G:150 C:0
EA2454	snippy:4.3.6	variation	3885390	3885390	.	.	0	note=snp T=>A A:139 T:0
EA2454	snippy:4.3.6	variation	3885435	3885435	.	.	0	note=snp G=>T T:139 G:3
EA2454	snippy:4.3.6	variation	3885462	3885462	.	.	0	note=complex GCGTGGAGCC=>ACGCGGTGCT ACGCGGTGCT:115 GCGTGGAGCC:0
EA2454	snippy:4.3.6	variation	3885480	3885480	.	.	0	note=snp T=>G G:140 T:0
EA2454	snippy:4.3.6	variation	3885517	3885517	.	.	0	note=snp G=>A A:149 G:0
EA2454	snippy:4.3.6	variation	3885531	3885531	.	.	0	note=snp G=>A A:151 G:3
EA2454	snippy:4.3.6	variation	3885636	3885636	.	.	0	note=snp G=>T T:148 G:0
EA2454	snippy:4.3.6	variation	3885811	3885811	.	.	0	note=snp G=>A A:101 G:0
EA2454	snippy:4.3.6	variation	3885869	3885869	.	.	0	note=complex TG=>CA CA:100 TG:0
EA2454	snippy:4.3.6	variation	3885876	3885876	.	.	0	note=complex TGTAGCTGGT=>GGTGGCCGGC GGTGGCCGGC:94 TGTAGCTGGT:0
EA2454	snippy:4.3.6	variation	3886347	3886347	.	.	0	note=snp G=>C C:172 G:1
EA2454	snippy:4.3.6	variation	3886583	3886583	.	.	0	note=snp G=>A A:146 G:1
EA2454	snippy:4.3.6	variation	3886645	3886645	.	.	0	note=complex ATC=>CTCAG CTCAG:55 ATC:0
EA2454	snippy:4.3.6	variation	3886691	3886691	.	.	0	note=complex GTA=>ATG ATG:26 GTA:1
EA2454	snippy:4.3.6	variation	3886844	3886844	.	.	0	note=snp A=>G G:113 A:0
EA2454	snippy:4.3.6	variation	3886893	3886893	.	.	0	note=snp A=>G G:119 A:0
EA2454	snippy:4.3.6	variation	3886901	3886901	.	.	0	note=snp A=>G G:116 A:0
EA2454	snippy:4.3.6	variation	3886942	3886942	.	.	0	note=snp A=>C C:139 A:0
EA2454	snippy:4.3.6	variation	3886972	3886972	.	.	0	note=snp T=>G G:107 T:0
EA2454	snippy:4.3.6	variation	3887005	3887005	.	.	0	note=complex TAT=>AG AG:54 TAT:0
EA2454	snippy:4.3.6	variation	3888283	3888283	.	.	0	note=snp C=>T T:31 C:0
EA2454	snippy:4.3.6	variation	3888595	3888595	.	.	0	note=snp A=>G G:165 A:0
EA2454	snippy:4.3.6	variation	3888922	3888922	.	.	0	note=snp C=>T T:145 C:1
EA2454	snippy:4.3.6	variation	3888966	3888966	.	.	0	note=snp A=>C C:133 A:0
EA2454	snippy:4.3.6	variation	3889072	3889072	.	.	0	note=snp A=>G G:87 A:0
EA2454	snippy:4.3.6	variation	3889577	3889577	.	.	0	note=snp C=>T T:76 C:0
EA2454	snippy:4.3.6	variation	3889661	3889661	.	.	0	note=snp A=>C C:152 A:0
EA2454	snippy:4.3.6	variation	3889703	3889703	.	.	0	note=complex TACA=>CACT CACT:134 TACA:0
EA2454	snippy:4.3.6	variation	3889713	3889713	.	.	0	note=snp A=>G G:147 A:0
EA2454	snippy:4.3.6	variation	3889814	3889814	.	.	0	note=snp G=>C C:163 G:2
EA2454	snippy:4.3.6	variation	3889829	3889829	.	.	0	note=snp A=>G G:168 A:0
EA2454	snippy:4.3.6	variation	3889838	3889838	.	.	0	note=snp G=>A A:172 G:0
EA2454	snippy:4.3.6	variation	3889844	3889844	.	.	0	note=snp A=>G G:175 A:2
EA2454	snippy:4.3.6	variation	3889859	3889859	.	.	0	note=snp C=>T T:171 C:2
EA2454	snippy:4.3.6	variation	3889922	3889922	.	.	0	note=snp C=>T T:166 C:1
EA2454	snippy:4.3.6	variation	3889961	3889961	.	.	0	note=snp G=>A A:155 G:0
EA2454	snippy:4.3.6	variation	3889967	3889967	.	.	0	note=complex TGCTGCC=>CGGTGCA CGGTGCA:130 TGCTGCC:0
EA2454	snippy:4.3.6	variation	3890075	3890075	.	.	0	note=snp C=>T T:156 C:3
EA2454	snippy:4.3.6	variation	3890101	3890101	.	.	0	note=snp C=>T T:160 C:2
EA2454	snippy:4.3.6	variation	3890179	3890179	.	.	0	note=snp G=>A A:166 G:2
EA2454	snippy:4.3.6	variation	3890325	3890325	.	.	0	note=snp G=>A A:156 G:0
EA2454	snippy:4.3.6	variation	3890330	3890330	.	.	0	note=snp G=>A A:158 G:0
EA2454	snippy:4.3.6	variation	3890345	3890345	.	.	0	note=snp T=>C C:152 T:0
EA2454	snippy:4.3.6	variation	3890375	3890375	.	.	0	note=snp C=>T T:156 C:0
EA2454	snippy:4.3.6	variation	3890391	3890391	.	.	0	note=snp C=>A A:164 C:1
EA2454	snippy:4.3.6	variation	3890402	3890402	.	.	0	note=complex TAA=>CAG CAG:146 TAA:0
EA2454	snippy:4.3.6	variation	3890414	3890414	.	.	0	note=snp A=>G G:151 A:0
EA2454	snippy:4.3.6	variation	3890423	3890423	.	.	0	note=snp C=>T T:149 C:1
EA2454	snippy:4.3.6	variation	3890471	3890471	.	.	0	note=snp T=>C C:143 T:1
EA2454	snippy:4.3.6	variation	3890515	3890515	.	.	0	note=complex CTCA=>TTCT TTCT:150 CTCA:0
EA2454	snippy:4.3.6	variation	3890534	3890534	.	.	0	note=mnp CG=>AA AA:151 CG:0
EA2454	snippy:4.3.6	variation	3890560	3890560	.	.	0	note=complex TCTGT=>CCTGC CCTGC:144 TCTGT:0
EA2454	snippy:4.3.6	variation	3890579	3890579	.	.	0	note=snp G=>T T:121 G:0
EA2454	snippy:4.3.6	variation	3890586	3890586	.	.	0	note=snp T=>C C:105 T:0
EA2454	snippy:4.3.6	variation	3890602	3890602	.	.	0	note=snp T=>C C:96 T:0
EA2454	snippy:4.3.6	variation	3890630	3890630	.	.	0	note=snp G=>C C:84 G:0
EA2454	snippy:4.3.6	variation	3890645	3890645	.	.	0	note=complex AATA=>GATG GATG:60 AATA:0
EA2454	snippy:4.3.6	variation	3890654	3890654	.	.	0	note=complex TGCGCCTCAGC=>CACCTCCCACA CACCTCCCACA:56 TGCGCCTCAGC:0
EA2454	snippy:4.3.6	variation	3890671	3890671	.	.	0	note=snp G=>T T:75 G:1
EA2454	snippy:4.3.6	variation	3890745	3890745	.	.	0	note=complex GCCGACAGC=>TCCGCCAGT TCCGCCAGT:135 GCCGACAGC:0
EA2454	snippy:4.3.6	variation	3890785	3890785	.	.	0	note=snp A=>T T:151 A:0
EA2454	snippy:4.3.6	variation	3890808	3890808	.	.	0	note=snp C=>T T:145 C:0
EA2454	snippy:4.3.6	variation	3890842	3890842	.	.	0	note=complex GTGT=>CTGC CTGC:118 GTGT:0
EA2454	snippy:4.3.6	variation	3890866	3890866	.	.	0	note=snp T=>C C:102 T:0
EA2454	snippy:4.3.6	variation	3890897	3890897	.	.	0	note=snp G=>A A:84 G:0
EA2454	snippy:4.3.6	variation	3890908	3890908	.	.	0	note=snp A=>T T:77 A:0
EA2454	snippy:4.3.6	variation	3890922	3890922	.	.	0	note=complex TG=>CT CT:51 TG:0
EA2454	snippy:4.3.6	variation	3890928	3890928	.	.	0	note=complex AACAGCCCCCGGA=>TACAACCACCAGG TACAACCACCAGG:51 AACAGCCCCCGGA:0
EA2454	snippy:4.3.6	variation	3890964	3890964	.	.	0	note=snp T=>C C:72 T:0
EA2454	snippy:4.3.6	variation	3890979	3890979	.	.	0	note=ins C=>CCT CCT:61 C:1
EA2454	snippy:4.3.6	variation	3890999	3890999	.	.	0	note=complex AGG=>GCC GCC:66 AGG:0
EA2454	snippy:4.3.6	variation	3891274	3891274	.	.	0	note=snp G=>T T:171 G:0
EA2454	snippy:4.3.6	variation	3891344	3891344	.	.	0	note=snp T=>C C:91 T:0
EA2454	snippy:4.3.6	variation	3891353	3891353	.	.	0	note=snp C=>T T:88 C:0
EA2454	snippy:4.3.6	variation	3891366	3891366	.	.	0	note=snp A=>G G:89 A:0
EA2454	snippy:4.3.6	variation	3891377	3891377	.	.	0	note=complex CAC=>TAT TAT:80 CAC:0
EA2454	snippy:4.3.6	variation	3891387	3891387	.	.	0	note=ins G=>GTA GTA:82 G:0
EA2454	snippy:4.3.6	variation	3891433	3891433	.	.	0	note=complex AC=>GT GT:75 AC:0
EA2454	snippy:4.3.6	variation	3891444	3891444	.	.	0	note=snp A=>G G:69 A:0
EA2454	snippy:4.3.6	variation	3891453	3891453	.	.	0	note=complex ATAAAGA=>CTGAAGG CTGAAGG:54 ATAAAGA:0
EA2454	snippy:4.3.6	variation	3891475	3891475	.	.	0	note=snp T=>C C:56 T:0
EA2454	snippy:4.3.6	variation	3891492	3891492	.	.	0	note=complex TGTA=>CGTAATGGCTCCCAGTT CGTAATGGCTCCCAGTT:23 TGTA:0
EA2454	snippy:4.3.6	variation	3891503	3891503	.	.	0	note=snp T=>G G:23 T:0
EA2454	snippy:4.3.6	variation	3891524	3891524	.	.	0	note=snp A=>G G:20 A:0
EA2454	snippy:4.3.6	variation	3891535	3891535	.	.	0	note=snp C=>T T:18 C:0
EA2454	snippy:4.3.6	variation	3898998	3898998	.	.	0	note=snp T=>C C:132 T:0
EA2454	snippy:4.3.6	variation	3902332	3902332	.	.	0	note=snp C=>T T:114 C:0
EA2454	snippy:4.3.6	variation	3904266	3904266	.	.	0	note=snp T=>C C:156 T:0
EA2454	snippy:4.3.6	variation	3904915	3904915	.	.	0	note=snp A=>T T:140 A:0
EA2454	snippy:4.3.6	variation	3905020	3905020	.	.	0	note=snp A=>C C:172 A:0
EA2454	snippy:4.3.6	variation	3905167	3905167	.	.	0	note=snp C=>A A:124 C:3
EA2454	snippy:4.3.6	variation	3908657	3908657	.	.	0	note=snp T=>C C:143 T:0
EA2454	snippy:4.3.6	variation	3908840	3908840	.	.	0	note=snp C=>A A:144 C:0
EA2454	snippy:4.3.6	variation	3929224	3929224	.	.	0	note=snp C=>T T:161 C:0
EA2454	snippy:4.3.6	variation	3931051	3931051	.	.	0	note=snp C=>T T:135 C:0
EA2454	snippy:4.3.6	variation	3935774	3935774	.	.	0	note=snp A=>G G:103 A:0
EA2454	snippy:4.3.6	variation	3937328	3937328	.	.	0	note=snp G=>A A:135 G:0
EA2454	snippy:4.3.6	variation	3939722	3939722	.	.	0	note=snp A=>C C:118 A:1
EA2454	snippy:4.3.6	variation	3944749	3944749	.	.	0	note=snp A=>C C:107 A:0
EA2454	snippy:4.3.6	variation	3970007	3970007	.	.	0	note=snp G=>C C:30 G:0
EA2454	snippy:4.3.6	variation	3995997	3995997	.	.	0	note=snp C=>T T:122 C:1
EA2454	snippy:4.3.6	variation	4004474	4004474	.	.	0	note=snp A=>G G:94 A:0
EA2454	snippy:4.3.6	variation	4004676	4004676	.	.	0	note=snp C=>T T:106 C:2
EA2454	snippy:4.3.6	variation	4004935	4004935	.	.	0	note=snp G=>A A:98 G:3
EA2454	snippy:4.3.6	variation	4006309	4006309	.	.	0	note=snp C=>T T:108 C:0
EA2454	snippy:4.3.6	variation	4008915	4008915	.	.	0	note=snp G=>A A:114 G:4
EA2454	snippy:4.3.6	variation	4014768	4014768	.	.	0	note=snp T=>C C:104 T:0
EA2454	snippy:4.3.6	variation	4016930	4016930	.	.	0	note=snp T=>A A:117 T:0
EA2454	snippy:4.3.6	variation	4020647	4020647	.	.	0	note=snp C=>T T:99 C:0
EA2454	snippy:4.3.6	variation	4026172	4026172	.	.	0	note=snp T=>G G:120 T:0
EA2454	snippy:4.3.6	variation	4030798	4030798	.	.	0	note=snp G=>T T:110 G:0
EA2454	snippy:4.3.6	variation	4036181	4036181	.	.	0	note=snp A=>G G:111 A:0
EA2454	snippy:4.3.6	variation	4036304	4036304	.	.	0	note=snp T=>C C:119 T:0
EA2454	snippy:4.3.6	variation	4041761	4041761	.	.	0	note=snp T=>C C:105 T:1
EA2454	snippy:4.3.6	variation	4046742	4046742	.	.	0	note=snp G=>A A:120 G:4
EA2454	snippy:4.3.6	variation	4058462	4058462	.	.	0	note=snp T=>G G:107 T:0
EA2454	snippy:4.3.6	variation	4062557	4062557	.	.	0	note=snp A=>C C:85 A:0
EA2454	snippy:4.3.6	variation	4116563	4116563	.	.	0	note=snp G=>A A:147 G:2
EA2454	snippy:4.3.6	variation	4124353	4124353	.	.	0	note=snp C=>T T:135 C:4
EA2454	snippy:4.3.6	variation	4141091	4141091	.	.	0	note=snp A=>G G:142 A:0
EA2454	snippy:4.3.6	variation	4141431	4141431	.	.	0	note=snp C=>A A:153 C:0
EA2454	snippy:4.3.6	variation	4148761	4148761	.	.	0	note=snp T=>G G:138 T:1
EA2454	snippy:4.3.6	variation	4168245	4168245	.	.	0	note=snp C=>T T:133 C:3
EA2454	snippy:4.3.6	variation	4168585	4168585	.	.	0	note=snp G=>T T:141 G:2
EA2454	snippy:4.3.6	variation	4169457	4169457	.	.	0	note=snp C=>T T:128 C:3
EA2454	snippy:4.3.6	variation	4174762	4174762	.	.	0	note=snp G=>T T:141 G:3
EA2454	snippy:4.3.6	variation	4190304	4190304	.	.	0	note=snp C=>T T:109 C:0
EA2454	snippy:4.3.6	variation	4192189	4192189	.	.	0	note=snp G=>A A:121 G:3
EA2454	snippy:4.3.6	variation	4200656	4200656	.	.	0	note=snp A=>G G:93 A:0
EA2454	snippy:4.3.6	variation	4201996	4201996	.	.	0	note=snp A=>G G:130 A:0
EA2454	snippy:4.3.6	variation	4204476	4204476	.	.	0	note=snp G=>T T:126 G:2
EA2454	snippy:4.3.6	variation	4205428	4205428	.	.	0	note=snp A=>G G:107 A:2
EA2454	snippy:4.3.6	variation	4208099	4208099	.	.	0	note=snp C=>T T:114 C:0
EA2454	snippy:4.3.6	variation	4208280	4208280	.	.	0	note=snp G=>T T:113 G:0
EA2454	snippy:4.3.6	variation	4212664	4212664	.	.	0	note=snp T=>A A:114 T:0
EA2454	snippy:4.3.6	variation	4216725	4216725	.	.	0	note=del CTTTT=>C C:80 CTTTT:0
EA2454	snippy:4.3.6	variation	4220410	4220410	.	.	0	note=snp G=>A A:106 G:2
EA2454	snippy:4.3.6	variation	4227994	4227994	.	.	0	note=snp G=>T T:102 G:0
EA2454	snippy:4.3.6	variation	4231555	4231555	.	.	0	note=snp C=>T T:139 C:1
EA2454	snippy:4.3.6	variation	4231669	4231669	.	.	0	note=snp C=>T T:137 C:0
EA2454	snippy:4.3.6	variation	4234319	4234319	.	.	0	note=snp A=>G G:115 A:0
EA2454	snippy:4.3.6	variation	4235320	4235320	.	.	0	note=snp A=>G G:117 A:0
EA2454	snippy:4.3.6	variation	4235599	4235599	.	.	0	note=snp C=>T T:126 C:0
EA2454	snippy:4.3.6	variation	4236400	4236400	.	.	0	note=snp C=>T T:138 C:0
EA2454	snippy:4.3.6	variation	4240327	4240327	.	.	0	note=snp G=>A A:107 G:0
EA2454	snippy:4.3.6	variation	4247151	4247151	.	.	0	note=del GGCTGCCGGACTCATTCGCAGTGGACAAATTTT=>G G:29 GGCTGCCGGACTCATTCGCAGTGGACAAATTTT:0
EA2454	snippy:4.3.6	variation	4257673	4257673	.	.	0	note=snp C=>T T:123 C:2
EA2454	snippy:4.3.6	variation	4259428	4259428	.	.	0	note=snp A=>G G:105 A:0
EA2454	snippy:4.3.6	variation	4267142	4267142	.	.	0	note=snp A=>G G:125 A:0
EA2454	snippy:4.3.6	variation	4272983	4272983	.	.	0	note=snp A=>G G:112 A:0
EA2454	snippy:4.3.6	variation	4273176	4273176	.	.	0	note=snp C=>T T:121 C:0
EA2454	snippy:4.3.6	variation	4281791	4281791	.	.	0	note=snp G=>A A:123 G:0
EA2454	snippy:4.3.6	variation	4282555	4282555	.	.	0	note=snp G=>A A:101 G:5
EA2454	snippy:4.3.6	variation	4283531	4283531	.	.	0	note=snp A=>T T:99 A:0
EA2454	snippy:4.3.6	variation	4285277	4285277	.	.	0	note=snp C=>T T:121 C:0
EA2454	snippy:4.3.6	variation	4290073	4290073	.	.	0	note=del AGGAT=>A A:87 AGGAT:0
EA2454	snippy:4.3.6	variation	4293633	4293633	.	.	0	note=del AC=>A A:18 AC:0
EA2454	snippy:4.3.6	variation	4318390	4318390	.	.	0	note=snp A=>G G:115 A:0
EA2454	snippy:4.3.6	variation	4321572	4321572	.	.	0	note=snp T=>C C:15 T:0
EA2454	snippy:4.3.6	variation	4321596	4321596	.	.	0	note=snp G=>T T:40 G:0
EA2454	snippy:4.3.6	variation	4322514	4322514	.	.	0	note=snp A=>G G:155 A:1
EA2454	snippy:4.3.6	variation	4323585	4323585	.	.	0	note=snp G=>A A:128 G:2
EA2454	snippy:4.3.6	variation	4325610	4325610	.	.	0	note=snp G=>T T:143 G:1
EA2454	snippy:4.3.6	variation	4326301	4326301	.	.	0	note=snp A=>G G:152 A:0
EA2454	snippy:4.3.6	variation	4351324	4351324	.	.	0	note=snp G=>A A:152 G:0
EA2454	snippy:4.3.6	variation	4357863	4357863	.	.	0	note=del AT=>A A:62 AT:0
EA2454	snippy:4.3.6	variation	4380080	4380080	.	.	0	note=snp A=>C C:98 A:2
EA2454	snippy:4.3.6	variation	4394302	4394302	.	.	0	note=snp C=>T T:145 C:2
EA2454	snippy:4.3.6	variation	4394869	4394869	.	.	0	note=snp T=>C C:129 T:0
EA2454	snippy:4.3.6	variation	4395064	4395064	.	.	0	note=snp C=>T T:100 C:1
EA2454	snippy:4.3.6	variation	4396058	4396058	.	.	0	note=snp C=>T T:100 C:1
EA2454	snippy:4.3.6	variation	4414071	4414071	.	.	0	note=snp G=>T T:118 G:0
EA2454	snippy:4.3.6	variation	4414845	4414845	.	.	0	note=snp G=>T T:183 G:0
EA2454	snippy:4.3.6	variation	4416190	4416190	.	.	0	note=snp A=>G G:137 A:0
EA2454	snippy:4.3.6	variation	4419628	4419628	.	.	0	note=snp T=>C C:130 T:0
EA2454	snippy:4.3.6	variation	4420363	4420363	.	.	0	note=snp A=>G G:124 A:0
EA2454	snippy:4.3.6	variation	4425949	4425949	.	.	0	note=snp A=>G G:50 A:0
EA2454	snippy:4.3.6	variation	4425971	4425971	.	.	0	note=snp C=>T T:68 C:0
EA2454	snippy:4.3.6	variation	4426004	4426004	.	.	0	note=snp C=>T T:102 C:0
EA2454	snippy:4.3.6	variation	4426020	4426020	.	.	0	note=complex GTT=>ATA ATA:97 GTT:0
EA2454	snippy:4.3.6	variation	4426268	4426268	.	.	0	note=snp A=>G G:113 A:0
EA2454	snippy:4.3.6	variation	4426346	4426346	.	.	0	note=snp A=>C C:112 A:0
EA2454	snippy:4.3.6	variation	4426449	4426449	.	.	0	note=snp T=>C C:93 T:0
EA2454	snippy:4.3.6	variation	4426552	4426552	.	.	0	note=complex GCGG=>ACGA ACGA:27 GCGG:0
EA2454	snippy:4.3.6	variation	4426565	4426565	.	.	0	note=snp A=>G G:46 A:0
EA2454	snippy:4.3.6	variation	4426570	4426570	.	.	0	note=snp G=>A A:54 G:0
EA2454	snippy:4.3.6	variation	4426578	4426578	.	.	0	note=snp C=>T T:66 C:0
EA2454	snippy:4.3.6	variation	4426585	4426585	.	.	0	note=complex GGTG=>AGTT AGTT:71 GGTG:0
EA2454	snippy:4.3.6	variation	4426615	4426615	.	.	0	note=snp G=>A A:78 G:0
EA2454	snippy:4.3.6	variation	4426633	4426633	.	.	0	note=snp A=>G G:68 A:0
EA2454	snippy:4.3.6	variation	4426654	4426654	.	.	0	note=complex GCAAG=>TCAAT TCAAT:44 GCAAG:0
EA2454	snippy:4.3.6	variation	4449842	4449842	.	.	0	note=snp C=>T T:35 C:0
EA2454	snippy:4.3.6	variation	4449848	4449848	.	.	0	note=complex CGGA=>TGGT TGGT:40 CGGA:0
EA2454	snippy:4.3.6	variation	4449881	4449881	.	.	0	note=snp T=>C C:67 T:0
EA2454	snippy:4.3.6	variation	4449908	4449908	.	.	0	note=snp C=>T T:77 C:0
EA2454	snippy:4.3.6	variation	4449923	4449923	.	.	0	note=complex TGAT=>AGAC AGAC:73 TGAT:0
EA2454	snippy:4.3.6	variation	4449935	4449935	.	.	0	note=complex CGTT=>TGTG TGTG:71 CGTT:0
EA2454	snippy:4.3.6	variation	4449956	4449956	.	.	0	note=snp T=>C C:69 T:0
EA2454	snippy:4.3.6	variation	4449974	4449974	.	.	0	note=snp T=>C C:67 T:0
EA2454	snippy:4.3.6	variation	4449983	4449983	.	.	0	note=snp C=>G G:69 C:0
EA2454	snippy:4.3.6	variation	4450022	4450022	.	.	0	note=snp T=>G G:69 T:0
EA2454	snippy:4.3.6	variation	4450067	4450067	.	.	0	note=snp C=>T T:69 C:0
EA2454	snippy:4.3.6	variation	4450115	4450115	.	.	0	note=snp G=>T T:65 G:1
EA2454	snippy:4.3.6	variation	4450151	4450151	.	.	0	note=snp A=>G G:56 A:0
EA2454	snippy:4.3.6	variation	4450286	4450286	.	.	0	note=snp C=>G G:74 C:1
EA2454	snippy:4.3.6	variation	4450294	4450294	.	.	0	note=snp T=>A A:69 T:0
EA2454	snippy:4.3.6	variation	4450348	4450348	.	.	0	note=complex TCCGT=>ACCGA ACCGA:62 TCCGT:1
EA2454	snippy:4.3.6	variation	4450358	4450358	.	.	0	note=snp C=>T T:63 C:0
EA2454	snippy:4.3.6	variation	4450366	4450366	.	.	0	note=complex TGGAGGAA=>CGGAACAG CGGAACAG:50 TGGAGGAA:0
EA2454	snippy:4.3.6	variation	4450397	4450397	.	.	0	note=snp G=>A A:69 G:0
EA2454	snippy:4.3.6	variation	4450432	4450432	.	.	0	note=snp A=>G G:73 A:0
EA2454	snippy:4.3.6	variation	4450441	4450441	.	.	0	note=snp C=>G G:73 C:1
EA2454	snippy:4.3.6	variation	4450451	4450451	.	.	0	note=complex CAG=>ACC ACC:73 CAG:1
EA2454	snippy:4.3.6	variation	4450462	4450462	.	.	0	note=snp C=>T T:89 C:1
EA2454	snippy:4.3.6	variation	4450481	4450481	.	.	0	note=snp A=>G G:83 A:0
EA2454	snippy:4.3.6	variation	4450486	4450486	.	.	0	note=snp C=>G G:82 C:0
EA2454	snippy:4.3.6	variation	4450539	4450539	.	.	0	note=complex TAAAG=>CAAAA CAAAA:79 TAAAG:1
EA2454	snippy:4.3.6	variation	4450561	4450561	.	.	0	note=snp A=>G G:79 A:0
EA2454	snippy:4.3.6	variation	4450579	4450579	.	.	0	note=snp G=>A A:81 G:0
EA2454	snippy:4.3.6	variation	4450589	4450589	.	.	0	note=snp T=>C C:87 T:0
EA2454	snippy:4.3.6	variation	4450648	4450648	.	.	0	note=snp C=>T T:90 C:0
EA2454	snippy:4.3.6	variation	4450666	4450666	.	.	0	note=complex TACG=>CACA CACA:91 TACG:0
EA2454	snippy:4.3.6	variation	4450690	4450690	.	.	0	note=complex AGGT=>GGGA GGGA:85 AGGT:0
EA2454	snippy:4.3.6	variation	4450699	4450699	.	.	0	note=snp A=>G G:92 A:0
EA2454	snippy:4.3.6	variation	4450713	4450713	.	.	0	note=snp A=>G G:91 A:0
EA2454	snippy:4.3.6	variation	4450722	4450722	.	.	0	note=snp C=>A A:93 C:0
EA2454	snippy:4.3.6	variation	4450731	4450731	.	.	0	note=snp G=>A A:93 G:0
EA2454	snippy:4.3.6	variation	4450747	4450747	.	.	0	note=snp A=>G G:80 A:0
EA2454	snippy:4.3.6	variation	4450776	4450776	.	.	0	note=snp A=>C C:77 A:0
EA2454	snippy:4.3.6	variation	4450785	4450785	.	.	0	note=snp C=>T T:86 C:0
EA2454	snippy:4.3.6	variation	4450815	4450815	.	.	0	note=complex CGGTAAGACG=>TGGCAGGTCA TGGCAGGTCA:57 CGGTAAGACG:0
EA2454	snippy:4.3.6	variation	4450836	4450836	.	.	0	note=complex TAAC=>CAAT CAAT:76 TAAC:0
EA2454	snippy:4.3.6	variation	4450846	4450846	.	.	0	note=snp C=>T T:81 C:0
EA2454	snippy:4.3.6	variation	4450861	4450861	.	.	0	note=snp T=>C C:80 T:1
EA2454	snippy:4.3.6	variation	4450878	4450878	.	.	0	note=snp C=>T T:81 C:1
EA2454	snippy:4.3.6	variation	4450914	4450914	.	.	0	note=complex GGATAAAAT=>AGAGAAAGC AGAGAAAGC:67 GGATAAAAT:0
EA2454	snippy:4.3.6	variation	4450956	4450956	.	.	0	note=snp T=>C C:85 T:1
EA2454	snippy:4.3.6	variation	4450970	4450970	.	.	0	note=snp C=>G G:85 C:0
EA2454	snippy:4.3.6	variation	4451046	4451046	.	.	0	note=snp T=>A A:93 T:0
EA2454	snippy:4.3.6	variation	4451056	4451056	.	.	0	note=complex AGTGTC=>TGCATT TGCATT:77 AGTGTC:0
EA2454	snippy:4.3.6	variation	4451073	4451073	.	.	0	note=snp G=>C C:89 G:1
EA2454	snippy:4.3.6	variation	4451118	4451118	.	.	0	note=snp G=>A A:86 G:1
EA2454	snippy:4.3.6	variation	4451130	4451130	.	.	0	note=complex TCCT=>CCCA CCCA:78 TCCT:0
EA2454	snippy:4.3.6	variation	4451160	4451160	.	.	0	note=complex GCGA=>ACGG ACGG:78 GCGA:0
EA2454	snippy:4.3.6	variation	4451178	4451178	.	.	0	note=complex GGCA=>AGCT AGCT:76 GGCA:0
EA2454	snippy:4.3.6	variation	4451195	4451195	.	.	0	note=snp T=>C C:73 T:0
EA2454	snippy:4.3.6	variation	4451214	4451214	.	.	0	note=snp A=>T T:67 A:0
EA2454	snippy:4.3.6	variation	4451227	4451227	.	.	0	note=complex CAA=>GAG GAG:53 CAA:0
EA2454	snippy:4.3.6	variation	4451235	4451235	.	.	0	note=snp A=>G G:48 A:0
EA2454	snippy:4.3.6	variation	4451245	4451245	.	.	0	note=snp T=>C C:41 T:0
EA2454	snippy:4.3.6	variation	4451251	4451251	.	.	0	note=snp C=>T T:31 C:1
EA2454	snippy:4.3.6	variation	4451269	4451269	.	.	0	note=complex CGG=>TGC TGC:19 CGG:0
EA2454	snippy:4.3.6	variation	4478572	4478572	.	.	0	note=snp A=>T T:118 A:0
EA2454	snippy:4.3.6	variation	4491535	4491535	.	.	0	note=snp T=>C C:99 T:3
EA2454	snippy:4.3.6	variation	4505570	4505570	.	.	0	note=ins A=>AG AG:95 A:0
EA2454	snippy:4.3.6	variation	4509771	4509771	.	.	0	note=snp G=>A A:122 G:0
EA2454	snippy:4.3.6	variation	4510584	4510584	.	.	0	note=del GT=>G G:101 GT:0
EA2454	snippy:4.3.6	variation	4515568	4515568	.	.	0	note=snp T=>C C:103 T:0
EA2454	snippy:4.3.6	variation	4522911	4522911	.	.	0	note=ins C=>CG CG:26 C:0
EA2454	snippy:4.3.6	variation	4524700	4524700	.	.	0	note=snp T=>C C:87 T:0
EA2454	snippy:4.3.6	variation	4526687	4526687	.	.	0	note=snp C=>A A:117 C:0
EA2454	snippy:4.3.6	variation	4533515	4533515	.	.	0	note=snp A=>G G:143 A:0
EA2454	snippy:4.3.6	variation	4537931	4537931	.	.	0	note=snp T=>G G:114 T:0
EA2454	snippy:4.3.6	variation	4544866	4544866	.	.	0	note=snp T=>C C:112 T:0
EA2454	snippy:4.3.6	variation	4559006	4559006	.	.	0	note=snp C=>A A:102 C:0
EA2454	snippy:4.3.6	variation	4565157	4565157	.	.	0	note=snp C=>T T:100 C:3
EA2454	snippy:4.3.6	variation	4568271	4568271	.	.	0	note=snp A=>G G:116 A:0
EA2454	snippy:4.3.6	variation	4568846	4568846	.	.	0	note=snp G=>T T:116 G:0
EA2454	snippy:4.3.6	variation	4578784	4578784	.	.	0	note=snp A=>G G:122 A:0
EA2454	snippy:4.3.6	variation	4586361	4586361	.	.	0	note=snp T=>C C:101 T:0
EA2454	snippy:4.3.6	variation	4588946	4588946	.	.	0	note=snp A=>G G:115 A:0
EA2454	snippy:4.3.6	variation	4593973	4593973	.	.	0	note=snp A=>C C:117 A:0
EA2454	snippy:4.3.6	variation	4595613	4595613	.	.	0	note=snp A=>G G:131 A:0
EA2454	snippy:4.3.6	variation	4600416	4600416	.	.	0	note=snp G=>A A:149 G:1
EA2454	snippy:4.3.6	variation	4603502	4603502	.	.	0	note=mnp CA=>TC TC:144 CA:0
EA2454	snippy:4.3.6	variation	4613336	4613336	.	.	0	note=snp C=>A A:143 C:2
EA2454	snippy:4.3.6	variation	4613663	4613663	.	.	0	note=snp G=>T T:176 G:0
EA2454	snippy:4.3.6	variation	4616724	4616724	.	.	0	note=snp A=>G G:139 A:0
EA2454	snippy:4.3.6	variation	4617046	4617046	.	.	0	note=snp T=>C C:154 T:3
EA2454	snippy:4.3.6	variation	4617581	4617581	.	.	0	note=snp A=>G G:132 A:0
EA2454	snippy:4.3.6	variation	4617743	4617743	.	.	0	note=snp T=>A A:161 T:0
EA2454	snippy:4.3.6	variation	4619923	4619923	.	.	0	note=snp T=>C C:147 T:0
EA2454	snippy:4.3.6	variation	4626629	4626629	.	.	0	note=snp A=>G G:145 A:0
EA2454	snippy:4.3.6	variation	4638132	4638132	.	.	0	note=snp G=>A A:150 G:3
EA2454	snippy:4.3.6	variation	4640298	4640298	.	.	0	note=snp C=>T T:157 C:0
EA2454	snippy:4.3.6	variation	4652543	4652543	.	.	0	note=snp C=>T T:108 C:0
EA2454	snippy:4.3.6	variation	4653396	4653396	.	.	0	note=snp C=>T T:96 C:1
EA2454	snippy:4.3.6	variation	4660745	4660745	.	.	0	note=snp G=>A A:114 G:0
EA2454	snippy:4.3.6	variation	4661591	4661591	.	.	0	note=snp A=>G G:91 A:0
EA2454	snippy:4.3.6	variation	4664714	4664714	.	.	0	note=snp C=>A A:121 C:0
EA2454	snippy:4.3.6	variation	4665829	4665829	.	.	0	note=snp G=>A A:102 G:1
EA2454	snippy:4.3.6	variation	4665968	4665968	.	.	0	note=snp G=>A A:88 G:1
EA2454	snippy:4.3.6	variation	4670848	4670848	.	.	0	note=complex TGCG=>CGCA CGCA:142 TGCG:0
EA2454	snippy:4.3.6	variation	4670861	4670861	.	.	0	note=snp T=>C C:153 T:0
EA2454	snippy:4.3.6	variation	4670947	4670947	.	.	0	note=snp T=>C C:176 T:0
EA2454	snippy:4.3.6	variation	4676005	4676005	.	.	0	note=snp C=>T T:19 C:0
EA2454	snippy:4.3.6	variation	4676024	4676024	.	.	0	note=complex TGAG=>GGAT GGAT:24 TGAG:0
EA2454	snippy:4.3.6	variation	4676032	4676032	.	.	0	note=del CA=>C C:29 CA:0
EA2454	snippy:4.3.6	variation	4676043	4676043	.	.	0	note=snp G=>T T:38 G:1
EA2454	snippy:4.3.6	variation	4676049	4676049	.	.	0	note=snp T=>G G:45 T:0
EA2454	snippy:4.3.6	variation	4676060	4676060	.	.	0	note=snp G=>T T:57 G:1
EA2454	snippy:4.3.6	variation	4676065	4676065	.	.	0	note=snp T=>A A:71 T:0
EA2454	snippy:4.3.6	variation	4676075	4676075	.	.	0	note=complex GATG=>TATT TATT:85 GATG:1
EA2454	snippy:4.3.6	variation	4676096	4676096	.	.	0	note=complex GAA=>CAG CAG:83 GAA:1
EA2454	snippy:4.3.6	variation	4676103	4676103	.	.	0	note=complex GGGT=>TGAC TGAC:83 GGGT:1
EA2454	snippy:4.3.6	variation	4676406	4676406	.	.	0	note=snp G=>C C:143 G:0
EA2454	snippy:4.3.6	variation	4676421	4676421	.	.	0	note=snp G=>A A:143 G:2
EA2454	snippy:4.3.6	variation	4676505	4676505	.	.	0	note=snp C=>G G:125 C:2
EA2454	snippy:4.3.6	variation	4676553	4676553	.	.	0	note=snp C=>T T:147 C:0
EA2454	snippy:4.3.6	variation	4676559	4676559	.	.	0	note=snp T=>C C:152 T:0
EA2454	snippy:4.3.6	variation	4676571	4676571	.	.	0	note=complex TGTC=>AGTG AGTG:146 TGTC:0
EA2454	snippy:4.3.6	variation	4676635	4676635	.	.	0	note=snp C=>A A:160 C:0
EA2454	snippy:4.3.6	variation	4676734	4676734	.	.	0	note=snp C=>G G:149 C:0
EA2454	snippy:4.3.6	variation	4676748	4676748	.	.	0	note=snp A=>G G:152 A:0
EA2454	snippy:4.3.6	variation	4676766	4676766	.	.	0	note=snp T=>C C:146 T:0
EA2454	snippy:4.3.6	variation	4676781	4676781	.	.	0	note=snp A=>G G:150 A:0
EA2454	snippy:4.3.6	variation	4676961	4676961	.	.	0	note=complex ATC=>GTT GTT:63 ATC:0
EA2454	snippy:4.3.6	variation	4676980	4676980	.	.	0	note=snp A=>C C:45 A:0
EA2454	snippy:4.3.6	variation	4696797	4696797	.	.	0	note=snp G=>C C:11 G:0
EA2454	snippy:4.3.6	variation	4696803	4696803	.	.	0	note=complex TACC=>CACG CACG:16 TACC:0
EA2454	snippy:4.3.6	variation	4696815	4696815	.	.	0	note=snp T=>G G:22 T:0
EA2454	snippy:4.3.6	variation	4696830	4696830	.	.	0	note=snp C=>T T:24 C:0
EA2454	snippy:4.3.6	variation	4696839	4696839	.	.	0	note=snp T=>C C:31 T:0
EA2454	snippy:4.3.6	variation	4696851	4696851	.	.	0	note=snp T=>C C:38 T:0
EA2454	snippy:4.3.6	variation	4696857	4696857	.	.	0	note=snp T=>A A:44 T:0
EA2454	snippy:4.3.6	variation	4696869	4696869	.	.	0	note=snp G=>C C:50 G:0
EA2454	snippy:4.3.6	variation	4696890	4696890	.	.	0	note=snp C=>T T:46 C:0
EA2454	snippy:4.3.6	variation	4696896	4696896	.	.	0	note=complex GATTAGTTCGACA=>CATCAGCTCAACG CATCAGCTCAACG:30 GATTAGTTCGACA:0
EA2454	snippy:4.3.6	variation	4696914	4696914	.	.	0	note=snp G=>C C:48 G:0
EA2454	snippy:4.3.6	variation	4696932	4696932	.	.	0	note=complex GCTC=>ACTG ACTG:54 GCTC:0
EA2454	snippy:4.3.6	variation	4696944	4696944	.	.	0	note=complex AGCAA=>TGCAC TGCAC:58 AGCAA:0
EA2454	snippy:4.3.6	variation	4696954	4696954	.	.	0	note=snp A=>C C:68 A:0
EA2454	snippy:4.3.6	variation	4696967	4696967	.	.	0	note=snp C=>T T:75 C:2
EA2454	snippy:4.3.6	variation	4697007	4697007	.	.	0	note=complex ACAC=>GCAG GCAG:100 ACAC:2
EA2454	snippy:4.3.6	variation	4697017	4697017	.	.	0	note=complex GTCACAAA=>ATCATAAG ATCATAAG:85 GTCACAAA:0
EA2454	snippy:4.3.6	variation	4697052	4697052	.	.	0	note=snp A=>G G:63 A:0
EA2454	snippy:4.3.6	variation	4697058	4697058	.	.	0	note=snp G=>A A:57 G:0
EA2454	snippy:4.3.6	variation	4702030	4702030	.	.	0	note=snp C=>T T:130 C:2
EA2454	snippy:4.3.6	variation	4702096	4702096	.	.	0	note=snp T=>C C:145 T:0
EA2454	snippy:4.3.6	variation	4702109	4702109	.	.	0	note=snp C=>T T:125 C:0
EA2454	snippy:4.3.6	variation	4702176	4702176	.	.	0	note=snp T=>C C:77 T:1
EA2454	snippy:4.3.6	variation	4702184	4702184	.	.	0	note=complex AATATCCGCTCTGAGCA=>GATGTGCAGTTTGAACC GATGTGCAGTTTGAACC:52 AATATCCGCTCTGAGCA:0
EA2454	snippy:4.3.6	variation	4702211	4702211	.	.	0	note=snp G=>C C:79 G:1
EA2454	snippy:4.3.6	variation	4702233	4702233	.	.	0	note=snp C=>T T:95 C:0
EA2454	snippy:4.3.6	variation	4702241	4702241	.	.	0	note=snp A=>C C:103 A:0
EA2454	snippy:4.3.6	variation	4702246	4702246	.	.	0	note=snp A=>G G:104 A:0
EA2454	snippy:4.3.6	variation	4702261	4702261	.	.	0	note=snp C=>A A:105 C:0
EA2454	snippy:4.3.6	variation	4702285	4702285	.	.	0	note=snp C=>T T:148 C:0
EA2454	snippy:4.3.6	variation	4702291	4702291	.	.	0	note=complex ACTG=>GCTA GCTA:151 ACTG:0
EA2454	snippy:4.3.6	variation	4702303	4702303	.	.	0	note=snp G=>A A:162 G:1
EA2454	snippy:4.3.6	variation	4702347	4702347	.	.	0	note=complex TTGGCCG=>CTGGACA CTGGACA:124 TTGGCCG:0
EA2454	snippy:4.3.6	variation	4702364	4702364	.	.	0	note=snp A=>G G:146 A:0
EA2454	snippy:4.3.6	variation	4702378	4702378	.	.	0	note=snp T=>C C:147 T:2
EA2454	snippy:4.3.6	variation	4702390	4702390	.	.	0	note=snp A=>T T:124 A:2
EA2454	snippy:4.3.6	variation	4702399	4702399	.	.	0	note=complex TGTGCA=>CGCACT CGCACT:102 TGTGCA:0
EA2454	snippy:4.3.6	variation	4702434	4702434	.	.	0	note=complex ACA=>GCT GCT:118 ACA:0
EA2454	snippy:4.3.6	variation	4702442	4702442	.	.	0	note=complex GGTAG=>AGTAA AGTAA:117 GGTAG:0
EA2454	snippy:4.3.6	variation	4702490	4702490	.	.	0	note=snp G=>C C:126 G:1
EA2454	snippy:4.3.6	variation	4702534	4702534	.	.	0	note=snp G=>C C:129 G:1
EA2454	snippy:4.3.6	variation	4702558	4702558	.	.	0	note=snp C=>T T:118 C:0
EA2454	snippy:4.3.6	variation	4702612	4702612	.	.	0	note=snp A=>G G:136 A:0
EA2454	snippy:4.3.6	variation	4702617	4702617	.	.	0	note=snp G=>A A:138 G:0
EA2454	snippy:4.3.6	variation	4702637	4702637	.	.	0	note=mnp TGT=>GTG GTG:113 TGT:6
EA2454	snippy:4.3.6	variation	4702648	4702648	.	.	0	note=mnp CC=>GG GG:121 CC:0
EA2454	snippy:4.3.6	variation	4702687	4702687	.	.	0	note=snp G=>T T:139 G:1
EA2454	snippy:4.3.6	variation	4702727	4702727	.	.	0	note=snp G=>A A:120 G:0
EA2454	snippy:4.3.6	variation	4702734	4702734	.	.	0	note=snp C=>A A:130 C:0
EA2454	snippy:4.3.6	variation	4702751	4702751	.	.	0	note=snp G=>A A:137 G:0
EA2454	snippy:4.3.6	variation	4702774	4702774	.	.	0	note=snp C=>T T:125 C:0
EA2454	snippy:4.3.6	variation	4702789	4702789	.	.	0	note=complex CA=>TG TG:115 CA:0
EA2454	snippy:4.3.6	variation	4702893	4702893	.	.	0	note=snp T=>C C:126 T:1
EA2454	snippy:4.3.6	variation	4703028	4703028	.	.	0	note=snp T=>C C:135 T:0
EA2454	snippy:4.3.6	variation	4703139	4703139	.	.	0	note=snp C=>G G:146 C:0
EA2454	snippy:4.3.6	variation	4703323	4703323	.	.	0	note=snp G=>C C:131 G:0
EA2454	snippy:4.3.6	variation	4703373	4703373	.	.	0	note=snp C=>T T:91 C:2
EA2454	snippy:4.3.6	variation	4703412	4703412	.	.	0	note=complex GTAC=>ATAT ATAT:72 GTAC:0
EA2454	snippy:4.3.6	variation	4703427	4703427	.	.	0	note=snp T=>C C:74 T:2
EA2454	snippy:4.3.6	variation	4703437	4703437	.	.	0	note=complex CAG=>TCC TCC:55 CAG:1
EA2454	snippy:4.3.6	variation	4703445	4703445	.	.	0	note=snp T=>C C:73 T:1
EA2454	snippy:4.3.6	variation	4703451	4703451	.	.	0	note=snp T=>C C:78 T:0
EA2454	snippy:4.3.6	variation	4703472	4703472	.	.	0	note=snp A=>G G:91 A:2
EA2454	snippy:4.3.6	variation	4703496	4703496	.	.	0	note=snp T=>A A:116 T:0
EA2454	snippy:4.3.6	variation	4703501	4703501	.	.	0	note=snp A=>T T:117 A:4
EA2454	snippy:4.3.6	variation	4703508	4703508	.	.	0	note=complex ACTC=>GCTG GCTG:106 ACTC:0
EA2454	snippy:4.3.6	variation	4703541	4703541	.	.	0	note=snp T=>C C:132 T:4
EA2454	snippy:4.3.6	variation	4703550	4703550	.	.	0	note=snp T=>C C:127 T:0
EA2454	snippy:4.3.6	variation	4703562	4703562	.	.	0	note=snp T=>C C:119 T:0
EA2454	snippy:4.3.6	variation	4703569	4703569	.	.	0	note=complex TCT=>GCC GCC:104 TCT:0
EA2454	snippy:4.3.6	variation	4703634	4703634	.	.	0	note=complex GAAGGCCGCA=>CAAATCTGCG CAAATCTGCG:10 GAAGGCCGCA:0
EA2454	snippy:4.3.6	variation	4703649	4703649	.	.	0	note=complex GGGCTATCGC=>CGCGTACCGT CGCGTACCGT:10 GGGCTATCGC:0
EA2454	snippy:4.3.6	variation	4703670	4703670	.	.	0	note=snp C=>T T:15 C:0
EA2454	snippy:4.3.6	variation	4703688	4703688	.	.	0	note=snp C=>A A:11 C:0
EA2454	snippy:4.3.6	variation	4703718	4703718	.	.	0	note=snp G=>C C:10 G:0
EA2454	snippy:4.3.6	variation	4703748	4703748	.	.	0	note=complex TCGT=>CCGC CCGC:49 TCGT:0
EA2454	snippy:4.3.6	variation	4703772	4703772	.	.	0	note=snp T=>C C:86 T:0
EA2454	snippy:4.3.6	variation	4703793	4703793	.	.	0	note=snp C=>G G:106 C:0
EA2454	snippy:4.3.6	variation	4703811	4703811	.	.	0	note=snp T=>C C:121 T:0
EA2454	snippy:4.3.6	variation	4703856	4703856	.	.	0	note=snp A=>C C:117 A:0
EA2454	snippy:4.3.6	variation	4703886	4703886	.	.	0	note=snp G=>C C:112 G:1
EA2454	snippy:4.3.6	variation	4703910	4703910	.	.	0	note=snp A=>G G:121 A:0
EA2454	snippy:4.3.6	variation	4704003	4704003	.	.	0	note=snp G=>T T:130 G:0
EA2454	snippy:4.3.6	variation	4704045	4704045	.	.	0	note=snp A=>C C:130 A:0
EA2454	snippy:4.3.6	variation	4704180	4704180	.	.	0	note=snp C=>T T:139 C:0
EA2454	snippy:4.3.6	variation	4704188	4704188	.	.	0	note=complex CA=>TG TG:123 CA:0
EA2454	snippy:4.3.6	variation	4704233	4704233	.	.	0	note=complex GAGAGAGAGT=>AAGGAGACGAGA AAGGAGACGAGA:105 GAGAGAGAGT:0
EA2454	snippy:4.3.6	variation	4704274	4704274	.	.	0	note=snp A=>C C:133 A:2
EA2454	snippy:4.3.6	variation	4704300	4704300	.	.	0	note=snp A=>G G:125 A:2
EA2454	snippy:4.3.6	variation	4704305	4704305	.	.	0	note=snp A=>G G:127 A:0
EA2454	snippy:4.3.6	variation	4704326	4704326	.	.	0	note=snp T=>C C:120 T:3
EA2454	snippy:4.3.6	variation	4704335	4704335	.	.	0	note=snp T=>A A:134 T:0
EA2454	snippy:4.3.6	variation	4704344	4704344	.	.	0	note=complex ACTG=>CCTC CCTC:116 ACTG:1
EA2454	snippy:4.3.6	variation	4704356	4704356	.	.	0	note=snp T=>A A:136 T:1
EA2454	snippy:4.3.6	variation	4704362	4704362	.	.	0	note=snp A=>T T:143 A:1
EA2454	snippy:4.3.6	variation	4704368	4704368	.	.	0	note=complex TCTGA=>CCTGT CCTGT:130 TCTGA:1
EA2454	snippy:4.3.6	variation	4704405	4704405	.	.	0	note=snp A=>C C:142 A:1
EA2454	snippy:4.3.6	variation	4704433	4704433	.	.	0	note=complex CTGAA=>TTGAG TTGAG:129 CTGAA:1
EA2454	snippy:4.3.6	variation	4704454	4704454	.	.	0	note=complex CCGCGGT=>GCGTGGC GCGTGGC:97 CCGCGGT:1
EA2454	snippy:4.3.6	variation	4704470	4704470	.	.	0	note=snp T=>C C:96 T:2
EA2454	snippy:4.3.6	variation	4704475	4704475	.	.	0	note=mnp GC=>AT AT:86 GC:2
EA2454	snippy:4.3.6	variation	4704485	4704485	.	.	0	note=snp C=>A A:112 C:1
EA2454	snippy:4.3.6	variation	4704542	4704542	.	.	0	note=snp T=>C C:113 T:1
EA2454	snippy:4.3.6	variation	4704608	4704608	.	.	0	note=snp T=>C C:126 T:0
EA2454	snippy:4.3.6	variation	4704617	4704617	.	.	0	note=snp T=>A A:140 T:0
EA2454	snippy:4.3.6	variation	4704642	4704642	.	.	0	note=snp A=>G G:125 A:1
EA2454	snippy:4.3.6	variation	4704664	4704664	.	.	0	note=snp A=>G G:109 A:1
EA2454	snippy:4.3.6	variation	4704672	4704672	.	.	0	note=snp A=>G G:109 A:1
EA2454	snippy:4.3.6	variation	4704688	4704688	.	.	0	note=del GCCTGC=>G G:74 GCCTGC:1
EA2454	snippy:4.3.6	variation	4704709	4704709	.	.	0	note=snp A=>T T:88 A:1
EA2454	snippy:4.3.6	variation	4704718	4704718	.	.	0	note=complex ACGCTT=>CCATG CCATG:54 ACGCTT:1
EA2454	snippy:4.3.6	variation	4704736	4704736	.	.	0	note=del AAACAGC=>A A:71 AAACAGC:0
EA2454	snippy:4.3.6	variation	4704751	4704751	.	.	0	note=snp C=>T T:99 C:0
EA2454	snippy:4.3.6	variation	4704766	4704766	.	.	0	note=snp T=>C C:108 T:0
EA2454	snippy:4.3.6	variation	4704874	4704874	.	.	0	note=snp G=>A A:91 G:2
EA2454	snippy:4.3.6	variation	4704895	4704895	.	.	0	note=complex TATC=>CGTT CGTT:78 TATC:3
EA2454	snippy:4.3.6	variation	4704904	4704904	.	.	0	note=snp T=>C C:83 T:1
EA2454	snippy:4.3.6	variation	4704909	4704909	.	.	0	note=complex GC=>AT AT:83 GC:3
EA2454	snippy:4.3.6	variation	4704916	4704916	.	.	0	note=snp A=>G G:96 A:3
[truncated: 1,086 more rows]
