# Supplementary material for: Escherichia coli ST302: Genomic Analysis of Virulence Potential and Antimicrobial Resistance Mediated by Mobile Genetic Elements
Source: Front Microbiol. 2020 Jan 21;10:3098. doi: 10.3389/fmicb.2019.03098 (PMC6985150; doi:10.3389/fmicb.2019.03098)
Supplement: DATA S2 — ST302 SNP analysis. [file Data_Sheet_2.ZIP › SNP_Analysis/ST302_SNP/SNP_analysis/snippyout/ST302/EA1682-Poultry-ST302.out/snps.csv]

CHROM	POS	TYPE	REF	ALT	EVIDENCE	FTYPE	STRAND	NT_POS	AA_POS	EFFECT	LOCUS_TAG	GENE	PRODUCT
EA2454	977	snp	T	C	C:42 T:0
EA2454	11382	snp	A	G	G:56 A:0
EA2454	25719	snp	T	C	C:82 T:0
EA2454	26663	snp	C	T	T:54 C:0
EA2454	34494	snp	T	C	C:62 T:0
EA2454	36375	snp	C	A	A:73 C:0
EA2454	37987	snp	T	C	C:109 T:0
EA2454	39065	snp	T	C	C:64 T:0
EA2454	52423	snp	A	C	C:78 A:0
EA2454	56628	snp	A	C	C:43 A:0
EA2454	57116	snp	A	T	T:78 A:0
EA2454	58152	snp	T	C	C:78 T:0
EA2454	67315	snp	A	C	C:63 A:0
EA2454	69595	snp	A	G	G:12 A:0
EA2454	74952	snp	G	T	T:23 G:0
EA2454	80560	snp	C	T	T:117 C:0
EA2454	84557	snp	T	G	G:47 T:0
EA2454	102014	snp	A	T	T:68 A:0
EA2454	109128	snp	C	T	T:42 C:0
EA2454	111773	snp	C	G	G:79 C:0
EA2454	124865	snp	T	C	C:50 T:0
EA2454	131613	snp	A	G	G:48 A:0
EA2454	140951	snp	T	G	G:76 T:1
EA2454	146087	snp	A	C	C:51 A:0
EA2454	162974	snp	G	T	T:35 G:0
EA2454	164371	snp	T	A	A:22 T:0
EA2454	174420	snp	A	G	G:84 A:0
EA2454	186550	snp	T	C	C:105 T:0
EA2454	188717	snp	C	T	T:90 C:0
EA2454	190313	snp	T	C	C:22 T:0
EA2454	220577	snp	G	A	A:74 G:0
EA2454	229589	snp	C	T	T:23 C:0
EA2454	229594	complex	ATCG	TTCA	TTCA:23 ATCG:0
EA2454	229613	complex	AAGACACTA	GCGACGCTG	GCGACGCTG:27 AAGACACTA:0
EA2454	229626	snp	G	C	C:35 G:0
EA2454	239221	snp	A	G	G:47 A:0
EA2454	245301	snp	C	T	T:97 C:0
EA2454	270317	snp	A	T	T:73 A:0
EA2454	277907	snp	G	T	T:73 G:1
EA2454	281316	snp	C	T	T:45 C:0
EA2454	285627	ins	A	AT	AT:45 A:0
EA2454	298286	snp	T	C	C:88 T:0
EA2454	304693	del	AT	A	A:33 AT:0
EA2454	313034	snp	A	G	G:41 A:0
EA2454	317106	snp	T	C	C:54 T:0
EA2454	318467	snp	T	C	C:72 T:0
EA2454	333155	snp	G	T	T:74 G:0
EA2454	334084	snp	G	A	A:67 G:0
EA2454	337102	snp	G	A	A:58 G:0
EA2454	342188	snp	G	A	A:67 G:0
EA2454	350969	snp	A	G	G:65 A:0
EA2454	359374	snp	C	T	T:78 C:0
EA2454	369480	snp	G	A	A:69 G:0
EA2454	371150	snp	T	C	C:62 T:0
EA2454	376903	snp	G	A	A:69 G:0
EA2454	388918	snp	T	G	G:103 T:0
EA2454	393575	snp	A	G	G:84 A:0
EA2454	393743	snp	A	G	G:110 A:0
EA2454	397444	snp	C	G	G:64 C:0
EA2454	407113	snp	A	G	G:95 A:0
EA2454	407887	snp	C	G	G:100 C:0
EA2454	412458	snp	G	A	A:93 G:0
EA2454	425610	snp	C	T	T:93 C:0
EA2454	429541	snp	G	A	A:106 G:0
EA2454	436532	snp	T	G	G:70 T:1
EA2454	437474	snp	A	G	G:70 A:0
EA2454	438347	snp	G	A	A:70 G:0
EA2454	440837	snp	C	A	A:83 C:0
EA2454	447459	snp	A	G	G:38 A:0
EA2454	448711	snp	A	G	G:52 A:0
EA2454	454890	snp	C	T	T:84 C:0
EA2454	457082	snp	C	T	T:52 C:0
EA2454	465826	snp	A	T	T:68 A:0
EA2454	470437	snp	C	T	T:95 C:0
EA2454	472911	snp	T	C	C:68 T:0
EA2454	478727	snp	C	A	A:94 C:3
EA2454	485246	snp	C	T	T:101 C:1
EA2454	485779	snp	C	G	G:156 C:0
EA2454	485955	snp	G	T	T:107 G:0
EA2454	497460	snp	T	G	G:16 T:0
EA2454	500446	snp	C	T	T:83 C:0
EA2454	506728	snp	G	A	A:11 G:0
EA2454	510992	snp	C	T	T:37 C:0
EA2454	519195	snp	G	A	A:14 G:0
EA2454	519811	snp	A	C	C:41 A:0
EA2454	524994	snp	T	G	G:56 T:0
EA2454	528123	snp	A	T	T:56 A:0
EA2454	534151	snp	A	G	G:55 A:0
EA2454	538980	snp	G	A	A:92 G:0
EA2454	539426	snp	T	C	C:115 T:0
EA2454	546428	snp	A	C	C:70 A:0
EA2454	550000	snp	G	A	A:96 G:0
EA2454	559017	snp	A	G	G:71 A:0
EA2454	561226	snp	G	A	A:72 G:0
EA2454	561259	snp	C	A	A:48 C:1
EA2454	561272	snp	T	A	A:40 T:0
EA2454	562933	snp	T	C	C:74 T:0
EA2454	590812	snp	C	T	T:93 C:0
EA2454	597386	snp	A	G	G:68 A:0
EA2454	606088	ins	G	GA	GA:58 G:0
EA2454	611222	del	TGCATA	T	T:17 TGCATA:0
EA2454	613906	snp	C	A	A:11 C:0
EA2454	642337	snp	A	G	G:56 A:0
EA2454	669330	snp	A	G	G:63 A:0
EA2454	670594	snp	C	A	A:102 C:2
EA2454	683177	snp	T	G	G:67 T:0
EA2454	686003	snp	A	G	G:37 A:0
EA2454	686104	snp	G	C	C:60 G:0
EA2454	687410	snp	A	G	G:85 A:0
EA2454	690408	snp	A	G	G:77 A:0
EA2454	690611	snp	T	C	C:80 T:0
EA2454	691294	snp	T	C	C:93 T:0
EA2454	691401	snp	C	T	T:108 C:0
EA2454	705263	snp	C	A	A:63 C:0
EA2454	709632	snp	T	C	C:105 T:0
EA2454	710977	snp	A	G	G:54 A:0
EA2454	715370	snp	C	T	T:92 C:0
EA2454	719734	snp	C	T	T:89 C:0
EA2454	731219	snp	T	G	G:100 T:0
EA2454	731329	snp	G	A	A:117 G:0
EA2454	738814	snp	A	C	C:90 A:0
EA2454	743375	snp	T	A	A:107 T:0
EA2454	751386	snp	G	A	A:76 G:0
EA2454	754898	snp	G	A	A:65 G:0
EA2454	755366	snp	A	G	G:71 A:0
EA2454	756040	snp	T	G	G:65 T:0
EA2454	758394	snp	C	T	T:69 C:0
EA2454	765032	snp	T	C	C:101 T:0
EA2454	785375	snp	T	C	C:53 T:0
EA2454	788461	snp	G	T	T:48 G:2
EA2454	789417	snp	A	C	C:61 A:1
EA2454	803220	snp	G	A	A:105 G:0
EA2454	805481	snp	A	G	G:53 A:0
EA2454	815610	snp	T	A	A:49 T:0
EA2454	817985	snp	T	G	G:53 T:0
EA2454	818649	snp	A	C	C:63 A:0
EA2454	829606	snp	G	A	A:76 G:0
EA2454	831520	snp	G	T	T:92 G:0
EA2454	839497	snp	T	A	A:94 T:0
EA2454	852695	snp	A	G	G:80 A:0
EA2454	860226	snp	C	A	A:104 C:0
EA2454	881078	snp	A	T	T:122 A:0
EA2454	894224	snp	G	A	A:73 G:0
EA2454	894538	snp	C	T	T:59 C:0
EA2454	904482	snp	A	G	G:73 A:0
EA2454	916363	snp	G	A	A:38 G:0
EA2454	923875	snp	T	A	A:84 T:0
EA2454	924579	snp	T	C	C:71 T:0
EA2454	926548	snp	G	A	A:83 G:0
EA2454	930102	snp	A	G	G:52 A:0
EA2454	934663	snp	G	A	A:32 G:0
EA2454	938891	snp	T	C	C:124 T:0
EA2454	938923	snp	G	A	A:138 G:0
EA2454	945162	snp	A	G	G:111 A:0
EA2454	946875	snp	T	C	C:88 T:0
EA2454	953980	complex	GCCG	ACCT	ACCT:11 GCCG:0
EA2454	953998	snp	G	A	A:64 G:0
EA2454	954238	snp	T	G	G:19 T:0
EA2454	962086	snp	C	T	T:15 C:0
EA2454	962176	snp	C	T	T:110 C:0
EA2454	962188	snp	A	G	G:124 A:0
EA2454	962197	snp	T	C	C:129 T:0
EA2454	962206	snp	A	C	C:137 A:1
EA2454	962263	snp	G	A	A:165 G:0
EA2454	962289	snp	G	T	T:155 G:0
EA2454	962383	mnp	GC	TG	TG:125 GC:0
EA2454	962400	del	GCAGGT	G	G:112 GCAGGT:0
EA2454	962433	snp	C	T	T:138 C:0
EA2454	962440	snp	T	C	C:129 T:0
EA2454	962460	mnp	AGT	TTG	TTG:122 AGT:0
EA2454	962499	snp	A	G	G:105 A:0
EA2454	962507	snp	C	T	T:107 C:0
EA2454	962516	snp	T	C	C:104 T:0
EA2454	962541	snp	T	G	G:99 T:0
EA2454	962550	snp	T	C	C:93 T:0
EA2454	962563	snp	A	G	G:83 A:0
EA2454	962591	snp	C	A	A:58 C:0
EA2454	962610	complex	TGGCA	GGGCG	GGGCG:42 TGGCA:0
EA2454	962695	snp	A	G	G:78 A:0
EA2454	962748	snp	A	G	G:109 A:0
EA2454	962781	complex	TGA	ACT	ACT:106 TGA:0
EA2454	962823	snp	A	G	G:128 A:0
EA2454	962845	snp	G	A	A:127 G:2
EA2454	962859	snp	A	T	T:104 A:0
EA2454	962864	mnp	TT	GG	GG:105 TT:0
EA2454	962874	snp	A	G	G:111 A:0
EA2454	962895	snp	A	G	G:119 A:0
EA2454	962910	snp	G	A	A:117 G:0
EA2454	962960	snp	A	G	G:132 A:0
EA2454	962970	snp	C	T	T:133 C:0
EA2454	962982	snp	A	G	G:131 A:0
EA2454	963024	snp	T	A	A:149 T:0
EA2454	963036	snp	A	G	G:160 A:0
EA2454	963084	complex	AGCGACA	GGTGACG	GGTGACG:148 AGCGACA:0
EA2454	963102	snp	A	G	G:160 A:0
EA2454	963144	complex	CACCGGA	TACTGGT	TACTGGT:127 CACCGGA:0
EA2454	963174	snp	G	A	A:137 G:0
EA2454	963273	snp	G	A	A:141 G:1
EA2454	963283	snp	G	T	T:149 G:1
EA2454	963338	snp	T	C	C:138 T:0
EA2454	963390	snp	A	G	G:141 A:0
EA2454	963396	snp	C	T	T:142 C:0
EA2454	963465	snp	T	C	C:139 T:0
EA2454	963480	snp	G	A	A:145 G:0
EA2454	963513	complex	GCGC	ACGT	ACGT:147 GCGC:0
EA2454	963525	snp	T	C	C:166 T:0
EA2454	963555	snp	A	G	G:160 A:0
EA2454	963590	snp	A	G	G:147 A:0
EA2454	963600	snp	G	A	A:141 G:0
EA2454	963612	snp	G	T	T:127 G:1
EA2454	963654	snp	A	G	G:116 A:0
EA2454	963706	snp	A	G	G:96 A:0
EA2454	963751	complex	GCCC	ACCT	ACCT:99 GCCC:0
EA2454	963769	snp	C	T	T:95 C:0
EA2454	963790	snp	A	C	C:96 A:0
EA2454	963796	complex	TCCATCG	GCCGTCA	GCCGTCA:89 TCCATCG:0
EA2454	963811	snp	C	T	T:89 C:0
EA2454	963879	snp	G	A	A:33 G:0
EA2454	963916	snp	A	G	G:11 A:0
EA2454	964577	snp	A	G	G:21 A:0
EA2454	964586	snp	A	G	G:40 A:0
EA2454	964604	snp	T	G	G:41 T:0
EA2454	964625	complex	TCCT	CCCA	CCCA:46 TCCT:0
EA2454	964671	snp	A	G	G:43 A:0
EA2454	964703	mnp	TG	CA	CA:29 TG:0
EA2454	964710	snp	T	C	C:30 T:0
EA2454	986640	snp	G	A	A:59 G:0
EA2454	990058	snp	G	T	T:65 G:0
EA2454	990374	snp	C	A	A:75 C:0
EA2454	1001425	snp	A	G	G:18 A:0
EA2454	1003603	snp	A	G	G:12 A:0
EA2454	1003611	snp	C	A	A:11 C:0
EA2454	1026843	snp	T	C	C:91 T:0
EA2454	1044717	snp	G	A	A:58 G:0
EA2454	1046210	snp	G	A	A:74 G:0
EA2454	1049442	snp	G	A	A:67 G:0
EA2454	1052435	snp	C	T	T:47 C:0
EA2454	1055114	snp	T	G	G:114 T:1
EA2454	1064726	del	GCAGCCGTTC	G	G:34 GCAGCCGTTC:0
EA2454	1065372	snp	G	A	A:75 G:0
EA2454	1067401	snp	C	A	A:91 C:0
EA2454	1067992	snp	G	T	T:18 G:0
EA2454	1073767	snp	A	G	G:77 A:0
EA2454	1079000	snp	T	C	C:93 T:0
EA2454	1082762	snp	G	A	A:76 G:0
EA2454	1093309	snp	A	G	G:113 A:0
EA2454	1095599	snp	C	A	A:49 C:1
EA2454	1098037	snp	T	G	G:77 T:0
EA2454	1120563	snp	T	C	C:29 T:0
EA2454	1125821	snp	C	T	T:77 C:0
EA2454	1130184	snp	G	T	T:25 G:0
EA2454	1131579	snp	C	A	A:22 C:0
EA2454	1138215	snp	T	C	C:94 T:0
EA2454	1153745	snp	G	A	A:118 G:0
EA2454	1155705	snp	T	G	G:78 T:0
EA2454	1160822	snp	A	T	T:86 A:0
EA2454	1167666	snp	T	C	C:79 T:0
EA2454	1170071	snp	C	T	T:92 C:0
EA2454	1174352	snp	T	C	C:25 T:0
EA2454	1186746	snp	T	C	C:98 T:0
EA2454	1190353	snp	G	T	T:32 G:0
EA2454	1211256	snp	T	C	C:136 T:0
EA2454	1214132	snp	C	T	T:108 C:0
EA2454	1217059	snp	T	G	G:59 T:0
EA2454	1225308	snp	C	A	A:106 C:0
EA2454	1228038	snp	C	T	T:94 C:0
EA2454	1234596	snp	T	G	G:84 T:0
EA2454	1236700	del	TA	T	T:49 TA:0
EA2454	1236723	snp	T	C	C:57 T:0
EA2454	1253669	snp	C	T	T:88 C:0
EA2454	1255231	snp	A	C	C:97 A:0
EA2454	1261876	snp	A	C	C:43 A:0
EA2454	1264081	snp	A	G	G:48 A:0
EA2454	1279253	snp	C	T	T:43 C:0
EA2454	1280572	snp	C	A	A:114 C:0
EA2454	1284261	snp	C	T	T:68 C:0
EA2454	1289894	snp	A	G	G:67 A:0
EA2454	1292634	snp	G	A	A:91 G:0
EA2454	1299878	snp	C	T	T:51 C:0
EA2454	1311735	snp	G	A	A:92 G:0
EA2454	1317400	snp	G	A	A:88 G:0
EA2454	1320805	snp	A	G	G:39 A:0
EA2454	1322163	snp	T	C	C:78 T:0
EA2454	1322665	snp	T	C	C:63 T:0
EA2454	1331179	snp	T	G	G:43 T:0
EA2454	1337753	snp	A	T	T:72 A:0
EA2454	1340886	snp	A	C	C:56 A:0
EA2454	1358384	snp	A	G	G:81 A:0
EA2454	1360577	snp	A	G	G:50 A:0
EA2454	1365639	snp	G	A	A:90 G:1
EA2454	1371250	snp	T	C	C:68 T:0
EA2454	1382646	snp	C	T	T:55 C:0
EA2454	1391807	snp	C	T	T:52 C:0
EA2454	1392683	snp	C	T	T:92 C:0
EA2454	1394505	snp	A	G	G:76 A:0
EA2454	1401264	snp	A	G	G:86 A:0
EA2454	1412307	snp	A	G	G:21 A:0
EA2454	1413295	snp	T	C	C:49 T:1
EA2454	1416501	snp	A	C	C:117 A:0
EA2454	1435223	snp	G	A	A:49 G:0
EA2454	1442459	snp	G	A	A:72 G:0
EA2454	1443281	snp	G	A	A:37 G:0
EA2454	1443339	snp	C	T	T:14 C:0
EA2454	1445619	snp	G	A	A:135 G:0
EA2454	1445708	snp	G	A	A:127 G:0
EA2454	1446603	snp	G	A	A:55 G:0
EA2454	1449720	snp	C	G	G:62 C:0
EA2454	1455169	snp	G	A	A:71 G:0
EA2454	1458988	snp	A	T	T:89 A:0
EA2454	1461457	snp	T	G	G:62 T:0
EA2454	1471260	snp	C	T	T:69 C:0
EA2454	1480708	snp	T	G	G:77 T:0
EA2454	1484305	snp	C	T	T:54 C:0
EA2454	1484634	del	AG	A	A:22 AG:0
EA2454	1492527	ins	C	CA	CA:55 C:0
EA2454	1495581	snp	T	A	A:64 T:0
EA2454	1496904	snp	G	A	A:71 G:0
EA2454	1518455	snp	G	A	A:43 G:0
EA2454	1525679	snp	C	T	T:61 C:0
EA2454	1533339	snp	A	G	G:113 A:0
EA2454	1534292	snp	A	G	G:68 A:0
EA2454	1537678	snp	C	T	T:11 C:0
EA2454	1547465	snp	G	T	T:67 G:2
EA2454	1549828	snp	T	C	C:99 T:0
EA2454	1557966	snp	A	G	G:99 A:0
EA2454	1560679	snp	G	A	A:66 G:0
EA2454	1561932	snp	G	A	A:87 G:0
EA2454	1570233	snp	A	G	G:85 A:0
EA2454	1577742	snp	G	A	A:103 G:0
EA2454	1587710	snp	C	A	A:120 C:1
EA2454	1587792	snp	A	C	C:95 A:0
EA2454	1588489	snp	G	A	A:54 G:0
EA2454	1592505	snp	T	C	C:65 T:0
EA2454	1597496	snp	T	C	C:62 T:0
EA2454	1599906	snp	T	C	C:42 T:0
EA2454	1600199	snp	C	T	T:49 C:0
EA2454	1600919	snp	A	G	G:93 A:0
EA2454	1612435	snp	G	A	A:73 G:0
EA2454	1613406	snp	T	A	A:60 T:0
EA2454	1613463	snp	A	G	G:66 A:0
EA2454	1613617	snp	C	T	T:18 C:0
EA2454	1616033	snp	G	A	A:63 G:0
EA2454	1619172	snp	G	A	A:19 G:0
EA2454	1619178	complex	TACA	AACG	AACG:20 TACA:0
EA2454	1620915	snp	A	T	T:19 A:0
EA2454	1620945	snp	C	T	T:31 C:0
EA2454	1621020	snp	C	A	A:44 C:0
EA2454	1621049	snp	G	A	A:46 G:0
EA2454	1621074	snp	T	A	A:39 T:0
EA2454	1621137	snp	T	A	A:37 T:0
EA2454	1621185	complex	TGCGTTAGCG	GGCATTGGCT	GGCATTGGCT:22 TGCGTTAGCG:0
EA2454	1621200	snp	C	T	T:27 C:0
EA2454	1621221	snp	C	T	T:28 C:0
EA2454	1621227	snp	T	A	A:27 T:0
EA2454	1621255	snp	C	T	T:12 C:0
EA2454	1624032	snp	A	T	T:15 A:0
EA2454	1624047	snp	C	T	T:17 C:0
EA2454	1624053	snp	C	T	T:19 C:0
EA2454	1624069	complex	GAAGGT	AACGGC	AACGGC:19 GAAGGT:0
EA2454	1624086	snp	C	T	T:30 C:0
EA2454	1624128	complex	TAG	AAA	AAA:38 TAG:0
EA2454	1624137	snp	T	C	C:39 T:0
EA2454	1624153	snp	T	A	A:45 T:0
EA2454	1624217	snp	A	G	G:41 A:0
EA2454	1624254	snp	A	G	G:30 A:0
EA2454	1624263	complex	ATTG	GTTA	GTTA:30 ATTG:0
EA2454	1624280	snp	T	C	C:28 T:0
EA2454	1624351	mnp	GT	TA	TA:12 GT:0
EA2454	1625175	complex	TCCG	CCCA	CCCA:15 TCCG:0
EA2454	1625193	snp	G	A	A:19 G:0
EA2454	1625205	snp	C	T	T:27 C:0
EA2454	1625235	snp	A	G	G:40 A:0
EA2454	1625258	complex	AACTA	GACTC	GACTC:44 AACTA:0
EA2454	1625280	snp	A	T	T:62 A:0
EA2454	1625298	snp	A	G	G:62 A:0
EA2454	1625376	snp	G	T	T:81 G:0
EA2454	1625382	snp	T	C	C:85 T:0
EA2454	1625390	snp	G	A	A:83 G:0
EA2454	1625406	complex	AGGC	TGGT	TGGT:82 AGGC:0
EA2454	1625417	snp	G	A	A:81 G:0
EA2454	1625424	snp	G	A	A:83 G:0
EA2454	1625430	snp	G	A	A:77 G:0
EA2454	1625455	snp	G	A	A:80 G:0
EA2454	1625460	snp	A	T	T:85 A:0
EA2454	1625475	complex	CGGT	AGGA	AGGA:74 CGGT:0
EA2454	1625505	snp	A	T	T:90 A:0
EA2454	1625519	snp	G	A	A:94 G:0
EA2454	1625559	snp	G	A	A:95 G:0
EA2454	1625589	snp	C	A	A:108 C:0
EA2454	1625637	snp	T	C	C:85 T:0
EA2454	1625649	mnp	CG	TC	TC:79 CG:0
EA2454	1625658	snp	T	C	C:81 T:0
EA2454	1625688	complex	TGTC	CATT	CATT:76 TGTC:0
EA2454	1625826	snp	T	C	C:79 T:0
EA2454	1625835	snp	A	G	G:70 A:0
EA2454	1625853	snp	T	G	G:73 T:0
EA2454	1625874	snp	T	C	C:59 T:0
EA2454	1625895	snp	A	G	G:46 A:0
EA2454	1625922	snp	T	C	C:37 T:0
EA2454	1625946	snp	T	A	A:48 T:0
EA2454	1625960	snp	A	G	G:45 A:0
EA2454	1625984	snp	T	C	C:47 T:0
EA2454	1625995	complex	TGCGCAAT	GGAACAAC	GGAACAAC:30 TGCGCAAT:0
EA2454	1626008	snp	A	T	T:31 A:1
EA2454	1626017	complex	CAAC	GAGA	GAGA:32 CAAC:0
EA2454	1626031	snp	G	A	A:33 G:0
EA2454	1626042	snp	T	C	C:34 T:0
EA2454	1626118	snp	A	G	G:16 A:0
EA2454	1626543	snp	G	T	T:11 G:0
EA2454	1626549	snp	C	T	T:15 C:0
EA2454	1626559	snp	A	G	G:18 A:0
EA2454	1626568	complex	TGC	CGT	CGT:23 TGC:0
EA2454	1626586	snp	G	A	A:33 G:0
EA2454	1626595	complex	ACGA	GCGT	GCGT:35 ACGA:0
EA2454	1626603	snp	A	T	T:43 A:0
EA2454	1626611	snp	T	C	C:45 T:0
EA2454	1626705	snp	A	G	G:72 A:0
EA2454	1626723	snp	C	T	T:80 C:0
EA2454	1626772	mnp	GG	AA	AA:91 GG:0
EA2454	1626790	snp	T	C	C:89 T:0
EA2454	1626807	snp	T	C	C:98 T:0
EA2454	1626849	snp	G	A	A:98 G:0
EA2454	1626896	snp	A	G	G:86 A:0
EA2454	1627011	snp	G	T	T:88 G:2
EA2454	1627061	snp	A	T	T:72 A:0
EA2454	1627068	snp	C	T	T:68 C:0
EA2454	1627153	snp	C	T	T:56 C:0
EA2454	1627159	snp	G	A	A:52 G:0
EA2454	1627168	snp	A	G	G:51 A:0
EA2454	1627173	snp	A	G	G:54 A:0
EA2454	1627182	snp	C	T	T:52 C:0
EA2454	1627188	snp	G	T	T:48 G:0
EA2454	1627206	snp	T	C	C:52 T:0
EA2454	1627314	snp	T	A	A:65 T:0
EA2454	1627320	snp	A	G	G:62 A:0
EA2454	1627350	snp	C	T	T:60 C:0
EA2454	1627377	snp	T	G	G:63 T:0
EA2454	1627407	snp	T	G	G:41 T:0
EA2454	1627560	snp	C	T	T:60 C:0
EA2454	1627605	snp	G	T	T:61 G:0
EA2454	1627656	snp	A	C	C:51 A:0
EA2454	1627737	snp	C	A	A:56 C:0
EA2454	1627800	snp	A	C	C:58 A:0
EA2454	1627809	snp	T	C	C:57 T:0
EA2454	1627815	snp	T	C	C:55 T:0
EA2454	1628278	snp	A	G	G:60 A:0
EA2454	1628285	snp	G	A	A:62 G:0
EA2454	1628345	snp	C	T	T:64 C:0
EA2454	1628366	complex	AGAGAGCAAG	CGAAAGTAAA	CGAAAGTAAA:60 AGAGAGCAAG:0
EA2454	1628390	snp	G	A	A:88 G:0
EA2454	1628427	snp	T	C	C:83 T:0
EA2454	1628438	snp	T	C	C:82 T:0
EA2454	1628465	complex	GGCT	AGCG	AGCG:85 GGCT:0
EA2454	1628498	snp	T	C	C:79 T:0
EA2454	1628523	snp	C	A	A:74 C:0
EA2454	1628540	snp	A	G	G:68 A:0
EA2454	1628553	snp	A	C	C:64 A:0
EA2454	1628585	snp	A	T	T:71 A:0
EA2454	1628591	snp	C	T	T:72 C:0
EA2454	1628597	snp	T	C	C:69 T:0
EA2454	1628627	snp	A	G	G:74 A:0
EA2454	1628649	mnp	AG	GA	GA:72 AG:0
EA2454	1628690	snp	A	G	G:61 A:0
EA2454	1628750	complex	CACA	TACG	TACG:58 CACA:0
EA2454	1628810	snp	T	C	C:70 T:0
EA2454	1628831	snp	G	A	A:62 G:0
EA2454	1628837	snp	A	T	T:65 A:0
EA2454	1628869	snp	T	C	C:61 T:0
EA2454	1628897	complex	ACGA	CCGG	CCGG:60 ACGA:0
EA2454	1628912	snp	A	T	T:62 A:0
EA2454	1628980	complex	TACTA	GACTT	GACTT:43 TACTA:0
EA2454	1629008	snp	A	C	C:41 A:0
EA2454	1629015	snp	C	T	T:42 C:0
EA2454	1629065	complex	TCCG	CCCT	CCCT:45 TCCG:0
EA2454	1629122	snp	A	G	G:36 A:0
EA2454	1629149	snp	T	C	C:36 T:0
EA2454	1629156	snp	A	G	G:37 A:0
EA2454	1629183	snp	A	C	C:32 A:0
EA2454	1629196	complex	GAACT	TAACC	TAACC:24 GAACT:0
EA2454	1629240	snp	T	C	C:24 T:0
EA2454	1629375	snp	G	A	A:17 G:0
EA2454	1629397	complex	AAG	CAA	CAA:10 AAG:0
EA2454	1629404	snp	T	A	A:10 T:0
EA2454	1631639	snp	C	T	T:68 C:0
EA2454	1633823	snp	C	G	G:100 C:0
EA2454	1634228	snp	A	G	G:97 A:0
EA2454	1634503	snp	T	C	C:83 T:0
EA2454	1642336	snp	A	G	G:60 A:0
EA2454	1648224	snp	C	T	T:74 C:0
EA2454	1650551	snp	C	T	T:42 C:0
EA2454	1652374	snp	G	A	A:98 G:1
EA2454	1666579	snp	G	A	A:74 G:0
EA2454	1669905	snp	C	T	T:71 C:0
EA2454	1682457	snp	A	G	G:49 A:0
EA2454	1682580	snp	G	T	T:50 G:0
EA2454	1686306	snp	G	A	A:28 G:0
EA2454	1690423	snp	G	A	A:63 G:0
EA2454	1694320	snp	A	C	C:77 A:0
EA2454	1697626	snp	T	A	A:64 T:0
EA2454	1701919	snp	A	G	G:103 A:0
EA2454	1711079	snp	C	T	T:56 C:0
EA2454	1714697	snp	T	C	C:106 T:0
EA2454	1728257	snp	G	T	T:71 G:0
EA2454	1730329	snp	T	C	C:79 T:0
EA2454	1732462	snp	A	G	G:54 A:0
EA2454	1737561	snp	A	G	G:69 A:0
EA2454	1740180	snp	T	A	A:69 T:0
EA2454	1745576	snp	T	C	C:72 T:0
EA2454	1748003	snp	C	T	T:72 C:0
EA2454	1748585	snp	A	C	C:76 A:0
EA2454	1753772	snp	T	G	G:31 T:0
EA2454	1754939	snp	T	C	C:21 T:0
EA2454	1761551	snp	T	G	G:104 T:0
EA2454	1763293	snp	T	C	C:71 T:0
EA2454	1766365	snp	G	T	T:62 G:0
EA2454	1770797	snp	C	T	T:122 C:0
EA2454	1771506	snp	G	A	A:58 G:0
EA2454	1778092	snp	C	T	T:100 C:0
EA2454	1795161	snp	A	G	G:63 A:0
EA2454	1799132	snp	G	A	A:81 G:0
EA2454	1803610	snp	C	A	A:88 C:1
EA2454	1803664	snp	T	C	C:72 T:0
EA2454	1815466	snp	A	G	G:43 A:0
EA2454	1817358	snp	A	C	C:41 A:0
EA2454	1818484	snp	G	A	A:57 G:0
EA2454	1820083	snp	T	C	C:77 T:0
EA2454	1824156	snp	T	C	C:59 T:0
EA2454	1824499	snp	T	C	C:56 T:0
EA2454	1850317	snp	G	A	A:56 G:0
EA2454	1860665	snp	T	C	C:75 T:0
EA2454	1875721	snp	G	T	T:122 G:0
EA2454	1887544	snp	A	G	G:70 A:0
EA2454	1906815	snp	A	T	T:69 A:0
EA2454	1906895	ins	A	AG	AG:79 A:0
EA2454	1909088	snp	T	C	C:98 T:0
EA2454	1909804	snp	G	A	A:49 G:0
EA2454	1944963	snp	G	A	A:47 G:0
EA2454	1945608	snp	T	C	C:64 T:0
EA2454	1948462	snp	G	A	A:103 G:0
EA2454	1950298	snp	T	G	G:89 T:0
EA2454	1956825	snp	G	T	T:79 G:0
EA2454	1958733	snp	T	C	C:52 T:0
EA2454	1965637	snp	G	A	A:16 G:0
EA2454	1970914	snp	A	T	T:13 A:0
EA2454	1970924	complex	CAA	ATC	ATC:13 CAA:0
EA2454	1970935	snp	C	A	A:20 C:0
EA2454	1979564	snp	A	G	G:60 A:0
EA2454	1980186	snp	C	T	T:108 C:0
EA2454	1994897	snp	G	T	T:15 G:0
EA2454	1995211	snp	T	C	C:30 T:0
EA2454	1996710	snp	T	C	C:74 T:0
EA2454	1997936	snp	C	T	T:67 C:0
EA2454	2006271	snp	G	A	A:74 G:0
EA2454	2030451	snp	T	G	G:83 T:0
EA2454	2038279	ins	A	AAC	AAC:63 A:0
EA2454	2041023	snp	G	A	A:61 G:0
EA2454	2052981	snp	T	C	C:29 T:0
EA2454	2062156	snp	T	C	C:65 T:0
EA2454	2063839	snp	T	C	C:74 T:0
EA2454	2068297	snp	T	G	G:28 T:0
EA2454	2070162	snp	T	C	C:37 T:0
EA2454	2091780	snp	T	C	C:111 T:0
EA2454	2094829	snp	T	C	C:65 T:0
EA2454	2096088	snp	A	G	G:69 A:0
EA2454	2099145	snp	G	A	A:82 G:0
EA2454	2110900	snp	G	A	A:70 G:0
EA2454	2118474	snp	A	G	G:85 A:0
EA2454	2119737	snp	T	C	C:70 T:0
EA2454	2135446	snp	C	A	A:79 C:0
EA2454	2141700	snp	C	T	T:78 C:0
EA2454	2157814	snp	G	A	A:95 G:0
EA2454	2158854	snp	G	A	A:54 G:0
EA2454	2159363	snp	C	T	T:90 C:0
EA2454	2171889	snp	A	G	G:13 A:0
EA2454	2181710	snp	T	C	C:105 T:0
EA2454	2183355	snp	T	C	C:91 T:0
EA2454	2195062	snp	T	C	C:87 T:0
EA2454	2198103	snp	C	T	T:62 C:0
EA2454	2217598	snp	A	G	G:64 A:0
EA2454	2217926	snp	G	A	A:85 G:0
EA2454	2228600	snp	T	C	C:106 T:0
EA2454	2232376	snp	A	G	G:35 A:0
EA2454	2232963	snp	C	T	T:71 C:0
EA2454	2233442	snp	A	T	T:91 A:0
EA2454	2248643	snp	T	G	G:67 T:0
EA2454	2253986	snp	C	T	T:51 C:0
EA2454	2256445	snp	G	A	A:30 G:0
EA2454	2258733	snp	C	T	T:72 C:0
EA2454	2259197	snp	G	A	A:42 G:0
EA2454	2268389	snp	G	C	C:40 G:0
EA2454	2283117	snp	T	C	C:107 T:0
EA2454	2283880	snp	A	G	G:103 A:2
EA2454	2287651	snp	T	C	C:48 T:0
EA2454	2289041	snp	T	C	C:80 T:0
EA2454	2291863	snp	T	C	C:97 T:0
EA2454	2309202	snp	C	T	T:64 C:0
EA2454	2310884	snp	C	T	T:40 C:0
EA2454	2331237	snp	A	G	G:40 A:0
EA2454	2331676	snp	G	T	T:66 G:0
EA2454	2338673	snp	G	A	A:38 G:0
EA2454	2350030	snp	C	T	T:108 C:0
EA2454	2350339	snp	T	C	C:83 T:0
EA2454	2354351	snp	A	G	G:93 A:0
EA2454	2359024	snp	A	G	G:64 A:0
EA2454	2364340	snp	T	G	G:94 T:0
EA2454	2368711	snp	C	T	T:30 C:0
EA2454	2371672	snp	T	C	C:54 T:0
EA2454	2403442	snp	T	C	C:100 T:0
EA2454	2407449	snp	A	G	G:39 A:0
EA2454	2413493	snp	G	A	A:102 G:0
EA2454	2421589	snp	G	A	A:56 G:0
EA2454	2427955	snp	T	C	C:11 T:0
EA2454	2450826	snp	C	T	T:59 C:0
EA2454	2461974	snp	A	G	G:14 A:0
EA2454	2517178	snp	T	G	G:77 T:0
EA2454	2518906	snp	A	C	C:24 A:0
EA2454	2521382	snp	C	T	T:91 C:0
EA2454	2528246	snp	T	C	C:63 T:0
EA2454	2531242	snp	G	A	A:132 G:0
EA2454	2533120	snp	C	T	T:92 C:0
EA2454	2538084	snp	G	A	A:47 G:0
EA2454	2538679	snp	T	C	C:65 T:0
EA2454	2543041	snp	G	A	A:56 G:0
EA2454	2555441	snp	A	G	G:49 A:0
EA2454	2559290	snp	C	A	A:34 C:0
EA2454	2565432	snp	G	A	A:89 G:0
EA2454	2584919	snp	A	T	T:53 A:0
EA2454	2585715	snp	C	T	T:81 C:0
EA2454	2586095	snp	C	T	T:64 C:0
EA2454	2589008	snp	T	C	C:57 T:0
EA2454	2591008	snp	G	A	A:11 G:0
EA2454	2596899	snp	G	A	A:86 G:0
EA2454	2597428	snp	T	C	C:64 T:0
EA2454	2598908	snp	T	C	C:89 T:0
EA2454	2607401	snp	A	T	T:70 A:0
EA2454	2610069	snp	C	T	T:72 C:0
EA2454	2618567	snp	G	A	A:67 G:0
EA2454	2631943	snp	A	G	G:45 A:0
EA2454	2632096	snp	G	C	C:21 G:0
EA2454	2637688	snp	C	T	T:68 C:0
EA2454	2639012	snp	C	T	T:72 C:0
EA2454	2641059	snp	T	C	C:58 T:0
EA2454	2644202	snp	T	G	G:67 T:1
EA2454	2653437	snp	G	A	A:28 G:0
EA2454	2658667	snp	A	C	C:108 A:1
EA2454	2658752	snp	C	T	T:83 C:0
EA2454	2660000	snp	A	G	G:36 A:0
EA2454	2664103	snp	G	A	A:78 G:0
EA2454	2666737	snp	C	T	T:100 C:0
EA2454	2670543	snp	C	T	T:87 C:0
EA2454	2718692	snp	A	C	C:81 A:0
EA2454	2720677	ins	A	AACCTGCACCTGCACCTGC	AACCTGCACCTGCACCTGC:13 A:1
EA2454	2722619	snp	A	G	G:19 A:0
EA2454	2743080	snp	T	G	G:47 T:0
EA2454	2748849	del	GT	G	G:12 GT:0
EA2454	2749469	snp	C	G	G:85 C:0
EA2454	2755025	snp	C	T	T:89 C:0
EA2454	2755245	snp	G	C	C:72 G:0
EA2454	2760352	snp	A	G	G:14 A:0
EA2454	2760369	snp	G	A	A:14 G:0
EA2454	2763065	snp	A	G	G:109 A:0
EA2454	2771595	snp	T	A	A:46 T:0
EA2454	2774852	snp	A	G	G:21 A:0
EA2454	2777153	snp	T	G	G:69 T:0
EA2454	2782946	snp	C	T	T:88 C:0
EA2454	2785945	snp	T	A	A:65 T:0
EA2454	2793323	snp	T	C	C:14 T:0
EA2454	2802439	snp	A	T	T:108 A:0
EA2454	2809435	snp	G	C	C:41 G:0
EA2454	2815762	snp	A	G	G:44 A:0
EA2454	2816107	snp	C	A	A:65 C:0
EA2454	2824579	ins	C	CT	CT:33 C:0
EA2454	2829690	snp	G	C	C:115 G:0
EA2454	2830990	snp	C	A	A:65 C:0
EA2454	2831971	snp	C	T	T:98 C:0
EA2454	2832637	snp	C	T	T:65 C:0
EA2454	2837636	snp	T	C	C:51 T:0
EA2454	2843028	snp	C	G	G:86 C:0
EA2454	2845039	snp	C	T	T:59 C:0
EA2454	2847080	snp	T	C	C:40 T:0
EA2454	2850370	snp	A	C	C:83 A:1
EA2454	2851743	snp	T	A	A:77 T:0
EA2454	2860024	snp	T	G	G:101 T:2
EA2454	2861514	snp	G	A	A:65 G:0
EA2454	2865701	snp	T	C	C:103 T:0
EA2454	2872360	snp	A	G	G:102 A:0
EA2454	2876151	snp	T	C	C:10 T:0
EA2454	2881008	snp	G	C	C:59 G:0
EA2454	2883184	snp	T	C	C:77 T:0
EA2454	2897200	snp	G	A	A:135 G:1
EA2454	2901111	snp	A	G	G:88 A:0
EA2454	2901769	snp	C	T	T:77 C:0
EA2454	2903547	snp	C	A	A:92 C:0
EA2454	2903624	snp	C	A	A:96 C:0
EA2454	2927920	snp	T	C	C:82 T:0
EA2454	2931389	snp	T	G	G:54 T:1
EA2454	2934279	snp	A	G	G:85 A:0
EA2454	2937585	snp	A	G	G:92 A:0
EA2454	2939135	ins	A	AT	AT:46 A:0
EA2454	2941498	snp	G	A	A:71 G:0
EA2454	2945610	snp	G	A	A:90 G:0
EA2454	2954356	snp	T	A	A:10 T:0
EA2454	2954364	snp	A	T	T:10 A:0
EA2454	2954372	snp	G	T	T:10 G:0
EA2454	2954374	snp	A	G	G:12 A:0
EA2454	2954402	snp	C	T	T:14 C:0
EA2454	2954425	snp	A	G	G:14 A:0
EA2454	2954433	snp	G	C	C:12 G:0
EA2454	2954439	snp	A	G	G:10 A:0
EA2454	2963100	snp	G	A	A:77 G:0
EA2454	3017377	snp	G	A	A:12 G:0
EA2454	3027647	snp	T	C	C:102 T:0
EA2454	3033291	snp	A	T	T:39 A:0
EA2454	3039630	snp	C	T	T:55 C:0
EA2454	3041125	snp	T	G	G:75 T:0
EA2454	3052455	snp	G	A	A:49 G:0
EA2454	3052992	snp	G	C	C:60 G:0
EA2454	3055255	snp	G	A	A:67 G:0
EA2454	3057242	snp	A	G	G:78 A:0
EA2454	3058223	snp	C	T	T:71 C:0
EA2454	3070440	snp	A	G	G:60 A:0
EA2454	3091335	snp	T	C	C:92 T:0
EA2454	3093850	snp	T	C	C:86 T:0
EA2454	3099129	snp	T	C	C:71 T:0
EA2454	3101851	snp	A	G	G:107 A:0
EA2454	3104888	snp	C	T	T:71 C:0
EA2454	3109320	snp	C	T	T:48 C:0
EA2454	3112595	ins	C	CG	CG:59 C:0
EA2454	3112890	snp	A	G	G:55 A:0
EA2454	3115749	snp	T	A	A:71 T:0
EA2454	3117020	snp	C	G	G:94 C:1
EA2454	3125212	snp	A	G	G:87 A:0
EA2454	3133556	snp	G	T	T:87 G:2
EA2454	3135617	snp	A	C	C:76 A:0
EA2454	3141450	snp	A	T	T:80 A:0
EA2454	3149583	snp	G	A	A:68 G:0
EA2454	3154708	snp	G	A	A:66 G:0
EA2454	3175254	snp	T	C	C:88 T:0
EA2454	3188469	snp	T	C	C:78 T:0
EA2454	3188675	snp	T	A	A:60 T:0
EA2454	3192856	snp	C	T	T:16 C:0
EA2454	3196063	snp	T	C	C:31 T:0
EA2454	3211809	snp	T	C	C:77 T:0
EA2454	3213292	snp	A	C	C:74 A:0
EA2454	3218193	snp	T	G	G:71 T:2
EA2454	3224798	snp	A	G	G:45 A:0
EA2454	3240902	del	AACTG	A	A:46 AACTG:0
EA2454	3244869	snp	C	A	A:32 C:0
EA2454	3246115	snp	A	G	G:76 A:0
EA2454	3254909	snp	C	G	G:36 C:0
EA2454	3258454	snp	T	A	A:43 T:0
EA2454	3258466	snp	C	T	T:42 C:0
EA2454	3263384	snp	T	C	C:30 T:0
EA2454	3268326	snp	G	A	A:83 G:0
EA2454	3272561	snp	G	T	T:23 G:0
EA2454	3274783	snp	T	C	C:57 T:0
EA2454	3281767	ins	G	GC	GC:87 G:0
EA2454	3305295	snp	A	G	G:123 A:2
EA2454	3305988	snp	G	C	C:82 G:0
EA2454	3307020	snp	C	T	T:65 C:0
EA2454	3307663	snp	C	T	T:106 C:0
EA2454	3310578	snp	A	G	G:42 A:0
EA2454	3312346	snp	C	T	T:68 C:0
EA2454	3318387	snp	C	G	G:47 C:1
EA2454	3374309	snp	G	A	A:61 G:0
EA2454	3374533	snp	G	T	T:51 G:0
EA2454	3381441	snp	A	G	G:72 A:0
EA2454	3387556	snp	T	A	A:25 T:0
EA2454	3395362	snp	A	C	C:117 A:0
EA2454	3398937	snp	A	G	G:78 A:0
EA2454	3400480	ins	T	TGAAGCTGGA	TGAAGCTGGA:55 T:1
EA2454	3405179	snp	T	G	G:46 T:0
EA2454	3426445	snp	T	C	C:94 T:0
EA2454	3440338	snp	C	T	T:74 C:0
EA2454	3441887	snp	T	C	C:57 T:0
EA2454	3441936	snp	A	G	G:61 A:0
EA2454	3448725	snp	C	T	T:66 C:0
EA2454	3451003	snp	C	T	T:73 C:0
EA2454	3462462	snp	T	C	C:61 T:0
EA2454	3462699	snp	A	G	G:69 A:0
EA2454	3463669	snp	T	C	C:62 T:0
EA2454	3527982	ins	G	GA	GA:76 G:0
EA2454	3536376	snp	T	C	C:59 T:0
EA2454	3539749	snp	T	C	C:67 T:0
EA2454	3540229	snp	T	C	C:63 T:0
EA2454	3547214	snp	C	A	A:72 C:0
EA2454	3547948	snp	T	C	C:112 T:0
EA2454	3548625	snp	G	C	C:55 G:0
EA2454	3554302	snp	G	T	T:38 G:0
EA2454	3556473	snp	G	A	A:105 G:0
EA2454	3566015	snp	T	C	C:45 T:0
EA2454	3569782	snp	C	T	T:106 C:0
EA2454	3590214	snp	T	C	C:58 T:0
EA2454	3590259	snp	C	T	T:48 C:0
EA2454	3594055	snp	T	C	C:106 T:0
EA2454	3595770	snp	T	G	G:61 T:0
EA2454	3600939	snp	G	C	C:96 G:0
EA2454	3602569	snp	C	A	A:70 C:0
EA2454	3613661	snp	G	A	A:22 G:0
EA2454	3613761	snp	T	C	C:36 T:0
EA2454	3615292	snp	T	G	G:77 T:1
EA2454	3615330	snp	A	C	C:73 A:0
EA2454	3628517	snp	A	G	G:149 A:0
EA2454	3632526	snp	C	A	A:81 C:0
EA2454	3634246	snp	A	T	T:13 A:0
EA2454	3634750	snp	C	T	T:60 C:0
EA2454	3640661	snp	A	G	G:62 A:0
EA2454	3645952	snp	G	A	A:64 G:0
EA2454	3657942	snp	T	G	G:152 T:0
EA2454	3662284	snp	A	G	G:56 A:0
EA2454	3665749	snp	G	A	A:101 G:0
EA2454	3666055	snp	C	T	T:95 C:0
EA2454	3682843	snp	T	G	G:67 T:1
EA2454	3690835	snp	T	G	G:114 T:0
EA2454	3701518	snp	C	T	T:86 C:0
EA2454	3701756	snp	A	G	G:56 A:0
EA2454	3705284	snp	A	G	G:34 A:0
EA2454	3709916	snp	G	A	A:63 G:0
EA2454	3730872	snp	G	A	A:86 G:0
EA2454	3731404	snp	G	A	A:85 G:0
EA2454	3731422	snp	C	A	A:100 C:0
EA2454	3739482	snp	A	G	G:73 A:0
EA2454	3750262	del	GAA	G	G:22 GAA:0
EA2454	3756054	snp	T	C	C:38 T:0
EA2454	3763988	snp	A	G	G:67 A:0
EA2454	3766157	snp	G	A	A:97 G:0
EA2454	3772277	snp	T	A	A:67 T:0
EA2454	3779368	snp	C	T	T:71 C:0
EA2454	3795140	snp	T	C	C:85 T:0
EA2454	3807575	snp	A	G	G:57 A:0
EA2454	3808964	snp	C	T	T:33 C:0
EA2454	3812714	snp	C	T	T:46 C:0
EA2454	3815430	snp	T	C	C:29 T:0
EA2454	3837457	snp	C	A	A:54 C:0
EA2454	3840206	snp	C	T	T:101 C:0
EA2454	3842198	ins	C	CT	CT:56 C:0
EA2454	3844395	snp	T	C	C:90 T:0
EA2454	3851580	complex	AC	TT	TT:10 AC:0
EA2454	3851623	snp	C	T	T:23 C:0
EA2454	3851632	complex	GAAG	AAAA	AAAA:21 GAAG:0
EA2454	3851667	snp	A	G	G:25 A:0
EA2454	3851703	snp	A	G	G:25 A:0
EA2454	3851770	complex	TAGCC	CAGCG	CAGCG:16 TAGCC:0
EA2454	3851842	snp	C	T	T:16 C:0
EA2454	3851865	complex	CCAGT	GCAGC	GCAGC:11 CCAGT:0
EA2454	3851884	complex	CTT	ACCCC	ACCCC:12 CTT:0
EA2454	3851901	snp	C	T	T:12 C:0
EA2454	3851915	snp	T	C	C:11 T:0
EA2454	3851918	snp	T	C	C:10 T:0
EA2454	3851976	snp	T	G	G:15 T:0
EA2454	3852061	snp	G	C	C:13 G:1
EA2454	3852067	complex	GCCG	TCCA	TCCA:12 GCCG:0
EA2454	3852076	snp	T	C	C:15 T:0
EA2454	3852124	snp	T	C	C:15 T:0
EA2454	3852262	complex	CGGGCAG	TGGGAAA	TGGGAAA:15 CGGGCAG:0
EA2454	3852286	snp	C	T	T:21 C:0
EA2454	3852395	snp	C	A	A:37 C:0
EA2454	3852453	snp	G	A	A:32 G:0
EA2454	3852559	snp	A	G	G:21 A:0
EA2454	3852607	complex	CCGTT	TCGTC	TCGTC:15 CCGTT:0
EA2454	3852640	snp	A	G	G:20 A:0
EA2454	3852680	snp	T	C	C:30 T:0
EA2454	3852688	mnp	GCG	AAA	AAA:24 GCG:0
EA2454	3852712	complex	CAGA	AAGG	AAGG:29 CAGA:0
EA2454	3852799	snp	A	G	G:17 A:0
EA2454	3852830	snp	T	A	A:14 T:0
EA2454	3852950	snp	G	T	T:10 G:0
EA2454	3855834	complex	AA	TC	TC:11 AA:0
EA2454	3855884	snp	C	T	T:10 C:0
EA2454	3856015	ins	T	TA	TA:12 T:0
EA2454	3856047	complex	AAAG	GAAA	GAAA:16 AAAG:0
EA2454	3856122	snp	A	C	C:16 A:0
EA2454	3856149	snp	T	A	A:10 T:0
EA2454	3856155	snp	G	A	A:10 G:0
EA2454	3856242	snp	T	A	A:16 T:0
EA2454	3856458	snp	A	G	G:25 A:0
EA2454	3856521	snp	T	C	C:23 T:0
EA2454	3856982	complex	CTGG	ATGT	ATGT:22 CTGG:0
EA2454	3857194	snp	A	G	G:24 A:0
EA2454	3857206	snp	T	C	C:29 T:0
EA2454	3857236	snp	C	T	T:33 C:0
EA2454	3857347	snp	C	T	T:38 C:0
EA2454	3857368	snp	C	T	T:34 C:0
EA2454	3857386	complex	CCCG	TCCT	TCCT:29 CCCG:0
EA2454	3857455	snp	G	A	A:19 G:0
EA2454	3857571	snp	C	T	T:25 C:0
EA2454	3857766	snp	C	G	G:36 C:0
EA2454	3857781	complex	ACCC	GCCT	GCCT:39 ACCC:0
EA2454	3857904	complex	CGAG	TGAA	TGAA:31 CGAG:0
EA2454	3857976	snp	C	T	T:33 C:0
EA2454	3857994	snp	G	A	A:28 G:0
EA2454	3858009	snp	T	A	A:27 T:0
EA2454	3858021	snp	G	C	C:30 G:0
EA2454	3858047	complex	TGCCT	CGCCA	CGCCA:28 TGCCT:0
EA2454	3858066	snp	C	G	G:31 C:0
EA2454	3858264	snp	A	G	G:29 A:0
EA2454	3858330	complex	GTCG	CTCA	CTCA:30 GTCG:0
EA2454	3858381	snp	C	T	T:33 C:0
EA2454	3858405	snp	A	G	G:28 A:0
EA2454	3858465	snp	G	A	A:26 G:0
EA2454	3858471	snp	C	T	T:29 C:0
EA2454	3858477	snp	A	T	T:29 A:0
EA2454	3858486	snp	C	T	T:22 C:0
EA2454	3858505	complex	GAC	AAT	AAT:24 GAC:0
EA2454	3858690	complex	AGCC	CGCT	CGCT:24 AGCC:0
EA2454	3858705	complex	TGGT	CGGC	CGGC:28 TGGT:0
EA2454	3858717	snp	G	T	T:31 G:0
EA2454	3858981	snp	C	T	T:32 C:0
EA2454	3859719	snp	G	A	A:14 G:0
EA2454	3859941	snp	T	C	C:13 T:0
EA2454	3860187	snp	T	C	C:15 T:0
EA2454	3860215	snp	A	G	G:21 A:0
EA2454	3860282	snp	A	G	G:25 A:0
EA2454	3860759	complex	CGTTGTGC	TGTTATGT	TGTTATGT:21 CGTTGTGC:0
EA2454	3861129	snp	G	A	A:35 G:0
EA2454	3861180	snp	C	T	T:21 C:0
EA2454	3861192	snp	G	T	T:25 G:0
EA2454	3861216	snp	C	T	T:25 C:0
EA2454	3861225	snp	C	T	T:31 C:0
EA2454	3861405	complex	AC	GT	GT:12 AC:0
EA2454	3861522	snp	G	A	A:14 G:0
EA2454	3861702	snp	C	T	T:33 C:0
EA2454	3861708	snp	A	G	G:33 A:0
EA2454	3861717	snp	T	G	G:32 T:0
EA2454	3861762	snp	G	A	A:28 G:0
EA2454	3861768	snp	C	T	T:27 C:0
EA2454	3861828	snp	C	T	T:20 C:0
EA2454	3861873	snp	A	G	G:14 A:0
EA2454	3861891	snp	T	A	A:15 T:0
EA2454	3861906	snp	C	T	T:13 C:0
EA2454	3861957	snp	G	A	A:10 G:0
EA2454	3861993	complex	AGTTGAAAAGGAGGCG	CGTGGAGAAAGAAGCT	CGTGGAGAAAGAAGCT:11 AGTTGAAAAGGAGGCG:0
EA2454	3862023	snp	G	A	A:16 G:0
EA2454	3862086	snp	C	A	A:21 C:0
EA2454	3862113	snp	A	G	G:26 A:0
EA2454	3862197	snp	T	C	C:29 T:0
EA2454	3862329	snp	A	G	G:26 A:0
EA2454	3862338	snp	C	T	T:23 C:0
EA2454	3862353	snp	T	C	C:27 T:0
EA2454	3862431	complex	CACC	AACA	AACA:12 CACC:0
EA2454	3862456	snp	T	C	C:15 T:0
EA2454	3862476	snp	T	C	C:18 T:0
EA2454	3862536	snp	C	T	T:27 C:0
EA2454	3862584	snp	T	C	C:27 T:0
EA2454	3862608	snp	C	T	T:32 C:0
EA2454	3862614	snp	C	T	T:28 C:0
EA2454	3862638	snp	C	T	T:26 C:0
EA2454	3862695	complex	TCTGC	CCTGT	CCTGT:19 TCTGC:0
EA2454	3862715	snp	A	G	G:22 A:0
EA2454	3862731	snp	C	T	T:24 C:0
EA2454	3862740	snp	T	G	G:25 T:0
EA2454	3862765	snp	A	G	G:19 A:0
EA2454	3862783	snp	A	C	C:20 A:0
EA2454	3862788	complex	CAGCGAG	TAACGAC	TAACGAC:19 CAGCGAG:0
EA2454	3862802	snp	C	T	T:23 C:0
EA2454	3862833	snp	T	C	C:22 T:0
EA2454	3862902	snp	G	A	A:16 G:0
EA2454	3862947	complex	GGGA	TGGG	TGGG:13 GGGA:0
EA2454	3862974	snp	T	G	G:13 T:0
EA2454	3862990	complex	TCCCTGATTATC	AGCCTTATCATT	AGCCTTATCATT:14 TCCCTGATTATC:0
EA2454	3863014	snp	A	C	C:22 A:0
EA2454	3863036	complex	CT	AC	AC:22 CT:0
EA2454	3863043	snp	A	G	G:22 A:0
EA2454	3863055	snp	C	T	T:26 C:0
EA2454	3863100	snp	C	T	T:27 C:0
EA2454	3863139	snp	C	T	T:26 C:0
EA2454	3863199	snp	C	A	A:22 C:0
EA2454	3863208	snp	T	A	A:21 T:0
EA2454	3863298	snp	C	T	T:20 C:0
EA2454	3863319	snp	G	C	C:14 G:0
EA2454	3863331	snp	C	T	T:19 C:0
EA2454	3863346	snp	T	C	C:21 T:0
EA2454	3863406	snp	T	C	C:28 T:0
EA2454	3863481	complex	CAGG	TAAA	TAAA:11 CAGG:0
EA2454	3863490	snp	C	G	G:15 C:0
EA2454	3863532	complex	ATCG	GTCA	GTCA:29 ATCG:0
EA2454	3863559	snp	G	A	A:30 G:0
EA2454	3863700	snp	G	A	A:25 G:0
EA2454	3863732	snp	A	G	G:30 A:0
EA2454	3863740	snp	T	C	C:30 T:0
EA2454	3863840	snp	T	C	C:40 T:0
EA2454	3863865	complex	ACG	GCA	GCA:26 ACG:0
EA2454	3863900	snp	T	G	G:30 T:0
EA2454	3863924	snp	A	T	T:33 A:0
EA2454	3863957	snp	T	C	C:33 T:0
EA2454	3863966	snp	G	A	A:29 G:0
EA2454	3864034	snp	A	C	C:30 A:0
EA2454	3864046	snp	C	T	T:32 C:0
EA2454	3864070	mnp	GC	AA	AA:33 GC:0
EA2454	3864181	snp	C	T	T:28 C:0
EA2454	3864199	complex	TCCTGGA	GCCCGGT	GCCCGGT:16 TCCTGGA:0
EA2454	3864220	snp	A	G	G:22 A:0
EA2454	3864227	snp	A	G	G:21 A:0
EA2454	3864307	snp	A	T	T:33 A:0
EA2454	3864690	snp	G	A	A:15 G:0
EA2454	3865077	snp	T	G	G:36 T:0
EA2454	3865110	snp	T	C	C:30 T:0
EA2454	3865119	snp	A	C	C:32 A:0
EA2454	3865284	snp	C	T	T:29 C:0
EA2454	3865473	snp	C	T	T:23 C:0
EA2454	3865485	snp	A	G	G:20 A:0
EA2454	3865509	snp	T	C	C:17 T:0
EA2454	3865545	snp	T	C	C:13 T:0
EA2454	3865931	snp	A	G	G:12 A:0
EA2454	3865940	snp	C	A	A:12 C:0
EA2454	3865979	snp	C	T	T:21 C:0
EA2454	3865988	complex	TAAT	CAAC	CAAC:22 TAAT:0
EA2454	3866000	complex	GA	AG	AG:22 GA:0
EA2454	3866006	snp	C	G	G:24 C:0
EA2454	3866015	snp	C	A	A:24 C:0
EA2454	3866024	snp	C	T	T:27 C:0
EA2454	3866039	complex	CGCAACT	TGCGACC	TGCGACC:25 CGCAACT:0
EA2454	3866060	snp	C	T	T:30 C:0
EA2454	3866096	complex	TGTA	CGTG	CGTG:22 TGTA:0
EA2454	3866105	snp	A	T	T:21 A:0
EA2454	3866123	snp	T	C	C:18 T:0
EA2454	3866129	complex	AT	GC	GC:16 AT:0
EA2454	3866150	snp	C	T	T:15 C:0
EA2454	3866156	complex	GGTCG	CGTCA	CGTCA:10 GGTCG:0
EA2454	3866335	snp	T	G	G:13 T:0
EA2454	3866365	snp	C	A	A:19 C:0
EA2454	3866373	complex	TT	CG	CG:19 TT:0
EA2454	3866383	snp	T	C	C:17 T:0
EA2454	3866395	snp	C	T	T:17 C:0
EA2454	3866419	snp	T	G	G:18 T:1
EA2454	3867113	snp	C	T	T:18 C:0
EA2454	3867122	snp	C	T	T:18 C:0
EA2454	3867188	snp	C	T	T:22 C:0
EA2454	3867227	snp	T	G	G:22 T:0
EA2454	3867239	snp	A	G	G:22 A:0
EA2454	3867296	snp	C	T	T:23 C:0
EA2454	3867326	complex	TAGCCGG	AAACCGC	AAACCGC:20 TAGCCGG:0
EA2454	3867905	snp	T	G	G:15 T:0
EA2454	3868706	snp	T	C	C:16 T:0
EA2454	3868760	snp	A	G	G:13 A:0
EA2454	3868774	snp	A	G	G:11 A:0
EA2454	3869252	snp	T	C	C:13 T:0
EA2454	3869489	snp	T	C	C:19 T:0
EA2454	3871816	snp	A	G	G:17 A:0
EA2454	3871828	snp	C	T	T:19 C:0
EA2454	3871837	snp	C	T	T:18 C:0
EA2454	3871864	snp	G	A	A:23 G:0
EA2454	3872110	snp	T	C	C:24 T:0
EA2454	3872599	snp	G	A	A:28 G:0
EA2454	3872721	snp	T	C	C:20 T:0
EA2454	3873021	snp	G	A	A:27 G:0
EA2454	3873264	snp	G	T	T:32 G:0
EA2454	3873309	snp	C	T	T:30 C:0
EA2454	3873315	snp	G	A	A:32 G:0
EA2454	3873396	snp	T	C	C:27 T:0
EA2454	3873417	snp	C	A	A:20 C:0
EA2454	3873594	snp	G	A	A:35 G:0
EA2454	3873774	snp	C	T	T:32 C:0
EA2454	3874221	snp	T	C	C:27 T:0
EA2454	3874248	snp	G	A	A:28 G:0
EA2454	3874254	snp	G	A	A:27 G:0
EA2454	3874266	snp	T	G	G:29 T:1
EA2454	3874278	snp	T	C	C:28 T:0
EA2454	3874329	complex	GGCG	AGCA	AGCA:22 GGCG:0
EA2454	3874350	snp	C	T	T:18 C:0
EA2454	3874393	snp	T	A	A:26 T:0
EA2454	3874464	complex	CGCA	TGCT	TGCT:27 CGCA:0
EA2454	3874500	snp	C	T	T:30 C:0
EA2454	3874551	complex	AAGA	TCAG	TCAG:13 AAGA:0
EA2454	3874568	snp	G	C	C:12 G:0
EA2454	3874586	complex	CGGGG	GTGGA	GTGGA:10 CGGGG:0
EA2454	3874598	complex	GC	CT	CT:10 GC:0
EA2454	3874839	snp	G	T	T:11 G:0
EA2454	3874860	snp	T	C	C:17 T:0
EA2454	3874870	snp	C	T	T:18 C:0
EA2454	3874893	snp	A	G	G:26 A:0
EA2454	3874989	snp	T	C	C:38 T:0
EA2454	3874995	complex	CC	TT	TT:37 CC:0
EA2454	3875034	snp	G	A	A:38 G:0
EA2454	3875073	snp	C	A	A:28 C:0
EA2454	3875100	snp	T	G	G:27 T:0
EA2454	3875106	snp	G	A	A:28 G:0
EA2454	3875172	complex	CATC	TATT	TATT:29 CATC:0
EA2454	3875191	snp	A	G	G:29 A:0
EA2454	3875205	complex	GGGG	TGGT	TGGT:33 GGGG:0
EA2454	3875213	snp	G	A	A:37 G:0
EA2454	3875232	snp	T	C	C:33 T:0
EA2454	3875259	snp	G	T	T:28 G:0
EA2454	3877324	snp	A	G	G:14 A:0
EA2454	3877374	snp	T	G	G:20 T:0
EA2454	3877383	snp	G	A	A:20 G:0
EA2454	3877453	snp	C	T	T:18 C:0
EA2454	3877606	snp	G	A	A:24 G:0
EA2454	3877622	snp	G	A	A:25 G:0
EA2454	3877737	snp	C	A	A:27 C:0
EA2454	3877935	snp	C	A	A:13 C:0
EA2454	3877948	complex	GTC	ATT	ATT:10 GTC:0
EA2454	3877981	complex	ATC	GTG	GTG:14 ATC:0
EA2454	3877989	snp	T	C	C:13 T:0
EA2454	3878007	snp	C	T	T:15 C:0
EA2454	3878037	complex	AAAA	CAGG	CAGG:14 AAAA:0
EA2454	3878049	complex	GGTC	AGTA	AGTA:18 GGTC:0
EA2454	3878061	snp	C	T	T:16 C:0
EA2454	3878094	complex	GGCT	TGCC	TGCC:12 GGCT:0
EA2454	3878112	snp	A	T	T:12 A:0
EA2454	3878133	snp	A	T	T:18 A:0
EA2454	3878148	snp	T	C	C:22 T:0
EA2454	3878193	snp	T	C	C:28 T:0
EA2454	3878208	snp	T	C	C:28 T:0
EA2454	3878292	snp	T	C	C:18 T:0
EA2454	3878397	snp	A	G	G:23 A:0
EA2454	3878658	snp	G	T	T:28 G:0
EA2454	3879225	snp	G	T	T:27 G:0
EA2454	3879252	snp	C	T	T:29 C:0
EA2454	3879402	snp	C	T	T:30 C:0
EA2454	3879462	snp	T	C	C:35 T:0
EA2454	3879804	snp	A	G	G:22 A:0
EA2454	3879864	snp	A	G	G:27 A:0
EA2454	3879883	snp	T	C	C:19 T:0
EA2454	3879903	snp	G	T	T:20 G:0
EA2454	3880514	snp	C	T	T:48 C:0
EA2454	3880947	snp	G	A	A:23 G:0
EA2454	3881115	snp	C	T	T:38 C:0
EA2454	3881246	snp	C	G	G:26 C:0
EA2454	3881461	snp	T	C	C:34 T:0
EA2454	3881684	snp	A	C	C:52 A:0
EA2454	3881743	snp	T	C	C:47 T:0
EA2454	3882296	snp	T	C	C:35 T:0
EA2454	3882404	snp	C	T	T:35 C:0
EA2454	3883133	snp	A	G	G:46 A:0
EA2454	3883233	snp	G	A	A:46 G:0
EA2454	3883477	snp	T	A	A:43 T:0
EA2454	3883535	snp	A	G	G:41 A:0
EA2454	3883557	snp	A	G	G:49 A:0
EA2454	3883567	snp	T	A	A:50 T:0
EA2454	3883583	snp	C	T	T:47 C:0
EA2454	3883592	snp	C	T	T:45 C:0
EA2454	3883637	snp	G	A	A:49 G:0
EA2454	3883685	complex	GGACC	AGACA	AGACA:58 GGACC:0
EA2454	3883800	snp	C	T	T:44 C:0
EA2454	3883826	snp	A	T	T:48 A:0
EA2454	3883883	snp	C	T	T:53 C:0
EA2454	3883908	snp	C	G	G:56 C:0
EA2454	3883927	snp	T	C	C:48 T:0
EA2454	3883964	snp	C	T	T:56 C:0
EA2454	3884000	complex	AAC	GAG	GAG:48 AAC:0
EA2454	3884078	snp	A	G	G:55 A:0
EA2454	3884138	snp	C	A	A:41 C:0
EA2454	3884321	complex	TGATG	CGATA	CGATA:37 TGATG:0
EA2454	3884372	snp	G	A	A:30 G:0
EA2454	3884388	complex	CTG	TTT	TTT:30 CTG:0
EA2454	3884400	complex	GCT	CCG	CCG:28 GCT:0
EA2454	3884430	snp	T	C	C:28 T:0
EA2454	3884444	snp	A	G	G:26 A:0
EA2454	3884471	snp	G	C	C:23 G:0
EA2454	3884498	snp	T	G	G:19 T:0
EA2454	3884537	complex	ACGT	GCGC	GCGC:23 ACGT:0
EA2454	3884549	snp	A	G	G:25 A:0
EA2454	3884591	snp	A	G	G:17 A:0
EA2454	3884597	snp	C	A	A:20 C:0
EA2454	3884615	snp	G	A	A:22 G:0
EA2454	3884622	snp	T	A	A:17 T:1
EA2454	3884663	complex	CCGT	ACGG	ACGG:21 CCGT:0
EA2454	3884741	snp	T	C	C:34 T:0
EA2454	3884753	snp	T	C	C:33 T:0
EA2454	3884783	snp	T	C	C:28 T:0
EA2454	3884795	snp	A	G	G:29 A:1
EA2454	3884837	snp	C	A	A:29 C:0
EA2454	3884888	snp	A	G	G:22 A:0
EA2454	3884948	snp	T	C	C:25 T:0
EA2454	3884985	snp	A	G	G:25 A:0
EA2454	3885023	snp	C	T	T:20 C:0
EA2454	3885028	snp	G	A	A:20 G:0
EA2454	3885050	snp	A	G	G:16 A:0
EA2454	3885064	snp	A	T	T:14 A:0
EA2454	3885071	snp	C	G	G:14 C:0
EA2454	3885096	complex	GCC	ACT	ACT:14 GCC:0
EA2454	3885126	snp	T	C	C:13 T:0
EA2454	3885212	snp	T	C	C:23 T:0
EA2454	3885235	snp	C	A	A:21 C:0
EA2454	3885242	snp	C	T	T:23 C:0
EA2454	3885261	snp	A	G	G:25 A:0
EA2454	3885267	snp	A	G	G:27 A:0
EA2454	3885384	snp	C	G	G:11 C:0
EA2454	3885390	snp	T	A	A:10 T:0
EA2454	3885560	complex	CGGTG	GGATT	GGATT:12 CGGTG:0
EA2454	3885591	snp	C	A	A:12 C:0
EA2454	3885654	snp	A	G	G:10 A:0
EA2454	3885723	snp	C	G	G:12 C:0
EA2454	3885775	snp	A	C	C:17 A:0
EA2454	3885799	complex	AT	GC	GC:14 AT:1
EA2454	3885869	mnp	TG	CA	CA:16 TG:0
EA2454	3885876	complex	TGTAGCT	GGTGGCC	GGTGGCC:14 TGTAGCT:0
EA2454	3885906	snp	T	C	C:19 T:0
EA2454	3885970	complex	ACG	GTA	GTA:22 ACG:0
EA2454	3885978	snp	T	C	C:26 T:0
EA2454	3886011	snp	A	G	G:23 A:0
EA2454	3886035	snp	G	A	A:26 G:0
EA2454	3886116	snp	A	G	G:28 A:0
EA2454	3886122	snp	A	G	G:27 A:0
EA2454	3886140	snp	C	G	G:22 C:0
EA2454	3886176	snp	A	G	G:28 A:0
EA2454	3886197	snp	A	G	G:25 A:0
EA2454	3886212	snp	G	A	A:25 G:0
EA2454	3886260	snp	G	A	A:26 G:0
EA2454	3886278	snp	C	T	T:21 C:0
EA2454	3886285	complex	TCA	ACG	ACG:18 TCA:0
EA2454	3886314	snp	G	A	A:15 G:0
EA2454	3886328	complex	AATTA	GATTG	GATTG:10 AATTA:0
EA2454	3886477	snp	G	T	T:19 G:0
EA2454	3889450	snp	G	T	T:15 G:0
EA2454	3889477	mnp	CA	TG	TG:15 CA:0
EA2454	3889496	complex	TCTAT	CAGCAA	CAGCAA:11 TCTAT:0
EA2454	3889511	complex	GA	TAAG	TAAG:11 GA:0
EA2454	3889529	complex	TAACAAG	CATCTAA	CATCTAA:18 TAACAAG:0
EA2454	3889577	snp	C	T	T:25 C:0
EA2454	3889615	snp	G	A	A:20 G:0
EA2454	3889667	snp	G	T	T:24 G:0
EA2454	3889766	snp	C	A	A:18 C:1
EA2454	3889814	snp	G	C	C:21 G:0
EA2454	3889829	snp	A	G	G:23 A:0
EA2454	3889838	snp	G	A	A:23 G:0
EA2454	3889844	snp	A	G	G:25 A:0
EA2454	3889859	snp	C	T	T:24 C:0
EA2454	3889922	snp	C	T	T:28 C:0
EA2454	3889949	snp	C	T	T:31 C:0
EA2454	3889961	snp	G	A	A:29 G:0
EA2454	3889967	complex	TGCTGCC	CGGTGCA	CGGTGCA:25 TGCTGCC:0
EA2454	3890213	snp	T	C	C:28 T:0
EA2454	3890222	snp	G	A	A:20 G:0
EA2454	3890249	snp	G	T	T:18 G:0
EA2454	3890291	snp	T	G	G:20 T:0
EA2454	3890300	snp	A	G	G:24 A:0
EA2454	3890402	complex	TAA	CAG	CAG:20 TAA:0
EA2454	3890414	snp	A	G	G:27 A:0
EA2454	3890423	snp	C	T	T:24 C:0
EA2454	3890471	snp	T	C	C:23 T:0
EA2454	3890515	complex	CTCA	TTCT	TTCT:20 CTCA:0
EA2454	3890534	complex	CG	AA	AA:14 CG:0
EA2454	3890560	complex	TCTGT	CCTGC	CCTGC:12 TCTGT:0
EA2454	3890579	snp	G	T	T:16 G:0
EA2454	3890586	snp	T	C	C:14 T:0
EA2454	3890602	snp	T	C	C:14 T:0
EA2454	3890608	snp	C	T	T:12 C:0
EA2454	3890755	snp	T	C	C:10 T:0
EA2454	3890864	snp	G	A	A:13 G:0
EA2454	3891090	complex	TGTT	AGTC	AGTC:12 TGTT:0
EA2454	3891120	snp	G	A	A:18 G:0
EA2454	3891211	snp	A	C	C:10 A:0
EA2454	3891221	snp	G	C	C:10 G:0
EA2454	3891232	del	GC	G	G:10 GC:0
EA2454	3891433	complex	AC	GT	GT:11 AC:0
EA2454	3891444	snp	A	G	G:11 A:0
EA2454	3891453	complex	ATAAAGA	CTGAAGG	CTGAAGG:11 ATAAAGA:0
EA2454	3891475	snp	T	C	C:10 T:0
EA2454	3904266	snp	T	C	C:19 T:0
EA2454	3905167	snp	C	A	A:35 C:0
EA2454	3905342	snp	G	T	T:49 G:0
EA2454	3908657	snp	T	C	C:50 T:0
EA2454	3908840	snp	C	A	A:16 C:1
EA2454	3917749	snp	T	A	A:49 T:0
EA2454	3929224	snp	C	T	T:13 C:0
EA2454	3931051	snp	C	T	T:58 C:0
EA2454	3937328	snp	G	A	A:55 G:0
EA2454	3939722	snp	A	C	C:22 A:1
EA2454	3940525	snp	C	T	T:29 C:0
EA2454	3944749	snp	A	C	C:84 A:0
EA2454	3955870	snp	T	A	A:42 T:0
EA2454	3962485	snp	T	C	C:24 T:0
EA2454	3983239	snp	G	T	T:41 G:0
EA2454	4004474	snp	A	G	G:63 A:0
EA2454	4004676	snp	C	T	T:41 C:0
EA2454	4004935	snp	G	A	A:64 G:1
EA2454	4006309	snp	C	T	T:74 C:0
EA2454	4008915	snp	G	A	A:75 G:0
EA2454	4014768	snp	T	C	C:84 T:0
EA2454	4016930	snp	T	A	A:88 T:0
EA2454	4026172	snp	T	G	G:106 T:0
EA2454	4030798	snp	G	T	T:24 G:0
EA2454	4046247	snp	C	A	A:90 C:0
EA2454	4046742	snp	G	A	A:64 G:0
EA2454	4058462	snp	T	G	G:73 T:0
EA2454	4062557	snp	A	C	C:69 A:1
EA2454	4074511	snp	T	C	C:56 T:0
EA2454	4116563	snp	G	A	A:64 G:0
EA2454	4134190	snp	C	T	T:54 C:0
EA2454	4141091	snp	A	G	G:55 A:0
EA2454	4168245	snp	C	T	T:80 C:0
EA2454	4182996	snp	C	T	T:95 C:0
EA2454	4183014	snp	A	G	G:101 A:0
EA2454	4183029	mnp	AC	GT	GT:93 AC:0
EA2454	4183591	snp	A	C	C:38 A:0
EA2454	4183725	complex	AAAA	GAAG	GAAG:59 AAAA:0
EA2454	4183772	complex	AGCCG	GGCCT	GGCCT:66 AGCCG:0
EA2454	4184203	snp	C	T	T:17 C:0
EA2454	4184212	snp	T	C	C:18 T:0
EA2454	4184328	complex	GACAAAAAATAAAACCAGCAAAATAAAATATCCCCCCAAAAAAAATTTAAAATACAGA	AACAAAAAAATAAAACCCGCAAAATAAAATATCAGCCCCAAAAATACAGC	AACAAAAAAATAAAACCCGCAAAATAAAATATCAGCCCCAAAAATACAGC:16 GACAAAAAATAAAACCAGCAAAATAAAATATCCCCCCAAAAAAAATTTAAAATACAGA:0
EA2454	4184557	complex	GC	AT	AT:24 GC:0
EA2454	4184586	ins	A	AT	AT:20 A:0
EA2454	4184705	complex	GC	AT	AT:53 GC:0
EA2454	4190041	del	TC	T	T:45 TC:0
EA2454	4200656	snp	A	G	G:123 A:0
EA2454	4208099	snp	C	T	T:79 C:0
EA2454	4208280	snp	G	T	T:66 G:0
EA2454	4212664	snp	T	A	A:25 T:0
EA2454	4216725	del	CTTTT	C	C:48 CTTTT:0
EA2454	4227994	snp	G	T	T:84 G:0
EA2454	4231555	snp	C	T	T:11 C:0
EA2454	4231669	snp	C	T	T:29 C:0
EA2454	4234319	snp	A	G	G:65 A:0
EA2454	4235320	snp	A	G	G:45 A:0
EA2454	4235834	snp	C	T	T:54 C:0
EA2454	4236400	snp	C	T	T:59 C:0
EA2454	4240327	snp	G	A	A:81 G:0
EA2454	4247151	del	GGCTGCCGGACTCATTCGCAGTGGACAAATTTT	G	G:29 GGCTGCCGGACTCATTCGCAGTGGACAAATTTT:0
EA2454	4247909	snp	G	A	A:103 G:0
EA2454	4257673	snp	C	T	T:90 C:0
EA2454	4259428	snp	A	G	G:123 A:0
EA2454	4267142	snp	A	G	G:68 A:0
EA2454	4272983	snp	A	G	G:66 A:0
EA2454	4273176	snp	C	T	T:24 C:0
EA2454	4281791	snp	G	A	A:48 G:0
EA2454	4283531	snp	A	T	T:47 A:0
EA2454	4285277	snp	C	T	T:60 C:0
EA2454	4290073	del	AGGAT	A	A:65 AGGAT:0
EA2454	4321572	snp	T	C	C:23 T:0
EA2454	4323585	snp	G	A	A:78 G:0
EA2454	4325610	snp	G	T	T:79 G:0
EA2454	4326301	snp	A	G	G:60 A:0
EA2454	4351324	snp	G	A	A:89 G:0
EA2454	4356355	snp	A	G	G:48 A:0
EA2454	4394869	snp	T	C	C:75 T:0
EA2454	4414071	snp	G	T	T:112 G:0
EA2454	4414845	snp	G	T	T:48 G:0
EA2454	4416190	snp	A	G	G:75 A:0
EA2454	4419628	snp	T	C	C:91 T:0
EA2454	4420363	snp	A	G	G:84 A:0
EA2454	4449842	snp	C	T	T:15 C:0
EA2454	4449848	complex	CGGA	TGGT	TGGT:16 CGGA:0
EA2454	4449881	snp	T	C	C:28 T:0
EA2454	4449908	snp	C	T	T:37 C:0
EA2454	4449923	complex	TGAT	AGAC	AGAC:46 TGAT:0
EA2454	4449935	complex	CGTT	TGTG	TGTG:52 CGTT:0
EA2454	4449956	snp	T	C	C:64 T:0
EA2454	4449974	snp	T	C	C:58 T:0
EA2454	4449983	snp	C	G	G:58 C:0
EA2454	4450022	snp	T	G	G:71 T:0
EA2454	4450067	snp	C	T	T:56 C:0
EA2454	4450115	snp	G	T	T:60 G:0
EA2454	4450151	snp	A	G	G:58 A:0
EA2454	4450286	snp	C	G	G:50 C:0
EA2454	4450294	snp	T	A	A:49 T:0
EA2454	4450348	complex	TCCGT	ACCGA	ACCGA:41 TCCGT:0
EA2454	4450358	snp	C	T	T:41 C:0
EA2454	4450366	complex	TGGAGGAA	CGGAACAG	CGGAACAG:27 TGGAGGAA:0
EA2454	4450397	snp	G	A	A:35 G:0
EA2454	4450432	snp	A	G	G:39 A:0
EA2454	4450441	snp	C	G	G:43 C:0
EA2454	4450451	complex	CAG	ACC	ACC:38 CAG:0
EA2454	4450462	snp	C	T	T:45 C:0
EA2454	4450481	snp	A	G	G:44 A:0
EA2454	4450486	snp	C	G	G:42 C:0
EA2454	4450539	complex	TAAAG	CAAAA	CAAAA:52 TAAAG:0
EA2454	4450561	snp	A	G	G:49 A:0
EA2454	4450579	snp	G	A	A:46 G:0
EA2454	4450589	snp	T	C	C:47 T:0
EA2454	4450648	snp	C	T	T:51 C:0
EA2454	4450666	complex	TACG	CACA	CACA:47 TACG:0
EA2454	4450690	complex	AGGT	GGGA	GGGA:48 AGGT:0
EA2454	4450699	snp	A	G	G:52 A:0
EA2454	4450713	snp	A	G	G:49 A:0
EA2454	4450722	snp	C	A	A:48 C:0
EA2454	4450731	snp	G	A	A:45 G:0
EA2454	4450747	snp	A	G	G:51 A:0
EA2454	4450776	snp	A	C	C:46 A:1
EA2454	4450785	snp	C	T	T:46 C:0
EA2454	4450815	complex	CGGTAAGACG	TGGCAGGTCA	TGGCAGGTCA:38 CGGTAAGACG:0
EA2454	4450836	complex	TAAC	CAAT	CAAT:42 TAAC:0
EA2454	4450846	snp	C	T	T:59 C:0
EA2454	4450861	snp	T	C	C:56 T:0
EA2454	4450878	snp	C	T	T:58 C:0
EA2454	4450914	complex	GGATAAAAT	AGAGAAAGC	AGAGAAAGC:51 GGATAAAAT:0
EA2454	4450956	snp	T	C	C:60 T:0
EA2454	4450970	snp	C	G	G:56 C:0
EA2454	4451046	snp	T	A	A:75 T:0
EA2454	4451056	complex	AGTGTC	TGCATT	TGCATT:62 AGTGTC:0
EA2454	4451073	snp	G	C	C:87 G:0
EA2454	4451118	snp	G	A	A:89 G:0
EA2454	4451130	complex	TCCT	CCCA	CCCA:79 TCCT:0
EA2454	4451160	complex	GCGA	ACGG	ACGG:60 GCGA:0
EA2454	4451178	complex	GGCA	AGCT	AGCT:51 GGCA:0
EA2454	4451195	snp	T	C	C:52 T:0
EA2454	4451214	snp	A	T	T:29 A:0
EA2454	4451227	complex	CAA	GAG	GAG:21 CAA:0
EA2454	4451235	snp	A	G	G:23 A:0
EA2454	4451245	snp	T	C	C:23 T:0
EA2454	4451251	snp	C	T	T:23 C:0
EA2454	4451269	complex	CGG	TGC	TGC:13 CGG:0
EA2454	4478572	snp	A	T	T:61 A:0
EA2454	4491535	snp	T	C	C:74 T:0
EA2454	4505570	ins	A	AG	AG:88 A:0
EA2454	4507253	del	TA	T	T:15 TA:0
EA2454	4509292	snp	T	G	G:83 T:0
EA2454	4509771	snp	G	A	A:61 G:0
EA2454	4510584	del	GT	G	G:14 GT:0
EA2454	4515568	snp	T	C	C:65 T:0
EA2454	4524700	snp	T	C	C:67 T:0
EA2454	4526687	snp	C	A	A:48 C:0
EA2454	4531145	snp	C	T	T:72 C:0
EA2454	4533515	snp	A	G	G:30 A:0
EA2454	4539519	snp	C	T	T:80 C:0
EA2454	4541430	snp	A	C	C:48 A:0
EA2454	4544866	snp	T	C	C:51 T:0
EA2454	4549385	snp	A	G	G:96 A:0
EA2454	4559006	snp	C	A	A:74 C:0
EA2454	4568271	snp	A	G	G:68 A:0
EA2454	4568846	snp	G	T	T:60 G:0
EA2454	4578784	snp	A	G	G:28 A:0
EA2454	4586361	snp	T	C	C:22 T:0
EA2454	4588946	snp	A	G	G:51 A:0
EA2454	4593973	snp	A	C	C:82 A:0
EA2454	4595613	snp	A	G	G:81 A:0
EA2454	4603502	complex	CA	TC	TC:11 CA:0
EA2454	4613336	snp	C	A	A:55 C:0
EA2454	4613663	snp	G	T	T:51 G:0
EA2454	4615463	snp	G	A	A:77 G:0
EA2454	4616724	snp	A	G	G:55 A:0
EA2454	4617046	snp	T	C	C:18 T:0
EA2454	4619923	snp	T	C	C:54 T:0
EA2454	4626629	snp	A	G	G:65 A:0
EA2454	4638132	snp	G	A	A:95 G:0
EA2454	4640298	snp	C	T	T:58 C:0
EA2454	4643353	snp	C	T	T:52 C:0
EA2454	4652543	snp	C	T	T:47 C:0
EA2454	4653396	snp	C	T	T:76 C:0
EA2454	4660745	snp	G	A	A:94 G:1
EA2454	4661591	snp	A	G	G:70 A:0
EA2454	4664714	snp	C	A	A:96 C:0
EA2454	4665968	snp	G	A	A:53 G:0
EA2454	4670848	complex	TGCG	CGCA	CGCA:45 TGCG:0
EA2454	4670861	snp	T	C	C:49 T:0
EA2454	4670947	snp	T	C	C:73 T:0
EA2454	4676096	complex	GAA	CAG	CAG:13 GAA:0
EA2454	4676103	complex	GGGT	TGAC	TGAC:13 GGGT:0
EA2454	4676406	snp	G	C	C:23 G:0
EA2454	4676421	snp	G	A	A:21 G:0
EA2454	4676505	snp	C	G	G:28 C:0
EA2454	4676553	snp	C	T	T:36 C:0
EA2454	4676559	snp	T	C	C:36 T:0
EA2454	4676571	complex	TGTC	AGTG	AGTG:35 TGTC:0
EA2454	4676635	snp	C	A	A:33 C:0
EA2454	4676734	snp	C	G	G:40 C:0
EA2454	4676748	snp	A	G	G:41 A:0
EA2454	4676766	snp	T	C	C:33 T:0
EA2454	4676781	snp	A	G	G:35 A:0
EA2454	4676961	snp	A	G	G:13 A:0
EA2454	4696857	snp	T	A	A:11 T:0
EA2454	4696869	snp	G	C	C:14 G:0
EA2454	4696890	snp	C	T	T:15 C:0
EA2454	4696896	snp	G	C	C:13 G:0
EA2454	4696899	snp	T	C	C:13 T:0
EA2454	4696914	snp	G	C	C:15 G:0
EA2454	4696932	complex	GCTC	ACTG	ACTG:13 GCTC:0
EA2454	4696944	complex	AGCAA	TGCAC	TGCAC:13 AGCAA:0
EA2454	4696954	snp	A	C	C:13 A:0
EA2454	4702030	snp	C	T	T:28 C:0
EA2454	4702096	snp	T	C	C:30 T:0
EA2454	4702109	snp	C	T	T:30 C:0
EA2454	4702176	snp	T	C	C:17 T:0
EA2454	4702184	snp	A	G	G:11 A:0
EA2454	4702211	snp	G	C	C:16 G:0
EA2454	4702233	snp	C	T	T:24 C:0
EA2454	4702241	snp	A	C	C:23 A:0
EA2454	4702246	snp	A	G	G:23 A:0
EA2454	4702261	snp	C	A	A:24 C:0
EA2454	4702285	snp	C	T	T:25 C:0
EA2454	4702291	complex	ACTG	GCTA	GCTA:24 ACTG:0
EA2454	4702303	snp	G	A	A:30 G:0
EA2454	4702308	snp	A	G	G:27 A:0
EA2454	4702342	snp	C	T	T:34 C:0
EA2454	4702347	snp	T	C	C:42 T:0
EA2454	4702353	snp	G	A	A:35 G:0
EA2454	4702364	snp	A	G	G:38 A:0
EA2454	4702381	snp	T	G	G:37 T:0
EA2454	4702399	snp	T	C	C:31 T:0
EA2454	4702414	snp	A	C	C:33 A:0
EA2454	4702434	complex	ACA	GCT	GCT:33 ACA:0
EA2454	4702442	complex	GGTAG	AGTAA	AGTAA:33 GGTAG:0
EA2454	4702486	complex	CGTAG	TGTAC	TGTAC:45 CGTAG:0
EA2454	4702534	snp	G	C	C:49 G:0
EA2454	4702558	snp	C	T	T:49 C:0
EA2454	4702597	snp	A	G	G:45 A:0
EA2454	4702612	snp	A	G	G:40 A:0
EA2454	4702617	snp	G	A	A:40 G:0
EA2454	4702637	mnp	TGT	GTG	GTG:34 TGT:1
EA2454	4702648	mnp	CC	GG	GG:35 CC:0
EA2454	4702660	snp	T	C	C:39 T:0
EA2454	4702687	snp	G	T	T:42 G:0
EA2454	4702727	snp	G	A	A:43 G:0
EA2454	4702734	snp	C	A	A:40 C:0
EA2454	4702751	snp	G	A	A:37 G:0
EA2454	4702774	snp	C	T	T:41 C:0
EA2454	4702789	complex	CA	TG	TG:37 CA:0
EA2454	4703028	snp	T	C	C:25 T:0
EA2454	4703139	snp	C	G	G:28 C:0
EA2454	4703323	snp	G	C	C:16 G:0
EA2454	4703373	snp	C	T	T:24 C:0
EA2454	4703415	snp	C	T	T:25 C:0
EA2454	4703427	snp	T	C	C:24 T:0
EA2454	4703437	complex	CAG	TCC	TCC:23 CAG:0
EA2454	4703445	snp	T	C	C:23 T:0
EA2454	4703454	snp	C	T	T:22 C:0
EA2454	4703469	snp	T	C	C:21 T:0
EA2454	4703496	snp	T	G	G:19 T:0
EA2454	4703508	complex	ACTC	GCTG	GCTG:14 ACTC:0
EA2454	4703524	complex	TTA	CTG	CTG:14 TTA:0
EA2454	4703790	snp	G	A	A:11 G:0
EA2454	4703793	snp	C	G	G:11 C:0
EA2454	4703856	snp	A	C	C:18 A:0
EA2454	4703871	snp	C	T	T:20 C:0
EA2454	4703983	snp	A	G	G:27 A:0
EA2454	4704003	snp	G	T	T:25 G:0
EA2454	4704036	snp	T	G	G:16 T:0
EA2454	4704045	snp	A	G	G:13 A:0
EA2454	4704335	snp	T	G	G:20 T:0
EA2454	4705457	mnp	GTA	ACC	ACC:32 GTA:0
EA2454	4705489	snp	A	C	C:37 A:0
EA2454	4705546	snp	T	C	C:30 T:0
EA2454	4705601	snp	G	A	A:28 G:0
EA2454	4705787	snp	G	C	C:44 G:0
EA2454	4705797	snp	T	C	C:43 T:0
EA2454	4705835	complex	C	TG	TG:39 C:0
EA2454	4705849	complex	GT	TA	TA:36 GT:0
EA2454	4705864	snp	A	C	C:35 A:0
EA2454	4705983	complex	GTAT	TTAC	TTAC:31 GTAT:0
EA2454	4706187	complex	CA	TG	TG:24 CA:0
EA2454	4706193	snp	C	T	T:24 C:0
EA2454	4706199	complex	CTCC	TTCT	TTCT:28 CTCC:0
EA2454	4706313	snp	C	T	T:26 C:0
EA2454	4706337	snp	T	A	A:29 T:0
EA2454	4706411	snp	A	G	G:28 A:0
EA2454	4706470	snp	A	G	G:24 A:0
EA2454	4706595	snp	G	A	A:22 G:0
EA2454	4706805	snp	C	G	G:29 C:0
EA2454	4706855	mnp	AAA	GGG	GGG:22 AAA:0
EA2454	4706873	snp	G	A	A:29 G:0
EA2454	4706902	snp	T	A	A:31 T:1
EA2454	4706907	snp	A	C	C:28 A:0
EA2454	4706964	complex	CGGT	GGGC	GGGC:25 CGGT:0
EA2454	4706980	complex	CTG	TTA	TTA:25 CTG:0
EA2454	4706990	snp	A	G	G:26 A:0
EA2454	4707009	snp	A	G	G:23 A:0
EA2454	4707062	snp	G	A	A:12 G:0
EA2454	4707112	snp	T	G	G:10 T:0
EA2454	4707231	complex	T	GG	GG:28 T:0
EA2454	4707523	snp	C	T	T:21 C:0
EA2454	4707538	snp	C	A	A:22 C:0
EA2454	4707551	snp	C	T	T:24 C:0
EA2454	4707636	snp	G	A	A:21 G:0
EA2454	4707666	snp	C	A	A:24 C:0
EA2454	4707738	snp	A	T	T:15 A:0
EA2454	4708126	snp	A	G	G:13 A:0
EA2454	4708162	snp	T	A	A:18 T:0
EA2454	4708219	snp	C	T	T:19 C:0
EA2454	4708354	snp	G	A	A:30 G:0
EA2454	4708459	snp	G	C	C:35 G:0
EA2454	4708474	snp	T	C	C:36 T:0
EA2454	4708504	snp	C	G	G:33 C:0
EA2454	4708510	snp	A	G	G:38 A:0
EA2454	4708600	snp	A	T	T:26 A:0
EA2454	4708777	snp	A	T	T:24 A:0
EA2454	4708813	snp	G	A	A:23 G:0
EA2454	4708833	mnp	TC	GG	GG:22 TC:0
EA2454	4708864	snp	C	T	T:19 C:0
EA2454	4708956	snp	G	A	A:20 G:0
EA2454	4709051	snp	G	T	T:23 G:0
EA2454	4709071	complex	GAGCCGG	AAGTCGA	AAGTCGA:24 GAGCCGG:0
EA2454	4709143	snp	C	T	T:38 C:0
EA2454	4709254	snp	A	G	G:34 A:0
EA2454	4709275	complex	ACAGGTTTT	GCAGATTTG	GCAGATTTG:29 ACAGGTTTT:0
EA2454	4709311	snp	C	T	T:32 C:0
EA2454	4709368	snp	T	C	C:16 T:0
EA2454	4709404	snp	T	A	A:18 T:0
EA2454	4709421	snp	G	A	A:23 G:0
EA2454	4709445	mnp	CC	TT	TT:21 CC:0
EA2454	4709456	complex	GAGA	CAGG	CAGG:24 GAGA:0
EA2454	4709470	snp	T	C	C:24 T:0
EA2454	4709475	snp	C	T	T:23 C:0
EA2454	4709485	snp	C	T	T:23 C:0
EA2454	4709659	snp	T	C	C:19 T:0
EA2454	4709671	complex	ACAG	GCAA	GCAA:19 ACAG:0
EA2454	4709682	complex	GTATAT	ACTTAC	ACTTAC:16 GTATAT:0
EA2454	4709693	complex	CGG	GGA	GGA:16 CGG:0
EA2454	4709704	ins	C	CG	CG:16 C:0
EA2454	4709720	snp	T	C	C:17 T:0
EA2454	4709743	complex	AAGAA	GGGAG	GGGAG:16 AAGAA:0
EA2454	4709777	snp	T	C	C:19 T:0
EA2454	4709784	mnp	GC	AG	AG:11 GC:0
EA2454	4709793	complex	GCTGAAATCCGGGCT	ATCGAGATTCCGGCA	ATCGAGATTCCGGCA:11 GCTGAAATCCGGGCT:0
EA2454	4709812	snp	C	T	T:12 C:0
EA2454	4709828	snp	T	A	A:15 T:0
EA2454	4709843	snp	T	C	C:14 T:0
EA2454	4709851	del	TGGTGA	T	T:14 TGGTGA:0
EA2454	4709867	snp	G	A	A:16 G:0
EA2454	4709912	complex	GA	AG	AG:16 GA:0
EA2454	4709942	snp	A	G	G:24 A:0
EA2454	4710126	snp	G	A	A:25 G:0
EA2454	4710161	snp	C	T	T:25 C:1
EA2454	4710173	snp	C	G	G:29 C:0
EA2454	4710179	complex	ACCA	GCCG	GCCG:27 ACCA:0
EA2454	4710203	snp	G	A	A:26 G:0
EA2454	4710233	snp	G	A	A:26 G:0
EA2454	4710255	snp	C	A	A:25 C:0
EA2454	4710284	snp	G	T	T:27 G:0
EA2454	4710291	snp	A	T	T:28 A:0
EA2454	4710321	snp	T	C	C:22 T:0
EA2454	4710327	snp	T	C	C:24 T:0
EA2454	4710342	complex	AA	GAC	GAC:19 AA:0
EA2454	4710391	snp	T	C	C:17 T:0
EA2454	4712072	snp	C	T	T:82 C:0
EA2454	4712180	snp	A	G	G:67 A:0
EA2454	4712713	snp	G	A	A:18 G:0
EA2454	4712732	snp	A	G	G:15 A:0
EA2454	4713260	snp	A	G	G:56 A:0
EA2454	4720598	snp	A	G	G:70 A:0
EA2454	4720801	snp	C	A	A:37 C:0
EA2454	4720827	snp	T	G	G:31 T:0
EA2454	4720836	snp	G	T	T:34 G:0
EA2454	4726464	ins	C	CA	CA:49 C:0
EA2454	4731705	snp	G	A	A:45 G:0
EA2454	4735220	snp	A	G	G:116 A:0
EA2454	4739555	snp	T	C	C:58 T:0
EA2454	4740005	snp	C	T	T:61 C:0
EA2454	4745379	snp	T	G	G:59 T:0
EA2454	4749488	snp	T	C	C:13 T:0
EA2454	4750294	snp	A	G	G:76 A:0
EA2454	4750305	snp	T	C	C:72 T:0
EA2454	4750320	complex	AATC	GATA	GATA:61 AATC:0
EA2454	4750329	snp	A	G	G:60 A:0
EA2454	4750988	del	CT	C	C:13 CT:0
EA2454	4751001	complex	AC	GT	GT:14 AC:0
EA2454	4751034	complex	ACGGGAT	CCGTGAG	CCGTGAG:16 ACGGGAT:0
EA2454	4751055	complex	GTTG	ATTA	ATTA:22 GTTG:0
EA2454	4751067	snp	A	G	G:25 A:0
EA2454	4751092	snp	A	T	T:33 A:0
EA2454	4751118	complex	TGCTCCCCTG	GGCACCTTTT	GGCACCTTTT:29 TGCTCCCCTG:0
EA2454	4751133	complex	ACCA	GCCT	GCCT:31 ACCA:0
EA2454	4751149	complex	CTG	TTA	TTA:36 CTG:0
EA2454	4751169	snp	A	G	G:41 A:0
EA2454	4751181	snp	A	G	G:42 A:0
EA2454	4751234	mnp	AT	GC	GC:39 AT:0
EA2454	4751241	complex	TTT	CCG	CCG:37 TTT:0
EA2454	4751274	snp	A	G	G:53 A:0
EA2454	4751289	snp	G	A	A:53 G:0
EA2454	4751296	snp	T	C	C:50 T:0
EA2454	4751307	snp	C	T	T:47 C:0
EA2454	4751313	snp	C	T	T:48 C:0
EA2454	4751318	snp	A	G	G:47 A:0
EA2454	4751328	complex	CGGGACG	AGGAATA	AGGAATA:33 CGGGACG:0
EA2454	4751340	snp	T	C	C:41 T:0
EA2454	4751364	complex	GCGA	ACGG	ACGG:38 GCGA:0
EA2454	4751372	snp	T	G	G:42 T:0
EA2454	4751382	snp	A	C	C:43 A:0
EA2454	4751388	snp	G	A	A:41 G:0
EA2454	4752803	snp	G	A	A:48 G:0
EA2454	4752814	complex	G	AA	AA:45 G:0
EA2454	4752900	complex	ACCAA	GCCT	GCCT:25 ACCAA:0
EA2454	4752946	snp	T	C	C:26 T:0
EA2454	4752969	snp	G	A	A:11 G:0
EA2454	4753161	snp	T	C	C:46 T:0
EA2454	4754020	snp	C	T	T:99 C:0
EA2454	4754067	snp	T	C	C:80 T:0
EA2454	4754086	snp	A	G	G:76 A:0
EA2454	4754200	snp	T	A	A:36 T:0
EA2454	4754215	complex	CACC	GACG	GACG:26 CACC:0
EA2454	4754226	complex	ACACA	GAACG	GAACG:23 ACACA:0
EA2454	4754236	complex	CGGGTTC	GGGATTT	GGGATTT:23 CGGGTTC:0
EA2454	4754248	snp	T	C	C:23 T:0
EA2454	4754254	snp	A	C	C:25 A:0
EA2454	4754260	snp	G	T	T:26 G:0
EA2454	4754266	complex	CGC	GGA	GGA:27 CGC:0
EA2454	4754275	snp	G	A	A:27 G:0
EA2454	4754290	complex	TTTA	CTTG	CTTG:24 TTTA:0
EA2454	4754299	snp	A	C	C:25 A:0
EA2454	4754308	snp	C	T	T:24 C:0
EA2454	4754320	snp	G	A	A:22 G:0
EA2454	4754333	complex	TCCGCA	GACTCG	GACTCG:16 TCCGCA:0
EA2454	4754452	snp	C	A	A:70 C:0
EA2454	4754491	complex	TGCCT	AGCCC	AGCCC:73 TGCCT:0
EA2454	4754536	snp	G	A	A:81 G:0
EA2454	4754545	snp	G	A	A:68 G:0
EA2454	4754581	snp	A	G	G:63 A:0
EA2454	4755223	complex	TCA	CCC	CCC:17 TCA:0
EA2454	4755231	complex	ACCTGG	TCCTTC	TCCTTC:18 ACCTGG:0
EA2454	4755251	snp	T	A	A:27 T:0
EA2454	4755277	complex	TAGTA	AAGTG	AAGTG:30 TAGTA:0
EA2454	4755345	snp	T	C	C:42 T:0
EA2454	4755358	snp	C	T	T:59 C:0
EA2454	4755454	snp	C	T	T:63 C:0
EA2454	4755476	complex	TGGTG	AGGTA	AGGTA:61 TGGTG:0
EA2454	4755509	snp	A	G	G:61 A:0
EA2454	4755653	snp	A	G	G:76 A:0
EA2454	4755722	snp	G	T	T:71 G:0
EA2454	4755808	complex	GGCAGCA	TGCGGCG	TGCGGCG:15 GGCAGCA:0
EA2454	4755820	complex	AACCG	CACCA	CACCA:15 AACCG:0
EA2454	4757085	snp	T	G	G:14 T:0
EA2454	4757091	complex	CAC	AAT	AAT:13 CAC:0
EA2454	4758383	snp	G	A	A:14 G:0
EA2454	4758435	snp	G	T	T:16 G:0
EA2454	4758466	snp	T	C	C:16 T:0
EA2454	4758500	snp	T	C	C:10 T:0
EA2454	4764339	snp	A	G	G:19 A:0
EA2454	4764345	snp	C	T	T:19 C:0
EA2454	4764355	snp	G	A	A:25 G:0
EA2454	4764364	snp	C	T	T:27 C:0
EA2454	4764399	snp	T	C	C:37 T:0
EA2454	4764441	snp	G	A	A:37 G:0
EA2454	4764483	snp	G	A	A:22 G:0
EA2454	4764490	snp	C	T	T:20 C:0
EA2454	4764501	snp	A	G	G:18 A:0
EA2454	4764525	snp	G	A	A:13 G:0
EA2454	4764781	snp	C	T	T:25 C:0
EA2454	4764840	snp	T	C	C:21 T:0
EA2454	4764869	snp	C	A	A:10 C:0
EA2454	4767229	snp	A	G	G:62 A:0
EA2454	4772922	snp	G	T	T:100 G:0
EA2454	4774021	snp	T	C	C:66 T:0
EA2454	4776446	snp	G	A	A:33 G:0
EA2454	4795607	snp	G	A	A:75 G:0
EA2454	4818512	snp	A	G	G:89 A:0
EA2454	4820334	snp	T	A	A:107 T:0
EA2454	4834350	snp	A	G	G:46 A:0
EA2454	4835997	snp	A	T	T:72 A:0
EA2454	4837912	ins	G	GA	GA:39 G:0
EA2454	4840149	snp	C	T	T:51 C:0
EA2454	4844884	snp	G	A	A:73 G:0
EA2454	4847158	snp	A	C	C:63 A:1
EA2454	4847769	snp	A	G	G:86 A:0
EA2454	4850501	snp	A	T	T:63 A:0
EA2454	4859892	del	GT	G	G:68 GT:0
EA2454	4862363	snp	C	T	T:25 C:0
EA2454	4870753	snp	G	A	A:85 G:0
EA2454	4875894	snp	G	A	A:85 G:0
EA2454	4877788	snp	A	G	G:76 A:0
EA2454	4880417	snp	G	A	A:111 G:0
EA2454	4885424	snp	T	C	C:58 T:0
EA2454	4890417	snp	A	T	T:128 A:0
EA2454	4901276	snp	T	C	C:52 T:0
EA2454	4907501	snp	C	A	A:58 C:0
EA2454	4911136	snp	T	A	A:33 T:0
EA2454	4922182	snp	T	C	C:19 T:0
EA2454	4939780	snp	C	A	A:73 C:0
EA2454	4950721	complex	AGTCA	GGCCG	GGCCG:11 AGTCA:0
EA2454	4950731	complex	AA	TG	TG:11 AA:0
EA2454	4950741	snp	T	A	A:11 T:0
EA2454	4950750	snp	A	G	G:13 A:0
EA2454	4950764	complex	TGG	GGT	GGT:11 TGG:0
EA2454	4950771	snp	A	G	G:11 A:0
EA2454	4950791	snp	A	G	G:11 A:0
EA2454	4950860	complex	ATC	GTA	GTA:18 ATC:0
EA2454	4950871	snp	T	A	A:21 T:0
EA2454	4950886	snp	C	T	T:26 C:0
EA2454	4950896	snp	T	C	C:28 T:0
EA2454	4950912	snp	C	T	T:34 C:1
EA2454	4950917	snp	T	C	C:35 T:0
EA2454	4950927	complex	ACTCG	GCGCA	GCGCA:33 ACTCG:0
EA2454	4950971	complex	AAAGT	GAAGC	GAAGC:23 AAAGT:0
EA2454	4950984	snp	T	C	C:24 T:0
EA2454	4950995	complex	CGA	TGT	TGT:20 CGA:0
EA2454	4951018	del	AT	A	A:11 AT:0
EA2454	4951029	complex	AGCA	GGGG	GGGG:11 AGCA:0
EA2454	4951195	snp	C	T	T:16 C:0
EA2454	4951212	snp	C	T	T:18 C:0
EA2454	4951222	mnp	AG	CA	CA:20 AG:0
EA2454	4951250	complex	ACGTTCT	GTCTGCC	GTCTGCC:20 ACGTTCT:0
EA2454	4951261	mnp	CA	TG	TG:21 CA:0
EA2454	4951286	snp	G	A	A:31 G:0
EA2454	4951313	snp	G	A	A:40 G:0
EA2454	4951341	snp	G	A	A:45 G:0
EA2454	4951415	mnp	CG	AT	AT:55 CG:0
EA2454	4951428	snp	A	G	G:69 A:0
EA2454	4951485	complex	CACACGCTCC	TACGCGTTCG	TACGCGTTCG:61 CACACGCTCC:0
EA2454	4951506	complex	ACT	GCG	GCG:67 ACT:0
EA2454	4951526	complex	GTGTA	ATGTG	ATGTG:70 GTGTA:0
EA2454	4951536	complex	ACTC	GCTA	GCTA:71 ACTC:0
EA2454	4951545	snp	T	A	A:87 T:0
EA2454	4951550	snp	T	G	G:87 T:0
EA2454	4951581	complex	CTCG	TTCA	TTCA:89 CTCG:0
EA2454	4951592	snp	A	G	G:90 A:0
EA2454	4951605	snp	G	A	A:82 G:0
EA2454	4951611	snp	T	C	C:81 T:0
EA2454	4951626	snp	A	T	T:82 A:1
EA2454	4951634	complex	TCGGG	CCGGA	CCGGA:87 TCGGG:0
EA2454	4951676	snp	C	G	G:107 C:1
EA2454	4951745	snp	T	G	G:96 T:0
EA2454	4951755	complex	ACT	GCC	GCC:94 ACT:0
EA2454	4951769	snp	A	T	T:100 A:0
EA2454	4951805	snp	G	A	A:94 G:0
EA2454	4951820	snp	G	A	A:99 G:0
EA2454	4951826	snp	A	T	T:93 A:0
EA2454	4951844	snp	G	T	T:87 G:0
EA2454	4952035	snp	C	G	G:84 C:0
EA2454	4952846	snp	G	A	A:67 G:0
EA2454	4952873	complex	CCCTTCGTCA	TCCCTCATCT	TCCCTCATCT:52 CCCTTCGTCA:0
EA2454	4952897	snp	A	G	G:56 A:0
EA2454	4952912	snp	A	G	G:57 A:0
EA2454	4952921	complex	TGCAATT	CGCGATC	CGCGATC:56 TGCAATT:0
EA2454	4952948	snp	T	C	C:64 T:1
EA2454	4952963	complex	ATCGCG	GTCTCT	GTCTCT:62 ATCGCG:0
EA2454	4952993	snp	A	G	G:56 A:0
EA2454	4953022	complex	GTTG	ATTT	ATTT:58 GTTG:0
EA2454	4953032	snp	T	C	C:56 T:0
EA2454	4953039	snp	A	T	T:62 A:0
EA2454	4953048	complex	ACT	GCC	GCC:52 ACT:0
EA2454	4953056	snp	T	C	C:54 T:0
EA2454	4953065	snp	A	T	T:46 A:0
EA2454	4953091	snp	G	T	T:22 G:0
EA2454	4953102	snp	G	A	A:11 G:0
EA2454	4953386	snp	T	C	C:10 T:0
EA2454	4953404	snp	A	G	G:24 A:0
EA2454	4953416	snp	T	C	C:26 T:0
EA2454	4953441	complex	ACCGA	GCCGT	GCCGT:27 ACCGA:0
EA2454	4953486	snp	T	C	C:52 T:0
EA2454	4953506	complex	TCCA	GCCT	GCCT:50 TCCA:0
EA2454	4953521	complex	CAT	TAC	TAC:46 CAT:0
EA2454	4953547	complex	GG	CC	CC:33 GG:0
EA2454	4953563	complex	ATGC	GTGT	GTGT:30 ATGC:0
EA2454	4953575	snp	C	T	T:28 C:0
EA2454	4953584	snp	T	C	C:24 T:0
EA2454	4953605	snp	A	G	G:13 A:0
EA2454	4953820	snp	G	T	T:11 G:0
EA2454	4954639	snp	A	G	G:14 A:0
EA2454	4954655	snp	T	C	C:17 T:0
EA2454	4954664	complex	AGCAAAATTA	GGTAAAGTTC	GGTAAAGTTC:14 AGCAAAATTA:0
EA2454	4954682	snp	G	T	T:20 G:0
EA2454	4954694	complex	TACGA	AACGG	AACGG:25 TACGA:0
EA2454	4954706	snp	T	A	A:27 T:0
EA2454	4954712	snp	T	A	A:29 T:0
EA2454	4954726	complex	ATTCCT	GCTCCC	GCTCCC:27 ATTCCT:0
EA2454	4954743	snp	T	G	G:28 T:0
EA2454	4954748	complex	CCTTACAATG	ACTGACGATA	ACTGACGATA:27 CCTTACAATG:0
EA2454	4954766	snp	C	A	A:33 C:0
EA2454	4954778	snp	C	G	G:30 C:0
EA2454	4954784	snp	G	A	A:27 G:0
EA2454	4954789	snp	A	C	C:31 A:0
EA2454	4954811	complex	AAAG	GAAT	GAAT:39 AAAG:0
EA2454	4954825	complex	CGTTA	TGTTG	TGTTG:43 CGTTA:0
EA2454	4954835	snp	T	C	C:44 T:0
EA2454	4954841	snp	T	C	C:46 T:0
EA2454	4954853	snp	T	G	G:46 T:0
EA2454	4954858	complex	TCGT	CCGC	CCGC:47 TCGT:0
EA2454	4954868	snp	T	A	A:50 T:0
EA2454	4954874	snp	C	T	T:53 C:0
EA2454	4954895	snp	A	C	C:56 A:0
EA2454	4954901	snp	A	G	G:54 A:0
EA2454	4954907	complex	TCCC	GCCT	GCCT:53 TCCC:0
EA2454	4954931	snp	G	T	T:50 G:0
EA2454	4954937	complex	CCCC	GCCT	GCCT:42 CCCC:0
EA2454	4954955	complex	ATCGGCA	GTCAGCC	GTCAGCC:33 ATCGGCA:0
EA2454	4954994	complex	GCGCCCTCCT	ACGTCCACCA	ACGTCCACCA:25 GCGCCCTCCT:0
EA2454	4955012	complex	GAGT	AAGC	AAGC:38 GAGT:0
EA2454	4955024	complex	CTCC	TTCA	TTCA:39 CTCC:0
EA2454	4955036	snp	G	C	C:38 G:0
EA2454	4955048	complex	GCCAGCAAGCAGGG	CCCTGCCAGAAGGC	CCCTGCCAGAAGGC:29 GCCAGCAAGCAGGG:0
EA2454	4955066	complex	AATATGGGTA	TATGTGTGTG	TATGTGTGTG:29 AATATGGGTA:0
EA2454	4955084	snp	C	T	T:39 C:0
EA2454	4955093	complex	TCCC	CCCG	CCCG:41 TCCC:0
EA2454	4955117	snp	G	A	A:44 G:0
EA2454	4955135	snp	G	C	C:51 G:0
EA2454	4955156	complex	TAA	CAG	CAG:62 TAA:0
EA2454	4955197	complex	TTGCAGCATGT	CGGCTGCGTGC	CGGCTGCGTGC:79 TTGCAGCATGT:0
EA2454	4955222	complex	GAAA	AAAG	AAAG:80 GAAA:0
EA2454	4955234	snp	A	G	G:83 A:0
EA2454	4955249	snp	T	C	C:89 T:0
EA2454	4955257	complex	CTA	GTG	GTG:80 CTA:0
EA2454	4955282	snp	A	G	G:86 A:1
EA2454	4955295	snp	C	A	A:82 C:0
EA2454	4955302	snp	G	C	C:75 G:0
EA2454	4955311	snp	A	T	T:64 A:0
EA2454	4955318	snp	A	G	G:64 A:0
EA2454	4955341	snp	T	C	C:69 T:0
EA2454	4955346	snp	A	G	G:72 A:0
EA2454	4955354	complex	AGT	GGC	GGC:73 AGT:0
EA2454	4955363	snp	T	C	C:75 T:0
EA2454	4955372	complex	ACCG	GCCA	GCCA:74 ACCG:0
EA2454	4955384	snp	C	G	G:76 C:0
EA2454	4955390	complex	GGGG	TGGT	TGGT:79 GGGG:0
EA2454	4955435	complex	ACGT	GCGC	GCGC:75 ACGT:0
EA2454	4955447	snp	C	A	A:75 C:0
EA2454	4955472	snp	A	G	G:57 A:0
EA2454	4955489	complex	CAGC	AAGT	AAGT:55 CAGC:0
EA2454	4955537	snp	G	A	A:23 G:0
EA2454	4955552	complex	TGCATGAACACACACA	AGGATGTACGCAAACG	AGGATGTACGCAAACG:13 TGCATGAACACACACA:0
EA2454	4956055	complex	GCCC	ACCT	ACCT:10 GCCC:0
EA2454	4956065	snp	G	C	C:11 G:0
EA2454	4956077	snp	C	G	G:13 C:0
EA2454	4956094	snp	G	A	A:14 G:0
EA2454	4956102	snp	G	A	A:15 G:0
EA2454	4956300	mnp	GC	TT	TT:34 GC:0
EA2454	4956620	complex	GG	AA	AA:27 GG:0
EA2454	4956645	snp	G	A	A:33 G:0
EA2454	4956666	snp	C	T	T:42 C:0
EA2454	4956765	snp	G	A	A:53 G:0
EA2454	4956890	snp	G	A	A:30 G:0
EA2454	4956898	snp	T	C	C:25 T:0
EA2454	4956917	complex	CAG	TAT	TAT:21 CAG:0
EA2454	4957026	snp	G	T	T:10 G:0
EA2454	4957042	snp	A	G	G:11 A:0
EA2454	4960771	snp	A	G	G:73 A:0
EA2454	4960975	complex	CTGGA	GTGGC	GTGGC:109 CTGGA:0
EA2454	4961009	snp	G	A	A:119 G:0
EA2454	4961048	snp	A	G	G:112 A:0
EA2454	4961214	snp	G	A	A:154 G:0
EA2454	4961304	snp	T	G	G:142 T:0
EA2454	4961379	snp	T	A	A:118 T:0
EA2454	4961434	snp	G	A	A:118 G:0
EA2454	4961449	snp	T	C	C:127 T:0
EA2454	4961583	snp	A	G	G:177 A:0
EA2454	4961694	snp	C	T	T:173 C:0
EA2454	4961704	snp	T	C	C:165 T:0
EA2454	4961715	snp	G	A	A:159 G:0
EA2454	4961736	snp	C	T	T:153 C:0
EA2454	4961745	snp	G	A	A:149 G:0
EA2454	4961754	snp	A	T	T:159 A:0
EA2454	4961805	snp	A	C	C:115 A:0
EA2454	4961817	snp	A	G	G:108 A:0
EA2454	4961832	snp	C	T	T:108 C:1
EA2454	4961838	snp	A	G	G:111 A:0
EA2454	4961937	snp	A	G	G:132 A:0
EA2454	4961952	snp	G	A	A:144 G:0
EA2454	4961973	snp	T	C	C:132 T:0
EA2454	4962018	snp	C	T	T:96 C:2
EA2454	4962030	snp	C	T	T:93 C:0
EA2454	4962036	complex	GGGC	CGGT	CGGT:88 GGGC:0
EA2454	4962075	snp	A	G	G:76 A:0
EA2454	4962508	complex	GGCT	AGCC	AGCC:17 GGCT:0
EA2454	4962634	snp	A	T	T:38 A:0
EA2454	4962682	snp	G	A	A:18 G:0
EA2454	4968314	snp	C	T	T:46 C:0
EA2454	4970995	snp	T	C	C:41 T:0
EA2454	4974312	snp	T	A	A:23 T:0
EA2454	4974991	snp	T	C	C:68 T:0
EA2454	4976124	snp	G	A	A:43 G:0
EA2454	4983783	snp	T	C	C:89 T:0
EA2454	4990421	snp	C	T	T:88 C:0
EA2454	4998297	snp	C	A	A:75 C:0
EA2454	5003396	snp	T	C	C:69 T:0
EA2454	5008386	snp	G	T	T:101 G:1
EA2454	5009017	snp	T	C	C:60 T:0
EA2454	5010610	snp	C	T	T:65 C:0
EA2454	5013305	snp	T	C	C:77 T:0
EA2454	5024480	snp	T	G	G:59 T:0
EA2454	5026350	snp	C	T	T:63 C:0
EA2454	5029388	snp	T	C	C:88 T:0
EA2454	5029726	snp	C	T	T:24 C:0
EA2454	5034597	snp	A	T	T:59 A:0
EA2454	5037494	snp	G	A	A:29 G:0
EA2454	5037689	snp	G	T	T:27 G:0
EA2454	5048061	snp	A	T	T:69 A:0
EA2454	5048408	snp	G	A	A:16 G:0
EA2454	5048692	snp	A	G	G:26 A:0
EA2454	5048889	complex	GCTTCT	ACCTCC	ACCTCC:22 GCTTCT:0
EA2454	5048899	complex	AACCA	GACCG	GACCG:22 AACCA:0
EA2454	5049992	complex	AGCC	GGCT	GGCT:28 AGCC:0
EA2454	5050002	snp	A	T	T:25 A:0
EA2454	5050010	snp	T	C	C:26 T:0
EA2454	5050037	snp	A	T	T:25 A:0
EA2454	5050053	snp	T	C	C:28 T:0
EA2454	5050082	snp	T	C	C:22 T:0
EA2454	5050091	complex	CCGT	TCGC	TCGC:19 CCGT:0
EA2454	5050124	snp	T	G	G:18 T:0
EA2454	5052436	snp	C	T	T:25 C:0
EA2454	5060361	snp	A	C	C:67 A:0
EA2454	5062756	snp	A	G	G:73 A:0
EA2454	5064591	snp	T	A	A:71 T:0
EA2454	5077659	snp	A	G	G:50 A:0
EA2454	5079510	snp	C	T	T:24 C:0
EA2454	5079516	snp	G	A	A:27 G:0
EA2454	5084749	snp	T	C	C:10 T:0
EA2454	5101967	snp	A	G	G:50 A:0
EA2454	5119203	snp	A	G	G:71 A:0
EA2454	5121224	snp	G	C	C:70 G:0
EA2454	5123373	snp	A	G	G:58 A:0
EA2454	5132175	snp	G	T	T:46 G:0
EA2454	5132620	snp	G	A	A:70 G:0
EA2454	5132907	snp	C	T	T:88 C:0
EA2454	5135011	snp	C	T	T:34 C:0
EA2454	5137753	snp	C	A	A:23 C:0
EA2454	5137810	snp	C	T	T:56 C:0
EA2454	5137999	snp	A	C	C:52 A:0
EA2454	5138018	snp	T	C	C:58 T:0
EA2454	5138027	snp	T	C	C:48 T:0
EA2454	5138039	snp	C	T	T:42 C:0
EA2454	5138051	complex	CCATAAC	TCAGTGT	TCAGTGT:27 CCATAAC:0
EA2454	5138066	complex	ACGTGGGTATGAGTTTAG	GCGCGGATACGAGGTTAA	GCGCGGATACGAGGTTAA:29 ACGTGGGTATGAGTTTAG:0
EA2454	5138096	snp	C	T	T:41 C:0
EA2454	5138122	snp	A	C	C:43 A:0
EA2454	5138132	complex	GCCG	TCCT	TCCT:40 GCCG:0
EA2454	5138144	snp	G	A	A:49 G:0
EA2454	5138219	snp	C	T	T:54 C:0
EA2454	5138232	complex	TGGGT	CGGGC	CGGGC:46 TGGGT:0
EA2454	5138242	complex	GTCC	ATCG	ATCG:42 GTCC:0
EA2454	5138250	complex	ACCA	GCCG	GCCG:45 ACCA:0
EA2454	5138270	snp	A	C	C:44 A:0
[truncated: 444 more rows]
