# Supplementary material for: Escherichia coli ST302: Genomic Analysis of Virulence Potential and Antimicrobial Resistance Mediated by Mobile Genetic Elements
Source: Front Microbiol. 2020 Jan 21;10:3098. doi: 10.3389/fmicb.2019.03098 (PMC6985150; doi:10.3389/fmicb.2019.03098)
Supplement: DATA S2 — ST302 SNP analysis. [file Data_Sheet_2.ZIP › SNP_Analysis/ST302_SNP/SNP_analysis/snippyout/ST302/EA1682-Poultry-ST302.out/snps.gff]

##gff-version 3
EA2454	snippy:4.3.6	variation	977	977	.	.	0	note=snp T=>C C:42 T:0
EA2454	snippy:4.3.6	variation	11382	11382	.	.	0	note=snp A=>G G:56 A:0
EA2454	snippy:4.3.6	variation	25719	25719	.	.	0	note=snp T=>C C:82 T:0
EA2454	snippy:4.3.6	variation	26663	26663	.	.	0	note=snp C=>T T:54 C:0
EA2454	snippy:4.3.6	variation	34494	34494	.	.	0	note=snp T=>C C:62 T:0
EA2454	snippy:4.3.6	variation	36375	36375	.	.	0	note=snp C=>A A:73 C:0
EA2454	snippy:4.3.6	variation	37987	37987	.	.	0	note=snp T=>C C:109 T:0
EA2454	snippy:4.3.6	variation	39065	39065	.	.	0	note=snp T=>C C:64 T:0
EA2454	snippy:4.3.6	variation	52423	52423	.	.	0	note=snp A=>C C:78 A:0
EA2454	snippy:4.3.6	variation	56628	56628	.	.	0	note=snp A=>C C:43 A:0
EA2454	snippy:4.3.6	variation	57116	57116	.	.	0	note=snp A=>T T:78 A:0
EA2454	snippy:4.3.6	variation	58152	58152	.	.	0	note=snp T=>C C:78 T:0
EA2454	snippy:4.3.6	variation	67315	67315	.	.	0	note=snp A=>C C:63 A:0
EA2454	snippy:4.3.6	variation	69595	69595	.	.	0	note=snp A=>G G:12 A:0
EA2454	snippy:4.3.6	variation	74952	74952	.	.	0	note=snp G=>T T:23 G:0
EA2454	snippy:4.3.6	variation	80560	80560	.	.	0	note=snp C=>T T:117 C:0
EA2454	snippy:4.3.6	variation	84557	84557	.	.	0	note=snp T=>G G:47 T:0
EA2454	snippy:4.3.6	variation	102014	102014	.	.	0	note=snp A=>T T:68 A:0
EA2454	snippy:4.3.6	variation	109128	109128	.	.	0	note=snp C=>T T:42 C:0
EA2454	snippy:4.3.6	variation	111773	111773	.	.	0	note=snp C=>G G:79 C:0
EA2454	snippy:4.3.6	variation	124865	124865	.	.	0	note=snp T=>C C:50 T:0
EA2454	snippy:4.3.6	variation	131613	131613	.	.	0	note=snp A=>G G:48 A:0
EA2454	snippy:4.3.6	variation	140951	140951	.	.	0	note=snp T=>G G:76 T:1
EA2454	snippy:4.3.6	variation	146087	146087	.	.	0	note=snp A=>C C:51 A:0
EA2454	snippy:4.3.6	variation	162974	162974	.	.	0	note=snp G=>T T:35 G:0
EA2454	snippy:4.3.6	variation	164371	164371	.	.	0	note=snp T=>A A:22 T:0
EA2454	snippy:4.3.6	variation	174420	174420	.	.	0	note=snp A=>G G:84 A:0
EA2454	snippy:4.3.6	variation	186550	186550	.	.	0	note=snp T=>C C:105 T:0
EA2454	snippy:4.3.6	variation	188717	188717	.	.	0	note=snp C=>T T:90 C:0
EA2454	snippy:4.3.6	variation	190313	190313	.	.	0	note=snp T=>C C:22 T:0
EA2454	snippy:4.3.6	variation	220577	220577	.	.	0	note=snp G=>A A:74 G:0
EA2454	snippy:4.3.6	variation	229589	229589	.	.	0	note=snp C=>T T:23 C:0
EA2454	snippy:4.3.6	variation	229594	229594	.	.	0	note=complex ATCG=>TTCA TTCA:23 ATCG:0
EA2454	snippy:4.3.6	variation	229613	229613	.	.	0	note=complex AAGACACTA=>GCGACGCTG GCGACGCTG:27 AAGACACTA:0
EA2454	snippy:4.3.6	variation	229626	229626	.	.	0	note=snp G=>C C:35 G:0
EA2454	snippy:4.3.6	variation	239221	239221	.	.	0	note=snp A=>G G:47 A:0
EA2454	snippy:4.3.6	variation	245301	245301	.	.	0	note=snp C=>T T:97 C:0
EA2454	snippy:4.3.6	variation	270317	270317	.	.	0	note=snp A=>T T:73 A:0
EA2454	snippy:4.3.6	variation	277907	277907	.	.	0	note=snp G=>T T:73 G:1
EA2454	snippy:4.3.6	variation	281316	281316	.	.	0	note=snp C=>T T:45 C:0
EA2454	snippy:4.3.6	variation	285627	285627	.	.	0	note=ins A=>AT AT:45 A:0
EA2454	snippy:4.3.6	variation	298286	298286	.	.	0	note=snp T=>C C:88 T:0
EA2454	snippy:4.3.6	variation	304693	304693	.	.	0	note=del AT=>A A:33 AT:0
EA2454	snippy:4.3.6	variation	313034	313034	.	.	0	note=snp A=>G G:41 A:0
EA2454	snippy:4.3.6	variation	317106	317106	.	.	0	note=snp T=>C C:54 T:0
EA2454	snippy:4.3.6	variation	318467	318467	.	.	0	note=snp T=>C C:72 T:0
EA2454	snippy:4.3.6	variation	333155	333155	.	.	0	note=snp G=>T T:74 G:0
EA2454	snippy:4.3.6	variation	334084	334084	.	.	0	note=snp G=>A A:67 G:0
EA2454	snippy:4.3.6	variation	337102	337102	.	.	0	note=snp G=>A A:58 G:0
EA2454	snippy:4.3.6	variation	342188	342188	.	.	0	note=snp G=>A A:67 G:0
EA2454	snippy:4.3.6	variation	350969	350969	.	.	0	note=snp A=>G G:65 A:0
EA2454	snippy:4.3.6	variation	359374	359374	.	.	0	note=snp C=>T T:78 C:0
EA2454	snippy:4.3.6	variation	369480	369480	.	.	0	note=snp G=>A A:69 G:0
EA2454	snippy:4.3.6	variation	371150	371150	.	.	0	note=snp T=>C C:62 T:0
EA2454	snippy:4.3.6	variation	376903	376903	.	.	0	note=snp G=>A A:69 G:0
EA2454	snippy:4.3.6	variation	388918	388918	.	.	0	note=snp T=>G G:103 T:0
EA2454	snippy:4.3.6	variation	393575	393575	.	.	0	note=snp A=>G G:84 A:0
EA2454	snippy:4.3.6	variation	393743	393743	.	.	0	note=snp A=>G G:110 A:0
EA2454	snippy:4.3.6	variation	397444	397444	.	.	0	note=snp C=>G G:64 C:0
EA2454	snippy:4.3.6	variation	407113	407113	.	.	0	note=snp A=>G G:95 A:0
EA2454	snippy:4.3.6	variation	407887	407887	.	.	0	note=snp C=>G G:100 C:0
EA2454	snippy:4.3.6	variation	412458	412458	.	.	0	note=snp G=>A A:93 G:0
EA2454	snippy:4.3.6	variation	425610	425610	.	.	0	note=snp C=>T T:93 C:0
EA2454	snippy:4.3.6	variation	429541	429541	.	.	0	note=snp G=>A A:106 G:0
EA2454	snippy:4.3.6	variation	436532	436532	.	.	0	note=snp T=>G G:70 T:1
EA2454	snippy:4.3.6	variation	437474	437474	.	.	0	note=snp A=>G G:70 A:0
EA2454	snippy:4.3.6	variation	438347	438347	.	.	0	note=snp G=>A A:70 G:0
EA2454	snippy:4.3.6	variation	440837	440837	.	.	0	note=snp C=>A A:83 C:0
EA2454	snippy:4.3.6	variation	447459	447459	.	.	0	note=snp A=>G G:38 A:0
EA2454	snippy:4.3.6	variation	448711	448711	.	.	0	note=snp A=>G G:52 A:0
EA2454	snippy:4.3.6	variation	454890	454890	.	.	0	note=snp C=>T T:84 C:0
EA2454	snippy:4.3.6	variation	457082	457082	.	.	0	note=snp C=>T T:52 C:0
EA2454	snippy:4.3.6	variation	465826	465826	.	.	0	note=snp A=>T T:68 A:0
EA2454	snippy:4.3.6	variation	470437	470437	.	.	0	note=snp C=>T T:95 C:0
EA2454	snippy:4.3.6	variation	472911	472911	.	.	0	note=snp T=>C C:68 T:0
EA2454	snippy:4.3.6	variation	478727	478727	.	.	0	note=snp C=>A A:94 C:3
EA2454	snippy:4.3.6	variation	485246	485246	.	.	0	note=snp C=>T T:101 C:1
EA2454	snippy:4.3.6	variation	485779	485779	.	.	0	note=snp C=>G G:156 C:0
EA2454	snippy:4.3.6	variation	485955	485955	.	.	0	note=snp G=>T T:107 G:0
EA2454	snippy:4.3.6	variation	497460	497460	.	.	0	note=snp T=>G G:16 T:0
EA2454	snippy:4.3.6	variation	500446	500446	.	.	0	note=snp C=>T T:83 C:0
EA2454	snippy:4.3.6	variation	506728	506728	.	.	0	note=snp G=>A A:11 G:0
EA2454	snippy:4.3.6	variation	510992	510992	.	.	0	note=snp C=>T T:37 C:0
EA2454	snippy:4.3.6	variation	519195	519195	.	.	0	note=snp G=>A A:14 G:0
EA2454	snippy:4.3.6	variation	519811	519811	.	.	0	note=snp A=>C C:41 A:0
EA2454	snippy:4.3.6	variation	524994	524994	.	.	0	note=snp T=>G G:56 T:0
EA2454	snippy:4.3.6	variation	528123	528123	.	.	0	note=snp A=>T T:56 A:0
EA2454	snippy:4.3.6	variation	534151	534151	.	.	0	note=snp A=>G G:55 A:0
EA2454	snippy:4.3.6	variation	538980	538980	.	.	0	note=snp G=>A A:92 G:0
EA2454	snippy:4.3.6	variation	539426	539426	.	.	0	note=snp T=>C C:115 T:0
EA2454	snippy:4.3.6	variation	546428	546428	.	.	0	note=snp A=>C C:70 A:0
EA2454	snippy:4.3.6	variation	550000	550000	.	.	0	note=snp G=>A A:96 G:0
EA2454	snippy:4.3.6	variation	559017	559017	.	.	0	note=snp A=>G G:71 A:0
EA2454	snippy:4.3.6	variation	561226	561226	.	.	0	note=snp G=>A A:72 G:0
EA2454	snippy:4.3.6	variation	561259	561259	.	.	0	note=snp C=>A A:48 C:1
EA2454	snippy:4.3.6	variation	561272	561272	.	.	0	note=snp T=>A A:40 T:0
EA2454	snippy:4.3.6	variation	562933	562933	.	.	0	note=snp T=>C C:74 T:0
EA2454	snippy:4.3.6	variation	590812	590812	.	.	0	note=snp C=>T T:93 C:0
EA2454	snippy:4.3.6	variation	597386	597386	.	.	0	note=snp A=>G G:68 A:0
EA2454	snippy:4.3.6	variation	606088	606088	.	.	0	note=ins G=>GA GA:58 G:0
EA2454	snippy:4.3.6	variation	611222	611222	.	.	0	note=del TGCATA=>T T:17 TGCATA:0
EA2454	snippy:4.3.6	variation	613906	613906	.	.	0	note=snp C=>A A:11 C:0
EA2454	snippy:4.3.6	variation	642337	642337	.	.	0	note=snp A=>G G:56 A:0
EA2454	snippy:4.3.6	variation	669330	669330	.	.	0	note=snp A=>G G:63 A:0
EA2454	snippy:4.3.6	variation	670594	670594	.	.	0	note=snp C=>A A:102 C:2
EA2454	snippy:4.3.6	variation	683177	683177	.	.	0	note=snp T=>G G:67 T:0
EA2454	snippy:4.3.6	variation	686003	686003	.	.	0	note=snp A=>G G:37 A:0
EA2454	snippy:4.3.6	variation	686104	686104	.	.	0	note=snp G=>C C:60 G:0
EA2454	snippy:4.3.6	variation	687410	687410	.	.	0	note=snp A=>G G:85 A:0
EA2454	snippy:4.3.6	variation	690408	690408	.	.	0	note=snp A=>G G:77 A:0
EA2454	snippy:4.3.6	variation	690611	690611	.	.	0	note=snp T=>C C:80 T:0
EA2454	snippy:4.3.6	variation	691294	691294	.	.	0	note=snp T=>C C:93 T:0
EA2454	snippy:4.3.6	variation	691401	691401	.	.	0	note=snp C=>T T:108 C:0
EA2454	snippy:4.3.6	variation	705263	705263	.	.	0	note=snp C=>A A:63 C:0
EA2454	snippy:4.3.6	variation	709632	709632	.	.	0	note=snp T=>C C:105 T:0
EA2454	snippy:4.3.6	variation	710977	710977	.	.	0	note=snp A=>G G:54 A:0
EA2454	snippy:4.3.6	variation	715370	715370	.	.	0	note=snp C=>T T:92 C:0
EA2454	snippy:4.3.6	variation	719734	719734	.	.	0	note=snp C=>T T:89 C:0
EA2454	snippy:4.3.6	variation	731219	731219	.	.	0	note=snp T=>G G:100 T:0
EA2454	snippy:4.3.6	variation	731329	731329	.	.	0	note=snp G=>A A:117 G:0
EA2454	snippy:4.3.6	variation	738814	738814	.	.	0	note=snp A=>C C:90 A:0
EA2454	snippy:4.3.6	variation	743375	743375	.	.	0	note=snp T=>A A:107 T:0
EA2454	snippy:4.3.6	variation	751386	751386	.	.	0	note=snp G=>A A:76 G:0
EA2454	snippy:4.3.6	variation	754898	754898	.	.	0	note=snp G=>A A:65 G:0
EA2454	snippy:4.3.6	variation	755366	755366	.	.	0	note=snp A=>G G:71 A:0
EA2454	snippy:4.3.6	variation	756040	756040	.	.	0	note=snp T=>G G:65 T:0
EA2454	snippy:4.3.6	variation	758394	758394	.	.	0	note=snp C=>T T:69 C:0
EA2454	snippy:4.3.6	variation	765032	765032	.	.	0	note=snp T=>C C:101 T:0
EA2454	snippy:4.3.6	variation	785375	785375	.	.	0	note=snp T=>C C:53 T:0
EA2454	snippy:4.3.6	variation	788461	788461	.	.	0	note=snp G=>T T:48 G:2
EA2454	snippy:4.3.6	variation	789417	789417	.	.	0	note=snp A=>C C:61 A:1
EA2454	snippy:4.3.6	variation	803220	803220	.	.	0	note=snp G=>A A:105 G:0
EA2454	snippy:4.3.6	variation	805481	805481	.	.	0	note=snp A=>G G:53 A:0
EA2454	snippy:4.3.6	variation	815610	815610	.	.	0	note=snp T=>A A:49 T:0
EA2454	snippy:4.3.6	variation	817985	817985	.	.	0	note=snp T=>G G:53 T:0
EA2454	snippy:4.3.6	variation	818649	818649	.	.	0	note=snp A=>C C:63 A:0
EA2454	snippy:4.3.6	variation	829606	829606	.	.	0	note=snp G=>A A:76 G:0
EA2454	snippy:4.3.6	variation	831520	831520	.	.	0	note=snp G=>T T:92 G:0
EA2454	snippy:4.3.6	variation	839497	839497	.	.	0	note=snp T=>A A:94 T:0
EA2454	snippy:4.3.6	variation	852695	852695	.	.	0	note=snp A=>G G:80 A:0
EA2454	snippy:4.3.6	variation	860226	860226	.	.	0	note=snp C=>A A:104 C:0
EA2454	snippy:4.3.6	variation	881078	881078	.	.	0	note=snp A=>T T:122 A:0
EA2454	snippy:4.3.6	variation	894224	894224	.	.	0	note=snp G=>A A:73 G:0
EA2454	snippy:4.3.6	variation	894538	894538	.	.	0	note=snp C=>T T:59 C:0
EA2454	snippy:4.3.6	variation	904482	904482	.	.	0	note=snp A=>G G:73 A:0
EA2454	snippy:4.3.6	variation	916363	916363	.	.	0	note=snp G=>A A:38 G:0
EA2454	snippy:4.3.6	variation	923875	923875	.	.	0	note=snp T=>A A:84 T:0
EA2454	snippy:4.3.6	variation	924579	924579	.	.	0	note=snp T=>C C:71 T:0
EA2454	snippy:4.3.6	variation	926548	926548	.	.	0	note=snp G=>A A:83 G:0
EA2454	snippy:4.3.6	variation	930102	930102	.	.	0	note=snp A=>G G:52 A:0
EA2454	snippy:4.3.6	variation	934663	934663	.	.	0	note=snp G=>A A:32 G:0
EA2454	snippy:4.3.6	variation	938891	938891	.	.	0	note=snp T=>C C:124 T:0
EA2454	snippy:4.3.6	variation	938923	938923	.	.	0	note=snp G=>A A:138 G:0
EA2454	snippy:4.3.6	variation	945162	945162	.	.	0	note=snp A=>G G:111 A:0
EA2454	snippy:4.3.6	variation	946875	946875	.	.	0	note=snp T=>C C:88 T:0
EA2454	snippy:4.3.6	variation	953980	953980	.	.	0	note=complex GCCG=>ACCT ACCT:11 GCCG:0
EA2454	snippy:4.3.6	variation	953998	953998	.	.	0	note=snp G=>A A:64 G:0
EA2454	snippy:4.3.6	variation	954238	954238	.	.	0	note=snp T=>G G:19 T:0
EA2454	snippy:4.3.6	variation	962086	962086	.	.	0	note=snp C=>T T:15 C:0
EA2454	snippy:4.3.6	variation	962176	962176	.	.	0	note=snp C=>T T:110 C:0
EA2454	snippy:4.3.6	variation	962188	962188	.	.	0	note=snp A=>G G:124 A:0
EA2454	snippy:4.3.6	variation	962197	962197	.	.	0	note=snp T=>C C:129 T:0
EA2454	snippy:4.3.6	variation	962206	962206	.	.	0	note=snp A=>C C:137 A:1
EA2454	snippy:4.3.6	variation	962263	962263	.	.	0	note=snp G=>A A:165 G:0
EA2454	snippy:4.3.6	variation	962289	962289	.	.	0	note=snp G=>T T:155 G:0
EA2454	snippy:4.3.6	variation	962383	962383	.	.	0	note=mnp GC=>TG TG:125 GC:0
EA2454	snippy:4.3.6	variation	962400	962400	.	.	0	note=del GCAGGT=>G G:112 GCAGGT:0
EA2454	snippy:4.3.6	variation	962433	962433	.	.	0	note=snp C=>T T:138 C:0
EA2454	snippy:4.3.6	variation	962440	962440	.	.	0	note=snp T=>C C:129 T:0
EA2454	snippy:4.3.6	variation	962460	962460	.	.	0	note=mnp AGT=>TTG TTG:122 AGT:0
EA2454	snippy:4.3.6	variation	962499	962499	.	.	0	note=snp A=>G G:105 A:0
EA2454	snippy:4.3.6	variation	962507	962507	.	.	0	note=snp C=>T T:107 C:0
EA2454	snippy:4.3.6	variation	962516	962516	.	.	0	note=snp T=>C C:104 T:0
EA2454	snippy:4.3.6	variation	962541	962541	.	.	0	note=snp T=>G G:99 T:0
EA2454	snippy:4.3.6	variation	962550	962550	.	.	0	note=snp T=>C C:93 T:0
EA2454	snippy:4.3.6	variation	962563	962563	.	.	0	note=snp A=>G G:83 A:0
EA2454	snippy:4.3.6	variation	962591	962591	.	.	0	note=snp C=>A A:58 C:0
EA2454	snippy:4.3.6	variation	962610	962610	.	.	0	note=complex TGGCA=>GGGCG GGGCG:42 TGGCA:0
EA2454	snippy:4.3.6	variation	962695	962695	.	.	0	note=snp A=>G G:78 A:0
EA2454	snippy:4.3.6	variation	962748	962748	.	.	0	note=snp A=>G G:109 A:0
EA2454	snippy:4.3.6	variation	962781	962781	.	.	0	note=complex TGA=>ACT ACT:106 TGA:0
EA2454	snippy:4.3.6	variation	962823	962823	.	.	0	note=snp A=>G G:128 A:0
EA2454	snippy:4.3.6	variation	962845	962845	.	.	0	note=snp G=>A A:127 G:2
EA2454	snippy:4.3.6	variation	962859	962859	.	.	0	note=snp A=>T T:104 A:0
EA2454	snippy:4.3.6	variation	962864	962864	.	.	0	note=mnp TT=>GG GG:105 TT:0
EA2454	snippy:4.3.6	variation	962874	962874	.	.	0	note=snp A=>G G:111 A:0
EA2454	snippy:4.3.6	variation	962895	962895	.	.	0	note=snp A=>G G:119 A:0
EA2454	snippy:4.3.6	variation	962910	962910	.	.	0	note=snp G=>A A:117 G:0
EA2454	snippy:4.3.6	variation	962960	962960	.	.	0	note=snp A=>G G:132 A:0
EA2454	snippy:4.3.6	variation	962970	962970	.	.	0	note=snp C=>T T:133 C:0
EA2454	snippy:4.3.6	variation	962982	962982	.	.	0	note=snp A=>G G:131 A:0
EA2454	snippy:4.3.6	variation	963024	963024	.	.	0	note=snp T=>A A:149 T:0
EA2454	snippy:4.3.6	variation	963036	963036	.	.	0	note=snp A=>G G:160 A:0
EA2454	snippy:4.3.6	variation	963084	963084	.	.	0	note=complex AGCGACA=>GGTGACG GGTGACG:148 AGCGACA:0
EA2454	snippy:4.3.6	variation	963102	963102	.	.	0	note=snp A=>G G:160 A:0
EA2454	snippy:4.3.6	variation	963144	963144	.	.	0	note=complex CACCGGA=>TACTGGT TACTGGT:127 CACCGGA:0
EA2454	snippy:4.3.6	variation	963174	963174	.	.	0	note=snp G=>A A:137 G:0
EA2454	snippy:4.3.6	variation	963273	963273	.	.	0	note=snp G=>A A:141 G:1
EA2454	snippy:4.3.6	variation	963283	963283	.	.	0	note=snp G=>T T:149 G:1
EA2454	snippy:4.3.6	variation	963338	963338	.	.	0	note=snp T=>C C:138 T:0
EA2454	snippy:4.3.6	variation	963390	963390	.	.	0	note=snp A=>G G:141 A:0
EA2454	snippy:4.3.6	variation	963396	963396	.	.	0	note=snp C=>T T:142 C:0
EA2454	snippy:4.3.6	variation	963465	963465	.	.	0	note=snp T=>C C:139 T:0
EA2454	snippy:4.3.6	variation	963480	963480	.	.	0	note=snp G=>A A:145 G:0
EA2454	snippy:4.3.6	variation	963513	963513	.	.	0	note=complex GCGC=>ACGT ACGT:147 GCGC:0
EA2454	snippy:4.3.6	variation	963525	963525	.	.	0	note=snp T=>C C:166 T:0
EA2454	snippy:4.3.6	variation	963555	963555	.	.	0	note=snp A=>G G:160 A:0
EA2454	snippy:4.3.6	variation	963590	963590	.	.	0	note=snp A=>G G:147 A:0
EA2454	snippy:4.3.6	variation	963600	963600	.	.	0	note=snp G=>A A:141 G:0
EA2454	snippy:4.3.6	variation	963612	963612	.	.	0	note=snp G=>T T:127 G:1
EA2454	snippy:4.3.6	variation	963654	963654	.	.	0	note=snp A=>G G:116 A:0
EA2454	snippy:4.3.6	variation	963706	963706	.	.	0	note=snp A=>G G:96 A:0
EA2454	snippy:4.3.6	variation	963751	963751	.	.	0	note=complex GCCC=>ACCT ACCT:99 GCCC:0
EA2454	snippy:4.3.6	variation	963769	963769	.	.	0	note=snp C=>T T:95 C:0
EA2454	snippy:4.3.6	variation	963790	963790	.	.	0	note=snp A=>C C:96 A:0
EA2454	snippy:4.3.6	variation	963796	963796	.	.	0	note=complex TCCATCG=>GCCGTCA GCCGTCA:89 TCCATCG:0
EA2454	snippy:4.3.6	variation	963811	963811	.	.	0	note=snp C=>T T:89 C:0
EA2454	snippy:4.3.6	variation	963879	963879	.	.	0	note=snp G=>A A:33 G:0
EA2454	snippy:4.3.6	variation	963916	963916	.	.	0	note=snp A=>G G:11 A:0
EA2454	snippy:4.3.6	variation	964577	964577	.	.	0	note=snp A=>G G:21 A:0
EA2454	snippy:4.3.6	variation	964586	964586	.	.	0	note=snp A=>G G:40 A:0
EA2454	snippy:4.3.6	variation	964604	964604	.	.	0	note=snp T=>G G:41 T:0
EA2454	snippy:4.3.6	variation	964625	964625	.	.	0	note=complex TCCT=>CCCA CCCA:46 TCCT:0
EA2454	snippy:4.3.6	variation	964671	964671	.	.	0	note=snp A=>G G:43 A:0
EA2454	snippy:4.3.6	variation	964703	964703	.	.	0	note=mnp TG=>CA CA:29 TG:0
EA2454	snippy:4.3.6	variation	964710	964710	.	.	0	note=snp T=>C C:30 T:0
EA2454	snippy:4.3.6	variation	986640	986640	.	.	0	note=snp G=>A A:59 G:0
EA2454	snippy:4.3.6	variation	990058	990058	.	.	0	note=snp G=>T T:65 G:0
EA2454	snippy:4.3.6	variation	990374	990374	.	.	0	note=snp C=>A A:75 C:0
EA2454	snippy:4.3.6	variation	1001425	1001425	.	.	0	note=snp A=>G G:18 A:0
EA2454	snippy:4.3.6	variation	1003603	1003603	.	.	0	note=snp A=>G G:12 A:0
EA2454	snippy:4.3.6	variation	1003611	1003611	.	.	0	note=snp C=>A A:11 C:0
EA2454	snippy:4.3.6	variation	1026843	1026843	.	.	0	note=snp T=>C C:91 T:0
EA2454	snippy:4.3.6	variation	1044717	1044717	.	.	0	note=snp G=>A A:58 G:0
EA2454	snippy:4.3.6	variation	1046210	1046210	.	.	0	note=snp G=>A A:74 G:0
EA2454	snippy:4.3.6	variation	1049442	1049442	.	.	0	note=snp G=>A A:67 G:0
EA2454	snippy:4.3.6	variation	1052435	1052435	.	.	0	note=snp C=>T T:47 C:0
EA2454	snippy:4.3.6	variation	1055114	1055114	.	.	0	note=snp T=>G G:114 T:1
EA2454	snippy:4.3.6	variation	1064726	1064726	.	.	0	note=del GCAGCCGTTC=>G G:34 GCAGCCGTTC:0
EA2454	snippy:4.3.6	variation	1065372	1065372	.	.	0	note=snp G=>A A:75 G:0
EA2454	snippy:4.3.6	variation	1067401	1067401	.	.	0	note=snp C=>A A:91 C:0
EA2454	snippy:4.3.6	variation	1067992	1067992	.	.	0	note=snp G=>T T:18 G:0
EA2454	snippy:4.3.6	variation	1073767	1073767	.	.	0	note=snp A=>G G:77 A:0
EA2454	snippy:4.3.6	variation	1079000	1079000	.	.	0	note=snp T=>C C:93 T:0
EA2454	snippy:4.3.6	variation	1082762	1082762	.	.	0	note=snp G=>A A:76 G:0
EA2454	snippy:4.3.6	variation	1093309	1093309	.	.	0	note=snp A=>G G:113 A:0
EA2454	snippy:4.3.6	variation	1095599	1095599	.	.	0	note=snp C=>A A:49 C:1
EA2454	snippy:4.3.6	variation	1098037	1098037	.	.	0	note=snp T=>G G:77 T:0
EA2454	snippy:4.3.6	variation	1120563	1120563	.	.	0	note=snp T=>C C:29 T:0
EA2454	snippy:4.3.6	variation	1125821	1125821	.	.	0	note=snp C=>T T:77 C:0
EA2454	snippy:4.3.6	variation	1130184	1130184	.	.	0	note=snp G=>T T:25 G:0
EA2454	snippy:4.3.6	variation	1131579	1131579	.	.	0	note=snp C=>A A:22 C:0
EA2454	snippy:4.3.6	variation	1138215	1138215	.	.	0	note=snp T=>C C:94 T:0
EA2454	snippy:4.3.6	variation	1153745	1153745	.	.	0	note=snp G=>A A:118 G:0
EA2454	snippy:4.3.6	variation	1155705	1155705	.	.	0	note=snp T=>G G:78 T:0
EA2454	snippy:4.3.6	variation	1160822	1160822	.	.	0	note=snp A=>T T:86 A:0
EA2454	snippy:4.3.6	variation	1167666	1167666	.	.	0	note=snp T=>C C:79 T:0
EA2454	snippy:4.3.6	variation	1170071	1170071	.	.	0	note=snp C=>T T:92 C:0
EA2454	snippy:4.3.6	variation	1174352	1174352	.	.	0	note=snp T=>C C:25 T:0
EA2454	snippy:4.3.6	variation	1186746	1186746	.	.	0	note=snp T=>C C:98 T:0
EA2454	snippy:4.3.6	variation	1190353	1190353	.	.	0	note=snp G=>T T:32 G:0
EA2454	snippy:4.3.6	variation	1211256	1211256	.	.	0	note=snp T=>C C:136 T:0
EA2454	snippy:4.3.6	variation	1214132	1214132	.	.	0	note=snp C=>T T:108 C:0
EA2454	snippy:4.3.6	variation	1217059	1217059	.	.	0	note=snp T=>G G:59 T:0
EA2454	snippy:4.3.6	variation	1225308	1225308	.	.	0	note=snp C=>A A:106 C:0
EA2454	snippy:4.3.6	variation	1228038	1228038	.	.	0	note=snp C=>T T:94 C:0
EA2454	snippy:4.3.6	variation	1234596	1234596	.	.	0	note=snp T=>G G:84 T:0
EA2454	snippy:4.3.6	variation	1236700	1236700	.	.	0	note=del TA=>T T:49 TA:0
EA2454	snippy:4.3.6	variation	1236723	1236723	.	.	0	note=snp T=>C C:57 T:0
EA2454	snippy:4.3.6	variation	1253669	1253669	.	.	0	note=snp C=>T T:88 C:0
EA2454	snippy:4.3.6	variation	1255231	1255231	.	.	0	note=snp A=>C C:97 A:0
EA2454	snippy:4.3.6	variation	1261876	1261876	.	.	0	note=snp A=>C C:43 A:0
EA2454	snippy:4.3.6	variation	1264081	1264081	.	.	0	note=snp A=>G G:48 A:0
EA2454	snippy:4.3.6	variation	1279253	1279253	.	.	0	note=snp C=>T T:43 C:0
EA2454	snippy:4.3.6	variation	1280572	1280572	.	.	0	note=snp C=>A A:114 C:0
EA2454	snippy:4.3.6	variation	1284261	1284261	.	.	0	note=snp C=>T T:68 C:0
EA2454	snippy:4.3.6	variation	1289894	1289894	.	.	0	note=snp A=>G G:67 A:0
EA2454	snippy:4.3.6	variation	1292634	1292634	.	.	0	note=snp G=>A A:91 G:0
EA2454	snippy:4.3.6	variation	1299878	1299878	.	.	0	note=snp C=>T T:51 C:0
EA2454	snippy:4.3.6	variation	1311735	1311735	.	.	0	note=snp G=>A A:92 G:0
EA2454	snippy:4.3.6	variation	1317400	1317400	.	.	0	note=snp G=>A A:88 G:0
EA2454	snippy:4.3.6	variation	1320805	1320805	.	.	0	note=snp A=>G G:39 A:0
EA2454	snippy:4.3.6	variation	1322163	1322163	.	.	0	note=snp T=>C C:78 T:0
EA2454	snippy:4.3.6	variation	1322665	1322665	.	.	0	note=snp T=>C C:63 T:0
EA2454	snippy:4.3.6	variation	1331179	1331179	.	.	0	note=snp T=>G G:43 T:0
EA2454	snippy:4.3.6	variation	1337753	1337753	.	.	0	note=snp A=>T T:72 A:0
EA2454	snippy:4.3.6	variation	1340886	1340886	.	.	0	note=snp A=>C C:56 A:0
EA2454	snippy:4.3.6	variation	1358384	1358384	.	.	0	note=snp A=>G G:81 A:0
EA2454	snippy:4.3.6	variation	1360577	1360577	.	.	0	note=snp A=>G G:50 A:0
EA2454	snippy:4.3.6	variation	1365639	1365639	.	.	0	note=snp G=>A A:90 G:1
EA2454	snippy:4.3.6	variation	1371250	1371250	.	.	0	note=snp T=>C C:68 T:0
EA2454	snippy:4.3.6	variation	1382646	1382646	.	.	0	note=snp C=>T T:55 C:0
EA2454	snippy:4.3.6	variation	1391807	1391807	.	.	0	note=snp C=>T T:52 C:0
EA2454	snippy:4.3.6	variation	1392683	1392683	.	.	0	note=snp C=>T T:92 C:0
EA2454	snippy:4.3.6	variation	1394505	1394505	.	.	0	note=snp A=>G G:76 A:0
EA2454	snippy:4.3.6	variation	1401264	1401264	.	.	0	note=snp A=>G G:86 A:0
EA2454	snippy:4.3.6	variation	1412307	1412307	.	.	0	note=snp A=>G G:21 A:0
EA2454	snippy:4.3.6	variation	1413295	1413295	.	.	0	note=snp T=>C C:49 T:1
EA2454	snippy:4.3.6	variation	1416501	1416501	.	.	0	note=snp A=>C C:117 A:0
EA2454	snippy:4.3.6	variation	1435223	1435223	.	.	0	note=snp G=>A A:49 G:0
EA2454	snippy:4.3.6	variation	1442459	1442459	.	.	0	note=snp G=>A A:72 G:0
EA2454	snippy:4.3.6	variation	1443281	1443281	.	.	0	note=snp G=>A A:37 G:0
EA2454	snippy:4.3.6	variation	1443339	1443339	.	.	0	note=snp C=>T T:14 C:0
EA2454	snippy:4.3.6	variation	1445619	1445619	.	.	0	note=snp G=>A A:135 G:0
EA2454	snippy:4.3.6	variation	1445708	1445708	.	.	0	note=snp G=>A A:127 G:0
EA2454	snippy:4.3.6	variation	1446603	1446603	.	.	0	note=snp G=>A A:55 G:0
EA2454	snippy:4.3.6	variation	1449720	1449720	.	.	0	note=snp C=>G G:62 C:0
EA2454	snippy:4.3.6	variation	1455169	1455169	.	.	0	note=snp G=>A A:71 G:0
EA2454	snippy:4.3.6	variation	1458988	1458988	.	.	0	note=snp A=>T T:89 A:0
EA2454	snippy:4.3.6	variation	1461457	1461457	.	.	0	note=snp T=>G G:62 T:0
EA2454	snippy:4.3.6	variation	1471260	1471260	.	.	0	note=snp C=>T T:69 C:0
EA2454	snippy:4.3.6	variation	1480708	1480708	.	.	0	note=snp T=>G G:77 T:0
EA2454	snippy:4.3.6	variation	1484305	1484305	.	.	0	note=snp C=>T T:54 C:0
EA2454	snippy:4.3.6	variation	1484634	1484634	.	.	0	note=del AG=>A A:22 AG:0
EA2454	snippy:4.3.6	variation	1492527	1492527	.	.	0	note=ins C=>CA CA:55 C:0
EA2454	snippy:4.3.6	variation	1495581	1495581	.	.	0	note=snp T=>A A:64 T:0
EA2454	snippy:4.3.6	variation	1496904	1496904	.	.	0	note=snp G=>A A:71 G:0
EA2454	snippy:4.3.6	variation	1518455	1518455	.	.	0	note=snp G=>A A:43 G:0
EA2454	snippy:4.3.6	variation	1525679	1525679	.	.	0	note=snp C=>T T:61 C:0
EA2454	snippy:4.3.6	variation	1533339	1533339	.	.	0	note=snp A=>G G:113 A:0
EA2454	snippy:4.3.6	variation	1534292	1534292	.	.	0	note=snp A=>G G:68 A:0
EA2454	snippy:4.3.6	variation	1537678	1537678	.	.	0	note=snp C=>T T:11 C:0
EA2454	snippy:4.3.6	variation	1547465	1547465	.	.	0	note=snp G=>T T:67 G:2
EA2454	snippy:4.3.6	variation	1549828	1549828	.	.	0	note=snp T=>C C:99 T:0
EA2454	snippy:4.3.6	variation	1557966	1557966	.	.	0	note=snp A=>G G:99 A:0
EA2454	snippy:4.3.6	variation	1560679	1560679	.	.	0	note=snp G=>A A:66 G:0
EA2454	snippy:4.3.6	variation	1561932	1561932	.	.	0	note=snp G=>A A:87 G:0
EA2454	snippy:4.3.6	variation	1570233	1570233	.	.	0	note=snp A=>G G:85 A:0
EA2454	snippy:4.3.6	variation	1577742	1577742	.	.	0	note=snp G=>A A:103 G:0
EA2454	snippy:4.3.6	variation	1587710	1587710	.	.	0	note=snp C=>A A:120 C:1
EA2454	snippy:4.3.6	variation	1587792	1587792	.	.	0	note=snp A=>C C:95 A:0
EA2454	snippy:4.3.6	variation	1588489	1588489	.	.	0	note=snp G=>A A:54 G:0
EA2454	snippy:4.3.6	variation	1592505	1592505	.	.	0	note=snp T=>C C:65 T:0
EA2454	snippy:4.3.6	variation	1597496	1597496	.	.	0	note=snp T=>C C:62 T:0
EA2454	snippy:4.3.6	variation	1599906	1599906	.	.	0	note=snp T=>C C:42 T:0
EA2454	snippy:4.3.6	variation	1600199	1600199	.	.	0	note=snp C=>T T:49 C:0
EA2454	snippy:4.3.6	variation	1600919	1600919	.	.	0	note=snp A=>G G:93 A:0
EA2454	snippy:4.3.6	variation	1612435	1612435	.	.	0	note=snp G=>A A:73 G:0
EA2454	snippy:4.3.6	variation	1613406	1613406	.	.	0	note=snp T=>A A:60 T:0
EA2454	snippy:4.3.6	variation	1613463	1613463	.	.	0	note=snp A=>G G:66 A:0
EA2454	snippy:4.3.6	variation	1613617	1613617	.	.	0	note=snp C=>T T:18 C:0
EA2454	snippy:4.3.6	variation	1616033	1616033	.	.	0	note=snp G=>A A:63 G:0
EA2454	snippy:4.3.6	variation	1619172	1619172	.	.	0	note=snp G=>A A:19 G:0
EA2454	snippy:4.3.6	variation	1619178	1619178	.	.	0	note=complex TACA=>AACG AACG:20 TACA:0
EA2454	snippy:4.3.6	variation	1620915	1620915	.	.	0	note=snp A=>T T:19 A:0
EA2454	snippy:4.3.6	variation	1620945	1620945	.	.	0	note=snp C=>T T:31 C:0
EA2454	snippy:4.3.6	variation	1621020	1621020	.	.	0	note=snp C=>A A:44 C:0
EA2454	snippy:4.3.6	variation	1621049	1621049	.	.	0	note=snp G=>A A:46 G:0
EA2454	snippy:4.3.6	variation	1621074	1621074	.	.	0	note=snp T=>A A:39 T:0
EA2454	snippy:4.3.6	variation	1621137	1621137	.	.	0	note=snp T=>A A:37 T:0
EA2454	snippy:4.3.6	variation	1621185	1621185	.	.	0	note=complex TGCGTTAGCG=>GGCATTGGCT GGCATTGGCT:22 TGCGTTAGCG:0
EA2454	snippy:4.3.6	variation	1621200	1621200	.	.	0	note=snp C=>T T:27 C:0
EA2454	snippy:4.3.6	variation	1621221	1621221	.	.	0	note=snp C=>T T:28 C:0
EA2454	snippy:4.3.6	variation	1621227	1621227	.	.	0	note=snp T=>A A:27 T:0
EA2454	snippy:4.3.6	variation	1621255	1621255	.	.	0	note=snp C=>T T:12 C:0
EA2454	snippy:4.3.6	variation	1624032	1624032	.	.	0	note=snp A=>T T:15 A:0
EA2454	snippy:4.3.6	variation	1624047	1624047	.	.	0	note=snp C=>T T:17 C:0
EA2454	snippy:4.3.6	variation	1624053	1624053	.	.	0	note=snp C=>T T:19 C:0
EA2454	snippy:4.3.6	variation	1624069	1624069	.	.	0	note=complex GAAGGT=>AACGGC AACGGC:19 GAAGGT:0
EA2454	snippy:4.3.6	variation	1624086	1624086	.	.	0	note=snp C=>T T:30 C:0
EA2454	snippy:4.3.6	variation	1624128	1624128	.	.	0	note=complex TAG=>AAA AAA:38 TAG:0
EA2454	snippy:4.3.6	variation	1624137	1624137	.	.	0	note=snp T=>C C:39 T:0
EA2454	snippy:4.3.6	variation	1624153	1624153	.	.	0	note=snp T=>A A:45 T:0
EA2454	snippy:4.3.6	variation	1624217	1624217	.	.	0	note=snp A=>G G:41 A:0
EA2454	snippy:4.3.6	variation	1624254	1624254	.	.	0	note=snp A=>G G:30 A:0
EA2454	snippy:4.3.6	variation	1624263	1624263	.	.	0	note=complex ATTG=>GTTA GTTA:30 ATTG:0
EA2454	snippy:4.3.6	variation	1624280	1624280	.	.	0	note=snp T=>C C:28 T:0
EA2454	snippy:4.3.6	variation	1624351	1624351	.	.	0	note=mnp GT=>TA TA:12 GT:0
EA2454	snippy:4.3.6	variation	1625175	1625175	.	.	0	note=complex TCCG=>CCCA CCCA:15 TCCG:0
EA2454	snippy:4.3.6	variation	1625193	1625193	.	.	0	note=snp G=>A A:19 G:0
EA2454	snippy:4.3.6	variation	1625205	1625205	.	.	0	note=snp C=>T T:27 C:0
EA2454	snippy:4.3.6	variation	1625235	1625235	.	.	0	note=snp A=>G G:40 A:0
EA2454	snippy:4.3.6	variation	1625258	1625258	.	.	0	note=complex AACTA=>GACTC GACTC:44 AACTA:0
EA2454	snippy:4.3.6	variation	1625280	1625280	.	.	0	note=snp A=>T T:62 A:0
EA2454	snippy:4.3.6	variation	1625298	1625298	.	.	0	note=snp A=>G G:62 A:0
EA2454	snippy:4.3.6	variation	1625376	1625376	.	.	0	note=snp G=>T T:81 G:0
EA2454	snippy:4.3.6	variation	1625382	1625382	.	.	0	note=snp T=>C C:85 T:0
EA2454	snippy:4.3.6	variation	1625390	1625390	.	.	0	note=snp G=>A A:83 G:0
EA2454	snippy:4.3.6	variation	1625406	1625406	.	.	0	note=complex AGGC=>TGGT TGGT:82 AGGC:0
EA2454	snippy:4.3.6	variation	1625417	1625417	.	.	0	note=snp G=>A A:81 G:0
EA2454	snippy:4.3.6	variation	1625424	1625424	.	.	0	note=snp G=>A A:83 G:0
EA2454	snippy:4.3.6	variation	1625430	1625430	.	.	0	note=snp G=>A A:77 G:0
EA2454	snippy:4.3.6	variation	1625455	1625455	.	.	0	note=snp G=>A A:80 G:0
EA2454	snippy:4.3.6	variation	1625460	1625460	.	.	0	note=snp A=>T T:85 A:0
EA2454	snippy:4.3.6	variation	1625475	1625475	.	.	0	note=complex CGGT=>AGGA AGGA:74 CGGT:0
EA2454	snippy:4.3.6	variation	1625505	1625505	.	.	0	note=snp A=>T T:90 A:0
EA2454	snippy:4.3.6	variation	1625519	1625519	.	.	0	note=snp G=>A A:94 G:0
EA2454	snippy:4.3.6	variation	1625559	1625559	.	.	0	note=snp G=>A A:95 G:0
EA2454	snippy:4.3.6	variation	1625589	1625589	.	.	0	note=snp C=>A A:108 C:0
EA2454	snippy:4.3.6	variation	1625637	1625637	.	.	0	note=snp T=>C C:85 T:0
EA2454	snippy:4.3.6	variation	1625649	1625649	.	.	0	note=mnp CG=>TC TC:79 CG:0
EA2454	snippy:4.3.6	variation	1625658	1625658	.	.	0	note=snp T=>C C:81 T:0
EA2454	snippy:4.3.6	variation	1625688	1625688	.	.	0	note=complex TGTC=>CATT CATT:76 TGTC:0
EA2454	snippy:4.3.6	variation	1625826	1625826	.	.	0	note=snp T=>C C:79 T:0
EA2454	snippy:4.3.6	variation	1625835	1625835	.	.	0	note=snp A=>G G:70 A:0
EA2454	snippy:4.3.6	variation	1625853	1625853	.	.	0	note=snp T=>G G:73 T:0
EA2454	snippy:4.3.6	variation	1625874	1625874	.	.	0	note=snp T=>C C:59 T:0
EA2454	snippy:4.3.6	variation	1625895	1625895	.	.	0	note=snp A=>G G:46 A:0
EA2454	snippy:4.3.6	variation	1625922	1625922	.	.	0	note=snp T=>C C:37 T:0
EA2454	snippy:4.3.6	variation	1625946	1625946	.	.	0	note=snp T=>A A:48 T:0
EA2454	snippy:4.3.6	variation	1625960	1625960	.	.	0	note=snp A=>G G:45 A:0
EA2454	snippy:4.3.6	variation	1625984	1625984	.	.	0	note=snp T=>C C:47 T:0
EA2454	snippy:4.3.6	variation	1625995	1625995	.	.	0	note=complex TGCGCAAT=>GGAACAAC GGAACAAC:30 TGCGCAAT:0
EA2454	snippy:4.3.6	variation	1626008	1626008	.	.	0	note=snp A=>T T:31 A:1
EA2454	snippy:4.3.6	variation	1626017	1626017	.	.	0	note=complex CAAC=>GAGA GAGA:32 CAAC:0
EA2454	snippy:4.3.6	variation	1626031	1626031	.	.	0	note=snp G=>A A:33 G:0
EA2454	snippy:4.3.6	variation	1626042	1626042	.	.	0	note=snp T=>C C:34 T:0
EA2454	snippy:4.3.6	variation	1626118	1626118	.	.	0	note=snp A=>G G:16 A:0
EA2454	snippy:4.3.6	variation	1626543	1626543	.	.	0	note=snp G=>T T:11 G:0
EA2454	snippy:4.3.6	variation	1626549	1626549	.	.	0	note=snp C=>T T:15 C:0
EA2454	snippy:4.3.6	variation	1626559	1626559	.	.	0	note=snp A=>G G:18 A:0
EA2454	snippy:4.3.6	variation	1626568	1626568	.	.	0	note=complex TGC=>CGT CGT:23 TGC:0
EA2454	snippy:4.3.6	variation	1626586	1626586	.	.	0	note=snp G=>A A:33 G:0
EA2454	snippy:4.3.6	variation	1626595	1626595	.	.	0	note=complex ACGA=>GCGT GCGT:35 ACGA:0
EA2454	snippy:4.3.6	variation	1626603	1626603	.	.	0	note=snp A=>T T:43 A:0
EA2454	snippy:4.3.6	variation	1626611	1626611	.	.	0	note=snp T=>C C:45 T:0
EA2454	snippy:4.3.6	variation	1626705	1626705	.	.	0	note=snp A=>G G:72 A:0
EA2454	snippy:4.3.6	variation	1626723	1626723	.	.	0	note=snp C=>T T:80 C:0
EA2454	snippy:4.3.6	variation	1626772	1626772	.	.	0	note=mnp GG=>AA AA:91 GG:0
EA2454	snippy:4.3.6	variation	1626790	1626790	.	.	0	note=snp T=>C C:89 T:0
EA2454	snippy:4.3.6	variation	1626807	1626807	.	.	0	note=snp T=>C C:98 T:0
EA2454	snippy:4.3.6	variation	1626849	1626849	.	.	0	note=snp G=>A A:98 G:0
EA2454	snippy:4.3.6	variation	1626896	1626896	.	.	0	note=snp A=>G G:86 A:0
EA2454	snippy:4.3.6	variation	1627011	1627011	.	.	0	note=snp G=>T T:88 G:2
EA2454	snippy:4.3.6	variation	1627061	1627061	.	.	0	note=snp A=>T T:72 A:0
EA2454	snippy:4.3.6	variation	1627068	1627068	.	.	0	note=snp C=>T T:68 C:0
EA2454	snippy:4.3.6	variation	1627153	1627153	.	.	0	note=snp C=>T T:56 C:0
EA2454	snippy:4.3.6	variation	1627159	1627159	.	.	0	note=snp G=>A A:52 G:0
EA2454	snippy:4.3.6	variation	1627168	1627168	.	.	0	note=snp A=>G G:51 A:0
EA2454	snippy:4.3.6	variation	1627173	1627173	.	.	0	note=snp A=>G G:54 A:0
EA2454	snippy:4.3.6	variation	1627182	1627182	.	.	0	note=snp C=>T T:52 C:0
EA2454	snippy:4.3.6	variation	1627188	1627188	.	.	0	note=snp G=>T T:48 G:0
EA2454	snippy:4.3.6	variation	1627206	1627206	.	.	0	note=snp T=>C C:52 T:0
EA2454	snippy:4.3.6	variation	1627314	1627314	.	.	0	note=snp T=>A A:65 T:0
EA2454	snippy:4.3.6	variation	1627320	1627320	.	.	0	note=snp A=>G G:62 A:0
EA2454	snippy:4.3.6	variation	1627350	1627350	.	.	0	note=snp C=>T T:60 C:0
EA2454	snippy:4.3.6	variation	1627377	1627377	.	.	0	note=snp T=>G G:63 T:0
EA2454	snippy:4.3.6	variation	1627407	1627407	.	.	0	note=snp T=>G G:41 T:0
EA2454	snippy:4.3.6	variation	1627560	1627560	.	.	0	note=snp C=>T T:60 C:0
EA2454	snippy:4.3.6	variation	1627605	1627605	.	.	0	note=snp G=>T T:61 G:0
EA2454	snippy:4.3.6	variation	1627656	1627656	.	.	0	note=snp A=>C C:51 A:0
EA2454	snippy:4.3.6	variation	1627737	1627737	.	.	0	note=snp C=>A A:56 C:0
EA2454	snippy:4.3.6	variation	1627800	1627800	.	.	0	note=snp A=>C C:58 A:0
EA2454	snippy:4.3.6	variation	1627809	1627809	.	.	0	note=snp T=>C C:57 T:0
EA2454	snippy:4.3.6	variation	1627815	1627815	.	.	0	note=snp T=>C C:55 T:0
EA2454	snippy:4.3.6	variation	1628278	1628278	.	.	0	note=snp A=>G G:60 A:0
EA2454	snippy:4.3.6	variation	1628285	1628285	.	.	0	note=snp G=>A A:62 G:0
EA2454	snippy:4.3.6	variation	1628345	1628345	.	.	0	note=snp C=>T T:64 C:0
EA2454	snippy:4.3.6	variation	1628366	1628366	.	.	0	note=complex AGAGAGCAAG=>CGAAAGTAAA CGAAAGTAAA:60 AGAGAGCAAG:0
EA2454	snippy:4.3.6	variation	1628390	1628390	.	.	0	note=snp G=>A A:88 G:0
EA2454	snippy:4.3.6	variation	1628427	1628427	.	.	0	note=snp T=>C C:83 T:0
EA2454	snippy:4.3.6	variation	1628438	1628438	.	.	0	note=snp T=>C C:82 T:0
EA2454	snippy:4.3.6	variation	1628465	1628465	.	.	0	note=complex GGCT=>AGCG AGCG:85 GGCT:0
EA2454	snippy:4.3.6	variation	1628498	1628498	.	.	0	note=snp T=>C C:79 T:0
EA2454	snippy:4.3.6	variation	1628523	1628523	.	.	0	note=snp C=>A A:74 C:0
EA2454	snippy:4.3.6	variation	1628540	1628540	.	.	0	note=snp A=>G G:68 A:0
EA2454	snippy:4.3.6	variation	1628553	1628553	.	.	0	note=snp A=>C C:64 A:0
EA2454	snippy:4.3.6	variation	1628585	1628585	.	.	0	note=snp A=>T T:71 A:0
EA2454	snippy:4.3.6	variation	1628591	1628591	.	.	0	note=snp C=>T T:72 C:0
EA2454	snippy:4.3.6	variation	1628597	1628597	.	.	0	note=snp T=>C C:69 T:0
EA2454	snippy:4.3.6	variation	1628627	1628627	.	.	0	note=snp A=>G G:74 A:0
EA2454	snippy:4.3.6	variation	1628649	1628649	.	.	0	note=mnp AG=>GA GA:72 AG:0
EA2454	snippy:4.3.6	variation	1628690	1628690	.	.	0	note=snp A=>G G:61 A:0
EA2454	snippy:4.3.6	variation	1628750	1628750	.	.	0	note=complex CACA=>TACG TACG:58 CACA:0
EA2454	snippy:4.3.6	variation	1628810	1628810	.	.	0	note=snp T=>C C:70 T:0
EA2454	snippy:4.3.6	variation	1628831	1628831	.	.	0	note=snp G=>A A:62 G:0
EA2454	snippy:4.3.6	variation	1628837	1628837	.	.	0	note=snp A=>T T:65 A:0
EA2454	snippy:4.3.6	variation	1628869	1628869	.	.	0	note=snp T=>C C:61 T:0
EA2454	snippy:4.3.6	variation	1628897	1628897	.	.	0	note=complex ACGA=>CCGG CCGG:60 ACGA:0
EA2454	snippy:4.3.6	variation	1628912	1628912	.	.	0	note=snp A=>T T:62 A:0
EA2454	snippy:4.3.6	variation	1628980	1628980	.	.	0	note=complex TACTA=>GACTT GACTT:43 TACTA:0
EA2454	snippy:4.3.6	variation	1629008	1629008	.	.	0	note=snp A=>C C:41 A:0
EA2454	snippy:4.3.6	variation	1629015	1629015	.	.	0	note=snp C=>T T:42 C:0
EA2454	snippy:4.3.6	variation	1629065	1629065	.	.	0	note=complex TCCG=>CCCT CCCT:45 TCCG:0
EA2454	snippy:4.3.6	variation	1629122	1629122	.	.	0	note=snp A=>G G:36 A:0
EA2454	snippy:4.3.6	variation	1629149	1629149	.	.	0	note=snp T=>C C:36 T:0
EA2454	snippy:4.3.6	variation	1629156	1629156	.	.	0	note=snp A=>G G:37 A:0
EA2454	snippy:4.3.6	variation	1629183	1629183	.	.	0	note=snp A=>C C:32 A:0
EA2454	snippy:4.3.6	variation	1629196	1629196	.	.	0	note=complex GAACT=>TAACC TAACC:24 GAACT:0
EA2454	snippy:4.3.6	variation	1629240	1629240	.	.	0	note=snp T=>C C:24 T:0
EA2454	snippy:4.3.6	variation	1629375	1629375	.	.	0	note=snp G=>A A:17 G:0
EA2454	snippy:4.3.6	variation	1629397	1629397	.	.	0	note=complex AAG=>CAA CAA:10 AAG:0
EA2454	snippy:4.3.6	variation	1629404	1629404	.	.	0	note=snp T=>A A:10 T:0
EA2454	snippy:4.3.6	variation	1631639	1631639	.	.	0	note=snp C=>T T:68 C:0
EA2454	snippy:4.3.6	variation	1633823	1633823	.	.	0	note=snp C=>G G:100 C:0
EA2454	snippy:4.3.6	variation	1634228	1634228	.	.	0	note=snp A=>G G:97 A:0
EA2454	snippy:4.3.6	variation	1634503	1634503	.	.	0	note=snp T=>C C:83 T:0
EA2454	snippy:4.3.6	variation	1642336	1642336	.	.	0	note=snp A=>G G:60 A:0
EA2454	snippy:4.3.6	variation	1648224	1648224	.	.	0	note=snp C=>T T:74 C:0
EA2454	snippy:4.3.6	variation	1650551	1650551	.	.	0	note=snp C=>T T:42 C:0
EA2454	snippy:4.3.6	variation	1652374	1652374	.	.	0	note=snp G=>A A:98 G:1
EA2454	snippy:4.3.6	variation	1666579	1666579	.	.	0	note=snp G=>A A:74 G:0
EA2454	snippy:4.3.6	variation	1669905	1669905	.	.	0	note=snp C=>T T:71 C:0
EA2454	snippy:4.3.6	variation	1682457	1682457	.	.	0	note=snp A=>G G:49 A:0
EA2454	snippy:4.3.6	variation	1682580	1682580	.	.	0	note=snp G=>T T:50 G:0
EA2454	snippy:4.3.6	variation	1686306	1686306	.	.	0	note=snp G=>A A:28 G:0
EA2454	snippy:4.3.6	variation	1690423	1690423	.	.	0	note=snp G=>A A:63 G:0
EA2454	snippy:4.3.6	variation	1694320	1694320	.	.	0	note=snp A=>C C:77 A:0
EA2454	snippy:4.3.6	variation	1697626	1697626	.	.	0	note=snp T=>A A:64 T:0
EA2454	snippy:4.3.6	variation	1701919	1701919	.	.	0	note=snp A=>G G:103 A:0
EA2454	snippy:4.3.6	variation	1711079	1711079	.	.	0	note=snp C=>T T:56 C:0
EA2454	snippy:4.3.6	variation	1714697	1714697	.	.	0	note=snp T=>C C:106 T:0
EA2454	snippy:4.3.6	variation	1728257	1728257	.	.	0	note=snp G=>T T:71 G:0
EA2454	snippy:4.3.6	variation	1730329	1730329	.	.	0	note=snp T=>C C:79 T:0
EA2454	snippy:4.3.6	variation	1732462	1732462	.	.	0	note=snp A=>G G:54 A:0
EA2454	snippy:4.3.6	variation	1737561	1737561	.	.	0	note=snp A=>G G:69 A:0
EA2454	snippy:4.3.6	variation	1740180	1740180	.	.	0	note=snp T=>A A:69 T:0
EA2454	snippy:4.3.6	variation	1745576	1745576	.	.	0	note=snp T=>C C:72 T:0
EA2454	snippy:4.3.6	variation	1748003	1748003	.	.	0	note=snp C=>T T:72 C:0
EA2454	snippy:4.3.6	variation	1748585	1748585	.	.	0	note=snp A=>C C:76 A:0
EA2454	snippy:4.3.6	variation	1753772	1753772	.	.	0	note=snp T=>G G:31 T:0
EA2454	snippy:4.3.6	variation	1754939	1754939	.	.	0	note=snp T=>C C:21 T:0
EA2454	snippy:4.3.6	variation	1761551	1761551	.	.	0	note=snp T=>G G:104 T:0
EA2454	snippy:4.3.6	variation	1763293	1763293	.	.	0	note=snp T=>C C:71 T:0
EA2454	snippy:4.3.6	variation	1766365	1766365	.	.	0	note=snp G=>T T:62 G:0
EA2454	snippy:4.3.6	variation	1770797	1770797	.	.	0	note=snp C=>T T:122 C:0
EA2454	snippy:4.3.6	variation	1771506	1771506	.	.	0	note=snp G=>A A:58 G:0
EA2454	snippy:4.3.6	variation	1778092	1778092	.	.	0	note=snp C=>T T:100 C:0
EA2454	snippy:4.3.6	variation	1795161	1795161	.	.	0	note=snp A=>G G:63 A:0
EA2454	snippy:4.3.6	variation	1799132	1799132	.	.	0	note=snp G=>A A:81 G:0
EA2454	snippy:4.3.6	variation	1803610	1803610	.	.	0	note=snp C=>A A:88 C:1
EA2454	snippy:4.3.6	variation	1803664	1803664	.	.	0	note=snp T=>C C:72 T:0
EA2454	snippy:4.3.6	variation	1815466	1815466	.	.	0	note=snp A=>G G:43 A:0
EA2454	snippy:4.3.6	variation	1817358	1817358	.	.	0	note=snp A=>C C:41 A:0
EA2454	snippy:4.3.6	variation	1818484	1818484	.	.	0	note=snp G=>A A:57 G:0
EA2454	snippy:4.3.6	variation	1820083	1820083	.	.	0	note=snp T=>C C:77 T:0
EA2454	snippy:4.3.6	variation	1824156	1824156	.	.	0	note=snp T=>C C:59 T:0
EA2454	snippy:4.3.6	variation	1824499	1824499	.	.	0	note=snp T=>C C:56 T:0
EA2454	snippy:4.3.6	variation	1850317	1850317	.	.	0	note=snp G=>A A:56 G:0
EA2454	snippy:4.3.6	variation	1860665	1860665	.	.	0	note=snp T=>C C:75 T:0
EA2454	snippy:4.3.6	variation	1875721	1875721	.	.	0	note=snp G=>T T:122 G:0
EA2454	snippy:4.3.6	variation	1887544	1887544	.	.	0	note=snp A=>G G:70 A:0
EA2454	snippy:4.3.6	variation	1906815	1906815	.	.	0	note=snp A=>T T:69 A:0
EA2454	snippy:4.3.6	variation	1906895	1906895	.	.	0	note=ins A=>AG AG:79 A:0
EA2454	snippy:4.3.6	variation	1909088	1909088	.	.	0	note=snp T=>C C:98 T:0
EA2454	snippy:4.3.6	variation	1909804	1909804	.	.	0	note=snp G=>A A:49 G:0
EA2454	snippy:4.3.6	variation	1944963	1944963	.	.	0	note=snp G=>A A:47 G:0
EA2454	snippy:4.3.6	variation	1945608	1945608	.	.	0	note=snp T=>C C:64 T:0
EA2454	snippy:4.3.6	variation	1948462	1948462	.	.	0	note=snp G=>A A:103 G:0
EA2454	snippy:4.3.6	variation	1950298	1950298	.	.	0	note=snp T=>G G:89 T:0
EA2454	snippy:4.3.6	variation	1956825	1956825	.	.	0	note=snp G=>T T:79 G:0
EA2454	snippy:4.3.6	variation	1958733	1958733	.	.	0	note=snp T=>C C:52 T:0
EA2454	snippy:4.3.6	variation	1965637	1965637	.	.	0	note=snp G=>A A:16 G:0
EA2454	snippy:4.3.6	variation	1970914	1970914	.	.	0	note=snp A=>T T:13 A:0
EA2454	snippy:4.3.6	variation	1970924	1970924	.	.	0	note=complex CAA=>ATC ATC:13 CAA:0
EA2454	snippy:4.3.6	variation	1970935	1970935	.	.	0	note=snp C=>A A:20 C:0
EA2454	snippy:4.3.6	variation	1979564	1979564	.	.	0	note=snp A=>G G:60 A:0
EA2454	snippy:4.3.6	variation	1980186	1980186	.	.	0	note=snp C=>T T:108 C:0
EA2454	snippy:4.3.6	variation	1994897	1994897	.	.	0	note=snp G=>T T:15 G:0
EA2454	snippy:4.3.6	variation	1995211	1995211	.	.	0	note=snp T=>C C:30 T:0
EA2454	snippy:4.3.6	variation	1996710	1996710	.	.	0	note=snp T=>C C:74 T:0
EA2454	snippy:4.3.6	variation	1997936	1997936	.	.	0	note=snp C=>T T:67 C:0
EA2454	snippy:4.3.6	variation	2006271	2006271	.	.	0	note=snp G=>A A:74 G:0
EA2454	snippy:4.3.6	variation	2030451	2030451	.	.	0	note=snp T=>G G:83 T:0
EA2454	snippy:4.3.6	variation	2038279	2038279	.	.	0	note=ins A=>AAC AAC:63 A:0
EA2454	snippy:4.3.6	variation	2041023	2041023	.	.	0	note=snp G=>A A:61 G:0
EA2454	snippy:4.3.6	variation	2052981	2052981	.	.	0	note=snp T=>C C:29 T:0
EA2454	snippy:4.3.6	variation	2062156	2062156	.	.	0	note=snp T=>C C:65 T:0
EA2454	snippy:4.3.6	variation	2063839	2063839	.	.	0	note=snp T=>C C:74 T:0
EA2454	snippy:4.3.6	variation	2068297	2068297	.	.	0	note=snp T=>G G:28 T:0
EA2454	snippy:4.3.6	variation	2070162	2070162	.	.	0	note=snp T=>C C:37 T:0
EA2454	snippy:4.3.6	variation	2091780	2091780	.	.	0	note=snp T=>C C:111 T:0
EA2454	snippy:4.3.6	variation	2094829	2094829	.	.	0	note=snp T=>C C:65 T:0
EA2454	snippy:4.3.6	variation	2096088	2096088	.	.	0	note=snp A=>G G:69 A:0
EA2454	snippy:4.3.6	variation	2099145	2099145	.	.	0	note=snp G=>A A:82 G:0
EA2454	snippy:4.3.6	variation	2110900	2110900	.	.	0	note=snp G=>A A:70 G:0
EA2454	snippy:4.3.6	variation	2118474	2118474	.	.	0	note=snp A=>G G:85 A:0
EA2454	snippy:4.3.6	variation	2119737	2119737	.	.	0	note=snp T=>C C:70 T:0
EA2454	snippy:4.3.6	variation	2135446	2135446	.	.	0	note=snp C=>A A:79 C:0
EA2454	snippy:4.3.6	variation	2141700	2141700	.	.	0	note=snp C=>T T:78 C:0
EA2454	snippy:4.3.6	variation	2157814	2157814	.	.	0	note=snp G=>A A:95 G:0
EA2454	snippy:4.3.6	variation	2158854	2158854	.	.	0	note=snp G=>A A:54 G:0
EA2454	snippy:4.3.6	variation	2159363	2159363	.	.	0	note=snp C=>T T:90 C:0
EA2454	snippy:4.3.6	variation	2171889	2171889	.	.	0	note=snp A=>G G:13 A:0
EA2454	snippy:4.3.6	variation	2181710	2181710	.	.	0	note=snp T=>C C:105 T:0
EA2454	snippy:4.3.6	variation	2183355	2183355	.	.	0	note=snp T=>C C:91 T:0
EA2454	snippy:4.3.6	variation	2195062	2195062	.	.	0	note=snp T=>C C:87 T:0
EA2454	snippy:4.3.6	variation	2198103	2198103	.	.	0	note=snp C=>T T:62 C:0
EA2454	snippy:4.3.6	variation	2217598	2217598	.	.	0	note=snp A=>G G:64 A:0
EA2454	snippy:4.3.6	variation	2217926	2217926	.	.	0	note=snp G=>A A:85 G:0
EA2454	snippy:4.3.6	variation	2228600	2228600	.	.	0	note=snp T=>C C:106 T:0
EA2454	snippy:4.3.6	variation	2232376	2232376	.	.	0	note=snp A=>G G:35 A:0
EA2454	snippy:4.3.6	variation	2232963	2232963	.	.	0	note=snp C=>T T:71 C:0
EA2454	snippy:4.3.6	variation	2233442	2233442	.	.	0	note=snp A=>T T:91 A:0
EA2454	snippy:4.3.6	variation	2248643	2248643	.	.	0	note=snp T=>G G:67 T:0
EA2454	snippy:4.3.6	variation	2253986	2253986	.	.	0	note=snp C=>T T:51 C:0
EA2454	snippy:4.3.6	variation	2256445	2256445	.	.	0	note=snp G=>A A:30 G:0
EA2454	snippy:4.3.6	variation	2258733	2258733	.	.	0	note=snp C=>T T:72 C:0
EA2454	snippy:4.3.6	variation	2259197	2259197	.	.	0	note=snp G=>A A:42 G:0
EA2454	snippy:4.3.6	variation	2268389	2268389	.	.	0	note=snp G=>C C:40 G:0
EA2454	snippy:4.3.6	variation	2283117	2283117	.	.	0	note=snp T=>C C:107 T:0
EA2454	snippy:4.3.6	variation	2283880	2283880	.	.	0	note=snp A=>G G:103 A:2
EA2454	snippy:4.3.6	variation	2287651	2287651	.	.	0	note=snp T=>C C:48 T:0
EA2454	snippy:4.3.6	variation	2289041	2289041	.	.	0	note=snp T=>C C:80 T:0
EA2454	snippy:4.3.6	variation	2291863	2291863	.	.	0	note=snp T=>C C:97 T:0
EA2454	snippy:4.3.6	variation	2309202	2309202	.	.	0	note=snp C=>T T:64 C:0
EA2454	snippy:4.3.6	variation	2310884	2310884	.	.	0	note=snp C=>T T:40 C:0
EA2454	snippy:4.3.6	variation	2331237	2331237	.	.	0	note=snp A=>G G:40 A:0
EA2454	snippy:4.3.6	variation	2331676	2331676	.	.	0	note=snp G=>T T:66 G:0
EA2454	snippy:4.3.6	variation	2338673	2338673	.	.	0	note=snp G=>A A:38 G:0
EA2454	snippy:4.3.6	variation	2350030	2350030	.	.	0	note=snp C=>T T:108 C:0
EA2454	snippy:4.3.6	variation	2350339	2350339	.	.	0	note=snp T=>C C:83 T:0
EA2454	snippy:4.3.6	variation	2354351	2354351	.	.	0	note=snp A=>G G:93 A:0
EA2454	snippy:4.3.6	variation	2359024	2359024	.	.	0	note=snp A=>G G:64 A:0
EA2454	snippy:4.3.6	variation	2364340	2364340	.	.	0	note=snp T=>G G:94 T:0
EA2454	snippy:4.3.6	variation	2368711	2368711	.	.	0	note=snp C=>T T:30 C:0
EA2454	snippy:4.3.6	variation	2371672	2371672	.	.	0	note=snp T=>C C:54 T:0
EA2454	snippy:4.3.6	variation	2403442	2403442	.	.	0	note=snp T=>C C:100 T:0
EA2454	snippy:4.3.6	variation	2407449	2407449	.	.	0	note=snp A=>G G:39 A:0
EA2454	snippy:4.3.6	variation	2413493	2413493	.	.	0	note=snp G=>A A:102 G:0
EA2454	snippy:4.3.6	variation	2421589	2421589	.	.	0	note=snp G=>A A:56 G:0
EA2454	snippy:4.3.6	variation	2427955	2427955	.	.	0	note=snp T=>C C:11 T:0
EA2454	snippy:4.3.6	variation	2450826	2450826	.	.	0	note=snp C=>T T:59 C:0
EA2454	snippy:4.3.6	variation	2461974	2461974	.	.	0	note=snp A=>G G:14 A:0
EA2454	snippy:4.3.6	variation	2517178	2517178	.	.	0	note=snp T=>G G:77 T:0
EA2454	snippy:4.3.6	variation	2518906	2518906	.	.	0	note=snp A=>C C:24 A:0
EA2454	snippy:4.3.6	variation	2521382	2521382	.	.	0	note=snp C=>T T:91 C:0
EA2454	snippy:4.3.6	variation	2528246	2528246	.	.	0	note=snp T=>C C:63 T:0
EA2454	snippy:4.3.6	variation	2531242	2531242	.	.	0	note=snp G=>A A:132 G:0
EA2454	snippy:4.3.6	variation	2533120	2533120	.	.	0	note=snp C=>T T:92 C:0
EA2454	snippy:4.3.6	variation	2538084	2538084	.	.	0	note=snp G=>A A:47 G:0
EA2454	snippy:4.3.6	variation	2538679	2538679	.	.	0	note=snp T=>C C:65 T:0
EA2454	snippy:4.3.6	variation	2543041	2543041	.	.	0	note=snp G=>A A:56 G:0
EA2454	snippy:4.3.6	variation	2555441	2555441	.	.	0	note=snp A=>G G:49 A:0
EA2454	snippy:4.3.6	variation	2559290	2559290	.	.	0	note=snp C=>A A:34 C:0
EA2454	snippy:4.3.6	variation	2565432	2565432	.	.	0	note=snp G=>A A:89 G:0
EA2454	snippy:4.3.6	variation	2584919	2584919	.	.	0	note=snp A=>T T:53 A:0
EA2454	snippy:4.3.6	variation	2585715	2585715	.	.	0	note=snp C=>T T:81 C:0
EA2454	snippy:4.3.6	variation	2586095	2586095	.	.	0	note=snp C=>T T:64 C:0
EA2454	snippy:4.3.6	variation	2589008	2589008	.	.	0	note=snp T=>C C:57 T:0
EA2454	snippy:4.3.6	variation	2591008	2591008	.	.	0	note=snp G=>A A:11 G:0
EA2454	snippy:4.3.6	variation	2596899	2596899	.	.	0	note=snp G=>A A:86 G:0
EA2454	snippy:4.3.6	variation	2597428	2597428	.	.	0	note=snp T=>C C:64 T:0
EA2454	snippy:4.3.6	variation	2598908	2598908	.	.	0	note=snp T=>C C:89 T:0
EA2454	snippy:4.3.6	variation	2607401	2607401	.	.	0	note=snp A=>T T:70 A:0
EA2454	snippy:4.3.6	variation	2610069	2610069	.	.	0	note=snp C=>T T:72 C:0
EA2454	snippy:4.3.6	variation	2618567	2618567	.	.	0	note=snp G=>A A:67 G:0
EA2454	snippy:4.3.6	variation	2631943	2631943	.	.	0	note=snp A=>G G:45 A:0
EA2454	snippy:4.3.6	variation	2632096	2632096	.	.	0	note=snp G=>C C:21 G:0
EA2454	snippy:4.3.6	variation	2637688	2637688	.	.	0	note=snp C=>T T:68 C:0
EA2454	snippy:4.3.6	variation	2639012	2639012	.	.	0	note=snp C=>T T:72 C:0
EA2454	snippy:4.3.6	variation	2641059	2641059	.	.	0	note=snp T=>C C:58 T:0
EA2454	snippy:4.3.6	variation	2644202	2644202	.	.	0	note=snp T=>G G:67 T:1
EA2454	snippy:4.3.6	variation	2653437	2653437	.	.	0	note=snp G=>A A:28 G:0
EA2454	snippy:4.3.6	variation	2658667	2658667	.	.	0	note=snp A=>C C:108 A:1
EA2454	snippy:4.3.6	variation	2658752	2658752	.	.	0	note=snp C=>T T:83 C:0
EA2454	snippy:4.3.6	variation	2660000	2660000	.	.	0	note=snp A=>G G:36 A:0
EA2454	snippy:4.3.6	variation	2664103	2664103	.	.	0	note=snp G=>A A:78 G:0
EA2454	snippy:4.3.6	variation	2666737	2666737	.	.	0	note=snp C=>T T:100 C:0
EA2454	snippy:4.3.6	variation	2670543	2670543	.	.	0	note=snp C=>T T:87 C:0
EA2454	snippy:4.3.6	variation	2718692	2718692	.	.	0	note=snp A=>C C:81 A:0
EA2454	snippy:4.3.6	variation	2720677	2720677	.	.	0	note=ins A=>AACCTGCACCTGCACCTGC AACCTGCACCTGCACCTGC:13 A:1
EA2454	snippy:4.3.6	variation	2722619	2722619	.	.	0	note=snp A=>G G:19 A:0
EA2454	snippy:4.3.6	variation	2743080	2743080	.	.	0	note=snp T=>G G:47 T:0
EA2454	snippy:4.3.6	variation	2748849	2748849	.	.	0	note=del GT=>G G:12 GT:0
EA2454	snippy:4.3.6	variation	2749469	2749469	.	.	0	note=snp C=>G G:85 C:0
EA2454	snippy:4.3.6	variation	2755025	2755025	.	.	0	note=snp C=>T T:89 C:0
EA2454	snippy:4.3.6	variation	2755245	2755245	.	.	0	note=snp G=>C C:72 G:0
EA2454	snippy:4.3.6	variation	2760352	2760352	.	.	0	note=snp A=>G G:14 A:0
EA2454	snippy:4.3.6	variation	2760369	2760369	.	.	0	note=snp G=>A A:14 G:0
EA2454	snippy:4.3.6	variation	2763065	2763065	.	.	0	note=snp A=>G G:109 A:0
EA2454	snippy:4.3.6	variation	2771595	2771595	.	.	0	note=snp T=>A A:46 T:0
EA2454	snippy:4.3.6	variation	2774852	2774852	.	.	0	note=snp A=>G G:21 A:0
EA2454	snippy:4.3.6	variation	2777153	2777153	.	.	0	note=snp T=>G G:69 T:0
EA2454	snippy:4.3.6	variation	2782946	2782946	.	.	0	note=snp C=>T T:88 C:0
EA2454	snippy:4.3.6	variation	2785945	2785945	.	.	0	note=snp T=>A A:65 T:0
EA2454	snippy:4.3.6	variation	2793323	2793323	.	.	0	note=snp T=>C C:14 T:0
EA2454	snippy:4.3.6	variation	2802439	2802439	.	.	0	note=snp A=>T T:108 A:0
EA2454	snippy:4.3.6	variation	2809435	2809435	.	.	0	note=snp G=>C C:41 G:0
EA2454	snippy:4.3.6	variation	2815762	2815762	.	.	0	note=snp A=>G G:44 A:0
EA2454	snippy:4.3.6	variation	2816107	2816107	.	.	0	note=snp C=>A A:65 C:0
EA2454	snippy:4.3.6	variation	2824579	2824579	.	.	0	note=ins C=>CT CT:33 C:0
EA2454	snippy:4.3.6	variation	2829690	2829690	.	.	0	note=snp G=>C C:115 G:0
EA2454	snippy:4.3.6	variation	2830990	2830990	.	.	0	note=snp C=>A A:65 C:0
EA2454	snippy:4.3.6	variation	2831971	2831971	.	.	0	note=snp C=>T T:98 C:0
EA2454	snippy:4.3.6	variation	2832637	2832637	.	.	0	note=snp C=>T T:65 C:0
EA2454	snippy:4.3.6	variation	2837636	2837636	.	.	0	note=snp T=>C C:51 T:0
EA2454	snippy:4.3.6	variation	2843028	2843028	.	.	0	note=snp C=>G G:86 C:0
EA2454	snippy:4.3.6	variation	2845039	2845039	.	.	0	note=snp C=>T T:59 C:0
EA2454	snippy:4.3.6	variation	2847080	2847080	.	.	0	note=snp T=>C C:40 T:0
EA2454	snippy:4.3.6	variation	2850370	2850370	.	.	0	note=snp A=>C C:83 A:1
EA2454	snippy:4.3.6	variation	2851743	2851743	.	.	0	note=snp T=>A A:77 T:0
EA2454	snippy:4.3.6	variation	2860024	2860024	.	.	0	note=snp T=>G G:101 T:2
EA2454	snippy:4.3.6	variation	2861514	2861514	.	.	0	note=snp G=>A A:65 G:0
EA2454	snippy:4.3.6	variation	2865701	2865701	.	.	0	note=snp T=>C C:103 T:0
EA2454	snippy:4.3.6	variation	2872360	2872360	.	.	0	note=snp A=>G G:102 A:0
EA2454	snippy:4.3.6	variation	2876151	2876151	.	.	0	note=snp T=>C C:10 T:0
EA2454	snippy:4.3.6	variation	2881008	2881008	.	.	0	note=snp G=>C C:59 G:0
EA2454	snippy:4.3.6	variation	2883184	2883184	.	.	0	note=snp T=>C C:77 T:0
EA2454	snippy:4.3.6	variation	2897200	2897200	.	.	0	note=snp G=>A A:135 G:1
EA2454	snippy:4.3.6	variation	2901111	2901111	.	.	0	note=snp A=>G G:88 A:0
EA2454	snippy:4.3.6	variation	2901769	2901769	.	.	0	note=snp C=>T T:77 C:0
EA2454	snippy:4.3.6	variation	2903547	2903547	.	.	0	note=snp C=>A A:92 C:0
EA2454	snippy:4.3.6	variation	2903624	2903624	.	.	0	note=snp C=>A A:96 C:0
EA2454	snippy:4.3.6	variation	2927920	2927920	.	.	0	note=snp T=>C C:82 T:0
EA2454	snippy:4.3.6	variation	2931389	2931389	.	.	0	note=snp T=>G G:54 T:1
EA2454	snippy:4.3.6	variation	2934279	2934279	.	.	0	note=snp A=>G G:85 A:0
EA2454	snippy:4.3.6	variation	2937585	2937585	.	.	0	note=snp A=>G G:92 A:0
EA2454	snippy:4.3.6	variation	2939135	2939135	.	.	0	note=ins A=>AT AT:46 A:0
EA2454	snippy:4.3.6	variation	2941498	2941498	.	.	0	note=snp G=>A A:71 G:0
EA2454	snippy:4.3.6	variation	2945610	2945610	.	.	0	note=snp G=>A A:90 G:0
EA2454	snippy:4.3.6	variation	2954356	2954356	.	.	0	note=snp T=>A A:10 T:0
EA2454	snippy:4.3.6	variation	2954364	2954364	.	.	0	note=snp A=>T T:10 A:0
EA2454	snippy:4.3.6	variation	2954372	2954372	.	.	0	note=snp G=>T T:10 G:0
EA2454	snippy:4.3.6	variation	2954374	2954374	.	.	0	note=snp A=>G G:12 A:0
EA2454	snippy:4.3.6	variation	2954402	2954402	.	.	0	note=snp C=>T T:14 C:0
EA2454	snippy:4.3.6	variation	2954425	2954425	.	.	0	note=snp A=>G G:14 A:0
EA2454	snippy:4.3.6	variation	2954433	2954433	.	.	0	note=snp G=>C C:12 G:0
EA2454	snippy:4.3.6	variation	2954439	2954439	.	.	0	note=snp A=>G G:10 A:0
EA2454	snippy:4.3.6	variation	2963100	2963100	.	.	0	note=snp G=>A A:77 G:0
EA2454	snippy:4.3.6	variation	3017377	3017377	.	.	0	note=snp G=>A A:12 G:0
EA2454	snippy:4.3.6	variation	3027647	3027647	.	.	0	note=snp T=>C C:102 T:0
EA2454	snippy:4.3.6	variation	3033291	3033291	.	.	0	note=snp A=>T T:39 A:0
EA2454	snippy:4.3.6	variation	3039630	3039630	.	.	0	note=snp C=>T T:55 C:0
EA2454	snippy:4.3.6	variation	3041125	3041125	.	.	0	note=snp T=>G G:75 T:0
EA2454	snippy:4.3.6	variation	3052455	3052455	.	.	0	note=snp G=>A A:49 G:0
EA2454	snippy:4.3.6	variation	3052992	3052992	.	.	0	note=snp G=>C C:60 G:0
EA2454	snippy:4.3.6	variation	3055255	3055255	.	.	0	note=snp G=>A A:67 G:0
EA2454	snippy:4.3.6	variation	3057242	3057242	.	.	0	note=snp A=>G G:78 A:0
EA2454	snippy:4.3.6	variation	3058223	3058223	.	.	0	note=snp C=>T T:71 C:0
EA2454	snippy:4.3.6	variation	3070440	3070440	.	.	0	note=snp A=>G G:60 A:0
EA2454	snippy:4.3.6	variation	3091335	3091335	.	.	0	note=snp T=>C C:92 T:0
EA2454	snippy:4.3.6	variation	3093850	3093850	.	.	0	note=snp T=>C C:86 T:0
EA2454	snippy:4.3.6	variation	3099129	3099129	.	.	0	note=snp T=>C C:71 T:0
EA2454	snippy:4.3.6	variation	3101851	3101851	.	.	0	note=snp A=>G G:107 A:0
EA2454	snippy:4.3.6	variation	3104888	3104888	.	.	0	note=snp C=>T T:71 C:0
EA2454	snippy:4.3.6	variation	3109320	3109320	.	.	0	note=snp C=>T T:48 C:0
EA2454	snippy:4.3.6	variation	3112595	3112595	.	.	0	note=ins C=>CG CG:59 C:0
EA2454	snippy:4.3.6	variation	3112890	3112890	.	.	0	note=snp A=>G G:55 A:0
EA2454	snippy:4.3.6	variation	3115749	3115749	.	.	0	note=snp T=>A A:71 T:0
EA2454	snippy:4.3.6	variation	3117020	3117020	.	.	0	note=snp C=>G G:94 C:1
EA2454	snippy:4.3.6	variation	3125212	3125212	.	.	0	note=snp A=>G G:87 A:0
EA2454	snippy:4.3.6	variation	3133556	3133556	.	.	0	note=snp G=>T T:87 G:2
EA2454	snippy:4.3.6	variation	3135617	3135617	.	.	0	note=snp A=>C C:76 A:0
EA2454	snippy:4.3.6	variation	3141450	3141450	.	.	0	note=snp A=>T T:80 A:0
EA2454	snippy:4.3.6	variation	3149583	3149583	.	.	0	note=snp G=>A A:68 G:0
EA2454	snippy:4.3.6	variation	3154708	3154708	.	.	0	note=snp G=>A A:66 G:0
EA2454	snippy:4.3.6	variation	3175254	3175254	.	.	0	note=snp T=>C C:88 T:0
EA2454	snippy:4.3.6	variation	3188469	3188469	.	.	0	note=snp T=>C C:78 T:0
EA2454	snippy:4.3.6	variation	3188675	3188675	.	.	0	note=snp T=>A A:60 T:0
EA2454	snippy:4.3.6	variation	3192856	3192856	.	.	0	note=snp C=>T T:16 C:0
EA2454	snippy:4.3.6	variation	3196063	3196063	.	.	0	note=snp T=>C C:31 T:0
EA2454	snippy:4.3.6	variation	3211809	3211809	.	.	0	note=snp T=>C C:77 T:0
EA2454	snippy:4.3.6	variation	3213292	3213292	.	.	0	note=snp A=>C C:74 A:0
EA2454	snippy:4.3.6	variation	3218193	3218193	.	.	0	note=snp T=>G G:71 T:2
EA2454	snippy:4.3.6	variation	3224798	3224798	.	.	0	note=snp A=>G G:45 A:0
EA2454	snippy:4.3.6	variation	3240902	3240902	.	.	0	note=del AACTG=>A A:46 AACTG:0
EA2454	snippy:4.3.6	variation	3244869	3244869	.	.	0	note=snp C=>A A:32 C:0
EA2454	snippy:4.3.6	variation	3246115	3246115	.	.	0	note=snp A=>G G:76 A:0
EA2454	snippy:4.3.6	variation	3254909	3254909	.	.	0	note=snp C=>G G:36 C:0
EA2454	snippy:4.3.6	variation	3258454	3258454	.	.	0	note=snp T=>A A:43 T:0
EA2454	snippy:4.3.6	variation	3258466	3258466	.	.	0	note=snp C=>T T:42 C:0
EA2454	snippy:4.3.6	variation	3263384	3263384	.	.	0	note=snp T=>C C:30 T:0
EA2454	snippy:4.3.6	variation	3268326	3268326	.	.	0	note=snp G=>A A:83 G:0
EA2454	snippy:4.3.6	variation	3272561	3272561	.	.	0	note=snp G=>T T:23 G:0
EA2454	snippy:4.3.6	variation	3274783	3274783	.	.	0	note=snp T=>C C:57 T:0
EA2454	snippy:4.3.6	variation	3281767	3281767	.	.	0	note=ins G=>GC GC:87 G:0
EA2454	snippy:4.3.6	variation	3305295	3305295	.	.	0	note=snp A=>G G:123 A:2
EA2454	snippy:4.3.6	variation	3305988	3305988	.	.	0	note=snp G=>C C:82 G:0
EA2454	snippy:4.3.6	variation	3307020	3307020	.	.	0	note=snp C=>T T:65 C:0
EA2454	snippy:4.3.6	variation	3307663	3307663	.	.	0	note=snp C=>T T:106 C:0
EA2454	snippy:4.3.6	variation	3310578	3310578	.	.	0	note=snp A=>G G:42 A:0
EA2454	snippy:4.3.6	variation	3312346	3312346	.	.	0	note=snp C=>T T:68 C:0
EA2454	snippy:4.3.6	variation	3318387	3318387	.	.	0	note=snp C=>G G:47 C:1
EA2454	snippy:4.3.6	variation	3374309	3374309	.	.	0	note=snp G=>A A:61 G:0
EA2454	snippy:4.3.6	variation	3374533	3374533	.	.	0	note=snp G=>T T:51 G:0
EA2454	snippy:4.3.6	variation	3381441	3381441	.	.	0	note=snp A=>G G:72 A:0
EA2454	snippy:4.3.6	variation	3387556	3387556	.	.	0	note=snp T=>A A:25 T:0
EA2454	snippy:4.3.6	variation	3395362	3395362	.	.	0	note=snp A=>C C:117 A:0
EA2454	snippy:4.3.6	variation	3398937	3398937	.	.	0	note=snp A=>G G:78 A:0
EA2454	snippy:4.3.6	variation	3400480	3400480	.	.	0	note=ins T=>TGAAGCTGGA TGAAGCTGGA:55 T:1
EA2454	snippy:4.3.6	variation	3405179	3405179	.	.	0	note=snp T=>G G:46 T:0
EA2454	snippy:4.3.6	variation	3426445	3426445	.	.	0	note=snp T=>C C:94 T:0
EA2454	snippy:4.3.6	variation	3440338	3440338	.	.	0	note=snp C=>T T:74 C:0
EA2454	snippy:4.3.6	variation	3441887	3441887	.	.	0	note=snp T=>C C:57 T:0
EA2454	snippy:4.3.6	variation	3441936	3441936	.	.	0	note=snp A=>G G:61 A:0
EA2454	snippy:4.3.6	variation	3448725	3448725	.	.	0	note=snp C=>T T:66 C:0
EA2454	snippy:4.3.6	variation	3451003	3451003	.	.	0	note=snp C=>T T:73 C:0
EA2454	snippy:4.3.6	variation	3462462	3462462	.	.	0	note=snp T=>C C:61 T:0
EA2454	snippy:4.3.6	variation	3462699	3462699	.	.	0	note=snp A=>G G:69 A:0
EA2454	snippy:4.3.6	variation	3463669	3463669	.	.	0	note=snp T=>C C:62 T:0
EA2454	snippy:4.3.6	variation	3527982	3527982	.	.	0	note=ins G=>GA GA:76 G:0
EA2454	snippy:4.3.6	variation	3536376	3536376	.	.	0	note=snp T=>C C:59 T:0
EA2454	snippy:4.3.6	variation	3539749	3539749	.	.	0	note=snp T=>C C:67 T:0
EA2454	snippy:4.3.6	variation	3540229	3540229	.	.	0	note=snp T=>C C:63 T:0
EA2454	snippy:4.3.6	variation	3547214	3547214	.	.	0	note=snp C=>A A:72 C:0
EA2454	snippy:4.3.6	variation	3547948	3547948	.	.	0	note=snp T=>C C:112 T:0
EA2454	snippy:4.3.6	variation	3548625	3548625	.	.	0	note=snp G=>C C:55 G:0
EA2454	snippy:4.3.6	variation	3554302	3554302	.	.	0	note=snp G=>T T:38 G:0
EA2454	snippy:4.3.6	variation	3556473	3556473	.	.	0	note=snp G=>A A:105 G:0
EA2454	snippy:4.3.6	variation	3566015	3566015	.	.	0	note=snp T=>C C:45 T:0
EA2454	snippy:4.3.6	variation	3569782	3569782	.	.	0	note=snp C=>T T:106 C:0
EA2454	snippy:4.3.6	variation	3590214	3590214	.	.	0	note=snp T=>C C:58 T:0
EA2454	snippy:4.3.6	variation	3590259	3590259	.	.	0	note=snp C=>T T:48 C:0
EA2454	snippy:4.3.6	variation	3594055	3594055	.	.	0	note=snp T=>C C:106 T:0
EA2454	snippy:4.3.6	variation	3595770	3595770	.	.	0	note=snp T=>G G:61 T:0
EA2454	snippy:4.3.6	variation	3600939	3600939	.	.	0	note=snp G=>C C:96 G:0
EA2454	snippy:4.3.6	variation	3602569	3602569	.	.	0	note=snp C=>A A:70 C:0
EA2454	snippy:4.3.6	variation	3613661	3613661	.	.	0	note=snp G=>A A:22 G:0
EA2454	snippy:4.3.6	variation	3613761	3613761	.	.	0	note=snp T=>C C:36 T:0
EA2454	snippy:4.3.6	variation	3615292	3615292	.	.	0	note=snp T=>G G:77 T:1
EA2454	snippy:4.3.6	variation	3615330	3615330	.	.	0	note=snp A=>C C:73 A:0
EA2454	snippy:4.3.6	variation	3628517	3628517	.	.	0	note=snp A=>G G:149 A:0
EA2454	snippy:4.3.6	variation	3632526	3632526	.	.	0	note=snp C=>A A:81 C:0
EA2454	snippy:4.3.6	variation	3634246	3634246	.	.	0	note=snp A=>T T:13 A:0
EA2454	snippy:4.3.6	variation	3634750	3634750	.	.	0	note=snp C=>T T:60 C:0
EA2454	snippy:4.3.6	variation	3640661	3640661	.	.	0	note=snp A=>G G:62 A:0
EA2454	snippy:4.3.6	variation	3645952	3645952	.	.	0	note=snp G=>A A:64 G:0
EA2454	snippy:4.3.6	variation	3657942	3657942	.	.	0	note=snp T=>G G:152 T:0
EA2454	snippy:4.3.6	variation	3662284	3662284	.	.	0	note=snp A=>G G:56 A:0
EA2454	snippy:4.3.6	variation	3665749	3665749	.	.	0	note=snp G=>A A:101 G:0
EA2454	snippy:4.3.6	variation	3666055	3666055	.	.	0	note=snp C=>T T:95 C:0
EA2454	snippy:4.3.6	variation	3682843	3682843	.	.	0	note=snp T=>G G:67 T:1
EA2454	snippy:4.3.6	variation	3690835	3690835	.	.	0	note=snp T=>G G:114 T:0
EA2454	snippy:4.3.6	variation	3701518	3701518	.	.	0	note=snp C=>T T:86 C:0
EA2454	snippy:4.3.6	variation	3701756	3701756	.	.	0	note=snp A=>G G:56 A:0
EA2454	snippy:4.3.6	variation	3705284	3705284	.	.	0	note=snp A=>G G:34 A:0
EA2454	snippy:4.3.6	variation	3709916	3709916	.	.	0	note=snp G=>A A:63 G:0
EA2454	snippy:4.3.6	variation	3730872	3730872	.	.	0	note=snp G=>A A:86 G:0
EA2454	snippy:4.3.6	variation	3731404	3731404	.	.	0	note=snp G=>A A:85 G:0
EA2454	snippy:4.3.6	variation	3731422	3731422	.	.	0	note=snp C=>A A:100 C:0
EA2454	snippy:4.3.6	variation	3739482	3739482	.	.	0	note=snp A=>G G:73 A:0
EA2454	snippy:4.3.6	variation	3750262	3750262	.	.	0	note=del GAA=>G G:22 GAA:0
EA2454	snippy:4.3.6	variation	3756054	3756054	.	.	0	note=snp T=>C C:38 T:0
EA2454	snippy:4.3.6	variation	3763988	3763988	.	.	0	note=snp A=>G G:67 A:0
EA2454	snippy:4.3.6	variation	3766157	3766157	.	.	0	note=snp G=>A A:97 G:0
EA2454	snippy:4.3.6	variation	3772277	3772277	.	.	0	note=snp T=>A A:67 T:0
EA2454	snippy:4.3.6	variation	3779368	3779368	.	.	0	note=snp C=>T T:71 C:0
EA2454	snippy:4.3.6	variation	3795140	3795140	.	.	0	note=snp T=>C C:85 T:0
EA2454	snippy:4.3.6	variation	3807575	3807575	.	.	0	note=snp A=>G G:57 A:0
EA2454	snippy:4.3.6	variation	3808964	3808964	.	.	0	note=snp C=>T T:33 C:0
EA2454	snippy:4.3.6	variation	3812714	3812714	.	.	0	note=snp C=>T T:46 C:0
EA2454	snippy:4.3.6	variation	3815430	3815430	.	.	0	note=snp T=>C C:29 T:0
EA2454	snippy:4.3.6	variation	3837457	3837457	.	.	0	note=snp C=>A A:54 C:0
EA2454	snippy:4.3.6	variation	3840206	3840206	.	.	0	note=snp C=>T T:101 C:0
EA2454	snippy:4.3.6	variation	3842198	3842198	.	.	0	note=ins C=>CT CT:56 C:0
EA2454	snippy:4.3.6	variation	3844395	3844395	.	.	0	note=snp T=>C C:90 T:0
EA2454	snippy:4.3.6	variation	3851580	3851580	.	.	0	note=complex AC=>TT TT:10 AC:0
EA2454	snippy:4.3.6	variation	3851623	3851623	.	.	0	note=snp C=>T T:23 C:0
EA2454	snippy:4.3.6	variation	3851632	3851632	.	.	0	note=complex GAAG=>AAAA AAAA:21 GAAG:0
EA2454	snippy:4.3.6	variation	3851667	3851667	.	.	0	note=snp A=>G G:25 A:0
EA2454	snippy:4.3.6	variation	3851703	3851703	.	.	0	note=snp A=>G G:25 A:0
EA2454	snippy:4.3.6	variation	3851770	3851770	.	.	0	note=complex TAGCC=>CAGCG CAGCG:16 TAGCC:0
EA2454	snippy:4.3.6	variation	3851842	3851842	.	.	0	note=snp C=>T T:16 C:0
EA2454	snippy:4.3.6	variation	3851865	3851865	.	.	0	note=complex CCAGT=>GCAGC GCAGC:11 CCAGT:0
EA2454	snippy:4.3.6	variation	3851884	3851884	.	.	0	note=complex CTT=>ACCCC ACCCC:12 CTT:0
EA2454	snippy:4.3.6	variation	3851901	3851901	.	.	0	note=snp C=>T T:12 C:0
EA2454	snippy:4.3.6	variation	3851915	3851915	.	.	0	note=snp T=>C C:11 T:0
EA2454	snippy:4.3.6	variation	3851918	3851918	.	.	0	note=snp T=>C C:10 T:0
EA2454	snippy:4.3.6	variation	3851976	3851976	.	.	0	note=snp T=>G G:15 T:0
EA2454	snippy:4.3.6	variation	3852061	3852061	.	.	0	note=snp G=>C C:13 G:1
EA2454	snippy:4.3.6	variation	3852067	3852067	.	.	0	note=complex GCCG=>TCCA TCCA:12 GCCG:0
EA2454	snippy:4.3.6	variation	3852076	3852076	.	.	0	note=snp T=>C C:15 T:0
EA2454	snippy:4.3.6	variation	3852124	3852124	.	.	0	note=snp T=>C C:15 T:0
EA2454	snippy:4.3.6	variation	3852262	3852262	.	.	0	note=complex CGGGCAG=>TGGGAAA TGGGAAA:15 CGGGCAG:0
EA2454	snippy:4.3.6	variation	3852286	3852286	.	.	0	note=snp C=>T T:21 C:0
EA2454	snippy:4.3.6	variation	3852395	3852395	.	.	0	note=snp C=>A A:37 C:0
EA2454	snippy:4.3.6	variation	3852453	3852453	.	.	0	note=snp G=>A A:32 G:0
EA2454	snippy:4.3.6	variation	3852559	3852559	.	.	0	note=snp A=>G G:21 A:0
EA2454	snippy:4.3.6	variation	3852607	3852607	.	.	0	note=complex CCGTT=>TCGTC TCGTC:15 CCGTT:0
EA2454	snippy:4.3.6	variation	3852640	3852640	.	.	0	note=snp A=>G G:20 A:0
EA2454	snippy:4.3.6	variation	3852680	3852680	.	.	0	note=snp T=>C C:30 T:0
EA2454	snippy:4.3.6	variation	3852688	3852688	.	.	0	note=mnp GCG=>AAA AAA:24 GCG:0
EA2454	snippy:4.3.6	variation	3852712	3852712	.	.	0	note=complex CAGA=>AAGG AAGG:29 CAGA:0
EA2454	snippy:4.3.6	variation	3852799	3852799	.	.	0	note=snp A=>G G:17 A:0
EA2454	snippy:4.3.6	variation	3852830	3852830	.	.	0	note=snp T=>A A:14 T:0
EA2454	snippy:4.3.6	variation	3852950	3852950	.	.	0	note=snp G=>T T:10 G:0
EA2454	snippy:4.3.6	variation	3855834	3855834	.	.	0	note=complex AA=>TC TC:11 AA:0
EA2454	snippy:4.3.6	variation	3855884	3855884	.	.	0	note=snp C=>T T:10 C:0
EA2454	snippy:4.3.6	variation	3856015	3856015	.	.	0	note=ins T=>TA TA:12 T:0
EA2454	snippy:4.3.6	variation	3856047	3856047	.	.	0	note=complex AAAG=>GAAA GAAA:16 AAAG:0
EA2454	snippy:4.3.6	variation	3856122	3856122	.	.	0	note=snp A=>C C:16 A:0
EA2454	snippy:4.3.6	variation	3856149	3856149	.	.	0	note=snp T=>A A:10 T:0
EA2454	snippy:4.3.6	variation	3856155	3856155	.	.	0	note=snp G=>A A:10 G:0
EA2454	snippy:4.3.6	variation	3856242	3856242	.	.	0	note=snp T=>A A:16 T:0
EA2454	snippy:4.3.6	variation	3856458	3856458	.	.	0	note=snp A=>G G:25 A:0
EA2454	snippy:4.3.6	variation	3856521	3856521	.	.	0	note=snp T=>C C:23 T:0
EA2454	snippy:4.3.6	variation	3856982	3856982	.	.	0	note=complex CTGG=>ATGT ATGT:22 CTGG:0
EA2454	snippy:4.3.6	variation	3857194	3857194	.	.	0	note=snp A=>G G:24 A:0
EA2454	snippy:4.3.6	variation	3857206	3857206	.	.	0	note=snp T=>C C:29 T:0
EA2454	snippy:4.3.6	variation	3857236	3857236	.	.	0	note=snp C=>T T:33 C:0
EA2454	snippy:4.3.6	variation	3857347	3857347	.	.	0	note=snp C=>T T:38 C:0
EA2454	snippy:4.3.6	variation	3857368	3857368	.	.	0	note=snp C=>T T:34 C:0
EA2454	snippy:4.3.6	variation	3857386	3857386	.	.	0	note=complex CCCG=>TCCT TCCT:29 CCCG:0
EA2454	snippy:4.3.6	variation	3857455	3857455	.	.	0	note=snp G=>A A:19 G:0
EA2454	snippy:4.3.6	variation	3857571	3857571	.	.	0	note=snp C=>T T:25 C:0
EA2454	snippy:4.3.6	variation	3857766	3857766	.	.	0	note=snp C=>G G:36 C:0
EA2454	snippy:4.3.6	variation	3857781	3857781	.	.	0	note=complex ACCC=>GCCT GCCT:39 ACCC:0
EA2454	snippy:4.3.6	variation	3857904	3857904	.	.	0	note=complex CGAG=>TGAA TGAA:31 CGAG:0
EA2454	snippy:4.3.6	variation	3857976	3857976	.	.	0	note=snp C=>T T:33 C:0
EA2454	snippy:4.3.6	variation	3857994	3857994	.	.	0	note=snp G=>A A:28 G:0
EA2454	snippy:4.3.6	variation	3858009	3858009	.	.	0	note=snp T=>A A:27 T:0
EA2454	snippy:4.3.6	variation	3858021	3858021	.	.	0	note=snp G=>C C:30 G:0
EA2454	snippy:4.3.6	variation	3858047	3858047	.	.	0	note=complex TGCCT=>CGCCA CGCCA:28 TGCCT:0
EA2454	snippy:4.3.6	variation	3858066	3858066	.	.	0	note=snp C=>G G:31 C:0
EA2454	snippy:4.3.6	variation	3858264	3858264	.	.	0	note=snp A=>G G:29 A:0
EA2454	snippy:4.3.6	variation	3858330	3858330	.	.	0	note=complex GTCG=>CTCA CTCA:30 GTCG:0
EA2454	snippy:4.3.6	variation	3858381	3858381	.	.	0	note=snp C=>T T:33 C:0
EA2454	snippy:4.3.6	variation	3858405	3858405	.	.	0	note=snp A=>G G:28 A:0
EA2454	snippy:4.3.6	variation	3858465	3858465	.	.	0	note=snp G=>A A:26 G:0
EA2454	snippy:4.3.6	variation	3858471	3858471	.	.	0	note=snp C=>T T:29 C:0
EA2454	snippy:4.3.6	variation	3858477	3858477	.	.	0	note=snp A=>T T:29 A:0
EA2454	snippy:4.3.6	variation	3858486	3858486	.	.	0	note=snp C=>T T:22 C:0
EA2454	snippy:4.3.6	variation	3858505	3858505	.	.	0	note=complex GAC=>AAT AAT:24 GAC:0
EA2454	snippy:4.3.6	variation	3858690	3858690	.	.	0	note=complex AGCC=>CGCT CGCT:24 AGCC:0
EA2454	snippy:4.3.6	variation	3858705	3858705	.	.	0	note=complex TGGT=>CGGC CGGC:28 TGGT:0
EA2454	snippy:4.3.6	variation	3858717	3858717	.	.	0	note=snp G=>T T:31 G:0
EA2454	snippy:4.3.6	variation	3858981	3858981	.	.	0	note=snp C=>T T:32 C:0
EA2454	snippy:4.3.6	variation	3859719	3859719	.	.	0	note=snp G=>A A:14 G:0
EA2454	snippy:4.3.6	variation	3859941	3859941	.	.	0	note=snp T=>C C:13 T:0
EA2454	snippy:4.3.6	variation	3860187	3860187	.	.	0	note=snp T=>C C:15 T:0
EA2454	snippy:4.3.6	variation	3860215	3860215	.	.	0	note=snp A=>G G:21 A:0
EA2454	snippy:4.3.6	variation	3860282	3860282	.	.	0	note=snp A=>G G:25 A:0
EA2454	snippy:4.3.6	variation	3860759	3860759	.	.	0	note=complex CGTTGTGC=>TGTTATGT TGTTATGT:21 CGTTGTGC:0
EA2454	snippy:4.3.6	variation	3861129	3861129	.	.	0	note=snp G=>A A:35 G:0
EA2454	snippy:4.3.6	variation	3861180	3861180	.	.	0	note=snp C=>T T:21 C:0
EA2454	snippy:4.3.6	variation	3861192	3861192	.	.	0	note=snp G=>T T:25 G:0
EA2454	snippy:4.3.6	variation	3861216	3861216	.	.	0	note=snp C=>T T:25 C:0
EA2454	snippy:4.3.6	variation	3861225	3861225	.	.	0	note=snp C=>T T:31 C:0
EA2454	snippy:4.3.6	variation	3861405	3861405	.	.	0	note=complex AC=>GT GT:12 AC:0
EA2454	snippy:4.3.6	variation	3861522	3861522	.	.	0	note=snp G=>A A:14 G:0
EA2454	snippy:4.3.6	variation	3861702	3861702	.	.	0	note=snp C=>T T:33 C:0
EA2454	snippy:4.3.6	variation	3861708	3861708	.	.	0	note=snp A=>G G:33 A:0
EA2454	snippy:4.3.6	variation	3861717	3861717	.	.	0	note=snp T=>G G:32 T:0
EA2454	snippy:4.3.6	variation	3861762	3861762	.	.	0	note=snp G=>A A:28 G:0
EA2454	snippy:4.3.6	variation	3861768	3861768	.	.	0	note=snp C=>T T:27 C:0
EA2454	snippy:4.3.6	variation	3861828	3861828	.	.	0	note=snp C=>T T:20 C:0
EA2454	snippy:4.3.6	variation	3861873	3861873	.	.	0	note=snp A=>G G:14 A:0
EA2454	snippy:4.3.6	variation	3861891	3861891	.	.	0	note=snp T=>A A:15 T:0
EA2454	snippy:4.3.6	variation	3861906	3861906	.	.	0	note=snp C=>T T:13 C:0
EA2454	snippy:4.3.6	variation	3861957	3861957	.	.	0	note=snp G=>A A:10 G:0
EA2454	snippy:4.3.6	variation	3861993	3861993	.	.	0	note=complex AGTTGAAAAGGAGGCG=>CGTGGAGAAAGAAGCT CGTGGAGAAAGAAGCT:11 AGTTGAAAAGGAGGCG:0
EA2454	snippy:4.3.6	variation	3862023	3862023	.	.	0	note=snp G=>A A:16 G:0
EA2454	snippy:4.3.6	variation	3862086	3862086	.	.	0	note=snp C=>A A:21 C:0
EA2454	snippy:4.3.6	variation	3862113	3862113	.	.	0	note=snp A=>G G:26 A:0
EA2454	snippy:4.3.6	variation	3862197	3862197	.	.	0	note=snp T=>C C:29 T:0
EA2454	snippy:4.3.6	variation	3862329	3862329	.	.	0	note=snp A=>G G:26 A:0
EA2454	snippy:4.3.6	variation	3862338	3862338	.	.	0	note=snp C=>T T:23 C:0
EA2454	snippy:4.3.6	variation	3862353	3862353	.	.	0	note=snp T=>C C:27 T:0
EA2454	snippy:4.3.6	variation	3862431	3862431	.	.	0	note=complex CACC=>AACA AACA:12 CACC:0
EA2454	snippy:4.3.6	variation	3862456	3862456	.	.	0	note=snp T=>C C:15 T:0
EA2454	snippy:4.3.6	variation	3862476	3862476	.	.	0	note=snp T=>C C:18 T:0
EA2454	snippy:4.3.6	variation	3862536	3862536	.	.	0	note=snp C=>T T:27 C:0
EA2454	snippy:4.3.6	variation	3862584	3862584	.	.	0	note=snp T=>C C:27 T:0
EA2454	snippy:4.3.6	variation	3862608	3862608	.	.	0	note=snp C=>T T:32 C:0
EA2454	snippy:4.3.6	variation	3862614	3862614	.	.	0	note=snp C=>T T:28 C:0
EA2454	snippy:4.3.6	variation	3862638	3862638	.	.	0	note=snp C=>T T:26 C:0
EA2454	snippy:4.3.6	variation	3862695	3862695	.	.	0	note=complex TCTGC=>CCTGT CCTGT:19 TCTGC:0
EA2454	snippy:4.3.6	variation	3862715	3862715	.	.	0	note=snp A=>G G:22 A:0
EA2454	snippy:4.3.6	variation	3862731	3862731	.	.	0	note=snp C=>T T:24 C:0
EA2454	snippy:4.3.6	variation	3862740	3862740	.	.	0	note=snp T=>G G:25 T:0
EA2454	snippy:4.3.6	variation	3862765	3862765	.	.	0	note=snp A=>G G:19 A:0
EA2454	snippy:4.3.6	variation	3862783	3862783	.	.	0	note=snp A=>C C:20 A:0
EA2454	snippy:4.3.6	variation	3862788	3862788	.	.	0	note=complex CAGCGAG=>TAACGAC TAACGAC:19 CAGCGAG:0
EA2454	snippy:4.3.6	variation	3862802	3862802	.	.	0	note=snp C=>T T:23 C:0
EA2454	snippy:4.3.6	variation	3862833	3862833	.	.	0	note=snp T=>C C:22 T:0
EA2454	snippy:4.3.6	variation	3862902	3862902	.	.	0	note=snp G=>A A:16 G:0
EA2454	snippy:4.3.6	variation	3862947	3862947	.	.	0	note=complex GGGA=>TGGG TGGG:13 GGGA:0
EA2454	snippy:4.3.6	variation	3862974	3862974	.	.	0	note=snp T=>G G:13 T:0
EA2454	snippy:4.3.6	variation	3862990	3862990	.	.	0	note=complex TCCCTGATTATC=>AGCCTTATCATT AGCCTTATCATT:14 TCCCTGATTATC:0
EA2454	snippy:4.3.6	variation	3863014	3863014	.	.	0	note=snp A=>C C:22 A:0
EA2454	snippy:4.3.6	variation	3863036	3863036	.	.	0	note=complex CT=>AC AC:22 CT:0
EA2454	snippy:4.3.6	variation	3863043	3863043	.	.	0	note=snp A=>G G:22 A:0
EA2454	snippy:4.3.6	variation	3863055	3863055	.	.	0	note=snp C=>T T:26 C:0
EA2454	snippy:4.3.6	variation	3863100	3863100	.	.	0	note=snp C=>T T:27 C:0
EA2454	snippy:4.3.6	variation	3863139	3863139	.	.	0	note=snp C=>T T:26 C:0
EA2454	snippy:4.3.6	variation	3863199	3863199	.	.	0	note=snp C=>A A:22 C:0
EA2454	snippy:4.3.6	variation	3863208	3863208	.	.	0	note=snp T=>A A:21 T:0
EA2454	snippy:4.3.6	variation	3863298	3863298	.	.	0	note=snp C=>T T:20 C:0
EA2454	snippy:4.3.6	variation	3863319	3863319	.	.	0	note=snp G=>C C:14 G:0
EA2454	snippy:4.3.6	variation	3863331	3863331	.	.	0	note=snp C=>T T:19 C:0
EA2454	snippy:4.3.6	variation	3863346	3863346	.	.	0	note=snp T=>C C:21 T:0
EA2454	snippy:4.3.6	variation	3863406	3863406	.	.	0	note=snp T=>C C:28 T:0
EA2454	snippy:4.3.6	variation	3863481	3863481	.	.	0	note=complex CAGG=>TAAA TAAA:11 CAGG:0
EA2454	snippy:4.3.6	variation	3863490	3863490	.	.	0	note=snp C=>G G:15 C:0
EA2454	snippy:4.3.6	variation	3863532	3863532	.	.	0	note=complex ATCG=>GTCA GTCA:29 ATCG:0
EA2454	snippy:4.3.6	variation	3863559	3863559	.	.	0	note=snp G=>A A:30 G:0
EA2454	snippy:4.3.6	variation	3863700	3863700	.	.	0	note=snp G=>A A:25 G:0
EA2454	snippy:4.3.6	variation	3863732	3863732	.	.	0	note=snp A=>G G:30 A:0
EA2454	snippy:4.3.6	variation	3863740	3863740	.	.	0	note=snp T=>C C:30 T:0
EA2454	snippy:4.3.6	variation	3863840	3863840	.	.	0	note=snp T=>C C:40 T:0
EA2454	snippy:4.3.6	variation	3863865	3863865	.	.	0	note=complex ACG=>GCA GCA:26 ACG:0
EA2454	snippy:4.3.6	variation	3863900	3863900	.	.	0	note=snp T=>G G:30 T:0
EA2454	snippy:4.3.6	variation	3863924	3863924	.	.	0	note=snp A=>T T:33 A:0
EA2454	snippy:4.3.6	variation	3863957	3863957	.	.	0	note=snp T=>C C:33 T:0
EA2454	snippy:4.3.6	variation	3863966	3863966	.	.	0	note=snp G=>A A:29 G:0
EA2454	snippy:4.3.6	variation	3864034	3864034	.	.	0	note=snp A=>C C:30 A:0
EA2454	snippy:4.3.6	variation	3864046	3864046	.	.	0	note=snp C=>T T:32 C:0
EA2454	snippy:4.3.6	variation	3864070	3864070	.	.	0	note=mnp GC=>AA AA:33 GC:0
EA2454	snippy:4.3.6	variation	3864181	3864181	.	.	0	note=snp C=>T T:28 C:0
EA2454	snippy:4.3.6	variation	3864199	3864199	.	.	0	note=complex TCCTGGA=>GCCCGGT GCCCGGT:16 TCCTGGA:0
EA2454	snippy:4.3.6	variation	3864220	3864220	.	.	0	note=snp A=>G G:22 A:0
EA2454	snippy:4.3.6	variation	3864227	3864227	.	.	0	note=snp A=>G G:21 A:0
EA2454	snippy:4.3.6	variation	3864307	3864307	.	.	0	note=snp A=>T T:33 A:0
EA2454	snippy:4.3.6	variation	3864690	3864690	.	.	0	note=snp G=>A A:15 G:0
EA2454	snippy:4.3.6	variation	3865077	3865077	.	.	0	note=snp T=>G G:36 T:0
EA2454	snippy:4.3.6	variation	3865110	3865110	.	.	0	note=snp T=>C C:30 T:0
EA2454	snippy:4.3.6	variation	3865119	3865119	.	.	0	note=snp A=>C C:32 A:0
EA2454	snippy:4.3.6	variation	3865284	3865284	.	.	0	note=snp C=>T T:29 C:0
EA2454	snippy:4.3.6	variation	3865473	3865473	.	.	0	note=snp C=>T T:23 C:0
EA2454	snippy:4.3.6	variation	3865485	3865485	.	.	0	note=snp A=>G G:20 A:0
EA2454	snippy:4.3.6	variation	3865509	3865509	.	.	0	note=snp T=>C C:17 T:0
EA2454	snippy:4.3.6	variation	3865545	3865545	.	.	0	note=snp T=>C C:13 T:0
EA2454	snippy:4.3.6	variation	3865931	3865931	.	.	0	note=snp A=>G G:12 A:0
EA2454	snippy:4.3.6	variation	3865940	3865940	.	.	0	note=snp C=>A A:12 C:0
EA2454	snippy:4.3.6	variation	3865979	3865979	.	.	0	note=snp C=>T T:21 C:0
EA2454	snippy:4.3.6	variation	3865988	3865988	.	.	0	note=complex TAAT=>CAAC CAAC:22 TAAT:0
EA2454	snippy:4.3.6	variation	3866000	3866000	.	.	0	note=complex GA=>AG AG:22 GA:0
EA2454	snippy:4.3.6	variation	3866006	3866006	.	.	0	note=snp C=>G G:24 C:0
EA2454	snippy:4.3.6	variation	3866015	3866015	.	.	0	note=snp C=>A A:24 C:0
EA2454	snippy:4.3.6	variation	3866024	3866024	.	.	0	note=snp C=>T T:27 C:0
EA2454	snippy:4.3.6	variation	3866039	3866039	.	.	0	note=complex CGCAACT=>TGCGACC TGCGACC:25 CGCAACT:0
EA2454	snippy:4.3.6	variation	3866060	3866060	.	.	0	note=snp C=>T T:30 C:0
EA2454	snippy:4.3.6	variation	3866096	3866096	.	.	0	note=complex TGTA=>CGTG CGTG:22 TGTA:0
EA2454	snippy:4.3.6	variation	3866105	3866105	.	.	0	note=snp A=>T T:21 A:0
EA2454	snippy:4.3.6	variation	3866123	3866123	.	.	0	note=snp T=>C C:18 T:0
EA2454	snippy:4.3.6	variation	3866129	3866129	.	.	0	note=complex AT=>GC GC:16 AT:0
EA2454	snippy:4.3.6	variation	3866150	3866150	.	.	0	note=snp C=>T T:15 C:0
EA2454	snippy:4.3.6	variation	3866156	3866156	.	.	0	note=complex GGTCG=>CGTCA CGTCA:10 GGTCG:0
EA2454	snippy:4.3.6	variation	3866335	3866335	.	.	0	note=snp T=>G G:13 T:0
EA2454	snippy:4.3.6	variation	3866365	3866365	.	.	0	note=snp C=>A A:19 C:0
EA2454	snippy:4.3.6	variation	3866373	3866373	.	.	0	note=complex TT=>CG CG:19 TT:0
EA2454	snippy:4.3.6	variation	3866383	3866383	.	.	0	note=snp T=>C C:17 T:0
EA2454	snippy:4.3.6	variation	3866395	3866395	.	.	0	note=snp C=>T T:17 C:0
EA2454	snippy:4.3.6	variation	3866419	3866419	.	.	0	note=snp T=>G G:18 T:1
EA2454	snippy:4.3.6	variation	3867113	3867113	.	.	0	note=snp C=>T T:18 C:0
EA2454	snippy:4.3.6	variation	3867122	3867122	.	.	0	note=snp C=>T T:18 C:0
EA2454	snippy:4.3.6	variation	3867188	3867188	.	.	0	note=snp C=>T T:22 C:0
EA2454	snippy:4.3.6	variation	3867227	3867227	.	.	0	note=snp T=>G G:22 T:0
EA2454	snippy:4.3.6	variation	3867239	3867239	.	.	0	note=snp A=>G G:22 A:0
EA2454	snippy:4.3.6	variation	3867296	3867296	.	.	0	note=snp C=>T T:23 C:0
EA2454	snippy:4.3.6	variation	3867326	3867326	.	.	0	note=complex TAGCCGG=>AAACCGC AAACCGC:20 TAGCCGG:0
EA2454	snippy:4.3.6	variation	3867905	3867905	.	.	0	note=snp T=>G G:15 T:0
EA2454	snippy:4.3.6	variation	3868706	3868706	.	.	0	note=snp T=>C C:16 T:0
EA2454	snippy:4.3.6	variation	3868760	3868760	.	.	0	note=snp A=>G G:13 A:0
EA2454	snippy:4.3.6	variation	3868774	3868774	.	.	0	note=snp A=>G G:11 A:0
EA2454	snippy:4.3.6	variation	3869252	3869252	.	.	0	note=snp T=>C C:13 T:0
EA2454	snippy:4.3.6	variation	3869489	3869489	.	.	0	note=snp T=>C C:19 T:0
EA2454	snippy:4.3.6	variation	3871816	3871816	.	.	0	note=snp A=>G G:17 A:0
EA2454	snippy:4.3.6	variation	3871828	3871828	.	.	0	note=snp C=>T T:19 C:0
EA2454	snippy:4.3.6	variation	3871837	3871837	.	.	0	note=snp C=>T T:18 C:0
EA2454	snippy:4.3.6	variation	3871864	3871864	.	.	0	note=snp G=>A A:23 G:0
EA2454	snippy:4.3.6	variation	3872110	3872110	.	.	0	note=snp T=>C C:24 T:0
EA2454	snippy:4.3.6	variation	3872599	3872599	.	.	0	note=snp G=>A A:28 G:0
EA2454	snippy:4.3.6	variation	3872721	3872721	.	.	0	note=snp T=>C C:20 T:0
EA2454	snippy:4.3.6	variation	3873021	3873021	.	.	0	note=snp G=>A A:27 G:0
EA2454	snippy:4.3.6	variation	3873264	3873264	.	.	0	note=snp G=>T T:32 G:0
EA2454	snippy:4.3.6	variation	3873309	3873309	.	.	0	note=snp C=>T T:30 C:0
EA2454	snippy:4.3.6	variation	3873315	3873315	.	.	0	note=snp G=>A A:32 G:0
EA2454	snippy:4.3.6	variation	3873396	3873396	.	.	0	note=snp T=>C C:27 T:0
EA2454	snippy:4.3.6	variation	3873417	3873417	.	.	0	note=snp C=>A A:20 C:0
EA2454	snippy:4.3.6	variation	3873594	3873594	.	.	0	note=snp G=>A A:35 G:0
EA2454	snippy:4.3.6	variation	3873774	3873774	.	.	0	note=snp C=>T T:32 C:0
EA2454	snippy:4.3.6	variation	3874221	3874221	.	.	0	note=snp T=>C C:27 T:0
EA2454	snippy:4.3.6	variation	3874248	3874248	.	.	0	note=snp G=>A A:28 G:0
EA2454	snippy:4.3.6	variation	3874254	3874254	.	.	0	note=snp G=>A A:27 G:0
EA2454	snippy:4.3.6	variation	3874266	3874266	.	.	0	note=snp T=>G G:29 T:1
EA2454	snippy:4.3.6	variation	3874278	3874278	.	.	0	note=snp T=>C C:28 T:0
EA2454	snippy:4.3.6	variation	3874329	3874329	.	.	0	note=complex GGCG=>AGCA AGCA:22 GGCG:0
EA2454	snippy:4.3.6	variation	3874350	3874350	.	.	0	note=snp C=>T T:18 C:0
EA2454	snippy:4.3.6	variation	3874393	3874393	.	.	0	note=snp T=>A A:26 T:0
EA2454	snippy:4.3.6	variation	3874464	3874464	.	.	0	note=complex CGCA=>TGCT TGCT:27 CGCA:0
EA2454	snippy:4.3.6	variation	3874500	3874500	.	.	0	note=snp C=>T T:30 C:0
EA2454	snippy:4.3.6	variation	3874551	3874551	.	.	0	note=complex AAGA=>TCAG TCAG:13 AAGA:0
EA2454	snippy:4.3.6	variation	3874568	3874568	.	.	0	note=snp G=>C C:12 G:0
EA2454	snippy:4.3.6	variation	3874586	3874586	.	.	0	note=complex CGGGG=>GTGGA GTGGA:10 CGGGG:0
EA2454	snippy:4.3.6	variation	3874598	3874598	.	.	0	note=complex GC=>CT CT:10 GC:0
EA2454	snippy:4.3.6	variation	3874839	3874839	.	.	0	note=snp G=>T T:11 G:0
EA2454	snippy:4.3.6	variation	3874860	3874860	.	.	0	note=snp T=>C C:17 T:0
EA2454	snippy:4.3.6	variation	3874870	3874870	.	.	0	note=snp C=>T T:18 C:0
EA2454	snippy:4.3.6	variation	3874893	3874893	.	.	0	note=snp A=>G G:26 A:0
EA2454	snippy:4.3.6	variation	3874989	3874989	.	.	0	note=snp T=>C C:38 T:0
EA2454	snippy:4.3.6	variation	3874995	3874995	.	.	0	note=complex CC=>TT TT:37 CC:0
EA2454	snippy:4.3.6	variation	3875034	3875034	.	.	0	note=snp G=>A A:38 G:0
EA2454	snippy:4.3.6	variation	3875073	3875073	.	.	0	note=snp C=>A A:28 C:0
EA2454	snippy:4.3.6	variation	3875100	3875100	.	.	0	note=snp T=>G G:27 T:0
EA2454	snippy:4.3.6	variation	3875106	3875106	.	.	0	note=snp G=>A A:28 G:0
EA2454	snippy:4.3.6	variation	3875172	3875172	.	.	0	note=complex CATC=>TATT TATT:29 CATC:0
EA2454	snippy:4.3.6	variation	3875191	3875191	.	.	0	note=snp A=>G G:29 A:0
EA2454	snippy:4.3.6	variation	3875205	3875205	.	.	0	note=complex GGGG=>TGGT TGGT:33 GGGG:0
EA2454	snippy:4.3.6	variation	3875213	3875213	.	.	0	note=snp G=>A A:37 G:0
EA2454	snippy:4.3.6	variation	3875232	3875232	.	.	0	note=snp T=>C C:33 T:0
EA2454	snippy:4.3.6	variation	3875259	3875259	.	.	0	note=snp G=>T T:28 G:0
EA2454	snippy:4.3.6	variation	3877324	3877324	.	.	0	note=snp A=>G G:14 A:0
EA2454	snippy:4.3.6	variation	3877374	3877374	.	.	0	note=snp T=>G G:20 T:0
EA2454	snippy:4.3.6	variation	3877383	3877383	.	.	0	note=snp G=>A A:20 G:0
EA2454	snippy:4.3.6	variation	3877453	3877453	.	.	0	note=snp C=>T T:18 C:0
EA2454	snippy:4.3.6	variation	3877606	3877606	.	.	0	note=snp G=>A A:24 G:0
EA2454	snippy:4.3.6	variation	3877622	3877622	.	.	0	note=snp G=>A A:25 G:0
EA2454	snippy:4.3.6	variation	3877737	3877737	.	.	0	note=snp C=>A A:27 C:0
EA2454	snippy:4.3.6	variation	3877935	3877935	.	.	0	note=snp C=>A A:13 C:0
EA2454	snippy:4.3.6	variation	3877948	3877948	.	.	0	note=complex GTC=>ATT ATT:10 GTC:0
EA2454	snippy:4.3.6	variation	3877981	3877981	.	.	0	note=complex ATC=>GTG GTG:14 ATC:0
EA2454	snippy:4.3.6	variation	3877989	3877989	.	.	0	note=snp T=>C C:13 T:0
EA2454	snippy:4.3.6	variation	3878007	3878007	.	.	0	note=snp C=>T T:15 C:0
EA2454	snippy:4.3.6	variation	3878037	3878037	.	.	0	note=complex AAAA=>CAGG CAGG:14 AAAA:0
EA2454	snippy:4.3.6	variation	3878049	3878049	.	.	0	note=complex GGTC=>AGTA AGTA:18 GGTC:0
EA2454	snippy:4.3.6	variation	3878061	3878061	.	.	0	note=snp C=>T T:16 C:0
EA2454	snippy:4.3.6	variation	3878094	3878094	.	.	0	note=complex GGCT=>TGCC TGCC:12 GGCT:0
EA2454	snippy:4.3.6	variation	3878112	3878112	.	.	0	note=snp A=>T T:12 A:0
EA2454	snippy:4.3.6	variation	3878133	3878133	.	.	0	note=snp A=>T T:18 A:0
EA2454	snippy:4.3.6	variation	3878148	3878148	.	.	0	note=snp T=>C C:22 T:0
EA2454	snippy:4.3.6	variation	3878193	3878193	.	.	0	note=snp T=>C C:28 T:0
EA2454	snippy:4.3.6	variation	3878208	3878208	.	.	0	note=snp T=>C C:28 T:0
EA2454	snippy:4.3.6	variation	3878292	3878292	.	.	0	note=snp T=>C C:18 T:0
EA2454	snippy:4.3.6	variation	3878397	3878397	.	.	0	note=snp A=>G G:23 A:0
EA2454	snippy:4.3.6	variation	3878658	3878658	.	.	0	note=snp G=>T T:28 G:0
EA2454	snippy:4.3.6	variation	3879225	3879225	.	.	0	note=snp G=>T T:27 G:0
EA2454	snippy:4.3.6	variation	3879252	3879252	.	.	0	note=snp C=>T T:29 C:0
EA2454	snippy:4.3.6	variation	3879402	3879402	.	.	0	note=snp C=>T T:30 C:0
EA2454	snippy:4.3.6	variation	3879462	3879462	.	.	0	note=snp T=>C C:35 T:0
EA2454	snippy:4.3.6	variation	3879804	3879804	.	.	0	note=snp A=>G G:22 A:0
EA2454	snippy:4.3.6	variation	3879864	3879864	.	.	0	note=snp A=>G G:27 A:0
EA2454	snippy:4.3.6	variation	3879883	3879883	.	.	0	note=snp T=>C C:19 T:0
EA2454	snippy:4.3.6	variation	3879903	3879903	.	.	0	note=snp G=>T T:20 G:0
EA2454	snippy:4.3.6	variation	3880514	3880514	.	.	0	note=snp C=>T T:48 C:0
EA2454	snippy:4.3.6	variation	3880947	3880947	.	.	0	note=snp G=>A A:23 G:0
EA2454	snippy:4.3.6	variation	3881115	3881115	.	.	0	note=snp C=>T T:38 C:0
EA2454	snippy:4.3.6	variation	3881246	3881246	.	.	0	note=snp C=>G G:26 C:0
EA2454	snippy:4.3.6	variation	3881461	3881461	.	.	0	note=snp T=>C C:34 T:0
EA2454	snippy:4.3.6	variation	3881684	3881684	.	.	0	note=snp A=>C C:52 A:0
EA2454	snippy:4.3.6	variation	3881743	3881743	.	.	0	note=snp T=>C C:47 T:0
EA2454	snippy:4.3.6	variation	3882296	3882296	.	.	0	note=snp T=>C C:35 T:0
EA2454	snippy:4.3.6	variation	3882404	3882404	.	.	0	note=snp C=>T T:35 C:0
EA2454	snippy:4.3.6	variation	3883133	3883133	.	.	0	note=snp A=>G G:46 A:0
EA2454	snippy:4.3.6	variation	3883233	3883233	.	.	0	note=snp G=>A A:46 G:0
EA2454	snippy:4.3.6	variation	3883477	3883477	.	.	0	note=snp T=>A A:43 T:0
EA2454	snippy:4.3.6	variation	3883535	3883535	.	.	0	note=snp A=>G G:41 A:0
EA2454	snippy:4.3.6	variation	3883557	3883557	.	.	0	note=snp A=>G G:49 A:0
EA2454	snippy:4.3.6	variation	3883567	3883567	.	.	0	note=snp T=>A A:50 T:0
EA2454	snippy:4.3.6	variation	3883583	3883583	.	.	0	note=snp C=>T T:47 C:0
EA2454	snippy:4.3.6	variation	3883592	3883592	.	.	0	note=snp C=>T T:45 C:0
EA2454	snippy:4.3.6	variation	3883637	3883637	.	.	0	note=snp G=>A A:49 G:0
EA2454	snippy:4.3.6	variation	3883685	3883685	.	.	0	note=complex GGACC=>AGACA AGACA:58 GGACC:0
EA2454	snippy:4.3.6	variation	3883800	3883800	.	.	0	note=snp C=>T T:44 C:0
EA2454	snippy:4.3.6	variation	3883826	3883826	.	.	0	note=snp A=>T T:48 A:0
EA2454	snippy:4.3.6	variation	3883883	3883883	.	.	0	note=snp C=>T T:53 C:0
EA2454	snippy:4.3.6	variation	3883908	3883908	.	.	0	note=snp C=>G G:56 C:0
EA2454	snippy:4.3.6	variation	3883927	3883927	.	.	0	note=snp T=>C C:48 T:0
EA2454	snippy:4.3.6	variation	3883964	3883964	.	.	0	note=snp C=>T T:56 C:0
EA2454	snippy:4.3.6	variation	3884000	3884000	.	.	0	note=complex AAC=>GAG GAG:48 AAC:0
EA2454	snippy:4.3.6	variation	3884078	3884078	.	.	0	note=snp A=>G G:55 A:0
EA2454	snippy:4.3.6	variation	3884138	3884138	.	.	0	note=snp C=>A A:41 C:0
EA2454	snippy:4.3.6	variation	3884321	3884321	.	.	0	note=complex TGATG=>CGATA CGATA:37 TGATG:0
EA2454	snippy:4.3.6	variation	3884372	3884372	.	.	0	note=snp G=>A A:30 G:0
EA2454	snippy:4.3.6	variation	3884388	3884388	.	.	0	note=complex CTG=>TTT TTT:30 CTG:0
EA2454	snippy:4.3.6	variation	3884400	3884400	.	.	0	note=complex GCT=>CCG CCG:28 GCT:0
EA2454	snippy:4.3.6	variation	3884430	3884430	.	.	0	note=snp T=>C C:28 T:0
EA2454	snippy:4.3.6	variation	3884444	3884444	.	.	0	note=snp A=>G G:26 A:0
EA2454	snippy:4.3.6	variation	3884471	3884471	.	.	0	note=snp G=>C C:23 G:0
EA2454	snippy:4.3.6	variation	3884498	3884498	.	.	0	note=snp T=>G G:19 T:0
EA2454	snippy:4.3.6	variation	3884537	3884537	.	.	0	note=complex ACGT=>GCGC GCGC:23 ACGT:0
EA2454	snippy:4.3.6	variation	3884549	3884549	.	.	0	note=snp A=>G G:25 A:0
EA2454	snippy:4.3.6	variation	3884591	3884591	.	.	0	note=snp A=>G G:17 A:0
EA2454	snippy:4.3.6	variation	3884597	3884597	.	.	0	note=snp C=>A A:20 C:0
EA2454	snippy:4.3.6	variation	3884615	3884615	.	.	0	note=snp G=>A A:22 G:0
EA2454	snippy:4.3.6	variation	3884622	3884622	.	.	0	note=snp T=>A A:17 T:1
EA2454	snippy:4.3.6	variation	3884663	3884663	.	.	0	note=complex CCGT=>ACGG ACGG:21 CCGT:0
EA2454	snippy:4.3.6	variation	3884741	3884741	.	.	0	note=snp T=>C C:34 T:0
EA2454	snippy:4.3.6	variation	3884753	3884753	.	.	0	note=snp T=>C C:33 T:0
EA2454	snippy:4.3.6	variation	3884783	3884783	.	.	0	note=snp T=>C C:28 T:0
EA2454	snippy:4.3.6	variation	3884795	3884795	.	.	0	note=snp A=>G G:29 A:1
EA2454	snippy:4.3.6	variation	3884837	3884837	.	.	0	note=snp C=>A A:29 C:0
EA2454	snippy:4.3.6	variation	3884888	3884888	.	.	0	note=snp A=>G G:22 A:0
EA2454	snippy:4.3.6	variation	3884948	3884948	.	.	0	note=snp T=>C C:25 T:0
EA2454	snippy:4.3.6	variation	3884985	3884985	.	.	0	note=snp A=>G G:25 A:0
EA2454	snippy:4.3.6	variation	3885023	3885023	.	.	0	note=snp C=>T T:20 C:0
EA2454	snippy:4.3.6	variation	3885028	3885028	.	.	0	note=snp G=>A A:20 G:0
EA2454	snippy:4.3.6	variation	3885050	3885050	.	.	0	note=snp A=>G G:16 A:0
EA2454	snippy:4.3.6	variation	3885064	3885064	.	.	0	note=snp A=>T T:14 A:0
EA2454	snippy:4.3.6	variation	3885071	3885071	.	.	0	note=snp C=>G G:14 C:0
EA2454	snippy:4.3.6	variation	3885096	3885096	.	.	0	note=complex GCC=>ACT ACT:14 GCC:0
EA2454	snippy:4.3.6	variation	3885126	3885126	.	.	0	note=snp T=>C C:13 T:0
EA2454	snippy:4.3.6	variation	3885212	3885212	.	.	0	note=snp T=>C C:23 T:0
EA2454	snippy:4.3.6	variation	3885235	3885235	.	.	0	note=snp C=>A A:21 C:0
EA2454	snippy:4.3.6	variation	3885242	3885242	.	.	0	note=snp C=>T T:23 C:0
EA2454	snippy:4.3.6	variation	3885261	3885261	.	.	0	note=snp A=>G G:25 A:0
EA2454	snippy:4.3.6	variation	3885267	3885267	.	.	0	note=snp A=>G G:27 A:0
EA2454	snippy:4.3.6	variation	3885384	3885384	.	.	0	note=snp C=>G G:11 C:0
EA2454	snippy:4.3.6	variation	3885390	3885390	.	.	0	note=snp T=>A A:10 T:0
EA2454	snippy:4.3.6	variation	3885560	3885560	.	.	0	note=complex CGGTG=>GGATT GGATT:12 CGGTG:0
EA2454	snippy:4.3.6	variation	3885591	3885591	.	.	0	note=snp C=>A A:12 C:0
EA2454	snippy:4.3.6	variation	3885654	3885654	.	.	0	note=snp A=>G G:10 A:0
EA2454	snippy:4.3.6	variation	3885723	3885723	.	.	0	note=snp C=>G G:12 C:0
EA2454	snippy:4.3.6	variation	3885775	3885775	.	.	0	note=snp A=>C C:17 A:0
EA2454	snippy:4.3.6	variation	3885799	3885799	.	.	0	note=complex AT=>GC GC:14 AT:1
EA2454	snippy:4.3.6	variation	3885869	3885869	.	.	0	note=mnp TG=>CA CA:16 TG:0
EA2454	snippy:4.3.6	variation	3885876	3885876	.	.	0	note=complex TGTAGCT=>GGTGGCC GGTGGCC:14 TGTAGCT:0
EA2454	snippy:4.3.6	variation	3885906	3885906	.	.	0	note=snp T=>C C:19 T:0
EA2454	snippy:4.3.6	variation	3885970	3885970	.	.	0	note=complex ACG=>GTA GTA:22 ACG:0
EA2454	snippy:4.3.6	variation	3885978	3885978	.	.	0	note=snp T=>C C:26 T:0
EA2454	snippy:4.3.6	variation	3886011	3886011	.	.	0	note=snp A=>G G:23 A:0
EA2454	snippy:4.3.6	variation	3886035	3886035	.	.	0	note=snp G=>A A:26 G:0
EA2454	snippy:4.3.6	variation	3886116	3886116	.	.	0	note=snp A=>G G:28 A:0
EA2454	snippy:4.3.6	variation	3886122	3886122	.	.	0	note=snp A=>G G:27 A:0
EA2454	snippy:4.3.6	variation	3886140	3886140	.	.	0	note=snp C=>G G:22 C:0
EA2454	snippy:4.3.6	variation	3886176	3886176	.	.	0	note=snp A=>G G:28 A:0
EA2454	snippy:4.3.6	variation	3886197	3886197	.	.	0	note=snp A=>G G:25 A:0
EA2454	snippy:4.3.6	variation	3886212	3886212	.	.	0	note=snp G=>A A:25 G:0
EA2454	snippy:4.3.6	variation	3886260	3886260	.	.	0	note=snp G=>A A:26 G:0
EA2454	snippy:4.3.6	variation	3886278	3886278	.	.	0	note=snp C=>T T:21 C:0
EA2454	snippy:4.3.6	variation	3886285	3886285	.	.	0	note=complex TCA=>ACG ACG:18 TCA:0
EA2454	snippy:4.3.6	variation	3886314	3886314	.	.	0	note=snp G=>A A:15 G:0
EA2454	snippy:4.3.6	variation	3886328	3886328	.	.	0	note=complex AATTA=>GATTG GATTG:10 AATTA:0
EA2454	snippy:4.3.6	variation	3886477	3886477	.	.	0	note=snp G=>T T:19 G:0
EA2454	snippy:4.3.6	variation	3889450	3889450	.	.	0	note=snp G=>T T:15 G:0
EA2454	snippy:4.3.6	variation	3889477	3889477	.	.	0	note=mnp CA=>TG TG:15 CA:0
EA2454	snippy:4.3.6	variation	3889496	3889496	.	.	0	note=complex TCTAT=>CAGCAA CAGCAA:11 TCTAT:0
EA2454	snippy:4.3.6	variation	3889511	3889511	.	.	0	note=complex GA=>TAAG TAAG:11 GA:0
EA2454	snippy:4.3.6	variation	3889529	3889529	.	.	0	note=complex TAACAAG=>CATCTAA CATCTAA:18 TAACAAG:0
EA2454	snippy:4.3.6	variation	3889577	3889577	.	.	0	note=snp C=>T T:25 C:0
EA2454	snippy:4.3.6	variation	3889615	3889615	.	.	0	note=snp G=>A A:20 G:0
EA2454	snippy:4.3.6	variation	3889667	3889667	.	.	0	note=snp G=>T T:24 G:0
EA2454	snippy:4.3.6	variation	3889766	3889766	.	.	0	note=snp C=>A A:18 C:1
EA2454	snippy:4.3.6	variation	3889814	3889814	.	.	0	note=snp G=>C C:21 G:0
EA2454	snippy:4.3.6	variation	3889829	3889829	.	.	0	note=snp A=>G G:23 A:0
EA2454	snippy:4.3.6	variation	3889838	3889838	.	.	0	note=snp G=>A A:23 G:0
EA2454	snippy:4.3.6	variation	3889844	3889844	.	.	0	note=snp A=>G G:25 A:0
EA2454	snippy:4.3.6	variation	3889859	3889859	.	.	0	note=snp C=>T T:24 C:0
EA2454	snippy:4.3.6	variation	3889922	3889922	.	.	0	note=snp C=>T T:28 C:0
EA2454	snippy:4.3.6	variation	3889949	3889949	.	.	0	note=snp C=>T T:31 C:0
EA2454	snippy:4.3.6	variation	3889961	3889961	.	.	0	note=snp G=>A A:29 G:0
EA2454	snippy:4.3.6	variation	3889967	3889967	.	.	0	note=complex TGCTGCC=>CGGTGCA CGGTGCA:25 TGCTGCC:0
EA2454	snippy:4.3.6	variation	3890213	3890213	.	.	0	note=snp T=>C C:28 T:0
EA2454	snippy:4.3.6	variation	3890222	3890222	.	.	0	note=snp G=>A A:20 G:0
EA2454	snippy:4.3.6	variation	3890249	3890249	.	.	0	note=snp G=>T T:18 G:0
EA2454	snippy:4.3.6	variation	3890291	3890291	.	.	0	note=snp T=>G G:20 T:0
EA2454	snippy:4.3.6	variation	3890300	3890300	.	.	0	note=snp A=>G G:24 A:0
EA2454	snippy:4.3.6	variation	3890402	3890402	.	.	0	note=complex TAA=>CAG CAG:20 TAA:0
EA2454	snippy:4.3.6	variation	3890414	3890414	.	.	0	note=snp A=>G G:27 A:0
EA2454	snippy:4.3.6	variation	3890423	3890423	.	.	0	note=snp C=>T T:24 C:0
EA2454	snippy:4.3.6	variation	3890471	3890471	.	.	0	note=snp T=>C C:23 T:0
EA2454	snippy:4.3.6	variation	3890515	3890515	.	.	0	note=complex CTCA=>TTCT TTCT:20 CTCA:0
EA2454	snippy:4.3.6	variation	3890534	3890534	.	.	0	note=complex CG=>AA AA:14 CG:0
EA2454	snippy:4.3.6	variation	3890560	3890560	.	.	0	note=complex TCTGT=>CCTGC CCTGC:12 TCTGT:0
EA2454	snippy:4.3.6	variation	3890579	3890579	.	.	0	note=snp G=>T T:16 G:0
EA2454	snippy:4.3.6	variation	3890586	3890586	.	.	0	note=snp T=>C C:14 T:0
EA2454	snippy:4.3.6	variation	3890602	3890602	.	.	0	note=snp T=>C C:14 T:0
EA2454	snippy:4.3.6	variation	3890608	3890608	.	.	0	note=snp C=>T T:12 C:0
EA2454	snippy:4.3.6	variation	3890755	3890755	.	.	0	note=snp T=>C C:10 T:0
EA2454	snippy:4.3.6	variation	3890864	3890864	.	.	0	note=snp G=>A A:13 G:0
EA2454	snippy:4.3.6	variation	3891090	3891090	.	.	0	note=complex TGTT=>AGTC AGTC:12 TGTT:0
EA2454	snippy:4.3.6	variation	3891120	3891120	.	.	0	note=snp G=>A A:18 G:0
EA2454	snippy:4.3.6	variation	3891211	3891211	.	.	0	note=snp A=>C C:10 A:0
EA2454	snippy:4.3.6	variation	3891221	3891221	.	.	0	note=snp G=>C C:10 G:0
EA2454	snippy:4.3.6	variation	3891232	3891232	.	.	0	note=del GC=>G G:10 GC:0
EA2454	snippy:4.3.6	variation	3891433	3891433	.	.	0	note=complex AC=>GT GT:11 AC:0
EA2454	snippy:4.3.6	variation	3891444	3891444	.	.	0	note=snp A=>G G:11 A:0
EA2454	snippy:4.3.6	variation	3891453	3891453	.	.	0	note=complex ATAAAGA=>CTGAAGG CTGAAGG:11 ATAAAGA:0
EA2454	snippy:4.3.6	variation	3891475	3891475	.	.	0	note=snp T=>C C:10 T:0
EA2454	snippy:4.3.6	variation	3904266	3904266	.	.	0	note=snp T=>C C:19 T:0
EA2454	snippy:4.3.6	variation	3905167	3905167	.	.	0	note=snp C=>A A:35 C:0
EA2454	snippy:4.3.6	variation	3905342	3905342	.	.	0	note=snp G=>T T:49 G:0
EA2454	snippy:4.3.6	variation	3908657	3908657	.	.	0	note=snp T=>C C:50 T:0
EA2454	snippy:4.3.6	variation	3908840	3908840	.	.	0	note=snp C=>A A:16 C:1
EA2454	snippy:4.3.6	variation	3917749	3917749	.	.	0	note=snp T=>A A:49 T:0
EA2454	snippy:4.3.6	variation	3929224	3929224	.	.	0	note=snp C=>T T:13 C:0
EA2454	snippy:4.3.6	variation	3931051	3931051	.	.	0	note=snp C=>T T:58 C:0
EA2454	snippy:4.3.6	variation	3937328	3937328	.	.	0	note=snp G=>A A:55 G:0
EA2454	snippy:4.3.6	variation	3939722	3939722	.	.	0	note=snp A=>C C:22 A:1
EA2454	snippy:4.3.6	variation	3940525	3940525	.	.	0	note=snp C=>T T:29 C:0
EA2454	snippy:4.3.6	variation	3944749	3944749	.	.	0	note=snp A=>C C:84 A:0
EA2454	snippy:4.3.6	variation	3955870	3955870	.	.	0	note=snp T=>A A:42 T:0
EA2454	snippy:4.3.6	variation	3962485	3962485	.	.	0	note=snp T=>C C:24 T:0
EA2454	snippy:4.3.6	variation	3983239	3983239	.	.	0	note=snp G=>T T:41 G:0
EA2454	snippy:4.3.6	variation	4004474	4004474	.	.	0	note=snp A=>G G:63 A:0
EA2454	snippy:4.3.6	variation	4004676	4004676	.	.	0	note=snp C=>T T:41 C:0
EA2454	snippy:4.3.6	variation	4004935	4004935	.	.	0	note=snp G=>A A:64 G:1
EA2454	snippy:4.3.6	variation	4006309	4006309	.	.	0	note=snp C=>T T:74 C:0
EA2454	snippy:4.3.6	variation	4008915	4008915	.	.	0	note=snp G=>A A:75 G:0
EA2454	snippy:4.3.6	variation	4014768	4014768	.	.	0	note=snp T=>C C:84 T:0
EA2454	snippy:4.3.6	variation	4016930	4016930	.	.	0	note=snp T=>A A:88 T:0
EA2454	snippy:4.3.6	variation	4026172	4026172	.	.	0	note=snp T=>G G:106 T:0
EA2454	snippy:4.3.6	variation	4030798	4030798	.	.	0	note=snp G=>T T:24 G:0
EA2454	snippy:4.3.6	variation	4046247	4046247	.	.	0	note=snp C=>A A:90 C:0
EA2454	snippy:4.3.6	variation	4046742	4046742	.	.	0	note=snp G=>A A:64 G:0
EA2454	snippy:4.3.6	variation	4058462	4058462	.	.	0	note=snp T=>G G:73 T:0
EA2454	snippy:4.3.6	variation	4062557	4062557	.	.	0	note=snp A=>C C:69 A:1
EA2454	snippy:4.3.6	variation	4074511	4074511	.	.	0	note=snp T=>C C:56 T:0
EA2454	snippy:4.3.6	variation	4116563	4116563	.	.	0	note=snp G=>A A:64 G:0
EA2454	snippy:4.3.6	variation	4134190	4134190	.	.	0	note=snp C=>T T:54 C:0
EA2454	snippy:4.3.6	variation	4141091	4141091	.	.	0	note=snp A=>G G:55 A:0
EA2454	snippy:4.3.6	variation	4168245	4168245	.	.	0	note=snp C=>T T:80 C:0
EA2454	snippy:4.3.6	variation	4182996	4182996	.	.	0	note=snp C=>T T:95 C:0
EA2454	snippy:4.3.6	variation	4183014	4183014	.	.	0	note=snp A=>G G:101 A:0
EA2454	snippy:4.3.6	variation	4183029	4183029	.	.	0	note=mnp AC=>GT GT:93 AC:0
EA2454	snippy:4.3.6	variation	4183591	4183591	.	.	0	note=snp A=>C C:38 A:0
EA2454	snippy:4.3.6	variation	4183725	4183725	.	.	0	note=complex AAAA=>GAAG GAAG:59 AAAA:0
EA2454	snippy:4.3.6	variation	4183772	4183772	.	.	0	note=complex AGCCG=>GGCCT GGCCT:66 AGCCG:0
EA2454	snippy:4.3.6	variation	4184203	4184203	.	.	0	note=snp C=>T T:17 C:0
EA2454	snippy:4.3.6	variation	4184212	4184212	.	.	0	note=snp T=>C C:18 T:0
EA2454	snippy:4.3.6	variation	4184328	4184328	.	.	0	note=complex GACAAAAAATAAAACCAGCAAAATAAAATATCCCCCCAAAAAAAATTTAAAATACAGA=>AACAAAAAAATAAAACCCGCAAAATAAAATATCAGCCCCAAAAATACAGC AACAAAAAAATAAAACCCGCAAAATAAAATATCAGCCCCAAAAATACAGC:16 GACAAAAAATAAAACCAGCAAAATAAAATATCCCCCCAAAAAAAATTTAAAATACAGA:0
EA2454	snippy:4.3.6	variation	4184557	4184557	.	.	0	note=complex GC=>AT AT:24 GC:0
EA2454	snippy:4.3.6	variation	4184586	4184586	.	.	0	note=ins A=>AT AT:20 A:0
EA2454	snippy:4.3.6	variation	4184705	4184705	.	.	0	note=complex GC=>AT AT:53 GC:0
EA2454	snippy:4.3.6	variation	4190041	4190041	.	.	0	note=del TC=>T T:45 TC:0
EA2454	snippy:4.3.6	variation	4200656	4200656	.	.	0	note=snp A=>G G:123 A:0
EA2454	snippy:4.3.6	variation	4208099	4208099	.	.	0	note=snp C=>T T:79 C:0
EA2454	snippy:4.3.6	variation	4208280	4208280	.	.	0	note=snp G=>T T:66 G:0
EA2454	snippy:4.3.6	variation	4212664	4212664	.	.	0	note=snp T=>A A:25 T:0
EA2454	snippy:4.3.6	variation	4216725	4216725	.	.	0	note=del CTTTT=>C C:48 CTTTT:0
EA2454	snippy:4.3.6	variation	4227994	4227994	.	.	0	note=snp G=>T T:84 G:0
EA2454	snippy:4.3.6	variation	4231555	4231555	.	.	0	note=snp C=>T T:11 C:0
EA2454	snippy:4.3.6	variation	4231669	4231669	.	.	0	note=snp C=>T T:29 C:0
EA2454	snippy:4.3.6	variation	4234319	4234319	.	.	0	note=snp A=>G G:65 A:0
EA2454	snippy:4.3.6	variation	4235320	4235320	.	.	0	note=snp A=>G G:45 A:0
EA2454	snippy:4.3.6	variation	4235834	4235834	.	.	0	note=snp C=>T T:54 C:0
EA2454	snippy:4.3.6	variation	4236400	4236400	.	.	0	note=snp C=>T T:59 C:0
EA2454	snippy:4.3.6	variation	4240327	4240327	.	.	0	note=snp G=>A A:81 G:0
EA2454	snippy:4.3.6	variation	4247151	4247151	.	.	0	note=del GGCTGCCGGACTCATTCGCAGTGGACAAATTTT=>G G:29 GGCTGCCGGACTCATTCGCAGTGGACAAATTTT:0
EA2454	snippy:4.3.6	variation	4247909	4247909	.	.	0	note=snp G=>A A:103 G:0
EA2454	snippy:4.3.6	variation	4257673	4257673	.	.	0	note=snp C=>T T:90 C:0
EA2454	snippy:4.3.6	variation	4259428	4259428	.	.	0	note=snp A=>G G:123 A:0
EA2454	snippy:4.3.6	variation	4267142	4267142	.	.	0	note=snp A=>G G:68 A:0
EA2454	snippy:4.3.6	variation	4272983	4272983	.	.	0	note=snp A=>G G:66 A:0
EA2454	snippy:4.3.6	variation	4273176	4273176	.	.	0	note=snp C=>T T:24 C:0
EA2454	snippy:4.3.6	variation	4281791	4281791	.	.	0	note=snp G=>A A:48 G:0
EA2454	snippy:4.3.6	variation	4283531	4283531	.	.	0	note=snp A=>T T:47 A:0
EA2454	snippy:4.3.6	variation	4285277	4285277	.	.	0	note=snp C=>T T:60 C:0
EA2454	snippy:4.3.6	variation	4290073	4290073	.	.	0	note=del AGGAT=>A A:65 AGGAT:0
EA2454	snippy:4.3.6	variation	4321572	4321572	.	.	0	note=snp T=>C C:23 T:0
EA2454	snippy:4.3.6	variation	4323585	4323585	.	.	0	note=snp G=>A A:78 G:0
EA2454	snippy:4.3.6	variation	4325610	4325610	.	.	0	note=snp G=>T T:79 G:0
EA2454	snippy:4.3.6	variation	4326301	4326301	.	.	0	note=snp A=>G G:60 A:0
EA2454	snippy:4.3.6	variation	4351324	4351324	.	.	0	note=snp G=>A A:89 G:0
EA2454	snippy:4.3.6	variation	4356355	4356355	.	.	0	note=snp A=>G G:48 A:0
EA2454	snippy:4.3.6	variation	4394869	4394869	.	.	0	note=snp T=>C C:75 T:0
EA2454	snippy:4.3.6	variation	4414071	4414071	.	.	0	note=snp G=>T T:112 G:0
EA2454	snippy:4.3.6	variation	4414845	4414845	.	.	0	note=snp G=>T T:48 G:0
EA2454	snippy:4.3.6	variation	4416190	4416190	.	.	0	note=snp A=>G G:75 A:0
EA2454	snippy:4.3.6	variation	4419628	4419628	.	.	0	note=snp T=>C C:91 T:0
EA2454	snippy:4.3.6	variation	4420363	4420363	.	.	0	note=snp A=>G G:84 A:0
EA2454	snippy:4.3.6	variation	4449842	4449842	.	.	0	note=snp C=>T T:15 C:0
EA2454	snippy:4.3.6	variation	4449848	4449848	.	.	0	note=complex CGGA=>TGGT TGGT:16 CGGA:0
EA2454	snippy:4.3.6	variation	4449881	4449881	.	.	0	note=snp T=>C C:28 T:0
EA2454	snippy:4.3.6	variation	4449908	4449908	.	.	0	note=snp C=>T T:37 C:0
EA2454	snippy:4.3.6	variation	4449923	4449923	.	.	0	note=complex TGAT=>AGAC AGAC:46 TGAT:0
EA2454	snippy:4.3.6	variation	4449935	4449935	.	.	0	note=complex CGTT=>TGTG TGTG:52 CGTT:0
EA2454	snippy:4.3.6	variation	4449956	4449956	.	.	0	note=snp T=>C C:64 T:0
EA2454	snippy:4.3.6	variation	4449974	4449974	.	.	0	note=snp T=>C C:58 T:0
EA2454	snippy:4.3.6	variation	4449983	4449983	.	.	0	note=snp C=>G G:58 C:0
EA2454	snippy:4.3.6	variation	4450022	4450022	.	.	0	note=snp T=>G G:71 T:0
EA2454	snippy:4.3.6	variation	4450067	4450067	.	.	0	note=snp C=>T T:56 C:0
EA2454	snippy:4.3.6	variation	4450115	4450115	.	.	0	note=snp G=>T T:60 G:0
EA2454	snippy:4.3.6	variation	4450151	4450151	.	.	0	note=snp A=>G G:58 A:0
EA2454	snippy:4.3.6	variation	4450286	4450286	.	.	0	note=snp C=>G G:50 C:0
EA2454	snippy:4.3.6	variation	4450294	4450294	.	.	0	note=snp T=>A A:49 T:0
EA2454	snippy:4.3.6	variation	4450348	4450348	.	.	0	note=complex TCCGT=>ACCGA ACCGA:41 TCCGT:0
EA2454	snippy:4.3.6	variation	4450358	4450358	.	.	0	note=snp C=>T T:41 C:0
EA2454	snippy:4.3.6	variation	4450366	4450366	.	.	0	note=complex TGGAGGAA=>CGGAACAG CGGAACAG:27 TGGAGGAA:0
EA2454	snippy:4.3.6	variation	4450397	4450397	.	.	0	note=snp G=>A A:35 G:0
EA2454	snippy:4.3.6	variation	4450432	4450432	.	.	0	note=snp A=>G G:39 A:0
EA2454	snippy:4.3.6	variation	4450441	4450441	.	.	0	note=snp C=>G G:43 C:0
EA2454	snippy:4.3.6	variation	4450451	4450451	.	.	0	note=complex CAG=>ACC ACC:38 CAG:0
EA2454	snippy:4.3.6	variation	4450462	4450462	.	.	0	note=snp C=>T T:45 C:0
EA2454	snippy:4.3.6	variation	4450481	4450481	.	.	0	note=snp A=>G G:44 A:0
EA2454	snippy:4.3.6	variation	4450486	4450486	.	.	0	note=snp C=>G G:42 C:0
EA2454	snippy:4.3.6	variation	4450539	4450539	.	.	0	note=complex TAAAG=>CAAAA CAAAA:52 TAAAG:0
EA2454	snippy:4.3.6	variation	4450561	4450561	.	.	0	note=snp A=>G G:49 A:0
EA2454	snippy:4.3.6	variation	4450579	4450579	.	.	0	note=snp G=>A A:46 G:0
EA2454	snippy:4.3.6	variation	4450589	4450589	.	.	0	note=snp T=>C C:47 T:0
EA2454	snippy:4.3.6	variation	4450648	4450648	.	.	0	note=snp C=>T T:51 C:0
EA2454	snippy:4.3.6	variation	4450666	4450666	.	.	0	note=complex TACG=>CACA CACA:47 TACG:0
EA2454	snippy:4.3.6	variation	4450690	4450690	.	.	0	note=complex AGGT=>GGGA GGGA:48 AGGT:0
EA2454	snippy:4.3.6	variation	4450699	4450699	.	.	0	note=snp A=>G G:52 A:0
EA2454	snippy:4.3.6	variation	4450713	4450713	.	.	0	note=snp A=>G G:49 A:0
EA2454	snippy:4.3.6	variation	4450722	4450722	.	.	0	note=snp C=>A A:48 C:0
EA2454	snippy:4.3.6	variation	4450731	4450731	.	.	0	note=snp G=>A A:45 G:0
EA2454	snippy:4.3.6	variation	4450747	4450747	.	.	0	note=snp A=>G G:51 A:0
EA2454	snippy:4.3.6	variation	4450776	4450776	.	.	0	note=snp A=>C C:46 A:1
EA2454	snippy:4.3.6	variation	4450785	4450785	.	.	0	note=snp C=>T T:46 C:0
EA2454	snippy:4.3.6	variation	4450815	4450815	.	.	0	note=complex CGGTAAGACG=>TGGCAGGTCA TGGCAGGTCA:38 CGGTAAGACG:0
EA2454	snippy:4.3.6	variation	4450836	4450836	.	.	0	note=complex TAAC=>CAAT CAAT:42 TAAC:0
EA2454	snippy:4.3.6	variation	4450846	4450846	.	.	0	note=snp C=>T T:59 C:0
EA2454	snippy:4.3.6	variation	4450861	4450861	.	.	0	note=snp T=>C C:56 T:0
EA2454	snippy:4.3.6	variation	4450878	4450878	.	.	0	note=snp C=>T T:58 C:0
EA2454	snippy:4.3.6	variation	4450914	4450914	.	.	0	note=complex GGATAAAAT=>AGAGAAAGC AGAGAAAGC:51 GGATAAAAT:0
EA2454	snippy:4.3.6	variation	4450956	4450956	.	.	0	note=snp T=>C C:60 T:0
EA2454	snippy:4.3.6	variation	4450970	4450970	.	.	0	note=snp C=>G G:56 C:0
EA2454	snippy:4.3.6	variation	4451046	4451046	.	.	0	note=snp T=>A A:75 T:0
EA2454	snippy:4.3.6	variation	4451056	4451056	.	.	0	note=complex AGTGTC=>TGCATT TGCATT:62 AGTGTC:0
EA2454	snippy:4.3.6	variation	4451073	4451073	.	.	0	note=snp G=>C C:87 G:0
EA2454	snippy:4.3.6	variation	4451118	4451118	.	.	0	note=snp G=>A A:89 G:0
EA2454	snippy:4.3.6	variation	4451130	4451130	.	.	0	note=complex TCCT=>CCCA CCCA:79 TCCT:0
EA2454	snippy:4.3.6	variation	4451160	4451160	.	.	0	note=complex GCGA=>ACGG ACGG:60 GCGA:0
EA2454	snippy:4.3.6	variation	4451178	4451178	.	.	0	note=complex GGCA=>AGCT AGCT:51 GGCA:0
EA2454	snippy:4.3.6	variation	4451195	4451195	.	.	0	note=snp T=>C C:52 T:0
EA2454	snippy:4.3.6	variation	4451214	4451214	.	.	0	note=snp A=>T T:29 A:0
EA2454	snippy:4.3.6	variation	4451227	4451227	.	.	0	note=complex CAA=>GAG GAG:21 CAA:0
EA2454	snippy:4.3.6	variation	4451235	4451235	.	.	0	note=snp A=>G G:23 A:0
EA2454	snippy:4.3.6	variation	4451245	4451245	.	.	0	note=snp T=>C C:23 T:0
EA2454	snippy:4.3.6	variation	4451251	4451251	.	.	0	note=snp C=>T T:23 C:0
EA2454	snippy:4.3.6	variation	4451269	4451269	.	.	0	note=complex CGG=>TGC TGC:13 CGG:0
EA2454	snippy:4.3.6	variation	4478572	4478572	.	.	0	note=snp A=>T T:61 A:0
EA2454	snippy:4.3.6	variation	4491535	4491535	.	.	0	note=snp T=>C C:74 T:0
EA2454	snippy:4.3.6	variation	4505570	4505570	.	.	0	note=ins A=>AG AG:88 A:0
EA2454	snippy:4.3.6	variation	4507253	4507253	.	.	0	note=del TA=>T T:15 TA:0
EA2454	snippy:4.3.6	variation	4509292	4509292	.	.	0	note=snp T=>G G:83 T:0
EA2454	snippy:4.3.6	variation	4509771	4509771	.	.	0	note=snp G=>A A:61 G:0
EA2454	snippy:4.3.6	variation	4510584	4510584	.	.	0	note=del GT=>G G:14 GT:0
EA2454	snippy:4.3.6	variation	4515568	4515568	.	.	0	note=snp T=>C C:65 T:0
EA2454	snippy:4.3.6	variation	4524700	4524700	.	.	0	note=snp T=>C C:67 T:0
EA2454	snippy:4.3.6	variation	4526687	4526687	.	.	0	note=snp C=>A A:48 C:0
EA2454	snippy:4.3.6	variation	4531145	4531145	.	.	0	note=snp C=>T T:72 C:0
EA2454	snippy:4.3.6	variation	4533515	4533515	.	.	0	note=snp A=>G G:30 A:0
EA2454	snippy:4.3.6	variation	4539519	4539519	.	.	0	note=snp C=>T T:80 C:0
EA2454	snippy:4.3.6	variation	4541430	4541430	.	.	0	note=snp A=>C C:48 A:0
EA2454	snippy:4.3.6	variation	4544866	4544866	.	.	0	note=snp T=>C C:51 T:0
EA2454	snippy:4.3.6	variation	4549385	4549385	.	.	0	note=snp A=>G G:96 A:0
EA2454	snippy:4.3.6	variation	4559006	4559006	.	.	0	note=snp C=>A A:74 C:0
EA2454	snippy:4.3.6	variation	4568271	4568271	.	.	0	note=snp A=>G G:68 A:0
EA2454	snippy:4.3.6	variation	4568846	4568846	.	.	0	note=snp G=>T T:60 G:0
EA2454	snippy:4.3.6	variation	4578784	4578784	.	.	0	note=snp A=>G G:28 A:0
EA2454	snippy:4.3.6	variation	4586361	4586361	.	.	0	note=snp T=>C C:22 T:0
EA2454	snippy:4.3.6	variation	4588946	4588946	.	.	0	note=snp A=>G G:51 A:0
EA2454	snippy:4.3.6	variation	4593973	4593973	.	.	0	note=snp A=>C C:82 A:0
EA2454	snippy:4.3.6	variation	4595613	4595613	.	.	0	note=snp A=>G G:81 A:0
EA2454	snippy:4.3.6	variation	4603502	4603502	.	.	0	note=complex CA=>TC TC:11 CA:0
EA2454	snippy:4.3.6	variation	4613336	4613336	.	.	0	note=snp C=>A A:55 C:0
EA2454	snippy:4.3.6	variation	4613663	4613663	.	.	0	note=snp G=>T T:51 G:0
EA2454	snippy:4.3.6	variation	4615463	4615463	.	.	0	note=snp G=>A A:77 G:0
EA2454	snippy:4.3.6	variation	4616724	4616724	.	.	0	note=snp A=>G G:55 A:0
EA2454	snippy:4.3.6	variation	4617046	4617046	.	.	0	note=snp T=>C C:18 T:0
EA2454	snippy:4.3.6	variation	4619923	4619923	.	.	0	note=snp T=>C C:54 T:0
EA2454	snippy:4.3.6	variation	4626629	4626629	.	.	0	note=snp A=>G G:65 A:0
EA2454	snippy:4.3.6	variation	4638132	4638132	.	.	0	note=snp G=>A A:95 G:0
EA2454	snippy:4.3.6	variation	4640298	4640298	.	.	0	note=snp C=>T T:58 C:0
EA2454	snippy:4.3.6	variation	4643353	4643353	.	.	0	note=snp C=>T T:52 C:0
EA2454	snippy:4.3.6	variation	4652543	4652543	.	.	0	note=snp C=>T T:47 C:0
EA2454	snippy:4.3.6	variation	4653396	4653396	.	.	0	note=snp C=>T T:76 C:0
EA2454	snippy:4.3.6	variation	4660745	4660745	.	.	0	note=snp G=>A A:94 G:1
EA2454	snippy:4.3.6	variation	4661591	4661591	.	.	0	note=snp A=>G G:70 A:0
EA2454	snippy:4.3.6	variation	4664714	4664714	.	.	0	note=snp C=>A A:96 C:0
EA2454	snippy:4.3.6	variation	4665968	4665968	.	.	0	note=snp G=>A A:53 G:0
EA2454	snippy:4.3.6	variation	4670848	4670848	.	.	0	note=complex TGCG=>CGCA CGCA:45 TGCG:0
EA2454	snippy:4.3.6	variation	4670861	4670861	.	.	0	note=snp T=>C C:49 T:0
EA2454	snippy:4.3.6	variation	4670947	4670947	.	.	0	note=snp T=>C C:73 T:0
EA2454	snippy:4.3.6	variation	4676096	4676096	.	.	0	note=complex GAA=>CAG CAG:13 GAA:0
EA2454	snippy:4.3.6	variation	4676103	4676103	.	.	0	note=complex GGGT=>TGAC TGAC:13 GGGT:0
EA2454	snippy:4.3.6	variation	4676406	4676406	.	.	0	note=snp G=>C C:23 G:0
EA2454	snippy:4.3.6	variation	4676421	4676421	.	.	0	note=snp G=>A A:21 G:0
EA2454	snippy:4.3.6	variation	4676505	4676505	.	.	0	note=snp C=>G G:28 C:0
EA2454	snippy:4.3.6	variation	4676553	4676553	.	.	0	note=snp C=>T T:36 C:0
EA2454	snippy:4.3.6	variation	4676559	4676559	.	.	0	note=snp T=>C C:36 T:0
EA2454	snippy:4.3.6	variation	4676571	4676571	.	.	0	note=complex TGTC=>AGTG AGTG:35 TGTC:0
EA2454	snippy:4.3.6	variation	4676635	4676635	.	.	0	note=snp C=>A A:33 C:0
EA2454	snippy:4.3.6	variation	4676734	4676734	.	.	0	note=snp C=>G G:40 C:0
EA2454	snippy:4.3.6	variation	4676748	4676748	.	.	0	note=snp A=>G G:41 A:0
EA2454	snippy:4.3.6	variation	4676766	4676766	.	.	0	note=snp T=>C C:33 T:0
EA2454	snippy:4.3.6	variation	4676781	4676781	.	.	0	note=snp A=>G G:35 A:0
EA2454	snippy:4.3.6	variation	4676961	4676961	.	.	0	note=snp A=>G G:13 A:0
EA2454	snippy:4.3.6	variation	4696857	4696857	.	.	0	note=snp T=>A A:11 T:0
EA2454	snippy:4.3.6	variation	4696869	4696869	.	.	0	note=snp G=>C C:14 G:0
EA2454	snippy:4.3.6	variation	4696890	4696890	.	.	0	note=snp C=>T T:15 C:0
EA2454	snippy:4.3.6	variation	4696896	4696896	.	.	0	note=snp G=>C C:13 G:0
EA2454	snippy:4.3.6	variation	4696899	4696899	.	.	0	note=snp T=>C C:13 T:0
EA2454	snippy:4.3.6	variation	4696914	4696914	.	.	0	note=snp G=>C C:15 G:0
EA2454	snippy:4.3.6	variation	4696932	4696932	.	.	0	note=complex GCTC=>ACTG ACTG:13 GCTC:0
EA2454	snippy:4.3.6	variation	4696944	4696944	.	.	0	note=complex AGCAA=>TGCAC TGCAC:13 AGCAA:0
EA2454	snippy:4.3.6	variation	4696954	4696954	.	.	0	note=snp A=>C C:13 A:0
EA2454	snippy:4.3.6	variation	4702030	4702030	.	.	0	note=snp C=>T T:28 C:0
EA2454	snippy:4.3.6	variation	4702096	4702096	.	.	0	note=snp T=>C C:30 T:0
EA2454	snippy:4.3.6	variation	4702109	4702109	.	.	0	note=snp C=>T T:30 C:0
EA2454	snippy:4.3.6	variation	4702176	4702176	.	.	0	note=snp T=>C C:17 T:0
EA2454	snippy:4.3.6	variation	4702184	4702184	.	.	0	note=snp A=>G G:11 A:0
EA2454	snippy:4.3.6	variation	4702211	4702211	.	.	0	note=snp G=>C C:16 G:0
EA2454	snippy:4.3.6	variation	4702233	4702233	.	.	0	note=snp C=>T T:24 C:0
EA2454	snippy:4.3.6	variation	4702241	4702241	.	.	0	note=snp A=>C C:23 A:0
EA2454	snippy:4.3.6	variation	4702246	4702246	.	.	0	note=snp A=>G G:23 A:0
EA2454	snippy:4.3.6	variation	4702261	4702261	.	.	0	note=snp C=>A A:24 C:0
EA2454	snippy:4.3.6	variation	4702285	4702285	.	.	0	note=snp C=>T T:25 C:0
EA2454	snippy:4.3.6	variation	4702291	4702291	.	.	0	note=complex ACTG=>GCTA GCTA:24 ACTG:0
EA2454	snippy:4.3.6	variation	4702303	4702303	.	.	0	note=snp G=>A A:30 G:0
EA2454	snippy:4.3.6	variation	4702308	4702308	.	.	0	note=snp A=>G G:27 A:0
EA2454	snippy:4.3.6	variation	4702342	4702342	.	.	0	note=snp C=>T T:34 C:0
EA2454	snippy:4.3.6	variation	4702347	4702347	.	.	0	note=snp T=>C C:42 T:0
EA2454	snippy:4.3.6	variation	4702353	4702353	.	.	0	note=snp G=>A A:35 G:0
EA2454	snippy:4.3.6	variation	4702364	4702364	.	.	0	note=snp A=>G G:38 A:0
EA2454	snippy:4.3.6	variation	4702381	4702381	.	.	0	note=snp T=>G G:37 T:0
EA2454	snippy:4.3.6	variation	4702399	4702399	.	.	0	note=snp T=>C C:31 T:0
EA2454	snippy:4.3.6	variation	4702414	4702414	.	.	0	note=snp A=>C C:33 A:0
EA2454	snippy:4.3.6	variation	4702434	4702434	.	.	0	note=complex ACA=>GCT GCT:33 ACA:0
EA2454	snippy:4.3.6	variation	4702442	4702442	.	.	0	note=complex GGTAG=>AGTAA AGTAA:33 GGTAG:0
EA2454	snippy:4.3.6	variation	4702486	4702486	.	.	0	note=complex CGTAG=>TGTAC TGTAC:45 CGTAG:0
EA2454	snippy:4.3.6	variation	4702534	4702534	.	.	0	note=snp G=>C C:49 G:0
EA2454	snippy:4.3.6	variation	4702558	4702558	.	.	0	note=snp C=>T T:49 C:0
EA2454	snippy:4.3.6	variation	4702597	4702597	.	.	0	note=snp A=>G G:45 A:0
EA2454	snippy:4.3.6	variation	4702612	4702612	.	.	0	note=snp A=>G G:40 A:0
EA2454	snippy:4.3.6	variation	4702617	4702617	.	.	0	note=snp G=>A A:40 G:0
EA2454	snippy:4.3.6	variation	4702637	4702637	.	.	0	note=mnp TGT=>GTG GTG:34 TGT:1
EA2454	snippy:4.3.6	variation	4702648	4702648	.	.	0	note=mnp CC=>GG GG:35 CC:0
EA2454	snippy:4.3.6	variation	4702660	4702660	.	.	0	note=snp T=>C C:39 T:0
EA2454	snippy:4.3.6	variation	4702687	4702687	.	.	0	note=snp G=>T T:42 G:0
EA2454	snippy:4.3.6	variation	4702727	4702727	.	.	0	note=snp G=>A A:43 G:0
EA2454	snippy:4.3.6	variation	4702734	4702734	.	.	0	note=snp C=>A A:40 C:0
EA2454	snippy:4.3.6	variation	4702751	4702751	.	.	0	note=snp G=>A A:37 G:0
EA2454	snippy:4.3.6	variation	4702774	4702774	.	.	0	note=snp C=>T T:41 C:0
EA2454	snippy:4.3.6	variation	4702789	4702789	.	.	0	note=complex CA=>TG TG:37 CA:0
EA2454	snippy:4.3.6	variation	4703028	4703028	.	.	0	note=snp T=>C C:25 T:0
EA2454	snippy:4.3.6	variation	4703139	4703139	.	.	0	note=snp C=>G G:28 C:0
EA2454	snippy:4.3.6	variation	4703323	4703323	.	.	0	note=snp G=>C C:16 G:0
EA2454	snippy:4.3.6	variation	4703373	4703373	.	.	0	note=snp C=>T T:24 C:0
EA2454	snippy:4.3.6	variation	4703415	4703415	.	.	0	note=snp C=>T T:25 C:0
EA2454	snippy:4.3.6	variation	4703427	4703427	.	.	0	note=snp T=>C C:24 T:0
EA2454	snippy:4.3.6	variation	4703437	4703437	.	.	0	note=complex CAG=>TCC TCC:23 CAG:0
EA2454	snippy:4.3.6	variation	4703445	4703445	.	.	0	note=snp T=>C C:23 T:0
EA2454	snippy:4.3.6	variation	4703454	4703454	.	.	0	note=snp C=>T T:22 C:0
EA2454	snippy:4.3.6	variation	4703469	4703469	.	.	0	note=snp T=>C C:21 T:0
EA2454	snippy:4.3.6	variation	4703496	4703496	.	.	0	note=snp T=>G G:19 T:0
EA2454	snippy:4.3.6	variation	4703508	4703508	.	.	0	note=complex ACTC=>GCTG GCTG:14 ACTC:0
EA2454	snippy:4.3.6	variation	4703524	4703524	.	.	0	note=complex TTA=>CTG CTG:14 TTA:0
EA2454	snippy:4.3.6	variation	4703790	4703790	.	.	0	note=snp G=>A A:11 G:0
EA2454	snippy:4.3.6	variation	4703793	4703793	.	.	0	note=snp C=>G G:11 C:0
EA2454	snippy:4.3.6	variation	4703856	4703856	.	.	0	note=snp A=>C C:18 A:0
EA2454	snippy:4.3.6	variation	4703871	4703871	.	.	0	note=snp C=>T T:20 C:0
EA2454	snippy:4.3.6	variation	4703983	4703983	.	.	0	note=snp A=>G G:27 A:0
EA2454	snippy:4.3.6	variation	4704003	4704003	.	.	0	note=snp G=>T T:25 G:0
EA2454	snippy:4.3.6	variation	4704036	4704036	.	.	0	note=snp T=>G G:16 T:0
EA2454	snippy:4.3.6	variation	4704045	4704045	.	.	0	note=snp A=>G G:13 A:0
EA2454	snippy:4.3.6	variation	4704335	4704335	.	.	0	note=snp T=>G G:20 T:0
EA2454	snippy:4.3.6	variation	4705457	4705457	.	.	0	note=mnp GTA=>ACC ACC:32 GTA:0
EA2454	snippy:4.3.6	variation	4705489	4705489	.	.	0	note=snp A=>C C:37 A:0
EA2454	snippy:4.3.6	variation	4705546	4705546	.	.	0	note=snp T=>C C:30 T:0
EA2454	snippy:4.3.6	variation	4705601	4705601	.	.	0	note=snp G=>A A:28 G:0
EA2454	snippy:4.3.6	variation	4705787	4705787	.	.	0	note=snp G=>C C:44 G:0
EA2454	snippy:4.3.6	variation	4705797	4705797	.	.	0	note=snp T=>C C:43 T:0
EA2454	snippy:4.3.6	variation	4705835	4705835	.	.	0	note=complex C=>TG TG:39 C:0
EA2454	snippy:4.3.6	variation	4705849	4705849	.	.	0	note=complex GT=>TA TA:36 GT:0
EA2454	snippy:4.3.6	variation	4705864	4705864	.	.	0	note=snp A=>C C:35 A:0
EA2454	snippy:4.3.6	variation	4705983	4705983	.	.	0	note=complex GTAT=>TTAC TTAC:31 GTAT:0
EA2454	snippy:4.3.6	variation	4706187	4706187	.	.	0	note=complex CA=>TG TG:24 CA:0
EA2454	snippy:4.3.6	variation	4706193	4706193	.	.	0	note=snp C=>T T:24 C:0
EA2454	snippy:4.3.6	variation	4706199	4706199	.	.	0	note=complex CTCC=>TTCT TTCT:28 CTCC:0
EA2454	snippy:4.3.6	variation	4706313	4706313	.	.	0	note=snp C=>T T:26 C:0
EA2454	snippy:4.3.6	variation	4706337	4706337	.	.	0	note=snp T=>A A:29 T:0
EA2454	snippy:4.3.6	variation	4706411	4706411	.	.	0	note=snp A=>G G:28 A:0
EA2454	snippy:4.3.6	variation	4706470	4706470	.	.	0	note=snp A=>G G:24 A:0
EA2454	snippy:4.3.6	variation	4706595	4706595	.	.	0	note=snp G=>A A:22 G:0
EA2454	snippy:4.3.6	variation	4706805	4706805	.	.	0	note=snp C=>G G:29 C:0
EA2454	snippy:4.3.6	variation	4706855	4706855	.	.	0	note=mnp AAA=>GGG GGG:22 AAA:0
EA2454	snippy:4.3.6	variation	4706873	4706873	.	.	0	note=snp G=>A A:29 G:0
EA2454	snippy:4.3.6	variation	4706902	4706902	.	.	0	note=snp T=>A A:31 T:1
EA2454	snippy:4.3.6	variation	4706907	4706907	.	.	0	note=snp A=>C C:28 A:0
EA2454	snippy:4.3.6	variation	4706964	4706964	.	.	0	note=complex CGGT=>GGGC GGGC:25 CGGT:0
EA2454	snippy:4.3.6	variation	4706980	4706980	.	.	0	note=complex CTG=>TTA TTA:25 CTG:0
EA2454	snippy:4.3.6	variation	4706990	4706990	.	.	0	note=snp A=>G G:26 A:0
EA2454	snippy:4.3.6	variation	4707009	4707009	.	.	0	note=snp A=>G G:23 A:0
EA2454	snippy:4.3.6	variation	4707062	4707062	.	.	0	note=snp G=>A A:12 G:0
EA2454	snippy:4.3.6	variation	4707112	4707112	.	.	0	note=snp T=>G G:10 T:0
EA2454	snippy:4.3.6	variation	4707231	4707231	.	.	0	note=complex T=>GG GG:28 T:0
EA2454	snippy:4.3.6	variation	4707523	4707523	.	.	0	note=snp C=>T T:21 C:0
EA2454	snippy:4.3.6	variation	4707538	4707538	.	.	0	note=snp C=>A A:22 C:0
EA2454	snippy:4.3.6	variation	4707551	4707551	.	.	0	note=snp C=>T T:24 C:0
EA2454	snippy:4.3.6	variation	4707636	4707636	.	.	0	note=snp G=>A A:21 G:0
EA2454	snippy:4.3.6	variation	4707666	4707666	.	.	0	note=snp C=>A A:24 C:0
EA2454	snippy:4.3.6	variation	4707738	4707738	.	.	0	note=snp A=>T T:15 A:0
EA2454	snippy:4.3.6	variation	4708126	4708126	.	.	0	note=snp A=>G G:13 A:0
EA2454	snippy:4.3.6	variation	4708162	4708162	.	.	0	note=snp T=>A A:18 T:0
EA2454	snippy:4.3.6	variation	4708219	4708219	.	.	0	note=snp C=>T T:19 C:0
EA2454	snippy:4.3.6	variation	4708354	4708354	.	.	0	note=snp G=>A A:30 G:0
EA2454	snippy:4.3.6	variation	4708459	4708459	.	.	0	note=snp G=>C C:35 G:0
EA2454	snippy:4.3.6	variation	4708474	4708474	.	.	0	note=snp T=>C C:36 T:0
EA2454	snippy:4.3.6	variation	4708504	4708504	.	.	0	note=snp C=>G G:33 C:0
EA2454	snippy:4.3.6	variation	4708510	4708510	.	.	0	note=snp A=>G G:38 A:0
EA2454	snippy:4.3.6	variation	4708600	4708600	.	.	0	note=snp A=>T T:26 A:0
EA2454	snippy:4.3.6	variation	4708777	4708777	.	.	0	note=snp A=>T T:24 A:0
EA2454	snippy:4.3.6	variation	4708813	4708813	.	.	0	note=snp G=>A A:23 G:0
EA2454	snippy:4.3.6	variation	4708833	4708833	.	.	0	note=mnp TC=>GG GG:22 TC:0
EA2454	snippy:4.3.6	variation	4708864	4708864	.	.	0	note=snp C=>T T:19 C:0
EA2454	snippy:4.3.6	variation	4708956	4708956	.	.	0	note=snp G=>A A:20 G:0
EA2454	snippy:4.3.6	variation	4709051	4709051	.	.	0	note=snp G=>T T:23 G:0
EA2454	snippy:4.3.6	variation	4709071	4709071	.	.	0	note=complex GAGCCGG=>AAGTCGA AAGTCGA:24 GAGCCGG:0
EA2454	snippy:4.3.6	variation	4709143	4709143	.	.	0	note=snp C=>T T:38 C:0
EA2454	snippy:4.3.6	variation	4709254	4709254	.	.	0	note=snp A=>G G:34 A:0
EA2454	snippy:4.3.6	variation	4709275	4709275	.	.	0	note=complex ACAGGTTTT=>GCAGATTTG GCAGATTTG:29 ACAGGTTTT:0
EA2454	snippy:4.3.6	variation	4709311	4709311	.	.	0	note=snp C=>T T:32 C:0
EA2454	snippy:4.3.6	variation	4709368	4709368	.	.	0	note=snp T=>C C:16 T:0
EA2454	snippy:4.3.6	variation	4709404	4709404	.	.	0	note=snp T=>A A:18 T:0
EA2454	snippy:4.3.6	variation	4709421	4709421	.	.	0	note=snp G=>A A:23 G:0
EA2454	snippy:4.3.6	variation	4709445	4709445	.	.	0	note=mnp CC=>TT TT:21 CC:0
EA2454	snippy:4.3.6	variation	4709456	4709456	.	.	0	note=complex GAGA=>CAGG CAGG:24 GAGA:0
EA2454	snippy:4.3.6	variation	4709470	4709470	.	.	0	note=snp T=>C C:24 T:0
EA2454	snippy:4.3.6	variation	4709475	4709475	.	.	0	note=snp C=>T T:23 C:0
EA2454	snippy:4.3.6	variation	4709485	4709485	.	.	0	note=snp C=>T T:23 C:0
EA2454	snippy:4.3.6	variation	4709659	4709659	.	.	0	note=snp T=>C C:19 T:0
EA2454	snippy:4.3.6	variation	4709671	4709671	.	.	0	note=complex ACAG=>GCAA GCAA:19 ACAG:0
EA2454	snippy:4.3.6	variation	4709682	4709682	.	.	0	note=complex GTATAT=>ACTTAC ACTTAC:16 GTATAT:0
EA2454	snippy:4.3.6	variation	4709693	4709693	.	.	0	note=complex CGG=>GGA GGA:16 CGG:0
EA2454	snippy:4.3.6	variation	4709704	4709704	.	.	0	note=ins C=>CG CG:16 C:0
EA2454	snippy:4.3.6	variation	4709720	4709720	.	.	0	note=snp T=>C C:17 T:0
EA2454	snippy:4.3.6	variation	4709743	4709743	.	.	0	note=complex AAGAA=>GGGAG GGGAG:16 AAGAA:0
EA2454	snippy:4.3.6	variation	4709777	4709777	.	.	0	note=snp T=>C C:19 T:0
EA2454	snippy:4.3.6	variation	4709784	4709784	.	.	0	note=mnp GC=>AG AG:11 GC:0
EA2454	snippy:4.3.6	variation	4709793	4709793	.	.	0	note=complex GCTGAAATCCGGGCT=>ATCGAGATTCCGGCA ATCGAGATTCCGGCA:11 GCTGAAATCCGGGCT:0
EA2454	snippy:4.3.6	variation	4709812	4709812	.	.	0	note=snp C=>T T:12 C:0
EA2454	snippy:4.3.6	variation	4709828	4709828	.	.	0	note=snp T=>A A:15 T:0
EA2454	snippy:4.3.6	variation	4709843	4709843	.	.	0	note=snp T=>C C:14 T:0
EA2454	snippy:4.3.6	variation	4709851	4709851	.	.	0	note=del TGGTGA=>T T:14 TGGTGA:0
EA2454	snippy:4.3.6	variation	4709867	4709867	.	.	0	note=snp G=>A A:16 G:0
EA2454	snippy:4.3.6	variation	4709912	4709912	.	.	0	note=complex GA=>AG AG:16 GA:0
EA2454	snippy:4.3.6	variation	4709942	4709942	.	.	0	note=snp A=>G G:24 A:0
EA2454	snippy:4.3.6	variation	4710126	4710126	.	.	0	note=snp G=>A A:25 G:0
EA2454	snippy:4.3.6	variation	4710161	4710161	.	.	0	note=snp C=>T T:25 C:1
EA2454	snippy:4.3.6	variation	4710173	4710173	.	.	0	note=snp C=>G G:29 C:0
EA2454	snippy:4.3.6	variation	4710179	4710179	.	.	0	note=complex ACCA=>GCCG GCCG:27 ACCA:0
EA2454	snippy:4.3.6	variation	4710203	4710203	.	.	0	note=snp G=>A A:26 G:0
EA2454	snippy:4.3.6	variation	4710233	4710233	.	.	0	note=snp G=>A A:26 G:0
EA2454	snippy:4.3.6	variation	4710255	4710255	.	.	0	note=snp C=>A A:25 C:0
EA2454	snippy:4.3.6	variation	4710284	4710284	.	.	0	note=snp G=>T T:27 G:0
EA2454	snippy:4.3.6	variation	4710291	4710291	.	.	0	note=snp A=>T T:28 A:0
EA2454	snippy:4.3.6	variation	4710321	4710321	.	.	0	note=snp T=>C C:22 T:0
EA2454	snippy:4.3.6	variation	4710327	4710327	.	.	0	note=snp T=>C C:24 T:0
EA2454	snippy:4.3.6	variation	4710342	4710342	.	.	0	note=complex AA=>GAC GAC:19 AA:0
EA2454	snippy:4.3.6	variation	4710391	4710391	.	.	0	note=snp T=>C C:17 T:0
EA2454	snippy:4.3.6	variation	4712072	4712072	.	.	0	note=snp C=>T T:82 C:0
EA2454	snippy:4.3.6	variation	4712180	4712180	.	.	0	note=snp A=>G G:67 A:0
EA2454	snippy:4.3.6	variation	4712713	4712713	.	.	0	note=snp G=>A A:18 G:0
EA2454	snippy:4.3.6	variation	4712732	4712732	.	.	0	note=snp A=>G G:15 A:0
EA2454	snippy:4.3.6	variation	4713260	4713260	.	.	0	note=snp A=>G G:56 A:0
EA2454	snippy:4.3.6	variation	4720598	4720598	.	.	0	note=snp A=>G G:70 A:0
EA2454	snippy:4.3.6	variation	4720801	4720801	.	.	0	note=snp C=>A A:37 C:0
EA2454	snippy:4.3.6	variation	4720827	4720827	.	.	0	note=snp T=>G G:31 T:0
EA2454	snippy:4.3.6	variation	4720836	4720836	.	.	0	note=snp G=>T T:34 G:0
EA2454	snippy:4.3.6	variation	4726464	4726464	.	.	0	note=ins C=>CA CA:49 C:0
EA2454	snippy:4.3.6	variation	4731705	4731705	.	.	0	note=snp G=>A A:45 G:0
EA2454	snippy:4.3.6	variation	4735220	4735220	.	.	0	note=snp A=>G G:116 A:0
EA2454	snippy:4.3.6	variation	4739555	4739555	.	.	0	note=snp T=>C C:58 T:0
EA2454	snippy:4.3.6	variation	4740005	4740005	.	.	0	note=snp C=>T T:61 C:0
EA2454	snippy:4.3.6	variation	4745379	4745379	.	.	0	note=snp T=>G G:59 T:0
EA2454	snippy:4.3.6	variation	4749488	4749488	.	.	0	note=snp T=>C C:13 T:0
EA2454	snippy:4.3.6	variation	4750294	4750294	.	.	0	note=snp A=>G G:76 A:0
EA2454	snippy:4.3.6	variation	4750305	4750305	.	.	0	note=snp T=>C C:72 T:0
EA2454	snippy:4.3.6	variation	4750320	4750320	.	.	0	note=complex AATC=>GATA GATA:61 AATC:0
EA2454	snippy:4.3.6	variation	4750329	4750329	.	.	0	note=snp A=>G G:60 A:0
EA2454	snippy:4.3.6	variation	4750988	4750988	.	.	0	note=del CT=>C C:13 CT:0
EA2454	snippy:4.3.6	variation	4751001	4751001	.	.	0	note=complex AC=>GT GT:14 AC:0
EA2454	snippy:4.3.6	variation	4751034	4751034	.	.	0	note=complex ACGGGAT=>CCGTGAG CCGTGAG:16 ACGGGAT:0
EA2454	snippy:4.3.6	variation	4751055	4751055	.	.	0	note=complex GTTG=>ATTA ATTA:22 GTTG:0
EA2454	snippy:4.3.6	variation	4751067	4751067	.	.	0	note=snp A=>G G:25 A:0
EA2454	snippy:4.3.6	variation	4751092	4751092	.	.	0	note=snp A=>T T:33 A:0
EA2454	snippy:4.3.6	variation	4751118	4751118	.	.	0	note=complex TGCTCCCCTG=>GGCACCTTTT GGCACCTTTT:29 TGCTCCCCTG:0
EA2454	snippy:4.3.6	variation	4751133	4751133	.	.	0	note=complex ACCA=>GCCT GCCT:31 ACCA:0
EA2454	snippy:4.3.6	variation	4751149	4751149	.	.	0	note=complex CTG=>TTA TTA:36 CTG:0
EA2454	snippy:4.3.6	variation	4751169	4751169	.	.	0	note=snp A=>G G:41 A:0
EA2454	snippy:4.3.6	variation	4751181	4751181	.	.	0	note=snp A=>G G:42 A:0
EA2454	snippy:4.3.6	variation	4751234	4751234	.	.	0	note=mnp AT=>GC GC:39 AT:0
EA2454	snippy:4.3.6	variation	4751241	4751241	.	.	0	note=complex TTT=>CCG CCG:37 TTT:0
EA2454	snippy:4.3.6	variation	4751274	4751274	.	.	0	note=snp A=>G G:53 A:0
EA2454	snippy:4.3.6	variation	4751289	4751289	.	.	0	note=snp G=>A A:53 G:0
EA2454	snippy:4.3.6	variation	4751296	4751296	.	.	0	note=snp T=>C C:50 T:0
EA2454	snippy:4.3.6	variation	4751307	4751307	.	.	0	note=snp C=>T T:47 C:0
EA2454	snippy:4.3.6	variation	4751313	4751313	.	.	0	note=snp C=>T T:48 C:0
EA2454	snippy:4.3.6	variation	4751318	4751318	.	.	0	note=snp A=>G G:47 A:0
EA2454	snippy:4.3.6	variation	4751328	4751328	.	.	0	note=complex CGGGACG=>AGGAATA AGGAATA:33 CGGGACG:0
EA2454	snippy:4.3.6	variation	4751340	4751340	.	.	0	note=snp T=>C C:41 T:0
EA2454	snippy:4.3.6	variation	4751364	4751364	.	.	0	note=complex GCGA=>ACGG ACGG:38 GCGA:0
EA2454	snippy:4.3.6	variation	4751372	4751372	.	.	0	note=snp T=>G G:42 T:0
EA2454	snippy:4.3.6	variation	4751382	4751382	.	.	0	note=snp A=>C C:43 A:0
EA2454	snippy:4.3.6	variation	4751388	4751388	.	.	0	note=snp G=>A A:41 G:0
EA2454	snippy:4.3.6	variation	4752803	4752803	.	.	0	note=snp G=>A A:48 G:0
EA2454	snippy:4.3.6	variation	4752814	4752814	.	.	0	note=complex G=>AA AA:45 G:0
EA2454	snippy:4.3.6	variation	4752900	4752900	.	.	0	note=complex ACCAA=>GCCT GCCT:25 ACCAA:0
EA2454	snippy:4.3.6	variation	4752946	4752946	.	.	0	note=snp T=>C C:26 T:0
EA2454	snippy:4.3.6	variation	4752969	4752969	.	.	0	note=snp G=>A A:11 G:0
EA2454	snippy:4.3.6	variation	4753161	4753161	.	.	0	note=snp T=>C C:46 T:0
EA2454	snippy:4.3.6	variation	4754020	4754020	.	.	0	note=snp C=>T T:99 C:0
EA2454	snippy:4.3.6	variation	4754067	4754067	.	.	0	note=snp T=>C C:80 T:0
EA2454	snippy:4.3.6	variation	4754086	4754086	.	.	0	note=snp A=>G G:76 A:0
EA2454	snippy:4.3.6	variation	4754200	4754200	.	.	0	note=snp T=>A A:36 T:0
EA2454	snippy:4.3.6	variation	4754215	4754215	.	.	0	note=complex CACC=>GACG GACG:26 CACC:0
EA2454	snippy:4.3.6	variation	4754226	4754226	.	.	0	note=complex ACACA=>GAACG GAACG:23 ACACA:0
EA2454	snippy:4.3.6	variation	4754236	4754236	.	.	0	note=complex CGGGTTC=>GGGATTT GGGATTT:23 CGGGTTC:0
EA2454	snippy:4.3.6	variation	4754248	4754248	.	.	0	note=snp T=>C C:23 T:0
EA2454	snippy:4.3.6	variation	4754254	4754254	.	.	0	note=snp A=>C C:25 A:0
EA2454	snippy:4.3.6	variation	4754260	4754260	.	.	0	note=snp G=>T T:26 G:0
EA2454	snippy:4.3.6	variation	4754266	4754266	.	.	0	note=complex CGC=>GGA GGA:27 CGC:0
EA2454	snippy:4.3.6	variation	4754275	4754275	.	.	0	note=snp G=>A A:27 G:0
EA2454	snippy:4.3.6	variation	4754290	4754290	.	.	0	note=complex TTTA=>CTTG CTTG:24 TTTA:0
EA2454	snippy:4.3.6	variation	4754299	4754299	.	.	0	note=snp A=>C C:25 A:0
EA2454	snippy:4.3.6	variation	4754308	4754308	.	.	0	note=snp C=>T T:24 C:0
EA2454	snippy:4.3.6	variation	4754320	4754320	.	.	0	note=snp G=>A A:22 G:0
EA2454	snippy:4.3.6	variation	4754333	4754333	.	.	0	note=complex TCCGCA=>GACTCG GACTCG:16 TCCGCA:0
EA2454	snippy:4.3.6	variation	4754452	4754452	.	.	0	note=snp C=>A A:70 C:0
EA2454	snippy:4.3.6	variation	4754491	4754491	.	.	0	note=complex TGCCT=>AGCCC AGCCC:73 TGCCT:0
EA2454	snippy:4.3.6	variation	4754536	4754536	.	.	0	note=snp G=>A A:81 G:0
EA2454	snippy:4.3.6	variation	4754545	4754545	.	.	0	note=snp G=>A A:68 G:0
EA2454	snippy:4.3.6	variation	4754581	4754581	.	.	0	note=snp A=>G G:63 A:0
EA2454	snippy:4.3.6	variation	4755223	4755223	.	.	0	note=complex TCA=>CCC CCC:17 TCA:0
EA2454	snippy:4.3.6	variation	4755231	4755231	.	.	0	note=complex ACCTGG=>TCCTTC TCCTTC:18 ACCTGG:0
EA2454	snippy:4.3.6	variation	4755251	4755251	.	.	0	note=snp T=>A A:27 T:0
EA2454	snippy:4.3.6	variation	4755277	4755277	.	.	0	note=complex TAGTA=>AAGTG AAGTG:30 TAGTA:0
EA2454	snippy:4.3.6	variation	4755345	4755345	.	.	0	note=snp T=>C C:42 T:0
EA2454	snippy:4.3.6	variation	4755358	4755358	.	.	0	note=snp C=>T T:59 C:0
EA2454	snippy:4.3.6	variation	4755454	4755454	.	.	0	note=snp C=>T T:63 C:0
EA2454	snippy:4.3.6	variation	4755476	4755476	.	.	0	note=complex TGGTG=>AGGTA AGGTA:61 TGGTG:0
EA2454	snippy:4.3.6	variation	4755509	4755509	.	.	0	note=snp A=>G G:61 A:0
EA2454	snippy:4.3.6	variation	4755653	4755653	.	.	0	note=snp A=>G G:76 A:0
EA2454	snippy:4.3.6	variation	4755722	4755722	.	.	0	note=snp G=>T T:71 G:0
EA2454	snippy:4.3.6	variation	4755808	4755808	.	.	0	note=complex GGCAGCA=>TGCGGCG TGCGGCG:15 GGCAGCA:0
EA2454	snippy:4.3.6	variation	4755820	4755820	.	.	0	note=complex AACCG=>CACCA CACCA:15 AACCG:0
EA2454	snippy:4.3.6	variation	4757085	4757085	.	.	0	note=snp T=>G G:14 T:0
EA2454	snippy:4.3.6	variation	4757091	4757091	.	.	0	note=complex CAC=>AAT AAT:13 CAC:0
EA2454	snippy:4.3.6	variation	4758383	4758383	.	.	0	note=snp G=>A A:14 G:0
EA2454	snippy:4.3.6	variation	4758435	4758435	.	.	0	note=snp G=>T T:16 G:0
EA2454	snippy:4.3.6	variation	4758466	4758466	.	.	0	note=snp T=>C C:16 T:0
EA2454	snippy:4.3.6	variation	4758500	4758500	.	.	0	note=snp T=>C C:10 T:0
EA2454	snippy:4.3.6	variation	4764339	4764339	.	.	0	note=snp A=>G G:19 A:0
EA2454	snippy:4.3.6	variation	4764345	4764345	.	.	0	note=snp C=>T T:19 C:0
EA2454	snippy:4.3.6	variation	4764355	4764355	.	.	0	note=snp G=>A A:25 G:0
EA2454	snippy:4.3.6	variation	4764364	4764364	.	.	0	note=snp C=>T T:27 C:0
EA2454	snippy:4.3.6	variation	4764399	4764399	.	.	0	note=snp T=>C C:37 T:0
EA2454	snippy:4.3.6	variation	4764441	4764441	.	.	0	note=snp G=>A A:37 G:0
EA2454	snippy:4.3.6	variation	4764483	4764483	.	.	0	note=snp G=>A A:22 G:0
EA2454	snippy:4.3.6	variation	4764490	4764490	.	.	0	note=snp C=>T T:20 C:0
EA2454	snippy:4.3.6	variation	4764501	4764501	.	.	0	note=snp A=>G G:18 A:0
EA2454	snippy:4.3.6	variation	4764525	4764525	.	.	0	note=snp G=>A A:13 G:0
EA2454	snippy:4.3.6	variation	4764781	4764781	.	.	0	note=snp C=>T T:25 C:0
EA2454	snippy:4.3.6	variation	4764840	4764840	.	.	0	note=snp T=>C C:21 T:0
EA2454	snippy:4.3.6	variation	4764869	4764869	.	.	0	note=snp C=>A A:10 C:0
EA2454	snippy:4.3.6	variation	4767229	4767229	.	.	0	note=snp A=>G G:62 A:0
EA2454	snippy:4.3.6	variation	4772922	4772922	.	.	0	note=snp G=>T T:100 G:0
EA2454	snippy:4.3.6	variation	4774021	4774021	.	.	0	note=snp T=>C C:66 T:0
EA2454	snippy:4.3.6	variation	4776446	4776446	.	.	0	note=snp G=>A A:33 G:0
EA2454	snippy:4.3.6	variation	4795607	4795607	.	.	0	note=snp G=>A A:75 G:0
EA2454	snippy:4.3.6	variation	4818512	4818512	.	.	0	note=snp A=>G G:89 A:0
EA2454	snippy:4.3.6	variation	4820334	4820334	.	.	0	note=snp T=>A A:107 T:0
EA2454	snippy:4.3.6	variation	4834350	4834350	.	.	0	note=snp A=>G G:46 A:0
EA2454	snippy:4.3.6	variation	4835997	4835997	.	.	0	note=snp A=>T T:72 A:0
EA2454	snippy:4.3.6	variation	4837912	4837912	.	.	0	note=ins G=>GA GA:39 G:0
EA2454	snippy:4.3.6	variation	4840149	4840149	.	.	0	note=snp C=>T T:51 C:0
EA2454	snippy:4.3.6	variation	4844884	4844884	.	.	0	note=snp G=>A A:73 G:0
EA2454	snippy:4.3.6	variation	4847158	4847158	.	.	0	note=snp A=>C C:63 A:1
EA2454	snippy:4.3.6	variation	4847769	4847769	.	.	0	note=snp A=>G G:86 A:0
EA2454	snippy:4.3.6	variation	4850501	4850501	.	.	0	note=snp A=>T T:63 A:0
EA2454	snippy:4.3.6	variation	4859892	4859892	.	.	0	note=del GT=>G G:68 GT:0
EA2454	snippy:4.3.6	variation	4862363	4862363	.	.	0	note=snp C=>T T:25 C:0
EA2454	snippy:4.3.6	variation	4870753	4870753	.	.	0	note=snp G=>A A:85 G:0
EA2454	snippy:4.3.6	variation	4875894	4875894	.	.	0	note=snp G=>A A:85 G:0
EA2454	snippy:4.3.6	variation	4877788	4877788	.	.	0	note=snp A=>G G:76 A:0
EA2454	snippy:4.3.6	variation	4880417	4880417	.	.	0	note=snp G=>A A:111 G:0
EA2454	snippy:4.3.6	variation	4885424	4885424	.	.	0	note=snp T=>C C:58 T:0
EA2454	snippy:4.3.6	variation	4890417	4890417	.	.	0	note=snp A=>T T:128 A:0
EA2454	snippy:4.3.6	variation	4901276	4901276	.	.	0	note=snp T=>C C:52 T:0
EA2454	snippy:4.3.6	variation	4907501	4907501	.	.	0	note=snp C=>A A:58 C:0
EA2454	snippy:4.3.6	variation	4911136	4911136	.	.	0	note=snp T=>A A:33 T:0
EA2454	snippy:4.3.6	variation	4922182	4922182	.	.	0	note=snp T=>C C:19 T:0
EA2454	snippy:4.3.6	variation	4939780	4939780	.	.	0	note=snp C=>A A:73 C:0
EA2454	snippy:4.3.6	variation	4950721	4950721	.	.	0	note=complex AGTCA=>GGCCG GGCCG:11 AGTCA:0
EA2454	snippy:4.3.6	variation	4950731	4950731	.	.	0	note=complex AA=>TG TG:11 AA:0
EA2454	snippy:4.3.6	variation	4950741	4950741	.	.	0	note=snp T=>A A:11 T:0
EA2454	snippy:4.3.6	variation	4950750	4950750	.	.	0	note=snp A=>G G:13 A:0
EA2454	snippy:4.3.6	variation	4950764	4950764	.	.	0	note=complex TGG=>GGT GGT:11 TGG:0
EA2454	snippy:4.3.6	variation	4950771	4950771	.	.	0	note=snp A=>G G:11 A:0
EA2454	snippy:4.3.6	variation	4950791	4950791	.	.	0	note=snp A=>G G:11 A:0
EA2454	snippy:4.3.6	variation	4950860	4950860	.	.	0	note=complex ATC=>GTA GTA:18 ATC:0
EA2454	snippy:4.3.6	variation	4950871	4950871	.	.	0	note=snp T=>A A:21 T:0
EA2454	snippy:4.3.6	variation	4950886	4950886	.	.	0	note=snp C=>T T:26 C:0
EA2454	snippy:4.3.6	variation	4950896	4950896	.	.	0	note=snp T=>C C:28 T:0
EA2454	snippy:4.3.6	variation	4950912	4950912	.	.	0	note=snp C=>T T:34 C:1
EA2454	snippy:4.3.6	variation	4950917	4950917	.	.	0	note=snp T=>C C:35 T:0
EA2454	snippy:4.3.6	variation	4950927	4950927	.	.	0	note=complex ACTCG=>GCGCA GCGCA:33 ACTCG:0
EA2454	snippy:4.3.6	variation	4950971	4950971	.	.	0	note=complex AAAGT=>GAAGC GAAGC:23 AAAGT:0
EA2454	snippy:4.3.6	variation	4950984	4950984	.	.	0	note=snp T=>C C:24 T:0
EA2454	snippy:4.3.6	variation	4950995	4950995	.	.	0	note=complex CGA=>TGT TGT:20 CGA:0
EA2454	snippy:4.3.6	variation	4951018	4951018	.	.	0	note=del AT=>A A:11 AT:0
EA2454	snippy:4.3.6	variation	4951029	4951029	.	.	0	note=complex AGCA=>GGGG GGGG:11 AGCA:0
EA2454	snippy:4.3.6	variation	4951195	4951195	.	.	0	note=snp C=>T T:16 C:0
EA2454	snippy:4.3.6	variation	4951212	4951212	.	.	0	note=snp C=>T T:18 C:0
EA2454	snippy:4.3.6	variation	4951222	4951222	.	.	0	note=mnp AG=>CA CA:20 AG:0
EA2454	snippy:4.3.6	variation	4951250	4951250	.	.	0	note=complex ACGTTCT=>GTCTGCC GTCTGCC:20 ACGTTCT:0
EA2454	snippy:4.3.6	variation	4951261	4951261	.	.	0	note=mnp CA=>TG TG:21 CA:0
EA2454	snippy:4.3.6	variation	4951286	4951286	.	.	0	note=snp G=>A A:31 G:0
EA2454	snippy:4.3.6	variation	4951313	4951313	.	.	0	note=snp G=>A A:40 G:0
EA2454	snippy:4.3.6	variation	4951341	4951341	.	.	0	note=snp G=>A A:45 G:0
EA2454	snippy:4.3.6	variation	4951415	4951415	.	.	0	note=mnp CG=>AT AT:55 CG:0
EA2454	snippy:4.3.6	variation	4951428	4951428	.	.	0	note=snp A=>G G:69 A:0
EA2454	snippy:4.3.6	variation	4951485	4951485	.	.	0	note=complex CACACGCTCC=>TACGCGTTCG TACGCGTTCG:61 CACACGCTCC:0
EA2454	snippy:4.3.6	variation	4951506	4951506	.	.	0	note=complex ACT=>GCG GCG:67 ACT:0
EA2454	snippy:4.3.6	variation	4951526	4951526	.	.	0	note=complex GTGTA=>ATGTG ATGTG:70 GTGTA:0
EA2454	snippy:4.3.6	variation	4951536	4951536	.	.	0	note=complex ACTC=>GCTA GCTA:71 ACTC:0
EA2454	snippy:4.3.6	variation	4951545	4951545	.	.	0	note=snp T=>A A:87 T:0
EA2454	snippy:4.3.6	variation	4951550	4951550	.	.	0	note=snp T=>G G:87 T:0
EA2454	snippy:4.3.6	variation	4951581	4951581	.	.	0	note=complex CTCG=>TTCA TTCA:89 CTCG:0
EA2454	snippy:4.3.6	variation	4951592	4951592	.	.	0	note=snp A=>G G:90 A:0
EA2454	snippy:4.3.6	variation	4951605	4951605	.	.	0	note=snp G=>A A:82 G:0
EA2454	snippy:4.3.6	variation	4951611	4951611	.	.	0	note=snp T=>C C:81 T:0
EA2454	snippy:4.3.6	variation	4951626	4951626	.	.	0	note=snp A=>T T:82 A:1
EA2454	snippy:4.3.6	variation	4951634	4951634	.	.	0	note=complex TCGGG=>CCGGA CCGGA:87 TCGGG:0
EA2454	snippy:4.3.6	variation	4951676	4951676	.	.	0	note=snp C=>G G:107 C:1
EA2454	snippy:4.3.6	variation	4951745	4951745	.	.	0	note=snp T=>G G:96 T:0
EA2454	snippy:4.3.6	variation	4951755	4951755	.	.	0	note=complex ACT=>GCC GCC:94 ACT:0
EA2454	snippy:4.3.6	variation	4951769	4951769	.	.	0	note=snp A=>T T:100 A:0
EA2454	snippy:4.3.6	variation	4951805	4951805	.	.	0	note=snp G=>A A:94 G:0
EA2454	snippy:4.3.6	variation	4951820	4951820	.	.	0	note=snp G=>A A:99 G:0
EA2454	snippy:4.3.6	variation	4951826	4951826	.	.	0	note=snp A=>T T:93 A:0
EA2454	snippy:4.3.6	variation	4951844	4951844	.	.	0	note=snp G=>T T:87 G:0
EA2454	snippy:4.3.6	variation	4952035	4952035	.	.	0	note=snp C=>G G:84 C:0
EA2454	snippy:4.3.6	variation	4952846	4952846	.	.	0	note=snp G=>A A:67 G:0
EA2454	snippy:4.3.6	variation	4952873	4952873	.	.	0	note=complex CCCTTCGTCA=>TCCCTCATCT TCCCTCATCT:52 CCCTTCGTCA:0
EA2454	snippy:4.3.6	variation	4952897	4952897	.	.	0	note=snp A=>G G:56 A:0
EA2454	snippy:4.3.6	variation	4952912	4952912	.	.	0	note=snp A=>G G:57 A:0
EA2454	snippy:4.3.6	variation	4952921	4952921	.	.	0	note=complex TGCAATT=>CGCGATC CGCGATC:56 TGCAATT:0
EA2454	snippy:4.3.6	variation	4952948	4952948	.	.	0	note=snp T=>C C:64 T:1
EA2454	snippy:4.3.6	variation	4952963	4952963	.	.	0	note=complex ATCGCG=>GTCTCT GTCTCT:62 ATCGCG:0
EA2454	snippy:4.3.6	variation	4952993	4952993	.	.	0	note=snp A=>G G:56 A:0
EA2454	snippy:4.3.6	variation	4953022	4953022	.	.	0	note=complex GTTG=>ATTT ATTT:58 GTTG:0
EA2454	snippy:4.3.6	variation	4953032	4953032	.	.	0	note=snp T=>C C:56 T:0
EA2454	snippy:4.3.6	variation	4953039	4953039	.	.	0	note=snp A=>T T:62 A:0
EA2454	snippy:4.3.6	variation	4953048	4953048	.	.	0	note=complex ACT=>GCC GCC:52 ACT:0
EA2454	snippy:4.3.6	variation	4953056	4953056	.	.	0	note=snp T=>C C:54 T:0
EA2454	snippy:4.3.6	variation	4953065	4953065	.	.	0	note=snp A=>T T:46 A:0
EA2454	snippy:4.3.6	variation	4953091	4953091	.	.	0	note=snp G=>T T:22 G:0
EA2454	snippy:4.3.6	variation	4953102	4953102	.	.	0	note=snp G=>A A:11 G:0
EA2454	snippy:4.3.6	variation	4953386	4953386	.	.	0	note=snp T=>C C:10 T:0
EA2454	snippy:4.3.6	variation	4953404	4953404	.	.	0	note=snp A=>G G:24 A:0
EA2454	snippy:4.3.6	variation	4953416	4953416	.	.	0	note=snp T=>C C:26 T:0
EA2454	snippy:4.3.6	variation	4953441	4953441	.	.	0	note=complex ACCGA=>GCCGT GCCGT:27 ACCGA:0
EA2454	snippy:4.3.6	variation	4953486	4953486	.	.	0	note=snp T=>C C:52 T:0
EA2454	snippy:4.3.6	variation	4953506	4953506	.	.	0	note=complex TCCA=>GCCT GCCT:50 TCCA:0
EA2454	snippy:4.3.6	variation	4953521	4953521	.	.	0	note=complex CAT=>TAC TAC:46 CAT:0
EA2454	snippy:4.3.6	variation	4953547	4953547	.	.	0	note=complex GG=>CC CC:33 GG:0
EA2454	snippy:4.3.6	variation	4953563	4953563	.	.	0	note=complex ATGC=>GTGT GTGT:30 ATGC:0
EA2454	snippy:4.3.6	variation	4953575	4953575	.	.	0	note=snp C=>T T:28 C:0
EA2454	snippy:4.3.6	variation	4953584	4953584	.	.	0	note=snp T=>C C:24 T:0
EA2454	snippy:4.3.6	variation	4953605	4953605	.	.	0	note=snp A=>G G:13 A:0
EA2454	snippy:4.3.6	variation	4953820	4953820	.	.	0	note=snp G=>T T:11 G:0
EA2454	snippy:4.3.6	variation	4954639	4954639	.	.	0	note=snp A=>G G:14 A:0
EA2454	snippy:4.3.6	variation	4954655	4954655	.	.	0	note=snp T=>C C:17 T:0
EA2454	snippy:4.3.6	variation	4954664	4954664	.	.	0	note=complex AGCAAAATTA=>GGTAAAGTTC GGTAAAGTTC:14 AGCAAAATTA:0
EA2454	snippy:4.3.6	variation	4954682	4954682	.	.	0	note=snp G=>T T:20 G:0
EA2454	snippy:4.3.6	variation	4954694	4954694	.	.	0	note=complex TACGA=>AACGG AACGG:25 TACGA:0
EA2454	snippy:4.3.6	variation	4954706	4954706	.	.	0	note=snp T=>A A:27 T:0
EA2454	snippy:4.3.6	variation	4954712	4954712	.	.	0	note=snp T=>A A:29 T:0
EA2454	snippy:4.3.6	variation	4954726	4954726	.	.	0	note=complex ATTCCT=>GCTCCC GCTCCC:27 ATTCCT:0
EA2454	snippy:4.3.6	variation	4954743	4954743	.	.	0	note=snp T=>G G:28 T:0
EA2454	snippy:4.3.6	variation	4954748	4954748	.	.	0	note=complex CCTTACAATG=>ACTGACGATA ACTGACGATA:27 CCTTACAATG:0
EA2454	snippy:4.3.6	variation	4954766	4954766	.	.	0	note=snp C=>A A:33 C:0
EA2454	snippy:4.3.6	variation	4954778	4954778	.	.	0	note=snp C=>G G:30 C:0
EA2454	snippy:4.3.6	variation	4954784	4954784	.	.	0	note=snp G=>A A:27 G:0
EA2454	snippy:4.3.6	variation	4954789	4954789	.	.	0	note=snp A=>C C:31 A:0
EA2454	snippy:4.3.6	variation	4954811	4954811	.	.	0	note=complex AAAG=>GAAT GAAT:39 AAAG:0
EA2454	snippy:4.3.6	variation	4954825	4954825	.	.	0	note=complex CGTTA=>TGTTG TGTTG:43 CGTTA:0
EA2454	snippy:4.3.6	variation	4954835	4954835	.	.	0	note=snp T=>C C:44 T:0
EA2454	snippy:4.3.6	variation	4954841	4954841	.	.	0	note=snp T=>C C:46 T:0
EA2454	snippy:4.3.6	variation	4954853	4954853	.	.	0	note=snp T=>G G:46 T:0
EA2454	snippy:4.3.6	variation	4954858	4954858	.	.	0	note=complex TCGT=>CCGC CCGC:47 TCGT:0
EA2454	snippy:4.3.6	variation	4954868	4954868	.	.	0	note=snp T=>A A:50 T:0
EA2454	snippy:4.3.6	variation	4954874	4954874	.	.	0	note=snp C=>T T:53 C:0
EA2454	snippy:4.3.6	variation	4954895	4954895	.	.	0	note=snp A=>C C:56 A:0
EA2454	snippy:4.3.6	variation	4954901	4954901	.	.	0	note=snp A=>G G:54 A:0
EA2454	snippy:4.3.6	variation	4954907	4954907	.	.	0	note=complex TCCC=>GCCT GCCT:53 TCCC:0
EA2454	snippy:4.3.6	variation	4954931	4954931	.	.	0	note=snp G=>T T:50 G:0
EA2454	snippy:4.3.6	variation	4954937	4954937	.	.	0	note=complex CCCC=>GCCT GCCT:42 CCCC:0
EA2454	snippy:4.3.6	variation	4954955	4954955	.	.	0	note=complex ATCGGCA=>GTCAGCC GTCAGCC:33 ATCGGCA:0
EA2454	snippy:4.3.6	variation	4954994	4954994	.	.	0	note=complex GCGCCCTCCT=>ACGTCCACCA ACGTCCACCA:25 GCGCCCTCCT:0
EA2454	snippy:4.3.6	variation	4955012	4955012	.	.	0	note=complex GAGT=>AAGC AAGC:38 GAGT:0
EA2454	snippy:4.3.6	variation	4955024	4955024	.	.	0	note=complex CTCC=>TTCA TTCA:39 CTCC:0
EA2454	snippy:4.3.6	variation	4955036	4955036	.	.	0	note=snp G=>C C:38 G:0
EA2454	snippy:4.3.6	variation	4955048	4955048	.	.	0	note=complex GCCAGCAAGCAGGG=>CCCTGCCAGAAGGC CCCTGCCAGAAGGC:29 GCCAGCAAGCAGGG:0
EA2454	snippy:4.3.6	variation	4955066	4955066	.	.	0	note=complex AATATGGGTA=>TATGTGTGTG TATGTGTGTG:29 AATATGGGTA:0
EA2454	snippy:4.3.6	variation	4955084	4955084	.	.	0	note=snp C=>T T:39 C:0
EA2454	snippy:4.3.6	variation	4955093	4955093	.	.	0	note=complex TCCC=>CCCG CCCG:41 TCCC:0
EA2454	snippy:4.3.6	variation	4955117	4955117	.	.	0	note=snp G=>A A:44 G:0
EA2454	snippy:4.3.6	variation	4955135	4955135	.	.	0	note=snp G=>C C:51 G:0
EA2454	snippy:4.3.6	variation	4955156	4955156	.	.	0	note=complex TAA=>CAG CAG:62 TAA:0
EA2454	snippy:4.3.6	variation	4955197	4955197	.	.	0	note=complex TTGCAGCATGT=>CGGCTGCGTGC CGGCTGCGTGC:79 TTGCAGCATGT:0
EA2454	snippy:4.3.6	variation	4955222	4955222	.	.	0	note=complex GAAA=>AAAG AAAG:80 GAAA:0
EA2454	snippy:4.3.6	variation	4955234	4955234	.	.	0	note=snp A=>G G:83 A:0
EA2454	snippy:4.3.6	variation	4955249	4955249	.	.	0	note=snp T=>C C:89 T:0
EA2454	snippy:4.3.6	variation	4955257	4955257	.	.	0	note=complex CTA=>GTG GTG:80 CTA:0
EA2454	snippy:4.3.6	variation	4955282	4955282	.	.	0	note=snp A=>G G:86 A:1
EA2454	snippy:4.3.6	variation	4955295	4955295	.	.	0	note=snp C=>A A:82 C:0
EA2454	snippy:4.3.6	variation	4955302	4955302	.	.	0	note=snp G=>C C:75 G:0
EA2454	snippy:4.3.6	variation	4955311	4955311	.	.	0	note=snp A=>T T:64 A:0
EA2454	snippy:4.3.6	variation	4955318	4955318	.	.	0	note=snp A=>G G:64 A:0
EA2454	snippy:4.3.6	variation	4955341	4955341	.	.	0	note=snp T=>C C:69 T:0
EA2454	snippy:4.3.6	variation	4955346	4955346	.	.	0	note=snp A=>G G:72 A:0
EA2454	snippy:4.3.6	variation	4955354	4955354	.	.	0	note=complex AGT=>GGC GGC:73 AGT:0
EA2454	snippy:4.3.6	variation	4955363	4955363	.	.	0	note=snp T=>C C:75 T:0
EA2454	snippy:4.3.6	variation	4955372	4955372	.	.	0	note=complex ACCG=>GCCA GCCA:74 ACCG:0
EA2454	snippy:4.3.6	variation	4955384	4955384	.	.	0	note=snp C=>G G:76 C:0
EA2454	snippy:4.3.6	variation	4955390	4955390	.	.	0	note=complex GGGG=>TGGT TGGT:79 GGGG:0
EA2454	snippy:4.3.6	variation	4955435	4955435	.	.	0	note=complex ACGT=>GCGC GCGC:75 ACGT:0
EA2454	snippy:4.3.6	variation	4955447	4955447	.	.	0	note=snp C=>A A:75 C:0
EA2454	snippy:4.3.6	variation	4955472	4955472	.	.	0	note=snp A=>G G:57 A:0
EA2454	snippy:4.3.6	variation	4955489	4955489	.	.	0	note=complex CAGC=>AAGT AAGT:55 CAGC:0
EA2454	snippy:4.3.6	variation	4955537	4955537	.	.	0	note=snp G=>A A:23 G:0
EA2454	snippy:4.3.6	variation	4955552	4955552	.	.	0	note=complex TGCATGAACACACACA=>AGGATGTACGCAAACG AGGATGTACGCAAACG:13 TGCATGAACACACACA:0
EA2454	snippy:4.3.6	variation	4956055	4956055	.	.	0	note=complex GCCC=>ACCT ACCT:10 GCCC:0
EA2454	snippy:4.3.6	variation	4956065	4956065	.	.	0	note=snp G=>C C:11 G:0
EA2454	snippy:4.3.6	variation	4956077	4956077	.	.	0	note=snp C=>G G:13 C:0
EA2454	snippy:4.3.6	variation	4956094	4956094	.	.	0	note=snp G=>A A:14 G:0
EA2454	snippy:4.3.6	variation	4956102	4956102	.	.	0	note=snp G=>A A:15 G:0
EA2454	snippy:4.3.6	variation	4956300	4956300	.	.	0	note=mnp GC=>TT TT:34 GC:0
EA2454	snippy:4.3.6	variation	4956620	4956620	.	.	0	note=complex GG=>AA AA:27 GG:0
EA2454	snippy:4.3.6	variation	4956645	4956645	.	.	0	note=snp G=>A A:33 G:0
EA2454	snippy:4.3.6	variation	4956666	4956666	.	.	0	note=snp C=>T T:42 C:0
EA2454	snippy:4.3.6	variation	4956765	4956765	.	.	0	note=snp G=>A A:53 G:0
EA2454	snippy:4.3.6	variation	4956890	4956890	.	.	0	note=snp G=>A A:30 G:0
EA2454	snippy:4.3.6	variation	4956898	4956898	.	.	0	note=snp T=>C C:25 T:0
EA2454	snippy:4.3.6	variation	4956917	4956917	.	.	0	note=complex CAG=>TAT TAT:21 CAG:0
EA2454	snippy:4.3.6	variation	4957026	4957026	.	.	0	note=snp G=>T T:10 G:0
EA2454	snippy:4.3.6	variation	4957042	4957042	.	.	0	note=snp A=>G G:11 A:0
EA2454	snippy:4.3.6	variation	4960771	4960771	.	.	0	note=snp A=>G G:73 A:0
EA2454	snippy:4.3.6	variation	4960975	4960975	.	.	0	note=complex CTGGA=>GTGGC GTGGC:109 CTGGA:0
EA2454	snippy:4.3.6	variation	4961009	4961009	.	.	0	note=snp G=>A A:119 G:0
EA2454	snippy:4.3.6	variation	4961048	4961048	.	.	0	note=snp A=>G G:112 A:0
EA2454	snippy:4.3.6	variation	4961214	4961214	.	.	0	note=snp G=>A A:154 G:0
EA2454	snippy:4.3.6	variation	4961304	4961304	.	.	0	note=snp T=>G G:142 T:0
EA2454	snippy:4.3.6	variation	4961379	4961379	.	.	0	note=snp T=>A A:118 T:0
EA2454	snippy:4.3.6	variation	4961434	4961434	.	.	0	note=snp G=>A A:118 G:0
EA2454	snippy:4.3.6	variation	4961449	4961449	.	.	0	note=snp T=>C C:127 T:0
EA2454	snippy:4.3.6	variation	4961583	4961583	.	.	0	note=snp A=>G G:177 A:0
EA2454	snippy:4.3.6	variation	4961694	4961694	.	.	0	note=snp C=>T T:173 C:0
EA2454	snippy:4.3.6	variation	4961704	4961704	.	.	0	note=snp T=>C C:165 T:0
EA2454	snippy:4.3.6	variation	4961715	4961715	.	.	0	note=snp G=>A A:159 G:0
EA2454	snippy:4.3.6	variation	4961736	4961736	.	.	0	note=snp C=>T T:153 C:0
EA2454	snippy:4.3.6	variation	4961745	4961745	.	.	0	note=snp G=>A A:149 G:0
EA2454	snippy:4.3.6	variation	4961754	4961754	.	.	0	note=snp A=>T T:159 A:0
EA2454	snippy:4.3.6	variation	4961805	4961805	.	.	0	note=snp A=>C C:115 A:0
EA2454	snippy:4.3.6	variation	4961817	4961817	.	.	0	note=snp A=>G G:108 A:0
EA2454	snippy:4.3.6	variation	4961832	4961832	.	.	0	note=snp C=>T T:108 C:1
EA2454	snippy:4.3.6	variation	4961838	4961838	.	.	0	note=snp A=>G G:111 A:0
EA2454	snippy:4.3.6	variation	4961937	4961937	.	.	0	note=snp A=>G G:132 A:0
EA2454	snippy:4.3.6	variation	4961952	4961952	.	.	0	note=snp G=>A A:144 G:0
EA2454	snippy:4.3.6	variation	4961973	4961973	.	.	0	note=snp T=>C C:132 T:0
EA2454	snippy:4.3.6	variation	4962018	4962018	.	.	0	note=snp C=>T T:96 C:2
EA2454	snippy:4.3.6	variation	4962030	4962030	.	.	0	note=snp C=>T T:93 C:0
EA2454	snippy:4.3.6	variation	4962036	4962036	.	.	0	note=complex GGGC=>CGGT CGGT:88 GGGC:0
EA2454	snippy:4.3.6	variation	4962075	4962075	.	.	0	note=snp A=>G G:76 A:0
EA2454	snippy:4.3.6	variation	4962508	4962508	.	.	0	note=complex GGCT=>AGCC AGCC:17 GGCT:0
EA2454	snippy:4.3.6	variation	4962634	4962634	.	.	0	note=snp A=>T T:38 A:0
EA2454	snippy:4.3.6	variation	4962682	4962682	.	.	0	note=snp G=>A A:18 G:0
EA2454	snippy:4.3.6	variation	4968314	4968314	.	.	0	note=snp C=>T T:46 C:0
EA2454	snippy:4.3.6	variation	4970995	4970995	.	.	0	note=snp T=>C C:41 T:0
EA2454	snippy:4.3.6	variation	4974312	4974312	.	.	0	note=snp T=>A A:23 T:0
EA2454	snippy:4.3.6	variation	4974991	4974991	.	.	0	note=snp T=>C C:68 T:0
EA2454	snippy:4.3.6	variation	4976124	4976124	.	.	0	note=snp G=>A A:43 G:0
EA2454	snippy:4.3.6	variation	4983783	4983783	.	.	0	note=snp T=>C C:89 T:0
EA2454	snippy:4.3.6	variation	4990421	4990421	.	.	0	note=snp C=>T T:88 C:0
EA2454	snippy:4.3.6	variation	4998297	4998297	.	.	0	note=snp C=>A A:75 C:0
EA2454	snippy:4.3.6	variation	5003396	5003396	.	.	0	note=snp T=>C C:69 T:0
EA2454	snippy:4.3.6	variation	5008386	5008386	.	.	0	note=snp G=>T T:101 G:1
EA2454	snippy:4.3.6	variation	5009017	5009017	.	.	0	note=snp T=>C C:60 T:0
EA2454	snippy:4.3.6	variation	5010610	5010610	.	.	0	note=snp C=>T T:65 C:0
EA2454	snippy:4.3.6	variation	5013305	5013305	.	.	0	note=snp T=>C C:77 T:0
EA2454	snippy:4.3.6	variation	5024480	5024480	.	.	0	note=snp T=>G G:59 T:0
EA2454	snippy:4.3.6	variation	5026350	5026350	.	.	0	note=snp C=>T T:63 C:0
EA2454	snippy:4.3.6	variation	5029388	5029388	.	.	0	note=snp T=>C C:88 T:0
EA2454	snippy:4.3.6	variation	5029726	5029726	.	.	0	note=snp C=>T T:24 C:0
EA2454	snippy:4.3.6	variation	5034597	5034597	.	.	0	note=snp A=>T T:59 A:0
EA2454	snippy:4.3.6	variation	5037494	5037494	.	.	0	note=snp G=>A A:29 G:0
EA2454	snippy:4.3.6	variation	5037689	5037689	.	.	0	note=snp G=>T T:27 G:0
EA2454	snippy:4.3.6	variation	5048061	5048061	.	.	0	note=snp A=>T T:69 A:0
EA2454	snippy:4.3.6	variation	5048408	5048408	.	.	0	note=snp G=>A A:16 G:0
EA2454	snippy:4.3.6	variation	5048692	5048692	.	.	0	note=snp A=>G G:26 A:0
EA2454	snippy:4.3.6	variation	5048889	5048889	.	.	0	note=complex GCTTCT=>ACCTCC ACCTCC:22 GCTTCT:0
EA2454	snippy:4.3.6	variation	5048899	5048899	.	.	0	note=complex AACCA=>GACCG GACCG:22 AACCA:0
EA2454	snippy:4.3.6	variation	5049992	5049992	.	.	0	note=complex AGCC=>GGCT GGCT:28 AGCC:0
EA2454	snippy:4.3.6	variation	5050002	5050002	.	.	0	note=snp A=>T T:25 A:0
EA2454	snippy:4.3.6	variation	5050010	5050010	.	.	0	note=snp T=>C C:26 T:0
EA2454	snippy:4.3.6	variation	5050037	5050037	.	.	0	note=snp A=>T T:25 A:0
EA2454	snippy:4.3.6	variation	5050053	5050053	.	.	0	note=snp T=>C C:28 T:0
EA2454	snippy:4.3.6	variation	5050082	5050082	.	.	0	note=snp T=>C C:22 T:0
EA2454	snippy:4.3.6	variation	5050091	5050091	.	.	0	note=complex CCGT=>TCGC TCGC:19 CCGT:0
EA2454	snippy:4.3.6	variation	5050124	5050124	.	.	0	note=snp T=>G G:18 T:0
EA2454	snippy:4.3.6	variation	5052436	5052436	.	.	0	note=snp C=>T T:25 C:0
EA2454	snippy:4.3.6	variation	5060361	5060361	.	.	0	note=snp A=>C C:67 A:0
EA2454	snippy:4.3.6	variation	5062756	5062756	.	.	0	note=snp A=>G G:73 A:0
EA2454	snippy:4.3.6	variation	5064591	5064591	.	.	0	note=snp T=>A A:71 T:0
EA2454	snippy:4.3.6	variation	5077659	5077659	.	.	0	note=snp A=>G G:50 A:0
EA2454	snippy:4.3.6	variation	5079510	5079510	.	.	0	note=snp C=>T T:24 C:0
EA2454	snippy:4.3.6	variation	5079516	5079516	.	.	0	note=snp G=>A A:27 G:0
EA2454	snippy:4.3.6	variation	5084749	5084749	.	.	0	note=snp T=>C C:10 T:0
EA2454	snippy:4.3.6	variation	5101967	5101967	.	.	0	note=snp A=>G G:50 A:0
EA2454	snippy:4.3.6	variation	5119203	5119203	.	.	0	note=snp A=>G G:71 A:0
EA2454	snippy:4.3.6	variation	5121224	5121224	.	.	0	note=snp G=>C C:70 G:0
EA2454	snippy:4.3.6	variation	5123373	5123373	.	.	0	note=snp A=>G G:58 A:0
EA2454	snippy:4.3.6	variation	5132175	5132175	.	.	0	note=snp G=>T T:46 G:0
EA2454	snippy:4.3.6	variation	5132620	5132620	.	.	0	note=snp G=>A A:70 G:0
EA2454	snippy:4.3.6	variation	5132907	5132907	.	.	0	note=snp C=>T T:88 C:0
EA2454	snippy:4.3.6	variation	5135011	5135011	.	.	0	note=snp C=>T T:34 C:0
EA2454	snippy:4.3.6	variation	5137753	5137753	.	.	0	note=snp C=>A A:23 C:0
EA2454	snippy:4.3.6	variation	5137810	5137810	.	.	0	note=snp C=>T T:56 C:0
EA2454	snippy:4.3.6	variation	5137999	5137999	.	.	0	note=snp A=>C C:52 A:0
EA2454	snippy:4.3.6	variation	5138018	5138018	.	.	0	note=snp T=>C C:58 T:0
EA2454	snippy:4.3.6	variation	5138027	5138027	.	.	0	note=snp T=>C C:48 T:0
EA2454	snippy:4.3.6	variation	5138039	5138039	.	.	0	note=snp C=>T T:42 C:0
EA2454	snippy:4.3.6	variation	5138051	5138051	.	.	0	note=complex CCATAAC=>TCAGTGT TCAGTGT:27 CCATAAC:0
EA2454	snippy:4.3.6	variation	5138066	5138066	.	.	0	note=complex ACGTGGGTATGAGTTTAG=>GCGCGGATACGAGGTTAA GCGCGGATACGAGGTTAA:29 ACGTGGGTATGAGTTTAG:0
EA2454	snippy:4.3.6	variation	5138096	5138096	.	.	0	note=snp C=>T T:41 C:0
EA2454	snippy:4.3.6	variation	5138122	5138122	.	.	0	note=snp A=>C C:43 A:0
EA2454	snippy:4.3.6	variation	5138132	5138132	.	.	0	note=complex GCCG=>TCCT TCCT:40 GCCG:0
EA2454	snippy:4.3.6	variation	5138144	5138144	.	.	0	note=snp G=>A A:49 G:0
EA2454	snippy:4.3.6	variation	5138219	5138219	.	.	0	note=snp C=>T T:54 C:0
EA2454	snippy:4.3.6	variation	5138232	5138232	.	.	0	note=complex TGGGT=>CGGGC CGGGC:46 TGGGT:0
EA2454	snippy:4.3.6	variation	5138242	5138242	.	.	0	note=complex GTCC=>ATCG ATCG:42 GTCC:0
EA2454	snippy:4.3.6	variation	5138250	5138250	.	.	0	note=complex ACCA=>GCCG GCCG:45 ACCA:0
EA2454	snippy:4.3.6	variation	5138270	5138270	.	.	0	note=snp A=>C C:44 A:0
[truncated: 444 more rows]
