# Supplementary material for: Escherichia coli ST302: Genomic Analysis of Virulence Potential and Antimicrobial Resistance Mediated by Mobile Genetic Elements
Source: Front Microbiol. 2020 Jan 21;10:3098. doi: 10.3389/fmicb.2019.03098 (PMC6985150; doi:10.3389/fmicb.2019.03098)
Supplement: DATA S2 — ST302 SNP analysis. [file Data_Sheet_2.ZIP › SNP_Analysis/ST302_SNP/SNP_analysis/snippyout/ST302/EA2455-Poultry-ST302.out/snps.consensus.fa]

>EA2454
ACTTAGGATAGCCAACCATCAGATGCTGCATTTGCATAGTGCAATCTCCCCTTACTTATC
CGGAGGCAATTGCAATATCTCTGTGAACTTACACAGGGGGAGCTTTTACCTGAAATACGC
CACGGAGGCGGGTATGAAACTGGCAGTCGTCACTGGACAAATTGTTTGTACCGTACGCCA
TCACGGACTGGCGCATGACAAATTGCTGATGGTGGAAATGATTGATCCACAAGGTAATCC
TGACGGGCAATGCGCCGTCGCCATCGACAATATTGGCGCGGGAACCGGGGAGTGGGTGTT
ACTGGTGAGTGGCAGTTCCGCCCGCCAGGCGCATAAAAGCGAAACGTCACCGGTCGATCT
GTGCGTGATTGGCATTGTCGATGAGGTGGTGTCTGGCGGTCAGGTAATTTTCCACAAATA
AGGCAGAACATCATGAATCAACAGGATATTGAACAGGTGGTGAAAGCGGTACTGCTGAAA
ATGCAAAGCAGTGACACGCCGCCCGCCGCCGTTCATGAGATGGGCGTTTTCGCGTCCCTG
GATGACGCCGTTGCGGCAGCCAAAGTCGCCCAGCAAGGGTTAAAGAGCGTGGCAATGCGC
CAGTTAGCCATTGCTGCCATTCGTGAAGCAGGCGAAAAACACGCCAGAGATTTAGCGGAA
CTTGCCGTCAGTGAAACCGGCATGGGGCGCGTTGAAGATAAATTTGCAAAAAACGTCGCT
CAGGCGCGCGGCACACCAGGCGTTGAGTACCTCTCTCCGCAAGTGCTGACTGGCGACAAC
GGCCTGACCCTAATTGAAAACGCACCCTGGGGCGTGGTGGCTTCGGTGACGCCGTCCACT
AACCCGGCGGCAACCGTAATTAACAACGCCATCAGCCTGATTGCCGCGGGCAACAGCGTC
ATTTTTGCCCCGCATCCGGCGGCGAAAAAAGTCTCCCAGCGGGCGATTACGCTGCTCAAC
CAGGCGATTGTTGCCGTAGGTGGGCCGGAAAACTTACTGGTTACTGTGGCAAATCCGGAT
ATCGAAACCGCGCAACGCTTGTTCAAGTTTCCGGGCATCGGCCTGCTGGTGGTGACCGGC
GGCGAAGCGGTAGTAGAAGCGGCGCGTAAACACACCAATAAACGTCTGATTGCCGCAGGC
GCTGGCAACCCGCCGGTAGTGGTGGATGAAACCGCTGACCTCGCCCGTGCTGCTCAGTCC
ATCGTTAAAGGCGCGTCTTTCGATAACAACATCATTTGTGCCGACGAAAAGGTACTGATT
GTTGTTGATAGCGTAGCCGATGAACTGATGCGTCTGATGGAAGGCCAGCACGCGGTGAAA
CTGACCGCAGAGCAGGCGCAGCAATTGCAACCGGTGTTGCTGAAAAATATCGACGAGCGC
GGAAAAGGTACCGTCAGCCGTGACTGGGTAGGTCGCGATGCAGGCAAAATCGCGGCGGCA
ATCGGCCTTAAAGTTCCGGAACAAACGCGATTGCTGTTTGTAGAAACCACCGCAGAACAT
CCGTTTGCCGTGACTGAACTGATGATGCCGGTGTTGCCCGTCGTGCGCGTCGCCAACGTG
GCGGATGCCATTGCGCTGGCGGTGAAACTGGAAGGCGGTTGCCACCACACGGCGGCAATG
CACTCGCGCAATATCGAGAACATGAACCAGATGGCGAATGCCATTGATACCAGCATTTTC
GTTAAGAACGGACCGTGCATTGCCGGGCTGGGGCTGGGCGGGGAAGGCTGGACCACCATG
ACCATCACCACGCCAACCGGTGAAGGGGTAACCAGCGCGCGTACGTTTGTCCGTCTGCGT
CGCTGTGTATTAGTCGATGCGTTTCGCATTGTTTAAGGAGTAACAGATGGCGCACGACGA
ACAATGGCTCACCCCACGTCTGCAAACGGCGGCAACGCTGTGTAACCAGACGCCCGCCGC
GACGGAATCTCCGCTGTGGCTGGGGGTGGATCTGGGCACCTGCGATGTGGTGTCGATGGT
TGTCGACCGCGACGGTCAGCCGGTGGCGGTATGCCTCGACTGGGCCGATGTGGTCCGCGA
CGGCATCGTCTGGGATTTCTTCGGCGCGGTCACCATTGTTCGTCGCCATCTCGACACGCT
CGAGCAGCAATTCGGTCGTCGTTTTAGCCATGCGGCGACTTCATTTCCTCCAGGTACGGA
CCCGCGTATTTCCATCAACGTGCTGGAGTCTGCCGGGCTGGAAGTGAGCCATGTGCTGGA
TGAGCCAACCGCAGTCGCGGATCTACTGCAACTGGATAACGCAGGCGTAGTGGATATCGG
CGGTGGCACTACCGGCATTGCCATCGTGAAAAAGGGCAAAGTGACGTACTCGGCGGATGA
AGCCACCGGCGGACATCACATCTCTCTGACTCTCGCCGGAAATCGCCGTATTTCGCTGGA
AGAGGCGGAGCAGTACAAGCGCGGTCACGGTGAAGAGATTTGGCCTGCGGTGAAACCGGT
GTACGAAAAAATGGCGGACATTGTCGCCCGGCATATTGAAGGGCAGGGCATTACTGATTT
ATGGCTGGCGGGCGGCTCTTGTATGCAACCGGGCGTGGCGGAACTGTTTCGCAAACAATT
CCCGGCGTTACAGGTGCATTTACCGCAGCACAGTTTGTTTATGACCCCGCTGGCAATCGC
CAGTAGTGGGCGAGAGAAAGCGGAGGGGCTATATGCAAAATGAATTGCAGACCGCGCTCT
TTCAGGCGTTCGATACCCTGAATCTGCAACGGGTAAAAACATTTAGCGTTCCACCGGTGA
CGCTTTGCGGTCCGGGCTCGGTGAGCAGTTGCGGACAGCAAGCGCAAACGCGTGGGCTGA
AACATCTGTTCGTGATGGCAGACAGCTTTTTGCATCAGGCAGGGATGACCGCCGGGCTGA
CGCGTAGCCTGGCCGTTAAAGGTATCGCCATGACGCTCTGGCCATGTCCGGTGGGCGAAC
CGTGCATTACCGACGTGTGTGCAGCCGTGGCGCAGTTGCGTGAGTCAGGTTGTGACGGGG
TGATCGCATTTGGCGGCGGCTCGGTGCTGGATGCGGCGAAAGCCGTGGCGTTGCTGGTGA
CGAACCCGGATAGCACGCTGGCAGAGATGTCAGAAACCAGCGTTCTGCAACCGCGCTTGC
CGCTGATTGCCATTCCAACTACCGCCGGAACCGGCTCTGAAACCACCAATGTAACGGTGA
TTATCGACGCGGTGAGCGGGCGCAAGCAGGTGTTAGCCCATGCCTCGCTGATGCCGGATG
TGGCGATCCTCGACGCCGCATTGACCGAAGGTGTGCCGTCGCATGTCACGGCGATGACCG
GCATTGATGCGTTAACCCATGCCATTGAAGCATACAGCGCCCTGAACGCTACACCGTTTA
CCGACAGTCTGGCGATTGGTGCCATTGCGATGATTGGCAAATCGCTGCCGAAAGCGGTGG
GCTACGGTCACGACCTTGCCGCGCGCGAGAGCATGTTGCTGGCTTCATGTATGGCGGGAA
TGGCGTTTTCCAGTGCGGGTCTTGGGTTGTGCCACGCGATGGCGCATCAGCCGGGCGCGG
CGCTGCATATTCCGCACGGTCTGGCGAACGCTATGTTGCTGCCAACGGTGATGGAGTTTA
ACCGGATGGTATGTCGCGAACGCTTTAGTCAGATTGGTCGGGCACTGCGAACTAAAAAAT
CCGACGATCGTGACGCTATTAACGCGGTAAGTGAGCTGATTGCGGAAGTTGGGATTGGTA
AACGACTGGGCGATGTTGGCGCGACATCTGCGCATTACGGTGCATGGGCGCAGGCCGCGC
AGGAAGATATTTGTCTGCGCAGCAACCCGCGTACCGCCAGCCTGGAACAGATTGTCGGCC
TGTACGCGGCGGCGCAATAAATGCCGCGTCTTATCCGGTCTGTGGGATTGCACATGTAGT
GCGGATAAGGCTTCACGCAGCATCCGCTAATAAATAACAACTAACAGGGAGTAAAGGCGA
TGGGAATTAACGAAATCATCATGTACATCATGATGTTCTTTATGCTGATAGCTGCCGTAG
ACAGGATCCTGTCACAGTTCGGCGGTTCTGCTCGTTTCCTCGGTAAGTTCGGTAAAAGTA
TCGAAGGATCAGGCGGTCAGTTCGAAGAAGGCTTTATGGCAATGGGCGCTCTGGGTCTGG
CGATGGTCGGTATGACCGCGCTGGCACCGGTACTGGCTCACGTACTCGGGCCGGTAATTA
TCCCGGTTTACGAAATGCTCGGCGCAAACCCGTCAATGTTCGCCGGAACGCTGCTGGCGT
GCGATATGGGCGGCTTCTTCCTCGCCAAAGAGCTGGCGGGCGGCGACGTAGCAGCGTGGC
TATACTCTGGGTTAATTCTCGGGTCGATGATGGGGCCAACGATTGTGTTTTCCATTCCGG
TGGCGCTCGGCATTATCGAACCTTCTGACCGTCGTTATCTGGCGCTCGGCGTGCTGGCGG
GCATTGTGACCATTCCGATTGGTTGTATCGCTGGTGGTCTGGTAGCTATGTACTCCGGTG
TTCAGATCAACGGCCAGCCGGTGGAATTCACTTTCGCCCTGATCCTGATGAACATGATCC
CGGTGATCATTGTTGCGATTCTGGTGGCGCTGGGGCTGAAATTCATCCCGGAAAAAATGA
TCAACGGCTTCCAGATCTTCGCCAAATTCCTCGTTGCATTGATCACCCTCGGTCTTGCCG
CTGCGGTAGTGAAATTCCTGCTTGGCTGGGAACTGATCCCCGGTCTGGATCCTATCTTTA
TGGCCCCTGGCGATAAACCCGGTGAGGTGATGCGCGCCATTGAAGTTATCGGTTCTATCT
CCTGCGTTCTGTTAGGGGCGTATCCAATGGTGCTGCTGCTGACCCGCTGGTTTGAAAAAC
CGCTGATGAGCGTCGGTAAAGTGCTGAATATGAACAACATTGCGGCAGCCGGCATGGTGG
CAACGCTTGCCAACAACATCCCGATGTTCGGCATGATGAAGCAGATGGATACCCGCGGCA
AAGTCATCAACTGCGCCTTCGCCGTTTCCGCTGCTTTCGCCCTGGGCGACCACTTAGGCT
TCGCCGCTGCCAACATGAATGCCATGATCTTCCCGATGATTGTCGGCAAGTTGATCGGCG
GCGTAACGGCGATTGGCGTGGCGATGATGCTGGTGCCAAAAGACGACGCGACCGCGGCTA
AAACCGAAGCGGAGGCACAATCGTGAACACTCGCCAGCTACTGAGCGTCGGTATCGATAT
CGGCACCACCACCACCCAGGTGATTTTCTCCCACCTGGAACTGGTTAACCGTGCGGCGGT
GTCGCAGGTGCCGCGCTACGAATTCATCAAACGCGAAATTAGCTGGCAAAGCCCGGTGTT
CTTTACCCCTGTCGATAAACAGGGTGGTTTAAAAGAAGCGGAACTGAAATCGCTGATTTT
AGAGCAATATCAGGCTGCGGGCATTGCGCCGGAAAGCGTTGATTCTGGTGCCATCATCAT
CACCGGTGAAAGCGCGAAAACCCGCAATGCTCGCCCGGCGGTGATGGCGCTCTCTCAGTC
GCTGGGCGATTTTGTCGTCGCCAGCGCCGGGCCGCACCTCGAATCCGTGATCGCCGGTCA
CGGTGCCGGGGCGCAAACCCTTTCTGAACAACGGCTGTGTCGGGTACTGAATATCGACAT
CGGCGGTGGCACCGCGAACTACGCCCTGTTCGATGCCGGAAAAATCAGCGGCACTGCCTG
CCTCAACGTCGGTGGTCGCCTGCTGGAAACCGACAGCCAGGGGCGCGTGGTTTACGCTCA
TAAACCGGGGCAGATGATTGTGGATGAGTGCTTCGGCGCAGGCACCGACGCCCGTTCGCT
GACCGGCGCGCAGCTGGTGCAGGTTACCCGGCGGATGGCAGAGCTGATTGTCGAAGTGAT
TGACGGAACGCTTTCGCCGCTCGCGCAGGCATTAATGCAAACCGGTTTGCTGCCCGCAGG
TGTTACGCCCGAAATCATTACGCTTTCTGGCGGCGTGGGCGAATGTTATCGCCACCAGCC
CGCCGACCCGTTCTGTTTTGCCGATATTGGCCCGCTTCTGGCAACGGCGCTGCATGACCA
TCCGCGCCTGCGTGAGATGAACGTGCAGTTTCCGGCGCAAACCGTACGCGCCACGGTGAT
TGGCGCGGGTGCACATACCCTTTCGCTCTCTGGCAGCACAATCTGGCTGGAGGGCGTACA
ACTGCCGCTGCGCAATTTGCCGGTGGCGATCCCGATTGATGAAACGGATCTGGTGAGTGC
CTGGCAACAGGCGCTGATTCAGCTGGATCTTGATCCCAAAACTGACGCGTACGTGCTGGC
GCTTCCCGCCTCGCTGCCTGTGCGTTACGCCGCGGTACTGACGGTCATCAACGCGTTGGT
CGATTTCGTCGCGCGTTTTCCGAATCCGCATCCCCTGCTGGTGGTGGCCGGGCAGGACTT
TGGTAAAGCTCTGGGCATGTTGTTGCGCCCACAGCTACAACAACTCCCGTTGGCAGTCAT
TGACGAAGTGATTGTCCGCGCGGGGGACTATATCGACATTGGTACGCCTCTTTTTGGCGG
ATCGGTTGTGCCGGTGACGGTGAAATCACTCGCATTTCCTTCCTGAGGGAACGACTTATG
AAACTAAAGACCACATTGTTCGGCAATGTATATCAGTTTAAGGATGTAAAAGAGGTGCTG
GCTAAAGCCAACGAACTGCGTTCGGGGGATGTGCTGGCGGGCGTTGCAGCGGCAAGCTCA
CAGGAGCGCGTGGCAGCAAAGCAGGTGTTGTCGGAAATGACCGTAGCGGACATCCGCAAT
AATCCGGTGATTGCCTATGAAGATGACTGCGTGACGCGGCTGATTCAGGACGATGTTAAC
GAAACGGCCTACAACCAGATTAAAAACTGGAGCATCAGCGAACTGCGTGAGTATGTGCTG
AGCGATGAAACCAGCGTGGACGACATTGCCTTTACCCGCAAAGGGCTGACCTCGGAAGTG
GTCGCGGCGGTAGCGAAGATTTGCTCCAACGCGGACCTGATCTACGGCGCGAAGAAAATG
CCGGTAATCAAAAAGGCCAATACCACCATCGGTATTCCGGGCACCTTTAGCGCCCGTTTG
CAGCCAAATGACACCCGTGACGACGTGCAAAGTATCGCCGCGCAAATCTACGAAGGGCTT
TCCTTCGGGGTGGGCGATGCGGTGATCGGCGTCAACCCGGTAACTGACGACGTGGAAAAC
TTAAGCCGCGTGCTGGACACCATCTATGGCGTGATCGACAAATTCAACATCCCAACTCAG
GGCTGCGTACTGGCGCACGTCACCACCCAGATCGAAGCGATTCGTCGTGGCGCACCAGGC
GGGCTGATTTTCCAGAGTATCTGTGGCAGTGAAAAAGGGCTGAAAGAGTTTGGCGTGGAA
CTGGCGATGCTCGACGAAGCGCGCGCAGTGGGTGCAGAGTTCAACCGTATCGCCGGGGAA
AACTGCCTCTACTTCGAAACCGGGCAAGGTTCGGCGCTGTCGGCGGGTGCCAACTACGGC
GCAGACCAGGTGACCATGGAAGCGCGTAACTACGGGCTGGCGCGTCATTACGATCCGTTT
ATCGTCAACACCGTGGTCGGCTTTATTGGGCCGGAGTATCTCTACAATGACCGCCAGATT
ATTCGTGCGGGCTTAGAAGATCACTTTATGGGCAAGCTGAGCGGCATCTCTATGGGCTGT
GACTGCTGTTACACCAACCACGCTGACGCTGACCAGAACCTCAACGAAAACCTGATGATC
CTGCTCGCCACCGCAGGCTGCAACTACATCATGGGGATGCCGCTGGGTGATGACATCATG
CTCAATTACCAGACCACCGCATTCCACGATACCGCCACTGTGCGTCAGTTACTCAACCTG
CGCCCGTCACCGGAGTTTGAACGCTGGCTGGAAAGCATGGGCATTATGGCAAACGGTCGC
CTGACCAAACGGGCGGGCGATCCGTCACTGTTCTTCTGATGACGCGGAGATAACACATCA
TGGATCAAAAACAGATTGAAGAAATTGTACGCAGCGTGATGGCGTCAATGGGACAAACGG
CCCCCGCGCCGTCAGAAGCAAAGTGCGCCACTACCACCTGTGCGGCACCGGTGACCTCGG
AAAGCTGTGCGCTGGATTTAGGTTCCGCTGAAGCAAAAGCGTGGATTGGTGTTGAAAACC
CGCATCGCGCAGACGTATTAACAGAACTGCGCCGCAGCACCGTGGCCCGCGTTTGTACCG
GTCGTGCCGGTCCGCGTCCGCGTACCCAGGCGCTGCTGCGTTTCCTGGCCGATCACTCTC
GTTCGAAAGATACCGTACTGAAAGAAGTGCCGGAAGAGTGGGTGAAAGCGCAGGGCTTGC
TGGAAGTACGCTCCGAAATTAGCGACAAAAATCTCTACCTGACTCGCCCGGATATGGGCC
GCCGCCTGTGTGCAGAAGCTGTTGAAGCGCTGAAAGCACAGTGTGTTGCTAATCCGGACG
TACAGGTCGTTATTTCTGATGGCCTGTCAACTGATGCGATCACCGTGAACTACGAAGAGA
TCCTGCCACCGCTGATGGCGGGCCTGAAACAGGCCGGGCTGAAAGTCGGTACACCATTCT
TTGTTCGTTATGGTCGCGTGAAGATTGAAGATCAGATCGGTGAGATCCTCGGCGCGAAAG
TAGTGATCCTGCTGGTGGGCGAACGTCCGGGGTTGGGTCAGTCAGAAAGCCTCTCCTGCT
ACGCCGTTTACTCGCCGCGTATGGCGACCACCGTTGAGGCCGATCGCACCTGTATCTCTA
ACATTCACCAGGGCGGCACGCCGCCGGTTGAAGCCGCAGCCGTCATTGTGGATTTGGCGA
AACGTATGCTGGAGCAGAAAGCATCCGGCATCAACATGACCCGATAAGGAGGCATCATGC
CAGCTTTAGATTTGATTCGACCGTCGGTAACCGCCATGCGGGTGATTGCCTCCGTTAACG
CCGAATTTGCGCGTGAACTGAAATTGCCGCCGCATATTCGTAGCCTCGGGCTGATTTCTG
CTGATTCCGATGACGTCACCTACATTGCCGCTGATGAAGCAACCAAACAGGCGATGGTCG
AAGTGGTGTATGGCCGCTCGCTGTATGCGGGCGCTGCACACGGCCCGTCACCGACTGCCG
GTGAAGTGCTGATTATGCTTGGTGGGCCAAACCCGGCGGAAGTGCGTGCAGGTCTGGATG
CGATGGTTGCGCATATTGAAAATGGCGCTGCTTTCCAGTGGGCTAATGATGCGCAAGATA
CGGCATTCCTGGCACATGTAGTTTCGCGTACCGGTTCTTATCTCTCATCAACCGCCGGGA
TCACGCTTGGCGATCCGATGGCGTATCTGGTGGCACCGCCGCTGGAAGCGACCTACGGCA
TTGATGCAGCGTTGAAATCTGCCGACGTACAGCTGGTGACCTATGTCCCGCCACCGTCTG
AAACTAACTACTCGGCAGCATTTTTAACCGGTAGCCAGGCAGCGTGTAAAGCGGCCTGTA
ACGCCTTTACCGATGCAGTGCTGGAAATCGCGCGTAATCCAATCCAGCGTGCGTAATGGA
GGTTGCCGATGATCAATGCACTGGGATTGCTGGAAGTGGACGGCATGGTCGCTGCGATAG
ATGCAGCGGATGCCATGCTCAAAGCAGCTAACGTTCGTCTGCTCAGTCACGAAGTGCTTG
ACCCTGGTCGCTTAACGCTGGTGGTGGAAGGCGATCTGGCGGCGTGTCGTGCTGCGCTGG
ACGCAGGTTGTGCTGCCGCGATGCGTACCGGGCGTGTCATCAGCCGTAAGGAGATCGGTC
GGCCAGACGATGACACCCAGTGGCTGGTTACTGGCTTTAACCGCCAGCCGAAGCAACCCG
TACAGGAACCCGACGCGCCAGTTATCGTCGCGGAATCTGCTGACGAGTTGTTGGCGCTGT
TAACATCAGTACGTCAGGGAATGACGGCAGGAGAAGTGGCTGCCCACTTTGGCTGGCCGC
TGGAAAAAGCCAGAAATGCGCTCGAACAGCTCTTTTCTGCCGGGACGTTACGTAAACGCA
GTAGTCGTTATCGTCTCAAGCCCCATTAACCTGTCGGAGGTGCCGGGTGTCCTACAACAC
CCGGCATTAACATCATGAAAAAGACCCGTACAGCCAATTTGCACCATCTTTATCATGAAC
CCTTACCCGAAAACCTGAAGCTCACGCCGAAGGTCGAAGTGGATAATGTTCATCAACGAC
AGACAACGGATGTCTATGAACATGCTTTAACGATTACCGCCTGGCAGCAGATTTACGATC
AGCTGCATCCGGGCAAGTTTCATGGTGAATTTACGGAAATTCTACTCGATGATATTCAGG
TTTTTCGTGAATACACCGGTCTGGCGCTGCGTCAGTCGTGTCTGGTCTGGCCGAACTCGT
TCTGGTTTGGCATTCCGGCGACGCGCGGTGAGCAGGGATTTATCGGTTCGCAATGTCTGG
GAAGCGCAGAAATAGCGACGCGCCCTGGTGGAACCGAGTTTGAATTAAGTACGCCGGACG
ATTACACGATCCTGGGCGTAGTGCTTTCTGAAGATGTCATCACCCGTCAGGCTAACTTTT
TGCATAATCCGGATCGGGTATTACATATGTTGCGTAGCCAGTCGGCGCTGGAAGTGAAAG
AGCAGCATAAAGCCGCGCTGTGGGGCTTTGTCCAACAGGCGCTGGCGACGTTTTGCGAGA
ACCCGGAAAATCTTCATCAGCCTGCAGTGCGAAAAGTGCTGGGGGATAATTTGCTAATGG
CGATGGGGGCGATGCTGGAAGAAGCGCAACCAATGGTGACGGCGGAAAGCATCAGTCATC
AGAGTTACCGTAGATTACTTTCCCGCGCCCGTGAATATGTGCTGGAAAACATGTCCGAAC
CGGTGACGGTGCTGGATTTGTGTAATCAACTGCATGTCAGCCGCCGCACGCTACAAAACG
CGTTTCACGCTATTTTAGGCATTGGCCCAAACGCGTGGCTGAAACGCATTCGCCTGAACG
CCGTACGCCGCGAACTGATAAGCCCGTGGTCGCAAAGCACAACGGTAAAAGACGCCGCCA
TGCAGTGGGGATTCTGGCATCTGGGGCAATTTGCCACGGATTACCAGCAGCTGTTTGCCG
AGAAGCCGTCGTTGACGTTGCATCAGCGGATGCGGGAATGGGGGTGAGGGAGTTACACCC
AATCCCTGACCTTAATAAACTCACTTAACGCCGCTTCTGGGCTGCCATCTTTTGGCTGAT
AATCATACTCCCAGCGTACCAGTGGCGGCATTGACATCAGGATCGACTCGGTGCGCCCGC
CAGTTTGCAGGCCAAACAGAGTGCCGCGATCCCAGACCAGATTGAACTCGACATAACGAC
CGCGACGGTAGAGCTGAAAATTGCGCTCGCGCTCGCCGTAGACCATCGCTTTCCGTCGCT
CTACAATTGGTAAATAAGCGTCGGTGTAGCCTTTGCCTACCGCCTGCATAAAGGCAAAAC
AGTGGTCGAAATCTGGCGTGTTCAGATCATCAAAGAACAGCCCGCCAATACCGCGCTGTT
CGTTGCGATGTTTGAGGTAGAAGTAATCGTCGCACCATTTTTTGTAACGGGGATAAACGT
CTTCACCAAATGGCAGGCACAGGTCACGGGCGGTTCGGTGCCAGTGAATGGCATCTTCTT
CAAAACCATAGAAAGGGGTTAAATCGAAGCCGCCGCCAAACCACCAGACTGGCTCTGCAC
CCGGTTTTTCGGCAATAAAAAAGCGCACATTCGCGTGGCTGGTGGGAACATACGGGTTAT
GCGGATGCACTACCAGTGAAACGCCCATCGCCTCGAAACTGCGCCCGGCAAGTTCCGGGC
GATGAGCGGTGGCGGAAGCAGGCATCGCCTCACCATGGACATGTGAAAAGTTGACGCCCG
CCTGTTCGAAAACACCACCATTACGCAACACCCGGCTACGTCCGCCGCCGCCAGCTTCGC
GCTGCCAGCTATCTTCGACAAATTCTGTGCCATCGACGGCGGTCAGCTGCTGACAAATCG
TATCCTGAAGGTTGAGCAGAAACTGTTTAACCTGGTGTGCGTCGGGTTTCATAACTTATC
GCTTTTTCGAATGTGCTTTCTGGTTGTCGAACCAGTGGAAATAACTGATCACGCCTTCAG
CAATCGCTGTGGCGATTTTCTGACGAAACGCCGCCGTGCCTAACAGTCGCTCTTCTTCTG
GGTTGGTGATAAACGAGGTTTCCACCAGCACCGAAGGAACCGACGGCGATTTCAACACCA
CAAACGCGGCTTGTTCGGTGTTGCGGCTGTGCAGTTTATGCACCGGCTTAATCTTTTTCA
GAATATGCGAGCCGAGCGTCAGGCTGTTTTTAATAGTATCGGTTTGCACCAGATCAAACA
GCACTTGCTGCAATAGGTGATCCTTGTCAGTCGCCTTTTTACCGGCAACTTCATCGGCGC
GGTTTTCGCGTTCAGACAGGTATTTCGCCATTGCGCTACTTGCCCCACGGTTAGAGAGGG
CAAATACCGAAGCACCGGCAGCTTTCGGGTTGGTAAAGCCATCGGCATGAATTGACATAA
ACAGATCTGCGCCATGTTTATGGGCGATTTCAACGCGATCGTAAAGTGGGATAAACGTAT
CGCCAGAACGCGTTAAACGCGCATCAATCCCATGATTACGCAAAATGGAACGGACGTTTT
TAGCAATCGCCAGCACCACATGTTTTTCTTTCGAACCGTTGCGCCCGATCGCTCCGGTAT
CAATTCCGCCGTGGCCTGGATCGAGAACAACGACACGTTTGCCGCCAGATTTTTTGGCTT
TCGGCTTGCTGTGTCCGTTGCTGGTTTTTAAAGGTTCGTCTTTGGCGATGGCTTGCGACA
TTCCTGACAACGTCAGGGCAGCCAAACCGGCTTTCAGCACCTGGCGGCGCGAAGTGAGTG
TTTTTAGTGGTTTAAAAGTGCTCATACGGCCTGAGTTGTAATAATAAAGTTCCAGATGTT
ATATCGTATCGCGTAATCCGTTACGACCGTTTGCTGTTGAGAATTGTTTTACTTTTCATT
TCAATAGTTGACAACTCCCCATTATGCCACTTTTTCAACCGATTTTCGTCAGATATTGGC
TAATTCGACCGTTCACGCCATAATCAGCCTTTTAACCCGCAAAAAGGTAACGAATACCAT
GGAGATACGCGTATTTCGCCAGGAAGATTTCGAAGAGGTCATCACCCTTTGGGAGCGTTG
CGACTTGCTGCGTCCGTGGAACGATCCGGAAATGGACATCGAGCGTAAGATGAACCATGA
CGTCAGTTTGTTTCTGGTCGCTGAGGTGAACGGTGAAGTGGTCGGAACGGTGATGGGCGG
TTATGACGGGCATCGCGGGTCTGCTTATTATCTTGGCGTGCATCCAGAGTTTCGTGGGCG
TGGAATTGCCAATGCGTTGCTTAACCGGCTGGAGAAAAAGCTGATTGCTCGCGGCTGCCC
GAAAATTCAGATCAACGTGCCGGAAGATAACGACATGGTGCTCGGAATGTATGAACGCCT
GGGATATGAACACGCCGACGTGCTGAGTCTGGGTAAGCGTTTGATTGAAGATGAAGAGTA
CTGAGTTTCATCCTGTCCATTATGATGCGCACGGTCGCCTGCGTTTACCCTTGCTCTTCT
GGCTTGTGCTATTGCTTCAGGCGCGAACCTGGGTGCTGTTTGTTATTGCCGGTGCGTCGC
GCGAGCAGGGTACTGCGCTGCTAAATCTGTTTTATCCCGATCACGATAATTTCTGGCTGG
GGCTGATTCCTGGCATTCCGGCGGTGCTGGCGTTTTTGCTGAGTGGTCGGCGGGCTTCGT
TTCCCCGTATCTGGCATGTGCTCTATTTTCTGTTGCTGTTGGCGCAAGTGGTTTTACTTT
GCTGGCAACCGTGGCTGTGGCTGAACGGTGAATCCGTTAGCGGTTTCGGTCTGGCGCTGG
TAGTGGCGGATATTGTGGCATTAATCTGGCTGCTGACCAATCGACGTTTACGCGCTTGTT
TTAATGAAGTAAAAGAATAACGGCACTTTTTGGTGAATTTGCACTCCAAGCAACGTTATT
GAATAACCAAAGGAAGTGACATGAAATCGCTGCGTTTAATGTTATGCGCTATGCCATTGA
TGCTGACCGGCTGTTCCACGATGTCGTCAGTTAACTGGTCTGCCGCTAACCCGTGGAACT
GGTTTGGGTCGTCCACCAAAGTGAGCGAGCAGGGCGTTGGTGAATTAACGGCGTCCACAC
CACTGCAAGAACAAGCCATTGCCGATGCGCTTGATGGCGATTATCGCCTGCGCAGCGGAA
TGAAAACCGCGAACGGCAACGTGGTGCGCTTTTTTGAAGTGATGAAGGGCGACAACGTGG
CGATGGTGATTAACGGCGATCAAGGCACGATCAGTCGCATTGACGTGCTGGATAGCGATA
TTCCTGCTGACACCGGTGTTAAAATCGGTACACCGTTTAGCGACCTTTACAGCAAAGCAT
TTGGCAATTGCCAAAAAGCTGATGGTGATGATAATCGTGCCGTCGAATGTAAAGCCGAAG
GCAGTCAACATATTAGCTACCAGTTCAGCGGGGAATGGAGTGGTCCTGAAGGGTTAATGC
CTTCGGACGATACCCTGAAAAACTGGAAAGTCAGTAAAATTATCTGGCGGCGTTAATTTG
CGTCTGAACAAACCGCCGCCGCGAAAAAACACGTAAAATAGCGCTCAACAATGCCACGGA
TTGCGTGGCATTATTATTTTCAGGAGGAACAATGTCTCAGGTTCAGAGTGGCATTTTGCC
AGAACATTGCCGCGCGGCGATTTGGATCGAAGCCAACGTGAAAGGGGAAGTTGACGCCCT
GCGTGCGGCCAGTAAAACATTTGCCGACAAACTGGCAACTTTTGAAGCGAAATTCCCGGA
CGCGCATCTTGGTGCGGTGGTTGCCTTTGGTAACAACACCTGGCGCGCTCTGAGCGGCGG
CGTTGGGGCAGAAGAGCTGAAAGATTTTCCGGGCTACGGTAAAGGCCTTGCGCCGACCAC
CCAGTTCGATGTGTTGATCCACATTCTTTCTCTGCGTCACGACGTAAACTTCTCTGTCGC
CCAGGCGGCGATGGAAGCCTTTGGTGACTGCATTGAAGTGAAAGAAGAGATCCACGGCTT
CCGTTGGGTGGAAGAGCGTGACCTGAGCGGCTTTGTTGACGGTACAGAAAACCCGGCGGG
TGAAGAGACGCGTCGCGAAGTGGCGGTTATCAAAGACGGCGTGGATGCCGGCGGCAGCTA
TGTGTTTGTGCAGCGTTGGGAGCACAACCTGAAGCAGCTCAACCGGATGAGCGTTCACGA
TCAGGAGATGATGATCGGGCGCACCAAAGAGGCCAACGAAGAGATTGACGGCGACGAACG
TCCGGAAACCTCTCACCTCACCCGCGTTGATCTGAAAGAAGATGGCAAAGGGCTGAAGAT
TGTTCGCCAGAGCCTGCCGTACGGCACCGCCAGTGGCACTCACGGTCTGTACTTCTGCGC
CTACTGCGCGCGTCTGCATAACATTGAGCAGCAACTGCTGAGCATGTTTGGCGATACCGA
TGGTAAGCGTGATGCGATGTTGCGTTTCACCAAACCGGTAACCGGCGGCTATTATTTCGC
ACCGTCGCTGGACAAGTTGATGGCGCTGTAAGCGTTTCTGATTCATTGATTAAAGGCCAG
GCAGTAACATTACTGACTGGCCTTTTTATTACTTTTGCTTTAACGCCGCATACACCTGAT
CAACTACCCAACCATACGTTGCAATCGGCAGCTGACCGCTTTCGAACATATTGGGATTCT
TTTGCGGATCGGCAACCGGCGAATGTGGCTTGTTGCTTAACATCACAATCGCCATATGAT
TCACCGGATCGATAACGGTCACCGTTCCGGTCCAGCCAGTGTGACCGTAGGTTTGCGGGC
TTGCCAGCGTGCCAAACGTCGGCGTCATGGTGGCATTACCATTCACGCGCCAGCCGAGGC
CAAAAGTGGCATCTTCCTTAGAGCTGGTGGTGAACATCTTCACCGTTTCCGCACTGAACA
GCTGCACATCGCCATAGCCCCCGCCGTTCAGCATCGTTTGCATTAACACCGCAATATCGC
CGGTATTGGAAAACAAACCTGCGTGCCCGGAAACGCCGCCCATCGAATAAAAGGCTTTTT
CATCGTGCACCTGACCCCAGAGAGTGGAGGTGCGGATATTCGGGAAGTGGATCACTCCAT
CGCGGGTATTGCCGTTCAATTCCGTGGCGGCAATTTGTTGCGGTTTAAAGCCTTTCAGCA
GCGGGTTAAATACCGTATGTGTCAGGCCGAGCGGGCGATAAATCGACTCTTCAACATAGC
GGTCAAGCGGCTGACCGGTGACCGACTCGACGATAAATCCAAGCAGCATATAATCGACAT
CACTGTAAATATGCTTGCTGCCGGGCTGATACTCTAGCGGCGTGCGCTTGATCATCTCCA
GCGTCTGGCCTTTATCCTGGGAATATAACGCGCCCGCGACCGCTTTATTCGGATATTGTG
GGTCCGCCGGGAAACCGCCGCTGTGATGCAGCAGGTCAGAAATCCGCAGCGTGTTTTTGC
CTTTGATGGTGTCATTTGGACTATCGGCAAACCCCGAAATATATTTCGCAATCCGATCGT
CAGGATGCAGCTTGCCTTCGCTCATTAGCTTTTGCAGAGCAAAGTTAGTGGCGTACATTT
TGGTATTGGAAGCCAGGTCATACAGCGTCCCGGTGGTGGCTTTGACAGGCTGTTCCATCA
ATACGCTGCCATCGTACTTTTTCGCCGCTCCCCAGGCTTTGCGATACACAATCTGATTAT
CTTTTATAATCAGCAGGTTTACGCCGGGATAACCGGCGTCCACTTGCTGGCTAATCCAGC
GATCCATCTGGTTAAGCCGTTCGACGTTGAACCCTGCTTTCTCTGGCGAACTTTCTGTCA
GAACAGGGTATTTTGCGGCGCTGACGCTACAACTGACAGCCAGCAGAGAAAGATAGAGCA
TTGTCCGTTTCATAATATCAGTCCAGATTGACGTTACGGCAGCCAAAGAGCGTGGTGAAA
ATAAACCCGCAAACCCATGCCACCAGAATCCCACCTGCATATACCGCCATGGCCGGAAGG
ATGCCTTGCGCGGATGTCATCAGCGGCAGCGCCACCAGACCAGACGGCCCAAAGGCGCTG
TTTAAGCCCATCGGCAGACCCCACCAGGCTATCAGCCCGATAAACAAACCGCCCGCTGCG
CCGCCTAAACAGGCGGTAATAAACGGTTTCATGCGGGGCAGGGTGACGCCGTAAATCAGC
GGTTCGCCAACGCCCAGCAGACCAGGAATAATCGCCCCGCGTACCTGACTGCGTAATGCA
CTGTGCGGTTGCGCCCGCCAGTAGAGTGCCAGCGCCGCGCCCACCTGGCCCGCGCCTGCC
ATTGAAAGGATGGGAAATAAGCTGTTGAATCCCTGGCTGTCCATTAACGCGAGGTAAACA
GGAATAAAGCCCTGATGCACGCCAAATACCACGGCGATCAGGAACAGCCCGGCTAAAACC
GCACAACCGAGCGGATTACTGTTCAGGTGCATAAACAGCCACGACATACCTTCGAATAAC
CAGCCGCCCAGCGGCATAATGATCAGGTAGGCCAGCGTAGCGGTGATCAGTAGGGTGATT
AACGAGGTCAGCAGCATGTCGAGATCGTCCGGCATAAAGCGGCGCACCATGCCTTCAATG
CGAGCGCAGGCCCATGCGGCAATCAACACGCCGATAATATTGCCGCGCGGATCGATGGGC
AGACCAAAGAAATCGTGAAAACCGGCGTAGTAACCGGTGGTTGCAGCGGGGTTATAACCG
AGCAAAAAGAGTGCGGCAATAATTGCGCCATTGACGCCCGTGCCGCCAAATGCCTGGGCG
GCGTTATAGCCCACCAGAATCACCAGGAAGGTGAACAAACCTTTGCTGAACACCTTCATA
AAATTCAGCGCGTCGGGTAGCGTGCCCTGAGCATCTGCCGGAACGTGCATCACCGTGGCA
AATAACGTCGCTATCCCCAGCAGCAGACCGGCGGCAATAAAACCGGGGATAAGCGGCGTA
AAGATGGTGGCGAATTTAGCGAGAAATTGTTGCACGCCGGAGGTTTGTTTGGCTTTTAAC
TGACGTTTGTTCTGGGCGGCGATTTCTGCGGCATCCTGTACCGGTGCTTCTCCCAGCAGC
TCGCTCATCGCTTTTGCGGCACGATGCGCTTTACCAGGCCCAAAAACGACCTGCACCTGG
TCGCTGGTCAAAATGACGCCCTTCACGCCTTCCAGCGTTTTGATATTGGGATCAACCAGT
GAACTGTCATGTACACCCAGACGCAGGCGCGTCATACAGTTACCACAACTGGCGATATTT
CCCGGTCCGCCGACACGGGTAAGAATGGTGTTCAGAAGTTCACTGCTGATCTCTTTGACC
ATGGGTTATTCCTTGTCTAAAACCTGACGAATAAAGCCGCCGTGTTGATCCAGGCGTTTT
TTAGCTTCTGTGGCATCGAGATTTTTCAGCACCATCACAATGGCCGTTTTACAGTTGCGC
TCGCAGGCAATTAACGCCGCTTCCGCTTGTTCGGCATTACATCCGGTGGCGTTTTTAACG
ATATTGACCTGGCGCACATGCAGTTTTTCGTTGGTGGCGACCACATCGACCATCAGGTTG
CCGAACACTTTGCCGGATTTAATCATCAGCCCGGTGGAGAGCATATTGAGCACCAGTTTC
TGCGCTGTACCTGCTTTCATCCGCGAAGAACCGGTAACCACTTCGGCACCTACAATCGGT
GTAATGGCAAACTCTGCGGTGGTTGAAACGGCGCTCCCCGGATTACAGGAAATTCCCACT
GTGCGGCAGCCGAGCTGGCGTGCGTATTCCAGTCCGGCAATTACATACGGCGTGCGACCA
CTGGCCGCAATACCAACCACCACATCCTGTGCCGTTAAATTAATATTTTTCAGATCGTTA
ACACCACCTTCCCGGCTATCTTCAGCGCCTTCCACCGCGTGCTGAATGGCATATTCGCCT
CCAGCAATCAAACCAACTACCAGACCCGGTTTCACGCCGTAGGTGGGCGGACATTCGCTG
GCATCCAGAATCCCCAGACGACCGGATGTTCCCGCACCGAGATAAATCAGACGACCGCCG
CCGCTTACCTGGGCGTGGATAACATCGATCGCCGCGGCGATATCCGGCAGTACGCGCTCA
ACGGCAAGCGGTACGGTTTTATCTTCATCGTTGATAATCCGGCACATTTCCAGCGTTGAT
ACGCGGTCAATTTCAGCCGAGGCGGCGTTCGAGCCTTCGGTAATCATCTTTTCAAGTTGC
ATCGGTGGTGACCTTACTATTTACGATCAAATAATTGCAGATGTATGGAATCATATATCC
CGAATTGACAGACTTAAAGGAATCATTGAGTCTACACTCGCAGAGTGTGAAGAGCGTCAT
AAGAACTTAAGCGGAATTTTTGCTGCCAGCCCAGGAGAGTGGAAGATGTTGTACCTGACG
AAAATACGCAATGCGGAAAGTGAATTTACCGAGAACGAGCAAAAAATTGCTGACTTTCTG
CGGGCCAACGTGAGTGAGCTGAAATCCGTCTCTTCGCGCAAGATGGCGAAACAGCTCGGC
ATCAGCCAGTCGAGTATTGTGAAATTTGCCCAGAAGCTCGGCGCGCAAGGATTTACTGAA
TTGCGTATGGCGTTAATTGGCGAATACAGTGCCAGCCGGGAGAAAACGAATGCCACGGCG
CTGCACCTGCACAGTTCGATTACCAGTGATGATTCGCTGGAAGTGATTGCCCGCAAATTG
AATCGCGAAAAAGAGCTGGCGCTGGATCAAACCTGTGCGTTGTTCGACTACGCGCGGATG
CAAAAAATCATTGAGGTCATCAGTAAAGCACCGTTTATCCAGATAACGGGCCTGGGCGGA
TCGGCGCTGGTGGGGCGCGATCTGTCGTTCAAACTGATGAAAATTGGCTATCGCGTGGCC
TGCGAAGCCGACACGCACGTACAAGCTACCGTTTCCCAGGCGTTGAAAAAAGGCGATGTA
CAAATCGCTATCTCTTACAGCGGCAGTAAAAAAGAGATTGTCTTGTGCGCAGAAGCGGCA
CGAAAGCAGGGGGCAACGGTGATTGCCATTACTTCTCTGGCTGACTCTCCGCTGCGGCGG
CTGGCGCATTTCACGCTCGATACCGTTTCCGGTGAAACCGAATGGCGTAGCTCGTCGATG
TCTACCCGCACGGCGCAAAATTCTGTTACCGATTTACTGTTTGTTGGTCTTGTGCAACTC
AATGATGTGGAGTCATTGAAAATGATTCAGCGCAGCAGTGAGCTAACACAACGCCTGAAA
TGATGCATAAAGCAGCGACTGGATTGAGATTTTCCTGAATTAGTGAGCTGATCCGCAGCA
ATATTTTGTTTATCCTGTATTTTCAGAGGGAATGGAGTGTAACGCTCTGTATTAACAAGG
AGAGCATTAAAATGGGTAAACTCACGGGCAAGACAGCACTGATTACGGGCGCATTGCAGG
GAATTGGCGAAGGAATTGCCAGAACTTTTGCGCGTCATGGCGCAAACCTAATCTTGCTGG
ATATCTCCCCTGAGATCGAAAAGCTGGCGGACGAACTGTGTGGTCGTGGTCATCGCTGTA
CGGCGGTTGTCGCCGATGTGCGTGACCCGGCGTCGGTAGCCGCAGCTATCAAACGCGCGA
AGGAAAAAGAAGGGCGCATTGATATCCTGGTGAATAACGCAGGCGTTTGTCGTCTGGGCA
GTTTCCTCGATATGAGCGATGACGATCGCGATTTCCATATTGATATCAATATTAAAGGCG
TATGGAACGTCACGAAGGCGGTGTTGCCGGAGATGATTGCCCGCAAAGATGGTCGCATTG
TGATGATGTCTTCAGTCACTGGCGATATGGTGGCCGATCCGGGTGAAACGGCGTATGCCT
TAACGAAAGCGGCGATTGTTGGCCTGACTAAATCGCTGGCGGTGGAGTACGCGCAGTCTG
GTATTCGCGTTAACGCCATCTGCCCGGGATACGTTCGCACGCCAATGGCGGAAAGCATTG
CCCGCCAGTCGAACCCGGAAGATCCAGAATCGGTGCTGACTGAAATGGCAAAAGCAATCC
CGCTGCGTCGCCTCGCCGATCCGCTGGAAGTCGGCGAACTGGCAGCCTTCCTCGCATCGG
ATGAATCAAGTTATTTAACCGGTACACAGAATGTGATTGATGGCGGCAGCACACTGCCGG
AGACGGTTAGCGTCGGCATCTGATTCACCTCTGTTTCCTCCCTGCATGTGTGGGGAGGAT
TTCGTCTTATTCCCTTTTCAACTTCCAAATCACCAAACGGTATATAAAACCGTTACTCCT
TTCACGTCCGTTATAAATATGATGGCTATTAGAAAGTCATTAAATTTATAAGGGTGCGCA
ATGGCCGTTAACTTACTGAAAAAGAACTCACTCGCGCTGGTCGCTTCTCTGCTGCTGGCG
GGCCATGTACAGGCAACGGAACTGCTGAACAGTTCTTATGACGTCTCCCGCGAGCTGTTT
GCCGCCCTGAACCCGCCGTTTGAGCAACAATGGGCCAAAGATAACGGCGGCGACAAACTG
ACGATAAAACAATCTCATGCCGGGTCATCAAAACAGGCGCTGGCAATTTTGCAGGGCTTA
AAAGCCGACGTTGTCACTTATAACCAGGTGACCGACGTACAAATTCTGCACGATAAAGGC
AAGCTTATCCCGGCGGACTGGCAGTCGCGCCTGCCGAATAATAGCTCGCCGTTCTACTCC
ACCATGGGCTTCCTGGTGCGTAAGGGCAACCCGAAGAATATCCACGACTGGAACGACCTG
GTGCGCTCCGACGTGAAGCTGATTTTCCCGAACCCGAAAACGTCGGGTAACGCGCGTTAT
ACCTATCTGGCGGCATGGGGCGCAGCGGATAAAGCTGACGGTGGCGACAAAGCCAAAACC
GAACAGTTTATGACCCAGTTCCTGAAAAACGTTGAAGTGTTCGATACTGGCGGTCGTGGC
GCGACCACCACTTTTGCCGAGCGCGGCCTGGGCGATGTGCTGATCAGCTTCGAGTCGGAA
GTGAACAACATCCGCAAACAGTATGAAGCGCAGGGCTTTGAAGTGGTGATTCCGAAAACC
AACATTCTGGCGGAATTCCCGGTGGCGTGGGTCGATAAAAACGTGCAGGCCAACGGTACG
GAAAAAGCAGCAAAAGCCTACCTGAACTGGCTCTACAGCCCGCAGGCGCAGACCATCATC
ACCGACTATTACTACCGCGTAAATAACCCGGAAGTCATGGACAAACTGAAAGATAAATTC
CCGCAGACCGAACTGTTCCGCGTGGAAGACAAATTTGGCTCCTGGCCGGAAGTGATGAAA
ACCCACTTCACCAGCGGCGGCGAGTTAGACAAGCTGTTAGCGGCGGGGCGTAACTGATGT
TTGCAGTTTCATCAAGACGCGTGCTGCCGGGCTTTACCTTAAGCCTCGGCACCAGTCTGC
TGTTTGTTTGCCTGATTTTGCTCCTGCCACTCTCCGCGCTGGTGATGCAGCTGGCCCAGA
TGAGCTGGGCGCAGTACTGGGAGGTGATCACCAACCCGCAGGTGGTCGCAGCCTACAAAG
TGACGCTGCTGTCGGCGTTTGTGGCATCGATTTTTAACGGCGTTTTCGGCCTGCTGATGG
CGTGGATCTTAACTCGTTATCGCTTCCCTGGCCGCACGCTGCTTGATGCGCTGATGGATT
TACCCTTTGCGCTGCCAACGGCAGTCGCCGGTTTAACGCTGGCCTCGCTCTTTTCCGTGA
ACGGTTTTTACGGTGAATGGCTGGCGAAGTTTGATATCAAAGTCACCTACACCTGGCTTG
GGATTGCGGTGGCGATGGCCTTTACCAGCATTCCGTTTGTGGTGCGTACCGTGCAGCCGG
TGCTGGAAGAGTTAGGCCCGGAATATGAAGAAGCGGCGGAAACGCTTGGTGCAACGCGCT
GGCAGAGTTTCTGCAAAGTGGTGCTGCCGGAACTTTCTCCGGCGCTGGTGGCGGGCGTGG
CGTTGTCGTTTACCCGTAGTCTTGGTGAGTTTGGCGCGGTGATATTTATCGCCGGGAACA
TCGCCTGGAAGACGGAAGTGACGTCGCTGATGATTTTTGTGCGCTTGCAGGAGTTTGATT
ACCCGGCAGCGAGCGCGATTGCTTCGGTGATCCTCGCGGCATCTCTGCTGCTGCTGTTCT
CAATTAACACTCTGCAAAGTCGCTTTGGTCGGCGTGTGGTAGGTCATTAATGGCGGAAGT
TACCCAATTGAAGCGTTATGACGCGCGCCCGATTAACTGGGGCAAATGGTTTCTGATTGG
CATCGGGATGCTGGTATCGGCGTTCATCCTGCTGGTGCCGATGATTTATATCTTCGTACA
GGCGTTCAGCAAAGGGCTGATGCCGGTTTTACAGAATCTGGCCGATCCGGATATGCTGCA
CGCCATCTGGCTGACGGTGATGATCGCGCTGATTGCCGTACCGGTAAACCTGGTGTTCGG
CATTCTGCTGGCCTGGCTGGTGACGCGCTTTAACTTCCCTGGACGCCAGTTACTGCTGAC
GCTACTGGACATTCCGTTTGCCGTATCGCCGGTGGTTGCCGGTCTGGTGTATCTGCTGTT
CTACGGCTCTAACGGCCCGCTCGGCGGCTGGCTGGATGAACATAATCTGCAAATTATGTT
CTCCTGGCCGGGAATGGTGCTGGTCACCATCTTTGTGACATGTCCGTTTGTGGTGCGCGA
GCTGGTGCCGGTGATGTTAAGCCAGGGCAGCCAGGAAGACGAAGCGGCGATTTTGCTTGG
CGCGTCTGGCTGGCAGATGTTCCGCCGTGTCACATTGCCGAACATCCGCTGGGCGCTGCT
TTATGGCGTAGTGCTGACCAACGCCCGCGCGATTGGCGAGTTTGGCGCGGTGTCGGTGGT
TTCCGGCTCGATTCGCGGCGAAACACTTTCGCTGCCGTTACAGATTGAATTGCTGGAGCA
GGACTACAACACCGTCGGCTCCTTTACCGCCGCCGCGCTGTTGACGCTGATGGCGATTAT
CACCCTGTTTTTAAAGAGTATGTTGCAGTGGCGTCTGGAGAATCAGGAAAAACGCGCGCA
GCAGGAGGAGCATCATGAGCATTGAGATTGCCAATATTAAGAAGTCTTTTGGTCGCACCC
AGGTGCTGAACGATATCTCACTGGATATTCCTTCAGGTCAGATGGTCGCGTTGCTGGGGC
CGTCCGGTTCCGGGAAAACCACGCTGCTGCGCATTATCGCCGGGCTGGAGCATCAAACCA
GCGGGCATATTCGCTTCCACGGCACCGACGTGAGCCGCCTGCACGCACGTGATCGTAAAG
TCGGTTTCGTGTTCCAGCATTACGCGCTGTTCCGCCATATGACGGTGTTCGACAATATCT
CTTTTGGCCTGACGGTGCTGCCGCGTCGCGAGCGCCCGAATGCCGCAGCCATCAAAGCGA
AAGTGACAAAATTGCTGGAAATGGTCCAGCTTGCCCATCTGGCGGATCGTTATCCGGCGC
AGCTTTCCGGCGGCCAGAAACAGCGCGTGGCGCTGGCGCGCGCGCTGGCTGTGGAACCGC
AAATTCTGCTGCTTGATGAACCGTTTGGCGCGCTGGATGCGCAGGTGCGTAAAGAGCTGC
GTCGCTGGCTGCGTCAACTCCATGAAGAACTAAAATTCACCAGCGTTTTTGTGACCCACG
ATCAGGAAGAAGCGACCGAAGTAGCTGATCGTGTAGTTGTGATGAGCCAGGGCAATATTG
AACAGGCTGACGCGCCGGATCAGGTATGGCGCGAACCGGCGACCCGTTTTGTGCTCGAAT
TTATGGGCGAAGTGAACCGCCTGCAGGGAACCATTCGCGGCGGGCAGTTCCATGTTGGCG
CGCATCGCTGGCCGCTGGGCTACACACCTGCATATCAGGGGCCGGTGGATCTCTTCCTGC
GCCCTTGGGAAGTGGATATCAGCCGCCGTACCAGCCTCGATTCGCCGCTGCCGGTACAGG
TACTGGAAGCCAGCCCGAAAGGTCACTACACCCAATTAGTGGTGCAGCCGCTGGGGTGGT
ACAACGAACCGCTGACGGTCGTGATGCATGGCGACGATGCCCCGCAGCGTGGCGAGCGTT
TATTCGTTGGTCTGCAACATGCGCGGCTGTATAACGGCGACGAGCGTATCGAAACCCGAG
ATGAGGAACTTGCTCTCGCACAAAGCGCCTGATAGGTTGAGTGAATGTTAAACGCCCGGA
GGCGCTTCCCGCGATCCGGGCTTTTTAATGGCAAGGTTTGTAACCTGTAGGCCTGATAAG
ACGCGCAAGCGTCGCATCAGGCAACACCACGTATGGATAGAGATCGTGAGTACATTAGAA
CAAACAATTGGCAATACACCTCTGGTGAAGTTGCAGCGAATGGGGCCGAATAACGGCAGT
GAAGTGTGGTTGAAACTGGAAGGCAATAACCCGGCAGGTTCGGTAAAAGATCGTGCGGCG
CTTTCGATGATCGTCGAGGCGGAAAAGCGCGGGGAAATTAAACCGGGTGATGTGTTAATC
GAAGCCACCAGTGGTAACACCGGCATTGCGCTGGCAATGATTGCCGCGCTTAAAGGCTAT
CGCATGAAATTGCTGATGCCCGACAACATGAGCCAGGAACGCCGTGCGGCGATGCGTGCT
TATGGTGCGGAACTGATTCTTGTCACCAAAGAGCAGGGTATGGAAGGTGCGCGCGATCTG
GCGCTGGAGATGGCGAATCGTGGTGAAGGAAAGCTGCTCGATCAGTTCAATAATCCCGAT
AACCCTTACGCCCATTACACCACTACCGGGCCGGAAATCTGGCAGCAAACTGGCGGGCGC
ATTACCCATTTTGTCTCCAGCATGGGAACAACCGGCACTATCACCGGCGTGTCACGCTTT
ATGCGCGAACAATCCAAACCGGTGACCATTGTCGGCCTGCAACCGGAAGAGGGCAGCAGC
ATTCCCGGCATTCGCCGCTGGCCTGCGGAATATCTGCCGGGGATTTTCAACGCTTCGCTG
ATGGATGAGGTGCTGGATATTCATCAGCGCGATGCGGAAAACACCATGCGCGAACTGGCA
GTGCGGGAAGGAATATTCTGTGGCGTCAGCTCCGGCGGCGCGGTTGCTGGAGCACTGCGG
GTGGCAAAAGCTAACCCTGGTGCGGTGGTGGTAGCGATCATCTGCGATCGTGGCGATCGC
TACCTTTCCACCGGGGTGTTTGGGGAAGAGCATTTTAGTCAGGGGGCGGGGATTTAAGAT
TATTGCGCAGGCACCGTTTTATCCGTCTGCGCAATTAACGCATGTAAAAAAGGCTGTGCA
TTCTCATCGCTCTTACCGGGCATCTTCACGATATACGGCTTCCCGGTAATCGATGATGAC
GAAGCAACCTTATCAATAAACTGCTCGGCAGTGTTAATGCGGTTACGGGTATTGCCGAGC
TTCAGACGCAGATGAGAAACCGCTTCATCGCAGGTATGTTCATCACCGTTGCGCACAAAT
ATCAAATCCTTTTTCTGTGCTAATCCCTCCAGCATGGCGTTGATGCGGGCTTCTTCATGG
GCAGTTAACTTCGCGTAAGCGGGGAGTGTCATTAGTAGTGTAATGACCAGACAAATGATT
TTCTTCATTGAATTACCTTATCCTTGTTTTGTGATAGCCGATTTGACTGCCAGAATCAGG
TAAAGTTTCGGTTGGAATACGATGAGGATCATCGGCAAGGAGAAAAAATTAAATGAGTAG
TTTGTTGTTGTTTAACGATAAGAGCAGGGCACTGCAGGCGGATATCGTCGCCGTGCAGTC
GCAGGTAGTGTACGGCAGCGTAGGCAACAGCATTGCGGTGCCTGCTATCAAACAGAACGG
TCTGAATGTCTTTGCCGTGCCGACGGTATTGCTGAGCAATACGCCGCATTATGACACTTT
CTACGGTGGTGCGATTCCGGACGAATGGTTTAGCGGCTATTTGCGTGCGCTTCAGGAGCG
TGATGCGCTGCGCCAACTTCGAGCTGTAACCACGGGCTATATGGGAACGGCATCGCAAAT
CAAAATCCTTGCCGAGTGGCTGACTGCGCTACGCAAAGACCATCCTGACCTATTGATCAT
GGTCGATCCGGTGATTGGCGATATTGATAGCGGAATTTATGTCAAACCTGACCTTCCCGA
GGCGTATCGACAATATTTACTGCCACTAGCGCAGGGAATTACCCCCAATATCTTTGAGCT
GGAAATCCTGACCGGTAAAAATTGCCGCGATCTCGACAGTGCCATTGCTGCCGCAAAAAG
TCTGCTTTCAGACACATTAAAATGGGTGGTGATTACCAGCGCCTCCGGTAATGAAGAAAA
TCAGGAGATGCAGGTGGTGGTGGTCACTGCCGACAGCGTGAATGTCATTTCCCATTCACG
GGTAAAAACCGACCTGAAAGGGACTGGCGACCTGTTTTGTGCTCAGCTTATCAGTGGTTT
GCTGAAAGGGAAGGCGTTAACCGATGCAGTGCACCGAGCGGGGTTGCGCGTACTGGAAGT
GATGCGCTACACCCAGCAGCATGAGAGCGATGAATTGATTTTGCCGCCGCTGGCGGAAGC
ATAAAAAAATGGCGCCGATGGGCGCCATTTTTCACTGCGGCAAGAATTACTTCTTGATGC
GGATAACCGGGGTTTCACCCACGGTTACGCTACCGGACAGTTTGATCAGTTCTTTGATTT
CGTCCATGTTGGAGATAACAACCGGAGTCAGGGTAGACTTGGCTTTCTCTTCCAGCAGCG
GCAGATCAAATTCAATGACAGTATCGCCAACTTTCACGCGCTGACCTTCTTCAGCAATAC
GCTTGAAGCCTTCGCCTTTCAGTTCAACGGTGTCGATACCGAAGTGGACGAACAGTTCAA
CGCCGCTATCAGATTCGATAGAGAATGCGTGGTTGGTTTCAAAGATTTTACCAATGGTAC
CGTCTACAGGCGCGACCATTTTGTTACCCGTTGGTTTGATAGCAATACCATCACCAACGA
TTTTTTCCGCAAAAACGACATCCGGCACGTCTTCGATATTGACGATCTCGCCAGAGAGCG
GAGCAATGATCTCAATAGTTCCGGTATCCTTCTTGTCGTCGGAAACCAGAGATTTCAGTT
TATCGAACAAACCCATGATCTTCTCCTAAGCAGTAAATTGGGCCGCATCTCGTGGATTAG
CAGATTGTTTTTTCTTCAATGAACTTGTTAACCAGCGTCATTAACTCGTCCGTTGTCGGT
TGAGCAAGAGCCTGCTCTGCTAACACCTTCGCATCTTCGAAGTTCGTGTTACGGATAATC
TTCTTAATGCGCGGGATAGAAATGGCGCTCATAGAGAATTCGTCCAGACCCATCCCCAGC
AACAGAAGTGTAGCACGTTCATCGCCAGCAAGCTCACCACACATGCCAGTCCATTTGCCT
TCAGCATGAGAAGCATCAATAACTTGCTTGATCAAGTTCAGCACGGACGGTGACATTGGC
TGGTAAAGGTGTGAAATCATATCATTACCACGGTCAACTGCCAGAGTGTACTGCGTTAAA
TCATTGGTGCCGATACTAAAGAAATCAACTTCTTTGGCTAAATGACGTGCAATTGTTGCG
GCAGCCGGTGTTTCCACCATTACGCCGATTTCAATTGACTCGTCAAACGCTTTACCTTCG
TCGCGCAGTTCCTGTTTGTAGATTTCGATCTCTTTGCGCAGTGCACGCACTTCTTCAACA
GAGATGATCATCGGGAACATAATGCGCAATTTACCGAAAGCCGAGGCACGCAGGATAGCG
CGGAGCTGATCGCGCAGGATCTCTTTACGATCCATTGCGATACGGATAGCGCGCCAGCCG
AGGAACGGGTTCTCTTCTTTCGGGAAGTTCATGTATGGCAGCTCTTTGTCGCCGCCGATG
TCCATGGTACGAACGATAACCGCCTGCGAGCCACACGCTTCAGCCACTGCTTTGTAAGCA
GCAAACTGTTCTTCTTCAGTGGGCAGCGCGTCGCGGTCCATGAACAGGAACTCAGTACGA
TACAGACCAACGCCTTCAGCGCCGTTACGCTCTGCACCTTCAACGTCACGAACCGTACCA
ATGTTAGCGCATACTTCTACCTGGTGACCGTCCAGCGTAATAGCTGGCAGATCTTTCAGT
TTAGCAAGCTCTGCTTTTTCAGAAGCCACTTGCTCCTGAACAGCGCGCATTTTATCAATA
ACTTCGTTGGTTGGATTGACGTAAACCTGATTATTTACGGCATCCAGAATCAGATAGTCG
TCATTTTTCACCTGAGAGGTGACGCTACCGGTACCCACGATAGCAGGTAGTTCCAGAGAA
CGCGCCATGATAGAGGTGTGGGAAGTACGGCCACCCGCGTCGGTGATGAAACCCAGCACC
TTCTTCAGGTTCAGCTGTGCGGTTTCGGACGGCGTCAGGTCAGCGGCAACCAGAATGACT
TCATCCTGAATGGCGCTCAGGTCGATAATCTTCAGGCCCAGGATGTTGCGCAGCAGGCGC
TTACCGATATCACGTACGTCAGCCGCACGTTCTTTCAGGTATTCATCATCCAGCTCTTCC
AGGGCAGAAGCCTGACCTTCGATAACTTCATGAGCAGCTGCGTCAGCTGTCATGTGCTTA
TCTTTAATCAGGGCTATGATTTCCTGCTCCAGCTCCTCATCTTCGAGCAGCATAATATGC
CCTTCAAAGATGGCTTCTTTTTCTTCACCGAACGTTTCACCAGCTTTCGTTTTGATCGTT
TCCAGCTGGGCTGATGCCTTGGCACGACCGCTCAGAAAACGTTCAACTTCCTGATCAACC
TGGTCGGCAGAAATTTTTTTCCGGTCAATGACAATTTCGTCTTCTTTCAGAAGCAGAGCT
TTACCGAAAGCGATACCCGGGGATGCTAAAATGCCTGAAATCATAACCCTACCTTACTTG
TGACTGATTTTTAAAAGAACCCGGGAAATTACTCGAGTTCCGCCATCAGTTTAACCAGAT
GTTCAACCGCTTTCTGCTCGTCTTCGCCTTCTGCGGAGATAGTCACAACGGTACCTTGAG
TCAGGCCCAGAGTCTGCAGTTTAAACAGGCTTTTCGCGCTGGCGCTTTTGCCGTTGGAAG
TCACAGTAATTTCAGAAGTGAAGCCCTTAGCTTCTTTTACAAACTGGGCAGCAGGGCGGG
TGTGCAGACCGTTCGGAGCGGTAATGGTAACTTCTTGCTGGAACATTGTATTTCCCCAAC
TTATAGGTTTAGTGTTGTGGAACTAAAGTCTAGCCTGGCGGTTCGACTTTAGCCTGTATT
GTTAGCGCCAGTTTTTAACAGACGCGACGCACGAAGAGCGCAATACAGTCCATTGCTGGC
GGGTGTTGACCGCTGACGTTTCGTACGTCATTAAACATTATGCCGCTAAAGGAAGAATTG
AACCAAATCATAAAATCGATTCAGCTTTGGCTTTTCCTGTAACGATTAATTTCGCGCATC
AAAATAATTAGTCTGGTTAAATACCAGTTCCGACAGGCTGAATCAATGCCAGGAGGGGCG
AAAGTTTGAAGCAGGCCACAAAAAAGCACCTAAAAAGGTGCTTTTTTACGCATTTTTAAC
AAGCTGGCATTACTGTTGCAGTTCTTTCTCAGTGAAGAGATCGGCAAACAATGCGGTGCT
TAAATAACGCTCACCCGATGACGGTAGAATAACCACAATATTCTTGTTGGTAAAGCTTTC
ATCTTCTTGTAGTTTCAACGCCGCAGCAACAGCTGCTCCAGAAGAGATACCTGCAAGAAT
ACCTTCTTCTTCCATCAGACGACGCGCGGTAGAAATGGCTTCTTCATTGGTAATGCCAAT
GACTTTATCGATCAGCTTGAGATCGAGGTTAGCCGGGATAAAACCAGCGCCAATACCCTG
AATTTTATGCGGGCCAGGTTTAATCTCTTCACCTGCCAGCGCCTGGGCGATAACTGGAGA
ATCGGTTGGCTCAACGGCGACAGAGATAAGATCGGTCTTGCCTTTGGTGCCTTTAATGTA
GCGGCTGACGCCGGTCAGCGTACCGCCAGTCCCAACGCCAGCAATAAATACATCAACCTG
ACCGTCGGTATCTTCCCAGATCTCCGGACCGGTGGTTTTTTCGTGAATTTCAGGGTTTGC
CGGATTGCTGAATTGTTGCAGCAGCAGGTATTTCTCTGGATTGCTGGCGACAATTTCTTC
TGCTTTTTGGATTGCGCCTTTCATGCCTTTAGCACCTTCGGTCAGCACCAGGTTTGCACC
TAACGCTTTCAGCAGCTTGCGGCGTTCAATACTCATGGTTTCTGGCATGGTCAGGGTGAG
TTTGTAACCGCGAGCGGCAGCTACATAGGCCAGTGCAATCCCGGTATTACCGCTGGTCGG
TTCAACCAGTTCAACGCCTGGTTTCAGCACGCCGCGCTTTTCGGCATCCCAAATCATGTT
GGCACCGATACGGCACTTAACGCTGAAGCTGGGGTTACGAGATTCCACCTTCGCCAGAAT
GCGTCCGTTACCGATGCGATTCAGGCGAACCAGCGGCGTGTGACCGATAGTCAGCGAGTT
ATCTTCAAAAATCTTACTCATGGCCTGTCCTTAACTGTATGAAATTGGGATACAACAGGT
AGCATACCCGCTCAGAGAATATGCGGAAGTAAGGATTTAGCATATCTATATACAGAAGGG
AAATAATGACATGCAAGATGGAATAAGGGGCGGCATAAGCCACCCCTGTTTCACACAAAC
GGTTTACAAAATAACCGGTAGATTGTTACCGCCACATCGCGTGTTTATCGCGATAGCAAT
CGACCCACATCGCCGTCGCGCCACAAACGGCAACGGGCATGATGAACAGATTAAGCAGCG
GGATCATCGTAAACAGGCTGGTTAAAGCACCAAACTGCATATTGGTGATTTTGCGTGTGC
GCAGGGCGGTGCGCATCTCTTTAAACGGCACTTTGTGGTTATCGAAGGGGTAATCGCAAT
ACTGGATGGCTAACATCCAGGCGCTAAACAGGAACCACAGTACCGGCGCGACGGTTTGCC
CAATACCAGGGATGAAGTAAAGAATTAGTAATACAATTGCGCGCGGCAGATACCAGGCAA
ATTTTTGCCATTCGCGTTTCATGATTCGCGGCACATCTTTCATGATACCGAAAATCCCGG
TATCTGGCGGTGTAGCGCCAGTCAATCGTGCTTCCAGTTGTTCAGCCAATAAACCGTTAA
ACGGAGCGGCAATCCAGTTAGCAATCGTGGAGAAGAAATAGCCAAACACTAACAGCACAG
AGATGACAGCCAGAGGCCACAACAGATAGCTCAGCCATTGTAACCAGTCCGGAACATAAC
TCATGAGAGTCGGGATCCAGACATCGAGTTGCGTAAAGAGCCACCAGAATGCGCCCCCCA
TCAACAAAATATTGACCAGCAGCGGTAAAATAACGAAACGCCGAATCCCAGGTTGCGAGA
CGAGCTTCCAGCCTTGCGCAAAATAGTAAAAACCGCTGCGTGGGGCAGATGTGAATGATG
AAACCATAATCAGGATGAGCTCCTTTTGACCAATCCCAGGAAAATTGTGCGTATTTTACC
GGGTAATTGCGCAATGGACAGTTAGGATATGTTCGAAAAAACAGCAAAAAGCACGATTTC
ATCTATCTTTGTGCTGTGAAAGTTAATAGTGCACTTGCACTTGAGGTAATCGGCAAATAC
TCTTAGTGAGTAAATGTTTGCCGTGGTGGCAAGGTGTTAGAACAACAGAGAATATAATGA
TGCAGGATTTGCGTCTGATATTAATCATTGTTGGCGCGATCGCCATAATCGCTTTACTGG
TACATGGTTTCTGGACCAGCCGTAAAGAACGATCTTCTATGTTCCGCGATCGGCCATTAA
AACGAATGAAGTCAAAACGTGACGACGATTCTTATGACGAGGATGTCGAAGATGATGAGG
GCGTTGGTGAGGTTCGTGTTCACCGCGTGAATCATGCCCCGGCTAACGCCCAGGAGCATG
AGGCTGCTCGTCCGTCGCCGCAACACCAGTACCAACCGCCTTATGCGTCTGCGCAGCCGC
GTCAACCGGTCCAGCAGCCGCCTGAAGCGCAGGTACCGCCGCAACATGCTCCGCGTCCAG
CGCAGCCGGTGCAGCAACCCGTGCAGCAGCCTGCCTATCAGCCGCAGCCTGAACAGCCGT
TGCAGCAGCCAGTTTCGCCACAGGTCGCGCCAGCGCCGCAGCCAGTGCATTCAGCACCGC
AACCGGCACAACAGGCTTTCCAGCCTGCAGAACCCGTAGCGGCACCACAGCCTGAGCCTG
TAGCGGAACCGGCTCCAGTTATGGATAAACCGAAGCGCAAAGAAGCGGTGATTATCATGA
ACGTCGCGGCGCATCACGGTAGCGAGCTAAACGGTGAACTGCTTCTTAACAGCATTCAAC
AAGCGGGCTTCATTTTTGGCGATATGAATATTTACCATCGTCATCTTAGCCCGGATGGCA
GCGGCCCGGCGTTATTCAGCCTGGCGAATATGGTGAAACCGGGAACCTTTGATCCTGAAA
TGAAGGATTTCACTACTCCGGGTGTCACTATCTTTATGCAGGTACCGTCTTACGGTGACG
AGCTGCAGAACTTCAAGCTGATGCTGCAATCTGCGCAGCATATTGCCGATGAAGTGGGCG
GTGTCGTGCTTGACGATCAGCGCCGTATGATGACTCCGCAGAAATTGCGCGAGTACCAGG
ACATCATCCGCGAAGTCAAAGACGCCAACGCCTGATACACTTAAGGCAAATTAACTCCTC
TTCGAACCCCCGCTTGTCGGGGGTTTTTAGCATTGATGGTGCGATATGGAATCAATCGAA
CAACAACTGACAGAACTGCGAACGACGCTTCGCCATCATGAATATCTTTATCATGTGATG
GATGCGCCGGAAATTCCCGACGCTGAATACGACAGGCTGATGCGCGAACTGCGCGAGCTG
GAAACCAAACATCCAGAACTGATTACGCCTGATTCGCCTACCCAACGTGTAGGTGCTGCG
CCGCTGGCGGCTTTCAGCCAGATTCGCCATGAAGTGCCAATGCTGTCGCTGGATAACGTT
TTTGATGAAGAAAGCTTTCTTGCTTTCAACAAACGTGTGCAGGACCGTCTGAAAAGCAAC
GAGAAAGTCACCTGGTGCTGTGAGCTGAAGCTGGATGGCCTTGCCGTCAGTATTCTGTAT
GAAAATGGCGTTTTAGTCAGTGCCGCGACCCGTGGCGATGGCACCACCGGGGAAGATATC
ACGTCTAATGTGCGTACTATTCGCGCCATTCCGCTGAAGCTGCACGGAGAGAATATCCCG
GCGCGTCTGGAAGTGCGTGGTGAAGTGTTCCTGCCGCAGGCGGGGTTCGAAAAGATTAAC
GAAGATGCGCGACGCACGGGCGGGAAAGTGTTTGCTAACCCACGTAATGCGGCAGCTGGT
TCACTGCGTCAGCTTGATCCGCGTATTACAGCGAAGCGACCGCTCACTTTTTTTTGCTAT
GGCGTTGGTGTTCTGGAAGGTGGCGAGCTGCCGGATACTCATCTTGGCCGTTTACTGCAA
TTTAAAAAGTGGGGGTTGCCGGTCAGCGATCGGGTAACGCTTTGTGAATCGGCGGAAGAA
GTGCTGGCGTTCTATCACAAAGTGGAAGAAGACCGCCCGACGCTGGGCTTTGATATCGAC
GGCGTGGTGATTAAGGTCAACTCACTGGAACAGCAGGAGCAGCTTGGCTTTGTCGCGCGT
GCCCCGCGCTGGGCGGTAGCGTTTAAATTCCCGGCGCAGGAGCAGATGACCTTTGTGCGT
GACGTCGAGTTTCAGGTTGGGCGTACTGGCGCGATTACGCCTGTTGCGCGTCTGGAACCT
GTCCATGTTGCTGGCGTGCTGGTGAGTAACGCAACCTTACACAATGCGGATGAAATCGAA
CGTCTTGGTTTACGCATTGGCGATAAAGTGGTGATTCGCCGCGCTGGCGACGTGATCCCG
CAGGTGGTTAACGTCGTGCTTTCTGAACGCCCGGAAGATACCCGTGAGGTTGTATTCCCG
ACGCATTGTCCGGTATGTGGTTCTGACGTTGAGCGTGTGGAAGGTGAAGCTGTTGCCCGC
TGTACCGGTGGCCTGATTTGCGGTGCGCAGCGTAAAGAGTCGCTGAAACACTTTGTTTCC
CGCCGTGCGATGGATGTTGACGGAATGGGCGACAAAATCATCGATCAGCTGGTTGAAAAA
GAATATGTCCACACTCCGGCGGATCTGTTCAAACTCACCGCAGGCAAACTTACCGGACTG
GAGCGTATGGGGCCAAAATCGGCACAAAACGTGGTTAACGCGCTGGAAAAAGCGAAAGAA
ACCACCTTTGCTCGCTTCCTCTATGCACTTGGCATCCGTGAAGTCGGCGAGGCCACCGCA
GCAGGTCTGGCGGCATATTTCGGCACGCTGGAAGCGCTGGAAGCCGCTTCGATTGAAGAA
CTGCAAAAGGTGCCTGATGTTGGCATTGTCGTTGCATCCCACGTTCACAACTTCTTTGCC
GAAGAAAGCAACCGCAATGTCATCAGCGAGCTGTTGGCGGAAGGTGTTCACTGGCCTGCG
CCGATCGTTATCAACGCGGAAGAGATTGACAGCCCGTTTGCTGGTAAAACCGTGGTGCTT
ACGGGCAGCTTAAGCCAGATGTCGCGTGATGACGCTAAAGCTCGACTGGTCGAACTGGGC
GCGAAAGTCGCGGGCAGCGTGTCGAAGAAAACCGATCTGGTGATAGCGGGTGAAGCTGCA
GGATCTAAACTGGCGAAGGCGCAGGAACTGGGCATTGAAGTCATCGACGAAGCGGAAATG
CTGCGTTTGCTGGGTAGCTGAGATGGAAAAAGAGCAGCTGATTGAAATAGCCAATACGAT
AATGCCGTTTGGCAAATACAAAGGGCGTCGCTTAATCGACCTGCCGGAGGAGTATCTGCT
GTGGTTTGCCCGCAAAGATGAGTTCCCGGCAGGGAAGCTCGGTGAGCTAATGCAAATCAC
GCTGCTGATTAAAACCGAGGGGCTGACGCAACTGGTCCAGCCCCTGAAGCGTCCGCTTTA
AGCTTTATCGGTGCTGCTTTCCTGCTGTGCCTGTAACTGTTCGGTCTGGCGTTTGTATCG
CCGCGCCAGCACCGCACAGACCATCAATTGGATCTGATGGAAAATCATCAGGGGCAGCAC
CATCATACCGATCACCGATGTGGGGAACAGAATGTTTGCCATCGGGATGCCATTTGCCAG
ACTCTTTTTCGAACCACAAAAGACGATAGTAATTTCATCTGCTTTATTGAAGCCTAGTCG
GCGTGCCATAAAGACGTTAACTACAATCACGATAGCCAGAAGAACGCAGCTGACCACCAC
GATAAACAGCAATGCTCCCCAGCCAACTTTATGCCAGATACCATTAACGACGGCTTCGCT
GAACGCTGTATAAACCACCAACAGAATGGACGTCTGGTCAGTTTTCGCAATCCATTTTTT
ATTGCGCGACACCCAGTCACCAATCCACGGCCGGGAAAGATGCCCCAACACAAACGGCAG
CAACAGTTGCAGCATAATTTTACCGACCTGCTCAAGGCTGCCCCCTGCACCGTGAACATT
CATCACCAGGCCAACCAGCAATGGTGAAAGGAAAATCCCCAGCAGGCTGGATGCCGACGC
AGAACAAACCGCCGCCGCGACGTTACCGCCCGCCATTGACGTGAAGGCGATTGCAGACTG
CACGGTAGCCGGGAGAATGCACAAGTAGAGAAAACCGGAGTAGAGCATCGGGTCGACATT
TACCGGTTTCCACCAGGCAAACAGTACACCCAGAATCGGAAACAGCACGAAGGTGCTGCA
CATTACCCACAAATGCAGTCGCCAGTGACCACCGCCAGCAATAATCGCCTCACGCGACAA
CTTCGCGCCGTGCATAAAGAACAGCAGGGCAATAGCTGCGGTGGTCAGATTTTCAAAGAA
GGGGACGAAATCGCCTCTGGCCGGAAAGAAAGAGGCCAGCAACACCACCGTGATCAGGGT
TAAGGTGAAAGGATCGAGGATACGAAAAAGTTTCATAAAGACTCCAGATGATCGATGGTT
CTATTGTGCTTCTTCCAGTTTGAGAAATAAAATTGATTTATTGCATCCATTCATGAAGAA
AACAGATGAATTATTCTTTAAAACAGTTAAAGGTTTTCGTCACAGTAGCGCAGGAGAAAA
GTTTTAGTCGTGCAGGAGAGCGTATCGGCCTGAGCCAGTCGGCAGTAAGTCACAGTGTGA
AGGAGCTGGAAAATCATACAGGTGTTCGCCTGCTGGACAGAACCACGCGTGAAGTGGTAC
TTACAGATGCAGGGCAGCAGTTGGCTTTGCGTCTTGAGCGACTGCTGGATGAACTTAACA
GCACGTTGCGCGATACCGGGCGTATGGGGCAACAACTGAGCGGAAAAGTTCGGGTCGCTG
CCAGCCAGACCATTTCCGCGCATCTTATTCCGCAATGCATTGCTGAAAGCCATCGCCGCT
ATCCAGATATTCAGTTTGTCCTGCACGATCGTCCGCAGCAGTGGGTGATGGAAAGTATTC
GCCAGGGAGATGTCGACTTTGGCATCGTCATAGATCCAGGCCCAGTGGGCGATCTGCAAT
GTGAAGCGATTCTTTCCGAGCCTTTCTTTCTGCTTTGCCATCGCGATAGCGCTTTGGCCG
TGGAAGATTATGTACCCTGGCAGGCATTACAGGGAGCGAAATTGGTGTTGCAGGATTACG
CGTCAGGCAGCCGACCGCTGATTGACGCAGCGCTGGCGCGCAATGGTATTCAGGCGAATA
TTGTGCAGGAGATTGGACATCCGGCGACGCTGTTCCCGATGGTAGCCGCAGGCATCGGCA
TCAGTATTCTTCCCGCACTGGCGCTACCATTGCCTGAAGGTAGCCCACTGGTGGTAAAGC
GCATTACGCCGGTGGTGGAACGCCAGTTGATGCTGGTGCGCAGGAAAAACCGTTCACTTT
CCACCGTCGCTGAAGCGTTATGGGACGTGGTACGAGACCAGGGCAATACGCTAATGGCTG
GGCGGGAAGGGGATCCGTTGTATCAGATATAGATATCGATATGAGTCGTATTTTCAACAG
GATTTAGAAGGGATACATTCAGAGACAAACGCTGCTCTTTCTCCTGCGCCTTTTCTGCCT
GCTGTCTCTGCAACTGCGCCAGTTGTGTTTCCAGTAGGGTGATTTGCTGTTGAATCAATT
CGGCCTGTTTTTGCTTGTCTTCAGCACTGCCGCTAGTGTCTACAATCTCTTTAATTTGTT
GAGTGAGTTTGATGATTTGCTGACTTATCCGCGCGATTTGTGAAGCAACATCGCTACCTT
GTGATGCCCTGTTACTACTCTGTGTTTGTATGGAAGGAATTGAAGTTGAAGAGATAGTGG
CCATTGTTCAGTCCTCGTCACTGTACGAGGTAATATCGGTAGAAGAACAAGGAACTTGAG
AAGAAAAATCAATCTTACAAATCGCAGATAGCAAAAAAGCGCCTTTAGGGCGCTTTTTTA
CATTGGTGGGTCGTGCAGGATGACTCGCTTCGCTCGCCCTTCGGGCCGTCGCCGCGAGCG
GCTCCGTTGTTTCGCTGCGCTCAACTCGAACCTGCTGCAGGTTCGAATCTTTGAGTATCG
CAGATAGCAAAAAAGCGCCTTTAGGGCGCCTTTTTAAATTGGTGGGTCGTGCAGGATTCG
AACCTGCGACCAATTGATTAAAAGTCAACTGCTCTACCAACTGAGCTAACGACCCGAAGT
GGTGGGTGATGACGGGATCGAACCGCCGACCCCCTCCTTGTAAGGGAGGTGCTCTCCCAG
CTGAGCTAATCACCCACTTCTCAATTTCTTGCTACACGGCGGAGACTACATAAAGTAGTT
GGTGGGTGATGACGGGATCGAACCGCCGACCCCCTCCTTGTAAGGGAGGTGCTCTCCCAG
CTGAGCTAATCACCCCCGCTGTGTGGAGTCGCATTATAGGGAGAGTTCAAAATGAGTCAA
CGCATTTTCTAAAGAAATTGTTCGTTCGTCGTAAATTTAAGCAAGATGATCGCAAAACAG
ACCGTGTTGCGCAATTTGTCAACGAAAACAATAATGCGTAAGGTTGCAACCCGAACTACA
TTGAGGAATCAGGCGGGAGTGATAGAATATCGCCCACTCAATTTTTCCAGGATTTGCCGG
TTGTCGGCATCTTTCTAAACGTAAGGCCATTTCATGAAAATCAAAACTCGCTTCGCGCCA
AGCCCAACAGGCTATCTGCACGTTGGCGGCGCGCGTACTGCTCTTTACTCCTGGCTTTTT
GCACGTAATCACGGCGGTGAGTTCGTGCTGCGTATTGAAGACACCGATCTTGAGCGTTCC
ACGCCGGAAGCTATCGAAGCCATTATGGATGGCATGAACTGGCTGAGCCTGGAGTGGGAT
GAAGGTCCGTACTTCCAGACCAAACGTTTTGATCGCTACAACGCGGTGATCGATCAGATG
CTGGAAGAGGGCACAGCTTATAAATGCTATTGCTCTAAAGAGCGCCTGGAAGCGCTGCGC
GAAGAGCAAATGGCGAAAGGTGAGAAGCCGCGTTATGACGGTCGCTGCCGCCACAGTCAT
GAGCATCACGCTGATGATGAGCCGTGTGTCGTACGTTTTGCTAACCCGCAGGAAGGTTCT
GTTGTTTTTGACGATCAGATCCGTGGTCCGATCGAGTTCAGCAACCAGGAACTGGACGAT
CTTATTATCCGCCGTACCGATGGTTCCCCAACCTATAACTTCTGTGTGGTTGTCGATGAC
TGGGATATGGAAATCACCCACGTTATCCGTGGCGAAGACCATATCAACAACACGCCACGC
CAGATCAACATTCTTAAGGCCCTGAAAGCGCCGGTGCCGGTTTACGCGCACGTTTCTATG
ATCAACGGCGATGACGGTAAAAAACTGTCCAAACGTCACGGGGCGGTCAGCGTAATGCAG
TATCGTGACGACGGTTATTTGCCAGAAGCACTGCTGAACTATCTGGTGCGTCTGGGCTGG
TCCCACGGCGATCAGGAAATCTTCACTCGTGAAGAGATGATCAAATACTTCACCCTGAAT
GCCGTCAGCAAATCTGCCAGTGCGTTCAACACCGACAAGCTGCTGTGGCTGAACCATCAC
TACATTAACGCGCTGCCGCCGGAGTATGTTGCTACTCACTTACAGTGGCACATTGAGCAG
GAAAATATCGATACCCGTAACGGCCCGCAGCTGGCTGATCTGGTGAAACTGCTGGGCGAA
CGCTGCAAGACGCTGAAAGAGATGGCACAGAGCTGCCGTTATTTCTACGAAGATTTTGCA
GAGTTCGATGCCGACGCCGCGAAAAAACATCTGCGTCCGGTAGCGCGTCAGCCGCTGGAA
GTGGTTCGTGACAAACTGGCCGCGATTACTGACTGGACCGCTGAAAACGTTCATCACGCT
ATTCAGGCGACGGCGGATGAGCTGGAAGTGGGTATGGGTAAAGTTGGTATGCCGCTGCGT
GTCGCCGTAACCGGTGCGGGGCAGTCTCCAGCACTGGATGTTACCGTTCACGCGATCGGT
AAGACACGTAGCATTGAGCGTATCAACAAAGCGCTGGCTTTTATTGCTGAACGCGAAAAT
CAGCAGTAATTAGCGCATAAAAGACAAACGGCAGGAGAGAAACCCCTGCCGTTTTTTATT
TATGCTGATTCATTTATGTCGAGACGAGCCAGGAAATTACGAATTCCTTCGCGTGACAAA
AATTGCGCAACTTTTTCCTGCTCACTGTGAGTCATGTTGTCTATTGCGCTTATGATTTGT
CGATAAGCAGGAGTGCGAATCCCCGGTGCGTATTCGGCAAGGGGTTCTTCGGCTTCCAGA
AGCATCGGTGTGTTATGGAAGGCTGGCGTGTTCTGAATAAACTCGCAAACTTGCGTATCG
ACCAGAATAAGTCTGGCACGACCGCCTTTCACGCCGGGAAATTTTTCCGTTTTCCAGCCT
TTTTCTCTGATCCAACGGTTAACAGTTTGTTTAGCCACACCGAGGCATTCAGCCAGTTCT
TCGGTGGTCATTTTGTTGCGTAATCTTTTCATATTATTTGCTATCGCGAATCCCTAAGCG
TTGTAACAATCCGATAATCCCTTCCCGCAGAAGCAAGGATGTAAACTGTTTTTGTTCAAC
TGGCGTCATCTCTTTCGCCAGTGTCACCAGCAATACTTCAAGCGGCGCATCACCAGAAAG
GGCAGGCGCTTCTCCCTGACCTTCTGGACGTTCAGCATTACGAATATATTCACGAACCTG
TTCATTGACGTGAACCAGTCGGGCTTTGCCACCCTGGACGCCTGGTTTTGGTGACGTCGT
CCAGCCTTCCTTGCGTACCCATTTATTAATGGTCTGGCGGCTATAGCCGGTCAGTCTGGC
AAGTTCATCTGGTGTCATCCTCTCCTTGAACATAACAATTCCCTGAATGTATGTGGGTCT
ATTAGTAGTTCATTTTATAGCACCACTTTACAGGAAACCGTGACATGAATAACTACTGAA
TGCGAGCGGTTTTCCAAAATTGTTCATTTGCCTGATTTTTCAGCGATTGAAACTACACGT
TGCAATTTGCCGTTGACACATTCGGGCGGAATTCATATGATGCCGCCCGTCAACTCGACA
AGCTTTACGTGACGGGGCTATAGCTCAGCTGGGAGAGCGCTTGCATGGCATGCAAGAGGT
CAGCGGTTCGATCCCGCTTAGCTCCACCAAATTTTGCACCCAGCAAATTTGGTACGTAAA
CGCATCGTGGGGCTATAGCTCAGCTGGGAGAGCGCTTGCATGGCATGCAAGAGGTCAGCG
GTTCGATCCCGCTTAGCTCCACCAAATTTCCAACCCTCGCTGCAAAGCGGGGGTTTTTTG
TCTCTGCTTTTTGCCGCTTTTGTAATACAGTCTACGTCCGGGTTAGTGCCGCCTGGTGAA
AGCATCATTGGATGAAAAATCGGCAACAGGCTGGCCCCTGTTTGCTTCGCGATGCGAATA
AACTTATTATTTGTGTGCCTGAAAACCCCGATCAGTGAGAGTAGTGTACTCATGTTTGTG
GAGCATAACCTGATAAAAAATATCAAGATATTCACACTAGCGTTTACGCTCACCGTGGTA
CTTATTCAGCTATCCCGTTTTATTTCGCCACTTGCCATTATCCATTCCAGTTATATCTTT
CTGGCGTGGATGCCACTGTGCGTAATGCTGTCAATCTTGTTTATCTTTGGCTGGCGCGGT
GTCGTTCCCGTTTTATGCGGGATGTTTTGCACCAATCTGTGGAACTTTCATCTCTCTTTT
TTACAGACTGCGGTCATGCTCGGCAGCCAGACGTTTGTCGTGTTGTGTGCCTGCGCAATA
TTACGCTGGCAGCTGGGGACGCGTTGGCGTTATGGATTGACCAGCCGATATGTCTGGCAA
CGTCTGTTCTGGCTTGGTTTGGTGACGCCGATCGGCATCAAATGCAGCATGTATTTTGTG
GGGAGCTTCTTTGATTTCCCGCTAAAGATATCCACCTTTTTCGGCGATGCGGATGCCATT
TTCACGGTTGTTGATTTACTAAGCCTTTTCACCGCTGTGCTGATTTACAACATGCTTTTC
TACTATCTCACTCGCATGATTGTAAGTCCCCACTTTGCGCAGATATTGTGGCGCAGGGAT
ATCGCTCCGTCGTTGGGCAAAGAGAAACGCGCATTTACCTTAAGCTGGCTGGCAGCGTTA
AGCGTGCTGCTACTTCTGTTGTGCACACCTTATGAAAACGACTTTATTGCCGGTTACCTG
GTACCCGTTTTCTTCATCATCTTTACCCTCGGGGTCGGTAAGCTTCGCTATCCGTTTTTA
AATCTCACCTGGGCTGTTTCAACGCTTTGCCTGCTGAATTACAACCAGAACTTTTTGCAA
GGGGTGGAAACCGAATATTCGCTGGCATTTATTCTTGCGGTGCTGATTTCCTTTAGCGTT
TGCCTGCTCTATATGGTGCGCATTTATCATCGCAGTGAATGGCTTAATCGACGCTGGCAT
TTGCAGGCGCTGACCGATCCGTTAACGCTCCTACCCAATTTTCGTGCGTTGGAACAAGCG
CCGGAGCAAGAGGCGGGCAAGAGTTTTTGCTGCCTGCGCATTGATAATCTTGAGTTTATG
AGTCGTCATTACGGGTTAATGATGCGCGTTCACTGTATCCGATCAATTTACCGTACGCTG
CTGCCGTTGATGCAGGAAAACGAAAAGTTGTATCAATTGCCGGGTAGTGAACTGCTGTTA
GTGCTGAGCGGGCCGGAAACGGAAGGGCGACTCCAGCATATGGTTAACATCCTGAATAGT
CGGCAAATTCACTGGAACAATACCGGGCTGGATATGGGCTATGGTGCTGCCTGGGGGCGT
TTTGATGGAAATCAGGAAACCCTGCAACCCTTGTTGGGGCAGTTAAGCTGGCTGGCGGAG
CAATCCTGCGCACATCATCATGTGCTGGCGCTGGATAGCAGAGAGGAGATGGTTTCCGGG
CAGACCACTAAACAAGTGCTATTGCTGAATACCATTCGCACGGCGTTAGATCAGGGTGAT
TTGCTGCTCTACGCCCAGCCAATTCGCAACAAAGAGGGTGAAGGTTATGATGAGATCCTC
GCGCGACTGAAGTATGACGGCGGCATTATGACCCCGGATAAGTTTCTGCCCCTTATTGCT
CAGTTTAACCTTAGCGCGCGTTTTGATTTGCAAGTGCTGGAATCCTTGTTGAAGTGGCTG
GCAACACACCCTTGCGACAAAAAAGGCCCGCGCTTTTCAGTTAATTTAATGCCGCTCACG
CTGCTACAAAAGAATATTGCCGGGCGGATTATTCGTCTGTTTAAGCGTTATCACATCTCC
CCGCAGGCGGTCATTCTTGAGATCACCGAGGAGCAGGCGTTTTCTAACGCAGAAAGCAGC
ATGTACAACATCGAGCAACTGCATAAGTTTGGCTTCCGGATTGCGATTGATGACTTTGGC
ACCGGCTATGCCAACTACGAACGGTTAAAGCGTTTGCAGGCTGATATCATCAAAATTGAT
GGTGTCTTTGTGAAAGATATCGTCACGAATACGCTGGATGCGATGATTGTGAGATCAATT
ACCGATCTGGCGAAAGCGAAGTCATTGAGTGTGGTTGCGGAGTTTGTCGAGACGCAACAG
CAGCAGGCGTTATTGCATAAGCTCGGGGTGCAATATCTGCAAGGGTATTTGATTGGTCGC
CCGCAGCCATTAGCTGATTAACAGGCGTAAAAAAACCGGGGAATTATCCCCGGCTTTTTT
ATGTATGGTCTTACAGCACCAGTGCTGCGATTGACGCAGACAGCACACTCACCAGGGTAG
AGCCGTAAACCAGTTTCAGACCGAAGCGAGAAACCACGTTACCTTGCTCTTCATTCAGAC
CCTTAACTGCACCTGCGATAATCCCGATTGAAGAGAAGTTAGCGAAGGAAACCAGGAACA
CAGAGATGATGCCTTCAGCACGCGGAGAGAGCGTGGAAGCAATTTTCTGCAGATCCATCA
TCGCAACGAACTCGTTGGAAACCAGTTTGGTCGCCATGATACTGCCCACTTGCAGTGCTT
CGCTGGACGGAACACCCATCACCCATGCAATCGGATAGAAGATGTAGCCCAGGATGCCCT
GGAAGGAGATGCTGTAGCCAAACCAGCCAGTCACGGTGGCAAACAGTGCGTTCAACGCGG
CGATCAGGGCGATAAAGCCGATCAGCATCGCGGCAACGATAATGGCAACTTTGAAACCTG
CCAGAATGTATTCACCCAGCATTTCGAAGAAGCTCTGACCTTCGTGCAGGTTGGACATCT
GAATGTTTTCTTCACTGGCATCAACACGGTAAGGGTTGATCAGCGACAGCACGATAAAGG
TGCTGAACATGTTCAGTACCAGCGCCGCAACGACATATTTCGGCTCCAGCATGGTCATGT
ATGCACCAACGATGGACATAGATACGGTGGACATCGCCGTTGCTGCCATGGTGTACATAC
GATTGCGGGAGATTTTGCCGAGGATATCTTTATAGGCAATAAAGTTTTCAGACTGACCCA
GAATCAGAGAGCTGACGGCGTTAAAGGATTCCAGTTTGCCCATGCCGTTGACTTTGGAGA
GCAGGAAACCAATTGCGCGGATAATCACCGGCAACACGCGAATGTGCTGGAGAATACCGA
TCAGTGCAGAGATAAAGACGATTGGGCACAGCACTTTCAGGAAGAAGAATGCCAGGCCTT
GATCATTCATGCTACCAAAGACGAAGTTAGTCCCTTCGTTGGCAAATCCGAGCAGTTTTT
CGAACATTTCGGAGAAGCCTTTCACGAAGCCTAAACCAACGTCGGAGTTCAGGAAGAACC
ACGCCAGTAACACTTCGATAACAAGCAGTTGAATAACATAACGGATACGAATTTTTTTGC
GGTCGCTGCTTACCAGCAGTGCGAGAATCGCAACAACGGCAAGTGCCAGTACAAAATGAA
GGACGCGGTCCATATTTGCTCCAAATATGAGGCAGGTTAAATTTCCGTGCACATTCTATG
TAACATGGTTAAGGAAAACGAGATCTGACACACACTATAATGACGTCCTGTGACAAGCTT
CAAAAATAGTGAGCTGTCATACATTTCTGCTATGTTGTGTATGGAAGCTGAAAGTTATGT
AAATGTGCTAACATTAAACATAACCATAACATTCAAGTCATCAATCTTTTCGTAGTCATA
ATCCTGGTCTATCAGAGAAATCACCACAACCCATTTAAATGAATTTGATAATCATTCTCG
TTTGGCATAGCATGAAACATAGCAAAGGCTATGTTTTAGAGGCACAAGATGACGAACTAT
CGCGTTGAGAGTAGCAGCGGACGGGCGGCGCGCAAGATGAGGCTCGCATTAATGGGACCT
GCGTTCATTGCGGCGATTGGTTATATCGATCCCGGTAACTTTGCGACCAATATTCAGGCG
GGTGCCAGCTTCGGCTATCAGCTACTGTGGGTTGTCGTTTGGGCCAACCTGATGGCGATG
CTGATTCAGATCCTCTCTGCCAAACTAGGGATTGCCACCGGTAAAAATCTGGCGGAGCAG
ATTCGCGATCACTATCCGCGTCCCGTAGTGTGGTTCTATTGGGTTCAGGCAGAAATTATT
GCGATGGCAACCGACCTGGCGGAATTTATTGGTGCGGCGATCGGTTTTAAACTCATTCTT
GGTGTTTCGTTGTTGCAGGGCGCGGTGCTGACGGGGATCGCGACTTTCCTGATTTTAATG
CTGCAACGTCGCGGGCAAAAACCGCTGGAGAAAGTGATTGGCGGGTTACTGTTGTTTGTT
GCCGCGGCTTACATCGTCGAGTTGATTTTCTCCCAGCCTAACCTGGCGCAGCTGGGTAAA
GGAATGGTGATCCCGAGTTTACCTACTTCGGAGGCGGTCTTCCTGGCAGCAGGCGTGTTA
GGGGCGACGATTATGCCGCATGTGATTTATTTGCACTCTTCGCTCACTCAGCATTTACAT
GGCGGTTCGCGTCAACAACGTTATTCCGCCACCAAATGGGATGTGGCTATCGCCATGACT
ATTGCCGGTTTTGTCAATCTGGCGATGATGGCTACAGCTGCGGCGGCGTTCCACTTTTCT
GGTCATACTGGTGTTGCCGATCTTGATGAGGCTTATCTGACGCTGCAACCGCTGTTAAGC
CATGCTGCGGCAACGGTCTTTGGATTAAGCCTGGTTGCTGCCGGACTGTCCTCAACGGTG
GTGGGGACACTGGCGGGGCAGGTGGTGATGCAGGGCTTCATTCGCTTCCATATCCCGCTG
TGGGTGCGTCGTACAGTCACCATGTTGCCATCATTTATTGTCATTCTGATGGGATTAGAT
CCGACACGGATTCTGGTTATGAGTCAGGTACTGTTAAGTTTTGGCATCGCCCTGGCGCTG
GTTCCACTGCTGATTTTCACCAGTGACAGCAAGTTGATGGGCGATCTGGTGAACAGCAAA
CGCGTAAAACAGACAGGCTGGGTGATTGTAGTGCTGGTCGTGGCGCTGAATATCTGGTTG
TTGGTGGGGACGGCGCTGGGATTGTAGTTGAATGAGCGTCGCATCTGGCACTATTGGCGG
ATGCGGCGTAAACGCCTTATCCGCCTTACGCGTTAAAGAGCCGGTTTGTAGGCCTGATAA
GACGCACTAGCGTCGCATCAGGCCTTGTGCTCCATTGGCAAATGTGTTTAATGGCGGTGC
CCATGTCCGCGGCCTTTTCCGCGATGATCGTCACGATCGCGCCAGCCTTCACGATAGCCA
CGCTCATACGCTTTACGCTTATCCCAGCCACGATGATAGCCATTATCATGACGCCACCAG
CGGTTTTTGCGCCACTCATAATTGCGATGCCAGTAATCACGATCTCGCCAGTGACCACCG
TCCCAGTAATTACCGTAATGATCGCGATCGCCAATTTGTAATTTGATTGATGGCAGTAGG
GTGATTTCACCTGCGTTTGCTGCAAGCGGGGTAAATGCCATCAGGGCGGCCGCCAGAAAC
AGTGACCTGAACATTGTTATTCTCCTTCACGATCGAAGCCGTCAGCGGCCTGTTAACGCA
ATATTACGGGGAGGTAAAGCCCCGTATCATCGCCATAACTCTTAAATCATAAAGGAGAGC
ATTTTTTGTTAAACGTTATCGTGGGGTGGCTGTTGCTTCGGACGATTGACCATCATCATC
GGCTTACCTGCTAATAACAGCCATGCCGGAAGCATGACGATACAGAGCAGCGGTAGCAAT
GTGGTATTGGGTACAACGACTGCCGCCATAAAAAGACTTAACCAGCCATCGCGTGTTACC
ACCAGCACGATGCCGAGAATAGCGCAGGAAACGGTTATTGCCGCTGGAACGGCGGGGACG
TGCTCATGCAGCATCAACCCTAATGCCACGCCGACGAACACTGCCGGGAAAATTCGTCCA
CCGCGAAAGCCACTGGCGGCAGCAACGACCAGGGCGGTAAGTTTAATCACCGCCAGTAAA
AAGTAATCGCTGGTGCTGAAAGCCTGATTTGCCACCATCTGCTGCATCTCATCCAGTCCT
TTAAACAGCGAAACTGGTCCACCAATAACCCCCAGAATACCGAGAATAAATCCGCCAATA
CCCAGCACGAGCACCGGATTTTTCATTTGATGCATCATCGCGTGCAACCGTGGTAAGCAC
CATACGGCGCCCATCCCTGCTGCGATGGCAATCGCCGCGACAATTGCACCGCTGAGAATA
TCGGTCATTTCCATCTGTCCGTAATGCGCAATGGGCAGTGAAAAATGGGGATGGAAAAAT
AATCCGGTAGTAAGTGCACCAGCTGCTGCCGCCATTAACGGCGCAAAAAGACGATCCCAT
AGCGGAACTTCACTACTGCCATTTAAGGTTTGCGAAAATATCAACGCCGCCGCAACAGGT
GTACCAAACAGCGCGCCGATGGTTCCGGCAGAGGCTAAAATAGTCCACTCCATTCGGTTG
ACGCGCGGTAACAGACGAGCGCCAATGGCAACCGCAAGGGCGATATTGACGGTCATGATC
GGATGTTCCGGCCCCAGGCTGACGCCGCCAGCAAGACCGAGAATTAATGCTACGATAAGT
CCTGGTAGCGCAGAGGGCGGAACCGGTGCGCCGATCAGCGGTTCACAGGCGGGGTCTGGT
CCGGCATGACCCTGGCTGAAACGGATAACCAACCCCACTGCAATACCCGTTAACGTTAAT
ACACCGATGATCCAGAGAGGTGAATCCTGGGCTATCCCCAGAGTTCCCGGCAGTCGTTGC
CAGAGCAAATTCTGTAATGCCGAGGCGATTTTCATCACCACAATCAGAATAAGACTGGAC
GCAATCCCAATTGCCACGGCGGGGAGCGATAATAACAACATGGTTCTGGCTCGCGGATGG
AGCATGTTCTATTCCTTATGCGGGGTCAGATACTTAGTTTGCCCAGCTTGCAAAAAGGCA
TCGCTGCAATTGGTGCTGAAACGATAAAGTAATTGTGTGACCCAGATCGATATTTACAGG
GAGCCTGCCTTTCCGGCGTTGTTGTTATGCCCCCAGGTATTTACAGTGTGAGAAAGAATT
ATTTTGACTTTAGCGGAGCAGTTGAAGAATGACAAAGTATGCATTAGTCGGTGATGTGGG
CGGCACCAACGCACGTCTTGCTCTGTGTGATATTGCCAGTGGTGAAATCTCTCAGGCTAA
GACCTATTCAGGGCTTGATTACCCCAGCCTCGAAGCGGTCATTCGCGTTTATCTTGAAGA
ACATAAGGTCGAGGTGAAAGACGGCTGTATTGCCATCGCTTGCCCGATTACCGGAGACTG
GGTGGCAATGACCAACCATACCTGGGCGTTCTCAATTGCCGAAATGAAAAAGAATCTCGG
TTTTAGCCATCTGGAAATTATTAACGATTTTACCGCTGTATCGATGGCGATTCCGATGCT
GAAAAAAGAGCATCTGATTCAGTTTGGTGGCGCAGAACCGGTAGAAGGTAAACCTATTGC
GGTTTACGGTGCCGGAACGGGGCTTGGGGTTGCGCATCTGGTCCATGTCGATAAGCGTTG
GGTAAGCTTGCCGGGCGAAGGCGGTCACGTTGATTTTGCGCCGAATAGTGAAGAAGAGGC
CATTATCCTCGAAATATTGCGTGCGGAAATTGGCCATGTTTCGGCGGAACGCGTGCTTTC
TGGCCCTGGGCTGGTGAATTTGTATCGCGCAATTGTGAAAGCTGACAACCGCCTGCCAGA
AAATCTCAAGCCAAAAGATATTACCGAACGCGCGCTGGCTGACAGCTGCACCGATTGCCG
CCGTGCGTTGTCGCTGTTTTGCGTCATTATGGGCCGTTTTGGCGGCAATCTGGCGCTCAA
TCTCGGGACATTTGGGGGCGTGTTTATTGCGGGCGGTATCGTGCCGCGCTTCCTTGAGTT
CTTCAAAGCCTCTGGTTTCCGTGCCGCATTTGAAGATAAAGGGCGCTTTAAAGAATATGT
CCATGATATTCCGGTGTATCTCATCGTCCATGACAATCCGGGTCTTCTCGGTTCCGGTGC
ACATTTACGCCAGACCTTAGGTCACATTCTGTAAATCCTTCCTGTTATATCGGGAGGTAA
CTCTCCCGATAATCTTTTAAATCATACAGTTAATTCAATTTTTCTTTGTGTCCCCTCACA
AGGCCGACCTGCGTCACACTTCCGTACAGCGGGATTAATTCTCCAGTAAATGCATTATTT
GTCTGGTAACGGCGATTTGTTTTGCACGTTCATAATTTCACTCGTCAACTATCACTGAAC
GAGGAATTAACGATGAGTAAGAAACTGATTGCATTATGTGCCTGCCCAATGGGCCTGGCT
CACACTTTTATGGCCGCTCAGGCGCTGGAAGAAGCGGCGGTAGAAGCCGGTTATGAAGTG
AAAATTGAAACCCAGGGCGCGGACGGTATCCAGAATCGCCTGACGGCGCAGGATATCGCC
GAAGCGACCATCATCATCCACTCCGTGGCAGTTACCCCGGAAGATAACGAACGTTTCGAA
TCACGCGACGTTTATGAAATCACTTTGCAGGACGCAATTAAAAACGCTGCGGGCATCATC
AAAGAAATCGAAGAGATGATTGCCTCTGAACAACAGTAATATTCGACAGGGATAATTGTT
ATGGCCATTAAAAAACGCAGTGCAACCGTTGTGCCTGGCGCATCCGGTGCGGCAGCGGCA
GTTAAGAATCCGCAGGCCTCTAAAAGCAGCTTCTGGGGTGAACTCCCGCAGCATGTGATG
TCAGGGATTTCACGCATGGTGCCGACCTTAATTATGGGCGGTGTGATCCTCGCTTTCAGC
CAGCTGATTGCTTATAGCTGGCTTAAAATTACTGCTGATATCGGCATCATGGATGCTCTT
AATAGCGGGAAATTCTCCGGTTTCGACCTCTCCTTACTGAAATTTGCCTGGTTGTCGCAG
TCCTTCGGCGGCGTGTTGTTTGGTTTTGCCATTCCGATGTTTGCTGCTTTTGTGGCGAAC
TCTATCGGTGGCAAACTGGCGTTTCCGGCTGGTTTTATCGGCGGCTTGATGTCTACCCAG
CCGACGCAACTGCTGAACTTCGATCCCAGCACTATGCAATGGGCGACCTCTTCGCCGGTG
CCGTCCACCTTCATTGGTGCGCTGATTATTTCTATCGTTGCCGGTTACCTTGTGAAATGG
ATGAACCAGAAAATCCAGTTACCGGATTTCCTGTTAGCGTTCAAAACCACATTTTTGCTC
CCGATTCTTTCCGCCATTTTTGTCATGCTGGCGATGTACTACGTGATCACCCCCTTTGGC
GGCTGGATCAACGGTGGTATCCGTACCGTGCTGACTGCCGCAGGTGAGAAGGGCGCGCTA
ATGTATGCGATGGGGATCGCCGCGGCGACAGCAATCGACCTTGGTGGCCCGATCAACAAA
GCCGCAGGTTTCGTTGCCTTCAGCTTTACCACTGACCACGTATTACCGGTCACCGCACGT
TCTATCGCAATCGTTATTCCGCCGATTGGTCTGGGGCTGGCGACCATTATCGACCGTCGT
TTAACCGGCAAACGCCTGTTCAACGCTCAACTTTATCCGCAGGGTAAGACCGCCATGTTC
CTGGCGTTTATGGGGATTAGTGAGGGTGCGATTCCGTTTGCGCTGGAAAGCCCCATCACC
GCCATTCCGTCGTATATGGTCGGCGCGATTGTCGGCTCAACCGCCGCTGTCTGGCTGGGC
GCAGTGCAATGGTTCCCGGAATCCGCTATCTGGGCATGGCCGCTGGTCACTAACCTCGGC
GTCTACATGGCGGGGATCGCGCTGGGGGCAGTCATTACTGCGCTGATGGTGGTGTTCCTG
CGTCTGATGATGTTCCGTAAAGGCAAATTGTTAATCGATAGCCTGTAAGAAGGAAAATCC
AGATGACATTACTCGCTTCGCTGCGTGACTGGCTTAAGGCGCAACAACTGGATGCGGTGC
TTCTCTCCTCACGGCAGAACAAACAGCCGCATCTGGGGATCTCCACCGGATCAGGCTATG
TGCTGATTAGCCGTGAAAGTGCGCACATTCTGGTGGACTCGCGCTATTACGCGGATGTAG
AAGCCCGCACGCAAGGTTACCAGCTGCATTTGCTTGACGCGACGCACACGCTTACAACCA
TCGCCAGGCAAATCATTGCCGATGAGCAGTTGCAAACGCTCGGTTTTGAAGGCCAGCAGG
TGAGTTGGGAAACCGCGCACCGCTGGCAGTCTGAACTCAATGCGAAACTGGTTAGCGCCA
CGCCGGATGTGCTGCGGCAAATCAAAACGCCAGAGGAGGTGGAGAAAATCCGCCTTGCCT
GTGGGATTGCCGATCGCGGTGCAGAGCATATTCGCCGCTTTATTCAGGCGGGGATGAGCG
AGCGCGAGATAGCCGCTGAACTGGAGTGGTTTATGCGTCAGCAAGGCGCGGAAAAAGCCT
CTTTTGACACCATTGTCGCCAGTGGCTGGCGTGGGGCGCTGCCGCACGGCAAAGCCAGCG
ACAAGATTGTTGCAGCGGGCGAGTTTGTCACTCTCGATTTCGGTGCGCTGTATCAGGGCT
ACTGCTCTGATATGACGCGCACCTTGCTGGTGAATGGCGAAGGGGTGAGCGCCGAATCTC
ATCCGCTGTTTAACGTCTATCAGATTGTTTTGCAGGCACAGCTCGCAGCAATCTCTGCAA
TTCGCCCCGGCGTGCGCTGCCAGCAGGTTGACGACGCCGCGCGCCGGGTCATTACAGAAG
CCGGTTATGGCGACTATTTCGGTCATAACACCGGTCATGCTATCGGCATTGAAGTACACG
AAGATCCGCGCTTTTCACCGCGGGACACCACGACGCTACAGCCAGGCATGTTACTGACCG
TGGAGCCGGGGATTTATTTGCCAGGGCAAGGGGGCGTGCGCATCGAGGATGTTGTGCTGG
TCACCCCGCAAGGCGCAGAAGTGCTCTACGCCATGCCGAAAACAGTGTTGCTCACGGGAG
AGGCATAATGGATTTATCGCTATTGAAAGCGTTGAGCGAGGCAGATGCGATCGCCTCCTC
GGAACAGGAAGTGCGGCAGATCCTGCTGGAAGAAGCGGATCGCCTGCAAAAAGAAGTGCG
ATTTGATGGGCTGGGATCGGTGCTGATCCGCCTCAATGAATCGACAGGTCCGAAAGCGAT
GATCTGTGCGCATATGGACGAAGTTGGATTTATGGTGCGCAGTATCTCCCGCGAAGGCGC
AATTGATGTGCTGCCGGTTGGCAACGTGCGCATGGCTGCCCGCCAGCTGCAGCCGGTGCG
CATCACCACCCGTGAAGAGTGCAAAATTCCAGGCCTGCTTGACGGCGACCGGCAGGGGAA
TGACGTCAGCGCCATGCGCGTGGATATTGGCGCGCGCTCGTATGACGAAGTGATGCAGGC
GGGAATTCGTCCAGGCGATCGCGTCACGTTCGATACCACTTTTCAGGTTCTCCCCCACCA
GCGAGTGATGGGGAAAGCCTTTGATGACCGCCTTGGTTGCTATCTGCTGGTGACGTTACT
ATGTGAGCTGCACGACGCCGAACTGCCTGCGGAAGTGTGGCTGGTGGCAAGTTCCAGCGA
AGAGGTGGGATTACGCGGCGGGCAAACTGCCACCCGCGCGGTGTCGCCGGACGTCGCCAT
TGTGCTTGATACCGCCTGCTGGGCGAAAAACTTTGATTATGGCGCGGCTAACCATCGCCA
GATTGGTAACGGCCCGATGCTGGTGTTAAGCGACAAGTCGCTGATTGCGCCGCCAAAACT
TACCGCCTGGGTCGAAACCGTGGCGGCAGAAATTGGCGTGCCGTTGCAGGCAGATATGTT
CAGCAACGGCGGCACGGACGGCGGGGCGGTGCACTTAACCGGCACCGGCGTGCCCACAGT
GGTGATGGGGCCAGCAACCCGCCATGGACATTGCGCCGCATCGATTGCCGATTGCCGCGA
CATTTTGCAGATGCAGCAACTTTTATCTGCCCTGATTCAACGTCTTACGCGTGAGACGGT
TGTTCAACTGACGGATTTCAGATGATCTCCTGATTAACCCGGAGCGGTTATGCTAACGAT
TCAATTTCTCTGTCCTTTGCCTAACGGTCTTCATGCCCGTCCGGCGTGGGAACTTAAAGA
ACAGTGCAGCCAGTGGCAAAGCGAAATCACCTTCATCAACCATCGCCAGAACGCAAAGGC
CGATGCCAAAAGCTCGCTGGCGCTGATTGGCACCGGCACCTTATTTAATGACAGTTGCAG
CCTGAACATTAGCGGCAGCGATGAAGAGCAGGCGCGGCGCGTGCTGGAAGAGTACATCCA
GGTGTGCTTTATTGACAGCGACAGCGTTCAGCCAACGCAGGCAGAACTGACGGCGCATCC
GCTGCCGCGTTCATTAAGCCGCCTTAACCCGGATTTACTGTACGGCAATGTGCTGGCAAG
CGGCGTCGGCGTGGGTACGCTGACCCTGTTACAAAGCGACAGCCTCGACAGTTATCGGGC
AATCCCCGCCAGTGCGCAAGACTCCACCCGGCTGGAGCACAGCCTGGCAACGCTTGCCGA
GCAACTGAACCAGCAATTGCGTGAGCGTGACGGCGAAAGCAAAACTATCCTCAGCGCCCA
TTTGTCGCTGATTCAGGATGATGAGTTCGCGGGCAATATCCGTCGCCTGATGACAGAACA
GCATCAGGGGCTGGGGGCGGCGATCATCAGCAATATGGAGCAGGTTTGCGCCAAACTATC
TGCTTCTGCCAGCGATTATCTGCGCGAGCGGGTTAGCGACATTCGCGATATCAGCGAACA
GTTGCTGCATATCACCTGGCCGGAACTGAAGCCGCGCAACAATCTGGTGCTTGAAAAACC
GACCATTCTGGTGGCTGAAGATTTAACCCCAAGCCAGTTTTTGAGCCTTGATTTGAAAAA
TCTTGCGGGCATGATTCTGGAGAAAACCGGGCGCACCTCGCATACCCTGATTCTGGCCCG
CGCCTCGGCGATCCCGGTACTGAGCGGCCTGTCGCTGGATGCGATTGCCCGTTATGCCGG
GCAACCTGCAGTGCTTGACGCCCAGTGCGGCGTGCTGGCGATTAACCCGAATGACGCGGT
GAGCGGTTATTATCAGGTCGCGCAGACGCTGGCGGATAAACGCCAAAAACAACAGGCGCA
GGCTGCCGCGCAGCTGGCTTATTCCCGTGATAACAAGCGTATTGATATCGCGGCGAATAT
TGGCACCGCTCTGGAAGCGCCTGGCGCGTTTGCCAACGGCGCGGAAGGCGTCGGGCTGTT
CCGTACCGAAATGCTCTATATGGATCGCGACAGCGCGCCGGACGAGCAGGAGCAATTTGA
AGCCTACCAGCAGGTGCTACTGGCAGCGGGCGATAAGCCGATTATCTTCCGCACAATGGA
CATCGGAGGCGATAAAAGCATTCCTTATCTGAATATTCCCCAGGAAGAGAACCCGTTCCT
CGGCTATCGCGCGGTACGTATTTACCCGGAATTTGCTGGCCTGTTCCGCACTCAACTGCG
GGCCATTTTGCGCGCCGCCAGTTTCGGCAACGCCCAGTTGATGATCCCGATGGTCCACAG
CCTCGATCAGATCTTATGGGTGAAGGGCGAGATCCAAAAAGCGATCGTTGAGCTTAAGCG
CGATGGCCTGCGTCATGCAGAGACGATTACGCTGGGTATCATGGTGGAAGTGCCGTCGGT
GTGCTACATCATCGATCACTTCTGCGATGAGGTCGATTTCTTCAGTATCGGCTCCAACGA
TATGACCCAGTATCTTTATGCGGTCGATCGTAATAACCCGCGCGTATCGCCGCTATATAA
CCCGATTACGCCATCGTTCCTGCGCATGTTGCAGCAAATAGTTACCACTGCGCATCAGCG
GGGCAAATGGGTAGGCATTTGCGGTGAACTGGGAGGCGAAAGTCGTTACCTGCCGCTACT
GCTTGGGCTGGGCCTGGATGAGCTGAGTATGAGTAGCCCGCGCATTCCGGCGGTGAAAAG
CCAGCTTCGTCAACTGGATAGCGAGGCGTGTCGGGAACTGGCACGTCAGGCGTGTGAATG
TCGCAGCGCGCAGGAAATTGAAGCGTTACTCACCGCCTTTACGCCGGAAGAAGACGTTCG
CCCGCTGCTGGCGCTGGAGAATATCTTCGTTGATCAGGCCTTTAGCAATAAAGAGCAGGC
GATCCAGTTCCTGTGCGGTAACCTCGGCGTTAACGGGCGCACTGAACATCCGTTCGAGCT
GGAAGAGGATGTCTGGCAGCGGGAAGAGATTGTCACCACTGGCGTTGGTTTTGGCGTGGC
GATCCCGCACACCAAATCGCAGTGGATCCGTCATTCCAGTATCAGCATTGCCCGGCTGGT
GAAACCGGTTGACTGGCAGTCAGAAATGGGCGAAGTCGAACTGGTGATCATGCTGACGCT
GGGCGCTAACGAAGGGATGAATCATGTGAAAGTCTTCTCGCAGCTGGCGCGTAAACTGGT
GAATAAAAACTTCCGCCAGTCGTTGTTTGCCGCGCAAGATGCACAAAGTATCCTGACGCT
GCTGGAAACAGAATTAACCTTCTGACGTTAGCCCTGAAAACGGGCGCTGTACTCTCCCGG
CGTCAGACCAAACTGACGCCGGAAAACGCGACAAAAATAGTCGCTATACGGAAAACCGCA
ACGCTGTGCCACTTCATGAATTGACAGATGATATTTCTGCAAAATCATCCTCGCCTTCGC
CATTCGCACCCAACGCACATACTCGATAAAACGCATCGTTCCATGCTGAGCAAACAGTTT
TGACAGATGATTGGGCGTGATATTAAAAAACTGCGCCACGCTCTCGCGGGTGAGCGGCTG
GGCATAATTATCCTGAACCCAGTTACAAATGCTGTGATAGAGAAAATCGCCGCGCGGCTG
CGAATTGCCCGGCGGCATATTCACCACGTTACGGCAAAGATGCAGCAAACTTAACACCAG
CGGCTGAATGATATTTTGCTCCAGCGGCGAACGGCTAAGATGGGTGAGGGCGGTAAGCAT
CGCTTCACCTTCACCGCGTTGCAGGCTGGGAAGCTGGATCTGGCGAGCAGGATGCAACAA
CGACGTGGTGCGGCTATCGTAAAACGATAACCCAAGCCAGGTCGGAGCGAACACCAGGCT
TAACAGCATCACCGGTTTGTTGTTGACCGGTAAATTAGCCGCGCGCGCCGGAATAAACAG
CATTTCTCCTTCCACCAAACGTTGCTGCTTTGCTTCCAGCAGATTGCCGTATTCGCCGCG
CAGCACGATATCCAGACGGGGAAAATCAATACATAAACTGCCCACCGGCAACGAGGCAGG
CTGGCTGGCAAAACAGACGCGCCCCAGTAGTTGCGGGTTAAGCACCAGGCCGCTGAACAG
ATCGGCGAAAAATTGTTGATCGGCGGGCAAGCCTGGTGCTTTCATGAAAGTTCCCGATTA
AAGATGCATTAACTGGCGAAATTCTTTTACTTTGCTGCGGCTGACTGGCACTTCAAAATC
CAGATCTTTCAGCCGCAGAATATAGGTGTTATTAAACCACGGTTCGATTTCGCGGATTTT
GTTCAGATTGACACAAAATGAGCGATGGCAGCGGAAAAAATGCGACGGCGGCAGTTTGCT
GCAAAATTCGGTAATGTTCATCGGCATTACGTAGGATTCACGCCGCGTATAGACAAAGGT
CATTTTCTCGTGCGCTTCGGCGTAATAGATATCGTTAATTGGCGTGACGATTATTCGCTC
ATCTTTCACCAGATTAATGGTGTCATTCTCACGCGTTACCGTCGCGGCAGGCGTGCTGCT
GGTCTGCTGTTGCTGCCAGGCCGCTTCCAGTTTTTGCAGCATCCCGGTAATGCGAGACTC
CTGATACGGTTTGAGAATGTAGTCAAACGCCTCAAGTTCAAACGCTTCTACCGCATGTTC
TTTCCACGCGGTGATGAACACAATAAACGGTTTATGGGCGAACTGGCTGATGTTTTGCGC
CAGCAACACACCATCCAGCGACGGAATATTGATATCCAGAAAAATGGCGTCGACGCGGTT
ATGCTGCAAAAACTTCAACACGTCCAGACCGTCGTCAAAGGTGCCGACAATCTCCATCTG
GCTGTGCTCTTTAATTAGCCAGCTCAGTTCCTGTTGTGCCAGGAATTCGTCTTCAACAAT
GATGACTTTCATAATATCACTCCGGCTCAAAGCAATAACGTAGCCTGTGAGGCGACTGGG
GTGCGTTGGTTAGGAATGTAAAACGCAATTTCCGTTCCTGGTTCCAGGCGGCGGATATGC
AGCCCCTCGCCATACAATAACTTCACGCGATGATGAACATTCAGCAGGCCAATTTTATTG
CCCGGCATTTCATTCGCTTCGACCCGCTCAATCACCTTTGGATCGATGCCGTGCCCGGTA
TCCCGCACCGCAATGCGTACCCGATTGCCGCACTCTGCAACGCTGATGGTGACAACGCCT
TTACCTTTGCAAGGCTGGATACCGTGGACAATGGCATTCTCCACCAACGGCTGGATCAGC
AGGCTGGGAATGCAGCAATTCACCTCTTCATCAATATCATAGATAACCGTCAGCTTGTCG
CCAAAGCGGGCCTGCTCAATGGCAATATAGTCTTTAATTTGATACAGCTCTTTTTTGATA
TCGATTTGCTCATCGTCTTTTAATTCAATGTTATAGCGCAGATAACGCGACAGATTAAAG
ATCAGCTGGCGAGCGGTATCCGGATTCAGACGGATCGACGATGAAATAGCGTTCAAAGCG
TTAAACAGGAAATGGGGATTAATTTTGCTTTGCAGGGCGCGAAGCTCTGCCTTATTTGCC
ATTTCACGTAGCTGCTCGGCGCGTGAAACCTCCAGTTGCGTGGAGATGATTTGCGACAGA
CCAACCGCCATTTCCTGTAATGACGAGGTTATCTGATGCGCGTGGCAGTAGTAAATTTTC
AGCGTTCCGGTCACAACGCCTTTCTCCCACAATGGGATCACCAGCATGGAATGAATCTCT
GGTGTGCGGTGGGCTTCATCATTGTTTTTAATGATGATTTTTCCGTAATTCATCGCCTGA
CGGGTAGTCGGGCTAATGAAGTCATCGCCATTCTGATAGTTATGTTCACCCACGCCAACA
TAGGCCAGCACATGATCGGTATTGGTAATCGCCACCGCATCGGCGTGAATGTCATCGCGA
ATAATTTCACAAACTTTGCGTAATGACTCGCTATTGACATGGCGAAACAGAGGTAGCGTT
TTGTTGGCGATATCCAGCGCCAACTTGGCCTGCCGCGCGGCGCTGGCCTCTTTTTCGCCC
TCAACGCTTTGCACCAGAAGCACAATAAAGCCGATACAGACGCTGCCGAGGATCATTGGA
ATCCCGATTTTAGAGACGATATCGATCCCCAACGCGGTAGTTGGTGCCCAGACAATCACC
AGAATCATGGTCAACGTTTCACACAACATGCCGCCGAGAATACCGACGCGCCAGCGCTGT
GCTTTGGGGATTTTCAGGTTGATCCAGCCCGATATACAACCAGCCAGAATGCTGGTGATA
AAGCAGGGGATCGCCGTCACGCCGCCGATATCAATTAAATAACGATGAATACCCGCAATC
ACGCCGGTAATGATGCCCACCCACGGGCCAAACAGAATCCCGCCGGACATCACCGCGATA
ATACGTACGTTCACCAGCGAGCCTTCTACGGGAACGCCGGACCAGGTGCTGAACAGGGCG
AACAGCGAGAAAATGGCGGTAACGGCGAGCAACTCTTTCGGTGAGTGTGCCGACTTGTGC
AACAGTTCGCGAAACAGGCGGATACGGATGAGAAAGAACAGGCAGATAAGCATTAACGCT
GCCCGATCGAAGACCGCCAGCAGCATGTTGAATATTTCGTGCACGGGTGACTCTGAATAA
GGATTAAACCTCTATGATAGGTAACCTGAAGGCTGATGACCAGCAGGCCGTTTTTGAGGA
AAAACCACAATTTTAAAAGGGGATTGATAGATAAATGGTGTATTAGCAATGCATCTCTTG
ATAATGCACTTCTGGTTAGTAAATTTATTGAAATTATTATGTTAATAAAATGAGTGGTAA
TTTTCTTGTTAGCGCAGATAAATTTCCTGTTTTTAAAGCAGAGTTCCTCATTTAACGTCA
TTAATAAAAATGTTCTAAAACGCTGGACAGACAGAAATTAATCAGGCTATTTTCAAAACA
GCCACCATCGTGGCAGCGTCGCTCGGACGGTCCGGGCGCTAACGTTAATCTGAGGAAATT
ATGGCTGACACTCGCCCTGAACGTCGCTTTACGCGCATTGATCGTCTCCCGCCCTATGTT
TTTAACATTACCGCTGAACTGAAAATGGCTGCGCGTCGGCGCGGCGAAGATATTATCGAT
TTCAGTATGGGTAACCCGGACGGTGCGACTCCGCCGCATATCGTCGAAAAATTATGTACT
GTGGCCCAGCGCCCGGACACGCATGGTTACTCCACTTCACGCGGTATTCCGCGGCTACGT
CGCGCCATTTCCCGCTGGTATCAGGATCGCTACGACGTTGAAATCGACCCGGAATCAGAA
GCCATCGTCACTATTGGTTCGAAAGAGGGCCTGGCGCATCTGATGCTGGCGACACTGGAT
CACGGTGACACAGTGCTGGTGCCGAATCCAAGTTACCCCATTCATATTTACGGCGCGGTG
ATTGCCGGGGCTCAGGTACGCTCAGTGCCGCTGGTGGAAGGTGTCGATTTCTTCAACGAA
CTGGAGCGCGCCATTCGTGAAAGTTATCCGAAACCGAAGATGATGATCCTCGGCTTCCCG
TCGAACCCAACCGCGCAATGCGTGGAACTGGAGTTCTTCGAAAAGGTTGTGGCGCTGGCG
AAACGCTACGATGTGCTGGTGGTCCATGACCTGGCCTATGCCGATATCGTCTACGATGGC
TGGAAAGCGCCGTCAATCATGCAGGTGCCGGGTGCACGCGATGTGGCGGTCGAGTTCTTT
ACGCTGTCGAAAAGCTACAACATGGCGGGCTGGCGTATCGGCTTTATGGTTGGCAACAAA
ACGCTGGTCAGCGCCCTGGCACGTATTAAAAGCTATCACGATTACGGCACCTTTACGCCG
TTGCAGGTGGCGGCGATTGCGGCACTCGAGGGCGATCAACAGTGCGTGCGCGACATTGCC
GAACAGTACAAACGCCGCCGTGATGTATTGGTTAAAGGGCTGCATGAAGCGGGCTGGATG
GTCGAAATGCCGAAGGCTTCGATGTATGTCTGGGCGAAAATCCCTGAACCTTACGCTGCC
ATGGGCTCGCTGGAGTTTGCCAAGAAATTACTTAACGAAGCGAAGGTTTGTGTCTCGCCG
GGGATCGGCTTTGGCGACTATGGTGATACGCATGTGCGCTTTGCACTGATTGAAAACCGC
GACCGTATTCGTCAGGCGATTCGTGGGATTAAAGCGATGTTCCGTGCCGACGGTTTACTA
CCCGCCAGCAGCAAACATATTCACGAAAACGCGGAATAAACACCGACCTCAGAAATGCAA
ACAGGAGCCTGATGGCTCCTGTTTTTCATTGCACAGTTTGCTTTTAGATCATCAGGGCAA
AAGTACCGGCCCAAACGATGACCATAAAAGAAATGCCCATAAAGAAATATTTCACTTTAC
ATCTCTCCGCGTAATTGCTGTTACGCCTGAATGACTTCATTACACCTGATACAGTGAGTT
GACACCGGGCAAAACGACCTTAAAAGTCCTGTATTTTACCGTGGGCATCACCCCAGAATT
CTGAGCTAAACTGCTCGAGACGGCGCTAATGTACGCCTAAAACTGAAACGAGACAAGAGG
CATTTTCTTATTTACTTTTAGTAACTTACAGGTGTCTCATATCGGCGACAGTTTAATTTC
TGACGGTAATAATTAGATATTCAGCGAAGGAAAAAACCTTAAGAAAAAAGCCATAAAAAC
CATGAGGTTATTATGGCTTATGTGAGGAGGTAAAGAGTCAGAGCAGTTTGTTAAATGTAT
AACGACGATTCTCCCACCGGGCGCGTTTTAAAGCGACGGTGGATCCAGAGGTACTGCTCC
GGTGCGCGCATGATCTCTTTCTCGATAATCTTGTTCATATAGGCAGCGGCTTGATTTTCA
TCTGTCGGGTAGCCTTCCATCTCTGGGGTGATGAACAAACGATATCCGCTGTAATCCGCT
TTTCTTACCATCGTTACGGTCAACATGGCTGCGCCAGAGAGACGGGAGAGAACATAGGTG
CCATTGGTTGTGGCGACATTTTCTACCGCAAAGAACGGCGCGAAGGAGCTGCCTTTACGA
CCATAATCCTGATCGGGAGCAAACCATACCGCTTCACCTTTCTTCAGTGCACTGACAATG
CCGCGCAGATTATTTCTGCCGATCATCGCTTTGTTAGAGCGCATGCGACCACGGGTCTGC
ACCCATTCCATCAGCTGATTATTATGTGGACGATAGGTAGCCATCATTGGCTGACAAAGT
CCCATCACGCGGCCGCCCAGTTCCAGCGACATAAAATGGACGCCGACAACCATTACGCCG
CGATTTTGCATTTGTGCGCGTTTAAGGTTATCCAGCCCTTCAACATCAAACCATTTACGT
ACGCGACTGTCGGGCCAGAACCACGCCATGCCGGTTTCTACCAGCGCCATGCCGAGTGAA
CGAAAGTTTTCGGCAATCATCTTCTCGCGTTCTTCCGCAGAATGCTGCGGGAAGCAAAGT
TCCAGGTTTTTACGGGCGATAGATTCACGCCGTTTCAGGAATGGTCGCGCCATTGCGCCA
ATACGCGTGCCGAGAAAGCAGAGAACAGGATAAGGAAGCTGTACCCAAAGCCAGAGTACA
CCAAGCCCAAACCATGTGAGCCAGTAGCGAGGATGCAGAAACTCGCGGGAAAATTTGCAT
TGTGGAAACATAGTTACCTTCTGTAGATACGAATTGTTGTATCGCAGAAGATTCCATGTC
GACAGCGGTACACTCAATTGGTTGGGCCATCATGTACGACAATGGTTCCTGTAAAGAGTG
TAAAGACTAGTCAGGACATAACCACGAGGAGCATGAATGCGGTGGCTCTACTTTATCACT
GGCTGACTGCTTTCAGCTACTGATTATTAATCGTGCAAAGTAAAAAATTTTCCGCATGCA
ATAGTGTTGCATTTAACATGCTGTTTTCATTGATGCTTAGCAAAAATTGCCAGAGGGTAA
GGATTGTCTTACTATTAAAGTGACTGAAGTTACAGGTTTTTTAGCGCGGCAGGAGGTTGA
GCTATGATTTATTTATGGATGTTTCTCGCCCTGTGTATTGTCTGCGTAAGCGGATACATC
GGTCAGGTACTGAACGTGGTATCGGCGGTCTCTTCTTTCTTCGGCATGGTGATCCTCGCT
GCACTCATTTATTACTTCACCATGTGGTTAACTGGCGGTAATGAACTGGTGACGGGGATA
TTTATGTTTCTTGCCCCGGCTTGTGGCTTGATGATTCGCTTTATGGTGGGGTATGGCAGG
CGATAGTGGGTCAGGATGGCTCATTTGGGCAGGTGTTCACATCAGCATCAGACATGATTG
TTCACCTGCCAGGTGACAGACGCTATCGCACAGGATGAATAAGATAATTCGCCTTTGTCG
GAAAAGGGGGCGTGGTTTCTTCTGTGAGGTTTAATGGTGGCGCATCTTCTCTCATCTTAA
ACAAAATTGCCTGTGATGGCTGAATTTTTGTAGAGTGAGTTGTCGTCATCGCTGATGTTT
TTTCCGTCTCTTTATAGCTCCTCTCACTTCCACCACCAGAAATGGAAAATGCAAAAACAT
TGCATGCCATAATAGAGACCAATAAAAATAAGCTAAAAAGTATTAAGTTTACTTTCATAG
AAAGTTATCCTGAAAATGGTTCACTGAGAATGTACGATGTTATGGCTGTATTTACATATA
ATTAATCAATATTTACATCGATATAATAAATGACATCTCTTTGTGGTACATAAGAATAGT
TCTCTGTGACAGGAAGCATATTCCTACAATTGTAAGACTAAAATACTTCTTGCGATAATA
ACTACAACTGTAAGATAACCCTTTCAAAATGACCGTTGCTCTCTGATTTCTCATTTCATG
CTCACCCAATATGATGGCGGCGTTTTCTAAAACTGTTAAAGAATGAGGTAAGTATGAAAC
GTTTAATTATGGCCACGATGGTCACAGCAATTCTGGCATCTTCAACTGTATGGGCTGCTG
ATAATGCTCCGGTAGCGGCACAACAGCAAACTCAGCAAGTTCAGCAAACCCAGAAAACGG
CAGCGGCAGCAGAGCGTATCTCTGAACAAGGTTTATATGCGATGCGTGACGTGCAGGTAG
CGCGCCTGGCTCTGTTTCATGGCGATCCGGAAAAGGCAAAAGAACTGACCAATGAAGCTT
CCGCTTTGTTGTCAGATGACAGTACCGAATGGGCAAAGTTCGCTAAGCCAGGTAAAAAGA
CCAATCTCAATGATGACCAATATATTGTCATTAATGCATCTGTCGGAATTTCTGAGAGTT
ATGTAGCAACACCCGAAAAAGAAGCCGCGATAAAAATTGCCAATGAAAAAATGGCGAAAG
GGGATAAAAAGGGCGCAATGGAAGAGCTTCGCCTGGCCGGTGTTGGCGTAATGGAAAACC
AATATCTGATGCCGCTTAAACAGACTCGTAATGCACTTGCTGATGCGCAGAAACTGCTTG
ATAAAAAGCAATACTACGAGGCAAACCTGGCGCTTAAAGGTGCGGAAGATGGAATCATCG
TCGATAGCGAAGCACTGTTTGTGAACTAATGCTGACAGGCAGTATATTGAGGTAAAGGAT
TTAACTCCCTCCAGCCGACAATTTTTTATGACCACAATACGACAGGTTGTGGTCATAAAA
TTATTTGGCGCTCGCGGTTCTATAAACTCGCATTTTATATTCCTCAAAGTAAACCGCAAT
AATCCCGTGTCATCACAAATCATTTAATATGTTATATTTTATGGTACGCTTTAAAAAGCG
TAATCATACCCTTACTTGTAAATCACCGGCGCTTCTTACAGTTGTAAGAATAACATCACA
AATGTCGCGACTCTCTCTGATTACCACGAACCAATATTTATCATATTCTTCTTTTCGTCC
TCACTACTTACCATGCAGAAAGGAATTGGAAGTAGCGATGAAATGATTTTCAGTACTTGA
TACAGGAATGTGAAAATATCGAGTGCAGCTACGACGATATTTTGCGGATTATTTATAGAG
GCGTTATGCCTTAAATAAACGCTAAATTAACACATATTTAATTAACTAATAGGTATTGCT
ATGTCAACTCCACTTCAAGGAATTAAAGTTCTCGATTTCACCGGTGTGCAATCTGGCCCA
TCTTGTACTCAAATGCTGGCCTGGTTTGGCGCTGACGTCATTAAAATTGAACGCCCCGGC
GTTGGTGACGTAACGCGTCACCAGCTGCGAGATATTCCTGATATCGATGCGCTTTACTTC
ACCATGCTTAACAGTAACAAACGTTCTATTGAATTAAATACCAAAACAGCGGAAGGCAAA
GAGGTAATGGAAAAGCTGATCCGCGAAGCTGATATCTTAGTCGAGAACTTTCATCCAGGG
GCCATTGATCATATGGGCTTCACTTGGGAGCATATTCAAGAAATCAATCCACGTCTGATT
TTTGGTTCGATCAAAGGGTTTGATGAGTGTTCGCCTTATGTGAATGTAAAAGCCTATGAA
AACGTTGCTCAGGCAGCGGGTGGCGCGGCATCTACTACGGGTTTTTGGGACGGTCCGCCG
CTGGTAAGCGCTGCAGCGTTGGGTGACAGCAACACCGGAATGCATTTACTGATCGGTTTA
CTTGCTGCTTTGCTGCATCGAGAAAAAACGGGGCGTGGGCAACGAGTCACCATGTCAATG
CAGGATGCCGTATTGAACCTTTGCCGCGTGAAATTACGCGACCAGCAGCGTCTCGATAAA
TTGGGTTATCTGGAAGAATACCCGCAGTATCCGAATGGCACATTTGGTGATGCAGTTCCC
CGCGGTGGTAATGCGGGTGGTGGCGGTCAGCCTGGCTGGATCCTGAAATGTAAAGGCTGG
GAAACAGATCCTAACGCCTATATTTATTTCACTATTCAGGAGCAAAACTGGGAAAACACC
TGTAAAGCCATCGGCAAACCAGATTGGATTACCGATCCGGCATACAGTACAGCCCATGCC
CGACAGCCACATATTTTCGATATTTTTGCTGAAATCGAAAAATACACTGTCACTATTGAT
AAACATGAAGCGGTGGCCTATTTGACTCAGTTTGATATTCCTTGTGCACCGGTTTTAAGT
ATGAAAGAAATTTCACTTGATCCCTCTTTACGCCAAAGTGGCAGTGTTGTCGAAGTGGAA
CAACCGTTGCGTGGAAAATATCTGACAGTTGGTTGTCCAATGAAATTCTCTGCCTTTACG
CCAGATATTAAAGCTGCGCCGCTATTAGGTGAACATACCGCTGCTGTATTGCAGGAGCTG
GGTTATAGCGACGATGAAATTGCTGCAATGAAGCAAAACCACGCCATCTGATATTAACGG
GGGCTTCTGGCTCCCAATTTATAAAAATTTCGAGGTTATTAATCATGTCAGATCAACTTC
AAATGACAGATGGTATGCATATCATCGTTGAAGCATTAAAACAGAATAATATTGACACTA
TTTATGGTGTTGTAGGTATTCCTGTGACGGATATGGCGCGCCATGCCCAGGCGGAAGGCA
TTCGTTATATTGGTTTTCGTCATGAGCAGTCGGCAGGCTATGCCGCTGCGGCAAGCGGTT
TTCTTACCCAAAAACCAGGGATCTGCCTGACAGTGTCTGCGCCAGGATTCCTCAATGGTT
TGACCGCATTGGCCAACGCAACGGTAAATGGTTTTCCGATGATCATGATTAGCGGCTCCA
GCGACCGCGCGATCGTCGACCTACAGCAAGGTGATTATGAAGAGCTGGACCAAATGAATG
CGGCAAAACCGTATGCCAAAGCAGCATTTCGCGTTAATCAGCCGCAGGATCTTGGCATTG
CATTGGCACGCGCTATCCGGGTCTCGATATCGGGTCGCCCTGGCGGAGTTTATCTTGATT
TGCCAGCAAATGTCCTGGCCGCGACGATGGAAAAAGACGAAGCGTTAACCACGATTGTAA
AAGTTGAAAATCCGTCGCCAGCATTATTGCCATGCCCGAAGTCAGTCGCTAGCGCAATTT
CGCTTTTAGCAAAAGCTGAACGACCATTAGTTATCCTTGGCAAAGGCGCGGCGTATTCAC
AAGCTGATGAACAGCTTCGTGAATTTATTGAAAGTGCCCAGATTCCATTCCTGCAAATGT
CTATGGCGAAAGGGATCCTCGAAGATACGCATCCACTTTCTGCGGCAGCTGCGCGTTCGT
TTGCCCTGGCAAATGCTGACGTTGTCATGCTTGTTGGTGCACGACTGAATTGGTTACTGG
CACACGGTAAAAAAGGATGGGCGGCAGATACACAGTTTATTCAACTGGATATTGAACCGC
AGGAAATTGACAGCAACCGCCCCATTGCTGTGCCAGTCGTTGGTGATATTGCATCCAGTA
TGCAAGGTATGCTGGCAGAACTGAAACAAAACACATTTACGACTCCACTGGTATGGCGCG
ATATTTTAAATATCCACAAGCAGCAAAATGCACAAAAAATGCATGAAAAATTAAGTACAG
ATACCCAACCATTAAATTACTTTAATGCATTAAGTGCTGTGCGCGATGTATTGCGCGAGA
ACCAGGATATTTATTTAGTTAATGAAGGGGCAAATACCCTGGATAATGCACGAAATATTA
TTGATATGTATAAACCACGTCGTCGTCTGGATTGTGGTACCTGGGGTGTCATGGGCATCG
GTATGGGCTATGCCATCGGTGCTAGCGTGACTTCTGGTTCTCCGGTTGTCGCCATTGAAG
GTGATAGTGCTTTTGGTTTCAGTGGGATGGAAATTGAAACGATTTGTCGATATAACCTGC
CGGTAACGATCGTTATTTTTAATAATGGCGGCATCTACAGAGGAGACGGTGTTGATCTCA
GTGGCGCTGGTGCACCATCACCAACAGATCTGTTGCACCATGCAAGGTATGACAAATTAA
TGGATGCGTTTCGTGGCGTTGGCTATAACGTCACCACGACAGATGAACTTCGTCATGCTT
TAACCACCGGTATTCAGTCGCGCAAACCGACCATTATTAATATGGTCATCGACCCTGCAG
CAGGAACTGAAAGTGGCCATATTACCAAACTGAACCCAAAACAAGTCGCTGGTAATTAAA
TACTGACATCGTCTCCTCTTGCCAACTCATTATGCGATGGTGAGGGGACCCTTATCGGAA
ATACTATTATGCTAACATTTTTTATTGGCGATTTATTGCCTATTATCGTAATCATGCTGT
TGGGTTATTTTAGCGGCAGACGAGAAACATTTTCAGAAGATCAAGCTCGGGCATTTAATA
AACTGGTATTAAACTACGCGCTTCCTGCGGCTCTATTTGTATCTATTACCCGGGCAAACA
GGGAAATGATTTTTGCGGACACTCGTCTGACCCTTGTATCACTTGTGGTTATTGTCGGAT
GTTTCTTTTTCTCCTGGTTCGGTTGCTACAAATTTTTTAAACGTACTCATGCAGAAGCAG
CTGTATGTGCATTAATTGCAGGTTCACCTACCATTGGATTCCTGGGGTTTGCAGTTCTCG
ATCCTATTTATGGTGATTCCGTATCAACAGGTTTAGTGGTAGCAATTATTTCTATTATTG
TTAACGCAATTACTATTCCTATTGGTCTGTATTTGCTGAATCCTTCCTCAGGAGCGGATG
GTAAGAAGAATAGTAATCTGAGCGCATTAATTTCTGCGGCAAAGGAGCCAGTTGTATGGG
CACCTGTTCTGGCAACGATCCTGGTGTTGGTTGGGGTAAAAATTCCGGCAGCATGGGACC
CAACCTTTAATCTGATTGCGAAGGCTAACTCAGGGGTAGCGGTATTCGCTGCGGGGTTGA
CTCTGGCTGCACATAAATTCGAGTTCAGTGCCGAAATTGCTTATAACACCTTCCTGAAGC
TGATTCTGATGCCACTGGCGCTGCTTCTCGTTGGTATGGCATGTCATTTGAACAGCGAAC
ATTTGCAGATGATGGTACTGGCAGGCGCATTACCGCCGGCATTCTCCGGAATCATTATTG
CCAGCCGGTTTAATGTCTACACCCGCACTGGTACAGCGTCATTGGCTGTGAGCGTACTGG
GCTTTGTCGTCACGGCTCCCTTGTGGATTTATGTCAGTCGACTGGTTTCATAATTAATCA
TGTTATTGATTTTACATAAATGCCGAAGTGTCTTTTCACCTTCGGCTTTTTTCAAGGCAT
AAGCAAATGACAAATAATGAAAGCAAAGGGCCGTTTGAAGGCTTATTAGTTATCGATATG
ACACATGTCCTTAATGGACCTTTCGGAACTCAACTTCTTTGTAATATGGGCGCAAGGGTA
ATTAAAGTTGAGCCGCCGGGCCATGGTGATGATACCCGCACATTTGGTCCCTATGTGGAT
GGACAGTCACTCTATTACAGTTTTATTAATCATGGCAAAGAGAGTGTGGTTCTTAATTTA
AAGAATGATCACGATAAAAGTATATTTATAAATATGCTTAAACAAGCTGATGTATTAGCT
GAGAATTTTCGCCCAGGTACAATGGAAAAACTAGGGTTTTCATGGGAAAGGTTACAAGAA
ATCAACCCGCGCCTCATATATGCTTCATCGTCAGGTTTCGGACATACCGGTCCGCTAAAA
GATGCTCCTGCCTACGATACCATCATTCAGGCAATGAGCGGGATAATGATGGAAACAGGG
TACCCTGATGCTCCGCCAGTGCGTGTTGGTACCTCTCTTGCGGATCTATGCGGCGGTGTC
TATTTATTCAGCGGAATAGTGAGTGCACTTTATGGCCGCGAAAAGAGCCAGAGAGGGGCG
CATGTCGATATAGCGATGTTTGATGCTACTCTGAGTTTTCTGGAGCACGGGCTGATGGCA
TATATCGCGACTGGGAAGTCACCACAACGTTTGGGAAATCGCCACCCCTACATGGCACCT
TTTGATGTTTTCGATACTCAGGATAAGCCGATTACGATTTGTTGTGGTAATGACAAGCTT
TTCTCTGCGTTATGCCAGGCACTGGAGCTTACGGAACTGGTTAATGATCCCAGATTTAGC
AGCAATATTTTACGCGTACAAAACCAGGCTATTCTTAAACAATATATTGAGCGGACGTTA
AAAACGCAGGCAGCTGAAGTTTGGTTAGCCAAAATACATGAAGTTGGTGTGCCCGTCGCG
CCGTTATTAAGTGTGGCTGAGGCCATTAATTTGCCACAAACTCAGGCGAGAAATATGTTG
ATTGAAGCCGGAGGAATAATGATGCCAGGTAATCCGATAAAAATCAGCGGCTGCGCGGAC
CCGCATGTTATGCCGGGAGCGGCAATGCTCGACCAGCATGGGGAACAAATTCGCCAGGAG
TTCTCATCATAAATGTAAGATGTGCTGGTAAATAGCTCCCACATTTGAACATTGTGGGAG
CCACTATTTAGTTATTTTGTTGACAGAAAACAGCAATCTCCTGGTCCAGCTCTGCAATGT
GTTCTTTTACAGAGTTCAGCAACTGAAGAATTTCAGGCTTACTGTCATCTGAAACAGGTG
TTATTTCTAACTGATGGCTAATATTAATCAACTTTTGCAAATTCAGGATGTTAGCCGCAC
CGTGGATGCGATGAATACATTGATGGAAAGTTCTGTTATCGCCAGCTTCTAGTGCATGAA
ACGCAGCGGGTAGATCTTTATGCGTTTCATGCTGGAAAGTCATGAGAATCTCCTGCATCA
GTTGTAGATCGTTCGCCGTATTATTTTTCAGGGCTTCGATATCAAGGTGGCGATACTGAG
GTGCAATATGCGCAACCTGGTGTAACTGACTTAAATGTGTTTTCAGTACATCCAGGGTCA
ACGGTTTGAACAAACATAAGTTCATGCCGCAATTTAACCCTTTTTCACGTTCGTTAGCCT
GTGCGTTGGCTGTAAGCCCCCAGATGGGTAAGGAAGAATTTTGCTCACGGAGTTTGCGAG
TCAACTCAAAACCATCCATATTCGGCATATTAACGTCAGTAATAAGCAGATCATAATGTT
GCATACTGACTTTGTGTAGCGCTTGCACACCATCAGTGGCTTCATCAACATCATATCCTA
ATAGATTTAGCTGGCGTTTGAGTAATAGCCTGTTGGTCGGATGATCATCCGCGATTAATA
TGCTCAACTTTTCAGGTAGTGTGATGGGTTGTTCTGCTTTTGCCTCGACAGTCGCCACTT
GTTGGATAATTTCTACCGGGATTGTGATCGTAAATGTTGTTCCTATGCCTGGATGACTTT
CTAATGACAAATCACCCTGCATGTTTTTAATTAATTCTTTGCAGATCATTAAGCCTAAAC
CAGAACCTGTTTGCTGACGACCTGCACTTGTTTGGCTATAGCGTTTAAACAGTTGTTGTT
GTTCTTCCTGCGATAATCCACTTCCAGAATCCATAATCGTCATTTTGATTACAGCGTGGT
TGTCATCAATGTGAACCAGGGAGGTCGTAATTTTTACTGCCCCCTCGGTGGTAAATTTGA
GAGCATTACTCAGTAAATTTGATAAGACCTGCTTAAACGCCTGAGGGTCGATCTTAACCA
GGTAATGTTCAGGAAACGTACTGCTGCAACTTAATGCGATCGATTTGCTTGCAGCAATCG
CACCGAAAGAGTGACAAGTGTTCTGGACTAAAGTAGGGATATCGACCCATTGTGGTTGAA
GTTGATAGTTACCCGATTCAATTTTGTCGACATCAAGGATTTCACCAATTAAGCCGAGGA
GTGATTGTCCGGTGGCGTAGGCAAGTGAAATCGCCTCCACCCGTTGCTCCTTGCTAAGAC
CAGAACCCGACAGAAGTTCCAGGAAGCCCATAATGGAGCTTATTGGTGTTCTTATTTCGT
GACTCATTGTTGCCAGAAACTGACTTTTTGCGACAGTTGCATTGATCGCTTTATTTCTCT
CTACTTCGAGTGCATGAATTAAATCACGCGTCTCGGTAATATCTTGCCAACCACAAATAT
AAACAGCATGATCGCTGGCTGGCAGATTGCATAATGTATGCCAGTGATTAATGCATCTTT
TCTCGATGCCATTATCAATTTCAAATACCTGTGTGTATATTGTTCGATTTTCTTTCGTTT
CTGCTGTGACTTCATGCGCATTAGAAAAAACATCTTTAAAGGGTGAGTCACTGTTTTCTA
ATGGTAACATTGCATTTTTGTAGTAATCAGCAGTGAAATAATGTTCAAATGCACTATTGT
GACTAATGACATTACCTTGCCAGTTTACAACATAAGTTGGATTCGGTAAGGAGTCCGAGA
GCGCTTTCCGGAATGATATTTGGTTTTCTAAATCACCCTGAATGACTTTACGACGACGAA
CTGAGCGTAACAGGTAGAATCCCCATAAAAGGCTACTGCCAACTAATAAAACGGATAATG
TCGTAACAATATAAAATTGCTCGCTATAGAGGTCCCATGTGTCAATGGTCACATTGGGCA
TTTTAATCCATTTTTCGGTCAGGCGCAGAACTTCGCTTGGGGGGATTGCATTCAGTGCTT
TATTAATAATATCCTTAAGTTCCGGTTCTCCGCGAGGAAAAGCGAACGAAAGCGATGCAT
TCGGAACGCCGGGAATAAGAAAATGATACAGTTCATTAGGATAGTAATGGTCGATCATGT
AACGCGAATTTAACTGTGTCGCGACCAGAGCATCAAGTTCACCTTCCTTGACCTTGTGAA
ATGCAGCGCTGGCGTTATCGACTTTTATCCACTCTACCTCCGGATACATCTCTTTTAATT
GCGAATGCAGCTCATAATAATATGGAATGGCAACTTTCATTCCTTTTTTTAATGTTTGTT
CACTGTCAGGCGCTTTTTGCATGACAAAAACGTAAGGCGTTGTTATGAAGGCTTCAGCAA
ATAAAACATTATTTTCTCTATCTTCACTATAAATAGCACCGGGTAATATATCCCATCCGC
CGGGATTCAGCTGTGTTCCAGCATGGATATTGTGTGAAACGGTGATCGGAGAAAAATTTA
AACCTGTTTGCAAAGTAATAATATTAAGAATATCCCCCATAACGCCCCGAACCGAGCCAT
TTTCATCCGTCATAGAATAGGGAGGGGAGTAAGGATTTTCCAGCACCTTTAAATCGGGAT
GCTGCTTAATCCATTGTTTTTCATGTTCAGTGAGTTCTAATGGTTTGTTCAGAAAGGCCA
GGTTTCCTGTATCAAGCCAATTTTGTGATACTTCATAGCGAACTTCATTTGTCAAAGCAT
CAACAAATCGATTGAGTACTTCATTAAGAACGACAGATTCTTTTCTGGTCAAGAAAAAAT
TATATTGACGCGGTGAGTTATAATATTTCACTACATTTAAGGAGTGAGTGAAATAGCGGG
AAATCATACTGCTGGTAATGATGTTACTACCAATAAAGTAATCATTCTGTCCGGCTGAGA
CGGATGCTAATGCCTGATATAAATTTGTAAAAGAGATAATTGTTGCTTTTGGAAATGATT
GATGAATTACCTCGTCAGGGGGATAATTTGCTACTCGAGCAATATTTACTGGTTTTGATG
AGGTAAGCGGTCGCATTGAATCGTGAAGGGTGGTGACGAGCGCCGGAAAGGTAATTATCA
GTGGTTTGGTTGCAGCAATGTCATCATTAAGAGGCGGCGAAGCAACTAAATGTGATAACA
CTATATCGACTTCACCTTCTTCCAGCGCGTCCATTGCTTTTTGATGATCGGCGTATTCCC
GGAGTGTTAGTTTGATATTTAACGCTCTTTTTAAAAGATTTAAATAATCAGCATTAATAC
CACGAACCCGTTGCTGCGAATCGGTATGCAACAACGTAGCCGTTTGGGACTTGTGTACTG
CAATCACAAGATTTTTTTTGCTCGCTAACCAACGTAATTCCTTGTTGCTCAGACGTAGTG
GATCAAGTGTGACACGGTTGTTACTACTGATGCCACGATATTCGATGTAATCTTCGTCTG
CGAAACTTATGGTCGACCAAAGACCACAACAGAGAAGAAAAATATAGGGTAAAAACTTCA
TGTGGTTAGCCGATTTTGTTACGTTGTGCGAATGTGTAAAGATCCATCAGTGATTTACAT
TCTAATTTTTCCATCAGGCGACTTTTATAAGTGCTGACAGTTTTGTTGCTGATGAACATT
TTTTCAGCAATGTCATTATTATCCTTGCCATCAAGAATATAGCGCATGACACTAATTTCT
TGTTTCGATAAGGAGTCGAGTTTTTGCTGGTCGGACGTTAAACTTCCAACAAACCGGTTG
AGAGAGAAGGGGAAATAGCAGTAGCCATTTTTTGCAGCTTCAATAGCCGCAATGATATTG
TTCATGCCTTCTTTTTTACTCACGAAACCATTAGCGCCAGCATCAGCACAATGTTTCCCG
TAAAAATGGTCATTTTTAGCGGAGACGATAATAATAATTCCGCTATATTGGCGCTTCCTC
AGCGTTTCTAACACCTGGATACCGTTAACTCCGGGGATATCGACATCAATGATGACGATA
TCAGGCTTAAGTGTTTCCACCCGCTGAACGACACTTCCGCCTTCAGTCAACTCTGCTAAG
ATTTCAATATCGTTTTTGATCAATAAATTACGAATTGCTGCGATAGCAAGAGGATGGTCA
TCAATAATTATTGCGTTCATAGATTATTCCCTTTGCAATGAAGCATCTCCCTTCTCCCTG
TAGTAATACAGACATAAGGCATCATCTCATTTTCTCAATAAAAATAAGAAAATTTGAGCT
TCCTTTAAGATAATTCGACAAGTATACCATATAAATAGTCGGCATATATGAAATGTCAAC
AATAAAATCAGGGATTGTACCGATGATTTATAGTTTCACATTAGCACTATAAGTCTTCTC
ACTAATCCTACAGGCGTAAGAATTGTATTGCAAAAGCCACGGTTTAGTCCTCTGTTGTTT
TTTTTGCACCTCATTTAAATTAGGCCTCCAACGTTCCTGGGATAATGTGCAACACATGCA
CTGTGTTTGATATGAAGAATGAATACTCTTTTCATTCAATTCATAAATTTCATCTATGCG
AAATGAGAGATAAAAGTGGAACAGATTAATTCAAATAAAAAACATTCTAACAGAAGAAAA
TACTTTTCTTTATTGGCGGTAGTTTTATTTATTGCGTTTTCAGGTGCCTATGCCTATTGG
TCAATGGAATTAGAAGACATGATTAGTACAGATGACGCCTATGTCACGGGGAATGCAGAT
CCAATTTCTGCACAAGTCTCAGGTAGTGTCACTGTAGTTAATCATAAAGATACGAACTAC
GTTCGACAAGGTGACATTTTAGTTTCACTGGATAAAACTGATGCCACTATCGCACTCAAT
AAAGCTAAAAATAATCTGGCAAATATTGTTCGGCAAACGAATAAACTATACTTACAGGAT
AAACAATACAGTGCCGAAGTCGCTTCAGCGCGTATTCAGTATCAACAATCTTTAGAAGAT
TATAACCGTCGAGTGCCGTTAGCGAAGCAGGGGGTTATTTCAAAAGAAACGCTGGAGCAT
ACCAAAGATACGTTAATAAGTAGCAAAGCGGCATTGAATGCCGCTATCCAGGCTTATAAA
GCGAATAAAGCTTTAGTAATGAACACACCATTAAACCGTCAGCCACAAGTCGTTGAAGCG
GCGGATGCAACTAAAGAAGCCTGGTTGGCGCTTAAACGTACGGATATTAAGAGTCCGGTT
ACCGGCTATATTGCCCAGAGAAGTGTTCAGGTCGGCGAAACAGTGAGCCCCGGACAATCG
TTAATGGCTGTCGTACCGGCACGTCAAATGTGGGTTAATGCCAACTTTAAAGAAACACAA
CTCACGGATGTACGGATTGGTCAATCGGTCAATATTATCAGCGATCTTTATGGTGAAAAT
GTTGTGTTTCATGGTCGGGTGACAGGGATCAATATGGGAACCGGCAATGCGTTCTCCTTA
TTACCTGCACAAAATGCGACAGGGAACTGGATCAAAATCGTTCAGCGTGTACCGGTTGAA
GTTTCTCTGGATCCAAAAGAACTCATGGAACACCCCTTGCGCATTGGTTTATCGATGACT
GCAACTATTGATACCAGGAACGAAGACATTGCTGAGATGCCTGATCTGGCTTCAACCGTG
ACCTCCATGCCTGCTTATACCAGTAAGGCTTTAGTTATCGATACCAGTCCGATAGAAAAA
GAAATTAGCAACATTATTTCGCATAATGGACAACTTTAATGGCAATCACTAAATCAACTC
CGGCACCATTAACCGGTGGGACGTTATGGTGCGTCACTATTGCATTGTCATTAGCGACAT
TTATGCAAATGTTGGATTCCACTATTTCTAACGTCGCAATACCGACAATATCTGGCTTTC
TGGGAGCATCAACAGACGAAGGTACCTGGGTTATCACCTCGTTTGGCGTAGCAAATGCCA
TTGCGATCCCTGTTACCGGCAGGCTGGCACAAAGAATAGGCGAATTAAGGTTATTTTTAC
TTTCAGTCACTTTTTTTTCGCTGTCTTCCTTAATGTGTAGTTTATCGACCAATCTTGATG
TGCTGATATTTTTTAGAGTCGTTCAGGGGTTAATGGCAGGGCCGTTAATTCCACTGTCAC
AGAGTTTATTATTAAGGAATTATCCACCAGAAAAAAGAACATTTGCTCTGGCATTATGGT
CAATGACCGTGATTATCGCTCCGATATGTGGGCCGATATTGGGCGGTTATATTTGTGATA
ACTTTAGCTGGGGTTGGATATTTTTAATCAATGTCCCTATGGGGGTTATCGTCCTGACAT
TATGCTTAACCTTACTTAAAGGAAGAGAAACTGAGACTTCACCGGTCAAAATGAATCTAC
CAGGACTGACCCTGTTAGTGCTTGGTGTTGGTGGCTTGCAAATTATGCTTGATAAAGGGC
GCGATCTGGATTGGTTCAACTCGAGTACAATAATAATATTAACAGTAGTATCAGTTATTT
CTCTGATCTCTTTAGTCATTTGGGAGTCAACCTCAGAGAACCCGATTCTTGATCTCAGTT
TGTTTAAGTCCCGTAATTTCACCATTGGTATTGTGAGTATCACATGCGCGTATTTATTTT
ACTCTGGAGCGATAGTCCTTATGCCGCAGTTACTCCAGGAAACAATGGGGTATAATGCGA
TTTGGGCTGGGCTTGCTTATGCGCCCATCGGCATCATGCCACTATTAATTTCACCTTTGA
TAGGACGTTATGGCAACAAAATAGACATGCGGTTGTTAGTGACATTTAGTTTTTTGATGT
ATGCGGTTTGCTATTACTGGCGTTCTGTGACATTTATGCCAACGATTGATTTTACAGGCA
TCATTTTGCCACAGTTTTTCCAGGGATTCGCCGTTGCCTGTTTCTTTTTACCCTTAACAA
CGATTTCGTTTTCAGGGTTGCCAGATAATAAATTTGCCAATGCCTCGAGTATGAGTAATT
TTTTTCGTACCTTGTCAGGATCAGTTGGTACGTCGTTGACAATGACGCTGTGGGGACGAC
GCGAATCGTTACACCATAGTCAGTTGACAGCAACCATCGATCAATTTAACCCCGTGTTTA
ATTCATCGTCACAAATTATGGATAAATACTATGGTTCGCTTTCAGGAGTTCTTAATGAAA
TTAATAATGAAATAACCCAGCAGTCACTTTCTATTTCTGCAAATGAGATTTTCCGTATGG
CGGCTATTGCTTTTATCTTACTTACGGTTTTGGTTTGGTTTGCGAAACCGCCGTTTACAG
CGAAAGGCGTTGGGTGATGGTAAAAGCAGGGGGTTATAGCGGGTAAGACCGGGGATCTTA
AGTCTGCGCCATCGGCAGCATCGCTCATCCAGGGAAAGGATGGCGATGCTGAATTGAAAA
TTAATTAGCGGCCTTTTGCCAGATATTGCTCCATCTCTTCTTCCGGCACCATTCCACCTC
CCGTCGCCCACACCAGATGAGTGGCATTACGCAGTTGTTCTGCGCTGCAACCGTGCATCT
GTTGGTAACTTACTGATGCGCACACGCGCTGAGGCCCGGCCATACCCGCCAGTGCCGAAG
GTTCAAGACGAATGCCTTCTTCCTGCGCCAGCCAGCCAAGCATGTTATACATGGTTTGAT
CGCTAAGGGTATAGAAGCCATCCAGTAGACGCTCCATTGCCCGCCCGACAAAGCCTGATG
CGCGACCAACTGCAAGGCCATCCGCTGCGGTAAGGTTGTCGATACCAATATCCTGAACAG
AAATCTGATCGTGTAATCCTGTATGGACGCCTAACAGCATACAAGGGGAGTGCGTTGGTT
CGGCAAAAAAGCAGTGAACATGATCGCCAAACGCCAGTTTAAGCCCGAATGCGACGCCAC
CAGGACCACCGCCAACACCACACGGCAGATAGACAAACAGAGGGTTATCAGCATCGACAA
TACGACCTTGCTCGGCAAATTGCGCTTTAAGACGCTGGCCAGCGACGGAATACCCAAGGA
ACAACGTGCGGGAATTTTCGTCATCAATAAAGAAACAGTTCGGGTCAGACTGCGCTGCTC
TACGTCCTTCCTCGACGGCAACACCATAATCTTGCTCATATTCCACGACCGTAACGCCAT
GGCTGCGCAGTTTCGCTTTTTTCCATGCCCGGGCATCAGCAGACATATGCACTGTCACCT
TAAAGCCAATGCGGGCGCTCATAATGCCGATTGATAACCCCAGATTTCCGGTTGAGCCCA
CAGCAATGCTGTATTGGCTAAAGAACTGTTTAAACTCCGGAGAAAGCAGTTTGCTGTAGT
CATCATCAAGCGTCAGCAACCCCGCTTCCAGAGCCAGTTTTTCTGCGTGTGCCAGGACTT
CATAAATCCCGCCGCGTGCTTTTATGGAGCCGGAAATGGGCAAATGGCTATCTTTTTTCA
GTAACAGTTGCCCGCTGATCGGTTGTTGATATTCCTTTTCCAGCCGTTTTTGCATAGCCG
GAATGGCAACCAGTTCTGATTCAATAATCCCCCCAGTGGCAGCAGTTTCAGGAAATGCTT
TTGTCAGATAGGGTGCAAAACGGGATAAGCGCGCATGGGCGTCCTGAACATCCTGTTCGG
TCAGGCCAACATAAGGTAAACCTTCAGCCAATGAGGTCGTGCCAGGATTAAACCAGGTGG
TTTCTTTAAGAGCAACCAGATCCTTTACCAACGGATACTGGGCGATGAGCGAGTTCATTT
TAGCGTTTTCCATAGTACGTCTCTTTGCGCTTAGATGATAAATGACAGCAGGAATGTGCC
CGCCAGAGCGACGACTGAAGCGATAAATGTCGCTGTCGTATAGTATTTAAATGTTTCATT
GAGCGTAGCGCCGCAATATTGCTTCACCAGCCAGAAAAGCGAGTCCGTAACGATAGTGCA
GCCAATTGCACCTGAACCGATAGCAATCGCAATAATTTCCGGGCTGATGTCGGGATACAG
CGGCAGCACAATGATCCATATTTATATTTTCTTCTCCAGGTTGGCGATGCCAGTTGGCAT
GTTTTACTTACTTGCCTATATGGTTACTCGTTGGCGAGAACAGAGGCGGAATTGGGGACA
ATTGGCCGGGAATTATTGTTATTTTTTATTGTATTGCCGTGTCAGGTGATAGGGCGTTGG
ATCTCGCCAGTGACGTCTGTTTCTGCTACAGTGCCCGTTTTACGACAAACGGCTTGGGTA
TGGCTTCATTAAAGGATGTCGCACGCCTGGCGGGAGTGTCGATGATGACAGTCTCCCGGG
TGATGCATAATGCAGAATCTGTGCGTCCTGCAACGCGTGACCGCGTATTGCAGGCAATCC
AGACCCTGAATTATGTTCCTGATCTTTCCGCCCGTAAGATGCGCGCTCAAGGACGTAAGC
CGTCGACTCTCGCCGTGCTGGCGCAGGACACTGCTACCACTCCTTTCTCTGTTGATATTC
TGCTTGCCATTGAGCAAACCGCCAGCGAGTTCGGCTGGAATAGTTTTTTAATCAATATTT
TTTCTGAAGATGACGCTGCCCGCGCGGCACGTCAGCTGCTTGCCCACCGTCCGGATGGCA
TTATCTATACTACAATGGGGCTGCGACATATCACGCTGCCTGAGTCTCTGTATGGTGAAA
ATATTGTATTGGCGAACTGTGTGGCGGATGACCCAGCGTTACCCAGTTATATCCCTGATG
ATTACACTGCACAATATGAATCAACACAGCATTTGCTCGCGGCGGGCTATCGTCAACCGT
TATGCTTCTGGCTACCGGAAAGTGCGTTGGCAACAGGGTATCGTCGGCAGGGATTTGAGC
AGGCCTGGCGTGATGCTGGACGAGATCTGGCTGAGGTGAAACAATTTCACATGGCAACAG
GTGATGATCACTACACCGATCTCGCAAGTTTACTCAATGACCACTTCAAATCGGGCAAAC
CAGATTTTGATGTTCTGATATGTGGTAACGATCGCGCAGCCTTTGTGGCTTATCAGGTTC
TCCTGGCGAAGGGGGTACGTATCCCGCAGGATGTCGCCGTAATGGGCTTTGATAATCTGG
TTGGCGTCGGGCATCTGTTTTTACCGCCGCTGACCACAATTCAGCTTCCACATGACATTA
TCGGGCGGGAAGCTGCATTGCATATTATTGAAGGTCGTGAAGGGGGAAGTGTGACGCGGA
TCCCTTGCCCGCTGTTGATCCGTTGTTCCACCTGATATTATGCTAACCCAGTTGCCAGAG
TGCTCCATGTTGCACCACAGCCACTCCGTGGGAGGCATAAAGCGACAGTTCCCGTTCTTC
TGGCTGCGGATAGATTCGACTACTCATCACCGCTTCCCCGTCGTTAATAAATACTTCCAC
GGATGATGTATCGATAAATATCCTTAGGGCGAGCGTCTCACCCTGCGGGAGGGGAATACT
ACGGTAGCCGTCTAAATTCTCGTGTGGGTAATACCGCCACAAAACAAGTCGCTCAGATTG
GTTATCAATATACAGCCGCATTCCAGTGCCGAGCTGTAATCCGTAATGTTCGGCATCACT
GTTCTTCAGCGCCCACTGCAACTGAATCTCAACTGCTTGCGCGTTTTCCTGCAAAACATA
TTTATTGCTGATTGTGCGGGGAGAGATAGATTGATGCTGCTGGCGTAACGACTCAGCTTC
GTGTACCGGGCGTTGTAGGAGTTTGCCATTGCTCTCTGATAGCTCGCGCGCCAGCGTCAT
GCAGCCTGCCCAGCCTTCACGTTTTGAGGGCATTGGCGATTCCCACATATCCATCCAGCC
GATAACAATACGCCGACCATCCTTCGCTACAAAGCTTTGTGGTGCATAAAAGTCATGCCC
GTTATCAAGTTCAGTAAAATGCCCGGATTGTGCAAAAAGTCGTCCTGGCGACCACATTCC
GGGTATTACGCCACTTTGAAAGCGATTTCGGTAACTGTATCCCTCGGCATTCATTCCCTG
CGGGGAAAACATCAGATAATGCTGATCGCCAAGGCTGAAAAAGTCCGGACATTCCCACAT
ATAGCTTTCACCCGCATCAGCGTGGGCCAGTACGCGATCGAAAGTCCATTCACGTAATGA
ACTGCCGCGATAAAGCAGGATCTGCCCCGTGTTGCCTGGGTCTTTCGCCCCGACTACCAT
CCACCATGAGTCGGCTTCACGCCACACTTTAGGATCGCGGAAGTGCATGATTCCTTCTGG
TGGAGTGAGGATCACACCCTGTTTCTCGAAATGAATACCATCCCGACTGGTAGCCAGACA
TTGTACTTCGCGAATTGCATCGTCATTACCTGCACCATCGAGCCAGACGTGTCCGGTGTA
GATAAGTGAGAGGACACCATTGTCATCGACAGCACTACCTGAAAAACACCCGTCTTTGTC
ATTATCGTCTCCTGGCGCTAGCGCAATAGGCTCATGCTGCCAGTGGATCATATCGTCGCT
GGTGGCATGTCCCCAGTGCATTGGCCCCCAGTGTTCGCTCATCGGGTGATGTTGATAAAA
CGCGTGATAACGATCGTTAAACCAGATCAGGCCGTTTGGATCGTTCATCCACCCGGCAGG
AGGCGCGAGGTGAAAATGGGGATAGAAAGTGTTACCCCGGTGCTCATGAAGTTTTGCTAG
TGCGTTTTGCGCCGCATGCAATCGAGATTGCGTCATTTTAATCATCCTGGTTAAGCAAAT
TTGGTGAATTGTTAACGTTAACTTTTATAAAAATAAAGTCCCTTACTTTCATAAATGCGA
TGAATATCACAAATGTTAACGTTAACTATGACATTTTGTGATCGAATATGCATGTTTTAG
TAAATCCATGACGATTTTGCGAAAAAGAGGTTTATCACTATGCGTAAGTCAGATGAATTT
AAGGGAAAAAAATGTCAGCCAAAGTATGGGTTTTAGGGGATGCGGTAGTAGATCTCTTGC
CAGAATCAGACGGGCGCCTACTGCCTTGTCCTGGCGGCGCGCCAGCTAACGTTGCGGTGG
GAATCGCCAGATTAGGCGGAATAAGTGGGTTTATAGGTCGGGTCGGTGATGATCCTTTTG
GTGCGTTAATGCAAAGAACTCTGCTAACTGAGGGAGTCGATATCACGTATCTGAAGCAAG
ATGAATGGCACCGGACATCCACGGTGCTTGTCGATCTGAACGATCAAGGGGAACGTTCAT
TTACGTTTATGGTTCGCCCCAGTGCCGATCTTTTTTTAGAGACGACAGACTTGCCCTGCT
GGCGACATGGCGAATGGTTACATCTCTGTTCAATTGCGTTGTCTGCCGAGCCTTCGCGTA
CCAGCGCATTTACTGCGATGACGGCGATCCGGCATGCCGGAGGTTTTGTCAGCTTCGATC
CCAATATTCGTGAAGATCTATGGCAAGACGAGCATTTGCTCCGCTTGTGTTTGCGGCAGG
CGCTACAACTGGCGGATGTCGTCAAGCTCTCGGAAGAAGAATGGCGACTTATCAGTGGAA
AAACACAGAACGATCGGGATATATGCGCCCTGGCAAAAGAGTATGAGATCGCCATGCTGT
TGGTGACTAAAGGTGCAGAAGGGGTGGTGGTCTGTTATCGAGGACAAGTTCACCATTTTG
CTGGAATGTCTGTGAATTGTGTCGATAGCACGGGGGCGGGAGATGCGTTCGTTGCCGGGT
TACTCACAGGTCTGTCCTCTACGGGATTATCTACAGATGAGAGAGAAATGCGACGAATTA
TCGATCTCGCTCAACGTTGCGGAGCGCTTGCAGTAACGGCGAAAGGGGCAATGACAGCGC
TGCCATGTCGACAAGAACTGGAATAGTGAGAAGTAAACGGCGAAGTCGCTCTTATCTCTA
AATAGGACGTGAATTTTTTAACGACAGGCAGGTAATTATGGCACTGAATATTCCATTCAG
AAATGCGTACTATCGTTTTGCATCCAGTTACTCATTTCTCTTTTTTATTTCCTGGTCGCT
GTGGTGGTCGTTATACGCTATTTGGCTGAAAGGACATCTAGGGTTGACAGGGACGGAATT
AGGTACACTTTATTCGGTCAACCAGTTTACCAGCATTCTATTTATGATGTTCTACGGCAT
CGTTCAGGATAAACTCGGTCTGAAGAAACCGCTCATCTGGTGTATGAGTTTCATCCTGGT
CTTGACCGGACCGTTTATGATTTACGTTTATGAACCGTTACTGCAAAGCAATTTTTCTGT
AGGTCTAATTCTGGGGGCGCTCTTTTTTGGCTTGGGGTATCTGGCGGGATGCGGTTTGCT
TGACAGCTTCACCGAAAAAATGGCGCGAAATTTTCATTTCGAATATGGAACAGCGCGCGC
CTGGGGATCTTTTGGCTATGCTATTGGCGCGTTCTTTGCCGGCATATTTTTTAGTATCAG
TCCCCATATCAACTTCTGGTTGGTCTCGCTATTTGGCGCTGTATTTATGATGATCAACAT
GTGTTTTAAAGACCAGGATCACCAGTGCGTAGCGGCGGATGCGGGAGGGGTAAAAAAAGA
GGATTTTATCGCAGTTTTCAAGGATCGAAACTTCTGGGTTTTCGTCATATTTATTGTGGG
GACGTGGTCTTTCTATAACATTTTTGATCAACAACTCTTTCCTGTCTTTTATGCAGGTTT
ATTCGAATCACACGATGTAGGAACGCGCCTGTATGGTTATCTCAACTCATTCCAGGTGGT
ACTCGAAGCGCTGTGCATGGCGATTATTCCTTTCTTTGTGAATCGGGTAGGGCCAAAAAA
TGCATTACTTATCGGTGTTGTGATTATGGCGTTGCGTATCCTTTCCTGCGCGCTGTTCGT
TAACCCCTGGATTATTTCATTAGTGAAGTTGTTACATGCCATTGAGGTTCCACTTTGTGT
CATATCCGTCTTCAAATACAGCGTGGCAAACTTTGATAAGCGCCTGTCGTCGACGATCTT
TCTGATTGGTTTTCAAATTGCCAGTTCGCTTGGGATTGTGCTGCTTTCAACGCCGACTGG
GATACTCTTTGACCACTCAGGCTACCAGACAGTTTTCTTCGCAATTTCGGGTATTGTCTG
CCTGATGTTGCTATTTGGTATTTTCTTCTTGAGTAAAAAACGCGAGCAAATAGTTATGGA
AACGCCTGTACCTTCAGCAATATAGACATAAACTTTTTCCGGTTGTTGTCGATATCTCCA
TATCCCTCAACCGGAAAATAATAATACTAAAATGCTTAGGCCTGCTAATAATCGCCTAAT
CCAAACACCTCATTCATGTTCTGGTACAGTCGCTCAAATGTACTCCGGATACACGGTTCG
CTGATTTCCAGGACATTGTCGTCATTCAGCGACCTGTCCCGTGTATTACGGGCCTGCGAA
TTCATCAAGGAATGCATTGCGGAGTGAAGTATCGAGTCACGCCATATTTCGCTATCAGGA
TTCTGTGTGATGGTTACATCGCCCGGCCCAGGGCTGTTTAGTCATCAGCGCTTTCTGACA
GTGCTGAGATTTCAACCTGTTGCAGTAAAAATGAGTAGATATAGGGCAAGTGTGCTGCCA
AACCCATCTTTTACGGGGTGAAGGTAGATTTGGTTTGAAGGGTATCTGGTGTCCCCTGCA
GGAATCGAACCTGCAATTAGCCCTTAGGAGGGGCTCGTTATATCCATTTAACTAAGAGGA
CAATGCGGCATGAGTATACCCGCTAATGGACTGCGGGGTAAGTACGCTGCCGCTCGATTG
CTTAAACCCTCGCCATTTATGCCGGGTTTTTATCATTTTTCTTAATGTTTTCCGCACGTT
CTGCTTTTTGGCGTGCTTCTGCTTTGCGCTTGTTGCTCATGTCGTTACGGATCTGTGCAT
GACTCATTAACGCGAAGATAAAGGTGCCGCCGCAGATGTTCCCCGCTAAAGTAGGTAGTG
CGAAGGGCCAGATGAAATCGCTCCAGTGCAGCGTGCCGTTAAACACCAGATAGAGGATTT
CAACAGAACCGACAACGATGTGGGTGGTGTCACCCAGGGCAATAAGCCAGGTCATCAATA
TAATCACCACAATCTTTGCCGCACCCGCTGCAGGAAACATCCATACCATAGTGGCGATCA
GCCAGCCGGAAATGATCGCGTTGGCAAACATCTCGCTGGGGGTGTTCTTCATCACATCCA
TGCCGATATTGACAAATGCATCGCGAGTTTCTTCATTGAAGATTGGCATATATTCAAATG
CCCACGCCGCAATACCTGTCCCGAGAATATTACCCAGCAGCACGACGCCCCATAACCGCA
TAAGTAAGCCAACGTTGCTCATTGTCGGTTTTTGCATGACGGGTAGTACCGCAGTCACGG
TGTTTTCGGTAAATAATTGCTGGCGGGCCATAATGACGATAATAAAACCAAAGGTATAAC
CGAGATTCTCCAGCAAGAAGCTGCCCGGCACACCTTCCAGTTCGACATGAAATATCCCTT
TTGCCAGTAATGAAGCGCCCATCGACAGACCCGCCGCAATGGCTGACCACAGTAGTGCCA
TTGCGTCGCGTTCCAGCTCTTTTTCACCATCCTGGCGGATATGCTCATGAATTGCCATCG
CCCGGGAGGGGAGTCGATCTTCATCTATTTCTATTTTTTTGCCACGCTCTTTTTCTTCGC
TCTCAACTTCAATTTCGTCGCTGTGTTGATCAATTTTGTCGTTGTCCATGGTCTCTTCTC
TTGAATTAGCACGTATAGCTAAAGCGTAGCGGCTTTTTTGCTCGCAACTGGCGGGAGTTA
CTCTGAAAATGTAGAAAAGGCCGCGTTTGCCTTTTTCTGTTTCCATAGAATCAAGTAGCC
TACAGGGCGGCGATTACCAGGCTATGATCAAATCAGCAAATCAGGGCGTCTGGACATCAG
TTGACGTGCTGTTACAATCGCCCACACCTAAACAGGCGGATACGGTATCGTTCCGTCATG
GATGGCAAACTGCATAAGCCATAAAAAAACAGGGAGACATTTATGAAGCTTCGCCTGTCG
GCGCTTGCTCTGGGAACTACGCTTCTGGTGGGGTGTGCGAGTTCCGGTACAGATCAGCAA
GGGCGTTCTGACCCGTTAGAAGGGTTCAACCGCACCATGTACAACTTCAACTTCAACGTA
CTAGACCCGTATATTGTTCGACCGGTCGCTGTCGCCTGGCGTGATTATGTTCCGCAACCG
GCGCGTAACGGTTTGAGCAACTTTACCGGCAACCTTGAAGAACCTGCGGTGATGGTTAAC
TACTTCTTGCAGGGCGACCCTTATCAGGGGATGGTCCACTTTACCCGCTTTTTCCTGAAC
ACCATTTTGGGGATGGGCGGCTTTATTGATGTTGCAGGGATGGCGAACCCGAAACTGCAA
CGGACTGAACCTCACCGCTTCGGTAGTACGCTTGGTCATTATGGCGTGGGTTATGGGCCG
TACGTTCAGTTACCATTCTACGGTAGCTTCACGCTGCGTGATGACGGTGGTGATATGGCG
GATGGTCTTTACCCGGTTCTTTCCTGGTTGACCTGGCCGATGTCTGTGGGTAAATGGACG
CTTGAAGGGATCGAAACCCGCGCTCAGCTGCTGGATTCCGACGGTCTGCTGCGTCAGTCG
TCCGATCCTTATATTATGGTGCGCGAAGCGTACTTCCAGCGTCATGATTTCATCGCTAAT
GGCGGCGAACTCAAACCGCAGGAAAATCCGAACGCGCAAGCGATTCAGGATGATTTAAAA
GATATCGATTCTGAATAAGAAACAAATAAAAAAGGTGAGTCGCAAAACTCACCTTTTTTG
TTGTTATCCCTCAATTACCACAAGTAAAAGGAGATAAACCGACAATGACCCGGACGTAAT
GATGTAAAAATACTGATGTTCGTCACTGACTATTTCCGATATTCAGGCGTTAAAAAATCA
AAAAACTGGAAAAATAATTTTAAATATCATCAAAATTAACACCTGGCGCATATAGTTGAT
TAATTTCATTTTGATATTCCGTCTGGCGATTTTGAAGCCTTTCTTCAATTTTACCTTCGA
GTTCCTTATAGTGCATATATATATTTTGAGAATGGTCAACGTTAACTTCGTTACCGAATA
AAGTAGAAACTATTTCTTTTGTATTCTTAAGTGTATATTTTCTATCATCCTCTTAATATT
CATATCCTCTTGCTAGATTTGAAGGATTAAAAGCTTCGTTAGGTTCTCTCAGTCTTTCCC
CTTTGAGTTCGTTTACAACTTGATGATCGGGACCTGTTGCAAATGATTCTGCGATGATTG
CTTTACTGTGTTCAAACCACGCAGAAGCACTCCTGGCTTTTTTACTACAATATTGGGTGA
GATTATCACCATCAATACGAAATCCTTTTTGAATGTGGTAGCCATCCTGATCGTAGTAAC
CGAGAGATAAGTAATCATTTCCATTTTTATTTTTTATTACAATAGCGAGAGAGTCGCCTT
TTTTATCTTTACCGTACCAGGTAAATAAGCACGTTGGTTCGCTTTTCCCGCTCTCATCGA
ATTCCGTTACCGTATGTCTGAGTTTGTGTGATATTTTATCGAAGATAAAACTTGGATTTT
CATCATATATTTCTTTTATTGCGCTGAAGATCATTTTCTTGTTATTGATATCATGAGTAT
TCTCTACTATGTTTTCATTGATGATGGTTTGACCGACTTTTTTGTTTTCATCGTTCGCGG
GTGATTTTGTTGGTTCTTGATTTTCAATATCAATATCAATATCAATATCAATATCAATAT
CAATATCAAAAGTAATATCGTTTGTATCATTGGAGTCAATACCAATATCACTACGATCAT
CAATACCACTAATAATAATACCATCAGTAAATTCAGCATTATTTATATCATCATGAGTCT
TCTCAACTATGTTGTCATTAATGATAGTACGGACGAGTTCTTTGTCTTTATAACTCGCAG
GTAATTTTATTGGTTCTTGGTTGTCGATACCAATAGTAATATGGTCTGTATCATTGGAAC
CAATATTAATATAAGTAACTGAAGAATTATTGATATTTATTCTATCAGGATCGTCGTTTC
CTCGTATGGCGTTTTTTATAAGCTCAAGTAGATGTTTAATACAGGTGCTTATTCCTTCCT
TACCATTAAAAAGGTTTTTGAACTCTTGTACTAATCCATTAACTTCATCATTGTTATTTT
CATTGATGGATTCTGGGTAAGCTGCGCTGGTATTGTTGATTGAAATAGATGGTAGCATGA
TTTTATTCCATGTTGATTGATTTGTTACAAATATATATTACCTAATGAAATAGACTATCA
AAAAACGCTCATTTATTTAGACCCTATCTTTAATTTGAGTGTATGAGCGCACAATAGCCA
GGGTGGTTTGAGTATCCTGGAAATTCAGAAAAGTAAACTCTTTGAGAAAGACGAGCAGAA
CGCCTGAAAATATGCCTTTCCCTTCAGGTTTGTCTGTGGATACCACTTAATGATTTGAAA
GGGCAAGCTACCATCAGGCTGTTTGCAAAACTCAGGAGGCAAGCAATGAGGACACTACTT
TCGGTGAAGTGGGGAAGTTAAAGTCACCTGCATAGCAGGTGACTTTAACCAGGCGAACGC
GTTATCAGAACGCGTAGTTAAAGTTAGTACCGAACAGCCAGGCTTTACCTTCAGATTTAA
AGGTATATGCTGCTGGCCCTTCACCTTCAGTAAACTTCACATTCTGACCGTGCATATAAG
ATGCACCAACGTCAATGGATGCATCTTCATTAAATGCATAAGTCGCACCTGCACTTAACC
ACAGACGATCCTGATCTGGGATAGAGATAGAACGTTTATCTGCCGGAACCGGGCTGTCAT
CGAATGCAATACCCGTACGGAAGGTCCAGTTTTTATCGTGGTAGTAGGTTGTACCTAACG
CGATACGGTAAGCATCCCGGAAACCTTCGTCTTTATAGAACAGCGTTTGACCAGAGTCTC
CTTTCGCTTTCAGTTCCTGGAATTGACTCCAACTGGTATACGCCAGACTATAGTGGATAG
CCCATTGTGGTGCGACACGGTTATAGCCAGAAATTTCCCACATCTCAGGTAAATTCAGCG
TTAAGGACCCATTTTGGGTTGCACCCATTGTGCCATATGGTAAACCCATGCTACCCAAGA
TGTTGTTCAGATTTGGGTTGATGGAGCTTTTGTAATCTCCTTCAAAGTCAATTTTCACTT
CTGAACGATAGGTTAGGCCCCAACGGTTATCTTTATCCAGTTCATAAAGAATACCGGCGT
TCCAGCCGAATCCCCATTCATCACCCTTGAGATGAGCAATTTGCGAATCCGGTGTATTGA
TGCCGTTTGTCCAACTTTGTGGCACGCCTTGCGCTATCAGTTGTTGGGAAAGCAATGGAC
CGAGTGAACCGGCAGTACGCTCAATTTTTGCCTTAGCGTATACAGCATCAAAACCAAGAC
CAAAACTCCAGCTATTGTTAAGGCGGTAGGCTCCGCTAAGGTTAAGGTTGATCGTCTGCA
GATCGGTTTTACCGCCATAGATTCCAGCAGCGTAGTTATCATTAAATTCCGTGGCCAGAC
CATAGTTCGAGGTAATAGAAGCCCCCCAACCAAACTGATCGTTAATAGGTGCTACGAAAT
GTAGGTTAGGCACCCACGCAGTTGGTGCAATATTATCTGCATCAGCACGCTGGCCCGTTA
AATCGGAACGCCCAGAAATATCTACATCCGGGTCAATATAAACCGCACCCGCAGAAAATG
TCGGGCGGTCAAACATGGTAATCAATGCGGGGTTACGGCTGACGTTACCTGCATCATCGG
CAATTGCGCCTTCCCCTGAATAAGCCCGGCCCAGGCCAGAGGAAGAAAATTCGTTTAACT
GAAAGCCTGCCGACCAGGCCTGGGTGGAGATAAGTGCCACTGCGACTGCGAGAGCAGACT
TTGTAAACAGGGTTTTCTGGCTCATGACCATAACCTCAATGATTTATTTTTATACAAACT
ATGTTACGTGCTGTAACAGGAGCGCGAAGTGTAGGGTCTGAGGTACATCTTAGAAATCAG
ACCAGTGGCGAGAGTATAGGTCGGACCAGCTGGAATGTTGCAAGTATGTTTCTATCTTTT
TTCAAATATGATCTAAGAAACGCGATCCAGCTGGCAAAATTTGGAGGTGGCGCACTCATG
GATTCGGGTGAATTTTGTTTTAGATCATTTTTAAGTGTGATTTCGGTCACTTATCCGATT
TTGCAGAATTAACAACTGGAGCAGCACTTTCCGGAAGCGTAAAATATCCACAACGTTTAT
CTGGCACCTTGGGTGCACATACAGAGGAAATCAACGATGAGTAAATGTAGTGCTGATGAA
ACCCCGGTTTGCTGCTGTATGGATGTTGGCACCATTATGGACAACTCCGACTGCACCGCG
TCTTACAGCCGCGTGTTTGCAAACCGCGCAGAAGCAGAACAAACGCTGGCGGCACTGACT
GAGAAAGCCCGTAGCGTGGAATCCGAACCGTGCAAAATCTCCCCGACTTTCACTGAAGAG
TCTGATGGTGTGCGCCTGGATATCGATTTCACTTTTGCCTGCGAAGCTGAAATGCTGATC
TTCCAGCTGGGTCTGCGTTAATTCCTCTCGGGTACGTACGCCCCTGTCAGTTGCTGGCAG
GGGCGTTTTCTTTTCTCTTCTTCTTTTCTCTCTGTGTCATAGCTCCCACTTTCCCTTTTC
TCCGCTTGGCTAAATGTAAAAAAATGGTTAAGACTATGATCAGGTCAGACCACTTTATTT
ATTTTTTTACAGGGGAGTGTTATGGGTCAGGTTTTACCGCTGGTTACCCGCCAGGGCGAT
CGTATCGCCATTGTTAGCGGTTTACGTACGCCTTTTGCCCGCCAGGCGACGGCTTTTCAT
GGCATTCCCGCGGTTGATTTAGGGAAGATGGTGGTAGGCGAACTGCTGGCACGCAGCGAG
ATCCCCGCCGAAGTGATTGAACAACTGGTCTTTGGTCAGGTCGTACAAATGCCTGAAGCT
CCCAACATTGCGCGTGAAATTGTTCTCGGTACTGGAATGAATGTGCATACCGATGCTTAC
AGCGTCAGCCGCGCTTGCGCTACCAGTTTCCAGGCGGTTGCAAACGTCGCAGAAAGCCTG
ATGGCGGGGACTATCCGAGCGGGGATTGCCGGTGGGGCAGATTCCTCTTCGGTATTGCCA
ATTGGCGTCAGTAAAAAACTGGCGCGCGTGCTGGTTGATGTCAACAAAGCCCGCACAATG
AGCCAGCGTCTGAAACTCTTCTCTCGCCTGCGTTTGCGCGACTTAATGCCCGTACCACCT
GCGGTAGCAGAATATTCTACCGGCTTGCGGATGGGCGACACTGCAGAGCAAATGGCGAAA
ACCTACGGCATCACCCGAGAACAGCAAGATGCATTAGCGCACCGTTCGCATCAGCGTGCC
GCTCAGGCATGGTCAGACGGAAAACTCAAAGAAGAGGTGATGACTGCCTTTATCCCTCCT
TATAAACAACTGCTCGCGGAAGACAACAATATTCGCGGTAATTCCTCGCTTGCTGATTAC
GCAAAGCTGCGTCCGGCGTTTGATCGTAAACACGGAACGGTAACGGCGGCGAACAGTACG
CCGCTGACCGATGGCGCAGCGGCGGTGATCCTGATGACTGAATCCCGGGCGAAAGAATTA
GGGCTGGTACCGCTGGGATATCTGCGCAGCTACGCATTTACCGCTATCGATGTCTGGCAG
GACATGTTGCTCGGTCCAGCCTGGTCAACACCGCTGGCGCTGGAGCGTGCCGGTTTGACG
ATGAGCGATCTGACATTGATCGATATGCACGAAGCCTTTGCAGCTCAGACACTGGCGAAT
ATTCAGTTGCTGGGTAGTGAACGTTTTGCTCGTGAAGCACTGGGGCGTGCACATGCCACT
GGCGAAGTGGACGATAGCAAATTTAACGTGCTTGGCGGTTCGATTGCTTACGGGCATCCC
TTCGCGGCGACCGGCGCGCGGATGATTACCCAGACATTGCATGAACTTCGCCGTCGCGGC
GGTGGATTTGGTTTAGTTACCGCCTGTGCTGCTGGTGGGCTTGGCGCGGCAATGGTTCTG
GAGGCGGAATAATGGAAATGACATCAGCGTTTACCCTTAATGTTCGTCTGGACAACATTG
CCGTTATCACCATCGACGTACCGGGTGAGAAAATGAATACCCTGAAGGCGGAGTTTGCCT
CGCAGGTGCGCGCCATTATTAAGCAACTCCGTGAAAACAAAGAGTTGCGAGGCGTGGTGT
TTGTCTCCGCTAAACCGGACAACTTCATTGCTGGCGCAGACATCAACATGATCGGCAATT
GCAAAACGGCGCAAGAAGCGGAAGCTCTGGCGCGGCAGGGCCAACAGTTGATGGCGGAGA
TTCATGCTTTGCCCATTCAGGTTATCGCGGCTATTCATGGCGCTTGCCTGGGTGGTGGGC
TGGAGTTGGCGCTGGCGTGCCACGGTCGCGTTTGTACTGACGATCCTAAAACGGTGCTCG
GTTTGCCTGAAGTACAACTTGGATTGTTACCCGGTTCAGGCGGCACCCAGCGTTTACCGC
GTCTGATAGGCGTCAGCACAGCATTAGAGATGATCCTCACCGGAAAACAACTTCGGGCGA
AACAGGCATTAAAGCTGGGGCTGGTGGATGATGTTGTTCCGCACTCCATTCTGCTGGAAG
CCGCTGTTGAGCTGGTAAAGAAGGATCGCCCATCTTCCCGCCCTCTACCTGTACGCGAGC
GTATTCTGGCGGGGCCGTTAGGTCGTGCGCTGCTGTTCAAAATGGTCGGCAAGAAAACAG
AACACAAAACTCAAGGCAATTATCCGGCGACAGAACGCATCCTGGAGGTTGTTGAAACGG
GATTAGCGCAGGGCACCAGCAGTGGCTATGACGCTGAAGCACGGGCGTTTGGCGAACTGG
CGATGACGCCACAATCGCAAGCTTTGCGTAGTATCTTTTTTGCCAGTACGGAAGTGAAGA
AAGATCCCGGCAGTGATGCGCCGCCTGCGCCATTAAACAGCGTGGGGATTTTAGGTGGTG
GCTTGATGGGCGGCGGTATTGCTTATGTCACTGCTTGTAAAGCGGGGATTCCGGTCAGAA
TTAAAGATATCAACCCGCAGGGCATAAATCATGCGCTGAAGTACAGTTGGGATCAGCTGG
AGGGCAAAGTTCGCCGTCGTCATCTCAAAGCCAGCGAACGTGACAAACAGCTGGCATTAA
TCTCCGGAACGACGGACTATCGCGGCTTTGCCCATCGCGATCTGATTATTGAAGCGGTGT
TTGAAAATCTCGAATTGAAACAACAGATGGTGGCGGAAGTTGAGCAAAATTGCGCCGCTC
ATACCATCTTTGCTTCGAATACGTCATCTTTACCGATTGGTGATATCGCCGCTCACGCCA
CGCGACCTGAGCAAGTTATCGGCCTGCATTTCTTCAGTCCGGTGGAAAAAATGCCGCTGG
TGGAGATTATTCCTCATGCGGGTACATCAGCGCAAACCATCGCCACTACGGTAAAACTGG
CGAAAAAACAGGGCAAAACGCCCATTGTCGTGCGTGACAAAGCCGGGTTTTACGTCAATC
GCATCTTAGCGCCTTACATTAATGAAGCTATCCGCATGCTGACCGAAGGTGAACGGGTAG
AGCACATTGATGCCGCGCTAGTGAAATTTGGTTTTCCGGTAGGTCCAATCCAACTTTTGG
ATGAGGTAGGAATCGACACCGGGACTAAAATTATTCCTGTACTGGAAGCTGCTTATGGAG
AACGTTTTAGCGCGCCTGCAAATGTTGTTTCTTCAATTTTGAACGACGATCGCAAAGGCA
GAAAAAATGGTCGGGGTTTCTATCTTTATGGTCAGAAAGGGCGTAAAAGCAAAAAACAGG
TCGATCCTGCCATTTACCCGCTCATTGGCGCACAAGGGCAGGGGCGACTCTCCGCACCGC
AGGTTGCTGAACGGTGTGTGATGTTGATGCTGAATGAAGCAGTACGTTGTGTTGATGAGC
AGGTTATCCGTAGCGTGCGTGACGGGGATATTGGTGCGGTATTTGGCATTGGTTTTCCGC
CATTTCTCGGTGGACCGTTCCGCTATATCGATTCTCTCGGCGCGGGCGAAGTGGTTGCAA
TAATGCAACGACTTGCCACGCAGTATGGTTCCCGTTTTACCCCCTGTGAGCGTTTGGTCG
AGATGGGCGAGCGTGGGGAAAGTTTTTGGAAAACAACTGCAACTGACCTGCAATAAGAAG
GTCAAAGCTATATGAATCCGCGCTGAATGGCGGATAGTTGGTCAAAATGTAAACGCATAT
TGACTATACTTACGCCATTGAGGTAAAAAACAGCGTTTCATTCGGTGAATGGATAAGGCA
CAATGCCGGCCACCGTTTTCTTTCTCTGGTTTCAGATGAAAGAAAACGGGCGAATCTGGT
TAACAAAAGCGGTGCAATATGCAAGTTTTTATCATGCGTCACGGCGACGCAGCCCTCGAT
GCCGCCAGTGATTCGGTTCGTCCTCTGACTACTAATGGTTGTGACGAATCTCGCCTGATG
GCGAACTGGCTGAAAGGTCAAAAAGTGGAAATCGAACGCGTTCTGGTGAGCCCGTTCCTG
CGAGCCGAGCAAACACTGGAGGAAGTAGGGGATTGTCTGAACCTGCCTTCCAGTGCAGAA
GTTCTGCCGGAGTTAACGCCCTGCGGCGATGTTGGTCTGGTCAGTGCCTATTTGCAGGCG
TTGACCAATGAAGGTGTTGCTTCGGTGTTGGTTATCTCCCACTTACCGTTAGTTGGGTAT
CTGGTCGCCGAGTTATGTCCGGGCGAAACGCCGCCTATGTTTACCACCTCGGCCATTGCC
AGCGTCACGCTTGATGAAAGCGGAAACGGCACATTCAACTGGCAGATGAGCCCGTGTAAT
CTGAAGATGGCGAAAGCTATCTGATTTGTTTGAAAAAATGCCCGATGTAAGCTGTACATC
GGGCATTTGTCTTTTTGCAATAGTATAAATTCACTCAAAACCCTTCACGGAGTTGGTATG
CTGCGATGATGATTTCATCGCACTCTTTCCTCTGCTTCCCTATTAATTTCTGATGAAATG
AGACTAAGTTGTAATATATTTTTACAAATTATAAAACTAATGGAACAATTAACAGTAAAA
AAGAAATGATATTTTTGTGTCTTGATTTAATATTATTTGTGATGCTTTAATATTATATCT
TCAAAAAATACAATTTCAAAATTAATCTAAGATCGTCTTTTTTTGTATACATTTCCCATA
AATTTTAATTATGTAAAAGATGTTTTCTAAGCATTTTATTTGTTTTTTATAAGTAAACTC
TCAAAATTTCACCTTTTTGATTATATGTTAAGTGCTCCTTAATTTACTGTTAAGTAAATA
TAAATTGAAACAATAAAGACAAAACATCACCATCCACCCACACCAAAGAATATCTTCTTA
TGCGACCTATTTTCTTGTTAGTTAGATCGGATAGCTTATTCAATGGCTGAGTATAAATAA
TTGCTATTGACTGAATCAATGTATTGCAATGTTTATATTTTTAATTATTTATGGTTTAAG
GACAAATAATGAGTAAGTTTGTAAAAACAGCTATTGCTGCAACAATGGTAATGGGTGCGT
TCGCTTCTACTTCAACAATCGCCGCTGGCAACAACGGTACAGCTCGTTTTTACGGCACCA
TTGAAGATTCCCCGTGCTCCATCGTTCCTGATGATCACAAACTGGAAGTGGATATGGGTG
ACATTGGTTCGGGGATCCTGAAAAATAACGGGACCTCCACGCCGAAAGCTTTCCAGATCC
ATCTGCAAGACTGCGTGTTTGACACCCAGACAACCATGACAACGACCTTCACCGGTAACG
CGTCCGCTACCAACAGCGGCAATTACTACACCATTTACAATACCGACACCGGCGCGGCAT
TTAACAATGTCAGCCTGGCGATTGGTGATGCTCAGGGGACCTCTTACAAAAGCGGTACGG
GCATCAACCAGACAATTGTAAAAGATACTGCCACCAACAAAGGCAAAGCGAAGCAGACGC
TGGACTTTAAAGCCTGGCTGGTGGGCGCTGCTGATGCGCCAGATTTGGGTAACTTCGAAG
CCAACACGACTTTCCAGATTACTTATCTCTAAGTGATATCCCCATAGCCTTCGGCTATGG
GGTTTTTTAAATGGAATTTGCGCAAATTATAATAATTACGGATGGATACGTGCATGCCTG
ACGATTCTCTTTTCCGACTGCGGGTGCTTCCCTGCTGCATTGCGCTGGCAATGTCAGGGT
GTTATGTCAATGCCTGGGCTGAAGATGAAATTCAGTTTGATTCCCGTTTCCTGGAGTTAA
AAGGCGACACAAAAATCGATCTGAAGCGATTTTCCAGCCAGGGATATGTCGAACCTGGTA
AATACAATTTACAGGTTCAACTAAATAAACAGCCGCTGGCGGAAGAATACGATATTTACT
GGTACGCCTCTGAGAACGATGCCAGTAAAACCTATGCCTGCCTGACACCTGAACTGGTCG
CTCAGTTTGGTTTAAAAGAGGATGCGGCAAAAAACCTGCAATGGATCCACGACGGCAAAT
GTTTGAAACCCGGCCAGCTGGAAGGCATTGATATTAAAGCTGACCTGAGTCAGTCAGCGT
TAGTCATTTCATTACCCCAGGCTTACCTTGAATATACCGACACCGACTGGGACCCACCTT
CACGCTGGGATGACGGTATTTCTGGTTTAATTGCTGACTACAGTATTACCGCCCAGACAC
GACATGAAGAAAATGGCGGGGATGACAGCAATGAAATTAGCGGCAACGGAACGGTTGGGG
TTAACCTCGGCGCATGGCGTCTGCGAGCCGACTGGCAGACCGACTACCAGCACAGCAAAA
GCAATGATGAAGATGTTATCAACGGTGATGACACGCAAAAAAACTGGGAGTGGAGCCGCT
ACTACGCCTGGCGGGCTTTACCGTCGCTAAAAGCCAAACTTGGCCTTGGCGAAGACTACC
TTAATTCTGATATTTTCGACGGCTTTAACTACGTGGGTGGCAGTATCAGCACCGACGATC
AAATGTTGCCGCCGAATCTGCGCGGCTATGCGCCGGATATCTCCGGCGTGGCGCACACCA
CCGCGAAAGTGACCGTCAGCCAGATGGGCCGCGTGATTTACGAAACGCAGGTTCCGGCGG
GGCCGTTCCGCATCCAGGATCTTGGCGATTCTGTCTCCGGTACACTGCACATCCGCATTG
AAGAACAGAACGGCCAGGTGCAGGAATATGACATCAACACCGCCTCGATGCCGTTCCTGA
CCCGCCCCGGCCAGGTGCGCTATAAGCTGATGATGGGCCGCCCGCAGGAGTGGGGGCATC
ATGTTGAAGGTGGTTTCTTCTCCGGCGGCGAAGCTTCATGGGGGATTGCCAACGGCTGGT
CGCTCTACGGCGGAGCGCTGGCAGATGAACACTATCAGTCGGCGGCGCTTGGCGTCGGTC
GCGACCTGTCTGTCTTTGGCGCAGTCGCCTTTGATATCACCCACTCGCATACCCGCCTGG
ATAAAGAGACCGCCTACGGTAAAGGTTCACTGGACGGTAACTCGTTTCGCGTGAGCTATT
CCAAAGACTTCGATGAACTGAACAGCCGCGTCACTTTTGCCGGATACCGCTTCTCGGAAG
AGAACTTCATGACCATGAGCGAGTATCTCGATGCCAGCGACAGCGAAATGGTGCGCACTG
GCAACGACAAAGAGATGTACACCGCCACCTACAACCAGAACTTCAGGGATGCCGGTGTGT
CTGTTTATCTAAACTACACCCGCCATACCTACTGGGATCGCGACGAACAGACCAACTACA
ACGTCATGCTCTCGCACTACTTCAACCTGGGCAGTATCCGCAATATGAGTATTTCCATGA
CCGGATACCGCTACGAATATGACAACCGCGCCGATAAAGGTGTGTACATATCGCTCAGTA
TGCCGTGGGGCGACAGCAGCACCATCAGCTATAACGGTAACTACGGCAGCGGTGCGGACA
GCAGCCAGGTGGGGTATTTCAGCCGTGTCGATGACGCAACCCACTACCAGTTGAACGTGG
GAACCAGTGACAAACACTCCAGCGTTGACGGCTATTACAGCCACGATGGTTCGCTGGCGC
AGGTCGATCTCAGCGCCAACTACCATGAAGGGCAGTACACCTCGGCGGGCATTTCCTTAC
AGGGCGGCGCGACGCTCACCGCACAAGGTGGCGCGCTTCACCGTACCCAGAATATGGGCG
GCACGCGTCTGCTGATTGATGCCGACGGCGTGGCTGGTGTTCCGGTAGAAGGAAATGGTG
CGGCGGTTTACACCAATATGTTCGGTAAGGCCGTGGTGGCAGACGTCAACAACTACTACC
GCAACCAGGCGTATATCGACCTTAACAACCTGCCGGAAAACGCCGAAGCCACCCAGTCCG
TGGTGCAGGCGACGCTTACCGAAGGAGCCATTGGCTACCGTAAGTTTTCGGTTATCAGCG
GGCAAAAAGCGATGGCGGTATTGCGCCTGCAAGATGGCAGTCATCCGCCGTTTGGCGCGG
AAGTGAAAAATGACAACGCGCAGAACGTCGGTCTGGTTGATGATGATGGCAACGTCTACC
TCGCGGGTGTGAAACCTGGCGAGCATATGACCGTTTCATGGGGCGGCGTGGCCCACTGTG
ATATTCATCTGCCGGACCCACTGCCTGCCGATCTGTTCAATGGCCTGTTATTGCCATGTC
AGCAAACAGGGCCGATATCTCCTTCGATGCCCAATGAAATTAAGCCGGTGATCCAGGAGC
AGACCCAGCAGGTGATGCCAACGGAAGCGCCGGTATCGGTATCCGCCAATTAACAACGTG
ATTAAGGAATGATCCATGACGAATCTATTTTGCTCTGCCAGAACGGCCGCAACGACGCTG
GCGTTACTGATAACTGCCGCCAGCCTGTCAGCACAGGCCTCTGTCACGCCGGACCGTACA
CGCCTGATTTTTAACGAAAGTGATAAATCAATCAGTGTCACGCTGCGCAATAACGACCCG
AAAATGCCGTATCTGGCACAAAGCTGGATGGAAGATGAACAGGGTAACAAGATTAGCTCG
CCACTGACGGTACTGCCGCCGGTGCAGCGCATCGATTCCATGATGAACGGTCAGGTGAAG
GTACAGGGCATGCCGGATATCAACAAGCTGCCTGCCGACCGCGAGAGCGTGTTCTATTTC
AACGTGCGTGAGATCCCGCCGAAATCGAACAAACCCAACACGTTACAGATTGCGCTGCAA
ACGCGCATCAAGCTGTTCTGGCGACCAAAGGCGCTGGAAAACGTCAGCATGAAAAATCCA
TGGCAGCATAAGGTGACCTTAACCCGCAGCGGCCAGGAGTTTACTGTCAATAACCCGACG
CCGTACTTCGTGGTTATCAGTAACGCCAGCGCGCAGAAAAACGGCAATCCGGCAGCGGGA
TTTTCTCCCATGGTGATATCGCCAAAAACCTCCGTGCCGCTGAATGTCAAAATGGATAGC
GTCCCGGTGCTGACCTACGTCAACGACTATGGCGCGCGGATGCCGCTGTATTTTAAATGT
GGTGGCGATACCTGCCAGGTGGACGCAGAGCAGAGCCGCAAAGGCTGATGCCGGGAGAGC
CATATGAAAATAATTTATCTGGCGGTGTCGGGCATTGCGCTGCTGGCCTGGAATGTCGCC
AGTGCAGAAACGAAACCCGTCAACCTGGAACTCAGAGTCCTGGTGGATGCGCCGCCGCCC
TGTACCGTGACCGGTAGTGCAGTGGAGTTTGGCGATGTGCTGATCGCCAGTATCGATGGC
AACAATTACCGCCAGAACGCGGGCTATACCCTCGATTGTTCGGGGCGTCTGGCAGACGAT
CTGCGGATGCAACTGAAGGGCACCACCACAACCGTGAACGGTGAAACTGTGCTGGATGCA
GGCATTGCCGGGTTTGGCATCCGCATCGAAAACGCCGCCGATAACTCGCTGTTTTCCATT
GGTGAAAATAACTGGACGCCTTTTGCATTTAACTCTCTGCCGCAACTGAAGGCTGTGCCG
GTAAAACAGAACGGCGTGCAGCTCGCGCCAACGGAATTTAACGCCAGTATGACCATGGTG
GTGGATTACCAATGAAACGACTCGCACTTTTCCTGATTTGGGGTGCCTGCGGGGGCGCTC
TGGCCTCACCGGATATCACCTTTCACGGCACGCTGGTGTCGCCGCCTGCCTGCACCATCA
ACGAAGGCCAGACCATTGAACTGGAGTTTCGCGATGTACTTATCGACAGCATTGATGGCA
ACTACGCCCGCCAGGAGGTGCCGTACACCATCAAATGTGACTCCGACGTTCGCAATGAGG
CCTGGCAGATGACGCTCACCTGGACCGGGACGCAAACCAGCTACAACGATGCGGCAATCG
AAACCGATGTTCCGGGATTCGGGATTCAGCTTTTGCAAAACGGGCAACGTTTTCAGCTTA
ATACCCCACTGACCATCAATGCCACGGATTTGACACAAAAACCGAAGCTTGAGGCCGTTC
CGGTTAAAGCGAGTGACGCTGTTTTAAACGACGGCACGTTTTCAGCGTACGCAACATTAC
GGGTGGAATATCAATGAAGACAAATACCGGATGTGTGCTTCTGGCAAGCCTGATGCTCAC
CGCCAGCGGAACCACGTTGGCGGCGGACAACCTGCATTTTTACGGCAACTTGTTAAGTAA
ATCCTGCACGCTGGTGGTGGATGGTGAAGTGCTGGCGGAAGTGCATTTCCCGACCATCAG
CAACCAGGATTTAACGGTGGCGGGCCAGTCTTCCAGGGTGCAGGTGGTCTTTAAGTTGAA
AGATTGCAAAGGCCCGGCGGATTACCAGGTCAAAGTCACGCTGACCGGTACGGAAGATAG
CGAACAGCCAGGTTTTCTGGCGCTTGACCCGGCATCCAGCGCGCAAGGGGTAGGGATTGG
TATGGAAAAGTCAGACGGTACCTGGGTGCCGCTTAACGATTCTGCCGGTGCCACCTTTAA
CCTCACTAACGGCGCGAATAACCTCAATTTTAATGCCTGGTTGCAGGCGAAAAGCGGTCG
TGAAGTGACTTCTGGTGACTTCACCGCCAGCCTGACTGCCACTTTTGAGTATATTTAAGA
TGAAGATAATACGAAACTTTTTGGGGCTGTTGACGCTGATGGTGTTGAGCCTGACGGCTC
AGGCACAGACATTTCAGATGTATACCCCTATGGGTGTACCAGGCGCTTTAGCCAGGATAA
TATTTACTCTGGAAGTTGTTACCCCTGCAGGCGTTTATACAGGTACATATCAGTCGCGCG
ATCCCAGGATGCTTCTCGTTGGCAATTTAACATTGTTAAGCTGGAATGGTCCATCTTCAA
TTCCTGCGCCAACTATTTATCTGGATCATTCGAACGAAATAAATATGTCAAATTGTCCCG
GTCTTGCTGGCGTTCCCTCCACCAACGGCAAAGGATGGGATTGTTATGCTGCTGATTTAA
AAGTCACGGTAACAGGGGACGTGCAGGGGTGTCCATGGCTGGTTTCAACCCAGATTACCA
CTACGGACCTGGGAGATGTGGGGGCTACCTATGTAGGTCCTAAATACAATAACTCCACCT
GTCCATCAATCCCACTGACGACATATGATGTTTCCTGGGATGAGAATACGGTGATTCATA
AAAAAACATTGAATCTGAAATCAACAGACGCCGTAGGGGGAATCATCGAGAAAACCCTGT
CGACCTATTTAATGGAAAGTGAGAGGCTGTGTGATGGTAGCCAGTTTGATCCTCGCGGGG
CAAATTGCCGTTTTGTTTCGCAGATGATCACTTTTACAGCATCAGGCTGCGACGATGCCA
AAGTGACGGTGACGCCGGTTCCGCATCCGATTACTGACAGGCAACTGCATGATATTGTGG
TGCGCGTCGATGCCAGCGCATTGCAGCCTATTGATTCAACGTGTCGCTTCCAGTATGTGT
TGAATATGTTCTAGCACATACCAGCCTGGTGACAGGAGTTTACCAGGCTTTTTTTCTCTC
ATATTGGATAATTTGCCCTACCTGAACACATTTAGGCCGGATAAGGCGTTTACCCCGCAT
CCGGCATTCGATACCAGCATTCAGGGCGAAATGGCAAAACGCATCCGCCCCTAATATTCA
CGGTAACTCCGGCGGCAGCCACTCTTCCACTTCAATCAACACTAACAACGCTGCATCTCC
GCCGTACTCTTTCGGTGCCTGGTGAAATGCCATTACATGCGGATGTTGCGCCAGCCACAG
CGGCGTTTGCTGTTTCAAAATATGCTTCCCGTGCCCGTGCATTACGCATGCGCAAAACAC
ATGTTCACGGCGGCAGGCGGCAATCAACGCCCCCAGTTCCTGCTTGGCCTGCATTTGCGT
CAAACCATGTAAATCGAGGAAAAGCTCCGGTGAATAATCGCCGCGTCGCAACTTCTTCGC
CTCAAAATGACTCACATCCGGGCGGACATATTTCACCGGGCCTTCGGTATTCAATAACGG
CTGAAACTCATCTGAGAAATAATGGCTGGCATCGGCCTGCTCCTGAATCAACCGTTTCAC
CGGCACTTCGCTGATTTTCTTACGCTGCGGTCGGTGGACAATCGTGTCCTGCTTAATCTT
GCGAGTCCCCGCCATCAACTGGCGAAACAGAGCCTGGTCCTCCTCGCTAAGTGTTGTTTT
CTTTTTCATTTATCTGTCTCTATTTCTAATTTTCCTACAGTTTACCCGACTCGTAGCGCA
ATCGATCGTTTTAAACGTATTTTTCCTCACTCACCGCGCGTGAATGCTGATTTATCGTCA
TCTTCGTGGCAAACTAGCCGCCGAAATTATTGCGATCATGCCCTGGAGGAATACGTGGAT
AAAATTTTCGTTGATGAAGCAGTTAATGAGCTGCAAACCATTCAGGACATGTTGCGCTGG
TCGGTTAGCCGCTTCAGCGCGGCAAATATCTGGTACGGTCACGGCACCGATAACCCGTGG
GATGAAGCGGTACAATTGGTGTTGCCGTCGCTCTACCTGCCGCTGGATATTCCGGAAGAT
ATGCGCACCGCGCGTCTGACCTCCAGCGAAAAACATCGTATTGTTGAGCGCGTGATCCGC
CGCGTCAACGAACGCATTCCGGTGGCTTACCTGACCAATAAAGCATGGTTCTGCGGTCAT
GAATTTTACGTCGATGAACGTGTGCTGGTGCCGCGCTCGCCGATTGGTGAACTGATCAAC
AATAAATTTGCCGGGCTAATCAGCAAGCAACCGCAGCATATTTTAGATATGTGTACCGGT
AGCGGCTGCATTGCCATTGCCTGTGCTTATGCCTTCCCGGAAGCGGAAGTCGATGCGGTA
GATATCTCTCCCGACGCGCTGGCGGTTGCCGAACAGAACATCGAAGAACACGGTCTGATC
CACAATGTCATACCGATTCGTTCCGATCTGTTCCGTGATTTGCCGAAAGTGCAGTACGAC
TTGATCGTCACTAACCCGCCGTATGTCGATGCGGAAGATATGTCCGACCTGCCAAACGAA
TACCGTCACGAGCCAGAACTGGGCCTGGCATCTGGCACTGACGGCCTGAAACTGACGCGT
CGCATTCTCGGTAACGCGGCAGATTACCTTGCTGATGATGGTGTGCTGATTTGTGAAGTC
GGCAACAGCATGGTACATCTTATGGAACAATATCCGGATGTTCCGTTCACCTGGCTGGAG
TTTGATAACGGCGGCGATGGTGTGTTTATGCTCACCAAAGAGCAGCTGCTGGCGGCCCGT
GAACATTTCGCGATTTATAAAGATTAAGTAAACACGCAAACACAACAATAACGGAGCCGT
GATGGCTGGAAACACAATTGGACAACTCTTTCGCGTAACCACCTTCGGCGAATCGCACGG
GCTGGCGCTTGGCTGCATCGTCGATGGTGTTCCGCCAGGCATTCCGCTGACGGAAGCGGA
CCTGCAACATGACCTTGATCGTCGTCGCCCTGGGACATCGCGCTATACCACCCAGCGTCG
TGAGCCAGATCAGGTCAAAATTCTCTCCGGTGTTTTTGAAGGTGTTACTACCGGCACCAG
CATTGGTTTGTTGATCGAAAATACCGATCAGCGTTCTCAGGATTATAGTGCGATTAAGGA
CGTTTTCCGTCCTGGCCATGCCGATTACACCTACGAACAAAAATACGGTCTGCGCGATTA
TCGCGGCGGTGGACGTTCTTCCGCCCGCGAAACCGCCATGCGCGTGGCGGCAGGGGCGAT
TGCCAAAAAATATCTCGCCGAGAAATTTGGTATTGAAATCCGCGGCTGCCTGACCCAGAT
GGGCGACATTCCGCTGGAAATCAAAGACTGGTCGCAGGTTGAACAAAATCCGTTCTTCTG
CCCGGACCCGGACAAAATCGACGCGTTAGATGAACTGATGCGCGCGCTGAAAAAAGAGGG
CGACTCCATCGGCGCGAAAGTCACCGTTGTAGCCAGTGGTGTCCCCGCCGGACTTGGCGA
GCCGGTCTTTGACCGCCTGGATGCCGACATCGCCCATGCGCTGATGAGCATCAACGCGGT
GAAAGGCGTGGAAATTGGCGACGGTTTTGACGTAGTGGCGCTGCGCGGCAGCCAGAATCG
CGACGAAATCACCAAAGACGGTTTCCAGAGCAACCATGCGGGCGGCATTCTTGGCGGTAT
CAGCAGCGGGCAGCAAATCATTGCCCATATGGCGCTGAAACCGACCTCCAGCATTACCGT
GCCGGGGCGCACCATTAACCGCTTTGGCGAAGAAGTTGAGATGATCACCAAAGGCCGTCA
CGATCCTTGTGTCGGGATCCGCGCGGTGCCGATCGCTGAAGCGATGCTGGCGATCGTTTT
AATGGATCACCTGCTACGGCAGCGGGCGCAAAATGCCGATGTGAAGACTGATATTCCACG
CTGGTAAAAAATGAACAAAACCGCGATTGCGCTGCTGGCCCTGCTTGCCAGTAGCGCCAG
CCTGGCAGCGACGCCGTGGCAAAAAATAACCCAACCTGTGCCGGGTAGCGCACAATCGAT
AGGCAGTTTTTCTAATGGCTGTATCGTCGGCGCTGACACGCTGCCGATACAGTCCGAACA
TTATCAGGTCATGCGTACCGATCAGCGTCGCTATTTCGGTCACCCGGACCTGGTGATGTT
TATCCAGCGTCTGAGTAGCCAGGTGAGCAATCTGGGCATGGGTACGGTGCTGATTGGCGA
TATGGGGATGCCCGCTGGTGGGCGTTTCAACGGCGGTCATGCCAGCCACCAGACCGGACT
GGATGTCGATATCTTTCTGCAACTGCCGAAAACACGCTGGACCTCCGCGCAGCTCTTGCG
CCCGCAAGCACTGGACTTAGTTTCCCGCGACGGTAAACACGTTGTCCCCACGCTGTGGAA
GCCAGAAATTTTCAGCTTGATCAAACTCGCCGCCCAGGACAAAGACGTCACACGCATTTT
TGTTAATCCGGCGATTAAACAACAACTTTGCCTTGATGCGGGCACCGATCGCGACTGGTT
GCGCAAAGTGCGACCCTGGTTCCAGCATCGCGCGCATATGCATGTACGATTACGTTGTCC
TGCCGATAGTCTGGAGTGTGAAGATCAACCTTTACCGCCACCAGGCGATGGTTGCGGGGC
AGAACTGCAAAGCTGGTTTGAACCTCCAAAACCGGGAACAACAAAGCCTGAGAAGAAGAC
ACCGCCTCCGTTGCCGCCTTCCTGCCAGGCGCTACTGGATGAGCACGTGATCTAATGGAA
ACGTTTAATAGCCTGTTTATGGTTTCCCCGCTGTTGCTGGGAGTTCTCTTTTTTGTCGCC
ATGCTGGCGGGATTTATCGACTCGATTGCCGGTGGTGGTGGGTTACTCACGATTCCGGCA
TTAATGGCTGCGGGGATGTCTCCCGCTAATGCGCTGGCAACCAATAAACTGCAAGCCTGC
GGCGGCTCTATTTCCGCCACTATCTACTTTATTCGCCGCAAAGTGGTTAGTTTAAGCGAT
CAGAAACTCAATATCGCCATGACCTTTATCGGCTCAATGAGCGGCGCACTGCTGGTGCAA
TACGTTCAGGCTGATGTCTTACGGCAGATTTTGCCCATTCTGGTGATTTGTATCGGCCTC
TATTTCTTGCTGATGCCAAAGCTGGGTGAAGAAGATCGCCAGCGCCGGATGTACGGTTTA
CCCTTCGCGTTAATTGCCGGTGGCTGCGTCGGTTTTTACGACGGATTCTTTGGTCCGGCA
GCCGGATCGTTTTACGCGCTGGCCTTTGTTACGCTGTGCGGATTCAACCTCGCCAAAGCC
ACGGCTCACGCCAAATTACTTAACGCAACGTCAAACATCGGCGGTTTGCTGCTGTTTATT
CTCGGCGGCAAAGTGATTTGGGCGACGGGCTTTGTGATGCTGGTGGGGCAGTTCCTCGGC
GCGCGCATGGGTTCAAGACTGGTGTTGAGCAAAGGACAAAAGCTGATCCGCCCGATGATT
GTTATCGTCTCGGCGGTGATGAGTGCCAAATTACTTTACGATAGCCATGGACAGGAGATC
CTCCACTGGTTGGGGATGAACTAATGAACAGTACACACCACTATGAGCAGTTGATTGAAA
TTTTTAATAGCTGCTTTGCCGATGATTTTAATACCCGTCTGATTAAAGGCGACGACGAAC
CGATCTATCTTCCCGCTGAAGCGGAAGTACCGTATAACCGAATCGTCTTTGCTCATGGCT
TTTATGCCAGCGCAATTCATGAGATTTCGCACTGGTGTATTGCCGGAAAAGCGCGCCGTA
AGCTGGTTGATTTCGGCTACTGGTATTGCCCGGACGGACGCGATGCCCAAACGCAAAGCC
AGTTTGAAGATGTTGAAGTGAAGCCGCAGGCGCTCGACTGGTTGTTCTGCGTGGCGGCGG
GATATCCGTTTAACGTCAGTTGCGACAATCTGGAAGGGGATTTCGAACCGGACCGCGTGG
TGTTTCAACGGCGGGTACATGCGCAGGTGATGGATTATCTGGCAAATGGCATTCCGGAAC
GCCCGGCACGTTTCATTAAAGCACTACAAAATTATTATCACACGCCGGAACTTACGGCGG
AACAGTTCCCGTGGCCGGAAGCGCTAAACTAAAGCCAGTGCCACGTTTTACAATGAGGAA
AGAAGATGATCGCGGAGTTTGAATCACGCATTCTGGCATTAATCGACGGTATGGTTGACC
ATGCCAGTGATGATGAGTTGTTTGCCAGTGGGTATTTGCGTGGCCACCTGACATTAGCCA
TCGCAGAACTGGAAAGTGGTGATGACCACTCCGCTCAGGCGGTGCATACGACCGTTAGCC
AGAGTCTGGAAAAAGCCATTGGTGCTGGTGAATTGTCGCCGCGTGACCAGGCGCTGGTGA
CCGATATGTGGGAAAACCTGTTTCAGCAGGCATCACAGCAGTAAGTTGCGGCGTCTGGAG
CACCATGCCTGATGCGACGCTTATCGCGTCTTATCAGGCCTACACGTCACACGTAGGTCG
GATAAGGCGTTCACGCCGCATCCGACAAACAATGCCAAAGCTGGTTACCCAGCCTTAACT
GCTTTACCCTTCAACAATTTCCGCACCCATAACCGATTCGGATTTAACGCCGCCAGCGTA
CTGGCATCCATCGGAATCGGTTCTTCACTCATCTGTGCCGCCAGAATCTCTGCGCACAGT
GGGGCAGAACACAAACCACGCGAACCCAAAGCAGCAAGCATAAAGAGATCGTCATAAACC
GGCGCGCTTACCGCCTTATCTTTCTGCTCCGCCAGCGACGCATATTCCACAAGTGTTGCC
TCATAATCGGGAACATTACCTACCATTGGTAGATGATCGCGGGTGGCACAACGCACACCG
CAGCGCGCCTCTTTCTCACTGATATCAACCTCTTTTGCCCACTGTGCCTGCGGGAAACAA
TCAATCAACCGCTGGCGATTCTGCTGCTGATCTTCATCACTGTACGTCGTATCTTCGCTG
CCGCGATGATAACTGGCACCAATACAATGATGCTGATTCGCCGGATTTTGTGGCGTGAGA
TAACCGTCATAGCACAGCACCTGCTTCAGTTTTGCCAGTTCCGGTGTCGTCGGAATATGG
CTGACCTGACCGGCAACCGAATATACTGGCAGAGATGATGTTTGGCTGAAACGGCTGATT
TGATGCCCGTTCGCCAGTACCACTACGCTGTGTGTTGCTTGCTGATCTCCTGCAAAATTC
AACAACCAACAGTCATCCTTACGGGATAAATCCTGTAACTGATATTGATAATAAATCTGC
AACCCCTGCTGTTGCGCCAGTTCCAGCACATTACGGGTCAGTTCTGCTGGGCACAGCCAA
CCACCTTGCGGATAAGTAATGCCGCTGCAATTTGTCGCAACGCCCGTAATTTGTTCAACC
GCATTTGCCTCAACGGCTACAGCCAGTTCTTCGGGTAAATCCATTGACAACATCTGTGCG
ATTTTATGCTGGCTTTTCTCATCCCAGCCTAACTGCGTGACGCCGCACCAGTCATGATCA
AATTTAACGGGTAATTGGTCGTAAAACCGACGAGCAAAAGTAAACGCATTAGAGAAAAAG
CGGTTTAGCGCCTCATCGTGTTTGCTTAATAACGGATACAACGCCCCCTGGCGATTGCCG
GAAGCACCCAGCGCGGGGGCTTCATCCGCGCAATAAAGCGTTACCTGCCAGCCGCGGCGT
AATAACGCCAGCGACAACAACGCGCTGGCAATACCACCGCCGATAATCGCCGCTTCCAGT
TTGCTGCTGCCCGTACGATTAAACCACGGCGTGGAGCAGGGGAGTGGTAATGTCTGTTCC
ATCACCCCACAAAGCATTTCCCGTTTGCGCCCAAAGCCCTTACGTTTTTGCATCGTGAAT
CCGGCTTCCTGCAAACCGCGGCGGACAAAACCGGCAGACGTAAATGTCGCCAGCGTGCCG
CCTGGACGCGCCAACCTTGCCATGGCGTTAAACAGATTTTGCGTCCACATATCCGGGTTT
TTAGCTGGCGCAAAGCCGTCCAGAAACCAGGCATCTACTTTTTGATTTAGAGAATCGTCC
AGTTGGCTGGTCAGTTCATTAATATCGCCAAACCATAAATCCAGCGTCACGCGGCCTTCA
TCGAGTAATAAACGATGGCAACCGGGCAAGGGCATTGGCCACTGCGCCTGAAGTTGTTCT
GCCCACGGAGTCAGTTCCGGCCAGTGTTGATGCGCTAAGGCTAAATCCGCACGGGTGAGG
GGAAATTTCTCAAAACTAATGAAATGTAAGCGTTGTAATTGCGCTTGCGGATGCGCTTCG
CGAAACTGATCAAATGCCTGCCATAGCGTCAGGAAGTTTAATCCGGTGCCGAAGCCGCTC
TCTGCTACCACAAACAGAGGATGTGGATGTTCAGGAAAGCGTGCCTCTAATTGGTTACCT
CCCAGAAAAACATAACGCGTCTCTTCCAGCCCGTTATCGTTGGAAAAATAGACATCGTCA
AAATCTCGGGAAACAGGTGTACCCTCAGCATTAAATTCGAGGTTGGCAGGTTGTATGGAG
TAGTGTTTCACGTAAGTTACTCGTCTTACAGGCGGTGGCTCGATCTTAGCGATGTGTGTA
AGGCTGCGCAAATTTCTCTATTAATTGGCTGATCGGACTTGTTCGGCGTACAAGTGTACG
CTATTGTGCATTCGAAACTTACTCTATGTGCGACTTACAGAGGTATTGAATGAAACGTGC
AGTGATTACTGGCCTGGGCATTGTTTCCAGCATCGGTAATAACCAGCAGGAAGTCCTGGC
ATCTCTGCGTGAAGGACGTTCAGGGATCACTTTCTCTCAGGAGCTGAAGGATTCCGGCAT
GCGTAGCCACGTCTGGGGCAACGTAAAACTGGATACCACTGGCCTCATTGACCGCAAAGT
TGTGCGCTTTATGAGCGACGCATCCATTTATGCATTCCTTTCTATGGAGCAGGCAATCGC
TGATGCGGGCCTCTCTCCGGAAGCTTACCAGAATAACCCGCGCGTTGGCCTGATTGCAGG
TTCCGGCGGCGGCTCCCCGCGTTTCCAGGTGTTCGGCGCTGACGCAATGCGCGGCCCGCG
CGGCCTGAAAGCGGTTGGCCCGTATGTGGTCACCAAAGCGATGGCATCCGGCGTTTCTGC
CTGCCTCGCCACCCCGTTTAAAATTCATGGCGTTAACTACTCCATCAGCTCCGCGTGTGC
GACTTCCGCACACTGTATCGGTAACGCAGTAGAGCAGATCCAACTGGGCAAACAGGACAT
CGTGTTTGCTGGCGGCGGCGAAGAGCTGTGCTGGGAAATGGCTTGCGAATTCGACGCGAT
GGGTGCGCTGTCTACTAAATACAACGACACCCCGGAAAAAGCCTCCCGTACTTACGATGC
TCACCGTGACGGTTTTGTTATCGCTGGCGGCGGCGGTATGGTTGTGGTCGAAGAACTGGA
ACACGCGTTGGCACGTGGTGCTCATATCTACGCTGAAATCGTTGGCTACGGCGCAACGTC
TGATGGCGCAGACATGGTTGCTCCATCTGGCGAAGGCGCAGTGCGCTGCATGAAGATGGC
GATGCACGGTGTTGATACGCCAATCGACTACCTGAACTCCCACGGTACTTCGACTCCGGT
TGGCGACGTGAAAGAGCTGGCTGCTATCCGTGAAGTGTTCGGCGATAAGAGCCCGGCGAT
TTCTGCAACCAAAGCCATGACCGGTCACTCTCTGGGCGCTGCTGGCGTACAGGAAGCTAT
CTACTCTCTGCTGATGCTGGAACACGGCTTTATCGCCCCGAGCATCAACATTGAAGAGCT
GGACGAGCAGGCTGCGGGTCTGAATATCGTGACCGAAACGACCGATCGCGAACTGACCAC
CGTTATGTCTAACAGCTTCGGCTTCGGCGGCACCAACGCCACGCTGGTAATGCGCAAGCT
GAAAGATTAATTCGGAGTAGGTCGGAGTAGGTCGGATAAGACGCGCCAGCGTCGCATCCG
ACGTTACGCGCCAATGCGGCATTCGGCACTAACGCCAAAGGGAACCCGATGGTTCCCTTT
TTCACATCATTGACAATCGCCGCCTGTTCCAGGCAAACTTCCCGCTTTGTCGATTTCCTT
CTGAAAAGACGTACGCGTTAATTCCTGCCAACGCACCGTAACCCTGAAACCAGAGAGATG
AGACGGGGATACTCCTCGCCTTGCGCTGCATTCTGGAGTAATGCATGACTGCTGTAAGCC
AAACCGAAACACGATCTTCTGCCAATTTTTCGCTCTTCCGCATCGCTTTTGCCGTTTTTC
TCACCTACATGACCGTAGGGCTGCCGTTGCCGGTTATCCCGCTGTTTGTTCATCATGAAC
TGGGCTATGGCAATACCATGGTCGGCATTGCCGTCGGGATTCAGTTTCTGGCTACGGTGC
TGACGCGTGGCTATGCCGGGCGACTGGCCGATCAATATGGCGCAAAACGTTCGGCGCTTC
AGGGGATGTTAGCTTGTGGTCTGGCGGGGGGCGCGTTGCTGCTGGCGGCGATTTTGCCCG
TCTCCGCACCGTTCAAATTTGCCCTGTTGGTCGTCGGGCGTTTGATTCTTGGCTTTGGTG
AAAGCCAGTTACTGACAGGCGCTCTGACCTGGGGATTAGGCATCGTAGGGCCAAAACACT
CTGGCAAAGTAATGTCATGGAACGGAATGGCGATTTACGGTGCCCTCGCTGTTGGTGCAC
CGCTTGGCCTGTTGATTCATAGCCATTACGGTTTTGCCGCACTGGCGATCACCACAATGG
CATTACCCTTACTGGCGTGGGCCTGTAACGGCACAGTGCGCAAAGTACCGGCCCTGGCGG
GAGAACGTCCATCGCTGTGGAGCGTTGTCGGGCTTATCTGGAAACCAGGGTTAGGTCTGG
CACTACAAGGCGTTGGTTTTGCGGTTATCGGGACTTTCGTTTCGCTCTACTTTGCCAGCA
AAGGATGGGCGATGGCGGGCTTTACTCTTACCGCGTTTGGCGGGGCATTTGTCGTGATGC
GCGTCATGTTTGGCTGGATGCCGGACCGTTTTGGCGGCGTGAAAGTGGCGATAGTCTCTC
TGCTTGTAGAAACGGTGGGCTTGTTGCTGCTCTGGCAAGCCCCGGGTGCGTGGGTCGCAT
TAGCGGGCGCGGCGTTAACCGGAGCCGGATGTTCGCTTATCTTTCCTGCGCTGGGCGTGG
AGGTGGTTAAACGCGTCCCCTCACAAGTTCGCGGCACCGCACTGGGCGGTTACGCCGCGT
TTCAGGATATCGCCCTCGGCGTCTCCGGGCCGCTGGCGGGAATGCTGGCGACCACGTTTG
GTTACTCTTCGGTATTTCTTGCCGGGGCGATCTCTGCAGTGCTGGGAATTATTGTCACGA
TACTGTCATTTCGTCGGGGCTAACGAACCAGCCAGACCAGCATCAGGATAATCGCGACTA
ACAGTATCCACAGCGCGGGACGCGTTGCCATATTTTGCAACGTGTCCATCATCGGTGGAA
AAGGATTAAGCAGCGGTTGCATATCACGCGGATCAATCCCTTTAACCCGCCGTTGATAAA
GCTGATTAAGAATATCCTCGGCCTGGGCAGAAGAAAGCGATGATTGCGCAGAAAGGCCAT
ATTTTTGCTGGATATATGCCGATAACGCCGCCAGTTCACTGGCATCTAAAGGTTGTTTTA
GCGCCATCTGTAGTGATTCCAGCGTCGGCGTATTTTGCTGGCTTAGCGTCTGACGCGCCT
GTAGCCAGGTCACCAGATGGTTAAACAGTTTCGCTGGAATTAACTCGCCATCTTTCACCC
CGGAAAGTTCCAGCATCGATTGCCAGATCTGTTTGCTGGGTTCCCCCGTTGCCGCCGCAA
GTTTGGTCACCAGCTGTTTGAGCGCATTGTGCTCCGCCGGTAATAAAGGACGATCGGTCG
CCTCGCGCTGCTGCGGTTGCGGAATAACCATCTTCCCTTCCTGCAACAGGGTTAGAATGG
TTTTTAATTGCTCCGGTGAGAGCTGATTCAGCGGCGTCTGACCAAAGTTATGACGGATAT
AATCCGTGACCGCCTGACGATTATTCCCCAGACGTAAATACTCCCCTAATTGCGCTAAAA
GCTGGCGGGCAGAATGGCTTTTTTGCGCGGCCAGCAGACGTTGCGCCAGATTATGCTCAG
CGGCAGGGAAGTGACGCGAAAGCAGCGGTGAATCTCCCGACAGACCAATATCGTGCCTGA
TACCCGCCCACAGTTCTGCTCTTTGCTGTTGCGTCAGTGAGGTCACTTTCGTCATTAAGC
TTTCCAGCGAAGTACGTTGCTGACTGGATAAAGGCTGATTGCCCGCGCCAGACGGCAGGT
TATCTCCCTGACCTGGTGGTTGCCCAGGAGGAGGGCCGGAAATAGGTTGTATCATTACGT
ATCCTTATACCTGAAATCTTCGCAAGTATGCCTGGCCGCGAGATTATGGCACACTTGTCC
GGTTAACTCTCGTCTCATACAGGTAACACAAACGTGAAAATCCTTGTTGATGAAAATATG
CCTTATGCCCGCGACTTATTTAGCCGTTTGGGTGAGGTGACCGCGGTTCCCGGGCGTCCA
ATCCCCGTCGCTCAACTGGCAGACGCGGATGCGCTGATGGTGCGTTCGGTCACGAAAGTG
AATGAATCTTTGCTGGCAGGAAAACCCATTAAATTTGTTGGCACTGCCACTGCGGGGACC
GACCATGTCGATGAAGCATGGTTGAAGCAGGCGGGAATTGGTTTTTCCGCTGCACCTGGC
TGTAATGCGATTGCGGTGGTGGAATATGTTTTCTCCTCCCTGCTGATGCTTGCCGAACGC
GATGGATTTTCACTGCACGAGCGTACCGTGGGGATCGTGGGCGTTGGTAACGTTGGACGT
CGATTGCAGGCGCGACTGGAAGCGTTAGGGATTAAAACCTTGCTTTGCGATCCGCCTCGC
GCTGACCGTGGGGATGAGGGTGATTTCCGCTCGCTGGATGAGTTAGTCCAGCGCGCGGAT
ATTCTGACTTTCCATACGCCACTCTTTAAAGATGGTCCGTACAAAACGCTACATCTGGCG
GATGAAAAACTGATCCGTAGCCTGAAGCCGGGAGCGATTCTGATTAACGCCTGCCGTGGC
GCAGTCGTCGATAATACCGCGCTGCTGACCTGCCTGAATGAAGGCCAGAAGTTAAGCGTG
GTGCTGGATGTCTGGGAAGGCGAGCCGGAACTTAATGTGGAATTGCTGACAAAAGTGGAT
ATCGGCACGCCGCATATTGCAGGCTATACCCTGGAAGGTAAAGCACGCGGTACTACGCAA
GTGTTTGAAGCCTATAGCAAGTTTATTGGGCATGAACAGCACGTTGCGCTGGATACATTA
CTGCCCGCGCCAGAGTTTGGTCGCATTACGCTGCATGGCCCGCTCGATCAACCGACGCTG
AAAAGGCTGGTGCATTTGGTGTATGATGTGCGCCGCGATGACGCACCGCTGCGTAAAGTC
GCCGGGATACCGGGTGAGTTCGATAAACTGCGCAAAAACTATCTTGAGCGCCGTGAATGG
TCATCTCTGTATGTAATTTGTGATGACGCCAGTGCGGCATCATTGCTGTGTAAACTGGGT
TTTAACGCCGTTCATCATCCGGCACGTTAATCTCTTCTTCATGCTCTCTGCTGTAACATT
GGCAGGGAGCTTTGCTATTTCTGGAGTAAACCACCATGTCTGAAGGCTGGAACATTGCCG
TCCTGGGCGCAACTGGCGCTGTGGGCGAAGCCCTGCTTGAAACGCTGGCTGAACGTCAGT
TCCCGGTTGGGGAAATTTATGCACTGGCACGTAACGAAAGCGCAGGCGAACAACTGCGCT
TTGGTGGTAAAACAATCACCGTGCAGGATGCCGCTGAATTCGACTGGACGCAGGCGCAGC
TGGCATTTTTTGTCGCAGGCAAAGAAGCTACCGCTGCCTGGGTTGAAGAAGCGACCAACT
CAGGTTGCCTGGTGATCGACAGCAGCGGACTGTTTGCTCTCGAACCAGACGTACCGCTGG
TGGTGCCGGAAGTAAACCCGTTTGTACTGACCGATTACCGCAACCGGAATGTCATCGCCG
TACCGGACAGTCTGACCAGCCAGTTGCTGGCGGCACTGAAACCGTTAATCGATCAGGGCG
GTTTATCACGTATCAGCGTTACCAGCCTGATTTCAGCCTCCGCCCAGGGCAAAAAAGCGG
TCGATGCGTTAGCGGGGCAGAGTGCGAAATTGCTCAACGGCATTCCGATTGACGAAGAAG
ATTTCTTCGGGCGTCAGCTGGCGTTCAACATGCTGCCGTTACTGCCGGATAGCGAAGGTA
GCGTGCGTGAAGAACGTCGTATCGTTGACGAAGTACGCAAAATCCTGCAGGACGAAGGGC
TGATGATTTCGGCAAGCGTCGTCCAGGCACCGGTATTCTACGGTCATGCCCAGATGGTCA
ACTTTGAAGCACTGCGTCCGCTGGCGGCAGAAGAAGCGCGTGATGCGTTTGCTCAGGGCG
AAGATATTGTGCTCTCTGAAGAGAACGAATTCCCGACTCAGGTAGGGGATGCTTCTGGTA
CGCCGCATCTTTCTGTTGGCTGCGTGCGTAATGACTACGGTATGCCGGAGCAAGTCCAGT
TCTGGTCGGTGGCCGATAACGTTCGCTTTGGCGGCGCGCTGATGGCAGTAAAAATCGCCG
AGAAACTGGTGCAGGAGTATCTGTACTAATGTCCGACCAGCAACAACCGCCAGTTTATAA
AATTGCGCTGGGCATTGAGTACGACGGCAGTAAGTATTACGGCTGGCAACGGCAGAACGA
AGTTCGCAGTGTGCAGGAGAAGCTGGAAAAGGCGCTCTCCCAGGTGGCGAACGAACCCAT
CACCGTCTTCTGCGCCGGGCGTACTGACGCAGGGGTACACGGTACCGGGCAGGTTGTGCA
TTTCGAAACAACCGCGCAGCGCAAAGACGCTGCGTGGACGTTGGGCGTAAATGCGAATTT
ACCTGGTGACATCGCCGTGCGTTGGGTTAAAGCTGTACCTGATGATTTTCATGCCCGATT
TAGCGCCACGGCTCGCCGTTATCGCTACATCATCTACAATCATCGGCTGCGCCCGGCGGT
ACTGAGTAAAGGGGTAACCCATTTTTACGAACCGCTGGACGCTGAACGGATGCATCGGGC
TGCGCAATGCTTGCTGGGCGAGAATGATTTCACCTCGTTCCGTGCGGTGCAGTGCCAGTC
CCGAACCCCGTGGCGCAACGTTATGCATATTAATGTCACGCGTCACGGTCCTTATGTGGT
GGTAGATATCAAAGCGAATGCCTTTGTACATCATATGGTCAGGAATATTGTCGGCAGCCT
GATGGAAGTCGGTGCCCACAACCAGCCGGAGAGCTGGATAGCAGAGTTGCTGGCGGCAAA
GGACAGAACGCTGGCGGCAGCAACGGCAAAAGCGGAAGGGCTGTATCTGGTCGCGGTGGA
TTACCCTGACCGGTATGATCTTCCAAAACCGCCAATGGGCCCGCTATTTCTGGCGGACTA
ACGAGAATAACGCTCGTAACATTTCAGGCTGTAGCCAACGTAGTTACAGCCTGAAAGATG
ACGAGTACAAGGCATAGGCAAATATGGACCTGATTTATTTCCTCATCGATTTTATCCTGC
ACATTGACGTGCATCTGGCAGAGCTGGTCGCGGAGTACGGCGTCTGGGTTTATGCCATTT
TGTTCTTAATTTTGTTCTGTGAAACCGGTCTGGTGGTAACGCCGTTTTTACCGGGTGATT
CATTGCTGTTTGTTGCCGGTGCGTTGGCATCACTGGAAACCAACGATCTCAACGTCCATA
TGATGGTGGTGCTGATGCTGATCGCCGCGATTGTGGGTGACGCGGTCAATTACACTATCG
GGCGGTTGTTCGGTGAAAAGTTATTCAGTAATCCCAATTCGAAAATTTTCCGTCGCAGTT
ATCTCGACAAAACCCATCAGTTTTATGAGAAACATGGCGGCAAAACGATTATTCTCGCCC
GTTTTGTGCCGATCGTCAGAACGTTCGCCCCGTTTGTTGCGGGAATGGGCCACATGTCGT
ACCGTCATTTCGCTGCTTATAACGTGATCGGCGCACTGTTGTGGGTACTGCTTTTTACCT
ACGCAGGCTATTTCTTCGGTACAATCCCGATGGTTCAGGATAACCTTAAGCTGCTGATCG
TCGGGATTATTGTGGTTTCTATTTTGCCGGGCGTCATCGAAATAATCCGTCACAAACGCG
CTGCGGCACGCGCCGCAAAATAAAAAGTAACTCAGCGGTTCGACCACTTTTTTATCCAAA
GTTTCGGGCTGTTATGTTTTAATGTGCAACATTCATGGTCTGTTGGGGGCAAAAATGGCA
TTATGCGTCCCCAAAGATAAAACTGGCATCGAACCAGGTTCAGACAGAAAGGTCCCTAAT
GAGCTGGATTGAACGAATTAAAAGCAACATTACTCCCACCCGCAAGGCGAGCATTCCTGA
AGGGGTGTGGACTAAGTGTGATAGCTGCGGTCAGGTTTTATACCGCGCTGAGCTGGAACG
TAATCTTGAGGTCTGTCCGAAGTGTGACCATCACATGCGTATGACAGCGCGTAATCGCCT
GCATAGCCTGTTAGATGAAGGAAGCCTTGTGGAGCTGGGTAGCGAGCTTGAGCCGAAAGA
TGTGCTGAAGTTTCGTGACTCCAAGAAGTATAAAGACCGTCTGGCATCTGCGCAGAAAGA
AACCGGCGAAAAAGATGCGCTGGTGGTGATGAAAGGCACTCTGTATGGAATGCCGGTTGT
CGCTGCGGCATTCGAGTTCGCCTTTATGGGCGGTTCAATGGGGTCTGTTGTGGGTGCACG
TTTCGTGCGTGCCGTTGAGCAGGCGCTGGAAGATAACTGCCCGCTGATCTGCTTCTCCGC
CTCTGGTGGCGCACGTATGCAGGAAGCACTGATGTCGCTGATGCAGATGGCGAAAACCTC
TGCGGCACTGGCAAAAATGCAGGAGCGCGGCTTGCCGTACATCTCCGTGCTGACCGACCC
GACGATGGGCGGTGTTTCTGCAAGTTTCGCCATGCTGGGCGATCTCAACATCGCTGAACC
GAAAGCGTTAATCGGCTTTGCCGGTCCGCGTGTTATCGAACAGACCGTTCGCGAAAAACT
GCCGCCAGGATTCCAGCGCAGTGAATTCCTGATCGAGAAAGGCGCGATCGACATGATCGT
CCGTCGTCCGGAAATGCGCCTGAAACTGGCGAGCATTCTGGCGAAGTTGATGAATCTGCC
TGCGCCGAATCCTGAAGCGCCGCGTGAAGGCGTAGTGGTACCCCCGGTACCGGATCAGGA
ACCTGAGGCCTGATAACTGATAAGGGCAGGGCCACTGGCTCTGCCCTTTTGCTATTCTCA
CCGTAACGAATCAGCGGATACCATGATTATCAAACGCACTCCTCAAGCCGCGTCGCCTCT
GGCTTCGTGGCTTTCTTATCTGGAAAACCTGCACAGTAAAACTATCGATCTCGGCCTTGA
GCGCGTGAGCCAGGTCGCGGCGCGTCTTGGCGTTCTGAAACCAGCGCCATTTGTGTTTAC
CGTTGCGGGTACGAATGGCAAAGGCACCACCTGCCGTACGCTGGAGTCGATTCTGATGGC
GGCAGGGTACAAAGTGGGCGTCTACAGTTCGCCTCATCTGGTGCGTTATACCGAGCGCGT
ACGTGTGCAGGGTCAGGAATTGCCGGAATCGGCCCACACCGCCTCTTTTGCGGAGATTGA
ATCGGCACGCGGTGATATTTCCCTGACCTATTTCGAGTACGGTACGCTGTCGGCGTTGTG
GCTGTTCAAACAGGCACAACTTGACGTGGTGATTCTGGAAGTAGGGCTGGGCGGTCGTCT
GGACGCAACCAATATTGTCGACGCCGATGTCGCGGTAGTAACCAGTATTGCGCTGGATCA
TACCGACTGGCTGGGGCCAGATCGCGAAAGTATTGGTCGCGAGAAAGCAGGCATCTTCCG
CAGCGAAAAACCGGCAATTGTCGGTGAGCCGGAAATGCCTTCTACCATTGCTGATGTGGC
GCAGGAAAAAGGTGCACTGTTACAACGTCGGGGCGTTGAGTGGAACTATTCCGTCACCGA
TCATTACTGGGCGTTTAGCGATGCTCACGGCACGCTGGAAAATCTGCCGTTGCCGCTTGT
CCCGCAACCGAATGCCGCAACGGCGCTGGCGGCACTGCGTGCCAGCGGGCTGGAGGTCAG
TGAAAATGCCATTCGCGACGGGATTGCCAGCGCAATTTTGCCGGGACGTTTCCAGATTGT
GAGCGAGTCGCCACGCGTTATTTTTGATGTCGCGCATAATCCACATGCGGCGGAATATCT
CACCGGGCGTATGAAAGCGCTACCGAAAAACGGGCGCGTGCTGGCGGTTATCGGTATGCT
ACATGATAAAGATATTGCCGGAACTCTGGCCTGGTTGAAAAGCGTGGTTGATGACTGGTA
TTGTGCGCCACTGGAAGGGCCGCGCGGTGCCACGGCAGAACAACTGCTTGAGCATTTGGG
TAACGGCAAATCATTTGATAGCGTTGCGCAGGCATGGGATGCCGCAATGGCGGACGCTAA
AGCGGAAGACACCGTGCTGGTGTGTGGTTCTTTCCACACGGTCGCACATGTCATGGAAGT
GATTGACGCGAGGAGAAGCGGTGGCAAGTAAGTTTCAGAATCGGTTAGTGGGCACGATCG
TGCTGGTGGCGCTGGGGGTGATTGTACTTCCAGGGCTGCTGGACGGGCAGAAAAAACATT
ATCAGGATGAGTTTGCGGCTATCCCGCTGGTTCCAAAAGCGGGCGATCGCGATGAGCCTG
ATATGATGCCAGCCGCCACCCAGGCGTTGCCGACGCAGCCGCCGGAAGGCGCAGCGGAAG
AGGTGCGGGCAGGTGATGCCGCAGCACCGTCGCTCGATCCGGCCACTATTGCAGCCAATA
ACACCGAGTTTGAACCGGAACCTGCACCGGTCGCGCCACCGAAGCCGAAACCGGTGGAGC
CGCCTAAACCAAAGGTTGAAGCACCACCTGCGCCGAAGCCAGAACCGAAGCCGGTCGTGG
AAGAAAAAGCTGCACCGACGGGTAAAGCCTATGTTGTGCAACTGGGTGCGCTGAAAAATG
CCGATAAAGTGAATGAAATTGTCGGTAAGCTGCGCGGTGCCGGTTATCGGGTTTATACGT
CGCCATCCACGCCAGTGCAGGGTAAAATTACCCGTATTCTGGTTGGGCCGGATGCCTCGA
AAGATAAGCTGAAAGGTTCGCTGGGTGAGTTGAAGCAACTTTCTGGCTTAAGTGGCGTGG
TAATGGGCTATACGCCGAATTAATACGGTCTTGCCTGATGCGACGCTGGCGCGTCTTATC
AGGCCTACGCAGGGGTAGAACCGTAGGTTGGATAAGGCGTTTACGCCGCATCCGACACGC
ATTGCACGATGCCGCAAAGGCATAAAAAGTCGATGGCGTTGAATATTTTTTCAGCGCCAT
TTTTATTGATGCGCGGGAAGGAAATCCCTACGCAAACGTTTTCTTTTTCTGTTAGAATGC
GCCCCGAACAGGATGACAGGGCGTAAAATCGTAGGACACATATGGTCTGGATTGATTACG
CCATAATCGCGGTGATTGCTTTTTCCTCTCTGGTTAGCCTGATCCGCGGCTTTGTTCGTG
AAGCGTTATCGCTGGTGACATGGGGTTGTGCTTTCTTTGTTGCCAGTCATTACTACACTT
ACCTGTCAGTCTGGTTTACGGGCTTTGAAGACGAACTGGTTCGAAATGGGATTGCCATCG
CGGTACTGTTTATCGCTACCCTGATCGTTGGTGCTATCGTGAACTTCGTGATAGGCCAGT
TGGTGGAGAAAACGGGGTTGTCAGGCACCGATCGGGTGCTGGGCGTCTGTTTCGGTGCGT
TGCGCGGTGTGTTGATTGTTGCCGCCATTCTCTTCTTTCTCGACTCCTTTACCGGGGTGT
CGAAAAGCGAAGACTGGAGCAAATCACAGCTGATCCCGCAGTTCAGTTTTATCATCAGAT
GGTTTTTTGATTATCTGCAAAGCTCGTCAAGTTTCTTGCCCAGAGCGTAAGTGCTCTGAG
ATGTGGCTTAACGAGGAAAAAGACGTATGTGCGGTATTGTCGGTATCGCCGGTGTTATGC
CGGTTAACCAGTCGATTTATGATGCCTTAACGGTGCTTCAGCATCGCGGTCAGGATGCCG
CCGGCATCATCACCATAGATGCCAATAACTGCTTCCGTTTGCGTAAAGCGAACGGGCTGG
TGAGCGATGTATTTGAAGCTCGCCATATGCAGCGTTTGCAGGGCAATATGGGCATTGGTC
ATGTGCGTTACCCCACGGCTGGCAGCTCCAGCGCCTCTGAAGCGCAGCCGTTTTACGTTA
ACTCTCCGTATGGCATTACGCTTGCCCACAACGGCAATCTGACCAACGCTCACGAGTTGC
GTAAAAAACTGTTTGAAGAAAAACGCCGCCACATCAACACCACTTCCGACTCGGAAATTC
TGCTTAATATCTTCGCCAGCGAGCTGGACAACTTCCGCCACTACCCGCTGGAAGCCGACA
ACATTTTCGCCGCCATCGCTGCTACAAACCGCTTAATCCGCGGCGCGTATGCCTGTGTGG
CGATGATTATCGGCCACGGTATGGTTGCTTTCCGCGATCCTAACGGTATTCGTCCGCTGG
TACTGGGAAAACGTGATATTGACGAGAACCGCACAGAATATATGGTCGCTTCCGAAAGCG
TTGCGCTCGATACACTGGGCTTTGATTTCCTGCGTGACGTCGCGCCTGGCGAAGCGATTT
ACATCACTGAAGAAGGGCAGTTGTTTACCCGTCAATGTGCTGACAATCCGGTCAGCAATC
CGTGCCTGTTTGAGTATGTATACTTTGCTCGCCCGGACTCGTTCATCGACAAAATTTCCG
TTTACAGCGCGCGTGTGAATATGGGCACGAAGCTGGGCGAGAAAATTGCCCGCGAATGGG
AAGATCTGGATATCGACGTGGTGATCCCGATCCCGGAAACCTCGTGTGATATCGCGCTGG
AAATTGCGCGTATTCTGGGCAAACCGTACCGCCAGGGCTTCGTTAAAAACCGCTATGTTG
GCCGCACCTTCATCATGCCGGGCCAGCAGCTGCGTCGTAAGTCCGTGCGCCGTAAACTGA
ACGCCAACCGCGCCGAGTTCCGCGATAAAAACGTCCTGCTGGTCGACGACTCCATCGTCC
GTGGCACCACTTCTGAGCAGATTATCGAGATGGCACGCGAAGCCGGAGCGAAGAAAGTGT
ACCTCGCTTCTGCGGCACCGGAAATTCGCTTCCCGAACGTTTACGGTATCGATATGCCGA
GCGCTACGGAACTGATCGCTCACGGTCGCGAAGTAGATGAAATTCGCCAGATCATCGGTG
CTGACGGGTTGATTTTCCAGGATCTGAACGATCTGATCGAAGCCGTTCGCGCTGAAAACC
CGGATATCCAGCAGTTTGAATGCTCGGTGTTCAACGGCGTCTACGTCACCAAAGATGTTG
ATCAGGGCTACCTCGATTTCCTCGATACTTTACGTAATGACGACGCCAAAGCAGTGCAAC
GTCAGAACGAAGTGGAAAATCTCGAAATGCATAACGAAGGATGATGCCTTCGCTCAGGGT
GCCGATCTGGCACCCTGACTTGCAACTCCCGCCGAAATCCTGCAAAGTCTGCCTGCAAGT
CTGACAGGGCAACTATTTATGAAACGACTTATTGTGGGCATCAGCGGTGCCAGCGGCGCG
ATTTATGGCGTGCGTTTATTACAGGTTCTGCGCGATGTCACAGATATCGAAACGCATCTG
GTAATGAGCCAGGCGGCGCGCCAGACCTTATCCCTCGAAACGGATTTTTCCCTGCGCGAA
GTGCAGGCGTTAGCCGATGTCACGCACGATGCGCGCGATATTGCCGCCAGCATCTCTTCC
GGTTCTTTCCAGACGTTGGGGATGGTGATTTTACCCTGTTCAATCAAAACCCTGTCCGGC
ATTGTCCATAGCTATACTGATGGCTTACTGACCCGTGCGGCAGATGTTGTGCTGAAAGAG
CGTCGCCCGTTGGTGCTCTGCGTGCGTGAAACACCATTGCACTTAGGCCATCTGCGTTTA
ATGACGCAGGCAGCAGAAATCGGTGCGGTGATTATGCCTCCCGTTCCGGCGTTTTATCAT
CGCCCGCAATCCCTTGATGATGTGATAAATCAGACGGTTAATCGTGTTCTTGACCAGTTT
GCGATAACCCTTCCTGAAGATCTCTTTGCCCGCTGGCAGGGCGCATAACTCCGCTGTTGC
CCTGTTTCAGGGCAATTTTGCAACCGCGATCAAATCCTCGACATTTTGTTTCTGCCATTC
AATCGAAACGCTGCGATTCAACCGCTATACCTGCTATCTTCAACTTTAGGACAATAATGC
AACGTCTTATTAACATATTTAACGTTGAATGTTATTGTTGTCGTCAAGATGGCATAAGAC
CTGCATGAAAGAGCCTGCAAACACACAACACAATACACAACATAAAAAGCCATTTTTACT
TGAGGGTTATGTATGAAGAAGTCGATTCTCGCTCTGTCTTTGTTAGTCGGTCTCTCCGCA
GCGGCTTCCAGCTATGCGGCGCTACCGGAGACGGTACGTATCGGAACCGATACCACCTAT
GCGCCGTTCTCGTCGAAAGATGCTAAAGGTGATTTTGTTGGCTTTGATATCGATCTCGGT
AACGAGATGTGCAAACGGATGCAGGTGAAATGTACCTGGGTTGCCAGTGACTTTGACGCG
CTGATCCCCTCACTGAAAGCGAAAAAAATCGACGCCATTATTTCGTCGCTCTCCATTACC
GATAAACGTCAGCAGGAGATTGCTTTCTCCGACAAGTTGTACGCCGCAGATTCTCGTTTG
ATTGCCGCCAAAGGTTCGCCGATTCAGCCAACGCTGGATTCACTGAAAGGTAAACATGTT
GGTGTGCTGCAGGGATCAACCCAGGAAGCTTACGCTAACGAGACCTGGCGTAGCAAAGGT
GTGGATGTGGTGGCCTATGCCAACCAGGATTTGGTCTATTCCGATCTGGCTGCAGGACGT
CTGGATGCTGCACTGCAGGATGAAGTTGCTGCCAGCGAAGGATTCCTCAAGCAACCTGCT
GGTAAAGACTTCGCCTTTGCTGGCTCATCAGTGAAAGACAAAAAATACTTCGGTGACGGC
ACCGGTGTAGGGCTACGTAAAGATGATGCTGAACTGACGGCTGCCTTCAATAAGGCGCTT
GGCGAGCTGCGTCAGGACGGCACCTACGACAAGATGGCGAAAAAGTATTTTGACTTTAAT
GTCTACGGTGACTGATACGTCGCAGGGAAGCTGTACCTGATGGAATGATCATCATGGTGC
ACGCTAGGTTTGTTGCACTATTGTGGTGCATTGAAATGCATACTTAAGCATTTTTAATGA
AAAATAATACGTCTAACGGGGCGGGATATTTTGCCTTGATGGTCAATTTTATGGCACGAT
AAGTGTAACAAACCTGTAAATATTCCCTATAAAAAGACTGTCAGTTGAGGACATTATGAA
AAAACTGGTGCTATCGCTCTCTCTGGTTCTGGCCTTCTCCAGCGCAACTGCGGCATTTGC
TGCGATTCCGCAAAACATCCGCATCGGTACCGACCCGACCTATGCGCCATTTGAATCAAA
AAATTCACAAGGCGAACTGGTTGGCTTCGATATCGATCTGGCAAAGGAATTATGCAAACG
CATCAATACGCAATGTACGTTTGTCGAAAATCCGCTGGATGCGTTAATCCCGTCCTTAAA
AGCGAAGAAGATTGACGCCATCATGTCATCGCTTTCCATTACGGAAAAACGTCAGCAAGA
AATAGCCTTCACCGACAAACTGTACGCTGCCGATTCTCGTCTGGTGGTGGCGAAAAATTC
TGACATTCAGCCGACAGTCGAGTCGCTGAAAGGCAAACGGGTAGGCGTATTGCAGGGCAC
CACCCAGGAGACGTTCGGTAACGAACACTGGGCACCAAAAGGCATTGAAATCGTCTCGTA
TCAGGGGCAGGACAACATTTATTCTGACCTGACTGCCGGACGTATTGATGCCGCGTTCCA
GGATGAGGTCGCTGCCAGCGAAGGTTTCCTTAAACAACCTGTCGGTAAAGATTACAAATT
CGGTGGCCCGTCTGTTAAAGATGAAAAACTGTTTGGCGTAGGGACCGGCATGGGCCTACG
TAAAGAAGATAACGAACTGCGCGAGGCACTGAACAAAGCCTTTGCCGAAATGCGCGCTGA
CGGTACTTACGAGAAATTAGCGAAAAAGTACTTCGATTTTGATGTTTATGGTGGCTAATC
GCCATCGGTGAAAGAAAGCCCGCTCCCTTCGGGTAACCGGAGGGAGACAAGAGGCGGTAA
TTCACCACACACGACAGGACAGGCTGCATGTTGTATGGGTTTTCAGGTGTTATTTTACAG
GGTGCGCTCGTCACGCTGGAGCTGGCTATCAGCTCTGTAGTGCTCGCTGTAATCATCGGT
TTAATTGGCGCTGGCGGTAAGCTCTCTCAAAATCGGCTTTCGGGGCTGATTTTCGAAGGG
TACACCACGCTGATTCGTGGCGTGCCGGACTTAGTGTTGATGCTGCTGATTTTCTACGGT
TTGCAGATTGCGCTAAACACGGTGACGGAGGCGATGGGCGTCGGGCAGATTGATATCGAT
CCGATGGTCGCTGGTATTATCACTCTCGGTTTTATCTACGGTGCTTATTTTACCGAAACG
TTCCGTGGTGCTTTTATGGCAGTGCCGAAAGGACATATAGAGGCGGCGACGGCGTTCGGT
TTTACTCGTGGGCAAGTGTTTCGGCGGATCATGTTTCCGGCGATGATGCGTTACGCCCTG
CCAGGCATTGGCAACAACTGGCAGGTGATCCTCAAATCTACCGCACTGGTTTCGTTACTC
GGCCTGGAAGATGTGGTCAAAGCCACGCAGCTGGCAGGCAAAAGTACCTGGGAACCGTTC
TATTTCGCCATCGTCTGTGGCGTAATTTACCTGGTTTTCACCACCGTTTCCAATGGTGTG
CTGCTGTTCCTTGAGCGCCGCTACTCCGTGGGTGTGAAGAGGGCTGACCTGTGATCGAAA
TCTTACATGAATACTGGAAACCGCTGCTGTGGACCGACGGTTATCGCTTTACTGGTGTGG
CGATCACTCTGTGGCTGCTTATTTTGTCGGTAGTGATAGGCGGAGTCCTGGCGCTGTTTC
TGGCGATTGGTCGTGTCTCCAGTAATAAATACATCCAGTTTCCAATCTGGTTATTTACCT
ATATTTTTCGCGGTACGCCGCTGTATGTTCAGTTGCTGGTGTTCTATTCCGGCATGTATA
CGCTGGAGATTGTTAAGGGGACCGAGTTTCTTAACGCCTTTTTCCGCAGTGGCCTGAACT
GTACCGTGCTGGCGCTGACGCTTAACACCTGCGCTTACACTACCGAGATTTTTGCTGGGG
CAATCCGTTCGGTTCCGCATGGGGAAATTGAAGCCGCCAGAGCCTATGGCTTCTCGACTT
TTAAAATGTATCGCTGCATTATTTTGCCTTCTGCGCTGCGTATTGCGTTACCGGCATACA
GCAACGAAGTGATCCTGATGCTGCACTCTACTGCGTTGGCATTTACTGCCACGGTGCCGG
ATCTGCTGAAAATAGCCCGCGATATTAACGCCGCCACGTATCAACCTTTTACCGCCTTCG
GCATTGCCGCGGTGCTCTATTTAATCATCTCTTATGTCCTGATCAGCCTCTTTCGCAGAG
CGGAAAAACGCTGGTTGCAGCATGTGAAACCTTCTTCAACGCACTGAGAATACGATGTCC
GAGAATAAATTAAACGTTATCGATTTGCACAAACGCTATGGCGAACACGAAGTGCTGAAA
GGGGTGTCACTGCAAGCGAATGCCGGAGATGTCATAAGCATCATCGGATCGTCGGGATCG
GGGAAAAGTACCTTTCTGCGCTGCATTAACTTCCTCGAAAAACCGAGTGAAGGGTCGATC
GTGGTCAATGGCCAGACGATCAATCTGGTGCGCGGCAAAGACGGTCAACTCAAAGTCGCC
GATAAAAATCAACTGCGCTTACTGCGCACACGCCTGACGATGGTATTCCAGCACTTCAAT
CTCTGGAGCCATATGACGGTGCTGGAAAACGTCATGGAAGCGCCGATTCAGGTGTTGGGC
CTGAGCAAGCAGGAAGCGCGCGAGCGGGCGGTGAAGTATCTGGCAAAAGTTGGGATAGAC
GAACGTGCACAGGGGAAATATCCGGTGCATCTTTCCGGCGGTCAGCAACAGCGTGTTTCT
ATCGCGCGGGCGCTGGCGATGGAACCGGAAGTTTTACTGTTTGATGAACCTACCTCGGCG
CTCGATCCTGAACTGGTAGGCGAAGTGTTGCGCATTATGCAGCAACTGGCAGAAGAGGGG
AAAACCATGGTGGTTGTGACTCACGAAATGGGCTTTGCTCGTCATGTTTCTACTCACGTC
ATTTTCCTCCATCAGGGGAAAATAGAGGAAGAAGGCGCGCCGGAGCAGTTATTTGGCAAC
CCGCAAAGCCCTCGTCTGCAACAGTTCCTTAAAGGTTCGCTGAAATAATTGCCTCTCCGG
TGGCTAACGCTGCCGGAGTATTTTCAAGGGGAATTTGCGAGTCAGCTTCCGCTGAAATGT
AAAAGTTGCAGTCCGCTAAAAATACTTCTGAATTCGCTGTCCAAAGATAAAAACTGCCTG
CTGCATTGGGTGTTAATCGTGGTTATTGTCGCGTCATCTTAAATTTGAGGGGTGACGGAA
CGCCATGACAATATCGACAACTTCCACGCCGCATGATGCGGTATTTAAATCTTTTTTACG
CCATCCAGACACCGCGCGGGATTTTATTGATATTCATCTTCCCGCGCCGCTGCGCAAACT
GTGAGATTTAACGACGCTTAAACTGGAACCAAACAGTTTTATTGATGAAGACCTGCGGCA
ATATTATTCCGACCTCTTATGGTCTGTGAAAACGCAGGAGGGAGTGGGTTATATTTATGT
AGTGATAGAGCACCAAAGTAAGCCGGAAGAATTAATGGCTTTTCGCATGATGCGTTATTC
CATTGCGGCAATGCAAAACCATCTTGATGCGGGCTATAAAGAGCTTCCATTGGTGATCCC
GATGCTGTTTTATCATGGTTGCAGAAGTCCTTATCCTTATTCACTCTGCTGGCTTGATGA
ATTTGCCGAGCCTGCGATTGCCCGTAAAATATATTCATCGGCTTTTCCGTTGGTGGATAT
TACCGTGGTGCCGGATGACGAGATTATGCAACATCGCAAAATGGCGCTGTTGGAGTTAAT
TCAGAAACATATTCGTCAGCGCGATCTGTTGGGATTAGTCGACCAAATTGTTTCGCTGCT
AGTTACAGGGAACACTAATGACAGACAGCTAAAAGCCCTGTTTAATTATGTATTACAAAC
GGGAGATGCCCAGCGTTTCCGTGCATTTATTGGTGAGATAGCAGAACGCGCACCACAGGA
AAAGGAGAAACTGATGACCATTGCTGACAGATTACGTGAAGAAGGGCGGAATGATGGATT
AATTCTTGGCAAACGCGAAGAAGCCCTGCGTATTGCTCAGGAGATGCTGGATAGAGGTTT
AGACCGAGAGTTAGTTATGATGGTGACCCGACTTTCACCAGACGATCTTATCGCGCAAAG
CCACTAACCCTGTAACACCGGGAGTTAACTGGCGGATGTTTGCAGTAAACCACATCAGCG
AACGACATCCGCCAGCGCCTCTTCTAAATCGTACCAACGAAACGCAAAACCCGCTTCTTC
CAGCCGTTTAGGCAGCGCGCGTTGTCCACCTAATACCAGTACTGAAGATTCGCCCATTAA
CAGCCGAATGGCGGTTGCGGGGACGCGCAAAATAGCCGGGCGATGCAGCGCATGACCGAG
CGCATGGGCAAATTGTTCATTGCGTATCGGGTAGGGCGAAACCATATTAAATGGCCCGCG
CAGCTCGTTATCCAGCAGCCAGAGAATGCCGTTGACCATATCATCGATATGAATCCAGGC
CAGATACTGCCGACCGGAACCAATCGGCCCGCCCAGGCCAAGACGAAACGGCGGCAGCAT
TTTACCGAGAATACCGCCATCCGGTGCCAGCACTACGCCGGTACGCAGCAGGCACACTCG
CGTTTTGTCACTTTGCGCCCGGCAGGCAATTTCTTCCCAGCGGGCGCAGAGTTTATGGGT
AAATTCGTTATGCGGCGGTTCCTCTTCGGTAACCACCACTTCACCTAAGTCGCCATAATA
GCCCGTTGCCGAGCCGGAAATGAGTACCGACGGTGGCGTGTCGCTGGCATTAATCAAATC
GACCAGTTTTTGCGTGATATTCCAGCGGCTTTGGCAGAGACGCTCTTTTTGCTCGTGAGT
CCAGCGTTTATCAGCAATCGGTTCTCCGGCGAGGTTGATTACCGCATCAACGCCGTTGAG
GTTGCTTTGATCGGCAAGCCCTTGCCATAGCGTCACCTGCGGCCCGAGCACGGAACTGGC
TTTCTGCGGGTTACGCGTCATTACCGTGATTTGATGGCCCAGCTCCAGCAAACGTGGAAT
CAAATGGCGACCAATTAATCCCGTCCCTCCGGTGATCACTATGTTCATGCAGCCTCCCGA
TATGGCGGTTAACGCTGCCAGCTTAAGGTCATGGATACCGAATCGGCGTAGCGCAGCGCG
TGCAGTTTATCGATCTCCACTTCAGCATACGTCACCCAGTGATGTTCACGTGCGATATCG
AGCACATCCTGAGTTAATTTTTCCAGCAAAGAGAAACGGTTATTCTCTACATGCTGAATA
ATGTTTTTCGTTACGGTGCGATAATTCAGCGCATCGTTGATATCTTCGCTGGTGCGCGCT
TTATCGGCGGGGTAGTGGATCGTCACATTGATAACAATATCCTGACGGTTGTTAATTTCT
TCTTCCTTAATTCCGATAAATGTACGTAAACGAAGGTTCTTTATACGAATAATAGCGGCA
GGTTGTGCCATTGCAGGTTCTCCGTTGTTTTACTTAGGATGAAATAATACACGAGAACCT
GTTTCTGTTAACTATCCGAACGCTCATCACCGAGTTGTGCTTTTAGCAGTGCCTGCCCAG
TGGCAGGGCGCGAACGGATCCGCTCATGCCAGTTCTTGACTGCCGGATACATTGCGAGGT
CAATTCGCTGGCGAGTCCAGGCATTAACCCACGGCCAGCAGGCAATATCCGCAATGCTGT
AGTTCTCACCTCCCAGCCAGGGCGAGTTTTCCAGCCGCTTGTTCAGTACATGGTACAGGC
GCTGAGTTTCAACCTGATAACGTTCAATAGCGTAAGGAATGGTTTGGGGGGCTGCGTGAT
TAAAATGATGATTTTGCCCAAGCATCGGCCCCAGTCCGCCTACCTGCCAGAATAACCACT
GTAATGTGGCGGCGCGCTCACGCGTTTCATGACTCAAAAAGAGTCCTGTTTTCTCAGCCA
GATACAACAAAATGGCACCAGATTCAAAGAGGCTTAGCGGTTCGCCGCCATCGGCTGGAG
AATGATCAACAATTGCCGGAATTTTGTTGTTAGGCGAAATGCGCAAAAATTCCGGGCGAA
ACTGACCGCCTTTCCCCAGGTCTACCTTTATCAAGCGATAATCCAGCCCTGCTTCTTCGA
GAAACAGCGTAATTTTGTGGCCATTGGGTGTCGGGGCGAAATAGAGATCGATCATTGCAG
CTCCGGTTGTCTAATCATCTGAACACCACAAGTATAGAAAGCGCGGCGACTTGCGTGAGT
ATTCGTCACGTGACAGTGACAAAAAGGCTCTATAGTTTGATAGCCAGCCCCCTTTATTGC
CGAGGACATAATGAGTAAACCCGCTATCACGCTTTGGTCAGATGCCCATTTTTTCTCCCC
TTATGTGTTATCCGCCTGGGTGGCGTTGCAGGAAAAAGGCCTGTCGTTTCATATCAAGAC
CATCGACCTCGACAGCGGTGAACATTTGCAACCGACGTGGCAAGGTTACGGTCAGACACG
CCGTGTGCCGTTATTACAAATCGATGATTTTGAGTTGAGTGAATCTTCTGCCATTGCGGA
GTATCTGGAAGATCGATTTGCGCCACCGACCTAGGAACGTATTTATCCGCTTGATTTAGA
AAATCGTGCGCGTGCACGACAGATTCGGGCCTGGCTGCGCAGCGATCTGATGCCCATTCG
CGAAGAGCGTCCGACGGATGTTGTCTTTGCGGGGGCGAAAAAAGCGCCACTAACGGCCGA
GGGAAAAGCCAGTGCAGAGAAACTGTTCGCGATGGCAGAACATTTGTTAGTACTGGGTCA
GCCGAATTTATTTGGTGAATGGTGCATTGCTGATACTGATCTGGCGCTAATGATTAACCG
CCTGGTACTACATGGCGATGAGGTGCCAGAACGCCTGGTGGATTATGCGACATTCCAGTG
GCAGCGAGCGTCTGTCCAGCGTTTTATTGCACTTTCAGCGAAGCAATCTGGCTGATAGCA
ACGACAGAATCCAGTATCATAGCTTACGTTTTTTCGACGAGGAGTGAGTGATGAAACTGA
TGTTTGCATCGGACATTCATGGGTCGTTACCGGCGACGGAACGTGTTCTGGAGTTGTTTG
CCCAAAGCGGTGCCCAGTGGCTGGTGATCCTTGGCGACGTGTTGAATCACGGCCCGCGTA
ATGCTTTACCGGAGGGTTACGCGCCAGCCAAAGTCGCTGAACGGCTTAATGAAGTGGCAC
ATAAGGTTATCGCTGTGCGCGGCAACTGCGACAGCGAAGTGGATCAAATGCTGCTGCATT
TCCCGATAACCGCGCCGTGGCAACAGGTATTACTGGAAAAACAACGTCTGTTTTTGACGC
ATGGTCATCTTTTTGGCCCGGAAAATCTGCCTGCTTTAAACCAGAACGATGTGCTGGTTT
ACGGTCATACCCATCTGCCAGTAGCAGAACAGCGGGGGGAGATTTTCCACTTCAACCCCG
GCTCGGTGAGTATTCCGAAAGGCGGTAATCCGGCGAGTTATGGCATGCTGGATAATGACG
TACTTAGTGTAATCGCACTCAATGATCAAAGTATCATTGCGCAGGTCGCGATTAATCCGT
AATTTACCCACAACTCAAAATGCGCCGTAAGAGCGCCAGAAAAAGAAGGTTTCCTGATAA
TGGAACAGCGTCGTTTGGCAAGTACTGAATGGGTGGATATTGTCAATGAAGAGAACGAAG
TCATTGCACAAGCCAGCCGGGAGCAAATGCGGGCACAGTGTCTGCGTCATCGTGCAACTT
ACATCGTCGTGCATGATGGCATGGGCAAAATTCTGGTCCAGCGTCGTACCGAGACAAAAG
ACTTTTTACCCGGCATGTTAGATGCGACCGCAGGCGGTGTGGTTCAGGCCGATGAGCAAC
TGCTGGAATCCGCGCGTCGCGAAGCGGAAGAAGAGTTGGGCATTGCCGGTGTCCCCTTTG
CCGAGCACGGGCAGTTCTATTTCGAAGATAAAAATTGCCGTGTCTGGGGCGCATTGTTCA
GCTGCGTCTCTCACGGTCCCTTCGCCCTACAGGAAGATGAAGTCAGTGAAGTTTGCTGGC
TGACGCCGGAAGAAATCACCGCACGCTGCGATGAGTTCACTCCAGACTCGCTGAAAGCGC
TAGCGTTGTGGATGAAGCGCAATGCCAAAAATGAAGCCGTAGAGACTGAAACGGCAGAAT
GAAAAAAGAGCCGCAATTGCGGCTCTTAACATTTTTAGTGGTAGCCCATCAACTGAGCGC
CGATCACTACGACGCTGGACATAATAAACAGCAGTCCAAGTAGGGTCGCGCCCACCTTCA
GCCAGTTACGGAAGTCCACCCTGCACACACCGAGCGTTGCCATTAACGAAGCTGAGGTTG
GGTAAATGATGTGACTGAAGCCATCACCAAACTGGAACGCCAGCACGGTAACCTGACGGT
TAACACCGACCAGATCGCCAAGCGGTGCCAGTAACGGCATGGTTAACGCCGCCTGACCAG
AACCGGACGTCACGAAGAAATTAAATACCGCCTGGAAGAGCAACATAAACCAGGCCGCGA
CCGCGTTGTCCAGACCGCTAATGGCATTGGCAATGCTGTTGAGGATAGTATTTAACACGC
TGGCCTCACCTGCTTCACCATTACCAACCAGCAGCAAAATCCCTTTGGCGAAACCCACCA
GCAGGGCAGGGGCGATCATCATTCGCGCCCCTTCGGTAAAGGATGAAGCCATGGTATTAA
CCGTCATGCCGTTAAGGCGGAAAACAACGCCGATGATGCCAATCACCAGACCCATGGTGA
AGAACTGGCTGGCAATTTCTGGAATAAACCAGGCATTAACGATCACGCCCCAAATCACCC
AGACCATTACGGCGGTCAGGACAATCAATACCAGCCAGTCACCAAAGGTAAACGGACGTT
GTTCAACATCCGCCTGCTTTTCACGAAAGAAGCGGTCGGACTCATGCACGCGTGACAGAA
GAGGATTCTTTTTCACTCGTGAGGCGTAGACCATGGTAAAGATCAGGCCAATCAGAGTGG
CGATAACCCACACCACGATGCGCAACCCGGAGCCAGAAAGCACCGGAACGCCGGCAATCC
CCTGAGCAACGACCACACAAAACGGGTTCATCCACGAACTGGCAAAACCGATTTGCGTGG
CAATATAGGTCACCAGGACGGTGGTAATACTGTCATAGCCCAGCCGGACCATTAGCGGTG
CGATGATAATGGCAAAGGCGACGGCCTCTTCTCCCATACCAAATACCGCGCCGCCAAGTG
AAAACAGAATAAACAGCGCAGGAATAAAGAGAATTTCATTCCCGCGGGTATGGCGAATAA
GCGCCAGGATACCGTTATCAATGGTTCCTGTACGCATCACAATGCCAAACGCGCCGCCAA
TCACCAGCATAAACATGATGATGCCAACGGCTGTCCCGTATTTCGATCCTGAGGTTAACC
CTTCAAACGGGAAGTTCATCAGGCCCGGGCGTTCATCGCCCGTCGTGAACAGCTGTACGC
GGTGATACTCAGGTTCGCCTGCTTCGTTAGTCAGAATGCGAAATGAGTGTGGATCTACGA
CTTTGCGTGTTTTTGTTTGACCATCAACCTGATACTGCACTTCCTGACTGTCAAACATCC
CCACCGGAACTACCCAGGTGGCAAGGCTGGTTAAAATAGCAACAAAAAAGATAATCACCA
ACGTATCGGGCATTGCCCATCTTCTTGTTGGTTTGGATTCAGTGATTGCGGACATAGCGC
AAATATTCCCTTGCACAAAACAAAGTGGTAAGTATGCAAAGTGAGATGGCGCAATTCATT
GATGCAGAGCAGTTAAGCAAGATAATCAGAAAGGATTAATGCAAATTAAGAGAATAAAAA
ACCGGAAATAGTGACTATTTCCGGTTCAGATATCCGCAGCGCAAAGCTGCGGATGATGAC
GAGGTTACTGCTGCTGTGCAGACTGAATCGCAGTCAGCGCGATAGTGTAGACGATATCGT
CAACCAGTGCGCCACGGGACAGGTCGTTAACCGGCTTGCGCATACCCTGCAGCATCGGCC
CGATGGAGATCAGGTCGGCAGAACGCTGTACCGCTTTGTAGGTGGTGTTACCGGTGTTCA
GATCCGGGAAGATGAACACGGTAGCGCGACCTGCAACCGGAGAGTTCGGCGCTTTGGATT
TCGCAACGTCAGCCATTACCGCAGCGTCGTACTGCAGCGGACCGTCGATCATCAGGTCAG
GACGTTTTTCCTGCGCCAGACGAGTTGCTTCGCGAACTTTTTCTACGTCGCTACCTGCAC
CAGAAGTACCGGTGGAGTAGGAGAGCATAGCAACGCGCGGTTCGATACCGAAGGCTGCAG
CGGAATCAGCGGACTGAATCGCGATTTCTGCCAGCTGTTCTGCGGTCGGATCCGGGTTGA
TCGCACAGTCACCGTAAACGTAAACCTGTTCCGGCAGCAGCATGAAGAACACGGAAGATA
CCAGGGAGCTGCCCGGTGCAGTTTTGATCAGCTGCAGCGGCGGACGGATGGTGTTTGCGG
TAGTGTGAACAGCACCGGAAACCAGACCATCAACTTCATCCTGTTCCAGCATCAGCGTAC
CGAGCACCACGTTGTCTTCCAGCTGTTCGCGGGCAACGGTTTCGGTCATGCCTTTGTTCT
TACGCAGCTCGACCAGACGACCAACATAGCTTTCGCGAACCACTTCTGGATCAACGATTT
CAATGCCTGCACCCAGTTCTACACCCTGAGACGCTGCAACACGGTTGATCTCTGCCGGAT
TACCCAGCAGTACGCAAGTTGCGATACCACGTTCAGCACAGATAGCGGCTGCTTTAACGG
TACGCGGTTCGTCACCTTCCGGCAGTACGATACGTTTGCCCGCTTTGCGCGCAAGTTCAG
TCAGCTGATAACGGAACGCTGGCGGAGACAGACGACGGCTGCGCTCAGAAGTGGCAGTCA
GAGAATCGATCCAGTCAGCGTTGATGTAGTTAGCAACGTATTCCTGAACTTTCTCGATAC
GCTCGTGATCGTCAACTGGAACTTCCAGGTTGAAGCTCTGCAGGCTCAGAGAAGTCTGCC
AGGTGTTGGTGTTCACCATAAATACCGGCAGGCCGGTAGCGAAAGCACGTTCGCACAGTT
TAGAAATGCGCGCGTCCATTTCGTAGCCGCCAGTCAGCAGCAGGGCACCGATTTCTACGC
CGTTCATGGCAGCCAGGCAAGCGGCAACCAGCACGTCAGGACGGTCTGCGGAAGTCACCA
GCAGAGAACCGGCACGGAAGTGCTCCAGCATGTGCGGAATGCTGCGTGCGCAGAAAGTGA
CGGATTTAACGCGGCGAGTATTGATGTCGCCTTCGTTGATGATGGTCGCATTCAGGTGGC
GAGCCATATCGATCGCACGAGTCGCGATCAGGTCAAAGCTCCACGGCACAGCGCCGAGAA
CCGGCAGCGGGCTGGATTCTTGCAGCTTCGCCGGATCAACATTGTTTACTTTAGCTTTGG
AAGAGTCGTCGAAAATCTCGGACAGATCCGGGCGAGTACGACCCTGTTCATCAACCGGTG
CGTTCAGTTTGTTAACGATAACGCCGGTGATGTTGGTGTTTTTGGCACCGCCGAAGCTGT
TGCGGGTCAGTTCGATACGCTCTTTCAGCTGTTCCGGGGTGTCAGTGCCCTGAGACATAA
CGAAGACGATTTCCGCATTCAGCGTTTTAGCGATTTCGTAGTTCAGAGACTGGGCAAACT
GGTGCTTACGTGTCGGGACCAGACCTTCAACCAGAACGACTTCAGCGTCTTTGGTGTTAG
CGTGGTAGTTTGCGACGATCTCTTCCATCAGCACATCTTTCTGATTGCTGGAAAGCAGAC
CTTCAACGTAGCTCATTTTCAGCGGTTCAGCGGCCGTCGTGGTGGAAGAGTTCGCACGCA
CGATAGTCGTAGTCTGATCGGGCGCATCGCCACCGGTACGCGGCTGAGCGATAGGTTTGA
AAACGCTCAGACGAACGCCTTTGCGTTCCATTGCACGGATCACGCCAAGGCTGACGCTGG
TCAGACCGACGCTGGTTCCGGTAGGGATCAGCATAATAATACGGGACACGGTTTATCCTC
TTTCGTTACCGCCGATTTGGCGGGTTACAAAACAGCACCGCCAGCTGAGCTGGCGGTGTG
AAATCAGGCAGTCAGGCGGCTCGCGTCTTGCGCGATAACCAGTTCTTCGTTGGTTGGGAT
AACCACCGCAGGACGGGTACCTTCTTTGTTGATGAAACCAGATTTGCCGAAACGTGCAGC
CAGGTTGCGTTCATGATCAACTTCAAAGCCCAGCACGCCCAGTTTGCCCAGAGACAGTTC
ACGAACCATCGCGGCATTTTCACCGATACCACCGGTGAATACAACAGCGTCCAGACGACC
ATCCATCAGCGCAGTGTAGGCACCGATGTATTTCGCCAGGCGGTGGCAGTAAACGTCCAT
TGCGCGCTTCGCGTCTTCTTTCGTCGCGTAGTTGTCTTCAACATAGCGGCAGTCGCTGGT
CACTTCGGTCAGACCCAGCAGGCCAGACTCTTTGGTCAGCAGTTTGTTGATTGCGTCAAC
GCTCATGCCCAGGGTGTCGTGCAGGTGGAAGATGATCGCCGGATCGATATCACCAGAACG
GGTACCCATGACCAGACCTTCCAGCGGGGTCAGGCCCATAGAGGTGTCAACGCATTTACC
GTTGCGGATAGCAGAAACGGAACCACCGTTGCCCAGGTGGCAGGTGATGATGTTCAGTTC
TTCTACCGGTTTGTTCAGCATTTTTGCCGCTTCCTGGGTTACATAGAAGTGGCTGGTGCC
GTGCGCGCCGTAACGACGGATGCCGTGCTCTTTGTACAGGTTGTACGGCAGGGCGTAGAG
GTAAGACTCTTCCGGCATAGTCTGGTGGAACGCGGTGTCAAATACAGCAACGTTTTTGTC
TTTCAGCTGTGGGAAAGATTTCAGAGCTTCTTCGATACCGATCAGGTGAGCCGGGTTGTG
CAGCGGTGCAAAAGAAGCTGCATCTTTGATACCCTGAATAACAGACTCATCGATCACTAC
GGAGCTGGTATACTTTTCGCCGCCGTGTACGATACGGTGACCGATAGCAGTCAGCTGCGC
AGACAGTTCTGGTTTTTGTGCCAGAATAGTATTAACGATAAAGTTGAGCGCTTCGCTGTG
AGCGGCGCCTGCACCTAAAGCCGCTTCCTGTTTATTGCCGTCCATTTTCCATTTGATACG
TGCTTCGGGCAGGTGGAAACATTCGGCTAAACCAGAAAGGTACTCTTCACCATTTACTGC
ATCGATGATGGCAAATTTCAGTGAAGAACTACCGCAGTTCAGAACCAGTACTAACTTACT
CGACATGGAAGTACCTATAATTGATACGTGGCTAAAAAAACGTCAGGGAGCCATAGAGCG
TAGCGCATGATGACACCGACATTTATGATTAACATCATGCACTGCAAATTTTTTTTGCAT
GATGGAAGAAATATCTTGAGTCTATGCCATTTTGCGTAATTTTCAGCCAATGGCATAATG
TATATGAATTTGACGACTCAATGAATATGTACTACTTAGGCCTTCAGGCTGCTAAAGGAT
ACCTGATAGTGGGTATGGAAGACAAAATGTTTTGAACGTTGTCCCGCTGAGTTGTGAATT
TGCACAAATTTTTGAATCTTTATATGTGAAGTTGAGGTGAAGCATGTCAACGCCGGATAA
TCGTTCTGTTAATTTTTTTAGCTTGTTTCGCCGGGGACAGCATTACTCAAAGACGTGGCC
GCTGGAAAAACGCCTTGCCCCGGTCTTTGTCGAAAATCGCGTTATCAAGATGACGCGTTA
TGCGATCCGTTTTATGCCGCCGATCGCCGTATTTACTCTCTGCTGGCAGATTGCCCTGGG
CGGTCAGCTTGGGCCGGCAGTTGCCACCGCCCTGTTCGCCTTAAGTTTACCCATGCAGGG
ATTGTGGTGGCTGGGCAAGCGTTCTGTCACGCCATTACCCCCTGCAATCCTCAACTGGTT
TTATGAAGTTCGCGGTAAATTGCAGGAGTCTGGACAGGTGTTGGCACCCGTTGAAGGCAA
GCCTGATTACCAGGCATTAGCTGACACGCTTAAGCGCGCCTTCAAACAACTGGATAAAAC
TTTCCTTGATGATTTGTAATTGACCCCTGATTACGCATATAAAAGAAAGCATACTCAGCC
TTCTTTTTTTTCACCGTAATAGAGTGATACAGGAGTCAACAATGGAAATGACCAACGCGC
AACGTCTTATTTTGTCTAATCAGTACAAGATGATGACTATGCTCGATCCGGCAAATGCTG
AACGTTACCGTCGCCTGCAAACAATTATTGAGCGTGGTTATGGATTACAGATGCGTGAAC
TGGATCGCGAGTTTGGCGAGCTGAAAGAAGAAACCTGCCGCACTATCATCGACATTATGG
AGATGTATCATGCGTTGCATGTTTCCTGGTCTAATTTGCAGGACCAGCAATCCATCGATG
AACGTCGTGTCACCTTCCTCGGCTTTGACGCCGCCACTGAAGCACGTTACCTCGGTTATG
TCCGCTTTATGGTTAATGTGGAAGGGCGCTATACCCATTTTGACGCCGGAACTCACGGTT
TTAACGCCCAGACGCCAATGTGGGAAAAATATCAGCGCATGCTTAATGTGTGGCATGCCT
GCCCGCGTCAGTACCATTTGAGCGCCAACGAAATTAATCAAATTATCAACGCCTGAGGAG
GCCCGCGTGCGGTGCAAAGGTTTTCTGTTTGATCTTGATGGAACGCTGGTGGATTCCCTG
CCTGCGGTAGAACGGGCGTGGAGCAACTGGGCCAGACGTCATGGGTTAGCGCCGGAAGAG
GTGCTGGCTTTCATTCACGGTAAACAGGCGATCACCTCTCTGCGCCATTTTATGGCGGGC
AAATCCGAGGCTGATATTGCCGCCGAGTTTACGCGTCTGGAGCAAATCGAGGCCACGGAA
ACCGAAGGTATTACCGCGCTTCCGGGGGCAATCGCCTTACTCAATCATTTGAATAAAGCA
GGTATTCCGTGGGCCATTGTGACTTCTGGCTCCATGCCGGTAGCGCGAGCGCGCCATAAA
ATAGCTGGGCTTCCCGCACCAGAGGTGTTTGTAACCGCTGAGCGAGTGAAGCGCGGAAAA
CCAGAACCTGATGCGTATCTGTTAGGTGCGCAGCTGCTGGGGCTTGCGCCGCAGGAGTGT
GTGGTGGTGGAAGATGCTCCCGCTGGCGTGCTTTCTGGCCTGGCGGCGGGTTGCCATGTC
ATTGCGGTTAACGCTCCGGCAGATACCCCGCGCCTGAATGAGGTCGATTTGGTCCTCCAC
AGTCTGGAGCAAATTACTGTGACTAAACAGCCAAATGGCGATGTTATTATTCAGTGAAAC
ACCTGATCATGATTTAGCCCCGTCTCGTCGGGGCTTTTTTATGGCAGAATCAAGTCATCC
CCCTCAATTAACAAGGATAAGTTGTGAACGGTGAATTGATTTGGGTTCTTTCATTACTGG
CCGTTGCCATCGTCTTGTTTGCGACGGGCAGAGTGCGTATGGATGCGGTCGCTTTGTTTG
TTATTGTCGCGTTTGCATTAAGCGGAACGCTGACAGTCCCAGAAGTATTTTCCGGCTTTT
CTGATCCTAACGTTGTCCTGATTGCCGCCTTGTTTATTATTGGCGATGGTTTGGTCCGTA
CCGGTGTTGCCACCGTAATGGGAACATGGCTGGTCAAAGTTGCGGGCAACAGTGAAATCA
AAATGTTGGTTTTGTTGATGCTGACCGTCGCGGGGCTTGGCGCGTTTATGAGTTCAACCG
GTGTTGTCGCTATCTTTATTCCCGTGGTGTTAAGCGTTGCCATGCGTATGCAAACGTCGC
CGTCACGTCTGATGATGCCGTTAAGTTTTGCCGGGCTGATTAGCGGCATGATGACGCTGG
TGGCGACGCCTCCGAACCTGGTAGTCAACAGTGAATTGCTGCGTGAAGGCTATCACGGCT
TCAGTTTCTTTAGCGTAACACCTATTGGCCTGGTCGTGCTGGTGCTGGGTATTTTGTATA
TGTTAGTGATGCGTTTCATGCTGAAAGGGGATACCCAGACCCCGCAGCGCGAAGGCTGGA
CGCGTCGAACCTTTCGCGATCTTATCCGTGAATATCGACTGACCGGGCGTGCGCGACGTC
TGGCTATTCGCCCCGGATCGCCAATGATTGGTCAACGGCTGGATGATCTCAAATTACGTG
AGCGTTATGGCGCTAACGTCATCGGTGTTGAACGCTGGCGGCGTTTTCGTCGCGTTATCG
TGAACGTTAATGGGGTTTCTGAATTTCGCGCGCGTGACGTTTTGCTTATTGATATGTCTG
CGGCTGATGTCGATCTCCGGCAATTTTGTAGTGAGCAATTGCTGGAGCCGATGGTACTGC
GCGGCGAGTATTTTTCTGACCAGGCCCTTGATGTGGGCATGGCAGAGATTTCATTAATTC
CTGAGTCAGAACTGATTGGTAAATCGGTGCGCGAAATTGGTTTTCGTACACGCTACGGAC
TGAATGTGGTGGGGCTAAAGCGCAATGGCGTGGCGCTGGAAGGTTCGCTGGCGGATGAGC
CTCTGCTGCTGGGCGATATCATTCTGGTTGTGGGTAACTGGAAACTGATCGGTATGCTGG
CCAAACAGGGCCGCGACTTCGTAGCGCTGAACTTACCGGAAGAGGTGAGTGAAGCATCGC
CCGCGCACAGCCAGGCACCCCATGCCATTTTCTGTCTGGTGCTAATGGTGGCGTTAATGC
TGACAGATGAAATTCCTAATCCTGTTGCCGCTATCATCGCCTGCCTGCTGATGGGGAAAT
TCCGCTGTATAGATGCTGAAAGCGCCTATAAATCCATTCACTGGCCGAGCATTATTTTGA
TCGTTGGGATGATGCCGTTTGCTGTGGCATTACAGAAAACGGGAGGTGTCGCGCTGGCGG
TGAAAGGGCTGATGGACATTGGCGGTGGTTACGGGCCACATATGATGCTGGGTTGTTTGT
TTGTCTTGTCGGCGGTTATTGGGCTATTTATCTCTAATACCGCGACGGCGGTGTTGATGG
CTCCGATTGCGCTGGCTGCTGCCAAAACGATGGGGGTGTCGCCTTATCCATTCGCGATGG
TCGTGGCGATGGCAGCATCCGCCGCCTTTATGACACCGGTTTCTTCACCGGTTAACACCC
TGGTTTTAGGTCCGGGAAATTACAGCTTCAGTGACTTTGTGAAGTTGGGGGTACCGTTCA
CCATTATCGTGATGGCGGTTTGTGTGGTGATGATCCCGATGCTGTTTCCGTTTTGACAAG
AGCCTGATGTCGCATCCGGCGCTTATTGCCTGATGCGACGCAGACTCCAGCTGCTTACAG
CGGTGAATCCTGGCTAATCTCATCGAGCGAAAGATGGAAGCTGGGAACAAATACTTCCAT
GAAGTAGTCCATCTCCTGGCTGCGGCGCGCTTCAAGCGTCGCTTCCAGTCGCGTTTTTGC
CAGCAAGAATTCATTATTTCCGGCCGCGAGTTCTTCCAGACATTTCAGATATGCACACAG
TGCATCTGCCTGTTTCACCAACGATTTTTCTTCATCGCTATATGCATGCTCGTCAATTAA
CGGCGCAAAGATATCCCGCAGCTCTTCCGGAACCATATCGACCAGTTTTTGCTGAGCGAT
TTTTTCAATAGCCTTGTATTCCTGAGCGATTTGCGAATTGAAGTATTTCACCGGAGTAGG
GAGATCGCCGGTGAGCACTTCTGAGGCATCGTGGTACATCGCCAGTAAAGCGATACGTTC
GGCGTTGACATTACCGCCAAATTTCCGATTTTTGATAGCTGCCAGCGCATGGGCGACCAT
CGCTACCTGCAAACTGTGTTCGGACACATTTTCCGTCCGCACGTTGCGCATGAGCGGCCA
GCGGTTAATGAGTTTCAGGCGGGAGAGATGGGCAAAAAAATGGCTCTGTTTCATAGTGAC
CTTACGTATGATGACATCATCAGGTCATTGTGGCGGGATAACACTGCCGGATGCAATCTC
CGGCAGTGAAATTAAGATTACAGCTGATGATAACCAGAAAGGAAACGCGCGAACTTGCTC
AAAGACAGCTCGATATCATCGACACGCGGTAGCGTGACAATGCGGAAGTGATCCGGCCAC
GGCCAGTTGAATGCCGTCCCTTGCACCAACAGAACTTTTTCCTGCAACAGGAAATCCAGC
ACCATTTTCTGATCGTCGTGAATGTTAAAGCGTTTGGCGTCGATTTTCGGGAACATGTAC
AGCGCACCACGAGGTTTCACGCAGGAAACGCCCGGAATATCGTTGATCAATTCCCACGCG
CGGTTACGCTGCTCATAAAGACGACCGCCAGGGGTAATAAATTCACTGATGCTCTGATAA
CCACCCAGCGCGGTCTGAATGGCGTGTTGCGCAGGAACGTTAGCACACAGGCGCATTGAA
GCCAGCATTTCCAGACCTTCGATGTAGCCTTTGGCGTGTTTTTTCGGCCCGTTCAACACC
ATCCACCCCTGACGGAAGCCTGCAACGCGGTACGTTTTCGACAGTCCATTAAAGGTAATG
GTCAGCAGGTCAGGTGCCAGCGGCGCAATTGAGTGATGCTCAGCGTCGTCGTAGAGAATT
TTGTCATAAATTTCATCGGCGAAGATAATGAGATTATGCTGACGTGCAATCTCCACAATC
TCCATTAAAAGCTCTTTGGAATATACCGCGCCGGTTGGGTTATTTGGGTTGATAATAACG
ATCCCACGCGTACGAGGCGTAATTTTAGCGCGAATATCATCGAGGTCCGGGAACCAGTCA
GAGGATTCATCGCAAAGATAATGCACCGCTTTACCGCTGGAAAGCGAAACCGCCGCGGTC
CATAGTGGGTAATCTGGTGCAGGAACCAACATTTCGTCCCCGCTGTTCAGCAATGCCTGC
ATTGCCTGAACGATAAGCTCCGATACACCATTGCCGATGTAAATATCTTCCACGGTAACA
TCACGCATGCCACGAGCCTGGTAGTGCTGCATGATGGCTTTACGCGCAGAGTAAAGACCT
TTGGAATCGCAATACCCTTGAGCTGTAGGCAGGTTGCGTATCACGTCAACGAGAATTTCA
TCTGGCGCGTCAAAACCGAACGGGGCTGGGTTGCCGATGTTCAGTTTCAGTACCTTGTTA
CCTTCTTCTTCCAGTCGTTTTGCTTCTTTCAGCACCGGACCACGGATGTCATAACAGACA
TTCTCTAATTTGCTGGATTTTTCAATGGGGGACATGAATCTTGACCTTTTTTGCTGTTAT
CGCCACTCCCTGCCGTGGAAGTCAGCTTAGAACAATGTACTCCCCCAGGACGGTGTTTTG
AAGGTCTGCAGAATAAGATTTTGCCAGAGGGGAAGGCTCGATTGTGCTGTTAATAACTTA
ATAATGACAAAATAATGAGGCGTATATGCTTTACATACAATGTTATATAGTGAATTGTTC
TGATTCTTAATTGTAAGTCTGGTTTTTTTATCTGTAAGATAATTGTGTGAAAATGCCTCA
TTTAAGAATTCACTAATGAAACGCGATGATGATATTTCCGCATTACGGAGAGTTTAACAG
CGTGATGATTTCCGAGGTGTCGCAATGGGGGCAAGGTGTGAAACTATTGTTAAGCGGAAT
TAATGAATGAGGATGATGCTAATTAATTATTATTTAATATTCAAAAAGGTTTTGATGTGC
TTATTAATAATAGAAGATTACTTTGCCTAACATAACATAACTTTGCATCAGATAATTCGC
AATGACCCTTATAAATAAAAGGTTTTTGGGGTAAAATGCTCGCATAAATGACGGATCCCT
GCTCTTGATGCCGCCTCACCATTGCTGTTTGTACGTGTTCGCGTATGACCAGCGATGCTG
CACGAGAGTGGAACAAGGACTCACATTTACATTTATACAAACACGCGCATGTCATAAATA
GAAAAGAGTGAGTAACTTAATAGATATGCGATCCCTGAAGATATATTCTGTGATCTACTT
CAGGCATTATAACGGAACAATGTGAGTCGCTTTTTTAGTGCAACTCATATGCATTTTTAC
TTTCGTCCGGGTTCCGGATGAAACTGCCAGGGAGGCACATTACAAATGGAATTGCTTGTT
TGTGTGTGCACAGCATTAACCAGCTCAGTATGAGCCGCCAGTAAGTGATAATATATGATA
AGTGCAAATCGTCCGATAATTAACCTCGACCTCGATCTGCTGAGAACATTTGTTGCTGTT
GCCGATCTGAACACTTTTGCTGCCGCAGCTGCCGCTGTGTGTCGTACTCAGTCCGCCGTA
AGTCAGCAAATGCAGCGTCTGGAACAACTCGTTGGGAAAGAACTGTTCGCTCGTCACGGT
CGCAACAAACTGTTAACTGAACATGGCATTCAACTTCTTGGTTACGCTAGGAAAATCCTG
CGTTTTAATGATGAGGCCTGCTCATCATTAATGTTCAGTAATCTTCAGGGCGTGTTAACT
ATCGGTGCTTCAGATGAATCTGCCGATACGATCTTACCTTTCCTGTTAAATCGCGTGAGT
TCGGTTTATCCGAAATTAGCGCTGGATGTCCGCGTTAAACGTAATGCCTATATGGCAGAA
ATGCTGGAATCCCAGGAAGTGGATTTGATGGTAACCACCCATCGTCCTTCAGCGTTTAAG
GCATTGAACCTGCGTACCTCGCCAACACACTGGTACTGCGCAGCGGAATACGTATTGCAA
AAAGGTGAGCCGATCCCTCTTGTATTGCTGGATGATCCAAGTCCGTTTCGCGATATGGTG
CTGGCGACGCTTAATAAAGCAGATATTCCCTGGCGACTGGCTTATGTCGCCTCGACGCTT
CCGGCCGTTCGTGCGGCAGTGAAAGCCGGTCTTGGCGTGACGGCAAGGCCGGTCGAGATG
ATGAGTCCGGACTTGCGTGTGCTGAGTGGAGTAGATGGCTTACCGCCGCTACCTGATACC
GAATATTTGCTGTGCTATGACCCGTCCAGTAATAATGAGCTGGCCCAGGTGATCTATCAG
GCGATGGAGAGCTACCATAATCCGTGGCAATACAGCCCAATATCTGATCCGGAAGGGGAT
GATTCATTGTTGATTGAAAGGGATATCGAGTAATCGACGGACGATAGATAATTCCTGAGA
CAATAGTGTAAAAAACGAGCCGCTGGGGGTGTTTTAAACCCCAGCGGCTTTTTTTTAGTA
AAGAACCTTCTTCACATCGTGCAGAACGTACAAAACTGTTCATTTTTCAATCGCCAGAGA
TTCACGCCCCGTACGCACAAATAATCGCCTGAAAAAAATCACCTGCTACAATGATGTTAA
AAAATACGTAAATTTGTTGCTGCGTTTTTGTTATGGAATGACAAAAGCGTGTCACAGATC
AAGAAAATACTCTCTTTTGGGGGGAGGAATCGACACAAATTCCTGTCAAAATAGACCCGT
ATTTTTTCCATTGCTTCACAACGGACACGATTCAACAACATCTAATTATCCTGGAGTCGT
CAAGGATCTGGGGTGAAAGGGCATTAAATGCTAATGGTGTTGATATTATGTAAACTAATG
TGAAGAAACTTTTGTTAAAGTTGACAAAAGGTTATAGAAAGGAGTAAAAGACCACATCAA
TTAGCTGTATAAAAGAATTTCTACAGTGATTGTAAGGTTTTTTTTATTCCTCCCCATGAA
TCGATGTGGCGTCCATCTGCCGTGAAGAGCAGTGAATCTGGCGCTACTTTTGATGAGTAA
GCAATGAGTATGTCAACATCCACTGAAGTCATCGCTCATCACTGGGCATTCGCTATCTTT
CTTATCGTTGCCATTGGCCTGTGTTGCCTGATGCTGGTAGGCGGTTGGTTTTTAGGCGGT
CGCGCACGCGCGAGGTCGAAAAACGTGCCGTTTGAATCCGGTATCGACTCGGTCGGCTCC
GCCCGCTTACGCCTGTCCGCCAAGTTTTATCTGGTGGCCATGTTCTTCGTTATCTTCGAC
GTTGAAGCGCTGTATCTGTTCGCATGGTCAACCTCTATCCGCGAAAGCGGCTGGGTAGGC
TTTGTGGAAGCTGCAATTTTTATTTTTGTGTTACTGGCAGGTCTGGTTTATCTGGTGCGT
ATTGGCGCGCTGGACTGGACGCCCGCGCGTTCACGCCGCGAGCGTATGAACCCGGAAACG
AACAGTATCGCTAATCGTCAACGCTAACCGCGAGGCATTAAGATGGATTATACGCTCACC
CGCATAGATCCCAACGGTGAGAACGACCGTTACCCCCTGCAAAAGCAGGAGATCGTAACC
GACCCTCTGGAGCAAGAAGTTAACAAAAACGTGTTTATGGGCAAGCTCAATGACATGGTT
AACTGGGGTCGTAAAAACTCAATTTGGCCGTATAACTTCGGTCTTTCCTGCTGTTACGTT
GAGATGGTGACTTCGTTTACCGCGGTGCATGACGTGGCGCGTTTTGGCGCAGAAGTATTG
CGTGCTTCGCCGCGTCAGGCTGACCTGATGGTGGTTGCAGGAACCTGCTTTACCAAAATG
GCACCGGTTATTCAGCGTCTGTATGACCAGATGCTGGAACCAAAATGGGTTATCTCAATG
GGTGCCTGTGCCAACTCTGGTGGTATGTACGATATTTATTCCGTTGTGCAGGGCGTCGAT
AAATTCATCCCGGTTGATGTGTATATCCCGGGCTGCCCGCCGCGTCCTGAAGCGTACATG
CAGGCACTGATGCTGTTGCAGGAATCTATCGGCAAAGAACGTCGTCCGCTCTCCTGGGTG
GTTGGCGATCAGGGCGTTTATCGCGCCAATATGCAATCAGAGCGCGAACGCAAGCGCGGT
GAACGCATTGCCGTAACCAACCTGCGTACACCTGACGAGATTTAATTTGCGCCTGTCGGC
AAAGGGATTTTTCTTCGCTTATTCCTAAATCTATTTCGCGAAGCTTACTGCGCCGACAGT
CACCACGGACCATTTGCAATGGTGAACAATATGACCGACTTAACCGCGCAAGAACCCGCC
TGGCAGACCCGCGATCATCTTGATGATCCGGTAATTGGCGAACTGCGCAACCGTTTTGGG
CCGGATGCCTTTACTGTTCAGGCGACTCGCACCGGGGTTCCCGTTGTGTGGATCAAGCGT
GAACAATTACTGGAAGTTGGCGATTTCTTAAAGAAACTGCCGAAACCTTACGTCATGCTG
TTTGACTTACACGGCATGGACGAACGTCTGCGCACACACCGCGAAGGGTTACCTGCCGCG
GATTTTTCCGTTTTCTACCATCTGATTTCTATCGATCGTAACCGCGACATCATGCTGAAG
GTGGCGTTGGCAGAAAACGACCTGCACGTACCGACCTTCACCAAACTGTTCCCGAACGCT
AACTGGTATGAGCGTGAAACCTGGGATCTGTTTGGCATTACATTCGACGGTCACCCGAAC
CTGCGCCGCATCATGATGCCGCAAACCTGGAAAGGTCACCCGCTGCGTAAAGATTACCCG
GCGCGCGCTACCGAATTCTCGCCGTTTGAGCTGACCAAAGCCAAACAGGATCTGGAGATG
GAAGCCCTGACCTTCAAACCGGAAGAGTGGGGGATGAAGCGCGGCACCGAAAACGAGGAC
TTCATGTTCCTCAACCTCGGCCCGAACCACCCGTCGGCGCACGGTGCTTTCCGTATCGTT
TTGCAGCTTGATGGCGAAGAGATTGTCGACTGCGTACCAGACATCGGTTACCACCACCGT
GGTGCGGAGAAAATGGGCGAACGCCAGTCCTGGCACAGCTACATTCCGTATACCGACCGT
ATCGAATACCTCGGCGGCTGCGTTAACGAAATGCCTTACGTGCTGGCGGTAGAGAAACTG
GCCGGGATCACCGTGCCGGATCGCGTTAACGTCATTCGCGTAATGCTCTCCGAACTGTTC
CGCATCAACAGCCACCTGCTGTATATCTCGACCTTTATTCAGGACGTCGGCGCAATGACG
CCCGTGTTCTTCGCCTTTACCGATCGTCAGAAAATTTACGATCTGGTGGAAGCGATCACG
GGTTTCCGTATGCACCCGGCGTGGTTCCGTATTGGCGGCGTAGCGCACGACCTGCCGCGC
GGCTGGGATCGCCTGCTGCGTGAGTTCCTCGACTGGATGCCGAAACGTCTGGCGTCTTAC
GAGAAAGCGGCGCTGCAAAATACCATTCTGAAAGGTCGTTCCCAGGGCGTTGCCGCCTAT
GGCGCGAAAGAGGCGCTGGAGTGGGGCACCACTGGCGCGGGCCTGCGTGCTACCGGGATT
GACTTCGACGTGCGTAAGGCGCGTCCTTATTCTGGCTATGAAAACTTCGACTTTGAAATC
CCGGTTGGTGGTGGTGTTTCTGACTGCTACACCCGCGTAATGCTGAAAGTGGAAGAGCTG
CGCCAGAGTCTGCGCATTCTTGAGCAGTGCCTCAACAACATGCCGGAAGGCCCGTTCAAA
GCGGATCACCCGCTGACCACGCCACCGCCGAAAGAGCGCACGCTGCAACATATCGAAACC
CTGATCACCCACTTCCTGCAAGTGTCGTGGGGGCCGGTGATGCCTGCCAATGAATCTTTC
CAGATGATTGAGGCGACCAAGGGGATCAACAGTTACTACCTGACCAGCGACGGTAGCACC
ATGAGTTATCGCACTCGTATCCGCACGCCGAGTTATGCGCATTTGCAGCAAATTCCGGCG
GCGATCCGCGGCAGCCTGGTGTCTGACCTGATTGTTTATCTGGGCAGTATCGATTTTGTT
ATGTCAGATGTGGACCGCTAATTATGCACGAGAATCAACAACCACAAACCGAGGCTTTTG
AGCTGAGTGCGGCAGAGCGTGAAGCGATTGAGCACGAGATGCACCACTACGAAGACCCGC
GTGCGGCGTCCATTGAAGCGCTGAAAATCGTTCAGAAGCAGCGTGGCTGGGTGCCGGATG
GCGCGATCCACGCGATCGCCGATGTGCTGGGTATTCCGGCGAGCGACGTCGAAGGCGTGG
CAACGTTCTACAGCCAGATCTTCCGCCAGCCGGTTGGCCGCCATGTGATCCGTTATTGCG
ACAGCGTGGTCTGTCATATCAACGGTTACCAGGGTATTCAGGCGGCGCTCGAGAAAAAGC
TAAACATCAAACCAGGGCAAACGACATTTGACGGTCGCTTTACGCTGCTGCCAACTTGCT
GCCTGGGGAACTGTGATAAAGGGCCAAACATGATGATCGATGAGGACACTCACGCGCATC
TGACCCCGGAAGCGATCCCTGAACTGCTGGAGCGGTATAAATGAAAAACATTATCCGTAC
TCCCGAAACGCATCCGCTGACCTGGCGTCTGCGCGATGACAAACAGCCAGTGTGGCTGGA
CGAATACCGCAGCAAAAACGGTTACGAAGGCGCGCGTAAGGCGCTGACCGGGCTGTCTCC
GGACGAAATCGTTAATCAGGTAAAAGACGCTGGTCTGAAAGGGCGTGGCGGCGCGGGTTT
CTCGACTGGCCTGAAATGGAGCCTGATGCCGAAAGACGAATCCATGAACATCCGTTACCT
GCTGTGTAACGCCGATGAAATGGAGCCAGGCACCTATAAAGACCGCCTGCTGATGGAGCA
ACTGCCGCACCTGCTGGTGGAAGGCATGCTCATCTCCGCGTTTGCGCTGAAAGCTTACCG
TGGCTATATCTTCCTGCGCGGCGAATATATCGAAGCGGCAGTGAATCTACGCCGTGCCAT
TGCCGAAGCGACTGAAGCGGGCTTGCTTGGCAAAAACATTATGGGAACAGGTTTCGACTT
CGAACTGTTCGTCCATACCGGGGCAGGGCGCTACATCTGCGGGGAAGAAACAGCGTTAAT
CAACTCCCTGGAAGGGCGTCGTGCTAACCCGCGCTCGAAGCCTCCATTCCCGGCGACCTC
CGGCGCATGGGGTAAACCGACCTGTGTCAACAACGTCGAAACCCTGTGTAACGTTCCGGC
GATCCTCGCTAACGGCGTGGAGTGGTATCAGAACATCTCGAAAAGTAAAGATGCTGGCAC
CAAGCTGATGGGCTTCTCCGGTCGGGTGAAAAATCCGGGCCTGTGGGAACTGCCGTTTGG
TACTACCGCGCGCGAGATCCTCGAAGATTACGCCGGTGGTATGCGTGACGGTCTGAAATT
CAAAGCCTGGCAGCCAGGCGGCGCGGGCACCGACTTCCTGACCGAAGCGCACCTTGACCT
GCCGATGGAATTCGAAAGTATCGGTAAAGCGGGAAGCCGTCTGGGTACGGCGCTGGCGAT
GGCGGTTGACCATGAGATCAACATGGTGTCGCTGGTGCGTAACCTGGAAGAGTTTTTCGC
CCGTGAGTCCTGCGGCTGGTGTACGCCGTGCCGCGACGGTCTGCCGTGGAGCGTGAAAAT
TCTGCGTGCGCTGGAGCGTGGTGAAGGTCAGCCGGGCGATATCGAAACACTTGAGCAACT
GTGTCGATTCTTAGGCCCGGGTAAAACTTTCTGTGCCCACGCACCTGGTGCAGTGGAGCC
GTTACAGAGCGCCATCAAATATTTCCGCGAAGAATTTGAGGCGGGGATCAAACAGCCGTT
CAGCAATACCCATTTGATTAATGGGATTCAGCCGAACCTGCTGAAAGAGCGCTGGTAACC
GAATTTCGATTAACGCTCAGTCTCTGACTGAGAAAACTGGAAGCATGCTAATGGCTACAA
TTCATGTAGACGGCAAAGAATACGAGGTCAACGGAGCGGACAACCTGCTGGAAGCTTGTC
TGTCTCTTGGCCTTGATATTCCTTACTTTTGCTGGCATCCGGCGCTGGGAAGCGTCGGTG
CTTGCCGCCAGTGTGCGGTGAAGCAATACCAAAACGCGGAAGACACGCGTGGTCGCCTGG
TGATGTCCTGTATGACACCGGCTTCCGATGGCACCTTTATTTCCATTGACGACGAAGAAG
CGAAACAGTTCCGTGAAAGTGTGGTCGAGTGGTTAATGACCAACCACCCGCACGACTGTC
CGGTATGTGAAGAAGGCGGTAACTGCCATCTTCAGGATATGACCGTGATGACCGGACACA
GCTTCCGTCGCTACCGTTTCACCAAACGTACCCACCGTAATCAGGATTTGGGACCGTTCA
TCTCTCACGAAATGAACCGCTGCATCGCCTGCTACCGCTGCGTGCGTTACTACAAAGATT
ACGCTGACGGTACAGATCTGGGCGTTTATGGCGCGCACGACAACGTCTACTTCGGTCGCC
CGGAAGACGGCACGCTGGAAAGCGAATTTTCCGGTAACCTGGTCGAAATTTGCCCGACTG
GCGTATTTACCGACAAAACGCACTCCGAGCGTTACAACCGTAAATGGGATATGCAGTTTG
CGCCGAGCATCTGCCAGCAATGTTCCATCGGCTGTAACATCAGCCCCGGTGAACGTTATG
GCGAACTGCGTCGTATCGAAAACCGTTACAACGGTACGGTAAACCACTACTTCCTCTGCG
ACCGTGGTCGTTTCGGTTACGGTTACGTCAACCTGAAGGATCGTCCGCGTCAGCCAGTAC
AGCGTCGTGGCGATGATTTCATTACCCTCAACGCCGAACAGGCAATGCAGGGCGCGGCAG
ATATTCTGCGTCAGTCGAAGAAAGTGATCGGTATTGGTTCTCCGCGTGCCAGCGTGGAAA
GCAACTTTGCGCTGCGTGAACTGGTGGGCGAAGAAAACTTCTACACCGGTATCGCTCACG
GTGAGCAGGAACGTCTGCAACTGGCGCTGAAAGTGCTGCGTGAAGGCGGCATTTATACTC
CGGCTCTGCGCGAAATCGAATCTTACGATGCGGTACTGGTGCTGGGCGAAGACGTTACCC
AGACCGGCGCGCGCGTCGCGCTGGCAGTGCGTCAGGCGGTGAAAGGTAAAGCGCGCGAAA
TGGCGGCAGCACAGAAAGTGGCTGACTGGCAGATTGCGGCAATCCTCAACATCGGTCAAC
GTGCGAAGCATCCGCTGTTTGTTACCAACGTTGATGACACCCGTCTGGATGATATCGCGG
CGTGGACTTACCGCGCACCGGTTGAAGATCAGGCGCGTTTAGGTTTTGCCATCGCCCATG
CGCTGGATAACTCTGCACCAGCGGTTGACGGTATCGAACCTGAGCTGCAAAGCAAAATCG
ACGTCATCGTGCAGGCACTGGCAGGTGCGAAGAAACCGTTGATTATCTCCGGGACGAACG
CCGGTAGCGCTGAAGTAATTCAGGCTGCGGCTAACGTCGCGAAAGCCCTGAAAGGTCGCG
GCGCTGACGTCGGTATCACCATGATTGCCCGTTCCGTCAACAGCATGGGGCTGGGCATTA
TGGGCGGTGGATCGCTTGAAGAAGCGTTAACCGAACTGGAAACCGGACGCGCCGACGCGG
TGGTGGTGCTGGAGAACGATCTGCATCGTCACGCATCCGCTACCCGCGTGAATGCTGCGC
TGGCTAAAGCGCCGCTGGTGATGGTGGTTGACCATCAACGCACAGCGATCATGGAAAACG
CCCATCTGGTGCTTTCCGCCGCCAGCTTTGCTGAAAGCGACGGTACAGTGATCAACAACG
AAGGCCGCGCCCAACGTTTCTTCCAGGTTTACGATCCGGCTTATTACGACAGCAAAACTG
TCATGCTGGAAAGCTGGCGCTGGTTACACTCGCTGCACAGCACTCTGCTGAGCCGTGAAG
TGGACTGGACGCAGCTCGACCATGTGATTGACGCTGTTGTGGCGAAAATCCCGGAACTGG
CAGGTATCAAAGATGCTGCGCCGGATGCGACATTCCGTATTCGTGGGCAGAAACTGGCCC
GTGAACCGCACCGTTACAGCGGTCGTACCGCCATGCGCGCCAATATCAGCGTTCATGAGC
CGCGTCAGCCGCAGGATATTGACACCATGTTCACCTTCTCGATGGAAGGTAACAACCAGC
CGACCGCGCATCGTTCGCAAGTGCCGTTTGCCTGGGCTCCGGGCTGGAACTCCCCGCAGG
CGTGGAACAAATTCCAGGACGAAGTGGGCGGCAAACTGCGCTTTGGCGATCCGGGCGTGC
GTCTGTTTGAAACCAGCGAAAATGGTCTGGATTACTTCACCAGCGTACCGGCACGCTTCC
AGCCGCAGGACGGGAAATGGCGTATCGCGCCGTATTACCACCTGTTTGGCAGTGATGAAT
TGTCACAGCGTGCTCCGGTCTTCCAGAGCCGTATGCCGCAGCCGTACATCAAACTCAACC
CGGCAGATGCCGCGAAGTTGGGTGTGAATGCAGGTACACGCGTCTCCTTTAGTTACGATG
GCAACACGGTCACGCTGCCGGTTGAAATCGCCGAAGGGCTGACGGCAGGGCAGGTGGGCT
TGCCGATGGGTATGTCCGGCATTGCTCCGGTGCTGGCTGGCGCGCATCTTGAGGATCTCA
AGGAGGCACAACAATGAGTTGGATATCACCGGAACTGATTGAGATCCTGCTGACCATCCT
CAAAGCGGTGGTGATCCTGCTGGTGGTTGTCACCTGCGGGGCATTCATGAGCTTTGGCGA
ACGTCGCCTGCTGGGTCTGTTCCAGAACCGTTACGGACCTAACCGTGTTGGCTGGGGCGG
TTCGCTCCAGCTGGTTGCGGACATGATCAAAATGTTCTTTAAAGAAGACTGGATCCCGAA
ATTCTCGGATCGCGTCATCTTTACCCTGGCACCGATGATTGCCTTTACCTCGTTGCTGCT
GGCCTTTGCGATTGTGCCAGTCAGCCCGGGTTGGGTGGTTGCCGACCTGAACATCGGGAT
TTTGTTCTTCCTGATGATGGCTGGTCTGGCGGTTTACGCGGTGCTGTTTGCGGGCTGGTC
AAGTAACAACAAATACTCGCTGCTGGGTGCGATGCGTGCTTCTGCACAGACCCTGAGCTA
CGAAGTGTTCCTCGGGCTTTCTCTGATGGGCGTGGTGGCGCAGGCCGGTTCATTCAACAT
GACCGACATCGTCAACAGCCAGGCGCATGTGTGGAACGTCATCCCGCAATTCTTTGGTTT
TATTACCTTTGCCATCGCGGGTGTGGCGGTGTGTCACCGTCACCCGTTTGACCAGCCGGA
AGCCGAGCAGGAACTGGCGGATGGTTACCACATTGAATACTCCGGCATGAAGTTCGGTCT
GTTCTTCGTGGGTGAGTACATCGGGATTGTGACCATCTCTGCATTGATGGTGACGCTGTT
CTTCGGTGGCTGGCAAGGCCCGTTGTTACCGCCATTCATCTGGTTCGCGCTGAAAACCGC
GTTCTTTATGATGATGTTCATTTTGATTCGTGCGTCGTTACCGCGTCCGCGTTATGACCA
GGTAATGTCCTTCGGCTGGAAAATCTGCCTGCCGCTGACGCTGATCAACTTGCTGGTAAC
GGCGGCTGTCATTCTCTGGCAGGCGCAATAAGGGGCAATAAGACCATGACCTTAAAAGAA
TTGTTAGTAGGTTTCGGCACCCAGGTTCGTAGTATCTGGATGATCGGCCTGCACGCGTTC
GCCAAACGCGAAACGCGAATGTACCCGGAAGAGCCGGTCTATCTGCCGCCCCGTTATCGT
GGTCGTATCGTTCTGACCCGCGACCCGGACGGCGAAGAGCGTTGCGTAGCCTGTAACCTC
TGTGCGGTAGCCTGCCCGGTCGGCTGTATCTCGCTGCAAAAAGCAGAAACCAAAGACGGT
CGCTGGTATCCGGAATTTTTCCGCATCAACTTCTCACGCTGCATTTTCTGTGGTCTGTGC
GAAGAAGCCTGTCCGACCACGGCGATTCAGTTAACCCCGGATTTCGAAATGGGGGAATAC
AAGCGCCAGGATCTGGTTTACGAGAAAGAGGATCTGCTGATCTCCGGTCCGGGCAAATAC
CCGGAATATAACTTCTACCGGATGGCAGGTATGGCAATCGACGGCAAAGATAAGGGCGAA
GCAGAGAACGAAGCCAAGCCTATCGACGTCAAGAGCCTGTTACCGTAAGGAGAGGAGCAA
TGGAGTTCGCTTTTTATATCTGTGGCCTGATAGCCATACTTGCGACCTTGCGAGTGATCA
CCCATACCAATCCGGTACACGCACTGCTGTACCTGATTATTTCGCTGCTGGCGATTTCTG
GGGTGTTCTTCTCACTGGGCGCTTACTTCGCCGGTGCGCTGGAAATTATCGTCTACGCGG
GTGCCATTATGGTGCTGTTCGTGTTCGTGGTGATGATGCTCAACCTGGGCGGTTCAGAAA
TCGAACAGGAACGCCAGTGGCTGAAACCGCAGGTGTGGATTGGTCCGGCAATTTTGTCGG
CCATCATGCTGGTGGTGATTGTTTACGCCATCCTCGGTGTTAACGATCAGGGTATCGACG
GTACGCCAATCAGTGCTAAAGCAGTGGGTATTACGCTGTTCGGGCCTTACGTACTGGCGG
TGGAACTGGCTTCTATGCTGCTGCTCGCGGGTCTGGTTGTGGCCTTCCACGTCGGTCGTG
AAGAGCGTGCGGGTGAAGTGCTGAGCAATCGTAAAGACGACAGCGCGAAAAGAAAAACGG
AGGAGCACGCATGATCCCCTTACAACATGGACTGATCCTCGCGGCAATCTTATTCGTTCT
TGGCTTAACCGGTCTGGTTATCCGTCGCAATCTGCTGTTTATGCTGATTGGTCTGGAAAT
CATGATTAACGCCTCCGCGCTGGCCTTTGTGGTCGCCGGAAGCTACTGGGGCCAGACCGA
CGGTCAGGTGATGTACATTCTCGCCATCAGCCTCGCGGCGGCAGAAGCGAGTATCGGCCT
TGCGCTGCTGCTGCAACTTCACCGTCGTCGCCAGAACCTGAACATCGATTCAGTAAGTGA
GATGCGCGGATGAACATGCTTGCCTTAACCATTATTTTGCCATTGATTGGCTTCGTCCTG
CTGGCGTTCTCCCGTGGGCGCTGGTCTGAAAACGTTTCGGCGATCGTCGGCGTTGGCTCT
GTGGGCCTGGCGGCGCTGGTAACCGCCTTTATCGGCGTTGATTTCTTCGCTAACGGCGAG
CAGGCATACAGCCAGCCGCTGTGGACGTGGATGTCGGTAGGCGACTTTAACATCGGTTTT
AACCTGGTGCTGGACGGCCTGTCGCTGACCATGCTCTCGGTGGTCACTGGTGTGGGTTTC
CTGATCCACATGTACGCCTCCTGGTATATGCGTGGTGAAGAGGGCTACTCTCGCTTCTTC
GCCTACACCAACCTGTTCATCGCCAGCATGGTGGTTCTGGTGCTTGCCGATAACCTGCTG
TTGATGTACCTCGGCTGGGAAGGCGTGGGCCTGTGCTCCTATCTGCTGATCGGTTTCTAT
TACACCGATCCGAAGAATGGCGCAGCGGCAATGAAAGCGTTCGTCGTGACCCGTGTGGGT
GACGTGTTCCTCGCTTTCGCGCTGTTCATTCTTTACAACGAACTGGGCACCCTGAACTTC
CGCGAAATGGTGGAACTGGCACCAGCGCACTTTGCTGACGGCAATAACATGCTGATGTGG
GCGACGCTGATGCTGCTGGGCGGTGCGGTCGGTAAATCTGCGCAGTTGCCGTTGCAGACA
TGGCTTGCCGACGCGATGGCGGGCCCGACGCCTGTCTCCGCGCTGATCCACGCCGCAACG
ATGGTAACCGCGGGTGTCTACCTGATCGCCCGTACCCACGGCCTGTTCCTGATGACCCCG
GAAGTTCTGCATCTGGTGGGTATTGTCGGGGCAGTTACGCTGCTGCTGGCCGGTTTTGCC
GCGCTGGTACAGACCGACATCAAACGTGTTCTCGCTTACTCTACCATGAGCCAGATTGGC
TACATGTTCCTCGCGCTTGGCGTGCAGGCATGGGATGCGGCGATTTTCCACTTGATGACT
CACGCGTTCTTTAAAGCGCTGCTGTTCCTGGCATCCGGTTCCGTCATTCTGGCCTGCCAT
CACGAACAGAACATCTTCAAGATGGGCGGTCTGCGTAAATCTATTCCGCTGGTTTATCTC
TGCTTCCTGGTGGGTGGTGCAGCACTGTCGGCACTGCCGCTGGTCACTGCGGGCTTCTTC
AGTAAGGATGAGATCCTCGCGGGTGCGATGGCGAATGGTCATATCAATCTGATGGTGGCA
GGTCTGGTCGGTGCGTTTATGACCTCGCTCTACACCTTCCGTATGATTTTCATCGTCTTC
CACGGAAAAGAACAAATTCACGCTCACGCCGTGAAAGGGGTAACTCACAGCCTGCCGCTG
ATTGTGCTGCTGATCCTTTCCACCTTCGTTGGCGCACTGATTGTACCGCCGCTGCAGGGC
GTGCTTCCGCAAACGACGGAGCTGGCGCACGGCAGCATGTTGACCCTGGAAATTACCTCT
GGCGTGGTCGCGGTGGTCGGCATTCTGCTGGCTGCCTGGCTGTGGCTGGGTAAACGTACT
CTGGTGACCTCCATCGCCAACAGTGCGCCGGGCCGTCTGCTGGGCACCTGGTGGTACAAC
GCCTGGGGCTTTGACTGGCTGTACGACAAAGTGTTCGTCAAGCCGTTCCTGGGTATTGCC
TGGTTGCTGAAACGCGATCCGCTGAACGCAATGATGAACATTCCGGCGGTTCTTTCCCGC
TTTGCAGGTAAAGGTCTGCTGTTAAGCGAGAACGGCTATCTGCGCTGGTATGTGGCATCC
ATGAGCATCGGTGCGGTCGTGGTGCTGGCACTGTTGATGGTACTGCGTTGAGTTAAGGAT
TGTGGGATTGCCCCTGGGCATATAAGAACGTAGGTCGGATAAGCCTCCTTCGCGGTGCAT
CCGACACTACCCCCAGTCCGAAGAGAATTTTCTGTCGTGAGAATTCGTTGAAAATCCGGT
CCTGACGGGACTTTTACAAGGAATAAAGATCGCCATGTTACTACCCTGGCTAATATTAAT
TCCCTTTATCGGCGGCTTCCTGTGCTGGCAGACCGAACGCTTTGGCGTCAAGGTGCCGCG
CTGGATCGCGCTGATCACCATGGGATTGACGCTGGCGCTGTCGCTGCAACTGTGGTTGCA
GGGCGGTTATTCACTGACGCAATCCGCCGGAATTCCGCAGTGGCAGTCTGAATTCGACAT
GCCGTGGATCCCGCGTTTTGGTATCTCTATTCATCTCGCCATTGACGGGCTGTCGCTGCT
GATGGTCGTGCTGACCGGTCTGCTCGGTGTGCTGGCGGTACTCTGTTCGTGGAAAGAGAT
CGAAAAATATCAGGGCTTCTTCCACCTCAACCTGATGTGGATCCTGGGCGGCGTTATCGG
CGTGTTCCTTGCCATCGACATGTTCCTGTTCTTCTTCTTCTGGGAAATGATGCTGGTGCC
GATGTACTTCCTGATCGCACTGTGGGGGCATAAAGCCTCTGACGGTAAAACGCGTATCAC
GGCGGCAACCAAGTTCTTCATTTACACCCAGGCGAGTGGTCTTGTGATGTTGATCGCCAT
CCTGGCGCTGGTTTTTGTTCACTACAATGCGACCGGCGTCTGGACCTTCAACTATGAAGA
GCTGCTGAATACGCCAATGTCCAGTGGTGTGGAATATCTGTTGATGCTGGGCTTCTTCAT
CGCCTTCGCAGTCAAAATGCCGGTGGTTCCGCTGCATGGCTGGCTGCCGGATGCGCACTC
CCAGGCTCCGACCGCCGGTTCCGTTGACCTCGCGGGGATCTTGCTGAAAACTGCCGCTTA
CGGTTTGCTGCGTTTCTCCCTGCCGCTGTTCCCAAATGCGTCGGCAGAGTTCGCGCCAAT
CGCTATGTGGCTGGGTGTTATCGGCATCTTTTACGGTGCGTGGATGGCCTTCGCCCAGAC
CGATATCAAACGTCTGATCGCCTACACCTCGGTTTCCCACATGGGCTTCGTGCTGATTGC
TATCTACACCGGCAGCCAGTTGGCCTACCAGGGCGCGGTAATCCAGATGATTGCGCACGG
CTTGTCGGCGGCGGGTCTGTTTATTCTCTGCGGTCAGCTTTATGAACGTATCCATACCCG
CGACATGCGCATGATGGGCGGTCTGTGGAGCAAGATGAAATGGCTGCCAGCACTGTCGCT
GTTCTTTGCGGTGGCAACGCTTGGGATGCCTGGCACCGGTAACTTCGTCGGCGAATTTAT
GATTCTGTTCGGCAGCTTCCAGGTTGTCCCGGTGATTACCGTTATTTCTACCTTTGGGCT
GGTCTTTGCATCTGTTTATTCGCTGGCGATGTTGCATCGTGCTTACTTCGGTAAAGCGAA
AAGCCAGATTGCCAGCCAGGAACTGCCAGGGATGTCGCTGCGTGAGCTGTTTATGATCCT
GTTGCTGGTGGTGCTGCTGGTACTGCTGGGCTTCTATCCGCAGCCGATTCTGGATACCTC
GCACTCCGCGATTGGCAATATCCAGCAGTGGTTTGTTAATTCCGTTACTACTACAAGGCC
GTAAATCGCCATGACAATAACTCCACAAAACCTGATCGCACTGCTACCGTTGCTGATCGT
CGGCTTGACGGTGGTGGTTGTGATGCTCTCCATTGCGTGGCGACGCAATCATTTCCTCAA
CGCTACGCTCTCGGTTATTGGGCTTAACGCGGCGCTGGTTTCGCTCTGGTTTGTCGGCCA
GGCGGGCGCTATGGATGTTACGCCGCTGATGCGCGTTGATGGTTTCGCCATGCTTTACAC
CGGGCTGGTCCTGCTGGCGAGCCTCGCCACCTGTACTTTCGCCTACCCGTGGCTTGAAGG
CTATAACGACAACAAGGATGAGTTCTACCTGTTGGTGTTAATTGCCGCGCTGGGCGGGAT
CCTGCTGGCGAATGCCAACCATCTGGCGTCTCTGTTCCTCGGTATCGAACTGATCTCTTT
GCCGCTGTTTGGCCTGGTCGGTTACGCTTTCCGCCAGAAACGTTCGCTGGAAGCCAGTAT
CAAATACACCATCCTTTCTGCCGCAGCGTCTTCTTTCCTGCTGTTTGGTATGGCGCTGGT
GTATGCGCAGTCTGGCGACCTGTCGTTTGTCGCGTTGGGTAAAAACCTTGGCGACGGTAT
GCTCAACGAGCCGCTGTTGCTGGCAGGTTTCGGCCTGATGATTGTTGGCCTCGGCTTCAA
ACTCTCTCTGGTGCCGTTCCACCTGTGGACGCCAGACGTATACCAGGGCGCGCCTGCGCC
GGTTTCCACTTTCCTGGCGACGGCGAGCAAAATCGCTATCTTCGGTGTGGTGATGCGTCT
GTTCCTCTACGCACCGGTGGGTGACAGCGAAGCGATTCGCGTAGTACTGGCGATTATCGC
CTTTGCCTCCATCATCTTCGGTAACCTGATGGCGTTGAGCCAGACCAACATCAAACGTCT
GCTCGGTTACTCATCTATCTCTCACCTCGGCTATCTGCTGGTGGCGCTGATTGCGCTGCA
AACCGGCGAGATGTCGATGGAAGCGGTAGGGGTTTACCTGGCCGGTTATCTGTTCAGCAG
CCTCGGCGCGTTCGGCGTGGTCAGCCTGATGTCCAGCCCGTATCGTGGCCCGGATGCTGA
TTCCCTGTTCTCTTACCGCGGTCTGTTCTGGCATCGTCCGATCCTCGCGGCAGTGATGAC
GGTGATGATGCTGTCTCTGGCCGGTATCCCGATGACGCTGGGCTTTATCGGTAAGTTCTA
CGTGCTGGCGGTCGGTGTCCAGGCTCACTTGTGGTGGCTGGTGGGTGCCGTGGTTGTCGG
TTCGGCAATCGGCCTTTACTACTACCTGCGCGTGGCGGTGAGTCTGTACCTGCACGCACC
GGAACAACCGGGTCGCGATGCACCGTCAAACTGGCAGTACAGCGCGGGCGGTATCGTGGT
GCTGATTTCTGCACTGTTGGTACTGGTGCTGGGTGTATGGCCACAACCGCTGATTAGCAT
TGTGCGTTTGGCAATGCCGCTGATGTAATCTGTTAGTTTGTAAGTCAGAAAGCCGCCGAC
ATGCTCGGCGGTTTTTTTTGGCGCTCTGACACCATCACCCAACAATAACCGTCAGCGCAT
GATTCCCTTGTCGCAGCATACGTCGATACGCGCTAATCAGCTTTTCCATATCAAGCATGA
TCGAGGCAAAGAGTTGCCCCTCTAACTCTTCTGAAAAGGTCACTCCCGGATAAATCTCCA
TTTCATTGAGTCGCTTAATGGAAAACTGTTTACGCAGCTCACTTCGATCCAGTGATTCCA
GTCGGTCGATTGTCGCGGCTAACTCCTGATTCCAGGTCAATCCCAGGAAGCCATCTATGC
CATCTTCGAGGCTGTGTTCACCAAGCACGGCACGACTCAGCGGATCATTCTTCGCGGGAT
CAAAAGCAGAGGTGCCTGTCAGCCCAAAGTGTAAAAAATCCCAGCGTTTATCAATATCCA
GTCGGCGTAATCCTGAAAGCGTGTCATGTATATTATCCATCAAAGGTTTTTCAGTAGACT
CAAGCAGTTGGTTAATCTTTTCTGAGTCAATTTCTGCAAAATAACCAATCATTCCCATTT
ATTTTTCCTCCATTGAATTTCATGTTTCGCATCTTAAAACAGACGAGGGAAAATAAAATG
TGCATGTCGCTTTTTCTGGACCCGCCTCGAGAAATTTTTATTATTTACTGTTGTATAACA
AATTTATAACACCATCCACCACCTGAGCCATTTTCTGATAATTCAATCTGTCTGCGGTAT
CACCGGGCAAGTGGTATTGTTTATTACGATAAAAAGCGGTGTCAGTAATCATTACGGCGG
GAATATCGTGTTGCCAATAATTCAGGTGGTCAGAGAAATCAATACCGGGAATAAACCCTG
GGGCATTCATAGAATAAACAGATAAATCCCGGGATGACAACAATGCCGCTTTTACCTGAC
GAACGGCGTTGATATCCTGTATTCTGCCGACCAGGCAATAAAGTCCCCCCGATCGGGATA
AAGCCAGGACATTGCGGGTAAGGGTAATCCTGGCTACCAGGCGCAGAGTCGTAATAGCCA
ATCGGGGACGCCCTGCGCGGTAACTCTGGCACCGCTACTGACAAAGACCTCTTTTATATA
CTCTACGGACCTATTCAGATTATCAATATTGTCGGCATTACGTGGATGCACAGCTTGTGT
AAGATAACGAACTGTTTTTTCTAATTGCTCAGGAATTACGTGTCGGGGCGTTGGCGATAA
TGCAGTGACCCAGGGTTGGTAAAAATAATCAGAGGGAGTGAAAACAGAAATAATATAACA
AAAGGAAAATTTTTTCATATGTAAATTATCAATAAAAGGCGTTATTTCATTATTATTTAT
AATGAATTATGAGCGTTTATTTTATTACACTTGGTAGAGATATACAAAAAGTGTTTTTTA
CAGTGGGTTCGCTATTTTTAAAAAGGAATTTCTGTGAGGAATAAAAATATAATTATGTTA
TTTATTGGCAGATTGAATTGACAAGTGGGGCAGAAATCTGAGGGTAAGAAAAGTCAGCAA
CTACAATCCACTACATCAACAGACCAGCAATCGCGTGCCGAGATACGCTGGAAATACCCG
AAGATTGAACTGCAGGGTGGTGTGACTGACATCAGTCAGTGATGACTTTTTAGCAAACTA
TGTTCGACCAGTCAGCATATTTGCTGACTGGTCGAATTAATTAACAATGATGTTAACTTA
CTCTTTTGCCTGATGCTCTATTTTGGGGTTGTGAGTGTTTTATTTCTAAGTCTCTATAAT
AATCATTGATATTTGCATCGCCATATTTATCTAAATAACAATTTCTGTTTACCAGTCGAT
GTTGAAAATCAATTTCGTACTGCTCTTCTGCTGAATATTTTTTAAATCTGTCAGCATAGT
TTTTTAATAACGTATAGGGGGCGCTGTCAGAATTACTTTCCCTTTGTTCAATCACTTCCT
GGGCTGCCATGCACACAAATGCACCGCAACTTTGGCTTAAGTATTGCTGAAGATCGGTAT
GTAAAAATATTATCTCGGGTTCAGTTAAATGAACTTTTATATTATTATTCGACATTTCTC
CCATGAGTTCAGAATTAAAACTATTAATGACACGCTTAAGTGAATTTTCTTTATCATGGC
CTAGTGCGCGCAATGAGTTGAATATGACGCATTTTATTTGTTGTGTATTATTTTTTTTCA
TTTACTATTTTCTGTAGCGAAACTAATATCCAGTGTCCGCCAGTATTTATGGGGAATAAC
TGGACTTCATTCGGCCATGATGGATCGCTCTTAATATTTTCATTGAGAGCGTCTTCCAGG
TGAGTTCTGGTGGAGTAGGGGACGTAGAGACCAGTAGGATAATTGACTTCAGTATTTTTT
GCATTAGCGGCGATCTTCTGAAGATAGCAATCTATTTCATCTGTGGTTAATTGACGATTT
TTATCCCAGAAGTTTGTACCATCGCTCAGTTCATTATTCTCATCATTTAAAAGCACCTTC
GAAAGCGACTGTTTTTCAGATATAAGAGGAATTTCATCACCGATAATTGTCATTAATTTC
GAAGGGGAGAATAGCTTTTTGAACAGGAGATCATCTGAATTATCCGGACCAGTTGGTTTA
AGGTGGGAGTTGGTTGCGGTATGTGCCAAATTATATAATTTTAAACAGGCATTTTTAATA
AGTCGGATAATCGATAGGGTCTCATTTGTTGGGTTTCTAACAATATGGTAAAGAATATCT
TCAGCTTTTTTTCCAAATTCATCATAACCTAACGCAATATTATGCAGTAACTCAATACTT
TCTTCATCTCCGGATAACGCTGTTTTTTTTAAAGACTGCAGTAATTCCTCGGTCACAGTA
AATTTTTCTGCAAATGTCTGACTGAGTTGGGTTTGAGATAATTGACAATAATTGCTGACA
ACTGTAACCATCATATGCTCCTTTTAGTTGCAAAGGTTGTGCTGAATGAAGATAAAAAGA
GGCAACTTATTGCTCTGAATATAGTGCGTAAGGAGATGAATAAATATCAAAAATCGCTCA
ATATGCCCGTGTGGGTGGATATATGTAGCGCGGGTTGCGATAACAGGGCAAGTTTCGCCC
TGTTTTTAATAATAAGCAGAGTTAAACGTTAAACACGGTGAAATCATTCGCTAGTTCAGT
CGCCGGGAAAATTGACCTGCATTCACGTAACAGGTGCTGACAACCTTTGTCATCATAGCG
CGAGCTGACGTGGGTAATGATTAGCTTACCGACTCCAGCCTCACGGGCCAGTGTCGCAGC
CTGGCGTGTAGAGCTATGACCGCGACTATTGGCTTTGGCTTCCATGGTTATATCCAGCGT
CGCTTCGTGTACCATGACATCGACACCTTTAGCCAGGTCAAGTGCGGCATCGCAGGGGCC
GGTATCGCCGAAAATAGCGAGCGCTTTACCTGGCACTGGAGCAGCTAAGTAATCTGCGCC
GTTAATCTGCCTTCCATCTTCCAGCATGATTGTTTTGCCCGCTTTTAATTCCTGAAACAG
TGGGCCAGGCGGTACGCCAGCAGCTTTTAATGCCTGGGCATTTAATGCACCCGGTTTATC
ATGTTCTTCAATACGATAGCCATAACATTCCAGTGGGTGTTCCATTGGATAAGCGGTCAC
TTTGCGCAGGCCATCATCGAGAATTTCGCCAGCGCCAATTTCGACAATTTCCAGCGGATA
ATCGGTCCATGAGCCGCTAATCCGCAGCGCGGTCTCCACAAATTCACGGATACCTTGCGG
ACCATAAATCGTTAAGGGTTGGACAATACCAGACATAGAACGACTGCACAGCAAGCCGGG
TAAACCAAAGAGATGATCGCCATGAAGGTGACTAATAAAAATCTTGTCCAGTTTTCCAGG
GTTAAAGGCGGTATGCAGTAGCTGATGCTGGGTGCCTTCACCGCAGTCAAACAACCAAAG
ACCGCTCTGGGTCGGATGTTGCAGGTTAAGCAATATTGCCGTGACATTGCGCGTACGGGT
TGGCACACCGGCTGAAGTACCTAAAAAAATTAATTCCATGAGTTCATCACGTTTCAAAAA
ATATTCCGGCTAGTATAAGGCATACATCTAAAAGGAGAGCATTATGATTGAATGGCAAGA
TCTGCATCACTCTGAATTATCGGTTTCCCAGCTTTATGCCTTATTACAACTGCGTTGCGC
GGTGTTTGTTGTCGAGCAGAATTGCCCTTATCAGGATATCGATGGTGATGATTTGACGGG
GGATAATCGCCATATTCTCGGTTGGAAAAATGATGAACTGGTGGCATATGCGAGGATTCT
GAAAAGTGATGATGATCTTGAGCCGGTCGTTATAGGTCGGGTGATTGTCAGTGAAGCGTT
GCGTGGCGAAAAAGTGGGGCAGCAACTGATGAGTAAAACCCTCGACACATGCACGCATCA
CTGGCCTGATAAGCCTGTTTACCTTGGGGCGCAGGCGCATCTGCAAAACTTCTACCAGAG
TTTCGGTTTTATCCCTGTGACGGAGATCTATGAAGAAGATGGTATCCCACACATTGGGAT
GGCACGCGAGGTAATTCAGGCGTAATCAATAACCCTTGTCTATAGTTAGTGACAGGTTTT
ACGCAAATGGAGAACGAGAATGTCTAATCAGTTTGGTGATACACGTATCGATGACGACCT
GACGCTGCTTAGTGAAACACTGGAAGAGGTGCTCCGCTCCTCTGGCGATCCCGCCGATCA
GAAATATGTTGAGCTGAAAGCGCGTGCAGAAAAAGCGCTGGATGATGTGAAAAAACGGGT
TAGCCAGGCTTCAGACAGTTATTACTATCGGGCGAAGCAGGCTGTTTATCGTGCTGATGA
CTACGTCCACGAAAAACCCTGGCAGGGAATTGGTGTGGGTGCGGCCGTTGGGCTGGTACT
AGGACTGTTGCTGGCACGCCGTTAAAACCTCCCTACACCGGGGTACTGCATTTTTTTTGT
AGTACCCCGTATAATGTGAGGCTTTTAACAGGGAGAGGTCCGCGTGCAATCACTTACTAC
GGCGCTGGAAAATCTACTGCGCCATTTGTCGCAAGAGATTCCGGTGACACCCGGCATTCG
GGTTATCGATATTCCTTTCCCTCTCAAAGACGCTTTTGATGCCTTGAGCTGGCTGGCCAG
TCAGCAAACGTACCCGCAATTCTACTGGCAACAACGTAATGGTGATGAAGAAGCTGCCGT
CCTGGGCGCGATTACCCGTTTTACGTCGTTGGACCAGGCACAACGTTTTCTTCGCCAGCA
CCCGGAACACGCCGACTTACGCATTTGGGGGCTGAATGCGTTCGACCCGTCGCAGGGCAA
TTTACTTTTACCACGCCTGGAATGGCGACGCTGTGGCGGTAAAGCCACGCTGCGGCTGAC
GCTATTCAGCGAAAGCTCCCTTCAGCACGATGCGATTAAGGCAAGAGAATTTATCGCCAC
ACTGGTGAGTATCAAGCCCTTGCCTGGGTTACATTTAACCACTACGCGAGAACAACACTG
GCCGGACAAAACGGGCTGGACGCAATTAATCGAACTGGCAACGAAAACCATCGCCGAAGG
GGAGCTCGACAAAGTGGTGCTTGCTCGGGCAACTGACCTGCATTTCGCAAGTCCGGTCAA
TGCGGCGGCGATGATGGCTGCCAGTCGTCGACTGAATCTCAATTGCTACCATTTTTACAT
GGCCTTTGATGGCGAAAATGCTTTTCTTGGCTCTTCACCGGAACGGTTATGGCGGCGGCG
TGACAAAGCGCTGCGTACTGAAGCGCTGGCGGGAACAGTAGCAAATCATCCTGATGATAA
GCAGGCGCAGCAGTTAGGAGAGTGGCTGATGGCGGATGATAAAAACCAGCGCGAGAACAT
GCTGGTGGTGGAAGATATCTGCCAACGATTACAGGCCGATACCCAGACGCTGGATGTTTT
ACCGCCGCAGGTACTGCGTCTGCGTAAAGTGCAGCATCTTCGCCGCTGTATCTGGACTTC
ACTCAACAAAGCGGATGATGTGATCTGTTTACATCAGTTGCAGCCAACGGCAGCAGTTGC
TGGCTTACCGCGCGATCTGGCGCGACAGTTTATCGCCCGTCACGAACCGTTCACCCGAGA
ATGGTACGCCGGTTCTGCGGGCTATCTCTCATTACAACAAAGCGAATTCTGCGTTTCCCT
GCGCTCAGCAAAAATTAGCGGCAATGTCGTGCGATTATATGCTGGCGCGGGCATTGTCCG
TGGTTCCGACCCCGAGCAAGAGTGGCAGGAAATCGACAACAAAGCGGCAGGGCTGCGTAC
TTTATTACAGATGGAATAGTAATGAGTCGCATCATTACCGATTCATATCAATAATCTATT
TTTGTAGCTCCTTATACTTAGCCGCAATATTGATACCGGACAAACTCATGTCAGTAAGCG
CATTTAACCGACGCTGGGCGGCGGTCATTCTGGAAGCATTAACGCGTCACGGCGTCAGAC
ACATCTGTATCGCCCCAGGCTCGCGTTCTACACCGTTAACGTTAGCGGCGGCGGAGAATT
CCGCATTCATTCACCACACCCATTTCGATGAGCGTGGACTGGGGCATCTGGCGCTGGGGC
TGGCGAAAGTCAGCAAGCAGCCGGTGGCGGTGATTGTGACCTCCGGCACGGCGGTAGCAA
ATCTCTATCCTGCACTGATTGAAGCTGGGTTAACCGGAGAAAAACTGATCCTGTTAACCG
CCGATCGCCCGCCGGAGCTAATTGACTGCGGCGCGAATCAGGCGATTCGTCAGCCGGGAA
TGTTCGCCTCTCACCCCACGCACAGTATTTCATTGCCGCGCCCGACCCAGGATATCCCCG
CAAGTTGGCTGGTTTCTACCATCGACCATGCTCTCGGTACGCTTCATGCGGGCGGAGTCC
ATATCAACTGCCCGTTTGCTGAACCGCTGTATGGCGAGATGGACGACACTGGGCTTAGCT
GGCAACAGCGTCTGGGTGACTGGTGGCAGGATGATAAGCCGTGGCTGCGTGAAGCGCCTC
GTCTGGAAAGTGAAAAACAGCGCGACTGGTTCTTCTGGCGGCAAAAACGCGGCGTGGTGG
TTGCCGGGCGCATGAGTGCGGAAGAGGGCAAAAAAGTTGCACTGTGGGCGCAAACTCTTG
GCTGGCCGCTGATTGGCGACGTGCTGTCGCAAACCGGACAGCCGCTGCCGTGTGCCGATC
TTTGGTTAGGCAATGCCAAAGCGACCAGCGAACTGCAACAGGCACAGATTGTGGTGCAAC
TGGGCAGCAGCCTGACGGGCAAACGGCTCCTGCAATGGCAGGCAAGCTGTGAACCCGAAG
AGTACTGGATTGTGGATGACATCGAAGGGCGACTTGATCCGGCACACCATCGTGGACGCC
GCTTAATTGCCAATATTGCCGACTGGCTGGAGCTGCATCCGGCAGAAAAACGCCAGCCCT
GGTGCGTTGAAATCCCGCGCCTGGCAGAACAGGCAATGCAGGCGGTTATTGCCCGTCGCG
ATGCGTTTGGCGAAGCGCAACTGGCGCATCGCATCAGCGACTATCTGCCTGAACAGGGGC
AATTGTTTGTTGGTAACAGCCTGGTGGTACGTCTGATTGATGCGCTTTCGCAACTTCCAG
CAGGTTACCCGGTGTACAGCAACCGTGGGGCCAGCGGTATCGACGGACTGCTTTCTACTG
CCGCCGGCGTTCAGCGTGCCAGTGGCAAACCGACGCTGGCGATTGTGGGCGATCTCTCCG
CACTTTACGATCTCAACGCGCTGGCGTTATTGCGTCAGGTTTCCGCGCCGCTGGTATTAA
TTGTGGTGAATAACAACGGCGGGCAAATTTTTTCGCTGTTGCCAACGCCGCAAAGCGAGC
GCGAACGTTTCTATCTGATGCCGCAAAACGTTCATTTTGAGCACGCCGCCGCGATGTTCG
AGCTGAAATATCATCGTCCGCAAAACTGGCAGGAACTTGAAACGGCACTTGCCGATGCCT
GGCGCACGCCAACCACCACGGTAATTGAAATGGTGGTTAACGACACCGATGGTGCGCAAA
CGCTCCAGCAACTTCTGGCGCAGGTAAGCCATTTATGATCCTGCACGCGCAGGCAAAACA
CGGCAAACCAGGTTTACCCTGGCTGGTGTTTTTGCACGGTTTTTCCGGCGATTGCCACGA
ATGGCAAGAAGTGGGCGAGGCGTTTGCCGACTACTCACGGTTGTATGTTGATCTTCCCGG
GCACGGTGGTTCGGCGGCGATTAGCGTCGATGGATTTGATGATGTCACCGACTTACTGCG
TAAAACCCTGGTTAGTTACAACATCCTTAACTTCTGGCTGGTGGGGTACTCGCTTGGCGG
ACGGGTGGCGATGATGGCCGCTTGCCAGGGGCTGGCGGGGCTTTGTGGGGTTATTGTCGA
AGGCGGGCATCCGGGGCTGCAAAATGCTGAACAACGTGCGGAACGTCAGCGTTCCGATCG
CCAATGGGCGCAGCGTTTTCGCACAGAACCGTTAACGGCGGTATTTGCCGACTGGTATCA
ACAGTCTGTTTTTGCCTCGCTCAATGACGATCAACGCCGGGAGCTGGTGGCGCTGCGCAG
CAACAATAATGGCGCAACCCTTGCCGCCATGCTGGAGGCGACTTCTCTCGCCGTCCAGCC
TGATTTACGTGCTAACCTTAGCGCCCGCACATTTGCGTTTTATTATTTATGTGGTGAACG
TGACAGCAAATTCCGCGCTCTGGCGGCGGAACTGGCTGCCGACTGCCATGTCATTCCTCG
CGCCGGACATAACGCGCATCGGGAAAATCCCGCTGGCGTTATCGCAAGTCTGGCGCAGAT
CTTGCGTTTCTGACTAAAGGACACAATATGATTTATCCTGATGAAGCAATGCTTTACGCA
CCGGTTGAATGGCACGACTGCTCCGAAGGTTTCGAGGACATTCGTTATGAAAAATCCACC
GACGGTATCGCAAAAATCACCATTAATCGTCCGCAGGTGCGCAATGCCTTCCGTCCTCTG
ACGGTAAAAGAGATGATCCAGGCACTGGCAGATGCGCGTTATGACGACAATATCGGCGTG
ATCATTCTGACTGGCGCAGGCGATAAAGCGTTCTGCTCCGGTGGTGACCAGAAAGTGCGT
GGTGATTACGGCGGCTATAAAGATGATTCCGGCGTACATCACCTGAACGTGCTGGACTTC
CAGCGTCAGATCCGTACCTGTCCGAAACCGGTTGTCGCGATGGTGGCTGGCTACTCCATC
GGCGGTGGTCACGTTCTGCACATGATGTGCGACCTGACTATCGCGGCAGATAATGCCATC
TTCGGTCAGACTGGCCCGAAAGTCGGTTCCTTCGACGGCGGCTGGGGCGCTTCCTACATG
GCTCGTATCGTCGGGCAGAAAAAAGCGCGTGAAATCTGGTTCCTGTGCCGTCAGTACGAC
GCAAAACAGGCGCTGGATATGGGCCTTGTGAACACCGTGGTACCGCTGGCGGATCTGGAA
AAAGAAACCGTCCGTTGGTGCCGCGAAATGCTGCAAAACAGCCCGATGGCGCTGCGCTGC
CTGAAAGCTGCACTGAACGCCGACTGTGACGGTCAGGCAGGTCTGCAGGAGCTGGCGGGC
AACGCCACCATGCTGTTCTACATGACGGAAGAAGGTCAGGAAGGTCGCAACGCCTTCAAC
CAGAAACGTCAGCCTGATTTCAGCAAATTTAAACGGAATCCGTAATGCGTAGCGCGCAGG
TATACCGCTGGCAGATCCCCATGGACGCGGGGGTGGTTCTGCGCGACAGGCGGTTAAAAA
CCCGCGACGGGCTGTATGTTTGCCTGCGTGAAGGCGAGCGCGAAGGGTGGGGGGAGATCT
CCCCACTGCCGGGCTTCAGTCAGGAAACCTGGGAAGAGGCGCAAAGTGTGCTGCTTGCCT
GGGTAAATAACTGGCTGGCAGGCGATTGCGAATTACCGCAGCTGCCTTCCGTCGCCTTTG
GCGTAAGCTGTGCATTGGCGGAGCTGGCAGATACGCTCCCGCAGGCGGCCAATTACCGTG
CGGCACCACTGTGTAATGGCGATCCTGACGATCTGATCCTCAAACTTGCTGATATGCCAG
GCGAGAAAGTGGCGAAGGTCAAAGTGGGATTGTACGAAGCCGTGCGCGACGGCATGGTGG
TGAATCTGTTGCTGGAGGCAATTCCGGATCTGCATTTGCGTCTTGACGCGAATCGCGCCT
GGACACCGCTGAAAGGCCAGCAGTTTGCCAAATATGTTAACCCGGATTATCGCCACCGCA
TCGCGTTTCTCGAAGAGCCGTGCAAAACCCGCGATGATTCGCGAGCGTTTGCCCGTGAAA
CCGGCATTGCCATTGCCTGGGATGAAAGCTTGCGCGAGCCGGATTTTGCCTTTGTGGCTG
AAGAGGGCGTGCGCGCGGTAGTTATCAAACCCACGCTCACGGGCAGTCTGGAGAAAGTAC
GCGAGCAGGTACAGGCGGCGCACGCGCTGGGGCTGACGGCGGTGATCAGTTCTTCCATTG
AATCGAGCTTAGGCTTAACGCAACTGGCGCGGATTGCCGCCTGGTTAACGCCGGACACCA
TTCCAGGGCTGGACACGCTGGATCTAATGCAGGCGCAGCAGGTACGTCGCTGGCCGGGTA
GCACGCTGCCTGTCGTGGAAGTTGATGCACTGGAGCGGTTGTTATGATCTTCTCTGACTG
GCCGTGGCGTCACTGGCGGCAAGTGCGGGGAGAAGCCATCGCCTTACGTCTTAATGACGA
GCAACTCAACTGGCGCGAGCTTTGTGCTCGCGTCGATGAATTAGCCTCCGGCTTTGCGGC
GCAGGGCGTAGTTGAGGGCAGCGGCGTGATGTTGCGGGCGTGGAATACGCCGCAAACGCT
GCTCGCCTGGCTGGCGTTACTGCAATGCGGGGCGCGGGTGTTGCCCGTGAACCCTCAGCT
GCCGCAACCGTTGCTTGAAGAATTGCTGCCCAATCTTACGCTGCAATTTGCGCTGGTGCC
GGAAGGGGAAAACACGTTTCCGGCGTTAGCGTCGCTGCACATTCAGCGGGTTGAAGGCGC
ACATGCCGCTGCGTGGCAGCCGACGCGTCTGTGCTCAATGACGTTAACCTCTGGGTCCAC
TGGCTTGCCGAAAGCCGCTGTTCATAATTACCAGGCTCATCTTGCCAGCGCCGAAGGGGT
GTTATCGCTGATTCCGTTTGGCGATCACGATGATTGGTTGCTCTCTTTACCGCTGTTTCA
CGTCTCCGGTCAGGGAATTATGTGGCGCTGGTTATACGCTGGTGCGCGGATGACGGTACG
TGATAAACAGCCATTGGAGCAAATGCTGGCAGGCTGTACTCACGCTTCACTGGTGCCAAC
ACAACTCTGGCGTTTGCTGGTTAACCGCAGTTCCGTTTCCCTGAAAGCGGTGTTACTTGG
CGGCGCGGCTATCCCGGTCGAGTTGACGGAACAGGCGCGCGAGCAGGGGATTCGTTGCTT
TTGCGGCTATGGTCTGACCGAGTTTGCCTCCACGGTGTGTGCGAAAGAAGCCGACGGCCT
GGCAGACGTTGGTTCGCCGCTGCCGGGTCGGGAAGTGAAAATCGTTAATAATGAAGTGTG
GCTGCGGGCTGCCAGTATGGCAGAAGGTTACTGGCGTAACGGGCAACTGGTTTCACTGGT
TAATGACGAAGGCTGGTACGCTACGCGCGATCGCGGTGAGATGCATAATGGCAAGCTGAC
CATTGTCGGACGTTTAGACAATCTATTCTTCAGTGGCGGAGAGGGTATTCAGCCGGAAGA
AGTCGAGCGCGTAATTGCTGCACATCCTGCGGTTTTGCAGGTGTTTATCGTCCCCGTTGC
CGACAAGGAGTTTGGTCATCGACCGGTGGCGGTGATGGAGTATGACCACGAGAGCGTTGA
TCTTAGTGAATGGGTGAAAGATAAGCTGGCCCGTTTTCAGCAACCGGTGCGTTGGTTAAC
GTTGCCGCCTGAACTGAAAAACGGCGGTATTAAAATTTCACGTCAGGCGCTAAAAGAGTG
GGTGCAACGTCAGCAATAATTAACCCTCCGTTTCACTTCTCATTTCTGCCATTCCATTGC
CGTTGATAAAGAGTTTATCTGTTAATCTGTAAATTGATGTGAAAACTCTTAGCAAACAGG
ATAATGCAATGGAATGGCTGGTCAAAAAATCGTGCTGCAATAAACAAGATAACAGACATG
TACTTATGCTCTGCGATGCTGGCGGCGCGATAAAAATGATCGCCGAAGTGAAGAGTGACT
TCGCCGTGAAAGTGGGGGATTTACTCTCGCCTTTGCAGAATGCGCTTTATTGTATTAATC
GTGAAAAGCTGCATACGGTGAAAGTCCTCTCGGCAAGCAGTTATAGCCCCGATGAGTGGG
AACGGCAGTGTAAAGCGGCAGGGAAAACTCAGTAACGTTGTTTTGTCGTGGGCAGGAAAA
TCAGCATCAACCCGCTCATAATACAGGCTACTCCCAGTAGTGCTTTCAGCGAAAAAGTCC
CTTCCCAGCCGGGAAGTACCATTGAAGCAATCCATACCAGCACATAACTCATACTGAGCA
AGGCATAGGCTTTGCTTAGCGCAAGTATATGTAGCGTTTTATACCAACAAAAAACGGAAA
GCAGATAACCCAGCAGCCCGAGTAACAGTATCCGGGCATCCAGGCCAAAAGCTAACAGCA
TCGCGATAAAATCCCATAAGTGCGTCATCGGCGGCAGATGACTCGCCGCAAAACCCAGGC
TTAATTGCGCAGCTGAGGCAATAATGACGCTGAATAATCCCCACATCAGGCCCATTACAC
CGTACTCCCGAGGATCACAATGCCACCAATAATGAACGCCACCCCACACCAGTGACGCGG
CGATACCGGTTCGTGCCACAGTTTTACTGCAGCCAGCGTCACCCAGACAAAATTCAGACT
TAACATCGGGTAGGCAATGCCTACCGGTACGTTCTGCAAGACCAGCAGCCAGAGCACCAT
GGCAAGACCAAGACAAGCCAGCGCCAGTCCCAGCCACAGCACGATATGTTTGCGCCGTTT
GTTTATCGCCACAAAGCAGGTTGCCTGTTTCTGACACAACTGCCCGGCAACGCTAAGCAA
GCTGGCAAAGACTAATGTTAGCCAGATCATTTGGGACGATACTGAATCAGCACCAGACGC
TCCTGACGATCGATGGCATCTGCGGGCGGAATGGCGAGACTGTTGATATCTTCATCGCGG
TCAACCGAAAGCACGAGTGTAATAATCCCCTCCTGACGATGTTGATTAAGCCAGTTTGCG
AACTCATCACCGCTGACAAATCTCCCTTTCGCATCCGGATAATTAAGGCCGTATTTCAAC
TCACCTGTCTGGCGATACATGATGATGTCATCGCGTTGCAGGCTCCATGCCAGACCTGCG
GCAACACCGACGCTATCAGTAAGAATATAGCGGCTTGGCTGAAGTGATTCTTGTGTCATC
TCGACAAAAAATTGCGGATGTTTTCCTTCCATGACTCTGTCAGGAATTGAAAATCCTACC
AGCAACGCCAGCCCCAGCGGGCAAAGCGCGGCAAAAGACCAGGTCTTTTCGACGTTTGTT
AAGGTGTACCAGCCGAAAAATGCCCATAGTGAAAAAATCGACCAGGCACAAAAGACTTTA
TAGCTCTCGAAGGTTTGCCACACCGGCGTGTTCATTGGTCCCCAGGGGGAGACCACAAAT
GTGGCAATAATGCCAGTGACGCCAAAAGCGATGTTAATCCAGCCATTAATCCGCAACGCC
AGAGGATTATTTTTTGCTGCCAGCAAAGCGTAATGCGCCATCAGCATTGCCAGAGGTGCA
AAGCAGGAAAGAATATAGGTGGGCAATTTACCTTTAGCGACGGAGAAAAACAGCAGCGGC
ATTATCGTCCAGCTCAACAAATAGACGGTTGCGGAATGCTTGCGGTTTTTCCAGCCTGCG
TACAGTGCACCGGGGAGTAATCCCAGCCACGGCAGGCTACCGGCAATGATGACCGGCACG
TAGTACCAGAACGGAGCTCTATGTTGGGCATCATCCAGTGCAAAGCGTTGAATATGCTCA
ACCCAGAAAAAATAGTGCCAGAAGTCAGGCTCCCGCTGCGCTATCGCCAGTCCCCAGGGG
AGAACCGTCAGTACGCAACTGATAACCGCCAGCCAGCCGTAAATAAAGAGATCTTTCCAG
CGTTTTTGCGTCGCTACCCATGGCAGTACGCTTAATACCGGCACGGCAAGGGCGAGAAAA
CCTTTGGTCATCACCCCCATGCCGCAGGTGATTCCCAGCAGTAAAAATCCTGCGCTTTTG
CCTTTCCACGTCTGTGCCTGCATTGCCAGCCAGAAGCTGCACATTCCCGCCACCAGCCAG
AATGCAATAAACGGATCGAGCACGGCATAAGTGCCGATGGCATAGACAATAAACAATGAG
AGATAAATTACTGTGGCGAGTAGAGCCAGACGTTTATCGCGCCATAAGCGCAGAGTAAAC
CAGGTCACCAGCGCGGCAGTTAACAGGGTCGCAAAGATAACGCCTGCCCGCACACCAAAG
TTATTCGCACCAAATAGCCATTGCCCAATGCTGTTAATCCAGTATCCAGCAATGGGTTTT
TCAAAATAACGTAGCCCTAACAGATGGGGCACAATCCAGTCGCCGGATGCCAGCATTTCC
CGACTGATTTCCGCATAACGCGTTTCATCGGGTTGCCAGAGCAGACGCGTGCTGATCGGT
AACAGGTAATAGCAGGCAATAAACGCGAAGAGGCCGATAAGGTAACGTACCGATTTCATC
AGCGACTACCCGCAATTTGTTGGCAACCCAGCCAGCCTTCACGTCCGGCAATATTTCCGC
GAACAACTTGTCCGAGCGGCAACGTCTCTGATAACAGTTCGCTTAAAGGGCAAAATGTCA
CGCCTTCCTGAGCTGCGCGTTTGAGGAGATCCACAAAATTATGCTGATAAGCGCAGCCTT
CAACTTCTGCATGAATGGTATAAACCGGCGTGCCTTTATCTCGCAGGATGCGGTTGAGTA
ACCAACCGTTAAAATCTTCTGCTTTCACATCCCGACCAATCACTTCATCCCAGGTGGGTA
AGGTCACCGGAATTTGCGCAGTGCCAGGGTTTCCTGATTCGAGCAGTGGACGGAACGGCA
TGGCCCCACGACAATCGCTGTTGTAGCGCAAATGGAACGCTTCTTTTGCTTCGATCACCT
GCTGGTCGGCACGCCAGCCCGCAGCGGCAGAACAGGTTACCGGTTGACCGATAATCTCTT
CCAGGGTGCGAAGGCCGAGTGCAATATCGTCGATCATTGTTTGCCGATCCCAGTTACCGC
TATGGGCTTGCCAGGCATGGTGATCCCAGGCGTGCAGGCCGACTTCGTGATGTTTAGCCG
CTTCACGAATGATATCGGCATTGGCAGGACCAATCTCTTTACCTGGCCAGGCCGTACCTG
CCAGTAAAATATCCCAGCCATAAAGCGATGCCGCGTTTGAGCGCAGCATCTTCCACAAAA
ACTGTGGCTTCACCAGTCGCCAGAGATGGCGGCCCATATTGTCCGGGCCGACGCTGAAAA
AAATGCTGGCCTGAATATTATGCTTACTCAAGATTTCCAGCAGACGCGGCACGCCTTCAC
GGGTGCCACGAAAGGTATCGACATCAATGCGTAAGCCTACTTTGGTCATGATGGTTTATC
CGTAAGATCAACGGTGCGCAGGAAGAAATCCAGCGTTTCGTCGATGGTTTCCTGCATATC
AATTTTCGGCTCCCAGTCCAGGCAGCGGTGGGCATTGCGGATGCTCGGTTTACGATGCTC
TACGTCCTGATATCCTTTGCCGTAGTAGCTGCTACTTTCGACAACGCGAAAGCCCGCAAA
CGGTGGGAAGTGATGGCGCAGCGGATGTTTTTCGAAGCTCGCCAGCAGCATCTCGCCCAG
TTCCTCAATGCTCGCTTCGTTCTCAGGATTGCCAATGTTGATAATTTCGCCGTCGCAGCG
ATTTCCCACATTTTCGATAATGCGGTACAACGCCTCGATACCATCCCGGATATCAGTAAA
GCAGCGTTTTTGTTTTCCGCCATCAATCAGCTTAATCGGTGAACCTTCTACCAGATTGAG
AATGAGTTGCGTAATAGCGCGGGAGCTGCCGATTCGTGCCGCATTAAGGTTATCCAGTCG
TGGTCCCATCCAGTTAAACGGGCGGAAGAGGGTGAACTGTAAACCCTCTTTTTCGCCATA
GGCCCAGATAACCCGATCAAGTAATTGTTTTGACACCGAATAAATCCAGCGTGGTTTATT
CACCGGGCCGACGATTAAATTAGAATGGTCCTCATCGAAGTATTTATCGCTACACATCCC
ATAAACTTCTGAAGTTGACGGGAAGATGATTCGCTTACGGTACTTCACGCAGTAGCGGAT
AATGCGCAGATTCTCTTCAAAATCGAGTTCAAATACGCGCAGCGGGTTGCGGGTATATTC
AATCGGCGTGGCTATCGCCACCAGCGGCAAGACGACATCACATTTTTTGACGTGATACTC
AATCCATTCGGAATGAATACTGATATCGCCTTCGACAAAGTGAAAATGCGGATGATTCAG
AAAACGGCTTATCGCATCGCTGCCAATATCCAGACCGTAAACTTCATAATGATCTTCGCG
CAGCAGGCGTTCTGTCAGATGGTTGCCAATAAAGCCATTCACCCCGAGGATGAGTACCCG
GGTACGGCGTCGGGCGGCACAGGCAGGCTGGCTATTCAAGCGTGAACCTTGCACCAGGCC
CAGCGTCTGCGCTAATTGCGAGCCCTGCATAGTAATGCCGTCGCCCGCCTGTCCGGTGAC
GATTTCCAGCGCGCCATCGCCACAGGCAATCAGCAGTGGCGCAACAGAAATCACGCTCCC
CGGCTGCGCTGCGGATGTATGAGGATGTACGCGTGACGACCAGACGGTGAATTTCTGATT
GCCAGCATAGCTGAAGGCACCCGGCCACGGATCGGCAACGGCGCGGACCATGTTATGCAA
TACGGCTGCCGGTTTGTGCCACTCGAGGAAGCTATCTTCTGGTGTTCTGCGACCAAAACA
GGTGGCTTCGTTCTCGCGTTGGGCGATTTCCAGAATATTACCGTGTTTAATGGCGGGTAA
TGTCTGTTCCAGTAGCTGGCGCGCGGCATGGCACAATTTATGATGCAGCGTAATAGCGAT
ATCGTCTGGCGCAATGGCAATGCGCAGTTGCGCCACAATGGCCCCGGCATCGGCACGTTT
CACCATTCGGTGCAATGTAACGCCAGTTTCCGTTTCACCGTTGACCAGCACCCAGTTCAG
CGGCGCGCGACCACGATATTTTGGTAACAGCGAACCATGCAGATTAAATGCACCTGCGGG
AGCGAGCTGCAAAATTTCGTCGCAAATAAGATGGCGATAATAAAAAGAGAAAATCACCTC
TGGTGATAGTTGGGCAATGCGTTCCACCCACAGCGGATGATTAACGTTATCCGGCGCATA
AACCGGAATGCCTCTTTCCGCTGCCAGACGAGCCACCGAACCATAAAAGGCTTTTTCACC
GGGATTATCAGTATGGGTAAAAATGGCGCTAATTTCGTAACCGGTAGCCAGCAGGGCTTC
AATACCGAGGCATCCCATATCGTGGTAGGCAAAAACGACGGTTTTCATTATTCATTTTCC
TTGCTGGATGGACGGATAACTTGCTGAACAAAATAGCGGGGGCGGGCGCGGACATCGGTG
TAGATCCTGCCGATATATTCACCGAGTAATCCCATGCCGATAAACTGAGCGCCAATAAAA
GTAAACAGCACGGCAAATAGCATAAAGACGCCTTCTGCCGCCCATTGTGGTCCGAAGGTC
AGGCGTAAAATCACCAGCAGCACCGCAATGCTAAAACCTCCAATCGCAATAATGCTGCCG
AGCAGACTCAGCATACGTAGCGGCGTTGTGGTAAGGCAGGTCACCAGGTCGTACATCAAA
TTAATCAGGCGCATAAAACTGTATTTGGATTCACCAAACTCACGCTCGGCATGATGCACT
GGAATTTCAATGGCACGGCGGGCGAAGATATTCGCCAGAATCGGGATAAAGGTGCTGCGT
TCATGGCAGTGCAACATCGCATCGACAATATGACGGCGATAGGCGCGCAGCATACAACCG
TAGTCACCCATCGCTTTGCCGGTGGTGCGCTGAATAAGCCGGTTAATCATCTTCGAAGCG
GTTTTACGAAACCAGCTGTCCTGGCGGTTCTGGCGTACAGTCCCTACCACGTCGTAACCT
TCATCGGCTTTTGCCACCAGGCGGGGGATTTCTTCTGGCGGATTCTGGAGATCGGCATCA
AGGGTAATAATTAAGTCGCCAGTAACGTGACTGAATCCCGCCATAATCGCTGAATGTTGC
CCGTAATTGCGGTTAAGCAAAATAGACACAATATGGCTGTTCTCCGCTTGTGAGGCTTCG
ACCAGCATATGCGCGGAATTATCGCTACTGCCGTCATCAATCAGCAGGATCTCATACTCT
TTCCCCAGTGATTCACAGGCTGTGGTGGTGCGCCTGATTAATTCCGGTAAGCTTTCCTGC
TCGTTATAAACGGGAATAACCACCGAGACTTTCTTAACAGGGTGGATTTCAAACATGGCT
TATTGTCCTGCGAGTTGCTGAAGGGCTGTGATGACGCGGTCGGCATCGGCGGTGGTCATA
TCCGGGAACAGCGGCAACGAACAGATGCGTTCGCTATTCCATTCGCTATTCGGTAACGAC
AGCGTGGGAAAACGCTCGCGATAATATTTTTGTGTGTGAGCGGCGCGGAAATGTAACCCG
GTACCAATACCTCTTTCTTTTAACGCTTCCATCAACGCATCGCGACTGATACCACAACGT
TGTTCATCGACACGAATAATAAACAGATGCCAGGCGTGAACGTGCGGCCAGGCGGGAAGG
CTTAATGGCTGAAAGGGGAGAGCTGCCAGTGCTTGCTGATATTGCTGGGCAATTTCGCGC
CGACGGGTGTTGAGGTGCTCTAATTTGACTAACTGTGTCAGGGCAATCGCGGCGTTAATA
TCGGTCAGATTGTACTTATAGCCCGGCGTTAAGACTTCAGCCTGCGGTACACGGCCCCAG
GTTTGTCTGTCATAGGCATCGACACCCAGACCGTGAAATTTCAGCATCCGTAGCTGGCGG
GCAAGGTTTTCATTATCAGTTACAATCAGGCCACCTTCAGCACAGGTAATATTTTTAATG
GCATGAAATGAAAAAATAGCGGTACCTTTTGCGCCAATATGTCGCCCTTTGTAATACGTA
CCTACGGCATGGGCAGCATCTTCGATAACTGCGATGCCGTAACGTTCGCCAATGGCGCGA
ATGGCGTCAATATCTGCTGGCGCACCGGCATAATGCACCGGAATGATGGCTTTAGTGCGT
GGCGTAATGGCTGACTCGATAGCTTCAGGCGTGACCATCAGCGTATCGCGGTCGACATCC
ACCATTACCGGCGTTGCACCCAACAAGGAAATCATATTGAGGGTTGAAACCCAGGTCAGG
GAAGGCGTAATCACTTCATCGCCCTTGCCAATTTCCAACGCCATTAGCGTGATATGCATT
CCGGCGGTGGCTGAACTGACCGCGATGGCATGCTGATTTCCCGTCAACTGGCAAAAGGCT
TGCTCAAGCGCCTGATTCTTCGGACCGGTTGTGATCCAACCGGATTCGAGAACCTCTTTA
ACTGCAGCGAGTTCCTCCACGCCCATTGCTGGTCGCGAAAAAGGCAAAAATTCTGACATT
GCTTTTCCTTCCGCCATTGAATACCTGTCCACTTATATTTGCTATAAAGAGTGTTGTGTA
TATTTTGCCATTTGGAGCGAAATTTTAAGGATAGAATATTAACTTAACCTTAAGAAACTA
ATATTAGACGTAAATATTGAAATTTTTATATTTTTTCTTATTTAGGCTTTGCATTTGGCA
AAATTTTGAGGCATTTTGCCGGCATCGCAGGATTTTTAATATTACACCAACTGCTAATTA
TCGCCAGAAATGTCGCTCAATTTCACGGTAATTGTCTGGTTGCGCTTGTCTATAGGTGGA
GTTTACGTGTTAGCTTTTTGCCGCTCTTCGTTGAAGTCAAAAAAATATTTCATCATTTTA
CTGGCGCTCGCTGCAATTGCCGGACTGGGTACTCATGCTGCCTGGAGTAGCAATGGTTTG
CCACGTATCGACAATAAAACACTGGCCAGACTGGCACAGCAGCACCCGGTTGTCGTTTTG
TTTCGCCATGCTGAACGTTGCGATCGTTCAACCAATCAATGCTTGTCAGATAAAACAGGT
ATTACGGTCAAAGGTACCCAGGATGCCCGAGAACTGGGCAACGCTTTTAGTGCTGATATC
CCTGATTTCGATCTCTATTCCAGTAATACCGTCCGGACCATTCAGTCGGCGACCTGGTTT
TCAGCGGGTAAAAAATTGACGGTAGATAAACGACTTCTTCAGTGCGGTAATGAGATTTAT
AGTGCAATTAAGGACTTACAAAGCAAAGCGCCTGATAAAAATATCGTTATTTTCACCCAT
AATCATTGCCTGACATATATTGCTAAAGATAAGCGTGATGCGACATTTAAACCTGATTAT
CTGGATGGTTTAGTCATGCATGTGGAAAAAGGCAAAGTTTATCTGGATGGGGAATTCGTT
AACCACTAAATTTTCAATCTGACAGCCAGTGATGGCTGTCATCATTGTTAAAGAAGACCT
TTCAAACGTAACGTTTTTCGGGTGGCAACATTCAAATCATAATGCACCAGATCTTCAGGT
TTTACCCTCGCGTAGTCCTGAAACTCTTCGTTTATTTTCACTTCTCGGTTGGCAGAAACG
CAGTCAAAAATCAGGTAAATCATATAAATCTCTTCCTTGCGACCATCTGCATACGTCTTG
GTGCGAATATCATCGCTGAAGGTCCACGGCGTGATTTCTGTCAAAAGCAGCTGTTCTCCC
AGTTCTTCGCGAATTTCGCGGCGTAGTGCCTCTTCAATTCGTTCGCCGGGCTCCACGCCG
CCACCCGAAAGCGCCCATTGACCGGGGAAAACGCCGCGATCGTCGGCCATTTTACACAGC
AAATAAGCACCATCATTTTGAATCAAAGGGCATACAATAGTCCGTTGTCGCACAGGGGTA
TTCCTTATAAATAAAAAGAAACCATGAGAATACGGTAACTCAGAAATATGTGAAAGTGAC
AGTAATCTCTTTTGCGATGATAACTGCACTTATTATTATTTTTGTGTGTATCGGTAAACT
GTGTTTATTTTTTCGGCGTTTAATTATTTAAGAAGTATTTAGTTACAATAAGTGACTAGA
TCCCTTTTTTCGCTCATTGAATCCTCTGCGCCAGGCAGTACAATCCCGCAGCTTTGGGAA
TTTTGATTAATTGCTTGTGGGAAAGGGGATAATGAAAAAAATTGCGCTAGCAGGTCTGGC
CGGAATGCTGTTGGTTTCTGCATCGGTCAATGCAATGAGCATCAGCGGCCAGGCGGGTAA
AGAATACACCAATATTGGTGTCGGTTTTGGGACTGAATCGACGGGCCTGGCTTTAAGCGG
TAACTGGACACATAACGACGACGACGGTGACGTCGCGGGCGTGGGGCTGGGGTTGAATCT
GCCTCTCGGGCCGTTAATGGCGACCGTTGGCGGAAAAGGCGTTTACACCAACCCGAATTA
CGGCGATGAAGGTTATGCCGCAGCGGTAGGAGGTGGTTTGCAGTGGAAAATTGGCAACAG
CTTCCGTTTGTTTGGCGAGTATTACTACTCTCCGGATTCGCTCTCCAGCGGTATTCAAAG
TTATGAGGAAGCGAATGCTGGCGCGCGTTACACCATTATGCGTCCAGTCAGTATTGAGGC
GGGTTATCGCTACCTGAATCTGTCGGGTAAAGACGGCAACCGCGACAACGCCGTGGCTGA
CGGCCCGTATGTTGGGGTTAACGCCAGTTTCTGATCCCTTCCGGCGCGGCATTCTGCCGC
GCCATTCAGTTTCTTACTACGCCTTATCTCCCTTTGCGTTATAGTGATTCGATAACAAAA
GCAGGAGATAACCATGTTAAAAGTGGAAATGCTATCCACCGGGGATGAAGTGTTACACGG
GCAAATCGTTGACACTAACGCTGCCTGGCTGGCCGATTTTTTCTTTCATCAGGGGTTGCC
ATTATCTCGCCGCAATACGGTGGGGGATAACCTTGATGACTTAGTCACCATTCTTCGCGA
ACGTAGTCAGCACGCCGATGTGCTGATCGTTAACGGCGGGCTGGGACCGACCAGCGATGA
TTTAAGCGCACTCGCCGCTGCGACAGCAAAAGGTGAAGGCCTGGTGTTGCATGAAGCCTG
GCTCAAAGAGATGGAACGCTATTTCCACGAACGTGGACGAGTAATGGCACCGAGCAACCG
TAAACAAGCGGAGCTTCCTGCCAGTGCTGAATTTATCAATAACCCGGTAGGCACCGCCTG
TGGTTTTGCCGTGCAGCTTAATCGTTGCCTGATGTTCTTTACCCCCGGCGTACCGTCAGA
ATTTAAGGTGATGGTCGAGCACGAAATCCTGCCGCGCCTGCGCGAGCGTTTTTCTTTACC
ACAGCCGCCGGTTTGCCTGCGTTTGACTACCTTTGGTCGTTCGGAAAGCGATCTGGCACA
AAGCCTGGACACTCTACAACTGCCGCCGGGCGTAACAATGGGCTATCGCTCCTCAATGCC
GATCATCGAACTGAAACTCACCGGACCGGCAAGCGAGCAACAGGCGATGGAAAAACTGTG
GCTGGACGTTAAACGTGTTGCCGGACAGAGCGTGATTTTCGAAGGCACCGAAGGACTGCC
CGCGCAAATCAGTCGCGAATTGCAAAACCGCCAGTTCAGCCTGACGTTGAGCGAGCAATT
CACCGGTGGTTTATTGGCTTTGCAACTTTCTCGCGCAGGTGCTCCATTGCTGGCGTGTGA
AGTGGTTCCTTCACAGGAAGAAACCCTGGCGCAAACTGCGCACTGGATTACAGAACGGCG
GGCCAACCATTTTGCCGGGCTGGCACTGGCTGTTTCGGGTTTCGAGAACGAGCATCTCAA
CTTTGCGCTAGCCACGCCAGATGGCACTTTCGCTCTGCGTGTGCGTTTCAGCACTACACG
CTATAGCCTGGCTATCCGTCAGGAAGTGTGCGCAATGATGGCACTGAATATGCTACGCCG
TTGGTTAAACGGCCAGGACATTGCCAGTGAGCATGGCTGGATTGAGGTTGTTGAGTCGTT
GATGCTGTCGCCACAGGGGGCATGAAAGAGGCGCGCCGGGGAGAAGGCTTTTACCCGGCA
CGTTGTCGCATTCATTGCAGGCTTAATGGAGCGAGATCGGCCTCGGTTAGCTGGGTTGTT
GCCAGCACCAGGTCAAGATCGATACCCTGCTCCAGCATGCGCAAGGCAATTTTAATGGCT
TGTTCATGCATGCCTTGCTGCAAACCTTCTAATTTACCTTCCTGCCAGCCAATTTGATGC
CCTTCCTGCCTCAGCCGTTCAGCAATAGTCATTAATCTCTCCTTTTGTAGTGGTGAACGT
TCGGCAATCTCCTGAATAAAACGGGTGAAACGGGAGGTATCGCCGCATTGCAGCAGATAA
TTAAACAGTGTTTGTAGCTGGCTGTCATTAGTGAAGCCTCTAACCAAAAGCGTGGTGATC
CTGTCGACCATACCGATTAAATCGCGGTCGCGAATATGCTTTTGAATCAGTTCAAGCAGA
GCTATACGCCGATGTTGCATGATCTCATCGTCAGGTACGATGGTGATATCCACCAACGGA
AAAGCTTCGGTGTACAACTGCCGGGCAAGTTGCGGACCGTCAAACTCATCCAGCCAGTTG
AGTGAGTACGGGTAGGGCGAGGTTTCGCCATGATAAAACAGCAACGGCACCACCAGCGGG
ACTCTGTCATAGCCTTTGTCCAGGTGACGCTGCATGGCGGCAGTGGCATAGCGCATTAGC
CGAAAAGCCATATTCTTTTCTGCAGAGCTTTGATGTTCAATCACGCAGTAGATATAGCCG
TCACCGTCGCTGGTTTCCACGGACCACAAAACATCCGAGTAGTAAGCGCGTAAACTTTTT
TCAATAAAACTAGTGGGTTCCAGGCGTAAGGTTTGCAGGTTGCAAAGCTTGCGCAGTGGT
TCTGGTAAATGTATTTCGAGAAAATCCCGTGCGGTTTCGGGTGTGAACATAAAGGTTTTA
AATACTGCATCATGCGGGGAGGAGGTTGTTGATTCGGTCATGGTTGTCCGTCACCTGATA
TTTATGATGACGCGACATTACGGTTATCCCAGGCCTTTGACATCTGCCAGTTTCAGCCTT
TGCGAGACGTTTTCAGAGGAATTTTCACTGCGTTGCAACGCATACATTGGGCACGGAATC
GTGTACGCAAAAATGCCCGGTAACCACATGCTTACCGGGCATCAGAAAGGAGTTTAAGCC
AGCGCCTGGGCCAGTAGCGTAATCGGATGTTCGCAGCGAAGACTTGTGGACATCTCAATC
TGCCATTTACAGGTTTCGCAGTCGGTGACCACCAGATCTGCGCCGCTTTCTTCTATCTGG
CGGAACAGTGGTGCGCCGATGGCTTGTGAGGTGGGGTAGTTCTCTTTTTTGAAACCGTAA
GTACCCGCAATACCGCAGCACTGGGAATCCAGCACCGTTAACTCAAGCCCCGGGATGTTA
CGCAACAGCTCCAGGGTGTAGAGCGTCCAGCCCATTTTTTCCATATGGCACGGAGTGTGA
TAAACCACTTTCAGCGGCAGCGGTTTCAGCGGTAACGTTTTGCCTTCGTCCAGCTTGCGC
CACAACCAGTGGGTCGCCAGTTCGATATGATCGCGCAAGCCTTTGTTGTCGACATTCAGC
ACTTCCGGGTATTCGTCGCGCAGGGCAAATGTACAGGTTGAGGAGGTGGCAATCACCGGA
ATGCCTTTTACTCCCACAGCTTCGCGGATCGACTCTACATTCGTAATTGCCTGTTTGCGT
GCTTTATCGGTAAAGCCGTTGGCGATCAGCGGTACGCCGCAGCATTTTTCTTTGCTGAGC
AGTTGTACACCGGTACCCATTGCGTTGAGCACTTTAATTAAATCTTTACCTAACTGCGGA
TGGTTGTAGTTAACGAAGCAGCCGTGAAAGAAAGCGACCTGGTCTTTATACTGCGCTTGC
TGAGCCGCCACGCTGCGATACCAGCGACGAAACGTGCCGAAGGAGTATTTCGGTAGCGTG
CGGCGATGATCGATTTTTAACGCCGCATCAAGCAACTGCCGCACCGGTTTCAGCGAGGTA
GCGGTGTTGACGATTGGTGCGAACGGCGTGGAAACGCTACCCATCAGGTCGGTATGACTC
AACACAAAATTACGCAGCGACGGGCGCGTGGTGTCATATTTCGCCCGCGCGCGCTGGATG
ATATCGCCAATCTTCACATCGGACGGGCAGGCGACTTCACAACGTTTGCAGTTGATACAA
TATTTCAGCGCCTCGTCATACAGTGCGCCATCTTTTAAACGCAGACGCTCGCCATCCGGC
CCGGCTTGTTTTGGCCCTGGATAACCGGGATTCACCCGGCTCACTGGGCAGGCGGTGGTG
CAGACGGTGCACTTAATGCAGTTTTCGAAGCTGGTGTCATTCATTGTTGGCCTCCTGCGC
GTTGGGCAATCTGTTGAGCGGCATGTAAAGCACTGACGGCACAAACACCGCCGCCGCATC
CCTGGGCGATGGGATCAAATCCGCCCAGCACCGAACCGATGGCAAACAGGTTCTCAATGG
TTTGCCCTGCCTGTGATGGGCGTAGCGTCTTATCAGTGGTTACACCGAACTGCTGCCACG
GTTGCGGCGCAAAAAAATCTCCCTTATACCATTCACCCCGCGTGGCGGTTTGTAGCACAT
CAAGGCCGAGAATCGGCTCTCGAATGCCGTTACGTTCCGCTACCAGTCCGCCACTAAAGA
AACTGCCGCTGGCGAGAACCGCGAAACGTGGACGTAGCGGGATATCGGCGTGATTGCGGG
TCCAGATTTCATTCACTACGCCATTTTTACAGGTCACTTTTTTCACTTCATCGCCCGGCA
TCCACACGCCACCCTGGCGCACAAACTGGCGCTGTAACTGGTTTTGCAGACGAATGCCCA
GCACGGAAGGCGGCAGCGTTGGCAAAAGCATCAGTGAACAAGGTAGTTTTTCATTCAACC
AACGCCACAGTTTGTCATCGACCAGGCCGAAGCAGGCGGGCATCAGGATCATTTCGCAGG
TATTGGCGACAGGAATAAGCGCATCAAGTAACAGCGACCAGTTTTCTTCATTATCAAGGA
AACGGGCGATATTCACCGCGCGGAACTCGGTGGCGTTATTGCGCAGGACATCCAGTTCCG
GCAGCTCTATTTCTGCGGTTTCAACCGAAAGATCCAGTTCACGCAACGAAGCTGCCGCAA
GGTGCGCCTGAAAATCCATCAGCCCGCTTATCCCCACTACACATATCTTCTTCGCGGGTA
GCGGCCAGACGGGGACTTCTGGCGAACTTAACCAGGTTGCACGCAAAGTGCCGAGCGGGG
TAACGCGCTGATGGGCCAGTTCCACGCTGCCCTGCAATTGCGCACCGCTTTCAGCGATTA
ATGCCTGCGCCTGGCAAGCGAGATCGAGCACGCGTTGTGGCCCGAGAAGAGAGTAAGGAT
GTGCAGGTGCCTGCTGACGCAAAGATTCCAGTCCACTGTGAATGTCTGTCACCGCTTGAC
CATCTGGCAGATGGCTCAGCAAATCCAGCGAACCGGATGAGAAATGCAGCGCGCTTTGAC
CACGCGTGACAATGGCACAGCGCAGGCCGTGTTTTTGCAGTTGCAGGCCACAGAGTAATC
CGGCGAGGCCGCCGCCCATAATGACAGTATCAAAGCGCATCTTTCTGCTCCTTCTCCAGA
CCACACAGTCCCTGATAAACCCAGCGGGTAAATTCGCTTTCGCGCAGTGCATCTCCCCAG
GCGATGGGTTGCACGCCTTTCCAGCGTTCGTTAAGGAAGGTGGAAAGTTGCTCGATAGAT
TGCGCGGACGTCGTGACGTTAAAACGTTGCAGCAGTCCGGCAGCGCGGCAGGCGCAGAGT
TCGCCCTGGCAGGTACCCATCCCCACACGGGTACGACGGCGTAAATCCAGCAGGCTATTA
ACGTTTAAATTTTCTACCGCGTACTGCACTTCACCCGCAGTTACCGCTTCGCACTCACAT
ACCAGGCTACGGTGCAGACGGCCTTCGCTCAGCCAGGCAGGCGTGCGATCGCCATGACGA
TAAACCGCAGAACCGCGCAGCGGGGCAGGCAGGGAGATGACTTTACGTAAGGTAACTTCA
GCGGGTTCTTGTGAACCAGGCAGTGCCAGATCGGCAGTCGTACAGGGGCGCGTGTTGCCC
AGTTTGCGGCATACCGCGTCGGTAGCCCATTCAGCCATCAGCCGATAGGTCATCAGTTTG
CCACCGGTGATGGTGATAAATCCGTCCAGACCATCGCGTTCAGCATGGTCGAGCAGCACG
ATGCCACGGCTGACGTTACGTCCGCTCGGGTCGTCATCGCTGGCAACCAGCGGGCGCACG
CCAGAATAGGCCCGCAAAATGCGCGTTTTCGCCATCACGGGGGCCAGTTTTTCCCCTTCA
CGCAGCAGAATATCAACCTCTTCTGCCGTCACTCGATTATCGTCAATCTCGTTGTAATCA
ATACGTAAAGAGGTGGTGCCAATCAGCGAAATGGTATCGCCAGGCACCAGAATATCGGCG
TCGGAAGGTTTACGGCAGCGGTTGATCACATGCTGGTTAATGCGGTGATCCATGATCAGC
AGCGATCCTTTCGCCGGGAACATGCGAATGCGCAGATCGGCATATTCGGCAATGTGTTGC
CCCCAGATCCCAGCGGCATTAACCACGACAGGTGCATGAAGGGCCTGAGTTTCGCCGGTG
AGATGGTTACGTACACGAACACCGCACACCGTCGCGCCTTCACGAATCAGTCCCGTGACT
TCATGAGCGGTAAGGATAACGGCACCGTGTTCTTTGGCATCCAGCATGTTTGCTGCGGTC
AGACGAAATGGATCAACGGTGCCATCCGGAACTTTCACCGCGCCAATCAGTGCCGGGTTA
ACGGCAGGTTCGATAATGCGCGCTTGCTGCGGGTCTATAGCTTCTGCGCTGATCCCTGCT
TCTTCGCAGGCGCGAATAAAAGTGGCCTGGAAGGAGAGGTCATCTTCCGGCAGGGTGATA
AACAGGCCGTTGGTTGGTTCAACGCAGTGACGTGCAATGCGTTTCAGGATCTGGTTTTCA
CTAATGCATTCGCGGGCCGATTCCGCATCGGTTACCGCATAGCGCGCACCGCTGTGCAGC
AGGCCGTGGTTACGCCCGGTGGCACCGGTTGCGATGTCGTGGCGCTCAACCAAAATCACG
CGCAGCCCGCGCAGGGCACAGTCGCGGGCAATCCCGGCTCCCGTTGCGCCGCCGCCAATG
ATAATCACGTCACTTGATTGCGAGTCGCGAGTTTTCATTGTTATCCCTCTGAAGTTCGTT
TTTTACCATTTAGCCATAGTAAAAACATGAATTGTTTGATTTCGCGCATATTTGCTCATA
ATTCGAAAGTGAAACGTGATTTCATGCGTCATTTTGAACATTTTGTAAATCTTATTTAAT
AATGTGTGCGGCAATTCACATTTAATTTATGAATGTTTTCTTAACATCGCGGCAACTCAA
GAAACGGCAGGTTCTCTCACTGAATCAGGCTGTTAATCATAAATAAGACCACGGGCCACG
GAGGCTATCAATGTTGAGTATTTTTAAACCAGCGCCACACAAAGCGCGCTTACCTGCCGC
GGAGATCGATCCGACTTATCGTCGATTGCGCTGGCAAATTTTCCTGGGGATATTCTTTGG
CTATGCTGCTTACTATTTGGTTCGTAAGAACTTTGCGCTTGCTATGCCTTATCTGGTTGA
GCAGGGATTCTCACGCGGTGATTTAGGTTTTGCCCTTTCGGGGATCTCGATTGCTTATGG
ATTTTCGAAATTCATCATGGGTTCGGTATCGGATCGCTCGAATCCGCGCGTTTTCCTGCC
CGCAGGTTTGATTCTGGCGGCGGCAGTGATGTTGTTTATGGGCTTTGTGCCATGGGCGAC
GTCGAGCATTGCGGTGATGTTTGTACTGTTGTTCCTCTGCGGTTGGTTCCAGGGGATGGG
GTGGCCGCCGTGTGGTCGTACTATGGTGCACTGGTGGTCGCAGAAAGAACGTGGCGGCAT
TGTGTCAGTGTGGAACTGTGCGCACAACGTCGGTGGTGGTATTCCGCCGCTGCTGTTCCT
GCTGGGGATGGCCTGGTTCAATGACTGGCACGCGGCGCTCTATATGCCCGCTTTTTGCGC
CATTCTGGTGGCATTATTCGCCTTTGCGATGATGCGCGATACCCCGCAATCCTGTGGCTT
GCCGCCGATCGAAGAGTACAAAAATGATTATCCGGACGACTATAACGAAAAAGCGGAACA
GGAGCTGACCGCGAAGCAAATCTTCATGCAGTACGTGCTGCCGAACAAACTGCTGTGGTA
CATCGCCATCGCCAACGTGTTCGTTTATCTGCTGCGTTACGGCATCCTCGACTGGTCACC
GACTTATCTGAAAGAGGTTAAGCATTTCGCGCTGGATAAATCCTCCTGGGCCTACTTCTT
CTATGAGTATGCGGGTATTCCGGGCACCCTGCTGTGCGGCTGGATGTCGGACAAAGTCTT
CCGCGGTAACCGTGGGGCAACCGGCGTCTTCTTTATGACACTGGTGACCATCGCGACTAT
CGTTTACTGGATGAACCCGGCAGGTAACCCAACCGTCGATATGATTTGTATGATTGTTAT
CGGCTTCCTGATCTACGGCCCTGTGATGCTGATCGGTCTGCATGCGCTGGAACTGGCACC
GAAAAAAGCGGCAGGAACGGCAGCGGGCTTTACCGGTCTGTTTGGTTACCTGGGCGGTTC
GGTGGCGGCGAGCGCGATTGTTGGCTACACCGTGGACTTCTTCGGCTGGGATGGCGGCTT
TATGGTAATGATTGGCGGCAGCATTCTGGCGGTTATCTTGTTGATTGTTGTGATGATTGG
CGAAAAACGTCGCCATCAGGAATTACTGCAAAAACGCAACGGAGGCTAATGGCATGAAAT
TGACGCTGAAAAACCTTAGCATGGCGATCATGATGAGCACTATAGTCATGGGAAGCAGTG
CAATGGCGGCGAACAGCAACGAAAAAATAGTCATCGCCCATCGCGGTGCCAGTGGATATT
TGCCGGAGCATACGCTGCCAGCAAAAGCGATGGCGTATGCGCAGGGAGCGGATTATCTGG
AACAGGATTTGGTGATGACCAAAGACGACCATCTGGTTGTTCTGCATGACCATTACCTCG
ATCGTGTTACTGATGTTGCCGATCGTTTCCCGGATCGGGCGCGCAAAGACGGTCGTTACT
ACGCGATAGATTTCACGCTGGATGAAATTAAGTCGCTGAAATTTACCGAAGGTTTCGATA
TTGAAAACGGTAAAAAAGTGCAGACTTATCCGGGGCGTTTCCCAATGGGTAAGTCCGACT
TCCGGGTGCACTCCTTTGAAGAAGAGATTGAATTTGTTCAGGGGTTAAATCACTCTACCG
GGAAAAATATCGGTATCTATCCAGAAATTAAAGCGCCGTGGTTCCATCATCAGGAAGGGA
AGGATATTGCGGCAAAAACGCTGGAAGTGCTGAAGAAATATGGTTACACCGGTAAGGACG
ACAAAGTTTATCTGCAATGCTTTGATGCTGATGAACTGAAGCGTATTAAGAATGAGCTGG
AACCTAAAATGGGTATGGACCTCAACCTGGTACAGCTGATTGCCTATACCGACTGGAACG
AAACTCAGCAGAAACAACCGGACGGAAGCTGGGTTAATTACAGCTATGACTGGATGTTTA
AGCCGGGTGCCATGAAACAGGTGGCGGAATATGCTGATGGTATTGGCCCAGATTACCATA
TGTTGATTGAGGAGACATCGCAGCCGGGTAATATCAAACTCACTGGCATGGTGCAAGATG
CTCAGCAGAATAAACTGGTAGTGCATCCTTATACCGTGCGGTCAGATAAACTGCCTGAAT
ACACTACTGATGTGAATCAGTTATATGATGTTCTGTATAACAAAGCGGGTGTAAATGGGC
TGTTTACTGATTTCCCTGATAAGGCAGTAAAATTCCTTAATAAAGAGTAATGCTACTGCA
GGATGGCGTTCATGCGCCATCCTCAGCTAAAGCGAAATAATGCTACTACCGGTTATTCTA
TTCATTCACCTGAGCATCCTGTTAAAAAAGATGCCAACATATTTGCGTAAAACTCATTTG
TTAGGAAAGCTAACACTGGGTATTGTTATTCTTTAAACAGTATGAATAGGGCTCAATAAT
AAATTGTAATGTAGTTTATAATATACAGTATTATTCGCATTTCGGGAAAGTAAAGAAAAT
ATTAATGTATCTTATTAATTTATCATATTGTTCTTGGGTGAATGCTGTTTGCACACCTTC
AGGACAATACTCACCAGTAATAATCAGTTGCCCATTGCTGTGTTGTACCATTAAACCTTT
TTTTTCCTTTGGATCTTCAAACTTAGAATTATCAAACGTGAAGATGTTATTTTCCTGTTT
TGAGTAAGCAAAGAAATCTCGTGTATAGCTGAAACTATCATTTATTAATGGTGCTAACTT
TTTGTCGGCGATATCGATAAGCTCACCACCTAATTTATTGATATATTTCATTTGGTTCAA
TTTTTTCTGCGCTTGTACAATTTGCTTGTAGGTGTTTTTAATTTCCTTAGAAGAATTCTT
GAATTTATCATAGCGTTCCTCGGAGGATGCGTATTTGTACCATTCTGTATTTTTCTCAGA
ATGTTGTAGCAGGTCTGCATATTTTTTTTGATCGCTGTAAAGTTGACTTTTAATACTTTC
CTCACTGCTGGTTTTATAAGGCTTATCAGAGCTGTTTATTTTTGAAATGTCTTTTTCTGT
CAGTGACTGGACCGTGTTGTGGGTATTTTCTTTTGCAACATGCTCATTGATGATGTTAAT
TGCAGTTTCATATTCATTTAAGTTTATTGTTCTTTGTGAAATAGACCCTTCTTTGCTTTC
GATACTCAAAACACCTTCGTTGTTTTCACCTCGGGTAAAGGTAAGGGTATAGGGTTCATA
ATCCGCTGCAAATTCATTTTTATACGTTATGACATGCTCGACAAAATGTCTTATTGGTAC
GAAACCATAACTGTGAACGTCAATTTTTTGGGTCTTGATACTATCAATTTCATCTGAGGC
TTTCGTGAAAAAAGCCAATAAATTAGCTATGTTGTCTGCTGAGGTTGATAACCCGAATCT
ACTTTGAGATATTTTTAGAAACTCATTGCAAAAAATCTCAAGTTTCGCGGTTTGTTGTGA
TTCTTTGTAAATTTCTGCTGTTTGCAATTTATTATTTTGTAAAAGATTACAGCGAGATAA
TTGAATAGATGTATTTGGCATAAATGATTCCTTGTATTGTGAGTTAACAAGATACAATTT
AATCTTTGCAGAATATATTCACTATCAAATTTAGCTCATTTTATTACGAAGACCTTTACG
CATGTTAGAAAGTATCATTATTGTTAATAAACACGGTAATAAGTAACAAACAGATATTGA
TAACTTCCCTGACAAGTTATTAGGTATCCCACTTGAAGATTGAGAGTGGCTCCAGAGTAA
ACTGTGTACTGTTCGCCGGAGTGTCATTACTCTCAACAATCGGTTTTGACAGTGAGTCGG
GCGCTTCATACTGGTTTCTACCTGGAGTCATTGTCACTTCCCTAAACTGGATAAATATAT
ATCGCTAATTCACAAAGTGGACCAAAATCAGGTGAAAACGAATTATTACGCCTGGTAAAG
ACTACAGGCCAACTAAGTGTGGCGAATCAGGCAATCTTACATTTGTCATCAATCTCATGT
CTTACATCAAATTTTTCCACTCACCACGAGTTGTTCCGTACACATTTGTAGTAAAAACAG
TGGACTGCCTTCTACCGGCTTTTCTTTAGCCAGCAACGAAATCTGTCGATAGAAGGTTGG
TTCGAGAGGAACGGAACACAATTCATCTGCAATGGTTTTCAGCGTTAACTCTGGTAATAA
GGCGATGCCTAATCCCTGTCGAATAAAACTGATCGCTGTATCCGGGTGATTAAATTCATA
TTTTATCTGTGGGGTAATATTCTTTTCTTTAAATAGTGCCATAATGCTTAATTCATAGCG
TCCTTTACTAATGATTAATGGTTCACCCATTAATTCTTCCACTGTAATAGTGCTGTTTTT
TGCCAGAGCATGGTTGGGCGGTAACACTACGGTGAATTTATCCTGATAAATGGGCACGGA
GTACATTCCGCTCACCGGAAAATGAACAAAACCGGCATCAATGGATTCATTCTGAAGCGA
ATCAATAATCGCTGTGCTATTTTCCTCAAAAGGAATAATTTTTATATTCGGATGATGAAT
TTCAAAGTAGCGAATCACAACCGGTAAGATACAGGCGCAGACGCTGGGGAAACAACCAAG
TCTCAGCGTTCTTTGAGGGTTCTGCTTTTCCTGCTCGGCTATCTCTTTTACTGCGTTAAC
TTCCCGATTAATGGCGCGCAGATGTTGCACAATGCGATGACCTGCTGTGGTCAGTTGTAT
AGCTTTACGGCGATCGCGTAACAGTATATTCACACCAAGTTCTTGTTCGAGGGCAGCAAT
TGCCTGACTTACCGCCGACTGCGTCATGAACAATCGCTTGCTGGCTTCAGTAAAGCCACC
GTAATCCAGCACGGCGAGTAAAGAATTTATTTGGGTAAGAGTCATTAGAGTTTGCTAATC
AATAATATTAAAACGATTAATTTCTCTAATAGCATGCCGCCATTTATACTTCTGTTCTGC
AAAGTACATCACAATTTGACGCAACCGCAGTAACGGGAGTGTTGTCTGCGTGCGTCATCC
TGACAGGCGGTAGGGTATGAAAGAGAAGTTATGGACGAAGGATTTTTGGGCAATAACCAT
CATCAGCTTTATTATTTTCTTCGTCTTTTATGTTTTACTAACATTGTTGCCAATTTATAT
CTCTGACCGCTTGCATGCCTCTCCTGATAAAGCTGGTCTGCTGGTGACATTATTTTTAAT
TGCGGCGATTGTTATTCGACCCTTTGCCGGGCAATGGGTGGGTAAATATTCGAATAAAAC
TATTCTGGTGCTCTCTTCTCTGGCCTTTTTGGTGGTCACTGCGCTGTATCCTTTTTGCCA
CTCAATAGAATCACTGCTTTTTATTAGGGTGCTTCATGGTATTACCTTCGGGGTTATCAC
AACGGTAAAGGGAACGATTTCCGCGCGGCTGATCCCGGCCTCCCGACGTGGGGAGGGCAT
CAGTTTTTTCTCTCTGGCAATGGGGCTGGCAATGGTGGTCGGGCCGTGGATTGGCCTGAA
TATGGCGCGCTGGGAGGCCTTTAATATGGCTTTCTGGTTATGTACTGGCGTTGCGGCGGT
GGGGATTATCCTGTCGCTGATTATGACCGTGCCGCCGGTTATCAGCCATGCCGACGGTTC
AAAGCCAAAGATGGGCTTCGCCGCCATGTTCGATCGCGCGGCATTGCCGTTTGCCATGGT
TACATTCTTTATGACCTTTTCGTATGCCGGGGTTTCTGCCTTTCTGGCGCTTTACGCCCG
CGAACTTAATCTGATGTCGGCGGCCAGTAATTTCCTGCTTTGCTACGCCATCTTCCTGAT
GATCTGCCGTACCTTTACCGGCAATGTCTGCGACAAAAAAGGACCGAAATATGTGGTTTA
CCCTTGCCTTGTGTTCTTTACGGTAGGACTGGTGGTTCTCGGCTACACCCAGGGAAGCAT
AATGATGGTTGTTTCTGGCGCGTTGATTGGTATCGGGTATGGTTCCGTGACGCCAGTTTT
TCAGACGCAGATTATCAGTTCAGTGGAACCGCATAAAATCGGTGTCGCAAACTCCCTCTT
CTTCAATGCGATGGATGCAGGCCTGGCGCTGGGAGCCTGTGTGATGGGGATGATGGTTGC
ACATACTGGCTACCGAATGATTTATCTGCTGGGCGCACTATTAGTGGTAGTGGCTGGTGG
AGTCTATGCGCTGCAAATGAAGGGTAAAAGCGGTGTCGCGCTAGTAGTGGCAAAAGAAAT
TCATTAATACGACACGTTTCATTAAGATTTTTCGCAGGTAACCACCTATAGTCATTGTCG
TTAATAAAAAATGACAGGCGATAGGGTATGGCAGTTTCAGCAAAGCACGACGAATTTAAT
CACTGGTGGGCAACAGAGGGCGACTGGGTTGAAGAGCCTAACTATCGCCGTAATGGTATG
AGCGGGGTGCAATGCGTCGAGCGCAACGGCAAAAAGCTATATGTAAAGCGCATGACGCAT
CATCTGTTTCATTCCGTACGTTATCCTTTCGGCCGACCAACGATTGTCCGTGAGGTTGCG
GTAATTAAAGAACTGGAACGGGCCGGTGTCATCGTGCCGAAGATCGTTTTTGGTGAAGCG
GTGAAAATTGAGGGTGAATGGCGAGCGTTGCTGGTGACTGAAGATATGGCGGGGTTCATC
AGCATTGCTGACTGGTATGCCCAGCATGCAGTATCGCCTTATTCTGACGAAGTACGGCAA
GCCATGTTGAAAGCAGTGGCGCTGGCGTTTAAGAAAATGCATAGCATTAATCGTCAGCAT
GGCTGTTGTTATGTTCGCCATATCTATGTGAAAACAGAAGGTAAGGCAGAAGCTGGTTTT
CTTGACCTGGAGAAAAGTCGTCGCCGCTTGCGTCGCGATAAAGCGATTAATCATGACTTC
CGCCAGCTGGAAAAATATCTGGAGCCAATTCCCAAAGCGGACTGGGAGCAGGTGAAAGCG
TATTACTACGCCATGTAATCGTTGTAGGCCAGATAAGACGCATAAGCGTCGTATCTGGCA
CTACAACCAATTCACATCTCGATTTCAATATCGCCTTTTGCCCGGCAACAACAGGGCAAA
ATTTCCCCCGGCTGAATAAAGGCTAACGGTTCGGCAATCCAGTCCACCTGACCTGCGACC
AGTCGGGTGCGACAGGAGCCGCAGTAACCTTCGCGGCACTGGTACTCAACCGCCACATTG
TGGGATTCCAGCGCCGCCAGAAGGGAAGGGTGTTCATCCTGGCACAGCAGTTGTGTGCCA
GTGATGCGCAGGGTAACGCGAGCCATCAGAGCTGGAAGTTACTCAAATCGTCGGTGTCCA
CTTCCGAGTCAATCTGCCCGACCAGATAAGAACTGACTTCCACTTCCTGCGGAGCAACCT
GCACGTTATCAGACACCAGCCAGGTGTTGATCCACGGGATCGGGTTGGAGCGCGTCTGGA
ACGGCAGATCCAAACCGACTGCCTGCATGCGGATATTGGTGATGTATTCAACGTACTGGC
AGAGAATGTCTTTATTCAGACCAATCATCGAACCGTCACGGAACAGATAATCCGCCCAGT
CTTTCTCTTGCTGTGCCGCCTGGACAAACAGGTCATAGCACTCCTGCTTACATTCTTCGG
CAATTTCCGCCATCTCCGGATCATCCGCACCGCTGCGCAGCAGATTCAGCATATGCTGAG
TACCGGTCAGGTGCAGGGCTTCGTCGCGGGCAATCAGGCGAATAATTTTGGCGTTACCTT
CCATCAGCTCACGTTCAGCGAATGCGAAAGAGCAGGCAAAGCTGACGTAGAAACGAATCG
CTTCCAGCGCGTTAACGCTCATCAGGCAGAGATACAGTTTTTTCTTCAGCTCGCGCAGGC
TAACGGTCACGGTTTTACCGTTAACGGTGTGGGTGCCTTCGCCCAGCAGATGCCAGTAGC
TGGTCATTTCGATCAGCTCATCGTAATAGCTGGAGATCCCTTCCGCACGTTTCTGGATCT
GCTCGTTGGTGACGATATCGTCAAACACAACAGACGGATCGTTAACGATATTACGAATGA
TATGAGTATAGGAACGGGAATGAATCGTTTCTGAGAACGCCCAGGTTTCGACCCAGGTTT
CCAGTTCCGGAATAGAAATAAGCGGCAATAGCGCCACGTTCGGGCTACGACCCTGAATGG
AATCCAGCAGCGTCTGATATTTCAGGTTGCTGATAAAGATGTGTTTTTCGTGTTCAGGCA
ATGCCTGGTAATCAATACGGTCACGAGAAACGTCAACTTCTTCCGGACGCCAGAAGAAAG
AGAGCTGCTTTTCGATCAGCTTTTCGAAGATGTCATATTTTTGCTGATCGTAGCGAGCCA
CGTTGACCGGCTGACCAAAGAACATCGGTTCTTTGAGCTGATCATTTTTCGTCTGTGAAA
AGGTGGTATATGCCATGAGTGTGTCCTGTTGGGAGTTTAATGCCGGATAAGGCATTTTAC
GCCGCATCCTGTGCCTGATGCGACGCTGGCGCGTCTTATCAGGCCTACAAATCCGAGCCG
TAGGCCGGATAAGGCGTTCACGCTGCATCCGGCACCCGGAGCCTGATGCGACGCTGGCGC
GTCTTATCAGGCCTACAAACCGAGCCGTAGGCCGGATAAGGCGTTTACGCCGCATCCGGC
ATCTCAATATCAGATCTTACATGCGCCGCTTTCGCAGCCATCGTCCTGGATTGACGGCAC
CAGATCGTCCTGCGCGTCTTCAGCGCCGTCACGGGTGTTCTGATAATACAGCGTTTTGAC
CCCGAATTTGTAGGCGGTGAGCAGGTCTTTCAGCAACTGCTGCATCGGCACTTTTCCTGA
CGGGAAACGTGACGGATCGTAGTTGGTGTTAGCAGAGATCGACTGATCGATAAATTTCTG
CATGATACCCACCAGTTGCAGGTAGCCATCGTTACCCGGCATTTCCCACAGCAGCTCATA
GGCGTCGTGCAGATGCTCGTAGTCCGGCACCACCTGGCGCAGAATACCGTCTTTCGACGC
TTTGATGCTGACGTAACCGCGCGGCGGTTCAATACCGTTAGTGGCGTTAGAGATCTGCGA
AGAAGTCTCGGACGGCATCAGAGCAGAAAGCGTGGAGTTACGCAGGCCGTGCGTTTTGAT
TGACTCACGCAGAGCTTCCCAGTCGTAATGCAGCGGCTCATTAGCGATGGTATCCAGATC
TTTCTTATAGGTATCGATCGGCAGGATCCCTTTCGCGTAAGTGGTTTCGTTAAACCACGG
GCACGCGCCTTGCTCTTTCGCCAGCTCATTAGACGCTTTCAGCAGGTAATACTGAATCGC
TTCGAAGGTTTTATGCGTCAGGTTGTTGGCGCTGCCGTCGGAGTAGCGTTTACCATGCTT
CGCCAGGTAGTAAGCGAAGTTGATCACACCAATACCCAGCGTACGACGACCCATCGCTCC
ACGTTTGGCGGCCGGGATCGGGTAATCCTGATAATCCAGCAGCGCGTCAAGTGCACGAAC
CGCCAGAATTGCCAGCTCTTCCAGTTCATCCAGGCTATTAATTGCGCCCAGGTTGAAAGC
AGACAGCGTACACAGCGCGATTTCACCGTTCTCGTCGTTGACGTCGTTCAGCGGTTTGGT
CGGCAGGGCTATCTCCAGGCACAGGTTAGACTGACGCACTGGCGCGATGGCCGGATCAAA
CGGGCTATGGGTATTGCAGTGGTCAACGTTCTGAATATAGATACGACCGGTAGACGCACG
TTCCTGCATCATCAGCGAGAACAGCTCAACGGCTTTCACACGCTGCTTGCGGATGCTGTC
GTCTTTCTCATATTTGGTATACAGACGTTCAAACTCTTCCTGATCGGCGAAGAATGCGTC
GTACAGCCCCGGTACGTCGGACGGGCTGAACAGGGTGATATCTTCACCTTTCAGCAGGCG
GGTATACATCAGTTTGTTGATCTGTACCCCGTAGTCCATATGGCGCACGCGGTTGCCTTC
CACACCACGGTTGTTTTTCAACACCAGCAGGCTTTCCACTTCCAGATGCCACATCGGGTA
GAACAGCGTTGCCGCACCGCCGCGCACACCGCCCTGAGAGCAGGATTTCACCGCAGTCTG
GAAATGTTTGTAGAACGGAATGCAGCCGGTATGGAACGCTTCGCCACCGCGAATCGGGCT
ACCCAGCGCACGAATACGCCCGGCGTTGATGCCGATCCCGGCACGCTGGGAAACATATTT
CACAATCGCGCTGGAGGTGGCGTTGATGGAATCCAGGCTGTCGCCGCACTCGATCAGTAC
GCAGGAGCTGAACTGACGAGTCGGGGTACGCACGCCGGACATGATTGGCGTCGGCAGCGA
AATTTTAAATGTGGAAACCGCGTCGTAAAAACGCTTCACATATTGCAGGCGCGTTTCACG
CGGGTAGTTCGAGAACAGGCACGCGGCAACCAGAATATAAAGGAACTGGGCGCTTTCGTA
GATTTCGCCGGTCACGCGGTTCTGTACCAGATATTTGCCTTCCAGTTGCTTAACGGCAGC
ATAAGAGAAGGTCATATCACGGTCGTGATCGATAAACGTGTCCATCTGCTTGAACTCTTC
TTCCGTGTAGTCTTCCAGCAGATGATTATCGTATTTGCCCATCTCGACCATTTTCACCAC
GTGGTCGTACAGCGCAGGCGGCTCAAACTGGCCGTAGGCTTTTTTACGCAGGTGGAAGAT
CGCCAGGCGCGCGGCGAGATACTGATAATCCGGCGCATCACGGGAGATCAGGTCTGCGGC
AGCCTTGATAATAGTTTCGTGGATGTCAGAGGTCTTGATACCGTCATAAAACTGAATGTG
GGAGCGCAGCTCGACCTGGGAAATCGAAACGTTATGCAGTCCTTCTGCCGCCCAATCCAG
AACGCGATGGATTTTGTCGAGATTGATGCGCTCTGTGCTACCGTCGCGCTTTGTCACCAG
CAGATTCTGATTCATGTATGTCGTACCTGTTTTTGGAATTCTTTCCGCAATAGTTTCGTG
CAGACTACCTGTAGTACGGGAAGCTGCTTAGAACACTATATATAGGGGGTATGTTTGGGA
TTCACTGCAAGATAGTGTGAAAATGGCCCTCTTGCAAGTGCATAACTTTGTGGATAACTC
AGGAAGGAAAAAGTGGCTTTCGCGCACCTTAGGTCAGACAAGGTGTCCGGGAAAGTCAAT
GGGAAGAGAAAAATTTGTTAAAAATAACTGTTCGGCGATTTCTTGAACGGCAGAATAGGT
TGGATAAATTGATATAGATGGTTTATTAATCTTTTTGCTAATGATTGCAAAAATTGATCT
AAGCACGAGTCATCACATAATCTGATGTATCAGTTGTGGTCAATATATAAGCGAATGTAA
GCGATTGTTGATGTCGAAATGGTTGTTTTCTATTCGGTTATTGTTAAATGCGAAGCCATT
TTGTTAATTTACCTTATATTATAAGAAAATTATTCATTACTTTAATTTAGTTTAAATATA
ACTGGTATCCCTTAAGGTTATTAACTTGAATTATGACGCACTGATACTATTCATCAAATA
ATAACAAAATAGCTATTGCATCGGGTTGGACAATTTACAAAAGAAAGATAACCCATATTG
TATAATGCGTTTAAATATGCCGTCTTATATAAAATGATGGTCAGATTAATATGCGAATTA
TTTTTCTACGCAAGGAGTATCTATCTTTACTCCCGTCAATGATTGCGTCTCTCTTCTCTG
CTAATGGCATTGCGGCAGTCACTGATTCATGCCAGGGATATGATATCAAAGCGAGTTGCC
AGGCCAGCAGGCAAAGCCTTGCAGGCATTACGCAGGACTGGAGCATCGCCGATGGGCAAT
GGCTGGTTTTTTCGGATATGACCAATAATGCCAGCGGTGGGGCCGTATTTTTGCAACAAG
GAGCGGAATTTACATTATCACCAGAAAATGAAACTGGAATGACTCTGTTTGCCAATAACA
CCGTTTCAGGAGAATATAATAACGGCGGGGCAATATTTGCTAAAGAAAACTCAACGCTGA
ATCTTACGGATGTTATTTTTTCTGGTAACGTCGCAGGCGGCTATGGTGGCGCAATCTATT
CTTCTGGTACTAACGATACCGGTGCCATCGATTTACGTGTCACTAACGCCGTGTTTCGCA
ATAACATCGCTAATGACGGCAAAGGTGGTGCAATTTATACCATCAATAATGATATCTATT
TAAGTGATGATGTTTTTAACAATAACCAGGCATATACATCAACAAGTTACAGTGATGGCG
ATGGCGGCGCAATCGATGTCACAGATAATAATAGCGACAGCAAGCATCCTTCAGGTTATA
CGATAATAAATAACACTGCCTTTACAAATAACACTGCCGAAGGTTATGGCGGGGCGATAT
ATACCAATAGCGCGACGGCTCCCTATCTTATTGATATTTCTGTTGATGACAGCTACAGCC
AGAACGGAGGCGTGTTAGTCGATGAGAACAATAGCGCAGCAGGCTATGGAGATGGTCCTT
CCTCTGCGGCGGGTGGCTTTATGTATCTCGGCTTAAGTGAAGTTACATTTGATATTGCCG
ACGGAAAAACGCTGGTTATTGGCAATACAGAGAATGACGGAGCTGTTGACTCTATTGCTG
GTACCGGGTTAATCACCAAAACAGGTTCCGGCGATCTGGTACTTAATGCAGATAACAATG
ACTTTACTGGTGAGATGCAGATTGAAAACGGTGAAGTTACCCTGGGCCGCAGCAACTCCC
TGATGAATGTCGGCGATACGCATTGCCAGGACGATCCGCAAGACTGCTACGGTCTGACGA
TAGGGAGTATTGATAAGTACCAGAATCAGGCAGAGCTAAATGTTGGCTCCACCCAACAAA
CCTTTGTGCACTCATTGACGGGCTTTCAGAATGGCACTTTAAATATCGATGCTGGTGGCA
ATGTTACTGTTAATGAAGGCAGTTTTGCTGGCACCATCGAAGGTGCTGGTCAGCTCACCA
TTGCGCAAAACGGCAGCTATGTGCTGGCGGGAGCGTCGTCGATGGCGCTAACCGGCGATA
TAGTCGTTGATGATGGTGCGGTGCTTTCGCTGGAAGGCGACGCGGCAGATCTTGCCGCTC
TCCAGGACGATCCGCAGTCGATCGTGTTAAACGGCGGTGTGCTCGATCTCTCTGATTTCT
CCACCTGGCAGAGCGGTACATCATACAAAGATGGCCTTGAAGTCAGCGGCAGCAGCGGAA
CGGTTATCGGCAGTCAGGATGTGGTAGATCTTGCAGGCGGAAACGATATGCATATCGGCG
GTGACGGGAAAGATGGCGTCTACGTGGTGATCGATGCGGGTGACGGGCAGGTCCGCCTGG
CAAATGACAATCAATACCTCGGCACAACGCAAATCGCCTCCGGTACGCTGATGGTGAGCG
ACAACTCGCAGCTTGGAGATACCCATTACAACCGCCAGGTTATCTTTACCGATAATCAAC
AAGAAAGCGTGATGGAGATTACTGCCAATGTCGATACTCGCTCTACAACGACTGAGCATG
GGCGTGATATTGAAATGCGCGCCGACGGTGAAGTGGCAGTTGATGCGGGGGTAGACACGC
AGTGGGGCGCACTGATGGCTGACAGCAGCGGGCAGCATCAGGATGAGGGTAGCACATTGA
CGAAAACGGGGGCGGGTACGCTGGAGCTGACCGCCAGCGGTACAACGCAGTCGGCGGTAC
GTGTCGAAGAAGGCACCCTGAAAGGTGATGTTGCTGATATCCTTCCTTATGCTTCGTCAC
TGTGGGTTGGTGATGGGGCAACGTTCGTTACTGGCGCGGATCAGGATATTCAGTCAATTG
ATGCTATTTCCAGCGGCACTATTGACATCAGCGATGGTACGGTTTTGCGCCTGACCGGGC
AGGATACTTCCGTCGCCCTTAATGCCTCACTGTTTAACGGCGATGGGACGCTGGTGAATG
CCACCGATGGTGTGACGTTGACAGGTGAGCTTAATACCAACCTTGAAACTGACAGCCTGA
CTTATCTTTCCAACGTGACGGTTAATGGCAATCTGACCAATACGTCCGGTGCGGTTAGCC
TGCAAAATGGCGTCGCTGGCGATACGCTGACGGTAAACGGTGATTATACCGGCGGCGGTA
CGCTACTGCTCGATAGCGAATTAAACGGCGATGACTCGGTAAGCGATCAATTGGTGATGA
ACGGTAATACTGCTGGCAACACAACTGTGGTGGTTAACTCCATTACAGGGATTGGTGAGC
CGACATCGACAGGCATTAAAGTGGTTGATTTCGCAGCTGATCCCACGCAGTTTCAAAACA
ATGCGCAGTTCAGTCTGGCAGGCAGTGGCTACGTCAACATGGGAGCGTATGACTACACGC
TGGTGGAAGATAACAACGACTGGTATCTGCGATCGCAAGAAGTAACGCCGCCATCGCCAC
CTGATCCAGACCCGGACCCAACCCCCGATCCTGACCCAACACCCGATCCAATCCCCGCTT
ACCAGCCGGTGCTGAATGCCAAAGTTGGCGGTTATCTCAATAACCTGCGGGCGGCAAATC
AGGCGTTTGTGATGGAGCGACGCGATCACGCTGGTGGCGATGGTCAGACGCTGAATTTAC
GTGTTATCGGCGGACGTTATCATTACACGGCGGCAGGGCAACTGGCTCAGCATGAAGACA
CTTCTACGGTGCAGCTAAGCGGCGATCTGTTTAGCGGGCGCTGGGGCGATGATGGCGAGT
GGATGCTTGGGATTGTAGGTGGCTACAGCGATAACCAGGGCGACAGCCGCTCGAATCTGA
CCGGAACTCGCGCCGATAACCAGAACCACGGTTATGCCGTTGGGCTAACCTCAAGCTGGT
TTCAGCACGGTAATCAGAAGCAGGGGGCCTGGCTGGATAACTGGCTGCAATACGCGTGGT
TTAACAATGATGTTTCCGAACAAGACGATGGCGCGGATCATTACCATTCGTCGGGGATTA
TCGCCTCGCTGGAAGCCGGGTATCAATGGTTACCGGGGCGTGGTGTGGTGATTGAACCGC
AGGCGCAGGTGATTTATCAGGGCGTGCAGCAGGATGATTTTACCGCCGCTAACCGTGCGC
GCGTGTCACAATCGCAGGGTGATGATATTCAGACGCGGCTGGGTTTACACAGCGAATGGC
GTACCGCTGTTCATGTCATACCAACATTAGATCTGAATTATTATCACGATCCCCATTCGA
CGGAAATTGAAGAGGATGGCAGCACTATCAGTGACGATGCGGTGAAGCAACGGGGTGAAA
TAAAAGTGGGAGTCACGGGCAATATCAGTCAGCGAGTGTCCCTGCGCGGCAGCGTGGCGT
GGCAGAAAGGGAGTGATGATTTTGCCCAGACGGCAGGATTTTTGTCGATGACGGTGAAAT
GGTAATCGCTGTCTGACCATCACTATTGCCGGATGCGGCGTAAACGCCTTATCTGGCCTA
CGGAGAGCATTTGTAGGCCTGATAAGACGCGGCAAGCGTCGCATCAGGCATTGGCGCGGT
TGCCGGATGAATCCAAACAACAACCTCACTTATTCTGCGTGTGCAGCATATAGTTCACAT
CCACGCCGGGGCCGAGTTTAAAAGAATTAGTGATCGGGTTGTAATGTAGCCCGGTTATAT
GTCGCTCTTTAAGGCTTGTCTGATCTACCCAGCCAAGCAGCTCTGCCGGTTTAATAAACT
TCTTCACATCATGCGTGCCTTTGGGCACCATGCGCAAAATATATTCCGCGCCAACCACCG
CCATCAGCCATGACTTGCCGTTGCGGTTAAGCGTCGAGAAAAAGACATCGCCGCCCGGTT
TCACCAGTTGCGCACAGGCTCTGACTACTGACTGCGGATCGGGGACGTGCTCCAGCATCT
CCATGCAGGTCACCACATCATACTGCCCGGCATGTTTTGCCGCGTGCTCTTCCACGGTTT
CCTGCACGTAATCCACCTGAATGCCGCTTTCCAGCGCGTGCAGCTTTGCCACCTGCAATG
GCTCAAAGCCCATATCCAGACCGGTCACCGTCGCGCCTTCGCGCGCCATACTCTCGGCCA
GAATGCCGCCGCCACAACCGACATCGAGCACCTTTTTGCCAAATAAACCGCCAGCACGCT
CGGCAATATAGCCCAGACGTAGCGGATTAATGCGGTGCAACGGTTTGAACTCACCTTCAA
GATCCCACCAGCGGGAGGCGACGGCTTCAAATTTAGCGATCTCTTCGTGGTCTACGTTAT
GGTTTACCGGCGATTTTTCGGCATTCATTGGCACTTCTACTCCGTAATTGGCAAGACAAA
CGAGTATATCAGGCATTGGATGTGAATAAAGCGTATAGGTTTACCTCAAACTGCGCGGCT
GTGTTATAATTTGCGACCTTTGAATCCGGGATACAGTAGAGGGATAGCGGTTAGATGAGC
GACCTTGCGAGAGAAATTACACCGGTCAACATTGAGGAAGAGCTGAAGAGCTCCTATCTG
GATTATGCGATGTCGGTCATTGTTGGCCGTGCGCTGCCAGATGTCCGAGATGGCCTGAAA
CCGGTACACCGTCGCGTACTTTACGCCATGAACGTACTAGGCAATGACTGGAACAAAGCC
TATAAAAAATCTGCCCGTGTCGTTGGTGACGTAATCGGTAAATACCATCCCCATGGTGAC
TCGGCGGTTTATGACACGATCGTCCGTATGGCGCAGCCATTCTCGCTGCGTTACATGCTG
GTAGACGGTCAGGGTAACTTCGGTTCCATCGACGGCGACTCTGCGGCGGCAATGCGTTAT
ACGGAAATCCGTCTGGCGAAAATTGCCCATGAACTGATGGCCGATCTCGAAAAAGAGACG
GTCGATTTCGTTGATAACTATGACGGCACGGAAAAAATTCCGGACGTCATGCCAACCAAA
ATTCCTAACCTGCTGGTGAACGGTTCTTCCGGTATCGCCGTAGGTATGGCAACCAACATC
CCGCCGCACAACCTGACGGAAGTCATCAACGGTTGTCTGGCGTATATCGATGATGAAGAC
ATCAGCATTGAAGGGCTGATGGAATACATCCCGGGGCCGGACTTCCCGACGGCGGCAATC
ATTAACGGTCGTCGCGGTATTGAAGAAGCTTACCGTACCGGTCGCGGCAAGGTATATATC
CGCGCCCGTGCTGAAGTGGAAGTTGACGCCAAAACCGGACGTGAAACCATTATCGTCCAC
GAAATTCCGTATCAGGTAAACAAAGCGCGCCTGATCGAGAAGATTGCGGAACTGGTAAAA
GAAAAACGCGTGGAAGGCATCAGCGCGCTGCGTGACGAGTCTGACAAAGACGGTATGCGC
ATCGTGATTGAAGTGAAACGCGATGCGGTCGGTGAAGTTGTGCTCAACAACCTCTACTCC
CAGACCCAGTTGCAGGTTTCTTTCGGTATCAACATGGTGGCATTGCACCATGGTCAGCCG
AAGATCATGAACCTGAAAGACATCATCGCGGCGTTTGTTCGTCACCGCCGTGAAGTGGTG
ACCCGTCGTACTATTTTCGAACTGCGTAAAGCTCGCGATCGTGCTCATATCCTTGAAGCA
TTAGCCGTGGCGCTGGCGAACATCGACCCGATCATCGAACTGATCCGTCATGCGCCGACG
CCTGCAGAAGCGAAAACTGCGCTGGTTGCTAATCCGTGGCAGCTGGGCAACGTTGCCGCG
ATGCTCGAACGTGCTGGCGACGATGCTGCGCGTCCGGAATGGCTGGAGCCAGAGTTCGGC
GTGCGTGATGGTCTGTACTACCTGACCGAACAGCAAGCTCAGGCGATTCTGGATCTGCGT
TTGCAGAAACTGACCGGCCTTGAGCACGAAAAACTGCTCGACGAATACAAAGAGCTGCTG
GATCAGATCGCGGAACTGCTGCGTATTCTTGGTAGCGCCGATCGTCTGATGGAAGTGATC
CGTGAAGAGCTGGAGCTGGTTCGTGAACAGTTCGGTGACAAACGTCGTACTGAAATCACC
GCCAACAGCGCAGACATCAACCTGGAAGATCTGATCACCCAGGAAGATGTGGTCGTGACG
CTCTCTCACCAGGGCTACGTTAAATATCAGCCGCTTTCTGAATACGAAGCGCAGCGTCGT
GGCGGGAAAGGTAAATCTGCCGCACGTATTAAAGAAGAAGACTTTATCGACCGACTGCTG
GTGGCGAACACGCACGACCATATTCTGTGCTTCTCCAGCCGTGGTCGCGTCTATTCGATG
AAAGTTTACCAGTTGCCGGAGGCCACTCGTGGCGCGCGCGGTCGTCCGATCGTCAACCTG
CTGCCGCTGGAGCAGGACGAACGTATCACCGCGATCCTGCCGGTGACCGAGTTTGAAGAA
GGCGTGAAAGTCTTCATGGCGACCGCTAACGGTACTGTGAAGAAAACCGTCCTCACCGAG
TTCAACCGTCTGCGTACCGCCGGTAAAGTGGCGATCAAACTGGTTGAAGGCGATGAGCTG
ATCGGCGTTGACCTGACCAGCGGCGAAGACGAAGTAATGCTGTTCTCCGCCGAAGGTAAA
GTGGTGCGCTTTAAAGAGTCTTCTGTCCGTGCGATGGGCTGCAACACCACCGGTGTTCGC
GGTATTCGTTTAGGCGAAGGTGATAAAGTCGTCTCTCTGATCGTGCCTCGTGGCGATGGC
GCAATCCTCACCGCAACGCAGAACGGTTATGGTAAACGTACCGCAGTGGCGGAATACCCG
ACTAAGTCGCGTGCGACGAAAGGGGTTATCTCCATCAAGGTTACCGAACGTAACGGTTTA
GTGGTTGGCGCGGTGCAGGTAGATGATTGCGATCAGATCATGATGATCACCGACGCCGGT
ACGCTGGTACGTACTCGCGTTTCAGAAATCAGCATCGTGGGCCGTAACACCCAGGGCGTG
ATCCTCATCCGTACTGCGGAAGATGAAAACGTAGTGGGTCTGCAACGTGTTGCTGAACCG
GTTGACGAGGAAGATCTGGACACCATCGACGGCAGTGCCGCGGAAGGGGACGATGAAATC
GCTCCGGAAGTGGACGTTGACGACGAGCCAGAAGAAGAATAATTTTACTTCTTCATGCCA
AAAGGGAGCTATCTCCCTTGTTTGAATTGAAAAGTCCAGGCTGCAAAGTCTGGGCTTTTG
TCGTATTAGGGCACGGTAAAGTTTGGCTGTGCCCGTAAAAAATGGCTGGCTATACACAAG
GAATGTGGCAATGAGTGGTGAAAAAAAGGCGAAAGGCTGGCGGTTCTATGGTCTTGTAGG
TTTTGGCGCAATAGCACTGCTTTCCGCTGGCGTCTGGGCGTTGCAATATGCTGGCAGTGG
GCCAGAAAAAACGTTGTCGCCGCTGGTGGTGCACAACAATCTGCAAATCGATCTCAATGA
GCCGGACCTCTTTCTCGACAGCGACTCTCTGAGCCAGCTTCCCAAAGATCTCCTCACCAT
TCCGTTTCTCCACGATGTTCTGAGTGAAGATTTCGTTTTCTATTATCAGAATCATGCCGA
TCGTCTGGGCATTGAAGGCAGCATTCGCCGCATTGTCTATGAACACGATCTCACGCTGAA
AGATAAGCTCTTTTCGTCACTCTTAGATCAGCCCGCGCAGGCGGCGCTATGGCACGATAA
ACAAGGCCATCTTTCACATTACATAGTGCTGATCCAGCGCAGTGGTTTAAGCAAACTGCT
GGAGCCATTGTTGTTTGCCGCTACCAGCGACAGCCAGTTAAGCAAAACGGAAATCAGTAG
CATCAAGATAAATAGTGAAACTATTCCTGTTTATCAGTTGCGCTATAACGGTAATAACGC
CCTGATGTTCGCGACATATCAGGACAAGATGCTGGTGTTTTCCAGCACGGATATGCTGTT
TAAAGATGATCAGCAGGATACCGAAGCCACGGCGATCGCAAGTGATTTGTTGAGCGGCAA
AAAACGCTGGCAAGCCAGCTTTGGCCTGGAAGAGCGTGCTGCCGAAAAAACGCCAGTACG
CCAGCGCATCGTGGCCAGCGCCAGGTTGCTGGGTTTTGGCTACCAGCGGTTAATGCCTTC
TTTTGCTGGCGTACGCTTCGAAATGGGTAACGACGGCTGGCACAGTTTTGTGGCGTTAAA
TGATGAATCCGCCAGCGTAGATGCCAGTTTCGATTTTACGCCGGTCTGGAACAGTATGCC
TGCCGGGGCCAGCTTCTGTGTGGCGGTGCCGTATTCACACGGTATTGCCGAAGAGATGCT
TTCGCACATCAGCCAGGAAAACGATAAGCTGAATGGGGCGTTAGACGGTGCCGCGGGGCT
GTGCTGGTATGAAGACTCAAAATTGCAAACCCCGCTGTTTGTCGGTCAGTTTGATGGCAC
TGCCGAACAGGCGCAATTGCCAGGGAAACTGTTTACGCAAAATATTGGTGCGCACGAAAG
CAAAGCGCCAGAAGGTGTTTTGCCGGTAAGCCAGACTCAGCAGGGCGAAGCGCAAATCTG
GCGTCGCGAAGTGAGTTCCCGATACGGTCAGTATCTGAAAGCGCAGGCGGCGCAACCCGA
TCAATTAATGTCGGATTATTTTTTCCGCGTGTCGCTGGCGATGCAAAACAAAACGCTGCT
TTTCTCCCTCGATGACACGCTGGTTAATAACGCCCTGCAAACACTGAATAAAACCCGCCC
GGCAATGGTAGATGTAATACCCACTGATGGCATCGTTCCGCTCTATATCAATCCACAAGG
AATGGCGAAACTGCTGCGTAACGAAACGCTGACCAGTCTGCCGAAGAATCTCGAACCGGT
TTTTTATAACGCCGCACAAACTTTATTAATGCCGAAGCTGGACGCTTTATCTCAACAACC
GCGTTATGTCATGAAGCTGGCCCAGATGGAACCCGGTGTCGCCTGGCAGTGGCTACCCAT
AACCTGGCAGCCGCTATGAGGCACGGGCTGCTGGCGCTGATTTGCTGGCTGTGTTGTGTT
GTTGCCCATAGCGAAATGCTGAATGTCGAACAATCCGGGCTGTTTCGCGCCTGGTTTGTA
CGCATTGCACAGGAACAGCTCCGCCAGGGGCCAAGTCCACGCTGGTATCAGCAGGATTGT
GCGGGCCTGGTGCGATTTGCAGCGAACGAGGCGCTGAAAGTTCACGACAGTAAATGGCTA
AAAAGTAACGGGTTATCTAACCAGTATTTGCCGCCAGAGATGTCGCTAACACCTGAACAG
CGTCAACTGGCGCAAAACTGGAATCAGGGGAACGGGAAAACCGGCCCCTACGTGACCGCG
ATTAATTTGATTCAGTACAACAGCCAGTTTATTGGCCAGGACATAAACCAGGCGCTGCCT
GGCGATATGATTTTTTTCGATCAGGGCGATGCCCAGCACTTAATGGTCTGGATGGGGCGT
TACGTCATCTACCACACCGGAAGCGCCACGAAAACTGACAACGGAATGCGCGCAGTCAGT
CTGCAACAACTTATGACATGGAAGGACACCCGATGGATACCCAACGATTCCAATCCCAAT
TTCATTGGCATTTATCGTTTAAATTTTCTGGCGCGATAGCAGCGTGCTTGTCCCTGTCTC
TTGTGGGAACAGGGCTTGCTAATGCTGATGATTCGCTTCCTTCCAGTAACTATGCGCCGC
CCGCAGGGGGAACATTCTTTTTGCTTGCTGACAGCAGTTTTAGCAGCAGTGAAGAGGCGA
AAGTGCGACTGGAAGCGCCGGGGCGTGATTATCGGCGCTATCAGATGGAAGAGTACGGCG
GTGTGGACGTTCGCCTGTATCGTATTCCTGACCCGATGGCATTTTTGCGCCAGCAGAAAA
ACCTGCATCGCATTGTGGTGCAACCGCAATATCTGGGCGACGGGCTGAACAATACGCTGA
CCTGGCTGTGGGATAACTGGTACGGCAAATCTCGCCGCGTGATGCAGCGTACTTTCTCTT
CTCAGTCACGGCAGAATGTGACTCAGGCATTACCCGAATTACATCTCGGCAATGCCATTA
TTAAACCTTCCCGTTATGTACAGAACAACCAGTTTTCCCCGCTGAAAAAATATCCCCTGG
TGGAACAGTTCCGTTATCCACTATGGCAGGCTAAACCGGTCGAGCCGCAGCAAGGGGTAA
AACTGGAAGGCGCATCCAGCAATTTCATCTCGCCGCAGCCGGGTAACATTTATATTCCTC
TCGGCCAACAAGAGCCGGGACTGTACCTCGTCGAGGCGATGGTTGGTGGGTATCGGGCGA
CGACGGTGGTGTTTGTTTCCGATACCGTGGCGCTTAGCAAAGTGTCAGGCAAAGAGCTTC
TGGTGTGGACCGCGGGTAAAAAACAGGGTGAAGCGAAGCCAGGCTCAGAGATCTTGTGGA
CTGACGGTCTTGGCGTGATGACCCGCGGTGTGACCGATGACAGCGGTACCTTGCAGTTAC
AACATATATCGCCAGAACGTTCATACATTCTGGGTAAGGATGCCGAAGGCGGCGTTTTTG
TCTCCGAGAACTTCTTCTACGAAAGCGAAATCTACAACACCCGCTTGTATATTTTTACCG
ATCGCCCGCTATATCGCGCAGGCGATCGTGTCGATGTTAAAGTGATGGGCCGCGAGTTCC
ACGATCCGTTGCATTCATCCCCCATCGTCAGCGCCCCGGCGAAGCTTTCGGTGCTGGACG
CCAACGGCAGTCTGTTGCAAACCGTCGATGTCACGCTGGATGCGCGCAATGGCGGGCAGG
GAAGTTTCCGCCTGCCAGAAAATGCCATTGCCGGAGGTTATGAGTTACGTCTTGCTTACC
GCAATCAGGTCTATAGCAGTAGTTTTCGCGTAGCCAACTATATCAAGCCACATTTCGAGA
TTGGTTTAGCTCTCGACAAAAAAGAGTTCAAAACTGGCGAAGCGGTCAGCGGCAAACTGC
AACTGCTCTACCCGGATGGTGAGCCGGTAAAAGATGCCCGCGTGCAGTTAAGTTTGCGCG
CTCAGCAATTATCAATGGTCGGTAACGATTTGCGTTATGCCGGACGTTTCCCCGTGTCGC
TGGAAGGCAGTGAAACGGTGTCCGACGATAGCGGTCATGTGGCGTTAAATCTCCCCGCCG
CCGATAAACCAAGCCGCTATTTGTTAACCGTCTCCGCCAGTGACGGCGCGGCGTATCGCG
TCACCACCACCAAAGAGATCCTCATTGAACGCGGCCTGGCGCATTACTCTTTAAGTACCG
CCGCACAATACAGTAATAGCGGCGAGTCGGTTGTGTTCCGTTATGCCGCGCTGGAATCTT
CAAAACAGGTTCCTGTTACGTATGAATGGTTGCGTCTCGAAGACCGCACGAGCCATAGCG
GAGAGCTACCGTCAGGCGGCAAATCCTTTACCGTCAATTTCGCTAAACCTGGCAACTACA
ATCTGACATTACGCGATAAAGACGGCTTAATTCTCGCTGGGTTAAGTCATGCCGTCAGCG
GTAAGGGCAGCATGTCGCATACTGGTACGGTAGATATCGTGGCAGATAAAACGCTGTACC
AGCCTGGCGAAACCGCGAAGATGCTGATTACCTTTCCGGAGCCAATTGATGAAGCATTAT
TGACGCTGGAACGCGATCGCGTGGAACAGCAGTCGCTGCTTTCGCATCCGGCAAACTGGC
TAACGCTACAACGTTTAAACGATACCCAGTATGAAGCCCGGGTTCCAGTGAGCAATTCCT
TTGCGCCTAACATCACTTTTTCGGTGCTGTATACCCGTAACGGTCAGTACAGTTTTCAGA
ATGCCGGGATCAAAGTTGCCGTTCCCCAGCTGGATATCCGGGTGAAAACGGACAAAACCC
ATTACCAGCCTGGTGAACTGGTCAATGTCGAATTAACCTCGTCGCTGAAAGGTAAACCTG
TTTCTGCGCAGCTAACGGTAGGCGTGGTCGATGAAATGATCTACGCGCTGCAACCAGAAA
TCGCGCCGAATATCGGCAAATTTTTCTATCCGCTGGGGCGTAACAATGTGCGTACCAGCT
CCAGTCTGTCGTTTATCAGCTACGACCAGGCGCTCTCCAACGAGCCGGTTGCGCCTGGCG
CAACTAACCGCAGCGAGCGGCGAGTAAAAATGCTTGAACGTCCACGGCGTGAAGAGGTGG
ATACCGCGGCATGGATGCCGTCACTCACAACCGATAAACAAGGCAAAGCGTATTTCACGT
TCCTGATGCCTGATTCGTTAACCCGCTGGCGTATCACCGCGCGTGGGATGAACGGCGACG
GGCTGGTCGGGCAGGGGCGTGCTTATCTGCGTTCGGAAAAAAATCTCTACATGAAGTGGA
GTATGCCAACGGTGTATCGCGTGGGCGACAAACCGGCGGCAGGACTGTTTATCTTCAGTC
AGCAGGATAACGAACCGGTGGCGCTGGTGACTAAATTTGCAGGCGCTGAGATGCGCCAGA
CGCTGACGCTGCACAAAGGGGCGAATTATATTTCGCTGACGCAGAATATTCAGCAATCTG
GCTTGTTAAGTGCAGAACTGCAACAAAATGGGCAAGTGCAGGACAGCATTAGCACAAAAC
TGTCTTTTGTGGATAACAGCTGGCCCGTTGAACAGCAGAAAAATATCATGCTCGGTGGTG
GCGATAACGCGCTGATGTTGCCCGAGCAGGCGAGCAATATCCGGCTACAAAGTAGTGAAA
CGCCGCAGGAGATTTTCCGCAACAATCTTGATGCGTTAGTCGATGAACCGTGGGGTGGGG
TGATCAACACCGGTAGCCGTCTGATCCCGCTCAGTCTCGCCTGGCGTTCGCTTGCCGATC
ATCAAAGTGCCGCCGCTAACGACATTCGTCAGATGATTCAGGATAACCGTCTGCGGCTGA
TGCAACTGGCGGGGCCCGGAGCGCGCTTTACCTGGTGGGGTGAAGATGGCAATGGTGACG
CCTTCCTTACGGCATGGGCATGGTACGCCGACTGGCAGGCCAGCCAGGCGCTCGGCGTAA
CGCAACAACCGGAATACTGGCAGCATATGCTCGACAGTTATGCCGAGCAGGCAGATAACA
TGCCGTTATTGCATCGGGCGCTGGTGCTGGCGTGGGCACAGGAGATGAATCTGCCGTGCA
AAACGTTGTTGAAAGGGTTGGATGAAGCTATCGCCCGGCGCGGAACTAAAACTGAAGATT
TCTCTGAGGAAGCCCCCCGCGATATCAATGACAGCCTGATCCTCGATACACCGGAATCTC
CACTGGCAGATGCGGTGGCAAACGTCTTAACCATGACGTTGCTGAAAAAAGCGCAGTTGA
AGTCCACGGTGATGCCACAGGTTCAGCAATATGCGTGGGATAAAGCGGCAAACAGCAATC
AGCCGCTGGCGCACACGGTTGTGCTGCTCAATAGCGGGGGCGACGCTACCCAGGCGGCTG
CTATTTTAAGTGGTTTGACCGCTGAGCAATCTACTATTGAGCGCGCGCTGGCCATGAACT
GGCTGGCGAAATATATGGCGACAATGCCTCCAGTTGTTTTGCCTGCGCCTGCGGGCGCAT
GGGCCAAACATAAGTTAACTGGAGGGGGCGAATACTGGCGTTGGGTTGGTCAGGGCGTGC
CGGACATTCTCTCTTTTGGTGACGAATTATCGCCGCAAAATGTGCAGGTCCGCTGGCATG
AACCGGCAAAAACGGCTCAACAAAGTAACATTCCGGTGACCGTTGAACGCCAGTTGTATC
GGCTTATCCCCGGTGAAGAAGAGATGAGCTTTACTCTGCAGCCGGTGACCAGCAATGAGA
TTGACAGCGATGCGCTGTATCTCGATGAAATTACGCTTACCAGCGAGCAGGATGCAGTTC
TGCGCTATGGTCAGGTGGAAGTACCGCTCCCGCCGGGAGCCGACGTTGAGCGCACAACAT
GGGGCATTTCAGTCAATAAACCCAACGCCGCGAAACAGCAGGGGCAATTGCTGGAAAAAG
CGCGTAATGAAATGGGCGAACTGGCCTATATGGTGCCGGTGAAAGAACTGACGGGAACGG
TCACTTTCCGCCATTTGCTGCGCTTCTCGCAAAAAGGGCAATTCGTTCTGCCTCCTGCTC
GTTATGTGCGTTCCTATGCACCTGCGCAGCAAAGTGTTGCGGCAGGGAGCGAATGGCCCG
GGATGCAGGTGAAATAAGTGAACTGGCGCAGAATCGTCTGGCTATTGGCGTTGGTTACTC
TGCCAACGCTTGCGGAGGAGACGCCGTTACAACTGGCACTGCGTGGTGCGCAGCACGATC
AACTGTATCAGCTGTCGTCATCAGGCGTGACCAAAGCCTCGACATTACCTGACTCGCTCA
CCACGCCGTTAGGGAGTTTGTGGAAACTGTATGTTTACGCCTGGCTGGAGGATACCCATC
AACCGGAGCAGCCCTACCAGTGTCGCGGAAACTCCCCGGAAGAGGTTTATTGTTGTCAGG
CTGGGGAGAGCATAACGCGCGATACCGCGCTGGTACGTTCCTGTGGGCTCTATTTTGCGC
CGCAGCGGTTGCATATTGGCGCAGATGTGTGGGGGCAATACTGGCAACAGCGTCAGGCAC
CTGCGTGGTTAGCGTCTCTTACTACGCTGAAGCCAGAAACCTCGGTAACGGTTAAATCGC
TGCTTGATTCATTAGCGACGTTACCTGCGCAAAACAAAGCTCAGGAAGTCTTACTGGAAG
TGGTGCTGGACGAGGCGAAAATCGGTGTCGCATCCATGCTCGGTAGTCGGGTTCGGGTGA
AAACCTGGAGCTGGTTTGCCGATGATAAACAGGAAATCCGTCAGGGTGGTTTTGCCGGCT
GGTTAACCGATGGTACACCGCTGTGGGTTACTGGCAGTGGCACCAGCAAAACGGTACTGA
CCCGTTATGCGACGGTGCTTAATCGGGTTTTGCCAGTGCCGACACAAGTTGCCAGTGGGC
AATGTGTAGAGGTGGAGCTATTTGCCCGCTATCCGCTGAAGAAAATCACAGCGGAAAAGA
GTACGACGTCAGTAAAACCCGGCGTACTTAATGGGCGCTATCGTGTGACATTTGCCAATG
GTAACCACATTACGTTTGTCAGCCACGGTGAGACGACCTTACTGACCGAAAAGGGCAAAC
TGAAATTGCAGTCGCATCTCGATCGTGAAGAGTACGTTGCCAGAGTTCTGGATCGCGAGG
CGAAAAGTACGCCACCTGAGGCAGCGAAAGCCATGACCGTGGCGATACGCACTTTTTTAC
AGCAAAACGCCAATCGGGAAGGCGATTGCCTGACCATCCCCGACAGCAGCGCCACGCAGC
GTGTTTCTGCTTCGCCAGCGACCACGGGGGCGCGAACGATGACCGCCTGGACGCAGGATC
TCATCTATGCGGGCGATCCGGTTCATTATCACGGCAGTCGCGCTACCGAAGGGACGCTTT
CCTGGCGGCAAGCCATGGCCCAGGCCGGGCAGGGAGAGCGTTACGACCAGATACTCGCGT
TTGCTTATCCCGACAACAGCCTTAGCCGCTGGGGAGCGCCACGCTCAACCTGTCAGTTAT
TACCCAAAGCGAAAGCCTGGCTGGCGAAAAAAATGCCGCAGTGGCGGCGTATATTAGAAG
GCGAGACGGGGTACAACGAACCAGACGTGTTTGCGGTCTGTCGTTTAGTCTCAGGTTTCC
CCTATACCGATCGGCAGCAGAAACGGCTGTTTATTCGTAACTTCTTTACGCTTCAGGATC
GGCTGGATTTAACCCATGAGTATCTGCACCTGGCCTTTGATGGTTATCCCACCGGGCTTG
ATGAGAACTATATCGAAACGCTGACCCGACAATTATTAATGGACTAATGCTATGCGAAAG
ATTTTTCTTCCGTTGTTACTGGTGGCACTTTCGCCTGTCGCTCACAGTGAAGGTGTGCAG
GAAGTCGAGATTGACGCACCGCTCTCTGGCTGGCATCCGGCAGAGGGCGAAGATGCCAGT
TTTTCACAATCGATCAATTACCCGGCGTCGTCCGTCAACATGGCAGATGATCAAAATATC
TCAGCGCAGATCCGCGGCAAAATAAAGAATTATGCTGCGGCGGGTAAAGTTCAGCAGGGC
CGGCTGGTGGTCAACGGTGCCAGTATGCCGCAGAGAGTTGAATCCGATGGTTCATTTGCA
CGCCCTTATATTTTCACTGAAGGCAGCAACAGCGTGCAGGTCATCAGCCCGGATGGGCAA
AGCCGACAAAAAATGCAGTTTTACTCAACGCCGGGTACAGGAACGATTCGTGCACGTTTA
CGGCTGGTTCTCTCGTGGGATACGGACAATACCGATCTCGATCTCCATGTTGTCACGCCC
GATGGAGAACACGCCTGGTACGGTAACACCGTGCTGAAAAACAGTGGTGCACTGGATATG
GATGTCACGACGGGGTATGGACCCGAGATTTTCGCCATGCCAGCACCAGTTCACGGGCGC
TATCAGGTGTATATCAACTACTATGGTGGGCGCAGCGAAACGGAATTGACGACCGCCCAA
CTGACGCTGATTACCGATGAAGGATCGGTCAATGAGAAACAGGAAACATTTATTGTACCG
ATGCGTAATGCTGGCGAGCTGACGCTGGTGAAAAGTTTTGACTGGTGATTAATGGGGTTA
CCTTCGCCGTCGATGTTCAAGAAAACACCCGATAACTTTCGCTATCGGGTGTTTTTATTG
ATTAATTCAACCGTTCAATCACCATCGCAATTCCCTGGCCGCCACCAATGCACAGTGTTG
CCAGCCCCAGCGTTTTATCGCGTGCCTGCATGGCATGTAATAGTGTGACCAGAATACGAG
CACCACTGGCACCGATAGGATGCCCGAGCGCGATGGCCCCGCCGTTGACATTCACTTTCT
CAGAATCAAAGCCCAGGGTTTTCCCAACGGCAAGGAACTGTGCAGCAAATGCTTCATTAG
CCTCAATGAGATCAATATCCGCCAGTTGCAGCCCCGCCAGTTGTAACGCTTTTTGCGTGG
CAGGTACTGGACCCATACCCATCAATGCGGGGGGCACGCCACCGCTGGCATAACTTTTAA
TGCGAGCCAGGGGGGTAAGGCCTGCTGCCAGCGCCGCAGATTCTTCCATAATCACCAGAG
CGGCAGCACCGTCGTTAATACCAGACGCGTTCCCGGCGGTGACTGTTCCTGCTTTATCGA
AGGCCGGGCGCAATGCGCCTAACGCTTCAGTCGTAGAATCCGCTTTCGGGAATTCGTCTT
GACTGAAGACGAAGGTTTTCTTCCGAGTGACAACATTTACCGGGACGATTTCGGCTGTAA
AAGCACCGGACTCAATTGCGGCTGCCGCTTTACGCTGTGAATGCAGCGCCAGTTCATCCT
GCATTTCTCGGGTAATTCCGTACTCTTTGGCCACGTTCTCGGCGGTAATCCCCATATGAT
AACCATGGGTGGCGCACATCAGACCATCGCGCAGGATTACGTCATAAACCTGTCCGTCTC
CAAGACGATAACCAGAGCGTGCTTTTGCATCGAGTAAGTAGGGCGCTAAACTCATATTTT
CCATACCCCCCGCCACAATGCTTTGCGCCTGACCTGCCTGAATTGCCTGGGCGGCAAGCG
CCACACTTTTAAGACCCGAACCACACACTTTATTGACCGTGAATCCGCACACCGTTTCTG
CCAGCCCGCTTTTTAACAGTGCCTGACGTGCCGGATTTTGCCCCAACCCGGCTTGCAACA
CGTTACCCATAATCACTTCATCAATGTGTAGTGAATCGATTTTTGCACGTTCAATGGCGG
CTTTAATTACTGTCGCCCCCAGGTCGATGGCGCTGGTGGAAGCGAGTGAACCGTTAAAAC
TACCGATAGCAGTACGTACCGCACTGACGATGACACAATTTTTCATTTTTTATTCCTTCT
GTCTGTAGGGGTGCCGTCAGAACAGCGTTAAACCAATGACGAAAATGACGCCGGAGAAGA
GCAGGGCAGTGATGCAATAGCCCATGATGTCGCGGACACCGAGTCCGGCGATTGCCAGTG
CTGGCAGCGCCCAGAATGGTTGTGCCATGTTCATCCATTGCTCGCCGTAGGCGATCGCCA
TTACCGATTTACCGAGGTCAGCGCCCAGCGCCTGGGCTGCGGGTATCACGAAAGGTCCCT
GAATAACCCAGTGACCGCCGCCAGACGGAACGGCGAAGTTAATCAGTGCAGAACTAAAAA
AGGTCATTACCGGGAAGGTGTCTTTGTTCGCAACATTGATGAAGAATTCGGTAATGAGTC
CGCCCAGACCGGAATGCTCCATCATCAGTTGGATCCCAGCGTAGAAGGGGAATTGCACCA
GAATACCGGCGGTACTGCGTGCTGCCGCGCTGATAGCACGCATATAAGCCATTGGCGTTT
TATGTAGCAGCAGACCCGCAATCATAAACATCAGGTTGACGGTATTGATGGTGATGTTGA
AGCCATGTTCGCTGAAGTACATCGCCAGGTAAGCGATACCGAGTGCGCCGATGATCAACG
TCAGAATGCGGCTTTCTTCCAGTCGCTCGGACGGTGGAGCATCTTTCGGTAGCTGCTTTT
GAAAATCAGCCTCTTCCATGAGTAGTTTTGGATCGATACTCACCACGTCAGACGGTTTTG
GCATCATCATGCGGGTGATAAATGGCATCACCACAATCAACGCCACAGTGATGAAAATGT
TAAAACCACTGAACAGAGTATCGCCCACCGGGATCAGCCCGGCGATATGCTCAACCGGGT
TGCCCGGTGTTGCAGCCAACAGAGGCATTGATCCAGAGAAGCCGCCACCCCAGGTGAGAA
AACCAATGTAGGCGCAGGCAATGAGCAACGGATAATCAGAACCGGGGACTCGCCGGGCGA
CTTCACGGGCAAACATTGCGCCGACAACCAAACCAAATCCCCAGTTGATGACACAAGCGA
CTGAACCGAAGAAAGTGACCAGCATGACGCCCTGTACGGGCGTCTTTGCGGCGGAGGCGG
CAGTACGCAGCAAACTTTTCACCGGAGCAGAGCTGGCAAGGGCATGACCGGTAACGATGA
TAAGCGCCATCTGCATACCAAACGCCAGCAAGTTCCAGAAACCGTCACCCCACATTTTCA
CCATGCTGATCGGCGTTTGTGGTGTTAACCAAAGCGCGATCACGAATGTTAGCAATGTCA
GCAACATGGCAAAGATCAGTGGATCGGGAAGCCACCGGCTGACAAAACGCGTCATAAAAC
GCGATATGCGACCAATCATAAATCACCCCGTTGCGTATTCAGATCGGCGGCGACTTCAAA
CCGAGCTTCTGTTTTGGCACGCACGGTAGCTAAATCACACCCGTCGGCAATTTCGGTGAG
CCACATTTTGCCGTCAATAAAACGAAAGACAGCCAGTTCAGTAACCAGCATATGCACCGC
ATGTTGCGCAGTGAGTGGCATGGTGCAGCGGCGCAAAATTTTTGCTGAACCATCTTTGGC
GCAATGTTCCATGGCGATGATCACTTTGCGCGACCCGGTCACCAGATCCATCGCGCCACC
CATACCGGGCACCATTTTCCCAGGCACTACCCAGTTCGCGAGGTTTGCTTCTTCGTCTAC
TTGCAAACCGCCGAGCACGCAGGCATCAATATGACCGCCGCGGATTAGCGCAAATGACAT
GGCGCTATCAAACATGGCTGCACCGGGTAAAATACCGCACGGTTGTCCGCCAGCGTTCAC
CAGATCTGGATGCGCTGTCGTGACCGGGCCTAAACCGAGGAAGCCGTTTTCCGATTGCAG
AGTGATATGAATACCCTCCGGTAAATAATTGGCGACCATTGTGGGTAAACCGATCCCTAA
GTTAACGATGTCACCATCACGAAGCTCTTGCGCCACACGGCGCGCAATACGTTGTTTCGC
ATCCATTATTTGCTCTCCTGTGAAACGATGATGTGGTCGATAACGGCACCAGGGGTGACA
ATATGGTCAGGTTGCAGCTCGCCGGTTTCGACAAGTTCATCTGGCTCTACCAGCGTGATA
TCAGCCGCAAGGGCTATCAGGGGGTTAAAGTTGCGGGCGCTAAGTTGATAGGTCAGGTTG
CCAAGTGTGTCGCAACGATGAGCGCGAATTAGCGCCAGGTCGGCGCGCAGTGGGCGTTCG
AGCAGCCAGGTTTTACCGTCGAGTGTCAGTGTCTGTTTGCCTTCCTCTACGACGGTGCCG
ACACCCGTTGGGGTGAGAAAACCACCAAGTCCAGCTCCACCACAGCGAATTTGCTCGATT
AGCGTACCTTGCGGCACCAGAACGACGTCCATCTCACCAGATATCATGCGCCGACCTGTT
TCCGGGTTGGTGCCGATATGTGAAGCAATCACTTTGCGGACTCGACCATTGACGATGAGC
GGACCGATGCCGGTATCAACAAACGCGGTATCATTGGCTATCAATGTCAGGTCGCGAACA
CCAGATTCCAGTAATGCTTCAACCAGGCGGGATGGAGTGCCAATCCCCATAAATCCGCCC
ACCATGATGGTCATGCCGTCACGAAAGAAGCCGGTGGCGTCTTGTAATGTCATCAATTTT
GTTTTCATTTTTTATCCCTCTTGCATACACCGTTGTGGGTACAGTCAGGGAATAGCAAGG
GGAGTGCCAGAATGAGATTATTGGATGTTTTTATTTAACTAATTGAATAGAAAAGGATAA
ATTAGATGGGGATTCATAAGGAGAATGAGCTGCTATGCAGAAAATTGCGCACTGTGCAAA
TTTCTGCATAGCAAGTTTTGGTGTTATACATCCGCCGGATCGATACCGTATTCCTGGAGT
TTATACATCAATGCACGGCGACTGATGCCCAGCATTAAAGCAGTGCGGGTTCGGTTTCCT
TCTTGTTGTTCCAGCACTTCCATAATGATGCGTTTTTCGACGCGTTTAATTTCCTCTTTT
AAATTACGCTCTCCGACAGGGGCTGTTTTTACCTCGCCAGCATTACAGACTGGCTGACGA
ATCTGCGGCGGAAGATCCTCAGAAAAAATGATCGGGCCTGAATTCATCACGACGGCGCGT
TCAATAACGTTGGAAAGCTCTCGAATATTTCCCGGCCATGACCAGGCGGTAAGCAGTGAC
ATTGCCATCGGATCGATGTCGATAATATCGCGCTGATTCTCACTACTGAATTTTTGCAAA
AAGTGATTAGCTAACAGGGAAATATCTTCCCGGCGATCGCGCAGAGGCGGCAGTATTAAA
TGAATAACGTTAAGGCGATAAAAGAGATCTTCACGGAAGGTGCCTTCTTTTACCATTGCC
TGCAAGTCGCGGTTGGTGGCAGCAATGATGCGGATATCAACTTTTATGGTCTGATGGCCG
CCAATCCGTTCAAATTCCCGTTCCTGCAGAATGCGTAGTAATTTGGCTTGCAGTACCAGC
GGCATTTCGCCAATTTCGTCGAGGAGCAGAGTACCTTCGTTGGCACGTTCAAATAATCCC
TGACGCAAGGTTTGTGCACCAGTAAATGCACCTTTTTCATGACCAAACAGTTCACTTTCG
AGCAACGATTCCGGCAGCGCCGCGCAGTTGACTTTAATGAACGGCCCCTTTGCCCGCCGC
GAATTGTAGTGAATCGCTCTGGCAATCAACTCTTTCCCGGTGCCGCTTTCACCGCTAATC
AAGACGCTGGCCTGAGAAAGGGCAATTTTGGCGGTGTCTTTGCAGATATCCATCATCGCC
GGGCTGTTGGTGAGAATGTGCCCCCATTGCCAGCTGGTGCTCAGTGCCTGGTGCAGATGA
CGGATCTCTTTTTTCATTGACTGGAGTTGTAAAGCGCGCTGAACGATTAAATTCAACTCA
TCGAGATCAAACGGTTTAATAACATAGTCGAAGGCCCCGCAGCGTAGCGCTTCGACGGCG
GTTTCCACTTCAGCATAGGCCGTCATCAGAATAACGGGTGTCCGGGTCTCATTACTGCGC
ATCTCCTTTAGTGCCTTGATGCCGTCCATCTCTGGCATGCGGATATCCATCAACACCACG
TCAGGGTGAATATCAGCAAACAGGTGTAATGCTGTGCGTCCGTTGTTCGCACAATGTGTT
TCGAAACCTTGTAGTGCAAAAGCGGTGCTCAGCATACGGCGAACATTATCTTCATCATCC
ACAATAAGGATGCGATTAATAGCAGTCATACAGTCTGATTTCCCTGCGGGTTGATTGGTA
AAATAAGCGTGAAGGTTGCGCCGTAGCCCGGCAAACTGGCGACGCGAATATCACCCTGAT
GGGCATTAATGATGCGTTGACTTAACGCCAGACCAAGCCCGGTTCCTGAGGCTTTGGTGG
TGAAAAAGGGATCGAAGATCTTTTTTTGCAGCGAGAGATCAATGCCACAGCCGTTGTCCT
CTATCGAAATGGCCTGTTGTGAGTCGCTGTATTGCCAGGTTTGAATGCGAATTTTCCCTC
GTGCGCTGATAGCCTGGACGGCATTGATCAGGATATTCAGTAGTACCTGTTTGAGCAGTT
CACGATCGGCGTTAATCGGGTTTAATTCATTATCCAGTTCGCTTATGAAGTCGACCCGCG
CTTGTACGCCGGCGGTTTGTACCAGTACCAGAGTTTCTTCAACCAATGCATTGAGACTGA
CTTGTTGCCATTGACTGTGGCGTGGACGTGAAAATTCGAGCAATTGCTGAATAACTTTGT
TAATTGAATCGATTTCTTTGAGTACTACGGACAGATATTCCTGATGTATTAGGTCGCTGG
TTTGTTGGCGCAAGATCTGTACATAACCACGAATAGCCGTTAGCGGATTACGTACTTCAT
GCGCGACGCCAGCCATCAGCTCACCCAGTGTGGCGAGGCGTTCTGCTTGCGCCATGCGGC
GCTGGGTTTCTTTGCGGGCAGTTAAATCAGAGAAAATAACCAAAGCACCTATCATTTCAC
CATGCGTGTTATGAATACGACTGGTAGTGACACTGAGTTCAATGGTGCGGTCACGGCCTG
GAAAACTGATCTCCAGCGCTACATGTTCGGTGCCATGTTCCAGCGTATCCAGTACTGGAC
TGTAGAACTGAGTATTGTCGAACAACATGGAGTAAGGCTGCCCTACCAGTTCATGACGTT
GATAGCCAGTGATGACTTCTGCTGCCGGGTTCATGGTGGTTACATCACCCTGGCGGTCAA
TGGCAATGACGCCATCGGCAGCGTTTTCAATAATCAGATCGTTAAGTGTCCGCGTTTCAC
GCAGTGCCTGGGCGAGGTTGTTAACACTCTGACTGATTTGCCCCATTTCACCGGGCAATT
GTGGTAATCGAGTGGGAATATTTTGTGCCAGAGTCGAGAGGCCATCGGTGATGATATCAA
TATTGGCGCTCAGGCGACGGGAGAAAAGGACAATCAACAGCAGGCTTATCAGCAAACCGG
CGGTGAGCACAATGATAATCCTCACATCCATTTTCCAGGCCTGGCGGCGAATATCTTCGG
TTAATTCATTGGCCCAGATATAGCCGAGAATTTCACCATTACGCTCAATGGGGATCATTG
AATTCAAAATATCGCCGCGCACCTGCCTGCCTGAATAAACCAAAGGGGTATTTGTACGCA
TGACTTCGCGACCAGGGTGATCTGCGGCAATGGTAACGCCCACATTATTCTGATATAGCG
CTGAAGGCGCGTAGGTGATTATCGCATCCAGCGTTTTGTTGTAATAACCAGCGCCGATGC
CAGGGAAGGCGTGAGTGATATTTTCGGTAATGGGGGCAAGTTCTGCATTTAATGCGCGGA
TACGCTCCTCACGTGGTAAGTCGATGTAGAGATCATAGCGATCGCCTAGTGCCTGATTAA
GCAGGTTGACCACGGCAGAAAGTTTTTTCTCTTTTTCAGATAAGACTGCTGAACGTCCTT
CCGTTTCTACGATATAACCAATAGTAAGCGTTGGGACAATGACCATCAGGATTGCCATCA
GGATCATTTGATTGCGTAAGCGGCGTGGATAAATCCACTTCATATAATGCATGCTGAAAT
CCACTAGTCTTGTCCGGTATATGACGATTATCAGAGGTTAAGGTGATGATTTCTCGGCGG
TGTATCATATTCCAGAGAAGAGAGAACATTGCGGTAACACGCTTTTACCGCTACCTTAAC
CACACTCCATCGGTCACCTGAGGCGGAGCTTCGCCCCTTTGAAATACCTTGCTTCTTTTC
GTACAACCCTGAAAGCCTCGCGCTACATGTTCAGAGCATTGGCGTTAGTGCTCTGGCTGT
TGATTGCTTTTTCATCCGTTTTTTACATCGTTAATGCGTTACATCAGCGAGAATCGGAAA
TTCGTCAGGAATTTAATCTGAGTTCCGATCAGGCTCAGCGCTTTATTCAACGCACCTCTG
ATGTGATGAAAGAGCTGAAGTACATCGCTGAAAATCGCTTATCGGCAGAAAACGGTGTGC
TTTCCCCGCGTGGACGAGAAACGCAGGCGGATGTGCCTGCGTTTGAACCGCTGTTTGCCG
ACTCCGATTGTTCCGCAATGAGTAACACCTGGCGAGGTTCTCTGGAGTCATTGGCGTGGT
TTATGCGCTACTGGCGCGATAATTTTTCTGCGGCTTACGATCTCAACCGGGTATTTTTAA
TCGGCAGCGATAACCTCTGCATGGCCAATTTCGGTCTGCGTGATATGCCAGTGGAACGCG
ATACCGCGTTGAAAGCTTTGCATGAACGCATCAATAAATATCGAAATGCACCACAAGATG
ATAGCGGCAGTAACCTCTACTGGATCAGCGAAGGTCCGCGCCCTGGCGTCGGGTATTTTT
ACGCGTTGACGCCAGTTTATCTGGCGAACCGGTTGCAGGCGCTTTTGGGTGTCGAGCAGA
CCATCCGGATGGAGAACTTTTTCTTACCTGGTACGTTGCCGATGGGGGTTACCATTCTTG
ATGAAAATGGTCATACCCTGATTTCGCTTACCGGACCAGAAAGTAAAATTAAGGGCGATC
CTCGCTGGATGCAGGAACGCTCCTGGTTTGGCTATACGGAAGGGTTCCGGGAGCTGGTGC
TGAAGAAAAATCTGCCACCCTCATCGCTAAGCATCGTGTATTCGGTGCCGGTTGATAAGG
TGCTGGAACGCATTCGCATGTTGATCCTTAACGCAATTTTGCTGAATGTGCTTGCTGGAG
CTGCATTGTTTACTCTCGCGCGGATGTACGAGCGGCGTATTTTCATTCCGGCGGAAAGCG
ACGCCCTGAGACTGGAAGAACATGAGCAGTTTAACCGCAAGATTGTCGCCTCCGCGCCAG
TGGGTATCTGTATTTTGCGTACCGCAGATGGCGTCAATATTTTAAGTAACGAACTGGCGC
ATACCTATCTCAATATGCTTACGCATGAGGACCGCCAACGGCTGACACAAATTATCTGTG
GGCAGCAGGTCAATTTTGTTGATGTCCTGACCAGCAACAATACCAATCTGCAAATCAGCT
TCGTCCATTCGCGCTATCGTAATGAAAACGTGGCCATTTGTGTGCTGGTGGATGTTTCTT
CGCGCGTGAAGATGGAAGAGTCGTTGCAGGAGATGGCACAAGCAGCGGAACAGGCGAGCC
AGTCAAAATCGATGTTCCTTGCCACCGTCAGTCATGAGCTGCGAACGCCGCTGTATGGCA
TTATCGGTAACCTGGATCTGTTGCAAACCAAAGAGTTACCGAAAGGCGTCGATCGTCTGG
TGACGGCAATGAACAACTCTTCCAGCCTGTTGTTGAAAATTATCAGCGATATTCTCGATT
TCTCGAAGATTGAATCGGAACAGTTGAAGATCGAACCGCGTGAGTTTTCACCGCGTGAAG
TGATGAACCACATCACCGCCAACTATTTACCGCTGGTGGTACGCAAGCAGTTAGGCTTGT
ACTGCTTTATTGAACCGGATGTGCCAGTGGCCTTAAATGGCGACCCGATGCGTTTACAGC
AGGTCATCTCCAATCTGTTGAGTAACGCCATAAAATTCACCGATACCGGCTGTATAGTTT
TGCATGTTCGCGCTGATGGCGATTATCTCTCTATCCGTGTTCGCGATACCGGCGTGGGGA
TTCCGGCGAAAGAAGTGGTGCGCTTGTTTGATCCCTTCTTCCAGGTCGGAACGGGCGTAC
AGCGAAACTTCCAGGGGACCGGTCTGGGTCTGGCGATTTGTGAAAAACTGATCAGCATGA
TGGACGGCGATATCTCGGTAGATTCAGAACCGGGAATGGGCAGCCAGTTTACCGTGCGTA
TTCCGTTGTACGGCGCTCAGTACCCGCAGAAAAAAGGCGTGGAAGGGTTGAGTGGTAAAC
GCTGCTGGCTGGCGGTCCGCAATGCGTCGCTCTGTCAGTTCCTGGAAACCAGTTTGCAGC
GCAGCGGCATCGTCGTAACAACATACGAAGGGCAGGAACCGACTCCCGAAGATGTGTTAA
TCACTGACGAGGTAGTGAGTAAAAAATGGCAGGGCAGAGCGGTAGTGACCTTCTGTCGTC
GACATATTGGTATTCCGCTGGAGAAAGCGCCAGGGGAGTGGGTACACAGTGTGGCTGCCC
CGCATGAGCTACCGGCATTGTTGGCGCGTATTTATTTGATCGAGATGGAGAGCGACGATC
CTGCTAACGCTCTGCCGTCGACGGACAAAGCGGTCAGCGATAATGACGATATGATGATTC
TGGTCGTGGATGATCATCCGATTAACCGACGTCTGCTGGCAGATCAGTTGGGATCGTTGG
GCTATCAATGTAAAACCGCGAATGATGGCGTCGATGCGCTTAATGTACTTAGCAAGAATC
ATATTGATATCGTGCTTAGCGACGTCAACATGCCAAATATGGATGGTTACCGCTTGACGC
AACGCATTCGTCAGTTGGGACTGACGTTGCCGGTAATCGGAGTAACTGCTAATGCGTTGG
CTGAAGAGAAGCAGCGGTGTCTGGAGTCCGGTATGGACAGCTGCCTGTCGAAGCCGGTAA
CGCTGGATGTAATAAAACAGACGCTGACGGTATATGCCGAGAGGGTCAGGAAATCGCGGG
AATCGTAGGACGGATAAGGCGTTTACGCCGCATCTGGCATTCAGTGCAAATGCCAGATGC
GACGCTGACGCCTCTTATCTGGCCTACTTTAATGTAATCTGTTGAAATAATGGGAATCGT
AGGCCGGATAAGGCGTTTACGCCGCATCCGGCAATCGGTGCAAATGCCAGATAAGACACT
AACGCGTCTTATCTGGCCTACAGATGATTAGTCTTTATCTGCCGGACTTAAGGTCACAGA
AGAGAGATAATTCAGCAGGGCGATATCGTTCTCGACACCCAGCTTCATCATCGCAGATTT
CTTCTGGCTACTGATGGTTTTAATACTGCGGTTCAGCTTTTTAGCGATCTCGGTCACCAG
GAAGCCTTCCGCAAACAGGCGCAGAACTTCACTCTCTTTTGGCGAGAGACGCTTGTCACC
GTAACCACCAGCACTGATTTTTTCCAACAGGCGAGAAACGCTTTCCGGGGTAAATTTCTT
CCCTTTCTGCAGCGCGGCGAGAGCTTTCGGCAGATCGGTCGGTGCACCTTGTTTCAGCAC
GATCCCTTCGATATCCAGATCCAATACCGCACTAAGAATCGCCGGGTTGTTGTTCATAGT
CAGAACAATGATCGACAGGCTTGGGAAATGGCGCTTGATGTACTTGATTAAGGTAATGCC
ATCGCCGTACTTATCGCCAGGCATGGAGAGATCGGTAATCAACACATGCGCATCCAGTTT
CGGCAGGTTGTTGATCAGTGCTGTAGAGTCTTCAAATTCGCCGACAACATTCACCCACTC
AATTTGCTCAAGTGATTTGCGAATACCGAACAAGACTATCGGATGGTCATCGGCAATAAT
TACGTTCATATTGTTCATGTAATAGGCTACCTTGCTACAGCAAGCTCTTGACATAACTGT
CAATGTCGCTGATGTATTTTTCTATTCCTGGAACATCCTTCTCACGAATCAGATGTTCCA
GCGTTTCACATAACTGCTTGCCGGGTACCAGATTTAGCATGGCAAATACGCCTTTAAGAC
GATGAGCCGTTTGGGCTAACGCAGCAAAGTCACTGGTTGCTGCTTCAGTATACAGCCTCT
TAACATCATCCGGTACTGTGTCTACAAAGAGCGCATAATAGCCGCTGGCATGGAGTTGCG
CATTTTCATCTCCGCCCAGAGGCGATTCTGTCACCTCTTCCTGCGCCAGTTGCACTTCAA
TTAATTGTAAGACCGCTTCCTGCATAGCGTTGCTCATATTGAAGTTGACGCACAATTGAC
CAGGCCCAATTTCCCGTACGCCAGACTCATCATCGCTTAAAAGCAAGCCAGAGGCAGTAA
GATTAGACGGATTATCCGTTAAAAAGATATCATAATCTTGACTAATTAATCTTTCATCGG
GTGTGATACAGGTTGCACCCCAATTTTCTAACTGGCGAGTGACAATATTCCGAATTTCTG
CCGAAGTAACATCCACCATTACGCAGACATCATCCAGTAAACGCTCTTCTTCCTCTTCAA
CTTCCGGGTCAGCTGCGAGCATTTTGATATGCACAGAGTAGCGTGTACCAAGCCCATCCC
GCGTTTTGATGTTTAAATGACCGCCCAGTTTACGTGCCAGTTGATCGCTCAGCCAGAATG
CCAGCGGGTCCGCCTTGCCATAGCGATCGTTTTGGGTCTGGTTGATAAACGGGAAGTGCA
AATTATCCATTTCATGAATGCTTACGCCTTCTCCGGTGTCCAGAATGCGGAACGTCAGGC
GGTCTTCGGAGGACTCATCCTGATCAACCTCAAGGGTGATTTTTCCCAATTGCGTTGAGG
TCACGGCATATTGCATCAGTAGCAGCAAAATACGTCGTAAGGCATCGCGATCGCCACGGC
GCATATCGTGTGCTTTCAGATGATTGTTAATCAGCAGTTGCAGACCTTTACGCTTGATGG
CAGGCAACACTGAAGGCACAACTTCATCAATTAAATCCTGCACGGAGAACAGCACCGTCT
CACTTTTCCAGCTATCGTCCGCAAGCATGTTCGCTAACTGTATTTCATCGACCAGCCGCA
CCAGCACATCTGCCTGATTCGCCAGTTGTTTGCTTTCCGGGGCGTTGAGTTTAGCCGCGC
TCTCCGCCAGGGACTGTGCAGGTTCTTTCAGCGCATCGCCAATGTTTTTCATAAAGGTCA
TCCGCCCCTGCTGGTTTTTCTCATACAGACGCTGCGCCTGCTTGAGTTTCTTGTTTACCA
GCACTTCGCGATCCTGATCGCGAATAATGAAAATTTGTGTGCGCGGCGCGACCTGGCTGC
GGAACATGCGGATCTCATACAGCTCGTTATTGATCGTCGCCTGAATAATCCCCTGATGCT
GTTCCGCCATGGTGGTGATGTTTTGCAGATTCAAATGCGGCAGCAAATGATCGGCAATTT
TGTTACTTATGACAGTGCGGTTCGATTCCTGATCGTGAACCAGCAGGCCGAGCGGCAGCA
GTGAGACTATCTCTTCATTGATTGCCCGTAAAATGCGCAATTCGTTATTGACCGCCGTGT
TGGGTAGACTTTCTGTACTGCGACTGGAGAAATGGCGAAATGTGGTATAGCCAAATAACG
CCAGCGCCAGCAAACCGATGTTCAGCAGCAGTGGCAGCAGAATGTTTTGCAACGTATCCA
GCAATAAGGTGCCATAAGGAACCTGCCAGACCAGGCGCATATCAGTAGAGTTGAGTGCCG
AGGAGATTTCAATCTTCGTACTGTTAAAGTGGATACTGACGCTATCCGTCCCTTCTTTCT
CATTATCATTGTTTCCCGTTGCCGTCGCGTCTGGCTCAAGGCGGAAACTGTCCAGCGGCA
TACCCGGTGGGATCAAATCATTAATCGGCAGATCAAAAGCCACGACCGTTGCCAGATGTC
CTGGCTGGTTAAAGGTAGTACGCAAGGTAAAGTAATGACCGTTCTGCCAGGCCAGGCGGC
GCATGTTAGAAAAACTTTCGCGTTCATCGAGGGCGTTGGCCTGTTGCAACATCTCTGCAC
GACGTGAATCAACAATGTCACTGACGGTCGATTCTTTAAATCCGGAGGTGAGATCTTTGA
GGGGCAGGGTTGAGATCAGTACCAGACTGTTATCCTGACCATTCAGGTAATACATTGACC
ACGGTACATTTTCTGCGCCCCACAATGTATCCAGATAAGTGGACATCCGTTGAGTCATCT
CAAGCGTTGAGTTGTCGTGAGAGCCAAAGATTAACGCTTCCGTTTTGCGGCGCGGTTTTT
CCAGATAGTAGACATCCTGTTTCAGGCGCGTCTCTTGTAAACCTTCGCCGGAGGAGGGGG
AGGTCGTCGCGGCAATGTTGTCGTAGATCTGCCAGGTCACGTAACGCCAGGTATCGACGC
GCTTTTGGATTGCGTGGGTAATGTCGACAATCTGGTAACTTTTATCTTTCAGCCAGGCGT
TAACGGCGCTTTGTACCATTACACCCATCGTCACCAGTAACACAATGATCAACAGTAAAA
AGAAGCGGGTAATGCTCCCGGGTAGGAGTGAAAAGCGGGTCGTGGCCGTTGTCTCTTTCT
GACGCATTCGTGTTTATGACCTGTTAAAACTTCGCGAAGTGATAGGGCAGTATAAAGGGT
ACAGTGTGAAATTCCAGACTCTTACCTGATTGATGATTCTCTATTCTCCTGTGATATTTA
TCATCCTGTATGGGGGGAAATAGATGTACAAGCGCCATTTTGCTGTACAAATAACCTACG
AAAAGCCCAACGAAATTAATTGCAAATAAACGAAAATTGCTGGAAATTATGCTGATGTTA
ATTATTTGTGAAATAGTTAACAAGCGTTATAGTTTTTCTCTGGTAGCACAGAATAATGAA
AAGTGTGTAAAGAAGGGTAAAAAAAACCGGATGCGAGGCATCCGGTTGAAATAGGGGTAA
ACAGACATTCAGAAATGAATGACGGTAATAAATAAAGTTAATGATGATAGCGGGAGTTAT
TCTAGTTGCGAGTGAAGGTTTTGTTTTGACATTCAGTGCTGTCAAATACTTAAGAATAAG
TTATTGATTTTAACCTTGAATTATTATTGCTTGATGTTAGGTGCTTATTTCGCCATTCCG
CAATAATCTTAAAAAGTTCCCTTGCATTTACATTTTGAAACATCTATAGCGATAAATGAA
ACATCTTAAAAGTTTTAGTATCATATTCGTGTTGGATTATTCTGCATTTTTGGGGAGAAT
GGACTTGCCGACTGATTAATGAGGGTTAATCAGTATGCAGTGGCATAAAAAAGCAAATAA
AGGCATATAACAGAGGGTTAATAACATGAAAGTTAAAGTACTGTCCCTCCTGGTCCCAGC
TCTGCTGGTAGCAGGCGCAGCAAACGCTGCTGAAGTTTACAACAAAGACGGCAACAAATT
AGATCTGTACGGTAAAGTAGACGGCCTGCACTATTTCTCTGACAACAAGTCAGAAGACGG
CGACCAGACCTATGTACGTCTTGGTTTCAAAGGCGAAACTCAGGTTACTGACCAGCTGAC
CGGTTACGGCCAGTGGGAATATCAGATCCAGGGCAATACCTCTGAAGACAACAAAGAAAA
CTCCTGGACCCGTGTGGCATTCGCAGGTCTGAAATTCCAGGATGTTGGTTCTTTCGACTA
CGGTCGTAACTACGGCGTTGTTTACGACGTAACTTCCTGGACCGACGTACTGCCAGAATT
CGGTGGTGACACTTACGGTTCTGACAACTTCATGCAGCAGCGTGGTAACGGCTTCGCGAC
CTACCGTAACACTGACTTCTTCGGGCTGGTTGATGGCCTGAACTTTGCTGTTCAGTACCA
GGGCAAAAATGGTAGCGTAAGCGGCGAAGGCATGACCAACAATGGTCGTGGTGCTCTGCG
TCAGAATGGCGACGGTGTCGGCGGATCTATCACTTATGATTACGAAGGCTTCGGTATCGG
TGCTGCAGTTTCCAGCTCCAAACGTACTGATGCTCAGAACACCGCTGCTTACATCGGTAA
CGGCGACCGTGCTGAAACCTACACTGGTGGTCTGAAATACGATGCTAACAACATCTACCT
GGCTGCTCAGTACACCCAGACCTACAACGCAACTCGCGTAGGTTCCCTGGGTTGGGCGAA
CAAAGCACAGAACTTCGAAGCTGTTGCTCAGTACCAGTTCGACTTCGGTCTGCGCCCGTC
TGTAGCATACCTGCAGTCTAAAGGTAAAAACCTGGGCACCATCGGTACTCGTAACTACGA
CGACGAAGATATCCTGAAATATGTTGATGTTGGTGCAACCTACTACTTCAACAAAAACAT
GTCCACCTACGTTGACTACAAAATCAACCTGCTGGACGACAACCAGTTCACTCGTGACGC
TGGCATCAACACTGATAACATCGTAGCTCTGGGTCTGGTTTACCAGTTCTAATCTCGATT
GATATCGAACAAAGGGCCTGCGGGCCCTTTTTTCATTGTTTTCAGCGTACAAACTCAGTT
TTTTGGTGTACTCTTGCGACCGTTCGCATGAGGATAATCACGTATGGAAATAAGCTTTAC
CCGCGTGGCACTGCTGGCTGCCGCGCTCTTCTTTGTTGGTTGCGATCAAAAACCACAACC
CGCCAAAACCCACGCTACTGAAGTTACCGTTCTTGAAGGCAAAACCATGGGTACCTTCTG
GCGTGCCAGCATCCCGGGCATTGATGCCAAACGCAGTGCCGAACTTAAAGAAAAGATTCA
GACCCAGCTGGACGCCGACGATCAGCTGCTTTCGACCTATAAAAAAGATTCCGCGCTGAT
GCGCTTTAACGACTCGCAAAGTTTGTCGCCGTGGCCGGTAAGTGAAGCGATGGCCGATAT
CGTCACCACCTCGCTGCGCATTGGCGCAAGGACCGATGGTGCGATGGATATAACCGTCGG
GCCGCTGGTGAATCTGTGGGGCTTTGGCCCGGAACAACAGCCGGTTCAAATTCCGAGCCA
GGAACAGATCGATGCGATGAAAGCCAAAACCGGCTTACAGCACCTGACGGTCATTAATCA
GTCGCATCAGCAATATCTGCAAAAAGACCTGCCGGATTTATATGTCGATCTCTCCACCGT
CGGTGAAGGTTATGCGGCGGATCACCTGGCACGCTTGATGGAGCAGGAAGGGATTTCCCG
CTATCTGGTGTCGGTGGGCGGCGCGCTGAACAGCCGTGGTATGAACGGTGAAGGCCTGCC
GTGGCGGGTAGCGATTCAAAAACCAACCGATAAAGAAAACGCGGTTCAGGCTGTGGTGGA
TATCAACGGTCATGGGATTAGCACCTCTGGCAGCTACCGTAACTATTACGAATTGGACGG
CAAACGTCTTTCCCATGTTATCGATCCGCAAACCGGGCGTCCCATCGAACACAATCTGGT
ATCCGTGACGGTGATTGCTCCGACGGCGCTGGAAGCCGATGCCTGGGATACTGGCTTGAT
GGTACTCGGGCCGGAGAAAGCCAAAGAGGTTGTTCGCCGGGAAGGGCTGGCGGTTTATAT
GATCACCAAAGAAGGCGATAGCTTTAAAACCTGGATGTCACCACAGTTTAAAAGCTTCCT
TGTCAGCGAAAAAAATTAAAGCGCAAGATTGTTGGTTTTTGCGTGATGGTGACCGGGCAG
ACTAAAGGCTATCCTTAACCAGGGAGCTGATTATGAAAAACGCCACATGCTTAACTGACG
ATCAACGCTGGCAATCTGTCTTAGCCCGCGACCCGAATGCCGACGGCGAATTCGTTTTCG
CCGTGCGCACCACAGGCATCTTTTGCCGTCCGTCTTGCCGCGCCAGACATGCCTTGCGGG
AAAATGTCTCCTTCTACGCAAATGCCAGCGAGGCACTCGCCGCCGGATTTCGCCCCTGCA
AACGCTGCCAACCTGATAAAGCCAATGCCCAGCAACATCGGTTGGATAAAATCACCCACG
CGTGTCGACTGCTGGAACAGGAAACGCCTGTAACGTTGGAAGCCTTAGCTGACCAGGTGG
CGATGAGTCCATTTCATCTACATCGGTTGTTTAAAGCGACTACCGGAATGACGCCTAAAG
CCTGGCAACAGGCCTGGCGCGCTCGCCGTTTGCGCGAATCGCTGGCGAAAGGGGAGAGCG
TGACGACGTCTATTCTTAACGCCGGATTCCCCGACAGCAGCAGTTACTACCGCAAAGCTG
ACGAAACGCTGGGCATGACGGCTAAACAATTCCGTCACGGTGGCGAAAATCTGGCGGTGC
GTTACGCGCTGGCTGATTGTGAGCTGGGTCGTTGCCTGGTGGCAGAAAGCGAGCGGGGGA
TTTGCGCGATATTGCTGGGCGATGATGACGCGACATTAATCAGCGAGTTGCAGCAGATGT
TTCCCGCTGCCGACAACGCGCCTGCCGATCTGATGTTTCAGCAACATGTGCGTGAAGTGA
TCGCCAGCCTCAATCAACGCGATACGCCGCTGACGTTACCGCTGGATATTCGCGGCACTG
CTTTTCAGCAACAAGTCTGGCAGGCACTGCGCACGATACCTTGCGGTGAAACCGTCAGTT
ATCAGCAACTGGCTAACGCCATCGGCAAACCGAAAGCGGTACGGGCCGTTGCAAGTGCCT
GTGCCGCCAACAAGCTGGCTATCGTTATACCCTGTCATCGGGTAGTACGCGGTGATGGAT
CGCTTTCAGGTTACCGCTGGGGCGCGTCGCGCAAAGCGCAACTGCTGCGCCGCGAAGCTG
AGAATGAGGAGAGGTAATGTTGGATCTGTTTGCCGATGCTGAACCGTGGCAAGAGCCACT
GGCGGCTGGTGCGGTAATTTTACGGCGTTTTGCTTTTAATGCTGCGGAGCAACTGATCCG
CGATATTAATGACGTTGCCAGCCAGTCGCCGTTTCGCCAGATGGTCACCCCCGGGGGATA
TACCATGTCGGTGGCGATGACCAACTGTGGGCATCTGGGCTGGACGACCCATCGGCAAGG
TTATCTCTATTCGCCCATTGATCCGCAAACAAATAAACCGTGGCCCGCCATGCCGCAGAG
TTTTCATAATTTATGTCAACGTGCGGCTACGGCGGCGGGCTATCCAGATTTCCAGCCAGA
TGCTTGTCTTATCAACCGCTACGCTCCTGGCGCGAAACTGTCGCTGCATCAGGATAAAGA
CGAACCGGATCTGCGCGCGCCAATTGTTTCTGTTTCTCTGGGCTTACCCGCTATTTTTCA
ATTTGGCGGCCTGAAACGAAATGATCCGCTAAAACGATTGTTGTTGGAACATGGCGATGT
GGTGGTATGGGGCGGTGAATCGCGGCTGTTTTATCACGGCATTCAACCGCTGAAAGCGGG
GTTTCATCCACTCACCGGCGACTGCCGTTACAACCTGACATTCCGTCAGGCAGGTAAAAA
AGAATAAAAATAAGAATTATTATTGCTGTGCGCGCGAAGATGTTTAAACTGCGGGCTGTA
ATTCATTGTCCGGGTTTTCTGCATGGAACTTCTTGTACTTGTCTGGCGGCAGTATCGCTG
GCCATTTATCAGTGTGATGGCGCTAAGCCTCGCCAGTGCGGCTTTAGGCATTGGCTTAAT
TGCTTTTATCAATCAGCGCCTTATCGAAACGGCGGATACCAGTCTGCTGGTGTTGCCGGA
GTTTCTGGGATTATTGCTGCTGTTGATGGCAGTCACTCTCGGATCGCAACTGGCGCTCAC
CACTTTGGGGCATCACTTCGTTTACCGACTGCGTAGTGAATTTATCAAGCGGATTCTGGA
TACCCACGTCGAGCGCATTGAACAACTCGGTAGCGCCTCGTTGCTGGCGGGATTAACCAG
CGATGTGCGCAATATCACCATTGCTTTTGTGCGTCTGCCGGAACTGGTGCAGGGGATCAT
TCTCACTATCGGTTCCGCGGCGTATCTGTGGATGCTGTCGGGCAAAATGTTGCTGGTAAC
GGCTATCTGGATGGCAGTCACCATCTGGGGCGGTTTTGTGCTGGTGGCGCGGGTGTACAA
ACATATGGCGACCCTGCGTGAAACCGAAGACAAGCTGTACACGGATTTTCAAACCGTACT
CGAAGGGCGCAAAGAGCTGACTCTGAACCGGGAACGCGCCGAGTATGTGTTTAACAACCT
CTACATTCCTGATGCGCAAGAGTATCGCCATCATATTATTCGCGCAGACACCTTCCATCT
TAGTGCCGTGAACTGGTCAAACATCATGATGCTGGGCGCAATCGGTCTGGTGTTCTGGAT
GGCGAACAGTCTCGGTTGGGCTGATACCAACGTTGCCGCGACCTATTCGTTGACGTTGTT
ATTCCTGCGTACGCCGCTGCTTTCGGCGGTTGGCGCATTGCCGACGCTGCTGACGGCGCA
GGTGGCGTTTAACAAGCTGAACAAATTCGCGCTCGCGCCTTTCAAAGCAGAGTTTCCGCG
CCCGCAGGCGTTTCCCAACTGGCAAACGCTGGAGCTGCGTAACGTGATGTTTGCTTATCA
GGATAACGCGTTTTCCGTTGGTCCGATTAATCTCACCATCAAACGTGGCGAGCTGCTGTT
TCTGATTGGCGGCAACGGTAGCGGAAAATCGACGCTGGCGATGTTGTTGACGGGCTTGTA
TCAGCCACAAAGCGGCGAAATCTTGCTGGATGGCAAACCTGTCAGCGGCGAACAACCGGA
AGATTATCGCAAACTGTTTTCGGCAGTGTTTACCGATGTCTGGCTGTTTGATCAACTGCT
GGGGCCGGAGGGTAAACCCGCTAACCCGCAACTGGTTGAGAAGTGGCTGGCGCAGCTGAA
AATGGCTCATAAGCTTGAGTTAAGCAACGGGCGTATTGTTAACCTGAAGTTATCAAAAGG
ACAGAAAAAACGCGTGGCGCTGTTGCTGGCGCTGGCAGAAGAACGCGATATTATCCTGCT
GGATGAATGGGCGGCGGATCAGGATCCACACTTCCGTCGTGAGTTTTATCAGGTGTTGCT
GCCGCTGATGCAGGAGATGGGTAAAACTATTTTCGCCATCAGTCATGATGATCATTACTT
TATCCACGCCGACCGCCTGCTGGAGATGCGCAACGGGCAACTTAGCGAGCTGACGGGCGA
AGAGCGCGATGCCGCTTCGCGTGATGCCGTTGCCCGGACGGCATAATATTACGACGCTGA
CCTGGCGGACTGCTGCCGCCAGGTCAATATGCTAAAAATCCCTTCATTTCTAATAACCCT
ATAATTAATCAACGAAATTATAATGTTTCTAAAATTAGAATATAATTTATAAACATTATT
TAAATGTTGTTACTTAAGTGTTACCGTTGATGCCGCGCAAATCTCACCTGCAATAAAGCG
ACTAAAAGTAAGGCATTAACAAGATGAAAAAAGTGACTGCCATGCTCTTCTCGATGGCCG
TGGGGCTTAATGCCGTTTCGATGGCGGCAAAAGCGAAAGCGTCCGAGGAGCAGGAAACTG
ATGTACTGTTGATTGGCGGCGGCATTATGAGCGCCACGTTGGGGACCTATTTACGCGAGC
TGGAGCCTGAATGGTCGATGACCATGGTGGAGCGCCTGGAGGGTGTCGCGCAGGAGAGTT
CGAACGGCTGGAATAACGCCGGAACCGGGCATTCTGCACTGATGGAACTGAACTACACCC
CGCAAAACGCCGATGGCAGCATCAGTATTGAAAAAGCAGTCGCCATTAACGAAGCATTTC
AGATTTCCCGCCAGTTCTGGGCGCACCAGGTCGAGCGCGGCGTGCTGCGTACTCCGCGTT
CATTTATCAATACCGTTCCGCATATGAGCTTTGTCTGGGGCGAGGATAACGTTAATTTCC
TGCGCGCCCGTTACGCCGCGTTGCAACAAAGCTCGCTGTTTCGCGGTATGCGTTACTCTG
AAGATCACGCGCAGATCAAAGAGTGGGCACCGTTAGTGATGGAAGGGCGCGATCCGCAAC
AGAAAGTGGCAGCCACGCGTACGGAAATTGGTACCGATGTGAACTACGGCGAGATCACCC
GCCAGTTAATTGCTTCCTTGCAGAAGAAATCTAACTTCTCGCTGCAACTCAGCAGCGAAG
TCCGCGCCCTAAAGCGTAATGACGATAACACCTGGACCGTTACCGTTGCCGATCTGAAAA
ATGGCACTGCACAGAACATCCGTGCGAAATTTGTCTTTATCGGCGCGGGCGGTGCGGCAC
TGAAGCTGTTACAGGAATCGGGGATTCCGGAAGCGAAAGACTACGCCGGTTTCCCGGTGG
GCGGTCAGTTCCTTGTTTCGGAAAACCCGGACGTGGTTAATCACCATCTGGCGAAGGTTT
ACGGTAAAGCATCCGTTGGCGCACCACCGATGTCGGTTCCGCATATCGATACCCGTGTTC
TGGACGGTAAACGCGTAGTGCTGTTTGGGCCATTTGCCACCTTCTCAACCAAATTCCTCA
AAAACGGTTCATTGTGGGATCTGATGAGTTCCACCACCACCTCTAACGTGATGCCGATGA
TGCACGTCGGGCTGGATAATTTCGATCTGGTGAAATATCTGGTGAGTCAGGTGATGTTGA
GTGAAGAGGATCGTTTTGAAGCGTTGAAAGAGTACTATCCGCAAGCGAAAAAAGAGGACT
GGCGTTTGTGGCAAGCGGGGCAGCGTGTGCAGATTATCAAGCGTGATGCCGATAAAGGTG
GTGTACTGCGTCTGGGTACTGAAGTGGTCAGTGACCAGCAAGGAACCATTGCCGCGCTCC
TGGGGGCATCGCCAGGGGCGTCAACCGCCGCGCCGATTATGTTGAATCTGCTGGAAAAAG
TATTTGGCGATCGCGTTTCCAGCCCGCAATGGCAGGCTACGTTGAAAGCGATCGTTCCGT
CTTATGGACGCAAGCTGAACGGTGATGTAGCGGCAACAGAACGCGAGTTGCAGTACACCA
GCGAAGTGCTGGGGCTGAAATACGACAAACCGCAAGCAGCAGATAGTACGCCGAAACCGC
AGCTGAAACCGCAACCCGTTCAAAAAGAAGTGGCGGATATTGCGTTGTAATGATGTGCCA
CATCCGGCATGGTATGCCGGATGTGGCGTATGCTGATAAGACGCGCCAGCGTCGCATCAG
GCAACCGGCTCGGGCGTTAGATGTTGGATGCGGCGTAACCGCCTTATCCAACCTACGGGG
TGGAGCACTTCACAGCGGTGTAGGCCTGATAAGACGCGTCAGCGTCGCATCAGGCAACCG
GCTCGGACGTTGGATGTTGGATGCGGCGTAACCGCCTTATCCGACCTACGGGGTGGAGCA
CTTCACAGCGGTGTAGGCCTGATAAGACGCGCCAGCGTCGCATCAGGCAACCGGCTCGGG
CGTTAGATGTCGGATGCGGCGTGACCGCTTTATCCAACCTACGGGGTGCCGCACTTCACG
GCAGTTTAGCGAACTACCGCGTTGTCAATCTTCTCTTCCGCCTTCCAGACGCGGTACTTC
ACATCTACATTGTCTGGCGTATACACCACGATCGGCAGCTTGCTGTTGTAACGCAGCATT
CCAGCATCACCCAGATACGCGGTGACAAATTTCTTCTCTTTTTTGCCATCCGGGCAGGCC
ATCATCGTCGAAACCGGGGAACTGACTTTATCAAAGACATAATAATCATAGCCCCAGCCT
TCCAGCGTTTTGCTTTCCAGCTTCCCGCCGAGACGATGCAAATTGCAATCGACTTCCAGC
GTCTGACCGATTAACAGTTCTACTTTCAGGGTAGATTCCTCTTCTTGCGGGGTTAACTGA
ATCACCTGACGCTTCATGCCTTTTTCAGCTTGTGGATAAGGCGCGATTTTTTCCAGTGGC
TGGACGCTCTCTGCCGCCCAGGCGGAAGTGGTGGCGAAAGCGGCAAACAATACTGCAGGT
AGAATGGTCTTCATTTTTTGCTTTCCTTCTTCATTTATAGGTTTGCACCGATGATGTCGC
TGAAGGTTAACATATTCATCAGATTTATTAATTTGCTTTATGAATAACTTAAAGAATATT
CAGACAATTTTACCTGCTCTTTTAGTGTTAAATTCTGATGAGAGAGCAAACCAGCAGAAA
TATCTCTGGTGAATTAATCGCTATATAAATATATTTATAACCATTTGAAATGTGAGCAAA
AGCCCGTTTTTGCCACGCTTCCCGCCACTCTTTTGATCCTGCTACAGGTTTTACCTCGAT
CGGGGTATGCATCTTTGACACATCCTTTAATATCTTAGCGGCTATAAAAATGGCTTATTA
ATTATGCGGTTTATTTGGTCGCTCTCAATTTTCAGAGCGCGTTAATGATGGAAGGTCAAT
GTGAAGATTGATGCATCCCGTCGGGGCATACTCACTGGTCGCTGGCGCAAAGCCAGTAAC
GGTATCCGTCCGCCCTGGTCCGGTGATGAATCTCATTTTCTGACCCATTGCACCCGCTGC
GACGCTTGTATTAATGCTTGTGAAAACAACATTCTGCAACGCGGCGCGGGCGGCTATCCG
AGCGTTAATTTCAAAAATAACGAGTGCAGCTTCTGTTACGCCTGCGCGCAGGCTTGCCCC
GAATCGCTATTTTCTCCGCGCCACACCAGGGCCTGGGATTTGCAGTTCACCATTGGGGAC
GCGTGCCTGGCGTATCTGTCAGTTGAATGCCGCCGCTGTCAGGATAGCTGTGAGCCAATG
GCAATTATCTTTCGCCCGACGCTCTCCGGGATCTACCAGCCGCAACTTAATAGCCAACTT
TGCAACGGATGTGGAGCATGTGCAGCCAGCTGTCCGGTATCAGCCATAACTGCGGAGTAT
CTCCATGCACACTAACTGGCAAGTTTGCAGCCTGGTCGTGCAGGCCAAAAGCGAACGAAT
TTCAGACATCAGCACCCAACTGAACGCCTTTCCCGGCTGTGAAGTTGCTGTCAGCGACGC
GCCGAGCGGTCAGTTGATTGTGGTGGTGGAAGCAGAAGACAGCGAAACGCTGATCCAAAC
CATTGAGTCAGTACGCAACGTAGAGGGCGTGCTGGCGGTGTCGCTGGTTTATCACCAGCA
GGAAGAGCAAGGTGAGGAAACACCATGAAACTCAGTCGTCGTAGCTTTATGAAAGCTAAC
GCCGTTGCGGCCGCTGCGGCGGCTGCCGGTCTCAGCGTGCCGGGCGTTGCCCGCGCCGTT
GTTGGTCAGCAGGAAGCCATCAAATGGGATAAAGCGCCGTGCCGTTTCTGCGGTACTGGT
TGCGGCGTTCTGGTCGGAACGCAGCAGGGGCGTGTGGTGGCCTGTCAGGGCGACCCGGAC
GCACCGGTTAACCGTGGCCTGAACTGCATTAAGGGCTATTTCCTGCCCAAGATCATGTAC
GGTAAAGACCGTTTGACGCAGCCGCTGCTGCGTATGAAAAACGGTAAATATGACAAAGAA
GGCGAATTTACCCCAATCACCTGGGATCAGGCCTTCGATGTGATGGAAGAGAAATTCAAA
ACCGCCCTGAAAGAAAAAGGGCCGGAATCGATCGGTATGTTCGGTTCTGGTCAGTGGACT
ATCTGGGAAGGTTATGCCGCGTCCAAGCTGTTTAAAGCGGGCTTCCGTTCGAACAACATC
GACCCGAACGCGCGTCACTGTATGGCGTCGGCAGTAGTTGGCTTTATGCGTACCTTTGGT
ATGGATGAGCCGATGGGCTGCTATGACGACATCGAGCAGGCTGACGCGTTTGTGCTGTGG
GGCGCAAACATGGCGGAAATGCACCCGATCCTCTGGTCGCGCATCACTAACCGTCGTCTC
TCTAACCAGAACGTCACCGTGGCGGTGCTTTCTACCTACCAGCATCGTAGCTTCGAGCTG
GCGGATAACGGCATCATCTTTACTCCGCAATCTGACCTGGTGATCCTGAACTACATCGCC
AACTATATCATTCAAAACAATGCGATAAATCAGGACTTCTTCAGCAAGCACGTCAACCTG
CGCAAAGGTGCGACGGACATCGGCTACGGTTTACGTCCGACCCATCCGCTGGAAAAAGCA
GCGAAGAATCCGGGTTCTGATGCTTCCGAACCGATGAGCTTTGAAGATTACAAAGCCTTC
GTTGCTGAGTATACGCTGGAAAAAACCGCTGAAATGACCGGCGTGCCGAAAGACCAGTTA
GAACAACTGGCGCAGCTGTATGCCGATCCGAACAAGAAAGTCATCTCCTACTGGACGATG
GGCTTCAACCAGCATACCCGTGGTGTGTGGGCCAACAACCTGGTCTACAACCTGCACCTG
CTGACCGGCAAAATTTCCCAGCCGGGTTGCGGTCCGTTCTCCCTGACCGGGCAGCCTTCC
GCGTGTGGTACTGCGCGTGAAGTGGGCACCTTTGCCCACCGTCTGCCTGCGGACATGGTG
GTGACTAACGAGAAACACCGTGATATCTGCGAGAAGAAGTGGAATATCCCGAGCGGCACC
ATTCCGGCGAAAATCGGTCTGCACGCGGTGGCACAAGACCGTGCGCTGAAAGACGGCAAG
CTGAATGTTTACTGGACTATGTGTACCAACAACATGCAGGCCGGGCCGAACATCAATGAA
GAGCGTATGCCGGGCTGGCGCGATCCGCGCAACTTCATCATCGTCTCCGATCCGTATCCG
ACAGTCAGTGCGCTGGCCGCCGACTTGATCCTGCCGACCGCAATGTGGGTAGAGAAAGAG
GGCGCTTACGGTAACGCCGAACGCCGTACTCAGTTCTGGCGTCAGCAGGTACAGGCACCG
GGCGAAGCGAAATCGGATCTCTGGCAGTTAGTCCAGTTCTCCCGCCGCTTCAAAACTGAA
GAAGTATGGCCGGAAGAGCTGCTGGCGAAGAAACCGGAACTGCGTGGCAAAACGCTGTAC
GAAGTTCTGTATGCCACCCCCGAAGTGAGCAAATTCCCGGTATCCGAACTGGCGGAAGAT
CAGCTGAACGATGAATCCCGCGAGCTGGGCTTCTATCTGCAAAAAGGGTTGTTCGAAGAG
TACGCATGGTTTGGTCGCGGCCACGGTCACGATCTCGCGCCGTTCGATGACTACCACAAA
GCGCGCGGTCTGCGCTGGCCGGTGGTGAACGGTAAAGAAACGCAGTGGCGTTACAGCGAA
GGTAACGACCCGTACGTGAAAGCGGGCGAAGGCTATAAGTTCTACGGTAAACCGGATGGT
AAAGCGGTGATCTTCGCGCTGCCGTTCGAACCGGCGGCGGAAGCACCGGATGAAGAGTAC
GACCTGTGGCTCTCTACCGGACGCGTCCTGGAGCACTGGCACACCGGCAGTATGACTCGC
CGTGTGCCGGAACTGCACCGTGCCTTCCCGGAAGCGGTCCTGTTTATTCACCCGTTGGAT
GCGAAAGCGCGCGATCTGCGCCGTGGCGACAAAGTGAAAGTGGTTTCTCGCCGTGGCGAA
GTGATCTCGATTGTCGAAACGCGCGGTCGTAACCGTCCGCCGCAGGGCCTGGTGTACATG
CCGTTCTTCGACGCCGCACAGCTGGTTAACAAACTAACGCTGGACGCGACCGATCCGCTC
TCGAAAGAGACGGACTTCAAGAAGTGCGCGGTCAAACTGGAGAAGGTGTAAGCCATTATG
TCCCGGTCAGCGAAACCTCAAAATGGTCGCCGCCGCTTTCTGCGCGATGTCGTTCGCACA
GCAGGCGGGCTGGCTGCCGTGGGTGTGGCGCTGGGGTTACAACAGCAAACCGCACGCGCA
TCTGGCGTGCGGTTGCGCCCGCCCGGAGCCATAAACGAGAACGCCTTTGCCAGTGCCTGT
GTGCGTTGCGGTCAGTGTGTTCAGGCTTGCCCTTACGACACCTTAAAACTGGCGACGCTG
GCCTCTGGCCTGTCGGCGGGCACGCCATATTTTGTCGCACGGGATATTCCTTGCGAAATG
TGTGAGGACATTCCGTGCGCCAAAGTGTGCCCGAGCGGTGCGCTGGATCGTGAGATTGAA
TCGATCGACGACGCGCGGATGGGGCTGGCGGTACTGGTGGACCAGGAAAACTGTCTCAAC
TTTCAGGGGCTGCGCTGCGATGTTTGTTATCGCGAATGCCCGAAAATTGATGAGGCCATC
ACCCTGGAGCTGGAGCGCAACACGCGTACCGGTAAGCACGCCCGCTTTCTGCCGACGGTT
CACAGCGACGCCTGTACCGGTTGCGGTAAGTGCGAAAAAGTGTGCGTGCTGGAACAACCG
GCAATCAAGGTGTTACCGCTGTCACTGGCGAAAGGGGAGTTAGGTCACCATTACCGCTTC
GGCTGGCTGGAGGGGAACAATGGCAAATCGTAAACGTGACGCCGGGCGCGAGGCGCTGGA
GAAAAAAGGCTGGTGGCGCAGTCACCGTTGGCTGGTGTTACGTCGCCTTTGTCAGTTCTT
CGTGCTGGGGATGTTTTTGAGCGGTCCGTGGTTTGGTGTGTGGATCTTGCACGGCAACTA
CAGCAGTAGCCTGTTATTCGACACCGTTCCGCTGACCGATCCGCTGATGACGCTGCAAAG
TCTTGCCAGCGGTCATCTGCCTGCCACGGTGGCGTTGACCGGTGCGGTGATTATCACCGT
GCTCTACGCTCTGGCAGGAAAGCGATTATTTTGCAGCTGGGTCTGCCCGCTGAACCCGAT
TACCGACTTAGCGAACTGGTTACGCAGGCGCTTTGACCTCAATCAGTCTGCGACGATCCC
TCGCCACATTCGCTACGTACTGTTGGTGGTCATTCTGCTGGGATCGGCCTTAACTGGCAC
GCTCATCTGGGAATGGATCAACCCCGTTTCTCTGATGGGGCGTAGCCTGGTAATGGGCTT
CGGCAGCGGCGCGCTGCTTATTGTCGCGCTGTTTTTATTTGATCTACTGGTCGTTGAACA
CGGCTGGTGCGGGCACATTTGTCCGGTTGGCGCGCTGTATGGCGTGCTGGGTAGCAAAGG
TGTGATTACCGTTGCGGCCAGCGATCGGCAGAAATGTAACCGCTGTATGGATTGTTTTCA
TGTTTGCCCGGAACCGCATGTGCTACGTGCCCCGGTGCTGGATGAACAAAGCCCGGTGCA
GGTCACCAGCCGCGATTGCATGACGTGCGGTCGCTGCGTGGATGTCTGTTCTGAGGATGT
ATTTACAATAACTACACGATGGAGTTCGGGAGCGAAATCATGAAAAGCCATGACCTGAAG
AAAGCGCTGTGTCAATGGACGGCGATGCTGGCCCTGGTGGTAAGCGGCGCGGTTTGGGCG
GCTAATGGCGTCGATTTTAGCCAGTCGCCGGAAGTATCCGGGACGCAGGAAGGGGCCATT
CGGATGCCAAAAGAGCAGGATCGGATGCCGCTGAACTATGTGAATCAGCCGCCAATGATC
CCGCATAGCGTTGAAGGTTATCAGGTAACGACCAATACCAACCGCTGCTTGCAGTGCCAC
GGTGTCGAAAGCTATCGCACCACTGGCGCGCCGCGTATCAGTCCTACTCACTTTATGGAC
AGCGACGGCAAAGTGGGCGCGGAAGTGGCTCCGCGTCGTTATTTCTGTCTGCAATGTCAC
GTACCGCAGGCCGATACCGCGCCAATCGTGGGGAATACCTTTACCCCATCAAAAGGTTAC
GGGAAATAAGAGGTTATTATGGGAAATTCTGACCGTAAGCCTGGTCTGATTAAGCGCCTG
TGGAAATGGTGGCGTACCCCCAGCCGTCTGGCGCTGGGGACGCTGCTGTTGATCGGTTTT
GTCGGCGGCATCGTCTTCTGGGGCGGCTTTAACACCGGAATGGAAAAAGCCAATACCGAG
GAGTTCTGCATTAGCTGCCACGAAATGCGTAACACGGTGTATCAGGAATACATGGATTCC
GTGCACTACAACAACCGTAGCGGCGTCCGTGCGACCTGTCCGGATTGTCACGTTCCGCAC
GAGTTTGTGCCGAAGATGATACGCAAGCTCAAAGCAAGTAAAGAGCTGTATGGTAAAATT
TTTGGCGTTATTGACACGCCGCAGAAATTTGAAGCTCATCGCCTGACGATGGCACAGAAT
GAGTGGCGGCGCATGAAGGACAATAACTCGCAGGAGTGCCGTAACTGTCACAACTTCGAG
TATATGGATACAACCGCCCAGAAATCGGTTGCCGCGAAGATGCATGACCAGGCGGTGAAA
GATGGGCAAACCTGTATTGATTGCCATAAAGGGATAGCGCACAAGCTGCCCGATATGCGT
GAAGTCGAGCTAGGTTTTTAACAGGGTTATTGCGTGGGTATGCTTGAAGCCAGAGAGTTA
CTTTGTGAGCGGGATGAACGAACCTTATTTAGTGGCTTGTCATTTACGCTGAACGCAGGA
GAGTGGGTACAAATCACCGGTAGCAACGGCGCGGGGAAGACAACGCTTCTCCGTTTGCTG
ACGGGGTTGTCTCGCCCTGACGCAGGCGAGGTTCTCTGGCAAGGGCAGCCCTTGCATCAG
GTACGCGACAGCTACCATCAAAACCTGTTATGGATAGGCCATCAGCCGGGGATCAAAACC
CGGCTGACGGCGTTAGAAAATCTGCACTTTTATCATCGCGATGGCGATACCGCACAATGT
CTGGAAGCCCTGGCGCAGGCCGGGCTTGCCGGATTCGAAGATATTCCGGTAAATCAACTT
TCTGCCGGGCAACAACGCCGCGTCGCTTTAGCGCGTCTGTGGCTGACCCGTGCCACGTTA
TGGATCCTCGACGAGCCTTTTACCGCGATTGACGTCAACGGCGTCGATCGTCTGACCCAG
CGTATGGCGCAGCATACGGAGCAGGGGGGGATTGTGATTCTGACTACCCACCAGCCGCTC
AACGTTGCTGAAAGTAAAATTCGCCGCATTTCACTGACGCAAACGAGGGCCGTATGATGT
TCTGGCGCATTTTCCGTCTTGAGCTGCGCGTAGCGTTTCGCCATAGCGCCGAAATCGCCA
ACCCGCTGTGGTTCTTCCTGATTGTAATTACCCTTTTTCCGCTCAGTATCGGTCCGGAGC
CGCAACTGCTGGCGCGTATTGCACCGGGCATTATCTGGGTTGCAGCCCTGCTTTCATCCT
TGCTGGCGCTGGAACGACTGTTCCGTGACGATTTGCAGGACGGCAGTCTTGAACAATTGA
TGTTGTTGCCGTTACCCTTGCCCGCCGTTGTGCTGGCGAAGGTGATGGCGCACTGGATGG
TAACCGGTCTGCCGTTACTCATCCTTTCGCCACTGGTAGCAATGCTACTGGGAATGGATG
TTTATGGCTGGCAAGTGATGGCGCTGACGCTGCTGCTGGGAACGCCTACGCTTGGCTTTC
TCGGTGCACCGGGCGTGGCGCTGACAGTGGGACTTAAACGCGGTGGTGTGCTGCTCAGCA
TACTGGTGTTACCGCTGACTATCCCATTACTCATCTTTGCCACCGCCGCGATGGACGCGG
CTTCCATGCATTTGCCCGTTGACGGGTATCTGGCAATTTTAGGCGCGTTGCTGGCAGGCA
CCGCGACATTAAGTCCTTTTGCGACGGCGGCAGCGTTACGAATCAGCATTCAATAACGCT
GGATTACTGATTTTTGTTCGAGTCTGGTATCGAAACTATGTGGAAAACACTGCATCAACT
GGCGATCCCACCACGGCTGTATCAAATCTGTGGCTGGTTTATACCGTGGCTGGCAATTGC
CAGTGTGGTCGTGCTTACCGTCGGCTGGATCTGGGGATTCGGCTTTGCTCCGGCTGATTA
TCAACAGGGAAATAGCTACCGCATTATTTACCTGCATGTGCCTGCGGCGATCTGGTCGAT
GGGCATTTATGCATCAATGGCGGTGGCGGCGTTTATTGGCCTTGTCTGGCAGATGAAAAT
GGCCAACCTGGCGGTGGCGGCGATGGCCCCCATTGGTGCCGTGTTTACCTTTATTGCCCT
GGTTACCGGCTCTGCATGGGGAAAACCGATGTGGGGCACCTGGTGGGTATGGGATGCACG
TCTGACTTCTGAACTGGTGCTGCTGTTTTTGTATGTGGGTGTGATTGCCCTGTGGCACGC
CTTCGACGACCGCCGTCTGGCGGGCCGTGCGGCAGGTATCCTGGTGCTGATTGGCGTGGT
GAATCTGCCGATTATTCATTACTCCGTTGAGTGGTGGAACACCCTGCATCAGGGATCAAC
GCGGATGCAGCAAAGTATCGATCCGGCGATGCGTTCGCCGCTGCGCTGGTCGATTTTTGG
CTTCCTGCTCCTGTCTGCCACGCTGACGCTGATGCGGATGCGGAATTTGATTTTGCTGAT
GGAAAAACGCCGTCCGTGGGTGAGTGAACTGATACTGAAAAGAGGCCGTAAATGACCCCT
GCATTTGCTTCCTGGAATGAATTTTTCGCAATGGGCGGTTACGCCTTTTTTGTCTGGCTG
GCGGTGGTGATGACCGTTATTCCGCTGGTGGTTTTGGTCGTGCACTCGGTGATGCAGCAT
CGCGCAATTCTGCGTGGTGTGGCGCAACAGCGGGCGCGTGAGGCGCGTTTACGTGCTGCG
CAACAGCAGGAGGCTGCATGAATATTCGCCGTAAAAACCGCTTGTGGATTGCCTGTGCCG
TGTTGGCAGGGCTGGCGCTGACTATCGGTCTGGTGCTATATGCGCTGCGCTCGAATATCG
ATCTCTTTTATACGCCGGGGGAAATTCTCTACGGCAAGCGTGAAACTCAGCAGATGCCGG
AAGTCGGTCAGCGTCTGCGCGTTGGCGGGATGGTGATGCCGGGTAGCGTGCAGCGCGATC
CCAATTCGCTGAAAGTGACCTTCACCATTTACGATGCTGAAGGCTCAGTGGATGTCTCTT
ACGAAGGCATTTTGCCGGATCTGTTCCGTGAAGGGCAGGGCGTTGTGGTGCAGGGCGAGC
TGGAAAAAGGCAATCATATCCTCGCAAAAGAAGTGCTGGCGAAACATGATGAAAACTACA
CGCCGCCAGAAGTTGAGAAAGCGATGGAAGCTAACCACCGTCGCCCGGCGAGTGTTTATA
AGGACCCAGCATCATGATGCCGGAAATTGGTAACGGGCTGCTGTGCCTGGCGTTAGGGAT
TGCGCTGCTGCTGTCCGTGTATCCGCTATGGGGCGTGGCGCGCGGAGATGCGCGCATGAT
GGCGTCTTCCCGCTTGTTTGCCTGGCTGCTGTTTATGTCTGTGGCTGGCGCATTTCTGGT
GCTGGTCAATGCTTTCGTGGTCAACGACTTTACCGTCACCTATGTTGCCAGCAACTCCAA
TACCCAGCTTCCGGTGTGGTATCGCGTGGCGGCTACCTGGGGCGCACATGAAGGCTCACT
GCTGCTGTGGGTGCTGCTGATGAGCGGCTGGACCTTTGCGGTGGCGATTTTTAGTCAGCG
TATTCCGCTGGATATTGTGGCCCGCGTACTGGCGATAATGGGGATGGTCAGCGTCGGCTT
TTTGCTGTTCATTCTCTTTACCTCTAACCCATTCTCACGCACGCTGCCGAACTTCCCGAT
TGAAGGGCGCGATCTTAACCCGCTGTTACAGGATCCGGGGCTGATCTTCCATCCGCCTCT
GCTTTATATGGGGTACGTGGGTTTCTCGGTGGCGTTTGCTTTTGCCATTGCTTCTTTGCT
GAGCGGGCGTCTGGACAGCACTTATGCGCGTTTTACTCGTCCGTGGACGCTGGCGGCGTG
GATTTTCCTGACGCTCGGCATTGTGCTCGGTTCCGCATGGGCCTATTACGAACTCGGCTG
GGGTGGCTGGTGGTTCTGGGATCCGGTAGAAAACGCCTCGTTTATGCCGTGGCTGGTGGG
GACTGCGCTGATGCACTCACTGGCGGTCACTGAACAACGCGCCAGCTTCAAAGCGTGGAC
ATTACTGCTGGCAATCAGTGCCTTCTCGTTGTGTCTGTTGGGGACTTTCCTCGTGCGTTC
CGGCGTGCTGGTATCGGTACACGCGTTTGCGTCTGATCCGGCGCGCGGTATGTTTATCCT
CGCCTTTATGGTGCTGGTGATTGGCGGTTCGCTGCTGCTGTTTGCCGCGCGTGGACACAA
AGTTCGCTCACGCGTAAACAATGCGCTGTGGTCGCGGGAATCTTTGCTGTTAGCGAACAA
CGTTTTGCTGGTCGCCGCGATGCTGGTAGTGTTGCTGGGGACGCTGCTGCCGCTGGTGCA
CAAGCAACTGGGACTGGGCAGTATTTCGATTGGCGAACCGTTCTTCAACACCATGTTTAC
CTGGCTGATGGTGCCGTTTGCGCTACTGCTTGGTGTCGGTCCTCTGGTGCGCTGGGGGCG
CGATCGCCCACGTAAAATCCGCAATTTATTGATTATCGCCTTCATCTCTACGCTGGTGCT
GTCTCTGCTGCTGCCGTGGCTGTTCGAAAGCAAAGTTGTGGCGATGACGGTGCTCGGCCT
GGCAATGGCCTGCTGGATTGCGGTGCTGGCAATTGCGGAAGCTGTGCTGCGTATTTCACG
CGGCACGAAAACCACCTTCAGTTATTGGGGGATGGTGGCGGCTCACCTGGGGCTGGCAGT
GACAATTGTTGGCATTGCCTTTAGTCAGAACTACAGTGTTGAGCGTGATGTGCGCATGAA
GTCCGGCGATAGCGTCGATATTCATGAATATCGCTTCACCTTCCGTGATGTCAAAGAGGT
GACTGGCCCGAACTGGCGTGGCGGTGTGGCGACTATCGGCGTAACGCGAGAGGGTAAACC
GGAAACAGTGCTGTATGCGGAAAAACGTTATTACAACACTGCCGGGTCGATGATGACCGA
AGCGGCGATTGACGGTGGCATCACGCGTGACCTGTACGCCGCGCTCGGTGAAGAGCTGGA
AAACGGCGCGTGGGCTGTGCGTCTTTACTACAAACCGTTTGTTCGCTGGATTTGGGCGGG
CGGGCTGATGATGGCGTTGGGCGGACTGCTGTGTCTGTTTGATCCTCGCTATCGTAAGCG
CGTAAGTCCGCAAAAAACTGCGCCGGAGGCTGTATGAAGCGCAAAGTATTGTTAATTCCG
TTGATTATCTTCCTGGCGATTGCCGCGGCGCTGCTGTGGCAGCTGGCGCGTAATGCCGAA
GGGGATGATCCGACCAATCTGGAATCGGCGCTCATTGGCAAGCCAGTGCCGAAGTTTCGC
CTCGAATCACTGGACAATCCGGGGCAGTTTTATCAGGCGGATGTGCTGACTCAGGGCAAA
CCAGTGCTGCTTAACGTCTGGGCGACCTGGTGTCCGACCTGCCGTGCGGAACATCAATAT
CTGAATCAGCTTTCTGCGCAGGGCATCCGCGTGGTCGGCATGAACTATAAAGACGATCGC
CAGAAGGCAATCAGCTGGCTGAAAGAGCTGGGCAATCCTTACGCGCTAAGCCTGTTTGAT
GGCGATGGCATGTTAGGGCTGGATCTCGGTGTCTATGGCGCGCCAGAAACGTTCCTTATT
GACGGCAACGGCATCATTCGCTATCGCCATGCGGGCGATCTCAATCCTCGCGTCTGGGAG
GAAGAGATCAAGCCGCTGTGGGAGAAATACAGTAAGGAGGCCGCACAATGAGGTTTTTAT
TGGGCGTGCTGATGCTGATGATCTCCGGCTCAGCGCTGGCGACCATCGACGTGTTGCAGT
TTAAAGATGAAGCACAGGAACAACAGTTCCGTCAGCTCACTGAAGAACTGCGCTGCCCGA
AATGCCAGAACAACAGCATTGCCGATTCCAACTCGATGATTGCCACCGACCTGCGTCAGA
AAGTGTATGAACTGATGCAGGAAGGTAAAAGTAAAAAAGAGATTGTCGATTATATGGTGG
CACGTTACGGCAACTTCGTCACTTACGATCCGCCGTTAACGCCGCTGACCGTGCTGCTGT
GGGTGCTGCCAGTAGTGGCTATTGGCATTGGCGGTTGGGTCATATACGCCCGCTCGCGGC
GTCGGGTACGCGTGGTGCCGGAAGCGTTTCCTGAACAAAGCGTGCCGGAAGGTAAGCGTG
CCGGATATGTTGTTTATCTGCCGGGTATTGTGGTGGCGTTAATTGTGGCTGGCGTCAGCT
ACTACCAGACTGGCAATTATCAGCAGGTGAAAATCTGGCAGCAGGCCACGGCACAGGCTC
CGGCGTTGCTGGACAGGGCGCTGGATCCGAAAGCCGATCCGCTCAACGAAGAAGAGATGT
CGCGTCTTGCGCTGGGGATGCGTACTCAACTGCAAAAAAATCCGGGAGATATAGAAGGCT
GGATTATGTTGGGCCGCGTTGGCATGGCGCTGGGTAACGCCAGTATCGCCACCGATGCAT
ACGCCACTGCGTATCGCCTCGATCCGAAGAATAGCGATGCCGCACTGGGATACGCTGAAG
CGTTGACACGTTCATCTGATCCCAACGACAACCGCCTCGGCGGCGAACTGCTGCGCCAGT
TGGTGAGAAGCGACCACAGCAATATCCGTGTGTTAAGCATGTATGCGTTTAATGCCTTTG
AGCAGCAGCGATTTGGCGAAGCCGTTGCCGCGTGGGAGATGATGTTGAAACTCTTACCTG
CCAACGATACTCGCCGTGCGGTGATTGAACGTAGTATCGCGCAGGCGATGCAACATTTGT
CGCCGCAGGAGAGTAAATAAAAAGTGGCCCGATGGTGATGCCATCAGGCCAGACTGATGA
CAAAGTGCGCTTAGTTTATGCCGGATGCGGCGTGAACGCCTTATCCGGCCTACAAAATCG
TGTGAATTCAATAAATTGATCGATCCGCGTAGGCCTGATAAGCGTAGCGCATCAGGCAGT
TTTGCGTTTGTCATAAATCTCAGCCCGATGATAAATCCATCGGGCTATTTTTATTGTGCC
CCGCGTTGTTGCAGGAACAGAATGGTGGCCGCCACGCGTGAGCGGACATTGAGTTTACGC
AGCAGATTGCGAATATGTACTTTTACTGTCTGCTCGGAAATATTCAATACCGAGGCAATC
TGTTTATTTGACAGCCCCTGTGCCAGCTCGTGCAGAACATCCAGCTCGCGCTCCGTCAGC
ACGCTGAAGGGATCTTCTTCCGCGCCAAACATTTCACGTTCACGTAAGTACTGATTGACG
CGTTCGCTAAAGACTTTGCTGCCTTTCGCTCCGGCACGAATCGCTTCCAGCAATACTTCC
GGGTCGCTGTCTTTCAACAGATAACCGTCTGCGCCTGCGTCTATCAGCGCAAAGACATCG
CTGGAGGCATCGGATACGGTCAGGATAATAATTTGCGCGGTAACGCCATCCCTGCGCAAG
GCATTGAGGGTATCCAGGCCACTCATACCTTTCATATTGAGATCCAGCAAGATCACGTCG
ATATCCAGTCTATTCGCCAGATCGATAGCGCTCGCGCCGTCGCCCGCTTCGGCGACCACT
TCAAAGCCAGGATCAAGCTCCAGTAACTGACGAACACCGCGTCGCATAAGTGGATGATCA
TCCACAATCATCACCTGAAAAGGCGTTGCTTCAGGCATAGTAGTCTCCTGAGGTTTTATT
AGAATCATTATGTTTGAGCGTAGCGTTGGTAACGCTACCAGGCGCGTGAATGTTACCCCA
TTTTATGTATGGACATGTAGTGAAAACTACAACCTTGTCCTTCGCTTTGGCATCATTTTC
ATTATAAAGACGGAATTTTGCATCAGCTTCTCATCAAGAAAAACAACTAAAAAATCAATC
ACAATACTTGTGCATTTCTTTAAACAGTTTTTAAAAACTGACTCCGGGTATGGAGCTATG
GGTATTTTCTGTACCCAATGCTTTTAACAGCAATTAATTTCATAGGATGAAAGCTCAATG
CATCAATCTGGTTCTGTTTCTCTTTGTCGTTCCGCAATATCTGTTCTGGTGGCTACAGCG
TTATATTCACCCATAGCATTGGCATCAACAGTTGAGTATGGTGAGACAGTTGATGGTGTT
GTCCTGGAAAAAGATATCCAGCTGGTTTATGGGATCGCCAATAATACGAAAATCAATCCT
GGCGGAGAACAGCATATTAAAGAATTTGGTGTAAGTAATAATACTGAAATTAACGGAGGG
TATCAGTACATTGAAATGAATGGCGCCGCAGAATACTCAGTATTAAATGACGGTTATCAA
ATTGTTCAAATGGGTGGCGCGGCAAACCAGACTACGCTCAATAATGGTGTGCTACAGGTT
TATGGCGCAGCGAATGATCCCACGATTAAAGGCGGGCGCTTAATCGTTGAAAAAGATGGG
GGGGCCGTCTTTGTCGCTATCGAAAAGGGAGGACTACTGGAGGTTAAAGAGGGGGGATTT
GCATTTGCGGTAGATCAGAAAGCAGGCGGTGCTATTAAAACAACCACGCGGGCCATGGAG
GTATTCGGAACAAACCGTCTCGGTCAGTTCGATATCAAGAATGGTATTGCTAATAATATG
TTGTTGGAAAACGGCGGAAGTTTGCGAGTTGAAGAAAATGACTTCGCTTATAATACCACT
GTGGATAGTGGCGGCTTACTGGAGGTTATGGATGGCGGGACTGCAACTGGCGTTGATAAA
AAAGCAGGCGGGAAATTAATTGTCTCAACGAATGCGCTGGAAGTGAGTGGTACAAACAGT
AAAGGCCAATTTAGTATAAAAGATGGTGTGTCAAAAAATTATGAACTGGATGATGGTTCC
GGGCTCATTGTTATGGAGGACACGCAGGCCATTGACACTATCCTTGATGAGCATGCCACT
ATGCAATCGCTGGGAAAGGATACTGGTACGAAAGTGCAGGCAAATGCGGTATATGATCTC
GGTCGATCAGACCAGAATGGAAGTATCACGTATTCCTCAAAAGCCATCTCTGAAAATATG
GTAATCAACAATGGCCGCGCTAATGTCTGGGCTGGCACAATGGTTAACGTGTCAGTCAGA
GGGAATGATGGCATTCTTGAGGTCATGAAGCCGCAAATAAATTATGCACCTGCTATGTTG
GTGGGTAAGGTAGTGGTTTCTGAGGGCGCTTCTTTTAGAACGCATGGTGCCGTGGATACC
AGCAAAGCGGACGTTTCGCTCGAAAATAGCGCATGGACCATCATTGCCGATATCACTACG
ACGAACCAAAACACCCGCCTCAACTTAGCCAACCTTGTGATGTCTGGCGCAAATGTGATT
ATGATGGCTGAGACAGTGACTCGTTCATCTGTGACAGCAAGTGCGGAAAATTTCATAACG
TTGACCACCAATACCCTGTCGGGAAACGGCAATTTTTATATGCGTACCGATATGGCCAAT
CATCAGAGCGATCAGCTTAACGTCACTGGCCAGGCAACAGGTGATTTCAAAATATTTGTG
ACGGACACGGGGGCCAGCCCGGCAGCAGGTGATAGCCTTACACTGGTAACAACGGGCGGC
GGTGATGCTGCATTTACGTTGGGCAATGCCGGAGGCGTTGTTGATATCGGTACGTATGAA
TATACCTTGCTGGATAATGGCAACCATAGCTGGAGCCTCGCAGAGAATCGCGCGCAAATT
ACCCCTTCAACCACTGATGTGCTGAACATGGCAGCAGCACAACCGCTGGTATTTGATGCA
GAACTGGACACCGTGCGTGAGCGTCTTGGTAGCGTAAAAGGCGTTAATTACGATACGGCG
ATGTGGAGTTCGGCAATTAACACCCGCAACAACGTGACCACTGATGCGGGAGCTGGCTTT
GAGCAAACATTGACGGGGCTGACGCTCGGTATCGATAGCCGTTTCTCCCGTGAAGAAAGC
AGCACAATTCGCGGCTTGTTCTTTGGTTACTCTCATTCTGATATTGGTTTTGATCGCGGC
GGCAAAGGTAATGTCGATAGCTATACCCTGGGGGCTTATGCCGGTTGGGAGCATCAGAAC
GGTGCCTATGTTGATGGAGTGGTGAAAGTTGATCGTTTTGCCAACACCATCCATGGCAAG
ATGAGTAATGGGGCAACAGCGTTTGGCGATTACAGTAGTAACGGCGCGGGTGCTCATGTC
GAGAGCGGGTTCCGTTGGGTTGACGGATTGTGGAGTGTTAGACCCTATCTGGCCTTTACC
GGCTTTACCACAGATGGTCAGGACTACACGTTATCAAACGGCATGCGCGCTGATGTGGGA
AATACCCGGATATTACGCGCTGAAGCGGGAACGGCGGTAAGCTATCACATGGACCTGCAA
AATGGTACGACGCTGGAACCCTGGCTGAAAGCCGCCGTACGTCAGGAATACGCCGATTCT
AACCAGGTGAAAGTTAATGACGATGGCAAATTTAATAATGATGTGGCTGGAACCCGTGGC
GTTTATCAGGCTGGGATAAGGTCATCGTTTACCCCGACGTTAAGCGGTCATTTGTCAGTC
AGCTATGGCAATGGCGCAGGGGTAGAATCGCCGTGGAATACTCAGGCGGGAGTGGTCTGG
ACGTTCTGATAACAGAAAATAAACAGGCCGTGATGTGTCGCGGTCTGTTTATCTAATTAA
TTGCAGATATAAAAAAAAACCAACCGTAAAGGTTGGTTTTTTCTTGGGATTTTTGGTCGG
CACGAGAGGATTTGAACCTCCGACCCCCGACACCCCATGACGGTGCGCTACCAGGCTGCG
CTACGTGCCGACTCGTGGCTGCTAATACTACCGTTTTCCACACCGATTGCAAGTAAGATA
TTTTGCTAACTGATTTATAATTAATCAGTTAGCGATAAAACGCTTCTCGTCTGTCAGTAC
TTGCAATAACAAACTTAACTGTGGTTTTTCATCTTTCACTCTTTCACCACGTAAGTTGTA
AGTGCGGTATTTACCGTTATTGTTCAGCACCAGCGTCTTTTTCGGGGTGGTTATTGCCAG
CGTATCGTTATCCGCTGCGGTTACCCAGTAATGACGGCGTTGAGGGTTGAACAAATCCTG
ACCTTGCGAATATTCGCTGGCAGGTGTGCTGACATGTAGCAGGCGTTGCATCAGCGTCGT
CATCAGATCGGTATGATCAGTCAGCGCATTAATACGCTGCGCCGGCGTGCCTGGCCAGTG
AATCACTAATGGCACCTGCAGATGACCGTGGGACCAGTCAAAGGTTTCTTCCTCTTCGCT
CAGTGGAATACCCCGACCGGCAGTGATAATTACAACCGTATTGTCCAGTTTGCCAGAATC
ACGCAGTGCATTGAGCACGCGGTTGATCTGGTCATCGACATTGCCTGCCGCCCGGCTATA
TTTCCGTGCAAATGCCTGCTGATTGCTGTCGTCAATGTTAGTACCATTGAAAGAAACCCA
CGAGAACCAGCGGTTATCTTCTTGTGCGTAGCGTCCCAGCCAGTTGATCCACTGCGTGGC
GGTCTGCTCGTCGGATTGGGTGCGTACGCTCGGCATCGAGAAGTCTGACAACAATGCCTG
GCGATACAGCGGGCTGGTAAAGCCATCTGATGAGAATAACCCCAGCTGATAGCCTTGCTG
ATTAAGCGCAGTAATTAATGCCGCAGGCGTACGGGTCGACAGAATGCCGTCCATATAGCT
CGGCGAGATGCCATAGAACAGGCCAAAGATGCCGTTGTCTGTAGTGTTGCCGGAGCTCAT
ATGGCGCGTGAACGAAATATTTTGCTCAGCAAAACCTGCCAGCGCAGGCATCTGCTTCTC
GAAGCGTGAGTAGTTCAGGCCATCGACAGTAATCAACAGCACATTCTGCCCGGTGCCCAT
ATCGCGATAGCGCAGTTCGCTTAACGGATACTGAACGGAAACGGCGTCTGGATTACCTTG
CTCAATAAGACGGCGTTGATACTCCTGCGCATCAAGCAGACCATGCTTCTCAAGAAAACG
TCGCGCCGTCATCGGGTACGAAAGCGGCAGGTTAGCGCGCTGCATGGTGATCGGGCGATA
GAAGTTGGCATCGGCCCAGATATACACCACATGCGAGGCGATAAAGGCGATAAATAAGAA
TGCGGCCAGCGGACGCGCGAAGCGCCGACGACGCGTCAGGCTGCGCAGCTTTTGCCAGCT
CCACGTCGCAAACACCAGTTCAAGCAATAAAATAACCGGCACGCTAATGAACATCAGCTG
CCAGTCGCGCGCCATCTCATTTTCGTCTGGATTAATAACCAGTTGCCAGACGATGGGATT
AAGATGGAGATGGAAACGAGTAAAGACTTCGCTATCGATCAGTAATAGCGTCATTCCCGC
CGTTGCCAGAATGACGGACAAAAACCTCATCAGCCTCTGGGAGCCGACGATAAAGGTCAG
CGGGAAGAGGATCAGCAAATAGGTGGCGAAGACCAGGAAGCTGAAATGGCCGATAATGCT
TACGTAGGAATAAATGCGACCAGCAAGCGTTGTCGGCCAGTCGGCGATAAACAGGTAACG
GCTGCCAATGACGAGCGAAAGCAGAATATTGAACAGTGCAAACCAGTGCCCCCAACTGAC
CATTTGGGAGACTTTTTCACGGTAGCGCTGACGATGAGTTACCATAACCTGTTATCTGTT
TCCCTTAGTGCGCTTTTTCTTCGTTGATAGAGGACTGTAAGGCGCGGGCAAAAGAGTTGG
CAATTGCCTGGCGTTGGGCCGGGGCAATGCTGGTGTTGATAAGGTTAGTGACCATGTTGC
CTAACACCATCAGGGAAAGGTCGGTCGGAGCCTTATGTTTTTCCAGTACGTTGAGCAGCT
CTGCGAGCAATTGTTCAACCTGTTCATCACTGTAGCGGGAAATTTGTGGCATAAATCGAA
ATCAGTTAGTTGATGAAAGGGCAACATATTACCGTAGCAACGGTTTTTTTTCTGCTTTTT
TATGCGTTAAATCATTCTCGTTACGCTGCCTTCTGTAAAATGACCGCCATCTTTTATTGC
GTCGCTTAACCGGCGGTGGTTGAATACCGCCCGGTCTTAAAGGAGAGTTTATCATGAGTC
TGGATATCAACCAGATTGCTCTGCACCAGCTTATCAAGCGTGATGAGCAGAACCTTGAGC
TGGTGTTGCGCGATTCATTGCTGGAACCGACAGAAACCGTCGTTGAGATGGTGGCAGAAC
TGCATCGGGTCTATAGCGCCAAAAATAAAGCTTACGGCTTGTTTAGCGAAGAGAGTGAAC
TGGCGCAGACGCTGCGCTTACAGCGTCAGGGCGAAGAGGACTTTCTGGCATTTAGCCGCG
CGGCAACCGGCCGCCTGCGTGACGAATTAGCGAAATATCCTTTTGCTGACGGTGGATTCG
TGCTGTTTTGCCACTACCGTTATCTGGCGGTGGAGTATCTGCTGGTGGCAGTCCTGAGCA
ACCTGAGCAGTATGCGCGTTAACGAAAATCTCGACATCAACCCAACCCATTATCTTGATA
TCAATCATGCGGATATTGTTGCGCGTATCGATTTAACCGAATGGGAAACCAATCCAGAGT
CGACCCGCTATCTCACTTTCCTGAAAGGGAGAGTAGGGCGCAAAGTGGCGGATTTCTTTA
TGGATTTCCTCGGGGCCAGCGAAGGATTGAACGCGAAAGCGCAAAACCGTGGGCTGTTGC
AAGCGGTTGATGATTTCACTGCCGAAGCACAACTGGATAAAGCAGAGCGACAGAACGTGC
GCCAGCAGGTTTATAGCTACTGTAATGAGCAGCTGCAGGCAGGCGAAGAGATTGAACTGG
AATCGCTGTCGAAAGAGCTGGCAGGCGTAAGCGAAGTGAGCTTCACGGAGTTTGCGGCTG
AAAAAGGCTACGAACTGGAAGAGAGCTTCCCGGCAGACCGTAGCACACTGCGTCAGTTGA
CAAAGTTTGCCGGTAGCGGCGGTGGCTTGACTATTAACTTTGATGCGATGCTGTTAGGTG
AGCGGATTTTCTGGGATCCAGCAACCGATACCCTGACCATTAAAGGCACGCCGCCGAATT
TGCGCGACCAATTGCAGCGCCGGACGTCTGGCGGCAATTAATCGGTTTTGTGTTCTGAAT
GCCAGATGCGGCGTGAACGCCTTATCTGGCCTGCAAAAAATAGCAATACCGTAATCAGGC
ATAATCTGCAGATACAAAAAACCCCGCCGGAGCGGGGTTTTTTACAACTTATTCAGCAAT
TAAGCGCGAACGAAGTCGATGTGCTGCAGCTTCGGTTTGTACGGGTGACGCTGTACGTCC
TGAGCTTTAACTTTGATTTCTTTACCGTCAACAACGATGGTCAGAACTTCGCTGTAGAAT
TCAGCTTTAGCTTGCATGTTCATGACTTTGTCGTGATCCAGCTCGATAGCCAGCGGTGCT
TCTTTGCCACCGTAGATGATTGCCGGGAACTTGTTAGCGGCACGCAGGCGGCGGCTCGCA
CCCTTACCCTGCTCTTTACGTACTTCTGCGTTGATAGTAAACATTTCTTTCTCTCTTAAA
TTAATCCTGCTACAGGCGACCCAGCAACAGGTAAGTGATCTGCTTTGCGTATGCAAAAGC
GGGCGAGATTCTATACTCAATCGCCTTATACATCAATCAAAACTACCATTAACCGCGTAA
TTCGTGCGCCCGACGAAAACGACCTTCGTAATCGAACACTTTTTCACGCACTTGCCAGTA
CTGACCTTTCATGCGGGCGACGACAAAATCCGGATGTCGCAGTAAGGCTTGCTGGGCGAG
GATATCGGCGGCGGTGATCCAGCGCAGAGGGATGCCCGGTGTGCGCGTATGCGGGCGGAT
AAAAAGCTGCTCGAAAGCAGTTCGCTGGGCGGGCGTTTGCAGACGGAAACGCTCACTCAC
ATCCGCGCCGTCTTCATCGTAATAGGTGATTTTCAACCATTCGCCTTTCTCGTCGTGCCC
ATGCTGCAAAGACATGCCGCTACAGCGTAATACCAGCGCATCTTTCAGTCGTAGCGCCGC
TTTTAACATATCATCCGGATCAACCAGTACCGTGTCACATTCGCGGCAGCGGCGAGCGGC
AATATCATTTTCTGCGTTACATTGCGGGCAATTTTTAAAACGGAAACGGAAGTCACACTG
TTCGCGATGACCGTCGTCATCTTCAAACCATCCCTGACAGCGGCGACCAAAGTGTTCAAT
CAATGTCCCGTCGGCGGTCGTTTTCCCCCAAAAGGTGTTGGCAAAACCGCAGGCAGGGCA
GAAAACCTGTACCGGAACGTTGTCACTTTTGCCTTTCGGTGTACCAACTTCCGGCGCGTA
GAGATCGTGAGGATTACCCGCATAATCAAGAATTAAACAATCAGTCTTGCCCGGAGCGAG
ACGCAGACCGCGCCCGACAATTTGTTGGTAAAGACTCACTGATTCGGTAGGGCGCAGAAT
GGCGATAAGATCGACGTGCGGGGCGTCAAATCCGGTGGTCAGTACCGCGACGTTGACCAG
ATAGCGAAAACGCTGGGCTTTAAAATCTTCAATTAACACATCGCGCTCAGCGCCGGGGGT
GTCGCCAGTAATCAGTGCAGCATCTTCGGCGGGTAGTAATCCCACAATCTCTTTTGCGTG
TTCAACGGTGGCGGCGAAAATCATCACCCCTTTGCGCGTTGCAGCAAACTCCATAATCTG
GCTGATGATGTGCGGGGTAATACGTTGTTGTTTTTTTAGCTCGCGGTTGAGATCGGCTTC
GCTGAACAGCCCATTACTCTGTGCCTGCAAGCGGCTGAAATCGTATTGCACTACTGGCAT
ATCCAGTCGTTCTGGCGGCGTCAGATAGCCGTGTTTAATCATATAACGCAGCGGCAGTTC
ATAAATGCAGTCACGGAAAAGGGCTTTCTCATCGCCGCGTACCATGCCGTGATAATGGAA
CTGGTAGATCCAGCCTTTGCCCAGTCGAAAAGGCGTGGCAGTCAGCCCCAGCAGGCGTAA
GTGGGGATTCACTTTTGTCAGGTGAGTGAGGATTTGCTGATACTGGCTCTCTTCATCGTC
ACCAATACGGTGACATTCATCGACAATCAACAGCGAAAATTCACCCTGAAAGGCATCAAG
ATTACGGGCGACCGACTGCACGCTGCCAAATACCACTTTACCGTGGCTCTCTTTGCGCTT
TAGCCCGGCGGCAAAAATATCGGCTTCCAGCCCCAGCGCCTGATACTTTGCATGGTTTTG
CGCCACCAGTTCTTTAACGTGTGCCAGCACCAGCACGCGACCACGAGCCAGCCGCGCAAG
TTCCGCTATCACCAGGCTTTTACCTGCACCGGTGGGCAGCACGATAACGGCAGGGGTTTT
ATGACGACGAAAATGGTTGAGCGTGGCATCCACGGCTTCTTGCTGATATGGGCGGAGTGT
AAAAATCATGGTCTCGCGTAGGTAGATTATTCTGCTAATAGTATGCCACGGTTCTTTTTC
CCTTGAGGGAAGTTATTAGACCGCTATACTGGGCAGACAACAGTTCAGATTTTCGGGTCA
ATGCCCGACCTCCGTTTTTACAGGCAAAATCACACACATGCGACTTGATAAATTTATCGC
ACAGCAACTCGGCGTTAGCCGTGCTATTGCCGGGCGTGAAATCCGCGGCAATCGTGTCAC
CGTCGATGGCGAAATCGTCCGTAATGCAGCGTTCAAACTGCTTCCTGAACATGATGTCGC
TTACGATGGCAACCCACTGGCGCAGCAACACGGTCCACGTTACTTCATGCTCAATAAGCC
TCAGGGCTATGTTTGCTCCACGGACGACCCTGATCACCCAACGGTGCTCTATTTTCTAGA
TGAACCAGTGGCGTGGAAACTGCACGCCGCAGGGCGGCTGGATATCGATACCACCGGTCT
GGTACTAATGACAGATGATGGTCAGTGGTCACACCGCATTACTTCTCCGCGCCATCATTG
CGAGAAGACTTATCTGGTGACGCTGGAATCACCCGTAGCTGACGATACGGCAGAGCAATT
TGCTAAAGGCGTGCAGCTGCATAACGAAAAAGATCTCACTAAGCCGGCGGTGCTGGAAGT
GATTACCCCAACGCAGGTTCGTCTGACCATCAGCGAAGGGCGTTATCATCAGGTGAAACG
CATGTTCGCCGCCGTGGGTAACCATGTGGTTGAGCTGCATCGTGAACGTATTGGCGGCAT
TACGCTGGATGCTGATTTAGCCCCCGGTGAATATCGTCCGTTAACTGAAGAAGAAATTGC
CAGCGTCGTCTAACTTTTCAATGACTTTCAGGAGCCCGTTGTGACCACCCGACAGCATTC
GTCGTTTGCTATTGTTTTTATCCTTGGCCTGCTGGCCATGTTGATGCCGCTGTCGATTGA
TATGTATCTGCCCGCGCTACCGGTAATTTCAGCGCAGTTTGGCGTACCGGCGGGCAGTAC
GCAGATGACCCTCAGTACTTATATTCTGGGCTTTGCGTTGGGGCAGTTAATCTACGGGCC
GATGGCAGACAGCTTCGGGCGTAAGCCGGTGGTTCTTGGCGGTACGCTGGTGTTTGCCGC
CGCCGCGGTGGCGTGTGCGTTGGCACAAACCATCGATCAGCTGATTGTGATGCGTTTCTT
CCACGGGCTGGCGGCGGCTGCGGCCAGCGTGGTTATCAACGCCTTGATGCGTGATATCTA
CCCGAAAGAAGAGTTCTCGCGGATGATGTCGTTTGTCATGCTGGTGACAACCATTGCACC
GCTGATGGCACCGATAGTTGGCGGCTGGGTGCTGGTGTGGCTGAGCTGGCATTACATCTT
CTGGATCCTCGCCGTGGCGGCGATTCTGGCTTCGGCAATGATCTTCTTTCTGATCAAAGA
AACCTTACCACCGGAGCGTCGCCAGCCTTTTCACATTCGTACCACTATTGGTAACTTTGC
GGCGCTGTTCCGTCATAAGCGTGTCCTGAGTTATATGCTGGCCAGTGGTTTCAGCTTTGC
CGGGATGTTCTCGTTCTTAAGCGCCGGACCGTTTGTCTACATTGAAATTAACCACGTCGC
GCCGGAAAACTTTGGTTATTACTTTGCACTAAACATTGTTTTCCTGTTCGTGATGACCAT
CTTTAATAGCCGCTTCGTCCGCCGTATTGGCGCGTTAAATATGTTCCGCTCGGGGTTGTG
GATACAATTTATTATGGCAGCGTGGATGGTCATCAGTGCGCTGCTGGGGCTGGGATTTTG
GTCGCTGGTGGTTGGCGTTGCGGCGTTTGTGGGCTGCGTGTCGATGGTGTCATCCAATGC
GATGGCGGTCATTCTTGATGAGTTTCCCCATATGGCGGGAACGGCATCTTCACTGGCAGG
AACCTTCCGTTTTGGCATAGGGGCAATTGTTGGCGCATTGCTTTCTCTTGCGACCTTTAA
CTCTGCATGGCCGATGATTTGGTCAATTGCATTCTGCGCAACCAGCTCCATTCTCTTCTG
TCTGTACGCCAGTCGGCCGAAAAAACGGTGATCTATTGCACAACGAGGAAGCTAAAAGGC
TTCCTTTGTTGATGCATGTCAACCACAAATCTATCATTCCCCCGATATATGTTTATTTTA
TGTAAAATCAATTTATGTAAAAAGTCACATCATTGTAGTTAAAAAGGTTGAGTTAGATCG
CAGAAACGGGTACATATAGCCCCGCAAACGTGACCACGCCCGCAGATATTACTTAAATCA
GAGCCATAGAGGCCACGCAGGCGAGGCATCAATCTTTACGATCTGTATAAAGACGGATTG
TTGATGATGTGTTAAAATTGATGTAAACAAATTGTGAAGTAAATGTGCTTCCGGGGAAAA
TAAGTGACTTCATTACAACTCTCAATCGTCCATCGACTGCCGCAGAACTATCGCTGGTCT
GCTGGTTTCGCAGGTTCGAAGGTTGAACCGATTCCGCAAAATGGACCGTGCGGTGACAAC
AGCCTGGTGGCGCTTAAATTGCTTAGCCCGGATGGTGATAATGCATGGTCGGTGATGTAT
AAACTAAGCCAGGCGTTAAGCGACATCGAAGTTCCATGTTCGGTGCTGGAGTGTGAAGGT
GAGCCGTGCCTGTTTGTAAATCGCCAGGACGAGTTTGCTGCAACATGCCGATTGAAAAAT
TTTGGTGTGGCAATTGCCGAACCCTTTTCAAACTACAATCCTTTTTAAGCGTCAGCTCAA
CGCCAGTAGCTGACGCGTATACTCCTGCTGCGGTGTGGCAAACACGCGCGCGCACGGTCC
TTGTTCCACTACTTCCCCTTGTCGCAGTACGATAACCTGATGACATAACGCGCGGACAAC
GTGCAAATCATGGCTGATAAACAAATAGGCCAGTTGATGCTTTTGTTGCAATGATTTCAA
TAGCGTCAATATTTGCGCCTGTACCGTTTTGTCGAGTGATGATGTCGGTTCATCAAGTAT
GATCAGCGAGGGCTTAAGAATTAATGCCCTGGCAATCGCAATACGTTGTCGCTGACCACC
AGAGAACTCCGCCGGATAACGGTGGCGTGTTTCAGGATCTAATCCCACTTCATGCATCAC
GGCTATCACTTGTTGTTCGCGTTGTGCGGCAGAAAGCGTCGGCTGGTGAACCCGTAAGCC
TTCCTCAATAATCTGCAAAACGTTGAGTCGTGGGTTGAGCGAGGAGTTTGGATCCTGAAA
TACCACCTGAATGCGATGACGAATAGGTAACAGCTGGCGGCGATTTAAATTTTGCAGTGG
CTGACCGTCAAAGACGATGCTGCCCTGAGAATTAATCAGTCGCAGCAGCGCCAGTCCCGT
CGTGCTTTTCCCGGAACCGGACTCGCCCACTAAACCCAGTGTTTCACCCGCCCGTAGCGT
AAAACTGATGTTTTTCACCACCACATTATGATCCACAATGCGCTTCAAGATCCCTTTGCG
AATGGGGAAGGCAACCTGAAGCTGTTCAACATCCAGCAACGTTGAGGCAGGTTCTGGCAA
CGGCACCGGGTCGCCTGACGGTTCACTGTTGAGTAGCTTTTGTGTGTAAGGATGAGTGGG
TGAGGCAAATAGCGTAGCGGCGTTATTTTGCTCGACACAGCGACCATTTTGCATTACCGC
CACGCGGTGGGCCAGTTTTCTGACAATGCTGAGGTTATGAGTAATAAACAGCATGCCCAT
ATTCAGCTCGCCTTGCAGTTCGCGCAACAGCTGTAAAATCTGCGCCTGGACAGAGACGTC
CAGTGCGGTGGTTGGTTCATCGGCAATTAATAATTCCGGTCGCGTTAACAGCGCCATCGC
AATCATCACCCGCTGGCGTTCGCCGCCGGAGAGCTGATGCGGATAATCTGTCAGCCGTTT
TGCCGCCTGGCGGATACCGACGCGATCAAGGCAGTTAAGAATTTCGCCACGAGCCGCTTC
CCGACGCATCCCGCGGTGGAGTGAAAGCACTTCATAAAGCTGTTTTTCCAGGGTATGCAA
TGGATTTAACGACACCATCGGCTCCTGAAAAATCATGGCGATCTTATTACCGCGTACACC
GCGCAACGTTTGATCGCTGGCATGAAGCAGCGATTCGCCATGAAAACGAATATCGCCGGA
GAGATATTCAACCGGCGGGGAAGGGAGCAGACGTAAAATTGACAGCGCGGTAACGCTTTT
GCCAGAACCTGACTCACCCACCAGCGCCAGCGTTTCGCCAGCCTCAATCTGTAGTGAAAC
ATCATTGACTACTGTACGTACGGTTTGCTGATGGCGAAAACCCACCGACAAATTTTCAAT
CGCTAACAGAGTTTGCGTCATGCTACACCGCCTTATTAGGATCAAATGCGTCGCGGACGG
CTTCACCAATAAAGATCAGCAAAGACAATAATATCGCCACCGACAAGAAGGCGGTGATCC
CAAGCCACGGAGCCTGAAGGTTATTTTTCCCTTGTAACAGCAGTTCACCGAGTGACGGTG
AACCGAGCGGCAGACCGAAGCCGAGGAAATCGAGTGAGGTCAGGGTGGTTATCGAACTAC
ATAAAATAAACGGTAAAAAGGTGAGCGTAGCGACCATGGCATTAGGCAACATATGACGCA
GGATGATACTGCGATCGCTGACGCCAAGCGCCTGCGCCGCACGAATGTAGTCGAAATTAC
GGGTACGTAAAAACTCCGCCCGCACCACGCCGACCAGACTCATCCAGCCAAACAAGACAG
TAATTGCCAGCAGCCACCAGAAGTTAGGCTGTACGACGCTGGAAAGTAAAATAATCAAAA
ACAGCGTCGGCATCCCCGACCATACTTCAATAAAGCGTTGCCCCCAGAGATCGACTTTAC
CGCCGTAATAGCCTTGTAGCGCCCCCGCCAGCACGCCCATCACGCTGGAACAGAGAGTCA
GCATCAGGCCAAACAGAACCGAGATCCGCGTGCCATAGAGAATACGTGCCAGCACATCGC
CGCCGTTGGCATCCGTTCCCAGCCAGTTTTGCCGGGAGGGTGGAGAAGGGAAGGGCTTAT
CGGTAGCAAAGTTGATACTGGTAGCACCAAAGCGAATCGGTGCCCACAGTACCCAGCCAT
TATTTTCCAGCCGTTGTTTCAGCCACGGGTCCTGATAATCAGCCTGACTTGCCAGCGGGC
CGCCAAAATCGCTTTCGCTGTAGTTTTTCAATAACGGGAAATACCAACTGCCGTCATAAC
GTACCAGCAACGGTTTATCGTTGGCGATAAGCTCAGAACACAAACTCAAACCAAACAAGA
CGAGGAAAATCCATAACGACCAGTAGCCGCGACGGTTATGACGAAAACGCGCCCAACGGG
CCTGATTGACGGGGCTGAGTCGCGACATTAACGTCCCTCAAAATCTATACGCGGATCGAC
CAGCGTATAGCTGATATCACTGACAATATTCAGCAGCAGGCCAATCAGGGTGAAAATATA
CAAGGTACCAAACATTACAGGATAATCGCGCGAGACGGTCGCTTCGTAGCCCAGTAAGCC
AAGACCATTGAGTGAAAACATCACCTCAATCAGCAGCGAGCCGGTAAAAAACATGCTGAT
AAACGTCGCCGGAAAACCAGCAATCACCAGCAGCATGGCGTTGCGGAACACATGTTTCCA
GAGAATGTTTTTCTCACTTACCCCTTTCGCACGCGCGGTCACCACGTATTGCTTGCGCAC
TTCATCAAGGAATGAGTTTTTGGTCAGCATGGTCAGCGCCGCAAAGCCACCAATCACCGT
CGCCAGCACCGGCAGCGTGATATGCCATAGATAATCGGTGATTTTCTGATACCACGGCAG
CGAATCAAAGTTAGCGGAAACCAGGCCGCGTAGAGGGAACAGGTCGAAATAGCTGCCGCC
TGCGAAGAAGACAATCAGCAGGATGGCAAACAAAAAGGCCGGAATGGCGTAGCCGATGAT
GATAAATGCGCTACTCCAGACGTCAAAGCGGCTCCCATTATAAACAGCTTTGCGAATGCC
TAACGGAATCGACACCAGATAGATAATCAGCGTGCTCCACAATCCGAGGGTGATGGAAAC
CGGCAGACTGTCTTTAATCAGCGTCAGCACCGAGGCGCTGCGAAACAGGCTATCGCCAAA
ATCAAAGCGGATGTAGTCCCAGAGCATTTTGAAGTAACGTTCGTGGATCGGCTTATCGAA
ACCGTAGCGATGAGTGATCTCGGCGATCACTTCTGGATCTAATCCGCGTCCGCCACGGTA
ATTACTGTCGCTGATATTACCGACGCCCGTTTGCGCATGGCTGGCGCGAACGCCTTCACC
GCCTGCGCCGGGTAATACTCCGGCATTACCAAACTCAATGGCGGCGATGGCCTGGTCGAC
CGGACCGCCAGGCGCAATTTGCACGATGAAAAAGTTGATAGTGATAATCGCCCATAACGT
TGGGATCACCAGCAACAGACGGCGAATCAGATATGCGCCCATCTACTCTCCCTGTTGTCT
GGCTGACGGCAGTTTGGCCGCTTTATTAACGTCATACCACCAGGTATCGATACCCAGGCT
GTAAACAGGGCGTACAGCGGGTTGGGAGAATTTATCCCACCAGGCGAGACGGTCTTCCGC
CATGTACCACATTGGCAGCATGTAATAATTCCACGTTAATACGCGATCCAGTGCTCGCCC
TAACGGCAGTAATTTTTCTTTATTTCCCTGCGCGGCAATAATTTGGTTGATCAGCGAGTC
GATAACCGGGCTTTGCACGCCGGGGGCATTATAAGTGGAATTGATATATTCCGATGACCA
GGAAATCTGTAAATCGGAACTGGGCCACGGCATCGCCCGCCATACGCGCGGCATCATGTC
ATAGTCGCGACTGCGCATGCGGTTGGTGATTTGCGAGTTATCCACCTTGCGAATGTCCAT
GTTGATACCCAGCCGTTGCAGGCTGTGCTGGAACGGCAATACCCACTGACTATTGCTGCT
TGCGGGAAGCAATAATTCAAAGCTGAGTGGCTGACCCGTTGTGGCATTAACGCGTTGCTG
ACCCTTCAGCACCCAGCCCGCTTCGTTGAGAAGTTTGTCGGCTTTTAACAGGTTGTCACG
ATCGTAGCCATCGCCTTTAGATACCGGCGGCTGGTAGATTTGTGTGAAGACTTCTGACGG
TAGATCTTTTTTCATTGGTGCCAGAAGCACCAGCTCCGCGGCGTCGGGGTAATTTCTGGC
CGCGTATTCGGTATTCTGAAAATAACTGTTCGTGCGACTCCAGGCATTGTAAAACAACGC
CTTGTTCATCCATTCAAAGTCAAAGGCGAGAGTGATCGCTTCCCGGACCCGGCGATCGCT
GAATACCGGACGTTGGATATTAAACGCCAGCCAGCGCGTATCCTGGGCTGATTCGTTCTT
TTGCTCATCTTTGATGATGTATTTTTTATCGAAATTTTTACCGGTATAACGCGTGGCCCA
GTTTTTAGCGTCGTTTTCCATACGCAAATCAAAGGCACCTGCTTTAAACGCTTCAAAGGC
GACGTTATCATCGAGGTAATAATCGTAGCGAATGGTGTCGAAATTCCAGCGTCCACGGTT
TACCGGTAAGTTTGCTGCCCAGTAATCTTTCACGCGGGAATAGACAATATTTTGCCCCAT
TTTCCAGGACGTAATGCGGTACGGACCACTGGCAAGCGGAGGCGTGGCGAGCGGATCGCT
AAGTTTGTGATCCTTCCAGTACTTTTCTGGAAATACCGGCAGCGAAAACAGACTCAACAT
ATCTTCTTTGCCGGGTTTAGCTAACTCAATGCGCACGGTTAACGGCGCAATGGCTTTGAC
GGTGGTGCCTTTGTAGACCAGACGAAATTGCGGCACGCCTTCGGTCATAAATTTTTGAAA
AGTAAACTCTACATCGCGGGCAGTAATGGGCGAACCATCATGAAAACGGGCGCGCGGATT
AATAGCGACCTCCACCCAGGAATAATCGTCAGCATAGCGTGCACTTTCAGCAATCAGCGG
GTAATAACTGCCTGGTTCGTCATCGGAAGTCGTAAATAGCGTGTCGTACAACTGCTCGGT
GCGTGCGCCCGGGTTGCCGCGCAGTGCATAGCGGTTGAAATTATCGAAGGTGCCGAGGGC
TGACAACGTTATCTGCCCACCTTTTGGCGCGGCGGGGTTCACATAATCAAAATGGTTGAA
ATTAAACGCGTACCGGGGTTCGCCCAGCACGGCAAAGGCATAGCTTTCCTTGATAGCCTG
CGCCTGCGCACCGAAGGTGAACAGAGCGATAAACAGCAGCAGTATGCGCACAATCATCTG
CAACGGATTTCCTTTTACTCATCATTAGCCGCAAACCGGCATGCTTTCACTATGAATAAT
AAGGGACGTAAGCACACCTTACCACTGCGGCCTATACGGTTTCTTCAGCCAGCGAACAAA
ATCGTCCAGCGGTAACGGGCGACTAATCCAGTAGCCTTGCATGAAATTAACGCCGCGTTC
GCTTAGCCATCGCGCTTGTTCCGGCGTTTCGACCCCTTCAGCAACTGTCAGCATATTGAG
ACGTTTCGCCAGCGTCAGCACCGCGTCAAGTACGGGTGAAGTGATCGTTTCCGTACCGAT
GGCGTTGATAAATCCACGGTCAATTTTCAGATAATCGAGCGTAAAACGCTCAAGATAGAT
AAGCGCGCTGTGCCCGGTGCCGAAGTCATCAATAGCAATTTCTATGCCGACCGAGTGCAG
CCAGGCGAAGAGTTGTGTGGCTTCTTGCTCTTTCAGCATATCGCGCTCGGTAATTTCCAG
CACAATCTGGAAATGGTGTGCGGGTAGGGAGGTGAGCAGTTTCTGGATATCTGCTTTAAA
GCTTTCGCTGTGCAGATGGTCCGGCGCAATGTTAATGCCAAATTTGACGCCTACCGGCAG
CACTTTTTCTAATTCTGCGGCATCGCGGGCAATTAACTCAAACAGGTGCTGAGTCAGCGG
TACAATCATCTTTTGCGATTCGGCAAAGTTAATGAAGGCATCCGGGGGAATTTCTCCCGC
GACAGGATGCCGCCAGCGTAGCAGTACTTCCAGGCCCGTTACTCGCAAAGCTTGTGTATC
CACCACCGGTTGATACGCCACGTAAAATTGTTCGCGCTTGATGGCGGTCATGATTTCTCT
GCCGGGGCGCATACGTACGCTCATCAGGTAATAGCAGAGCAGGCCAACGACAGTTCCACT
CATGCCGCCCAGTAAAAATGCGTACCACACATCGTTCCATGTCCAGTCATCTGCATAAAG
CCGAACGGTCAGAGGAATGCCCGCAATTTTAGTTTCACGGACTGGCATGTCGGTTAATTC
GTTAACGTTCATCAAACGTGAAGAAAAGGTAGATAGCGCAGTATTGCCAATAATGAGGGC
GACGCCATCGTAATCTTCCTGCCGTGAACTATAAAAGAGTGAAGGCGTCAGGTTGAGATT
CAGAGCGGCAAAGACGCCGCTATTTTTCAGCAAAGGGTTGCGATACCAGATGACGATTGC
GGGTTTGTTCGGCACCATCGGCGTGCCGGGTAAGATCGCCATATCGACATTTTTATTAAT
GTCGAGCGCCGGAATCAATTCATTGAGTGGAATGTCCATCTCACCGGTCGCAGATGAACA
GAATGTTTTTTTATCTTTCACCAGCACAAACGTTCGGACATTCATGCTAAACGCCGCGCG
GGCGGTCAGTTCGGGGTTAGCTTGCTGGCAGGTATCTAAGGTCAGCGGCTGGAGCCGGTC
AGTAGTGGATTTCAGGTCGGCAAAATAGGTATCGAGATACTTTTGTACGTCGGTAATCAG
TGTGTCGTATTTGACTTCGTGCTTATGCCAGGCCACTAAAAACTGAAGGCAACTCACCAG
TATCGCAATCATTACGCCTGCAACAATGCAGGTAAGCAGGAGCTTACGTCCAGAATTGGG
AGCGCGTATGAACATGATTCCGTTAATTTCCTGAAATTACGACAACATTTAAAAGATAAC
AATGACCGGACTATAGCCTGGATCAAGACGCGGAAACATCATTTTCTCTGATGAATGAAA
ACAAAAAAGCACTGCCTAAGCAGTGCTTTCAGTTAACTCGTCAGGATAGCCAAGGGATTG
CATCCAAACGGTTTATTAGCTGCGGCTGAGAACCCGGCGTGCTTCGTTGTAACGCTTCTT
CCAGTACGGTTCATTCATGCTGGAAATAATAACACCACTGCTGGTGGAAGCATGGACAAA
CTGATTGTTGCCGATATAAATACCGACATGGCGTCCCGTTGAACCGGCACGGAACAGAAC
TAAATCACCCGTACGCAAATTACTGCGGGAAACAGATTTACCCATTTCCTGCTGTTCGTA
AGTCGAACGCGGAAGTTCTAAGCCAAATTGCTCACGGAATGTACGCTGTACGAAACCAGA
ACAATCGATACCTTTTTTAGTGCTGCCGCCCAGACGATAACGTACGCCTTTCCAGTCAGC
ATACTGATCCATAATTCGCGATTTTACGTCGACATTACGAACCAGGTTTTCAAATTCATC
CTGAGAAGCTTGCAGTGATGATGTTTCACTACCCACTGCACGTGTCTCAGGATGCATATT
CTTTGCGGTGTTATTTGCACTACATGCAGAAAGCAGAACCGCTACTGCAATCGCGGGGAT
CCCGCGCAAGATATATCTCAAAATCGGTTGAGATTTGACCATGTTGTTTGTTTTCCCTTG
AAGTCCTTAACGACAAATATCGTTATAAAAAAATGCCAAGCGACACGAGACTAATTACCT
GGGCATGTTGAAACAATTCCTTAAGGCCAAATCTGTGGACTAACGCACAAAATTATATGC
TGTGAGGATAATCTACCGCCGAGGCAAAACGAGTTCGAGATTACCCGATTGGTGCGGTCT
TGGCGAGCGGTTTTACATGATTTTTTATAAGAAAAAGTGATACAGAAAGTTAATAAGCGG
GATTGCTCAATTAAAGTACGATTGAGTGAAACGCATGCAATCCATTCATTTACTTAGAGA
ATGATTTTTGCTTTCGATGCATGAAAGCACGGTGCGCATCATCAGGATTATCCTCACTAT
AAAAATAAACCTGATGATGTTAATTACTGTGAGTTATTTGTTTTGGAAATGTTTGTTTTT
TCCCGGTAGTGATTTGTCAAAAAAGGTGATTAATCGATCACTTAATGGCGTCAGCAACAC
CCAGGGCAAACCGATCAATATCACGGTCATCGAACCGACAATGATGTCAGTAAACCAGTG
TGCGCCAATCATTACTCTGGGAAACGCAAAAACCACAAAAATAATAAGGGCGATAAGACC
TGCAACTTTGCCGAAATAGCGCCACATGAATGCCGAAAAAATAAGCAGCATCATGCCGTG
ATCGCCGGGAAAGCTATCTCGTGAGGCATCTTTCGTGGGGACAGAGAGCAGCAGTTCGCT
GACGCGGTTAATATCGGTAAAAGTCAATGTTGGGCTGGCCCGTTTTACAGGAATTAATGC
CTGACCCAGCTGGTTTAATACCACTGCAGTTAATAGCATGACCAGACCAATAATCACGAT
ACGTCGTCTGCCTGGGGCGTTTTCTTTCAGCCAGAAACTCAGCATCAACATTCCCATCGC
CAGCAGTGAACAACCGTCGAAAGCGCGATTGTTGGTCAATGCAACCAGCCACAAAAAGGC
CTTACTTTCGACCAGTTTCTGATTAAAGAAATAAAAAATATCCGCATCAATCGGCAACCA
GAATCCATGATTAACGGGAATATACCAGGAAAGAAACAGCGCGAGGCCGACAATATTCAA
CAACACTATTTGCGGCAAATTTTTAATCATATTTTCTCTAATTATCTTACTGAAAAACGC
AGGCAACCTTACGCGGTAGTCGCTAAACGAAGCTTCAACAGCGCGCTCTGCAAGGCATTC
CAGTCAGCTTCGCTGCTGGAAATCAGCTCAATACGGCTGTCCGGTGGCGCAACGTTTTGC
GTTTCAATGTGCAGGTCATCGCCCTGACGGTTGATTCGCACCAGCCCTTCGGGAATACGC
AGCACGCCTTTGACGCGTTCCACCGGTGCAAGTCGCGCCCATTCCAGAATGCCAATGGTG
TCGAATACCGTATCAGCGTCGAATATCCAGCCGCAGGCCTGATATCCTTGCCCGCTGTTC
AGACTGCGACGCCAGCGTTGATGCTCTGGCAGGCTTAACGCTGCTAACCCTTTTTTCACG
ACATGCTGATGAGAATGCGCGGCGCTGGCGGGCAACTCGGCTAAATTGCGACGCGGCAAA
TCCAGAAGATGACCGTCAACTTTCCCATGCTCACTGTGAATTAATTGCCGATCGCCACCA
TTTTGCTGCCACCAGCGCTGTAGCGCTTGCTCGCTTTCAGGTGTCGCACGGTCGGATTTA
TTGGCGACAATGATGTCTGCGGCAGCCAGCTGGTCACGGAAGTTTTCATTGCTGGCGCTT
TTTTCGTCCAGCAGCAGGCGTGGATCGAGAATGCACAACGTGGCGCGCAGATCTATCCAC
GGTTCATAGACTGGTGCGGTTAACAGATCGAGGATCTGTTTCGGATGGCCCAGCCCGGTC
GGCTCTATCAACAAGCGGTCTGGTTTTCCCTGACGCAGTAAGGTATTCAACCCTACCTGC
ATGGGTAAACCATTAACGCAGCACATGCAGCCGCCGGGGATCTCTTTCAGCAATGCGCCG
CTATCGGCGAGCAAAGCACCATCAATTCCGACTTCCCCAAATTCATTAACCAGTACCGCC
CATTTTTCGTTGGGATCTTTATGGGCTAACAGATGAAGAATCGACGTAGTTTTCCCGCTG
CCGAGAAAACCGGTGATGAGGTTGGTCCTGGTCACAACGGCTCCGCAATACTCTGATAAG
TTAACTGAGCGTTAATCCTGGCTAAAAACGGCAGAAAAGAGAAGGGGAGAGCGGACGAAG
GTGAGCTTCATCCGCTTTAACCGCAGAAATCGTTAAATTTTGAGGGTGTTTAATAGCGCC
TGATGCGCGCCGAATTGTGCGATTTGTTGCCAGGCTTGTTCGATGGCCTGCACAAAATGC
GGGTTATCTGGCAGATCATCACCGAAAACTTCACGCAGGGAAAGCAGGGCGGTGACGCGT
TGCTCACTGCTGCTGCCCGCAACAAGATCGCGAATTTTATCGCTAAGCGGATCGCGAACA
TCAATGGCATTTCCGGCATCATCAACGCCGCTGACGTAACGCATCCAGCCTGCAACGCCT
AATGCCAGCAACGACCAGTCCGTTTCGCGCCCCAGATGTATGCGAATACCTGCCAGCATA
CGTTGCGGTAATTTCTGGCTGCCATCCATCGCGATTTGCCAGGTCTTATGTTTCAGCGCC
GGATTAGCAAAACGTGCAATTAACTTATCCGCATATTGTGTTAAATCGACATCTTTAATT
TGCAGTGTCGGCGCTTGCTCATCCAGCATTAATGTTCTGGCAGCATGGCGAAATGCGCGA
TCCTGCATGCAATCACTGATATGGGCGAATCCTGAGAGGTAACCCAGATAAGCGAGAAAA
GAGTGGCTGCCATTAAGCATACGCAGTTTCATCTCTTCCCATGGCAGGACATCATTCACC
ATTTGTACACCTGCGACTTCCCAGGCAGGACGCCCAGCGACGAAGTGATCTTCCACCACC
CACTGGATAAACGGTTCGCAGCTAATCGCGCAGGGATCATTTACCCCCAGATGCTGGCTG
ATTTCTGCCAGTGATTCGTCGGTTGCAGCCGGAACAATGCGGTCGACCATGGTTCCCGGA
AAACTGACGTGTTCTTTTATCCACCCGGCGAGTTCTGGCGAACGTTTTTCTGCCATTCCC
AGCACCGCGTTTTTCACCACATGGCCATTGTCGGGAATATTGTCGCAGGAGAGCACGGTA
AACGGTGTAAGGCCGCGCTCACGGCGGCGTTTCAGTGCTTCGACGAGAATACCTGGCGCG
GAGTGAGGTTCTTCAGGGTTTTGTAGATCGTGAATAATCCGCGGATTGCTGGTGTCGAGT
GCACCGGTGGCCGGGTCAATACAATAGCCTTTTTCGGTAATCGTCAGGGAAACAATTGCC
ACCTGTGGCTCGCAAAATTTCTCAATAATTGCCGCTAAGGAATCCAGTTTTGCATTCAGG
CATTCGTGAACGGCACCGACAATTATCGCCTGATTGCCGTCCGCCCCTTTCTCCAGCACG
GTGTATAAATGGTTCTGTGCGCGGAGCTGGCTCATCAGTTGATCACCGCTGAACAAGCTG
ATTTCACAGATCCCCCAGTCACCGCCCTGGGCATTCAGCACACGATCGGTCAGTAACGCC
TGATGTGCGCGGTGAAAGGCTCCAAAGCCAAAATGAACGATACGTGATTGCAACTGCTGG
CGATCGTAGCGTGGAGCGTGTACATGATGCGGGAGCGTAACGGAGGCGATTGTATTCATA
GGAGTCACGTCTTAGTAACGATTAATTAACAATGACAGTGTAAAGTTATATGACAGCAAT
TGAAATTGGTCTGGATTGTTAATGCGATGAAGTGTGAGGGCGATCAATCAACGAGTGAAA
ATTGAGGGCGTAAGGTGTTCAGGAAGCACAAAATAGAAGATTGGTATAATAAATTAAAAA
AGGGACAGCCTGAGCTATCCCTTTTCTGCATGCGGCTGAAGTTAGTCAGCACGACCCATA
TAACGGCGTTCTTCGATATGGATACGAATTTTTTCGCCCGGGCTTAAGTATTCTGGTACC
TGAATCACCAGACCAGTGCTCAATGTCGCCGGTTTGTTACGGGCGCTGGCAGATGCCCCT
TTGATGCCTGGTGCAGTTTCAACGATTTCCAGATCAACGGTCTGCGGCAGCTCAAGCGCC
AGCAGTTGACCGTCCCAGGTCAGCACCTGCATGTCCGGCATGCCGCCCTCTGGCATAAAC
AGCAACTCTTCTTCAATCTGATCTTTGGTGAAGGTATACGGGGTATAGTCTTCTTTATCC
ATAAAGACATATTCGTTGCCATCGACATAGGAGAAGTCAACGTAACGGCGGGTCAGCGTC
ACGGTGTCAACGATATCATCTCCTTTGAAACGCTCTTCTACTTTCAGCCCGGTACGGACA
TCAGAAAAACGCATTTTGTACAGCGTAGCGGCACCGCGGGCAGTGGGCGACTGAATATCA
ATGTCCTTAACCAGCAGCAGTTTGCCGTTGTAATTCAGTACCATACCTTTTTTAATTTCG
TTCGCTCTTGGCATCGAAAAATTCCTGTAGTCGAAAATGTCAAAAATATCGCGACAAAGT
ACTCGCGACGGGCCTTTCGGGCAAGTGGTATTCGCACTTTTGCTAGTGCAAAAAAGGTGG
TACTGTGCGCGCTCATCAATCCGGTGGTTAACCTTAAGAGAACAACGTATGGAATGCCGT
CCGGGTTGCGGGGCGTGTTGCACTGCCCCTTCAATTTCCAGCCCTATTCCCGGTATGCCA
GATGGCAAGCCCGCCAATACGCCCTGCATTCAGCTTGATGAACAGCAACGCTGTAAAATT
TTCACCTCGCCACTGCGACCGAAAGTCTGTGCAGGCTTACAAGCCAGCGCTGAAATGTGT
GGTAACTCGCGTCAGCAGGCCATGACCTGGCTTATCGATCTGGAAATGTTGACCGCGCCT
TAAACATCTTTAATCCGCAGTAAGCAAAACAGAGTGGCGATAATCATCACCATCGCAAAC
CAGAACACAGCGTGATAATTCCAGATCTCGGCGACGATGCCCGCCACTGATCCTGCGATG
ATCCAGCCCACGCGCGACGTGTTGGTATAGAGCGTGGTGGCTGAACCTGCCTGACCGGGC
ATCAAATCCTGAAAATAGAGCATCCCGATGCCGCCCAGAATGCCAATAAAAATAGCATTT
AGCAGCTGCAAGCCCAACAGAATGATAGGTGAATGCGCCATCAGCATTCCTGCGTAAAAA
CAGACGCCACCCACGGCAGCAACGCGCATTAAGAAACGCTTACCCAGACGTTTGGCGAAA
TATCCGGCAATCAACATCGTCGGGATTTCCAGCCCGGCGGCGGTCCCCATCATCACACCG
GCCAGTTTCTCGGGAAGATGCAGTTCGTTGATAATAAATAGCGGCATGTTGATGATGTAC
AGACTGTTCGAGCCCCACATCAATGTACAAATGACAAACAGCAGCAGCGTATCGCGACGG
TTACGGCGCGGCGCTTCAACCGTGCCGGTCGCCAACGGAAGCTCTTTTTGCATCGACGGT
AAAAACAGCCACACCATCACGCCGCAAACAATAAATGCTACCGCTGCGCTCAGATACATT
ACCGTAAAGCTGAAACCCATCGCTAAGGCATAAGCCAGCGGTGGGCCAATGACCCATGCC
AGTGAAACCTGAGCGCGTAAAAAAGAGCTGAACATCACCGCCTCACGTCCGGTTTTGTCG
GCATGTTCACGGGCAAGGGCAAACATTTGCGGGTTAGCGGTCGAGCCAAAGCTGCTAAGA
AAGACGCCAACGAATAGCAACACAAAGTAGTTGCGATTCCAGGCAAAAAGGGTGCAGGCC
AGCACGCCTAACAGGCAGCAAAAGACAATCAGCGATTTGCGATCGCCGCGCTTATCAGAG
CGCCCGGCGAGAAACTGACTCACCAGAATCCCAATGACAGCGCTGCCGGTAAAGAAGAAT
CCCACCATCGCCGGACGGGCATGTACTTCATCGGTAAGAAAAATACTGAGTGTCGGGGTT
TGCAGAGCGCCCGCAATACCGGTGAGAAAGGCAACGATTAAAAACGCCGTCGAGGTCAGG
TCAAACGATTTCGCGCTGGAGACTGCGGGGGAGTTATGCATGCTGGTCGATCATTGGAAG
AGGAAGACGCGGAGTTTACGCTGCTTGTCAGAAAATAAACAGACAGCGAAATCAAAAGCG
CCACGAATAATCAAAATGCCATTTCACTGTTGCTGATTGGCTGCTGACGCTGCTGAAATG
AAATTGCTGATAACGGATTTTTCCATCAGCAGTTCGGAAAAATGACAAAAAATTGTGCAG
CACATCAAACTTTTGCTCATAACTTTACGGCTTTCCTTGCGTGCTGAAACAGAAGTATTA
TGCTTTCTTGAAACGTTTCAGCGCGATCTTGTCTTTAACCCTAAGCCAGGTTGGCGCTTT
TTTTCTCATAGAAGCTGAATCGTTTCAATTCAGCAAGAGAGGAGAACTATGTTCCAGTTA
TCCGTACAGGACATCCATCCGGGCGAAAAGGCCGGAGACAAAGAAGAGGCGATTCGCCAG
GTCGCTGCGGCGCTGGTGCAGGCCGGTAATGTAGCAGAAGGCTACGTCAATGGCATGCTG
GCGCGCGAACAGCAAACCTCAACGTTCCTCGGCAATGGTATTGCTATTCCACACGGCACT
ACCGACACCCGCGATCAGGTGCTGAAAACCGGCGTTCAGGTATTTCAGTTCCCGGAAGGC
GTCACTTGGGGTGACGGTCAGGTAGCGTACGTAGCGATCGGTATTGCTGCCAGCTCGGAT
GAGCATCTGGGCCTGCTACGCCAGCTGACCCACGTACTGAGCGATGATTCCGTTGCTGAA
CAACTGAAGTCAGCAACAACAGCAGAAGAACTTCGCGCATTGCTGATGGGCGAAAAGCAG
AGTGAGCAGCTGAAGCTCGACAACGAAATGCTGACACTGGATATCGTCGCCAGCGATCTG
CTGACTCTTCAGGCGCTGAACGCTGCGCGTCTGAAAGAAGCGGGGGCAGTTGACGCCACT
TTCGTCACCAAAGCCATCAATGAACAACCGCTGAACCTCGGACAGGGCATCTGGCTGAGC
GATAGCGCCGAAGGCAATTTGCGTAGCGCGATTGCGGTAAGCCGTGCGGCAAATGCTTTT
GATGTGGACGGCGAAACGGCAGCCATGCTGGTGAGTGTGGCGATGAATGACGATCAGCCC
ATTGCGGTTCTTAAGCGTCTCGCTGATTTGTTGCTCGACAATAAAGCTGACCGCTTGCTG
AAAGCGGATGCGGCAACGTTGCTGGCGCTGCTGACCAGCGATGATGCGCCGACCGACGAC
GTGTTAAGCGCGGAGTTTGTGGTGCGCAATGAACACGGCCTGCATGCTCGTCCAGGTACC
ATGCTGGTCAACACCATTAAACAATTTAACAGTGATATTACCGTGACAAACCTTGATGGT
ACCGGCAAACCGGCAAACGGACGTAGTCTGATGAAAGTTGTGGCACTTGGCGTTAAGAAA
GGTCATCGCCTACGCTTTACCGCCCAGGGTGCAGATGCTGAACAGGCGCTGAAAGCAATC
GGCGACGCTATCGCTGCTGGTCTTGGGGAGGGCGCATAATGAGCAGACGTGTTGCTACTA
TCACCCTTAATCCGGCTTATGACCTTGTTGGTTTCTGCCCGGAAATTGAACGCGGCGAAG
TGAACCTGGTGAAAACCACCGGTCTGCATGCGGCGGGTAAAGGCATCAACGTGGCCAAAG
TATTAAAAGACCTGGGAATTGATGTCACCGTTGGCGGCTTCCTCGGTAAAGACAATCAGG
ATGGTTTTCAGCAACTGTTCAGCGAGCTGGGCATTGCCAACCGTTTCCAGGTTGTACAGG
GGCGCACCCGAATTAACGTTAAGCTGACGGAAAAAGACGGCGAAGTGACTGACTTCAACT
TCTCGGGTTTTGAAGTCACTCCCGCCGACTGGGAACGCTTTGTGACTGATTCTCTGAGCT
GGCTCGGTCAGTTCGATATGGTCTGTGTCAGCGGAAGCTTACCGTCAGGCGTCAGCCCGG
AAGCGTTCACCGACTGGATGACTCGCCTGCGTAGTCAGTGTCCTTGCATTATCTTTGATA
GTAGCCGTGAAGCGTTAGTAGCAGGTTTGAAAGCGGCACCGTGGCTGGTGAAACCTAACC
GCCGCGAGCTGGAAATCTGGGCAGGCCGTAAACTGCCTGAAATGAAAGATGTGATTGAAG
CTGCGCATGCGCTGCGTGAACAAGGTATTGCGCATGTCGTTATTTCACTGGGTGCCGAAG
GCGCGCTTTGGGTTAATGCCTCCGGCGAATGGATCGCCAAACCACCGTCAGTCGATGTCG
TAAGCACCGTTGGCGCAGGGGATTCTATGGTTGGTGGCCTGATTTATGGCTTGCTAATGC
GTGAATCCAGTGAACACACACTGCGTCTGGCGACTGCTGTTGCAGCCCTGGCGGTAAGTC
AAAGCAATGTGGGTATTACCGATCGTCCGCAGTTGGCCGCAATGATGGCGCGCGTCGACT
TACAACCTTTTAACTGACAGCAGGAGAGGCATAATGAAAACGCTGCTGATTATTGACGCT
AATCTCGGTCAGGCACGCGCCTATATGGCGAAGACCCTGCTGGGCGCGGCGGCGCGAAAA
GCAAAACTGGAAATCATCGACAATCCGAACGACGCAGAAATGGCGATTGTTCTCGGTGAT
TCCATCCCGAATGACAGCGCGCTGAACGGTAAAAATGTCTGGCTGGGCGATATTTCCCGG
GCAGTTGCGCACCCTGAGCTGTTCCTGAGTGAAGCCAAAGGCCATGCGAAACCTTACACT
GCGCCGGTCGCTGCGACAGCACCGGTTGCCGCCAGCGGTCCGAAACGCGTAGTTGCGGTG
ACTGCTTGCCCGACTGGCGTAGCACACACCTTTATGGCGGCTGAAGCCATTGAAACCGAA
GCGAAAAAACGTGGCTGGTGGGTGAAAGTTGAAACCCGTGGTTCTGTTGGTGCGGGTAAT
GCAATCACCCCCGAAGAAGTAGCCGCAGCGGATCTGGTGATTGTGGCGGCAGATATCGAA
GTGGATCTGGCGAAATTTGCGGGTAAACCGATGTATCGCACCTCTACCGGTCTGGCGCTG
AAGAAAACCGCGCAGGAACTGGATAAAGCGATTGCTGAAGCAACGCCGTATGAACCGGCG
GGCAAAGCTCAAACGGCGACCACTGAAGGTAAGAAAGAGAGTGCAGGCGCTTATCGTCAC
TTGCTGACGGGCGTCTCTTACATGCTGCCGATGGTCGTTGCAGGTGGTCTGTGTATCGCG
CTTTCTTTTGCTTTTGGTATCGAAGCGTTTAAAGAGCCGGGTACGTTGGCAGCGGCGCTG
ATGCAGATTGGTGGTGGTTCAGCCTTTGCGCTGATGGTGCCGGTACTGGCAGGTTACATT
GCCTTCTCCATTGCCGATCGTCCGGGTCTCACGCCGGGTCTGATTGGCGGTATGCTGGCG
GTCAGCACCGGTTCTGGCTTCATTGGCGGTATTATTGCGGGCTTCCTGGCTGGTTACATT
GCGAAGTTAATCAGTACGCAACTGAAACTGCCACAGAGTATGGAGGCGCTGAAACCGATC
CTGATCATTCCGCTAATTTCCAGTCTGGTGGTCGGTCTGGCGATGATCTACCTGATCGGT
AAACCGGTTGCTGGCATTCTCGAAGGGTTGACTCACTGGCTGCAGACCATGGGGACTGCG
AATGCGGTTCTGCTGGGGGCGATCCTCGGTGGCATGATGTGTACTGACATGGGCGGTCCG
GTAAATAAAGCAGCGTACGCATTCGGTGTGGGTCTGCTGAGTACTCAAACCTATGGCCCG
ATGGCGGCGATTATGGCGGCAGGTATGGTGCCACCGCTGGCAATGGGCCTGGCAACAATG
GTGGCGCGTCGCAAATTCGACAAAGCGCAGCAGGAAGGTGGCAAAGCCGCTCTGGTACTG
GGACTGTGCTTTATTTCGGAAGGTGCAATTCCGTTTGCTGCTCGTGATCCGATGCGTGTG
CTGCCGTGCTGTATCGTGGGTGGGGCGCTGACTGGCGCAATCTCAATGGCGATTGGTGCG
AAACTGATGGCACCGCACGGTGGTCTGTTTGTTCTGCTGATCCCTGGCGCTATTACGCCG
GTACTGGGTTACCTGGTAGCAATTATTGCCGGTACGCTGGTGGCGGGTTTGGCCTATGCC
TTCCTGAAACGTCCGGAAGTGGACGCAGTAGCGAAAGCCGCGTAATAAAAGGTGTGTTAC
AGGGCAGAAATTTACTGCCCTGTATCATTGGATGAGCGCAAAGAGAATGACCGGTTTGTG
AATGTAATTTTATGAATTTAAATGGTTTTATCTTTCAGTAGAAACCTGAAACGTTCATCA
AATACTAAGGTTATTTCCTCAAGGGCAGATTCTTTTCTGCCCTTTTTTAGTGTTCATGTT
CTGTGCATCCCGTCACAAATTCCTCGCTTTTGTAATTCAGGCATTTAATCGCATTTTGTG
AGCCTGCTCAAATCTGCCTATTTTGCCTCTCTGGCGGTAATTTACTTTACGTAAAACATG
CATACTATGAGCACATGTTTAAATATGAACACATGTTTAAACCGTCTTTGCAGTATCTAT
ATTCTTGTGGATTGACAGGGTTGGTAATTTTTACCAGAGGACGTGCTATGCGCGAAAAGG
ATTATGTCGTAATTATAGGTTCGGCGAATATTGATGTCGCCGGATATTCACATGAATCAT
TAAATTATGCGGATTCAAATCCAGGTAAAATAAAATTTACGCCTGGTGGAGTAGGGCGCA
ATATTGCACAAAACCTGGCGTTGCTGGGTAACAAAGCCTGGCTACTGAGCGCCGTAGGCA
GTGATTTTTATGGTCAATCGCTGCTAACGCAAACCAATCAATCAGGCGTTTATGTCGATA
AATGCCTGATTGTGCCGGGAGAAAATACGTCGAGTTATTTATCATTACTCGATAATACCG
GTGAAATGCTGGTTGCTATAAATGACATGAATATTAGCAACGCTATTACAGCTGAATATC
TCGCACAGCACCGTGAATTTATTCAGAGGGCAAAGGTCATTGTCGCGGACTGTAATATCA
GTGAAGAGGCACTGGCATGGATTCTGGATAATGCCGCCAACGTACCTGTATTTGTCGATC
CGGTTTCCGCGTGGAAATGTGTCAAAGTGCACGACCGTCTAAATCAGATCCACACTCTCA
AGCCAAACCGCCTTGAAGCGGAAACCCTGAGTGGGATTGCGCTGTCAGGGCGTGAAGATG
TGGCAAAAGTTGCTGCCTGGTTCCATCAACATGGCCTGAACCGACTGGTATTGAGCATGG
GCGGCGATGGCGTTTATTACAGTGATATCAGCGGTGAAAGTGGCTGGTCTGCCCCGATCA
AAACCAATGTTATTAATGTTACCGGAGCGGGCGATGCCATGATGGCGGGACTTGCTTCGT
GTTGGGTAGACGGAATGCCGTTTGCCGAATCTGTTCGTTTCGCACAGGGATGTTCGTCAA
TGGCGCTCTCCTGTGAATACACCAATAACCCCGATTTATCGATTGCCAACGTTATATCGT
TAGTGGAGAACGCAGAATGTCTGAATTAAAAATTTCCCCTGAATTATTACAAATTTCCCC
GGAAGTGCAGGACGCTTTAAAAAACAAAAAACCGGTTGTGGCGCTGGAATCGACCATTAT
TTCTCACGGGATGCCGTTCCCACAAAATGCCCAGACCGCAATTGAAGTTGAAGAAACTAT
TCGTAAACAGGGCGCTGTACCTGCCACTATCGCCATTATTGGCGGCGTGATGAAAGTGGG
TTTAAGCAAAGAAGAAATTGAATTACTGGGTCGTGAAGGGCATAACGTGACCAAAGTTAG
TCGTCGCGATTTACCTTTTGTTGTTGCCGCCGGAAAAAATGGCGCAACCACTGTGGCTTC
AACGATGATTATTGCGGCGCTTGCCGGAATTAAAGTATTTGCCACCGGGGGAATTGGTGG
TGTGCATCGCGGGGCGGAACATACCTTCGATATTTCTGCCGATTTGCAAGAACTGGCAAA
TACTAATGTCACCGTTGTTTGTGCCGGGGCGAAATCTATTCTCGATTTAGGATTAACCAC
TGAGTATTTAGAAACCTTCGGTGTGCCGTTAATTGGCTATCAGACTAAAGCGCTGCCTGC
GTTTTTCTGCCGTACCAGCCCGTTTGACGTCAGCATTCGTCTCGACAGCGCCTGTGAAAT
TGCCCGTGCAATGGCGGTGAAATGGCAAAGCGGGCTGAACGGTGGCCTCGTGGTAGCGAA
CCCGATCCCGGAACAGTTTGCGATGCCAGAACACACTATCAATGCGGCGATCGATCAGGC
GGTAGCTGAAGCTGAAGCGCAGGGTGTTATTGGTAAAGAAAGTACGCCATTCCTGCTGGC
GCGCGTTGCTGAACTGACCGGCGGTGACAGCCTGAAATCCAACATCCAACTGGTGTTCAA
CAACGCCATTCTGGCGAGTGAAATTGCCAAAGAATACCAGCGTCTCGCGGGTTAATTTCT
GACGGGCAGAAAGCCGTCGCCCGTACTCATCAAACATACCAAAACCTGGCGCTGACGCCG
GGTTTACTGGCATGAAGGGAAAATCATTATGGACATAATGAGAAGTGTTGTGGGGATGGT
GGTGTTACTGGCAATAGCATTTCTGTTGTCAGTGAATAAAAAGAGCATCAGTTTGCGTAC
GGTTGGAGCCGCACTACTGCTGCAAATTGCTATTGGTGGCATCATGCTCTATTTTCCGCC
GGGAAAGTGGGCTGTAGAACAGGCGGCATTAGGCGTTCATAAAGTGATGTCTTACAGTGA
TGCCGGTAGCGCCTTCATTTTTGGTTCGCTGGTCGGGCCGAAAATGGATGTCCTCTTTGA
CGGTGCGGGTTTTATCTTCGCCTTTCGCGTACTCCCGGCGATTATCTTCGTCACTGCGCT
CATTAGTCTGCTGTACTACATTGGCGTGATGGGGCTGCTGATTCGCATCCTTGGCAGCAT
TTTCCAGAAAGCCCTCAACATCAGCAAAATCGAATCTTTTGTTGCGGTTACCACTATTTT
CCTCGGGCAAAATGAGATCCCGGCGATCGTTAAACCGTTTATCGATCGCATGAATCGCAA
CGAGTTGTTTACCGCAATTTGTAGCGGGATGGCGTCCATTGCGGGTTCGATGATGATTGG
TTATGCCGGAATGGGCGTACCAATTGACTACCTGTTGGCGGCATCGCTGATGGCGATCCC
CGGCGGTATTTTGTTTGCACGTATTCTTAGTCCGGCAACCGAGCCTTCGCAGGTCACATT
TGAAAATCTGTCGTTCAGTGAAACGCCGCCAAAAAGCTTTATCGAAGCGGCGGCGAGCGG
TGCGATGACCGGGTTGAAAATCGCCGCCGGTGTGGCGACGGTGGTAATGGCGTTTGTCGC
AATTATTGCGCTGATTAATGGCATTATCGGCGGAATTGGCGGCTGGTTTGGTTTTACCAA
TGCTTCTCTGGAAAGTATTTTTGGCTATGTGCTGGCACCGCTGGCGTGGATCATGGGTGT
GGACTGGAGTGATGCTAACCTTGCGGGTAGCCTGATTGGGCAGAAACTGGCGATTAACGA
ATTCGTCGCTTACCTGAGTTTCTCCCCATACCTGCAAACGGGCGGCACGCTGGGAGTGAA
AACCATTGCGATTATCTCCTTTGCGCTTTGTGGTTTTGCTAACTTTGGTTCTATCGGTGT
TGTCGTTGGCGCATTTTCGGCTATTTCGCCAAAACGTGCACCGGAAATCGCCCAGCTTGG
TTTACGGGCGCTGGCAGCAGCAACGCTTTCCAACCTGATGAGCGCGACCATTGCCGGGTT
CTTTATTGGTTTAGCTTGAGTTTCATTGCCGGATGTACTCGCTTATTAAGCGTTGCATCC
GGCAATCGCGCTATTGCAAATAATTTTTACTGCATCATCCCGGAGAATTTATTCTCCGGG
TCCATCTCCAGCGCCAGTCCTGACAACTGCCTTTTGTTTTTAATGAGATACCCTTTCTTG
CTTTTAATTAATAAACCGTCGTGAATGAATTGCGCGAGAACATATAAAAGATGTCGATAA
GAAACGCCTAAATACTCTGCCGCTTGCGTATGCTTTTCGTGATAAAGATCACCTTCTTGT
GAGAGTAATATAAATGCTGCCAGGCGATTCACTAACGGAAATGATTGGTTCTGAGTTAAA
GAAACAATATTACGATAATTTTTATGACTTAAGGTGACGCAAAGTTTTCGTAAAAATAGG
GTGTCGTTTAATAACAGCGGACGGTAATGTTTCATAGGGAGCGCAAGGCACCAACACTCT
TCAATCGCCTGTACTGCACGTGGTTCATGGTCTTTATCGATTAACTCAATCTCGCCAATA
AAACAGGGGGCGGCAAAGAAATCGATCAGCGACACGCGACCATTAGCTAGCGTGGCGTAA
AGCCTGGCGCGGCCTCGCGTCAGGTAAAACAGCCAGGACGGCTGTTGCCCTTCCTGCACA
ATGTAGTCACGCGCTAAAAAATGAAACAGCCGCGTATCGGCTGAAACATCCGTTAAAAAG
CAATCCTTAAACGCGGATTCACTCATCAATTGCAGCTTAAGATCATTATTGTGGATTTCT
TTCACGATGTTTATCCGCTGTGAGATTTCTCATATTTAGCATACGTACGCTGTTGTTAAG
ATTCAATCATCGGCCCGGTCGAAATTTCTTTGCTGTAGAAAAAAATAACGCAACTGGAAA
CAGAGGAAATAAACAATGGAAAAGAGAAAAATTATTCTGGATTGTGATCCGGGTCATGAT
GATGCTATTGCTATAATGATGGCGGCGAAACATCCGGCGATTGATTTATTAGGTATCACC
ATTGTTGCGGGTAATCAGACGCTTGATAAAACATTAATTAATGGCCTGAATGTTTGCCAG
AAACTGGAGATTAATGTTCCGGTTTATGCGGGGATGCCGCAACCCATTATGCGTCAACAA
ATCGTTGCCGATAATATTCACGGTGAAACCGGACTGGATGGCCCGGTATTCGAGCCGCTG
ACCCGCCAGGCAGAAAGTACCCACGCGGTGAAATACATCATTGATACCCTGATGGCAAGC
GATGGCGATATCACTCTGGTGCCGGTTGGTCCGTTGTCAAATATCGCGGTGGCAATGCGT
ATGCAACCCGCAATCCTGCCCAAAATCCGTGAAATTGTGCTAATGGGCGGCGCTTACGGT
ACAGGCAACTTCACGCCATCTGCCGAGTTCAACATCTTTGCTGACCCGGAAGCCGCACGC
GTGGTGTTCACCTCTGGCGTTCCATTAGTGATGATGGGCCTCGATCTCACCAACCAGACC
GTTTGCACCCCGGACGTGATTGCACGAATGGAAAGGGCAGGCGGCCCTGCCGGAGAGCTG
TTCAGCGACATCATGAACTTCACTCTCAAAACCCAGTTCGAAAACTACGGCCTGGCTGGC
GGCCCGGTGCACGACGCCACCTGCATCGGTTATCTGATTAACCCTGATGGCATTAAAACC
CAGGAGATGTACGTCGAAGTGGACGTCAACAGTGGCCCTTGCTATGGGCGTACCGTCTGC
GACGAGCTGGGCGTTCTTGGCAAGCCCGCTAATACCAAAGTCGGCATCACTATTGATACC
GACTGGTTCTGGGGCTTAGTCGAAGAGTGCGTGCGCGGCTACATCAAAACCCATTAAGTG
TTGATAACAAGCCGGGTCAGTATCGCAAGATGCAGGCCCGGCTATTTCTGAGGGGCAGAA
AGCCGTCGCCCAATATGACATGAAGAGATAATAACTATGGATGTCATGAGAAGTGTTCTG
GGAATGGTGGTATTGCTGACGATTGCGTTTTTACTGTCAGTAAACAAGAAGAAGATCAGC
CTGCGTACCGTTGGCGCGGCGTTAGTGTTACAGGTTGTGATTGGCGGGATTATGCTTTGG
TTACCGCCAGGGCGTTGGGTCGCTGAAAAAGTCGCTTTTGGCGTGCATAAAGTGATGGCG
TACAGCGACGCGGGTAGCGCATTTATCTTCGGTTCGCTGGTCGGGCCGAAAATGGACACG
CTGTTTGATGGCGCAGGATTTATCTTTGGTTTCAGGGTGTTACCGGCAATTATCTTCGTC
ACCGCGCTGGTGAGTATTCTCTATTACATCGGTGTGATGGGGATCTTAATTCGCATTCTC
GGCGGTATATTCCAGAAAGCATTAAATATCAGCAAGATCGAGTCATTCGTCGCGGTCACT
ACCATTTTCCTCGGGCAAAACGAAATTCCGGCGATCGTCAAACCCTTTATCGATCGTCTG
AATCGCAATGAATTATTTACAGCGATTTGTAGTGGCATGGCCTCGATTGCTGGTTCGACA
ATGATTGGTTACGCCGCACTGGGCGTACCTGTGGAATATTTGCTGGCGGCATCGTTAATG
GCGATCCCCGGCGGGATCTTGTTTGCCCGCATGCTAAGCCCGGCTACGGAATCTTCACAG
GTTTCCTTTAATAACCTCTCTTTCACCGAAACACCGCCAAAAAGCATTATTGAAGCGGCA
GCGACAGGGGCGATGACCGGGCTGAAAATCGCTGCGGGTGTGGCAACAGTGGTGATGGCA
TTTGTTGCCATCATTGCGTTAATTAACGGTATTATCGGCGGCGTAGGCGGCTGGTTTGGT
TTTGAACATGCCTCGCTGGAGTCCATTTTAGGTTACCTGCTGGCCCCACTGGCGTGGGTA
ATGGGTGTTGACTGGAGTGATGCGAATCTTGCCGGGAGTTTGATTGGACAGAAACTGGCA
ATAAATGAATTTGTCGCTTATCTCAATTTCTCACCCTATCTGCAAACGGCTGACACGCTG
GATGCTAAAACCGTGGCGATTATTTCCTTCGCGTTGTGCGGTTTCGCTAACTTTGGTTCT
ATCGGGGTGGTGGTGGGGGCGTTTTCTGCGGTTGCGCCACACCGTGCGCCGGAAATCGCC
CAGCTTGGTTTACGCGCGCTGGCGGCGGCGACACTTTCTAACCTGATGAGTGCCACCATT
GCCGGGTTCTTTATTGGTTTAGCGTAGTGTGCGATTTATGAGCCGGATTAGATGCGGTCA
AGCGTCGAATCCGGCAACATTGTTACACCATTGGCACTAATGACAGCGCGTTATCGGCAG
ACAGGGTAGGGTTGTTTAAGCTGCCGCTGGCGCGTGAAATTGCCGCGCAGGCCATCGCAA
AACGGGCGCTGTCACGGAAATTGTTTCCCTCCAGAAAGCTATATACCAGGCCCGCCATAA
AACCATCGTCAGCACCAAAACTGTCTACTGTCGTATGCGCTGGTGCGGTCAGCAAAAATT
GTTCACCATCCTTTTCGCTGCAATAAACTGACTCATCGGGCAAATAAACAAACAGTTGCT
GAACACCTTGCTGATGCAACGCATTCACTGCGGCATTACGGTCAGCATCGCTGGTGATCG
CCTGTCCCCATAAAATTTCCAGCTCCGGTAAAGTGGGTTTCAGGGTGTGAATATGCGCCA
GCCAGGGTTTGATTTTGCCCGCTTTGAATTCTGAAACGGTATCGACAAACACCGGGATTT
GATCAGCGAGGGTAAAGACCCATTCCAGCGCCTCGGCTGTCAGGTTGCAATCAGCCAGTA
CCACGCCCGCATGACGAAGTAAATCGCGCGACCCGTTCAGTAGTTGCGGTGTCAACTGTT
CCAGCAGATGGGTATCGTTAATCGCCAGCACGGTTTGATCGTCTCGATTGGCAATTGCCA
GATACGTCGATGTGCTTTGACCATGTAAACGAACGCAGCCGGAGACATTCACGCCGGCAC
GGCGCGTTTCTTCCAGGAGCATTTCGCCATAAAAGTCATCGCCAATCACTGAAAGCAAAT
GGACGTCGCGGCCTAACAGCGCCAGATTGTGGGCGATATTGCGTCCAACGCCGCCTGCCG
AGCAATGAATTGTACCGGGATGAGAAGCCGCTTGCGGGTAACGGATATCCGCCATCCCGC
GAATATCCATATTGATTGTCCCCACCACTACGCAGTATTCCTGCTCGGTGAGAATGTAAC
CTTTGCCTTTAATCCGCCCTTTGCGCATTAAATCCATAATATGCGCCGCAACGCGCGAAC
GACTGATTTGCAGCATGTCCGCAATTTCGTTCTGCTGAATCAGCGGGTTACGCCGTAAAA
TTGCAAGGATCTCCTTTTCCCGGTTATTCATCTTCAGGCAACCGCTTTTTCAGTTTGTTG
CGCTTTCAGCCAGGCGATCTCTTCTGCCCAGATATCCGGGTTAATGGTTTCAAGGATCAG
CGGAATGCCGTCGAAACGGTCGTCCTGCATGATCCAGCGGAACGCATCATGACCGATATT
GCCTTCACCGAGGCTATGATGGCGGTCAACGCGGCTGCCAAAGGTGCTTTTCGCATCGTT
AAGGTGCATCCCGCGCAGATACTTAAAGCCGACAATACGGGCAAAATCAGCGAACGTTTT
CTCGCATTCGGCTGGAGTACGCAAATCATACCCGGCAGCGAAAGCATGGCAGGTATCAAT
GCAGATGCCGACACGGGATTTATCTTCCACGCCGTCGATAATCGCCGCGAGATGTTCGAA
TTTAAACCCTAAGTTACTGCCCTGACCGGCGGTGTTTTCAATCACCGCGGTCACACCTTG
AGTTTTATCCAGCGCAATGTTGATGGATTCGGCAATACGCGCAAGGCAATCCTCTTCTGA
AATCTGCATCAGATGGCTGCCAGGGTGGAAGTTGAGCAAAGAAAGCCCCAGTTGTTCGCA
ACGCTGCATTTCATCTATAAAGGCATCGCGCGATTTTTCCAGAGCTTCAGTGACCGGATG
TCCGAGGTTAATCAGATAGCTGTCGTGGGGAAGAATTTGCGCCGATGTGTAGTGATATTT
TTCACAGGCGGCTTTGAATTCATCGATGGTTTGCGTCGTGAGCGGTGCGGCACGCCACTG
ACGTTGGTTTTTGGTGAACAAGGCAAACGCGGTTGCGTCGATTTCGGCGGCGCGAATTGC
GGCATTTGCCAGACCGCCAGCAGCACTAACGTGCGCTCCAATGTATTTCATGCGAGGACT
CCTGTTAAACCCGCTGGAGGAAAACGGTAATGATAGCGGGTTAACAGGAGCAAGATGTAG
TGGTTTATGCGATGACGCTTTGAATCACATAGTTAATCGCACCACCACCAACAATCAGCC
AGGCAAACAGTACCAGTGCCATCAGCAGAGGTTTCGCCCCAGCTTTTTTCAGCGCGCTGA
CGTGAGTGGTCAGACCCAGCGCCGCCATCGCCATTGCCAGCAGGAAGGTATCCAGCGTTA
CCAGCATGTTCACCACGCTCTGCGGTAACAGGTGGAACGAGTTAAAGATGGCAACTACGA
TGAACAAGATGGCAAACCACGGAATAGTGATTTTGCTTTTCTCGCCGCTGTTCGCCCCAG
ACAGCTGTTTAACACGCGCCGCCAGCAGGATGAGGAACGGAGCCAGCATCATCACGCGCA
GCATTTTGGAAATAACTGCTGCGTTTTCCGCATCCGGGCTGATGGCATGACCTGCCGCCA
CCACCTGCGCCACTTCGTGCACAGTAGAACCAATGTAGATACCGAAAGTTTCCGGACTAA
ACCATTGAGACATCAGCGGATATATCGCCGGGTAGAGGAAAATCGCGACGGTCCCGAAGA
TAACAACGGTTGCAACAGCCACGGTTACTTTACTGGCTTCCGCTTTCACTACCGGCTCAG
TCGCCAGTACCGCGGCAGCACCACAGATACTGCTACCGGCACCGATCAACCAGCTGGTGT
GCTTATCCAGACCAAACACTTTCTGCCCCAGGAAGCAAGCCAGCAGGAAGGTACTGGACA
GCGTCAACACGTCAATGATGATCCCACTGATACCGACATCGGCAATTTGCGAGAACGTCA
GACGGAAGCCATAAAGAATGATACCCAGACGTAATAAATATTGCTTGGCAAACAGCACAC
CACCGTCACAGCTTTTCCAGATGTGCGGATAGATGGTGTTGCCTAAAACCATCCCCAACA
AGATTGCGAGGGTGAGGGCACTAAACCCGGCACCCGCAACCGCGGGAATGGAACCACCCC
ACAGGGCGACCCCGGTGATAACTGCACTCAGGGCTAACCCCGGAATAAAATGCCACAGTG
TACGATGTTGTTTCTGTAAGGTGATATTCGTCATAACCCTCTCCTTTAACCGGGCATAAG
GTTACGACTAACTGGTTTAAAAATAAAATTGATTATATATTTATAATTAATCTTTATAAG
TGGTAAGCGACTATGCACATCACCCTCCGGCAGTTGGAAGTTTTTGCAGAAGTATTGAAA
AGTGGATCAACCACCCAGGCGTCGGTGATGCTGGCGTTGTCGCAATCAGCAGTGAGCGCA
GCCTTGACCGACCTGGAAGGGCAGCTTGGCGTTCAACTGTTTGATCGCGTGGGGAAAAGA
CTGGTTGTTAATGAACACGGGCGGCTGCTCTATCCGCGTGCGTTGGCATTGCTTGAACAG
GCGGTTGAAATCGAACAACTGTTTCGCGAAGACAACGGCGCGATTCGTATCTATGCCAGT
AGTACCATCGGTAACTACATTCTGCCTGCAGTTATCGCCCGTTATCGCCATGATTATCCG
CAGTTGCCGATTGAACTTAGCGTTGGGAACAGCCAGGACGTGATGCAAGCGGTGCTGGAT
TTCCGCGTTGATATTGGCTTTATTGAAGGACCGTGCCACAGCACTGAAATCATTTCTGAA
CCGTGGCTGGAAGACGAGCTGGTGGTTTTCGCCGCGCCGACTTCGCCGTTGGCCCGTGGT
CCGGTCACCTTAGAACAGCTGGCCGCTGCGCCGTGGATCCTGCGTGAACGCGGTTCCGGC
ACGCGGGAGATTGTCGATTATCTGTTGCTGTCACATTTACCGAAGTTTGAGATGGCGATG
GAATTAGGTAACTCCGAGGCAATCAAACATGCGGTGCGTCATGGGTTGGGAATTAGTTGC
CTGTCGCGACGGGTGATTGAAGACCAATTGCAGGCAGGCACATTAAGTGAAGTTGCGGTC
CCTCTGCCGCGCCTGATGCGTACGTTGTGGCGTATACATCATCGGCAAAAACACCTTTCC
AACGCGCTACGGCGCTTTCTGGACTATTGCGATCCCGCAAATGTGCCGCGTTAAGTTGCT
GTACAAGAACATGCTGGTGCTGTGTCGATTTCGTGACGCAGCGCCTTCAGCATGCATTCG
CCAGAAAAGAGATTGGCTGCTTTACTTATAATCCCTGGGCGATCATGAAGGTGTCTTATA
ACCGTGTATTTCTGCCGGAAGGATTGCCAATCGTCTGCTACAATCGCGCCTCATTTTTTA
GATGGATAGCATTTTTGTATGGTTTCCGAAACTAAAACCACAGAAGCGCCGGGCTTACGC
CGTGAATTAAAGGCGCGTCACCTGACGATGATTGCCATTGGCGGTTCCATCGGTACAGGT
CTTTTTGTTGCCTCTGGCGCAACGATTTCTCAGGCAGGTCCGGGCGGGGCATTGCTCTCG
TATATGCTGATTGGCCTGATGGTTTACTTCCTGATGACCAGTCTCGGTGAACTGGCTGCA
TATATGCCGGTTTCCGGTTCGTTTGCCACTTACGGTCAGAACTATGTTGAAGAAGGCTTT
GGCTTCGCGCTGGGCTGGAACTACTGGTACAACTGGGCGGTGACTATCGCCGTTGACCTG
GTTGCAGCTCAGCTGGTCATGAGCTGGTGGTTCCCGGATACACCGGGCTGGATCTGGAGT
GCGTTGTTCCTCGGCGTTATCTTCCTGCTGAACTACATCTCTGTTCGCGGCTTTGGTGAA
GCGGAATACTGGTTCTCACTGATCAAAGTCACGACAGTTATTGTCTTTATCATCGTTGGC
GTGCTGATGATTATCGGTATCTTCAAAGGCGCGCAGCCTGCGGGCTGGAGCAACTGGACA
ATCGGCGAAGCGCCGTTTGCTGGTGGTTTTGCGGCGATGATCGGCGTAGCTATGATTGTC
GGCTTCTCTTTCCAGGGAACCGAGCTGATCGGTATTGCTGCAGGCGAGTCCGAAGATCCG
GCGAAAAACATTCCACGCGCGGTACGTCAGGTGTTCTGGCGAATCCTGTTGTTCTATGTG
TTCGCGATTCTGATTATCAGCCTGATTATTCCGTACACCGATCCGAGCCTGCTGCGTAAC
GATGTTAAAGACATCAGCGTTAGTCCGTTCACCCTGGTGTTCCAGCATGCGGGTCTGCTC
TCTGCGGCGGCGGTGATGAACGCAGTTATTCTGACGGCGGTGCTGTCAGCGGGTAACTCC
GGTATGTATGCGTCTACTCGTATGCTGTACACCCTGGCGTGTGACGGTAAAGCGCCGCGC
ATTTTCGCTAAACTGTCGCGTGGTGGCGTGCCGCGTAATGCGCTGTATGCGACGACGGTG
ATTGCCGGTCTGTGCTTCCTGACCTCCATGTTTGGCAACCAGACGGTATACCTGTGGCTG
CTGAATACCTCCGGGATGACCGGTTTTATCGCCTGGCTGGGGATTGCCATTAGCCACTAT
CGCTTCCGTCGCGGTTACGTATTGCAGGGACACGACATTAACGATCTGCCGTACCGTTCA
GGTTTCTTCCCATTGGGGCCGATCTTCGCATTCATTCTGTGTCTGATTATCACTTTGGGC
CAGAACTACGAAGCGTTCCTGAAAGATACCATTGACTGGGGCGGCGTAGCGGCAACGTAT
ATTGGTATTCCGCTGTTCCTGATTATTTGGTTCGGCTACAAGCTGATTAAAGGAACTCAC
TTCGTACGCTACAGCGAAATGAAGTTCCCGCAGAACGATAAGAAATAAGTTTCCTCCCTT
CCTTGCTAAGCCCTCTCAACCGAGAGGGCTTTTTCAATTCCATTTCCCTGACAAATCATG
CGGATATAAAATTTAACATTTGGATTGATAATTGTTATCGTTTGCATTATCGTTACGCCG
CAATCAAAAAAGGCTGACAAATCAGAGGCTGTTCCGGCTTTCTGGGATGATCACCTGCAT
ACAAATAAGTCCACCGCGATGCTGCCGTACGCAAGGGGACGTGAAGAAGATGTGAGCGAT
AACCCATTTTATTTTCGTAGTTACCTCATGGAGATATGGAATGTTTAGGTTGAACCCTTT
CGTACGGGTCGGGCTGTGTTTGTCCGCTATTTCTTGTGCATGGCCTGTGTTAGCGGTCGA
TGATGATGGCGAAACGATGGTTGTCACTGCATCTTCCGTTGAACAAAACCTTAAAGATGC
ACCCGCCAGTATCAGCGTCATTACCTAGGAAGACCTGCAGCGAAAACCGGTACAGAATCT
GAAGGATGTCCTCAAAGAAGTGCCTGGCGTACAACTGACGAACGAAGGGGATAACCGTAA
GGGCGTTAGTATTCGTGGTCTGGACAGCAGCTACACCCTGATTCTTGTCGACGGTAAACG
CGTTAACTCCCGCAATGCCGTCTTCCGCCACAATGATTTCGATCTGAACTGGATCCCGGT
CGATTCCATCGAACGTATTGAAGTGGTCCGTGGCCCGATGTCGTCGCTGTACGGTTCCGA
TGCGCTCGGCGGTGTAGTGAATATCATCACCAAAAAAATCGGTCAGAAATGGTCGGGTAC
CGTTACCGTCGATACCACCATTCAGGAACATCGCGATCGCGGTGATACCTATAACGGTCA
GTTCTTTACCAGTGGACCATTAATTGATGGTGTGCTGGGAATGAAAGCTTACGGCAGCCT
GGCAAAACGTGAAAAGGATGACCCGCAAAACTCAACGACCACCGATACCGGAGAAACGCC
GCGTATTGAAGGATTCTCCAGCCGCGACGGCAATGTCGAATTTGCCTGGACACCGAATCA
AAATCACGATTTTACTGCCGGATACGGTTTCGACCGTCAGGATCGTGATTCCGACTCGCT
GGACAAAAACCGCCTGGAACGCCAGAACTACTCCGTCAGCCATAATGGGCGTTGGGATTA
CGGCACCAGCGAACTGAAATACTACGGTGAGAAAGTCGAGAACAAAAACCCTGGCAACAG
CAGCCCGATAACTTCCGAAAGCAATACGGTCGACGGCAAATACACGTTGCCGCTGACGGC
GATTAATCAGTTTCTCACGGTTGGCGGTGAATGGCGTCACGACAAACTTAGCGATGCGGT
GAACCTGACCGGGGGAACCAGCTCCAAAACGTCTGCCAGCCAGTACGCGCTGTTTGTGGA
AGATGAATGGCGGATCTTCGAGCCGCTGGCGCTGACGACCGGCGTGCGTATGGACGATCA
CGAAACCTACGGTGAACACTGGAGTCCGCGTGCCTACCTGGTTTATAACGCCACCGACAC
CGTAACGGTGAAAGGGGGCTGGGCGACGGCATTTAAAGCGCCTTCTCTGTTGCAACTTAG
CCCTGACTGGACGAGCAATTCCTGCCGTGGCGCATGTAAGATTGTAGGTAGCCCGGATCT
GAAACCAGAAACCAGCGAAAGTTGGGAGCTGGGGCTGTACTACATGGGTGAAGAAGGCTG
GCTGGAAGGGGTTGAATCCAGCGTTACCGTTTTCCGTAACGATGTGAAAGATCGCATCAG
CATCAGCCGTACGTCTGACGTCAATGCTGCACCGGGCTACCAAAACTTTGTCGGTTTTGA
GACGGGCGCTAACGGACGGCGCATACCGGTATTTAGCTACTACAACGTTAACAAAGCTCG
TATTCAGGGCGTGGAAACCGAACTGAAAATTCCGTTCAACGATGAATGGAAACTGTCACT
CAACTACACCTATAACGATGGTCGTGATGTCAGCAACGGCGAAAACAAACCGCTATCCGA
TCTGCCGTTCCATACCGCTAACGGTACGCTGGACTGGAAACCGCTGGCGCTGGAAGACTG
GTCATTCTATGTTTCTGGTCACTATACCGGGCAGAAACGAGCCGACAGCGCGACGGCTAA
AACACCGGGCGGTTATACCATCTGGAATACCGGCGCGGCCTGGCAGGTGACTAAAGACGT
CAAACTGCGCGCAGGTGTGCTGAACCTTGGCGACAAGGATCTCAGTCGTGACGACTACAG
CTATAACGAAGACGGACGTCGTTACTTTATGGCAGTGGATTATCGCTTCTGATGAGAAGA
TGCCCGGCGAACCGGGCGGACTTTCACTTCAGTAAATACTGCGCATGGAAGCGCAGGTGA
TCCTCTATAAAAGAGGCGATGAAGTAGTAACTGTGATCATATCCCGGCTGAATACGCAGC
GTCATCGGCCATGCTTTCTGGCGCGCGGCTTCTGCAAGTACTGCAGGTTGCAGTTGGTCA
GCAAGAAACTGATCGTTATCACCCTGATCGATAAGCGTCGGGATCGCATCCTGCGCGTTA
CTGGCATACATCAGCGCGCAACTGTCCCATTCCAGCCATGCATTTTTGTCCTCACCTAAA
TAGCGGCTAAACGCTTTGATTCCCCACGGGACGCTGCACGGATTCACAATTGGCGCAAAG
GCGGAAACGCTGGCGTATTTGCCCGGGTTTTTCAGCGCCATAATCAGCGCACCGTGACCA
CCCATTGAATGACCGCTAATGGCGCAGCGGTCGCTGACATTAAATTGCGACTGAATCAGC
GCCGGTAATTCATCGCGCAGATAATCATACATCCGGTAATGCGTCGCCCACGGCGGTTGC
GTGGCGTTAAGATAAAAGCCCGCGCCCTGGCCTAAATCGTAGCCATCGTCGTTGGCAACC
TGTTCACCGCGCGGGCTGGTGTCTGGCATCACCAGTACAATCCCCAGTTCCGCCGCCACG
CGCTGGGCACCCGCCTTGGTGGTGAAGTTCTCGTCATTGCAGGTTAATCCGGAAAGCCAG
TACAGCACTGGTGGCGGGGTGTGATCACGAGGGGGTGGGAGAAAGATACTGAACGTCATC
GGGCAGTTTAAGGTACTGGAGTAGTGTCGCCAGCGTTGCTGCCAGCCTTCAAAACAGCGG
TGCTCTTCGAGCATTTCCATGCGTGGCTCCTTGTTGTGTTGTTTGCAATTTCTTCATCAT
ACCGTTTATTCAATGTGCTGTGAGTAACTTTCACTTCCGTATTTGCATAACGATGTTTTA
ACATCTGCTGATGAAAGGCAGCGGCAATTACAATAATTATCGCTGTGAATACTGGATTAT
GTGCGCCGCCTCACGCACAATAATCAGGCTGTAAATCAGCTTAATAACTTTGCCCCCACG
CAGGGCGGAGGCGTCACACCTGCAGGAGAAATCATAAATGCCATCACTCAGTAAAGAAGC
GGCCCTGGTTCATGAAGCGTTAGTTGCGCGAGGACTGGAAACACCGCTGCGCCCGCCCGT
GCATGAAATGGATAACGAAACGCGCAAAAGCCTTATTGCTGGTCATATGACCGAAATCAT
GCAGCTGCTGAATCTCGACCTGGCTGATGACAGTTTGATGGAAACGCCGCATCGCATCGC
TAAAATGTATGTCGATGAAATTTTCTCCGGTCTGGATTACGCCAATTTCCCGAAAATCAC
CCTCATTGAAAACAAAATGAAGGTCGATGAAATGGTCACCGTGCGCGATATCACTCTGAC
CAGTACCTGTGAACACCATTTTGTTACCATCGATGGCAAAGCGACGGTGGCTTATATCCC
GAAAGATTCGGTGATCGGTCTGTCAAAAATTAACCGTATCGTGCAGTTCTTTGCCCAGCG
TCCGCAGGTGCAGGAACGTCTGACGCAGCAAATTCTCATTGCGCTACAAACGCTGTTGGG
CACCAATAACGTGGCTGTTTCTATCGACGCGGTGCATTACTGCGTGAAGGCGCGTGGCAT
CCGCGATGCAACCAGTGCCACGACAACGACCTCTCTTGGTGGATTGTTCAAATCCAGTCA
GAATACGCGCCACGAGTTTCTGCGCGCTGTGCGTCATCACAACTGATTAAAAGGCAGGAA
CCATGGAGCGCAACGTCACGCTCGATTTTGTTCGCGGCGTCGCCATTCTGGGGATCCTGC
TATTAAACATCAGCGCCTTTGGGCTACCAAAGGCGGCTTATCTTAATCCCGCCTGGTACG
GCGCTATTACGCCGCAGGATGCATGGACCTGGGCATTTCTCGATCTCATCGGCCAGGTGA
AATTCCTCACGCTTTTTGCGCTGCTGTTTGGTGCTGGCCTGCAAATGTTGCTGCCCCGTG
GCAGACGCTGGATCCAGTCGCGGTTAACGCTGTTAGTCTTGCTGGGCTTTATTCACGGTT
TATTGTTCTGGGACGGCGATATTCTGCTGGCTTACGGGCTGGTGGGCTTAATCTGCTGGC
GGCTGGTGCGCGATGCGCCATCGGTAAAAAGCCTGTTTAATACAGGCGTCATGCTTTATC
TGGTGGGGCTTGGCGTTTTGCTGTTATTGGGGTTGATTTCCGATACCCAGACCAGCCGCG
CCTGGACGCCGGATGCATCGGCTATTTTGTATGAAAAATACTGGAAGCTTCACGGCGGCG
TTGAAGCGATCAGTAATCGTGCCGATGGTGTTGGGAACAGTTTACTGGCACTGGGCGCAC
AGTATGGCTGGCAACTGGCTGGGATGATGCTCATTGGTGCGGCGCTGATGCGCAGCGGCT
GGCTGAAAGGGCAGTTCAGCTTACGTCACTATCGTCGTACTGGTTTTGTGCTGGTGGCGA
TTGGGGTGATCATTAACCTTCCTGCCATCGCCCTGCAATGGCGGCTGGACTGGGCATATC
GCTGGTGCGCCTTCTTACTTCAGATGCCGCGGGAACTGAGTGCACCGTTTCAGGCGATTG
GCTATGCGTCGCTGTTTTATGGTTTCTGGCCGCAATTGAGCCGCTTTAAGCTGGTGCTTG
CGATCGCCTGCGTCGGACGGATGGCGCTGACCAACTATCTATTGCAAACGCTGATTTGTA
CCACGCTTTTTTATCACCTCGGTTTGTTTATGCAGTTTGACCGTCTGGGATTGCTGGCGT
TTGTTATTCCGGTATGGCTGGCGAATATCCTCTTCTCTGTTATCTGGCTGCGTTACTTCC
GCCAGGGGCCGGTGGAATGGCTCTGGCGTCAGTTAACTTTGCGTGCTGCCGGACCGGCAA
TATCTAAAACATCAAGATAACGATCTGGATCACATTCGTTAACAAAACGGCTGTAACCGT
TTCCATTGCTGTGACTCGATTCACGAAGTCCTGTATTCAGTGCTGACAAAATAGCCGCCA
GCAAGCAGTCATTTACTGCAATCTCATAACAGGTAGTGAATATGATCACCATTCGTGATG
TAGCGCGTCAGGCTGGCGTCTCTGTGGCAACGGTTTCCCGGGTGCTCAATAACAGCACGC
TGGTCAGTGCCGACACGCGTGAAGCAGTAATGAAAGCCGTGAGTGAGCTGGATTATCGGC
CAAACGCCAATGCCCAGGCGCTGGCAACTCAGGTTAGCGACACCATTGGCGTGGTGGTGA
TGGACGTTTCTGATGCGTTTTTCGGCGCGCTGGTAAAAGCGGTGGATCTGGTCGCCCAGC
AGCATCAGAAATACGTGCTAATCGGCAATAGCTATCATGAAGCGGAAAAAGAACGTCACG
CCATTGAGGTGTTAATTCGCCAGCGTTGTAATGCATTGATTGTTCACTCAAAAGCATTGA
GTGACGATGAACTGGCGCAATTTATGGATAACATTCCCGGTATGGTGTTAATCAACCGCG
TTGTGCCGGGGTACGCCCATCGTTGCGTTTGCCTGGATAATCTCAGCGGTGCCCGAATGG
CGACGCGCATGTTGCTGAATAACGGTCATCAACGTATTGGTTATCTTTCTTCCAGCCACG
GCATTGAAGATGACGCCATGCGTAAAGCAGGCTGGATGAGTGCGTTGAAAGAGCAGGATA
TTATTCCGCCGGAAAGCTGGATTGGCACTGGTACGCCGGACATGCCGGGCGGTGAGGCGG
CGATGGTTGAACTGCTGGGGCGCAATCTACAACTTACCGCTGTATTTGCTTATAACGACA
ATATGGCTGCTGGCGCACTGACAGCATTAAAAGATAATGGTATTGCGATTCCGTTACATC
TCTCAATCATCGGTTTCGATGATATTCCCATCGCCCGTTACACCGACCCGCAATTAACGA
CCGTGCGTTATCCCATTGCTTCAATGGCTAAATTAGCCACCGAACTGGCCTTGCAGGGGG
CAGCAGGCAATATTGATCCTCGTGCCAGCCACTGTTTTATGCCGACGTTAGTGCGTCGTC
ATTCTGTCGCAACGCGCCAGAATGCGGCGGCGATCACTAACTCAACAAATCAGGCGATGT
AACCGCTTTCAATCTGTGAGTGATTTCACAGTATCTTAACAATGTGATAGCTATGATTGC
ACCGTTTTAACGTTGTAACCCGTATGTAACAGTGAATAATCACTTTCACCGAGGTAATAG
CGTCATAACAACAATTAAAGCCGTTTTCTGGAGCGTTACCGGGCACTGATGAATCCCCTA
ATGATTTTGGTAAAAATCATTAAGTTAAGGTGGATACACATCTTGTCATATGATCAAATG
GTTTCGCGAAAAATCAACTTGAGACTTGGTATTCATTTTTCGTCTTGCGACGTTAAGAAT
CCGTATCTTCGAGTGCCCACACAGATTGTCTGATAAATTGTTAAAGAGCAGTTGCGACGC
GGCTTTCAGCTCACTGTCGCGAGGTGGCGTATATTACGCTTTCCTCTTTCAGAGTCAACC
CTGAATTTCAGGATTTTTTCTCTTCAACCGAACAGGCTGTTTGTGTGAAGTGATTCACAT
CCGCCGTGTCGATGGAGGCGCATTATAGGGAGTCGGCTCAGGAAGACAAGCGGAAAAATG
CATTTTTATTTCAACCGCTCATCTTTTAATCATTACGCCGGTTTTTGCTGCTTTTTTATC
GCTTGCGGCAGGTCTGCCAGGCTATTTAACACCCAATCTGCCGCGTTTTCTGCTTCAGGT
GTAATAGGTTTACCCGTACGCACCAGCACTTTTGTTCCCACGTTCGCCGCAGCCGCTGCC
TGCATATCTTCTAATTTATCGCCCACCATATAAGAGGCGGCCATATCAATATGCAAATAA
TCGCGTGCTGACAAAAGCATCCCCGGATGTGGTTTGCGGCAATCGCAGACCTGGCGAAAC
TCTTCAACACTACCCTGCGGATGATGCGGGCAATAATAGATACCATCCAGATCGACATCG
CGGTCCGCCAGCGACCAGTCCATCCACTCGGTCAGCGTTTCAAACTGTGCTTCAGTAAAT
TTACCGCGAGCAATGCCAGACTGGTTGGTTACTATCACCAGCGCAAAGCCCATTTTTTTC
AGCTCGCGCATGGCGTCAATAACACCGTCGATAAATTCAAAGTTGTCGATCTCATGGACA
TAGCCGTGATCGACATTAATGGTGCCATCACGGTCAAGAAAAATTGCGGGTACGCTCTTC
GCCACCTTTTATAGCTCCTTAATAAGGCATGTGGCGCTAGTATCGCATGTTTCGACCTGC
AAGAAAGTGCTCTTCGCATAAACCTGATTGATTTAGACGTCTGGATGCCTTAACATCCAT
TTCATTGACGGCGTTGCCCGTTTCAGGCATTCGAAATGCCACGACTAACTTAATGACGAT
AATAAATATTCAATGATAAAACTTTCGAATATCACCAAAGTGTTCCACCAGGGCACCCGC
ACCATCCAGGCGTTGAACAACGTCAGCCTGCATGTGCCAACTGGACAAATTTATGGCGTT
ATCGGGGCCTCAGGCGCGGGTAAGAGTACGCTTATACGTTGTGTAAACCTGCTGGAGCGC
CCAACCGAGGGTAGCGTGCTGGTCGATGGACAGGAACTGACCACGCTGTCAGAATCCGAG
TTGACCAAAGCTCGCCGCCAGATTGGTATGATTTTCCAGCATTTTAACCTGCTCTCTTCG
CGTACTGTTTTTGGCAACGTGGCTCTGCCGCTGGAGCTGGACAACACACCGAAAGACGAG
ATCAAACGTCGCGTGACGGAATTGCTGTCATTGGTTGGTCTTGGCGATAAGCATGATAGC
TACCCGTCGAATCTTTCCGGTGGGCAGAAACAACGTGTGGCGATTGCCCGTGCATTAGCC
AGCAATCCCAAAGTATTGCTGTGTGATGAAGCCACCAGCGCGCTGGACCCGGCAACGACA
CGTTCTATTCTCGAACTGCTGAAAGACATCAACCGCCGTCTGGGTTTGACGATTCTGTTG
ATCACTCACGAAATGGACGTTGTGAAGCGCATTTGTGATTGCGTGGCGGTCATCAGCAAT
GGCGAACTGATCGAGCAGGACACGGTAAGTGAAGTGTTCTCACATCCGAAAACGCCGCTG
GCGCAGAAGTTTATTCAGTCAACCCTGCATCTGGATATCCCGGAAGATTACCAGGAACGT
CTGCAAGCGGAGCCATTCACTGACTGCGTGCCGATGCTGCGTCTGGAGTTTACCGGTCAA
TCGGTCGATGCCCCACTGCTTTCTGAAACCGCGCGTCGTTTTAACGTCAACAACAACATT
ATTAGCGCGCAGATGGATTACGCCGGTGGCGTTAAGTTCGGCATCATGCTGACTGAAATG
CATGGCACACAACAAGATACGCAAGCCGCCATTGCCTGGCTGCAGGAACACCATGTAAAA
GTAGAGGTACTGGGTTATGTCTGAGCCGATGATGTGGCTGCTGGTTCGTGGCGTATGGGA
AACGCTGGCAATGACCTTCGTATCCGGATTTTTTGGGTTTGTGATTGGTCTGCCGGTTGG
CGTCCTGCTTTATGTCACGCGTCCGGGGCAAATTATTGCTAACGCGAAGCTGTATCGTAC
CGTTTCTGCGATTGTGAACATTTTCCGTTCCATCCCGTTCATTATCTTGCTGGTATGGAT
GATTCCGTTTACCCGCGTTATTGTCGGTACATCGATTGGTTTGCAGGCAGCGATTGTTCC
GTTAACCGTTGGCGCAGCGCCGTTTATTGCCCGTATGGTCGAGAACGCTCTTCTGGAGAT
CCCAACCGGGTTAATTGAAGCTTCCCGCGCAATGGGTGCCACTCCAATGCAGATCGTCCG
TAAGGTGCTGTTACCGGAAGCGTTGCCGGGTCTGGTGAATGCGGCAACTATCACCCTGAT
TACCCTGGTCGGTTATTCCGCGATGGGTGGTGCAGTCGGTGCCGGTGGTTTAGGTCAGAT
TGGCTATCAGTATGGCTACATCGGCTACAACGCGACGGTTATGAATACGGTACTGGTATT
GCTGGTCATTCTGGTTTATTTAATTCAGTTCGCAGGCGACCGCATCGTCCGGGCTGTCAC
TCGCAAGTAACGTTCAACACAACATAAATAATTGAAGAAGGAATAAGGTATGGCGTTCAA
ATTCAAAACCTTTGCGGCAGTGGGAGCCCTGATCGGATCACTGGCACTGGTAGGCTGCGG
TCAGGATGAAAAAGATCCAAACCACATTAAAGTCGGCGTGATTGTTGGTGCCGAACAGCA
GGTTGCAGAAGTCGCGCAGAAAGTTGCGAAAGACAAATATGGCCTGGACGTTGAGCTGGT
AACCTTCAACGACTATGTTCTGCCAAACGAAGCATTGAGCAAAGGCGATATCGACGCCAA
CGCCTTCCAGCATAAACCGTACCTTGATCAGCAACTGAAAGATCGTGGCTACAAACTGGT
CGCAGTAGGCAACACTTTTGTTTATCCGATTGCTGGTTACTCCAAGAAAATCAAATCACT
GGATGAACTGCAGGATGGTTCGCAGGTTGCCGTGCCAAACGACCCAACTAACCTTGGTCG
TTCACTGCTGCTGCTGCAAAAAGTGGGCTTGATCAAACTGAAAGATGGCGTTGGCCTGCT
GCCGACCGTACTTGATGTTGTTGAGAACCCAAAAAATCTGAAAATTGTTGAGCTGGAAGC
ACCGCAGCTGCCTCGCTCTCTGGACGACGCGCAAATCGCTCTGGCAGTTATCAATACCAC
CTATGCCAGCCAGATTGGCCTGACTCCAGCGAAAGACGGTATCTTTGTCGAAGATAAAGA
CTCCCCGTACGTAAACCTGATCGTGACGCGTGAAGATAACAAAGACGCCGAGAACGTGAA
GAAATTCGTCCAGGCTTATCAGTCTGACGAAGTTTACGAAGCAGCAAACAAAGTGTTTAA
CGGCGGCGCTGTTAAAGGCTGGTAATTTTTAGGCTGTTTCCACAATTTGTAATATCATTC
AGGACGGGCGCTTGCCCGTCTTGTCATTTTTACAAGCTCCTGATTCAATATTGACGTTTT
GATCATACATTGAGGAAATACTATGCGTGCTTTACCGATCTGTTTAGTAGCACTCATGCT
AAGCGGCTGTTCCATGTTAAGCAGATCCCCTGTCGAACCCGTTCAAAGCACTGCACCCCA
GCCGAAAGCGGAGCCTGCAAAACCGAAAGCGCCGCGCGCCACGCCGGTCCGAATTTATAC
CAATGCAGAAGAATTAGTCGGCAAACCGTTCCGCGATCTCGGTGAAGTCAGTGGCGACTC
TTGCCAGGCCTCTAATCAGGACTCTCCGCCGAGCATTCCAACCGCACGTAAGCGGATGCA
AATCAACGCCTCTAAAATGAAAGCCAATGCTGTATTACTGCATAGCTGCGAAGTCACCAG
CGGTACGCCGGGCTGCTATCGTCAGGCTGTATGTATCGGCTCTGCGCTTAACATTACGGC
GAAATGAGCAGTTTCCAGTTCGAGCAAATAGGCGTTATTCGCTCGCCCTATAAAGAAAAA
TTCGCCGTTCCGCGCCAGCCTGGTCTGGTAAAAAGCGCCAACGGCGAACTGCATCTCATT
GCTCCCTACAACCAGGCCGACGCCGTTCGCGGCCTGGAAGCATTCAGCCATTTATGGATC
CTTTTCGTCTTTCATCAAACGATGGAAGGCGGCTGGCGTCCGACTGTGCGTCCGCCTCGT
CTTGGCGGTAATGCCAGAATGGGTGTTTTCGCTACGCGTTCCACTTTTCGCCCTAACCCA
ATTGGTATGTCGTTGGTAGAGCTGAAAGAGGTTGTTTGCCATAAAGACAGCGTGATTCTG
AAGCTCGGCAGTATGGATCTGGTCGATGGTACGCCGGTAGTGGATATCAAACCGTATCTC
CCCTTTGCTGAATCGCTTCCCGATGCCTGTGCCAGCTATGCGCAAAGTGCGCCAGCGGCA
GAGATGACGGTGAGTTTTACCGCAGAGGTCGAAAAGCAGCTTTTGACGCTGGAGAAGCGT
TATCCGCAGTTAACCCTGTTTATCCGCGAAGTACTGGCGCAAGACCCACGCCCGGCCTAT
CGTAAAGGTGAGGAAACGGGTAAAACCTATGCCGTCTGGCTACATGATTTTAACGTTCGC
TGGCGCGTCACCGACGCAGGTTTTGAAGTCTTTGCGCTGGAACCGCGTTAAATTCACGCC
CTTCTCTTTTGACATTTCTTTTGCACTGGTAAACTAAATCACTTTTTTTGTCCCAGGCTC
GCCTTGAGCCTGTTCTACCTTCCAACTGGAACCGTAACAACATGCGTACTAGCCAATACC
TGCTCTCCACTCTCAAGGAGACACCTGCCGACGCCGAGGTGATCAGCCATCAGCTGATGC
TGCGCGCCGGGATGATCCGCAAGCTGGCCTCCGGGTTATATACCTGGCTGCCGACCGGCG
TGCGCGTTCTGAAAAAAGTCGAAAACATCGTGCGTGAAGAGATGAACAACGCCGGTGCAA
TCGAGGTGTCGATGCCGGTGGTTCAGCCAGCCGATTTGTGGCAAGAGAGTGGTCGTTGGG
AACAGTACGGTCCGGAACTGCTGCGTTTTGTTGACCGTGGCGAGCGTCCGTTCGTACTCG
GCCCAACTCATGAAGAAGTTATCACTGACCTGATTCGTAACGAGCTTAGCTCTTACAAAC
AGCTGCCGCTGAACTTCTATCAGATCCAGACCAAGTTCCGCGACGAAGTGCGTCCGCGTT
TCGGCGTCATGCGTTCCCGCGAATTCCTGATGAAAGATGCTTACTCTTTCCATACTTCTC
AGGAATCCCTGCAGGAAACCTACGATGCAATGTATGCGGCCTACAGCAAAATCTTCAGCC
GCATGGGGCTGGATTTCCGCGCCGTACAGGCCGACACCGGTTCTATCGGCGGCAGCGCCT
CTCACGAATTCCAGGTGCTGGCGCAGAGCGGTGAAGACGATGTGGTCTTCTCCGACACCT
CTGACTATGCAGCGAACATTGAACTGGCAGAAGCTATCGCGCCGAAAGAACCGCGCGCTG
CTGCTACCCAGGAAATGACGCTGGTTGATACGCCGAACGCGAAAACCATCGCGGAACTGG
TTGAACAGTTCAATCTGCCGATTAAGAAAACGGTTAAGACTCTGCTGGTTAAAGCGGTTG
AAGGCAGTAGCTTCCCGCTGGTTGCGCTGCTGGTGCGCGGTGATCACGAGCTGAACGAAG
TTAAAGCAGAAAAACTGCCGCAGGTTGCAAGCCCGCTGACTTTCGCGACCGAAGAAGAAA
TTCGTGCCGTGGTTAAAGCCGGTCCGGGTTCACTGGGTCCAGTAAACATGCCGATTCCGG
TGGTGATTGACCGTACCGTTGCGGCGATGAGTGATTTCGCTGCTGGTGCTAACATCGATG
GTAAACACTACTTCGGTATCAACTGGGATCGCGATGTCGCTACCCCAGAAATTGCTGATA
TCCGCAACGTGGTGGCGGGCGATCCAAGCCCGGATGGTCAGGGTACGCTGCTGATCAAAC
GTGGTATCGAAGTCGGTCACATCTTCCAGCTGGGTACCAAGTACTCCGAAGCACTGAAAG
CCTCCGTACAGGGTGAAGATGGCCGTAACCAAATCCTGACTATGGGTTGCTACGGTATCG
GCGTAACGCGCGTAGTAGCTGCAGCAATTGAGCAGAACTACGACGAACGCGGCATCGTAT
GGCCTGACGCGATCGCACCGTTCCAGGTAGCGATTCTGCCTATGAATATGCACAAGTCCT
TCCGTGTACAAGAGCTGGCCGAGAAGCTGTACAGCGAACTGCGTGCACAAGGTATCGAAG
TCCTGCTGGATGACCGCAAAGAGCGTCCGGGCGTGATGTTTGCTGATATGGAACTGATCG
GTATTCCGCACACTATTGTGCTGGGCGACCGTAACCTCGACAACGACGATATCGAATACA
AATACCGTCGTAACGGCGAGAAACAGTTAATTAAGACCGGTGACATCGTCGATTATCTGG
TGAAACAGATTAAAGGCTGATGCCAGAAAGGGTCCTGAATTTCAGGACCCTTTTTTACAG
GGATTGTATAAAATGGATAAACCAAAGGCATACTGCCGCCTGCTTCTCCCCTGCTTTCTT
TTACTTTCGGCCTGTACCGTTGATATCAGCCAGCCAGACTCCTCAGCCACAGCGATAGAT
ACCGAGGCGAAAACATGGGCTGTCAAATTCCAGCATCAAAGCTCTTTCACCGAACAATCA
ATAAAAGAAATAACAGAACCTGACCTCAAACCCGGCGATTTGCTGTTCTCCTCAAGTCTT
GGGGTAACCTCATTTGGTATCCGCGTCTTCAGCACTTCCTCAGTGAGTCACGTTGCAATC
TATCTGGGTGATAACAACGTTGCAGAAGCGACAGGGGCTGGCGTCCAGATTGTTTCCCTT
AAAAAAGCGATGAAGCATAGCGATAAGCTTTTCGTCTTACGAGTCCCGGATCTTACCCCG
CAACAAGCCACAGAAATCACCGCGTTCGCCAACAAAATTAAAGATAGCGGTTACAACTAT
CGCGGCATTGTCGAATTTATTCCCTTTATGGTGACTCGCCAGATGTGCTCACTGAATCCG
TTCTCCGAGGATTTTCGCCAACAGTGCGTCAGCGGCCTGGCGAAAGCGCAGTTAAGCAGT
GTGGGCGAAGGAGACAAAAAGTCGTGGTTTTGTTCGGAATTTGTCACTGATGCATTTGCC
AAAGCCGGGCATCCGCTTACGCTGGCGCAATCGGGCTGGATTAGCCCTGCCGATCTGATG
CATATGCGTATTGGTGATGTCTCTGCGTTTAAGCCAGAAACGCAGTTACAGTATGTTGGG
CACCTGAAGCCAGGGATTTATATCAAGGCGGGTCGCTTTGTTGGTTTGACTCAGTGATAA
AGCCAGCCTCGTGCACAAAATGCCGGATGCGGCGTGAACGCCTTATCCGGCCTACAAAAT
CGTGCTAATTCAAAATGTTGCATTATATGCTGTAGGCCTGATAAGCGCAGCGCATCAGGC
AATTTTGCGTTTGTTTCTGCCTTAAGCAGGTTTACTGCCCCAAACTACTGCAATCCTGGT
TCGGATAAAATTTACCCGCCGTATCGGGCGCTAATACTTTGGTCGGCGCACCGGTATCCG
GATTAGCCTCAAGCGTAAAGTGACCTTCTACTGACAGTAACACCGGTTTTTCACTGTGCC
CGCGCGCAGCCAGGTAGCCACGCTCCAGCTCTGCGTTATTCGCTACCATGAAACGTTTTC
CGGTCGCGCAATCAGTGAAGGTCGCCGCATCAGCCATATAAAAATACATGCCCCGCAGAG
TCATCGGCGTCATGGGTAAACTGGATTGTGCCGCTTCCAGCGTATAGTTGAACTGCGATT
CAATCGGTTTACCTTCACGATCGAGCATCTCCAGCGCATCGCCTTTCGCCCGATAATATG
ACTTTTCACCTTTGCTGTCGGTTAATACCAGCTTGTCAGCGGTTCGCGCCCATGTACCGT
AGGAAGCGAAGGAGGAAGGTTCTTCACGAGCACCGAGATAACGCTCATTCATCACCCATG
TTCCGTCTTTTTCGAGGAACAGAGAGGTTTCGATTCCTTCGCAATCGGCACACGGCAGCA
CGCCGCGCCAACTTTGCGGCATCGGTTTCAGTTCGGCTGCCTGCGCCGGAGAAAGCGTAT
CGACTTCGGCCCGATTATTACAACCCATCAGAGTAAAGAGGCTGATTACAGCCATCGCTG
TCACTATCGCTTTTTTCACCATCCATTCCTTCTTTTTATTCCCGACCGCTGCGCACTTTG
CCGCGCATCGCCTTCACGCTTGATTTTTGTGCTTTCGATGCCAGCCTGCGCTCTTTCGAT
GCACGGGTGGGCCACGTGGGTCGTCGGGCTTTTTGTTCTGTTGTTAATTCTTTAATCACA
GCCACCAGCCGGGCCAGAGCTGCTTCGCGGTTCAGTTCCTGACTGCGGTATTCCTGTGCC
TTAATGACAATCACGCCATCACTGCTGATCAAATGATGGCTGGCGGCGAGCAGACGCTCT
TTGTAATACTCTGGCAGGCTGGACGCCCGAATGTCAAAACGCAGATGAATAGCCGTTGAG
GTCTTATTAACATGCTGCCCGCCCGCGCCCTGCGCACGAATGGCGGTGATCTCAAGCTCA
CCATCGGGAATAGCAACATGTCGGGAAATCACAATCATGAAGGTTGTTGCCAGGCGGTTA
AGTTCACTTCCAGATTATTCTTATCATCCGATAACCAGATCACGCCATCCTGAATCGTTG
CCTGCAGCGTCATGGTACGATCGGCAAAGGCGCTTACTTTCGCCAGTTGTTCATCGTCCA
GATACCAGACGGAAAGATTGGCAAACTGCACACATTTGCTCTGATTTTGCTGCCACCAGA
TTTGCGCCGCCCGACTATTATAGGTAAACAGCGCCACTTCTGCGGCCTGGGTGCAGGCTT
TCTTAATCCGCCGCTCATCCGGCAGCCCCAGCTCAATCCACAAATCAATGCCCAGGTGAT
CGTTACGCAGCCACGCTTCCGGCTCATCATCGGCACACAAACCACGGGTAAATTGCAGAC
GTTCATCAGCATATTTCAGCCACGCCAGCAAGCGCAGCATCATACGCTCCTGGGTTTCTG
AAGGGTGGCGCGCCAGCGTCAGAGAGGCATCGAGAAACTGGTTGCGGTCGAGATCGGCCA
CATTAACCGTCGCTTTATAAATTGTCGCTTTAAGCGCCATAAGAAAACTCCTTTCGAATC
AGGAGGCCATTGTAACGGAATACGTGCAGTTGCGGCGCTGATATTGCAGAAATGAGTGTG
GTATAGTCACCTTGCGAAACAGAGTTTATCTTCGTAGGCTTAGACTTGCATCCACGGTTA
AGTCAGAGTGCTGACAGGAGGGCATGTGGAAAAATATTGTGAGTTAATACGCAAGCGGTA
CGCGGAAATCGCCAGCGGAGACTTAGGATACGTTCCGGACGCGCTGGGCTGCGTTTTGAA
AGTGCTGAATGAAATGGCTGCCGACGACGCCCTTTCTGAGGCTGTCAGGGAAAAAGCAGC
ATACGCTGCGGCAAACTTACTGGTGAGCGATTATGTCAATGAATGATACGTATCAACCAA
TCAATTGTGATGATTACGATAATCTTGAGCTCGCCTGCCAGCATCATTTAATGCTGACAC
TTGAGCTGAAAGATGGCGAAAAATTGCAGGCAAAAGCCAGCGATTTAGTCTCCCGCAAAA
ATGTGGAGTATCTGGTCGTCGAGGCCGCTGGCGAAACCCGTGAGCTACGTCTGGATAAAA
TTACCAGCTTTAGCCACCCGGAAATCGGTACGGTGGTGGTGAGCGAGTCCTGATTGACTT
TCGCCGGATGCGACGCTTAATGCGTCATATCCGGCCTTCACTTAACTAAGCGTTTCGCTG
CCAGACAAAACTTATGCCATTCTCACCTTCAGCCACACCTTCTTGCGTCACAAATACCCC
TGCCGCCGCAATCAGCGTTTCGCCATAAAACAGCAGTGGCGTGGTGTCACGTAGCCACGG
CGGCACGCCCAGCTCTTGCCAGATTTTCTTTAGCTTACGTCCGCCGTTACGCCCGACAAT
ATGCAGCAATCCTGGCGCTTTGAAACGCACGCTGACCGCTTCGTCTGCACGCGGAGGGCG
AATATCGCCTCCCGCATTAAGCTGTACACTTCCCAGCCCCGCCGGTAATTCCAGCGGTTG
AAGCCACGTCTGCCACGGCACAATGTTTTCGCTTTGCCCGGTGACGGATTTAATCCACCA
CAGTTGCGACTGATAGCGTCGGATTTCAAACGCGCCCAAACGTAAACAGGGGGAGGCATC
TTCCCGCGCCAGCGCCACTTCCTGCCAGATCCGCCCCAACGCGTCGCGGGAAGGCATCGG
TGCATTCTGCCCTGCAAGCCAGCGGCGGATAATCGCCGCGCGGCGGGCATCACTCATCGC
CAGCATTGGCGCAATCTGCAGCGTCCTCTGCGGCGATTGACAGTGTGCTAAATCATCCGC
CAGCAGTTCATCCAACAGGCTCTCTTGTTCAGCGCAAAGTGCGGCGCTGCGGGCTGTTGC
TTCGGCAAAATGCGGCCAACGCTGCTGCAATAACGGCACTACGCGCAGGCGCAGAAAGTT
ACGATCGTATGAGTCGTCCTGATTACTTTCGTCTTCAATCCAGCGTAAACCATGCGCCAA
TGCCCACTGCGCCAGTTCCCCCCGCGTGCGGGCAAGCAACGGGCGGATAAGCCGTGTTCC
GGCAAACTCCGAAACTTCCGCCATAGCCGAAAGCCCGGCAGGGCCGCTACCGCGTTTTAG
CGCCAGCAGAAAAGTTTCACATTGATCGTCGAGATGTTGCGCGGTGACCAGCACTTCACC
GGGCAACAAGGTGCGGGCAAATGCCTGATAACGCGCCTGCCGCGCCTGGGCCTCAATGCC
CAGTCCTTCTTGCGCAAGTTGCACGCGCTCGACCACCAGCGGCACCTGCCACTGTTGGCA
GATGTTCTCGCAATGCCTAACCCAGGCATCGGCATTGGCACTTAAACCGTGATGCACATG
AATAGCGCGCAGAGTGACGCCCGGATTTTCCGCCCGCCACTGCACCAACTGATGCAGCAG
AACGGTGGAGTCAAGCCCGCCGCTAAAGGCCACCAGAATCTGGCGTGAGGTGAGAAGTTG
TCTATTGAGCGTGAGTGTCATGATGGTGCGATTTTACAGTAGCAATGCCCGGCACGTTAC
CGGGCAAATGCGGCGATGACAAGCCTTACTGCTCATACAGTTCCAACGGCAGCCCGTCCG
GATCGTTAAAGAACGTGAAGCGTTTTTGCGTGTATGGATCGACACGGATGGCTTCACACT
TCACGTTATGGCTTTCAAGGTGCGCCACTGCCGCATCGATATCATCAACGCTAAAAGCCA
GATGACGCAGGCCGCAAGCTTCCGGTCGGCTGGGGCGCTCCGGCGGGAACGGAAATGAGA
AAAGCTCAATCACATATTGCCCATTAAGCGCCAAATCCCCTTTCCACGAGTCGCGCGCTT
CGCGATAGACTTCGCTTTGCAGCGTGAAACCAAGAATATCGCAGTAGAAAGCTTTGCTCA
CCGCATAATCCGTCGCAATAATCGCAATATGGTGAACCTGTTTTAAACCCAGCATAACGT
CTCCTTTATTTGTTAACAGCACGTTACTCGCCCGGAAGCCGCTCTGGCAAGTTATCCCGC
CATTTTTAGGACTCGTACGCGGTAAACGCCGTCTTCGTCCTGTTTCGCGCCGTGAATATC
CGTTTCAAAACCGGGGTAATGTTGCCCTACGGAACAAAGCATCAGTAGAAAATCGAGTAC
TGTGCGGCTCTCTTTGGTCAGCATTTCTCCAGGCATCAACAGCGGTACGCCCGGTGGATA
AGGCAGGATCATATTTGCCGATACTCTACCGACCAGTTGTTCCAGCGCAATGGTTTCTAC
TTCACCTTTAATCTGTCTCTGCCATGCCTGATGTGGCGTCATGATCATTTCCGGCAAAGT
ATCGAATGCCCGCAACATCAAACCGGGAAGATCGTGTTTACGAATCAGCTTATGGATCCC
TTGCGCCAGATCCTGAATACGCATATTGCGGTAGAAATCGGGATCTTCAGCATAGAGATC
GGGTAGCATATTTTTGATCCGCAGGTTGAGATCGTAAGAGCGCTTAAATTCCGTCAGCCC
ACGCAATAATCCCATTGCTTTGGTTTTATCAATGCCAATACTAAAGAGAAACAGCAGGTT
ATAAGGGCCGGTTTTCTCTACTACGATCCCACGTTCGTCGAGGAATTTTGCCACCAGCGC
CGCCGGGATCCCCTCCTCACTCATATTGCCCTGTTCGTCCATCCCCGGTGTCAAAATAGT
GACTTTAACCGGATCGAGAAACATATGATCGGCATCCGCATCGTTAAAGCCGTGCCACTG
TTCGCTAGGCGCAACGGGCCAGCATTCGGCTTCATCCACCTGCGGCGGTTGCCAGATATC
GAAAAACCAACCGTCAGACTCTTCCCGCAACCGCTGGACCTCTTTGCGAAAATGCAGAGC
TCGTTCTACTGAACGATTAATCAGCCGTTTGCCCGGATTACCACGCAGCATCGCCGCCGC
CGTCTCAACCGAAGCAACAATGGGATAACTGGGCGAGGTGGTGGTATGCATCATAAAGGC
TTCGTTAAAGGCCTCTTCGTCATACTCGCCTTTAATGTGGATCAGCGAAGCCTGCGATAA
CGCCGCCAGCATTTTGTGGGTCGATTGCGTTTCGAAGATCACTTTTCCCGCAACACGCTC
GCCGCTCATACCACTTTTACCCTGGTAGATCGGATGAAAATGGGTGTACGGCACCCAGGC
GGAATCGAAGTGGATCGAGGGGACATCCAGCGTCTGTTTGATCCAGTCGGTGTTGTAGAG
CAAGCCATCATAGGTGGAGTTGGTGATCACCGCATGAACCGGCCATTGTGCCTGCGTGGT
GGCAGCGACTTTCTCTTCGATGCTGTCGCGAGTAAATTCACGGCGCGGGATCCCACCAAG
AATCCCCAACGCATTACGCGTCGGTTTCAGCCAGACTGGCACTACATCGTTCATCATCAA
CAGATGCGCCAGCGATTTATGACAATTGCGGTCGATCAACAGCGTGCTGCCGGATGGCGC
GGCGTACATACCCACAATTTTGTTCGACGTCGATGTTCCGTTGGTAACGATATAACTCTG
TTCCGCGCCAAAAGTCCGCGCGATGTACTCTTCCGCTTCCAGATGTGGCCCGGTGTGGTC
GAGCAACGAACCAAGCTCGGTGACCGAAATAGAGACATCAGCCTTAAGGGTATTCCCGCC
GAAAAAATCATAAAACAGACAGCCAACCGGGCTTTTTTGATATGCGGTGCCGCCCATATG
ACCCGGCGTACAAAAGGTGTACTTCCGCTCTTTGACGTAGGTAAACAAGGCTTTCGTGAA
CGGTGGGGTAATGTTATCAAGATATTCGTTGGTGTACTGACGCATACGAATAGCGATATC
TTCCGCCTGCCCCAGCGCATATTCAAAAAACCAGAGCGCCATCCGCATATCCTGCACGCT
GACATCCATCGTCGAGTGGGTGTTGATGAAGGCATAAAGCGGGAGATATTCATTAAGCTG
ATTGATATCGCTACATAAATCGAGACTGTACTCATCCCAGTCAAAAATCACGCCGCAAAT
TCGTGGGTTATGTTCGATAAACTTCAGCAAATCAACGCTGTTTTGTGGCCAGATAATCTG
AAAGCCTTGCGCCACCAGCGCCGACTCCAGTTCTTTGATGGGCTCATCTTTATAAAAGAC
GCCATGCGGTCCCATAATGGCAATGATGTTCATGTGTTCCTCCTGGAAAATCCTTCCTTA
ATCATAGCCTGCTCAAACCGTGGCGATAAAAAAGGGCCACCGAAGTGACCCTTTTTCAGA
ACTTTTGCGAATTACGCGTAACCGTAGCTCATCAGGCGCTGATAACGACGATTTTTTAAA
TCTTCAGTGCTTAACACGTCGAGATCGGCCAGATCCGCCAGCAGTTGCGCTTTCAACGAT
GCCGCCATCGCTTCCGGGTTACGGTGAGCACCACCCAGCGGTTCCGGGATGATGGAGTCG
ATCAGTTTTAGTTCTTTCAGACGCGGAGCGATGATACCCATCGCTTCAGCTGCCAGCGGT
GCTTTGTCGGCGCTCTTCCACAGAATGGACGCACAACCTTCCGGCGAGATAACGGAATAG
GTGCTGTATTGCAGCATATTCACTTTATCGCCCACGCCAATCGCCAGCGCGCCGCCAGAA
CCACCTTCACCGATAACCGTACAAACTACCGGTACACCGAGGCGAGACATTTCACGCAGG
TTGCGTGCAATAGCTTCAGACTGACCGCGTTCTTCTGCGCCCACGCCCGGATAAGCCCCC
GGGGTGTCGATAAAGGTGATGATTGGCATCTTAAAGCGTTCAGCCATTTGCATCAGACGC
AGTGCTTTGCGGTAACCTTCTGGCGCTGGCATACCAAAGTTACGGCGAATTTTTTCTTTG
GTTTCACGACCTTTTTGATGACCAATGATCATCACCGGACGACCATCGAGACGGGCGATA
CCACCGACGATAGCTTTATCGTCTGCATACGCGCGGTCGCCAGCCAGTTCGTCAAATTCA
TCAAATGCCAGGCGAACGTAATCCAGGGTATAAGGACGCTGTGGATGGCGTGCCAGTTGC
GCAATCTGCCATGCACCGAGATCGGCGAAGATTTTACGCGTCAGTTCTACGCTTTTTTCA
CGCAGACGATGCACTTCTTCATCGATGTTAATATCCAGTTTCTCATCCTGACGGCTAACC
GCAGTCAGAGAATCGATTTTCGCTTCCAGCTCTGCAATCGGCTGTTCAAAATCAAGGAAA
TTCAGACTCATAGTATTCCTGTATTAGTCAAACTCCAGTTCCACCTGCTCCGAACCAATG
AGGCCACGGAGATCGTTTAATAAACGATCGCTCGGAGAGACACGCCACGTCGCGCCAAAA
CGCAACCGCGCGCGTGCATCCGCCCTCTGATAGTAGAGATGTACTGGAATTGTCCCAGAG
CGGTGGGGTTCCAGAGACTGACGGAGTCGGTTTAAAAGCTGGTCATCAATTTGCCTGTCC
GTCAGCGAGATAGCAAGCCCGCGAGCATATTTTTCCCGGGCTTCGTCAATATCCATCACT
TCGCGAGCGGTCATTTTAAGCCCACCGCTGAAGTCATCAAAGCTGACCTGTCCGCTGACG
ATAAGTATGCGGTCTTTTTCCAGCAATTGCTGGTATTTATCCAGGGCGTCAGTAAACAAC
ATCACTTCCAGCCGCCCGGAACGGTCATCCAGCGTGCAGATACCGATACGATTGCCGCGC
TTGGTGACCATAACCCGCGCGGCAACAACGAGCCCCGCAGCCGTGATGACTTTACCACGT
TCTGTCGGGTGCATGTCTTTCAGCCTTACGCCTCCGACATAACGCTCAATCTCTTTTAAA
TACTGGTTGATAGGGTGTCCGGTCAGGTACAGGCCTAACGTTTCACGTTCCCCATCTAAT
ACCACCTGCTCCGGCCACGGTTGGCAGCTGGCGTAGGATTGTTCAATTTGTTCCGGTTCT
TCGGCCAGCACGCCGAACATATCGGCCTGACCGATAGCTTCCGCTTTCGCGTGTTGATCT
GCCGCTTTTAACGCATCACCCAGCGAGTTCATCAGTGCCGCGCGGTGTGGCCCAAGACGG
TCAAACGCCCCGGACATGATCAGTTTTTCCAGCACCCGCCGGTTTAACTTTTTGGTGTCG
GTTCGGGCGCAGAGATCAAACAGTTCGCGGAAGTAGCCGCCTTTATTACGGGCTTCGATG
ATCGCCTCAATCGGACCTTCACCGACCCCTTTGATCGCGCCAATACCATACACGATTTCG
CCGTCGTCGTTGACGTGGAAATGGTAAAGACCGGAGTTTATATCTGGTGGCAGGATTTTC
AGCCCCATCCGCCAGCACTCATCCACCAGGCCCACCACCTTCTCGGTGTTGTCCATATCG
GCGGTCATTACCGCCGCCATAAACTCTGCCGGATAGTGCGCTTTCAGCCATAATGTTTGA
TATGACACCAAAGCATAGGCCGCAGAGTGCGATTTGTTAAATCCGTAACCAGCGAATTTC
TCCACCAGGTCGAAGATTTTCATCGCCAGTTCGGCGTTGATTCCGTTCTTTTCTGCACCT
TCAGCAAATACAGAACGCTGCTTAGCCATCTCTTCCGGCTTTTTCTTACCCATCGCACGA
CGCAGCATATCCGCGCCACCGAGGGTATAACCAGAGAGCACCTGCGCAATCTGCATGACC
TGTTCCTGATACAGGATAATGCCGTAGGTTGGCTCCAGTACTGGTTTCAGGCTTTCATGC
TGCCACTGCACGTCCGGGTAGGAAATCTCTTCGCGACCATGTTTACGGTCGATAAAGTTA
TCCACCATCCCTGATTGCAACGGACCAGGGCGGAACAGTGCCACCAGTGCGATCATATCT
TCGAAGCAGTCAGGTTGCAGACGCTTGATCAGGTCCTTCATGCCGCGCGATTCAAGCTGG
AATACCGCCGTGGTTTCCGAGCGTTGCAGCATGTCGAAGCTTTTCTTGTCATCCAGCGGG
ATCGCGGCGATATCCAGCGGCGGCTCGCCATTCTTCGCCCGCCGCTTGTTGATCATCTCC
AGCGCCCAGTTGATGATGGTGAGCGTACGTAAACCAAGGAAGTCGAACTTCACCAGTCCG
GCATATTCAACGTCGCTTTTATCAAACTGGGTGACCGGATGTTTGCCCTCTTCATCGCAA
TAAAGCGGCGCAAAATCGGTAATTTTGGTCGGCGCGATAACCACTCCACCGGCGTGCTTA
CCGGCGTTACGGGTGACCCCTTCCAGTTTGCGCGCCATGTCGATCAGCGCCTTAACTTCT
TCATCCGCTTCGTAGATTTCCGGCAGCTGCGGCTCGGCTTCAAACGCTTTCGCCAGCGTC
ATGCCCGGATCGGGCGGGATCAGTTTCGAGATACGGTCGACAAAGCCGTACGGATGCCCC
AGCACGCGGCCTACGTCGCGGATCACCGCTTTCGCCGCCATCGTACCGAAGGTGATAATC
TGCGATACCGCATCACGACCGTACATGTCCGCTACGTGCTCGATAACCTGGTCGCGTTTC
TCCATACAGAAGTCAACGTCGAAGTCAGGCATGGAGACACGTTCCGGGTTAAGGAAACGT
TCGAACAGCAGGTCAAATTCCAGCGGATCGAGGTCGGTGATTTTCAGCGCGTAGGCCACC
AGTGAACCCGCACCGGAGCCACGGCCTGGCCCTACCGGTACGCCGTTATCTTTCGACCAC
TGGATAAATTCCATAACGATGAGGAAGTAGCCCGGGAAGCCCATCTGGTTGATAACCTGA
AGTTCAGTCTCCAGACGTTCGTCATATTCCGGGCGGCGCTTAAGACGTTCTTCCTCATCA
GGGAATAAAAAGGCCAGACGCTCTTCCAGGCCTTCTTTTGCACGCTTGACCAGATAATCT
TCGGTGCTCATGTCCCCGGTCGGGAACTGCGGCAGGAAGTATTCACCCAGACGCACAGTT
ACGTTACAACGTTTGGCGATCTCAACGGTGTTGGCAAGGGCTTCGGGGATGTCGGCAAAC
AGCTCGCACATCTCCTCTTCGCTACGCATATATTGCTGCGGCGAATAGTTACGCGGGCGT
TTAGGATCGTCGAGGGTAAAGCCGTCGTGGATCGCGACGCGGATTTCGTGTGCGTCAAAG
TCGCTGCTGTCGATAAAGCGCACATCGTTAGTCGCCACGACGGGCAAACCGCGCGCTTCC
GCCAGTTCCACCGCCGCGTGCAGATAGCTTTCTTCATCCGGCCTGCCGGTGCGGATCAGC
TCGAGAAAATAGCGATCCGGGAAGTGTTCTTCATAAAACGCGACACACTCATCTACCAGC
GCGCTGTTGCCACGCAAAAGACTGCGTCCGACGTCGCCCATGCGCCCGCCGGAAAGAAGG
ATCAACCCTTCGTTTAATTCGATAAGCCAGTCGCGATCGATGATCGGCCCGGCGGCACCG
TACCCGCGCTGATACGCTTTTGAGATCAGCAACGTCAGATTCTGATAGCCGGTATTGTTC
GCCGCCAGTACCGTCAGGTGGGTTAACTCATCACCCAGCAGGTCGCACTGGACGTTAAAA
TCTGCCCCGACGATAGGCTTAATCCCTGCGCCATGTCCCGCTCCGTAGAACTTCACCAGA
CCGCAAAGGTTGGTGAAATCGGTGATCGCCAGTGCTGGCATACCCAACGCCGCCGCCTTT
TTTACCAGCGGTGCGGTTTTGGCCAGGCCATCGATCATCGAGTAGTCGCTGTGCACCCGC
AGGTGTACGAAACGTGGTTCAGACATCTTCAGATTCCGGTTTACTTAATCTCGACACAAG
AATCAGGACGCAAGTCCCAGTGCTCGTTTGACAGGCCCAAAGCTGCGACGATGATGTTCA
GTCGCGCCATATTCAGCCAGTTTTTCCAGATGAAAAGCGGTTGGATACCCTTTGTGTTGG
GCAAAACCATATTGCGGGAAAACAATATCCAGCGCCGCCATTTCGGCGTCACGCGTCACT
TTCGCCAGGATAGACGCGGCACTGATTTCCGGTACGCGGCTATCGCCTTTCACCACTGCC
ATCGAAGGCATCGGTAATTTCGGGCAGCGGTTACCATCAATCAACACATATTCCGGCGCA
ATATGCAGCCCAGCAACGGCACGCTGCATCGCCAGCATGGTCGCATGTAAAATATTCAGT
TCATCGATTTCGTGAGGTTCCGCGCGGCCCAGACTCCAGCTCAACGCTTTCTCTTTGATC
TCTTCACAGAGCGCCAGACGACGTTTTTCGCTCAGCTTTTTGGAATCATTCAGCCCGGCA
ATCGGGCGCGCCGGGTCGAGAATCACCGCAGCGGTGACGACCGCGCCAACTAACGGCCCG
CGTCCGGCTTCATCCACACCCGCAACCAGCTGCGTGTGCGGATAGACAAATTCGATCATT
GTGCTAACTCCAGAACGGCTTGTGCCGCCTGCTCATCGGCATTGCAGCGGATCTGCTGAT
GCAGTTCACGGAAGGTATCGTGCATCGCGTGGCTGGTTTTCCCGTTCGCCAACAGCGGTA
ACAGCGCCGCAGCCAGTTTTTGCGGCTCACACTCTTCCTGCAATAACTCTTTGACTAACT
CTCTGCCCGCCAGCAGATTTGGCAGCGAGACATAATCAGTTTTCACCAGACGCTTCGCCA
ACCAGAAAGTGAAAGGCTTCATGCGATACCCCACCACCATCGGGCATTTCGCCAGCATAC
ACTCCAGTGCTGCCGTACCCGACGCCAGTAGCGCCGCATCGCTGGCAACCATCGCCTCAC
GGCCCATTCCATCCAGCAAATGAACCGACAGGTCTGGCGCGACTGCAGCTTTGATGCGTT
CAAACTGCTCGCGGCGTTTGGCATTCACCAGCGGCACCACGATTTCGAGATCTGGATATG
TCTGGCGCAAAAGCTGGGCCGTTTTCAGGAAATCGGCACTAAGCATTTCGACTTCTGCAC
CACGGCTGCCCGGCAACAATGCCAGACAGTGGGCATCGTAAGGGATCCCCAGCACATCAC
GGGCACCATTTTTATCTGGATCTAATGGCATGGCATCAGCCATGGTATGACCGATAAAGC
GGCACGGTACGTTGTATTTGTCATAAAACGCTTTTTCGAAAGGCAGAAATGCGAGCACCA
GATCGGTGGCTCTGCCTATTTTGAAAACGCGTTTCTGTCGCCACGCCCAGACGGACGGAC
TGACGTAATGAATGGTTTTGATACCCTGCTTTTTGAGGTTACCTTCAAGAGTAATATTGA
AGTCAGGCGCATCAATACCGACAAAAACATCTGGCTTCAGTTCGCCAAAACGCTTTGTCA
GATCGGCACGAATATGCAGTAAGCGACGCAGACGACCGAGCACTTCAACAATGCCCATTA
CCGCCAGTTCTTCCATTTCGTACCAGGCTTCGCAGCCTTCAGCTTGCATTCGTGGCCCGG
CAACACCAACAAAGCGGGCGTTGGGCACACGTTCTTTCAGAGCGCGGATTAAACCGGCCC
CCAGGATATCGCCGGAGGTTTCTCCGGCGACCAGGGCAATCGTTAATGGACGCTGTTCAG
TCATTAACGAATCAGACCGCGCGTTGAGCGTGCAAAGAAATCGGTAAAGGCTTTCACTTC
CGGATATGTTTCCGCCAGTTCAGCAATTTCCGGTTTCACTTCATCGAGCGTTTTACCGCT
ACGATAAATCAGCTTATACGCATTGCGGATAGCGGTAATCGCCTCACGGCTGAATCCGCG
GCGCTTCAGCCCTTCGATATTGACACCGAACGGCGTTGCGTGGTTACCCTGCGCAATGAC
ATAAGGAGGGACGTCCTGCGCCACACCGGAGCAGCCGCCAACCATCACATGCGCACCAAT
GATGCAGAACTGATGGACTGCGGTCATGCCGCCGATGATCGCGAAGTCGTCAACCGATAC
GTGACCCGCCAGCGTTGCGTTGTTGGCGAGAATACAGCGGTTACCTACCGTACAATCGTG
CGCAATGTGCGCGTTGATCATCAGTAAGTTGTCGCTGCCCACCTTCGTCAATCCACCGCC
CTGGACTGTGCCACGATGAATGGTGACGCTTTCGCGAATGCGGTTACGATCGCCGATTTC
CACACGGGTCGGTTCGCCAGCATATTTCAAATCCTGGTTAACTTCGCCGATGGAGGCGAA
CTGATAAATCTCATTATCGCGGCCAATTTTAGTATGACCATTCACGACAACGTGAGATTT
CAGTACGGTACCCTCACCAATTTCGACATGGGGTCCAACGATACAAAAAGGACCAATGTG
TGCGTTCGCGCCAATCGACGCGCCCTCTTCCACAATGGCGGTTGGATGCACAAAGGCGGA
TTTATCAATCACGTATCAGGCCTCCCGGCTACGAGCACACATCATCGTTGCTTCGCAAAC
TACTTTACCGTCGACCAGAGCAACCCCTTTAAAACGGGTCAGGCCGCGGCGCGTTTTTTC
GAAAGTGACTTCCATGATCATTTGATCGCCAGGCACGACCGGGCGCTTGAAGCGCGCTTC
GTCAATACCGGCGAAGTAGTACAGCTCACCCGGTTCCAGTTTTCCTACGCTTTTAAACGC
CAGAATACCTGTTGCCTGTGCCATTGCTTCCAGAATCAGCACACCCGGGAAAATCGGTTT
TCCAGGGAAATGGCCCTGGAAGAATGGCTCATTGACAGAGACATTTTTTACTGCGCGCAG
AAAACGACCTTCTTCAAAATCCAGCACGCGATCCACCAGTAAGAACGGGAAACGGTGCGG
CAGAAGTTCTAAAATCTCTTCAATCTGCAGAGTATGAGTGTTAGTAGTCAAGATACTCTT
CCTGTCAAAATATAAGAAACGACAATAATAACACGGCCTGCCGCAATCGTAAGAATGAGA
CAGGCCGTAAAGTTTGGCGAACAAAAGATGGAACGTTAGTCTTGTTGATTAACCTTGCGC
TCAAGCGATTTCAGACGCTTGCTCATGTCATCAATGTTCATCACCAGTGCAGCGGTTTTG
CGCCAGACTTTGTTGGGTTGCAGCGGAATGCCTGAGGAATAGACGCCTGGTTCAGTGATG
GGACGCATCACCATACCCATGCCCGTAACCGTCACTTTGTCGCATATTTCCATATGCCCG
TTGATTACGCTGGCTCCGCCGATCATGCAGTAACGACCAATTTTCAGGCTGCCCGCCATA
ATGACGCCACCGGCAACCGCCGTATTGTCGCCAATCACGACGTTATGTGCAATCTGGCAC
TGGTTATCAATGATCACGCCATTGCCAATAACCGTGTCATCCAGCGCGCCGCGATCGATG
GTAGTGCAGGCACCGATCTCCACGCGATCGCCAATAATTACGCGACCAATCTGTGGGATC
TTCACCCAGTTACCACGATCGTTGGCATAACCAAAGCCGTCTGCGCCTACCACTGTTCCG
GACTGGATCAGGCAATTCTGACCGATCTGGATCTCATGGTAAATGGTTACATTCGCCCAG
AGACGCGAACCTGCACCGATTTTGCTGTTTTTACCTACGAAGCAACCGGCACCGATAATC
ACGTTATCGCCCAGTTCAACGCCGGACTCAATCACCGCGTTAGCGCCAATCGATACGTTG
TTACCCAGCTTCGCCGTCGCGTCGATCACTGCACTGGGTGCAATATTCTGCGCGGGCTGC
GGCGTGGTATCTAAAATTTGCGCCATGCGCGCGTAAGTCAGGTAGGGATTCTTCACTACC
AGCGCGGCACTTTTCGCGAAAGGAAGATCGTCCTGGGTCATGACAACCGCGGATGCCTGG
CACAAGCCTAAATGCTCACGGTATTTTGGGTTAACCATGAACGTAATGTGACCTGTTTGT
GCAGATTGCATGGACGCAACGCCGGTGATGACGATATCGCCATCACCGTGTAGTTCTGCA
TCCAACTGCTGCGCTAAATCAGCCAGTCGAATTGAAGGCATTACTTATTTAACCTGTTTC
AGTACGTCGGCAGTGATGTCTTTTACATCGCTGCTGTTGTAAGCAACGGCGTTTGCATCA
ACAACCAGATCGATATCCTGGCTGTTGGCAACGGATTTCACAGCAGTCTGGATACGAGTA
ACCAGTTTGCCGCGTTCTTCGTTGGAACGACGTGCGCGATCCTGCTCAAAAGCCTGCGCT
TTCTGAGCAAAAGTCTGGCGCTGAGCCATCACGTCTTTTTCCAGCTTAGTGCGATCGCTG
CCCGCTTTCATGGACTGCAGCTTTTTCATTTTAGCCTGCAGATCGGTTTCCATACGCTGC
AGTTCGCTGGCACGGCCTTTGAACTCATTTTCCAGCGTGTTAGAAACACCGGTTTTCTGC
GCTACCTGCTGGAACAGGCTGCCCATGTTGACGATTGCAATTTTGTCAGCCGCCTGAGCA
GATGTTGCCAGTGCTAAACCGAGACCTGCAGCTAATAACCACTTTTTCACAATAAACTCC
TTACCATCCCATTTGCACCGGAGGGTGCAGTTCTTTGCGTGGCCCGGCGATCTTATATTG
ATCGCCTAAAGTCATCGCTACACTACCACTACATTCCTTTGTGGAGAACACTTACCAAGT
TTTACCGATGTTAAACTGGAACTGTTCTGCCTTGTCTCCATCGTACTTTTTGAACGGCTG
GGCGTAGGAGAACACCAACGGCCCCAATGGGGACATCCATTGTAATGCGATACCCGCAGA
CATACGGATATTGCTTGGATCACTATAGTCCGGATATCCAGAATATTGGCTGGAATCCCA
GTTTGTATCCCAAACGGTACCCATATCCCAGAAGAAGGAAGTACGAACCGAGTTAGCATA
CTTATCGCTAATAAACGGAGTCGGGGTTATGAACTCGAGGCTGGCAACCGCCATGGCGTT
ACCGCCTACAGCATCATCCGATTTACACAGGTCTTTCGCGCCGTCCTGAGTCGCACATTC
GTAATCATAGTCCGGATCATAATTACTGGCCTGATGCGGGAAGTAAACTGCTTTCGGACC
AATGGTATTGGACTGGAAGCCACGGACGGTGCTGGAACCACCGGCATAGAAGTTCTCGTA
GAACGGCATCTCTTTGCCGCCTAAACCATCACCATAACCCCAGCGGGTACGACCCAGAAC
AACCCATTTGTGATCGTCATCGATCGGCACATAAGTCGCCGTGTCTAACGTCACTTTGTA
GTATTCGTTATCCGATCCCGGAATGGTCACTTTACCGGTCAGGTTGACACGTGAACCATC
TGTCGGGAAGTAACCACGGTCAAGCTTGTTATAGGTCCAACCATAGTTGAACGTGAAGTC
GTCTGTTTTGAAGCTGTTATCCTGATCAGAGGTGCTCGGATGTTCACCCATAGAGTACAG
ATAACGCCACATCGCAACCTGAGGCTGCATGTTGGACAGGGAGTTATGTACATAACCCAG
ACCTGCACGCAGCGAGTTATATTCGTTAATCGGGAAGCCCAACGTCACGTCTGTACCATA
ACTCTTGTTGGTATAGTCGGACAGGTCGGCGTCATCTGCCTGGAAGTCATTATAGAAGAG
ACGACCACCGAGGCTTACGCCATCTACGGTGAAGTACGGGTTGGTTACCGACAGTTCAGC
ATAGGTCTGGTAATCGTTTTTGGTCCCGTTGATACCAACAGCATAACCTGTACCTAACCA
GTTATCCTGTTGCACACCAGCCTGGAAGCTCACGCCACTTTCAGTACCGTAACCAATACC
AAAGTTGAAGCTACCGGTGTTGCGCTCTTTTACCTTGTAGACTACATCAACCTGGTCCGG
GCTACCCGGAACACGTTGGGTATCGGTATCGACAGTTTCAAAGAAGCCCAGACGATTCAG
ACGCTCCTTACCCTGATCGACCAGATCGCTCCCCAGCCATGCACCTTCCATCTGACGCAT
TTCGCGACGCAGGACGGCATCTTTCGAGGTATCGTTACCTTCAAAACGGATCTTACGCAC
GTAGAAACGGTTACCCGCATCAACGTTCACACGTAATTTAACGGTTTTGTCGGCATCGTT
AATTTCGGGCATGGACTGTACGCGCGGATAGGCATAACCATAGCGACCGAGAAGCTTTTT
AATGTCATCTTCCATCTTGGTCACTTTGGTGCCGTTATACAGCTCACCCGGCTCGATCTT
AGTCAGCTGCTCAATTTCAGCGGAGTGCCCGGCAAGGTTGCCGCTCACTTCAACGCCAGA
AAGCTTGTACTGATCGCCTTCGGTGATGTTCACCGTGACGTAAATACCTTTTTTATCTGG
CGTCAGACTGACCTGGGTAGAGTCGATGTTGAAACGGGCATAACCGCGGTCCAGATAGTA
GCTGCGCAGGGTTTCAAGGTCGCCCGCCAGTTTCTGTTTCTGGTATTTACGATCGCCTAC
CACGTTCCACCACGGCACTTCGTCACGCAGTTGGAAATGAGAGATCAGTTCGTCGGTGGT
GAAAGCATGGTTACCAACAATGTTAATTTGCTGGATTTCAGCTGACACACCTTCCTGGAA
CACCAGTTTTAGGTCAACACGGTTGCGCGGCAGCGGGGTCACGACAGCTTTAACGCTGGC
GCTATATTTACCGACGCTGTAGTAGAAGTCTTCCAGACCTTTCTCGATATCGGCAATGGT
GGTGCGATCGAGGGATTCGCCCACACGCACACCAGAAGCCTCGAGGTTTTGCTTCAGCAT
GTCATCTTTCACCGATTTGTTACCGGAGAAAGTAATGCTGGCAATGGTCGGACGTTCTTT
TACCTGAACCAGAAGGGTATCACCATCACGAAGGACGCGAACATCCTCAAAGTTGCCGGT
AGCAAACAGAGCGCGAATGGTATTACTGATATCTTCATCATTAACCGTGTCGCCTGTGCG
CACCGGCATACTGAGGAGGGCCGCACCAACGGCGACACGCTGAAGGCCTTCGAAATGAAT
ATCTTTCACTACGAACCCTTCAGCACCGTATACGGTGGCGCTGCTAAACAGCAGCGACGC
TATGAGCAACTTTTTCATCGCCATCGTTATTATGCGTTCTTCCTAACTAACTCTCATAAC
CGAGAGAAATCATTGAAAAGTGCAAGCCCCATTAACAGCACCAGCAGAATCGAGCCAATG
CGATAACAAAAGTCTTGAACCCGCTCGGATACCGGTCCGCCCTTGATCTTTTCGATCGCA
AGGAACAGCAGATGCCCCCCGTCAAGTACGGGCAACGGAAACAGGTTAATTATCCCTAAG
TTCACGCTAATAAGCGCAAGAAACGGCAGGTAATAAACTACCCCGAGTTCCGCTGTCATC
CCAGCCCCCTTGGCGATAGAGATCGGCCCACTGAGGTTGTTCAGTTTCACATCACCGGTG
ATCAATTTTCCCAGCATACTGACCGTCAGCTTCATCAGCTGCCACGTTTTGTCCGTGGCT
TCGACGATGGCGTTGAACGGCCCATACTGGCGTACAACTTTATACTCATCTGGCAAAGGA
ATGACTTTCGGCTCAATACCGACAAAACCAATCGCTTTACCATTACCCGGTTTACTCTCC
GGGATTAATGTCAAAGACAAGGGACTCCCCTGCCTTTCGATTTCTAACGCTAAGGATTTA
CCCGGGTTATCCCGGACAAGCATCACAAAGGTCACCCACTGCGTTAAGGGCTGACCATCG
ACTTTAACGATCCTGTCGCCTGCTTGCAAACCTGCCTTGCTTGCCGCCGAGTTTGGCTGC
ACATTTTCCAGTACAGGTTCAATTTGCGGTCCACGAGGACGAATCCCCAGCGAAGATACC
GGATCTTCTTTATCAGGCTCAAACGCCCAGTGACGTAAATCGAGCTTTACATCCCGCCGT
TGGTCGCTGCCAAATGGCGCTACTGTAATGGTGGTGCTTTCATCGCCAATTTTATCGACC
AACTGCAAACGCACAGCATCCCAATCAGGCGTTTCGATACCATCTACGGCTTTTAGTTCC
GTACCTGGTGCAATTTGTGCTTCCGCAGCTATCGAATTGGCTGCTATTTCGCCAACCACC
GGACGTACGCCAGGCACACCAATAATAAAAACCAGCCAGTAGGCAAAGATAGCAAAAATG
AAGTTTGCAACCGGACCTGCGGCAATAATCGCCGCTCGTTGGCCGACAGATTTATTATTG
AAGGCATGGTGGCGGAGTTCCGGAACGACCGGTTCTGCGCGCTCATCCAGCATTTTGACA
TAACCGCCCAGCGGGATCAGGGCGATAACATATTCGGTACCGAGCTTATCAGTTCGCCGC
CAGAGCGCCTTACCAAACCCTATTGAGAAACGCTCAACGCGAACACCACAACGCCGGGCA
ACCCAGAAATGACCAAATTCATGCACGGTGATAAGTACACCCAGTGCAACGATGAACGAA
GCCAAATCCCAGAGAAAACTCAGCATATTACCTTCCGTTAAAGCGTCCTGAATACCAGTA
ACAACAAGCAAGCAAAGACCGGTACCGCAGCCGTCAGGCTATCAATACGATCTAAAATAC
CACCGTGTCCTGGAATTAAATGACCGCTGTCCTTAATTCCTGCTTCACGCTTAAACATAC
TCTCGGTCAGATCGCCGAGCACTGAGGCTAACGCTGCGACAATAGAGCAAATGAGTAAGG
TGACGGGAGCGACGTCGAGATTCGCCCACATGCCATAACCCCATGAGATTACCGCTGCGG
TCGCTAGTCCACCTATAAAGCCTTGCCAGGTTTTACCCGGAGAAACCTTCGGTGCCAGCT
TATGTTTACCAAACAATTTGCCAAACATATATGCGCCAGAGTCAGCGCCCCATACCAGGA
TCATGACATAGAGCAGCCATATTGCGCCACTGTAATGATTCTCGTCGTAGTGCCAGGCCC
GTAACGCCAGCATGCCCCAGAAGAAGGGAACAATGGTTAGCACGCCAAAAATAAGGCGCA
ATGTTTTAGAGTTACGCCAGATTGCTGCGGAATCTGGGTAAAACAGCACCAGCAATAGCG
CGACAATCCACCAACCCAACGAAGCCCAAAGTGAGATTTCAACCAGCGGTTGATGAATAT
TTCGGTGATATTCCGGCAACAGAAAAAGCATCAGCGCCAACAATAACCCGCATAACACCG
CCAACCATACTCGCTGCGAACGAGTGGTAAAACCGCTAAGCTGTCCCCATTCCCACGCTG
CCAGCATGCAGACCACCAGCGTTACAATGGCGAACCCCACCGGCGGCAACAGAAACAACG
CCGCGATGACGACGGGTATTAACACAAAAGCAGATATCAGGCGATACTTCAGCAAAAGCG
ACCCCCATCAGGCTGTTTCATCACCGGGCTCGGTGCCGCCGAAACGACGCTCTCGATTAG
CAAAGGCATTTAACGCCCCTTCAAAGTCTTGTTCATCGAAATCGGGCCAGAGAACATCTG
TAAAGTAAAGTTCGGCATAGGCAATTTGCCAAAGCAAAAAGTTACTAATGCGATGCTCCC
CCCCAGTCCTAATTACTAAATCTACAGGGGCCAGTTCATGCATACAGACATGCTGGTTTA
GCATCTCTTCATCTATCTGATCTGGTTGCAGGTTTCCTTGCTGCACCTTTTCAGCCAGTT
GCCTGACTCCCTGGACTATATCCCAACGTCCACCGTAGTTCGCCGCAATATTCAGCGTCA
GACCGGTATTCCCGGCTGTTAGCGCTTCAGATTTACGAATACGTTCTTGCAAACGCGAGT
TAAAGCGACTGGTATCGCCAATAATACGCAGACGCACGTTATGTCGGTGCAGACTTTTTA
CTTCGCTATCGAGCGCCCACACAAACAGTTCCATTAACGCACTGACTTCCTGCGCTGGTC
GGTTCCAGTTTTCACTACTAAAGGCATACAGCGTTAACGCCTCAATACCGTTGTTGGCCG
CAAAAGAGACAGCCCGGCGGACGGATTTTGCCCCGGCTTTATGCCCAAAGGCACGAATCT
TCCCTTGCTTTTTTGCCCAGCGACCATTGCCGTCCATAATGATCGCAACATGACGGCAGC
CATGCGCTGGCAATTTTTCGCTAAGTGGTTGAGTAGCAGACAACATCACGCGTTTTTTAT
TCCCTGACAGGGTTTACGGTACTCAGGAATACTGAAGCCTATACAAAAAAAAGCCGTGTA
AAACCACGGCATACCTGACCTTATAAAGCCAACTACTTACGATCAGATGGCGCAGACTAT
ATCACTGAAGCCCTACGCTAACAAATAGCGCGACTCTCTGTAGCCGGATTATCCTCAGCT
TGCGAGACGCATCACCTCTTTTCTGGCGACTTCACGCGCGTTCGCATCAACAGATAACAC
ATCGTCCACACATTGTGGTTCGCGCATATCCATTTTTTCCAGTACGGATAAATTCAACGC
AGCGATATCCGTAAAGCGGATTTGTTGCGCAAGAAAAGCAGCAACGGTGATTTCGTTTGC
GGCATTCAATGCTGTCGTCGCTGCCTGACCTTGTTCGAACGCCTCCATCGCCAGTTTCAG
GCATGGATAACGATCATAATCCGGTGCGGCAAATGTCAACGCACTTAGTTTGCAAAAATC
GAGCGGCTTCACGCCAGAGTTCACGCGATTCGGCCATGCCATGGTGTGGGCAATTGGCGT
ACGCATATCCGGTTCCCCCAGCTGCGCCAGAACACTGCCGTCCTGATAGCGCACCATTGA
GTGAATCACTGACTGCGGGTGAATCAGCACTTCCATCTGGCTGGCGCTGGCGTTAAACAG
CCAACGCGCTTCAATGTATTCCAGACCTTTGTTCATCATGGTAGCCGAATCGACAGAAAT
TTTACGTCCCATCGACCAGTTCGGATGACGGCAGGCTTGATGGGGCGTCATTGTTGCCAA
ATCGCGCAATGGCGTCTCACGGAAAGGGCCACCAGACCCGGTAAGTAAAATGGACACCAC
GCCATTTTGCTCAAGGTCAGCGTATCCCAGATTATGCTGGATAGGTTGCGGTAAACTCTG
AAAAATAGCGTTATGTTCGCTATCGACCGGTAACAATTGCGCTTTGCTCTGCTTTACGGC
GTCCATAAACAGACGTCCGCAGGTAACCAGTGATTCTTTATTGGCCAGCAAAATGGTTTT
ACCCGCGCGGATCGCAGCAAGCGTAGGTAACAGCCCAGCAGCACCAACAATGGCTGCCAT
CACCTGATCAACCTCCTCAAGCGCTGCCATATCGCAAGCGGCTTGTTGCCCACTTAAGAC
TTCGGTGCGGCTCCCCTGTTGCTGTAGCATCGTTTTAAGAAGTTTCGCACTCGCTTCATC
GTCCATTACGGCATAGCGGGGAGAGAATTCCAGGCACTGTTCTACCATGCGAGTGACATT
TTTGCCTGCCACCAGCGCAACTACGCGGAAGTGTTCGGGATTATGGCGCACCACGTCCAG
CGTGCTGCAACCAATCGAGCCGGTCGAGCCCAGAATGGTGAGTTGCTTCATGAAACATCC
AGAGTTGAGACAGAATAAAAAGCAAAACGCCGCCAGCCGATCCGCAAGGATCTACTAAGC
GGCGTTTTTGTCGTTCAAGAAATCAGAACTGCATCAGTTCTGCTTCTTTGTCTGCCAGCG
CCGCTTCAATTTTCTTGATTGCAGCATCAGTCAGTTTCTGTACATCGTCCTGAGAACGGC
GATCGTCGTCTTCGCTGATCTCTTTATCTTTCAACAGTGCTTTCACTTTGTCGTTCGCGT
CACGACGCACGTTACGTACTGCAACACGCGCTTGTTCTGCTTCACCACGAACGATTTTGG
TCAGATCTTTACGACGTTCTTCCGTCAGCGGCGGCAGCGGAACACGGATGTCGCTACCCG
CAGAGTTCGGGTTCAGGCCAAGATCGGACGCCATAATCGCTTTTTCAACGGCCGGAGACA
TTGAACGATCAAACACGTTGATTTTCAGAGTACGGGAATCTTCTACCGTTACGCTTGCCA
GCTGACGCAGCGGCGTCGGCGTGCCGTAATATTCCACGACAATGCCATCCAGCAGGCTGG
GAGAAGCACGACCCGTGCGTATTTTGCTGATTTGGGTTTTGAACGCTTCTACGCATTTGT
CCATGCGTACTTCAGCATCTTTTCTGATATCGCTAATCACGTTACGAATCCTTGAAAACT
TGTCTCAGTCAGACCAGACAGTCACACACAGTGGAAGTGTGCTAAGTATAGCCCTGATTA
AACATATTACGGGTAATCGTCTGGATTATTAGGCTATTTTATTTGCCATTTTGGCCCCGG
GCAGTGCTCGCCATCCTCACGTACTTTTGTACGCTCCGGTTGCTGCGCGCTGGCCGTGAC
CAAACTGCCTGCAACAATAACGCCTTATAACCAGACTTACGCCCCCGCGATACTTATGCG
GAATCTTACCCTTATTTATCCATCACGGGAATTATTCCGTGATTAAAGTCCCTTCTTTTT
CACCCATTACCACACGGCGCAGCGCACCCGGTTTGTTCATGTTGAAAACACGAATCGGTA
ATTTATGGTCACGAGCCAGCGTGAAGGCCGCCAGGTCCATGACTTTCAGCTCTTTTTCCA
GCACTTCGCTGTAAGTCAGTTGCTCGTACATGGTTGCAGTTGGATCTTTCGCCGGATCAG
CAGTAAACACGCCGTCAACTTTGGTTGCTTTCAGCACCACATCGGCTTCAATTTCGATAC
CACGCAGGCAAGCTGCTGAGTCGGTGGTAAAGAACGGGTTACCTGTACCGGCGGAGAGGA
TCACCACACGGTTGTTGCGCAACAGGCTGATAGCTTCTGCCCAACTGTAGCTGTCGCACA
CGCCATTCAATGGAATAGCGGACATCAGGCGAGCGTTCACATAGGCGCGGTGCAGTGCAT
CACGCATTGCCAGGCCGTTCATTACGGTCGCCAGCATCCCCATGTGGTCGCCCACAACGC
GGTTCATACCCGCTTTCGCCAGACCAGCGCCACGGAACAGGTTACCCCCACCAATCACCA
CACCAACCTGAATACCCAGTTCAACCAGTTCTTTGATTTCCTGAGCCATGCGATCCAGTA
TGCTTGCATCAATACCGAAGCCTTCAGTGCCCTGCAGAGCTTCGCCACTCAACTTAAGCA
GAATGCGTTTATAGACGGGTTTTGCATTGGTAGCCATGTTTCTTTCCTGAGACTGTCAAC
GATTGAAATGAATTAATACTAGCGACATTGTACGTCGCTATTCAGCGCAGCCCCACAAGG
GTTAGCTGAATTTACAAGATGGGCACAAAAAGAAGCCGCCCTCAGGCGGCTCCTTTTCGA
TGATTAAGACTGCTTGGACATCGCAGCAACTTCTGCTGCAAAGTCAGTCTCAACTTTCTC
GATGCCTTCACCTACTTCGAAGCGGATGAAGCCAGTCACTTCAGCGTTATGCTCTTTCAG
CAGCTGACCAACAGTTTTTGCCGGTTCCATAACGAACGGCTGACCAGTCAGAGAAACTTC
GCCGGTGAATTTCTTCATGCGGCCTTCAACCATTTTCTCTGCGATTTCTTTCGGCTTACC
AGACTGCATCGCGATATCCAGCTGTACCTGGTATTCTTTTTCTACCACTTCAGCGGATAC
GTCTTCTGGTTTGATGAATTCTGGCTTGCTTGCAGCAACGTGCATAGCGATGTGTTTAAC
CAGCTCTTCGTCAGCGCCTTTAGCAGCAACCAGAACGCCGATACGCGCACCGTGCTGATA
AGAACCCAGAACGTCGCCTTCCAGCGCAGCAACGCGGCGAATGTTGATGTTTTCACCAAT
TTTCGCTACCAGCGCAACACGTTCTTCTTCGAACTGTGCTTTCAGAACTTCAACGTCAGT
GATTTTGCCAGCAACAGCTGCGTCCAGAACTTTGTCTGCGAACGCCTGGAAACCAGCGTC
TTTTGCAACGAAGTCAGTCTGGCAGTTAACTTCCAGAATGATGCCGTAGTTGCCGTCGAT
TTTGGTTTTGATCACGCCGTCAGCAGCAACGTTGCCTGCTTTTTTCGCTGCTTTAATAGC
ACCGGACTTACGCATGTTTTCGATTGCCAGCTCGATGTCGCCGTTAGCTTCAGTCAGTGC
TTTTTTGCAATCCATCATGCCTGCGCCAGTACGCTCACGCAGCTCTTTTACCAGGGATGC
GGTAATTTCAGCCATTCTAAAATCCTCGGAGATGTGATCTGCCCGGCATTAAACCGCACA
GATATAAAAGTGAAAAAGGGGGCCATATGCAGGCCCCCTAACCAAACGTGTACTACCTGG
TCTATAAGGGCTCTCCCCCTTCATATTTCGCGCCGCAGATGCGTTGTCTTCGCTCGCTCA
TCCCGGTCACTTACTGATGTAAGCTCCCGGGAATTCTCGAGCTTGCCGCCTTTCTGCAAC
TCGAACTATTTTGGGGGAGTTATCAAGCCTTATTACTCAGCTTCTACGAAGCTTTCTTCC
GCCTGGGAAGCCAGATCCTGAGAACGGCCTTCACGTACGGTTGCAGCAACAGCGCCCAGG
TACAGGGTCACAGCACGGATTGCGTCGTCGTTACCCGGGATAACGAAGTCAACACCGTCC
GGATCAGAGTTGGTATCAACGATAGCAAATACCGGAATACCCAGGTTGTTTGCTTCTTTG
ATAGCAATGTGTTCGTGGTCAGCATCGATTACAAACAGAGCGTCCGGCAGACCGCCCATG
TCTTTGATACCGCCCAGGCTGTTTTCCAGTTTCTCCAGCTCACGAGTGCGCATCAGCGCT
TCTTTCTTGGTCAGCTTGTCGAAAGTACCGTCCTGAGACTGAGTTTCCAGGTCTTTCAGA
CGTTTGATGGACTGACGAACGGTTTTCCAGTTAGTCAGCATACCGCCCAGCCAGCGATGG
TTCACGAAGAACTGGTCGCAGCTCAGAGCAGCGTCTTTCACCGCTTCGCTTGCAGCGCGT
TTAGTACCAACGAAAAGGATTTTACCTTTGCGAGAAGCAATCTTGTTCAGTTCAGCCAGA
GCTTCGTTGAACATCGGTACAGTTTTCTCAAGGTTGATGATGTGAACTTTGTTACGCGCA
CCGAAGATGAACGGCTTCATTTTCGGGTTCCAGTAACGGGTCTGGTGACCGAAGTGAACA
CCAGCCTTGAGCATGTCGCGCATGGAAACAGTTGCCATGATTAAAACCTCTATATAAAAG
TTGGGGTTATGCCTCCACGTATCCCATATTACCGACCCCAAAGGGCACCCCGGAATATGT
GCCGATACGTGTGTGTTGTTACACAAAGTGAGATTGTCGCTTCCGTCCAGTCTGTGTATA
CGAAATGGATCGGAAGTCCGGCGCGCTTTATACCACAAATACGTCTGGGACACCAATAAT
TGTTGGCGCTGTGTACAGCATCAGACGTCGAATTTTCTATTATAGAAAACCTTCAGTGGC
ACGTTTGGCGAAATTCAGAATGATTCTCAATTTGCCCGGGTGTGATACCATTGACGGCAC
TTACATATATATTGTCGGTATCACCGACGCTGATGGACAGAATTAATGGCTATCTCAATC
AAGACCCCAGAAGATATCGAAAAAATGCGCGTCGCTGGCCGACTGGCTGCCGAAGTGCTG
GAGATGATCGAACCGTATGTTAAACCGGGCGTCAGCACCGGCGAGCTGGATCGCATCTGT
AATGATTACATTGTTAATGAACAACACGCGGTTTCTGCCTGCCTCGGCTATCACGGTTAT
CCGAAATCCGTTTGCATCTCAATTAATGAAGTGGTGTGCCACGGTATTCCGGACGATGCT
AAGCTGCTGAAAGATGGCGATATCGTTAACATTGATGTCACCGTAATCAAAGATGGTTTC
CACGGCGATACCTCGAAAATGTTTATCGTCGGTAAGCCGACCATCATGGGCGAACGTCTG
TGCCGTATCACGCAAGAAAGCCTGTACCTGGCGCTACGCATGGTAAAACCAGGCATTAAT
CTGCGCGAAATCGGTGCGGCGATTCAGAAATTTGTCGAAGCAGAAGGCTTCTCCGTCGTT
CGTGAATATTGCGGACACGGTATTGGTCGCGGCTTCCATGAAGAACCGCAGGTGCTGCAC
TATGACTCCCGTGAAACCAACGTCGTACTGAAACCTGGGATGACGTTCACCATCGAGCCA
ATGGTCAACGCGGGTAAAAAAGAGATCCGCACCATGAAAGATGGCTGGACGGTAAAAACC
AAAGATCGCAGCTTGTCTGCACAATATGAGCATACTATTGTGGTGACTGATAACGGCTGC
GAAATTCTGACGCTACGCAAGGATGACACCATCCCGGCGATAATCTCGCACGACGAATAA
AATGAAGCCGGCGAATGCCGGCTTTTTTAATGCGATAATTTAATCTTATGGGTGGCGCAC
AATGAATACCCTTCCAGAACAGTACGCAAACACCGCTCTCCCCACCCTGCCCGGTCAACC
GCAAAATCCATGCGCCTGGCCCCGTGATGAATTAACCGTCGGTGGGATAAAAGCCCATAT
CGATACTTTCCAGCGTTGGCTGGGTGATGCCTTTGACAATGGTATCTCCGCAGAACAGTT
GATTGAGGCGCGTACCGAGTTTATCGACCAGCTCCTGCAACGATTATGGATTGAAGCGGG
ATTCAGCCAGATTGCCGACCTGGCATTGGTCGCCGTCGGTGGCTACGGTCGTGGCGAGCT
GCATCCACTTTCAGACGTCGATTTACTGATTTTAAGCCGTAAAAAGCTCCCGGACGATCA
AGCGCAAAAAGTGGGCGAGCTGTTAACGCTGCTCTGGGATGTAAAGCTGGAAGTCGGTCA
TAGTGTGCGCACGCTTGAAGAGTGCATGCTGGAAGGGTTATCGGATTTAACCGTCGCCAC
CAATTTAATCGAATCCCGCTTATTAATTGGCGATGTTGCGCTGTTCCTCGAACTGCAAAA
ACATATTTTCAGCGAAGGATTCTGGCCTTCCGACAAGTTCTACGCGGCGAAAGTTGAAGA
ACAGAACCAGCGCCATCAGCGTTACCATGGCACCAGCTACAACCTTGAACCAGACATCAA
AAGCAGCCCTGGCGGCTTGCGCGATATCCACACTCTGCAATGGGTGGCCCGCCGTCATTT
TGGCGCAACATCGCTGGATGAAATGGTCGGGTTTGGCTTCTTAACCTCAGCGGAGCGGGC
GGAATTAAACGAATGTCTGCATATATTGTGGCGTATTCGCTTTGCCCTGCATCTGGTCGT
CAGCCGTTACGATAATCGCCTGTTATTCGATCGCCAGCTTAGCGTCGCCCAGCGTCTGAA
TTACAGTGGCGAAGGTAACGAACCGGTCGAGCGGATGATGAAGGATTACTTCCGCGTGAC
ACGCCGCGTCAGTGAACTCAACCAGATGCTGCTGCAACTGTTCGATGAAGCGATCCTCGC
CCTTCCCGCCGACGAAAAACCCCGTCCAATCGACGATGAGTTTCAGCTACGCGGTACGCT
AATCGACCTGCGTGATGAAACACTATTTATGCGCCAGCCGGAAGCCATCTTGCGTATGTT
CTACACCATGGTGCGCAACAGTGCGATCACCGGCATTTACTCCACCACACTGCGCCAGTT
ACGCCATGCCCGTCGCCATCTGCAACAACCGCTGTGTAATATTCCGGAAGCACGAAAACT
GTTTTTGAGCATTCTGCGTCACCCCGGAGCGGTGCGGCGCGGGCTATTGCCAATGCATCG
CCATAGCGTGCTCGGCGCGTATATGCCGCAATGGTCGCATATCGTCGGGCAGATGCAGTT
TGATCTGTTCCACGCCTACACGGTGGATGAACATACTATCCGCGTGATGCTGAAACTGGA
GAGTTTTGCCAGTGAAGAAACGCGCCAGCGCCATCCGTTGTGTGTGGACGTCTGGCCGCG
CCTACCGTCAACTGAGCTGATTTTCATCGCCGCGCTGTTTCACGATATCGCCAAAGGACG
CGGCGGCGACCATTCCATTCTCGGTGCTCAGGATGTAGTGCATTTTACCGAACTCCACGG
GCTGAACTCACGCGAAACACAGCTGGTCGCCTGGCTGGTTCGCCAGCACTTGCTGATGTC
GGTGACAGCTCAGCGTCGCGATATTCAGGACCCGGAAGTCATCAAGCAGTTTGCCGAAGA
AGTTCAAACGGAAAATCGTCTGCGCTATCTGGTATGCCTGACAGTGGCTGACATTTGCGC
CACCAACGAAACGCTGTGGAATAGCTGGAAGCAAAGTCTGTTGCGCGAACTCTATTTTGC
CACCGAAAAACAGCTACGACGCGGAATGCAAAACACGCCGGATATGCGCGAACGGGTTCG
CCATCACCAACTCCAGGCGCTGGCACTGCTGCGCATGGATAACATCGACGAAGAGGCGCT
GCACCAAATTTGGTCACGCTGTCGTGCTAACTATTTTGTCCGCCATAGCCCAAATCAACT
GGCCTGGCATGCGCGCCATTTATTACAGCATGATTTAAGCAAACCGCTGGTATTGCTTAG
TCCGCAGGCTACGCGTGGAGGCACCGAGATTTTTATCTGGAGCCCGGACCGCCCCTATCT
GTTTGCCGCCGTCTGTGCCGAATTAGACCGCCGCAATTTAAGTGTTCACGACGCACAAAT
TTTCACCACTCGCGACGGTATGGCGATGGATACCTTTATCGTGCTGGAACCCGATGGTAG
CCCGCTATCCGCAGATCGCCATGAGGTTATTCGGTTTGGTCTGGAGCAAGTACTGACACA
AAGTAGCTGGCAGCCACCACAGCCGCGTCGTCAACCGGCTAAACTACGTCACTTTACTGT
TGAAACCGAAGTGACGTTTTTGCCTACCCATACCGACCGAAAATCATTCCTTGAGCTTAT
CGCGCTCGACCAGCCAGGACTGCTGGCGAGAGTCGGGAAAATTTTTGCCGATCTGGGAAT
TTCGCTTCATGGCGCCCGAATTACAACCATTGGCGAGCGAGTAGAAGATTTATTCATAAT
TGCCACCGCTGACCGGCGTGCACTTAATAACGAGTTGCAGCAGGAAGTGCATCAGCGGTT
GACAGAGGCCCTCAATCCAAACGATAAAGGGTGATGTGTTTACTGATATGAAAAGAGTTT
AACAATGCAGCAGTTACAGAACATTATTGAAACCGCTTTTGAACGCCGTGCCGAGATCAC
GCCAGCCAATGCAGACACCGTTACCCGCGAAGCGGTAAATCAGGTGATCACCCTGCTGGA
TTCCGGCGCACTGCGTGTAGCGGAAAAAATTGACGGTCAGTGGGTGACGCATCAGTGGTT
AAAAAAAGCGGTGCTGCTCTCTTTCCGTATTAATGATAATCAGGTGATCGAAGGGGCAGA
AAGCCGCTACTTCGACAAAGTGCCGATGAAATTCGCCGACTACGACGAAGCACGTTTCCA
GAAAGAAGGCTTCCGCGTTGTACCACCAGCGGCGGTACGTCAGGGTGCGTTTATTGCCCG
TAACACCGTGCTGATGCCGTCTTACGTCAACATCGGCGCATATGTTGATGAAGGCACGAT
GGTTGATACCTGGGCGACCGTCGGTTCTTGTGCGCAGATTGGTAAAAACGTCCACCTTTC
CGGTGGCGTGGGCATCGGCGGCGTGCTGGAGCCGCTGCAGGCTAACCCGACCATTATTGA
AGATAACTGCTTCATTGGCGCACGCTCTGAAGTGGTTGAAGGGGTGATTGTCGAAGAAGG
TTCCGTCATCTCTATGGGCGTATACATTGGTCAGAGCACCCGTATTTACGACCGTGAAAC
CGGCGAAATCCACTACGGTCGCGTTCCGGCGGGGTCTGTGGTTGTTTCAGGTAATCTGCC
GTCAAAAGATGGCAAATACAGCCTCTACTGTGCGGTTATCGTTAAGAAAGTTGACGCGAA
AACTCGCGGTAAAGTTGGTATTAACGAACTGCTGCGTACCATCGACTAAAAGTATGTACA
CGGGCAGCACGACGCTGCCCGATTGCTTTCTGGTTCAGAATAATTCGTCCTACTCATTCT
TCCTCCCCCTTTTTTAAATACTTTTTCATCTTGTTTCGGACTGTCATGTAATTCGCAAAA
CGAAGATAAATGTGCTAATCCATCCCATGGAATATCGCCACAATAAAGCAGGTAATTTTT
TGATTTTTACGCCATGATAGAAGTCTGGAAGAAAAAGGCTTTCTGCGATCACAGTCGAGC
CGGGCGGGCCAGGCCAAATGCTAAAATAAGCACAATTTACTGACTCATTTTGAGGTAACG
CTATGTACGACAATCTGAAAAGTCTGGGTATTACCAATCCTGAAGAAATTGATCGTTACA
GCCTCCGGCAGGAAGCCAACAACGATATTCTGAAAATCTATTTCCAGAAAGACAAAGGCG
AGTTTTTCGCCAAGAGCGTGAAGTTTAAATATCCGCGTCAGCGTAAAACGGTCGTCGCTG
ATGGTGTGGGTCAGGGTTATAAAGAAGTCCAGGAAATCAGCCCGAATCTACGGTATATCA
TTGATGAGCTTGATCAAATCTGCCAGCGTGACCGCAGCGAAGTTGATCTTAAGCGTAAGA
TCCTCGACGACTTACGTCACCTGGAGTCAGTCGTAACCAATAAGATCAGCGAGATTGAAG
CCGATCTGGAAAAACTAACGCGTAAATAATCCCGAACTGACGGTTAACTCGGGCATTCCC
CTCTCCCCTTCGGGCTGAGGGGAATGAGCCAGCGCCGCCTCAACCTTAACGCATAACCTA
CCGCTCTTCATCCAGTTGTAACGCCACATACAGCAGCAACCTGTCATCAAAATTGCCCAA
ATCAAGCCCGGTCAGTTCCGATATACGATTAAGCCGATACTCCAGAGTATTACGATGAAT
AAACAACGCCTTTGACGTTGCCAGCGGTTGCACATTGTGACGAAACCACGCCGCCAGCGT
TCGCCGCAGCAAGCCGTTATTGTCCATCGCTTTCAGCCGCGCCAGCGGTCGCGCCAGTTC
GTTGGCCTGCCAGTCGCCACGCAAACTGTCGAGTAACACAGGTAACATCAGATCCTGATA
AAAATAGCAGCGACTTTCTGGCATCCGCTGTTTACCCACCACCATCGTCGTTTTCGCCGT
ACGATAGGATCGGGCAATACTGCCAGGACCAGTAAAATAGTTGCCCAGCGAAACGCGAAA
ACGCAGCTGGCCGTACTCTTTCATGCGGGTAATCAGTTGTTCAACTCGCTTACGATGATC
TTCTGCATCCCAGCGCCCAAAAGAGTTCAACGCCGGTTTCAACACCACCATTTCGGTTAG
CGAGACAATCGCCACCAGATTATTACGCTCGGGCGTAGTCAGCGCATTTTGCAGTTGTTG
TAACTCCGCCATTGCGCTGTCCACGCCAAGCTGACCGCTGTCGACCTCAACAATAGCCAC
TACTCGCGGTTGATTGAGATCGATCCCCAGCCGTTGCGCCCATTCAGTAAGTGCGGGAGT
ATTCTCCTCAGCCTGAATCAGGTTCATCACCAGTTCTTCCCGCAAACGGCTATCCTGCGC
CAACAGGTGCATCAACCGCGACTGTTCCAGCATCATTTCAGCCGTCATGCAGACCAGTTC
GCCATATTTACGCAGGTTCTCTGGTTCACCTGTCAGGCCAATTACGCCGACAATTTCACC
TTCCAGCCGTAACGGTAGATTAATCCCCTGCCGCACACCGTGCAGATGACGTGCCACCGC
GTCATCGATATCGACGACTCGTCCCTGTGAAAGTACCAGCAATGCACCTTCGTGCAATTC
ACCAATACGCTCACGATCGCCGCTGCCGATAATTCGCCCGCGGGCATCCATTACGTTGAT
ATTGGTATCGATGATGCGCATGGTATGTGCCACGATATCCTGCGCCATTTTGGTATCAAG
ATGCCAGCCAGCCATAAGTCCTCCGTTATGCACGGCTTAGCATAAGGAAGTACGTAACGT
ACGGCATTGTGCAAATGCCTAAAGGATGATGAAGATGTATGGAGTTGTGGTGAAGTTCAC
AGATTGTAAGGAGAACCCCTTCCCGTTTTCAGGAAGGGGTTGAGGGAGATTACTGCATTA
ACAGGTAGATGGTGCTGTCGCCGCGCTGAATGTTCAGTGCCAGCACAGACGGTTTGCTGT
CGAGAACTTTACGCAGTTCAGCGATGTTTTTCACTGCCTGCTGGTTCGCGCCAATAATCA
CATCACCTTTCTTCAGGCCGATCTGCGCAGCCGGAGTGCCCGTTTTCACGTTGTTCACTA
CCACGCCCTGATCTTTGCCTTTGTTGCTCATCTCAGCACCTTCAATGCCGTTGAAGATGG
AGCTGGAATCAACCTGATTCTGGCTGCTCTGCTGCAGTTCCAGATTCACGTTGACCTGCT
TACCGTCGCGCAGCAAGCCCAGGGTCAGTTTGCTGCCCACCGGCATAGTACCCACCTGAG
CACGCAGTGCGGCAAAGCTGCTGATCGGCTTACCGTTCAGTGAGGTGATCACATCACCCG
CTTTAATGCCCGCTTTTGCAGCGGAGGAATTAGGCAGAACCTGGCTTACGAAAGCACCGC
GCTGGGCGTCAACTTTCATCGCTTTCGCCAGTTCGGAATTCAGCTCAGTCCCCATAATAC
CCAGCTCACCGCGTTTCACCTGGCCGTATTCCACCATCTGCGAGGTCAGGTTTTTCACCA
TGTTGCTCGGGATAGCAAAACCGATACCGATGTTGCCGCCGTCCGGTGCGAGGATCGCGG
TGTTGATACCGATCAGTTCGCCGTTCAGGTTAACCAGCGCACCACCGGAGTTACCACGGT
TGATCGCTGCATCGGTCTGGATGAAGTTTTCGTAGTTTTCGGCATTCAGGCCGCTACGCC
CCAGCGCAGAGACAATCCCGGAAGTTACCGTCTCGCCCAGACCAAACGGGTTACCAATCG
CTACGGTGTAATCACCCACGCGCAGTGCATCAGAATCCGCCATCTTAATTGCGGTCAGGT
TTTTCGGATTCTGGATTTGGATCAGCGCGATATCAGAGCGCGGATCTTTGCCAACCATCT
TCGCGTCGAACTTACGGCCATCGCTCAGTTGAACTTTAATGACCGTCGCGTTATCAACAA
CGTGGTTGTTGGTGACGACATAGCCTTTATCGGCATCAATGATGACGCCGGAACCCAGCG
CCATGAATTTCTGTTGCTGGCCGCCACCATTACCGCCCTGGCCACCCTGGCAGAACGGAG
AGCTCTGGAACGGAGAACCTTCCTGGCAGAACGGAGAATCATCACCGAAGAACTGCTGGA
AATTACGCGGCATACGCGGCGTATTAACGGTTGTGCTACCTTCTACGTTAATGCTGACCA
CTGAAGGCATCACCTTTTCGAGCATCGGTGCAAGGCTTGGCATCTGCTGGGCTGTCGTTG
CTGAAGAAGTCTCAGCCGCCGTTGCAGAGAGCGGAGATAACGCCAAACCTAAACTCAGAG
CCAGTGCACTCAGTGCTAATGTGGTTTTTTTCATGTATTTCAGTCTCGATTAACAGATAA
CGCAAAATTGCTGTGTTCTTCAGATTCGTTTTATAGCGCGAAGTTCCGAACTAAAGTTTC
TGCAAAAGGTAAAAATTTATTGTTCGTCTTTACAAAAGCCTGGTTATTGTTCTACGGCCA
TCAGACGTCGGTATTCATCCCACGCATAGAGGTCGGTCATACCGCTGATATAATCATGCA
GCAGGCGGCAACGGTAATAATATTCCCATAGCGGAAACTCAGGAGAATCTGACGGTAATT
TACTGACAGCTTCGACATAGGCCAGCCGATGGCGCGTCGAGAGTTTGTGGAATAAGCGCG
ATTCAATAGGGAAACGTTTCACCCGTTCTTTTTCTACCAGTTCAGTAAAGTCTGATAACG
ACAGGCTTAATAAAGGACGATAAATCTCTAATAATCCGCTAATGACCCGATAGCCCTGCA
ATTCAAGCTGCTCGACATCTGGATGGCTAAACACATGTTTTACAGCGACATTTTTATATA
GCTTAAGAAGATCGCTGCATTCGCTGGCATCTTCCAATAATGCATGATTAAACGTTCCGG
CGAAAATCGCAGGCAGATTATCAATAAATCGTTGTGCCGCGTAGGGTACCAGTTTATTTA
GGGTATTTACCCGTAAATACATAAAAAACTGATCTTCCGTACTGCGGCTTAAACTATTTG
AGCGTGATTTTTCCCAGGCATTTTCAACCACTAGCGAAAAGAGCGAACCTTTCTCATGCT
GACCCCACGCCTCGTGCAAATGATGATAAAGCTGCTCAACGGTAAATATTCTTTTCTCTA
CCGCATCTTCAAGGTCTGCCACACAATAGGAGATGTCGTCGGCAGCTTCCATAATCCACG
TTAATGGAAAACGACTGTAAAGCGCCAAATTAAGTTCTTTACGCAACCGGGCAATATAGG
CTTCTTCAGAAAGATAATAACCCGGCTTTTTCATTAAATAGTGATGTGTCTCAGGCGTTT
CGCCACGCCACCACGCCGGACGGGTATATTTTAAAATACCGCCAACCTGTGCCCAGGTGA
GATTCATCCTCATCAATGTATGCACCAGACGAATGCCTTGTGCATTCCCCTCAAAATGAC
ATAAGTCCTGACGAATCTTGCGCCGCAGCTCGTTAAGCGGTTCTTCCCCGTCCCGTAAAC
GTAGTGCTGCCACGCTGCAGCGATCGTCAGTCAGAGGCTGGCTTTCGGCATCTTCCGGGT
ATAAACGCTGGCGAAACCAGTCATTTATCGCCGCTTCGCCAAAATGACCAAACGGCGGAT
TGCCGATATCGTGCATCAGGCATGACATCTCAACAATGCTTTCAAAAGGTCCGGTCAGTT
CATCCAGGCCGTATGCTTCCAGCAATTTAAGCTCTTTCAGACGGCTTAAAATTTCTTTGG
CGATGTAGCGCCCCACCTGCTGGACTTCCATCGAGTGGGTAAGACGCGTGCGCACGGCGG
CATTGCGCTCCAGTGGAAAAACCTGGGTCTTTTGTTGCAGACGACGAATTGCCGGAGAGT
TGATGATACGCCCGCGATCGCTCTCGAAGATCCGCAGGATCTCATGTTCGGTTTTAACGC
CCTGCGGTGAACGGTAACGACGATGCCAGTTTATTTTTTTTCGGAAATCAATCTGTGCCA
TGTCCTCTCCCGCGTGAGAAATACGCTTCCCCGTAAGCGCATGGTAAACTATGCCTTCAA
ATCGGGCTTATCGCGAGTAAATCTATGAAAATCGGCATCATTGGTGCAATGGAAGAAGAA
GTTACGCTACTGCGTGACAAAATCGAAAACCGTCAAACTATCAGTCTCGGCGGTTGCGAA
ATCTATACCGGCCAACTGAATGGAACCGAGGTTGCGCTTCTGAAATCGGGCATCGGTAAA
GTCGCTGCGGCGCTGGGTGCCACTTTGCTGTTGGAACACTGCAAGCCAGATGTGATTATT
AACACCGGTTCTGCCGGTGGCCTGGCACCAACGTTGAAAGTGGGCGATATCGTTGTCTCG
GACGAAGCACGTTATCACGACGCGGATGTCACGGCATTTGGTTATGAATACGGTCAGTTA
CCAGGCTGTCCGGCAGGCTTTAAAGCTGACGATAAACTGATCGCTGCCGCTGAGGCCTGC
ATTGCCGAACTGAATCTTAACGCTGTACGTGGCCTGATTGTTAGCGGCGACGCTTTCATC
AACGGTTCTGTTGGTCTGGCGAAAATCCGCCACAACTTCCCACAGGCCATTGCTGTAGAG
ATGGAAGCGACGGCAATCGCCCATGTCTGCCACAATTTCAACGTCCCGTTTGTTGTCGTA
CGCGCCATCTCCGACGTGGCCGATCAACAGTCTCATCTTAGCTTCGATGAGTTCCTGGCT
GTTGCCGCTAAACAGTCCAGCCTGATGGTTGAGTCACTGGTGCAGAAACTGGCACATGGC
TAAGTCACTGTTCAGGGCGCTGGTCGCCCTGTCTTTTCTCGCGCCACTGTGGCTCAACGC
GGCACCGCGCGTCATCACGCTTTCTCCCGCCAACACTGAACTTGCCTTTGCCGCCGGGAT
CACGCCGGTTGGGGTCAGCAGCTATTCCGACTATCCTCCACAAGCGCAAAAGATTGAGCA
GGTTTCCACCTGGCAGGGGATGAATCTGGAACGCATTGTCGCGCTGAAACCCGATCTGGT
GATTGCCTGGCGTGGAGGTAATGCCGAGCGGCAGGTTGACCAGCTGGCTTCGCTGGGAAT
AAAAGTGATGTGGGTCGATGCGACAAGCATTGAACAAATTGCCAATGCGTTACGTCAACT
GGCCCCCTGGAGTCCGCAACCGGATAAGGCCGAACAAGCCGCGCAATCCCTGCTGGATCA
GTACGCGCAATTGAAAGCGCAATATGCTGATAAACCTAAAAAACGTGTTTTTCTGCAATT
CGGCATTAATCCGCCATTTACCAGTGGAAAAGAGTCGATTCAGAACCAGGTACTCGAAGT
TTGTGGCGGAGAAAACATCTTTAAAGACAGCCGGGTTCCCTGGCCGCAAGTTAGCCGCGA
ACAGGTGTTAGCACGCTCGCCACAGGCGATTGTCATTACAGGCGGACCGGACCAAATTCC
TAAAATCAAACAATACTGGGGTGAACAGCTCAAAATTCCCGTTATTCCTCTCACGAGTGA
CTGGTTTGAACGTGCAAGCCCACGTATTATCCTCGCTGCACAACAGCTCTGTAATGCGCT
TTCACAGGTAGATTAGTGCCTGACCTTTTCAGGTGCTCAGTGGGGATTGAACAATGCTCG
TCTATTGGCTGGATATAGTCGGCACAGCGGTATTTGCCATCTCCGGCGTTTTGTTAGCCG
GAAAATTGCGTATGGACCCTTTTGGTGTTCTGGTATTGGGCGTGGTTACCGCAGTAGGCG
GCGGGACAATTCGCGACATGGCGCTGGATCACGGCCCGGTATTTTGGGTGAAAGATCCCA
CCGATCTGGTCGTTGCAATGGTCACCAGCATGCTGACCATCGTGCTGGTGCGCCAGCCAA
GACGCTTACCAAAATGGATGTTGCCGGTGCTGGACGCCGTTGGTCTGGCGGTGTTTGTCG
GCATTGGCGTGAATAAAGCCTTTAATGCGGAAGCCGGTCCGTTAATCGCGGTTTGCATGG
GCGTCATTACTGGCGTTGGCGGCGGGATTATTCGTGATGTACTGGCCCGCGAGATCCCCA
TGATTTTACGTACAGAAATCTACGCAACAGCCTGTATTATCGGCGGTATTGTCCACGCTA
CGGCTTATTACACATTTTCCGTACCACTGGAAACAGCCAGTATGATGGGCATGGTCGTGA
CGCTATTGATTCGGCTGGCGGCTATTCGTTGGCATCTTAAGCTACCGACGTTTGCGCTGG
ATGAGAATGGGCGTTGAAGAGAGAAGATGTGCCGGATAGTTTATCCGGCACATGAACAAC
AGATTAGATGCTAAAGGAAGAACCGCAACCGCAGGTGCTTTTCGCGTTCGGGTTGGTCAC
GATGAAACGAGAACCTTCCAGTCCTTCGGTGTAGTCAACGGAACCGCCGACCAGATATTG
CAGGCTCATCGGATCAACCACCAGGCCAACGCCCTGTTTTTCGATGGTCATATCGCCTTC
GTTCACCTGATCATCAAAGGTGAAACCATACTGGAAGCCGCTGCAACCGCCACCGGTGAT
ATACACGCGTAATTTCAGATTCGGGTTATCTTCGTCAGCGATCAGGCTTTTAACTTTGTT
GGCTGCTGCGTCGGTAAACTCCAGCGGCAGTGCTACGTCATCACTCATATTTTGCTCCAA
ACGACATCGGCAATTGGGCAAATTCTAACCCAATAATAATCGCCATTATCTAATACCCTG
GTATTTCGTTCAAGTATTCTCGCTGGCTAATGCGGCCTTGCTTCGCGCCAGTTGCTCAGC
TTCCTGTTTTGCCAGCGTGCGCGCAAGAATCGCCGAGTATAGCGGTTTCCCACCGGTAAA
TTGCGCTAATAGTGTTGCGCCAAGACCGGTAATAATCATTGGCAAAATGAGCTGGTAGTT
ATCGGTCATCTCCAGAACCAGAATGATCCCCGTTAACGGCGCGCGAATAGATGCCGCCAG
TAACGCCCCCATTCCGGCAATAGCAAATGTCCCCGCCTCAAGGTGATATTGCGGAAACAG
CTCAACGGCAACCATTCCGAAAGCGGTTCCCAGCACAGTACCCAGCGCCAGCATCGGGGC
AAAAATACCGCCCGGCGCGCCGGAAGAGAAGCACAGTAAAGTGGTAATGACCCGCGCGAC
GAAGATAAACACCAGCATTCCCATGCTGAAATTCCCCGCGGTAGCGATAGGAATCAGGTT
AAAACCGCCGCCCGACGTTGCTGGTGCCACAAACCCCAGCAATCCACACAGACCGCCAAT
CGCACCACCCATCAGTACCCATTTGGTAATATTGCCGCCGTGCACACGGTGCAGCAAATC
CTGCATTCCCAGCACCCATTTATTAAAAATAGGGCCGAAAATGCCAAAAATAATACCGAG
GATCAGATAAAGCCACAGCGTATTAAGCGGCGCATCAGAAAGTTTACCGACGTCAATCAA
CGCAACTTCATGATTAAAAATCCGGTACATAATGGTCGACATAATGACACCAATAAATAC
CGCTTTAATCGAAATTAACGTATAGCGAAACTGCGGACGCATCTCTTCGATAATAAACAA
AATACCCGCCAGCGGCGCGTTAAAGGCCGCCGCCAGCCCCGCAGCAGCACCGGTTGCCAG
CAGCGTATGGCGAGCTTCATCACCTTTCAGGCGGAAAACATCGAGTACCATCCGCCCGAT
ATTGCCGCCGATCTGCACGGTTGGCCCTTCGCGCCCCAACACCATGCCTCCGCCGAGCGT
CCCCAGCCCGCCAAAGAATTTCACCGGCAATACACGCCACCAGCGAACGGGACGTTGATC
TTCCAGCGCCCCTTCAATTTCCGGGATCCCCGACCCCCCTGCTTCCGGCGCGTATTTGCG
CACCAAAAAGTAGCCGAACATCGCCAGCAGCGCCGAACAGAGAAAAGCGACGGTTAACAG
AAGCGGATAATTATCAGCAGTATGTACCAGCGCCCCCATACGTTGGTTCTGCAACCAGGC
GACACCTTTGTCAAAAGCAACCGCTGCCAGCCCGACAAGCGTGCCGACGACTGCCGCCAT
AAACAAAATGGCTAACGGGGTTTTATCGCGCTCAAGAAGTTGGCGAATCAGTTGTCTGCG
TCGCAGGCGCGCGGCCTGCGGTGTTTCTAAAGAGGGAGTATCAGTTTTCATCCAATGATC
ACTTATTGGTCATACAAATAAGATGACGGCATTTTACTCGCACGTTCCATGAAAATCCTT
TGCAAAGCGTAATGTTTCAAATGCACAAAACTTTTATACTCTAAGAAATCAGGATTGCAC
CAGTACAAGCAGCCTGATGTTTGACGAGTATTTAACTTGTTATGAATAACATAGAATAGC
AGCCATTCACTTTTTCTACGAATCAGGAACCCTCCATGAGTAAGTCTGAAAATCTTTACA
GCGCAGCGCGCGAGCTGATCCCTGGCGGTGTGAACTCCCCTGTTCGCGCCTTTACTGGCG
TGGGCGGCACTCCACTGTTTATCGAAAAAGCGGACGGCGCTTATCTGTACGATGTTGATG
GCAAAGCCTATATCGATTATGTCGGTTCCTGGGGGCCGATGGTGCTGGGCCATAACCATC
CGGCGATCCGCAATGCCGTGATTGAAGCCGCCGAGCGTGGTTTAAGCTTTGGTGCACCGA
CCGAAATGGAAGTGAGAATGGCGCAACTGGTGACCGAACTGGTCCCGACCATGGATATGG
TGCGCATGGTGAACTCCGGCACCGAGGCGACCATGAGCGCCATCCGCCTGGCCCGTGGTT
TTACCGGTCGCGACAAAATTATTAAATTTGAAGGTTGTTACCACGGTCACGCTGACTGCC
TGCTGGTAAAAGCCGGTTCTGGCGCACTCACGTTAGGCCAGCCAAACTCGCCGGGCGTTC
CGGCAGATTTCGCCAAACATACCTTAACCTGTACTTATAACGATCTGGCTTCTGTACGCG
CCGCGTTTGAGCAATACCCGCAAGAGATTGCCTGTATTATCGTCGAGCCGGTGGCAGGCA
ATATGAACTGTGTTCCGCCGCTGCCAGAGTTCCTGCCAGGTCTGCGTGCGCTGTGTGACG
AATTTGGCGCGTTGCTGATCATCGATGAAGTGATGACCGGTTTCCGCGTAGCGCTAGCTG
GCGCACAGGATTATTACGGCGTAGTGCCAGATTTAACCTGCCTCGGAAAAATCATCGGCG
GTGGAATGCCGGTAGGCGCATTCGGTGGTCGTCGTGATGTAATGGATGCGCTGGCCCCGA
CGGGTCCGGTCTATCAGGCGGGTACGCTTTCCGGTAACCCAATTGCGATGGCAGCCGGTT
TCGCCTGTCTGAATGAAGTCGCGCAGCCGGGCGTTCACGAAACGCTGGATGAGCTGACAA
CACGTCTGGCAGAAGGTCTGCTGGAAGCGGCAGAAGAAGCCGGAATTCCGCTGGTCGTTA
ACCACGTCGGTGGTATGTTCGGTATCTTCTTTACCGACGCCGGGTCCGTGACGTGCTATC
AGGATGTGATGGCCTGTGACGTCGAGCGCTTTAAGCGTTTCTTCCATATGATGCTGGATG
AAGGTGTTTACCTGGCACCGTCAGCGTTTGAAGCGGGCTTTATGTCTGTGGCGCACAGCA
TGGAAGATATCAATAACACCATCGATGCTGCACGTCGGGTGTTTGCGAAGTTGTGATGAT
TTTGCCTCGCCCACCGGGCGAGGCATTCTATTAACGGCTCTGCTTTCTCAACAAATAGAT
AAAATATGGCGCGCCGATAAAGGTCGACAGCAGCCCCGCCGGGATCTGGAATGGAAACAG
CACCATCCGCCCACACCAGTCAGCGAATACCAGCAGTAAACCACCCACCAGCGCCGAAAT
TACGATGTGTGGCATCGTCCGTCGAAAACCCATCATCCGCGCAATATGCGGTGCCATTAA
ACCAACAAAACTCAACGGTCCAATAGTCATCGTCGCGGTCGCCGTCAGGCAAGCCGCTAA
CAGCAGCAGCGCAATTCGCGTCGGCGTCAGCGCCATTCCTACGGCTCGGGCGGTATCACC
ACCCAGCGGTAAAATGGTCAGCCAGCGGCGGCACAGCGGGGTAATCGCCAGCAAAATCAC
CATCACAATTCCGGTGCGCCAGACCTGCGCATCGGTCGCGTTGTAGGTCGAACCGGAAAT
CCAGGTCAGCACTTGCGCCATTCGCGGGTCACCGCTCGCCTGCAACATCATCAAAAGCAT
GGTGAATGCGGTACTTAACGCCATCCCCGCCAGTAACATACGGTGTGGGGAAAATCCACC
GCGTCCGGCGGCGATCATAATGATCAACAGCGTCACCGCCGCCCCGAGACTGCCTGCGGG
TAACAGCCAGCCAAAGGCATTACCCGGTACCAGAAACAGCATTAACACCACGCCAAACGC
CGCGCCGGAGCTAATCCCCAGCACTTCCGGGCTTGCCATCGGGTTTCCGGTCAGCCGCTG
AATAATACAGCCCGCCACCGCCAGCATGACGCCCGCAAACAGCGCCGCCATAATTCGCGG
CCAGCGCCAGGGCATTAAATCATCGAGCAACGCCCCGCTCGCCCACGTCCAGCCGTGCGC
ATCACGACCAAACGACAGCGCCACCACCACAGCCATCAACAGCAGCACGCCGCCCGCGAG
GGCAAACGCCAGCACATGTTGGCGTTCAGCCGCGACACGATCGTTGACCTTCATATCCGG
CGCGCTAATGCTGCGTAAACGCGGCAACAGCCACAGTAGCAGCGGCGCACCGATCAACGC
AGTGACCGAACCGGTGGACACTTCCATCCACACACGAGTCAGCCAGAGGATGATTTGATC
GGAAAGCCAGAGGATCAGCGCCCCAATCAGCGACGCCAGCATCAACCGTGGCAGCAGACG
CCGCGCCCCCAGCATTTTTGCCAGCAGCGGCGCGAACAACCCGATAAAGCCGATAATCCC
TACCGCATTCACCAGCAGCGCACTGATGACAATCGCCAGCGACAGCGCCGCCAGACGCGC
GAGCGACAAGGCCAGCCCGAGATTGCGCGCCACGCCATCATCAAGCCCCATCAGGGTTAA
CGGGCGAAGTAGCAATAACGTCAGCATCACGCCGCCCAGCAGCTGCGGCCATAAACGCTC
AACGCCGCCCCAGTCGGTTTGCGTCAGCGTTCCAGTGCTCCACAGAAACATGCTTTGCAA
CTGGTCATGATGGAAGATAACCAGTAATTGATTGATTGCCCCACAATAAAGGCTCACTAC
CAGCCCCGCGAGAATCAGCGTTACCGGCGACAGCCGTTTCCCCCACGCGACGCCAAAGAC
AATTAAGCCAACAACACAAGCCCCTGCCAGCGCAGCAAACTGGCTCGCCATCGCACCAGG
GATCGCCCAGAGCGTCGTGACGGTAATCCCCAGTTGCGCGCCTGTAGCAACGCCCAACGT
CGTCGGTTCCGCCAGCGGGTTACGCAGCACTTGCTGAAACAGCACGCCCACCAGCCCCAG
GCCCGCGCCCACCAGCAGCGAAATCGCCAGACGCGGCAACAAGCTGTAGTGAAAAATCAT
CTGCTCGATGACGTCAATATCCGGCGACCAGGCAGCCTGCGCCCACTGGCTACGCGGCAG
CGCCTGCGAGAAGTTCATCCAGGTGAGCGCCGTAGCGACAATCACTAACAGCGCCAGCAA
TAACGCCGGGAAAAGCGCAATTCGTTTACTCACGCTTTACCTCCGATGGCGTTATCCAGA
ATACGCACAAAGTGCATTGCCGAGAGCGTCGCACCATAAAACCAGACTGCAGGTACGCGC
TGAAAGCGCCCTGTACGGACAAACGGCATGGCCTGCCACAGCGGGGTTGCCATTAGCGCA
TCCATGTCTTTGCTGTTGTCGTGATCAAAACAGAGCACATCAACATCTTTATACGCCGCC
AGACGATCGATACTGACGGCGGTGCTGCCCCAGAAGTTGGTTTCCCCTTGCCAGGCATTT
GGGATGCCGTACTCATCGAGAATTTCCTGGAACAAGCTGTTTGGCCCGAAGACCAACATA
TGGCGCGGATCGATAAGCGTCGTCAGCAATAACGGGCGTGCACCACGCTTCACAAAGCGG
GGTTTCATGCTGCGGATAAAGTCTTCGTATTGCGCTAAATGCGTTTCCGCTGCGCTTTGC
AGGTTAAGTAAATCTGCCATTTCCGTCAGTGATTTACGCGCCATCGCCAGCGGCTGTTTG
CCGTCGCTGAAGTTAAATCCGCGCCCCGGCGCAATACGAGCCAGCATTTCTGGTGAAGGG
CCATATCCTGCCGACCAGACCATAAACGACGGTTTCATTTCGGTCAGCAGTTCAAGGTTA
GGTTCTGTGCGCAAACCGACGTCAATCACCGATTCAGGTAACGGTGGTTCGCTAACCCAC
AGGCGATAGTTGATGGTGTCCGCCACGCCATAAGGCACGATGCCGAGCGCCAGCAGTAAT
TCCACCGGCAACCACTCCAGCGCCACAATACGATTGGGATCAATAGCCGCCGCGTGGGCG
GCATTCATCTGCCATAACAACGGAGAAAGCGCCATCGCCGTTAACAGTCGACGGCGCGAA
ATAAGAGGTAAGCCGCTCATCAATAAACAAAACTCACAGGTGCAGCACCCGCCGGATGCG
GCAAAATACCCATCGGGATGCCATAAATCATTTCGAGGGTTTCGCCGCGCATAATTTCCG
CAGGCGTTCCCTGAGCAATCATTTCACCGCCGCGCAGGGCGACCAGATAATCACAGTAGC
GTGCCGCCATATTGATATCGTGCAGCACGGCAATGACCGTCAGACCACGTTCCTGACTTA
AACGGTGCACCAGCGCCAGCACATCAACCTGGTGGGCGATATCCAACGCCGAGGTCGGTT
CGTCGAGCAACAGACAACGGCTATCCTGCGCCACCAGCATGGCGATCCACGCCCGCTGAC
GCTCACCGCCAGAGAGACTATCGACCAGCCGATGCGCCAGCGGTTTTAAGCCAACCAGCG
AGATAGCTTCCTCAACTTTTTCGCGATCTGCCGCACCAAAGCGCCCCAGCGCGCCATGCC
ACGGGTAACGACCAATCGCCACCAGTTCACGCACGGTCATCCCTTCTGCCGGAGGAAGCT
GCTGCGGCAAATAAGCCACTTTGCGGGCGAATGCTTTGCTACTCCAGCTTTCCAGCGGCT
GGGCATCAAGAAGAATTTCACCTTCTGACGGCGGCTGATGACGGCCCAACATTTTTAACA
GCGTGGATTTACCAGAACCGTTGTGACCAATCAAACCAGTCACTTTTCCGGCAGGAAAGG
TTAACGACAGCGGATGCAAAAGCGTGCGCCCTGGCACACGAAAGGAGATATTACGCAGTG
CAAAAGTGGTATCGGAATGATTCGTGTATTCCTGCATAACAGCCAACTTGTGAAACGGGC
ACGGAAATCCGTGCCCCAAAAGAGAAATTAGAAACGGAAGGTTGCGGTTGCAACGACCTG
ACGTTCTGCGCCCCAGAAGCAGCCATAAGTGTTAAAGCAGCTGGCGACGTATTCACGATC
GAACAGGTTGTTAACATGCAGCGCCACGTTGGAGCCAGCCATGCCGACTCGCGCCAGATC
ATAACGCACTAACGCATCCACGACCGTATAACTTCCCACTTTAAAGGAGTTAGCCGGATC
ACCATAGCTGGAGCCAGTATAACGACCACCGGTGCCCAGCGTCAGACCTGAAAGCGGACC
GTCAAAGAAGGTATAGTCAGCCCACAGCGAAGCCATGTGTTTTGGCACCTGTGCCGGCGT
ATTGCCTTTGTAGTTGGTGTCAGTGGTGTATTCCGCGTCGGTGTAGGTGTAAGAACCAAC
TAAGTTAACACTCGCCGATAGTGCCGCTTTCGCTTCCAGCTCTACGCCACGCGCACGAAT
CTCACCGCCTTCAACCGAGAACAGTGAACCGTTCGGATCCGCCATCAGGTTATTAGTTTT
GGTAAGCTGATACAGTGCGCCAGTCACCACAATTGGGCGATCTTCTGGCACATATTTCAC
GCCGACTTCATACTGTTTGCCTTTCGAAGGTGCAAACAGATCGCCGTTTGCATCGGTCTG
CGAAGCGGGTTCAAACGATTCACTGTAGCTGAAATAAGGCGTTACGCCGTTGTCGAACAG
ATAGTTAACACCGCCACGCCAGGTGAACTGTTTATCATCGCGATCGGATTTATTACCGTA
ATCACGGTTGAAAGATGACTGATCGGCCCAGTCATAGCGACCGCCAAGCGTAACCAGCAC
TTTATCCCACTGCGCCTGATCCTGAACATACAGACCGGTTTGTTTCTGTTTCAGCAGAAC
GCGGTATGGACCAGACGGATTTGGGTGAGCGCCAAAATCAAAGTCACTACGGTCTAAATT
ATAGATATCAGATGGTGCAACTGAACCGGCATATCCGAACCAGGAGTCGATGTCATTACG
CATACGCATAAAGTCAACGCCAGTCAGCAGAGTGTGATCCACTGAACCGGTTGCGAATTT
GCTTTGCAACTGAGTATCAACAGAGAAGTTTTCTAACTTCTCATTATCGATAACGTACTG
ACGAGTCAGTGTATGGCCCCATTGAGACTGCGGCACGTTGGCACATGGACTCGAAGAGGG
GTTTGAGGAATAGAGAGGATCTGAACACATGCCGTAGCCATATACGCTCTTTTGCGAAAC
TTTATTTTGCGCAAAGCGAAGGTTCTGACGTACGGTAAAGGTGTCGTTAAATTCGTGGTC
GAAGCTATAGCCAATCATCTTCTCATTACGAGAATAGGTGTTGTTCTTCGCCCCTTCGTT
AAAGTCTGTCGGCAGACGCTTACCGTTCGGCAGCGGCTCAACGGTTCCCTCTTTCGGCAA
CCAGCCGTAATAACCGGTTTCCGGCTCGTTCTGGAAGTAAGAGAGGAAGGTGAAATTGGT
TTTATCGTCCGGACGCCAGGTGAACGCTGGCGCAATGGCATAACGCTGCTCTTCCGCGCC
CTTTTGCTGGGCATTGGCAGAGCGCGCAAGACCGGTCAGACGATAAGAGTAAACGCCGTC
ATCATCCAGCGCATCGCTGAAGTCAAAACCGGTCTGGAACAGGCTGTCAGTACCGGCCTT
AAACTGAACTTCTTTCAACGGTTCAGTGGTCGGGCGCTTGCTGACCATGTTCAACAGGCC
ACCTGGGCTGCTTTTCCCATACAGCACGGAAACCGGGCCACGCATGATTTCAGCGCGCTC
CAGCATATATGGGTCAATAACCGCATCGTTATAGAAGTTGCCCTGCATCTTCAGGCCATT
CAGATAGTTGTTCTGGCTTTGGCCGTCAGCGGCGAATCCGCGGATGATCAGGTAATCGTA
AGTGTTGGATGCGCCACGAGTTCCCACGGCAACGCCAGGAGTGTAGCTAAGCGCTTCTTT
TACCGACTTCGGCTGATGCAGCGCCATCTCTTCGGCGGTCACAACAGAAATAGACTGTGG
CACTTTTTGAATCGGCGTATCGGTTTTAGTGCCGGTAGCTGACTGTCGCGCCGCAATAGT
TGCAGCAGGCCCCCATGCGCTTTCTTGCGGCGCAGGTGCAGCGGTAACGGTGATAGTGTC
TTCTTTCGGTTCAACCGCTGCCTGTGCATAAACAGACATGCCGCTAACCGCTGTGGCTAC
TACAACTGCGATTTTACGCAGTGAGTGTTTTGGCTGAGCAGTTTTGGAACGCGCCATTGG
TATATCTCTGATGTAAAGTGAATGATAACGTAAACGAGAATGATTATTATAAAGATAAGA
TAATATTCGAAACGCTGGCGGGTTCGCAAGCGGTACGCAATCTGAGCGTTCCTGAAGGGT
TAATAAACAACCAGATGAAAAGAAAGGGTTAATACTTTAGGTGGGATGTTATTTTACCGG
ATGGCAACTCGCCATCCGGTATGTCACGTTTAGACGTTAATTACTACCAAACATATCCTT
GATCCAACCGGCTACACCGTCGCTGTCTTTCTGCTCTTGCTGAGCAGGTTGCTGTTGCGG
CTGTTGCTGCGGCTGAGAAGACTGATCAAACGGATTGCCTGACGGCTGCTGCTGCATCTC
ACTCTGCTGGCACAGCGATTGCGGATCGCTGGTCCAGACCGGCAAGACACGCATGCCACC
GCTGCAAACAAAGTTGCCGTCGTAGTCCACGCCCATATCTGCAATATCTTCTGGCGGAAC
AAGATTCAGCGGCGTTGGCGTCTGGTTTGCCAGATAACGCTGATAAATCGACATTGCCCC
GCTGGCACCATACAGTTTGGTCGGCTGGTTGTTATCACGGCCGACCCAGGTGATGGTCAC
CGTGCTGCCGTCAATGCCCGCAAACCAGGTATCTACGTTATTGTTGGTAGTCCCTGTTTT
CCCTGCCAGATGCAGGTTCGGGTATTTCGCCCCAAGCTGACGACCCGTACCGCGTTGTAC
AACCTGCTGCATGGTCCATAGTGTCAGATACGCCGCCTGCGCCGGAACAGCGCGTTCCGC
CTGCGGGAAGCTCTGATACAGCACTTTGCCATCTTCCGCGATTACCGAACGCAGCGCAGA
AAGCGGTGCACGGTTACCACCGCTGGCGATGGTCTGGAATGCCTGCGCCACTTCGATTGG
CGTTAAGTTCAACGCCCCCAGCAGCATTGCCGGAACCGGATGCAACTGATCTTTCGGTAC
GCCCAGTTTAATCCAGGTATCCGTAACCGCAGGCAGCCCCAGCGCCATCCCCAGATTTAC
CGTCGGCACGTTCATCGAACGGGTCAACGCATCCACCAGCATCACTCTGCCGCTTTCGCT
ATAACGACGGTCATCATTCTGCGGTGACCAGACCTGGCCATTCGGCTGACGCAGCGCAAT
TGGCGCATCCGCAATCCACGTATTCAGACGATAGATTTTCGGCTGGCTTAAGGCCGTCAG
ATAAGTCGCTGGTTTTGCAAGGGAACCAATCGAACGACGCGCCTGCATCGCACGGTTGTA
GCCCGCAAACTGCGGCTCAGAACCTCCGACCATCGCACGAACTTCACCACTAAAGCGGTC
GACGACCACAATCGCGGTTTCCAGATCGCTCAGCTTACGCTGTTTCTTCAGTGCCGGAAT
GCCTTCCACGGCGGCTTTTTCTGCCGCGTCCTGGGCCACCGAGTCAAAGGTAGTGAAGAT
CTTCACGCCGGAGAGATCTTTTACCTTATCGCCTAATTTAGCCTGAAGCTCCTGACGCAC
CAGTTGCATAAAGGCTGGCTGAGGAGAGATCACCCCACCGCGCGGCTGAACACCCAGCGG
ACGCGCACTCAACATGTCATAGAGTTCTTGATCAATAATCTGTTGCTGTTGCAGCAGACG
CAGTACCAGATTACGTCGCTCCAGCGCCAGTTTCGGGTTACGCCACGGGTTGTAGATGGA
CGCTCCTTTCACCATACCGACTAACAGCGCCTGCTGATCGAGGCTCAATTCTTCTACCGG
GCGACCAAAGTAATACAAGCTCGCCAGCGGGAAGCCACGGATTTCGTTGTCGCCACTCTG
ACCGAGATACACCTCGTTCATATACAGCTCAAGAATACGGTCTTTGCTGTAACGCGCGTC
CATGATCAGCGCCATGTAGGCTTCATTCGCTTTACGCCAGTAAGAGCGCTCGCTGGAGAG
GAACAGGTTTTTCACCAGCTGTTGCGTCAGCGTACTCGCTCCCTGCACCGTGCGTCCGGC
GGTCAGGTTTGCCAGCACCGCACGTCCGATTGAGTAGAGACTGATCCCATCATGCTCGTA
GAAATGACGGTCTTCTGTCGCCAGCAAAGTATCCACCAGCAAATCCGGGAAACCACTGCG
CGGCACAAACAAACGCTGCTCACCGTTTGGTGAGGAGATCATGGTGATCAGACGCGGATC
AAGACGGAAGAAACCGAACTGACGGTTGTTCTCCATATTGACGATCGTCGCCAGATGATC
GCCATCAAAGGTCAGACGCGCACGCACCTGCCCTTCTTTGCTGTCCGGAAAATCAAACGG
ACGGCGGATCATCTCAATGCTGTTAGCCTGCACAGTAAATTCGCCAGGACGGGTCATTTT
CGACACCTGACGATACTGTGTTGCCTCCAGCAGCTTCACCATCTCGTTCTTGCTGATGGT
CATGTCTGGCTCAAGGTTGACCATTCGACCATAAACTGCCGCAGGCAGTTGCCAGACCTT
GCCATCAATACGGCTACGAATTTTTTGATCGAGATAAACGCCGTAAATGGCGATCAGCAC
GGCAAAAACGATAGCCAGTTTTAACAGCAGCCATAGCCAGCCGCGTTTGCCACGAGGCTT
ACGCCCTTTGCCTTTGCCCTTACCTTTGCGCGGCATCGGTTCTTCATCCTCATAGTCATC
ATAATCGTCGTAATCATCGTCATCTTCGTAACGACGACGGCTTACCTTTTGTTTGACCGG
ACGCGTCGGTTTCCCTTTGCGTCCAATTGGCTCGCGGTCATTCCCGGCCATGCTTTTTCT
CCGCAATATTCAGGCGCAAAAGCCCGATTTTCTGTTCTTCTGTTACAAGACAGAAGAAGA
TATCTCTCAAAATTTGTGCTCGATCGGTCCCCTCTCCCTTGAGGGTGAGGGTGAACGTAC
GCGCTGATGCCCTCACCCCGGCCCTCTCCCACAGGGAGAGGGAGAAAACCAACCTTACGA
ATACTTTTTCGTCCGTCGCGTCGGTGCCGTGTTTGCCGGGTCGTCCGGCCAGACGTGTTT
GGGATAACGCCCTTTCATCTCTTTTTGCACCTCACGATACGCCCCTTTCCAGAAGGCCCC
CAAATCACGCGTGATTTGCAGCGGCCTTTGGGCAGGGGAAAGCAACTCCAGCACCAGCGG
CACGCGCCCCTGAGCGATCGTCGGATTGGTGGCCTCACCAAACATCTCCTGCATTCTCAC
CGCCAGCGCGGGCGGGTTATCTTCATGATAACGAATGGCGATCCGGCTTCCCGTCGGCAC
AGTGTAATGCGCAGGCAATTCACTATCCAGACGTTGCTGCATTCCCCAATCAAGTAATCC
GCGTAGTGCCTGATAAATGTCGAGTGATTTCAGGCCGCGTAGTGAATGTACACCGGCCAT
ATGTGGCAGCAGCCACGTTTCCAGCGTCGCCAACAAACTTTCATCATCAACCGCTGGCCA
GTCATATTCTGGCAACCACTTTCCGGCGCATAACAAACGCAAGCGTAGCTGTTCCGCTTC
CGCCGTCCAGTTGAGCACGCTTAAACCTTTATCACGGATGCCGTTAAGCATCGCCTGATG
CAACTCGTCTTCTGACGGTTTCGCCAACGGCTGCACTTTCACCGTCAACTGACCGATTTG
CAGCCGACGCCAGGCTTTCAGCGTACCTTGCGCGTCATCCCATTCCACGGTGTCAGATTG
CTGCACCAGCTGCGGACAGCGTCGCACTAATTCATCAATATCGACCGGTAGCGCCAGTAA
AATCCGCGCATCCGGCGAGGCGCTGCCCTGCAATAATAACGGTGCGATCAACCATTCGTG
GCGGCTTAGCGCGTCGTCGGCATCGAGCATCGCTCCCATGCCGTTTGCCAGTTGATAGCG
TCCATCTTGCCCACGGCGGCGAGCAATGCGATCGGCAAACGCCCCGGCAAGTAGCAGCGC
GATAAGCGAACTGTCTGCCTCACCGCCGTATACGTTTAAGCGTTTTAACAGTTGCTGACT
ACGTTGCTGCCAGGCTGGCTGATTGCGCGAAAACACCACGCCCAGGTCACTATTGCCCAT
CCGTGGCGGCTCTTCGAGAATGGCGGCAATTTTTGCCGCGGTAGCAGCTTCGTCGTCGCT
CTTTGCGCTAACCAGCATTGCCGCTAAACGCGGATCGTTACCCAGCGCTGCCATTTTTTG
CCCCTGCGCACTAAGCCGTTCACCGTCCAGCGCCCCCAGCATCCGTAACAGGCGTTTCGC
GGCCAGTAGATTCACCGTTGGCGGTTGATCCAGCCAGCTCATCTGCGCCGGATCGCTGCA
TCCCCATTGCAGTAATTCCATCAGCAAACCGGAAAGATCGCTTTGTAATATTTCCGGTTC
ACTTTGCGCCGCGGCGCGTTCTGCTTGTTCCTTGGCGATTAAATGCAGGCAGATACCCGG
CTCCAGACGCCCGGCGCGCCCGGCACGCTGCGTCATCGACGCCTGACTGATTCGCTGAGT
AATTAGTCGCGTAAGCCCTGTTCGCGGATCAAAACGCGCCACCCTTTCCTGGGCGCAATC
CACCACCAGACGAATACCTTCGATAGTTAAACTGGTTTCAGCAATATTGGTCGCCAGCAC
GACTTTGCGCATCCCTTGCGGTGCCGGGAGGATCGCTTTTCGCTGATCGTTCAGCGACAA
CGCGCCATACAGCGGGCAGAGCAACACATCACTGCCGATACGCGAAGCCAGTTGTTCCTG
CACACGCTGAATTTCTCCGACGCCCGGTAAAAATAACAGTAATGATCCACTTTCCTGACG
CAGCATTTCGGCGGTCGCAACCGCGACGGCTTCGTCAAAACGCTGATGGGCGGGCAGCGG
TAAATAACGGCGTTCAACCGGAAACGAGCGCCCTTCTGAGATGACGACGGGCGCTTCTGG
TAGCATTTGTTGCAAGCGGTCGTTGTCCAGCGTAGCCGACATAATCAGCAGTTTAAGGTC
ATCACGCAGACCTTGTTGCACATCGAGTAACAGCGCCAACGCCAAATCCGCCTGCAAGCT
ACGCTCATGAAATTCATCAAGGATCACCAATCCAACACCGCTCAACTCCGGGTCACGCTG
GATCATCCGCGTCAGCACGCCTTCGGTAACCACTTCCAGGCGGGTATTCGGCCCGACGCA
GTTTTGCGCACGCATCCGGTAGCCAACGGTATCGCCTGGCTTTTCGTTAAGCAGCTCCGC
CAGCCGTTGCGCGACGTTACGCGCCGCCAGACGCCGTGGCTCCAACAGGATAATTTTCCC
GTTAATGCCGGGATGCGCCAGCAGTTGCAGCGGCAGCCAGGTTGATTTCCCGGCCCCGGT
CGGCGCACTTAATAATACCTGCGGCGCACAATCGAGAGCGGTAAGTAATTCAGGTAAGAC
GGCAGCAACGGGCAACGACGACACAAAACGCTCCAGAGGGTTAACATTCTTCGCGCCACA
TTGTAGCATCGCGGTAATTCATAACCGAGTGCCTCACATGTCTGAACCGCAACGTCTGTT
CTTTGCTATCGACTTACCTGCAGAAATCCGCGAACAGATTATCCACTGGCGCGCCACACA
CTTCCCACTTGAGGCGGGACGTCCGGTCGCCGCCGATAATTTGCATCTGACTCTGGCATT
TTTAGGCGAAGTGAGCGCCGAGAAAGAGAAGGCGCTTTCTCTTTTAGCCGGACGGATTCG
TCAACCTGGTTTCACACTCACGCTTGATGACGCCGGACAATGGCTGCGTTCGCGTGTGGT
GTGGTTAGGGATGCGTCAGCCTCCACGCGGCTTAATCCAGCTGGCGAATATGCTCCGTTC
ACAGGCTGCCCGCAGCGGTTGTTTTCAAAGCAATCGTCCGTTTCATCCACATATTACCTT
ATTGCGCGACGCCAGCGAGGCGGTGACAATCCCGCCGCCAGGTTTTAACTGGTCGTATGC
GGTGACGGAGTTCACCCTTTACGCCTCCTCGTTTGCCCGTGGACGCACACGCTACACGCC
GCTAAAACGCTGGGCGCTAACGCAATAACAAGGATTGTCGCAATGGAATTTTCTCCCCCT
CTACAGCGCGCGACGCTAATTCAGCGTTACAAACGTTTTTTAGCCGATGTGATCACACCC
GATGGTCGCGAATTAACGCTACACTGCCCGAATACGGGTGCGATGACCGGTTGTGCAACG
CCTGGCGATACCGTCTGGTATTCGACTTCAGACAACACCAAACGGAAATACCCACACACC
TGGGAATTAACTCAAAGCCAGAGTGGCGCATTTATTTGCGTCAACACGCTTTGGGCTAAC
AGGTTGACGAAAGAGGCTATCCTTAATGAATCAATTTCAGAACTGTCAGGCTATAGCTCG
CTGAAAAGCGAAGTAAAATACGGCGCAGAACGCAGCCGTATTGACTTTATGTTGCAGGCG
GATTCGCGTCCAGACTGCTATATTGAAGTGAAATCGGTTACGTTAGCGGAGAACGAACAG
GGATATTTTCCCGATGCGGTCACTGAACGAGGTCAGAAACACCTTCGGGAGTTGATGAGC
GTAGCGGCTGAAGGCCAGCGTGCGGTTATCTTTTTCGCCGTGCTGCATTCAGCCATTACA
CGGTTTTCACCCGCGCGCCACATCGATGAGAAATACGCGCAACTATTGTCAGAAGCTCAA
CAGAGGGGGGTAGAAATTCTGGCTTACAAAGCGGAAATTTCTGCTGAAGGCATGGCTCTT
AAAAAATCACTGCCGGTTACATTGTAGTAAAGTAAGTAACTGGTTAATTTACATTCTGGT
CGCGTGCGCAAATACGCTTTTCCTCACACAGTTGTCAAGTGTTACGTTTAGATAATTGCT
ATCCGGAAAAGCATCTGCTATTTATAGCGGCCTCATTTTTCCCCCGAACATGGGGATCGA
TAGTGCGTGTTAAGGAGAAGCAACATGCAAGAAGGGCAAAACCGTAAAACATCGTCCCTG
AGTATTCTCGCCATCGCTGGGGTGGAACCATATCAGGAGAAGCCGGGCGAAGAGTATATG
AATGAAGCCCAGCTGGCGCACTTCCGTCGTATTCTGGAAGCATGGCGTAATCAACTCAGG
GATGAAGTCGATCGCACCGTTACACATATGCAGGATGAAGCAGCCAACTTCCCGGACCCG
GTAGACCGTGCAGCCCAGGAAGAAGAGTTCAGCCTCGAACTGCGTAACCGCGATCGCGAG
CGTAAGCTGATCAAAAAGATCGAGAAGACGCTGAAAAAAGTGGAAGACGAAGATTTCGGC
TACTGCGAATCCTGCGGTGTTGAAATTGGTATTCGCCGTCTGGAAGCGCGCCCGACAGCC
GATCTGTGCATCGACTGCAAAACGCTGGCTGAAATTCGCGAAAAACAGATGGCTGGCTAA
TTACAGCCGTTCCATCACGTTTACCACAGGCGGGAAATGCTCCCGCCTTATTTTTTGTTC
AAAGAGATGACAGACACACACTATATTGGCCGCTTCGCCCCCTCTCCTTCCGGCGAGCTT
CATTTTGGTTCTCTGATTGCTGCGCTTGGCAGCTATTTGCAGGCTCACGCCCGGCAAGGT
CGCTGGCTGGTACGTATAGAAGATATCGACCCGCCTCGTGAAGTTCCCGGTGCCGCAGAA
ACTATCCTGCGCCAGCTGGAACATTACGGCCTGCACTGGGACGGCGATGTTCTCTGGCAA
TCGCAACGTCACCACGCCTATCGCGAAGCACTCGCCTGGTTACATGAGCAAGGACTAAGT
TATTACTGCACCTGCACGCGTGCACGTATTCAAAGCATTGGCGGTATTTACGACGGTCAT
TGCCGGGAATTGCATCATGGACCAGACAACGCCGCAGTGCGTATCCGCCAGCAGCATCCG
GTCACCCAGTTTACTGACCTGCTGCGAGGCATTATTCACGCCGACGAAAAACTGGCACGG
GAAGATTTTATTATTCATCGCCGTGATGGTTTGTTTGCCTATAACCTGGCGGTGGTGGTG
GATGATCACTTCCAGGGTGTGAGCGAAATTGTCCGCGGGGCAGATTTGATCGAACCGACA
GTGCGGCAAATCTCGCTGTACCAGCTTTTTGGCTGGAAAGTGCCAGATTACATTCATCTG
CCGCTGGCGCTTAATCCACAAGGCGCTAAACTTTCCAAGCAGAATCATGCGCCTGCGTTG
CCGAAAGGCGATCCACGCCCGGTACTAATCGCGGCACTTCAATTTCTGGGGCAGCAGGCA
GAAGCACACTGGCAGGATTTCAGCGTCGAGCAAATCCTTCAGTCAGCCGTCAAAAACTGG
ACGCTGACCGCCGTGCCTGAGTCGGCAATTGTAAATTCAACATTCTCAAATGCGTCATGC
TGAGCTATGATTAGCCGCTATTTTTTTGTCCTGAATGATGTTTGACACTACCGAGGTGTA
CTATTTTTACCCGAGTCGCTAATTTTTGCCGCAAGGTGCTAAGCCGCGAGGAAAGCGAGG
CTGAACAGGCAGTCGCCCGTCCACAGGTGACGGTGATCCCGCGTGAGCAGCATGCTATTT
CCCGCAAAGATATCAGTGAAAATGCCCTGAAGGTAATGTACAGGCTCAATAAAGCGGGAT
ACGAAGCCTGGCTGGTTGGCGGCGGCGTGCGCGACCTGTTACTCGGCAAAAAGCCGAAAG
ATTTTGACGTAACCACTAACGCCACGCCTGAGCAGGTGCGCAAACTGTTCCGTAACTGCC
GCCTGGTGGGTCGCCGTTTCCGTCTGGCTCATGTGATGTTTGGCCCGGAGATTATCGAAG
TTGCGACCTTCCGTGGACACCACGAAGGTAACGTCAGCGACCGCACGACTTCCCAACGCG
GGCAAAACGGCATGTTGCTGCGCGACAACATTTTCGGCTCCATCGAAGAAGACGCCCAGC
GCCGCGATTTTACTATCAACAGCCTGTATTACAGCGTAGCGGATTTTACCGTCCGTGATT
ACGTTGGCGGTATGAAGGATCTGAAGGACGGTGTTATCCGTCTGATTGGTAACCCGGAAA
CGCGCTACCGTGAAGATCCGGTACGTATGCTGCGCGCGGTACGTTTTGCCGCCAAATTGG
GTATGCGCATCAGCCCGGAAACCGCAGAACCGATCCCTCGCCTCGCTACCCTGCTGAACG
ATATCCCACCAGCACGCCTGTTTGAAGAATCGCTTAAACTGCTACAAGCGGGCTACGGTT
ACGAAACCTATAAGCTGCTGTGTGAATATCATCTGTTCCAGCCGCTGTTCCCGACCATTA
CCCGCTACTTCACGGAAAATGGCGACAGCCCGATGGAGCGGATCATTGAACAGGTGCTGA
AGAATACCGATACGCGTATCCATAACGATATGCGCGTGAACCCGGCGTTCCTGTTTGCCG
CCATGTTCTGGTACCCACTGCTGGAGACGGCACAGAAGATCGCCCAGGAAAGCGGCCTGA
CCTATCACGACGCTTTCGCGCTGGCGATGAACGACGTGCTGGACGAAGCCTGCCGTTCAC
TGGCAATCCCGAAACGCCTGACGACGTTAACCCGCGATATCTGGCAGTTGCAATTGCGTA
TGTCCCGACGTCAGGGTAAACGCGCATGGAAACTGCTGGAGCATCCTAAGTTCCGTGCGG
CTTATGACTTGTTGGCCTTGCGAGCTGAAGTTGAACGTAACGCTGAATTGCAGCGTCTGG
TGAAATGGTGGGGTGAGTTCCAGGTTTCCGCGCCACCAGACCAAAAAGGGATGCTCAACG
AGCTGGATGAAGAACCGTCACCGCGTCGTCGTACTCGTCGTCCACGCAAACGCGCACCAC
GTCGTGAGGGTACCGCATGACAGTGGCGTATATTGCCATAGGCAGCAATCTGGCCTCTCC
GCTGGAGCAGGTCAATGCTGCCTTGAAAGCATTAGGCGATATCCCTGAAAGCCACATTCT
TGCCGTTTCTTCGTTTTACCGCACCCCACCGCTGGGGCCGCAAGATCAACCCGATTACTT
AAACGCAGCCGTGGCGCTGAAAACCTCTCTTGCACCTGAAGAGTTACTCAATCACACTCA
GCGTATTGAATTGCAGCAAGGTCGCGTCCGTAAAGCTGAACGCTGGGGACCGCGCACACT
CGATCTTGATATCATGTTGTTTGGTAATGAAACCATTAATACCGAACGACTCACCGTTCC
GCATTATGATATGAAGAATCGCGGCTTTATGCTGTGGCCGCTGTTTGAGATTGCCCCGGA
ACTCGTGTTTCCTGATGGGGAGACATTACGTGAAATACTCACTTCGCTAGCAGTACCACA
ACCTGCCATCTGGTAATAGCTGTATTATTTTATTTTCTTGACGAGAGGAATACAAAATGA
TACGGCTATTTCATCCACCAAGAAAAAATTATTTTCTTATCTTACTCCTCACTTCCCCCC
TTACATATTAAATATACTTAATTTACATTTTAGTTTTTTTTAATTCATTCATGAAATAGC
ACTTCATGCAAATAAATTAGGCATTTTTTGTTTAAACAACCTAAAATAACAACAATTCAA
TACACCACATAAATATATTCACATCCGTGATAACTCACCCCTATTACATCCTCCAAAAAC
TTTGAGTAATATCCGCTCGCAATATTAATTTCATATAATTTTTGTAAGGATGCATGTAAT
GAAAAAAGCACTTCTCGCAGCCGTTCTGGTTATGGCTTCTGGTTCCGCCCTGGCTGTAGA
TGGTGGTCATATCGACTTTAACGGTATGGTACAGTCCGGTACCTGTAAAGTGGGTGTGGT
AGATACCGGTATGCACGGCATCAGCACTGATGGCGTGGTTACCCTGGATACTGCAAATGT
TACTGATAACTTTGCTGAAGTAAGCGCTGCTGCTGTTGGTTTACTGCCGAAAGAGTTCAT
GATTTCTGTGGATTGCGAACCGGGTAAAACAACTGCCCAGTTGACCATGGGTTCTGCAAG
CTACGCGAACACCAGCGGCACCCTGAACAACAATACCAATATCACGATTAACGGTATTCA
ACCGGCTCAGAACGTGAACATTGCTGTTCATAACATGAAAAACAAAGCTGGCGCTGCTGA
AATTAAGCAGGTCCATATGAACAATTCTTCTGAAATCCAGGAATTGACATTAGACGCACA
AGGCAACGGTCAGTATGTGTTTAACGCATCTTACGTTAAAGCACCGAACAGCCAGGCTGT
TACTGCTGGTCACGTTACCACTAACGCACTGTACACCATTACTTATCAGTAATTGATAGC
GAATTGAGTATAGGGTTTGTCATCAGGCAAACCTTATTTTCGCTAATTTTATCTCAACAC
AGACAGCAAGGAGTGCTTATGTTTCCCTTGGTTAAAAAAACGGTTAGTGTATTATTTGTG
AGTACTCTGTTAGCCAGTACGCCAGCATTCGCTGACATTATTATTTCCGGGACTCGTATC
ATTTATAACGCTGATAAAAAAGATGTTAACGTTCGTCTGGAAAATAAAGGGAATCGCCCC
TTACTGATTCAGAACTGGTTGGACACCGGCAATGACAATGTCGACCCCAGCCAGATCAAA
GTGCCCTTTACCTCTACGCCCCCCGTTTCACGCGTGGAGCCAAAACGCGGGCAAACCGTA
AAAGTAATGTATACCGGTGCAACAGCCCTACCTAAAGACCGGGAAAGTGTCTACTGGTTT
AACGTGCTGGAAGTGCCGCCAAAGCCGAAAGATGCCCAGGCTGACAAAAACTTACTACAA
CTGGCTTTCCGCACGCGCATCAAACTTTTTTATCGCCCGAGCGGTTTGCAGGGTGAACCT
GCTGAAGCGCCAGCAAAAATCACCTGGAAGTTGAACAACACGCAATTGCAGGCGAATAAC
CCAACGCCTTATTACGTGTCATTCAATGACGTCAAACTGGAAAGCGGCGGCAAAAGCTAC
AAAGTCGATTCCAGCATGATCGCGCCGTTCAGTCAGGCAAGCTTTAGCGTAACGGGTCTG
TCAGGTGGCGTTTCATCGGGCAAAGTCGTGTTCCAGGCCATAAATGACTTTGGCGGCAAT
ATCGATGGTTCAGCAACATTCTAAAAAATAAACGGATTCTTTTAACATCGCCAGGAATGC
AACCTTGTACCAGTTTACTCATCACAAAAGTCGTACACCGAAAAAAACGCTACTTGCGGC
CTGTTGCGCCCTCCTTTATAGCAGCAACGGTGCTGCGGCAGACACGGTGGAATATGACAG
TTCCTTCTTAATGGGAACTGGCTCATCAACCATTGATGTTAAACGCTATGCTCAAGGTAA
CCCGACACCGCCGGGTCTTTATAATGTCCGCGTGTTTGTAAACGGTCAGGCCACCTCCAG
TTTAGAAATTCCGTTTGTGGATATTGGTGAAAACAGCGCGGCGGCCTGTATTACCCGCAA
AAACCTGGCGCAGTTACACATTAAACAATCCGAACAGCTTGTGACCCTACTCGCCAGAGA
AGGTGAAGAAGAAGACTGTCTTGATCTGGCAAAGTCATACGATCAGGCCGAAGTTCAATT
TGATGGCAGTGACCAGTATCTCGATCTGACCATTCCTCAGGCCTATGTCCTGAAGAGCTA
TGGCGGCTACGTTGATCCTTCCTTATGGGAGTCGGGAATTAACGCTGCCACGCTGTCGTA
TTCCTTGAACGCGTATCACACAAGTTCAGAAGACAACAATAACGATAGTGTCTATGGCGC
ATTTAACTCAGGTATCAATTTAGGTGCCTGGCATTTCCGTGCGCGCGGCAACTATAACTG
GACAACAGATAGCGGCAGTGATTTCGATTTCCAGGATCGTTACCTACAGCGTGATATTCC
GGCAATACGTTCACAGATAATCATGGGTGATGCCTACACCACCGGTGAAACGTTTGACTC
TGTCAACGTCCGGGGTGTTCGCCTGTACAGTGACAGCCGTATGCTGCCTTCTGCGTTAGC
CAGCTACGCCCCGACCATTCGTGGTGTGGCAAACTCTAACGCCAAAGTTACCGTGACGCA
GAACGGCTATAAAATCTATGAAACCACCGTTCCGCCAGGTGAGTTTGTTATTGATGACAT
CAGCCCTTCCGGATTTGGTAGCGAACTGGTTATTACCATTGAAGAAGCGGATGGTTCCAA
ACGTTCCTTTACGCAGCCCTTCTCCTCCGTCGTGCAGATGCAGCGTCCTGGCGTGGGTCG
TTGGGATTTCAGTGCCGGTAAAGTTATTGATGACAGCCTGCGATCCGAACCTAATATGGG
GCAAGCCTCTTATTACTATGGTCTGAATAACCTCTTCACGGGTTACACCGGCATTCAGTT
CACCGACAACAACTATCTTGCCGGACTGTTAGGTGTGGGTATTAACACCAGCATCGGTGC
TTTTGCGATGGACGTTACCCATTCCCGCGCTGAAATTCCGGATGATAAAACCTACCAGGG
GCAAAGTTATCGCGTAACCTGGAACAAACTTTTCCAGGATACCGGAACATCATTTAACCT
GGCGGCTTACCGCTATTCCACCCAGGATTACCTGGGCCTGCATGACGCGTTAGTCCTCAT
TGACGACGCGAAACATATGTCTGCCGATGAAGACAAAAACACCATGCAGACATACTCACG
CATGAAAAACCAGTTTACCGTCAGCATCAACCAACCGTTGAACATCGCCTATGTCGATTA
CGGTTCGCTGTTTATTTCCGGTAGCTGGACGGACTACTGGGCGGCGAACAATAGCAGGAC
TGAATATAACGTCGGTTACAGTAAAAGCGTTTCGTGGGGTAGCTTCAGCGTTAACCTGCA
ACGTAGCTGGAATGAAGATGGCGATAAAGATGACGCAATGTATGTCAGCGTTAGCGTGCC
TTTTGAGAATATTTTCGGTGGCAAACGCAAGACTTCCGGTTTCCGTAATTTAAATACTCA
GCTCAATACCGATTTTGATGGTTCACACCAGTTGAATATGAACAGTTCCGGTAGCAATGA
AAGCGGCCAGGTGAACTATAGCGTCAACACAGGTTATAGCATGGATAAAAATTACGGCGA
TCTAGCTTCTGTTGGCGGTTATCTCAACTATGAATCTGGGTTAGGCGGTATTTCCGCTTC
GGCCTCTGCCTCTTCTGATAATAGCCAACAGTACTCCATCTCAACCGATGGCGGCTTTGT
GTTACACAGCGGTGGTCTGACATTTACCAATAACAGTTTCAGCAGTAACGATACGCTGGT
GTTAGTCAATGCCCCAGGCGCTAAAGGCGCACGAGTCAATAACAGTAATAACGAAATCGA
TCGCTGGGGATATGCCGTAACGTCCGCTGTCAGCCCATACCGTGAAAACCGCGTAGGCCT
GAACATTGAGTCGCTGGAAAACGACGTAGAACTGAAAAGTACCAGCGCCACCACCGTACC
ACGTAGCGGGTCCGTTGTTTTGACCCGTTTTGAAACTGACGAAGGGCGTTCTGCCGTGCT
GAATATTACCTCCAACACTGACAAACCGATTCCGTTTGCTGCGGAGGTTTACCAGGATGA
AGTCATGATCGGCAGTATGGGCCAGGGCGGTCAGGCATTTGTGCGTGGTATTAACGACAG
TGGGGAATTAACCGTGCGCTGGTTTGAAAACAACCAAACCGTGGACTGTAAGTTGCATTA
CCAGTTCCCGGCCCAGCCACAAACTCTGGGAAGCACTAACACCTTATTACTTAACAATCT
TACCTGTCAGGTAGCAAAACATTAATATGGAAAATTCTATGAAAAGGATACTACTAACAT
CCGCGTTAATAGGCCTGGGTTTACCGGCAGTTGGCTCTGCAACAGATCTCAAAGTCGATT
TTACGGCCACTGTACTCGCCACCACCTGTACGATAACCATTGAACAAGATGGTGGCCCCG
TGGTGACCAGTAGCGGTAACGATGAATACAGCCTGACCATTCCTGATGTTGGCCTGGACA
AAGTTGTCACTGGTGATGTTGCAGCGCAAGCCAACTTTAAATTAAAGGCTAAAGATTGCA
GCGATGGTTACTCAAAAATTTTTACCACACTTACAGGAACGTCTGTTTCAGGCAAGTTGA
TTGTCAATGAAGCAAGCTCTGGCGCTGCTGGTGTGGGTATGGGTATTAAGCGTAGAGATG
CCGCAGACTCGGCTTTCTTCACGCCCAATAATACTGACAAATTTGAATGGTCTTCCGATG
AGAAAACTAACGGTGTGCCTCTGACCGTTGCACTGCGCGAAACCACGGCGGGAGCGGGAC
GCACCGGTGCGTTTCAGGCAAAAGCCACCTTTAACTTCACCTACGAATAACAGGGACAGC
CACCATGAAATTAAAAGTCATCGCCACACTGATTGCTACTGTTGCCGTAGGTGCAAGCTT
TAATTCAAATCTCGCCTATGCGAGTACTACTTCTGCATCTTTAACCGTAAACAGTAACCT
GACTATGGGTACCTGTAGTGCTCAGGTTCTGGATTCCAGCAATAAAGCGACAGATACTGT
TGCCCTGGGCAATGTTTATATTTCTGAGTTAGCGGCAAAAAGCAAAGTGCAACCATTCAA
AATCCGCTTCAGTGATTGTGCCGGTCTTCCAGGGAAGAGTGCTCAACTCGTTTTAGCGCC
CAGGCCTGGTACGGGTTGCGCTGGCGGTCAGTCTAACACTGCCGGCTTTGCAAATTCAAT
TTCCTCCGGCGCTGGTGGTTCAAGCAGAGCAGCGGTCGAAGTATGGACGACTACGACCCC
CGAGGGAAGCGGCAGTCAGCAACTCAGTTGTGTTCAACGAAACGTCATCACGGTTGATCT
TTCTAATGCCAGTACAACACAGCCTTATGATTACGATTTAAGTGCGCGGATGATTATCGC
CGATGGAAGAACGGTTAATGATGTATTACCGGGCGAGTTTCTTTCTCCCACCACCTTCAC
TATCACTTATCAGTAATAGCAGATAAGGATATTAGAATGCTATGCAGGCATCATAAATTT
GTATGTTTTTTGGGGCTGGCAACAGCCCTCATAACGCCTTTTGCCTATGCTGGTCAGGAT
GTGAATCTCACCGCGCAGATTGTCGCCAGTACCTGTCAGGTTGAAGTGAGTAATAATGGC
GTGGTGGATCTCGGCAGTGTGACCCTGGACTATTTTGCCGACAACGTAACTCCAACAACG
GATTATGCGGGTGGCAAGACGTTTAATGTTAACGTGGTCGCCTGCGATAATATTCAAACG
ACCCAGTCGCAAATGAAATTAGATTTTCAGCCGCAGGCAGGTTCGCTTGCGCAGGTGAAT
AATCAAATTTTTAGTAATGAATATGAACAGCAGGCTACCGGGGCAAAAAACGTCGGCATT
GTAATATTTTCGGCACAGCCGAATCAGCAGACCTTTAACGTGCGGGGAACGGACGGTTCC
TCAACGGCGATTTATTCTGTCGCTCCAGGCAATGCTGTTCCGTCAACCTGGACCTTTTAT
TCCCGTATGCAACGGGTGAATAATGCTCTCCCACCCGAGTCGGGGATGGTGAGAAGCCAG
GTTATTGTTAATGTTTCTTACGAATAATAAGGATAATTATGCAAAGGAAAGGCAATAAAC
TGTTACGACAGTTATGCAGTGCAATACTGTTATTTTTTATGTGCTCCTTGTCTGCATCTG
CGATGGAATGTTATATAGAAAAATGGGCGGGGGGAACTTATGACATGGTCATAAACCCTG
AGGTTGAAAGTATAACAACGCAAATGGTATCTTCGCCACAAGAAATAAGCGACATGGTTC
ATGATACAAATATTAAACTTAAGGACAGGAACGGTGAGACGATTGGATGTAAGTCCGATA
TAGGGGGTACTACTTCAGTACACTTTCTTAACACTGCGGATGCAGGTTTGTTATCAACCT
ATGTTTCGAAAGATAATGGCGCATTATTAAAAACAACAGTTCCTGGTATTGTCTACTCCG
TAGAATTGGTATGTATAAGCTGTGGTGCTGCAGATGAACTTGATTTAGTTTTACCTGCAC
AAAGCGGCGCAGATAACTTCATACCGGCCAGCGATACCAAGTGGGCTTATGAATACAGTG
ACAACGACTGGTATTTGCGTTTTCGTTTTTACTGGACGCCGGAATTTAAACCTCAAAATG
GGGTTTTCGAAGGATATGCCTTGCCAGGAAAAATTGCTTCCTGGTATATAGGTGATAATA
CCCAGGCATGGGTAAACTTTACTGTTCAGGATAGTGCCGTTCACTTTTACGTTGACCAAC
CAACCTGTTCAATGATTACCCTGGATCAGGACAAAGGCAATGTGAGTGGCACAGAAATCC
AGTTAGGTAACAGTTACGTATCCGAAGTTAAAAATGGTCTTACCCGAGAAGTTCCCTTTG
CTATCCGTGGTGAGTATTGTTATGCCAGCAAGATTACGGTTAAGCTGACGGCTGCAAATG
CAGCCACTGACAAAAATCTGGTGGGTAAAACAACTGGCTCTGCCACAGGCGTGGCTGTAA
GAGTTAATTCAACTTATAATGATAGCAAAGTGTTATTAAAACCAGATGGCGTTGCTTCCA
TTGATTATAACTTCCCTGTCTGGTCGAATAACTTGTTGTCATTCCCTTTTACAGCACAAC
TCGTCCCCGATGGCAGTGGTAAACCTATCGGAACAGGAACATTCTCCGGTAACGCGACCT
TCTCCTTTACCTACGAATAAGTAAAACGTTATTCCCTCCTCATCGCACCAGAGTTCTGCT
CTGGTGCGAACGTTTTCCCCACACTAAAAACCATTGCCCCCCTGATTTCGGCTGTTAGAA
TGCGAACAGATCTGACTTTAGCCATCAGGACACGTTATGAAACCGACCACCATTGCTTCA
TTGCAAAAATGCAAACAGGAAAAAAAACGTTTCGCGACCATCACCGCTTACGACTATAGC
TTCGCCAAACTCTTTACCGATGAAGGACTTAACGTCATGCTGGTAGGCGACTCGCTGGGC
ATGACGGTTCAGGGGCACGACTCCACCCTGCCAGTTACCGTTGCTGATATCGCCTACCAC
ACTGCCGCCGTACGTCGTGGCGCGCCAAACTGCCTGTTGTTGGCTGACCTGCCGTTTATG
GCGTATGCCACGCCGGAACAGGCCTTTGAAAATGCCGCCACAGTAATGCGTGCCGGAGCC
AATATGGTCAAAATCGAAGGTGGCGCATGGCTGGTGGAAACCGTGCAGATGCTGACTGAA
CGCGCGGTTCCGGTATGTGGTCATTTAGGTTTAACGCCGCAGTCAGTGAACATTTTCGGC
GGCTACAAAGTACAAGGGCGTGGCGAGGCAGGCGATCAACTGCTCAGCGATGCATTAGCC
TTAGAAGCCGCTGGTGCACAGTTGCTGGTGCTGGAATGCGTACCAGTTGAACTGGCAAAA
CGTATTACCGAGGCGCTGGCTATTCCGGTTATCGGTATCGGCGCAGGTAACGTCACCGAC
GGGCAGATCCTCGTCATGCACGACGCCTTCGGTATTACTGGCGGTCATATCCCTAAATTT
GCCAAAAATTTCCTTGCTGAAACGGGCGACATCCGCGCGGCTGTGCGGCAGTATATGGCT
GAAGTGGAGTCCGGCGTATATCCGGGCGAAGAACACAGTTTCCATTAAGGAGTCACGTTG
TGTTAATTATCGAAACCCTGCCGCTGCTGCGTCAGCAAATTCGCCGCCTGCGTATGGAAG
GCAAGCGCGTGGCGCTGGTGCCTACTATGGGTAACCTGCACGATGGCCATATGAAGCTGG
TCGACGAAGCCAAAGCCCGCGCCGATGTGGTCGTCGTCAGTATTTTCGTTAACCCAATGC
AGTTTGACCGCCCGGAAGATCTGGCACGTTATCCACGGACCTTGCAGGAAGACTGCGAAA
AGCTAAACAAACGTAAAGTGGATTTAGTTTTCGCCCCTTCGGTAAAAGAGATCTACCCGA
ACGGTACTGAAACCCACACTTACGTTGACGTTCCTGGTCTTTCCACCATGCTGGAAGGTG
CCAGCCGTCCTGGCCATTTTCGCGGCGTTTCGACTATTGTCAGCAAGCTGTTCAACCTGG
TCCAGCCGGACATCGCCTGCTTCGGTGAAAAAGATTTTCAGCAACTGGCGCTGATCCGCA
AAATGGTTGCTGATATGGGCTTTGATATTGAGATTGTCGGTGTGCCAATTATGCGCGCCA
AAGACGGTCTGGCGCTGAGTTCCCGTAACGGTTATCTGACAGCGGAACAACGCAAAATTG
CGCCCGGTCTGTACAAAGTTTTAAGTTCAATTGCCGACAAATTGCAGGCTGGCGAACGGG
ATCTCGATGAAATTATTGCTATTGCCGGGCAAGAACTGAATGAAAAAGGCTTCCGCGCCG
ATGATATTCAGATTCGCGATGCCGACACGTTGCTGGAAGTCTCTGAAACCAGCAAACGAG
CTGTGATTCTGGTAGCCGCCTGGCTTGGCGATGCCCGCCTGATCGACAACAAAATGGTCG
AACTGGCGTAATACTTAACTGGCGCTACGGCTGATGGCGCCAGTTATTAATTTGCCCTAC
GTCATGGCGATGACGTCTGTAAGTGATTATTCATATCGCTGGCAATTTAGTTAGAGTTAA
TTAGCTTATCAATCTCTGTAAGAGGTAAAGTTGTCACCTCTGCAACGTCTTCCCGAGACA
TCCCTTTACTTAGAAAACGCTGGGCGAATTCCTGTCTTACCTTCTGGAGTTCCTCTTGAT
ATCCCTTCTGAAATCCCTTCTCTTCAAACCACTGCGCCAACGTCTGCCTGGTTTCTCTCC
GTGTCTTTATTTCCATAGGTTCCCTTAATTATCTGGTCAGTTAACAATAACAATTATCTG
GCTATAACTGATGATGCAGACAACTTAGTTAATCAGCTTATCAATCTCGGCAAGGGGTAA
ATTTGCCATCTCTGCAACGTCTTCCCGAGACATTCCTTTATTCAGAAGACGCAGGACGAA
TTCTTGCCTTTCCTCCTGTCTTCCCCTCTCTTCAAACCACTGCGCCAGCGTCATCATAGA
CTCCCCTCCCGTTTCCCTGTCTCTCAGCACACCATAAAACAAATCCGCTTGTTCAGTATG
ACCGCGTTGCAGCATATAGTTTTGCATGGCAACTAACTGACTTCCGCTAGTGTACCCTTC
GTCAATCAGCGTGACCAGTTGCTCCAGCAATAACATTAAGTCGCGCTGGCGAATATGTTT
TTGCAGTAGTTCGAGAATCGCAATCCGCCGATGTTGCATGATTTCGTCATCCGGTGTGAT
GGTGATATCCACCAGCGGGAAAGGACTGTTATAGACGCGTCGCGCCAGCTCCGGAGAGTA
AAACATATCAAACCAGCACATTGAGAGCGGATAAGGTGTGGCCTCGCCCTGATAAAAGAG
AATCGGCACTACCAGCGGTAGTTTGTCGTGATCCGCCTCCAGATGCCGATGCATGGCGGC
TATAGAATAACGCATCATGCGAAAGGCCATTTTCTTATCCGGCTTGCTTTGGTGTTCAAT
CACAACATGCAGATAACCGGGATTGCCCTGCATTTGCACGGAATAGAGCACGTCCGTGCT
GTGTCCTTTCAGGCTCTCTTCAATGAAACTCCCCGACTCTAAATGAAGCGTGTTGAGGTC
ACAAAGTTCGCGTAATTCCACTGGCAAATGTATCTCCAGAAAGTCGCGAGCCGTCTCCGC
ATGCATTAAAAATTGTTTAAATACCGCGTCATGCGGTGTAGTACTCGGTGCATCCATCTT
CCCTGTCTTCCGTGTTGTCTTGCGTGAAGGCAGTATCCAGCCAAGGCGCGCCGTCGTCAG
CCACCTCTTTATTGTTTACCGAGCAGCGTTCAGAGAAATATCAATTCGTTACAGGCGATA
CATGGCACACTTCGGCGCGGTACGCAAACTGCTGATGCAAATGCCGTCAGATGAGTAGAC
ACTAAACAAAAATCGGGCAATACTGCGTGAGAATTTCCTCAAAGCAGGCACCGCCTGCTT
CGTTAACGACAGGGTAGAAAGGTAGAAGTTATGATTCGCACGATGCTGCAGGGCAAACTC
CACCGCGTGAAAGTGACTCATGCGGACCTGCACTATGAAGGTTCTTGCGCCATTGACCAG
GATTTTCTTGACGCAGCCGGTATTCTCGAAAACGAAGCCATTGATATCTGGAATGTCACC
AACGGCAAGCGTTTCTCCACTTATGCCATCGCGGCAGAACGCGGTTCGAGAATTATTTCT
GTTAACGGTGCGGCGGCCCACTGCGCCAGTGTCGGCGATATTGTCATCATCGCTAGCTTC
GTTACCATGCCAGATGAAGAAGCTCGCACCTGGCGACCCAACGTCGCCTATTTTGAAGGC
GACAATGAAATGAAACGTACCGCGAAAGCGATTCCGGTACAGGTTGCTTGATTGTTATCC
CTGCGGCTGGTTACTCACCAGCCGCGACATCGTCTCGAGCGAATCCGTTCTTAAGATATA
AAGTCGTTTTAGTAACAACGGATTATCCCCCGGTTTTACTTTGCCTTTCATGGTTGTCAC
CGCCAAGTGAAATCCGGCATCGTTTGCTGCCTTCACGGCTTTGTCATTAAATCCGCCAAA
CGGATACGAAAGATACCAGACATGCGGATTAAATTGCGCCAGAGCGCGGCGTGAACGTGC
AAAATCAAACAGAATATTGTGCTCACTACGACTCAGTAATATGGGGCGGCGATAGCCATC
CACCCGATGCAAAAAATGGGTATGTGACTGAAAATCAAAAACATCGCGAATTTCGTTAAG
CTCAGAAACGCTCATAAATTGCAGCGATTTTGGGTTCCACTTCTGCGGGTGACGTTTGAT
GCGTGAGGTAACAATAAACGCCGTCGCCTTCATGCCATATTGTTTCAACACAGGATACGC
ATAGCGGCTCACCGACTTGAGGCCATCATCAAAGGTAATCACCACCGCTCGCGCAGGGAG
ATTGATCTTATTCTTCACGTAGCCTTCCAGCTGCACCATGCTCAGTGTCGCGTATCCCCT
GTCGCGCAGCCAGGCCATCTGGTTATTGAAAGCGCGTACCGAGGTGGTCGTCGAAGTGTG
GCGAAAACGGGTGTTTTCTTCGTCGCGCAGAATATGATGATAGGTTAGCACCGGAAGGCC
ATTATCGGGTTGGGCATCCAGCGCGCTGATATAGGCCAGTCGATCGCCAATACGGACCTG
ATACCAGGTTTGATTTAACCTGTCTTTCAGTTTATGCAAAATCGGGTAGCGCAAATTGTC
CGCCAGTACCCCAAATGGCGCACTGCCCACACTCGGCGCGTTATAGACCGGCGTATCTTT
CCAGGTAACTAAGTTCTGATTACTCAGCGGCTTGTTGAGGTCACCCAAACCGTCTTCAAC
TTTTTGTCGCCCCTGAACCGGCTCGAGATGCCCTTTATCGATAAACCCTTTACCAAAGCC
AAAATTAAATGCGTAATAACTTGCGGCAGTGGGCTCCACGGCAATGATTTGTCCGGCCCG
AATATTCCCCACGGTCACCATCTTGTCGCCAATTTGCGCCCAGACCGCAGCATTTTCGAT
GGTTTGCATATAACGGGCAGGTAACGCGGCACTGACACTTGCGGTAAACAGCATCAGCAG
GAGAATAACAGCTTGTTTGTACATGAAAAAATAACCGAGGGTGAAACAACGCTTTTATTG
TAGCAAAAGCGCTATAAGAATCGTGGGTTAATACTCATACAAATTATGTTTGAGGACGAA
AGGTGGATTTTTTTGTTGTTGGTGCCAAAGACTACTCACCTCCGGCCCACCCAGTTCGAC
AATACGCTCGCGAAACTCTGAACTGGTCATGGTTTCACGGCAAGCCATCATCTGTTCAAT
TAACGGTAACGTGACACCAGAAATCACTTCGCAACGGGAGTGTTTGTGGCTTAATAATGA
AGCCACGCGGTACGGTGGCGCTCCGGCTATATCGGTTAAGAAGATGACACCCTCACCAGA
GTCCGCTTCATGCAGAGCATCGCACATCATGCGGCTGAGCATATTAGAGCTTAACCCACG
CCAGAAATTCACGGCCCGGCACTGAAGAAGTGCCCCATGTTTTTTCTCCAGCGCATCCAG
TATCTCTTGCGCCCGGTCATCGTGACAGGTAATTACCCAACCTAACATCGCCTTCCTCCT
TAGCCGAAAATCAGTCTACCCTGACCATTGTTGATAAAGGGTGATAGCCGTCAAAACTCC
TCTCCCCCAAATCCAGAGGAGAGGAAATAGCCTTAGCTACGCAAACCACGTCCACGTTGG
ATCAGCGACCAACAGATCAAATAAAACGCCACAATAAAGACCACCAGTACGCCAAAGGTA
GTGACCAGCGGAACATCATTGATACCGAGGAAGCCGTAGCGGAAACCACTGATCATATAA
ACGATTGGGTTCAGGTGCGACAGCCCTTGCCAGAACGGCGGCAACAAAGTCAGTGAGTAA
AAGACCCCACCCAAATACGTGAGTGGCGTTAACACAAAGGTTGGCACCAGGCTGATGTCA
TCGAACGTTTTGGCAAACACACCGTTCAGCAAACCCGCAAGGGAGAACAACACCGCCGTG
AGCACCAGGGTTAAGGCAACGAATACCCATGAATGCACCTGAAACGGCACAAAAAACAGT
GAAATTGCCGTCACCAGAATGCCAACAAACAGACCACGCGCCACGCCACCGCCGACATAT
CCGGCAATAATGACGTGAGTCGGAACCGGCGCTACCAGCAGCTCTTCAATATTACGCTGG
AATTTGGCACCAAAAAATGATGACGCGACGTTAGCGTAGGCGTTGGTGATCACCGACATC
ATGATCAGCCCCGGTACGATGAACTGCATGTAGCTGAAGCCATGCATATCGCCAATACGC
GAACCAATCAGGTTACCGAAGATAATAAAGTAAAGGGTCATGGTGATGACTGGCGGCACC
AGCGTCTGCACCCAGATACGCATAAAGCGATGGATCTCTTTCGCCCAGATGCTTTTTAGC
GCCACCCAGTAAAGATGCATCATGCGCGATCTCCTTGTTTTTCATTAACCAGTGAAACAA
ACAGCTCTTCCAGACGGTTAGCTTTGTTACGCATACTTAATACCTGAATGCCCTGCTCAC
TTAACTGCGTAAATACGCTGTTGATCCCCTGCTCACGCAGCACTTCAACTTCCAGCGTCG
CGGTATCGACCAGTCGATACTGATAGCCATCGAGCTTCGGTAACGGACTTTTCGGTGCGA
GATCGAGAATAAAGGTTTCCGATTTCAGCTTCGCCAGCAGCGCCTTCATCGAGGTATTTT
CCACCAGCTCACCATGTTGAATAATGCCGATATTGCGGCACAGCATTTCTGCTTCTTCCA
GGTAGTGTGTGGTGAGAATGATGGTGGTGCCTTTGTCGTTTAAATCCTTCAAAAAGCCCC
ACATTGAGCGGCGAAGCTCAATATCCACGCCTGCCGTTGGCTCGTCGAGAATCAGCAGTT
TAGGTTCATGCATTAACGCACGGGCAATCATTAAACGACGCTTCATCCCGCCCGATAACA
TGCGCGCACGTTCGTTGCGTTTTCCCCATAAATCGAGCTGCTTAAGATACTTTTCGCTGC
GGATGTACGCTTCTTTGCGCTCCACGCCGTAGTACCCTGCCTGATTCACCACAATTTGCT
GCACGGTTTCAAACGGGTTGAAGTTAAATTCCTGCGGCACCAGTCCCAACTGACGTTTAG
CGTTCACGACATCCTTCTCGAGATCGTAACCAAATACGCTGACCCGCCCGGAGGTTTTAT
TTACCAGAGAGCTGATAATACCGATAGTGGTCGATTTCCCGGCCCCGTTCGGCCCGAGAA
GCGCATAAAAATCACCCGCTTCGACCTGCAAATCTATTCCACGAAGCGCCTGAACGCCGC
CTGGATAGGTTTTTTTAAGCTGTTGAAGTTCCAGTGCAATGGTCATAAATTTTTACTTAC
CTTACGTTCTTACACTTTATCTGTGGTTTAAATCGTCCCGGAGTTGCCCTATATTAGCCA
AACGTAATTATTTGGTTACAGGTCGTTAACCTCCATGAAAGACATAGATACACTCATCAG
CAACAATGCACTATGGTCAAAAATGCTGGTGGAAGAGGATCCCGGGTTTTTTGAGAAACT
GGCACAAGCGCAAAAACCGCGCTTTCTATGGATTGGATGTTCCGACAGTCGCGTTCCTGC
AGAACGTTTAACCGGTCTTGAGCCGGGCGAACTCTTTGTTCACCGTAATGTTGCTAACCT
GGTCATTCACACCGACCTGAACTGCCTTTCCGTGGTTCAGTATGCAGTGGATGTACTCGA
AGTTGAACACATTATTATCTGTGGCCACTACGGTTGCGGCGGCGTACAAGCCGCAGTTGA
AAACCCGGAACTGGGGCTTATCAACAACTGGCTGCTGCATATCCGCGATATCTGGTTCAA
ACATAGCTCATTGCTCGGCGAAATGCCGCAAGAGCGCCGTCTGGATACCTTGTGTGAACT
GAACGTCATGGAACAGGTGTATAACCTGGGCCACTCCACCATTATGCAATCAGCGTGGAA
ACGCGGGCAGAAAGTTACCATTCACGGCTGGGCCTACGGTATTCACGACGGCTTGCTGCG
TGATCTGGATGTCACAGCGACCAACCGCGAAACCCTTGAGCAACGTTACCGTCATGGGAT
TTCCAACCTCAAGCTGAAACACGCCAACCACAAATAAAAATGCCATGCCGGATGCAACAC
ATCCGGCAACTTCACACTTACTCGTCCAGCAGAATCACTTTGCCGATATACGGCAGATGA
CGGTAACGCTGTGCGTAATCAATGCCGTAACCCACCACAAACTCATCCGGGATCGAGAAA
CCGATAAATTCTACCGGGACGTTCACTTCACGACGGGACGGTTTATCCAGCAGCGTACAA
ATCGCCAGCGACTTCGGTTCGCGCAGGCTTAAGATCTCACGCACTTTCGACAGTGTATTC
CCCGAGTCGATGATATCTTCAACAATCAGCACGTCCTTGCCACGGATATCTTCATCCAGA
TCTTTGAGGATTTTCACATCACGGGTGGTGGACATGCCGCTACCGTAGCTGGAGGCGGTC
ATAAAGTCGACTTCATGAGATACCTGAACTTCACGGCACAGGTCCGCCATAAACATAAAT
GAGCCACGCAGCAGACCCACCAGCACCATATCGCTGCCGCTGTCTTTGTAACGCTCAGTA
ATCTGACGACCCAGTTCGGCGATACGCGCTTTAATCTCCGCTTCGGGGATCATTACTTCT
ACAGTATGTTTCATATCTCTAACCATATGATTTAAAAACAAATCACTTCGCACGGGCAGG
TTTTGGCACCGCAACAAAGCGCAAGACACGCAGTATACCAGTAAAACTATTCATTCGCGG
AATCTGTTAATAAAGCTCGAATTGTGATGACGGTCACACATGTTAAAACCTATAATTAAT
TGCTACTAAAATATTAATGAATTGAAATGGTGTCTCTTTATGGCAATTAACAATACAGGC
TCGCGACGATTACTCGTCACGCTAACAGCCCTTTTTGCAGCGCTTTGCGGGCTGTATCTA
CTCATTGGCGGAGGCTGGCTGGTCGCGATTGGCGGCTCCTGGTACTACCCTATCGCTGGC
CTTGTGATGCTCGGCGTCGCCTGGATGCTGTGGCGCAGTAAACGTGCCGCGCTTTGGCTA
TACGCCGCCCTGCTGCTCGGCACCATGATTTGGGGCGTCTGGGAAGTTGGTTTCGACTTC
TGGGCGCTGACTCCGCGCAGCGATATTCTGGTCTTCTTCGGCATCTGGCTGATCCTGCCG
TTTGTCTGGCGTCGCCTGGTCATTCCTGCCAGCGGCGCAGTTGCCGCACTGGTGGTGGCA
CTGCTGATTAGCGGTAGTATCCTGACCTGGGCCGGATTTAACGATCCGCAGGAAATCAAC
GGCACCTTAAGCGCCGATGCCACACCTGCGGAAGCTATCTCACCCGTTGCCGATCAGGAC
TGGCCTGCCTATGGTCGCAATCAGGAAGGTCAACGCTTTTCACCTCTGAAACAAATTAAC
GCCGATAACGTCCATAATCTGAAAGAAGCCTGGGTGTTCCGTACTGGCGATGTGAAGCAG
CCGAACGATCCGGGCGAAATCACCAATGAAGTGACGCCGATTAAAGTGGGCGACACCCTT
TACCTGTGTACCGCTCACCAGCGCCTGTTTGCGCTCGATGCCGCCAGCGGCAAAGAGAAA
TGGCATTACGATCCTGAGCTGAAAACTAACGAGTCTTTCCAGCACGTAACCTGCCGTGGC
GTCTCTTATCATGAAGCCAAAGCAGAAACGGCTTCGCCGGAAGTGATGGCGGATTGCCCG
CGTCGTATCATTCTTCCGGTCAATGATGGTCGACTGATTGCGATTAACGCTGAAAACGGC
AAACTGTGCGAAACCTTCGCCAATAAAGGCGTGCTCAATCTGCAAAGCAATATGCCAGAC
ACCAAACCGGGTCTGTATGAACCGACTTCGCCACCGATTATCACCGATAAAACCATCGTG
ATGGCAGGTTCAGTTACCGATAACTTCTCAACCCGCGAAACGTCTGGTGTGATCCGTGGT
TTTGATGTCAACACCGGGGAGCTGCTGTGGGCTTTTGATCCGGGCGCGAAAGATCCGAAC
GCAATCCCGTCTGACGAACACACCTTTACCTTTAACTCGCCAAACTCGTGGGCACCAGCG
GCCTATGACGCGAAGCTGGATCTGGTGTATCTGCCGATGGGCGTGACCACGCCGGATATC
TGGGGCGGTAACCGCACACCGGAACAGGAACGTTATGCCAGCTCGATTCTGGCGCTGAAT
GCCACAACCGGGAAATTGGCGTGGAGCTACCAGACCGTTCACCACGACCTGTGGGATATG
GATCTTCCGGCACAGCCGACGCTGGCGGACATCACCGTTAATGGTCAGAAAGTGCCAGTT
ATTTACGCTCCGGCGAAAACCGGCAACATTTTTGTGCTCGATCGTCGCAATGGTGAACTG
GTGGTTCCTGCCCCGGAAAAACCGGTTCCCCAAGGCGCTGCCAAAGGCGATTACGTAACC
CCAACTCAACCGTTTTCTGAACTGAGCTTCCGTCCGACGAAAGATTTGAGCGGAGCGGAT
ATGTGGGGCGCCACCATGTTTGACCAACTGGTGTGCCGCGTGATGTTCCACCAGATGCGC
TATGAAGGCATTTTCACGCCGCCATCTGAACAGGGTACGCTGGTCTTCCCTGGTAACCTG
GGGATGTTCGAATGGGGCGGGATTTCTGTCGATCCGAATCGTGAAGTAGCAATTGCCAAC
CCAATGGCGCTGCCGTTTGTTTCGAAACTGATCCCTCGCGGTCCGGGTAACCCAATGGAG
CAGCCGAAAGATGCCAAAGGCACGGGTACGGAATCCGGCATTCAGCCACAGTACGGTGTA
CCGTATGGTGTCACGCTCAACCCGTTCCTCTCACCATTTGGTCTGCCATGTAAACAGCCA
GCATGGGGTTATATCTCGGCGCTGGATCTGAAAACTAATGAAGTGGTGTGGAAGAAACGT
ATTGGTACGCCGCAGGACAGTATGCCGTTCCCGATGCCTGTACCGGTGCCGTTCAATATG
GGTATGCCGATGCTGGGCGGGCCAATCTCCACGGCGGGTAACGTGCTGTTTATCGCCGCT
ACGGCAGATAACTACCTGCGCGCTTACAACATGAGCAACGGTGAAAAACTGTGGCAAGGT
CGTTTACCAGCGGGTGGTCAGGCGACGCCAATGACCTATGAAGTGAATGGTAAGCAGTAT
GTGGTGATCTCCGCAGGCGGTCACGGTTCATTTGGTACGAAGATGGGCGACTATATTGTG
GCTTATGCGCTGCCGGATGATGTGAAGTAAGACTTGCTCAGATTGCTGACAACGTGCGCG
TTGTTCATGCCGGATGCGGCGTGAACGCCTTATCCAGCCTACAAAATTGTGCAAAATCAA
TGGATTGCACAGGTAGCGTAGGCCTGATAAGCGTAGCGCATCAGGCAGATTTGCGTTTGT
CATCAGTTTAATGCCCGGAGAGATCCGGGCATATTCCCGAATACGGTCTTTTTATACCGT
AAACCCTAACATCATCCCCGTATCTTCATGCTCCAGCAGATGGCAGTGCGCCATATAAGC
ATGTTCTTTCGGTGCGTCGTGATTAAACTTCACCAGCACTTCGCTGACATTACCTTCTAC
CTTAACGGTATCTTTCCAGCCCGCGCGATGCGTCGCTGGCGGTTTGCCATTTTCTGACAA
GATACGGAACTGCGTGCCGTGAATATGGAACGGATGCAGCATCATGTCGCCCACGCCAGA
GATAACCCAACGTTCGTACTGCCCTTTCGCCGCCGCAAACATCGGCTTATTCATATCAAA
CGCCTGACCGTTGATTTTATTGGCATGGTGGAAATCGAACTTCCCGCCGTGGTTCATATG
ATTCATATTGCCGTGCCCCATATGGCCCATCATCTGGCTGTGATCCATTCCGGCCATCGC
CTGATCGCCATATTTCTCCATTAGCATCTGCATCCCCATCATATCTAGCATCGGGTCCAT
AGAAAGTTGCAGCTTGCGTACCGTCAGCCCTTCCAGCGAAGGTAACGCAGGCAGGCTACT
TAATGTGTCTGGCAAAGCACCGGAGGCACTAATAGCAATCGGCTGAATCCGCATTACCGG
ATGCGGCTTGTCAAACGGCGCAATCGCCATCCCCATCTGGCTGACCGGCAGCGTCACCAG
GTCAAAGGGTTTGTTGTCGTTAACCTCCACCAGCACTTCAAAACGCTCGCCCATCAGCAC
CGGCAGCTCGTTCACCTTCACCGGTTCAGGTAGCAGACCACCGTCGCTGGCAATCACATA
AAGCGGGCGATTGTCGCTGGTGGCGAAATTGAGCGAGCGGGCATTACAGCCATTGAGCAA
ACGCAGGCGCAGCCAACCACGCGGGGCAGCGTGTTGCGGGTAGATTGCACCGTTGGTCAG
CAACGTATCGCCAAACCAGCCCACGGCGGCGGTCATCACATCCAGTTGATAATCAATCTG
CCCGTCGGCGCTAAATTTCTTATCCTGAACGATCACCGGAACATCATCGATACCCCACTG
TTTTGGCAGCATTAATTTCAGGATCTCGTCATCTTCAATTACCACCAGACCAGCCAGCCC
CATCGCCACCTGTCGCCCGGTCTTGCCATGTTGATGTGGATGGAACCAGCAGGTAGCGGC
AGGTTGATCAACGTTCAACGTCACCGAGCGCTTGCCACCTGGCGGAATAATTCCCTGTGG
GCCGCCGTCGACTTCACCCGGTACTTCCAGCCCGTGCCAGTGCAACGTCGTCTCTTCCGT
CAGTTGGTTATAGATATCAACCGTTACCGCTTTGCCGCGCTGTAATTTCACCGCCGGCCC
CAACAGATTGCCGTTATAGCCCCAGGTAGTTGCAGTTTTCTCGCCAAAGGTAGACTGACC
TGCGCCAATAGTTAACTGAATGCGATTACGGGCATCGGTCGTGAGCAAATCAGGGATCGG
TAACGTTGGGCGTTCCGCCGCAAAAACTGCACGGCTCCACAGTGGCAAGGCTGAAGCCAC
ACCCAGTGCGACGGAATATTTCAAGAAATCACGACGTTGCATAGTTATTTCCTTATTCTT
AAGCAGGCGAAACAAAATCAAACGTTGAGCATAGTCCTTCCCCTTACGGGAAGGTCAAGC
CGCAGACACAATTTAATCGACAATAATGGTCGTCGCCTCGCTCGCAGTGTGCTAACGTTT
ATCTTCTTTAAGCCCCTGGTAGAAGCAATGAAGACGTTTTTCAGAACAGTGTTATTCGGC
AGCCTGATGGCCGTTTGCGCAAACAGTTACGCGCTCAGCGAGTCTGAAGCCGAAGATATG
GCCGATTTAACGGCAGTTTTTGTCTTTCTGAAGAACGATTGTGGTTACCAGAACTTACCT
AACGGGCAAATTCGTCGCGCACTGGTCTTTTTCGCCCAGCAAAACCAGTGGGATCTCAGT
AATTACGACACCTTCGACATGAAAGCTCTCGGTGAAGACAGCTACCGCGATCTCAGCGGC
ATTGGCATTCCCGTCGCTAAAAAATGCAAAGCCCTGGCCCGCGATTCCTTAAGCCTGCTT
GCCTACGTCAAATAATCCCTGATACCTTTTTGTAGAAATATTGACCGTGCATCCGCGGTC
AATGTTAGCTATTATGTTGCGCCCTTTTTTTACGGGTGTTAACAAAGGAGGTATCAACCC
ATGGCCGAAAAAAAACAGTGGCATGAAACGCTACACGACCAGTTTGGGCAGTACTTTGCA
GTAGATAACGTTCTGTATCATGAAAAGACCGATCACCAGGATTTGATCATTTTTGAGAAC
GCTGCATTTGGTCGCGTAATGGCGCTGGATGGCGTAGTACAAACCACCGAACGCGACGAG
TTTATCTATCATGAGATGATGACCCATGTTCCGCTACTGGCCCACGGTCACGCGAAACAT
GTGCTGATTATCGGCGGCGGCGACGGCGCCATGCTGCGTGAAGTGACCCGACATAAAAAC
GTTGAGTCAATCACGATGGTGGAAATCGATGCGGGTGTCGTGTCGTTCTGCCGTCAATAT
CTGCCCAACCATAACGCCGGTAGCTACGACGATCCGCGCTTTAAGCTGGTGATCGACGAT
GGCGTCAATTTCGTTAATCAAACCAGCCAGACCTTTGATGTTATTATCTCCGACTGCACC
GATCCTATCGGGCCCGGCGAAAGCCTTTTCACTTCGGCATTTTATGAAGGCTGCAAACGT
TGCCTGAATCCTGGCGGTATCTTCGTCGCACAAAACGGCGTCTGCTTTTTACAGCAGGAA
GAAGCCATCGACAGCCATCGCAAACTCAGCCATTACTTCAGCGACGTTGGCTTTTATCAG
GCGGCGATCCCGACCTATTACGGCGGTATCATGACTTTTGCATGGGCGACAGATAACGAC
GCCTTACGCCATCTCTCAACCGAAATTATTCAGGCGCGTTTTCTCGCCTCTGGCCTGAAA
TGCCGTTATTACAATCCGGCAGTCCATACGGCAGCTTTTGCCTTACCCCAGTATCTGCAA
GACGCACTGGCTTCACAGCCGTCCTAAGGAGAAGATAAGAAATTGAAAAAACTGAAACTG
CATGGCTTTAATAATCTGACCAAAAGTCTGAGTTTTTGTATTTACGATATCTGCTACGCC
AAAACTGCCGAAGAGCGCGACGGTTATATTGCTTATATCGATGAACTCTATAATGCCAAC
CGTCTGACCGAAATCCTGTCAGAAACCTGTTCCATTATCGGGGCTAATATTCTTAACATC
GCCCGCCAGGATTACGAACCACAGGGTGCCAGCGTCACTATTCTGGTGAGTGAAGAACCG
GTTGACCCGAAACTCATCGACAAAACAGAACACCCCGGCCCACTGCCAGAAACGGTCGTT
GCCCATCTCGATAAAAGTCATATTTGCGTACATACCTACCCGGAAAGTCATCCTGAAGGC
GGTTTATGTACCTTCCGCGCCGATATTGAAGTCTCTACCTGCGGCGTGATTTCTCCGCTG
AAGGCGCTGAATTACCTGATCCACCAGCTTGAGTCCGATATCGTAACCATTGATTATCGC
GTGCGCGGTTTTACCCGCGACATTAACGGTATGAAGCACTTTATCGACCATGAGATTAAT
TCGATTCAGAACTTTATGTCTGACGATATGAAGGCGCTGTATGACATGGTGGATGTAAAC
GTCTATCAGGAAAATATCTTCCATACCAAGATGTTGCTTAAAGAGTTCGATCTTAAGCAC
TACATGTTCCACACCAAACCGGAAGATTTAACCGACAGCGAGCGCCAGGAAATTACCGCT
GCGCTGTGGAAAGAGATGCGCGAGATTTATTACGGGCGCAATATGCCAGCTGTTTAACGG
CTCTGGCGGAGCTCCCAGGCTCCGCCAGATTTATTTACTTCTGCTGCACGAAATTACGGT
AAGCCGCCACCACCTGCAGAAAATCCTCAACGCCGCATAGCGACAGGCTTTCTTCGTCGT
AGTAGTTCATCCCCTCTTCCATTTCATCGCCAGCGAATTCCAGTTGATTGGCGCGAACCA
TCACCTCTTCACCGTCCATCCACAGGGTGTATTCGTGCCCTGCCCGTTGCCAGGACCGTT
CGCTACCTTTCAGTGCGTGCGCTGCTTGTTCCACTTCATCAAGCAAGGCCAGGTTTTCTT
TCACCTCTTCATTAAACCAGTGCCCGACCACTTCATGCCCCATGGACATACGCACCTTTA
CCACTCCGGTAATATCGCGCAGAAATTCGTAATCCATAGTGTGTTCCTCTGCTCCCGGCA
ATGCGCCGAAATCGCATTGCGCCATTGATGTAATTATCGCAGCCTTACCGGAGAAAAACA
GCGGAACGGCGATGGTTTAGAAATAAAAAATGCCCGGGAATCTCATTCACCGGGCATTGT
GTCGTTTATGCGCAGCGCGTGCGCTGACTTTTTAAACTGCAGTCTGGAAAATCACACCAT
CGGCTTTTTCAGTGTACTGAGAAAGCTGGTTGAAGTTCAGGTAACGGTAAGTATCAACGG
CAGTTTTATCCACCTGCGCCACGTAGGTCTGGTACTCTTCCGGCGTCGGCAGTTTGCCAA
TCAGCGCCGCAACAGCAGCCAGTTCCGCAGAAGCCAGGAAGACATTCGCGCCAGTCCCCA
[truncated: 5,030,073 more chars]
