# Supplementary material for: Escherichia coli ST302: Genomic Analysis of Virulence Potential and Antimicrobial Resistance Mediated by Mobile Genetic Elements
Source: Front Microbiol. 2020 Jan 21;10:3098. doi: 10.3389/fmicb.2019.03098 (PMC6985150; doi:10.3389/fmicb.2019.03098)
Supplement: DATA S2 — ST302 SNP analysis. [file Data_Sheet_2.ZIP › SNP_Analysis/ST302_SNP/SNP_analysis/snippyout/ST302/EA2455-Poultry-ST302.out/snps.csv]

CHROM	POS	TYPE	REF	ALT	EVIDENCE	FTYPE	STRAND	NT_POS	AA_POS	EFFECT	LOCUS_TAG	GENE	PRODUCT
EA2454	572900	snp	G	A	A:12 G:0
EA2454	606088	ins	G	GA	GA:65 G:0
EA2454	690611	snp	T	C	C:48 T:0
EA2454	731329	snp	G	A	A:91 G:0
EA2454	951585	snp	G	A	A:13 G:0
EA2454	1026843	snp	T	C	C:44 T:0
EA2454	1120746	snp	C	A	A:45 C:4
EA2454	1799132	snp	G	A	A:69 G:0
EA2454	1970914	snp	A	T	T:12 A:0
EA2454	1970924	complex	CAA	ATC	ATC:14 CAA:0
EA2454	1970935	snp	C	A	A:18 C:0
EA2454	2644202	snp	T	G	G:67 T:1
EA2454	2672475	ins	G	GCAAGACAT	GCAAGACAT:19 G:0
EA2454	2941498	snp	G	A	A:48 G:0
EA2454	2963100	snp	G	A	A:51 G:0
EA2454	3281767	ins	G	GC	GC:71 G:0
EA2454	3554302	snp	G	T	T:17 G:0
EA2454	3662284	snp	A	G	G:60 A:0
EA2454	3905020	snp	A	C	C:16 A:0
EA2454	4465659	del	TG	T	T:19 TG:0
EA2454	4859892	del	GT	G	G:114 GT:1
EA2454	4960645	snp	G	A	A:113 G:8
EA2454	4968314	snp	C	T	T:59 C:0
EA2454	5196683	snp	T	C	C:17 T:2
EA2454	5223981	ins	A	ATCTCCTTG	ATCTCCTTG:27 A:0
EA2454	5275612	complex	CTA	GTT	GTT:20 CTA:0
EA2454	5284659	complex	AACT	CGCA	CGCA:62 AACT:5
EA2454	5284677	complex	CCCTC	GTCTG	GTCTG:52 CCCTC:4
EA2454	5284688	snp	G	C	C:61 G:6
EA2454	5284697	snp	T	C	C:65 T:6
EA2454	5284731	complex	GCAGC	ACAGA	ACAGA:44 GCAGC:5
EA2454	5284748	complex	TTCTG	CT	CT:29 TTCTG:3
EA2454	5284759	complex	TCTGAA	GCTGCT	GCTGCT:30 TCTGAA:2
EA2454	5284800	snp	T	C	C:55 T:5
EA2454	5284896	complex	GCGC	ACGT	ACGT:66 GCGC:7
EA2454	5289040	snp	T	C	C:71 T:8
EA2454	5304218	snp	T	G	G:63 T:1
EA2454	5307725	snp	C	T	T:87 C:0
EA2454	5307730	snp	G	T	T:81 G:0
EA2454	5307744	snp	T	G	G:84 T:1
EA2454	5311943	snp	G	T	T:10 G:0
EA2454	5313050	snp	A	C	C:30 A:0
EA2454	5313211	snp	T	A	A:83 T:0
EA2454	5313359	snp	A	C	C:43 A:1
EA2454	5314769	snp	G	T	T:67 G:0
EA2454	5315735	snp	C	G	G:33 C:0
EA2454	5323190	snp	A	C	C:24 A:0
EA2454	5323207	snp	T	G	G:26 T:0
EA2454	5323221	snp	A	T	T:28 A:0
EA2454	5323231	snp	T	G	G:36 T:0
EA2454	5323236	complex	CGGA	GGGC	GGGC:34 CGGA:0
EA2454	5323249	complex	CAGA	GCGT	GCGT:32 CAGA:0
EA2454	5323260	snp	T	G	G:42 T:0
EA2454	5323286	snp	T	G	G:49 T:0
EA2454	5323406	snp	A	C	C:62 A:0
EA2454	5327411	snp	T	A	A:106 T:0
EA2454	5327419	snp	T	A	A:100 T:0
EA2454	5327442	complex	TGGT	GGGG	GGGG:76 TGGT:0
EA2454	5327462	snp	T	A	A:84 T:1
EA2454	5327484	snp	T	A	A:72 T:0
EA2454	5327539	snp	T	A	A:72 T:1
EA2454	5327918	snp	T	A	A:65 T:0
EA2454	5327973	snp	A	T	T:28 A:0
EA2454	5327986	snp	T	G	G:19 T:0
EA2454	5328099	snp	C	A	A:45 C:0
EA2454	5328113	snp	C	A	A:49 C:0
EA2454	5328120	complex	CCC	ACT	ACT:49 CCC:0
EA2454	5328165	snp	G	T	T:48 G:0
EA2454	5328197	snp	C	A	A:52 C:0
EA2454	5328208	snp	G	T	T:62 G:0
EA2454	5329596	snp	C	A	A:14 C:1
EA2454	5329635	complex	CG	AT	AT:18 CG:0
EA2454	5329648	snp	T	G	G:20 T:0
EA2454	5329842	complex	GGA	TGT	TGT:29 GGA:0
EA2454	5329856	complex	GGGCTT	TGGCAG	TGGCAG:26 GGGCTT:0
EA2454	5329868	snp	G	C	C:29 G:0
EA2454	5329877	snp	G	C	C:27 G:0
EA2454	5330066	snp	T	G	G:34 T:1
EA2454	5339167	complex	A	GTT	GTT:10 A:0
EA2454	5339172	complex	CAAGT	AAG	AAG:10 CAAGT:0
EA2454	5339184	complex	AT	TG	TG:10 AT:0
EA2454	5339325	snp	C	T	T:32 C:0
