# Supplementary material for: Escherichia coli ST302: Genomic Analysis of Virulence Potential and Antimicrobial Resistance Mediated by Mobile Genetic Elements
Source: Front Microbiol. 2020 Jan 21;10:3098. doi: 10.3389/fmicb.2019.03098 (PMC6985150; doi:10.3389/fmicb.2019.03098)
Supplement: DATA S2 — ST302 SNP analysis. [file Data_Sheet_2.ZIP › SNP_Analysis/ST302_SNP/SNP_analysis/snippyout/ST302/EA2455-Poultry-ST302.out/snps.gff]

##gff-version 3
EA2454	snippy:4.3.6	variation	572900	572900	.	.	0	note=snp G=>A A:12 G:0
EA2454	snippy:4.3.6	variation	606088	606088	.	.	0	note=ins G=>GA GA:65 G:0
EA2454	snippy:4.3.6	variation	690611	690611	.	.	0	note=snp T=>C C:48 T:0
EA2454	snippy:4.3.6	variation	731329	731329	.	.	0	note=snp G=>A A:91 G:0
EA2454	snippy:4.3.6	variation	951585	951585	.	.	0	note=snp G=>A A:13 G:0
EA2454	snippy:4.3.6	variation	1026843	1026843	.	.	0	note=snp T=>C C:44 T:0
EA2454	snippy:4.3.6	variation	1120746	1120746	.	.	0	note=snp C=>A A:45 C:4
EA2454	snippy:4.3.6	variation	1799132	1799132	.	.	0	note=snp G=>A A:69 G:0
EA2454	snippy:4.3.6	variation	1970914	1970914	.	.	0	note=snp A=>T T:12 A:0
EA2454	snippy:4.3.6	variation	1970924	1970924	.	.	0	note=complex CAA=>ATC ATC:14 CAA:0
EA2454	snippy:4.3.6	variation	1970935	1970935	.	.	0	note=snp C=>A A:18 C:0
EA2454	snippy:4.3.6	variation	2644202	2644202	.	.	0	note=snp T=>G G:67 T:1
EA2454	snippy:4.3.6	variation	2672475	2672475	.	.	0	note=ins G=>GCAAGACAT GCAAGACAT:19 G:0
EA2454	snippy:4.3.6	variation	2941498	2941498	.	.	0	note=snp G=>A A:48 G:0
EA2454	snippy:4.3.6	variation	2963100	2963100	.	.	0	note=snp G=>A A:51 G:0
EA2454	snippy:4.3.6	variation	3281767	3281767	.	.	0	note=ins G=>GC GC:71 G:0
EA2454	snippy:4.3.6	variation	3554302	3554302	.	.	0	note=snp G=>T T:17 G:0
EA2454	snippy:4.3.6	variation	3662284	3662284	.	.	0	note=snp A=>G G:60 A:0
EA2454	snippy:4.3.6	variation	3905020	3905020	.	.	0	note=snp A=>C C:16 A:0
EA2454	snippy:4.3.6	variation	4465659	4465659	.	.	0	note=del TG=>T T:19 TG:0
EA2454	snippy:4.3.6	variation	4859892	4859892	.	.	0	note=del GT=>G G:114 GT:1
EA2454	snippy:4.3.6	variation	4960645	4960645	.	.	0	note=snp G=>A A:113 G:8
EA2454	snippy:4.3.6	variation	4968314	4968314	.	.	0	note=snp C=>T T:59 C:0
EA2454	snippy:4.3.6	variation	5196683	5196683	.	.	0	note=snp T=>C C:17 T:2
EA2454	snippy:4.3.6	variation	5223981	5223981	.	.	0	note=ins A=>ATCTCCTTG ATCTCCTTG:27 A:0
EA2454	snippy:4.3.6	variation	5275612	5275612	.	.	0	note=complex CTA=>GTT GTT:20 CTA:0
EA2454	snippy:4.3.6	variation	5284659	5284659	.	.	0	note=complex AACT=>CGCA CGCA:62 AACT:5
EA2454	snippy:4.3.6	variation	5284677	5284677	.	.	0	note=complex CCCTC=>GTCTG GTCTG:52 CCCTC:4
EA2454	snippy:4.3.6	variation	5284688	5284688	.	.	0	note=snp G=>C C:61 G:6
EA2454	snippy:4.3.6	variation	5284697	5284697	.	.	0	note=snp T=>C C:65 T:6
EA2454	snippy:4.3.6	variation	5284731	5284731	.	.	0	note=complex GCAGC=>ACAGA ACAGA:44 GCAGC:5
EA2454	snippy:4.3.6	variation	5284748	5284748	.	.	0	note=complex TTCTG=>CT CT:29 TTCTG:3
EA2454	snippy:4.3.6	variation	5284759	5284759	.	.	0	note=complex TCTGAA=>GCTGCT GCTGCT:30 TCTGAA:2
EA2454	snippy:4.3.6	variation	5284800	5284800	.	.	0	note=snp T=>C C:55 T:5
EA2454	snippy:4.3.6	variation	5284896	5284896	.	.	0	note=complex GCGC=>ACGT ACGT:66 GCGC:7
EA2454	snippy:4.3.6	variation	5289040	5289040	.	.	0	note=snp T=>C C:71 T:8
EA2454	snippy:4.3.6	variation	5304218	5304218	.	.	0	note=snp T=>G G:63 T:1
EA2454	snippy:4.3.6	variation	5307725	5307725	.	.	0	note=snp C=>T T:87 C:0
EA2454	snippy:4.3.6	variation	5307730	5307730	.	.	0	note=snp G=>T T:81 G:0
EA2454	snippy:4.3.6	variation	5307744	5307744	.	.	0	note=snp T=>G G:84 T:1
EA2454	snippy:4.3.6	variation	5311943	5311943	.	.	0	note=snp G=>T T:10 G:0
EA2454	snippy:4.3.6	variation	5313050	5313050	.	.	0	note=snp A=>C C:30 A:0
EA2454	snippy:4.3.6	variation	5313211	5313211	.	.	0	note=snp T=>A A:83 T:0
EA2454	snippy:4.3.6	variation	5313359	5313359	.	.	0	note=snp A=>C C:43 A:1
EA2454	snippy:4.3.6	variation	5314769	5314769	.	.	0	note=snp G=>T T:67 G:0
EA2454	snippy:4.3.6	variation	5315735	5315735	.	.	0	note=snp C=>G G:33 C:0
EA2454	snippy:4.3.6	variation	5323190	5323190	.	.	0	note=snp A=>C C:24 A:0
EA2454	snippy:4.3.6	variation	5323207	5323207	.	.	0	note=snp T=>G G:26 T:0
EA2454	snippy:4.3.6	variation	5323221	5323221	.	.	0	note=snp A=>T T:28 A:0
EA2454	snippy:4.3.6	variation	5323231	5323231	.	.	0	note=snp T=>G G:36 T:0
EA2454	snippy:4.3.6	variation	5323236	5323236	.	.	0	note=complex CGGA=>GGGC GGGC:34 CGGA:0
EA2454	snippy:4.3.6	variation	5323249	5323249	.	.	0	note=complex CAGA=>GCGT GCGT:32 CAGA:0
EA2454	snippy:4.3.6	variation	5323260	5323260	.	.	0	note=snp T=>G G:42 T:0
EA2454	snippy:4.3.6	variation	5323286	5323286	.	.	0	note=snp T=>G G:49 T:0
EA2454	snippy:4.3.6	variation	5323406	5323406	.	.	0	note=snp A=>C C:62 A:0
EA2454	snippy:4.3.6	variation	5327411	5327411	.	.	0	note=snp T=>A A:106 T:0
EA2454	snippy:4.3.6	variation	5327419	5327419	.	.	0	note=snp T=>A A:100 T:0
EA2454	snippy:4.3.6	variation	5327442	5327442	.	.	0	note=complex TGGT=>GGGG GGGG:76 TGGT:0
EA2454	snippy:4.3.6	variation	5327462	5327462	.	.	0	note=snp T=>A A:84 T:1
EA2454	snippy:4.3.6	variation	5327484	5327484	.	.	0	note=snp T=>A A:72 T:0
EA2454	snippy:4.3.6	variation	5327539	5327539	.	.	0	note=snp T=>A A:72 T:1
EA2454	snippy:4.3.6	variation	5327918	5327918	.	.	0	note=snp T=>A A:65 T:0
EA2454	snippy:4.3.6	variation	5327973	5327973	.	.	0	note=snp A=>T T:28 A:0
EA2454	snippy:4.3.6	variation	5327986	5327986	.	.	0	note=snp T=>G G:19 T:0
EA2454	snippy:4.3.6	variation	5328099	5328099	.	.	0	note=snp C=>A A:45 C:0
EA2454	snippy:4.3.6	variation	5328113	5328113	.	.	0	note=snp C=>A A:49 C:0
EA2454	snippy:4.3.6	variation	5328120	5328120	.	.	0	note=complex CCC=>ACT ACT:49 CCC:0
EA2454	snippy:4.3.6	variation	5328165	5328165	.	.	0	note=snp G=>T T:48 G:0
EA2454	snippy:4.3.6	variation	5328197	5328197	.	.	0	note=snp C=>A A:52 C:0
EA2454	snippy:4.3.6	variation	5328208	5328208	.	.	0	note=snp G=>T T:62 G:0
EA2454	snippy:4.3.6	variation	5329596	5329596	.	.	0	note=snp C=>A A:14 C:1
EA2454	snippy:4.3.6	variation	5329635	5329635	.	.	0	note=complex CG=>AT AT:18 CG:0
EA2454	snippy:4.3.6	variation	5329648	5329648	.	.	0	note=snp T=>G G:20 T:0
EA2454	snippy:4.3.6	variation	5329842	5329842	.	.	0	note=complex GGA=>TGT TGT:29 GGA:0
EA2454	snippy:4.3.6	variation	5329856	5329856	.	.	0	note=complex GGGCTT=>TGGCAG TGGCAG:26 GGGCTT:0
EA2454	snippy:4.3.6	variation	5329868	5329868	.	.	0	note=snp G=>C C:29 G:0
EA2454	snippy:4.3.6	variation	5329877	5329877	.	.	0	note=snp G=>C C:27 G:0
EA2454	snippy:4.3.6	variation	5330066	5330066	.	.	0	note=snp T=>G G:34 T:1
EA2454	snippy:4.3.6	variation	5339167	5339167	.	.	0	note=complex A=>GTT GTT:10 A:0
EA2454	snippy:4.3.6	variation	5339172	5339172	.	.	0	note=complex CAAGT=>AAG AAG:10 CAAGT:0
EA2454	snippy:4.3.6	variation	5339184	5339184	.	.	0	note=complex AT=>TG TG:10 AT:0
EA2454	snippy:4.3.6	variation	5339325	5339325	.	.	0	note=snp C=>T T:32 C:0
