# Supplementary material for: Escherichia coli ST302: Genomic Analysis of Virulence Potential and Antimicrobial Resistance Mediated by Mobile Genetic Elements
Source: Front Microbiol. 2020 Jan 21;10:3098. doi: 10.3389/fmicb.2019.03098 (PMC6985150; doi:10.3389/fmicb.2019.03098)
Supplement: DATA S2 — ST302 SNP analysis. [file Data_Sheet_2.ZIP › SNP_Analysis/ST302_SNP/SNP_analysis/snippyout/ST302/EA8393-Porcine-ST302.out/snps.consensus.fa]

>EA2454
ACTTAGGATAGCCAACCATCAGATGCTGCATTTGCATAGTGCAATCTCCCCTTACTTATC
CGGAGGCAATTGCAATATCTCTGTGAACTTACACAGGGGGAGCTTTTACCTGAAATACGC
CACGGAGGCGGGTATGAAACTGGCAGTCGTCACTGGACAAATTGTTTGTACCGTACGCCA
TCACGGACTGGCGCATGACAAATTGCTGATGGTGGAAATGATTGATCCACAAGGTAATCC
TGACGGGCAATGCGCCGTCGCCATCGACAATATTGGCGCGGGAACCGGGGAGTGGGTGTT
ACTGGTGAGTGGCAGTTCCGCCCGCCAGGCGCATAAAAGCGAAACGTCACCGGTCGATCT
GTGCGTGATTGGCATTGTCGATGAGGTGGTGTCTGGCGGTCAGGTAATTTTCCACAAATA
AGGCAGAACATCATGAATCAACAGGATATTGAACAGGTGGTGAAAGCGGTACTGCTGAAA
ATGCAAAGCAGTGACACGCCGCCCGCCGCCGTTCATGAGATGGGCGTTTTCGCGTCCCTG
GATGACGCCGTTGCGGCAGCCAAAGTCGCCCAGCAAGGGTTAAAGAGCGTGGCAATGCGC
CAGTTAGCCATTGCTGTCATTCGTGAAGCAGGCGAAAAACACGCCAGAGATTTAGCGGAA
CTTGCCGTCAGTGAAACCGGCATGGGGCGCGTTGAAGATAAATTTGCAAAAAACGTCGCT
CAGGCGCGCGGCACACCAGGCGTTGAGTACCTCTCTCCGCAAGTGCTGACTGGCGACAAC
GGCCTGACCCTAATTGAAAACGCACCCTGGGGCGTGGTGGCTTCGGTGACGCCGTCCACT
AACCCGGCGGCAACCGTAATTAACAACGCCATCAGCCTGATTGCCGCGGGCAACAGCGTC
ATTTTTGCCCCGCATCCGGCGGCGAAAAAAGTCTCCCAGCGGGCGATTACGCTGCTCAAC
CAGGCGATTGTTGCCGCAGGTGGGCCGGAAAACTTACTGGTTACTGTGGCAAATCCGGAT
ATCGAAACCGCGCAACGCTTGTTCAAGTTTCCGGGCATCGGCCTGCTGGTGGTGACCGGC
GGCGAAGCGGTAGTAGAAGCGGCGCGTAAACACACCAATAAACGTCTGATTGCCGCAGGC
GCTGGCAACCCGCCGGTAGTGGTGGATGAAACCGCTGACCTCGCCCGTGCTGCTCAGTCC
ATCGTTAAAGGCGCGTCTTTCGATAACAACATCATTTGTGCCGACGAAAAGGTACTGATT
GTTGTTGATAGCGTAGCCGATGAACTGATGCGTCTGATGGAAGGCCAGCACGCGGTGAAA
CTGACCGCAGAGCAGGCGCAGCAATTGCAACCGGTGTTGCTGAAAAATATCGACGAGCGC
GGAAAAGGTACCGTCAGCCGTGACTGGGTAGGTCGCGATGCAGGCAAAATCGCGGCGGCA
ATCGGCCTTAAAGTTCCGGAACAAACGCGATTGCTGTTTGTAGAAACCACCGCAGAACAT
CCGTTTGCCGTGACTGAACTGATGATGCCGGTGTTGCCCGTCGTGCGCGTCGCCAACGTG
GCGGATGCCATTGCGCTGGCGGTGAAACTGGAAGGCGGTTGCCACCACACGGCGGCAATG
CACTCGCGCAATATCGAGAACATGAACCAGATGGCGAATGCCATTGATACCAGCATTTTC
GTTAAGAACGGACCGTGCATTGCCGGGCTGGGGCTGGGCGGGGAAGGCTGGACCACCATG
ACCATCACCACGCCAACCGGTGAAGGGGTAACCAGCGCGCGTACGTTTGTCCGTCTGCGT
CGCTGTGTATTAGTCGATGCGTTTCGCATTGTTTAAGGAGTAACAGATGGCGCACGACGA
ACAATGGCTCACCCCACGTCTGCAAACGGCGGCAACGCTGTGTAACCAGACGCCCGCCGC
GACGGAATCTCCGCTGTGGCTGGGGGTGGATCTGGGCACCTGCGATGTGGTGTCGATGGT
TGTCGACCGCGACGGTCAGCCGGTGGCGGTATGCCTCGACTGGGCCGATGTGGTCCGCGA
CGGCATCGTCTGGGATTTCTTCGGCGCGGTCACCATTGTTCGTCGCCATCTCGACACGCT
CGAGCAGCAATTCGGTCGTCGTTTTAGCCATGCGGCGACTTCATTTCCTCCAGGTACGGA
CCCGCGTATTTCCATCAACGTGCTGGAGTCTGCCGGGCTGGAAGTGAGCCATGTGCTGGA
TGAGCCAACCGCAGTCGCGGATCTACTGCAACTGGATAACGCAGGCGTAGTGGATATCGG
CGGTGGCACTACCGGCATTGCCATCGTGAAAAAGGGCAAAGTGACGTACTCGGCGGATGA
AGCCACCGGCGGACATCACATCTCTCTGACTCTCGCCGGAAATCGCCGTATTTCGCTGGA
AGAGGCGGAGCAGTACAAGCGCGGTCACGGTGAAGAGATTTGGCCTGCGGTGAAACCGGT
GTACGAAAAAATGGCGGACATTGTCGCCCGGCATATTGAAGGGCAGGGCATTACTGATTT
ATGGCTGGCGGGCGGCTCTTGTATGCAACCGGGCGTGGCGGAACTGTTTCGCAAACAATT
CCCGGCGTTACAGGTGCATTTACCGCAGCACAGTTTGTTTATGACCCCGCTGGCAATCGC
CAGTAGTGGGCGAGAGAAAGCGGAGGGGCTATATGCAAAATGAATTGCAGACCGCGCTCT
TTCAGGCGTTCGATACCCTGAATCTGCAACGGGTAAAAACATTTAGCGTTCCACCGGTGA
CGCTTTGCGGTCCGGGCTCGGTGAGCAGTTGCGGACAGCAAGCGCAAACGCGTGGGCTGA
AACATCTGTTCGTGATGGCAGACAGCTTTTTGCATCAGGCAGGGATGACCGCCGGGCTGA
CGCGTAGCCTGGCCGTTAAAGGTATCGCCATGACGCTCTGGCCATGTCCGGTGGGCGAAC
CGTGCATTACCGACGTGTGTGCAGCCGTGGCGCAGTTGCGTGAGTCAGGTTGTGACGGGG
TGATCGCATTTGGCGGCGGCTCGGTGCTGGATGCGGCGAAAGCCGTGGCGTTGCTGGTGA
CGAACCCGGATAGCACGCTGGCAGAGATGTCAGAAACCAGCGTTCTGCAACCGCGCTTGC
CGCTGATTGCCATTCCAACTACCGCCGGAACCGGCTCTGAAACCACCAATGTAACGGTGA
TTATCGACGCGGTGAGCGGGCGCAAGCAGGTGTTAGCCCATGCCTCGCTGATGCCGGATG
TGGCGATCCTCGACGCCGCATTGACCGAAGGTGTGCCGTCGCATGTCACGGCGATGACCG
GCATTGATGCGTTAACCCATGCCATTGAAGCATACAGCGCCCTGAACGCTACACCGTTTA
CCGACAGTCTGGCGATTGGTGCCATTGCGATGATTGGCAAATCGCTGCCGAAAGCGGTGG
GCTACGGTCACGACCTTGCCGCGCGCGAGAGCATGTTGCTGGCTTCATGTATGGCGGGAA
TGGCGTTTTCCAGTGCGGGTCTTGGGTTGTGCCACGCGATGGCGCATCAGCCGGGCGCGG
CGCTGCATATTCCGCACGGTCTGGCGAACGCTATGTTGCTGCCAACGGTGATGGAGTTTA
ACCGGATGGTATGTCGCGAACGCTTTAGTCAGATTGGTCGGGCACTGCGAACTAAAAAAT
CCGACGATCGTGACGCTATTAACGCGGTAAGTGAGCTGATTGCGGAAGTTGGGATTGGTA
AACGACTGGGCGATGTTGGCGCGACATCTGCGCATTACGGTGCATGGGCGCAGGCCGCGC
AGGAAGATATTTGTCTGCGCAGCAACCCGCGTACCGCCAGCCTGGAACAGATTGTCGGCC
TGTACGCGGCGGCGCAATAAATGCCGCGTCTTATCCGGTCTGTGGGATTGCACATGTAGT
GCGGATAAGGCTTCACGCAGCATCCGCTAATAAATAACAACTAACAGGGAGTAAAGGCGA
TGGGAATTAACGAAATCATCATGTACATCATGATGTTCTTTATGCTGATAGCTGCCGTAG
ACAGGATCCTGTCACAGTTCGGCGGTTCTGCTCGTTTCCTCGGTAAGTTCGGTAAAAGTA
TCGAAGGATCAGGCGGTCAGTTCGAAGAAGGCTTTATGGCAATGGGCGCTCTGGGTCTGG
CGATGGTCGGTATGACCGCGCTGGCACCGGTACTGGCTCACGTACTCGGGCCGGTAATTA
TCCCGGTTTACGAAATGCTCGGCGCAAACCCGTCAATGTTCGCCGGAACGCTGCTGGCGT
GCGATATGGGCGGCTTCTTCCTCGCCAAAGAGCTGGCGGGCGGCGACGTAGCAGCGTGGC
TATACTCTGGGTTAATTCTCGGGTCGATGATGGGGCCAACGATTGTGTTTTCCATTCCGG
TGGCGCTCGGCATTATCGAACCTTCTGACCGTCGTTATCTGGCGCTCGGCGTGCTGGCGG
GCATTGTGACCATTCCGATTGGTTGTATCGCTGGTGGTCTGGTAGCTATGTACTCCGGTG
TTCAGATCAACGGCCAGCCGGTGGAATTCACTTTCGCCCTGATCCTGATGAACATGATCC
CGGTGATCATTGTTGCGATTCTGGTGGCGCTGGGGCTGAAATTCATCCCGGAAAAAATGA
TCAACGGCTTCCAGATCTTCGCCAAATTCCTCGTTGCATTGATCACCCTCGGTCTTGCCG
CTGCGGTAGTGAAATTCCTGCTTGGCTGGGAACTGATCCCCGGTCTGGATCCTATCTTTA
TGGCCCCTGGCGATAAACCCGGTGAGGTGATGCGCGCCATTGAAGTTATCGGTTCTATCT
CCTGCGTTCTGTTAGGGGCGTATCCAATGGTGCTGCTGCTGACCCGCTGGTTTGAAAAAC
CGCTGATGAGCGTCGGTAAAGTGCTGAATATGAACAACATCGCGGCAGCCGGCATGGTGG
CAACGCTTGCCAACAACATCCCGATGTTCGGCATGATGAAGCAGATGGATACCCGCGGCA
AAGTCATCAACTGCGCCTTCGCCGTTTCCGCTGCTTTCGCCCTGGGCGACCACTTAGGCT
TCGCCGCTGCCAACATGAATGCCATGATCTTCCCGATGATTGTCGGCAAGTTGATCGGCG
GCGTAACGGCGATTGGCGTGGCGATGATGCTGGTGCCAAAAGACGACGCGACCGCGGCTA
AAACCGAAGCGGAGGCACAATCGTGAACACTCGCCAGCTACTGAGCGTCGGTATCGATAT
CGGCACCACCACCACCCAGGTGATTTTCTCCCACCTGGAACTGGTTAACCGTGCGGCGGT
GTCGCAGGTGCCGCGCTACGAATTCATCAAACGCGAAATTAGCTGGCAAAGCCCGGTGTT
CTTTACCCCTGTCGATAAACAGGGTGGTTTAAAAGAAGCGGAACTGAAATCGCTGATTTT
AGAGCAATATCAGGCTGCGGGCATTGCGCCGGAAAGCGTTGATTCTGGTGCCATCATCAT
CACCGGTGAAAGCGCGAAAACCCGCAATGCTCGCCCGGCGGTGATGGCGCTCTCTCAGTC
GCTGGGCGATTTTGTCGTCGCCAGCGCCGGGCCGCACCTCGAATCCGTGATCGCCGGTCA
CGGTGCCGGGGCGCAAACCCTTTCTGAACAACGGCTGTGTCGGGTACTGAATATCGACAT
CGGCGGTGGCACCGCGAACTACGCCCTGTTCGATGCCGGAAAAATCAGCGGCACTGCCTG
CCTCAACGTCGGTGGTCGCCTGCTGGAAACCGACAGCCAGGGGCGCGTGGTTTACGCTCA
TAAACCGGGGCAGATGATTGTGGATGAGTGCTTCGGCGCAGGCACCGACGCCCGTTCGCT
GACCGGCGCGCAGCTGGTGCAGGTTACCCGGCGGATGGCAGAGCTGATTGTCGAAGTGAT
TGACGGAACGCTTTCGCCGCTCGCGCAGGCATTAATGCAAACCGGTTTGCTGCCCGCAGG
TGTTACGCCCGAAATCATTACGCTTTCTGGCGGCGTGGGCGAATGTTATCGCCACCAGCC
CGCCGACCCGTTCTGTTTTGCCGATATTGGCCCGCTTCTGGCAACGGCGCTGCATGACCA
TCCGCGCCTGCGTGAGATGAACGTGCAGTTTCCGGCGCAAACCGTACGCGCCACGGTGAT
TGGCGCGGGTGCACATACCCTTTCGCTCTCTGGCAGCACAATCTGGCTGGAGGGCGTACA
ACTGCCGCTGCGCAATTTGCCGGTGGCGATCCCGATTGATGAAACGGATCTGGTGAGTGC
CTGGCAACAGGCGCTGATTCAGCTGGATCTTGATCCCAAAACTGACGCGTACGTGCTGGC
GCTTCCCGCCTCGCTGCCTGTGCGTTACGCCGCGGTACTGACGGTCATCAACGCGTTGGT
CGATTTCGTCGCGCGTTTTCCGAATCCGCATCCCCTGCTGGTGGTGGCCGGGCAGGACTT
TGGTAAAGCTCTGGGCATGTTGTTGCGCCCACAGCTACAACAACTCCCGTTGGCAGTCAT
TGACGAAGTGATTGTCCGCGCGGGGGACTATATCGACATTGGTACGCCTCTTTTTGGCGG
ATCGGTTGTGCCGGTGACGGTGAAATCACTCGCATTTCCTTCCTGAGGGAACGACTTATG
AAACTAAAGACCACATTGTTCGGCAATGTATATCAGTTTAAGGATGTAAAAGAGGTGCTG
GCTAAAGCCAACGAACTGCGTTCGGGGGATGTGCTGGCGGGCGTTGCAGCGGCAAGCTCA
CAGGAGCGCGTGGCAGCAAAGCAGGTGTTGTCGGAAATGACCGTAGCGGACATCCGCAAT
AATCCGGTGATTGCCTATGAAGATGACTGCGTGACGCGGCTGATTCAGGACGATGTTAAC
GAAACGGCCTACAACCAGATTAAAAACTGGAGCATCAGCGAACTGCGTGAGTATGTGCTG
AGCGATGAAACCAGCGTGGACGACATTGCCTTTACCCGCAAAGGGCTGACCTCGGAAGTG
GTCGCGGCGGTAGCGAAGATTTGCTCCAACGCGGACCTGATCTACGGCGCGAAGAAAATG
CCGGTAATCAAAAAGGCCAATACCACCATCGGTATTCCGGGCACCTTTAGCGCCCGTTTG
CAGCCAAATGACACCCGTGACGACGTGCAAAGTATCGCCGCGCAAATCTACGAAGGGCTT
TCCTTCGGGGTGGGCGATGCGGTGATCGGCGTCAACCCGGTAACTGACGACGTGGAAAAC
TTAAGCCGCGTGCTGGACACCATCTATGGCGTGATCGACAAATTCAACATCCCAACTCAG
GGCTGCGTACTGGCGCACGTCACCACCCAGATCGAAGCGATTCGTCGTGGCGCACCAGGC
GGGCTGATTTTCCAGAGTATCTGTGGCAGTGAAAAAGGGCTGAAAGAGTTTGGCGTGGAA
CTGGCGATGCTCGACGAAGCGCGCGCAGTGGGTGCAGAGTTCAACCGTATCGCCGGGGAA
AACTGCCTCTACTTCGAAACCGGGCAAGGTTCGGCGCTGTCGGCGGGTGCCAACTACGGC
GCAGACCAGGTGACCATGGAAGCGCGTAACTACGGGCTGGCGCGTCATTACGATCCGTTT
ATCGTCAACACCGTGGTCGGCTTTATTGGGCCGGAGTATCTCTACAATGACCGCCAGATT
ATTCGTGCGGGCTTAGAAGATCACTTTATGGGCAAGCTGAGCGGCATCTCTATGGGCTGT
GACTGCTGTTACACCAACCACGCTGACGCTGACCAGAACCTCAACGAAAACCTGATGATC
CTGCTCGCCACCGCAGGCTGCAACTACATCATGGGGATGCCGCTGGGTGATGACATCATG
CTCAATTACCAGACCACCGCATTCCACGATACCGCCACTGTGCGTCAGTTACTCAACCTG
CGCCCGTCACCGGAGTTTGAACGCTGGCTGGAAAGCATGGGCATTATGGCAAACGGTCGC
CTGACCAAACGGGCGGGCGATCCGTCACTGTTCTTCTGATGACGCGGAGATAACACATCA
TGGATCAAAAACAGATTGAAGAAATTGTACGCAGCGTGATGGCGTCAATGGGACAAACGG
CCCCCGCGCCGTCAGAAGCAAAGTGCGCCACTACCACCTGTGCGGCACCGGTGACCTCGG
AAAGCTGTGCGCTGGATTTAGGTTCCGCTGAAGCAAAAGCGTGGATTGGTGTTGAAAACC
CGCATCGCGCAGACGTATTAACAGAACTGCGCCGCAGCACCGTGGCCCGCGTTTGTACCG
GTCGTGCCGGTCCGCGTCCGCGTACCCAGGCGCTGCTGCGTTTCCTGGCCGATCACTCTC
GTTCGAAAGATACCGTACTGAAAGAAGTGCCGGAAGAGTGGGTGAAAGCGCAGGGCTTGC
TGGAAGTACGCTCCGAAATTAGCGACAAAAATCTCTACCTGACTCGCCCGGATATGGGCC
GCCGCCTGTGTGCAGAAGCTGTTGAAGCGCTGAAAGCACAGTGTGTTGCTAATCCGGACG
TACAGGTCGTTATTTCTGATGGCCTGTCAACTGATGCGATCACCGTGAACTACGAAGAGA
TCCTGCCACCGCTGATGGCGGGCCTGAAACAGGCCGGGCTGAAAGTCGGTACACCATTCT
TTGTTCGTTATGGTCGCGTGAAGATTGAAGATCAGATCGGTGAGATCCTCGGCGCGAAAG
TAGTGATCCTGCTGGTGGGCGAACGTCCGGGGTTGGGTCAGTCAGAAAGCCTCTCCTGCT
ACGCCGTTTACTCGCCGCGTATGGCGACCACCGTTGAGGCCGATCGCACCTGTATCTCTA
ACATTCACCAGGGCGGCACGCCGCCGGTTGAAGCCGCAGCCGTCATTGTGGATTTGGCGA
AACGTATGCTGGAGCAGAAAGCATCCGGCATCAACATGACCCGATAAGGAGGCATCATGC
CAGCTTTAGATTTGATTCGACCGTCGGTAACCGCCATGCGGGTGATTGCCTCCGTTAACG
CCGAATTTGCGCGTGAACTGAAATTGCCGCCGCATATTCGTAGCCTCGGGCTGATTTCTG
CTGATTCCGATGACGTCACCTACATTGCCGCTGATGAAGCAACCAAACAGGCGATGGTCG
AAGTGGTGTATGGCCGCTCGCTGTATGCGGGCGCTGCACACGGCCCGTCACCGACTGCCG
GTGAAGTGCTGATTATGCTTGGTGGGCCAAACCCGGCGGAAGTGCGTGCAGGTCTGGATG
CGATGGTTGCGCATATTGAAAATGGCGCTGCTTTCCAGTGGGCTAATGATGCGCAAGATA
CGGCATTCCTGGCACATGTAGTTTCGCGTACCGGTTCTTATCTCTCATCAACCGCCGGGA
TCACGCTTGGCGATCCGATGGCGTATCTGGTGGCACCGCCGCTGGAAGCGACCTACGGCA
TTGATGCAGCGTTGAAATCTGCCGACGTACAGCTGGTGACCTATGTCCCGCCACCGTCTG
AAACTAACTACTCGGCAGCATTTTTAACCGGTAGCCAGGCAGCGTGTAAAGCGGCCTGTA
ACGCCTTTACCGATGCAGTGCTGGAAATCGCGCGTAATCCAATCCAGCGTGCGTAATGGA
GGTTGCCGATGATCAATGCACTGGGATTGCTGGAAGTGGACGGCATGGTCGCTGCGATAG
ATGCAGCGGATGCCATGCTCAAAGCAGCTAACGTTCGTCTGCTCAGTCACGAAGTGCTTG
ACCCTGGTCGCTTAACGCTGGTGGTGGAAGGCGATCTGGCGGCGTGTCGTGCTGCGCTGG
ACGCAGGTTGTGCTGCCGCGATGCGTACCGGGCGTGTCATCAGCCGTAAGGAGATCGGTC
GGCCAGACGATGACACCCAGTGGCTGGTTACTGGCTTTAACCGCCAGCCGAAGCAACCCG
TACAGGAACCCGACGCGCCAGTTATCGTCGCGGAATCTGCTGACGAGTTGTTGGCGCTGT
TAACATCAGTACGTCAGGGAATGACGGCAGGAGAAGTGGCTGCCCACTTTGGCTGGCCGC
TGGAAAAAGCCAGAAATGCGCTCGAACAGCTCTTTTCTGCCGGGACGTTACGTAAACGCA
GTAGTCGTTATCGTCTCAAGCCCCATTAACCTGTCGGAGGTGCCGGGTGTCCTACAACAC
CCGGCATTAACATCATGAAAAAGACCCGTACAGCCAATTTGCACCATCTTTATCATGAAC
CCTTACCCGAAAACCTGAAGCTCACGCCGAAGGTCGAAGTGGATAATGTTCATCAACGAC
AGACAACGGATGTCTATGAACATGCTTTAACGATTACCGCCTGGCAGCAGATTTACGATC
AGCTGCATCCGGGCAAGTTTCATGGTGAATTTACGGAAATTCTACTCGATGATATTCAGG
TTTTTCGTGAATACACCGGTCTGGCGCTGCGTCAGTCGTGTCTGGTCTGGCCGAACTCGT
TCTGGTTTGGCATTCCGGCGACGCGCGGTGAGCAGGGATTTATCGGTTCGCAATGTCTGG
GAAGCGCAGAAATAGCGACGCGCCCTGGTGGAACCGAGTTTGAATTAAGTACGCCGGACG
ATTACACGATCCTGGGCGTAGTGCTTTCTGAAGATGTCATCACCCGTCAGGCTAACTTTT
TGCATAATCCGGATCGGGTATTACATATGTTGCGTAGCCAGTCGGCGCTGGAAGTGAAAG
AGCAGCATAAAGCCGCGCTGTGGGGCTTTGTCCAACAGGCGCTGGCGACGTTTTGCGAGA
ACCCGGAAAATCTTCATCAGCCTGCAGTGCGAAAAGTGCTGGGGGATAATTTGCTAATGG
CGATGGGGGCGATGCTGGAAGAAGCGCAACCAATGGTGACGGCGGAAAGCATCAGTCATC
AGAGTTACCGTAGATTACTTTCCCGCGCCCGTGAATATGTGCTGGAAAACATGTCCGAAC
CGGTGACGGTGCTGGATTTGTGTAATCAACTGCATGTCAGCCGCCGCACGCTACAAAACG
CGTTTCACGCTATTTTAGGCATTGGCCCAAACGCGTGGCTGAAACGCATTCGCCTGAACG
CCGTACGCCGCGAACTGATAAGCCCGTGGTCGCAAAGCACAACGGTAAAAGACGCCGCCA
TGCAGTGGGGATTCTGGCATCTGGGGCAATTTGCCACGGATTACCAGCAGCTGTTTGCCG
AGAAGCCGTCGTTGACGTTGCATCAGCGGATGCGGGAATGGGGGTGAGGGAGTTACACCC
AATCCCTGACCTTAATAAACTCACTTAACGCCGCTTCTGGGCTGCCATCTTTTGGCTGAT
AATCATACTCCCAGCGTACCAGTGGCGGCATTGACATCAGGATCGACTCGGTGCGCCCGC
CAGTTTGCAGGCCAAACAGAGTGCCGCGATCCCAGACCAGATTGAACTCGACATAACGAC
CGCGACGGTAGAGCTGAAAATTGCGCTCGCGCTCGCCGTAGGCCATCGCTTTCCGTCGCT
CTACAATTGGTAAATAAGCGTCGGTGTAGCCTTTGCCTACCGCCTGCATAAAGGCAAAAC
AGTGGTCGAAATCTGGCGTGTTCAGATCATCAAAGAACAGCCCGCCAATACCGCGCTGTT
CGTTGCGATGTTTGAGGTAGAAGTAATCGTCGCACCATTTTTTGTAACGGGGATAAACGT
CTTCACCAAATGGCAGGCACAGGTCACGGGCGGTGCGGTGCCAGTGAATGGCATCTTCTT
CAAAACCATAGAAAGGGGTTAAATCGAAGCCGCCGCCAAACCACCAGACTGGCTCTGCAC
CCGGTTTTTCGGCAATAAAAAAGCGCACATTCGCGTGGCTGGTGGGAACATACGGGTTAT
GCGGATGCACTACCAGTGAAACGCCCATCGCCTCGAAACTGCGCCCGGCAAGTTCCGGGC
GATGAGCGGTGGCGGAAGCAGGCATCGCCTCACCATGGACATGTGAAAAGTTGACGCCCG
CCTGTTCGAAAACACCACCATTACGCAACACCCGGCTACGTCCGCCGCCGCCAGCTTCGC
GCTGCCAGCTATCTTCGACAAATTCTGTGCCATCGACGGCGGTCAGCTGCTGACAAATCG
TATCCTGAAGGTTGAGCAGAAACTGTTTAACCTGGTGTGCGTCGGGTTTCATAACTTATC
GCTTTTTCGAATGTGCTTTCTGGTTGTCGAACCAGTGGAAATAACTGATCACGCCTTCAG
CAATCGCTGTGGCGATTTTCTGACGAAACGCCGCCGTGCCTAACAGTCGCTCTTCTTCTG
GGTTGGTGATAAACGAGGTTTCCACCAGCACCGAAGGAACCGACGGCGATTTCAACACCA
CAAACGCGGCTTGTTCGGTGTTGCGGCTGTGCAGTTTATGCACCGGCTTAATCTTTTTCA
GAATATGCGAGCCGAGCGTCAGGCTGTTTTTAATAGTATCGGTTTGCACCAGATCAAACA
GCACTTGCTGCAATAGGTGATCCTTGTCAGTCGCCTTTTTACCGGCAACTTCATCGGCGC
GGTTTTCGCGTTCAGACAGGTATTTCGCCATTGCGCTACTTGCCCCACGGTTAGAGAGGG
CAAATACCGAAGCACCGGCAGCTTTCGGGTTGGTAAAGCCATCGGCATGAATTGACATAA
ACAGATCTGCGCCATGTTTATGGGCGATTTCAACGCGATCGTAAAGTGGGATAAACGTAT
CGCCAGAACGCGTTAAACGCGCATCAATCCCATGATTACGCAAAATGGAACGGACGTTTT
TAGCAATCGCCAGCACCACATGTTTTTCTTTCGAACCGTTGCGCCCGATCGCTCCGGTAT
CAATTCCGCCGTGGCCTGGATCGAGAACAACGACACGTTTGCCGCCAGATTTTTTGGCTT
TCGGCTTGCTGTGTCCGTTGCTGGTTTTTAAAGGTTCGTCTTTGGCGATGGCTTGCGACA
TTCCTGACAACGTCAGGGCAGCCAAACCGGCTTTCAGCACCTGGCGGCGCGAAGTGAGTG
TTTTTAGTGGTTTAAAAGTGCTCATACGGCCTGAGTTGTAATAATAAAGTTCCAGATGTT
ATATCGTATCGCGTAATCCGTTACGACCGTTTGCTGTTGAGAATTGTTTTACTTTTCATT
TCAATAGTTGACAACTCCCCATTATGCCACTTTTTCAACCGATTTTCGTCAGATATTGGC
TAATTCGACCGTTCACGCCATAATCAGCCTTTTAACCCGCAAAAAGGTAACGAATACCAT
GGAGATACGCGTATTTCGCCAGGAAGATTTCGAAGAGGTCATCACCCTTTGGGAGCGTTG
CGACTTGCTGCGTCCGTGGAACGATCCGGAAATGGACATCGAGCGTAAGATGAACCATGA
CGTCAGTTTGTTTCTGGTCGCTGAGGTGAACGGTGAAGTGGTCGGAACGGTGATGGGCGG
TTATGACGGGCATCGCGGGTCTGCTTATTATCTTGGCGTGCATCCAGAGTTTCGTGGGCG
TGGAATTGCCAATGCGTTGCTTAACCGGCTGGAGAAAAAGCTGATTGCTCGCGGCTGCCC
GAAAATTCAGATCAACGTGCCGGAAGATAACGACATGGTGCTCGGAATGTATGAACGCCT
GGGATATGAACACGCCGACGTGCTGAGTCTGGGTAAGCGTTTGATTGAAGATGAAGAGTA
CTGAGTTTCATCCTGTCCATTATGATGCGCACGGTCGCCTGCGTTTACCCTTGCTCTTCT
GGCTTGTGCTATTGCTTCAGGCGCGAACCTGGGTGCTGTTTGTTATTGCCGGTGCGTCGC
GCGAGCAGGGTACTGCGCTGCTAAATCTGTTTTATCCCGATCACGATAATTTCTGGCTGG
GGCTGATTCCTGGCATTCCGGCGGTGCTGGCGTTTTTGCTGAGTGGTCGGCGGGCTTCGT
TTCCCCGTATCTGGCATGTGCTCTATTTTCTGTTGCTGTTGGCGCAAGTGGTTTTACTTT
GCTGGCAACCGTGGCTGTGGCTGAACGGTGAATCCGTTAGCGGTTTCGGTCTGGCGCTGG
TAGTGGCGGATATTGTGGCATTAATCTGGCTGCTGACCAATCGACGTTTACGCGCTTGTT
TTAATGAAGTAAAAGAATAACGGCACTTTTTGGTGAATTTGCACTCCAAGCAACGTTATT
GAATAACCAAAGGAAGTGACATGAAATCGCTGCGTTTAATGTTATGCGCTATGCCATTGA
TGCTGACCGGCTGTTCCACGATGTCGTCAGTTAACTGGTCTGCCGCTAACCCGTGGAACT
GGTTTGGGTCGTCCACCAAAGTGAGCGAGCAGGGCGTTGGTGAATTAACGGCGTCCACAC
CACTGCAAGAACAAGCCATTGCCGATGCGCTTGATGGCGATTATCGCCTGCGCAGCGGAA
TGAAAACCGCGAACGGCAACGTGGTGCGCTTTTTTGAAGTGATGAAGGGCGACAACGTGG
CGATGGTGATTAACGGCGATCAAGGCACGATCAGTCGCATTGACGTGCTGGATAGCGATA
TTCCTGCTGACACCGGTGTTAAAATCGGTACACCGTTTAGCGACCTTTACAGCAAAGCAT
TTGGCAATTGCCAAAAAGCTGATGGTGATGATAATCGTGCCGTCGAATGTAAAGCCGAAG
GCAGTCAACATATTAGCTACCAGTTCAGCGGGGAATGGAGTGGTCCTGAAGGGTTAATGC
CTTCGGACGATACCCTGAAAAACTGGAAAGTCAGTAAAATTATCTGGCGGCGTTAATTTG
CGTCTGAACAAACCGCCGCCGCGAAAAAACACGTAAAATAGCGCTCAACAATGCCACGGA
TTGCGTGGCATTATTATTTTCAGGAGGAACAATGTCTCAGGTTCAGAGTGGCATTTTGCC
AGAACATTGCCGCGCGGCGATTTGGATCGAAGCCAACGTGAAAGGGGAAGTTGACGCCCT
GCGTGCGGCCAGTAAAACATTTGCCGACAAACTGGCAACTTTTGAAGCGAAATTCCCGGA
CGCGCATCTTGGTGCGGTGGTTGCCTTTGGTAACAACACCTGGCGCGCTCTGAGCGGCGG
CGTTGGGGCAGAAGAGCTGAAAGATTTTCCGGGCTACGGTAAAGGCCTTGCGCCGACCAC
CCAGTTCGATGTGTTGATCCACATTCTTTCTCTGCGTCACGACGTAAACTTCTCTGTCGC
CCAGGCGGCGATGGAAGCCTTTGGTGACTGCATTGAAGTGAAAGAAGAGATCCACGGCTT
CCGTTGGGTGGAAGAGCGTGACCTGAGCGGCTTTGTTGACGGTACAGAAAACCCGGCGGG
TGAAGAGACGCGTCGCGAAGTGGCGGTTATCAAAGACGGCGTGGATGCCGGCGGCAGCTA
TGTGTTTGTGCAGCGTTGGGAGCACAACCTGAAGCAGCTCAACCGGATGAGCGTTCACGA
TCAGGAGATGATGATCGGGCGCACCAAAGAGGCCAACGAAGAGATTGACGGCGACGAACG
TCCGGAAACCTCTCACCTCACCCGCGTTGATCTGAAAGAAGATGGCAAAGGGCTGAAGAT
TGTTCGCCAGAGCCTGCCGTACGGCACCGCCAGTGGCACTCACGGTCTGTACTTCTGCGC
CTACTGCGCGCGTCTGCATAACATTGAGCAGCAACTGCTGAGCATGTTTGGCGATACCGA
TGGTAAGCGTGATGCGATGTTGCGTTTCACCAAACCGGTAACCGGCGGCTATTATTTCGC
ACCGTCGCTGGACAAGTTGATGGCGCTGTAAGCGTTTCTGATTCATTGATTAAAGGCCAG
GCAGTAACATTACTGACTGGCCTTTTTATTACTTTTGCTTTAACGCCGCATACACCTGAT
CAACTACCCAACCATACGTTGCAATCGGCAGCTGACCGCTTTCGAACATATTGGGATTCT
TTTGCGGATCGGCAACCGGCGAATGTGGCTTGTTGCTTAACATCACAATCGCCATATGAT
TCACCGGATCGATAACGGTCACCGTTCCGGTCCAGCCAGTGTGACCGTAGGTTTGCGGGC
TTGCCAGCGTGCCAAACGTCGGCGTCATGGTGGCATTACCATTCACGCGCCAGCCGAGGC
CAAAAGTGGCATCTTCCTTAGAGCTGGTGGTGAACATCTTCACCGTTTCCGCACTGAACA
GCTGCACATCGCCATAGCCCCCGCCGTTCAGCATCGTTTGCATTAACACCGCAATATCGC
CGGTATTGGAAAACAAACCTGCGTGCCCGGAAACGCCGCCCATCGAATAAAAGGCTTTTT
CATCGTGCACCTGACCCCAGAGAGTGGAGGTGCGGATATTCGGGAAGTGGATCACTCCAT
CGCGGGTATTGCCGTTCAATTCCGTGGCGGCAATTTGTTGCGGTTTAAAGCCTTTCAGCA
GCGGGTTAAATACCGTATGTGTCAGGCCGAGCGGGCGATAAATCGACTCTTCAACATAGC
GGTCAAGCGGCTGACCGGTGACCGACTCGACGATAAATCCAAGCAGCATATAATCGACAT
CACTGTAAATATGCTTGCTGCCGGGCTGATACTCTAGCGGCGTGCGCTTGATCATCTCCA
GCGTCTGGCCTTTATCCTGGGAATATAACGCGCCCGCGACCGCTTTATTCGGATATTGTG
GGTCCGCCGGGAAACCGCCGCTGTGATGCAGCAGGTCAGAAATCCGCAGCGTGTTTTTGC
CTTTGATGGTGTCATTTGGACTATCGGCAAACCCCGAAATATATTTCGCAATCCGATCGT
CAGGATGCAGCTTGCCTTCGCTCATTAGCTTTTGCAGAGCAAAGTTAGTGGCGTACATTT
TGGTATTGGAAGCCAGGTCATACAGCGTCCCGGTGGTGGCTTTGACAGGCTGTTCCATCA
ATACGCTGCCATCGTACTTTTTCGCCGCTCCCCAGGCTTTGCGATACACAATCTGATTAT
CTTTTATAATCAGCAGGTTTACGCCGGGATAACCGGCGTCCACTTGCTGGCTAATCCAGC
GATCCATCTGGTTAAGCCGTTCGACGTTGAACCCTGCTTTCTCTGGCGAACTTTCTGTCA
GAACAGGGTATTTTGCGGCGCTGACGCTACAACTGACAGCCAGCAGAGAAAGATAGAGCA
TTGTCCGTTTCATAATATCAGTCCAGATTGACGTTACGGCAGCCAAAGAGCGTGGTGAAA
ATAAACCCGCAAACCCATGCCACCAGAATCCCACCTGCATATACCGCCATGGCCGGAAGG
ATGCCTTGCGCGGATGTCATCAGCGGCAGCGCCACCAGACCAGACGGCCCAAAGGCGCTG
TTTAAGCCCATCGGCAGACCCCACCAGGCTATCAGCCCGATAAACAAACCGCCCGCTGCG
CCGCCTAAACAGGCGGTAATAAACGGTTTCATGCGGGGCAGGGTGACGCCGTAAATCAGC
GGTTCGCCAACGCCCAGCAGACCAGGAATAATCGCCCCGCGTACCTGACTGCGTAATGCA
CTGTGCGGTTGCGCCCGCCAGTAGAGTGCCAGCGCCGCGCCCACCTGGCCCGCGCCTGCC
ATTGAAAGGATGGGAAATAAGCTGTTGAATCCCTGGCTGTCCATTAACGCGAGGTAAACA
GGAATAAAGCCCTGATGCACGCCAAATACCACGGCGATCAGGAACAGCCCGGCTAAAACC
GCACAACCGAGCGGATTACTGTTCAGGTGCATAAACAGCCACGACATACCTTCGAATAAC
CAGCCGCCCAGCGGCATAATGATCAGGTAGGCCAGCGTAGCGGTGATCAGTAGGGTGATT
AACGAGGTCAGCAGCATGTCGAGATCGTCCGGCATAAAGCGGCGCACCATGCCTTCAATG
CGAGCGCAGGCCCATGCGGCAATCAACACGCCGATAATATTGCCGCGCGGATCGATGGGC
AGACCAAAGAAATCGTGAAAACCGGCGTAGTAACCGGTGGTTGCAGCGGGGTTATAACCG
AGCAAAAAGAGTGCGGCAATAATTGCGCCATTGACGCCCGTGCCGCCAAATGCCTGGGCG
GCGTTATAGCCCACCAGAATCACCAGGAAGGTGAACAAACCTTTGCTGAACACCTTCATA
AAATTCAGCGCGTCGGGTAGCGTGCCCTGAGCATCTGCCGGAACGTGCATCACCGTGGCA
AATAACGTCGCTATCCCCAGCAGCAGACCGGCGGCAATAAAACCGGGGATAAGCGGCGTA
AAGATGGTGGCGAATTTAGCGAGAAATTGTTGCACGCCGGAGGTTTGTTTGGCTTTTAAC
TGACGTTTGTTCTGGGCGGCGATTTCTGCGGCATCCTGTACCGGTGCTTCTCCCAGCAGC
TCGCTCATCGCTTTTGCGGCACGATGCGCTTTACCAGGCCCAAAAACGACCTGCACCTGG
TCGCTGGTCAAAATGACGCCCTTCACGCCTTCCAGCGTTTTGATATTGGGATCAACCAGT
GAACTGTCATGTACACCCAGACGCAGGCGCGTCATACAGTTACCACAACTGGCGATATTT
CCCGGTCCGCCGACACGGGTAAGAATGGTGTTCAGAAGTTCACTGCTGATCTCTTTGACC
ATGGGTTATTCCTTGTCTAAAACCTGACGAATAAAGCCGCCGTGTTGATCCAGGCGTTTT
TTAGCTTCTGTGGCATCGAGATTTTTCAGCACCATCACAATGGCCGTTTTACAGTTGCGC
TCGCAGGCAATTAACGCCGCTTCCGCTTGTTCGGCATTACATCCGGTGGCGTTTTTAACG
ATATTGACCTGGCGCACATGCAGTTTTTCGTTGGTGGCGACCACATCGACCATCAGGTTG
CCGAACACTTTGCCGGATTTAATCATCAGCCCGGTGGAGAGCATATTGAGCACCAGTTTC
TGCGCTGTACCTGCTTTCATCCGCGAAGAACCGGTAACCACTTCGGCACCTACAATCGGT
GTAATGGCAAACTCTGCGGTGGTTGAAACGGCGCTCCCCGGATTACAGGAAATTCCCACT
GTGCGGCAGCCGAGCTGGCGTGCGTATTCCAGTCCGGCAATTACATACGGCGTGCGACCA
CTGGCCGCAATACCAACCACCACATCCTGTGCCGTTAAATTAATATTTTTCAGATCGTTA
ACACCACCTTCCCGGCTATCTTCAGCGCCTTCCACCGCGTGCTGAATGGCATATTCGCCT
CCAGCAATCAAACCAACTACCAGACCCGGTTTCACGCCGTAGGTGGGCGGACATTCGCTG
GCATCCAGAATCCCCAGACGACCGGATGTTCCCGCACCGAGATAAATCAGACGACCGCCG
CCGCTTACCTGGGCGTGGATAACATCGATCGCCGCGGCGATATCCGGCAGTACGCGCTCA
ACGGCAAGCGGTACGGTTTTATCTTCATCGTTGATAATCCGGCACATTTCCAGCGTTGAT
ACGCGGTCAATTTCAGCCGAGGCGGCGTTCGAGCCTTCGGTAATCATCTTTTCAAGTTGC
ATCGGTGGTGACCTTACTATTTACGATCAAATAATTGCAGATGTATGGAATCATATATCC
TGAATTGACAGACTTAAAGGAATCATTGAGTCTACACTCGCAGAGTGTGAAGAGCGTCAT
AAGAACTTAAGCGGAATTTTTGCTGCCAGCCCAGGAGAGTGGAAGATGTTGTACCTGACG
AAAATACGCAATGCGGAAAGTGAATTTACCGAGAACGAGCAAAAAATTGCTGACTTTCTG
CGGGCCAACGTGAGTGAGCTGAAATCCGTCTCTTCGCGCAAGATGGCGAAACAGCTCGGC
ATCAGCCAGTCGAGTATTGTGAAATTTGCCCAGAAGCTCGGCGCGCAAGGATTTACTGAA
TTGCGTATGGCGTTAATTGGCGAATACAGTGCCAGCCGGGAGAAAACGAATGCCACGGCG
CTGCACCTGCACAGTTCGATTACCAGTGATGATTCGCTGGAAGTGATTGCCCGCAAATTG
AATCGCGAAAAAGAGCTGGCGCTGGATCAAACCTGTGCGTTGTTCGACTACGCGCGGATG
CAAAAAATCATTGAGGTCATCAGTAAAGCACCGTTTATCCAGATAACGGGCCTGGGCGGA
TCGGCGCTGGTGGGGCGCGATCTGTCGTTCAAACTGATGAAAATTGGCTATCGCGTGGCC
TGCGAAGCCGACACGCACGTACAAGCTACCGTTTCCCAGGCGTTGAAAAAAGGCGATGTA
CAAATCGCTATCTCTTACAGCGGCAGTAAAAAAGAGATTGTCTTGTGCGCAGAAGCGGCA
CGAAAGCAGGGGGCAACGGTGATTGCCATTACTTCTCTGGCTGACTCTCCGCTGCGGCGG
CTGGCGCATTTCACGCTCGATACCGTTTCCGGTGAAACCGAATGGCGTAGCTCGTCGATG
TCTACCCGCACGGCGCAAAATTCTGTTACCGATTTACTGTTTGTTGGTCTTGTGCAACTC
AATGATGTGGAGTCATTGAAAATGATTCAGCGCAGCAGTGAGCTAACACAACGCCTGAAA
TGATGCATAAAGCAGCGACTGGATTGAGATTTTCCTGAATTAGTGAGCTGATCCGCAGCA
ATATTTTGTTTATCCTGTATTTTCAGAGGGAATGGAGTGTAACGCTCTGTATTAACAAGG
AGAGCATTAAAATGGGTAAACTCACGGGCAAGACAGCACTGATTACGGGCGCATTGCAGG
GAATTGGCGAAGGAATTGCCAGAACTTTTGCGCGTCATGGCGCAAACCTAATCTTGCTGG
ATATCTCCCCTGAGATCGAAAAGCTGGCGGACGAACTGTGTGGTCGTGGTCATCGCTGTA
CGGCGGTTGTCGCCGATGTGCGTGACCCGGCGTCGGTAGCCGCAGCTATCAAACGCGCGA
AGGAAAAAGAAGGGCGCATTGATATCCTGGTGAATAACGCAGGCGTTTGTCGTCTGGGCA
GTTTCCTCGATATGAGCGATGACGATCGCGATTTCCATATTGATATCAATATTAAAGGCG
TATGGAACGTCACGAAGGCGGTGTTGCCGGAGATGATTGCCCGCAAAGATGGTCGCATTG
TGATGATGTCTTCAGTCACTGGCGATATGGTGGCCGATCCGGGTGAAACGGCGTATGCCT
TAACGAAAGCGGCGATTGTTGGCCTGACTAAATCGCTGGCGGTGGAGTACGCGCAGTCTG
GTATTCGCGTTAACGCCATCTGCCCGGGATACGTTCGCACGCCAATGGCGGAAAGCATTG
CCCGCCAGTCGAACCCGGAAGATCCAGAATCGGTGCTGACTGAAATGGCAAAAGCAATCC
CGCTGCGTCGCCTCGCCGATCCGCTGGAAGTCGGCGAACTGGCAGCCTTCCTCGCATCGG
ATGAATCAAGTTATTTAACCGGTACACAGAATGTGATTGATGGCGGCAGCACACTGCCGG
AGACGGTTAGCGTCGGCATCTGATTCACCTCTGTTTCCTCCCTGCATGTGTGGGGAGGAT
TTCGTCTTATTCCCTTTTCAACTTCCAAATCACCAAACGGTATATAAAACCGTTACTCCT
TTCACGTCCGTTATAAATATGATGGCTATTAGAAAGTCATTAAATTTATAAGGGTGCGCA
ATGGCCGTTAACTTACTGAAAAAGAACTCACTCGCGCTGGTCGCTTCTCTGCTGCTGGCG
GGCCATGTACAGGCAACGGAACTGCTGAACAGTTCTTATGACGTCTCCCGCGAGCTGTTT
GCCGCCCTGAACCCGCCGTTTGAGCAACAATGGGCCAAAGATAACGGCGGCGACAAACTG
ACGATAAAACAATCTCATGCCGGGTCATCAAAACAGGCGCTGGCAATTTTGCAGGGCTTA
AAAGCCGACGTTGTCACTTATAACCAGGTGACCGACGTACAAATTCTGCACGATAAAGGC
AAGCTTATCCCGGCGGACTGGCAGTCGCGCCTGCCGAATAATAGCTCGCCGTTCTACTCC
ACCATGGGCTTCCTGGTGCGTAAGGGCAACCCGAAGAATATCCACGACTGGAACGACCTG
GTGCGCTCCGACGTGAAGCTGATTTTCCCGAACCCGAAAACGTCGGGTAACGCGCGTTAT
ACCTATCTGGCGGCATGGGGCGCAGCGGATAAAGCTGACGGTGGCGACAAAGCCAAAACC
GAACAGTTTATGACCCAGTTCCTGAAAAACGTTGAAGTGTTCGATACTGGCGGTCGTGGC
GCGACCACCACTTTTGCCGAGCGCGGCCTGGGCGATGTGCTGATCAGCTTCGAGTCGGAA
GTGAACAACATCCGCAAACAGTATGAAGCGCAGGGCTTTGAAGTGGTGATTCCGAAAACC
AACATTCTGGCGGAATTCCCGGTGGCGTGGGTCGATAAAAACGTGCAGGCCAACGGTACG
GAAAAAGCAGCAAAAGCCTACCTGAACTGGCTCTACAGCCCGCAGGCGCAGACCATCATC
ACCGACTATTACTACCGCGTAAATAACCCGGAAGTCATGGACAAACTGAAAGATAAATTC
CCGCAGACCGAACTGTTCCGCGTGGAAGACAAATTTGGCTCCTGGCCGGAAGTGATGAAA
ACCCACTTCACCAGCGGCGGCGAGTTAGACAAGCTGTTAGCGGCGGGGCGTAACTGATGT
TTGCAGTTTCATCAAGACGCGTGCTGCCGGGCTTTACCTTAAGTCTCGGCACCAGTCTGC
TGTTTGTTTGCCTGATTTTGCTCCTGCCACTCTCCGCGCTGGTGATGCAGCTGGCCCAGA
TGAGCTGGGCGCAGTACTGGGAGGTGATCACCAACCCGCAGGTGGTCGCAGCCTACAAAG
TGACGCTGCTGTCGGCGTTTGTGGCATCGATTTTTAACGGCGTTTTCGGCCTGCTGATGG
CGTGGATCTTAACTCGTTATCGCTTCCCTGGCCGCACGCTGCTTGATGCGCTGATGGATT
TACCCTTTGCGCTGCCAACGGCAGTCGCCGGTTTAACGCTGGCCTCGCTCTTTTCCGTGA
ACGGTTTTTACGGTGAATGGCTGGCGAAGTTTGATATCAAAGTCACCTACACCTGGCTTG
GGATTGCGGTGGCGATGGCCTTTACCAGCATTCCGTTTGTGGTGCGTACCGTGCAGCCGG
TGCTGGAAGAGTTAGGCCCGGAATATGAAGAAGCAGCGGAAACGCTTGGTGCAACGCGCT
GGCAGAGTTTCTGCAAAGTGGTGCTGCCGGAACTTTCTCCGGCGCTGGTGGCGGGCGTGG
CGTTGTCGTTTACCCGTAGTCTTGGTGAGTTTGGCGCGGTGATATTTATCGCCGGGAACA
TCGCCTGGAAGACGGAAGTGACGTCGCTGATGATTTTTGTGCGCTTGCAGGAGTTTGATT
ACCCGGCAGCGAGCGCGATTGCTTCGGTGATCCTCGCGGCATCTCTGCTGCTGCTGTTCT
CAATTAACACTCTGCAAAGTCGCTTTGGTCGGCGTGTGGTAGGTCATTAATGGCGGAAGT
TACCCAATTGAAGCGTTATGACGCGCGCCCGATTAACTGGGGCAAATGGTTTCTGATTGG
CATCGGGATGCTGGTATCGGCGTTCATCCTGCTGGTGCCGATGATTTATATCTTCGTACA
GGCGTTCAGCAAAGGGCTGATGCCGGTTTTACAGAATCTGGCCGATCCGGATATGCTGCA
CGCCATCTGGCTGACGGTGATGATCGCGCTGATTGCCGTACCGGTAAACCTGGTGTTCGG
CATTCTGCTGGCCTGGCTGGTGACGCGCTTTAACTTCCCTGGACGCCAGTTACTGCTGAC
GCTACTGGACATTCCGTTTGCCGTATCGCCGGTGGTTGCCGGTCTGGTGTATCTGCTGTT
CTACGGCTCTAACGGCCCGCTCGGCGGCTGGCTGGATGAACATAATCTGCAAATTATGTT
CTCCTGGCCGGGAATGGTGCTGGTCACCATCTTTGTGACATGTCCGTTTGTGGTGCGCGA
GCTGGTGCCGGTGATGTTAAGCCAGGGCAGCCAGGAAGACGAAGCGGCGATTTTGCTTGG
CGCGTCTGGCTGGCAGATGTTCCGCCGTGTCACATTGCCGAACATCCGCTGGGCGCTGCT
TTATGGCGTAGTGCTGACCAACGCCCGCGCGATTGGCGAGTTTGGCGCGGTGTCGGTGGT
TTCCGGCTCGATTCGCGGCGAAACACTTTCGCTGCCGTTACAGATTGAATTGCTGGAGCA
GGACTACAACACCGTCGGCTCCTTTACCGCCGCCGCGCTGTTGACGCTGATGGCGATTAT
CACCCTGTTTTTAAAGAGTATGTTGCAGTGGCGTCTGGAGAATCAGGAAAAACGCGCGCA
GCAGGAGGAGCATCATGAGCATTGAGATTGCCAATATTAAGAAGTCTTTTGGTCGCACCC
AGGTGCTGAACGATATCTCACTGGATATTCCTTCAGGTCAGATGGTCGCGTTGCTGGGGC
CGTCCGGTTCCGGGAAAACCACGCTGCTGCGCATTATCGCCGGGCTGGAGCATCAAACCA
GCGGGCATATTCGCTTCCACGGCACCGACGTGAGCCGCCTGCACGCACGTGATCGTAAAG
TCGGTTTCGTGTTCCAGCATTACGCGCTGTTCCGCCATATGACGGTGTTCGACAATATCG
CTTTTGGCCTGACGGTGCTGCCGCGTCGCGAGCGCCCGAATGCCGCAGCCATCAAAGCGA
AAGTGACAAAATTGCTGGAAATGGTCCAGCTTGCCCATCTGGCGGATCGTTATCCGGCGC
AGCTTTCCGGCGGCCAGAAACAGCGCGTGGCGCTGGCGCGCGCGCTGGCTGTGGAACCGC
AAATTCTGCTGCTTGATGAACCGTTTGGCGCGCTGGATGCGCAGGTGCGTAAAGAGCTGC
GTCGCTGGCTGCGTCAACTCCATGAAGAACTAAAATTCACCAGCGTTTTTGTGACCCACG
ATCAGGAAGAAGCGACCGAAGTAGCTGATCGTGTAGTTGTGATGAGCCAGGGCAATATTG
AACAGGCTGACGCGCCGGATCAGGTATGGCGCGAACCGGCGACCCGTTTTGTGCTCGAAT
TTATGGGCGAAGTGAACCGCCTGCAGGGAACCATTCGCGGCGGGCAGTTCCATGTTGGCG
CGCATCGCTGGCCGCTGGGCTACACACCTGCATATCAGGGGCCGGTGGATCTCTTCCTGC
GCCCTTGGGAAGTGGATATCAGCCGCCGTACCAGCCTCGATTCGCCGCTGCCGGTACAGG
TACTGGAAGCCAGCCCGAAAGGTCACTACACCCAATTAGTGGTGCAGCCGCTGGGGTGGT
ACAACGAACCGCTGACGGTCGTGATGCATGGCGACGATGCCCCGCAGCGTGGCGAGCGTT
TATTCGTTGGTCTGCAACATGCGCGGCTGTATAACGGCGACGAGCGTATCGAAACCCGAG
ATGAGGAACTTGCTCTCGCACAAAGCGCCTGATAGGTTGAGTGAATGTTAAACGCCCGGA
GGCGCTTCCCGCGATCCGGGCTTTTTAATGGCAAGGTTTGTAACCTGTAGGCCTGATAAG
ACGCGCAAGCGTCGCATCAGGCAACACCACGTATGGATAGAGATCGTGAGTACATTAGAA
CAAACAATTGGCAATACACCTCTGGTGAAGTTGCAGCGAATGGGGCCGAATAACGGCAGT
GAAGTGTGGTTGAAACTGGAAGGCAATAACCCGGCAGGTTCGGTAAAAGATCGTGCGGCG
CTTTCGATGATCGTCGAGGCGGAAAAGCGCGGGGAAATTAAACCGGGTGATGTGTTAATC
GAAGCCACCAGTGGTAACACCGGCATTGCGCTGGCAATGATTGCCGCGCTTAAAGGCTAT
CGCATGAAATTGCTGATGCCCGACAACATGAGCCAGGAACGCCGTGCGGCGATGCGTGCT
TATGGTGCGGAACTGATTCTTGTCACCAAAGAGCAGGGCATGGAAGGTGCGCGCGATCTG
GCGCTGGAGATGGCGAATCGTGGTGAAGGAAAGCTGCTCGATCAGTTCAATAATCCCGAT
AACCCTTACGCCCATTACACCACTACCGGGCCGGAAATCTGGCAGCAAACTGGCGGGCGC
ATTACCCATTTTGTCTCCAGCATGGGAACAACCGGCACTATCACCGGCGTGTCACGCTTT
ATGCGCGAACAATCCAAACCGGTGACCATTGTCGGCCTGCAACCGGAAGAGGGCAGCAGC
ATTCCCGGCATTCGCCGCTGGCCTGCGGAATATCTGCCGGGGATTTTCAACGCTTCGCTG
ATGGATGAGGTGCTGGATATTCATCAGCGCGATGCGGAAAACACCATGCGCGAACTGGCA
GTGCGGGAAGGAATATTCTGTGGCGTCAGCTCCGGCGGCGCGGTTGCTGGAGCACTGCGG
GTGGCAAAAGCTAACCCTGGTGCGGTGGTGGTAGCGATCATCTGCGATCGTGGCGATCGC
TACCTTTCCACCGGGGTGTTTGGGGAAGAGCATTTTAGTCAGGGGGCGGGGATTTAAGAT
TATTGCGCAGGCACCGTTTTATCCGTCTGCGCAATTAACGCATGTAAAAAAGGCTGTGCA
TTCTCATCGCTCTTACCGGGCATCTTCACGATATACGGCTTCCCGGTAATCGATGATGAC
GAAGCAACCTTATCAATAAACTGCTCGGCAGTGTTAATGCGGTTACGGGTATTGCCGAGC
TTCAGACGCAGATGAGAAACCGCTTCATCGCAGGTATGTTCATCACCGTTGCGCACAAAT
ATCAAATCCTTTTTCTGTGCTAATCCCTCCAGCATGGCGTTGATGCGGGCTTCTTCATGG
GCAGTTAACTTCGCGTAAGCGGGGAGTGTCATTAGTAGTGTAATGACCAGACAAATGATT
TTCTTCATTGAATTACCTTATCCTTGTTTTGTGATAGCCGATTTGACTGCCAGAATCAGG
TAAAGTTTCGGTTGGAATACGATGAGGATCATCGGCAAGGAGAAAAAATTAAATGAGTAG
TTTGTTGTTGTTTAACGATAAGAGCAGGGCACTGCAGGCGGATATCGTCGCCGTGCAGTC
GCAGGTAGTGTACGGCAGCGTAGGCAACAGCATTGCGGTGCCTGCTATCAAACAGAACGG
TCTGAATGTCTTTGCCGTGCCGACGGTATTGCTGAGCAATACGCCGCATTATGACACTTT
CTACGGTGGTGCGATTCCGGACGAATGGTTTAGCGGCTATTTGCGTGCGCTTCAGGAGCG
TGATGCGCTGCGCCAACTTCGAGCTGTAACCACGGGCTATATGGGAACGGCATCGCAAAT
CAAAATCCTTGCCGAGTGGCTGACTGCGCTACGCAAAGACCATCCTGACCTATTGATCAT
GGTCGATCCGGTGATTGGCGATATTGATAGCGGAATTTATGTCAAACCTGACCTTCCCGA
GGCGTATCGACAATATTTACTGCCACTAGCGCAGGGAATTACCCCCAATATCTTTGAGCT
GGAAATCCTGACCGGTAAAAATTGCCGCGATCTCGACAGTGCCATTGCTGCCGCAAAAAG
TCTGCTTTCAGACACATTAAAATGGGTGGTGATTACCAGCGCCTCCGGTAATGAAGAAAA
TCAGGAGATGCAGGTGGTGGTGGTCACTGCCGACAGCGTGAATGTCATTTCCCATTCACG
GGTAAAAACCGACCTGAAAGGGACTGGCGACCTGTTTTGTGCTCAGCTTATCAGTGGTTT
GCTGAAAGGGAAGGCGTTAACCGATGCAGTGCACCGAGCGGGGTTGCGCGTACTGGAAGT
GATGCGCTACACCCAGCAGCATGAGAGCGATGAATTGATTTTGCCGCCGCTGGCGGAAGC
ATAAAAAAATGGCGCCGATGGGCGCCATTTTTCACTGCGGCAAGAATTACTTCTTGATGC
GGATAACCGGGGTTTCACCCACGGTTACGCTACCGGACAGTTTGATCAGTTCTTTGATTT
CGTCCATGTTGGAGATAACAACCGGAGTCAGGGTAGACTTGGCTTTCTCTTCCAGCAGCG
GCAGATCAAATTCAATGACAGTATCGCCAACTTTCACGCGCTGACCTTCTTCAGCAATAC
GCTTGAAGCCTTCGCCTTTCAGTTCAACGGTGTCGATACCGAAGTGGACGAACAGTTCAA
CGCCGCTATCAGATTCGATAGAGAATGCGTGGTTGGTTTCAAAGATTTTACCAATGGTAC
CGTCTACAGGCGCGACCATTTTGTTACCCGTTGGTTTGATAGCAATACCATCACCAACGA
TTTTTTCCGCAAAAACGACATCCGGCACGTCTTCGATATTGACGATCTCGCCAGAGAGCG
GAGCAATGATCTCAATAGTTCCGGTATCCTTCTTGTCGTCGGAAACCAGAGATTTCAGTT
TATCGAACAAACCCATGATCTTCTCCTAAGCAGTAAATTGGGCCGCATCTCGTGGATTAG
CAGATTGTTTTTTCTTCAATGAACTTGTTAACCAGCGTCATTAACTCGTCCGTTGTCGGT
TGAGCAAGAGCCTGCTCTGCTAACACCTTCGCATCTTCGAAGTTCGTGTTACGGATAATC
TTCTTAATGCGCGGGATAGAAATGGCGCTCATAGAGAATTCGTCCAGACCCATCCCCAGC
AACAGAAGTGTAGCACGTTCATCGCCAGCAAGCTCACCACACATGCCAGTCCATTTGCCT
TCAGCATGAGAAGCATCAATAACTTGCTTGATCAAGTTCAGCACGGACGGTGACATTGGC
TGGTAAAGGTGTGAAATCATATCATTACCACGGTCAACTGCCAGAGTGTACTGCGTTAAA
TCATTGGTGCCGATACTAAAGAAATCAACTTCTTTGGCTAAATGACGTGCAATTGTTGCG
GCAGCCGGTGTTTCCACCATTACGCCGATTTCAATTGACTCGTCAAACGCTTTACCTTCG
TCGCGCAGTTCCTGTTTGTAGATTTCGATCTCTTTGCGCAGTGCACGCACTTCTTCAACA
GAGATGATCATCGGGAACATAATGCGCAATTTACCGAAAGCCGAGGCACGCAGGATAGCG
CGGAGCTGATCGCGCAGGATCTCTTTACGATCCATTGCGATACGGATAGCGCGCCAGCCG
AGGAACGGGTTCTCTTCTTTCGGGAAGTTCATGTATGGCAGCTCTTTGTCGCCGCCGATG
TCCATGGTACGAACGATAACCGCCTGCGAGCCACACGCTTCAGCCACTGCTTTGTAAGCA
GCAAACTGTTCTTCTTCAGTGGGCAGCGCGTCGCGGTCCATGAACAGGAACTCAGTACGA
TACAGACCAACGCCTTCAGCGCCGTTACGCTCTGCACCTTCTACGTCACGAACCGTACCA
ATGTTAGCGCATACTTCTACCTGGTGACCGTCCAGCGTAATAGCTGGCAGATCTTTCAGT
TTAGCAAGCTCTGCTTTTTCAGAAGCCACTTGCTCCTGAACAGCGCGCATTTTATCAATA
ACTTCGTTGGTTGGATTGACGTAAACCTGATTATTTACGGCATCCAGAATCAGATAGTCG
TCATTTTTCACCTGAGAGGTGACGCTACCGGTACCCACGATAGCAGGTAGTTCCAGAGAA
CGCGCCATGATAGAGGTGTGGGAAGTACGGCCACCCGCGTCGGTGATGAAACCCAGCACC
TTCTTCAGGTTCAGCTGTGCGGTTTCGGACGGCGTCAGGTCAGCGGCAACCAGAATGACT
TCATCCTGAATGGCGCTCAGGTCGATAATCTTCAGGCCCAGGATGTTGCGCAGCAGGCGC
TTACCGATATCACGTACGTCAGCCGCACGTTCTTTCAGGTATTCATCATCCAGCTCTTCC
AGGGCAGAAGCCTGACCTTCGATAACTTCATGAGCAGCTGCGTCAGCTGTCATGTGCTTA
TCTTTAATCAGGGCTATGATTTCCTGCTCCAGCTCCTCATCTTCGAGCAGCATAATATGC
CCTTCAAAGATGGCTTCTTTTTCTTCACCGAACGTTTCACCAGCTTTCGTTTTGATCGTT
TCCAGCTGGGCTGATGCCTTGGCACGACCGCTCAGAAAACGTTCAACTTCCTGATCAACC
TGGTCGGCAGAAATTTTTTTCCGGTCAATGACAATTTCGTCTTCTTTCAGAAGCAGAGCT
TTACCGAAAGCGATACCCGGGGATGCTAAAATGCCTGAAATCATAACCCTACCTTACTTG
TGACTGATTTTTAAAAGAACCCGGGAAATTACTCGAGTTCCGCCATCAGTTTAACCAGAT
GTTCAACCGCTTTCTGCTCGTCTTCGCCTTCTGCGGAGATAGTCACAACGGTACCTTGAG
TCAGGCCCAGAGTCTGCAGTTTAAACAGGCTTTTCGCGCTGGCGCTTTTGCCGTTGGAAG
TCACAGTAATTTCAGAAGTGAAGCCCTTAGCTTCTTTTACAAACTGGGCAGCAGGGCGGG
TGTGCAGACCGTTCGGAGCGGTAATGGTAACTTCTTGCTGGAACATTGTATTTCCCCAAC
TTATAGGTTTAGTGTTGTGGAACTAAAGTCTAGCCTGGCGGTTCGACTTTAGCCTGTATT
GTTAGCGCCAGTTTTTAACAGACGCGACGCACGAAGAGCGCAATACAGTCCATTGCTGGC
GGGTGTTGACCGCTGACGTTTCGTACGTCATTAAACATTATGCCGCTAAAGGAAGAATTG
AACCAAATCATAAAATCGATTCAGCTTTGGCTTTTCCTGTAACGATTAATTTCGCGCATC
AAAATAATTAGTCTGGTTAAATACCAGTTCCGACAGGCTGAATCAATGCCAGGAGGGGCG
AAAGTTTGAAGCAGGCCACAAAAAAGCACCTAAAAAGGTGCTTTTTTACGCATTTTTAAC
AAGCTGGCATTACTGTTGCAGTTCTTTCTCAGTGAAGAGATCGGCAAACAATGCGGTGCT
TAAATAACGCTCACCCGATGACGGTAGAATAACCACAATATTCTTGTTGGTAAAGCTTTC
ATCTTCTTGTAGTTTCAACGCCGCAGCAACAGCTGCTCCAGAAGAGATACCTGCAAGAAT
ACCTTCTTCTTCCATCAGACGACGCGCGGTAGAAATGGCTTCTTCATTGGTAATGCCAAT
GACTTTATCGATCAGCTTGAGATCGAGGTTAGCCGGGATAAAACCAGCGCCAATACCCTG
AATTTTATGCGGGCCAGGTTTAATCTCTTCACCTGCCAGCGCCTGGGCGATAACTGGAGA
ATCGGTTGGCTCAACGGCGACAGAGATAAGATCGGTCTTGCCTTTGGTGCCTTTAATGTA
GCGGCTGACGCCGGTCAGCGTACCGCCAGTCCCAACGCCAGCAATAAATACATCAACCTG
ACCGTCGGTATCTTCCCAGATCTCCGGACCGGTGGTTTTTTCGTGAATTTCAGGGTTTGC
CGGATTGCTGAATTGTTGCAGCAGCAGGTATTTCTCTGGATTGCTGGCGACAATTTCTTC
TGCTTTTTGGATTGCGCCTTTCATGCCTTTAGCACCTTCGGTCAGCACCAGGTTTGCACC
TAACGCTTTCAGCAGCTTGCGGCGTTCAATACTCATGGTTTCTGGCATGGTCAGGGTGAG
TTTGTAACCGCGAGCGGCAGCTACATAGGCCAGTGCAATCCCGGTATTACCGCTGGTCGG
TTCAACCAGTTCAACGCCTGGTTTCAGCACGCCGCGCTTTTCGGCATCCCAAATCATGTT
GGCACCGATACGGCACTTAACGCTGAAGCTGGGGTTACGAGATTCCACCTTCGCCAGAAT
GCGTCCGTTACCGATGCGATTCAGGCGAACCAGCGGCGTGTGACCGATAGTCAGCGAGTT
ATCTTCAAAAATCTTACTCATGGCCTGTCCTTAACTGTATGAAATTGGGATACAACAGGT
AGCATACCCGCTCAGAGAATATGCGGAAGTAAGGATTTAGCATATCTATATACAGAAGGG
AAATAATGACATGCAAGATGGAATAAGGGGCGGCATAAGCCACCCCTGTTTCACACAAAC
GGTTTACAAAATAACCGGTAGATTGTTACCGCCACATCGCGTGTTTATCGCGATAGCAAT
CGACCCACATCGCCGTCGCGCCACAAACGGCAACGGGCATGATGAACAGATTAAGCAGCG
GGATCATCGTAAACAGGCTGGTTAAAGCACCAAACTGCATATTGGTGATTTTGCGTGTGC
GCAGGGCGGTGCGCATCTCTTTAAACGGCACTTTGTGGTTATCGAAGGGGTAATCGCAAT
ACTGGATGGCTAACATCCAGGCGCTAAACAGGAACCACAGTACCGGCGCGACGGTTTGCC
CAATACCAGGGATGAAGTAAAGAATTAGTAATACAATTGCGCGCGGCAGATACCAGGCAA
ATTTTTGCCATTCGCGTTTCATGATTCGCGGCACATCTTTCATGATACCGAAAATCCCGG
TATCTGGCGGTGTAGCGCCAGTCAATCGTGCTTCCAGTTGTTCAGCCAATAAACCGTTAA
ACGGAGCGGCAATCCAGTTAGCAATCGTGGAGAAGAAATAGCCAAACACTAACAGCACAG
AGATGACAGCCAGAGGCCACAACAGATAGCTCAGCCATTGTAACCAGTCCGGAACATAAC
TCATGAGAGTCGGGATCCAGACATCGAGTTGCGTAAAGAGCCACCAGAATGCGCCCCCCA
TCAACAAAATATTGACCAGCAGCGGTAAAATAACGAAACGCCGAATCCCAGGTTGCGAGA
CGAGCTTCCAGCCTTGCGCAAAATAGTAAAAACCGCTGCGTGGGGCAGATGTGAATGATG
AAACCATAATCAGGATGAGCTCCTTTTGACCAATCCCAGGAAAATTGTGCGTATTTTACC
GGGTAATTGCGCAATGGACAGTTAGGATATGTTCGAAAAAACAGCAAAAAGCACGATTTC
ATCTATCTTTGTGCTGTGAAAGTTAATAGTGCACTTGCACTTGAGGTAATCGGCAAATAC
TCTTAGTGAGTAAATGTTTGCCGTGGTGGCAAGGTGTTAGAACAACAGAGAATATAATGA
TGCAGGATTTGCGTCTGATATTAATCATTGTTGGCGCGATCGCCATAATCGCTTTACTGG
TACATGGTTTCTGGACCAGCCGTAAAGAACGATCTTCTATGTTCCGCGATCGGCCATTAA
AACGAATGAAGTCAAAACGTGACGACGATTCTTATGACGAGGATGTCGAAGATGATGAGG
GCGTTGGTGAGGTTCGTGTTCACCGCGTGAATCATGCCCCGGCTAACGCCCAGGAGCATG
AGGCTGCTCGTCCGTCGCCGCAACACCAGTACCAACCGCCTTATGCGTCTGCGCAGCCGC
GTCAACCGGTCCAGCAGCCGCCTGAAGCGCAGGTACCGCCGCAACATGCTCCGCGTCCAG
CGCAGCCGGTGCAGCAACCCGTGCAGCAGCCTGCCTATCAGCCGCAGCCTGAACAGCCGT
TGCAGCAGCCAGTTTCGCCACAGGTCGCGCCAGCGCCGCAGCCAGTGCATTCAGCACCGC
AACCGGCACAACAGGCTTTCCAGCCTGCAGAACCCGTAGCGGCACCACAGCCTGAGCCTG
TAGCGGAACCGGCTCCAGTTATGGATAAACCGAAGCGCAAAGAAGCGGTGATTATCATGA
ACGTCGCGGCGCATCACGGTAGCGAGCTAAACGGTGAACTGCTTCTTAACAGCATTCAAC
AAGCGGGCTTCATTTTTGGCGATATGAATATTTACCATCGTCATCTTAGCCCGGATGGCA
GCGGCCCGGCGTTATTCAGCCTGGCGAATATGGTGAAACCGGGAACCTTTGATCCTGAAA
TGAAGGATTTCACTACTCCGGGTGTCACTATCTTTATGCAGGTACCGTCTTACGGTGACG
AGCTGCAGAACTTCAAGCTGATGCTGCAATCTGCGCAGCATATTGCCGATGAAGTGGGCG
GTGTCGTGCTTGACGATCAGCGCCGTATGATGACTCCGCAGAAATTGCGCGAGTACCAGG
ACATCATCCGCGAAGTCAAAGACGCCAACGCCTGATACACTTAAGGCAAATTAACTCCTC
TTCGAACCCCCGCTTGTCGGGGGTTTTTAGCATTGATGGTGCGATATGGAATCAATCGAA
CAACAACTGACAGAACTGCGAACGACGCTTCGCCATCATGAATATCTTTATCATGTGATG
GATGCGCCGGAAATTCCCGACGCTGAATACGACAGGCTGATGCGCGAACTGCGCGAGCTG
GAAACCAAACATCCAGAACTGATTACGCCTGATTCGCCTACCCAACGTGTAGGTGCTGCG
CCGCTGGCGGCTTTCAGCCAGATTCGCCATGAAGTGCCAATGCTGTCGCTGGATAACGTT
TTTGATGAAGAAAGCTTTCTTGCTTTCAACAAACGTGTGCAGGACCGTCTGAAAAGCAAC
GAGAAAGTCACCTGGTGCTGTGAGCTGAAGCTGGATGGCCTTGCCGTCAGTATTCTGTAT
GAAAATGGCGTTTTAGTCAGTGCCGCGACCCGTGGCGATGGCACCACCGGGGAAGATATC
ACGTCTAATGTGCGTACTATTCGCGCCATTCCGCTGAAGCTGCACGGAGAGAATATCCCG
GCGCGTCTGGAAGTGCGTGGTGAAGTGTTCCTGCCGCAGGCGGGGTTCGAAAAGATTAAC
GAAGATGCGCGACGCACGGGCGGGAAAGTGTTTGCTAACCCACGTAATGCGGCAGCTGGT
TCACTGCGTCAGCTTGATCCGCGTATTACAGCGAAGCGACCGCTCACTTTTTTCTGCTAT
GGCGTTGGTGTTCTGGAAGGTGGCGAGCTGCCGGATACTCATCTTGGCCGTTTACTGCAA
TTTAAAAAGTGGGGGTTGCCGGTCAGCGATCGGGTAACGCTTTGTGAATCGGCGGAAGAA
GTGCTGGCGTTCTATCACAAAGTGGAAGAAGACCGCCCGACGCTGGGCTTTGATATCGAC
GGCGTGGTGATTAAGGTCAACTCACTGGAACAGCAGGAGCAGCTTGGCTTTGTCGCGCGT
GCCCCGCGCTGGGCGGTAGCGTTTAAATTCCCGGCGCAGGAGCAGATGACCTTTGTGCGT
GACGTCGAGTTTCAGGTTGGGCGTACTGGCGCGATTACGCCTGTTGCGCGTCTGGAACCT
GTCCATGTTGCTGGCGTGCTGGTGAGTAACGCAACCTTACACAATGCGGATGAAATCGAA
CGTCTTGGTTTACGCATTGGCGATAAAGTGGTGATTCGCCGCGCTGGCGACGTGATCCCG
CAGGTGGTTAACGTCGTGCTTTCTGAACGCCCGGAAGATACCCGTGAGGTTGTATTCCCG
ACGCATTGTCCGGTATGTGGTTCTGACGTTGAGCGTGTGGAAGGTGAAGCTGTTGCCCGC
TGTACCGGTGGCCTGATTTGCGGTGCGCAGCGTAAAGAGTCGCTGAAACACTTTGTTTCC
CGCCGTGCGATGGATGTTGACGGAATGGGCGACAAAATCATCGATCAGCTGGTTGAAAAA
GAATATGTCCACACTCCGGCGGATCTGTTCAAACTCACCGCAGGCAAACTTACCGGACTG
GAGCGTATGGGGCCAAAATCGGCACAAAACGTGGTTAACGCGCTGGAAAAAGCGAAAGAA
ACCACCTTTGCTCGCTTCCTCTATGCACTTGGCATCCGTGAAGTCGGCGAGGCCACCGCA
GCAGGTCTGGCGGCATATTTCGGCACGCTGGAAGCGCTGGAAGCCGCTTCGATTGAAGAA
CTGCAAAAGGTGCCTGATGTTGGCATTGTCGTTGCATCCCACGTTCACAACTTCTTTGCC
GAAGAAAGCAACCGCAATGTCATCAGCGAGCTGTTGGCGGAAGGTGTTCACTGGCCTGCG
CCGATCGTTATCAACGCGGAAGAGATTGACAGCCCGTTTGCTGGTAAAACCGTGGTGCTT
ACGGGCAGCTTAAGCCAGATGTCGCGTGATGACGCTAAAGCTCGACTGGTCGAACTGGGC
GCGAAAGTCGCGGGCAGCGTGTCGAAGAAAACCGATCTGGTGATAGCGGGTGAAGCTGCA
GGATCTAAACTGGCGAAGGCGCAGGAACTGGGCATTGAAGTCATCGACGAAGCGGAAATG
CTGCGTTTGCTGGGTAGCTGAGATGGAAAAAGAGCAGCTGATTGAAATAGCCAATACGAT
AATGCCGTTTGGCAAATACAAAGGGCGTCGCTTAATCGACCTGCCGGAGGAGTATCTGCT
GTGGTTTGCCCGCAAAGATGAGTTCCCGGCAGGGAAGCTCGGTGAGCTAATGCAAATCAC
GCTGCTGATTAAAACCGAGGGGCTGACGCAACTGGTCCAGCCCCTGAAGCGTCCGCTTTA
AGCTTTATCGGTGCTGCTTTCCTGCTGTGCCTGTAACTGTTCGGTCTGGCGTTTGTATCG
CCGCGCCAGCACCGCACAGACCATCAATTGGATCTGATGGAAAATCATCAGGGGCAGCAC
CATCATACCGATCACCGATGTGGGGAACAGAATGTTTGCCATCGGGATGCCATTTGCCAG
ACTCTTTTTCGAACCACAAAAGACGATAGTAATTTCATCTGCTTTATTGAAGCCTAGTCG
GCGTGCCATAAAGACGTTAACTACAATCACGATAGCCAGAAGAACGCAGCTGACCACCAC
GATAAACAGCAATGATCCCCAGCCAACTTTATGCCAGATACCATTAACGACGGCTTCGCT
GAACGCTGTATAAACCACCAACAGAATGGACGTCTGGTCAGTTTTCGCAATCCATTTTTT
ATTGCGCGACACCCAGTCACCAATCCACGGCCGGGAAAGATGCCCCAACACAAACGGCAG
CAACAGTTGCAGCATAATTTTACCGACCTGCTCAAGGCTGCCCCCTGCACCGTGAACATT
CATCACCAGGCCAACCAGCAATGGTGAAAGGAAAATCCCCAGCAGGCTGGATGCCGACGC
AGAACAAACCGCCGCCGCGACGTTACCGCCCGCCATTGACGTGAAGGCGATTGCAGACTG
CACGGTAGCCGGGAGAATGCACAAGTAGAGAAAACCGGAGTAGAGCATCGGGTCGACATT
TACCGGTTTCCACCAGGCAAACAGTACACCCAGAATCGGAAACAGCACGAAGGTGCTGCA
CATTACCCACAAATGCAGTCGCCAGTGACCACCGCCAGCAATAATCGCCTCACGCGACAA
CTTCGCGCCGTGCATAAAGAACAGCAGGGCAATAGCTGCGGTGGTCAGATTTTCAAAGAA
GGGGACGAAATCGCCTCTGGCCGGAAAGAAAGAGGCCAGCAACACCACCGTGATCAGGGT
TAAGGTGAAAGGATCGAGGATACGAAAAAGTTTCATAAAGACTCCAGATGATCGATGGTT
CTATTGTGCTTCTTCCAGTTTGAGAAATAAAATTGATTTATTGCATCCATTCATGAAGAA
AACAGATGAATTATTCTTTAAAACAGTTAAAGGTTTTCGTCACAGTAGCGCAGGAGAAAA
GTTTTAGTCGTGCAGGAGAGCGTATCGGCCTGAGCCAGTCGGCAGTAAGTCACAGTGTGA
AGGAGCTGGAAAATCATACAGGTGTTCGCCTGCTGGACAGAACCACGCGTGAAGTGGTAC
TTACAGATGCAGGGCAGCAGTTGGCTTTGCGTCTTGAGCGACTGCTGGATGAACTTAACA
GCACGTTGCGCGATACCGGGCGTATGGGGCAACAACTGAGCGGAAAAGTTCGGGTCGCTG
CCAGCCAGACCATTTCCGCGCATCTTATTCCGCAATGCATTGCTGAAAGCCATCGCCGCT
ATCCAGATATTCAGTTTGTCCTGCACGATCGTCCGCAGCAGTGGGTGATTGAAAGTATTC
GCCAGGGAGATGTCGACTTTGGCATCGTCATAGATCCAGGCCCAGTGGGCGATCTGCAAT
GTGAAGCGATTCTTTCCGAGCCTTTCTTTCTGCTTTGCCATCGCGATAGCGCTTTGGCCG
TGGAAGATTATGTACCCTGGCAGGCATTACAGGGAGCGAAATTGGTGTTGCAGGATTACG
CGTCAGGCAGCCGACCGCTGATTGACGCAGCGCTGGCGCGCAATGGTATTCAGGCGAATA
TTGTGCAGGAGATTGGACATCCGGCGACGCTGTTCCCGATGGTAGCCGCAGGCATCGGCA
TCAGTATTCTTCCCGCACTGGCGCTACCATTGCCTGAAGGTAGCCCACTGGTGGTAAAGC
GCATTACGCCGGTGGTGGAACGCCAGTTGATGCTGGTGCGCAGGAAAAACCGTTCACTTT
CCACCGCCGCTGAAGCGTTATGGGACGTGGTACGAGACCAGGGCAATACGCTAATGGCTG
GGCGGGAAGGGGATCCGTTGTATCAGATATAGATATCGATATGAGTCGTATTTTCAACAG
GATTTAGAAGGGATACATTCAGAGACAAACGCTGCTCTTTCTCCTGCGCCTTTTCTGCCT
GCTGTCTCTGCAACTGCGCCAGTTGTGTTTCCAGTAGGGTGATTTGCTGTTGAATCAATT
CGGCCTGTTTTTGCTTGTCTTCAGCACTGCCGCTAGTGTCTACAATCTCTTTAATTTGTT
GAGTGAGTTTGATGATTTGCTGACTTATCCGCGCGATTTGTGAAGCAACATCGCTACCTT
GTGATGCCCTGTTACTACTCTGTGTTTGTATGGAAGGAATTGAAGTTGAAGAGATAGTGG
CCATTGTTCAGTCCTCGTCACTGTACGAGGTAATATCGGTAGAAGAACAAGGAACTTGAG
AAGAAAAATCAATCTTACAAATCGCAGATAGCAAAAAAGCGCCTTTAGGGCGCTTTTTTA
CATTGGTGGGTCGTGCAGGATGACTCGCTTCGCTCGCCCTTCGGGCCGTCGCCGCGAGCG
GCTCCGTTGTTTCGCTGCGCTCAACTCGAACCTGCTGCAGGTTCGAATCTTTGAGTATCG
CAGATAGCAAAAAAGCGCCTTTAGGGCGCCTTTTTACATTGGTGGGTCGTGCAGGATTCG
AACCTGCGACCAATTGATTAAAAGTCAACTGCTCTACCAACTGAGCTAACGACCCGAAGT
GGTGGGTGATGACGGGATCGAACCGCCGACCCCCTCCTTGTAAGGGAGGTGCTCTCCCAG
CTGAGCTAATCACCCACTTCTCAATTTCTTGCTACACGGCGGAGACTACATAAAGTAGTT
GGTGGGTGATGACGGGATCGAGCCGCCGACCCCCTCCTTGTAAGGGAGGTGCTCTCCCAG
CTGAGCTAATCACCCCCGCTGTGTGGAGTCGCATTATAGGGAGAGTTCAAAATGAGTCAA
CGCATTTTCTAAAGAAATTGTTCGTTCGTCGTAAATTTAAGCAAGATGATCGCAAAACAG
ACCGTGTTGCGCAATTTGTCAACGAAAACAATAATGCGTAAGGTTGCAACCCGAACTACA
TTGAGGAATCAGGCGGGAGTGATAGAATATCGCCCACTCAATTTTTCCAGGATTTGCCGG
TTGTCGGCATCTTTCTAAACGTAAGGCCATTTCATGAAAATCAAAACTCGCTTCGCGCCA
AGCCCAACAGGCTATCTGCACGTTGGCGGCGCGCGTACTGCTCTTTACTCCTGGCTTTTT
GCACGTAATCACGGCGGTGAGTTCGTGCTGCGTATTGAAGACACCGATCTTGAGCGTTCC
ACGCCGGAAGCTATCGAAGCCATTATGGATGGCATGAACTGGCTGAGCCTGGAGTGGGAT
GAAGGTCCGTACTTCCAGACCAAACGTTTTGATCGCTACAACGCGGTGATCGATCAGATG
CTGGAAGAGGGCACAGCTTATAAATGCTATTGCTCTAAAGAGCGCCTGGAAGCGCTGCGC
GAAGAGCAAATGGCGAAAGGTGAGAAGCCGCGTTATGACGGTCGCTGCCGCCACAGTCAT
GAGCATCACGCTGATGATGAGCCGTGTGTCGTACGTTTTGCTAACCCGCAGGAAGGTTCT
GTTGTTTTTGACGATCAGATCCGTGGTCCGATCGAGTTCAGCAACCAGGAACTGGACGAT
CTTATTATCCGCCGTACCGATGGTTCCCCAACCTATAACTTCTGTGTGGTTGTCGATGAC
TGGGATATGGAAATCACCCACGTTATCCGTGGCGAAGACCATATCAACAACACGCCACGC
CAGATCAACATTCTTAAGGCCCTGAAAGCGCCGGTGCCGGTTTACGCGCACGTTTCTATG
ATCAACGGCGATGACGGTAAAAAACTGTCCAAACGTCACGGGGCGGTCAGCGTAATGCAG
TATCGTGACGACGGTTATTTGCCAGAAGCACTGCTGAACTATCTGGTGCGTCTGGGCTGG
TCCCACGGCGATCAGGAAATCTTCACTCGTGAAGAGATGATCAAATACTTCACCCTGAAT
GCCGTCAGCAAATCTGCCAGTGCGTTCAACACCGACAAGCTGCTGTGGCTGAACCATCAC
TACATTAACGCGCTGCCGCCGGAGTATGTTGCTACTCACTTACAGTGGCACATTGAGCAG
GAAAATATCGATACCCGTAACGGCCCGCAGCTGGCTGATCTGGTGAAACTGCTGGGCGAA
CGCTGCAAGACGCTGAAAGAGATGGCACAGAGCTGCCGTTATTTCTACGAAGATTTTGCA
GAGTTCGATGCCGACGCCGCGAAAAAACATCTGCGTCCGGTAGCGCGTCAGCCGCTGGAA
GTGGTTCGTGACAAACTGGCCGCGATTACTGACTGGACCGCTGAAAACGTTCATCACGCT
ATTCAGGCGACGGCGGATGAGCTGGAAGTGGGTATGGGTAAAGTTGGTATGCCGCTGCGT
GTCGCCGTAACCGGTGCGGGGCAGTCTCCAGCACTGGATGTTACCGTTCACGCGATCGGT
AAGACACGTAGCATTGAGCGTATCAACAAAGCGCTGGCTTTTATTGCTGAACGCGAAAAT
CAGCAGTAATTAGCGCATAAAAGACAAACGGCAGGAGAGAAACCCCTGCCGTTTTTTATT
TATGCTGATTCATTTATGTCGAGACGAGCCAGGAAATTACGAATTCCTTCGCGTGACAAA
AATTGCGCAACTTTTTCCTGCTCACTGTGAGTCATGTTGTCTATTGCGCTTATGATTTGT
CGATAAGCAGGAGTGCGAATCCCCGGTGCGTATTCGGCAAGGGGTTCTTCGGCTTCCAGA
AGCATCGGTGTGTTATGGAAGGCTGGCGTGTTCTGAATAAACTCGCAAACTTGCGTATCG
ACCAGAATAAGTCTGGCACGACCGCCTTTCACGCCGGGAAATTTTTCCGTTTTCCAGCCT
TTTTCTCTGATCCAACGGTTAACAGTTTGTTTAGCCACACCGAGGCATTCAGCCAGTTCT
TCGGTGGTCATTTTGTTGCGTAATCTTTTCATATTATTTGCTATCGCGAATCCCTAAGCG
TTGTAACAATCCGATAATCCCTTCCCGCAGAAGCAAGGATGTAAACTGTTTTTGTTCAAC
TGGCGTCATCTCTTTCGCCAGTGTCACCAGCAATACTTCAAGCGGCGCATCACCAGAAAG
GGCAGGCGCTTCTCCCTGACCTTCTGGACGTTCAGCATTACGAATATATTCACGAACCTG
TTCATTGACGTGAACCAGTCGGGCTTTGCCACCCTGGACGCCTGGTTTTGGTGACGTCGT
CCAGCCTTCCTTGCGTACCCATTTATTAATGGTCTGGCGGCTATAGCCGGTCAGTCTGGC
AAGTTCATCTGGTGTCATCCTCTCCTTGAACATAACAATTCCCTGAATGTATGTGGGTCT
ATTAGTAGTTCATTTTATAGCACCACTTTACAGGAAACCGTGACATGAATAACTACTGAA
TGCGAGCGGTTTTCCAAAATTGTTCATTTGCCTGATTTTTCAGCGATTGAAACTACACGT
TGCAATTTGCCGTTGACACATTCGGGCGGAATTCATATGATGCCGCCCGTCAACTCGACA
AGCTTTACGTGACGGGGCTATAGCTCAGCTGGGAGAGCGCTTGCATGGCATGCAAGAGGT
CAGCGGTTCGATCCCGCTTAGCTCCACCAAATTTTGCACCCAGCAAATTTGGTACGTAAA
CGCATCGTGGGGCTATAGCTCAGCTGGGAGAGCGCTTGCATGGCATGCAAGAGGTCAGCG
GTTCGATCCCGCTTAGCTCCACCAAATTTCCAACCCTCGCTGCAAAGCGGGGTTTTTTTG
TCTCTGCTTTTTGCCGCTTTTGTAATACAGTCTACGTCCGGGTTAGTGCCGCCTGGTGAA
AGCATCATTGGATGAAAAATCGGCAACAGGCTGGCCCCTGTTTGCTTCGCGATGCGAATA
AACTTATTATTTGTGTGCCTGAAAACCCCGATCAGTGAGAGTAGTGTACTCATGTTTGTG
GAGCATAACCTGATAAAAAATATCAAGATATTCACACTAGCGTTTACGCTCACCGTGGTA
CTTATTCAGCTATCCCGTTTTATTTCGCCACTTGCCATTATCCATTCCAGTTATATCTTT
CTGGCGTGGATGCCACTGTGCGTAATGCTGTCAATCTTGTTTATCTTTGGCTGGCGCGGT
GTCGTTCCCGTTTTATGCGGGATGTTTTGCACCAATCTGTGGAACTTTCATCTCTCTTTT
TTACAGACTGCGGTCATGCTCGGCAGCCAGACGTTTGTCGTGTTGTGTGCCTGCGCAATA
TTACGCTGGCAGCTGGGGACGCGTTGGCGTTATGGATTGACCAGCCGATATGTCTGGCAA
CGTCTGTTCTGGCTTGGTTTGGTGACGCCGATCGGCATCAAATGCAGCATGTATTTTGTG
GGGAGCTTCTTTGATTTCCCGCTAAAGATATCCACCTTTTTCGGCGATGCGGATGCCATT
TTCACGGTTGTTGATTTACTAAGCCTTTTCACCGCTGTGCTGATTTACAACATGCTTTTC
TACTATCTCACTCGCATGATTGTAAGTCCCCACTTTGCGCAGATATTGTGGCGCAGGGAT
ATCGCTCCGTCGTTGGGCAAAGAGAAACGCGCATTTACCTTAAGCTGGCTGGCAGCGTTA
AGCGTGCTGCTACTTCTGTTGTGCACACCTTATGAAAACGACTTTATTGCCGGTTACCTG
GTACCCGTTTTCTTCATCATCTTTACCCTCGGGGTCGGTAAGCTTCGCTATCCGTTTTTA
AATCTCACCTGGGCTGTTTCAACGCTTTGCCTGCTGAATTACAACCAGAACTTTTTGCAA
GGGGGGGAAACCGAATATTCGCTGGCATTTATTCTTGCGGTGCTGATTTCCTTTAGCGTT
TGCCTGCTCTATATGGTGCGCATTTATCATCGCAGTGAATGGCTTAATCGACGCTGGCAT
TTGCAGGCGCTGACCGATCCGTTAACGCTCCTACCCAATTTTCGTGCGTTGGAACAAGCG
CCGGAGCAAGAGGCGGGCAAGAGTTTTTGCTGCCTGCGCATTGATAATCTTGAGTTTATG
AGTCGTCATTACGGGTTAATGATGCGCGTTCACTGTATCCGATCAATTTACCGTACGCTG
CTGCCGTTGATGCAGGAAAACGAAAAGTTGTATCAATTGCCGGGTAGTGAACTGCTGTTA
GTGCTGAGCGGGCCGGAAACGGAAGGGCGACTCCAGCATATGGTTAACATCCTGAATAGT
CGGCAAATTCACTGGAACAATACCGGGCTGGATATGGGCTATGGTGCTGCCTGGGGGCGT
TTTGATGGAAATCAGGAAACCCTGCAACCCTTGTTGGGGCAGTTAAGCTGGCTGGCGGAG
CAATCCTGCGCACATCATCATGTGCTGGCGCTGGATAGCAGAGAGGAGATGGTTTCCGGG
CAGACCACTAAACAAGTGCTATTGCTGAATACCATTCGCACGGCGTTAGATCAGGGTGAT
TTGCTGCTCTACGCCCAGCCAATTCGCAACAAAGAGGGTGAAGGTTATGATGAGATCCTC
GCGCGACTGAAGTATGACGGCGGCATTATGACCCCGGATAAGTTTCTGCCCCTTATTGCT
CAGTTTAACCTTAGCGCGCGTTTTGATTTGCAAGTGCTGGAATCCTTGTTGAAGTGGCTG
GCAACACACCCTTGCGACAAAAAAGGCCCGCGCTTTTCAGTTAATTTAATGCCGCTCACG
CTGCTACAAAAGAATATTGCCGGGCGGATTATTCGTCTGTTTAAGCGTTATCACATCTCC
CCGCAGGCGGTCATTCTTGAGATCACCGAGGAGCAGGCGTTTTCTAACGCAGAAAGCAGC
ATGTACAACATCGAGCAACTGCATAAGTTTGGCTTCCGGATTGCGATTGATGACTTTGGC
ACCGGCTATGCCAACTACGAACGGTTAAAGCGTTTGCAGGCTGATATCATCAAAATTGAT
GGTGTCTTTGTGAAAGATATCGTCACGAATACGCTGGATGCGATGATTGTGAGATCAATT
ACCGATCTGGCGAAAGCGAAGTCATTGAGTGTGGTTGCGGAGTTTGTCGAGACGCAACAG
CAGCAGGCGTTATTGCATAAGCTCGGGGTGCAATATCTGCAAGGGTATTTGATTGGTCGC
CCGCAGCCATTAGCTGATTAACAGGCGTAAAAAAACCGGGGAATTATCCCCGGCTTTTTT
ATGTATGGTCTTACAGCACCAGTGCTGCGATTGACGCAGACAGCACACTCACCAGGGTAG
AGCCGTAAACCAGTTTCAGACCGAAGCGAGAAACCACGTTACCTTGCTCTTCATTCAGAC
CCTTAACTGCACCTGCGATAATCCCGATTGAAGAGAAGTTAGCGAAGGAAACCAGGAACA
CAGAGATGATGCCTTCAGCACGCGGAGAGAGCGTGGACGCAATTTTCTGCAGATCCATCA
TCGCAACGAACTCGTTGGAAACCAGTTTGGTCGCCATGATACTGCCCACTTGCAGTGCTT
CGCTGGACGGAACACCCATCACCCATGCAATCGGATAGAAGATGTAGCCCAGGATGCCCT
GGAAGGAGATGCTGTAGCCAAACCAGCCAGTCACGGTGGCAAACAGTGCGTTCAACGCGG
CGATCAGGGCGATAAAGCCGATCAGCATCGCGGCAACGATAATGGCAACTTTGAAACCTG
CCAGAATGTATTCACCCAGCATTTCGAAGAAGCTCTGACCTTCGTGCAGGTTGGACATCT
GAATGTTTTCTTCACTGGCATCAACACGGTAAGGGTTGATCAGCGACAGCACGATAAAGG
TGCTGAACATGTTCAGTACCAGCGCCGCAACGACATATTTCGGCTCCAGCATGGTCATGT
ATGCACCAACGATGGACATAGATACGGTGGACATCGCCGTTGCTGCCATGGTGTACATAC
GATTGCGGGAGATTTTGCCGAGGATATCTTTATAGGCAATAAAGTTTTCAGACTGACCCA
GAATCAGAGAGCTGACGGCGTTAAAGGATTCCAGTTTGCCCATGCCGTTGACTTTGGAGA
GCAGGAAACCAATTGCGCGGATAATCACCGGCAACACGCGAATGTGCTGGAGAATACCGA
TCAGTGCAGAGATAAAGACGATTGGGCACAGCACTTTCAGGAAGAAGAATGCCAGGCCTT
GATCATTCATGCTACCAAAGACGAAGTTAGTCCCTTCGTTGGCAAATCCGAGCAGTTTTT
CGAACATTTCGGAGAAGCCTTTCACGAAGCCTAAACCAACGTCGGAGTTCAGGAAGAACC
ACGCCAGTAACACTTCGATAACAAGCAGTTGAATAACATAACGGATACGAATTTTTTTGC
GGTCGCTGCTTACCAGCAGTGCGAGAATCGCAACAACGGCAAGTGCCAGTACAAAATGAA
GGACGCGGTCCATATTTGCTCCAAATATGAGGCAGGTTAAATTTCCGTGCACATTCTATG
TAACATGGTTAAGGAAAACGAGATCTGACACACACTATAATGACGTCCTGTGACAAGCTT
CAAAAATAGTGAGCTGTCATACATTTCTGCTATGTTGTGTATGGAAGCTGAAAGTTATGT
AAATGTGCTAACATTAAACATAACCATAACATTCAAGTCATCAATCTTTTCGTAGTCATA
ATCCTGGTCTATCAGAGAAATCACCACAACCCATTTAAATGAATTTGATAATCATTCTCG
TTTGGCATAGCATGAAACATAGCAAAGGCTATGTTTTAGAGGCACAAGATGACGAACTAT
CGCGTTGAGAGTAGCAGCGGACGGGCGGCGCGCAAGATGAGGCTCGCATTAATGGGACCT
GCGTTCATTGCGGCGATTGGTTATATCGATCCCGGTAACTTTGCGACCAATATTCAGGCG
GGTGCCAGCTTCGGCTATCAGCTACTGTGGGTTGTCGTTTGGGCCAACCTGATGGCGATG
CTGATTCAGATCCTCTCTGCCAAACTAGGGATTGCCACCGGTAAAAATCTGGCGGAGCAG
ATTCGCGATCACTATCCGCGTCCCGTAGTGTGGTTCTATTGGGTTCAGGCAGAAATTATT
GCGATGGCAACCGACCTGGCGGAATTTATTGGTGCGGCGATCGGTTTTAAACTCATTCTT
GGTGTTTCGTTGTTGCAGGGCGCGGTGCTGACGGGGATCGCGACTTTCCTGATTTTAATG
CTGCAACGTCGCGGGCAAAAACCGCTGGAGAAAGTGATTGGCGGGTTACTGTTGTTTGTT
GCCGCGGCTTACATCGTCGAGTTGATTTTCTCCCAGCCTAACCTGGCGCAGCTGGGTAAA
GGAATGGTGATCCCGAGTTTACCTACTTCGGAGGCGGTCTTCCTGGCAGCAGGCGTGTTA
GGGGCGACGATTATGCCGCATGTGATTTATTTGCACTCTTCGCTCACTCAGCATTTACAT
GGCGGTTCGCGTCAACAACGTTATTCCGCCACCAAATGGGATGTGGCTATCGCCATGACT
ATTGCCGGTTTTGTCAATCTGGCGATGATGGCTACAGCTGCGGCGGCGTTCCACTTTTCT
GGTCATACTGGTGTTGCCGATCTTGATGAGGCTTATCTGACGCTGCAACCGCTGTTAAGC
CATGCTGCGGCAACGGTCTTTGGATTAAGCCTGGTTGCTGCCGGACTGTCCTCAACGGTG
GTGGGGACACTGGCGGGGCAGGTGGTGATGCAGGGCTTCATTCGCTTCCATATCCCGCTG
TGGGTGCGTCGTACAGTCACCATGTTGCCATCATTTATTGTCATTCTGATGGGATTAGAT
CCGACACGGATTCTGGTTATGAGTCAGGTACTGTTAAGTTTTGGCATCGCCCTGGCGCTG
GTTCCACTGCTGATTTTCACCAGTGACAGCAAGTTGATGGGCGATCTGGTGAACAGCAAA
CGCGTAAAACAGACAGGCTGGGTGATTGTAGTGCTGGTCGTGGCGCTGAATATCTGGTTG
TTGGTGGGGACGGCGCTGGGATTGTAGTTGAATGAGCGTCGCATCTGGCACTATTGGCGG
ATGCGGCGTAAACGCCTTATCCGCCTTACGCGTTAAAGAGCCGGTTTGTAGGCCTGATAA
GACGCACTAGCGTCGCATCAGGCCTTGTGCTCCATTGGCAAATGTGTTTAATGGCGGTGC
CCATGTCCGCGGCCTTTTCCGCGATGATCGTCACGATCGCGCCAGCCTTCACGATAGCCA
CGCTCATACGCTTTACGCTTATCCCAGCCACGATGATAGCCATTATCATGACGCCACCAG
CGGTTTTTGCGCCACTCATAATTGCGATGCCAGTAATCACGATCTCGCCAGTGACCACCG
TCCCAGTAATTACCGTAATGATCGCGATCGCCAATTTGTAATTTGATTGATGGCAGTAGG
GTGATTTCACCTGCGTTTGCTGCAAGCGGGGTAAATGCCATCAGGGCGGCCGCCAGAAAC
AGTGACCTGAACATTGTTATTCTCCTTCACGATCGAAGCCGTCAGCGGCCTGTTAACGCA
ATATTACGGGGAGGTAAAGCCCCGTATCATCGCCATAACTCTTAAATCATAAAGGAGAGC
ATTTTTTGTTAAACGTTATCGTGGGGTGGCTGTTGCTTCGGACGATTGACCATCATCATC
GGCTTACCTGCTAATAACAGCCATGCCGGAAGCATGACGATACAGAGCAGCGGTAGCAAT
GTGGTATTGGGTACAACGACTGCCGCCATAAAAAGACTTAACCAGCCATCGCGTGTTACC
ACCAGCACGATGCCGAGAATAGCGCAGGAAACGGTTATTGCCGCTGGAACGGCGGGGACG
TGCTCATGCAGCATCAACCCTAATGCCACGCCGACGAACACTGCCGGGAAAATTCGTCCA
CCGCGAAAGCCACTGGCGGCAGCAACGACCAGGGCGGTAAGTTTAATCACCGCCAGTAAA
AAGTAATCGCTGGTGCTGAAAGCCTGATTTGCCACCATCTGCTGCATCTCATCCAGTCCT
TTAAACAGCGAAACTGGTCCACCAATAACCCCCAGAATACCGAGAATAAATCCGCCAATA
CCCAGCACGAGCACCGGATTTTTCATTTGATGCATCATCGCGTGCAACCGTGGTAAGCAC
CATACGGCGACCATCCCTGCTGCGATGGCAATCGCCGCGACAATTGCACCGCTGAGAATA
TCGGTCATTTCCATCTGTCCGTAATGCGCAATGGGCAGTGAAAAATGGGGATGGAAAAAT
AATCCGGTAGTAAGTGCACCAGCTGCTGCCGCCATTAACGGCGCAAAAAGACGATCCCAT
AGCGGAACTTCACTACTGCCATTTAAGGTTTGCGAAAATATCAACGCCGCCGCAACAGGT
GTACCAAACAGCGCGCCGATGGTTCCGGCAGAGGCTAAAATAGTCCACTCCATTCGGTTG
ACGCGCGGTAACAGACGAGCGCCAATGGCAACCGCAAGGGCGATATTGACGGTCATGATC
GGATGTTCCGGCCCCAGGCTGACGCCGCCAGCAAGACCGAGAATTAATGCTACGATAAGT
CCTGGTAGCGCAGAGGGCGGAACCGGTGCGCCGATCAGCGGTTCACAGGCGGGGTCTGGT
CCGGCATGACCCTGGCTGAAACGGATAACCAACCCCACTGCAATACCCGTTAACGTTAAT
ACACCGATGATCCAGAGAGGTGAATCCTGGGCTATCCCCAGAGTTCCCGGCAGTCGTTGC
CAGAGCAAATTCTGTAATGCCGAGGCGATTTTCATCACCACAATCAGAATAAGACTGGAC
GCAATCCCAATTGCCACGGCGGGGAGCGATAATAACAACATGGTTCTGGCTCGCGGATGG
AGCATGTTCTATTCCTTATGCGGGGTCAGATACTTAGTTTGCCCAGCTTGCAAAAAGGCA
TCGCTGCAATTGGTGCTGAAACGATAAAGTAATTGTGTGACCCAGATCGATATTTACAGG
GAGCCTGCCTTTCCGGCGTTGTTGTTATGCCCCCAGGTATTTACAGTGTGAGAAAGAATT
ATTTTGACTTTAGCGGAGCAGTTGAAGAATGACAAAGTATGCATTAGTCGGTGATGTGGG
CGGCACCAACGCACGTCTTGCTCTGTGTGATATTGCCAGTGGTGAAATCTCTCAGGCTAA
GACCTATTCAGGGCTTGATTACCCCAGCCTCGAAGCGGTCATTCGCGTTTATCTTGAAGA
ACATAAGGTCGAGGTGAAAGACGGCTGTATTGCCATCGCTTGCCCGATTACCGGAGACTG
GGTGGCAATGACCAACCATACCTGGGCGTTCTCAATTGCCGAAATGAAAAAGAATCTCGG
TTTTAGCCATCTGGAAATTATTAACGATTTTACCGCTGTATCGATGGCGATTCCGATGCT
GAAAAAAGAGCATCTGATTCAGTTTGGTGGCGCAGAACCGGTAGAAGGTAAACCTATTGC
GGTTTACGGTGCCGGAACGGGGCTTGGGGTTGCGCATCTGGTCCATGTCGATAAGCGTTG
GGTAAGCTTGCCGGGCGAAGGCGGTCACGTTGATTTTGCGCCGAATAGTGAAGAAGAGGC
CATTATCCTCGAAATATTGCGTGCGGAAATTGGCCATGTTTCGGCGGAACGAGTGCTTTC
TGGCCCTGGGCTGGTGAATTTGTATCGCGCAATTGTGAAAGCTGACAACCGCCTGCCAGA
AAATCTCAAGCCAAAAGATATTACCGAACGCGCGCTGGCTGACAGCTGCACCGATTGCCG
CCGTGCGTTGTCGCTGTTTTGCGTCATTATGGGCCGTTTTGGCGGCAATCTGGCGCTCAA
TCTCGGGACATTTGGGGGCGTGTTTATTGCGGGCGGTATCGTGCCGCGCTTCCTTGAGTT
CTTCAAAGCCTCTGGTTTCCGTGCCGCATTTGAAGATAAAGGGCGCTTTAAAGAATATGT
CCATGATATTCCGGTGTATCTCATCGTCCATGACAATCCGGGTCTTCTCGGTTCCGGTGC
ACATTTACGCCAGACCTTAGGTCACATTCTGTAAATCCTTCCTGTTATATCGGGAGGTAA
CTCTCCCGATAATCTTTTAAATCATACAGTTAATTCAATTTTTCTTTGTGTCCCCTCACA
AGGCCGACCTGCGTCACACTTCCGTACAGCGGGATTAATTCTCCAGTAAATGCATTATTT
GTCTGGTAACGGCGATTTGTTTTGCACGTTCATAATTTCACTCGTCAACTATCACTGAAC
GAGGAATTAACGATGAGTAAGAAACTGATTGCATTATGTGCCTGCCCAATGGGCCTGGCT
CACACTTTTATGGCCGCTCAGGCGCTGGAAGAAGCGGCGGTAGAAGCCGGTTATGAAGTG
AAAATTGAAACCCAGGGCGCGGACGGTATCCAGAATCGCCTGACGGCGCAGGATATCGCC
GAAGCGACCATCATCATCCACTCCGTGGCAGTTACCCCGGAAGATAACGAACGTTTCGAA
TCACGCGACGTTTATGAAATCACTTTGCAGGACGCAATTAAAAACGCTGCGGGCATCATC
AAAGAAATCGAAGAGATGATTGCCTCTGAACAACAGTAATATTCGACAGGGATAATTGTT
ATGGCCATTAAAAAACGCAGTGCAACCGTTGTGCCTGGCGCATCCGGTGCGGCAGCGGCA
GTTAAGAATCCGCAGGCCTCTAAAAGCAGCTTCTGGGGTGAACTCCCGCAGCATGTGATG
TCAGGGATTTCACGCATGGTGCCGACCTTAATTATGGGCGGTGTGATCCTCGCTTTCAGC
CAGCTGATTGCTTATAGCTGGCTTAAAATTCCTGCTGATATCGGCATCATGGATGCTCTT
AATAGCGGGAAATTCTCCGGTTTCGACCTCTCCTTACTGAAATTTGCCTGGTTGTCGCAG
TCCTTCGGCGGCGTGTTGTTTGGTTTTGCCATTCCGATGTTTGCTGCTTTTGTGGCGAAC
TCTATCGGTGGCAAACTGGCGTTTCCGGCTGGTTTTATCGGCGGCTTGATGTCTACCCAG
CCGACGCAACTGCTGAACTTCGATCCCAGCACTATGCAATGGGCGACCTCTTCGCCGGTG
CCGTCCACCTTCATTGGTGCGCTGATTATTTCTATCGTTGCCGGTTACCTTGTGAAATGG
ATGAACCAGAAAATCCAGTTACCGGATTTCCTGTTAGCGTTCAAAACCACATTTTTGCTC
CCGATTCTTTCCGCCATTTTTGTCATGCTGGCGATGTACTACGTGATCACCCCCTTTGGC
GGCTGGATCAACGGTGGTATCCGTACCGTGCTGACTGCCGCAGGTGAGAAGGGCGCGCTA
ATGTATGCGATGGGGATCGCCGCGGCGACAGCAATCGACCTTGGTGGCCCGATCAACAAA
GCCGCAGGTTTCGTTGCCTTCAGCTTTACCACTGACCACGTATTACCGGTCACCGCACGT
TCTATCGCAATCGTTATTCCGCCGATTGGTCTGGGGCTGGTGACCATTATCGACCGTCGT
TTAACCGGCAAACGCCTGTTCAACGCTCAACTTTATCCGCAGGGTAAGACCGCCATGTTC
CTGGCGTTTATGGGGATTAGTGAGGGTGCGATTCCGTTTGCGCTGGAAAGCCCCATCACC
GCCATTCCGTCGTATATGGTCGGCGCGATTGTCGGCTCAACCGCCGCTGTCTGGCTGGGC
GCAGTGCAATGGTTCCCGGAATCCGCTATCTGGGCATGGCCGCTGGTCACTAACCTCGGC
GTCTACATGGCGGGGATCGCGCTGGGGGCAGTCATTACTGCGCTGATGGTGGTGTTCCTG
CGTCTGATGATGTTCCGTAAAGGCAAATTGTTAATCGATAGCCTGTAAGAAGGAAAATCC
AGATGACATTACTCGCTTCGCTGCGTGACTGGCTTAAGGCGCAACAACTGGATGCGGTGC
TTCTCTCCTCACGGCAGAACAAACAGCCGCATCTGGGGATCTCCACCGGATCAGGCTATG
TGCTGATTAGCCGTGAAAGTGCGCACATTCTGGTGGACTCGCGCTATTACGCGGATGTAG
AAGCCCGCACGCAAGGTTACCAGCTGCATTTGCTTGACGCGACGCACACGCTTACAACCA
TCGCCAGGCAAATCATTGCCGATGAGCAGTTGCAAACGCTCGGTTTTGAAGGCCAGCAGG
TGAGTTGGGAAACCGCGCACCGCTGGCAGTCTGAACTCAATGCGAAACTGGTTAGCGCCA
CGCCGGATGTGCTGCGGCAAATCAAAACGCCAGAGGAGGTGGAGAAAATCCGCCTTGCCT
GTGGGATTGCCGATCGCGGTGCAGAGCATATTCGCCGCTTTATTCAGGCGGGGATGAGCG
AGCGCGAGATAGCCGCTGAACTGGAGTGGTTTATGCGTCAGCAAGGCGCGGAAAAAGCCT
CTTTTGACACCATTGTCGCCAGTGGCTGGCGTGGGGCGCTGCCGCACGGCAAAGCCAGCG
ACAAGATTGTTGCAGCGGGCGAGTTTGTCACTCTCGATTTCGGTGCGCTGTATCAGGGCT
ACTGCTCTGATATGACGCGCACCTTGCTGGTGAATGGCGAAGGGGTGAGCGCCGAATCTC
ATCCGCTGTTTAACGTCTATCAGATTGTTTTGCAGGCACAGCTCGCAGCAATCTCTGCAA
TTCGCCCCGGCGTGCGCTGCCAGCAGGTTGACGACGCCGCGCGCCGGGTCATTACAGAAG
CCGGTTATGGCGACTATTTCGGTCATAACACCGGTCATGCTATCGGCATTGAAGTACACG
AAGATCCGCGCTTTTCACCGCGGGACACCACGACGCTACAGCCAGGCATGTTACTGACCG
TGGAGCCGGGGATTTATTTGCCAGGGCAAGGGGGCGTGCGCATCGAGGATGTTGTGCTGG
TCACCCCGCAAGGCGCAGAAGTGCTCTACGCCATGCCGAAAACAGTGTTGCTCACGGGAG
AGGCATAATGGATTTATCGCTATTGAAAGCGTTGAGCGAGGCAGATGCGATCGCCTCCTC
GGAACAGGAAGTGCGGCAGATCCTGCTGGAAGAAGCGGATCGCCTGCAAAAAGAAGTGCG
ATTTGATGGGCTGGGATCGGTGCTGATCCGCCTCAATGAATCGACAGGTCCGAAAGTGAT
GATCTGTGCGCATATGGACGAAGTTGGATTTATGGTGCGCAGTATCTCCCGCGAAGGCGC
AATTGATGTGCTGCCGGTTGGCAACGTGCGCATGGCTGCCCGCCAGCTGCAGCCGGTGCG
CATCACCACCCGTGAAGAGTGCAAAATTCCAGGCCTGCTTGACGGCGACCGGCAGGGGAA
TGACGTCAGCGCCATGCGCGTGGATATTGGCGCGCGCTCGTATGACGAAGTGATGCAGGC
GGGAATTCGTCCAGGCGATCGCGTCACGTTCGATACCACTTTTCAGGTTCTCCCCCACCA
GCGAGTGATGGGGAAAGCCTTTGATGACCGCCTTGGTTGCTATCTGCTGGTGACGTTACT
ATGTGAGCTGCACGACGCCGAACTGCCTGCGGAAGTGTGGCTGGTGGCAAGTTCCAGCGA
AGAGGTGGGATTACGCGGCGGGCAAACTGCCACCCGCGCGGTGTCGCCGGACGTCGCCAT
TGTGCTTGATACCGCCTGCTGGGCGAAAAACTTTGATTATGGCGCGGCTAACCATCGCCA
GATTGGTAACGGCCCGATGCTGGTGTTAAGCGACAAGTCGCTGATTGCGCCGCCAAAACT
TACCGCCTGGGGCGAAACCGTGGCGGCAGAAATTGGCGTGCCGTTGCAGGCAGATATGTT
CAGCAACGGCGGCACGGACGGCGGGGCGGTGCACTTAACCGGCACCGGCGTGCCCACAGT
GGTGATGGGGCCAGCAACCCGCCATGGACATTGCGCCGCATCGATTGCCGATTGCCGCGA
CATTTTGCAGATGCAGCAACTTTTATCTGCCCTGATTCAACGTCTTACGCGTGAGACGGT
TGTTCAACTGACGGATTTCAGATGATCTCCTGATTAACCCGGAGCGGTTATGCTAACGAT
TCAATTTCTCTGTCCTTTGCCTAACGGTCTTCATGCCCGTCCGGCGTGGGAACTTAAAGA
ACAGTGCAGCCAGTGGCAAAGCGAAATCACCTTCATCAACCATCGCCAGAACGCAAAGGC
CGATGCCAAAAGCTCGCTGGCGCTGATTGGCACCGGCACCTTATTTAATGACAGTTGCAG
CCTGAACATTAGCGGCAGCGATGAAGAGCAGGCGCGGCGCGTGCTGGAAGAGTACATCCA
GGTGTGCTTTATTGACAGCGACAGCGTTCAGCCAACGCAGGCAGAACTGACGGCGCATCC
GCTGCCGCGTTCATTAAGCCGCCTTAACCCGGATTTACTGTACGGCAATGTGCTGGCAAG
CGGCGTCGGCGTGGGTACGCTGACCCTGTTACAAAGCGACAGCCTCGACAGTTATCGGGC
AATCCCCGCCAGTGCGCAAGACTCCACCCGGCTGGAGCACAGCCTGGCAACGCTTGCCGA
GCAACTGAACCAGCAATTGCGTGAGCGTGACGGCGAAAGCAAAACTATCCTCAGCGCCCA
TTTGTCGCTGATTCAGGATGATGAGTTCGCGGGCAATATCCGTCGCCTGATGACAGAACA
GCATCAGGGGCTGGGGGCGGCGATCATCAGCAATATGGAGCAGGTTTGCGCCAAACTATC
TGCTTCTGCCAGCGATTATCTGCGCGAGCGGGTTAGCGACATTCGCGATATCAGCGAACA
GTTGCTGCATATCACCTGGCCGGAACTGAAGCCGCGCAACAATCTGGTGCTTGAAAAACC
GACCATTCTGGTGGCTGAAGATTTAACCCCAAGCCAGTTTTTGAGCCTTGATTTGAAAAA
TCTTGCGGGCATGATTCTGGAGAAAACCGGGCGCACCTCGCATACCCTGATTCTGGCCCG
CGCCTCGGCGATCCCGGTACTGAGCGGCCTGCCGCTGGATGCGATTGCCCGTTATGCCGG
GCAACCTGCAGTGCTTGACGCCCAGTGCGGCGTGCTGGCGATTAACCCGAATGACGCGGT
GAGCGGTTATTATCAGGTCGCGCAGACGCTGGCGGATAAACGCCAAAAACAACAGGCGCA
GGCTGCCGCGCAGCTGGCTTATTCCCGTGATAACAAGCGTATTGATATCGCGGCGAATAT
TGGCACCGCTCTGGAAGCGCCTGGCGCGTTTGCCAACGGCGCGGAAGGCGTCGGGCTGTT
CCGTACCGAAATGCTCTATATGGATCGCGACAGCGCGCCGGACGAGCAGGAGCAATTTGA
AGCCTACCAGCAGGTGCTACTGGCAGCGGGCGATAAGCCGATTATCTTCCGCACAATGGA
CATCGGAGGCGATAAAAGCATTCCTTATCTGAATATTCCCCAGGAAGAGAACCCGTTCCT
CGGCTATCGCGCGGTACGTATTTACCCGGAATTTGCTGGCCTGTTCCGCACTCAACTGCG
GGCCATTTTGCGCGCCGCCAGTTTCGGCAACGCCCAGTTGATGATCCCGATGGTCCACAG
CCTCGATCAGATCTTATGGGTGAAGGGCGAGATCCAAAAAGCGATCGTTGAGCTTAAGCG
CGATGGCCTGCGTCATGCAGAGACGATTACGCTGGGTATCATGGTGGAAGTGCCGTCGGT
GTGCTACATCATCGATCACTTCTGCGATGAGGTCGATTTCTTCAGTATCGGCTCCAACGA
TATGACCCAGTATCTTTATGCGGTCGATCGTAATAACCCGCGCGTATCGCCGCTATATAA
CCCGATTACGCCATCGTTCCTGCGCATGTTGCAGCAAATAGTTACCACTGCGCATCAGCG
GGGCAAATGGGTAGGCATTTGCGGTGAACTGGGAGGCGAAAGTCGTTACCTGCCGCTACT
GCTTGGGCTGGGCCTGGATGAGCTGAGTATGAGTAGCCCGCGCATTCCGGCGGTGAAAAG
CCAGCTTCGTCAACTGGATAGCGAGGCGTGTCGGGAACTGGCACGTCAGGCGTGTGAATG
TCGCAGCGCGCAGGAAATTGAAGCGTTACTCACCGCCTTTACGCCGGAAGAAGACGTTCG
CCCGCTGCTGGCGCTGGAGAATATCTTCGTTGATCAGGCCTTTAGCAATAAAGAGCAGGC
GATCCAGTTCCTGTGCGGTAACCTCGGCGTTAACGGGCGCACTGAACATCCGTTCGAGCT
GGAAGAGGATGTCTGGCAGCGGGAAGAGATTGTCACCACTGGCGTTGGTTTTGGCGTGGC
GATCCCGCACACCAAATCGCAGTGGATCCGTCATTCCAGTATCAGCATTGCCCGGCTGGT
GAAACCGGTTGACTGGCAGTCAGAAATGGGCGAAGTCGAACTGGTGATCATGCTGACGCT
GGGCGCTAACGAAGGGATGAATCATGTGAAAGTCTTCTCGCAGCTGGCGCGTAAACTGGT
GAATAAAAACTTCCGCCAGTCGTTGTTTGCCGCGCAAGATGCACAAAGTATCCTGACGCT
GCTGGAAACAGAATTAACCTTCTGACGTTAGCCCTGAAAACGGGCGCTGTACTCTCCCGG
CGTCAGACCAAACTGACGCCGGAAAACGCGACAAAAATAGTCGCTATCCGGAAAACCGCA
ACGCTGTGCCACTTCATGAATTGACAGATGATATTTCTGCAAAATCATCCTCGCCTTCGC
CATTCGCACCCAACGCACATACTCGATAAAACGCATCGTTCCATGCTGAGCAAACAGTTT
TGACAGATGATTGGGCGTGATATTAAAAAACTGCGCCACGCTCTCGCGGGTGAGCGGCTG
GGCATAATTATCCTGAACCCAGTTACAAATGCTGTGATAGAGAAAATCGCCGCGCGGCTG
CGAATTGCCCGGCGGCATATTCACCACGTTACGGCAAAGATGCAGCAAACTTAACACCAG
CGGCTGAATGATATTTTGCTCCAGCGGCGAACGGCTAAGATGGGTGAGGGCGGTAAGCAT
CGCTTCACCTTCACCGCGTTGCAGGCTGGGAAGCTGGATCTGGCGAGCAGGATGCAACAA
CGACGTGGTGCGGCTATCGTAAAACGATAACCCAAGCCAGGTCGGAGCGAACACCAGGCT
TAACAGCATCACCGGTTTGTTGTTGACCGGTAAATTAGCCGCGCGCGCCGGAATAAACAG
CATTTCTCCTTCCACCAAACGTTGCTGCTTTGCTTCCAGCAGATTGCCGTATTCGCCGCG
CAGCACGATATCCAGACGGGGAAAATCAATACATAAACTGCCCACCGGCAACGAGGCAGG
CTGGCTGGCAAAACAGACGCGCCCCAGTAGTTGCGGGTTAAGCACCAGGCCGCTGAACAG
ATCGGCGAAAAATTGTTGATCGGCGGGCAAGCCTGGTGCTTTCATGAAAGTTCCCGATTA
AAGATGCATTAACTGGCGAAATTCTTTTACTTTGCTGCGGCTGACTGGCACTTCAAAATC
CAGATCTTTCAGCCGCAGAATATAGGTGTTATTAAACCACGGTTCGATTTCGCGGATTTT
GTTCAGATTGACACAAAATGAGCGATGGCAGCGGAAAAAATGCGACGGCGGCAGTTTGCT
GCAAAATTCGGTAATGTTCATCGGCATTACGTAGGATTCACGCCGCGTATAGACAAAGGT
CATTTTCTCGTGCGCTTCGGCGTAATAGATATCGTTAATTGGCGTGACGATTATTCGCTC
ATCTTTCACCAGATTAATGGTGTCATTCTCACGCGTTACCGTCGCGGCAGGCGTGCTGCT
GGTCTGCTGTTGCTGCCAGGCCGCTTCCAGTTTTTGCAGCATCCCGGTAATGCGAGACTC
CTGATACGGTTTGAGAATGTAGTCAAACGCCTCAAGTTCAAACGCTTCTACCGCATGTTC
TTTCCACGCGGTGATGAACACAATAAACGGTTTATGGGCGAACTGGCTGATGTTTTGCGC
CAGCAACACACCATCCAGCGACGGAATATTGATATCCAGAAAAATGGCGTCGACGCGGTT
ATGCTGCAAAAACTTCAACACGTCCAGACCGTCGTCAAAGGTGCCGACAATCTCCATCTG
GCTGTGCTCTTTAATTAGCCAGCTCAGTTCCTGTTGTGCCAGGAATTCGTCTTCAACAAT
GATGACTTTCACAATATCACTCCGGCTCAAAGCAATAACGTAGCCTGTGAGGCGACTGGG
GTGCGTTGGTTAGGAATGTAAAACGCAATTTCCGTTCCTGGTTCCAGGCGGCGGATATGC
AGCCCCTCGCCATACAATAACTTCACGCGATGATGAACATTCAGCAGGCCAATTTTATTG
CCCGGCATTTCATTCGCTTCGACCCGCTCAATCACCTTTGGATCGATGCCGTGCCCGGTA
TCCCGCACCGCAATGCGTACCCGATTGCCGCACTCTGCAACGCTGATGGTGACAACGCCT
TTACCTTTGCAAGGCTGGATACCGTGGACAATGGCATTCTCCACCAACGGCTGGATCAGC
AGGCTGGGAATGCAGCAATTCACCTCTTCATCAATATCATAGATAACCGTCAGCTTGTCG
CCAAAGCGGGCCTGCTCAATGGCAATATAGTCTTTAATTTGATACAGCTCTTTTTTGATA
TCGATTTGCTCATCGTCTTTTAATTCAATGTTATAGCGCAGATAACGCGACAGATTAAAG
ATCAGCTGGCGAGCGGTATCCGGATTCAGACGGATCGACGATGAAATAGCGTTCAAAGCG
TTAAACAGGAAATGGGGATTAATTTTGCTTTGCAGGGCGCGAAGCTCTGCCTTATTTGCC
ATTTCACGTAGCTGCTCGGCGCGTGAAACCTCCAGTTGCGTGGAGATGATTTGCGACAGA
CCAACCGCCATTTCCTGTAATGACGAGGTTATCTGATGCGCGTGGCAGTAGTAAATTTTC
AGCGTTCCGGTCACAACGCCTTTCTCCCACAATGGGATCACCAGCATGGAATGAATCTCT
GGTGTGCGGTGGGCTTCATCATTGTTTTTAATGATGATTTTTCCGTAATTCATCGCCTGA
CGGGTAGTCGGGCTAATGAAGTCATCGCCATTCTGATAGTTATGTTCACCCACGCCAACA
TAGGCCAGCACATGATCGGTATTGGTAATCGCCACCGCATCGGCGTGAATGTCATCGCGA
ATAATTTCACAAACTTTGCGTAATGACTCGCTATTGACATGGCGAAACAGAGGTAGCGTT
TTGTTGGCGATATCCAGCGCCAACTTGGCCTGCCGCGCGGCGCTGGCCTCTTTTTCGCCC
TCAACGCTTTGCACCAGAAGCACAATAAAGCCGATACAGACGCTGCCGAGGATCATTGGA
ATCCCGATTTTAGAGACGATATCGATCCCCAACGCGGTAGTTGGTGCCCAGACAATCACC
AGAATCATGGTCAACGTTTCACACAACATGCCGCCGAGAATACCGACGCGCCAGCGCTGT
GCTTTGGGGATTTTCAGGTTGATCCAGCCCGATATACAACCAGCCAGAATGCTGGTGATA
AAGCAGGGGATCGCCGTCACGCCGCCGATATCAATTAAATAACGATGAATACCCGCAATC
ACGCCGGTAATGATGCCCACCCACGGGCCAAACAGAATCCCGCCGGACATCACCGCGATA
ATACGTACGTTCACCAGCGAGCCTTCTACGGGAACGCCGGACCAGGTGCTGAACAGGGCG
AACAGCGAGAAAATGGCGGTAACGGCGAGCAACTCTTTCGGTGAGTGTGCCGACTTGTGC
AACAGTTCGCGAAACAGGCGGATACGGATGAGAAAGAACAGGCAGATAAGCATTAACGCT
GCCCGATCGAAGACCGCCAGCAGCATGTTGAATATTTCGTGCACGGGTGACTCTGAATAA
GGATTAAACCTCTATGATAGGTAACCTGAAGGCTGATGACCAGCAGGCCGTTTTTGAGGA
AAAACCACAATTTTAAAATGGGATTGATAGATAAATGGTGTATTAGCAATGCATCTCTTG
ATAATGCACTTCTGGTTAGTAAATTTATTGAAATTATTATGTTAATAAAATGAGTGGTAA
TTTTCTTGTTAGCGCAGATAAATTTCCTGTTTTTAAAGCAGAGTTCCTCATTTAACGTCA
TTAATAAAAATGTTCTAAAACGCTGGACAGACAGAAATTAATCAGGCTATTTTCAAAACA
GCCACCATCGTGGCAGCGTCGCTCGGACGGTCCGGGCGCTAACGTTAATCTGAGGAAATT
ATGGCTGACACTCGCCCTGAACGTCGCTTTACGCGCATTGATCGTCTCCCGCCCTATGTT
TTTAACATTACCGCTGAACTGAAAATGGCTGCGCGTCGGCGCGGCGAAGATATTATCGAT
TTCAGTATGGGTAACCCGGACGGTGCGACTCCGCCGCATATCGTCGAAAAATTATGTACT
GTGGCCCAGCGCCCGGACACGCATGGTTACTCCACTTCACGCGGTATTCCGCGGCTACGT
CGCGCCATTTCCCGCTGGTATCAGGATCGCTACGACGTTGAAATCGACCCGGAATCAGAA
GCCATCGTCACTATTGGTTCGAAAGAGGGCCTGGCGCATCTGATGCTGGCGACACTGGAT
CACGGTGACACAGTGCTGGTGCCGAATCCAAGTTACCCCATTCATATTTACGGCGCGGTG
ATTGCCGGGGCTCAGGTACGCTCAGTGCCGCTGGTGGAAGGTGTCGATTTCTTCAACGAA
CTGGAGCGCGCCATTCGTGAAAGTTATCCGAAACCGAAGATGATGATCCTCGGCTTCCCG
TCGAACCCAACCGCGCAATGCGTGGAACTGGAGTTCTTCGAAAAGGTTGTGGCGCTGGCG
AAACGCTACGATGTGCTGGTGGTCCATGACCTGGCCTATGCCGATATCGTCTACGATGGC
TGGAAAGCGCCGTCAATCATGCAGGTGCCGGGTGCACGCGATGTGGCGGTCGAGTTCTTT
ACGCTGTCGAAAAGCTACAACATGGCGGGCTGGCGTATCGGCTTTATGGTTGGCAACAAA
ACGCTGGTCAGCGCCCTGGCACGTATTAAAAGCTATCACGATTACGGCACCTTTACGCCG
TTGCAGGTGGCGGCGATTGCGGCACTCGAGGGCGATCAACAGTGCGTGCGCGACATTGCC
GAACAGTACAAACGCCGCCGTGATGTATTGGTTAAAGGGCTGCATGAAGCGGGCTGGATG
GTCGAAATGCCGAAGGCTTCGATGTATGTCTGGGCGAAAATCCCTGAACCTTACGCTGCC
ATGGGCTCGCTGGAGTTTGCCAAGAAATTACTTAACGAAGCGAAGGTTTGTGTCTCGCCG
GGGATCGGCTTTGGCGACTATGGTGATACGCATGTGCGCTTTGCACTGATTGAAAACCGC
GACCGTATTCGTCAGGCGATTCGTGGGATTAAAGCGATGTTCCGTGCCGACGGTTTACTA
CCCGCCAGCAGCAAACATATTCACGAAAACGCGGAATAAACACCGACCTCAGAAATGCAA
ACAGGAGCCTGATGGCTCCTGTTTTTCATTGCACAGTTTGCTTTTAGATCATCAGGGCAA
AAGTACCGGCCCAAACGATGACCATAAAAGAAATGCCCATAAAGAAATATTTCACTTTAC
ATCTCTCCGCGTAATTGCTGTTACGCCTGAATGACTTCATTACACCTGATACAGTGAGTT
GACACCGGGCAAAACGACCTTAAAAGTCCTGTATTTTACCGTGGGCATCACCCCAGAATT
CTGAGCTAAACTGCTCGAGACGGCGCTAATGTACGCCTAAAACTGAAACGAGACAAGAGG
CATTTTCTTATTTACTTTTAGTAACTTACAGGTGTCTCATATCGGCGACAGTTTAATTTC
TGACGGTAATAATTAGATATTCAGCGAAGGAAAAAACCTTAAGAAAAAAGCCATAAAAAC
CATGAGGTTATTATGGCTTATGTGAGGAGGTAAAGAGTCAGAGCAGTTTGTTAAATGTAT
AACGACGATTCTCCCACCGGGCGCGTTTTAAAGCGACGGTGGATCCAGAGGTACTGCTCC
GGTGCGCGCATGATCTCTTTCTCGATAATCTTGTTCATATAGGCAGCGGCTTGATTTTCA
TCTGTCGGGTAGCCTTCCATCTCTGGGGTGATGAACAAACGATATCCGCTGTAATCCGCT
TTTCTTACCATCGTTACGGTCAACATGGCTGCGCCAGAGAGACGGGAGAGAACATAGGTG
CCATTGGTTGTGGCGACATTTTCTACCGCAAAGAACGGCGCGAAGGAGCTGCCTTTACGA
CCATAATCCTGATCGGGAGCAAACCATACCGCTTCACCTTTCTTCAGTGCACTGACAATG
CCGCGCAGATTATTTCTGCCGATCATCGCTTTGTTAGAGCGCATGCGACCACGGGTCTGC
ACCCATTCCATCAGCTGATTATTATGTGGACGATAGGTAGCCATCATTGGCTGACAAAGT
CCCATCACGCGGCCGCCCAGTTCCAGCGACATAAAATGGACGCCGACAACCATTACGCCG
CGATTTTGCATTTGTGCGCGTTTAAGGTTATCCAGCCCTTCAACATCAAACCATTTACGT
ACGCGACTGTCGGGCCAGAACCACGCCATGCCGGTTTCTACCAGCGCCATGCCGAGTGAA
CGAAAGTTTTCGGCAATCATCTTCTCGCGTTCTTCCGCAGAATGCTGCGGGAAGCAAAGT
TCCAGGTTTTTACGGGCGATAGATTCACGCCGTTTCAGGAATGGTCGCGCCATTGCGCCA
ATACGCGTGCCGAGAAAGCAGAGAACAGGATAAGGAAGCTGTACCCAAAGCCAGAGTACA
CCAAGCCCAAACCATGTGAGCCAGTAGCGAGGATGCAGAAACTCGCGGGAAAATTTGCAT
TGTGGAAACATAGTTACCTTCTGTAGATACGAATTGTTGTATCGCAGAAGATTCCATGTC
GACAGCGGTACACTCAATTGGTTGGGCCATCATGTACGACAATGGTTCCTGTAAAGAGTG
TAAAGACTAGTCAGGACATAACCACGAGGAGCATGAATGCGGTGGCTCTACTTTATCACT
GGCTGACTGCTTTCAGCTACTGATTATTAATCGTGCAAAGTAAAAAATTTTCCGCATGCA
ATAGTGTTGCATTTAACATGCTGTTTTCATTGATGCTTAGCAAAAATTGCCAGAGGGTAA
GGATTGTCTTACTATTAAAGTGACTGAAGTTACAGGTTTTTTAGCGCGGCAGGAGGTTGA
GCTATGATTTATTTATGGATGTTTCTCGCCCTGTGTATTGTCTGCGTAAGCGGATACATC
GGTCAGGTACTGAACGTGGTATCGGCGGTCTCTTCTTTCTTCGGCATGGTGATCCTCGCT
GCACTCATTTATTACTTCACCATGTGGTTAACTGGCGGTAATGAACTGGTGACGGGGATA
TTTATGTTTCTTGCCCCGGCTTGTGGCTTGATGATTCGCTTTATGGTGGGGTATGGCAGG
CGATAGTGGGTCAGGATGGCTCATTTGGGCAGGTGTTCACATCAGCATCAGACATGATTG
TTCACCTGCCAGGTGACAGACGCTATCGCACAGGATGAATAAGATAATTCGCCTTTGTCG
GAAAAGGGGGCGTGGTTTCTTCTGTGAGGTTTAATGGTGGCGCATCTTCTCTCATCTTAA
ACAAAATTGCCTGTGATGGCTGAATTTTTGTAGAGTGAGTTGTCGTCATCGCTGATGTTT
TTTCCGTCTCTTTATAGCTCCTCTCACTTCCACCACCAGAAATGGAAAATGCAAAAACAT
TGCATGCCATAATAGAGACCAATAAAAATAAGCTAAAAAGTATTAAGTTTACTTTCATAG
AAAGTTATCCTGAAAATGGTTCACTGAGAATGTACGATGTTATGGCTGTATTTACATATA
ATTAATCAATATTTACATCGATATAATAAATGACATCTCTTTGTGGTACATAAGAATAGT
TCTCTGTGACAGGAAGCATATTCCTACAATTGTAAGACTAAAATACTTCTTGCGATAATA
ACTACAACTGTAAGATAACCCTTTCAAAATGACCGTTGCTCTCTGATTTCTCATTTCATG
CTCACCCAATATGATGGCGGCGTTTTCTAAAACTGTTAAAGAATGAGGTAAGTATGAAAC
GTTTAATTATGGCCACGATGGTCACAGCAATTCTGGCATCTTCAACTGTATGGGCTGCTG
ATAATGCTCCGGTAGCGGCACAACAGCAAACTCAGCAAGTTCAGCAAACCCAGAAAACGG
CAGCGGCAGCAGAGCGTATCTCTGAACAAGGTTTATATGCGATGCGTGACGTGCAGGTAG
CGCGCCTGGCTCTGTTTCATGGCGATCCGGAAAAGGCAAAAGAACTGACCAATGAAGCTT
CCGCTTTGTTGTCAGATGACAGTACCGAATGGGCAAAGTTCGCTAAGCCAGGTAAAAAGA
CCAATCTCAATGATGACCAATATATTGTCATTAATGCATCTGTCGGAATTTCTGAGAGTT
ATGTAGCAACACCCGAAAAAGAAGCCGCGATAAAAATTGCCAATGAAAAAATGGCGAAAG
GGGATAAAAAGGGCGCAATGGAAGAGCTTCGCCTGGCCGGTGTTGGCGTAATGGAAAACC
AATATCTGATGCCGCTTAAACAGACTCGTAATGCACTTGCTGATGCGCAGAAACTGCTTG
ATAAAAAGCAATACTACGAGGCAAACCTGGCGCTTAAAGGTGCGGAAGATGGAATCATCG
TCGATAGCGAAGCACTGTTTGTGAACTAATGCTGACAGGCAGTATATTGAGGTAAAGGAT
TTAACTCCCTCCAGCCGACAATTTTTTATGACCACAATACGACAGGTTGTGGTCATAAAA
TTATTTGGCGCTCGCGGTTCTATAAACTCGCATTTTATATTCCTCAAAGTAAACCGCAAT
AATCCCGTGTCATCACAAATCATTTAATATGTTATATTTTATGGTACGCTTTAAAAAGCG
TAATCATACCCTTACTTGTAAATCACCGGCGCTTCTTACAGTTGTAAGAATAACATCACA
AATGTCGCGACTCTCTCTGATTACCACGAACCAATATTTATCATATTCTTCTTTTCGTCC
TCACTACTTACCATGCAGAAAGGAATTGGAAGTAGCGATGAAATGATTTTCAGTACTTGA
TACAGGAATGTGAAAATATCGAGTGCAGCTACGACGATATTTTGCAGATTATTTATAGAG
GCGTTATGCCTTAAATAAACGCTAAATTAACACATATTTAATTAACTAATAGGTATTGCT
ATGTCAACTCCACTTCAAGGAATTAAAGTTCTCGATTTCACCGGTGTGCAATCTGGCCCA
TCTTGTACTCAAATGCTGGCCTGGTTTGGCGCTGACGTCATTAAAATTGAACGCCCCGGC
GTTGGTGACGTAACGCGTCACCAGCTGCGAGATATTCCTGATATCGATGCGCTTTACTTC
ACCATGCTTAACAGTAACAAACGTTCTATTGAATTAAATACCAAAACAGCGGAAGGCAAA
GAGGTAATGGAAAAGCTGATCCGCGAAGCTGATATCTTAGTCGAGAACTTTCATCCAGGG
GCCATTGATCATATGGGCTTCACTTGGGAGCATATTCAAGAAATCAATCCACGTCTGATT
TTTGGTTCGATCAAAGGGTTTGATGAGTGTTCGCCTTATGTGAATGTAAAAGCCTATGAA
AACGTTGCTCAGGCAGCGGGTGGCGCGGCATCTACTACGGGTTTTTGGGACGGTCCGCCG
CTGGTAAGCGCTGCAGCGTTGGGTGACAGCAACACCGGAATGCATTTACTGATCGGTTTA
CTTGCTGCTTTGCTGCATCGAGAAAAAACGGGGCGTGGGCAACGAGTCACCATGTCAATG
CAGGATGCCGTATTGAACCTTTGCCGCGTGAAATTACGCGACCAGCAGCGTCTCGATAAA
TTGGGTTATCTGGAAGAATACCCGCAGTATCCGAATGGCACATTTGGTGATGCAGTTCCC
CGCGGTGGTAATGCGGGTGGTGGCGGTCAGCCTGGCTGGATCCTGAAATGTAAAGGCTGG
GAAACAGATCCTAACGCCTATATTTATTTCACTATTCAGGAGCAAAACTGGGAAAACACC
TGTAAAGCCATCGGCAAACCAGATTGGATTACCGATCCGGCATACAGTACAGCCCATGCC
CGACAGCCACATATTTTCGATATTTTTGCTGAAATCGAAAAATACACTGTCACTATTGAT
AAACATGAAGCGGTGGCCTATTTGACTCAGTTTGATATTCCTTGTGCACCGGTTTTAAGT
ATGAAAGAAATTTCACTTGATCCCTCTTTACGCCAAAGTGGCAGTGTTGTCGAAGTGGAA
CAACCGTTGCGTGGAAAATATCTGACAGTTGGTTGTCCAATGAAATTCTCTGCCTTTACG
CCAGATATTAAAGCTGCGCCGCTATTAGGTGAACATACCGCTGCTGTATTGCAGGAGCTG
GGTTATAGCGACGATGAAATTGCTGCAATGAAGCAAAACCACGCCATCTGATATTAACGG
GGGCTTCTGGCTCCCAATTTATAAAAATTTCGAGGTTATTAATCATGTCAGATCAACTTC
AAATGACAGATGGTATGCATATCATCGTTGAAGCATTAAAACAGAATAATATTGACACTA
TTTATGGTGTTGTAGGTATTCCTGTGACGGATATGGCGCGCCATGCCCAGGCGGAAGGCA
TTCGTTATATTGGTTTTCGTCATGAGCAGTCGGCAGGCTATGCCGCTGCGGCAAGCGGTT
TTCTTACCCAAAAACCAGGGATCTGCCTGACAGTGTCTGCGCCAGGATTCCTCAATGGTT
TGACCGCATTGGCCAACGCAACGGTAAATGGTTTTCCGATGATCATGATTAGCGGCTCCA
GCGACCGCGCGATCGTCGACCTACAGCAAGGTGATTATGAAGAGCTGGACCAAATGAATG
CGGCAAAACCGTATGCCAAAGCAGCATTTCGCGTTAATCAGCCGCAGGATCTTGGCATTG
CATTGGCACGCGCTATCCGGGTCTCGATATCGGGTCGCCCTGGCGGAGTTTATCTTGATT
TGCCAGCAAATGTCCTGGCCGCGACGATGGAAAAAGACGAAGCGTTAACCACGATTGTAA
AAGTTGAAAATCCGTCGCCAGCATTATTGCCATGCCCGAAGTCAGTCGCTAGCGCAATTT
CGCTTTTAGCAAAAGCTGAACGACCATTAGTTATCCTTGGCAAAGGCGCGGCGTATTCAC
AAGCTGATGAACAGCTTCGTGAATTTATTGAAAGTGCCCAGATTCCATTCCTGCCAATGT
CTATGGCGAAAGGGATCCTCGAAGATACGCATCCACTTTCTGCGGCAGCTGCGCGTTCGT
TTGCCCTGGCAAATGCTGACGTTGTCATGCTTGTTGGTGCACGACTGAATTGGTTACTGG
CACACGGTAAAAAAGGATGGGCGGCAGATACACAGTTTATTCAACTGGATATTGAACCGC
AGGAAATTGACAGCAACCGCCCCATTGCTGTGCCAGTCGTTGGTGATATTGCATCCAGTA
TGCAAGGTATGCTGGCAGAACTGAAACAAAACACATTTACGACTCCACTGGTATGGCGCG
ATATTTTAAATATCCACAAGCAGCAAAATGCACAAAAAATGCATGAAAAATTAAGTACAG
ATACCCAACCATTAAATTACTTTAATGCATTAAGTGCTGTGCGCGATGTATTGCGCGAGA
ACCAGGATATTTATTTAGTTAATGAAGGGGCAAATACCCTGGATAATGCACGAAATATTA
TTGATATGTATAAACCACGTCGTCGTCTGGATTGTGGTACCTGGGGTGTCATGGGCATCG
GTATGGGCTATGCCATCGGTGCTAGCGTGACTTCTGGTTCTCCGGTTGTCGCCATTGAAG
GTGATAGTGCTTTTGGTTTCAGTGGGATGGAAATTGAAACGATTTGTCGATATAACCTGC
CGGTAACGATCGTTATTTTTAATAATGGCGGCATCTACAGAGGAGACGGTGTTGATCTCA
GTGGCGCTGGTGCACCATCACCAACAGATCTGTTGCACCATGCAAGGTATGACAAATTAA
TGGATGCGTTTCGTGGCGTTGGCTATAACGTCACCACGACAGATGAACTTCGTCATGCTT
TAACCACCGGTATTCAGTCGCGCAAACCGACCATTATTAATATGGTCATCGACCCTGCAG
CAGGAACTGAAAGTGGCCATATTACCAAACTGAACCCAAAACAAGTCGCTGGTAATTAAA
TACTGACATCGTCTCCTCTTGCCAACTCATTATGCGATGGTGAGGGGACCCTTATCGGAA
ATACTATTATGCTAACATTTTTTATTGGCGATTTATTGCCTATTATCGTAATCATGCTGT
TGGGTTATTTTAGCGGCAGACGAGAAACATTTTCAGAAGATCAAGCTCGGGCATTTAATA
AACTGGTATTAAACTACGCGCTTCCTGCGGCTCTATTTGTATCTATTACCCGGGCAAACA
GGGAAATGATTTTTGCGGACACTCGTCTGACCCTTGTATCACTTGTGGTTATTGTCGGAT
GTTTCTTTTTCTCCTGGTTCGGTTGCTACAAATTTTTTAAACGTACTCATGCAGAAGCAG
CTGTATGTGCATTAATTGCAGGTTCACCTACCATTGGATTCCTGGGGTTTGCAGTTCTCG
ATCCTATTTATGGTGATTCCGTATCAACAGGTTTAGTGGTAGCAATTATTTCTATTATTG
TTAACGCAATTACTATTCCTATTGGTCTGTATTTGCTGAATCCTTCCTCAGGAGCGGATG
GTAAGAAGAATAGTAATCTGAGCGCATTAATTTCTGCGGCAAAGGAGCCAGTTGTATGGG
CACCTGTTCTGGCAACGATCCTGGTGTTGGTTGGGGTAAAAATTCCGGCAGCATGGGACC
CAACCTTTAATCTGATTGCGAAGGCTAACTCAGGGGTAGCGGTATTCGCTGCGGGGTTGA
CTCTGGCTGCACATAAATTCGAGTTCAGTGCCGAAATTGCTTATAACACCTTCCTGAAGC
TGATTCTGATGCCACTGGCGCTGCTTCTCGTTGGTATGGCATGTCATTTGAACAGCGAAC
ATTTGCAGATGATGGTACTGGCAGGCGCATTACCGCCGGCATTCTCCGGAATCATTATTG
CCAGCCGGTTTAATGTCTACACCCGCACTGGTACAGCGTCATTGGCTGTGAGCGTACTGG
GCTTTGTCGTCACGGCTCCCTTGTGGATTTATGTCAGTCGACTGGTTTCATAATTAATCA
TGTTATTGATTTTACATAAATGCCGAAGTGTCTTTTCACCTTCGGCTTTTTTCAAGGCAT
AAGCAAATGACAAATAATGAAAGCAAAGGGCCGTTTGAAGGCTTATTAGTTATCGATATG
ACACATGTCCTTAATGGACCTTTCGGAACTCAACTTCTTTGTAATATGGGCGCAAGGGTA
ATTAAAGTTGAGCCGCCGGGCCATGGTGATGATACCCGCACATTTGGTCCCTATGTGGAT
GGACAGTCACTCTATTACAGTTTTATTAATCATGGCAAAGAGAGTGTGGTTCTTGATTTA
AAGAATGATCACGATAAAAGTATATTTATAAATATGCTTAAACAAGCTGATGTATTAGCT
GAGAATTTTCGCCCAGGTACAATGGAAAAACTAGGGTTTTCATGGGAAAGGTTACAAGAA
ATCAACCCGCGCCTCATATATGCTTCATCGTCAGGTTTCGGACATACCGGTCCGCTAAAA
GATGCTCCTGCCTACGATACCATCATTCAGGCAATGAGCGGGATAATGATGGAAACAGGG
TACCCTGATGCTCCGCCAGTGCGTGTTGGTACCTCTCTTGCGGATCTATGCGGCGGTGTC
TATTTATTCAGCGGAATAGTGAGTGCACTTTATGGCCGCGAAAAGAGCCAGAGAGGGGCG
CATGTCGATATAGCGATGTTTGATGCTACTCTGAGTTTTCTGGAGCACGGGCTGATGGCA
TATATCGCGACTGGGAAGTCACCACAACGTTTGGGAAATCGCCACCCCTACATGGCACCT
TTTGATGTTTTCGATACTCAGGATAAGCCGATTACGATTTGTTGTGGTAATGACAAGCTT
TTCTCTGCGTTATGCCAGGCACTGGAGCTTACGGAACTGGTTAATGATCCCAGATTTAGC
AGCAATATTTTACGCGTACAAAACCAGGCTATTCTTAAACAATATATTGAGCGGACGTTA
AAAACGCAGGCAGCTGAAGTTTGGTTAGCCAAAATACATGAAGTTGGTGTGCCCGTCGCG
CCGTTATTAAGTGTGGCTGAGGCCATTAATTTGCCACAAACTCAGGCGAGAAATATGTTG
ATTGAAGCCGGAGGAATAATGATGCCAGGTAATCCGATAAAAATCAGCGGCTGCGCGGAC
CCGCATGTTATGCCGGGAGCGGCAATGCTCGACCAGCATGGGGAACAAATTCGCCAGGAG
TTCTCATCATAAATGTAAGATGTGCTGGTAAATAGCTCCCACATTTGAACATTGTGGGAG
CCACTATTTAGTTATTTTGTTGACAGAAAACAGCAATCTCCTGGTCCAGCTCTGCAATGT
GTTCTTTTACAGAGTTCAGCAACTGAAGAATTTCAGGCTTACTGTCATCTGAAACAGGTG
TTATTTCTAACTGATGGCTAATATTAATCAACTTTTGCAAATTCAGGATGTTAGCCGCAC
CGTGGATGCGATGAATACATTGATGGAAAGTTCTGTTATCGCCAGCTTCTAGTGCATGAA
ACGCAGCGGGTAGATCTTTATGCGTTTCATGCTGGAAAGTCATGAGAATCTCCTGCATCA
GTTGTAGATCGTTCGCCGTATTATTTTTCAGGGCTTCGATATCAAGGTGGCGATACTGAG
GTGCAATATGCGCAACCTGGTGTAACTGACTTAAATGTGTTTTCAGTACATCCAGGGTCA
ACGGTTTGAACAAACATAAGTTCATGCCGCAATTTAACCCTTTTTCACGTTCGTTAGCCT
GTGCGTTGGCTGTAAGCCCCCAGATGGGTAAGGAAGAATTTTGCTCACGGAGTTTGCGAG
TCAACTCAAAACCATCCATATTCGGCATATTAACGTCAGTAATAAGCAGATCATAATGTT
GCATACTGACTTTGTGTAGCGCTTGCACACCATCAGTGGCTTCATCAACATCATATCCTA
ATAGATTTAGCTGGCGTTTGAGTAATAGCCTGTTGGTCGGATGATCATCCGCGATTAATA
TGCTCAACTTTTCAGGTAGTGTGATGGGTTGTTCTGCTTTTGCCTCGACAGTCGCCACTT
GTTGGATAATTTCTACCGGGATTGTGATCGTAAATGTTGTTCCTATGCCTGGATGACTTT
CTAATGACAAATCACCCTGCATGTTTTTAATTAATTCTTTGCAGATCATTAAGCCTAAAC
CAGAACCTGTTTGCTGACGACCTGCACTTGTTTGGCTATAGCGTTTAAACAGTTGTTGTT
GTTCTTCCTGCGATAATCCACTTCCAGAATCCATAATCGTCATTTTGATTACAGCGTGGT
TGTCATCAATGTGAACCAGGGAGGTCGTAATTTTTACTGCCCCCTCGGTGGTAAATTTGA
GAGCATTACTCAGTAAATTTGATAAGACCTGCTTAAACGCCTGAGGGTCGATCTTAACCA
GGTAATGTTCAGGAAACGTACTGCTGCAACTTAATGCGATCGATTTGCTTGCAGCAATCG
CACCGAAAGAGTGACAAGTGTTCTGGACTAAAGTAGGGATATCGACCCATTGTGGTTGAA
GTTGATAGTTACCCGATTCAATTTTGTCGACATCAAGGATTTCACCAATTAAGCCGAGGA
GTGATTGTCCGGTGGTGTAGGCAAGTGAAATCGCCTCCACCCGTTGCTCCTTGCTAAGAC
CAGAACCCGACAGAAGTTCCAGGAAGCCCATAATGGAGCTTATTGGTGTTCTTATTTCGT
GACTCATTGTTGCCAGAAACTGACTTTTTGCGACAGTTGCATTGATCGCTTTATTTCTCT
CTACTTCGAGTGCATGAATTAAATCACGCGTCTCGGTAATATCTTGCCAACCACAAATAT
AAACAGCATGATCGCTGGCTGGCAGATTGCATAATGTATGCCAGTGATTAATGCATCTTT
TCTCGATGCCATTATCAATTTCAAATACCTGTGTGTATATTGTTCGATTTTCTTTCGTTT
CTGCTGTGACTTCATGCGCATTAGAAAAAACATCTTTAAAGGGTGAGTCACTGTTTTCTA
ATGGTAACATTGCATTTTTGTAGTAATCAGCAGTGAAATAATGTTCAAATGCACTATTGT
GACTAATGACATTACCTTGCCAGTTTACAACATAAGTTGGATTCGGTAAGGAGTCCGAGA
GCGCTTTCCGGAATGATATTTGGTTTTCTAAATCACCCTGAATGACTTTACGACGACGAA
CTGAGCGTAACAGGTAGAATCCCCATAAAAGGCTACTGCCAACTAATAAAACGGATAATG
TCGTAACAATATAAAATTGCTCGCTATAGAGGTCCCATGTGTCAATGGTCACATTGGGCA
TTTTAATCCATTTTTCGGTCAGGCGCAGAACTTCGCTTGGGGGGATTGCATTCAGTGCTT
TATTAATAATATCCTTAAGTTCCGGTTCTCCGCGAGGAAAAGCGAACGAAAGCGATGCAT
TCGGAACGCCGGGAATAAGAAAATGATACAGTTCATTAGGATAGTAATGGTCGATCATGT
AACGCGAATTTAACTGTGTCGCGACCAGAGCATCAAGTTCACCTTCCTTGACCTTGTGAA
ATGCAGCGCTGGCGTTATCGACTTTTATCCACTCTACCTCCGGATACATCTCTTTTAATT
GCGAATGCAGCTCATAATAATATGGAATGGCAACTTTCATTCCTTTTTTTAATGTTTGTT
CACTGTCAGGCGCTTTTTGCATGACAAAAACGTAAGGCGTTGTTATGAAGGCTTCAGCAA
ATAAAACATTATTTTCTCTATCTTCACTATAAATAGCACCGGGTAATATATCCCATCCGC
CGGGATTCAGCTGTGTTCCAGCATGGATATTGTGTGAAACGGTGATCGGAGAAAAATTTA
AACCTGTTTGCAAAGTAATAATATTAAGAATATCCCCCATAACGCCCCGAACCGAGCCAT
TTTCATCCGTCATAGAATAGGGAGGGGAGTAAGGATTTTCCAGCACCTTTAAATCGGGAT
GCTGCTTAATCCATTGTTTTTCATGTTCAGTGAGTTCTAATGGTTTGTTCAGAAAGGCCA
GGTTTCCTGTATCAAGCCAATTTTGTGATACTTCATAGCGAACTTCATTTGTCAAAGCAT
CAACAAATCGATTGAGTACTTCATTAAGAACGACAGATTCTTTTCTGGTCAAGAAAAAAT
TATATTGACGCGGTGAGTTATAATATTTCACTACATTTAAGGAGTGAGTGAAATAGCGGG
AAATCATACTGCTGGTAATGATGTTACTACCAATAAAGTAATCATTCTGTCCGGCTGAGA
CGGATGCTAATGCCTGATATAAATTTGTAAAAGAGATAATTGTTGCTTTTGGAAATGATT
GATGAATTACCTCGTCAGGGGGATAATTTGCTACTCGAGCAATATTTACTGGTTTTGATG
AGGTAAGCGGTCGCATTGAATCGTGAAGGGTGGTGACGAGCGCCGGAAAGGTAATTATCA
GTGGTTTGGTTGCAGCAATGTCATCATTAAGAGGCGGCGAAGCAACTAAATGTGATAACA
CTATATCGACTTCACCTTCTTCCAGCGCGTCCATTGCTTTTTGATGATCGGCGTATTCCC
GGAGTGTTAGTTTGATATTTAACGCTCTTTTTAAAAGATTTAAATAATCAGCATTAATAC
CACGAACCCGTTGCTGCGAATCGGTATGCAACAACGTAGCCGTTTGGGACTTGTGTACTG
CAATCACAAGATTTTTTTTGCTCGCTAACCAACGTAATTCCTTGTTGCTCAGACGTAGTG
GATCAAGTGTGACACGGTTGTTACTACTGATGCCACGATATTCGATGTAATCTTCGTCTG
CGAAACTTATGGTCGACCAAAGACCACAACAGAGAAGAAAAATATAGGGTAAAAACTTCA
TGTGGTTAGCCGATTTTGTTACGTTGTGCGAATGTGTAAAGATCCATCAGTGATTTACAT
TCTAATTTTTCCATCAGGCGACTTTTATAAGTGCTGACAGTTTTGTTGCTGATGAACATT
TTTTCAGCAATGTCATTATTATCCTTGCCATCAAGAATATAGCGCATGACACTAATTTCT
TGTTTCGATAAGGAGTCGAGTTTTTGCTGGTCGGACGTTAAACTTCCAACAAACCGGTTG
AGAGAGAAGGGGAAATAGCAGTAGCCATTTTTTGCAGCTTCAATAGCCGCAATGATATTG
TTCATGCCTTCTTTTTTACTCACGAAACCATTAGCGCCAGCATCAGCACAATGTTTCCCG
TAAAAATGGTCATTTTTAGCGGAGACGATAATAATAATTCCGCTATATTGGCGCTTCCTC
AGCGTTTCTAACACCTGGATACCGTTAACTCCGGGGATATCGACATCAATGATGACGATA
TCAGGCTTAAGTGTTTCCACCCGCTGAACGGCACTTCCGCCTTCAGTCAACTCTGCTAAG
ATTTCAATATCGTTTTTGATCAATAAATTACGAATTGCTGCGATAGCAAGAGGATGGTCA
TCAATAATTATTGCGTTCATAGATTATTCCCTTTGCAATGAAGCATCTCCCTTCTCCCTG
TAGTAATACAGACATAAGGCATCATCTCATTTTCTCAATAAAAATAAGAAAATTTGAGCT
TCCTTTAAGATAATTCGACAAGTATACCATATAAATAGTCGGCATATATGAAATGTCAAC
AATAAAATCAGGGATTGTACCGATGATTTATAGTTTCACATTAGCACTATAAGTCTTCTC
ACTAATCCTACAGGCGTAAGAATTGTATTGCAAAAGCCACGGTTTAGTCCTCTGTTGTTT
TTTTTGCACCTCATTTAAATTAGGCCTCCAACGTTCCTGGGATAATGTGCAACACATGCA
CTGTGTTTGATATGAAGAATGAATACTCTTTTCATTCAATTCATAAATTTCATCTATGCG
AAATGAGAGATAAAAGTGGAACAGATTAATTCAAATAAAAAACATTCTAACAGAAGAAAA
TACTTTTCTTTATTGGCGGTAGTTTTATTTATTGCGTTTTCAGGTGCCTATGCCTATTGG
TCAATGGAATTAGAAGACATGATTAGTACAGATGACGCCTATGTCACGGGGAATGCAGAT
CCAATTTCTGCACAAGTCTCAGGTAGTGTCACTGTAGTTAATCATAAAGATACGAACTAC
GTTCGACAAGGTGACATTTTAGTTTCACTGGATAAAACTGATGCCACTATCGCACTCAAT
AAAGCTAAAAATAATCTGGCAAATATTGTTCGGCAAACGAATAAACTATACTTACAGGAT
AAACAATACAGTGCCGAAGTCGCTTCAGCGCGTATTCAGTATCAACAATCTTTAGAAGAT
TATAACCGTCGAGTGCCGTTAGCGAAGCAGGGGGTTATTTCAAAAGAAACGCTGGAGCAT
ACCAAAGATACGTTAATAAGTAGCAAAGCGGCATTGAATGCCGCTATCCAGGCTTATAAA
GCGAATAAAGCTTTAGTAATGAACACACCATTAAACCGTCAGCCACAAGTCGTTGAAGCG
GCGGATGCAACTAAAGAAGCCTGGTTGGCGCTTAAACGTACGGATATTAAGAGTCCGGTT
ACCGGCTATATTGCCCAGAGAAGTGTTCAGGTCGGCGAAACAGTGAGCCCCGGACAATCG
TTAATGGCTGTCGTACCGGCACGTCAAATGTGGGTTAATGCCAACTTTAAAGAAACACAA
CTCACGGATGTACGGATTGGTCAATCGGTCAATATTATCAGCGATCTTTATGGTGAAAAT
GTTGTGTTTCATGGTCGGGTGACAGGGATCAATATGGGAACCGGCAATGCGTTCTCCTTA
TTACCTGCACAAAATGCGACAGGGAACTGGATCAAAATCGTTCAGCGTGTACCGGTTGAA
GTTTCTCTGGATCCAAAAGAACTCATGGAACACCCCTTGCGCATTGGTTTATCGATGACT
GCAACTATTGATACCAGGAACGAAGACATTGCTGAGATGCCTGATCTGGCTTCAACCGTG
ACCTCCATGCCTGCTTATACCAGTAAGGCTTTAGTTATCGATACCAGTCCGATAGAAAAA
GAAATTAGCAACATTATTTCGCATAATGGACAACTTTAATGGCAATCACTAAATCAACTC
CGGCACCATTAACCGGTGGGACGTTATGGTGCGTCACTATTGCATTGTCATTAGCGACAT
TTATGCAAATGTTGGATTCCACTATTTCTAACGTCGCAATACCGACAATATCTGGCTTTC
TGGGAGCATCAACAGACGAAGGTACCTGGGTTATCACCTCGTTTGGCGTAGCAAATGCCA
TTGCGATCCCTGTTACCGGCAGGCTGGCACAAAGAATAGGCGAATTAAGGTTATTTTTAC
TTTCAGTCACTTTTTTTTCGCTGTCTTCCTTAATGTGTAGTTTATCGACCAATCTTGATG
TGCTGATATTTTTTAGAGTCGTTCAGGGGTTAATGGCAGGGCCGTTAATTCCACTGTCAC
AGAGTTTATTATTAAGGAATTATCCACCAGAAAAAAGAACATTTGCTCTGGCATTATGGT
CAATGACCGTGATTATCGCTCCGATATGTGGGCCGATATTGGGCGGTTATATTTGTGATA
ACTTTAGCTGGGGTTGGATATTTTTAATCAATGTCCCTATGGGGGTTATCGTCCTGACAT
TATGCTTAACCTTACTTAAAGGAAGAGAAACTGAGACTTCACCGGTCAAAATGAATCTAC
CAGGACTGACCCTGTTAGTGCTTGGTGTTGGTGGCTTGCAAATTATGCTTGATAAAGGGC
GCGATCTGGATTGGTTCAACTCGAGTACAATAATAATATTAACAGTAGTATCAGTTATTT
CTCTGATCTCTTTAGTCATTTGGGAGTCAACCTCAGAGAACCCGATTCTTGATCTCAGTT
TGTTTAAGTCCCGTAATTTCACCATTGGTATTGTGAGTATCACATGCGCGTATTTATTTT
ACTCTGGAGCGATAGTCCTTATGCCGCAGTTACTCCAGGAAACAATGGGGTATAATGCGA
TTTGGGCTGGGCTTGCTTATGCGCCCATCGGCATCATGCCACTATTAATTTCACCTTTGA
TAGGACGTTATGGCAACAAAATAGACATGCGGTTGTTAGTGACATTTAGTTTTTTGATGT
ATGCGGTTTGCTATTACTGGCGTTCTGTGACATTTATGCCAACGATTGATTTTACAGGCA
TCATTTTGCCACAGTTTTTCCAGGGATTCGCCGTTGCCTGTTTCTTTTTACCCTTAACAA
CGATTTCGTTTTCAGGGTTGCCAGATAATAAATTTGCCAATGCCTCGAGTATGAGTAATT
TTTTTCGTACCTTGTCAGGATCAGTTGGTACGTCGTTGACAATGACGCTGTGGGGACGAC
GCGAATCGTTACACCATAGTCAGTTGACAGCAACCATCGATCAATTTAACCCCGTGTTTA
ATTCATCGTCACAAATTATGGATAAATACTATGGTTCGCTTTCAGGAGTTCTTAATGAAA
TTAATAATGAAATAACCCAGCAGTCACTTTCTATTTCTGCAAATGAGATTTTCCGTATGG
CGGCTATTGCTTTTATCTTACTTACGGTTTTGGTTTGGTTTGCGAAACCGCCGTTTACAG
CGAAAGGCGTTGGGTGATGGTAAAAGCAGGGGGTTATAGCGGGTAAGACCGGGGATCTTA
AGTCTGCGCCATCGGCAGCATCGCTCATCCAGGGAAAGGATGGCGATGCTGAATTGAAAA
TTAATTAGCGGCCTTTTGCCAGATATTGCTCCATCTCTTCTTCCGGCACCATTCCACCTC
CCGTCGCCCACACCAGATGAGTGGCATTACGCAGTTGTTCTGCGCTGCAACCGTGCATCT
GTTGGTAACTTACTGATGCGCACACGCGCTGAGGCCCGGCCATACCCGCCAGTGCCGAAG
GTTCAAGACGAATGCCTTCTTCCTGCGCCAGCCAGCCAAGCATGTTATACATGGTTTGAT
CGCTAAGGGTATAGAAGCCATCCAGTAGACGCTCCATTGCCCGCCCGACAAAGCCTGATG
CGCGACCAACTGCAAGGCCATCCGCTGCGGTAAGGTTGTCGATACCAATATCCTGAACAG
AAATCTGATCGTGTAATCCTGTATGGACGCCTAACAGCATACAAGGGGAGTGCGTTGGTT
CGGCAAAAAAGCAGTGAACATGATCGCCAAACGCCAGTTTAAGCCCGAATGCGACGCCAC
CAGGACCACCGCCAACACCACACGGCAGATAGACAAACAGAGGGTTATCAGCATCGACAA
TACGACCTTGCTCGGCAAATTGCGCTTTAAGACGCTGGCCAGCGACGGAATACCCAAGGA
ACAACGTGCGGGAATTTTCGTCATCAATAAAGAAACAGTTCGGGTCAGACTGCGCTGCTC
TACGTCCTTCCTCGACGGCAACACCATAATCTTGCTCATATTCCACGACCGTAACGCCAT
GGCTGCGCAGTTTCGCTTTTTTCCATGCCCGGGCATCAGCAGACATATGCACTGTCACCT
TAAAGCCAATGCGGGCGCTCATAATGCCGATTGATAACCCCAGATTTCCGGTTGAGCCCA
CAGCAATGCTGTATTGGCTAAAGAACTGTTTAAACTCCGGAGAAAGCAGTTTGCTGTAGT
CATCATCAAGCGTCAGCAACCCCGCTTCCAGAGCCAGTTTTTCTGCGTGTGCCAGGACTT
CATAAATCCCGCCGCGTGCTTTTATGGAGCCGGAAATGGGCAAATGGCTATCTTTTTTCA
GTAACAGTTGCCCGCTGATCGGTTGTTGATATTCCTTTTCCAGCCGTTTTTGCATAGCCG
GAATGGCAACCAGTTCTGATTCAATAATCCCCCCAGTGGCAGCAGTTTCAGGAAATGCTT
TTGTCAGATAGGGTGCAAAACGGGATAAGCGCGCATGGGCGTCCTGAACATCCTGTTCGG
TCAGGCCAACATAAGGTAAACCTTCAGCCAATGAGGTCGTGCCAGGATTAAACCAGGTGG
TTTCTTTAAGAGCAACCAGATCCTTTACCAACGGATACTGGGCGATGAGCGAGTTCATTT
TAGCGTTTTCCATAGTACGTCTCTTTGCGCTTAGATGATAAATGACAGCAGGAATGTGCC
CGCCAGAGCGACGACTGAAGCGATAAATGTCGCTGTCGTATAGTATTTAAATGTTTCATT
GAGCGTAGCGCCGCAATATTGCTTCACCAGCCAGAAAAGCGAGTCCGTAACGATAGTGCA
GCCAATTGCACCTGAACCGATAGCAATCGCAATAATTTCCGGGCTGATGTCGGGATACAG
CGGCAGCACAATGATCCATATTTATATTTTCTTCTCCAGGTTGGCGATGCCAGTTGGCAT
GTTTTACTTACTTGCCTATATGGTTACTCGTTGGCGAGAACAGAGGCGGAATTGGGGACA
ATTGGCCGGGAATTATTGTTATTTTTTATTGTATTGCCGTGTCAGGTGATAGGGCGTTGG
ATCTCGCCAGTGACGTCTGTTTCTGCTACAGTGCCCGTTTTACGACAAACGGCTTGGGTA
TGGCTTCATTAAAGGATGTCGCACGCCTGGCGGGAGTGTCGATGATGACAGTCTCCCGGG
TGATGCATAATGCAGAATCTGTGCGTCCTGCAACGCGTGACCGCGTATTGCAGGCAATCC
AGACCCTGAATTATGTTCCTGATCTTTCCGCCCGTAAGATGCGCGCTCAAGGACGTAAGC
CGTCGACTCTCGCCGTGCTGGCGCAGGACACTGCTACCACTCCTTTCTCTGTTGATATTC
TGCTTGCCATTGAGCAAACCGCCAGCGAGTTCGGCTGGAATAGTTTTTTAATCAATATTT
TTTCTGAAGATGACGCTGCCCGCGCGGCACGTCAGCTGCTTGCCCACCGTCCGGATGGCA
TTATCTATACTACAATGGGGCTGCGACATATCACGCTGCCTGAGTCTCTGTATGGTGAAA
ATATTGTATTGGCGAACTGTGTGGCGGATGACCCAGCGTTACCCAGTTATATCCCTGATG
ATTACACTGCACAATATGAATCAACACAGCATTTGCTCGCGGCGGGCTATCGTCAACCGT
TATGCTTCTGGCTACCGGAAAGTGCGTTGGTAACAGGGTATCGTCGGCAGGGATTTGAGC
AGGCCTGGCGTGATGCTGGACGAGATCTGGCTGAGGTGAAACAATTTCACATGGCAACAG
GTGATGATCACTACACCGATCTCGCAAGTTTACTCAATGACCACTTCAAATCGGGCAAAC
CAGATTTTGATGTTCTGATATGTGGTAACGATCGCGCAGCCTTTGTGGCTTATCAGGTTC
TCCTGGCGAAGGGGGTACGTATCCCGCAGGATGTCGCCGTAATGGGCTTTGATAATCTGG
TTGGCGTCGGGCATCTGTTTTTACCGCCGCTGACCACAATTCAGCTTCCACATGACATTA
TCGGGCGGGAAGCTGCATTGCATATTATTGAAGGTCGTGAAGGGGGAAGTGTGACGCGGA
TCCCTTGCCCGCTGTTGATCCGTTGTTCCACCTGATATTATGCTAACCCAGTTGCCAGAG
TGCTCCATGTTGCACCACAGCCACTCCGTGGGAGGCATAAAGCGACAGTTCCCGTTCTTC
TGGCTGCGGATAGATTCGACTACTCATCACCGCTTCCCCGTCGTTAATAAATACTTCCAC
GGATGATGTATCGATAAATATCCTTAGGGCGAGCGTCTCACCCTGCGGGAGGGGAATACT
ACGGTAGCCGTCTAAATTCTCGTGTGGGTAATACCGCCACAAAACAAGTCGCTCAGATTG
GTTATCAATATACAGCCGCATTCCAGTGCCGAGCTGTAATCCGTAATGTTCGGCATCACT
GTTCTTCAGCGCCCACTGCAACTGAATCTCAACTGCTTGCGCGTTTTCCTGCAAAACATA
TTTATTGCTGATTGTGCGGGGAGAGATAGATTGATGCTGCTGGCGTAACGACTCAGCTTC
GTGTACCGGGCGTTGTAGGAGTTTGCCATTGCTCTCTGATAGCTCGCGCGCCAGCGTCAT
GCAGCCTGCCCAGCCTTCACGTTTTGAGGGCATTGGCGATTCCCACATATCCATCCAGCC
GATAACAATACGCCGACCATCCTTCGCTACAAAGCTTTGTGGTGCATAAAAGTCATGCCC
GTTATCAAGTTCAGTAAAATGCCCGGATTGTGCAAAAAGTCGTCCTGGCGACCACATTCC
GGGTATTACGCCACTTTGAAAGCGATTTCGGTAACTGTATCCCTCGGCATTCATTCCCTG
CGGGGAAAACATCAGATAATGCTGATCGCCAAGGCTGAAAAAGTCCGGACATTCCCACAT
ATAGCTTTCACCCGCATCAGCGTGGGCCAGTACGCGATCGAAAGTCCATTCACGTAATGA
ACTGCCGCGATAAAGCAGGATCTGCCCCGTGTTGCCTGGGTCTTTCGCCCCGACTACCAT
CCACCATGAGTCGGCTTCACGCCACACTTTAGGATCGCGGAAGTGCATGATTCCTTCTGG
TGGAGTGAGGATCACACCCTGTTTCTCGAAATGAATACCATCCCGACTGGTAGCCAGACA
TTGTACTTCGCGAATTGCATCGTCATTACCTGCACCATCGAGCCAGACGTGTCCGGTGTA
GATAAGTGAGAGGACACCATTGTCATCGACAGCACTACCTGAAAAACACCCGTCTTTGTC
ATTATCGTCTCCTGGCGCTAGCGCAATAGGCTCATGCTGCCAGTGGATCATATCGTCGCT
GGTGGCATGTCCCCAGTGCATTGGCCCCCAGTGTTCGCTCATCGGGTGATGTTGATAAAA
CGCGTGATAACGATCGTTAAACCAGATCAGGCCGTTTGGATCGTTCATCCACCCGGCAGG
AGGCGCGAGGTGAAAATGGGGATAGAAAGTGTTACCCCGGTGCTCATGAAGTTTTGCTAG
TGCGTTTTGCGCCGCATGCAATCGAGATTGCGTCATTTTAATCATCCTGGTTAAGCAAAT
TTGGTGAATTGTTAACGTTAACTTTTATAAAAATAAAGTCCCTTACTTTCATAAATGCGA
TGAATATCACAAATGTTAACGTTAACTATGACATTTTGTGATCGAATATGCATGTTTTAG
TAAATCCATGACGATTTTGCGAAAAAGAGGTTTATCACTATGCGTAAGTCAGATGAATTT
AAGGGAAAAAAATGTCAGCCAAAGTATGGGTTTTAGGGGATGCGGTAGTAGATCTCTTGC
CAGAATCAGACGGGCGCCTACTGCCTTGTCCTGGCGGCGCGCCAGCTAACGTTGCGGTGG
GAATCGCCAGATTAGGCGGAATAAGTGGGTTTATAGGTCGGGTCGGTGATGATCCTTTTG
GTGCGTTAATGCAAAGAACTCTGCTAACTGAGGGAGTCGATATCACGTATCTGAAGCAAG
ATGAATGGCACCGGACATCCACGGTGCTTGTCGATCTGAACGATCAAGGGGAACGTTCAT
TTACGTTTATGGTTCGCCCCAGTGCCGATCTTTTTTTAGAGACGACAGACTTGCCCTGCT
GGCGACATGGCGAATGGTTACATCTCTGTTCAATTGCGTTGTCTGCCGAGCCTTCGCGTA
CCAGCGCATTTACTGCGATGACGGCGATCCGGCATGCCGGAGGTTTTGTCAGCTTCGATC
CCAATATTCGTGAAGATCTATGGCAAGACGAGCATTTGCTCCGCTTGTGTTTGCGGCAGG
CGCTACAACTGGCGGATGTCGTCAAGCTCTCGGAAGAAGAATGGCGACTTATCAGTGGAA
AAACACAGAACGATCGGGATATATGCGCCCTGGCAAAAGAGTATGAGATCGCCATGCTGT
TGGTGACTAAAGGTGCAGAAGGGGTGGTGGTCTGTTATCGAGGACAAGTTCACCATTTTG
CTGGAATGTCTGTGAATTGTGTCGATAGCACGGGGGCGGGAGATGCGTTCGTTGCCGGGT
TACTCACAGGTCTGTCCTCTACGGGATTATCTACAGATGAGAGAGAAATGCGACGAATTA
TCGATCTCGCTCAACGTTGCGGAGCGCTTGCAGTAACGGCGAAAGGGGCAATGACAGCGC
TGCCATGTCGACAAGAACTGGAATAGTGAGAAGTAAACGGCGAAGTCGCTCTTATCTCTA
AATAGGACGTGAATTTTTTAACGACAGGCAGGTAATTATGGCACTGAATATTCCATTCAG
AAATGCGTACTATCGTTTTGCATCCAGTTACTCATTTCTCTTTTTTATTTCCTGGTCGCT
GTGGTGGTCGTTATACGCTATTTGGCTGAAAGGACATCTAGGGTTGACAGGGACGGAATT
AGGTACACTTTATTCGGTCAACCAGTTTACCAGCATTCTATTTATGATGTTCTACGGCAT
CGTTCAGGATAAACTCGGTCTGAAGAAACCGCTCATCTGGTGTATGAGTTTCATCCTGGT
CTTGACCGGACCGTTTATGATTTACGTTTATGAACCGTTACTGCAAAGCAATTTTTCTGT
AGGTCTAATTCTGGGGGCGCTCTTTTTTGGCTTGGGGTATCTGGCGGGATGCGGTTTGCT
TGACAGCTTCACCGAAAAAATGGCGCGAAATTTTCATTTCGAATATGGAACAGCGCGCGC
CTGGGGATCTTTTGGCTATGCTATTGGCGCGTTCTTTGCCGGCATATTTTTTAGTATCAG
TCCCCATATCAACTTCTGGTTGGTCTCGCTATTTGGCGCTGTATTTATGATGATCAACAT
GTGTTTTAAAGACCAGGATCACCAGTGCGTAGCGGCGGATGCGGGAGGGGTAAAAAAAGA
GGATTTTATCGCAGTTTTCAAGGATCGAAACTTCTGGGTTTTCGTCATATTTATTGTGGG
GACGTGGTCTTTCTATAACATTTTTGATCAACAACTCTTTCCTGTCTTTTATGCAGGTTT
ATTCGAATCACACGATGTAGGAACGCGCCTGTATGGTTATCTCAACTCATTCCAGGTGGT
ACTCGAAGCGCTGTGCATGGCGATTATTCCTTTCTTTGTGAATCGGGTAGGGCCAAAAAA
TGCATTACTTATCGGTGTTGTGATTATGGCGTTGCGTATCCTTTCCTGCGCGCTGTTCGT
TAACCCCTGGATTATTTCATTAGTGAAGTTGTTACATGCCATTGAGGTTCCACTTTGTGT
CATATCCGTCTTCAAATACAGCGTGGCAAACTTTGATAAGCGCCTGTCGTCGACGATCTT
TCTGATTGGTTTTCAAATTGCCAGTTCGCTTGGGATTGTGCTGCTTTCAACGCCGACTGG
GATACTCTTTGACCACGCAGGCTACCAGACAGTTTTCTTCGCAATTTCGGGTATTGTCTG
CCTGATGTTGCTATTTGGTATTTTCTTCTTGAGTAAAAAACGCGAGCAAATAGTTATGGA
AACGCCTGTACCTTCAGCAATATAGACATAAACTTTTTCCGGTTGTTGTCGATATCTCCA
TATCCCTCAACCGGAAAATAATAATACTAAAATGCTTAGGCCTGCTAATAATCGCCTAAT
CCAAACACCTCATTCATGTTCTGGTACAGTCGCTCAAATGTACTCCGGATACACGGTTCG
CTGATTTCCAGGACATTGTCGTCATTCAGCGACCTGTCCCGTGTATTACGGGCCTGCGAA
TTCATCAAGGAATGCATTGCGGAGTGAAGTATCGAGTCACGCCATATTTCGCTATCAGGA
TTCTGTGTGATGGTTACATCGCCCGGCCCAGGGCTGTTTAGTCATCAGCGCTTTCTGACA
GTGCTGAGATTTCAACCTGTTGCAGTAAAAATGAGTAGATATAGGGCAAGTGTGCTGCCA
AACCCATCTTTTACGGGGTGAAGGTAGATTTGGTTTGAAGGGTATCTGGTGTCCCCTGCA
GGAATCGAACCTGCAATTAGCCCTTAGGAGGGGCTCGTTATATCCATTTAACTAAGAGGA
CAATGCGGCATGAGTATACCCGCTAATGGACTGCGGGGTAAGTACGCTGCCGCTCGATTG
CTTAAACCCTCGCCATTTATGCCGGGTTTTTATCATTTTTCTTAATGTTTTCCGCACGTT
CTGCTTTTTGGCGTGCTTCTGCTTTGCGCTTGTTGCTCATGTCGTTACGGATCTGTGCAT
GACTCATTAACGCGAAGATAAAGGTGCCGCCGCAGATGTTCCCCGCTAAAGTAGGTAGTG
CGAAGGGCCAGATGAAATCGCTCCAGTGCAGCGTGCCGTTAAACACCAGATAGAGGATTT
CAACAGAACCGACAACGATGTGGGTGGTGTCACCCAGGGCAATAAGCCAGGTCATCAATA
TAATCACCACAATCTTTGCCGCACCCGCTGCAGGAAACATCCATACCATAGTGGCGATCA
GCCAGCCGGAAATGATCGCGTTGGCAAACATCTCGCTGGGGGTGTTCTTCATCACATCCA
TGCCGATATTGACAAATGCATCGCGAGTTTCTTCATTGAAGATTGGCATATATTCAAATG
CCCACGCCGCAATACCTGTCCCGAGAATATTACCCAGCAGCACGACGCCCCATAACCGCA
TAAGTAAGCCAACGTTGCTCATTGTCGGTTTTTGCATGACGGGTAGTACCGCAGTCACGG
TGTTTTCGGTAAATAATTGCTGGCGGGCCATAATGACGATAATAAAACCAAAGGTATAAC
CGAGATTCTCCAGCAAGAAGCTGCCCGGCACACCTTCCAGTTCGACATGAAATATCCCTT
TTGCCAGTAATGAAGCGCCCATCGACAGACCCGCCGCAATGGCTGACTACAGTAGTGCCA
TTGCGTCGCGTTCCAGCTCTTTTTCACCATCCTGGCGGATATGCTCATGAATTGCCATCG
CCCGGGAGGGGAGTCGATCTTCATCTATTTCTATTTTTTTGCCACGCTCTTTTTCTTCGC
TCTCAACTTCAATTTCGTCGCTGTGTTGATCAATTTTGTCGTTGTCCATGGTCTCTTCTC
TTGAATTAGCACGTATAGCTAAAGCGTAGCGGCTTTTTTGCTCGCAACTGGCGGGAGTTA
CTCTGAAAATGTAGAAAAGGCCGCTTTTGCCTTTTTCTGTTTCCATAGAATCAAGTAGCC
TACAGGGCGGCGATTACCAGGCTATGATCAAATCAGCAAATCAGGGCGTCTGGACATCAG
TTGACGTGCTGTTACAATCGCCCACACCTAAACAGGCGGATACGGTATCGTTCCGTCATG
GATGGCAAACTGCATAAGCCATAAAAAAACAGGGAGACATTTATGAAGCTTCGCCTGTCG
GCGCTTGCTCTGGGAACTACGCTTCTGGTGGGGTGTGCGAGTTCCGGTACAGATCAGCAA
GGGCGTTCTGACCCGTTAGAAGGGTTCAACCGCACCATGTACAACTTCAACTTCAACGTA
CTAGACCCGTATATTGTTCGACCGGTCGCTGTCGCCTGGCGTGATTATGTTCCGCAACCG
GCGCGTAACGGTTTGAGCAACTTTACCGGCAACCTTGAAGAACCTGCGGTGATGGTTAAC
TACTTCTTGCAGGGCGACCCTTATCAGGGGATGGTCCACTTTACCCGCTTTTTCCTGAAC
ACCATTTTGGGGATGGGCGGCTTTATTGATGTTGCAGGGATGGCGAACCCGAAACTGCAA
CGGACTGAACCTCACCGCTTCGGTAGTACGCTTGGTCATTATGGCGTGGGTTATGGGCCG
TACGTTCAGTTACCATTCTACGGTAGCTTCACGCTGCGTGATGACGGTGGTGATATGGCG
GATGGTCTTTACCCGGTTCTTTCCTGGTTGACCTGGCCGATGTCTGTGGGTAAATGGACG
CTTGAAGGGATCGAAACCCGCGCTCAGCTGCTGGATTCCGACGGTCTGCTGCGTCAGTCG
TCCGATCCTTATATTATGGTGCGCGAAGCGTACTTCCAGCGTCATGATTTCATCGCTAAT
GGCGGCGAACTCAAACCGCAGGAAAATCCGAACGCGCAAGCGATTCAGGATGATTTAAAA
GATATCGATTCTGAATAAGAAACAAATAAAAAAGGTGAGTCGCAAAACTCACCTTTTTTG
TTGTTATCCCTCAATTACCACAAGTAAAAGGAGATAAACCGACAATGACCCGGACGTAAT
GATGTAAAAATACTGATGTTCGTCACTGACTATTTCCGATATTCAGGCGTTGAAAAATCA
AAAAACTGGAAAAATAATTTTAAATATCATCAAAATTAACACCTGGCGCATATAGTTGAT
TAATTTCATTTTGATATTCCGTCTGGCGATTTTGAAGCCTTTCTTCAATTTTACCTTCGA
GTTCCTTATAGTGCATATATATATTTTGAGAATGGTCAACGTTAACTTCGTTACCGAATA
AAGTAGAAACTATTTCTTTTGTATTCTTAAGTGTATATTTTCTATCATCCTCTTAATATT
CATATCCTCTTGCTAGATTTGAAGGATTAAAAGCTTCGTTAGGTTCTCTCAGTCTTTCCC
CTTTGAGTTCGTTTACAACTTGATGATCGGGACCTGTTGCAAATGATTCTGCGATGATTG
CTTTACTGTGTTCAAACCACGCAGAAGCACTCCTGGCTTTTTTACTACAATATTGGGTGA
GATTATCACCATCAATACGAAATCCTTTTTGAATGTGGTAGCCATCCTGATCGTAGTAAC
CGAGAGATAAGTAATCATTTCCATTTTTATTTTTTATTACAATAGCGAGAGAGTCGCCTT
TTTTATCTTTACCGTACCAGGTAAATAAGCACGTTGGTTCGCTTTTCCCGCTCTCATCGA
ATTCCGTTACCGTATGTCTGAGTTTGTGTGATATTTTATCGAAGATAAAACTTGGATTTT
CATCATATATTTCTTTTATTGCGCTGAAGATCATTTTCTTGTTATTGATATCATGAGTAT
TCTCTACTATGTTTTCATTGATGATGGTTTGACCGACTTTTTTGTTTTCATCGTTCGCGG
GTGATTTTGTTGGTTCTTGATTTTCAATATCAATATCAATATCAATATCAAAAGTAATAT
CGTTTGTATCATTGGAGTCAATACCAATATCACTACGATCATCAATACCACTAATAATAA
TACCATCAGTAAATTCAGCATTATTTATATCATCATGAGTCTTCTCAACTATGTTGTCAT
TAATGATAGTACGGACGAGTTCTTTGTCTTTATAACTCGCAGGTAATTTTATTGGTTCTT
GGTTGTCGATACCAATAGTAATATGGTCTGTATCATTGGAACCAATATTAATATAAGTAA
CTGAAGAATTATTGATATTTATTCTATCAGGATCGTCGTTTCCTCGTATGGCGTTTTTTA
TAAGCTCAAGTAGATGTTTAATACAGGTGCTTATTCCTTCCTTACCATTAAAAAGGTTTT
TGAACTCTTGTACTAATCCATTAACTTCATCATTGTTATTTTCATTGATGGATTCTGGGT
AAGCTGTGCTGGTATTGTTGATTGAAATAGATGGTAGCATGATTTTATTCCATGTTGATT
GATTTGTTACAAATATATATTACCTAATGAAATAGACTATCAAAAAACGCTCATTTATTT
AGACCCTATCTTTAATTTGAGTGTATGAGCGCACAATAGCCAGGGTGGTTTGAGTATCCT
GGAAATTCAGAAAAGTAAACTCTTTGAGAAAGACGAGCAGAACGCCTGAAAATATGCCTT
TCCCTTCAGGTTTGTCTGTGGATACCACTTAATGATTTGAAAGGGCAAGCTACCATCAGG
CTGTTTGCAAAACTCAGGAGGCAAGCAATGAGGACACTACTTTCGGTGAAGTGGGGAAGT
TAAAGTCACCTGCATAGCAGGTGACTTTAACCAGGCGAACGCGTTATCAGAACGCGTAGT
TAAAGTTAGTACCGAACAGCCAGGCTTTACCTTCAGATTTAAAGGTATATGCTGCTGGCC
CTTCACCTTCAGTAAACTTCACATTCTGACCGTGCATATAAGATGCACCAACGTCAATGG
ATGCATCTTCATTAAATGCATAAGTCGCACCTGCACTTAACCACAGACGATCCTGATCTG
GGATAGAGATAGAACGTTTATCTGCCGGAACCGGGCTGTCATCGAATGCAATACCCGTAC
GGAAGGTCCAGTTTTTATCGTGGTAGTAGGTTGTACCTAACGCGATACGGTAAGCATCCC
GGAAACCTTCGTCTTTATAGAACAGCGTTTGACCAGAGTCTCCTTTCGCTTTCAGTTCCT
GGAATTGACTCCAACTGGTATACGCCAGACTATAGTGGATAGCCCATTGTGGTGCGACAC
GGTTATAGCCAGAAATTTCCCACATCTCAGGTAAATTCAGCGTTAAGGACCCATTTTGGG
TTGCACCCATTGTGCCATATGGTAAACCCATGCTACCCAAGATGTTGTTCAGATTTGGGT
TGATGGAGCTTTTGTAATCTCCTTCAAAGTCAATTTTCACTTCTGAACGATAGGTTAGGC
CCCAACGGTTATCTTTATCCAGTTCATAAAGAATACCGGCGTTCCAGCCGAATCCCCATT
CATCACCCTTGAGATGAGCAATTTGCGAATCCGGTGTATTGATGCCGTTTGTCCAACTTT
GTGGCACGCCTTGCGCTATCAGTTGTTGGGAAAGCAATGGACCGAGTGAACCGGCAGTAC
GCTCAATTTTTGCCTTAGCGTATACAGCATCAAAACCAAGACCAAAACTCCAGCTATTGT
TAAGGCGGTAGGCTCCGCTAAGGTTAAGGTTGATCGTCTGCAGATCGGTTTTACCGCCAT
AGATTCCAGCAGCGTAGTTATCATTAAATTCCGTGGCCAGACCATAGTTCGAGGTAATAG
AAGCCCCCCAACCAAACTGATCGTTAATAGGTGCTACGAAATGTAGGTTAGGCACCCACG
CAGTTGGTGCAATATTATCTGCATCAGCACGCTGGCCCGTTAAATCGGAACGCCCAGAAA
TATCTACATCCGGGTCAATATAAACCGCACCCGCAGAAAATGTCGGGCGGTCAAACATGG
TAATCAATGCGGGGTTACGGCTGACGTTACCTGCATCATCGGCAATTGCGCCTTCCCCTG
AATAAGCCCGGCCCAGGCCAGAGGAAGAAAATTCGTTTAACTGAAAGCCTGCCGACCAGG
CCTGGGTGGAGATAAGTGCCACTGCGACTGCGAGAGCAGACTTTGTAAACAGGGTTTTCT
GGCTCATGACCATAACCTCAATGATTTATTTTTATACAAACTATGTTACGTGCTGTAACA
GGAGCGCGAAGTGTAGGGTCTGAGGTACATCTTAGAAATCAGACCAGTGGCGAGAGTATA
GGTCGGACCAGCTGGAATGTTGCAAGTATGTTTCTATCTTTTTTCAAATATGATCTAAGA
AACGCGATCCAGCTGGCAAAATTTGGAGGTGGCGCACTCATGGATTCGGGTGAATTTTGT
TTTAGATCATTTTTAAGTGTGATTTCGGTCACTTATCCGATTTTGCAGAATTAACAACTG
GAGCAGCACTTTCCGGAAGCGTAAAATATCCACAACGTTTATCTGGCACCTTGGGTGCAC
ATACAGAGGAAATCAACGATGAGTAAATGTAGTGCTGATGAAACCCCGGTTTGCTGCTGT
ATGGATGTTGGCACCATTATGGACAACTCCGACTGCACCGCGTCTTACAGCCGCGTGTTT
GCAAACCGCGCAGAAGCAGAACAAACGCTGGCGGCACTGACTGAGAAAGCCCGTAGCGTG
GAATCCGAACCGTGCAAAATCTCCCCGACTTTCACTGAAGAGTCTGATGGTGTGCGCCTG
GATATCGATTTCACTTTTGCCTGCGAAGCTGAAATGCTGATCTTCCAGCTGGGTCTGCGT
TAATTCCTCTCGGGTACGTACGCCCCTGTCAGTTGCTGGCAGGGGCGTTTTCTTTTCTCT
TCTTCTTTTCTCTCTGTGTCATAGCTCCCACTTTCCCTTTTCTCCGCTTGGCTAAATGTA
AAAAAATGGTTAAGACTATGATCAGGTCAGACCACTTTATTTATTTTTTTACAGGGGAGT
GTTATGGGTCAGGTTTTACCGCTGGTTACCCGCCAGGGCGATCGTATCGCCATTGTTAGC
GGTTTACGTACGCCTTTTGCCCGCCAGGCGACGGCTTTTCATGGCATTCCCGCGGTTGAT
TTAGGGAAGATGGTGGTAGGCGAACTGCTGGCACGCAGCGAGATCCCCGCCGAAGTGATT
GAACAACTGGTCTTTGGTCAGGTCGTACAAATGCCTGAAGCTCCCAACATTGCGCGTGAA
ATTGTTCTCGGTACTGGAATGAATGTGCATACCGATGCTTACAGCGTCAGCCGCGCTTGC
GCTACCAGTTTCCAGGCGGTTGCAAACGTCGCAGAAAGCCTGATGGCGGGGACTATCCGA
GCGGGGATTGCCGGTGGGGCAGATTCCTCTTCGGTATTGCCAATTGGCGTCAGTAAAAAA
CTGGCGCGCGTGCTGGTTGATGTCAACAAAGCCCGCACAATGAGCCAGCGTCTGAAACTC
TTCTCTCGCCTGCGTTTGCGCGACTTAATGCCCGTACCACCTGCGGTAGCAGAATATTCT
ACCGGCTTGCGGATGGGCGACACTGCAGAGCAAATGGCGAAAACCTACGGCATCACCCGA
GAACAGCAAGATGCATTAGCGCACCGTTCGCATCAGCGTGCCGCTCAGGCATGGTCAGAC
GGAAAACTCAAAGAAGAGGTGATGACTGCCTTTATCCCTCCTTATAAACAACTGCTCGCG
GAAGACAACAATATTCGCGGTAATTCCTCGCTTGCTGATTACGCAAAGCTGCGTCCGGCG
TTTGATCGTAAACACGGAACGGTAACGGCGGCGAACAGTACGCCGCTGACCGATGGCGCA
GCGGCGGTGATCCTGATGACTGAATCCCGGGCGAAAGAATTAGGGCTGGTACCGCTGGGA
TATCTGCGCAGCTACGCATTTACCGCTATCGATGTCTGGCAGGACATGTTGCTCGGTCCA
GCCTGGTCAACACCGCTGGCGCTGGAGCGTGCCGGTTTGACGATGAGCGATCTGACATTG
ATCGATATGCACGAAGCCTTTGCAGCTCAGACACTGGCGAATATTCAGTTGCTGGGTAGT
GAACGTTTTGCTCGTGAAGCACTGGGGCGTGCACATGCCACTGGCGAAGTGGACGATAGC
AAATTTAACGTGCTTGGCGGTTCGATTGCTTACGGGCATCCCTTCGCGGCGACCGGCGCG
CGGATGATTACCCAGACATTGCATGAACTTCGCCGTCGCGGCGGTGGATTTGGTTTAGTT
ACCGCCTGTGCTGCTGGTGGGCTTGGCGCGGCAATGGTTCTGGAGGCGGAATAATGGAAA
TGACATCAGCGTTTACCCTTAATGTTCGTCTGGACAACATTGCCGTTATCACCATCGACG
TACCGGGTGAGAAAATGAATACCCTGAAGGCGGAGTTTGCCTCGCAGGTGCGCGCCATTA
TTAAGCAACTCCGTGAAAACAAAGAGTTGCGAGGCGTGGTGTTTGTCTCCGCTAAACCGG
ACAACTTCATTGCTGGCGCAGACATCAACATGATCGGCAATTGCAAAACGGCGCAAGAAG
CGGAAGCTCTGGCGCGGCAGGGCCAACAGTTGATGGCGGAGATTCATGCTTTGCCCATTC
AGGTTATCGCGGCTATTCATGGCGCTTGCCTGGGTGGTGGGCTGGAGTTGGCGCTGGCGT
GCCACGGTCGCGTTTGTACTGACGATCCTAAAACGGTGCTCGGTTTGCCTGAAGTACAAC
TTGGATTGTTACCCGGTTCAGGCGGCACCCAGCGTTTACCGCGTCTGATAGGCGTCAGCA
CAGCATTAGAGATGATCCTCACCGGAAAACAACTTCGGGCGAAACAGGCATTAAAGCTGG
GGCTGGTGGATGATGTTGTTCCGCACTCCATTCTGCTGGAAGCCGCTGTTGAGCTGGTAA
AGAAGGATCGCCCATCTTCCCGCCCTCTACCTGTACGCGAGCGTATTCTGGCGGGGCCGT
TAGGTCGTGCGCTGCTGTTCAAAATGGTCGGCAAGAAAACAGAACACAAAACTCAAGGCA
ATTATCCGGCGACAGAACGCATCCTGGAGGTTGTTGAAACGGGATTAGCGCAGGGCACCA
GCAGTGGCTATGACGCTGAAGCACGGGCGTTTGGCGAACTGGCGATGACGCCACAATCGC
AAGCTTTGCGTAGTATCTTTTTTGCCAGTACGGAAGTGAAGAAAGATCCCGGCAGTGATG
CGCCGCCTGCGCCATTAAACAGCGTGGGGATTTTAGGTGGTGGCTTGATGGGCGGCGGTA
TTGCTTATGTCACTGCTTGTAAAGCGGGGATTCCGGTCAGAATTAAAGATATCAACCCGC
AGGGCATAAATCATGCGCTGAAGTACAGTTGGGATCAGCTGGAGGGCAAAGTTCGCCGTC
GTCATCTCAAAGCCAGCGAACGTGACAAACAGCTGGCATTAATCTCCGGAACGACGGACT
ATCGCGGCTTTGCCCATCGCGATCTGATTATTGAAGCGGTGTTTGAAAATCTCGAATTGA
AACAACAGATGGTGGCGGAAGTTGAGCAAAATTGCGCCGCTCATACCATCTTTGCTTCGA
ATACGTCATCTTTACCGATTGGTGATATCGCCGCTCACGCCACGCGACCTGAGCAAGTTA
TCGGCCTGCATTTCTTCAGTCCGGTGGAAAAAATGCCGCTGGTGGAGATTATTCCTCATG
CGGGTACATCAGCGCAAACCATCGCCACTACGGTAAAACTGGCGAAAAAACAGGGCAAAA
CGCCCATTGTCGTGCGTGACAAAGCCGGGTTTTACGTCAATCGCATCTTAGCGCCTTACA
TTAATGAAGCTATCCGCATGCTGACCGAAGGTGAACGGGTAGAGCACATTGATGCCGCGC
TAGTGAAATTTGGTTTTCCGGTAGGTCCAATCCAACTTTTGGATGAGGTAGGAATCGACA
CCGGGACTAAAATTATTCCTGTACTGGAAGCTGCTTATGGAGAACGTTTTAGCGCGCCTG
CAAATGTTGTTTCTTCAATTTTGAACGACGATCGCAAAGGCAGAAAAAATGGTCGGGGTT
TCTATCTTTATGGTCAGAAAGGGCGTAAAAGCAAAAAACAGGTCGATCCTGCCATTTACC
CGCTCATTGGCGCACAAGGGCAGGGGCGACTCTCCGCACCGCAGGTTGCTGAACGGTGTG
TGATGTTGATGCTGAATGAAGCAGTACGTTGTGTTGATGAGCAGGTTATCCGTAGCGTGC
GTGACGGGGATATTGGTGCGGTATTTGGCATTGGTTTTCCGCCATTTCTCGGTGGACCGT
TCCGCTATATCGATTCTCTCGGCGCGGGCGAAGTGGTTGCAATAATGCAACGACTTGCCA
CGCAGTATGGTTCCCGTTTTACCCCCTGTGAGCGTTTGGTCGAGATGGGCGAGCGTGGGG
AAAGTTTTTGGAAAACAACTGCAACTGACCTGCAATAAGAAGGTCAAAGCTATATGAATC
CGCGCTGAATGGCGGATAGTTGGTCAAAATGTAAACGCATATTGACTATACTTACGCCAT
TGAGGTAAAAAACAGCGTTTCATTCGGTGAATGGATAAGGCACAATGCCGGCCACCGTTT
TCTTTCTCTGGTTTCAGATGAAAGAAAACGGGCGAATCTGGTTAACAAAAGCGGTGCAAT
ATGCAAGTTTTTATCATGCGTCACGGCGACGCAGCCCTCGATGCCGCCAGTGATTCGGTT
CGTCCTCTGACTACTAATGGTTGTGACGAATCTCGCCTGATGGCGAACTGGCTGAAAGGT
CAAAAAGTGGAAATCGAACGCGTTCTGGTGAGCCCGTTCCTGCGAGCCGAGCAAACACTG
GAGGAAGTAGGGGATTGTCTGAACCTGCCTTCCAGTGCAGAAGTTCTGCCGGAGTTAACG
CCCTGCGGCGATGTTGGTCTGGTCAGTGCCTATTTGCAGGCGTTGACCAATGAAGGTGTT
GCTTCGGTGTTGGTTATCTCCCACTTACCGTTAGTTGGGTATCTGGTCGCCGAGTTATGT
CCGGGCGAAACGCCGCCTATGTTTACCACCTCGGCCATTGCCAGCGTCACGCTTGATGAA
AGCGGAAACGGCACATTCAACTGGCAGATGAGCCCGTGTAATCTGAAGATGGCGAAAGCT
ATCTGATTTGTTTGAAAAAATGCCCGATGTAAGCTGTACATCGGGCATTTGTCTTTTTGC
AATAGTATAAATTCACTCAAAACCCTTCACGGAGTTGGTATGCTGCGATGATGATTTCAT
CGCACTCTTTCCTCTGCTTCCCTATTAATTTCTGATGAAATGAGACTAAGTTGTAATATA
TTTTTACAAATTATAAAACTAATGGAACAATTAACAGTAAAAAAGAAATGATATTTTTGT
GTCTTGATTTAATATTATTTGTGATGCTTTAATATTATATCTTCAAAAAATACAATTTCA
AAATTAATCTAAGATCGTCTTTTTTTGTATACATTTCCCATAAATTTTAATTATGTAAAA
GATGTTTTCTAAGCATTTTATTTGTTTTTTATAAGTAAACTCTCAAAATTTCACCTTTTT
GATTATATGTTAAGTGCTCCTTAATTTACTGTTAAGTAAATATAAATTGAAACAATAAAG
ACAAAACATCACCATCCACCCACACCAAAGAATATCTTCTTATGCGACCTATTTTCTTGT
TAGTTAGATCGGATAGCTTATTCAATGGCTGAGTATAAATAATTGCTATTGACTGAATCA
ATGTATTGCAATGTTTATATTTTTAATTATTTATGGTTTAAGGACAAATAATGAGTAAGT
TTGTAAAAACAGCTATTGCTGCAACAATGGTAATGGGTGCGTTCGCTTCTACTTCAACAA
TCGCCGCTGGCAACAACGGTACAGCTCGTTTTTACGGCACCATTGAAGATTCCCCGTGCT
CCATCGTTCCTGATGATCACAAACTGGAAGTGGATATGGGTGACATTGGTTCGGGGATCC
TGAAAAATAACGGGACCTCCACGCCGAAAGCTTTCCAGATCCATCTGCAAGACTGCGTGT
TTGACACCCAGACAACCATGACAACGACCTTCACCGGTAACGCGTCCGCTACCAACAGCG
GCAATTACTACACCATTTACAATACCGACACCGGCGCGGCATTTAACAATGTCAGCCTGG
CGATTGGTGATGCTCAGGGGACCTCTTACAAAAGCGGTACGGGCATCAACCAGACAATTG
TAAAAGATACTGCCACCAACAAAGGCAAAGCGAAGCAGACGCTGGACTTTAAAGCCTGGC
TGGTGGGCGCTGCTGATGCGCCAGATTTGGGTAACTTCGAAGCCAACACGACTTTCCAGA
TTACTTATCTCTAAGTGATATCCCCATAGCCTTCGGCTATGGGGTTTTTTAAATGGAATT
TGCGCAAATTATAATAATTACGGATGGATACGTGCATGCCTGACGATTCTCTTTTCCGAC
TGCGGGTGCTTCCCTGCTGCATTGCGCTGGCAATGTCAGGGTGTTATGTCAATGCCTGGG
CTGAAGATGAAATTCAGTTTGATTCCCGTTTCCTGGAGTTAAAAGGCGACACAAAAATCG
ATCTGAAGCGATTTTCCAGCCAGGGATATGTCGAACCTGGTAAATACAATTTACAGGTTC
AACTAAATAAACAGCCGCTGGCGGAAGAATACGATATTTACTGGTACGCCTCTGAGAACG
ATGCCAGTAAAACCTATGCCTGCCTGACACCTGAACTGGTCGCTCAGTTTGGTTTAAAAG
AGGATGCGGCAAAAAACCTGCAATGGATCCACGACGGCAAATGTTTGAAACCCGGCCAGC
TGGAAGGCATTGATATTAAAGCTGACCTGAGTCAGTCAGCGTTAGTCATTTCATTACCCC
AGGCTTACCTTGAATATACCGACACCGACTGGGACCCACCTTCACGCTGGGATGACGGTA
TTTCTGGTTTAATTGCTGACTACAGTATTACCGCCCAGACACGACATGAAGAAAATGGCG
GGGATGACAGCAATGAAATTAGCGGCAACGGAACGGTTGGGGTTAACCTCGGCGCATGGC
GTCTGCGAGCCGACTGGCAGACCGACTACCAGCACAGCAAAAGCAATGATGAAGATGTTA
TCAACGGTGATGACACGCAAAAAAACTGGGAGTGGAGCCGCTACTACGCCTGGCGGGCTT
TACCGTCGCTAAAAGCCAAACTTGGCCTTGGCGAAGACTACCTTAATTCTGATATTTTCG
ACGGCTTTAACTACGTGGGTGGCAGTATCAGCACCGACGATCAAATGTTGCCGCCGAATC
TGCGCGGCTATGCGCCGGATATCTCCGGCGTGGCGCACACCACCGCGAAAGTGACCGTCA
GCCAGATGGGCCGCGTGATTTACGAAACGCAGGTTCCGGCGGGGCCGTTCCGCATCCAGG
ATCTTGGCGATTCTGTCTCCGGTACACTGCACATCCGCATTGAAGAACAGAACGGCCAGG
TGCAGGAATATGACATCAACACCGCCTCGATGCCGTTCCTGACCCGCCCCGGCCAGGTGC
GCTATAAGCTGATGATGGGCCGCCCGCAGGAGTGGGGGCATCATGTTGAAGGTGGTTTCT
TCTCCGGCGGCGAAGCTTCATGGGGGATTGCCAACGGCTGGTCGCTCTACGGCGGAGCGC
TGGCAGATGAACACTATCAGTCGGCGGCGCTTGGCGTCGGTCGCGACCTGTCTGTCTTTG
GCGCAGTCGCCTTTGATATCACCCACTCGCATACCCGCCTGGATAAAGAGACCGCCTACG
GTAAAGGTTCACTGGACGGTAACTCGTTTCGCGTGAGCTATTCCAAAGACTTCGATGAAC
TGAACAGCCGCGTCACTTTTGCCGGATACCGCTTCTCGGAAGAGAACTTCATGACCATGA
GCGAGTATCTCGATGCCAGCGGCAGCGAAATGGTGCGCACTGGCAACGACAAAGAGATGT
ACACCGCCACCTACAACCAGAACTTCAGGGATGCCGGTGTGTCTGTTTATCTAAACTACA
CCCGCCATACCTACTGGGATCGCGACGAACAGACCAACTACAACGTCATGCTCTCGCACT
ACTTCAACCTGGGCAGTATCCGCAATATGAGTATTTCCATGACCGGATACCGCTACGAAT
ATGACAACCGCGCCGATAAAGGTGTGTACATATCGCTCAGTATGCCGTGGGGCGACAGCA
GCACCATCAGCTATAACGGTAACTACGGCAGCGGTGCGGACAGCAGCCAGGTGGGGTATT
TCAGCCGTGTCGATGACGCAACCCACTACCAGTTGAACGTGGGAACCAGTGACAAACACT
CCAGCGTTGACGGCTATTACAGCCACGATGGTTCGCTGGCGCAGGTCGATCTCAGCGCCA
ACTACCATGAAGGGCAGTACACCTCGGCGGGCATTTCCTTACAGGGCGGCGCGACGCTCA
CCGCACAAGGTGGCGCGCTTCACCGTACCCAGAATATGGGCGGCACGCGTCTGCTGATTG
ATGCCGACGGCGTGGCTGGTGTTCCGGTAGAAGGAAATGGTGCGGCGGTTTACACCAATA
TGTTCGGTAAGGCCGTGGTGGCAGACGTCAACAACTACTACCGCAACCAGGCGTATATCG
ACCTTAACAACCTGCCGGAAAACGCCGAAGCCACCCAGTCCGTGGTGCAGGCGACGCTTA
CCGAAGGAGCCATTGGCTACCGTAAGTTTTCGGTTATCAGCGGGCAAAAAGCGATGGCGG
TATTGCGCCTGCAAGATGGCAGTCATCCGCCGTTTGGCGCGGAAGTGAAAAATGACAACG
CGCAGAACGTCGGTCTGGTTGATGATGATGGCAACGTCTACCTCGCGGGTGTGAAACCTG
GCGAGCATATGACCGTTTCATGGGGCGGCGTGGCCCACTGTGATATTCATCTGCCGGACC
CACTGCCTGCCGATCTGTTCAATGGCCTGTTATTGCCATGTCAGCAAACAGGGCCGATAT
CTCCTTCGATGCCCAATGAAATTAAGCCGGTGATCCAGGAGCAGACCCAGCAGGTGATGC
CAACGGAAGCGCCGGTATCGGTATCCGCCAATTAACAACGTGATTAAGGAATGATCCATG
ACGAATCTATTTTGCTCTGCCAGAACGGCCGCAACGACGCTGGCGTTACTGATAACTGCC
GCCAGCCTGTCAGCACAGGCCTCTGTCACGCCGGACCGTACACGCCTGATTTTTAACGAA
AGTGATAAATCAATCAGTGTCACGCTGCGCAATAACGACCCGAAAATGCCGTATCTGGCA
CAAAGCTGGATGGAAGATGAACAGGGTAACAAGATTAGCTCGCCACTGACGGTACTGCCG
CCGGTGCAGCGCATCGATTCCATGATGAACGGTCAGGTGAAGGTACAGGGCATGCCGGAT
ATCAACAAGCTGCCTGCCGACCGCGAGAGCGTGTTCTATTTCAACGTGCGTGAGATCCCG
CCGAAATCGAACAAACCCAACACGTTACAGATTGCGCTGCAAACGCGCATCAAGCTGTTC
TGGCGACCAAAGGCGCTGGAAAACGTCAGCATGAAAAATCCATGGCAGCATAAGGTGACC
TTAACCCGCAGCGGCCAGGAGTTTACTGTCAATAACCCGACGCCGTACTTCGTGGTTATC
AGTAATGCCAGCGCGCAGAAAAACGGCAATCCGGCAGCGGGATTTTCTCCCATGGTGATA
TCGCCAAAAACCTCCGTGCCGCTGAATGTCAAAATGGATAGCGTCCCGGTGCTGACCTAC
GTCAACGACTATGGCGCGCGGATGCCGCTGTATTTTAAATGTGGTGGCGATACCTGCCAG
GTGGACGCAGAGCAGAGCCGCAAAGGCTGATGCCGGGAGAGCCATATGAAAATAATTTAT
CTGGCGGTGTCGGGCATTGCGCTGCTGGCCTGGAATGTCGCCAGTGCAGAAACGAAACCC
GTCAACCTGGAACTCAGAGTCCTGGTGGATGCGCCGCCGCCCTGTACCGTGACCGGTAGT
GCAGTGGAGTTTGGCGATGTGCTGATCGCCAGTATCGATGGCAACAATTACCGCCAGAAC
GCGGGCTATACCCTCGATTGTTCGGGGCGTCTGGCAGACGATCTGCGGATGCAACTGAAG
GGCACCACCACAACCGTGAACGGTGAAACTGTGCTGGATGCAGGCATTGCCGGGTTTGGC
ATCCGCATCGAAAACGCCGCCGATAACTCGCTGTTTTCCATTGGTGAAAATAACTGGACG
CCTTTTGCATTTAACTCTCTGCCGCAACTGAAGGCTGTGCCGGTAAAACAGAACGGCGTG
CAGCTCGCGCCAACGGAATTTAACGCCAGTATGACCATGGTGGTGGATTACCAATGAAAC
GACTCGCACTTTTCCTGATTTGGGGTGCCTGCGGGGGCGCTCTGGCCTCACCGGATATCA
CCTTTCACGGCACGCTGGTGTCGCCGCCTGCCTGCACCATCAACGAAGGCCAGACCATTG
AACTGGAGTTTCGCGATGTACTTATCGACAGCATTGATGGCAACTACGCCCGCCAGGAGG
TGCCGTACACCATCAAATGTGACTCCGACGTTCGCAATGAGGCCTGGCAGATGACGCTCA
CCTGGACCGGGACGCAAACCAGCTACAACGATGCGGCAATCGAAACCGATGTTCCGGGAT
TCGGGATTCAGCTTTTGCAAAACGGGCAACGTTTTCAGCTTAATACCCCACTGACCATCA
ATGCCACGGATTTGACACAAAAACCGAAGCTTGAGGCCGTTCCGGTTAAAGCGAGTGACG
CTGTTTTAAACGACGGCACGTTTTCAGCGTACGCAACATTACGGGTGGAATATCAATGAA
GACAAATACCGGATGTGTGCTTCTGGCAAGCCTGATGCTCACCGCCAGCGGAACCACGTT
GGCGGCGGACAACCTGCATTTTTACGGCAACTTGTTAAGTAAATCCTGCACGCTGGTGGT
GGATGGTGAAGTGCTGGCGGAAGTGCATTTCCCGACCATCAGCAACCAGGATTTAACGGT
GGCGGGCCAGTCTTCCAGGGTGCAGGTGGTCTTTAAGTTGAAAGATTGCAAAGGCCCGGC
GGATTACCAGGTCAAAGTCACGCTGACCGGTACGGAAGATAGCGAACAGCCAGGTTTTCT
GGCGCTTGACCCGGCATCCAGCGCGCAAGGGGTAGGGATTGGTATGGAAAAGTCAGACGG
TACCTGGGTGCCGCTTAACGATTCTGCCGGTGCCACCTTTAACCTCACTAACGGCGCGAA
TAACCTCAATTTTAATGCCTGGTTGCAGGCGAAAAGCGGTCGTGAAGTGACTTCTGGTGA
CTTCACCGCCAGCCTGACTGCCACTTTTGAGTATATTTAAGATGAAGATAATACGAAACT
TTTTGGGGCTGTTGACGCTGATGGTGTTGAGCCTGACGGCTCAGGCACAGACATTTCAGA
TGTATCCCCCTATGGGTGTACCAGGCGCTTTAGCCAGGATAATATTTACTCTGGAAGTTG
TTACCCCTGCAGGCGTTTATACAGGTACATATCAGTCGCGCGATCCCAGGATGCTTCTCG
TTGGCAATTTAACATTGTTAAGCTGGAATGGTCCATCTTCAATTCCTGCGCCAACTATTT
ATCTGGATCATTCGAACGAAATAAATATGTCAAATTGTCCCGGTCTTGCTGGCGTTCCCT
CCACCAACGGCAAAGGATGGGATTGTTATGCTGCTGATTTAAAAGTCACGGTAACAGGGG
ACGTGCAGGGGTGTCCATGGCTGGTTTCAACCCAGATTACCACTACGGACCTGGGAGATG
TGGGGGCTACCTATGTAGGTCCTAAATACAATAACTCCACCTGTCCATCAATCCCACTGA
CGACATATGATGTTTCCTGGGATGAGAATACGGTGATTCATAAAAAAACATTGAATCTGA
AATCAACAGACGCCGTAGGGGGAATCATCGAGAAAACCCTGTCGACCTATTTAATGGAAA
GTGAGAGGCTGTGTGATGGTAGCCAGTTTGATCCTCGCGGGGCAAATTGCCGTTTTGTTT
CGCAGATGATCACTTTTACAGCATCAGGCTGCGACGATGCCAAAGTGACGGTGACGCCGG
TTCCGCATCCGATTACTGACAGGCAACTGCATGATATTGTGGTGCGCGTCGATGCCAGCG
CATTGCAGCCTATTGATTCAACGTGTCGCTTCCAGTATGTGTTGAATATGTTCTAGCACA
TACCAGCCTGGTGACAGGAGTTTACCAGGCTTTTTTTCTCTCATATTGGATAATTTGCCC
TACCTGAACACATTTAGGCCGGATAAGGCGTTTACCCCGCATCCGGCATTCGATACCAGC
ATTCAGGGCGAAATGGCAAAACGCATCCGCCCCTAATATTCACGGTAACTCCGGCGGCAG
CCACTCTTCCACTTCAATCAACACTAACAACGCTGCATCTCCGCCGTACTCTTTCGGTGC
CTGGTGAAATGCCATTACATGCGGATGTTGCGCCAGCCACAGCGGCGTTTGCTGTTTCAA
AATATGCTTCCCGTGCCCGTGCATTACGCATGCGCAAAACACATGTTCACGGCGGCAGGC
GGCAATCAACGCCCCCAGTTCCTGCTTGGCCTGCATTTGCGTCAAACCATGTAAATCGAG
GAAAAGCTCCGGTGAATAATCGCCGCGTCGCAACTTCTTCGCCTCAAAATGACTCACATC
CGGGCGGACATATTTCACCGGGCCTTCGGTATTCAATAACGGCTGAAACTCATCTGAGAA
ATAATGGCTGGCATCGGCCTGCTCCTGAATCAACCGTTTCACCGGCACTTCGCTGATTTT
CTTACGCTGCGGTCGGTGGACAATCGTGTCCTGCTTAATCTTGCGAGTCCCCGCCATCAA
CTGGCGAAACAGAGCCTGGTCCTCCTCGCTAAGTGTTGTTTTCTTTTTCATTTATCTGTC
TCTATTTCTAATTTTCCTACAGTTTACCCGACTCGTAGCGCAATCGATCGTTTTAAACGT
ATTTTTCCTCACTCACCGCGCGTGAATGCTGATTTATCGTCATCTTCGTGGCAAACTAGC
CGCCGAAATTATTGCGATCATGCCCTGGAGGAATACGTGGATAAAATTTTCGTTGATGAA
GCAGTTAATGAGCTGCAAACCATTCAGGACATGTTGCGCTGGTCGGTTAGCCGCTTCAGC
GCGGCAAATATCTGGTACGGTCACGGCACCGATAACCCGTGGGATGAAGCGGTACAATTG
GTGTTGCCGTCGCTCTACCTGCCGCTGGATATTCCGGAAGATATGCGCACCGCGCGTCTG
ACCTCCAGCGAAAAACATCGTATTGTTGAGCGCGTGATCCGCCGCGTCAACGAACGCATT
CCGGTGGCTTACCTGACCAATAAAGCATGGTTCTGCGGTCATGAATTTTACGTCGATGAA
CGTGTGCTGGTGCCGCGCTCGCCGATTGGTGAACTGATCAACAATAAATTTGCCGGGCTA
ATCAGCAAGCAACCGCAGCATATTTTAGATATGTGTACCGGTAGCGGCTGCATTGCCATT
GCCTGTGCTTATGCCTTCCCGGAAGCGGAAGTCGATGCGGTAGATATCTCTCCCGACGCG
CTGGCGGTTGCCGAACAGAACATCGAAGAACACGGTCTGATCCACAATGTCATACCGATT
CGTTCCGATCTGTTCCGTGATTTGCCGAAAGTGCAGTACGACTTGATCGTCACTAACCCG
CCGTATGTCGATGCGGAAGATATGTCCGACCTGCCAAACGAATACCGTCACGAGCCAGAA
CTGGGCCTGGCATCTGGCACTGACGGCCTGAAACTGACGCGTCGCATTCTCGGTAACGCG
GCAGATTACCTTGCTGATGATGGTGTGCTGATTTGTGAAGTCGGCAACAGCATGGTACAT
CTTATGGAACAATATCCGGATGTTCCGTTCACCTGGCTGGAGTTTGATAACGGCGGCGAT
GGTGTGTTTATGCTCACCAAAGAGCAGCTGCTGGCGGCCCGTGAACATTTCGCGATTTAT
AAAGATTAAGTAAACACGCAAACACAACAATAACGGAGCCGTGATGGCTGGAAACACAAT
TGGACAACTCTTTCGCGTAACCACCTTCGGCGAATCGCACGGGCTGGCGCTTGGCTGCAT
CGTCGATGGTGTTCCGCCAGGCATTCCGCTGACGGAAGCGGACCTGCAACATGACCTTGA
TCGTCGTCGCCCTGGGACATCGCGCTATACCACCCAGCGTCGTGAGCCAGATCAGGTCAA
AATTCTCTCCGGTGTTTTTGAAGGTGTTACTACCGGCACCAGCATTGGTTTGTTGATCGA
AAATACCGATCAGCGTTCTCAGGATTATAGTGCGATTAAGGACGTTTTCCGTCCTGGCCA
TGCCGATTACACCTACGAACAAAAATACGGTCTGCGCGATTATCGCGGCGGTGGACGTTC
TTCCGCCCGCGAAACCGCCATGCGCGTGGCGGCAGGGGCGATTGCCAAAAAATATCTCGC
CGAGAAATTTGGTATTGAAATCCGCGGCTGCCTGACCCAGATGGGCGACATTCCGCTGGA
AATCAAAGACTGGTCGCAGGTTGAACAAAATCCGTTCTTCTGCCCGGACCCGGACAAAAT
CGACGCGTTAGATGAACTGATGCGCGCGCTGAAAAAAGAGGGCGACTCCATCGGCGCGAA
AGTCACCGTTGTAGCCAGTGGTGTCCCCGCCGGACTTGGCGAGCCGGTCTTTGACCGCCT
GGATGCCGACATCGCCCATGCGCTGATGAGCATCAACGCGGTGAAAGGCGTGGAAATTGG
CGACGGTTTTGACGTAGTGGCGCTGCGCGGCAGCCAGAATCGCGACGAAATCACCAAAGA
CGGTTTCCAGAGCAACCATGCGGGCGGCATTCTTGGCGGTATCAGCAGCGGGCAGCAAAT
CATTGCCCATATGGCGCTGAAACCGACCTCCAGCATTACCGTGCCGGGGCGCACCATTAA
CCGCTTTGGCGAAGAAGTTGAGATGATCACCAAAGGCCGTCACGATCCTTGTGTCGGGAT
CCGCGCGGTGCCGATCGCTGAAGCGATGCTGGCGATCGTTTTAATGGATCACCTGCTACG
GCAGCGGGCGCAAAATGCCGATGTGAAGACTGATATTCCACGCTGGTAAAAAATGAACAA
AACCGCGATTGCGCTGCTGGCCCTGCTTGCCAGTAGCGCCAGCCTGGCAGCGACGCCGTG
GCAAAAAATAACCCAACCTGTGCCGGGTAGCGCACAATCGATAGGCAGTTTTTCTAATGG
CTGTATCGTCGGCGCTGACACGCTGCCGATACAGTCCGAACATTATCAGGTCATGCGTAC
CGATCAGCGTCGCTATTTCGGTCACCCGGACCTGGTGATGTTTATCCAGCGTCTGAGTAG
CCAGGTGAGCAATCTGGGCATGGGTACGGTGCTGATTGGCGATATGGGGATGCCCGCTGG
TGGGCGTTTCAACGGCGGTCATGCCAGCCACCAGGCCGGACTGGATGTCGATATCTTTCT
GCAACTGCCGAAAACACGCTGGACCTCCGCGCAGCTCTTGCGCCCGCAAGCACTGGACTT
AGTTTCCCGCGACGGTAAACACGTTGTCCCCACGCTGTGGAAGCCAGAAATTTTCAGCTT
GATCAAACTCGCCGCCCAGGACAAAGACGTCACACGCATTTTTGTTAATCCGGCGATTAA
ACAACAACTTTGCCTTGATGCGGGCACCGATCGCGACTGGTTGCGCAAAGTGCGACCCTG
GTTCCAGCATCGCGCGCATATGCATGTACGATTACGTTGTCCTGCCGATAGTCTGGAGTG
TGAAGATCAACCTTTACCGCCACCAGGCGATGGTTGCGGGGCAGAACTGCAAAGCTGGTT
TGAACCTCCAAAACCGGGAACAACAAAGCCTGAGAAGAAGACACCGCCTCCGTTGCCGCC
TTCCTGCCAGGCGCTACTGGATGAGCACGTGATCTAATGGAAACGTTTAATAGCCTGTTT
ATGGTTTCCCCGCTGTTGCTGGGAGTTCTCTTTTTTGTCGCCATGCTGGCGGGATTTATC
GACTCGATTGCCGGTGGTGGTGGGTTACTCACGATTCCGGCATTAATGGCTGCGGGGATG
TCTCCCGCTAATGCGCTGGCAACCAATAAACTGCAAGCCTGCGGCGGCTCTATTTCCGCC
ACTATCTACTTTATTCGCCGCAAAGTGGTTAGTTTAAGCGATCAGAAACTCAATATCGCC
ATGACCTTTATCGGCTCAATGAGCGGCGCACTGCTGGTGCAATACGTTCAGGCTGATGTC
TTACGGCAGATTTTGCCCATTCTGGTGATTTGTATCGGCCTCTATTTCTTGCTGATGCCA
AAGCTGGGTGAAGAAGATCGCCAGCGCCGGATGTACGGTTTACCCTTCGCGTTAATTGCC
GGTGGCTGCGTCGGTTTTTACGACGGATTCTTTGGTCCGGCAGCCGGATCGTTTTACGCG
CTGGCCTTTGTTACGCTGTGCGGATTCAACCTCGCCAAAGCCACGGCTCACGCCAAATTA
CTTAACGCAACGTCAAACATCGGCGGTTTGCTGCTGTTTATTCTCGGCGGCAAAGTGATT
TGGGCGACGGGCTTTGTGATGCTGGTGGGGCAGTTCCTCGGCGCGCGCATGGGTTCAAGA
CTGGTGTTGAGCAAAGGACAAAAGCTGATCCGCCCGATGATTGTTATCGTCTCGGCGGTG
ATGAGTGCCAAATTACTTTACGATAGCCATGGACAGGAGATCCTCCACTGGTTGGGGATG
AACTAATGAACAGTACACACCACTATGAGCAGTTGATTGAAATTTTTAATAGCTGCTTTG
CCGATGATTTTAATACCCGTCTGATTAAAGGCGACGACGAACCGATCTATCTTCCCGCTG
AAGCGGAAGTACCGTATAACCGAATCGTCTTTGCTCATGGCTTTTATGCCAGCGCAATTC
ATGAGATTTCGCACTGGTGTATTGCCGGAAAAGCGCGCCGTAAGCTGGTTGATTTCGGCT
ACTGGTATTGCCCGGACGGACGCGATGCCCAAACGCAAAGCCAGTTTGAAGATGTTGAAG
TGAAGCCGCAGGCGCTCGACTGGTTGTTCTGCGTGGCGGCGGGATATCCGTTTAACGTCA
GTTGCGACAATCTGGAAGGGGATTTCGAACCGGACCGCGTGGTGTTTCAACGGCGGGTAC
ATGCGCAGGTGATGGATTATCTGGCAAATGGCATTCCGGAACGCCCGGCACGTTTCATTA
AAGCACTACAAAATTATTATCACACGCCGGAACTTACGGCGGAACAGTTCCCGTGGCCGG
AAGCGCTAAACTAAAGCCAGTGCCACGTTTTACAATGAGGAAAGAAGATGATCGCGGAGT
TTGAATCACGCATTCTGGCATTAATCGACGGTATGGTTGACCATGCCAGTGATGATGAGT
TGTTTGCCAGTGGGTATTTGCGTGGCCACCTGACATTAGCCATCGCAGAACTGGAAAGTG
GTGATGACCACTCCGCTCAGGCGGTGCATACGACCGTTAGCCAGAGTCTGGAAAAAGCCA
TTGGTGCTGGTGAATTGTCGCCGCGTGACCAGGCGCTGGTGACCGATATGTGGGAAAACC
TGTTTCAGCAGGCATCACAGCAGTAAGTTGCGGCGTCTGGAGCACCATGCCTGATGCGAC
GCTTATCGCGTCTTATCAGGCCTACACGTCACACGTAGGTCGGATAAGGCGTTCACGCCG
CATCCGACAAACAATGCCAAAGCTGGTTACCCAGCCTTAACTGCTTTACCCTTCAACAAT
TTCCGCACCCATAACCGATTCGGATTTAACGCCGCCAGCGTACTGGCATCCATCGGAATC
GGTTCTTCACTCATCTGTGCCGCCAGAATCTCTGCGCACAGTGGGGCAGAACACAAACCA
CGCGAACCCAAAGCAGCAAGCATAAAGAGATCGTCATAAACCGGCGCGCTTACCGCCTTA
TCTTTCTGCTCCGCCAGCGACGCATATTCCACAAGTGTTGCCTCATAATCGGGAACATTA
CCTACCATTGGTAGATGATCGCGGGTGGCACAACGCACACCGCAGCGCGCCTCTTTCTCA
CTGATATCAACCTCTTTTGCCCACTGTGCCTGCGGGAAACAATCAATCAACCGCTGGCGA
TTCTGCTGCTGATCTTCATCACTGTACGTCGTATCTTCGCTGCCGCGATGATAACTGGCA
CCAATACAATGATGCTGATTCGCCGGATTTTGTGGCGTGAGATAACCGTCATAGCACAGC
ACCTGCTTCAGTTTTGCCAGTTCCGGTGTCGTCGGAATATGGCTGACCTGACCGGCAACC
GAATATACTGGCAGAGATGATGTTTGGCTGAAACGGCTGATTTGATGCCCGTTCGCCAGT
ACCACTACGCTGTGTGTTGCTTGCTGATCTCCTGCAAAATTCAACAACCAACAGTCATCC
TTACGGGATAAATCCTGTAACTGATATTGATAATAAATCTGCAACCCCTGCTGTTGCGCC
AGTTCCAGCACATTACGGGTCAGTTCTGCTGGGCACAGCCAACCACCTTGCGGATAAGTA
ATGCCGCTGCAATTTGTCGCAACGCCCGTAATTTGTTCAACCGCATTTGCCTCAACGGCT
ACAGCCAGTTCTTCGGGTAAATCCATTGACAACATCTGTGCGATTTTATGCTGGCTTTTC
TCATCCCAGCCTAACTGCGTGACGCCGCACCAGTCATGATCAAATTTAACGGGTAATTGG
TCGTAAAACCGACGAGCAAAAGTAAACGCATTAGAGAAAAAGCGGTTTAGCGCCTCATCG
TGTTTGCTTAATAACGGATACAACGCCCCCTGGCGATTGCCGGAAGCACCCAGCGCGGGG
GCTTCATCCGCGCAATAAAGCGTTACCTGCCAGCCGCGGCGTAATAACGCCAGCGACAAC
AACGCGCTGGCAATACCACCGCCGATAATCGCCGCTTCCAGTTTGCTGCTGCCCGTACGA
TTAAACCACGGCGTGGAGCAGGGGAGTGGTAATGTCTGTTCCATCACCCCACAAAGCATT
TCCCGTTTGCGCCCAAAGCCCTTACGTTTTTGCATCGTGAATCCGGCTTCCTGCAAACCG
CGGCGGACAAAACCGGCAGACGTAAATGTCGCCAGCGTGCCGCCTGGACGCGCCAACCTT
GCCATGGCGTTAAACAGATTTTGCGTCCACATATCCGGGTTTTTAGCTGGCGCAAAGCCG
TCCAGAAACCAGGCATCTACTTTTTGATTTAGAGAATCGTCCAGTTGGCTGGTCAGTTCA
TTAATATCGCCAAACCATAAATCCAGCGTCACGCGGCCTTCATCGAGTAATAAACGATGG
CAACCGGGCAAGGGCATTGGCCACTGCGCCTGAAGTTGTTCTGCCCACGGAGTCAGTTCC
GGCCAGTGTTGATGCGCTAAGGCTAAATCCGCACGGGTGAGGGGAAATTTCTCAAAACTA
ATGAAATGTAAGCGTTGTAATTGCGCTTGCGGATGCGCTTCGCGAAACTGATCAAATGCC
TGCCATAGCGTCAGGAAGTTTAATCCGGTGCCGAAGCCGCTCTCTGCTACCACAAACAGA
GGATGTGGATGTTCAGGAAAGCGTGCCTCTAATTGGTTACCTCCCAGAAAAACATAACGC
GTCTCTTCCAGCCCGTTATCGTTGGAAAAATAGACATCGTCAAAATCTCGGGAAACAGGT
GTACCCTCAGCATTAAATTCGAGGTTGGCAGGTTGTATGGAGTAGTGTTTCACGTAAGTT
ACTCGTCTTACAGGCGGTGGCTCGATCTTAGCGATGTGTGTAAGGCTGCGCAAATTTCTC
TATTAATTGGCTGATCGGACTTGTTCGGCGTACAAGTGTACGCTATTGTGCATTCGAAAC
TTACTCTATGTGCGACTTACAGAGGTATTGAATGAAACGTGCAGTGATTACTGGCCTGGG
CATTGTTTCCAGCATCGGTAATAACCAGCAGGAAGTCCTGGCATCTCTGCGTGAAGGACG
TTCAGGGATCACTTTCTCTCAGGAGCTGAAGGATTCCGGCATGCGTAGCCACGTCTGGGG
CAACGTAAAACTGGATACCACTGGCCTCATTGACCGCAAAGTTGTGCGCTTTATGAGCGA
CGCATCCATTTATGCATTCCTTTCTATGGAGCAGGCAATCGCTGATGCGGGCCTCTCTCC
GGAAGCTTACCAGAATAACCCGCGCGTTGGCCTGATTGCAGGTTCCGGCGGCGGCTCCCC
GCGTTTCCAGGTGTTCGGCGCTGACGCAATGCGCGGCCCGCGCGGCCTGAAAGCGGTTGG
CCCGTATGTGGTCACCAAAGCGATGGCATCCGGCGTTTCTGCCTGCCTCGCCACCCCGTT
TAAAATTCATGGCGTTAACTACTCCATCAGCTCCGCGTGTGCGACTTCCGCACACTGTAT
CGGTAACGCAGTAGAGCAGATCCAACTGGGCAAACAGGACATCGTGTTTGCTGGCGGCGG
CGAAGAGCTGTGCTGGGAAATGGCTTGCGAATTCGACGCGATGGGTGCGCTGTCTACTAA
ATACAACGACACCCCGGAAAAAGCCTCCCGTACTTACGATGCTCACCGTGACGGTTTTGT
TATCGCTGGCGGCGGCGGTATGGTTGTGGTCGAAGAACTGGAACACGCGTTGGCACGTGG
TGCTCATATCTACGCTGAAATCGTTGGCTACGGCGCAACGTCTGATGGCGCAGACATGGT
TGCTCCATCTGGCGAAGGCGCAGTGCGCTGCATGAAGATGGCGATGCACGGTGTTGATAC
GCCAATCGACTACCTGAACTCCCACGGTACTTCGACTCCGGTTGGCGACGTGAAAGAGCT
GGCTGCTATCCGTGAAGTGTTCGGCGATAAGAGCCCGGCGATTTCTGCAACCAAAGCCAT
GACCGGTCACTCTCTGGGCGCTGCTGGCGTACAGGAAGCTATCTACTCTCTGCTGATGCT
GGAACACGGCTTTATCGCCCCGAGCATCAACATTGAAGAGCTGGACGAGCAGGCTGCGGG
TCTGAATATCGTGACCGAAACGACCGATCGCGAACTGACCACCGTTATGTCTAACAGCTT
CGGCTTCGGCGGCACCAACGCCACGCTGGTAATGCGCAAGCTGAAAGATTAATTCGGAGT
AGGTCGGAGTAGGTCGGATAAGACGCGCCAGCGTCGCATCCGACGTTACGCGCCAATGCG
GCATTCGGCACTAACGCCAAAGGGAACCCGATGGTTCCCTTTTTCACATCATTGACAATC
GCCGCCTGTTCCAGGCAAACTTCCCGCTTTGTCGATTTCCTTCTGAAAAGACGTACGCGT
TAATTCCTGCCAACGCACCGTAACCCTGAAACCAGAGAGATGAGACGGGGATACTCCTCG
CCTTGCGCTGCATTCTGGAGTAATGCATGACTGCTGTAAGCCAAACCGAAACACGATCTT
CTGCCAATTTTTCGCTCTTCCGCATCGCTTTTGCGGTTTTTCTCACCTACATGACCGTAG
GGCTGCCGTTGCCGGTTATCCCGCTGTTTGTTCATCATGAACTGGGCTATGGCAATACCA
TGGTCGGCATTGCCGTCGGGATTCAGTTTCTGGCTACGGTGCTGACGCGTGGCTATGCCG
GGCGACTGGCCGATCAATATGGCGCAAAACGTTCGGCGCTTCAGGGGATGTTAGCTTGTG
GTCTGGCGGGGGGCGCGTTGCTGCTGGCGGCGATTTTGCCCGTCTCCGCACCGTTCAAAT
TTGCCCTGTTGGTCGTCGGGCGTTTGATTCTTGGCTTTGGTGAAAGCCAGTTACTGACAG
GCGCTCTGACCTGGGGATTAGGCATCGTAGGGCCAAAACACTCTGGCAAAGTAATGTCAT
GGAACGGAATGGCGATTTACGGTGCCCTCGCTGTTGGTGCACCGCTTGGCCTGTTGATTC
ATAGCCATTACGGTTTTGCCGCACTGGCGATCACCACAATGGCATTACCCTTACTGGCGT
GGGCCTGTAACGGCACAGTGCGCAAAGTACCGGCCCTGGCGGGAGAACGTCCATCGCTGT
GGAGCGTTGTCGGGCTTATCTGGAAACCAGGGTTAGGTCTGGCACTACAAGGCGTTGGTT
TTGCGGTTATCGGGACTTTCGTTTCGCTCTACTTTGCCAGCAAAGGATGGGCGATGGCGG
GCTTTACTCTTACCGCGTTTGGCGGGGCATTTGTCGTGATGCGCGTCATGTTTGGCTGGA
TGCCGGACCGTTTTGGCGGCGTGAAAGTGGCGATAGTCTCTCTGCTTGTAGAAACGGTGG
GCTTGTTGCTGCTCTGGCAAGCCCCGGGTGCGTGGGTCGCATTAGCGGGCGCGGCGTTAA
CCGGAGCCGGATGTTCGCTTATCTTTCCTGCGCTGGGCGTGGAGGTGGTTAAACGCGTCC
CCTCACAAGTTCGCGGCACCGCACTGGGCGGTTACGCCGCGTTTCAGGATATCGCCCTCG
GCGTCTCCGGGCCGCTGGCGGGAATGCTGGCGACCACGTTTGGTTACTCTTCGGTATTTC
TTGCCGGGGCGATCTCTGCAGTGCTGGGAATTATTGTCACGATACTGTCATTTCGTCGGG
GCTAACGAACCAGCCAGACCAGCATCAGGATAATCGCGACTAACAGTATCCACAGCGCGG
GACGCGTTGCCATATTTTGCAACGTGTCCATCATCGGTGGAAAAGGATTAAGCAGCGGTT
GCATATCACGCGGATCAATCCCTTTAACCCGCCGTTGATAAAGCTGATTAAGAATATCCT
CGGCCTGGGCAGAAGAAAGCGATGATTGCGCAGAAAGGCCATATTTTTGCTGGATATATG
CCGATAACGCCGCCAGTTCACTGGCATCTAAAGGTTGTTTTAGCGCCATCTGTAGTGATT
CCAGCGTCGGCGTATTTTGCTGGCTTAGCGTCTGACGCGCCTGTAGCCAGGTCACCAGAT
GGTTAAACAGTTTCGCTGGAATTAACTCGCCATCTTTCACCCCGGAAAGTTCCAGCATCG
ATTGCCAGATCTGTTTGCTGGGTTCCCCCGTTGCCGCCGCAAGTTTGGTCACCAGCTGTT
TGAGCGCATTGTGCTCCGCCGGTAATAAAGGACGATCGGTCGCCTCGCGCTGCTGCGGTT
GCGGAATAACCATCTTCCCTTCCTGCAACAGGGTTAGAATGGTTTTTAATTGCTCCGGTG
AGAGCTGATTCAGCGGCGTCTGACCAAAGTTATGACGGATATAATCCGTGACCGCCTGAC
GATTATTCCCCAGACGTAAATACTCCCCTAATTGCGCTAAAAGCTGGCGGGCAGAATGGC
TTTTTTGCGCGGCCAGCAGACGTTGCGCCAGATTATGCTCAGCGGCAGGGAAGTGACGCG
AAAGCAGCGGTGAATCTCCCGACAGACCAATATCGTGCCTGATACCCGCCCACAGTTCTG
CTCTTTGCTGTTGCGTCAGTGAGGTCACTTTCGTCATTAAGCTTTCCAGCGAAGTACGTT
GCTGACTGGATAAAGGCTGATTGCCCGCGCCAGACGGCAGGTTATCTCCCTGACCTGGTG
GTTGCCCAGGAGGAGGGCCGGAAATAGGTTGTATCATTACGTATCCTTATACCTGAAATC
TTCGCAAGTATGCCTGGCCGCGAGATTATGGCACACTTGTCCGGTTAACTCTCGTCTCAT
ACAGGTAACACAAACGTGAAAATCCTTGTTGATGAAAATATGCCTTATGCCCGCGACTTA
TTTAGCCGTTTGGGTGAGGTGACCGCGGTTCCCGGGCGTCCAATCCCCGTCGCTCAACTG
GCAGACGCGGATGCGCTGATGGTGCGTTCGGTCACGAAAGTGAATGAATCTTTGCTGGCA
GGAAAACCCATTAAATTTGTTGGCACTGCCACTGCGGGGACCGACCATGTCGATGAAGCA
TGGTTGAAGCAGGCGGGAATTGGTTTTTCCGCTGCACCTGGCTGTAATGCGATTGCGGTG
GTGGAATATGTTTTCTCCTCCCTGCTGATGCTTGCCGAACGCGATGGATTTTCACTGCAC
GAGCGTACCGTGGGGATCGTGGGCGTTGGTAACGTTGGACGTCGATTGCAGGCGCGACTG
GAAGCGTTAGGGATTAAAACCTTGCTTTGCGATCCGCCTCGCGCTGACCGTGGGGATGAG
GGTGATTTCCGCTCGCTGGATGAGTTAGTCCAGCGCGCGGATATTCTGACTTTCCATACG
CCACTCTTTAAAGATGGTCCGTACAAAACGCTACATCTGGCGGATGAAAAACTGATCCGT
AGCCTGAAGCCGGGAGCGATTCTGATTAACGCCTGCCGTGGCGCAGTCGTCGATAATACC
GCGCTGCTGACCTGCCTGAATGAAGGCCAGAAGTTAAGCGTGGTGCTGGATGTCTGGGAA
GGCGAGCCGGAACTTAATGTGGAATTGCTGACAAAAGTGGATATCGGCACGCCGCATATT
GCAGGCTATACCCTGGAAGGTAAAGCACGCGGTACTACGCAAGTGTTTGAAGCCTATAGC
AAGTTTATTGGGCATGAACAGCACGTTGCGCTGGATACATTACTGCCCGCGCCAGAGTTT
GGTCGCATTACGCTGCATGGCCCGCTCGATCAACCGACGCTGAAAAGGCTGGTGCATTTG
GTGTATGATGTGCGCCGCGATGACGCACCGCTGCGTAAAGTCGCCGGGATACCGGGTGAG
TTCGATAAACTGCGCAAAAACTATCTTGAGCGCCGTGAATGGTCATCTCTGTATGTAATT
TGTGATGACGCCAGTGCGGCATCATTGCTGTGTAAACTGGGTTTTAACGCCGTTCATCAT
CCGGCACGTTAATCTCTTCTTCATGCTCTCTGCTGTAACATTGGCAGGGAGCTTTGCTAT
TTCTGGAGTAAACCACCATGTCTGAAGGCTGGAACATTGCCGTCCTGGGCGCAACTGGCG
CTGTGGGCGAAGCCCTGCTTGAAACGCTGGCTGAACGTCAGTTCCCGGTTGGGGAAATTT
ATGCACTGGCACGTAACGAAAGCGCAGGCGAACAACTGCGCTTTGGTGGTAAAACAATCA
CCGTGCAGGATGCCGCTGAATTCGACTGGACGCAGGCGCAGCTGGCATTTTTTGTCGCAG
GCAAAGAAGCTACCGCTGCCTGGGTTGAAGAAGCGACCAACTCAGGTTGCCTGGTGATCG
ACAGCAGCGGACTGTTTGCTCTCGAACCAGACGTACCGCTGGTGGTGCCGGAAGTAAACC
CGTTTGTACTGACCGATTACCGCAACCGGAATGTCATCGCCGTACCGGACAGTCTGACCA
GCCAGTTGCTGGCGGCACTGAAACCGTTAATCGATCAGGGCGGTTTATCACGTATCAGCG
TTACCAGCCTGATTTCAGCCTCCGCCCAGGGCAAAAAAGCGGTCGATGCGTTAGCGGGGC
AGAGTGCGAAATTGCTCAACGGCATTCCGATTGACGAAGAAGATTTCTTCGGGCGTCAGC
TGGCGTTCAACATGCTGCCGTTACTGCCGGATAGCGAAGGTAGCGTGCGTGAAGAACGTC
GTATCGTTGACGAAGTACGCAAAATCCTGCAGGACGAAGGGCTGATGATTTCGGCAAGCG
TCGTCCAGGCACCGGTATTCTACGGTCATGCCCAGATGGTCAACTTTGAAGCACTGCGTC
CGCTGGCGGCAGAAGAAGCGCGTGATGCGTTTGCTCAGGGCGAAGATATTGTGCTCTCTG
AAGAGAACGAATTCCCGACTCAGGTAGGGGATGCTTCTGGTACGCCGCATCTTTCTGTTG
GCTGCGTGCGTAATGACTACGGTATGCCGGAGCAAGTCCAGTTCTGGTCGGTGGCCGATA
ACGTTCGCTTTGGCGGCGCGCTGATGGCAGTAAAAATCGCCGAGAAACTGGTGCAGGAGT
ATCTGTACTAATGTCCGACCAGCAACAACCGCCAGTTTATAAAATTGCGCTGGGCATTGA
GTACGACGGCAGTAAGTATTACGGCTGGCAACGGCAGAACGAAGTTCGCAGTGTGCAGGA
GAAGCTGGAAAAGGCGCTCTCCCAGGTGGCGAACGAACCCATCACCGTCTTCTGCGCCGG
GCGTACTGACGCAGGGGTACACGGTACCGGGCAGGTTGTGCATTTCGAAACAACCGCGCA
GCGCAAAGACGCTGCGTGGACGTTGGGCGTAAATGCGAATTTACCTGGTGACATCGCCGT
GCGTTGGGTTAAAGCTGTACCTGATGATTTTCATGCCCGATTTAGCGCCACGGCTCGCCG
TTATCGCTACATCATCTACAATCATCGGCTGCGCCCGGCGGTACTGAGTAAAGGGGTAAC
CCATTTTTACGAACCGCTGGACGCTGAACGGATGCATCGGGCTGCGCAATGCTTGCTGGG
CGAGAATGATTTCACCTCGTTCCGTGCGGTGCAGTGCCAGTCCCGAACCCCGTGGCGCAA
CGTTATGCATATTAATGTCACGCGTCACGGTCCTTATGTGGTGGTAGATATCAAAGCGAA
TGCCTTTGTACATCATATGGTCAGGAATATTGTCGGCAGCCTGATGGAAGTCGGTGCCCA
CAACCAGCCGGAGAGCTGGATAGCAGAGTTGCTGGCGGCAAAGGACAGAACGCTGGCGGC
AGCAACGGCAAAAGCGGAAGGGCTGTATCTGGTCGCGGTGGATTACCCTGACCGGTATGA
TCTTCCAAAACCGCCAATGGGCCCGCTATTTCTGGCGGACTAACGAGAATAACGCTCGTA
ACATTTCAGGCTGTAGCCAACGTAGTTACAGCCTGAAAGATGACGAGTACAAGGCATAGG
CAAATATGGACCTGATTTATTTCCTCATCGATTTTATCCTGCACATTGACGTGCATCTGG
CAGAGCTGGTCGCGGAGTACGGCGTCTGGGTTTATGCCATTTTGTTCTTAATTTTGTTCT
GTGAAACCGGTCTGGTGGTAACGCCGTTTTTACCGGGTGATTCATTGCTGTTTGTTGCCG
GTGCGTTGGCATCACTGGAAACCAACGATCTCAACGTCCATATGATGGTGGTGCTGATGC
TGATCGCCGCGATTGTGGGTGACGCGGTCAATTACACTATCGGGCGGTTGTTCGGTGAAA
AGTTATTCAGTAATCCCAATTCGAAAATTTTCCGTCGCAGTTATCTCGACAAAACCCATC
AGTTTTATGAGAAACATGGCGGCAAAACGATTATTCTCGCCCGTTTTGTGCCGATCGTCA
GAACGTTCGCCCCGTTTGTTGCGGGAATGGGCCACATGTCGTACCGTCATTTCGCTGCTT
ATAACGTGATCGGCGCACTGTTGTGGGTACTGCTTTTTACCTACGCAGGCTATTTCTTCG
GTACAATCCCGATGGTTCAGGATAACCTTAAGCTGCTGATCGTCGGGATTATTGTGGTTT
CTATTTTGCCGGGCGTCATCGAAATAATCCGTCACAAACGCGCTGCGGCACGCGCCGCAA
AATAAAAAGTAACTCAGCGGTTCGACCACTTTTTTATCCAAAGTTTCGGGCTGTTATGTT
TTAATGTGCAACATTCATGGTCTGTTGGGGGCAAAAATGGCATTATGCGTCCCCAAAGAT
AAAACTGGCATCGAACCAGGTTCAGACAGAAAGGTCCCTAATGAGCTGGATTGAACGAAT
TAAAAGCAACATTACTCCCACCCGCAAGGCGAGCATTCCTGAAGGGGTGTGGACTAAGTG
TGATAGCTGCGGTCAGGTTTTATACCGCGCTGAGCTGGAACGTAATCTTGAGGTCTGTCC
GAAGTGTGACCATCACATGCGTATGACAGCGCGTAATCGCCTGCATAGCCTGTTAGATGA
AGGAAGCCTTGTGGAGCTGGGTAGCGAGCTTGAGCCGAAAGATGTGCTGAAGTTTCGTGA
CTCCAAGAAGTATAAAGACCGTCTGGCATCTGCGCAGAAAGAAACCGGCGAAAAAGATGC
GCTGGTGGTGATGAAAGGCACTCTGTATGGAATGCCGGTTGTCGCTGCGGCATTCGAGTT
CGCCTTTATGGGCGGTTCAATGGGGTCTGTTGTGGGTGCACGTTTCGTGCGTGCCGTTGA
GCAGGCGCTGGAAGATAACTGCCCGCTGATCTGCTTCTCCGCCTCTGGTGGCGCACGTAT
GCAGGAAGCACTGATGTCGCTGATGCAGATGGCGAAAACCTCTGCGGCACTGGCAAAAAT
GCAGGAGCGCGGCTTGCCGTACATCTCCGTGCTGACCGACCCGACGATGGGCGGTGTTTC
TGCAAGTTTCGCCATGCTGGGCGATCTCAACATCGCTGAACCGAAAGCGTTAATCGGCTT
TGCCGGTCCGCGTGTTATCGAACAGACCGTTCGCGAAAAACTGCCGCCAGGATTCCAGCG
CAGTGAATTCCTGATCGAGAAAGGCGCGATCGACATGATCGTCCGTCGTCCGGAAATGCG
CCTGAAACTGGCGAGCATTCTGGCGAAGTTGATGAATCTGCCTGCGCCGAATCCTGAAGC
GCCGCGTGAAGGCGTAGTGGTACCCCCGGTACCGGATCAGGAACCTGAGGCCTGATAACT
GATAAGGGCAGGGCCACTGGCTCTGCCCTTTTGCTATTCTCACCGTAACGAATCAGCGGA
TACCATGATTATCAAACGCACTCCTCAAGCCGCGTCGCCTCTGGCTTCGTGGCTTTCTTA
TCTGGAAAACCTGCACAGTAAAACTATCGATCTCGGCCTTGAGCGCGTGAGCCAGGTCGC
GGCGCGTCTTGGCGTTCTGAAACCAGCGCCGTTTGTGTTTACCGTTGCGGGTACGAATGG
CAAAGGCACCACCTGCCGTACGCTGGAGTCGATTCTGATGGCGGCAGGGTACAAAGTGGG
CGTCTACAGTTCGCCTCATCTGGTGCGTTATACCGAGCGCGTACGTGTGCAGGGTCAGGA
ATTGCCGGAATCGGCCCACACCGCCTCTTTTGCGGAGATTGAATCGGCACGCGGTGATAT
TTCCCTGACCTATTTCGAGTACGGTACGCTGTCGGCGTTGTGGCTGTTCAAACAGGCACA
ACTTGACGTGGTGATTCTGGAAGTAGGGCTGGGCGGTCGTCTGGACGCAACCAATATTGT
CGACGCCGATGTCGCGGTAGTAACCAGTATTGCGCTGGATCATACCGACTGGCTGGGGCC
AGATCGCGAAAGTATTGGTCGCGAGAAAGCAGGCATCTTCCGCAGCGAAAAACCGGCAAT
TGTCGGTGAGCCGGAAATGCCTTCTACCATTGCTGATGTGGCGCAGGAAAAAGGTGCACT
GTTACAACGTCGGGGCGTTGAGTGGAACTATTCCGTCACCGATCATTACTGGGCGTTTAG
CGATGCTCACGGCACGCTGGAAAATCTGCCGTTGCCGCTTGTCCCGCAACCGAATGCCGC
AACGGCGCTGGCGGCACTGCGTGCCAGCGGGCTGGAGGTCAGTGAAAATGCCATTCGCGA
CGGGATTGCCAGCGCAATTTTGCCGGGACGTTTCCAGATTGTGAGCGAGTCGCCACGCGT
TATTTTTGATGTCGCGCATAATCCACATGCGGCGGAATATCTCACCGGGCGTATGAAAGC
GCTACCGAAAAACGGGCGCGTGCTGGCGGTTATCGGTATGCTACATGATAAAGATATTGC
CGGAACTCTGGCCTGGTTGAAAAGCGTGGTTGATGACTGGTATTGTGCGCCACTGGAAGG
GCCGCGCGGTGCCACGGCAGAACAACTGCTTGAGCATTTGGGTAACGGCAAATCATTTGA
TAGCGTTGCGCAGGCATGGGATGCCGCAATGGCGGACGCTAAAGCGGAAGACACCGTGCT
GGTGTGTGGTTCTTTCCACACGGTCGCACATGTCATGGAAGTGATTGACGCGAGGAGAAG
CGGTGGCAAGTAAGTTTCAGAATCGGTTAGTGGGCACGATCGTGCTGGTGGCGCTGGGGG
TGATTGTACTTCCAGGGCTGCTGGACGGGCAGAAAAAACATTATCAGGATGAGTTTGCGG
CTATCCCGCTGGTTCCAAAAGCGGGCGATCGCGATGAGCCTGATATGATGCCAGCCGCCA
CCCAGGCGTTGCCGACGCAGCCGCCGGAAGGCGCAGCGGAAGAGGTGCGGGCAGGTGATG
CCGCAGCACCGTCGCTCGATCCGGCCACTATTGCAGCCAATAACACCGAGTTTGAACCGG
AACCTGCACCGGTCGCGCCACCGAAGCCGAAACCGGTGGAGCCGCCTAAACCAAAGGTTG
AAGCACCACCTGCGCCGAAGCCAGAACCGAAGCCGGTCGTGGAAGAAAAAGCTGCACCGA
CGGGTAAAGCCTATGTTGTGCAACTGGGTGCGCTGAAAAATGCCGATAAAGTGAATGAAA
TTGTCGGTAAGCTGCGCGGTGCCGGTTATCGGGTTTATACGTCGCCATCCACGCCAGTGC
AGGGTAAAATTACCCGTATTCTGGTTGGGCCGGATGCCTCGAAAGATAAGCTGAAAGGTT
CGCTGGGTGAGTTGAAGCAACTTTCTGGCTTAAGTGGCGTGGTAATGGGCTATACGCCGA
ATTAATACGGTCTTGCCTGATGCGACGCTGGCGCGTCTTATCAGGCCTACGCAGGGGTAG
AACCGTAGGTTGGATAAGGCGTTTACGCCGCATCCGACACGCATTGCACGATGCCGCAAA
GGCATAAAAAGTCGATGGCGTTGAATATTTTTTCAGCGCCATTTTTATTGATGCGCGGGA
AGGAAATCCCTACGCAAACGTTTTCTTTTTCTGTTAGAATGCGCCCCGAACAGGATGACA
GGGCGTAAAATCGTAGGACACATATGGTCTGGATTGATTACGCCATAATCGCGGTGATTG
CTTTTTCCTCTCTGGTTAGCCTGATCCGCGGCTTTGTTCGTGAAGCGTTATCGCTGGTGA
CATGGGGTTGTGCTTTCTTTGTTGCCAGTCATTACTACACTTACCTGTCAGTCTGGTTTA
CGGGCTTTGAAGACGAACTGGTTCGAAATGGGATTGCCATCGCGGTACTGTTTATCGCTA
CCCTGATCGTTGGTGCTATCGTGAACTTCGTGATAGGCCAGTTGGTGGAGAAAACGGGGT
TGTCAGGCACCGATCGGGTGCTGGGCGTCTGTTTCGGTGCGTTGCGCGGTGTGTTGATTG
TTGCCGCCATTCTCTTCTTTCTCGACTCCTTTACCGGGGTGTCGAAAAGCGAAGACTGGA
GCAAATCACAGCTGATCCCGCAGTTCAGTTTTATCATCAGATGGTTTTTTGATTATCTGC
AAAGCTCGTCAAGTTTCTTGCCCAGAGCGTAAGTGCTCTGAGATGTGGCTTAACGAGGAA
AAAGACGTATGTGCGGTATTGTCGGTATCGCCGGTGTTATGCCGGTTAACCAGTCGATTT
ATGATGCCTTAACGGTGCTTCAGCATCGCGGTCAGGATGCCGCCGGCATCATCACCATAG
ATGCCAATAACTGCTTCCGTTTGCGTAAAGCGAACGGGCTGGTGAGCGATGTATTTGAAG
CTCGCCATATGCAGCGTTTGCAGGGCAATATGGGCATTGGTCATGTGCGTTACCCCACGG
CTGGCAGCTCCAGCGCCTCTGAAGCGCAGCCGTTTTACGTTAACTCTCCGTATGGCATTA
CGCTTGCCCACAACGGCAATCTGACCAACGCTCACGAGTTGCGTAAAAAACTGTTTGAAG
AAAAACGCCGCCACATCAACACCACTTCCGACTCGGAAATTCTGCTTAATATCTTCGCCA
GCGAGCTGGACAACTTCCGCCACTACCCGCTGGAAGCCGACAACATTTTCGCCGCCATCG
CTGCTACAAACCGCTTAATCCGCGGCGCGTATGCCTGTGTGGCGATGATTATCGGCCACG
GTATGGTTGCTTTCCGCGATCCTAACGGTATTCGTCCGCTGGTACTGGGAAAACGTGATA
TTGACGAGAACCGCACAGAATATATGGTCGCTTCCGAAAGCGTTGCGCTCGATACACTGG
GCTTTGATTTCCTGCGTGACGTCGCGCCTGGCGAAGCGATTTACATCACTGAAGAAGGGC
AGTTGTTTACCCGTCAATGTGCTGACAATCCGGTCAGCAATCCGTGCCTGTTTGAGTATG
TATACTTTGCTCGCCCGGACTCGTTCATCGACAAAATTTCCGTTTACAGCGCGCGTGTGA
ATATGGGCACGAAGCTGGGCGAGAAAATTGCCCGCGAATGGGAAGATCTGGATATCGACG
TGGTGATCCCGATCCCGGAAACCTCGTGTGATATCGCGCTGGAAATTGCGCGTATTCTGG
GCAAACCGTACCGCCAGGGCTTCGTTAAAAACCGCTATGTTGGCCGCACCTTCATCATGC
CGGGCCAGCAGCTGCGTCGTAAGTCCGTGCGCCGTAAACTGAACGCCAACCGCGCCGAGT
TCCGCGATAAAAACGTCCTGCTGGTCGACGACTCCATCGTCCGTGGCACCACTTCTGAGC
AGATTATCGAGATGGCACGCGAAGCCGGAGCGAAGAAAGTGTACCTCGCTTCTGCGGCAC
CGGAAATTCGCTTCCCGAACGTTTACGGTATCGATATGCCGAGCGCTACGGAACTGATCG
CTCACGGTCGCGAAGTAGATGAAATTCGCCAGATCATCGGTGCTGACGGGTTGATTTTCC
AGGATCTGAACGATCTGATCGAAGCCGTTCGCGCTGAAAACCCGGATATCCAGCAGTTTG
AATGCTCGGTGTTCAACGGCGTCTACGTCACCAAAGATGTTGATCAGGGCTACCTCGATT
TCCTCGATACTTTACGTAATGACGACGCCAAAGCAGTGCAACGTCAGAACGAAGTGGAAA
ATCTCGAAATGCATAACGAAGGATGATGCCTTCGCTCAGGGTGCCGATCTGGCACCCTGA
CTTGCAACTCCCGCCGAAATCCTGCAAAGTCTGCCTGCAAGTCTGACAGGGCAACTATTT
ATGAAACGACTTATTGTGGGCATCAGCGGTGCCAGCGGCGCGATTTATGGCGTGCGTTTA
TTACAGGTTCTGCGCGATGTCACAGATATCGAAACGCATCTGGTAATGAGCCAGGCGGCG
CGCCAGACCTTATCCCTCGAAACGGATTTTTCCCTGCGCGAAGTGCAGGCGTTAGCCAAT
GTCACGCACGATGCGCGCGATATTGCCGCCAGCATCTCTTCCGGTTCTTTCCAGACGTTG
GGGATGGTGATTTTACCCTGTTCAATCAAAACCCTGTCCGGCATTGTCCATAGCTATACT
GATGGCTTACTGACCCGTGCGGCAGATGTTGTGCTGAAAGAGCGTCGCCCGTTGGTGCTC
TGCGTGCGTGAAACACCATTGCACTTAGGCCATCTGCGTTTAATGACGCAGGCAGCAGAA
ATCGGTGCGGTGATTATGCCTCCCGTTCCGGCGTTTTATCATCGCCCGCAATCCCTTGAT
GATGTGATAAATCAGACGGTTAATCGTGTTCTTGACCAGTTTGCGATAACCCTTCCTGAA
GATCTCTTTGCCCGCTGGCAGGGCGCATAACTCCGCTGTTGCCCTGTTTCAGGGCAATTT
TGCAACCGCGATCAAATCCTCGACATTTTGTTTCTGCCATTCAATCGAAACGCTGCGATT
CAACCGCTATACCTGCTATCTTCAACTTTAGGACAATAATGCAACGTCTTATTAACATAT
TTAACGTTGAATGTTATTGTTGTCGTCAAGATGGCATAAGACCTGCATGAAAGAGCCTGC
AAACACACAACACAATACACAACATAAAAAGCCATTTTTACTTGAGGGTTATGTATGAAG
AAGTCGATTCTCGCTCTGTCTTTGTTAGTCGGTCTCTCCGCAGCGGCTTCCAGCTATGCG
GCGCTACCGGAGACGGTACGTATCGGAACCGATACCACCTATGCGCCGTTCTCGTCGAAA
GATGCTAAAGGTGATTTTGTTGGCTTTGATATCGATCTCGGTAACGAGATGTGCAAACGG
ATGCAGGTGAAATGTACCTGGGTTGCCAGTGACTTTGACGCGCTGATCCCCTCACTGAAA
GCGAAAAAAATCGACGCCATTATTTCGTCGCTCTCCATTACCGATAAACGTCAGCAGGAG
ATTGCTTTCTCCGACAAGTTGTACGCCGCAGATTCTCGTTTGATTGCCGCCAAAGGTTCG
CCGATTCAGCCAACGCTGGATTCACTGAAAGGTAAACATGTTGGTGTGCTGCAGGGATCA
ACCCAGGAAGCTTACGCTAACGAGACCTGGCGTAGCAAAGGTGTGGATGTGGTGGCCTAT
GCCAACCAGGATTTGGTCTATTCCGATCTGGCTGCAGGACGTCTGGATGCTGCACTGCAG
GATGAAGTTGCTGCCAGCGAAGGATTCCTCAAGCAACCTGCTGGTAAAGACTTCGCCTTT
GCTGGCTCATCAGTGAAAGACAAAAAATACTTCGGTGACGGCACCGGTGTAGGGCTACGT
AAAGATGATGCTGAACTGACGGCTGCCTTCAATAAGGCGCTTGGCGAGCTGCGTCAGGAC
GGCACCTACGACAAGATGGCGAAAAAGTATTTTGACTTTAATGTCTACGGTGACTGATAC
GTCGCAGGGAAGCTGTACCTGATGGAATGATCATCATGGTGCACGCCAGGTTTGTTGCAC
TATTGTGGTGCATTGAAATGCATACTTAAGCATTTTTAATGAAAAATAATACGTCTAACG
GGGCGGGATATTTTGCCTTGATGGTCAATTTTATGGCACGATAAGTGTAACAAACCTGTA
AATATTCCCTATAAAAAGACTGTCAGTTGAGGACATTATGAAAAAACTGGTGCTATCGCT
CTCTCTGGTTCTGGCCTTCTCCAGCGCAACTGCGGCATTTGCTGCGATTCCGCAAAACAT
CCGCATCGGTACCGACCCGACCTATGCGCCATTTGAATCAAAAAATTCACAAGGCGAACT
GGTTGGCTTCGATATCGATCTGGCAAAGGAATTATGCAAACGCATCAATACGCAATGTAC
GTTTGTCGAAAATCCGCTGGATGCGTTAATCCCGTCCTTAAAAGCGAAGAAGATTGACGC
CATCATGTCATCGCTTTCCATTACGGAAAAACGTCAGCAAGAAATAGCCTTCACCGACAA
ACTGTACGCTGCCGATTCTCGTCTGGTGGTGGCGAAAAATTCTGACATTCAGCCGACAGT
CGAGTCGCTGAAAGGCAAACGGGTAGGCGTATTGCAGGGCACCACCCAGGAGACGTTCGG
TAACGAACACTGGGCACCAAAAGGCATTGAAATCGTCTCGTATCAGGGGCAGGACAACAT
TTATTCTGACCTGACTGCCGGACGTATTGATGCCGCGTTCCAGGATGAGGTCGCTGCCAG
CGAAGGTTTCCTTAAACAACCTGTCGGTAAAGATTACAAATTCGGTGGCCCGTCTGTTAA
AGATGAAAAACTGTTTGGCGTAGGGACCGGCATGGGCCTACGTAAAGAAGATAACGAACT
GCGCGAGGCACTGAACAAAGCCTTTGCCGAAATGCGCGCTGACGGTACTTACGAGAAATT
AGCGAAAAAGTACTTCGATTTTGATGTTTATGGTGGCTAATCGCCATCGGTGAAAGAAAG
CCCGCTCCCTTCGGGTAACCGGAGGGAGACAAGAGGCGGTAATTCACCACACACGACAGG
ACAGGCTGCATGTTGTATGGGTTTTCAGGTGTTATTTTACAGGGTGCGCTCGTCACGCTG
GAGCTGGCTATCAGCTCTGTAGTGCTCGCTGTAATCATCGGTTTAATTGGCGCTGGCGGT
AAGCTCTCTCAAAATCGGCTTTCGGGGCTGATTTTCGAAGGGTACACCACGCTGATTCGT
GGCGTGCCGGACTTAGTGTTGATGCTGCTGATTTTCTACGGTTTGCAGATTGCGCTAAAC
ACGGTGACGGAGGCGATGGGCGTCGGGCAGATTGATATCGATCCGATGGTCGCTGGTATT
ATCACTCTCGGTTTTATCTACGGTGCTTATTTTACCGAAACGTTCCGTGGTGCTTTTATG
GCAGTGCCGAAAGGACATATAGAGGCGGCGACGGCGTTCGGTTTTACTCGTGGGCAAGTG
TTTCGGCGGATCATGTTTCCGGCGATGATGCGTTACGCCCTGCCAGGCATTGGCAACAAC
TGGCAGGTGATCCTCAAATCTACCGCACTGGTTTCGTTACTCGGCCTGGAAGATGTGGTC
AAAGCCACGCAGCTGGCAGGCAAAAGTACCTGGGAACCGTTCTATTTCGCCATCGTCTGT
GGCGTGATTTACCTGGTTTTCACCACCGTTTCCAATGGTGTGCTGCTGTTCCTTGAGCGC
CGCTACTCCGTGGGTGTGAAGAGGGCTGACCTGTGATCGAAATCTTACATGAATACTGGA
AACCGCTGCTGTGGACCGACGGTTATCGCTTTACTGGTGTGGCGATCACTCTGTGGCTGC
TTATTTTGTCGGTAGTGATAGGCGGAGTCCTGGCGCTGTTTCTGGCGATTGGTCGTGTCT
CCAGTAATAAATACATCCAGTTTCCAATCTGGTTATTTACCTATATTTTTCGCGGTACGC
CGCTGTATGTTCAGTTGCTGGTGTTCTATTCCGGCATGTATACGCTGGAGATTGTTAAGG
GGACCGAGTTTCTTAACGCCTTTTTCCGCAGTGGCCTGAACTGTACCGTGCTGGCGCTGA
CGCTTAACACCTGCGCTTACACTACCGAGATTTTTGCTGGGGCAATCCGTTCGGTTCCGC
ATGGGGAAATTGAAGCCGCCAGAGCCTATGGCTTCTCGACTTTTAAAATGTATCGCTGCA
TTATTTTGCCTTCTGCGCTGCGTATTGCGTTACCGGCATACAGCAACGAAGTGATCCTGA
TGCTGCACTCTACTGCGTTGGCATTTACTGCCACGGTGCCGGATCTGCTGAAAATAGCCC
GCGATATTAACGCCGCCACGTATCAACCTTTTACCGCCTTCGGCATTGCCGCGGTGCTCT
ATTTAATCATCTCTTATGTCCTGATCAGCCTCTTTCGCAGAGCGGAAAAACGCTGGTTGC
AGCATGTGAAACCTTCTTCAACGCACTGAGAATACGATGTCCGAGAATAAATTAAACGTT
ATCGATTTGCACAAACGCTATGGCGAACACGAAGTGCTGAAAGGGGTGTCACTGCAAGCG
AATGCCGGAGATGTCATAAGCATCATCGGATCGTCGGGATCGGGGAAAAGTACCTTTCTG
CGCTGCATTAACTTCCTCGAAAAACCGAGTGAAGGGTCGATCGTGGTCAATGGCCAGACG
ATCAATCTGGTGCGCGGCAAAGACGGTCAACTCAAAGTCGCCGATAAAAATCAACTGCGC
TTACTGCGCACACGCCTGACGATGGTATTCCAGCACTTCAATCTCTGGAGCCATATGACG
GTGCTGGAAAACGTCATGGAAGCGCCGATTCAGGTGTTGGGCCTGAGCAAGCAGGAAGCG
CGCGAGCGGGCGGTGAAGTATCTGGCAAAAGTTGGGATAGACGAACGTGCACAGGGGAAA
TATCCGGTGCATCTTTCCGGCGGTCAGCAACAGCGTGTTTCTATCGCGCGGGCGCTGGCG
ATGGAACCGGAAGTTTTACTGTTTGATGAACCTACCTCGGCGCTCGATCCTGAACTGGTA
GGCGAAGTGTTGCGCATTATGCAGCAACTGGCAGAAGAGGGGAAAACCATGGTGGTTGTG
ACTCACGAAATGGGCTTTGCTCGTCATGTTTCTACTCACGTCATTTTCCTCCATCAGGGG
AAAATAGAGGAAGAAGGCGCGCCGGAGCAGTTATTTGGCAACCCGCAAAGCCCTCGTCTG
CAACAGTTCCTTAAAGGTTCGCTGAAATAATTGCCTCTCCGGTGGCTAACGCTGCCGGAG
TATTTTCAAGGGGAATTTGCGAGTCAGCTTCCGCTGAAATGTAAAAGTTGCAGTCCGCTA
AAAATACTTCTGAATTCGCTGTCCAAAGATAAAAACTGCCTGCTGCATTGGGTGTTAATC
GTGGTTATTGTCGCGTCATCTTAAATTTGAGGGGTGACGGAACGCCATGACAATATCGAC
AACTTCCACGCCGCATGATGCGGTATTTAAATCTTTTTTACGCCATCCAGACACCGCGCG
GGATTTTATTGATATTCATCTTCCCGCGCCGCTGCGCAAACTGTGAGATTTAACGACGCT
TAAACTGGAACCAAACAGTTTTATTGATGAAGACCTGCGGCAATATTATTCCGACCTCTT
ATGGTCTGTGAAAACGCAGGAGGGAGTGGGTTATATTTATGTAGTGATAGAGCACCAAAG
TAAGCCGGAAGAATTAATGGCTTTTCGCATGATGCGTTATTCCATTGCGGCAATGCAAAA
CCATCTTGATGCGGGCTATAAAGAGCTTCCATTGGTGATCCCGATGCTGTTTTATCATGG
TTGCAGAAGTCCTTATCCTTATTCACTCTGCTGGCTTGATGAATTTGCCGAGCCTGCGAT
TGCCCGTAAAATATATTCATCGGCTTTTCCGTTGGTGGATATTACCGTGGTGCCGGATGA
CGAGATTATGCAACATCGCAAAATGGCGCTGTTGGAGTTAATTCAGAAACATATTCGTCA
GCGCGATCTGTTGGGATTAGTCGACCAAATTGTTTCGCTGCTAGTTACAGGGAACACTAA
TGACGGACAGCTAAAAGCCCTGTTTAATTATGTATTACAAACGGGAGATGCCCAGCGTTT
CCGTGCATTTATTGGTGAGATAGCAGAACGCGCACCACAGGAAAAGGAGAAACTGATGAC
CATTGCTGACAGATTACGTGAAGAAGGGCGGAATGATGGATTAATTCTTGGCAAACGCGA
AGAAGCCCTGCGTATTGCTCAGGAGATGCTGGATAGAGGTTTAGACCGAGAGTTAGTTAT
GATGGTGACCCGACTTTCACCAGACGATCTTATCGCGCAAAGCCACTAACCCTGTAACAC
CGGGAGTTAACTGGCGGATGTTTGCAGTAAACCACATCAGCGAACGACATCCGCCAGCGC
CTCTTCTAAATCGTACCAACGAAACGCAAAACCCGCTTCTTCCAGCCGTTTAGGCAGCGC
GCGTTGTCCACCTAATACCAGTACTGAAGATTCGCCCATTAACAGCCGAATGGCGGTTGC
GGGGACGCGCAAAATAGCCGGGCGATGCAGCGCATGACCGAGCGCATGGGCAAATTGTTC
ATTGCGTATCGGGTAGGGCGAAACCATATTAAATGGCCCGCGCAGCTCGTTATCCAGCAG
CCAGAGAATGCCGTTGACCATATCATCGATATGAATCCAGGCCAGATACTGCCGACCGGA
ACCAATCGGCCCGCCCAGGCCAAGACGAAACGGCGGCAGCATTTTACCGAGAATACCGCC
ATCCGGTGCCAGCACTACGCCGGTACGCAGCAGGCACACTCGCGTTTTGTCACTTTGCGC
CCGGCAGGCAATTTCTTCCCAGCGGGCGCAGAGTTTATGGGTAAATTCGTTATGCGGCGG
TTCCTCTTCGGTAACCACCACTTCACCTAAGTCGCCATAATAGCCCGTTGCCGAGCCGGA
AATGAGTACCGACGGTGGCGTGTCGCTGGCATTAATCAAATCGACCAGTTTTTGCGTGAT
ATTCCAGCGGCTTTGGCAGAGACGCTCTTTTTGCTCGTGAGTCCAGCGTTTATCAGCAAT
CGGTTCTCCGGCGAGGTTGATTACCGCATCAACGCCGTTGAGGTTGCTTTGATCGGCAAG
CCCTTGCCATAGCGTCACCTGCGGCCCGAGCACGGAACTGGCTTTCTGCGGGTTACGCGT
CATTACCGTGATTTGATGGCCCAGCTCCAGCAAACGTGGAATCAAATGGCGACCAATTAA
TCCCGTCCCTCCGGTGATCACTATGTTCATGCAGCCTCCCGATATGGCGGTTAACGCTGC
CAGCTTAAGGTCATGGATACCGAATCGGCGTAGCGCAGCGCGTGCAGTTTATCGATCTCC
ACTTCAGCATACGTCACCCAGTGATGTTCACGTGCGATATCGAGCACATCCTGAGTTAAT
TTTTCCAGCAAAGAGAAACGGTTATTCTCTACATGCTGAATAATGTTTTTCGTTACGGTG
CGATAATTCAGCGCATCGTTGATATCTTCGCTGGTGCGCGCTTTATCGGCGGGGTAGTGG
ATCGTCACATTGATAACAATATCCTGACGGTTGTTAATTTCTTCTTCCTTAATTCCGATA
AATGTACGTAAACGAAGGTTCTTTATACGAATAATAGCGGCAGGTTGTGCCATTGCAGGT
TCTCCGTTGTTTTACTTAGGATGAAATAATACACGAGAACCTGTTTCTGTTAACTATCCG
AACGCTCATCACCGAGTTGTGCTTTTAGCAGTGCCTGCCCAGTGGCAGGGCGCGAACGGA
TCCGCTCATGCCAGTTCTTGACTGCCGGATACATTGCGAGGTCAATTCGCTGGCGAGTCC
AGGCATTAACCCACGGCCAGCAGGCAATATCCGCAATGCTGTAGTTCTCACCTCCCAGCC
AGGGCGAGTTTTCCAGCCGCTTGTTCAGTACATGGTACAGGCGCTGAGTTTCAACCTGAT
AACGTTCAATAGCGTAAGGAATGGTTTGGGGGGCTGCGTGATTAAAATGATGATTTTGCC
CAAGCATCGGCCCCAGTCCGCCTACCTGCCAGAATAACCACTGTAATGTGGCGGCGCGCT
CACGCGTTTCATGACTCAAAAAGAGTCCTGTTTTCTCAGCCAGATACAACAAAATGGCAC
CAGATTCAAAGAGGCTTAGCGGTTCGCCGCCATCGGCTGGAGAATGATCAACAATTGCCG
GAATTTTGTTGTTAGGCGAAATGCGCAAAAATTCCGGGCGAAACTGACCGCCTTTCCCCA
GGTCTACCTTTATCAAGCGATAATCCAGCCCTGCTTCTTCGAGAAACAGCGTAATTTTGT
GGCCATTGGGTGTCGGGGCGAAATAGAGATCGATCATTGCAGCTCCGGTTGTCTAATCAT
CTGAACACCACAAGTATAGAAAGCGCGGCGACTTGCGTGAGTATTCGTCACGTGACAGTG
ACAAAAAGGCTCTATAGTTTGATAGCCAGCCCCCTTTATTGCCGAGGACATAATGAGTAA
ACCCGCTATCACGCTTTGGTCAGATGCCCATTTTTTCTCCCCTTATGTGTTATCCGCCTG
GGTGGCGTTGCAGGAAAAAGGCCTGTCGTTTCATATCAAGACCATCGACCTCGACAGCGG
TGAACATTTGCAACCGACGTGGCAAGGTTACGGTCAGACACGCCGTGTGCCGTTATTACA
AATCGATGATTTTGAGTTGAGTGAATCTTCTGCCATTGCGGAGTATCTGGAAGATCGATT
TGCGCCACCGACCTGGGAACGTATTTATCCGCTTGATTTAGAAAATCGTGCGCGTGCACG
ACAGATTCAGGCCTGGCTGCGCAGCGATCTGATGCCCATTCGCGAAGAGCGTCCGACGGA
TGTTGTCTTTGCGGGGGCGAAAAAAGCGCCACTAACGGCCGAGGGAAAAGCCAGTGCAGA
GAAACTGTTCGCGATGGCAGAACATTTGTTAGTACTGGGTCAGCCGAATTTATTTGGTGA
ATGGTGCATTGCTGATACTGATCTGGCGCTAATGATTAACCGCCTGGTACTACATGGCGA
TGAGGTGCCAGAACGCCTGGTGGATTATGCGACATTCCAGTGGCAGCGAGCGTCTGTCCA
GCGTTTTATTGCACTTTCAGCGAAGCAATCTGGCTGATAGCAACGACAGAATCCAGTATC
ATAGCTTACGTTTTTTCGACGAGGAGTGAGTGATGAAACTGATGTTTGCATCGGACATTC
ATGGGTCGTTACCGGCGACGGAACGTGTTCTGGAGTTGTTTGCCCAAAGCGGTGCCCAGT
GGCTGGTGATCCTTGGCGACGTGTTGAATCACGGCCCGCGTAATGCTTTACCGGAGGGTT
ACGCGCCAGCCAAAGTCGCTGAACGGCTTAATGAAGTGGCACATAAGGTTATCGCTGTGC
GCGGCAACTGCGACAGCGAAGTGGATCAAATGCTGCTGCATTTCCCGATAACCGCGCCGT
GGCAACAGGTATTACTGGAAAAACAACGTCTGTTTTTGACGCATGGTCATCTTTTTGGCC
CGGAAAATCTGCCTGCTTTAAACCAGAACGATGTGCTGGTTTACGGTCATACCCATCTGC
CAGTAGCAGAACAGCGGGGGGAGATTTTCCACTTCAACCCCGGCTCGGTGAGTATTCCGA
AAGGCGGTAATCCGGCGAGTTATGGCATGCTGGATAATGACGTACTTAGTGTAATCGCAC
TCAATGATCAAAGTATCATTGCGCAGGTCGCGATTAATCCGTAATTTACCCACAACTCAA
AATGCGCCGTAAGAGCGCCAGAAAAAGAAGGTTTCCTGATAATGGAACAGCGTCGTTTGG
CAAGTACTGAATGGGTGGATATTGTCAATGAAGAGAACGAAGTCATTGCACAAGCCAGCC
GGGAGCAAATGCGGGCACAGTGTCTGCGTCATCGTGCAACTTACATCGTCGTGCATGATG
GCATGGGCAAAATTCTGGTCCAGCGTCGTACCGAGACAAAAGACTTTTTACCCGGCATGT
TAGATGCGACCGCAGGCGGTGTGGTTCAGGCCGATGAGCAACTGCTGGAATCCGCGCGTC
GCGAAGCGGAAGAAGAGTTGGGCATTGCCGGTGTCCCCTTTGCCGAGCACGGGCAGTTCT
ATTTCGAAGATAAAAATTGCCGTGTCTGGGGCGCATTGTTCAGCTGCGTCTCTCACGGTC
CCTTCGCCCTACAGGAAGATGAAGTCAGTGAAGTTTGCTGGCTGACGCCGGAAGAAATCA
CCGCACGCTGCGATGAGTTCACTCCAGACTCGCTGAAAGCGCTAGCGTTGTGGATGAAGC
GCAATGCCAAAAATGAAGCCGTAGAGACTGAAACGGCAGAATGAAAAAAGAGCCGCAATT
GCGGCTCTTAACATTTTTAGTGGTAGCCCATCAACTGAGCGCCGATCACTACGACGCTGG
ACATAATAAACAGCAGTCCAAGTAGGGTCGCGCCCACCTTCAGCCAGTTACGGAAGTCCA
CCCTGCACACACCGAGCGTTGCCATTAACGAAGCTGAGGTTGGGTAAATGATGTGACTGA
AGCCATCACCAAACTGGAACGCCAGCACGGTAACCTGACGGTTAACACCGACCAGATCGC
CAAGCGGTGCCAGTAACGGCATGGTTAACGCCGCCTGACCAGAACCGGACGTCACGAAGA
AATTAAATACCGCCTGGAAGAGCAACATAAACCAGGCCGCGACCGCGTTGTCCAGACCGC
TAATGGCATTGGCAATGCTGTTGAGGATAGTATTTAACACGCTGGCCTCACCTGCTTCAC
CATTACCAACCAGCAGCAAAATCCCTTTGGCGAAACCCACCAGCAGGGCAGGGGCGATCA
TCATTCGCGCCCCTTCGGTAAAGGATGAAGCCATGGTATTAACCGTCATGCCGTTAAGGC
GGAAAACAACGCCGATGATGCCAATCACCAGACCCATGGTGAAGAACTGGCTGGCAATTT
CTGGAATAAACCAGGCATTAACGATCACGCCCCAAATCACCCAGACCATTACGGCGGTCA
GGACAATCAATACCAGCCAGTCACCAAAGGTAAACGGACGTTGTTCAACATCCGCCTGCT
TTTCACGAAAGAAGCGGTCGGACTCATGCACGCGTGACAGAAGAGGATTCTTTTTCACTC
GTGAGGCGTAGACCATGGTAAAGATCAGGCCAATCAGAGTGGCGATAACCCACACCACGA
TGCGCAACCCGGAGCCAGAAAGCACCGGAACGCCGGCAATCCCCTGAGCAACGACCACAC
AAAACGGGTTCATCCACGAACTGGCAAAACCGATTTGCGTGGCAATATAGGTCACCAGGA
CGGTGGTAATACTGTCATAGCCCAGCCGGACCATTAGCGGTGCGATGATAATGGCAAAGG
CGACGGCCTCTTCTCCCATACCAAATACCGCGCCGCCAAGTGAAAACAGAATAAACAGCG
CAGGAATAAAGAGAATTTCATTCCCGCGGGTATGGCGAATAAGCGCCAGGATACCGTTAT
CAATGGTTCCTGTACGCATCACAATGCCAAACGCGCCGCCAATCACCAGCATAAACATGA
TGATGCCAACGGCTGTCCCGTATTTCGATCCTGAGGTTAACCCTTCAAACGGGAAGTTCA
TCAGGCCCGGGCGTTCATCGCCCGTCGTGAACAGCTGTACGCGGTGATACTCAGGTTCGC
CTGCTTCGTTAGTCAGAATGCGAAATGAGTGTGGATCTACGACTTTGCGTGTTTTTGTTT
GACCATCAACCTGATACTGCACTTCCTGACTGTCAAACATCCCCACCGGAACTACCCAGG
TGGCAAGGCTGGTTAAAATAGCAACAAAAAAGATAATCACCAACGTATCGGGCATTGCCC
ATCTTCTTGTTGGTTTGGATTCAGTGATTGCGGACATAGCGCAAATATTCCCTTGCACAA
AACAAAGTGGTAAGTATGCAAAGTGAGATGGCGCAATTCATTGATGCAGAGCAGTTAAGC
AAGATAATCAGAAAGGATTAATGCAAATTAAGAGAATAAAAAACCGGAAATAGTGACTAT
TTCCGGTTCAGATATCCGCAGCGCAAAGCTGCGGATGATGACGAGGTTACTGCTGCTGTG
CAGACTGAATCGCAGTCAGCGCGATAGTGTAGACGATATCGTCAACCAGTGCGCCACGGG
ACAGGTCGTTAACCGGCTTGCGCATACCCTGCAGCATCGGCCCGATGGAGATCAGGTCGG
CAGAACGCTGTACCGCTTTGTAGGTGGTGTTACCGGTGTTCAGATCCGGGAAGATGAACA
CGGTAGCGCGACCTGCAACCGGAGAGTTCGGCGCTTTGGATTTCGCAACGTCAGCCATTA
CCGCAGCGTCGTACTGCAGCGGACCGTCGATCATCAGGTCAGGACGTTTTTCCTGCGCCA
GACGAGTTGCTTCGCGAACTTTTTCTACGTCGCTACCTGCACCAGAAGTACCGGTGGAGT
AGGAGAGCATAGCAACGCGCGGTTCGATACCGAAGGCTGCAGCGGAATCAGCGGACTGAA
TCGCGATTTCTGCCAGCTGTTCTGCGGTCGGATCCGGGTTGATCGCACAGTCACCGTAAA
CGTAAACCTGTTCCGGCAGCAGCATGAAGAACACGGAAGATACCAGGGAGCTGCCCGGTG
CAGTTTTGATCAGCTGCAGCGGCGGACGGATGGTGTTTGCGGTAGTGTGAACAGCACCGG
AAACCAGACCATCAACTTCATCCTGTTCCAGCATCAGCGTACCGAGCACCACGTTGTCTT
CCAGCTGTTCGCGGGCAACGGTTTCGGTCATGCCTTTGTTCTTACGCAGCTCGACCAGAC
GACCAACATAGCTTTCGCGAACCACTTCTGGATCAACGATTTCAATGCCTGCACCCAGTT
CTACACCCTGAGACGCTGCAACACGGTTGATCTCTGCCGGATTACCCAGCAGTACGCAAG
TTGCGATACCACGTTCAGCACAGATAGCGGCTGCTTTAACGGTACGCGGTTCGTCACCTT
CCGGCAGTACGATACGTTTGCCCGCTTTGCGCGCAAGTTCAGTCAGCTGATAACGGAACG
CTGGCGGAGACAGACGACGGCTGCGCTCAGAAGTGGCAGTCAGAGAATCGATCCAGTCAG
CGTTGATGTAGTTAGCAACGTATTCCTGAACTTTCTCGATACGCTCGTGATCGTCAACTG
GAACTTCCAGGTTGAAGCTCTGCAGGCTCAGAGAAGTCTGCCAGGTGTTGGTGTTCACCA
TAAATACCGGCAGGCCGGTAGCGAAAGCACGTTCGCACAGTTTAGAAATGCGCGCGTCCA
TTTCGTAGCCGCCAGTCAGCAGCAGGGCACCGATTTCTACGCCGTTCATGGCAGCCAGGC
AAGCGGCAACCAGCACGTCAGGACGGTCTGCGGAAGTCACCAGCAGAGAACCGGCACGGA
AGTGCTCCAGCATGTGCGGAATGCTGCGTGCGCAGAAAGTGACGGATTTAACGCGGCGAG
TATTGATGTCGCCTTCGTTGATGATGGTCGCATTCAGGTGGCGAGCCATATCGATCGCAC
GAGTCGCGATCAGGTCAAAGCTCCACGGCACAGCGCCGAGAACCGGCAGCGGGCTGGATT
CTTGCAGCTTCGCCGGATCAACATTGTTTACTTTAGCTTTGGAAGAGTCGTCGAAAATCT
CGGACAGATCCGGGCGAGTACGACCCTGTTCATCAACCGGTGCGTTCAGTTTGTTAACGA
TAACGCCGGTGATGTTGGTGTTTTTGGCACCGCCGAAGCTGTTGCGGGTCAGTTCGATAC
GCTCTTTCAGCTGTTCCGGGGTGTCAGTGCCCTGAGACATAACGAAGACGATTTCCGCAT
TCAGCGTTTTAGCGATTTCGTAGTTCAGAGACTGGGCAAACTGGTGCTTACGTGTCGGGA
CCAGACCTTCAACCAGAACGACTTCAGCGTCTTTGGTGTTAGCGTGGTAGTTTGCGACGA
TCTCTTCCATCAGCACATCTTTCTGATTGCTGGAAAGCAGACCTTCAACGTAGCTCATTT
TCAGCGGTTCAGCGGCCGTCGTGGTGGAAGAGTTCGCACGCACGATAGTCGTAGTCTGAT
CGGGCGCATCGCCACCGGTACGCGGCTGAGCGATAGGTTTGAAAACGCTCAGACGAACGC
CTTTGCGTTCCATTGCACGGATCACGCCAAGGCTGACGCTGGTCAGACCGACGCTGGTTC
CGGTAGGGATCAGCATAATAATACGGGACACGGTTTATCCTCTTTCGTTACCGCCGATTT
GGCGGGTTACAAAACAGCACCGCCAGCTGAGCTGGCGGTGTGAAATCAGGCAGTCAGGCG
GCTCGCGTCTTGCGCGATAACCAGTTCTTCGTTGGTTGGGATAACCACCGCAGGACGGGT
ACCTTCTTTGTTGATGAAACCAGATTTGCCGAAACGTGCAGCCAGGTTGCGTTCATGATC
AACTTCAAAGCCCAGCACGCCCAGTTTGCCCAGAGACAGTTCACGAACCATCGCGGCATT
TTCACCGATACCACCGGTGAATACAACAGCGTCCAGACGACCATCCATCAGCGCAGTGTA
GGCACCGATGTATTTCGCCAGGCGGTGGCAGTAAACGTCCATTGCGCGCTTCGCGTCTTC
TTTCGTCGCGTAGTTGTCTTCAACATAGCGGCAGTCGCTGGTCACTTCGGTCAGACCCAG
CAGGCCAGACTCTTTGGTCAGCAGTTTGTTGATTGCGTCAACGCTCATGCCCAGGGTGTC
GTGCAGGTGGAAGATGATCGCCGGATCGATATCACCAGAACGGGTACCCATGACCAGACC
TTCCAGCGGGGTCAGGCCCATAGAGGTGTCAACGCATTTACCGTTGCGGATAGCAGAAAC
GGAACCACCGTTGCCCAGGTGGCAGGTGATGATGTTCAGTTCTTCTACCGGTTTGTTCAG
CATTTTTGCCGCTTCCTGGGTTACATAGAAGTGGCTGGTGCCGTGCGCGCCGTAACGACG
GATGCCGTGCTCTTTGTACAGGTTGTACGGCAGGGCGTAGAGGTAAGACTCTTCCGGCAT
AGTCTGGTGGAACGCGGTGTCAAATACAGCAACGTTTTTGTCTTTCAGCTGTGGGAAAGA
TTTCAGAGCTTCTTCGATACCGATCAGGTGAGCCGGGTTGTGCAGCGGTGCAAAAGAAGC
TGCATCTTTGATACCCTGAATAACAGACTCATCGATCACTACGGAGCTGGTATACTTTTC
GCCGCCGTGTACGATACGGTGACCGATAGCAGTCAGCTGCGCAGACAGTTCTGGTTTTTG
TGCCAGAATAGTATTAACGATAAAGTTGAGCGCTTCGCTGTGAGCGGCGCCTGCACCTAA
AGCCGCTTCCTGTTTATTGCCGTCCATTTTCCATTTGATACGTGCTTCGGGCAGGTGGAA
ACATTCGGCTAAACCAGAAAGGTACTCTTCACCATTTACTGCATCGATGATGGCAAATTT
CAGTGAAGAACTACCGCAGTTCAGAACCAGTACTAACTTACTCGACATGGAAGTACCTAT
AATTGATACGTGGCTAAAAAAACGTCAGGGAGCCATAGAGCGTAGCGCATGATGACACCG
ACATTTATGATTAACATCATGCACTGCAAATTTTTTTTGCATGATGGAAGAAATATCTTG
AGTCTATGCCATTTTGCGTAATTTTCAGCCAATGGCATAATGTATATGAATTTGACGACT
CAATGAATATGTACTACTTAGGCCTTCAGGCTGCTAAAGGATACCTGATAGTGGGTATGG
AAGACAAAATGTTTTGAACGTTGTCCCGCTGAGTTGTGAATTTGCACAAATTTTTGAATC
TTTATATGTGAAGTTGAGGTGAAGCATGTCAACGCCGGATAATCGTTCTGTTAATTTTTT
TAGCTTGTTTCGCCGGGGACAGCATTACTCAAAGACGTGGCCGCTGGAAAAACGCCTTGC
CCCGGTCTTTGTCGAAAATCGCGTTATCAAGATGACGCGTTATGCGATCCGTTTTATGCC
GCCGATCGCCGTATTTACTCTCTGCTGGCAGATTGCCCTGGGCGGTCAGCTTGGGCCGGC
AGTTGCCACCGCCCTGTTCGCCTTAAGTTTACCCATGCAGGGATTGTGGTGGCTGGGCAA
GCGTTCTGTCACGCCATTACCCCCTGCAATCCTCAACTGGTTTTATGAAGTTCGCGGTAA
ATTGCAGGAGTCTGGACAGGTGTTGGCACCCGTTGAAGGCAAGCCTGATTACCAGGCATT
AGCTGACACGCTTAAGCGCGCCTTCAAACAACTGGATAAAACTTTCCTTGATGATTTGTA
ATTGACCCCTGATTACGCATATAAAAGAAAGCATACTCAGCCTTCTTTTTTTTCACCGTA
ATAGAGTGATACAGGAGTCAACAATGGAAATGACCAACGCGCAACGTCTTATTTTGTCTA
ATCAGTACAAGATGATGACTATGCTCGATCCGGCAAATGCTGAACGTTACCGTCGCCTGC
AAACAATTATTGAGCGTGGTTATGGATTACAGATGCGTGAACTGGATCGCGAGTTTGGCG
AGCTGAAAGAAGAAACCTGCCGCACTATCATCGACATTATGGAGATGTATCATGCGTTGC
ATGTTTCCTGGTCTAATTTGCAGGACCAGCAATCCATCGATGAACGTCGTGTCACCTTCC
TCGGCTTTGACGCCGCCACTGAAGCACGTTACCTCGGTTATGTCCGCTTTATGGTTAATG
TGGAAGGGCGCTATACCCATTTTGACGCCGGAACTCACGGTTTTAACGCCCAGACGCCAA
TGTGGGAAAAATATCAGCGCATGCTTAATGTGTGGCATGCCTGCCCGCGTCAGTACCATT
TGAGCGCCAACGAAATTAATCAAATTATCAACGCCTGAGGAGGCCCGCGTGCGGTGCAAA
GGTTTTCTGTTTGATCTTGATGGAACGCTGGTGGATTCCCTGCCTGCGGTAGAACGGGCG
TGGAGCAACTGGGCCAGACGTCATGGGTTAGCGCCGGAAGAGGTGCTGGCTTTCATTCAC
GGTAAACAGGCGATCACCTCTCTGCGCCATTTTATGGCGGGCAAATCCGAGGCTGATATT
GCCGCCGAGTTTACGCGTCTGGAGCAAATCGAGGCCACGGAAACCGAAGGTATTACCGCG
CTTCCGGGGGCAATCGCCTTACTCAATCATTTGAATAAAGCAGGTATTCCGTGGGCCATT
GTGACTTCTGGCTCCATGCCGGTAGCGCGAGCGCGCCATAAAATAGCTGGGCTTCCCGCA
CCAGAGGTGTTTGTAACCGCTGAGCGAGTGAAGCGCGGAAAACCAGAACCTGATGCGTAT
CTGTTAGGTGCGCAGCTGCTGGGGCTTGCGCCGCAGGAGTGTGTGGTGGTGGAAGATGCT
CCCGCTGGCGTGCTTTCTGGCCTGGCGGCGGGTTGCCATGTCATTGCGGTTAACGCTCCG
GCAGATACCCCGCGCCTGAATGAGGTCGATTTGGTCCTCCACAGTCTGGAGCAAATTACT
GTGACTAAACAGCCAAATGGCGATGTTATTATTCAGTGAAACACCTGATCATGATTTAGC
CCCGTCTCGTCGGGGCTTTTTTATGGCAGAATCAAGTCATCCCCCTCAATTAACAAGGAT
AAGTTGTGAACGGTGAATTGATTTGGGTTCTTTCATTACTGGCCGTTGCCATCGTCTTGT
TTGCGACGGGCAGAGTGCGTATGGATGCGGTCGCTTTGTTTGTTATTGTCGCGTTTGCAT
TAAGCGGAACGCTGACAGTCCCAGAAGTATTTTCCGGCTTTTCTGATCCTAACGTTGTCC
TGATTGCCGCCTTGTTTATTATTGGCGATGGTTTGGTCCGTACCGGTGTTGCCACCGTAA
TGGGAACATGGCTGGTCAAAGTTGCGGGCAACAGTGAAATCAAAATGTTGGTTTTGTTGA
TGCTGACCGTCGCGGGGCTTGGCGCGTTTATGAGTTCAACCGGTGTTGTCGCTATCTTTA
TTCCCGTGGTGTTAAGCGTTGCCATGCGTATGCAAACGTCGCCGTCACGTCTGATGATGC
CGTTAAGTTTTGCCGGGCTGATTAGCGGCATGATGACGCTGGTGGCGACGCCGCCGAACC
TGGTAGTCAACAGTGAATTGCTGCGTGAAGGCTATCACGGCTTCAGTTTCTTTAGCGTAA
CACCTATTGGCCTGGTCGTGCTGGTGCTGGGTATTTTGTATATGTTAGTGATGCGTTTCA
TGCTGAAAGGGGATACCCAGACCCCGCAGCGCGAAGGCTGGACGCGTCGAACCTTTCGCG
ATCTTATCCGTGAATATCGACTGACCGGGCGTGCGCGACGTCTGGCTATTCGCCCCGGAT
CGCCAATGATTGGTCAACGGCTGGATGATCTCAAATTACGTGAGCGTTATGGCGCTAACG
TCATCGGTGTTGAACGCTGGCGGCGTTTTCGTCGCGTTATCGTGAACGTTAATGGGGTTT
CTGAATTTCGCGCGCGTGACGTTTTGCTTATTGATATGTCTGCGGCTGATGTCGATCTCC
GGCAATTTTGTAGTGAGCAATTGCTGGAGCCGATGGTACTGCGCGGCGAGTATTTTTCTG
ACCAGGCCCTTGATGTGGGCATGGCAGAGATTTCATTAATTCCTGAGTCAGAACTGATTG
GTAAATCGGTGCGCGAAATTGGTTTTCGTACACGCTACGGACTGAATGTGGTGGGGCTAA
AGCGCAATGGCGTGGCGCTGGAAGGTTCGCTGGCGGATGAGCCTCTGCTGCTGGGCGATA
TCATTCTGGTTGTGGGTAACTGGAAACTGATCGGTATGCTGGCCAAACAGGGCCGCGACT
TCGTAGCGCTGAACTTACCGGAAGAGGTGAGTGAAGCATCGCCCGCGCACAGCCAGGCAC
CCCATGCCATTTTCTGTCTGGTGCTAATGGTGGCGTTAATGCTGACAGATGAAATTCCTA
ATCCTGTTGCCGCTATCATCGCCTGCCTGCTGATGGGGAAATTCCGCTGTATAGATGCTG
AAAGCGCCTATAAATCCATTCACTGGCCGAGCATTATTTTGATCGTTGGGATGATGCCGT
TTGCTGTGGCATTACAGAAAACGGGAGGTGTCGCGCTGGCGGTGAAAGGGCTGATGGACA
TTGGCGGTGGTTACGGGCCACATATGATGCTGGGTTGTTTGTTTGTCTTGTCGGCGGTTA
TTGGGCTATTTATCTCTAATACCGCGACGGCGGTGTTGATGGCTCCGATTGCGCTGGCTG
CTGCCAAAACGATGGGGGTGTCGCCTTATCCATTCGCGATGGTCGTGGCGATGGCAGCAT
CCGCCGCCTTTATGACACCGGTTTCTTCACCGGTTAACACCCTGGTTTTAGGTCCGGGAA
ATTACAGCTTCAGTGACTTTGTGAAGTTGGGGGTACCGTTCACCATTATCGTGATGGCGG
TTTGTGTGGTGATGATCCCGATGCTGTTTCCGTTTTGACAAGAGCCTGATGTCGCATCCG
GCGCTTATTGCCTGATGCGACGCAGACTCCAGCTGCTTACAGCGGTGAATCCTGGCTAAT
CTCATCGAGCGAAAGATGGAAGCTGGGAACAAATACTTCCATGAAGTAGTCCATCTCCTG
GCTGCGGCGCGCTTCAAGCGTCGCTTCCAGTCGCGTTTTTGCCAGCAAGAATTCATTATT
TCCGGCCGCGAGTTCTTCCAGACATTTCAGATATGCACACAGTGCATCTGCCTGTTTCAC
CAACGATTTTTCTTCATCGCTATATGCATGCTCGTCAATTAACGGCGCAAAGATATCCCG
CAGCTCTTCCGGAACCATATCGACCAGTTTTTGCTGAGCGATTTTTTCAATAGCCTTGTA
TTCCTGAGCGATTTGCGAATTGAAGTATTTCACCGGAGTAGGGAGATCGCCGGTGAGCAC
TTCTGAGGCATCGTGGTACATCGCCAGTAAAGCGATACGTTCGGCGTTGACATTACCGCC
AAATTTCCGATTTTTGATAGCTGCCAGCGCATGGGCGACCATCGCTACCTGCAAACTGTG
TTCGGACACATTTTCCGTCCGCACGTTGCGCATGAGCGGCCAGCGGTTAATGAGTTTCAG
GCGGGAGAGATGGGCAAAAAAATGGCTCTGTTTCATAGTGACCTTACGTATGATGACATC
ATCAGGTCATTGTGGCGGGATAACACTGCCGGATGCAATCTCCGGCAGTGAAATTAAGAT
TACAGCTGATGATAACCAGAAAGGAAACGCGCGAACTTGCTCAAAGACAGCTCGATATCA
TCGACACGCGGTAGCGTGACAATGCGGAAGTGATCCGGCCACGGCCAGTTGAATGCCGTC
CCTTGCACCAACAGAACTTTTTCCTGCAACAGGAAATCCAGCACCATTTTCTGATCGTCG
TGAATGTTAAAGCGTTTGGCGTCGATTTTCGGGAACATGTACAGCGCACCACGAGGTTTC
ACGCAGGAAACGCCCGGAATATCGTTGATCAATTCCCACGCGCGGTTACGCTGCTCATAA
AGACGACCGCCAGGGGTAATAAATTCACTGATGCTCTGATAACCACCCAGCGCGGTCTGA
ATGGCGTGTTGCGCAGGAACGTTAGCACACAGGCGCATTGAAGCCAGCATTTCCAGACCT
TCGATGTAGCCTTTGGCGTGTTTTTTCGGCCCGTTCAACACCATCCACCCCTGACGGAAG
CCTGCAACGCGGTACGTTTTCGACAGTCCATTAAAGGTAATGGTCAGCAGGTCAGGTGCC
AGCGGCGCAATTGAGTGATGCTCAGCGTCGTCGTAGAGAATTTTGTCATAAATTTCATCG
GCGAAGATAATGAGATTATGCTGACGTGCAATCTCCACAATCTCCATTAAAAGCTCTTTG
GAATATACCGCGCCGGTTGGGTTATTTGGGTTGATAATAACGATCCCACGCGTACGAGGC
GTAATTTTAGCGCGAATATCATCGAGGTCCGGGAACCAGTCAGAGGATTCATCGCAAAGA
TAATGCACCGCTTTACCGCTGGAAAGCGAAACCGCCGCGGTCCATAGTGGGTAATCTGGT
GCAGGAACCAACATTTCGTCCCCGCTGTTCAGCAATGCCTGCATTGCCTGAACGATAAGC
TCCGATACACCATTGCCGATGTAAATATCTTCCACGGTAACATCACGCATGCCACGAGCC
TGGTAGTGCTGCATGATGGCTTTACGCGCAGAGTAAAGACCTTTGGAATCGCAATACCCT
TGAGCTGTAGGCAGGTTGCGTATCACGTCAACGAGAATTTCATCTGGCGCGTCAAAACCG
AACGGGGCTGGGTTGCCGATGTTCAGTTTCAGTACCTTGTTACCTTCTTCTTCCAGTCGT
TTTGCTTCTTTCAGCACCGGACCACGGATGTCATAACAGACATTCTCTAATTTGCTGGAT
TTTTCAATGGGGGACATGAATCTTGACCTTTTTTGCTGTTATCGCCACTCCCTGCCGTGG
AAGTCAGCTTAGAACAATGTACTCCCCCAGGACGGTGTTTTGAAGGTCTGCAGAATAAGA
TTTTGCCAGAGGGGAAGGCTCGATTGTGCTGTTAATAACTTAATAATGACAAAATAATGA
GGCGTATATGCTTTACATACAATGTTATATAGTGAATTGTTCTGATTCTTAATTGTAAGT
CTGGTTTTTTTATCTGTAAGATAATTGTGTGAAAATGCCTCATTTAAGAATTCACTAATG
AAACGCGATGATGATATTTCCGCATTACGGAGAGTTTAACAGCGTGATGATTTCCGAGGT
GTCGCAATGGGGGCAAGGTGTGAAACTATTGTTAAGCGGAATTAATGAATGAGGATGATG
CTAATTAATTATTATTTAATATTCAAAAAGGTTTTGATGTGCTTATTAATAATAGAAGAT
TACTTTGCCTAACATAACATAACTTTGCATCAGATAATTCGCAATGACCCTTATAAATAA
AAGGTTTTTGGGGTAAAATGCTCGCATAAATGACGGATCCCTGCTCTTGATGCCGCCTCA
CCATTGCTGTTTGTACGTGTTCGCGTATGACCAGCGATGCTGCACGAGAGTGGAACAAGG
ACTCACATTTACATTTATACAAACACGCGCATGTCATAAATAGAAAAGAGTGAGTAACTT
AATAGATATGCGATCCCTGAAGATATATTCTGTGATCTACTTCAGGCATTATAACGGAAC
AATGTGAGTCGCTTTTTTAGTGCAACTCATATGCATTTTTACTTTCGTCCGGGTTCCGGA
TGAAACTGCCAGGGAGGCACATTACAAATGGAATTGCTTGTTTGTGTGTGCACAGCATTA
ACCAGCTCAGTATGAGCCGCCAGTAAGTGATAATATATGATAAGTGCAAATCGTCCGATA
ATTAACCTCGACCTCGATCTGCTGAGAACATTTGTTGCTGTTGCCGATCTGAACACTTTT
GCTGCCGCAGCTGCCGCTGTGTGTCGTACTCAGTCCGCCGTAAGTCAGCAAATGCAGCGT
CTGGAACAACTCGTTGGGAAAGAACTGTTCGCTCGTCACGGTCGCAACAAACTGTTAACT
GAACATGGCATTCAACTTCTTGGTTACGCCAGGAAAATCCTGCGTTTTAATGATGAGGCC
TGCTCATCATTAATGTTCAGTAATCTTCAGGGCGTGTTAACTATCGGTGCTTCAGATGAA
TCTGCCGATACGATCTTACCTTTCCTGTTAAATCGCGTGAGTTCGGTTTATCCGAAATTA
GCGCTGGATGTCCGCGTTAAACGTAATGCCTATATGGCAGAAATGCTGGAATCCCAGGAA
GTGGATTTGATGGTAACCACCCATCGTCCTTCAGCGTTTAAGGCATTGAACCTGCGTACC
TCGCCAACACACTGGTACTGCGCAGCGGAATACGTATTGCAAAAAGGTGAGCCGATCCCT
CTTGTATTGCTGGATGATCCAAGTCCGTTTCGCGATATGGTGCTGGCGACGCTTAATAAA
GCAGATATTCCCTGGCGACTGGCTTATGTCGCCTCGACGCTTCCGGCCGTTCGTGCGGCA
GTGAAAGCCGGTCTTGGCGTGACGGCAAGGCCGGTCGAGATGATGAGTCCGGACTTGCGT
GTGCTGAGTGGAGTAGATGGCTTACCGCCGCTACCTGATACCGAATATTTGCTGTGCTAT
GACCCGTCCAGTAATAATGAGCTGGCCCAGGTGATCTATCAGGCGATGGAGAGCTACCAT
AATCCGTGGCAATACAGCCCAATATCTGCTCCGGAAGGGGATGATTCATTGTTGATTGAA
AGGGATATCGAGTAATCGACGGACGATAGATAATTCCTGAGACAATAGTGTAAAAAACGA
GCCGCTGGGGGTGTTTTAAACCCCAGCGGCTTTTTTTTAGTAAAGAACCTTCTTCACATC
GTGCAGAACGTACAAAACTGTTCATTTTTCAATCGCCAGAGATTCACGCCCCGTACGCAC
AAATAATCGCCTGAAAAAAATCACCTGCTACAATGATGTTAAAAAATACGTAAATTTGTT
GCTGCGTTTTTGTTATGGAATGACAAAAGCGTGTCACAGATCAAGAAAATACTCTCTTTT
GGGGGGAGGAATCGACACAAATTCCTGTCAAAATAGACCCGTATTTTTTCCATTGCTTCA
CAACGGACACGATTCAACAACATCTAATTATCCTGGAGTCGTCAAGGATCTGGGGTGAAA
GGGCATTAAATGCTAATGGTGTTGATATTATGTAAACTAATGTGAAGAAACTTTTGTTAA
AGTTGACAAAAGGTTATAGAAAGGAGTAAAAGACCACATCAATTAGCTGTATAAAAGAAT
TTCTACAGTGATTGTAAGGTTTTTTTTATTCCTCCCCATGAATCGATGTGGCGTCCATCT
GCCGTGAAGAGCAGTGAATCTGGCGCTACTTTTGATGAGTAAGCAATGAGTATGTCAACA
TCCACTGAAGTCATCGCTCATCACTGGGCATTCGCTATCTTTCTTATCGTTGCCATTGGC
CTGTGTTGCCTGATGCTGGTAGGCGGTTGGTTTTTAGGCGGTCGCGCACGCGCGAGGTCG
AAAAACGTGCCGTTTGAATCCGGTATCGACTCGGTCGGCTCCGCCCGCTTACGCCTGTCC
GCCAAGTTTTATCTGGTGGCCATGTTCTTCGTTATCTTCGACGTTGAAGCGCTGTATCTG
TTCGCATGGTCAACCTCTATCCGCGAAAGCGGCTGGGTAGGCTTTGTGGAAGCTGCAATT
TTTATTTTTGTGTTACTGGCAGGTCTGGTTTATCTGGTGCGTATTGGCGCGCTGGACTGG
ACGCCCGCGCGTTCACGCCGCGAGCGTATGAACCCGGAAACGAACAGTATCGCTAATCGT
CAACGCTAACCGCGAGGCATTAAGATGGATTATACGCTCACCCGCATAGATCCCAACGGT
GAGAACGACCGTTACCCCCTGCAAAAGCAGGAGATCGTAACCGACCCTCTGGAGCAAGAA
GTTAACAAAAACGTGTTTATGGGCAAGCTCAATGACATGGTTAACTGGGGTCGTAAAAAC
TCAATTTGGCCGTATAACTTCGGTCTTTCCTGCTGTTACGTTGAGATGGTGACTTCGTTT
ACCGCGGTGCATGACGTGGCGCGTTTTGGCGCAGAAGTATTGCGTGCTTCGCCGCGTCAG
GCTGACCTGATGGTGGTTGCAGGAACCTGCTTTACCAAAATGGCACCGGTTATTCAGCGT
CTGTATGACCAGATGCTGGAACCAAAATGGGTTATCTCAATGGGTGCCTGTGCCAACTCT
GGTGGTATGTACGATATTTATTCCGTTGTGCAGGGCGTCGATAAATTCATCCCGGTTGAT
GTGTATATCCCGGGCTGCCCGCCGCGTCCTGAAGCGTACATGCAGGCACTGATGCTGTTG
CAGGAATCTATCGGCAAAGAACGTCGTCCGCTCTCCTGGGTGGTTGGCGATCAGGGCGTT
TATCGCGCCAATATGCAATCAGAGCGCGAACGCAAGCGCGGTGAACGCATTGCCGTAACC
AACCTGCGTACACCTGACGAGATTTAATTTGCGCCTGTCGGCAAAGGGATTTTTCTTCGC
TTATTCCTAAATCTATTTCGCGAAGCTTACTGCGCCGACAGTCACCACGGACCATTTGCA
ATGGTGAACAATATGACCGACTTAACCGCGCAAGAACCCGCCTGGCAGACCCGCGATCAT
CTTGATGATCCGGTAATTGGCGAACTGCGCAACCGTTTTGGGCCGGATGCCTTTACTGTT
CAGGCGACTCGCACCGGGGTTCCCGTTGTGTGGATCAAGCGTGAACAATTACTGGAAGTT
GGCGATTTCTTAAAGAAACTGCCGAAACCTTACGTCATGCTGTTTGACTTACACGGCATG
GACGAACGTCTGCGCACACACCGCGAAGGGTTACCTGCCGCGGATTTTTCCGTTTTCTAC
CATCTGATTTCTATCGATCGTAACCGCGACATCATGCTGAAGGTGGCGTTGGCAGAAAAC
GACCTGCACGTACCGACCTTCACCAAACTGTTCCCGAACGCTAACTGGTATGAGCGTGAA
ACCTGGGATCTGTTTGGCATTACATTCGACGGTCACCCGAACCTGCGCCGCATCATGATG
CCGCAAACCTGGAAAGGTCACCCGCTGCGTAAAGATTACCCGGCGCGCGCTACCGAATTC
TCGCCGTTTGAGCTGACCAAAGCCAAACAGGATCTGGAGATGGAAGCCCTGACCTTCAAA
CCGGAAGAGTGGGGGATGAAGCGCGGCACCGAAAACGAGGACTTCATGTTCCTCAACCTC
GGCCCGAACCACCCGTCGGCGCACGGTGCTTTCCGTATCGTTTTGCAGCTTGATGGCGAA
GAGATTGTCGACTGCGTACCAGACATCGGTTACCACCACCGTGGTGCGGAGAAAATGGGC
GAACGCCAGTCCTGGCACAGCTACATTCCGTATACCGACCGTATCGAATACCTCGGCGGC
TGCGTTAACGAAATGCCTTACGTGCTGGCGGTAGAGAAACTGGCCGGGATCACCGTGCCG
GATCGCGTTAACGTCATTCGCGTAATGCTCTCCGAACTGTTCCGCATCAACAGCCACCTG
CTGTATATCTCGACCTTTATTCAGGACGTCGGCGCAATGACGCCCGTGTTCTTCGCCTTT
ACCGATCGTCAGAAAATTTACGATCTGGTGGAAGCGATCACGGGTTTCCGTATGCACCCG
GCGTGGTTCCGTATTGGCGGCGTAGCGCACGACCTGCCGCGCGGCTGGGATCGCCTGCTG
CGTGAGTTCCTCGACTGGATGCCGAAACGTCTGGCGTCTTACGAGAAAGCGGCGCTGCAA
AATACCATTCTGAAAGGTCGTTCCCAGGGCGTTGCCGCCTATGGCGCGAAAGAGGCGCTG
GAGTGGGGCACCACTGGCGCGGGCCTGCGTGCTACCGGGATTGACTTCGACGTGCGTAAG
GCGCGTCCTTATTCTGGCTATGAAAACTTCGACTTTGAAATCCCGGTTGGTGGTGGTGTT
TCTGACTGCTACACCCGCGTAATGCTGAAAGTGGAAGAGCTGCGCCAGAGTCTGCGCATT
CTTGAGCAGTGCCTCAACAACATGCCGGAAGGCCCGTTCAAAGCGGATCACCCGCTGACC
ACGCCACCGCCGAAAGAGCGCACGCTGCAACATATCGAAACCCTGATCACCCACTTCCTG
CAAGTGTCGTGGGGGCCGGTGATGCCTGCCAATGAATCTTTCCAGATGATTGAGGCGACC
AAGGGGATCAACAGTTACTACCTGACCAGCGACGGTAGCACCATGAGTTATCGCACTCGT
ATCCGCACGCCGAGTTATGCGCATTTGCAGCAAATTCCGGCGGCGATCCGCGGCAGCCTG
GTGTCTGACCTGATTGTTTATCTGGGCAGTATCGATTTTGTTATGTCAGATGTGGACCGC
TAATTATGCACGAGAATCAACAACCACAAACCGAGGCTTTTGAGCTGAGTGCGGCAGAGC
GTGAAGCGATTGAGCACGAGATGCACCACTACGAAGACCCGCGTGCGGCGTCCATTGAAG
CGCTGAAAATCGTTCAGAAGCAGCGTGGCTGGGTGCCGGATGGCGCGATCCACGCGATCG
CCGATGTGCTGGGTATTCCGGCGAGCGACGTCGAAGGCGTGGCAACGTTCTACAGCCAGA
TCTTCCGCCAGCCGGTTGGCCGCCATGTGATCCGTTATTGCGACAGCGTGGTCTGTCATA
TCAACGGTTACCAGGGTATTCAGGCGGCGCTCGAGAAAAAGCTAAACATCAAACCAGGGC
AAACGACATTTGACGGTCGCTTTACGCTGCTGCCAACTTGCTGCCTGGGGAACTGTGATA
AAGGGCCAAACATGATGATCGATGAGGACACTCACGCGCATCTGACCCCGGAAGCGATCC
CTGAACTGCTGGAGCGGTATAAATGAAAAACATTATCCGTACTCCCGAAACGCATCCGCT
GACCTGGCGTCTGCGCGATGACAAACAGCCAGTGTGGCTGGACGAATACCGCAGCAAAAA
CGGTTACGAAGGCGCGCGTAAGGCGCTGACCGGGCTGTCTCCGGACGAAATCGTTAATCA
GGTAAAAGACGCTGGTCTGAAAGGGCGTGGCGGCGCGGGTTTCTCGACTGGCCTGAAATG
GAGCCTGATGCCGAAAGACGAATCCATGAACATCCGTTACCTGCTGTGTAACGCCGATGA
AATGGAGCCAGGCACCTATAAAGACCGCCTGCTGATGGAGCAACTGCCGCACCTGCTGGT
GGAAGGCATGCTCATCTCCGCGTTTGCGCTGAAAGCTTACCGTGGCTATATCTTCCTGCG
CGGCGAATATATCGAAGCGGCAGTGAATCTACGCCGTGCCATTGCCGAAGCGACTGAAGC
GGGCTTGCTTGGCAAAAACATTATGGGAACAGGTTTCGACTTCGAACTGTTCGTCCATAC
CGGGGCAGGGCGCTACATCTGCGGGGAAGAAACAGCGTTAATCAACTCCCTGGAAGGGCG
TCGTGCTAACCCGCGCTCGAAGCCTCCATTCCCGGCGACCTCCGGCGCATGGGGTAAACC
GACCTGTGTCAACAACGTCGAAACCCTGTGTAACGTTCCGGCGATCCTCGCTAACGGCGT
GGAGTGGTATCAGAACATCTCGAAAAGTAAAGATGCTGGCACCAAGCTGATGGGCTTCTC
CGGTCGGGTGAAAAATCCGGGCCTGTGGGAACTGCCGTTTGGTACTACCGCGCGCGAGAT
CCTCGAAGATTACGCCGGTGGTATGCGTGACGGTCTGAAATTCAAAGCCTGGCAGCCAGG
CGGCGCGGGCACCGACTTCCTGACCGAAGCGCACCTTGACCTGCCGATGGAATTCGAAAG
TATCGGTAAAGCGGGAAGCCGTCTGGGTACGGCGCTGGCGATGGCGGTTGACCATGAGAT
CAACATGGTGTCGCTGGTGCGTAACCTGGAAGAGTTTTTCGCCCGTGAGTCCTGCGGCTG
GTGTACGCCGTGCCGCGACGGTCTGCCGTGGAGCGTGAAAATTCTGCGTGCGCTGGAGCG
TGGTGAAGGTCAGCCGGGCGATATCGAAACACTTGAGCAACTGTGTCGATTCTTAGGCCC
GGGTAAAACTTTCTGTGCCCACGCACCTGGTGCAGTGGAGCCGTTACAGAGCGCCATCAA
ATATTTCCGCGAAGAATTTGAGGCGGGGATCAAACAGCCGTTCAGCAATACCCATTTGAT
TAATGGGATTCAGCCGAACCTGCTGAAAGAGCGCTGGTAACCGAATTTCGATTAACGCTC
AGTCTCTGACTGAGAAAACTGGAAGCATGCTAATGGCTACAATTCATGTAGACGGCAAAG
AATACGAGGTCAACGGAGCGGACAACCTGCTGGAAGCTTGTCTGTCTCTTGGCCTTGATA
TTCCTTACTTTTGCTGGCATCCGGCGCTGGGAAGCGTCGGTGCTTGCCGCCAGTGTGCGG
TGAAGCAATACCAAAACGCGGAAGACACGCGTGGTCGCCTGGTGATGTCCTGTATGACAC
CGGCTTCCGATGGCACCTTTATTTCCATTGACGACGAAGAAGCGAAACAGTTCCGTGAAA
GTGTGGTCGAGTGGTTAATGACCAACCACCCGCACGACTGTCCGGTATGTGAAGAAGGCG
GTAACTGCCATCTTCAGGATATGACCGTGATGACCGGACACAGCTTCCGTCGCTACCGTT
TCACCAAACGTACCCACCGTAATCAGGATTTGGGACCGTTCATCTCTCACGAAATGAACC
GCTGCATCGCCTGCTACCGCTGCGTGCGTTACTACAAAGATTACGCTGACGGTACAGATC
TGGGCGTTTATGGCGCGCACGACAACGTCTACTTCGGTCGCCCGGAAGACGGCACGCTGG
AAAGCGAATTTTCCGGTAACCTGGTCGAAATTTGCCCGACTGGCGTATTTACCGACAAAA
CGCACTCCGAGCGTTACAACCGTAAATGGGATATGCAGTTTGCGCCTAGCATCTGCCAGC
AATGTTCCATCGGCTGTAACATCAGCCCCGGTGAACGTTATGGCGAACTGCGTCGTATCG
AAAACCGTTACAACGGTACGGTAAACCACTACTTCCTCTGCGACCGTGGTCGTTTCGGTT
ACGGTTACGTCAACCTGAAGGATCGTCCGCGTCAGCCAGTACAGCGTCGTGGCGATGATT
TCATTACCCTCAACGCCGAACAGGCAATGCAGGGCGCGGCAGATATTCTGCGTCAGTCGA
AGAAAGTGATCGGTATTGGTTCTCCGCGTGCCAGCGTGGAAAGCAACTTTGCGCTGCGTG
AACTGGTGGGCGAAGAAAACTTCTACACCGGTATCGCTCACGGTGAGCAGGAACGTCTGC
AACTGGCGCTGAAAGTGCTGCGTGAAGGCGGCATTTATACTCCGGCTCTGCGCGAAATCG
AATCTTACGATGCGGTACTGGTGCTGGGCGAAGACGTTACCCAGACCGGCGCGCGCGTCG
CGCTGGCAGTGCGTCAGGCGGTGAAAGGTAAAGCGCGCGAAATGGCGGCAGCACAGAAAG
TGGCTGACTGGCAGATTGCGGCAATCCTCAACATCGGTCAACGTGCGAAGCATCCGCTGT
TTGTTACCAACGTTGATGACACCCGTCTGGATGATATCGCGGCGTGGACTTACCGCGCAC
CGGTTGAAGATCAGGCGCGTTTAGGTTTTGCCATCGCCCATGCGCTGGATAACTCTGCAC
CAGCGGTTGACGGTATCGAACCTGAGCTGCAAAGCAAAATCGACGTCATCGTGCAGGCAC
TGGCAGGTGCGAAGAAACCGTTGATTATCTCCGGGACGAACGCCGGTAGCGCTGAAGTAA
TTCAGGCTGCGGCTAACGTCGCGAAAGCCCTGAAAGGTCGCGGCGCTGACGTCGGTATCA
CCATGATTGCCCGTTCCGTCAACAGCATGGGGCTGGGCATTATGGGCGGTGGATCGCTTG
AAGAAGCGTTAACCGAACTGGAAACCGGACGCGCCGACGCGGTGGTGGTGCTGGAGAACG
ATCTGCATCGTCACGCATCCGCTACCCGCGTGAATGCTGCGCTGGCTAAAGCGCCGCTGG
TGATGGTGGTTGACCATCAACGCACAGCGATCATGGAAAACGCCCATCTGGTGCTTTCCG
CCGCCAGCTTTGCTGAAAGCGACGGTACAGTGATCAACAACGAAGGCCGCGCCCAACGTT
TCTTCCAGGTTTACGATCCGGCTTATTACGACAGCAAAACTGTCATGCTGGAAAGCTGGC
GCTGGTTACACTCGCTGCACAGCACTCTGCTGAGCCGTGAAGTGGACTGGACGCAGCTCG
ACCATGTGATTGACGCTGTTGTGGCGAAAATCCCGGAACTGGCAGGTATCAAAGATGCTG
CGCCGGATGCGACATTCCGTATTCGTGGGCAGAAACTGGCCCGTGAACCGCACCGTTACA
GCGGTCGTACCGCCATGCGCGCCAATATCAGCGTTCATGAGCCGCGTCAGCCGCAGGATA
TTGACACCATGTTCACCTTCTCGATGGAAGGTAACAACCAGCCGACCGCGCATCGTTCGC
AAGTGCCGTTTGCCTGGGCTCCGGGCTGGAACTCCCCGCAGGCGTGGAACAAATTCCAGG
ACGAAGTGGGCGGCAAACTGCGCTTTGGCGATCCGGGCGTGCGTCTGTTTGAAACCAGCG
AAAATGGTCTGGATTACTTCACCAGCGTACCGGCACGCTTCCAGCCGCAGGACGGGAAAT
GGCGTATCGCGCCGTATTACCACCTGTTTGGCAGTGATGAATTGTCACAGCGTGCTCCGG
TCTTCCAGAGCCGTATGCCGCAGCCGTACATCAAACTCAACCCGGCAGATGCCGCGAAGT
TGGGTGTGAATGCAGGTACACGCGTCTCCTTTAGTTACGATGGCAACACGGTCACGCTGC
CGGTTGAAATCGCCGAAGGGCTGACGGCAGGGCAGGTGGGCTTGCCGATGGGTATGTCCG
GCATTGCTCCGGTGCTGGCTGGCGCGCATCTTGAGGATCTCAAGGAGGCACAACAATGAG
TTGGATATCACCGGAACTGATTGAGATCCTGCTGACCATCCTCAAAGCGGTGGTGATCCT
GCTGGTGGTTGTCACCTGCGGGGCATTCATGAGCTTTGGCGAACGTCGCCTGCTGGGTCT
GTTCCAGAACCGTTACGGACCTAACCGTGTTGGCTGGGGCGGTTCGCTCCAGCTGGTTGC
GGACATGATCAAAATGTTCTTTAAAGAAGACTGGATCCCGAAATTCTCGGATCGCGTCAT
CTTTACCCTGGCACCGATGATTGCCTTTACCTCGTTGCTGCTGGCCTTTGCGATTGTGCC
AGTCAGCCCGGGTTGGGTGGTTGCCGACCTGAACATCGGGATTTTGTTCTTCCTGATGAT
GGCTGGTCTGGCGGTTTACGCGGTGCTGTTTGCGGGCTGGTCAAGTAACAACAAATACTC
GCTGCTGGGTGCGATGCGTGCTTCTGCACAGACCCTGAGCTACGAAGTGTTCCTCGGGCT
TTCTCTGATGGGCGTGGTGGCGCAGGCCGGTTCATTCAACATGACCGACATCGTCAACAG
CCAGGCGCATGTGTGGAACGTCATCCCGCAATTCTTTGGTTTTATTACCTTTGCCATCGC
GGGTGTGGCGGTGTGTCACCGTCACCCGTTTGACCAGCCGGAAGCCGAGCAGGAACTGGC
GGATGGTTACCACATTGAATACTCCGGCATGAAGTTCGGTCTGTTCTTCGTGGGTGAGTA
CATCGGGATTGTGACCATCTCTGCATTGATGGTGACGCTGTTCTTCGGTGGCTGGCAAGG
CCCGTTGTTACCGCCATTCATCTGGTTCGCGCTGAAAACCGCGTTCTTTATGATGATGTT
CATTTTGATTCGTGCGTCGTTACCGCGTCCGCGTTATGACCAGGTAATGTCCTTCGGCTG
GAAAATCTGCCTGCCGCTGACGCTGATCAACTTGCTGGTAACGGCGGCTGTCATTCTCTG
GCAGGCGCAATAAGGGGCAATAAGACCATGACCTTAAAAGAATTGTTAGTAGGTTTCGGC
ACCCAGGTTCGTAGTATCTGGATGATCGGCCTGCACGCGTTCGCCAAACGCGAAACGCGA
ATGTACCCGGAAGAGCCGGTCTATCTGCCGCCCCGTTATCGTGGTCGTATCGTTCTGACC
CGCGACCCGGACGGCGAAGAGCGTTGCGTAGCCTGTAACCTCTGTGCGGTAGCCTGCCCG
GTCGGCTGTATCTCGCTGCAAAAAGCAGAAACCAAAGACGGTCGCTGGTATCCGGAATTT
TTCCGCATCAACTTCTCACGCTGCATTTTCTGTGGTCTGTGCGAAGAAGCCTGTCCGACC
ACGGCGATTCAGTTAACCCCGGATTTCGAAATGGGGGAATACAAGCGCCAGGATCTGGTT
TACGAGAAAGAGGATCTGCTGATCTCCGGTCCGGGCAAATACCCGGAATATAACTTCTAC
CGGATGGCAGGTATGGCAATCGACGGCAAAGATAAGGGCGAAGCAGAGAACGAAGCCAAG
CCTATCGACGTCAAGAGCCTGTTACCGTAAGGAGAGGAGCAATGGAGTTCGCTTTTTATA
TCTGTGGCCTGATAGCCATACTTGCGACCTTGCGAGTGATCACCCATACCAATCCGGTAC
ACGCACTGCTGTACCTGATTATTTCGCTGCTGGCGATTTCTGGGGTGTTCTTCTCACTGG
GCGCTTACTTCGCCGGTGCGCTGGAAATTATCGTCTACGCGGGTGCCATTATGGTGCTGT
TCGTGTTCGTGGTGATGATGCTCAACCTGGGCGGTTCAGAAATCGAACAGGAACGCCAGT
GGCTGAAACCGCAGGTGTGGATTGGTCCGGCAATTTTGTCGGCCATCATGCTGGTGGTGA
TTGTTTACGCCATCCTCGGTGTTAACGATCAGGGTATCGACGGTACGCCAATCAGTGCTA
AAGCAGTGGGTATTACGCTGTTCGGGCCTTACGTACTGGCGGTGGAACTGGCTTCTATGC
TGCTGCTCGCGGGTCTGGTTGTGGCCTTCCACGTCGGTCGTGAAGAGCGTGCGGGTGAAG
TGCTGAGCAATCGTAAAGACGACAGCGCGAAAAGAAAAACGGAGGAGCACGCATGATCCC
CTTACAACATGGACTGATCCTCGCGGCAATCTTATTCGTTCTTGGCTTAACCGGTCTGGT
TATCCGTCGCAATCTGCTGTTTATGCTGATTGGTCTGGAAATCATGATTAACGCCTCCGC
GCTGGCCTTTGTGGTCGCCGGAAGCTACTGGGGCCAGACCGACGGTCAGGTGATGTACAT
TCTCGCCATCAGCCTCGCGGCGGCAGAAGCGAGTATCGGCCTTGCGCTGCTGCTGCAACT
TCACCGTCGTCGCCAGAACCTGAACATCGATTCAGTAAGTGAGATGCGCGGATGAACATG
CTTGCCTTAACCATTATTTTGCCATTGATTGGCTTCGTCCTGCTGGCGTTCTCCCGTGGG
CGCTGGTCTGAAAACGTTTCGGCGATCGTCGGCGTTGGCTCTGTGGGCCTGGCGGCGCTG
GTAACCGCCTTTATCGGCGTTGATTTCTTCGCTAACGGCGAGCAGGCATACAGCCAGCCG
CTGTGGACGTGGATGTCGGTAGGCGACTTTAACATCGGTTTTAACCTGGTGCTGGACGGC
CTGTCGCTGACCATGCTCTCGGTGGTCACTGGTGTGGGTTTCCTGATCCACATGTACGCC
TCCTGGTATATGCGTGGTGAAGAGGGCTACTCTCGCTTCTTCGCCTACACCAACCTGTTC
ATCGCCAGCATGGTGGTTCTGGTGCTTGCCGATAACCTGCTGTTGATGTACCTCGGCTGG
GAAGGCGTGGGCCTGTGCTCCTATCTGCTGATCGGTTTCTATTACACCGATCCGAAGAAT
GGCGCAGCGGCAATGAAAGCGTTCGTCGTGACCCGTGTGGGTGACGTGTTCCTCGCTTTC
GCGCTGTTCATTCTTTACAACGAACTGGGCACCCTGAACTTCCGCGAAATGGTGGAACTG
GCACCAGCGCACTTTGCTGACGGCAATAACATGCTGATGTGGGCGACGCTGATGCTGCTG
GGCGGTGCGGTCGGTAAATCTGCGCAGTTGCCGTTGCAGACATGGCTTGCCGACGCGATG
GCGGGCCCGACGCCTGTCTCCGCGCTGATCCACGCCGCAACGATGGTAACCGCGGGTGTC
TACCTGATCGCCCGTACCCACGGCCTGTTCCTGATGACCCCGGAAGTTCTGCATCTGGTG
GGTATTGTCGGGGCAGTTACGCTGCTGCTGGCCGGTTTTGCCGCGCTGGTACAGACCGAC
ATCAAACGTGTTCTCGCTTACTCTACCATGAGCCAGATTGGCTACATGTTCCTCGCGCTT
GGCGTGCAGGCATGGGATGCGGCGATTTTCCACTTGATGACTCACGCGTTCTTTAAAGCG
CTGCTGTTCCTGGCATCCGGTTCCGTCATTCTGGCCTGCCATCACGAACAGAACATCTTC
AAGATGGGCGGTCTGCGTAAATCTATTCCGCTGGTTTATCTCTGCTTCCTGGTGGGTGGT
GCAGCACTGTCGGCACTGCCGCTGGTCACTGCGGGCTTCTTCAGTAAGGATGAGATCCTC
GCGGGTGCGATGGCGAATGGTCATATCAATCTGATGGTGGCAGGTCTGGTCGGTGCGTTT
ATGACCTCGCTCTACACCTTCCGTATGATTTTCATCGTCTTCCACGGAAAAGAACAAATT
CACGCTCACGCCGTGAAAGGGGTAACTCACAGCCTGCCGCTGATTGTGCTGCTGATCCTT
TCCACCTTCGTTGGCGCACTGATTGTACCGCCGCTGCAGGGCGTGCTTCCGCAAACGACG
GAGCTGGCGCACGGCAGCATGTTGACCCTGGAAATTACCTCTGGCGTGGTCGCGGTGGTC
GGCATTCTGCTGGCTGCCTGGCTGTGGCTGGGTAAACGTACTCTGGTGACCTCCATCGCC
AACAGTGCGCCGGGCCGTCTGCTGGGCACCTGGTGGTACAACGCCTGGGGCTTTGACTGG
CTGTACGACAAAGTGTTCGTCAAGCCGTTCCTGGGTATTGCCTGGTTGCTGAAACGCGAT
CCGCTGAACGCAATGATGAACATTCCGGCGGTTCTTTCCCGCTTTGCAGGTAAAGGTCTG
CTGTTAAGCGAGAACGGCTATCTGCGCTGGTATGTGGCATCCATGAGCATCGGTGCGGTC
GTGGTGCTGGCACTGTTGATGGTACTGCGTTGAGTTAAGGATTGTGGGATTGCCCCTGGG
CATATAAGAACGTAGGTCGGATAAGCCTCCTTCGCGGTGCATCCGACACTACCCCCAGTC
CGAAGAGAATTTTCTGTCGTGAGAATTCGTTGAAAATCCGGTCCTGACGGGACTTTTACA
AGGAATAAAGATCGCCATGTTACTACCCTGGCTAATATTAATTCCCTTTATCGGCGGCTT
CCTGTGCTGGCAGACCGAACGCTTTGGCGTCAAGGTGCCGCGCTGGATCGCGCTGATCAC
CATGGGATTGACGCTGGCGCTGTCGCTGCAACTGTGGTTGCAGGGCGGTTATTCACTGAC
GCAATCCGCCGGAATTCCGCAGTGGCAGTCTGAATTCGACATGCCGTGGATCCCGCGTTT
TGGTATCTCTATTCATCTCGCCATTGACGGGCTGTCGCTGCTGATGGTCGTGCTGACCGG
TCTGCTCGGTGTGCTGGCGGTACTCTGTTCGTGGAAAGAGATCGAAAAATATCAGGGCTT
CTTCCACCTCAACCTGATGTGGATCCTGGGCGGCGTTATCGGCGTGTTCCTTGCCATCGA
CATGTTCCTGTTCTTCTTCTTCTGGGAAATGATGCTGGTGCCGATGTACTTCCTGATCGC
ACTGTGGGGGCATAAAGCCTCTGACGGTAAAACGCGTATCACGGCGGCAACCAAGTTCTT
CATTTACACCCAGGCGAGTGGTCTTGTGATGTTGATCGCCATCCTGGCGCTGGTTTTTGT
TCACTACAATGCGACCGGCGTCTGGACCTTCAACTATGAAGAGCTGCTGAATACGCCAAT
GTCCAGTGGTGTGGAATATCTGTTGATGCTGGGCTTCTTCATCGCCTTCGCAGTCAAAAT
GCCGGTGGTTCCGCTGCATGGCTGGCTGCCGGATGCGCACTCCCAGGCTCCGACCGCCGG
TTCCGTTGACCTCGCGGGGATCTTGCTGAAAACTGCCGCTTACGGTTTGCTGCGTTTCTC
CCTGCCGCTGTTCCCAAATGCGTCGGCAGAGTTCGCGCCAATCGCTATGTGGCTGGGTGT
TATCGGCATCTTTTACGGTGCGTGGATGGCCTTCGCCCAGACCGATATCAAACGTCTGAT
CGCCTACACCTCGGTTTCCCACATGGGCTTCGTGCTGATTGCTATCTACACCGGCAGCCA
GTTGGCCTACCAGGGCGCGGTAATCCAGATGATTGCGCACGGCTTGTCGGCGGCGGGTCT
GTTTATTCTCTGCGGTCAGCTTTATGAACGTATCCATACCCGCGACATGCGCATGATGGG
CGGTCTGTGGAGCAAGATGAAATGGCTGCCAGCACTGTCGCTGTTCTTTGCGGTGGCAAC
GCTTGGGATGCCTGGCACCGGTAACTTCGTCGGCGAATTTATGATTCTGTTCGGCAGCTT
CCAGGTTGTCCCGGTGATTACCGTTATTTCTACCTTTGGGCTGGTCTTTGCATCTGTTTA
TTCGCTGGCGATGTTGCATCGTGCTTACTTCGGTAAAGCGAAAAGCCAGATTGCCAGCCA
GGAACTGCCAGGGATGTCGCTGCGTGAGCTGTTTATGATCCTGTTGCTGGTGGTGCTGCT
GGTACTGCTGGGCTTCTATCCGCAGCCGATTCTGGATACCTCGCACTCCGCGATTGGCAA
TATCCAGCAGTGGTTTGTTAATTCCGTTACTACTACAAGGCCGTAAATCGCCATGACAAT
AACTCCACAAAACCTGATCGCACTGCTACCGTTGCTGATCGTCGGCTTGACGGTGGTGGT
TGTGATGCTCTCCATTGCGTGGCGACGCAATCATTTCCTCAACGCTACGCTCTCGGTTAT
TGGGCTTAACGCGGCGCTGGTTTCGCTCTGGTTTGTCGGCCAGGCGGGCGCTATGGATGT
TACGCCGCTGATGCGCGTTGATGGTTTCGCCATGCTTTACACCGGGCTGGTCCTGCTGGC
GAGCCTCGCCACCTGTACTTTCGCCTACCCGTGGCTTGAAGGCTATAACGACAACAAGGA
TGAGTTCTACCTGTTGGTGTTAATTGCCGCGCTGGGCGGGATCCTGCTGGCGAATGCCAA
CCATCTGGCGTCTCTGTTCCTCGGTATCGAACTGATCTCTTTGCCGCTGTTTGGCCTGGT
CGGTTACGCTTTCCGCCAGAAACGTTCGCTGGAAGCCAGTATCAAATACACCATCCTTTC
TGCCGCAGCGTCTTCTTTCCTGCTGTTTGGTATGGCGCTGGTGTATGCGCAGTCTGGCGA
CCTGTCGTTTGTCGCGTTGGGTAAAAACCTTGGCGACGGTATGCTCAACGAGCCGCTGTT
GCTGGCAGGTTTCGGCCTGATGATTGTTGGCCTCGGCTTCAAACTCTCTCTGGTGCCGTT
CCACCTGTGGACGCCAGACGTATACCAGGGCGCGCCTGCGCCGGTTTCCACTTTCCTGGC
GACGGCGAGCAAAATCGCTATCTTCGGTGTGGTGATGCGTCTGTTCCTCTACGCACCGGT
GGGTGACAGCGAAGCGATTCGCGTAGTACTGGCGATTATCGCCTTTGCCTCCATCATCTT
CGGTAACCTGATGGCGTTGAGCCAGACCAACATCAAACGTCTGCTCGGTTACTCATCTAT
CTCTCACCTCGGCTATCTGCTGGTGGCGCTGATTGCGCTGCAAACCGGCGAGATGTCGAT
GGAAGCGGTAGGGGTTTACCTGGCCGGTTATCTGTTCAGCAGCCTCGGCGCGTTCGGCGT
GGTCAGCCTGATGTCCAGCCCGTATCGTGGCCCGGATGCTGATTCCCTGTTCTCTTACCG
CGGTCTGTTCTGGCATCGTCCGATCCTCGCGGCAGTGATGACGGTGATGATGCTGTCTCT
GGCCGGTATCCCGATGACGCTGGGCTTTATCGGTAAGTTCTACGTGCTGGCGGTCGGTGT
CCAGGCTCACTTGTGGTGGCTGGTGGGTGCCGTGGTTGTCGGTTCGGCAATCGGCCTTTA
CTACTACCTGCGCGTGGCGGTGAGTCTGTACCTGCACGCACCGGAACAACCGGGTCGCGA
TGCACCGTCAAACTGGCAGTACAGCGCGGGCGGTATCGTGGTGCTGATTTCTGCACTGTT
GGTACTGGTGCTGGGTGTATGGCCACAACCGCTGATTAGCATTGTGCGTTTGGCAATGCC
GCTGATGTAATCTGTTAGTTTGTAAGTCAGAAAGCCGCCGACATGCTCGGCGGTTTTTTT
TGGCGCTCTGACACCATCACCCAACAATAACCGTCAGCGCATGATTCCCTTGTCGCAGCA
TACGTCGATACGCGCTAATCAGCTTTTCCATATCAAGCATGATCGAGGCAAAGAGTTGCC
CCTCTAACTCTTCTGAAAAGGTCACTCCCGGATAAATCTCCATTTCATTGAGTCGCTTAA
TGGAAAACTGTTTACGCAGCTCACTTCGATCCAGTGATTCCAGTCGGTCGATTGTCGCGG
CTAACTCCTGATTCCAGGTCAATCCCAGGAAGCCATCTATGCCATCTTCGAGGCTGTGTT
CACCAAGCACGGCACGACTCAGCGGATCATTCTTCGCGGGATCAAAAGCAGAGGTGCCTG
TCAGCCCAAAGTGTAAAAAATCCCAGCGTTTATCAATATCCAGTCGGCGTAATCCTGAAA
GCGTGTCATGTATATTATCCATCAAAGGTTTTTCAGTAGACTCAAGCAGTTGGTTAATCT
TTTCTGAGTCAATTTCTGCAAAATAACCAATCATTCCCATTTATTTTTCCTCCATTGAAT
TTCATGTTTCGCATCTTAAAACAGACGAGGGAAAATAAAATGTGCATGTCGCTTTTTCTG
GACCCGCCTCGAGAAATTTTTATTATTTACTGTTGTATAACAAATTTATAACACCATCCA
CCACCTGAGCCATTTTCTGATAATTCAATCTGTCTGCGGTATCACCGGGCAAGTGGTATT
GTTTATTACGATAAAAAGCGGTGTCAGTAATCATTACGGCGGGAATATCGTGTTGCCAAT
AATTCAGGTGGTCAGAGAAATCAATACCGGGAATAAACCCTGGGGCATTCATAGAATAAA
CAGATAAATCCCGGGATGACAACAATGCCGCTTTTACCTGACGAACGGCGTTGATATCCT
GTATTCTGCCGACCAGGCAATAAAGTCCCCCCGATCGGGATAAAGCCAGGACATTGCGGG
TAAGGGTAATCCTGGCTACCAGGCGCAGAGTCGTAATAGCCAATCGGGGACGCCCTGCGC
GGTAACTCTGGCACCGCTACTGACAAAGACCTCTTTTATATACTCTACGGACCTATTCAG
ATTATCAATATTGTCGGCATTACGTGGATGCACAGCTTGTGTAAGATAACGAACTGTTTT
TTCTAATTGCTCAGGAATTACGTGTCGGGGCGTTGGCGATAATGCAGTGACCCAGGGTTG
GTAAAAATAATCAGAGGGAGTGAAAACAGAAATAATATAACAAAAGGAAAATTTTTTCAT
ATGTAAATTATCAATAAAAGGCGTTATTTCATTATTATTTATAATGAATTATGAGCGTTT
ATTTTATTACACTTGGTAGAGATATACAAAAAGTGTTTTTTACAGTGGGTTCGCTATTTT
TAAAAAGGAATTTCTGTGAGGAATAAAAATATAATTATGTTATTTATTGGCAGATTGAAT
TGACAAGTGGGGCAGAAATCTGAGGGTAAGAAAAGTCAGCAACTACAATCCACTACATCA
ACAGACCAGCAATCGCGTGCCGAGATACGCTGGAAATACCCGAAGATTGAACTGCAGGGT
GGTGTGACTGACATCAGTCAGTGATGACTTTTTAGCAAACTATGTTCGACCAGTCAGCAT
ATTTGCTGACTGGTCGAATTAATTAACAATGATGTTAACTTACTCTTTTGCCTGATGCTC
TATTTTGGGGTTGTGAGTGTTTTATTTCTAAGTCTCTATAATAATCATTGATATTTGCAT
CGCCATATTTATCTAAATAACAATTTCTGTTTACCAGTCGATGTTGAAAATCAATTTCGT
ACTGCTCTTCTGCTGAATATTTTTTAAATCTGTCAGCATAGTTTTTTAATAACGTATAGG
GGGCGCTGTCAGAATTACTTTCCCTTTGTTCAATCACTTCCTGGGCTGCCATGCACACAA
ATGCACCGCAACTTTGGCTTAAGTATTGCTGAAGATCGGCATGTAAAAATATTATCTCGG
GTTCAGTTAAATGAACTTTTATATTATTATTCGACATTTCTCCCATGAGTTCAGAATTAA
AACTATTAATGACACGCTTAAGTGAATTTTCTTTATCATGGCCTAGTGCGCGCAATGAGT
TGAATATGACGCATTTTATTTGTTGTGTATTATTTTTTTCATTTACTATTTTCTGTAGCG
AAACTAATATCCAGTGTCCGCCAGTATTTATGGGGAATAACTGGACTTCATTCGGCCATG
ATGGATCGCTCTTAATATTTTCATTGAGAGCGTCTTCCAGGTGAGTTCTGGTGGAGTAGG
GGACGTAGAGACCAGTAGGATAATTGACTTCAGTATTTTTTGCATTAGCGGCGATCTTCT
GAAGATAGCAATCTATTTCATCTGTGGTTAATTGACGATTTTTATCCCAGAAGTTTGTAC
CATCGCTCAGTTCATTATTCTCATCATTTAAAAGCACCTTCGAAAGCGACTGTTTTTCAG
ATATAAGAGGAATTTCATCACCGATAATTGTCATTAATTTCGAAGGGGAGAATAGCTTTT
TGAACAGGAGATCATCTGAATTATCCGGACCAGTTGGTTTAAGGTGGGAGTTGGTTGCGG
TATGTGCCAAATTATATAATTTTAAACAGGCATTTTTAATAAGTCGGATAATCGATAGGG
TCTCATTTGTTGGGTTTCTAACAATATGGTAAAGAATATCTTCAGCTTTTTTTCCAAATT
CATCATAACCTAACGCAATATTATGCAGTAACTCAATACTTTCTTCATCTCCGGATAACG
CTGTTTTTTTTAAAGACTGCAGTAATTCCTCGGTCACAGTAAATTTTTCTGCAAATGTCT
GACTGAGTTGGGTTTGAGATAATTGACAATAATTGCTGACAACTGTAACCATCATATGCT
CCTTTTAGTTGCAAAGGTTGTGCTGAATGAAGATAAAAAGAGGCAACTTATTGCTCTGAA
TATAGTGCGTAAGGAGATGAATAAATATCAAAAATCGCTCAATATGCCCGTGTGGGTGGA
TATATGTAGCGCGGGTTGCGATAACAGGGCAAGTTTCGCCCTGTTTTTAATAATAAGCAG
AGTTAAACGTTAAACACGGTGAAATCATTCGCTAGTTCAGTCGCCGGGAAAATTGACCTG
CATTCACGTAACAGGTGCTGACAACCTTTGTCATCATAGCGCGAGCTGACGTGGGTAATG
ATTAGCTTACCGACTCCAGCCTCACGGGCCAGTGTCGCAGCCTGGCGTGTAGAGCTATGA
CCGCGACTATTGGCTTTGGCTTCCATGGTTATATCCAGCGTCGCTTCGTGTACCATGACA
TCGACACCTTTAGCCAGGTCAAGTGCGGCATCGCAGGGGCCGGTATCGCCGAAAATAGCG
AGCGCTTTACCTGGCACTGGAGCAGCTAAGTAATCTGCGCCGTTAATCTGCCTTCCATCT
TCCAGCATGATTGTTTTGCCCGCTTTTAATTCCTGAAACAGTGGGCCAGGCGGTACGCCA
GCAGCTTTTAATGCCTGGGCATTTAATGCACCCGGTTTATCATGTTCTTCAATACGATAG
CCATAACATTCCAGTGGGTGTTCCATTGGATAAGCGGTCACTTTGCGCAGGCCATCATCG
AGAATTTCGCCAGCGCCAATTTCGACAATTTCCAGCGGATAATCGGTCCATGAGCCGCTA
ATCCGCAGCGCGGTCTCCACAAATTCACGGATACCTTGCGGACCATAAATCGTTAAGGGT
TGGACAATACCAGACATAGAACGACTGCACAGCAAGCCGGGTAAACCAAAGAGATGATCG
CCATGAAGGTGACTAATAAAAATCTTGTCCAGTTTTCCAGGGTTAAAGGCGGTATGCAGT
AGCTGATGCTGGGTGCCTTCACCGCAGTCAAACAACCAAAGACCGCTCTGGGTCGGATGT
TGCAGGTTAAGCAATATTGCCGTGACATTGCGCGTACGGGTTGGCACACCGGCTGAAGTA
CCTAAAAAAATTAATTCCATGAGTTCATCACGTTTCAAAAAATATTCCGGCTAGTATAAG
GCATACATCTAAAAGGAGAGCATTATGATTGAATGGCAAGATCTGCATCACTCTGAATTA
TCGGTTTCCCAGCTTTATGCCTTATTACAACTGCGTTGCGCGGTGTTTGTTGTCGAGCAG
AATTGCCCTTATCAGGATATCGATGGTGATGATTTGACGGGGGATAATCGCCATATTCTC
GGTTGGAAAAATGATGAACTGGTGGCATATGCGAGGATTCTGAAAAGTGATGATGATCTT
GAGCCGGTCGTTATAGGTCGGGTGATTGTCAGTGAAGCGTTGCGTGGCGAAAAAGTGGGG
CAGCAACTGATGAGTAAAACCCTCGACACATGCACGCATCACTGGCCTGATAAGCCTGTT
TACCTTGGGGCGCAGGCGCATCTGCAAAACTTCTACCAGAGTTTCGGTTTTATCCCTGTG
ACGGAGATCTATGAAGAAGATGGTATCCCACACATTGGGATGGCACGCGAGGTAATTCAG
GCGTAATCAATAACCCTTGTCTATAGTTAGTGACAGGTTTTACGCAAATGGAGAACGAGA
ATGTCTAATCAGTTTGGTGATACACGTATCGATGACGACCTGACGCTGCTTAGTGAAACA
CTGGAAGAGGTGCTCCGCTCCTCTGGCGATCCCGCCGATCAGAAATATGTTGAGCTGAAA
GCGCGTGCAGAAAAAGCGCTGGATGATGTGAAAAAACGGGTTAGCCAGGCTTCAGACAGT
TATTACTATCGGGCGAAGCAGGCTGTTTATCGTGCTGATGACTACGTCCACGAAAAACCC
TGGCAGGGAATTGGTGTGGGTGCGGCCGTTGGGCTGGTACTAGGACTGTTGCTGGCACGC
CGTTAAAACCTCCCTACACCGGGGTACTGCATTTTTTTTGTAGTACCCCGTATAATGTGA
GGCTTTTAACAGGGAGAGGTCCGCGTGCAATCACTTACTACGGCGCTGGAAAATCTACTG
CGCCATTTGTCGCAAGAGATTCCGGTGACACCCGGCATTCGGGTTATCGATATTCCTTTC
CCTCTCAAAGACGCTTTTGATGCCTTGAGCTGGCTGGCCAGTCAGCAAACGTACCCGCAA
TTCTACTGGCAACAACGTAATGGTGATGAAGAAGCTGCCGTCCTGGGCGCGATTACCCGT
TTTACGTCGTTGGACCAGGCACAACGTTTTCTTCGCCAGCACCCGGAACACGCCGACTTA
CGCATTTGGGGGCTGAATGCGTTCGACCCGTCGCAGGGCAATTTACTTTTACCACGCCTG
GAATGGCGACGCTGTGGCGGTAAAGCCACGCTGCGGCTGACGCTATTCAGCGAAAGCTCC
CTTCAGCACGATGCGATTAAGGCAAGAGAATTTATCGCCACACTGGTGAGTATCAAGCCC
TTGCCTGGGTTACATTTAACCACTACGCGAGAACAACACTGGCCGGACAAAACGGGCTGG
ACGCAATTAATCGAACTGGCAACGAAAACCATCGCCGAAGGGGAGCTCGACAAAGTGGTG
CTTGCTCGGGCAACTGACCTGCATTTCGCAAGTCCGGTCAATGCGGCGGCGATGATGGCT
GCCAGTCGTCGACTGAATCTCAATTGCTACCATTTTTACATGGCCTTTGATGGCGAAAAT
GCTTTTCTTGGCTCTTCACCGGAACGGTTATGGCGGCGGCGTGACAAAGCGCTGCGTACT
GAAGCGCTGGCGGGAACAGTAGCAAATCATCCTGATGATAAGCAGGCGCAGCAGTTAGGA
GAGTGGCTGATGGCGGATGATAAAAACCAGCGCGAGAACATGCTGGTGGTGGAAGATATC
TGCCAACGATTACAGGCCGATACCCAGACGCTGGATGTTTTACCGCCGCAGGTACTGCGT
CTGCGTAAAGTGCAGCATCTTCGCCGCTGTATCTGGACTTCACTCAACAAAGCGGATGAT
GTGATCTGTTTACATCAGTTGCAGCCAACGGCAGCAGTTGCTGGCTTACCGCGCGATCTG
GCGCGACAGTTTATCGCCCGTCACGAACCGTTCACCCGAGAATGGTACGCCGGTTCTGCG
GGCTATCTCTCATTACAACAAAGCGAATTCTGCGTTTCCCTGCGCTCAGCAAAAATTAGC
GGCAATGTCGTGCGATTATATGCTGGCGCGGGCATTGTCCGTGGTTCCGACCCCGAGCAA
GAGTGGCAGGAAATCGACAACAAAGCGGCAGGGCTGCGTACTTTATTACAGATGGAATAG
TAATGAGTCGCATCATTACCGATTCATATCAATAATCTATTTTTGTAGCTCCTTATACTT
AGCCGCAATATTGATACCGGACAAACTCATGTCAGTAAGCGCATTTAACCGACGCTGGGC
GGCGGTCATTCTGGAAGCATTAACGCGTCACGGCGTCAGACACATCTGTATCGCCCCAGG
CTCGCGTTCTACACCGTTAACGTTAGCGGCGGCGGAGAATTCCGCATTCATTCACCACAC
CCATTTCGATGAGCGTGGACTGGGGCATCTGGCGCTGGGGCTGGCGAAAGTCAGCAAGCA
GCCGGTGGCGGTGATTGTGACCTCCGGCACGGCGGTAGCAAATCTCTATCCTGCACTGAT
TGAAGCTGGGTTAACCGGAGAAAAACTGATCCTGTTAACCGCCGATCGCCCGCCGGAGCT
AATTGACTGCGGCGCGAATCAGGCGATTCGTCAGCCGGGAATGTTCGCCTCTCACCCCAC
GCACAGTATTTCATTGCCGCGCCCGACCCAGGATATCCCCGCAAGTTGGCTGGTTTCTAC
CATCGACCATGCTCTCGGTACGCTTCATGCGGGCGGAGTCCATATCAACTGCCCGTTTGC
TGAACCGCTGTATGGCGAGATGGACGACACTGGGCTTAGCTGGCAACAGCGTCTGGGTGA
CTGGTGGCAGGATGATAAGCCGTGGCTGCGTGAAGCGCCTCGTCTGGAAAGTGAAAAACA
GCGCGACTGGTTCTTCTGGCGGCAAAAACGCGGCGTGGTGGTTGCCGGGCGCATGAGTGC
GGAAGAGGGCAAAAAAGTTGCACTGTGGGCGCAAACTCTTGGCTGGCCGCTGATTGGCGA
CGTGCTGTCGCAAACCGGACAGCCGCTGCCGTGTGCCGATCTTTGGTTAGGCAATGCCAA
AGCGACCAGCGAACTGCAACAGGCACAGATTGTGGTGCAACTGGGCAGCAGCCTGACGGG
CAAACGGCTCCTGCAATGGCAGGCAAGCTGTGAACCCGAAGAGTACTGGATTGTGGATGA
CATCGAAGGGCGACTTGATCCGGCACACCATCGTGGACGCCGCTTAATTGCCAATATTGC
CGACTGGCTGGAGCTGCATCCGGCAGAAAAACGCCAGCCCTGGTGCGTTGAAATCCCGCG
CCTGGCAGAACAGGCAATGCAGGCGGTTATTGCCCGTCGCGATGCGTTTGGCGAAGCGCA
ACTGGCGCATCGCATCAGCGACTATCTGCCTGAACAGGGGCAATTGTTTGTTGGTAACAG
CCTGGTGGTACGTCTGATTGATGCGCTTTCGCAACTTCCAGCAGGTTACCCGGTGTACAG
CAACCGTGGGGCCAGCGGTATCGACGGACTGCTTTCTACTGCCGCCGGCGTTCAGCGTGC
CAGTGGCAAACCGACGCTGGCGATTGTGGGCGATCTCTCCGCACTTTACGATCTCAACGC
GCTGGCGTTATTGCGTCAGGTTTCCGCGCCGCTGGTATTAATTGTGGTGAATAACAACGG
CGGGCAAATTTTTTCGCTGTTGCCAACGCCGCAAAGCGAGCGCGAACGTTTCTATCTGAT
GCCGCAAAACGTTCATTTTGAGCACGCCGCCGCGATGTTCGAGCTGAAATATCATCGTCC
GCAAAACTGGCAGGAACTTGAAACGGCACTTGCCGATGCCTGGCGCACGCCAACCACCAC
GGTAATTGAAATGGTGGTTAACGACACCGATGGTGCGCAAACGCTCCAGCAACTTCTGGC
GCAGGTAAGCCATTTATGATCCTGCACGCGCAGGCAAAACACGGCAAACCAGGTTTACCC
TGGCTGGTGTTTTTGCACGGTTTTTCCGGCGATTGCCACGAATGGCAAGAAGTGGGCGAG
GCGTTTGCCGACTACTCACGGTTGTATGTTGATCTTCCCGGGCACGGTGGTTCGGCGGCG
ATTAGCGTCGATGGATTTGATGATGTCACCGACTTACTGCGTAAAACCCTGGTTAGTTAC
AACATCCTTAACTTCTGGCTGGTGGGGTACTCGCTTGGCGGACGGGTGGCGATGATGGCC
GCTTGCCAGGGGCTGGCGGGGCTTTGTGGGGTTATTGTCGAAGGCGGGCATCCGGGGCTG
CAAAATGCTGAACAACGTGCGGAACGTCAGCGTTCCGATCGCCAATGGGCGCAGCGTTTT
CGCACAGAACCGTTAACGGCGGTATTTGCCGACTGGTATCAACAGTCTGTTTTTGCCTCG
CTCAATGACGATCAACGCCGGGAGCTGGTGGCGCTGCGCAGCAACAATAATGGCGCAACC
CTTGCCGCCATGCTGGAGGCGACTTCTCTCGCCGTCCAGCCTGATTTACGTGCTAACCTT
AGCGCCCGCACATTTGCGTTTTATTATTTATGTGGTGAACGTGACAGCAAATTCCGCGCT
CTGGCGGCGGAACTGGCTGCCGACTGCCATGTCATTCCTCGCGCCGGACATAACGCGCAT
CGGGAAAATCCCGCTGGCGTTATCGCAAGTCTGGCGCAGATCTTGCGTTTCTGACTAAAG
GACACAATATGATTTATCCTGATGAAGCAATGCTTTACGCACCGGTTGAATGGCACGACT
GCTCCGAAGGTTTCGAGGACATTCGTTATGAAAAATCCACCGACGGTATCGCAAAAATCA
CCATTAATCGTCCGCAGGTGCGCAATGCCTTCCGTCCTCTGACGGTAAAAGAGATGATCC
AGGCACTGGCAGATGCGCGTTATGACGACAATATCGGCGTGATCATTCTGACTGGCGCAG
GCGATAAAGCGTTCTGCTCCGGTGGTGACCAGAAAGTGCGTGGTGATTACGGCGGCTATA
AAGATGATTCCGGCGTACATCACCTGAACGTGCTGGACTTCCAGCGTCAGATCCGTACCT
GTCCGAAACCGGTTGTCGCGATGGTGGCTGGCTACTCCATCGGCGGTGGTCACGTTCTGC
ACATGATGTGCGACCTGACTATCGCGGCAGATAATGCCATCTTCGGTCAGACTGGCCCGA
AAGTCGGTTCCTTCGACGGCGGCTGGGGCGCTTCCTACATGGCTCGTATCGTCGGGCAGA
AAAAAGCGCGTGAAATCTGGTTCCTGTGCCGTCAGTACGACGCAAAACAGGCGCTGGATA
TGGGCCTTGTGAACACCGTGGTACCGCTGGCGGATCTGGAAAAAGAAACCGTCCGTTGGT
GCCGCGAAATGCTGCAAAACAGCCCGATGGCGCTGCGCTGCCTGAAAGCTGCACTGAACG
CCGACTGTGACGGTCAGGCAGGTCTGCAGGAGCTGGCGGGCAACGCCACCATGCTGTTCT
ACATGACGGAAGAAGGTCAGGAAGGTCGCAACGCCTTCAACCAGAAACGTCAGCCTGATT
TCAGCAAATTTAAACGGAATCCGTAATGCGTAGCGCGCAGGTATACCGCTGGCAGATCCC
CATGGACGCGGGGATGGTTCTGCGCGACAGGCGGTTAAAAACCCGCGACGGGCTGTATGT
TTGCCTGCGTGAAGGCGAGCGCGAAGGGTGGGGGGAGATCTCCCCACTGCCGGGCTTCAG
TCAGGAAACCTGGGAAGAGGCGCAAAGTGTGCTGCTTGCCTGGGTAAATAACTGGCTGGC
AGGCGATTGCGAATTACCGCAGCTGCCTTCCGTCGCCTTTGGCGTAAGCTGTGCATTGGC
GGAGCTGGCAGATACGCTCCCGCAGGCGGCCAATTACCGTGCGGCACCACTGTGTAATGG
CGATCCTGACGATCTGATCCTCAAACTTGCTGATATGCCAGGCGAGAAAGTGGCGAAGGT
CAAAGTGGGATTGTACGAAGCCGTGCGCGACGGCATGGTGGTGAATCTGTTGCTGGAGGC
AATTCCGGATCTGCATTTGCGTCTTGACGCGAATCGCGCCTGGACACCGCTGAAAGGCCA
GCAGTTTGCCAAATATGTTAACCCGGATTATCGCCACCGCATCGCGTTTCTCGAAGAGCC
GTGCAAAACCCGCGATGATTCGCGAGCGTTTGCCCGTGAAACCGGCATTGCCATTGCCTG
GGATGAAAGCTTGCGCGAGCCGGATTTTGCCTTTGTGGCTGAAGAGGGCGTGCGCGCGGT
AGTTATCAAACCCACGCTCACGGGCAGTCTGGAGAAAGTACGCGAGCAGGTACAGGCGGC
GCACGCGCTGGGGCTGACGGCGGTGATCAGTTCTTCCATTGAATCGAGCTTAGGCTTAAC
GCAACTGGCGCGGATTGCCGCCTGGTTAACGCCGGACACCATTCCAGGGCTGGACACGCT
GGATCTAATGCAGGCGCAGCAGGTACGTCGCTGGCCGGGTAGCACGCTGCCTGTCGTGGA
AGTTGATGCACTGGAGCGGTTGTTATGATCTTCTCTGACTGGCCGTGGCGTCACTGGCGG
CAAGTGCGGGGAGAAGCCATCGCCTTACGTCTTAATGACGAGCAACTCAACTGGCGCGAG
CTTTGTGCTCGCGTCGATGAATTAGCCTCCGGCTTTGCGGCGCAGGGCGTAGTTGAGGGC
AGCGGCGTGATGTTGCGGGCGTGGAATACGCCGCAAACGCTGCTCGCCTGGCTGGCGTTA
CTGCAATGCGGGGCGCGGGTGTTGTCCGTGAACCCTCAGCTGCCGCAACCGTTGCTTGAA
GAATTGCTGCCCAATCTTACGCTGCAATTTGCGCTGGTGCCGGAAGGGGAAAACACGTTT
CCGGCGTTAGCGTCGCTGCACATTCAGCGGGTTGAAGGCGCACATGCCGCTGCGTGGCAG
CCGACGCGTCTGTGCTCAATGACGTTAACCTCTGGGTCCACTGGCTTGCCGAAAGCCGCT
GTTCATAATTACCAGGCTCATCTTGCCAGCGCCGAAGGGGTGTTATCGCTGATTCCGTTT
GGCGATCACGATGATTGGTTGCTCTCTTTACCGCTGTTTCACGTCTCCGGTCAGGGAATT
ATGTGGCGCTGGTTATACGCTGGTGCGCGGATGACGGTACGTGATAAACAGCCATTGGAG
CAAATGCTGGCAGGCTGTACTCACGCTTCACTGGTGCCAACACAACTCTGGCGTTTGCTG
GTTAACCGCAGTTCCGTTTCCCTGAAAGCGGTGTTACTTGGCGGCGCGGCTATCCCGGTC
GAGTTGACGGAACAGGCGCGCGAGCAGGGGATTCGTTGCTTTTGCGGCTATGGTCTGACC
GAGTTTGCCTCCACGGTGTGTGCGAAAGAAGCCGACGGCCTGGCAGACGTTGGTTCGCCG
CTGCTGGGTCGGGAAGTGAAAATCGTTAATAATGAAGTGTGGCTGCGGGCTGCCAGTATG
GCAGAAGGTTACTGGCGTAACGGGCAACTGGTTTCACTGGTTAATGACGAAGGCTGGTAC
GCTACGCGCGATCGCGGTGAGATGCATAATGGCAAGCTGACCATTGTCGGACGTTTAGAC
AATCTATTCTTCAGTGGCGGAGAGGGTATTCAGCCGGAAGAAGTCGAGCGCGTAATTGCT
GCACATCCTGCGGTTTTGCAGGTGTTTATCGTCCCCGTTGCCGACAAGGAGTTTGGTCAT
CGACCGGTGGCGGTGATGGAGTATGACCACGAGAGCGTTGATCTTAGTGAATGGGTGAAA
GATAAGCTGGCCCGTTTTCAGCAACCGGTGCGTTGGTTAACGTTGCCGCCTGAACTGAAA
AACGGCGGTATTAAAATTTCACGTCAGGCGCTAAAAGAGTGGGTGCAACGTCAGCAATAA
TTAACCCTCCGTTTCACTTCTCATTTCTGCCATTCCATTGCCGTTGATAAAGAGTTTATC
TGTTAATCTGTAAATTGATGTGAAAACTCTTAGCAAACAGGATAATGCAATGGAATGGCT
GGTCAAAAAATCGTGCTGCAATAAACAAGATAACAGACATGTACTTATGCTCTGCGATGC
TGGCGGCGCGATAAAAATGATCGCCGAAGTGAAGAGTGACTTCGCCGTGAAAGTGGGGGA
TTTACTCTCGCCTTTGCAGAATGCGCTTTATTGTATTAATCGTGAAAAGCTGCATACGGT
GAAAGTCCTCTCGGCAAGCAGTTATAGCCCCGATGAGTGGGAACGGCAGTGTAAAGCGGC
AGGGAAAACTCAGTAACGTTGTTTTGTCGTGGGCAGGAAAATCAGCATCAACCCGCTCAT
AATACAGGCTACTCCCAGTAGTGCTTTCAGCGAAAAAGTCCCTTCCCAGCCGGGAAGTAC
CATTGAAGCAATCCATACCAGCACATAACTCATACTGAGCAAGGCATAGGCTTTGCTTAG
CGCAAGTATATGTAGCGTTTTATACCAACAAAAAACGGAAAGCAGATAACCCAGCAGCCC
GAGTAACAGTATCCGGGCATCCAGGCCAAAAGCTAACAGCGTCGCGATAAAATCCCATAA
GTGCGTCATCGGCGGCAGATGACTCGCCGCAAAACCCAGGCTTAATTGCGCAGCTGAGGC
AATAATGACGCTGAATAATCCCCACATCAGGCCCATTACACCGTACTCCCGAGGATCACA
ATGCCACCAATAATGAACGCCACCCCACACCAGTGACGCGGCGATACCGGTTCGTGCCAC
AGTTTTACTGCAGCCAGCGTCACCCAGACAAAATTCAGACTTAACATCGGGTAGGCAATG
CCTACCGGTACGTTCTGCAAGACCAGCAGCCAGAGCACCATGGCAAGACCAAGACAAGCC
AGCGCCAGTCCCAGCCACAGCACGATATGTTTGCGCCGTTTGTTTATCGCCACAAAGCAG
GTTGCCTGTTTCTGACACAACTGCCCGGCAACGCTAAGCAAGCTGGCAAAGACTAATGTT
AGCCAGATCATTTGGGACGATACTGAATCAGCACCAGACGCTCCTGACGATCGATGGCAT
CTGCGGGCGGAATGGCGAGACTGTTGATATCTTCATCGCGGTCAACCGAAAGCACGAGTG
TAATAATCCCCTCCTGACGATGTTGATTAAGCCAGTTTGCGAACTCATCACCGCTGACAA
ATCTCCCTTTCGCATCCGGATAATTAAGGCCGTATTTCAACTCACCTGTCTGGCGATACA
TGATGATGTCATCGCGTTGCAGGCTCCATGCCAGACCTGCGGCAACACCGACGCTATCAG
TAAGAATATAGCGGCTTGGCTGAAGTGATTCTTGTGTCATCTCGACAAAAAATTGCGGAT
GTTTTCCTTCCATGACTCTGTCAGGAATTGAAAATCCTACCAGCAACGCCAGCCCCAGCG
GGCAAAGCGCGGCAAAAGACCAGGTCTTTTCGACGTTTGTTAAGGTGTACCAGCCGAAAA
ATGCCCATAGTGAAAAAATCGACCAGGCACAAAAGACTTTATAGCTCTCGAAGGTTTGCC
ACACCGGCGTGTTCATTGGTCCCCAGGGGGAGACCACAAATGTGGCAATAATGCCAGTGA
CGCCAAAAGCGATGTTAATCCAGCCATTAATCCGCAACGCCAGAGGATTATTTTTTGCTG
CCAGCAAAGCGTAATGCGCCATCAGCATTGCCAGAGGTGCAAAGCAGGAAAGAATATAGG
TGGGCAATTTACCTTTAGCGACGGAGAAAAACAGCAGCGGCATTATCGTCCAGCTCAACA
AATAGACGGTTGCGGAATGCTTGCGGTTTTTCCAGCCTGCGTACAGTGCACCGGGGAGTA
ATCCCAGCCACGGCAGGCTACCGGCAATGATGACCGGCACGTAGTACCAGAACGGAGCTC
TATGTTGGGCATCATCCAGTGCAAAGCGTTGAATATGCTCAACCCAGAAAAAATAGTGCC
AGAAGTCAGGCTCCCGCTGCGCTATCGCCAGTCCCCAGGGGAGAACCGTCAGTACGCAAC
TGATAACCGCCAGCCAGCCGTAAATAAAGAGATCTTTCCAGCGTTTTTGCGTCGCTACCC
ATGGCAGTACGCTTAATACCGGCACGGCAAGGGCGAGAAAACCTTTGGTCATCACCCCCA
TGCCGCAGGTGATTCCCAGCAGTAAAAATCCTGCGCTTTTGCCTTTCCACGTCTGTGCCT
GCATTGCCAGCCAGAAGCTGCACATTCCCGCCACCAGCCAGAATGCAATAAACGGATCGA
GCACGGCATAAGTGCCGATGGCATAGACAATAAACAATGAGAGATAAATTACTGTGGCGA
GTAGAGCCAGACGTTTATCGCGCCATAAGCGCAGAGTAAACCAGGTCACCAGCGCGGCAG
TTAACAGGGTCGCAAAGATAACGCCTGCCCGCACACCAAAGTTATTCGCACCAAATAGCC
ATTGCCCAATGCTGTTAATCCAGTATCCAGCAATGGGTTTTTCAAAATAACGTAGCCCTA
ACAGATGGGGCACAATCCAGTCGCCGGATGCCAGCATTTCCCGACTGATTTCCGCATAAC
GCGTTTCATCGGGTTGCCAGAGCAGACGCGTGCTGATCGGTAACAGGTAATAGCAGGCAA
TAAACGCGAAGAGGCCGATAAGGTAACGTACCGATTTCATCAGCGACTACCCGCAATTTG
TTGGCAACCCAGCCAGCCTTCACGTCCGGCAATATTTCCGCGAACAACTTGTCCGAGCGG
CAACGTCTCTGATAACAGTTCGCTTAAAGGGCAAAATGTCACGCCTTCCTGAGCTGCGCG
TTTGAGGAGATCCACAAAATTATGCTGATAAGCGCAGCCTTCAACTTCTGCATGAATGGT
ATAAACCGGCGTGCCTTTATCTCGCAGGATGCGGTTGAGTAACCAACCGTTAAAATCTTC
TGCTTTCACATCCCGACCAATCACTTCATCCCAGGTGGGTAAGGTCACCGGAATTTGCGC
AGTGCCAGGGTTTCCTGATTCGAGCAGTGGACGGAACGGCATGGCCCCACGACAATCGCT
GTTGTAGCGCAAATGGAACGCTTCTTTTGCTTCGATCACCTGCTGGTCGGCACGCCAGCC
CGCAGCGGCAGAACAGGTTACCGGTTGACCGATAATCTCTTCCAGGGTGCGAAGGCCGAG
TGCAATATCGTCGATCATTGTTTGCCGATCCCAGTTACCGCTATGGGCTTGCCAGGCATG
GTGATCCCAGGCGTGCAGGCCGACTTCGTGATGTTTAGCCGCTTCACGAATGATATCGGC
ATTGGCAGGACCAATCTCTTTACCTGGCCAGGCCGTACCTGCCAGTAAAATATCCCAGCC
ATAAAGCGATGCCGCGTTTGAGCGCAGCATCTTCCACAAAAACTGTGGCTTCACCAGTCG
CCAGAGATGGCGGCCCATATTGTCCGGGCCGACGCTGAAAAAAATGCTGGCCTGAATATT
ATGCTTACTCAAGATTTCCAGCAGACGCGGCACGCCTTCACGGGTGCCACGAAAGGTATC
GACATCAATGCGTAAGCCTACTTTGGTCATGATGGTTTATCCGTAAGATCAACGGTGCGC
AGGAAGAAATCCAGCGTTTCGTCGATGGTTTCCTGCATATCAATTTTCGGCTCCCAGTCC
AGGCAGCGGTGGGCATTGCGGATGCTCGGTTTACGATGCTCTACGTCCTGATATCCTTTG
CCGTAGTAGCTGCTACTTTCGACAACGCGAAAGCCCGCAAACGGTGGGAAGTGATGGCGC
AGCGGATGTTTTTCGAAGCTCGCCAGCAGCATCTCGCCCAGTTCCTCAATGCTCGCTTCG
TTCTCAGGATTGCCAATGTTGATAATTTCGCCGTCGCAGCGATTTCCCACATTTTCGATA
ATGCGGTACAACGCCTCGATACCATCCCGGATATCAGTAAAGCAGCGTTTTTGTTTTCCG
CCATCAATCAGCTTAATCGGTGAACCTTCTACCAGATTGAGAATGAGTTGCGTAATAGCG
CGGGAGCTGCCGATTCGTGCCGCATTAAGGTTATCCAGTCGTGGTCCCATCCAGTTAAAC
GGGCGGAAGAGGGTGAACTGTAAACCCTCTTTTTCGCCATAGGCCCAGATAACCCGATCA
AGTAATTGTTTTGACACCGAATAAATCCAGCGTGGTTTATTCACCGGGCCGACGATTAAA
TTAGAATGGTCCTCATCGAAGTATTTATCGCTACACATCCCATAAACTTCTGAAGTTGAC
GGGAAGATGATTCGCTTACGGTACTTCACGCAGTAGCGGATAATGCGCAGATTCTCTTCA
AAATCGAGTTCAAATACGCGCAGCGGGTTGCGGGTATATTCAATCGGCGTGGCTATCGCC
ACCAGCGGCAAGACGACATCACATTTTTTGACGTGATACTCAATCCATTCGGAATGAATA
CTGATATCGCCTTCGACAAAGTGAAAATGCGGATGATTCAGAAAACGGCTTATCGCATCG
CTGCCAATATCCAGACCGTAAACTTCATAATGATCTTCGCGCAGCAGGCGTTCTGTCAGA
TGGTTGCCAATAAAGCCATTCACCCCGAGGATGAGTACCCGGGTACGGCGTCGGGCGGCA
CAGGCAGGCTGGCTATTCAAGCGTGAACCTTGCACCAGGCCCAGCGTCTGCGCTAATTGC
GAGCCCTGCATAGTAATGCCGTCGCCCGCCTGTCCGGTGACGATTTCCAGCGCGCCATCG
CCACAGGCAATCAGCAGTGGCGCAACAGAAATCACGCTCCCCGGCTGCGCTGCGGATGTA
TGAGGATGTACGCGTGACGACCAGACGGTGAATTTCTGATTGCCAGCATAGCTGAAGGCA
CCCGGCCACGGATCGGCAACGGCGCGGACCATGTTATGCAATACGGCTGCCGGTTTGTGC
CACTCGAGGAAGCTATCTTCTGGTGTTCTGCGACCAAAACAGGTGGCTTCGTTCTCGCGT
TGGGCGATTTCCAGAATATTACCGTGTTTAATGGCGGGTAATGTCTGTTCCAGTAGCTGG
CGCGCGGCATGGCACAATTTATGATGCAGCGTAATAGCGATATCGTCTGGCGCAATGGCA
ATGCGCAGTTGCGCCACAATGGCCCCGGCATCGGCACGTTTCACCATTCGGTGCAATGTA
ACGCCAGTTTCCGTTTCACCGTTGACCAGCACCCAGTTCAGCGGCGCGCGACCACGATAT
TTTGGTAACAGCGAACCATGCAGATTAAATGCACCTGCGGGAGCGAGCTGCAAAATTTCG
TCGCAAATAAGATGGCGATAATAAAAAGAGAAAATCACCTCTGGTGATAGTTGGGCAATG
CGTTCCACCCACAGCGGATGATTAACGTTATCCGGCGCATAAACCGGAATGCCTCTTTCC
GCTGCCAGACGAGCCACCGAACCATAAAAGGCTTTTTCACCGGGATTATCAGTATGGGTA
AAAATGGCGCTAATTTCGTAACCGGTAGCCAGCAGGGCTTCAATACCGAGGCATCCCATA
TCGTGGTAGGCAAAAACGACGGTTTTCATTATTCATTTTCCTTGCTGGATGGACGGATAA
CTTGCTGAACAAAATAGCGGGGGCGGGCGCGGACATCGGTGTAGATCCTGCCGATATATT
CACCGAGTAATCCCATGCCGATAAACTGAGCGCCAATAAAAGTAAACAGCACGGCAAATA
GCATAAAGACGCCTTCTGCCGCCCATTGTGGTCCGAAGGTCAGGCGTAAAATCACCAGCA
GCACCGCAATGCTAAAACCTCCAATCGCAATAATGCTGCCGAGCAGACTCAGCATACGTA
GCGGCGTTGTGGTAAGGCAGGTCACCAGGTCGTACATCAAATTAATCAGGCGCATAAAAC
TGTATTTGGATTCACCAAACTCACGCTCGGCATGATGCACTGGAATTTCAATGGCACGGC
GGGCGAAGATATTCGCCAGAATCGGGATAAAGGTGCTGCGTTCATGGCAGTGCAACATCG
CATCGACAATATGACGGCGATAGGCGCGCAGCATACAACCGTAGTCACCCATCGCTTTGC
CGGTGGTGCGCTGAATAAGCCGGTTAATCATCTTCGAAGCGGTTTTACGAAACCAGCTGT
CCTGGCGGTTCTGGCGTACAGTCCCTACCACGTCGTAACCTTCATCGGCTTTTGCCACCA
GGCGGGGGATTTCTTCTGGCGGATTCTGGAGATCGGCATCAAGGGTAATAATTAAGTCGC
CAGTAACGTGACTGAATCCCGCCATAATCGCTGAATGTTGCCCGTAATTGCGGTTAAGCA
AAATAGACACAATATGGCTGTTCTCCGCTTGTGAGGCTTCGACCAGCATATGCGCGGAAT
TATCGCTACTGCCGTCATCAATCAGCAGGATCTCATACTCTTTCCCCAGTGATTCACAGG
CTGTGGTGGTGCGCCTGATTAATTCCGGTAAGCTTTCCTGCTCGTTATAAACGGGAATAA
CCACCGAGACTTTCTTAACAGGGTGGATTTCAAACATGGCTTATTGTCCTGCGAGTTGCT
GAAGGGCTGTGATGACGCGGTCGGCATCGGCGGTGGTCATATCCGGGAACAGCGGCAACG
AACAGATGCGTTCGCTATTCCATTCGCTATTCGGTAACGACAGCGTGGGAAAACGCTCGC
GATAATATTTTTGTGTGTGAGCGGCGCGGAAATGTAACCCGGTACCAATACCTCTTTCTT
TTAACGCTTCCATCAACGCATCGCGACTGATACCACAACGTTGTTCATCGACACGAATAA
TAAACAGATGCCAGGCGTGAACGTGCGGCCAGGCGGGAAGGCTTAATGGCTGAAAGGGGA
GAGCTGCCAGTGCTTGCTGATATTGCTGGGCAATTTCGCGCCGACGGGTGTTGAGGTGCT
CTAATTTGACTAACTGTGTCAGGGCAATCGCGGCGTTAATATCGGTCAGATTGTACTTAT
AGCCCGGCGTTAAGACTTCAGCCTGCGGTACACGGCCCCAGGTTTGTCTGTCATAGGCAT
CGACACCCAGACCGTGAAATTTCAGCATCCGTAGCTGGCGGGCAAGGTTTTCATTATCAG
TTACAATCAGGCCACCTTCAGCACAGGTAATATTTTTAATGGCATGAAATGAAAAAATAG
CGGTACCTTTTGCGCCAATATGTCGCCCTTTGTAATACGTACCTACGGCATGGGCAGCAT
CTTCGATAACTGCGATGCCGTAACGTTCGCCAATGGCGCGAATGGCGTCAATATCTGCTG
GCGCACCGGCATAATGCACCGGAATGATGGCTTTAGTGCGTGGCGTAATGGCTGACTCGA
TAGCTTCAGGCGTGACCATCAGCGTATCGCGGTCGACATCCACCATTACCGGCGTTGCAC
CCAACAAGGAAATCATATTGAGGGTTGAAACCCAGGTCAGGGAAGGCGTAATCACTTCAT
CGCCCTTGCCAATTTCCAACGCCATTAGCGTGATATGCATTCCGGCGGTGGCTGAACTGA
CCGCGATGGCATGCTGATTTCCCGTCAACTGGCAAAAGGCTTGCTCAAGCGCCTGATTCT
TCGGACCGGTTGTGATCCAACCGGATTCGAGAACCTCTTTAACTGCAGCGAGTTCCTCCA
CGCCCATTGCTGGTCGCTAAAAAGGCAAAAATTCTGACATTGCTTTTCCTTCCGCCATTG
AATACCTGTCCACTTATATTTGCTATAAAGAGTGTTGTGTATATTTTGCCATTTGGAGCG
AAATTTTAAGGATAGAATATTAACTTAACCTTAAGAAACTAATATTAGACGTAAATATTG
AAATTTTTATATTTTTTCTTATTTAGGCTTTGCATTTGGCAAAATTTTGAGGCATTTTGC
CGGCATCGCAGGATTTTTAATATTACACCAACTGCTAATTATCGCCAGAAATGTCGCTCA
ATTTCACGGTAATTGTCTGGTTGCGCTTGTCTATAGGTGGAGTTTACGTGTTAGCTTTTT
GCCGCTCTTCGTTGAAGTCAAAAAAATATTTCATCATTTTACTGGCGCTCGCTGCAATTG
CCGGACTGGGTACTCATGCTGCCTGGAGTAGCAATGGTTTGCCACGTATCGACAATAAAA
CACTGGCCAGACTGGCACAGCAGCACCCGGTTGTCGTTTTGTTTCGCCATGCTGAACGTT
GCGATCGTTCAACCAATCAATGCTTGTCAGATAAAACAGGTATTACGGTCAAAGGTACCC
AGGATGCCCGAGAACTGGGCAACGCTTTTAGTGCTGATATCCCTGATTTCGATCTCTATT
CCAGTAATACCGTCCGGACCATTCAGTCGGCGACCTGGTTTTCAGCGGGTAAAAAATTGA
CGGTAGATAAACGACTTCTTCAGTGCGGTAATGAGATTTATAGTGCAATTAAGGACTTAC
AAAGCAAAGCGCCTGATAAAAATATCGTTATTTTCACCCATAATCATTGCCTGACATATC
TTGCTAAAGATAAGCGTGATGCGACATTTAAACCTGATTATCTGGATGGTTTAGTCATGC
ATGTGGAAAAAGGCAAAGTTTATCTGGATGGGGAATTCGTTAACCACTAAATTTTCAATC
TGACAGCCAGTGATGGCTGTCATCATTGTTAAAGAAGACCTTTCAAACGTAACGTTTTTC
GGGTGGCAACATTCAAATCATAATGCACCAGATCTTCAGGTTTTACCCTCGCGTAGTCCT
GAAACTCTTCGTTTATTTTCACTTCTCGGTTGGCAGAAACGCAGTCAAAAATCAGGTAAA
TCATATAAATCTCTTCCTTGCGACCATCTGCATACGTCTTGGTGCGAATATCATCGCTGA
AGGTCCACGGCGTGATTTCTGTCAAAAGCAGCTGTTCTCCCAGTTCTTCGCGAATTTCGC
GGCGTAGTGCCTCTTCAATTCGTTCGCCGGGCTCCACGCCGCCACCCGAAAGCGCCCATT
GACCGGGGAAAACGCCGCGATCGTCGGCCATTTTACACAGCAAATAAGCACCATCATTTT
GAATCAAAGGGCATACAATAGTCCGTTGTCGCACAGGGGTATTCCTTATAAATAAAAAGA
AACCATGAGAATACGGTAACTCAGAAATATGTGAAAGTGACAGTAATCTCTTTTGCGATG
ATAACTGCACTTATTATTATTTTTGTGTGTATCGGTAAACTGTGTTTATTTTTTCGGCGT
TTAATTATTTAAGAAGTATTTAGTTACAATAAGTGACTAGATCCCTTTTTTCGCTCATTG
AATCCTCTGCGCCAGGCAGTACAATCCCGCAGCTTTGGGAATTTTGATTAATTGCTTGTG
GGAAAGGGGATAATGAAAAAAATTGCGCTAGCAGGTCTGGCCGGAATGCTGTTGGTTTCT
GCATCGGTCAATGCAATGAGCATCAGCGGCCAGGCGGGTAAAGAATACACCAATATTGGT
GTCGGTTTTGGGACTGAATCGACGGGCCTGGCTTTAAGCGGTAACTGGACACATAACGAC
GACGACGGTGACGTCGCGGGCGTGGGGCTGGGGTTGAATCTGCCTCTCGGGCCGTTAATG
GCGACCGTTGGCGGAAAAGGCGTTTACACCAACCCGAATTACGGCGATGAAGGTTATGCC
GCAGCGGTAGGAGGTGGTTTGCAGTGGAAAATTGGCAACAGCTTCCGTTTGTTTGGCGAG
TATTACTACTCTCCGGATTCGCTCTCCAGCGGTATTCAAAGTTATGAGGAAGCGAATGCT
GGCGCGCGTTACACCATTATGCGTCCAGTCAGTATTGAGGCGGGTTATCGCTACCTGAAT
CTGTCGGGTAAAGACGGCAACCGCGACAACGCCGTGGCTGACGGCCCGTATGTTGGGGTT
AACGCCAGTTTCTGATCCCTTCCGGCGCGGCATTCTGCCGCGCCATTCAGTTTCTTACTA
CGCCTTATCTCCCTTTGCGTTATAGTGATTCGATAACAAAAGCAGGAGATAACCATGTTA
AAAGTGGAAATGCTATCCACCGGGGATGAAGTGTTACACGGGCAAATCGTTGACACTAAC
GCTGCCTGGCTGGCCGATTTTTTCTTTCATCAGGGGTTGCCATTATCTCGCCGCAATACG
GTGGGGGATAACCTTGATGACTTAGTCACCATTCTTCGCGAACGTAGTCAGCACGCCGAT
GTGCTGATCGTTAACGGCGGGCTGGGACCGACCAGCGATGATTTAAGCGCACTCGCCGCT
GCGACAGCAAAAGGTGAAGGCCTGGTGTTGCATGAAGCCTGGCTCAAAGAGATGGAACGC
TATTTCCACGAACGTGGACGAGTAATGGCACCGAGCAACCGTAAACAAGCGGAGCTTCCT
GCCAGTGCTGAATTTATCAATAACCCGGTAGGCACCGCCTGTGGTTTTGCCGTGCAGCTT
AATCGTTGCCTGATGTTCTTTACCCCCGGCGTACCGTCAGAATTTAAGGTGATGGTCGAG
CACGAAATCCTGCCGCGCCTGCGCGAGCGTTTTTCTTTACCACAGCCGCCGGTTTGCCTG
CGTTTGACTACCTTTGGTCGTTCGGAAAGCGATCTGGCACAAAGCCTGGACACTCTACAA
CTGCCGCCGGGCGTAACAATGGGCTATCGCTCCTCAATGCCGATCATCGAACTGAAACTC
ACCGGACCGGCAAGCGAGCAACAGGCGATGGAAAAACTGTGGCTGGACGTTAAACGTGTT
GCCGGACAGAGCGTGATTTTCGAAGGCACCGAAGGACTGCCCGCGCAAATCAGTCGCGAA
TTGCAAAACCGCCAGTTCAGCCTGACGTTGAGCGAGCAATTCACCGGTGGTTTATTGGCT
TTGCAACTTTCTCGCGCAGGTGCTCCATTGCTGGCGTGTGAAGTGGTTCCTTCACAGGAA
GAAACCCTGGCGCAAACTGCGCACTGGATTACAGAACGGCGGGCCAACCATTTTGCCGGG
CTGGCACTGGCTGTTTCGGGTTTCGAGAACGAGCATCTCAACTTTGCGCTAGCCACGCCA
GATGGCACTTTCGCTCTGCGTGTGCGTTTCAGCACTACACGCTATAGCCTGGCTATCCGT
CAGGAAGTGTGCGCAATGATGGCACTGAATATGCTACGCCGTTGGTTAAACGGCCAGGAC
ATTGCCAGTGAGCATGGCTGGATTGAGGTTGTTGAGTCGTTGATGCTGTCGCCACAGGGG
GCATGAAAGAGGCGCGCCGGGGAGAAGGCTTTTACCCGGCACGTTGTCGCATTCATTGCA
GGCTTAATGGAGCGAGATCGGCCTCGGTTAGCTGGGTTGTTGCCAGCACCAGGTCAAGAT
CGATACCCATGCTCCAGCATGCGCAAGGCAATTTTAATGGCTTGTTCATGCATGCCTTGC
TGCAAACCTTCTAATTTACCTTCCTGCCAGCCAATTTGATGCCCTTCCTGCCTCAGCCGT
TCAGCAATAGTCATTAATCTCTCCTTTTGTAGTGGTGAACGTTCGGCAATCTCCTGAATA
AAACGGGTGAAACGGGAGGTATCGCCGCATTGCAGCAGATAATTAAACAGTGTTTGTAGC
TGGCTGTCATTAGTGAAGCCTCTAACCAAAAGCGTGGTGATCCTGTCGACCATACCGATT
AAATCGCGGTCGCGAATATGCTTTTGAATCAGTTCAAGCAGAGCTATACGCCGATGTTGC
ATGATCTCATCGTCAGGTACGATGGTGATATCCACCAACGGAAAAGCTTCGGTGTACAAC
TGCCGGGCAAGTTGCGGACCGTCAAACTCATCCAGCCAGTTGAGTGAGTACGGGTAGGGC
GAGGTTTCGCCATGATAAAACAGCAACGGCACCACCAGCGGGACTCTGTCATAGCCTTTG
TCCAGGTGACGCTGCATGGCGGCAGTGGCATAGCGCATTAGCCGAAAAGCCATATTCTTT
TCTGCAGAGCTTTGATGTTCAATCACGCAGTAGATATAGCCGTCACCGTCGCTGGTTTCC
ACGGACCACAAAACATCCGAGTAGTAAGCGCGTAAACTTTTTTCAATAAAACTAGTGGGT
TCCAGGCGTAAGGTTTGCAGGTTGCAAAGCTTGCGCAGTGGTTCTGGTAAATGTATTTCG
AGAAAATCCCGTGCGGTTTCGGGTGTGAACATAAAGGTTTTAAATACTGCATCATGCGGG
GAGGAGGTTGTTGATTCGGTCATGGTTGTCCGTCACCTGATATTTATGATGACGCGACAT
TACGGTTATCCCAGGCCTTTGACATCTGCCAGTTTCAGCCTTTGCGAGACGTTTTCAGAG
GAATTTTCACTGCGTTGCAACGCATACATTGGGCACGGAATCGTGTACGCAAAAATGCCC
GGTAACCACATGCTTACCGGGCATCAGAAAGGAGTTTAAGCCAGCGCCTGGGCCAGTAGC
GTAATCGGATGTTCGCAGCGAAGACTTGTGGACATCTCAATCTGCCATTTACAGGTTTCG
CAGTCGGTGACCACCAGATCTGCGCCGCTTTCTTCTATCTGGCGGAACAGTGGTGCGCCG
ATGGCTTGTGAGGTGGGGTAGTTCTCTTTTTTGAAACCGTAAGTACCCGCAATACCGCAG
CACTGGGAATCCAGCACCGTTAACTCAAGCCCCGGGATGTTACGCAACAGCTCCAGGGTG
TAGAGCGTCCAGCCCATTTTTTCCATATGGCACGGAGTGTGATAAACCACTTTCAGCGGC
AGCGGTTTCAGCGGTAACGTTTTGCCTTCGTCCAGCTTGCGCCACAACCAGCGGGTCGCC
AGTTCGATATGATCGCGCAAGCCTTTGTTGTCGACATTCAGCACTTCCGGGTATTCGTCG
CGCAGGGCAAATGTACAGGTTGAGGAGGTGGCAATCACCGGAATGCCTTTTACTCCCACA
GCTTCGCGGATCGACTCTACATTCGTAATTGCCTGTTTGCGTGCTTTATCGGTAAAGCCG
TTGGCGATCAGCGGTACGCCGCAGCATTTTTCTTTGCTGAGCAGTTGTACACCGGTACCC
ATTGCGTTGAGCACTTTAATTAAATCTTTACCTAACTGCGGATGGTTGTAGTTAACGAAG
CAGCCGTGAAAGAAAGCGACCTGGTCTTTATACTGCGCTTGCTGAGCCGCCACGCTGCGA
TACCAGCGACGAAACGTGCCGAAGGAGTATTTCGGTAGCGTGCGGCGATGATCGATTTTT
AACGCCGCATCAAGCAACTGCCGCACCGGTTTCAGCGAGGTAGCGGTGTTGACGATTGGT
GCGAACGGCGTGGAAACGCTACCCATCAGGTCGGTATGACTCAACACAAAATTACGCAGC
GACGGGCGCGTGGTGTCATATTTCGCCCGCGCGCGCTGGATGATATCGCCAATCTTCACA
TCGGACGGGCAGGCGACTTCACAACGTTTGCAGTTGATACAATATTTCAGCGCCTCGTCA
TACAGTGCGCCATCTTTTAAACGCAGACGCTCGCCATCCGGCCCGGCTTGTTTTGGCCCT
GGATAACCGGGATTCACCCGGCTCACTGGGCAGGCGGTGGTGCAGACGGTGCACTTAATG
CAGTTTTCGAAGCTGGTGTCATTCATTGTTGGCCTCCTGCGCGTTGGGCAATCTGTTGAG
CGGCATGTAAAGCACTGACGGCACAAACACCGCCGCCGCATCCCTGGGCGATGGGATCAA
ATCCGCCCAGCACCGAACCGATGGCAAACAGGTTCTCAATGGTTTGCCCTGCCTGTGATG
GGCGTAGCGTCTTATCAGTGGTTACACCGAACTGCTGCCACGGTTGCGGCGCAAAAAAAT
CTCCCTTATACCATTCACCCCGCGTGGCGGTTTGTAGCACATCAAGGCCGAGAATCGGCT
CTCGAATGCCGTTACGTTCCGCTACCAGTCCGCCACTAAAGAAACTGCCGCTGGCGAGAA
CCGCGAAACGTGGACGTAGCGGGATATCGGCGTGATTGCGGGTCCAGATTTCATTCACTA
CGCCATTTTTACAGGTCACTTTTTTCACTTCATCGCCCGGCATCCACACGCCACCCTGGC
GCACAAACTGGCGCTGTAACTGGTTTTGCAGACGAATGCCCAGCACGGAAGGCGGCAGCG
TTGGCAAAAGCATCAGTGAACAAGGTAGTTTTTCATTCAACCAACGCCACAGTTTGTCAT
CGGCCAGGCCGAAGCAGGCGGGCATCAGGATCATTTCGCAGGTATTGGCGACAGGAATAA
GCGCATCAAGTAACAGCGACCAGTTTTCTTCATTATCAAGGAAACGGGCGATATTCACCG
CGCGGAACTCGGTGGCGTTATTGCGCAGGACATCCAGTTCCGGCAGCTCTATTTCTGCGG
TTTCAACCGAAAGATCCAGTTCACGCAACGAAGCTGCCGCAAGGTGCGCCTGAAAATCCA
TCAGCCCGCTTATCCCCACTACACATATCTTCTTCGCGGGTAGCGGCCAGACGGGGACTT
CTGGCGAACTTAACCAGGTTGCACGCAAAGTGCCGAGCGGGGTAACGCGCTGATGGGCCA
GTTCCACGCTGCCCTGCAATTGCGCACCGCTTTCAGCGATTAATGCCTGCGCCTGGCAAG
CGAGATCGAGCACGCGTTGTGGCCCGAGAAGAGAGTAAGGATGTGCAGGTGCCTGCTGAC
GCAAAGATTCCAGTCCACTGTGAATGTCTGTCACCGCTTGACCATCTGGCAGATGGCTCA
GCAAATCCAGCGAACCGGATGAGAAATGCAGCGCGCTTTGACCACGCGTGACAATGGCAC
AGCGCAGGCCGTGTTTTTGCAGTTGCAGGCCACAGAGTAATCCGGCGAGGCCGCCGCCCA
TAATGACAGTATCAAAGCGCATCTTTCTGCTCCTTCTCCAGACCACACAGTCCCTGATAA
ACCCAGCGGGTAAATTCGCTTTCGCGCAGTGCATCTCCCCAGGCGATGGGTTGCACGCCT
TTCCAGCGTTCGTTAAGGAAGGTGGAAAGTTGCTCGATAGATTGCGCGGACGTCGTGACG
TTAAAACGTTGCAGCAGTCCGGCAGCGCGGCAGGCGCAGAGTTCGCCCTGGCAGGTACCC
ATCCCCACACGGGTACGACGGCGTAAATCCAGCAGGCTATTAACGTTTAAATTTTCTACC
GCGTACTGCACTTCACCCGCAGTTACCGCTTCGCACTCACATACCAGGCTACGGTGCAGA
CGGCCTTCGCTCAGCCAGGCAGGCGTGCGATCGCCATGACGATAAACCGCAGAACCGCGC
AGCGGGGCAGGCAGGGAGATGACTTTACGTAAGGTAACTTCAGCGGGTTCTTGTGAACCA
GGCAGTGCCAGATCGGCAGTCGTACAGGGGCGCGTGTTGCCCAGTTTGCGGCATACCGCG
TCGGTAGCCCATTCAGCCATCAGCCGATAGGTCATCAGTTTGCCACCGGTGATGGTGATA
AATCCGTCCAGACCATCGCGTTCAGCATGGTCGAGCAGCACGATGCCACGGCTGACGTTA
CGTCCGCTCGGGTCGTCATCGCTGGCAACCAGCGGGCGCACGCCAGAATAGGCCCGCAAA
ATGCGCGTTTTCGCCATCACGGGGGCCAGTTTTTCCCCTTCACGCAGCAGAATATCAACC
TCTTCTGCCGTCACTCGATTATCGTCAATCTCGTTGTAATCAATACGTAAAGAGGTGGTG
CCAATCAGCGAAATGGTATCGCCAGGCACCAGAATATCGGCGTCGGAAGGTTTACGGCAG
CGGTTGATCACATGCTGGTTAATGCGGTGATCCATGATCAGCAGCGATCCTTTCGCCGGG
AACATGCGAATGCGCAGATCGGCATATTCGGCAATGTGTTGCCCCCAGATCCCAGCGGCA
TTAACCACGACAGGTGCATGAAGGGCCTGAGTTTCGCCGGTGAGATGGTTACGTACACGA
ACACCGCACACCGTCGCGCCTTCACGAATCAGTCCCGTGACTTCATGAGCGGTAAGGATA
ACGGCACCGTGTTCTTTGGCATCCAGCATGTTTGCTGCGGTCAGACGAAATGGATCAACG
GTGCCATCCGGAACTTTCACCGCGCCAATCAGTGCCGGGTTAACGGCAGGTTCGATAATG
CGCGCTTGCTGCGGGTCTATAGCTTCTGCGCTGATCCCTGCTTCTTCGCAGGCGCGAATA
AAAGTGGCCTGGAAGGAGAGGTCATCTTCCGGCAGGGTGATAAACAGGCCGTTGGTTGGT
TCAACGCAGTGACGTGCAATGCGTTTCAGGATCTGGTTTTCACTAATGCATTCGCGGGCC
GATTCCGCATCGGTTACCGCATAGCGCGCACCGCTGTGCAGCAGGCCGTGGTTACGCCCG
GTGGCACCGGTTGCGATGTCGTGGCGCTCAACCAAAATCACGCGCAGCCCGCGCAGGGCA
CAGTCGCGGGCAATCCCGGCTCCCGTTGCGCCGCCGCCAATGATAATCACGTCACTTGAT
TGCGAGTCGCGAGTTTTCATTGTTATCCCTCTGAAGTTCGTTTTTTACCATTTAGCCATA
GTAAAAACATGAATTGTTTGATTTCGCGCATATTCGCTCATAATTCGAAAGTGAAACGTG
ATTTCATGCGTCATTTTGAACATTTTGTAAATCTTATTTAATAATGTGTGCGGCAATTCA
CATTTAATTTATGAATGTTTTCTTAACATCGCGGCAACTCAAGAAACGGCAGGTTCTCTC
ACTGAATCAGGCTGTTAATCATAAATAAGACCACGGGCCACGGAGGCTATCAATGTTGAG
TATTTTTAAACCAGCGCCACACAAAGCGCGCTTACCTGCCGCGGAGATCGATCCGACTTA
TCGTCGATTGCGCTGGCAAATTTTCCTGGGGATATTCTTTGGCTATGCTGCTTACTATTT
GGTTCGTAAGAACTTTGCGCTTGCTATGCCTTATCTGGTTGAGCAGGGATTCTCACGCGG
TGATTTAGGTTTTGCCCTTTCGGGGATCTCGATTGCTTATGGATTTTCGAAATTCATCAT
GGGTTCGGTATCGGATCGCTCGAATCCGCGCGTTTTCCTGCCCGCAGGTTTGATTCTGGC
GGCGGCAGTGATGTTGTTTATGGGCTTTGTGCCATGGGCGACGTCGAGCATTGCGGTGAT
GTTTGTACTGTTGTTCCTCTGCGGTTGGTTCCAGGGGATGGGGTGGCCGCCGTGTGGTCG
TACTATGGTGCACTGGTGGTCGCAGAAAGAACGTGGCGGCATTGTGTCAGTGTGGAACTG
TGCGCACAACGTCGGTGGTGGTATTCCGCCGCTGCTGTTCCTGCTGGGGATGGCCTGGTT
CAATGACTGGCACGCGGCGCTCTATATGCCCGCTTTTTGCGCCATTCTGGTGGCATTATT
CGCCTTTGCGATGATGCGCGATACCCCGCAATCCTGTGGCTTGCCGCCGATCGAAGAGTA
CAAAAATGATTATCCGGACGACTATAACGAAAAAGCGGAACAGGAGCTGACCGCGAAGCA
AATCTTCATGCAGTACGTGCTGCCGAACAAACTGCTGTGGTACATCGCCATCGCCAACGT
GTTCGTTTATCTGCTGCGTTACGGCATCCTCGACTGGTCACCGACTTATCTGAAAGAGGT
TAAGCATTTCGCGCTGGATAAATCCTCCTGGGCCTACTTCTTCTATGAGTATGCGGGTAT
TCCGGGCACCCTGCTGTGCGGCTGGATGTCGGACAAAGTCTTCCGCGGTAACCGTGGGGC
AACCGGCGTCTTCTTTATGACACTGGTGACCATCGCGACTATCGTTTACTGGATGAACCC
GGCAGGTAACCCAACCGTCGATATGATTTGTATGATTGTTATCGGCTTCCTGATCTACGG
CCCTGTGATGCTGATCGGTCTGCATGCGCTGGAACTGGCACCGAAAAAAGCGGCAGGAAC
GGCAGCGGGCTTTACCGGTCTGTTTGGTTACCTGGGCGGTTCGGTGGCGGCGAGCGCGAT
TGTTGGCTACACCGTGGACTTCTTCGGCTGGGATGGCGGCTTTATGGTAATGATTGGCGG
CAGCATTCTGGCGGTTATCTTGTTGATTGTTGTGATGATTGGCGAAAAACGTCGCCATCA
GGAATTACTGCAAAAACGCAACGGAGGCTAATGGCATGAAATTGACGCTGAAAAACCTTA
GCATGGCGATCATGATGAGCACTATAGTCATGGGAAGCAGTGCAATGGCGGCGAACAGCA
ACGAAAAAATAGTCATCGCCCATCGCGGTGCCAGTGGATATTTGCCGGAGCATACGCTGC
CAGCAAAAGCGATGGCGTATGCGCAGGGAGCGGATTATCTGGAACAGGATTTGGTGATGA
CCAAAGACGACCATCTGGTTGTTCTGCATGACCATTACCTCGATCGTGTTACTGATGTTG
CCGATCGTTTCCCGGATCGGGCGCGCAAAGACGGTCGTTACTACGCGATAGATTTCACGC
TGGATGAAATTAAGTCGCTGAAATTTACCGAAGGTTTCGATATTGAAAACGGTAAAAAAG
TGCAGACTTATCCGGGGCGTTTCCCAATGGGTAAGTCCGACTTCCGGGTGCACTCCTTTG
AAGAAGAGATTGAATTTGTTCAGGGGTTAAATCACTCTACCGGGAAAAATATCGGTATCT
ATCCAGAAATTAAAGCGCCGTGGTTCCATCATCAGGAAGGGAAGGATATTGCGGCAAAAA
CGCTGGAAGTGCTGAAGAAATATGGTTACACCGGTAAGGACGACAAAGTTTATCTGCAAT
GCTTTGATGCTGATGAACTGAAGCGTATTAAGAATGAGCTGGAACCTAAAATGGGTATGG
ACCTCAACCTGGTACAGCTGATTGCCTATACCGACTGGAACGAAACTCAGCAGAAACAAC
CGGACGGAAGCTGGGTTAATTACAGCTATGACTGGATGTTTAAGCCGGGTGCCATGAAAC
AGGTGGCGGAATATGCTGATGGTATTGGCCCAGATTACCATATGTTGATTGAGGAGACAT
CGCAGCCGGGTAATATCAAACTCACTGGCATGGTGCAAGATGCTCAGCAGAATAAACTGG
TAGTGCATCCTTATACCGTGCGGTCAGATAAACTGCCTGAATACACTACTGATGTGAATC
AGTTATATGATGTTCTGTATAACAAAGCGGGTGTAAATGGGCTGTTTACTGATTTCCCTG
ATAAGGCAGTAAAATTCCTTAATAAAGAGTAATGCTACTGCAGGATGGCGTTCATGCGCC
ATCCTCAGCTAAAGCGAAATAATGCTACTACCGGTTATTCTATTCATTCACCTGAGCATC
CTGTTAAAAAAGATGCCAACATATTTGCGTAAAACTCATTTGTTAGGAAAGCTAACACTG
GGTATTGTTATTCTTTAAACAGTATGAATAGGGCTCAATAATAAATTGTAATGTAGTTTA
TAATATACAGTATTATTCGCATTTCGGGAAAGTAAAGAAAATATTAATGTATCTTATTAA
TTTATCATATTGTTCTTGGGTGAATGCTGTTTGCACACCTTCAGGACAATACTCACCAGT
AATAATCAGTTGCCCATTGCTGTGTTGTACCATTAAACCTTTTTTTTCCTTTGGATCTTC
AAACTTAGAATTATCAAACGCGAAGATGTTATTTTCCTGTTTTGAGTAAGCAAAGAAATC
TCGTGTATAGCTGAAACTATCATTTATTAATGGTGCTAACTTTTTGTCGGCGATATCGAT
AAGCTCACCACCTAATTTATTGATATATTTCATTTGGTTCAATTTTTTCTGCGCTTGTAC
AATTTGCTTGTAGGTGTTTTTAATTTCCTTAGAAGAATTCTTGAATTTATCATAGCGTTC
CTCGGAGGATGCGTATTTGTACCATTCTGTATTTTTCTCAGAATGTTGTAGCAGGTCTGC
ATATTTTTTTGATCGCTGTAAAGTTGACTTTTAATACTTTCCTCACTGCTGGTTTTATAA
GGCTTATCAGAGCTGTTTATTTTTGAAATGTCTTTTTCTGTCAGTGACTGGACCGTGTTG
TGGGTATTTTCTTTTGCAACATGCTCATTGATGATGTTAATTGCAGTTTCATATTCATTT
AAGTTTATTGTTCTTTGTGAAATAGACCCTTCTTTGCTTTCAATACTCAAAACACCTTCG
TTGTTTTCACCTCGGGTAAAGGTAAGGGTATAGGGTTCATAATCCGCTGCAAATTCATTT
TTATACGTTATGACATGCTCGACAAAATGTCTTATTGGTACGAAACCATAACTGTGAACG
TCAATTTTTTGGGTCTTGATACTATCAATTTCATCTGAGGCTTTCGTGAAAAAAGCCAAT
AAATTAGCTATGTTGTCTGCTGAGGTTGATAACCCGAATCTACTTTGAGATATTTTTAGA
AACTCATTGCAAAAAATCTCAAGTTTCGCGGTTTGTTGTGATTCTTTGTAAATTTCTGCT
GTTTGCAATTTATTATTTTGTAAAAGATTACAGCGAGATAATTGAATAGATGTATTTGGC
ATAAATGATTCCTTGTATTGTGAGTTAACAAGATACAATTTAATCTTTGCAGAATATATT
CACTATCAAATTTAGCTCATTTTATTACGAAGACCTTTACGCATGTTAGAAAGTATCATT
ATTGTTAATAAACACGGTAATAAGTAACAAACAGATATTGATAACTTCCCTGACAAGTTA
TTAGGTATCCCACTTGAAGATTGAGAGTGGCTCCAGAGTAAACTGTGTACTGTTCGCCGG
AGTGTCATTACTCTCAACAATCGGTTTTGACAGTGAGTCGGGCGCTTCATACTGGTTTCT
ACCTGGAGTCATTGTCACTTCCCTAAACTGGATAAATATATATCGCTAATTCACAAAGTG
GACCAAAATCAGGTGAAAACGAATTATTACGCCTGGTAAAGACTACAGGCCAACTAAGTG
TGGCGAATCAGGCAATCTTACATTTGTCATCAATCTCATGTCTTACATCAAATTTTTCCA
CTCACCACGAGTTGTTCCGTACACATTTGTAGTAAAAACAGTGGACTGCCTTCTACCGGC
TTTTCTTTAGCCAGCAACGAAATCTGTCGATAGAAGGTTGGTTCGAGAGGAACGGAACAC
AATTCATCTGCAATGGTTTTCAGCGTTAACTCTGGTAATAAGGCGATGCCTAATCCCTGT
CGAATAAAACTGATCGCTGTATCCGGGTGATTAAATTCATATTTTATCTGTGGGGTAATA
TTCTTTTCTTTAAATAGTGCCATAATGCTTAATTCATAGCGTCCTTTACTAATGATTAAT
GGTTCACCCATTAATTCTTCCACTGTAATAGTGCTGTTTTTTGCCAGAGCATGGTTGGGC
GGTAACACTACGGTGAATTTATCCTGATAAATGGGCACGGAGTACATTCCGCTCACCGGA
AAATGAACAAAACCGGCATCAATGGATTCATTCTGAAGCGAATCAATAATCGCTGTGCTA
TTTTCCTCAAAAGGAATAATTTTTATATTCGGATGATGAATTTCAAAGTAGCGAATCACA
ACCGGTAAGATACAGGCGCAGACGCTGGGGAAACAACCAAGTCTCAGCGTTCTTTGAGGG
TTCTGCTTTTCCTGCTCGGCTATCTCTTTTACTGCGTTAACTTCCCGATTAATGGCGCGC
AGATGTTGCACAATGCGATGACCTGCTGTGGTCAGTTGTATAGCTTTACGGCGATCGCGT
AACAGTATATTCACACCAAGTTCTTGTTCGAGGGCAGCAATTGCCTGACTTACCGCCGAC
TGCGTCATGAACAATCGCTTGCTGGCTTCAGTAAAGCCACCGTAATCCAGCACGGCGAGT
AAAGAATTTATTTGGGTAAGAGTCATTAGAGTTTGCTAATCAATAATATTAAAACGATTA
ATTTCTCTAATAGCATGCCGCCATTTATACTTCTGTTCTGCAAAGTACATCACAATTTGA
CGCAACCGCAGTAACGGGAGTGTTGTCTGCGTGCGTCATCCTGACAGGCGGTAGGGTATG
AAAGAGAAGTTATGGACGAAGGATTTTTGGGCAATAACCATCATCAGCTTTATTATTTTC
TTCGTCTTTTATGTTTTACTAACATTGTTGCCAATTTATATCTCTGACCGCTTGCATGCC
TCTCCTGATAAAGCTGGTCTGCTGGTGACATTATTTTTAATTGCGGCGATTGTTATTCGA
CCCTTTGCCGGGCAATGGGTGGGTAAATATTCGAATAAAACTATTCTGGTGCTCTCTTCT
CTGGCCTTTTTGGTGGTCACTGCGCTGTATCCTTTTTGCCACTCAATAGAATCACTGCTT
TTTATTAGGGTGCTTCATGGTATTACCTTCGGGGTTATCACAACGGTAAAGGGAACGATT
TCCGCGCGGCTGATCCCGGCCTCCCGACGTGGGGAGGGCATCAGTTTTTTCTCTCTGGCA
ATGGGGCTGGCAATGGTGGTCGGGCCGTGGATTGGCCTGAATATGGCGCGCTGGGAGGCC
TTTAATATGGCTTTCTGGTTATGTACTGGCGTTGCGGCGGTGGGGATTATCCTGTCGCTG
ATTATGACCGTGCCGCCGGTTATCAGCCATGCCGACGGTTCAAAGCCAAAGATGGGCTTC
GCCGCCATGTTCGATCGCGCGGCATTGCCGTTTGCCATGGTTACATTCTTTATGACCTTT
TCGTATGCCGGGGTTTCTGCCTTTCTGGCGCTTTACGCCCGCGAACTTAATCTGATGTCG
GCGGCCAGTAATTTCCTGCTTTGCTACGCCATCTTCCTGATGATCTGCCGTACCTTTACC
GGCAATGTCTGCGACAAAAAAGGACCGAAATATGTGGTTTACCCTTGCCTTGTGTTCTTT
ACGGTAGGACTGGTGGTTCTCGGCTACACCCAGGGAAGCATAATGATGGTTGTTTCTGGC
GCGTTGATTGGTATCGGGTATGGTTCCGTGACGCCAGTTTTTCAGACGCAGATTATCAGT
TCAGTGGAACCGCATAAAATCGGTGTCGCAAACTCCCTCTTCTTCAATGCGATGGATGCA
GGCCTGGCGCTGGGAGCCTGTGTGATGGGGATGATGGTTGCACATACTGGCTACCGAATG
ATTTATCTGCTGGGCGCACTATTAGTGGTAGTGGCTGGTGGAGTCTATGCGCTGCAAATG
AAGGGTAAAAGCGGTGTCGCGCTAGTAGTGGCAAAAGAAATTCATTAATACGACACGTTT
CATTAAGATTTTTCGCAGGTAACCACCTATAGTCATTGTCGTTAATAAAAAATGACAGGC
GATAGGGTATGGCAGTTTCAGCAAAGCACGACGAATTTAATCACTGGTGGGCAACAGAGG
GCGACTGGGTTGAAGAGCCTAACTATCGCCGTAATGGTATGAGCGGGGTGCAATGCGTCG
AGCGCAACGGCAAAAAGCTATATGTAAAGCGCATGACGCATCATCTGTTTCATTCCGTAC
GTTATCCTTTCGGCCGACCAACGATTGTCCGTGAGGTTGCGGTAATTAAAGAACTGGAAC
GGGCCGGTGTCATCGTGCCGAAGATCGTTTTTGGTGAAGCGGTGAAAATTGAGGGTGAAT
GGCGAGCGTTGCTGGTGACTGAAGATATGGCGGGGTTCATCAGCATTGCTGACTGGTATG
CCCAGCATGCAGTATCGCCTTATTCTGACGAAGTACGGCAAGCCATGTTGAAAGCAGTGG
CGCTGGCGTTTAAGAAAATGCATAGCATTAATCGTCAGCATGGCTGTTGTTATGTTCGCC
ATATCTATGTGAAAACAGAAGGTAAGGCAGAAGCTGGTTTTCTTGACCTGGAGAAAAGTC
GTCGCCGCTTGCGTCGCGATAAAGCGATTAATCATGACTTCCGCCAGCTGGAAAAATATC
TGGAGCCAATTCCCAAAGCGGACTGGGAGCAGGTGAAAGCGTATTACTACGCCATGTAAT
CGTTGTAGGCCAGATAAGACGCATAAGCGTCGTATCTGGCACTACAACCAATTCACATCT
CGATTTCAATATCGCCTTTTGCCCGGCAACAACAGGGCAAAATTTCCCCCGGCTGAATAA
AGGCTAACGGTTCGGCAATCCAGTCCACCTGACCTGCGACCAGTCGGGTGCGACAGGAGC
CGCAGTAACCTTCGCGGCACTGGTACTCAACCGCCACATTGTGGGATTCCAGCGCCGCCA
GAAGGGAAGGGTGTTCATCCTGGCACAGCAGTTGTGTGCCAGTGATGCGCAGGGTAACGC
GAGCCATCAGAGCTGGAAGTTACTCAAATCGTCGGTGTCCACTTCCGAGTCAATCTGCCC
GACCAGATAAGAACTGACTTCCACTTCCTGCGGAGCAACCTGCACGTTATCAGACACCAG
CCAGGTGTTGATCCACGGGATCGGGTTGGAGCGCGTCTGGAACGGCAGATCCAAACCGAC
TGCCTGCATGCGGATATTGGTGATGTATTCAACGTACTGGCAGAGAATGTCTTTATTCAG
ACCAATCATCGAACCGTCACGGAACAGATAATCCGCCCAGTCTTTCTCTTGCTGTGCCGC
CTGGACAAACAGGTCATAGCACTCCTGCTTACATTCTTCGGCAATTTCCGCCATCTCCGG
ATCATCCGCACCGCTGCGCAGCAGATTCAGCATATGCTGAGTACCGGTCAGGTGCAGGGC
TTCGTCGCGGGCAATCAGGCGAATAATTTTGGCGTTACCTTCCATCAGCTCACGTTCAGC
GAATGCGAAAGAGCAGGCAAAGCTGACGTAGAAACGAATCGCTTCCAGCGCGTTAACGCT
CATCAGGCAGAGATACAGTTTTTTCTTCAGCTCGCGCAGGCTAACGGTCACGGTTTTACC
GTTAACGGTGTGGGTGCCTTCGCCCAGCAGATGCCAGTAGCTGGTCATTTCGATCAGCTC
ATCGTAATAGCTGGAGATCCCTTCCGCACGTTTCTGGATCTGCTCGTTGGTGACGATATC
GTCAAACACAACAGACGGATCGTTAACGATATTACGAATGATATGAGTATAGGAACGGGA
ATGAATCGTTTCTGAGAACGCCCAGGTTTCGACCCAGGTTTCCAGTTCCGGAATAGAAAT
AAGCGGCAATAGCGCCACGTTCGGGCTACGACCCTGAATGGAATCCAGCAGCGTCTGATA
TTTCAGGTTGCTGATAAAGATGTGTTTTTCGTGTTCAGGCAATGCCTGGTAATCAATACG
GTCACGAGAAACGTCAACTTCTTCCGGACGCCAGAAGAAAGAGAGCTGCTTTTCGATCAG
CTTTTCGAAGATGTCATATTTTTGCTGATCGTAGCGAGCCACGTTGACCGGCTGACCAAA
GAACATCGGTTCTTTGAGCTGATCATTTTTCGTCTGTGAAAAGGTGGTATATGCCATGAG
TGTGTCCTGTTGGGAGTTTAATGCCGGATAAGGCATTTTACGCCGCATCCTGTGCCTGAT
GCGACGCTGGCGCGTCTTATCAGGCCTACAAATCCGAGCCGTAGGCCGGATAAGGCGTTC
ACGCTGCATCCGGCACCCGGAGCCTGATGCGACGCTGGCGCGTCTTATCAGGCCTACAAA
CCGAGCCGTAGGCCGGATAAGGCGTTTACGCCGCATCCGGCATCTCAATATCAGATCTTA
CATGCGCCGCTTTCGCAGCCATCGTCCTGGATTGACGGCACCAGATCGTCCTGCGCGTCT
TCAGCGCCGTCACGGGTGTTCTGATAATACAGCGTTTTGACCCCGAATTTGTAGGCGGTG
AGCAGGTCTTTCAGCAACTGCTGCATCGGCACTTTTCCTGACGGGAAACGTGACGGATCG
TAGTTGGTGTTAGCAGAGATCGACTGATCGATAAATTTCTGCATGATACCCACCAGTTGC
AGGTAGCCATCGTTACCCGGCATTTCCCACAGCAGCTCATAGGCGTCGTGCAGATGCTCG
TAGTCCGGCACCACCTGGCGCAGAATACCGTCTTTCGACGCTTTGATGCTGACGTAACCG
CGCGGCGGTTCAATACCGTTAGTGGCGTTAGAGATCTGCGAAGAAGTCTCGGACGGCATC
AGAGCAGAAAGCGTGGAGTTACGCAGGCCGTGCGTTTTGATTGACTCACGCAGAGCTTCC
CAGTCGTAATGCAGCGGCTCATTAGCGATGGTATCCAGATCTTTCTTATAGGTATCGATC
GGCAGGATCCCTTTCGCGTAAGTGGTTTCGTTAAACCACGGGCACGCGCCTTGCTCTTTC
GCCAGCTCATTAGACGCTTTCAGCAGGTAATACTGAATCGCTTCGAAGGTTTTATGCGTC
AGGTTGTTGGCGCTGCCGTCGGAGTAGCGTTTACCATGCTTCGCCAGGTAGTAAGCGAAG
TTGATCACACCAATACCCAGCGTACGACGACCCATCGCTCCACGTTTGGCGGCCGGGATC
GGGTAATCCTGATAATCCAGCAGCGCGTCAAGTGCACGAACCGCCAGAATTGCCAGCTCT
TCCAGTTCATCCAGGCTATTAATTGCGCCCAGGTTGAAAGCAGACAGCGTACACAGCGCG
ATTTCACCGTTCTCGTCGTTGACGTCGTTCAGCGGTTTGGTCGGCAGGGCTATCTCCAGG
CACAGGTTAGACTGACGCACTGGCGCGATGGCCGGATCAAACGGGCTATGGGTATTGCAG
TGGTCAACGTTCTGAATATAGATACGACCGGTAGACGCACGTTCCTGCATCATCAGCGAG
AACAGCTCAACGGCTTTCACACGCTGCTTGCGGATGCTGTCGTCTTTCTCATATTTGGTA
TACAGACGTTCAAACTCTTCCTGATCGGCGAAGAATGCGTCGTACAGCCCCGGTACGTCG
GACGGGCTGAACAGGGTGATATCTTCACCTTTCAGCAGGCGGGTATACATCAGTTTGTTG
ATCTGTACCCCGTAGTCCATATGGCGCACGCGGTTGCCTTCCACACCACGGTTGTTTTTC
AACACCAGCAGGCTTTCCACTTCCAGATGCCACATCGGGTAGAACAGCGTTGCCGCACCG
CCGCGCACACCGCCCTGAGAGCAGGATTTCACCGCAGTCTGGAAATGTTTGTAGAACGGA
ATGCAGCCGGTATGGAACGCTTCGCCACCGCGAATCGGGCTACCCAGCGCACGAATACGC
CCGGCGTTGATGCCGATCCCGGCACGCTGGGAAACATATTTCACAATCGCGCTGGAGGTG
GCGTTGATGGAATCCAGGCTGTCGCCGCACTCGATCAGTACGCAGGAGCTGAACTGACGA
GTCGGGGTACGCACGCCGGACATGATTGGCGTCGGCAGCGAAATTTTAAATGTGGAAACC
GCGTCGTAAAAACGCTTCACATATTGCAGGCGCGTTTCACGCGGGTAGTTCGAGAACAGG
CACGCGGCAACCAGAATATAAAGGAACTGGGCGCTTTCGTAGATTTCGCCGGTCACGCGG
TTCTGTACCAGATATTTGCCTTCCAGTTGCTTAACGGCAGCATAAGAGAAGGTCATATCA
CGGTCGTGATCGATAAACGTGTCCATCTGCTTGAACTCTTCTTCCGTGTAGTCTTCCAGC
AGATGATTATCGTATTTGCCCATCTCGACCATTTTCACCACGTGGTCGTACAGCGCAGGC
GGCTCAAACTGGCCGTAGGCTTTTTTACGCAGGTGGAAGATCGCCAGGCGCGCGGCGAGA
TACTGATAATCCGGCGCATCACGGGAGATCAGGTCTGCGGCAGCCTTGATAATAGTTTCG
TGGATGTCAGAGGTCTTGATACCGTCATAAAACTGAATGTGGGAGCGCAGCTCGACCTGG
GAAATCGAAACGTTATGCAGTCCTTCTGCCGCCCAATCCAGAACGCGATGGATTTTGTCG
AGATTGATGCGCTCTGTGCTACCGTCGCGCTTTGTCACCAGCAGATTCTGATTCATGTAT
GTCGTACCTGTTTTTGGAATTCTTTCCGCAATAGTTTCGTGCAGACTACCTGTAGTACGG
GAAGCTGCTTAGAACACTATATATAGGGGGTATGTTTGGGATTCACTGCAAGATAGTGTG
AAAATGGCCCTCTTGCAAGTGCATAACTTTGTGGATAACTCAGGAAGGAAAAAGTGGCTT
TCGCGCACCTTAGGTCAGACAAGGTGTCCGGGAAAGTCAATGGGAAGAGAAAAATTTGTT
AAAAATAACTGTTCGGCGATTTCTTGAACGGCAGAATAGGTTGGATAAATTGATATAGAT
GGTTTATTAATCTTTTTGCTAATGATTGCAAAAATTGATCTAAGCACGAGTCATCACATA
ATCTGATGTATCAGTTGTGGTCAATATATAAGCGAATGTAAGCGATTGTTGATGTCGAAA
TGGTTGTTTTCTATTCGGTTATTGTTAAATGCGAAGCCATTTTGTTAATTTACCTTATAT
TATAAGAAAATTATTCATTACTTTAATTTAGTTTAAATATAACTGGTATCCCTTAAGGTT
ATTAACTTGAATTATGACGCACTGATACTATTCATCAAATAATAACAAAATAGCTATTGC
ATCGGGTTGGACAATTTACAAAAGAAAGATAACCCATATTGTATAATGCGTTTAAATATG
CCGTCTTATATAAAATGATGGTCAGATTAATATGCGAATTATTTTTCTACGCAAGGAGTA
TCTATCTTTACTCCCGTCAATGATTGCGTCTCTCTTCTCTGCTAATGGCATTGCGGCAGT
CACTGATTCATGCCAGGGATATGATATCAAAGCGAGTTGCCAGGCCAGCAGGCAAAGCCT
TGCAGGCATTACGCAGGACTGGAGCATCGCCGATGGGCAATGGCTGGTTTTTTCGGATAT
GACCAATAATGCCAGCGGTGGGGCCGTATTTTTGCAACAAGGAGCGGAATTTACATTATC
ACCAGAAAATGAAACTGGAATGACTCTGTTTGCCAATAACACCGTTTCAGGAGAATATAA
TAACGGCGGGGCAATATTTGCTAAAGAAAACTCAACGCTGAATCTTACGGATGTTATTTT
TTCTGGTAACGTCGCAGGCGGCTATGGTGGCGCAATCTATTCTTCTGGTACTAACGATAC
CGGTGCCATCGATTTACGTGTCACTAACGCCGTGTTTCGCAATAACATCGCTAATGACGG
CAAAGGTGGTGCAATTTATACCATCAATAATGATATCTATTTAAGTGATGATGTTTTTAA
CAATAACCAGGCATATACATCAACAAGTTACAGTGATGGCGATGGCGGCGCAATCGATGT
CACAGATAATAATAGCGACAGCAAGCATCCTTCAGGTTATACGATAATAAATAACACTGC
CTTTACAAATAACACTGCCGAAGGTTATGGCGGGGCGATATATACCAATAGCGCGACGGC
TCCCTATCTTATTGATATTTCTGTTGATGACAGCTACAGCCAGAACGGAGGCGTGTTAGT
CGATGAGAACAATAGCGCAGCAGGCTATGGAGATGGTCCTTCCTCTGCGGCGGGTGGCTT
TATGTATCTCGGCTTAAGTGAAGTTACATTTGATATTGCCGACGGAAAAACGCTGGTTAT
TGGCAATACAGAGAATGACGGAGCTGTTGACTCTATTGCTGGTACCGGGTTAATCACCAA
AACAGGTTCCGGCGATCTGGTACTTAATGCAGATAACAATGACTTTACTGGTGAGATGCA
GATTGAAAACGGTGAAGTTACCCTGGGCCGCAGCAACTCCCTGATGAATGTCGGCGATAC
GCATTGCCAGGACGATCCGCAAGACTGCTACGGTCTGACGATAGGGAGTATTGATAAGTA
CCAGAATCAGGCAGAGCTAAATGTTGGCTCCACCCAACAAACCTTTGTGCACTCATTGAC
GGGCTTTCAGAATGGCACTTTAAATATCGATGCTGGTGGCAATGTTACTGTTAATGAAGG
CAGTTTTGCTGGCACCATCGAAGGTGCTGGTCAGCTCACCATTGCGCAAAACGGCAGCTA
TGTGCTGGCGGGAGCGTCGTCGATGGCGCTAACCGGCGATATAGTCGTTGATGATGGTGC
GGTGCTTTCGCTGGAAGGCGACGCGGCAGATCTTGCCGCTCTCCAGGACGATCCGCAGTC
GATCGTGTTAAACGGCGGTGTGCTCGATCTCTCTGATTTCTCCACCTGGCAGAGCGGTAC
ATCATACAAAGATGGCCTTGAAGTCAGCGGCAGCAGCGGAACGGTTATCGGCAGTCAGGA
TGTGGTAGATCTTGCAGGCGGAAACGATATGCATATCGGCGGTGACGGGAAAGATGGCGT
CTACGTGGTGATCGATGCGGGTGACGGGCAGGTCCGCCTGGCAAATGACAATCAATACCT
CGGCACAACGCAAATCGCCTCCGGTACGCTGATGGTGAGCGACAACTCGCAGCTTGGAGA
TACCCATTACAACCGCCAGGTTATCTTTACCGATAATCAACAAGAAAGCGTGATGGAGAT
TACTGCCAATGTCGATACTCGCTCTACAACGACTGAGCATGGGCGTGATATTGAAATGCG
CGCCGACGGTGAAGTGGCAGTTGATGCGGGGGTAGACACGCAGTGGGGCGCACTGATGGC
TGACAGCAGCGGGCAGCATCAGGATGAGGGTAGCACATTGACGAAAACGGGGGCGGGTAC
GCTGGAGCTGACCGCCAGCGGTACAACGCAGTCGGCGGTACGTGTCGAAGAAGGCACCCT
GAAAGGTGATGTTGCTGATATCCTTCCTTATGCTTCGTCACTGTGGGTTGGTGATGGGGC
AACGTTCGTTACTGGCGCGGATCAGGATATTCAGTCAATTGATGCTATTTCCAGCGGCAC
TATTGACATCAGCGATGGTACGGTTTTGCGCCTGACCGGGCAGGATACTTCCGTCGCCCT
TAATGCCTCACTGTTTAACGGCGATGGGACGCTGGTGAATGCCACCGATGGTGTGACGTT
GACAGGTGAGCTTAATACCAACCTTGAAACTGACAGCCTGACTTATCTTTCCAACGTGAC
GGTTAATGGCAATCTGACCAATACGTCCGGTGCGGTTAGCCTGCAAAATGGCGTCGCTGG
CGATACGCTGACGGTAAACGGTGATTATACCGGCGGCGGTACGCTACTGCTCGATAGCGA
ATTAAACGGCGATGACTCGGTAAGCGATCAATTGGTGATGAACGGTAATACTGCTGGCAA
CACAACTGTGGTGGTTAACTCCATTACAGGGATTGGTGAGCCGACATCGACAGGCATTAA
AGTGGTTGATTTCGCAGCTGATCCCACGCAGTTTCAAAACAATGCGCAGTTCAGTCTGGC
AGGCAGTGGCTACGTCAACATGGGAGCGTATGACTACACGCTGGTGGAAGATAACAACGA
CTGGTATCTGCGATCGCAAGAAGTAACGCCGCCATCGCCACCTGATCCAGACCCGGACCC
AACCCCCGATCCTGACCCAACACCCGATCCAATCCCCGCTTACCAGCCGGTGCTGAATGC
CAAAGTTGGCGGTTATCTCAATAACCTGCGGGCGGCAAATCAGGCGTTTGTGATGGAGCG
ACGCGATCACGCTGGTGGCGATGGTCAGACGCTGAATTTACGTGTTATCGGCGGACGTTA
TCATTACACGGCGGCAGGGCAACTGGCTCAGCATGAAGACACTTCTACGGTGCAGCTAAG
CGGCGATCTGTTTAGCGGGCGCTGGGGCGATGATGGCGAGTGGATGCTTGGGATTGTAGG
TGGCTACAGCGATAACCAGGGCGACAGCCGCTCGAATCTGACCGGAACTCGCGCCGATAA
CCAGAACCACGGTTATGCCGTTGGGCTAACCTCAAGCTGGTTTCAGCACGGTAATCAGAA
GCAGGGGGCCTGGCTGGATAACTGGCTGCAATACGCGTGGTTTAACAATGATGTTTCCGA
ACAAGACGATGGCGCGGATCATTACCATTCGTCGGGGATTATCGCCTCGCTGGAAGCCGG
GTATCAATGGTTACCGGGGCGTGGTGTGGTGATTGAACCGCAGGCGCAGGTGATTTATCA
GGGCGTGCAGCAGGATGATTTTACCGCCGCTAACCGTGCGCGCGTGTCACAATCGCAGGG
TGATGATATTCAGACGCGGCTGGGTTTACACAGCGAATGGCGTACCGCTGTTCATGTCAT
ACCAACATTAGATCTGAATTATTATCACGATCCCCATTCGACGGAAATTGAAGAGGATGG
CAGCACTATCAGTGACGATGCGGTGAAGCAACGGGGTGAAATAAAAGTGGGAGTCACGGG
CAATATCAGTCAGCGAGTGTCCCTGCGCGGCAGCGTGGCGTGGCAGAAAGGGAGTGATGA
TTTTGCCCAGACGGCAGGATTTTTGTCGATGACGGTGAAATGGTAATCGCTGTCTGACCA
TCACTATTGCCGGATGCGGCGTAAACGCCTTATCTGGCCTACGGAGAGCATTTGTAGGCC
TGATAAGACGCGGCAAGCGTCGCATCAGGCATTGGCGCGGTTGCCGGATGAATCCAAACA
ACAACCTCACTTATTCTGCGTGTGCAGCATATAGTTCACATCCACGCCGGGGCCGAGTTT
AAAAGAATTAGTGATCGGGTTGTAATGTAGCCCGGTTATATGTCGCTCTTTAAGGCTTGT
CTGATCTACCCAGCCAAGCAGCTCTGCCGGTTTAATAAACTTCTTCACATCATGCGTGCC
TTTGGGCACCATGCGCAAAATATATTCCGCGCCAACCACCGCCATCAGCCATGACTTGCC
GTTGCGGTTAAGCGTCGAGAAAAAGACATCGCCGCCCGGTTTCACCAGTTGCGCACAGGC
TCTGACTACTGACTGCGGATCGGGGACGTGCTCCAGCATCTCCATGCAGGTCACCACATC
ATACTGCCCGGCATGTTTTGCCGCGTGCTCTTCCACGGTTTCCTGCACGTAATCCACCTG
AATGCCGCTTTCCAGCGCGTGCAGCTTTGCCACCTGCAATGGCTCAAAGCCCATATCCAG
ACCGGTCACCGTCGCGCCTTCGCGCGCCATACTCTCGGCCAGAATGCCGCCGCCACAACC
GACATCGAGCACCTTTTTGCCAAATAAACCGCCAGCACGCTCGGCAATATAGCCCAGACG
TAGCGGATTAATGCGGTGCAACGGTTTGAACTCACCTTCAAGATCCCACCAGCGGGAGGC
GACGGCTTCAAATTTAGCGATCTCTTCGTGGTCTACGTTATGGTTTACCGGCGATTTTTC
GGCATTCATTGGCACTTCTACTCCGTAATTGGCAAGACAAACGAGTATATCAGGCATTGG
ATGTGAATAAAGCGTATAGGTTTACCTCAAACTGCGCGGCTGTGTTATAATTTGCGACCT
TTGAATCCGGGATACAGTAGAGGGATAGCGGTTAGATGAGCGACCTTGCGAGAGAAATTA
CACCGGTCAACATTGAGGAAGAGCTGAAGAGCTCCTATCTGGATTATGCGATGTCGGTCA
TTGTTGGCCGTGCGCTGCCAGATGTCCGAGATGGCCTGAAACCGGTACACCGTCGCGTAC
TTTACGCCATGAACGTACTAGGCAATGACTGGAACAAAGCCTATAAAAAATCTGCCCGTG
TCGTTGGTGACGTAATCGGTAAATACCATCCCCATGGTGACTCGGCGGTTTATGACACGA
TCGTCCGTATGGCGCAGCCATTCTCGCTGCGTTACATGCTGGTAGACGGTCAGGGTAACT
TCGGTTCCATCGACGGCGACTCTGCGGCGGCAATGCGTTATACGGAAATCCGTCTGGCGA
AAATTGCCCATGAACTGATGGCCGATCTCGAAAAAGAGACGGTCGATTTCGTTGATAACT
ATGACGGCACGGAAAAAATTCCGGACGTCATGCCAACCAAAATTCCTAACCTGCTGGTGA
ACGGTTCTTCCGGTATCGCCGTAGGTATGGCAACCAACATCCCGCCGCACAACCTGACGG
AAGTCATCAACGGTTGTCTGGCGTATATCGATGATGAAGACATCAGCATTGAAGGGCTGA
TGGAATACATCCCGGGGCCGGACTTCCCGACGGCGGCAATCATTAACGGTCGTCGCGGTA
TTGAAGAAGCTTACCGTACCGGTCGCGGCAAGGTATATATCCGCGCCCGTGCTGAAGTGG
AAGTTGACGCCAAAACCGGACGTGAAACCATTATCGTCCACGAAATTCCGTATCAGGTAA
ACAAAGCGCGCCTGATCGAGAAGATTGCGGAACTGGTAAAAGAAAAACGCGTGGAAGGCA
TCAGCGCGCTGCGTGACGAGTCTGACAAAGACGGTATGCGCATCGTGATTGAAGTGAAAC
GCGATGCGGTCGGTGAAGTTGTGCTCAACAACCTCTACTCCCAGACCCAGTTGCAGGTTT
CTTTCGGTATCAACATGGTGGCATTGCACCATGGTCAGCCGAAGATCATGAACCTGAAAG
ACATCATCGCGGCGTTTGTTCGTCACCGCCGTGAAGTGGTGACCCGTCGTACTATTTTCG
AACTGCGTAAAGCTCGCGATCGTGCTCATATCCTTGAAGCATTAGCCGTGGCGCTGGCGA
ACATCGACCCGATCATCGAACTGATCCGTCATGCGCCGACGCCTGCAGAAGCGAAAACTG
CGCTGGTTGCTAATCCGTGGCAGCTGGGCAACGTTGCCGCGATGCTCGAACGTGCTGGCG
ACGATGCTGCGCGTCCGGAATGGCTGGAGCCAGAGTTCGGCGTGCGTGATGGTCTGTACT
ACCTGACCGAACAGCAAGCTCAGGCGATTCTGGATCTGCGTTTGCAGAAACTGACCGGCC
TTGAGCACGAAAAACTGCTCGACGAATACAAAGAGCTGCTGGATCAGATCGCGGAACTGC
TGCGTATTCTTGGTAGCGCCGATCGTCTGATGGAAGTGATCCGTGAAGAGCTGGAGCTGG
TTCGTGAACAGTTCGGTGACAAACGTCGTACTGAAATCACCGCCAACAGCGCAGACATCA
ACCTGGAAGATCTGATCACCCAGGAAGATGTGGTCGTGACGCTCTCTCACCAGGGCTACG
TTAAATATCAGCCGCTTTCTGAATACGAAGCGCAGCGTCGTGGCGGGAAAGGTAAATCTG
CCGCACGTATTAAAGAAGAAGACTTTATCGACCGACTGCTGGTGGCGAACACGCACGACC
ATATTCTGTGCTTCTCCAGCCGTGGTCGCGTCTATTCGATGAAAGTTTACCAGTTGCCGG
AGGCCACTCGTGGCGCGCGCGGTCGTCCGATCGTCAACCTGCTGCCGCTGGAGCAGGACG
AACGTATCACCGCGATCCTGCCGGTGACCGAGTTTGAAGAAGGCGTGAAAGTCTTCATGG
CGACCGCTAACGGTACTGTGAAGAAAACCGTCCTCACCGAGTTCAACCGTCTGCGTACCG
CCGGTAAAGTGGCGATCAAACTGGTTGAAGGCGATGAGCTGATCGGCGTTGACCTGACCA
GCGGCGAAGACGAAGTAATGCTGTTCTCCGCCGAAGGTAAAGTGGTGCGCTTTAAAGAGT
CTTCTGTCCGTGCGATGGGCTGCAACACCACCGGTGTTCGCGGTATTCGTTTAGGCGAAG
GTGATAAAGTCGTCTCTCTGATCGTGCCTCGTGGCGATGGCGCAATCCTCACCGCAACGC
AGAACGGTTATGGTAAACGTACCGCAGTGGCGGAATACCCGACTAAGTCGCGTGCGACGA
AAGGGGTTATCTCCATCAAGGTTACCGAACGTAACGGTTTAGTGGTTGGCGCGGTGCAGG
TAGATGATTGCGATCAGATCATGATGATCACCGACGCCGGTACGCTGGTACGTACTCGCG
TTTCAGAAATCAGCATCGTGGGCCGTAACACCCAGGGCGTGATCCTCATCCGTACTGCGG
AAGATGAAAACGTAGTGGGTCTGCAACGTGTTGCTGAACCGGTTGACGAGGAAGATCTGG
ACACCATCGACGGCAGTGCCGCGGAAGGGGACGATGAAATCGCTCCGGAAGTGGACGTTG
ACGACGAGCCAGAAGAAGAATAATTTTACTTCTTCATGCCAAAAGGGAGCTATCTCCCTT
GTTTGAATTGAAAAGTCCAGGCTGCAAAGTCTGGGCTTTTGTCGTATTAGGGCACGGTAA
AGTTTGGCTGTGCCCGTAAAAAATGGCTGGCTATACACAAGGAATGTGGCAATGAGTGGT
GAAAAAAAGCGAAAGGCTGGCGGTTCTATGGTCTTGTAGGTTTTGGCGCAATAGCACTGC
TTTCCGCTGGCGTCTGGGCGTTGCAATATGCTGGCAGTGGGCCAGAAAAAACGTTGTCGC
CGCTGGTGGTGCACAACAATCTGCAAATCGATCTCAATGAGCCGGACCTCTTTCTCGACA
GCGACTCTCTGAGCCAGCTTCCCAAAGATCTCCTCACCATTCCGTTTCTCCACGATGTTC
TGTGTGAAGATTTCGTTTTCTATTATCAGAATCATGCCGATCGTCTGGGCATTGAAGGCA
GCATTCGCCGCATTGTCTATGAACACGATCTCACGCTGAAAGATAAGCTCTTTTCGTCAC
TCTTAGATCAGCCCGCGCAGGCGGCGCTATGGCACGATAAACAAGGCCATCTTTCACATT
ACATAGTGCTGATCCAGCGCAGTGGTTTAAGCAAACTGCTGGAGCCATTGTTGTTTGCCG
CTACCAGCGACAGCCAGTTAAGCAAAACGGAAATCAGTAGCATCAAGATAAATAGTGAAA
CTATTCCTGTTTATCAGTTGCGCTATAACGGTAATAACGCCCTGATGTTCGCGACATATC
AGGACAAGATGCTGGTGTTTTCCAGCACGGATATGCTGTTTAAAGATGATCAGCAGGATA
CCGAAGCCACGGCGATCGCAAGTGATTTGTTGAGCGGCAAAAAACGCTGGCAAGCCAGCT
TTGGCCTGGAAGAGCGTGCTGCCGAAAAAACGCCAGTACGCCAGCGCATCGTGGCCAGCG
CCAGGTTGCTGGGTTTTGGCTACCAGCGGTTAATGCCTTCTTTTGCTGGCGTACGCTTCG
AAATGGGTAACGACGGCTGGCACAGTTTTGTGGCGTTAAATGATGAATCCGCCAGCGTAG
ATGCCAGTTTCGATTTTACGCCGGTCTGGAACAGTATGCCTGCCGGGGCCAGCTTCTGTG
TGGCGGTGCCGTATTCACACGGTATTGCCGAAGAGATGCTTTCGCACATCAGCCAGGAAA
ACGATAAGCTGAATGGGGCGTTAGACGGTGCCGCGGGGCTGTGCTGGTATGAAGACTCAA
AATTGCAAACCCCGCTGTTTGTCGGTCAGTTTGATGGCACTGCCGAACAGGCGCAATTGC
CAGGGAAACTGTTTACGCAAAATATTGGTGCGCACGAAAGCAAAGCGCCAGAAGGTGTTT
TGCCGGTAAGCCAGACTCAGCAGGGCGAAGCGCAAATCTGGCGTCGCGAAGTGAGTTCCC
GATACGGTCAGTATCTGAAAGCGCAGGCGGCGCAACCCGATCAATTAATGTCGGATTATT
TTTTCCGCGTGTCGCTGGCGATGCAAAACAAAACGCTGCTTTTCTCCCTCGATGACACGC
TGGTTAATAACGCCCTGCAAACACTGAATAAAACCCGCCCGGCAATGGTAGATGTAATAC
CCACTGATGGCATCGTTCCGCTCTATATCAATCCACAAGGAATGGCGAAACTGCTGCGTA
ACGAAACGCTGACCAGTCTGCCGAAGAATCTCGAACCGGTTTTTTATAACGCCGCACAAA
CTTTATTAATGCCGAAGCTGGACGCTTTATCTCAACAACCGCGTTATGTCATGAAGCTGG
CCCAGATGGAACCCGGTGTCGCCTGGCAGTGGCTACCCATAACCTGGCAGCCGCTATGAG
GCACGGGCTGCTGGCGCTGATTTGCTGGCTGTGTTGTGTTGTTGCCCATAGCGAAATGCT
GAATGTCGAACAATCCGGGCTGTTTCGCGCCTGGTTTGTACGCATTGCACAGGAACAGCT
CCGCCAGGGGCCAAGTCCACGCTGGTATCAGCAGGATTGTGCGGGCCTGGTGCGATTTGC
AGCGAACGAGGCGCTGAAAGTTCACGACAGTAAATGGCTAAAAAGTAACGGGTTATCTAA
CCAGTATTTGCCGCCAGAGATGTCGCTAACACCTGAACAGCGTCAACTGGCGCAAAACTG
GAATCAGGGGAACGGGAAAACCGGCCCCTACGTGACCGCGATTAATTTGATTCAGTACAA
CAGCCAGTTTATTGGCCAGGACATAAACCAGGCGCTGCCTGGCGATATGATTTTTTTCGA
TCAGGGCGATGCCCAGCACTTAATGGTCTGGATGGGGCGTTACGTCATCTACCACACCGG
AAGCGCCACGAAAACTGACAACGGAATGCGCGCAGTCAGTCTGCAACAACTTATGACATG
GAAGGACACCCGATGGATACCCAACGATTCCAATCCCAATTTCATTGGCATTTATCGTTT
AAATTTTCTGGCGCGATAGCAGCGTGCTTGTCCCTGTCTCTTGTGGGAACAGGGCTTGCT
AATGCTGATGATTCGCTTCCTTCCAGTAACTATGCGCCGCCCGCAGGGGGAACATTCTTT
TTGCTTGCTGACAGCAGTTTTAGCAGCAGTGAAGAGGCGAAAGTGCGACTGGAAGCGCCG
GGGCGTGATTATCGGCGCTATCAGATGGAAGAGTACGGCGGTGTGGACGTTCGCCTGTAT
CGTATTCCTGACCCGATGGCATTTTTGCGTCAGCAGAAAAACCTGCATCGCATTGTGGTG
CAACCGCAATATCTGGGCGACGGGCTGAACAATACGCTGACCTGGCTGTGGGATAACTGG
TACGGCAAATCTCGCCGCGTGATGCAGCGTACTTTCTCTTCTCAGTCACGGCAGAATGTG
ACTCAGGCATTACCCGAATTACATCTCGGCAATGCCATTATTAAACCTTCCCGTTATGTA
CAGAACAACCAGTTTTCCCCGCTGAAAAAATATCCCCTGGTGGAACAGTTCCGTTATCCA
CTATGGCAGGCTAAACCGGTCGAGCCGCAGCAAGGGGTAAAACTGGAAGGCGCATCCAGC
AATTTCATCTCGCCGCAGCCGGGTAACATTTATATTCCTCTCGGCCAACAAGAGCCGGGA
CTGTACCTCGTCGAGGCGATGGTTGGTGGGTATCGGGCGACGACGGTGGTGTTTGTTTCC
GATACCGTGGCGCTTAGCAAAGTGTCAGGCAAAGAGCTTCTGGTGTGGACCGCGGGTAAA
AAACAGGGTGAAGCGAAGCCAGGCTCAGAGATCTTGTGGACTGACGGTCTTGGCGTGATG
ACCCGCGGTGTGACCGATGACAGCGGTACCTTGCAGTTACAACATATATCGCCAGAACGT
TCATACATTCTGGGTAAGGATGCCGAAGGCGGCGTTTTTGTCTCCGAGAACTTCTTCTAC
GAAAGCGAAATCTACAACACCCGCTTGTATATTTTTACCGATCGCCCGCTATATCGCGCA
GGCGATCGTGTCGATGTTAAAGTGATGGGCCGCGAGTTCCACGATCCGTTGCATTCATCC
CCCATCGTCAGCGCCCCGGCGAAGCTTTCGGTGCTGGACGCCAACGGCAGTCTGTTGCAA
ACCGTCGATGTCACGCTGGATGCGCGCAATGGCGGGCAGGGAAGTTTCCGCCTGCCAGAA
AATGCCATTGCCGGAGGTTATGAGTTACGTCTTGCTTACCGCAATCAGGTCTATAGCAGT
AGTTTTCGCGTAGCCAACTATATCAAGCCACATTTCGAGATTGGTTTAGCTCTCGACAAA
AAAGAGTTCAAAACTGGCGAAGCGGTCAGCGGCAAACTGCAACTGCTCTACCCGGATGGT
GAGCCGGTAAAAGATGCCCGCGTGCAGTTAAGTTTGCGCGCTCAGCAATTATCAATGGTC
GGTAACGATTTGCGTTATGCCGGACGTTTCCCCGTGTCGCTGGAAGGCAGTGAAACGGTG
TCCGACGATAGCGGTCATGTGGCGTTAAATCTCCCCGCCGCCGATAAACCAAGCCGCTAT
TTGTTAACCGTCTCCGCCAGTGACGGCGCGGCGTATCGCGTCACCACCACCAAAGAGATC
CTCATTGAACGCGGCCTGGCGCATTACTCTTTAAGTACCGCCGCACAATACAGTAATAGC
GGCGAGTCGGTTGTGTTCCGTTATGCCGCGCTGGAATCTTCAAAACAGGTTCCTGTTACG
TATGAATGGTTGCGTCTCGAAGACCGCACGAGCCATAGCGGAGAGCTACCGTCAGGCGGC
AAATCCTTTACCGTCAATTTCGCTAAACCTGGCAACTACAATCTGACATTACGCGATAAA
GACGGCTTAATTCTCGCTGGGTTAAGTCATGCCGTCAGCGGTAAGGGCAGCATGTCGCAT
ACTGGTACGGTAGATATCGTGGCAGATAAAACGCTGTACCAGCCTGGCGAAACCGCGAAG
ATGCTGATTACCTTTCCGGAGCCAATTGATGAAGCATTATTGACGCTGGAACGCGATCGC
GTGGAACAGCAGTCGCTGCTTTCGCATCCGGCAAACTGGCTAACGCTACAACGTTTAAAC
GATACCCAGTATGAAGCCCGGGTTCCAGTGAGCAATTCCTTTGCGCCTAACATCACTTTT
TCGGTGCTGTATACCCGTAACGGTCAGTACAGTTTTCAGAATGCCGGGATCAAAGTTGCC
GTTCCCCAGCTGGATATCCGGGTGAAAACGGACAAAACCCATTACCAGCCTGGTGAACTG
GTCAATGTCGAATTAACCTCGTCGCTGAAAGGTAAACCTGTTTCTGCGCAGCTAACGGTA
GGCGTGGTCGATGAAATGATCTACGCGCTGCAACCAGAAATCGCGCCGAATATCGGCAAA
TTTTTCTATCCGCTGGGGCGTAACAATGTGCGTACCAGCTCCAGTCTGTCGTTTATCAGC
TACGACCAGGCGCTCTCCAACGAGCCGGTTGCGCCTGGCGCAACTAACCGCAGCGAGCGG
CGAGTAAAAATGCTTGAACGTCCACGGCGTGAAGAGGTGGATACCGCGGCATGGATGCCG
TCACTCACAACCGATAAACAAGGCAAAGCGTATTTCACGTTCCTGATGCCTGATTCGTTA
ACCCGCTGGCGTATCACCGCGCGTGGGATGAACGGCGACGGGCTGGTCGGGCAGGGGCGT
GCTTATCTGCGTTCGGAAAAAAATCTCTACATGAAGTGGAGTATGCCAACGGTGTATCGC
GTGGGCGACAAACCGGCGGCAGGACTGTTTATCTTCAGTCAGCAGGATAACGAACCGGTG
GCGCTGGTGACTAAATTTGCAGGCGCTGAGATGCGCCAGACGCTGACGCTGCACAAAGGG
GCGAATTATATTTCGCTGACGCAGAATATTCAGCAATCTGGCTTGTTAAGTGCAGAACTG
CAACAAAATGGGCAAGTGCAGGACAGCATTAGCACAAAACTGTCTTTTGTGGATAACAGC
TGGCCCGTTGAACAGCAGAAAAATATCATGCTCGGTGGTGGCGATAACGCGCTGATGTTG
CCCGAGCAGGCGAGCAATATCCGGCTACAAAGTAGTGAAACGCCGCAGGAGATTTTCCGC
AACAATCTTGATGCGTTAGTCGATGAACCGTGGGGTGGGGTGATCAACACCGGTAGCCGT
CTGATCCCGCTCAGTCTCGCCTGGCGTTCGCTTGCCGATCATCAAAGTGCCGCCGCTAAC
GACATTCGTCAGATGATTCAGGATAACCGTCTGCGGCTGATGCAACTGGCGGGGCCCGGA
GCGCGCTTTACCTGGTGGGGTGAAGATGGCAATGGTGACGCCTTCCTTACGGCATGGGCA
TGGTACGCCGACTGGCAGGCCAGCCAGGCGCTCGGCGTAACGCAACAACCGGAATACTGG
CAGCATATGCTCGACAGTTATGCCGAGCAGGCAGATAACATGCCGTTATTGCATCGGGCG
CTGGTGCTGGCGTGGGCACAGGAGATGAATCTGCCGTGCAAAACGTTGTTGAAAGGGTTG
GATGAAGCTATCGCCCGGCGCGGAACTAAAACTGAAGATTTCTCTGAGGAAGCCCCCCGC
GATATCAATGACAGCCTGATCCTCGATACACCGGAATCTCCACTGGCAGATGCGGTGGCA
AACGTCTTAACCATGACGTTGCTGAAAAAAGCGCAGTTGAAGTCCACGGTGATGCCACAG
GTTCAGCAATATGCGTGGGATAAAGCGGCAAACAGCAATCAGCCGCTGGCGCACACGGTT
GTGCTGCTCAATAGCGGGGGCGACGCTACCCAGGCGGCTGCTATTTTAAGTGGTTTGACC
GCTGAGCAATCTACTATTGAGCGCGCGCTGGCCATGAACTGGCTGGCGAAATATATGGCG
ACAATGCCTCCAGTTGTTTTGCCTGCGCCTGCGGGCGCATGGGCCAAACATAAGTTAACT
GGAGGGGGCGAATACTGGCGTTGGGTTGGTCAGGGCGTGCCGGACATTCTCTCTTTTGGT
GACGAATTATCGCCGCAAAATGTGCAGGTCCGCTGGCATGAACCGGCAAAAACGGCTCAA
CAAAGTAACATTCCGGTGACCGTTGAACGCCAGTTGTATCGGCTTATCCCCGGTGAAGAA
GAGATGAGCTTTACTCTGCAGCCGGTGACCAGCAATGAGATTGACAGCGATGCGCTGTAT
CTCGATGAAATTACGCTTACCAGCGAGCAGGATGCAGTTCTGCGCTATGGTCAGGTGGAA
GTACCGCTCCCGCCGGGAGCCGACGTTGAGCGCACAACATGGGGCATTTCAGTCAATAAA
CCCAACGCCGCGAAACAGCAGGGGCAATTGCTGGAAAAAGCGCGTAATGAAATGGGCGAA
CTGGCCTATATGGTGCCGGTGAAAGAACTGACGGGAACGGTCACTTTCCGCCATTTGCTG
CGCTTCTCGCAAAAAGGGCAATTCGTTCTGCCTCCTGCTCGTTATGTGCGTTCCTATGCA
CCTGCGCAGCAAAGTGTTGCGGCAGGGAGCGAATGGCCCGGGATGCAGGTGAAATAAGTG
AACTGGCGCAGAATCGTCTGGCTATTGGCGTTGGTTACTCTGCCAACGCTTGCGGAGGAG
ACGCCGTTACAACTGGCACTGCGTGGTGCGCAGCACGATCAACTGTATCAGCTGTCGTCA
TCAGGCGTGACCAAAGCCTCGACATTACCTGACTCGCTCACCACGCCGTTAGGGAGTTTG
TGGAAACTGTATGTTTACGCCTGGCTGGAGGATACCCATCAACCGGAGCAGCCCTACCAG
TGTCGCGGAAACTCCCCGGAAGAGGTTTATTGTTGTCAGGCTGGGGAGAGCATAACGCGC
GATACCGCGCTGGTACGTTCCTGTGGGCTCTATTTTGCGCCGCAGCGGTTGCATATTGGC
GCAGATGTGTGGGGGCAATACTGGCAACAGCGTCAGGCACCTGCGTGGTTAGCGTCTCTT
ACTACGCTGAAGCCAGAAACCTCGGTAACGGTTAAATCGCTGCTTGATTCATTAGCGACG
TTACCTGCGCAAAACAAAGCTCAGGAAGTCTTACTGGAAGTGGTGCTGGACGAGGCGAAA
ATCGGTGTCGCATCCATGCTCGGTAGTCGGGTTCGGGTGAAAACCTGGAGCTGGTTTGCC
GATGATAAACAGGAAATCCGTCAGGGTGGTTTTGCCGGCTGGTTAACCGATGGTACACCG
CTGTGGGTTACTGGCAGTGGCACCAGCAAAACGGTACTGACCCGTTATGCGACGGTGCTT
AATCGGGTTTTGCCAGTGCCGACACAAGTTGCCAGTGGGCAATGTGTAGAGGTGGAGCTA
TTTGCCCGCTATCCGCTGAAGAAAATCACAGCGGAAAAGAGTACGACGTCAGTAAAACCC
GGCGTACTTAATGGGCGCTATCGTGTGACATTTGCCAATGGTAACCACATTACGTTTGTC
AGCCACGGTGAGACGACCTTACTGACCGAAAAGGGCAAACTGAAATTGCAGTCGTATCTC
GATCGTGAAGAGTACGTTGCCAGAGTTCTGGATCGCGAGGCGAAAAGTACGCCACCTGAG
GCAGCGAAAGCCATGACCGTGGCGATACGCACTTTTTTACAGCAAAACGCCAATCGGGAA
GGCGATTGCCTGACCATCCCCGACAGCAGCGCCACGCAGCGTGTTTCTGCTTCGCCAGCG
ACCACGGGGGCGCGAACGATGACCGCCTGGACGCAGGATCTCATCTATGCGGGCGATCCG
GTTCATTATCACGGCAGTCGCGCTACCGAAGGGACGCTTTCCTGGCGGCAAGCCATGGCC
CAGGCCGGGCAGGGAGAGCGTTACGACCAGATACTCGCGTTTGCTTATCCCGACAACAGC
CTTAGCCGCTGGGGAGCGCCACGCTCAACCTGTCAGTTATTACCCAAAGCGAAAGCCTGG
CTGGCGAAAAAAATGCCGCAGTGGCGGCGTATATTAGAAGGCGAGACGGGGTACAACGAA
CCAGACGTGTTTGCGGTCTGTCGTTTAGTCTCAGGTTTCCCCTATACCGATCGGCAGCAG
AAACGGCTGTTTATTCGTAACTTCTTTACGCTTCAGGATCGGCTGGATTTAACCCATGAG
TATCTGCACCTGGCCTTTGATGGTTATCCCACCGGGCTTGATGAGAACTATATCGAAACG
CTGACCCGACAATTATTAATGGACTAATGCTATGCGAAAGATTTTTCTTCCGTTGTTACT
GGTGGCACTTTCGCCTGTCGCTCACAGTGAAGGTGTGCAGGAAGTCGAGATTGACGCACC
GCTCTCTGGCTGGCATCCGGCAGAGGGCGAAGATGCCAGTTTTTCACAATCGATCAATTA
CCCGGCGTCGTCCGTCAACATGGCAGATGATCAAAATATCTCAGCGCAGATCCGCGGCAA
AATAAAGAATTATGCTGCGGCGGGTAAAGTTCAGCAGGGCCGGCTGGTGGTCAACGGTGC
CAGTATGCCGCAGAGAGTTGAATCCGATGGTTCATTTGCACGCCCTTATATTTTCACTGA
AGGCAGCAACAGCGTGCAGGTCATCAGCCCGGATGGGCAAAGCCGACAAAAAATGCAGTT
TTACTCAACGCCGGGTACAGGAACGATTCGTGCACGTTTACGGCTGGTTCTCTCGTGGGA
TACGGACAATACCGATCTCGATCTCCATGTTGTCACGCCCGATGGAGAACACGCCTGGTA
CGGTAACACCGTGCTGAAAAACAGTGGTGCACTGGATATGGATGTCACGACGGGGTATGG
ACCCGAGATTTTCGCCATGCCAGCACCAGTTCACGGGCGCTATCAGGTGTATATCAACTA
CTATGGTGGGCGCAGCGAAACGGAATTGACGACCGCCCAACTGACGCTGATTACCGATGA
AGGATCGGTCAATGAGAAACAGGAAACATTTATTGTACCGATGCGTAATGCTGGCGAGCT
GACGCTGGTGAAAAGTTTTGACTGGTGATTAATGGGGTTACCTTCGCCGTCGATGTTCAA
GAAAACACCCGATAACTTTCGCTATCGGGTGTTTTTATTGATTAATTCAACCGTTCAATC
ACCATCGCAATTCCCTGGCCGCCACCAATGCACAGTGTTGCCAGCCCCAGCGTTTTATCG
CGTGCCTGCATGGCATGTAATAGTGTGACCAGAATACGAGCACCACTGGCACCGATAGGA
TGCCCGAGCGCGATGGCCCCGCCGTTGACATTCACTTTCTCAGAATCAAAGCCCAGGGTT
TTCCCAACGGCAAGGAACTGTGCAGCAAATGCTTCATTAGCCTCAATGAGATCAATATCC
GCCAGTTGCAGCCCCGCCAGTTGTAACGCTTTTTGCGTGGCAGGTACTGGACCCATACCC
ATCAATGCGGGGGGCACGCCACCGCTGGCATAACTTTTAATGCGAGCCAGGGGGGTAAGG
CCTGCTGCCAGCGCCGCAGATTCTTCCATAATCACCAGAGCGGCAGCACCGTCGTTAATA
CCAGACGCGTTCCCGGCGGTGACTGTTCCTGCTTTATCGAAGGCCGGGCGCAATGCGCCT
AACGCTTCAGTCGTAGAATCCGCTTTCGGGAATTCGTCTTGACTGAAGACGAAGGTTTTC
TTCCGAGTGACAACATTTACCGGGACGATTTCGGCTGTAAAAGCACCGGACTCAATTGCG
GCTGCCGCTTTACGCTGTGAATGCAGCGCCAGTTCATCCTGCATTTCTCGGGTAATTCCG
TACTCTTTGGCCACGTTCTCGGCGGTAATCCCCATATGATAACCATGGGTGGCGCACATC
AGACCATCGCGCAGGATTACGTCATAAACCTGTCCGTCTCCAAGACGATAACCAGAGCGT
GCTTTTGCATCGAGTAAGTAGGGCGCTAAACTCATATTTTCCATACCCCCCGCCACAATG
CTTTGCGCCTGACCTGCCTGAATTGCCTGGGCGGCAAGCGCCACACTTTTAAGACCCGAA
CCACACACTTTATTGACCGTGAATCCGCACACCGTTTCTGCCAGCCCGCTTTTTAACAGT
GCCTGACGTGCCGGATTTTGCCCCAACCCGGCTTGCAACACGTTACCCATAATCACTTCA
TCAATGTGTAGTGAATCGATTTTTGCACGTTCAATGGCGGCTTTAATTACTGTCGCCCCC
AGGTCGATGGCGCTGGTGGAAGCGAGTGAACCGTTAAAACTACCGATAGCAGTACGTACC
GCACTGACGATGACACAATTTTTCATTTTTTATTCCTTCTGTCTGTAGGGGTGCCGTCAG
AACAGCGTTAAACCAATGACGAAAATGACGCCGGAGAAGAGCAGGGCAGTGATGCAATAG
CCCATGATGTCGCGGACACCGAGTCCGGCGATTGCCAGTGCTGGCAGCGCCCAGAATGGT
TGTGCCATGTTCATCCATTGCTCGCCGTAGGCGATCGCCATTACCGATTTACCGAGATCA
GCGCCCAGCGCCTGGGCTGCGGGTATCACGAAAGGTCCCTGAATAACCCAGTGACCGCCG
CCAGACGGAACGGCGAAGTTAATCAGTGCAGAACTAAAAAAGGTCATTACCGGGAAGGTG
TCTTTGTTCGCAACATTGATGAAGAATTCGGTAATGAGTCCGCCCAGACCGGAATGCTCC
ATCATCAGTTGGATCCCAGCGTAGAAGGGGAATTGCACCAGAATACCGGCGGTACTGCGT
GCTGCCGCGCTGATAGCACGCATATAAGCCATTGGCGTTTTATGTAGCAGCAGACCCGCA
ATCATAAACATCAGGTTGACGGTATTGATGGTGATGTTGAAGCCATGTTCGCTGAAGTAC
ATCGCCAGGTAAGCGATACCGAGTGCGCCGATGATCAACGTCAGAATGCGGCTTTCTTCC
AGTCGCTCGGACGGTGGAGCATCTTTCGGTAGCTGCTTTTGAAAATCAGCCTCTTCCATG
AGTAGTTTTGGATCGATACTCACCACGTCAGACGGTTTTGGCATCATCATGCGGGTGATA
AATGGCATCACCACAATCAACGCCACAGTGATGAAAATGTTAAAACCACTGAACAGAGTA
TCGCCCACCGGGATCAGCCCGGCGATATGCTCAACCGGGTTGCCCGGTGTTGCAGCCAAC
AGAGGCATTGATCCAGAGAAGCCGCCACCCCAGGTGAGAAAACCAATGTAGGCGCAGGCA
ATGAGCAACGGATAATCAGAACCGGGGACTCGCCGGGCGACTTCACGGGCAAACATTGCG
CCGACAACCAAACCAAATCCCCAGTTGATGACACAAGCGACTGAACCGAAGAAAGTGACC
AGCATGACGCCCTGTACGGGCGTCTTTGCGGCGGAGGCGGCAGTACGCAGCAAACTTTTC
ACCGGAGCAGAGCTGGCAAGGGCATGACCGGTAACGATGATAAGCGCCATCTGCATACCA
AACGCCAGCAAGTTCCAGAAACCGTCACCCCACATTTTCACCATGCTGATCGGCGTTTGT
GGTGTTAACCAAAGCGCGATCACGAATGTTAGCAATGTCAGCAACATGGCAAAGATCAGT
GGATCGGGAAGCCACCGGCTGACAAAACGCGTCATAAAACGCGATATGCGACCAATCATA
AATCACCCCGTTGCGTATTCAGATCGGCGGCGACTTCAAACCGAGCTTCTGTTTTGGCAC
GCACGGTAGCTAAATCACACCCGTCGGCAATTTCGGTGAGCCACATTTTGCCGTCAATAA
AACGAAAGACAGCCAGTTCAGTAACCAGCATATGCACCGCATGTTGCGCAGTGAGTGGCA
TGGTGCAGCGGCGCAAAATTTTTGCTGAACCATCTTTGGCGCAATGTTCCATGGCGATGA
TCACTTTGCGCGACCCGGTCACCAGATCCATCGCGCCACCCATACCGGGCACCATTTTCC
CAGGCACTACCCAGTTCGCGAGGTTTGCTTCTTCGTCTACTTGCAAACCGCCGAGCACGC
AGGCATCAATATGACCGCCGCGGATTAGCGCAAATGACATGGCGCTATCAAACATGGCTG
CACCGGGTAAAATACCGCACGGTTGTCCGCCAGCGTTCACCAGATCTGGATGCGCTGTCG
TGACCGGGCCTAAACCGAGGAAGCCGTTTTCCGATTGCAGAGTGATATGAATACCCTCCG
GTAAATAATTGGCGACCATTGTGGGTAAACCGATCCCTAAGTTAACGATGTCACCATCAC
GAAGCTCTTGCGCCACACGGCGCGCAATACGTTGTTTCGCATCCATTATTTGCTCTCCTG
TGAAACGATGATGTGGTCGATAACGGCACCAGGGGTGACAATATGGTCAGGTTGCAGCTC
GCCGGTTTCGACAAGTTCATCTGGCTCTACCAGCGTGATATCAGCCGCAAGGGCTATCAG
GGGGTTAAAGTTGCGGGCGCTAAGTTGATAGGTCAGGTTGCCAAGTGTGTCGCAACGATG
AGCGCGAATTAGCGCCAGGTCGGCGCGCAGTGGGCGTTCGAGCAGCCAGGTTTTACCGTC
GAGTGTCAGTGTCTGTTTGCCTTCCTCTACGACGGTGCCGACACCCGTTGGGGTGAGAAA
ACCACCAAGTCCAGCTCCACCACAGCGAATTTGCTCGATTAGCGTACCTTGCGGCACCAG
AACGACGTCCATCTCACCAGATATCATGCGCCGACCTGTTTCCGGGTTGGTGCCGATATG
TGAAGCAATCACTTTGCGGACTCGACCATTGACGATGAGCGGACCGATGCCGGTATCAAC
AAACGCGGTATCATTGGCTATCAATGTCAGGTCGCGAACACCAGATTCCAGTAATGCTTC
AACCAGGCGGGATGGAGTGCCAATCCCCATAAATCCGCCCACCATGATGGTCATGCCGTC
ACGAAAGAAGCCGGTGGCGTCTTGTAATGTCATCAATTTTGTTTTCATTTTTTATCCCTC
TTGCATACACCGTTGTGGGTACAGTCAGGGAATAGCAAGGGGAGTGCCAGAATGAGATTA
TTGGATGTTTTTATTTAACTAATTGAATAGAAAAGGATAAATTAGATGGGGATTCATAAG
GAGAATGAGCTGCTATGCAGAAAATTGCGCACTGTGCAAATTTCTGCATAGCAAGTTTTG
GTGTTATACATCCGCCGGATCGATACCGTATTCCTGGAGTTTATACATCAATGCACGGCG
ACTGATGCCCAGCATTAAAGCAGTGCGGGTTCGGTTTCCTTCTTGTTGTTCCAGCACTTC
CATAATGATGCGTTTTTCGACGCGTTTAATTTCCTCTTTTAAATTACGCTCTCCGACAGG
GGCTGTTTTTACCTCGCCAGCATTACAGACTGGCTGACGAATCTGCGGCGGAAGATCCTC
AGAAAAAATGATCGGGCCTGAATTCATCACGACGGCGCGTTCAATAACGTTGGAAAGCTC
TCGAATATTTCCCGGCCATGACCAGGCGGTAAGCAGTGACATTGCCATCGGATCGATGTC
GATAATATCGCGCTGATTCTCACTACTGAATTTTTGCAAAAAGTGATTAGCTAACAGGGA
AATATCTTCCCGGCGATCGCGCAGAGGCGGCAGTATTAAATGAATAACGTTAAGGCGATA
AAAGAGATCTTCACGGAAGGTGCCTTCTTTTACCATTGCCTGCAAGTCGCGGTTGGTGGC
AGCAATGATGCGGATATCAACTTTTATGGTCTGATGGCCGCCAATCCGTTCAAATTCCCG
TTCCTGCAGAATGCGTAGTAATTTGGCTTGCAGTACCAGCGGCATTTCGCCAATTTCGTC
GAGGAGCAGAGTACCTTCGTTGGCACGTTCAAATAATCCCTGACGCAAGGTTTGTGCACC
AGTAAATGCACCTTTTTCATGACCAAACAGTTCACTTTCGAGCAACGATTCCGGCAGCGC
CGCGCAGTTGACTTTAATGAACGGCCCCTTTGCCCGCCGCGAATTGTAGTGAATCGCTCT
GGCAATCAACTCTTTCCCGGTGCCGCTTTCACCGCTAATCAAGACGCTGGCCTGAGAAAG
GGCAATTTTGGCGGTGTCTTTGCAGATATCCATCATCGCCGGGCTGTTGGTGAGAATGTG
CCCCCATTGCCAGCTGGTGCTCAGTGCCTGGTGCAGATGACGGATCTCTTTTTTCATTGA
CTGGAGTTGTAAAGCGCGCTGAACGATTAAATTCAACTCATCGAGATCAAACGGTTTAAT
AACATAGTCGAAGGCCCCGCAGCGTAGCGCTTCGACGGCGGTTTCCACTTCAGCATAGGC
CGTCATCAGAATAACGGGTGTCCGGGTCTCATTACTGCGCATCTCCTTTAGTGCCTTGAT
GCCGTCCATCTCTGGCATGCGGATATCCATCAACACCACGTCAGGGTGAATATCAGCAAA
CAGGTGTAATGCTGTGCGTCCGTTGTTCGCACAATGTGTTTCGAAACCTTGTAGTGCAAA
AGCGGTGCTCAGCATACGGCGAACATTATCTTCATCATCCACAATAAGGATGCGATTAAT
AGCAGTCATACAGTCTGATTTCCCTGCGGGTTGATTGGTAAAATAAGCGTGAAGGTTGCG
CCGTAGCCCGGCAAACTGGCGACGCGAATATCACCCTGATGGGCATTAATGATGCGTTGA
CTTAACGCCAGACCAAGCCCGGTTCCTGAGGCTTTGGTGGTGAAAAAGGGATCGAAGATC
TTTTTTTGCAGCGAGAGATCAATGCCACAGCCGTTGTCCTCTATCGAAATGGCCTGTTGT
GAGTCGCTGTATTGCCAGGTTTGAATGCGAATTTTCCCTCGTGCGCTGATAGCCTGGACG
GCATTGATCAGGATATTCAGTAGTACCTGTTTGAGCAGTTCACGATCGGCGTTAATCGGG
TTTAATTCATTATCCAGTTCGCTTATGAAGTCGACCCGCGCTTGTACGCCGGCGGTTTGT
ACCAGTACCAGAGTTTCTTCAACCAATGCATTGAGACTGACTTGTTGCCATTGACTGTGG
CGTGGACGTGAAAATTCGAGCAATTGCTGAATAACTTTGTTAATTGAATCGATTTCTTTG
AGTACTACGGACAGATATTCCTGATGTATTAGGTCGCTGGTTTGTTGGCGCAAGATCTGT
ACATAACCACGAATAGCCGTTAGCGGATTACGTACTTCATGCGCGACGCCAGCCATCAGC
TCACCCAGTGTGGCGAGGCGTTCTGCTTGCGCCATGCGGCGCTGGGTTTCTTTGCGGGCA
GTTAAATCAGAGAAAATAACCAAAGCACCTATCATTTCACCATGCGTGTTATGAATACGA
CTGGTAGTGACACTGAGTTCAATGGTGCGGTCACGGCCTGGAAAACTGATCTCCAGCGCT
ACATGTTCGGTGCCATGTTCCAGCGTATCCAGTACTGGACTGTAGAACTGAGTATTGTCG
AACAACATGGAGTAAGGCTGCCCTACCAGTTCATGACGTTGATAGCCAGTGATGACTTCT
GCTGCCGGGTTCATGGTGGTTACATCACCCTGGCGGTCAATGGCAATGACGCCATCGGCA
GCGTTTTCAATAATCAGATCGTTAAGTGTCCGCGTTTCACGCAGTGCCTGGGCGAGGTTG
TTAACACTCTGACTGATTTGCCCCATTTCACCGGGCAATTGTGGTAATCGAGTGGGAATA
TTTTGTGCCAGAGTCGAGAGGCCATCGGTGATGATATCAATATTGGCGCTCAGGCGACGG
GAGAAAAGGACAATCAACAGCAGGCTTATCAGCAAACCGGCGGTGAGCACAATGATAATC
CTCACATCCATTTTCCAGGCCTGGCGGCGAATATCTTCGGTTAATTCATTGGCCCAGATA
TAGCCGAGAATTTCACCATTACGCTCAATGGGGATCATTGAATTCAAAATATCGCCGCGC
ACCTGCCTGCCTGAATAAACCAAAGGGGTATTTGTACGCATGACTTCGCGACCAGGGTGA
TCTGCGGCAATGGTAACGCCCACATTATTCTGATATAGCGCTGAAGGCGCGTAGGTGATT
ATCGCATCCAGCGTTTTGTTGTAATAACCAGCGCCGATGCCAGGGAAGGCGTGAGTGATA
TTTTCGGTAATGGGGGCAAGTTCTGCATTTAATGCGCGGATACGCTCCTCACGTGGTAAG
TCGATGTAGAGATCATAGCGATCGCCTAGTGCCTGATTAAGCAGGTTGACCACGGCAGAA
AGTTTTTTCTCTTTTTCAGATAAGACTGCTGAACGTCCTTCCGTTTCTACGATATAACCA
ATAGTAAGCGTTGGGACAATGACCATCAGGATTGCCATCAGGATCATTTGATTGCGTAAG
CGGCGTGGATAAATCCACTTCATATAATGCATGCTGAAATCCACTAGTCTTGTCCGGTAT
ATGACGATTATCAGAGGTTAAGGTGATGATTTCTCGGCGGTGTATCATATTCCAGAGAAG
AGAGAACATTGCGGTAACACGCTTTTACCGCTACCTTAACCACACTCCATCGGTCACCTG
AGGCGGAGCTTCGCCCCTTTGAAATACCTTGCTTCTTTTCGTACAACCCTGAAAGCCTCG
CGCTACATGTTCAGAGCATTGGCGTTAGTGCTCTGGCTGTTGATTGCTTTTTCATCCGTT
TTTTACATCGTTAATGCGTTACATCAGCGAGAATCGGAAATTCGTCAGGAATTTAATCTG
AGTTCCGATCAGGCTCAGCGCTTTATTCAACGCACCTCTGATGTGATGAAAGAGCTGAAG
TACATCGCTGAAAATCGCTTATCGGCAGAAAACGGTGTGCTTTCCCCGCGTGGACGAGAA
ACGCAGGCGGATGTGCCTGCGTTTGAACCGCTGTTTGCCGACTCCGATTGTTCCGCAATG
AGTAACACCTGGCGAGGTTCTCTGGAGTCATTGGCGTGGTTTATGCGCTACTGGCGCGAT
AATTTTTCTGCGGCTTACGATCTCAACCGGGTATTTTTAATCGGCAGCGATAACCTCTGC
ATGGCCAATTTCGGTCTGCGTGATATGCCAGTGGAACGCGATACCGCGTTGAAAGCTTTG
CATGAACGCATCAATAAATATCGAAATGCACCACAAGATGATAGCGGCAGTAACCTCTAC
TGGATCAGCGAAGGTCCGCGCCCTGGCGTCGGGTATTTTTACGCGTTGACGCCAGTTTAT
CTGGCGAACCGGTTGCAGGCGCTTTTGGGTGTCGAGCAGACCATCCGGATGGAGAACTTT
TTCTTACCTGGTACGTTGCCGATGGGGGTTACCATTCTTGATGAAAATGGTCATACCCTG
ATTTCGCTTACCGGACCAGAAAGTAAAATTAAGGGCGATCCTCGCTGGATGCAGGAACGC
TCCTGGTTTGGCTATACGGAAGGGTTCCGGGAGCTGGTGCTGAAGAAAAATCTGCCACCC
TCATCGCTAAGCATCGTGTATTCGGTGCCGGTTGATAAGGTGCTGGAACGCATTCGCATG
TTGATCCTTAACGCAATTTTGCTGAATGTGCTTGCTGGAGCTGCATTGTTTACTCTCGCG
CGGATGTACGAGCGGCGTATTTTCATTCCGGCGGAAAGCGACGCCCTGAGACTGGAAGAA
CATGAGCAGTTTAACCGCAAGATTGTCGCCTCCGCGCCAGTGGGTATCTGTATTTTGCGT
ACCGCAGATGGCGTCAATATTTTAAGTAACGAACTGGCGCATACCTATCTCAATATGCTT
ACGCATGAGGACCGCCAACGGCTGACACAAATTATCTGTGGGCAGCAGGTCAATTTTGTT
GATGTCCTGACCAGCAACAATACCAATCTGCAAATCAGCTTCGTCCATTCGCGCTATCGT
AATGAAAACGTGGCCATTTGTGTGCTGGTGGATGTTTCTTCGCGCGTGAAGATGGAAGAG
TCGTTGCAGGAGATGGCACAAGCAGCGGAACAGGCGAGCCAGTCAAAATCGATGTTCCTT
GCCACCGTCAGTCATGAGCTGCGAACGCCGCTGTATGGCATTATCGGTAACCTGGATCTG
TTGCAAACCAAAGAGTTACCGAAAGGCGTCGATCGTCTGGTGACGGCAATGAACAACTCT
TCCAGCCTGTTGTTGAAAATTATCAGCGATATTCTCGATTTCTCGAAGATTGAATCGGAA
CAGTTGAAGATCGAACCGCGTGAGTTTTCACCGCGTGAAGTGATGAACCACATCACCGCC
AACTATTTACCGCTGGTGGTACGCAAGCAGTTAGGCTTGTACTGCTTTATTGAACCGGAT
GTGCCAGTGGCCTTAAATGGCGACCCGATGCGTTTACAGCAGGTCATCTCCAATCTGTTG
AGTAACGCCATAAAATTCACCGATACCGGCTGTATAGTTTTGCATGTTCGCGCTGATGGC
GATTATCTCTCTATCCGTGTTCGCGATACCGGCGTGGGGATTCCGGCGAAAGAAGTGGTG
CGCTTGTTTGATCCCTTCTTCCAGGTCGGAACGGGCGTACAGCGAAACTTCCAGGGGACC
GGTCTGGGTCTGGCGATTTGTGAAAAACTGATCAGCATGATGGACGGCGATATCTCGGTA
GATTCAGAACCGGGAATGGGCAGCCAGTTTACCGTGCGTATTCCGTTGTACGGCGCTCAG
TACCCGCAGAAAAAAGGCGTGGAAGGGTTGAGTGGTAAACGCTGCTGGCTGGCGGTCCGC
AATGCGTCGCTCTGTCAGTTCCTGGAAACCAGTTTGCAGCGCAGCGGCATCGTCGTAACA
ACATACGAAGGGCAGGAACCGACTCCCGAAGATGTGTTAATCACTGACGAGGTAGTGAGT
AAAAAATGGCAGGGCAGAGCGGTAGTGACCTTCTGTCGTCGACATATTGGTATTCCGCTG
GAGAAAGCGCCAGGGGAGTGGGTACACAGTGTGGCTGCCCCGCATGAGCTACCGGCATTG
TTGGCGCGTATTTATTTGATCGAGATGGAGAGCGACGATCCTGCTAACGCTCTGCCGTCG
ACGGACAAAGCGGTCAGCGATAATGACGATATGATGATTCTGGTCGTGGATGATCATCCG
ATTAACCGACGTCTGCTGGCAGATCAGTTGGGATCGTTGGGCTATCAATGTAAAACCGCG
AATGATGGCGTCGATGCGCTTAATGTACTTAGCAAGAATCATATTGATATCGTGCTTAGC
GACGTCAACATGCCAAATATGGATGGTTACCGCTTGACGCAACGCATTCGTCAGTTGGGA
CTGACGTTGCCGGTAATCGGAGTAACTGCTAATGCGTTGGCTGAAGAGAAGCAGCGGTGT
CTGGAGTCCGGTATGGACAGCTGCCTGTCGAAGCCGGTAACGCTGGATGTAATAAAACAG
ACGCTGACGGTATATGCCGAGAGGGTCAGGAAATCGCGGGAATCGTAGGACGGATAAGGC
GTTTACGCCGCATCTGGCATTCAGTGCAAATGCCAGATGCGACGCTGACGCCTCTTATCT
GGCCTACTTTAATGTAATCTGTTGAAATAATGGGAATCGTAGGCCGGATAAGGCGTTTAC
GCCGCATCCGGCAATCGGTGCAAATGCCAGATAAGACACTAACGCGTCTTATCTGGCCTA
CAGATGATTAGTCTTTATCTGCCGGACTTAAGGTCACAGAAGAGAGATAATTCAGCAGGG
CGATATCGTTCTCGACACCCAGCTTCATCATCGCAGATTTCTTCTGGCTACTGATGGTTT
TAATACTGCGGTTCAGCTTTTTAGCGATCTCGGTCACCAGGAAGCCTTCCGCAAACAGGC
GCAGAACTTCACTCTCTTTTGGCGAGAGACGCTTGTCACCGTAACCACCAGCACTGATTT
TTTCCAACAGGCGAGAAACGCTTTCCGGGGTAAATTTCTTCCCTTTCTGCAGCGCGGCGA
GAGCTTTCGGCAGATCGGTCGGTGCACCTTGTTTCAGCACGATCCCTTCGATATCCAGAT
CCAATACCGCACTAAGAATCGCCGGGTTGTTGTTCATAGTCAGAACAATGATCGACAGGC
TTGGGAAATGGCGCTTGATGTACTTGATTAAGGTAATGCCATCGCCGTACTTATCGCCAG
GCATGGAGAGATCGGTAATCAACACATGCGCATCCAGTTTCGGCAGGTTGTTGATCAGTG
CTGTAGAGTCTTCAAATTCGCCGACAACATTCACCCACTCAATTTGCTCAAGTGATTTGC
GAATACCGAACAAGACTATCGGATGGTCATCGGCAATAATTACGTTCATATTGTTCATGT
AATAGGCTACCTTGCTACAGCAAGCTCTTGACATAACTGTCAATGTCGCTGATGTATTTT
TCTATTCCTGGAACATCCTTCTCACGAATCAGATGTTCCAGCGTTTCACATAACTGCTTG
CCGGGTACCAGATTTAGCATGGCAAATACGCCTTTAAGACGATGAGCCGTTTGGGCTAAC
GCAGCAAAGTCACTGGTTGCTGCTTCAGTATACAGCCTCTTAACATCATCCGGTACTGTG
TCTACAAAGAGCGCATAATAGCCGCTGGCATGGAGTTGCGCATTTTCATCTCCGCCCAGA
GGCGATTCTGTCACCTCTTCCTGCGCCAGTTGCACTTCAATTAATTGTAAGACCGCTTCC
TGCATAGCGTTGCTCATATTGAAGTTGACGCACAATTGACCAGGCCCAATTTCCCGTACG
CCAGACTCATCATCGCTTAAAAGCAAGCCAGAGGCAGTAAGATTAGACGGATTATCCGTT
AAAAAGATATCATAATCTTGACTAATTAATCTTTCATCGGGTGTGATACAGGTTGCACCC
CAATTTTCTAACTGGCGAGTGACAATATTCCGAATTTCTGCCGAAGTAACATCCACCATT
ACGCAGACATCATCCAGTAAACGCTCTTCTTCCTCTTCAACTTCCGGGTCAGCTGCGAGC
ATTTTGATATGCACAGAGTAGCGTGTACCAAGCCCATCCCGCGTTTTGATGTTTAAATGA
CCGCCCAGTTTACGTGCCAGTTGATCGCTCAGCCAGAATGCCAGTGGGTCCGCCTTGCCA
TAGCGATCGTTTTGGGTCTGGTTGATAAACGGGAAGTGCAAATTATCCATTTCATGAATG
CTTACGCCTTCTCCGGTGTCCAGAATGCGGAACGTCAGGCGGTCTTCGGAGGACTCATCC
TGATCAACCTCAAGGGTGATTTTTCCCAATTGCGTTGAGGTCACGGCATATTGCATCAGT
AGCAGCAAAATACGTCGTAAGGCATCGCGATCGCCACGGCGCATATCGTGTGCTTTCAGA
TGATTGTTAATCAGCAGTTGCAGACCTTTACGCTTGATGGCAGGCAACACTGAAGGCACA
ACTTCATCAATTAAATCCTGCACGGAGAACAGCACCGTCTCACTTTTCCAGCTATCGTCC
GCAAGCATGTTCGCTAACTGTATTTCATCGACCAGCCGCACCAGCACATCTGCCTGATTC
GCCAGTTGTTTGCTTTCCGGGGCGTTGAGTTTAGCCGCGCTCTCCGCCAGGGACTGTGCA
GGTTCTTTCAGCGCATCGCCAATGTTTTTCATAAAGGTCATCCGCCCCTGCTGGTTTTTC
TCATACAGACGCTGCGCCTGCTTGAGTTTCTTGTTTACCAGCACTTCGCGATCCTGATCG
CGAATAATGAAAATTTGTGTGCGCGGCGCGACCTGGCTGCGGAACATGCGGATCTCATAC
AGCTCGTTATTGATCGTCGCCTGAATAATCCCCTGATGCTGTTCCGCCATGGTGGTGATG
TTTTGCAGATTCAAATGCGGCAGCAAATGATCGGCAATTTTGTTACTTATGACAGTGCGG
TTCGATTCCTGATCGTGAACCAGCAGGCCGAGCGGCAGCAGTGAGACTATCTCTTCATTG
ATTGCCCGTAAAATGCGCAATTCGTTATTGACCGCCGTGTTGGGTAGACTTTCTGTACTG
CGACTGGAGAAATGGCGAAATGTGGTATAGCCAAATAACGCCAGCGCCAGCAAACCGATG
TTCAGCAGCAGTGGCAGCAGAATGTTTTGCAACGTATCCAGCAATAAGGTGCCATAAGGA
ACCTGCCAGACCAGGCGCATATCAGTAGAGTTGAGTGCCGAGGAGATTTCAATCTTCGTA
CTGTTAAAGTGGATACTGACGCTATCCGTCCCTTCTTTCTCATTATCATTGTTTCCCGTT
GCCGTCGCGTCTGGCTCAAGGCGGAAACTGTCCAGCGGCATACCCGGTGGGATCAAATCA
TTAATCGGCAGATCAAAAGCCACGACCGTTGCCAGATGTCCTGGCTGGTTAAAGGTAGTA
CGCAAGGTAAAGTAATGACCGTTCTGCCAGGCCAGGCGGCGCATGTTAGAAAAACTTTCG
CGTTCATCGAGGGCGTTGGCCTGTTGCAACATCTCTGCACGACGTGAATCAACAATGTCA
CTGACGGTCGATTCTTTAAATCCGGAGGTGAGATCTTTGAGGGGCAGGGTTGAGATCAGT
ACCAGACTGTTATCCTGACCATTCAGGTAATACATTGACCACGGTACATTTTCTGCGCCC
CACAATGTATCCAGATAAGTGGACATCCGTTGAGTCATCTCAAGCGTTGAGTTGTCGTGA
GAGCCAAAGATTAACGCTTCCGTTTTGCGGCGCGGTTTTTCCAGATAGTAGACATCCTGT
TTCAGGCGCGTCTCTTGTAAACCTTCGCCGGAGGAGGGGGAGGTCGTCGCGGCAATGTTG
TCGTAGATCTGCCAGGTCACGTAACGCCAGGTATCGACGCGCTTTTGGATTGCGTGGGTA
ATGTCGACAATCTGGTAACTTTTATCTTTCAGCCAGGCGTTAACGGCGCTTTGTACCATT
ACACCCATCGTCACCAGTAACACAATGATCAACAGTAAAAAGAAGCGGGTAATGCTCCCG
GGTAGGAGTGAAAAGCGGGTCGTGGCCGTTGTCTCTTTCTGACGCATTCGTGTTTATGAC
CTGTTAAAACTTCGCGAAGTGATAGGGCAGTATAAAGGGTACAGTGTGAAATTCCAGACT
CTTACCTGATTGATGATTCTCTATTCTCCTGTGATATTTATCATCCTGTATGGGGGGAAA
TAGATGTACAAGCGCCATTTTGCTGTACAAATAACCTACGAAAAGCCCAACGAAATTAAT
TGCAAATAAACGAAAATTGCTGGAAATTATGCTGATGTTAATTATTTGTGAAATAGTTAA
CAAGCGTTATAGTTTTTCTCTGGTAGCACAGAATAATGAAAAGTGTGTAAAGAAGGGTAA
AAAAAACCGGATGCGAGGCATCCGGTTGAAATAGGGGTAAACAGACATTCAGAAATGAAT
GACGGTAATAAATAAAGTTAATGATGATAGCGGGAGTTATTCTAGTTGCGAGTGAAGGTT
TTGTTTTGACATTCAGTGCTGTCAAATACTTAAGAATAAGTTATTGATTTTAACCTTGAA
TTATTATTGCTTGATGTTAGGTGCTTATTTCGCCATTCCGCAATAATCTTAAAAAGTTCC
CTTGCATTTACATTTTGAAACATCTATAGCGATAAATGAAACATCTTAAAAGTTTTAGTA
TCATATTCGTGTTGGATTATTCTGCATTTTTGGGGAGAATGGACTTGCCGACTGATTAAT
GAGGGTTAATCAGTATGCAGTGGCATAAAAAAGCAAATAAAGGCATATAACAGAGGGTTA
ATAACATGAAAGTTAAAGTACTGTCCCTCCTGGTCCCAGCTCTGCTGGTAGCAGGCGCAG
CAAACGCTGCTGAAGTTTACAACAAAGACGGCAACAAATTAGATCTGTACGGTAAAGTAG
ACGGCCTGCACTATTTCTCTGACAACAAGTCAGAAGACGGCGACCAGACCTATGTACGTC
TTGGTTTCAAAGGCGAAACTCAGGTTACTGACCAGCTGACCGGTTACGGCCAGTGGGAAT
ATCAGATCCAGGGCAATACCTCTGAAGACAACAAAGAAAACTCCTGGACCCGTGTGGCAT
TCGCAGGTCTGAAATTCCAGGATGTTGGTTCTTTCGACTACGGTCGTAACTACGGCGTTG
TTTACGACGTAACTTCCTGGACCGACGTACTGCCAGAATTCGGTGGTGACACTTACGGTT
CTGACAACTTCATGCAGCAGCGTGGTAACGGCTTCGCGACCTACCGTAACACTGACTTCT
TCGGGCTGGTTGATGGCCTGAACTTTGCTGTTCAGTACCAGGGCAAAAATGGTAGCGTAA
GCGGCGAAGGCATGACCAACAATGGTCGTGGTGCTCTGCGTCAGAATGGCGACGGTGTCG
GCGGATCTATCACTTATGATTACGAAGGCTTCGGTATCGGTGCTGCAGTTTCCAGCTCCA
AACGTACTGATGCTCAGAACACCGCTGCTTACATCGGTAACGGCGACCGTGCTGAAACCT
ACACTGGTGGTCTGAAATACGATGCTAACAACATCTACCTGGCTGCTCAGTACACCCAGA
CCTACAACGCAACTCGCGTAGGTTCCCTGGGTTGGGCGAACAAAGCACAGAACTTCGAAG
CTGTTGCTCAGTACCAGTTCGACTTCGGTCTGCGCCCGTCTGTAGCATACCTGCAGTCTA
AAGGTAAAAACCTGGGCACCATCGGTACTCGTAACTACGACGACGAAGATATCCTGAAAT
ATGTTGATGTTGGTGCAACCTACTACTTCAACAAAAACATGTCCACCTACGTTGACTACA
AAATCAACCTGCTGGACGACAACCAGTTCACTCGTGACGCTGGCATCAACACTGATAACA
TCGTAGCTCTGGGTCTGGTTTACCAGTTCTAATCTCGATTGATATCGAACAAAGGGCCTG
CGGGCCCTTTTTTCATTGTTTTCAGCGTACAAACTCAGTTTTTTGGTGTACTCTTGCGAC
CGTTCGCATGAGGATAATCACGTATGGAAATAAGCTTTACCCGCGTGGCACTGCTGGCTG
CCGCGCTCTTCTTTGTTGGTTGCGATCAAAAACCACAACCCGCCAAAACCCACGCTACTG
AAGTTACCGTTCTTGAAGGCAAAACCATGGGTACCTTCTGGCGTGCCAGCATCCCGGGCA
TTGATGCCAAACGCAGTGCCGAACTTAAAGAAAAGATTCAGACCCAGCTGGACGCCGACG
ATCAGCTGCTTTCGACCTATAAAAAAGATTCCGCGCTGATGCGCTTTAACGACTCGCAAA
GTTTGTCGCCGTGGCCGGTAAGTGAAGCGATGGCCGATATCGTCACCACCTCGCTGCGCA
TTGGCGCAAGGACCGATGGTGCGATGGATATAACCGTCGGGCCGCTGGTGAATCTGTGGG
GCTTTGGCCCGGAACAACAGCCGGTTCAAATTCCGAGCCAGGAACAGATCGATGCGATGA
AAGCCAAAACCGGCTTACAGCACCTGACGGTCATTAATCAGTCGCATCAGCAATATCTGC
AAAAAGACCTGCCGGATTTATATGTCGATCTCTCCACCGTCGGTGAAGGTTATGCGGCGG
ATCACCTGGCACGCTTGATGGAGCAGGAAGGGATTTCCCGCTATCTGGTGTCGGTGGGCG
GCGCGCTGAACAGCCGTGGTATGAACGGTGAAGGCCTGCCGTGGCGGGTAGCGATTCAAA
AACCAACCGATAAAGAAAACGCGGTTCAGGCTGTGGTGGATATCAACGGTCATGGGATTA
GCACCTCTGGCAGCTACCGTAACTATTACGAATTGGACGGCAAACGTCTTTCCCATGTTA
TCGATCCGCAAACCGGGCGTCCCATCGAACACAATCTGGTATCCGTGACGGTGATTGCTC
CGACGGCGCTGGAAGCCGATGCCTGGGATACTGGCTTGATGGTACTCGGGCCGGAGAAAG
CCAAAGAGGTTGTTCGCCGGGAAGGGCTGGCGGTTTATATGATCACCAAAGAAGGCGATA
GCTTTAAAACCTGGATGTCACCACAGTTTAAAAGCTTCCTTGTCAGCGAAAAAAATTAAA
GCGCAAGATTGTTGGTTTTTGCGTGATGGTGACCGGGCAGACTAAAGGCTATCCTTAACC
AGGGAGCTGATTATGAAAAACGCCACATGCTTAACTGACGATCAACGCTGGCAATCTGTC
TTAGCCCGCGACCCGAATGCCGACGGCGAATTCGTTTTCGCCGTGCGCACCACAGGCATC
TTTTGCCGTCCGTCTTGCCGCGCCAGACATGCCTTGCGGGAAAATGTCTCCTTCTACGCA
AATGCCAGCGAGGCACTCGCCGCCGGATTTCGCCCCTGCAAACGCTGCCAACCTGATAAA
GCCAATGCCCAGCAACATCGGTTGGATAAAATCACCCACGCGTGTCGACTGCTGGAACAG
GAAACGCCTGTAACGTTGGAAGCCTTAGCTGACCAGGTGGCGATGAGTCCATTTCATCTA
CATCGGTTGTTTAAAGCGACTACCGGAATGACGCCTAAAGCCTGGCAACAGGCCTGGCGC
GCTCGCCGTTTGCGCGAATCGCTGGCGAAAGGGGAGAGCGTGACGACGTCTATTCTTAAC
GCCGGATTCCCCGACAGCAGCAGTTACTACCGCAAAGCTGACGAAACGCTGGGCATGACG
GCTAAACAATTCCGTCACGGTGGCGAAAATCTGGCGGTGCGTTACGCGCTGGCTGATTGT
GAGCTGGGTCGTTGCCTGGTGGCAGAAAGCGAGCGGGGGATTTGCGCGATATTGCTGGGC
GATGATGACGCGACATTAATCAGCGAGTTGCAGCAGATGTTTCCCGCTGCCGACAACGCG
CCTGCCGATCTGATGTTTCAGCAACATGTGCGTGAAGTGATCGCCAGCCTCAATCAACGC
GATACGCCGCTGACGTTACCGCTGGATATTCGCGGCACTGCTTTTCAGCAACAAGTCTGG
CAGGCACTGCGCACGATACCTTGCGGTGAAACCGTCAGTTATCAGCAACTGGCTAACGCC
ATCGGCAAACCGAAAGCGGTACGGGCCGTTGCAAGTGCCTGTGCCGCCAACAAGCTGGCT
ATCGTTATACCCTGTCATCGGGTAGTACGCGGTGATGGATCGCTTTCAGGTTACCGCTGG
GGCGCGTCGCGCAAAGCGCAACTGCTGCGCCGCGAAGCTGAGAATGAGGAGAGGTAATGT
TGGATCTGTTTGCCGATGCTGAACCGTGGCAAGAGCCACTGGCGGCTGGTGCGGTAATTT
TACGGCGTTTTGCTTTTAATGCTGCGGAGCAACTGATCCGCGATATTAATGACGTTGCCA
GCCAGTCGCCGTTTCGCCAGATGGTCACCCCCGGGGGATATACCATGTCGGTGGCGATGA
CCAACTGTGGGCATCTGGGCTGGACGACCCATCGGCAAGGTTATCTCTATTCGCCCATTG
ATCCGCAAACAAATAAACCGTGGCCCGCCATGCCGCAGAGTTTTCATAATTTATGTCAAC
GTGCGGCTACGGCGGCGGGCTATCCAGATTTCCAGCCAGATGCTTGTCTTATCAACCGCT
ACGCTCCTGGCGCGAAACTGTCGCTGCATCAGGATAAAGACGAACCGGATCTGCGCGCGC
CAATTGTTTCTGTTTCTCTGGGCTTACCCGCTATTTTTCAATTTGGCGGCCTGAAACGAA
ATGATCCGCTAAAACGATTGTTGTTGGAACATGGCGATGTGGTGGTATGGGGCGGTGAAT
CGCGGCTGTTTTATCACGGCATTCAACCGCTGAAAGCGGGGTTTCATCCACTCACCGGCG
ACTGCCGTTACAACCTGACATTCCGTCAGGCAGGTAAAAAAGAATAAAAATAAGAATTAT
TATTGCTGTGCGCGCGAAGATGTTTAAACTGCGGGCTGTAATTCATTGTCCGGGTTTTCT
GCATGGAACTTCTTGTACTTGTCTGGCGGCAGTATCGCTGGCCATTTATCAGTGTGATGG
CGCTAAGCCTCGCCAGTGCGGCTTTAGGCATTGGCTTAATTGCTTTTATCAATCAGCGCC
TTATCGAAACGGCGGATACCAGTCTGCTGGTGTTGCCGGAGTTTCTGGGATTATTGCTGC
TGTTGATGGCAGTCACTCTCGGATCGCAACTGGCGCTCACCACTTTGGGGCATCACTTCG
TTTACCGACTGCGTAGTGAATTTATCAAGCGGATTCTGGATACCCACGTCGAGCGCATTG
AACAACTCGGTAGCGCCTCGTTGCTGGCGGGATTAACCAGCGATGTGCGCAATATCACCA
TTGCTTTTGTGCGTCTGCCGGAACTGGTGCAGGGGATCATTCTCACTATCGGTTCCGCGG
CGTATCTGTGGATGCTGTCGGGCAAAATGTTGCTGGTAACGGCTATCTGGATGGCAGTCA
CCATCTGGGGCGGTTTTGTGCTGGTGGCGCGGGTGTACAAACATATGGCGACCCTGCGTG
AAACCGAAGACAAGCTGTACACGGATTTTCAAACCGTACTCGAAGGGCGCAAAGAGCTGA
CTCTGAACCGGGAACGCGCCGAGTATGTGTTTAACAACCTCTACATTCCTGATGCGCAAG
AGTATCGCCATCATATTATTCGCGCAGACACCTTCCATCTTAGTGCCGTGAACTGGTCAA
ACATCATGATGCTGGGCGCAATCGGTCTGGTGTTCTGGATGGCGAACAGTCTCGGTTGGG
CTGATACCAACGTTGCCGCGACCTATTCGTTGACGTTGTTATTCCTGCGTACGCCGCTGC
TTTCGGCGGTTGGCGCATTGCCGACGCTGCTGACGGCGCAGGTGGCGTTTAACAAGCTGA
ACAAATTCGCGCTCGCGCCTTTCAAAGCAGAGTTTCCGCGCCCGCAGGCGTTTCCCAACT
GGCAAACGCTGGAGCTGCGTAACGTGATGTTTGCTTATCAGGATAACGCGTTTTCCGTTG
GTCCGATTAATCTCACCATCAAACGTGGCGAGCTGCTGTTTCTGATTGGCGGCAACGGTA
GCGGAAAATCGACGCTGGCGATGTTGTTGACGGGCTTGTATCAGCCACAAAGCGGCGAAA
TCTTGCTGGATGGCAAACCTGTCAGCGGCGAACAACCGGAAGATTATCGCAAACTGTTTT
CGGCAGTGTTTACCGATGTCTGGCTGTTTGATCAACTGCTGGGGCCGGAGGGTAAACCCG
CTAACCCGCAACTGGTTGAGAAGTGGCTGGCGCAGCTGAAAATGGCTCATAAGCTTGAGT
TAAGCAACGGGCGTATTGTTAACCTGAAGTTATCAAAAGGGCAGAAAAAACGCGTGGCGC
TGTTGCTGGCGCTGGCAGAAGAACGCGATATTATCCTGCTGGATGAATGGGCGGCGGATC
AGGATCCACACTTCCGTCGTGAGTTTTATCAGGTGTTGCTGCCGCTGATGCAGGAGATGG
GTAAAACTATTTTCGCCATCAGTCATGATGATCATTACTTTATCCACGCCGACCGCCTGC
TGGAGATGCGCAACGGGCAACTTAGCGAGCTGACGGGCGAAGAGCGCGATGCCGCTTCGC
GTGATGCCGTTGCCCGGACGGCATAATATTACGACGCTGACCTGGCGGACTGCTGCCGCC
AGGTCAATATGCTAAAAATCCCTTCATTTCTAATAACCCTATAATTAATCAACGAAATTA
TAATGTTTCTAAAATTAGAATATAATTTATAAACATTATTTAAATGTTGTTACTTAAGTG
TTACCGTTGATGCCGCGCAAATCTCACCTGCAATAAAGCGACTAAAAGTAAGGCATTAAC
AAGATGAAAAAAGTGACTGCCATGCTCTTCTCGATGGCCGTGGGGCTTAATGCCGTTTCG
ATGGCGGCAAAAGCGAAAGCGTCCGAGGAGCAGGAAACTGATGTACTGTTGATTGGCGGC
GGCATTATGAGCGCCACGTTGGGGACCTATTTACGCGAGCTGGAGCCTGAATGGTCGATG
ACCATGGTGGAGCGCCTGGAGGGTGTCGCGCAGGAGAGTTCGAACGGCTGGAATAACGCC
GGAACCGGGCATTCTGCACTGATGGAACTGAACTACACCCCGCAAAACGCCGATGGCAGC
ATCAGTATTGAAAAAGCAGTCGCCATTAACGAAGCATTTCAGATTTCCCGCCAGTTCTGG
GCGCACCAGGTCGAGCGCGGCGTGCTGCGTACTCCGCGTTCATTTATCAATACCGTTCCG
CATATGAGCTTTGTCTGGGGCGAGGATAACGTTAATTTCCTGCGCGCCCGTTACGCCGCG
TTGCAACAAAGCTCGCTGTTTCGCGGTATGCGTTACTCTGAAGATCACGCGCAGATCAAA
GAGTGGGCACCGTTAGTGATGGAAGGGCGCGATCCGCAACAGAAAGTGGCAGCCACGCGT
ACGGAAATTGGTACCGATGTGAACTACGGCGAGATCACCCGCCAGTTAATTGCTTCCTTG
CAGAAGAAATCTAACTTCTCGCTGCAACTCAGCAGCGAAGTCCGCGCCCTAAAGCGTAAT
GACGATAACACCTGGACCGTTACCGTTGCCGATCTGAAAAATGGCACTGCACAGAACATC
CGTGCGAAATTTGTCTTTATCGGCGCGGGCGGTGCGGCACTGAAGCTGTTACAGGAATCG
GGGATTCCGGAAGCGAAAGACTACGCCGGTTTCCCGGTGGGCGGTCAGTTCCTTGTTTCG
GAAAACCCGGACGTGGTTAATCACCATCTGGCGAAGGTTTACGGTAAAGCATCCGTTGGC
GCACCACCGATGTCGGTTCCGCATATCGATACCCGTGTTCTGGACGGTAAACGCGTAGTG
CTGTTTGGGCCATTTGCCACCTTCTCAACCAAATTCCTCAAAAACGGTTCATTGTGGGAT
CTGATGAGTTCCACCACCACCTCTAACGTGATGCCGATGATGCACGTCGGGCTGGATAAT
TTCGATCTGGTGAAATATCTGGTGAGTCAGGTGATGTTGAGTGAAGAGGATCGTTTTGAA
GCGTTGAAAGAGTACTATCCGCAAGCGAAAAAAGAGGACTGGCGTTTGTGGCAAGCGGGG
CAGCGTGTGCAGATTATCAAGCGTGATGCCGATAAAGGTGGTGTACTGCGTCTGGGTACT
GAAGTGGTCAGTGACCAGCAAGGAACCATTGCCGCGCTCCTGGGGGCATCGCCAGGGGCG
TCAACCGCCGCGCCGATTATGTTGAATCTGCTGGAAAAAGTATTTGGCGATCGCGTTTCC
AGCCCGCAATGGCAGGCTACGTTGAAAGCGATCGTTCCGTCTTATGGACGCAAGCTGAAC
GGTGATGTAGCGGCAACAGAACGCGAGTTGCAGTACACCAGCGAAGTGCTGGGGCTGAAA
TACGACAAACCGCAAGCAGCAGATAGTACGCCGAAACCGCAGCTGAAACCGCAACCCGTT
CAAAAAGAAGTGGCGGATATTGCGTTGTAATGATGTGCCACATCCGGCATGGTATGCCGG
ATGTGGCGTATGCTGATAAGACGCGCCAGCGTCGCATCAGGCAACCGGCTCGGGCGTTAG
ATGTTGGATGCGGCGTAACCGCCTTATCCAACCTACGGGGTGGAGCACTTCACAGCGGTG
TAGGCCTGATAAGACGCGTCAGCGTCGCATCAGGCAACCGGCTCGGACGTTGGATGTTGG
ATGCGGCGTAACCGCCTTATCCGACCTACGGGGTGGAGCACTTCACAGCGGTGTAGGCCT
GATAAGACGCGCCAGCGTCGCATCAGGCAACCGGCTCGGGCGTTAGATGTCGGATGCGGC
GTGACCGCTTTATCCAACCTACGGGGTGCCGCACTTCACGGCAGTTTAGCGAACTACCGC
GTTGTCAATCTTCTCTTCCGCCTTCCAGACGCGGTACTTCACATCTACATTGTCTGGCGT
ATACACCACGATCGGCAGCTTGCTGTTGTAACGCAGCATTCCAGCATCACCCAGATACGC
GGTGACAAATTTCTTCTCTTTTTTGCCATCCGGGCAGGCCATCATCGTCGAAACCGGGGA
ACTGACTTTATCAAAGACATAATAATCATAGCCCCAGCCTTCCAGCGTTTTGCTTTCCAG
CTTCCCGCCGAGACGATGCAAATTGCAATCGACTTCCAGCGTCTGACCGATTAACAGTTC
TACTTTCAGGGTAGATTCCTCTTCTTGCGGGGTTAACTGAATCACCTGACGCTTCATGCC
TTTTTCAGCTTGTGGATAAGGCGCGATTTTTTCCAGTGGCTGGACGCTCTCTGCCGCCCA
GGCGGAAGTGGTGGCGAAAGCGGCAAACAATACTGCAGGTAGAATGGTCTTCATTTTTTG
CTTTCCTTCTTCATTTATAGGTTTGCACCGATGATGTCGCTGAAGGTTAACATATTCATC
AGATTTATTAATTTGCTTTATGAATAACTTAAAGAATATTCAGACAATTTTACCTGCTCT
TTTAGTGTTAAATTCTGATGAGAGAGCAAACCAGCAGAAATATCTCTGGTGAATTAATCG
CTATATAAATATATTTATAACCATTTGAAATGTGAGCAAAAGCCCGTTTTTGCCACGCTT
CCCGCCACTCTTTTGATCCTGCTACAGGTTTTACCTCGATCGGGGTATGCATCTTTGACA
CATCCTTTAATATCTTAGCGGCTATAAAAATGGCTTATTAATTATGCGGTTTATTTGGTC
GCTCTCAATTTTCAGAGCGCGTTAATGATGGAAGGTCAATGTGAAGATTGATGCATCCCG
TCGGGGCATACTCACTGGTCGCTGGCGCAAAGCCAGTAACGGTATCCGTCCGCCCTGGTC
CGGTGATGAATCTCATTTTCTGACCCATTGCACCCGCTGCGACGCTTGTATTAATGCTTG
TGAAAACAACATTCTGCAACGCGGCGCGGGCGGCTATCCGAGCGTTAATTTCAAAAATAA
CGAGTGCAGCTTCTGTTACGCCTGCGCGCAGGCTTGCCCCGAATCGCTATTTTCTCCGCG
CCACACCAGGGCCTGGGATTTGCAGTTCACCATTGGGGACGCGTGCCTGGCGTATCTGTC
AGTTGAATGCCGCCGCTGTCAGGATAGCTGTGAGCCAATGGCAATTATCTTTCGCCCGAC
GCTCTCCGGGATCTACCAGCCGCAACTTAATAGCCAACTTTGCAACGGATGTGGAGCATG
TGCAGCCAGCTGTCCGGTATCAGCCATAACTGCGGAGTATCTCCATGCACACTAACTGGC
AAGTTTGCAGCCTGGTCGTGCAGGCCAAAAGCGAACGAATTTCAGACATCAGCACCCAAC
TGAACGCCTTTCCCGGCTGTGAAGTTGCTGTCAGCGACGCGCCGAGCGGTCAGTTGATTG
TGGTGGTGGAAGCAGAAGACAGCGAAACGCTGATCCAAACCATTGAGTCAGTACGCAACG
TAGAGGGCGTGCTGGCGGTGTCGCTGGTTTATCACCAGCAGGAAGAGCAAGGTGAGGAAA
CACCATGAAACTCAGTCGTCGTAGCTTTATGAAAGCTAACGCCGTTGCGGCCGCTGCGGC
GGCTGCCGGTCTCAGCGTGCCGGGCGTTGCCCGCGCCGTTGTTGGTCAGCAGGAAGCCAT
CAAATGGGATAAAGCGCCGTGCCGTTTCTGCGGTACTGGTTGCGGCGTTCTGGTCGGAAC
GCAGCAGGGGCGTGTGGTGGCCTGTCAGGGCGACCCGGACGCACCGGTTAACCGTGGCCT
GAACTGCATTAAGGGCTATTTCCTGCCCAAGATCATGTACGGTAAAGACCGTTTGACGCA
GCCGCTGCTGCGTATGAAAAACGGTAAATATGACAAAGAAGGCGAATTTACCCCAATCAC
CTGGGATCAGGCCTTCGATGTGATGGAAGAGAAATTCAAAACCGCCCTGAAAGAAAAAGG
GCCGGAATCGATCGGTATGTTCGGTTCTGGTCAGTGGACTATCTGGGAAGGTTATGCCGC
GTCCAAGCTGTTTAAAGCGGGCTTCCGTTCGAACAACATCGACCCGAACGCGCGTCACTG
TATGGCGTCGGCAGTAGTTGGCTTTATGCGTACCTTTGGTATGGATGAGCCGATGGGCTG
CTATGACGACATCGAGCAGGCTGACGCGTTTGTGCTGTGGGGCGCAAACATGGCGGAAAT
GCACCCGATCCTCTGGTCGCGCATCACTAACCGTCGTCTCTCTAACCAGAACGTCACCGT
GGCGGTGCTTTCTACCTACCAGCATCGTAGCTTCGAGCTGGCGGATAACGGCATCATCTT
TACTCCGCAATCTGACCTGGTGATCCTGAACTACATCGCCAACTATATCATTCAAAACAA
TGCGATAAATCAGGACTTCTTCAGCAAGCACGTCAACCTGCGCAAAGGTGCGACGGACAT
CGGCTACGGTTTACGTCCGACCCATCCGCTGGAAAAAGCAGCGAAGAATCCGGGTTCTGA
TGCTTCCGAACCGATGAGCTTTGAAGATTACAAAGCCTTCGTTGCTGAGTATACGCTGGA
AAAAACCGCTGAAATGACCGGCGTGCCGAAAGACCAGTTAGAACAACTGGCGCAGCTGTA
TGCCGATCCGAACAAGAAAGTCATCTCCTACTGGACGATGGGCTTCAACCAGCATACCCG
TGGTGTGTGGGCCAACAACCTGGTCTACAACCTGCACCTGCTGACCGGCAAAATTTCCCA
GCCGGGTTGCGGTCCGTTCTCCCTGACCGGGCAGCCTTCCGCGTGTGGTACTGCGCGTGA
AGTGGGCACCTTTGCCCACCGTCTGCCTGCGGACATGGTGGTGACTAACGAGAAACACCG
TGATATCTGCGAGAAGAAGTGGAATATCCCGAGCGGCACCATTCCGGCGAAAATCGGTCT
GCACGCGGTGGCACAAGACCGTGCGCTGAAAGACGGCAAGCTGAATGTTTACTGGACTAT
GTGTACCAACAACATGCAGGCCGGGCCGAACATCAATGAAGAGCGTATGCCGGGCTGGCG
CGATCCGCGCAACTTCATCATCGTCTCCGATCCGTATCCGACAGTCAGTGCGCTGGCCGC
CGACTTGATCCTGCCGACCGCAATGTGGGTAGAGAAAGAGGGCGCTTACGGTAACGCCGA
ACGCCGTACTCAGTTCTGGCGTCAGCAGGTACAGGCACCGGGCGAAGCGAAATCGGATCT
CTGGCAGTTAGTCCAGTTCTCCCGCCGCTTCAAAACTGAAGAAGTATGGCCGGAAGAGCT
GCTGGCGAAGAAACCGGAACTGCGTGGCAAAACGCTGTACGAAGTTCTGTATGCCACCCC
CGAAGTGAGCAAATTCCCGGTATCCGAACTGGCGGAAGATCAGCTGAACGATGAATCCCG
CGAGCTGGGCTTCTATCTGCAAAAAGGGTTGTTCGAAGAGTACGCATGGTTTGGTCGCGG
TCACGGTCACGATCTCGCGCCGTTCGATGACTACCACAAAGCGCGCGGTCTGCGCTGGCC
GGTGGTGAACGGTAAAGAAACGCAGTGGCGTTACAGCGAAGGTAACGACCCGTACGTGAA
AGCGGGCGAAGGCTATAAGTTCTACGGTAAACCGGATGGTAAAGCGGTGATCTTCGCGCT
GCCGTTCGAACCGGCGGCGGAAGCACCGGATGAAGAGTACGACCTGTGGCTCTCTACCGG
ACGCGTCCTGGAGCACTGGCACACCGGCAGTATGACTCGCCGTGTGCCGGAACTGCACCG
TGCCTTCCCGGAAGCGGTCCTGTTTATTCACCCGTTGGATGCGAAAGCGCGCGATCTGCG
CCGTGGCGACAAAGTGAAAGTGGTTTCTCGCCGTGGCGAAGTGATCTCGATTGTCGAAAC
GCGCGGTCGTAACCGTCCGCCGCAGGGCCTGGTGTACATGCCGTTCTTCGACGCCGCACA
GCTGGTTAACAAACTAACGCTGGACGCGACCGATCCGCTCTCGAAAGAGACGGACTTCAA
GAAGTGCGCGGTCAAACTGGAGAAGGTGTAAGCCATTATGTCCCGGTCAGCGAAACCTCA
AAATGGTCGCCGCCGCTTTCTGCGCGATGTCGTTCGCACAGCAGGCGGGCTGGCTGCCGT
GGGTGTGGCGCTGGGGTTACAACAGCAAACCGCACGCGCATCTGGCGTGCGGTTGCGCCC
GCCCGGAGCCATAAACGAGAACGCCTTTGCCAGTGCCTGTGTGCGTTGCGGTCAGTGTGT
TCAGGCTTGCCCTTACGACACCTTAAAACTGGCGACGCTGGCCTCTGGCCTGTCGGCGGG
CACGCCATATTTTGTCGCACGGGATATTCCTTGCGAAATGTGTGAGGACATTCCGTGCGC
CAAAGTGTGCCCGAGCGGTGCGCTGGATCGTGAGATTGAATCGATCGACGACGCGCGGAT
GGGGCTGGCGGTACTGGTGGACCATGAAAACTGTCTCAACTTTCAGGGGCTGCGCTGCGA
TGTTTGTTATCGCGAATGCCCGAAAATTGATGAGGCCATCACCCTGGAGCTGGAGCGCAA
CACGCGTACCGGTAAGCACGCCCGCTTTCTGCCGACGGTTCACAGCGACGCCTGTACCGG
TTGCGGTAAGTGCGAAAAAGTGTGCGTGCTGGAACAACCGGCAATCAAGGTGTTACCGCT
GTCACTGGCGAAAGGGGAGTTAGGTCACCATTACCGCTTCGGCTGGCTGGAGGGGAACAA
TGGCAAATCGTAAACGTGACGCCGGGCGCGAGGCGCTGGAGAAAAAAGGCTGGTGGCGCA
GTCACCGTTGGCTGGTGTTACGTCGCCTTTGTCAGTTCTTCGTGCTGGGGATGTTTTTGA
GCGGTCCGTGGTTTGGTGTGTGGATCTTGCACGGCAACTACAGCAGTAGCCTGTTATTCG
ACACCGTTCCGCTGACCGATCCGCTGATGACGCTGCAAAGTCTTGCCAGCGGTCATCTGC
CTGCCACGGTGGCGTTGACCGGTGCGGTGATTATCACCGTGCTCTACGCTCTGGCAGGAA
AGCGATTATTTTGCAGCTGGGTCTGCCCGCTGAACCCGATTACCGACTTAGCGAACTGGT
TACGCAGGCGCTTTGACCTCAATCAGTCTGCGACGATCCCTCGCCACATTCGCTACGTAC
TGTTGGTGGTCATTCTGCTGGGATCGGCCTTAACTGGCACGCTCATCTGGGAATGGATCA
ACCCCGTTTCTCTGATGGGGCGTAGCCTGGTAATGGGCTTCGGCAGCGGCGCGCTGCTTA
TTGTCGCGCTGTTTTTATTTGATCTACTGGTCGTTGAACACGGCTGGTGCGGGCACATTT
GTCCGGTTGGCGCGCTGTATGGCGTGCTGGGTAGCAAAGGTGTGATTACCGTTGCGGCCA
GCGATCGGCAGAAATGTAACCGCTGTATGGATTGTTTTCATGTTTGCCCGGAACCGCATG
TGCTACGTGCCCCGGTGCTGGATGAACAAAGCCCGGTGCAGGTCACCAGCCGCGATTGCA
TGACGTGCGGTCGCTGCGTGGATGTCTGTTCTGAGGATGTATTTACAATAACTACACGAT
GGAGTTCGGGAGCGAAATCATGAAAAGCCATGACCTGAAGAAAGCGCTGTGTCAATGGAC
GGCGATGCTGGCCCTGGTGGTAAGCGGCGCGGTTTGGGCGGCTAATGGCGTCGATTTTAG
CCAGTCGCCGGAAGTATCCGGGACGCAGGAAGGGGCCATTCGGATGCCAAAAGAGCAGGA
TCGGATGCCGCTGAACTATGTGAATCAGCCGCCAATGATCCCGCATAGCGTTGAAGGTTA
TCAGGTAACGACCAATACCAACCGCTGCTTGCAGTGCCACGGTGTCGAAAGCTATCGCAC
CACTGGCGCGCCGCGTATCAGTCCTACTCACTTTATGGACAGCGACGGCAAAGTGGGCGC
GGAAGTGGCTCCGCGTCGTTATTTCTGTCTGCAATGTCACGTACCGCAGGCCGATACCGC
GCCAATCGTGGGGAATACCTTTACCCCATCAAAAGGTTACGGGAAATAAGAGGTTATTAT
GGGAAATTCTGACCGTAAGCCTGGTCTGATTAAGCGCCTGTGGAAATGGTGGCGTACCCC
CAGCCGTCTGGCGCTGGGGACGCTGCTGTTGATCGGTTTTGTCGGCGGCATCGTCTTCTG
GGGCGGCTTTAACACCGGAATGGAAAAAGCCAATACCGAGGAGTTCTGCATTAGCTGCCA
CGAAATGCGTAACACGGTGTATCAGGAATACATGGATTCCGTGCACTACAACAACCGTAG
CGGCGTCCGTGCGACCTGTCCGGATTGTCACGTTCCGCACGAGTTTGTGCCGAAGATGAT
ACGCAAGCTCAAAGCAAGTAAAGAGCTGTATGGTAAAATTTTTGGCGTTATTGACACGCC
GCAGAAATTTGAAGCTCATCGCCTGACGATGGCACAGAATGAGTGGCGGCGCATGAAGGA
CAATAACTCGCAGGAGTGCCGTAACTGTCACAACTTCGAGTATATGGATACAACCGCCCA
GAAATCGGTTGCCGCGAAGATGCATGACCAGGCGGTGAAAGATGGGCAAACCTGTATTGA
TTGCCATAAAGGGATAGCGCACAAGCTGCCCGATATGCGTGAAGTCGAGCCAGGTTTTTA
ACAGGGTTATTGCGTGGGTATGCTTGAAGCCAGAGAGTTACTTTGTGAGCGGGATGAACG
AACCTTATTTAGTGGCTTGTCATTTACGCTGAACGCAGGAGAGTGGGTACAAATCACCGG
TAGCAACGGCGCGGGGAAGACAACGCTTCTCCGTTTGCTGACGGGGTTGTCTCGCCCTGA
CGCAGGCGAGGTTCTCTGGCAAGGGCAGCCCTTGCATCAGGTACGCGACAGCTACCATCA
AAACCTGTTATGGATAGGCCATCAGCCGGGGATCAAAACCCGGCTGACGGCGTTAGAAAA
TCTGCACTTTTATCATCGCGATGGCGATACCGCACAATGTCTGGAAGCCCTGGCGCAGGC
CGGGCTTGCCGGATTCGAAGATATTCCGGTAAATCAACTTTCTGCCGGGCAACAACGCCG
CGTCGCTTTAGCGCGTCTGTGGCTGACCCGTGCCACGTTATGGATCCTCGACGAGCCTTT
TACCGCGATTGACGTCAACGGCGTCGATCGTCTGACCCAGCGTATGGCGCAGCATACGGA
GCAGGGGGGGATTGTGATTCTGACTACCCACCAGCCGCTCAACGTTGCTGAAAGTAAAAT
TCGCCGCATTTCACTGACGCAAACGAGGGCCGTATGATGTTCTGGCGCATTTTCCGTCTT
GAGCTGCGCGTAGCGTTTCGCCATAGCGCCGAAATCGCCAACCCGCTGTGGTTCTTCCTG
ATTGTAATTACCCTTTTTCCGCTCAGTATCGGTCCGGAGCCGCAACTGCTGGCGCGTATT
GCACCGGGCATTATCTGGGTTGCAGCCCTGCTTTCATCCTTGCTGGCGCTGGAACGACTG
TTCCGTGACGATTTGCAGGACGGCAGTCTTGAACAATTGATGTTGTTGCCGTTACCCTTG
CCCGCCGTTGTGCTGGCGAAGGTGATGGCGCACTGGATGGTAACCGGTCTGCCGTTACTC
ATCCTTTCGCCACTGGTAGCAATGCTACTGGGAATGGATGTTTATGGCTGGCAAGTGATG
GCGCTGACGCTGCTGCTGGGAACGCCTACGCTTGGCTTTCTCGGTGCACCGGGCGTGGCG
CTGACAGTGGGACTTAAACGCGGTGGTGTGCTGCTCAGCATACTGGTGTTACCGCTGACT
ATCCCATTACTCATCTTTGCCACCGCCGCGATGGACGCGGCTTCCATGCATTTGCCCGTT
GACGGGTATCTGGCAATTTTAGGCGCGTTGCTGGCAGGCACCGCGACATTAAGTCCTTTT
GCGACGGCGGCAGCGTTACGAATCAGCATTCAATAACGCTGGATTACTGATTTTTGTTCG
AGTCTGGTATCGAAACTATGTGGAAAACACTGCATCAACTGGCGATCCCACCACGGCTGT
ATCAAATCTGTGGCTGGTTTATACCGTGGCTGGCAATTGCCAGTGTGGTCGTGCTTACCG
TCGGCTGGATCTGGGGATTCGGCTTTGCTCCGGCTGATTATCAACAGGGAAATAGCTACC
GCATTATTTACCTGCATGTGCCTGCGGCGATCTGGTCGATGGGCATTTATGCATCAATGG
CGGTGGCGGCGTTTATTGGCCTTGTCTGGCAGATGAAAATGGCCAACCTGGCGGTGGCGG
CGATGGCCCCCATTGGTGCCGTGTTTACCTTTATTGCCCTGGTTACCGGCTCTGCATGGG
GAAAACCGATGTGGGGCACCTGGTGGGTATGGGATGCACGTCTGACTTCTGAACTGGTGC
TGCTGTTTTTGTATGTGGGTGTGATTGCCCTGTGGCACGCCTTCGACGACCGCCGTCTGG
CGGGCCGTGCGGCAGGTATCCTGGTGCTGATTGGCGTGGTGAATCTGCCGATTATTCATT
ACTCCGTTGAGTGGTGGAACACCCTGCATCAGGGATCAACGCGGATGCAGCAAAGTATCG
ATCCGGCGATGCGTTCGCCGCTGCGCTGGTCGATTTTTGGCTTCCTGCTCCTGTCTGCCA
CGCTGACGCTGATGCGGATGCGGAATTTGATTTTGCTGATGGAAAAACGCCGTCCGTGGG
TGAGTGAACTGATACTGAAAAGAGGCCGTAAATGACCCCTGCATTTGCTTCCTGGAATGA
ATTTTTCGCAATGGGCGGTTACGCCTTTTTTGTCTGGCTGGCGGTGGTGATGACCGTTAT
TCCGCTGGTGGTTTTGGTCGTGCACTCGGTGATGCAGCATCGCGCAATTCTGCGTGGTGT
GGCGCAACAGCGGGCGCGTGAGGCGCGTTTACGTGCTGCGCAACAGCAGGAGGCTGCATG
AATATTCGCCGTAAAAACCGCTTGTGGATTGCCTGTGCCGTGTTGGCAGGGCTGGCGCTG
ACTATCGGTCTGGTGCTATATGCGCTGCGCTCGAATATCGATCTCTTTTATACGCCGGGG
GAAATTCTCTACGGCAAGCGTGAAACTCAGCAGATGCCGGAAGTCGGTCAGCGTCTGCGC
GTTGGCGGGATGGTGATGCCGGGTAGCGTGCAGCGCGATCCCAATTCGCTGAAAGTGACC
TTCACCATTTACGATGCTGAAGGCTCAGTGGATGTCTCTTACGAAGGCATTTTGCCGGAT
CTGTTCCGTGAAGGGCAGGGCGTTGTGGTGCAGGGCGAGCTGGAAAAAGGCAATCATATC
CTCGCAAAAGAAGTGCTGGCGAAACATGATGAAAACTACACGCCGCCAGAAGTTGAGAAA
GCGATGGAAGCTAACCACCGTCGCCCGGCGAGTGTTTATAAGGACCCAGCATCATGATGC
CGGAAATTGGTAACGGGCTGCTGTGCCTGGCGTTAGGGATTGCGCTGCTGCTGTCCGTGT
ATCCGCTATGGGGCGTGGCGCGCGGAGATGCGCGCATGATGGCGTCTTCCCGCTTGTTTG
CCTGGCTGCTGTTTATGTCTGTGGCTGGCGCATTTCTGGTGCTGGTCAATGCTTTCGTGG
TCAACGACTTTACCGTCACCTATGTTGCCAGCAACTCCAATACCCAGCTTCCGGTGTGGT
ATCGCGTGGCGGCTACCTGGGGCGCACATGAAGGCTCACTGCTGCTGTGGGTGCTGCTGA
TGAGCGGCTGGACCTTTGCGGTGGCGATTTTTAGTCAGCGTATTCCGCTGGATATTGTGG
CCCGCGTACTGGCGATAATGGGGATGGTCAGCGTCGGCTTTTTGCTGTTCATTCTCTTTA
CCTCTAACCCATTCTCACGCACGCTGCCGAACTTCCCGATTGAAGGGCGCGATCTTAACC
CGCTGTTACAGGATCCGGGGCTGATCTTCCATCCGCCTCTGCTTTATATGGGGTACGTGG
GTTTCTCGGTGGCGTTTGCTTTTGCCATTGCTTCTTTGCTGAGCGGGCGTCTGGACAGCA
CTTATGCGCGTTTTACTCGTCCGTGGACGCTGGCGGCGTGGATTTTCCTGACGCTCGGCA
TTGTGCTCGGTTCCGCATGGGCCTATTACGAACTCGGCTGGGGTGGCTGGTGGTTCTGGG
ATCCGGTAGAAAACGCCTCGTTTATGCCGTGGCTGGTGGGGACTGCGCTGATGCACTCAC
TGGCGGTCACTGAACAACGCGCCAGCTTCAAAGCGTGGACATTACTGCTGGCAATCAGTG
CCTTCTCGTTGTGTCTGTTGGGGACTTTCCTCGTGCGTTCCGGCGTGCTGGTATCGGTAC
ACGCGTTTGCGTCTGATCCGGCGCGCGGTATGTTTATCCTCGCCTTTATGGTGCTGGTGA
TTGGCGGTTCGCTGCTGCTGTTTGCCGCGCGTGGACACAAAGTTCGCTCACGCGTAAACA
ATGCGCTGTGGTCGCGGGAATCTTTGCTGTTAGCGAACAACGTTTTGCTGGTCGCCGCGA
TGCTGGTAGTGTTGCTGGGGACGCTGCTGCCGCTGGTGCACAAGCAACTGGGACTGGGCA
GTATTTCGATTGGCGAACCGTTCTTCAACACCATGTTTACCTGGCTGATGGTGCCGTTTG
CGCTACTGCTTGGTGTCGGTCCTCTGGTGCGCTGGGGGCGCGATCGCCCACGTAAAATCC
GCAATTTATTGATTATCGCCTTCATCTCTACGCTGGTGCTGTCTCTGCTGCTGCCGTGGC
TGTTCGAAAGCAAAGTTGTGGCGATGACGGTGCTCGGCCTGGCAATGGCCTGCTGGATTG
CGGTGCTGGCAATTGCGGAAGCTGTGCTGCGTATTTCACGCGGCACGAAAACCACCTTCA
GTTATTGGGGGATGGTGGCGGCTCACCTGGGGCTGGCAGTGACAATTGTTGGCATTGCCT
TTAGTCAGAACTACAGTGTTGAGCGTGATGTGCGCATGAAGTCCGGCGATAGCGTCGATA
TTCATGAATATCGCTTCACCTTCCGTGATGTCAAAGAGGTGACTGGCCCGAACTGGCGTG
GCGGTGTGGCGACTATCGGCGTAACGCGAGAGGGTAAACCGGAAACAGTGCTGTATGCGG
AAAAACGTTATTACAACACTGCCGGGTCGATGATGACCGAAGCGGCGATTGACGGTGGCA
TCACGCGTGACCTGTACGCCGCGCTCGGTGAAGAGCTGGAAAACGGCGCGTGGGCTGTGC
GTCTTTACTACAAACCGTTTGTTCGCTGGATTTGGGCGGGCGGGCTGATGATGGCGTTGG
GCGGACTGCTGTGTCTGTTTGATCCTCGCTATCGTAAGCGCGTAAGTCCGCAAAAAACTG
CGCCGGAGGCTGTATGAAGCGCAAAGTATTGTTAATTCCGTTGATTATCTTCCTGGCGAT
TGCCGCGGCGCTGCTGTGGCAGCTGGCGCGTAATGCCGAAGGGGATGATCCGACCAATCT
GGAATCGGCGCTCATTGGCAAGCCAGTGCCGAAGTTTCGCCTCGAATCACTGGACAATCC
GGGGCAGTTTTATCAGGCGGATGTGCTGACTCAGGGCAAACCAGTGCTGCTTAACGTCTG
GGCGACCTGGTGTCCGACCTGCCGTGCGGAACATCAATATCTGAATCAGCTTTCTGCGCA
GGGCATCCGCGTGGTCGGCATGAACTATAAAGACGATCGCCAGAAGGCAATCAGCTGGCT
GAAAGAGCTGGGCAATCCTTACGCGCTAAGCCTGTTTGATGGCGATGGCATGTTAGGGCT
GGATCTCGGTGTCTATGGCGCGCCAGAAACGTTCCTTATTGACGGCAACGGCATCATTCG
CTATCGCCATGCGGGCGATCTCAATCCTCGCGTCTGGGAGGAAGAGATCAAGCCGCTGTG
GGAGAAATACAGTAAGGAGGCCGCACAATGAGGTTTTTATTGGGCGTGCTGATGCTGATG
ATCTCCGGCTCAGCGCTGGCGACCATCGACGTGTTGCAGTTTAAAGATGAAGCACAGGAA
CAACAGTTCCGTCAGCTCACTGAAGAACTGCGCTGCCCGAAATGCCAGAACAACAGCATT
GCCGATTCCAACTCGATGATTGCCACCGACCTGCGTCAGAAAGTGTATGAACTGATGCAG
GAAGGTAAAAGTAAAAAAGAGATTGTCGATTATATGGTGGCACGTTACGGCAACTTCGTC
ACTTACGATCCGCCGTTAACGCCGCTGACCGTGCTGCTGTGGGTGCTGCCAGTAGTGGCT
ATTGGCATTGGCGGTTGGGTCATATACGCCCGCTCGCGGCGTCGGGTACGCGTGGTGCCG
GAAGCGTTTCCTGAACAAAGCGTGCCGGAAGGTAAGCGTGCCGGATATGTTGTTTATCTG
CCGGGTATTGTGGTGGCGTTAATTGTGGCTGGCGTCAGCTACTACCAGACTGGCAATTAT
CAGCAGGTGAAAATCTGGCAGCAGGCCACGGCACAGGCTCCGGCGTTGCTGGACAGGGCG
CTGGATCCGAAAGCCGATCCGCTCAACGAAGAAGAGATGTCGCGTCTTGCGCTGGGGATG
CGTACTCAACTGCAAAAAAATCCGGGAGATATAGAAGGCTGGATTATGTTGGGCCGCGTT
GGCATGGCGCTGGGTAACGCCAGTATCGCCACCGATGCATACGCCACTGCGTATCGCCTC
GATCCGAAGAATAGCGATGCCGCACAGGGATACGCTGAAGCGTTGACACGTTCATCTGAT
CCCAACGACAACCGCCTCGGCGGCGAACTGCTGCGCCAGTTGGTGAGAAGCGACCACAGC
AATATCCGTGTGTTAAGCATGTATGCGTTTAATGCCTTTGAGCAGCAGCGATTTGGCGAA
GCCGTTGCCGCGTGGGAGATGATGTTGAAACTCTTACCTGCCAACGATACTCGCCGTGCG
GTGATTGAACGTAGTATCGCGCAGGCGATGCAACATTTGTCGCCGCAGGAGAGTAAATAA
AAAGTGGCCCGATGGTGATGCCATCAGGCCAGACTGATGACAAAGTGCGCTTAGTTTATG
CCGGATGCGGCGTGAACGCCTTATCCGGCCTACAAAATCGTGTGAATTCAATAAATTGAT
CGATCCGCGTAGGCCTGATAAGCGTAGCGCATCAGGCAGTTTTGCGTTTGTCATAAATCT
CAGCCCGATGATAAATCCATCGGGCTATTTTTATTGTGCCCCGCGTTGTTGCAGGAACAG
AATGGTGGCCGCCACGCGTGAGCGGACATTGAGTTTACGCAGCAGATTGCGAATATGTAC
TTTTACTGTCTGCTCGGAAATATTCAATACCGAGGCAATCTGTTTATTTGACAGCCCCTG
TGCCAGCTCGTGCAGAACATCCAGCTCGCGCTCCGTCAGCACGCTGAAGGGATCTTCTTC
CGCGCCAAACATTTCACGTTCACGTAAGTACTGATTGACGCGTTCGCTAAAGACTTTGCT
GCCTTTCGCTCCGGCACGAATCGCTTCCAGCAATACTTCCGGGTCGCTGTCTTTCAACAG
ATAACCGTCTGCGCCTGCGTCTATCAGCGCAAAGACATCGCTGGAGGCATCGGATACGGT
CAGGATAATAATTTGCGCGGTAACGCCATCCCTGCGCAAGGCATTGAGGGTATCCAGGCC
ACTCATACCTTTCATATTGAGATCCAGCAAGATCACGTCGATATCCAGTCTATTCGCCAG
ATCGATAGCGCTCGCGCCGTCGCCCGCTTCGGCGACTACTTCAAAGCCAGGATCAAGCTC
CAGTAACTGACGAACACCGCGTCGCATAAGTGGATGATCATCCACAATCATCACCTGAAA
AGGCGTTGCTTCAGGCATAGTAGTCTCCTGAGGTTTTATTAGAATCATTATGTTTGAGCG
TAGCGTTGGTAACGCTACCAGGCGCGTGAATGTTACCCCATTTTATGTATGGACATGTAG
TGAAAACTACAACCTTGTCCTTCGCTTTGGCATCATTTTCATTATAAAGACGGAATTTTG
CATCAGCTTCTCATCAAGAAAAACAACTAAAAAATCAATCACAATACTTGTGCATTTCTT
TAAACAGTTTTTAAAAACTGACTCCGGGTATGGAGCTATGGGTATTTTCTGTACCCAATG
CTTTTAACAGCAATTAATTTCATAGGATGAAAGCTCAATGCATCAATCTGGTTCTGTTTC
TCTTTGTCGTTCCGCAATATCTGTTCTGGTGGCTACAGCGTTATATTCACCCATAGCATT
GGCATCAACAGTTGAGTATGGTGAGACAGTTGATGGTGTTGTCCTGGAAAAAGATATCCA
GCTGGTTTATGGGATCGCCAATAATACGAAAATCAATCCTGGCGGAGAACAGCATATTAA
AGAATTTGGTGTAAGTAATAATACTGAAATTAACGGAGGGTATCAGTACATTGAAATGAA
TGGCGCCGCAGAATACTCAGTATTAAATGACGGTTATCAAATTGTTCAAATGGGTGGCGC
GGCAAACCAGACTACGCTCAATAATGGTGTGCTACAGGTTTATGGCGCAGCGAATGATCC
CACGATTAAAGGCGGGCGCTTAATCGTTGAAAAAGATGGGGGGGCCGTCTTTGTCGCTAT
CGAAAAGGGAGGACTACTGGAGGTTAAAGAGGGGGGATTTGCATTTGCGGTAGATCAGAA
AGCAGGCGGTGCTATTAAAACAACCACGCGGGCCATGGAGGTATTCGGAACAAACCGTCT
CGGTCAGTTCGATATCAAGAATGGTATTGCTAATAATATGTTGTTGGAAAACGGCGGAAG
TTTGCGAGTTGAAGAAAATGACTTCGCTTATAATACCACTGTGGATAGTGGCGGCTTACT
GGAGGTTATGGATGGCGGGACTGCAACTGGCGTTGATAAAAAAGCAGGCGGGAAATTAAT
TGTCTCAACGAATGCGCTGGAAGTGAGTGGTACAAACAGTAAAGGCCAATTTAGTATAAA
AGATGGTGTGTCAAAAAATTATGAACTGGATGATGGTTCCGGGCTCATTGTTATGGAGGA
CACGCAGGCCATTGACACTATCCTTGATGAGCATGCCACTATGCAATCGCTGGGAAAGGA
TACTGGTACGAAAGTGCAGGCAAATGCGGTATATGATCTCGGTCGATCAGACCAGAATGG
AAGTATCACGTATTCCTCAAAAGCCATCTCTGAAAATATGGTAATCAACAATGGCCGCGC
TAATGTCTGGGCTGGCACAATGGTTAACGTGTCAGTCAGAGGGAATGATGGCATTCTTGA
GGTCATGAAGCCGCAAATAAATTATGCACCTGCTATGTTGGTGGGTAAGGTAGTGGTTTC
TGAGGGCGCTTCTTTTAGAACGCATGGTGCCGTGGATACCAGCAAAGCGGACGTTTCGCT
CGAAAATAGCGCATGGACCATCATTGCCGATATCACTACGACGAACCAAAACACCCGCCT
CAACTTAGCCAACCTTGTGATGTCTGGCGCAAATGTGATTATGATGGCTGAGACAGTGAC
TCGTTCATCTGTGACAGCAAGTGCGGAAAATTTCATAACGTTGACCACCAATACCCTGTC
GGGAAACGGCAATTTTTATATGCGTACCGATATGGCCAATCATCAGAGCGATCAGCTTAA
CGTCACTGGCCAGGCAACAGGTGATTTCAAAATATTTGTGACGGACACGGGGGCCAGCCC
GGCAGCAGGTGATAGCCTTACACTGGTAACAACGGGCGGCGGTGATGCTGCATTTACGTT
GGGCAATGCCGGAGGCGTTGTTGATATCGGTACGTATGAATATACCTTGCTGGATAATGG
CAACCATAGCTGGAGCCTCGCAGAGAATCGCGCGCAAATTACCCCTTCAACCACTGATGT
GCTGAACATGGCAGCAGCACAACCGCTGGTATTTGATGCAGAACTGGACACCGTGCGTGA
GCGTCTTGGTAGCGTAAAAGGCGTTAATTACGATACGGCGATGTGGAGTTCGGCAATTAA
CACCCGCAACAACGTGACCACTGATGCGGGAGCTGGCTTTGAGCAAACATTGACGGGGCT
GACGCTCGGTATCGATAGCCGTTTCTCCCGTGAAGAAAGCAGCACAATTCGCGGCTTGTT
CTTTGGTTACTCTCATTCTGATATTGGTTTTGATCGCGGCGGCAAAGGTAATGTCGATAG
CTATACCCTGGGGGCTTATGCCGGTTGGGAGCATCAGAACGGTGCCTATGTTGATGGAGT
GGTGAAAGTTGATCGTTTTGCCAACACCATCCATGGCAAGATGAGTAATGGGGCAACAGC
GTTTGGCGATTACAGTAGTAACGGCGCGGGTGCTCATGTCGAGAGCGGGTTCCGTTGGGT
TGACGGATTGTGGAGTGTTAGACCCTATCTGGCCTTTACCGGCTTTACCACAGATGGTCA
GGACTACACGTTATCAAACGGCATGCGCGCTGATGTGGGAAATACCCGGATATTACGCGC
TGAAGCGGGAACGGCGGTAAGCTATCACATGGACCTGCAAAATGGTACGACGCTGGAACC
CTGGCTGAAAGCCGCCGTACGTCAGGAATACGCCGATTCTAACCAGGTGAAAGTTAATGA
CGATGGCAAATTTAATAATGATGTGGCTGGAACCCGTGGCGTTTATCAGGCTGGGATAAG
GTCATCGTTTACCCCGACGTTAAGCGGTCATTTGTCAGTCAGCTATGGCAATGGCGCAGG
GGTAGAATCGCCGTGGAATACTCAGGCGGGAGTGGTCTGGACGTTCTGATAACAGAAAAT
AAACAGGCCGTGATGTGTCGCGGTCTGTTTATCTAATTAATTGCAGATATAAAAAAAAAC
CAACCGTAAAGGTTGGTTTTTTCTTGGGATTTTTGGTCGGCACGAGAGGATTTGAACCTC
CGACCCCCGACACCCCATGACGGTGCGCTACCAGGCTGCGCTACGTGCCGACTCGTGGCT
GCTAATACTACCGTTTTCCACACCGATTGCAAGTAAGATATTTTGCTAACTGATTTATAA
TTAATCAGTTAGCGATAAAACGCTTCTCGTCTGTCAGTACTTGCAATAACAAACTTAACT
GTGGTTTTTCATCTTTCACTCTTTCACCACGTAAGTTGTAAGTGCGGTATTTACCGTTAT
TGTTCAGCACCAGCGTCTTTTTCGGGGTGGTTATTGCCAGCGTATCGTTATCCGCTGCGG
TTACCCAGTAATGACGGCGTTGAGGGTTGAACGAATCCTGACCTTGCGAATATTCGCTGG
CAGGTGTGCTGACATGTAGCAGGCGTTGCATCAGCGTCGTCATCAGATCGGTATGATCAG
TCAGCGCATTAATACGCTGCGCCGGCGTGCCTGGCCAGTGAATCACTAATGGCACCTGCA
GATGACCGTGGGACCAGTCAAAGGTTTCTTCCTCTTCGCTCAGTGGAATACCCCGACCGG
CAGTGATAATTACAACCGTATTGTCCAGTTTGCCAGAATCACGCAGTGCATTGAGCACGC
GGTTGATCTGGTCATCGACATTGCCTGCCGCCCGGCTATATTTCCGTGCAAATGCCTGCT
GATTGCTGTCGTCAATGTTAGTACCATTGAAAGAAACCCACGAGAACCAGCGGTTATCTT
CTTGTGCGTAGCGTCCCAGCCAGTTGATCCACTGCGTGGCGGTCTGCTCGTCGGATTGGG
TGCGTACGCTCGGCATCGAGAAGTCTGACAACAATGCCTGGCGATACAGCGGGCTGGTAA
AGCCATCTGATGAGAATAACCCCAGCTGATAGCCTTGCTGATTAAGCGCAGTAATTAATG
CCGCAGGCGTACGGGTCGACAGAATGCCGTCCATATAGCTCGGCGAGATGCCATAGAACA
GGCCAAAGATGCCGTTGTCTGTAGTGTTGCCGGAGCTCATATGGCGCGTGAACGAAATAT
TTTGCTCAGCAAAACCTGCCAGCGCAGGCATCTGCTTCTCGAAGCGTGAGTAGTTCAGGC
CATCGACAGTAATCAACAGCACATTCTGCCCGGTGCCCATATCGCGATAGCGCAGTTCGC
TTAACGGATACTGAACGGAAACGGCGTCTGGATTACCTTGCTCAATAAGACGGCGTTGAT
ACTCCTGCGCATCAAGCAGACCATGCTTCTCAAGAAAACGTCGCGCCGTCATCGGGTACG
AAAGCGGCAGGTTAGCGCGCTGCATGGTGATCGGGCGATAGAAGTTGGCATCGGCCCAGA
TATACACCACATGCGAGGCGATAAAGGCGATAAATAAGAATGCGGCCAGCGGACGCGCGA
AGCGCCGACGACGCGTCAGGCTGCGCAGCTTTTGCCAGCTCCACGTCGCAAACACCAGTT
CAAGCAATAAAATAACCGGCACGCTAATGAACATCAGCTGCCAGTCGCGCGCCATCTCAT
TTTCGTCTGGATTAATAACCAGTTGCCAGACGATGGGATTAAGATGGAGATGGAAACGAG
TAAAGACTTCGCTATCGATCAGTAATAGCGTCATTCCCGCCGTTGCCAGAATGACGGACA
AAAACCTCATCAGCCTCTGGGAGCCGACGATAAAGGTCAGCGGGAAGAGGATCAGCAAAT
AGGTGGCGAAGACCAGGAAGCTGAAATGGCCGATAATGCTTACGTAGGAATAAATGCGAC
CAGCAAGCGTTGTCGGCCAGTCGGCGATAAACAGGTAACGGCTGCCAATGACGAGCGAAA
GCAGAATATTGAACAGTGCAAACCAGTGCCCCCAACTGACCATTTGGGAGACTTTTTCAC
GGTAGCGCTGACGATGAGTTACCATAACCTGTTATCTGTTTCCCTTAGTGCGCTTTTTCT
TCGTTGATAGAGGACTGTAAGGCGCGGGCAAAAGAGTTGGCAATTGCCTGGCGTTGGGCC
GGGGCAATGCTGGTGTTGATAAGGTTAGTGACCATGTTGCCTAACACCATCAGGGAAAGG
TCGGTCGGAGCCTTATGTTTTTCCAGTACGTTGAGCAGCTCTGCGAGCAATTGTTCAACC
TGTTCATCACTGTAGCGGGAAATTTGTGGCATAAATCGAAATCAGTTAGTTGATGAAAGG
GCAACATATTACCGTAGCAACGGTTTTTTTTCTGCTTTTTTATGCGTTAAATCATTCTCG
TTACGCTGCCTTCTGTAAAATGACCGCCATCTTTTATTGCGTCGCTTAACCGGCGGTGGT
TGAATACCGCCCGGTCTTAAAGGAGAGTTTATCATGAGTCTGGATATCAACCAGATTGCT
CTGCACCAGCTTATCAAGCGTGATGAGCAGAACCTTGAGCTGGTGTTGCGCGATTCATTG
CTGGAACCGACAGAAACCGTCGTTGAGATGGTGGCAGAACTGCATCGGGTCTATAGCGCC
AAAAATAAAGCTTACGGCTTGTTTAGCGAAGAGAGTGAACTGGCGCAGACGCTGCGCTTA
CAGCGTCAGGGCGAAGAGGACTTTCTGGCATTTAGCCGCGCGGCAACCGGCCGCCTGCGT
GACGAATTAGCGAAATATCCTTTTGCTGACGGTGGATTCGTGCTGTTTTGCCACTACCGT
TATCTGGCGGTGGAGTATCTGCTGGTGGCAGTCCTGAGCAACCTGAGCAGTATGCGCGTT
AACGAAAATCTCGACATCAACCCAACCCATTATCTTGATATCAATCATGCGGATATTGTT
GCGCGTATCGATTTAACCGAATGGGAAACCAATCCAGAGTCGACCCGCTATCTCACTTTC
CTGAAAGGGAGAGTAGGGCGCAAAGTGGCGGATTTCTTTATGGATTTCCTCGGGGCCAGC
GAAGGATTGAACGCGAAAGCGCAAAACCGTGGGCTGTTGCAAGCGGTTGATGATTTCACT
GCCGAAGCACAACTGGATAAAGCAGAGCGACAGAACGTGCGCCAGCAGGTTTATAGCTAC
TGTAATGAGCAGCTGCAGGCAGGCGAAGAGATTGAACTGGAATCGCTGTCGAAAGAGCTG
GCAGGCGTAAGCGAAGTGAGCTTCACGGAGTTTGCGGCTGAAAAAGGCTACGAACTGGAA
GAGAGCTTCCCGGCAGACCGTAGCACACTGCGTCAGTTGACAAAGTTTGCCGGTAGCGGC
GGTGGCTTGACTATTAACTTTGATGCGATGCTGTTAGGTGAGCGGATTTTCTGGGATCCA
GCAACCGATACCCTGACCATTAAAGGCACGCCGCCGAATTTGCGCGACCAATTGCAGCGC
CGGACGTCTGGCGGCAATTAATCGGTTTTGTGTTCTGAATGCCAGATGCGGCGTGAACGC
CTTATCTGGCCTGCAAAAAATAGCAATACCGTAATCAGGCATAATCTGCAGATACAAAAA
ACCCCGCCGGAGCGGGGTTTTTTACAACTTATTCAGCAATTAAGCGCGAACGAAGTCGAT
GTGCTGCAGCTTCGGTTTGTACGGGTGACGCTGTACGTCCTGAGCTTTAACTTTGATTTC
TTTACCGTCAACAACGATGGTCAGAACTTCGCTGTAGAATTCAGCTTTAGCTTGCATGTT
CATGACTTTGTCGTGATCCAGCTCGATAGCCAGCGGTGCTTCTTTGCCACCGTAGATGAT
TGCCGGGAACTTGTTAGCGGCACGCAGGCGGCGGCTCGCACCCTTACCCTGCTCTTTACG
TACTTCTGCGTTGATAGTAAACATTTCTTTCTCTCTTAAATTAATCCTGCTACAGGCGAC
CCAGCAACAGGTAAGTGATCTGCTTTGCGTATGCAAAAGCGGGCGAGATTCTATACTCAA
TCGCCTTATACATCAATCAAAACTACCATTAACCGCGTAATTCGTGCGCCCGACGAAAAC
GACCTTCGTAATCGAACACTTTTTCACGCACTTGCCAGTACTGACCTTTCATGCGGGCGA
CGACAAAATCCGGATGTCGCAGTAAGGCTTGCTGGGCGAGGATATCGGCGGCGGTGATCC
AGCGCAGAGGGATGCCCGGTGTGCGCGTATGCGGGCGGATAAAAAGCTGCTCGAAAGCAG
TTCGCTGGGCGGGCGTTTGCAGACGGAAACGCTCACTCACATCCGCGCCGTCTTCATCGT
AATAGGTGATTTTCAACCATTCGCCTTTCTCGTCGTGCCCATGCTGCAAAGACATGCCGC
TACAGCGTAATACCAGCGCATCTTTCAGTCGTAGCGCCGCTTTTAACATATCATCCGGAT
CAACCAGTACCGTGTCACATTCGCGGCAGCGGCGAGCGGCAATATCATTTTCTGCGTTAC
ATTGCGGGCAATTTTTAAAACGGAAACGGAAGTCACACTGTTCGCGATGACCGTCGTCAT
CTTCAAACCATCCCTGACAGCGGCGACCAAAGTGTTCAATCAATGTCCCGTCGGCGGTCG
TTTTCCCCCAAAAGGTGTTGGCAAAACCGCAGGCAGGGCAGAAAACCTGTACCGGAACGT
TGTCACTTTTGCCTTTCGGTGTACCAACTTCCGGCGCGTAGAGATCGTGAGGATTACCCG
CATAATCAAGAATTAAACAATCAGTCTTGCCCGGAGCGAGACGCAGACCGCGCCCGACAA
TTTGTTGGTAAAGACTCACTGATTCGGTAGGGCGCAGAATGGCGATAAGATCGACGTGCG
GGGCGTCAAATCCGGTGGTCAGTACCGCGACGTTGACCAGATAGCGAAAACGCTGGGCTT
TAAAATCTTCAATTAACACATCGCGCTCAGCGCCGGGGGTGTCGCCAGTAATCAGTGCAG
CATCTTCGGCGGGTAGTAATCCCACAATCTCTTTTGCGTGTTCAACGGTGGCGGCGAAAA
TCATCACCCCTTTGCGCGTTGCAGCAAACTCCATAATCTGGCTGATGATGTGCGGGGTAA
TACGTTGTTGTTTTTTTAGCTCGCGGTTGAGATCGGCTTCGCTGAACAGCCCATTACTCT
GTGCCTGCAAGCGGCTGAAATCGTATTGCACTACTGGCATATCCAGTCGTTCTGGCGGCG
TCAGATAGCCGTGTTTAATCATATAACGCAGCGGCAGTTCATAAATGCAGTCACGGAAAA
GGGCTTTCTCATCGCCGCGTACCATGCCGTGATAATGGAACTGGTAGATCCAGCCTTTGC
CCAGTCGAAAAGGCGTGGCAGTCAGCCCCAGCAGGCGTAAGTGGGGATTCACTTTTGTCA
GGTGAGTGAGGATTTGCTGATACTGGCTCTCTTCATCGTCACCAATACGGTGACATTCAT
CGACAATCAACAGCGAAAATTCACCCTGAAAGGCATCAAGATTACGGGCGACCGACTGCA
CGCTGCCAAATACCACTTTACCGTGGCTCTCTTTGCGCTTTAGCCCGGCGGCAAAAATAT
CGGCTTCCAGCCCCAGCGCCTGATACTTTGCATGGTTTTGCGCCACCAGTTCTTTAACGT
GTGCCAGCACCAGCACGCGACCACGAGCCAGCCGCGCAAGTTCCGCTATCACCAGGCTTT
TACCTGCACCGGTGGGCAGCACGATAACGGCAGGGGTTTTATGACGACGAAAATGGTTGA
GCGTGGCATCCACGGCTTCTTGCTGATATGGGCGGAGTGTAAAAATCATGGTCTCGCGTA
GGTAGATTATTCTGCTAATAGTATGCCACGGTTCTTTTTCCCTTGAGGGAAGTTATTAGA
CCGCTATACTGGGCAGACAACAGTTCAGATTTTCGGGTCAATGCCCGACCTCCGTTTTTA
CAGGCAAAATCACACACATGCGACTTGATAAATTTATCGCACAGCAACTCGGCGTTAGCC
GTGCTATTGCCGGGCGTGAAATCCGCGGCAATCGTGTCACCGTCGATGGCGAAATCGTCC
GTAATGCAGCGTTCAAACTGCTTCCTGAACATGATGTCGCTTACGATGGCAACCCACTGG
CGCAGCAACACGGTCCACGTTACTTCATGCTCAATAAGCCTCAGGGCTATGTTTGCTCCA
CGGACGACCCTGATCACCCAACGGTGCTCTATTTTCTAGATGAACCAGTGGCGTGGAAAC
TGCACGCCGCAGGGCGGCTGGATATCGATACCACCGGTCTGGTACTAATGACAGATGATG
GTCAGTGGTCACACCGCATTACTTCTCCGCGCCATCATTGCGAGAAGACTTATCTGGTGA
CGCTGGAATCACCCGTAGCTGACGATACGGCAGAGCAATTTGCTAAAGGCGTGCAGCTGC
ATAACGAAAAAGATCTCACTAAGCCGGCGGTGCTGGAAGTGATTACCCCAACGCAGGTTC
GTCTGACCATCAGCGAAGGGCGTTATCATCAGGTGAAACGCATGTTCGCCGCCGTGGGTA
ACCATGTGGTTGAGCTGCATCGTGAACGTATTGGCGGCATTACGCTGGATGCTGATTTAG
CCCCCGGTGAATATCGTCCGTTAACTGAAGAAGAAATTGCCAGCGTCGTCTAACTTTTCA
ATGACTTTCAGGAGCCCGTTGTGACCACCCGACAGCATTCGTCGTTTGCTATTGTTTTTA
TCCTTGGCCTGCTGGCCATGTTGATGCCGCTGTCGATTGATATGTATCTGCCCGCGCTAC
CGGTAATTTCAGCGCAGTTTGGCGTACCGGCGGGCAGTACGCAGATGACCCTCAGTACTT
ATATTCTGGGCTTTGCGTTGGGGCAGTTAATCTACGGGCCGATGGCAGACAGCTTCGGGC
GTAAGCCGGTGGTTCTTGGCGGTACGCTGGTGTTTGCCGCCGCCGCGGTGGCGTGTGCGT
TGGCACAAACCATCGATCAGCTGATTGTGATGCGTTTCTTCCACGGGCTGGCGGCGGCTG
CGGCCAGCGTGGTTATCAACGCCTTGATGCGTGATATCTACCCGAAAGAAGAGTTCTCGC
GGATGATGTCGTTTGTCATGCTGGTGACAACCATTGCACCGCTGATGGCACCGATAGTTG
GCGGCTGGGTGCTGGTGTGGCTGAGCTGGCATTACATCTTCTGGATCCTCGCCGTGGCGG
CGATTCTGGCTTCGGCAATGATCTTCTTTCTGATCAAAGAAACCTTACCACCGGAGCGTC
GCCAGCCTTTTCACATTCGTACCACTATTGGTAACTTTGCGGCGCTGTTCCGTCATAAGC
GTGTCCTGAGTTATATGCTGGCCAGTGGTTTCAGCTTTGCCGGGATGTTCTCGTTCTTAA
GCGCCGGACCGTTTGTCTACATTGAAATTAACCACGTCGCGCCGGAAAACTTTGGTTATT
ACTTTGCACTAAACATTGTTTTCCTGTTCGTGATGACCATCTTTAATAGCCGCTTCGTCC
GCCGTATTGGCGCGTTAAATATGTTCCGCTCGGGGTTGTGGATACAATTTATTATGGCAG
CGTGGATGGTCATCAGTGCGCTGCTGGGGCTGGGATTTGGGTCGCTGGTGGTTGGCGTTG
CGGCGTTTGTGGGCTGCGTGTCGATGGTGTCATCCAATGCGATGGCGGTCATTCTTGATG
AGTTTCCCCATATGGCGGGAACGGCATCTTCACTGGCAGGAACCTTCCGTTTTGGCATAG
GGGCAATTGTTGGCGCATTGCTTTCTCTTGCGACCTTTAACTCTGCATGGCCGATGATTT
GGTCAATTGCATTCTGCGCAACCAGCTCCATTCTCTTCTGTCTGTACGCCAGTCGGCCGA
AAAAACGGTGATCTATTGCACAACGAGGAAGCTAAAAGGCTTCCTTTGTTGATGCATGTC
AACCACAAATCTATCATTCCCCCGATATATGTTTATTTTATGTAAAATCAATTTATGTAA
AAAGTCACATCATTGTAGTTAAAAAGGTTGAGTTAGATCGCAGAAACGGGTACATATAGC
CCCGCAAACGTGACCACGCCCGCAGATATTACTTAAATCAGAGCCATAGAGGCCACGCAG
GCGAGGCATCAATCTTTACGATCTGTATAAAGACGGATTGTTGATGATGTGTTAAAATTG
ATGTAAACAAATTGTGAAGTAAATGTGCTTCCGGGGAAAATAAGTGACTTCATTACAACT
CTCAATCGTCCATCGACTGCCGCAGAACTATCGCTGGTCTGCTGGTTTCGCAGGTTCGAA
GGTTGAACCGATTCCGCAAAATGGACCGTGCGGTGACAACAGCCTGGTGGCGCTTAAATT
GCTTAGCCCGGATGGTGATAATGCATGGTCGGTGATGTATAAACTAAGCCAGGCGTTAAG
CGACATCGAAGTTCCATGTTCGGTGCTGGAGTGTGAAGGTGAGCCGTGCCTGTTTGTAAA
TCGCCAGGACGAGTTTGCTGCAACATGCCGATTGAAAAATTTTGGTGTGGCAATTGCCGA
ACCCTTTTCAAACTACAATCCTTTTTAAGCGTCAGCTCAACGCCAGTAGCTGACGCGTAT
ACTCCTGCTGCGGTGTGGCAAACACGCGCGCGCACGGTCCTTGTTCCACTACTTCCCCTT
GTCGCAGTACGATAACCTGATGACATAACGCGCGGACAACGTGCAAATCATGGCTGATAA
ACAAATAGGCCAGTTGATGCTTTTGTTGCAATGATTTCAATAGCGTCAATATTTGCGCCT
GTACCGTTTTGTCGAGTGATGATGTCGGTTCATCAAGTATGATCAGCGAGGGCTTAAGAA
TTAATGCCCTGGCAATCGCAATACGTTGTCGCTGACCACCAGAGAACTCCGCCGGATAAC
GGTGGCGTGTTTCAGGATCTAATCCCACTTCATGCATCACGGCTATCACTTGTTGTTCGC
GTTGTGCGGCAGAAAGCGTCGGCTGGTGAACCCGTAAGCCTTCCTCAATAATCTGCAAAA
CGTTGAGTCGTGGGTTGAGCGAGGAGTTTGGATCCTGAAATACCACCTGAATGCGATGAC
GAATAGGTAACAGCTGGCGGCGATTTAAATTTTGCAGTGGCTGACCGTCAAAGACGATGC
TGCCCTGAGAATTAATCAGTCGCAGCAGCGCCAGTCCCGTCGTGCTTTTCCCGGAACCGG
ACTCGCCCACTAAACCCAGTGTTTCACCCGCCCGTAGCGTAAAACTGATGTTTTTAACCA
CCACATTATGATCCACAATGCGCTTCAAGATCCCTTTGCGAATGGGGAAGGCAACCTGAA
GCTGTTCAACATCCAGCAACGTTGAGGCAGGTTCTGGCAACGGCACCGGGTCGCCTGACG
GTTCACTGTTGAGTAGCTTTTGTGTGTAAGGATGAGTGGGTGAGGCAAATAGCGTAGCGG
CGTTATTTTGCTCGACACAGCGACCATTTTGCATTACCGCCACGCGGTGGGCCAGTTTTC
TGACAATGCTGAGGTTATGAGTAATAAACAGCATGCCCATATTCAGCTCGCCTTGCAGTT
CGCGCAACAGCTGTAAAATCTGCGCCTGGACAGAGACGTCCAGTGCGGTGGTTGGTTCAT
CGGCAATTAATAATTCCGGTCGCGTTAACAGCGCCATCGCAATCATCACCCGCTGGCGTT
CGCCGCCGGAGAGCTGATGCGGATAATCTGTCAGCCGTTTTGCCGCCTGGCGGATACCGA
CGCGATCAAGGCAGTTAAGAATTTCGCCACGAGCCGCTTCCCGACGCATCCCGCGGTGGA
GTGAAAGCACTTCATAAAGCTGTTTTTCCAGGGTATGCAATGGATTTAACGACACCATCG
GCTCCTGAAAAATCATGGCGATCTTATTACCGCGTACACCGCGCAACGTTTGATCGCTGG
CATGAAGCAGCGATTCGCCATGAAAACGAATATCGCCGGAGAGATATTCAACCGGCGGGG
AAGGGAGCAGACGTAAAATTGACAGCGCGGTAACGCTTTTGCCAGAACCTGACTCACCCA
CCAGCGCCAGCGTTTCGCCAGCCTCAATCTGTAGTGAAACATCATTGACTACTGTACGTA
CGGTTTGCTGATGGCGAAAACCCACCGACAAATTTTCAATCGCTAACAGAGTTTGCGTCA
TGCTACACCGCCTTATTAGGATCAAATGCGTCGCGGACGGCTTCACCAATAAAGATCAGC
AAAGACAATAATATCGCCACCGACAAGAAGGCGGTGATCCCAAGCCACGGAGCCTGAAGG
TTATTTTTCCCTTGTAACAGCAGTTCACCGAGTGACGGTGAACCGAGCGGCAGACCGAAG
CCGAGGAAATCGAGTGAGGTCAGGGTGGTTATCGAACTACATAAAATAAACGGTAAAAAG
GTGAGCGTAGCGACCATGGCATTAGGCAACATATGACGCAGGATGATACTGCGATCGCTG
ACGCCAAGCGCCTGCGCCGCACGAATGTAGTCGAAATTACGGGTACGTAAAAACTCCGCC
CGCACCACGCCGACCAGACTCATCCAGCCAAACAAGACAGTAATTGCCAGCAGCCACCAG
AAGTTAGGCTGTACGACGCTGGAAAGTAAAATAATCAAAAACAGCGTCGGCATCCCCGAC
CATACTTCAATAAAGCGTTGCCCCCAGAGATCGACTTTACCGCCGTAATAGCCTTGTAGC
GCCCCCGCCAGCACGCCCATCACGCTGGAACAGAGAGTCAGCATCAGGCCAAACAGAACC
GAGATCCGCGTGCCATAGAGAATACGTGCCAGCACATCGCCGCCGTTGGCATCCGTTCCC
AGCCAGTTTTGCCGGGAGGGTGGAGAAGGGAAGGGCTTATCGGTAGCAAAGTTGATACTG
GTAGCACCAAAGCGAATCGGTGCCCACAGTACCCAGCCATTATTTTCCAGCCGTTGTTTC
AGCCACGGGTCCTGATAATCAGCCTGACTTGCCAGCGGGCCGCCAAAATCGCTTTCGCTG
TAGTTTTTCAATAACGGGAAATACCAACTGCCGTCATAACGTACCAGCAACGGTTTATCG
TTGGCGATAAGCTCAGAACACAAACTCAAACCAAACAAGACGAGGAAAATCCATAACGAC
CAGTAGCCGCGACGGTTATGACGAAAACGCGCCCAACGGGCCTGATTGACGGGGCTGAGT
CGCGACATTAACGTCCCTCAAAATCTATACGCGGATCGACCAGCGTATAGCTGATATCAC
TGACAATATTCAGCAGCAGGCCAATCAGGGTGAAAATATACAAGGTACCAAACATTACAG
GATAATCGCGCGAGACGGTCGCTTCGTAGCCCAGTAAGCCAAGACCATTGAGTGAAAACA
TCACCTCAATCAGCAGCGAGCCGGTAAAAAACATGCTGATAAACGTCGCCGGAAAACCAG
CAATCACCAGCAGCATGGCGTTGCGGAACACATGTTTCCAGAGAATGTTTTTCTCACTTA
CCCCTTTCGCACGCGCGGTCACCACGTATTGCTTGCGCACTTCATCAAGGAATGAGTTTT
TGGTCAGCATGGTCAGCGCCGCAAAGCCACCAATCACCGTCGCCAGCACCGGCAGCGTGA
TATGCCATAGATAATCGGTGATTTTCTGATACCACGGCAGCGAATCAAAGTTAGCGGAAA
CCAGGCCGCGTAGAGGGAACAGGTCGAAATAGCTGCCGCCTGCGAAGAAGACAATCAGCA
GGATGGCAAACAAAAAGGCCGGAATGGCGTAGCCGATGATGATAAATGCGCTACTCCAGA
CGTCAAAGCGGCTCCCATTATAAACAGCTTTGCGAATGCCTAACGGAATCGACACCAGAT
AGATAATCAGCGTGCTCCACAATCCGAGGGTGATGGAAACCGGCAGACTGTCTTTAATCA
GCGTCAGCACCGAGGCGCTGCGAAACAGGCTATCGCCAAAATCAAAGCGGATGTAGTCCC
AGAGCATTTTGAAGTAACGTTCGTGGATCGGCTTATCGAAACCGTAGCGATGAGTGATCT
CGGCGATCACTTCTGGATCTAATCCGCGTCCGCCACGGTAATTACTGTCGCTGATATTAC
CGACGCCCGTTTGCGCATGGCTGGCGCGAACGCCTTCACCGCCTGCGCCGGGTAATACTC
CGGCATTACCAAACTCAATGGCGGCGATGGCCTGGTCGACCGGACCGCCAGGCGCAATTT
GCACGATGAAAAAGTTGATAGTGATAATCGCCCATAACGTTGGGATCACCAGCAACAGAC
GGCGAATCAGATATGCGCCCATCTACTCTCCCTGTTGTCTGGCTGACGGCAGTTTGGCCG
CTTTATTAACGTCATACCACCAGGTATCGATACCCAGGCTGTAAACAGGGCGTACAGCGG
GTTGGGAGAATTTATCCCACCAGGCGAGACGGTCTTCCGCCATGTACCACATTGGCAGCA
TGTAATAATTCCACGTTAATACGCGATCCAGTGCTCGCCCTAACGGCAGTAATTTTTCTT
TATTTCCCTGCGCGGCAATAATTTGGTTGATCAGCGAGTCGATAACCGGGCTTTGCACGC
CGGGGGCATTATAAGTGGAATTGATATATTCCGATGACCAGGAAATCTGTAAATCGGAAC
TGGGCCACGGCATCGCCCGCCATACGCGCGGCATCATGTCATAGTCGCGACTGCGCATGC
GGTTGGTGATTTGCGAGTTATCCACCTTGCGAATGTCCATGTTGATACCCAGCCGTTGCA
GGCTGTGCTGGAACGGCAATACCCACTGACTATTGCTGCTTGCGGGAAGCAATAATTCAA
AGCTGAGTGGCTGACCCGTTGTGGCATTAACGCGTTGCTGACCCTTCAGCACCCAGCCCG
CTTCGTTGAGAAGTTTGTCGGCTTTTAACAGGTTGTCACGATCGTAGCCATCGCCTTTAG
ATACCGGCGGCTGGTAGATTTGTGTGAAGACTTCTGACGGTAGATCTTTTTTCATTGGTG
CCAGAAGCACCAGCTCCGCGGCGTCGGGGTAATTTCTGGCCGCGTATTCGGTATTCTGAA
AATAACTGTTCGTGCGACTCCAGGCATTGTAAAACAACGCCTTGTTCATCCATTCAAAGT
CAAAGGCGAGAGTGATCGCTTCCCGGACCCGGCGATCGCTGAATACCGGACGTTGGATAT
TAAACGCCAGCCAGCGCGTATCCTGGGCTGATTCGTTCTTTTGCTCATCTTTGATGATGT
ATTTTTTATCGAAATTTTTACCGGTATAACGCGTGGCCCAGTTTTTAGCGTCGTTTTCCA
TACGCAAATCAAAGGCACCTGCTTTAAACGCTTCAAAGGCGACGTTATCATCGAGGTAAT
AATCGTAGCGAATGGTGTCGAAATTCCAGCGTCCACGGTTTACCGGTAAGTTTGCTGCCC
AGTAATCTTTCACGCGGGAATAGACAATATTTTGCCCCATTTTCCAGGACGTAATGCGGT
ACGGACCACTGGCAAGCGGAGGCGTGGCGAGCGGATCGCTAAGTTTGTGAGCCTTCCAGT
ACTTTTCTGGAAATACCGGCAGCGAAAACAGACTCAACATATCTTCTTTGCCGGGTTTAG
CTAACTCAATGCGCACGGTTAACGGCGCAATGGCTTTGACGGTGGTGCCTTTGTAGACCA
GACGAAATTGCGGCACGCCTTCGGTCATAAATTTTTGAAAAGTAAACTCTACATCGCGGG
CAGTAATGGGCGAACCATCATGAAAACGGGCGCGCGGATTAATAGCGACCTCCACCCAGG
AATAATCGTCAGCATAGCGTGCACTTTCAGCAATCAGCGGGTAATAACTGCCTGGTTCGT
CATCGGAAGTCGTAAATAGCGTGTCGTACAACTGCTCGGTGCGTGCGCCCGGGTTGCCGC
GCAGTGCATAGCGGTTGAAATTATCGAAGGTGCCGAGGGCTGACAACGTTATCTGCCCAC
CTTTTGGCGCGGCGGGGTTCACATAATCAAAATGGTTGAAATTAAACGCGTACCGGGGTT
CGCCCAGCACGGCAAAGGCATAGCTTTCCTTGATAGCCTGCGCCTGCGCACCGAAGGTGA
ACAGAGCGATAAACAGCAGCAGTATGCGCACAATCATCTGCAACGGATTTCCTTTTACTC
ATCATTAGCCGCAAACCGGCATGCTTTCACTATGAATAATAAGGGACGTAAGCACACCTT
ACCACTGCGGCCTATACGGTTTCTTCAGCCAGCGAACAAAATCGTCCAGCGGTAACGGGC
GACTAATCCAGTAGCCTTGCATGAAATTAACGCCGCGTTCGCTTAGCCATCGCGCTTGTT
CCGGCGTTTCGACCCCTTCAGCAACTGTCAGCATATTGAGACGTTTCGCCAGCGTCAGCA
CCGCGTCAAGTACGGGTGAAGTGATCGTTTCCGTACCGATGGCGTTGATAAATCCACGGT
CAATTTTCAGATAATCGAGCGTAAAACGCTCAAGATAGATAAGCGCGCTGTGCCCGGTGC
CGAAGTCATCAATAGCAATTTCTATGCCGACCGAGTGCAGCCAGGCGAAGAGTTGTGTGG
CTTCTTGCTCTTTCAGCATATCGCGCTCGGTAATTTCCAGCACAATCTGGAAATGGTGTG
CGGGTAGGGAGGTGAGCAGTTTCTGGATATCTGCTTTAAAGCTTTCGCTGTGCAGATGGT
CCGGCGCAATGTTAATGCCAAATTTGACGCCTACCGGCAGCACTTTTTCTAATTCTGCGG
CATCGCGGGCAATTAACTCAAACAGGTGCTGAGTCAGCGGTACAATCATCTTTTGCGATT
CGGCAAAGTTAATGAAGGCATCCGGGGGAATTTCTCCCGCGACAGGATGCCGCCAGCGTA
GCAGTACTTCCAGGCCCGTTACTCGCAAAGCTTGTGTATCCACCACCGGTTGATACGCCA
CGTAAAATTGTTCGCGCTTGATGGCGGTCATGATTTCTCTGCCGGGGCGCATACGTACGC
TCATCAGGTAATAGCAGAGCAGGCCAACGACAGTTCCACTCATGCCGCCCAGTAAAAATG
CGTACCACACATCGTTCCATGTCCAGTCATCTGCATAAAGCCGAACGGTCAGAGGAATGC
CCGCAATTTTAGTTTCACGGACTGGCATGTCGGTTAATTCGTTAACGTTCATCAAACGTG
AAGAAAAGGTAGATAGCGCAGTATTGCCAATAATGAGGGCGACGCCATCGTAATCTTCCT
GCCGTGAACTATAAAAGAGTGAAGGCGTCAGGTTGAGATTCAGAGCGGCAAAGACGCCGC
TATTTTTCAGCAAAGGGTTGCGATACCAGATGACGATTGCGGGTTTGTTCGGCACCATCG
GCGTGCCGGGTAAGATCGCCATATCGACATTTTTATTAATGTCGAGCGCCGGAATCAATT
CATTGAGTGGAATGTCCATCTCACCGGTCGCAGATGAACAGAATGTTTTTTTATCTTTCA
CCAGCACAAACGTTCGGACATTCATGCTAAACGCCGCGCGGGCGGTCAGTTCGGGGTTAG
CTTGCTGGCAGGTATCTAAGGTCAGCGGCTGGAGCCGGTCAGTAGTGGATTTCAGGTCGG
CAAAATAGGTATCGAGATACTTTTGTACGTCGGTAATCAGTGTGTCGTATTTGACTTCGT
GCTTATGCCAGGCCACTAAAAACTGAAGGCAACTCACCAGTATCGCAATCATTACGCCTG
CAACAATGCAGGTAAGCAGGAGCTTACGTCCAGAATTGGGAGCGCGTATGAACATGATTC
CGTTAATTTCCTGAAATTACGACAACATTTAAAAGATAACAATGACCGGACTATAGCCTG
GATCAAGACGCGGAAACATCATTTTCTCTGATGAATGAAAACAAAAAAGCACTGCCTAAG
CAGTGCTTTCAGTTAACTCGTCAGGATAGCCAAGGGATTGCATCCAAACGGTTTATTAGC
TGCGGCTGAGAACCCGGCGTGCTTCGTTGTAACGCTTCTTCCAGTACGGTTCATTCATGC
TGGAAATAATAACACCACTGCTGGTGGAAGCATGGACAAACTGATTGTTGCCGATATAAA
TACCGACATGGCGTCCCGTTGAACCGGCACGGAACAGAACTAAATCACCCGTACGCAAAT
TACTGCGGGAAACAGATTTACCCATTTCCTGCTGTTCGTAAGTCGAACGCGGAAGTTCTA
AGCCAAATTGCTCACGGAATGTACGCTGTACGAAACCAGAACAATCGATACCTTTTTTAG
TGCTGCCGCCCAGACGATAACGTACGCCTTTCCAGTCAGCATACTGATCCATAATTCGCG
ATTTTACGTCGACATTACGAACCAGGTTTTCAAATTCATCCTGAGAAGCTTGCAGTGATG
ATGTTTCACTACCCACTGCACGTGTCTCAGGATGCATATTCTTTGCGGTGTTATTTGCAC
TACATGCAGAAAGCAGAACCGCTACTGCAATCGCGGGGATCCCGCGCAAGATATATCTCA
AAATCGGTTGAGATTTGACCATGTTGTTTGTTTTCCCTTGAAGTCCTTAACGACAAATAT
CGTTATAAAAAAATGCCAAGCGACACGAGACTAATTACCTGGGCATGTTGAAACAATTCC
TTAAGGCCAAATCTGTGGACTAACGCACAAAATTATATGCTGTGAGGATAATCTACCGCC
GAGGCAAAACGAGTTCGAGATTACCCGATTGGTGCGGTCTTGGCGAGCGGTTTTACATGA
TTTTTTATAAGAAAAAGTGATACAGAAAGTTAATAAGCGGGATTGCTCAATTAAAGTACG
ATTGAGTGAAACGCATGCAATCCATTCATTTACTTAGAGAATGATTTTTGCTTTCGATGC
ATGAAAGCACGGTGCGCATCATCAGGATTATCCTCACTATAAAAATAAACCTGATGATGT
TAATTACTGTGAGTTATTTGTTTTGGAAATGTTTGTTTTTTCCCGGTAGTGATTTGTCAA
AAAAGGTGATTAATCGATCACTTAATGGCGTCAGCAACACCCAGGGCAAACCGATCAATA
TCACGGTCATCGAACCGACAATGATGTCAGTAAACCAGTGTGCGCCAATCATTACTCTGG
GAAACGCAAAAACCACAAAAATAATAAGGGCGATAAGACCTGCAACTTTGCCGAAATAAC
GCCACATGAATGCCGAAAAAATAAGCAGCATCATGCCGTGATCGCCGGGAAAGCTATCTC
GTGAGGCATCTTTCGTGGGGACAGAGAGCAGTTCGCTGACGCGGTTAATATCGGTAAAAG
TCAATGTTGGGCTGGCCCGTTTTACAGGAATTAATGCCTGACCCAGCTGGTTTAATACCA
CTGCAGTTAATAGCATGACCAGACCAATAATCACGATACGTCGTCTGCCTGGGGCGTTTT
CTTTCAGCCAGAAACTCAGCATCAACATTCCCATCGCCAGCAGTGAACAACCGTCGAAAG
CGCGATTGTTGGTCAATGCAACCAGCCACAAAAAGGCCTTACTTTCGACCAGTTTCTGAT
TAAAGAAATAAAAAATATCCGCATCAATCGGCAACCAGAATCCATGATTAACGGGAATAT
ACTAGGAAAGAAACAGCGCGAGGCCGACAATATTCAACAACACTATTTGCGGCAAATTTT
TAATCATATTTTCTCTAATTATCTTACTGAAAAACGCAGGCAACCTTACGCGGTAGTCGC
TAAACGAAGCTTCAACAGCGCGCTCTGCAAGGCATTCCAGTCAGCTTCGCTGCTGGAAAT
CAGCTCAATACGGCTGTCCGGTGGCGCAACGTTTTGCGTTTCAATGTGCAGGTCATCGCC
CTGACGGTTGATTCGCACCAGCCCTTCGGGAATACGCAGCACGCCTTTGACGCGTTCCAC
CGGTGCAAGTCGCGCCCATTCCAGAATGCCAATGGTGTCGAATACCGTATCAGCGTCGAA
TATCCAGCCGCAGGCCTGATATCCTTGCCCGCTGTTCAGACTGCGACGCCAGCGTTGATG
CTCTGGCAGGCTTAACGCTGCTAACCCTTTTTTCACGACATGCTGATGAGAATGCGCGGC
GCTGGCGGGCAACTCGGCTAAATTGCGACGCGGCAAATCCAGAAGATGACCGTCAACTTT
CCCATGCTCACTGTGAATTAATTGCCGATCGCCACCATTTTGCTGCCACCAGCGCTGTAG
CGCTTGCTCGCTTTCAGGTGTCGCACGGTCGGATTTATTGGCGACAATGATGTCTGCGGC
AGCCAGCTGGTCACGGAAGTTTTCATTGCTGGCGCTTTTTTCGTCCAGCAGCAGGCGTGG
ATCGAGAATGCACAACGTGGCGCGCAGATCTATCCACGGTTCATAGACTGGTGCGGTTAA
CAGATCGAGGATCTGTTTCGGATGGCCCAGCCCGGTCGGCTCTATCAACAAGCGGTCTGG
TTTTCCCTGACGCAGTAAGGTATTCAACCCTACCTGCATGGGTAAACCATTAACGCAGCA
CATGCAGCCGCCGGGGATCTCTTTCAGCAATGCGCCGCTATCGGCGAGCAAAGCACCATC
AATTCCGACTTCCCCAAATTCATTAACCAGTACCGCCCATTTTTCGTTGGGATCTTTATG
GGCTAACAGATGAAGAATCGACGTAGTTTTCCCGCTGCCGAGAAAACCGGTGATGAGGTT
GGTCCTGGTCACAACGGCTCCGCAATACTCTGATAAGTTAACTGAGCGTTAATCCTGGCT
AAAAACGGCAGAAAAGAGAAGGGGAGAGCGGACGAAGGTGAGCTTCATCCGCTTTAACCG
CAGAAATCGTTAAATTTTGAGGGTGTTTAATAGCGCCTGATGCGCGCCGAATTGTGCGAT
TTGTTGCCAGGCTTGTTCGATGGCCTGCACAAAATGCGGGTTATCTGGCAGATCATCACC
GAAAACTTCACGCAGGGAAAGCAGGGCGGTGACGCGTTGCTCACTGCTGCTGCCCGCAAC
AAGATCGCGAATTTTATCGCTAAGCGGATCGCGAACATCAATGGCATTTCCGGCATCATC
AACGCCGCTGACGTAACGCATCCAGCCTGCAACGCCTAATGCCAGCAACGACCAGTCCGT
TTCGCGCCCCAGATGTATGCGAATACCTGCCAGCATACGTTGCGGTAATTTCTGGCTGCC
ATCCATCGCGATTTGCCAGGTCTTATGTTTCAGCGCCGGATTAGCAAAACGTGCAATTAA
CTTATCCGCATATTGTGTTAAATCGACATCTTTAATTTGCAGTGTCGGCGCTTGCTCATC
CAGCATTAATGTTCTGGCAGCATGGCGAAATGCGCGATCCTGCATGCAATCACTGATATG
GGCGAATCCTGAGAGGTAACCCAGATAAGCGAGAAAAGAGTGGCTGCCATTAAGCATACG
CAGTTTCATCTCTTCCCATGGCAGGACATCATTCACCATTTGTACACCTGCGACTTCCCA
GGCAGGACGCCCAGCGACGAAGTTATCTTCCACCACCCACTGGATAAACGGTTCGCAGCT
AATCGCGCAGGGATCATTTACCCCCAGATGCTGGCTGATTTCTGCCAGTGATTCGTCGGT
TGCAGCCGGAACAATGCGGTCGACCATGGTTCCCGGAAAACTGACGTGTTCTTTTATCCA
CCCGGCGAGTTCTGGCGAACGTTTTTCTGCCATTCCCAGCACCGCGTTTTTCACCACATG
GCCATTGTCGGGAATATTGTCGCAGGAGAGCACGGTAAACGGTGTAAGGCCGCGCTCACG
GCGGCGTTTCAGTGCTTCGACGAGAATACCTGGCGCGGAGTGAGGTTCTTCAGGGTTTTG
TAGATCGTGAATAATCCGCGGATTGCTGGTGTCGAGTGCACCGGTGGCCGGGTCAATACA
ATAGCCTTTTTCGGTAATCGTCAGGGAAACAATTGCCACCTGTGGCTCGCAAAATTTCTC
AATAATTGCCGCTAAGGAATCCAGTTTTGCATTCAGGCATTCGTGAACGGCACCGACAAT
TATCGCCTGATTGCCGTCCGCCCCTTTCTCCAGCACGGTGTATAAATGGTTCTGTGCGCG
GAGCTGGCTCATCAGTTGATCACCGCTGAACAAGCTGATTTCACAGATCCCCCAGTCACC
GCCCTGGGCATTCAGCACACGATCGGTCAGTAACGCCTGATGTGCGCGGTGAAAGGCTCC
AAAGCCAAAATGAACGATACGTGATTGCAACTGCTGGCGATCGTAGCGTGGAGCGTGTAC
ATGATGCGGGAGCGTAACGGAGGCGATTGTATTCATAGGAGTCACGTCTTAGTAACGATT
AATTAACAATGACAGTGTAAAGTTATATGACAGCAATTGAAATTGGTCTGGATTGTTAAT
GCGATGAAGTGTGAGGGCGATCAATCAACGAGTGAAAATTGAGGGCGTAAGGTGTTCAGG
AAGCGCAAAATAGAAGATTGGTATAATAAATTAAAAAAGGGACAGCCTGAGCTATCCCTT
TTCTGCATGCGGCTGAAGTTAGTCAGCACGACCCATATAACGGCGTTCTTCGATATGGAT
ACGAATTTTTTCGCCCGGGCTTAAGTATTCTGGTACCTGAATCACCAGACCAGTGCTCAA
TGTCGCCGGTTTGTTACGGGCGCTGGCAGATGCCCCTTTGATGCCTGGTGCAGTTTCAAC
GATTTCCAGATCAACGGTCTGCGGCAGCTCAAGCGCCAGCAGTTGACCGTCCCAGGTCAG
CACCTGCATGTCCGGCATGCCGCCCTCTGGCATAAACAGCAACTCTTCTTCAATCTGATC
TTTGGTGAAGGTATACGGGGTATAGTCTTCTTTATCCATAAAGACATATTCGTTGCCATC
GACATAGGAGAAGTCAACGTAACGGCGGGTCAGCGTCACGGTGTCAACGATATCATCTCC
TTTGAAACGCTCTTCTACTTTCAGCCCGGTACGGACATCAGAAAAACGCATTTTGTACAG
CGTAGCGGCACCGCGGGCAGTGGGCGACTGAATATCAATGTCCTTAACCAGCAGCAGTTT
GCCGTTGTAATTCAGTACCATACCTTTTTTAATTTCGTTCGCTCTTGGCATCGAAAAATT
CCTGTAGTCGAAAATGTCAAAAATATCGCGACAAAGTACTCGCGACGGGCCTTTCGGGCA
AGTGGTATTCGCACTTTTGCTAGTGCAAAAAAGGTGGTACTGTGCGCGCTCATCAATCCG
GTGGTTAACCTTAAGAGAACAACGTATGGAATGCCGTCCGGGTTGCGGGGCGTGTTGCAC
TGCCCCTTCAATTTCCAGCCCTATTCCCGGTATGCCAGATGGCAAGCCCGCCAATACGCC
CTGCATTCAGCTTGATGAACAGCAACGCTGTAAAATTTTCACCTCGCCACTGCGACCGAA
AGTCTGTGCAGGCTTACAAGCCAGCGCTGAAATGTGTGGTAACTCGCGTCAGCAGGCCAT
GACCTGGCTTATCGATCTGGAAATGTTGACCGCGCCTTAAACATCTTTAATCCGCAGTAA
GCAAAACAGAGTGGCGATAATCATCACCATCGCAAACCAGAACACAGCGTGATAATTCCA
GATCTCGGCGACGATGCCCGCCACTGATCCTGCGATGATCCAGCCCACGCGCGACGTGTT
GGTATAGAGCGTGGCGGCTGAACCTGCCTGACCGGGCATCAAATCCTGAAAATAGAGCAT
CCCGATGCCGCCCAGAATGCCAATAAAAATAGCATTTAGCAGCTGCAAGCCCAACAGAAT
GATAGGTGAATGCGCCATCAGCATTCCTGCGTAAAAACAGACGCCACCCACGGCAGCAAC
GCGCATTAAGAAACGCTTACCCAGACGTTTGGCGAAATATCCGGCAATCAACATCGTCGG
GATTTCCAGCCCGGCGGCGGTCCCCATCATCACACCGGCCAGTTTCTCGGGAAGATGCAG
TTCGTTGATAATAAATAGCGGCATGTTGATGATGTACAGACTGTTCGAGCCCCACATCAA
TGTACAAATGACAAACAGCAGCAGCGTATCGCGACGGTTACGGCGCGGCGCTTCAACCGT
GCCGGTCGCCAACGGAAGCTCTTTTTGCATCGACGGTAAAAACAGCCACACCATCACGCC
GCAAACAATAAATGCTACCGCTGCGCTCAGATACATTACCGTAAAGCTGAAACCCATCGC
TAAGGCATAAGCCAGCGGTGGGCCAATGACCCATGCCAGTGAAACCTGAGCGCGTAAAAA
AGAGCTGAACATCACCGCCTCACGTCCGGTTTTGTCGGCATGTTCACGGGCAAGGGCAAA
CATTTGCGGGTTAGCGGTCGAGCCAAAGCTGCTAAGAAAGACGCCAACGAATAGCAACAC
AAAGTAGTTGCGATTCCAGGCAAAAAGGGTGCAGGCCAGCACGCCTAACAGGCAGCAAAA
GACAATCAGCGATTTGCGATCGCCGCGCTTATCAGAGCGCCCGGCGAGAAACTGACTCAC
CAGAATCCCAATGACAGCGCTGCCGGTAAAGAAGAATCCCACCATCGCCGGACGGGCATG
TACTTCATCGGTAAGAAAAATACTGAGTGTCGGGGTTTGCAGAGCGCCCGCAATACCGGT
GAGAAAGGCAACGATTAAAAACGCCGTCGAGGTCAGGTCAAACGATTTCGCGCTGGAGAC
TGCGGGGGAGTTATGCATGCTGGTCGATCATTGGAAGAGGAAGACGCGGAGTTTACGCTG
CTTGTCAGAAAATAAACAGACAGCGAAATCAAAAGCGCCACGAATAATCAAAATGCCATT
TCACTGTTGCTGATTGGCTGCTGACGCTGCTGAAATGAAATTGCTGATAACGGATTTTTC
CATCAGCAGTTCGGAAAAATGACAAAAAATTGTGCAGCACATCAAACTTTTGCTCATAAC
TTTACGGCTTTCCTTGCGTGCTGAAACAGAAGTATTATGCTTTCTTGAAACGTTTCAGCG
CGATCTTGTCTTTAACCCTAAGCCAGGTTGGCGCTTTTTTTCTCATAGAAGCTGAATCGT
TTCAATTCAGCAAGAGAGGAGAACTATGTTCCAGTTATCCGTACAGGACATCCATCCGGG
CGAAAAGGCCGGAGACAAAGAAGAGGCGATTCGCCAGGTCGCTGCGGCGCTGGTGCAGGC
CGGTAATGTAGCAGAAGGCTACGTCAATGGCATGCTGGCGCGCGAACAGCAAACCTCAAC
GTTCCTCGGCAATGGTATTGCTATTCCACACGGCACTACCGACACCCGCGATCAGGTGCT
GAAAACCGGCGTTCAGGTATTTCAGTTCCCGGAAGGCGTCACTTGGGGTGACGGTCAGGT
AGCGTACGTAGCGATCGGTATTGCTGCCAGCTCGGATGAGCATCTGGGCCTGCTACGCCA
GCTGACCCACGTACTGAGCGATGATTCCGTTGCTGAACAACTGAAGTCAGCAACAACAGC
AGAAGAACTTCGCGCATTGCTGATGGGCGAAAAGCAGAGTGAGCAGCTGAAGCTCGACAA
CGAAATGCTGACACTGGATATCGTCGCCAGCGATCTGCTGACTCTTCAGGCGCTGAACGC
TGCGCGTCTGAAAGAAGCGGGGGCAGTTGACGCCACTTTCGTCACCAAAGCCATCAATGA
ACAACCGCTGAACCTCGGACAGGGCATCTGGCTGAGCGATAGCGCCGAAGGCAATTTGCG
TAGCGCGATTGCGGTAAGCCGTGCGGCAAATGCTTTTGATGTGGACGGCGAAACGGCAGC
CATGCTGGTGAGTGTGGCGATGAATGACGATCAGCCCATTGCGGTTCTTAAGCGTCTCGC
TGATTTGTTGCTCGACAATAAAGCTGACCGCTTGCTGAAAGCGGATGCGGCAACGTTGCT
GGCGCTGCTGACCAGCGATGATGCGCCGACCGACGACGTGTTAAGCGCGGAGTTTGTGGT
GCGCAATGAACACGGCCTGCATGCTCGTCCAGGTACCATGCTGGTCAACACCATTAAACA
ATTTAACAGTGATATTACCGTGACAAACCTTGATGGTACCGGCAAACCGGCAAACGGACG
TAGTCTGATGAAAGTTGTGGCACTTGGCGTTAAGAAAGGTCATCGCCTACGCTTTACCGC
CCAGGGTGCAGATGCTGAACAGGCGCTGAAAGCAATCGGCGACGCTATCGCTGCTGGTCT
TGGGGAGGGCGCATAATGAGCAGACGTGTTGCTACTATCACCCTTAATCCGGCTTATGAC
CTTGTTGGTTTCTGCCCGGAAATTGAACGCGGCGAAGTGAACCTGGTGAAAACCACCGGT
CTGCATGCGGCGGGTAAAGGCATCAACGTGGCCAAAGTATTAAAAGACCTGGGAATTGAT
GTCACCGTTGGCGGCTTCCTCGGTAAAGACAATCAGGATGGTTTTCAGCAACTGTTCAGC
GAGCTGGGCATTGCCAACCGTTTCCAGGTTGTACAGGGGCGCACCCGAATTAACGTTAAG
CTGACGGAAAAAGACGGCGAAGTGACTGACTTCAACTTCTCGGGTTTTGAAGTCACTCCC
GCCGACTGGGAACGCTTTGTGACTGATTCTCTGAGCTGGCTCGGTCAGTTCGATATGGTC
TGTGTCAGCGGAAGCTTACCGTCAGGCGTCAGCCCGGAAGCGTTCACCGACTGGATGACT
CGCCTGCGTAGTCAGTGTCCTTGCATTATCTTTGATAGTAGCCGTGAAGCGTTAGTAGCA
GGTTTGAAAGCGGCACCGTGGCTGGTGAAACCTAACCGCCGCGAGCTGGAAATCTGGGCA
GGCCGTAAACTGCCTGAAATGAAAGATGTGATTGAAGCTGCGCATGCGCTGCGTGAACAA
GGTATTGCGCATGTCGTTATTTCACTGGGTGCCGAAGGCGCGCTTTGGGTTAATGCCTCC
GGCGAATGGATCGCCAAACCACCGTCAGTCGATGTCGTAAGCACCGTTGGCGCAGGGGAT
TCTATGGTTGGTGGCCTGATTTATGGCTTGCTAATGCGTGAATCCAGTGAACACACACTG
CGTCTGGCGACTGCTGTTGCAGCCCTGGCGGTAAGTCAAAGCAATGTGGGTATTACCGAT
CGTCCGCAGTTGGCCGCAATGATGGCGCGCGTCGACTTACAACCTTTTAACTGACAGCAG
GAGAGGCATAATGAAAACGCTGCTGATTATTGACGCTAATCTCGGTCAGGCACGCGCCTA
TATGGCGAAGACCCTGCTGGGCGCGGCGGCGCGAAAAGCAAAACTGGAAATCATCGACAA
TCCGAACGACGCAGAAATGGCGATTGTTCTCGGTGATTCCATCCCGAATGACAGCGCGCT
GAACGGTAAAAATGTCTGGCTGGGCGATATTTCCCGGGCAGTTGCGCACCCTGAGCTGTT
CCTGAGTGAAGCCAAAGGCCATGCGAAACCTTACACTGCGCCGGTCGCTGCGACAGCACC
GGTTGCCGCCAGCGGTCCGAAACGCGTAGTTGCGGTGACTGCTTGCCCGACTGGCGTAGC
ACACACCTTTATGGCGGCTGAAGCCATTGAAACCGAAGCGAAAAAACGTGGCTGGTGGGT
GAAAGTTGAAACCCGTGGTTCTGTTGGTGCGGGTAATGCAATCACCCCCGAAGAAGTAGC
CGCAGCGGATCTGGTGATTGTGGCGGCAGATATCGAAGTGGATCTGGCGAAATTTGCGGG
TAAACCGATGTATCGCACCTCTACCGGTCTGGCGCTGAAGAAAACCGCGCAGGAACTGGA
TAAAGCGGTTGCTGAAGCAACGCCGTATGAACCGGCGGGCAAAGCTCAAACGGCGACCAC
TGAAGGTAAGAAAGAGAGTGCAGGCGCTTATCGTCACTTGCTGACGGGCGTCTCTTACAT
GCTGCCGATGGTCGTTGCAGGTGGTCTGTGTATCGCGCTTTCTTTTGCTTTTGGTATCGA
AGCGTTTAAAGAGCCGGGTACGTTGGCAGCGGCGCTGATGCAGATTGGTGGTGGTTCAGC
CTTTGCGCTGATGGTGCCGGTACTGGCAGGTTACATTGCCTTCTCCATTGCCGATCGTCC
GGGTCTCACGCCGGGTCTGATTGGCGGTATGCTGGCGGTCAGCACCGGTTCTGGCTTCAT
TGGCGGTATTATTGCGGGCTTCCTGGCTGGTTACATTGCGAAGTTAATCAGTACGCAACT
GAAACTGCCACAGAGTATGGAGGCGCTGAAACCGATCCTGATCATTCCGCTAATTTCCAG
TCTGGTGGTCGGTCTGGCGATGATCTACCTGATCGGTAAACCGGTTGCTGGCATTCTCGA
AGGGTTGACTCACTGGCTGCAGACCATGGGGACTGCGAATGCGGTTCTGCTGGGGGCGAT
CCTCGGTGGCATGATGTGTACTGACATGGGCGGTCCGGTAAATAAAGCAGCGTACGCATT
CGGTGTGGGTCTGCTGAGTACTCAAACCTATGGCCCGATGGCGGCGATTATGGCGGCAGG
TATGGTGCCACCGCTGGCAATGGGCCTGGCAACAATGGTGGCGCGTCGCAAATTCGACAA
AGCGCAGCAGGAAGGTGGCAAAGCCGCTCTGGTACTGGGACTGTGCTTTATTTCGGAAGG
TGCAATTCCGTTTGCTGCTCGTGATCCGATGCGTGTGCTGCCGTGCTGTATCGTGGGTGG
GGCGCTGACTGGCGCAATCTCAATGGCGATTGGTGCGAAACTGATGGCACCGCACGGTGG
TCTGTTTGTTCTGCTGATCCCTGGCGCTATTACGCCGGTACTGGGTTACCTGGTAGCAAT
TATTGCCGGTACGCTGGTGGCGGGTTTGGCCTATGCCTTCCTGAAACGTCCGGAAGTGGA
CGCAGTAGCGAAAGCCGCGTAATAAAAGGTGTGTTACAGGGCAGAAATTTAAATTTACTG
CCCTGTATCATTGGATGAGCGCAAAGAGAATGACCGGTTTGTGAATGTAATTTTATGAAT
TTAAATGGTTTTATCTTTCAGTAGAAACCTGAAACGTTCATCAAATACTAAGGTTATTTC
CTCAAGGGCAGATTCTTTTCTGCCCTTTTTTAGTGTTCATGTTCTGTGCATCCCGTCACA
AATTCCTCGCTTTTGTAATTCAGGCATTTAATCGCATTTTGTGAGCCTGCTCAAATCTGC
CTATTTTGCCTCTCTGGCGGTAATTTACTTTACGTAAAACATGCATACTATGAGCACATG
TTTAAATATGAACACATGTTTAAACCGTCTTTGCAGTATCTATATTCTTGTGGATTGACA
GGGTTGGTAATTTTTTACCAGAGGACGTGCTATGCGCGAAAAGGATTATGTCGTAATTAT
AGGTTCGGCGAATATTGATGTCGCCGGATATTCACATGAATCATTAAATTATGCGGATTC
AAATCCAGGTAAAATAAAATTTACGCCTGGTGGAGTAGGGCGCAATATTGCACAAAACCT
GGCGTTGCTGGGTAACAAAGCCTGGCTACTGAGCGCCGTAGGCAGTGATTTTTATGGTCA
ATCGCTGCTAACGCAAACCAATCAATCAGGCGTTTATGTCGATAAATGCCTGATTGTGCC
GGGAGAAAATACGTCGAGTTATTTATCATTACTCGATAATACCGGTGAAATGCTGGTTGC
TATAAATGACATGAATATTAGCAACGCTATTACAGCTGAATATCTCGCACAGCACCGTGA
ATTTATTCAGAGGGCAAAGGTCATTGTCGCGGACTGTAATATCAGTGAAGAGGCACTGGC
ATGGATTCTGGATAATGCCGCCAACGTACCTGTATTTGTCGATCCGGTTTCCGCGTGGAA
ATGTGTCAAAGTGCACGACCGTCTAAATCAGATCCACACTCTCAAGCCAAACCGCCTTGA
AGCGGAAACCCTGAGTGGGATTGCGCTGTCAGGGCGTGAAGATGTGGCAAAAGTTGCTGC
CTGGTTCCATCAACATGGCCTGAACCGACTGGTATTGAGCATGGGCGGCGATGGCGTTTA
TTACAGTGATATCAGCGGTGAAAGTGGCTGGTCTGCCCCGATCAAAACCAATGTTATTAA
TGTTACCGGAGCGGGCGATGCCATGATGGCGGGACTTGCTTCGTGTTGGGTAGACGGAAT
GCCGTTTGCCGAATCTGTTCGTTTCGCACAGGGATGTTCGTCAATGGCGCTCTCCTGTGA
ATACACCAATAACCCCGATTTATCGATTGCCAACGTTATATCGTTAGTGGAGAACGCAGA
ATGTCTGAATTAAAAATTTCCCCTGAATTATTACAAATTTCCCCGGAAGTGCAGGACGCT
TTAAAAAACAAAAAACCGGTTGTGGCGCTGGAATCGACCATTATTTCTCACGGGATGCCG
TTCCCACAAAATGCCCAGACCGCAATTGAAGTTGAAGAAACTATTCGTAAACAGGGCGCT
GTACCTGCCACTATCGCCATTATTGGCGGCGTGATGAAAGTGGGTTTAAGCAAAGAAGAA
ATTGAATTACTGGGTCGTGAAGGGCATAACGTGACCAAAATTAGTCGTCGCGATTTACCT
TTTGTTGTTGCCGCCGGAAAAAATGGCGCAACCACTGTGGCTTCAACGATGATTATTGCG
GCGCTTGCCGGAATTAAAGTATTTGCCACCGGGGGAATTGGTGGTGTGCATCGCGGGGCG
GAACATACCTTCGATATTTCTGCCGATTTGCAAGAACTGGCAAATACTAATGTCACCGTT
GTTTGTGCCGGGGCGAAATCTATTCTCGATTTAGGATTAACCACTGAGTATTTAGAAACC
TTCGGTGTGCCGTTAATTGGCTATCAGACTAAAGCGCTGCCTGCGTTTTTCTGCCGTACC
AGCCCGTTTGACGTCAGCATTCGTCTCGACAGCGCCTGTGAAATTGCCCGTGCAATGGCG
GTGAAATGGCAAAGCGGGCTGAACGGTGGCCTCGTGGTAGCGAACCCGATCCCGGAACAG
TTTGCGATGCCAGAACACACTATCAATGCGGCGATCGATCAGGCGGTAGCTGAAGCTGAA
GCGCAGGGTGTTATTGGTAAAGAAAGTACGCCATTCCTGCTGGCGCGCGTTGCTGAACTG
ACCGGCGGTGACAGCCTGAAATCCAACATCCAACTGGTGTTCAACAACGCCATTCTGGCG
AGTGAAATTGCCAAAGAATACCAGCGTCTCGCGGGTTAATTTCTGACGGGCAGAAAGCCG
TCGCCCGTACTCATCAAACATACCAAAACCTGGCGCTGACGCCGGGTTTACTGGCATGAA
GGGAAAATCATTATGGACATAATGAGAAGTGTTGTGGGGATGGTGGTGTTACTGGCAATA
GCATTTCTGTTGTCAGTGAATAAAAAGAGCATCAGTTTGCGTACGGTTGGAGCCGCACTA
CTGCTGCAAATTGCTATTGGTGGCATCATGCTCTATTTTCCGCCGGGAAAGTGGGCTGTA
GAACAGGCGGCATTAGGCGTTCATAAAGTGATGTCTTACAGTGATGCCGGTAGCGCCTTC
ATTTTTGGTTCGCTGGTCGGGCCGAAAATGGATGTCCTCTTTGACGGTGCGGGTTTTATC
TTCGCCTTTCGCGTACTCCCGGCGATTATCTTCGTCACTGCGCTCATTAGTCTGCTGTAC
TACATTGGCGTGATGGGGCTGCTGATTCGCATCCTTGGCAGCATTTTCCAGAAAGCCCTC
AACATCAGCAAAATCGAATCTTTTGTTGCGGTTACCACTATTTTCCTCGGGCAAAATGAG
ATCCCGGCGATCGTTAAACCGTTTATCGATCGCATGAATCGCAACGAGTTGTTTACCGCA
ATTTGTAGCGGGATGGCGTCCATTGCGGGTTCGATGATGATTGGTTATGCCGGAATGGGC
GTACCAATTGACTACCTGTTGGCGGCATCGCTGATGGCGATCCCCGGCGGTATTTTGTTT
GCACGTATTCTTAGTCCGGCAACCGAGCCTTCGCAGGTCACATTTGAAAATCTGTCGTTC
AGTGAAACGCCGCCAAAAAGCTTTATCGAAGCGGCGGCGAGCGGTGCGATGACCGGGTTG
AAAATCGCCGCCGGTGTGGCGACGGTGGTAATGGCGTTTGTCGCAATTATTGCGCTGATT
AATGGCATTATCGGCGGAATTGGCGGCTGGTTTGGTTTTACCAATGCTTCTCTGGAAAGT
ATTTTTGGCTATGTGCTGGCACCGCTGGCGTGGATCATGGGTGTGGACTGGAGTGATGCT
AACCTTGCGGGTAGCCTGATTGGGCAGAAACTGGCGATTAACGAATTCGTCGCTTACCTG
AGTTTCTCCCCATACCTGCAAACGGGCGGCACGCTGGGAGTGAAAACCATTGCGATTATC
TCCTTTGCGCTTTGTGGTTTTGCTAACTTTGGTTCTATCGGTGTTGTCGTTGGCGCATTT
TCGGCTATTTCGCCAAAACGTGCACCGGAAATCGCCCAGCTTGGTTTACGGGCGCTGGCA
GCAGCAACGCTTTCCAACCTGATGAGCGCGACCATTGCCGGGTTCTTTATTGGTTTAGCT
TGAGTTTCATTGCCGGATGTACTCGCTTATTAAGCGTTGCATCCGGCAATCGCGCTATTG
CAAATAATTTTTACTGCATCATCCCGGAGAATTTATTCTCCGGGTCCATCTCCAGCGCCA
GTCCTGACAACTGCTTTCTGTTTTTAATGAGATACCCTTTCTTGCTTTTAATTAATAAAC
CGTCGTGAATGAACTGCGCGAGAACATATAAAAGATGTCGATAAGAAACGCCTAAATACT
CTGCCGCTTGCGTATGCTTTTCGTGATAAAGATCACCTTCCTGCGAGAGTAATATAAATG
CTGCCAGGCGATTCACTAACGGAAATGATTGATTCTGAGTTAAAGAAACAATATTACGAT
AATTTTTATGACTTAAGGTGACGCAGAGTTTTCGTAAAAATAGCGTGTCGTTTAATAACA
GCGGACGGTAATGTTTCATAGGGAGCGCAAGGCACCAACACTCTTCAATAGCCTGCACCG
CACGCGGTTCATGGTCTTTATCGATTAACTCAATCTCGCCAATAAAACAGGGGGCGGCAA
AGAAATCGATCAGCGACACGCGACCATTAGCTAGCGTGGCGTAAAGCCTGGCGCGGCCTC
GCGTCAGGTAAAACAGCCAGGACGGCTGTTGCCCTTCCTGCACAATGTAGTCACGCGCTA
AAAAATGAAACAGCCGCGTATCGGCTGAAACATCCGTTAAAAAGCAATCCTTAAACGCGG
ATTCACTCATCAATTGCTGCTTAAGATCATTATTGTGGATTTCTTTCACGATGTTTATCC
GCTATGAGATTTCTCATATTTAGCATACGTACGCTGTTGTTAAGATTCAATCATCGGCCC
GGTCGAATTTTCTTTGCTGTAGAAAAAATAACGCAACTGGAAACAGAGGAAATAAACAAT
GGAAAAGAGAAAAATTATTCTGGATTGTGATCCGGGTCATGATGATGCTATTGCTATAAT
GATGGCGGCGAAACATCCGGCAATAGATTTATTAGGCATCACTATTGTAGCGGGTAATCA
GACGCTTGATAAAACATTAATTAATGGCCTGAATGTTTGCCAGAAACTGGAGATTAATGT
TCCGGTTTATGCGGGGATGCCGCAGCCCATTATGCGTCAACAAATCGTTGCCGATAATAT
TCACGGTGAAACCGGACTGGATGGCCCGGTATTCGAGCCGCTGACCCGCCAGGCAGAAAG
CACTCATGCGGTGAAATATATCATTGATACCCTGATGGCAAGCGATGGCGATATCACTCT
GGTGCCGGTTGGTCCGCTTTCAAATATCGCGGTGGCAATGCGTATGCAACCCGCGATCCT
GCCCAAAATCCGTGAAATTGTGCTAATGGGCGGCGCTTACGGTACAGGCAACTTCACGCC
ATCTGCCGAGTTCAACATCTTTGCCGACCCGGAAGCCGCACGCGTAGTGTTCACATCCGG
CGTTCCATTAGTGATGATGGGCCTCGATCTCACCAACCAGACCGTTTGCACCCCGGACGT
GATTGCTCGGATGGAAAGGGCAGGCGGCCCCGCCGGAGAGCTGTTCAGCGACATCATGAA
CTTCACTCTCAAAACGCAGTTCGAAAACTACGGCCTTGCTGGCGGCCCGGTGCACGACGC
CACCTGCATCGGTTATCTGATTAACCCTGATGGCATTAAAACCCAGGAGATGTACGTCGA
AGTGGACGTCAACAGTGGCCCTTGCTATGGGCGTACCGTCTGCGACGAGCTGGGCGTTCT
TGGCAAGCCCGCCAATACCAAAGTCGGCATCACTATTGATACAGACTGGTTCTGGGGATT
AGTCGAAGAGTGCGTGCGCGGCTACATCAAAACCCATTAAGTGTTGATAACAAGCCGGGC
CGGTATCGCAAGATGCAGGCCTGGCTATTTCTGATGGGCAGAAAGCCGTCGCCCAATATG
ACATGAAGAGATAATCACTATGGATGTCATGAGAAGTGTTCTGGGAATGGTGGTATTGCT
GACGATTGCGTTTTTACTGTCAGTAAACAAGAAGAAGATCAGCCTGCGTACCGTTGGCGC
GGCGTTAGTGTTACAGGTCGTGATTGGCGGCATTATGCTTTGGTTACCGCCAGGGCGTTG
GGTCGCTGAAAAAGTCGCTTTTGGCGTGCATAAAGTGATGGCGTACAGCGACGCGGGTAG
CGCATTTATCTTCGGTTCTCTGGTCGGACCGAAAATGGATACCTTATTTGATGGTGCAGG
ATTTATCTTTGGTTTCAGGGTGTTACCGGCAATTATCTTCGTCACCGCGCTGGTGAGTAT
TCTCTACTACATCGGTGTGATGGGGATTTTAATTCGAATTCTCGGCGGTATCTTCCAGAA
AGCATTAAATATCAGCAAGATCGAGTCATTCGTCGCGGTCACCACCATTTTCCTCGGGCA
AAACGAAATTCCGGCAATCGTCAAACCCTTTATCGATCGTCTGAATCGCAATGAATTATT
TACAGCGATTTGTAGTGGCATGGCCTCGATTGCTGGTTCGACAATGATTGGTTACGCCGC
ACTGGGCGTGCCTGTGGAATATCTGCTGGCGGCATCATTAATGGCGATCCCTGGCGGGAT
CTTGTTTGCCCGCCTGTTAAGCCCGGCAACGGAATCTTCGCAGGTTTCCTTTAATAACCT
CTCTTTCACCGAAACACCGCCAAAAAGCATTATTGAAGCCGCTGCGACAGGGGCAATGAC
CGGGCTGAAAATCGCCGCAGGTGTGGCAACAGTGGTGATGGCATTTGTTGCAATAATTGC
GTTGATTAACGGTATTATCGGCGGCGTTGGTGGCTGGTTTGGTTTTGAACATGCCTCGCT
GGAGTCCATTTTAGGTTACCTGCTGGCTCCACTGGCGTGGGTGATGGGTGTGGACTGGAG
TGATGCGAATCTTGCCGGGAGTTTGATTGGACAGAAACTGGCAATAAATGAATTTGTCGC
TTATCTCAATTTCTCACCCTATCTGCAAACGGCTGGCACTCTCGATGCTAAAACTGTGGC
GATTATTTCCTTCGCGTTGTGCGGTTTCGCTAACTTTGGTTCTATCGGGGGGGTGGTGGG
GGCGTTTTCTGCGGTTGCGCCACACCGTGCGCCGGAAATCGCCCAGCTTGGTTTACGGGC
GCTGGCGGCGGCGACGCTTTCCAACTTGATGAGTGCGACCATTGCCGGGTTCTTTATTGG
TTTAGCGTAGTGTGCGATTTATGAGCCGGATTAGATGCGGTCAAGCGTCGAATCCGGCAA
CATTGTTACACCATTGGCACTAATGAAAGCGCGTTATCGGCAGACAGGGTAGGGTTGTTT
AAGCTGCCGCTGGCGCGCGAAATTGCCGCGCAGGCTACCGCAAAACGGGCGCTGTCGCGG
AAACTGTATCCTTCAAGAAAGCTATATACCAGGCCCGCCATAAAACCATCGTCAGCACCA
AAACTGTCTACTGTCGTATGCGCTGGCGCGGTCAGCAAAAATTGTTCTCCATCCTTTTCG
CTGCAATAAACTGACTCATCGGGCAAATAAACAAACAGTTGCTGAACACCTTGCTGATGC
AATGCATTCACTGCGGTATTACGGTCAGCATCGCTGGTGATCGCCTGTCCCCATAAAATT
TCCAGCTCCGGTAAAGTGGGTTTCAGGGTGTGAATATGCGCCAGCCAGTGTTTGATTTTG
CCCGCTTTGAATTCTGAAACGGTATCGACAAACACCGGGATTTCATCAGCGAGGGTAAAG
ACCCATTCCAGCGCCTCGGCTGTCAGGTTGCAATCAGCCAGTACCACGCCCGCATGACGA
AGTAAATCGCGCGACCCGTTCAGTAGTTGCGGTGTCAACTGTTCCAGCAGATGGGTATCG
TTAATCGCCAGCACGGTTTGATCGTCTCGATTGGCAATTGCCAGATACGTCGATGTGCTT
TGACCATGCAAACGAACGCAGCCGGAGACATTCACGCCGGCACGGCGCGTTTCTTCCAGG
AGCATTTCGCCATAAAAGTCATCGCCAATCACTGAAAGCAAATGGACGTCACGGCCTAAC
AGCGCCAGATTGTGGGCGATGTTGCGTCCCACGCCGCCCGCTGAGCAATGAATTGTACCG
GGATGAGAAGCCGATTGCGGGTAACGGATATCCGCCATCCCGCGAATATCCATATTGATT
GTCCCCACCACTACGCAGTATTCCTGCTCGGTGAGAATGTAACCTTTGCCTTTAATCCGG
CCTTTGCGCATTAAATCCATAATATGCGCCGCAACGCGCGAACGGCTGATTTGCAGCATG
TCCGCAATTTCGTTCTGCTGAATCAGCGGGTTACGCCGTAAAATTGCAAGGATCTCCTTT
TCCCGGTTATTCATCTTCAGGCTACCGCTTTTTCAGTTTGTTGCGCTTTCAGCCAGGCGA
TCTCTTCTGCCCAGATATCCGGGTTGATGGTTTCGAGGATCAGCGGAATGCCGTCGAAAC
GGTCGTCCTGCATGATCCAGCGGAACGCATCATGACCGATATTGCCTTCACCGAGGCTAT
GATGGCGGTCAACGCGGCTGCCAAAGGTGCTTTTCGCATCGTTAAGGTGCATCCCGCGCA
GATACTTAAAGCCGACAGTACGGGCAAAATCCGCGAATGTTTTCTCGCATTCGGCTGGAG
TACGCAAATCATACCCGGCAGCGAAAGCATGGCAGGTATCAATGCAGACGCCGACGCGGG
ATTTATCTTCCACGCCGTCGATAATCGCCGCGAGATGTTCGAATTTAAACCCTAAGTTAC
TGCCCTGACCGGCGGTGTTTTCTATCACCGCTGTCACACCTTGAGTTTTATCCAGCGCAA
TGTTGATGGATTCGGCAATACGCGCAAGGCAATCCTCTTCTGAAATCTGCATCAGATGGC
TGCCAGGGTGGAAGTTGAGCAAAGAAAGCCCCAGCTGTTCGCAACGCTGCATTTCATCTA
TAAAGGCATCGCGCGATTTTTCCAGAGCTTCAGTGACCGGATGTCCGAGGTTAATCAGAT
AACTGTCGTGGGGAAGAATTTGCGCCGATGTGTAGTGATATTTTTCACAGGCGGCTTTGA
ATTCATCGATGGTTTGCGTCGTGAGCGGTGCGGCACGCCACTGACGTTGGTTTTTGGTGA
ACAAGGCAAACGCGGTTGCGTCGATTTCGGCGGCGCGAATTGCGGCATTTGCCAGACCGC
CAGCAGCACTAACGTGCGCTCCAATGTATTTCATGCGAGGACTCCTGTTAAACCCGCTGG
AGGAAAACGGTAATGATAGCGGGTTAACAGGAGCAAGATGTAGTGGTTTATGCGATGACG
CTTTGAATCACATAGTTAATCGCACCACCACCAACAATCAGCCAGGCAAACAGTACCAGT
GCCATCAGCAGAGGTTTCGCCCCAGCTTTTTTCAGCGCGCTGACGTGAGTGGTCAGACCC
AGCGCCGCCATCGCCATTGCCAGCAGGAAGGTATCCAGCGTTACCAGCATGTTCACCACG
CTCTGCGGTAACAGGTGGAACGAGTTAAAGATGGCAACTACGATGAACAAGATGGCAAAC
CACGGAATAGTGATTTTGCTTTTCTCGCCGCTGTTCGCCCCAGACAGCTGTTTAACACGC
GCCGCCAGCAGGATGAGGAACGGAGCCAGCATCATCACGCGCAGCATTTTGGAAATAACT
GCTGCGTTTTCCGCATCCGGGCTGATGGCATGACCTGCCGCCACCACCTGCGCCACTTCG
TGCACAGTAGAACCAATGTAGATACCGAAAGTTTCCGGACTAAACCATTGAGACATCAGC
GGATATATCGCCGGGTAGAGGAAAATCGCGACGGTCCCGAAGATAACAACGGTTGCAACA
GCCACGGTTACTTTACTGGCTTCCGCTTTCACTACCGGCTCAGTCGCCAGTACCGCGGCA
GCACCACAGATACTGCTACCGGCACCGATCAACCAGCTGGTGTGCTTATCCAGACCAAAC
ACTTTCTGCCCCAGGAAGCAAGCCAGCAGGAAGGTACTGGACAGCGTCAACACGTCAATG
ATGATCCCACTGATACCGACATCGGCAATTTGCGAGAACGTCAGACGGAAGCCATAAAGA
ATGATACCCAGACGTAATAAATATTGCTTGGCAAACAGCACACCACCGTCACAGCTTTTC
CAGATGTGCGGATAGATGGTGTTGCCTAAAACCATCCCCAACAAGATTGCGAGGGTGAGG
GCACTAAACCCGGCACCCGCAACCGCGGGAATGGAACCACCCCACAGGGCGACCCCGGTG
ATAACTGCACTCAGGGCTAACCCCGGAATAAAATGCCACAGTGTACGATGTTGTTTCTGT
AAGGTGATATTCGTCATAACCCTCTCCTTTAACCGGGCATAAGGTTACGACTAACTGGTT
TAAAAATAAAATTGATTATATATTTATAATTAATCTTTATAAGTGGTAAGCGACTATGCA
CATCACCCTCCGGCAGTTGGAAGTTTTTGCAGAAGTATTGAAAAGTGGATCAACCACCCA
GGCGTCGGTGATGCTGGCGTTGTCGCAATCAGCAGTGAGCGCAGCCTTGACCGACCTGGA
AGGGCAGCTTGGCGTGCAACTGTTTGATCGCGTGGGGAAAAGACTGGTTGTTAATGAACA
CGGGCGGCTGCTCTATCCGCGTGCGTTGGCATTGCTTGAACAGGCGGTTGAAATCGAACA
ACTGTTTCGCGAAGACAACGGCGCGATTCGTATCTATGCCAGTAGTACCATCGGTAACTA
CATTCTGCCTGCAGTTATCGCCCGTTATCGCCATGATTATCCGCAGTTGCCGATTGAACT
TAGCGTTGGGAATAGCCAGGACGTGATGCAAGCGGTGCTGGATTTCCGCGTTGATATTGG
CTTTATTGAAGGACCGTGCCACAGCACTGAAATCATTTCTGAACCGTGGCTGGAAGACGA
GCTGGTGGTTTTCGCCGCGCCGACTTCGCCGTTGGCCCGTGGTCCGGTCACCTTAGAACA
GCTGGCCGCTGCGCCGTGGATCCTGCGTGAACGCGGTTCCGGCACGCGGGAGATTGTCGA
TTATCTGTTGCTGTCACATTTACCGAAGTTTGAGATGGCGATGGAATTAGGTAACTCCGA
GGCAATCAAACATGCGGTGCGTCATGGGTTGGGAATTAGTTGCCTGTCGCGACGTGTGAT
TGAAGATCAATTGCAGGCAGGCACATTAAGTGAAGTTGCGGTCCCTCTGCCGCGCCTGAT
GCGTACGTTGTGGCGTATACATCATCGGCAAAAACACCTTTCCAACGCGCTACGGCGCTT
TCTGGACTATTGCGATCCCGCAAATGTGCCGCGTTAAGTTGCTGTACAAGAACATGCTGG
TGCTGTGTCGATTTCGTGACGCAGCGCCTTCAGCATGCATTCGCCAGAAAAGAGATTGGC
TGCTTTACTTATAATCCCTGGGCGATCATGAAGGTGTCTTATAACCGTGTATTTCTGCCG
GAAGGATTGCCAATCGTCTGCTACAATCGCGCCTCATTTTTAAGATGGATAGCATTTTTG
TATGGTTTCCGAAACTAAAACCACAGAAGCGCCGGGCTTACGCCGTGAATTAAAGGCGCG
TCACCTGACGATGATTGCCATTGGCGGTTCCATCGGTACAGGTCTTTTTGTTGCCTCTGG
CGCAACGATTTCTCAGGCAGGTCCGGGCGGGGCATTGCTCTCGTATATGCTGATTGGCCT
GATGGTTTACTTCCTGATGACCAGTCTCGGTGAACTGGCTGCATATATGCCGGTTTCCGG
TTCGTTTGCCACTTACGGTCAGAACTATGTTGAAGAAGGCTTTGGCTTCGCGCTGGGCTG
GAACTACTGGTACAACTGGGCGGTGACTATCGCCGTTGACCTGGTTGCAGCTCAGCTGGT
CATGAGCTGGTGGTTCCCGGATACACCGGGCTGGATCTGGAGTGCGTTGTTCCTCGGCGT
TATCTTCCTGCTGAACTACATCTCAGTTCGTGGCTTTGGTGAAGCGGAATACTGGTTCTC
ACTGATCAAAGTCACGACAGTTATTGTCTTTATCATCGTTGGCGTGCTGATGATTATCGG
TATCTTCAAAGGCGCGCAGCCTGCGGGCTGGAGCAACTGGACAATCGGCGAAGCGCCGTT
TGCTGGTGGTTTTGCGGCGATGATCGGCGTAGCTATGATTGTCGGCTTCTCTTTCCAGGG
AACCGAGCTGATCGGTATTGCTGCAGGCGAGTCCGAAGATCCGGCGAAAAACATTCCACG
CGCGGTACGTCAGGTGTTCTGGCGAATCCTGTTGTTCTATGTGTTCGCGATCCTGATTAT
CAGCCTGATTATTCCGTACACCGATCCGAGCCTGCTGCGTAACGATGTTAAAGACATCAG
CGTTAGTCCGTTCACCCTGGTGTTCCAGCACGCGGGTCTGCTCTCTGCGGCGGCGGTGAT
GAACGCAGTTATTCTGACGGCGGTGCTGTCAGCGGGTAACTCCGGTATGTATGCGTCTAC
TCGTATGCTGTACACCCTGGCGTGTGACGGTAAAGCGCCGCGCATTTTCGCTAAACTGTC
GCGTGGTGGCGTGCCGCGTAATGCGCTGTATGCGACGACGGTGATTGCCGGTCTGTGCTT
CCTGACCTCCATGTTTGGCAACCAGACGGTATACCTGTGGCTGCTGAACACCTCCGGGAT
GACGGGTTTTATCGCCTGGCTGGGGATTGCCATTAGCCACTATCGCTTCCGTCGCGGTTA
CGTATTGCAGGGACACGACATTAACGATCTGCCGTACCGTTCAGGTTTCTTCCCACTGGG
GCCGATCTTCGCATTCATTCTGTGTCTGATTATCACTTTGGGCCAGAACTACGAAGCGTT
CCTGAAAGATACTATTGACTGGGGCGGCGTAGCGGCAACGTATATTGGTATCCCGCTGTT
CCTGATTATTTGGTTCGGCTACAAGCTGATTAAAGGAACTCACTTCGTACGCTACAGCGA
AATGAAGTTCCCGCAGAACGATAAGAAATAAGTTTCCTCCCTTCCTTGCTAAGCCCTCTC
AACCGAGAGGGCTTTTTCAATTCCATTTCCCTGACAAATCATGCGGATATAAAATTTAAC
ATTTGGATTGATAATTGTTATCGTTTGCATTATCGTTACGCCGCAATCAAAAAAGGCTGA
CAAATCAGAGGCTGTTCCGGCTTTCTGGGATGATCACCTGCATAAAAAATAAGTCCACCG
CGATGCTGCCGTACGCAAGGGGACGTGAAGAAGATGTGAGCGATAACCCATTTTATTTTC
GTAGTTACCTCATGGAGATATGGAATGTTTAGGTTGAACCCTTTCGTACGGGTCGGGCTG
TGTTTGTCCGCTATTTCTTGTGCATGGCCTGTGTTAGCGGTCGATGATGATGGCGAAACG
ATGGTTGTCACTGCATCTTCCGTGGAACAAAATCTTAAAGATGCACCTGCCAGTATCAGC
GTCATTACCCAGGAAGACCTGCAGCGAAAACCGGTACAGAATCTGAAGGATGTCCTCAAA
GAAGTGCCTGGCGTACAACTGACGAACGAAGGGGATAACCGTAAGGGCGTTAGTATTCGT
GGTCTGGACAGCAGCTATACCCTGATTCTCGTCGACGGTAAACGCGTGAACTCCCGCAAT
GCCGTCTTCCGCCACAATGATTTCGATCTGAACTGGATCCCGGTCGATTCCATCGAACGT
ATTGAAGTGGTCCGTGGCCCGATGTCGTCGCTGTACGGTTCCGATGCGCTCGGCGGTGTA
GTGAATATCATCACCAAAAAAATCGGTCAGAAATGGTCGGGTACCGTTACCGTCGATACC
ACCATTCAGGAACATCGCGATCGCGGTGACACCTATAACGGTCAGTTCTTTACCAGTGGA
CCATTAATTGATGGTGTGCTGGGAATGAAAGCTTACGGCAGCCTGGCAAAACGTGAAAAG
GATGACCCGCAAAACTCAACGACCACCGATACCGGAGAAACGCCGCGTATTGAAGGATTC
TCCAGCCGCGACGGCAATGTCGAATTTGCCTGGACACCGAATCAAAATCACGATTTTACT
GCCGGATACGGTTTCGACCGTCAGGATCGTGATTCCGACTCGCTGGACAAAAACCGCCTG
GAACGCCAGAACTACTCCGTCAGCCATAATGGGCGTTGGGATTACGGCACCAGCGAACTG
AAATACTACGGTGAGAAAGTCGAGAACAAAAACCCTGGCAACAGCAGCCCGATAACTTCC
GAAAGCAATACGGTCGACGGCAAATACACGTTGCCGCTGACGGCGATTAATCAGTTTCTC
ACGGTTGGCGGTGAATGGCGTCACGACAAACTTAGCGATGCGGTGAACCTGACCGGGGGA
ACCAGCTCCAAAACGTCTGCCAGCCAGTACGCGCTGTTTGTGGAAGATGAATGGCGGATC
TTCGAGCCGCTGGCGCTGACGACCGGCGTGCGTATGGACGATCACGAAACCTACGGTGAA
CACTGGAGTCCGCGTGCCTACCTGGTTTATAACGCCACCGACACCGTAACGGTGAAAGGG
GGCTGGGCGACGGCATTTAAAGCACCTTCTCTGTTGCAACTTAGCCCTGACTGGACGAGC
AATTCCTGCCGTGGCGCATGTAAGATTGTGGGTAGCCCGGATCTGAAACCAGAAACCAGC
GAAAGTTGGGAGCTGGGGCTTTACTACATGGGTGAAGAAGGCTGGCTGGAAGGGGTTGAA
TCCAGCGTTACCGTTTTCCGTAACGATGTGAAAGATCGTATCAGCATCAGCCGTACGTCT
GACGTCAACGCTGCACCGGGCTACCAAAACTTTGTTGGTTTTGAGACGGGCGCTAACGGA
CGGCGCATACCGGTATTTAGCTACTACAACGTTAACAAAGCTCGTATTCAGGGCGTGGAA
ACCGAACTGAAAATTCCGTTCAACGATGAATGGAAACTGTCGATCAACTACACCTACAAC
GATGGTCGTGATGTCAGCAACGGCGAAAACAAACCGCTATCCGATCTGCCGTTCCATACT
GCTAACGGTACGCTGGACTGGAAACCGCTGGCGCTGGAAGACTGGTCATTCTATGTTTCT
GGGCACTATACCGGGCAGAAACGCGCCGACAGCGCGACGGCTAAAACACCGGGCGGTTAT
ACCATCTGGAATACCGGCGCGGCCTGGCAGGTGACTAAAGACGTCAAACTGCGCGCAGGC
GTGCTGAACCTTGGCGACAAGGATCTCAGTCGTGACGACTACAGCTATAACGAAGACGGA
CGTCGTTACTTTATGGCAGTGGATTATCGCTTCTGATGAGAAGATGCCCGGCGAACCGGG
CGGACTTTCACTTCAGTAAATACTGCGCATGGAAGCGCAGGTGATCCTCTATAAAAGAGG
CGATGAAGTAGTAACTGTGATCATATCCCGGCTGAATACGCAGCGTCATCGGCCACGCTT
TCTGGCGCGCGGCTTCTGCCAGTACCGCAGGTTGCAACTGGTCGGCAAGAAACTGATCAT
TATCGCCCTGATCGATAAGCGTCGGGATCGCATCCTGCGCGTTACTGGCATACATCAGTG
CGCAACTGTCCCATTCCAGCCATGCATTTTTGTCCTCACCTAAATAGCTGCTAAACGCTT
TGATTCCCCACGGGACGCTGCACGGATTCACAATTGGCGCAAAGGCCGAAACGCTGGTGT
ATTTACCCGGATTTTTCAGCGCCATAATCAGCGCACCGTGACCACCCATTGAGTGACCGC
TAATGGCGCAGCGGTCGCTGACATTAAATTGCGACTGAACCAGCGCCGGTAATTCATCGC
GCAGATAATCATACATCCGGTAATGCGTCGCCCACGGCGGTTGCGTGGCATTAAGATAAA
AGCCTGCGCCCTGGCCTAAATCGTAGCCATCGTCGTTGGCAACCTTTTCGCCGCGCGGGC
TGGTGTCTGGCATCACCAGTACAATCCCCAGTTCCGCCGCTACCCGCTGGGCACCCGCCT
TGGTGGTGAAGTTCTCGTCATTGCAGGTTAATCCGGAAAGCCAGTACAGCACTGGTGGCG
GAGTGTGATCACGAGGTGGAGGGAGAAAGATACTGAACGTCATCGGGCAGTTTAAGGTAC
TGGAGTCGTGTCGCCAGCGTTGCTGCCAGCCTTCAAAACAGCGGTGCTCTTCGAGCATTT
CCATGCGTGGCTCCTTGTTGTGTTGTTTGCAATTTCTTCATCATACCGTTTATTCAATGT
GCTGTGAGTAACTTTCACTTCCGTATTTGCATAACGATGTTTTAACATCTGCTGATGAAA
GGCAGCGGCAATTACAATAATTATCGCTGTGAATACTGGATTATGTGCGCCGCCTCACGC
ACAATAATCAGGCTGTAAATCAGCTTAATAACTTTGCCCCCACGCAGGGCGGAGGCGTCA
CACCTGCAGGAGAAATCATAAATGCCATCACTCAGTAAAGAAGCGGCCCTGGTTCATGAA
GCGTTAGTTGCGCGAGGACTGGAAACACCGCTGCGCCCGCCCGTGCATGAAATGGATAAC
GAAACGCGCAAAAGCCTTATTGCTGGTCATATGACCGAAATCATGCAGCTGCTGAATCTC
GACCTGGCTGATGACAGTTTGATGGAAACGCCGCATCGCATCGCTAAAATGTATGTCGAT
GAAATTTTCTCCGGTCTGGATTACGCCAATTTCCCGAAAATCACCCTCATTGAAAACAAA
ATGAAGGTCGATGAAATGGTCACCGTGCGCGATATCACTCTGACCAGCACCTGTGAACAC
CATTTTGTTACCATCGATGGCAAAGCGACGGTGGCCTATATCCCGAAAGATTCGGTGATC
GGTCTGTCAAAAATTAACCGCATTGTGCAGTTCTTTGCCCAGCGTCCGCAGGTGCAGGAA
CGTCTGACGCAGCAAATTCTTATTGCGCTACAAACGCTGCTGGGCACCAATAACGTGGCT
GTCTCGATCGACGCGGTGCATTACTGCGTGAAGGCGCGTGGCATCCGCGATGCAACCAGT
GCCACGACAACGACCTCTCTTGGTGGATTGTTCAAATCCAGTCAGAATACGCGCCACGAG
TTTCTGCGCGCTGTGCGTCATCACAACTGATTAAAAGGCAGGAACCATGGAGCGCAACGT
CACGCTCGATTTTGTTCGCGGCGTCGCCATTCTGGGGATCCTGCTATTAAACATCAGCGC
CTTTGGGCTACGAAAGGCGGCTTATCTCAATCCCGCCTGGTACGGTGCTATTACGCCGCG
GGATGCATGGACTTGGGCATTTCTTGATCTCATCGGCCAGGTGAAATTCCTCACGCTTTT
TGCGCTACTGTTTGGTGCGGGCCTGCAAATGTTGCTGCCCCGTGGCAGACGCTGGATCCA
GTCGCGGTTAACGCTGTTAGTCTTGTTGGGCTTTATTCACGGTTTATTGTTCTGGGACGG
CGATATTTTGCTGGCTTACGGGCTGGTGGGCTTAATCTGCTGGCGGCTGGTGCGCGATGC
GCCATCGGTAAAAAGCCTGTTTAATACAGGCGTCATGCTTTATCTGGTGGGGCTTGGCGT
TTTGCTGTTATTGGGGCTGATTTCCGACAGCCAGACCAGCCGCGCCTGGACGCCGGATGC
ATCGGCTATTTTGTATGAAAAATACTGGAAGCTTCACGGCGGCGTTGAAGCGATCAGTAA
TCGTGCCGATGGTGTTGGCAACAGTTTACTGGCACTGGGCGCACAGTATGGCTGGCAACT
GGCAGGGATGATGCTCATTGGTGCGGCGCTGATGCGCAGCGGCTGGCTGAAAGGGCAGTT
CAGCTTACGTCACTATCGTCGTACTGGTTTTGTGCTGGTGGCGATTGGGGTGACCATTAA
CCTTCCTGCCATCGCCCTGCAATGGCAGCTGGACTGGGCGTATCGCTGGTGTGCCTTCTT
ACTTCAAATGCCGCGGGAACTGAGTGCGCCGTTTCAGGCGATTGGCTATGCGTCGCTGTT
TTATGGCTTCTGGCCGCAATTGAGCCGCTTTAAGCTGGTGCTTGCGATCGCCTGCGTCGG
ACGGATGGCGCTGACCAACTATCTATTGCAAACGCTGATTTGTACCACGCTTTTTTACCA
CCTCGGTTTGTTTATGCATTTTGACCGCCTGGAGCTGCTGGCGTTTGTTATTCCGGTATG
GCTGGCGAATATCCTCTTCTCTGTTATCTGGCTGCGTTACTTCCGCCAGGGGCCGGTGGA
ATGGCTCTGGCATCAGTTAACTTTGCGTGCTGCCGGACCGGCAATATCTAAAACATCAAG
ATAACGATCTGGATCACATTCGTTAACAAAACGGCTGTAACCGTTTCCATTGCTGTGACT
CGATTCACGAAGTCCTGTATTCAGTGCTGACAAAATAGCCGCCAGCAAGCAGTCATTTAC
TGCAATCTCATAACAGGTAGTGAATATGATCACCATTCGTGATGTAGCGCGTCAGGCTGG
CGTCTCTGTGGCAACGGTTTCCCGGGTGCTCAATAACAGCACGCTGGTCAGTGCCGACAC
GCGTGAAGCAGTAATGAAAGCCGTGAGTGAGCTGGATTATCGGCCAAACGCCAATGCCCA
GGCGCTGGCAACTCAGGTTAGCGACACCATTGGCGTGGTGGTGATGGACGTTTCTGATGC
GTTTTTCGGCGCGCTGGTAAAAGCGGTGGATCTGGTCGCTCAGCAGCATCAGAAATACGT
GCTAATCGGCAATAGCTATCATGAAGCGGAAAAAGAGCGTCACGCCATTGAGGTGTTAAT
TCGCCAGCGTTGTAATGCGTTGATTGTTCACTCAAAAGCATTGAGTGACGATGAACTGGC
GCAATTTATGGATAACATTCCCGGTATGGTGTTAATCAACCGCGTTGTGCCGGGGTACGC
CCATCGTTGCGTTTGCCTGGATAATCTCAGCGGTGCCCGAATGGCGACGCGCATGTTGCT
GAATAACGGTCATCAACGTATTGGTTATCTTTCTTCCAGCCACGGCATTGAAGATGACGC
CATGCGTAAAGCAGGCTGGATGAGTGCGTTGAAAGAGCAGGATATTATTCCGCCGGAAAG
CTGGATTGGCGCTGGTACGCCGGACATGCCGGGCGGTGAGGCGGCGATGGTTGAACTGCT
GGGGCGCAATCTACAACTTACCGCTGTATTTGCTTATAACGACAATATGGCCGCTGGCGC
ACTGACAGCATTAAAAGATAATGGCATTGCGATTCTGTTACATCTCTCAATCATCGGTTT
CGATGATATTCCCATCGCCCGTTACACCGACCCGCAATTAACGACCGTGCGTTATCCCAT
TGCTTCAATAGCGAAATTAGCCACCGAACTGGCCTTGCAGGGGGCAGCAGGCAATATTGA
TCCTCGTGCCAGCCACTGTTTTATGCCGACGTTAGTGCGTCGCCATTCTGTCGCAACACG
CCAGAATGCGGCGGCGATCACTAACTCAACAAATCAGGCGATGTAACCGCTTTCAATCTG
TGAGTGATTTCACAGTATCTTAACAATGTGATAGCTATGATTGCACCGTTTTAACGTTGT
AACCCGTATGTAACAGTGAATAATCACTTTTGCCGAGGTAACAGCGTCATAACAACAATT
AAAGCCGTTTTCTGGAGCGTTACCGGGCACTGATGAATCCCCTAATGATTTTGGTAAAAA
TCATTAAGTTAAGGTGGATACACATCTTGTCATATGATCAAATGGTTTCGCGAAAAATCA
ACTTGAGACTTGGTATTCATTTTTCGTCTTGCGACGTTAAGAATCCGTATCTTCGAGTGC
CCACACAGATTGTCTGATAAATTGTTAAAGAGCAGTTGCGACGCGGCTTTCAGCTCACTG
TCGCGAGGTGGCGTATATTACGCTTTCCTCTTTCAGAGTCAACCCTGAATTTCAGGATTT
TTCTCTTCAACCGAACAGGCTGTTTGTGTGAAGTGATTCACATCCGCCGTGTCGATGGAG
GCGCATTATAGGGAGTCGGCTCAGGAAGACAAGCGGAAAAATGCATTTTTATTTCAACCG
CTCATCTTTTAATCATTACGCCGGTTTTTGCTGCTTTTTTATCGCTTGCGGCAGGTCTGC
CAGGCTATTTAACACCCAATCTGCCGCGTTTTCTGCTTCAGGTGTAATAGGTTTACCCGT
ACGCACCAGCACTTTTGTTCCCACGTTCGCCGCAGCCGCTGCCTGCATATCTTCTAATTT
ATCGCCCACCATATAAGAGGCGGCCATATCAATATGCAAATAATCGCGTGCTGACAAAAG
CATCCCCGGATGTGGTTTGCGGCAATCGCAGACCTGGCGAAACTCTTCAACACTACCCTG
CGGATGATGCGGGCAATAATAGATACCATCCAGATCGACATCGCGGTCCGCCAGCGACCA
GTCCATCCACTCGGTCAGCGTTTCAAACTGTGCTTCAGTAAATTTACCGCGAGCAATGCC
AGACTGGTTGGTTACTATCACCAGCGCAAAGCCCATTTTTTTCAGCTCGCGCATGGCGTC
AATAACACCGTCGATAAATTCAAAGTTGTCGATCTCATGGACATAGCCGTGATCGACATT
AATGGTGCCATCACGGTCAAGAAAAATTGCGGGTACGCTCTTCGCCACCTTTTATAGCTC
CTTAATAAGGCATGTGGCGCTAGTATCGCATGTTTCGACCTGCAAGAAAGTGCTCTTCGC
ATAAACCTGATTGATTTAGACGTCTGGATGCCTTAACATCCATTTCATTGACGGCGTTGC
CCGTTTCAGGCATTCGAAATGCCACGACTAACTTAATGACGATAATAAATATTCAATGAT
AAAACTTTCGAATATCACCAAAGTGTTCCACCAGGGCACCCGCACCATCCAGGCGTTGAA
CAACGTCAGCCTGCATGTGCCAACTGGACAAATTTATGGCGTTATCGGGGCCTCAGGCGC
GGGTAAGAGTACGCTTATACGTTGTGTAAACCTGCTGGAGCGCCCAACCGAGGGTAGCGT
GCTGGTCGATGGACAGGAACTGACCACGCTGTCAGAATCCGAGTTGACCAAAGCTCGCCG
CCAGATTGGTATGATTTTCCAGCATTTTAACCTGCTCTCTTCGCGTACTGTTTTTGGCAA
CGTGGCTCTGCCGCTGGAGCTGGACAACACACCGAAAGACGAGATCAAACGTCGCGTGAC
GGAATTGCTGTCATTGGTTGGTCTTGGCGATAAGCATGATAGCTACCCGTCGAATCTTTC
CGGTGGGCAGAAACAACGTGTGGCGATTGCCCGTGCATTAGCCAGCAATCCCAAAGTATT
GCTGTGTGATGAAGCCACCAGCGCGCTGGACCCGGCAACGACACGTTCTATTCTCGAACT
GCTGAAAGACATCAACCGCCGTCTGGGTTTGACGATTCTGTTGATCACTCACGAAATGGA
CGTTGTGAAGCGCATTTGTGATTGCGTGGCGGTCATCAGCAATGGCGAACTGATCGAGCA
GGACACGGTAAGTGAAGTGTTCTCACATCCGAAAACGCCGCTGGCGCAGAAGTTTATTCA
GTCAACCCTGCATCTGGATATCCCGGAAGATTACCAGGAACGTCTGCAAGCGGAGCCATT
CACTGACTGCGTGCCGATGCTGCGTCTGGAGTTTACCGGTCAATCGGTCGATGCCCCACT
GCTTTCTGAAACCGCGCGTCGTTTTAACGTCAACAACAACATTATTAGCGCGCAGATGGA
TTACGCCGGTGGCGTTAAGTTCGGCATCATGCTGACTGAAATGCATGGCACACAACAAGA
TACGCAAGCCGCCATTGCCTGGCTGCAGGAACACCATGTAAAAGTAGAGGTACTGGGTTA
TGTCTGAGCCGATGATGTGGCTGCTGGTTCGTGGCGTATGGGAAACGCTGGCAATGACCT
TCGTATCCGGATTTTTTGGGTTTGTGATTGGTCTGCCGGTTGGCGTCCTGCTTTATGTCA
CGCGTCCGGGGCAAATTATTGCTAACGCGAAGCTGTATCGTACCGTTTCTGCGATTGTGA
ACATTTTCCGTTCCATCCCGTTCATTATCTTGCTGGTATGGATGATTCCGTTTACCCGCG
TTATTGTCGGTACATCGATTGGTTTGCAGGCAGCGATTGTTCCGTTAACCGTTGGCGCAG
CGCCGTTTATTGCCCGTATGGTCGAGAACGCTCTTCTGGAGATCCCAACCGGGTTAATTG
AAGCTTCCCGCGCAATGGGTGCCACTCCAATGCAGATCGTCCGTAAGGTGCTGTTACCGG
AAGCGTTGCCGGGTCTGGTGAATGCGGCAACTATCACCCTGATTACCCTGGTCGGTTATT
CCGCGATGGGTGGTGCAGTCGGTGCCGGTGGTTTAGGTCAGATTGGCTATCAGTATGGCT
ACATCGGCTACAACGCGACGGTTATGAATACGGTACTGGTATTGCTGGTCATTCTGGTTT
ATTTAATTCAGTTCGCAGGCGACCGCATCGTCCGGGCTGTCACTCGCAAGTAACGTTCAA
CACAACATAAATAATTGAAGAAGGAATAAGGTATGGCGTTCAAATTCAAAACCTTTGCGG
CAGTGGGAGCCCTGATCGGATCACTGGCACTGGTAGGCTGCGGTCAGGATGAAAAAGATC
CAAACCACATTAAAGTCGGCGTGATTGTTGGTGCCGAACAGCAGGTTGCAGAAGTCGCGC
AGAAAGTTGCGAAAGACAAATATGGCCTGGACGTTGAGCTGGTAACCTTCAACGACTATG
TTCTGCCAAACGAAGCATTGAGCAAAGGCGATATCGACGCCAACGCCTTCCAGCATAAAC
CGTACCTTGATCAGCAACTGAAAGATCGTGGCTACAAACTGGTCGCAGTAGGCAACACTT
TTGTTTATCCGATTGCTGGTTACTCCAAGAAAATCAAATCACTGGATGAACTGCAGGATG
GTTCGCAGGTTGCCGTGCCAAACGACCCAACTAACCTTGGTCGTTCACTGCTGCTGCTGC
AAAAAGTGGGCTTGATCAAACTGAAAGATGGCGTTGGCCTGCTGCCGACCGTACTTGATG
TTGTTGAGAACCCAAAAAATCTGAAAATTGTTGAGCTGGAAGCACCGCAGCTGCCTCGCT
CTCTGGACGACGCGCAAATCGCTCTGGCAGTTATCAATACCACCTATGCCAGCCAGATTG
GCCTGACTCCAGCGAAAGACGGTATCTTTGTCGAAGATAAAGACTCCCCGTACGTAAACC
TGATCGTGACGCGTGAAGATAACAAAGACGCCGAGAACGTGAAGAAATTCGTCCAGGCTT
ATCAGTCTGACGAAGTTTACGAAGCAGCAAACAAAGTGTTTAACGGCGGCGCTGTTAAAG
GCTGGTAATTTTTAGGCTGTTTCCACAATTTGTAATATCATTCAGGACGGGCGCTTGCCC
GTCTTGTCATTTTTACAAGCTCCTGATTCAATATTGACGTTTTGATCATACATTGAGGAA
ATACTATGCGTGCTTTACCGATCTGTTTAGTAGCACTCATGCTAAGCGGCTGTTCCATGT
TAAGCAGATCCCCTGTCGAACCCGTTCAAAGCACTGCACCCCAGCCGAAAGCGGAGCCTG
CAAAACCGAAAGCGCCGCGCGCCACGCCGGTCCGAATTTATACCAATGCAGAAGAATTAG
TCGGCAAACCGTTCCGCGATCTCGGTGAAGTCAGTGGCGACTCTTGCCAGGCCTCTAATC
AGGACTCTCCGCCGAGCATTCCAACCGCACGTAAGCGGATGCAAATCAACGCCTCTAAAA
TGAAAGCCAATGCTGTATTACTGCATAGCTGCGAAGTCACCAGCGGTACGCCGGGCTGCT
ATCGTCAGGCTGTATGTATCGGCTCTGCGCTTAACATTACGGCGAAATGAGCAGTTTCCA
GTTCGAGCAAATAGGCGTTATTCGCTCGCCCTATAAAGAAAAATTCGCCGTTCCGCGCCA
GCCTGGTCTGGTAAAAAGCGCCAACGGCGAACTGCATCTCATTGCTCCCTACAACCAGGC
CGACGCCGTTCGCGGCCTGGAAGCATTCAGCCATTTATGGATCCTTTTCGTCTTTCATCA
AACGATGGAAGGCGGCTGGCGTCCGACTGTGCGTCCGCCTCGTCTTGGCGGTAATGCCAG
AATGGGTGTTTTCGCTACGCGTTCCACTTTTCGCCCTAACCCAATTGGTATGTCGTTGGT
AGAGCTGAAAGAGGTTGTTTGCCATAAAGACAGCGTGATTCTGAAGCTCGGCAGTATGGA
TCTGGTCGATGGTACGCCGGTAGTGGATATCAAACCGTATCTCCCCTTTGCTGAATCGCT
TCCCGATGCCTGTGCCAGCTATGCGCAAAGTGCGCCAGCGGCAGAGATGACGGTGAGTTT
TACCGCAGAGGTCGAAAAGCAGCTTTTGACGCTGGAGAAGCGTTATCCGCAGTTAACCCT
GTTTATCCGCGAAGTACTGGCGCAAGACCCACGCCCGGCCTATCGTAAAGGTGAGGAAAC
GGGTAAAACCTATGCCGTCTGGCTACATGATTTTAACGTTCGCTGGCGCGTCACCGACGC
AGGTTTTGAAGTCTTTGCGCTGGAACCGCGTTAAATTCACGCCCTTCTCTTTTGACATTT
CTTTTGCACTGGTAAACTAAATCACTTTTTTTGTCCCAGGCTCGCCTTGAGCCTGTTCTA
CCTTCCAACTGGAACCGTAACAACATGCGTACTAGCCAATACCTGCTCTCCACTCTCAAG
GAGACACCTGCCGACGCCGAGGTGATCAGCCATCAGCTGATGCTGCGCGCCGGGATGATC
CGCAAGCTGGCCTCCGGGTTATATACCTGGCTGCCGACCGGCGTGCGCGTTCTGAAAAAA
GTCGAAAACATCGTGCGTGAAGAGATGAACAACGCCGGTGCAATCGAGGTGTCGATGCCG
GTGGTTCAGCCAGCCGATTTGTGGCAAGAGAGTGGTCGTTGGGAACAGTACGGTCCGGAA
CTGCTGCGTTTTGTTGACCGTGGCGAGCGTCCGTTCGTACTCGGCCCAACTCATGAAGAA
GTTATCACTGACCTGATTCGTAACGAGCTTAGCTCTTACAAACAGCTGCCGCTGAACTTC
TATCAGATCCAGACCAAGTTCCGCGACGAAGTGCGTCCGCGTTTCGGCGTCATGCGTTCC
CGCGAATTCCTGATGAAAGATGCTTACTCTTTCCATACTTCTCAGGAATCCCTGCAGGAA
ACCTACGATGCAATGTATGCGGCCTACAGCAAAATCTTCAGCCGCATGGGGCTGGATTTC
CGCGCCGTACAGGCCGACACCGGTTCTATCGGCGGCAGCGCCTCTCACGAATTCCAGGTG
CTGGCGCAGAGCGGTGAAGACGATGTGGTCTTCTCCGACACCTCTGACTATGCAGCGAAC
ATTGAACTGGCAGAAGCTATCGCGCCGAAAGAACCGCGCGCTGCTGCTACCCAGGAAATG
ACGCTGGTTGATACGCCGAACGCGAAAACCATCGCGGAACTGGTTGAACAGTTCAATCTG
CCGATTAAGAAAACGGTTAAGACTCTGCTGGTTAAAGCGGTTGAAGGCAGTAGCTTCCCG
CTGGTTGCGCTGCTGGTGCGCGGTGATCACGAGCTGAACGAAGTTAAAGCAGAAAAACTG
CCGCAGGTTGCAAGCCCGCTGACTTTCGCGACCGAAGAAGAAATTCGTGCCGTGGTTAAA
GCCGGTCCGGGTTCACTGGGTCCAGTAAACATGCCGATTCCGGTGGTGATTGACCGTACC
GTTGCGGCGATGAGTGATTTCGCTGCTGGTGCTAACATCGATGGTAAACACTACTTCGGT
ATCAACTGGGATCGCGATGTCGCTACCCCAGAAATTGCTGATATCCGCAACGTGGTGGCG
GGCGATCCAAGCCCGGATGGTCAGGGTACGCTGCTGATCAAACGTGGTATCGAAGTCGGT
CACATCTTCCAGCTGGGTACCAAGTACTCCGAAGCACTGAAAGCCTCCGTACAGGGTGAA
GATGGCCGTAACCAAATCCTGACTATGGGTTGCTACGGTATCGGCGTAACGCGCGTAGTA
GCTGCAGCAATTGAGCAGAACTACGACGAACGCGGCATCGTATGGCCTGACGCGATCGCA
CCGTTCCAGGTAGCGATTCTGCCTATGAATATGCACAAGTCCTTCCGTGTACAAGAGCTG
GCCGAGAAGCTGTACAGCGAACTGCGTGCACAAGGTATCGAAGTCCTGCTGGATGACCGC
AAAGAGCGTCCGGGCGTGATGTTTGCTGATATGGAACTGATCGGTATTCCGCACACTATT
GTGCTGGGCGACCGTAACCTCGACAACGACGATATCGAATACAAATACCGTCGTAACGGC
GAGAAACAGTTAATTAAGACCGGTGACATCGTCGATTATCTGGTGAAACAGATTAAAGGC
TGATGCCAGAAAGGGTCCTGAATTTCAGGACCCTTTTTTACAGGGATTGTATAAAATGGA
TAAACCAAAGGCATACTGCCGCCTGCTTCTCCCCTGCTTTCTTTTACTTTCGGCCTGTAC
CGTTGATATCAGCCAGCCAGACTCCTCAGCCACAGCGATAGATACCGAGGCGAAAACATG
GGCTGTCAAATTCCAGCATCAAAGCTCTTTCACCGAACAATCAATAAAAGAAATAACAGA
ACCTGACCTCAAACCCGGCGATTTGCTGTTCTCCTCAAGTCTTGGGGTAACCTCATTTGG
TATCCGCGTCTTCAGCACTTCCTCAGTGAGTCACGTTGCAATCTATCTGGGTGATAACAA
CGTTGCAGAAGCGACAGGGGCTGGCGTCCAGATTGTTTCCCTTAAAAAAGCGATGAAGCA
TAGCGATAAGCTTTTCGTCTTACGAGTCCCGGATCTTACCCCGCAACAAGCCACAGAAAT
CACCGCGTTCGCCAACAAAATTAAAGATAGCGGTTACAACTATCGCGGCATTGTCGAATT
TATTCCCTTTATGGTGACTCGCCAGATGTGCTCACTGAATCCGTTCTCCGAGGATTTTCG
CCAACAGTGCGTCAGCGGCCTGGCGAAAGCGCAGTTAAGCAGTGTGGGCGAAGGAGACAA
AAAGTCGTGGTTTTGTTCGGAATTTGTCACTGATGCATTTGCCAAAGCCGGGCATCCGCT
TACGCTGGCGCAATCGGGCTGGATTAGCCCTGCCGATCTGATGCATATGCGTATTGGTGA
TGTCTCTGCGTTTAAGCCAGAAACGCAGTTACAGTATGTTGGGCACCTGAAGCCAGGGAT
TTATATCAAGGCGGGTCGCTTTGTTGGTTTGACTCAGTGATAAAGCCAGCCTCGTGCACA
AAATGCCGGATGCGGCGTGAACGCCTTATCCGGCCTACAAAATCGTGCTAATTCAAAATG
TTGCATTATATGCTGTAGGCCTGATAAGCGCAGCGCATCAGGCAATTTTGCGTTTGTTTC
TGCCTTAAGCAGGTTTACTGCCCCAAACTACTGCAATCCTGGTTCGGATAAAATTTACCC
GCCGTATCGGGCGCTAATACTTTGGTCGGCGCACCGGTATCCGGATTAGCCTCAAGCGTA
AAGTGACCTTCTACTGACAGTAACACCGGTTTTTCACTGTGCCCGCGCGCAGCCAGGTAG
CCACGCTCCAGCTCTGCGTTATTCGCTACCATGAAACGTTTTCCGGTCGCGCAATCAGTG
AAGGTCGCCGCATCAGCCATATAAAAATACATGCCCCGCAGAGTCATCGGCGTCATGGGT
AAACTGGATTGTGCCGCTTCCAGCGTATAGTTGAACTGCGATTCAATCGGTTTACCTTCA
CGATCGAGCATCTCCAGCGCATCGCCTTTCGCCCGATAATATGACTTTTCACCTTTGCTG
TCGGTTAATACCAGCTTGTCAGCGGTTCGCGCCCATGTACCGTAGGAAGCGAAGGAGGAA
GGTTCTTCACGAGCACCGAGATAACGCTCATTCATCACCCATGTTCCGTCTTTTTCGAGG
AACAGAGAGGTTTCGATTCCTTCGCAATCGGCACACGGCAGCACGCCGCGCCAACTTTGC
GGCATCGGTTTCAGTTCGGCTGCCTGCGCCGGAGAAAGCGTATCGACTTCGGCCCGATTA
TTACAACCCATCAGAGTAAAGAGGCTGATTACAGCCATCGCTGTCACTATCGCTTTTTTC
ACCATCCATTCCTTCTTTTTATTCCCGACCGCTGCGCACTTTGCCGCGCATCGCCTTCAC
GCTTGATTTTTGTGTTTTCGATGCCAGCCTGCGCTCTTTCGATGCACGGGTGGGCCGCGT
GGGTCGTCGGGCTTTTTGTTCTGTTGTTAATTCTTTAATCACAGCCACCAGCCGGGCCAG
AGCTGCTTCGCGGTTCAGTTCCTGACTGCGGTATTCCTGTGCCTTAATGACAATCACGCC
ATCACTGCTGATCAAATGATGGCTGGCGGCGAGCAGACGCTCTTTGTAATACTCTGGCAG
GCTGGACGCCCGAATGTCAAAACGCAGATGAATAGCCGTTGAGGTCTTATTAACATGCTG
CCCGCCCGCGCCCTGCGCACGAATGGCGGTGATCTCAAGCTCACCATCGGGAATAGCAAC
ATGTCGGGAAATCACAATCATGAAGGTTGTTGCCAGGCGGTTAAGTTCACTTCCAGATTA
TTCTTATCATCCGATAACCAGATCACGCCATCCTGAATCGTTGCCTGCAGCGTCATGGTA
CGATCGGCAAAGGCGCTTACTTTCGCCAGTTGTTCATCGTCCAGATACCAGACGGAAAGA
TTGGCAAACTGCACACATTTGCTCTGATTTTGCTGCCACCAGATTTGCGCCGCCCGACTA
TTATAGGTAAACAGCGCCACTTCTGCGGCCTGGGTGCAGGCTTTCTTAATCCGCCGCTCA
TCCGGCAGCCCCAGCTCAATCCACAAATCAATGCCCAGGTGATCGTTACGCAGCCACGCT
TCCGGCTCATCATCGGCACACAAACCACGGGTAAATTGCAGACGTTCATCAGCATATTTC
AGCCACGCCAGCAAGCGCAGCATCATACGCTCCTGGGTTTCTGAAGGGTGGCGCGCCAGC
GTCAGAGAGGCATCGAGAAACTGGTTGCGGTCGAGATCGGCCACATTAACCGTCGCTTTA
TAAATTGTCGCTTTAAGCGCCATAAGAAAACTCCTTTCGAATCAAGAGGCCATTGTAACG
GAATACGTGCAGTTGCGGCGCTGATATTGCAGAAATGAGTGTGGTATAGTCACCTTGCGA
AACAGAGTTTATCTTCGTAGGCTTAGACTTGCATCCACGGTTAAGTCAGAGTGCTGACAG
GAGGGCATGTGGAAAAATATTGTGAGTTAATACGCAAGCGGTACGCGGAAATCGCCAGCG
GAGACTTAGGATACGTTCCGGACGCGCTGGGCTGCGTTTTGAAAGTGCTGAATGAAATGG
CTGCCGACGACGCCCTTTCTGAGGCTGTCAGGGAAAAAGCAGCATACGCTGCGGCAAACT
TACTGGTGAGCGATTATGTCAATGAATGATACGTATCAACCAATCAATTGTGATGATTAC
GATAATCTTGAGCTCGCCTGCCAGCATCATTTAATGCTGACACTTGAGCTGAAAGATGGC
GAAAAATTGCAGGCAAAAGCCAGCGATTTAGTCTCCCGCAAAAATGTGGAGTATCTGGTC
GTCGAGGCCGCTGGCGAAACCCGTGAGCTACGTCTGGATAAAATTACCAGCTTTAGCCAC
CCGGAAATCGGTACGGTGGTGGTGAGCGAGTCCTGATTGACTTTCGCCGGATGCGACGCT
TAATGCGTCATATCCGGCCTTCACTTAACTAAGCGTTTCGCTGCCAGACAAAACTTATGC
CATTCTCACCTTCAGCCACACCTTCTTGCGTCACAAATACCCCTGCCGCCGCAATCAGCG
TTTCGCCATAAAACAGCAGTGGCGTGGTGTCACGTAGCCACGGCGGCACGCCCAGCTCTT
GCCAGATTTTCTTTAGCTTACGTCCGCCGTTACGCCCGACAATATGCAGCAATCCTGGCG
CTTTGAAACGCACGCTGACCGCTTCGTCTGCACGCGGAGGGCGAATATCGCCTCCCGCAT
TAAGCTGTACACTTCCCAGCCCCGCCGGTAATTCCAGCGGTTGAAGCCACGTCTGCCACG
GCACAATGTTTTCGCTTTGCCCGGTGACGGATTTAATCCACCACAGTTGCGACTGATAGC
GTCGGATTTCAAACGCGCCCAAACGTAAACAGGGGGAGGCATCTTCCCGCGCCAGCGCCA
CTTCCTGCCAGATCCGCCCCAACGCGTCGCGGGAAGGCATCGGTGCATTCTGCCCTGCAA
GCCAGCGGCGGATAATCGCCGCGCGGCGGGCATCACTCATCGCCAGCATTGGCGCAATCT
GCAGCGTCCTCTGCGGCGATTGACAGTGTGCTAAATCATCCGCCAGCAGTTCATCCAACA
GGCTCTCTTGTTCAGCGCAAAGTGCGGCGCTGCGGGCTGTTGCTTCGGCAAAATGCGGCC
AACGCTGCTGCAATAACGGCACTACGCGCAGGCGCAGAAAGTTACGATCGTATGAGTCGT
CCTGATTACTTTCGTCTTCAATCCAGCGTAAACCATGCGCCAATGCCCACTGCGCCAGTT
CCCCCCGCGTGCGGGCAAGCAACGGGCGGATAAGCCGTGTTCCGGCAAACTCCGAAACTT
CCGCCATAGCCGAAAGCCCGGCAGGGCCGCTACCGCGTTTTAGCGCCAGCAGAAAAGTTT
CACATTGATCGTCGAGATGTTGCGCGGTGACCAGCACTTCACCGGGCAACAAGGTGCGGG
CAAATGCCTGATAACGCGCCTGCCGCGCCTGGGCCTCAATGCCCAGTCCTTCTTGCGCAA
GTTGCACGCGCTCGACCACCAGCGGCACCTGCCACTGTTGGCAGATGTTCTCGCAATGCC
TAACCCAGGCATCGGCATTGGCACTTAAACCGTGATGCACATGAATAGCGCGCAGAGTGA
CGCCCGGATTTTCCGCCCGCCACTGCACCAACTGATGCAGCAGAACGGTGGAGTCAAGCC
CGCCGCTAAAGGCCACCAGAATCTGGCGTGAGGTGAGAAGTTGTCTATTGAGCGTGAGTG
TCATGATGGTGCGATTTTACAGTAGCAATGCCCGGCACGTTACCGGGCAAATGCGGCGAT
GACAAGCCTTACTGCTCATACAGTTCCAACGGCAGCCCGTCCGGATCGTTAAAGAACGTG
AAGCGTTTTTGCGTGTATGGATCGACACGGATGGCTTCACACTTCACGTTATGGCTTTCA
AGGTGCGCCACTGCCGCATCGATATCATCAACGCTAAAAGCCAGATGACGCAGGCCGCAA
GCTTCCGGTCGGCTGGGGCGCTCCGGCGGGAACGGAAATGAGAAAAGCTCAATCACATAT
TGCCCATTAAGCGCCAAATCCCCTTTCCACGAGTCGCGCGCTTCGCGATAGACTTCGCTT
TGCAGCGTGAAACCAAGAATATCGCAGTAGAAAGCTTTGCTCACCGCATAATCCGTCGCA
ATAATCGCAATATGGTGAACCTGTTTTAAACCCAGCATAACGTCTCCTTTATTTGTTAAC
AGCACGTTACTCGCCCGGAAGCCGCTCTGGCAAGTTATCCCGCCATTTTTAGGACTCGTA
CGCGGTAAACGCCGTCTTCGTCCTGTTTCGCGCCGTGAATATCCGTTTCAAAACCGGGGT
AATGTTGCCCTACGGAACAAAGCATCAGTAGAAAATCGAGTACTGTGCGGCTCTCTTTGG
TCAGCATTTCTCCAGGCATCAACAGCGGTACGCCCGGTGGATAAGGCAGGATCATATTTG
CCGATACTCTACCGACCAGTTGTTCCAGCGCAATGGTTTCTACTTCACCTTTAATCTGTC
TCTGCCATGCCTGATGTGGCGTCATGATCATTTCCGGCAAAGTATCGAATGCCCGCAACA
TCAAACCGGGAAGATCGTGTTTACGAATCAGCTTATGGATCCCTTGCGCCAGATCCTGAA
TACGCATATTGCGGTAGAAATCGGGATCTTCAGCATAGAGATCGGGTAGCATATTTTTGA
TCCGCAGGTTGAGATCGTAAGAGCGCTTAAATTCCGTCAGCCCACGCAATAATCCCATTG
CTTTGGTTTTATCAATGCCAATACTAAAGAGAAACAGCAGGTTATAAGGGCCGGTTTTCT
CTACTACGATCCCACGTTCGTCGAGGAATTTTGCCACCAGCGCCGCCGGGATCCCCTCCT
CACTCATATTGCCCTGTTCGTCCATCCCCGGTGTCAAAATAGTGACTTTAACCGGATCGA
GAAACATATGATCGGCATCCGCATCGTTAAAGCCGTGCCACTGTTCGCCAGGCGCAACGG
GCCAGCATTCGGCTTCATCCACCTGCGGCGGTTGCCAGATATCGAAAAACCAACCGTCAG
ACTCTTCCCGCAACCGCTGGACCTCTTTGCGAAAATGCAGAGCTCGTTCTACTGAACGAT
TAATCAGCCGTTTGCCCGGATTACCACGCAGCATCGCCGCCGCCGTCTCAACCGAAGCAA
CAATGGGATAACTGGGCGAGGTGGTGGTATGCATCATAAAGGCTTCGTTAAAGGCCTCTT
CGTCATACTCGCCTTTAATGTGGATCAGCGAAGCCTGCGATAACGCCGCCAGCATTTTGT
GGGTCGATTGCGTTTCGAAGATCACTTTTCCCGCAACACGCTCGCCGCTCATACCACTTT
TACCCTGGTAGATCGGATGAAAATGGGTGTACGGCACCCAGGCGGAATCGAAGTGGATCG
AGGGGACATCCAGCGTCTGTTTGATCCAGTCGGTGTTGTAGAGCAAGCCATCATAGGTGG
AGTTGGTGATCACCGCATGAACCGGCCATTGTGCCTGCGTGGTGGCAGCGACTTTCTCTT
CGATGCTGTCGCGAGTAAATTCACGGCGCGGGATCCCACCAAGAATCCCCAACGCATTAC
GCGTCGGTTTCAGCCAGACTGGCACTACATCGTTCATCATCAACAGATGCGCCAGCGATT
TATGACAATTGCGGTCGATCAACAGCGTGCTGCCGGATGGCGCGGCGTACATACCCACAA
TTTTGTTCGACGTCGATGTTCCGTTGGTAACGATATAACTCTGTTCCGCGCCAAAAGTCC
GCGCGATGTACTCTTCCGCTTCCAGATGTGGCCCGGTGTGGTCGAGCAACGAACCAAGCT
CGGTGACCGAAATAGAGACATCAGCCTTAAGGGTATTCCCGCCGAAAAAATCATAAAACA
GACAGCCAACCGGGCTTTTTTGATATGCGGTGCCGCCCATATGACCCGGCGTACAAAAGG
TGTACTTCCGCTCTTTGACGTAGGTAAACAAGGCTTTCGTGAACGGTGGGGTAATGTTAT
CAAGATATTCGTTGGTGTACTGACGCATACGAATAGCGATATCTTCCGCCTGCCCCAGCG
CATATTCAAAAAACCAGAGCGCCATCCGCATATCCTGCACGCTGACATCCATCGTCGAGT
GGGTGTTGATGAAGGCATAAAGCGGGAGATATTCATTAAGCTGATTGATATCGCTACATA
AATCGAGACTGTACTCATCCCAGTCAAAAATCACGCCGCAAATTCGTGGGTTATGTTCGA
TAAACTTCAGCAAATCAACGCTGTTTTGTGGCCAGATAATCTGAAAGCCTTGCGCCACCA
GCGCCGACTCCAGTTCTTTGATGGGCTCATCTTTATAAAAGACGCCATGCGGTCCCATAA
TGGCAATGATGTTCATGTGTTCCTCCTGGAAAATCCTTCCTTAATCATAGCCTGCTCAAA
CCGTGGCGATAAAAAAGGGCCACCGAAGTGACCCTTTTTCAGAACTTTTGCGAATTACGC
GTAACCGTAGCTCATCAGGCGCTGATAACGACGATTTTTTAAATCTTCAGTGCTTAACAC
GTCGAGATCGGCCAGATCCGCCAGCAGTTGCGCTTTCAACGATGCCGCCATCGCTTCCGG
GTTACGGTGAGCACCACCCAGCGGTTCCGGGATGATGGAGTCGATCAGTTTTAGTTCTTT
CAGACGCGGAGCGATGATACCCATCGCTTCAGCTGCCAGCGGTGCTTTGTCGGCGCTCTT
CCACAGAATGGACGCACAACCTTCCGGCGAGATAACGGAATAGGTGCTGTATTGCAGCAT
ATTCACTTTATCGCCCACGCCAATCGCCAGCGCGCCGCCAGAACCACCTTCACCGATAAC
CGTACAAACTACCGGTACACCGAGGCGAGACATTTCACGCAGGTTGCGTGCAATAGCTTC
AGACTGACCGCGTTCTTCTGCGCCCACGCCCGGATAAGCCCCCGGGGTGTCGATAAAGGT
GATGATTGGCATCTTAAAGCGTTCAGCCATTTGCATCAGACGCAGTGCTTTGCGGTAACC
TTCTGGCGCTGGCATACCAAAGTTACGGCGAATTTTTTCTTTGGTTTCACGACCTTTTTG
ATGACCAATGATCATCACCGGACGACCATCGAGACGGGCGATACCACCGACGATAGCTTT
ATCGTCTGCATACGCGCGGTCGCCAGCCAGTTCGTCAAATTCATCAAATGCCAGGCGAAC
GTAATCCAGGGTATAAGGACGCTGTGGATGGCGTGCCAGTTGCGCAATCTGCCATGCACC
GAGATCGGCGAAGATTTTACGCGTCAGTTCTACGCTTTTTTCACGCAGACGATGCACTTC
TTCATCGATGTTAATATCCAGTTTCTCATCCTGACGGCTAACCGCAGTCAGAGAATCGAT
TTTCGCTTCCAGCTCTGCAATCGGCTGTTCAAAATCAAGGAAATTCAGACTCATAGTATT
CCTGTATTAGTCAAACTCCAGTTCCACCTGCTCCGAACCAATGAGGCCACGGAGATCGTT
TAATAAACGATCGCTCGGAGAGACACGCCACGTCGCGCCAAAACGCAACCGCGCGCGTGC
ATCCGCCCTCTGATAGTAGAGATGTACTGGAATTGTCCCAGAGCGGTGGGGTTCCAGAGA
CTGACGGAGTCGGTTTAAAAGCTGGTCATCAATTTGCCTGTCCGTCAGCGAGATAGCAAG
CCCGCGAGCATATTTTTCCCGGGCTTCGTCAATATCCATCACTTCGCGAGCGGTCATTTT
AAGCCCACCGCTGAAGTCATCAAAGCTGACCTGTCCGCTGACGATAAGTATGCGGTCTTT
TTCCAGCAATTGCTGGTATTTATCCAGGGCGTCAGTAAACAACATCACTTCCAGCCGCCC
GGAACGGTCATCCAGCGTGCAGATACCGATACGATTGCCGCGCTTGGTGACCATAACCCG
CGCGGCAACAACGAGCCCCGCAGCCGTGATGACTTTACCACGTTCTGTCGGGTGCATGTC
TTTCAGCCTTACGCCTCCGACATAACGCTCAATCTCTTTTAAATACTGGTTGATAGGGTG
TCCGGTCAGGTACAGGCCTAACGTTTCACGTTCCCCATCTAATACCACCTGCTCCGGCCA
CGGTTGGCAGCTGGCGTAGGATTGTTCAATTTGTTCCGGTTCTTCGGCCAGCACGCCGAA
CATATCGGCCTGACCGATAGCTTCCGCTTTCGCGTGTTGATCTGCCGCTTTTAACGCATC
ACCCAGCGAGTTCATCAGTGCCGCGCGGTGTGGCCCAAGACGGTCAAACGCCCCGGACAT
GATCAGTTTTTCCAGCACCCGCCGGTTTAACTTTTTGGTGTCGGTTCGGGCGCAGAGATC
AAACAGTTCGCGGAAGTAGCCGCCTTTATTACGGGCTTCGATGATCGCCTCAATCGGACC
TTCACCGACCCCTTTGATCGCGCCAATACCATACACGATTTCGCCGTCGTCGTTGACGTG
GAAATGGTAAAGACCGGAGTTTATATCTGGTGGCAGGATTTTCAGCCCCATCCGCCAGCA
CTCATCCACCAGGCCCACCACCTTCTCGGTGTTGTCCATATCGGCGGTCATTACCGCCGC
CATAAACTCTGCCGGATAGTGCGCTTTCAGCCATAATGTTTGATATGACACCAAAGCATA
GGCCGCAGAGTGCGATTTGTTAAATCCGTAACCAGCGAATTTCTCCACCAGGTCGAAGAT
TTTCATCGCCAGTTCGGCGTTGATTCCGTTCTTTTCTGCACCTTCAGCAAATACAGAACG
CTGCTTAGCCATCTCTTCCGGCTTTTTCTTACCCATCGCACGACGCAGCATATCCGCGCC
ACCGAGGGTATAACCAGAGAGCACCTGCGCAATCTGCATGACCTGTTCCTGATACAGGAT
AATGCCGTAGGTTGGCTCCAGTACTGGTTTCAGGCTTTCATGCTGCCACTGCACGTCCGG
GTAGGAAATCTCTTCGCGACCATGTTTACGGTCGATAAAGTTATCCACCATCCCTGATTG
CAACGGACCAGGGCGGAACAGTGCCACCAGTGCGATCATATCTTCGAAGCAGTCAGGTTG
CAGACGCTTGATCAGGTCCTTCATGCCGCGCGATTCAAGCTGGAATACCGCCGTGGTTTC
CGAGCGTTGCAGCATGTCGAAGCTTTTCTTGTCATCCAGCGGGATCGCGGCGATATCCAG
CGGCGGCTCGCCATTCTTCGCCCGCCGCTTGTTGATCATCTCCAGCGCCCAGTTGATGAT
GGTGAGCGTACGTAAACCAAGGAAGTCGAACTTCACCAGTCCGGCATATTCAACGTCGCT
TTTATCAAACTGGGTGACCGGATGTTTGCCCTCTTCATCGCAATAAAGCGGCGCAAAATC
GGTAATTTTGGTCGGCGCGATAACCACTCCACCGGCGTGCTTACCGGCGTTACGGGTGAC
CCCTTCCAGTTTGCGCGCCATGTCGATCAGCGCCTTAACTTCTTCATCCGCTTCGTAGAT
TTCCGGCAGCTGCGGCTCGGCTTCAAACGCTTTCGCCAGCGTCATGCCCGGATCGGGCGG
GATCAGTTTCGAGATACGGTCGACAAAGCCGTACGGATGCCCCAGCACGCGGCCTACGTC
GCGGATCACCGCTTTCGCCGCCATCGTACCGAAGGTGATAATCTGCGATACCGCATCACG
ACCGTACATGTCCGCTACGTGCTCGATAACCTGGTCGCGTTTCTCCATACAGAAGTCAAC
GTCGAAGTCAGGCATGGAGACACGTTCCGGGTTAAGGAAACGTTCGAACAGCAGGTCAAA
TTCCAGCGGATCGAGGTCGGTGATTTTCAGCGCGTAGGCCACCAGTGAACCCGCACCGGA
GCCACGGCCTGGCCCTACCGGTACGCCGTTATCTTTCGACCACTGGATAAATTCCATAAC
GATGAGGAAGTAGCCCGGGAAGCCCATCTGGTTGATAACCTGAAGTTCAGTCTCCAGACG
TTCGTCATATTCCGGGCGGCGCTTAAGACGTTCTTCCTCATCAGGGAATAAAAAGGCCAG
ACGCTCTTCCAGGCCTTCTTTTGCACGCTTGACCAGATAATCTTCGGTGCTCATGTCCCC
GGTCGGGAACTGCGGCAGGAAGTATTCACCCAGACGCACAGTTACGTTACAACGTTTGGC
GATCTCAACGGTGTTGGCAAGGGCTTCGGGGATGTCGGCAAACAGCTCGCACATCTCCTC
TTCGCTACGCATATATTGCTGCGGCGAATAGTTACGCGGGCGTTTAGGATCGTCGAGGGT
AAAGCCGTCGTGGATCGCGACGCGGATTTCGTGTGCGTCAAAGTCGCTGCTGTCGATAAA
GCGCACATCGTTAGTCGCCACGACGGGCAAACCGCGCGCTTCCGCCAGTTCCACCGCCGC
GTGCAGATAGCTTTCTTCATCCGGCCTGCCGGTGCGGATCAGCTCGAGAAAATAGCGATC
CGGGAAGTGTTCTTCATAAAACGCGACACACTCATCTACCAGCGCGCTGTTGCCACGCAA
AAGACTGCGTCCGACGTCGCCCATGCGCCCGCCGGAAAGAAGGATCAACCCTTCGTTTAA
TTCGATAAGCCAGTCGCGATCGATGATCGGCCCGGCGGCACCGTACCCGCGCTGATACGC
TTTTGAGATCAGCAACGTCAGATTCTGATAGCCGGTATTGTTCGCCGCCAGTACCGTCAG
GTGGGTTAACTCATCACCCAGCAGGTCGCACTGGACGTTAAAATCTGCCCCGACGATAGG
CTTAATCCCTGCGCCATGTCCCGCTCCGTAGAACTTCACCAGACCGCAAAGGTTGGTGAA
ATCGGTGATCGCCAGTGCTGGCATACCCAACGCCGCCGCCTTTTTTACCAGCGGTGCGGT
TTTGGCCAGGCCATCGATCATCGAGTAGTCGCTGTGCACCCGCAGGTGTACGAAACGTGG
TTCAGACATCTTCAGATTCCGGTTTACTTAATCTCGACACAAGAATCAGGACGCAAGTCC
CAGTGCTCGTTTGACAGGCCCAAAGCTGCGACGATGATGTTCAGTCGCGCCATATTCAGC
CAGTTTTTCCAGATGAAAAGCGGTTGGATACCCTTTGTGTTGGGCAAAACCATATTGCGG
GAAAACAATATCCAGCGCCGCCATTTCGGCGTCACGCGTCACTTTCGCCAGGATAGACGC
GGCACTGATTTCCGGTACGCGGCTATCGCCTTTCACCACTGCCATCGAAGGCATCGGTAA
TTTCGGGCAGCGGTTACCATCAATCAACACATATTCCGGCGCAATATGCAGCCCAGCAAC
GGCACGCTGCATCGCCAGCATGGTCGCATGTAAAATATTCAGTTCATCGATTTCGTGAGG
TTCCGCGCGGCCCAGACTCCAGCTCAACGCTTTCTCTTTGATCTCTTCACAGAGCGCCAG
ACGACGTTTTTCGCTCAGCTTTTTGGAATCATTCAGCCCGGCAATCGGGCGCGCCGGGTC
GAGAATCACCGCAGCGGTGACGACCGCGCCAACTAACGGCCCGCGTCCGGCTTCATCCAC
ACCCGCAACCAGCTGCGTGTGCGGATAGACAAATTCGATCATTGTGCTAACTCCAGAACG
GCTTGTGCCGCCTGCTCATCGGCATTGCAGCGGATCTGCTGATGCAGTTCACGGAAGGTA
TCGTGCATCGCGTGGCTGGTTTTCCCGTTCGCCAACAGCGGTAACAGCGCCGCAGCCAGT
TTTTGCGGCTCACACTCTTCCTGCAATAACTCTTTGACTAACTCTCTGCCCGCCAGCAGA
TTTGGCAGCGAGACATAATCAGTTTTCACCAGACGCTTCGCCAACCAGAAAGTGAAAGGC
TTCATGCGATACCCCACCACCATCGGGCATTTCGCCAGCATACACTCCAGTGCTGCCGTA
CCCGACGCCAGTAGCGCCGCATCGCTGGCAACCATCGCCTCACGGCCCATTCCATCCAGC
AAATGAACCGACAGGTCTGGCGCGACTGCAGCTTTGATGCGTTCAAACTGCTCGCGGCGT
TTGGCATTCACCAGCGGCACCACGATTTCGAGATCTGGATATGTCTGGCGCAAAAGCTGG
GCCGTTTTCAGGAAATCGGCACTAAGCATTTCGACTTCTGCACCACGGCTGCCCGGCAAC
AATGCCAGACAGTGGGCATCGTAAGGGATCCCCAGCACATCACGGGCACCATTTTTATCT
GGATCTAATGGCATGGCATCAGCCATGGTATGACCGATAAAGCGGCACGGTACGTTGTAT
TTGTCATAAAACGCTTTTTCGAAAGGCAGAAATGCGAGCACCAGATCGGTGGCTCTGCCT
ATTTTGAAAACGCGTTTCTGTCGCCACGCCCAGACGGACGGACTGACGTAATGAATGGTT
TTGATACCCTGCTTTTTGAGGTTACCTTCAAGAGTAATATTGAAGTCAGGCGCATCAATA
CCGACAAAAACATCTGGCTTCAGTTCGCCAAAACGCTTTGTCAGATCGGCACGAATATGC
AGTAAGCGACGCAGACGACCGAGCACTTCAACAATGCCCATTACCGCCAGTTCTTCCATT
TCGTACCAGGCTTCGCAGCCTTCAGCTTGCATTCGTGGCCCGGCAACACCAACAAAGCGG
GCGTTGGGCACACGTTCTTTCAGAGCGCGGATTAAACCGGCCCCCAGGATATCGCCGGAG
GTTTCTCCGGCGACCAGGGCAATCGTTAATGGACGCTGTTCAGTCATTAACGAATCAGAC
CGCGCGTTGAGCGTGCAAAGAAATCGGTAAAGGCTTTCACTTCCGGATATGTTTCCGCCA
GTTCAGCAATTTCCGGTTTCACTTCATCGAGCGTTTTACCGCTACGATAAATCAGCTTAT
ACGCATTGCGGATAGCGGTAATCGCCTCACGGCTGAATCCGCGGCGCTTCAGCCCTTCGA
TATTGACACCGAACGGCGTTGCGTGGTTACCCTGCGCAATGACATAAGGAGGGACGTCCT
GCGCCACACCGGAGCAGCCGCCAACCATCACATGCGCACCAATGATGCAGAACTGATGGA
CTGCGGTCATGCCGCCGATGATCGCGAAGTCGTCAACCGATACGTGACCCGCCAGCGTTG
CGTTGTTGGCGAGAATACAGCGGTTACCTACCGTACAATCGTGCGCAATGTGCGCGTTGA
TCATCAGTAAGTTGTCGCTGCCCACCTTCGTCAATCCACCGCCCTGGACTGTGCCACGAT
GAATGGTGACGCTTTCGCGAATGCGGTTACGATCGCCGATTTCCACACGGGTCGGTTCGC
CAGCATATTTCAAATCCTGGTTAACTTCGCCGATGGAGGCGAACTGATAAATCTCATTAT
CGCGGCCAATTTTAGTATGACCATTCACGACAACGTGAGATTTCAGTACGGTACCCTCAC
CAATTTCGACATGGGGTCCAACGATACAAAAAGGACCAATGTGTGCGTTCGCGCCAATCG
ACGCGCCCTCTTCCACAATGGCGGTTGGATGCACAAAGGCGGATTTATCAATCACGTATC
AGGCCTCCCGGCTACGAGCACACATCATCGTTGCTTCGCAAACTACTTTACCGTCGACCA
GAGCAACCCCTTTAAAACGGGTCAGGCCGCGGCGCGTTTTTTCGAAAGTGACTTCCATGA
TCATTTGATCGCCAGGCACGACCGGGCGCTTGAAGCGCGCTTCGTCAATACCGGCGAAGT
AGTACAGCTCACCCGGTTCCAGTTTTCCTACGCTTTTAAACGCCAGAATACCTGTTGCCT
GTGCCATTGCTTCCAGAATCAGCACACCCGGGAAAATCGGTTTTCCAGGGAAATGGCCCT
GGAAGAATGGCTCATTGACAGAGACATTTTTTACTGCGCGCAGAAAACGACCTTCTTCAA
AATCCAGCACGCGATCCACCAGTAAGAACGGGAAACGGTGCGGCAGAAGTTCTAAAATCT
CTTCAATCTGCAGAGTATGAGTGTTAGTAGTCAAGATACTCTTCCTGTCAAAATATAAGA
AACGACAATAATAACACGGCCTGCCGCAATCGTAAGAATGAGACAGGCCGTAAAGTTTGG
CGAACAAAAGATGGAACGTTAGTCTTGTTGATTAACCTTGCGCTCAAGCGATTTCAGACG
CTTGCTCATGTCATCAATGTTCATCACCAGTGCAGCGGTTTTGCGCCAGACTTTGTTGGG
TTGCAGCGGAATGCCTGAGGAATAGACGCCTGGTTCAGTGATGGGACGCATCACCATACC
CATGCCCGTAACCGTCACTTTGTCGCATATTTCCATATGCCCGTTGATTACGCTGGCTCC
GCCGATCATGCAGTAACGACCAATTTTCAGGCTGCCCGCCATAATGACGCCACCGGCAAC
CGCCGTATTGTCGCCAATCACGACGTTATGTGCAATCTGGCACTGGTTATCAATGATCAC
GCCATTGCCAATAACCGTGTCATCCAGCGCGCCGCGATCGATGGTAGTGCAGGCACCGAT
CTCCACGCGATCGCCAATAATTACGCGACCAATCTGTGGGATCTTCACCCAGTTACCACG
ATCGTTGGCATAACCAAAGCCGTCTGCGCCTACCACTGTTCCGGACTGGATCAGGCAATT
CTGACCGATCTGGATCTCATGGTAAATGGTTACATTCGCCCAGAGACGCGAACCTGCACC
GATTTTGCTGTTTTTACCTACGAAGCAACCGGCACCGATAATCACGTTATCGCCCAGTTC
AACGCCGGACTCAATCACCGCGTTAGCGCCAATCGATACGTTGTTACCCAGCTTCGCCGT
CGCGTCGATCACTGCACTGGGTGCAATATTCTGCGCGGGCTGCGGCGTGGTATCTAAAAT
TTGCGCCATGCGCGCGTAAGTCAGGTAGGGATTCTTCACTACCAGCGCGGCACTTTTCGC
GAAAGGAAGATCGTCCTGGGTCATGACAACCGCGGATGCCTGGCACAAGCCTAAATGCTC
ACGGTATTTTGGGTTAACCATGAACGTAATGTGACCTGTTTGTGCAGATTGCATGGACGC
AACGCCGGTGATGACGATATCGCCATCACCGTGTAGTTCTGCATCCAACTGCTGCGCTAA
ATCAGCCAGTCGAATTGAAGGCATTACTTATTTAACCTGTTTCAGTACGTCGGCAGTGAT
GTCTTTTACATCGCTGCTGTTGTAAGCAACGGCGTTTGCATCAACAACCAGATCGATATC
CTGGCTGTTGGCAACGGATTTCACAGCAGTCTGGATACGAGTAACCAGTTTGCCGCGTTC
TTCGTTGGAACGACGTGCGCGATCCTGCTCAAAAGCCTGCGCTTTCTGAGCAAAAGTCTG
GCGCTGAGCCATCACGTCTTTTTCCAGCTTAGTGCGATCGCTGCCCGCTTTCATGGACTG
CAGCTTTTTCATTTTAGCCTGCAGATCGGTTTCCATACGCTGCAGTTCGCTGGCACGGCC
TTTGAACTCATTTTCCAGCGTGTTAGAAACACCGGTTTTCTGCGCTACCTGCTGGAACAG
GCTGCCCATGTTGACGATTGCAATTTTGTCAGCCGCCTGAGCAGATGTTGCCAGTGCTAA
ACCGAGACCTGCAGCTAATAACCACTTTTTCACAATAAACTCCTTACCATCCCATTTGCA
CCGGAGGGTGCAGTTCTTTGCGTGGCCCGGCGATCTTATATTGATCGCCTAAAGTCATCG
CTACACTACCACTACATTCCTTTGTGGAGAACACTTACCAAGTTTTACCGATGTTAAACT
GGAACTGTTCTGCCTTGTCTCCATCGTACTTTTTGAACGGCTGGGCGTAGGAGAACACCA
ACGGCCCCAATGGGGACATCCATTGTAATGCGATACCCGCAGACATACGGATATTGCTTG
GATCACTATAGTCCGGATATCCAGAATATTGGCTGGAATCCCAGTTTGTATCCCAAACGG
TACCCATATCCCAGAAGAAGGAAGTACGAACCGAGTTAGCATACTTATCGCTAATAAACG
GAGTCGGGGTTATGAACTCGAGGCTGGCAACCGCCATGGCGTTACCGCCTACAGCATCAT
CCGATTTACACAGGTCTTTCGCGCCGTCCTGAGTCGCACATTCGTAATCATAGTCCGGAT
CATAATTACTGGCCTGATGCGGGAAGTAAACTGCTTTCGGACCAATGGTATTGGACTGGA
AGCCACGGACGGTGCTGGAACCACCGGCATAGAAGTTCTCGTAGAACGGCATCTCTTTGC
CGCCTAAACCATCACCATAACCCCAGCGGGTACGACCCAGAACAACCCATTTGTGATCGT
CATCGATCGGCACATAAGTCGCCGTGTCTAACGTCACTTTGTAGTATTCGTTATCCGATC
CCGGAATGGTCACTTTACCGGTCAGGTTGACACGTGAACCATCTGTCGGGAAGTAACCAC
GGTCAAGCTTGTTATAGGTCCAACCATAGTTGAACGTGAAGTCGTCTGTTTTGAAGCTGT
TATCCTGATCAGAGGTGCTCGGATGTTCACCCATAGAGTACAGATAACGCCACATCGCAA
CCTGAGGCTGCATGTTGGACAGGGAGTTATGTACATAACCCAGACCTGCACGCAGCGAGT
TATATTCGTTAATCGGGAAGCCCAACGTCACGTCTGTACCATAACTCTTGTTGGTATAGT
CGGACAGGTCGGCGTCATCTGCCTGGAAGTCATTATAGAAGAGACGACCACCGAGGCTTA
CGCCATCTACGGTGAAGTACGGGTTGGTTACCGACAGTTCAGCATAGGTCTGGTAATCGT
TTTTGGTCCCGTTGATACCAACAGCATAACCTGTACCTAACCAGTTATCCTGTTGCACAC
CAGCCTGGAAGCTCACGCCACTTTCAGTACCGTAACCAATACCAAAGTTGAAGCTACCGG
TGTTGCGCTCTTTTACCTTGTAGACTACATCAACCTGGTCCGGGCTACCCGGAACACGTT
GGGTATCGGTATCGACAGTTTCAAAGAAGCCCAGACGATTCAGACGCTCCTTACCCTGAT
CGACCAGATCGCTCCCCAGCCATGCACCTTCCATCTGACGCATTTCGCGACGCAGGACGG
CATCTTTCGAGGTATCGTTACCTTCAAAACGGATCTTACGCACGTAGAAACGGTTACCCG
CATCAACGTTCACACGTAATTTAACGGTTTTGTCGGCATCGTTAATTTCGGGCATGGACT
GTACGCGCGGATAGGCATAACCATAGCGACCGAGAAGCTTTTTAATGTCATCTTCCATCT
TGGTCACTTTGGTGCCGTTATACAGCTCACCCGGCTCGATCTTAGTCAGCTGCTCAATTT
CAGCGGAGTGCCCGGCAAGGTTGCCGCTCACTTCAACGCCAGAAAGCTTGTACTGATCGC
CTTCGGTGATGTTCACCGTGACGTAAATACCTTTTTTATCTGGCGTCAGACTGACCTGGG
TAGAGTCGATGTTGAAACGGGCATAACCGCGGTCCAGATAGTAGCTGCGCAGGGTTTCAA
GGTCGCCCGCCAGTTTCTGTTTCTGGTATTTACGATCGCCTACCACGTTCCACCACGGCA
CTTCGTCACGCAGTTGGAAATGAGAGATCAGTTCGTCGGTGGTGAAAGCATGGTTACCAA
CAATGTTAATTTGCTGGATTTCAGCTGACACACCTTCCTGGAACACCAGTTTTAGGTCAA
CACGGTTGCGCGGCAGCGGGGTCACGACAGCTTTAACGCTGGCGCTATATTTACCGACGC
TGTAGTAGAAGTCTTCCAGACCTTTCTCGATATCGGCAATGGTGGTGCGATCGAGGGATT
CGCCCACACGCACACCAGAAGCCTCGAGGTTTTGCTTCAGCATGTCATCTTTCACCGATT
TGTTACCGGAGAAAGTAATGCTGGCAATGGTCGGACGTTCTTTTACCTGAACCAGAAGGG
TATCACCATCACGAAGGACGCGAACATCCTCAAAGTTGCCGGTAGCAAACAGAGCGCGAA
TGGTATTACTGATATCTTCATCATTAACCGTGTCGCCTGTGCGCACCGGCATACTGAGGA
GGGCCGCACCAACGGCGACACGCTGAAGGCCTTCGAAATGAATATCTTTCACTACGAACC
CTTCAGCACCGTATACGGTGGCGCTGCTAAACAGCAGCGACGCTATGAGCAACTTTTTCA
TCGCCATCGTTATTATGCGTTCTTCCTAACTAACTCTCATAACCGAGAGAAATCATTGAA
AAGTGCAAGCCCCATTAACAGCACCAGCAGAATCGAGCCAATGCGATAACAAAAGTCTTG
AACCCGCTCGGATACCGGTCCGCCCTTGATCTTTTCGATCGCAAGGAACAGCAGATGCCC
CCCGTCAAGTACGGGCAACGGAAACAGGTTAATTATCCCTAAGTTCACGCTAATAAGCGC
AAGAAACGGCAGGTAATAAACTACCCCGAGTTCCGCTGTCATCCCAGCCCCCTTGGCGAT
AGAGATCGGCCCACTGAGGTTGTTCAGTTTCACATCACCGGTGATCAATTTTCCCAGCAT
ACTGACCGTCAGCTTCATCAGCTGCCACGTTTTGTCCGTGGCTTCGACGATGGCGTTGAA
CGGCCCATACTGGCGTACAACTTTATACTCATCTGGCAAAGGAATGACTTTCGGCTCAAT
ACCGACAAAACCAATCGCTTTACCATTACCCGGTTTACTCTCCGGGATTAATGTCAAAGA
CAAGGGACTCCCCTGCCTTTCGATTTCTAACGCTAAGGATTTACCCGGGTTATCCCGGAC
AAGCATCACAAAGGTCACCCACTGCGTTAAGGGCTGACCATCGACTTTAACGATCCTGTC
GCCTGCTTGCAAACCTGCCTTGCTTGCCGCCGAGTTTGGCTGCACATTTTCCAGTACAGG
TTCAATTTGCGGTCCACGAGGACGAATCCCCAGCGAAGATACCGGATCTTCTTTATCAGG
CTCAAACGCCCAGTGACGTAAATCGAGCTTTACATCCCGCCGTTGGTCGCTGCCAAATGG
CGCTACTGTAATGGTGGTGCTTTCATCGCCAATTTTATCGACCAACTGCAAACGCACAGC
ATCCCAATCAGGCGTTTCGATACCATCTACGGCTTTTAGTTCCGTACCTGGTGCAATTTG
TGCTTCCGCAGCTATCGAATTGGCTGCTATTTCGCCAACCACCGGACGTACGCCAGGCAC
ACCAATAATAAAAACCAGCCAGTAGGCAAAGATAGCAAAAATGAAGTTTGCAACCGGACC
TGCGGCAATAATCGCCGCTCGTTGGCCGACAGATTTATTATTGAAGGCATGGTGGCGGAG
TTCCGGAACGACCGGTTCTGCGCGCTCATCCAGCATTTTGACATAACCGCCCAGCGGGAT
CAGGGCGATAACATATTCGGTACCGAGCTTATCAGTTCGCCGCCAGAGCGCCTTACCAAA
CCCTATTGAGAAACGCTCAACGCGAACACCACAACGCCGGGCAACCCAGAAATGACCAAA
TTCATGCACGGTGATAAGTACACCCAGTGCAACGATGAACGAAGCCAAATCCCAGAGAAA
ACTCAGCATATTACCTTCCGTTAAAGCGTCCTGAATACCAGTAACAACAAGCAAGCAAAG
ACCGGTACCGCAGCCGTCAGGCTATCAATACGATCTAAAATACCACCGTGTCCTGGAATT
AAATGACCGCTGTCCTTAATTCCTGCTTCACGCTTAAACATACTCTCGGTCAGATCGCCG
AGCACTGAGGCTAACGCTGCGACAATAGAGCAAATGAGTAAGGTGACGGGAGCGACGTCG
AGATTCGCCCACATGCCATAACCCCATGAGATTACCGCTGCGGTCGCTAGTCCACCTATA
AAGCCTTGCCAGGTTTTACCCGGAGAAACCTTCGGTGCCAGCTTATGTTTACCAAACAAT
TTGCCAAACATATATGCGCCAGAGTCAGCGCCCCATACCAGGATCATGACATAGAGCAGC
CATATTGCGCCACTGTAATGATTCTCGTCGTAGTGCCAGGCCCGTAACGCCAGCATGCCC
CAGAAGAAGGGAACAATGGTTAGCACGCCAAAAATAAGGCGCAATGTTTTAGAGTTACGC
CAGATTGCTGCGGAATCTGGGTAAAACAGCACCAGCAATAGCGCGACAATCCACCAACCC
AACGAAGCCCAAAGTGAGATTTCAACCAGCGGTTGATGAATATTTCGGTGATATTCCGGC
AACAGAAAAAGCATCAGCGCCAACAATAACCCGCATAACACCGCCAACCATACTCGCTGC
GAACGAGTGGTAAAACCGCTAAGCTGTCCCCATTCCCACGCTGCCAGCATGCAGACCACC
AGCGTTACAATGGCGAACCCCACCGGCGGCAACAGAAACAACGCCGCGATGACGACGGGT
ATTAACACAAAAGCAGATATCAGGCGATACTTCAGCAAAAGCGACCCCCATCAGGCTGTT
TCATCACCGGGCTCGGTGCCGCCGAAACGACGCTCTCGATTAGCAAAGGCATTTAACGCC
CCTTCAAAGTCTTGTTCATCGAAATCGGGCCAGAGAACATCTGTAAAGTAAAGTTCGGCA
TAGGCAATTTGCCAAAGCAAAAAGTTACTAATGCGATGCTCCCCCCCAGTTCTAATTACT
AAATCTACAGGGGCCAGTTCATGCATACAGACATGCTGGTTTAGCATCTCTTCATCTATC
TGATCTGGTTGCAGGTTTCCTTGCTGCACCTTTTCAGCCAGTTGCCTGACTCCCTGGACT
ATATCCCAACGTCCACCGTAGTTCGCCGCAATATTCAGCGTCAGACCGGTATTCCCGGCT
GTTAGCGCTTCAGATTTACGAATACGTTCTTGCAAACGCGAGTTAAAGCGACTGGTATCG
CCAATAATACGCAGACGCACGTTATGTCGGTGCAGACTTTTTACTTCGCTATCGAGCGCC
CACACAAACAGTTCCATTAACGCACTGACTTCCTGCGCTGGTCGGTTCCAGTTTTCACTA
CTAAAGGCATACAGCGTTAACGCCTCAATACCGTTGTTGGCCGCAAAAGAGACAGCCCGG
CGGACGGATTTTGCCCCGGCTTTATGCCCAAAGGCACGAATCTTCCCTTGCTTTTTTGCC
CAGCGACCATTGCCGTCCATAATGATCGCAACATGACGGCAGCCATGCGCTGGCAATTTT
TCGCTAAGTGGTTGAGTAGCAGACAACATCACGCGTTTTTTATTCCCTGACAGGGTTTAC
GGTACTCAGGAATACTGAAGCCTATACAAAAAAAAGCCGTGTAAAACCACGGCATACCTG
ACCTTATAAAGCCAACTACTTACGATCAGATGGCGCAGACTATATCACTGAAGCCCTACG
CTAACAAATAGCGCGACTCTCTGTAGCCGGATTATCCTCAGCTTGCGAGACGCATCACCT
CTTTTCTGGCGACTTCACGCGCGTTCGCATCAACAGATAACACATCGTCCACACATTGTG
GTTCGCGCATATCCATTTTTTCCAGTACGGATAAATTCAACGCAGCGATATCCGTAAAGC
GGATTTGTTGCGCAAGAAAAGCAGCAACGGTGATTTCGTTTGCGGCATTCAATGCTGTCG
TCGCTGCCTGACCTTGTTCGAACGCCTCCATCGCCAGTTTCAGGCATGGATAACGATCAT
AATCCGGTGCGGCAAATGTCAACGCACTTAGTTTGCAAAAATCGAGCGGCTTCACGCCAG
AGTTCACGCGATTCGGCCATGCCATGGTGTGGGCAATTGGCGTACGCATATCCGGTTCCC
CCAGCTGCGCCAGAACACTGCCGTCCTGATAGCGCACCATTGAGTGAATCACTGACTGCG
GGTGAATCAGCACTTCCATCTGGCTGGCGCTGGCGTTAAACAGCCAACGCGCTTCAATGT
ATTCCAGACCTTTGTTCATCATGGTAGCCGAATCGACAGAAATTTTACGTCCCATCGACC
AGTTCGGATGACGGCAGGCTTGATGGGGCGTCATTGTTGCCAAATCGCGCAATGGCGTCT
CACGGAAAGGGCCACCAGACCCGGTAAGTAAAATGGACACCACGCCATTTTGCTCAAGGT
CAGCGTATCCCAGATTATGCTGGATAGGTTGCGGTAAACTCTGAAAAATAGCGTTATGTT
CGCTATCGACCGGTAACAATTGCGCTTTGCTCTGCTTTACGGCGTCCATAAACAGACGTC
CGCAGGTAACCAGTGATTCTTTATTGGCCAGCAAAATGGTTTTACCCGCGCGGATCGCAG
CAAGCGTAGGTAACAGCCCAGCAGCACCAACAATGGCTGCCATCACCTGATCAACCTCCT
CAAGCGCTGCCATATCGCAAGCGGCTTGTTGCCCACTTAAGACTTCGGTGCGGCTCCCCT
GTTGCTGTAGCATCGTTTTAAGAAGTTTCGCACTCGCTTCATCGTCCATTACGGCATAGC
GGGGAGAGAATTCCAGGCACTGTTCTACCATGCGAGTGACATTTTTGCCTGCCACCAGCG
CAACTACGCGGAAGTGTTCGGGATTATGGCGCACCACGTCCAGCGTGCTGCAACCAATCG
AGCCGGTCGAGCCCAGAATGGTGAGTTGCTTCATGAAACATCCAGAGTTGAGACAGAATA
AAAAGCAAAACGCCGCCAGCCGATCCGCAAGGATCTACTAAGCGGCGTTTTTGTCGTTCA
AGAAATCAGAACTGCATCAGTTCTGCTTCTTTGTCTGCCAGCGCCGCTTCAATTTTCTTG
ATTGCAGCATCAGTCAGTTTCTGTACATCGTCCTGAGAACGGCGATCGTCGTCTTCGCTG
ATCTCTTTATCTTTCAACAGTGCTTTCACTTTGTCGTTCGCGTCACGACGCACGTTACGT
ACTGCAACACGCGCTTGTTCTGCTTCACCACGAACGATTTTGGTCAGATCTTTACGACGT
TCTTCCGTCAGCGGCGGCAGCGGAACACGGATGTCGCTACCCGCAGAGTTCGGGTTCAGG
CCAAGATCGGACGCCATAATCGCTTTTTCAACGGCCGGAGACATTGAACGATCAAACACG
TTGATTTTCAGAGTACGGGAATCTTCTACCGTTACGCTTGCCAGCTGACGCAGCGGCGTC
GGCGTGCCGTAATATTCCACGACAATGCCATCCAGCAGGCTGGGAGAAGCACGACCCGTG
CGTATTTTGCTGATTTGGGTTTTGAACGCTTCTACGCATTTGTCCATGCGTACTTCAGCA
TCTTTTCTGATATCGCTAATCACGTTACGAATCCTTGAAAACTTGTCTCAGTCAGACCAG
ACAGTCACACACAGTGGAAGTGTGCTAAGTATAGCCCTGATTAAACATATTACGGGTAAT
CGTCTGGATTATTAGGCTATTTTATTTGCCATTTTGGCCCCGGGCAGTGCTCGCCATCCT
CACGTACTTTTGTACGCTCCGGTTGCTGCGCGCTGGCCGTGACCAAACTGCCTGCAACAA
TAACGCCTTATAACCAGACTTACGCCCCCGCGATACTTATGCGGAATCTTACCCTTATTT
ATCCATCACGGGAATTATTCCGTGATTAAAGTCCCTTCTTTTTCACCCATTACCACACGG
CGCAGCGCACCCGGTTTGTTCATGTTGAAAACACGAATCGGTAATTTATGGTCACGAGCC
AGCGTGAAGGCCGCCAGGTCCATGACTTTCAGCTCTTTTTCCAGCACTTCGCTGTAAGTC
AGTTGCTCGTACATGGTTGCAGTTGGATCTTTCGCCGGATCAGCAGTAAACACGCCGTCA
ACTTTGGTTGCTTTCAGCACCACATCGGCTTCAATTTCGATACCACGCAGGCAAGCTGCT
GAGTCGGTGGTAAAGAACGGGTTACCTGTACCGGCGGAGAGGATCACCACACGGTTGTTG
CGCAACAGGCTGATAGCTTCTGCCCAACTGTAGCTGTCGCACACGCCATTCAATGGAATA
GCGGACATCAGGCGAGCGTTCACATAGGCGCGGTGCAGTGCATCACGCATTGCCAGGCCG
TTCATTACGGTCGCCAGCATCCCCATGTGGTCGCCCACAACGCGGTTCATACCCGCTTTC
GCCAGACCAGCGCCACGGAACAGGTTACCCCCACCAATCACCACACCAACCTGAATACCC
AGTTCAACCAGTTCTTTGATTTCCTGAGCCATGCGATCCAGTATGCTTGCATCAATACCG
AAGCCTTCAGTGCCCTGCAGAGCTTCGCCACTCAACTTAAGCAGAATGCGTTTATAGACG
GGTTTTGCATTGGTAGCCATGTTTCTTTCCTGAGACTGTCAACGATTGAAATGAATTAAT
ACTAGCGACATTGTACGTCGCTATTCAGCGCAGCCCCACAAGGGTTAGCTGAATTTACAA
GATGGGCACAAAAAGAAGCCGCCCTCAGGCGGCTCCTTTTCGATGATTAAGACTGCTTGG
ACATCGCAGCAACTTCTGCTGCAAAGTCAGTCTCAACTTTCTCGATGCCTTCACCTACTT
CGAAGCGGATGAAGCCAGTCACTTCAGCGTTATGCTCTTTCAGCAGCTGACCAACAGTTT
TTGCCGGTTCCATAACGAACGGCTGACCAGTCAGAGAAACTTCGCCGGTGAATTTCTTCA
TGCGGCCTTCAACCATTTTCTCTGCGATTTCTTTCGGCTTACCAGACTGCATCGCGATAT
CCAGCTGTACCTGGTATTCTTTTTCTACCACTTCAGCGGATACGTCTTCTGGTTTGATGA
ATTCTGGCTTGCTTGCAGCAACGTGCATAGCGATGTGTTTAACCAGCTCTTCGTCAGCGC
CTTTAGCAGCAACCAGAACGCCGATACGCGCACCGTGCTGATAAGAACCCAGAACGTCGC
CTTCCAGCGCAGCAACGCGGCGAATGTTGATGTTTTCACCAATTTTCGCTACCAGCGCAA
CACGTTCTTCTTCGAACTGTGCTTTCAGAACTTCAACGTCAGTGATTTTGCCAGCAACAG
CTGCGTCCAGAACTTTGTCTGCGAACGCCTGGAAACCAGCGTCTTTTGCAACGAAGTCAG
TCTGGCAGTTAACTTCCAGAATGATGCCGTAGTTGCCGTCGATTTTGGTTTTGATCACGC
CGTCAGCAGCAACGTTGCCTGCTTTTTTCGCTGCTTTAATAGCACCGGACTTACGCATGT
TTTCGATTGCCAGCTCGATGTCGCCGTTAGCTTCAGTCAGTGCTTTTTTGCAATCCATCA
TGCCTGCGCCAGTACGCTCACGCAGCTCTTTTACCAGGGATGCGGTAATTTCAGCCATTC
TAAAATCCTCGGAGATGTGATCTGCCCGGCATTAAACCGCACAGATATAAAAGTGAAAAA
GGGGGCCATATGCAGGCCCCCTAACCAAACGTGTACTACCTGGTCTATAAGGGCTCTCCC
CCTTCATATTTCGCGCCGCAGATGCGTTGTCTTCGCTCGCTCATCCCGGTCACTTACTGA
TGTAAGCTCCCGGGAATTCTCGAGCTTGCCGCCTTTCTGCAACTCGAACTATTTTGGGGG
AGTTATCAAGCCTTATTACTCAGCTTCTACGAAGCTTTCTTCCGCCTGGGAAGCCAGATC
CTGAGAACGGCCTTCACGTACGGTTGCAGCAACAGCGCCCAGGTACAGGGTCACAGCACG
GATTGCGTCGTCGTTACCCGGGATAACGAAGTCAACACCGTCCGGATCAGAGTTGGTATC
AACGATAGCAAATACCGGAATACCCAGGTTGTTTGCTTCTTTGATAGCAATGTGTTCGTG
GTCAGCATCGATTACAAACAGAGCGTCCGGCAGACCGCCCATGTCTTTGATACCGCCCAG
GCTGTTTTCCAGTTTCTCCAGCTCACGAGTGCGCATCAGCGCTTCTTTCTTGGTCAGCTT
GTCGAAAGTACCGTCCTGAGACTGAGTTTCCAGGTCTTTCAGACGTTTGATGGACTGACG
AACGGTTTTCCAGTTAGTCAGCATACCGCCCAGCCAGCGATGGTTCACGAAGAACTGGTC
GCAGCTCAGAGCAGCGTCTTTCACCGCTTCGCTTGCAGCGCGTTTAGTACCAACGAAAAG
GATTTTACCTTTGCGAGAAGCAATCTTGTTCAGTTCAGCCAGAGCTTCGTTGAACATCGG
TACAGTTTTCTCAAGGTTGATGATGTGAACTTTGTTACGCGCACCGAAGATGAACGGCTT
CATTTTCGGGTTCCAGTAACGGGTCTGGTGACCGAAGTGAACACCAGCCTTGAGCATGTC
GCGCATGGAAACAGTTGCCATGATTAAAACCTCTATATAAAAGTTGGGGTTATGCCTCCA
CGTATCCCATATTACCGACCCCAAAGGGCACCCCGGAATATGTGCCGATACGTGTGTGTT
GTTACACAAAGTGAGATTGTCGCTTCCGTCCAGTCTGTGTATACGAAATGGATCGGAAGT
CCGGCGCGCTTTATACCACAAATACGTCTGGGACACCAATAATTGTTGGCGCTGTGTACA
GCATCAGACGTCGAATTTTCTATTATAGAAAACCTTCAGTGGCACGTTTGGCGAAATTCA
GAATGATTCTCAATTTGCCCGGGTGTGATACCATTGACGGCACTTACATATATATTGTCG
GTATCACCGACGCTGATGGACAGAATTAATGGCTATCTCAATCAAGACCCCAGAAGATAT
CGAAAAAATGCGCGTCGCTGGCCGACTGGCTGCCGAAGTGCTGGAGATGATCGAACCGTA
TGTTAAACCGGGCGTCAGCACCGGCGAGCTGGATCGCATCTGTAATGATTACATTGTTAA
TGAACAACACGCGGTTTCTGCCTGCCTCGGCTATCACGGTTATCCGAAATCCGTTTGCAT
CTCAATTAATGAAGTGGTGTGCCACGGTATTCCGGACGATGCTAAGCTGCTGAAAGATGG
CGATATCGTTAACATTGATGTCACCGTAATCAAAGATGGTTTCCACGGCGATACCTCGAA
AATGTTTATCGTCGGTAAGCCGACCATCATGGGCGAACGTCTGTGCCGTATCACGCAAGA
AAGCCTGTACCTGGCGCTACGCATGGTAAAACCAGGCATTAATCTGCGCGAAATCGGTGC
GGCGATTCAGAAATTTGTCGAAGCAGAAGGCTTCTCCGTCGTTCGTGAATATTGCGGACA
CGGTATTGGTCGCGGCTTCCATGAAGAACCGCAGGTGCTGCACTATGACTCCCGTGAAAC
CAACGTCGTACTGAAACCTGGGATGACGTTCACCATCGAGCCAATGGTCAACGCGGGTAA
AAAAGAGATCCGCACCATGAAAGATGGCTGGACGGTAAAAACCAAAGATCGCAGCTTGTC
TGCACAATATGAGCATACTATTGTGGTGACTGATAACGGCTGCGAAATTCTGACGCTACG
CAAGGATGACACCATCCCGGCGATAATCTCGCACGACGAATAAAATGAAGCCGGCGAATG
CCGGCTTTTTTAATGCGATAATTTAATCTTATGGGTGGCGCACAATGAATACCCTTCCAG
AACAGTACGCAAACACCGCTCTCCCCACCCTGCCCGGTCAACCGCAAAATCCATGCGCCT
GGCCCCGTGATGAATTAACCGTCGGTGGGATAAAAGCCCATATCGATACTTTCCAGCGTT
GGCTGGGTGATGCCTTTGACAATGGTATCTCCGCAGAACAGTTGATTGAGGCGCGTACCG
AGTTTATCGACCAGCTCCTGCAACGATTATGGATTGAAGCGGGATTCAGCCAGATTGCCG
ACCTGGCATTGGTCGCCGTCGGTGGCTACGGTCGTGGCGAGCTGCATCCACTTTCAGACG
TCGATTTACTGATTTTAAGCCGTAAAAAGCTCCCGGACGATCAAGCGCAAAAAGTGGGCG
AGCTGTTAACGCTGCTCTGGGATGTAAAGCTGGAAGTCGGTCATAGTGTGCGCACGCTTG
AAGAGTGCATGCTGGAAGGGTTATCGGATTTAACCGTCGCCACCAATTTAATCGAATCCC
GCTTATTAATTGGCGATGTTGCGCTGTTCCTCGAACTGCAAAAACATATTTTCAGCGAAG
GATTCTGGCCTTCCGACAAGTTCTACGCGGCGAAAGTTGAAGAACAGAACCAGCGCCATC
AGCGTTACCATGGCACCAGCTACAACCTTGAACCAGACATCAAAAGCAGCCCTGGCGGCT
TGCGCGATATCCACACTCTGCAATGGGTGGCCCGCCGTCATTTTGGCGCAACATCGCTGG
ATGAAATGGTCGGGTTTGGCTTCTTAACCTCAGCGGAGCGGGCGGAATTAAACGAATGTC
TGCATATATTGTGGCGTATTCGCTTTGCCCTGCATCTGGTCGTCAGCCGTTACGATAATC
GCCTGTTATTCGATCGCCAGCTTAGCGTCGCCCAGCGTCTGAATTACAGTGGCGAAGGTA
ACGAACCGGTCGAGCGGATGATGAAGGATTACTTCCGCGTGACACGCCGCGTCAGTGAAC
TCAACCAGATGCTGCTGCAACTGTTCGATGAAGCGATCCTCGCCCTTCCCGCCGACGAAA
AACCCCGTCCAATCGACGATGAGTTTCAGCTACGCGGTACGCTAATCGACCTGCGTGATG
AAACACTATTTATGCGCCAGCCGGAAGCCATCTTGCGTATGTTCTACACCATGGTGCGCA
ACAGTGCGATCACCGGCATTTACTCCACCACACTGCGCCAGTTACGCCATGCCCGTCGCC
ATCTGCAACAACCGCTGTGTAATATTCCGGAAGCACGAAAACTGTTTTTGAGCATTCTGC
GTCACCCCGGAGCGGTGCGGCGCGGGCTATTGCCAATGCATCGCCATAGCGTGCTCGGCG
CGTATATGCCGCAATGGTCGCATATCGTCGGGCAGATGCAGTTTGATCTGTTCCACGCCT
ACACGGTGGATGAACATACTATCCGCGTGATGCTGAAACTGGAGAGTTTTGCCAGTGAAG
AAACGCGCCAGCGCCATCCGTTGTGTGTGGACGTCTGGCCGCGCCTACCGTCAACTGAGC
TGATTTTCATCGCCGCGCTGTTTCACGATATCGCCAAAGGACGCGGCGGCGACCATTCCA
TTCTCGGTGCTCAGGATGTAGTGCATTTTACCGAACTCCACGGGCTGAACTCACGCGAAA
CACAGCTGGTCGCCTGGCTGGTTCGCCAGCACTTGCTGATGTCGGTGACAGCTCAGCGTC
GCGATATTCAGGACCCGGAAGTCATCAAGCAGTTTGCCGAAGAAGTTCAAACGGAAAATC
GTCTGCGCTATCTGGTATGCCTGACAGTGGCTGACATTTGCGCCACCAACGAAACGCTGT
GGAATAGCTGGAAGCAAAGTCTGTTGCGCGAACTCTATTTTGCCACCGAAAAACAGCTAC
GACGCGGAATGCAAAACACGCCGGATATGCGCGAACGGGTTCGCCATCACCAACTCCAGG
CGCTGGCACTGCTGCGCATGGATAACATCGACGAAGAGGCGCTGCACCAAATTTGGTCAC
GCTGTCGTGCTAACTATTTTGTCCGCCATAGCCCAAATCAACTGGCCTGGCATGCGCGCC
ATTTATTACAGCATGATTTAAGCAAACCGCTGGTATTGCTTAGTCCGCAGGCTACGCGTG
GAGGCACCGAGATTTTTATCTGGAGCCCGGACCGCCCCTATCTGTTTGCCGCCGTCTGTG
CCGAATTAGACCGCCGCAATTTAAGTGTTCACGACGCACAAATTTTCACCACTCGCGACG
GTATGGCGATGGATACCTTTATCGTGCTGGAACCCGATGGTAGCCCGCTATCCGCAGATC
GCCATGAGGTTATTCGGTTTGGTCTGGAGCAAGTACTGACACAAAGTAGCTGGCAGCCAC
CACAGCCGCGTCGTCAACCGGCTAAACTACGTCACTTTACTGTTGAAACCGAAGTGACGT
TTTTGCCTACCCATACCGACCGAAAATCATTCCTTGAGCTTATCGCGCTCGACCAGCCAG
GACTGCTGGCGAGAGTCGGGAAAATTTTTGCCGATCTGGGAATTTCGCTTCATGGCGCCC
GAATTACAACCATTGGCGAGCGAGTAGAAGATTTATTCATAATTGCCACCGCTGACCGGC
GTGCACTTAATAACGAGTTGCAGCAGGAAGTGCATCAGCGGTTGACAGAGGCCCTCAATC
CAAACGATAAAGGGTGATGTGTTTACTGATATGAAAAGAGTTTAACAATGCAGCAGTTAC
AGAACATTATTGAAACCGCTTTTGAACGCCGTGCCGAGATCACGCCAGCCAATGCAGACA
CCGTTACCCGCGAAGCGGTAAATCAGGTGATCACCCTGCTGGATTCCGGCGCACTGCGTG
TAGCGGAAAAAATTGACGGTCAGTGGGTGACGCATCAGTGGTTAAAAAAAGCGGTGCTGC
TCTCTTTCCGTATTAATGATAATCAGGTGATCGAAGGGGCAGAAAGCCGCTACTTCGACA
AAGTGCCGATGAAATTCGCCGACTACGACGAAGCACGTTTCCAGAAAGAAGGCTTCCGCG
TTGTACCACCAGCGGCGGTACGTCAGGGTGCGTTTATTGCCCGTAACACCGTGCTGATGC
CGTCTTACGTCAACATCGGCGCATATGTTGATGAAGGCACGATGGTTGATACCTGGGCGA
CCGTCGGTTCTTGTGCGCAGATTGGTAAAAACGTCCACCTTTCCGGTGGCGTGGGCATCG
GCGGCGTGCTGGAGCCGCTGCAGGCTAACCCGACCATTATTGAAGATAACTGCTTCATTG
GCGCACGCTCTGAAGTGGTTGAAGGGGTGATTGTCGAAGAAGGTTCCGTCATCTCTATGG
GCGTATACATTGGTCAGAGCACCCGTATTTACGACCGTGAAACCGGCGAAATCCACTACG
GTCGCGTTCCGGCGGGGTCTGTGGTTGTTTCAGGTAATCTGCCGTCAAAAGATGGCAAAT
ACAGCCTCTACTGTGCGGTTATCGTTAAGAAAGTTGACGCGAAAACTCGCGGTAAAGTTG
GTATTAACGAACTGCTGCGTACCATCGACTAAAAGTATGTACACGGGCAGCACGACGCTG
CCCGATTGCTTTCTGGTTCAGAATAATTCGTCCTACTCATTCTTCCTCCCCCTTTTTTAA
ATACTTTTTCATCTTGTTTCGGACTGTCATGTAATTCGCAAAACGAAGATAAATGTGCTA
ATCCATCCCATGGAATATCGCCACAATAAAGCAGGTAATTTTTTGATTTTTACGCCATGA
TAGAAGTCTGGAAGAAAAAGGCTTTCTGCGATCACAGTCGAGCCGGGCGGGCCAGGCCAA
ATGCTAAAATAAGCACAATTTACTGACTCATTTTGAGGTAACGCTATGTACGACAATCTG
AAAAGTCTGGGTATTACCAATCCTGAAGAAATTGATCGTTACAGCCTCCGGCAGGAAGCC
AACAACGATATTCTGAAAATCTATTTCCAGAAAGACAAAGGCGAGTTTTTCGCCAAGAGC
GTGAAGTTTAAATATCCGCGTCAGCGTAAAACGGTCGTCGCTGATGGTGTGGGTCAGGGT
TATAAAGAAGTCCAGGAAATCAGCCCGAATCTACGGTATATCATTGATGAGCTTGATCAA
ATCTGCCAGCGTGACCGCAGCGAAGTTGATCTTAAGCGTAAGATCCTCGACGACTTACGT
CACCTGGAGTCAGTCGTAACCAATAAGATCAGCGAGATTGAAGCCGATCTGGAAAAACTA
ACGCGTAAATAATCCCGAACTGACGGTTAACTCGGGCATTCCCCTCTCCCCTTCGGGCTG
AGGGGAATGAGCCAGCGCCGCCTCAACCTTAACGCATAACCTACCGCTCTTCATCCAGTT
GTAACGCCACATACAGCAGCAACCTGTCATCAAAATTGCCCAAATCAAGCCCGGTCAGTT
CCGATATACGATTAAGCCGATACTCCAGAGTATTACGATGAATAAACAACGCCTTTGACG
TTGCCAGCGGTTGCACATTGTGACGAAACCACGCCGCCAGCGTTCGCCGCAGCAAGCCGT
TATTGTCCATCGCTTTCAGCCGCGCCAGCGGTCGCGCCAGTTCGTTGGCCTGCCAGTCGC
CACGCAAACTGTCGAGTAACACAGGTAACATCAGATCCTGATAAAAATAGCAGCGACTTT
CTGGCATCCGCTGTTTACCCACCACCATCGTCGTTTTCGCCGTACGATAGGATCGGGCAA
TACTGCCAGGACCAGTAAAATAGTTGCCCAGCGAAACGCGAAAACGCAGCTGGCCGTACT
CTTTCATGCGGGTAATCAGTTGTTCAACTCGCTTACGATGATCTTCTGCATCCCAGCGCC
CAAAAGAGTTCAACGCCGGTTTCAACACCACCATTTCGGTTAGCGAGACAATCGCCACCA
GATTATTACGCTCGGGCGTAGTCAGCGCATTTTGCAGTTGTTGTAACTCCGCCATTGCGC
TGTCCACGCCAAGCTGACCGCTGTCGACCTCAACAATAGCCACTACTCGCGGTTGATTGA
GATCGATCCCCAGCCGTTGCGCCCATTCAGTAAGTGCGGGAGTATTCTCCTCAGCCTGAA
TCAGGTTCATCACCAGTTCTTCCCGCAAACGGCTATCCTGCGCCAACAGGTGCATCAACC
GCGACTGTTCCAGCATCATTTCAGCCGTCATGCAGACCAGTTCGCCATATTTACGCAGGT
TCTCTGGTTCACCTGTCAGGCCAATTACGCCGACAATTTCACCTTCCAGCCGTAACGGTA
GATTAATCCCCTGCCGCACACCGTGCAGATGACGTGCCACCGCGTCATCGATATCGACGA
CTCGTCCCTGTGAAAGTACCAGCAATGCACCTTCGTGCAATTCACCAATACGCTCACGAT
CGCCGCTGCCGATAATTCGCCCGCGGGCATCCATTACGTTGATATTGGTATCGATGATGC
GCATGGTACGTGCCACGATATCCTGCGCCATTTTGGTATCAAGATGCCAGCCAGCCATAA
GTCCTCCGTTATGCACGGCTTAGCATAAGGAAGTACGTAACGTACGGCATTGTGCAAATG
CCTAAAGGATGATGAAGATGTATGGAGTTGTGGTGAAGTTCACAGATTGTAAGGAGAACC
CCTTCCCGTTTTCAGGAAGGGGTTGAGGGAGATTACTGCATTAACAGGTAGATGGTGCTG
TCGCCGCGCTGAATGTTCAGTGCCAGCACAGACGGTTTGCTGTCGAGAACTTTACGCAGT
TCAGCGATGTTTTTCACTGCCTGCTGGTTCGCGCCAATAATCACATCACCTTTCTTCAGG
CCGATCTGCGCAGCCGGAGTGCCCGTTTTCACGTTGTTCACTACCACGCCCTGATCTTTG
CCTTTGTTGCTCATCTCAGCACCTTCAATGCCGTTGAAGATGGAGCTGGAATCAACCTGA
TTCTGGCTGCTCTGCTGCAGTTCCAGATTCACGTTGACCTGCTTACCGTCGCGCAGCAAG
CCCAGGGTCAGTTTGCTGCCCACCGGCATAGTACCCACCTGAGCACGCAGTGCGGCAAAG
CTGCTGATCGGCTTACCGTTCAGTGAGGTGATCACATCACCCGCTTTAATGCCCGCTTTT
GCAGCGGAGGAATTAGGCAGAACCTGGCTTACGAAAGCACCGCGCTGGGCGTCAACTTTC
ATCGCTTTCGCCAGTTCGGAATTCAGCTCAGTCCCCATAATACCCAGCTCACCGCGTTTC
ACCTGGCCGTATTCCACCATCTGCGAGGTCAGGTTTTTCACCATGTTGCTCGGGATAGCA
AAACCGATACCGATGTTGCCGCCGTCCGGTGCGAGGATCGCGGTGTTGATACCGATCAGT
TCGCCGTTCAGGTTAACCAGCGCACCACCGGAGTTACCACGGTTGATCGCTGCATCGGTC
TGGATGAAGTTTTCGTAGTTTTCGGCATTCAGGCCGCTACGCCCCAGCGCAGAGACAATC
CCGGAAGTTACCGTCTCGCCCAGACCAAACGGGTTACCAATCGCTACGGTGTAATCACCC
ACGCGCAGTGCATCAGAATCCGCCATCTTAATTGCGGTCAGGTTTTTCGGATTCTGGATT
TGGATCAGCGCGATATCAGAGCGCGGATCTTTGCCAACCATCTTCGCGTCGAACTTACGG
CCATCGCTCAGTTGAACTTTAATGACCGTCGCGTTATCAACAACGTGGTTGTTGGTGACG
ACATAGCCTTTATCGGCATCAATGATGACGCCGGAACCCAGCGCCATGAATTTCTGTTGC
TGGCCGCCACCATTACCGCCCTGGCCACCCTGGCAGAACGGAGAGCTCTGGAACGGAGAA
CCTTCCTGGCAGAACGGAGAATCATCACCGAAGAACTGCTGGAAATTACGCGGCATACGC
GGCGTATTAACGGTTGTGCTACCTTCTACGTTAATGCTGACCACTGAAGGCATCACCTTT
TCGAGCATCGGTGCAAGGCTTGGCATCTGCTGGGCTGTCGTTGCTGAAGAAGTCTCAGCC
GCCGTTGCAGAGAGCGGAGATAACGCCAAACCTAAACTCAGAGCCAGTGCACTCAGTGCT
AATGTGGTTTTTTTCATGTATTTCAGTCTCGATTAACAGATAACGCAAAATTGCTGTGTT
CTTCAGATTCGTTTTATAGCGCGAAGTTCCGAACTAAAGTTTCTGCAAAAGGTAAAAATT
TATTGTTCGTCTTTACAAAAGCCTGGTTATTGTTCTACGGCCATCAGACGTCGGTATTCA
TCCCACGCATAGAGGTCGGTCATACCGCTGATATAATCATGCAGCAGGCGGCAACGGTAA
TAATATTCCCATAGCGGAAACTCAGGAGAATCTGACGGTAATTTACTGACAGCTTCGACA
TAGGCCAGCCGATGGCGCGTCGAGAGTTTGTGGAATAAGCGCGATTCAATAGGGAAACGT
TTCACCCGTTCTTTTTCTACCAGTTCAGTAAAGTCTGATAACGACAGGCTTAATAAAGGA
CGATAAATCTCTAATAATCCGCTAATGACCCGATAGCCCTGCAATTCAAGCTGCTCGACA
TCTGGATGGCTAAACACATGTTTTACAGCGACATTTTTATATAGCTTAAGAAGATCGCTG
CATTCGCTGGCATCTTCCAATAATGCATGATTAAACGTTCCGGCGAAAATCGCAGGCAGA
TTATCAATAAATCGTTGTGCCGCGTAGGGTACCAGTTTATTTAGGGTATTTACCCGTAAA
TACATAAAAAACTGATCTTCCGTACTGCGGCTTAAACTATTTGAGCGTGATTTTTCCCAG
GCATTTTCAACCACTAGCGAAAAGAGCGAACCTTTCTCATGCTGACCCCACGCCTCGTGC
AAATGATGATAAAGCTGCTCAACGGTAAATATTCTTTTCTCTACCGCATCTTCAAGGTCT
GCCACACAATAGGAGATGTCGTCGGCAGCTTCCATAATCCACGTTAATGGAAAACGACTG
TAAAGCGCCAAATTAAGTTCTTTACGCAACCGGGCAATATAGGCTTCTTCAGAAAGATAA
TAACCCGGCTTTTTCATTAAATAGTGATGTGTCTCAGGCGTTTCGCCACGCCACCACGCC
GGACGGGTATATTTTAAAATACCGCCAACCTGTGCCCAGGTGAGATTCATCCTCATCAAT
GTATGCACCAGACGAATGCCTTGTGCATTCCCCTCAAAATGACATAAGTCCTGACGAATC
TTGCGCCGCAGCTCGTTAAGCGGTTCTTCCCCGTCCCGTAAACGTAGTGCTGCCACGCTG
CAGCGATCGTCAGTCAGAGGCTGGCTTTCGGCATCTTCCGGGTATAAACGCTGGCGAAAC
CAGTCATTTATCGCCGCTTCGCCAAAATGACCAAACGGCGGATTGCCGATATCGTGCATC
AGGCATGACATCTCAACAATGCTTTCAAAAGGTCCGGTCAGTTCATCCAGGCCGTATGCT
TCCAGCAATTTAAGCTCTTTCAGACGGCTTAAAATTTCTTTGGCGATGTAGCGCCCCACC
TGCTGGACTTCCATCGAGTGGGTAAGACGAGTGCGCACGGCGGCATTGCGCTCCAGTGGA
AAAACCTGGGTCTTTTGTTGCAGACGACGAATTGCCGGAGAGTTGATGATACGCCCGCGA
TCGCTCTCGAAGATCCGCAGGATCTCATGTTCGGTTTTAACGCCCTGCGGTGAACGGTAA
CGACGATGCCAGTTTATTTTTTTTCGGAAATCAATCTGTGCCATGTCCTCTCCCGCGTGA
GAAATACGCTTCCCCGTAAGCGCATGGTAAACTATGCCTTCAAATCGGGCTTATCGCGAG
TAAATCTATGAAAATCGGCATCATTGGTGCAATGGAAGAAGAAGTTACGCTACTGCGTGA
CAAAATCGAAAACCGTCAAACTATCAGTCTCGGCGGTTGCGAAATCTATACCGGCCAACT
GAATGGAACCGAGGTTGCGCTTCTGAAATCGGGCATCGGTAAAGTCGCTGCGGCGCTGGG
TGCCACTTTGCTGTTGGAACACTGCAAGCCAGATGTGATTATTAACACCGGTTCTGCCGG
TGGCCTGGCACCAACGTTGAAAGTGGGCGATATCGTTGTCTCGGACGAAGCACGTTATCA
CGACGCGGATGTCACGGCATTTGGTTATGAATACGGTCAGTTACCAGGCTGTCCGGCAGG
CTTTAAAGCTGACGATAAACTGATCGCTGCCGCTGAGGCCTGCATTGCCGAACTGAATCT
TAACGCTGTACGTGGCCTGATTGTTAGCGGCGACGCTTTCATCAACGGTTCTGTTGGTCT
GGCGAAAATCCGCCACAACTTCCCACAGGCCATTGCTGTAGAGATGGAAGCGACGGCAAT
CGCCCATGTCTGCCACAATTTCAACGTCCCGTTTGTTGTCGTACGCGCCATCTCCGACGT
GGCCGATCAACAGTCTCATCTTAGCTTCGATGAGTTCCTGGCTGTTGCCGCTAAACAGTC
CAGCCTGATGGTTGAGTCACTGGTGCAGAAACTGGCACATGGCTAAGTCACTGTTCAGGG
CGCTGGTCGCCCTGTCTTTTCTCGCGCCACTGTGGCTCAACGCGGCACCGCGCGTCATCA
CGCTTTCTCCCGCCAACACTGAACTTGCCTTTGCCGCCGGGATCACGCCGGTTGGGGTCA
GCAGCTATTCCGACTATCCTCCACAAGCGCAAAAGATTGAGCAGGTTTCCACCTGGCAGG
GGATGAATCTGGAACGCATTGTCGCGCTGAAACCCGATCTGGTGATTGCCTGGCGTGGAG
GTAATGCCGAGCGGCAGGTTGACCAGCTGGCTTCGCTGGGAATAAAAGTGATGTGGGTCG
ATGCGACAAGCATTGAACAAATTGCCAATGCGTTACGTCAACTGGCCCCCTGGAGTCCGC
AACCGGATAAGGCCGAACAAGCCGCGCAATCCCTGCTGGATCAGTACGCGCAATTGAAAG
CGCAATATGCTGATAAACCTAAAAAACGTGTTTTTCTGCAATTCGGCATTAATCCGCCAT
TTACCAGTGGAAAAGAGTCGATTCAGAACCAGGTACTCGAAGTTTGTGGCGGAGAAAACA
TCTTTAAAGACAGCCGGGTTCCCTGGCCGCAAGTTAGCCGCGAACAGGTGTTAGCACGCT
CGCCACAGGCGATTGTCATTACAGGCGGACCGGACCAAATTCCTAAAATCAAACAATACT
GGGGTGAACAGCTCAAAATTCCCGTTATTCCTCTCACGAGTGACTGGTTTGAACGTGCAA
GCCCACGTATTATCCTCGCTGCACAACAGCTCTGTAATGCGCTTTCACAGGTAGATTAGT
GCCTGACCTTTTCAGGTGCTCAGTGGGGATTGAACAATGCTCGTCTATTGGCTGGATATA
GTCGGCACAGCGGTATTTGCCATCTCCGGCGTTTTGTTAGCCGGAAAATTGCGTATGGAC
CCTTTTGGTGTTCTGGTATTGGGCGTGGTTACCGCAGTAGGCGGCGGGACAATTCGCGAC
ATGGCGCTGGATCACGGCCCGGTATTTTGGGTGAAAGATCCCACCGATCTGGTCGTTGCA
ATGGTCACCAGCATGCTGACCATCGTGCTGGTGCGCCAGCCAAGACGCTTACCAAAATGG
ATGTTGCCGGTGCTGGACGCCGTTGGTCTGGCGGTGTTTGTCGGCATTGGCGTGAATAAA
GCCTTTAATGCGGAAGCCGGTCCGTTAATCGCGGTTTGCATGGGCGTCATTACTGGCGTT
GGCGGCGGGATTATTCGTGATGTACTGGCCCGCGAGATCCCCATGATTTTACGTACAGAA
ATCTACGCAACAGCCTGTATTATCGGCGGTATTGTCCACGCTACGGCTTATTACACATTT
TCCGTACCACTGGAAACAGCCAGTATGATGGGCATGGTCGTGACGCTATTGATTCGGCTG
GCGGCTATTCGTTGGCATCTTAAGCTACCGACGTTTGCGCTGGATGAGAATGGGCGTTGA
AGAGAGAAGATGTGCCGGATAGTTTATCCGGCACATGAACAACAGATTAGATGCTAAAGG
AAGAACCGCAACCGCAGGTGCTTTTCGCGTTCGGGTTGGTCACGATGAAACGAGAACCTT
CCAGTCCTTCGGTGTAGTCAACGGAACCGCCGACCAGATATTGCAGGCTCATCGGATCAA
CCACCAGGCCAACGCCCTGTTTTTCGATGGTCATATCGCCTTCGTTCACCTGATCATCAA
AGGTGAAACCATACTGGAAGCCGCTGCAACCGCCACCGGTGATATACACGCGTAATTTCA
GATTCGGGTTATCTTCGTCAGCGATCAGGCTTTTAACTTTGTTGGCTGCTGCGTCGGTAA
ACTCCAGCGGCAGTGCTACGTCATCACTCATATTTTGCTCCAAACGACATCGGCAATTGG
GCAAATTCTAACCCAATAATAATCGCCATTATCTAATACCCTGGTATTTCGTTCAAGTAT
TCTCGCTGGCTGATGCGGCCTTGCTTCGCGCCAGTTGCTCAGCTTCCTGTTTTGCCAGCG
TGCGCGCAAGAATCGCCGAGTATAGCGGTTTCCCACCGGTAAATTGCGCTAATAGTGTTG
CGCCAAGACCGGTAATAATCATTGGCAAAATGAGCTGGTAGTTATCGGTCATCTCCAGAA
CCAGAATGATCCCCGTTAACGGCGCGCGAATAGATGCCGCCAGTAACGCCCCCATTCCGG
CAATAGCAAATGTCCCCGCCTCAAGGTGATATTGCGGAAACAGCTCAACGGCAACCATTC
CGAAAGCGGTTCCCAGCACAGTACCCAGCGCCAGCATCGGGGCAAAAATACCGCCCGGCG
CGCCGGAAGAGAAGCACAGTAAAGTGGTAATGACCCGCGCGACGAAGATAAACACCAGCA
TTCCCATGCTGAAATTCCCCGCGGTAGCGATAGGAATCAGGTTAAAACCGCCGCCCGACG
TTGCTGGTGCCACAAACCCCAGCAATCCACACAGACCGCCAATCGCACCACCCATCAGTA
CCCATTTGGTAATATTGCCGCCGTGCACACGGTGCAGCAAATCCTGCATTCCCAGCACCC
ATTTATTAAAAATAGGGCCGAAAATGCCAAAAATAATACCGAGGATCAGATAAAGCCACA
GCGTATTAAGCGGCGCATCAGAAAGTTTACCGACGTCAATCAACGCAACTTCATGATTAA
AAATCCGGTACATAATGGTCGACATAATGACACCAATAAATACCGCTTTAATCGAAATTA
ACGTATAGCGAAACTGCGGACGCATCTCTTCGATAATAAACAAAATACCCGCCAGCGGCG
CGTTAAAGGCCGCCGCCAGCCCCGCAGCAGCACCGGTTGCCAGCAGCGTATGGCGAGCTT
CATCACCTTTCAGGCGGAAAACATCGAGTACCATCCGCCCGATATTGCCGCCGATCTGCA
CGGTTGGCCCTTCGCGCCCCAACACCATGCCTCCGCCGAGCGTCCCCAGCCCGCCAAAGA
ATTTCACCGGCAATACACGCCACCAGCGAACGGGACGTTGATCTTCCAGCGCCCCTTCAA
TTTCCGGGATCCCCGAACCCCCTGCTTCCGGCGCGTATTTGCGCACCAAAAAGTAGCCGA
ACATCGCCAGCAGCGCCGAACAGAGAAAAGCGACGGTTAACAGAAGCGGATAATTATCAG
CAGTATGTACCAGCGCCCCCATACGTTGGTTCTGCAACCAGGCGACACCTTTGTCAAAAG
CAACCGCTGCCAGCCCGACAAGCGTGCCGACGACTGCCGCCATAAACAAAATGGCTAACG
GGGTTTTATCGCGCTCAAGAAGTTGGCGAATCAGTTGTCTGCGTCGCAGGCGCGCGGCCT
GCGGTGTTTCTAAAGAGGGAGTATCAGTTTTCATCCAATGATCACTTATTGGTCATACAA
ATAAGATGACGGCATTTTACTCGCACGTTCCATGAAAATCCTTTGCAAAGCGTAATGTTT
CAAATGCACAAAACTTTTATACTCTAAGAAATCAGGATTGCACCAGTACAAGCAGCCTGA
TGTTTGACGAGTATTTAACTTGTTATGAATAACATAGAATAGCAGCCATTCACTTTTTCT
ACGAATCAGGAACCCTCCATGAGTAAGTCTGAAAATCTTTACAGCGCAGCGCGCGAGCTG
ATCCCTGGCGGTGTGAACTCCCCTGTTCGCGCCTTTACTGGCGTGGGCGGCACTCCACTG
TTTATCGAAAAAGCGGACGGCGCTTATCTGTACGATGTTGATGGCAAAGCCTATATCGAT
TATGTCGGTTCCTGGGGGCCGATGGTGCTGGGCCATAACCATCCGGCGATCCGCAATGCC
GTGATTGAAGCCGCCGAGCGTGGTTTAAGCTTTGGTGCACCGACCGAAATGGAAGTGAGA
ATGGCGCAACTGGTGACCGAACTGGTCCCGACCATGGATATGGTGCGCATGGTGAACTCC
GGCACCGAGGCGACCATGAGCGCCATCCGCCTGGCCCGTGGTTTTACCGGTCGCGACAAA
ATTATTAAATTTGAAGGTTGTTACCACGGTCACGCTGACTGCCTGCTGGTAAAAGCCGGT
TCTGGCGCACTCACGTTAGGCCAGCCAAACTCGCCGGGCGTTCCGGCAGATTTCGCCAAA
CATACCTTAACCTGTACTTATAACGATCTGGCTTCTGTACGCGCCGCGTTTGAGCAATAC
CCGCAAGAGATTGCCTGTATTATCGTCGAGCCGGTGGCAGGCAATATGAACTGTGTTCCG
CCGCTGCCAGAGTTCCTGCCAGGTCTGCGTGCGCTGTGTGACGAATTTGGCGCGTTGCTG
ATCATCGATGAAGTGATGACCGGTTTCCGCGTAGCGCTAGCTGGCGCACAGGATTATTAC
GGCGTAGTGCCAGATTTAACCTGCCTCGGAAAAATCATCGGCGGTGGAATGCCGGTAGGC
GCATTCGGTGGTCGTCGTGATGTAATGGATGCGCTGGCCCCGACGGGTCCGGTCTATCAG
GCGGGTACGCTTTCCGGTAACCCAATTGCGATGGCAGCCGGTTTCGCCTGTCTGAATGAA
GTCGCGCAGCCGGGCGTTCACGAAACGCTGGATGAGCTGACAACACGTCTGGCAGAAGGT
CTGCTGGAAGCGGCAGAAGAAGCCGGAATTCCGCTGGTCGTTAACCACGTCGGTGGTATG
TTCGGTATCTTCTTTACCGACGCCGGGTCCGTGACGTGCTATCAGGATGTGATGGCCTGT
GACGTCGAGCGCTTTAAGCGTTTCTTCCATATGATGCTGGATGAAGGTGTTTACCTGGCA
CCGTCAGCGTTTGAAGCGGGCTTTATGTCTGTGGCGCACAGCATGGAAGATATCAATAAC
ACCATCGATGCTGCACGTCGGGTGTTTGCGAAGTTGTGATGATTTTGCCTCGCCCACCGG
GCGAGGCATTCTATTAACGGCTCTGCTTTCTCAACAAATAGATAAAATATGGCGCGCCGA
TAAAGGTCGACAGCAGCCCCGCCGGGATCTGGAATGGAAACAGCACCATCCGCCCACACC
AGTCAGCGAATACCAGCAGTAAACCACCCACCAGCGCCGAAATTACGATGTGTGGCATCG
TCCGTCGAAAACCCATCATCCGCGCAATATGCGGTGCCATTAAACCAACAAAACTCAACG
GTCCAATAGTCATCGTCGCGGTCGCCGTCAGGCAAGCCGCTAACAGCAGCAGCGCAATTC
GCGTCGGCGTCAGCGCCATTCCTACGGCTCGGGCGGTATCACCACCCAGCGGTAAAATGG
TCAGCCAGCGGCGGCACAGCGGGGTAATCGCCAGCAAAATCACCATCACAATTCCGGTGC
GCCAGACCTGCGCATCGGTCGCGTTGTAGGTCGAACCGGAAATCCAGGTCAGCACTTGCG
CCATTCGCGGGTCACCGCTCGCCTGCAACATCATCAAAAGCATGGTGAATGCGGTACTTA
ACGCCATCCCCGCCAGTAACATACGGTGTGGGGAAAATCCACCGCGTCCGGCGGCGATCA
TAATGATCAACAGCGTCACCGCCGCCCCGAGACTGCCTGCGGGTAACAGCCAGCCAAAGG
CATTACCCGGTACCAGAAACAGCATTAACACCACGCCAAACGCCGCGCCGGAGCTAATCC
CCAGCACTTCCGGGCTTGCCATCGGGTTTCCGGTCAGCCGCTGAATAATACAGCCCGCCA
CCGCCAGCATGACGCCCGCAAACAGCGCCGCCATAATTCGCGGCCAGCGCCAGGGCATTA
AATCATCGAGCAACGCCCCGCTCGCCCACGTCCAGCCGTGCGCATCACGACCAAACGACA
GCGCCACCACCACAGCCATCAACAGCAGCACGCCGCCCGCGAGGGCAAACGCCAGCACAT
GTTGGCGTTCAGCCGCGACACGATCGTTGACCTTCATATCCGGCGCGCTAATGCTGCGTA
AACGCGGCAACAGCCACAGTAGCAGCGGCGCACCGATCAACGCAGTGACCGAACCGGTGG
ACACTTCCATCCACACACGAGTCAGCCAGAGGATGATTTGATCGGAAAGCCAGAGGATCA
GCGCCCCAATCAGCGACGCCAGCATCAACCGTGGCAGCAGACGCCGCGCCCCCAGCATTT
TTGCCAGCAGCGGCGCGAACAACCCGATAAAGCCGATAATCCCTACCGCATTCACCAGCA
GCGCACTGATGACAATCGCCAGCGACAGCGCCGCCAGACGCGCGAGCGACAAGGCCAGCC
CGAGATTGCGCGCCACGCCATCATCAAGCCCCATCAGGGTTAACGGGCGAAGTAGCAATA
ACGTCAGCATCACGCCGCCCAGCAGCTGCGGCCATAAACGCTCAACGCCGCCCCAGTCGG
TTTGCGTCAGCGTTCCAGTGCTCCACAGAAACATGCTTTGCAACTGGTCATGATGGAAGA
TAACCAGTAATTGATTGCCCCACAATAAAGGCTCACTACCAGCCCCGCGAGAATCAGCGT
TACCGGCGACAGCCGTTTCCCCCACGCGACGCCAAAGACAATTAAGCCAACAACACAAGC
CCCTGCCAGCGCAGCAAACTGGCTCGCCATCGCACCAGGGATCGCCCAGAGCGTCGTGAC
GGTAATCCCCAGTTGCGCGCCTGTAGCAACGCCCAACGTCGTCGGTTCCGCCAGCGGGTT
ACGCAGCACTTGCTGAAACAGCACGCCCACCAGCCCCAGGCCCGCGCCCACCAGCAGCGA
AATCGCCAGACGCGGCAACAAGCTGTAGTGAAAAATCATCTGCTCGATGACGTCAATATC
CGGCGACCAGGCAGCCTGCGCCCACTGGCTACGCGGCAGCGCCTGCGAGAAGTTCATCCA
GGTGAGCGCCGTAGCGACAATCACTAACAGCGCCAGCAATAACGCCGGGAAAAGCGCAAT
TCGTTTACTCACGCTTTACCTCCGATGGCGTTATCCAGAATACGCACAAAGTGCATTGCC
GAGAGCGTCGCACCATAAAACCAGACTGCAGGTACGCGCTGAAAGCGCCCTGTACGGACA
AACGGCATGGCCTGCCACAGCGGGGTTGCCATTAGCGCATCCATGTCTTTGCTGTTGTCG
TGATCAAAACAGAGCACATCAACATCTTTATACGCCGCCAGACGATCGATACTGACGGCG
GTGCTGCCCCAGAAGTTGGTTTCCCCTTGCCAGGCATTTGGGATGCCGTACTCATCGAGA
ATTTCCTGGAACAAGCTGTTTGGCCCGAAGACCAACATATGGCGCGGATCGATAAGCGTC
GTCAGCAATAACGGGCGTGCACCACGCTTCACAAAGCGGGGTTTCATGCTGCGGATAAAG
TCTTCGTATTGCGCTAAATGCGTTTCCGCTGCGCTTTGCAGGTTAAGTAAATCTGCCATT
TCCGTCAGTGATTTACGCGCCATCGCCAGCGGCTGTTTGCCGTCGCTGAAGTTAAATCCG
CGCCCCGGCGCAATACGAGCCAGCATTTCTGGTGAAGGGCCATATCCTGCCGACCAGACC
ATAAACGACGGTTTCATTTCGGTCAGCAGTTCAAGGTTAGGTTCTGTGCGCAAACCGACG
TCAATCACCGATTCAGGTAACGGTGGTTCGCTAACCCACAGGCGATAGTTGATGGTGTCC
GCCACGCCATAAGGCACGATGCCGAGCGCCAGCAGTAATTCCACCGGCAACCACTCCAGC
GCCACAATACGATTGGGATCAATAGCCGCCGCGTGGGCGGCATTCATCTGCCATAACAAC
GGAGAAAGCGCCATCGCCGTTAACAGTCGACGGCGCGAAATAAGAGGTAAGCCGCTCATC
AATAAACAAAACTCACAGGTGCAGCACCCGCCGGATGCGGCAAAATACCCATCGGGATGC
CATAAATCATTTCGAGGGTTTCGCCGCGCATAATTTCCGCAGGCGTTCCCTGAGCAATCA
TTTCACCGCCGCACAGGGCGACCAGATAATCACAGTAGCGTGCCGCCATATTGATATCGT
GCAGCACGGCAATGACCGTCAGACCACGTTCCTGACTTAAACGGTGCACCAGCGCCAGCA
CATCAACCTGGTGGGCGATATCCAACGCCGAGGTCGGTTCGTCGAGCAACAGACAACGGC
TATCCTGCGCCACCAGCATGGCGATCCACGCCCGCTGACGCTCACCGCCAGAGAGACTAT
CGACCAGCCGATGCGCCAGCGGTTTTAAGCCAACCAGCGAGATAGCTTCCTCAACTTTTT
CGCGATCTGCCGCACCAAAGCGCCCCAGCGCGCCATGCCACGGGTAACGACCAATCGCCA
CCAGTTCACGCACGGTCATCCCTTCTGCCGGAGGAAGCTGCTGCGGCAAATAAGCCACTT
TGCGGGCGAATGCTTTGCTACTCCAGCTTTCCAGCGGCTGGGCATCAAGAAGAATTTCAC
CTTCTGACGGCGGCTGATGACGGCCCAACATTTTTAACAGCGTGGATTTACCAGAACCGT
TGTGACCAATCAAACCAGTCACTTTTCCGGCAGGAAAGGTTAACGACAGCGGATGCAAAA
GCGTGCGCCCTGGCACACGAAAGGAGATATTACGCAGTGCAAAAGTGGTATCGGAATGAT
TCGTGTATTCCTGCATAACAGCCAACTTGTGAAACGGGCACGGAAATCCGTGCCCCAAAA
GAGAAATTAGAAACGGAAGGTTGCGGTTGCAACGACCTGACGTTCTGCGCCCCAGAAGCA
GCCATAAGTGTTAAAGCAGCTGGCGACGTATTCACGATCGAACAGGTTGTTAACATGCAG
CGCCACGTTGGAGCCAGCCATGCCGACTCGCGCCAGATCATAACGCACTAACGCATCCAC
GACCGTATAACTTCCCACTTTAAAGGAGTTAGCCGGATCACCATAGCTGGAGCCAGTATA
ACGACCACCGGTGCCCAGCGTCAGACCTGAAAGCGGACCGTCAAAGAAGGTATAGTCAGC
CCACAGCGAAGCCATGTGTTTTGGCACCTGTGCCGGCGTATTGCCTTTGTAGTTGGTGTC
AGTGGTGTATTCCGCGTCGGTGTAGGTGTAAGAACCAACTAAGTTAACACTCGCCGATAG
TGCCGCTTTCGCTTCCAGCTCTACGCCACGCGCACGAATCTCACCGCCTTCAACCGAGAA
CAGTGAACCGTTCGGATCCGCCATCAGGTTATTAGTTTTGGTAAGCTGATACAGTGCGCC
AGTCACCACAATTGGGCGATCTTCTGGCACATATTTCACGCCGACTTCATACTGTTTGCC
TTTCGAAGGTGCAAACAGATCGCCGTTTGCATCGGTCTGCGAAGCGGGTTCAAACGATTC
ACTGTAGCTGAAATAAGGCGTTACGCCGTTGTCGAACAGATAGTTAACACCGCCACGCCA
GGTGAACTGTTTATCATCGCGATCGGATTTATTACCGTAATCACGGTTGAAAGATGACTG
ATCGGCCCAGTCATAGCGACCGCCAAGCGTAACCAGCACTTTATCCCACTGCGCCTGATC
CTGAACATACAGACCGGTTTGTTTCTGTTTCAGCAGAACGCGGTATGGACCAGACGGATT
TGGGTGAGCGCCAAAATCAAAGTCACTACGGTCTAAATTATAGATATCAGATGGTGCAAC
TGAACCGGCATATCCGAACCAGGAGTCGATGTCATTACGCATACGCATAAAGTCAACGCC
AGTCAGCAGAGTGTGATCCACTGAACCGGTTGCGAATTTGCTTTGCAACTGAGTATCAAC
AGAGAAGTTTTCTAACTTCTCATTATCGATAACGTACTGACGAGTCAGTGTATGGCCCCA
TTGAGACTGCGGCACGTTGGCACATGGACTCGAAGAGGGGTTTGAGGAATAGAGAGGATC
TGAACACATGCCGTAGCCATATACGCTCTTTTGCGAAACTTTATTTTGCGCAAAGCGAAG
GTTCTGACGTACGGTAAAGGTGTCGTTAAATTCGTGGTCGAAGCTATAGCCAATCATCTT
CTCATTACGAGAATAGGTGTTGTTCTTCGCCCCTTCGTTAAAGTCTGTCGGCAGACGCTT
ACCGTTCGGCAGCGGCTCAACGGTTCCCTCTTTCGGCAACCAGCCGTAATAACCGGTTTC
CGGCTCGTTCTGGAAGTAAGAGAGGAAGGTGAAATTGGTTTTATCGTCCGGACGCCAGGT
GAACGCTGGCGCAATGGCATAACGCTGCTCTTCCGCGCCCTTTTGCTGGGCATTGGCAGA
GCGCGCAAGACCGGTCAGACGATAAGAGTAAACGCCGTCATCATCCAGCGCATCGCTGAA
GTCAAAACCGGTCTGGAACAGGCTGTCAGTACCGGCCTTAAACTGAACTTCTTTCAACGG
TTCAGTGGTCGGGCGCTTGCTGACCATGTTCAACAGGCCACCTGGGCTGCTTTTCCCATA
CAGCACGGAAACCGGGCCACGCATGATTTCAGCGCGCTCCAGCATATATGGGTCAATAAC
CGCATCGTTATAGAAGTTGCCCTGCATCTTCAGGCCATTCAGATAGTTGTTCTGGCTTTG
GCCGTCAGCGGCGAATCCGCGGATGATCAGGTAATCGTAAGTGTTGGATGCGCCACGAGT
TCCCACGGCAACGCCAGGAGTGTAGCTAAGCGCTTCTTTTACCGACTTCGGCTGATGCAG
CGCCATCTCTTCGGCGGTCACAACAGAAATAGACTGTGGCACTTTTTGAATCGGCGTATC
GGTTTTAGTGCCGGTAGCTGACTGTCGCGCCGCAATAGTTGCAGCAGGCCCCCATGCGCT
TTCTTGCGGCGCAGGTGCAGCGGTAACGGTGATAGTGTCTTCTTTCGGTTCAACCGCTGC
CTGTGCATAAACAGACATGCCGCTAACCGCTGTGGCTACTACAACTGCGATTTTACGCAG
TGAGTGTTTTGGCTGAGCAGTTTTGGAACGCGCCATTGGTATATCTCTGATGTAAAGTGA
ATGATAACGTAAACGAGAATGATTATTATAAAGATAAGATAATATTCGAAACGCTGGCGG
GTTCGCAAGCGGTACGCAATCTGAGCGTTCCTGAAGGGTTAATAAACAACCAGATGAAAA
GAAAGGGTTAATACTTTAGGTGGGATGTTATTTTACCGGATGGCAACTCGCCATCCGGTA
TGTCACGTTTAGACGTTAATTACTACCAAACATATCCTTGATCCAACCGGCTACACCGTC
GCTGTCTTTCTGCTCTTGCTGAGCAGGTTGCTGTTGCGGCTGTTGCTGCGGCTGAGAAGA
CTGATCAAACGGATTGCCTGACGGCTGCTGCTGCATCTCACTCTGCTGGCACAGCGATTG
CGGATCGCTGGTCCAGACCGGCAAGACACGCATGCCACCGCTGCAAACAAAGTTGCCGTC
GTAGTCCACGCCCATATCTGCAATATCTTCTGGCGGAACAAGATTCAGCGGCGTTGGCGT
CTGGTTTGCCAGATAACGCTGATAAATCGACATTGCCCCGCTGGCACCATACAGTTTGGT
CGGCTGGTTGTTATCACGGCCGACCCAGGTGATGGTCACCGTGCTGCCGTCAATGCCCGC
AAACCAGGTATCTACGTTATTGTTGGTAGTCCCTGTTTTCCCTGCCAGATGCAGGTTCGG
GTATTTCGCCCCAAGCTGACGACCCGTACCGCGTTGTACAACCTGCTGCATGGTCCATAG
TGTCAGATACGCCGCCTGCGCCGGAACAGCGCGTTCCGCCTGCGGGAAGCTCTGATACAG
CACTTTGCCATCTTCCGCGATTACCGAACGCAGCGCAGAAAGCGGTGCACGGTTACCACC
GCTGGCGATGGTCTGGAATGCCTGCGCCACTTCGATTGGCGTTAAGTTCAACGCCCCCAG
CAGCATTGCCGGAACCGGATGCAACTGATCTTTCGGTACGCCCAGTTTAATCCAGGTATC
CGTAACCGCAGGCAGCCCCAGCGCCATCCCCAGATTTACCGTCGGCACGTTCATCGAACG
GGTCAACGCATCCACCAGCATCACTCTGCCGCTTTCGCTATAACGACGGTCATCATTCTG
CGGTGACCAGACCTGGCCATTCGGCTGACGCAGCGCAATTGGCGCATCCGCAATCCACGT
ATTCAGACGATAGATTTTCGGCTGGCTTAAGGCCGTCAGATAAGTCGCTGGTTTTGCAAG
GGAACCAATCGAACGACGCGCCTGCATCGCACGGTTGTAGCCCGCAAACTGCGGCTCAGA
ACCTCCGACCATCGCACGAACTTCACCACTAAAGCGGTCGACGACCACAATCGCGGTTTC
CAGATCGCTCAGCTTACGCTGTTTCTTCAGTGCCGGAATGCCTTCCACGGCGGCTTTTTC
TGCCGCGTCCTGGGCCACCGAGTCAAAGGTAGTGAAGATCTTCACGCCGGAGAGATCTTT
TACCTTATCGCCTAATTTAGCCTGAAGCTCCTGACGCACCAGTTGCATAAAGGCTGGCTG
AGGAGAGATCACCCCACCGCGCGGCTGAACACCCAGCGGACGCGCACTCAACATGTCATA
GAGTTCTTGATCAATAATCTGTTGCTGTTGCAGCAGACGCAGTACCAGATTACGTCGCTC
CAGCGCCAGTTTCGGGTTACGCCACGGGTTGTAGATGGACGCTCCTTTCACCATACCGAC
TAACAGCGCCTGCTGATCGAGGCTCAATTCTTCTACCGGGCGACCAAAGTAATACAAGCT
CGCCAGCGGGAAGCCACGGATTTCGTTGTCGCCACTCTGACCGAGATACACCTCGTTCAT
ATACAGCTCAAGAATACGGTCTTTGCTGTAACGCGCGTCCATGATCAGCGCCATGTAGGC
TTCATTCGCTTTACGCCAGTAAGAGCGCTCGCTGGAGAGGAACAGGTTTTTCACCAGCTG
TTGCGTCAGCGTACTCGCTCCCTGCACCGTGCGTCCGGCGGTCAGGTTTGCCAGCACCGC
ACGTCCGATTGAGTAGAGACTGATCCCATCATGCTCGTAGAAATGACGGTCTTCTGTCGC
CAGCAAAGTATCCACCAGCAAATCCGGGAAACCACTGCGCGGCACAAACAAACGCTGCTC
ACCGTTTGGTGAGGAGATCATGGTGATCAGACGCGGATCAAGACGGAAGAAACCGAACTG
ACGGTTGTTCTCCATATTGACGATCGTCGCCAGATGATCGCCATCAAAGGTCAGACGCGC
ACGCACCTGCCCTTCTTTGCTGTCCGGAAAATCAAACGGACGGCGGATCATCTCAATGCT
GTTAGCCTGCACAGTAAATTCGCCAGGACGGGTCATTTTCGACACCTGACGATACTGTGT
TGCCTCCAGCAGCTTCACCATCTCGTTCTTGCTGATGGTCATGTCTGGCTCAAGGTTGAC
CATTCGACCATAAACTGCCGCAGGCAGTTGCCAGACCTTGCCATCAATACGGCTACGAAT
TTTTTGATCGAGATAAACGCCGTAAATGGCGATCAGCACGGCAAAAACGATAGCCAGTTT
TAACAGCAGCCATAGCCAGCCGCGTTTGCCACGAGGCTTACGCCCTTTGCCTTTGCCCTT
ACCTTTGCGCGGCATCGGTTCTTCATCCTCATAGTCATCATAATCGTCGTAATCATCGTC
ATCTTCGTAACGACGACGGCTTACCTTTTGTTTGACCGGACGCGTCGGTTTCCCTTTGCG
TCCAATTGGCTCGCGGTCATTCCCGGCCATGCTTTTTCTCCGCAATATTCAGGCGCAAAA
GCCCGATTTTCTGTTCTTCTGTTACAAGACAGAAGAAGATATCTCTCAAAATTTGTGCTC
GATCGGTCCCCTCTCCCTTGAGGGTGAGGGTGAACGTACGCGCTGATGCCCTCACCCCGG
CCCTCTCCCACAGGGAGAGGGAGAAAACCAACCTTACGAATACTTTTTCGTCCGTCGCGT
CGGTGCCGTGTTTGCCGGGTCGTCCGGCCAGACGTGTTTGGGATAACGCCCTTTCATCTC
TTTTTGCACCTCACGATACGCCCCTTTCCAGAAGGCCCCCAAATCACGCGTGATTTGCAG
CGGCCTTTGGGCAGGGGAAAGCAACTCCAGCACCAGCGGCACGCGCCCCTGAGCGATCGT
CGGATTGGTGGCCTCACCAAACATCTCCTGCATTCTCACCGCCAGCGCGGGCGGGTTATC
TTCATGATAACGAATGGCGATCCGGCTTCCCGTCGGCACAGTGTAATGCGCAGGCAATTC
ACTATCCAGACGTTGCTGCATTCCCCAATCAAGTAATCCGCGTAGTGCCTGATAAATGTC
GAGTGATTTCAGGCCGCGTAGTGAATGTACACCGGCCATATGTGGCAGCAGCCACGTTTC
CAGCGTCGCCAACAAACTTTCATCATCAACCGCTGGCCAGTCATATTCTGGCAACCACTT
TCCGGCGCATAACAAACGCAAGCGTAGCTGTTCCGCTTCCGCCGTCCAGTTGAGCACGCT
TAAACCTTTATCACGGATGCCGTTAAGCATCGCCTGATGCAACTCGTCTTCTGACGGTTT
CGCCAACGGCTGCACTTTCACCGTCAACTGACCGATTTGCAGCCGACGCCAGGCTTTCAG
CGTACCTTGCGCGTCATCCCATTCCACGGTGTCAGATTGCTGCACCAGCTGCGGACAGCG
TCGCACTAATTCATCAATATCGACCGGTAGCGCCAGTAAAATCCGCGCATCCGGCGAGGC
GCTGCCCTGCAATAATAACGGTGCGATCAACCATTCGTGGCGGCTTAGCGCGTCGTCGGC
ATCGAGCATCGCTCCCATGCCGTTTGCCAGTTGATAGCGTCCATCTTGCCCACGGCGGCG
AGCAATGCGATCGGCAAACGCCCCGGCAAGTAGCAGCGCGATAAGCGAACTGTCTGCCTC
ACCGCCGTATACGTTTAAGCGTTTTAACAGTTGCTGACTACGTTGCTGCCAGGCTGGCTG
ATTGCGCGAAAACACCACGCCCAGGTCACTATTGCCCATCCGTGGCGGCTCTTCGAGAAT
GGCGGCAATTTTTGCCGCGGTAGCAGCTTCGTCGTCGCTCTTTGCGCTAACCAGCATTGC
CGCTAAACGCGGATCGTTACCCAGCGCTGCCATTTTTTGCCCCTGCGCACTAAGCCGTTC
ACCGTCCAGCGCCCCCAGCATCCGTAACAGGCGTTTCGCGGCCAGTAGATTCACCGTTGG
CGGTTGATCCAGCCAGCTCATCTGCGCCGGATCGCTGCATCCCCATTGCAGTAATTCCAT
CAGCAAACCGGAAAGATCGCTTTGTAATATTTCCGGTTCACTTTGCGCCGCGGCGCGTTC
TGCTTGTTCCTTGGCGATTAAATGCAGGCAGATACCCGGCTCCAGACGCCCGGCGCGCCC
GGCACGCTGCGTCATCGACGCCTGACTGATTCGCTGAGTAATTAGTCGCGTAAGCCCTGT
TCGCGGATCAAAACGCGCCACCCTTTCCTGGGCGCAATCCACCACCAGACGAATACCTTC
GATAGTTAAACTGGTTTCAGCAATATTGGTCGCCAGCACGACTTTGCGCATCCCTTGCGG
TGCCGGGAGGATCGCTTTTCGCTGATCGTTCAGCGACAACGCGCCATACAGCGGGCAGAG
CAACACATCACTGCCGATACGCGAAGCCAGTTGTTCCTGCACACGCTGAATTTCTCCGAC
GCCCGGTAAAAATAACAGTAATGATCCACTTTCCTGACGCAGCATTTCGGCGGTCGCAAC
CGCGACGGCTTCGTCAAAACGCTGATGGGCGGGCAGCGGTAAATAACGGCGTTCAACCGG
AAACGAGCGCCCTTCTGAGATGACGACGGGCGCTTCTGGTAGCATTTGTTGCAAGCGGTC
GTTGTCCAGCGTAGCCGACATAATCAGCAGTTTAAGGTCATCACGCAGACCTTGTTGCAC
ATCGAGTAACAGCGCCAACGCCAAATCCGCCTGCAAGCTACGCTCATGAAATTCATCAAG
GATCACCAATCCAACACCGCTCAACTCCGGGTCACGCTGGATCATCCGCGTCAGCACGCC
TTCGGTAACCACTTCCAGGCGGGTATTCGGCCCGACGCAGTTTTGCGCACGCATCCGGTA
GCCAACGGTATCGCCTGGCTTTTCGTTAAGCAGCTCCGCCAGCCGTTGCGCGACGTTACG
CGCCGCCAGACGCCGTGGCTCCAACAGGATAATTTTCCCGTTAATGCCGGGATGCGCCAG
CAGTTGCAGCGGCAGCCAGGTTGATTTCCCGGCCCCGGTCGGCGCACTTAATAATACCTG
CGGCGCACAATCGAGAGCGGTAAGTAATTCAGGTAAGACGGCAGCAACGGGCAACGACGA
CACAAAACGCTCCAGAGGGTTAACATTCTTCGCGCCACATTGTAGCATCGCGGTAATTCA
TAACCGAGTGCCTCACATGTCTGAACCGCAACGTCTGTTCTTTGCTATCGACTTACCTGC
AGAAATCCGCGAACAGATTATCCACTGGCGCGCCACACACTTCCCACTTGAGGCGGGACG
TCCGGTCGCCGCCGATAATTTGCATCTGACTCTGGCATTTTTAGGCGAAGTGAGCGCCGA
GAAAGAGAAGGCGCTTTCTCTTTTAGCCGGACGGATTCGTCAACCTGGTTTCACACTCAC
GCTTGATGACGCCGGACAATGGCTGCGTTCGCGTGTGGTGTGGTTAGGGATGCGTCAGCC
TCCACGCGGCTTAATCCAGCTGGCGAATATGCTCCGTTCACAGGCTGCCCGCAGCGGTTG
TTTTCAAAGCAATCGTCCGTTTCATCCACATATTACCTTATTGCGCGACGCCAGCGAGGC
GGTGACAATCCCGCCGCCAGGTTTTAACTGGTCGTATGCGGTGACGGAGTTCACCCTTTA
CGCCTCCTCGTTTGCCCGTGGACGCACACGCTACACGCCGCTAAAACGCTGGGCGCTAAC
GCAATAACAAGGATTGTCGCAATGGAATTTTCTCCCCCTCTACAGCGCGCGACGCTAATT
CAGCGTTACAAACGTTTTTTAGCCGATGTGATCACACCCGATGGTCGCGAATTAACGCTA
CACTGCCCGAATACGGGTGCGATGACCGGTTGTGCAACGCCTGGCGATACCGTCTGGTAT
TCGACTTCAGACAACACCAAACGGAAATACCCACACACCTGGGAATTAACTCAAAGCCAG
AGTGGCGCATTTATTTGCGTCAACACGCTTTGGGCTAACAGGTTGACGAAAGAGGCTATC
CTTAATGAATCAATTTCAGAACTGTCAGGCTATAGCTCGCTGAAAAGCGAAGTAAAATAC
GGCGCAGAACGCAGCCGTATTGACTTTATGTTGCAGGCGGATTCGCGTCCAGACTGCTAT
ATTGAAGTGAAATCGGTTACGTTAGCGGAGAACGAACAGGGATATTTTCCCGATGCGGTC
ACTGAACGAGGTCAGAAACACCTTCGGGAGTTGATGAGCGTAGCGGCTGAAGGCCAGCGT
GCGGTTATCTTTTTCGCCGTGCTGCATTCAGCCATTACACGGTTTTCACCCGCGCGCCAC
ATCGATGAGAAATACGCGCAACTATTGTCAGAAGCTCAACAGAGGGGGGTAGAAATTCTG
GCTTACAAAGCGGAAATTTCTGCTGAAGGCATGGCTCTTAAAAAATCACTGCCGGTTACA
TTGTAGTAAAGTAAGTAACTGGTTAATTTACATTCTGGTCGCGTGCGCAAATACGCTTTT
CCTCACACAGTTGTCAAGTGTTACGTTTAGATAATTGCTATCCGGAAAAGCATCTGCTAT
TTATAGCGGCCTCATTTTTCCCCCGAACATGGGGATCGATAGTGCGTGTTAAGGAGAAGC
AACATGCAAGAAGGGCAAAACCGTAAAACATCGTCCCTGAGTATTCTCGCCATCGCTGGG
GTGGAACCATATCAGGAGAAGCCGGGCGAAGAGTATATGAATGAAGCCCAGCTGGCGCAC
TTCCGTCGTATTCTGGAAGCATGGCGTAATCAACTCAGGGATGAAGTCGATCGCACCGTT
ACACATATGCAGGATGAAGCAGCCAACTTCCCGGACCCGGTAGACCGTGCAGCCCAGGAA
GAAGAGTTCAGCCTCGAACTGCGTAACCGCGATCGCGAGCGTAAGCTGATCAAAAAGATC
GAGAAGACGCTGAAAAAAGTGGAAGACGAAGATTTCGGCTACTGCGAATCCTGCGGTGTT
GAAATTGGTATTCGCCGTCTGGAAGCGCGCCCGACAGCCGATCTGTGCATCGACTGCAAA
ACGCTGGCTGAAATTCGCGAAAAACAGATGGCTGGCTAATTACAGCCGTTCCATCACGTT
TACCACAGGCGGGAAATGCTCCCGCCTTATTTTTTGTTCAAAGAGATGACAGACACACAC
TATATTGGCCGCTTCGCCCCCTCTCCTTCCGGCGAGCTTCATTTTGGTTCTCTGATTGCT
GCGCTTGGCAGCTATTTGCAGGCTCACGCCCGGCAAGGTCGCTGGCTGGTACGTATAGAA
GATATCGACCCGCCTCGTGAAGTTCCCGGTGCCGCAGAAACTATCCTGCGCCAGCTGGAA
CATTACGGCCTGCACTGGGACGGCGATGTTCTCTGGCAATCGCAACGTCACCACGCCTAT
CGCGAAGCACTCGCCTGGTTACATGAGCAAGGACTAAGTTATTACTGCACCTGCACGCGT
GCACGTATTCAAAGCATTGGCGGTATTTACGACGGTCATTGCCGGGAATTGCATCATGGA
CCAGACAACGCCGCAGTGCGTATCCGCCAGCAGCATCCGGTCACCCAGTTTACTGACCTG
CTGCGAGGCATTATTCACGCCGACGAAAAACTGGCACGGGAAGATTTTATTATTCATCGC
CGTGATGGTTTGTTTGCCTATAACCTGGCGGTGGTGGTGGATGATCACTTCCAGGGTGTG
AGCGAAATTGTCCGCGGGGCAGATTTGATCGAACCGACAGTGCGGCAAATCTCGCTGTAC
CAGCTTTTTGGCTGGAAAGTGCCAGATTACATTCATCTGCCGCTGGCGCTTAATCCACAA
GGCGCTAAACTTTCCAAGCAGAATCATGCGCCTGCGTTGCCGAAAGGCGATCCACGCCCG
GTACTAATCGCGGCACTTCAATTTCTGGGGCAGCAGGCAGAAGCACACTGGCAGGATTTC
AGCGTCGAGCAAATCCTTCAGTCAGCCGTCAAAAACTGGACGCTGACCGCCGTGCCTGAG
TCGGCAATTGTAAATTCAACATTCTCAAATGCGTCATGCTGAGCTATGATTAGCCGCTAT
TTTTTTGTCCTGAATGATGTTTGACACTACCGAGGTGTACTATTTTTACCCGAGTCGCTA
ATTTTTGCCGCAAGGTGCTAAGCCGCGAGGAAAGCGAGGCTGAACAGGCAGTCGCCCGTC
CACAGGTGACGGTGATCCCGCGTGAGCAGCATGCTATTTCCCGCAAAGATATCAGTGAAA
ATGCCCTGAAGGTAATGTACAGGCTCAATAAAGCGGGATACGAAGCCTGGCTGGTTGGCG
GCGGCGTGCGCGACCTGTTACTCGGCAAAAAGCCGAAAGATTTTGACGTAACCACTAACG
CCACGCCTGAGCAGGTGCGCAAACTGTTCCGTAACTGCCGCCTGGTGGGTCGCCGTTTCC
GTCTGGCTCATGTGATGTTTGGCCCGGAGATTATCGAAGTTGCGACCTTCCGTGGACACC
ACGAAGGTAACGTCAGCGACCGCACGACTTCCCAACGCGGGCAAAACGGCATGTTGCTGC
GCGACAACATTTTCGGCTCCATCGAAGAAGACGCCCAGCGCCGCGATTTTACTATCAACA
GCCTGTATTACAGCGTAGCGGATTTTACCGTCCGTGATTACGTTGGCGGTATGAAGGATC
TGAAGGACGGTGTTATCCGTCTGATTGGTAACCCGGAAACGCGCTACCGTGAAGATCCGG
TACGTATGCTGCGCGCGGTACGTTTTGCCGCCAAATTGGGTATGCGCATCAGCCCGGAAA
CCGCAGAACCGATCCCTCGCCTCGCTACCCTGCTGAACGATATCCCACCAGCACGCCTGT
TTGAAGAATCGCTTAAACTGCTACAAGCGGGCTACGGTTACGAAACCTATAAGCTGCTGT
GTGAATATCATCTGTTCCAGCCGCTGTTCCCGACCATTACCCGCTACTTCACGGAAAATG
GCGACAGCCCGATGGAGCGGATCATTGAACAGGTGCTGAAGAATACCGATACGCGTATCC
ATAACGATATGCGCGTGAACCCGGCGTTCCTGTTTGCCGCCATGTTCTGGTACCCACTGC
TGGAGACGGCACAGAAGATCGCCCAGGAAAGCGGCCTGACCTATCACGACGCTTTCGCGC
TGGCGATGAACGACGTGCTGGACGAAGCCTGCCGTTCACTGGCAATCCCGAAACGCCTGA
CGACGTTAACCCGCGATATCTGGCAGTTGCAATTGCGTATGTCCCGACGTCAGGGTAAAC
GCGCATGGAAACTGCTGGAGCATCCTAAGTTCCGTGCGGCTTATGACCTGTTGGCCTTGC
GAGCTGAAGTTGAACGTAACGCTGAATTGCAGCGTCTGGTGAAATGGTGGGGTGAGTTCC
AGGTTTCCGCGCCACCAGACCAAAAAGGGATGCTCAACGAGCTGGATGAAGAACCGTCAC
CGCGTCGTCGTACTCGTCGTCCACGCAAACGCGCACCACGTCGTGAGGGTACCGCATGAC
AGTGGCGTATATTGCCATAGGCAGCAATCTGGCCTCTCCGCTGGAGCAGGTCAATGCTGC
CTTGAAAGCATTAGGCGATATCCCTGAAAGCCACATTCTTGCCGTTTCTTCGTTTTACCG
CACCCCACCGCTGGGGCCGCAAGATCAACCCGATTACTTAAACGCAGCCGTGGCGCTGAA
AACCTCTCTTGCACCTGAAGAGTTACTCAATCACACTCAGCGTATTGAATTGCAGCAAGG
TCGCGTCCGTAAAGCTGAACGCTGGGGACCGCGCACACTCGATCTTGATATCATGTTGTT
TGGTAATGAAACCATTAATACCGAACGACTCACCGTTCCGCATTATGATATGAAGAATCG
CGGCTTTATGCTGTGGCCGCTGTTTGAGATTGCCCCGGAACTCGTGTTTCCTGATGGGGA
GACATTACGTGAAATACTCACTTCGCTAGCAGTACCACAACCTGCCATCTGGTAATAGCT
GTATTATTTTATTTTCTTGACGAGAGGAATACAAAATGATACGGCTATTTCATCCACCAA
GAAAAAATTATTTTCTTATCTTACTCCTCACTTCCCCCCTTACATATTAAATATACTTAA
TTTACATTTTAGTTTTTTTTAATTCATTCATGAAATAGCACTTCATGCAAATAAATTAGG
CATTTTTTGTTTAAACAACCTAAAATAACAACAATTCAATACACCACATAAATATATTCA
CATCCGTGATAACTCACCCCTATTACATCCTCCAAAAACTTTGAGTAATATCCGCTCGCA
ATATTAATTTCATATAATTTTTGTAAGGATGCATGTAATGAAAAAAGCACTTCTCGCAGC
CGTTCTGGTTATGGCTTCTGGTTCCGCCCTGGCTGTAGATGGTGGTCATATCGACTTTAA
CGGTATGGTACAGTCCGGTACCTGTAAAGTGGGTGTGGTAGATACCGGTATGCACGGCAT
CAGCACTGATGGCGTGGTTACCCTGGATACTGCAAATGTTACTGATAACTTTGCTGAAGT
AAGCGCTGCTGCTGTTGGTTTACTGCCGAAAGAGTTCATGATTTCTGTGGATTGCGAACC
GGGTAAAACAACTGCCCAGTTGACCATGGGTTCTGCAAGCTACGCGAACACCAGCGGCAC
CCTGAACAACAATACCAATATCACGATTAACGGTATTCAACCGGCTCAGAACGTGAACAT
TGCTGTTCATAACATGAAAAACAAAGCTGGCGCTGCTGAAATTAAGCAGGTCCATATGAA
CAATTCTTCTGAAATCCAGGAATTGACATTAGACGCACAAGGCAACGGTCAGTATGTGTT
TAACGCATCTTACGTTAAAGCACCGAACAGCCAGGCTGTTACTGCTGGTCACGTTACCAC
TAACGCACTGTACACCATTACTTATCAGTAATTGATGGCGAATTGAGTATAGGGTTTGTC
ATCAGGCAAACCTTATTTTCGCTAATTTTATCTCAACACAGACAGCAAGGAGTGCTTATG
TTTCCCTTGGTTAAAAAAACGGTTAGTGCATTATTTGTGAGTACTCTGTTAGCCAGTACG
CCAGCATTCGCTGACATTATTATTTCCGGGACTCGTATCATTTATAACGCTGATAAAAAA
GATGTTAACGTTCGTCTGGAAAATAAAGGGAATCGCCCCTTACTGATTCAGAACTGGTTG
GACACCGGCAATGACAATGTCGACCCCAGCCAGATCAAAGTGCCCTTTACCTCTACGCCC
CCCGTTTCACGCGTGGAGCCAAAACGCGGGCAAACCGTAAAAGTAATGTATACCGGTGCA
ACAGCCCTACCTAAAGACCGGGAAAGTGTCTACTGGTTTAACGTGCTGGAAGTGCCGCCA
AAGCCGAAAGATGCCCAGGCTGACAAAAACTTACTACAACTGGCTTTCCGCACGCGCATC
AAACTTTTTTATCGCCCGAGCGGTTTGCAGGGTGAACCTGCTGAAGCGCCAGCAAAAATC
ACCTGGAAGTTGAACAACACGCAATTGCAGGCGAATAACCCAACGCCTTATTACGTGTCA
TTCAATGACGTCAAACTGGAAAGCGGCGGCAAAAGCTACAAAGTCGATTCCAGCATGATC
GCGCCGTTCAGTCAGGCAAGCTTTAGCGTAACGGGTCTGTCAGGTGGCGTTTCATCGGGC
AAAGTCGTGTTCCAGGCCATAAATGACTTTGGCGGCAATATCGATGGTTCAGCAACATTC
TAAAAAATAAACGGATTCTTTTAACATCGCCAGGAATGCAACCTTGTACCAGTTTACTCA
TCACAAAAGTCGTACACCGAAAAAAACGCTACTTGCGGCCTGTTGCGCCCTCCTTTATAG
CAGCAACGGTGCTGCGGCAGACACGGTGGAATATGACAGTTCCTTCTTAATGGGAACTGG
CTCATCAACCATTGATGTTAAACGCTATGCTCAAGGTAACCCGACACCGCCGGGTCTTTA
TAATGTCCGCGTGTTTGTAAACGGTCAGGCCACCTCCAGTTTAGAAATTCCGTTTGTGGA
TATTGGTGAAAACAGCGCGGCGGCCTGTATTACCCGCAAAAACCTGGCGCAGTTACACAT
TAAACAATCCGAACAGCTTGTGACCCTACTCGCCAGAGAAGGTGAAGAAGAAGACTGTCT
TGATCTGGCAAAGTCATACGATCAGGCCGAAGTTCAATTTGATGGCAGTGACCAGTATCT
CGATCTGACCATTCCTCAGGCCTATGTCCTGAAGAGCTATGGCGGCTACGTTGATCCTTC
CTTATGGGAGTCGGGAATTAACGCTGCCACGCTGTCGTATTCCTTGAACGCGTATCACAC
AAGTTCAGAAGACAACAATAACGATAGTGTCTATGGCGCATTTAACTCAGGTATCAATTT
AGGTGCCTGGCATTTCCGTGCGCGCGGCAACTATAACTGGACAACAGATAGCGGCAGTGA
TTTCGATTTCCAGGATCGTTACCTACAGCGTGATATTCCGGCAATACGTTCACAGATAAT
CATGGGTGATGCCTACACCACCGGTGAAACGTTTGACTCTGTCAACGTCCGGGGTGTTCG
CCTGTACAGTGACAGCCGTATGCTGCCTTCTGCGTTAGCCAGCTACGCCCCGACCATTCG
TGGTGTGGCAAACTCTAACGCCAAAGTTACCGTGACGCAGAACGGCTATAAAATCTATGA
AACCACCGTTCCGCCAGGTGAGTTTGTTATTGATGACATCAGCCCTTCCGGATTTGGTAG
CGAACTGGTTATTACCATTGAAGAAGCGGATGGTTCCAAACGTTCCTTTACGCAGCCCTT
CTCCTCCGTCGTGCAGATGCAGCGTCCTGGCGTGGGTCGTTGGGATTTCAGTGCCGGTAA
AGTTATTGATGACAGCCTGCGATCCGAACCTAATATGGGGCAAGCCTCTTATTACTATGG
TCTGAATAACCTCTTCACGGGTTACACCGGCATTCAGTTCACCGACAACAACTATCTTGC
CGGACTGTTAGGTGTGGGTATTAACACCAGCATCGGTGCTTTTGCGATGGACGTTACCCA
TTCCCGCGCTGAAATTCCGGATGATAAAACCTACCAGGGGCAAAGTTATCGCGTAACCTG
GAACAAACTTTTCCAGGATACCGGAACATCATTTAACCTGGCGGCTTACCGCTATTCCAC
CCAGGATTACCTGGGCCTGCATGACGCGTTAGTCCTCATTGACGACGCGAAACATATGTC
TGCCGATGAAGACAAAAACACCATGCAGACATACTCACGCATGAAAAACCAGTTTACCGT
CAGCATCAACCAACCGTTGAACATCGCCTATGTCGATTACGGTTCGCTGTTTATTTCCGG
TAGCTGGACGGACTACTGGGCGGCGAACAATAGCAGGACTGAATATAACGTCGGTTACAG
TAAAAGCGTTTCGTGGGGTAGCTTCAGCGTTAACCTGCAACGTAGCTGGAATGAAGATGG
CGATAAAGATGACGCAATGTATGTCAGCGTTAGCGTGCCTTTTGAGAATATTTTCGGTGG
CAAACGCAAGACTTCCGGTTTCCGTAATTTAAATACTCAGCTCAATACCGATTTTGATGG
TTCACACCAGTTGAATATGAACAGTTCCGGTAGCAATGAAAGCGGCCAGGTGAACTATAG
CGTCAACACAGGTTATAGCATGGATAAAAATTACGGCGATCTAGCTTCTGTTGGCGGTTA
TCTCAACTATGAATCTGGGTTAGGCGGTATTTCCGCTTCGGCCTCTGCCTCTTCTGATAA
TAGCCAACAGTACTCCATCTCAACCGATGGCGGCTTTGTGTTACACAGCGGTGGTCTGAC
ATTTACCAATAACAGTTTCAGCAGTAACGATACGCTGGTGTTAGTCAATGCCCCAGGCGC
TAAAGGCGCACGAGTCAATAACAGTAATAACGAAATCGATCGCTGGGGATATGCCGTAAC
GTCCGCTGTCAGCCCATACCGTGAAAACCGCGTAGGCCTGAACATTGAGTCGCTGGAAAA
CGACGTAGAACTGAAAAGTACCAGCGCCACCACCGTACCACGTAGCGGGTCCGTTGTTTT
GACCCGTTTTGAAACTGACGAAGGGCGTTCTGCCGTGCTGAATATTACCTCCAACACTGA
CAAACCGATTCCGTTTGCTGCGGAGGTTTACCAGGATGAAGTCATGATCGGCAGTGTGGG
CCAGGGCGGTCAGGCATTTGTGCGTGGTATTAACGACAGTGGGGAATTAACCGTGCGCTG
GTTTGAAAACAACCAAACCGTGGACTGTAAGTTGCATTACCAGTTCCCGGCCCAGCCACA
AACTCTGGGAAGCACTAACACCTTATTACTTAACAATCTTACCTGTCAGGTAGCAAAACA
TTAATATGGAAAATTCTATGAAAAGGATACTACTAACATCCGCGTTAATAGGCCTGGGTT
TACCGGCAGTTGGCTCTGCAACAGATCTCAAAGTCGATTTTACGGCCACTGTACTCGCCA
CCACCTGTACGATAACCATTGAACAAGATGGTGGCCCCGTGGTGACCAGTAGCGGTAACG
ATGAATACAGCCTGACCATTCCTGATGTTGGCCTGGACAAAGTTGTCACTGGTGATGTTG
CAGCGCAAGCCAACTTTAAATTAAAGGCTAAAGATTGCAGCGATGGTTACTCAAAAATTT
TTACCACACTTACAGGAACGTCTGTTTCAGGCAAGTTGATTGTCAATGAAGCAAGCTCTG
GCGCTGCTGGTGTGGGTATGGGTATTAAGCGTAGAGATGCCGCAGACTCGGCTTTCTTCA
CGCCCAATAATACTGACAAATTTGAATGGTCTTCCGATGAGAAAACTAACGGTGTGCCTC
TGACCGTTGCACTGCGCGAAACCACGGCGGGAGCGGGACGCACCGGTGCGTTTCAGGCAA
AAGCCACCTTTAACTTCACCTACGAATAACAGGGACAGCCACCATGAAATTAAAAGTCAT
CGCCACACTGATTGCTACTGTTGCCGTAGGTGCAAGCTTTAATTCAAATCTCGCCTATGC
GAGTACTACTTCTGCATCTTTAACCGTAAACAGTAACCTGACTATGGGTACCTGTAGTGC
TCAGGTTCTGGATTCCAGCAATAAAGCGACAGATACTGTTGCCCTGGGCAATGTTTATAT
TTCTGAGTTAGCGGCAAAAAGCAAAGTGCAACCATTCAAAATCCGCTTCAGTGATTGTGC
CGGTCTTCCAGGGAAGAGTGCTCAACTCGTTTTAGCGCCCAGGCCTGGTACGGGTTGCGC
TGGCGGTCAGTCTAACACTGCCGGCTTTGCAAATTCAATTTCCTCCGGCGCTGGTGGTTC
AAGCAGAGCAGCGGTCGAAGTATGGACGACTACGACCCCCGAGGGAAGCGGCAGTCAGCA
ACTCAGTTGTGTTCAACGAAACGTCATCACGGTTGATCTTTCTAATGCCAGTACAACACA
GCCTTATGATTACGATTTAAGTGCGCGGATGATTATCGCCGATGGAAGAACGGTTAATGA
TGTATTACCGGGCGAGTTTCTTTCTCCCACCACCTTCACTATCACTTATCAGTAATAGCA
GATAAGGATATTAGAATGCTATGCAGGCATCATAAATTTGTATGTTTTTTGGGGCTGGCA
ACAGCCCTCATAACGCCTTTTGCCTATGCTGGTCAGGATGTGAATCTCACCGCGCAGATT
GTCGCCAGTACCTGTCAGGTTGAAGTGAGTAATAATGGCGTGGTGGATCTCGGCAGTGTG
ACCCTGGACTATTTTGCCGACAACGTAACTCCAACAACGGATTATGCGGGTGGCAAGACG
TTTAATGTTAACGTGGTCGCCTGCGATAATATTCAAACGACCCAGTCGCAAATGAAATTA
GATTTTCAGCCGCAGGCAGGTTCGCTTGCGCAGGTGAATAATCAAATTTTTAGTAATGAA
TATGAACAGCAGGCTACCGGGGCAAAAAACGTCGGCATTGTAATATTTTCGGCACAGCCG
AATCAGCAGACCTTTAACGTGCGGGGAACGGACGGTTCCTCAACGGCGATTTATTCTGTC
GCTCCAGGCAATGCTGTTCCGTCAACCTGGACCTTTTATTCCCGTATGCAACGGGTGAAT
AATGCTCTCCCACCCGAGTCGGGGATGGTGAGAAGCCAGGTTATTGTTAATGTTTCTTAC
GAATAATAAGGATAATTATGCAAAGGAAAGGCAATAAACTGTTACGACAGTTATGCAGTG
CAATACTGTTATTTTTTATGTGCTCCTTGTCTGCATCTGCGATGGAATGTTATATAGAAA
AATGGGCGGGGGGAACTTATGACATGGTCATAAACCCTGAGGTTGAAAGTATAACAACGC
AAATGGTATCTTCGCCACAAGAAATAAGCGACATGGTTCATGATACAAATATTAAACTTA
AGGACAGGAACGGTGAGACGATTGGATGTAAGTCCGATATAGGGGGTACTACTTCAGTAC
ACTTTCTTAACACTGCGGATGCAGGTTTGTTATCAACCTATGTTTCGAAAGATAATGGCG
CATTATTAAAAACAACAGTTCCTGGTATTGTCTACTCCGTAGAATTGGTATGTATAAGCT
GTGGTGCTGCAGATGAACTTGATTTAGTTTTACCTGCACAAAGCGGCGCAGATAACTTCA
TACCGGCCAGCGATACCAAGTGGGCTTATGAATACAGTGACAACGACTGGTATTTGCGTT
TTCGTTTTTACTGGACGCCGGAATTTAAACCTCAAAATGGGGTTTTCGAAGGATATGCCT
TGCCAGGAAAAATTGCTTCCTGGTATATAGGTGATAATACCCAGGCATGGATAAACTTTA
CTGTTCAGGATAGTGCCGTTCACTTTTACGTTGACCAACCAACCTGTTCAATGATTACCC
TGGATCAGGACAAAGGCAATGTGAGTGGCACAGAAATCCAGTTAGGTAACAGTTACGTAT
CCGAAGTTAAAAATGGTCTTACCCGAGAAGTTCCCTTTGCTATCCGTGGTGAGTATTGTT
ATGCCAGCAAGATTACGGTTAAGCTGACGGCTGCAAATGCAGCCACTGACAAAAATCTGG
TGGGTAAAACAACTGGCTCTGCCACAGGCGTGGCTGTAAGAGTTAATTCAACTTATAATG
ATAGCAAAGTGTTATTAAAACCAGATGGCGTTGCTTCCATTGATTATAACTTCCCTGTCT
GGTCGAATAACTTGTTGTCATTCCCTTTTACAGCACAACTCGTCCCCGATGGCAGTGGTA
AACCTATCGGAACAGGAACATTCTCCGGTAACGCGACCTTCTCCTTTACCTACGAATAAG
TAAAACGTTATTCCCTCCTCATCGCACCAGAGTTCTGCTCTGGTGCGAACGTTTTCCCCA
CACTAAAAACCATTGCCCCCCTGATTTCGGCTGTTAGAATGCGAACAGATCTGACTTTAG
CCATCAGGACACGTTATGAAACCGACCACCATTGCTTCATTGCAAAAATGCAAACAGGAA
AAAAAACGTTTCGCGACCATCACCGCTTACGACTATAGCTTCGCCAAACTCTTTACCGAT
GAAGGACTTAACGTCATGCTGGTAGGCGACTCGCTGGGCATGACGGTTCAGGGGCACGAC
TCCACCCTGCCAGTTACCGTTGCTGATATCGCCTACCACACTGCCGCCGTACGTCGTGGC
GCGCCAAACTGCCTGTTGTTGGCTGACCTGCCGTTTATGGCGTATGCCACGCCGGAACAG
GCCTTTGAAAATGCCGCCACAGTAATGCGTGCCGGAGCCAATATGGTCAAAATCGAAGGT
GGCGCATGGCTGGTGGAAACCGTGCAGATGCTGACTGAACGCGCGGTTCCGGTATGTGGT
CATTTAGGTTTAACGCCGCAGTCAGTGAACATTTTCGGCGGCTACAAAGTACAAGGGCGT
GGCGAGGCAGGCGATCAACTGCTCAGCGATGCATTAGCCTTAGAAGCCGCTGGTGCACAG
TTGCTGGTGCTGGAATGCGTACCAGTTGAACTGGCAAAACGTATTACCGAGGCGCTGGCT
ATTCCGGTTATCGGTATCGGCGCAGGTAACGTCACCGACGGGCAGATCCTCGTCATGCAC
GACGCCTTCGGTATTACTGGCGGTCATATCCCTAAATTTGCCAAAAATTTCCTTGCTGAA
ACGGGCGACATCCGCGCGGCTGTGCGGCAGTATATGGCTGAAGTGGAGTCCGGCGTATAT
CCGGGCGAAGAACACAGTTTCCATTAAGGAGTCACGTTGTGTTAATTATCGAAACCCTGC
CGCTGCTGCGTCAGCAAATTCGCCGCCTGCGTATGGAAGGCAAGCGCGTGGCGCTGGTGC
CTACTATGGGTAACCTGCACGATGGCCATATGAAGCTGGTCGACGAAGCCAAAGCCCGCG
CCGATGTGGTCGTCGTCAGTATTTTCGTTAACCCAATGCAGTTTGACCGCCCGGAAGATC
TGGCACGTTATCCACGGACCTTGCAGGAAGACTGCGAAAAGCTAAACAAACGTAAAGTGG
ATTTAGTTTTCGCCCCTTCGGTAAAAGAGATCTACCCGAACGGTACTGAAACCCACACTT
ACGTTGACGTTCCTGGTCTTTCCACCATGCTGGAAGGTGCCAGCCGTCCTGGCCATTTTC
GCGGCGTTTCGACTATTGTCAGCAAGCTGTTCAACCTGGTCCAGCCGGACATCGCCTGCT
TCGGTGAAAAAGATTTTCAGCAACTGGCGCTGATCCGCAAAATGGTTGCTGATATGGGCT
TTGATATTGAGATTGTCGGTGTGCCAATTATGCGCGCCAAAGACGGTCTGGCGCTGAGTT
CCCGTAACGGTTATCTGACAGCGGAACAACGCAAAATTGCGCCCGGTCTGTACAAAGTTT
TAAGTTCAATTGCCGACAAATTGCAGGCTGGCGAACGGGATCTCGATGAAATTATTGCTA
TTGCCGGGCAAGAACTGAATGAAAAAGGCTTCCGCGCCGATGATATTCAGATTCGCGATG
CCGACACGTTGCTGGAAGTCTCTGAAACCAGCAAACGAGCTGTGATTCTGGTAGCCGCCT
GGCTTGGCGATGCCCGCCTGATCGACAACAAAATGGTCGAACTGGCGTAATACTTAACTG
GCGCTACGGCTGATGGCGCCAGTTATTAATTTGCCCTACGTCATGGCGATGACGTCTGTA
AGTGATTATTCATATCGCTGGCAATTTAGTTAGAGTTAATTAGCTTATCAATCTCTGTAA
GAGGTAAAGTTGTCACCTCTGCAACGTCTTCCCGAGACATCCCTTTACTTAGAAAACGCT
GGGCGAATTCCTGTCTTACCTTCTGGAGTTCCTCTTGATATCCCTTCTGAAATCCCTTCT
CTTCAAACCACTGCGCCAACGTCTGCCTGGTTTCTCTCCGTGTCTTTATTTCCATAGGTT
CCCTTAATTATCTGGTCAGTTAACAATAACAATTATCTGGCTATAACTGATGATGCAGAC
AACTTAGTTAATCAGCTTATCAATCTCGGCAAGGGGTAAATTTGCCATCTCTGCAACGTC
TTCCCGAGACATTCCTTTATTCAGAAGACGCAGGACGAATTCTTGCCTTTCCTCCTGTCT
TCCCCTCTCTTCAAACCACTGCGCCAGCGTCATCATAGACTCCCCTCCCGTTTCCCTGTC
TCTCAGCACACCATAAAACAAATCCGCTTGTTCAGTATGACCGCGTTGCAGCATATAGTT
TTGCATGGCAACTAACTGACTTCCGCTAGTGTACCCTTCGTCAATCAGCGTGACCAGTTG
CTCCAGCAATAACATTAAGTCGCGCTGGCGAATATGTTTTTGCAGTAGTTCGAGAATCGC
AATCCGCCGATGTTGCATGATTTCGTCATCCGGTGTGATGGTGATATCCACCAGCGGGAA
AGGACTGTTATAGACGCGTCGCGCCAGCTCCGGAGAGTAAAACATATCAAACCAGCACAT
TGAGAGCGGATAAGGTGTGGCCTCGCCCTGATAAAAGAGAATCGGCACTACCAGCGGTAG
TTTGTCGTGATCCGCCTCCAGATGCCGATGCATGGCGGCTATAGAATAACGCATCATGCG
AAAGGCCATTTTCTTATCCGGCTTGCTTTGGTGTTCAATCACAACATGCAGATAACCGGG
ATTGCCCTGCATTTGCACGGAATAGAGCACGTCCGTGCTGTGTCCTTTCAGGCTCTCTTC
AATGAAACTCCCCGACTCTAAATGAAGCGTGTTGAGGTCACAAAGTTCGCGTAATTCCAC
TGGCAAATGTATCTCCAGAAAGTCGCGAGCCGTCTCCGCATGCATTAAAAATTGTTTAAA
TACCGCGTCATGCGGTGTAGTACTCGGTGCATCCATCTTCCCTGTCTTCCGTGTTGTCTT
GCGTGAAGGCAGTATCCAGCCAAGGCGCGCCGTCGTCAGCCACCTCTTTATTGTTTACCG
AGCAGCGTTCAGAGAAATATCAATTCGTTACAGGCGATACATGGCACACTTCGGCGCGGT
ACGCAAACTGCTGATGCAAATGCCGTCAGATGAGTAGACACTAAACAAAAATCGGGCAAT
ACTGCGTGAGAATTTCCTCAAAGCAGGCACCGCCTGCTTCGTTAACGACAGGGTAGAAAG
GTAGAAGTTATGATTCGCACGATGCTGCAGGGCAAACTCCACCGCGTGAAAGTGACTCAT
GCGGACCTGCACTATGAAGGTTCTTGCGCCATTGACCAGGATTTTCTTGACGCAGCCGGT
ATTCTCGAAAACGAAGCCATTGATATCTGGAATGTCACCAACGGCAAGCGTTTCTCCACT
TATGCCATCGCGGCAGAACGCGGTTCGAGAATTATTTCTGTTAACGGTGCGGCGGCCCAC
TGCGCCAGTGTCGGCGATATTGTCATCATCGCTAGCTTCGTTACCATGCCAGATGAAGAA
GCTCGCACCTGGCGACCCAACGTCGCCTATTTTGAAGGCGACAATGAAATGAAACGTACC
GCGAAAGCGATTCCGGTACAGGTTGCTTGATTGTTATCCCTGCGGCTGGTTACTCACCAG
CCGCGACATCGTCTCGAGCGAATCCGTTCTTAAGATATAAAGTCGTTTTAGTAACAACGG
ATTATCCCCCGGTTTTACTTTGCCTTTCATGGTTGTCACCGCCAAGTGAAATCCGGCATC
GTTTGCTGCCTTCACGGCTTTGTCATTAAATCCGCCAAACGGATACGAAAGATACCAGAC
ATGCGGATTAAATTGCGCCAGAGCGCGGCGTGAACGTGCAAAATCAAACAGAATATTGTG
CTCACTACGACTCAGTAATATGGGGCGGCGATAGCCATCCACCCGATGCAAAAAATGGGT
ATGTGACTGAAAATCAAAAACATCGCGAATTTCGTTAAGCTCAGAAACGCTCATAAATTG
CAGCGATTTTGGGTTCCACTTCTGCGGGTGACGTTTGATGCGTGAGGTAACAATAAACGC
CGTCGCCTTCATGCCATATTGTTTCAACACAGGATACGCATAGCGGCTCACCGACTTGAG
GCCATCATCAAAGGTAATCACCACCGCTCGCGCAGGGAGATTGATCTTATTCTTCACGTA
GCCTTCCAGCTGCACCATGCTCAGTGTCGCGTATCCCCTGTCGCGCAGCCAGGCCATCTG
GTTATTGAAAGCGCGTACCGAGGTGGTCGTCGAAGTGTGGCGAAAACGGGTGTTTTCTTC
GTCGCGCAGAATATGATGATAGGTTAGCACCGGAAGGCCATTATCGGGTTGGGCATCCAG
CGCGCTGATATAGGCCAGTCGATCGCCAATACGGACCTGATACCAGGTTTGATTTAACCT
GTCTTTCAGTTTATGCAAAATCGGGTAGCGCAAATTGTCCGCCAGTACCCCAAATGGCGC
ACTGCCCACACTCGGCGCGTTATAGACCGGCGTATCTTTCCAGGTAACTAAGTTCTGATT
ACTCAGCGGCTTGTTGAGGTCACCCAAACCGTCTTCAACTTTTCGTCGCCCCTGAACCGG
CTCGAGATGCCCTTTATCGATAAACCCTTTACCAAAGCCAAAATTAAATGCGTAATAACT
TGCGGCAGTGGGCTCCACGGCAATGATTTGTCCGGCCCGAATATTCCCCACGGTCACCAT
CTTGTCGCCAATTTGCGCCCAGACCGCAGCATTTTCGATGGTTTGCATATAACGGGCAGG
TAACGCGGCACTGACACTTGCGGTAAACAGCATCAGCAGGAGAATAACAGCTTGTTTGTA
CATGAAAAAATAACCGAGGGTGAAACAACGCTTTTATTGTAGCAAAAGCGCTATAAGAAT
CGTGGGTTAATACTCATACAAATTATGTTTGAGGACGAAAGGTGGATTTTTTTGTTGTTG
GTGCCAAAGACTACTCACCTCCGGCCCACCCAGTTCGACAATACGCTCGCGAAACTCTGA
ACTGGTCATGGTTTCACGGCAAGCCATCATCTGTTCAATTAACGGTAACGTGACACCAGA
AATCACTTCGCAACGGGAGTGTTTGTGGCTTAATAATGAAGCCACGCGGTACGGTGGCGC
TCCGGCTATATCGGTTAAGAAGATGACACCCTCACCAGAGTCCGCTTCATGCAGAGCATC
GCACATCATGCGGCTGAGCATATTAGAGCTTAACCCACGCCAGAAATTCACGGCCCGGCA
CTGAAGAAGTGCCCCATGTTTTTTCTCCAGCGCATCCAGTATCTCTTGCGCCCGGTCATC
GTGACAGGTAATTACCCAACCTAACATCGCCTTCCTCCTTAGCCGAAAATCAGTCTACCC
TGACCATTGTTGATAAAGGGTGATAGCCGTCAAAACTCCTCTCCCCCAAATCCAGAGGAG
AGGAAATAGCCTTAGCTACGCAAACCACGTCCACGTTGGATCAGCGACCAACAGATCAAA
TAAAACGCCACAATAAAGACCACCAGTACGCCAAAGGTAGTGACCAGCGGAACATCATTG
ATACCGAGGAAGCCGTAGCGGAAACCACTGATCATATAAACGATTGGGTTCAGGTGCGAC
AGCCCTTGCCAGAACGGCGGCAACAAAGTCAGTGAGTAAAAGACCCCACCCAAATACGTG
AGTGGCGTTAACACAAAGGTTGGCACCAGGCTGATGTCATCGAACGTTTTGGCAAACACA
CCGTTCAGCAAACCCGCAAGGGAGAACAACACCGCCGTGAGCACCAGGGTTAAGGCAACG
AATACCCATGAATGCACCTGAAACGGCACAAAAAACAGTGAAATTGCCGTCACCAGAATG
CCAACAAACAGACCACGCGCCACGCCACCGCCGACATATCCGGCAATAATGACGTGAGTC
GGAACCGGCGCTACCAGCAGCTCTTCAATATTACGCTGGAATTTGGCACCAAAAAATGAT
GACGCGACGTTAGCGTAGGCGTTGGTGATCACCGACATCATGATCAGCCCCGGTACGATG
AACTGCATGTAGCTGAAGCCATGCATATCGCCAATACGCGAACCAATCAGGTTACCGAAG
ATAATAAAGTAAAGGGTCATGGTGATGACTGGCGGCACCAGCGTCTGCACCCAGATACGC
ATAAAGCGATGGATCTCTTTCGCCCAGATGCTTTTTAGCGCCACCCAGTAAAGATGCATC
ATGCGCGATCTCCTTGTTTTTCATTAACCAGTGAAACAAACAGCTCTTCCAGACGGTTAG
CTTTGTTACGCATACTTAATACCTGAATGCCCTGCTCACTTAACTGCGTAAATACGCTGT
TGATCCCCTGCTCACGCAGCACTTCAACTTCCAGCGTCGCGGTATCGACCAGTCGATACT
GATAGCCATCGAGCTTCGGTAACGGACTTTTCGGTGCGAGATCGAGAATAAAGGTTTCCG
ATTTCAGCTTCGCCAGCAGCGCCTTCATCGAGGTATTTTCCACCAGCTCACCATGTTGAA
TAATGCCGATATTGCGGCACAGCATTTCTGCTTCTTCCAGGTAGTGTGTGGTGAGAATGA
TGGTGGTGCCTTTGTCGTTTAAATCCTTCAAAAAGCCCCACATTGAGCGGCGAAGCTCAA
TATCCACGCCTGCCGTTGGCTCGTCGAGAATCAGCAGTTTAGGTTCATGCATTAACGCAC
GGGCAATCATTAAACGACGCTTCATCCCGCCCGATAACATGCGCGCACGTTCGTTGCGTT
TTCCCCATAAATCGAGCTGCTTAAGATACTTTTCGCTGCGGATGTACGCTTCTTTGCGCT
CCACGCCGTAGTACCCTGCCTGATTCACCACAATTTGCTGCACGGTTTCAAACGGGTTGA
AGTTAAATTCCTGCGGCACCAGTCCCAACTGACGTTTAGCGTTCACGACATCCTTCTCGA
GATCGTAACCAAATACGCTGACCCGCCCGGAGGTTTTATTTACCAGAGAGCTGATAATAC
CGATAGTGGTCGATTTCCCGGCCCCGTTCGGCCCGAGAAGCGCATAAAAATCACCCGCTT
CGACCTGCAAATCTATTCCACGAAGCGCCTGAACGCCGCCTGGATAGGTTTTTTTAAGCT
GTTGAAGTTCCAGTGCAATGGTCATAAATTTTTACTTACCTTACGTTCTTACACTTTATC
TGTGGTTTAAATCGTCCCGGAGTTGCCCTATATTAGCCAAACGTAATTATTTGGTTACAG
GTCGTTAACCTCCATGAAAGACATAGATACACTCATCAGCAACAATGCACTATGGTCAAA
AATGCTGGTGGAAGAGGATCCCGGGTTTTTTGAGAAACTGGCACAAGCGCAAAAACCGCG
CTTTCTATGGATTGGATGTTCCGACAGTCGCGTTCCTGCAGAACGTTTAACCGGTCTTGA
GCCGGGCGAACTCTTTGTTCACCGTAATGTTGCTAACCTGGTCATTCACACCGACCTGAA
CTGCCTTTCCGTGGTTCAGTATGCAGTGGATGTACTCGAAGTTGAACACATTATTATCTG
TGGCCACTACGGTTGCGGCGGCGTACAAGCCGCAGTTGAAAACCCGGAACTGGGGCTTAT
CAACAACTGGCTGCTGCATATCCGCGATATCTGGTTCAAACATAGCTCATTGCTCGGCGA
AATGCCGCAAGAGCGCCGTCTGGATACCTTGTGTGAACTGAACGTCATGGAACAGGTGTA
TAACCTGGGCCACTCCACCATTATGCAATCAGCGTGGAAACGCGGGCAGAAAGTTACCAT
TCACGGCTGGGCCTACGGTATTCACGACGGCTTGCTGCGTGATCTGGATGTCACAGCGAC
CAACCGCGAAACCCTTGAGCAACGTTACCGTCATGGGATTTCCAACCTCAAGCTGAAACA
CGCCAACCACAAATAAAAATGCCATGCCGGATGCAACACATCCGGCAACTTCACACTTAC
TCGTCCAGCAGAATCACTTTGCCGATATACGGCAGATGACGGTAACGCTGTGCGTAATCA
ATGCCGTAACCCACCACAAACTCATCCGGGATCGAGAAACCGATAAATTCTACCGGGACG
TTCACTTCACGACGGGACGGTTTATCCAGCAGCGTACAAATCGCCAGCGACTTCGGTTCG
CGCAGGCTTAAGATCTCACGCACTTTCGACAGTGTATTCCCCGAGTCGATGATATCTTCA
ACAATCAGCACGTCCTTGCCACGGATATCTTCATCCAGATCTTTGAGGATTTTCACATCA
CGGGTGGTGGACATGCCGCTACCGTAGCTGGAGGCGGTCATAAAGTCGACTTCATGAGAT
ACCTGAACTTCACGGCACAGGTCCGCCATAAACATAAATGAGCCACGCAGCAGACCCACC
AGCACCATATCGCTGCCGCTGTCTTTGTAACGCTCAGTAATCTGACGACCCAGTTCGGCG
ATACGCGCTTTAATCTCCGCTTCGGGGATCATTACTTCTACAGTATGTTTCATATCTCTA
ACCATATGATTTAAAAACAAATCACTTCGCACGGGCAGGTTTTGGCACCGCAACAAAGCG
CAAGACACGCAGTATACCAGTAAAACTATTCATTCGCGGAATCTGTTAATAAAGCTCGAA
TTGTGATGACGGTCACACATGTTAAAACCTATAATTAATTGCTACTAAAATATTAATGAA
TTGAAATGGTGTCTCTTTATGGCAATTAACAATACAGGCTCGCGACGATTACTCGTCACG
CTAACAGCCCTTTTTGCAGCGCTTTGCGGGCTGTATCTACTCATTGGCGGAGGCTGGCTG
GTCGCGATTGGCGGCTCCTGGTACTACCCTATCGCTGGCCTTGTGATGCTCGGCGTCGCC
TGGATGCTGTGGCGCAGTAAACGTGCCGCGCTTTGGCTATACGCCGCCCTGCTGCTCGGC
ACCATGATTTGGGGCGTCTGGGAAGTTGGTTTCGACTTCTGGGCGCTGACTCCGCGCAGC
GATATTCTGGTCTTCTTCGGCATCTGGCTGATCCTGCCGTTTGTCTGGCGTCGCCTGGTC
ATTCCTGCCAGCGGCGCAGTTGCCGCACTGGTGGTGGCACTGCTGATTAGCGGTAGTATC
CTGACCTGGGCCGGATTTAACGATCCGCAGGAAATCAACGGCACCTTAAGCGCCGATGCC
ACACCTGCGGAAGCTATCTCACCCGTTGCCGATCAGGACTGGCCTGCCTATGGTCGCAAT
CAGGAAGGTCAACGCTTTTCACCTCTGAAACAAATTAACGCCGATAACGTCCATAATCTG
AAAGAAGCCTGGGTGTTCCGTACTGGCGATGTGAAGCAGCCGAACGATCCGGGCGAAATC
ACCAATGAAGTGACGCCGATTAAAGTGGGCGACACCCTTTACCTGTGTACCGCTCACCAG
CGCCTGTTTGCGCTCGATGCCGCCAGCGGCAAAGAGAAATGGCATTACGATCCTGAGCTG
AAAACTAACGAGTCTTTCCAGCACGTAACCTGCCGTGGCGTCTCTTATCATGAAGCCAAA
GCAGAAACGGCTTCGCCGGAAGTGATGGCGGATTGCCCGCGTCGTATCATTCTTCCGGTC
AATGATGGTCGACTGATTGCGATTAACGCTGAAAACGGCAAACTGTGCGAAACCTTCGCC
AATAAAGGCGTGCTCAATCTGCAAAGCAATATGCCAGACACCAAACCGGGTCTGTATGAA
CCGACTTCGCCACCGATTATCACCGATAAAACCATCGTGATGGCAGGTTCAGTTACCGAT
AACTTCTCAACCCGCGAAACGTCTGGTGTGATCCGTGGTTTTGATGTCAACACCGGGGAG
CTGCTGTGGGCTTTTGATCCGGGCGCGAAAGATCCGAACGCAATCCCGTCTGACGAACAC
ACCTTTACCTTTAACTCGCCAAACTCGTGGGCACCAGCGGCCTATGACGCGAAGCTGGAT
CTGGTGTATCTGCCGATGGGCGTGACCACGCCGGATATCTGGGGCGGTAACCGCACACCG
GAACAGGAACGTTATGCCAGCTCGATTCTGGCGCTGAATGCCACAACCGGGAAATTGGCG
TGGAGCTACCAGACCGTTCACCACGACCTGTGGGATATGGATCTTCCGGCACAGCCGACG
CTGGCGGACATCACCGTTAATGGTCAGAAAGTGCCAGTTATTTACGCTCCGGCGAAAACC
GGCAACATTTTTGTGCTCGATCGTCGCAATGGTGAACTGGTGGTTCCTGCCCCGGAAAAA
CCGGTTCCCCAAGGCGCTGCCAAAGGCGATTACGTAACCCCAACTCAACCGTTTTCTGAA
CTGAGCTTCCGTCCGACGAAAGATTTGAGCGGAGCGGATATGTGGGGCGCCACCATGTTT
GACCAACTGGTGTGCCGCGTGATGTTCCACCAGATGCGCTATGAAGGCATTTTCACGCCG
CCATCTGAACAGGGTACGCTGGTCTTCCCTGGTAACCTGGGGATGTTCGAATGGGGCGGG
ATTTCTGTCGATCCGAATCGTGAAGTAGCAATTGCCAACCCAATGGCGCTGCCGTTTGTT
TCGAAACTGATCCCTCGCGGTCCGGGTAACCCAATGGAGCAGCCGAAAGATGCCAAAGGC
ACGGGTACGGAATCCGGCATTCAGCCACAGTACGGTGTACCGTATGGTGTCACGCTCAAC
CCGTTCCTCTCACCATTTGGTCTGCCATGTAAACAGCCAGCATGGGGTTATATCTCGGCG
CTGGATCTGAAAACTAATGAAGTGGTGTGGAAGAAACGTATTGGTACGCCGCAGGACAGT
ATGCCGTTCCCGATGCCTGTACCGGTGCCGTTCAATATGGGTATGCCGATGCTGGGCGGG
CCAATCTCCACGGCGGGTAACGTGCTGTTTATCGCCGCTACGGCAGATAACTACCTGCGC
GCTTACAACATGAGCAACGGTGAAAAACTGTGGCAAGGTCGTTTACCAGCGGGTGGTCAG
GCGACGCCAATGACCTATGAAGTGAATGGTAAGCAGTATGTGGTGATCTCCGCAGGCGGT
CACGGTTCATTTGGTACGAAGATGGGCGACTATATTGTGGCTTATGCGCTGCCGGATGAT
GTGAAGTAAGACTTGCTCAGATTGCTGACAACGTGCGCGTTGTTCATGCCGGATGCGGCG
TGAACGCCTTATCCAGCCTACAAAATTGTGCAAAATCAATGGATTGCACAGGTAGCGTAG
GCCTGATAAGCGTAGCGCATCAGGCAGATTTGCGTTTGTCATCAGTTTAATGCCCGGAGA
GATCCGGGCATATTCCCGAATACGGTCTTTTTATACCGTAAACCCTAACATCATCCCCGT
ATCTTCATGCTCCAGCAGATGGCAGTGCGCCATATAAGCATGTTCTTTCGGTGCGTCGTG
ATTAAACTTCACCAGCACTTCGCTGACATTACCTTCTACCTTAACGGTATCTTTCCAGCC
CGCGCGATGCGTCGCTGGCGGTTTGCCATTTTCTGACAAGATACGGAACTGCGTGCCGTG
AATATGGAACGGATGCAGCATCATGTCGCCCACGCCAGAGATAACCCAACGTTCGTACTG
CCCTTTCGCCGCCGCAAACATCGGCTTATTCATATCAAACGCCTGACCGTTGATTTTATT
GGCATGGTGGAAATCGAACTTCCCGCCGTGGTTCATATGATTCATATTGCCGTGCCCCAT
ATGGCCCATCATCTGGCTGTGATCCATTCCGGCCATCGCCTGATCGCCATATTTCTCCAT
TAGCATCTGCATCCCCATCATATCTAGCATCGGGTCCATAGAAAGTTGCAGCTTGCGTAC
CGTCAGCCCTTCCAGCGAAGGTAACGCAGGCAGGCTACTTAATGTGTCTGGCAAAGCACC
GGAGGCACTAATAGCAATCGGCTGAATCCGCATTACCGGATGCGGCTTGTCAAACGGCGC
AATCGCCATCCCCATCTGGCTGACCGGCAGCGTCACCAGGTCAAAGGGTTTGTTGTCGTT
AACCTCCACCAGCACTTCAAAACGCTCGCCCATCAGCACCGGCAGCTCGTTCACCTTCAC
CGGTTCAGGTAGCAGACCACCGTCGCTGGCAATCACATAAAGCGGGCGATTGTCGCTGGT
GGCGAAATTGAGCGAGCGGGCATTACAGCCATTGAGCAAACGCAGGCGCAGCCAACCACG
CGGGGCAGCGTGTTGCGGGTAGATTGCACCGTTGGTCAGCAACGTATCGCCAAACCAGCC
CACGGCGGCGGTCATCACATCCAGTTGATAATCAATCTGCCCGTCGGCGCTAAATTTCTT
ATCCTGAACGATCACCGGAACATCATCGATACCCCACTGTTTTGGCAGCATTAATTTCAG
GATCTCGTCATCTTCAATTACCACCAGACCAGCCAGCCCCATCGCCACCTGTCGCCCGGT
CTTGCCATGTTGATGTGGATGGAACCAGCAGGTAGCGGCAGGTTGATCAACGTTCAACGT
CACCGAGCGCTTGCCACCTGGCGGAATAATTCCCTGTGGGCCGCCGTCGACTTCACCCGG
TACTTCCAGCCCGTGCCAGTGCAACGTCGTCTCTTCCGTCAGTTGGTTATAGATATCAAC
CGTTACCGCTTTGCCGCGCTGTAATTTCACCGCCGGCCCCAACAGATTGCCGTTATAGCC
CCAGGTAGTTGCAGTTTTCTCGCCAAAGGTAGACTGACCTGCGCCAATAGTTAACTGAAT
GCGATTACGGGCATCGGTCGTGAGCAAATCAGGGATCGGTAACGTTGGGCGTTCCGCCGC
AAAAACTGCACGGCTCCACAGTGGCAAGGCTGAAGCCACACCCAGTGCGACGGAATATTT
CAAGAAATCACGACGTTGCATAGTTATTTCCTTATTCTTAAGCAGGCGAAACAAAATCAA
ACGTTGAGCATAGTCCTTCCCCTTACGGGAAGGTCAAGCCGCAGACACAATTTAATCGAC
AATAATGGTCGTCGCCTCGCTCGCAGTGTGCTAACGTTTATCTTCTTTAAGCCCCTGGTA
GAAGCAATGAAGACGTTTTTCAGAACAGTGTTATTCGGCAGCCTGATGGCCGTTTGCGCA
AACAGTTACGCACTCAGCGAGTCTGAAGCCGAAGATATGGCCGATTTAACGGCAGTTTTT
GTCTTTCTGAAGAACGATTGTGGTTACCAGAACTTACCTAACGGGCAAATTCGTCGCGCA
CTGGTCTTTTTCGCCCAGCAAAACCAGTGGGATCTCAGTAATTACGACACCTTCGACATG
AAAGCTCTCGGTGAAGACAGCTACCGCGATCTCAGCGGCATTGGCATTCCCGTCGCTAAA
AAATGCAAAGCCCTGGCCCGCGATTCCTTAAGCCTGCTTGCCTACGTCAAATAATCCCTG
ATACCTTTTTGTAGAAATATTGACCGTGCATCCGCGGTCAATGTTAGCTATTATGTTGCG
CCCTTTTTTTACGGGTGTTAACAAAGGAGGTATCAACCCATGGCCGAAAAAAAACAGTGG
CATGAAACGCTACACGACCAGTTTGGGCAGTACTTTGCAGTAGATAACGTTCTGTATCAT
GAAAAGACCGATCACCAGGATTTGAGCATTTTTGAGAACGCTGCATTTGGTCGCGTAATG
GCGCTGGATGGCGTAGTACAAACCACCGAACGCGACGAGTTTATCTATCATGAGATGATG
ACCCATGTTCCGCTACTGGCCCACGGTCACGCGAAACATGTGCTGATTATCGGCGGCGGC
GACGGCGCCATGCTGCGTGAAGTGACCCGACATAAAAACGTTGAGTCAATCACGATGGTG
GAAATCGATGCGGGTGTCGTGTCGTTCTGCCGTCAATATCTGCCCAACCATAACGCCGGT
AGCTACGACGATCCGCGCTTTAAGCTGGTGATCGACGATGGCGTCAATTTCGTTAATCAA
ACCAGCCAGACCTTTGATGTTATTATCTCCGACTGCACCGATCCTATCGGGCCCGGCGAA
AGCCTTTTCACTTCGGCATTTTATGAAGGCTGCAAACGTTGCCTGAATCCTGGCGGTATC
TTCGTCGCACAAAACGGCGTCTGCTTTTTACAGCAGGAAGAAGCCATCGACAGCCATCGC
AAACTCAGCCATTACTTCAGCGACGTTGGCTTTTATCAGGCGGCGATCCCGACCTATTAC
GGCGGTATCATGACTTTTGCATGGGCGACAGATAACGACGCCTTACGCCATCTCTCAACC
GAAATTATTCAGGCGCGTTTTCTCGCCTCTGGCCTGAAATGCCGTTATTACAATCCGGCA
GTCCATACGGCAGCTTTTGCCTTACCCCAGTATCTGCAAGACGCACTGGCTTCACAGCCG
TCCTAAGGAGAAGATAAGAAATTGAAAAAACTGAAACTGCATGGCTTTAATAATCTGACC
AAAAGTCTGAGTTTTTGTATTTACGATATCTGCTACGCCAAAACTGCCGAAGAGCGCGAC
GGTTATATTGCTTATATCGATGAACTCTATAATGCCAACCGTCTGACCGAAATCCTGTCA
GAAACCTGTTCCATTATCGGGGCTAATATTCTTAACATCGCCCGCCAGGATTACGAACCA
CAGGGTGCCAGCGTCACTATTCTGGTGAGTGAAGAACCGGTTGACCCGAAACTCATCGAC
AAAACAGAACACCCCGGCCCACTGCCAGAAACGGTCGTTGCCCATCTCGATAAAAGTCAT
ATTTGCGTACATACCTACCCGGAAAGTCATCCTGAAGGCGGTTTATGTACCTTCCGCGCC
GATATTGAAGTCTCTACCTGCGGCGTGATTTCTCCGCTGAAGGCGCTGAATTACCTGATC
CACCAGCTTGAGTCCGATATCGTAACCATTGATTATCGCGTGCGCGGTTTTACCCGCGAC
ATTAACGGTATGAAGCACTTTATCGACCATGAGATTAATTCGATTCAGAACTTTATGTCT
GACGATATGAAGGCGCTGTATGACATGGTGGATGTAAACGTCTATCAGGAAAATATCTTC
CATACCAAGATGTTGCTTAAAGAGTTCGACCTTAAGCACTACATGTTCCACACCAAACCG
GAAGATTTAACCGACAGCGAGCGCCAGGAAATTACCGCTGCGCTGTGGAAAGAGATGCGC
GAGATTTATTACGGGCGCAATATGCCAGCTGTTTAACGGCTCTGGCGGAGCTCCCAGGCT
CCGCCAGATTTATTTACTTCTGCTGCACGAAATTACGGTAAGCCGCCACCACCTGCAGAA
AATCCTCAACGCCGCATAGCGACAGGCTTTCTTCGTCGTAGTAGTTCATCCCCTCTTCCA
TTTCATCGCCAGCGAATTCCAGTTGATTGGCGCGAACCATCACCTCTTCACCGTCCATCC
ACAGGGTGTATTCGTGCCCTGCCCGTTGCCAGGACCGTTCGCTACCTTTCAGTGCGTGCG
CTGCTTGTTCCACTTCATCAAGCAAGGCCAGGTTTTCTTTCACCTCTTCATTAAACCAGT
GCCCGACCACTTCATGCCCCATGGACATACGCACCTTTACCACTCCGGTAATATCGCGCA
GAAATTCGTAATCCATAGTGTGTTCCTCTGCTCCCGGCAATGCGCCGAAATCGCATTGCG
CCATTGATGTAATTATCGCAGCCTTACCGGAGAAAAACAGCGGAACGGCGATGGTTTAGA
AATAAAAAATGCCCGGGAATCTCATTCACCGGGCATTGTGTCGTTTATGCGCAGCGCGTG
CGCTGACTTTTTAAACTGCAGTCTGGAAAATCACACCATCGGCTTTTTCAGTGTACTGAG
AAAGCTGGTTGAAGTTCAGGTAACGGTAAGTATCAACGGCAGTTTTATCCACCTGCGCCA
CGTAGGTCTGGTACTCTTCCGGCGTCGGCAGTTTGCCAATCAGCGCCGCAACAGCAGCCA
GTTCCGCAGAAGCCAGGAAGACATTCGCGCCAGTCCCCAGACGGTTCGGGAAGTTACGGG
[truncated: 5,030,007 more chars]
