# Supplementary material for: Escherichia coli ST302: Genomic Analysis of Virulence Potential and Antimicrobial Resistance Mediated by Mobile Genetic Elements
Source: Front Microbiol. 2020 Jan 21;10:3098. doi: 10.3389/fmicb.2019.03098 (PMC6985150; doi:10.3389/fmicb.2019.03098)
Supplement: DATA S2 — ST302 SNP analysis. [file Data_Sheet_2.ZIP › SNP_Analysis/ST302_SNP/SNP_analysis/snippyout/ST302/EA8393-Porcine-ST302.out/snps.gff]

##gff-version 3
EA2454	snippy:4.3.6	variation	617	617	.	.	0	note=snp C=>T T:75 C:0
EA2454	snippy:4.3.6	variation	977	977	.	.	0	note=snp T=>C C:106 T:0
EA2454	snippy:4.3.6	variation	4901	4901	.	.	0	note=snp T=>C C:101 T:0
EA2454	snippy:4.3.6	variation	11382	11382	.	.	0	note=snp A=>G G:121 A:0
EA2454	snippy:4.3.6	variation	11615	11615	.	.	0	note=snp T=>G G:89 T:0
EA2454	snippy:4.3.6	variation	19381	19381	.	.	0	note=snp C=>T T:111 C:0
EA2454	snippy:4.3.6	variation	22484	22484	.	.	0	note=snp C=>T T:75 C:0
EA2454	snippy:4.3.6	variation	22955	22955	.	.	0	note=snp G=>A A:80 G:0
EA2454	snippy:4.3.6	variation	24420	24420	.	.	0	note=snp T=>G G:89 T:0
EA2454	snippy:4.3.6	variation	25719	25719	.	.	0	note=snp T=>C C:117 T:0
EA2454	snippy:4.3.6	variation	29082	29082	.	.	0	note=snp A=>T T:157 A:2
EA2454	snippy:4.3.6	variation	34494	34494	.	.	0	note=snp T=>C C:116 T:0
EA2454	snippy:4.3.6	variation	36375	36375	.	.	0	note=snp C=>A A:133 C:2
EA2454	snippy:4.3.6	variation	37550	37550	.	.	0	note=snp G=>T T:140 G:0
EA2454	snippy:4.3.6	variation	37987	37987	.	.	0	note=snp T=>C C:145 T:0
EA2454	snippy:4.3.6	variation	38677	38677	.	.	0	note=snp A=>C C:130 A:0
EA2454	snippy:4.3.6	variation	38902	38902	.	.	0	note=snp A=>G G:60 A:2
EA2454	snippy:4.3.6	variation	41873	41873	.	.	0	note=snp G=>T T:121 G:1
EA2454	snippy:4.3.6	variation	42905	42905	.	.	0	note=snp T=>G G:94 T:0
EA2454	snippy:4.3.6	variation	44498	44498	.	.	0	note=snp A=>C C:140 A:0
EA2454	snippy:4.3.6	variation	48190	48190	.	.	0	note=snp C=>A A:101 C:2
EA2454	snippy:4.3.6	variation	49672	49672	.	.	0	note=snp C=>A A:90 C:0
EA2454	snippy:4.3.6	variation	50851	50851	.	.	0	note=snp A=>C C:111 A:0
EA2454	snippy:4.3.6	variation	51521	51521	.	.	0	note=snp C=>T T:128 C:0
EA2454	snippy:4.3.6	variation	53157	53157	.	.	0	note=snp C=>T T:134 C:0
EA2454	snippy:4.3.6	variation	53772	53772	.	.	0	note=snp T=>G G:123 T:2
EA2454	snippy:4.3.6	variation	54992	54992	.	.	0	note=snp T=>C C:124 T:0
EA2454	snippy:4.3.6	variation	56628	56628	.	.	0	note=snp A=>C C:69 A:0
EA2454	snippy:4.3.6	variation	58152	58152	.	.	0	note=snp T=>C C:117 T:0
EA2454	snippy:4.3.6	variation	59959	59959	.	.	0	note=snp G=>T T:68 G:0
EA2454	snippy:4.3.6	variation	65206	65206	.	.	0	note=snp G=>A A:99 G:0
EA2454	snippy:4.3.6	variation	67315	67315	.	.	0	note=snp A=>C C:120 A:1
EA2454	snippy:4.3.6	variation	69595	69595	.	.	0	note=snp A=>G G:39 A:0
EA2454	snippy:4.3.6	variation	71896	71896	.	.	0	note=snp C=>T T:142 C:0
EA2454	snippy:4.3.6	variation	74671	74671	.	.	0	note=snp A=>G G:141 A:0
EA2454	snippy:4.3.6	variation	80371	80371	.	.	0	note=snp C=>T T:89 C:0
EA2454	snippy:4.3.6	variation	84557	84557	.	.	0	note=snp T=>G G:146 T:2
EA2454	snippy:4.3.6	variation	86028	86028	.	.	0	note=snp C=>T T:126 C:0
EA2454	snippy:4.3.6	variation	86305	86305	.	.	0	note=snp G=>T T:122 G:1
EA2454	snippy:4.3.6	variation	87412	87412	.	.	0	note=snp A=>G G:34 A:0
EA2454	snippy:4.3.6	variation	88223	88223	.	.	0	note=del TTCAATATCAATATCAATA=>T T:28 TTCAATATCAATATCAATA:0
EA2454	snippy:4.3.6	variation	88705	88705	.	.	0	note=snp C=>T T:83 C:0
EA2454	snippy:4.3.6	variation	98200	98200	.	.	0	note=snp A=>G G:128 A:0
EA2454	snippy:4.3.6	variation	99924	99924	.	.	0	note=snp C=>T T:50 C:0
EA2454	snippy:4.3.6	variation	101724	101724	.	.	0	note=snp A=>C C:124 A:0
EA2454	snippy:4.3.6	variation	105773	105773	.	.	0	note=snp A=>G G:110 A:0
EA2454	snippy:4.3.6	variation	111773	111773	.	.	0	note=snp C=>G G:140 C:1
EA2454	snippy:4.3.6	variation	119029	119029	.	.	0	note=snp A=>G G:126 A:0
EA2454	snippy:4.3.6	variation	123376	123376	.	.	0	note=snp G=>A A:150 G:0
EA2454	snippy:4.3.6	variation	124865	124865	.	.	0	note=snp T=>C C:118 T:0
EA2454	snippy:4.3.6	variation	126504	126504	.	.	0	note=snp A=>G G:112 A:0
EA2454	snippy:4.3.6	variation	128903	128903	.	.	0	note=snp A=>G G:128 A:0
EA2454	snippy:4.3.6	variation	131613	131613	.	.	0	note=snp A=>G G:89 A:0
EA2454	snippy:4.3.6	variation	131667	131667	.	.	0	note=snp G=>A A:101 G:0
EA2454	snippy:4.3.6	variation	140951	140951	.	.	0	note=snp T=>G G:113 T:0
EA2454	snippy:4.3.6	variation	145428	145428	.	.	0	note=snp T=>C C:129 T:0
EA2454	snippy:4.3.6	variation	146087	146087	.	.	0	note=snp A=>C C:155 A:1
EA2454	snippy:4.3.6	variation	152345	152345	.	.	0	note=snp G=>T T:144 G:0
EA2454	snippy:4.3.6	variation	163798	163798	.	.	0	note=snp T=>C C:46 T:0
EA2454	snippy:4.3.6	variation	163970	163970	.	.	0	note=del AT=>A A:52 AT:0
EA2454	snippy:4.3.6	variation	171513	171513	.	.	0	note=snp G=>A A:126 G:0
EA2454	snippy:4.3.6	variation	172664	172664	.	.	0	note=snp C=>T T:76 C:0
EA2454	snippy:4.3.6	variation	173304	173304	.	.	0	note=snp C=>T T:70 C:0
EA2454	snippy:4.3.6	variation	174420	174420	.	.	0	note=snp A=>G G:142 A:0
EA2454	snippy:4.3.6	variation	181477	181477	.	.	0	note=snp G=>T T:115 G:0
EA2454	snippy:4.3.6	variation	182299	182299	.	.	0	note=snp A=>C C:118 A:1
EA2454	snippy:4.3.6	variation	185127	185127	.	.	0	note=ins C=>CA CA:135 C:0
EA2454	snippy:4.3.6	variation	186550	186550	.	.	0	note=snp T=>C C:123 T:0
EA2454	snippy:4.3.6	variation	187941	187941	.	.	0	note=snp A=>G G:70 A:0
EA2454	snippy:4.3.6	variation	190313	190313	.	.	0	note=snp T=>C C:74 T:0
EA2454	snippy:4.3.6	variation	193359	193359	.	.	0	note=snp T=>C C:88 T:1
EA2454	snippy:4.3.6	variation	193641	193641	.	.	0	note=del AT=>A A:88 AT:0
EA2454	snippy:4.3.6	variation	193861	193861	.	.	0	note=snp G=>A A:88 G:1
EA2454	snippy:4.3.6	variation	209847	209847	.	.	0	note=del AG=>A A:106 AG:0
EA2454	snippy:4.3.6	variation	210083	210083	.	.	0	note=snp A=>T T:180 A:0
EA2454	snippy:4.3.6	variation	212390	212390	.	.	0	note=snp C=>T T:127 C:0
EA2454	snippy:4.3.6	variation	217635	217635	.	.	0	note=snp C=>T T:117 C:0
EA2454	snippy:4.3.6	variation	220577	220577	.	.	0	note=snp G=>A A:156 G:0
EA2454	snippy:4.3.6	variation	231065	231065	.	.	0	note=snp C=>T T:127 C:0
EA2454	snippy:4.3.6	variation	239221	239221	.	.	0	note=snp A=>G G:108 A:1
EA2454	snippy:4.3.6	variation	245301	245301	.	.	0	note=snp C=>T T:137 C:0
EA2454	snippy:4.3.6	variation	246285	246285	.	.	0	note=snp G=>T T:112 G:1
EA2454	snippy:4.3.6	variation	248471	248471	.	.	0	note=snp T=>C C:124 T:0
EA2454	snippy:4.3.6	variation	254506	254506	.	.	0	note=snp T=>A A:178 T:0
EA2454	snippy:4.3.6	variation	255537	255537	.	.	0	note=snp C=>T T:146 C:0
EA2454	snippy:4.3.6	variation	259013	259013	.	.	0	note=snp A=>G G:134 A:0
EA2454	snippy:4.3.6	variation	266099	266099	.	.	0	note=snp T=>G G:66 T:0
EA2454	snippy:4.3.6	variation	267736	267736	.	.	0	note=snp C=>A A:107 C:2
EA2454	snippy:4.3.6	variation	271991	271991	.	.	0	note=snp T=>G G:95 T:1
EA2454	snippy:4.3.6	variation	275599	275599	.	.	0	note=snp G=>A A:100 G:0
EA2454	snippy:4.3.6	variation	275686	275686	.	.	0	note=del GAGC=>G G:101 GAGC:0
EA2454	snippy:4.3.6	variation	276026	276026	.	.	0	note=snp C=>T T:63 C:0
EA2454	snippy:4.3.6	variation	277907	277907	.	.	0	note=snp G=>T T:138 G:0
EA2454	snippy:4.3.6	variation	278848	278848	.	.	0	note=snp A=>G G:76 A:0
EA2454	snippy:4.3.6	variation	280058	280058	.	.	0	note=snp T=>C C:149 T:0
EA2454	snippy:4.3.6	variation	284131	284131	.	.	0	note=snp A=>G G:112 A:0
EA2454	snippy:4.3.6	variation	285247	285247	.	.	0	note=ins G=>GAAATTT GAAATTT:90 G:0
EA2454	snippy:4.3.6	variation	285627	285627	.	.	0	note=ins A=>AT AT:127 A:0
EA2454	snippy:4.3.6	variation	286856	286856	.	.	0	note=snp G=>A A:80 G:0
EA2454	snippy:4.3.6	variation	288991	288991	.	.	0	note=complex CTTT=>TTTC TTTC:80 CTTT:0
EA2454	snippy:4.3.6	variation	289050	289050	.	.	0	note=snp T=>C C:89 T:0
EA2454	snippy:4.3.6	variation	289137	289137	.	.	0	note=complex TTGT=>CTGC CTGC:96 TTGT:0
EA2454	snippy:4.3.6	variation	289188	289188	.	.	0	note=snp G=>A A:103 G:0
EA2454	snippy:4.3.6	variation	289242	289242	.	.	0	note=snp A=>G G:102 A:0
EA2454	snippy:4.3.6	variation	289260	289260	.	.	0	note=snp G=>C C:104 G:0
EA2454	snippy:4.3.6	variation	289326	289326	.	.	0	note=snp C=>A A:127 C:1
EA2454	snippy:4.3.6	variation	289332	289332	.	.	0	note=complex TACT=>CACC CACC:118 TACT:0
EA2454	snippy:4.3.6	variation	289341	289341	.	.	0	note=snp T=>C C:133 T:0
EA2454	snippy:4.3.6	variation	289594	289594	.	.	0	note=snp A=>T T:130 A:0
EA2454	snippy:4.3.6	variation	289640	289640	.	.	0	note=snp G=>A A:142 G:0
EA2454	snippy:4.3.6	variation	289704	289704	.	.	0	note=snp A=>T T:146 A:0
EA2454	snippy:4.3.6	variation	289718	289718	.	.	0	note=del GA=>G G:124 GA:0
EA2454	snippy:4.3.6	variation	289839	289839	.	.	0	note=complex GATT=>AATA AATA:105 GATT:0
EA2454	snippy:4.3.6	variation	289854	289854	.	.	0	note=snp T=>C C:116 T:0
EA2454	snippy:4.3.6	variation	289860	289860	.	.	0	note=snp C=>T T:137 C:0
EA2454	snippy:4.3.6	variation	289866	289866	.	.	0	note=snp T=>A A:133 T:1
EA2454	snippy:4.3.6	variation	289962	289962	.	.	0	note=snp A=>G G:113 A:0
EA2454	snippy:4.3.6	variation	290058	290058	.	.	0	note=complex TACCCAC=>CACTCAT CACTCAT:64 TACCCAC:0
EA2454	snippy:4.3.6	variation	290076	290076	.	.	0	note=snp C=>T T:90 C:0
EA2454	snippy:4.3.6	variation	290134	290134	.	.	0	note=complex TTG=>CTT CTT:96 TTG:0
EA2454	snippy:4.3.6	variation	290172	290172	.	.	0	note=snp A=>G G:110 A:0
EA2454	snippy:4.3.6	variation	290262	290262	.	.	0	note=snp T=>C C:100 T:0
EA2454	snippy:4.3.6	variation	290283	290283	.	.	0	note=snp G=>A A:105 G:0
EA2454	snippy:4.3.6	variation	290292	290292	.	.	0	note=complex CTCT=>ATCC ATCC:90 CTCT:0
EA2454	snippy:4.3.6	variation	290364	290364	.	.	0	note=complex ACGA=>TCGG TCGG:111 ACGA:0
EA2454	snippy:4.3.6	variation	290388	290388	.	.	0	note=snp T=>C C:122 T:0
EA2454	snippy:4.3.6	variation	290433	290433	.	.	0	note=snp C=>G G:117 C:0
EA2454	snippy:4.3.6	variation	290454	290454	.	.	0	note=snp G=>T T:116 G:1
EA2454	snippy:4.3.6	variation	290610	290610	.	.	0	note=snp T=>C C:144 T:0
EA2454	snippy:4.3.6	variation	290640	290640	.	.	0	note=snp C=>A A:141 C:0
EA2454	snippy:4.3.6	variation	290655	290655	.	.	0	note=snp C=>A A:128 C:0
EA2454	snippy:4.3.6	variation	290717	290717	.	.	0	note=complex TCA=>CCG CCG:134 TCA:0
EA2454	snippy:4.3.6	variation	290739	290739	.	.	0	note=snp C=>T T:145 C:0
EA2454	snippy:4.3.6	variation	290752	290752	.	.	0	note=snp G=>T T:154 G:0
EA2454	snippy:4.3.6	variation	290793	290793	.	.	0	note=snp A=>C C:162 A:0
EA2454	snippy:4.3.6	variation	290916	290916	.	.	0	note=snp T=>C C:143 T:0
EA2454	snippy:4.3.6	variation	290928	290928	.	.	0	note=snp G=>C C:122 G:0
EA2454	snippy:4.3.6	variation	291036	291036	.	.	0	note=snp G=>T T:122 G:0
EA2454	snippy:4.3.6	variation	291045	291045	.	.	0	note=snp G=>A A:120 G:0
EA2454	snippy:4.3.6	variation	291057	291057	.	.	0	note=complex CACGCTG=>TACCTTA TACCTTA:99 CACGCTG:0
EA2454	snippy:4.3.6	variation	291072	291072	.	.	0	note=snp C=>T T:128 C:0
EA2454	snippy:4.3.6	variation	291144	291144	.	.	0	note=snp T=>C C:121 T:0
EA2454	snippy:4.3.6	variation	291165	291165	.	.	0	note=snp C=>T T:111 C:0
EA2454	snippy:4.3.6	variation	291174	291174	.	.	0	note=snp C=>A A:114 C:0
EA2454	snippy:4.3.6	variation	291189	291189	.	.	0	note=snp A=>C C:125 A:1
EA2454	snippy:4.3.6	variation	291240	291240	.	.	0	note=snp T=>C C:119 T:0
EA2454	snippy:4.3.6	variation	291273	291273	.	.	0	note=snp G=>A A:118 G:0
EA2454	snippy:4.3.6	variation	291387	291387	.	.	0	note=snp A=>G G:95 A:0
EA2454	snippy:4.3.6	variation	291400	291400	.	.	0	note=snp T=>C C:93 T:0
EA2454	snippy:4.3.6	variation	291414	291414	.	.	0	note=snp G=>A A:100 G:1
EA2454	snippy:4.3.6	variation	291429	291429	.	.	0	note=snp C=>T T:95 C:0
EA2454	snippy:4.3.6	variation	291451	291451	.	.	0	note=complex ATGC=>CTGT CTGT:96 ATGC:0
EA2454	snippy:4.3.6	variation	291465	291465	.	.	0	note=snp T=>A A:101 T:0
EA2454	snippy:4.3.6	variation	291477	291477	.	.	0	note=snp A=>G G:94 A:0
EA2454	snippy:4.3.6	variation	291537	291537	.	.	0	note=complex GGCA=>CGCT CGCT:72 GGCA:0
EA2454	snippy:4.3.6	variation	291552	291552	.	.	0	note=snp G=>A A:80 G:0
EA2454	snippy:4.3.6	variation	291573	291573	.	.	0	note=complex TGCG=>CGCA CGCA:66 TGCG:0
EA2454	snippy:4.3.6	variation	291609	291609	.	.	0	note=complex CATC=>AATA AATA:82 CATC:0
EA2454	snippy:4.3.6	variation	291621	291621	.	.	0	note=snp A=>G G:91 A:0
EA2454	snippy:4.3.6	variation	291645	291645	.	.	0	note=complex AGGC=>TGGT TGGT:95 AGGC:0
EA2454	snippy:4.3.6	variation	291705	291705	.	.	0	note=snp C=>T T:105 C:0
EA2454	snippy:4.3.6	variation	291720	291720	.	.	0	note=snp A=>G G:111 A:0
EA2454	snippy:4.3.6	variation	291729	291729	.	.	0	note=snp T=>G G:112 T:1
EA2454	snippy:4.3.6	variation	291833	291833	.	.	0	note=complex ACACGCTG=>GCACTCTC GCACTCTC:64 ACACGCTG:0
EA2454	snippy:4.3.6	variation	291852	291852	.	.	0	note=snp C=>T T:54 C:0
EA2454	snippy:4.3.6	variation	291908	291908	.	.	0	note=snp T=>G G:36 T:0
EA2454	snippy:4.3.6	variation	291975	291975	.	.	0	note=snp C=>G G:22 C:0
EA2454	snippy:4.3.6	variation	291993	291993	.	.	0	note=snp A=>G G:18 A:0
EA2454	snippy:4.3.6	variation	291999	291999	.	.	0	note=complex TAACC=>CAACT CAACT:15 TAACC:0
EA2454	snippy:4.3.6	variation	292014	292014	.	.	0	note=snp C=>G G:12 C:0
EA2454	snippy:4.3.6	variation	292124	292124	.	.	0	note=snp C=>A A:53 C:0
EA2454	snippy:4.3.6	variation	292175	292175	.	.	0	note=snp T=>C C:86 T:0
EA2454	snippy:4.3.6	variation	292193	292193	.	.	0	note=complex CAT=>TAC TAC:91 CAT:0
EA2454	snippy:4.3.6	variation	292214	292214	.	.	0	note=snp A=>G G:97 A:0
EA2454	snippy:4.3.6	variation	292221	292221	.	.	0	note=complex TTGTTTCCCTCC=>CTGTATCCTTCA CTGTATCCTTCA:89 TTGTTTCCCTCC:0
EA2454	snippy:4.3.6	variation	292304	292304	.	.	0	note=snp T=>C C:111 T:0
EA2454	snippy:4.3.6	variation	292325	292325	.	.	0	note=snp A=>T T:111 A:1
EA2454	snippy:4.3.6	variation	292400	292400	.	.	0	note=snp C=>T T:128 C:1
EA2454	snippy:4.3.6	variation	292414	292414	.	.	0	note=snp C=>T T:126 C:0
EA2454	snippy:4.3.6	variation	292506	292506	.	.	0	note=snp G=>T T:114 G:1
EA2454	snippy:4.3.6	variation	292561	292561	.	.	0	note=snp G=>C C:126 G:0
EA2454	snippy:4.3.6	variation	292766	292766	.	.	0	note=snp T=>C C:145 T:0
EA2454	snippy:4.3.6	variation	292868	292868	.	.	0	note=snp G=>A A:146 G:0
EA2454	snippy:4.3.6	variation	292898	292898	.	.	0	note=snp A=>G G:150 A:0
EA2454	snippy:4.3.6	variation	292907	292907	.	.	0	note=snp A=>C C:136 A:1
EA2454	snippy:4.3.6	variation	292916	292916	.	.	0	note=complex TGCC=>CGCT CGCT:133 TGCC:0
EA2454	snippy:4.3.6	variation	292951	292951	.	.	0	note=snp C=>A A:126 C:0
EA2454	snippy:4.3.6	variation	293057	293057	.	.	0	note=snp C=>G G:119 C:0
EA2454	snippy:4.3.6	variation	293102	293102	.	.	0	note=snp A=>G G:138 A:0
EA2454	snippy:4.3.6	variation	293200	293200	.	.	0	note=snp A=>T T:129 A:0
EA2454	snippy:4.3.6	variation	293263	293263	.	.	0	note=snp A=>G G:123 A:0
EA2454	snippy:4.3.6	variation	293272	293272	.	.	0	note=snp A=>G G:125 A:0
EA2454	snippy:4.3.6	variation	293435	293435	.	.	0	note=snp A=>G G:123 A:0
EA2454	snippy:4.3.6	variation	293449	293449	.	.	0	note=snp A=>C C:118 A:0
EA2454	snippy:4.3.6	variation	293455	293455	.	.	0	note=snp C=>T T:116 C:0
EA2454	snippy:4.3.6	variation	293526	293526	.	.	0	note=snp T=>C C:111 T:0
EA2454	snippy:4.3.6	variation	293533	293533	.	.	0	note=snp A=>G G:114 A:0
EA2454	snippy:4.3.6	variation	293620	293620	.	.	0	note=snp A=>T T:111 A:0
EA2454	snippy:4.3.6	variation	293629	293629	.	.	0	note=snp G=>T T:99 G:2
EA2454	snippy:4.3.6	variation	293752	293752	.	.	0	note=snp T=>C C:82 T:0
EA2454	snippy:4.3.6	variation	293839	293839	.	.	0	note=snp G=>A A:86 G:0
EA2454	snippy:4.3.6	variation	295413	295413	.	.	0	note=snp T=>G G:95 T:0
EA2454	snippy:4.3.6	variation	295650	295650	.	.	0	note=snp C=>T T:134 C:0
EA2454	snippy:4.3.6	variation	295992	295992	.	.	0	note=snp G=>T T:106 G:0
EA2454	snippy:4.3.6	variation	296004	296004	.	.	0	note=snp C=>T T:109 C:0
EA2454	snippy:4.3.6	variation	296339	296339	.	.	0	note=snp T=>A A:99 T:0
EA2454	snippy:4.3.6	variation	296802	296802	.	.	0	note=snp T=>A A:136 T:0
EA2454	snippy:4.3.6	variation	296808	296808	.	.	0	note=snp C=>T T:136 C:0
EA2454	snippy:4.3.6	variation	297129	297129	.	.	0	note=snp T=>C C:118 T:0
EA2454	snippy:4.3.6	variation	297228	297228	.	.	0	note=snp T=>C C:120 T:0
EA2454	snippy:4.3.6	variation	297486	297486	.	.	0	note=snp T=>C C:143 T:0
EA2454	snippy:4.3.6	variation	297501	297501	.	.	0	note=snp C=>G G:137 C:1
EA2454	snippy:4.3.6	variation	297613	297613	.	.	0	note=snp T=>C C:127 T:0
EA2454	snippy:4.3.6	variation	297690	297690	.	.	0	note=snp C=>T T:144 C:0
EA2454	snippy:4.3.6	variation	297729	297729	.	.	0	note=snp T=>C C:123 T:0
EA2454	snippy:4.3.6	variation	298022	298022	.	.	0	note=complex C=>AA AA:74 C:0
EA2454	snippy:4.3.6	variation	298240	298240	.	.	0	note=snp T=>G G:148 T:0
EA2454	snippy:4.3.6	variation	298249	298249	.	.	0	note=snp C=>T T:154 C:0
EA2454	snippy:4.3.6	variation	298264	298264	.	.	0	note=snp C=>T T:142 C:0
EA2454	snippy:4.3.6	variation	298286	298286	.	.	0	note=snp T=>C C:149 T:0
EA2454	snippy:4.3.6	variation	298414	298414	.	.	0	note=snp C=>T T:115 C:0
EA2454	snippy:4.3.6	variation	298426	298426	.	.	0	note=snp T=>C C:103 T:0
EA2454	snippy:4.3.6	variation	298444	298444	.	.	0	note=snp T=>G G:116 T:0
EA2454	snippy:4.3.6	variation	298666	298666	.	.	0	note=snp T=>C C:128 T:0
EA2454	snippy:4.3.6	variation	299380	299380	.	.	0	note=snp G=>A A:133 G:0
EA2454	snippy:4.3.6	variation	299446	299446	.	.	0	note=snp A=>G G:144 A:0
EA2454	snippy:4.3.6	variation	299497	299497	.	.	0	note=snp G=>T T:148 G:0
EA2454	snippy:4.3.6	variation	299575	299575	.	.	0	note=snp C=>T T:145 C:0
EA2454	snippy:4.3.6	variation	299605	299605	.	.	0	note=snp T=>C C:140 T:0
EA2454	snippy:4.3.6	variation	299632	299632	.	.	0	note=snp C=>T T:140 C:0
EA2454	snippy:4.3.6	variation	299758	299758	.	.	0	note=mnp AC=>GA GA:124 AC:0
EA2454	snippy:4.3.6	variation	299773	299773	.	.	0	note=snp T=>C C:151 T:0
EA2454	snippy:4.3.6	variation	299836	299836	.	.	0	note=snp C=>T T:149 C:0
EA2454	snippy:4.3.6	variation	299899	299899	.	.	0	note=snp T=>G G:138 T:0
EA2454	snippy:4.3.6	variation	299920	299920	.	.	0	note=snp A=>C C:114 A:1
EA2454	snippy:4.3.6	variation	300016	300016	.	.	0	note=snp T=>C C:133 T:0
EA2454	snippy:4.3.6	variation	300252	300252	.	.	0	note=snp T=>C C:176 T:0
EA2454	snippy:4.3.6	variation	300276	300276	.	.	0	note=snp A=>C C:187 A:1
EA2454	snippy:4.3.6	variation	300282	300282	.	.	0	note=snp T=>C C:187 T:0
EA2454	snippy:4.3.6	variation	300293	300293	.	.	0	note=mnp GT=>AC AC:178 GT:0
EA2454	snippy:4.3.6	variation	300300	300300	.	.	0	note=snp A=>G G:174 A:0
EA2454	snippy:4.3.6	variation	300315	300315	.	.	0	note=snp G=>A A:181 G:0
EA2454	snippy:4.3.6	variation	300321	300321	.	.	0	note=snp A=>G G:178 A:0
EA2454	snippy:4.3.6	variation	300375	300375	.	.	0	note=snp C=>T T:131 C:0
EA2454	snippy:4.3.6	variation	300425	300425	.	.	0	note=snp G=>T T:129 G:0
EA2454	snippy:4.3.6	variation	300483	300483	.	.	0	note=snp G=>C C:109 G:0
EA2454	snippy:4.3.6	variation	300494	300494	.	.	0	note=snp C=>T T:109 C:0
EA2454	snippy:4.3.6	variation	300501	300501	.	.	0	note=snp G=>A A:114 G:0
EA2454	snippy:4.3.6	variation	300507	300507	.	.	0	note=snp G=>A A:112 G:1
EA2454	snippy:4.3.6	variation	300549	300549	.	.	0	note=snp A=>G G:121 A:0
EA2454	snippy:4.3.6	variation	300596	300596	.	.	0	note=snp T=>C C:121 T:0
EA2454	snippy:4.3.6	variation	300666	300666	.	.	0	note=snp G=>A A:151 G:0
EA2454	snippy:4.3.6	variation	300681	300681	.	.	0	note=snp C=>T T:143 C:0
EA2454	snippy:4.3.6	variation	300722	300722	.	.	0	note=complex GTTCA=>TTTCG TTTCG:148 GTTCA:0
EA2454	snippy:4.3.6	variation	300777	300777	.	.	0	note=complex CACG=>TACC TACC:168 CACG:0
EA2454	snippy:4.3.6	variation	300858	300858	.	.	0	note=snp G=>A A:138 G:0
EA2454	snippy:4.3.6	variation	300873	300873	.	.	0	note=complex GGGT=>TGGA TGGA:130 GGGT:0
EA2454	snippy:4.3.6	variation	300923	300923	.	.	0	note=snp A=>C C:110 A:1
EA2454	snippy:4.3.6	variation	301564	301564	.	.	0	note=snp T=>C C:118 T:0
EA2454	snippy:4.3.6	variation	301612	301612	.	.	0	note=snp T=>C C:151 T:0
EA2454	snippy:4.3.6	variation	301657	301657	.	.	0	note=complex TATC=>CATT CATT:151 TATC:0
EA2454	snippy:4.3.6	variation	301717	301717	.	.	0	note=snp C=>T T:155 C:0
EA2454	snippy:4.3.6	variation	301736	301736	.	.	0	note=snp T=>C C:141 T:0
EA2454	snippy:4.3.6	variation	301759	301759	.	.	0	note=complex TTCT=>CTCG CTCG:130 TTCT:0
EA2454	snippy:4.3.6	variation	302008	302008	.	.	0	note=snp C=>G G:150 C:0
EA2454	snippy:4.3.6	variation	302024	302024	.	.	0	note=snp T=>C C:155 T:0
EA2454	snippy:4.3.6	variation	302042	302042	.	.	0	note=snp C=>T T:152 C:0
EA2454	snippy:4.3.6	variation	302056	302056	.	.	0	note=snp A=>G G:134 A:0
EA2454	snippy:4.3.6	variation	302069	302069	.	.	0	note=snp C=>T T:140 C:0
EA2454	snippy:4.3.6	variation	302081	302081	.	.	0	note=snp C=>T T:147 C:0
EA2454	snippy:4.3.6	variation	302123	302123	.	.	0	note=snp G=>A A:142 G:0
EA2454	snippy:4.3.6	variation	302135	302135	.	.	0	note=snp T=>G G:140 T:0
EA2454	snippy:4.3.6	variation	302202	302202	.	.	0	note=snp C=>T T:110 C:0
EA2454	snippy:4.3.6	variation	302244	302244	.	.	0	note=snp C=>T T:103 C:0
EA2454	snippy:4.3.6	variation	302373	302373	.	.	0	note=snp T=>C C:89 T:0
EA2454	snippy:4.3.6	variation	302384	302384	.	.	0	note=complex TAC=>CAG CAG:97 TAC:0
EA2454	snippy:4.3.6	variation	302495	302495	.	.	0	note=snp G=>C C:88 G:0
EA2454	snippy:4.3.6	variation	302540	302540	.	.	0	note=snp T=>A A:114 T:1
EA2454	snippy:4.3.6	variation	302650	302650	.	.	0	note=snp T=>C C:147 T:0
EA2454	snippy:4.3.6	variation	302683	302683	.	.	0	note=snp G=>A A:132 G:0
EA2454	snippy:4.3.6	variation	302696	302696	.	.	0	note=snp A=>G G:134 A:0
EA2454	snippy:4.3.6	variation	302708	302708	.	.	0	note=snp C=>T T:129 C:0
EA2454	snippy:4.3.6	variation	302723	302723	.	.	0	note=snp G=>A A:119 G:0
EA2454	snippy:4.3.6	variation	302744	302744	.	.	0	note=snp A=>G G:118 A:0
EA2454	snippy:4.3.6	variation	302783	302783	.	.	0	note=snp T=>C C:115 T:0
EA2454	snippy:4.3.6	variation	302894	302894	.	.	0	note=snp T=>C C:134 T:0
EA2454	snippy:4.3.6	variation	302915	302915	.	.	0	note=snp G=>T T:129 G:0
EA2454	snippy:4.3.6	variation	302924	302924	.	.	0	note=snp T=>C C:115 T:0
EA2454	snippy:4.3.6	variation	302929	302929	.	.	0	note=mnp GAT=>AGC AGC:114 GAT:0
EA2454	snippy:4.3.6	variation	303028	303028	.	.	0	note=snp G=>A A:101 G:0
EA2454	snippy:4.3.6	variation	303476	303476	.	.	0	note=snp C=>T T:109 C:0
EA2454	snippy:4.3.6	variation	303533	303533	.	.	0	note=snp A=>G G:107 A:0
EA2454	snippy:4.3.6	variation	303575	303575	.	.	0	note=snp A=>G G:116 A:0
EA2454	snippy:4.3.6	variation	303867	303867	.	.	0	note=snp A=>G G:139 A:0
EA2454	snippy:4.3.6	variation	303968	303968	.	.	0	note=snp T=>C C:120 T:0
EA2454	snippy:4.3.6	variation	304001	304001	.	.	0	note=snp T=>C C:118 T:0
EA2454	snippy:4.3.6	variation	304012	304012	.	.	0	note=snp C=>T T:124 C:1
EA2454	snippy:4.3.6	variation	304106	304106	.	.	0	note=complex GGCT=>AGCG AGCG:120 GGCT:0
EA2454	snippy:4.3.6	variation	304199	304199	.	.	0	note=snp T=>C C:154 T:0
EA2454	snippy:4.3.6	variation	304214	304214	.	.	0	note=snp G=>A A:167 G:0
EA2454	snippy:4.3.6	variation	304367	304367	.	.	0	note=mnp CA=>TG TG:50 CA:0
EA2454	snippy:4.3.6	variation	304378	304378	.	.	0	note=snp T=>C C:49 T:0
EA2454	snippy:4.3.6	variation	304693	304693	.	.	0	note=del AT=>A A:63 AT:0
EA2454	snippy:4.3.6	variation	312992	312992	.	.	0	note=snp C=>T T:84 C:2
EA2454	snippy:4.3.6	variation	313034	313034	.	.	0	note=snp A=>G G:82 A:0
EA2454	snippy:4.3.6	variation	313922	313922	.	.	0	note=snp G=>A A:102 G:1
EA2454	snippy:4.3.6	variation	317106	317106	.	.	0	note=snp T=>C C:95 T:0
EA2454	snippy:4.3.6	variation	332708	332708	.	.	0	note=snp C=>T T:108 C:0
EA2454	snippy:4.3.6	variation	344966	344966	.	.	0	note=snp T=>C C:139 T:0
EA2454	snippy:4.3.6	variation	348047	348047	.	.	0	note=snp C=>A A:111 C:0
EA2454	snippy:4.3.6	variation	350969	350969	.	.	0	note=snp A=>G G:100 A:0
EA2454	snippy:4.3.6	variation	352054	352054	.	.	0	note=snp C=>A A:72 C:2
EA2454	snippy:4.3.6	variation	355406	355406	.	.	0	note=del AATTG=>A A:69 AATTG:0
EA2454	snippy:4.3.6	variation	356914	356914	.	.	0	note=snp G=>A A:140 G:0
EA2454	snippy:4.3.6	variation	369429	369429	.	.	0	note=snp T=>C C:109 T:0
EA2454	snippy:4.3.6	variation	371038	371038	.	.	0	note=snp A=>G G:177 A:0
EA2454	snippy:4.3.6	variation	371150	371150	.	.	0	note=snp T=>C C:162 T:0
EA2454	snippy:4.3.6	variation	374297	374297	.	.	0	note=snp A=>G G:139 A:0
EA2454	snippy:4.3.6	variation	376932	376932	.	.	0	note=snp G=>A A:181 G:0
EA2454	snippy:4.3.6	variation	382085	382085	.	.	0	note=snp T=>C C:121 T:0
EA2454	snippy:4.3.6	variation	390573	390573	.	.	0	note=snp G=>A A:111 G:0
EA2454	snippy:4.3.6	variation	391067	391067	.	.	0	note=snp T=>G G:139 T:3
EA2454	snippy:4.3.6	variation	392511	392511	.	.	0	note=snp T=>C C:144 T:0
EA2454	snippy:4.3.6	variation	393575	393575	.	.	0	note=snp A=>G G:115 A:0
EA2454	snippy:4.3.6	variation	393743	393743	.	.	0	note=snp A=>G G:145 A:0
EA2454	snippy:4.3.6	variation	397444	397444	.	.	0	note=snp C=>G G:71 C:0
EA2454	snippy:4.3.6	variation	398396	398396	.	.	0	note=snp C=>T T:133 C:1
EA2454	snippy:4.3.6	variation	407113	407113	.	.	0	note=snp A=>G G:120 A:0
EA2454	snippy:4.3.6	variation	407411	407411	.	.	0	note=snp A=>C C:117 A:1
EA2454	snippy:4.3.6	variation	407887	407887	.	.	0	note=snp C=>G G:149 C:1
EA2454	snippy:4.3.6	variation	409884	409884	.	.	0	note=snp T=>G G:118 T:3
EA2454	snippy:4.3.6	variation	411290	411290	.	.	0	note=snp A=>T T:109 A:0
EA2454	snippy:4.3.6	variation	412599	412599	.	.	0	note=snp C=>T T:135 C:0
EA2454	snippy:4.3.6	variation	417355	417355	.	.	0	note=snp T=>A A:100 T:1
EA2454	snippy:4.3.6	variation	421662	421662	.	.	0	note=snp T=>A A:156 T:0
EA2454	snippy:4.3.6	variation	423435	423435	.	.	0	note=snp C=>A A:141 C:1
EA2454	snippy:4.3.6	variation	429193	429193	.	.	0	note=snp C=>T T:115 C:0
EA2454	snippy:4.3.6	variation	430947	430947	.	.	0	note=snp T=>C C:159 T:0
EA2454	snippy:4.3.6	variation	437474	437474	.	.	0	note=snp A=>G G:112 A:0
EA2454	snippy:4.3.6	variation	440837	440837	.	.	0	note=snp C=>A A:127 C:0
EA2454	snippy:4.3.6	variation	441911	441911	.	.	0	note=snp T=>C C:56 T:0
EA2454	snippy:4.3.6	variation	442423	442423	.	.	0	note=snp G=>A A:128 G:0
EA2454	snippy:4.3.6	variation	443213	443213	.	.	0	note=snp A=>G G:19 A:0
EA2454	snippy:4.3.6	variation	443237	443237	.	.	0	note=snp G=>A A:14 G:0
EA2454	snippy:4.3.6	variation	443268	443268	.	.	0	note=snp T=>A A:29 T:0
EA2454	snippy:4.3.6	variation	444160	444160	.	.	0	note=snp C=>T T:134 C:0
EA2454	snippy:4.3.6	variation	447459	447459	.	.	0	note=snp A=>G G:103 A:0
EA2454	snippy:4.3.6	variation	448711	448711	.	.	0	note=snp A=>G G:121 A:0
EA2454	snippy:4.3.6	variation	452711	452711	.	.	0	note=snp T=>A A:118 T:0
EA2454	snippy:4.3.6	variation	454084	454084	.	.	0	note=del TGCTGTGGCAGGC=>T T:85 TGCTGTGGCAGGC:0
EA2454	snippy:4.3.6	variation	457082	457082	.	.	0	note=snp C=>T T:92 C:0
EA2454	snippy:4.3.6	variation	457893	457893	.	.	0	note=snp C=>A A:131 C:4
EA2454	snippy:4.3.6	variation	459248	459248	.	.	0	note=snp A=>G G:123 A:1
EA2454	snippy:4.3.6	variation	463635	463635	.	.	0	note=snp G=>T T:123 G:0
EA2454	snippy:4.3.6	variation	465826	465826	.	.	0	note=snp A=>T T:129 A:0
EA2454	snippy:4.3.6	variation	471709	471709	.	.	0	note=snp A=>G G:115 A:0
EA2454	snippy:4.3.6	variation	472911	472911	.	.	0	note=snp T=>C C:109 T:0
EA2454	snippy:4.3.6	variation	473611	473611	.	.	0	note=snp A=>G G:107 A:0
EA2454	snippy:4.3.6	variation	474484	474484	.	.	0	note=snp G=>A A:153 G:1
EA2454	snippy:4.3.6	variation	475511	475511	.	.	0	note=snp T=>A A:116 T:0
EA2454	snippy:4.3.6	variation	477552	477552	.	.	0	note=snp G=>A A:95 G:0
EA2454	snippy:4.3.6	variation	478727	478727	.	.	0	note=snp C=>A A:116 C:3
EA2454	snippy:4.3.6	variation	484564	484564	.	.	0	note=snp A=>G G:69 A:0
EA2454	snippy:4.3.6	variation	485759	485759	.	.	0	note=snp C=>T T:151 C:0
EA2454	snippy:4.3.6	variation	485779	485779	.	.	0	note=snp C=>G G:170 C:1
EA2454	snippy:4.3.6	variation	488462	488462	.	.	0	note=snp G=>A A:157 G:0
EA2454	snippy:4.3.6	variation	497400	497400	.	.	0	note=snp T=>G G:34 T:0
EA2454	snippy:4.3.6	variation	497460	497460	.	.	0	note=snp T=>G G:42 T:0
EA2454	snippy:4.3.6	variation	498706	498706	.	.	0	note=snp G=>A A:116 G:0
EA2454	snippy:4.3.6	variation	506352	506352	.	.	0	note=snp T=>G G:23 T:0
EA2454	snippy:4.3.6	variation	511943	511943	.	.	0	note=snp A=>G G:132 A:0
EA2454	snippy:4.3.6	variation	517520	517520	.	.	0	note=snp G=>A A:162 G:0
EA2454	snippy:4.3.6	variation	518900	518900	.	.	0	note=snp G=>A A:157 G:0
EA2454	snippy:4.3.6	variation	519811	519811	.	.	0	note=snp A=>C C:86 A:1
EA2454	snippy:4.3.6	variation	523923	523923	.	.	0	note=snp C=>G G:71 C:0
EA2454	snippy:4.3.6	variation	527663	527663	.	.	0	note=snp T=>A A:136 T:0
EA2454	snippy:4.3.6	variation	528123	528123	.	.	0	note=snp A=>T T:88 A:1
EA2454	snippy:4.3.6	variation	531431	531431	.	.	0	note=snp A=>G G:130 A:0
EA2454	snippy:4.3.6	variation	531539	531539	.	.	0	note=snp G=>A A:106 G:0
EA2454	snippy:4.3.6	variation	534151	534151	.	.	0	note=snp A=>G G:154 A:0
EA2454	snippy:4.3.6	variation	537287	537287	.	.	0	note=snp G=>C C:83 G:0
EA2454	snippy:4.3.6	variation	539426	539426	.	.	0	note=snp T=>C C:145 T:0
EA2454	snippy:4.3.6	variation	543142	543142	.	.	0	note=snp C=>T T:117 C:0
EA2454	snippy:4.3.6	variation	546428	546428	.	.	0	note=snp A=>C C:120 A:0
EA2454	snippy:4.3.6	variation	550654	550654	.	.	0	note=snp T=>C C:128 T:0
EA2454	snippy:4.3.6	variation	552561	552561	.	.	0	note=snp C=>T T:116 C:1
EA2454	snippy:4.3.6	variation	557809	557809	.	.	0	note=snp C=>T T:122 C:1
EA2454	snippy:4.3.6	variation	559017	559017	.	.	0	note=snp A=>G G:110 A:0
EA2454	snippy:4.3.6	variation	561226	561226	.	.	0	note=snp G=>A A:85 G:0
EA2454	snippy:4.3.6	variation	561259	561259	.	.	0	note=snp C=>A A:59 C:2
EA2454	snippy:4.3.6	variation	561272	561272	.	.	0	note=snp T=>A A:65 T:0
EA2454	snippy:4.3.6	variation	562933	562933	.	.	0	note=snp T=>C C:99 T:0
EA2454	snippy:4.3.6	variation	571709	571709	.	.	0	note=snp A=>G G:149 A:0
EA2454	snippy:4.3.6	variation	571951	571951	.	.	0	note=snp C=>A A:111 C:0
EA2454	snippy:4.3.6	variation	573830	573830	.	.	0	note=snp A=>G G:68 A:0
EA2454	snippy:4.3.6	variation	583662	583662	.	.	0	note=snp T=>A A:138 T:0
EA2454	snippy:4.3.6	variation	590181	590181	.	.	0	note=ins T=>TA TA:43 T:0
EA2454	snippy:4.3.6	variation	595216	595216	.	.	0	note=snp T=>A A:54 T:0
EA2454	snippy:4.3.6	variation	595654	595654	.	.	0	note=snp T=>C C:68 T:0
EA2454	snippy:4.3.6	variation	597386	597386	.	.	0	note=snp A=>G G:174 A:0
EA2454	snippy:4.3.6	variation	602583	602583	.	.	0	note=snp A=>G G:78 A:0
EA2454	snippy:4.3.6	variation	602608	602608	.	.	0	note=snp C=>T T:81 C:0
EA2454	snippy:4.3.6	variation	606088	606088	.	.	0	note=ins G=>GA GA:126 G:1
EA2454	snippy:4.3.6	variation	610464	610464	.	.	0	note=snp A=>C C:186 A:2
EA2454	snippy:4.3.6	variation	610851	610851	.	.	0	note=snp C=>T T:163 C:0
EA2454	snippy:4.3.6	variation	611188	611188	.	.	0	note=snp G=>A A:102 G:0
EA2454	snippy:4.3.6	variation	611872	611872	.	.	0	note=snp A=>G G:43 A:0
EA2454	snippy:4.3.6	variation	612726	612726	.	.	0	note=snp A=>G G:68 A:0
EA2454	snippy:4.3.6	variation	613906	613906	.	.	0	note=snp C=>A A:92 C:0
EA2454	snippy:4.3.6	variation	622741	622741	.	.	0	note=snp T=>G G:95 T:1
EA2454	snippy:4.3.6	variation	626592	626592	.	.	0	note=snp T=>G G:32 T:0
EA2454	snippy:4.3.6	variation	631335	631335	.	.	0	note=snp T=>C C:145 T:0
EA2454	snippy:4.3.6	variation	635649	635649	.	.	0	note=snp A=>C C:86 A:2
EA2454	snippy:4.3.6	variation	644101	644101	.	.	0	note=snp A=>G G:124 A:0
EA2454	snippy:4.3.6	variation	644770	644770	.	.	0	note=snp G=>T T:120 G:0
EA2454	snippy:4.3.6	variation	644913	644913	.	.	0	note=snp T=>C C:131 T:0
EA2454	snippy:4.3.6	variation	646569	646569	.	.	0	note=snp G=>A A:101 G:0
EA2454	snippy:4.3.6	variation	650009	650009	.	.	0	note=snp C=>T T:136 C:0
EA2454	snippy:4.3.6	variation	653031	653031	.	.	0	note=snp C=>T T:87 C:0
EA2454	snippy:4.3.6	variation	660547	660547	.	.	0	note=snp G=>A A:131 G:0
EA2454	snippy:4.3.6	variation	663798	663798	.	.	0	note=snp G=>T T:130 G:1
EA2454	snippy:4.3.6	variation	665110	665110	.	.	0	note=snp C=>G G:92 C:2
EA2454	snippy:4.3.6	variation	669330	669330	.	.	0	note=snp A=>G G:104 A:0
EA2454	snippy:4.3.6	variation	670954	670954	.	.	0	note=snp C=>T T:134 C:0
EA2454	snippy:4.3.6	variation	674305	674305	.	.	0	note=snp G=>C C:116 G:0
EA2454	snippy:4.3.6	variation	677753	677753	.	.	0	note=snp G=>A A:136 G:1
EA2454	snippy:4.3.6	variation	683177	683177	.	.	0	note=snp T=>G G:113 T:0
EA2454	snippy:4.3.6	variation	686003	686003	.	.	0	note=snp A=>G G:107 A:0
EA2454	snippy:4.3.6	variation	686104	686104	.	.	0	note=snp G=>C C:110 G:0
EA2454	snippy:4.3.6	variation	686561	686561	.	.	0	note=snp C=>T T:127 C:0
EA2454	snippy:4.3.6	variation	687410	687410	.	.	0	note=snp A=>G G:92 A:0
EA2454	snippy:4.3.6	variation	690408	690408	.	.	0	note=snp A=>G G:119 A:0
EA2454	snippy:4.3.6	variation	690611	690611	.	.	0	note=snp T=>C C:85 T:0
EA2454	snippy:4.3.6	variation	693295	693295	.	.	0	note=snp C=>T T:132 C:0
EA2454	snippy:4.3.6	variation	705171	705171	.	.	0	note=snp C=>T T:153 C:0
EA2454	snippy:4.3.6	variation	705263	705263	.	.	0	note=snp C=>A A:179 C:0
EA2454	snippy:4.3.6	variation	707477	707477	.	.	0	note=snp C=>T T:136 C:0
EA2454	snippy:4.3.6	variation	709632	709632	.	.	0	note=snp T=>C C:146 T:1
EA2454	snippy:4.3.6	variation	710977	710977	.	.	0	note=snp A=>G G:123 A:0
EA2454	snippy:4.3.6	variation	713026	713026	.	.	0	note=snp T=>G G:122 T:0
EA2454	snippy:4.3.6	variation	729583	729583	.	.	0	note=snp G=>A A:139 G:0
EA2454	snippy:4.3.6	variation	730566	730566	.	.	0	note=snp C=>T T:140 C:0
EA2454	snippy:4.3.6	variation	731219	731219	.	.	0	note=snp T=>G G:144 T:0
EA2454	snippy:4.3.6	variation	731329	731329	.	.	0	note=snp G=>A A:146 G:0
EA2454	snippy:4.3.6	variation	737158	737158	.	.	0	note=snp C=>T T:138 C:0
EA2454	snippy:4.3.6	variation	746522	746522	.	.	0	note=snp T=>C C:188 T:0
EA2454	snippy:4.3.6	variation	746983	746983	.	.	0	note=snp A=>T T:128 A:0
EA2454	snippy:4.3.6	variation	747674	747674	.	.	0	note=snp T=>G G:120 T:1
EA2454	snippy:4.3.6	variation	748560	748560	.	.	0	note=snp G=>C C:141 G:0
EA2454	snippy:4.3.6	variation	753727	753727	.	.	0	note=snp T=>C C:113 T:0
EA2454	snippy:4.3.6	variation	755366	755366	.	.	0	note=snp A=>G G:132 A:0
EA2454	snippy:4.3.6	variation	756040	756040	.	.	0	note=snp T=>G G:143 T:2
EA2454	snippy:4.3.6	variation	758394	758394	.	.	0	note=snp C=>T T:89 C:0
EA2454	snippy:4.3.6	variation	765032	765032	.	.	0	note=snp T=>C C:114 T:0
EA2454	snippy:4.3.6	variation	769268	769268	.	.	0	note=complex TCGC=>CCGT CCGT:10 TCGC:0
EA2454	snippy:4.3.6	variation	770688	770688	.	.	0	note=complex TGTATGC=>GGTGTGT GGTGTGT:13 TGTATGC:0
EA2454	snippy:4.3.6	variation	770721	770721	.	.	0	note=snp A=>G G:43 A:0
EA2454	snippy:4.3.6	variation	770751	770751	.	.	0	note=snp C=>T T:82 C:0
EA2454	snippy:4.3.6	variation	770757	770757	.	.	0	note=snp A=>G G:80 A:0
EA2454	snippy:4.3.6	variation	770765	770765	.	.	0	note=snp T=>C C:78 T:0
EA2454	snippy:4.3.6	variation	770772	770772	.	.	0	note=complex TGAG=>CGGA CGGA:75 TGAG:0
EA2454	snippy:4.3.6	variation	770784	770784	.	.	0	note=complex TAACACTGAT=>GAGCACAGAC GAGCACAGAC:71 TAACACTGAT:0
EA2454	snippy:4.3.6	variation	770799	770799	.	.	0	note=snp A=>G G:70 A:1
EA2454	snippy:4.3.6	variation	770804	770804	.	.	0	note=complex TTGCTCCG=>CAGCCCCA CAGCCCCA:71 TTGCTCCG:0
EA2454	snippy:4.3.6	variation	770876	770876	.	.	0	note=snp G=>A A:55 G:0
EA2454	snippy:4.3.6	variation	770915	770915	.	.	0	note=snp G=>A A:21 G:0
EA2454	snippy:4.3.6	variation	775145	775145	.	.	0	note=snp A=>C C:129 A:1
EA2454	snippy:4.3.6	variation	778154	778154	.	.	0	note=snp A=>G G:52 A:0
EA2454	snippy:4.3.6	variation	778161	778161	.	.	0	note=snp G=>A A:47 G:0
EA2454	snippy:4.3.6	variation	778504	778504	.	.	0	note=snp A=>C C:43 A:0
EA2454	snippy:4.3.6	variation	779037	779037	.	.	0	note=snp C=>A A:124 C:0
EA2454	snippy:4.3.6	variation	780129	780129	.	.	0	note=snp C=>T T:160 C:0
EA2454	snippy:4.3.6	variation	786559	786559	.	.	0	note=snp A=>C C:129 A:0
EA2454	snippy:4.3.6	variation	786570	786570	.	.	0	note=snp G=>A A:134 G:0
EA2454	snippy:4.3.6	variation	788461	788461	.	.	0	note=snp G=>T T:114 G:2
EA2454	snippy:4.3.6	variation	789417	789417	.	.	0	note=snp A=>C C:138 A:2
EA2454	snippy:4.3.6	variation	791956	791956	.	.	0	note=snp G=>A A:115 G:0
EA2454	snippy:4.3.6	variation	793051	793051	.	.	0	note=snp A=>G G:76 A:0
EA2454	snippy:4.3.6	variation	797963	797963	.	.	0	note=snp C=>T T:152 C:0
EA2454	snippy:4.3.6	variation	798063	798063	.	.	0	note=snp C=>T T:169 C:0
EA2454	snippy:4.3.6	variation	799162	799162	.	.	0	note=snp G=>A A:104 G:0
EA2454	snippy:4.3.6	variation	804247	804247	.	.	0	note=snp G=>A A:80 G:0
EA2454	snippy:4.3.6	variation	804998	804998	.	.	0	note=snp A=>C C:114 A:0
EA2454	snippy:4.3.6	variation	805481	805481	.	.	0	note=snp A=>G G:153 A:0
EA2454	snippy:4.3.6	variation	809867	809867	.	.	0	note=snp G=>A A:85 G:0
EA2454	snippy:4.3.6	variation	811804	811804	.	.	0	note=snp T=>C C:40 T:0
EA2454	snippy:4.3.6	variation	817446	817446	.	.	0	note=snp A=>G G:118 A:0
EA2454	snippy:4.3.6	variation	817985	817985	.	.	0	note=snp T=>G G:89 T:0
EA2454	snippy:4.3.6	variation	818649	818649	.	.	0	note=snp A=>C C:74 A:2
EA2454	snippy:4.3.6	variation	820251	820251	.	.	0	note=snp G=>T T:85 G:0
EA2454	snippy:4.3.6	variation	820901	820901	.	.	0	note=snp G=>A A:119 G:0
EA2454	snippy:4.3.6	variation	821110	821110	.	.	0	note=snp A=>C C:128 A:0
EA2454	snippy:4.3.6	variation	832537	832537	.	.	0	note=snp C=>T T:132 C:0
EA2454	snippy:4.3.6	variation	833175	833175	.	.	0	note=snp T=>G G:102 T:0
EA2454	snippy:4.3.6	variation	834575	834575	.	.	0	note=ins A=>AT AT:67 A:0
EA2454	snippy:4.3.6	variation	835751	835751	.	.	0	note=snp C=>G G:119 C:0
EA2454	snippy:4.3.6	variation	839497	839497	.	.	0	note=snp T=>A A:97 T:0
EA2454	snippy:4.3.6	variation	840811	840811	.	.	0	note=snp G=>A A:139 G:0
EA2454	snippy:4.3.6	variation	842772	842772	.	.	0	note=snp C=>T T:84 C:0
EA2454	snippy:4.3.6	variation	843890	843890	.	.	0	note=snp C=>T T:131 C:1
EA2454	snippy:4.3.6	variation	844850	844850	.	.	0	note=snp A=>C C:82 A:0
EA2454	snippy:4.3.6	variation	846335	846335	.	.	0	note=snp G=>T T:79 G:1
EA2454	snippy:4.3.6	variation	848455	848455	.	.	0	note=snp G=>T T:91 G:0
EA2454	snippy:4.3.6	variation	850201	850201	.	.	0	note=snp G=>T T:108 G:1
EA2454	snippy:4.3.6	variation	852695	852695	.	.	0	note=snp A=>G G:98 A:0
EA2454	snippy:4.3.6	variation	853768	853768	.	.	0	note=snp A=>G G:108 A:0
EA2454	snippy:4.3.6	variation	854948	854948	.	.	0	note=snp T=>C C:89 T:0
EA2454	snippy:4.3.6	variation	856699	856699	.	.	0	note=snp A=>T T:42 A:0
EA2454	snippy:4.3.6	variation	863496	863496	.	.	0	note=snp A=>G G:119 A:0
EA2454	snippy:4.3.6	variation	874702	874702	.	.	0	note=snp T=>C C:170 T:0
EA2454	snippy:4.3.6	variation	879121	879121	.	.	0	note=snp C=>A A:110 C:1
EA2454	snippy:4.3.6	variation	884502	884502	.	.	0	note=snp T=>G G:110 T:2
EA2454	snippy:4.3.6	variation	894538	894538	.	.	0	note=snp C=>T T:92 C:0
EA2454	snippy:4.3.6	variation	896090	896090	.	.	0	note=snp C=>T T:88 C:0
EA2454	snippy:4.3.6	variation	904482	904482	.	.	0	note=snp A=>G G:113 A:0
EA2454	snippy:4.3.6	variation	904955	904955	.	.	0	note=snp G=>T T:125 G:0
EA2454	snippy:4.3.6	variation	907131	907131	.	.	0	note=snp C=>A A:101 C:1
EA2454	snippy:4.3.6	variation	907900	907900	.	.	0	note=snp A=>C C:107 A:0
EA2454	snippy:4.3.6	variation	910897	910897	.	.	0	note=snp A=>G G:167 A:0
EA2454	snippy:4.3.6	variation	919060	919060	.	.	0	note=snp T=>G G:99 T:0
EA2454	snippy:4.3.6	variation	921266	921266	.	.	0	note=snp G=>A A:146 G:0
EA2454	snippy:4.3.6	variation	924418	924418	.	.	0	note=snp G=>A A:76 G:0
EA2454	snippy:4.3.6	variation	924524	924524	.	.	0	note=snp C=>T T:118 C:0
EA2454	snippy:4.3.6	variation	924579	924579	.	.	0	note=snp T=>C C:110 T:0
EA2454	snippy:4.3.6	variation	930102	930102	.	.	0	note=snp A=>G G:91 A:0
EA2454	snippy:4.3.6	variation	935073	935073	.	.	0	note=ins C=>CAA CAA:11 C:0
EA2454	snippy:4.3.6	variation	936248	936248	.	.	0	note=snp A=>C C:105 A:0
EA2454	snippy:4.3.6	variation	937614	937614	.	.	0	note=snp C=>T T:150 C:1
EA2454	snippy:4.3.6	variation	938195	938195	.	.	0	note=snp A=>G G:96 A:0
EA2454	snippy:4.3.6	variation	941489	941489	.	.	0	note=snp C=>A A:146 C:1
EA2454	snippy:4.3.6	variation	944490	944490	.	.	0	note=snp C=>T T:137 C:0
EA2454	snippy:4.3.6	variation	945162	945162	.	.	0	note=snp A=>G G:172 A:0
EA2454	snippy:4.3.6	variation	946875	946875	.	.	0	note=snp T=>C C:145 T:0
EA2454	snippy:4.3.6	variation	949221	949221	.	.	0	note=snp C=>A A:146 C:1
EA2454	snippy:4.3.6	variation	949585	949585	.	.	0	note=complex TCGCGT=>CGCG CGCG:23 TCGCGT:0
EA2454	snippy:4.3.6	variation	951474	951474	.	.	0	note=snp A=>C C:13 A:0
EA2454	snippy:4.3.6	variation	953284	953284	.	.	0	note=snp T=>A A:118 T:0
EA2454	snippy:4.3.6	variation	953462	953462	.	.	0	note=complex CCAG=>GTAA GTAA:28 CCAG:1
EA2454	snippy:4.3.6	variation	953505	953505	.	.	0	note=snp T=>C C:21 T:0
EA2454	snippy:4.3.6	variation	953513	953513	.	.	0	note=snp G=>C C:23 G:0
EA2454	snippy:4.3.6	variation	953539	953539	.	.	0	note=snp T=>C C:23 T:0
EA2454	snippy:4.3.6	variation	953763	953763	.	.	0	note=complex AC=>CG CG:34 AC:0
EA2454	snippy:4.3.6	variation	953802	953802	.	.	0	note=snp A=>T T:13 A:0
EA2454	snippy:4.3.6	variation	953998	953998	.	.	0	note=snp G=>A A:80 G:0
EA2454	snippy:4.3.6	variation	954235	954235	.	.	0	note=complex ATGT=>GTGG GTGG:29 ATGT:0
EA2454	snippy:4.3.6	variation	958993	958993	.	.	0	note=complex ACGCA=>GCGCG GCGCG:16 ACGCA:0
EA2454	snippy:4.3.6	variation	959053	959053	.	.	0	note=complex ACCGCCA=>GCTGTCC GCTGTCC:25 ACCGCCA:0
EA2454	snippy:4.3.6	variation	959074	959074	.	.	0	note=complex AGG=>GGA GGA:19 AGG:0
EA2454	snippy:4.3.6	variation	959082	959082	.	.	0	note=snp G=>A A:19 G:0
EA2454	snippy:4.3.6	variation	959087	959087	.	.	0	note=snp T=>A A:19 T:0
EA2454	snippy:4.3.6	variation	959096	959096	.	.	0	note=snp C=>G G:11 C:0
EA2454	snippy:4.3.6	variation	959100	959100	.	.	0	note=snp T=>A A:10 T:0
EA2454	snippy:4.3.6	variation	959103	959103	.	.	0	note=snp G=>C C:10 G:0
EA2454	snippy:4.3.6	variation	960140	960140	.	.	0	note=complex AT=>GC GC:19 AT:0
EA2454	snippy:4.3.6	variation	960146	960146	.	.	0	note=snp T=>C C:25 T:0
EA2454	snippy:4.3.6	variation	960163	960163	.	.	0	note=snp G=>A A:37 G:0
EA2454	snippy:4.3.6	variation	960167	960167	.	.	0	note=del TA=>T T:38 TA:0
EA2454	snippy:4.3.6	variation	960192	960192	.	.	0	note=snp G=>A A:49 G:0
EA2454	snippy:4.3.6	variation	960212	960212	.	.	0	note=complex AG=>CGT CGT:62 AG:0
EA2454	snippy:4.3.6	variation	960239	960239	.	.	0	note=complex TATTGCCCGGTTGGGGATA=>CAGTGTCCTGCCGGAGGTC CAGTGTCCTGCCGGAGGTC:55 TATTGCCCGGTTGGGGATA:0
EA2454	snippy:4.3.6	variation	960286	960286	.	.	0	note=snp G=>A A:93 G:0
EA2454	snippy:4.3.6	variation	960292	960292	.	.	0	note=snp T=>C C:101 T:0
EA2454	snippy:4.3.6	variation	960303	960303	.	.	0	note=del GAACGA=>G G:89 GAACGA:0
EA2454	snippy:4.3.6	variation	960358	960358	.	.	0	note=snp A=>G G:161 A:0
EA2454	snippy:4.3.6	variation	960367	960367	.	.	0	note=snp C=>T T:179 C:0
EA2454	snippy:4.3.6	variation	960381	960381	.	.	0	note=complex TGCG=>GGCA GGCA:184 TGCG:0
EA2454	snippy:4.3.6	variation	960392	960392	.	.	0	note=snp G=>A A:215 G:0
EA2454	snippy:4.3.6	variation	960449	960449	.	.	0	note=snp T=>G G:234 T:2
EA2454	snippy:4.3.6	variation	960463	960463	.	.	0	note=snp G=>A A:224 G:0
EA2454	snippy:4.3.6	variation	960506	960506	.	.	0	note=snp A=>G G:171 A:0
EA2454	snippy:4.3.6	variation	960520	960520	.	.	0	note=snp G=>A A:164 G:0
EA2454	snippy:4.3.6	variation	960528	960528	.	.	0	note=complex GCCGT=>ATCGG ATCGG:122 GCCGT:0
EA2454	snippy:4.3.6	variation	960547	960547	.	.	0	note=snp A=>G G:130 A:0
EA2454	snippy:4.3.6	variation	960570	960570	.	.	0	note=snp C=>T T:114 C:0
EA2454	snippy:4.3.6	variation	960586	960586	.	.	0	note=snp C=>T T:76 C:1
EA2454	snippy:4.3.6	variation	960591	960591	.	.	0	note=complex TACTCAGGGGC=>AGTGCAAAGGT AGTGCAAAGGT:57 TACTCAGGGGC:0
EA2454	snippy:4.3.6	variation	960619	960619	.	.	0	note=mnp CC=>GA GA:99 CC:0
EA2454	snippy:4.3.6	variation	960658	960658	.	.	0	note=snp C=>T T:101 C:0
EA2454	snippy:4.3.6	variation	960688	960688	.	.	0	note=snp A=>G G:110 A:0
EA2454	snippy:4.3.6	variation	960695	960695	.	.	0	note=snp G=>A A:113 G:0
EA2454	snippy:4.3.6	variation	960703	960703	.	.	0	note=snp C=>G G:117 C:0
EA2454	snippy:4.3.6	variation	960721	960721	.	.	0	note=snp G=>A A:162 G:0
EA2454	snippy:4.3.6	variation	960729	960729	.	.	0	note=complex CCGGATGCT=>TCGGGTGCC TCGGGTGCC:158 CCGGATGCT:0
EA2454	snippy:4.3.6	variation	960762	960762	.	.	0	note=complex TCA=>CCT CCT:151 TCA:0
EA2454	snippy:4.3.6	variation	960782	960782	.	.	0	note=del GAA=>G G:126 GAA:0
EA2454	snippy:4.3.6	variation	960788	960788	.	.	0	note=ins G=>GTA GTA:123 G:0
EA2454	snippy:4.3.6	variation	960799	960799	.	.	0	note=snp T=>C C:131 T:0
EA2454	snippy:4.3.6	variation	960811	960811	.	.	0	note=snp G=>A A:129 G:0
EA2454	snippy:4.3.6	variation	960860	960860	.	.	0	note=complex GCCACT=>TGCACC TGCACC:19 GCCACT:0
EA2454	snippy:4.3.6	variation	960877	960877	.	.	0	note=snp C=>T T:18 C:0
EA2454	snippy:4.3.6	variation	961111	961111	.	.	0	note=complex CGGT=>GGGC GGGC:12 CGGT:0
EA2454	snippy:4.3.6	variation	961123	961123	.	.	0	note=snp C=>T T:30 C:0
EA2454	snippy:4.3.6	variation	961130	961130	.	.	0	note=complex ACT=>GCC GCC:34 ACT:0
EA2454	snippy:4.3.6	variation	961143	961143	.	.	0	note=complex ATCG=>CTCA CTCA:38 ATCG:0
EA2454	snippy:4.3.6	variation	961160	961160	.	.	0	note=complex CTTTGC=>TTGTGT TTGTGT:53 CTTTGC:0
EA2454	snippy:4.3.6	variation	961186	961186	.	.	0	note=snp C=>T T:75 C:0
EA2454	snippy:4.3.6	variation	961206	961206	.	.	0	note=snp G=>T T:84 G:0
EA2454	snippy:4.3.6	variation	961232	961232	.	.	0	note=snp G=>A A:83 G:0
EA2454	snippy:4.3.6	variation	961240	961240	.	.	0	note=snp T=>A A:80 T:0
EA2454	snippy:4.3.6	variation	961252	961252	.	.	0	note=complex TG=>AC AC:43 TG:0
EA2454	snippy:4.3.6	variation	961270	961270	.	.	0	note=snp A=>G G:12 A:0
EA2454	snippy:4.3.6	variation	961392	961392	.	.	0	note=snp G=>A A:196 G:0
EA2454	snippy:4.3.6	variation	961418	961418	.	.	0	note=mnp TA=>GG GG:271 TA:0
EA2454	snippy:4.3.6	variation	961439	961439	.	.	0	note=snp G=>A A:324 G:0
EA2454	snippy:4.3.6	variation	961448	961448	.	.	0	note=snp A=>G G:317 A:0
EA2454	snippy:4.3.6	variation	961458	961458	.	.	0	note=snp G=>A A:312 G:0
EA2454	snippy:4.3.6	variation	961503	961503	.	.	0	note=snp C=>T T:304 C:0
EA2454	snippy:4.3.6	variation	961535	961535	.	.	0	note=snp T=>A A:291 T:0
EA2454	snippy:4.3.6	variation	961563	961563	.	.	0	note=complex TTGT=>ATGC ATGC:223 TTGT:0
EA2454	snippy:4.3.6	variation	961579	961579	.	.	0	note=complex AAT=>CAG CAG:212 AAT:0
EA2454	snippy:4.3.6	variation	961638	961638	.	.	0	note=snp G=>A A:208 G:0
EA2454	snippy:4.3.6	variation	961656	961656	.	.	0	note=snp C=>T T:223 C:0
EA2454	snippy:4.3.6	variation	961707	961707	.	.	0	note=snp T=>C C:200 T:0
EA2454	snippy:4.3.6	variation	961852	961852	.	.	0	note=complex AATATCGGAA=>GATGCCAGGG GATGCCAGGG:48 AATATCGGAA:0
EA2454	snippy:4.3.6	variation	961877	961877	.	.	0	note=snp T=>A A:71 T:0
EA2454	snippy:4.3.6	variation	961893	961893	.	.	0	note=snp A=>G G:80 A:0
EA2454	snippy:4.3.6	variation	961901	961901	.	.	0	note=snp C=>A A:81 C:0
EA2454	snippy:4.3.6	variation	961920	961920	.	.	0	note=snp G=>T T:76 G:0
EA2454	snippy:4.3.6	variation	961970	961970	.	.	0	note=snp A=>G G:66 A:0
EA2454	snippy:4.3.6	variation	961985	961985	.	.	0	note=snp G=>A A:58 G:1
EA2454	snippy:4.3.6	variation	961994	961994	.	.	0	note=complex GA=>AT AT:57 GA:0
EA2454	snippy:4.3.6	variation	962003	962003	.	.	0	note=del GC=>G G:49 GC:0
EA2454	snippy:4.3.6	variation	962061	962061	.	.	0	note=ins G=>GTTGTAT GTTGTAT:10 G:0
EA2454	snippy:4.3.6	variation	962114	962114	.	.	0	note=snp C=>G G:12 C:0
EA2454	snippy:4.3.6	variation	962206	962206	.	.	0	note=snp A=>T T:21 A:0
EA2454	snippy:4.3.6	variation	962287	962287	.	.	0	note=snp C=>G G:25 C:0
EA2454	snippy:4.3.6	variation	962400	962400	.	.	0	note=del GCAGGT=>G G:19 GCAGGT:0
EA2454	snippy:4.3.6	variation	962440	962440	.	.	0	note=snp T=>C C:21 T:0
EA2454	snippy:4.3.6	variation	962516	962516	.	.	0	note=snp T=>C C:32 T:0
EA2454	snippy:4.3.6	variation	962537	962537	.	.	0	note=snp A=>T T:29 A:0
EA2454	snippy:4.3.6	variation	962559	962559	.	.	0	note=complex GATGA=>TATGG TATGG:30 GATGA:0
EA2454	snippy:4.3.6	variation	962754	962754	.	.	0	note=snp T=>C C:24 T:0
EA2454	snippy:4.3.6	variation	962765	962765	.	.	0	note=mnp TA=>CG CG:23 TA:0
EA2454	snippy:4.3.6	variation	962781	962781	.	.	0	note=mnp TGA=>GCT GCT:20 TGA:0
EA2454	snippy:4.3.6	variation	962805	962805	.	.	0	note=snp G=>A A:29 G:0
EA2454	snippy:4.3.6	variation	962823	962823	.	.	0	note=snp A=>G G:27 A:0
EA2454	snippy:4.3.6	variation	962845	962845	.	.	0	note=snp G=>A A:25 G:0
EA2454	snippy:4.3.6	variation	962895	962895	.	.	0	note=snp A=>G G:21 A:0
EA2454	snippy:4.3.6	variation	962960	962960	.	.	0	note=snp A=>G G:27 A:0
EA2454	snippy:4.3.6	variation	962982	962982	.	.	0	note=snp A=>G G:22 A:0
EA2454	snippy:4.3.6	variation	963003	963003	.	.	0	note=snp T=>C C:27 T:0
EA2454	snippy:4.3.6	variation	963009	963009	.	.	0	note=snp A=>G G:24 A:0
EA2454	snippy:4.3.6	variation	963024	963024	.	.	0	note=snp T=>G G:26 T:0
EA2454	snippy:4.3.6	variation	963030	963030	.	.	0	note=snp A=>G G:26 A:0
EA2454	snippy:4.3.6	variation	963036	963036	.	.	0	note=snp A=>G G:29 A:0
EA2454	snippy:4.3.6	variation	963081	963081	.	.	0	note=complex TCCAGC=>CCCGGT CCCGGT:25 TCCAGC:0
EA2454	snippy:4.3.6	variation	963150	963150	.	.	0	note=snp A=>T T:24 A:0
EA2454	snippy:4.3.6	variation	963184	963184	.	.	0	note=snp A=>T T:18 A:0
EA2454	snippy:4.3.6	variation	963204	963204	.	.	0	note=snp G=>T T:19 G:1
EA2454	snippy:4.3.6	variation	963219	963219	.	.	0	note=snp G=>A A:17 G:0
EA2454	snippy:4.3.6	variation	963261	963261	.	.	0	note=complex AGA=>TGG TGG:22 AGA:0
EA2454	snippy:4.3.6	variation	963273	963273	.	.	0	note=snp G=>A A:28 G:0
EA2454	snippy:4.3.6	variation	963285	963285	.	.	0	note=snp A=>C C:30 A:0
EA2454	snippy:4.3.6	variation	963312	963312	.	.	0	note=snp A=>G G:32 A:0
EA2454	snippy:4.3.6	variation	963336	963336	.	.	0	note=complex GGT=>AGC AGC:31 GGT:0
EA2454	snippy:4.3.6	variation	963374	963374	.	.	0	note=snp C=>G G:32 C:0
EA2454	snippy:4.3.6	variation	963390	963390	.	.	0	note=snp A=>G G:33 A:0
EA2454	snippy:4.3.6	variation	963396	963396	.	.	0	note=snp C=>T T:34 C:0
EA2454	snippy:4.3.6	variation	963414	963414	.	.	0	note=snp C=>T T:31 C:0
EA2454	snippy:4.3.6	variation	963465	963465	.	.	0	note=snp T=>C C:28 T:0
EA2454	snippy:4.3.6	variation	963513	963513	.	.	0	note=snp G=>A A:30 G:0
EA2454	snippy:4.3.6	variation	963525	963525	.	.	0	note=snp T=>C C:27 T:0
EA2454	snippy:4.3.6	variation	963555	963555	.	.	0	note=snp A=>G G:21 A:0
EA2454	snippy:4.3.6	variation	963590	963590	.	.	0	note=snp A=>G G:20 A:0
EA2454	snippy:4.3.6	variation	963747	963747	.	.	0	note=snp T=>C C:15 T:0
EA2454	snippy:4.3.6	variation	963757	963757	.	.	0	note=snp A=>G G:12 A:0
EA2454	snippy:4.3.6	variation	964586	964586	.	.	0	note=snp A=>G G:17 A:0
EA2454	snippy:4.3.6	variation	964604	964604	.	.	0	note=snp T=>G G:22 T:0
EA2454	snippy:4.3.6	variation	964615	964615	.	.	0	note=snp T=>A A:22 T:0
EA2454	snippy:4.3.6	variation	964628	964628	.	.	0	note=snp T=>A A:23 T:0
EA2454	snippy:4.3.6	variation	964671	964671	.	.	0	note=snp A=>G G:24 A:0
EA2454	snippy:4.3.6	variation	964703	964703	.	.	0	note=complex TG=>CA CA:16 TG:0
EA2454	snippy:4.3.6	variation	964710	964710	.	.	0	note=snp T=>C C:16 T:0
EA2454	snippy:4.3.6	variation	983278	983278	.	.	0	note=snp T=>G G:65 T:0
EA2454	snippy:4.3.6	variation	983325	983325	.	.	0	note=complex TCG=>ACC ACC:89 TCG:0
EA2454	snippy:4.3.6	variation	983359	983359	.	.	0	note=complex GCATA=>ACACT ACACT:82 GCATA:0
EA2454	snippy:4.3.6	variation	983371	983371	.	.	0	note=snp G=>A A:108 G:0
EA2454	snippy:4.3.6	variation	983404	983404	.	.	0	note=snp T=>C C:103 T:0
EA2454	snippy:4.3.6	variation	983426	983426	.	.	0	note=snp G=>A A:118 G:0
EA2454	snippy:4.3.6	variation	983446	983446	.	.	0	note=snp A=>C C:124 A:0
EA2454	snippy:4.3.6	variation	983525	983525	.	.	0	note=snp A=>G G:125 A:0
EA2454	snippy:4.3.6	variation	983570	983570	.	.	0	note=complex CTGC=>TTGT TTGT:103 CTGC:0
EA2454	snippy:4.3.6	variation	983840	983840	.	.	0	note=snp A=>G G:90 A:0
EA2454	snippy:4.3.6	variation	983901	983901	.	.	0	note=snp C=>T T:102 C:0
EA2454	snippy:4.3.6	variation	983906	983906	.	.	0	note=complex TGGT=>CGGC CGGC:90 TGGT:0
EA2454	snippy:4.3.6	variation	984038	984038	.	.	0	note=snp A=>G G:145 A:0
EA2454	snippy:4.3.6	variation	984050	984050	.	.	0	note=snp G=>T T:151 G:0
EA2454	snippy:4.3.6	variation	984129	984129	.	.	0	note=complex ACTCTGG=>GCCCTGT GCCCTGT:110 ACTCTGG:0
EA2454	snippy:4.3.6	variation	984294	984294	.	.	0	note=snp G=>A A:115 G:0
EA2454	snippy:4.3.6	variation	984305	984305	.	.	0	note=complex AGCA=>TGCT TGCT:89 AGCA:0
EA2454	snippy:4.3.6	variation	984317	984317	.	.	0	note=snp A=>G G:92 A:0
EA2454	snippy:4.3.6	variation	984344	984344	.	.	0	note=snp C=>T T:74 C:0
EA2454	snippy:4.3.6	variation	984401	984401	.	.	0	note=snp A=>T T:47 A:0
EA2454	snippy:4.3.6	variation	984422	984422	.	.	0	note=complex GCGCAAC=>ACGCGAT ACGCGAT:23 GCGCAAC:0
EA2454	snippy:4.3.6	variation	984434	984434	.	.	0	note=snp G=>A A:21 G:0
EA2454	snippy:4.3.6	variation	984440	984440	.	.	0	note=snp T=>C C:17 T:0
EA2454	snippy:4.3.6	variation	984452	984452	.	.	0	note=snp T=>C C:13 T:0
EA2454	snippy:4.3.6	variation	989594	989594	.	.	0	note=snp T=>A A:35 T:0
EA2454	snippy:4.3.6	variation	989710	989710	.	.	0	note=complex TGTC=>CGTT CGTT:73 TGTC:0
EA2454	snippy:4.3.6	variation	989731	989731	.	.	0	note=snp G=>A A:74 G:0
EA2454	snippy:4.3.6	variation	989794	989794	.	.	0	note=complex CATCA=>TATCG TATCG:68 CATCA:0
EA2454	snippy:4.3.6	variation	989831	989831	.	.	0	note=snp G=>A A:76 G:0
EA2454	snippy:4.3.6	variation	989932	989932	.	.	0	note=snp A=>G G:101 A:0
EA2454	snippy:4.3.6	variation	989938	989938	.	.	0	note=complex AGAC=>GGAT GGAT:96 AGAC:0
EA2454	snippy:4.3.6	variation	989989	989989	.	.	0	note=snp A=>G G:108 A:0
EA2454	snippy:4.3.6	variation	990058	990058	.	.	0	note=mnp GC=>TT TT:115 GC:0
EA2454	snippy:4.3.6	variation	990100	990100	.	.	0	note=snp A=>T T:139 A:1
EA2454	snippy:4.3.6	variation	990118	990118	.	.	0	note=snp T=>A A:160 T:0
EA2454	snippy:4.3.6	variation	990124	990124	.	.	0	note=snp T=>C C:172 T:0
EA2454	snippy:4.3.6	variation	990230	990230	.	.	0	note=snp T=>C C:122 T:0
EA2454	snippy:4.3.6	variation	990400	990400	.	.	0	note=snp A=>G G:122 A:0
EA2454	snippy:4.3.6	variation	990463	990463	.	.	0	note=snp A=>G G:109 A:0
EA2454	snippy:4.3.6	variation	990562	990562	.	.	0	note=snp T=>C C:106 T:1
EA2454	snippy:4.3.6	variation	990572	990572	.	.	0	note=snp G=>A A:108 G:0
EA2454	snippy:4.3.6	variation	990627	990627	.	.	0	note=snp C=>T T:93 C:0
EA2454	snippy:4.3.6	variation	990637	990637	.	.	0	note=snp G=>A A:92 G:0
EA2454	snippy:4.3.6	variation	990685	990685	.	.	0	note=snp A=>G G:97 A:0
EA2454	snippy:4.3.6	variation	990691	990691	.	.	0	note=snp G=>T T:101 G:0
EA2454	snippy:4.3.6	variation	990697	990697	.	.	0	note=snp C=>G G:104 C:0
EA2454	snippy:4.3.6	variation	990727	990727	.	.	0	note=complex GCGT=>ACGG ACGG:93 GCGT:0
EA2454	snippy:4.3.6	variation	990742	990742	.	.	0	note=snp C=>T T:90 C:0
EA2454	snippy:4.3.6	variation	990757	990757	.	.	0	note=snp A=>G G:86 A:0
EA2454	snippy:4.3.6	variation	990763	990763	.	.	0	note=complex GCCA=>ACCG ACCG:79 GCCA:0
EA2454	snippy:4.3.6	variation	990872	990872	.	.	0	note=complex TTT=>GTA GTA:73 TTT:0
EA2454	snippy:4.3.6	variation	990880	990880	.	.	0	note=complex CAGTA=>AAGCG AAGCG:69 CAGTA:0
EA2454	snippy:4.3.6	variation	990904	990904	.	.	0	note=complex CCCCAC=>TGCCGT TGCCGT:74 CCCCAC:0
EA2454	snippy:4.3.6	variation	990925	990925	.	.	0	note=snp A=>G G:95 A:0
EA2454	snippy:4.3.6	variation	990931	990931	.	.	0	note=snp A=>G G:104 A:0
EA2454	snippy:4.3.6	variation	990970	990970	.	.	0	note=snp C=>T T:86 C:0
EA2454	snippy:4.3.6	variation	991009	991009	.	.	0	note=snp T=>G G:93 T:0
EA2454	snippy:4.3.6	variation	991060	991060	.	.	0	note=snp G=>A A:131 G:0
EA2454	snippy:4.3.6	variation	991066	991066	.	.	0	note=complex AATG=>GATA GATA:112 AATG:0
EA2454	snippy:4.3.6	variation	991169	991169	.	.	0	note=snp C=>T T:132 C:0
EA2454	snippy:4.3.6	variation	991239	991239	.	.	0	note=snp A=>C C:116 A:2
EA2454	snippy:4.3.6	variation	991259	991259	.	.	0	note=mnp CA=>TC TC:134 CA:0
EA2454	snippy:4.3.6	variation	991311	991311	.	.	0	note=snp A=>G G:147 A:0
EA2454	snippy:4.3.6	variation	991365	991365	.	.	0	note=snp A=>G G:162 A:0
EA2454	snippy:4.3.6	variation	991386	991386	.	.	0	note=snp G=>A A:173 G:0
EA2454	snippy:4.3.6	variation	991404	991404	.	.	0	note=snp A=>G G:154 A:0
EA2454	snippy:4.3.6	variation	991428	991428	.	.	0	note=snp G=>A A:158 G:0
EA2454	snippy:4.3.6	variation	991560	991560	.	.	0	note=snp C=>T T:150 C:0
EA2454	snippy:4.3.6	variation	991590	991590	.	.	0	note=snp A=>G G:118 A:0
EA2454	snippy:4.3.6	variation	991596	991596	.	.	0	note=snp G=>A A:133 G:0
EA2454	snippy:4.3.6	variation	991611	991611	.	.	0	note=snp G=>A A:139 G:0
EA2454	snippy:4.3.6	variation	991638	991638	.	.	0	note=snp C=>A A:153 C:2
EA2454	snippy:4.3.6	variation	991686	991686	.	.	0	note=snp G=>A A:156 G:0
EA2454	snippy:4.3.6	variation	991800	991800	.	.	0	note=snp C=>T T:119 C:0
EA2454	snippy:4.3.6	variation	991983	991983	.	.	0	note=snp A=>G G:138 A:0
EA2454	snippy:4.3.6	variation	992001	992001	.	.	0	note=snp T=>C C:129 T:0
EA2454	snippy:4.3.6	variation	992040	992040	.	.	0	note=snp A=>C C:134 A:0
EA2454	snippy:4.3.6	variation	992055	992055	.	.	0	note=snp G=>A A:116 G:0
EA2454	snippy:4.3.6	variation	992231	992231	.	.	0	note=snp G=>A A:116 G:0
EA2454	snippy:4.3.6	variation	992244	992244	.	.	0	note=snp C=>T T:114 C:0
EA2454	snippy:4.3.6	variation	992692	992692	.	.	0	note=snp G=>A A:156 G:0
EA2454	snippy:4.3.6	variation	992921	992921	.	.	0	note=snp C=>T T:84 C:0
EA2454	snippy:4.3.6	variation	993116	993116	.	.	0	note=snp C=>T T:77 C:0
EA2454	snippy:4.3.6	variation	994056	994056	.	.	0	note=snp A=>G G:164 A:0
EA2454	snippy:4.3.6	variation	994074	994074	.	.	0	note=snp T=>C C:165 T:0
EA2454	snippy:4.3.6	variation	994116	994116	.	.	0	note=snp G=>A A:184 G:0
EA2454	snippy:4.3.6	variation	994311	994311	.	.	0	note=snp T=>C C:142 T:0
EA2454	snippy:4.3.6	variation	994443	994443	.	.	0	note=snp A=>G G:139 A:0
EA2454	snippy:4.3.6	variation	994617	994617	.	.	0	note=snp C=>T T:108 C:0
EA2454	snippy:4.3.6	variation	994626	994626	.	.	0	note=snp G=>T T:128 G:0
EA2454	snippy:4.3.6	variation	994884	994884	.	.	0	note=snp T=>C C:134 T:0
EA2454	snippy:4.3.6	variation	994890	994890	.	.	0	note=snp T=>C C:117 T:0
EA2454	snippy:4.3.6	variation	994998	994998	.	.	0	note=snp A=>G G:134 A:0
EA2454	snippy:4.3.6	variation	995076	995076	.	.	0	note=snp A=>G G:129 A:0
EA2454	snippy:4.3.6	variation	995121	995121	.	.	0	note=snp T=>A A:138 T:0
EA2454	snippy:4.3.6	variation	995151	995151	.	.	0	note=complex AGCC=>CGCA CGCA:132 AGCC:0
EA2454	snippy:4.3.6	variation	995193	995193	.	.	0	note=snp A=>G G:143 A:0
EA2454	snippy:4.3.6	variation	995575	995575	.	.	0	note=snp T=>A A:135 T:1
EA2454	snippy:4.3.6	variation	996391	996391	.	.	0	note=snp G=>C C:142 G:1
EA2454	snippy:4.3.6	variation	996427	996427	.	.	0	note=snp C=>G G:125 C:0
EA2454	snippy:4.3.6	variation	996451	996451	.	.	0	note=snp C=>G G:109 C:0
EA2454	snippy:4.3.6	variation	996466	996466	.	.	0	note=snp A=>G G:109 A:0
EA2454	snippy:4.3.6	variation	996547	996547	.	.	0	note=snp T=>C C:113 T:0
EA2454	snippy:4.3.6	variation	996667	996667	.	.	0	note=snp T=>C C:112 T:2
EA2454	snippy:4.3.6	variation	996676	996676	.	.	0	note=snp C=>T T:104 C:0
EA2454	snippy:4.3.6	variation	996712	996712	.	.	0	note=complex TGGC=>CGGT CGGT:100 TGGC:0
EA2454	snippy:4.3.6	variation	996751	996751	.	.	0	note=snp T=>C C:111 T:0
EA2454	snippy:4.3.6	variation	996775	996775	.	.	0	note=snp G=>A A:124 G:0
EA2454	snippy:4.3.6	variation	996850	996850	.	.	0	note=snp A=>G G:115 A:0
EA2454	snippy:4.3.6	variation	996856	996856	.	.	0	note=snp T=>C C:111 T:0
EA2454	snippy:4.3.6	variation	996886	996886	.	.	0	note=snp G=>C C:106 G:0
EA2454	snippy:4.3.6	variation	996901	996901	.	.	0	note=snp G=>C C:106 G:0
EA2454	snippy:4.3.6	variation	997000	997000	.	.	0	note=snp A=>G G:108 A:0
EA2454	snippy:4.3.6	variation	997012	997012	.	.	0	note=snp G=>A A:111 G:0
EA2454	snippy:4.3.6	variation	997024	997024	.	.	0	note=snp C=>G G:115 C:0
EA2454	snippy:4.3.6	variation	997036	997036	.	.	0	note=snp T=>C C:106 T:0
EA2454	snippy:4.3.6	variation	997180	997180	.	.	0	note=complex CGTG=>TGTA TGTA:138 CGTG:0
EA2454	snippy:4.3.6	variation	997189	997189	.	.	0	note=snp A=>G G:147 A:0
EA2454	snippy:4.3.6	variation	997200	997200	.	.	0	note=snp T=>C C:153 T:0
EA2454	snippy:4.3.6	variation	997480	997480	.	.	0	note=snp A=>T T:144 A:0
EA2454	snippy:4.3.6	variation	997504	997504	.	.	0	note=snp A=>C C:151 A:3
EA2454	snippy:4.3.6	variation	997510	997510	.	.	0	note=snp C=>T T:159 C:0
EA2454	snippy:4.3.6	variation	997540	997540	.	.	0	note=complex TGGT=>CGGC CGGC:154 TGGT:0
EA2454	snippy:4.3.6	variation	997555	997555	.	.	0	note=snp T=>C C:160 T:0
EA2454	snippy:4.3.6	variation	997639	997639	.	.	0	note=snp C=>T T:156 C:0
EA2454	snippy:4.3.6	variation	997654	997654	.	.	0	note=snp C=>T T:137 C:0
EA2454	snippy:4.3.6	variation	997681	997681	.	.	0	note=snp G=>A A:128 G:0
EA2454	snippy:4.3.6	variation	997708	997708	.	.	0	note=snp T=>C C:127 T:0
EA2454	snippy:4.3.6	variation	997744	997744	.	.	0	note=snp G=>A A:103 G:0
EA2454	snippy:4.3.6	variation	997756	997756	.	.	0	note=snp G=>A A:102 G:0
EA2454	snippy:4.3.6	variation	997819	997819	.	.	0	note=snp G=>A A:93 G:0
EA2454	snippy:4.3.6	variation	997834	997834	.	.	0	note=snp T=>C C:97 T:0
EA2454	snippy:4.3.6	variation	997879	997879	.	.	0	note=snp A=>G G:74 A:0
EA2454	snippy:4.3.6	variation	997918	997918	.	.	0	note=snp A=>G G:92 A:0
EA2454	snippy:4.3.6	variation	997930	997930	.	.	0	note=snp C=>T T:94 C:0
EA2454	snippy:4.3.6	variation	997987	997987	.	.	0	note=snp G=>A A:120 G:0
EA2454	snippy:4.3.6	variation	998008	998008	.	.	0	note=snp C=>T T:128 C:0
EA2454	snippy:4.3.6	variation	998014	998014	.	.	0	note=complex TGGT=>CGGC CGGC:123 TGGT:0
EA2454	snippy:4.3.6	variation	998026	998026	.	.	0	note=snp G=>A A:136 G:1
EA2454	snippy:4.3.6	variation	998158	998158	.	.	0	note=snp C=>T T:128 C:0
EA2454	snippy:4.3.6	variation	998200	998200	.	.	0	note=snp A=>C C:138 A:1
EA2454	snippy:4.3.6	variation	998404	998404	.	.	0	note=snp T=>C C:114 T:0
EA2454	snippy:4.3.6	variation	998413	998413	.	.	0	note=snp G=>A A:108 G:0
EA2454	snippy:4.3.6	variation	998510	998510	.	.	0	note=snp A=>G G:130 A:0
EA2454	snippy:4.3.6	variation	998626	998626	.	.	0	note=snp T=>C C:109 T:0
EA2454	snippy:4.3.6	variation	998880	998880	.	.	0	note=complex AACACA=>CACC CACC:122 AACACA:0
EA2454	snippy:4.3.6	variation	998895	998895	.	.	0	note=snp C=>A A:129 C:0
EA2454	snippy:4.3.6	variation	998908	998908	.	.	0	note=snp C=>A A:134 C:2
EA2454	snippy:4.3.6	variation	999123	999123	.	.	0	note=snp C=>T T:125 C:0
EA2454	snippy:4.3.6	variation	999159	999159	.	.	0	note=snp T=>A A:111 T:0
EA2454	snippy:4.3.6	variation	999352	999352	.	.	0	note=snp G=>A A:104 G:0
EA2454	snippy:4.3.6	variation	999551	999551	.	.	0	note=snp T=>C C:115 T:0
EA2454	snippy:4.3.6	variation	999750	999750	.	.	0	note=snp G=>A A:142 G:0
EA2454	snippy:4.3.6	variation	999759	999759	.	.	0	note=snp A=>G G:135 A:0
EA2454	snippy:4.3.6	variation	999829	999829	.	.	0	note=snp C=>T T:139 C:0
EA2454	snippy:4.3.6	variation	999857	999857	.	.	0	note=snp A=>T T:156 A:0
EA2454	snippy:4.3.6	variation	999924	999924	.	.	0	note=snp T=>C C:144 T:0
EA2454	snippy:4.3.6	variation	1000250	1000250	.	.	0	note=snp T=>C C:58 T:0
EA2454	snippy:4.3.6	variation	1000365	1000365	.	.	0	note=snp C=>T T:106 C:2
EA2454	snippy:4.3.6	variation	1000385	1000385	.	.	0	note=snp T=>C C:135 T:0
EA2454	snippy:4.3.6	variation	1000493	1000493	.	.	0	note=snp G=>T T:98 G:1
EA2454	snippy:4.3.6	variation	1000664	1000664	.	.	0	note=snp G=>A A:105 G:0
EA2454	snippy:4.3.6	variation	1000840	1000840	.	.	0	note=snp A=>G G:103 A:0
EA2454	snippy:4.3.6	variation	1000929	1000929	.	.	0	note=snp G=>A A:121 G:0
EA2454	snippy:4.3.6	variation	1001318	1001318	.	.	0	note=snp A=>T T:99 A:0
EA2454	snippy:4.3.6	variation	1001337	1001337	.	.	0	note=snp G=>A A:101 G:0
EA2454	snippy:4.3.6	variation	1001375	1001375	.	.	0	note=snp C=>G G:85 C:0
EA2454	snippy:4.3.6	variation	1001425	1001425	.	.	0	note=snp A=>G G:78 A:0
EA2454	snippy:4.3.6	variation	1001433	1001433	.	.	0	note=snp C=>T T:86 C:0
EA2454	snippy:4.3.6	variation	1001516	1001516	.	.	0	note=snp C=>T T:111 C:0
EA2454	snippy:4.3.6	variation	1001557	1001557	.	.	0	note=snp C=>T T:114 C:0
EA2454	snippy:4.3.6	variation	1001617	1001617	.	.	0	note=snp C=>T T:115 C:0
EA2454	snippy:4.3.6	variation	1001665	1001665	.	.	0	note=snp C=>T T:112 C:0
EA2454	snippy:4.3.6	variation	1001689	1001689	.	.	0	note=complex TAGT=>CAGC CAGC:105 TAGT:0
EA2454	snippy:4.3.6	variation	1001899	1001899	.	.	0	note=snp T=>C C:132 T:0
EA2454	snippy:4.3.6	variation	1001941	1001941	.	.	0	note=snp A=>G G:106 A:0
EA2454	snippy:4.3.6	variation	1001956	1001956	.	.	0	note=complex CAAT=>AAAC AAAC:98 CAAT:0
EA2454	snippy:4.3.6	variation	1002058	1002058	.	.	0	note=snp T=>C C:91 T:0
EA2454	snippy:4.3.6	variation	1002091	1002091	.	.	0	note=snp A=>G G:97 A:0
EA2454	snippy:4.3.6	variation	1002109	1002109	.	.	0	note=snp G=>A A:90 G:0
EA2454	snippy:4.3.6	variation	1002145	1002145	.	.	0	note=snp G=>A A:114 G:0
EA2454	snippy:4.3.6	variation	1002160	1002160	.	.	0	note=snp G=>T T:109 G:1
EA2454	snippy:4.3.6	variation	1002181	1002181	.	.	0	note=snp A=>G G:105 A:0
EA2454	snippy:4.3.6	variation	1002196	1002196	.	.	0	note=snp A=>G G:110 A:0
EA2454	snippy:4.3.6	variation	1002217	1002217	.	.	0	note=complex CAG=>TAA TAA:97 CAG:0
EA2454	snippy:4.3.6	variation	1002277	1002277	.	.	0	note=snp T=>G G:103 T:1
EA2454	snippy:4.3.6	variation	1002406	1002406	.	.	0	note=snp C=>T T:106 C:0
EA2454	snippy:4.3.6	variation	1002450	1002450	.	.	0	note=complex TAAATAATTAATATCT=>AATTGATATCG AATTGATATCG:48 TAAATAATTAATATCT:0
EA2454	snippy:4.3.6	variation	1002492	1002492	.	.	0	note=complex AA=>CT CT:52 AA:0
EA2454	snippy:4.3.6	variation	1002518	1002518	.	.	0	note=complex CAGTG=>TAGTA TAGTA:24 CAGTG:0
EA2454	snippy:4.3.6	variation	1003118	1003118	.	.	0	note=snp G=>A A:23 G:0
EA2454	snippy:4.3.6	variation	1003129	1003129	.	.	0	note=snp G=>T T:25 G:0
EA2454	snippy:4.3.6	variation	1003138	1003138	.	.	0	note=snp T=>C C:30 T:0
EA2454	snippy:4.3.6	variation	1003170	1003170	.	.	0	note=snp C=>A A:33 C:0
EA2454	snippy:4.3.6	variation	1003180	1003180	.	.	0	note=snp T=>C C:32 T:0
EA2454	snippy:4.3.6	variation	1003192	1003192	.	.	0	note=snp T=>A A:31 T:0
EA2454	snippy:4.3.6	variation	1003200	1003200	.	.	0	note=complex CAATTC=>GGATTT GGATTT:23 CAATTC:0
EA2454	snippy:4.3.6	variation	1003216	1003216	.	.	0	note=complex ACCAAC=>TCCAGA TCCAGA:23 ACCAAC:0
EA2454	snippy:4.3.6	variation	1003228	1003228	.	.	0	note=complex TGGATG=>CCGATA CCGATA:23 TGGATG:0
EA2454	snippy:4.3.6	variation	1003245	1003245	.	.	0	note=snp A=>G G:25 A:0
EA2454	snippy:4.3.6	variation	1003251	1003251	.	.	0	note=complex CTTT=>TTTC TTTC:17 CTTT:0
EA2454	snippy:4.3.6	variation	1003269	1003269	.	.	0	note=snp T=>A A:15 T:0
EA2454	snippy:4.3.6	variation	1003452	1003452	.	.	0	note=snp G=>T T:20 G:0
EA2454	snippy:4.3.6	variation	1003464	1003464	.	.	0	note=snp A=>T T:20 A:0
EA2454	snippy:4.3.6	variation	1003476	1003476	.	.	0	note=snp A=>G G:24 A:0
EA2454	snippy:4.3.6	variation	1003484	1003484	.	.	0	note=snp T=>G G:24 T:0
EA2454	snippy:4.3.6	variation	1003521	1003521	.	.	0	note=complex ACC=>GTT GTT:16 ACC:0
EA2454	snippy:4.3.6	variation	1003542	1003542	.	.	0	note=complex ATT=>GTA GTA:14 ATT:0
EA2454	snippy:4.3.6	variation	1003554	1003554	.	.	0	note=complex CTGCGAG=>ATGAGGA ATGAGGA:10 CTGCGAG:0
EA2454	snippy:4.3.6	variation	1003733	1003733	.	.	0	note=complex TCTGATGAT=>CCTGCGGAA CCTGCGGAA:14 TCTGATGAT:0
EA2454	snippy:4.3.6	variation	1003755	1003755	.	.	0	note=snp C=>A A:31 C:0
EA2454	snippy:4.3.6	variation	1003796	1003796	.	.	0	note=snp C=>T T:49 C:0
EA2454	snippy:4.3.6	variation	1003824	1003824	.	.	0	note=snp A=>C C:63 A:0
EA2454	snippy:4.3.6	variation	1003842	1003842	.	.	0	note=complex AGACTTC=>GGATTTT GGATTTT:65 AGACTTC:0
EA2454	snippy:4.3.6	variation	1003858	1003858	.	.	0	note=snp C=>G G:77 C:0
EA2454	snippy:4.3.6	variation	1003877	1003877	.	.	0	note=snp A=>G G:65 A:0
EA2454	snippy:4.3.6	variation	1003882	1003882	.	.	0	note=mnp TT=>GA GA:63 TT:0
EA2454	snippy:4.3.6	variation	1003894	1003894	.	.	0	note=snp A=>G G:57 A:0
EA2454	snippy:4.3.6	variation	1003917	1003917	.	.	0	note=complex TTTAGTAG=>ATTATTAA ATTATTAA:49 TTTAGTAG:0
EA2454	snippy:4.3.6	variation	1003950	1003950	.	.	0	note=complex CTT=>TTC TTC:55 CTT:0
EA2454	snippy:4.3.6	variation	1003995	1003995	.	.	0	note=mnp GTA=>AAC AAC:32 GTA:0
EA2454	snippy:4.3.6	variation	1004003	1004003	.	.	0	note=snp T=>G G:31 T:2
EA2454	snippy:4.3.6	variation	1004008	1004008	.	.	0	note=snp T=>A A:33 T:0
EA2454	snippy:4.3.6	variation	1004014	1004014	.	.	0	note=snp T=>C C:33 T:0
EA2454	snippy:4.3.6	variation	1004023	1004023	.	.	0	note=complex GTATCTTTAGA=>TTATTTTTGAT TTATTTTTGAT:31 GTATCTTTAGA:0
EA2454	snippy:4.3.6	variation	1004043	1004043	.	.	0	note=snp A=>G G:33 A:0
EA2454	snippy:4.3.6	variation	1004121	1004121	.	.	0	note=complex CTTTG=>TTTTA TTTTA:19 CTTTG:0
EA2454	snippy:4.3.6	variation	1004144	1004144	.	.	0	note=complex CTC=>TCT TCT:19 CTC:0
EA2454	snippy:4.3.6	variation	1004152	1004152	.	.	0	note=complex GAAAGA=>TCAAGG TCAAGG:19 GAAAGA:0
EA2454	snippy:4.3.6	variation	1004163	1004163	.	.	0	note=complex GCTTCTGCTATT=>TCTTGTGTTATC TCTTGTGTTATC:20 GCTTCTGCTATT:0
EA2454	snippy:4.3.6	variation	1004182	1004182	.	.	0	note=complex CCGG=>TCGA TCGA:32 CCGG:0
EA2454	snippy:4.3.6	variation	1004201	1004201	.	.	0	note=snp C=>T T:35 C:0
EA2454	snippy:4.3.6	variation	1004211	1004211	.	.	0	note=complex CACATA=>AACACG AACACG:33 CACATA:0
EA2454	snippy:4.3.6	variation	1004225	1004225	.	.	0	note=complex CTAAGG=>TTAAAA TTAAAA:31 CTAAGG:0
EA2454	snippy:4.3.6	variation	1004236	1004236	.	.	0	note=snp T=>C C:39 T:0
EA2454	snippy:4.3.6	variation	1004308	1004308	.	.	0	note=snp A=>G G:59 A:0
EA2454	snippy:4.3.6	variation	1004348	1004348	.	.	0	note=snp T=>C C:88 T:0
EA2454	snippy:4.3.6	variation	1004471	1004471	.	.	0	note=snp T=>C C:89 T:0
EA2454	snippy:4.3.6	variation	1004521	1004521	.	.	0	note=snp C=>T T:96 C:0
EA2454	snippy:4.3.6	variation	1004537	1004537	.	.	0	note=snp T=>A A:103 T:0
EA2454	snippy:4.3.6	variation	1004690	1004690	.	.	0	note=snp G=>A A:133 G:0
EA2454	snippy:4.3.6	variation	1004774	1004774	.	.	0	note=snp G=>A A:127 G:0
EA2454	snippy:4.3.6	variation	1004790	1004790	.	.	0	note=snp A=>G G:117 A:0
EA2454	snippy:4.3.6	variation	1004801	1004801	.	.	0	note=snp T=>C C:106 T:0
EA2454	snippy:4.3.6	variation	1004904	1004904	.	.	0	note=snp C=>T T:81 C:0
EA2454	snippy:4.3.6	variation	1004946	1004946	.	.	0	note=snp T=>C C:83 T:0
EA2454	snippy:4.3.6	variation	1004951	1004951	.	.	0	note=snp C=>T T:92 C:0
EA2454	snippy:4.3.6	variation	1005037	1005037	.	.	0	note=snp T=>G G:143 T:1
EA2454	snippy:4.3.6	variation	1005062	1005062	.	.	0	note=snp G=>T T:141 G:0
EA2454	snippy:4.3.6	variation	1005089	1005089	.	.	0	note=snp G=>T T:154 G:0
EA2454	snippy:4.3.6	variation	1005131	1005131	.	.	0	note=snp G=>C C:174 G:0
EA2454	snippy:4.3.6	variation	1005199	1005199	.	.	0	note=snp C=>T T:176 C:0
EA2454	snippy:4.3.6	variation	1005243	1005243	.	.	0	note=snp T=>A A:207 T:0
EA2454	snippy:4.3.6	variation	1005263	1005263	.	.	0	note=snp G=>A A:189 G:0
EA2454	snippy:4.3.6	variation	1005296	1005296	.	.	0	note=snp G=>A A:201 G:0
EA2454	snippy:4.3.6	variation	1005336	1005336	.	.	0	note=snp G=>A A:189 G:0
EA2454	snippy:4.3.6	variation	1005347	1005347	.	.	0	note=snp C=>G G:194 C:0
EA2454	snippy:4.3.6	variation	1005353	1005353	.	.	0	note=snp C=>T T:190 C:0
EA2454	snippy:4.3.6	variation	1005404	1005404	.	.	0	note=snp A=>G G:158 A:0
EA2454	snippy:4.3.6	variation	1005437	1005437	.	.	0	note=complex CTTAT=>TTTAC TTTAC:140 CTTAT:0
EA2454	snippy:4.3.6	variation	1005567	1005567	.	.	0	note=snp A=>G G:179 A:0
EA2454	snippy:4.3.6	variation	1005624	1005624	.	.	0	note=mnp TT=>CC CC:126 TT:0
EA2454	snippy:4.3.6	variation	1005737	1005737	.	.	0	note=snp A=>T T:169 A:0
EA2454	snippy:4.3.6	variation	1005819	1005819	.	.	0	note=snp G=>A A:209 G:0
EA2454	snippy:4.3.6	variation	1005884	1005884	.	.	0	note=snp T=>C C:206 T:1
EA2454	snippy:4.3.6	variation	1005956	1005956	.	.	0	note=snp T=>G G:151 T:3
EA2454	snippy:4.3.6	variation	1006016	1006016	.	.	0	note=complex ATAC=>TTAT TTAT:128 ATAC:0
EA2454	snippy:4.3.6	variation	1006133	1006133	.	.	0	note=snp T=>C C:154 T:0
EA2454	snippy:4.3.6	variation	1006145	1006145	.	.	0	note=snp A=>G G:165 A:0
EA2454	snippy:4.3.6	variation	1006199	1006199	.	.	0	note=snp C=>T T:151 C:0
EA2454	snippy:4.3.6	variation	1006272	1006272	.	.	0	note=snp G=>A A:131 G:0
EA2454	snippy:4.3.6	variation	1006277	1006277	.	.	0	note=snp T=>G G:131 T:1
EA2454	snippy:4.3.6	variation	1006283	1006283	.	.	0	note=snp C=>T T:131 C:0
EA2454	snippy:4.3.6	variation	1006296	1006296	.	.	0	note=snp G=>A A:135 G:1
EA2454	snippy:4.3.6	variation	1006430	1006430	.	.	0	note=mnp TC=>AT AT:116 TC:0
EA2454	snippy:4.3.6	variation	1006482	1006482	.	.	0	note=snp T=>C C:117 T:0
EA2454	snippy:4.3.6	variation	1006489	1006489	.	.	0	note=complex TAT=>GAG GAG:107 TAT:0
EA2454	snippy:4.3.6	variation	1006575	1006575	.	.	0	note=snp G=>A A:119 G:0
EA2454	snippy:4.3.6	variation	1006584	1006584	.	.	0	note=snp A=>G G:115 A:0
EA2454	snippy:4.3.6	variation	1006770	1006770	.	.	0	note=snp T=>C C:108 T:0
EA2454	snippy:4.3.6	variation	1006788	1006788	.	.	0	note=snp A=>C C:95 A:1
EA2454	snippy:4.3.6	variation	1006812	1006812	.	.	0	note=snp G=>A A:100 G:0
EA2454	snippy:4.3.6	variation	1006833	1006833	.	.	0	note=snp G=>C C:108 G:0
EA2454	snippy:4.3.6	variation	1006847	1006847	.	.	0	note=snp C=>A A:108 C:0
EA2454	snippy:4.3.6	variation	1006863	1006863	.	.	0	note=snp C=>T T:124 C:0
EA2454	snippy:4.3.6	variation	1006922	1006922	.	.	0	note=snp T=>A A:111 T:0
EA2454	snippy:4.3.6	variation	1006936	1006936	.	.	0	note=snp C=>T T:96 C:0
EA2454	snippy:4.3.6	variation	1006947	1006947	.	.	0	note=snp T=>C C:95 T:0
EA2454	snippy:4.3.6	variation	1006994	1006994	.	.	0	note=snp C=>T T:101 C:0
EA2454	snippy:4.3.6	variation	1007029	1007029	.	.	0	note=snp A=>G G:90 A:0
EA2454	snippy:4.3.6	variation	1007067	1007067	.	.	0	note=complex C=>TG TG:74 C:0
EA2454	snippy:4.3.6	variation	1007078	1007078	.	.	0	note=mnp GT=>TC TC:89 GT:0
EA2454	snippy:4.3.6	variation	1007097	1007097	.	.	0	note=mnp TT=>CC CC:81 TT:0
EA2454	snippy:4.3.6	variation	1007107	1007107	.	.	0	note=snp A=>T T:79 A:0
EA2454	snippy:4.3.6	variation	1007373	1007373	.	.	0	note=snp A=>C C:90 A:1
EA2454	snippy:4.3.6	variation	1007487	1007487	.	.	0	note=snp C=>T T:128 C:0
EA2454	snippy:4.3.6	variation	1007529	1007529	.	.	0	note=complex TTCC=>ATCT ATCT:122 TTCC:0
EA2454	snippy:4.3.6	variation	1007872	1007872	.	.	0	note=snp C=>T T:164 C:0
EA2454	snippy:4.3.6	variation	1007952	1007952	.	.	0	note=snp T=>C C:141 T:0
EA2454	snippy:4.3.6	variation	1007970	1007970	.	.	0	note=snp C=>A A:145 C:0
EA2454	snippy:4.3.6	variation	1008024	1008024	.	.	0	note=snp T=>C C:141 T:0
EA2454	snippy:4.3.6	variation	1008048	1008048	.	.	0	note=snp C=>T T:134 C:0
EA2454	snippy:4.3.6	variation	1008057	1008057	.	.	0	note=snp A=>G G:133 A:0
EA2454	snippy:4.3.6	variation	1008063	1008063	.	.	0	note=snp A=>G G:139 A:0
EA2454	snippy:4.3.6	variation	1008219	1008219	.	.	0	note=snp T=>C C:125 T:0
EA2454	snippy:4.3.6	variation	1008249	1008249	.	.	0	note=snp G=>A A:127 G:0
EA2454	snippy:4.3.6	variation	1008423	1008423	.	.	0	note=snp T=>C C:183 T:0
EA2454	snippy:4.3.6	variation	1008591	1008591	.	.	0	note=snp G=>A A:145 G:0
EA2454	snippy:4.3.6	variation	1008918	1008918	.	.	0	note=complex TCAA=>CCAG CCAG:132 TCAA:0
EA2454	snippy:4.3.6	variation	1009017	1009017	.	.	0	note=complex TGGT=>AGGC AGGC:112 TGGT:0
EA2454	snippy:4.3.6	variation	1009047	1009047	.	.	0	note=snp T=>C C:115 T:0
EA2454	snippy:4.3.6	variation	1009059	1009059	.	.	0	note=snp A=>G G:103 A:0
EA2454	snippy:4.3.6	variation	1009086	1009086	.	.	0	note=complex AAACGCCACT=>TAATGCTACC TAATGCTACC:88 AAACGCCACT:0
EA2454	snippy:4.3.6	variation	1009122	1009122	.	.	0	note=snp C=>T T:106 C:0
EA2454	snippy:4.3.6	variation	1009179	1009179	.	.	0	note=snp G=>A A:125 G:0
EA2454	snippy:4.3.6	variation	1009381	1009381	.	.	0	note=snp A=>G G:132 A:0
EA2454	snippy:4.3.6	variation	1009529	1009529	.	.	0	note=complex TAAT=>CAGC CAGC:119 TAAT:0
EA2454	snippy:4.3.6	variation	1009649	1009649	.	.	0	note=snp A=>G G:132 A:0
EA2454	snippy:4.3.6	variation	1009733	1009733	.	.	0	note=snp A=>G G:146 A:0
EA2454	snippy:4.3.6	variation	1009832	1009832	.	.	0	note=snp A=>G G:128 A:0
EA2454	snippy:4.3.6	variation	1009904	1009904	.	.	0	note=snp G=>A A:130 G:0
EA2454	snippy:4.3.6	variation	1009970	1009970	.	.	0	note=snp T=>C C:139 T:0
EA2454	snippy:4.3.6	variation	1010000	1010000	.	.	0	note=snp A=>G G:157 A:0
EA2454	snippy:4.3.6	variation	1010048	1010048	.	.	0	note=snp T=>A A:158 T:0
EA2454	snippy:4.3.6	variation	1010054	1010054	.	.	0	note=snp C=>T T:148 C:0
EA2454	snippy:4.3.6	variation	1010222	1010222	.	.	0	note=snp A=>G G:133 A:0
EA2454	snippy:4.3.6	variation	1010230	1010230	.	.	0	note=snp A=>G G:144 A:0
EA2454	snippy:4.3.6	variation	1010267	1010267	.	.	0	note=complex GCGG=>ACGA ACGA:136 GCGG:0
EA2454	snippy:4.3.6	variation	1010309	1010309	.	.	0	note=snp A=>G G:146 A:0
EA2454	snippy:4.3.6	variation	1010462	1010462	.	.	0	note=snp G=>A A:108 G:0
EA2454	snippy:4.3.6	variation	1010594	1010594	.	.	0	note=snp G=>A A:117 G:0
EA2454	snippy:4.3.6	variation	1010870	1010870	.	.	0	note=snp A=>G G:139 A:0
EA2454	snippy:4.3.6	variation	1010888	1010888	.	.	0	note=snp G=>A A:143 G:0
EA2454	snippy:4.3.6	variation	1010972	1010972	.	.	0	note=snp A=>G G:161 A:0
EA2454	snippy:4.3.6	variation	1010978	1010978	.	.	0	note=snp C=>T T:159 C:0
EA2454	snippy:4.3.6	variation	1010990	1010990	.	.	0	note=snp G=>A A:159 G:1
EA2454	snippy:4.3.6	variation	1011035	1011035	.	.	0	note=snp G=>A A:150 G:0
EA2454	snippy:4.3.6	variation	1011647	1011647	.	.	0	note=snp T=>A A:117 T:0
EA2454	snippy:4.3.6	variation	1011722	1011722	.	.	0	note=snp T=>A A:133 T:0
EA2454	snippy:4.3.6	variation	1011815	1011815	.	.	0	note=snp G=>T T:131 G:0
EA2454	snippy:4.3.6	variation	1012482	1012482	.	.	0	note=snp G=>A A:157 G:1
EA2454	snippy:4.3.6	variation	1012525	1012525	.	.	0	note=snp G=>A A:148 G:2
EA2454	snippy:4.3.6	variation	1012705	1012705	.	.	0	note=snp C=>T T:125 C:0
EA2454	snippy:4.3.6	variation	1012856	1012856	.	.	0	note=snp G=>A A:118 G:0
EA2454	snippy:4.3.6	variation	1012876	1012876	.	.	0	note=snp C=>T T:123 C:0
EA2454	snippy:4.3.6	variation	1012885	1012885	.	.	0	note=snp C=>A A:125 C:0
EA2454	snippy:4.3.6	variation	1012934	1012934	.	.	0	note=snp G=>A A:124 G:0
EA2454	snippy:4.3.6	variation	1013020	1013020	.	.	0	note=snp C=>T T:147 C:0
EA2454	snippy:4.3.6	variation	1013065	1013065	.	.	0	note=snp G=>T T:159 G:0
EA2454	snippy:4.3.6	variation	1013137	1013137	.	.	0	note=snp C=>G G:157 C:0
EA2454	snippy:4.3.6	variation	1013167	1013167	.	.	0	note=snp A=>G G:139 A:0
EA2454	snippy:4.3.6	variation	1013194	1013194	.	.	0	note=complex CGCC=>TGCG TGCG:133 CGCC:0
EA2454	snippy:4.3.6	variation	1013293	1013293	.	.	0	note=complex GCCA=>ACCG ACCG:137 GCCA:0
EA2454	snippy:4.3.6	variation	1013311	1013311	.	.	0	note=snp T=>C C:135 T:1
EA2454	snippy:4.3.6	variation	1013338	1013338	.	.	0	note=snp T=>C C:149 T:0
EA2454	snippy:4.3.6	variation	1013374	1013374	.	.	0	note=snp G=>A A:144 G:0
EA2454	snippy:4.3.6	variation	1013383	1013383	.	.	0	note=snp G=>A A:151 G:0
EA2454	snippy:4.3.6	variation	1013633	1013633	.	.	0	note=snp A=>G G:137 A:0
EA2454	snippy:4.3.6	variation	1013771	1013771	.	.	0	note=snp C=>T T:141 C:0
EA2454	snippy:4.3.6	variation	1013795	1013795	.	.	0	note=snp G=>A A:148 G:0
EA2454	snippy:4.3.6	variation	1013910	1013910	.	.	0	note=snp C=>T T:140 C:0
EA2454	snippy:4.3.6	variation	1013927	1013927	.	.	0	note=snp T=>C C:140 T:0
EA2454	snippy:4.3.6	variation	1013990	1013990	.	.	0	note=snp A=>G G:118 A:0
EA2454	snippy:4.3.6	variation	1014080	1014080	.	.	0	note=snp G=>T T:130 G:0
EA2454	snippy:4.3.6	variation	1014125	1014125	.	.	0	note=snp C=>T T:128 C:0
EA2454	snippy:4.3.6	variation	1014236	1014236	.	.	0	note=snp G=>A A:115 G:0
EA2454	snippy:4.3.6	variation	1014275	1014275	.	.	0	note=snp G=>A A:116 G:0
EA2454	snippy:4.3.6	variation	1014281	1014281	.	.	0	note=snp A=>G G:116 A:0
EA2454	snippy:4.3.6	variation	1014320	1014320	.	.	0	note=snp A=>G G:110 A:0
EA2454	snippy:4.3.6	variation	1014344	1014344	.	.	0	note=snp G=>A A:117 G:0
EA2454	snippy:4.3.6	variation	1014422	1014422	.	.	0	note=snp T=>C C:125 T:0
EA2454	snippy:4.3.6	variation	1014473	1014473	.	.	0	note=snp C=>T T:136 C:0
EA2454	snippy:4.3.6	variation	1014500	1014500	.	.	0	note=snp C=>G G:136 C:0
EA2454	snippy:4.3.6	variation	1014518	1014518	.	.	0	note=snp G=>C C:140 G:0
EA2454	snippy:4.3.6	variation	1014533	1014533	.	.	0	note=snp G=>C C:132 G:0
EA2454	snippy:4.3.6	variation	1014572	1014572	.	.	0	note=snp T=>C C:129 T:0
EA2454	snippy:4.3.6	variation	1014662	1014662	.	.	0	note=snp A=>G G:106 A:0
EA2454	snippy:4.3.6	variation	1014683	1014683	.	.	0	note=complex GGCG=>CGCT CGCT:99 GGCG:1
EA2454	snippy:4.3.6	variation	1014824	1014824	.	.	0	note=snp C=>T T:123 C:0
EA2454	snippy:4.3.6	variation	1014898	1014898	.	.	0	note=snp T=>C C:119 T:0
EA2454	snippy:4.3.6	variation	1014971	1014971	.	.	0	note=snp T=>C C:112 T:0
EA2454	snippy:4.3.6	variation	1015006	1015006	.	.	0	note=snp C=>T T:104 C:0
EA2454	snippy:4.3.6	variation	1015113	1015113	.	.	0	note=snp T=>C C:136 T:0
EA2454	snippy:4.3.6	variation	1015148	1015148	.	.	0	note=snp A=>G G:135 A:0
EA2454	snippy:4.3.6	variation	1015257	1015257	.	.	0	note=snp C=>T T:146 C:0
EA2454	snippy:4.3.6	variation	1015329	1015329	.	.	0	note=snp C=>T T:132 C:0
EA2454	snippy:4.3.6	variation	1015530	1015530	.	.	0	note=snp A=>G G:111 A:0
EA2454	snippy:4.3.6	variation	1015610	1015610	.	.	0	note=snp C=>T T:109 C:0
EA2454	snippy:4.3.6	variation	1015646	1015646	.	.	0	note=snp C=>T T:122 C:0
EA2454	snippy:4.3.6	variation	1015656	1015656	.	.	0	note=snp G=>A A:131 G:0
EA2454	snippy:4.3.6	variation	1015668	1015668	.	.	0	note=snp A=>T T:129 A:0
EA2454	snippy:4.3.6	variation	1015728	1015728	.	.	0	note=snp A=>G G:139 A:0
EA2454	snippy:4.3.6	variation	1015884	1015884	.	.	0	note=complex AGGC=>CGGT CGGT:156 AGGC:0
EA2454	snippy:4.3.6	variation	1016017	1016017	.	.	0	note=snp G=>A A:161 G:0
EA2454	snippy:4.3.6	variation	1016175	1016175	.	.	0	note=snp A=>G G:128 A:0
EA2454	snippy:4.3.6	variation	1016214	1016214	.	.	0	note=snp G=>T T:124 G:4
EA2454	snippy:4.3.6	variation	1016337	1016337	.	.	0	note=snp T=>G G:129 T:1
EA2454	snippy:4.3.6	variation	1016385	1016385	.	.	0	note=snp T=>G G:157 T:0
EA2454	snippy:4.3.6	variation	1016440	1016440	.	.	0	note=complex GTT=>ATC ATC:133 GTT:0
EA2454	snippy:4.3.6	variation	1016561	1016561	.	.	0	note=snp T=>C C:149 T:0
EA2454	snippy:4.3.6	variation	1016852	1016852	.	.	0	note=snp C=>A A:108 C:0
EA2454	snippy:4.3.6	variation	1017030	1017030	.	.	0	note=snp T=>C C:117 T:0
EA2454	snippy:4.3.6	variation	1017255	1017255	.	.	0	note=snp T=>C C:132 T:0
EA2454	snippy:4.3.6	variation	1017279	1017279	.	.	0	note=snp T=>C C:125 T:0
EA2454	snippy:4.3.6	variation	1017291	1017291	.	.	0	note=snp A=>G G:122 A:0
EA2454	snippy:4.3.6	variation	1017315	1017315	.	.	0	note=snp T=>C C:130 T:0
EA2454	snippy:4.3.6	variation	1017579	1017579	.	.	0	note=snp G=>A A:148 G:0
EA2454	snippy:4.3.6	variation	1017585	1017585	.	.	0	note=snp C=>T T:154 C:0
EA2454	snippy:4.3.6	variation	1017645	1017645	.	.	0	note=snp G=>A A:151 G:0
EA2454	snippy:4.3.6	variation	1017684	1017684	.	.	0	note=snp T=>A A:145 T:0
EA2454	snippy:4.3.6	variation	1017696	1017696	.	.	0	note=snp T=>G G:141 T:2
EA2454	snippy:4.3.6	variation	1017723	1017723	.	.	0	note=snp C=>T T:129 C:0
EA2454	snippy:4.3.6	variation	1017830	1017830	.	.	0	note=snp A=>G G:155 A:0
EA2454	snippy:4.3.6	variation	1017843	1017843	.	.	0	note=snp C=>A A:157 C:0
EA2454	snippy:4.3.6	variation	1017924	1017924	.	.	0	note=snp C=>T T:143 C:0
EA2454	snippy:4.3.6	variation	1017939	1017939	.	.	0	note=snp G=>A A:134 G:0
EA2454	snippy:4.3.6	variation	1017954	1017954	.	.	0	note=snp C=>T T:149 C:0
EA2454	snippy:4.3.6	variation	1017984	1017984	.	.	0	note=snp G=>A A:149 G:0
EA2454	snippy:4.3.6	variation	1018029	1018029	.	.	0	note=snp C=>T T:139 C:0
EA2454	snippy:4.3.6	variation	1018089	1018089	.	.	0	note=snp C=>T T:136 C:0
EA2454	snippy:4.3.6	variation	1018155	1018155	.	.	0	note=snp A=>G G:125 A:0
EA2454	snippy:4.3.6	variation	1018425	1018425	.	.	0	note=snp C=>G G:99 C:0
EA2454	snippy:4.3.6	variation	1018458	1018458	.	.	0	note=snp C=>T T:98 C:0
EA2454	snippy:4.3.6	variation	1018617	1018617	.	.	0	note=snp T=>C C:113 T:0
EA2454	snippy:4.3.6	variation	1018635	1018635	.	.	0	note=snp C=>G G:110 C:0
EA2454	snippy:4.3.6	variation	1018815	1018815	.	.	0	note=snp C=>T T:152 C:0
EA2454	snippy:4.3.6	variation	1018935	1018935	.	.	0	note=snp G=>A A:163 G:0
EA2454	snippy:4.3.6	variation	1019229	1019229	.	.	0	note=snp A=>C C:115 A:1
EA2454	snippy:4.3.6	variation	1019284	1019284	.	.	0	note=complex TTGC=>CGGCTG CGGCTG:118 TTGC:0
EA2454	snippy:4.3.6	variation	1019343	1019343	.	.	0	note=snp T=>C C:141 T:0
EA2454	snippy:4.3.6	variation	1019503	1019503	.	.	0	note=snp C=>T T:136 C:0
EA2454	snippy:4.3.6	variation	1019578	1019578	.	.	0	note=snp T=>G G:152 T:2
EA2454	snippy:4.3.6	variation	1019642	1019642	.	.	0	note=snp C=>A A:148 C:0
EA2454	snippy:4.3.6	variation	1019667	1019667	.	.	0	note=snp G=>A A:158 G:0
EA2454	snippy:4.3.6	variation	1019707	1019707	.	.	0	note=snp A=>T T:136 A:0
EA2454	snippy:4.3.6	variation	1019749	1019749	.	.	0	note=snp G=>A A:125 G:0
EA2454	snippy:4.3.6	variation	1019968	1019968	.	.	0	note=snp A=>T T:100 A:0
EA2454	snippy:4.3.6	variation	1019995	1019995	.	.	0	note=snp G=>A A:96 G:2
EA2454	snippy:4.3.6	variation	1020007	1020007	.	.	0	note=snp G=>A A:93 G:0
EA2454	snippy:4.3.6	variation	1020019	1020019	.	.	0	note=snp G=>A A:91 G:0
EA2454	snippy:4.3.6	variation	1020046	1020046	.	.	0	note=complex TGGC=>CGGT CGGT:80 TGGC:0
EA2454	snippy:4.3.6	variation	1020055	1020055	.	.	0	note=mnp TC=>AT AT:76 TC:0
EA2454	snippy:4.3.6	variation	1020061	1020061	.	.	0	note=snp C=>G G:78 C:0
EA2454	snippy:4.3.6	variation	1020097	1020097	.	.	0	note=snp C=>T T:85 C:0
EA2454	snippy:4.3.6	variation	1020103	1020103	.	.	0	note=snp A=>G G:90 A:0
EA2454	snippy:4.3.6	variation	1020109	1020109	.	.	0	note=complex TTTG=>CTTC CTTC:89 TTTG:0
EA2454	snippy:4.3.6	variation	1020167	1020167	.	.	0	note=snp T=>G G:103 T:0
EA2454	snippy:4.3.6	variation	1020265	1020265	.	.	0	note=snp T=>A A:40 T:0
EA2454	snippy:4.3.6	variation	1020589	1020589	.	.	0	note=snp C=>A A:94 C:0
EA2454	snippy:4.3.6	variation	1020610	1020610	.	.	0	note=complex ATTC=>GTTT GTTT:98 ATTC:0
EA2454	snippy:4.3.6	variation	1020631	1020631	.	.	0	note=snp T=>C C:121 T:0
EA2454	snippy:4.3.6	variation	1020658	1020658	.	.	0	note=snp G=>T T:80 G:0
EA2454	snippy:4.3.6	variation	1020681	1020681	.	.	0	note=mnp AT=>GC GC:78 AT:0
EA2454	snippy:4.3.6	variation	1020721	1020721	.	.	0	note=complex CTGC=>TTGT TTGT:88 CTGC:0
EA2454	snippy:4.3.6	variation	1020736	1020736	.	.	0	note=snp A=>C C:106 A:0
EA2454	snippy:4.3.6	variation	1020802	1020802	.	.	0	note=snp C=>T T:106 C:2
EA2454	snippy:4.3.6	variation	1020811	1020811	.	.	0	note=snp G=>A A:107 G:0
EA2454	snippy:4.3.6	variation	1020889	1020889	.	.	0	note=snp G=>A A:113 G:0
EA2454	snippy:4.3.6	variation	1020901	1020901	.	.	0	note=snp C=>T T:106 C:0
EA2454	snippy:4.3.6	variation	1020997	1020997	.	.	0	note=snp A=>G G:112 A:0
EA2454	snippy:4.3.6	variation	1021005	1021005	.	.	0	note=snp A=>C C:103 A:0
EA2454	snippy:4.3.6	variation	1021072	1021072	.	.	0	note=snp T=>C C:104 T:0
EA2454	snippy:4.3.6	variation	1021108	1021108	.	.	0	note=snp A=>G G:95 A:0
EA2454	snippy:4.3.6	variation	1021132	1021132	.	.	0	note=snp A=>G G:105 A:0
EA2454	snippy:4.3.6	variation	1021141	1021141	.	.	0	note=snp G=>A A:105 G:0
EA2454	snippy:4.3.6	variation	1021255	1021255	.	.	0	note=snp T=>A A:158 T:0
EA2454	snippy:4.3.6	variation	1021345	1021345	.	.	0	note=snp G=>A A:154 G:0
EA2454	snippy:4.3.6	variation	1021360	1021360	.	.	0	note=snp C=>T T:156 C:1
EA2454	snippy:4.3.6	variation	1021366	1021366	.	.	0	note=snp C=>T T:152 C:0
EA2454	snippy:4.3.6	variation	1021432	1021432	.	.	0	note=snp G=>A A:154 G:1
EA2454	snippy:4.3.6	variation	1021441	1021441	.	.	0	note=snp T=>C C:160 T:0
EA2454	snippy:4.3.6	variation	1021447	1021447	.	.	0	note=snp G=>C C:165 G:1
EA2454	snippy:4.3.6	variation	1021531	1021531	.	.	0	note=complex AGTA=>GGTG GGTG:122 AGTA:0
EA2454	snippy:4.3.6	variation	1022304	1022304	.	.	0	note=snp G=>A A:128 G:0
EA2454	snippy:4.3.6	variation	1022310	1022310	.	.	0	note=snp A=>G G:128 A:0
EA2454	snippy:4.3.6	variation	1022349	1022349	.	.	0	note=snp A=>T T:147 A:1
EA2454	snippy:4.3.6	variation	1022358	1022358	.	.	0	note=snp C=>T T:134 C:0
EA2454	snippy:4.3.6	variation	1022430	1022430	.	.	0	note=complex GTTA=>ACTG ACTG:102 GTTA:0
EA2454	snippy:4.3.6	variation	1022442	1022442	.	.	0	note=snp C=>T T:119 C:0
EA2454	snippy:4.3.6	variation	1022471	1022471	.	.	0	note=snp A=>T T:109 A:1
EA2454	snippy:4.3.6	variation	1022561	1022561	.	.	0	note=snp A=>G G:97 A:0
EA2454	snippy:4.3.6	variation	1022577	1022577	.	.	0	note=complex AATG=>CTACGCACA CTACGCACA:81 AATG:0
EA2454	snippy:4.3.6	variation	1022593	1022593	.	.	0	note=snp A=>G G:161 A:0
EA2454	snippy:4.3.6	variation	1022809	1022809	.	.	0	note=snp C=>T T:138 C:0
EA2454	snippy:4.3.6	variation	1022856	1022856	.	.	0	note=snp A=>G G:112 A:0
EA2454	snippy:4.3.6	variation	1022929	1022929	.	.	0	note=snp A=>G G:105 A:0
EA2454	snippy:4.3.6	variation	1022953	1022953	.	.	0	note=snp C=>A A:113 C:0
EA2454	snippy:4.3.6	variation	1023004	1023004	.	.	0	note=snp G=>T T:113 G:2
EA2454	snippy:4.3.6	variation	1023040	1023040	.	.	0	note=snp A=>G G:111 A:0
EA2454	snippy:4.3.6	variation	1023046	1023046	.	.	0	note=snp A=>G G:113 A:0
EA2454	snippy:4.3.6	variation	1023109	1023109	.	.	0	note=snp T=>C C:110 T:0
EA2454	snippy:4.3.6	variation	1023193	1023193	.	.	0	note=snp A=>G G:120 A:0
EA2454	snippy:4.3.6	variation	1023205	1023205	.	.	0	note=snp A=>G G:118 A:0
EA2454	snippy:4.3.6	variation	1023211	1023211	.	.	0	note=complex GTCA=>ATCG ATCG:115 GTCA:0
EA2454	snippy:4.3.6	variation	1023220	1023220	.	.	0	note=snp T=>C C:121 T:0
EA2454	snippy:4.3.6	variation	1023244	1023244	.	.	0	note=snp C=>T T:126 C:0
EA2454	snippy:4.3.6	variation	1023466	1023466	.	.	0	note=snp A=>G G:119 A:0
EA2454	snippy:4.3.6	variation	1023519	1023519	.	.	0	note=snp C=>T T:121 C:0
EA2454	snippy:4.3.6	variation	1023571	1023571	.	.	0	note=snp T=>C C:133 T:0
EA2454	snippy:4.3.6	variation	1023577	1023577	.	.	0	note=snp G=>T T:130 G:0
EA2454	snippy:4.3.6	variation	1023592	1023592	.	.	0	note=snp A=>G G:127 A:0
EA2454	snippy:4.3.6	variation	1023640	1023640	.	.	0	note=snp G=>A A:116 G:0
EA2454	snippy:4.3.6	variation	1023832	1023832	.	.	0	note=snp C=>T T:140 C:0
EA2454	snippy:4.3.6	variation	1023943	1023943	.	.	0	note=snp T=>C C:95 T:0
EA2454	snippy:4.3.6	variation	1024055	1024055	.	.	0	note=snp T=>C C:100 T:0
EA2454	snippy:4.3.6	variation	1024090	1024090	.	.	0	note=mnp GA=>CC CC:99 GA:0
EA2454	snippy:4.3.6	variation	1024112	1024112	.	.	0	note=snp G=>A A:107 G:0
EA2454	snippy:4.3.6	variation	1024339	1024339	.	.	0	note=snp G=>A A:123 G:0
EA2454	snippy:4.3.6	variation	1024456	1024456	.	.	0	note=snp C=>T T:97 C:0
EA2454	snippy:4.3.6	variation	1024483	1024483	.	.	0	note=snp C=>A A:108 C:0
EA2454	snippy:4.3.6	variation	1024549	1024549	.	.	0	note=snp A=>C C:110 A:0
EA2454	snippy:4.3.6	variation	1024837	1024837	.	.	0	note=snp G=>A A:119 G:0
EA2454	snippy:4.3.6	variation	1024852	1024852	.	.	0	note=snp T=>G G:139 T:0
EA2454	snippy:4.3.6	variation	1024954	1024954	.	.	0	note=snp T=>C C:114 T:0
EA2454	snippy:4.3.6	variation	1024966	1024966	.	.	0	note=complex ACTG=>GCTT GCTT:111 ACTG:0
EA2454	snippy:4.3.6	variation	1025406	1025406	.	.	0	note=snp A=>G G:130 A:0
EA2454	snippy:4.3.6	variation	1025422	1025422	.	.	0	note=snp C=>T T:127 C:0
EA2454	snippy:4.3.6	variation	1025440	1025440	.	.	0	note=snp G=>A A:127 G:0
EA2454	snippy:4.3.6	variation	1025530	1025530	.	.	0	note=snp A=>G G:131 A:0
EA2454	snippy:4.3.6	variation	1025581	1025581	.	.	0	note=snp T=>C C:117 T:0
EA2454	snippy:4.3.6	variation	1025590	1025590	.	.	0	note=complex CGCA=>TGCG TGCG:114 CGCA:0
EA2454	snippy:4.3.6	variation	1025599	1025599	.	.	0	note=snp C=>G G:120 C:1
EA2454	snippy:4.3.6	variation	1025611	1025611	.	.	0	note=snp C=>T T:120 C:0
EA2454	snippy:4.3.6	variation	1025626	1025626	.	.	0	note=snp G=>A A:107 G:0
EA2454	snippy:4.3.6	variation	1025647	1025647	.	.	0	note=complex TATG=>AATA AATA:114 TATG:0
EA2454	snippy:4.3.6	variation	1025670	1025670	.	.	0	note=snp G=>A A:113 G:0
EA2454	snippy:4.3.6	variation	1025761	1025761	.	.	0	note=snp G=>A A:110 G:0
EA2454	snippy:4.3.6	variation	1025791	1025791	.	.	0	note=snp G=>A A:131 G:1
EA2454	snippy:4.3.6	variation	1025809	1025809	.	.	0	note=snp T=>C C:110 T:0
EA2454	snippy:4.3.6	variation	1025856	1025856	.	.	0	note=snp G=>A A:125 G:0
EA2454	snippy:4.3.6	variation	1025875	1025875	.	.	0	note=snp A=>G G:124 A:0
EA2454	snippy:4.3.6	variation	1025890	1025890	.	.	0	note=snp T=>C C:133 T:0
EA2454	snippy:4.3.6	variation	1025899	1025899	.	.	0	note=snp C=>T T:133 C:0
EA2454	snippy:4.3.6	variation	1025908	1025908	.	.	0	note=snp T=>C C:136 T:0
EA2454	snippy:4.3.6	variation	1025914	1025914	.	.	0	note=complex CAA=>TAG TAG:128 CAA:0
EA2454	snippy:4.3.6	variation	1025962	1025962	.	.	0	note=snp G=>A A:154 G:0
EA2454	snippy:4.3.6	variation	1026329	1026329	.	.	0	note=snp A=>C C:75 A:1
EA2454	snippy:4.3.6	variation	1026335	1026335	.	.	0	note=complex TGAG=>CGAA CGAA:64 TGAG:0
EA2454	snippy:4.3.6	variation	1026344	1026344	.	.	0	note=snp C=>T T:66 C:0
EA2454	snippy:4.3.6	variation	1026353	1026353	.	.	0	note=snp G=>A A:66 G:0
EA2454	snippy:4.3.6	variation	1026374	1026374	.	.	0	note=complex ACCA=>GCCG GCCG:66 ACCA:0
EA2454	snippy:4.3.6	variation	1026383	1026383	.	.	0	note=snp C=>A A:78 C:0
EA2454	snippy:4.3.6	variation	1026401	1026401	.	.	0	note=snp A=>G G:75 A:0
EA2454	snippy:4.3.6	variation	1026419	1026419	.	.	0	note=snp T=>C C:75 T:0
EA2454	snippy:4.3.6	variation	1026428	1026428	.	.	0	note=snp G=>A A:77 G:0
EA2454	snippy:4.3.6	variation	1026473	1026473	.	.	0	note=snp G=>A A:78 G:0
EA2454	snippy:4.3.6	variation	1026485	1026485	.	.	0	note=snp T=>C C:90 T:0
EA2454	snippy:4.3.6	variation	1026506	1026506	.	.	0	note=snp G=>A A:92 G:0
EA2454	snippy:4.3.6	variation	1026521	1026521	.	.	0	note=complex TCGT=>CCGC CCGC:72 TCGT:0
EA2454	snippy:4.3.6	variation	1026530	1026530	.	.	0	note=complex AACT=>TACC TACC:68 AACT:0
EA2454	snippy:4.3.6	variation	1026569	1026569	.	.	0	note=snp A=>G G:74 A:0
EA2454	snippy:4.3.6	variation	1026575	1026575	.	.	0	note=snp A=>G G:73 A:0
EA2454	snippy:4.3.6	variation	1026617	1026617	.	.	0	note=snp G=>C C:77 G:0
EA2454	snippy:4.3.6	variation	1026622	1026622	.	.	0	note=snp G=>T T:86 G:0
EA2454	snippy:4.3.6	variation	1026638	1026638	.	.	0	note=complex AATT=>GATA GATA:75 AATT:0
EA2454	snippy:4.3.6	variation	1026647	1026647	.	.	0	note=snp T=>C C:80 T:0
EA2454	snippy:4.3.6	variation	1026674	1026674	.	.	0	note=snp G=>A A:91 G:0
EA2454	snippy:4.3.6	variation	1026680	1026680	.	.	0	note=snp G=>A A:92 G:0
EA2454	snippy:4.3.6	variation	1026770	1026770	.	.	0	note=snp A=>G G:96 A:0
EA2454	snippy:4.3.6	variation	1026776	1026776	.	.	0	note=snp G=>A A:86 G:0
EA2454	snippy:4.3.6	variation	1026839	1026839	.	.	0	note=complex GGTGT=>AGTGC AGTGC:100 GGTGT:0
EA2454	snippy:4.3.6	variation	1026932	1026932	.	.	0	note=snp T=>C C:99 T:0
EA2454	snippy:4.3.6	variation	1026953	1026953	.	.	0	note=complex GGTG=>TGTT TGTT:79 GGTG:0
EA2454	snippy:4.3.6	variation	1026974	1026974	.	.	0	note=complex GCCAATC=>TCCGATA TCCGATA:68 GCCAATC:0
EA2454	snippy:4.3.6	variation	1026985	1026985	.	.	0	note=complex GTAA=>ACAG ACAG:70 GTAA:0
EA2454	snippy:4.3.6	variation	1026998	1026998	.	.	0	note=complex AGCT=>GGCC GGCC:77 AGCT:0
EA2454	snippy:4.3.6	variation	1027034	1027034	.	.	0	note=snp C=>T T:108 C:0
EA2454	snippy:4.3.6	variation	1027049	1027049	.	.	0	note=snp A=>G G:117 A:0
EA2454	snippy:4.3.6	variation	1027143	1027143	.	.	0	note=snp C=>A A:147 C:2
EA2454	snippy:4.3.6	variation	1027293	1027293	.	.	0	note=snp A=>G G:127 A:0
EA2454	snippy:4.3.6	variation	1027311	1027311	.	.	0	note=snp C=>T T:128 C:0
EA2454	snippy:4.3.6	variation	1027413	1027413	.	.	0	note=snp G=>A A:110 G:0
EA2454	snippy:4.3.6	variation	1027470	1027470	.	.	0	note=snp T=>C C:121 T:0
EA2454	snippy:4.3.6	variation	1027491	1027491	.	.	0	note=snp G=>A A:117 G:0
EA2454	snippy:4.3.6	variation	1027578	1027578	.	.	0	note=snp A=>G G:105 A:0
EA2454	snippy:4.3.6	variation	1027590	1027590	.	.	0	note=snp T=>A A:110 T:0
EA2454	snippy:4.3.6	variation	1027647	1027647	.	.	0	note=snp A=>G G:97 A:0
EA2454	snippy:4.3.6	variation	1027692	1027692	.	.	0	note=complex GATA=>AATG AATG:98 GATA:0
EA2454	snippy:4.3.6	variation	1027704	1027704	.	.	0	note=complex TGAC=>CGAA CGAA:95 TGAC:0
EA2454	snippy:4.3.6	variation	1027729	1027729	.	.	0	note=snp G=>T T:110 G:2
EA2454	snippy:4.3.6	variation	1027755	1027755	.	.	0	note=snp A=>C C:118 A:0
EA2454	snippy:4.3.6	variation	1027824	1027824	.	.	0	note=snp G=>T T:122 G:0
EA2454	snippy:4.3.6	variation	1027908	1027908	.	.	0	note=snp T=>G G:89 T:1
EA2454	snippy:4.3.6	variation	1028015	1028015	.	.	0	note=snp G=>A A:99 G:0
EA2454	snippy:4.3.6	variation	1028106	1028106	.	.	0	note=snp G=>A A:109 G:0
EA2454	snippy:4.3.6	variation	1028127	1028127	.	.	0	note=snp A=>G G:96 A:0
EA2454	snippy:4.3.6	variation	1028146	1028146	.	.	0	note=snp C=>T T:107 C:0
EA2454	snippy:4.3.6	variation	1028160	1028160	.	.	0	note=snp T=>C C:111 T:0
EA2454	snippy:4.3.6	variation	1028238	1028238	.	.	0	note=snp G=>A A:77 G:0
EA2454	snippy:4.3.6	variation	1028274	1028274	.	.	0	note=snp A=>G G:91 A:0
EA2454	snippy:4.3.6	variation	1028283	1028283	.	.	0	note=snp A=>G G:96 A:0
EA2454	snippy:4.3.6	variation	1028346	1028346	.	.	0	note=snp A=>G G:99 A:0
EA2454	snippy:4.3.6	variation	1028358	1028358	.	.	0	note=snp C=>G G:100 C:0
EA2454	snippy:4.3.6	variation	1028364	1028364	.	.	0	note=snp A=>G G:100 A:0
EA2454	snippy:4.3.6	variation	1028379	1028379	.	.	0	note=snp A=>G G:103 A:1
EA2454	snippy:4.3.6	variation	1028385	1028385	.	.	0	note=snp G=>A A:125 G:0
EA2454	snippy:4.3.6	variation	1028424	1028424	.	.	0	note=snp G=>T T:114 G:0
EA2454	snippy:4.3.6	variation	1028436	1028436	.	.	0	note=snp A=>G G:118 A:0
EA2454	snippy:4.3.6	variation	1028442	1028442	.	.	0	note=snp T=>G G:113 T:0
EA2454	snippy:4.3.6	variation	1028448	1028448	.	.	0	note=snp G=>A A:112 G:0
EA2454	snippy:4.3.6	variation	1028529	1028529	.	.	0	note=snp A=>T T:141 A:0
EA2454	snippy:4.3.6	variation	1028535	1028535	.	.	0	note=snp G=>A A:113 G:0
EA2454	snippy:4.3.6	variation	1028556	1028556	.	.	0	note=snp C=>T T:121 C:0
EA2454	snippy:4.3.6	variation	1028565	1028565	.	.	0	note=snp C=>T T:114 C:0
EA2454	snippy:4.3.6	variation	1028601	1028601	.	.	0	note=snp A=>G G:132 A:0
EA2454	snippy:4.3.6	variation	1028679	1028679	.	.	0	note=snp T=>C C:121 T:0
EA2454	snippy:4.3.6	variation	1028693	1028693	.	.	0	note=mnp CG=>TA TA:107 CG:0
EA2454	snippy:4.3.6	variation	1028774	1028774	.	.	0	note=snp T=>C C:130 T:0
EA2454	snippy:4.3.6	variation	1028781	1028781	.	.	0	note=snp T=>C C:128 T:0
EA2454	snippy:4.3.6	variation	1028896	1028896	.	.	0	note=snp G=>A A:101 G:0
EA2454	snippy:4.3.6	variation	1028914	1028914	.	.	0	note=complex TAA=>CAG CAG:91 TAA:0
EA2454	snippy:4.3.6	variation	1028965	1028965	.	.	0	note=snp A=>G G:92 A:0
EA2454	snippy:4.3.6	variation	1028971	1028971	.	.	0	note=snp A=>G G:92 A:0
EA2454	snippy:4.3.6	variation	1028977	1028977	.	.	0	note=complex TCCC=>ACCT ACCT:83 TCCC:0
EA2454	snippy:4.3.6	variation	1028986	1028986	.	.	0	note=snp G=>A A:96 G:2
EA2454	snippy:4.3.6	variation	1029004	1029004	.	.	0	note=snp G=>A A:101 G:0
EA2454	snippy:4.3.6	variation	1029025	1029025	.	.	0	note=snp C=>A A:104 C:0
EA2454	snippy:4.3.6	variation	1029043	1029043	.	.	0	note=snp G=>A A:104 G:0
EA2454	snippy:4.3.6	variation	1029052	1029052	.	.	0	note=snp A=>G G:97 A:0
EA2454	snippy:4.3.6	variation	1029058	1029058	.	.	0	note=complex AATG=>GATA GATA:90 AATG:0
EA2454	snippy:4.3.6	variation	1029067	1029067	.	.	0	note=complex CGTGAGG=>TGTCAGA TGTCAGA:82 CGTGAGG:0
EA2454	snippy:4.3.6	variation	1029085	1029085	.	.	0	note=snp C=>T T:94 C:1
EA2454	snippy:4.3.6	variation	1029325	1029325	.	.	0	note=snp G=>A A:99 G:0
EA2454	snippy:4.3.6	variation	1029388	1029388	.	.	0	note=snp G=>A A:103 G:0
EA2454	snippy:4.3.6	variation	1029397	1029397	.	.	0	note=snp A=>G G:100 A:1
EA2454	snippy:4.3.6	variation	1029406	1029406	.	.	0	note=snp G=>A A:101 G:2
EA2454	snippy:4.3.6	variation	1029421	1029421	.	.	0	note=snp A=>G G:104 A:0
EA2454	snippy:4.3.6	variation	1029460	1029460	.	.	0	note=snp G=>A A:120 G:0
EA2454	snippy:4.3.6	variation	1029526	1029526	.	.	0	note=snp T=>A A:108 T:0
EA2454	snippy:4.3.6	variation	1029532	1029532	.	.	0	note=snp G=>A A:109 G:0
EA2454	snippy:4.3.6	variation	1029568	1029568	.	.	0	note=complex TGCA=>CGCG CGCG:108 TGCA:0
EA2454	snippy:4.3.6	variation	1029670	1029670	.	.	0	note=snp T=>A A:137 T:0
EA2454	snippy:4.3.6	variation	1029694	1029694	.	.	0	note=snp G=>A A:135 G:0
EA2454	snippy:4.3.6	variation	1029816	1029816	.	.	0	note=snp A=>G G:111 A:0
EA2454	snippy:4.3.6	variation	1029901	1029901	.	.	0	note=snp A=>G G:166 A:0
EA2454	snippy:4.3.6	variation	1030004	1030004	.	.	0	note=complex CTGGT=>TTGGC TTGGC:147 CTGGT:0
EA2454	snippy:4.3.6	variation	1030266	1030266	.	.	0	note=snp A=>G G:121 A:0
EA2454	snippy:4.3.6	variation	1030314	1030314	.	.	0	note=snp A=>G G:125 A:0
EA2454	snippy:4.3.6	variation	1030443	1030443	.	.	0	note=snp C=>A A:136 C:1
EA2454	snippy:4.3.6	variation	1030611	1030611	.	.	0	note=snp C=>T T:81 C:0
EA2454	snippy:4.3.6	variation	1030626	1030626	.	.	0	note=snp C=>A A:78 C:0
EA2454	snippy:4.3.6	variation	1030645	1030645	.	.	0	note=snp A=>C C:63 A:0
EA2454	snippy:4.3.6	variation	1031410	1031410	.	.	0	note=complex TTAAT=>ATTGC ATTGC:12 TTAAT:0
EA2454	snippy:4.3.6	variation	1031450	1031450	.	.	0	note=complex GTGAG=>AT AT:15 GTGAG:0
EA2454	snippy:4.3.6	variation	1031458	1031458	.	.	0	note=ins A=>AAAG AAAG:15 A:0
EA2454	snippy:4.3.6	variation	1031467	1031467	.	.	0	note=complex CAGAAT=>AAAAATC AAAAATC:15 CAGAAT:0
EA2454	snippy:4.3.6	variation	1031478	1031478	.	.	0	note=complex TCGTC=>ATACA ATACA:15 TCGTC:0
EA2454	snippy:4.3.6	variation	1031488	1031488	.	.	0	note=snp A=>T T:47 A:0
EA2454	snippy:4.3.6	variation	1032037	1032037	.	.	0	note=snp C=>T T:150 C:1
EA2454	snippy:4.3.6	variation	1032370	1032370	.	.	0	note=snp G=>A A:140 G:1
EA2454	snippy:4.3.6	variation	1032916	1032916	.	.	0	note=snp G=>A A:142 G:0
EA2454	snippy:4.3.6	variation	1033048	1033048	.	.	0	note=snp G=>A A:93 G:0
EA2454	snippy:4.3.6	variation	1033258	1033258	.	.	0	note=snp C=>T T:94 C:0
EA2454	snippy:4.3.6	variation	1033357	1033357	.	.	0	note=snp C=>G G:92 C:0
EA2454	snippy:4.3.6	variation	1033426	1033426	.	.	0	note=snp C=>T T:94 C:0
EA2454	snippy:4.3.6	variation	1033434	1033434	.	.	0	note=snp T=>G G:103 T:0
EA2454	snippy:4.3.6	variation	1033441	1033441	.	.	0	note=snp G=>C C:108 G:0
EA2454	snippy:4.3.6	variation	1033480	1033480	.	.	0	note=complex AGCC=>GGCA GGCA:98 AGCC:0
EA2454	snippy:4.3.6	variation	1033570	1033570	.	.	0	note=snp A=>G G:111 A:0
EA2454	snippy:4.3.6	variation	1033731	1033731	.	.	0	note=snp G=>A A:98 G:0
EA2454	snippy:4.3.6	variation	1033741	1033741	.	.	0	note=snp C=>T T:95 C:1
EA2454	snippy:4.3.6	variation	1034035	1034035	.	.	0	note=snp A=>G G:90 A:0
EA2454	snippy:4.3.6	variation	1034080	1034080	.	.	0	note=snp T=>C C:96 T:0
EA2454	snippy:4.3.6	variation	1034095	1034095	.	.	0	note=snp C=>A A:95 C:0
EA2454	snippy:4.3.6	variation	1034218	1034218	.	.	0	note=snp A=>G G:128 A:0
EA2454	snippy:4.3.6	variation	1034269	1034269	.	.	0	note=snp C=>T T:103 C:0
EA2454	snippy:4.3.6	variation	1034274	1034274	.	.	0	note=snp A=>T T:101 A:0
EA2454	snippy:4.3.6	variation	1034282	1034282	.	.	0	note=snp A=>G G:104 A:0
EA2454	snippy:4.3.6	variation	1034379	1034379	.	.	0	note=snp A=>C C:111 A:2
EA2454	snippy:4.3.6	variation	1034450	1034450	.	.	0	note=snp A=>C C:120 A:0
EA2454	snippy:4.3.6	variation	1034713	1034713	.	.	0	note=snp T=>C C:139 T:0
EA2454	snippy:4.3.6	variation	1034746	1034746	.	.	0	note=complex GCTG=>ACTA ACTA:121 GCTG:0
EA2454	snippy:4.3.6	variation	1034755	1034755	.	.	0	note=snp G=>A A:132 G:0
EA2454	snippy:4.3.6	variation	1034761	1034761	.	.	0	note=snp A=>G G:132 A:0
EA2454	snippy:4.3.6	variation	1034815	1034815	.	.	0	note=complex CTGGT=>TTGAC TTGAC:122 CTGGT:0
EA2454	snippy:4.3.6	variation	1034889	1034889	.	.	0	note=snp G=>T T:143 G:1
EA2454	snippy:4.3.6	variation	1034956	1034956	.	.	0	note=complex GAGT=>AAGC AAGC:109 GAGT:0
EA2454	snippy:4.3.6	variation	1034964	1034964	.	.	0	note=snp G=>A A:114 G:0
EA2454	snippy:4.3.6	variation	1035037	1035037	.	.	0	note=snp A=>C C:104 A:1
EA2454	snippy:4.3.6	variation	1035058	1035058	.	.	0	note=snp C=>T T:111 C:0
EA2454	snippy:4.3.6	variation	1035073	1035073	.	.	0	note=snp C=>T T:114 C:1
EA2454	snippy:4.3.6	variation	1035106	1035106	.	.	0	note=snp G=>A A:101 G:0
EA2454	snippy:4.3.6	variation	1035130	1035130	.	.	0	note=snp A=>C C:102 A:0
EA2454	snippy:4.3.6	variation	1035169	1035169	.	.	0	note=snp A=>G G:95 A:0
EA2454	snippy:4.3.6	variation	1035193	1035193	.	.	0	note=snp C=>T T:99 C:0
EA2454	snippy:4.3.6	variation	1035211	1035211	.	.	0	note=snp T=>C C:101 T:0
EA2454	snippy:4.3.6	variation	1035217	1035217	.	.	0	note=snp A=>G G:101 A:0
EA2454	snippy:4.3.6	variation	1035226	1035226	.	.	0	note=snp A=>G G:107 A:0
EA2454	snippy:4.3.6	variation	1035232	1035232	.	.	0	note=snp C=>T T:109 C:1
EA2454	snippy:4.3.6	variation	1035241	1035241	.	.	0	note=complex CGTC=>TGTT TGTT:105 CGTC:0
EA2454	snippy:4.3.6	variation	1035259	1035259	.	.	0	note=snp A=>C C:118 A:0
EA2454	snippy:4.3.6	variation	1035316	1035316	.	.	0	note=snp A=>G G:125 A:0
EA2454	snippy:4.3.6	variation	1035328	1035328	.	.	0	note=snp A=>G G:124 A:0
EA2454	snippy:4.3.6	variation	1035337	1035337	.	.	0	note=snp G=>A A:128 G:0
EA2454	snippy:4.3.6	variation	1035346	1035346	.	.	0	note=snp A=>G G:124 A:0
EA2454	snippy:4.3.6	variation	1035364	1035364	.	.	0	note=complex GTT=>ATC ATC:105 GTT:0
EA2454	snippy:4.3.6	variation	1035379	1035379	.	.	0	note=complex GCTA=>ACTG ACTG:94 GCTA:0
EA2454	snippy:4.3.6	variation	1035427	1035427	.	.	0	note=snp C=>T T:102 C:0
EA2454	snippy:4.3.6	variation	1035439	1035439	.	.	0	note=snp T=>C C:105 T:0
EA2454	snippy:4.3.6	variation	1035507	1035507	.	.	0	note=snp T=>C C:108 T:0
EA2454	snippy:4.3.6	variation	1035753	1035753	.	.	0	note=snp C=>T T:105 C:0
EA2454	snippy:4.3.6	variation	1035975	1035975	.	.	0	note=snp G=>A A:141 G:1
EA2454	snippy:4.3.6	variation	1036254	1036254	.	.	0	note=snp A=>G G:125 A:0
EA2454	snippy:4.3.6	variation	1036473	1036473	.	.	0	note=snp A=>G G:143 A:0
EA2454	snippy:4.3.6	variation	1036515	1036515	.	.	0	note=snp C=>T T:130 C:0
EA2454	snippy:4.3.6	variation	1036707	1036707	.	.	0	note=snp T=>C C:102 T:0
EA2454	snippy:4.3.6	variation	1036712	1036712	.	.	0	note=snp A=>G G:105 A:0
EA2454	snippy:4.3.6	variation	1036971	1036971	.	.	0	note=snp T=>C C:164 T:0
EA2454	snippy:4.3.6	variation	1037052	1037052	.	.	0	note=snp A=>G G:126 A:0
EA2454	snippy:4.3.6	variation	1037510	1037510	.	.	0	note=complex AGC=>GGT GGT:94 AGC:0
EA2454	snippy:4.3.6	variation	1037532	1037532	.	.	0	note=snp T=>G G:105 T:1
EA2454	snippy:4.3.6	variation	1037793	1037793	.	.	0	note=snp A=>C C:152 A:0
EA2454	snippy:4.3.6	variation	1037808	1037808	.	.	0	note=snp C=>A A:162 C:0
EA2454	snippy:4.3.6	variation	1038081	1038081	.	.	0	note=snp C=>T T:152 C:0
EA2454	snippy:4.3.6	variation	1038089	1038089	.	.	0	note=snp G=>A A:155 G:0
EA2454	snippy:4.3.6	variation	1038273	1038273	.	.	0	note=snp G=>A A:134 G:0
EA2454	snippy:4.3.6	variation	1038350	1038350	.	.	0	note=snp C=>T T:160 C:0
EA2454	snippy:4.3.6	variation	1038937	1038937	.	.	0	note=complex GGTG=>TGTC TGTC:147 GGTG:0
EA2454	snippy:4.3.6	variation	1039012	1039012	.	.	0	note=snp C=>A A:136 C:1
EA2454	snippy:4.3.6	variation	1039024	1039024	.	.	0	note=snp G=>A A:134 G:0
EA2454	snippy:4.3.6	variation	1039186	1039186	.	.	0	note=snp T=>G G:163 T:2
EA2454	snippy:4.3.6	variation	1039462	1039462	.	.	0	note=snp A=>T T:138 A:0
EA2454	snippy:4.3.6	variation	1039501	1039501	.	.	0	note=snp A=>G G:135 A:0
EA2454	snippy:4.3.6	variation	1039522	1039522	.	.	0	note=snp C=>T T:135 C:0
EA2454	snippy:4.3.6	variation	1039552	1039552	.	.	0	note=snp G=>A A:131 G:0
EA2454	snippy:4.3.6	variation	1039564	1039564	.	.	0	note=snp A=>G G:148 A:0
EA2454	snippy:4.3.6	variation	1039621	1039621	.	.	0	note=complex TCCG=>CCCA CCCA:127 TCCG:0
EA2454	snippy:4.3.6	variation	1039660	1039660	.	.	0	note=snp A=>G G:124 A:0
EA2454	snippy:4.3.6	variation	1039774	1039774	.	.	0	note=snp T=>G G:103 T:1
EA2454	snippy:4.3.6	variation	1039895	1039895	.	.	0	note=snp T=>G G:117 T:1
EA2454	snippy:4.3.6	variation	1039930	1039930	.	.	0	note=del ATTACTGCATAGCACTTT=>A A:58 ATTACTGCATAGCACTTT:0
EA2454	snippy:4.3.6	variation	1040587	1040587	.	.	0	note=complex ACCT=>GCCG GCCG:103 ACCT:0
EA2454	snippy:4.3.6	variation	1040608	1040608	.	.	0	note=snp G=>A A:104 G:0
EA2454	snippy:4.3.6	variation	1040662	1040662	.	.	0	note=snp G=>A A:132 G:0
EA2454	snippy:4.3.6	variation	1040683	1040683	.	.	0	note=snp G=>A A:119 G:0
EA2454	snippy:4.3.6	variation	1040758	1040758	.	.	0	note=snp A=>G G:140 A:0
EA2454	snippy:4.3.6	variation	1040776	1040776	.	.	0	note=snp T=>C C:143 T:0
EA2454	snippy:4.3.6	variation	1040824	1040824	.	.	0	note=complex CGGC=>AGGG AGGG:127 CGGC:0
EA2454	snippy:4.3.6	variation	1040905	1040905	.	.	0	note=snp A=>C C:116 A:0
EA2454	snippy:4.3.6	variation	1040962	1040962	.	.	0	note=complex AGAC=>GGAT GGAT:58 AGAC:0
EA2454	snippy:4.3.6	variation	1041003	1041003	.	.	0	note=snp C=>A A:43 C:0
EA2454	snippy:4.3.6	variation	1041027	1041027	.	.	0	note=snp C=>A A:23 C:0
EA2454	snippy:4.3.6	variation	1042286	1042286	.	.	0	note=snp C=>T T:23 C:0
EA2454	snippy:4.3.6	variation	1042343	1042343	.	.	0	note=snp G=>A A:60 G:0
EA2454	snippy:4.3.6	variation	1042379	1042379	.	.	0	note=snp T=>A A:81 T:0
EA2454	snippy:4.3.6	variation	1042391	1042391	.	.	0	note=snp G=>A A:86 G:0
EA2454	snippy:4.3.6	variation	1042436	1042436	.	.	0	note=snp T=>C C:100 T:0
EA2454	snippy:4.3.6	variation	1042547	1042547	.	.	0	note=snp C=>A A:166 C:0
EA2454	snippy:4.3.6	variation	1042571	1042571	.	.	0	note=snp A=>G G:151 A:1
EA2454	snippy:4.3.6	variation	1042595	1042595	.	.	0	note=snp G=>A A:150 G:0
EA2454	snippy:4.3.6	variation	1042613	1042613	.	.	0	note=complex CGCT=>GGCC GGCC:165 CGCT:0
EA2454	snippy:4.3.6	variation	1042642	1042642	.	.	0	note=snp C=>T T:174 C:0
EA2454	snippy:4.3.6	variation	1042667	1042667	.	.	0	note=snp G=>A A:134 G:0
EA2454	snippy:4.3.6	variation	1042832	1042832	.	.	0	note=snp C=>A A:130 C:0
EA2454	snippy:4.3.6	variation	1042874	1042874	.	.	0	note=snp T=>A A:135 T:0
EA2454	snippy:4.3.6	variation	1043143	1043143	.	.	0	note=snp A=>G G:150 A:0
EA2454	snippy:4.3.6	variation	1043266	1043266	.	.	0	note=snp G=>A A:164 G:0
EA2454	snippy:4.3.6	variation	1043392	1043392	.	.	0	note=snp T=>G G:152 T:2
EA2454	snippy:4.3.6	variation	1043455	1043455	.	.	0	note=snp G=>A A:120 G:0
EA2454	snippy:4.3.6	variation	1043483	1043483	.	.	0	note=snp A=>G G:106 A:0
EA2454	snippy:4.3.6	variation	1043488	1043488	.	.	0	note=snp C=>T T:102 C:0
EA2454	snippy:4.3.6	variation	1043494	1043494	.	.	0	note=snp C=>T T:98 C:0
EA2454	snippy:4.3.6	variation	1043503	1043503	.	.	0	note=complex ATTA=>GCTG GCTG:71 ATTA:0
EA2454	snippy:4.3.6	variation	1043518	1043518	.	.	0	note=snp C=>T T:61 C:0
EA2454	snippy:4.3.6	variation	1043524	1043524	.	.	0	note=snp C=>G G:48 C:0
EA2454	snippy:4.3.6	variation	1043530	1043530	.	.	0	note=complex AACGCTTGGTAACCACGAG=>TACACTCGGCAATCATGAA TACACTCGGCAATCATGAA:32 AACGCTTGGTAACCACGAG:0
EA2454	snippy:4.3.6	variation	1043570	1043570	.	.	0	note=snp A=>C C:50 A:1
EA2454	snippy:4.3.6	variation	1043582	1043582	.	.	0	note=snp C=>T T:45 C:0
EA2454	snippy:4.3.6	variation	1043587	1043587	.	.	0	note=snp A=>G G:50 A:0
EA2454	snippy:4.3.6	variation	1043878	1043878	.	.	0	note=snp G=>A A:102 G:0
EA2454	snippy:4.3.6	variation	1043899	1043899	.	.	0	note=snp A=>G G:102 A:0
EA2454	snippy:4.3.6	variation	1043938	1043938	.	.	0	note=snp G=>T T:98 G:0
EA2454	snippy:4.3.6	variation	1043962	1043962	.	.	0	note=snp T=>C C:108 T:0
EA2454	snippy:4.3.6	variation	1044107	1044107	.	.	0	note=snp G=>A A:113 G:0
EA2454	snippy:4.3.6	variation	1044129	1044129	.	.	0	note=snp T=>C C:105 T:0
EA2454	snippy:4.3.6	variation	1044169	1044169	.	.	0	note=snp T=>C C:134 T:0
EA2454	snippy:4.3.6	variation	1044247	1044247	.	.	0	note=snp T=>C C:131 T:0
EA2454	snippy:4.3.6	variation	1044271	1044271	.	.	0	note=snp T=>C C:124 T:0
EA2454	snippy:4.3.6	variation	1044325	1044325	.	.	0	note=complex AGTA=>GGTG GGTG:106 AGTA:0
EA2454	snippy:4.3.6	variation	1044358	1044358	.	.	0	note=snp A=>G G:112 A:0
EA2454	snippy:4.3.6	variation	1044412	1044412	.	.	0	note=snp C=>T T:150 C:0
EA2454	snippy:4.3.6	variation	1044445	1044445	.	.	0	note=snp C=>T T:141 C:0
EA2454	snippy:4.3.6	variation	1044605	1044605	.	.	0	note=complex AACAG=>GACAA GACAA:138 AACAG:0
EA2454	snippy:4.3.6	variation	1044658	1044658	.	.	0	note=snp T=>C C:125 T:0
EA2454	snippy:4.3.6	variation	1044667	1044667	.	.	0	note=snp T=>G G:106 T:1
EA2454	snippy:4.3.6	variation	1044706	1044706	.	.	0	note=snp C=>T T:105 C:0
EA2454	snippy:4.3.6	variation	1044717	1044717	.	.	0	note=snp G=>A A:105 G:0
EA2454	snippy:4.3.6	variation	1044734	1044734	.	.	0	note=snp A=>G G:107 A:0
EA2454	snippy:4.3.6	variation	1044748	1044748	.	.	0	note=complex AGAGC=>GGAAA GGAAA:95 AGAGC:0
EA2454	snippy:4.3.6	variation	1044808	1044808	.	.	0	note=snp C=>G G:116 C:1
EA2454	snippy:4.3.6	variation	1044888	1044888	.	.	0	note=snp T=>A A:101 T:1
EA2454	snippy:4.3.6	variation	1044917	1044917	.	.	0	note=snp A=>G G:91 A:0
EA2454	snippy:4.3.6	variation	1044988	1044988	.	.	0	note=snp T=>A A:100 T:0
EA2454	snippy:4.3.6	variation	1045030	1045030	.	.	0	note=snp G=>A A:111 G:0
EA2454	snippy:4.3.6	variation	1045045	1045045	.	.	0	note=snp A=>G G:100 A:0
EA2454	snippy:4.3.6	variation	1045139	1045139	.	.	0	note=snp A=>T T:114 A:0
EA2454	snippy:4.3.6	variation	1045170	1045170	.	.	0	note=snp T=>C C:105 T:0
EA2454	snippy:4.3.6	variation	1045182	1045182	.	.	0	note=complex TTTATTGG=>CTTTTGT CTTTTGT:91 TTTATTGG:0
EA2454	snippy:4.3.6	variation	1045231	1045231	.	.	0	note=mnp AC=>GA GA:95 AC:0
EA2454	snippy:4.3.6	variation	1045243	1045243	.	.	0	note=snp A=>G G:94 A:0
EA2454	snippy:4.3.6	variation	1045247	1045247	.	.	0	note=del AAGCTC=>A A:82 AAGCTC:3
EA2454	snippy:4.3.6	variation	1045259	1045259	.	.	0	note=snp T=>G G:90 T:0
EA2454	snippy:4.3.6	variation	1045627	1045627	.	.	0	note=snp C=>T T:112 C:0
EA2454	snippy:4.3.6	variation	1045784	1045784	.	.	0	note=snp G=>A A:177 G:0
EA2454	snippy:4.3.6	variation	1045855	1045855	.	.	0	note=complex CCTGG=>ACTGA ACTGA:144 CCTGG:0
EA2454	snippy:4.3.6	variation	1046012	1046012	.	.	0	note=snp G=>A A:130 G:0
EA2454	snippy:4.3.6	variation	1046044	1046044	.	.	0	note=snp C=>T T:110 C:0
EA2454	snippy:4.3.6	variation	1046050	1046050	.	.	0	note=complex ACATGCA=>TCACGCG TCACGCG:92 ACATGCA:0
EA2454	snippy:4.3.6	variation	1046061	1046061	.	.	0	note=complex CCTCC=>AATCT AATCT:95 CCTCC:0
EA2454	snippy:4.3.6	variation	1046108	1046108	.	.	0	note=snp C=>T T:97 C:0
EA2454	snippy:4.3.6	variation	1046157	1046157	.	.	0	note=snp G=>C C:79 G:0
EA2454	snippy:4.3.6	variation	1046167	1046167	.	.	0	note=snp C=>T T:80 C:0
EA2454	snippy:4.3.6	variation	1046192	1046192	.	.	0	note=complex AAA=>GAG GAG:91 AAA:0
EA2454	snippy:4.3.6	variation	1046215	1046215	.	.	0	note=snp G=>C C:105 G:0
EA2454	snippy:4.3.6	variation	1046233	1046233	.	.	0	note=snp C=>T T:102 C:0
EA2454	snippy:4.3.6	variation	1046239	1046239	.	.	0	note=snp A=>G G:103 A:0
EA2454	snippy:4.3.6	variation	1046290	1046290	.	.	0	note=snp T=>C C:95 T:0
EA2454	snippy:4.3.6	variation	1046314	1046314	.	.	0	note=snp A=>G G:97 A:0
EA2454	snippy:4.3.6	variation	1046329	1046329	.	.	0	note=snp C=>T T:93 C:0
EA2454	snippy:4.3.6	variation	1046408	1046408	.	.	0	note=snp G=>A A:77 G:0
EA2454	snippy:4.3.6	variation	1046419	1046419	.	.	0	note=snp C=>T T:81 C:0
EA2454	snippy:4.3.6	variation	1046425	1046425	.	.	0	note=snp A=>G G:88 A:0
EA2454	snippy:4.3.6	variation	1046437	1046437	.	.	0	note=complex CGGA=>TGGC TGGC:79 CGGA:0
EA2454	snippy:4.3.6	variation	1046446	1046446	.	.	0	note=snp C=>T T:81 C:0
EA2454	snippy:4.3.6	variation	1046497	1046497	.	.	0	note=snp T=>C C:73 T:0
EA2454	snippy:4.3.6	variation	1046510	1046510	.	.	0	note=snp A=>G G:72 A:0
EA2454	snippy:4.3.6	variation	1046524	1046524	.	.	0	note=snp T=>G G:61 T:0
EA2454	snippy:4.3.6	variation	1046539	1046539	.	.	0	note=snp T=>C C:58 T:0
EA2454	snippy:4.3.6	variation	1046593	1046593	.	.	0	note=snp C=>A A:52 C:0
EA2454	snippy:4.3.6	variation	1046602	1046602	.	.	0	note=snp A=>T T:60 A:0
EA2454	snippy:4.3.6	variation	1046779	1046779	.	.	0	note=snp A=>G G:115 A:0
EA2454	snippy:4.3.6	variation	1046842	1046842	.	.	0	note=snp G=>A A:133 G:0
EA2454	snippy:4.3.6	variation	1046890	1046890	.	.	0	note=snp G=>C C:123 G:0
EA2454	snippy:4.3.6	variation	1046935	1046935	.	.	0	note=snp T=>C C:119 T:0
EA2454	snippy:4.3.6	variation	1046986	1046986	.	.	0	note=snp C=>T T:118 C:0
EA2454	snippy:4.3.6	variation	1046998	1046998	.	.	0	note=snp C=>T T:118 C:0
EA2454	snippy:4.3.6	variation	1047016	1047016	.	.	0	note=snp G=>C C:107 G:1
EA2454	snippy:4.3.6	variation	1047137	1047137	.	.	0	note=snp G=>A A:147 G:0
EA2454	snippy:4.3.6	variation	1047190	1047190	.	.	0	note=snp G=>A A:109 G:0
EA2454	snippy:4.3.6	variation	1047217	1047217	.	.	0	note=snp G=>A A:106 G:0
EA2454	snippy:4.3.6	variation	1047283	1047283	.	.	0	note=snp A=>G G:92 A:0
EA2454	snippy:4.3.6	variation	1047304	1047304	.	.	0	note=snp A=>G G:79 A:0
EA2454	snippy:4.3.6	variation	1047354	1047354	.	.	0	note=mnp CG=>TA TA:79 CG:0
EA2454	snippy:4.3.6	variation	1047374	1047374	.	.	0	note=snp C=>T T:73 C:0
EA2454	snippy:4.3.6	variation	1047379	1047379	.	.	0	note=snp C=>T T:78 C:0
EA2454	snippy:4.3.6	variation	1047400	1047400	.	.	0	note=snp A=>G G:90 A:0
EA2454	snippy:4.3.6	variation	1047416	1047416	.	.	0	note=snp A=>G G:84 A:0
EA2454	snippy:4.3.6	variation	1047445	1047445	.	.	0	note=snp C=>T T:101 C:0
EA2454	snippy:4.3.6	variation	1047508	1047508	.	.	0	note=snp T=>C C:112 T:0
EA2454	snippy:4.3.6	variation	1047520	1047520	.	.	0	note=snp G=>A A:106 G:0
EA2454	snippy:4.3.6	variation	1047547	1047547	.	.	0	note=complex ACTC=>GATA GATA:84 ACTC:0
EA2454	snippy:4.3.6	variation	1047571	1047571	.	.	0	note=snp A=>G G:108 A:0
EA2454	snippy:4.3.6	variation	1047602	1047602	.	.	0	note=snp A=>G G:118 A:0
EA2454	snippy:4.3.6	variation	1047616	1047616	.	.	0	note=complex CGCG=>TGCA TGCA:115 CGCG:0
EA2454	snippy:4.3.6	variation	1047674	1047674	.	.	0	note=snp G=>A A:123 G:0
EA2454	snippy:4.3.6	variation	1047745	1047745	.	.	0	note=snp G=>A A:99 G:0
EA2454	snippy:4.3.6	variation	1047834	1047834	.	.	0	note=snp A=>G G:129 A:0
EA2454	snippy:4.3.6	variation	1047894	1047894	.	.	0	note=snp C=>T T:125 C:0
EA2454	snippy:4.3.6	variation	1047939	1047939	.	.	0	note=snp A=>G G:127 A:0
EA2454	snippy:4.3.6	variation	1047951	1047951	.	.	0	note=snp C=>T T:121 C:0
EA2454	snippy:4.3.6	variation	1048005	1048005	.	.	0	note=snp T=>C C:119 T:0
EA2454	snippy:4.3.6	variation	1048047	1048047	.	.	0	note=mnp GT=>AC AC:117 GT:0
EA2454	snippy:4.3.6	variation	1048062	1048062	.	.	0	note=snp T=>C C:132 T:0
EA2454	snippy:4.3.6	variation	1052435	1052435	.	.	0	note=snp C=>T T:113 C:0
EA2454	snippy:4.3.6	variation	1053345	1053345	.	.	0	note=complex GCCCG=>TCCC TCCC:123 GCCCG:0
EA2454	snippy:4.3.6	variation	1053700	1053700	.	.	0	note=snp A=>G G:148 A:0
EA2454	snippy:4.3.6	variation	1053814	1053814	.	.	0	note=snp C=>T T:101 C:0
EA2454	snippy:4.3.6	variation	1053873	1053873	.	.	0	note=snp T=>C C:112 T:0
EA2454	snippy:4.3.6	variation	1053931	1053931	.	.	0	note=snp C=>T T:126 C:0
EA2454	snippy:4.3.6	variation	1053973	1053973	.	.	0	note=snp G=>A A:126 G:0
EA2454	snippy:4.3.6	variation	1054078	1054078	.	.	0	note=snp T=>A A:160 T:0
EA2454	snippy:4.3.6	variation	1054099	1054099	.	.	0	note=snp G=>T T:163 G:0
EA2454	snippy:4.3.6	variation	1054213	1054213	.	.	0	note=snp G=>A A:118 G:0
EA2454	snippy:4.3.6	variation	1054264	1054264	.	.	0	note=snp C=>T T:124 C:0
EA2454	snippy:4.3.6	variation	1054270	1054270	.	.	0	note=snp G=>A A:111 G:0
EA2454	snippy:4.3.6	variation	1054276	1054276	.	.	0	note=snp T=>C C:112 T:0
EA2454	snippy:4.3.6	variation	1054315	1054315	.	.	0	note=snp T=>C C:110 T:0
EA2454	snippy:4.3.6	variation	1054372	1054372	.	.	0	note=snp T=>C C:91 T:0
EA2454	snippy:4.3.6	variation	1054393	1054393	.	.	0	note=snp G=>A A:83 G:0
EA2454	snippy:4.3.6	variation	1054462	1054462	.	.	0	note=snp C=>A A:107 C:0
EA2454	snippy:4.3.6	variation	1054699	1054699	.	.	0	note=snp C=>T T:101 C:0
EA2454	snippy:4.3.6	variation	1054758	1054758	.	.	0	note=snp C=>T T:98 C:0
EA2454	snippy:4.3.6	variation	1054882	1054882	.	.	0	note=snp T=>C C:105 T:0
EA2454	snippy:4.3.6	variation	1055114	1055114	.	.	0	note=snp T=>G G:98 T:0
EA2454	snippy:4.3.6	variation	1055170	1055170	.	.	0	note=snp C=>T T:134 C:0
EA2454	snippy:4.3.6	variation	1055371	1055371	.	.	0	note=snp G=>A A:103 G:0
EA2454	snippy:4.3.6	variation	1055413	1055413	.	.	0	note=snp C=>G G:133 C:0
EA2454	snippy:4.3.6	variation	1055650	1055650	.	.	0	note=snp C=>T T:131 C:0
EA2454	snippy:4.3.6	variation	1055698	1055698	.	.	0	note=snp A=>G G:121 A:0
EA2454	snippy:4.3.6	variation	1055818	1055818	.	.	0	note=snp G=>A A:118 G:0
EA2454	snippy:4.3.6	variation	1055875	1055875	.	.	0	note=snp T=>C C:131 T:0
EA2454	snippy:4.3.6	variation	1055905	1055905	.	.	0	note=snp G=>T T:155 G:0
EA2454	snippy:4.3.6	variation	1055962	1055962	.	.	0	note=snp T=>G G:148 T:0
EA2454	snippy:4.3.6	variation	1055971	1055971	.	.	0	note=complex TCTGTTTGGTTGT=>GTTTTTCGGCTGC GTTTTTCGGCTGC:111 TCTGTTTGGTTGT:0
EA2454	snippy:4.3.6	variation	1056124	1056124	.	.	0	note=snp C=>G G:137 C:1
EA2454	snippy:4.3.6	variation	1056130	1056130	.	.	0	note=snp T=>C C:132 T:0
EA2454	snippy:4.3.6	variation	1056139	1056139	.	.	0	note=snp T=>A A:134 T:0
EA2454	snippy:4.3.6	variation	1056145	1056145	.	.	0	note=snp T=>C C:133 T:0
EA2454	snippy:4.3.6	variation	1056160	1056160	.	.	0	note=snp C=>T T:139 C:0
EA2454	snippy:4.3.6	variation	1056196	1056196	.	.	0	note=snp C=>T T:151 C:0
EA2454	snippy:4.3.6	variation	1056202	1056202	.	.	0	note=snp T=>C C:146 T:0
EA2454	snippy:4.3.6	variation	1056211	1056211	.	.	0	note=complex TGATGTAATT=>CGATATAACA CGATATAACA:116 TGATGTAATT:0
EA2454	snippy:4.3.6	variation	1059191	1059191	.	.	0	note=snp G=>T T:104 G:1
EA2454	snippy:4.3.6	variation	1067810	1067810	.	.	0	note=ins T=>TG TG:50 T:0
EA2454	snippy:4.3.6	variation	1073767	1073767	.	.	0	note=snp A=>G G:140 A:0
EA2454	snippy:4.3.6	variation	1075753	1075753	.	.	0	note=snp A=>G G:120 A:0
EA2454	snippy:4.3.6	variation	1079000	1079000	.	.	0	note=snp T=>C C:92 T:0
EA2454	snippy:4.3.6	variation	1087521	1087521	.	.	0	note=snp A=>C C:119 A:0
EA2454	snippy:4.3.6	variation	1088904	1088904	.	.	0	note=snp G=>A A:109 G:0
EA2454	snippy:4.3.6	variation	1093309	1093309	.	.	0	note=snp A=>G G:149 A:0
EA2454	snippy:4.3.6	variation	1100866	1100866	.	.	0	note=snp G=>A A:123 G:0
EA2454	snippy:4.3.6	variation	1103669	1103669	.	.	0	note=snp T=>C C:136 T:0
EA2454	snippy:4.3.6	variation	1107237	1107237	.	.	0	note=snp C=>T T:183 C:2
EA2454	snippy:4.3.6	variation	1109672	1109672	.	.	0	note=snp T=>C C:112 T:0
EA2454	snippy:4.3.6	variation	1122934	1122934	.	.	0	note=snp C=>T T:179 C:0
EA2454	snippy:4.3.6	variation	1128458	1128458	.	.	0	note=snp T=>C C:14 T:0
EA2454	snippy:4.3.6	variation	1128599	1128599	.	.	0	note=snp C=>T T:17 C:0
EA2454	snippy:4.3.6	variation	1129220	1129220	.	.	0	note=snp C=>T T:86 C:0
EA2454	snippy:4.3.6	variation	1130101	1130101	.	.	0	note=snp T=>C C:124 T:0
EA2454	snippy:4.3.6	variation	1137327	1137327	.	.	0	note=snp C=>T T:155 C:0
EA2454	snippy:4.3.6	variation	1138215	1138215	.	.	0	note=snp T=>C C:185 T:0
EA2454	snippy:4.3.6	variation	1139565	1139565	.	.	0	note=del CT=>C C:85 CT:0
EA2454	snippy:4.3.6	variation	1140326	1140326	.	.	0	note=snp A=>G G:120 A:0
EA2454	snippy:4.3.6	variation	1141515	1141515	.	.	0	note=snp A=>T T:77 A:0
EA2454	snippy:4.3.6	variation	1143467	1143467	.	.	0	note=snp C=>T T:136 C:0
EA2454	snippy:4.3.6	variation	1144975	1144975	.	.	0	note=snp T=>C C:19 T:0
EA2454	snippy:4.3.6	variation	1147228	1147228	.	.	0	note=snp C=>T T:106 C:0
EA2454	snippy:4.3.6	variation	1150160	1150160	.	.	0	note=snp T=>A A:86 T:0
EA2454	snippy:4.3.6	variation	1151448	1151448	.	.	0	note=snp T=>C C:140 T:0
EA2454	snippy:4.3.6	variation	1153447	1153447	.	.	0	note=snp T=>C C:88 T:0
EA2454	snippy:4.3.6	variation	1153937	1153937	.	.	0	note=snp G=>A A:111 G:0
EA2454	snippy:4.3.6	variation	1160822	1160822	.	.	0	note=snp A=>T T:116 A:1
EA2454	snippy:4.3.6	variation	1161286	1161286	.	.	0	note=snp C=>T T:129 C:0
EA2454	snippy:4.3.6	variation	1162900	1162900	.	.	0	note=snp T=>C C:87 T:0
EA2454	snippy:4.3.6	variation	1167666	1167666	.	.	0	note=snp T=>C C:111 T:0
EA2454	snippy:4.3.6	variation	1171208	1171208	.	.	0	note=snp C=>T T:112 C:0
EA2454	snippy:4.3.6	variation	1174352	1174352	.	.	0	note=snp T=>C C:94 T:0
EA2454	snippy:4.3.6	variation	1175890	1175890	.	.	0	note=snp G=>T T:132 G:1
EA2454	snippy:4.3.6	variation	1180279	1180279	.	.	0	note=snp C=>T T:56 C:0
EA2454	snippy:4.3.6	variation	1186746	1186746	.	.	0	note=snp T=>C C:161 T:0
EA2454	snippy:4.3.6	variation	1187745	1187745	.	.	0	note=snp C=>T T:106 C:0
EA2454	snippy:4.3.6	variation	1190353	1190353	.	.	0	note=snp G=>T T:117 G:0
EA2454	snippy:4.3.6	variation	1197020	1197020	.	.	0	note=snp G=>A A:144 G:0
EA2454	snippy:4.3.6	variation	1197286	1197286	.	.	0	note=snp C=>T T:177 C:0
EA2454	snippy:4.3.6	variation	1201704	1201704	.	.	0	note=snp G=>A A:123 G:0
EA2454	snippy:4.3.6	variation	1202802	1202802	.	.	0	note=del GT=>G G:63 GT:0
EA2454	snippy:4.3.6	variation	1204279	1204279	.	.	0	note=snp A=>T T:102 A:0
EA2454	snippy:4.3.6	variation	1211256	1211256	.	.	0	note=snp T=>C C:159 T:0
EA2454	snippy:4.3.6	variation	1216869	1216869	.	.	0	note=snp C=>T T:143 C:0
EA2454	snippy:4.3.6	variation	1216961	1216961	.	.	0	note=snp G=>T T:117 G:0
EA2454	snippy:4.3.6	variation	1218789	1218789	.	.	0	note=snp A=>G G:20 A:0
EA2454	snippy:4.3.6	variation	1219256	1219256	.	.	0	note=snp C=>T T:116 C:0
EA2454	snippy:4.3.6	variation	1235752	1235752	.	.	0	note=snp A=>G G:134 A:0
EA2454	snippy:4.3.6	variation	1236723	1236723	.	.	0	note=snp T=>C C:113 T:0
EA2454	snippy:4.3.6	variation	1244877	1244877	.	.	0	note=snp G=>A A:20 G:0
EA2454	snippy:4.3.6	variation	1244950	1244950	.	.	0	note=snp T=>C C:27 T:0
EA2454	snippy:4.3.6	variation	1245865	1245865	.	.	0	note=snp C=>T T:134 C:0
EA2454	snippy:4.3.6	variation	1245983	1245983	.	.	0	note=snp G=>A A:134 G:0
EA2454	snippy:4.3.6	variation	1255549	1255549	.	.	0	note=snp A=>G G:128 A:0
EA2454	snippy:4.3.6	variation	1260391	1260391	.	.	0	note=snp A=>G G:152 A:0
EA2454	snippy:4.3.6	variation	1261876	1261876	.	.	0	note=snp A=>C C:107 A:0
EA2454	snippy:4.3.6	variation	1272930	1272930	.	.	0	note=snp T=>C C:103 T:0
EA2454	snippy:4.3.6	variation	1274943	1274943	.	.	0	note=snp G=>T T:166 G:1
EA2454	snippy:4.3.6	variation	1280572	1280572	.	.	0	note=snp C=>A A:140 C:2
EA2454	snippy:4.3.6	variation	1282553	1282553	.	.	0	note=snp T=>C C:152 T:0
EA2454	snippy:4.3.6	variation	1297315	1297315	.	.	0	note=snp T=>G G:122 T:1
EA2454	snippy:4.3.6	variation	1298224	1298224	.	.	0	note=snp A=>G G:110 A:0
EA2454	snippy:4.3.6	variation	1309315	1309315	.	.	0	note=snp T=>C C:154 T:0
EA2454	snippy:4.3.6	variation	1317400	1317400	.	.	0	note=snp G=>A A:109 G:0
EA2454	snippy:4.3.6	variation	1320805	1320805	.	.	0	note=snp A=>G G:85 A:0
EA2454	snippy:4.3.6	variation	1322163	1322163	.	.	0	note=snp T=>C C:114 T:0
EA2454	snippy:4.3.6	variation	1322665	1322665	.	.	0	note=snp T=>C C:83 T:0
EA2454	snippy:4.3.6	variation	1325571	1325571	.	.	0	note=snp C=>T T:105 C:0
EA2454	snippy:4.3.6	variation	1328307	1328307	.	.	0	note=complex ATTAA=>GTTAG GTTAG:112 ATTAA:0
EA2454	snippy:4.3.6	variation	1330704	1330704	.	.	0	note=snp G=>T T:90 G:0
EA2454	snippy:4.3.6	variation	1331179	1331179	.	.	0	note=snp T=>G G:117 T:1
EA2454	snippy:4.3.6	variation	1335631	1335631	.	.	0	note=snp T=>G G:119 T:0
EA2454	snippy:4.3.6	variation	1340886	1340886	.	.	0	note=snp A=>C C:136 A:0
EA2454	snippy:4.3.6	variation	1343278	1343278	.	.	0	note=snp C=>A A:158 C:1
EA2454	snippy:4.3.6	variation	1345460	1345460	.	.	0	note=snp T=>G G:83 T:0
EA2454	snippy:4.3.6	variation	1345847	1345847	.	.	0	note=snp T=>C C:118 T:0
EA2454	snippy:4.3.6	variation	1351707	1351707	.	.	0	note=snp G=>C C:127 G:0
EA2454	snippy:4.3.6	variation	1351769	1351769	.	.	0	note=snp T=>G G:131 T:1
EA2454	snippy:4.3.6	variation	1355247	1355247	.	.	0	note=snp G=>C C:107 G:0
EA2454	snippy:4.3.6	variation	1358384	1358384	.	.	0	note=snp A=>G G:113 A:0
EA2454	snippy:4.3.6	variation	1360577	1360577	.	.	0	note=snp A=>G G:145 A:0
EA2454	snippy:4.3.6	variation	1365707	1365707	.	.	0	note=snp C=>T T:105 C:0
EA2454	snippy:4.3.6	variation	1371250	1371250	.	.	0	note=snp T=>C C:87 T:0
EA2454	snippy:4.3.6	variation	1373482	1373482	.	.	0	note=snp T=>C C:115 T:0
EA2454	snippy:4.3.6	variation	1378312	1378312	.	.	0	note=snp T=>C C:147 T:0
EA2454	snippy:4.3.6	variation	1382325	1382325	.	.	0	note=ins G=>GT GT:113 G:1
EA2454	snippy:4.3.6	variation	1387493	1387493	.	.	0	note=snp A=>G G:78 A:0
EA2454	snippy:4.3.6	variation	1389276	1389276	.	.	0	note=snp A=>G G:170 A:0
EA2454	snippy:4.3.6	variation	1389480	1389480	.	.	0	note=snp A=>C C:147 A:1
EA2454	snippy:4.3.6	variation	1394505	1394505	.	.	0	note=snp A=>G G:161 A:1
EA2454	snippy:4.3.6	variation	1398315	1398315	.	.	0	note=snp G=>A A:124 G:0
EA2454	snippy:4.3.6	variation	1401264	1401264	.	.	0	note=snp A=>G G:117 A:0
EA2454	snippy:4.3.6	variation	1401535	1401535	.	.	0	note=snp C=>T T:110 C:0
EA2454	snippy:4.3.6	variation	1413069	1413069	.	.	0	note=snp G=>A A:102 G:0
EA2454	snippy:4.3.6	variation	1413295	1413295	.	.	0	note=snp T=>C C:83 T:0
EA2454	snippy:4.3.6	variation	1473808	1473808	.	.	0	note=snp T=>C C:94 T:0
EA2454	snippy:4.3.6	variation	1474887	1474887	.	.	0	note=snp C=>T T:79 C:0
EA2454	snippy:4.3.6	variation	1476139	1476139	.	.	0	note=snp T=>C C:102 T:0
EA2454	snippy:4.3.6	variation	1476516	1476516	.	.	0	note=snp G=>A A:119 G:0
EA2454	snippy:4.3.6	variation	1478175	1478175	.	.	0	note=snp T=>G G:121 T:0
EA2454	snippy:4.3.6	variation	1480708	1480708	.	.	0	note=snp T=>G G:149 T:2
EA2454	snippy:4.3.6	variation	1482449	1482449	.	.	0	note=snp A=>G G:87 A:0
EA2454	snippy:4.3.6	variation	1483731	1483731	.	.	0	note=snp C=>T T:124 C:0
EA2454	snippy:4.3.6	variation	1483915	1483915	.	.	0	note=snp T=>C C:100 T:0
EA2454	snippy:4.3.6	variation	1485540	1485540	.	.	0	note=snp G=>A A:148 G:0
EA2454	snippy:4.3.6	variation	1490337	1490337	.	.	0	note=snp A=>T T:132 A:0
EA2454	snippy:4.3.6	variation	1491226	1491226	.	.	0	note=snp T=>C C:111 T:0
EA2454	snippy:4.3.6	variation	1491674	1491674	.	.	0	note=snp A=>G G:144 A:0
EA2454	snippy:4.3.6	variation	1492527	1492527	.	.	0	note=ins C=>CA CA:112 C:2
EA2454	snippy:4.3.6	variation	1495054	1495054	.	.	0	note=snp G=>A A:75 G:0
EA2454	snippy:4.3.6	variation	1495581	1495581	.	.	0	note=snp T=>A A:120 T:0
EA2454	snippy:4.3.6	variation	1500517	1500517	.	.	0	note=ins T=>TA TA:96 T:0
EA2454	snippy:4.3.6	variation	1505531	1505531	.	.	0	note=snp C=>A A:103 C:0
EA2454	snippy:4.3.6	variation	1505571	1505571	.	.	0	note=snp C=>T T:133 C:0
EA2454	snippy:4.3.6	variation	1505915	1505915	.	.	0	note=snp A=>C C:107 A:1
EA2454	snippy:4.3.6	variation	1506283	1506283	.	.	0	note=snp C=>T T:120 C:0
EA2454	snippy:4.3.6	variation	1509044	1509044	.	.	0	note=snp C=>G G:100 C:0
EA2454	snippy:4.3.6	variation	1518451	1518451	.	.	0	note=complex GGAAG=>AAAAA AAAAA:80 GGAAG:0
EA2454	snippy:4.3.6	variation	1518480	1518480	.	.	0	note=snp T=>G G:74 T:0
EA2454	snippy:4.3.6	variation	1519405	1519405	.	.	0	note=snp T=>C C:110 T:0
EA2454	snippy:4.3.6	variation	1521025	1521025	.	.	0	note=snp C=>A A:189 C:0
EA2454	snippy:4.3.6	variation	1521514	1521514	.	.	0	note=snp C=>A A:138 C:0
EA2454	snippy:4.3.6	variation	1525679	1525679	.	.	0	note=snp C=>T T:121 C:0
EA2454	snippy:4.3.6	variation	1528611	1528611	.	.	0	note=snp C=>T T:116 C:0
EA2454	snippy:4.3.6	variation	1533339	1533339	.	.	0	note=snp A=>G G:161 A:0
EA2454	snippy:4.3.6	variation	1534292	1534292	.	.	0	note=snp A=>G G:104 A:0
EA2454	snippy:4.3.6	variation	1546855	1546855	.	.	0	note=snp C=>T T:88 C:0
EA2454	snippy:4.3.6	variation	1547465	1547465	.	.	0	note=snp G=>T T:89 G:0
EA2454	snippy:4.3.6	variation	1548845	1548845	.	.	0	note=snp T=>C C:132 T:0
EA2454	snippy:4.3.6	variation	1549828	1549828	.	.	0	note=snp T=>C C:134 T:0
EA2454	snippy:4.3.6	variation	1549834	1549834	.	.	0	note=del ACGCCATTG=>A A:109 ACGCCATTG:0
EA2454	snippy:4.3.6	variation	1551196	1551196	.	.	0	note=snp A=>G G:141 A:0
EA2454	snippy:4.3.6	variation	1556519	1556519	.	.	0	note=snp A=>G G:113 A:0
EA2454	snippy:4.3.6	variation	1557966	1557966	.	.	0	note=snp A=>G G:126 A:0
EA2454	snippy:4.3.6	variation	1559423	1559423	.	.	0	note=snp A=>G G:99 A:0
EA2454	snippy:4.3.6	variation	1559525	1559525	.	.	0	note=snp G=>A A:107 G:1
EA2454	snippy:4.3.6	variation	1560679	1560679	.	.	0	note=snp G=>A A:104 G:0
EA2454	snippy:4.3.6	variation	1562488	1562488	.	.	0	note=snp G=>A A:131 G:0
EA2454	snippy:4.3.6	variation	1564301	1564301	.	.	0	note=snp G=>T T:115 G:1
EA2454	snippy:4.3.6	variation	1568375	1568375	.	.	0	note=snp A=>C C:125 A:2
EA2454	snippy:4.3.6	variation	1570233	1570233	.	.	0	note=snp A=>G G:124 A:0
EA2454	snippy:4.3.6	variation	1573803	1573803	.	.	0	note=snp T=>A A:122 T:0
EA2454	snippy:4.3.6	variation	1587379	1587379	.	.	0	note=snp T=>C C:135 T:0
EA2454	snippy:4.3.6	variation	1587792	1587792	.	.	0	note=snp A=>C C:122 A:1
EA2454	snippy:4.3.6	variation	1592505	1592505	.	.	0	note=snp T=>C C:96 T:0
EA2454	snippy:4.3.6	variation	1596282	1596282	.	.	0	note=snp T=>G G:118 T:1
EA2454	snippy:4.3.6	variation	1596875	1596875	.	.	0	note=snp A=>C C:102 A:0
EA2454	snippy:4.3.6	variation	1597496	1597496	.	.	0	note=snp T=>C C:173 T:0
EA2454	snippy:4.3.6	variation	1599599	1599599	.	.	0	note=snp T=>G G:104 T:1
EA2454	snippy:4.3.6	variation	1599906	1599906	.	.	0	note=snp T=>C C:97 T:0
EA2454	snippy:4.3.6	variation	1600127	1600127	.	.	0	note=snp G=>A A:86 G:0
EA2454	snippy:4.3.6	variation	1600258	1600258	.	.	0	note=snp C=>A A:124 C:0
EA2454	snippy:4.3.6	variation	1600919	1600919	.	.	0	note=snp A=>G G:134 A:0
EA2454	snippy:4.3.6	variation	1601885	1601885	.	.	0	note=snp A=>G G:147 A:0
EA2454	snippy:4.3.6	variation	1606482	1606482	.	.	0	note=snp A=>G G:125 A:1
EA2454	snippy:4.3.6	variation	1610176	1610176	.	.	0	note=snp G=>A A:63 G:0
EA2454	snippy:4.3.6	variation	1610501	1610501	.	.	0	note=del AT=>A A:120 AT:0
EA2454	snippy:4.3.6	variation	1612435	1612435	.	.	0	note=snp G=>A A:109 G:0
EA2454	snippy:4.3.6	variation	1613406	1613406	.	.	0	note=snp T=>A A:95 T:0
EA2454	snippy:4.3.6	variation	1613463	1613463	.	.	0	note=snp A=>G G:112 A:0
EA2454	snippy:4.3.6	variation	1614409	1614409	.	.	0	note=snp G=>T T:114 G:0
EA2454	snippy:4.3.6	variation	1616456	1616456	.	.	0	note=snp A=>G G:132 A:1
EA2454	snippy:4.3.6	variation	1617684	1617684	.	.	0	note=snp G=>C C:123 G:0
EA2454	snippy:4.3.6	variation	1630981	1630981	.	.	0	note=snp A=>G G:14 A:0
EA2454	snippy:4.3.6	variation	1630990	1630990	.	.	0	note=snp T=>C C:17 T:0
EA2454	snippy:4.3.6	variation	1634228	1634228	.	.	0	note=snp A=>G G:178 A:0
EA2454	snippy:4.3.6	variation	1642336	1642336	.	.	0	note=snp A=>G G:118 A:0
EA2454	snippy:4.3.6	variation	1652108	1652108	.	.	0	note=snp T=>C C:59 T:0
EA2454	snippy:4.3.6	variation	1652131	1652131	.	.	0	note=snp G=>C C:50 G:1
EA2454	snippy:4.3.6	variation	1652143	1652143	.	.	0	note=complex G=>TAT TAT:33 G:0
EA2454	snippy:4.3.6	variation	1652149	1652149	.	.	0	note=snp G=>A A:32 G:0
EA2454	snippy:4.3.6	variation	1652161	1652161	.	.	0	note=snp C=>T T:32 C:0
EA2454	snippy:4.3.6	variation	1652374	1652374	.	.	0	note=snp G=>A A:118 G:0
EA2454	snippy:4.3.6	variation	1655522	1655522	.	.	0	note=snp T=>G G:120 T:1
EA2454	snippy:4.3.6	variation	1676378	1676378	.	.	0	note=snp T=>C C:110 T:0
EA2454	snippy:4.3.6	variation	1681971	1681971	.	.	0	note=snp C=>T T:98 C:0
EA2454	snippy:4.3.6	variation	1682180	1682180	.	.	0	note=snp G=>T T:100 G:1
EA2454	snippy:4.3.6	variation	1682457	1682457	.	.	0	note=snp A=>G G:86 A:0
EA2454	snippy:4.3.6	variation	1683078	1683078	.	.	0	note=snp C=>T T:97 C:0
EA2454	snippy:4.3.6	variation	1684983	1684983	.	.	0	note=snp A=>C C:120 A:0
EA2454	snippy:4.3.6	variation	1686483	1686483	.	.	0	note=snp C=>T T:64 C:0
EA2454	snippy:4.3.6	variation	1689622	1689622	.	.	0	note=snp T=>A A:123 T:1
EA2454	snippy:4.3.6	variation	1690336	1690336	.	.	0	note=snp C=>A A:103 C:0
EA2454	snippy:4.3.6	variation	1694588	1694588	.	.	0	note=snp A=>T T:120 A:0
EA2454	snippy:4.3.6	variation	1701919	1701919	.	.	0	note=snp A=>G G:141 A:0
EA2454	snippy:4.3.6	variation	1702950	1702950	.	.	0	note=snp T=>A A:119 T:0
EA2454	snippy:4.3.6	variation	1707192	1707192	.	.	0	note=snp A=>G G:111 A:0
EA2454	snippy:4.3.6	variation	1708150	1708150	.	.	0	note=snp G=>A A:101 G:0
EA2454	snippy:4.3.6	variation	1710872	1710872	.	.	0	note=snp C=>T T:114 C:0
EA2454	snippy:4.3.6	variation	1714697	1714697	.	.	0	note=snp T=>C C:129 T:0
EA2454	snippy:4.3.6	variation	1717835	1717835	.	.	0	note=snp C=>A A:112 C:0
EA2454	snippy:4.3.6	variation	1719996	1719996	.	.	0	note=snp C=>G G:114 C:1
EA2454	snippy:4.3.6	variation	1729448	1729448	.	.	0	note=del GCTC=>G G:92 GCTC:0
EA2454	snippy:4.3.6	variation	1730329	1730329	.	.	0	note=snp T=>C C:99 T:0
EA2454	snippy:4.3.6	variation	1732438	1732438	.	.	0	note=snp G=>A A:107 G:0
EA2454	snippy:4.3.6	variation	1737561	1737561	.	.	0	note=snp A=>G G:105 A:0
EA2454	snippy:4.3.6	variation	1739772	1739772	.	.	0	note=del CG=>C C:81 CG:0
EA2454	snippy:4.3.6	variation	1740558	1740558	.	.	0	note=snp T=>G G:70 T:0
EA2454	snippy:4.3.6	variation	1743887	1743887	.	.	0	note=snp C=>T T:96 C:0
EA2454	snippy:4.3.6	variation	1745576	1745576	.	.	0	note=snp T=>C C:150 T:0
EA2454	snippy:4.3.6	variation	1748585	1748585	.	.	0	note=snp A=>C C:124 A:1
EA2454	snippy:4.3.6	variation	1763293	1763293	.	.	0	note=snp T=>C C:106 T:0
EA2454	snippy:4.3.6	variation	1780322	1780322	.	.	0	note=snp C=>T T:128 C:0
EA2454	snippy:4.3.6	variation	1780790	1780790	.	.	0	note=snp G=>C C:140 G:0
EA2454	snippy:4.3.6	variation	1783740	1783740	.	.	0	note=snp C=>T T:100 C:0
EA2454	snippy:4.3.6	variation	1785674	1785674	.	.	0	note=snp G=>T T:90 G:0
EA2454	snippy:4.3.6	variation	1786685	1786685	.	.	0	note=snp T=>C C:100 T:0
EA2454	snippy:4.3.6	variation	1788816	1788816	.	.	0	note=snp T=>G G:139 T:0
EA2454	snippy:4.3.6	variation	1794938	1794938	.	.	0	note=snp T=>G G:116 T:4
EA2454	snippy:4.3.6	variation	1795161	1795161	.	.	0	note=snp A=>G G:85 A:0
EA2454	snippy:4.3.6	variation	1799132	1799132	.	.	0	note=snp G=>A A:117 G:0
EA2454	snippy:4.3.6	variation	1802874	1802874	.	.	0	note=snp A=>G G:80 A:0
EA2454	snippy:4.3.6	variation	1803664	1803664	.	.	0	note=snp T=>C C:134 T:0
EA2454	snippy:4.3.6	variation	1809011	1809011	.	.	0	note=snp G=>A A:140 G:0
EA2454	snippy:4.3.6	variation	1816986	1816986	.	.	0	note=snp G=>A A:107 G:0
EA2454	snippy:4.3.6	variation	1820083	1820083	.	.	0	note=snp T=>C C:102 T:0
EA2454	snippy:4.3.6	variation	1824156	1824156	.	.	0	note=snp T=>C C:111 T:0
EA2454	snippy:4.3.6	variation	1824499	1824499	.	.	0	note=snp T=>C C:120 T:0
EA2454	snippy:4.3.6	variation	1825107	1825107	.	.	0	note=snp G=>A A:94 G:0
EA2454	snippy:4.3.6	variation	1825274	1825274	.	.	0	note=del GT=>G G:15 GT:0
EA2454	snippy:4.3.6	variation	1825439	1825439	.	.	0	note=snp C=>T T:82 C:0
EA2454	snippy:4.3.6	variation	1827400	1827400	.	.	0	note=snp G=>A A:94 G:0
EA2454	snippy:4.3.6	variation	1832674	1832674	.	.	0	note=snp A=>C C:143 A:1
EA2454	snippy:4.3.6	variation	1839836	1839836	.	.	0	note=snp C=>T T:144 C:0
EA2454	snippy:4.3.6	variation	1842556	1842556	.	.	0	note=ins A=>AACCAAT AACCAAT:89 A:0
EA2454	snippy:4.3.6	variation	1844569	1844569	.	.	0	note=snp A=>G G:125 A:0
EA2454	snippy:4.3.6	variation	1849257	1849257	.	.	0	note=snp G=>A A:194 G:1
EA2454	snippy:4.3.6	variation	1852886	1852886	.	.	0	note=snp A=>G G:119 A:0
EA2454	snippy:4.3.6	variation	1853109	1853109	.	.	0	note=snp C=>T T:149 C:0
EA2454	snippy:4.3.6	variation	1860310	1860310	.	.	0	note=snp T=>C C:72 T:1
EA2454	snippy:4.3.6	variation	1867578	1867578	.	.	0	note=snp G=>A A:138 G:0
EA2454	snippy:4.3.6	variation	1877345	1877345	.	.	0	note=snp T=>C C:128 T:0
EA2454	snippy:4.3.6	variation	1880076	1880076	.	.	0	note=snp G=>A A:161 G:0
EA2454	snippy:4.3.6	variation	1881056	1881056	.	.	0	note=snp C=>G G:99 C:0
EA2454	snippy:4.3.6	variation	1885869	1885869	.	.	0	note=snp A=>C C:69 A:0
EA2454	snippy:4.3.6	variation	1887544	1887544	.	.	0	note=snp A=>G G:84 A:0
EA2454	snippy:4.3.6	variation	1890386	1890386	.	.	0	note=snp T=>C C:133 T:0
EA2454	snippy:4.3.6	variation	1901401	1901401	.	.	0	note=snp G=>A A:164 G:0
EA2454	snippy:4.3.6	variation	1902291	1902291	.	.	0	note=snp G=>C C:112 G:0
EA2454	snippy:4.3.6	variation	1902743	1902743	.	.	0	note=snp C=>T T:101 C:0
EA2454	snippy:4.3.6	variation	1909088	1909088	.	.	0	note=snp T=>C C:163 T:0
EA2454	snippy:4.3.6	variation	1909748	1909748	.	.	0	note=snp T=>G G:137 T:1
EA2454	snippy:4.3.6	variation	1912473	1912473	.	.	0	note=snp A=>G G:138 A:0
EA2454	snippy:4.3.6	variation	1919919	1919919	.	.	0	note=snp G=>A A:121 G:0
EA2454	snippy:4.3.6	variation	1922848	1922848	.	.	0	note=snp A=>C C:126 A:0
EA2454	snippy:4.3.6	variation	1924083	1924083	.	.	0	note=snp C=>T T:69 C:0
EA2454	snippy:4.3.6	variation	1929193	1929193	.	.	0	note=ins T=>TTTA TTTA:47 T:0
EA2454	snippy:4.3.6	variation	1932163	1932163	.	.	0	note=snp G=>A A:119 G:0
EA2454	snippy:4.3.6	variation	1943617	1943617	.	.	0	note=snp C=>T T:118 C:0
EA2454	snippy:4.3.6	variation	1943853	1943853	.	.	0	note=snp A=>C C:122 A:1
EA2454	snippy:4.3.6	variation	1945608	1945608	.	.	0	note=snp T=>C C:127 T:0
EA2454	snippy:4.3.6	variation	1950298	1950298	.	.	0	note=snp T=>G G:150 T:0
EA2454	snippy:4.3.6	variation	1958733	1958733	.	.	0	note=snp T=>C C:136 T:0
EA2454	snippy:4.3.6	variation	1964682	1964682	.	.	0	note=snp C=>T T:74 C:1
EA2454	snippy:4.3.6	variation	1970914	1970914	.	.	0	note=snp A=>T T:23 A:0
EA2454	snippy:4.3.6	variation	1970924	1970924	.	.	0	note=complex CAA=>ATC ATC:23 CAA:0
EA2454	snippy:4.3.6	variation	1970935	1970935	.	.	0	note=snp C=>A A:32 C:1
EA2454	snippy:4.3.6	variation	1971161	1971161	.	.	0	note=snp G=>A A:150 G:0
EA2454	snippy:4.3.6	variation	1979564	1979564	.	.	0	note=snp A=>G G:114 A:0
EA2454	snippy:4.3.6	variation	1980186	1980186	.	.	0	note=snp C=>T T:139 C:0
EA2454	snippy:4.3.6	variation	1980270	1980270	.	.	0	note=snp T=>A A:129 T:0
EA2454	snippy:4.3.6	variation	1983040	1983040	.	.	0	note=snp T=>A A:134 T:0
EA2454	snippy:4.3.6	variation	1985305	1985305	.	.	0	note=snp G=>A A:106 G:0
EA2454	snippy:4.3.6	variation	1991121	1991121	.	.	0	note=snp T=>C C:77 T:0
EA2454	snippy:4.3.6	variation	1995211	1995211	.	.	0	note=snp T=>C C:120 T:0
EA2454	snippy:4.3.6	variation	1997790	1997790	.	.	0	note=snp G=>A A:103 G:0
EA2454	snippy:4.3.6	variation	1997936	1997936	.	.	0	note=snp C=>T T:111 C:1
EA2454	snippy:4.3.6	variation	1999636	1999636	.	.	0	note=snp A=>G G:175 A:0
EA2454	snippy:4.3.6	variation	2007738	2007738	.	.	0	note=snp A=>G G:112 A:0
EA2454	snippy:4.3.6	variation	2011981	2011981	.	.	0	note=snp A=>C C:87 A:0
EA2454	snippy:4.3.6	variation	2023335	2023335	.	.	0	note=snp A=>C C:146 A:0
EA2454	snippy:4.3.6	variation	2027149	2027149	.	.	0	note=snp G=>A A:90 G:0
EA2454	snippy:4.3.6	variation	2028327	2028327	.	.	0	note=snp G=>T T:118 G:1
EA2454	snippy:4.3.6	variation	2036702	2036702	.	.	0	note=snp C=>T T:92 C:0
EA2454	snippy:4.3.6	variation	2038279	2038279	.	.	0	note=ins A=>AAC AAC:107 A:0
EA2454	snippy:4.3.6	variation	2041809	2041809	.	.	0	note=snp A=>G G:93 A:0
EA2454	snippy:4.3.6	variation	2045195	2045195	.	.	0	note=snp G=>A A:144 G:2
EA2454	snippy:4.3.6	variation	2046204	2046204	.	.	0	note=snp T=>C C:96 T:0
EA2454	snippy:4.3.6	variation	2046266	2046266	.	.	0	note=snp G=>A A:68 G:0
EA2454	snippy:4.3.6	variation	2052249	2052249	.	.	0	note=snp C=>T T:70 C:0
EA2454	snippy:4.3.6	variation	2055447	2055447	.	.	0	note=snp C=>A A:115 C:0
EA2454	snippy:4.3.6	variation	2055836	2055836	.	.	0	note=snp A=>G G:164 A:0
EA2454	snippy:4.3.6	variation	2057764	2057764	.	.	0	note=snp G=>A A:137 G:0
EA2454	snippy:4.3.6	variation	2059644	2059644	.	.	0	note=snp G=>A A:111 G:0
EA2454	snippy:4.3.6	variation	2060512	2060512	.	.	0	note=snp G=>A A:153 G:0
EA2454	snippy:4.3.6	variation	2060675	2060675	.	.	0	note=snp A=>G G:114 A:0
EA2454	snippy:4.3.6	variation	2062156	2062156	.	.	0	note=snp T=>C C:132 T:0
EA2454	snippy:4.3.6	variation	2063676	2063676	.	.	0	note=snp T=>C C:109 T:0
EA2454	snippy:4.3.6	variation	2063839	2063839	.	.	0	note=snp T=>C C:135 T:0
EA2454	snippy:4.3.6	variation	2068297	2068297	.	.	0	note=snp T=>G G:99 T:0
EA2454	snippy:4.3.6	variation	2069320	2069320	.	.	0	note=snp A=>C C:105 A:2
EA2454	snippy:4.3.6	variation	2070162	2070162	.	.	0	note=snp T=>C C:84 T:0
EA2454	snippy:4.3.6	variation	2078028	2078028	.	.	0	note=snp A=>G G:168 A:0
EA2454	snippy:4.3.6	variation	2078286	2078286	.	.	0	note=snp G=>A A:134 G:0
EA2454	snippy:4.3.6	variation	2088535	2088535	.	.	0	note=snp C=>G G:49 C:0
EA2454	snippy:4.3.6	variation	2088956	2088956	.	.	0	note=snp G=>T T:109 G:0
EA2454	snippy:4.3.6	variation	2089692	2089692	.	.	0	note=snp A=>C C:94 A:0
EA2454	snippy:4.3.6	variation	2091315	2091315	.	.	0	note=snp G=>A A:119 G:0
EA2454	snippy:4.3.6	variation	2094829	2094829	.	.	0	note=snp T=>C C:110 T:1
EA2454	snippy:4.3.6	variation	2096088	2096088	.	.	0	note=snp A=>G G:123 A:0
EA2454	snippy:4.3.6	variation	2101273	2101273	.	.	0	note=snp C=>A A:79 C:1
EA2454	snippy:4.3.6	variation	2102720	2102720	.	.	0	note=snp A=>T T:113 A:1
EA2454	snippy:4.3.6	variation	2102812	2102812	.	.	0	note=snp G=>A A:87 G:1
EA2454	snippy:4.3.6	variation	2102993	2102993	.	.	0	note=snp T=>C C:90 T:0
EA2454	snippy:4.3.6	variation	2105260	2105260	.	.	0	note=snp T=>G G:120 T:1
EA2454	snippy:4.3.6	variation	2110904	2110904	.	.	0	note=snp A=>C C:96 A:1
EA2454	snippy:4.3.6	variation	2114129	2114129	.	.	0	note=snp T=>G G:123 T:1
EA2454	snippy:4.3.6	variation	2116036	2116036	.	.	0	note=del GC=>G G:93 GC:0
EA2454	snippy:4.3.6	variation	2117468	2117468	.	.	0	note=snp A=>G G:112 A:0
EA2454	snippy:4.3.6	variation	2119737	2119737	.	.	0	note=snp T=>C C:118 T:0
EA2454	snippy:4.3.6	variation	2120350	2120350	.	.	0	note=snp G=>A A:111 G:0
EA2454	snippy:4.3.6	variation	2128792	2128792	.	.	0	note=snp T=>C C:130 T:1
EA2454	snippy:4.3.6	variation	2133852	2133852	.	.	0	note=snp C=>A A:120 C:0
EA2454	snippy:4.3.6	variation	2139827	2139827	.	.	0	note=snp A=>C C:164 A:0
EA2454	snippy:4.3.6	variation	2142320	2142320	.	.	0	note=snp T=>C C:148 T:0
EA2454	snippy:4.3.6	variation	2142575	2142575	.	.	0	note=snp G=>C C:114 G:0
EA2454	snippy:4.3.6	variation	2147431	2147431	.	.	0	note=snp G=>T T:90 G:0
EA2454	snippy:4.3.6	variation	2148878	2148878	.	.	0	note=snp T=>A A:103 T:0
EA2454	snippy:4.3.6	variation	2149543	2149543	.	.	0	note=snp T=>A A:149 T:0
EA2454	snippy:4.3.6	variation	2149924	2149924	.	.	0	note=snp A=>G G:119 A:0
EA2454	snippy:4.3.6	variation	2154507	2154507	.	.	0	note=snp C=>T T:87 C:0
EA2454	snippy:4.3.6	variation	2154909	2154909	.	.	0	note=snp C=>A A:71 C:0
EA2454	snippy:4.3.6	variation	2155859	2155859	.	.	0	note=snp G=>A A:143 G:0
EA2454	snippy:4.3.6	variation	2162365	2162365	.	.	0	note=snp A=>G G:99 A:0
EA2454	snippy:4.3.6	variation	2163764	2163764	.	.	0	note=snp A=>G G:122 A:0
EA2454	snippy:4.3.6	variation	2171579	2171579	.	.	0	note=snp T=>A A:107 T:0
EA2454	snippy:4.3.6	variation	2171889	2171889	.	.	0	note=snp A=>G G:30 A:0
EA2454	snippy:4.3.6	variation	2173082	2173082	.	.	0	note=snp A=>G G:130 A:0
EA2454	snippy:4.3.6	variation	2174004	2174004	.	.	0	note=snp G=>A A:133 G:1
EA2454	snippy:4.3.6	variation	2177349	2177349	.	.	0	note=snp T=>C C:89 T:0
EA2454	snippy:4.3.6	variation	2180704	2180704	.	.	0	note=snp A=>G G:72 A:0
EA2454	snippy:4.3.6	variation	2183355	2183355	.	.	0	note=snp T=>C C:132 T:1
EA2454	snippy:4.3.6	variation	2189381	2189381	.	.	0	note=snp A=>G G:115 A:0
EA2454	snippy:4.3.6	variation	2190131	2190131	.	.	0	note=snp T=>C C:10 T:0
EA2454	snippy:4.3.6	variation	2190182	2190182	.	.	0	note=snp T=>C C:39 T:0
EA2454	snippy:4.3.6	variation	2190209	2190209	.	.	0	note=snp G=>A A:62 G:0
EA2454	snippy:4.3.6	variation	2190227	2190227	.	.	0	note=snp A=>G G:61 A:0
EA2454	snippy:4.3.6	variation	2190238	2190238	.	.	0	note=complex AC=>GT GT:62 AC:0
EA2454	snippy:4.3.6	variation	2190283	2190283	.	.	0	note=mnp GA=>TG TG:46 GA:0
EA2454	snippy:4.3.6	variation	2190299	2190299	.	.	0	note=snp A=>T T:41 A:0
EA2454	snippy:4.3.6	variation	2190317	2190317	.	.	0	note=snp C=>T T:31 C:0
EA2454	snippy:4.3.6	variation	2190326	2190326	.	.	0	note=snp C=>T T:23 C:0
EA2454	snippy:4.3.6	variation	2190350	2190350	.	.	0	note=complex CCTT=>TCTG TCTG:11 CCTT:0
EA2454	snippy:4.3.6	variation	2191519	2191519	.	.	0	note=snp G=>T T:29 G:0
EA2454	snippy:4.3.6	variation	2191524	2191524	.	.	0	note=snp G=>C C:29 G:0
EA2454	snippy:4.3.6	variation	2191532	2191532	.	.	0	note=complex TG=>CT CT:29 TG:0
EA2454	snippy:4.3.6	variation	2191551	2191551	.	.	0	note=complex CG=>TC TC:31 CG:0
EA2454	snippy:4.3.6	variation	2191582	2191582	.	.	0	note=snp G=>A A:29 G:0
EA2454	snippy:4.3.6	variation	2191594	2191594	.	.	0	note=snp T=>C C:19 T:0
EA2454	snippy:4.3.6	variation	2195062	2195062	.	.	0	note=snp T=>C C:112 T:0
EA2454	snippy:4.3.6	variation	2199134	2199134	.	.	0	note=snp A=>T T:103 A:0
EA2454	snippy:4.3.6	variation	2201733	2201733	.	.	0	note=ins A=>AC AC:40 A:1
EA2454	snippy:4.3.6	variation	2201778	2201778	.	.	0	note=snp A=>G G:35 A:0
EA2454	snippy:4.3.6	variation	2203503	2203503	.	.	0	note=snp T=>C C:118 T:1
EA2454	snippy:4.3.6	variation	2204993	2204993	.	.	0	note=snp A=>T T:154 A:0
EA2454	snippy:4.3.6	variation	2218062	2218062	.	.	0	note=snp C=>T T:128 C:0
EA2454	snippy:4.3.6	variation	2218147	2218147	.	.	0	note=snp C=>A A:134 C:0
EA2454	snippy:4.3.6	variation	2218842	2218842	.	.	0	note=snp G=>A A:138 G:0
EA2454	snippy:4.3.6	variation	2226298	2226298	.	.	0	note=snp T=>C C:140 T:0
EA2454	snippy:4.3.6	variation	2228600	2228600	.	.	0	note=snp T=>C C:109 T:0
EA2454	snippy:4.3.6	variation	2228733	2228733	.	.	0	note=snp T=>A A:128 T:0
EA2454	snippy:4.3.6	variation	2238615	2238615	.	.	0	note=snp G=>A A:148 G:0
EA2454	snippy:4.3.6	variation	2245025	2245025	.	.	0	note=snp C=>A A:123 C:0
EA2454	snippy:4.3.6	variation	2252185	2252185	.	.	0	note=snp G=>A A:76 G:0
EA2454	snippy:4.3.6	variation	2256445	2256445	.	.	0	note=snp G=>A A:83 G:0
EA2454	snippy:4.3.6	variation	2259197	2259197	.	.	0	note=snp G=>A A:109 G:0
EA2454	snippy:4.3.6	variation	2268389	2268389	.	.	0	note=snp G=>C C:121 G:0
EA2454	snippy:4.3.6	variation	2283117	2283117	.	.	0	note=snp T=>C C:131 T:0
EA2454	snippy:4.3.6	variation	2283880	2283880	.	.	0	note=snp A=>G G:130 A:0
EA2454	snippy:4.3.6	variation	2284468	2284468	.	.	0	note=snp T=>C C:111 T:0
EA2454	snippy:4.3.6	variation	2289041	2289041	.	.	0	note=snp T=>C C:70 T:0
EA2454	snippy:4.3.6	variation	2291863	2291863	.	.	0	note=snp T=>C C:110 T:0
EA2454	snippy:4.3.6	variation	2293725	2293725	.	.	0	note=snp C=>T T:159 C:0
EA2454	snippy:4.3.6	variation	2297238	2297238	.	.	0	note=snp C=>T T:116 C:0
EA2454	snippy:4.3.6	variation	2298963	2298963	.	.	0	note=snp G=>T T:143 G:0
EA2454	snippy:4.3.6	variation	2304764	2304764	.	.	0	note=snp G=>T T:88 G:3
EA2454	snippy:4.3.6	variation	2305544	2305544	.	.	0	note=snp C=>T T:123 C:1
EA2454	snippy:4.3.6	variation	2311767	2311767	.	.	0	note=snp T=>G G:155 T:2
EA2454	snippy:4.3.6	variation	2314676	2314676	.	.	0	note=snp C=>T T:115 C:0
EA2454	snippy:4.3.6	variation	2317444	2317444	.	.	0	note=snp C=>T T:128 C:0
EA2454	snippy:4.3.6	variation	2327804	2327804	.	.	0	note=snp G=>C C:66 G:0
EA2454	snippy:4.3.6	variation	2330158	2330158	.	.	0	note=del TC=>T T:85 TC:0
EA2454	snippy:4.3.6	variation	2335946	2335946	.	.	0	note=ins C=>CA CA:114 C:0
EA2454	snippy:4.3.6	variation	2335974	2335974	.	.	0	note=snp C=>T T:117 C:0
EA2454	snippy:4.3.6	variation	2336831	2336831	.	.	0	note=snp G=>A A:132 G:0
EA2454	snippy:4.3.6	variation	2338673	2338673	.	.	0	note=snp G=>A A:138 G:0
EA2454	snippy:4.3.6	variation	2346640	2346640	.	.	0	note=snp A=>T T:86 A:0
EA2454	snippy:4.3.6	variation	2346958	2346958	.	.	0	note=snp A=>G G:29 A:0
EA2454	snippy:4.3.6	variation	2349078	2349078	.	.	0	note=snp T=>C C:117 T:0
EA2454	snippy:4.3.6	variation	2350339	2350339	.	.	0	note=snp T=>C C:136 T:0
EA2454	snippy:4.3.6	variation	2351375	2351375	.	.	0	note=snp A=>C C:92 A:1
EA2454	snippy:4.3.6	variation	2352413	2352413	.	.	0	note=snp T=>G G:112 T:0
EA2454	snippy:4.3.6	variation	2354351	2354351	.	.	0	note=snp A=>G G:145 A:0
EA2454	snippy:4.3.6	variation	2356836	2356836	.	.	0	note=snp C=>A A:150 C:0
EA2454	snippy:4.3.6	variation	2359024	2359024	.	.	0	note=snp A=>G G:100 A:0
EA2454	snippy:4.3.6	variation	2364340	2364340	.	.	0	note=snp T=>G G:153 T:0
EA2454	snippy:4.3.6	variation	2371672	2371672	.	.	0	note=snp T=>C C:132 T:0
EA2454	snippy:4.3.6	variation	2372914	2372914	.	.	0	note=snp T=>C C:127 T:0
EA2454	snippy:4.3.6	variation	2373963	2373963	.	.	0	note=snp A=>G G:135 A:0
EA2454	snippy:4.3.6	variation	2373982	2373982	.	.	0	note=snp A=>G G:137 A:0
EA2454	snippy:4.3.6	variation	2380092	2380092	.	.	0	note=snp T=>G G:121 T:2
EA2454	snippy:4.3.6	variation	2381002	2381002	.	.	0	note=snp A=>T T:116 A:0
EA2454	snippy:4.3.6	variation	2382749	2382749	.	.	0	note=snp A=>C C:98 A:0
EA2454	snippy:4.3.6	variation	2383115	2383115	.	.	0	note=snp A=>T T:105 A:0
EA2454	snippy:4.3.6	variation	2387626	2387626	.	.	0	note=snp C=>T T:106 C:0
EA2454	snippy:4.3.6	variation	2388266	2388266	.	.	0	note=snp A=>T T:112 A:0
EA2454	snippy:4.3.6	variation	2389687	2389687	.	.	0	note=del ACGGCGCTGG=>A A:99 ACGGCGCTGG:0
EA2454	snippy:4.3.6	variation	2390419	2390419	.	.	0	note=snp A=>G G:124 A:0
EA2454	snippy:4.3.6	variation	2397205	2397205	.	.	0	note=snp T=>C C:88 T:0
EA2454	snippy:4.3.6	variation	2403442	2403442	.	.	0	note=snp T=>C C:149 T:0
EA2454	snippy:4.3.6	variation	2405136	2405136	.	.	0	note=snp G=>A A:93 G:0
EA2454	snippy:4.3.6	variation	2407449	2407449	.	.	0	note=snp A=>G G:94 A:0
EA2454	snippy:4.3.6	variation	2415138	2415138	.	.	0	note=snp G=>A A:167 G:0
EA2454	snippy:4.3.6	variation	2416531	2416531	.	.	0	note=snp C=>T T:101 C:0
EA2454	snippy:4.3.6	variation	2418183	2418183	.	.	0	note=snp C=>T T:115 C:0
EA2454	snippy:4.3.6	variation	2422174	2422174	.	.	0	note=snp G=>T T:138 G:1
EA2454	snippy:4.3.6	variation	2423399	2423399	.	.	0	note=snp T=>G G:103 T:0
EA2454	snippy:4.3.6	variation	2424078	2424078	.	.	0	note=snp A=>G G:70 A:0
EA2454	snippy:4.3.6	variation	2426171	2426171	.	.	0	note=snp G=>A A:118 G:0
EA2454	snippy:4.3.6	variation	2428499	2428499	.	.	0	note=snp G=>A A:13 G:0
EA2454	snippy:4.3.6	variation	2430299	2430299	.	.	0	note=snp C=>T T:115 C:0
[truncated: 6,937 more rows]
