# Supplementary material for: Escherichia coli ST302: Genomic Analysis of Virulence Potential and Antimicrobial Resistance Mediated by Mobile Genetic Elements
Source: Front Microbiol. 2020 Jan 21;10:3098. doi: 10.3389/fmicb.2019.03098 (PMC6985150; doi:10.3389/fmicb.2019.03098)
Supplement: DATA S2 — ST302 SNP analysis. [file Data_Sheet_2.ZIP › SNP_Analysis/ST302_SNP/SNP_analysis/snippyout/ST302/F2_18C-Porcine-ST302.out/snps.consensus.fa]

>EA2454
ACTTAGGATAGCCAACCATCAGATGCTGCATTTGCATAGTGCAATCTCCCCTTACTTATC
CGGAGGCAATTGCAATATCTCTGTGAACTTACACAGGGGGAGCTTTTACCTGAAATACGC
CACGGAGGCGGGTATGAAACTGGCAGTCGTCACTGGACAAATTGTTTGTACCGTACGCCA
TCACGGACTGGCGCATGACAAATTGCTGATGGTGGAAATGATTGATCCACAAGGTAATCC
TGACGGGCAATGCGCCGTCGCCATCGACAATATTGGCGCGGGAACCGGGGAGTGGGTGTT
ACTGGTGAGTGGCAGTTCCGCCCGCCAGGCGCATAAAAGCGAAACGTCACCGGTCGATCT
GTGCGTGATTGGCATTGTCGATGAGGTGGTGTCTGGCGGTCAGGTAATTTTCCACAAATA
AGGCAGAACATCATGAATCAACAGGATATTGAACAGGTGGTGAAAGCGGTACTGCTGAAA
ATGCAAAGCAGTGACACGCCGCCCGCCGCCGTTCATGAGATGGGCGTTTTCGCGTCCCTG
GATGACGCCGTTGCGGCAGCCAAAGTCGCCCAGCAAGGGTTAAAGAGCGTGGCAATGCGC
CAGTTAGCCATTGCTGCCATTCGTGAAGCAGGCGAAAAACACGCCAGAGATTTAGCGGAA
CTTGCCGTCAGTGAAACCGGCATGGGGCGCGTTGAAGATAAATTTGCAAAAAACGTCGCT
CAGGCGCGCGGCACACCAGGCGTTGAGTACCTCTCTCCGCAAGTGCTGACTGGCGACAAC
GGCCTGACCCTAATTGAAAACGCACCCTGGGGCGTGGTGGCTTCGGTGACGCCGTCCACT
AACCCGGCGGCAACCGTAATTAACAACGCCATCAGCCTGATTGCCGCGGGCAACAGCGTC
ATTTTTGCCCCGCATCCGGCGGCGAAAAAAGTCTCCCAGCGGGCGATTACGCTGCTCAAC
CAGGCGATTGTTGCCGCAGGTGGGCCGGAAAACTTACTGGTTACTGTGGCAAATCCGGAT
ATCGAAACCGCGCAACGCTTGTTCAAGTTTCCGGGCATCGGCCTGCTGGTGGTGACCGGC
GGCGAAGCGGTAGTAGAAGCGGCGCGTAAACACACCAATAAACGTCTGATTGCCGCAGGC
GCTGGCAACCCGCCGGTAGTGGTGGATGAAACCGCTGACCTCGCCCGTGCTGCTCAGTCC
ATCGTTAAAGGCGCGTCTTTCGATAACAACATCATTTGTGCCGACGAAAAGGTACTGATT
GTTGTTGATAGCGTAGCCGATGAACTGATGCGTCTGATGGAAGGCCAGCACGCGGTGAAA
CTGACCGCAGAGCAGGCGCAGCAATTGCAACCGGTGTTGCTGAAAAATATCGACGAGCGC
GGAAAAGGTACCGTCAGCCGTGACTGGGTAGGTCGCGATGCAGGCAAAATCGCGGCGGCA
ATCGGCCTTAAAGTTCCGGAACAAACGCGATTGCTGTTTGTAGAAACCACCGCAGAACAT
CCGTTTGCCGTGACTGAACTGATGATGCCGGTGTTGCCCGTCGTGCGCGTCGCCAACGTG
GCGGATGCCATTGCGCTGGCGGTGAAACTGGAAGGCGGTTGCCACCACACGGCGGCAATG
CACTCGCGCAATATCGAGAACATGAACCAGATGGCGAATGCCATTGATACCAGCATTTTC
GTTAAGAACGGACCGTGCATTGCCGGGCTGGGGCTGGGCGGGGAAGGCTGGACCACCATG
ACCATCACCACGCCAACCGGTGAAGGGGTAACCAGCGCGCGTACGTTTGTCCGTCTGCGT
CGCTGTGTATTAGTCGATGCGTTTCGCATTGTTTAAGGAGTAACAGATGGCGCACGACGA
ACAATGGCTCACCCCACGTCTGCAAACGGCGGCAACGCTGTGTAACCAGACGCCCGCCGC
GACGGAATCTCCGCTGTGGCTGGGGGTGGATCTGGGCACCTGCGATGTGGTGTCGATGGT
TGTCGACCGCGACGGTCAGCCGGTGGCGGTATGCCTCGACTGGGCCGATGTGGTCCGCGA
CGGCATCGTCTGGGATTTCTTCGGCGCGGTCACCATTGTTCGTCGCCATCTCGACACGCT
CGAGCAGCAATTCGGTCGTCGTTTTAGCCATGCGGCGACTTCATTTCCTCCAGGTACGGA
CCCGCGTATTTCCATCAACGTGCTGGAGTCTGCCGGGCTGGAAGTGAGCCATGTGCTGGA
TGAGCCAACCGCAGTCGCGGATCTACTGCAACTGGATAACGCAGGCGTAGTGGATATCGG
CGGTGGCACTACCGGCATTGCCATCGTGAAAAAGGGCAAAGTGACGTACTCGGCGGATGA
AGCCACCGGCGGACATCACATCTCTCTGACTCTCGCCGGAAATCGCCGTATTTCGCTGGA
AGAGGCGGAGCAGTACAAGCGCGGTCACGGTGAAGAGATTTGGCCTGCGGTGAAACCGGT
GTACGAAAAAATGGCGGACATTGTCGCCCGGCATATTGAAGGGCAGGGCATTACTGATTT
ATGGCTGGCGGGCGGCTCTTGTATGCAACCGGGCGTGGCGGAACTGTTTCGCAAACAATT
CCCGGCGTTACAGGTGCATTTACCGCAGCACAGTTTGTTTATGACCCCGCTGGCAATCGC
CAGTAGTGGGCGAGAGAAAGCGGAGGGGCTATATGCAAAATGAATTGCAGACCGCGCTCT
TTCAGGCGTTCGATACCCTGAATCTGCAACGGGTAAAAACATTTAGCGTTCCACCGGTGA
CGCTTTGCGGTCCGGGCTCGGTGAGCAGTTGCGGACAGCAAGCGCAAACGCGTGGGCTGA
AACATCTGTTCGTGATGGCAGACAGCTTTTTGCATCAGGCAGGGATGACCGCCGGGCTGA
CGCGTAGCCTGGCCGTTAAAGGTATCGCCATGACGCTCTGGCCATGTCCGGTGGGCGAAC
CGTGCATTACCGACGTGTGTGCAGCCGTGGCGCAGTTGCGTGAGTCAGGTTGTGACGGGG
TGATCGCATTTGGCGGCGGCTCGGTGCTGGATGCGGCGAAAGCCGTGGCGTTGCTGGTGA
CGAACCCGGATAGCACGCTGGCAGAGATGTCAGAAACCAGCGTTCTGCAACCGCGCTTGC
CGCTGATTGCCATTCCAACTACCGCCGGAACCGGCTCTGAAACCACCAATGTAACGGTGA
TTATCGACGCGGTGAGCGGGCGCAAGCAGGTGTTAGCCCATGCCTCGCTGATGCCGGATG
TGGCGATCCTCGACGCCGCATTGACCGAAGGTGTGCCGTCGCATGTCACGGCGATGACCG
GCATTGATGCGTTAACCCATGCCATTGAAGCATACAGCGCCCTGAACGCTACACCGTTTA
CCGACAGTCTGGCGATTGGTGCCATTGCGATGATTGGCAAATCGCTGCCGAAAGCGGTGG
GCTACGGTCACGACCTTGCCGCGCGCGAGAGCATGTTGCTGGCTTCATGTATGGCGGGAA
TGGCGTTTTCCAGTGCGGGTCTTGGGTTGTGCCACGCGATGGCGCATCAGCCGGGCGCGG
CGCTGCATATTCCGCACGGTCTGGCGAACGCTATGTTGCTGCCAACGGTGATGGAGTTTA
ACCGGATGGTATGTCGCGAACGCTTTAGTCAGATTGGTCGGGCACTGCGAACTAAAAAAT
CCGACGATCGTGACGCTATTAACGCGGTAAGTGAGCTGATTGCGGAAGTTGGGATTGGTA
AACGACTGGGCGATGTTGGCGCGACATCTGCGCATTACGGTGCATGGGCGCAGGCCGCGC
AGGAAGATATTTGTCTGCGCAGCAACCCGCGTACCGCCAGCCTGGAACAGATTGTCGGCC
TGTACGCGGCGGCGCAATAAATGCCGCGTCTTATCCGGTCTGTGGGATTGCACATGTAGT
GCGGATAAGGCTTCACGCAGCATCCGCTAATAAATAACAACTAACAGGGAGTAAAGGCGA
TGGGAATTAACGAAATCATCATGTACATCATGATGTTCTTTATGCTGATAGCTGCCGTAG
ACAGGATCCTGTCACAGTTCGGCGGTTCTGCTCGTTTCCTCGGTAAGTTCGGTAAAAGTA
TCGAAGGATCAGGCGGTCAGTTCGAAGAAGGCTTTATGGCAATGGGCGCTCTGGGTCTGG
CGATGGTCGGTATGACCGCGCTGGCACCGGTACTGGCTCACGTACTCGGGCCGGTAATTA
TCCCGGTTTACGAAATGCTCGGCGCAAACCCGTCAATGTTCGCCGGAACGCTGCTGGCGT
GCGATATGGGCGGCTTCTTCCTCGCCAAAGAGCTGGCGGGCGGCGACGTAGCAGCGTGGC
TATACTCTGGGTTAATTCTCGGGTCGATGATGGGGCCAACGATTGTGTTTTCCATTCCGG
TGGCGCTCGGCATTATCGAACCTTCTGACCGTCGTTATCTGGCGCTCGGCGTGCTGGCGG
GCATTGTGACCATTCCGATTGGTTGTATCGCTGGTGGTCTGGTAGCTATGTACTCCGGTG
TTCAGATCAACGGCCAGCCGGTGGAATTCACTTTCGCCCTGATCCTGATGAACATGATCC
CGGTGATCATTGTTGCGATTCTGGTGGCGCTGGGGCTGAAATTCATCCCGGAAAAAATGA
TCAACGGCTTCCAGATCTTCGCCAAATTCCTCGTTGCATTGATCACCCTCGGTCTTGCCG
CTGCGGTAGTGAAATTCCTGCTTGGCTGGGAACTGATCCCCGGTCTGGATCCTATCTTTA
TGGCCCCTGGCGATAAACCCGGTGAGGTGATGCGCGCCATTGAAGTTATCGGTTCTATCT
CCTGCGTTCTGTTAGGGGCGTATCCAATGGTGCTGCTGCTGACCCGCTGGTTTGAAAAAC
CGCTGATGAGCGTCGGTAAAGTGCTGAATATGAACAACATCGCGGCAGCCGGCATGGTGG
CAACGCTTGCCAACAACATCCCGATGTTCGGCATGATGAAGCAGATGGATACCCGCGGCA
AAGTCATCAACTGCGCCTTCGCCGTTTCCGCTGCTTTCGCCCTGGGCGACCACTTAGGCT
TCGCCGCTGCCAACATGAATGCCATGATCTTCCCGATGATTGTCGGCAAGTTGATCGGCG
GCGTAACGGCGATTGGCGTGGCGATGATGCTGGTGCCAAAAGACGACGCGACCGCGGCTA
AAACCGAAGCGGAGGCACAATCGTGAACACTCGCCAGCTACTGAGCGTCGGTATCGATAT
CGGCACCACCACCACCCAGGTGATTTTCTCCCACCTGGAACTGGTTAACCGTGCGGCGGT
GTCGCAGGTGCCGCGCTACGAATTCATCAAACGCGAAATTAGCTGGCAAAGCCCGGTGTT
CTTTACCCCTGTCGATAAACAGGGTGGTTTAAAAGAAGCGGAACTGAAATCGCTGATTTT
AGAGCAATATCAGGCTGCGGGCATTGCGCCGGAAAGCGTTGATTCTGGTGCCATCATCAT
CACCGGTGAAAGCGCGAAAACCCGCAATGCTCGCCCGGCGGTGATGGCGCTCTCTCAGTC
GCTGGGCGATTTTGTCGTCGCCAGCGCCGGGCCGCACCTCGAATCCGTGATCGCCGGTCA
CGGTGCCGGGGCGCAAACCCTTTCTGAACAACGGCTGTGTCGGGTACTGAATATCGACAT
CGGCGGTGGCACCGCGAACTACGCCCTGTTCGATGCCGGAAAAATCAGCGGCACTGCCTG
CCTCAACGTCGGTGGTCGCCTGCTGGAAACCGACAGCCAGGGGCGCGTGGTTTACGCTCA
TAAACCGGGGCAGATGATTGTGGATGAGTGCTTCGGCGCAGGCACCGACGCCCGTTCGCT
GACCGGCGCGCAGCTGGTGCAGGTTACCTGGCGGATGGCAGAGCTGATTGTCGAAGTGAT
TGACGGAACGCTTTCGCCGCTCGCGCAGGCATTAATGCAAACCGGTTTGCTGCCCGCAGG
TGTTACGCCCGAAATCATTACGCTTTCTGGCGGCGTGGGCGAATGTTATCGCCACCAGCC
CGCCGACCCGTTCTGTTTTGCCGATATTGGCCCGCTTCTGGCAACGGCGCTGCATGACCA
TCCGCGCCTGCGTGAGATGAACGTGCAGTTTCCGGCGCAAACCGTACGCGCCACGGTGAT
TGGCGCGGGTGCACATACCCTTTCGCTCTCTGGCAGCACAATCTGGCTGGAGGGCGTACA
ACTGCCGCTGCGCAATTTGCCGGTGGCGATCCCGATTGATGAAACGGATCTGGTGAGTGC
CTGGCAACAGGCGCTGATTCAGCTGGATCTTGATCCCAAAACTGACGCGTACGTGCTGGC
GCTTCCCGCCTCGCTGCCTGTGCGTTACGCCGCGGTACTGACGGTCATCAACGCGTTGGT
CGATTTCGTCGCGCGTTTTCCGAATCCGCATCCCCTGCTGGTGGTGGCCGGGCAGGACTT
TGGTAAAGCTCTGGGCATGTTGTTGCGCCCACAGCTACAACAACTCCCGTTGGCAGTCAT
TGACGAAGTGATTGTCCGCGCGGGGGACTATATCGACATTGGTACGCCTCTTTTTGGCGG
ATCGGTTGTGCCGGTGACGGTGAAATCACTCGCATTTCCTTCCTGAGGGAACGACTTATG
AAACTAAAGACCACATTGTTCGGCAATGTATATCAGTTTAAGGATGTAAAAGAGGTGCTG
GCTAAAGCCAACGAACTGCGTTCGGGGGATGTGCTGGCGGGCGTTGCAGCGGCAAGCTCA
CAGGAGCGCGTGGCAGCAAAGCAGGTGTTGTCGGAAATGACCGTAGCGGACATCCGCAAT
AATCCGGTGATTGCCTATGAAGATGACTGCGTGACGCGGCTGATTCAGGACGATGTTAAC
GAAACGGCCTACAACCAGATTAAAAACTGGAGCATCAGCGAACTGCGTGAGTATGTGCTG
AGCGATGAAACCAGCGTGGACGACATTGCCTTTACCCGCAAAGGGCTGACCTCGGAAGTG
GTCGCGGCGGTAGCGAAGATTTGCTCCAACGCGGACCTGATCTACGGCGCGAAGAAAATG
CCGGTAATCAAAAAGGCCAATACCACCATCGGTATTCCGGGCACCTTTAGCGCCCGTTTG
CAGCCAAATGACACCCGTGACGACGTGCAAAGTATCGCCGCGCAAATCTACGAAGGGCTT
TCCTTCGGGGTGGGCGATGCGGTGATCGGCGTCAACCCGGTAACTGACGACGTGGAAAAC
TTAAGCCGCGTGCTGGACACCATCTATGGCGTGATCGACAAATTCAACATCCCAACTCAG
GGCTGCGTACTGGCGCACGTCACCACCCAGATCGAAGCGATTCGTCGTGGCGCACCAGGC
GGGCTGATTTTCCAGAGTATCTGTGGCAGTGAAAAAGGGCTGAAAGAGTTTGGCGTGGAA
CTGGCGATGCTCGACGAAGCGCGCGCAGTGGGTGCAGAGTTCAACCGTATCGCCGGGGAA
AACTGCCTCTACTTCGAAACCGGGCAAGGTTCGGCGCTGTCGGCGGGTGCCAACTACGGC
GCAGACCAGGTGACCATGGAAGCGCGTAACTACGGGCTGGCGCGTCATTACGATCCGTTT
ATCGTCAACACCGTGGTCGGCTTTATTGGGCCGGAGTATCTCTACAATGACCGCCAGATT
ATTCGTGCGGGCTTAGAAGATCACTTTATGGGCAAGCTGAGCGGCATCTCTATGGGCTGT
GACTGCTGTTACACCAACCACGCTGACGCTGACCAGAACCTCAACGAAAACCTGATGATC
CTGCTCGCCACCGCAGGCTGCAACTACATCATGGGGATGCCGCTGGGTGATGACATCATG
CTCAATTACCAGACCACCGCATTCCACGATACCGCCACTGTGCGTCAGTTACTCAACCTG
CGCCCGTCACCGGAGTTTGAACGCTGGCTGGAAAGCATGGGCATTATGGCAAACGGTCGC
CTGACCAAACGGGCGGGCGATCCGTCACTGTTCTTCTGATGACGCGGAGATAACACATCA
TGGATCAAAAACAGATTGAAGAAATTGTACGCAGCGTGATGGCGTCAATGGGACAAACGG
CCCCCGCGCCGTCAGAAGCAAAGTGCGCCACTACCACCTGTGCGGCACCGGTGACCTCGG
AAAGCTGTGCGCTGGATTTAGGTTCCGCTGAAGCAAAAGCGTGGATTGGTGTTGAAAACC
CGCATCGCGCAGACGTATTAACAGAACTGCGCCGCAGCACCGTGGCCCGCGTTTGTACCG
GTCGTGCCGGTCCGCGTCCGCGTACCCAGGCGCTGCTGCGTTTCCTGGCCGATCACTCTC
GTTCGAAAGATACCGTACTGAAAGAAGTGCCGGAAGAGTGGGTGAAAGCGCAGGGCTTGC
TGGAAGTACGCTCCGAAATTAGCGACAAAAATCTCTACCTGACTCGCCCGGATATGGGCC
GCCGCCTGTGTGCAGAAGCTGTTGAAGCGCTGAAAGCACAGTGTGTTGCTAATCCGGACG
TACAGGTCGTTATTTCTGATGGCCTGTCAACTGATGCGATCACCGTGAACTACGAAGAGA
TCCTGCCACCGCTGATGGCGGGCCTGAAACAGGCCGGGCTGAAAGTCGGTACACCATTCT
TTGTTCGTTATGGTCGCGTGAAGATTGAAGATCAGATCGGTGAGATCCTCGGCGCGAAAG
TAGTGATCCTGCTGGTGGGCGAACGTCCGGGGTTGGGTCAGTCAGAAAGCCTCTCCTGCT
ACGCCGTTTACTCGCCGCGTATGGCGACCACCGTTGAGGCCGATCGCACCTGTATCTCTA
ACATTCACCAGGGCGGCACGCCGCCGGTTGAAGCCGCAGCCGTCATTGTGGATTTGGCGA
AACGTATGCTGGAGCAGAAAGCATCCGGCATCAACATGACCCGATAAGGAGGCATCATGC
CAGCTTTAGATTTGATTCGACCGTCGGTAACCGCCATGCGGGTGATTGCCTCCGTTAACG
CCGAATTTGCGCGTGAACTGAAATTGCCGCCGCATATTCGTAGCCTCGGGCTGATTTCTG
CTGATTCCGATGACGTCACCTACATTGCCGCTGATGAAGCAACCAAACAGGCGATGGTCG
AAGTGGTGTATGGCCGCTCGCTGTATGCGGGCGCTGCACACGGCCCGTCACCGACTGCCG
GTGAAGTGCTGATTATGCTTGGTGGGCCAAACCCGGCGGAAGTGCGTGCAGGTCTGGATG
CGATGGTTGCGCATATTGAAAATGGCGCTGCTTTCCAGTGGGCTAATGATGCGCAAGATA
CGGCATTCCTGGCACATGTAGTTTCGCGTACCGGTTCTTATCTCTCATCAACCGCCGGGA
TCACGCTTGGCGATCCGATGGCGTATCTGGTGGCACCGCCGCTGGAAGCGACCTACGGCA
TTGATGCAGCGTTGAAATCTGCCGACGTACAGCTGGTGACCTATGTCCCGCCACCGTCTG
AAACTAACTACTCGGCAGCATTTTTAACCGGTAGCCAGGCAGCGTGTAAAGCGGCCTGTA
ACGCCTTTACCGATGCAGTGCTGGAAATCGCGCGTAATCCAATCCAGCGTGCGTAATGGA
GGTTGCCGATGATCAATGCACTGGGATTGCTGGAAGTGGACGGCATGGTCGCTGCGATAG
ATGCAGCGGATGCCATGCTCAAAGCAGCTAACGTTCGTCTGCTCAGTCACGAAGTGCTTG
ACCCTGGTCGCTTAACGCTGGTGGTGGAAGGCGATCTGGCGGCGTGTCGTGCTGCGCTGG
ACGCAGGTTGTGCTGCCGCGATGCGTACCGGGCGTGTCATCAGCCGTAAGGAGATCGGTC
GGCCAGACGATGACACCCAGTGGCTGGTTACTGGCTTTAACCGCCAGCCGAAGCAACCCG
TACAGGAACCCGACGCGCCAGTTATCGTCGCGGAATATCTGCTGACGAGTTGTTGGCGCT
GTTAACATCAGTACGTCAGGGAATGACGGCAGGAGAAGTGGCTGCCCACTTTGGCTGGCC
GCTGGAAAAAGCCAGAAATGCGCTCGAACAGCTCTTTTCTGCCGGGACGTTACGTAAACG
CAGTAGTCGTTATCGTCTCAAGCCCCATTAACCTGTCGGAGGTGCCGGGTGTCCTACAAC
ACCCGGCATTAACATCATGAAAAAGACCCGTACAGCCAATTTGCACCATCTTTATCATGA
GCCCTTACCCGAAAACCTGAAGCTCACGCCGAAGGTCGAAGTGGATAATGTTCATCAACG
ACAGACAACGGATGTCTATGAACATGCTTTAACGATTACCGCCTGGCAGCAGATTTACGA
TCAGCTGCATCCGGGCAAGTTTCATGGTGAATTTACGGAAATTCTACTCGATGATATTCA
GGTTTTTCGTGAATACACCGGTCTGGCGCTGCGTCAGTCGTGTCTGGTCTGGCCGAACTC
GTTCTGGTTTGGCATTCCGGCGACGCGCGGTGAGCAGGGATTTATCGGTTCGCAATGTCT
GGGAAGCGCAGAAATAGCGACGCGCCCTGGTGGAACCGAGTTTGAATTAAGTACGCCGGA
CGATTACACGATCCTGGGCGTAGTGCTTTCTGAAGATGTCATCACCCGTCAGGCTAACTT
TTTGCATAATCCGGATCGGGTATTACATATGTTGCGTAGCCAGTCGGCGCTGGAAGTGAA
AGAGCAGCATAAAGCCGCGCTGTGGGGCTTTGTCCAACAGGCGCTGGCGACGTTTTGCGA
GAACCCGGAAAATCTTCATCAGCCTGCAGTGCGAAAAGTGCTGGGGGATAATTTGCTAAT
GGCGATGGGGGCGATGCTGGAAGAAGCGCAACCAATGGTGACGGCGGAAAGCATCAGTCA
TCAGAGTTACCGTAGATTACTTTCCCGCGCCCGTGAATATGTGCTGGAAAACATGTCCGA
ACCGGTGACGGTGCTGGATTTGTGTAATCAACTGCATGTCAGCCGCCGCACGCTACAAAA
CGCGTTTCACGCTATTTTAGGCATTGGCCCAAACGCGTGGCTGAAACGCATTCGCCTGAA
CGCCGTACGCCGCGAACTGATAAGCCCGTGGTCGCAAAGCACAACGGTAAAAGACGCCGC
CATGCAGTGGGGATTCTGGCATCTGGGGCAATTTGCCACGGATTACCAGCAGCTGTTTGC
CGAGAAGCCGTCGTTGACGTTGCATCAGCGGATGCGGGAATGGGGGTGAGGGAGTTACAC
CCAATCCCTGACCTTAATAAACTCACTTAACGCCGCTTCTGGGCTGCCATCTTTTGGCTG
ATAATCATACTCCCAGCGTACCAGTGGCGGCATTGACATCAGGATCGACTCGGTGCGCCC
GCCAGTTTGCAGGCCAAACAGAGTGCCGCGATCCCAGACCAGATTGAACTCGACATAACG
ACCGCGACGGTAGAGCTGAAAATTGCGCTCGCGCTCGCCGTAGGCCATCGCTTTCCGTCG
CTCTACAATTGGTAAATAAGCGTCGGTGTAGCCTTTGCCTACCGCCTGCATAAAGGCAAA
ACAGTGGTCGAAATCTGGCGTGTTCAGATCATCAAAGAACAGCCCGCCAATACCGCGCTG
TTCGTTGCGATGTTTGAGGTAGAAGTAATCGTCGCACCATTTTTTGTAACGGGGATAAAC
GTCTTCACCAAATGGCAGGCACAGGTCACGGGCGGTGCGGTGCCAGTGAATGGCATCTTC
TTCAAAACCATAGAAAGGGGTTAAATCGAAGCCGCCGCCAAACCACCAGACTGGCTCTGC
ACCCGGTTTTTCGGCAATAAAAAAGCGCACATTCGCGTGGCTGGTGGGAACATACGGGTT
ATGCGGATGCACTACCAGTGAAACGCCCATCGCCTCGAAACTGCGCCCGGCAAGTTCCGG
GCGATGAGCGGTGGCGGAAGCAGGCATCGCCTCACCATGGACATGTGAAAAGTTGACGCC
CGCCTGTTCGAAAACACCACCATTACGCAACACCCGGCTACGTCCGCCGCCGCCAGCTTC
GCGCTGCCAGCTATCTTCGACAAATTCTGTGCCATCGACGGCGGTCAGCTGCTGACAAAT
CGTATCCTGAAGGTTGAGCAGAAACTGTTTAACCTGGTGTGCGTCGGGTTTCATAACTTA
TCGCTTTTTCGAATGTGCTTTCTGGTTGTCGAACCAGTGGAAATAACTGATCACGCCTTC
AGCAATCGCTGTGGCGATTTTCTGACGAAACGCCGCCGTGCCTAACAGTCGCTCTTCTTC
TGGGTTGGTGATAAACGAGGTTTCCACCAGCACCGAAGGAACCGACGGCGATTTCAACAC
CACAAACGCGGCTTGTTCGGTGTTGCGGCTGTGCAGTTTATGCACCGGCTTAATCTTTTT
CAGAATATGCGAGCCGAGCGTCAGGCTGTTTTTAATAGTATCGGTTTGCACCAGATCAAA
CAGCACTTGCTGCAATAGGTGATCCTTGTCAGTCGCCTTTTTACCGGCAACTTCATCGGC
GCGGTTTTCGCGTTCAGACAGGTATTTCGCCATTGCGCTACTTGCCCCACGGTTAGAGAG
GGCAAATACCGAAGCACCGGCAGCTTTCGGGTTGGTAAAGCCATCGGCATGAATTGACAT
AAACAGATCTGCGCCATGTTTATGGGCGATTTCAACGCGATCGTAAAGTGGGATAAACGT
ATCGCCAGAACGCGTTAAACGCGCATCAATCCCATGATTACGCAAAATGGAACGGACGTT
TTTAGCAATCGCCAGCACCACATGTTTTTCTTTCGAACCGTTGCGCCCGATCGCTCCGGT
ATCAATTCCGCCGTGGCCTGGATCGAGAACAACGACACGTTTGCCGCCAGATTTTTTGGC
TTTCGGCTTGCTGTGTCCGTTGCTGGTTTTTAAAGGTTCGTCTTTGGCGATGGCTTGCGA
CATTCCTGACAACGTCAGGGCAGCCAAACCGGCTTTCAGCACCTGGCGGCGCGAAGTGAG
TGTTTTTAGTGGTTTAAAAGTGCTCATACGGCCTGAGTTGTAATAATAAAGTTCCAGATG
TTATATCGTATCGCGTAATCCGTTACGACCGTTTGCTGTTGAGAATTGTTTTACTTTTCA
TTTCAATAGTTGACAACTCCCCATTATGCCACTTTTTCAACCGATTTTCGTCAGATATTG
GCTAATTCGACCGTTCACGCCATAATCAGCCTTTTAACCCGCAAAAAGGTAACGAATACC
ATGGAGATACGCGTATTTCGCCAGGAAGATTTCGAAGAGGTCATCACCCTTTGGGAGCGT
TGCGACTTGCTGCGTCCGTGGAACGATCCGGAAATGGACATCGAGCGTAAGATGAACCAT
GACGTCAGTTTGTTTCTGGTCGCTGAGGTGAACGGTGAAGTGGTCGGAACGGTGATGGGC
GGTTATGACGGGCATCGCGGGTCTGCTTATTATCTTGGCGTGCATCCAGAGTTTCGTGGG
CGTGGAATTGCCAATGCGTTGCTTAACCGGCTGGAGAAAAAGCTGATTGCTCGCGGCTGC
CCGAAAATTCAGATCAACGTGCCGGAAGATAACGACATGGTGCTCGGAATGTATGAACGC
CTGGGATATGAACACGCCGACGTGCTGAGTCTGGGTAAGCGTTTGATTGAAGATGAAGAG
TACTGAGTTTCATCCTGTCCATTATGATGCGCACGGTCGCCTGCGTTTACCCTTGCTCTT
CTGGCTTGTGCTATTGCTTCAGGCGCGAACCTGGGTGCTGTTTGTTATTGCCGGTGCGTC
GCGCGAGCAGGGTACTGCGCTGCTAAATCTGTTTTATCCCGATCACGATAATTTCTGGCT
GGGGCTGATTCCTGGCATTCCGGCGGTGCTGGCGTTTTTGCTGAGTGGTCGGCGGGCTTC
GTTTCCCCGTATCTGGCATGTGCTCTATTTTCTGTTGCTGTTGGCGCAAGTGGTTTTACT
TTGCTGGCAACCGTGGCTGTGGCTGAACGGTGAATCCGTTAGCGGTTTCGGTCTGGCGCT
GGTAGTGGCGGATATTGTGGCATTAATCTGGCTGCTGACCAATCGACGTTTACGCGCTTG
TTTTAATGAAGTAAAAGAATAACGGCACTTTTTGGTGAATTTGCACTCCAAGCAACGTTA
TTGAATAACCAAAGGAAGTGACATGAAATCGCTGCGTTTAATGTTATGCGCTATGCCATT
GATGCTGACCGGCTGTTCCACGATGTCGTCAGTTAACTGGTCTGCCGCTAACCCGTGGAA
CTGGTTTGGGTCGTCCACCAAAGTGAGCGAGCAGGGCGTTGGTGAATTAACGGCGTCCAC
ACCACTGCAAGAACAAGCCATTGCCGATGCGCTTGATGGCGATTATCGCCTGCGCAGCGG
AATGAAAACCGCGAACGGCAACGTGGTGCGCTTTTTTGAAGTGATGAAGGGCGACAACGT
GGCGATGGTGATTAACGGCGATCAAGGCACGATCAGTCGCATTGACGTGCTGGATAGCGA
TATTCCTGCTGACACCGGTGTTAAAATCGGTACACCGTTTAGCGACCTTTACAGCAAAGC
ATTTGGCAATTGCCAAAAAGCTGATGGTGATGATAATCGTGCCGTCGAATGTAAAGCCGA
AGGCAGTCAACATATTAGCTACCAGTTCAGCGGGGAATGGAGTGGTCCTGAAGGGTTAAT
GCCTTCGGACGATACCCTGAAAAACTGGAAAGTCAGTAAAATTATCTGGCGGCGTTAATT
TGCGTCTGAACAAACCGCCGCCGCGAAAAAACACGTAAAATAGCGCTCAACAATGCCACG
GATTGCGTGGCATTATTATTTTCAGGAGGAACAATGTCTCAGGTTCAGAGTGGCATTTTG
CCAGAACATTGCCGCGCGGCGATTTGGATCGAAGCCAACGTGAAAGGGGAAGTTGACGCC
CTGCGTGCGGCCAGTAAAACATTTGCCGACAAACTGGCAACTTTTGAAGCGAAATTCCCG
GACGCGCATCTTGGTGCGGTGGTTGCCTTTGGTAACAACACCTGGCGCGCTCTGAGCGGC
GGCGTTGGGGCAGAAGAGCTGAAAGATTTTCCGGGCTACGGTAAAGGCCTTGCGCCGACC
ACCCAGTTCGATGTGTTGATCCACATTCTTTCTCTGCGTCACGACGTAAACTTCTCTGTC
GCCCAGGCGGCGATGGAAGCCTTTGGTGACTGCATTGAAGTGAAAGAAGAGATCCACGGC
TTCCGTTGGGTGGAAGAGCGTGACCTGAGCGGCTTTGTTGACGGTACAGAAAACCCGGCG
GGTGAAGAGACGCGTCGCGAAGTGGCGGTTATCAAAGACGGCGTGGATGCCGGCGGCAGC
TATGTGTTTGTGCAGCGTTGGGAGCACAACCTGAAGCAGCTCAACCGGATGAGCGTTCAC
GATCAGGAGATGATGATCGGGCGCACCAAAGAGGCCAACGAAGAGATTGACGGCGACGAA
CGTCCGGAAACCTCTCACCTCACCCGCGTTGATCTGAAAGAAGATGGCAAAGGGCTGAAG
ATTGTTCGCCAGAGCCTGCCGTACGGCACCGCCAGTGGCACTCACGGTCTGTACTTCTGC
GCCTACTGCGCGCGTCTGCATAACATTGAGCAGCAACTGCTGAGCATGTTTGGCGATACC
GATGGTAAGCGTGATGCGATGTTGCGTTTCACCAAACCGGTAACCGGCGGCTATTATTTC
GCACCGTCGCTGGACAAGTTGATGGCGCTGTAAGCGTTTCTGATTCATTGATTAAAGGCC
AGGCAGTAACATTACTGACTGGCCTTTTTATTACTTTTGCTTTAACGCCGCATACACCTG
ATCAACTACCCAACCATACGTTGCAATCGGCAGCTGACCGCTTTCGAACATATTGGGATT
CTTTTGCGGATCGGCAACCGGCGAATGTGGCTTGTTGCTTAACATCACAATCGCCATATG
ATTCACCGGATCGATAACGGTCACCGTTCCGGTCCAGCCAGTGTGACCGTAGGTTTGCGG
GCTTGCCAGCGTGCCAAACGTCGGCGTCATGGTGGCATTACCATTCACGCGCCAGCCGAG
GCCAAAAGTGGCATCTTCCTTAGAGCTGGTGGTGAACATCTTCACCGTTTCCGCACTGAA
CAGCTGCACATCGCCATAGCCCCCGCCGTTCAGCATCGTTTGCATTAACACCGCAATATC
GCCGGTATTGGAAAACAAACCTGCGTGCCCGGAAACGCCGCCCATCGAATAAAAGGCTTT
TTCATCGTGCACCTGACCCCAGAGAGTGGAGGTGCGGATATTCGGGAAGTGGATCACTCC
ATCGCGGGTATTGCCGTTCAATTCCGTGGCGGCAATTTGTTGCGGTTTAAAGCCTTTCAG
CAGCGGGTTAAATACCGTATGTGTCAGGCCGAGCGGGCGATAAATCGACTCTTCAACATA
GCGGTCAAGCGGCTGACCGGTGACCGACTCGACGATAAATCCAAGCAGCATATAATCGAC
ATCACTGTAAATATGCTTGCTGCCGGGCTGATACTCTAGCGGCGTGCGCTTGATCATCTC
CAGCGTCTGGCCTTTATCCTGGGAATATAACGCGCCCGCGACCGCTTTATTCGGATATTG
TGGGTCCGCCGGGAAACCGCCGCTGTGATGCAGCAGGTCAGAAATCCGCAGCGTGTTTTT
GCCTTTGATGGTGTCATTTGGACTATCGGCAAACCCCGAAATATATTTCGCAATCCGATC
GTCAGGATGCAGCTTGCCTTCGCTCATTAGCTTTTGCAGAGCAAAGTTAGTGGCGTACAT
TTTGGTATTGGAAGCCAGGTCATACAGCGTCCCGGTGGTGGCTTTGACAGGCTGTTCCAT
CAATACGCTGCCATCGTACTTTTTCGCCGCTCCCCAGGCTTTGCGATACACAATCTGATT
ATCTTTTATAATCAGCAGGTTTACGCCGGGATAACCGGCGTCCACTTGCTGGCTAATCCA
GCGATCCATCTGGTTAAGCCGTTCGACGTTGAACCCTGCTTTCTCTGGCGAACTTTCTGT
CAGAACAGGGTATTTTGCGGCGCTGACGCTACAACTGACAGCCAGCAGAGAAAGATAGAG
CATTGTCCGTTTCATAATATCAGTCCAGATTGACGTTACGGCAGCCAAAGAGCGTGGTGA
AAATAAACCCGCAAACCCATGCCACCAGAATCCCACCTGCATATACCGCCATGGCCGGAA
GGATGCCTTGCGCGGATGTCATCAGCGGCAGCGCCACCAGACCAGACGGCCCAAAGGCGC
TGTTTAAGCCCATCGGCAGACCCCACCAGGCTATCAGCCCGATAAACAAACCGCCCGCTG
CGCCGCCTAAACAGGCGGTAATAAACGGTTTCATGCGGGGCAGGGTGACGCCGTAAATCA
GCGGTTCGCCAACGCCCAGCAGACCAGGAATAATCGCCCCGCGTACCTGACTGCGTAATG
CACTGTGCGGTTGCGCCCGCCAGTAGAGTGCCAGCGCCGCGCCCACCTGGCCCGCGCCTG
CCATTGAAAGGATGGGAAATAAGCTGTTGAATCCCTGGCTGTCCATTAACGCGAGGTAAA
CAGGAATAAAGCCCTGATGCACGCCAAATACCACGGCGATCAGGAACAGCCCGGCTAAAA
CCGCACAACCGAGCGGATTACTGTTCAGGTGCATAAACAGCCACGACATACCTTCGAATA
ACCAGCCGCCCAGCGGCATAATGATCAGGTAGGCCAGCGTAGCGGTGATCAGTAGGGTGA
TTAACGAGGTCAGCAGCATGTCGAGATCGTCCGGCATAAAGCGGCGCACCATGCCTTCAA
TGCGAGCGCAGGCCCATGCGGCAATCAACACGCCGATAATATTGCCGCGCGGATCGATGG
GCAGACCAAAGAAATCGTGAAAACCGGCGTAGTAACCGGTGGTTGCAGCGGGGTTATAAC
CGAGCAAAAAGAGTGCGGCAATAATTGCGCCATTGACGCCCGTGCCGCCAAATGCCTGGG
CGGCGTTATAGCCCACCAGAATCACCAGGAAGGTGAACAAACCTTTGCTGAACACCTTCA
TAAAATTCAGCGCGTCGGGTAGCGTGCCCTGAGCATCTGCCGGAACGTGCATCACCGTGG
CAAATAACGTCGCTATCCCCAGCAGCAGACCGGCGGCAATAAAACCGGGGATAAGCGGCG
TAAAGATGGTGGCGAATTTAGCGAGAAATTGTTGCACGCCGGAGGTTTGTTTGGCTTTTA
ACTGACGTTTGTTCTGGGCGGCGATTTCTGCGGCATCCTGTACCGGTGCTTCTCCCAGCA
GCTCGCTCATCGCTTTTGCGGCACGATGCGCTTTACCAGGCCCAAAAACGACCTGCACCT
GGTCGCTGGTCAAAATGACGCCCTTCACGCCTTCCAGCGTTTTGATATTGGGATCAACCA
GTGAACTGTCATGTACACCCAGACGCAGGCGCGTCATACAGTTACCACAACTGGCGATAT
TTCCCGGTCCGCCGACACGGGTAAGAATGGTGTTCAGAAGTTCACTGCTGATCTCTTTGA
CCATGGGTTATTCCTTGTCTAAAACCTGACGAATAAAGCCGCCGTGTTGATCCAGGCGTT
TTTTAGCTTCTGTGGCATCGAGATTTTTCAGCACCATCACAATGGCCGTTTTACAGTTGC
GCTCGCAGGCAATTAACGCCGCTTCCGCTTGTTCGGCATTACATCCGGTGGCGTTTTTAA
CGATATTGACCTGGCGCACATGCAGTTTTTCGTTGGTGGCGACCACATCGACCATCAGGT
TGCCGAACACTTTGCCGGATTTAATCATCAGCCCGGTGGAGAGCATATTGAGCACCAGTT
TCTGCGCTGTACCTGCTTTCATCCGCGAAGAACCGGTAACCACTTCGGCACCTACAATCG
GTGTAATGGCAAACTCTGCGGTGGTTGAAACGGCGCTCCCCGGATTACAGGAAATTCCCA
CTGTGCGGCAGCCGAGCTGGCGTGCGTATTCCAGTCCGGCAATTACATACGGCGTGCGAC
CACTGGCCGCAATACCAACCACCACATCCTGTGCCGTTAAATTAATATTTTTCAGATCGT
TAACACCACCTTCCCGGCTATCTTCAGCGCCTTCCACCGCGTGCTGAATGGCATATTCGC
CTCCAGCAATCAAACCAACTACCAGACCCGGTTTCACGCCGTAGGTGGGCGGACATTCGC
TGGCATCCAGAATCCCCAGACGACCGGATGTTCCCGCACCGAGATAAATCAGACGACCGC
CGCCGCTTACCTGGGCGTGGATAACATCGATCGCCGCGGCGATATCCGGCAGTACGCGCT
CAACGGCAAGCGGTACGGTTTTATCTTCATCGTTGATAATCCGGCACATTTCCAGCGTTG
ATACGCGGTCAATTTCAGCCGAGGCGGCGTTCGAGCCTTCGGTAATCATCTTTTCAAGTT
GCATCGGTGGTGACCTTACTATTTACGATCAAATAATTGCAGATGTATGGAATCATATAT
CCCGAATTGACAGACTTAAAGGAATCATTGAGTCTACACTCGCAGAGTGTGAAGAGCGTC
ATAAGAACTTAAGCGGAATTTTTGCTGCCAGCCCAGGAGAGTGGAAGATGTTGTACCTGA
CGAAAATACGCAATGCGGAAAGTGAATTTACCGAGAACGAGCAAAAAATTGCTGACTTTC
TGCGGGCCAACGTGAGTGAGCTGAAATCCGTCTCTTCGCGCAAGATGGCGAAACAGCTCG
GCATCAGCCAGTCGAGTATTGTGAAATTTGCCCAGAAGCTCGGCGCGCAAGGATTTACTG
AATTGCGTATGGCGTTAATTGGCGAATACAGTGCCAGCCGGGAGAAAACGAATGCCACGG
CGCTGCACCTGCACAGTTCGATTACCAGTGATGATTCGCTGGAAGTGATTGCCCGCAAAT
TGAATCGCGAAAAAGAGCTGGCGCTGGATCAAACCTGTGCGTTGTTCGACTACGCGCGGA
TGCAAAAAATCATTGAGGTCATCAGTAAAGCACCGTTTATCCAGATAACGGGCCTGGGCG
GATCGGCGCTGGTGGGGCGCGATCTGTCGTTCAAACTGATGAAAATTGGCTATCGCGTGG
CCTGCGAAGCCGACACGCACGTACAAGCTACCGTTTCCCAGGCGTTGAAAAAAGGCGATG
TACAAATCGCTATCTCTTACAGCGGCAGTAAAAAAGAGATTGTCTTGTGCGCAGAAGCGG
CACGAAAGCAGGGGGCAACGGTGATTGCCATTACTTCTCTGGCTGACTCTCCGCTGCGGC
GGCTGGCGCATTTCACGCTCGATACCGTTTCCGGTGAAACCGAATGGCGTAGCTCGTCGA
TGTCTACCCGCACGGCGCAAAATTCTGTTACCGATTTACTGTTTGTTGGTCTTGTGCAAC
TCAATGATGTGGAGTCATTGAAAATGATTCAGCGCAGCAGTGAGCTAACACAACGCCTGA
AATGATGCATAAAGCAGCGACTGGATTGAGATTTTCCTGAATTAGTGAGCTGATCCGCAG
CAATATTTTGTTTATCCTGTATTTTCAGAGGGAATGGAGTGTAACGCTCTGTATTAACAA
GGAGAGCATTAAAATGGGTAAACTCACGGGCAAGACAGCACTGATTACGGGCGCATTGCA
GGGAATTGGCGAAGGAATTGCCAGAACTTTTGCGCGTCATGGCGCAAACCTAATCTTGCT
GGATATCTCCCCTGAGATCGAAAAGCTGGCGGACGAACTGTGTGGTCGTGGTCATCGCTG
TACGGCGGTTGTCGCCGATGTGCGTGACCCGGCGTCGGTAGCCGCAGCTATCAAACGCGC
GAAGGAAAAAGAAGGGCGCATTGATATCCTGGTGAATAACGCAGGCGTTTGTCGTCTGGG
CAGTTTCCTCGATATGAGCGATGACGATCGCGATTTCCATATTGATATCAATATTAAAGG
CGTATGGAACGTCACGAAGGCGGTGTTGCCGGAGATGATTGCCCGCAAAGATGGTCGCAT
TGTGATGATGTCTTCAGTCACTGGCGATATGGTGGCCGATCCGGGTGAAACGGCGTATGC
CTTAACGAAAGCGGCGATTGTTGGCCTGACTAAATCGCTGGCGGTGGAGTACGCGCAGTC
TGGTATTCGCGTTAACGCCATCTGCCCGGGATACGTTCGCACGCCAATGGCGGAAAGCAT
TGCCCGCCAGTCGAACCCGGAAGATCCAGAATCGGTGCTGACTGAAATGGCAAAAGCAAT
CCCGCTGCGTCGCCTCGCCGATCCGCTGGAAGTCGGCGAACTGGCAGCCTTCCTCGCATC
GGATGAATCAAGTTATTTAACCGGTACACAGAATGTGATTGATGGCGGCAGCACACTGCC
GGAGACGGTTAGCGTCGGCATCTGATTCACCTCTGTTTCCTCCCTGCATGTGTGGGGAGG
ATTTCGTCTTATTCCCTTTTCAACTTCCAAATCACCAAACGGTATATAAAACCGTTACTC
CTTTCACGTCCGTTATAAATATGATGGCTATTAGAAAGTCATTAAATTTATAAGGGTGCG
CAATGGCCGTTAACTTACTGAAAAAGAACTCACTCGCGCTGGTCGCTTCTCTGCTGCTGG
CGGGCCATGTACAGGCAACGGAACTGCTGAACAGTTCTTATGACGTCTCCCGCGAGCTGT
TTGCCGCCCTGAACCCGCCGTTTGAGCAACAATGGGCCAAAGATAACGGCGGCGACAAAC
TGACGATAAAACAATCTCATGCCGGGTCATCAAAACAGGCGCTGGCAATTTTGCAGGGCT
TAAAAGCCGACGTTGTCACTTATAACCAGGTGACCGACGTACAAATTCTGCACGATAAAG
GCAAGCTTATCCCGGCGGACTGGCAGTCGCGCCTGCCGAATAATAGCTCGCCGTTCTACT
CCACCATGGGCTTCCTGGTGCGTAAGGGCAACCCGAAGAATATCCACGACTGGAACGACC
TGGTGCGCTCCGACGTGAAGCTGATTTTCCCGAACCCGAAAACGTCGGGTAACGCGCGTT
ATACCTATCTGGCGGCATGGGGCGCAGCGGATAAAGCTGACGGTGGCGACAAAGCCAAAA
CCGAACAGTTTATGACCCAGTTCCTGAAAAACGTTGAAGTGTTCGATACTGGCGGTCGTG
GCGCGACCACCACTTTTGCCGAGCGCGGCCTGGGCGATGTGCTGATCAGCTTCGAGTCGG
AAGTGAACAACATCCGCAAACAGTATGAAGCGCAGGGCTTTGAAGTGGTGATTCCGAAAA
CCAACATTCTGGCGGAATTCCCGGTGGCGTGGGTCGATAAAAACGTGCAGGCCAACGGTA
CGGAAAAAGCAGCAAAAGCCTACCTGAACTGGCTCTACAGCCCGCAGGCGCAGACCATCA
TCACCGACTATTACTACCGCGTAAATAACCCGGAAGTCATGGACAAACTGAAAGATAAAT
TCCCGCAGACCGAACTGTTCCGCGTGGAAGACAAATTTGGCTCCTGGCCGGAAGTGATGA
AAACCCACTTCACCAGCGGCGGCGAGTTAGACAAGCTGTTAGCGGCGGGGCGTAACTGAT
GTTTGCAGTTTCATCAAGACGCGTGCTGCCGGGCTTTACCTTAAGCCTCGGCACCAGTCT
GCTGTTTGTTTGCCTGATTTTGCTCCTGCCACTCTCCGCGCTGGTGATGCAGCTGGCCCA
GATGAGCTGGGCGCAGTACTGGGAGGTGATCACCAACCCGCAGGTGGTCGCAGCCTACAA
AGTGACGCTGCTGTCGGCGTTTGTGGCATCGATTTTTAACGGCGTTTTCGGCCTGCTGAT
GGCGTGGATCTTAACTCGTTATCGCTTCCCTGGCCGCACGCTGCTTGATGCGCTGATGGA
TTTACCCTTTGCGCTGCCAACGGCAGTCGCCGGTTTAACGCTGGCCTCGCTCTTTTCCGT
GAACGGTTTTTACGGTGAATGGCTGGCGAAGTTTGATATCAAAGTCACCTACACCTGGCT
TGGGATTGCGGTGGCGATGGCCTTTACCAGCATTCCGTTTGTGGTGCGTACCGTGCAGCC
GGTGCTGGAAGAGTTAGGCCCGGAATATGAAGAAGCGGCGGAAACGCTTGGTGCAACGCG
CTGGCAGAGTTTCTGCAAAGTGGTGCTGCCGGAACTTTCTCCGGCGCTGGTGGCGGGCGT
GGCGTTGTCGTTTACCCGTAGTCTTGGTGAGTTTGGCGCGGTGATATTTATCGCCGGGAA
CATCGCCTGGAAGACGGAAGTGACGTCGCTGATGATTTTTGTGCGCTTGCAGGAGTTTGA
TTACCCGGCAGCGAGCGCGATTGCTTCGGTGATCCTCGCGGCATCTCTGCTGCTGCTGTT
CTCAATTAACACTCTGCAAAGTCGCTTTGGTCGGCGTGTGGTAGGTCATTAATGGCGGAA
GTTACCCAATTGAAGCGTTATGACGCGCGCCCGATTAACTGGGGCAAATGGTTTCTGATT
GGCATCGGGATGCTGGTATCGGCGTTCATCCTGCTGGTGCCGATGATTTATATCTTCGTA
CAGGCGTTCAGCAAAGGGCTGATGCCGGTTTTACAGAATCTGGCCGATCCGGATATGCTG
CACGCCATCTGGCTGACGGTGATGATCGCGCTGATTGCCGTACCGGTAAACCTGGTGTTC
GGCATTCTGCTGGCCTGGCTGGTGACGCGCTTTAACTTCCCTGGACGCCAGTTACTGCTG
ACGCTACTGGACATTCCGTTTGCCGTATCGCCGGTGGTTGCCGGTCTGGTGTATCTGCTG
TTCTACGGCTCTAACGGCCCGCTCGGCGGCTGGCTGGATGAACATAATCTGCAAATTATG
TTCTCCTGGCCGGGAATGGTGCTGGTCACCATCTTTGTGACATGTCCGTTTGTGGTGCGC
GAGCTGGTGCCGGTGATGTTAAGCCAGGGCAGCCAGGAAGACGAAGCGGCGATTTTGCTT
GGCGCGTCTGGCTGGCAGATGTTCCGCCGTGTCACATTGCCGAACATCCGCTGGGCGCTG
CTTTATGGCGTAGTGCTGACCAACGCCCGCGCGATTGGCGAGTTTGGCGCGGTGTCGGTG
GTTTCCGGCTCGATTCGCGGCGAAACACTTTCGCTGCCGTTACAGATTGAATTGCTGGAG
CAGGACTACAACACCGTCGGCTCCTTTACCGCCGCCGCGCTGTTGACGCTGATGGCGATT
ATCACCCTGTTTTTAAAGAGTATGTTGCAGTGGCGTCTGGAGAATCAGGAAAAACGCGCG
CAGCAGGAGGAGCATCATGAGCATTGAGATTGCCAATATTAAGAAGTCTTTTGGTCGCAC
CCAGGTGCTGAACGATATCTCACTGGATATTCCTTCAGGTCAGATGGTCGCGTTGCTGGG
GCCGTCCGGTTCCGGGAAAACCACGCTGCTGCGCATTATCGCCGGGCTGGAGCATCAAAC
CAGCGGGCATATTCGCTTCCACGGCACCGACGTGAGCCGCCTGCACGCACGTGATCGTAA
AGTCGGTTTCGTGTTCCAGCATTACGCGCTGTTCCGCCATATGACGGTGTTCGACAATAT
CGCTTTTGGCCTGACGGTGCTGCCGCGTCGCGAGCGCCCGAATGCCGCAGCCATCAAAGC
GAAAGTGACAAAATTGCTGGAAATGGTCCAGCTTGCCCATCTGGCGGATCGTTATCCGGC
GCAGCTTTCCGGCGGCCAGAAACAGCGCGTGGCGCTGGCGCGCGCGCTGGCTGTGGAACC
GCAAATTCTGCTGCTTGATGAACCGTTTGGCGCGCTGGATGCGCAGGTGCGTAAAGAGCT
GCGTCGCTGGCTGCGTCAACTCCATGAAGAACTAAAATTCACCAGCGTTTTTGTGACCCA
CGATCAGGAAGAAGCGACCGAAGTAGCTGATCGTGTAGTTGTGATGAGCCAGGGCAATAT
TGAACAGGCTGACGCGCCGGATCAGGTATGGCGCGAACCGGCGACCCGTTTTGTGCTCGA
ATTTATGGGCGAAGTGAACCGCCTGCAGGGAACCATTCGCGGCGGGCAGTTCCATGTTGG
CGCGCATCGCTGGCCGCTGGGCTACACACCTGCATATCAGGGGCCGGTGGATCTCTTCCT
GCGCCCTTGGGAAGTGGATATCAGCCGCCGTACCAGCCTCGATTCGCCGCTGCCGGTACA
GGTACTGGAAGCCAGCCCGAAAGGTCACTACACCCAATTAGTGGTGCAGCCGCTGGGGTG
GTACAACGAACCGCTGACGGTCGTGATGCATGGCGACGATGCCCCGCAGCGTGGCGAGCG
TTTATTCGTTGGTCTGCAACATGCGCGGCTGTATAACGGCGACGAGCGTATCGAAACCCG
AGATGAGGAACTTGCTCTCGCACAAAGCGCCTGATAGGTTGAGTGAATGTTAAACGCCCG
GAGGCGCTTCCCGCGATCCGGGCTTTTTAATGGCAAGGTTTGTAACCTGTAGGCCTGATA
AGACGCGCAAGCGTCGCATCAGGCAACACCACGTATGGATAGAGATCGTGAGTACATTAG
AACAAACAATTGGCAATACACCTCTGGTGAAGTTGCAGCGAATGGGGCCGAATAACGGCA
GTGAAGTGTGGTTGAAACTGGAAGGCAATAACCCGGCAGGTTCGGTAAAAGATCGTGCGG
CGCTTTCGATGATCGTCGAGGCGGAAAAGCGCGGGGAAATTAAACCGGGTGATGTGTTAA
TCGAAGCCACCAGTGGTAACACCGGCATTGCGCTGGCAATGATTGCCGCGCTTAAAGGCT
ATCGCATGAAATTGCTGATGCCCGACAACATGAGCCAGGAACGCCGTGCGGCGATGCGTG
CTTATGGTGCGGAACTGATTCTTGTCACCAAAGAGCAGGGCATGGAAGGTGCGCGCGATC
TGGCGCTGGAGATGGCGAATCGTGGTGAAGGAAAGCTGCTCGATCAGTTCAATAATCCCG
ATAACCCTTACGCCCATTACACCACTACCGGGCCGGAAATCTGGCAGCAAACTGGCGGGC
GCATTACCCATTTTGTCTCCAGCATGGGAACAACCGGCACTATCACCGGCGTGTCACGCT
TTATGCGCGAACAATCCAAACCGGTGACCATTGTCGGCCTGCAACCGGAAGAGGGCAGCA
GCATTCCCGGCATTCGCCGCTGGCCTGCGGAATATCTGCCGGGGATTTTCAACGCTTCGC
TGATGGATGAGGTGCTGGATATTCATCAGCGCGATGCGGAAAACACCATGCGCGAACTGG
CAGTGCGGGAAGGAATATTCTGTGGCGTCAGCTCCGGCGGCGCGGTTGCTGGAGCACTGC
GGGTGGCAAAAGCTAACCCTGGTGCGGTGGTGGTAGCGATCATCTGCGATCGTGGCGATC
GCTACCTTTCCACCGGGGTGTTTGGGGAAGAGCATTTTAGTCAGGGGGCGGGGATTTAAG
ATTATTGCGCAGGCACCGTTTTATCCGTCTGCGCAATTAACGCATGTAAAAAAGGCTGTG
CATTCTCATCGCTCTTACCGGGCATCTTCACGATATACGGCTTCCCGGTAATCGATGATG
ACGAAGCAACCTTATCAATAAACTGCTCGGCAGTGTTAATGCGGTTACGGGTATTGCCGA
GCTTCAGACGCAGATGAGAAACCGCTTCATCGCAGGTATGTTCATCACCGTTGCGCACAA
ATATCAAATCCTTTTTCTGTGCTAATCCCTCCAGCATGGCGTTGATGCGGGCTTCTTCAT
GGGCAGTTAACTTCGCGTAAGCGGGGAGTGTCATTAGTAGTGTAATGACCAGACAAATGA
TTTTCTTCATTGAATTACCTTATCCTTGTTTTGTGATAGCCGATTTGACTGCCAGAATCA
GGTAAAGTTTCGGTTGGAATACGATGAGGATCATCGGCAAGGAGAAAAAATTAAATGAGT
AGTTTGTTGTTGTTTAACGATAAGAGCAGGGCACTGCAGGCGGATATCGTCGCCGTGCAG
TCGCAGGTAGTGTACGGCAGCGTAGGCAACAGCATTGCGGTGCCTGCTATCAAACAGAAC
GGTCTGAATGTCTTTGCCGTGCCGACGGTATTGCTGAGCAATACGCCGCATTATGACACT
TTCTACGGTGGTGCGATTCCGGACGAATGGTTTAGCGGCTATTTGCGTGCGCTTCAGGAG
CGTGATGCGCTGCGCCAACTTCGAGCTGTAACCACGGGCTATATGGGAACGGCATCGCAA
ATCAAAATCCTTGCCGAGTGGCTGACTGCGCTACGCAAAGACCATCCTGACCTATTGATC
ATGGTCGATCCGGTGATTGGCGATATTGATAGCGGAATTTATGTCAAACCTGACCTTCCC
GAGGCGTATCGACAATATTTACTGCCACTAGCGCAGGGAATTACCCCCAATATCTTTGAG
CTGGAAATCCTGACCGGTAAAAATTGCCGCGATCTCGACAGTGCCATTGCTGCCGCAAAA
AGTCTGCTTTCAGACACATTAAAATGGGTGGTGATTACCAGCGCCTCCGGTAATGAAGAA
AATCAGGAGATGCAGGTGGTGGTGGTCACTGCCGACAGCGTGAATGTCATTTCCCATTCA
CGGGTAAAAACCGACCTGAAAGGGACTGGCGACCTGTTTTGTGCTCAGCTTATCAGTGGT
TTGCTGAAAGGGAAGGCGTTAACCGATGCAGTGCACCGAGCGGGGTTGCGCGTACTGGAA
GTGATGCGCTACACCCAGCAGCATGAGAGCGATGAATTGATTTTGCCGCCGCTGGCGGAA
GCATAAAAAAATGGCGCCGATGGGCGCCATTTTTCACTGCGGCAAGAATTACTTCTTGAT
GCGGATAACCGGGGTTTCACCCACGGTTACGCTACCGGACAGTTTGATCAGTTCTTTGAT
TTCGTCCATGTTGGAGATAACAACCGGAGTCAGGGTAGACTTGGCTTTCTCTTCCAGCAG
CGGCAGATCAAATTCAATGACAGTATCGCCAACTTTCACGCGCTGACCTTCTTCAGCAAT
ACGCTTGAAGCCTTCGCCTTTCAGTTCAACGGTGTCGATACCGAAGTGGACGAACAGTTC
AACGCCGCTATCAGATTCGATAGAGAATGCGTGGTTGGTTTCAAAGATTTTACCAATGGT
ACCGTCTACAGGCGCGACCATTTTGTTACCCGTTGGTTTGATAGCAATACCATCACCAAC
GATTTTTTCCGCAAAAACGACATCCGGCACGTCTTCGATATTGACGATCTCGCCAGAGAG
CGGAGCAATGATCTCAATAGTTCCGGTATCCTTCTTGTCGTCGGAAACCAGAGATTTCAG
TTTATCGAACAAACCCATGATCTTCTCCTAAGCAGTAAATTGGGCCGCATCTCGTGGATT
AGCAGATTGTTTTTTCTTCAATGAACTTGTTAACCAGCGTCATTAACTCGTCCGTTGTCG
GTTGAGCAAGAGCCTGCTCTGCTAACACCTTCGCATCTTCGAAGTTCGTGTTACGGATAA
TCTTCTTAATGCGCGGGATAGAAATGGCGCTCATAGAGAATTCGTCCAGACCCATCCCCA
GCAACAGAAGTGTAGCACGTTCATCGCCAGCAAGCTCACCACACATGCCAGTCCATTTGC
CTTCAGCATGAGAAGCATCAATAACTTGCTTGATCAAGTTCAGCACGGACGGTGACATTG
GCTGGTAAAGGTGTGAAATCATATCATTACCACGGTCAACTGCCAGAGTGTACTGCGTTA
AATCATTGGTGCCGATACTAAAGAAATCAACTTCTTTGGCTAAATGACGTGCAATTGTTG
CGGCAGCCGGTGTTTCCACCATTACGCCGATTTCAATTGACTCGTCAAACGCTTTACCTT
CGTCGCGCAGTTCCTGTTTGTAGATTTCGATCTCTTTGCGCAGTGCACGCACTTCTTCAA
CAGAGATGATCATCGGGAACATAATGCGCAATTTACCGAAAGCCGAGGCACGCAGGATAG
CGCGGAGCTGATCGCGCAGGATCTCTTTACGATCCATTGCGATACGGATAGCGCGCCAGC
CGAGGAACGGGTTCTCTTCTTTCGGGAAGTTCATGTATGGCAGCTCTTTGTCGCCGCCGA
TGTCCATGGTACGAACGATAACCGCCTGCGAGCCACACGCTTCAGCCACTGCTTTGTAAG
CAGCAAACTGTTCTTCTTCAGTGGGCAGCGCGTCGCGGTCCATGAACAGGAACTCAGTAC
GATACAGACCAACGCCTTCAGCGCCGTTACGCTCTGCACCTTCAACGTCACGAACCGTAC
CAATGTTAGCGCATACTTCTACCTGGTGACCGTCCAGCGTAATAGCTGGCAGATCTTTCA
GTTTAGCAAGCTCTGCTTTTTCAGAAGCCACTTGCTCCTGAACAGCGCGCATTTTATCAA
TAACTTCGTTGGTTGGATTGACGTAAACCTGATTATTTACGGCATCCAGAATCAGATAGT
CGTCATTTTTCACCTGAGAGGTGACGCTACCGGTACCCACGATAGCAGGTAGTTCCAGAG
AACGCGCCATGATAGAGGTGTGGGAAGTACGGCCACCCGCGTCGGTGATGAAACCCAGCA
CCTTCTTCAGGTTCAGCTGTGCGGTTTCGGACGGCGTCAGGTCAGCGGCAACCAGAATGA
CTTCATCCTGAATGGCGCTCAGGTCGATAATCTTCAGGCCCAGGATGTTGCGCAGCAGGC
GCTTACCGATATCACGTACGTCAGCCGCACGTTCTTTCAGGTATTCATCATCCAGCTCTT
CCAGGGCAGAAGCCTGACCTTCGATAACTTCATGAGCAGCTGCGTCAGCTGTCATGTGCT
TATCTTTAATCAGGGCTATGATTTCCTGCTCCAGCTCCTCATCTTCGAGCAGCATAATAT
GCCCTTCAAAGATGGCTTCTTTTTCTTCACCGAACGTTTCACCAGCTTTCGTTTTGATCG
TTTCCAGCTGGGCTGATGCCTTGGCACGACCGCTCAGAAAACGTTCAACTTCCTGATCAA
CCTGGTCGGCAGAAATTTTTTTCCGGTCAATGACAATTTCGTCTTCTTTCAGAAGCAGAG
CTTTACCGAAAGCGATACCCGGGGATGCTAAAATGCCTGAAATCATAACCCTACCTTACT
TGTGACTGATTTTTAAAAGAACCCGGGAAATTACTCGAGTTCCGCCATCAGTTTAACCAG
ATGTTCAACCGCTTTCTGCTCGTCTTCGCCTTCTGCGGAGATAGTCACAACGGTACCTTG
AGTCAGGCCCAGAGTCTGCAGTTTAAACAGGCTTTTCGCGCTGGCGCTTTTGCCGTTGGA
AGTCACAGTAATTTCAGAAGTGAAGCCCTTAGCTTCTTTTACAAACTGGGCAGCAGGGCG
GGTGTGCAGACCGTTCGGAGCGGTAATGGTAACTTCTTGCTGGAACATTGTATTTCCCCA
ACTTATAGGTTTAGTGTTGTGGAACTAAAGTCTAGCCTGGCGGTTCGACTTTAGCCTGTA
TTGTTAGCGCCAGTTTTTAACAGACGCGACGCACGAAGAGCGCAATACAGTCCATTGCTG
GCGGGTGTTGACCGCTGACGTTTCGTACGTCATTAAACATTATGCCGCTAAAGGAAGAAT
TGAACCAAATCATAAAATCGATTCAGCTTTGGCTTTTCCTGTAACGATTAATTTCGCGCA
TCAAAATAATTAGTCTGGTTAAATACCAGTTCCGACAGGCTGAATCAATGCCAGGAGGGG
CGAAAGTTTGAAGCAGGCCACAAAAAAGCACCTAAAAAGGTGCTTTTTTACGCATTTTTA
ACAAGCTGGCATTACTGTTGCAGTTCTTTCTCAGTGAAGAGATCGGCAAACAATGCGGTG
CTTAAATAACGCTCACCCGATGACGGTAGAATAACCACAATATTCTTGTTGGTAAAGCTT
TCATCTTCTTGTAGTTTCAACGCCGCAGCAACAGCTGCTCCAGAAGAGATACCTGCAAGA
ATACCTTCTTCTTCCATCAGACGACGCGCGGTAGAAATGGCTTCTTCATTGGTAATGCCA
ATGACTTTATCGATCAGCTTGAGATCGAGGTTAGCCGGGATAAAACCAGCGCCAATACCC
TGAATTTTATGCGGGCCAGGTTTAATCTCTTCACCTGCCAGCGCCTGGGCGATAACTGGA
GAATCGGTTGGCTCAACGGCGACAGAGATAAGATCGGTCTTGCCTTTGGTGCCTTTAATG
TAGCGGCTGACGCCGGTCAGCGTACCGCCAGTCCCAACGCCAGCAATAAATACATCAACC
TGACCGTCGGTATCTTCCCAGATCTCCGGACCGGTGGTTTTTTCGTGAATTTCAGGGTTT
GCCGGATTGCTGAATTGTTGCAGCAGCAGGTATTTCTCTGGATTGCTGGCGACAATTTCT
TCTGCTTTTTGGATTGCGCCTTTCATGCCTTTAGCACCTTCGGTCAGCACCAGGTTTGCA
CCTAACGCTTTCAGCAGCTTGCGGCGTTCAATACTCATGGTTTCTGGCATGGTCAGGGTG
AGTTTGTAACCGCGAGCGGCAGCTACATAGGCCAGTGCAATCCCGGTATTACCGCTGGTC
GGTTCAACCAGTTCAACGCCTGGTTTCAGCACGCCGCGCTTTTCGGCATCCCAAATCATG
TTGGCACCGATACGGCACTTAACGCTGAAGCTGGGGTTACGAGATTCCACCTTCGCCAGA
ATGCGTCCGTTACCGATGCGATTCAGGCGAACCAGCGGCGTGTGACCGATAGTCAGCGAG
TTATCTTCAAAAATCTTACTCATGGCCTGTCCTTAACTGTATGAAATTGGGATACAACAG
GTAGCATACCCGCTCAGAGAATATGCGGAAGTAAGGATTTAGCATATCTATATACAGAAG
GGAAATAATGACATGCAAGATGGAATAAGGGGCGGCATAAGCCACCCCTGTTTCACACAA
ACGGTTTACAAAATAACCGGTAGATTGTTACCGCCACATCGCGTGTTTATCGCGATAGCA
ATCGACCCACATCGCCGTCGCGCCACAAACGGCAACGGGCATGATGAACAGATTAAGCAG
CGGGATCATCGTAAACAGGCTGGTTAAAGCACCAAACTGCATATTGGTGATTTTGCGTGT
GCGCAGGGCGGTGCGCATCTCTTTAAACGGCACTTTGTGGTTATCGAAGGGGTAATCGCA
ATACTGGATGGCTAACATCCAGGCGCTAAACAGGAACCACAGTACCGGCGCGACGGTTTG
CCCAATACCAGGGATGAAGTAAAGAATTAGTAATACAATTGCGCGCGGCAGATACCAGGC
AAATTTTTGCCATTCGCGTTTCATGATTCGCGGCACATCTTTCATGATACCGAAAATCCC
GGTATCTGGCGGTGTAGCGCCAGTCAATCGTGCTTCCAGTTGTTCAGCCAATAAACCGTT
AAACGGAGCGGCAATCCAGTTAGCAATCGTGGAGAAGAAATAGCCAAACACTAACAGCAC
AGAGATGACAGCCAGAGGCCACAACAGATAGCTCAGCCATTGTAACCAGTCCGGAACATA
ACTCATGAGAGTCGGGATCCAGACATCGAGTTGCGTAAAGAGCCACCAGAATGCGCCCCC
CATCAACAAAATATTGACCAGCAGCGGTAAAATAACGAAACGCCGAATCCCAGGTTGCGA
GACGAGCTTCCAGCCTTGCGCAAAATAGTAAAAACCGCTGCGTGGGGCAGATGTGAATGA
TGAAACCATAATCAGGATGAGCTCCTTTTGACCAATCCCAGGAAAATTGTGCGTATTTTA
CCGGGTAATTGCGCAATGGACAGTTAGGATATGTTCGAAAAAACAGCAAAAAGCACGATT
TCATCTATCTTTGTGCTGTGAAAGTTAATAGTGCACTTGCACTTGAGGTAATCGGCAAAT
ACTCTTAGTGAGTAAATGTTTGCCGTGGTGGCAAGGTGTTAGAACAACAGAGAATATAAT
GATGCAGGATTTGCGTCTGATATTAATCATTGTTGGCGCGATCGCCATAATCGCTTTACT
GGTACATGGTTTCTGGACCAGCCGTAAAGAACGATCTTCTATGTTCCGCGATCGGCCATT
AAAACGAATGAAGTCAAAACGTGACGACGATTCTTATGACGAGGATGTCGAAGATGATGA
GGGCGTTGGTGAGGTTCGTGTTCACCGCGTGAATCATGCCCCGGCTAATGCCCAGGAGCA
TGAGGCTGCTCGTCCGTCGCCGCAACACCAGTACCAACCGCCTTATGCGTCTGCGCAGCC
GCGTCAACCGGTCCAGCAGCCGCCTGAAGCGCAGGTACCGCCGCAACATGCTCCGCGTCC
AGCGCAGCCGGTGCAGCAACCCGTGCAGCAGCCTGCCTATCAGCCGCAGCCTGAACAGCC
GTTGCAGCAGCCAGTTTCGCCACAGGTCGCGCCAGCGCCGCAGCCAGTGCATTCAGCACC
GCAACCGGCACAACAGGCTTTCCAGCCTGCAGAACCCGTAGCGGCACCACAGCCTGAGCC
TGTAGCGGAACCGGCTCCAGTTATGGATAAACCGAAGCGCAAAGAAGCGGTGATTATCAT
GAACGTCGCGGCGCATCACGGTAGCGAGCTAAACGGTGAACTGCTTCTTAACAGCATTCA
ACAAGCGGGCTTCATTTTTGGCGATATGAATATTTACCATCGTCATCTTAGCCCGGATGG
CAGCGGCCCGGCGTTATTCAGCCTGGCGAATATGGTGAAACCGGGAACCTTTGATCCTGA
AATGAAGGATTTCACTACTCCGGGTGTCACTATCTTTATGCAGGTACCGTCTTACGGTGA
CGAGCTGCAGAACTTCAAGCTGATGCTGCAATCTGCGCAGCATATTGCCGATGAAGTGGG
CGGTGTCGTGCTTGACGATCAGCGCCGTATGATGACTCCGCAGAAATTGCGCGAGTACCA
GGACATCATCCGCGAAGTCAAAGACGCCAACGCCTGATACACTTAAGGCAAATTAACTCC
TCTTCGAACCCCCGCTTGTCGGGGGTTTTTAGCATTGATGGTGCGATATGGAATCAATCG
AACAACAACTGACAGAACTGCGAACGACGCTTCGCCATCATGAATATCTTTATCATGTGA
TGGATGCGCCGGAAATTCCCGACGCTGAATACGACAGGCTGATGCGCGAACTGCGCGAGC
TGGAAACCAAACATCCAGAACTGATTACGCCTGATTCGCCTACCCAACGTGTAGGTGCTG
CGCCGCTGGCGGCTTTCAGTCAGATTCGCCATGAAGTGCCAATGCTGTCGCTGGATAACG
TTTTTGATGAAGAAAGCTTTCTTGCTTTCAACAAACGTGTGCAGGACCGTCTGAAAAGCA
ACGAGAAAGTCACCTGGTGCTGTGAGCTGAAGCTGGATGGCCTTGCCGTCAGTATTCTGT
ATGAAAATGGCGTTTTAGTCAGTGCCGCGACCCGTGGCGATGGCACCACCGGGGAAGATA
TCACGTCTAATGTGCGTACTATTCGCGCCATTCCGCTGAAGCTGCACGGAGAGAATATCC
CGGCGCGTCTGGAAGTGCGTGGTGAAGTGTTCCTGCCGCAGGCGGGGTTCGAAAAGATTA
ACGAAGATGCGCGACGCACGGGCGGGAAAGTGTTTGCTAACCCACGTAATGCGGCAGCTG
GTTCACTGCGTCAGCTTGATCCGCGTATTACAGCGAAGCGACCGCTCACTTTTTTCTGCT
ATGGCGTTGGTGTTCTGGAAGGTGGCGAGCTGCCGGATACTCATCTTGGCCGTTTACTGC
AATTTAAAAAGTGGGGGTTGCCGGTCAGCGATCGGGTAACGCTTTGTGAATCGGCGGAAG
AAGTGCTGGCGTTCTATCACAAAGTGGAAGAAGACCGCCCGACGCTGGGCTTTGATATCG
ACGGCGTGGTGATTAAGGTCAACTCACTGGAACAGCAGGAGCAGCTTGGCTTTGTCGCGC
GTGCCCCGCGCTGGGCGGTAGCGTTTAAATTCCCGGCGCAGGAGCAGATGACCTTTGTGC
GTGACGTCGAGTTTCAGGTTGGGCGTACTGGCGCGATTACGCCTGTTGCGCGTCTGGAAC
CTGTCCATGTTGCTGGCGTGCTGGTGAGTAACGCAACCTTACACAATGCGGATGAAATCG
AACGTCTTGGTTTACGCATTGGCGATAAAGTGGTGATTCGCCGCGCTGGCGACGTGATCC
CGCAGGTGGTTAACGTCGTGCTTTCTGAACGCCCGGAAGATACCCGTGAGGTTGTATTCC
CGACGCATTGTCCGGTATGTGGTTCTGACGTTGAGCGTGTGGAAGGTGAAGCTGTTGCCC
GCTGTACCGGTGGCCTGATTTGCGGTGCGCAGCGTAAAGAGTCGCTGAAACACTTTGTTT
CCCGCCGTGCGATGGATGTTGACGGAATGGGCGACAAAATCATCGATCAGCTGGTTGAAA
AAGAATATGTCCACACTCCGGCGGATCTGTTCAAACTCACCGCAGGCAAACTTACCGGAC
TGGAGCGTATGGGGCCAAAATCGGCACAAAACGTGGTTAACGCGCTGGAAAAAGCGAAAG
AAACCACCTTTGCTCGCTTCCTCTATGCACTTGGCATCCGTGAAGTCGGCGAGGCCACCG
CAGCAGGTCTGGCGGCATATTTCGGCACGCTGGAAGCGCTGGAAGCCGCTTCGATTGAAG
AACTGCAAAAGGTGCCTGATGTTGGCATTGTCGTTGCATCCCACGTTCACAACTTCTTTG
CCGAAGAAAGCAACCGCAATGTCATCAGCGAGCTGTTGGCGGAAGGTGTTCACTGGCCTG
CGCCGATCGTTATCAACGCGGAAGAGATTGACAGCCCGTTTGCTGGTAAAACCGTGGTGC
TTACGGGCAGCTTAAGCCAGATGTCGCGTGATGACGCTAAAGCTCGACTGGTCGAACTGG
GCGCGAAAGTCGCGGGCAGCGTGTCGAAGAAAACCGATCTGGTGATAGCGGGTGAAGCTG
CAGGATCTAAACTGGCGAAGGCGCAGGAACTGGGCATTGAAGTCATCGACGAAGCGGAAA
TGCTGCGTTTGCTGGGTAGCTGAGATGGAAAAAGAGCAGCTGATTGAAATAGCCAATACG
ATAATGCCGTTTGGCAAATACAAAGGGCGTCGCTTAATCGACCTGCCGGAGGAGTATCTG
CTGTGGTTTGCCCGCAAAGATGAGTTCCCGGCAGGGAAGCTCGGTGAGCTAATGCAAATC
ACGCTGCTGATTAAAACCGAGGGGCTGACGCAACTGGTCCAGCCCCTGAAGCGTCCGCTT
TAAGCTTTATCGGTGCTGCTTTCCTGCTGTGCCTGTAACTGTTCGGTCTGGCGTTTGTAT
CGCCGCGCCAGCACCGCACAGACCATCAATTGGATCTGATGGAAAATCATCAGGGGCAGC
ACCATCATACCGATCACCGATGTGGGGAACAGAATGTTTGCCATCGGGATGCCATTTGCC
AGACTCTTTTTCGAACCACAAAAGACGATAGTAATTTCATCTGCTTTATTGAAGCCTAGT
CGGCGTGCCATAAAGACGTTAACTACAATCACGATAGCCAGAAGAACGCAGCTGACCACC
ACGATAAACAGCAATGATCCCCAGCCAACTTTATGCCAGATACCATTAACGACGGCTTCG
CTGAACGCTGTATAAACCACCAACAGAATGGACGTCTGGTCAGTTTTCGCAATCCATTTT
TTATTGCGCGACACCCAGTCACCAATCCACGGCCGGGAAAGATGCCCCAACACAAACGGC
AGCAACAGTTGCAGCATAATTTTACCGACCTGCTCAAGGCTGCCCCCTGCACCGTGAACA
TTCATCACCAGGCCAACCAGCAATGGTGAAAGGAAAATCCCCAGCAGGCTGGATGCCGAC
GCAGAACAAACCGCCGCCGCGACGTTACCGCCCGCCATTGACGTGAAGGCGATTGCAGAC
TGCACGGTAGCCGGGAGAATGCACAAGTAGAGAAAACCGGAGTAGAGCATCGGGTCGACA
TTTACCGGTTTCCACCAGGCAAACAGTACACCCAGAATCGGAAACAGCACGAAGGTGCTG
CACATTACCCACAAATGCAGTCGCCAGTGACCACCGCCAGCAATAATCGCCTCACGCGAC
AACTTCGCGCCGTGCATAAAGAACAGCAGGGCAATAGCTGCGGTGGTCAGATTTTCAAAG
AAGGGGACGAAATCGCCTCTGGCCGGAAAGAAAGAGGCCAGCAACACCACCGTGATCAGG
GTTAAGGTGAAAGGATCGAGGATACGAAAAAGTTTCATAAAGACTCCAGATGATCGATGG
TTCTATTGTGCTTCTTCCAGTTTGAGAAATAAAATTGATTTATTGCATCCATTCATGAAG
AAAACAGATGAATTATTCTTTAAAACAGTTAAAGGTTTTCGTCACAGTAGCGCAGGAGAA
AAGTTTTAGTCGTGCAGGAGAGCGTATCGGCCTGAGCCAGTCGGCAGTAAGTCACAGTGT
GAAGGAGCTGGAAAATCATACAGGTGTTCGCCTGCTGGACAGAACCACGCGTGAAGTGGT
ACTTACAGATGCAGGGCAGCAGTTGGCTTTGCGTCTTGAGCGACTGCTGGATGAACTTAA
CAGCACGTTGCGCGATACCGGGCGTATGGGGCAACAACTGAGCGGAAAAGTTCGGGTCGC
TGCCAGCCAGACCATTTCCGCGCATCTTATTCCGCAATGCATTGCTGAAAGCCATCGCCG
CTATCCAGATATTCAGTTTGTCCTGCACGATCGTCCGCAGCAGTGGGTGATTGAAAGTAT
TCGCCAGGGAGATGTCGACTTTGGCATCGTCATAGATCCAGGCCCAGTGGGCGATCTGCA
ATGTGAAGCGATTCTTTCCGAGCCTTTCTTTCTGCTTTGCCATCGCGATAGCGCTTTGGC
CGTGGAAGATTATGTACCCTGGCAGGCATTACAGGGAGCGAAATTGGTGTTGCAGGATTA
CGCGTCAGGCAGCCGACCGCTGATTGACGCAGCGCTGGCGCGCAATGGTATTCAGGCGAA
TATTGTGCAGGAGATTGGACATCCGGCGACGCTGTTCCCGATGGTAGCCGCAGGCATCGG
CATCAGTATTCTTCCCGCACTGGCGCTACCATTGCCTGAAGGTAGCCCACTGGTGGTAAA
GCGCATTACGCCGGTGGTGGAACGCCAGTTGATGCTGGTGCGCAGGAAAAACCGTTCACT
TTCCACCGCCGCTGAAGCGTTATGGGACGTGGTACGAGACCAGGGCAATACGCTAATGGC
TGGGCGGGAAGGGGATCCGTTGTATCAGATATAGATATCGATATGAGTCGTATTTTCAAC
AGGATTTAGAAGGGATACATTCAGAGACAAACGCTGCTCTTTCTCCTGCGCCTTTTCTGC
CTGCTGTCTCTGCAACTGCGCCAGTTGTGTTTCCAGTAGGGTGATTTGCTGTTGAATCAA
TTCGGCCTGTTTTTGCTTGTCTTCAGCACTGCCGCTAGTGTCTACAATCTCTTTAATTTG
TTGAGTGAGTTTGATGATTTGCTGACTTATCCGCGCGATTTGTGAAGCAACATCGCTACC
TTGTGATGCCCTGTTACTACTCTGTGTTTGTATGGAAGGAATTGAAGTTGAAGAGATAGT
GGCCATTGTTCAGTCCTCGTCACTGTACGAGGTAATATCGGTAGAAGAACAAGGAACTTG
AGAAGAAAAATCAATCTTACAAATCGCAGATAGCAAAAAAGCGCCTTTAGGGCGCTTTTT
TACATTGGTGGGTCGTGCAGGATGACTCGCTTCGCTCGCCCTTCGGGCCGTCGCCGCGAG
CGGCTCCGTTGTTTCGCTGCGCTCAACTCGAACCTGCTGCAGGTTCGAATCTTTGAGTAT
CGCAGATAGCAAAAAAGCGCCTTTAGGGCGCCTTTTTAAATTGGTGGGTCGTGCAGGATT
CGAACCTGCGACCAATTGATTAAAAGTCAACTGCTCTACCAACTGAGCTAACGACCCGAA
GTGGTGGGTGATGACGGGATCGAACCGCCGACCCCCTCCTTGTAAGGGAGGTGCTCTCCC
AGCTGAGCTAATCACCCACTTCTCAATTTCTTGCTACACGGCGGAGACTACATAAAGTAG
TTGGTGGGTGATGACGGGATCGAACCGCCGACCCCCTCCTTGTAAGGGAGGTGCTCTCCC
AGCTGAGCTAATCACCCCCGCTGTGTGGAGTCGCATTATAGGGAGAGTTCAAAATGAGTC
AACGCATTTTCTAAAGAAATTGTTCGTTCGTCGTAAATTTAAGCAAGATGATCGCAAAAC
AGACCGTGTTGCGCAATTTGTCAACGAAAACAATAATGCGTAAGGTTGCAACCCGAACTA
CATTGAGGAATCAGGCGGGAGTGATAGAATATCGCCCACTCAATTTTTCCAGGATTTGCC
GGTTGTCGGCATCTTTCTAAACGTAAGGCCATTTCATGAAAATCAAAACTCGCTTCGCGC
CAAGCCCAACAGGCTATCTGCACGTTGGCGGCGCGCGTACTGCTCTTTACTCCTGGCTTT
TTGCACGTAATCACGGCGGTGAGTTCGTGCTGCGTATTGAAGACACCGATCTTGAGCGTT
CCACGCCGGAAGCTATCGAAGCCATTATGGATGGCATGAACTGGCTGAGCCTGGAGTGGG
ATGAAGGTCCGTACTTCCAGACCAAACGTTTTGATCGCTACAACGCGGTGATCGATCAGA
TGCTGGAAGAGGGCACAGCTTATAAATGCTATTGCTCTAAAGAGCGCCTGGAAGCGCTGC
GCGAAGAGCAAATGGCGAAAGGTGAGAAGCCGCGTTATGACGGTCGCTGCCGCCACAGTC
ATGAGCATCACGCTGATGATGAGCCGTGTGTCGTACGTTTTGCTAACCCGCAGGAAGGTT
CTGTTGTTTTTGACGATCAGATCCGTGGTCCGATCGAGTTCAGCAACCAGGAACTGGACG
ATCTTATTATCCGCCGTACCGATGGTTCCCCAACCTATAACTTCTGTGTGGTTGTCGATG
ACTGGGATATGGAAATCACCCACGTTATCCGTGGCGAAGACCATATCAACAACACGCCAC
GCCAGATCAACATTCTTAAGGCCCTGAAAGCGCCGGTGCCGGTTTACGCGCACGTTTCTA
TGATCAACGGCGATGACGGTAAAAAACTGTCCAAACGTCACGGGGCGGTCAGCGTAATGC
AGTATCGTGACGACGGTTATTTGCCAGAAGCACTGCTGAACTATCTGGTGCGTCTGGGCT
GGTCCCACGGCGATCAGGAAATCTTCACTCGTGAAGAGATGATCAAATACTTCACCCTGA
ATGCCGTCAGCAAATCTGCCAGTGCGTTCAACACCGACAAGCTGCTGTGGCTGAACCATC
ACTACATTAACGCGCTGCCGCCGGAGTATGTTGCTACTCACTTACAGTGGCACATTGAGC
AGGAAAATATCGATACCCGTAACGGCCCGCAGCTGGCTGATCTGGTGAAACTGCTGGGCG
AACGCTGCAAGACGCTGAAAGAGATGGCACAGAGCTGCCGTTATTTCTACGAAGATTTTG
CAGAGTTCGATGCCGACGCCGCGAAAAAACATCTGCGTCCGGTAGCGCGTCAGCCGCTGG
AAGTGGTTCGTGACAAACTGGCCGCGATTACTGACTGGACCGCTGAAAACGTTCATCACG
CTATTCAGGCGACGGCGGATGAGCTGGAAGTGGGTATGGGTAAAGTTGGTATGCCGCTGC
GTGTCGCCGTAACCGGTGCGGGGCAGTCTCCAGCACTGGATGTTACCGTTCACGCGATCG
GTAAGACACGTAGCATTGAGCGTATCAACAAAGCGCTGGCTTTTATTGCTGAACGCGAAA
ATCAGCAGTAATTAGCGCATAAAAGACAAACGGCAGGAGAGAAACCCCTGCCGTTTTTTA
TTTATGCTGATTCATTTATGTCGAGACGAGCCAGGAAATTACGAATTCCTTCGCGTGACA
AAAATTGCGCAACTTTTTCCTGCTCACTGTGAGTCATGTTGTCTATTGCGCTTATGATTT
GTCGATAAGCAGGAGTGCGAATCCCCGGTGCGTATTCGGCAAGGGGTTCTTCGGCTTCCA
GAAGCATCGGTGTGTTATGGAAGGCTGGCGTGTTCTGAATAAACTCGCAAACTTGCGTAT
CGACCAGAATAAGTCTGGCACGACCGCCTTTCACGCCGGGAAATTTTTCCGTTTTCCAGC
CTTTTTCTCTGATCCAACGGTTAACAGTTTGTTTAGCCACACCGAGGCATTCAGCCAGTT
CTTCGGTGGTCATTTTGTTGCGTAATCTTTTCATATTATTTGCTATCGCGAATCCCTAAG
CGTTGTAACAATCCGATAATCCCTTCCCGCAGAAGCAAGGATGTAAACTGTTTTTGTTCA
ACTGGCGTCATCTCTTTCGCCAGTGTCACCAGCAATACTTCAAGCGGCGCATCACCAGAA
AGGGCAGGCGCTTCTCCCTGACCTTCTGGACGTTCAGCATTACGAATATATTCACGAACC
TGTTCATTGACGTGAACCAGTCGGGCTTTGCCACCCTGGACGCCTGGTTTTGGTGACGTC
GTCCAGCCTTCCTTGCGTACCCATTTATTAATGGTCTGGCGGCTATAGCCGGTCAGTCTG
GCAAGTTCATCTGGTGTCATCCTCTCCTTGAACATAACAATTCCCTGAATGTATGTGGGT
CTATTAGTAGTTCATTTTATAGCACCACTTTACAGGAAACCGTGACATGAATAACTACTG
AATGCGAGCGGTTTTCCAAAATTGTTCATTTGCCTGATTTTTCAGCGATTGAAACTACAC
GTTGCAATTTGCCGTTGACACATTCGGGCGGAATTCATATGATGCCGCCCGTCAACTCGA
CAAGCTTTACGTGACGGGGCTATAGCTCAGCTGGGAGAGCGCTTGCATGGCATGCAAGAG
GTCAGCGGTTCGATCCCGCTTAGCTCCACCAAATTTTGCACCCAGCAAATTTGGTACGTA
AACGCATCGTGGGGCTATAGCTCAGCTGGGAGAGCGCTTGCATGGCATGCAAGAGGTCAG
CGGTTCGATCCCGCTTAGCTCCACCAAATTTCCAACCCTCGCTGCAAAGCGGGGGTTTTT
TGTCTCTGCTTTTTGCCGCTTTTGTAATACAGTCTACGTCCGGGTTAGTGCCGCCTGGTG
AAAGCATCATTGGATGAAAAATCGGCAACAGGCTGGCCCCTGTTTGCTTCGCGATGCGAA
TAAACTTATTATTTGTGTGCCTGAAAACCCCGATCAGTGAGAGTAGTGTACTCATGTTTG
CGGAGCATAACCTGATAAAAAATATCAAGATATTCACACTAGCGTTTACGCTCACCGTGG
TACTTATTCAGCTATCCCGTTTTATTTCGCCACTTGCCATTATCCATTCCAGTTATATCT
TTCTGGCGTGGATGCCACTGTGCGTAATGCTGTCAATCTTGTTTATCTTTGGCTGGCGCG
GTGTCGTTCCCGTTTTATGCGGGATGTTTTGCACCAATCTGTGGAACTTTCATCTCTCTT
TTTTACAGACTGCGGTCATGCTCGGCAGCCAGACGTTTGTCGTGTTGTGTGCCTGCGCAA
TATTACGCTGGCAGCTGGGGACGCGTTGGCGTTATGGATTGACCAGCCGATATGTCTGGC
AACGTCTGTTCTGGCTTGGTTTGGTGACGCCGATCGGCATCAAATGCAGCATGTATTTTG
TGGGGAGCTTCTTTGATTTCCCGCTAAAGATATCCACCTTTTTCGGCGATGCGGATGCCA
TTTTCACGGTTGTTGATTTACTAAGCCTTTTCACCGCTGTGCTGATTTACAACATGCTTT
TCTACTATCTCACTCGCATGATTGTAAGTCCCCACTTTGCGCAGATATTGTGGCGCAGGG
ATATCGCTCCGTCGTTGGGCAAAGAGAAACGCGCATTTACCTTAAGCTGGCTGGCAGCGT
TAAGCGTGCTGCTACTTCTGTTGTGCACACCTTATGAAAACGACTTTATTGCCGGTTACC
TGGTACCCGTTTTCTTCATCATCTTTACCCTCGGGGTCGGTAAGCTTCGCTATCCGTTTT
TAAATCTCACCTGGGCTGTTTCAACGCTTTGCCTGCTGAATTACAACCAGAACTTTTTGC
AAGGGGTGGAAACCGAATATTCGCTGGCATTTATTCTTGCGGTGCTGATTTCCTTTAGCG
TTTGCCTGCTCTATATGGTGCGCATTTATCATCGCAGTGAATGGCTTAATCGACGCTGGC
ATTTGCAGGCGCTGACCGATCCGTTAACGCTCCTACCCAATTTTCGTGCGTTGGAACAAG
CGCCGGAGCAAGAGGCGGGCAAGAGTTTTTGCTGCCTGCGCATTGATAATCTTGAGTTTA
TGAGTCGTCATTACGGGTTAATGATGCGCGTTCACTGTATCCGATCAATTTACCGTACGC
TGCTGCCGTTGATGCAGGAAAACGAAAAGTTGTATCAATTGCCGGGTAGTGAACTGCTGT
TAGTGCTGAGCGGGCCGGAAACGGAAGGGCGACTCCAGCATATGGTTAACATCCTGAATA
GTCGGCAAATTCACTGGAACAATACCGGGCTGGATATGGGCTATGGTGCTGCCTGGGGGC
GTTTTGATGGAAATCAGGAAACCCTGCAACCCTTGTTGGGGCAGTTAAGCTGGCTGGCGG
AGCAATCCTGCGCACATCATCATGTGCTGGCGCTGGATAGCAGAGAGGAGATGGTTTCCG
GGCAGACCACTAAACAAGTGCTATTGCTGAATACCATTCGCACGGCGTTAGATCAGGGTG
ATTTGCTGCTCTACGCCCAGCCAATTCGCAACAAAGAGGGTGAAGGTTATGATGAGATCC
TCGCGCGACTGAAGTATGACGGCGGCATTATGACCCCGGATAAGTTTCTGCCCCTTATTG
CTCAGTTTAACCTTAGCGCGCGTTTTGATTTGCAAGTGCTGGAATCCTTGTTGAAGTGGC
TGGCAACACACCCTTGCGACAAAAAAGGCCCGCGCTTTTCAGTTAATTTAATGCCGCTCA
CGCTGCTACAAAAGAATATTGCCGGGCGGATTATTCGTCTGTTTAAGCGTTATCACATCT
CCCCGCAGGCGGTCATTCTTGAGATCACCGAGGAGCAGGCGTTTTCTAACGCAGAAAGCA
GCATGTACAACATCGAGCAACTGCATAAGTTTGGCTTCCGGATTGCGATTGATGACTTTG
GCACCGGCTATGCCAACTACGAACGGTTAAAGCGTTTGCAGGCTGATATCATCAAAATTG
ATGGTGTCTTTGTGAAAGATATCGTCACGAATACGCTGGATGCGATGATTGTGAGATCAA
TTACCGATCTGGCGAAAGCGAAGTCATTGAGTGTGGTTGCGGAGTTTGTCGAGACGCAAC
AGCAGCAGGCGTTATTGCATAAGCTCGGGGTGCAATATCTGCAAGGGTATTTGATTGGTC
GCCCGCAGCCATTAGCTGATTAACAGGCGTAAAAAAACCGGGGAATTATCCCCGGCTTTT
TTATGTATGGTCTTACAGCACCAGTGCTGCGATTGACGCAGACAGCACACTCACCAGGGT
AGAGCCGTAAACCAGTTTCAGACCGAAGCGAGAAACCACGTTACCTTGCTCTTCATTCAG
ACCCTTAACTGCACCTGCGATAATCCCGATTGAAGAGAAGTTAGCGAAGGAAACCAGGAA
CACAGAGATGATGCCTTCAGCACGCGGAGAGAGCGTGGAAGCAATTTTCTGCAGATCCAT
CATCGCAACGAACTCGTTGGAAACCAGTTTGGTCGCCATGATACTGCCCACTTGCAGTGC
TTCGCTGGACGGAACACCCATCACCCATGCAATCGGATAGAAGATGTAGCCCAGGATGCC
CTGGAAGGAGATGCTGTAGCCAAACCAGCCAGTCACGGTGGCAAACAGTGCGTTCAACGC
GGCGATCAGGGCGATAAAGCCGATCAGCATCGCGGCAACGATAATGGCAACTTTGAAACC
TGCCAGAATGTATTCACCCAGCATTTCGAAGAAGCTCTGACCTTCGTGCAGGTTGGACAT
CTGAATGTTTTCTTCACTGGCATCAACACGGTAAGGGTTGATCAGCGACAGCACGATAAA
GGTGCTGAACATGTTCAGTACCAGCGCCGCAACGACATATTTCGGCTCCAGCATGGTCAT
GTATGCACCAACGATGGACATAGATACGGTGGACATCGCCGTTGCTGCCATGGTGTACAT
ACGATTGCGGGAGATTTTGCCGAGGATATCTTTATAGGCAATAAAGTTTTCAGACTGACC
CAGAATCAGAGAGCTGACGGCGTTAAAGGATTCCAGTTTGCCCATGCCGTTGACTTTGGA
GAGCAGGAAACCAATTGCGCGGATAATCACCGGCAACACGCGAATGTGCTGGAGAATACC
GATCAGTGCAGAGATAAAGACGATTGGGCACAGCACTTTCAGGAAGAAGAATGCCAGGCC
TTGATCATTCATGCTACCAAAGACGAAGTTAGTCCCTTCGTTGGCAAATCCGAGCAGTTT
TTCGAACATTTCGGAGAAGCCTTTCACGAAGCCTAAACCAACGTCGGAGTTCAGGAAGAA
CCACGCCAGTAACACTTCGATAACAAGCAGTTGAATAACATAACGGATACGAATTTTTTT
GCGGTCGCTGCTTACCAGCAGTGCGAGAATCGCAACAACGGCAAGTGCCAGTACAAAATG
AAGGACGCGGTCCATATTTGCTCCAAATATGAGGCAGGTTAAATTTCCGTGCACATTCTA
TGTAACATGGTTAAGGAAAACGAGATCTGACACACACTATAATGACGTCCTGTGACAAGC
TTCAAAAATAGTGAGCTGTCATACATTTCTGCTATGTTGTGTATGGAAGCTGAAAGTTAT
GTAAATGTGCTAACATTAAACATAACCATAACATTCAAGTCATCAATCTTTTCGTAGTCA
TAATCCTGGTCTATCAGAGAAATCACCACAACCCATTTAAATGAATTTGATAATCATTCT
CGTTTGGCATAGCATGAAACATAGCAAAGGCTATGTTTTAGAGGCACAAGATGACGAACT
ATCGCGTTGAGAGTAGCAGCGGACGGGCGGCGCGCAAGATGAGGCTCGCATTAATGGGAC
CTGCGTTCATTGCGGCGATTGGTTATATCGATCCCGGTAACTTTGCGACCAATATTCAGG
CGGGTGCCAGCTTCGGCTATCAGCTACTGTGGGTTGTCGTTTGGGCCAACCTGATGGCGA
TGCTGATTCAGATCCTCTCTGCCAAACTAGGGATTGCCACCGGTAAAAATCTGGCGGAGC
AGATTCGCGATCACTATCCGCGTCCCGTAGTGTGGTTCTATTGGGTTCAGGCAGAAATTA
TTGCGATGGCAACCGACCTGGCGGAATTTATTGGTGCGGCGATCGGTTTTAAACTCATTC
TTGGTGTTTCGTTGTTGCAGGGCGCGGTGCTGACGGGGATCGCGACTTTCCTGATTTTAA
TGCTGCAACGTCGCGGGCAAAAACCGCTGGAGAAAGTGATTGGCGGGTTACTGTTGTTTG
TTGCCGCGGCTTACATCGTCGAGTTGATTTTCTCCCAGCCTAACCTGGCGCAGCTGGGTA
AAGGAATGGTGATCCCGAGTTTACCTACTTCGGAGGCGGTCTTCCTGGCAGCAGGCGTGT
TAGGGGCGACGATTATGCCGCATGTGATTTATTTGCACTCTTCGCTCACTCAGCATTTAC
ATGGCGGTTCGCGTCAACAACGTTATTCCGCCACCAAATGGGATGTGGCTATCGCCATGA
CTATTGCCGGTTTTGTCAATCTGGCGATGATGGCTACAGCTGCGGCGGCGTTCCACTTTT
CTGGTCATACTGGTGTTGCCGATCTTGATGAGGCTTATCTGACGCTGCAACCGCTGTTAA
GCCATGCTGCGGCAACGGTCTTTGGATTAAGCCTGGTTGCTGCCGGACTGTCCTCAACGG
TGGTGGGGACACTGGCGGGGCAGGTGGTGATGCAGGGCTTCATTCGCTTCCATATCCCGC
TGTGGGTGCGTCGTACAGTCACCATGTTGCCATCATTTATTGTCATTCTGATGGGATTAG
ATCCGACACGGATTCTGGTTATGAGTCAGGTACTGTTAAGTTTTGGCATCGCCCTGGCGC
TGGTTCCACTGCTGATTTTCACCAGTGACAGCAAGTTGATGGGCGATCTGGTGAACAGCA
AACGCGTAAAACAGACAGGCTGGGTGATTGTAGTGCTGGTCGTGGCGCTGAATATCTGGT
TGTTGGTGGGGACGGCGCTGGGATTGTAGTTGAATGAGCGTCGCATCTGGCACTATTGGC
GGATGCGGCGTAAACGCCTTATCCGCCTTACGCGTTAAAGAGCCGGTTTGTAGGCCTGAT
AAGACGCACTAGCGTCGCATCAGGCCTTGTGCTCCATTGGCAAATGTGTTTAATGGCGGT
GCCCATGTCCGCGGCCTTTTCCGCGATGATCGTCACGATCGCGCCAGCCTTCACGATAGC
CACGCTCATACGCTTTACGCTTATCCCAGCCACGATGATAGCCATTATCATGACGCCACC
AGCGGTTTTTGCGCCACTCATAATTGCGATGCCAGTAATCACGATCTCGCCAGTGACCAC
CGTCCCAGTAATTACCGTAATGATCGCGATCGCCAATTTGTAATTTGATTGATGGCAGTA
GGGTGATTTCACCTGCGTTTGCTGCAAGCGGGGTAAATGCCATCAGGGCGGCCGCCAGAA
ACAGTGACCTGAACATTGTTATTCTCCTTCACGATCGAAGCCGTCAGCGGCCTGTTAACG
CAATATTACGGGGAGGTAAAGCCCCGTATCATCGCCATAACTCTTAAATCATAAAGGAGA
GCATTTTTTGTTAAACGTTATCGTGGGGTGGCTGTTGCTTCGGACGATTGACCATCATCA
TCGGCTTACCTGCTAATAACAGCCATGCCGGAAGCATGACGATACAGAGCAGCGGTAGCA
ATGTGGTATTGGGTACAACGACTGCCGCCATAAAAAGACTTAACCAGCCATCGCGTGTTA
CCACCAGCACGATGCCGAGAATAGCGCAGGAAACGGTTATTGCCGCTGGAACGGCGGGGA
CGTGCTCATGCAGCATCAACCCTAATGCCACGCCGACGAACACTGCCGGGAAAATTCGTC
CACCGCGAAAGCCACTGGCGGCAGCAACGACCAGGGCGGTAAGTTTAATCACCGCCAGTA
AAAAGTAATCGCTGGTGCTGAAAGCCTGATTTGCCACCATCTGCTGCATCTCATCCAGTC
CTTTAAACAGCGAAACTGGTCCACCAATAACCCCCAGAATACCGAGAATAAATCCGCCAA
TACCCAGCACGAGCACCGGATTTTTCATTTGATGCATCATCGCGTGCAACCGTGGTAAGC
ACCATACGGCGACCATCCCTGCTGCGATGGCAATCGCCGCGACAATTGCACCGCTGAGAA
TATCGGTCATTTCCATCTGTCCGTAATGCGCAATGGGCAGTGAAAAATGGGGATGGAAAA
ATAATCCGGTAGTAAGTGCACCAGCTGCTGCCGCCATTAACGGCGCAAAAAGACGATCCC
ATAGCGGAACTTCACTACTGCCATTTAAGGTTTGCGAAAATATCAACGCCGCCGCAACAG
GTGTACCAAACAGCGCGCCGATGGTTCCGGCAGAGGCTAAAATAGTCCACTCCATTCGGT
TGACGCGCGGTAACAGACGAGCGCCAATGGCAACCGCAAGGGCGATATTGACGGTCATGA
TCGGATGTTCCGGCCCCAGGCTGACGCCGCCAGCAAGACCGAGAATTAATGCTACGATAA
GTCCTGGTAGCGCAGAGGGCGGAACCGGTGCGCCGATCAGCGGTTCACAGGCGGGGTCTG
GTCCGGCATGACCCTGGCTGAAACGGATAACCAACCCCACTGCAATACCCGTTAACGTTA
ATACACCGATGATCCAGAGAGGTGAATCCTGGGCTATCCCCAGAGTTCCCGGCAGTCGTT
GCCAGAGCAAATTCTGTAATGCCGAGGCGATTTTCATCACCACAATCAGAATAAGACTGG
ACGCAATCCCAATTGCCACGGCGGGGAGCGATAATAACAACATGGTTCTGGCTCGCGGAT
GGAGCATGTTCTATTCCTTATGCGGGGTCAGATACTTAGTTTGCCCAGCTTGCAAAAAGG
CATCGCTGCAATTGGTGCTGAAACGATAAAGTAATTGTGTGACCCAGATCGATATTTACA
GGGAGCCTGCCTTTCCGGCGTTGTTGTTATGCCCCCAGGTATTTACAGTGTGAGAAAGAA
TTATTTTGACTTTAGCGGAGCAGTTGAAGAATGACAAAGTATGCATTAGTCGGTGATGTG
GGCGGCACCAACGCACGTCTTGCTCTGTGTGATATTGCCAGTGGTGAAATCTCTCAGGCT
AAGACCTATTCAGGGCTTGATTACCCCAGCCTCGAAGCGGTCATTCGCGTTTATCTTGAA
GAACATAAGGTCGAGGTGAAAGACGGCTGTATTGCCATCGCTTGCCCGATTACCGGAGAC
TGGGTGGCAATGACCAACCATACCTGGGCGTTCTCAATTGCCGAAATGAAAAAGAATCTC
GGTTTTAGCCATCTGGAAATTATTAACGATTTTACCGCTGTATCGATGGCGATTCCGATG
CTGAAAAAAGAGCATCTGATTCAGTTTGGTGGCGCAGAACCGGTAGAAGGTAAACCTATT
GCGGTTTACGGTGCCGGAACGGGGCTTGGGGTTGCGCATCTGGTCCATGTCGATAAGCGT
TGGGTAAGCTTGCCGGGCGAAGGCGGTCACGTTGATTTTGCGCCGAATAGTGAAGAAGAG
GCCATTATCCTCGAAATATTGCGTGCGGAAATTGGCCATGTTTCGGCGGAACGCGTGCTT
TCTGGCCCTGGGCTGGTGAATTTGTATCGCGCAATTGTGAAAGCTGACAACCGCCTGCCA
GAAAATCTCAAGCCAAAAGATATTACCGAACGCGCGCTGGCTGACAGCTGCACCGATTGC
CGCCGTGCGTTGTCGCTGTTTTGCGTCATTATGGGCCGTTTTGGCGGCAATCTGGCGCTC
AATCTCGGGACATTTGGGGGCGTGTTTATTGCGGGCGGTATCGTGCCGCGCTTCCTTGAG
TTCTTCAAAGCCTCTGGTTTCCGTGCCGCATTTGAAGATAAAGGGCGCTTTAAAGAATAT
GTCCATGATATTCCGGTGTATCTCATCGTCCATGACAATCCGGGTCTTCTCGGTTCCGGT
GCACATTTACGCCAGACCTTAGGTCACATTCTGTAAATCCTTCCTGTTATATCGGGAGGT
AACTCTCCCGATAATCTTTTAAATCATACAGTTAATTCAATTTTTCTTTGTGTCCCCTCA
CAAGGCCGACCTGCGTCACACTTCCGTACAGCGGGATTAATTCTCCAGTAAATGCATTAT
TTGTCTGGTAACGGCGATTTGTTTTGCACGTTCATAATTTCACTCGTCAACTATCACTGA
ACGAGGAATTAACGATGAGTAAGAAACTGATTGCATTATGTGCCTGCCCAATGGGCCTGG
CTCACACTTTTATGGCCGCTCAGGCGCTGGAAGAAGCGGCGGTAGAAGCCGGTTATGAAG
TGAAAATTGAAACCCAGGGCGCGGACGGTATCCAGAATCGCCTGACGGCGCAGGATATCG
CCGAAGCGACCATCATCATCCACTCCGTGGCAGTTACCCCGGAAGATAACGAACGTTTCG
AATCACGCGACGTTTATGAAATCACTTTGCAGGACGCAATTAAAAACGCTGCGGGCATCA
TCAAAGAAATCGAAGAGATGATTGCCTCTGAACAACAGTAATATTCGACAGGGATAATTG
TTATGGCCATTAAAAAACGCAGTGCAACCGTTGTGCCTGGCGCATCCGGTGCGGCAGCGG
CAGTTAAGAATCCGCAGGCCTCTAAAAGCAGCTTCTGGGGTGAACTCCCGCAGCATGTGA
TGTCAGGGATTTCACGCATGGTGCCGACCTTAATTATGGGCGGTGTGATCCTCGCTTTCA
GCCAGCTGATTGCTTATAGCTGGCTTAAAATTCCTGCTGATATCGGCATCATGGATGCTC
TTAATAGCGGGAAATTCTCCGGTTTCGACCTCTCCTTACTGAAATTTGCCTGGTTGTCGC
AGTCCTTCGGCGGCGTGTTGTTTGGTTTTGCCATTCCGATGTTTGCTGCTTTTGTGGCGA
ACTCTATCGGTGGCAAACTGGCGTTTCCGGCTGGTTTTATCGGCGGCTTGATGTCTACCC
AGCCGACGCAACTGCTGAACTTCGATCCCAGCACTATGCAATGGGCGACCTCTTCGCCGG
TGCCGTCCACCTTCATTGGTGCGCTGATTATTTCTATCGTTGCCGGTTACCTTGTGAAAT
GGATGAACCAGAAAATCCAGTTACCGGATTTCCTGTTAGCGTTCAAAACCACATTTTTGC
TCCCGATTCTTTCCGCCATTTTTGTCATGCTGGCGATGTACTACGTGATCACCCCCTTTG
GCGGCTGGATCAACGGTGGTATCCGTACCGTGCTGACTGCCGCAGGTGAGAAGGGCGCGC
TAATGTATGCGATGGGGATCGCCGCGGCGACAGCAATCGACCTTGGTGGCCCGATCAACA
AAGCCGCAGGTTTCGTTGCCTTCAGCTTTACCACTGACCACGTATTACCGGTCACCGCAC
GTTCTATCGCAATCGTTATTCCGCCGATTGGTCTGGGGCTGGCGACCATTATCGACCGTC
GTTTAACCGGCAAACGCCTGTTCAACGCTCAACTTTATCCGCAGGGTAAGACCGCCATGT
TCCTGGCGTTTATGGGGATTAGTGAGGGTGCGATTCCGTTTGCGCTGGAAAGCCCCATCA
CCGCCATTCCGTCGTATATGGTCGGCGCGATTGTCGGCTCAACCGCCGCTGTCTGGCTGG
GCGCAGTGCAATGGTTCCCGGAATCCGCTATCTGGGCATGGCCGCTGGTCACTAACCTCG
GCGTCTACATGGCGGGGATCGCGCTGGGGGCAGTCATTACTGCGCTGATGGTGGTGTTCC
TGCGTCTGATGATGTTCCGTAAAGGCAAATTGTTAATCGATAGCCTGTAAGAAGGAAAAT
CCAGATGACATTACTCGCTTCGCTGCGTGACTGGCTTAAGGCGCAACAACTGGATGCGGT
GCTTCTCTCCTCACGGCAGAACAAACAGCCGCATCTGGGGATCTCCACCGGATCAGGCTA
TGTGCTGATTAGCCGTGAAAGTGCGCACATTCTGGTGGACTCGCGCTATTACGCGGATGT
AGAAGCCCGCACGCAAGGTTACCAGCTGCATTTGCTTGACGCGACGCACACGCTTACAAC
CATCGCCAGGCAAATCATTGCCGATGAGCAGTTGCAAACGCTCGGTTTTGAAGGCCAGCA
GGTGAGTTGGGAAACCGCGCACCGCTGGCAGTCTGAACTCAATGCGAAACTGGTTAGCGC
CACGCCGGATGTGCTGCGGCAAATCAAAACGCCAGAGGAGGTGGAGAAAATCCGCCTTGC
CTGTGGGATTGCCGATCGCGGTGCAGAGCATATTCGCCGCTTTATTCAGGCGGGGATGAG
CGAGCGCGAGATAGCCGCTGAACTGGAGTGGTTTATGCGTCAGCAAGGCGCGGAAAAAGC
CTCTTTTGACACCATTGTCGCCAGTGGCTGGCGTGGGGCGCTGCCGCACGGCAAAGCCAG
CGACAAGATTGTTGCAGCGGGCGAGTTTGTCACTCTCGATTTCGGTGCGCTGTATCAGGG
CTACTGCTCTGATATGACGCGCACCTTGCTGGTGAATGGCGAAGGGGTGAGCGCCGAATC
TCATCCGCTGTTTAACGTCTATCAGATTGTTTTGCAGGCACAGCTCGCAGCAATCTCTGC
AATTCGCCCCGGCGTGCGCTGCCAGCAGGTTGACGACGCCGCGCGCCGGGTCATTACAGA
AGCCGGTTATGGCGACTATTTCGGTCATAACACCGGTCATGCTATCGGCATTGAAGTACA
CGAAGATCCGCGCTTTTCACCGCGGGACACCACGACGCTACAGCCAGGCATGTTACTGAC
CGTGGAGCCGGGGATTTATTTGCCAGGGCAAGGGGGCGTGCGCATCGAGGATGTTGTGCT
GGTCACCCCGCAAGGCGCAGAAGTGCTCTACGCCATGCCGAAAACAGTGTTGCTCACGGG
AGAGGCATAATGGATTTATCGCTATTGAAAGCGTTGAGCGAGGCAGATGCGATCGCCTCC
TCGGAACAGGAAGTGCGGCAGATCCTGCTGGAAGAAGCGGATCGCCTGCAAAAAGAAGTG
CGATTTGATGGGCTGGGATCGGTGCTGATCCGCCTCAATGAATCGACAGGTCCGAAAGTG
ATGATCTGTGCGCATATGGACGAAGTTGGATTTATGGTGCGCAGTATCTCCCGCGAAGGC
GCAATTGATGTGCTGCCGGTTGGCAACGTGCGCATGGCTGCCCGCCAGCTGCAGCCGGTG
CGCATCACCACCCGTGAAGAGTGCAAAATTCCAGGCCTGCTTGACGGCGACCGGCAGGGG
AATGACGTCAGCGCCATGCGCGTGGATATTGGCGCGCGCTCGTATGACGAAGTGATGCAG
GCGGGAATTCGTCCAGGCGATCGCGTCACGTTCGATACCACTTTTCAGGTTCTCCCCCAC
CAGCGAGTGATGGGGAAAGCCTTTGATGACCGCCTTGGTTGCTATCTGCTGGTGACGTTA
CTATGTGAGCTGCACGACGCCGAACTGCCTGCGGAAGTGTGGCTGGTGGCAAGTTCCAGC
GAAGAGGTGGGATTACGCGGCGGGCAAACTGCCACCCGCGCGGTGTCGCCGGACGTCGCC
ATTGTGCTTGATACCGCCTGCTGGGCGAAAAACTTTGATTATGGCGCGGCTAACCATCGC
CAGATTGGTAACGGCCCGATGCTGGTGTTAAGCGACAAGTCGCTGATTGCGCCGCCAAAA
CTTACCGCCTGGGTCGAAACCGTGGCGGCAGAAATTGGCGTGCCGTTGCAGGCAGATATG
TTCAGCAACGGCGGCACGGACGGCGGGGCGGTGCACTTAACCGGCACCGGCGTGCCCACA
GTGGTGATGGGGCCAGCAACCCGCCATGGACATTGCGCCGCATCGATTGCCGATTGCCGC
GACATTTTGCAGATGCAGCAACTTTTATCTGCCCTGATTCAACGTCTTACGCGTGAGACG
GTTGTTCAACTGACGGATTTCAGATGATCTCCTGATTAACCCGGAGCGGTTATGCTAACG
ATTCAATTTCTCTGTCCTTTGCCTAACGGTCTTCATGCCCGTCCGGCGTGGGAACTTAAA
GAACAGTGCAGCCAGTGGCAAAGCGAAATCACCTTCATCAACCATCGCCAGAACGCAAAG
GCCGATGCCAAAAGCTCGCTGGCGCTGATTGGCACCGGCACCTTATTTAATGACAGTTGC
AGCCTGAACATTAGCGGCAGCGATGAAGAGCAGGCGCGGCGCGTGCTGGAAGAGTACATC
CAGGTGTGCTTTATTGACAGCGACAGCGTTCAGCCAACGCAGGCAGAACTGACGGCGCAT
CCGCTGCCGCGTTCATTAAGCCGCCTTAACCCGGATTTACTGTACGGCAATGTGCTGGCA
AGCGGCGTCGGCGTGGGTACGCTGACCCTGTTACAAAGCGACAGCCTCGACAGTTATCGG
GCAATCCCCGCCAGTGCGCAAGACTCCACCCGGCTGGAGCACAGCCTGGCAACGCTTGCC
GAGCAACTGAACCAGCAATTGCGTGAGCGTGACGGCGAAAGCAAAACTATCCTCAGCGCC
CATTTGTCGCTGATTCAGGATGATGAGTTCGCGGGCAATATCCGTCGCCTGATGACAGAA
CAGCATCAGGGGCTGGGGGCGGCGATCATCAGCAATATGGAGCAGGTTTGCGCCAAACTA
TCTGCTTCTGCCAGCGATTATCTGCGCGAGCGGGTTAGCGACATTCGCGATATCAGCGAA
CAGTTGCTGCATATCACCTGGCCGGAACTGAAGCCGCGCAACAATCTGGTGCTTGAAAAA
CCGACCATTCTGGTGGCTGAAGATTTAACCCCAAGCCAGTTTTTGAGCCTTGATTTGAAA
AATCTTGCGGGCATGATTCTGGAGAAAACCGGGCGCACCTCGCATACCCTGATTCTGGCC
CGCGCCTCGGCGATCCCGGTACTGAGCGGCCTGCCGCTGGATGCGATTGCCCGTTATGCC
GGGCAACCTGCAGTGCTTGACGCCCAGTGCGGCGTGCTGGCGATTAACCCGAATGACGCG
GTGAGCGGTTATTATCAGGTCGCGCAGACGCTGGCGGATAAACGCCAAAAACAACAGGCG
CAGGCTGCCGCGCAGCTGGCTTATTCCCGTGATAACAAGCGTATTGATATCGCGGCGAAT
ATTGGCACCGCTCTGGAAGCGCCTGGCGCGTTTGCCAACGGCGCGGAAGGAGTCGGGCTG
TTCCGTACCGAAATGCTCTATATGGATCGCGACAGCGCGCCGGACGAGCAGGAGCAATTT
GAAGCCTACCAGCAGGTGCTACTGGCAGCGGGCGATAAGCCGATTATCTTCCGCACAATG
GACATCGGAGGCGATAAAAGCATTCCTTATCTGAATATTCCCCAGGAAGAGAACCCGTTC
CTCGGCTATCGCGCGGTACGTATTTACCCGGAATTTGCTGGCCTGTTCCGCACTCAACTG
CGGGCCATTTTGCGCGCCGCCAGTTTCGGCAACGCCCAGTTGATGATCCCGATGGTCCAC
AGCCTCGATCAGATCTTATGGGTGAAGGGCGAGATCCAAAAAGCGATCGTTGAGCTTAAG
CGCGATGGCCTGCGTCATGCAGAGACGATTACGCTGGGTATCATGGTGGAAGTGCCGTCG
GTGTGCTACATCATCGATCACTTCTGCGATGAGGTCGATTTCTTCAGTATCGGCTCCAAC
GATATGACCCAGTATCTTTATGCGGTCGATCGTAATAACCCGCGCGTATCGCCGCTATAT
AACCCGATTACGCCATCGTTCCTGCGCATGTTGCAGCAAATAGTTACCACTGCGCATCAG
CGGGGCAAATGGGTAGGCATTTGCGGTGAACTGGGAGGCGAAAGTCGTTACCTGCCGCTA
CTGCTTGGGCTGGGCCTGGATGAGCTGAGTATGAGTAGCCCGCGCATTCCGGCGGTGAAA
AGCCAGCTTCGTCAACTGGATAGCGAGGCGTGTCGGGAACTGGCACGTCAGGCGTGTGAA
TGTCGCAGCGCGCAGGAAATTGAAGCGTTACTCACCGCCTTTACGCCGGAAGAAGACGTT
CGCCCGCTGCTGGCGCTGGAGAATATCTTCGTTGATCAGGCCTTTAGCAATAAAGAGCAG
GCGATCCAGTTCCTGTGCGGTAACCTCGGCGTTAACGGGCGCACTGAACATCCGTTCGAG
CTGGAAGAGGATGTCTGGCAGCGGGAAGAGATTGTCACCACTGGCGTTGGTTTTGGCGTG
GCGATCCCGCACACCAAATCGCAGTGGATCCGTCATTCCAGTATCAGCATTGCCCGGCTG
GTGAAACCGGTTGACTGGCAGTCAGAAATGGGCGAAGTCGAACTGGTGATCATGCTGACG
CTGGGCGCTAACGAAGGGATGAATCATGTGAAAGTCTTCTCGCAGCTGGCGCGTAAACTG
GTGAATAAAAACTTCCGCCAGTCGTTGTTTGCCGCGCAAGATGCACAAAGTATCCTGACG
CTGCTGGAAACAGAATTAACCTTCTGACGTTAGCCCTGAAAACGGGCGCTGTACTCTCCC
GGCGTCAGACCAAACTGACGCCGGAAAACGCGACAAAAATAGTCGCTATCCGGAAAACCG
CAACGCTGTGCCACTTCATGAATTGACAGATGATATTTCTGCAAAATCATCCTCGCCTTC
GCCATTCGCACCCAACGCACATACTCGATAAAACGCATCGTTCCATGCTGAGCAAACAGT
TTTGACAGATGATTGGGCGTGATATTAAAAAACTGCGCCACGCTCTCGCGGGTGAGCGGC
TGGGCATAATTATCCTGAACCCAGTTACAAATGCTGTGATAGAGAAAATCGCCGCGCGGC
TGCGAATTGCCCGGCGGCATATTCACCACGTTACGGCAAAGATGCAGCAAACTTAACACC
AGCGGCTGAATGATATTTTGCTCCAGCGGCGAACGGCTAAGATGGGTGAGGGCGGTAAGC
ATCGCTTCACCTTCACCGCGTTGCAGGCTGGGAAGCTGGATCTGGCGAGCAGGATGCAAC
AACGACGTGGTGCGGCTATCGTAAAACGATAACCCAAGCCAGGTCGGAGCGAACACCAGG
CTTAACAGCATCACCGGTTTGTTGTTGACCGGTAAATTAGCCGCGCGCGCCGGAATAAAC
AGCATTTCTCCTTCCACCAAACGTTGCTGCTTTGCTTCCAGCAGATTGCCGTATTCGCCG
CGCAGCACGATATCCAGACGGGGAAAATCAATACATAAACTGCCCACCGGCAACGAGGCA
GGCTGGCTGGCAAAACAGACGCGCCCCAGTAGTTGCGGGTTAAGCACCAGGCCGCTGAAC
AGATCGGCGAAAAATTGTTGATCGGCGGGCAAGCCTGGTGCTTTCATGAAAGTTCCCGAT
TAAAGATGCATTAACTGGCGAAATTCTTTTACTTTGCTGCGGCTGACTGGCACTTCAAAA
TCCAGATCTTTCAGCCGCAGAATATAGGTGTTATTAAACCACGGTTCGATTTCGCGGATT
TTGTTCAGATTGACACAAAATGAGCGATGGCAGCGGAAAAAATGCGACGGCGGCAGTTTG
CTGCAAAATTCGGTAATGTTCATCGGCATTACGTAGGATTCACGCCGCGTATAGACAAAG
GTCATTTTCTCGTGCGCTTCGGCGTAATAGATATCGTTAATTGGCGTGACGATTATTCGC
TCATCTTTCACCAGATTAATGGTGTCATTCTCACGCGTTACCGTCGCGGCAGGCGTGCTG
CTGGTCTGCTGTTGCTGCCAGGCCGCTTCCAGTTTTTGCAGCATCCCGGTAATGCGAGAC
TCCTGATACGGTTTGAGAATGTAGTCAAACGCCTCAAGTTCAAACGCTTCTACCGCATGT
TCTTTCCACGCGGTGATGAACACAATAAACGGTTTATGGGCGAACTGGCTGATGTTTTGC
GCCAGCAACACACCATCCAGCGACGGAATATTGATATCCAGAAAAATGGCGTCGACGCGG
TTATGCTGCAAAAACTTCAACACGTCCAGACCGTCGTCAAAGGTGCCGACAATCTCCATC
TGGCTGTGCTCTTTAATTAGCCAGCTCAGTTCCTGTTGTGCCAGGAATTCGTCTTCAACA
ATGATGACTTTCACAATATCACTCCGGCTCAAAGCAATAACGTAGCCTGTGAGGCGACTG
GGGTGCGTTGGTTAGGAATGTAAAACGCAATTTCCGTTCCTGGTTCCAGGCGGCGGATAT
GCAGCCCCTCGCCATACAATAACTTCACGCGATGATGAACATTCAGCAGGCCAATTTTAT
TGCCCGGCATTTCATTCGCTTCGACCCGCTCAATCACCTTTGGATCGATGCCGTGCCCGG
TATCCCGCACCGCAATGCGTACCCGATTGCCGCACTCTGCAACGCTGATGGTGACAACGC
CTTTACCTTTGCAAGGCTGGATACCGTGGACAATGGCATTCTCCACCAACGGCTGGATCA
GCAGGCTGGGAATGCAGCAATTCACCTCTTCATCAATATCATAGATAACCGTCAGCTTGT
CGCCAAAGCGGGCCTGCTCAATGGCAATATAGTCTTTAATTTGATACAGCTCTTTTTTGA
TATCGATTTGCTCATCGTCTTTTAATTCAATGTTATAGCGCAGATAACGCGACAGATTAA
AGATCAGCTGGCGAGCGGTATCCGGATTCAGACGGATCGACGATGAAATAGCGTTCAAAG
CGTTAAACAGGAAATGGGGATTAATTTTGCTTTGCAGGGCGCGAAGCTCTGCCTTATTTG
CCATTTCACGTAGCTGCTCGGCGCGTGAAACCTCCAGTTGCGTGGAGATGATTTGCGACA
GACCAACCGCCATTTCCTGTAATGACGAGGTTATCTGATGCGCGTGGCAGTAGTAAATTT
TCAGCGTTCCGGTCACAACGCCTTTCTCCCACAATGGGATCACCAGCATGGAATGAATCT
CTGGTGTGCGGTGGGCTTCATCATTGTTTTTAATGATGATTTTTCCGTAATTCATCGCCT
GACGGGTAGTCGGGCTAATGAAGTCATCGCCATTCTGATAGTTATGTTCACCCACGCCAA
CATAGGCCAGCACATGATCGGTATTGGTAATCGCCACCGCATCGGCGTGAATGTCATCGC
GAATAATTTCACAAACTTTGCGTAATGACTCGCTATTGACATGGCGAAACAGAGGTAGCG
TTTTGTTGGCGATATCCAGCGCCAACTTGGCCTGCCGCGCGGCGCTGGCCTCTTTTTCGC
CCTCAACGCTTTGCACCAGAAGCACAATAAAGCCGATACAGACGCTGCCGAGGATCATTG
GAATCCCGATTTTAGAGACGATATCGATCCCCAACGCGGTAGTTGGTGCCCAGACAATCA
CCAGAATCATGGTCAACGTTTCACACAACATGCCGCCGAGAATACCGACGCGCCAGCGCT
GTGCTTTGGGGATTTTCAGGTTGATCCAGCCCGATATACAACCAGCCAGAATGCTGGTGA
TAAAGCAGGGGATCGCCGTCACGCCGCCGATATCAATTAAATAACGATGAATACCCGCAA
TCACGCCGGTAATGATGCCCACCCACGGGCCAAACAGAATCCCGCCGGACATCACCGCGA
TAATACGTACGTTCACCAGCGAGCCTTCTACGGGAACGCCGGACCAGGTGCTGAACAGGG
CGAACAGCGAGAAAATGGCGGTAACGGCGAGCAACTCTTTCGGTGAGTGTGCCGACTTGT
GCAACAGTTCGCGAAACAGGCGGATACGGATGAGAAAGAACAGGCAGATAAGCATTAACG
CTGCCCGATCGAAGACCGCCAGCAGCATGTTGAATATTTCGTGCACGGGTGACTCTGAAT
AAGGATTAAACCTCTATGATAGGTAACCTGAAGGCTGATGACCAGCAGGCCGTTTTTGAG
GAAAAACCACAATTTTAAAATGGGATTGATAGATAAATGGTGTATTAGCAATGCATCTCT
TGATAATGCACTTCTGGTTAGTAAATTTATTGAAATTATTATGTTAATAAAATGAGTGGT
AATTTTCTTGTTAGCGCAGATAAATTTCCTGTTTTTAAAGCAGAGTTCCTCATTTAACGT
CATTAATAAAAATGTTCTAAAACGCTGGACAGACAGAAATTAATCAGGCTATTTTCAAAA
CAGCCACCATCGTGGCAGCGTCGCTCGGACGGTCCGGGCGCTAACGTTAATCTGAGGAAA
TTATGGCTGACACTCGCCCTGAACGTCGCTTTACGCGCATTGATCGTCTCCCGCCCTATG
TTTTTAACATTACCGCTGAACTGAAAATGGCTGCGCGTCGGCGCGGCGAAGATATTATCG
ATTTCAGTATGGGTAACCCGGACGGTGCGACTCCGCCGCATATCGTCGAAAAATTATGTA
CTGTGGCCCAGCGCCCGGACACGCATGGTTACTCCACTTCACGCGGTATTCCGCGGCTAC
GTCGCGCCATTTCCCGCTGGTATCAGGATCGCTACGACGTTGAAATCGACCCGGAATCAG
AAGCCATCGTCACTATTGGTTCGAAAGAGGGCCTGGCGCATCTGATGCTGGCGACACTGG
ATCACGGTGACACAGTGCTGGTGCCGAATCCAAGTTACCCCATTCATATTTACGGCGCGG
TGATTGCCGGGGCTCAGGTACGCTCAGTGCCGCTGGTGGAAGGTGTCGATTTCTTCAACG
AACTGGAGCGCGCCATTCGTGAAAGTTATCCGAAACCGAAGATGATGATCCTCGGCTTCC
CGTCGAACCCAACCGCGCAATGCGTGGAACTGGAGTTCTTCGAAAAGGTTGTGGCGCTGG
CGAAACGCTACGATGTGCTGGTGGTCCATGACCTGGCCTATGCCGATATCGTCTACGATG
GCTGGAAAGCGCCGTCAATCATGCAGGTGCCGGGTGCACGCGATGTGGCGGTCGAGTTCT
TTACGCTGTCGAAAAGCTACAACATGGCGGGCTGGCGTATCGGCTTTATGGTTGGCAACA
AAACGCTGGTCAGCGCCCTGGCACGTATTAAAAGCTATCACGATTACGGCACCTTTACGC
CGTTGCAGGTGGCGGCGATTGCGGCACTCGAGGGCGATCAACAGTGCGTGCGCGACATTG
CCGAACAGTACAAACGCCGCCGTGATGTATTGGTTAAAGGGCTGCATGAAGCGGGCTGGA
TGGTCGAAATGCCGAAGGCTTCGATGTATGTCTGGGCGAAAATCCCTGAACCTTACGCTG
CCATGGGCTCGCTGGAGTTTGCCAAGAAATTACTTAACGAAGCGAAGGTTTGTGTCTCGC
CGGGGATCGGCTTTGGCGACTATGGTGATACGCATGTGCGCTTTGCACTGATTGAAAACC
GCGACCGTATTCGTCAGGCGATTCGTGGGATTAAAGCGATGTTCCGTGCCGACGGTTTAC
TACCCGCCAGCAGCAAACATATTCACGAAAACGCGGAATAAACACCGACCTCAGAAATGC
AAACAGGAGCCTGATGGCTCCTGTTTTTCATTGCACAGTTTGCTTTTAGATCATCAGGGC
AAAAGTACCGGCCCAAACGATGACCATAAAAGAAATGCCCATAAAGAAATATTTCACTTT
ACATCTCTCCGCGTAATTGCTGTTACGCCTGAATGACTTCATTACACCTGATACAGTGAG
TTGACACCGGGCAAAACGACCTTAAAAGTCCTGTATTTTACCGTGGGCATCACCCCAGAA
TTCTGAGCTAAACTGCTCGAGACGGCGCTAATGTACGCCTAAAACTGAAACGAGACAAGA
GGCATTTTCTTATTTACTTTTAGTAACTTACAGGTGTCTCATATCGGCGACAGTTTAATT
TCTGACGGTAATAATTAGATATTCAGCGAAGGAAAAAACCTTAAGAAAAAAGCCATAAAA
ACCATGAGGTTATTATGGCTTATGTGAGGAGGTAAAGAGTCAGAGCAGTTTGTTAAATGT
ATAACGACGATTCTCCCACCGGGCGCGTTTTAAAGCGACGGTGGATCCAGAGGTACTGCT
CCGGTGCGCGCATGATCTCTTTCTCGATAATCTTGTTCATATAGGCAGCGGCTTGATTTT
CATCTGTCGGGTAGCCTTCCATCTCTGGGGTGATGAACAAACGATATCCGCTGTAATCCG
CTTTTCTTACCATCGTTACGGTCAACATGGCTGCGCCAGAGAGACGGGAGAGAACATAGG
TGCCATTGGTTGTGGCGACATTTTCTACCGCAAAGAACGGCGCGAAGGAGCTGCCTTTAC
GACCATAATCCTGATCGGGAGCAAACCATACCGCTTCACCTTTCTTCAGTGCACTGACAA
TGCCGCGCAGATTATTTCTGCCGATCATCGCTTTGTTAGAGCGCATGCGACCACGGGTCT
GCACCCATTCCATCAGCTGATTATTATGTGGACGATAGGTAGCCATCATTGGCTGACAAA
GTCCCATCACGCGGCCGCCCAGTTCCAGCGACATAAAATGGACGCCGACAACCATTACGC
CGCGATTTTGCATTTGTGCGCGTTTAAGGTTATCCAGCCCTTCAACATCAAACCATTTAC
GTACGCGACTGTCGGGCCAGAACCACGCCATGCCGGTTTCTACCAGCGCCATGCCGAGTG
AACGAAAGTTTTCGGCAATCATCTTCTCGCGTTCTTCCGCAGAATGCTGCGGGAAGCAAA
GTTCCAGGTTTTTACGGGCGATAGATTCACGCCGTTTCAGGAATGGTCGCGCCATTGCGC
CAATACGCGTGCCGAGAAAGCAGAGAACAGGATAAGGAAGCTGTACCCAAAGCCAGAGTA
CACCAAGCCCAAACCATGTGAGCCAGTAGCGAGGATGCAGAAACTCGCGGGAAAATTTGC
ATTGTGGAAACATAGTTACCTTCTGTAGATACGAATTGTTGTATCGCAGAAGATTCCATG
TCGACAGCGGTACACTCAATTGGTTGGGCCATCATGTACGACAATGGTTCCTGTAAAGAG
TGTAAAGACTAGTCAGGACATAACCACGAGGAGCATGAATGCGGTGGCTCTACTTTATCA
CTGGCTGACTGCTTTCAGCTACTGATTATTAATCGTGCAAAGTAAAAAATTTTCCGCATG
CAATAGTGTTGCATTTAACATGCTGTTTTCATTGATGCTTAGCAAAAATTGCCAGAGGGT
AAGGATTGTCTTACTATTAAAGTGACTGAAGTTACAGGTTTTTTAGCGCGGCAGGAGGTT
GAGCTATGATTTATTTATGGATGTTTCTCGCCCTGTGTATTGTCTGCGTAAGCGGATACA
TCGGTCAGGTACTGAACGTGGTATCGGCGGTCTCTTCTTTCTTCGGCATGGTGATCCTCG
CTGCACTCATTTATTACTTCACCATGTGGTTAACTGGCGGTAATGAACTGGTGACGGGGA
TATTTATGTTTCTTGCCCCGGCTTGTGGCTTGATGATTCGCTTTATGGTGGGGTATGGCA
GGCGATAGTGGGTCAGGATGGCTCATTTGGGCAGGTGTTCACATCAGCATCAGACATGAT
TGTTCACCTGCCAGGTGACAGACGCTATCGCACAGGATGAATAAGATAATTCGCCTTTGT
CGGAAAAGGGGGCGTGGTTTCTTCTGTGAGGTTTAATGGTGGCGCATCTTCTCTCATCTT
AAACAAAATTGCCTGTGATGGCTGAATTTTTGTAGAGTGAGTTGTCGTCATCGCTGATGT
TTTTTCCGTCTCTTTATAGCTCCTCTCACTTCCACCACCAGAAATGGAAAATGCAAAAAC
ATTGCATGCCATAATAGAGACCAATAAAAATAAGCTAAAAAGTATTAAGTTTACTTTCAT
AGAAAGTTATCCTGAAAATGGTTCACTGAGAATGTACGATGTTATGGCTGTATTTACATA
TAATTAATCAATATTTACATCGATATAATAAATGACATCTCTTTGTGGTACATAAGAATA
GTTCTCTGTGACAGGAAGCATATTCCTACAATTGTAAGACTAAAATACTTCTTGCGATAA
TAACTACAACTGTAAGATAACCCTTTCAAAATGACCGTTGCTCTCTGATTTCTCATTTCA
TGCTCACCCAATATGATGGCGGCGTTTTCTAAAACTGTTAAAGAATGAGGTAAGTATGAA
ACGTTTAATTATGGCCACGATGGTCACAGCAATTCTGGCATCTTCAACTGTATGGGCTGC
TGATAATGCTCCGGTAGCGGCACAAAAGCAAACTCAGCAAGTTCAGCAAACCCAGAAAAC
GGCAGCGGCAGCAGAGCGTATCTCTGAACAAGGTTTATATGCGATGCGTGACGTGCAGGT
AGCGCGCCTGGCTCTGTTTCATGGCGATCCGGAAAAGGCAAAAGAACTGACCAATGAAGC
TTCCGCTTTGTTGTCAGATGACAGTACCGAATGGGCAAAGTTCGCTAAGCCAGGTAAAAA
GACCAATCTCAATGATGACCAATATATTGTCATTAATGCATCTGTCGGAATTTCTGAGAG
TTATGTAGCAACACCCGAAAAAGAAGCCGCGATAAAAATTGCCAATGAAAAAATGGCGAA
AGGGGATAAAAAGGGCGCAATGGAAGAGCTTCGCCTGGCCGGTGTTGGCGTAATGGAAAA
CCAATATCTGATGCCGCTTAAACAGACTCGTAATGCACTTGCTGATGCGCAGAAACTGCT
TGATAAAAAGCAATACTACGAGGCAAACCTGGCGCTTAAAGGTGCGGAAGATGGAATCAT
CGTCGATAGCGAAGCACTGTTTGTGAACTAATGCTGACAGGCAGTATATTGAGGTAAAGG
ATTTAACTCCCTCCAGCCGACAATTTTTTATGACCACAATACGACAGGTTGTGGTCATAA
AATTATTTGGCGCTCGCGGTTCTATAAACTCGCATTTTATATTCCTCAAAGTAAACCGCA
ATAATCCCGTGTCATCACAAATCATTTAATATGTTATATTTTATGGTACGCTTTAAAAAG
CGTAATCATACCCTTACTTGTAAATCACCGGCGCTTCTTACAGTTGTAAGAATAACATCA
CAAATGTCGCGACTCTCTCTGATTACCACGAACCAATATTTATCATATTCTTCTTTTCGT
CCTCACTACTTACCATGCAGAAAGGAATTGGAAGTAGCGATGAAATGATTTTCAGTACTT
GATACAGGAATGTGAAAATATCGAGTGCAGCTACGACGATATTTTGCGGATTATTTATAG
AGGCGTTATGCCTTAAATAAACGCTAAATTAACACATATTTAATTAACTAATAGGTATTG
CTATGTCAACTCCACTTCAAGGAATTAAAGTTCTCGATTTCACCGGTGTGCAATCTGGCC
CATCTTGTACTCAAATGCTGGCCTGGTTTGGCGCTGACGTCATTAAAATTGAACGCCCCG
GCGTTGGTGACGTAACGCGTCACCAGCTGCGAGATATTCCTGATATCGATGCGCTTTACT
TCACCATGCTTAACAGTAACAAACGTTCTATTGAATTAAATACCAAAACAGCGGAAGGCA
AAGAGGTAATGGAAAAGCTGATCCGCGAAGCTGATATCTTAGTCGAGAACTTTCATCCAG
GGGCCATTGATCATATGGGCTTCACTTGGGAGCATATTCAAGAAATCAATCCACGTCTGA
TTTTTGGTTCGATCAAAGGGTTTGATGAGTGTTCGCCTTATGTGAATGTAAAAGCCTATG
AAAACGTTGCTCAGGCAGCGGGTGGCGCGGCATCTACTACGGGTTTTTGGGACGGTCCGC
CGCTGGTAAGCGCTGCAGCGTTGGGTGACAGCAACACCGGAATGCATTTACTGATCGGTT
TACTTGCTGCTTTGCTGCATCGAGAAAAAACGGGGCGTGGGCAACGAGTCACCATGTCAA
TGCAGGATGCCGTATTGAACCTTTGCCGCGTGAAATTACGCGACCAGCAGCGTCTCGATA
AATTGGGTTATCTGGAAGAATACCCGCAGTATCCGAATGGCACATTTGGTGATGCAGTTC
CCCGCGGTGGTAATGCGGGTGGTGGCGGTCAGCCTGGCTGGATCCTGAAATGTAAAGGCT
GGGAAACAGATCCTAACGCCTATATTTATTTCACTATTCAGGAGCAAAACTGGGAAAACA
CCTGTAAAGCCATCGGCAAACCAGATTGGATTACCGATCCGGCATACAGTACAGCCCATG
CCCGACAGCCACATATTTTCGATATTTTTGCTGAAATCGAAAAATACACTGTCACTATTG
ATAAACATGAAGCGGTGGCCTATTTGACTCAGTTTGATATTCCTTGTGCACCGGTTTTAA
GTATGAAAGAAATTTCACTTGATCCCTCTTTACGCCAAAGTGGCAGTGTTGTCGAAGTGG
AACAACCGTTGCGTGGAAAATATCTGACAGTTGGTTGTCCAATGAAATTCTCTGCCTTTA
CGCCAGATATTAAAGCTGCGCCGCTATTAGGTGAACATACCGCTGCTGTATTGCAGGAGC
TGGGTTATAGCGACGATGAAATTGCTGCAATGAAGCAAAACCACGCCATCTGATATTAAC
GGGGGCTTCTGGCTCCCAATTTATAAAAATTTCGAGGTTATTAATCATGTCAGATCAACT
TCAAATGACAGATGGTATGCATATCATCGTTGAAGCATTAAAACAGAATAATATTGACAC
TATTTATGGTGTTGTAGGTATTCCTGTGACGGATATGGCGCGCCATGCCCAGGCGGAAGG
CATTCGTTATATTGGTTTTCGTCATGAGCAGTCGGCAGGCTATGCCGCTGCGGCAAGCGG
TTTTCTTACCCAAAAACCAGGGATCTGCCTGACAGTGTCTGCGCCAGGATTCCTCAATGG
TTTGACCGCATTGGCCAACGCAACGGTAAATGGTTTTCCGATGATCATGATTAGCGGCTC
CAGCGACCGCGCGATCGTCGACCTACAGCAAGGTGATTATGAAGAGCTGGACCAAATGAA
TGCGGCAAAACCGTATGCCAAAGCAGCATTTCGCGTTAATCAGCCGCAGGATCTTGGCAT
TGCATTGGCACGCGCTATCCGGGTCTCGATATCGGGTCGCCCTGGCGGAGTTTATCTTGA
TTTGCCAGCAAATGTCCTGGCCGCGACGATGGAAAAAGACGAAGCGTTAACCACGATTGT
AAAAGTTGAAAATCCGTCGCCAGCATTATTGCCATGCCCGAAGTCAGTCGCTAGCGCAAT
TTCGCTTTTAGCAAAAGCTGAACGACCATTAGTTATCCTTGGCAAAGGCGCGGCGTATTC
ACAAGCTGATGAACAGCTTCGTGAATTTATTGAAAGTGCCCAGATTCCATTCCTGCCAAT
GTCTATGGCGAAAGGGATCCTCGAAGATACGCATCCACTTTCTGCGGCAGCTGCGCGTTC
GTTTGCCCTGGCAAATGCTGACGTTGTCATGCTTGTTGGTGCACGACTGAATTGGTTACT
GGCACACGGTAAAAAAGGATGGGCGGCAGATACACAGTTTATTCAACTGGATATTGAACC
GCAGGAAATTGACAGCAACCGCCCCATTGCTGTGCCAGTCGTTGGTGATATTGCATCCAG
TATGCAAGGTATGCTGGCAGAACTGAAACAAAACACATTTACGACTCCACTGGTATGGCG
CGATATTTTAAATATCCACAAGCAGCAAAATGCACAAAAAATGCATGAAAAATTAAGTAC
AGATACCCAACCATTAAATTACTTTAATGCATTAAGTGCTGTGCGCGATGTATTGCGCGA
GAACCAGGATATTTATTTAGTTAATGAAGGGGCAAATACCCTGGATAATGCACGAAATAT
TATTGATATGTATAAACCACGTCGTCGTCTGGATTGTGGTACCTGGGGTGTCATGGGCAT
CGGTATGGGCTATGCCATCGGTGCTAGCGTGACTTCTGGTTCTCCGGTTGTCGCCATTGA
AGGTGATAGTGCTTTTGGTTTCAGTGGGATGGAAATTGAAACGATTTGTCGATATAACCT
GCCGGTAACGATCGTTATTTTTAATAATGGCGGCATCTACAGAGGAGACGGTGTTGATCT
CAGTGGCGCTGGTGCACCATCACCAACAGATCTGTTGCACCATGCAAGGTATGACAAATT
AATGGATGCGTTTCGTGGCGTTGGCTATAACGTCACCACGACAGATGAACTTCGTCATGC
TTTAACCACCGGTATTCAGTCGCGCAAACCGACCATTATTAATATGGTCATCGACCCTGC
AGCAGGAACTGAAAGTGGCCATATTACCAAACTGAACCCAAAACAAGTCGCTGGTAATTA
AATACTGACATCGTCTCCTCTTGCCAACTCATTATGCGATGGTGAGGGGACCCTTATCGG
AAATACTATTATGCTAACATTTTTTATTGGCGATTTATTGCCTATTATCGTAATCATGCT
GTTGGGTTATTTTAGCGGCAGACGAGAAACATTTTCAGAAGATCAAGCTCGGGCATTTAA
TAAACTGGTATTAAACTACGCGCTTCCTGCGGCTCTATTTGTATCTATTACCCGGGCAAA
CAGGGAAATGATTTTTGCGGACACTCGTCTGACCCTTGTATCACTTGTGGTTATTGTCGG
ATGTTTCTTTTTCTCCTGGTTCGGTTGCTACAAATTTTTTAAACGTACTCATGCAGAAGC
AGCTGTATGTGCATTAATTGCAGGTTCACCTACCATTGGATTCCTGGGGTTTGCAGTTCT
CGATCCTATTTATGGTGATTCCGTATCAACAGGTTTAGTGGTAGCAATTATTTCTATTAT
TGTTAACGCAATTACTATTCCTATTGGTCTGTATTTGCTGAATCCTTCCTCAGGAGCGGA
TGGTAAGAAGAATAGTAATCTGAGCGCATTAATTTCTGCGGCAAAGGAGCCAGTTGTATG
GGCACCTGTTCTGGCAACGATCCTGGTGTTGGTTGGGGTAAAAATTCCGGCAGCATGGGA
CCCAACCTTTAATCTGATTGCGAAGGCTAACTCAGGGGTAGCGGTATTCGCTGCGGGGTT
GACTCTGGCTGCACATAAATTCGAGTTCAGTGCCGAAATTGCTTATAACACCTTCCTGAA
GCTGATTCTGATGCCACTGGCGCTGCTTCTCGTTGGTATGGCATGTCATTTGAACCGCGA
ACATTTGCAGATGATGGTACTGGCAGGCGCATTACCGCCGGCATTCTCCGGAATCATTAT
TGCCAGCCGGTTTAATGTCTACACCCGCACTGGTACAGCGTCATTGGCTGTGAGCGTACT
GGGCTTTGTCGTCACGGCTCCCTTGTGGATTTATGTCAGTCGACTGGTTTCATAATTAAT
CATGTTATTGATTTTACATAAATGCCGAAGTGTCTTTTCACCTTCGGCTTTTTTCAAGGC
ATAAGCAAATGACAAATAATGAAAGCAAAGGGCCGTTTGAAGGCTTATTAGTTATCGATA
TGACACATGTCCTTAATGGACCTTTCGGAACTCAACTTCTTTGTAATATGGGCGCAAGGG
TAATTAAAGTTGAGCCGCCGGGCCATGGTGATGATACCCGCACATTTGGTCCCTATGTGG
ATGGACAGTCACTCTATTACAGTTTTATTAATCATGGCAAAGAGAGTGTGGTTCTTGATT
TAAAGAATGATCACGATAAAAGTATATTTATAAATATGCTTAAACAAGCTGATGTATTAG
CTGAGAATTTTCGCCCAGGTACAATGGAAAAACTAGGGTTTTCATGGGAAAGGTTACAAG
AAATCAACCCGCGCCTCATATATGCTTCATCGTCAGGTTTCGGACATACCGGTCCGCTAA
AAGATGCTCCTGCCTACGATACCATCATTCAGGCAATGAGCGGGATAATGATGGAAACAG
GGTACCCTGATGCTCCGCCAGTGCGTGTTGGTACCTCTCTTGCGGATCTATGCGGCGGTG
TCTATTTATTCAGCGGAATAGTGAGTGCACTTTATGGCCGCGAAAAGAGCCAGAGAGGGG
CGCATGTCGATATAGCGATGTTTGATGCTACTCTGAGTTTTCTGGAGCACGGGCTGATGG
CATATATCGCGACTGGGAAGTCACCACAACGTTTGGGAAATCGCCACCCCTACATGGCAC
CTTTTGATGTTTTCGATACTCAGGATAAGCCGATTACGATTTGTTGTGGTAATGACAAGC
TTTTCTCTGCGTTATGCCAGGCACTGGAGCTTACGGAACTGGTTAATGATCCCAGATTTA
GCAGCAATATTTTACGCGTACAAAACCAGGCTATTCTTAAACAATATATTGAGCGGACGT
TAAAAACGCAGGCAGCTGAAGTTTGGTTAGCCAAAATACATGAAGTTGGTGTGCCCGTCG
CGCCGTTATTAAGTGTGGCTGAGGCCATTAATTTGCCACAAACTCAGGCGAGAAATATGT
TGATTGAAGCCGGAGGAATAATGATGCCAGGTAATCCGATAAAAATCAGCGGCTGCGCGG
ACCCGCATGTTATGCCGGGAGCGGCAATGCTCGACCAGCATGGGGAACAAATTCGCCAGG
AGTTCTCATCATAAATGTAAGATGTGCTGGTAAATAGCTCCCACATTTGAACATTGTGGG
AGCCACTATTTAGTTATTTTGTTGACAGAAAACAGCAATCTCCTGGTCCAGCTCTGCAAT
GTGTTCTTTTACAGAGTTCAGCAACTGAAGAATTTCAGGCTTACTGTCATCTGAAACAGG
TGTTATTTCTAACTGATGGCTAATATTAATCAACTTTTGCAAATTCAGGATGTTAGCCGC
ACCGTGGATGCGATGAATACATTGATGGAAAGTTCTGTTATCGCCAGCTTCTAGTGCATG
AAACGCAGCGGGTAGATCTTTATGCGTTTCATGCTGGAAAGTCATGAGAATCTCCTGCAT
CAGTTGTAGATCGTTCGCCGTATTATTTTTCAGGGCTTCGATATCAAGGTGGCGATACTG
AGGTGCAATATGCGCAACCTGGTGTAACTGACTTAAATGTGTTTTCAGTACATCCAGGGT
CAACGGTTTGAACAAACATAAGTTCATGCCGCAATTTAACCCTTTTTCACGTTCGTTAGC
CTGTGCGTTGGCTGTAAGCCCCCAGATGGGTAAGGAAGAATTTTGCTCACGGAGTTTGCG
AGTCAACTCAAAACCATCCATATTCGGCATATTAACGTCAGTAATAAGCAGATCATAATG
TTGCATACTGACTTTGTGTAGCGCTTGCACACCATCAGTGGCTTCATCAACATCATATCC
TAATAGATTTAGCTGGCGTTTGAGTAATAGCCTGTTGGTCGGATGATCATCCGCGATTAA
TATGCTCAACTTTTCAGGTAGTGTGATGGGTTGTTCTGCTTTTGCCTCGACAGTCGCCAC
TTGTTGGATAATTTCTACCGGGATTGTGATCGTAAATGTTGTTCCTATGCCTGGATGACT
TTCTAATGACAAATCACCCTGCATGTTTTTAATTAATTCTTTGCAGATCATTAAGCCTAA
ACCAGAACCTGTTTGCTGACGACCTGCACTTGTTTGGCTATAGCGTTTAAACAGTTGTTG
TTGTTCTTCCTGCGATAATCCACTTCCAGAATCCATAATCGTCATTTTGATTACAGCGTG
GTTGTCATCAATGTGAACCAGGGAGGTCGTAATTTTTACTGCCCCCTCGGTGGTAAATTT
GAGAGCATTACTCAGTAAATTTGATAAGACCTGCTTAAACGCCTGAGGGTCGATCTTAAC
CAGGTAATGTTCAGGAAACGTACTGCTGCAACTTAATGCGATCGATTTGCTTGCAGCAAT
CGCACCGAAAGAGTAACAAGTGTTCTGGACTAAAGTAGGGATATCGACCCATTGTGGTTG
AAGTTGATAGTTACCCGATTCAATTTTGTCGACATCAAGGATTTCACCAATTAAGCCGAG
GAGTGATTGTCCGGTGGTGTAGGCAAGTGAAATCGCCTCCACCCGTTGCTCCTTGCTAAG
ACCAGAACCCGACAGAAGTTCCAGGAAGCCCATAATGGAGCTTATTGGTGTTCTTATTTC
GTGACTCATTGTTGCCAGAAACTGACTTTTTGCGACAGTTGCATTGATCGCTTTATTTCT
CTCTACTTCGAGTGCATGAATTAAATCACGCGTCTCGGTAATATCTTGCCAACCACAAAT
ATAAACAGCATGATCGCTGGCTGGCAGATTGCATAATGTATGCCAGTGATTAATGCATCT
TTTCTCGATGCCATTATCAATTTCAAATACCTGTGTGTATATTGTTCGATTTTCTTTCGT
TTCTGCTGTGACTTCATGCGCATTAGAAAAAACATCTTTAAAGGGTGAGTCACTGTTTTC
TAATGGTAACATTGCATTTTTGTAGTAATCAGCAGTGAAATAATGTTCAAATGCACTATT
GTGACTAATGACATTACCTTGCCAGTTTACAACATAAGTTGGATTCGGTAAGGAGTCCGA
GAGCGCTTTCCGGAATGATATTTGGTTTTCTAAATCACCCTGAATGACTTTACGACGACG
AACTGAGCGTAACAGGTAGAATCCCCATAAAAGGCTACTGCCAACTAATAAAACGGATAA
TGTCGTAACAATATAAAATTGCTCGCTATAGAGGTCCCATGTGTCAATGGTCACATTGGG
CATTTTAATCCATTTTTCGGTCAGGCGCAGAACTTCGCTTGGGGGGATTGCATTCAGTGC
TTTATTAATAATATCCTTAAGTTCCGGTTCTCCGCGAGGAAAAGCGAACGAAAGCGATGC
ATTCGGAACGCCGGGAATAAGAAAATGATACAGTTCATTAGGATAGTAATGGTCGATCAT
GTAACGCGAATTTAACTGTGTCGCGACCAGAGCATCAAGTTCACCTTCCTTGACCTTGTG
AAATGCAGCGCTGGCGTTATCGACTTTTATCCACTCTACCTCCGGATACATCTCTTTTAA
TTGCGAATGCAGCTCATAATAATATGGAATGGCAACTTTCATTCCTTTTTTTAATGTTTG
TTCACTGTCAGGCGCTTTTTGCATGACAAAAACGTAAGGCGTTGTTATGAAGGCTTCAGC
AAATAAAACATTATTTTCTCTATCTTCACTATAAATAGCACCGGGTAATATATCCCATCC
GCCGGGATTCAGCTGTGTTCCAGCATGGATATTGTGTGAAACGGTGATCGGAGAAAAATT
TAAACCTGTTTGCAAAGTAATAATATTAAGAATATCCCCCATAACGCCCCGAACCGAGCC
ATTTTCATCCGTCATAGAATAGGGAGGGGAGTAAGGATTTTCCAGCACCTTTAAATCGGG
ATGCTGCTTAATCCATTGTTTTTCATGTTCAGTGAGTTCTAATGGTTTGTTCAGAAAGGC
CAGGTTTCCTGTATCAAGCCAATTTTGTGATACTTCATAGCGAACTTCATTTGTCAAAGC
ATCAACAAATCGATTGAGTACTTCATTAAGAACGACAGATTCTTTTCTGGTCAAGAAAAA
ATTATATTGACGCGGTGAGTTATAATATTTCACTACATTTAAGGAGTGAGTGAAATAGCG
GGAAATCATACTGCTGGTAATGATGTTACTACCAATAAAGTAATCATTCTGTCCGGCTGA
GACGGATGCTAATGCCTGATATAAATTTGTAAAAGAGATAATTGTTGCTTTTGGAAATGA
TTGATGAATTACCTCGTCAGGGGGATAATTTGCTACTCGAGCAATATTTACTGGTTTTGA
TGAGGTAAGCGGTCGCATTGAATCGTGAAGGGTGGTGACGAGCGCCGGAAAGGTAATTAT
CAGTGGTTTGGTTGCAGCAATGTCATCATTAAGAGGCGGCGAAGCAACTAAATGTGATAA
CACTATATCGACTTCACCTTCTTCCAGCGCGTCCATTGCTTTTTGATGATCGGCGTATTC
CCGGAGTGTTAGTTTGATATTTAACGCTCTTTTTAAAAGATTTAAATAATCAGCATTAAT
ACCACGAACCCGTTGCTGCGAATCGGTATGCAACAACGTAGCCGTTTGGGACTTGTGTAC
TGCAATCACAAGATTTTTTTTGCTCGCTAACCAACGTAATTCCTTGTTGCTCAGACGTAG
TGGATCAAGTGTGACACGGTTGTTACTACTGATGCCACGATATTCGATGTAATCTTCGTC
TGCGAAACTTATGGTCGACCAAAGACCACAACAGAGAAGAAAAATATAGGGTAAAAACTT
CATGTGGTTAGCCGATTTTGTTACGTTGTGCGAATGTGTAAAGATCCATCAGTGATTTAC
ATTCTAATTTTTCCATCAGGCGACTTTTATAAGTGCTGACAGTTTTGTTGCTGATGAACA
TTTTTTCAGCAATGTCATTATTATCCTTGCCATCAAGAATATAGCGCATGACACTAATTT
CTTGTTTCGATAAGGAGTCGAGTTTTTGCTGGTCGGACGTTAAACTTCCAACAAACCGGT
TGAGAGAGAAGGGGAAATAGCAGTAGCCATTTTTTGCAGCTTCAATAGCCGCAATGATAT
TGTTCATGCCTTCTTTTTTACTCACGAAACCATTAGCGCCAGCATCAGCACAATGTTTCC
CGTAAAAATGGTCATTTTTAGCGGAGACGATAATAATAATTCCGCTATATTGGCGCTTCC
TCAGCGTTTCTAACACCTGGATACCGTTAACTCCGGGGATATCGACATCAATGATGACGA
TATCAGGCTTAAGTGTTTCCACCCGCTGAACGGCACTTCCGCCTTCAGTCAACTCTGCTA
AGATTTCAATATCGTTTTTGATCAATAAATTACGAATTGCTGCGATAGCAAGAGGATGGT
CATCAATAATTATTGCGTTCATAGATTATTCCCTTTGCAATGAAGCATCTCCCTTCTCCC
TGTAGTAATACAGACATAAGGCATCATCTCATTTTCTCAATAAAAATAAGAAAATTTGAG
CTTCCTTTAAGATAATTCGACAAGTATACCATATAAATAGTCGGCATATATGAAATGTCA
ACAATAAAATCAGGGATTGTACCGATGATTTATAGTTTCACATTAGCACTATAAGTCTTC
TCACTAATCCTACAGGCGTAAGAATTGTATTGCAAAAGCCACGGTTTAGTCCTCTGTTGT
TTTTTTTGCACCTCATTTAAATTAGGCCTCCAACGTTCCTGGGATAATGTGCAACACATG
CACTGTGTTTGATATGAAGAATGAATACTCTTTTCATTCAATTCATAAATTTCATCTATG
CGAAATGAGAGATAAAAGTGGAACAGATTAATTCAAATAAAAAACATTCTAACAGAAGAA
AATACTTTTCTTTATTGGCGGTAGTTTTATTTATTGCGTTTTCAGGTGCCTATGCCTATT
GGTCAATGGAATTAGAAGACATGATTAGTACAGATGACGCCTATGTCACGGGGAATGCAG
ATCCAATTTCTGCACAAGTCTCAGGTAGTGTCACTGTAGTTAATCATAAAGATACGAACT
ACGTTCGACAAGGTGACATTTTAGTTTCACTGGATAAAACTGATGCCACTATCGCACTCA
ATAAAGCTAAAAATAATCTGGCAAATATTGTTCGGCAAACGAATAAACTATACTTACAGG
ATAAACAATACAGTGCCGAAGTCGCTTCAGCGCGTATTCAGTATCAACAATCTTTAGAAG
ATTATAACCGTCGAGTGCCGTTAGCGAAGCAGGGGGTTATTTCAAAAGAAACGCTGGAGC
ATACCAAAGATACGTTAATAAGTAGCAAAGCGGCATTGAATGCCGCTATCCAGGCTTATA
AAGCGAATAAAGCTTTAGTAATGAACACACCATTAAACCGTCAGCCACAAGTCGTTGAAG
CGGCGGATGCAACTAAAGAAGCCTGGTTGGCGCTTAAACGTACGGATATTAAGAGTCCGG
TTACCGGCTATATTGCCCAGAGAAGTGTTCAGGTCGGCGAAACAGTGAGCCCCGGACAAT
CGTTAATGGCTGTCGTACCGGCACGTCAAATGTGGGTTAATGCCAACTTTAAAGAAACAC
AACTCACGGATGTACGGATTGGTCAATCGGTCAATATTATCAGCGATCTTTATGGTGAAA
ATGTTGTGTTTCATGGTCGGGTGACAGGGATCAATATGGGAACCGGCAATGCGTTCTCCT
TATTACCTGCACAAAATGCGACAGGGAACTGGATCAAAATCGTTCAGCGTGTACCGGTTG
AAGTTTCTCTGGATCCAAAAGAACTCATGGAACACCCCTTGCGCATTGGTTTATCGATGA
CTGCAACTATTGATACCAGGAACGAAGACATTGCTGAGATGCCTGATCTGGCTTCAACCG
TGACCTCCATGCCTGCTTATACCAGTAAGGCTTTAGTTATCGATACCAGTCCGATAGAAA
AAGAAATTAGCAACATTATTTCGCATAATGGACAACTTTAATGGCAATCACTAAATCAAC
TCCGGCACCATTAACCGGTGGGACGTTATGGTGCGTCACTATTGCATTGTCATTAGCGAC
ATTTATGCAAATGTTGGATTCCACTATTTCTAACGTCGCAATACCGACAATATCTGGCTT
TCTGGGAGCATCAACAGACGAAGGTACCTGGGTTATCACCTCGTTTGGCGTAGCAAATGC
CATTGCGATCCCTGTTACCGGCAGGCTGGCACAAAGAATAGGCGAATTAAGGTTATTTTT
ACTTTCAGTCACTTTTTTTTCGCTGTCTTCCTTAATGTGTAGTTTATCGACCAATCTTGA
TGTGCTGATATTTTTTAGAGTCGTTCAGGGGTTAATGGCAGGGCCGTTAATTCCACTGTC
ACAGAGTTTATTATTAAGGAATTATCCACCAGAAAAAAGAACATTTGCTCTGGCATTATG
GTCAATGACCGTGATTATCGCTCCGATATGTGGGCCGATATTGGGCGGTTATATTTGTGA
TAACTTTAGCTGGGGTTGGATATTTTTAATCAATGTCCCTATGGGGGTTATCGTCCTGAC
ATTATGCTTAACCTTACTTAAAGGAAGAGAAACTGAGACTTCACCGGTCAAAATGAATCT
ACCAGGACTGACCCTGTTAGTGCTTGGTGTTGGTGGCTTGCAAATTATGCTTGATAAAGG
GCGCGATCTGGATTGGTTCAACTCGAGTACAATAATAATATTAACAGTAGTATCAGTTAT
TTCTCTGATCTCTTTAGTCATTTGGGAGTCAACCTCAGAGAACCCGATTCTTGATCTCAG
TTTGTTTAAGTCCCGTAATTTCACCATTGGTATTGTGAGTATCACATGCGCGTATTTATT
TTACTCTGGAGCGATAGTCCTTATGCCGCAGTTCCTCCAGGAAACAATGGGGTATAATGC
GATTTGGGCTGGGCTTGCTTATGCGCCCATCGGCATCATGCCACTATTAATTTCACCTTT
GATAGGACGTTATGGCAACAAAATAGACATGCGGTTGTTAGTGACATTTAGTTTTTTGAT
GTATGCGGTTTGCTATTACTGGCGTTCTGTGACATTTATGCCAACGATTGATTTTACAGG
CATCATTTTGCCACAGTTTTTCCAGGGATTCGCCGTTGCCTGTTTCTTTTTACCCTTAAC
AACGATTTCGTTTTCAGGGTTGCCAGATAATAAATTTGCCAATGCCTCGAGTATGAGTAA
TTTTTTTCGTACCTTGTCAGGATCAGTTGGTACGTCGTTGACAATGACGCTGTGGGGACG
ACGCGAATCGTTACACCATAGTCAGTTGACAGCAACCATCGATCAATTTAACCCCGTGTT
TAATTCATCGTCACAAATTATGGATAAATACTATGGTTCGCTTTCAGGAGTTCTTAATGA
AATTAATAATGAAATAACCCAGCAGTCACTTTCTATTTCTGCAAATGAGATTTTCCGTAT
GGCGGCTATTGCTTTTATCTTACTTACGGTTTTGGTTTGGTTTGCGAAACCGCCGTTTAC
AGCGAAAGGCGTTGGGTGATGGTAAAAGCAGGGGGTTATAGCGGGTAAGACCGGGGATCT
TAAGTCTGCGCCATCGGCAGCATCGCTCATCCAGGGAAAGGATGGCGATGCTGAATTGAA
AATTAATTAGCGGCCTTTTGCCAGATATTGCTCCATCTCTTCTTCCGGCACCATTCCACC
TCCCGTCGCCCACACCAGATGAGTGGCATTACGCAGTTGTTCTGCGCTGCAACCGTGCAT
CTGTTGGTAACTTACTGATGCGCACACGCGCTGAGGCCCGGCCATACCCGCCAGTGCCGA
AGGTTCAAGACGAATGCCTTCTTCCTGCGCCAGCCAGCCAAGCATGTTATACATGGTTTG
ATCGCTAAGGGTATAGAAGCCATCCAGTAGACGCTCCATTGCCCGCCCGACAAAGCCTGA
TGCGCGACCAACTGCAAGGCCATCCGCTGCGGTAAGGTTGTCGATACCAATATCCTGAAC
AGAAATCTGATCGTGTAATCCTGTATGGACGCCTAACAGCATACAAGGGGAGTGCGTTGG
TTCGGCAAAAAAGCAGTGAACATGATCGCCAAACGCCAGTTTAAGCCCGAATGCGACGCC
ACCAGGACCACCGCCAACACCACACGGCAGATAGACAAACAGAGGGTTATCAGCATCGAC
AATACGACCTTGCTCGGCAAATTGCGCTTTAAGACGCTGGCCAGCGACGGAATACCCAAG
GAACAACGTGCGGGAATTTTCGTCATCAATAAAGAAACAGTTCGGGTCAGACTGCGCTGC
TCTACGTCCTTCCTCGACGGCAACACCATAATCTTGCTCATATTCCACGACCGTAACGCC
ATGGCTGCGCAGTTTCGCTTTTTTCCATGCCCGGGCATCAGCAGACATATGCACTGTCAC
CTTAAAGCCAATGCGGGCGCTCATAATGCCGATTGATAACCCCAGATTTCCGGTTGAGCC
CACAGCAATGCTGTATTGGCTAAAGAACTGTTTAAACTCCGGAGAAAGCAGTTTGCTGTA
GTCATCATCAAGCGTCAGCAACCCCGCTTCCAGAGCCAGTTTTTCTGCGTGTGCCAGGAC
TTCATAAATCCCGCCGCGTGCTTTTATGGAGCCGGAAATGGGCAAATGGCTATCTTTTTT
CAGTAACAGTTGCCCGCTGATCGGTTGTTGATATTCCTTTTCCAGCCGTTTTTGCATAGC
CGGAATGGCAACCAGTTCTGATTCAATAATCCCCCCAGTGGCAGCAGTTTCAGGAAATGC
TTTTGTCAGATAGGGTGCAAAACGGGATAAGCGCGCATGGGCGTCCTGAACATCCTGTTC
GGTCAGGCCAACATAAGGTAAACCTTCAGCCAATGAGGTCGTGCCAGGATTAAACCAGGT
GGTTTCTTTAAGAGCAACCAGATCCTTTACCAACGGATACTGGGCGATGAGCGAGTTCAT
TTTAGCGTTTTCCATAGTACGTCTCTTTGCGCTTAGATGATAAATGACAGCAGGAATGTG
CCCGCCAGAGCGACGACTGAAGCGATAAATGTCGCTGTCGTATAGTATTTAAATGTTTCA
TTGAGCGTAGCGCCGCAATATTGCTTCACCAGCCAGAAAAGCGAGTCCGTAACGATAGTG
CAGCCAATTGCACCTGAACCGATAGCAATCGCAATAATTTCCGGGCTGATGTCGGGATAC
AGCGGCAGCACAATGATCCATATTTATATTTTCTTCTCCAGGTTGGCGATGCCAGTTGGC
ATGTTTTACTTACTTGCCTATATGGTTACTCGTTGGCGAGAACAGAGGCGGAATTGGGGA
CAATTGGCCGGGAATTATTGTTATTTTTTATTGTATTGCCGTGTCAGGTGATAGGGCGTT
GGATCTCGCCAGTGACGTCTGTTTCTGCTACAGTGCCCGTTTTACGACAAACGGCTTGGG
TATGGCTTCATTAAAGGATGTCGCACGCCTGGCGGGAGTGTCGATGATGACAGTCTCCCG
GGTGATGCATAATGCAGAATCTGTGCGTCCTGCAACGCGTGACCGCGTATTGCAGGCAAT
CCAGACCCTGAATTATGTTCCTGATCTTTCCGCCCGTAAGATGCGCGCTCAAGGACGTAA
GCCGTCGACTCTCGCCGTGCTGGCGCAGGACACTGCTACCACTCCTTTCTCTGTTGATAT
TCTGCTTGCCATTGAGCAAACCGCCAGCGAGTTCGGCTGGAATAGTTTTTTAATCAATAT
TTTTTCTGAAGATGACGCTGCCCGCGCGGCACGTCAGCTGCTTGCCCACCGTCCGGATGG
CATTATCTATACTACAATGGGGCTGCGACATATCACGCTGCCTGAGTCTCTGTATGGTGA
AAATATTGTATTGGCGAACTGTGTGGCGGATGACCCAGCGTTACCCAGTTATATCCCTGA
TGATTACACTGCACAATATGAATCAACACAGCATTTGCTCGCGGCGGGCTATCGTCAACC
GTTATGCTTCTGGCTACCGGAAAGTGCGTTGGTAACAGGGTATCGTCGGCAGGGATTTGA
GCAGGCCTGGCGTGATGCTGGACGAGATCTGGCTGAGGTGAAACAATTTCACATGGCAAC
AGGTGATGATCACTACACCGATCTCGCAAGTTTACTCAATGACCACTTCAAATCGGGCAA
ACCAGATTTTGATGTTCTGATATGTGGTAACGATCGCGCAGCCTTTGTGGCTTATCAGGT
TCTCCTGGCGAAGGGGGTACGTATCCCGCAGGATGTCGCCGTAATGGGCTTTGATAATCT
GGTTGGCGTCGGGCATCTGTTTTTACCGCCGCTGACCACAATTCAGCTTCCACATGACAT
TATCGGGCGGGAAGCTGCATTGCATATTATTGAAGGTCGTGAAGGGGGAAGTGTGACGCG
GATCCCTTGCCCGCTGTTGATCCGTTGTTCCACCTGATATTATGCTAACCCAGTTGCCAG
AGTGCTCCATGTTGCACCACAGCCACTCCGTGGGAGGCATAAAGCGACAGTTCCCGTTCT
TCTGGCTGCGGATAGATTCGACTACTCATCACCGCTTCCCCGTCGTTAATAAATACTTCC
ACGGATGATGTATCGATAAATATCCTTAGGGCGAGCGTCTCACCCTGCGGGAGGGGAATA
CTACGGTAGCCGTCTAAATTCTCGTGTGGGTAATACCGCCACAAAACAAGTCGCTCAGAT
TGGTTATCAATATACAGCCGCATTCCAGTGCCGAGCTGTAATCCGTAATGTTCGGCATCA
CTGTTCTTCAGCGCCCACTGCAACTGAATCTCAACTGCTTGCGCGTTTTCCTGCAAAACA
TATTTATTGCTGATTGTGCGGGGAGAGATAGATTGATGCTGCTGGCGTAACGACTCAGCT
TCGTGTACCGGGCGTTGTAGGAGTTTGCCATTGCTCTCTGATAGCTCGCGCGCCAGCGTC
ATGCAGCCTGCCCAGCCTTCACGTTTTGAGGGCATTGGCGATTCCCACATATCCATCCAG
CCGATAACAATACGCCGACCATCCTTCGCTACAAAGCTTTGTGGTGCATAAAAGTCATGC
CCGTTATCAAGTTCAGTAAAATGCCCGGATTGTGCAAAAAGTCGTCCTGGCGACCACATT
CCGGGTATTACGCCACTTTGAAAGCGATTTCGGTAACTGTATCCCTCGGCATTCATTCCC
TGCGGGGAAAACATCAGATAATGCTGATCGCCAAGGCTGAAAAAGTCCGGACATTCCCAC
ATATAGCTTTCACCCGCATCAGCGTGGGCCAGTACGCGATCGAAAGTCCATTCACGTAAT
GAACTGCCGCGATAAAGCAGGATCTGCCCCGTGTTGCCTGGGTCTTTCGCCCCGACTACC
ATCCACCATGAGTCGGCTTCACGCCACACTTTAGGATCGCGGAAGTGCATGATTCCTTCT
GGTGGAGTGAGGATCACACCCTGTTTCTCGAAATGAATACCATCCCGACTGGTAGCCAGA
CATTGTACTTCGCGAATTGCATCGTCATTACCTGCACCATCGAGCCAGACGTGTCCGGTG
TAGATAAGTGAGAGGACACCATTGTCATCGACAGCACTACCTGAAAAACACCCGTCTTTG
TCATTATCGTCTCCTGGCGCTAGCGCAATAGGCTCATGCTGCCAGTGGATCATATCGTCG
CTGGTGGCATGTCCCCAGTGCATTGGCCCCCAGTGTTCGCTCATCGGGTGATGTTGATAA
AACGCGTGATAACGATCGTTAAACCAGATCAGGCCGTTTGGATCGTTCATCCACCCGGCA
GGAGGCGCGAGGTGAAAATGGGGATAGAAAGTGTTACCCCGGTGCTCATGAAGTTTTGCT
AGTGCGTTTTGCGCCGCATGCAATCGAGATTGCGTCATTTTAATCATCCTGGTTAAGCAA
ATTTGGTGAATTGTTAACGTTAACTTTTATAAAAATAAAGTCCCTTACTTTCATAAATGC
GATGAATATCACAAATGTTAACGTTAACCATGACATTTTGTGATCGAATATGCATGTTTT
AGTAAATCCATGACGATTTTGCGAAAAAGAGGTTTATCACTATGCGTAAGTCAGATGAAT
TTAAGGGAAAAAAATGTCAGCCAAAGTATGGGTTTTAGGGGATGCGGTAGTAGATCTCTT
GCCAGAATCAGACGGGCGCCTACTGCCTTGTCCTGGCGGCGCGCCAGCTAACGTTGCGGT
GGGAATCGCCAGATTAGGCGGAATAAGTGGGTTTATAGGTCGGGTCGGTGATGATCCTTT
TGGTGCGTTAATGCAAAGAACTCTGCTAACTGAGGGAGTCGATATCACGTATCTGAAGCA
AGATGAATGGCACCGGACATCCACGGTGCTTGTCGATCTGAACGATCAAGGGGAACGTTC
ATTTACGTTTATGGTTCGCCCCAGTGCCGATCTTTTTTTAGAGACGACAGACTTGCCCTG
CTGGCGACATGGCGAATGGTTACATCTCTGTTCAATTGCGTTGTCTGCCGAGCCTTCGCG
TACCAGCGCATTTACTGCGATGACGGCGATCCGGCATGCCGGAGGTTTTGTCAGCTTCGA
TCCCAATATTCGTGAAGATCTATGGCAAGACGAGCATTTGCTCCGCTTGTGTTTGCGGCA
GGCGCTACAACTGGCGGATGTCGTCAAGCTCTCGGAAGAAGAATGGCGACTTATCAGTGG
AAAAACACAGAACGATCGGGATATATGCGCCCTGGCAAAAGAGTATGAGATCGCCATGCT
GTTGGTGACTAAAGGTGCAGAAGGGGTGGTGGTCTGTTATCGAGGACAAGTTCACCATTT
TGCTGGAATGTCTGTGAATTGTGTCGATAGCACGGGGGCGGGAGATGCGTTCGTTGCCGG
GTTACTCACAGGTCTGTCCTCTACGGGATTATCTACAGATGAGAGAGAAATGCGACGAAT
TATCGATCTCGCTCAACGTTGCGGAGCGCTTGCAGTAACGGCGAAAGGGGCAATGACAGC
GCTGCCATGTCGACAAGAACTGGAATAGTGAGAAGTAAACGGCGAAGTCGCTCTTATCTC
TAAATAGGACGTGAATTTTTTAACGACAGGCAGGTAATTATGGCACTGAATATTCCATTC
AGAAATGCGTACTATCGTTTTGCATCCAGTTACTCATTTCTCTTTTTTATTTCCTGGTCG
CTGTGGTGGTCGTTATACGCTATTTGGCTGAAAGGACATCTAGGGTTGACAGGGACGGAA
TTAGGTACACTTTATTCGGTCAACCAGTTTACCAGCATTCTATTTATGATGTTCTACGGC
ATCGTTCAGGATAAACTCGGTCTGAAGAAACCGCTCATCTGGTGTATGAGTTTCATCCTG
GTCTTGACCGGACCGTTTATGATTTACGTTTATGAACCGTTACTGCAAAGCAATTTTTCT
GTAGGTCTAATTCTGGGGGCGCTCTTTTTTGGCTTGGGGTATCTGGCGGGATGCGGTTTG
CTTGACAGCTTCACCGAAAAAATGGCGCGAAATTTTCATTTCGAATATGGAACAGCGCGC
GCCTGGGGATCTTTTGGCTATGCTATTGGCGCGTTCTTTGCCGGCATATTTTTTAGTATC
AGTCCCCATATCAACTTCTGGTTGGTCTCGCTATTTGGCGCTGTATTTATGATGATCAAC
ATGTGTTTTAAAGACCAGGATCACCAGTGCGTAGCGGCGGATGCGGGAGGGGTAAAAAAA
GAGGATTTTATCGCAGTTTTCAAGGATCGAAACTTCTGGGTTTTCGTCATATTTATTGTG
GGGACGTGGTCTTTCTATAACATTTTTGATCAACAACTCTTTCCTGTCTTTTATGCAGGT
TTATTCGAATCACACGATGTAGGAACGCGCCTGTATGGTTATCTCAACTCATTCCAGGTG
GTACTCGAAGCGCTGTGCATGGCGATTATTCCTTTCTTTGTGAATCGGGTAGGGCCAAAA
AATGCATTACTTATCGGTGTTGTGATTATGGCGTTGCGTATCCTTTCCTGCGCGCTGTTC
GTTAACCCCTGGATTATTTCATTAGTGAAGTTGTTACATGCCATTGAGGTTCCACTTTGT
GTCATATCCGTCTTCAAATACAGCGTGGCAAACTTTGATAAGCGCCTGTCGTCGACGATC
TTTCTGATTGGTTTTCAAATTGCCAGTTCGCTTGGGATTGTGCTGCTTTCAACGCCGACT
GGGATACTCTTTGACCACGCAGGCTACCAGACAGTTTTCTTCGCAATTTCGGGTATTGTC
TGCCTGATGTTGCTATTTGGTATTTTCTTCTTGAGTAAAAAACGCGAGCAAATAGTTATG
GAAACGCCTGTACCTTCAGCAATATAGACATAAACTTTTTCCGGTTGTTGTCGATATCTC
CATATCCCTCAACCGGAAAATAATAATACTAAAATGCTTAGGCCTGCTAATAATCGCCTA
ATCCAAACACCTCATTCATGTTCTGGTACAGTCGCTCAAATGTACTCCGGATACACGGTT
CGCTGATTTCCAGGACATTGTCGTCATTCAGCGACCTGTCCCGTGTATTACGGGCCTGCG
AATTCATCAAGGAATGCATTGCGGAGTGAAGTATCGAGTCACGCCATATTTCGCTATCAG
GATTCTGTGTGATGGTTACATCGCCCGGCCCAGGGCTGTTTAGTCATCAGCGCTTTCTGA
CAGTGCTGAGATTTCAACCTGTTGCAGTAAAAATGAGTAGATATAGGGCAAGTGTGCTGC
CAAACCCATCTTTTACGGGGTGAAGGTAGATTTGGTTTGAAGGGTATCTGGTGTCCCCTG
CAGGAATCGAACCTGCAATTAGCCCTTAGGAGGGGCTCGTTATATCCATTTAACTAAGAG
GACAATGCGGCATGAGTATACCCGCTAATGGACTGCGGGGTAAGTACGCTGCCGCTCGAT
TGCTTAAACCCTCGCCATTTATGCCGGGTTTTTATCATTTTTCTTAATGTTTTCCGCACG
TTCTGCTTTTTGGCGTGCTTCTGCTTTGCGCTTGTTGCTCATGTCGTTACGGATCTGTGC
ATGACTCATTAACGCGAAGATAAAGGTGCCGCCGCAGATGTTCCCCGCTAAAGTAGGTAG
TGCGAAGGGCCAGATGAAATCGCTCCAGTGCAGCGTGCCGTTAAACACCAGATAGAGGAT
TTCAACAGAACCGACAACGATGTGGGTGGTGTCACCCAGGGCAATAAGCCAGGTCATCAA
TATAATCACCACAATCTTTGCCGCACCCGCTGCAGGAAACATCCATACCATAGTGGCGAT
CAGCCAGCCGGAAATGATCGCGTTGGCAAACATCTCGCTGGGGGTGTTCTTCATCACATC
CATGCCGATATTGACAAATGCATCGCGAGTTTCTTCATTGAAGATTGGCATATATTCAAA
TGCCCACGCCGCAATACCTGTCCCGAGAATATTACCCAGCAGCACGACGCCCCATAACCG
CATAAGTAAGCCAACGTTGCTCATTGTCGGTTTTTGCATGACGGGTAGTACCGCAGTCAC
GGTGTTTTCGGTAAATAATTGCTGGCGGGCCATAATGACGATAATAAAACCAAAGGTATA
ACCGAGATTCTCCAGCAAGAAGCTGCCCGGCACACCTTCCAGTTCGACATGAAATATCCC
TTTTGCCAGTAATGAAGCGCCCATCGACAGACCCGCCGCAATGGCTGACCACAGTAGTGC
CATTGCGTCGCGTTCCAGCTCTTTTTCACCATCCTGGCGGATATGCTCATGAATTGCCAT
CGCCCGGGAGGGGAGTCGATCTTCATCTATTTCTATTTTTTTGCCACGCTCTTTTTCTTC
GCTCTCAACTTCAATTTCGTCGCTGTGTTGATCAATTTTGTCGTTGTCCATGGTCTCTTC
TCTTGAATTAGCACGTATAGCTAAAGCGTAGCGGCTTTTTTGCTCGCAACTGGCGGGAGT
TACTCTGAAAATGTAGAAAAGGCCGCGTTTGCCTTTTTCTGTTTCCATAGAATCAAGTAG
CCTACAGGGCGGCGATTACCAGGCTATGATCAAATCAGCAAATCAGGGCGTCTGGACATC
AGTTGACGTGCTGTTACAATCGCCCACACCTAAACAGGCGGATACGGTATCGTTCCGTCA
TGGATGGCAAACTGCATAAGCCATAAAAAAACAGGGAGACATTTATGAAGCTTCGCCTGT
CGGCGCTTGCTCTGGGAACTACGCTTCTGGTGGGGTGTGCGAGTTCCGGTACAGATCAGC
AAGGGCGTTCTGACCCGTTAGAAGGGTTCAACCGCACCATGTACAACTTCAACTTCAACG
TACTAGACCCGTATATTGTTCGACCGGTCGCTGTCGCCTGGCGTGATTATGTTCCGCAAC
CGGCGCGTAACGGTTTGAGCAACTTTACCGGCAACCTTGAAGAACCTGCGGTGATGGTTA
ACTACTTCTTGCAGGGCGACCCTTATCAGGGGATGGTCCACTTTACCCGCTTTTTCCTGA
ACACCATTTTGGGGATGGGCGGCTTTATTGATGTTGCAGGGATGGCGAACCCGAAACTGC
AACGGACTGAACCTCACCGCTTCGGTAGTACGCTTGGTCATTATGGCGTGGGTTATGGGC
CGTACGTTCAGTTACCATTCTACGGTAGCTTCACGCTGCGTGATGACGGTGGTGATATGG
CGGATGGTCTTTACCCGGTTCTTTCCTGGTTGACCTGGCCGATGTCTGTGGGTAAATGGA
CGCTTGAAGGGATCGAAACCCGCGCTCAGCTGCTGGATTCCGACGGTCTGCTGCGTCAGT
CGTCCGATCCTTATATTATGGTGCGCGAAGCGTACTTCCAGCGTCATGATTTCATCGCTA
ATGGCGGCGAACTCAAACCGCAGGAAAATCCGAACGCGCAAGCGATTCAGGATGATTTAA
AAGATATCGATTCTGAATAAGAAACAAATAAAAAAGGTGAGTCGCAAAACTCACCTTTTT
TGTTGTTATCCCTCAATTACCACAAGTAAAAGGAGATAAACCGACAATGACCCGGACGTA
ATGATGTAAAAATACTGATGTTCGTCACTGACTATTTCCGATATTCAGGCGTTGAAAAAT
CAAAAAACTGGAAAAATAATTTTAAATATCATCAAAATTAACACCTGGCGCATATAGTTG
ATTAATTTCATTTTGATATTCCGTCTGGCGATTTTGAAGCCTTTCTTCAATTTTACCTTC
GAGTTCCTTATAGTGCATATATATATTTTGAGAATGGTCAACGTTAACTTCGTTACCGAA
TAAAGTAGAAACTATTTCTTTTGTATTCTTAAGTGTATATTTTCTATCATCCTCTTAATA
TTCATATCCTCTTGCTAGATTTGAAGGATTAAAAGCTTCGTTAGGTTCTCTCAGTCTTTC
CCCTTTGAGTTCGTTTACAACTTGATGATCGGGACCTGTTGCAAATGATTCTGCGATGAT
TGCTTTACTGTGTTCAAACCACGCAGAAGCACTCCTGGCTTTTTTACTACAATATTGGGT
GAGATTATCACCATCAATACGAAATCCTTTTTGAATGTGGTAGCCATCCTGATCGTAGTA
ACCGAGAGATAAGTAATCATTTCCATTTTTATTTTTTATTACAATAGCGAGAGAGTCGCC
TTTTTTATCTTTACCGTACCAGGTAAATAAGCACGTTGGTTCGCTTTTCCCGCTCTCATC
GAATTCCGTTACCGTATGTCTGAGTTTGTGTGATATTTTATCGAAGATAAAACTTGGATT
TTCATCATATATTTCTTTTATTGCGCTGAAGATCATTTTCTTGTTATTGATATCATGAGT
ATTCTCTACTATGTTTTCATTGATGATGGTTTGACCGACTTTTTTGTTTTCATCGTTCGC
GGGTGATTTTGTTGGTTCTTGATTTTCAATATCAATATCAATATCAATATCAAAAGTAAT
ATCGTTTGTATCATTGGAGTCAATACCAATATCACTACGATCATCAATACCACTAATAAT
AATACCATCAGTAAATTCAGCATTATTTATATCATCATGAGTCTTCTCAACTATGTTGTC
ATTAATGATAGTACGGACGAGTTCTTTGTCTTTATAACTCGCAGGTAATTTTATTGGTTC
TTGGTTGTCGATACCAATAGTAATATGGTCTGTATCATTGGAACCAATATTAATATAAGT
AACTGAAGAATTATTGATATTTATTCTATCAGGATCGTCGTTTCCTCGTATGGCGTTTTT
TATAAGCTCAAGTAGATGTTTAATACAGGTGCTTATTCCTTCCTTACCATTAAAAAGGTT
TTTGAACTCTTGTACTAATCCATTAACTTCATCATTGTTATTTTCATTGATGGATTCTGG
GTAAGCTGTGCTGGTATTGTTGATTGAAATAGATGGTAGCATGATTTTATTCCATGTTGA
TTGATTTGTTACAAATATATATTACCTAATGAAATAGACTATCAAAAAACGCTCATTTAT
TTAGACCCTATCTTTAATTTGAGTGTATGAGCGCACAATAGCCAGGGTGGTTTGAGTATC
CTGGAAATTCAGAAAAGTAAACTCTTTGAGAAAGACGAGCAGAACGCCTGAAAATATGCC
TTTCCCTTCAGGTTTGTCTGTGGATACCACTTAATGATTTGAAAGGGCAAGCTACCATCA
GGCTGTTTGCAAAACTCAGGAGGCAAGCAATGAGGACACTACTTTCGGTGAAGTGGGGAA
GTTAAAGTCACCTGCATAGCAGGTGACTTTAACCAGGCGAACGCGTTATCAGAACGCGTA
GTTAAAGTTAGTACCGAACAGCCAGGCTTTACCTTCAGATTTAAAGGTATATGCTGCTGG
CCCTTCACCTTCAGTAAACTTCACATTCTGACCGTGCATATAAGATGCACCAACGTCAAT
GGATGCATCTTCATTAAATGCATAAGTCGCACCTGCACTTAACCACAGACGATCCTGATC
TGGGATAGAGATAGAACGTTTATCTGCCGGAACCGGGCTGTCATCGAATGCAATACCCGT
ACGGAAGGTCCAGTTTTTATCGTGGTAGTAGGTTGTACCTAACGCGATACGGTAAGCATC
CCGGAAACCTTCGTCTTTATAGAACAGCGTTTGACCAGAGTCTCCTTTCGCTTTCAGTTC
CTGGAATTGACTCCAACTGGTATACGCCAGACTATAGTGGATAGCCCATTGTGGTGCGAC
ACGGTTATAGCCAGAAATTTCCCACATCTCAGGTAAATTCAGCGTTAAGGACCCATTTTG
GGTTGCACCCATTGTGCCATATGGTAAACCCATGCTACCCAAGATGTTGTTCAGATTTGG
GTTGATGGAGCTTTTGTAATCTCCTTCAAAGTCAATTTTCACTTCTGAACGATAGGTTAG
GCCCCAACGGTTATCTTTATCCAGTTCATAAAGAATACCGGCGTTCCAGCCGAATCCCCA
TTCATCACCCTTGAGATGAGCAATTTGCGAATCCGGTGTATTGATGCCGTTTGTCCAACT
TTGTGGCACGCCTTGCGCTATCAGTTGTTGGGAAAGCAATGGACCGAGTGAACCGGCAGT
ACGCTCAATTTTTGCCTTAGCGTATACAGCATCAAAACCAAGACCAAAACTCCAGCTATT
GTTAAGGCGGTAGGCTCCGCTAAGGTTAAGGTTGATCGTCTGCAGATCGGTTTTACCGCC
ATAGATTCCAGCAGCGTAGTTATCATTAAATTCCGTGGCCAGACCATAGTTCGAGGTAAT
AGAAGCCCCCCAACCAAACTGATCGTTAATAGGTGCTACGAAATGTAGGTTAGGCACCCA
CGCAGTTGGTGCAATATTATCTGCATCAGCACGCTGGCCCGTTAAATCGGAACGCCCAGA
AATATCTACATCCGGGTCAATATAAACCGCACCCGCAGAAAATGTCGGGCGGTCAAACAT
GGTAATCAATGCGGGGTTACGGCTGACGTTACCTGCATCATCGGCAATTGCGCCTTCCCC
TGAATAAGCCCGGCCCAGGCCAGAGGAAGAAAATTCGTTTAACTGAAAGCCTGCCGACCA
GGCCTGGGTGGAGATAAGTGCCACTGCGACTGCGAGAGCAGACTTTGTAAACAGGGTTTT
CTGGCTCATGACCATAACCTCAATGATTTATTTTTATACAAACTATGTTACGTGCTGTAA
CAGGAGCGCGAAGTGTAGGGTCTGAGGTACATCTTAGAAATCAGACCAGTGGCGAGAGTA
TAGGTCGGACCAGCTGGAATGTTGCAAGTATGTTTCTATCTTTTTTCAAATATGATCTAA
GAAACGCGATCCAGCTGGCAAAATTTGGAGGTGGCGCACTCATGGATTCGGGTGAATTTT
GTTTTAGATCATTTTTAAGTGTGATTTCGGTCACTTATCCGATTTTGCAGAATTAACAAC
TGGAGCAGCACTTTCCGGAAGCGTAAAATATCCACAACGTTTATCTGGCACCTTGGGTGC
ACATACAGAGGAAATCAACGATGAGTAAATGTAGTGCTGATGAAACCCCGGTTTGCTGCT
GTATGGATGTTGGCACCATTATGGACAACTCCGACTGCACCGCGTCTTACAGCCGCGTGT
TTGCAAACCGCGCAGAAGCAGAACAAACGCTGGCGGCACTGACTGAGAAAGCCCGTAGCG
TGGAATCCGAACCGTGCAAAATCTCCCCGACTTTCACTGAAGAGTCTGATGGTGTGCGCC
TGGATATCGATTTCACTTTTGCCTGCGAAGCTGAAATGCTGATCTTCCAGCTGGGTCTGC
GTTAATTCCTCTCGGGTACGTACGCCCCTGTCAGTTGCTGGCAGGGGCGTTTTCTTTTCT
CTTCTTCTTTTCTCTCTGTGTCATAGCTCCCACTTTCCCTTTTCTCCGCTTGGCTAAATG
TAAAAAAATGGTTAAGACTATGATCAGGTCAGACCACTTTATTTATTTTTTTACAGGGGA
GTGTTATGGGTCAGGTTTTACCGCTGGTTACCCGCCAGGGCGATCGTATCGCCATTGTTA
GCGGTTTACGTACGCCTTTTGCCCGCCAGGCGACGGCTTTTCATGGCATTCCCGCGGTTG
ATTTAGGGAAGATGGTGGTAGGCGAACTGCTGGCACGCAGCGAGATCCCCGCCGAAGTGA
TTGAACAACTGGTCTTTGGTCAGGTCGTACAAATGCCTGAAGCTCCCAACATTGCGCGTG
AAATTGTTCTCGGTACTGGAATGAATGTGCATACCGATGCTTACAGCGTCAGCCGCGCTT
GCGCTACCAGTTTCCAGGCGGTTGCAAACGTCGCAGAAAGCCTGATGGCGGGGACTATCC
GAGCGGGGATTGCCGGTGGGGCAGATTCCTCTTCGGTATTGCCAATTGGCGTCAGTAAAA
AACTGGCGCGCGTGCTGGTTGATGTCAACAAAGCCCGCACAATGAGCCAGCGTCTGAAAC
TCTTCTCTCGCCTGCGTTTGCGCGACTTAATGCCCGTACCACCTGCGGTAGCAGAATATT
CTACCGGCTTGCGGATGGGCGACACTGCAGAGCAAATGGCGAAAACCTACGGCATCACCC
GAGAACAGCAAGATGCATTAGCGCACCGTTCGCATCAGCGTGCCGCTCAGGCATGGTCAG
ACGGAAAACTCAAAGAAGAGGTGATGACTGCCTTTATCCCTCCTTATAAACAACTGCTCG
CGGAAGACAACAATATTCGCGGTAATTCCTCGCTTGCTGATTACGCAAAGCTGCGTCCGG
CGTTTGATCGTAAACACGGAACGGTAACGGCGGCGAACAGTACGCCGCTGACCGATGGCG
CAGCGGCGGTGATCCTGATGACTGAATCCCGGGCGAAAGAATTAGGGCTGGTACCGCTGG
GATATCTGCGCAGCTACGCATTTACCGCTATCGATGTCTGGCAGGACATGTTGCTCGGTC
CAGCCTGGTCAACACCGCTGGCGCTGGAGCGTGCCGGTTTGACGATGAGCGATCTGACAT
TGATCGATATGCACGAAGCCTTTGCAGCTCAGACACTGGCGAATATTCAGTTGCTGGGTA
GTGAACGTTTTGCTCGTGAAGCACTGGGGCGTGCACATGCCACTGGCGAAGTGGACGATA
GCAAATTTAACGTGCTTGGCGGTTCGATTGCTTACGGGCATCCCTTCGCGGCGACCGGCG
CGCGGATGATTACCCAGACATTGCATGAACTTCGCCGTCGCGGCGGTGGATTTGGTTTAG
TTACCGCCTGTGCTGCTGGTGGGCTTGGCGCGGCAATGGTTCTGGAGGCGGAATAATGGA
AATGACATCAGCGTTTACCCTTAATGTTCGTCTGGACAACATTGCCGTTATCACCATCGA
CGTACCGGGTGAGAAAATGAATACCCTGAAGGCGGAGTTTGCCTCGCAGGTGCGCGCCAT
TATTAAGCAACTCCGTGAAAACAAAGAGTTGCGAGGCGTGGTGTTTGTCTCCGCTAAACC
GGACAACTTCATTGCTGGCGCAGACATCAACATGATCGGCAATTGCAAAACGGCGCAAGA
AGCGGAAGCTCTGGCGCGGCAGGGCCAACAGTTGATGGCGGAGATTCATGCTTTGCCCAT
TCAGGTTATCGCGGCTATTCATGGCGCTTGCCTGGGTGGTGGGCTGGAGTTGGCGCTGGC
GTGCCACGGTCGCGTTTGTACTGACGATCCTAAAACGGTGCTCGGTTTGCCTGAAGTACA
ACTTGGATTGTTACCCGGTTCAGGCGGCACCCAGCGTTTACCGCGTCTGATAGGCGTCAG
CACAGCATTAGAGATGATCCTCACCGGAAAACAACTTCGGGCGAAACAGGCATTAAAGCT
GGGGCTGGTGGATGATGTTGTTCCGCACTCCATTCTGCTGGAAGCCGCTGTTGAGCTGGT
AAAGAAGGATCGCCCATCTTCCCGCCCTCTACCTGTACGCGAGCGTATTCTGGCGGGGCC
GTTAGGTCGTGCGCTGCTGTTCAAAATGGTCGGCAAGAAAACAGAACACAAAACTCAAGG
CAATTATCCGGCGACAGAACGCATCCTGGAGGTTGTTGAAACGGGATTAGCGCAGGGCAC
CAGCAGTGGCTATGACGCTGAAGCACGGGCGTTTGGCGAACTGGCGATGACGCCACAATC
GCAAGCTTTGCGTAGTATCTTTTTTGCCAGTACGGAAGTGAAGAAAGATCCCGGCAGTGA
TGCGCCGCCTGCGCCATTAAACAGCGTGGGGATTTTAGGTGGTGGCTTGATGGGCGGCGG
TATTGCTTATGTCACTGCTTGTAAAGCGGGGATTCCGGTCAGAATTAAAGATATCAACCC
GCAGGGCATAAATCATGCGCTGAAGTACAGTTGGGATCAGCTGGAGGGCAAAGTTCGCCG
TCGTCATCTCAAAGCCAGCGAACGTGACAAACAGCTGGCATTAATCTCCGGAACGACGGA
CTATCGCGGCTTTGCCCATCGCGATCTGATTATTGAAGCGGTGTTTGAAAATCTCGAATT
GAAACAACAGATGGTGGCGGAAGTTGAGCAAAATTGCGCCGCTCATACCATCTTTGCTTC
GAATACGTCATCTTTACCGATTGGTGATATCGCCGCTCACGCCACGCGACCTGAGCAAGT
TATCGGCCTGCATTTCTTCAGTCCGGTGGAAAAAATGCCGCTGGTGGAGATTATTCCTCA
TGCGGGTACATCAGCGCAAACCATCGCCACTACGGTAAAACTGGCGAAAAAACAGGGCAA
AACGCCCATTGTCGTGCGTGACAAAGCCGGGTTTTACGTCAATCGCATCTTAGCGCCTTA
CATTAATGAAGCTATCCGCATGCTGACCGAAGGTGAACGGGTAGAGCACATTGATGCCGC
GCTAGTGAAATTTGGTTTTCCGGTAGGTCCAATCCAACTTTTGGATGAGGTAGGAATCGA
CACCGGGACTAAAATTATTCCTGTACTGGAAGCTGCTTATGGAGAACGTTTTAGCGCGCC
TGCAAATGTTGTTTCTTCAATTTTGAACGACGATCGCAAAGGCAGAAAAAATGGTCGGGG
TTTCTATCTTTATGGTCAGAAAGGGCGTAAAAGCAAAAAACAGGTCGATCCTGCCATTTA
CCCGCTCATTGGCGCACAAGGGCAGGGGCGACTCTCCGCACCGCAGGTTGCTGAACGGTG
TGTGATGTTGATGCTGAATGAAGCAGTACGTTGTGTTGATGAGCAGGTTATCCGTAGCGT
GCGTGACGGGGATATTGGTGCGGTATTTGGCATTGGTTTTCCGCCATTTCTCGGTGGACC
GTTCCGCTATATCGATTCTCTCGGCGCGGGCGAAGTGGTTGCAATAATGCAACGACTTGC
CACGCAGTATGGTTCCCGTTTTACCCCCTGTGAGCGTTTGGTCGAGATGGGCGAGCGTGG
GGAAAGTTTTTGGAAAACAACTGCAACTGACCTGCAATAAGAAGGTCAAAGCTATATGAA
TCCGCGCTGAATGGCGGATAGTTGGTCAAAATGTAAACGCATATTGACTATACTTACGCC
ATTGAGGTAAAAAACAGCGTTTCATTCGGTGAATGGATAAGGCACAATGCCGGCCACCGT
TTTCTTTCTCTGGTTTCAGATGAAAGAAAACGGGCGAATCTGGTTAACAAAAGCGGTGCA
ATATGCAAGTTTTTATCATGCGTCACGGCGACGCAGCCCTCGATGCCGCCAGTGATTCGG
TTCGTCCTCTGACTACTAATGGTTGTGACGAATCTCGCCTGATGGCGAACTGGCTGAAAG
GTCAAAAAGTGGAAATCGAACGCGTTCTGGTGAGCCCGTTCCTGCGAGCCGAGCAAACAC
TGGAGGAAGTAGGGGATTGTCTGAACCTGCCTTCCAGTGCAGAAGTTCTGCCGGAGTTAA
CGCCCTGCGGCGATGTTGGTCTGGTCAGTGCCTATTTGCAGGCGTTGACCAATGAAGGTG
TTGCTTCGGTGTTGGTTATCTCCCACTTACCGTTAGTTGGGTATCTGGTCGCCGAGTTAT
GTCCGGGCGAAACGCCGCCTATGTTTACCACCTCGGCCATTGCCAGCGTCACGCTTGATG
AAAGCGGAAACGGCACATTCAACTGGCAGATGAGCCCGTGTAATCTGAAGATGGCGAAAG
CTATCTGATTTGTTTGAAAAAATGCCCGATGTAAGCTGTACATCGGGCATTTGTCTTTTT
GCAATAGTATAAATTCACTCAAAACCCTTCACGGAGTTGGTATGCTGCGATGATGATTTC
ATCGCACTCTTTCCTCTGCTTCCCTATTAATTTCTGATGAAATGAGACTAAGTTGTAATA
TATTTTTACAAATTATAAAACTAATGGAACAATTAACAGTAAAAAAGAAATGATATTTTT
GTGTCTTGATTTAATATTATTTGTGATGCTTTAATATTATATCTTCAAAAAATACAATTT
CAAAATTAATCTAAGATCGTCTTTTTTGTATACATTTCCCATAAATTTTAATTATGTAAA
AGATGTTTTCTAAGCATTTTATTTGTTTTTTATAAGTAAACTCTCAAAATTTCACCTTTT
TGATTATATGTTAAGTGCTCCTTAATTTACTGTTAAGTAAATATAAATTGAAACAATAAA
GACAAAACATCACCATCCACCCACACCAAAGAATATCTTCTTATGCGACCTATTTTCTTG
TTAGTTAGATCGGATAGCTTATTCAATGGCTGAGTATAAATAATTGCTATTGACTGAATC
AATGTATTGCAATGTTTATATTTTTAATTATTTATGGTTTAAGGACAAATAATGAGTAAG
TTTGTAAAAACAGCTATTGCTGCAACAATGGTAATGGGTGCGTTCGCTTCTACTTCAACA
ATCGCCGCTGGCAACAACGGTACAGCTCGTTTTTACGGCACCATTGAAGATTCCCCGTGC
TCCATCGTTCCTGATGATCACAAACTGGAAGTGGATATGGGTGACATTGGTTCGGGGATC
CTGAAAAATAACGGGACCTCCACGCCGAAAGCTTTCCAGATCCATCTGCAAGACTGCGTG
TTTGACACCCAGACAACCATGACAACGACCTTCACCGGTAACGCGTCCGCTACCAACAGC
GGCAATTACTACACCATTTACAATACCGACACCGGCGCGGCATTTAACAATGTCAGCCTG
GCGATTGGTGATGCTCAGGGGACCTCTTACAAAAGCGGTACGGGCATCAACCAGACAATT
GTAAAAGATACTGCCACCAACAAAGGCAAAGCGAAGCAGACGCTGGACTTTAAAGCCTGG
CTGGTGGGCGCTGCTGATGCGCCAGATTTGGGTAACTTCGAAGCCAACACGACTTTCCAG
ATTACTTATCTCTAAGTGATATCCCCATAGCCTTCGGCTATGGGGTTTTTTAAATGGAAT
TTGCGCAAATTATAATAATTACGGATGGATACGTGCATGCCTGACGATTCTCTTTTCCGA
CTGCGGGTGCTTCCCTGCTGCATTGCGCTGGCAATGTCAGGGTGTTATGTCAATGCCTGG
GCTGAAGATGAAATTCAGTTTGATTCCCGTTTCCTGGAGTTAAAAGGCGACACAAAAATC
GATCTGAAGCGATTTTCCAGCCAGGGATATGTCGAACCTGGTAAATACAATTTACAGGTT
CAACTAAATAAACAGCCGCTGGCGGAAGAATACGATATTTACTGGTACGCCTCTGAGAAC
GATGCCAGTAAAACCTATGCCTGCCTGACACCTGAACTGGTCGCTCAGTTTGGTTTAAAA
GAGGATGCGGCAAAAAACCTGCAATGGATCCACGACGGCAAATGTTTGAAACCCGGCCAG
CTGGAAGGCATTGATATTAAAGCTGACCTGAGTCAGTCAGCGTTAGTCATTTCATTACCC
CAGGCTTACCTTGAATATACCGACACCGACTGGGACCCACCTTCACGCTGGGATGACGGT
ATTTCTGGTTTAATTGCTGACTACAGTATTACCGCCCAGACACGACATGAAGAAAATGGC
GGGGATGACAGCAATGAAATTAGCGGCAACGGAACGGTTGGGGTTAACCTCGGCGCATGG
CGTCTGCGAGCCGACTGGCAGACCGACTACCAGCACAGCAAAAGCAATGATGAAGATGTT
ATCAACGGTGATGACACGCAAAAAAACTGGGAGTGGAGCCGCTACTACGCCTGGCGGGCT
TTACCGTCGCTAAAAGCCAAACTTGGCCTTGGCGAAGACTACCTTAATTCTGATATTTTC
GACGGCTTTAACTACGTGGGTGGCAGTATCAGCACCGACGATCAAATGTTGCCGCCGAAT
CTGCGCGGCTATGCGCCGGATATCTCCGGCGTGGCGCACACCACCGCGAAAGTGACCGTC
AGCCAGATGGGCCGCGTGATTTACGAAACGCAGGTTCCGGCGGGGCCGTTCCGCATCCAG
GATCTTGGCGATTCTGTCTCCGGTACACTGCACATCCGCATTGAAGAACAGAACGGCCAG
GTGCAGGAATATGACATCAACACCGCCTCGATGCCGTTCCTGACCCGCCCCGGCCAGGTG
CGCTATAAGCTGATGATGGGCCGCCCGCAGGAGTGGGGGCATCATGTTGAAGGTGGTTTC
TTCTCCGGCGGCGAAGCTTCATGGGGGATTGCCAACGGCTGGTCGCTCTACGGCGGAGCG
CTGGCAGATGAACACTATCAGTCGGCGGCGCTTGGCGTCGGTCGCGACCTGTCTGTCTTT
GGCGCAGTCGCCTTTGATATCACCCACTCGCATACCCGCCTGGATAAAGAGACCGCCTAC
GGTAAAGGTTCACTGGACGGTAACTCGTTTCGCGTGAGCTATTCCAAAGACTTCGATGAA
CTGAACAGCCGCGTCACTTTTGCCGGATACCGCTTCTCGGAAGAGAACTTCATGACCATG
AGCGAGTATCTCGATGCCAGCGACAGCGAAATGGTGCGCACTGGCAACGACAAAGAGATG
TACACCGCCACCTACAACCAGAACTTCAGGGATGCCGGTGTGTCTGTTTATCTAAACTAC
ACCCGCCATACCTACTGGGATCGCGACGAACAGACCAACTACAACGTCATGCTCTCGCAC
TACTTCAACCTGGGCAGTATCCGCAATATGAGTATTTCCATGACCGGATACCGCTACGAA
TATGACAACCGCGCCGATAAAGGTGTGTACATATCGCTCAGTATGCCGTGGGGCGACAGC
AGCACCATCAGCTATAACGGTAACTACGGCAGCGGTGCGGACAGCAGCCAGGTGGGGTAT
TTCAGCCGTGTCGATGACGCAACCCACTACCAGTTGAACGTGGGAACCAGTGACAAACAC
TCCAGCGTTGACGGCTATTACAGCCACGATGGTTCGCTGGCGCAGGTCGATCTCAGCGCC
AACTACCATGAAGGGCAGTACACCTCGGCGGGCATTTCCTTACAGGGCGGCGCGACGCTC
ACCGCACAAGGTGGCGCGCTTCACCGTACCCAGAATATGGGCGGCACGCGTCTGCTGATT
GATGCCGACGGCGTGGCTGGTGTTCCGGTAGAAGGAAATGGTGCGGCGGTTTACACCAAT
ATGTTCGGTAAGGCCGTGGTGGCAGACGTCAACAACTACTACCGCAACCAGGCGTATATC
GACCTTAACAACCTGCCGGAAAACGCCGAAGCCACCCAGTCCGTGGTGCAGGCGACGCTT
ACCGAAGGAGCCATTGGCTACCGTAAGTTTTCGGTTATCAGCGGGCAAAAAGCGATGGCG
GTATTGCGCCTGCAAGATGGCAGTCATCCGCCGTTTGGCGCGGAAGTGAAAAATGACAAC
GCGCAGAACGTCGGTCTGGTTGATGATGATGGCAACGTCTACCTCGCGGGTGTGAAACCT
GGCGAGCATATGACCGTTTCATGGGGCGGCGTGGCCCACTGTGATATTCATCTGCCGGAC
CCACTGCCTGCCGATCTGTTCAATGGCCTGTTATTGCCATGTCAGCAAACAGGGCCGATA
TCTCCTTCGATGCCCAATGAAATTAAGCCGGTGATCCAGGAGCAGACCCAGCAGGTGATG
CCAACGGAAGCGCCGGTATCGGTATCCGCCAATTAACAACGTGATTAAGGAATGATCCAT
GACGAATCTATTTTGCTCTGCCAGAACGGCCGCAACGACGCTGGCGTTACTGATAACTGC
CGCCAGCCTGTCAGCACAGGCCTCTGTCACGCCGGACCGTACACGCCTGATTTTTAACGA
AAGTGATAAATCAATCAGTGTCACGCTGCGCAATAACGACCCGAAAATGCCGTATCTGGC
ACAAAGCTGGATGGAAGATGAACAGGGTAACAAGATTAGCTCGCCACTGACGGTACTGCC
GCCGGTGCAGCGCATCGATTCCATGATGAACGGTCAGGTGAAGGTACAGGGCATGCCGGA
TATCAACAAGCTGCCTGCCGACCGCGAGAGCGTGTTCTATTTCAACGTGCGTGAGATCCC
GCCGAAATCGAACAAACCCAACACGTTACAGATTGCGCTGCAAACGCGCATCAAGCTGTT
CTGGCGACCAAAGGCGCTGGAAAACGTCAGCATGAAAAATCCATGGCAGCATAAGGTGAC
CTTAACCCGCAGCGGCCAGGAGTTTACTGTCAATAACCCGACGCCGTACTTCGTGGTTAT
CAGTAATGCCAGCGCGCAGAAAAACGGCAATCCGGCAGCGGGATTTTCTCCCATGGTGAT
ATCGCCAAAAACCTCCGTGCCGCTGAATGTCAAAATGGATAGCGTCCCGGTGCTGACCTA
CGTCAACGACTATGGCGCGCGGATGCCGCTGTATTTTAAATGTGGTGGCGATACCTGCCA
GGTGGACGCAGAGCAGAGCCGCAAAGGCTGATGCCGGGAGAGCCATATGAAAATAATTTA
TCTGGCGGTGTCGGGCATTGCGCTGCTGGCCTGGAATGTCGCCAGTGCAGAAACGAAACC
CGTCAACCTGGAACTCAGAGTCCTGGTGGATGCGCCGCCGCCCTGTACCGTGACCGGTAG
TGCAGTGGAGTTTGGCGATGTGCTGATCGCCAGTATCGATGGCAACAATTACCGCCAGAA
CGCGGGCTATACCCTCGATTGTTCGGGGCGTCTGGCAGACGATCTGCGGATGCAACTGAA
GGGCACCACCACAACCGTGAACGGTGAAACTGTGCTGGATGCAGGCATTGCCGGGTTTGG
CATCCGCATCGAAAACGCCGCCGATAACTCGCTGTTTTCCATTGGTGAAAATAACTGGAC
GCCTTTTGCATTTAACTCTCTGCCGCAACTGAAGGCTGTGCCGGTAAAACAGAACGGCGT
GCAGCTCGCGCCAACGGAATTTAACGCCAGTATGACCATGGTGGTGGATTACCAATGAAA
CGACTCGCACTTTTCCTGATTTGGGGTGCCTGCGGGGGCGCTCTGGCCTCACCGGATATC
ACCTTTCACGGCACGCTGGTGTCGCCGCCTGCCTGCACCATCAACGAAGGCCAGACCATT
GAACTGGAGTTTCGCGATGTACTTATCGACAGCATTGATGGCAACTACGCCCGCCAGGAG
GTGCCGTACACCATCAAATGTGACTCCGACGTTCGCAATGAGGCCTGGCAGATGACGCTC
ACCTGGACCGGGACGCAAACCAGCTACAACGATGCGGCAATCGAAACCGATGTTCCGGGA
TTCGGGATTCAGCTTTTGCAAAACGGGCAACGTTTTCAGCTTAATACCCCACTGACCATC
AATGCCACGGATTTGACACAAAAACCGAAGCTTGAGGCCGTTCCGGTTAAAGCGAGTGAC
GCTGTTTTAAACGACGGCACGTTTTCAGCGTACGCAACATTACGGGTGGAATATCAATGA
AGACAAATACCGGATGTGTGCTTCTGGCAAGCCTGATGCTCACCGCCAGCGGAACCACGT
TGGCGGCGGACAACCTGCATTTTTACGGCAACTTGTTAAGTAAATCCTGCACGCTGGTGG
TGGATGGTGAAGTGCTGGCGGAAGTGCATTTCCCGACCATCAGCAACCAGGATTTAACGG
TGGCGGGCCAGTCTTCCAGGGTGCAGGTGGTCTTTAAGTTGAAAGATTGCAAAGGCCCGG
CGGATTACCAGGTCAAAGTCACGCTGACCGGTACGGAAGATAGCGAACAGCCAGGTTTTC
TGGCGCTTGACCCGGCATCCAGCGCGCAAGGGGTAGGGATTGGTATGGAAAAGTCAGACG
GTACCTGGGTGCCGCTTAACGATTCTGCCGGTGCCACCTTTAACCTCACTAACGGCGCGA
ATAACCTCAATTTTAATGCCTGGTTGCAGGCGAAAAGCGGTCGTGAAGTGACTTCTGGTG
ACTTCACCGCCAGCCTGACTGCCACTTTTGAGTATATTTAAGATGAAGATAATACGAAAC
TTTTTGGGGCTGTTGACGCTGATGGTGTTGAGCCTGACGGCTCAGGCACAGACATTTCAG
ATGTATCCCCCTATGGGTGTACCAGGCGCTTTAGCCAGGATAATATTTACTCTGGAAGTT
GTTACCCCTGCAGGCGTTTATACAGGTACATATCAGTCGCGCGATCCCAGGATGCTTCTC
GTTGGCAATTTAACATTGTTAAGCTGGAATGGTCCATCTTCAATTCCTGCGCCAACTATT
TATCTGGATCATTCGAACGAAATAAATATGTCAAATTGTCCCGGTCTTGCTGGCGTTCCC
TCCACCAACGGCAAAGGATGGGATTGTTATGCTGCTGATTTAAAAGTCACGGTAACAGGG
GACGTGCAGGGGTGTCCATGGCTGGTTTCAACCCAGATTACCACTACGGACCTGGGAGAT
GTGGGGGCTACCTATGTAGGTCCTAAATACAATAACTCCACCTGTCCATCAATCCCACTG
ACGACATATGATGTTTCCTGGGATGAGAATACGGTGATTCATAAAAAAACATTGAATCTG
AAATCAACAGACGCCGTAGGGGGAATCATCGAGAAAACCCTGTCGACCTATTTAATGGAA
AGTGAGAGGCTGTGTGATGGTAGCCAGTTTGATCCTCGCGGGGCAAATTGCCGTTTTGTT
TCGCAGATGATCACTTTTACAGCATCAGGCTGCGACGATGCCAAAGTGACGGTGACGCCG
GTTCCGCATCCGATTACTGACAGGCAACTGCATGATATTGTGGTGCGCGTCGATGCCAGC
GCATTGCAGCCTATTGATTCAACGTGTCGCTTCCAGTATGTGTTGAATATGTTCTAGCAC
ATACCAGCCTGGTGACAGGAGTTTACCAGGCTTTTTTTCTCTCATATTGGATAATTTGCC
CTACCTGAACACATTTAGGCCGGATAAGGCGTTTACCCCGCATCCGGCATTCGATACCAG
CATTCAGGGCGAAATGGCAAAACGCATCCGCCCCTAATATTCACGGTAACTCCGGCGGCA
GCCACTCTTCCACTTCAATCAACACTAACAACGCTGCATCTCCGCCGTACTCTTTCGGTG
CCTGGTGAAATGCCATTACATGCGGATGTTGCGCCAGCCACAGCGGCGTTTGCTGTTTCA
AAATATGCTTCCCGTGCCCGTGCATTACGCATGCGCAAAACACATGTTCACGGCGGCAGG
CGGCAATCAACGCCCCCAGTTCCTGCTTGGCCTGCATTTGCGTCAAACCATGTAAATCGA
GGAAAAGCTCCGGTGAATAATCGCCGCGTCGCAACTTCTTCGCCTCAAAATGACTCACAT
CCGGGCGGACATATTTCACCGGGCCTTCGGTATTCAATAACGGCTGAAACTCATCTGAGA
AATAATGGCTGGCATCGGCCTGCTCCTGAATCAACCGTTTCACCGGCACTTCGCTGATTT
TCTTACGCTGCGGTCGGTGGACAATCGTGTCCTGCTTAATCTTGCGAGTCCCCGCCATCA
ACTGGCGAAACAGAGCCTGGTCCTCCTCGCTAAGTGTTGTTTTCTTTTTCATTTATCTGT
CTCTATTTCTAATTTTCCTACAGTTTACCCGACTCGTAGCGCAATCGATCGTTTTAAACG
TATTTTTCCTCACTCACCGCGCGTGAATGCTGATTTATCGTCATCTTCGTGGCAAACTAG
CCGCCGAAATTATTGCGATCATGCCCTGGAGGAATACGTGGATAAAATTTTCGTTGATGA
AGCAGTTAATGAGCTGCAAACCATTCAGGACATGTTGCGCTGGTCGGTTAGCCGCTTCAG
CGCGGCAAATATCTGGTACGGTCACGGCACCGATAACCCGTGGGATGAAGCGGTACAATT
GGTGTTGCCGTCGCTCTACCTGCCGCTGGATATTCCGGAAGATATGCGCACCGCGCGTCT
GACCTCCAGCGAAAAACATCGTATTGTTGAGCGCGTGATCCGCCGCGTCAACGAACGCAT
TCCGGTGGCTTACCTGACCAATAAAGCATGGTTCTGCGGTCATGAATTTTACGTCGATGA
ACGTGTGCTGGTGCCGCGCTCGCCGATTGGTGAACTGATCAACAATAAATTTGCCGGGCT
AATCAGCAAGCAACCGCAGCATATTTTAGATATGTGTACCGGTAGCGGCTGCATTGCCAT
TGCCTGTGCTTATGCCTTCCCGGAAGCGGAAGTCGATGCGGTAGATATCTCTCCCGACGC
GCTGGCGGTTGCCGAACAGAACATCGAAGAACACGGTCTGATCCACAGTGTCATACCGAT
TCGTTCCGATCTGTTCCGTGATTTGCCGAAAGTGCAGTACGACTTGATCGTCACTAACCC
GCCGTATGTCGATGCGGAAGATATGTCCGACCTGCCAAACGAATACCGTCACGAGCCAGA
ACTGGGCCTGGCATCTGGCACTGACGGCCTGAAACTGACGCGTCGCATTCTCGGTAACGC
GGCAGATTACCTTGCTGATGATGGTGTGCTGATTTGTGAAGTCGGCAACAGCATGGTACA
TCTTATGGAACAATATCCGGATGTTCCGTTCACCTGGCTGGAGTTTGATAACGGCGGCGA
TGGTGTGTTTATGCTCACCAAAGAGCAGCTGCTGGCGGCCCGTGAACATTTCGCGATTTA
TAAAGATTAAGTAAACACGCAAACACAACAATAACGGAGCCGTGATGGCTGGAAACACAA
TTGGACAACTCTTTCGCGTAACCACCTTCGGCGAATCGCACGGGCTGGCGCTTGGCTGCA
TCGTCGATGGTGTTCCGCCAGGCATTCCGCTGACGGAAGCGGACCTGCAACATGACCTTG
ATCGTCGTCGCCCTGGGACATCGCGCTATACCACCCAGCGTCGTGAGCCAGATCAGGTCA
AAATTCTCTCCGGTGTTTTTGAAGGTGTTACTACCGGCACCAGCATTGGTTTGTTGATCG
AAAATACCGATCAGCGTTCTCAGGATTATAGTGCGATTAAGGACGTTTTCCGTCCTGGCC
ATGCCGATTACACCTACGAACAAAAATACGGTCTGCGCGATTATCGCGGCGGTGGACGTT
CTTCCGCCCGCGAAACCGCCATGCGCGTGGCGGCAGGGGCGATTGCCAAAAAATATCTCG
CCGAGAAATTTGGTATTGAAATCCGCGGCTGCCTGACCCAGATGGGCGACATTCCGCTGG
AAATCAAAGACTGGTCGCAGGTTGAACAAAATCCGTTCTTCTGCCCGGACCCGGACAAAA
TCGACGCGTTAGATGAACTGATGCGCGCGCTGAAAAAAGAGGGCGACTCCATCGGCGCGA
AAGTCACCGTTGTAGCCAGTGGTGTCCCCGCCGGACTTGGCGAGCCGGTCTTTGACCGCC
TGGATGCCGACATCGCCCATGCGCTGATGAGCATCAACGCGGTGAAAGGCGTGGAAATTG
GCGACGGTTTTGACGTAGTGGCGCTGCGCGGCAGCCAGAATCGCGACGAAATCACCAAAG
ACGGTTTCCAGAGCAACCATGCGGGCGGCATTCTTGGCGGTATCAGCAGCGGGCAGCAAA
TCATTGCCCATATGGCGCTGAAACCGACCTCCAGCATTACCGTGCCGGGGCGCACCATTA
ACCGCTTTGGCGAAGAAGTTGAGATGATCACCAAAGGCCGTCACGATCCTTGTGTCGGGA
TCCGCGCGGTGCCGATCGCTGAAGCGATGCTGGCGATCGTTTTAATGGATCACCTGCTAC
GGCAGCGGGCGCAAAATGCCGATGTGAAGACTGATATTCCACGCTGGTAAAAATGAACAA
AACCGCGATTGCGCTGCTGGCCCTGCTTGCCAGTAGCGCCAGCCTGGCAGCGACGCCGTG
GCAAAAAATAACCCAACCTGTGCCGGGTAGCGCACAATCGATAGGCAGTTTTTCTAATGG
CTGTATCGTCGGCGCTGACACGCTGCCGATACAGTCCGAACATTATCAGGTCATGCGTAC
CGATCAGCGTCGCTATTTCGGTCACCCGGACCTGGTGATGTTTATCCAGCGTCTGAGTAG
CCAGGTGAGCAATCTGGGCATGGGTACGGTGCTGATTGGCGATATGGGGATGCCCGCTGG
TGGGCGTTTCAACGGCGGTCATGCCAGCCACCAGACCGGACTGGATGTCGATATCTTTCT
GCAACTGCCGAAAACACGCTGGACCTCCGCGCAGCTCTTGCGCCCGCAAGCACTGGACTT
AGTTTCCCGCGACGGTAAACACGTTGTCCCCACGCTGTGGAAGCCAGAAATTTTCAGCTT
GATCAAACTCGCCGCCCAGGACAAAGACGTCACACGCATTTTTGTTAATCCGGCGATTAA
ACAACAACTTTGCCTTGATGCGGGCACCGATCGCGACTGGTTGCGCAAAGTGCGACCCTG
GTTCCAGCATCGCGCGCATATGCATGTACGATTACGTTGTCCTGCCGATAGTCTGGAGTG
TGAAGATCAACCTTTACCGCCACCAGGCGATGGTTGCGGGGCAGAACTGCAAAGCTGGTT
TGAACCTCCAAAACCGGGAACAACAAAGCCTGAGAAGAAGACACCGCCTCCGTTGCCGCC
TTCCTGCCAGGCGCTACTGGATGAGCACGTGATCTAATGGAAACGTTTAATAGCCTGTTT
ATGGTTTCCCCGCTGTTGCTGGGAGTTCTCTTTTTTGTCGCCATGCTGGCGGGATTTATC
GACTCGATTGCCGGTGGTGGTGGGTTACTCACGATTCCGGCATTAATGGCTGCGGGGATG
TCTCCCGCTAATGCGCTGGCAACCAATAAACTGCAAGCCTGCGGCGGCTCTATTTCCGCC
ACTATCTACTTTATTCGCCGCAAAGTGGTTAGTTTAAGCGATCAGAAACTCAATATCGCC
ATGACCTTTATCGGCTCAATGAGCGGCGCACTGCTGGTGCAATACGTTCAGGCTGATGTC
TTACGGCAGATTTTGCCCATTCTGGTGATTTGTATCGGCCTCTATTTCTTGCTGATGCCA
AAGCTGGGTGAAGAAGATCGCCAGCGCCGGATGTACGGTTTACCCTTCGCGTTAATTGCC
GGTGGCTGCGTCGGTTTTTACGACGGATTCTTTGGTCCGGCAGCCGGATCGTTTTACGCG
CTGGCCTTTGTTACGCTGTGCGGATTCAACCTCGCCAAAGCCACGGCTCACGCCAAATTA
CTTAACGCAACGTCAAACATCGGCGGTTTGCTGCTGTTTATTCTCGGCGGCAAAGTGATT
TGGGCGACGGGCTTTGTGATGCTGGTGGGGCAGTTCCTCGGCGCGCGCATGGGTTCAAGA
CTGGTGTTGAGCAAAGGACAAAAGCTGATCCGCCCGATGATTGTTATCGTCTCGGCGGTG
ATGAGTGCCAAATTACTTTACGATAGCCATGGACAGGAGATCCTCCACTGGTTGGGGATG
AACTAATGAACAGTACACACCACTATGAGCAGTTGATTGAAATTTTTAATAGCTGCTTTG
CCGATGATTTTAATACCCGTCTGATTAAAGGCGACGACGAACCGATCTATCTTCCCGCTG
AAGCGGAAGTACCGTATAACCGAATCGTCTTTGCTCATGGCTTTTATGCCAGCGCAATTC
ATGAGATTTCGCACTGGTGTATTGCCGGAAAAGCGCGCCGTAAGCTGGTTGATTTCGGCT
ACTGGTATTGCCCGGACGGACGCGATGCCCAAACGCAAAGCCAGTTTGAAGATGTTGAAG
TGAAGCCGCAGGCGCTCGACTGGTTGTTCTGCGTGGCGGCGGGATATCCGTTTAACGTCA
GTTGCGACAATCTGGAAGGGGATTTCGAACCGGACCGCGTGGTGTTTCAACGGCGGGTAC
ATGCGCAGGTGATGGATTATCTGGCAAATGGCATTCCGGAACGCCCGGCACGTTTCATTA
AAGCACTACAAAATTATTATCACACGCCGGAACTTACGGCGGAACAGTTCCCGTGGCCGG
AAGCGCTAAACTAAAGCCAGTGCCACGTTTTACAATGAGGAAAGAAGATGATCGCGGAGT
TTGAATCACGCATTCTGGCATTAATCGACGGTATGGTTGACCATGCCAGTGATGATGAGT
TGTTTGCCAGTGGGTATTTGCGTGGCCACCTGACATTAGCCATCGCAGAACTGGAAAGTG
GTGATGACCACTCCGCTCAGGCGGTGCATACGACCGTTAGCCAGAGTCTGGAAAAAGCCA
TTGGTGCTGGTGAATTGTCGCCGCGTGACCAGGCGCTGGTGACCGATATGTGGGAAAACC
TGTTTCAGCAGGCATCACAGCAGTAAGTTGCGGCGTCTGGAGCACCATGCCTGATGCGAC
GCTTATCGCGTCTTATCAGGCCTACACGTCACACGTAGGTCGGATAAGGCGTTCACGCCG
CATCCGACAAACAATGCCAAAGCTGGTTACCCAGCCTTAACTGCTTTACCCTTCAACAAT
TTCCGCACCCATAACCGATTCGGATTTAACGCCGCCAGCGTACTGGCATCCATCGGAATC
GGTTCTTCACTCATCTGTGCCGCCAGAATCTCTGCGCACAGTGGGGCAGAACACAAACCA
CGCGAACCCAAAGCAGCAAGCATAAAGAGATCGTCATAAACCGGCGCGCTTACCGCCTTA
TCTTTCTGCTCCGCCAGCGACGCATATTCCACAAGTGTTGCCTCATAATCGGGAACATTA
CCTACCATTGGTAGATGATCGCGGGTGGCACAACGCACACCGCAGCGCGCCTCTTTCTCA
CTGATATCAACCTCTTTTGCCCACTGTGCCTGCGGGAAACAATCAATCAACCGCTGGCGA
TTCTGCTGCTGATCTTCATCACTGTACGTCGTATCTTCGCTGCCGCGATGATAACTGGCA
CCAATACAATGATGCTGATTCGCCGGATTTTGTGGCGTGAGATAACCGTCATAGCACAGC
ACCTGCTTCAGTTTTGCCAGTTCCGGTGTCGTCGGAATATGGCTGACCTGACCGGCAACC
GAATATACTGGCAGAGATGATGTTTGGCTGAAACGGCTGATTTGATGCCCGTTCGCCAGT
ACCACTACGCTGTGTGTTGCTTGCTGATCTCCTGCAAAATTCAACAACCAACAGTCATCC
TTACGGGATAAATCCTGTAACTGATATTGATAATAAATCTGCAACCCCTGCTGTTGCGCC
AGTTCCAGCACATTACGGGTCAGTTCTGCTGGGCACAGCCAACCACCTTGCGGATAAGTA
ATGCCGCTGCAATTTGTCGCAACGCCCGTAATTTGTTCAACCGCATTTGCCTCAACGGCT
ACAGCCAGTTCTTCGGGTAAATCCATTGACAACATCTGTGCGATTTTATGCTGGCTTTTC
TCATCCCAGCCTAACTGCGTGACGCCGCACCAGTCATGATCAAATTTAACGGGTAATTGG
TCGTAAAACCGACGAGCAAAAGTAAACGCATTAGAGAAAAAGCGGTTTAGCGCCTCATCG
TGTTTGCTTAATAACGGATACAACGCCCCCTGGCGATTGCCGGAAGCACCCAGCGCGGGG
GCTTCATCCGCGCAATAAAGCGTTACCTGCCAGCCGCGGCGTAATAACGCCAGCGACAAC
AACGCGCTGGCAATACCACCGCCGATAATCGCCGCTTCCAGTTTGCTGCTGCCCGTACGA
TTAAACCACGGCGTGGAGCAGGGGAGTGGTAATGTCTGTTCCATCACCCCACAAAGCATT
TCCCGTTTGCGCCCAAAGCCCTTACGTTTTTGCATCGTGAATCCGGCTTCCTGCAAACCG
CGGCGGACAAAACCGGCAGACGTAAATGTCGCCAGCGTGCCGCCTGGACGCGCCAACCTT
GCCATGGCGTTAAACAGATTTTGCGTCCACATATCCGGGTTTTTAGCTGGCGCAAAGCCG
TCCAGAAACCAGGCATCTACTTTTTGATTTAGAGAATCGTCCAGTTGGCTGGTCAGTTCA
TTAATATCGCCAAACCATAAATCCAGCGTCACGCGGCCTTCATCGAGTAATAAACGATGG
CAACCGGGCAAGGGCATTGGCCACTGCGCCTGAAGTTGTTCTGCCCACGGAGTCAGTTCC
GGCCAGTGTTGATGCGCTAAGGCTAAATCCGCACGGGTGAGGGGAAATTTCTCAAAACTA
ATGAAATGTAAGCGTTGTAATTGCGCTTGCGGATGCGCTTCGCGAAACTGATCAAATGCC
TGCCATAGCGTCAGGAAGTTTAATCCGGTGCCGAAGCCGCTCTCTGCTACCACAAACAGA
GGATGTGGATGTTCAGGAAAGCGTGCCTCTAATTGGTTACCTCCCAGAAAAACATAACGC
GTCTCTTCCAGCCCGTTATCGTTGGAAAAATAGACATCGTCAAAATCTCGGGAAACAGGT
GTACCCTCAGCATTAAATTCGAGGTTGGCAGGTTGTATGGAGTAGTGTTTCACGTAAGTT
ACTCGTCTTACAGGCGGTGGCTCGATCTTAGCGATGTGTGTAAGGCTGCGCAAATTTCTC
TATTAATTGGCTGATCGGACTTGTTCGGCGTACAAGTGTACGCTATTGTGCATTCGAAAC
TTACTCTATGTGCGACTTACAGAGGTATTGAATGAAACGTGCAGTGATTACTGGCCTGGG
CATTGTTTCCAGCATCGGTAATAACCAGCAGGAAGTCCTGGCATCTCTGCGTGAAGGACG
TTCAGGGATCACTTTCTCTCAGGAGCTGAAGGATTCCGGCATGCGTAGCCACGTCTGGGG
CAACGTAAAACTGGATACCACTGGCCTCATTGACCGCAAAGTTGTGCGCTTTATGAGCGA
CGCATCCATTTATGCATTCCTTTCTATGGAGCAGGCAATCGCTGATGCGGGCCTCTCTCC
GGAAGCTTACCAGAATAACCCGCGCGTTGGCCTGATTGCAGGTTCCGGCGGCGGCTCCCC
GCGTTTCCAGGTGTTCGGCGCTGACGCAATGCGCGGCCCGCGCGGCCTGAAAGCGGTTGG
CCCGTATGTGGTCACCAAAGCGATGGCATCCGGCGTTTCTGCCTGCCTCGCCACCCCGTT
TAAAATTCATGGCGTTAACTACTCCATCAGCTCCGCGTGTGCGACTTCCGCACACTGTAT
CGGTAACGCAGTAGAGCAGATCCAACTGGGCAAACAGGACATCGTGTTTGCTGGCGGCGG
CGAAGAGCTGTGCTGGGAAATGGCTTGCGAATTCGACGCGATGGGTGCGCTGTCTACTAA
ATACAACGACACCCCGGAAAAAGCCTCCCGTACTTACGATGCTCACCGTGACGGTTTTGT
TATCGCTGGCGGCGGCGGTATGGTTGTGGTCGAAGAACTGGAACACGCGTTGGCACGTGG
TGCTCATATCTACGCTGAAATCGTTGGCTACGGCGCAACGTCTGATGGCGCAGACATGGT
TGCTCCATCTGGCGAAGGCGCAGTGCGCTGCATGAAGATGGCGATGCACGGTGTTGATAC
GCCAATCGACTACCTGAACTCCCACGGTACTTCGACTCCGGTTGGCGACGTGAAAGAGCT
GGCTGCTATCCGTGAAGTGTTCGGCGATAAGAGCCCGGCGATTTCTGCAACCAAAGCCAT
GACCGGTCACTCTCTGGGCGCTGCTGGCGTACAGGAAGCTATCTACTCTCTGCTGATGCT
GGAACACGGCTTTATCGCCCCGAGCATCAACATTGAAGAGCTGGACGAGCAGGCTGCGGG
TCTGAATATCGTGACCGAAACGACCGATCGCGAACTGACCACCGTTATGTCTAACAGCTT
CGGCTTCGGCGGCACCAACGCCACGCTGGTAATGCGCAAGCTGAAAGATTAATTCGGAGT
AGGTCGGAGTAGGTCGGATAAGACGCGCCAGCGTCGCATCCGACGTTACGCGCCAATGCG
GCATTCGGCACTAACGCCAAAGGGAACCCGATGGTTCCCTTTTTCACATCATTGACAATC
GCCGCCTGTTCCAGGCAAACTTCCCGCTTTGTCGATTTCCTTCTGAAAAGACGTACGCGT
TAATTCCTGCCAACGCACCGTAACCCTGAAACCAGAGAGATGAGACGGGGATACTCCTCG
CCTTGCGCTGCATTCTGGAGTAATGCATGACTGCTGTAAGCCAAACCGAAACACGATCTT
CTGCCAATTTTTCGCTCTTCCGCATCGCTTTTGCGGTTTTTCTCACCTACATGACCGTAG
GGCTGCCGTTGCCGGTTATCCCGCTGTTTGTTCATCATGAACTGGGCTATGGCAATACCA
TGGTCGGCATTGCCGTCGGGATTCAGTTTCTGGCTACGGTGCTGACGCGTGGCTATGCCG
GGCGACTGGCCGATCAATATGGCGCAAAACGTTCGGCGCTTCAGGGGATGTTAGCTTGTG
GTCTGGCGGGGGGCGCGTTGCTGCTGGCGGCGATTTTGCCCGTCTCCGCACCGTTCAAAT
TTGCCCTGTTGGTCGTCGGGCGTTTGATTCTTGGCTTTGGTGAAAGCCAGTTACTGACAG
GCGCTCTGACCTGGGGATTAGGCATCGTAGGGCCAAAACACTCTGGCAAAGTAATGTCAT
GGAACGGAATGGCGATTTACGGTGCCCTCGCTGTTGGTGCACCGCTTGGCCTGTTGATTC
ATAGCCATTACGGTTTTGCCGCACTGGCGATCACCACAATGGCATTACCCTTACTGGCGT
GGGCCTGTAACGGCACAGTGCGCAAAGTACCGGCCCTGGCGGGAGAACGTCCATCGCTGT
GGAGCGTTGTCGGGCTTATCTGGAAACCAGGGTTAGGTCTGGCACTACAAGGCGTTGGTT
TTGCGGTTATCGGGACTTTCGTTTCGCTCTACTTTGCCAGCAAAGGATGGGCGATGGCGG
GCTTTACTCTTACCGCGTTTGGCGGGGCATTTGTCGTGATGCGCGTCATGTTTGGCTGGA
TGCCGGACCGTTTTGGCGGCGTGAAAGTGGCGATAGTCTCTCTGCTTGTAGAAACGGTGG
GCTTGTTGCTGCTCTGGCAAGCCCCGGGTGCGTGGGGCGCATTAGCGGGCGCGGCGTTAA
CCGGAGCCGGATGTTCGCTTATCTTTCCTGCGCTGGGCGTGGAGGTGGTTAAACGCGTCC
CCTCACAAGTTCGCGGCACCGCACTGGGCGGTTACGCCGCGTTTCAGGATATCGCCCTCG
GCGTCTCCGGGCCGCTGGCGGGAATGCTGGCGACCACGTTTGGTTACTCTTCGGTATTTC
TTGCCGGGGCGATCTCTGCAGTGCTGGGAATTATTGTCACGATACTGTCATTTCGTCGGG
GCTAACGAACCAGCCAGACCAGCATCAGGATAATCGCGACTAACAGTATCCACAGCGCGG
GACGCGTTGCCATATTTTGCAACGTGTCCATCATCGGTGGAAAAGGATTAAGCAGCGGTT
GCATATCACGCGGATCAATCCCTTTAACCCGCCGTTGATAAAGCTGATTAAGAATATCCT
CGGCCTGGGCAGAAGAAAGCGATGATTGCGCAGAAAGGCCATATTTTTGCTGGATATATG
CCGATAACGCCGCCAGTTCACTGGCATCTAAAGGTTGTTTTAGCGCCATCTGTAGTGATT
CCAGCGTTGGCGTATTTTGCTGGCTTAGCGTCTGACGCGCCTGTAGCCAGGTCACCAGAT
GGTTAAACAGTTTCGCTGGAATTAACTCGCCATCTTTCACCCCGGAAAGTTCCAGCATCG
ATTGCCAGATCTGTTTGCTGGGTTCCCCCGTTGCCGCCGCAAGTTTGGTCACCAGCTGTT
TGAGCGCATTGTGCTCCGCCGGTAATAAAGGACGATCGGTCGCCTCGCGCTGCTGCGGTT
GCGGAATAACCATCTTCCCTTCCTGCAACAGGGTTAGAATGGTTTTTAATTGCTCCGGTG
AGAGCTGATTCAGCGGCGTCTGACCAAAGTTATGACGGATATAATCCGTGACCGCCTGAC
GATTATTCCCCAGACGTAAATACTCCCCTAATTGCGCTAAAAGCTGGCGGGCAGAATGGC
TTTTTTGCGCGGCCAGCAGACGTTGCGCCAGATTATGCTCAGCGGCAGGGAAGTGACGCG
AAAGCAGCGGTGAATCTCCCGACAGACCAATATCGTGCCTGATACCCGCCCACAGTTCTG
CTCTTTGCTGTTGCGTCAGTGAGGTCACTTTCGTCATTAAGCTTTCCAGCGAAGTACGTT
GCTGACTGGATAAAGGCTGATTGCCCGCGCCAGACGGCAGGTTATCTCCCTGACCTGGTG
GTTGCCCAGGAGGAGGGCCGGAAATAGGTTGTATCATTACGTATCCTTATACCTGAAATC
TTCGCAAGTATGCCTGGCCGCGAGATTATGGCACACTTGTCCGGTTAACTCTCGTCTCAT
ACAGGTAACACAAACGTGAAAATCCTTGTTGATGAAAATATGCCTTATGCCCGCGACTTA
TTTAGCCGTTTGGGTGAGGTGACCGCGGTTCCCGGGCGTCCAATCCCCGTCGCTCAACTG
GCAGACGCGGATGCGCTGATGGTGCGTTCGGTCACGAAAGTGAATGAATCTTTGCTGGCA
GGAAAACCCATTAAATTTGTTGGCACTGCCACTGCGGGGACCGACCATGTCGATGAAGCA
TGGTTGAAGCAGGCGGGAATTGGTTTTTCCGCTGCACCTGGCTGTAATGCGATTGCGGTG
GTGGAATATGTTTTCTCCTCCCTGCTGATGCTTGCCGAACGCGATGGATTTTCACTGCAC
GAGCGTACCGTGGGGATCGTGGGCGTTGGTAACGTTGGACGTCGATTGCAGGCGCGACTG
GAAGCGTTAGGGATTAAAACCTTGCTTTGCGATCCGCCTCGCGCTGACCGTGGGGATGAG
GGTGATTTCCGCTCGCTGGATGAGTTAGTCCAGCGCGCGGATATTCTGACTTTCCATACG
CCACTCTTTAAAGATGGTCCGTACAAAACGCTACATCTGGCGGATGAAAAACTGATCCGT
AGCCTGAAGCCGGGAGCGATTCTGATTAACGCCTGCCGTGGCGCAGTCGTCGATAATACC
GCGCTGCTGACCTGCCTGAATGAAGGCCAGAAGTTAAGCGTGGTGCTGGATGTCTGGGAA
GGCGAGCCGGAACTTAATGTGGAATTGCTGACAAAAGTGGATATCGGCACGCCGCATATT
GCAGGCTATACCCTGGAAGGTAAAGCACGCGGTACTACGCAAGTGTTTGAAGCCTATAGC
AAGTTTATTGGGCATGAACAGCACGTTGCGCTGGATACATTACTGCCCGCGCCAGAGTTT
GGTCGCATTACGCTGCATGGCCCGCTCGATCAACCGACGCTGAAAAGGCTGGTGCATTTG
GTGTATGATGTGCGCCGCGATGACGCACCGCTGCGTAAAGTCGCCGGGATACCGGGTGAG
TTCGATAAACTGCGCAAAAACTATCTTGAGCGCCGTGAATGGTCATCTCTGTATGTAATT
TGTGATGACGCCAGTGCGGCATCATTGCTGTGTAAACTGGGTTTTAACGCCGTTCATCAT
CCGGCACGTTAATCTCTTCTTCATGCTCTCTGCTGTAACATTGGCAGGGAGCTTTGCTAT
TTCTGGAGTAAACCACCATGTCTGAAGGCTGGAACATTGCCGTCCTGGGCGCAACTGGCG
CTGTGGGCGAAGCCCTGCTTGAAACGCTGGCTGAACGTCAGTTCCCGGTTGGGGAAATTT
ATGCACTGGCACGTAACGAAAGCGCAGGCGAACAACTGCGCTTTGGTGGTAAAACAATCA
CCGTGCAGGATGCCGCTGAATTCGACTGGACGCAGGCGCAGCTGGCATTTTTTGTCGCAG
GCAAAGAAGCTACCGCTGCCTGGGTTGAAGAAGCGACCAACTCAGGTTGCCTGGTGATCG
ACAGCAGCGGACTGTTTGCTCTCGAACCAGACGTACCGCTGGTGGTGCCGGAAGTAAACC
CGTTTGTACTGACCGATTACCGCAACCGGAATGTCATCGCCGTACCGGACAGTCTGACCA
GCCAGTTGCTGGCGGCACTGAAACCGTTAATCGATCAGGGCGGTTTATCACGTATCAGCG
TTACCAGCCTGATTTCAGCCTCCGCCCAGGGCAAAAAAGCGGTCGATGCGTTAGCGGGGC
AGAGTGCGAAATTGCTCAACGGCATTCCGATTGACGAAGAAGATTTCTTCGGGCGTCAGC
TGGCGTTCAACATGCTGCCGTTACTGCCGGATAGCGAAGGTAGCGTGCGTGAAGAACGTC
GTATCGTTGACGAAGTACGCAAAATCCTGCAGGACGAAGGGCTGATGATTTCGGCAAGCG
TCGTCCAGGCACCGGTATTCTACGGTCATGCCCAGATGGTCAACTTTGAAGCACTGCGTC
CGCTGGCGGCAGAAGAAGCGCGTGATGCGTTTGCTCAGGGCGAAGATATTGTGCTCTCTG
AAGAGAACGAATTCCCGACTCAGGTAGGGGATGCTTCTGGTACGCCGCATCTTTCTGTTG
GCTGCGTGCGTAATGACTACGGTATGCCGGAGCAAGTCCAGTTCTGGTCGGTGGCCGATA
ACGTTCGCTTTGGCGGCGCGCTGATGGCAGTAAAAATCGCCGAGAAACTGGTGCAGGAGT
ATCTGTACTAATGTCCGACCAGCAACAACCGCCAGTTTATAAAATTGCGCTGGGCATTGA
GTACGACGGCAGTAAGTATTACGGCTGGCAACGGCAGAACGAAGTTCGCAGTGTGCAGGA
GAAGCTGGAAAAGGCGCTCTCCCAGGTGGCGAACGAACCCATCACCGTCTTCTGCGCCGG
GCGTACTGACGCAGGGGTACACGGTACCGGGCAGGTTGTGCATTTCGAAACAACCGCGCA
GCGCAAAGACGCTGCGTGGACGTTGGGCGTAAATGCGAATTTACCTGGTGACATCGCCGT
GCGTTGGGTTAAAGCTGTACCTGATGATTTTCATGCCCGATTTAGCGCCACGGCTCGCCG
TTATCGCTACATCATCTACAATCATCGGCTGCGCCCGGCGGTACTGAGTAAAGGGGTAAC
CCATTTTTACGAACCGCTGGACGCTGAACGGATGCATCGGGCTGCGCAATGCTTGCTGGG
CGAGAATGATTTCACCTCGTTCCGTGCGGTGCAGTGCCAGTCCCGAACCCCGTGGCGCAA
CGTTATGCATATTAATGTCACGCGTCACGGTCCTTATGTGGTGGTAGATATCAAAGCGAA
TGCCTTTGTACATCATATGGTCAGGAATATTGTCGGCAGCCTGATGGAAGTCGGTGCCCA
CAACCAGCCGGAGAGCTGGATAGCAGAGTTGCTGGCGGCAAAGGACAGAACGCTGGCGGC
AGCAACGGCAAAAGCGGAAGGGCTGTATCTGGTCGCGGTGGATTACCCTGACCGGTATGA
TCTTCCAAAATCGCCAATGGGCCCGCTATTTCTGGCGGACTAACGAGAATAACGCTCGTA
ACATTTCAGGCTGTAGCCAACGTAGTTACAGCCTGAAAGATGACGAGTACAAGGCATAGG
CAAATATGGACCTGATTTATTTCCTCATCGATTTTATCCTGCACATTGACGTGCATCTGG
CAGAGCTGGTCGCGGAGTACGGCGTCTGGGTTTATGCCATTTTGTTCTTAATTTTGTTCT
GTGAAACCGGTCTGGTGGTAACGCCGTTTTTACCGGGTGATTCATTGCTGTTTGTTGCCG
GTGCGTTGGCATCACTGGAAACCAACGATCTCAACGTCCATATGATGGTGGTGCTGATGC
TGATCGCCGCGATTGTGGGTGACGCGGTCAATTACACTATCGGGCGGTTGTTCGGTGAAA
AGTTATTCAGTAATCCCAATTCGAAAATTTTCCGTCGCAGTTATCTCGACAAAACCCATC
AGTTTTATGAGAAACATGGCGGCAAAACGATTATTCTCGCCCGTTTTGTGCCGATCGTCA
GAACGTTCGCCCCGTTTGTTGCGGGAATGGGCCACATGTCGTACCGTCATTTCGCTGCTT
ATAACGTGATCGGCGCACTGTTGTGGGTACTGCTTTTTACCTACGCAGGCTATTTCTTCG
GTACAATCCCGATGGTTCAGGATAACCTTAAGCTGCTGATCGTCGGGATTATTGTGGTTT
CTATTTTGCCGGGCGTCATCGAAATAATCCGTCACAAACGCGCTGCGGCACGCGCCGCAA
AATAAAAAGTAACTCAGCGGTTCGACCACTTTTTTATCCAAAGTTTCGGGCTGTTATGTT
TTAATGTGTAACATTCATGGTCTGTTGGGGGCAAAAATGGCATTATGCGTCCCCAAAGAT
AAAACTGGCATCGAACCAGGTTCAGACAGAAAGGTCCCTAATGAGCTGGATTGAACGAAT
TAAAAGCAACATTACTCCCACCCGCAAGGCGAGCATTCCTGAAGGGGTGTGGACTAAGTG
TGATAGCTGCGGTCAGGTTTTATACCGCGCTGAGCTGGAACGTAATCTTGAGGTCTGTCC
GAAGTGTGACCATCACATGCGTATGACAGCGCGTAATCGCCTGCATAGCCTGTTAGATGA
AGGAAGCCTTGTGGAGCTGGGTAGCGAGCTTGAGCCGAAAGATGTGCTGAAGTTTCGTGA
CTCCAAGAAGTATAAAGACCGTCTGGCATCTGCGCAGAAAGAAACCGGCGAAAAAGATGC
GCTGGTGGTGATGAAAGGCACTCTGTATGGAATGCCGGTTGTCGCTGCGGCATTCGAGTT
CGCCTTTATGGGCGGTTCAATGGGGTCTGTTGTGGGTGCACGTTTCGTGCGTGCCGTTGA
GCAGGCGCTGGAAGATAACTGCCCGCTGATCTGCTTCTCCGCCTCTGGTGGCGCACGTAT
GCAGGAAGCACTGATGTCGCTGATGCAGATGGCGAAAACCTCTGCGGCACTGGCAAAAAT
GCAGGAGCGCGGCTTGCCGTACATCTCCGTGCTGACCGACCCGACGATGGGCGGTGTTTC
TGCAAGTTTCGCCATGCTGGGCGATCTCAACATCGCTGAACCGAAAGCGTTAATCGGCTT
TGCCGGTCCGCGTGTTATCGAACAGACCGTTCGCGAAAAACTGCCGCCAGGATTCCAGCG
CAGTGAATTCCTGATCGAGAAAGGCGCGATCGACATGATCGTCCGTCGTCCGGAAATGCG
CCTGAAACTGGCGAGCATTCTGGCGAAGTTGATGAATCTGCCTGCGCCGAATCCTGAAGC
GCCGCGTGAAGGCGTAGTGGTACCCCCGGTACCGGATCAGGAACCTGAGGCCTGATAACT
GATAAGGGCAGGGCCACTGGCTCTGCCCTTTTGCTATTCTCACCGTAACGAATCAGCGGA
TACCATGATTATCAAACGCACTCCTCAAGCCGCGTCGCCTCTGGCTTCGTGGCTTTCTTA
TCTGGAAAACCTGCACAGTAAAACTATCGATCTCGGCCTTGAGCGCGTGAGCCAGGTCGC
GGCGCGTCTTGGCGTTCTGAAACCAGCGCCGTTTGTGTTTACCGTTGCGGGTACGAATGG
CAAAGGCACCACCTGCCGTACGCTGGAGTCGATTCTGATGGCGGCAGGGTACAAAGTGGG
CGTCTACAGTTCGCCTCATCTGGTGCGTTATACCGAGCGCGTACGTGTGCAGGGTCAGGA
ATTGCCGGAATCGGCCCACACCGCCTCTTTTGCGGAGATTGAATCGGCACGCGGTGATAT
TTCCCTGACCTATTTCGAGTACGGTACGCTGTCGGCGTTGTGGCTGTTCAAACAGGCACA
ACTTGACGTGGTGATTCTGGAAGTAGGGCTGGGCGGTCGTCTGGACGCAACCAATATTGT
CGACGCCGATGTCGCGGTAGTAACCAGTATTGCGCTGGATCATACCGACTGGCTGGGGCC
AGATCGCGAAAGTATTGGTCGCGAGAAAGCAGGCATCTTCCGCAGCGAAAAACCGGCAAT
TGTCGGTGAGCCGGAAATGCCTTCTACCATTGCTGATGTGGCGCAGGAAAAAGGTGCACT
GTTACAACGTCGGGGCGTTGAGTGGAACTATTCCGTCACCGATCATTACTGGGCGTTTAG
CGATGCTCACGGCACGCTGGAAAATCTGCCGTTGCCGCTTGTCCCGCAACCGAATGCCGC
AACGGCGCTGGCGGCACTGCGTGCCAGCGGGCTGGAGGTCAGTGAAAATGCCATTCGCGA
CGGGATTGCCAGCGCAATTTTGCCGGGACGTTTCCAGATTGTGAGCGAGTCGCCACGCGT
TATTTTTGATGTCGCGCATAATCCACATGCGGCGGAATATCTCACCGGGCGTATGAAAGC
GCTACCGAAAAACGGGCGCGTGCTGGCGGTTATCGGTATGCTACATGATAAAGATATTGC
CGGAACTCTGGCCTGGTTGAAAAGCGTGGTTGATGACTGGTATTGTGCGCCACTGGAAGG
GCCGCGCGGTGCCACGGCAGAACAACTGCTTGAGCATTTGGGTAACGGCAAATCATTTGA
TAGCGTTGCGCAGGCATGGGATGCCGCAATGGCGGACGCTAAAGCGGAAGACACCGTGCT
GGTGTGTGGTTCTTTCCACACGGTCGCACATGTCATGGAAGTGATTGACGCGAGGAGAAG
CGGTGGCAAGTAAGTTTCAGAATCGGTTAGTGGGCACGATCGTGCTGGTGGCGCTGGGGG
TGATTGTACTTCCAGGGCTGCTGGACGGGCAGAAAAAACATTATCAGGATGAGTTTGCGG
CTATCCCGCTGGTTCCAAAAGCGGGCGATCGCGATGAGCCTGATATGATGCCAGCCGCCA
CCCAGGCGTTGCCGACGCAGCCGCCGGAAGGCGCAGCGGAAGAGGTGAGGGCAGGTGATG
CCGCAGCACCGTCGCTCGATCCGGCCACTATTGCAGCCAATAACACCGAGTTTGAACCGG
AACCTGCACCGGTCGCGCCACCGAAGCCGAAACCGGTGGAGCCGCCTAAACCAAAGGTTG
AAGCACCACCTGCGCCGAAGCCAGAACCGAAGCCGGTCGTGGAAGAAAAAGCTGCACCGA
CGGGTAAAGCCTATGTTGTGCAACTGGGTGCGCTGAAAAATGCCGATAAAGTGAATGAAA
TTGTCGGTAAGCTGCGCGGTGCCGGTTATCGGGTTTATACGTCGCCATCCACGCCAGTGC
AGGGTAAAATTACCCGTATTCTGGTTGGGCCGGATGCCTCGAAAGATAAGCTGAAAGGTT
CGCTGGGTGAGTTGAAGCAACTTTCTGGCTTAAGTGGCGTGGTAATGGGCTATACGCCGA
ATTAATACGGTCTTGCCTGATGCGACGCTGGCGCGTCTTATCAGGCCTACGCAGGGGTAG
AACCGTAGGTTGGATAAGGCGTTTACGCCGCATCCGACACGCATTGCACGATGCCGCAAA
GGCATAAAAAGTCGATGGCGTTGAATATTTTTTCAGCGCCATTTTTATTGATGCGCGGGA
AGGAAATCCCTACGCAAACGTTTTCTTTTTCTGTTAGAATGCGCCCCGAACAGGATGACA
GGGCGTAAAATCGTAGGACACATATGGTCTGGATTGATTACGCCATAATCGCGGTGATTG
CTTTTTCCTCTCTGGTTAGCCTGATCCGCGGCTTTGTTCGTGAAGCGTTATCGCTGGTGA
CATGGGGTTGTGCTTTCTTTGTTGCCAGTCATTACTACACTTACCTGTCAGTCTGGTTTA
CGGGCTTTGAAGACGAACTGGTTCGAAATGGGATTGCCATCGCGGTACTGTTTATCGCTA
CCCTGATCGTTGGTGCTATCGTGAACTTCGTGATAGGCCAGTTGGTGGAGAAAACGGGGT
TGTCAGGCACCGATCGGGTGCTGGGCGTCTGTTTCGGTGCGTTGCGCGGTGTGTTGATTG
TTGCCGCCATTCTCTTCTTTCTCGACTCCTTTACCGGGGTGTCGAAAAGCGAAGACTGGA
GCAAATCACAGCTGATCCCGCAGTTCAGTTTTATCATCAGATGGTTTTTTGATTATCTGC
AAAGCTCGTCAAGTTTCTTGCCCAGAGCGTAAGTGCTCTGAGATGTGGCTTAACGAGGAA
AAAGACGTATGTGCGGTATTGTCGGTATCGCCGGTGTTATGCCGGTTAACCAGTCGATTT
ATGATGCCTTAACGGTGCTTCAGCATCGCGGTCAGGATGCCGCCGGCATCATCACCATAG
ATGCCAATAACTGCTTCCGTTTGCGTAAAGCGAACGGGCTGGTGAGCGATGTATTTGAAG
CTCGCCATATGCAGCGTTTGCAGGGCAATATGGGCATTGGTCATGTGCGTTACCCCACGG
CTGGCAGCTCCAGCGCCTCTGAAGCGCAGCCGTTTTACGTTAACTCTCCGTATGGCATTA
CGCTTGCCCACAACGGCAATCTGACCAACGCTCACGAGTTGCGTAAAAAACTGTTTGAAG
AAAAACGCCGCCACATCAACACCACTTCCGACTCGGAAATTCTGCTTAATATCTTCGCCA
GCGAGCTGGACAACTTCCGCCACTACCCGCTGGAAGCCGACAACATTTTCGCCGCCATCG
CTGCTACAAACCGCTTAATCCGCGGCGCGTATGCCTGTGTGGCGATGATTATCGGCCACG
GTATGGTTGCTTTCCGCGATCCTAACGGTATTCGTCCGCTGGTACTGGGAAAACGTGATA
TTGACGAGAACCGCACAGAATATATGGTCGCTTCCGAAAGCGTTGCGCTCGATACACTGG
GCTTTGATTTCCTGCGTGACGTCGCGCCTGGCGAAGCGATTTACATCACTGAAGAAGGGC
AGTTGTTTACCCGTCAATGTGCTGACAATCCGGTCAGCAATCCGTGCCTGTTTGAGTATG
TATACTTTGCTCGCCCGGACTCGTTCATCGACAAAATTTCCGTTTACAGCGCGCGTGTGA
ATATGGGCACGAAGCTGGGCGAGAAAATTGCCCGCGAATGGGAAGATCTGGATATCGACG
TGGTGATCCCGATCCCGGAAACCTCGTGTGATATCGCGCTGGAAATTGCGCGTATTCTGG
GCAAACCGTACCGCCAGGGCTTCGTTAAAAACCGCTATGTTGGCCGCACCTTCATCATGC
CGGGCCAGCAGCTGCGTCGTAAGTCCGTGCGCCGTAAACTGAACGCCAACCGCGCCGAGT
TCCGCGATAAAAACGTCCTGCTGGTCGACGACTCCATCGTCCGTGGCACCACTTCTGAGC
AGATTATCGAGATGGCACGCGAAGCCGGAGCGAAGAAAGTGTACCTCGCTTCTGCGGCAC
CGGAAATTCGCTTCCCGAACGTTTACGGTATCGATATGCCGAGCGCTACGGAACTGATCG
CTCACGGTCGCGAAGTAGATGAAATTCGCCAGATCATCGGTGCTGACGGGTTGATTTTCC
AGGATCTGAACGATCTGATCGAAGCCGTTCGCGCTGAAAACCCGGATATCCAGCAGTTTG
AATGCTCGGTGTTCAACGGCGTCTACGTCACCAAAGATGTTGATCAGGGCTACCTCGATT
TCCTCGATACTTTACGTAATGACGACGCCAAAGCAGTGCAACGTCAGAACGAAGTGGAAA
ATCTCGAAATGCATAACGAAGGATGATGCCTTCGCTCAGGGTGCCGATCTGGCACCCTGA
CTTGCAACTCCCGCCGAAATCCTGCAAAGTCTGCCTGCAAGTCTGACAGGGCAACTATTT
ATGAAACGACTTATTGTGGGCATCAGCGGTGCCAGCGGCGCGATTTATGGCGTGCGTTTA
TTACAGGTTCTGCGCGATGTCACAGATATCGAAACGCATCTGGTAATGAGCCAGGCGGCG
CGCCAGACCTTATCCCTCGAAACGGATTTTTCCCTGCGCGAAGTGCAGGCGTTAGCCAAT
GTCACGCACGATGCGCGCGATATTGCCGCCAGCATCTCTTCCGGTTCTTTCCAGACGTTG
GGGATGGTGATTTTACCCTGTTCAATCAAAACCCTGTCCGGCATTGTCCATAGCTATACT
GATGGCTTACTGACCCGTGCGGCAGATGTTGTGCTGAAAGAGCGTCGCCCGTTGGTGCTC
TGCGTGCGTGAAACACCATTGCACTTAGGCCATCTGCGTTTAATGACGCAGGCAGCAGAA
ATCGGTGCGGTGATTATGCCTCCCGTTCCGGCGTTTTATCATCGCCCGCAATCCCTTGAT
GATGTGATAAATCAGACGGTTAATCGTGTTCTTGACCAGTTTGCGATAACCCTTCCTGAA
GATCTCTTTGCCCGCTGGCAGGGCGCATAACTCCGCTGTTGCCCTGTTTCAGGGCAATTT
TGCAACCGCGATCAAATCCTCGACATTTTGTTTCTGCCATTCAATCGAAACGCTGCGATT
CAACCGCTATACCTGCTATCTTCAACTTTAGGACAATAATGCAACGTCTTATTAACATAT
TTAACGTTGAATGTTATTGTTGTCGTCAAGATGGCATAAGACCTGCATGAAAGAGCCTGC
AAACACACAACACAATACACAACATAAAAAGCCATTTTTACTTGAGGGTTATGTATGAAG
AAGTCGATTCTCGCTCTGTCTTTGTTAGTCGGTCTCTCCGCAGCGGCTTCCAGCTATGCG
GCGCTACCGGAGACGGTACGTATCGGAACCGATACCACCTATGCGCCGTTCTCGTCGAAA
GATGCTAAAGGTGATTTTGTTGGCTTTGATATCGATCTCGGTAACGAGATGTGCAAACGG
ATGCAGGTGAAATGTACCTGGGTTGCCAGTGACTTTGACGCGCTGATCCCCTCACTGAAA
GCGAAAAAAATCGACGCCATTATTTCGTCGCTCTCCATTACCGATAAACGTCAGCAGGAG
ATTGCTTTCTCCGACAAGTTGTACGCCGCAGATTCTCGTTTGATTGCCGCCAAAGGTTCG
CCGATTCAGCCAACGCTGGATTCACTGAAAGGTAAACATGTTGGTGTGCTGCAGGGATCA
ACCCAGGAAGCTTACGCTAACGAGACCTGGCGTAGCAAAGGTGTGGATGTGGTGGCCTAT
GCCAACCAGGATTTGGTCTATTCCGATCTGGCTGCAGGACGTCTGGATGCTGCACTGCAG
GATGAAGTTGCTGCCAGCGAAGGATTCCTCAAGCAACCTGCTGGTAAAGACTTCGCCTTT
GCTGGCTCATCAGTGAAAGACAAAAAATACTTCGGTGACGGCACCGGTGTAGGGCTACGT
AAAGATGATGCTGAACTGACGGCTGCCTTCAATAAGGCGCTTGGCGAGCTGCGTCAGGAC
GGCACCTACGACAAGATGGCGAAAAAGTATTTTGACTTTAATGTCTACGGTGACTGATAC
GTCGCAGGGAAGCTGTACCTGATGGAATGATCATCATGGTGCACGCCAGGTTTGTTGCAC
TATTGTGGTGCATTGAAATGCATACTTAAGCATTTTTAATGAAAAATAATACGTCTAACG
GGGCGGGATATTTTGCCTTGATGGTCAATTTTATGGCACGATAAGTGTAACAAACCTGTA
AATATTCCCTATAAAAAGACTGTCAGTTGAGGACATTATGAAAAAACTGGTGCTATCGCT
CTCTCTGGTTCTGGCCTTCTCCAGCGCAACTGCGGCATTTGCTGCGATTCCGCAAAACAT
CCGCATCGGTACCGACCCGACCTATGCGCCATTTGAATCAAAAAATTCACAAGGCGAACT
GGTTGGCTTCGATATCGATCTGGCAAAGGAATTATGCAAACGCATCAATACGCAATGTAC
GTTTGTCGAAAATCCGCTGGATGCGTTAATCCCGTCCTTAAAAGCGAAGAAGATTGACGC
CATCATGTCATCGCTTTCCATTACGGAAAAACGTCAGCAAGAAATAGCCTTCACCGACAA
ACTGTACGCTGCCGATTCTCGTCTGGTGGTGGCGAAAAATTCTGACATTCAGCCGACAGT
CGAGTCGCTGAAAGGCAAACGGGTAGGCGTATTGCAGGGCACCACCCAGGAGACGTTCGG
TAACGAACACTGGGCACCAAAAGGCATTGAAATCGTCTCGTATCAGGGGCAGGACAACAT
TTATTCTGACCTGACTGCCGGACGTATTGATGCCGCGTTCCAGGATGAGGTCGCTGCCAG
CGAAGGTTTCCTTAAACAACCTGTCGGTAAAGATTACAAATTCGGTGGCCCGTCTGTTAA
AGATGAAAAACTGTTTGGCGTAGGGACCGGCATGGGCCTACGTAAAGAAGATAACGAACT
GCGCGAGGCACTGAACAAAGCCTTTGCCGAAATGCGCGCTGACGGTACTTACGAGAAATT
AGCGAAAAAGTACTTCGATTTTGATGTTTATGGTGGCTAATCGCCATCGGTGAAAGAAAG
CCCGCTCCCTTCGGGTAACCGGAGGGAGACAAGAGGCGGTAATTCACCACACACGACAGG
ACAGGCTGCATGTTGTATGGGTTTTCAGGTGTTATTTTACAGGGTGCGCTCGTCACGCTG
GAGCTGGCTATCAGCTCTGTAGTGCTCGCTGTAATCATCGGTTTAATTGGCGCTGGCGGT
AAGCTCTCTCAAAATCGGCTTTCGGGGCTGATTTTCGAAGGGTACACCACGCTGATTCGT
GGCGTGCCGGACTTAGTGTTGATGCTGCTGATTTTCTACGGTTTGCAGATTGCGCTAAAC
ACGGTGACGGAGGCGATGGGCGTCGGGCAGATTGATATCGATCCGATGGTCGCTGGTATT
ATCACTCTCGGTTTTATCTACGGTGCTTATTTTACCGAAACGTTCCGTGGTGCTTTTATG
GCAGTGCCGAAAGGACATATAGAGGCGGCGACGGCGTTCGGTTTTACTCGTGGGCAAGTG
TTTCGGCGGATCATGTTTCCGGCGATGATGCGTTACGCCCTGCCAGGCATTGGCAACAAC
TGGCAGGTGATCCTCAAATCTACCGCACTGGTTTCGTTACTCGGCCTGGAAGATGTGGTC
AAAGCCACGCAGCTGGCAGGCAAAAGTACCTGGGAACCGTTCTATTTCGCCATCGTCTGT
GGCGTGATTTACCTGGTTTTCACCACCGTTTCCAATGGTGTGCTGCTGTTCCTTGAGCGC
CGCTACTCCGTGGGTGTGAAGAGGGCTGACCTGTGATCGAAATCTTACATGAATACTGGA
AACCGCTGCTGTGGACCGACGGTTATCGCTTTACTGGTGTGGCGATCACTCTGTGGCTGC
TTATTTTGTCGGTAGTGATAGGCGGAGTCCTGGCGCTGTTTCTGGCGATTGGTCGTGTCT
CCAGTAATAAATACATCCAGTTTCCAATCTGGTTATTTACCTATATTTTTCGCGGTACGC
CGCTGTATGTTCAGTTGCTGGTGTTCTATTCCGGCATGTATACGCTGGAGATTGTTAAGG
GGACCGAGTTTCTTAACGCCTTTTTCCGCAGTGGCCTGAACTGTACCGTGCTGGCGCTGA
CGCTTAACACCTGCGCTTACACTACCGAGATTTTTGCTGGGGCAATCCGTTCGGTTCCGC
ATGGGGAAATTGAAGCCGCCAGAGCCTATGGCTTCTCGACTTTTAAAATGTATCGCTGCA
TTATTTTGCCTTCTGCGCTGCGTATTGCGTTACCGGCATACAGCAACGAAGTGATCCTGA
TGCTGCACTCTACTGCGTTGGCATTTACTGCCACGGTGCCGGATCTGCTGAAAATAGCCC
GCGATATTAACGCCGCCACGTATCAACCTTTTACCGCCTTCGGCATTGCCGCGGTGCTCT
ATTTAATCATCTCTTATGTCCTGATCAGCCTCTTTCGCAGAGCGGAAAAACGCTGGTTGC
AGCATGTGAAACCTTCTTCAACGCACTGAGAATACGATGTCCGAGAATAAATTAAACGTT
ATCGATTTGCACAAACGCTATGGCGAACACGAAGTGCTGAAAGGGGTGTCACTGCAAGCG
AATGCCGGAGATGTCATAAGCATCATCGGATCGTCGGGATCGGGGAAAAGTACCTTTCTG
CGCTGCATTAACTTCCTCGAAAAACCGAGTGAAGGGTCGATCGTGGTCAATGGCCAGACG
ATCAATCTGGTGCGCGGCAAAGACGGTCAACTCAAAGTCGCCGATAAAAATCAACTGCGC
TTACTGCGCACACGCCTGACGATGGTATTCCAGCACTTCAATCTCTGGAGCCATATGACG
GTGCTGGAAAACGTCATGGAAGCGCCGATTCAGGTGTTGGGCCTGAGCAAGCAGGAAGCG
CGCGAGCGGGCGGTGAAGTATCTGGCAAAAGTTGGGATAGACGAACGTGCACAGGGGAAA
TATCCGGTGCATCTTTCCGGCGGTCAGCAACAGCGTGTTTCTATCGCGCGGGCGCTGGCG
ATGGAACCGGAAGTTTTACTGTTTGATGAACCTACCTCGGCGCTCGATCCTGAACTGGTA
GGCGAAGTGTTGCGCATTATGCAGCAACTGGCAGAAGAGGGGAAAACCATGGTGGTTGTG
ACTCACGAAATGGGCTTTGCTCGTCATGTTTCTACTCACGTCATTTTCCTCCATCAGGGG
AAAATAGAGGAAGAAGGCGCGCCGGAGCAGTTATTTGGCAACCCGCAAAGCCCTCGTCTG
CAACAGTTCCTTAGAGGTTCGCTGAAATAATTGCCTCTCCGGTGGCTAACGCTGCCGGAG
TATTTTCAAGGGGAATTTGCGAGTCAGCTTCCGCTGAAATGTAAAAGTTGCAGTCCGCTA
AAAATACTTCTGAATTCGCTGTCCAAAGATAAAAACTGCCTGCTGCATTGGGTGTTAATC
GTGGTTATTGTCGCGTCATCTTAAATTTGAGGGGTGACGGAACGCCATGACAATATCGAC
AACTTCCACGCCGCATGATGCGGTATTTAAATCTTTTTTACGCCATCCAGACACCGCGCG
GGATTTTATTGATATTCATCTTCCCGCGCCGCTGCGCAAACTGTGAGATTTAACGACGCT
TAAACTGGAACCAAACAGTTTTATTGATGAAGACCTGCGGCAATATTATTCCGACCTCTT
ATGGTCTGTGAAAACGCAGGAGGGAGTGGGTTATATTTATGTAGTGATAGAGCACCAAAG
TAAGCCGGAAGAATTAATGGCTTTTCGCATGATGCGTTATTCCATTGCGGCAATGCAAAA
CCATCTTGATGCGGGCTATAAAGAGCTTCCATTGGTGATCCCGATGCTGTTTTATCATGG
TTGCAGAAGTCCTTATCCTTATTCACTCTGCTGGCTTGATGAATTTGCCGAGCCTGCGAT
TGCCCGTAAAATATATTCATCGGCTTTTCCGTTGGTGGATATTACCGTGGTGCCGGATGA
CGAGATTATGCAACATCGCAAAATGGCGCTGTTGGAGTTAATTCAGAAACATATTCGTCA
GCGCGATCTGTTGGGATTAGTCGACCAAATTGTTTCGCTGCTAGTTACAGGGAACACTAA
TGACAGACAGCTAAAAGCCCTGTTTAATTATGTATTACAAACGGGAGATGCCCAGCGTTT
CCGTGCATTTATTGGTGAGATAGCAGAACGCGCACCACAGGAAAAGGAGAAACTGATGAC
CATTGCTGACAGATTACGTGAAGAAGGGCGGAATGATGGATTAATTCTTGGCAAACGCGA
AGAAGCCCTGCGTATTGCTCAGGAGATGCTGGATAGAGGTTTAGACCGAGAGTTAGTTAT
GATGGTGACCCGACTTTCACCAGACGATCTTATCGCGCAAAGCCACTAACCCTGTAACAC
CGGGAGTTAACTGGCGGATGTTTGCAGTAAACCACATCAGCGAACGACATCCGCCAGCGC
CTCTTCTAAATCGTACCAACGAAACGCAAAACCCGCTTCTTCCAGCCGTTTAGGCAGCGC
GCGTTGTCCACCTAATACCAGTACTGAAGATTCGCCCATTAACAGCCGAATGGCGGTTGC
GGGGACGCGCAAAATAGCCGGGCGATGCAGCGCATGACCGAGCGCATGGGCAAATTGTTC
ATTGCGTATCGGGTAGGGCGAAACCATATTAAATGGCCCGCGCAGCTCGTTATCCAGCAG
CCAGAGAATGCCGTTGACCATATCATCGATATGAATCCAGGCCAGATACTGCCGACCGGA
ACCAATCGGCCCGCCCAGGCCAAGACGAAACGGCGGCAGCATTTTACCGAGAATACCGCC
ATCCGGTGCCAGCACTACGCCGGTACGCAGCAGGCACACTCGCGTTTTGTCACTTTGCGC
CCGGCAGGCAATTTCTTCCCAGCGGGCGCAGAGTTTATGGGTAAATTCGTTATGCGGCGG
TTCCTCTTCGGTAACCACCACTTCACCTAAGTCGCCATAATAGCCCGTTGCCGAGCCGGA
AATGAGTACCGACGGTGGCGTGTCGCTGGCATTAATCAAATCGACCAGTTTTTGCGTGAT
ATTCCAGCGGCTTTGGCAGAGACGCTCTTTTTGCTCGTGAGTCCAGCGTTTATCAGCAAT
CGGTTCTCCGGCGAGGTTGATTACCGCATCAACGCCGTTGAGGTTGCTTTGATCGGCAAG
CCCTTGCCATAGCGTCACCTGCGGCCCGAGCACGGAACTGGCTTTCTGCGGGTTACGCGT
CATTACCGTGATTTGATGGCCCAGCTCCAGCAAACGTGGAATCAAATGGCGACCAATTAA
TCCCGTCCCTCCGGTGATCACTATGTTCATGCAGCCTCCCGATATGGCGGTTAACGCTGC
CAGCTTAAGGTCATGGATACCGAATCGGCGTAGCGCAGCGCGTGCAGTTTATCGATCTCC
ACTTCAGCATACGTCACCCAGTGATGTTCACGTGCGATATCGAGCACATCCTGAGTTAAT
TTTTCCAGCAAAGAGAAACGGTTATTCTCTACATGCTGAATAATGTTTTTCGTTACGGTG
CGATAATTCAGCGCATCGTTGATATCTTCGCTGGTGCGCGCTTTATCGGCGGGGTAGTGG
ATCGTCACATTGATAACAATATCCTGACGGTTGTTAATTTCTTCTTCCTTAATTCCGATA
AATGTACGTAAACGAAGGTTCTTTATACGAATAATAGCGGCAGGTTGTGCCATTGCAGGT
TCTCCGTTGTTTTACTTAGGATGAAATAATACACGAGAACCTGTTTCTGTTAACTATCCG
AACGCTCATCACCGAGTTGTGCTTTTAGCAGTGCCTGCCCAGTGGCAGGGCGCGAACGGA
TCCGCTCATGCCAGTTCTTGACTGCCGGATACATTGCGAGGTCAATTCGCTGGCGAGTCC
AGGCATTAACCCACGGCCAGCAGGCAATATCCGCAATGCTGTAGTTCTCACCTCCCAGCC
AGGGCGAGTTTTCCAGCCGCTTGTTCAGTACATGGTACAGGCGCTGAGTTTCAACCTGAT
AACGTTCAATAGCGTAAGGAATGGTTTGGGGGGCTGCGTGATTAAAATGATGATTTTGCC
CAAGCATCGGCCCCAGTCCGCCTACCTGCCAGAATAACCACTGTAATGTGGCGGCGCGCT
CACGCGTTTCATGACTCAAAAAGAGTCCTGTTTTCTCAGCCAGATACAACAAAATGGCAC
CAGATTCAAAGAGGCTTAGCGGTTCGCCGCCATCGGCTGGAGAATGATCAACAATTGCCG
GAATTTTGTTGTTAGGCGAAATGCGCAAAAATTCCGGGCGAAACTGACCGCCTTTCCCCA
GGTCTACCTTTATCAAGCGATAATCCAGCCCTGCTTCTTCGAGAAACAGCGTAATTTTGT
GGCCATTGGGTGTCGGGGCGAAATAGAGATCGATCATTGCAGCTCCGGTTGTCTAATCAT
CTGAACACCACAAGTATAGAAAGCGCGGCGACTTGCGTGAGTATTCGTCACGTGACAGTG
ACAAAAAGGCTCTATAGTTTGATAGCCAGCCCCCTTTATTGCCGAGGACATAATGAGTAA
ACCCGCTATCACGCTTTGGTCAGATGCCCATTTTTTCTCCCCTTATGTGTTATCCGCCTG
GGTGGCGTTGCAGGAAAAAGGCCTGTCGTTTCATATCAAGACCATCGACCTCGACAGCGG
TGAACATTTGCAACCGACGTGGCAAGGTTACGGTCAGACACGCCGTGTGCCGTTATTACA
AATCGATGATTTTGAGTTGAGTGAATCTTCTGCCATTGCGGAGTATCTGGAAGATCGATT
TGCGCCACCGACCTGGGAACGTATTTATCCGCTTGATTTAGAAAATCGTGCGCGTGCACG
ACAGATTCAGGCCTGGCTGCGCAGCGATCTGATGCCCATTCGCGAAGAGCGTCCGACGGA
TGTTGTCTTTGCGGGGGCGAAAAAAGCGCCACTAACGGCCGAGGGAAAAACCAGTGCAGA
GAAACTGTTCGCGATGGCAGAACATTTGTTAGTACTGGGTCAGCCGAATTTATTTGGTGA
ATGGTGCATTGCTGATACTGATCTGGCGCTAATGATTAACCGCCTGGTACTACATGGCGA
TGAGGTGCCAGAACGCCTGGTGGATTATGCGACATTCCAGTGGCAGCGAGCGTCTGTCCA
GCGTTTTATTGCACTTTCAGCGAAGCAATCTGGCTGATAGCAACGACAGAATCCAGTATC
ATAGCTTACGTTTTTTCGACGAGGAGTGAGTGATGAAACTGATGTTTGCATCGGACATTC
ATGGGTCGTTACCGGCGACGGAACGTGTTCTGGAGCTGTTTGCCCAAAGCGGTGCCCAGT
GGCTGGTGATCCTTGGCGACGTGTTGAATCACGGCCCGCGTAATGCTTTACCGGAGGGTT
ACGCGCCAGCCAAAGTCGCTGAACGGCTTAATGAAGTGGCACATAAGGTTATCGCTGTGC
GCGGCAACTGCGACAGCGAAGTGGATCAAATGCTGCTGCATTTCCCGATAACCGCGCCGT
GGCAACAGGTATTACTGGAAAAACAACGTCTGTTTTTGACGCATGGTCATCTTTTTGGCC
CGGAAAATCTGCCTGCTTTAAACCAGAACGATGTGCTGGTTTACGGTCATACCCATCTGC
CAGTAGCAGAACAGCGGGGGGAGATTTTCCACTTCAACCCCGGCTCGGTGAGTATTCCGA
AAGGCGGTAATCCGGCGAGTTATGGCATGCTGGATAATGACGTACTTAGTGTAATCGCAC
TCAATGATCAAAGTATCATTGCGCAGGTCGCGATTAATCCGTAATTTACCCACAACTCAA
AATGCGCCGTAAGAGCGCCAGAAAAAGAAGGTTTCCTGATAATGGAACAGCGTCGTTTGG
CAAGTACTGAATGGGTGGATATTGTCAATGAAGAGAACGAAGTCATTGCACAAGCCAGCC
GGGAGCAAATGCGGGCACAGTGTCTGCGTCATCGTGCAACTTACATCGTCGTGCATGATG
GCATGGGCAAAATTCTGGTCCAGCGTCGTACCGAGACAAAAGACTTTTTACCCGGCATGT
TAGATGCGACCGCAGGCGGTGTGGTTCAGGCCGATGAGCAACTGCTGGAATCCGCGCGTC
GCGAAGCGGAAGAAGAGTTGGGCATTGCCGGTGTCCCCTTTGCCGAGCACGGGCAGTTCT
ATTTCGAAGATAAAAATTGCCGTGTCTGGGGCGCATTGTTCAGCTGCGTCTCTCACGGTC
CCTTCGCCCTACAGGAAGATGAAGTCAGTGAAGTTTGCTGGCTGACGCCGGAAGAAATCA
CCGCACGCTGCGATGAGTTCACTCCAGACTCGCTGAAAGCGCTAGCGTTGTGGATGAAGC
GCAATGCCAAAAATGAAGCCGTAGAGACTGAAACGGCAGAATGAAAAAAGAGCCGCAATT
GCGGCTCTTAACATTTTTAGTGGTAGCCCATCAACTGAGCGCCGATCACTACGACGCTGG
ACATAATAAACAGCAGTCCAAGTAGGGTCGCGCCCACCTTCAGCCAGTTACGGAAGTCCA
CCCTGCACACACCGAGCGTTGCCATTAACGAAGCTGAGGTTGGGTAAATGATGTGACTGA
AGCCATCACCAAACTGGAACGCCAGCACGGTAACCTGACGGTTAACACCGACCAGATCGC
CAAGCGGTGCCAGTAACGGCATGGTTAACGCCGCCTGACCAGAACCGGACGTCACGAAGA
AATTAAATACCGCCTGGAAGAGCAACATAAACCAGGCCGCGACCGCGTTGTCCAGACCGC
TAATGGCATTGGCAATGCTGTTGAGGATAGTATTTAACACGCTGGCCTCACCTGCTTCAC
CATTACCAACCAGCAGCAAAATCCCTTTGGCGAAACCCACCAGCAGGGCAGGGGCGATCA
TCATTCGCGCCCCTTCGGTAAAGGATGAAGCCATGGTATTAACCGTCATGCCGTTAAGGC
GGAAAACAACGCCGATGATGCCAATCACCAGACCCATGGTGAAGAACTGGCTGGCAATTT
CTGGAATAAACCAGGCATTAACGATCACGCCCCAAATCACCCAGACCATTACGGCGGTCA
GGACAATCAATACCAGCCAGTCACCAAAGGTAAACGGACGTTGTTCAACATCCGCCTGCT
TTTCACGAAAGAAGCGGTCGGACTCATGCACGCGTGACAGAAGAGGATTCTTTTTCACTC
GTGAGGCGTAGACCATGGTAAAGATCAGGCCAATCAGAGTGGCGATAACCCACACCACGA
TGCGCAACCCGGAGCCAGAAAGCACCGGAACGCCGGCAATCCCCTGAGCAACGACCACAC
AAAACGGGTTCATCCACGAACTGGCAAAACCGATTTGCGTGGCAATATAGGTCACCAGGA
CGGTGGTAATACTGTCATAGCCCAGCCGGACCATTAGCGGTGCGATGATAATGGCAAAGG
CGACGGCCTCTTCTCCCATACCAAATACCGCGCCGCCAAGTGAAAACAGAATAAACAGCG
CAGGAATAAAGAGAATTTCATTCCCGCGGGTATGGCGAATAAGCGCCAGGATACCGTTAT
CAATGGTTCCTGTACGCATCACAATGCCAAACGCGCCGCCAATCACCAGCATAAACATGA
TGATGCCAACGGCTGTCCCGTATTTCGATCCTGAGGTTAACCCTTCAAACGGGAAGTTCA
TCAGGCCCGGGCGTTCATCGCCCGTCGTGAACAGCTGTACGCGGTGATACTCAGGTTCGC
CTGCTTCGTTAGTCAGAATGCGAAATGAGTGTGGATCTACGACTTTGCGTGTTTTTGTTT
GACCATCAACCTGATACTGCACTTCCTGACTGTCAAACATCCCCACCGGAACTACCCAGG
TGGCAAGGCTGGTTAAAATAGCAACAAAAAAGATAATCACCAACGTATCGGGCATTGCCC
ATCTTCTTGTTGGTTTGGATTCAGTGATTGCGGACATAGCGCAAATATTCCCTTGCACAA
AACAAAGTGGTAAGTATGCAAAGTGAGATGGCGCAATTCATTGATGCAGAGCAGTTAAGC
AAGATAATCAGAAAGGATTAATGCAAATTAAGAGAATAAAAAACCGGAAATAGTGACTAT
TTCCGGTTCAGATATCCGCAGCGCAAAGCTGCGGATGATGACGAGGTTACTGCTGCTGTG
CAGACTGAATCGCAGTCAGCGCGATAGTGTAGACGATATCGTCAACCAGTGCGCCACGGG
ACAGGTCGTTAACCGGCTTGCGCATACCCTGCAGCATCGGCCCGATGGAGATCAGGTCGG
CAGAACGCTGTACCGCTTTGTAGGTGGTGTTACCGGTGTTCAGATCCGGGAAGATGAACA
CGGTAGCGCGACCTGCAACCGGAGAGTTCGGCGCTTTGGATTTCGCAACGTCAGCCATTA
CCGCAGCGTCGTACTGCAGCGGACCGTCGATCATCAGGTCAGGACGTTTTTCCTGCGCCA
GACGAGTTGCTTCGCGAACTTTTTCTACGTCGCTACCTGCACCAGAAGTACCGGTGGAGT
AGGAGAGCATAGCAACGCGCGGTTCGATACCGAAGGCTGCAGCGGAATCAGCGGACTGAA
TCGCGATTTCTGCCAGCTGTTCTGCGGTCGGATCCGGGTTGATCGCACAGTCACCGTAAA
CGTAAACCTGTTCCGGCAGCAGCATGAAGAACACGGAAGATACCAGGGAGCTGCCCGGTG
CAGTTTTGATCAGCTGCAGCGGCGGACGGATGGTGTTTGCGGTAGTGTGAACAGCACCGG
AAACCAGACCATCAACTTCATCCTGTTCCAGCATCAGCGTACCGAGCACCACGTTGTCTT
CCAGCTGTTCGCGGGCAACGGTTTCGGTCATGCCTTTGTTCTTACGCAGCTCGACCAGAC
GACCAACATAGCTTTCGCGAACCACTTCTGGATCAACGATTTCAATGCCTGCACCCAGTT
CTACACCCTGAGACGCTGCAACACGGTTGATCTCTGCCGGATTACCCAGCAGTACGCAAG
TTGCGATACCACGTTCAGCACAGATAGCGGCTGCTTTAACGGTACGCGGTTCGTCACCTT
CCGGCAGTACGATACGTTTGCCCGCTTTGCGCGCAAGTTCAGTCAGCTGATAACGGAACG
CTGGCGGAGACAGACGACGGCTGCGCTCAGAAGTGGCAGTCAGAGAATCGATCCAGTCAG
CGTTGATGTAGTTAGCAACGTATTCCTGAACTTTCTCGATACGCTCGTGATCGTCAACTG
GAACTTCCAGGTTGAAGCTCTGCAGGCTCAGAGAAGTCTGCCAGGTGTTGGTGTTCACCA
TAAATACCGGCAGGCCGGTAGCGAAAGCACGTTCGCACAGTTTAGAAATGCGCGCGTCCA
TTTCGTAGCCGCCAGTCAGCAGCAGGGCACCGATTTCTACGCCGTTCATGGCAGCCAGGC
AAGCGGCAACCAGCACGTCAGGACGGTCTGCGGAAGTCACCAGCAGAGAACCGGCACGGA
AGTGCTCCAGCATGTGCGGAATGCTGCGTGCGCAGAAAGTGACGGATTTAACGCGGCGAG
TATTGATGTCGCCTTCGTTGATGATGGTCGCATTCAGGTGGCGAGCCATATCGATCGCAC
GAGTCGCGATCAGGTCAAAGCTCCACGGCACAGCGCCGAGAACCGGCAGCGGGCTGGATT
CTTGCAGCTTCGCCGGATCAACATTGTTTACTTTAGCTTTGGAAGAGTCGTCGAAAATCT
CGGACAGATCCGGGCGAGTACGACCCTGTTCATCAACCGGTGCGTTCAGTTTGTTAACGA
TAACGCCGGTGATGTTGGTGTTTTTGGCACCGCCGAAGCTGTTGCGGGTCAGTTCGATAC
GCTCTTTCAGCTGTTCCGGGGTGTCAGTGCCCTGAGACATAACGAAGACGATTTCCGCAT
TCAGCGTTTTAGCGATTTCGTAGTTCAGAGACTGGGCAAACTGGTGCTTACGTGTCGGGA
CCAGACCTTCAACCAGAACGACTTCAGCGTCTTTGGTGTTAGCGTGGTAGTTTGCGACGA
TCTCTTCCATCAGCACATCTTTCTGATTGCTGGAAAGCAGACCTTCAACGTAGCTCATTT
TCAGCGGTTCAGCGGCCGTCGTGGTGGAAGAGTTCGCACGCACGATAGTCGTAGTCTGAT
CGGGCGCATCGCCACCGGTACGCGGCTGAGCGATAGGTTTGAAAACGCTCAGACGAACGC
CTTTGCGTTCCATTGCACGGATCACGCCAAGGCTGACGCTGGTCAGACCGACGCTGGTTC
CGGTAGGGATCAGCATAATAATACGGGACACGGTTTATCCTCTTTCGTTACCGCCGATTT
GGCGGGTTACAAAACAGCACCGCCAGCTGAGCTGGCGGTGTGAAATCAGGCAGTCAGGCG
GCTCGCGTCTTGCGCGATAACCAGTTCTTCGTTGGTTGGGATAACCACCGCAGGACGGGT
ACCTTCTTTGTTGATGAAACCAGATTTGCCGAAACGTGCAGCCAGGTTGCGTTCATGATC
AACTTCAAAGCCCAGCACGCCCAGTTTGCCCAGAGACAGTTCACGAACCATCGCGGCATT
TTCACCGATACCACCGGTGAATACAACAGCGTCCAGACGACCATCCATCAGCGCAGTGTA
GGCACCGATGTATTTCGCCAGGCGGTGGCAGTAAACGTCCATTGCGCGCTTCGCGTCTTC
TTTCGTCGCGTAGTTGTCTTCAACATAGCGGCAGTCGCTGGTCACTTCGGTCAGACCCAG
CAGGCCAGACTCTTTGGTCAGCAGTTTGTTGATTGCGTCAACGCTCATGCCCAGGGTGTC
GTGCAGGTGGAAGATGATCGCCGGATCGATATCACCAGAACGGGTACCCATGACCAGACC
TTCCAGCGGGGTCAGGCCCATAGAGGTGTCAACGCATTTACCGTTGCGGATAGCAGAAAC
GGAACCACCGTTGCCCAGGTGGCAGGTGATGATGTTCAGTTCTTCTACCGGTTTGTTCAG
CATTTTTGCCGCTTCCTGGGTTACATAGAAGTGGCTGGTGCCGTGCGCGCCGTAACGACG
GATGCCGTGCTCTTTGTACAGGTTGTACGGCAGGGCGTAGAGGTAAGACTCTTCCGGCAT
AGTCTGGTGGAACGCGGTGTCAAATACAGCAACGTTTTTGTCTTTCAGCTGTGGGAAAGA
TTTCAGAGCTTCTTCGATACCGATCAGGTGAGCCGGGTTGTGCAGCGGTGCAAAAGAAGC
TGCATCTTTGATACCCTGAATAACAGACTCATCGATCACTACGGAGCTGGTATACTTTTC
GCCGCCGTGTACGATACGGTGACCGATAGCAGTCAGCTGCGCAGACAGTTCTGGTTTTTG
TGCCAGAATAGTATTAACGATAAAGTTGAGCGCTTCGCTGTGAGCGGCGCCTGCACCTAA
AGCCGCTTCCTGTTTATTGCCGTCCATTTTCCATTTGATACGTGCTTCGGGCAGGTGGAA
ACATTCGGCTAAACCAGAAAGGTACTCTTCACCATTTACTGCATCGATGATGGCAAATTT
CAGTGAAGAACTACCGCAGTTCAGAACCAGTACTAACTTACTCGACATGGAAGTACCTAT
AATTGATACGTGGCTAAAAAAACGTCAGGGAGCCATAGAGCGTAGCGCATGATGACACCG
ACATTTATGATTAACATCATGCACTGCAAATTTTTTTTGCATGATGGAAGAAATATCTTG
AGTCTATGCCATTTTGCGTAATTTTCAGCCAATGGCATAATGTATATGAATTTGACGACT
CAATGAATATGTACTACTTAGGCCTTCAGGCTGCTAAAGGATACCTGATAGTGGGTATGG
AAGACAAAATGTTTTGAACGTTGTCCCGCTGAGTTGTGAATTTGCACAAATTTTTGAATC
TTTATATGTGAAGTTGAGGTGAAGCATGTCAACGCCGGATAATCGTTCTGTTAATTTTTT
TAGCTTGTTTCGCCGGGGACAGCATTACTCAAAGACGTGGCCGCTGGAAAAACGCCTTGC
CCCGGTCTTTGTCGAAAATCGCGTTATCAAGATGACGCGTTATGCGATCCGTTTTATGCC
GCCGATCGCCGTATTTACTCTCTGCTGGCAGATTGCCCTGGGCGGTCAGCTTGGGCCGGC
AGTTGCCACCGCCCTGTTCGCCTTAAGTTTACCCATGCAGGGATTGTGGTGGCTGGGCAA
GCGTTCTGTCACGCCATTACCCCCTGCAATCCTCAACTGGTTTTATGAAGTTCGCGGTAA
ATTGCAGGAGTCTGGACAGGTGTTGGCACCCGTTGAAGGCAAGCCTGATTACCAGGCATT
AGCTGACACGCTTAAGCGCGCCTTCAAACAACTGGATAAAACTTTCCTTGATGATTTGTA
ATTGACCCCTGATTACGCATATAAAAGAAAGCATACTCAGCCTTCTTTTTTTTCACCGTA
ATAGAGTGATACAGGAGTCAACAATGGAAATGACCAACGCGCAACGTCTTATTTTGTCTA
ATCAGTACAAGATGATGACTATGCTCGATCCGGCAAATGCTGAACGTTACCGTCGCCTGC
AAACAATTATTGAGCGTGGTTATGGATTACAGATGCGTGAACTGGATCGCGAGTTTGGCG
AGCTGAAAGAAGAAACCTGCCGCACTATCATCGACATTATGGAGATGTATCATGCGTTGC
ATGTTTCCTGGTCTAATTTGCAGGACCAGCAATCCATCGATGAACGTCGTGTCACCTTCC
TCGGCTTTGACGCCGCCACTGAAGCACGTTACCTCGGTTATGTCCGCTTTATGGTTAATG
TGGAAGGGCGCTATACCCATTTTGACGCCGGAACTCACGGTTTTAACGCCCAGACGCCAA
TGTGGGAAAAATATCAGCGCATGCTTAATGTGTGGCATGCCTGCCCGCGTCAGTACCATT
TGAGCGCCAACGAAATTAATCAAATTATCAACGCCTGAGGAGGCCCGCGTGCGGTGCAAA
GGTTTTCTGTTTGATCTTGATGGAACGCTGGTGGATTCCCTGCCTGCGGTAGAACGGGCG
TGGAGCAACTGGGCCAGACGTCATGGGTTAGCGCCGGAAGAGGTGCTGGCTTTCATTCAC
GGTAAACAGGCGATCACCTCTCTGCGCCATTTTATGGCGGGCAAATCCGAGGCTGATATT
GCCGCCGAGTTTACGCGTCTGGAGCAAATCGAGGCCACGGAAACCGAAGGTATTACCGCG
CTTCCGGGGGCAATCGCCTTACTCAATCATTTGAATAAAGCAGGTATTCCGTGGGCCATT
GTGACTTCTGGCTCCATGCCGGTAGCGCGAGCGCGCCATAAAATAGCTGGGCTTCCCGCA
CCAGAGGTGTTTGTAACCGCTGAGCGAGTGAAGCGCGGAAAACCAGAACCTGATGCGTAT
CTGTTAGGTGCGCAGCTGCTGGGGCTTGCGCCGCAGGAGTGTGTGGTGGTGGAAGATGCT
CCCGCTGGCGTGCTTTCTGGCCTGGCGGCGGGTTGCCATGTCATTGCGGTTAACGCTCCG
GCAGATACCCCGCGCCTGAATGAGGTCGATTTGGTCCTCCACAGTCTGGAGCAAATTACT
GTGACTAAACAGCCAAATGGCGATGTTATTATTCAGTGAAACACCTGATCATGATTTAGC
CCCGTCTCGTCGGGGCTTTTTTATGGCAGAATCAAGTCATCCCCCTCAATTAACAAGGAT
AAGTTGTGAACGGTGAATTGATTTGGGTTCTTTCATTACTGGCCGTTGCCATCGTCTTGT
TTGCGACGGGCAGAGTGCGTATGGATGCGGTCGCTTTGTTTGTTATTGTCGCGTTTGCAT
TAAGCGGAACGCTGACAGTCCCAGAAGTATTTTCCGGCTTTTCTGATCCTAACGTTGTCC
TGATTGCCGCCTTGTTTATTATTGGCGATGGTTTGGTCCGTACCGGTGTTGCCACCGTAA
TGGGAACATGGCTGGTCAAAGTTGCGGGCAACAGTGAAATCAAAATGTTGGTTTTGTTGA
TGCTGACCGTCGCGGGGCTTGGCGCGTTTATGAGTTCAACCGGTGTTGTCGCTATCTTTA
TTCCCGTGGTGTTAAGCGTTGCCATGCGTATGCAAACGTCGCCGTCACGTCTGATGATGC
CGTTAAGTTTTGCCGGGCTGATTAGCGGCATGATGACGCTGGTGGCGACGCCGCCGAACC
TGGTAGTCAACAGTGAATTGCTGCGTGAAGGCTATCACGGCTTCAGTTTCTTTAGCGTAA
CACCTATTGGCCTGGTCGTGCTGGTGCTGGGTATTTTGTATATGTTAGTGATGCGTTTCA
TGCTGAAAGGGGATACCCAGACCCCGCAGCGCGAAGGCTGGACGCGTCGAACCTTTCGCG
ATCTTATCCGTGAATATCGACTGACCGGGCGTGCGCGACGTCTGGCTATTCGCCCCGGAT
CGCCAATGATTGGTCAACGGCTGGATGATCTCAAATTACGTGAGCGTTATGGCGCTAACG
TCATCGGTGTTGAACGCTGGCGGCGTTTTCGTCGCGTTATCGTGAACGTTAATGGGGTTT
CTGAATTTCGCGCGCGTGACGTTTTGCTTATTGATATGTCTGCGGCTGATGTCGATCTCC
GGCAATTTTGTAGTGAGCAATTGCTGGAGCCGATGGTACTGCGCGGCGAGTATTTTTCTG
ACCAGGCCCTTGATGTGGGCATGGCAGAGATTTCATTAATTCCTGAGTCAGAACTGATTG
GTAAATCGGTGCGCGAAATTGGTTTTCGTACACGCTACGGACTGAATGTGGTGGGGCTAA
AGCGCAATGGCGTGGCGCTGGAAGGTTCGCTGGCGGATGAGCCTCTGCTGCTGGGCGATA
TCATTCTGGTTGTGGGTAACTGGAAACTGATCGGTATGCTGGCCAAACAGGGCCGCGACT
TCGTAGCGCTGAACTTACCGGAAGAGGTGAGTGAAGCATCGCCCGCGCACAGCCAGGCAC
CCCATGCCATTTTCTGTCTGGTGCTAATGGTGGCGTTAATGCTGACAGATGAAATTCCTA
ATCCTGTTGCCGCTATCATCGCCTGCCTGCTGATGGGGAAATTCCGCTGTATAGATGCTG
AAAGCGCCTATAAATCCATTCACTGGCCGAGCATTATTTTGATCGTTGGGATGATGCCGT
TTGCTGTGGCATTACAGAAAACGGGAGGTGTCGCGCTGGCGGTGAAAGGGCTGATGGACA
TTGGCGGTGGTTACGGGCCACATATGATGCTGGGTTGTTTGTTTGTCTTGTCGGCGGTTA
TTGGGCTATTTATCTCTAATACCGCGACGGCGGTGTTGATGGCTCCGATTGCGCTGGCTG
CTGCCAAAACGATGGGGGTGTCGCCTTATCCATTCGCGATGGTCGTGGCGATGGCAGCAT
CCGCCGCCTTTATGACACCGGTTTCTTCACCGGTTAACACCCTGGTTTTAGGTCCGGGAA
ATTACAGCTTCAGTGACTTTGTGAAGTTGGGGGTACCGTTCACCATTATCGTGATGGCGG
TTTGTGTGGTGATGATCCCGATGCTGTTTCCGTTTTGACAAGAGCCTGATGTCGCATCCG
GCGCTTATTGCCTGATGCGACGCAGACTCCAGCTGCTTACAGCGGTGAATCCTGGCTAAT
CTCATCGAGCGAAAGATGGAAGCTGGGAACAAATACTTCCATGAAGTAGTCCATCTCCTG
GCTGCGGCGCGCTTCAAGCGTCGCTTCCAGTCGCGTTTTTGCCAGCAAGAATTCATTATT
TCCGGCCGCGAGTTCTTCCAGACATTTCAGATATGCACACAGTGCATCTGCCTGTTTCAC
CAACGATTTTTCTTCATCGCTATATGCATGCTCGTCAATTAACGGCGCAAAGATATCCCG
CAGCTCTTCCGGAACCATATCGACCAGTTTTTGCTGAGCGATTTTTTCAATAGCCTTGTA
TTCCTGAGCGATTTGCGAATTGAAGTATTTCACCGGAGTAGGGAGATCGCCGGTGAGCAC
TTCTGAGGCATCGTGGTACATCGCCAGTAAAGCGATACGTTCGGCGTTGACATTACCGCC
AAATTTCCGATTTTTGATAGCTGCCAGCGCATGGGCGACCATCGCTACCTGCAAACTGTG
TTCGGACACATTTTCCGTCCGCACGTTGCGCATGAGCGGCCAGCGGTTAATGAGTTTCAG
GCGGGAGAGATGGGCAAAAAAATGGCTCTGTTTCATAGTGACCTTACGTATGATGACATC
ATCAGGTCATTGTGGCGGGATAACACTGCCGGATGCAATCTCCGGCAGTGAAATTAAGAT
TACAGCTGATGATAACCAGAAAGGAAACGCGCGAACTTGCTCAAAGACAGCTCGATATCA
TCGACACGCGGTAGCGTGACAATGCGGAAGTGATCCGGCCACGGCCAGTTGAATGCCGTC
CCTTGCACCAACAGAACTTTTTCCTGCAACAGGAAATCCAGCACCATTTTCTGATCGTCG
TGAATGTTAAAGCGTTTGGCGTCGATTTTCGGGAACATGTACAGCGCACCACGAGGTTTC
ACGCAGGAAACGCCCGGAATATCGTTGATCAATTCCCACGCGCGGTTACGCTGCTCATAA
AGACGACCGCCAGGGGTAATAAATTCACTGATGCTCTGATAACCACCCAGCGCGGTCTGA
ATGGCGTGTTGCGCAGGAACGTTAGCACACAGGCGCATTGAAGCCAGCATTTCCAGACCT
TCGATGTAGCCTTTGGCGTGTTTTTTCGGCCCGTTCAACACCATCCACCCCTGACGGAAG
CCTGCAACGCGGTACGTTTTCGACAGTCCATTAAAGGTAATGGTCAGCAGGTCAGGTGCC
AGCGGCGCAATTGAGTGATGCTCAGCGTCGTCGTAGAGAATTTTGTCATAAATTTCATCG
GCGAAGATAATGAGATTATGCTGACGTGCAATCTCCACAATCTCCATTAAAAGCTCTTTG
GAATATACCGCGCCGGTTGGGTTATTTGGGTTGATAATAACGATCCCACGCGTACGAGGC
GTAATTTTAGCGCGAATATCATCGAGGTCCGGGAACCAGTCAGAGGATTCATCGCAAAGA
TAATGCACCGCTTTACCGCTGGAAAGCGAAACCGCCGCGGTCCATAGTGGGTAATCTGGT
GCAGGAACCAACATTTCGTCCCCGCTGTTCAGCAATGCCTGCATTGCCTGAACGATAAGC
TCCGATACACCATTGCCGATGTAAATATCTTCCACGGTAACATCACGCATGCCACGAGCC
TGGTAGTGCTGCATGATGGCTTTACGCGCAGAGTAAAGACCTTTGGAATCGCAATACCCT
TGAGCTGTAGGCAGGTTGCGTATCACGTCAACGAGAATTTCATCTGGCGCGTCAAAACCG
AACGGGGCTGGGTTGCCGATGTTCAGTTTCAGTACCTTGTTACCTTCTTCTTCCAGTCGT
TTTGCTTCTTTCAGCACCGGACCACGGATGTCATAACAGACATTCTCTAATTTGCTGGAT
TTTTCAATGGGGGACATGAATCTTGACCTTTTTTGCTGTTATCGCCACTCCCTGCCGTGG
AAGTCAGCTTAGAACAATGTACTCCCCCAGGACGGTGTTTTGAAGGTCTGCAGAATAAGA
TTTTGCCAGAGGGGAAGGCTCGATTGTGCTGTTAATAACTTAATAATGACAAAATAATGA
GGCGTATATGCTTTACATACAATGTTATATAGTGAATTGTTCTGATTCTTAATTGTAAGT
CTGGTTTTTTTATCTGTAAGATAATTGTGTGAAAATGCCTCATTTAAGAATTCACTAATG
AAACGCGATGATGATATTTCCGCATTACGGAGAGTTTAACAGCGTGATGATTTCCGAGGT
GTCGCAATGGGGGCAAGGTGTGAAACTATTGTTAAGCGGAATTAATGAATGAGGATGATG
CTAATTAATTATTATTTAATATTCAAAAAGGTTTTGATGTGCTTATTAATAATAGAAGAT
TACTTTGCCTAACATAACATAACTTTGCATCAGATAATTCGCAATGACCCTTATAAATAA
AAGGTTTTTGGGGTAAAATGCTCGCATAAATGACGGATCCCTGCTCTTGATGCCGCCTCA
CCATTGCTGTTTGTACGTGTTCGCGTATGACCAGCGATGCTGCACGAGAGTGGAACAAGG
ACTCACATTTACATTTATACAAACACGCGCATGTCATAAATAGAAAAGAGTGAGTAACTT
AATAGATATGCGATCCCTGAAGATATATTCTGTGATCTACTTCAGGCATTATAACGGAAC
AATGTGAGTCGCTTTTTTAGTGCAACTCATATGCATTTTTACTTTCGTCCGGGTTCCGGA
TGAAACTGCCAGGGAGGCACATTACAAATGGAATTGCTTGTTTGTGTGTGCACAGCATTA
ACCAGCTCAGTATGAGCCGCCAGTAAGTGATAATATATGATAAGTGCAAATCGTCCGATA
ATTAACCTCGACCTCGATCTGCTGAGAACATTTGTTGCTGTTGCCGATCTGAACACTTTT
GCTGCCGCAGCTGCCGCTGTGTGTCGTACTCAGTCCGCCGTAAGTCAGCAAATGCAGCGT
CTGGAACAACTCGTTGGGAAAGAACTGTTCGCTCGTCACGGTCGCAACAAACTGTTAACT
GAACATGGCATTCAACTTCTTGGTTACGCCAGGAAAATCCTGCGTTTTAATGATGAGGCC
TGCTCATCATTAATGTTCAGTAATCTTCAGGGCGTGTTAACTATCGGTGCTTCAGATGAA
TCTGCCGATACGATCTTACCTTTCCTGTTAAATCGCGTGAGTTCGGTTTATCCGAAATTA
GCGCTGGATGTCCGCGTTAAACGTAATGCCTATATGGCAGAAATGCTGGAATCCCAGGAA
GTGGATTTGATGGTAACCACCCATCGTCCTTCAGCGTTTAAGGCATTGAACCTGCGTACC
TCGCCAACACACTGGTACTGCGCAGCGGAATACGTATTGCAAAAAGGTGAGCCGATCCCT
CTTGTATTGCTGGATGATCCAAGTCCGTTTCGCGATATGGTGCTGGCGACGCTTAATAAA
GCAGATATTCCCTGGCGACTGGCTTATGTCGCCTCGACGCTTCCGGCCGTTCGTGCGGCA
GTGAAAGCCGGTCTTGGCGTGACGGCAAGGCCGGTCGAGATGATGAGTCCGGACTTGCGT
GTGCTGAGTGGAGTAGATGGCTTACCGCCGCTACCTGATACCGAATATTTGCTGTGCTAT
GACCCGTCCAGTAATAATGAGCTGGCCCAGGTGATCTATCAGGCGATGGAGAGCTACCAT
AATCCGTGGCAATACAGCCCAATATCTGCTCCGGAAGGGGATGATTCATTGTTGATTGAA
AGGGATATCGAGTAATCGACGGACGATAGATAATTCCTGAGACAATAGTGTAAAAAACGA
GCCGCTGGGGGTGTTTTAAACCCCAGCGGCTTTTTTTTAGTAAAGAACCTTCTTCACATC
GTGCAGAACGTACAAAACTGTTCATTTTTCAATCGCCAGAGATTCACGCCCCGTACGCAC
AAATAATCGCCTGAAAAAAATCACCTGCTACAATGATGTTAAAAAATACGTAAATTTGTT
GCTGCGTTTTTGTTATGGAATGACAAAAGCGTGTCACAGATCAAGAAAATACTCTCTTTT
GGGGGGAGGAATCGACACAAATTCCTGTCAAAATAGACCCGTATTTTTTCCATTGCTTCA
CAACGGACACGATTCAACAACATCTAATTATCCTGGAGTCGTCAAGGATCTGGGGTGAAA
GGGCATTAAATGCTAATGGTGTTGATATTATGTAAACTAATGTGAAGAAACTTTTGTTAA
AGTTGACAAAAGGTTATAGAAAGGAGTAAAAGACCACATCAATTAGCTGTATAAAAGAAT
TTCTACAGTGATTGTAAGGTTTTTTTTATTCCTCCCCATGAATCGATGTGGCGTCCATCT
GCCGTGAAGAGCAGTGAATCTGGCGCTACTTTTGATGAGTAAGCAATGAGTATGTCAACA
TCCACTGAAGTCATCGCTCATCACTGGGCATTCGCTATCTTTCTTATCGTTGCCATTGGC
CTGTGTTGCCTGATGCTGGTAGGCGGTTGGTTTTTAGGCGGTCGCGCACGCGCGAGGTCG
AAAAACGTGCCGTTTGAATCCGGTATCGACTCGGTCGGCTCCGCCCGCTTACGCCTGTCC
GCCAAGTTTTATCTGGTGGCCATGTTCTTCGTTATCTTCGACGTTGAAGCGCTGTATCTG
TTCGCATGGTCAACCTCTATCCGCGAAAGCGGCTGGGTAGGCTTTGTGGAAGCTGCAATT
TTTATTTTTGTGTTACTGGCAGGTCTGGTTTATCTGGTGCGTATTGGCGCGCTGGACTGG
ACGCCCGCGCGTTCACGCCGCGAGCGTATGAACCCGGAAACGAACAGTATCGCTAATCGT
CAACGCTAACCGCGAGGCATTAAGATGGATTATACGCTCACCCGCATAGATCCCAACGGT
GAGAACGACCGTTACCCCCTGCAAAAGCAGGAGATCGTAACCGACCCTCTGGAGCAAGAA
GTTAACAAAAACGTGTTTATGGGCAAGCTCAATGACATGGTTAACTGGGGTCGTAAAAAC
TCAATTTGGCCGTATAACTTCGGTCTTTCCTGCTGTTACGTTGAGATGGTGACTTCGTTT
ACCGCGGTGCATGACGTGGCGCGTTTTGGCGCAGAAGTATTGCGTGCTTCGCCGCGTCAG
GCTGACCTGATGGTGGTTGCAGGAACCTGCTTTACCAAAATGGCACCGGTTATTCAGCGT
CTGTATGACCAGATGCTGGAACCAAAATGGGTTATCTCAATGGGTGCCTGTGCCAACTCT
GGTGGTATGTACGATATTTATTCCGTTGTGCAGGGCGTCGATAAATTCATCCCGGTTGAT
GTGTATATCCCGGGCTGCCCGCCGCGTCCTGAAGCGTACATGCAGGCACTGATGCTGTTG
CAGGAATCTATCGGCAAAGAACGTCGTCCGCTCTCCTGGGTGGTTGGCGATCAGGGCGTT
TATCGCGCCAATATGCAATCAGAGCGCGAACGCAAGCGCGGTGAACGCATTGCCGTAACC
AATCTGCGTACACCTGACGAGATTTAATTTGCGCCTGTCGGCAAAGGGATTTTTCTTCGC
TTATTCCTAAATCTATTTCGCGAAGCTTACTGCGCCGACAGTCACCACGGACCATTTGCA
ATGGTGAACAATATGACCGACTTAACCGCGCAAGAACCCGCCTGGCAGACCCGCGATCAT
CTTGATGATCCGGTAATTGGCGAACTGCGCAACCGTTTTGGGCCGGATGCCTTTACTGTT
CAGGCGACTCGCACCGGGGTTCCCGTTGTGTGGATCAAGCGTGAACAATTACTGGAAGTT
GGCGATTTCTTAAAGAAACTGCCGAAACCTTACGTCATGCTGTTTGACTTACACGGCATG
GACGAACGTCTGCGCACACACCGCGAAGGGTTACCTGCCGCGGATTTTTCCGTTTTCTAC
CATCTGATTTCTATCGATCGTAACCGCGACATCATGCTGAAGGTGGCGTTGGCAGAAAAC
GACCTGCACGTACCGACCTTCACCAAACTGTTCCCGAACGCTAACTGGTATGAGCGTGAA
ACCTGGGATCTGTTTGGCATTACATTCGACGGTCACCCGAACCTGCGCCGCATCATGATG
CCGCAAACCTGGAAAGGTCACCCGCTGCGTAAAGATTACCCGGCGCGCGCTACCGAATTC
TCGCCGTTTGAGCTGACCAAAGCCAAACAGGATCTGGAGATGGAAGCCCTGACCTTCAAA
CCGGAAGAGTGGGGGATGAAGCGCGGCACCGAAAACGAGGACTTCATGTTCCTCAACCTC
GGCCCGAACCACCCGTCGGCGCACGGTGCTTTCCGTATCGTTTTGCAGCTTGATGGCGAA
GAGATTGTCGACTGCGTACCAGACATCGGTTACCACCACCGTGGTGCGGAGAAAATGGGC
GAACGCCAGTCCTGGCACAGCTACATTCCGTATACCGACCGTATCGAATACCTCGGCGGC
TGCGTTAACGAAATGCCTTACGTGCTGGCGGTAGAGAAACTGGCCGGGATCACCGTGCCG
GATCGCGTTAACGTCATTCGCGTAATGCTCTCCGAACTGTTCCGCATCAACAGCCACCTG
CTGTATATCTCGACCTTTATTCAGGACGTCGGCGCAATGACGCCCGTGTTCTTCGCCTTT
ACCGATCGTCAGAAAATTTACGATCTGGTGGAAGCGATCACGGGTTTCCGTATGCACCCG
GCGTGGTTCCGTATTGGCGGCGTAGCGCACGACCTGCCGCGCGGCTGGGATCGCCTGCTG
CGTGAGTTCCTCGACTGGATGCCGAAACGTCTGGCGTCTTACGAGAAAGCGGCGCTGCAA
AATACCATTCTGAAAGGTCGTTCCCAGGGCGTTGCCGCCTATGGCGCGAAAGAGGCGCTG
GAGTGGGGCACCACTGGCGCGGGCCTGCGTGCTACCGGGATTGACTTCGACGTGCGTAAG
GCGCGTCCTTATTCTGGCTATGAAAACTTCGACTTTGAAATCCCGGTTGGTGGTGGTGTT
TCTGACTGCTACACCCGCGTAATGCTGAAAGTGGAAGAGCTGCGCCAGAGTCTGCGCATT
CTTGAGCAGTGCCTCAACAACATGCCGGAAGGCCCGTTCAAAGCGGATCACCCGCTGACC
ACGCCACCGCCGAAAGAGCGCACGCTGCAACATATCGAAACCCTGATCACCCACTTCCTG
CAAGTGTCGTGGGGGCCGGTGATGCCTGCCAATGAATCTTTCCAGATGATTGAGGCGACC
AAGGGGATCAACAGTTACTACCTGACCAGCGACGGTAGCACCATGAGTTATCGCACTCGT
ATCCGCACGCCGAGTTATGCGCATTTGCAGCAAATTCCGGCGGCGATCCGCGGCAGCCTG
GTGTCTGACCTGATTGTTTATCTGGGCAGTATCGATTTTGTTATGTCAGATGTGGACCGC
TAATTATGCACGAGAATCAACAACCACAAACCGAGGCTTTTGAGCTGAGTGCGGCAGAGC
GTGAAGCGATTGAGCACGAGATGCACCACTACGAAGACCCGCGTGCGGCGTCCATTGAAG
CGCTGAAAATCGTTCAGAAGCAGCGTGGCTGGGTGCCGGATGGCGCGATCCACGCGATCG
CCGATGTGCTGGGTATTCCGGCGAGCGACGTCGAAGGCGTGGCAACGTTCTACAGCCAGA
TCTTCCGCCAGCCGGTTGGCCGCCATGTGATCCGTTATTGCGACAGCGTGGTCTGTCATA
TCAACGGTTACCAGGGTATTCAGGCGGCGCTCGAGAAAAAGCTAAACATCAAACCAGGGC
AAACGACATTTGACGGTCGCTTTACGCTGCTGCCAACTTGCTGCCTGGGGAACTGTGATA
AAGGGCCAAACATGATGATCGATGAGGACACTCACGCGCATCTGACCCCGGAAGCGATCC
CTGAACTGCTGGAGCGGTATAAATGAAAAACATTATCCGTACTCCCGAAACGCATCCGCT
GACCTGGCGTCTGCGCGATGACAAACAGCCAGTGTGGCTGGACGAATACCGCAGCAAAAA
CGGTTACGAAGGCGCGCGTAAGGCGCTGACCGGGCTGTCTCCGGACGAAATCGTTAATCA
GGTAAAAGACGCTGGTCTGAAAGGGCGTGGCGGCGCGGGTTTCTCGACTGGCCTGAAATG
GAGCCTGATGCCGAAAGACGAATCCATGAACATCCGTTACCTGCTGTGTAACGCCGATGA
AATGGAGCCAGGCACCTATAAAGACCGCCTGCTGATGGAGCAACTGCCGCACCTGCTGGT
GGAAGGCATGCTCATCTCCGCGTTTGCGCTGAAAGCTTACCGTGGCTATATCTTCCTGCG
CGGCGAATATATCGAAGCGGCAGTGAATCTACGCCGTGCCATTGCCGAAGCGACTGAAGC
GGGCTTGCTTGGCAAAAACATTATGGGAACAGGTTTCGACTTCGAACTGTTCGTCCATAC
CGGGGCAGGGCGCTACATCTGCGGGGAAGAAACAGCGTTAATCAACTCCCTGGAAGGGCG
TCGTGCTAACCCGCGCTCGAAGCCTCCATTCCCGGCGACCTCCGGCGCATGGGGTAAACC
GACCTGTGTCAACAACGTCGAAACCCTGTGTAACGTTCCGGCGATCCTCGCTAACGGCGT
GGAGTGGTATCAGAACATCTCGAAAAGTAAAGATGCTGGCACCAAGCTGATGGGCTTCTC
CGGTCGGGTGAAAAATCCGGGCCTGTGGGAACTGCCGTTTGGTACTACCGCGCGCGAGAT
CCTCGAAGATTACGCCGGTGGTATGCGTGACGGTCTGAAATTCAAAGCCTGGCAGCCAGG
CGGCGCGGGCACCGACTTCCTGACCGAAGCGCACCTTGACCTGCCGATGGAATTCGAAAG
TATCGGTAAAGCGGGAAGCCGTCTGGGTACGGCGCTGGCGATGGCGGTTGACCATGAGAT
CAACATGGTGTCGCTGGTGCGTAACCTGGAAGAGTTTTTCGCCCGTGAGTCCTGCGGCTG
GTGTACGCCGTGCCGCGACGGTCTGCCGTGGAGCGTGAAAATTCTGCGTGCGCTGGAGCG
TGGTGAAGGTCAGCCGGGCGATATCGAAACACTTGAGCAACTGTGTCGATTCTTAGGCCC
GGGTAAAACTTTCTGTGCCCACGCACCTGGTGCAGTGGAGCCGTTACAGAGCGCCATCAA
ATATTTCCGCGAAGAATTTGAGGCGGGGATCAAACAGCCGTTCAGCAATACCCATTTGAT
TAATGGGATTCAGCCGAACCTGCTGAAAGAGCGCTGGTAACCGAATTTCGATTAACGCTC
AGTCTCTGACTGAGAAAACTGGAAGCATGCTAATGGCTACAATTCATGTAGACGGCAAAG
AATACGAGGTCAACGGAGCGGACAACCTGCTGGAAGCTTGTCTGTCTCTTGGCCTTGATA
TTCCTTACTTTTGCTGGCATCCGGCGCTGGGAAGCGTCGGTGCTTGCCGCCAGTGTGCGG
TGAAGCAATACCAAAACGCGGAAGACACGCGTGGTCGCCTGGTGATGTCCTGTATGACAC
CGGCTTCCGATGGCACCTTTATTTCCATTGACGACGAAGAAGCGAAACAGTTCCGTGAAA
GTGTGGTCGAGTGGTTAATGACCAACCACCCGCACGACTGTCCGGTATGTGAAGAAGGCG
GTAACTGCCATCTTCAGGATATGACCGTGATGACCGGACACAGCTTCCGTCGCTACCGTT
TCACCAAACGTACCCACCGTAATCAGGATTTGGGACCGTTCATCTCTCACGAAATGAACC
GCTGCATCGCCTGCTACCGCTGCGTGCGTTACTACAAAGATTACGCTGACGGTACAGATC
TGGGCGTTTATGGCGCGCACGACAACGTCTACTTCGGTCGCCCGGAAGACGGCACGCTGG
AAAGCGAATTTTCCGGTAACCTGGTCGAAATTTGCCCGACTGGCGTATTTACCGACAAAA
CGCACTCCGAGCGTTACAACCGTAAATGGGATATGCAGTTTGCGCCGAGCATCTGCCAGC
AATGTTCCATCGGCTGTAACATCAGCCCCGGTGAACGTTATGGCGAACTGCGTCGTATCG
AAAACCGTTACAACGGTACGGTAAACCACTACTTCCTCTGCGACCGTGGTCGTTTCGGTT
ACGGTTACGTCAACCTGAAGGATCGTCCGCGTCAGCCAGTACAGCGTCGTGGCGATGATT
TCATTACCCTCAACGCCGAACAGGCAATGCAGGGCGCGGCAGATATTCTGCGTCAGTCGA
AGAAAGTGATCGGTATTGGTTCTCCGCGTGCCAGCGTGGAAAGCAACTTTGCGCTGCGTG
AACTGGTGGGCGAAGAAAACTTCTACACCGGTATCGCTCACGGTGAGCAGGAACGTCTGC
AACTGGCGCTGAAAGTGCTGCGTGAAGGCGGCATTTATACTCCGGCTCTGCGCGAAATCG
AATCTTACGATGCGGTACTGGTGCTGGGCGAAGACGTTACCCAGACCGGCGCGCGCGTCG
CGCTGGCAGTGCGTCAGGCGGTGAAAGGTAAAGCGCGCGAAATGGCGGCAGCACAGAAAG
TGGCTGACTGGCAGATTGCGGCAATCCTCAACATCGGTCAACGTGCGAAGCATCCGCTGT
TTGTTACCAACGTTGATGACACCCGTCTGGATGATATCGCGGCGTGGACTTACCGCGCAC
CGGTTGAAGATCAGGCGCGTTTAGGTTTTGCCATCGCCCATGCGCTGGATAACTCTGCAC
CAGCGGTTGACGGTATCGAACCTGAGCTGCAAAGCAAAATCGACGTCATCGTGCAGGCAC
TGGCAGGTGCGAAGAAACCGTTGATTATCTCCGGGACGAACGCCGGTAGCGCTGAAGTAA
TTCAGGCTGCGGCTAACGTCGCGAAAGCCCTGAAAGGTCGCGGCGCTGACGTCGGTATCA
CCATGATTGCCCGTTCCGTCAACAGCATGGGGCTGGGCATTATGGGCGGTGGATCGCTTG
AAGAAGCGTTAACCGAACTGGAAACCGGACGCGCCGACGCGGTGGTGGTGCTGGAGAACG
ATCTGCATCGTCACGCATCCGCTACCCGCGTGAATGCTGCGCTGGCTAAAGCGCCGCTGG
TGATGGTGGTTGACCATCAACGCACAGCGATCATGGAAAACGCCCATCTGGTGCTTTCCG
CCGCCAGCTTTGCTGAAAGCGACGGTACAGTGATCAACAACGAAGGCCGCGCCCAACGTT
TCTTCCAGGTTTACGATCCGGCTTATTACGACAGCAAAACTGTCATGCTGGAAAGCTGGC
GCTGGTTACACTCGCTGCACAGCACTCTGCTGAGCCGTGAAGTGGACTGGACGCAGCTCG
ACCATGTGATTGACGCTGTTGTGGCGAAAATCCCGGAACTGGCAGGTATCAAAGATGCTG
CGCCGGATGCGACATTCCGTATTCGTGGGCAGAAACTGGCCCGTGAACCGCACCGTTACA
GCGGTCGTACCGCCATGCGCGCCAATATCAGCGTTCATGAGCCGCGTCAGCCGCAGGATA
TTGACACCATGTTCACCTTCTCGATGGAAGGTAACAACCAGCCGACCGCGCATCGTTCGC
AAGTGCCGTTTGCCTGGGCTCCGGGCTGGAACTCCCCGCAGGCGTGGAACAAATTCCAGG
ACGAAGTGGGCGGCAAACTGCGCTTTGGCGATCCGGGCGTGCGTCTGTTTGAAACCAGCG
AAAATGGTCTGGATTACTTCACCAGCGTACCGGCACGCTTCCAGCCGCAGGACGGGAAAT
GGCGTATCGCGCCGTATTACCACCTGTTTGGCAGTGATGAATTGTCACAGCGTGCTCCGG
TCTTCCAGAGCCGTATGCCGCAGCCGTACATCAAACTCAACCCGGCAGATGCCGCGAAGT
TGGGTGTGAATGCAGGTACACGCGTCTCCTTTAGTTACGATGGCAACACGGTCACGCTGC
CGGTTGAAATCGCCGAAGGGCTGACGGCAGGGCAGGTGGGCTTGCCGATGGGTATGTCCG
GCATTGCTCCGGTGCTGGCTGGCGCGCATCTTGAGGATCTCAAGGAGGCACAACAATGAG
TTGGATATCACCGGAACTGATTGAGATCCTGCTGACCATCCTCAAAGCGGTGGTGATCCT
GCTGGTGGTTGTCACCTGCGGGGCATTCATGAGCTTTGGCGAACGTCGCCTGCTGGGTCT
GTTCCAGAACCGTTACGGACCTAACCGTGTTGGCTGGGGCGGTTCGCTCCAGCTGGTTGC
GGACATGATCAAAATGTTCTTTAAAGAAGACTGGATCCCGAAATTCTCGGATCGCGTCAT
CTTTACCCTGGCACCGATGATTGCCTTTACCTCGTTGCTGCTGGCCTTTGCGATTGTGCC
AGTCAGCCCGGGTTGGGTGGTTGCCGACCTGAACATCGGGATTTTGTTCTTCCTGATGAT
GGCTGGTCTGGCGGTTTACGCGGTGCTGTTTGCGGGCTGGTCAAGTAACAACAAATACTC
GCTGCTGGGTGCGATGCGTGCTTCTGCACAGACCCTGAGCTACGAAGTGTTCCTCGGGCT
TTCTCTGATGGGCGTGGTGGCGCAGGCCGGTTCATTCAACATGACCGACATCGTCAACAG
CCAGGCGCATGTGTGGAACGTCATCCCGCAATTCTTTGGTTTTATTACCTTTGCCATCGC
GGGTGTGGCGGTGTGTCACCGTCACCCGTTTGACCAGCCGGAAGCCGAGCAGGAACTGGC
GGATGGTTACCACATTGAATACTCCGGCATGAAGTTCGGTCTGTTCTTCGTGGGTGAGTA
CATCGGGATTGTGACCATCTCTGCATTGATGGTGACGCTGTTCTTCGGTGGCTGGCAAGG
CCCGTTGTTACCGCCATTCATCTGGTTCGCGCTGAAAACCGCGTTCTTTATGATGATGTT
CATTTTGATTCGTGCGTCGTTACCGCGTCCGCGTTATGACCAGGTAATGTCCTTCGGCTG
GAAAATCTGCCTGCCGCTGACGCTGATCAACTTGCTGGTAACGGCGGCTGTCATTCTCTG
GCAGGCGCAATAAGGGGCAATAAGACCATGACCTTAAAAGAATTGTTAGTAGGTTTCGGC
ACCCAGGTTCGTAGTATCTGGATGATCGGCCTGCACGCGTTCGCCAAACGCGAAACGCGA
ATGTACCCGGAAGAGCCGGTCTATCTGCCGCCCCGTTATCGTGGTCGTATCGTTCTGACC
CGCGACCCGGACGGCGAAGAGCGTTGCGTAGCCTGTAACCTCTGTGCGGTAGCCTGCCCG
GTCGGCTGTATCTCGCTGCAAAAAGCAGAAACCAAAGACGGTCGCTGGTATCCGGAATTT
TTCCGCATCAACTTCTCACGCTGCATTTTCTGTGGTCTGTGCGAAGAAGCCTGTCCGACC
ACGGCGATTCAGTTAACCCCGGATTTCGAAATGGGGGAATACAAGCGCCAGGATCTGGTT
TACGAGAAAGAGGATCTGCTGATCTCCGGTCCGGGCAAATACCCGGAATATAACTTCTAC
CGGATGGCAGGTATGGCAATCGACGGCAAAGATAAGGGCGAAGCAGAGAACGAAGCCAAG
CCTATCGACGTCAAGAGCCTGTTACCGTAAGGAGAGGAGCAATGGAGTTCGCTTTTTATA
TCTGTGGCCTGATAGCCATACTTGCGACCTTGCGAGTGATCACCCATACCAATCCGGTAC
ACGCACTGCTGTACCTGATTATTTCGCTGCTGGCGATTTCTGGGGTGTTCTTCTCACTGG
GCGCTTACTTCGCCGGTGCGCTGGAAATTATCGTCTACGCGGGTGCCATTATGGTGCTGT
TCGTGTTCGTGGTGATGATGCTCAACCTGGGCGGTTCAGAAATCGAACAGGAACGCCAGT
GGCTGAAACCGCAGGTGTGGATTGGTCCGGCAATTTTGTCGGCCATCATGCTGGTGGTGA
TTGTTTACGCCATCCTCGGTGTTAACGATCAGGGTATCGACGGTACGCCAATCAGTGCTA
AAGCAGTGGGTATTACGCTGTTCGGGCCTTACGTACTGGCGGTGGAACTGGCTTCTATGC
TGCTGCTCGCGGGTCTGGTTGTGGCCTTCCACGTCGGTCGTGAAGAGCGTGCGGGTGAAG
TGCTGAGCAATCGTAAAGACGACAGCGCGAAAAGAAAAACGGAGGAGCACGCATGATCCC
CTTACAACATGGACTGATCCTCGCGGCAATCTTATTCGTTCTTGGCTTAACCGGTCTGGT
TATCCGTCGCAATCTGCTGTTTATGCTGATTGGTCTGGAAATCATGATTAACGCCTCCGC
GCTGGCCTTTGTGGTCGCCGGAAGCTACTGGGGCCAGACCGACGGTCAGGTGATGTACAT
TCTCGCCATCAGCCTCGCGGCGGCAGAAGCGAGTATCGGCCTTGCGCTGCTGCTGCAACT
TCACCGTCGTCGCCAGAACCTGAACATCGATTCAGTAAGTGAGATGCGCGGATGAACATG
CTTGCCTTAACCATTATTTTGCCATTGATTGGCTTCGTCCTGCTGGCGTTCTCCCGTGGG
CGCTGGTCTGAAAACGTTTCGGCGATCGTCGGCGTTGGCTCTGTGGGCCTGGCGGCGCTG
GTAACCGCCTTTATCGGCGTTGATTTCTTCGCTAACGGCGAGCAGGCATACAGCCAGCCG
CTGTGGACGTGGATGTCGGTAGGCGACTTTAACATCGGTTTTAACCTGGTGCTGGACGGC
CTGTCGCTGACCATGCTCTCGGTGGTCACTGGTGTGGGTTTCCTGATCCACATGTACGCC
TCCTGGTATATGCGTGGTGAAGAGGGCTACTCTCGCTTCTTCGCCTACACCAACCTGTTC
ATCGCCAGCATGGTGGTTCTGGTGCTTGCCGATAACCTGCTGTTGATGTACCTCGGCTGG
GAAGGCGTGGGCCTGTGCTCCTATCTGCTGATCGGTTTCTATTACACCGATCCGAAGAAT
GGCGCAGCGGCAATGAAAGCGTTCGTCGTGACCCGTGTGGGTGACGTGTTCCTCGCTTTC
GCGCTGTTCATTCTTTACAACGAACTGGGCACCCTGAACTTCCGCGAAATGGTGGAACTG
GCACCAGCGCACTTTGCTGACGGCAATAACATGCTGATGTGGGCGACGCTGATGCTGCTG
GGCGGTGCGGTCGGTAAATCTGCGCAGTTGCCGTTGCAGACATGGCTTGCCGACGCGATG
GCGGGCCCGACGCCTGTCTCCGCGCTGATCCACGCCGCAACGATGGTAACCGCGGGTGTC
TACCTGATCGCCCGTACCCACGGCCTGTTCCTGATGACCCCGGAAGTTCTGCATCTGGTG
GGTATTGTCGGGGCAGTTACGCTGCTGCTGGCCGGTTTTGCCGCGCTGGTACAGACCGAC
ATCAAACGTGTTCTCGCTTACTCTACCATGAGCCAGATTGGCTACATGTTCCTCGCGCTT
GGCGTGCAGGCATGGGATGCGGCGATTTTCCACTTGATGACTCACGCGTTCTTTAAAGCG
CTGCTGTTCCTGGCATCCGGTTCCGTCATTCTGGCCTGCCATCACGAACAGAACATCTTC
AAGATGGGCGGTCTGCGTAAATCTATTCCGCTGGTTTATCTCTGCTTCCTGGTGGGTGGT
GCAGCACTGTCGGCACTGCCGCTGGTCACTGCGGGCTTCTTCAGTAAGGATGAGATCCTC
GCGGGTGCGATGGCGAATGGTCATATCAATCTGATGGTGGCAGGTCTGGTCGGTGCGTTT
ATGACCTCGCTCTACACCTTCCGTATGATTTTCATCGTCTTCCACGGAAAAGAACAAATT
CACGCTCACGCCGTGAAAGGGGTAACTCACAGCCTGCCGCTGATTGTGCTGCTGATCCTT
TCCACCTTCGTTGGCGCACTGATTGTACCGCCGCTGCAGGGCGTGCTTCCGCAAACGACG
GAGCTGGCGCACGGCAGCATGTTGACCCTGGAAATTACCTCTGGCGTGGTCGCGGTGGTC
GGCATTCTGCTGGCTGCCTGGCTGTGGCTGGGTAAACGTACTCTGGTGACCTCCATCGCC
AACAGTGCGCCGGGCCGTCTGCTGGGCACCTGGTGGTACAACGCCTGGGGCTTTGACTGG
CTGTACGACAAAGTGTTCGTCAAGCCGTTCCTGGGTATTGCCTGGTTGCTGAAACGCGAT
CCGCTGAACGCAATGATGAACATTCCGGCGGTTCTTTCCCGCTTTGCAGGTAAAGGTCTG
CTGTTAAGCGAGAACGGCTATCTGCGCTGGTATGTGGCATCCATGAGCATCGGTGCGGTC
GTGGTGCTGGCACTGTTGATGGTACTGCGTTGAGTTAAGGATTGTGGGATTGCCCCTGGG
CATATAAGAACGTAGGTCGGATAAGCCTCCTTCGCGGTGCATCCGACACTACCCCCAGTC
CGAAGAGAATTTTCTGTCGTGAGAATTCGTTGAAAATCCGGTCCTGACGGGACTTTTACA
AGGAATAAAGATCGCCATGTTACTACCCTGGCTAATATTAATTCCCTTTATCGGCGGCTT
CCTGTGCTGGCAGACCGAACGCTTTGGCGTCAAGGTGCCGCGCTGGATCGCGCTGATCAC
CATGGGATTGACGCTGGCGCTGTCGCTGCAACTGTGGTTGCAGGGCGGTTATTCACTGAC
GCAATCCGCCGGAATTCCGCAGTGGCAGTCTGAATTCGACATGCCGTGGATCCCGCGTTT
TGGTATCTCTATTCATCTCGCCATTGACGGGCTGTCGCTGCTGATGGTCGTGCTGACCGG
TCTGCTCGGTGTGCTGGCGGTACTCTGTTCGTGGAAAGAGATCGAAAAATATCAGGGCTT
CTTCCACCTCAACCTGATGTGGATCCTGGGCGGCGTTATCGGCGTGTTCCTTGCCATCGA
CATGTTCCTGTTCTTCTTCTTCTGGGAAATGATGCTGGTGCCGATGTACTTCCTGATCGC
ACTGTGGGGGCATAAAGCCTCTGACGGTAAAACGCGTATCACGGCGGCAACCAAGTTCTT
CATTTACACCCAGGCGAGTGGTCTTGTGATGTTGATCGCCATCCTGGCGCTGGTTTTTGT
TCACTACAATGCGACCGGCGTCTGGACCTTCAACTATGAAGAGCTGCTGAATACGCCAAT
GTCCAGTGGTGTGGAATATCTGTTGATGCTGGGCTTCTTCATCGCCTTCGCAGTCAAAAT
GCCGGTGGTTCCGCTGCATGGCTGGCTGCCGGATGCGCACTCCCAGGCTCCGACCGCCGG
TTCCGTTGACCTCGCGGGGATCTTGCTGAAAACTGCCGCTTACGGTTTGCTGCGTTTCTC
CCTGCCGCTGTTCCCAAATGCGTCGGCAGAGTTCGCGCCAATCGCTATGTGGCTGGGTGT
TATCGGCATCTTTTACGGTGCGTGGATGGCCTTCGCCCAGACCGATATCAAACGTCTGAT
CGCCTACACCTCGGTTTCCCACATGGGCTTCGTGCTGATTGCTATCTACACCGGCAGCCA
GTTGGCCTACCAGGGCGCGGTAATCCAGATGATTGCGCACGGCTTGTCGGCGGCGGGTCT
GTTTATTCTCTGCGGTCAGCTTTATGAACGTATCCATACCCGCGACATGCGCATGATGGG
CGGTCTGTGGAGCAAGATGAAATGGCTGCCAGCACTGTCGCTGTTCTTTGCGGTGGCAAC
GCTTGGGATGCCTGGCACCGGTAACTTCGTCGGCGAATTTATGATTCTGTTCGGCAGCTT
CCAGGTTGTCCCGGTGATTACCGTTATTTCTACCTTTGGGCTGGTCTTTGCATCTGTTTA
TTCGCTGGCGATGTTGCATCGTGCTTACTTCGGTAAAGCGAAAAGCCAGATTGCCAGCCA
GGAACTGCCAGGGATGTCGCTGCGTGAGCTGTTTATGATCCTGTTGCTGGTGGTGCTGCT
GGTACTGCTGGGCTTCTATCCGCAGCCGATTCTGGATACCTCGCACTCCGCGATTGGCAA
TATCCAGCAGTGGTTTGTTAATTCCGTTACTACTACAAGGCCGTAAATCGCCATGACAAT
AACTCCACAAAACCTGATCGCACTGCTACCGTTGCTGATCGTCGGCTTGACGGTGGTGGT
TGTGATGCTCTCCATTGCGTGGCGACGCAATCATTTCCTCACCGCTACGCTCTCGGTTAT
TGGGCTTAACGCGGCGCTGGTTTCGCTCTGGTTTGTCGGCCAGGCGGGCGCTATGGATGT
TACGCCGCTGATGCGCGTTGATGGTTTCGCCATGCTTTACACCGGGCTGGTCCTGCTGGC
GAGCCTCGCCACCTGTACTTTCGCCTACCCGTGGCTTGAAGGCTATAACGACAACAAGGA
TGAGTTCTACCTGTTGGTGTTAATTGCCGCGCTGGGCGGGATCCTGCTGGCGAATGCCAA
CCATCTGGCGTCTCTGTTCCTCGGTATCGAACTGATCTCTTTGCCGCTGTTTGGCCTGGT
CGGTTACGCTTTCCGCCAGAAACGTTCGCTGGAAGCCAGTATCAAATACACCATCCTTTC
TGCCGCAGCGTCTTCTTTCCTGCTGTTTGGTATGGCGCTGGTGTATGCGCAGTCTGGCGA
CCTGTCGTTTGTCGCGTTGGGTAAAAACCTTGGCGACGGTATGCTCAACGAGCCGCTGTT
GCTGGCAGGTTTCGGCCTGATGATTGTTGGCCTCGGCTTCAAACTCTCTCTGGTGCCGTT
CCACCTGTGGACGCCAGACGTATACCAGGGCGCGCCTGCGCCGGTTTCCACTTTCCTGGC
GACGGCGAGCAAAATCGCTATCTTCGGTGTGGTGATGCGTCTGTTCCTCTACGCACCGGT
GGGTGACAGCGAAGCGATTCGCGTAGTACTGGCGATTATCGCCTTTGCCTCCATCATCTT
CGGTAACCTGATGGCGTTGAGCCAGACCAACATCAAACGTCTGCTCGGTTACTCATCTAT
CTCTCACCTCGGCTATCTGCTGGTGGCGCTGATTGCGCTGCAAACCGGCGAGATGTCGAT
GGAAGCGGTAGGGGTTTACCTGGCCGGTTATCTGTTCAGCAGCCTCGGCGCGTTCGGCGT
GGTCAGCCTGATGTCCAGCCCGTATCGTGGCCCGGATGCTGATTCCCTGTTCTCTTACCG
CGGTCTGTTCTGGCATCGTCCGATCCTCGCGGCAGTGATGACGGTGATGATGCTGTCTCT
GGCCGGTATCCCGATGACGCTGGGCTTTATCGGTAAGTTCTACGTGCTGGCGGTCGGTGT
CCAGGCTCACTTGTGGTGGCTGGTGGGTGCCGTGGTTGTCGGTTCGGCAATCGGCCTTTA
CTACTACCTGCGCGTGGCGGTGAGTCTGTACCTGCACGCACCGGAACAACCGGGTCGCGA
TGCACCGTCAAACTGGCAGTACAGCGCGGGCGGTATCGTGGTGCTGATTTCTGCACTGTT
GGTACTGGTGCTGGGTGTATGGCCACAACCGCTGATTAGCATTGTGCGTTTGGCAATGCC
GCTGATGTAATCTGTTAGTTTGTAAGTCAGAAAGCCGCCGACATGCTCGGCGGTTTTTTT
TGGCGCTCTGACACCATCACCCAACAATAACCGTCAGCGCATGATTCCCTTGTCGCAGCA
TACGTCGATACGCGCTAATCAGCTTTTCCATATCAAGCATGATCGAGGCAAAGAGTTGCC
CCTCTAACTCTTCTGAAAAGGTCACTCCCGGATAAATCTCCATTTCATTGAGTCGCTTAA
TGGAAAACTGTTTACGCAGCTCACTTCGATCCAGTGATTCCAGTCGGTCGATTGTCGCGG
CTAACTCCTGATTCCAGGTCAATCCCAGGAAGCCATCTATGCCATCTTCGAGGCTGTGTT
CACCAAGCACGGCACGACTCAGCGGATCATTCTTCGCGGGATCAAAAGCAGAGGTGCCTG
TCAGCCCAAAGTGTAAAAAATCCCAGCGTTTATCAATATCCAGTCGGCGTAATCCTGAAA
GCGTGTCATGTATATTATCCATCAAAGGTTTTTCAGTAGACTCAAGCAGTTGGTTAATCT
TTTCTGAGTCAATTTCTGCAAAATAACCAATCATTCCCATTTATTTTTCCTCCATTGAAT
TTCATGTTTCGCATCTTAAAACAGACGAGGGAAAATAAAATGTGCATGTCGCTTTTTCTG
GACCCGCCTCGAGAAATTTTTATTATTTACTGTTGTATAACAAATTTATAACACCATCCA
CCACCTGAGCCATTTTCTGATAATTCAATCTGTCTGCGGTATCACCGGGCAAGTGGTATT
GTTTATTACGATAAAAAGCGGTGTCAGTAATCATTACGGCGGGAATATCGTGTTGCCAAT
AATTCAGGTGGTCAGAGAAATCAATACCGGGAATAAACCCTGGGGCATTCATAGAATAAA
CAGATAAATCCCGGGATGACAACAATGCCGCTTTTACCTGACGAACGGCGTTGATATCCT
GTATTCTGCCGACCAGGCAATAAAGTCCCCCCGATCGGGATAAAGCCAGGACATTGCGGG
TAAGGGTAATCCTGGCTACCAGGCGCAGAGTCGTAATAGCCAATCGGGGACGCCCTGCGC
GGTAACTCTGGCACCGCTACTGACAAAGACCTCTTTTATATACTCTACGGACCTATTCAG
ATTATCAATATTGTCGGCATTACGTGGATGCACAGCTTGTGTAAGATAACGAACTGTTTT
TTCTAATTGCTCAGGAATTACGTGTCGGGGCGTTGGCGATAATGCAGTGACCCAGGGTTG
GTAAAAATAATCAGAGGGAGTGAAAACAGAAATAATATAACAAAAGGAAAATTTTTTCAT
ATGTAAATTATCAATAAAAGGCGTTATTTCATTATTATTTATAATGAATTATGAGCGTTT
ATTTTATTACACTTGGTAGAGATATACAAAAAGTGTTTTTTACAGTGGGTTCGCTATTTT
TAAAAAGGAATTTCTGTGAGGAATAAAAATATAATTATGTTATTTATTGGCAGATTGAAT
TGACAAGTGGGGCAGAAATCTGAGGGTAAGAAAAGTCAGCAACTACAATCCACTACATCA
ACAGACCAGCAATCGCGTGCCGAGATACGCTGGAAATACCCGAAGATTGAACTGCAGGGT
GGTGTGACTGACATCAGTCAGTGATGACTTTTTAGCAAACTATGTTCGACCAGTCAGCAT
ATTTGCTGACTGGTCGAATTAATTAACAATGATGTTAACTTACTCTTTTGCCTGATGCTC
TATTTTGGGGTTGTGAGTGTTTTATTTCTAAGTCTCTATAATAATCATTGATATTTGCAT
CGCCATATTTATCTAAATAACAATTTCTGTTTACCAGTCGATGTTGAAAATCAATTTCGT
ACTGCTCTTCTGCTGAATATTTTTTAAATCTGTCAGCATAGTTTTTTAATAACGTATAGG
GGGCGCTGTCAGAATTACTTTCCCTTTGTTCAATCACTTCCTGGGCTGCCATGCACACAA
ATGCATCGCAACTTTGGCTTAAGTATTGCTGAAGATCGGCATGTAAAAATATTATCTCGG
GTTCAGTTAAATGAACTTTTATATTATTATTCGACATTTCTCCCATGAGTTCAGAATTAA
AACTATTAATGACACGCTTAAGTGAATTTTCTTTATCATGGCCTAGTGCGCGCAATGAGT
TGAATATGACGCATTTTATTTGTTGTGTATTATTTTTTTCATTTACTATTTTCTGTAGCG
AAACTAATATCCAGTGTCCGCCAGTATTTATGGGGAATAACTGGACTTCATTCGGCCATG
ATGGATCGCTCTTAATATTTTCATTGAGAGCGTCTTCCAGGTGAGTTCTGGTGGAGTAGG
GGACGTAGAGACCAGTAGGATAATTGACTTCAGTATTTTTTGCATTAGCGGCGATCTTCT
GAAGATAGCAATCTATTTCATCTGTGGTTAATTGACGATTTTTATCCCAGAAGTTTGTAC
CATCGCTCAGTTCATTATTCTCATCATTTAAAAGCACCTTCGAAAGCGACTGTTTTTCAG
ATATAAGAGGAATTTCATCACCGATAATTGTCATTAATTTCGAAGGGGAGAATAGCTTTT
TGAACAGGAGATCATCTGAATTATCCGGACCAGTTGGTTTAAGGTGGGAGTTGGTTGCGG
TATGTGCCAAATTATATAATTTTAAACAGGCATTTTTAATAAGTCGGATAATCGATAGGG
TCTCATTTGTTGGGTTTCTAACAATATGGTAAAGAATATCTTCAGCTTTTTTTCCAAATT
CATCATAACCTAACGCAATATTATGCAGTAACTCAATACTTTCTTCATCTCCGGATAACG
CTGTTTTTTTTAAAGACTGCAGTAATTCCTCGGTCACAGTAAATTTTTCTGCAAATGTCT
GACTGAGTTGGGTTTGAGATAATTGACAATAATTGCTGACAACTGTAACCATCATATGCT
CCTTTTAGTTGCAAAGGTTGTGCTGAATGAAGATAAAAAGAGGCAACTTATTGCTCTGAA
TATAGTGCGTAAGGAGATGAATAAATATCAAAAATCGCTCAATATGCCCGTGTGGGTGGA
TATATGTAGCGCGGGTTGCGATAACAGGGCAAGTTTCGCCCTGTTTTTAATAATAAGCAG
AGTTAAACGTTAAACACGGTGAAATCATTCGCTAGTTCAGTCGCCGGGAAAATTGACCTG
CATTCACGTAACAGGTGCTGACAACCTTTGTCATCATAGCGCGAGCTGACGTGGGTAATG
ATTAGCTTACCGACTCCAGCCTCACGGGCCAGTGTCGCAGCCTGGCGTGTAGAGCTATGA
CCGCGACTATTGGCTTTGGCTTCCATGGTTATATCCAGCGTCGCTTCGTGTACCATGACA
TCGACACCTTTAGCCAGGTCAAGTGCGGCATCGCAGGGGCCGGTATCGCCGAAAATAGCG
AGCGCTTTACCTGGCACTGGAGCAGCTAAGTAATCTGCGCCGTTAATCTGCCTTCCATCT
TCCAGCATGATTGTTTTGCCCGCTTTTAATTCCTGAAACAGTGGGCCAGGCGGTACGCCA
GCAGCTTTTAATGCCTGGGCATTTAATGCACCCGGTTTATCATGTTCTTCAATACGATAG
CCATAACATTCCAGTGGGTGTTCCATTGGATAAGCGGTCACTTTGCGCAGGCCATCATCG
AGAATTTCGCCAGCGCCAATTTCGACAATTTCCAGCGGATAATCGGTCCATGAGCCGCTA
ATCCGCAGCGCGGTCTCCACAAATTCACGGATACCTTGCGGACCATAAATCGTTAAGGGT
TGGACAATACCAGACATAGAACGACTGCACAGCAAGCCGGGTAAACCAAAGAGATGATCG
CCATGAAGGTGACTAATAAAAATCTTGTCCAGTTTTCCAGGGTTAAAGGCGGTATGCAGT
AGCTGATGCTGGGTGCCTTCACCGCAGTCAAACAACCAAAGACCGCTCTGGGTCGGATGT
TGCAGGTTAAGCAATATTGCCGTGACATTGCGCGTACGGGTTGGCACACCGGCTGAAGTA
CCTAAAAAAATTAATTCCATGAGTTCATCACGTTTCAAAAAATATTCCGGCTAGTATAAG
GCATACATCTAAAAGGAGAGCATTATGATTGAATGGCAAGATCTGCATCACTCTGAATTA
TCGGTTTCCCAGCTTTATGCCTTATTACAACTGCGTTGCGCGGTGTTTGTTGTCGAGCAG
AATTGCCCTTATCAGGATATCGATGGTGATGATTTGACGGGGGATAATCGCCATATTCTC
GGTTGGAAAAATGATGAACTGGTGGCATATGCGAGGATTCTGAAAAGTGATGATGATCTT
GAGCCGGTCGTTATAGGTCGGGTGATTGTCAGTGAAGCGTTGCGTGGCGAAAAAGTGGGG
CAGCAACTGATGAGTAAAACCCTCGACACATGCACGCATCACTGGCCTGATAAGCCTGTT
TACCTTGGGGCGCAGGCGCATCTGCAAAACTTCTACCAGAGTTTCGGTTTTATCCCTGTG
ACGGAGATCTATGAAGAAGATGGTATCCCACACATTGGGATGGCACGCGAGGTAATTCAG
GCGTAATCAATAACCCTTGTCTATAGTTAGTGACAGGTTTTACGCAAATGGAGAACGAGA
ATGTCTAACCAGTTTGGTGATACACGTATCGATGACGACCTGACGCTGCTTAGTGAAACA
CTGGAAGAGGTGCTCCGCTCCTCTGGCGATCCCGCCGATCAGAAATATGTTGAGCTGAAA
GCGCGTGCAGAAAAAGCGCTGGATGATGTGAAAAAACGGGTTAGCCAGGCTTCAGACAGT
TATTACTATCGGGCGAAGCAGGCTGTTTATCGTGCTGATGACTACGTCCACGAAAAACCC
TGGCAGGGAATTGGTGTGGGTGCGGCCGTTGGGCTGGTACTAGGACTGTTGCTGGCACGC
CGTTAAAACCTCCCTACACCGGGGTACTGCATTTTTTTTGTAGTACCCCGTATAATGTGA
GGCTTTTAACAGGGAGAGGTCCGCGTGCAATCACTTACTACGGCGCTGGAAAATCTACTG
CGCCATTTGTCGCAAGAGATTCCGGTGACACCCGGCATTCGGGTTATCGATATTCCTTTC
CCTCTCAAAGACGCTTTTGATGCCTTGAGCTGGCTGGCCAGTCAGCAAACGTACCCGCAA
TTCTACTGGCAACAACGTAATGGTGATGAAGAAGCTGCCGTCCTGGGCGCGATTACCCGT
TTTACGTCGTTGGACCAGGCACAACGTTTTCTTCGCCAGCACCCGGAACACGCCGACTTA
CGCATTTGGGGGCTGAATGCGTTCGACCCGTCGCAGGGCAATTTACTTTTACCACGCCTG
GAATGGCGACGCTGTGGCGGTAAAGCCACGCTGCGGCTGACGCTATTCAGCGAAAGCTCC
CTTCAGCACGATGCGATTAAGGCAAGAGAATTTATCGCCACACTGGTGAGTATCAAGCCC
TTGCCTGGGTTACATTTAACCACTACGCGAGAACAACACTGGCCGGACAAAACGGGCTGG
ACGCAATTAATCGAACTGGCAACGAAAACCATCGCCGAAGGGGAGCTCGACAAAGTGGTG
CTTGCTCGGGCAACTGACCTGCATTTCGCAAGTCCGGTCAATGCGGCGGCGATGATGGCT
GCCAGTCGTCGACTGAATCTCAATTGCTACCATTTTTACATGGCCTTTGATGGCGAAAAT
GCTTTTCTTGGCTCTTCACCGGAACGGTTATGGCGGCGGCGTGACAAAGCGCTGCGTACT
GAAGCGCTGGCGGGAACAGTAGCAAATCATCCTGATGATAAGCAGGCGCAGCAGTTAGGA
GAGTGGCTGATGGCGGATGATAAAAACCAGCGCGAGAACATGCTGGTGGTGGAAGATATC
TGCCAACGATTACAGGCCGATACCCAGACGCTGGATGTTTTACCGCCGCAGGTACTGCGT
CTGCGTAAAGTGCAGCATCTTCGCCGCTGTATCTGGACTTCACTCAACAAAGCGGATGAT
GTGATCTGTTTACATCAGTTGCAGCCAACGGCAGCAGTTGCTGGCTTACCGCGCGATCTG
GCGCGACAGTTTATCGCCCGTCACGAACCGTTCACCCGAGAATGGTACGCCGGTTCTGCG
GGCTATCTCTCATTACAACAAAGCGAATTCTGCGTTTCCCTGCGCTCAGCAAAAATTAGC
GGCAATGTCGTGCGATTATATGCTGGCGCGGGCATTGTCCGTGGTTCCGACCCCGAGCAA
GAGTGGCAGGAAATCGACAACAAAGCGGCAGGGCTGCGTACTTTATTACAGATGGAATAG
TAATGAGTCGCATCATTACCGATTCATATCAATAATCTATTTTTGTAGCTCCTTATACTT
AGCCGCAATATTGATACCGGACAAACTCATGTCAGTAAGCGCATTTAACCGACGCTGGGC
GGCGGTCATTCTGGAAGCATTAACGCGTCACGGCGTCAGACACATCTGTATCGCCCCAGG
CTCGCGTTCTACACCGTTAACGTTAGCGGCGGCGGAGAATTCCGCATTCATTCACCACAC
CCATTTCGATGAGCGTGGACTGGGGCATCTGGCGCTGGGGCTGGCGAAAGTCAGCAAGCA
GCCGGTGGCGGTGATTGTGACCTCCGGCACGGCGGTAGCAAATCTCTATCCTGCACTGAT
TGAAGCTGGGTTAACCGGAGAAAAACTGATCCTGTTAACCGCCGATCGCCCGCCGGAGCT
AATTGACTGCGGCGCGAATCAGGCGATTCGTCAGCCGGGAATGTTCGCCTCTCACCCCAC
GCACAGTATTTCATTGCCGCGCCCGACCCAGGATATCCCCGCAAGTTGGCTGGTTTCTAC
CATCGACCATGCTCTCGGTACGCTTCATGCGGGCGGAGTCCATATCAACTGCCCGTTTGC
TGAACCGCTGTATGGCGAGATGGACGACACTGGGCTTAGCTGGCAACAGCGTCTGGGTGA
CTGGTGGCAGGATGATAAGCCGTGGCTGCGTGAAGCGCCTCGTCTGGAAAGTGAAAAACA
GCGCGACTGGTTCTTCTGGCGGCAAAAACGCGGCGTGGTGGTTGCCGGGCGCATGAGTGC
GGAAGAGGGCAAAAAAGTTGCACTGTGGGCGCAAACTCTTGGCTGGCCGCTGATTGGCGA
CGTGCTGTCGCAAACCGGACAGCCGCTGCCGTGTGCCGATCTTTGGTTAGGCAATGCCAA
AGCGACCAGCGAACTGCAACAGGCACAGATTGTGGTGCAACTGGGCAGCAGCCTGACGGG
CAAACGGCTCCTGCAATGGCAGGCAAGCTGTGAACCCGAAGAGTACTGGATTGTGGATGA
CATCGAAGGGCGACTTGATCCGGCACACCATCGTGGACGCCGCTTAATTGCCAATATTGC
CGACTGGCTGGAGCTGCATCCGGCAGAAAAACGCCAGCCCTGGTGCGTTGAAATCCCGCG
CCTGGCAGAACAGGCAATGCAGGCGGTTATTGCCCGTCGCGATGCGTTTGGCGAAGCGCA
ACTGGCGCATCGCATCAGCGACTATCTGCCTGAACAGGGGCAATTGTTTGTTGGTAACAG
CCTGGTGGTACGTCTGATTGATGCGCTTTCGCAACTTCCAGCAGGTTACCCGGTGTACAG
CAACCGTGGGGCCAGCGGTATCGACGGACTGCTTTCTACTGCCGCCGGCGTTCAGCGTGC
CAGTGGCAAACCGACGCTGGCGATTGTGGGCGATCTCTCCGCACTTTACGATCTCAACGC
GCTGGCGTTATTGCGTCAGGTTTCCGCGCCGCTGGTATTAATTGTGGTGAATAACAACGG
CGGGCAAATTTTTTCGCTGTTGCCAACGCCGCAAAGCGAGCGCGAACGTTTCTATCTGAT
GCCGCAAAACGTTCATTTTGAGCACGCCGCCGCGATGTTCGAGCTGAAATATCATCGTCC
GCAAAACTGGCAGGAACTTGAAACGGCACTTGCCGATGCCTGGCGCACGCCAACCACCAC
GGTAATTGAAATGGTGGTTAACGACACCGATGGTGCGCAAACGCTCCAGCAACTTCTGGC
GCAGGTAAGCCATTTATGATCCTGCACGCGCAGGCAAAACACGGCAAACCAGGTTTACCC
TGGCTGGTGTTTTTGCACGGTTTTTCCGGCGATTGCCACGAATGGCAAGAAGTGGGCGAG
GCGTTTGCCGACTACTCACGGTTGTATGTTGATCTTCCCGGGCACGGTGGTTCGGCGGCG
ATTAGCGTCGATGGATTTGATGATGTCACCGACTTACTGCGTAAAACCCTGGTTAGTTAC
AACATCCTTAACTTCTGGCTGGTGGGGTACTCGCTTGGCGGACGGGTGGCGATGATGGCC
GCTTGCCAGGGGCTGGCGGGGCTTTGTGGGGTTATTGTCGAAGGCGGGCATCCGGGGCTG
CAAAATGCTGAACAACGTGCGGAACGTCAGCGTTCCGATCGCCAATGGGCGCAGCGTTTT
CGCACAGAACCGTTAACGGCGGTATTTGCCGACTGGTATCAACAGTCTGTTTTTGCCTCG
CTCAATGACGATCAACGCCGGGAGCTGGTGGCGCTGCGCAGCAACAATAATGGCGCAACC
CTTGCCGCCATGCTGGAGGCCACTTCTCTCGCCGTCCAGCCTGATTTACGTGCTAACCTT
AGCGCCCGCACATTTGCGTTTTATTATTTATGTGGTGAACGTGACAGCAAATTCCGCGCT
CTGGCGGCGGAACTGGCTGCCGACTGCCATGTCATTCCTCGCGCCGGACATAACGCGCAT
CGGGAAAATCCCGCTGGCGTTATCGCAAGTCTGGCGCAGATCTTGCGTTTCTGACTAAAG
GACACAATATGATTTATCCTGATGAAGCAATGCTTTACGCACCGGTTGAATGGCACGACT
GCTCCGAAGGTTTCGAGGACATTCGTTATGAAAAATCCACCGACGGTATCGCAAAAATCA
CCATTAATCGTCCGCAGGTGCGCAATGCCTTCCGTCCTCTGACGGTAAAAGAGATGATCC
AGGCACTGGCAGATGCGCGTTATGACGACAATATCGGCGTGATCATTCTGACTGGCGCAG
GCGATAAAGCGTTCTGCTCCGGTGGTGACCAGAAAGTGCGTGGTGATTACGGCGGCTATA
AAGATGATTCCGGCGTACATCACCTGAATGTGCTGGACTTCCAGCGTCAGATCCGTACCT
GTCCGAAACCGGTTGTCGCGATGGTGGCTGGCTACTCCATCGGCGGTGGTCACGTTCTGC
ACATGATGTGCGACCTGACTATCGCGGCAGATAATGCCATCTTCGGTCAGACTGGCCCGA
AAGTCGGTTCCTTCGACGGCGGCTGGGGCGCTTCCTACATGGCTCGTATCGTCGGGCAGA
AAAAAGCGCGTGAAATCTGGTTCCTGTGCCGTCAGTACGACGCAAAACAGGCGCTGGATA
TGGGCCTTGTGAACACCGTGGTACCGCTGGCGGATCTGGAAAAAGAAACCGTCCGTTGGT
GCCGCGAAATGCTGCAAAACAGCCCGATGGCGCTGCGCTGCCTGAAAGCTGCACTGAACG
CCGACTGTGACGGTCAGGCAGGTCTGCAGGAGCTGGCGGGCAACGCCACCATGCTGTTCT
ACATGACGGAAGAAGGTCAGGAAGGTCGCAACGCCTTCAACCAGAAACGTCAGCCTGATT
TCAGCAAATTTAAACGGAATCCGTAATGCGTAGCGCGCAGGTATACCGCTGGCAGATCCC
CATGGACGCGGGGGTGGTTCTGCGCGACAGGCGGTTAAAAACCCGCGACGGGCTGTATGT
TTGCCTGCGTGAAGGCGAGCGCGAAGGGTGGGGGGAGATCTCCCCACTGCCGGGCTTCAG
TCAGGAAACCTGGGAAGAGGCGCAAAGTGTGCTGCTTGCCTGGGTAAATAACTGGCTGGC
AGGCGATTGCGAATTACCGCAGCTGCCTTCCGTCGCCTTTGGCGTAAGCTGTGCATTGGC
GGAGCTGGCAGATACGCTCCCGCAGGCGGCCAATTACCGTGCGGCACCACTGTGTAATGG
CGATCCTGACGATCTGATCCTCAAACTTGCTGATATGCCAGGCGAGAAAGTGGCGAAGGT
CAAAGTGGGATTGTACGAAGCCGTGCGCGACGGCATGGTGGTGAATCTGTTGCTGGAGGC
AATTCCGGATCTGCATTTGCGTCTTGACGCGAATCGCGCCTGGACACCGCTGAAAGGCCA
GCAGTTTGCCAAATATGTTAACCCGGATTATCGCCACCGCATCGCGTTTCTCGAAGAGCC
GTGCAAAACCCGCGATGATTCGCGAGCGTTTGCCCGTGAAACCGGCATTGCCATTGCCTG
GGATGAAAGCTTGCGCGAGCCGGATTTTGCCTTTGTGGCTGAAGAGGGCGTGCGCGCGGT
AGTTATCAAACCCACGCTCACGGGCAGTCTGGAGAAAGTACGCGAGCAGGTACAGGCGGC
GCACGCGCTGGGGCTGACGGCGGTGATCAGTTCTTCCATTGAATCGAGCTTAGGCTTAAC
GCAACTGGCGCGGATTGCCGCCTGGTTAACGCCGGACACCATTCCAGGGCTGGACACGCT
GGATCTAATGCAGGCGCAGCAGGTACGTCGCTGGCCGGGTAGCACGCTGCCTGTCGTGGA
AGTTGATGCACTGGAGCGGTTGTTATGATCTTCTCTGACTGGCCGTGGCGTCACTGGCGG
CAAGTGCGGGGAGAAGCCATCGCCTTACGTCTTAATGACGAGCAACTCAACTGGCGCGAG
CTTTGTGCTCGCGTCGATGAATTAGCCTCCGGCTTTGCGGCGCAGGGCGTAGTTGAGGGC
AGCGGCGTGATGTTGCGGGCGTGGAATACGCCGCAAACGCTGCTCGCCTGGCTGGCGTTA
CTGCAATGCGGGGCGCGGGTGTTGTCCGTGAACCCTCAGCTGCCGCAACCGTTGCTTGAA
GAATTGCTGCCCAATCTTACGCTGCAATTTGCGCTGGTGCCGGAAGGGGAAAACACGTTT
CCGGCGTTAGCGTCGCTGCACATTCAGCGGGTTGAAGGCGCACATGCCGCTGCGTGGCAG
CCGACGCGTCTGTGCTCAATGACGTTAACCTCTGGGTCCACTGGCTTGCCGAAAGCCGCT
GTTCATAATTACCAGGCTCATCTTGCCAGCGCCGAAGGGGTGTTATCGCTGATTCCGTTT
GGCGATCACGATGATTGGTTGCTCTCTTTACCGCTGTTTCACGTCTCCGGTCAGGGAATT
ATGTGGCGCTGGTTATACGCTGGTGCGCGGATGACGGTACGTGATAAACAGCCATTGGAG
CAAATGCTGGCAGGCTGTACTCACGCTTCACTGGTGCCAACACAACTCTGGCGTTTGCTG
GTTAACCGCAGTTCCGTTTCCCTGAAAGCGGTGTTACTTGGCGGCGCGGCTATCCCGGTC
GAGTTGACGGAACAGGCGCGCGAGCAGGGGATTCGTTGCTTTTGCGGCTATGGTCTGACC
GAGTTTGCCTCCACGGTGTGTGCGAAAGAAGCCGACGGCCTGGCAGACGTTGGTTCGCCG
CTGCCGGGTCGGGAAGTGAAAATCGTTAATAATGAAGTGTGGCTGCGGGCTGCCAGTATG
GCAGAAGGTTACTGGCGTAACGGGCAACTGGTTTCACTGGTTAATGACGAAGGCTGGTAC
GCTACGCGCGATCGCGGTGAGATGCATAATGGCAAGCTGACCATTGTCGGACGTTTAGAC
AATCTATTCTTCAGTGGCGGAGAGGGTATTCAGCCGGAAGAAGTCGAGCGCGTAATTGCT
GCACATCCTGCGGTTTTGCAGGTGTTTATCGTCCCCGTTGCCGACAAGGAGTTTGGTCAT
CGACCGGTGGCGGTGATGGAGTATGACCACGAGAGCGTTGATCTTAGTGAATGGGTGAAA
GATAAGCTGGCCCGTTTTCAGCAACCGGTGCGTTGGTTAACGTTGCCGCCTGAACTGAAA
AACGGCGGTATTAAAATTTCACGTCAGGCGCTAAAAGAGTGGGTGCAACGTCAGCAATAA
TTAACCCTCCGTTTCACTTCTCATTTCTGCCATTCCATTGCCGTTGATAAAGAGTTTATC
TGTTAATCTGTAAATTGATGTGAAAACTCTTAGCAAACAGGATAATGCAATGGAATGGCT
GGTCAAAAAATCGTGCTGCAATAAACAAGATAACAGACATGTACTTATGCTCTGCGATGC
TGGCGGCGCGATAAAAATGATCGCCGAAGTGAAGAGTGACTTCGCCGTGAAAGTGGGGGA
TTTACTCTCGCCTTTGCAGAATGCGCTTTATTGTATTAATCGTGAAAAGCTGCATACGGT
GAAAGTCCTCTCGGCAAGCAGTTATAGCCCCGATGAGTGGGAACGGCAGTGTAAAGCGGC
AGGGAAAACTCAGTAACGTTGTTTTGTCGTGGGCAGGAAAATCAGCATCAACCCGCTCAT
AATACAGGCTACTCCCAGTAGTGCTTTCAGCGAAAAAGTCCCTTCCCAGCCGGGAAGTAC
CATTGAAGCAATCCATACCAGCACATAACTCATACTGAGCAAGGCATAGGCTTTGCTTAG
CGCAAGTATATGTAGCGTTTTATACCAACAAAAAACGGAAAGCAGATAACCCAGCAGCCC
GAGTAACAGTATCCGGGCATCCAGGCCAAAAGCTAACAGCGTCGCGATAAAATCCCATAA
GTGCGTCATCGGCGGCAGATGACTCGCCGCAAAACCCAGGCTTAATTGCGCAGCTGAGGC
AATAATGACGCTGAATAATCCCCACATCAGGCCCATTACACCGTACTCCCGAGGATCACA
ATGCCACCAATAATGAACGCCACCCCACACCAGTGACGCGGCGATACCGGTTCGTGCCAC
AGTTTTACTGCAGCCAGCGTCACCCAGACAAAATTCAGACTTAACATCGGGTAGGCAATG
CCTACCGGTACGTTCTGCAAGACCAGCAGCCAGAGCACCATGGCAAGACCAAGACAAGCC
AGCGCCAGTCCCAGCCACAGCACGATATGTTTGCGCCGTTTGTTTATCGCCACAAAGCAG
GTTGCCTGTTTCTGACACAACTGCCCGGCAACGCTAAGCAAGCTGGCAAAGACTAATGTT
AGCCAGATCATTTGGGACGATACTGAATCAGCACCAGACGCTCCTGACGATCGATGGCAT
CTGCGGGCGGAATGGCGAGACTGTTGATATCTTCATCGCGGTCAACCGAAAGCACGAGTG
TAATAATCCCCTCCTGACGATGTTGATTAAGCCAGTTTGCGAACTCATCACCGCTGACAA
ATCTCCCTTTCGCATCCGGATAATTAAGGCCGTATTTCAACTCACCTGTCTGGCGATACA
TGATGATGTCATCGCGTTGCAGGCTCCATGCCAGACCTGCGGCAACACCGACGCTATCAG
TAAGAATATAGCGGCTTGGCTGAAGTGATTCTTGTGTCATCTCGACAAAAAATTGCGGAT
GTTTTCCTTCCATGACTCTGTCAGGAATTGAAAATCCTACCAGCAACGCCAGCCCCAGCG
GGCAAAGCGCGGCAAAAGACCAGGTCTTTTCGACGTTTGTTAAGGTGTACCAGCCGAAAA
ATGCCCATAGTGAAAAAATCGACCAGGCACAAAAGACTTTATAGCTCTCGAAGGTTTGCC
ACACCGGCGTGTTCATTGGTCCCCAGGGGGAGACCACAAATGTGGCAATAATGCCAGTGA
CGCCAAAAGCGATGTTAATCCAGCCATTAATCCGCAACGCCAGAGGATTATTTTTTGCTG
CCAGCAAAGCGTAATGCGCCATCAGCATTGCCAGAGGTGCAAAGCAGGAAAGAATATAGG
TGGGCAATTTACCTTTAGCGACGGAGAAAAACAGCAGCGGCATTATCGTCCAGCTCAACA
AATAGACGGTTGCGGAATGCTTGCGGTTTTTCCAGCCTGCGTACAGTGCACCGGGGAGTA
ATCCCAGCCACGGCAGGCTACCGGCAATGATGACCGGCACGTAGTACCAGAACGGAGCTC
TATGTTGGGCATCATCCAGTGCAAAGCGTTGAATATGCTCAACCCAGAAAAAATAGTGCC
AGAAGTCAGGCTCCCGCTGCGCTATCGCCAGTCCCCAGGGGAGAACCGTCAGTACGCAAC
TGATAACCGCCAGCCAGCCGTAAATAAAGAGATCTTTCCAGCGTTTTTGCGTCGCTACCC
ATGGCAGTACGCTTAATACCGGCACGGCAAGGGCGAGAAAACCTTTGGTCATCACCCCCA
TGCCGCAGGTGATTCCCAGCAGTAAAAATCCTGCGCTTTTGCCTTTCCACGTCTGTGCCT
GCATTGCCAGCCAGAAGCTGCACATTCCCGCCACCAGCCAGAATGCAATAAACGGATCGA
GCACGGCATAAGTGCCGATGGCATAGACAATAAACAATGAGAGATAAATTACTGTGGCGA
GTAGAGCCAGACGTTTATCGCGCCATAAGCGCAGAGTAAACCAGGTCACCAGCGCGGCAG
TTAACAGGGTCGCAAAGATAACGCCTGCCCGCACACCAAAGTTATTCGCACCAAATAGCC
ATTGCCCAATGCTGTTAATCCAGTATCCAGCAATGGGTTTTTCAAAATAACGTAGCCCTA
ACAGATGGGGCACAATCCAGTCGCCGGATGCCAGCATTTCCCGACTGATTTCCGCATAAC
GCGTTTCATCGGGTTGCCAGAGCAGACGCGTGCTGATCGGTAACAGGTAATAGCAGGCAA
TAAACGCGAAGAGGCCGATAAGGTAACGTACCGATTTCATCAGCGACTACCCGCAATTTG
TTGGCAACCCAGCCAGCCTTCACGTCCGGCAATATTTCCGCGAACAACTTGTCCGAGCGG
CAACGTCTCTGATAACAGTTCGCTTAAAGGGCAAAATGTCACGCCTTCCTGAGCTGCGCG
TTTGAGGAGATCCACAAAATTATGCTGATAAGCGCAGCCTTCAACTTCTGCATGAATGGT
ATAAACCGGCGTGCCTTTATCTCGCAGGATGCGGTTGAGTAACCAACCGTTAAAATCTTC
TGCTTTCACATCCCGACCAATCACTTCATCCCAGGTGGGTAAGGTCACCGGAATTTGCGC
AGTGCCAGGGTTTCCTGATTCGAGCAGTGGACGGAACGGCATGGCCCCACGACAATCGCT
GTTGTAGCGCAAATGGAACGCTTCTTTTGCTTCGATCACCTGCTGGTCGGCACGCCAGCC
CGCAGCGGCAGAACAGGTTACCGGTTGACCGATAATCTCTTCCAGGGTGCGAAGGCCGAG
TGCAATATCGTCGATCATTGTTTGCCGATCCCAGTTACCGCTATGGGCTTGCCAGGCATG
GTGATCCCAGGCGTGCAGGCCGACTTCGTGATGTTTAGCCGCTTCACGAATGATATCGGC
ATTGGCAGGACCAATCTCTTTACCTGGCCAGGCCGTACCTGCCAGTAAAATATCCCAGCC
ATAAAGCGATGCCGCGTTTGAGCGCAGCATCTTCCACAAAAACTGTGGCTTCACCAGTCG
CCAGAGATGGCGGCCCATATTGTCCGGGCCGACGCTGAAAAAAATGCTGGCCTGAATATT
ATGCTTACTCAAGATTTCCAGCAGACGCGGCACGCCTTCACGGGTGCCACGAAAGGTATC
GACATCAATGCGTAAGCCTACTTTGGTCATGATGGTTTATCCGTAAGATCAACGGTGCGC
AGGAAGAAATCCAGCGTTTCGTCGATGGTTTCCTGCATATCAATTTTCGGCTCCCAGTCC
AGGCAGCGGTGGGCATTGCGGATGCTCGGTTTACGATGCTCTACGTCCTGATATCCTTTG
CCGTAGTAGCTGTTACTTTCGACAACGCGAAAGCCCGCAAACGGTGGGAAGTGATGGCGC
AGCGGATGTTTTTCGAAGCTCGCCAGCAGCATCTCGCCCAGTTCCTCAATGCTCGCTTCG
TTCTCAGGATTGCCAATGTTGATAATTTCGCCGTCGCAGCGATTTCCCACATTTTCGATA
ATGCGGTACAACGCCTCGATACCATCCCGGATATCAGTAAAGCAGCGTTTTTGTTTTCCG
CCATCAATCAGCTTAATCGGTGAACCTTCTACCAGATTGAGAATGAGTTGCGTAATAGCG
CGGGAGCTGCCGATTCGTGCCGCATTAAGGTTATCCAGTCGTGGTCCCATCCAGTTAAAC
GGGCGGAAGAGGGTGAACTGTAAACCCTCTTTTTCGCCATAGGCCCAGATAACCCGATCA
AGTAATTGTTTTGACACCGAATAAATCCAGCGTGGTTTATTCACCGGGCCGACGATTAAA
TTAGAATGGTCCTCATCGAAGTATTTATCGCTACACATCCCATAAACTTCTGAAGTTGAC
GGGAAGATGATTCGCTTACGGTACTTCACGCAGTAGCGGATAATGCGCAGATTCTCTTCA
AAATCGAGTTCAAATACGCGCAGCGGGTTGCGGGTATATTCAATCGGCGTGGCTATCGCC
ACCAGCGGCAAGACGACATCACATTTTTTGACGTGATACTCAATCCATTCGGAATGAATA
CTGATATCGCCTTCGACAAAGTGAAAATGCGGATGATTCAGAAAACGGCTTATCGCATCG
CTGCCAATATCCAGACCGTAAACTTCATAATGATCTTCGCGCAGCAGGCGTTCTGTCAGA
TGGTTGCCAATAAAGCCATTCACCCCGAGGATGAGTACCCGGGTACGGCGTCGGGCGGCA
CAGGCAGGCTGGCTATTCAAGCGTGAACCTTGCACCAGGCCCAGCGTCTGCGCTAATTGC
GAGCCCTGCATAGTAATGCCGTCGCCCGCCTGTCCGGTGACGATTTCCAGCGCGCCATCG
CCACAGGCAATCAGCAGTGGCGCAACAGAAATCACGCTCCCCGGCTGCGCTGCGGATGTA
TGAGGATGTACGCGTGACGACCAGACGGTGAATTTCTGATTGCCAGCATAGCTGAAGGCA
CCCGGCCACGGATCGGCAACGGCGCGGACCATGTTATGCAATACGGCTGCCGGTTTGTGC
CACTCGAGGAAGCTATCTTCTGGTGTTCTGCGACCAAAACAGGTGGCTTCGTTCTCGCGT
TGGGCGATTTCCAGAATATTACCGTGTTTAATGGCGGGTAATGTCTGTTCCAGTAGCTGG
CGCGCGGCATGGCACAATTTATGATGCAGCGTAATAGCGATATCGTCTGGCGCAATGGCA
ATGCGCAGTTGCGCCACAATGGCCCCGGCATCGGCACGTTTCACCATTCGGTGCAATGTA
ACGCCAGTTTCCGTTTCACCGTTGACCAGCACCCAGTTCAGCGGCGCGCGACCACGATAT
TTTGGTAACAGCGAACCATGCAGATTAAATGCACCTGCGGGAGCGAGCTGCAAAATTTCG
TCGCAAATAAGATGGCGATAATAAAAAGAGAAAATCACCTCTGGTGATAGTTGGGCAATG
CGTTCCACCCACAGCGGATGATTAACGTTATCCGGCGCATAAACCGGAATGCCTCTTTCC
GCTGCCAGACGAGCCACCGAACCATAAAAGGCTTTTTCACCGGGATTATCAGTATGGGTA
AAAATGGCGCTAATTTCGTAACCGGTAGCCAGCAGGGCTTCAATACCGAGGCATCCCATA
TCGTGGTAGGCAAAAACGACGGTTTTCATTATTCATTTTCCTTGCTGGATGGACGGATAA
CTTGCTGAACAAAATAGCGGGGGCGGGCGCGGACATCGGTGTAGATCCTGCCGATATATT
CACCGAGTAATCCCATGCCGATAAACTGAGCGCCAATAAAAGTAAACAGCACGGCAAATA
GCATAAAGACGCCTTCTGCCGCCCATTGTGGTCCGAAGGTCAGGCGTAAAATCACCAGCA
GCACCGCAATGCTAAAACCTCCAATCGCAATAATGCTGCCGAGCAGACTCAGCATACGTA
GCGGCGTTGTGGTAAGGCAGGTCACCAGGTCGTACATCAAATTAATCAGGCGCATAAAAC
TGTATTTGGATTCACCAAACTCACGCTCGGCATGATGCACTGGAATTTCAATGGCACGGC
GGGCGAAGATATTCGCCAGAATCGGGATAAAGGTGCTGCGTTCATGGCAGTGCAACATCG
CATCGACAATATGACGGCGATAGGCGCGCAGCATACAACCGTAGTCACCCATCGCTTTGC
CGGTGGTGCGCTGAATAAGCCGGTTAATCATCTTCGAAGCGGTTTTACGAAACCAGCTGT
CCTGGCGGTTCTGGCGTACAGTCCCTACCACGTCGTAACCTTCATCGGCTTTTGCCACCA
GGCGGGGGATTTCTTCTGGCGGATTCTGGAGATCGGCATCAAGGGTAATAATTAAGTCGC
CAGTAACGTGACTGAATCCCGCCATAATCGCTGAATGTTGCCCGTAATTGCGGTTAAGCA
AAATAGACACAATATGGCTGTTCTCCGCTTGTGAGGCTTCGACCAGCATATGCGCGGAAT
TATCGCTACTGCCGTCATCAATCAGCAGGATCTCATACTCTTTCCCCAGTGATTCACAGG
CTGTGGTGGTGCGCCTGATTAATTCCGGTAAGCTTTCCTGCTCGTTATAAACGGGAATAA
CCACCGAGACTTTCTTAACAGGGTGGATTTCAAACATGGCTTATTGTCCTGCGAGTTGCT
GAAGGGCTGTGATGACGCGGTCGGCATCGGCGGTGGTCATATCCGGGAACAGCGGCAACG
AACAGATGCGTTCGCTATTCCATTCGCTATTCGGTAACGACAGCGTGGGAAAACGCTCGC
GATAATATTTTTGTGTGTGAGCGGCGCGGAAATGTAACCCGGTACCAATACCTCTTTCTT
TTAACGCTTCCATCAACGCATCGCGACTGATACCACAACGTTGTTCATCGACACGAATAA
TAAACAGATGCCAGGCGTGAACGTGCGGCCAGGCGGGAAGGCTTAATGGCTGAAAGGGGA
GAGCTGCCAGTGCTTGCTGATATTGCTGGGCAATTTCGCGCCGACGGGTGTTGAGGTGCT
CTAATTTGACTAACTGTGTCAGGGCAATCGCGGCGTTAATATCGGTCAGATTGTACTTAT
AGCCCGGCGTTAAGACTTCAGCCTGCGGTACACGGCCCCAGGTTTGTCTGTCATAGGCAT
CGACACCCAGACCGTGAAATTTCAGCATCCGTAGCTGGCGGGCAAGGTTTTCATTATCAG
TTACAATCAGGCCACCTTCAGCACAGGTAATATTTTTAATGGCATGAAATGAAAAAATAG
CGGTACCTTTTGCGCCAATATGTCGCCCTTTGTAATACGTACCTACGGCATGGGCAGCAT
CTTCGATAACTGCGATGCCGTAACGTTCGCCAATGGCGCGAATGGCGTCAATATCTGCTG
GCGCACCGGCATAATGCACCGGAATGATGGCTTTAGTGCGTGGCGTAATGGCTGACTCGA
TAGCTTCAGGCGTGACCATCAGCGTATCGCGGTCGACATCCACCATTACCGGCGTTGCAC
CCAACAAGGAAATCATATTGAGGGTTGAAACCCAGGTCAGGGAAGGCGTAATCACTTCAT
CGCCCTTGCCAATTTCCAACGCCATTAGCGTGATATGCATTCCGGCGGTGGCTGAACTGA
CCGCGATGGCATGCTGATTTCCCGTCAACTGGCAAAAGGCTTGCTCAAGCGCCTGATTCT
TCGGACCGGTTGTGATCCAACCGGATTCGAGAACCTCTTTAACTGCAGCGAGTTCCTCCA
CGCCCATTGCTGGTCGCGAAAAAGGCAAAAATTCTGACATTGCTTTTCCTTCCGCCATTG
AATACCTGTCCACTTATATTTGCTATAAAGAGTGTTGTGTATATTTTGCCATTTGGAGCG
AAATTTTAAGGATAGAATATTAACTTAACCTTAAGAAACTAATATTAGACGTAAATATTG
AAATTTTTATATTTTTTCTTATTTAGGCTTTGCATTTGGCAAAATTTTGAGGCATTTTGC
CGGCATCGCAGGATTTTTAATATTACACCAACTGCTAATTATCGCCAGAAATGTCGCTCA
ATTTCACGGTAATTGTCTGGTTGCGCTTGTCTATAGGTGGAGTTTACGTGTTAGCTTTTT
GCCGCTCTTCGTTGAAGTCAAAAAAATATTTCATCATTTTACTGGCGCTCGCTGCAATTG
CCGGACTGGGTACTCATGCTGCCTGGAGTAGCAATGGTTTGCCACGTATCGACAATAAAA
CACTGGCCAGACTGGCACAGCAGCACCCGGTTGTCGTTTTGTTTCGCCATGCTGAACGTT
GCGATCGTTCAACCAATCAATGCTTGTCAGATAAAACAGGTATTACGGTCAAAGGTACCC
AGGATGCCCGAGAACTGGGCAACGCTTTTAGTGCTGATATCCCTGATTTCGATCTCTATT
CCAGTAATACCGTCCGGACCATTCAGTCGGCGACCTGGTTTTCAGCGGGTAAAAAATTGA
CGGTAGATAAACGACTTCTTCAGTGCGGTAATGAGATTTATAGTGCAATTAAGGACTTAC
AAAGCAAAGCGCCTGATAAAAATATCGTTATTTTCACCCATAATCATTGCCTGACATATA
TTGCTAAAGATAAGCGTGATGCGACATTTAAACCTGATTATCTGGATGGTTTAGTCATGC
ATGTGGAAAAAGGCAAAGTTTATCTGGATGGGGAATTCGTTAACCACTAAATTTTCAATC
TGACAGCCAGTGATGGCTGTCATCATTGTTAAAGAAGACCTTTCAAACGTAACGTTTTTC
GGGTGGCAACATTCAAATCATAATGCACCAGATCTTCAGGTTTTACCCTCGCGTAGTCCT
GAAACTCTTCGTTTATTTTCACTTCTCGGTTGGCAGAAACGCAGTCAAAAATCAGGTAAA
TCATATAAATCTCTTCCTTGCGACCATCTGCATACGTCTTGGTGCGAATATCATCGCTGA
AGGTCCACGGCGTGATTTCTGTCAAAAGCAGCTGTTCTCCCAGTTCTTCGCGAATTTCGC
GGCGTAGTGCCTCTTCAATTCGTTCGCCGGGCTCCACGCCGCCACCCGAAAGCGCCCATT
GACCGGGGAAAACGCCGCGATCGTCGGCCATTTTACACAGCAAATAAGCACCATCATTTT
GAATCAAAGGGCATACAATAGTCCGTTGTCGCACAGGGGTATTCCTTATAAATAAAAAGA
AACCATGAGAATACGGTAACTCAGAAATATGTGAAAGTGACAGTAATCTCTTTTGCGATG
ATAACTGCACTTATTATTATTTTTGTGTGTATCGGTAAACTGTGTTTATTTTTTCGGCGT
TTAATTATTTAAGAAGTATTTAGTTACAATAAGTGACTAGATCCCTTTTTTCGCTCATTG
AATCCTCTGCGCTAGGCAGTACAATCCCGCAGCTTTGGGAATTTTGATTAATTGCTTGTG
GGAAAGGGGATAATGAAAAAAATTGCGCTAGCAGGTCTGGCCGGAATGCTGTTGGTTTCT
GCATCGGTCAATGCAATGAGCATCAGCGGCCAGGCGGGTAAAGAATACACCAATATTGGT
GTCGGTTTTGGGACTGAATCGACGGGCCTGGCTTTAAGCGGTAACTGGACACATAACGAC
GACGACGGTGACGTCGCGGGCGTGGGGCTGGGGTTGAATCTGCCTCTCGGGCCGTTAATG
GCGACCGTTGGCGGAAAAGGCGTTTACACCAACCCGAATTACGGCGATGAAGGTTATGCC
GCAGCGGTAGGAGGTGGTTTGCAGTGGAAAATTGGCAACAGCTTCCGTTTGTTTGGCGAG
TATTACTACTCTCCGGATTCGCTCTCCAGCGGTATTCAAAGTTATGAGGAAGCGAATGCT
GGCGCGCGTTACACCATTATGCGTCCAGTCAGTATTGAGGCGGGTTATCGCTACCTGAAT
CTGTCGGGTAAAGACGGCAACCGCGACAACGCCGTGGCTGACGGCCCGTATGTTGGGGTT
AACGCCAGTTTCTGATCCCTTCCGGCGCGGCATTCTGCCGCGCCATTCAGTTTCTTACTA
CGCCTTATCTCCCTTTGCGTTATAGTGATTCGATAACAAAAGCAGGAGATAACCATGTTA
AAAGTGGAAATGCTATCCACCGGGGATGAAGTGTTACACGGGCAAATCGTTGACACTAAC
GCTGCCTGGCTGGCCGATTTTTTCTTTCATCAGGGGTTGCCATTATCTCGCCGCAATACG
GTGGGGGATAACCTTGATGACTTAGTCACCATTCTTCGCGAACGTAGTCAGCACGCCGAT
GTGCTGATCGTTAACGGCGGGCTGGGACCGACCAGCGATGATTTAAGCGCACTCGCCGCT
GCGACAGCAAAAGGTGAAGGCCTGGTGTTGCATGAAGCCTGGCTCAAAGAGATGGAACGC
TATTTCCACGAACGTGGACGAGTAATGGCACCGAGCAACCGTAAACAAGCGGAGCTTCCT
GCCAGTGCTGAATTTATCAATAACCCGGTAGGCACCGCCTGTGGTTTTGCCGTGCAGCTT
AATCGTTGCCTGATGTTCTTTACCCCCGGCGTACCGTCAGAATTTAAGGTGATGGTCGAG
CACGAAATCCTGCCGCGCCTGCGCGAGCGTTTTTCTTTACCACAGCCGCCGGTTTGCCTG
CGTTTGACTACCTTTGGTCGTTCGGAAAGCGATCTGGCACAAAGCCTGGACACTCTACAA
CTGCCGCCGGGCGTAACAATGGGCTATCGCTCCTCAATGCCGATCATCGAACTGAAACTC
ACCGGACCGGCAAGCGAGCAACAGGCGATGGAAAAACTGTGGCTGGACGTTAAACGTGTT
GCCGGACAGAGCGTGATTTTCGAAGGCACCGAAGGACTGCCCGCGCAAATCAGTCGCGAA
TTGCAAAACCGCCAGTTCAGCCTGACGTTGAGCGAGCAATTCACCGGTGGTTTATTGGCT
TTGCAACTTTCTCGCGCAGGTGCTCCATTGCTGGCGTGTGAAGTGGTTCCTTCACAGGAA
GAAACCCTGGCGCAAACTGCGCACTGGATTACAGAACGGCGGGCCAACCATTTTGCCGGG
CTGGCACTGGCTGTTTCGGGTTTCGAGAACGAGCATCTCAACTTTGCGCTAGCCACGCCA
GATGGCACTTTCGCTCTGCGTGTGCGTTTCAGCACTACACGCTATAGCCTGGCTATCCGT
CAGGAAGTGTGCGCAATGATGGCACTGAATATGCTACGCCGTTGGTTAAACGGCCAGGAC
ATTGCCAGTGAGCATGGCTGGATTGAGGTTGTTGAGTCGTTGATGCTGTCGCCACAGGGG
GCATGAAAGAGGCGCGCCGGGGAGAAGGCTTTTACCCGGCACGTTGTCGCATTCATTGCA
GGCTTAATGGAGCGAGATCGGCCTCGGTTAGCTGGGTTGTTGCCAGCACCAGGTCAAGAT
CGATACCCTGCTCCAGCATGCGCAAGGCAATTTTAATGGCTTGTTCATGCATGCCTTGCT
GCAAACCTTCTAATTTACCTTCCTGCCAGCCAATTTGATGCCCTTCCTGCCTCAGCCGTT
CAGCAATAGTCATTAATCTCTCCTTTTGTAGTGGTGAACGTTCGGCAATCTCCTGAATAA
AACGGGTGAAACGGGAGGTATCGCCGCATTGCAGCAGATAATTAAACAGTGTTTGTAGCT
GGCTGTCATTAGTGAAGCCTCTAACCAAAAGCGTGGTGATCCTGTCGACCATACCGATTA
AATCGCGGTCGCGAATATGCTTTTGAATCAGTTCAAGCAGAGCTATACGCCGATGTTGCA
TGATCTCATCGTCAGGTACGATGGTGATATCCACCAACGGAAAAGCTTCGGTGTACAACT
GCCGGGCAAGTTGCGGACCGTCAAACTCATCCAGCCAGTTGAGTGAGTACGGGTAGGGCG
AGGTTTCGCCATGATAAAACAGCAACGGCACCACCAGCGGGACTCTGTCATAGCCTTTGT
CCAGGTGACGCTGCATGGCGGCAGTGGCATAGCGCATTAGCCGAAAAGCCATATTCTTTT
CTGCAGAGCTTTGATGTTCAATCACGCAGTAGATATAGCCGTCACCGTCGCTGGTTTCCA
CGGACCACAAAACATCCGAGTAGTAAGCGCGTAAACTTTTTTCAATAAAACTAGTGGGTT
CCAGGCGTAAGGTTTGCAGGTTGCAAAGCTTGCGCAGTGGTTCTGGTAAATGTATTTCGA
GAAAATCCCGTGCGGTTTCGGGTGTGAACATAAAGGTTTTAAATACTGCATCATGCGGGG
AGGAGGTTGTTGATTCGGTCATGGTTGTCCGTCACCTGATATTTATGATGACGCGACATT
ACGGTTATCCCAGGCCTTTGACATCTGCCAGTTTCAGCCTTTGCGAGACGTTTTCAGAGG
AATTTTCACTGCGTTGCAACGCATACATTGGGCACGGAATCGTGTACGCAAAAATGCCCG
GTAACCACATGCTTACCGGGCATCAGAAAGGAGTTTAAGCCAGCGCCTGGGCCAGTAGCG
TAATCGGATGTTCGCAGCGAAGACTTGTGGACATCTCAATCTGCCATTTACAGGTTTCGC
AGTCGGTGACCACCAGATCTGCGCCGCTTTCTTCTATCTGGCGGAACAGTGGTGCGCCGA
TGGATTGTGAGGTGGGGTAGTTCTCTTTTTTGAAACCGTAAGTACCCGCAATACCGCAGC
ACTGGGAATCCAGCACCGTTAACTCAAGCCCCGGGATGTTACGCAACAGCTCCAGGGTGT
AGAGCGTCCAGCCCATTTTTTCCATATGGCACGGAGTGTGATAAACCACTTTCAGCGGCA
GCGGTTTCAGCGGTAACGTTTTGCCTTCGTCCAGCTTGCGCCACAACCAGCGGGTCGCCA
GTTCGATATGATCGCGCAAGCCTTTGTTGTCGACATTCAGCACTTCCGGGTATTCGTCGC
GCAGGGCAAATGTACAGGTTGAGGAGGTGGCAATCACCGGAATGCCTTTTACTCCCACAG
CTTCGCGGATCGACTCTACATTCGTAATTGCCTGTTTGCGTGCTTTATCGGTAAAGCCGT
TGGCGATCAGCGGTACGCCGCAGCATTTTTCTTTGCTGAGCAGTTGTACACCGGTACCCA
TTGCGTTGAGCACTTTAATTAAATCTTTACCTAACTGCGGATGGTTGTAGTTAACGAAGC
AGCCGTGAAAGAAAGCGACCTGGTCTTTATACTGCGCTTGCTGAGCCGCCACGCTGCGAT
ACCAGCGACGAAACGTGCCGAAGGAGTATTTCGGTAGCGTGCGGCGATGATCGATTTTTA
ACGCCGCATCAAGCAACTGCCGCACCGGTTTCAGCGAGGTAGCGGTGTTGACGATTGGTG
CGAACGGCGTGGAAACGCTACCCATCAGGTCGGTATGACTCAACACAAAATTACGCAGCG
ACGGGCGCGTGGTGTCATATTTCGCCCGCGCGCGCTGGATGATATCGCCAATCTTCACAT
CGGACGGGCAGGCGACTTCACAACGTTTGCAGTTGATACAATATTTCAGCGCCTCGTCAT
ACAGTGCGCCATCTTTTAAACGCAGACGCTCGCCATCCGGCCCGGCTTGTTTTGGCCCTG
GATAACCGGGATTCACCCGGCTCACTGGGCAGGCGGTGGTGCAGACGGTGCACTTAATGC
AGTTTTCGAAGCTGGTGTCATTCATTGTTGGCCTCCTGCGCGTTGGGCAATCTGTTGAGC
GGCATGTAAAGCACTGACGGCACAAACACCGCCGCCGCATCCCTGGGCGATGGGATCAAA
TCCGCCCAGCACCGAACCGATGGCAAACAGGTTCTCAATGGTTTGCCCTGCCTGTGATGG
GCGTAGCGTCTTATCAGTGGTTACACCGAACTGCTGCCACGGTTGCGGCGCAAAAAAATC
TCCCTTATACCATTCACCCCGCGTGGCGGTTTGTAGCACATCAAGGCCGAGAATCGGCTC
TCGAATGCCGTTACGTTCCGCTACCAGTCCGCCACTAAAGAAACTGCCGCTGGCGAGAAC
CGCGAAACGTGGACGTAGCGGGATATCGGCGTGATTGCGGGTCCAGATTTCATTCACTAC
GCCATTTTTACAGGTCACTTTTTTCACTTCATCGCCCGGCATCCACACGCCACCCTGGCG
CACAAACTGGCGCTGTAACTGGTTTTGCAGACGAATGCCCAGCACGGAAGGCGGCAGCGT
TGGCAAAAGCATCAGTGAACAAGGTAGTTTTTCATTCAACCAACGCCACAGTTTGTCATC
GGCCAGGCCGAAGCAGGCGGGCATCAGGATCATTTCGCAGGTATTGGCGACAGGAATAAG
CGCATCAAGTAACAGCGACCAGTTTTCTTCATTATCAAGGAAACGGGCGATATTCACCGC
GCGGAACTCGGTGGCGTTATTGCGCAGGACATCCAGTTCCGGCAGCTCTATTTCTGCGGT
TTCAACCGAAAGATCCAGTTCACGCAACGAAGCTGCCGCAAGGTGCGCCTGAAAATCCAT
CAGCCCGCTTATCCCCACTACACATATCTTCTTCGCGGGTAGCGGCCAGACGGGGACTTC
TGGCGAACTTAACCAGGTTGCACGCAAAGTGCCGAGCGGGGTAACGCGCTGATGGGCCAG
TTCCACGCTGCCCTGCAATTGCGCACCGCTTTCAGCGATTAATGCCTGCGCCTGGCAAGC
GAGATCGAGCACGCGTTGTGGCCCGAGAAGAGAGTAAGGATGTGCAGGTGCCTGCTGACG
CAAAGATTCCAGTCCACTGTGAATGTCTGTCACCGCTTGACCATCTGGCAGATGGCTCAG
CAAATCCAGCGAACCGGATGAGAAATGCAGCGCGCTTTGACCACGCGTGACAATGGCACA
GCGCAGGCCGTGTTTTTGCAGTTGCAGGCCACAGAGTAATCCGGCGAGGCCGCCGCCCAT
AATGACAGTATCAAAGCGCATCTTTCTGCTCCTTCTCCAGACCACACAGTCCCTGATAAA
CCCAGCGGGTAAATTCGCTTTCGCGCAGTGCATCTCCCCAGGCGATGGGTTGCACGCCTT
TCCAGCGTTCGTTAAGGAAGGTGGAAAGTTGCTCGATAGATTGCGCGGACGTCGTGACGT
TAAAACGTTGCAGCAGTCCGGCAGCGCGGCAGGCGCAGAGTTCGCCCTGGCAGGTACCCA
TCCCCACACGGGTACGACGGCGTAAATCCAGCAGGCTATTAACGTTTAAATTTTCTACCG
CGTACTGCACTTCACCCGCAGTTACCGCTTCGCACTCACATACCAGGCTACGGTGCAGAC
GGCCTTCGCTCAGCCAGGCAGGCGTGCGATCGCCATGACGATAAACCGCAGAACCGCGCA
GCGGGGCAGGCAGGGAGATGACTTTACGTAAGGTAACTTCAGCGGGTTCTTGTGAACCAG
GCAGTGCCAGATCGGCAGTCGTACAGGGGCGCGTGTTGCCCAGTTTGCGGCATACCGCGT
CGGTAGCCCATTCAGCCATCAGCCGATAGGTCATCAGTTTGCCACCGGTGATGGTGATAA
ATCCGTCCAGACCATCGCGTTCAGCATGGTCGAGCAGCACGATGCCACGGCTGACGTTAC
GTCCGCTCGGGTCGTCATCGCTGGCAACCAGCGGGCGCACGCCAGAATAGGCCCGCAAAA
TGCGCGTTTTCGCCATCACGGGGGCCAGTTTTTCCCCTTCACGCAGCAGAATATCAACCT
CTTCTGCCGTCACTCGATTATCGTCAATCTCGTTGTAATCAATACGTAAAGAGGTGGTGC
CAATCAGCGAAATGGTATCGCCAGGCACCAGAATATCGGCGTCGGAAGGTTTACGGCAGC
GGTTGATCACATGCTGGTTAATGCGGTGATCCATGATCAGCAGCGATCCTTTCGCCGGGA
ACATGCGAATGCGCAGATCGGCATATTCGGCAATGTGTTGCCCCCAGATCCCAGCGGCAT
TAACCACGACAGGTGCATGAAGGGCCTGAGTTTCGCCGGTGAGATGGTTACGTACACGAA
CACCGCACACCGTCGCGCCTTCACGAATCAGTCCCGTGACTTCATGAGCGGTAAGGATAA
CGGCACCGTGTTCTTTGGCATCCAGCATGTTTGCTGCGGTCAGACGAAATGGATCAACGG
TGCCATCCGGAACTTTCACCGCGCCAATCAGTGCCGGGTTAACGGCAGGTTCGATAATGC
GCGCTTGCTGCGGGTCTATAGCTTCTGCGCTGATCCCTGCTTCTTCGCAGGCGCGAATAA
AAGTGGCCTGGAAGGAGAGGTCATCTTCCGGCAGGGTGATAAACAGGCCGTTGGTTGGTT
CAACGCAGTGACGTGCAATGCGTTTCAGGATCTGGTTTTCACTAATGCATTCGCGGGCCG
ATTCCGCATCGGTTACCGCATAGCGCGCACCGCTGTGCAGCAGGCCGTGGTTACGCCCGG
TGGCACCGGTTGCGATGTCGTGGCGCTCAACCAAAATCACGCGCAGCCCGCGCAGGGCAC
AGTCGCGGGCAATCCCGGCTCCCGTTGCGCCGCCGCCAATGATAATCACGTCACTTGATT
GCGAGTCGCGAGTTTTCATTGTTATCCCTCTGAAGTTCGTTTTTTACCATTTAGCCATAG
TAAAAACATGAATTGTTTGATTTCGCGCATATTCGCTCATAATTCGAAAGTGAAACGTGA
TTTCATGCGTCATTTTGAACATTTTGTAAATCTTATTTAATAATGTGTGCGGCAATTCAC
ATTTAATTTATGAATGTTTTCTTAACATCGCGGCAACTCAAGAAACGGCAGGTTCTCTCA
CTGAATCAGGCTGTTAATCATAAATAAGACCACGGGCCACGGAGGCTATCAATGTTGAGT
ATTTTTAAACCAGCGCCACACAAAGCGCGCTTACCTGCCGCGGAGATCGAGCCGACTTAT
CGTCGATTGCGCTGGCAAATTTTCCTGGGGATATTCTTTGGCTATGCTGCTTACTATTTG
GTTCGTAAGAACTTTGCGCTTGCTATGCCTTATCTGGTTGAGCAGGGATTCTCACGCGGT
GATTTAGGTTTTGCCCTTTCGGGGATCTCGATTGCTTATGGATTTTCGAAATTCATCATG
GGTTCGGTATCGGATCGCTCGAATCCGCGCGTTTTCCTGCCCGCAGGTTTGATTCTGGCG
GCGGCAGTGATGTTGTTTATGGGCTTTGTGCCATGGGCGACGTCGAGCATTGCGGTGATG
TTTGTACTGTTGTTCCTCTGCGGTTGGTTCCAGGGGATGGGGTGGCCGCCGTGTGGTCGT
ACTATGGTGCACTGGTGGTCGCAGAAAGAACGTGGCGGCATTGTGTCAGTGTGGAACTGT
GCGCACAACGTCGGTGGTGGTATTCCGCCGCTGCTGTTCCTGCTGGGGATGGCCTGGTTC
AATGACTGGCACGCGGCGCTCTATATGCCCGCTTTTTGCGCCATTCTGGTGGCATTATTC
GCCTTTGCGATGATGCGCGATACCCCGCAATCCTGTGGCTTGCCGCCGATCGAAGAGTAC
AAAAATGATTATCCGGACGACTATAACGAAAAAGCGGAACAGGAGCTGACCGCGAAGCAA
ATCTTCATGCAGTACGTGCTGCCGAACAAACTGCTGTGGTACATCGCCATCGCCAACGTG
TTCGTTTATCTGCTGCGTTACGGCATCCTCGACTGGTCACCGACTTATCTGAAAGAGGTT
AAGCATTTCGCGCTGGATAAATCCTCCTGGGCCTACTTCTTCTATGAGTATGCGGGTATT
CCGGGCACCCTGCTGTGCGGCTGGATGTCGGACAAAGTCTTCCGCGGTAACCGTGGGGCA
ACCGGCGTCTTCTTTATGACACTGGTGACCATCGCGACTATCGTTTACTGGATGAACCCG
GCAGGTAACCCAACCGTCGATATGATTTGTATGATTGTTATCGGCTTCCTGATCTACGGC
CCTGTGATGCTGATCGGTCTGCATGCGCTGGAACTGGCACCGAAAAAAGCGGCAGGAACG
GCAGCGGGCTTTACCGGTCTGTTTGGTTACCTGGGCGGTTCGGTGGCGGCGAGCGCGATT
GTTGGCTACACCGTGGACTTCTTCGGCTGGGATGGCGGCTTTATGGTAATGATTGGCGGC
AGCATTCTGGCGGTTATCTTGTTGATTGTTGTGATGATTGGCGAAAAACGTCGCCATCAG
GAATTACTGCAAAAACGCAACGGAGGCTAATGGCATGAAATTGACGCTGAAAAACCTTAG
CATGGCGATCATGATGAGCACTATAGTCATGGGAAGCAGTGCAATGGCGGCGAACAGCAA
CGAAAAAATAGTCATCGCCCATCGCGGTGCCAGTGGATATTTGCCGGAGCATACGCTGCC
AGCAAAAGCGATGGCGTATGCGCAGGGAGCGGATTATCTGGAACAGGATTTGGTGATGAC
CAAAGACGACCATCTGGTTGTTCTGCATGACCATTACCTCGATCGTGTTACTGATGTTGC
CGATCGTTTCCCGGATCGGGCGCGCAAAGACGGTCGTTACTACGCGATAGATTTCACGCT
GGATGAAATTAAGTCGCTGAAATTTACCGAAGGTTTCGATATTGAAAACGGTAAAAAAGT
GCAGACTTATCCGGGGCGTTTCCCAATGGGTAAGTCCGACTTCCGGGTGCACTCCTTTGA
AGAAGAGATTGAATTTGTTCAGGGGTTAAATCACTCTACCGGGAAAAATATCGGTATCTA
TCCAGAAATTAAAGCGCCGTGGTTCCATCATCAGGAAGGGAAGGATATTGCGGCAAAAAC
GCTGGAAGTGCTGAAGAAATATGGTTACACCGGTAAGGACGACAAAGTTTATCTGCAATG
CTTTGATGCTGATGAACTGAAGCGTATTAAGAATGAGCTGGAACCTAAAATGGGTATGGA
CCTCAACCTGGTACAGCTGATTGCCTATACCGACTGGAACGAAACTCAGCAGAAACAACC
GGACGGAAGCTGGGTTAATTACAGCTATGACTGGATGTTTAAGCCGGGTGCCATGAAACA
GGTGGCGGAATATGCTGATGGTATTGGCCCAGATTACCATATGTTGATTGAGGAGACATC
GCAGCCGGGTAATATCAAACTCACTGGCATGGTGCAAGATGCTCAGCAGAATAAACTGGT
AGTGCATCCTTATACCGTGCGGTCAGATAAACTGCCTGAATACACTACTGATGTGAATCA
GTTATATGATGTTCTGTATAACAAAGCGGGTGTAAATGGGCTGTTTACTGATTTCCCTGA
TAAGGCAGTAAAATTCCTTAATAAAGAGTAATGCTACTGCAGGATGGCGTTCATGCGCCA
TCCTCAGCTAAAGCGAAATAATGCTACTACCGGTTATTCTATTCATTCACCTGAGCATCC
TGTTAAAAAAGATGCCAACATATTTGCGTAAAACTCATTTGTTAGGAAAGCTAACACTGG
GTATTGTTATTCTTTAAACAGTATGAATAGGGCTCAATAATAAATTGTAATGTAGTTTAT
AATATACAGTATTATTCGCATTTCGGGAAAGTAAAGAAAATATTAATGTATCTTATTAAT
TTATCATATTGTTCTTGGGTGAATGCTGTTTGCACACCTTCAGGACAATACTCACCAGTA
ATAATCAGTTGCCCATTGCTGTGTTGTACCATTAAACCTTTTTTTTCCTTTGGATCTTCA
AACTTAGAATTATCAAACGTGAAGATGTTATTTTCCTGTTTTGAGTAAGCAAAGAAATCT
CGTGTATAGCTGAAACTATCATTTATTAATGGTGCTAACTTTTTGTCGGCGATATCGATA
AGCTCACCACCTAATTTATTGATATATTTCATTTGGTTCAATTTTTTCTGCGCTTGTACA
ATTTGCTTGTAGGTGTTTTTAATTTCCTTAGAAGAATTCTTGAATTTATCATAGCGTTCC
TCGGAGGATGCGTATTTGTACCATTCTGTATTTTTCTCAGAATGTTGTAGCAGGTCTGCA
TATTTTTTTTGATCGCTGTAAAGTTGACTTTTAATACTTTCCTCACTGCTGGTTTTATAA
GGCTTATCAGAGCTGTTTATTTTTGAAATGTCTTTTTCTGTCAGTGACTGGACCGTGTTG
TGGGTATTTTCTTTTGCAACATGCTCATTGATGATGTTAATTGCAGTTTCATATTCATTT
AAGTTTATTGTTCTTTGTGAAATAGACCCTTCTTTGCTTTCGATACTCAAAACACCTTCG
TTGTTTTCACCTCGGGTAAAGGTAAGGGTATAGGGTTCATAATCCGCTGCAAATTCATTT
TTATACGTTATGACATGCTCGACAAAATGTCTTATTGGTACGAAACCATAACTGTGAACG
TCAATTTTTTGGGTCTTGATACTATCAATTTCATCTGAGGCTTTCGTGAAAAAAGCCAAT
AAATTAGCTATGTTGTCTGCTGAGGTTGATAACCCGAATCTACTTTGAGATATTTTTAGA
AACTCATTGCAAAAAATCTCAAGTTTCGCGGTTTGTTGTGATTCTTTGTAAATTTCTGCT
GTTTGCAATTTATTATTTTGTAAAAGATTACAGCGAGATAATTGAATAGATGTATTTGGC
ATAAATGATTCCTTGTATTGTGAGTTAACAAGATACAATTTAATCTTTGCAGAATATATT
CACTATCAAATTTAGCTCATTTTATTACGAAGACCTTTACGCATGTTAGAAAGTATCATT
ATTGTTAATAAACACGGTAATAAGTAACAAACAGATATTGATAACTTCCCTGACAAGTTA
TTAGGTATCCCACTTGAAGATTGAGAGTGGCTCCAGAGTAAACTGTGTACTGTTCGCCGG
AGTGTCATTACTCTCAACAATCGGTTTTGACAGTGAGTCGGGCGCTTCATACTGGTTTCT
ACCTGGAGTCATTGTCACTTCCCTAAACTGGATAAATATATATCGCTAATTCACAAAGTG
GACCAAAATCAGGTGAAAACGAATTATTACGCCTGGTAAAGACTACAGGCCAACTAAGTG
TGGCGAATCAGGCAATCTTACATTTGTCATCAATCTCATGTCTTACATCAAATTTTTCCA
CTCACCACGAGTTGTTCCGTACACATTTGTAGTAAAAACAGTGGACTGCCTTCTACCGGC
TTTTCTTTAGCCAGCAACGAAATCTGTCGATAGAAGGTTGGTTCGAGAGGAACGGAACAC
AATTCATCTGCAATGGTTTTCAGCGTTAACTCTGGTAATAAGGCGATGCCTAATCCCTGT
CGAATAAAACTGATCGCTGTATCCGGGTGATTAAATTCATATTTTATCTGTGGGGTAATA
TTCTTTTCTTTAAATAGTGCCATAATGCTTAATTCATAGCGTCCTTTACTAATGATTAAT
GGTTCACCCATTAATTCTTCCACTGTAATAGTGCTGTTTTTTGCCAGAGCATGGTTGGGC
GGTAACACTACGGTGAATTTATCCTGATAAATGGGCACGGAGTACATTCCGCTCACCGGA
AAATGAACAAAACCGGCATCAATGGATTCATTCTGAAGCGAATCAATAATCGCTGTGCTA
TTTTCCTCAAAAGGAATAATTTTTATATTCGGATGATGAATTTCAAAGTAGCGAATCACA
ACCGGTAAGATACAGGCGCAGACGCTGGGGAAACAACCAAGTCTCAGCGTTCTTTGAGGG
TTCTGCTTTTCCTGCTCGGCTATCTCTTTTACTGCGTTAACTTCCCGATTAATGGCGCGC
AGATGTTGCACAATGCGATGACCTGCTGTGGTCAGTTGTATAGCTTTACGGCGATCGCGT
AACAGTATATTCACACCAAGTTCTTGTTCGAGGGCAGCAATTGCCTGACTTACCGCCGAC
TGCGTCATGAACAATCGCTTGCTGGCTTCAGTAAAGCCACCGTAATCCAGCACGGCGAGT
AAAGAATTTATTTGGGTAAGAGTCATTAGAGTTTGCTAATCAATAATATTAAAACGATTA
ATTTCTCTAATAGCATGCCGCCATTTATACTTCTGTTCTGCAAAGTACATCACAATTTGA
CGCAACCGCAGTAACGGGAGTGTTGTCTGCGTGCGTCATCCTGACAGGCGGTAGGGTATG
AAAGAGAAGTTATGGACGAAGGATTTTTGGGCAATAACCATCATCAGCTTTATTATTTTC
TTCGTCTTTTATGTTTTACTAACATTGTTGCCAATTTATATCTCTGACCGCTTGCATGCC
TCTCCTGATAAAGCTGGTCTGCTGGTGACATTATTTTTAATTGCGGCGATTGTTATTCGA
CCCTTTGCCGGGCAATGGGTGGGTAAATATTCGAATAAAACTATTCTGGTGCTCTCTTCT
CTGGCCTTTTTGGTGGTCACTGCGCTGTATCCTTTTTGCCACTCAATAGAATCACTGCTT
TTTATTAGGGTGCTTCATGGTATTACCTTCGGGGTTATCACAACGGTAAAGGGAACGATT
TCCGCGCGGCTGATCCCGGCCTCCCGACGTGGGGAGGGCATCAGTTTTTTCTCTCTGGCA
ATGGGGCTGGCAATGGTGGTCGGGCCGTGGATTGGCCTGAATATGGCGCGCTGGGAGGCC
TTTAATATGGCTTTCTGGTTATGTACTGGCGTTGCGGCGGTGGGGATTATCCTGTCGCTG
ATTATGACCGTGCCGCCGGTTATCAGCCATGCCGACGGTTCAAAGCCAAAGATGGGCTTC
GCCGCCATGTTCGATCGCGCGGCATTGCCGTTTGCCATGGTTACATTCTTTATGACCTTT
TCGTATGCCGGGGTTTCTGCCTTTCTGGCGCTTTACGCCCGCGAACTTAATCTGATGTCG
GCGGCCAGTAATTTCCTGCTTTGCTACGCCATCTTCCTGATGATCTGCCGTACCTTTACC
GGCAATGTCTGCGACAAAAAAGGACCGAAATATGTGGTTTACCCTTGCCTTGTGTTCTTT
ACGGTAGGACTGGTGGTTCTCGGCTACACCCAGGGAAGCATAATGATGGTTGTTTCTGGC
GCGTTGATTGGTATCGGGTATGGTTCCGTGACGCCAGTTTTTCAGACGCAGATTATCAGT
TCAGTGGAACCGCATAAAATCGGTGTCGCAAACTCCCTCTTCTTCAATGCGATGGATGCA
GGCCTGGCGCTGGGAGCCTGTGTGATGGGGATGATGGTTGCACATACTGGCTACCGAATG
ATTTATCTGCTGGGCGCACTATTAGTGGTAGTGGCTGGTGGAGTCTATGCGCTGCAAATG
AAGGGTAAAAGCGGTGTCGCGCTAGTAGTGGCAAAAGAAATTCATTAATACGACACGTTT
CATTAAGATTTTTCGCAGGTAACCACCTATAGTCATTGTCGTTAATAAAAAATGACAGGC
GATAGGGTATGGCAGTTTCAGCAAAGCACGACGAATTTAATCACTGGTGGGCAACAGAGG
GCGACTGGGTTGAAGAGCCTAACTATCGCCGTAATGGTATGAGCGGGGTGCAATGCGTCG
AGCGCAACGGCAAAAAGCTATATGTAAAGCGCATGACGCATCATCTGTTTCATTCCGTAC
GTTATCCTTTCGGCCGACCAACGATTGTCCGTGAGGTTGCGGTAATTAAAGAACTGGAAC
GGGCCGGTGTCATCGTGCCGAAGATCGTTTTTGGTGAAGCGGTGAAAATTGAGGGTGAAT
GGCGAGCGTTGCTGGTGACTGAAGATATGGCGGGGTTCATCAGCATTGCTGACTGGTATG
CCCAGCATGCAGTATCGCCTTATTCTGACGAAGTACGGCAAGCCATGTTGAAAGCAGTGG
CGCTGGCGTTTAAGAAAATGCATAGCATTAATCGTCAGCATGGCTGTTGTTATGTTCGCC
ATATCTATGTGAAAACAGAAGGTAAGGCAGAAGCTGGTTTTCTTGACCTGGAGAAAAGTC
GTCGCCGCTTGCGTCGCGATAAAGCGATTAATCATGACTTCCGCCAGCTGGAAAAATATC
TGGAGCCAATTCCCAAAGCGGACTGGGAGCAGGTGAAAGCGTATTACTACGCCATGTAAT
CGTTGTAGGCCAGATAAGACGCATAAGCGTCGTATCTGGCACTACAACCAATTCACATCT
CGATTTCAATATCGCCTTTTGCCCGGCAACAACAGGGCAAAATTTCCCCCGGCTGAATAA
AGGCTAACGGTTCGGCAATCCAGTCCACCTGACCTGCGACCAGTCGGGTGCGACAGGAGC
CGCAGTAACCTTCGCGGCACTGGTACTCAACCGCCACATTGTGGGATTCCAGCGCCGCCA
GAAGGGAAGGGTGTTCATCCTGGCACAGCAGTTGTGTGCCAGTGATGCGCAGGGTAACGC
GAGCCATCAGAGCTGGAAGTTACTCAAATCGTCGGTGTCCACTTCCGAGTCAATCTGCCC
GACCAGATAAGAACTGACTTCCACTTCCTGCGGAGCAACCTGCACGTTATCAGACACCAG
CCAGGTGTTGATCCACGGGATCGGGTTGGAGCGCGTCTGGAACGGCAGATCCAAACCGAC
TGCCTGCATGCGGATATTGGTGATGTATTCAACGTACTGGCAGAGAATGTCTTTATTCAG
ACCAATCATCGAACCGTCACGGAACAGATAATCCGCCCAGTCTTTCTCTTGCTGTGCCGC
CTGGACAAACAGGTCATAGCACTCCTGCTTACATTCTTCGGCAATTTCCGCCATCTCCGG
ATCATCCGCACCGCTGCGCAGCAGATTCAGCATATGCTGAGTACCGGTCAGGTGCAGGGC
TTCGTCGCGGGCAATCAGGCGAATAATTTTGGCGTTACCTTCCATCAGCTCACGTTCAGC
GAATGCGAAAGAGCAGGCAAAGCTGACGTAGAAACGAATCGCTTCCAGCGCGTTAACGCT
CATCAGGCAGAGATACAGTTTTTTCTTCAGCTCGCGCAGGCTAACGGTCACGGTTTTACC
GTTAACGGTGTGGGTGCCTTCGCCCAGCAGATGCCAGTAGCTGGTCATTTCGATCAGCTC
ATCGTAATAGCTGGAGATCCCTTCCGCACGTTTCTGGATCTGCTCGTTGGTGACGATATC
GTCAAACACAACAGACGGATCGTTAACGATATTACGAATGATATGAGTATAGGAACGGGA
ATGAATCGTTTCTGAGAACGCCCAGGTTTCGACCCAGGTTTCCAGTTCCGGAATAGAAAT
AAGCGGCAATAGCGCCACGTTCGGGCTACGACCCTGAATGGAATCCAGCAGCGTCTGATA
TTTCAGGTTGCTGATAAAGATGTGTTTTTCGTGTTCAGGCAATGCCTGGTAATCAATACG
GTCACGAGAAACGTCAACTTCTTCCGGACGCCAGAAGAAAGAGAGCTGCTTTTCGATCAG
CTTTTCGAAGATGTCATATTTTTGCTGATCGTAGCGAGCCACGTTGACCGGCTGACCAAA
GAACATCGGTTCTTTGAGCTGATCATTTTTCGTCTGTGAAAAGGTGGTATATGCCATGAG
TGTGTCCTGTTGGGAGTTTAATGCCGGATAAGGCATTTTACGCCGCATCCTGTGCCTGAT
GCGACGCTGGCGCGTCTTATCAGGCCTACAAATCCGAGCCGTAGGCCGGATAAGGCGTTC
ACGCTGCATCCGGCACCCGGAGCCTGATGCGACGCTGGCGCGTCTTATCAGGCCTACAAA
CCGAGCCGTAGGCCGGATAAGGCGTTTACGCCGCATCCGGCATCTCAATATCAGATCTTA
CATGCGCCGCTTTCGCAGCCATCGTCCTGGATTGACGGCACCAGATCGTCCTGCGCGTCT
TCAGCGCCGTCACGGGTGTTCTGATAATACAGCGTTTTGACCCCGAATTTGTAGGCGGTG
AGCAGGTCTTTCAGCAACTGCTGCATCGGCACTTTTCCTGACGGGAAACGTGACGGATCG
TAGTTGGTGTTAGCAGAGATCGACTGATCGATAAATTTCTGCATGATACCCACCAGTTGC
AGGTAGCCATCGTTACCCGGCATTTCCCACAGCAGCTCATAGGCGTCGTGCAGATGCTCG
TAGTCCGGCACCACCTGGCGCAGAATACCGTCTTTCGACGCTTTGATGCTGACGTAACCG
CGCGGCGGTTCAATACCGTTAGTGGCGTTAGAGATCTGCGAAGAAGTCTCGGACGGCATC
AGAGCAGAAAGCGTGGAGTTACGCAGGCCGTGCGTTTTGATTGACTCACGCAGAGCTTCC
CAGTCGTAATGCAGCGGCTCATTAGCGATGGTATCCAGATCTTTCTTATAGGTATCGATC
GGCAGGATCCCTTTCGCGTAAGTGGTTTCGTTAAACCACGGGCACGCGCCTTGCTCTTTC
GCCAGCTCATTAGACGCTTTCAGCAGGTAATACTGAATCGCTTCGAAGGTTTTATGCGTC
AGGTTGTTGGCGCTGCCGTCGGAGTAGCGTTTACCATGCTTCGCCAGGTAGTAAGCGAAG
TTGATCACACCAATACCCAGCGTACGACGACCCATCGCTCCACGTTTGGCGGCCGGGATC
GGGTAATCCTGATAATCCAGCAGCGCGTCAAGTGCACGAACCGCCAGAATTGCCAGCTCT
TCCAGTTCATCCAGGCTATTAATTGCGCCCAGGTTGAAAGCAGACAGCGTACACAGCGCG
ATTTCACCGTTCTCGTCGTTGACGTCGTTCAGCGGTTTGGTCGGCAGGGCTATCTCCAGG
CACAGGTTAGACTGACGCACTGGCGCGATGGCCGGATCAAACGGGCTATGGGTATTGCAG
TGGTCAACGTTCTGAATATAGATACGACCGGTAGACGCACGTTCCTGCATCATCAGCGAG
AACAGCTCAACGGCTTTCACACGCTGCTTGCGGATGCTGTCGTCTTTCTCATATTTGGTA
TACAGACGTTCAAACTCTTCCTGATCGGCGAAGAATGCGTCGTACAGCCCCGGTACGTCG
GACGGGCTGAACAGGGTGATATCTTCACCTTTCAGCAGGCGGGTATACATCAGTTTGTTG
ATCTGTACCCCGTAGTCCATATGGCGCACGCGGTTGCCTTCCACACCACGGTTGTTTTTC
AACACCAGCAGGCTTTCCACTTCCAGATGCCACATCGGGTAGAACAGCGTTGCCGCACCG
CCGCGCACACCGCCCTGAGAGCAGGATTTCACCGCAGTCTGGAAATGTTTGTAGAACGGA
ATGCAGCCGGTATGGAACGCTTCGCCACCGCGAATCGGGCTACCCAGCGCACGAATACGC
CCGGCGTTGATGCCGATCCCGGCACGCTGGGAAACATATTTCACAATCGCGCTGGAGGTG
GCGTTGATGGAATCCAGGCTGTCGCCGCACTCGATCAGTACGCAGGAGCTGAACTGACGA
GTCGGGGTACGCACGCCGGACATGATTGGCGTCGGCAGCGAAATTTTAAATGTGGAAACC
GCGTCGTAAAAACGCTTCACATATTGCAGGCGCGTTTCACGCGGGTAGTTCGAGAACAGG
CACGCGGCAACCAGAATATAAAGGAACTGGGCGCTTTCGTAGATTTCGCCGGTCACGCGG
TTCTGTACCAGATATTTGCCTTCCAGTTGCTTAACGGCAGCATAAGAGAAGGTCATATCA
CGGTCGTGATCGATAAACGTGTCCATCTGCTTGAACTCTTCTTCCGTGTAGTCTTCCAGC
AGATGATTATCGTATTTGCCCATCTCGACCATTTTCACCACGTGGTCGTACAGCGCAGGC
GGCTCAAACTGGCCGTAGGCTTTTTTACGCAGGTGGAAGATCGCCAGGCGCGCGGCGAGA
TACTGATAATCCGGCGCATCACGGGAGATCAGGTCTGCGGCAGCCTTGATAATAGTTTCG
TGGATGTCAGAGGTCTTGATACCGTCATAAAACTGAATGTGGGAGCGCAGCTCGACCTGG
GAAATCGAAACGTTATGCAGTCCTTCTGCCGCCCAATCCAGAACGCGATGGATTTTGTCG
AGATTGATGCGCTCTGTGCTACCGTCGCGCTTTGTCACCAGCAGATTCTGATTCATGTAT
GTCGTACCTGTTTTTGGAATTCTTTCCGCAATAGTTTCGTGCAGACTACCTGTAGTACGG
GAAGCTGCTTAGAACACTATATATAGGGGGTATGTTTGGGATTCACTGCAAGATAGTGTG
AAAATGGCCCTCTTGCAAGTGCATAACTTTGTGGATAACTCAGGAAGGAAAAAGTGGCTT
TCGCGCACCTTAGGTCAGACAAGGTGTCCGGGAAAGTCAATGGGAAGAGAAAAATTTGTT
AAAAATAACTGTTCGGCGATTTCTTGAACGGCAGAATAGGTTGGATAAATTGATATAGAT
GGTTTATTAATCTTTTTGCTAATGATTGCAAAAATTGATCTAAGCACGAGTCATCACATA
ATCTGATGTATCAGTTGTGGTCAATATATAAGCGAATGTAAGCGATTGTTGATGTCGAAA
TGGTTGTTTTCTATTCGGTTATTGTTAAATGCGAAGCCATTTTGTTAATTTACCTTATAT
TATAAGAAAATTATTCATTACTTTAATTTAGTTTAAATATAACTGGTATCCCTTAAGGTT
ATTAACTTGAATTATGACGCACTGATACTATTCATCAAATAATAACAAAATAGCTATTGC
ATCGGGTTGGACAATTTACAAAAGAAAGATAACCCATATTGTATAATGCGTTTAAATATG
CCGTCTTATATAAAATGATGGTCAGATTAATATGCGAATTATTTTTCTACGCAAGGAGTA
TCTATCTTTACTCCCGTCAATGATTGCGTCTCTCTTCTCTGCTAATGGCATTGCGGCAGT
CACTGATTCATGCCAGGGATATGATATCAAAGCGAGTTGCCAGGCCAGCAGGCAAAGCCT
TGCAGGCATTACGCAGGACTGGAGCATCGCCGATGGGCAATGGCTGGTTTTTTCGGATAT
GACCAATAATGCCAGCGGTGGGGCCGTATTTTTGCAACAAGGAGCGGAATTTACATTATC
ACCAGAAAATGAAACTGGAATGACTCTGTTTGCCAATAACACCGTTTCAGGAGAATATAA
TAACGGCGGGGCAATATTTGCTAAAGAAAACTCAACGCTGAATCTTACGGATGTTATTTT
TTCTGGTAACGTCGCAGGCGGCTATGGTGGCGCAATCTATTCTTCTGGTACTAACGATAC
CGGTGCCATCGATTTACGTGTCACTAACGCCGTGTTTCGCAATAACATCGCTAATGACGG
CAAAGGTGGTGCAATTTATACCATCAATAATGATATCTATTTAAGTGATGATGTTTTTAA
CAATAACCAGGCATATACATCAACAAGTTACAGTGATGGCGATGGCGGCGCAATCGATGT
CACAGATAATAATAGCGACAGCAAGCATCCTTCAGGTTATACGATAATAAATAACACTGC
CTTTACAAATAACACTGCCGAAGGTTATGGCGGGGCGATATATACCAATAGCGCGACGGC
TCCCTATCTTATTGATATTTCTGTTGATGACAGCTACAGCCAGAACGGAGGCGTGTTAGT
CGATGAGAACAATAGCGCAGCAGGCTATGGAGATGGTCCTTCCTCTGCGGCGGGTGGCTT
TATGTATCTCGGCTTAAGTGAAGTTACATTTGATATTGCCGACGGAAAAACGCTGGTTAT
TGGCAATACAGAGAATGACGGAGCTGTTGACTCTATTGCTGGTACCGGGTTAATCACCAA
AACAGGTTCCGGCGATCTGGTACTTAATGCAGATAACAATGACTTTACTGGTGAGATGCA
GATTGAAAACGGTGAAGTTACCCTGGGCCGCAGCAACTCCCTGATGAATGTCGGCGATAC
GCATTGCCAGGACGATCCGCAAGACTGCTACGGTCTGACGATAGGGAGTATTGATAAGTA
CCAGAATCAGGCAGAGCTAAATGTTGGCTCCACCCAACAAACCTTTGTGCACTCATTGAC
GGGCTTTCAGAATGGCACTTTAAATATCGATGCTGGTGGCAATGTTACTGTTAATGAAGG
CAGTTTTGCTGGCACCATCGAAGGTGCTGGTCAGCTCACCATTGCGCAAAACGGCAGCTA
TGTGCTGGCGGGAGCGTCGTCGATGGCGCTAACCGGCGATATAGTCGTTGATGATGGTGC
GGTGCTTTCGCTGGAAGGCGACGCGGCAGATCTTGCCGCTCTCCAGGACGATCCGCAGTC
GATCGTGTTAAACGGCGGTGTGCTCGATCTCTCTGATTTCTCCACCTGGCAGAGCGGTAC
ATCATACAAAGATGGCCTTGAAGTCAGCGGCAGCAGCGGAACGGTTATCGGCAGTCAGGA
TGTGGTAGATCTTGCAGGCGGAAACGATATGCATATCGGCGGTGACGGGAAAGATGGCGT
CTACGTGGTGATCGATGCGGGTGACGGGCAGGTCCGCCTGGCAAATGACAATCAATACCT
CGGCACAACGCAAATCGCCTCCGGTACGCTGATGGTGAGCGACAACTCGCAGCTTGGAGA
TACCCATTACAACCGCCAGGTTATCTTTACCGATAATCAACAAGAAAGCGTGATGGAGAT
TACTGCCAATGTCGATACTCGCTCTACAACGACTGAGCATGGGCGTGATATTGAAATGCG
CGCCGACGGTGAAGTGGCAGTTGATGCGGGGGTAGACACGCAGTGGGGCGCACTGATGGC
TGACAGCAGCGGGCAGCATCAGGATGAGGGTAGCACATTGACGAAAACGGGGGCGGGTAC
GCTGGAGCTGACCGCCAGCGGTACAACGCAGTCGGCGGTACGTGTCGAAGAAGGCACCCT
GAAAGGTGATGTTGCTGATATCCTTCCTTATGCTTCGTCACTGTGGGTTGGTGATGGGGC
AACGTTCGTTACTGGCGCGGATCAGGATATTCAGTCAATTGATGCTATTTCCAGCGGCAC
TATTGACATCAGCGATGGTACGGTTTTGCGCCTGACCGGGCAGGATACTTCCGTCGCCCT
TAATGCCTCACTGTTTAACGGCGATGGGACGCTGGTGAATGCCACCGATGGTGTGACGTT
GACAGGTGAGCTTAATACCAACCTTGAAACTGACAGCCTGACTTATCTTTCCAACGTGAC
GGTTAATGGCAATCTGACCAATACGTCCGGTGCGGTTAGCCTGCAAAATGGCGTCGCTGG
CGATACGCTGACGGTAAACGGTGATTATACCGGCGGCGGTACGCTACTGCTCGATAGCGA
ATTAAACGGCGATGACTCGGTAAGCGATCAATTGGTGATGAACGGTAATACTGCTGGCAA
CACAACTGTGGTGGTTAACTCCATTACAGGGATTGGTGAGCCGACATCGACAGGCATTAA
AGTGGTTGATTTCGCAGCTGATCCCACGCAGTTTCAAAACAATGCGCAGTTCAGTCTGGC
AGGCAGTGGCTACGTCAACATGGGAGCGTATGACTACACGCTGGTGGAAGATAACAACGA
CTGGTATCTGCGATCGCAAGAAGTAACGCCGCCATCGCCACCTGATCCAGACCCGGACCC
AACCCCCGATCCTGACCCAACACCCGATCCAATCCCCGCTTACCAGCCGGTGCTGAATGC
CAAAGTTGGCGGTTATCTCAATAACCTGCGGGCGGCAAATCAGGCGTTTGTGATGGAGCG
ACGCGATCACGCTGGTGGCGATGGTCAGACGCTGAATTTACGTGTTATCGGCGGACGTTA
TCATTACACGGCGGCAGGGCAACTGGCTCAGCATGAAGACACTTCTACGGTGCAGCTAAG
CGGCGATCTGTTTAGCGGGCGCTGGGGCGATGATGGCGAGTGGATTCTTGGGATTGTAGG
TGGCTACAGCGATAACCAGGGCGACAGCCGCTCGAATCTGACCGGAACTCGCGCCGATAA
CCAGAACCACGGTTATGCCGTTGGGCTAACCTCAAGCTGGTTTCAGCACGGTAATCAGAA
GCAGGGGGCCTGGCTGGATAACTGGCTGCAATACGCGTGGTTTAACAATGATGTTTCCGA
ACAAGACGATGGCGCGGATCATTACCATTCGTCGGGGATTATCGCCTCGCTGGAAGCCGG
GTATCAATGGTTACCGGGGCGTGGTGTGGTGATTGAACCGCAGGCGCAGGTGATTTATCA
GGGCGTGCAGCAGGATGATTTTACCGCCGCTAACCGTGCGCGCGTGTCACAATCGCAGGG
TGATGATATTCAGACGCGGCTGGGTTTACACAGCGAATGGCGTACCGCTGTTCATGTCAT
ACCAACATTAGATCTGAATTATTATCACGATCCCCATTCGACGGAAATTGAAGAGGATGG
CAGCACTATCAGTGACGATGCGGTGAAGCAACGGGGTGAAATAAAAGTGGGAGTCACGGG
CAATATCAGTCAGCGAGTGTCCCTGCGCGGCAGCGTGGCGTGGCAGAAAGGGAGTGATGA
TTTTGCCCAGACGGCAGGATTTTTGTCGATGACGGTGAAATGGTAATCGCTGTCTGACCA
TCACTATTGCCGGATGCGGCGTAAACGCCTTATCTGGCCTACGGAGAGCATTTGTAGGCC
TGATAAGACGCGGCAAGCGTCGCATCAGGCATTGGCGCGGTTGCCGGATGAATCCAAACA
ACAACCTCACTTATTCTGCGTGTGCAGCATATAGTTCACATCCACGCCGGGGCCGAGTTT
AAAAGAATTAGTGATCGGGTTGTAATGTAGCCCGGTTATATGTCGCTCTTTAAGGCTTGT
CTGATCTACCCAGCCAAGCAGCTCTGCCGGTTTAATAAACTTCTTCACATCATGCGTGCC
TTTGGGCACCATGCGCAAAATATATTCCGCGCCAACCACCGCCATCAGCCATGACTTGCC
GTTGCGGTTAAGCGTCGAGAAAAAGACATCGCCGCCCGGTTTCACCAGTTGCGCACAGGC
TCTGACTACTGACTGCGGATCGGGGACGTGCTCCAGCATCTCCATGCAGGTCACCACATC
ATACTGCCCGGCATGTTTTGCCGCGTGCTCTTCCACGGTTTCCTGCACGTAATCCACCTG
AATGCCGCTTTCCAGCGCGTGCAGCTTTGCCACCTGCAATGGCTCAAAGCCCATATCCAG
ACCGGTCACCGTCGCGCCTTCGCGCGCCATACTCTCGGCCAGAATGCCGCCGCCACAACC
GACATCGAGCACCTTTTTGCCAAATAAACCGCCAGCACGCTCGGCAATATAGCCCAGACG
TAGCGGATTAATGCGGTGCAACGGTTTGAACTCACCTTCAAGATCCCACCAGCGGGAGGC
GACGGCTTCAAATTTAGCGATCTCTTCGTGGTCTACGTTATGGTTTACCGGCGATTTTTC
GGCATTCATTGGCACTTCTACTCCGTAATTGGCAAGACAAACGAGTATATCAGGCATTGG
ATGTGAATAAAGCGTATAGGTTTACCTCAAACTGCGCGGCTGTGTTATAATTTGCGACCT
TTGAATCCGGGATACAGTAGAGGGATAGCGGTTAGATGAGCGACCTTGCGAGAGAAATTA
CACCGGTCAACATTGAGGAAGAGCTGAAGAGCTCCTATCTGGATTATGCGATGTCGGTCA
TTGTTGGCCGTGCGCTGCCAGATGTCCGAGATGGCCTGAAACCGGTACACCGTCGCGTAC
TTTACGCCATGAACGTACTAGGCAATGACTGGAACAAAGCCTATAAAAAATCTGCCCGTG
TCGTTGGTGACGTAATCGGTAAATACCATCCCCATGGTGACTCGGCGGTTTATGACACGA
TCGTCCGTATGGCGCAGCCATTCTCGCTGCGTTACATGCTGGTAGACGGTCAGGGTAACT
TCGGTTCCATCGACGGCGACTCTGCGGCGGCAATGCGTTATACGGAAATCCGTCTGGCGA
AAATTGCCCATGAACTGATGGCCGATCTCGAAAAAGAGACGGTCGATTTCGTTGATAACT
ATGACGGCACGGAAAAAATTCCGGACGTCATGCCAACCAAAATTCCTAACCTGCTGGTGA
ACGGTTCTTCCGGTATCGCCGTAGGTATGGCAACCAACATCCCGCCGCACAACCTGACGG
AAGTCATCAACGGTTGTCTGGCGTATATCGATGATGAAGACATCAGCATTGAAGGGCTGA
TGGAATACATCCCGGGGCCGGACTTCCCGACGGCGGCAATCATTAACGGTCGTCGCGGTA
TTGAAGAAGCTTACCGTACCGGTCGCGGCAAGGTATATATCCGCGCCCGTGCTGAAGTGG
AAGTTGACGCCAAAACCGGACGTGAAACCATTATCGTCCACGAAATTCCGTATCAGGTAA
ACAAAGCGCGCCTGATCGAGAAGATTGCGGAACTGGTAAAAGAAAAACGCGTGGAAGGCA
TCAGCGCGCTGCGTGACGAGTCTGACAAAGACGGTATGCGCATCGTGATTGAAGTGAAAC
GCGATGCGGTCGGTGAAGTTGTGCTCAACAACCTCTACTCCCAGACCCAGTTGCAGGTTT
CTTTCGGTATCAACATGGTGGCATTGCACCATGGTCAGCCGAAGATCATGAACCTGAAAG
ACATCATCGCGGCGTTTGTTCGTCACCGCCGTGAAGTGGTGACCCGTCGTACTATTTTCG
AACTGCGTAAAGCTCGCGATCGTGCTCATATCCTTGAAGCATTAGCCGTGGCGCTGGCGA
ACATCGACCCGATCATCGAACTGATCCGTCATGCGCCGACGCCTGCAGAAGCGAAAACTG
CGCTGGTTGCTAATCCGTGGCAGCTGGGCAACGTTGCCGCGATGCTCGAACGTGCTGGCG
ACGATGCTGCGCGTCCGGAATGGCTGGAGCCAGAGTTCGGCGTGCGTGATGGTCTGTACT
ACCTGACCGAACAGCAAGCTCAGGCGATTCTGGATCTGCGTTTGCAGAAACTGACCGGCC
TTGAGCACGAAAAACTGCTCGACGAATACAAAGAGCTGCTGGATCAGATCGCGGAACTGC
TGCGTATTCTTGGTAGCGCCGATCGTCTGATGGAAGTGATCCGTGAAGAGCTGGAGCTGG
TTCGTGAACAGTTCGGTGACAAACGTCGTACTGAAATCACCGCCAACAGCGCAGACATCA
ACCTGGAAGATCTGATCACCCAGGAAGATGTGGTCGTGACGCTCTCTCACCAGGGCTACG
TTAAATATCAGCCGCTTTCTGAATACGAAGCGCAGCGTCGTGGCGGGAAAGGTAAATCTG
CCGCACGTATTAAAGAAGAAGACTTTATCGACCGACTGCTGGTGGCGAACACGCACGACC
ATATTCTGTGCTTCTCCAGCCGTGGTCGCGTCTATTCGATGAAAGTTTACCAGTTGCCGG
AGGCCACTCGTGGCGCGCGCGGTCGTCCGATCGTCAACCTGCTGCCGCTGGAGCAGGACG
AACGTATCACCGCGATCCTGCCGGTGACCGAGTTTGAAGAAGGCGTGAAAGTCTTCATGG
CGACCGCTAACGGTACTGTGAAGAAAACCGTCCTCACCGAGTTCAACCGTCTGCGTACCG
CCGGTAAAGTGGCGATCAAACTGGTTGAAGGCGATGAGCTGATCGGCGTTGACCTGACCA
GCGGCGAAGACGAAGTAATGCTGTTCTCCGCCGAAGGTAAAGTGGTGCGCTTTAAAGAGT
CTTCTGTCCGTGCGATGGGCTGCAACACCACCGGTGTTCGCGGTATTCGTTTAGGCGAAG
GTGATAAAGTCGTCTCTCTGATCGTGCCTCGTGGCGATGGCGCAATCCTCACCGCAACGC
AGAACGGTTATGGTAAACGTACCGCAGTGGCGGAATACCCGACTAAGTCGCGTGCGACGA
AAGGGGTTATCTCCATCAAGGTTACCGAACGTAACGGTTTAGTGGTTGGCGCGGTGCAGG
TAGATGATTGCGATCAGATCATGATGATCACCGACGCCGGTACGCTGGTACGTACTCGCG
TTTCAGAAATCAGCATCGTGGGCCGTAACACCCAGGGCGTGATCCTCATCCGTACTGCGG
AAGATGAAAACGTAGTGGGTCTGCAACGTGTTGCTGAACCGGTTGACGAGGAAGATCTGG
ACACCATCGACGGCAGTGCCGCGGAAGGGGACGATGAAATCGCTCCGGAAGTGGACGTTG
ACGACGAGCCAGAAGAAGAATAATTTTACTTCTTCATGCCAAAAGGGAGCTATCTCCCTT
GTTTGAATTGAAAAGTCCAGGCTGCAAAGTCTGGGCTTTTGTCGTATTAGGGCACGGTAA
AGTTTGGCTGTGCCCGTAAAAAATGGCTGGCTATACACAAGGAATGTGGCAATGAGTGGT
GAAAAAAAGGCGAAAGGCTGGCGGTTCTATGGTCTTGTAGGTTTTGGCGCAATAGCACTG
CTTTCCGCTGGCGTCTGGGCGTTGCAATATGCTGGCAGTGGGCCAGAAAAAACGTTGTCG
CCGCTGGTGGTGCACAACAATCTGCAAATCGATCTCAATGAGCCGGACCTCTTTCTCGAC
AGCGACTCTCTGAGCCAGCTTCCCAAAGATCTCCTCACCATTCCGTTTCTCCACGATGTT
CTGAGTGAAGATTTCGTTTTCTATTATCAGAATCATGCCGATCGTCTGGGCATTGAAGGC
AGCATTCGCCGCATTGTCTATGAACACGATCTCACGCTGAAAGATAAGCTCTTTTCGTCA
CTCTTAGATCAGCCCGCGCAGGCGGCGCTATGGCACGATAAACAAGGCCATCTTTCACAT
TACATAGTGCTGATCCAGCGCAGTGGTTTAAGCAAACTGCTGGAGCCATTGTTGTTTGCC
GCTACCAGCGACAGCCAGTTAAGCAAAACGGAAATCAGTAGCATCAAGATAAATAGTGAA
ACTATTCCTGTTTATCAGTTGCGCTATAACGGTAATAACGCCCTGATGTTCGCGACATAT
CAGGACAAGATGCTGGTGTTTTCCAGCACGGATATGCTGTTTAAAGATGATCAGCAGGAT
ACCGAAGCCACGGCGATCGCAAGTGATTTGTTGAGCGGCAAAAAACGCTGGCAAGCCAGC
TTTGGCCTGGAAGAGCGTGCTGCCGAAAAAACGCCAGTACGCCAGCGCATCGTGGCCAGC
GCCAGGTTGCTGGGTTTTGGCTACCAGCGGTTAATGCCTTCTTTTGCTGGCGTACGCTTC
GAAATGGGTAACGACGGCTGGCACAGTTTTGTGGCGTTAAATGATGAATCCGCCAGCGTA
GATGCCAGTTTCGATTTTACGCCGGTCTGGAACAGTATGCCTGCCGGGGCCAGCTTCTGT
GTGGCGGTGCCGTATTCACACGGTATTGCCGAAGAGATGCTTTCGCACATCAGCCAGGAA
AACGATAAGCTGAATGGGGCGTTAGACGGTGCCGCGGGGCTGTGCTGGTATGAAGACTCA
AAATTGCAAACCCCGCTGTTTGTCGGTCAGTTTGATGGCACTGCCGAACAGGCGCAATTG
CCAGGGAAACTGTTTACGCAAAATATTGGTGCGCACGAAAGCAAAGCGCCAGAAGGTGTT
TTGCCGGTAAGCCAGACTCAGCAGGGCGAAGCGCAAATCTGGCGTCGCGAAGTGAGTTCC
CGATACGGTCAGTATCTGAAAGCGCAGGCGGCGCAACCCGATCAATTAATGTCGGATTAT
TTTTTCCGCGTGTCGCTGGCGATGCAAAACAAAACGCTGCTTTTCTCCCTCGATGACACG
CTGGTTAATAACGCCCTGCAAACACTGAATAAAACCCGCCCGGCAATGGTAGATGTAATA
CCCACTGATGGCATCGTTCCGCTCTATATCAATCCACAAGGAATGGCGAAACTGCTGCGT
AACGAAACGCTGACCAGTCTGCCGAAGAATCTCGAACCGGTTTTTTATAACGCCGCACAA
ACTTTATTAATGCCGAAGCTGGACGCTTTATCTCAACAACCGCGTTATGTCATGAAGCTG
GCCCAGATGGAACCCGGTGTCGCCTGGCAGTGGCTACCCATAACCTGGCAGCCGCTATGA
GGCACGGGCTGCTGGCGCTGATTTGCTGGCTGTGTTGTGTTGTTGCCCATAGCGAAATGC
TGAATGTCGAACAATCCGGGCTGTTTCGCGCCTGGTTTGTACGCATTGCACAGGAACAGC
TCCGCCAGGGGCCAAGTCCACGCTGGTATCAGCAGGATTGTGCGGGCCTGGTGCGATTTG
CAGCGAACGAGGCGCTGAAAGTTCACGACAGTAAATGGCTAAAAAGTAACGGGTTATCTA
ACCAGTATTTGCCGCCAGAGATGTCGCTAACACCTGAACAGCGTCAACTGGCGCAAAACT
GGAATCAGGGGAACGGGAAAACCGGCCCCTACGTGACCGCGATTAATTTGATTCAGTACA
ACAGCCAGTTTATTGGCCAGGACATAAACCAGGCGCTGCCTGGCGATATGATTTTTTTCG
ATCAGGGCGATGCCCAGCACTTAATGGTCTGGATGGGGCGTTACGTCATCTACCACACCG
GAAGCGCCACGAAAACTGACAACGGAATGCGCGCAGTCAGTCTGCAACAACTTATGACAT
GGAAGGACACCCGATGGATACCCAACGATTCCAATCCCAATTTCATTGGCATTTATCGTT
TAAATTTTCTGGCGCGATAGCAGCGTGCTTGTCCCTGTCTCTTGTGGGAACAGGGCTTGC
TAATGCTGATGATTCGCTTCCTTCCAGTAACTATGCGCCGCCCGCAGGGGGAACATTCTT
TTTGCTTGCTGACAGCAGTTTTAGCAGCAGTGAAGAGGCGAAAGTGCGACTGGAAGCGCC
GGGGCGTGATTATCGGCGCTATCAGATGGAAGAGTACGGCGGTGTGGACGTTCGCCTGTA
TCGTATTCCTGACCCGATGGCATTTTTGCGCCAGCAGAAAAACCTGCATCGCATTGTGGT
GCAACCGCAATATCTGGGCGACGGGCTGAACAATACGCTGACCTGGCTGTGGGATAACTG
GTACGGCAAATCTCGCCGCGTGATGCAGCGTACTTTCTCTTCTCAGTCACGGCAGAATGT
GACTCAGGCATTACCCGAATTACATCTCGGCAATGCCATTATTAAACCTTCCCGTTATGT
ACAGAACAACCAGTTTTCCCCGCTGAAAAAATATCCCCTGGTGGAACAGTTCCGTTATCC
ACTATGGCAGGCTAAACCGGTCGAGCCGCAGCAAGGGGTAAAACTGGAAGGCGCATCCAG
CAATTTCATCTCGCCGCAGCCGGGTAACATTTATATTCCTCTCGGCCAACAAGAGCCGGG
ACTGTACCTCGTCGAGGCGATGGTTGGTGGGTATCGGGCGACGACGGTGGTGTTTGTTTC
CGATACCGTGGCGCTTAGCAAAGTGTCAGGCAAAGAGCTTCTGGTGTGGACCGCGGGTAA
AAAATAGGGTGAAGCGAAGCCAGGCTCAGAGATCTTGTGGACTGACGGTCTTGGCGTGAT
GACCCGCGGTGTGACCGATGACAGCGGTACCTTGCAGTTACAACATATATCGCCAGAACG
TTCATACATTCTGGGTAAGGATGCCGAAGGCGGCGTTTTTGTCTCCGAGAACTTCTTCTA
CGAAAGCGAAATCTACAACACCCGCTTGTATATTTTTACCGATCGCCCGCTATATCGCGC
AGGCGATCGTGTCGATGTTAAAGTGATGGGCCGCGAGTTCCACGATCCGTTGCATTCATC
CCCCATCGTCAGCGCCCCGGCGAAGCTTTCGGTGCTGGACGCCAACGGCAGTCTGTTGCA
AACCGTCGATGTCACGCTGGATGCGCGCAATGGCGGGCAGGGAAGTTTCCGCCTGCCAGA
AAATGCCATTGCCGGAGGTTATGAGTTACGTCTTGCTTACCGCAATCAGGTCTATAGCAG
TAGTTTTCGCGTAGCCAACTATATCAAGCCACATTTCGAGATTGGTTTAGCTCTCGACAA
AAAAGAGTTCAAAACTGGCGAAGCGGTCAGCGGCAAACTGCAACTGCTCTACCCGGATGG
TGAGCCGGTAAAAGATGCCCGCGTGCAGTTAAGTTTGCGCGCTCAGCAATTATCAATGGT
CGGTAACGATTTGCGTTATGCCGGACGTTTCCCCGTGTCGCTGGAAGGCAGTGAAACGGT
GTCCGACGATAGCGGTCATGTGGCGTTAAATCTCCCCGCCGCCGATAAACCAAGCCGCTA
TTTGTTAACCGTCTCCGCCAGTGACGGCGCGGCGTATCGCGTCACCACCACCAAAGAGAT
CCTCATTGAACGCGGCCTGGCGCATTACTCTTTAAGTACCGCCGCACAATACAGTAATAG
CGGCGAGTCGGTTGTGTTCCGTTATGCCGCGCTGGAATCTTCAAAACAGGTTCCTGTTAC
GTATGAATGGTTGCGTCTCGAAGACCGCACGAGCCATAGCGGAGAGCTACCGTCAGGCGG
CAAATCCTTTACCGTCAATTTCGCTAAACCTGGCAACTACAATCTGACATTACGCGATAA
AGACGGCTTAATTCTCGCTGGGTTAAGTCATGCCGTCAGCGGTAAGGGCAGCATGTCGCA
TACTGGTACGGTAGATATCGTGGCAGATAAAACGCTGTACCAGCCTGGCGAAACCGCGAA
GATGCTGATTACCTTTCCGGAGCCAATTGATGAAGCATTATTGACGCTGGAACGCGATCG
CGTGGAACAGCAGTCGCTGCTTTCGCATCCGGCAAACTGGCTAACGCTACAACGTTTAAA
CGATACCCAGTATGAAGCCCGGGTTCCAGTGAGCAATTCCTTTGCGCCTAACATCACTTT
TTCGGTGCTGTATACCCGTAACGGTCAGTACAGTTTTCAGAATGCCGGGATCAAAGTTGC
CGTTCCCCAGCTGGATATCCGGGTGAAAACGGACAAAACCCATTACCAGCCTGGTGAACT
GGTCAATGTCGAATTAACCTCGTCGCTGAAAGGTAAACCTGTTTCTGCGCAGCTAACGGT
AGGCGTGGTCGATGAAATGATCTACGCGCTGCAACCAGAAATCGCGCCGAATATCGGCAA
ATTTTTCTATCCGCTGGGGCGTAACAATGTGCGTACCAGCTCCAGTCTGTCGTTTATCAG
CTACGACCAGGCGCTCTCCAACGAGCCGGTTGCGCCTGGCGCAACTAACCGCAGCGAGCG
GCGAGTAAAAATGCTTGAACGTCCACGGCGTGAAGAGGTGGATACCGCGGCATGGATGCC
GTCACTCACAACCGATAAACAAGGCAAAGCGTATTTCACGTTCCTGATGCCTGATTCGTT
AACCCGCTGGCGTATCACCGCGCGTGGGATGAACGGCGACGGGCTGGTCGGGCAGGGGCG
TGCTTATCTGCGTTCGGAAAAAAATCTCTACATGAAGTGGAGTATGCCAACGGTGTATCG
CGTGGGCGACAAACCGGCGGCAGGACTGTTTATCTTCAGTCAGCAGGATAACGAACCGGT
GGCGCTGGTGACTAAATTTGCAGGCGCTGAGATGCGCCAGACGCTGACGCTGCACAAAGG
GGCGAATTATATTTCGCTGACGCAGAATATTCAGCAATCTGGCTTGTTAAGTGCAGAACT
GCAACAAAATGGGCAAGTGCAGGACAGCATTAGCACAAAACTGTCTTTTGTGGATAACAG
CTGGCCCGTTGAACAGCAGAAAAATATCATGCTCGGTGGTGGCGATAACGCGCTGATGTT
GCCCGAGCAGGCGAGCAATATCCGGCTACAAAGTAGTGAAACGCCGCAGGAGATTTTCCG
CAACAATCTTGATGCGTTAGTCGATGAACCGTGGGGTGGGGTGATCAACACCGGTAGCCG
TCTGATCCCGCTCAGTCTCGCCTGGCGTTCGCTTGCCGATCATCAAAGTGCCGCCGCTAA
CGACATTCGTCAGATGATTCAGGATAACCGTCTGCGGCTGATGCAACTGGCGGGGCCCGG
AGCGCGCTTTACCTGGTGGGGTGAAGATGGCAATGGTGACGCCTTCCTTACGGCATGGGC
ATGGTACGCCGACTGGCAGGCCAGCCAGGCGCTCGGCGTAACGCAACAACCGGAATACTG
GCAGCATATGCTCGACAGTTATGCCGAGCAGGCAGATAACATGCCGTTATTGCATCGGGC
GCTGGTGCTGGCGTGGGCACAGGAGATGAATCTGCCGTGCAAAACGTTGTTGAAAGGGTT
GGATGAAGCTATCGCCCGGCGCGGAACTAAAACTGAAGATTTCTCTGAGGAAGCCCCCCG
CGATATCAATGACAGCCTGATCCTCGATACACCGGAATCTCCACTGGCAGATGCGGTGGC
AAACGTCTTAACCATGACGTTGCTGAAAAAAGCGCAGTTGAAGTCCACGGTGATGCCACA
GGTTCAGCAATATGCGTGGGATAAAGCGGCAAACAGCAATCAGCCGCTGGCGCACACGGT
TGTGCTGCTCAATAGCGGGGGCGACGCTACCCAGGCGGCTGCTATTTTAAGTGGTTTGAC
CGCTGAGCAATCTACTATTGAGCGCGCGCTGGCCATGAACTGGCTGGCGAAATATATGGC
GACAATGCCTCCAGTTGTTTTGCCTGCGCCTGCGGGCGCATGGGCCAAACATAAGTTAAC
TGGAGGGGGCGAATACTGGCGTTGGGTTGGTCAGGGCGTGCCGGACATTCTCTCTTTTGG
TGACGAATTATCGCCGCAAAATGTGCAGGTCCGCTGGCATGAACCGGCAAAAACGGCTCA
ACAAAGTAACATTCCGGTGACCGTTGAACGCCAGTTGTATCGGCTTATCCCCGGTGAAGA
AGAGATGAGCTTTACTCTGCAGCCGGTGACCAGCAATGAGATTGACAGCGATGTGCTGTA
TCTCGATGAAATTACGCTTACCAGCGAGCAGGATGCAGTTCTGCGCTATGGTCAGGTGGA
AGTACCGCTCCCGCCGGGAGCCGACGTTGAGCGCACAACATGGGGCATTTCAGTCAATAA
ACCCAACGCCGCGAAACAGCAGGGGCAATTGCTGGAAAAAGCGCGTAATGAAATGGGCGA
ACTGGCCTATATGGTGCCGGTGAAAGAACTGACGGGAACGGTCACTTTCCGCCATTTGCT
GCGCTTCTCGCAAAAAGGGCAATTCGTTCTGCCTCCTGCTCGTTATGTGCGTTCCTATGC
ACCTGCGCAGCAAAGTGTTGCGGCAGGGAGCGAATGGCCCGGGATGCAGGTGAAATAAGT
GAACTGGCGCAGAATCGTCTGGCTATTGGCGTTGGTTACTCTGCCAACGCTTGCGGAGGA
GACGCCGTTACAACTGGCACTGCGTGGTGCGCAGCACGATCAACTGTATCAGCTGTCGTC
ATCAGGCGTGACCAAAGCCTCGACATTACCTGACTCGCTCACCACGCCGTTAGGGAGTTT
GTGGAAACTGTATGTTTACGCCTGGCTGGAGGATACCCATCAACCGGAGCAGCCCTACCA
GTGTCGCGGAAACTCCCCGGAAGAGGTTTATTGTTGTCAGGCTGGGGAGAGCATAACGCG
CGATACCGCGCTGGTACGTTCCTGTGGGCTCTATTTTGCGCCGCAGCGGTTGCATATTGG
CGCAGATGTGTGGGGGCAATACTGGCAACAGCGTCAGGCACCTGCGTGGTTAGCGTCTCT
TACTACGCTGAAGCCAGAAACCTCGGTAACGGTTAAATCGCTGCTTGATTCATTAGCGAC
GTTACCTGCGCAAAACAAAGCTCAGGAAGTCTTACTGGAAGTGGTGCTGGACGAGGCGAA
AATCGGTGTCGCATCCATGCTCGGTAGTCGGGTTCGGGTGAAAACCTGGAGCTGGTTTGC
CGATGATAAACAGGAAATCCGTCAGGGTGGTTTTGCCGGCTGGTTAACCGATGGTACACC
GCTGTGGGTTACTGGCAGTGGCACCAGCAAAACGGTACTGACCCGTTATGCGACGGTGCT
TAATCGGGTTTTGCCAGTGCCGACACAAGTTGCCAGTGGGCAATGTGTAGAGGTGGAGCT
ATTTGCCCGCTATCCGCTGAAGAAAATCACAGCGGAAAAGAGTACGACGTCAGTAAAACC
CGGCGTACTTAATGGGCGCTATCGTGTGACATTTGCCAATGGTAACCACATTACGTTTGT
CAGCCACGGTGAGACGACCTTACTGACCGAAAAGGGCAAACTGAAATTGCAGTCGTATCT
CGATCGTGAAGAGTACGTTGCCAGAGTTCTGGATCGCGAGGCGAAAAGTACGCCACCTGA
GGCAGCGAAAGCCATGACCGTGGCGATACGCACTTTTTTACAGCAAAACGCCAATCGGGA
AGGCGATTGCCTGACCATCCCCGACAGCAGCGCCACGCAGCGTGTTTCTGCTTCGCCAGC
GACCACGGGGGCGCGAACGATGACCGCCTGGACGCAGGATCTCATCTATGCGGGCGATCC
GGTTCATTATCACGGCAGTCGCGCTACCGAAGGGACGCTTTCCTGGCGGCAAGCCATGGC
CCAGGCCGGGCAGGGAGAGCGTTACGACCAGATACTCGCGTTTGCTTATCCCGACAACAG
CCTTAGCCGCTGGGGAGCGCCACGCTCAACCTGTCAGTTATTACCCAAAGCGAAAGCCTG
GCTGGCGAAAAAAATGCCGCAGTGGCGGCGTATATTAGAAGGCGAGACGGGGTACAACGA
ACCAGACGTGTTTGCGGTCTGTCGTTTAGTCTCAGGTTTCCCCTATACCGATCGGCAGCA
GAAACGGCTGTTTATTCGTAACTTCTTTACGCTTCAGGATCGGCTGGATTTAACCCATGA
GTATCTGCACCTGGCCTTTGATGGTTATCCCACCGGGCTTGATGAGAACTATATCGAAAC
GCTGACCCGACAATTATTAATGGACTAATGCTATGCGAAAGATTTTTCTTCCGTTGTTAC
TGGTGGCACTTTCGCCTGTCGCTCACAGTGAAGGTGTGCAGGAAGTCGAGATTGACGCAC
CGCTCTCTGGCTGGCATCCGGCAGAGGGCGAAGATGCCAGTTTTTCACAATCGATCAATT
ACCCGGCGTCGTCCGTCAACATGGCAGATGATCAAAATATCTCAGCGCAGATCCGCGGCA
AAATAAAGAATTATGCTGCGGCGGGTAAAGTTCAGCAGGGCCGGCTGGTGGTCAACGGTG
CCAGTATGCCGCAGAGAGTTGAATCCGATGGTTCATTTGCACGCCCTTATATTTTCACTG
AAGGCAGCAACAGCGTGCAGGTCATCAGCCCGGATGGGCAAAGCCGACAAAAAATGCAGT
TTTACTCAACGCCGGGTACAGGAACGATTCGTGCACGTTTACGGCTGGTTCTCTCGTGGG
ATACGGACAATACCGATCTCGATCTCCATGTTGTCACGCCCGATGGAGAACACGCCTGGT
ACGGTAACACCGTGCTGAAAAACAGTGGTGCACTGGATATGGATGTCACGACGGGGTATG
GACCCGAGATTTTCGCCATGCCAGCACCAGTTCACGGGCGCTATCAGGTGTATATCAACT
ACTATGGTGGGCGCAGCGAAACGGAATTGACGACCGCCCAACTGACGCTGATTACCGATG
AAGGATCGGTCAATGAGAAACAGGAAACATTTATTGTACCGATGCGTAATGCTGGCGAGC
TGACGCTGGTGAAAAGTTTTGACTGGTGATTAATGGGGTTACCTTCGCCGTCGATGTTCA
AGAAAACACCCGATAACTTTCGCTATCGGGTGTTTTTATTGATTAATTCAACCGTTCAAT
CACCATCGCAATTCCCTGGCCGCCACCAATGCACAGTGTTGCCAGCCCCAGCGTTTTATC
GCGTGCCTGCATGGCATGTAATAGTGTGACCAGAATACGAGCACCACTGGCACCGATAGG
ATGCCCGAGCGCGATGGCCCCGCCGTTGACATTCACTTTCTCAGAATCAAAGCCCAGGGT
TTTCCCAACGGCAAGGAACTGTGCAGCAAATGCTTCATTAGCCTCAATGAGATCAATATC
CGCCAGTTGCAGCCCCGCCAGTTGTAACGCTTTTTGCGTGGCAGGTACTGGACCCATACC
CATCAATGCGGGGGGCACGCCACCGCTGGCATAACTTTTAATGCGAGCCAGGGGGGTAAG
GCCTGCTGCCAGCGCCGCAGATTCTTCCATAATCACCAGAGCGGCAGCACCGTCGTTAAT
ACCAGACGCGTTCCCGGCGGTGACTGTTCCTGCTTTATCGAAGGCCGGGCGCAATGCGCC
TAACGCTTCAGTCGTAGAATCCGCTTTCGGGAATTCGTCTTGACTGAAGACGAAGGTTTT
CTTCCGAGTGACAACATTTACCGGGACGATTTCGGCTGTAAAAGCACCGGACTCAATTGC
GGCTGCCGCTTTACGCTGTGAATGCAGCGCCAGTTCATCCTGCATTTCTCGGGTAATTCC
GTACTCTTTGGCCACGTTCTCGGCGGTAATCCCCATATGATAACCATGGGTGGCGCACAT
CAGACCATCGCGCAGGATTACGTCATAAACCTGTCCGTCTCCAAGACGATAACCAGAGCG
TGCTTTTGCATCGAGTAAGTAGGGCGCTAAACTCATATTTTCCATACCCCCCGCCACAAT
GCTTTGCGCCTGACCTGCCTGAATTGCCTGGGCGGCAAGCGCCACACTTTTAAGACCCGA
ACCACACACTTTATTGACCGTGAATCCGCACACCGTTTCTGCCAGCCCGCTTTTTAACAG
TGCCTGACGTGCCGGATTTTGCCCCAACCCGGCTTGCAACACGTTACCCATAATCACTTC
ATCAATGTGTAGTGAATCGATTTTTGCACGTTCAATGGCGGCTTTAATTACTGTCGCCCC
CAGGTCGATGGCGCTGGTGGAAGCGAGTGAACCGTTAAAACTACCGATAGCAGTACGTAC
CGCACTGACGATGACACAATTTTTCATTTTTTATTCCTTCTGTCTGTAGGGGTGCCGTCA
GAACAGCGTTAAACCAATGACGAAAATGACGCCGGAGAAGAGCAGGGCAGTGATGCAATA
GCCCATGATGTCGCGGACACCGAGTCCGGCGATTGCCAGTGCTGGCAGCGCCCAGAATGG
TTGTGCCATGTTCATCCATTGCTCGCCGTAGGCGATCGCCATTACCGATTTACCGAGATC
AGCGCCCAGCGCCTGGGCTGCGGGTATCACGAAAGGTCCCTGAATAACCCAGTGACCGCC
GCCAGACGGAACGGCGAAGTTAATCAGTGCAGAACTAAAAAAGGTCATTACCGGGAAGGT
GTCTTTGTTCGCAACATTGATGAAGAATTCGGTAATGAGTCCGCCCAGACCGGAATGCTC
CATCATCAGTTGGATCCCAGCGTAGAAGGGGAATTGCACCAGAATACCGGCGGTACTGCG
TGCTGCCGCGCTGATAGCACGCATATAAGCCATTGGCGTTTTATGTAGCAGCAGACCCGC
AATCATAAACATCAGGTTGACGGTATTGATGGTGATGTTGAAGCCATGTTCGCTGAAGTA
CATCGCCAGGTAAGCGATACCGAGTGCGCCGATGATCAACGTCAGAATGCGGCTTTCTTC
CAGTCGCTCGGACGGTGGAGCATCTTTCGGTAGCTGCTTTTGAAAATCAGCCTCTTCCAT
GAGTAGTTTTGGATCGATACTCACCACGTCAGACGGTTTTGGCATCATCATGCGGGTGAT
AAATGGCATCACCACAATCAACGCCACAGTGATGAAAATGTTAAAACCACTGAACAGAGT
ATCGCCCACCGGGATCAGCCCGGCGATATGCTCAACCGGGTTGCCCGGTGTTGCAGCCAA
CAGAGGCATTGATCCAGAGAAGCCGCCACCCCAGGTGAGAAAACCAATGTAGGCGCAGGC
AATGAGCAACGGATAATCAGAACCGGGGACTCGCCGGGCGACTTCACGGGCAAACATTGC
GCCGACAACCAAACCAAATCCCCAGTTGATGACACAAGCGACTGAACCGAAGAAAGTGAC
CAGCATGACGCCCTGTACGGGCGTCTTTGCGGCGGAGGCGGCAGTACGCAGCAAACTTTT
CACCGGAGCAGAGCTGGCAAGGGCATGACCGGTAACGATGATAAGCGCCATCTGCATACC
AAACGCCAGCAAGTTCCAGAAACCGTCACCCCACATTTTCACCATGCTGATCGGCGTTTG
TGGTGTTAACCAAAGCGCGATCACGAATGTTAGCAATGTCAGCAACATGGCAAAGATCAG
TGGATCGGGAAGCCACCGGCTGACAAAACGCGTCATAAAACGCGATATGCGACCAATCAT
AAATCACCCCGTTGCGTATTCAGATCGGCGGCGACTTCAAACCGAGCTTCTGTTTTGGCA
CGCACGGTAGCTAAATCACACCCGTCGGCAATTTCGGTGAGCCACATTTTGCCGTCAATA
AAACGAAAGACAGCCAGTTCAGTAACCAGCATATGCACCGCATGTTGCGCAGTGAGTGGC
ATGGTGCAGCGGCGCAAAATTTTTGCTGAACCATCTTTGGCGCAATGTTCCATGGCGATG
ATCACTTTGCGCGACCCGGTCACCAGATCCATCGCGCCACCCATACCGGGCACCATTTTC
CCAGGCACTACCCAGTTCGCGAGGTTTGCTTCTTCGTCTACTTGCAAACCGCCGAGCACG
CAGGCATCAATATGACCGCCGCGGATTAGCGCAAATGACATGGCGCTATCAAACATGGCT
GCACCGGGTAAAATACCGCACGGTTGTCCGCCAGCGTTCACCAGATCTGGATGCGCTGTC
GTGACCGGGCCTAAACCGAGGAAGCCGTTTTCCGATTGCAGAGTGATATGAATACCCTCC
GGTAAATAATTGGCGACCATTGTGGGTAAACCGATCCCTAAGTTAACGATGTCACCATCA
CGAAGCTCTTGCGCCACACGGCGCGCAATACGTTGTTTCGCATCCATTATTTGCTCTCCT
GTGAAACGATGATGTGGTCGATAACGGCACCAGGGGTGACAATATGGTCAGGTTGCAGCT
CGCCGGTTTCGACAAGTTCATCTGGCTCTACCAGCGTGATATCAGCCGCAAGGGCTATCA
GGGGGTTAAAGTTGCGGGCGCTAAGTTGATAGGTCAGGTTGCCAAGTGTGTCGCAACGAT
GAGCGCGAATTAGCGCCAGGTCGGCGCGCAGTGGGCGTTCGAGCAGCCAGGTTTTACCGT
CGAGTGTCAGTGTCTGTTTGCCTTCCTCTACGACGGTGCCGACACCCGTTGGGGTGAGAA
AACCACCAAGTCCAGCTCCACCACAGCGAATTTGCTCGATTAGCGTACCTTGCGGCACCA
GAACGACGTCCATCTCACCAGATATCATGCGCCGACCTGTTTCCGGGTTGGTGCCGATAT
GTGAAGCAATCACTTTGCGGACTCGACCATTGACGATGAGCGGACCGATGCCGGTATCAA
CAAACGCGGTATCATTGGCTATCAATGTCAGGTCGCGAACACCAGATTCCAGTAATGCTT
CAACCAGGCGGGATGGAGTGCCAATCCCCATAAATCCGCCCACCATGATGGTCATGCCGT
CACGAAAGAAGCCGGTGGCGTCTTGTAATGTCATCAATTTTGTTTTCATTTTTTATCCCT
CTTGCATACACCGTTGTGGGTACAGTCAGGGAATAGCAAGGGGAGTGCCAGAATGAGATT
ATTGGATGTTTTTATTTAACTAATTGAATAGAAAAGGATAAATTAGATGGGGATTCATAA
GGAGAATGAGCTGCTATGCAGAAAATTGCGCACTGTGCAAATTTCTGCATAGCAAGTTTT
GGTGTTATACATCCGCCGGATCGATACCGTATTCCTGGAGTTTATACATCAATGCACGGC
GACTGATGCCCAGCATTAAAGCAGTGCGGGTTCGGTTTCCTTCTTGTTGTTCCAGCACTT
CCATAATGATGCGTTTTTCGACGCGTTTAATTTCCTCTTTTAAATTACGCTCTCCGACAG
GGGCTGTTTTTACCTCGCCAGCATTACAGACTGGCTGACGAATCTGCGGCGGAAGATCCT
CAGAAAAAATGATCGGGCCTGAATTCATCACGACGGCGCGTTCAATAACGTTGGAAAGCT
CTCGAATATTTCCCGGCCATGACCAGGCGGTAAGCAGTGACATTGCCATCGGATCGATGT
CGATAATATCGCGCTGATTCTCACTACTGAATTTTTGCAAAAAGTGATTAGCTAACAGGG
AAATATCTTCCCGGCGATCGCGCAGAGGCGGCAGTATTAAATGAATAACGTTAAGGCGAT
AAAAGAGATCTTCACGGAAGGTGCCTTCTTTTACCATTGCCTGCAAGTCGCGGTTGGTGG
CAGCAATGATGCGGATATCAACTTTTATGGTCTGATGGCCGCCAATCCGTTCAAATTCCC
GTTCCTGCAGAATGCGTAGTAATTTGGCTTGCAGTACCAGCGGCATTTCGCCAATTTCGT
CGAGGAGCAGAGTACCTTCGTTGGCACGTTCAAATAATCCCTGACGCAAGGTTTGTGCAC
CAGTAAATGCACCTTTTTCATGACCAAACAGTTCACTTTCGAGCAACGATTCCGGCAGCG
CCGCGCAGTTGACTTTAATGAACGGCCCCTTTGCCCGCCGCGAATTGTAGTGAATCGCTC
TGGCAATCAACTCTTTCCCGGTGCCGCTTTCACCGCTAATCAAGACGCTGGCCTGAGAAA
GGGCAATTTTGGCGGTGTCTTTGCAGATATCCATCATCGCCGGGCTGTTGGTGAGAATGT
GCCCCCATTGCCAGCTGGTGCTCAGTGCCTGGTGCAGATGACGGATCTCTTTTTTCATTG
ACTGGAGTTGTAAAGCGCGCTGAACGATTAAATTCAACTCATCGAGATCAAACGGTTTAA
TAACATAGTCGAAGGCCCCGCAGCGTAGCGCTTCGACGGCGGTTTCCACTTCAGCATAGG
CCGTCATCAGAATAACGGGTGTCCGGGTCTCATTACTGCGCATCTCCTTTAGTGCCTTGA
TGCCGTCCATCTCTGGCATGCGGATATCCATCAACACCACGTCAGGGTGAATATCAGCAA
ACAGGTGTAATGCTGTGCGTCCGTTGTTCGCACAATGTGTTTCGAAACCTTGTAGTGCAA
AAGCGGTGCTCAGCATACGGCGAACATTATCTTCATCATCCACAATAAGGATGCGATTAA
TAGCAGTCATACAGTCTGATTTCCCTGCGGGTTGATTGGTAAAATAAGCGTGAAGGTTGC
GCCGTAGCCCGGCAAACTGGCGACGCGAATATCACCCTGATGGGCATTAATGATGCGTTG
ACTTAACGCCAGACCAAGCCCGGTTCCTGAGGCTTTGGTGGTGAAAAAGGGATCGAAGAT
CTTTTTTTGCAGCGAGAGATCAATGCCACAGCCGTTGTCCTCTATCGAAATGGCCTGTTG
TGAGTCGCTGTATTGCCAGGTTTGAATGCGAATTTTCCCTCGTGCGCTGATAGCCTGGAC
GGCATTGATCAGGATATTCAGTAGTACCTGTTTGAGCAGTTCACGATCGGCGTTAATCGG
GTTTAATTCATTATCCAGTTCGCTTATGAAGTCGACCCGCGCTTGTACGCCGGCGGTTTG
TACCAGTACCAGAGTTTCTTCAACCAATGCATTGAGACTGACTTGTTGCCATTGACTGTG
GCGTGGACGTGAAAATTCGAGCAATTGCTGAATAACTTTGTTAATTGAATCGATTTCTTT
GAGTACTACGGACAGATATTCCTGATGTATTAGGTCGCTGGTTTGTTGGCGCAAGATCTG
TACATAACCACGAATAGCCGTTAGCGGATTACGTACTTCATGCGCGACGCCAGCCATCAG
CTCACCCAGTGTGGCGAGGCGTTCTGCTTGCGCCATGCGGCGCTGGGTTTCTTTGCGGGC
AGTTAAATCAGAGAAAATAACCAAAGCACCTATCATTTCACCATGCGTGTTATGAATACG
ACTGGTAGTGACACTGAGTTCAATGGTGCGGTCACGGCCTGGAAAACTGATCTCCAGCGC
TACATGTTCGGTGCCATGTTCCAGCGTATCCAGTACTGGACTGTAGAACTGAGTATTGTC
GAACAACATGGAGTAAGGCTGCCCTACCAGTTCATGACGTTGATAGCCAGTGATGACTTC
TGCTGCCGGGTTCATGGTGGTTACATCACCCTGGCGGTCAATGGCAATGACGCCATCGGC
AGCGTTTTCAATAATCAGATCGTTAAGTGTCCGCGTTTCACGCAGTGCCTGGGCGAGGTT
GTTAACACTCTGACTGATTTGCCCCATTTCACCGGGCAATTGTGGTAATCGAGTGGGAAT
ATTTTGTGCCAGAGTCGAGAGGCCATCGGTGATGATATCAATATTGGCGCTCAGGCGACG
GGAGAAAAGGACAATCAACAGCAGGCTTATCAGCAAACCGGCGGTGAGCACAATGATAAT
CCTCACATCCATTTTCCAGGCCTGGCGGCGAATATCTTCGGTTAATTCATTGGCCCAGAT
ATAGCCGAGAATTTCACCATTACGCTCAATGGGGATCATTGAATTCAAAATATCGCCGCG
CACCTGCCTGCCTGAATAAACCAAAGGGGTATTTGTACGCATGACTTCGCGACCAGGGTG
ATCTGCGGCAATGGTAACGCCCACATTATTCTGATATAGCGCTGAAGGCGCGTAGGTGAT
TATCGCATCCAGCGTTTTGTTGTAATAACCAGCGCCGATGCCAGGGAAGGCGTGAGTGAT
ATTTTCGGTAATGGGGGCAAGTTCTGCATTTAATGCGCGGATACGCTCCTCACGTGGTAA
GTCGATGTAGAGATCATAGCGATCGCCTAGTGCCTGATTAAGCAGGTTGACCACGGCAGA
AAGTTTTTTCTCTTTTTCAGATAAGACTGCTGAACGTCCTTCCGTTTCTACGATATAACC
AATAGTAAGCGTTGGGACAATGACCATCAGGATTGCCATCAGGATCATTTGATTGCGTAA
GCGGCGTGGATAAATCCACTTCATATAATGCATGCTGAAATCCACTAGTCTTGTCCGGTA
TATGACGATTATCAGAGGTTAAGGTGATGATTTCTCGGCGGTGTATCATATTCCAGAGAA
GAGAGAACATTGCGGTAACACGCTTTTACCGCTACCTTAACCACACTCCATCGGTCACCT
GAGGCGGAGCTTCGCCCCTTTGAAATACCTTGCTTCTTTTCGTACAACCCTGAAAGCCTC
GCGCTACATGTTCAGAGCATTGGCGTTAGTGCTCTGGCTGTTGATTGCTTTTTCATCCGT
TTTTTACATCGTTAATGCGTTACATCAGCGAGAATCGGAAATTCGTCAGGAATTTAATCT
GAGTTCCGATCAGGCTCAGCGCTTTATTCAACGCACCTCTGATGTGATGAAAGAGCTGAA
GTACATCGCTGAAAATCGCTTATCGGCAGAAAACGGTGTGCTTTCCCCGCGTGGACGAGA
AACGCAGGCGGATGTGCCTGCGTTTGAACCGCTGTTTGCCGACTCCGATTGTTCCGCAAT
GAGTAACACCTGGCGAGGTTCTCTGGAGTCATTGGCGTGGTTTATGCGCTACTGGCGCGA
TAATTTTTCTGCGGCTTACGATCTCAACCGGGTATTTTTAATCGGCAGCGATAACCTCTG
CATGGCCAATTTCGGTCTGCGTGATATGCCAGTGGAACGCGATACCGCGTTGAAAGCTTT
GCATGAACGCATCAATAAATATCGAAATGCACCACAAGATGATAGCGGCAGTAACCTCTA
CTGGATCAGCGAAGGTCCGCGCCCTGGCGTCGGGTATTTTTACGCGTTGACGCCAGTTTA
TCTGGCGAACCGGTTGCAGGCGCTTTTGGGTGTCGAGCAGACCATCCGGATGGAGAACTT
TTTCTTACCTGGTACGTTGCCGATGGGGGTTACCATTCTTGATGAAAATGGTCATACCCT
GATTTCGCTTACCGGACCAGAAAGTAAAATTAAGGGCGATCCTCGCTGGATGCAGGAACG
CTCCTGGTTTGGCTATACGGAAGGGTTCCGGGAGCTGGTGCTGAAGAAAAATCTGCCACC
CTCATCGCTAAGCATCGTGTATTCGGTGCCGGTTGATAAGGTGCTGGAACGCATTCGCAT
GTTGATCCTTAACGCAATTTTGCTGAATGTGCTTGCTGGAGCTGCATTGTTTACTCTCGC
GCGGATGTACGAGCGGCGTATTTTCATTCCGGCGGAAAGCGACGCCCTGAGACTGGAAGA
ACATGAGCAGTTTAACCGCAAGATTGTCGCCTCCGCGCCAGTGGGTATCTGTATTTTGCG
TACCGCAGATGGCGTCAATATTTTAAGTAACGAACTGGCGCATACCTATCTCAATATGCT
TACGCATGAGGACCGCCAACGGCTGACACAAATTATCTGTGGGCAGCAGGTCAATTTTGT
TGATGTCCTGACCAGCAACAATACCAATCTGCAAATCAGCTTCGTCCATTCGCGCTATCG
TAATGAAAACGTGGCCATTTGTGTGCTGGTGGATGTTTCTTCGCGCGTGAAGATGGAAGA
GTCGTTGCAGGAGATGGCACAAGCAGCGGAACAGGCGAGCCAGTCAAAATCGATGTTCCT
TGCCACCGTCAGTCATGAGCTGCGAACGCCGCTGTATGGCATTATCGGTAACCTGGATCT
GTTGCAAACCAAAGAGTTACCGAAAGGCGTCGATCGTCTGGTGACGGCAATGAACAACTC
TTCCAGCCTGTTGTTGAAAATTATCAGCGATATTCTCGATTTCTCGAAGATTGAATCGGA
ACAGTTGAAGATCGAACCGCGTGAGTTTTCACCGCGTGAAGTGATGAACCACATCACCGC
CAACTATTTACCGCTGGTGGTACGCAAGCAGTTAGGCTTGTACTGCTTTATTGAACCGGA
TGTGCCAGTGGCCTTAAATGGCGACCCGATGCGTTTACAGCAGGTCATCTCCAATCTGTT
GAGTAACGCCATAAAATTCACCGATACCGGCTGTATAGTTTTGCATGTTCGCGCTGATGG
CGATTATCTCTCTATCCGTGTTCGCGATACCGGCGTGGGGATTCCGGCGAAAGAAGTGGT
GCGCTTGTTTGATCCCTTCTTCCAGGTCGGAACGGGCGTACAGCGAAACTTCCAGGGGAC
CGGTCTGGGTCTGGCGATTTGTGAAAAACTGATCAGCATGATGGACGGCGATATCTCGGT
AGATTCAGAACCGGGAATGGGCAGCCAGTTTACCGTGCGTATTCCGTTGTACGGCGCTCA
GTACCCGCAGAAAAAAGGCGTGGAAGGGTTGAGTGGTAAACGCTGCTGGCTGGCGGTCCG
CAATGCGTCGCTCTGTCAGTTCCTGGAAACCAGTTTGCAGCGCAGCGGCATCGTCGTAAC
AACATACGAAGGGCAGGAACCGACTCCCGAAGATGTGTTAATCACTGACGAGGTAGTGAG
TAAAAAATGGCAGGGCAGAGCGGTAGTGACCTTCTGTCGTCGACATATTGGTATTCCGCT
GGAGAAAGCGCCAGGGGAGTGGGTACACAGTGTGGCTGCCCCGCATGAGCTACCGGCATT
GTTGGCGCGTATTTATTTGATCGAGATGGAGAGCGACGATCCTGCTAACGCTCTGCCGTC
GACGGACAAAGCGGTCAGCGATAATGACGATATGATGATTCTGGTCGTGGATGATCATCC
GATTAACCGACGTCTGCTGGCAGATCAGTTGGGATCGTTGGGCTATCAATGTAAAACCGC
GAATGATGGCGTCGATGCGCTTAATGTACTTAGCAAGAATCATATTGATATCGTGCTTAG
CGACGTCAACATGCCAAATATGGATGGTTACCGCTTGACGCAACGCATTCGTCAGTTGGG
ACTGACGTTGCCGGTAATCGGAGTAACTGCTAATGCGTTGGCTGAAGAGAAGCAGCGGTG
TCTGGAGTCCGGTATGGACAGCTGCCTGTCGAAGCCGGTAACGCTGGATGTAATAAAACA
GACGCTGACGGTATATGCCGAGAGGGTCAGGAAATCGCGGGAATCGTAGGACGGATAAGG
CGTTTACGCCGCATCTGGCATTCAGTGCAAATGCCAGATGCGACGCTGACGCCTCTTATC
TGGCCTACTTTAATGTAATCTGTTGAAATAATGGGAATCGTAGGCCGGATAAGGCGTTTA
CGCCGCATCCGGCAATCGGTGCAAATGCCAGATAAGACACTAACGCGTCTTATCTGGCCT
ACAGATGATTAGTCTTTATCTGCCGGACTTAAGGTCACAGAAGAGAGATAATTCAGCAGG
GCGATATCGTTCTCGACACCCAGCTTCATCATCGCAGATTTCTTCTGGCTACTGATGGTT
TTAATACTGCGGTTCAGCTTTTTAGCGATCTCGGTCACCAGGAAGCCTTCCGCAAACAGG
CGCAGAACTTCACTCTCTTTTGGCGAGAGACGCTTGTCACCGTAACCACCAGCACTGATT
TTTTCCAACAGGCGAGAAACGCTTTCCGGGGTAAATTTCTTCCCTTTCTGCAGCGCGGCG
AGAGCTTTCGGCAGATCGGTCGGTGCACCTTGTTTCAGCACGATCCCTTCGATATCCAGA
TCCAATACCGCACTAAGAATCGCCGGGTTGTTGTTCATAGTCAGAACAATGATCGACAGG
CTTGGGAAATGGCGCTTGATGTACTTGATTAAGGTAATGCCATCGCCGTACTTATCGCCA
GGCATGGAGAGATCGGTAATCAACACATGCGCATCCAGTTTCGGCAGGTTGTTGATCAGT
GCTGTAGAGTCTTCAAATTCGCCGACAACATTCACCCACTCAATTTGCTCAAGTGATTTG
CGAATACCGAACAAGACTATCGGATGGTCATCGGCAATAATTACGTTCATATTGTTCATG
TAATAGGCTACCTTGCTACAGCAAGCTCTTGACATAACTGTCAATGTCGCTGATGTATTT
TTCTATTCCTGGAACATCCTTCTCACGAATCAGATGTTCCAGCGTTTCACATAACTGCTT
GCCGGGTACCAGATTTAGCATGGCAAATACGCCTTTAAGACGATGAGCCGTTTGGGCTAA
CGCAGCAAAGTCACTGGTTGCTGCTTCAGTATACAGCCTCTTAACATCATCCGGTACTGT
GTCTACAAAGAGCGCATAATAGCCGCTGGCATGGAGTTGCGCATTTTCATCTCCGCCCAG
AGGCGATTCTGTCACCTCTTCCTGCGCCAGTTGCACTTCAATTAATTGTAAGACCGCTTC
CTGCATAGCGTTGCTCATATTGAAGTTGACGCACAATTGACCAGGCCCAATTTCCCGTAC
GCCAGACTCATCATCGCTTAAAAGCAAGCCAGAGGCAGTAAGATTAGACGGATTATCCGT
TAAAAAGATATCATAATCTTGACTAATTAATCTTTCATCGGGTGTGATACAGGTTGCACC
CCAATTTTCTAACTGGCGAGTGACAATATTCCGAATTTCTGCCGAAGTAACATCCACCAT
TACGCAGACATCATCCAGTAAACGCTCTTCTTCCTCTTCAACTTCCGGGTCAGCTGCGAG
CATTTTGATATGCACAGAGTAGCGTGTACCAAGCCCATCCCGCGTTTTGATGTTTAAATG
ACCGCCCAGTTTACGTGCCAGTTGATCGCTCAGCCAGAATGCCAGCGGGTCCGCCTTGCC
ATAGCGATCGTTTTGGGTCTGGTTGATAAACGGGAAGTGCAAATTATCCATTTCATGAAT
GCTTACGCCTTCTCCGGTGTCCAGAATGCGGAACGTCAGGCGGTCTTCGGAGGACTCATC
CTGATCAACCTCAAGGGTGATTTTTCCCAATTGCGTTGAGGTCACGGCATATTGCATCAG
TAGCAGCAAAATACGTCGTAAGGCATCGCGATCGCCACGGCGCATATCGTGTGCTTTCAG
ATGATTGTTAATCAGCAGTTGCAGACCTTTACGCTTGATGGCAGGCAACACTGAAGGCAC
AACTTCATCAATTAAATCCTGCACGGAGAACAGCACCGTCTCACTTTTCCAGCTATCGTC
CGCAAGCATGTTCGCTAACTGTATTTCATCGACCAGCCGCACCAGCACATCTGCCTGATT
CGCCAGTTGTTTGCTTTCCGGGGCGTTGAGTTTAGCCGCGCTCTCCGCCAGGGACTGTGC
AGGTTCTTTCAGCGCATCGCCAATGTTTTTCATAAAGGTCATCCGCCCCTGCTGGTTTTT
CTCATACAGACGCTGCGCCTGCTTGAGTTTCTTGTTTACCAGCACTTCGCGATCCTGATC
GCGAATAATGAAAATTTGTGTGCGCGGCGCGACCTGGCTGCGGAACATGCGGATCTCATA
CAGCTCGTTATTGATCGTCGCCTGAATAATCCCCTGATGCTGTTCCGCCATGGTGGTGAT
GTTTTGCAGATTCAAATGCGGCAGCAAATGATCGGCAATTTTGTTACTTATGACAGTGCG
GTTCGATTCCTGATCGTGAACCAGCAGGCCGAGCGGCAGCAGTGAGACTATCTCTTCATT
GATTGCCCGTAAAATGCGCAATTCGTTATTGACCGCCGTGTTGGGTAGACTTTCTGTACT
GCGACTGGAGAAATGGCGAAATGTGGTATAGCCAAATAACGCCAGCGCCAGCAAACCGAT
GTTCAGCAGCAGTGGCAGCAGAATGTTTTGCAACGTATCCAGCAATAAGGTGCCATAAGG
AACCTGCCAGACCAGGCGCATATCAGTAGAGTTGAGTGCCGAGGAGATTTCAATCTTCGT
ACTGTTAAAGTGGATACTGACGCTATCCGTCCCTTCTTTCTCATTATCATTGTTTCCCGT
TGCCGTCGCGTCTGGCTCAAGGCGGAAACTGTCCAGCGGCATACCCGGTGGGATCAAATC
ATTAATCGGCAGATCAAAAGCCACGACCGTTGCCAGATGTCCTGGCTGGTTAAAGGTAGT
ACGCAAGGTAAAGTAATGACCGTTCTGCCAGGCCAGGCGGCGCATGTTAGAAAAACTTTC
GCGTTCATCGAGGGCGTTGGCCTGTTGCAACATCTCTGCACGACGTGAATCAACAATGTC
ACTGACGGTCGATTCTTTAAATCCGGAGGTGAGATCTTTGAGGGGCAGGGTTGAGATCAG
TACCAGACTGTTATCCTGACCATTCAGGTAATACATTGACCACGGTACATTTTCTGCGCC
CCACAATGTATCCAGATAAGTGGACATCCGTTGAGTCATCTCAAGCGTTGAGTTGTCGTG
AGAGCCAAAGATTAACGCTTCCGTTTTGCGGCGCGGTTTTTCCAGATAGTAGACATCCTG
TTTCAGGCGCGTCTCTTGTAAACCTTCGCCGGAGGAGGGGGAGGTCGTCGCGGCAATGTT
GTCGTAGATCTGCCAGGTCACGTAACGCCAGGTATCGACGCGCTTTTGGATTGCGTGGGT
AATGTCGACAATCTGGTAACTTTTATCTTTCAGCCAGGCGTTAACGGCGCTTTGTACCAT
TACACCCATCGTCACCAGTAACACAATGATCAACAGTAAAAAGAAGCGGGTAATGCTCCC
GGGTAGGAGTGAAAAGCGGGTCGTGGCCGTTGTCTCTTTCTGACGCATTCGTGTTTATGA
CCTGTTAAAACTTCGCGAAGTGATAGGGCAGTATAAAGGGTACAGTGTGAAATTCCAGAC
TCTTACCTGATTGATGATTCTCTATTCTCCTGTGATATTTATCATCCTGTATGGGGGGAA
ATAGATGTACAAGCGCCATTTTGCTGTACAAATAACCTACGAAAAGCCCAACGAAATTAA
TTGCAAATAAACGAAAATTGCTGGAAATTATGCTGATGTTAATTATTTGTGAAATAGTTA
ACAAGCGTTATAGTTTTTCTCTGGTAGCACAGAATAATGAAAAGTGTGTAAAGAAGGGTA
AAAAAAACCGGATGCGAGGCATCCGGTTGAAATAGGGGTAAACAGACATTCAGAAATGAA
TGACGGTAATAAATAAAGTTAATGATGATAGCGGGAGTTATTCTAGTTGCGAGTGAAGGT
TTTGTTTTGACATTCAGTGCTGTCAAATACTTAAGAATAAGTTATTGATTTTAACCTTGA
ATTATTATTGCTTGATGTTAGGTGCTTATTTCGCCATTCCGCAATAATCTTAAAAAGTTC
CCTTGCATTTACATTTTGAAACATCTATAGCGATAAATGAAACATCTTAAAAGTTTTAGT
ATCATATTCGTGTTGGATTATTCTGCATTTTTGGGGAGAATGGACTTGCCGACTGATTAA
TGAGGGTTAATCAGTATGCAGTGGCATAAAAAAGCAAATAAAGGCATATAACAGAGGGTT
AATAACATGAAAGTTAAAGTACTGTCCCTCCTGGTCCCAGCTCTGCTGGTAGCAGGCGCA
GCAAACGCTGCTGAAGTTTACAACAAAGACGGCAACAAATTAGATCTGTACGGTAAAGTA
GACGGCCTGCACTATTTCTCTGACAACAAGTCAGAAGACGGCGACCAGACCTATGTACGT
CTTGGTTTCAAAGGCGAAACTCAGGTTACTGACCAGCTGACCGGTTACGGCCAGTGGGAA
TATCAGATCCAGGGCAATACCTCTGAAGACAACAAAGAAAACTCCTGGACCCGTGTGGCA
TTCGCAGGTCTGAAATTCCAGGATGTTGGTTCTTTCGACTACGGTCGTAACTACGGCGTT
GTTTACGACGTAACTTCCTGGACCGACGTACTGCCAGAATTCGGTGGTGACACTTACGGT
TCTGACAACTTCATGCAGCAGCGTGGTAACGGCTTCGCGACCTACCGTAACACTGACTTC
TTCGGGCTGGTTGATGGCCTGAACTTTGCTGTTCAGTACCAGGGCAAAAATGGTAGCGTA
AGCGGCGAAGGCATGACCAACAATGGTCGTGGTGCTCTGCGTCAGAATGGCGACGGTGTC
GGCGGATCTATCACTTATGATTACGAAGGCTTCGGTATCGGTGCTGCAGTTTCCAGCTCC
AAACGTACTGATGCTCAGAACACCGCTGCTTACATCGGTAACGGCGACCGTGCTGAAACC
TACACTGGTGGTCTGAAATACGATGCTAACAACATCTACCTGGCTGCTCAGTACACCCAG
ACCTACAACGCAACTCGCGTAGGTTCCCTGGGTTGGGCGAACAAAGCACAGAACTTCGAA
GCTGTTGCTCAGTACCAGTTCGACTTCGGTCTGCGCCCGTCTGTAGCATACCTGCAGTCT
AAAGGTAAAAACCTGGGCACCATCGGTACTCGTAACTACGACGACGAAGATATCCTGAAA
TATGTTGATGTTGGTGCAACCTACTACTTCAACAAAAACATGTCCACCTACGTTGACTAC
AAAATCAACCTGCTGGACGACAACCAGTTCACTCGTGACGCTGGCATCAACACTGATAAC
ATCGTAGCTCTGGGTCTGGTTTACCAGTTCTAATCTCGATTGATATCGAACAAAGGGCCT
GCGGGCCCTTTTTTCATTGTTTTCAGCGTACAAACTCAGTTTTTTGGTGTACTCTTGCGA
CCGTTCGCATGAGGATAATCACGTATGGAAATAAGCTTTACCCGCTTGGCACTGCTGGCT
GCCGCGCTCTTCTTTGTTGGTTGCGATCAAAAACCACAACCCGCCAAAACCCACGCTACT
GAAGTTACCGTTCTTGAAGGCAAAACCATGGGTACCTTCTGGCGTGCCAGCATCCCGGGC
ATTGATGCCAAACGCAGTGCCGAACTTAAAGAAAAGATTCAGACCCAGCTGGACGCCGAC
GATCAGCTGCTTTCGACCTATAAAAAAGATTCCGCGCTGATGCGCTTTAACGACTCGCAA
AGTTTGTCGCCGTGGCCGGTAAGTGAAGCGATGGCCGATATCGTCACCACCTCGCTGCGC
ATTGGCGCAAGGACCGATGGTGCGATGGATATAACCGTCGGGCCGCTGGTGAATCTGTGG
GGCTTTGGCCCGGAACAACAGCCGGTTCAAATTCCGAGCCAGGAACAGATCGATGCGATG
AAAGCCAAAACCGGCTTACAGCACCTGACGGTCATTAATCAGTCGCATCAGCAATATCTG
CAAAAAGACCTGCCGGATTTATATGTCGATCTCTCCACCGTCGGTGAAGGTTATGCGGCG
GATCACCTGGCACGCTTGATGGAGCAGGAAGGGATTTCCCGCTATCTGGTGTCGGTGGGC
GGCGCGCTGAACAGCCGTGGTATGAACGGTGAAGGCCTGCCGTGGCGGGTAGCGATTCAA
AAACCAACCGATAAAGAAAACGCGGTTCAGGCTGTGGTGGATATCAACGGTCATGGGATT
AGCACCTCTGGCAGCTACCGTAACTATTACGAATTGGACGGCAAACGTCTTTCCCATGTT
ATCGATCCGCAAACCGGGCGTCCCATCGAACACAATCTGGTATCCGTGACGGTGATTGCT
CCGACGGCGCTGGAAGCCGATGCCTGGGATACTGGCTTGATGGTACTCGGGCCGGAGAAA
GCCAAAGAGGTTGTTCGCCGGGAAGGGCTGGCGGTTTATATGATCACCAAAGAAGGCGAT
AGCTTTAAAACCTGGATGTCACCACAGTTTAAAAGCTTCCTTGTCAGCGAAAAAAATTAA
AGCGCAAGATTGTTGGTTTTTGCGTGATGGTGACCGGGCAGACTAAAGGCTATCCTTAAC
CAGGGAGCTGATTATGAAAAACGCCACATGCTTAACTGACGATCAACGCTGGCAATCTGT
CTTAGCCCGCGACCCGAATGCCGACGGCGAATTCGTTTTCGCCGTGCGCACCACAGGCAT
CTTTTGCCGTCCGTCTTGCCGCGCCAGACATGCCTTGCGGGAAAATGTCTCCTTCTACGC
AAATGCCAGCGAGGCACTCGCCGCCGGATTTCGCCCCTGCAAACGCTGCCAACCTGATAA
AGCCAATGCCCAGCAACATCGGTTGGATAAAATCACCCACGCGTGTCGACTGCTGGAACA
GGAAACGCCTGTAACGTTGGAAGCCTTAGCTGACCAGGTGGCGATGAGTCCATTTCATCT
ACATCGGTTGTTTAAAGCGACTACCGGAATGACGCCTAAAGCCTGGCAACAGGCCTGGCG
CGCTCGCCGTTTGCGCGAATCGCTGGCGAAAGGGGAGAGCGTGACGACGTCTATTCTTAA
CGCCGGATTCCCCGACAGCAGCAGTTACTACCGCAAAGCTGACGAAACGCTGGGCATGAC
GGCTAAACAATTCCGTCACGGTGGCGAAAATCTGGCGGTGCGTTACGCGCTGGCTGATTG
TGAGCTGGGTCGTTGCCTGGTGGCAGAAAGCGAGCGGGGGATTTGCGCGATATTGCTGGG
CGATGATGACGCGACATTAATCAGCGAGTTGCAGCAGATGTTTCCCGCTGCCGACAACGC
GCCTGCCGATCTGATGTTTCAGCAACATGTGCGTGAAGTGATCGCCAGCCTCAATCAACG
CGATACGCCGCTGACGTTACCGCTGGATATTCGCGGCACTGCTTTTCAGCAACAAGTCTG
GCAGGCACTGCGCACGATACCTTGCGGTGAAACCGTCAGTTATCAGCAACTGGCTAACGC
CATCGGCAAACCGAAAGCGGTACGGGCCGTTGCAAGTGCCTGTGCCGCCAACAAGCTGGC
TATCGTTATACCCTGTCATCGGGTAGTACGCGGTGATGGATCGCTTTCAGGTTACCGCTG
GGGCGCGTCGCGCAAAGCGCAACTGCTGCGCCGCGAAGCTGAGAATGAGGAGAGGTAATG
TTGGATCTGTTTGCCGATGCTGAACCGTGGCAAGAGCCACTGGCGGCTGGTGCGGTAATT
TTACGGCGTTTTGCTTTTAATGCTGCGGAGCAACTGATCCGCGATATTAATGACGTTGCC
AGCCAGTCGCCGTTTCGCCAGATGGTCACCCCCGGGGGATATACCATGTCGGTGGCGATG
ACCAACTGTGGGCATCTGGGCTGGACGACCCATCGGCAAGGTTATCTCTATTCGCCCATT
GATCCGCAAACAAATAAACCGTGGCCCGCCATGCCGCAGAGTTTTCATAATTTATGTCAA
CGTGCGGCTACGGCGGCGGGCTATCCAGATTTCCAGCCAGATGCTTGTCTTATCAACCGC
TACGCTCCTGGCGCGAAACTGTCGCTGCATCAGGATAAAGACGAACCGGATCTGCGCGCG
CCAATTGTTTCTGTTTCTCTGGGCTTACCCGCTATTTTTCAATTTGGCGGCCTGAAACGA
AATGATCCGCTAAAACGATTGTTGTTGGAACATGGCGATGTGGTGGTATGGGGCGGTGAA
TCGCGGCTGTTTTATCACGGCATTCAACCGCTGAAAGCGGGGTTTCATCCACTCACCGGC
GACTGCCGTTACAACCTGACATTCCGTCAGGCAGGTAAAAAAGAATAAAAATAAGAATTA
TTATTGCTGTGCGCGCGAAGATGTTTAAACTGCGGGCTGTAATTCATTGTCCGGGTTTTC
TGCATGGAACTTCTTGTACTTGTCTGGCGGCAGTATCGCTGGCCATTTATCAGTGTGATG
GCGCTAAGCCTCGCCAGTGCGGCTTTAGGCATTGGCTTAATTGCTTTTATCAATCAGCGC
CTTATCGAAACGGCGGATACCAGTCTGCTGGTGTTGCCGGAGTTTCTGGGATTATTGCTG
CTGTTGATGGCAGTCACTCTCGGATCGCAACTGGCGCTCACCACTTTGGGGCATCACTTC
GTTTACCGACTGCGTAGTGAATTTATCAAGCGGATTCTGGATACCCACGTCGAGCGCATT
GAACAACTCGGTAGCGCCTCGTTGCTGGCGGGATTAACCAGCGATGTGCGCAATATCACC
ATTGCTTTTGTGCGTCTGCCGGAACTGGTGCAGGGGATCATTCTCACTATCGGTTCCGCG
GCGTATCTGTGGATGCTGTCGGGCAAAATGTTGCTGGTAACGGCTATCTGGATGGCAGTC
ACCATCTGGGGCGGTTTTGTGCTGGTGGCGCGGGTGTACAAACATATGGCGACCCTGCGT
GAAACCGAAGACAAGCTGTACACGGATTTTCAAACCGTACTCGAAGGGCGCAAAGAGCTG
ACTCTGAACCGGGAACGCGCCGAGTATGTGTTTAACAACCTCTACATTCCTGATGCGCAA
GAGTATCGCCATCATATTATTCGCGCAGACACCTTCCATCTTAGTGCCGTGAACTGGTCA
AACATCATGATGCTGGGCGCAATCGGTCTGGTGTTCTGGATGGCGAACAGTCTCGGTTGG
GCTGATACCAACGTTGCCGCGACCTATTCGTTGACGTTGTTATTCCTGCGTACGCCGCTG
CTTTCGGCGGTTGGCGCATTGCCGACGCTGCTGACGGCGCAGGTGGCGTTTAACAAGCTG
AACAAATTCGCGCTCGCGCCTTTCAAAGCAGAGTTTCCGCGCCCGCAGGCGTTTCCCAAC
TGGCAAACGCTGGAGCTGCGTAACGTGATGTTTGCTTATCAGGATAACGCGTTTTCCGTT
GGTCCGATTAATCTCACCATCAAACGTGGCGAGCTGCTGTTTCTGATTGGCGGCAACGGT
AGCGGAAAATCGACGCTGGCGATGTTGTTGACGGGCTTGTATCAGCCACAAAGCGGCGAA
ATCTTGCTGGATGGCAAACCTGTCAGCGGCGAACAACCGGAAGATTATCGCAAACTGTTT
TCGGCAGTGTTTACCGATGTCTGGCTGTTTGATCAACTGCTGGGGCCGGAGGGTAAACCC
GCTAACCCGCAACTGGTTGAGAAGTGGCTGGCGCAGCTGAAAATGGCTCATAAGCTTGAG
TTAAGCAACGGGCGTATTGTTAACCTGAAGTTATCAAAAGGGCAGAAAAAACGCGTGGCG
CTGTTGCTGGCGCTGGCAGAAGAACGCGATATTATCCTGCTGGATGAATGGGCGGCGGAT
CAGGATCCACACTTCCGTCGTGAGTTTTATCAGGTGTTGCTGCCGCTGATGCAGGAGATG
GGTAAAACTATTTTCGCCATCAGTCATGATGATCATTACTTTATCCACGCCGACCGCCTG
CTGGAGATGCGCAACGGGCAACTTAGCGAGCTGACGGGCGAAGAGCGCGATGCCGCTTCG
CGTGATGCCGTTGCCCGGACGGCATAATATTACGACGCTGACCTGGCGGACTGCTGCCGC
CAGGTCAATATGCTAAAAATCCCTTCATTTCTAATAACCCTATAATTAATCAACGAAATT
ATAATGTTTCTAAAATTAGAATATAATTTATAAACATTATTTAAATGTTGTTACTTAAGT
GTTACCGTTGATGCCGCGCAAATCTCACCTGCAATAAAGCGACTAAAAGTAAGGCATTAA
CAAGATGAAAAAAGTGACTGCCATGCTCTTCTCGATGGCCGTGGGGCTTAATGCCGTTTC
GATGGCGGCAAAAGCGAAAGCGTCCGAGGAGCAGGAAACTGATGTACTGTTGATTGGCGG
CGGCATTATGAGCGCCACGTTGGGGACCTATTTACGCGAGCTGGAGCCTGAATGGTCGAT
GACCATGGTGGAGCGCCTGGAGGGTGTCGCGCAGGAGAGTTCGAACGGCTGGAATAACGC
CGGAACCGGGCATTCTGCACTGATGGAACTGAACTACACCCCGCAAAACGCCGATGGCAG
CATCAGTATTGAAAAAGCAGTCGCCATTAACGAAGCATTTCAGATTTCCCGCCAGTTCTG
GGCGCACCAGGTCGAGCGCGGCGTGCTGCGTACTCCGCGTTCATTTATCAATACCGTTCC
GCATATGAGCTTTGTCTGGGGCGAGGATAACGTTAATTTCCTGCGCGCCCGTTACGCCGC
GTTGCAACAAAGCTCGCTGTTTCGCGGTATGCGTTACTCTGAAGATCACGCGCAGATCAA
AGAGTGGGCACCGTTAGTGATGGAAGGGCGCGATCCGCAACAGAAAGTGGCAGCCACGCG
TACGGAAATTGGTACCGATGTGAACTACGGCGAGATCACCCGCCAGTTAATTGCTTCCTT
GCAGAAGAAATCTAACTTCTCGCTGCAACTCAGCAGCGAAGTCCGCGCCCTAAAGCGTAA
TGACGATAACACCTGGACCGTTACCGTTGCCGATCTGAAAAATGGCACTGCACAGAACAT
CCGTGCGAAATTTGTCTTTATCGGCGCGGGCGGTGCGGCACTGAAGCTGTTACAGGAATC
GGGGATTCCGGAAGCGAAAGACTACGCCGGTTTCCCGGTGGGCGGTCAGTTCCTTGTTTC
GGAAAACCCGGACGTGGTTAATCACCATCTGGCGAAGGTTTACGGTAAAGCATCCGTTGG
CGCACCACCGATGTCGGTTCCGCATATCGATACCCGTGTTCTGGACGGTAAACGCGTAGT
GCTGTTTGGGCCATTTGCCACCTTCTCAACCAAATTCCTCAAAAACGGTTCATTGTGGGA
TCTGATGAGTTCCACCACCACCTCTAACGTGATGCCGATGATGCACGTCGGGCTGGATAA
TTTCGATCTGGTGAAATATCTGGTGAGTCAGGTGATGTTGAGTGAAGAGGATCGTTTTGA
AGCGTTGAAAGAGTACTATCCGCAAGCGAAAAAAGAGGACTGGCGTTTGTGGCAAGCGGG
GCAGCGTGTGCAGATTATCAAGCGTGATGCCGATAAAGGTGGTGTACTGCGTCTGGGTAC
TGAAGTGGTCAGTGACCAGCAAGGAACCATTGCCGCGCTCCTGGGGGCATCGCCAGGGGC
GTCAACCGCCGCGCCGATTATGTTGAATCTGCTGGAAAAAGTATTTGGCGATCGCGTTTC
CAGCCCGCAATGGCAGGCTACGTTGAAAGCGATCGTTCCGTCTTATGGACGCAAGCTGAA
CGGTGATGTAGCGGCAACAGAACGCGAGTTGCAGTACACCAGCGAAGTGCTGGGGCTGAA
ATACGACAAACCGCAAGCAGCAGATAGTACGCCGAAACCGCAGCTGAAACCGCAACCCGT
TCAAAAAGAAGTGGCGGATATTGCGTTGTAATGATGTGCCACATCCGGCATGGTATGCCG
GATGTGGCGTATGCTGATAAGACGCGCCAGCGTCGCATCAGGCAACCGGCTCGGGCGTTA
GATGTTGGATGCGGCGTAACCGCCTTATCCAACCTACGGGGTGGAGCACTTCACAGCGGT
GTAGGCCTGATAAGACGCGTCAGCGTCGCATCAGGCAACCGGCTCGGACGTTGGATGTTG
GATGCGGCGTAACCGCCTTATCCGACCTACGGGGTGGAGCACTTCACAGCGGTGTAGGCC
TGATAAGACGCGCCAGCGTCGCATCAGGCAACCGGCTCGGGCGTTAGATGTCGGATGCGG
CGTGACCGCTTTATCCAACCTACGGGGTGCCGCACTTCACGGCAGTTTAGCGAACTACCG
CGTTGTCAATCTTCTCTTCCGCCTTCCAGACGCGGTACTTCACATCTACATTGTCTGGCG
TATACACCACGATCGGCAGCTTGCTGTTGTAACGCAGCATTCCAGCATCACCCAGATACG
CGGTGACAAATTTCTTCTCTTTTTTGCCATCCGGGCAGGCCATCATCGTCGAAACCGGGG
AACTGACTTTATCAAAGACATAATAATCATAGCCCCAGCCTTCCAGCGTTTTGCTTTCCA
GCTTCCCGCCGAGACGATGCAAATTGCAATCGACTTCCAGCGTCTGACCGATTAACAGTT
CTACTTTCAGGGTAGATTCCTCTTCTTGCGGGGTTAACTGAATCACCTGACGCTTCATGC
CTTTTTCAGCTTGTGGATAAGGCGCGATTTTTTCCAGTGGCTGGACGCTCTCTGCCGCCC
AGGCGGAAGTGGTGGCGAAAGCGGCAAACAATACTGCAGGTAGAATGGTCTTCATTTTTT
GCTTTCCTTCTTCATTTATAGGTTTGCACCGATGATGTCGCTGAAGGTTAACATATTCAT
CAGATTTATTAATTTGCTTTATGAATAACTTAAAGAATATTCAGACAATTTTACCTGCTC
TTTTAGTGTTAAATTCTGATGAGAGAGCAAACCAGCAGAAATATCTCTGGTGAATTAATC
GCTATATAAATATATTTATAACCATTTGAAATGTGAGCAAAAGCCCGTTTTTGCCACGCT
TCCCGCCACTCTTTTGATCCTGCTACAGGTTTTACCTCGATCGGGGTATGCATCTTTGAC
ACATCCTTTAATATCTTAGCGGCTATAAAAATGGCTTATTAATTATGCGGTTTATTTGGT
CGCTCTCAATTTTCAGAGCGCGTTAATGATGGAAGGTCAATGTGAAGATTGATGCATCCC
GTCGGGGCATACTCACTGGTCGCTGGCGCAAAGCCAGTAACGGTATCCGTCCGCCCTGGT
CCGGTGATGAATCTCATTTTCTGACCCATTGCACCCGCTGCGACGCTTGTATTAATGCTT
GTGAAAACAACATTCTGCAACGCGGCGCGGGCGGCTATCCGAGCGTTAATTTCAAAAATA
ACGAGTGCAGCTTCTGTTACGCCTGCGCGCAGGCTTGCCCCGAATCGCTATTTTCTCCGC
GCCACACCAGGGCCTGGGATTTGCAGTTCACCATTGGGGACGCGTGCCTGGCGTATCTGT
CAGTTGAATGCCGCCGCTGTCAGGATAGCTGTGAGCCAATGGCAATTATCTTTCGCCCGA
CGCTCTCCGGGATCTACCAGCCGCAACTTAATAGCCAACTTTGCAACGGATGTGGAGCAT
GTGCAGCCAGCTGTCCGGTATCAGCCATAACTGCGGAGTATCTCCATGCACACTAACTGG
CAAGTTTGCAGCCTGGTCGTGCAGGCCAAAAGCGAACGAATTTCAGACATCAGCACCCAA
CTGAACGCCTTTCCCGGCTGTGAAGTTGCTGTCAGCGACGCGCCGAGCGGTCAGTTGATT
GTGGTGGTGGAAGCAGAAGACAGCGAAACGCTGATCCAAACCATTGAGTCAGTACGCAAC
GTAGAGGGCGTGCTGGCGGTGTCGCTGGTTTATCACCAGCAGGAAGAGCAAGGTGAGGAA
ACACCATGAAACTCAGTCGTCGTAGCTTTATGAAAGCTAACGCCGTTGCGGCCGCTGCGG
CGGCTGCCGGTCTCAGCGTGCCGGGCGTTGCCCGCGCCGTTGTTGGTCAGCAGGAAGCCA
TCAAATGGGATAAAGCGCCGTGCCGTTTCTGCGGTACTGGTTGCGGCGTTCTGGTCGGAG
CGCAGCAGGGGCGTGTGGTGGCCTGTCAGGGCGACCCGGACGCACCGGTTAACCGTGGCC
TGAACTGCATTAAGGGCTATTTCCTGCCCAAGATCATGTACGGTAAAGACCGTTTGACGC
AGCCGCTGCTGCGTATGAAAAACGGTAAATATGACAAAGAAGGCGAATTTACCCCAATCA
CCTGGGATCAGGCCTTCGATGTGATGGAAGAGAAATTCAAAACCGCCCTGAAAGAAAAAG
GGCCGGAATCGATCGGTATGTTCGGTTCTGGTCAGTGGACTATCTGGGAAGGTTATGCCG
CGTCCAAGCTGTTTAAAGCGGGCTTCCGTTCGAACAACATCGACCCGAACGCGCGTCACT
GTATGGCGTCGGCAGTAGTTGGCTTTATGCGTACCTTTGGTATGGATGAGCCGATGGGCT
GCTATGACGACATCGAGCAGGCTGACGCGTTTGTGCTGTGGGGCGCAAACATGGCGGAAA
TGCACCCGATCCTCTGGTCGCGCATCACTAACCGTCGTCTCTCTAACCAGAACGTCACCG
TGGCGGTGCTTTCTACCTACCAGCATCGTAGCTTCGAGCTGGCGGATAACGGCATCATCT
TTACTCCGCAATCTGACCTGGTGATCCTGAACTACATCGCCAACTATATCATTCAAAACA
ATGCGATAAATCAGGACTTCTTCAGCAAGCACGTCAACCTGCGCAAAGGTGCGACGGACA
TCGGCTACGGTTTACGTCCGACCCATCCGCTGGAAAAAGCAGCGAAGAATCCGGGTTCTG
ATGCTTCCGAACCGATGAGCTTTGAAGATTACAAAGCCTTCGTTGCTGAGTATACGCTGG
AAAAAACCGCTGAAATGACCGGCGTGCCGAAAGACCAGTTAGAACAACTGGCGCAGCTGT
ATGCCGATCCGAACAAGAAAGTCATCTCCTACTGGACGATGGGCTTCAACCAGCATACCC
GTGGTGTGTGGGCCAACAACCTGGTCTACAACCTGCACCTGCTGACCGGCAAAATTTCCC
AGCCGGGTTGCGGTCCGTTCTCCCTGACCGGGCAGCCTTCCGCGTGTGGTACTGCGCGTG
AAGTGGGCACCTTTGCCCACCGTCTGCCTGCGGACATGGTGGTGACTAACGAGAAACACC
GTGATATCTGCGAGAAGAAGTGGAATATCCCGAGCGGCACCATTCCGGCGAAAATCGGTC
TGCACGCGGTGGCACAAGACCGTGCGCTGAAAGACGGCAAGCTGAATGTTTACTGGACTA
TGTGTACCAACAACATGCAGGCCGGGCCGAACATCAATGAAGAGCGTATGCCGGGCTGGC
GCGATCCGCGCAACTTCATCATCGTCTCCGATCCGTATCCGACAGTCAGTGCGCTGGCCG
CCGACTTGATCCTGCCGACCGCAATGTGGGTAGAGAAAGAGGGCGCTTACGGTAACGCCG
AACGCCGTACTCAGTTCTGGCGTCAGCAGGTACAGGCACCGGGCGAAGCGAAATCGGATC
TCTGGCAGTTAGTCCAGTTCTCCCGCCGCTTCAAAACTGAAGAAGTATGGCCGGAAGAGC
TGCTGGCGAAGAAACCGGAACTGCGTGGCAAAACGCTGTACGAAGTTCTGTATGCCACCC
CCGAAGTGAGCAAATTCCCGGTATCCGAACTGGCGGAAGATCAGCTGAACGATGAATCCC
GCGAGCTGGGCTTCTATCTGCAAAAAGGGTTGTTCGAAGAGTACGCATGGTTTGGTCGCG
GTCACGGTCACGATCTCGCGCCGTTCGATGACTACCACAAAGCGCGCGGTCTGCGCTGGC
CGGTGGTGAACGGTAAAGAAACGCAGTGGCGTTACAGCGAAGGTAACGACCCGTACGTGA
AAGCGGGCGAAGGCTATAAGTTCTACGGTAAACCGGATGGTAAAGCGGTGATCTTCGCGC
TGCCGTTCGAACCGGCGGCGGAAGCACCGGATGAAGAGTACGACCTGTGGCTCTCTACCG
GACGCGTCCTGGAGCACTGGCACACCGGCAGTATGACTCGCCGTGTGCCGGAACTGCACC
GTGCCTTCCCGGAAGCGGTCCTGTTTATTCACCCGTTGGATGCGAAAGTGCGCGATCTGC
GCCGTGGCGACAAAGTGAAAGTGGTTTCTCGCCGTGGCGAAGTGATCTCGATTGTCGAAA
CGCGCGGTCGTAACCGTCCGCCGCAGGGCCTGGTGTACATGCCGTTCTTCGACGCCGCAC
AGCTGGTTAACAAACTAACGCTGGACGCGACCGATCCGCTCTCGAAAGAGACGGACTTCA
AGAAGTGCGCGGTCAAACTGGAGAAGGTGTAAGCCATTATGTCCCGGTCAGCGAAACCTC
AAAATGGTCGCCGCCGCTTTCTGCGCGATGTCGTTCGCACAGCAGGCGGGCTGGCTGCCG
TGGGTGTGGCGCTGGGGTTACAACAGCAAACCGCACGCGCATCTGGCGTGCGGTTGCGCC
CGCCCGGAGCCATAAACGAGAACGCCTTTGCCAGTGCCTGTGTGCGTTGCGGTCAGTGTG
TTCAGGCTTGCCCTTACGACACCTTAAAACTGGCGACGCTGGCCTCTGGCCTGTCGGCGG
GCACGCCATATTTTGTCGCACGGGATATTCCTTGCGAAATGTGTGAGGACATTCCGTGCG
CCAAAGTGTGCCCGAGCGGTGCGCTGGATCGTGAGATTGAATCGATCGACGACGCGCGGA
TGGGGCTGGCGGTACTGGTGGACCAGGAAAACTGTCTCAACTTTCAGGGGCTGCGCTGCG
ATGTTTGTTATCGCGAATGCCCGAAAATTGATGAGGCCATCACCCTGGAGCTGGAGCGCA
ACACGCGTACCGGTAAGCACGCCCGCTTTCTGCCGACGGTTCACAGCGACGCCTGTACCG
GTTGCGGTAAGTGCGAAAAAGTGTGCGTGCTGGAACAACCGGCAATCAAGGTGTTACCGC
TGTCACTGGCGAAAGGGGAGTTAGGTCACCATTACCGCTTCGGCTGGCTGGAGGGGAACA
ATGGCAAATCGTAAACGTGACGCCGGGCGCGAGGCGCTGGAGAAAAAAGGCTGGTGGCGC
AGTCACCGTTGGCTGGTGTTACGTCGCCTTTGTCAGTTCTTCGTGCTGGGGATGTTTTTG
AGCGGTCCGTGGTTTGGTGTGTGGATCTTGCACGGCAACTACAGCAGTAGCCTGTTATTC
GACACCGTTCCGCTGACCGATCCGCTGATGACGCTGCAAAGTCTTGCCAGCGGTCATCTG
CCTGCCACGGTGGCGTTGACCGGTGCGGTGATTATCACCGTGCTCTACGCTCTGGCAGGA
AAGCGATTATTTTGCAGCTGGGTCTGCCCGCTGAACCCGATTACCGACTTAGCGAACTGG
TTACGCAGGCGCTTTGACCTCAATCAGTCTGCGACGATCCCTCGCCACATTCGCTACGTA
CTGTTGGTGGTCATTCTGCTGGGATCGGCCTTAACTGGCACGCTCATCTGGGAATGGATC
AACCCCGTTTCTCTGATGGGGCGTAGCCTGGTAATGGGCTTCGGCAGCGGCGCGCTGCTT
ATTGTCGCGCTGTTTTTATTTGATCTACTGGTCGTTGAACACGGCTGGTGCGGGCACATT
TGTCCGGTTGGCGCGCTGTATGGCGTGCTGGGTAGCAAAGGTGTGATTACCGTTGCGGCC
AGCGATCGGCAGAAATGTAACCGCTGTATGGATTGTTTTCATGTTTGCCCGGAACCGCAT
GTGCTACGTGCCCCGGTGCTGGATGAACAAAGCCCGGTGCAGGTCACCAGCCGCGATTGC
ATGACGTGCGGTCGCTGCGTGGATGTCTGTTCTGAGGATGTATTTACAATAACTACACGA
TGGAGTTCGGGAGCGAAATCATGAAAAGCCATGACCTGAAGAAAGCGCTGTGTCAATGGA
CGGCGATGCTGGCCCTGGTGGTAAGCGGCGCGGTTTGGGCGGCTAATGGCGTCGATTTTA
GCCAGTCGCCGGAAGTATCCGGGACGCAGGAAGGGGCCATTCGGATGCCAAAAGAGCAGG
ATCGGATGCCGCTGAACTATGTGAATCAGCCGCCAATGATCCCGCATAGCGTTGAAGGTT
ATCAGGTAACGACCAATACCAACCGCTGCTTGCAGTGCCACGGTGTCGAAAGCTATCGCA
CCACTGGCGCGCCGCGTATCAGTCCTACTCACTTTATGGACAGCGACGGCAAAGTGGGCG
CGGAAGTGGCTCCGCGTCGTTATTTCTGTCTGCAATGTCACGTACCGCAGGCCGATACCG
CGCCAATCGTGGGGAATACCTTTACCCCATCAAAAGGTTACGGGAAATAAGAGGTTATTA
TGGGAAATTCTGACCGTAAGCCTGGTCTGATTAAGCGCCTGTGGAAATGGTGGCGTACCC
CCAGCCGTCTGGCGCTGGGGACGCTGCTGTTGATCGGTTTTGTCGGCGGCATCGTCTTCT
GGGGCGGCTTTAACACCGGAATGGAAAAAGCCAATACCGAGGAGTTCTGCATTAGCTGCC
ACGAAATGCGTAACACGGTGTATCAGGAATACATGGATTCCGTGCACTACAACAACCGTA
GCGGCGTCCGTGCGACCTGTCCGGATTGTCACGTTCCGCACGAGTTTGTGCCGAAGATGA
TACGCAAGCTCAAAGCAAGTAAAGAGCTGTATGGTAAAATTTTTGGCGTTATTGACACGC
CGCAGAAATTTGAAGCTCATCGCCTGACGATGGCACAGAATGAGTGGCGGCGCATGAAGG
ACAATAACTCGCAGGAGTGCCGTAACTGTCACAACTTCGAGTATATGGATACAACCGCCC
AGAAATCGGTTGCCGCGAAGATGCATGACCAGGCGGTGAAAGATGGGCAAACCTGTATTG
ATTGCCATAAAGGGATAGCGCACAAGCTGCCCGATATGCGTGAAGTCGAGCCAGGTTTTT
AACAGGGTTATTGCGTGGGTATGCTTGAAGCCAGAGAGTTACTTTGTGAGCGGGATGAAC
GAACCTTATTTAGTGGCTTGTCATTTACGCTGAACGCAGGAGAGTGGGTACAAATCACCG
GTAGCAACGGCGCGGGGAAGACAACGCTTCTCCGTTTGCTGACGGGGTTGTCTCGCCCTG
ACGCAGGCGAGGTTCTCTGGCAAGGGCAGCCCTTGCATCAGGTACGCGACAGCTACCATC
AAAACCTGTTATGGATAGGCCATCAGCCGGGGATCAAAACCCGGCTGACGGCGTTAGAAA
ATCTGCACTTTTATCATCGCGATGGCGATACCGCACAATGTCTGGAAGCCCTGGCGCAGG
CCGGGCTTGCCGGATTCGAAGATATTCCGGTAAATCAACTTTCTGCCGGGCAACAACGCC
GCGTCGCTTTAGCGCGTCTGTGGCTGACCCGTGCCACGTTATGGATCCTCGACGAGCCTT
TTACCGCGATTGACGTCAACGGCGTCGATCGTCTGACCCAGCGTATGGCGCAGCATACGG
AGCAGGGGGGGATTGTGATTCTGACTACCCACCAGCCGCTCAACGTTGCTGAAAGTAAAA
TTCGCCGCATTTCACTGACGCAAACGAGGGCCGTATGATGTTCTGGCGCATTTTCCGTCT
TGAGCTGCGCGTAGCGTTTCGCCATAGCGCCGAAATCGCCAACCCGCTGTGGTTCTTCCT
GATTGTAATTACCCTTTTTCCGCTCAGTATCGGTCCGGAGCCGCAACTGCTGGCGCGTAT
TGCACCGGGCATTATCTGGGTTGCAGCCCTGCTTTCATCCTTGCTGGCGCTGGAACGACT
GTTCCGTGACGATTTGCAGGACGGCAGTCTTGAACAATTGATGTTGTTGCCGTTACCCTT
GCCCGCCGTTGTGCTGGCGAAGGTGATGGCGCACTGGATGGTAACCGGTCTGCCGTTACT
CATCCTTTCGCCACTGGTAGCAATGCTACTGGGAATGGATGTTTATGGCTGGCAAGTGAT
GGCGCTGACGCTGCTGCTGGGAACGCCTACGCTTGGCTTTCTCGGTGCACCGGGCGTGGC
GCTGACAGTGGGACTTAAACGCGGTGGTGTGCTGCTCAGCATACTGGTGTTACCGCTGAC
TATCCCATTACTCATCTTTGCCACCGCCGCGATGGACGCGGCTTCCATGCATTTGCCCGT
TGACGGGTATCTGGCAATTTTAGGCGCGTTGCTGGCAGGCACCGCGACATTAAGTCCTTT
TGCGACGGCGGCAGCGTTACGAATCAGCATTCAATAACGCTGGATTACTGATTTTTGTTC
GAGTCTGGTATCGAAACTATGTGGAAAACACTGCATCAACTGGCGATCCCACCACGGCTG
TATCAAATCTGTGGCTGGTTTATACCGTGGCTGGCAATTGCCAGTGTGGTCGTGCTTACC
GTCGGCTGGATCTGGGGATTCGGCTTTGCTCCGGCTGATTATCAACAGGGAAATAGCTAC
CGCATTATTTACCTGCATGTGCCTGCGGCGATCTGGTCGATGGGCATTTATGCATCAATG
GCGGTGGCGGCGTTTATTGGCCTTGTCTGGCAGATGAAAATGGCCAACCTGGCGGTGGCG
GCGATGGCCCCAATTGGTGCCGTGTTTACCTTTATTGCCCTGGTTACCGGCTCTGCATGG
GGAAAACCGATGTGGGGCACCTGGTGGGTATGGGATGCACGTCTGACTTCTGAACTGGTG
CTGCTGTTTTTGTATGTGGGTGTGATTGCCCTGTGGCACGCCTTCGACGACCGCCGTCTG
GCGGGCCGTGCGGCAGGTATCCTGGTGCTGATTGGCGTGGTGAATCTGCCGATTATTCAT
TACTCCGTTGAGTGGTGGAACACCCTGCATCAGGGATCAACGCGGATGCAGCAAAGTATC
GATCCGGCGATGCGTTCGCCGCTGCGCTGGTCGATTTTTGGCTTCCTGCTCCTGTCTGCC
ACGCTGACGCTGATGCGGATGCGGAATTTGATTTTGCTGATGGAAAAACGCCGTCCGTGG
GTGAGTGAACTGATACTGAAAAGAGGCCGTAAATGACCCCTGCATTTGCTTCCTGGAATG
AATTTTTCGCAATGGGCGGTTACGCCTTTTTTGTCTGGCTGGCGGTGGTGATGACCGTTA
TTCCGCTGGTGGTTTTGGTCGTGCACTCGGTGATGCAGCATCGCGCAATTCTGCGTGGTG
TGGCGCAACAGCGGGCGCGTGAGGCGCGTTTACGTGCTGCGCAACAGCAGGAGGCTGCAT
GAATATTCGCCGTAAAAACCGCTTGTGGATTGCCTGTGCCGTGTTGGCAGGGCTGGCGCT
GACTATCGGTCTGGTGCTATATGCGCTGCGCTCGAATATCGATCTCTTTTATACGCCGGG
GGAAATTCTCTACGGCAAGCGTGAAACTCAGCAGATGCCGGAAGTCGGTCAGCGTCTGCG
CGTTGGCGGGATGGTGATGCCGGGTAGCGTGCAGCGCGATCCCAATTCGCTGAAAGTGAC
CTTCACCATTTACGATGCTGAAGGCTCAGTGGATGTCTCTTACGAAGGCATTTTGCCGGA
TCTGTTCCGTGAAGGGCAGGGCGTTGTGGTGCAGGGCGAGCTGGAAAAAGGCAATCATAT
CCTCGCAAAAGAAGTGCTGGCGAAACATGATGAAAACTACACGCCGCCAGAAGTTGAGAA
AGCGATGGAAGCTAACCACCGTCGCCCGGCGAGTGTTTATAAGGACCCAGCATCATGATG
CCGGAAATTGGTAACGGGCTGCTGTGCCTGGCGTTAGGGATTGCGCTGCTGCTGTCCGTG
TATCCGCTATGGGGCGTGGCGCGCGGAGATGCGCGCATGATGGCGTCTTCCCGCTTGTTT
GCCTGGCTGCTGTTTATGTCTGTGGCTGGCGCATTTCTGGTGCTGGTCAATGCTTTCGTG
GTCAACGACTTTACCGTCACCTATGTTGCCAGCAACTCCAATACCCAGCTTCCGGTGTGG
TATCGCGTGGCGGCTACCTGGGGCGCACATGAAGGCTCACTGCTGCTGTGGGTGCTGCTG
ATGAGCGGCTGGACCTTTGCGGTGGCGATTTTTAGTCAGCGTATTCCGCTGGATATTGTG
GCCCGCGTACTGGCGATAATGGGGATGGTCAGCGTCGGCTTTTTGCTGTTCATTCTCTTT
ACCTCTAACCCATTCTCACGCACGCTGCCGAACTTCCCGATTGAAGGGCGCGATCTTAAC
CCGCTGTTACAGGATCCGGGGCTGATCTTCCATCCGCCCCTGCTTTATATGGGGTACGTG
GGTTTCTCGGTGGCGTTTGCTTTTGCCATTGCTTCTTTGCTGAGCGGGCGTCTGGACAGC
ACTTATGCGCGTTTTACTCGTCCGTGGACGCTGGCGGCGTGGATTTTCCTGACGCTCGGC
ATTGTGCTCGGTTCCGCATGGGCCTATTACGAACTCGGCTGGGGTGGCTGGTGGTTCTGG
GATCCGGTAGAAAACGCCTCGTTTATGCCGTGGCTGGTGGGGACTGCGCTGATGCACTCA
CTGGCGGTCACTGAACAACGCGCCAGCTTCAAAGCGTGGACATTACTGCTGGCAATCAGT
GCCTTCTCGTTGTGTCTGTTGGGGACTTTCCTCGTGCGTTCCGGCGTGCTGGTATCGGTA
CACGCGTTTGCGTCTGATCCGGCGCGCGGTATGTTTATCCTCGCCTTTATGGTGCTGGTG
ATTGGCGGTTCGCTGCTGCTGTTTGCCGCGCGTGGACACAAAGTTCGCTCACGCGTAAAC
AATGCGCTGTGGTCGCGGGAATCTTTGCTGTTAGCGAACAACGTTTTGCTGGTCGCCGCG
ATGCTGGTAGTGTTGCTGGGGACGCTGCTGCCGCTGGTGCACAAGCAACTGGGACTGGGC
AGTATTTCGATTGGCGAACCGTTCTTCAACACCATGTTTACCTGGCTGATGGTGCCGTTT
GCGCTACTGCTTGGTGTCGGTCCTCTGGTGCGCTGGGGGCGCGATCGCCCACGTAAAATC
CGCAATTTATTGATTATCGCCTTCATCTCTACGCTGGTGCTGTCTCTGCTGCTGCCGTGG
CTGTTCGAAAGCAAAGTTGTGGCGATGACGGTGCTCGGCCTGGCAATGGCCTGCTGGATT
GCGGTGCTGGCAATTGCGGAAGCTGTGCTGCGTATTTCACGCGGCACGAAAACCACCTTC
AGTTATTGGGGGATGGTGGCGGCTCACCTGGGGCTGGCAGTGACAATTGTTGGCATTGCC
TTTAGTCAGAACTACAGTGTTGAGCGTGATGTGCGCATGAAGTCCGGCGATAGCGTCGAT
ATTCATGAATATCGCTTCACCTTCCGTGATGTCAAAGAGGTGACTGGCCCGAACTGGCGT
GGCGGTGTGGCGACTATCGGCGTAACGCGAGAGGGTAAACCGGAAACAGTGCTGTATGCG
GAAAAACGTTATTACAACACTGCCGGGTCGATGATGACCGAAGCGGCGATTGACGGTGGC
ATCACGCGTGACCTGTACGCCGCGCTCGGTGAAGAGCTGGAAAACGGCGCGTGGGCTGTG
CGTCTTTACTACAAACCGTTTGTTCGCTGGATTTGGGCGGGCGGGCTGATGATGGCGTTG
GGCGGACTGCTGTGTCTGTTTGATCCTCGCTATCGTAAGCGCGTAAGTCCGCAAAAAACT
GCGCCGGAGGCTGTATGAAGCGCAAAGTATTGTTAATTCCGTTGATTATCTTCCTGGCGA
TTGCCGCGGCGCTGCTGTGGCAGCTGGCGCGTAATGCCGAAGGGGATGATCCGACCAATC
TGGAATCGGCGCTCATTGGCAAGCCAGTGCCGAAGTTTCGCCTCGAATCACTGGACAATC
CGGGGCAGTTTTATCAGGCGGATGTGCTGACTCAGGGCAAACCAGTGCTGCTTAACGTCT
GGGCGACCTGGTGTCCGACCTGCCGTGCGGAACATCAATATCTGAATCAGCTTTCTGCGC
AGGGCATCCGCGTGGTCGGCATGAACTATAAAGACGATCGCCAGAAGGCAATCAGCTGGC
TGAAAGAGCTGGGCAATCCTTACGCGCTAAGCCTGTTTGATGGCGATGGCATGTTAGGGC
TGGATCTCGGTGTCTATGGCGCGCCAGAAACGTTCCTTATTGACGGCAACGGCATCATTC
GCTATCGCCATGCGGGCGATCTCAATCCTCGCGTCTGGGAGGAAGAGATCAAGCCGCTGT
GGGAGAAATACAGTAAGGAGGCCGCACAATGAGGTTTTTATTGGGCGTGCTGATGCTGAT
GATCTCCGGCTCAGCGCTGGCGACCATCGACGTGTTGCAGTTTAAAGATGAAGCACAGGA
ACAACAGTTCCGTCAGCTCACTGAAGAACTGCGCTGCCCGAAATGCCAGAACAACAGCAT
TGCCGATTCCAACTCGATGATTGCCACCGACCTGCGTCAGAAAGTGTATGAACTGATGCA
GGAAGGTAAAAGTAAAAAAGAGATTGTCGATTATATGGTGGCACGTTACGGCAACTTCGT
CACTTACGATCCGCCGTTAACGCCGCTGACCGTGCTGCTGTGGGTGCTGCCAGTAGTGGC
TATTGGCATTGGCGGTTGGGTCATATACGCCCGCTCGCGGCGTCGGGTACGCGTGGTGCC
GGAAGCGTTTCCTGAACAAAGCGTGCCGGAAGGTAAGCGTGCCGGATATGTTGTTTATCT
GCCGGGTATTGTGGTGGCGTTAATTGTGGCTGGCGTCAGCTACTACCAGACTGGCAATTA
TCAGCAGGTGAAAATCTGGCAGCAGGCCACGGCACAGGCTCCGGCGTTGCTGGACAGGGC
GCTGGATCCGAAAGCCGATCCGCTCAACGAAGAAGAGATGTCGCGTCTTGCGCTGGGGAT
GCGTACTCAACTGCAAAAAAATCCGGGAGATATAGAAGGCTGGATTATGTTGGGCCGCGT
TGGCATGGCGCTGGGTAACGCCAGTATCGCCACCGATGCATACGCCACTGCGTATCGCCT
CGATCCGAAGAATAGCGATGCCGCACTGGGATACGCTGAAGCGTTGACACGTTCATCTGA
TCCCAACGACAACCGCCTCGGCGGCGAACTGCTGCGCCAGTTGGTGAGAAGCGACCACAG
CAATATCCGTGTGTTAAGCATGTATGCGTTTAATGCCTTTGAGCAGCAGCGATTTGGCGA
AGCCGTTGCCGCGTGGGAGATGATGTTGAAACTCTTACCTGCCAACGATACTCGCCGTGC
GGTGATTGAACGTAGTATCGCGCAGGCGATGCAACATTTGTCGCCGCAGGAGAGTAAATA
AAAAGTGGCCCGATGGTGATGCCATCAGGCCAGACTGATGACAAAGTGCGCTTAGTTTAT
GCCGGATGCGGCGTGAACGCCTTATCCGGCCTACAAAATCGTGTGAATTCAATAAATTGA
TCGATCCGCGTAGGCCTGATAAGCGTAGCGCATCAGGCAGTTTTGCGTTTGTCATAAATC
TCAGCCCGATGATAAATCCATCGGGCTATTTTTATTGTGCCCCGCGTTGTTGCAGGAACA
GAATGGTGGCCGCCACGCGTGAGCGGACATTGAGTTTACGCAGCAGATTGCGAATATGTA
CTTTTACTGTCTGCTCGGAAATATTCAATACCGAGGCAATCTGTTTATTTGACAGCCCCT
GTGCCAGCTCGTGCAGAACATCCAGCTCGCGCTCCGTCAGCACGCTGAAGGGATCTTCTT
CCGCGCCAAACATTTCACGTTCACGTAAGTACTGATTGACGCGTTCGCTAAAGACTTTGC
TGCCTTTCGCTCCGGCACGAATCGCTTCCAGCAATACTTCCGGGTCACTGTCTTTCAACA
GATAACCGTCTGCGCCTGCGTCTATCAGCGCAAAGACATCGCTGGAGGCATCGGATACGG
TCAGGATAATAATTTGCGCGGTAACGCCATCCCTGCGCAAGGCATTGAGGGTATCCAGGC
CACTCATACCTTTCATATTGAGATCCAGCAAGATCACGTCGATATCCAGTCTATTCGCCA
GATCGATAGCGCTCGCGCCGTCGCCCGCTTCGGCGACCACTTCAAAGCCAGGATCAAGCT
CCAGTAACTGACGAACACCGCGTCGCATAAGTGGATGATCATCCACAATCATCACCTGAA
AAGGCGTTGCTTCAGGCATAGTAGTCTCCTGAGGTTTTATTAGAATCATTATGTTTGAGC
GTAGCGTTGGTAACGCTACCAGGCGCGTGAATGTTACCCCATTTTATGTATGGACATGTA
GTGAAAACTACAACCTTGTCCTTCGCTTTGGCATCATTTTCATTATAAAGACGGAATTTT
GCATCAGCTTCTCATCAAGAAAAACAACTAAAAAATCAATCACAATACTTGTGCATTTCT
TTAAACAGTTTTTAAAAACTGACTCCGGGTATGGAGCTATGGGTATTTTCTGTACCCAAT
GCTTTTAACAGCAATTAATTTCATAGGATGAAAGCTCAATGCATCAATCTGGTTCTGTTT
CTCTTTGTCGTTCCGCAATATCTGTTCTGGTGGCTACAGCGTTATATTCACCCATAGCAT
TGGCATCAACAGTTGAGTATGGTGAGACAGTTGATGGTGTTGTCCTGGAAAAAGATATCC
AGCTGGTTTATGGGATCGCCAATAATACGAAAATCAATCCTGGCGGAGAACAGCATATTA
AAGAATTTGGTGTAAGTAATAATACTGAAATTAACGGAGGGTATCAGTACATTGAAATGA
ATGGCGCCGCAGAATACTCAGTATTAAATGACGGTTATCAAATTGTTCAAATGGGTGGCG
CGGCAAACCAGACTACGCTCAATAATGGTGTGCTACAGGTTTATGGCGCAGCGAATGATC
CCACGATTAAAGGCGGGCGCTTAATCGTTGAAAAAGATGGGGGGGCCGTCTTTGTCGCTA
TCGAAAAGGGAGGACTACTGGAGGTTAAAGAGGGGGGATTTGCATTTGCGGTAGATCAGA
AAGCAGGCGGTGCTATTAAAACAACCACGCGGGCCATGGAGGTATTCGGAACAAACCGTC
TCGGTCAGTTCGATATCAAGAATGGTATTGCTAATAATATGTTGTTGGAAAACGGCGGAA
GTTTGCGAGTTGAAGAAAATGACTTCGCTTATAATACCACTGTGGATAGTGGCGGCTTAC
TGGAGGTTATGGATGGCGGGACTGCAACTGGCGTTGATAAAAAAGCAGGCGGGAAATTAA
TTGTCTCAACGAATGCGCTGGAAGTGAGTGGTACAAACAGTAAAGGCCAATTTAGTATAA
AAGATGGTGTGTCAAAAAATTATGAACTGGATGATGGTTCCGGGCTCATTGTTATGGAGG
ACACGCAGGCCATTGACACTATCCTTGATGAGCATGCCACTATGCAATCGCTGGGAAAGG
ATACTGGTACGAAAGTGCAGGCAAATGCGGTATATGATCTCGGTCGATCAGACCAGAATG
GAAGTATCACGTATTCCTCAAAAGCCATCTCTGAAAATATGGTAATCAACAATGGCCGCG
CTAATGTCTGGGCTGGCACAATGGTTAACGTGTCAGTCAGAGGGAATGATGGCATTCTTG
AGGTCATGAAGCCGCAAATAAATTATGCACCTGCTATGTTGGTGGGTAAGGTAGTGGTTT
CTGAGGGCGCTTCTTTTAGAACGCATGGTGCCGTGGATACCAGCAAAGCGGACGTTTCGC
TCGAAAATAGCGCATGGACCATCATTGCCGATATCACTACGACGAACCAAAACACCCGCC
TCAACTTAGCCAACCTTGTGATGTCTGGCGCAAATGTGATTATGATGGCTGAGACAGTGA
CTCGTTCATCTGTGACAGCAAGTGCGGAAAATTTCATAACGTTGACCACCAATACCCTGT
CGGGAAACGGCAATTTTTATATGCGTACCGATATGGCCAATCATCAGAGCGATCAGCTTA
ACGTCACTGGCCAGGCAACAGGTGATTTCAAAATATTTGTGACGGACACGGGGGCCAGCC
CGGCAGCAGGTGATAGCCTTACACTGGTAACAACGGGCGGCGGTGATGCTGCATTTACGT
TGGGCAATGCCGGAGGCGTTGTTGATATCGGTACGTATGAATATACCTTGCTGGATAATG
GCAACCATAGCTGGAGCCTCGCAGAGAATCGCGCGCAAATTACCCCTTCAACCACTGATG
TGCTGAACATGGCAGCAGCACAACCGCTGGTATTTGATGCAGAACTGGACACCGTGCGTG
AGCGTCTTGGTAGCGTAAAAGGCGTTAATTACGATACGGCGATGTGGAGTTCGGCAATTA
ACACCCGCAACAACGTGACCACTGATGCGGGAGCTGGCTTTGAGCAAACATTGACGGGGC
TGACGCTCGGTATCGATAGCCGTTTCTCCCGTGAAGAAAGCAGCACAATTCGCGGCTTGT
TCTTTGGTTACTCTCATTCTGATATTGGTTTTGATCGCGGCGGCAAAGGTAATGTCGATA
GCTATACCCTGGGGGCTTATGCCGGTTGGGAGCATCAGAACGGTGCCTATGTTGATGGAG
TGGTGAAAGTTGATCGTTTTGCCAACACCATCCATGGCAAGATGAGTAATGGGGCAACAG
CGTTTGGCGATTACAGTAGTAACGGCGCGGGTGCTCATGTCGAGAGCGGGTTCCGTTGGG
TTGACGGATTGTGGAGTGTTAGACCCTATCTGGCCTTTACCGGCTTTACCACAGATGGTC
AGGACTACACGTTATCAAACGGCATGCGCGCTGATGTGGGAAATACCCGGATATTACGCG
CTGAAGCGGGAACGGCGGTAAGCTATCACATGGACCTGCAAAATGGTACGACGCTGGAAC
CCTGGCTGAAAGCCGCCGTACGTCAGGAATACGCCGATTCTAACCAGGTGAAAGTTAATG
ACGATGGCAAATTTAATAATGATGTGGCTGGAACCCGTGGCGTTTATCAGGCTGGGATAA
GGTCATCGTTTACCCCGACGTTAAGCGGTCATTTGTCAGTCAGCTATGGCAATGGCGCAG
GGGTAGAATCGCCGTGGAATACTCAGGCGGGAGTGGTCTGGACGTTCTGATAACAGAAAA
TAAACAGGCCGTGATGTGTCGCGGTCTGTTTATCTAATTAATTGCAGATATAAAAAAAAA
CCAACCGTAAAGGTTGGTTTTTTCTTGGGATTTTTGGTCGGCACGAGAGGATTTGAACCT
CCGACCCCCGACACCCCATGACGGTGCGCTACCAGGCTGCGCTACGTGCCGACTCGTGGC
TGCTAATACTACCGTTTTCCACACCGATTGCAAGTAAGATATTTTGCTAACTGATTTATA
ATTAATCAGTTAGCGATAAAACGCTTCTCGTCTGTCAGTACTTGCAATAACAAACTTAAC
TGTGGTTTTTCATCTTTCACTCTTTCACCACGTAAGTTGTAAGTGCGGTATTTACCGTTA
TTGTTCAGCACCAGCGTCTTTTTCGGGGTGGTTATTGCCAGCGTATCGTTATCCGCTGCG
GTTACCCAGTAATGACGGCGTTGAGGGTTGAACAAATCCTGACCTTGCGAATATTCGCTG
GCAGGTGTGCTGACATGTAGCAGGCGTTGCATCAGCGTCGTCATCAGATCGGTATGATCA
GTCAGCGCATTAATACGCTGCGCCGGCGTGCCTGGCCAGTGAATCACTAATGGCACCTGC
AGATGACCGTGGGACCAGTCAAAGGTTTCTTCCTCTTCGCTCAGTGGAATACCCCGACCG
GCAGTGATAATTACAACCGTATTGTCCAGTTTGCCAGAATCACGCAGTGCATTGAGCACG
CGGTTGATCTGGTCATCGACATTGCCTGCCGCCCGGCTATATTTCCGTGCAAATGCCTGC
TGATTGCTGTCGTCAATGTTAGTACCATTGAAAGAAACCCACGAGAACCAGCGGTTATCT
TCTTGTGCGTAGCGTCCCAGCCAGTTGATCCACTGCGTGGCGGTCTGCTCGTCGGATTGG
GTGCGTACGCTCGGCATCGAGAAGTCTGACAACAATGCCTGGCGATACAGCGGGCTGGTA
AAGCCATCTGATGAGAATAACCCCAGCTGATAGCCTTGCTGATTAAGCGCAGTAATTAAT
GCCGCAGGCGTACGGGTCGACAGAATGCCGTCCATATAGCTCGGCGAGATGCCATAGAAC
AGGCCAAAGATGCCGTTGTCTGTAGTGTTGCCGGAGCTCATATGGCGCGTGAACGAAATA
TTTTGCTCAGCAAAACCTGCCAGCGCAGGCATCTGCTTCTCGAAGCGTGAGTAGTTCAGG
CCATCGACAGTAATCAACAGCACATTCTGCCCGGTGCCCATATCGCGATAGCGCAGTTCG
CTTAACGGATACTGAACGGAAACGGCGTCTGGATTACCTTGCTCAATAAGACGGCGTTGA
TACTCCTGCGCATCAAGCAGACCATGCTTCTCAAGAAAACGTCGCGCCGTCATCGGGTAC
GAAAGCGGCAGGTTAGCGCGCTGCATGGTGATCGGGCGATAGAAGTTGGCATCGGCCCAG
ATATACAACACATGCGAGGCGATAAAGGCGATAAATAAGAATGCGGCCAGCGGACGCGCG
AAGCGCCGACGACGCGTCAGGCTGCGCAGCTTTTGCCAGCTCCACGTCGCAAACACCAGT
TCAAGCAATAAAATAACCGGCACGCTAATGAACATCAGCTGCCAGTCGCGCGCCATCTCA
TTTTCGTCTGGATTAATAACCAGTTGCCAGACGATGGGATTAAGATGGAGATGGAAACGA
GTAAAGACTTCGCTATCGATCAGTAATAGCGTCATTCCCGCCGTTGCCAGAATGACGGAC
AAAAACCTCATCAGCCTCTGGGAGCCGACGATAAAGGTCAGCGGGAAGAGGATCAGCAAA
TAGGTGGCGAAGACCAGGAAGCTGAAATGGCCGATAATGCTTACGTAGGAATAAATGCGA
CCAGCAAGCGTTGTCGGCCAGTCGGCGATAAACAGGTAACGGCTGCCAATGACGAGCGAA
AGCAGAATATTGAACAGTGCAAACCAGTGCCCCCAACTGACCATTTGGGAGACTTTTTCA
CGGTAGCGCTGACGATGAGTTACCATAACCTGTTATCTGTTTCCCTTAGTGCGCTTTTTC
TTCGTTGATAGAGGACTGTAAGGCGCGGGCAAAAGAGTTGGCAATTGCCTGGCGTTGGGC
CGGGGCAATGCTGGTGTTGATAAGGTTAGTGACCATGTTGCCTAACACCATCAGGGAAAG
GTCGGTCGGAGCCTTATGTTTTTCCAGTACGTTGAGCAGCTCTGCGAGCAATTGTTCAAC
CTGTTCATCACTGTAGCGGGAAATTTGTGGCATAAATCGAAATCAGTTAGTTGATGAAAG
GGCAACATATTACCGTAGCAACGGTTTTTTTTCTGCTTTTTTATGCGTTAAATCATTCTC
GTTACGCTGCCTTCTGTAAAATGACCGCCATCTTTTATTGCGTCGCTTAACCGGCGGTGG
TTGAATACCGCCCGGTCTTAAAGGAGAGTTTATCATGAGTCTGGATATCAACCAGATTGC
TCTGCACCAGCTTATCAAGCGTGATGAGCAGAACCTTGAGCTGGTGTTGCGCGATTCATT
GCTGGAACCGACAGAAACCGTCGTTGAGATGGTGGCAGAACTGCATCGGGTCTATAGCGC
CAAAAATAAAGCTTACGGCTTGTTTAGCGAAGAGAGTGAACTGGCGCAGACGCTGCGCTT
ACAGCGTCAGGGCGAAGAGGACTTTCTGGCATTTAGCCGCGCGGCAACCGGCCGCCTGCG
TGACGAATTAGCGAAATATCCTTTTGCTGACGGTGGATTCGTGCTGTTTTGCCACTACCG
TTATCTGGCGGTGGAGTATCTGCTGGTGGCAGTCCTGAGCAACCTGAGCAGTATGCGCGT
TAACGAAAATCTCGACATCAACCCAACCCATTATCTTGATATCAATCATGCGGATATTGT
TGCGCGTATCGATTTAACCGAATGGGAAACCAATCCAGAGTCGACCCGCTATCTCACTTT
CCTGAAAGGGAGAGTAGGGCGCAAAGTGGCGGATTTCTTTATGGATTTCCTCGGGGCCAG
CGAAGGATTGAACGCGAAAGCGCAAAACCGTGGGCTGTTGCAAGCGGTTGATGATTTCAC
TGCCGAAGCACAACTGGATAAAGCAGAGCGACAGAACGTGCGCCAGCAGGTTTATAGCTA
CTGTAATGAGCAGCTGCAGGCAGGCGAAGAGATTGAACTGGAATCGCTGTCGAAAGAGCT
GGCAGGCGTAAGCGAAGTGAGCTTCACGGAGTTTGCGGCTGAAAAAGGCTACGAACTGGA
AGAGAGCTTCCCGGCAGACCGTAGCACACTGCGTCAGTTGACAAAGTTTGCCGGTAGCGG
CGGTGGCTTGACTATTAACTTTGATGCGATGCTGTTAGGTGAGCGGATTTTCTGGGATCC
AGCAACCGATACCCTGACCATTAAAGGCACGCCGCCGAATTTGCGCGACCAATTGCAGCG
CCGGACGTCTGGCGGCAATTAATCGGTTTTGTGTTCTGAATGCCAGATGCGGCGTGAACG
CCTTATCTGGCCTGCAAAAAATAGCAATACCGTAATCAGGCATAATCTGCAGATACAAAA
AACCCCGCCGGAGCGGGGTTTTTTACAACTTATTCAGCAATTAAGCGCGAACGAAGTCGA
TGTGCTGCAGCTTCGGTTTGTACGGGTGACGCTGTACGTCCTGAGCTTTAACTTTGATTT
CTTTACCGTCAACAACGATGGTCAGAACTTCGCTGTAGAATTCAGCTTTAGCTTGCATGT
TCATGACTTTGTCGTGATCCAGCTCGATAGCCAGCGGTGCTTCTTTGCCACCGTAGATGA
TTGCCGGGAACTTGTTAGCGGCACGCAGGCGGCGGCTCGCACCCTTACCCTGCTCTTTAC
GTACTTCTGCGTTGATAGTAAACATTTCTTTCTCTCTTAAATTAATCCTGCTACAGGCGA
CCCAGCAACAGGTAAGTGATCTGCTTTGCGTATGCAAAAGCGGGCGAGATTCTATACTCA
ATCGCCTTATACATCAATCAAAACTACCATTAACCGCGTAATTCGTGCGCCCGACGAAAA
CGACCTTCGTAATCGAACACTTTTTCACGCACTTGCCAGTACTGACCTTTCATGCGGGCG
ACGACAAAATCCGGATGTCGCAGTAAGGCTTGCTGGGCGAGGATATCGGCGGCGGTGATC
CAGCGCAGAGGGATGCCCGGTGTGCGCGTATGCGGGCGGATAAAAAGCTGCTCGAAAGCA
GTTCGCTGGGCGGGCGTTTGCAGACGGAAACGCTCACTCACATCCGCGCCGTCTTCATCG
TAATAGGTGATTTTCAACCATTCGCCTTTCTCGTCGTGCCCATGCTGCAAAGACATGCCG
CTACAGCGTAATACCAGCGCATCTTTCAGTCGTAGCGCCGCTTTTAACATATCATCCGGA
TCAACCAGTACCGTGTCACATTCGCGGCAGCGGCGAGCGGCAATATCATTTTCTGCGTTA
CATTGCGGGCAATTTTTAAAACGGAAACGGAAGTCACACTGTTCGCGATGACCGTCGTCA
TCTTCAAACCATCCCTGACAGCGGCGACCAAAGTGTTCAATCAATGTCCCGTCGGCGGTC
GTTTTCCCCCAAAAGGTGTTGGCAAAACCGCAGGCAGGGCAGAAAACCTGTACCGGAACG
TTGTCACTTTTGCCTTTCGGTGTACCAACTTCCGGCGCGTAGAGATCGTGAGGATTACCC
GCATAATCAAGAATTAAACAATCAGTCTTGCCCGGAGCGAGACGCAGACCGCGCCCGACA
ATTTGTTGGTAAAGACTCACTGATTCGGTAGGGCGCAGAATGGCGATAAGATCGACGTGC
GGGGCGTCAAATCCGGTGGTCAGTACCGCGACGTTGACCAGATAGCGAAAACGCTGGGCT
TTAAAATCTTCAATTAACACATCGCGCTCAGCGCCGGGGGTGTCGCCAGTAATCAGTGCA
GCATCTTCGGCGGGTAGTAATCCCACAATCTCTTTTGCGTGTTCAACGGTGGCGGCGAAA
ATCATCACCCCTTTGCGCGTTGCAGCAAACTCCATAATCTGGCTGATGATGTGCGGGGTA
ATACGTTGTTGTTTTTTTAGCTCGCGGTTGAGATCGGCTTCGCTGAACAGCCCATTACTC
TGTGCCTGCAAGCGGCTGAAATCGTATTGCACTACTGGCATATCCAGTCGTTCTGGCGGC
GTCAGATAGCCGTGTTTAATCATATAACGCAGCGGCAGTTCATAAATGCAGTCACGGAAA
AGGGCTTTCTCATCGCCGCGTACCATGCCGTGATAATGGAACTGGTAGATCCAGCCTTTG
CCCAGTCGAAAAGGCGTGGCAGTCAGCCCCAGCAGGCGTAAGTGGGGATTCACTTTTGTC
AGGTGAGTGAGGATTTGCTGATACTGGCTCTCTTCATCGTCACCAATACGGTGACATTCA
TCGACAATCAACAGCGAAAATTCACCCTGAAAGGCATCAAGATTACGGGCGACCGACTGC
ACGCTGCCAAATACCACTTTACCGTGGCTCTCTTTGCGCTTTAGCCCGGCGGCAAAAATA
TCGGCTTCCAGCCCCAGCGCCTGATACTTTGCATGGTTTTGCGCCACCAGTTCTTTAACG
TGTGCCAGCACCAGCACGCGACCACGAGCCAGCCGCGCAAGTTCCGCTATCACCAGGCTT
TTACCTGCACCGGTGGGCAGCACGATAACGGCAGGGGTTTTATGACGACGAAAATGGTTG
AGCGTGGCATCCACGGCTTCTTGCTGATATGGGCGGAGTGTAAAAATCATGGTCTCGCGT
AGGTAGATTATTCTGCTAATAGTATGCCACGGTTCTTTTTCCCTTGAGGGAAGTTATTAG
ACCGCTATACTGGGCAGACAACAGTTCAGATTTTCGGGTCAATGCCCGACCTCCGTTTTT
ACAGGCAAAATCACACACATGCGACTTGATAAATTTATCGCACAGCAACTCGGCGTTAGC
CGTGCTATTGCCGGGCGTGAAATCCGCGGCAATCGTGTCACCGTCGATGGCGAAATCGTC
CGTAATGCAGCGTTCAAACTGCTTCCTGAACATGATGTCGCTTACGATGGCAACCCACTG
GCGCAGCAACACGGTCCACGTTACTTCATGCTCAATAAGCCTCAGGGCTATGTTTGCTCC
ACGGACGACCCTGATCACCCAACGGTGCTCTATTTTCTAGATGAACCAGTGGCGTGGAAA
CTGCACGCCGCAGGGCGGCTGGATATCGATACCACCGGTCTGGTACTAATGACAGATGAT
GGTCAGTGGTCACACCGCATTACTTCTCCGCGCCATCATTGCGAGAAGACTTATCTGGTG
ACGCTGGAATCACCCGTAGCTGACGATACGGCAGAGCAATTTGCTAAAGGCGTGCAGCTG
CATAACGAAAAAGATCTCACTAAGCCGGCGGTGCTGGAAGTGATTACCCCAACGCAGGTT
CGTCTGACCATCAGCGAAGGGCGTTATCATCAGGTGAAACGCATGTTCGCCGCCGTGGGT
AACCATGTGGTTGAGCTGCATCGTGAACGTATTGGCGGCATTACGCTGGATGCTGATTTA
GCCCCCGGTGAATATCGTCCGTTAACTGAAGAAGAAATTGCCAGCGTCGTCTAACTTTTC
AATGACTTTCAGGAGCCCGTTGTGACCACCCGACAGCATTCGTCGTTTGCTATTGTTTTT
ATCCTTGGCCTGCTGGCCATGTTGATGCCGCTGTCGATTGATATGTATCTGCCCGCGCTA
CCGGTAATTTCAGCGCAGTTTGGCGTACCGGCGGGCAGTACGCAGATGACCCTCAGTACT
TATATTCTGGGCTTTGCGTTGGGGCAGTTAATCTACGGGCCGATGGCAGACAGCTTCGGG
CGTAAGCCGGTGGTTCTTGGCGGTACGCTGGTGTTTGCCGCCGCCGCGGTGGCGTGTGCG
TTGGCACAAACCATCGATCAGCTGATTGTGATGCGTTTCTTCCACGGGCTGGCGGCGGCT
GCGGCCAGCGTGGTTATCAACGCCTTGATGCGTGATATCTACCCGAAAGAAGAGTTCTCG
CGGATGATGTCGTTTGTCATGCTGGTGACAACCATTGCACCGCTGATGGCACCGATAGTT
GGCGGCTGGGTGCTGGTGTGGCTGAGCTGGCATTACATCTTCTGGATCCTCGCCGTGGCG
GCGATTCTGGCTTCGGCAATGATCTTCTTTCTGATCAAAGAAACCTTACCACCGGAGCGT
CGCCAGCCTTTTCACATTCGTACCACTATTGGTAACTTTGCGGCGCTGTTCCGTCATAAG
CGTGTCCTGAGTTATATGCTGGCCAGTGGTTTCAGCTTTGCCGGGATGTTCTCGTTCTTA
AGCGCCGGACCGTTTGTCTACATTGAAATTAACCACGTCGCGCCGGAAAACTTTGGTTAT
TACTTTGCACTAAACATTGTTTTCCTGTTCGTGATGACCATCTTTAATAGCCGCTTCGTC
CGCCGTATTGGCGCGTTAAATATGTTCCGCTCGGGGTTGTGGATACAATTTATTATGGCA
GCGTGGATGGTCATCAGTGCGCTGCTGGGGCTGGGATTTTGGTCGCTGGTGGTTGGCGTT
GCGGCGTTTGTGGGCTGCGTGTCGATGGTGTCATCCAATGCGATGGCGGTCATTCTTGAT
GAGTTTCCCCATATGGCGGGAACGGCATCTTCACTGGCAGGAACCTTCCGTTTTGGCATA
GGGGCAATTGTTGGCGCATTGCTTTCTCTTGCGACCTTTAACTCTGCATGGCCGATGATT
TGGTCAATTGCATTCTGCGCAACCAGCTCCATTCTCTTCTGTCTGTACGCCAGTCGGCCG
AAAAAACGGTGATCTATTGCACAACGAGGAAGCTAAAAGGCTTCCTTTGTTGATGCATGT
CAACCACAAATCTATCATTCCCCCGATATATGTTTATTTTATGTAAAATCAATTTATGTA
AAAAGTCACATCATTGTAGTTAAAAAGGTTGAGTTAGATCGCAGAAACGGGTACATATAG
CCCCGCAAACGTGACCACGCCCGCAGATATTACTTAAATCAGAGCCATAGAGGCCACGCA
GGCGAGGCATCAATCTTTACGATCTGTATAAAGACGGATTGTTGATGATGTGTTAAAATT
GATGTAAACAAATTGTGAAGTAAATGTGCTTCCGGGGAAAATAAGTGACTTCATTACAAC
TCTCAATCGTCCATCGACTGCCGCAGAACTATCGCTGGTCTGCTGGTTTCGCAGGTTCGA
AGGTTGAACCGATTCCGCAAAATGGACCGTGCGGTGACAACAGCCTGGTGGCGCTTAAAT
TGCTTAGCCCGGATGGTGATAATGCATGGTCGGTGATGTATAAACTAAGCCAGGCGTTAA
GCGACATCGAAGTTCCATGTTCGGTGCTGGAGTGTGAAGGTGAGCCGTGCCTGTTTGTAA
ATCGCCAGGACGAGTTTGCTGCAACATGCCGATTGAAAAATTTTGGTGTGGCAATTGCCG
AACCCTTTTCAAACTACAATCCTTTTTAAGCGTCAGCTCAACGCCAGTAGCTGACGCGTA
TACTCCTGCTGCGGTGTGGCAAACACGCGCGCGCACGGTCCTTGTTCCACTACTTCCCCT
TGTCGCAGTACGATAACCTGATGACATAACGCGCGGACAACGTGCAAATCATGGCTGATA
AACAAATAGGCCAGTTGATGCTTTTGTTGCAATGATTTCAATAGCGTCAATATTTGCGCC
TGTACCGTTTTGTCGAGTGATGATGTCGGTTCATCAAGTATGATCAGCGAGGGCTTAAGA
ATTAATGCCCTGGCAATCGCAATACGTTGTCGCTGACCACCAGAGAACTCCGCCGGATAA
CGGTGGCGTGTTTCAGGATCTAATCCCACTTCATGCATCACGGCTATCACTTGTTGTTCG
CGTTGTGCGGCAGAAAGCGTCGGCTGGTGAACCCGTAAGCCTTCCTCAATAATCTGCAAA
ACGTTGAGTCGTGGGTTGAGCGAGGAGTTTGGATCCTGAAATACCACCTGAATGCGATGA
CGAATAGGTAACAGCTGGCGGCGATTTAAATTTTGCAGTGGCTGACCGTCAAAGACGATG
CTGCCCTGAGAATTAATCAGTCGCAGCAGCGCCAGTCCCGTCGTGCTTTTCCCGGAACCG
GACTCGCCCACTAAACCCAGTGTTTCACCCGCCCGTAGCGTAAAACTGATGTTTTTCACC
ACCACATTATGATCCACAATGCGCTTCAAGATCCCTTTGCGAATGGGGAAGGCAACCTGA
AGCTGTTCAACATCCAGCAACGTTGAGGCAGGTTCTGGCAACGGCACCGGGTCGCCTGAC
GGTTCACTGTTGAGTAGCTTTTGTGTGTAAGGATGAGTGGGTGAGGCAAATAGCGTAGCG
GCGTTATTTTGCTCGACACAGCGACCATTTTGCATTACCGCCACGCGGTGGGCCAGTTTT
CTGACAATGCTGAGGTTATGAGTAATAAACAGCATGCCCATATTCAGCTCGCCTTGCAGT
TCGCGCAACAGCTGTAAAATCTGCGCCTGGACAGAGACGTCCAGTGCGGTGGTTGGTTCA
TCGGCAATTAATAATTCCGGTCGCGTTAACAGCGCCATCGCAATCATCACCCGCTGGCGT
TCGCCGCCGGAGAGCTGATGCGGATAATCTGTCAGCCGTTTTGCCGCCTGGCGGATACCG
ACGCGATCAAGGCAGTTAAGAATTTCGCCACGAGCCGCTTCCCGACGCATCCCGCGGTGG
AGTGAAAGCACTTCATAAAGCTGTTTTTCCAGGGTATGCAATGGATTTAACGACACCATC
GGCTCCTGAAAAATCATGGCGATCTTATTACCGCGTACACCGCGCAACGTTTGATCGCTG
GCATGAAGCAGCGATTCGCCATGAAAACGAATATCGCCGGAGAGATATTCAACCGGCGGG
GAAGGGAGCAGACGTAAAATTGACAGCGCGGTAACGCTTTTGCCAGAACCTGACTCACCC
ACCAGCGCCAGCGTTTCGCCAGCCTCAATCTGTAGTGAAACATCATTGACTACTGTACGT
ACGGTTTGCTGATGGCGAAAACCCACCGACAAATTTTCAATCGCTAACAGAGTTTGCGTC
ATGCTACACCGCCTTATTAGGATCAAATGCGTCGCGGACGGCTTCACCAATAAAGATCAG
CAAAGACAATAATATCGCCACCGACAAGAAGGCGGTGATCCCAAGCCACGGAGCCTGAAG
GTTATTTTTCCCTTGTAACAGCAGTTCACCGAGTGACGGTGAACCGAGCGGCAGACCGAA
GCCGAGGAAATCGAGTGAGGTCAGGGTGGTTATCGAACTACATAAAATAAACGGTAAAAA
GGTGAGCGTAGCGACCATGGCATTAGGCAACATATGACGCAGGATGATACTGCGATCGCT
GACGCCAAGCGCCTGCGCCGCACGAATGTAGTCGAAATTACGGGTACGTAAAAACTCCGC
CCGCACCACGCCGACCAGACTCATCCAGCCAAACAAGACAGTAATTGCCAGCAGCCACCA
GAAGTTAGGCTGTACGACGCTGGAAAGTAAAATAATCAAAAACAGCGTCGGCATCCCCGA
CCATACTTCAATAAAGCGTTGCCCCCAGAGATCGACTTTACCGCCGTAATAGCCTTGTAG
CGCCCCCGCCAGCACGCCCATCACGCTGGAACAGAGAGTCAGCATCAGGCCAAACAGAAC
CGAGATCCGCGTGCCATAGAGAATACGTGCCAGCACATCGCCGCCGTTGGCATCCGTTCC
CAGCCAGTTTTGCCGGGAGGGTGGAGAAGGGAAGGGCTTATCGGTAGCAAAGTTGATACT
GGTAGCACCAAAGCGAATCGGTGCCCACAGTACCCAGCCATTATTTTCCAGCCGTTGTTT
CAGCCACGGGTCCTGATAATCAGCCTGACTTGCCAGCGGGCCGCCAAAATCGCTTTCGCT
GTAGTTTTTCAATAACGGGAAATACCAACTGCCGTCATAACGTACCAGCAACGGTTTATC
GTTGGCGATAAGCTCAGAACACAAACTCAAACCAAACAAGACGAGGAAAATCCATAACGA
CCAGTAGCCGCGACGGTTATGACGAAAACGCGCCCAACGGGCCTGATTGACGGGGCTGAG
TCGCGACATTAACGTCCCTCAAAATCTATACGCGGATCGACCAGCGTATAGCTGATATCA
CTGACAATATTCAGCAGCAGGCCAATCAGGGTGAAAATATACAAGGTACCAAACATTACA
GGATAATCGCGCGAGACGGTCGCTTCGTAGCCCAGTAAGCCAAGACCATTGAGTGAAAAC
ATCACCTCAATCAGCAGCGAGCCGGTAAAAAACATGCTGATAAACGTCGCCGGAAAACCA
GCAATCACCAGCAGCATGGCGTTGCGGAACACATGTTTCCAGAGAATGTTTTTCTCACTT
ACCCCTTTCGCACGCGCGGTCACCACGTATTGCTTGCGCACTTCATCAAGGAATGAGTTT
TTGGTCAGCATGGTCAGCGCCGCAAAGCCACCAATCACCGTCGCCAGCACCGGCAGCGTG
ATATGCCATAGATAATCGGTGATTTTCTGATACCACGGCAGCGAATCAAAGTTAGCGGAA
ACCAGGCCGCGTAGAGGGAACAGGTCGAAATAGCTGCCGCCTGCGAAGAAGACAATCAGC
AGGATGGCAAACAAAAAGGCCGGAATGGCGTAGCCGATGATGATAAATGCGCTACTCCAG
ACGTCAAAGCGGCTCCCATTATAAACAGCTTTGCGAATGCCTAACGGAATCGACACCAGA
TAGATAATCAGCGTGCTCCACAATCCGAGGGTGATGGAAACCGGCAGACTGTCTTTAATC
AGCGTCAGCACCGAGGCGCTGCGAAACAGGCTATCGCCAAAATCAAAGCGGATGTAGTCC
CAGAGCATTTTGAAGTAACGTTCGTGGATCGGCTTATCGAAACCGTAGCGATGAGTGATC
TCGGCGATCACTTCTGGATCTAATCCGCGTCCGCCACGGTAATTACTGTCGCTGATATTA
CCGACGCCCGTTTGCGCATGGCTGGCGCGAACGCCTTCACCGCCTGCGCCGGGTAATACT
CCGGCATTACCAAACTCAATGGCGGCGATGGCCTGGTCGACCGGACCGCCAGGCGCAATT
TGCACGATGAAAAAGTTGATAGTGATAATCGCCCATAACGTTGGGATCACCAGCAACAGA
CGGCGAATCAGATATGCGCCCATCTACTCTCCCTGTTGTCTGGCTGACGGCAGTTTGGCC
GCTTTATTAACGTCATACCACCAGGTATCGATACCCAGGCTGTAAACAGGGCGTACAGCG
GGTTGGGAGAATTTATCCCACCAGGCGAGACGGTCTTCCGCCATGTACCACATTGGCAGC
ATGTAATAATTCCACGTTAATACGCGATCCAGTGCTCGCCCTAACGGCAGTAATTTTTCT
TTATTTCCCTGCGCGGCAATAATTTGGTTGATCAGCGAGTCGATAACCGGGCTTTGCACG
CCGGGGGCATTATAAGTGGAATTGATATATTCCGATGACCAGGAAATCTGTAAATCGGAA
CTGGGCCACGGCATCGCCCGCCATACGCGCGGCATCATGTCATAGTCGCGACTGCGCATG
CGGTTGGTGATTTGCGAGTTATCCACCTTGCGAATGTCCATGTTGATACCCAGCCGTTGC
AGGCTGTGCTGGAACGGCAATACCCACTGACTATTGCTGCTTGCGGGAAGCAATAATTCA
AAGCTGAGTGGCTGACCCGTTGTGGCATTAACGCGTTGCTGACCCTTCAGCACCCAGCCC
GCTTCGTTGAGAAGTTTGTCGGCTTTTAACAGGTTGTCACGATCGTAGCCATCGCCTTTA
GATACCGGCGGCTGGTAGATTTGTGTGAAGACTTCTGACGGTAGATCTTTTTTCATTGGT
GCCAGAAGCACCAGCTCCGCGGCGTCGGGGTAATTTCTGGCCGCGTATTCGGTATTCTGA
AAATAACTGTTCGTGCGACTCCAGGCATTGTAAAACAACGCCTTGTTCATCCATTCAAAG
TCAAAGGCGAGAGTGATCGCTTCCCGGACCCGGCGATCGCTGAATACCGGACGTTGGATA
TTAAACGCCAGCCAGCGCGTATCCTGGGCTGATTCGTTCTTTTGCTCATCTTTGATGATG
TATTTTTTATCGAAATTTTTACCGGTATAACGCGTGGCCCAGTTTTTAGCGTCGTTTTCC
ATACGCAAATCAAAGGCACCTGCTTTAAACGCTTCAAAGGCGACGTTATCATCGAGGTAA
TAATCGTAGCGAATGGTGTCGAAATTCCAGCGTCCACGGTTTACCGGTAAGTTTGCTGCC
CAGTAATCTTTCACGCGGGAATAGACAATATTTTGCCCCATTTTCCAGGACGTAATGCGG
TACGGACCACTGGCAAGCGGAGGCGTGGCGAGCGGATCGCTAAGTTTGTGATCCTTCCAG
TACTTTTCTGGAAATACCGGCAGCGAAAACAGACTCAACATATCTTCTTTGCCGGGTTTA
GCTAACTCAATGCGCACGGTTAACGGCGCAATGGCTTTGACGGTGGTGCCTTTGTAGACC
AGACGAAATTGCGGCACGCCTTCGGTCATAAATTTTTGAAAAGTAAACTCTACATCGCGG
GCAGTAATGGGCGAACCATCATGAAAACGGGCGCGCGGATTAATAGCGACCTCCACCCAG
GAATAATCGTCAGCATAGCGTGCACTTTCAGCAATCAGCGGGTAATAACTGCCTGGTTCG
TCATCGGAAGTCGTAAATAGCGTGTCGTACAACTGCTCGGTGCGTGCGCCCGGGTTGCCG
CGCAGTGCATAGCGGTTGAAATTATCGAAGGTGCCGAGGGCTGACAACGTTATCTGCCCA
CCTTTTGGCGCGGCGGGGTTCACATAATCAAAATGGTTGAAATTAAACGCGTACCGGGGT
TCGCCCAGCACGGCAAAGGCATAGCTTTCCTTGATAGCCTGCGCCTGCGCACCGAAGGTG
AACAGAGCGATAAACAGCAGCAGTATGCGCACAATCATCTGCAACGGATTTCCTTTTACT
CATCATTAGCCGCAAACCGGCATGCTTTCACTATGAATAATAAGGGACGTAAGCACACCT
TACCACTGCGGCCTATACGGTTTCTTCAGCCAGCGAACAAAATCGTCCAGCGGTAACGGG
CGACTAATCCAGTAGCCTTGCATGAAATTAACGCCGCGTTCGCTTAGCCATCGCGCTTGT
TCCGGCGTTTCGACCCCTTCAGCAACTGTCAGCATATTGAGACGTTTCGCCAGCGTCAGC
ACCGCGTCAAGTACGGGTGAAGTGATCGTTTCCGTACCGATGGCGTTGATAAATCCACGG
TCAATTTTCAGATAATCGAGCGTAAAACGCTCAAGATAGATAAGCGCGCTGTGCCCGGTG
CCGAAGTCATCAATAGCAATTTCTATGCCGACCGAGTGCAGCCAGGCGAAGAGTTGTGTG
GCTTCTTGCTCTTTCAGCATATCGCGCTCGGTAATTTCCAGCACAATCTGGAAATGGTGT
GCGGGTAGGGAGGTGAGCAGTTTCTGGATATCTGCTTTAAAGCTTTCGCTGTGCAGATGG
TCCGGCGCAATGTTAATGCCAAATTTGACGCCTACCGGCAGCACTTTTTCTAATTCTGCG
GCATCGCGGGCAATTAACTCAAACAGGTGCTGAGTCAGCGGTACAATCATCTTTTGCGAT
TCGGCAAAGTTAATGAAGGCATCCGGGGGAATTTCTCCCGCGACAGGATGCCGCCAGCGT
AGCAGTACTTCCAGGCCCGTTACTCGCAAAGCTTGTGTATCCACCACCGGTTGATACGCC
ACGTAAAATTGTTCGCGCTTGATGGCGGTCATGATTTCTCTGCCGGGGCGCATACGTACG
CTCATCAGGTAATAGCAGAGCAGGCCAACGACAGTTCCACTCATGCCGCCCAGTAAAAAT
GCGTACCACACATCGTTCCATGTCCAGTCATCTGCATAAAGCCGAACGGTCAGAGGAATG
CCCGCAATTTTAGTTTCACGGACTGGCATGTCGGTTAATTCGTTAACGTTCATCAAACGT
GAAGAAAAGGTAGATAGCGCAGTATTGCCAATAATGAGGGCGACGCCATCGTAATCTTCC
TGCCGTGAACTATAAAAGAGTGAAGGCGTCAGGTTGAGATTCAGAGCGGCAAAGACGCCG
CTATTTTTCAGCAAAGGGTTGCGATACCAGATGACGATTGCGGGTTTGTTCGGCACCATC
GGCGTGCCGGGTAAGATCGCCATATCGACATTTTTATTAATGTCGAGCGCCGGAATCAAT
TCATTGAGTGGAATGTCCATCTCACCGGTCGCAGATGAACAGAATGTTTTTTTATCTTTC
ACCAGCACAAACGTTCGGACATTCATGCTAAACGCCGCGCGGGCGGTCAGTTCGGGGTTA
GCTTGCTGGCAGGTATCTAAGGTCAGCGGCTGGAGCCGGTCAGTAGTGGATTTCAGGTCG
GCAAAATAGGTATCGAGATACTTTTGTACGTCGGTAATCAGTGTGTCGTATTTGACTTCG
TGCTTATGCCAGGCCACTAAAAACTGAAGGCAACTCACCAGTATCGCAATCATTACGCCT
GCAACAATGCAGGTAAGCAGGAGCTTACGTCCAGAATTGGGAGCGCGTATGAACATGATT
CCGTTAATTTCCTGAAATTACGACAACATTTAAAAGATAACAATGACCGGACTATAGCCT
GGATCAAGACGCGGAAACATCATTTTCTCTGATGAATGAAAACAAAAAAGCACTGCCTAA
GCAGTGCTTTCAGTTAACTCGTCAGGATAGCCAAGGGATTGCATCCAAACGGTTTATTAG
CTGCGGCTGAGAACCCGGCGTGCTTCGTTATAACGCTTCTTCCAGTACGGTTCATTCATG
CTGGAAATAATAACACCACTGCTGGTGGAAGCATGGACAAACTGATTGTTGCCGATATAA
ATACCGACATGGCGTCCCGTTGAACCGGCACGGAACAGAACTAAATCACCCGTACGCAAA
TTACTGCGGGAAACAGATTTACCCATTTCCTGCTGTTCGTAAGTCGAACGCGGAAGTTCT
AAGCCAAATTGCTCACGGAATGTACGCTGTACGAAACCAGAACAATCGATACCTTTTTTA
GTGCTGCCGCCCAGACGATAACGTACGCCTTTCCAGTCAGCATACTGATCCATAATTCGC
GATTTTACGTCGACATTACGAACCAGGTTTTCAAATTCATCCTGAGAAGCTTGCAGTGAT
GATGTTTCACTACCCACTGCACGTGTCTCAGGATGCATATTCTTTGCGGTGTTATTTGCA
CTACATGCAGAAAGCAGAACCGCTACTGCAATCGCGGGGATCCCGCGCAAGATATATCTC
AAAATCGGTTGAGATTTGACCATGTTGTTTGTTTTCCCTTGAAGTCCTTAACGACAAATA
TCGTTATAAAAAAATGCCAAGCGACACGAGACTAATTACCTGGGCATGTTGAAACAATTC
CTTAAGGCCAAATCTGTGGACTAACGCACAAAATTATATGCTGTGAGGATAATCTACCGC
CGAGGCAAAACGAGTTCGAGATTACCCGATTGGTGCGGTCTTGGCGAGCGGTTTTACATG
ATTTTTTATAAGAAAAAGTGATACAGAAAGTTAATAAGCGGGATTGCTCAATTAAAGTAC
GATTGAGTGAAACGCATGCAATCCATTCATTTACTTAGAGAATGATTTTTGCTTTCGATG
CATGAAAGCACGGTGCGCATCATCAGGATTATCCTCACTATAAAAATAAACCTGATGATG
TTAATTACTGTGAGTTATTTGTTTTGGAAATGTTTGTTTTTTCCCGGTAGTGATTTGTCA
AAAAAGGTGATTAATCGATCACTTAATGGCGTCAGCAACACCCAGGGCAAACCGATCAAT
ATCACGGTCATCGAACCGACAATGATGTCAGTAAACCAGTGTGCGCCAATCATTACTCTG
GGAAACGCAAAAACCACAAAAATAATAAGGGCGATAAGACCTGCAACTTTGCCGAAATAA
CGCCACATGAATGCCGAAAAAATAAGCAGCATCATGCCGTGATCGCCGGGAAAGCTATCT
CGTGAGGCATCTTTCGTGGGGACAGAGAGCAGTTCGCTGACGCGGTTAATATCGGTAAAA
GTCAATGTTGGGCTGGCCCGTTTTACAGGAATTAATGCCTGACCCAGCTGGTTTAATACC
ACTGCAGTTAATAGCATGACCAGACCAATAATCACGATACGTCGTCTGCCTGGGGCGTTT
TCTTTCAGCCAGAAACTCAGCATCAACATTCCCATCGCCAGCAGTGAACAACCGTCGAAA
GCGCGATTGTTGGTCAATGCAACCAGCCACAAAAAGGCCTTACTTTCGACCAGTTTCTGA
TTAAAGAAATAAAAAATATCCGCATCAATCGGCAACCAGAATCCATGATTAACGGGAATA
TACCAGGAAAGAAACAGCGCGAGGCCGACAATATTCAACAACACTATTTGCGGCAAATTT
TTAATCATATTTTCTCTAATTATCTTACTGAAAAACGCAGGCAACCTTACGCGGTAGTCG
CTAAACGAAGCTTCAACAGCGCGCTCTGCAAGGCATTCCAGTCAGCTTCGCTGCTGGAAA
TCAGCTCAATACGGCTGTCCGGTGGCGCAACGTTTTGCGTTTCAATGTGCAGGTCATCGC
CCTGACGGTTGATTCGCACCAGCCCTTCGGGAATACGCAGCACGCCTTTGACGCGTTCCA
CCGGTGCAAGTCGCGCCCATTCCAGAATGCCAATGGTGTCGAATACCGTATCAGCGTCGA
ATATCCAGCCGCAGGCCTGATATCCTTGCCCGCTGTTCAGACTGCGACGCCAGCGTTGAT
GCTCTGGCAGGCTTAACGCTGCTAACCCTTTTTTCACGACATGCTGATGAGAATGCGCGG
CGCTGGCGGGCAACTCGGCTAAATTGCGACGCGGCAAATCCAGAAGATGACCGTCAACTT
TCCCATGCTCACTGTGAATTAATTGCCGATCGCCACCATTTTGCTGCCACCAGCGCTGTA
GCGCTTGCTCGCTTTCAGGTGTCGCACGGTCGGATTTATTGGCGACAATGATGTCTGCGG
CAGCCAGCTGGTCACGGAAGTTTTCATTGCTGGCGCTTTTTTCGTCCAGCAGCAGGCGTG
GATCGAGAATGCACAACGTGGCGCGCAGATCTATCCACGGTTCATAGACTGGTGCGGTTA
ACAGATCGAGGATCTGTTTCGGATGGCCCAGCCCGGTCGGCTCTATCAACAAGCGGTCTG
GTTTTCCCTGACGCAGTAAGGTATTCAACCCTACCTGCATGGGTAAACCATTAACGCAGC
ACATGCAGCCGCCGGGGATCTCTTTCAGCAATGCGCCGCTATCGGCGAGCAAAGCACCAT
CAATTCCGACTTCCCCAAATTCATTAACCAGTACCGCCCATTTTTCGTTGGGATCTTTAT
GGGCTAACAGATGAAGAATCGACGTAGTTTTCCCGCTGCCGAGAAAACCGGTGATGAGGT
TGGTCCTGGTCACAACGGCTCCGCAATACTCTGATAAGTTAACTGAGCGTTAATCCTGGC
TAAAAACGGCAGAAAAGAGAAGGGGAGAGCGGACGAAGGTGAGCTTCATCCGCTTTAACC
GCAGAAATCGTTAAATTTTGAGGGTGTTTAATAGCGCCTGATGCGCGCCGAATTGTGCGA
TTTGTTGCCAGGCTTGTTCGATGGCCTGCACAAAATGCGGGTTATCTGGCAGATCATCAC
CGAAAACTTCACGCAGGGAAAGCAGGGCGGTGATGCGTTGCTCACTGCTGCTGCCCGCAA
CAAGATCGCGAATTTTATCGCTAAGCGGATCGCGAACATCAATGGCATTTCCGGCATCAT
CAACGCCGCTGACGTAACGCATCCAGCCTGCAACGCCTAATGCCAGCAACGACCAGTCCG
TTTCGCGCCCCAGATGTATGCGAATACCTGCCAGCATACGTTGCGGTAATTTCTGGCTGC
CATCCATCGCGATTTGCCAGGTCTTATGTTTCAGCGCCGGATTAGCAAAACGTGCAATTA
ACTTATCCGCATATTGTGTTAAATCGACATCTTTAATTTGCAGTGTCGGCGCTTGCTCAT
CCAGCATTAATGTTCTGGCAGCATGGCGAAATGCGCGATCCTGCATGCAATCACTGATAT
GGGCGAATCCTGAGAGGTAACCCAGATAAGCGAGAAAAGAGTGGCTGCCATTAAGCATAC
GCAGTTTCATCTCTTCCCATGGCAGGACATCATTCACCATTTGTACACCTGCGACTTCCC
AGGCAGGACGCCCAGCGACGAAGTTATCTTCCACCACCCACTGGATAAACGGTTCGCAGC
TAATCGCGCAGGGATCATTTACCCCCAGATGCTGGCTGATTTCTGCCAGTGATTCGTCGG
TTGCAGCCGGAACAATGCGGTCGACCATGGTTCCCGGAAAACTGACGTGTTCTTTTATCC
ACCCGGCGAGTTCTGGCGAACGTTTTTCTGCCATTCCCAGCACCGCGTTTTTCACCACAT
GGCCATTGTCGGGAATATTGTCGCAGGAGAGCACGGTAAACGGTGTAAGGCCGCGCTCAC
GGCGGCGTTTCAGTGCTTCGACGAGAATACCTGGCGCGGAGTGAGGTTCTTCAGGGTTTT
GTAGATCGTGAATAATCCGCGGATTGCTGGTGTCGAGTGCACCGGTGGCCGGGTCAATAC
AATAGCCTTTTTCGGTAATCGTCAGGGAAACAATTGCCACCTGTGGCTCGCAAAATTTCT
CAATAATTGCCGCTAAGGAATCCAGTTTTGCATTCAGGCATTCGTGAACGGCACCGACAA
TTATCGCCTGATTGCCGTCCGCCCCTTTCTCCAGCACGGTGTATAAATGGTTCTGTGCGC
GGAGCTGGCTCATCAGTTGATCACCGCTGAACAAGCTGATTTCACAGATCCCCCAGTCAC
CGCCCTGGGCATTCAGCACACGATCGGTCAGTAACGCCTGATGTGCGCGGTGAAAGGCTC
CAAAGCCAAAATGAACGATACGTGATTGCAACTGCTGGCGATCGTAGCGTGGAGCGTGTA
CATGATGCGGGAGCGTAACGGAGGCGATTGTATTCATAGGAGTCACGTCTTAGTAACGAT
TAATTAACAATGACAGTGTAAAGTTATATGACAGCAATTGAAATTGGTCTGGATTGTTAA
TGCGATGAAGTGTGAGGGCGATCAATCAACGAGTGAAAATTGAGGGCGTAAGGTGTTCAG
GAAGCGCAAAATAGAAGATTGGTATAATAAATTAAAAAAGGGACAGCCTGAGCTATCCCT
TTTCTGCATGCGGCTGAAGTTAGTCAGCACGACCCATATAACGGCGTTCTTCGATATGGA
TACGAATTTTTTCGCCCGGGCTTAAGTATTCTGGTACCTGAATCACCAGACCAGTGCTCA
ATGTCGCCGGTTTGTTACGGGCGCTGGCAGATGCCCCTTTGATGCCTGGTGCAGTTTCAA
CGATTTCCAGATCAACGGTCTGCGGCAGCTCAAGCGCCAGCAGTTGACCGTCCCAGGTCA
GCACCTGCATGTCCGGCATGCCGCCCTCTGGCATAAACAGCAACTCTTCTTCAATCTGAT
CTTTGGTGAAGGTATACGGGGTATAGTCTTCTTTATCCATAAAGACATATTCGTTGCCAT
CGACATAGGAGAAGTCAACGTAACGGCGGGTCAGCGTCACGGTGTCAACGATATCATCTC
CTTTGAAACGCTCTTCTACTTTCAGCCCGGTACGGACATCAGAAAAACGCATTTTGTACA
GCGTAGCGGCACCGCGGGCAGTGGGCGACTGAATATCAATGTCCTTAACCAGCAGCAGTT
TGCCGTTGTAATTCAGTACCATACCTTTTTTAATTTCGTTCGCTCTTGGCATCGAAAAAT
TCCTGTAGTCGAAAATGTCAAAAATATCGCGACAAAGTACTCGCGACGGGCCTTTCGGGC
AAGTGGTATTCGCACTTTTGCTAGTGCAAAAAAGGTGGTACTGTGCGCGCTCATCAATCC
GGTGGTTAACCTTAAGAGAACAACGTATGGAATGCCGTCCGGGTTGCGGGGCGTGTTGCA
CTGCCCCTTCAATTTCCAGCCCTATTCCCGGTATGCCAGATGGCAAGCCCGCCAATACGC
CCTGCATTCAGCTTGATGAACAGCAACGCTGTAAAATTTTCACCTCGCCACTGCGACCGA
AAGTCTGTGCAGGCTTACAAGCCAGCGCTGAAATGTGTGGTAACTCGCGTCAGCAGGCCA
TGACCTGGCTTATCGATCTGGAAATGTTGACCGCGCCTTAAACATCTTTAATCCGCAGTA
AGCAAAACAGAGTGGCGATAATCATCACCATCGCAAACCAGAACACAGCGTGATAATTCC
AGATCTCGGCGACGATGCCCGCCACTGATCCTGCGATGATCCAGCCCACGCGCGACGTGT
TGGTATAGAGCGTGGTGGCTGAACCTGCCTGACCGGGCATCAAATCCTGAAAATAGAGCA
TCCCGATGCCGCCCAGAATGCCAATAAAAATAGCATTTAGCAGCTGCAAGCCCAACAGAA
TGATAGGTGAATGCGCCATCAGCATTCCTGCGTAAAAACAGACGCCACCCACGGCAGCAA
CGCGCATTAAGAAACGCTTACCCAGACGTTTGGCGAAATATCCGGCAATCAACATCGTCG
GGATTTCCAGCCCGGCGGCGGTCCCCATCATCACACCGGCCAGTTTCTCGGGAAGATGCA
GTTCGTTGATAATAAATAGCGGCATGTTGATGATGTACAGACTGTTCGAGCCCCACATCA
ATGTACAAATGACAAACAGCAGCAGCGTATCGCGACGGTTACGGCGCGGCGCTTCAACCG
TGCCGGTCGCCAACGGAAGCTCTTTTTGCATCGACGGTAAAAACAGCCACACCATCACGC
CGCAAACAATAAATGCTACCGCTGCGCTCAGATACATTACCGTAAAGCTGAAACCCATCG
CTAAGGCATAAGCCAGCGGTGGGCCAATGACTCATGCCAGTGAAACCTGAGCGCGTAAAA
AAGAGCTGAACATCACCGCCTCACGTCCGGTTTTGTCGGCATGTTCACGGGCAAGGGCAA
ACATTTGCGGGTTAGCGGTCGAGCCAAAGCTGCTAAGAAAGACGCCAACGAATAGCAACA
CAAAGTAGTTGCGATTCCAGGCAAAAAGGGTGCAGGCCAGCACGCCTAACAGGCAGCAAA
AGACAATCAGCGATTTGCGATCGCCGCGCTTATCAGAGCGCCCGGCGAGAAACTGACTCA
CCAGAATCCCAATGACAGCGCTGCCGGTAAAGAAGAATCCCACCATCGCCGGACGGGCAT
GTACTTCATCGGTAAGAAAAATACTGAGTGTCGGGGTTTGCAGAGCGCCCGCAATACCGG
TGAGAAAGGCAACGATTAAAAACGCCGTCGAGGTCAGGTCAAACGATTTCGCGCTGGAGA
CTGCGGGGGAGTTATGCATGCTGGTCGATCATTGGAAGAGGAAGACGCGGAGTTTACGCT
GCTTGTCAGAAAATAAACAGACAGCGAAATCAAAAGCGCCACGAATAATCAAAATGCCAT
TTCACTGTTGCTGATTGGCTGCTGACGCTGCTGAAATGAAATTGCTGATAACGGATTTTT
CCATCAGCAGTTCGGAAAAATGACAAAAAATTGTGCAGCACATCAAACTTTTGCTCATAA
CTTTACGGCTTTCCTTGCGTGCTGAAACAGAAGTATTATGCTTTCTTGAAACGTTTCAGC
GCGATCTTGTCTTTAACCCTAAGCCAGGTTGGCGCTTTTTTTCTCATAGAAGCTGAATCG
TTTCAATTCAGCAAGAGAGGAGAACTATGTTCCAGTTATCCGTACAGGACATCCATCCGG
GCGAAAAGGCCGGAGACAAAGAAGAGGCGATTCGCCAGGTCGCTGCGGCGCTGGTGCAGG
CCGGTAATGTAGCAGAAGGCTACGTCAATGGCATGCTGGCGCGCGAACAGCAAACCTCAA
CGTTCCTCGGCAATGGTATTGCTATTCCACACGGCACTACCGACACCCGCGATCAGGTGC
TGAAAACCGGCGTTCAGGTATTTCAGTTCCCGGAAGGCGTCACTTGGGGTGACGGTCAGG
TAGCGTACGTAGCGATCGGTATTGCTGCCAGCTCGGATGAGCATCTGGGCCTGCTACGCC
AGCTGACCCACGTACTGAGCGATGATTCCGTTGCTGAACAACTGAAGTCAGCAACAACAG
CAGAAGAACTTCGCGCATTGCTGATGGGCGAAAAGCAGAGTGAGCAGCTGAAGCTCGACA
ACGAAATGCTGACGCTGGATATCGTCGCCAGCGATCTGCTGACTCTTCAGGCGCTGAACG
CTGCGCGTCTGAAAGAAGCGGGGGCAGTTGACGCCACTTTCGTCACCAAAGCCATCAATG
AACAACCGCTGAACCTCGGACAGGGCATCTGGCTGAGCGATAGCGCCGAAGGCAATTTGC
GTAGCGCGATTGCGGTAAGCCGTGCGGCAAATGCTTTTGATGTGGACGGCGAAACGGCAG
CCATGCTGGTGAGTGTGGCGATGAATGACGATCAGCCCATTGCGGTTCTTAAGCGTCTCG
CTGATTTGTTGCTCGACAATAAAGCTGACCGCTTGCTGAAAGCGGATGCGGCAACGTTGC
TGGCGCTGCTGACCAGCGATGATGCGCCGACCGACGACGTGTTAAGCGCGGAGTTTGTGG
TGCGCAATGAACACGGCCTGCATGCTCGTCCAGGTACCATGCTGGTCAACACCATTAAAC
AATTTAACAGTGATATTACCGTGACAAACCTTGATGGTACCGGCAAACCGGCAAACGGAC
GTAGTCTGATGAAAGTTGTGGCACTTGGCGTTAAGAAAGGTCATCGCCTACGCTTTACCG
CCCAGGGTGCAGATGCTGAACAGGCGCTGAAAGCAATCGGCGACGCTATCGCTGCTGGTC
TTGGGGAGGGCGCATAATGAGCAGACGTGTTGCTACTATCACCCTTAATCCGGCTTATGA
CCTTGTTGGTTTCTGCCCGGAAATTGAACGCGGCGAAGTGAACCTGGTGAAAACCACCGG
TCTGCATGCGGCGGGTAAAGGCATCAACGTGGCCAAAGTATTAAAAGACCTGGGAATTGA
TGTCACCGTTGGCGGCTTCCTCGGTAAAGACAATCAGGATGGTTTTCAGCAACTGTTCAG
CGAGCTGGGCATTGCCAACCGTTTCCAGGTTGTACAGGGGCGCACCCGAATTAACGTTAA
GCTGACGGAAAAAGACGGCGAAGTGACTGACTTCAACTTCTCGGGTTTTGAAGTCACTCC
CGCCGATTGGGAACGCTTTGTGACTGATTCTCTGAGCTGGCTCGGTCAGTTCGATATGGT
CTGTGTCAGCGGAAGCTTACCGTCAGGCGTCAGCCCGGAAGCGTTCACCGACTGGATGAC
TCGCCTGCGTAGTCAGTGTCCTTGCATTATCTTTGATAGTAGCCGTGAAGCGTTAGTAGC
AGGTTTGAAAGCGGCACCGTGGCTGGTGAAACCTAACCGCCGCGAGCTGGAAATCTGGGC
AGGCCGTAAACTGCCTGAAATGAAAGATGTGATTGAAGCTGCGCATGCGCTGCGTGAACA
AGGTATTGCGCATGTCGTTATTTCACTGGGTGCCGAAGGCGCGCTTTGGGTTAATGCCTC
CGGCGAATGGATCGCCAAACCACCGTCAGTCGATGTCGTAAGCACCGTTGGCGCAGGGGA
TTCTATGGTTGGTGGCCTGATTTATGGCTTGCTAATGCGTGAATCCAGTGAACACACACT
GCGTCTGGCGACTGCTGTTGCAGCCCTGGCGGTAAGTCAAAGCAATGTGGGTATTACCGA
TCGTCCGCAGTTGGCCGCAATGATGGCGCGCGTCGACTTACAACCTTTTAACTGACAGCA
GGAGAGGCATAATGAAAACGCTGCTGATTATTGACGCTAATCTCGGTCAGGCACGCGCCT
ATATGGCGAAGACCCTGCTGGGCGCGGCGGCGCGAAAAGCAAAACTGGAAATCATCGACA
ATCCGAACGACGCAGAAATGGCGATTGTTCTCGGTGATTCCATCCCGAATGACAGCGCGC
TGAACGGTAAAAATGTCTGGCTGGGCGATATTTCCCGGGCAGTTGCGCACCCTGAGCTGT
TCCTGAGTGAAGCCAAAGGCCATGCGAAACCTTACACTGCGCCGGTCGCTGCGACAGCAC
CGGTTGCCGCCAGCGGTCCGAAACGCGTAGTTGCGGTGACTGCTTGCCCGACTGGCGTAG
CACACACCTTTATGGCGGCTGAAGCCATTGAAACCGAAGCGAAAAAACGTGGCTGGTGGG
TGAAAGTTGAAACCCGTGGTTCTGTTGGTGCGGGTAATGCAATCACCCCCGAAGAAGTAG
CCGCAGCGGATCTGGTGATTGTGGCGGCAGATATCGAAGTGGATCTGGCGAAATTTGCGG
GTAAACCGATGTATCGCACCTCTACCGGTCTGGCGCTGAAGAAAACCGCGCAGGAACTGG
ATAAAGCGGTTGCTGAAGCAACGCCGTATGAACCGGCGGGCAAAGCTCAAACGGCGACCA
CTGAAGGTAAGAAAGAGAGTGCAGGCGCTTATCGTCACTTGCTGACGGGCGTCTCTTACA
TGCTGCCGATGGTCGTTGCAGGTGGTCTGTGTATCGCGCTTTCTTTTGCTTTTGGTATCG
AAGCGTTTAAAGAGCCGGGTACGTTGGCAGCGGCGCTGATGCAGATTGGTGGTGGTTCAG
CCTTTGCGCTGATGGTGCCGGTACTGGCAGGTTACATTGCCTTCTCCATTGCCGATCGTC
CGGGTCTCACGCCGGGTCTGATTGGCGGTATGCTGGCGGTCAGCACCGGTTCTGGCTTCA
TTGGCGGTATTATTGCGGGCTTCCTGGCTGGTTACATTGCGAAGTTAATCAGTACGCAAC
TGAAACTGCCACAGAGTATGGAGGCGCTGAAACCGATCCTGATCATTCCGCTAATTTCCA
GTCTGGTGGTCGGTCTGGCGATGATCTACCTGATCGGTAAACCGGTTGCTGGCATTCTCG
AAGGGTTGACTCACTGGCTGCAGACCATGGGGACTGCGAATGCGGTTCTGCTGGGGGCGA
TCCTCGGTGGCATGATGTGTACTGACATGGGCGGTCCGGTAAATAAAGCAGCGTACGCAT
TCGGTGTGGGTCTGCTGAGTACTCAAACCTATGGCCCGATGGCGGCGATTATGGCGGCAG
GTATGGTGCCACCGCTGGCAATGGGCCTGGCAACAATGGTGGCGCGTCGCAAATTCGACA
AAGCGCAGCAGGAAGGTGGCAAAGCCGCTCTGGTACTGGGACTGTGCTTTATTTCGGAAG
GTGCAATTCCGTTTGCTGCTCGTGATCCGATGCGTGTGCTGCCGTGCTGTATCGTGGGTG
GGGCGCTGACTGGCGCAATCTCAATGGCGATTGGTGCGAAACTGATGGCACCGCACGGTG
GTCTGTTTGTTCTGCTGATCCCTGGCGCTATTACGCCGGTACTGGGTTACCTGGTAGCAA
TTATTGCCGGTACGCTGGTGGCGGGTTTGGCCTATGCCTTCCTGAAACGTCCGGAAGTGG
ACGCAGTAGCGAAAGCCGCGTAATAAAAGGTGTGTTACAGGGCAGAAATTTACTGCCCTG
TATCATTGGATGAGCGCAAAGAGAATGACCGGTTTGTGAATGTAATTTTATGAATTTAAA
TGGTTTTATCTTTCAGTAGAAACCTGAAACGTTCATCAAATACTAAGGTTATTTCCTCAA
GGGCAGATTCTTTTCTGCCCTTTTTTAGTGTTCATGTTCTGTGCATCCCGTCACAAATTC
CTCGCTTTTGTAATTCAGGCATTTAATCGCATTTTGTGAGCCTGCTCAAATCTGCCTATT
TTGCCTCTCTGGCGGTAATTTACTTTACGTAAAACATGCATACTATGAGCACATGTTTAA
ATATGAACACATGTTTAAACCGTCTTTGCAGTATCTATATTCTTGTGGATTGACAGGGTT
GGTAATTTTTTACCAGAGGACGTGCTATGCGCGAAAAGGATTATGTCGTAATTATAGGTT
CGGCGAATATTGATGTCGCCGGATATTCACATGAATCATTAAATTATGCGGATTCAAATC
CAGGTAAAATAAAATTTACGCCTGGTGGAGTAGGGCGCAATATTGCACAAAACCTGGCGT
TGCTGGGTAACAAAGCCTGGCTACTGAGCGCCGTAGGCAGTGATTTTTATGGTCAATCGC
TGCTAACGCAAACCAATCAATCAGGCGTTTATGTCGATAAATGCCTGATTGTGCCGGGAG
AAAATACGTCGAGTTATTTATCATTACTCGATAATACCGGTGAAATGCTGGTTGCTATAA
ATGACATGAATATTAGCAACGCTATTACAGCTGAATATCTCGCACAGCACCGTGAATTTA
TTCAGAGGGCAAAGGTCATTGTCGCGGACTGTAATATCAGTGAAGAGGCACTGGCATGGA
TTCTGGATAATGCCGCCAACGTACCTGTATTTGTCGATCCGGTTTCCGCGTGGAAATGTG
TCAAAGTGCACGACCGTCTAAATCAGATCCACACTCTCAAGCCAAACCGCCTTGAAGCGG
AAACCCTGAGTGGGATTGCGCTGTCAGGGCGTGAAGATGTGGCAAAAGTTGCTGCCTGGT
TCCATCAACATGGCCTGAACCGACTGGTATTGAGCATGGGCGGCGATGGCGTTTATTACA
GTGATATCAGCGGTGAAAGTGGCTGGTCTGCCCCGATCAAAACCAATGTTATTAATGTTA
CCGGAGCGGGCGATGCCATGATGGCGGGACTTGCTTCGTGTTGGGTAGACGGAATGCCGT
TTGCCGAATCTGTTCGTTTCGCACAGGGATGTTCGTCAATGGCGCTCTCCTGTGAATACA
CCAATAACCCCGATTTATCGATTGCCAACGTTATATCGTTAGTGGAGAACGCAGAATGTC
TGAATTAAAAATTTCCCCTGAATTATTACAAATTTCCCCGGAAGTGCAGGACGCTTTAAA
AAACAAAAAACCGGTTGTGGCGCTGGAATCGACCATTATTTCTCACGGGATGCCGTTCCC
ACAAAATGCCCAGACCGCAATTGAAGTTGAAGAAACTATTCGTAAACAGGGCGCTGTACC
TGCCACTATCGCCATTATTGGCGGCGTGATGAAAGTGGGTTTAAGCAAAGAAGAAATTGA
ATTACTGGGTCGTGAAGGGCATAACGTGACCAAAGTTAGTCGTCGCGATTTACCTTTTGT
TGTTGCCGCCGGAAAAAATGGCGCAACCACTGTGGCTTCAACGATGATTATTGCGGCGCT
TGCCGGAATTAAAGTATTTGCCACCGGGGGAATTGGTGGTGTGCATCGCGGGGCGGAACA
TACCTTCGATATTTCTGCCGATTTGCAAGAACTGGCAAATACTAATGTCACCGTTGTTTG
TGCCGGGGCGAAATCTATTCTCGATTTAGGATTAACCACTGAGTATTTAGAAACCTTCGG
TGTGCCGTTAATTGGCTATCAGACTAAAGCGCTGCCTGCGTTTTTCTGCCGTACCAGCCC
GTTTGACGTCAGCATTCGTCTCGACAGCGCCTGTGAAATTGCCCGTGCAATGGCGGTGAA
ATGGCAAAGCGGGCTGAACGGTGGCCTCGTGGTAGCGAACCCGATCCCGGAACAGTTTGC
GATGCCAGAACACACTATCAATGCGGCGATCGATCAGGCGGTAGCTGAAGCTGAAGCGCA
GGGTGTTATTGGTAAAGAAAGTACGCCATTCCTGCTGGCGCGCGTTGCTGAACTGACCGG
CGGTGACAGCCTGAAATCCAACATCCAACTGGTGTTCAACAACGCCATTCTGGCGAGTGA
AATTGCCAAAGAATACCAGCGTCTCGCGGGTTAATTTCTGACGGGCAGAAAGCCGTCGCC
CGTACTCATCAAACATACCAAAACCTGGCGCTGACGCCGGGTTTACTGGCATGAAGGGAA
AATCATTATGGACATAATGAGAAGTGTTGTGGGGATGGTGGTGTTACTGGCAATAGCATT
TCTGTTGTCAGTGAATAAAAAGAGCATCAGTTTGCGTACGGTTGGAGCCGCACTACTGCT
GCAAATTGCTATTGGTGGCATCATGCTCTATTTTCCGCCGGGAAAGTGGGCTGTAGAACA
GGCGGCATTAGGCGTTCATAAAGTGATGTCTTACAGTGATGCCGGTAGCGCCTTCATTTT
TGGTTCGCTGGTCGGGCCGAAAATGGATGTCCTCTTTGACGGTGCGGGTTTTATCTTCGC
CTTTCGCGTACTCCCGGCGATTATCTTCGTCACTGCGCTCATTAGTCTGCTGTACTACAT
TGGCGTGATGGGGCTGCTGATTCGCATCCTTGGCAGCATTTTCCAGAAAGCCCTCAACAT
CAGCAAAATCGAATCTTTTGTTGCGGTTACCACTATTTTCCTCGGGCAAAATGAGATCCC
GGCGATCGTTAAACCGTTTATCGATCGCATGAATCGCAACGAGTTGTTTACCGCAATTTG
TAGCGGGATGGCGTCCATTGCGGGTTCGATGATGATTGGTTATGCCGGAATGGGCGTACC
AATTGACTACCTGTTGGCGGCATCGCTGATGGCGATCCCCGGCGGTATTTTGTTTGCACG
TATTCTTAGTCCGGCAACCGAGCCTTCGCAGGTCACATTTGAAAATCTGTCGTTCAGTGA
AACGCCGCCAAAAAGCTTTATCGAAGCGGCGGCGAGCGGTGCGATGACCGGGTTGAAAAT
CGCCGCCGGTGTGGCGACGGTGGTAATGGCGTTTGTCGCAATTATTGCGCTGATTAATGG
CATTATCGGCGGAATTGGCGGCTGGTTTGGTTTTACCAATGCTTCTCTGGAAAGTATTTT
TGGCTATGTGCTGGCACCGCTGGCGTGGATCATGGGTGTGGACTGGAGTGATGCTAACCT
TGCGGGTAGCCTGATTGGGCAGAAACTGGCGATTAACGAATTCGTCGCTTACCTGAGTTT
CTCCCCATACCTGCAAACGGGCGGCACGCTGGGAGTGAAAACCATTGCGATTATCTCCTT
TGCGCTTTGTGGTTTTGCTAACTTTGGTTCTATCGGTGTTGTCGTTGGCGCATTTTCGGC
TATTTCGCCAAAACGTGCACCGGAAATCGCCCAGCTTGGTTTACGGGCGCTGGCAGCAGC
AACGCTTTCCAACCTGATGAGCGCGACCATTGCCGGGTTCTTTATTGGTTTAGCTTGAGT
TTCATTGCCGGATGTACTCGCTTATTAAGCGTTGCATCCGGCAATCGCGCTATTGCAAAT
AATTTTTACTGCATCATCCCGGAGAATTTATTCTCCGGGTCCATCTCCAGCGCCAGTCCT
GACAACTGCCTTTTGTTTTTAATGAGATACCCTTTCTTGCTTTTAATTAATAAACCGTCG
TGAATGAATTGCGCGAGAACATATAAAAGATGTCGATAAGAAACGCCTAAATACTCTGCC
GCTTGCGTATGCTTTTCGTGATAAAGATCACCTTCTTGTGAGAGTAATATAAATGCTGCC
AGGCGATTCACTAACGGAAATGATTGGTTCTGAGTTAAAGAAACAATATTACGATAATTT
TTATGACTTAAGGTGACGCAAAGTTTTCGTAAAAATAGGGTGTCGTTTAATAACAGCGGA
CGGTAATGTTTCATAGGGAGCGCAAGGCACCAACACTCTTCAATCGCCTGTACTGCACGT
GGTTCATGGTCTTTATCGATTAACTCAATCTCGCCAATAAAACAGGGGGCGGCAAAGAAA
TCGATCAGCGACACGCGACCATTAGCTAGCGTGGCGTAAAGCCTGGCGCGGCCTCGCGTC
AGGTAAAACAGCCAGGACGGCTGTTGCCCTTCCTGCACAATGTAGTCACGCGCTAAAAAA
TGAAACAGCCGCGTATCGGCTGAAACATCCGTTAAAAAGCAATCCTTAAACGCGGATTCA
TTCATCAATTGCAGCTTAAGATCATTATTGTGGATTTCTTTCACGATGTTTATCCGCTGT
GAGATTTCTCATATTTAGCATACGTACGCTGTTGTTAAGATTCAATCATCGGCCCGGTCG
AAATTTCTTTGCTGTAGAAAAAAATAACGCAACTGGAAACAGAGGAAATAAACAATGGAA
AAGAGAAAAATTATTCTGGATTGTGATCCGGGTCATGATGATGCTATTGCTATAATGATG
GCGGCGAAACATCCGGCGATTGATTTATTAGGTATCACCATTGTTGCGGGTAATCAGACG
CTTGATAAAACATTAATTAATGGCCTGAATGTTTGCCAGAAACTGGAGATTAATGTTCCG
GTTTATGCGGGGATGCCGCAACCCATTATGCGTCAACAAATCGTTGCCGATAATATTCAC
GGTGAAACCGGACTGGATGGCCCGGTATTCGAGCCGCTGACCCGCCAGGCAGAAAGTACC
CACGCGGTGAAATACATCATTGATACCCTGATGGCAAGCGATGGCGATATCACTCTGGTG
CCGGTTGGTCCGTTGTCAAATATCGCGGTGGCAATGCGTATGCAACCCGCAATCCTGCCC
AAAATACGTGAAATTGTGCTAATGGGCGGCGCTTACGGTACAGGCAACTTCACGCCATCT
GCCGAGTTCAACATCTTTGCTGACCCGGAAGCCGCACGCGTGGTGTTCACCTCTGGCGTT
CCATTAGTGATGATGGGCCTCGATCTCACCAACCAGACCGTTTGCACCCCGGACGTGATT
GCACGAATGGAAAGGGCAGGCGGCCCTGCCGGAGAGCTGTTCAGCGACATCATGAACTTC
ACTCTCAAAACCCAGTTCGAAAACTACGGCCTGGCTGGCGGCCCGGTGCACGACGCCACC
TGCATCGGTTATCTGATTAACCCTGATGGCATTAAAACCCAGGAGATGTACGTCGAAGTG
GACGTCAACAGTGGCCCTTGCTATGGGCGTACCGTCTGCGACGAGCTGGGCGTTCTTGGC
AAGCCCGCTAATACCAAAGTCGGCATCACTATTGATACCGACTGGTTCTGGGGCTTAGTC
GAAGAGTGCGTGCGCGGCTACATCAAAACCCATTAAGTGTTGATAACAAGCCGGGTCAGT
ATCGCAAGATGCAGGCCCGGCTATTTCTGAGGGGCAGAAAGCCGTCGCCCAATATGACAT
GAAGAGATAATAACTATGGATGTCATGAGAAGTGTTCTGGGAATGGTGGTATTGCTGACG
ATTGCGTTTTTACTGTCAGTAAACAAGAAGAAGATCAGCCTGCGTACCGTTGGCGCGGCG
TTAGTGTTACAGGTTGTGATTGGCGGGATTATGCTTTGGTTACCGCCAGGGCGTTGGGTC
GCTGAAAAAGTCGCTTTTGGCGTGCATAAAGTGATGGCGTACAGCGACGCGGGTAGCGCA
TTTATCTTCGGTTCGCTGGTCGGGCCGAAAATGGACACGCTGTTTGATGGCGCAGGATTT
ATCTTTGGTTTCAGGGTGTTACCGGCAATTATCTTCGTCACCGCGCTGGTGAGTATTCTC
TATTACATCGGTGTGATGGGGATCTTAATTCGCATTCTCGGCGGTATATTCCAGAAAGCA
TTAAATATCAGCAAGATCGAGTCATTCGTCGCGGTCACTACCATTTTCCTCGGGCAAAAC
GAAATTCCGGCGATCGTCAAACCCTTTATCGATCGTCTGAATCGCAATGAATTATTTACA
GCGATTTGTAGTGGCATGGCCTCGATTGCTGGTTCGACAATGATTGGTTACGCCGCACTG
GGCGTACCTGTGGAATATTTGCTGGCGGCATCGTTAATGGCGATCCCCGGCGGGATCTTG
TTTGCCCGCATGCTAAGCCCGGCTACGGAATCTTCACAGGTTTCCTTTAATAACCTCTCT
TTCACCGAAACACCGCCAAAAAGCATTATTGAAGCGGCAGCGACAGGGGCGATGACCGGG
CTGAAAATCGCTGCGGGTGTGGCAACAGTGGTGATGGCATTTGTTGCCATCATTGCGTTA
ATTAACGGTATTATCGGCGGCGTAGGCGGCTGGTTTGGTTTTGAACATGCCTCGCTGGAG
TCCATTTTAGGTTACCTGCTGGCCCCACTGGCGTGGGTAATGGGTGTTGACTGGAGTGAT
GCGAATCTTGCCGGGAGTTTGATTGGACAGAAACTGGCAATAAATGAATTTGTCGCTTAT
CTCAATTTCTCACCCTATCTGCAAACGGCTGACACGCTGGATGCTAAAACCGTGGCGATT
ATTTCCTTCGCGTTGTGCGGTTTCGCTAACTTTGGTTCTATCGGGGTGGTGGTGGGGGCG
TTTTCTGCGGTTGCGCCACACCGTGCGCCGGAAATCGCCCAGCTTGGTTTACGCGCGCTG
GCGGCGGCGACACTTTCTAACCTGATGAGTGCCACCATTGCCGGGTTCTTTATTGGTTTA
GCGTAGTGTGCGATTTATGAGCCGGATTAGATGCGGTCAAGCGTCGAATCCGGCAACATT
GTTACACCATTGGCACTAATGACAGCGCGTTATCGGCAGACAGGGTAGGGTTGTTTAAGC
TGCCGCTGGCGCGTGAAATTGCCGCGCAGGCCATCGCAAAACGGGCGCTGTCACGGAAAT
TGTTTCCCTCCAGAAAGCTATATACCAGGCCCGCCATAAAACCATCGTCAGCACCAAAAC
TGTCTACTGTCGTATGCGCTGGTGCGGTCAGCAAAAATTGTTCACCATCCTTTTCGCTGC
AATAAACTGACTCATCGGGCAAATAAACAAACAGTTGCTGAACACCTTGCTGATGCAACG
CATTCACTGCGGCATTACGGTCAGCATCGCTGGTGATCGCCTGTCCCCATAAAATTTCCA
GCTCCGGTAAAGTGGGTTTCAGGGTGTGAATATGCGCCAGCCAGGGTTTGATTTTGCCCG
CTTTGAATTCTGAAACGGTATCGACAAACACCGGGATTTGATCAGCGAGGGTAAAGACCC
ATTCCAGCGCCTCGGCTGTCAGGTTGCAATCAGCCAGTACCACGCCCGCATGACGAAGTA
AATCGCGCGACCCGTTCAGTAGTTGCGGTGTCAACTGTTCCAGCAGATGGGTATCGTTAA
TCGCCAGCACGGTTTGATCGTCTCGATTGGCAATTGCCAGATACGTCGATGTGCTTTGAC
CATGTAAACGAACGCAGCCGGAGACATTCACGCCGGCACGGCGCGTTTCTTCCAGGAGCA
TTTCGCCATAAAAGTCATCGCCAATCACTGAAAGCAAATGGACGTCGCGGCCTAACAGCG
CCAGATTGTGGGCGATATTGCGTCCAACGCCGCCTGCCGAGCAATGAATTGTACCGGGAT
GAGAAGCCGCTTGCGGGTAACGGATATCCGCCATCCCGCGAATATCCATATTGATTGTCC
CCACCACTACGCAGTATTCCTGCTCGGTGAGAATGTAACCTTTGCCTTTAATCCGCCCTT
TGCGCATTAAATCCATAATATGCGCCGCAACGCGCGAACGACTGATTTGCAGCATGTCCG
CAATTTCGTTCTGCTGAATCAGCGGGTTACGCCGTAAAATTGCAAGGATCTCCTTTTCCC
GGTTATTCATCTTCAGGCAACCGCTTTTTCAGTTTGTTGCGCTTTCAGCCAGGCGATCTC
TTCTGCCCAGATATCCGGGTTAATGGTTTCAAGGATCAGCGGAATGCCGTCGAAACGGTC
GTCCTGCATGATCCAGCGGAACGCATCATGACCGATATTGCCTTCACCGAGGCTATGATG
GCGGTCAACGCGGCTGCCAAAGGTGCTTTTCGCATCGTTAAGGTGCATCCCGCGCAGATA
CTTAAAGCCGACAATACGGGCAAAATCAGCGAACGTTTTCTCGCATTCGGCTGGAGTACG
CAAATCATACCCGGCAGCGAAAGCATGGCAGGTATCAATGCAGATGCCGACACGGGATTT
ATCTTCCACGCCGTCGATAATCGCCGCGAGATGTTCGAATTTAAACCCTAAGTTACTGCC
CTGACCGGCGGTGTTTTCAATCACCGCGGTCACACCTTGAGTTTTATCCAGCGCAATGTT
GATGGATTCGGCAATACGCGCAAGGCAATCCTCTTCTGAAATCTGCATCAGATGGCTGCC
AGGGTGGAAGTTGAGCAAAGAAAGCCCCAGTTGTTCGCAACGCTGCATTTCATCTATAAA
GGCATCGCGCGATTTTTCCAGAGCTTCAGTGACCGGATGTCCGAGGTTAATCAGATAGCT
GTCGTGGGGAAGAATTTGCGCCGATGTGTAGTGATATTTTTCACAGGCGGCTTTGAATTC
ATCGATGGTTTGCGTCGTGAGCGGTGCGGCACGCCACTGACGTTGGTTTTTGGTGAACAA
GGCAAACGCGGTTGCGTCGATTTCGGCGGCGCGAATTGCGGCATTTGCCAGACCGCCAGC
AGCACTAACGTGCGCTCCAATGTATTTCATGCGAGGACTCCTGTTAAACCCGCTGGAGGA
AAACGGTAATGATAGCGGGTTAACAGGAGCAAGATGTAGTGGTTTATGCGATGACGCTTT
GAATCACATAGTTAATCGCACCACCACCAACAATCAGCCAGGCAAACAGTACCAGTGCCA
TCAGCAGAGGTTTCGCCCCAGCTTTTTTCAGCGCGCTGACGTGAGTGGTCAGACCCAGCG
CCGCCATCGCCATTGCCAGCAGGAAGGTATCCAGCGTTACCAGCATGTTCACCACGCTCT
GCGGTAACAGGTGGAACGAGTTAAAGATGGCAACTACGATGAACAAGATGGCAAACCACG
GAATAGTGATTTTGCTTTTCTCGCCGCTGTTCGCCCCAGACAGCTGTTTAACACGCGCCG
CCAGCAGGATGAGGAACGGAGCCAGCATCATCACGCGCAGCATTTTGGAAATAACTGCTG
CGTTTTCCGCATCCGGGCTGATGGCATGACCTGCCGCCACCACCTGCGCCACTTCGTGCA
CAGTAGAACCAATGTAGATACCGAAAGTTTCCGGACTAAACCATTGAGACATCAGCGGAT
ATATCGCCGGGTAGAGGAAAATCGCGACGGTCCCGAAGATAACAACGGTTGCAACAGCCA
CGGTTACTTTACTGGCTTCCGCTTTCACTACCGGCTCAGTCGCCAGTACCGCGGCAGCAC
CACAGATACTGCTACCGGCACCGATCAACCAGCTGGTGTGCTTATCCAGACCAAACACTT
TCTGCCCCAGGAAGCAAGCCAGCAGGAAGGTACTGGACAGCGTCAACACGTCAATGATGA
TCCCACTGATACCGACATCGGCAATTTGCGAGAACGTCAGACGGAAGCCATAAAGAATGA
TACCCAGACGTAATAAATATTGCTTGGCAAACAGCACACCACCGTCACAGCTTTTCCAGA
TGTGCGGATAGATGGTGTTGCCTAAAACCATCCCCAACAAGATTGCGAGGGTGAGGGCAC
TAAACCCGGCACCCGCAACCGCGGGAATGGAACCACCCCACAGGGCGACCCCGGTGATAA
CTGCACTCAGGGCTAACCCCGGAATAAAATGCCACAGTGTACGATGTTGTTTCTGTAAGG
TGATATTCGTCATAACCCTCTCCTTTAACCGGGCATAAGGTTACGACTAACTGGTTTAAA
AATAAAATTGATTATATATTTATAATTAATCTTTATAAGTGGTAAGCGACTATGCACATC
ACCCTCCGGCAGTTGGAAGTTTTTGCAGAAGTATTGAAAAGTGGATCAACCACCCAGGCG
TCGGTGATGCTGGCGTTGTCGCAATCAGCAGTGAGCGCAGCCTTGACCGACCTGGAAGGG
CAGCTTGGCGTTCAACTGTTTGATCGCGTGGGGAAAAGACTGGTTGTTAATGAACACGGG
CGGCTGCTCTATCCGCGTGCGTTGGCATTGCTTGAACAGGCGGTTGAAATCGAACAACTG
TTTCGCGAAGACAACGGCGCGATTCGTATCTATGCCAGTAGTACCATCGGTAACTACATT
CTGCCTGCAGTTATCGCCCGTTATCGCCATGATTATCCGCAGTTGCCGATTGAACTTAGC
GTTGGGAACAGCCAGGACGTGATGCAAGCGGTGCTGGATTTCCGCGTTGATATTGGCTTT
ATTGAAGGACCGTGCCACAGCACTGAAATCATTTCTGAACCGTGGCTGGAAGACGAGCTG
GTGGTTTTCGCCGCGCCGACTTCGCCGTTGGCCCGTGGTCCGGTCACCTTAGAACAGCTG
GCCGCTGCGCCGTGGATCCTGCGTGAACGCGGTTCCGGCACGCGGGAGATTGTCGATTAT
CTGTTGCTGTCACATTTACCGAAGTTTGAGATGGCGATGGAATTAGGTAACTCCGAGGCA
ATCAAACATGCGGTGCGTCATGGGTTGGGAATTAGTTGCCTGTCGCGACGGGTGATTGAA
GACCAATTGCAGGCAGGCACATTAAGTGAAGTTGCGGTCCCTCTGCCGCGCCTGATGCGT
ACGTTGTGGCGTATACATCATCGGCAAAAACACCTTTCCAACGCGCTACGGCGCTTTCTG
GACTATTGCGATCCCGCAAATGTGCCGCGTTAAGTTGCTGTACAAGAACATGCTGGTGCT
GTGTCGATTTCGTGACGCAGCGCCTTCAGCATGCATTCGCCAGAAAAGAGATTGGCTGCT
TTACTTATAATCCCTGGGCGATCATGAAGGTGTCTTATAACCGTGTATTTCTGCCGGAAG
GATTGCCAATCGTCTGCTACAATCGCGCCTCATTTTTTAGATGGATAGCATTTTTGTATG
GTTTCCGAAACTAAAACCACAGAAGCGCCGGGCTTACGCCGTGAATTAAAGGCGCGTCAC
CTGACGATGATTGCCATTGGCGGTTCCATCGGTACAGGTCTTTTTGTTGCCTCTGGCGCA
ACGATTTCTCAGGCAGGTCCGGGCGGGGCATTGCTCTCGTATATGCTGATTGGCCTGATG
GTTTACTTCCTGATGACCAGTCTCGGTGAACTGGCTGCATATATGCCGGTTTCCGGTTCG
TTTGCCACTTACGGTCAGAACTATGTTGAAGAAGGCTTTGGCTTCGCGCTGGGCTGGAAC
TACTGGTACAACTGGGCGGTGACTATCGCCGTTGACCTGGTTGCAGCTCAGCTGGTCATG
AGCTGGTGGTTCCCGGATACACCGGGCTGGATCTGGAGTGCGTTGTTCCTCGGCGTTATC
TTCCTGCTGAACTACATCTCTGTTCGCGGCTTTGGTGAAGCGGAATACTGGTTCTCACTG
ATCAAAGTCACGACAGTTATTGTCTTTATCATCGTTGGCGTGCTGATGATTATCGGTATC
TTCAAAGGCGCGCAGCCTGCGGGCTGGAGCAACTGGACAATCGGCGAAGCGCCGTTTGCT
GGTGGTTTTGCGGCGATGATCGGCGTAGCTATGATTGTCGGCTTCTCTTTCCAGGGAACC
GAGCTGATCGGTATTGCTGCAGGCGAGTCCGAAGATCCGGCGAAAAACATTCCACGCGCG
GTACGTCAGGTGTTCTGGCGAATCCTGTTGTTCTATGTGTTCGCGATTCTGATTATCAGC
CTGATTATTCCGTACACCGATCCGAGCCTGCTGCGTAACGATGTTAAAGACATCAGCGTT
AGTCCGTTCACCCTGGTGTTCCAGCATGCGGGTCTGCTCTCTGCGGCGGCGGTGATGAAC
GCAGTTATTCTGACGGCGGTGCTGTCAGCGGGTAACTCCGGTATGTATGCGTCTACTCGT
ATGCTGTACACCCTGGCGTGTGACGGTAAAGCGCCGCGCATTTTCGCTAAACTGTCGCGT
GGTGGCGTGCCGCGTAATGCGCTGTATGCGACGACGGTGATTGCCGGTCTGTGCTTCCTG
ACCTCCATGTTTGGCAACCAGACGGTATACCTGTGGCTGCTGAATACCTCCGGGATGACC
GGTTTTATCGCCTGGCTGGGGATTGCCATTAGCCACTATCGCTTCCGTCGCGGTTACGTA
TTGCAGGGACACGACATTAACGATCTGCCGTACCGTTCAGGTTTCTTCCCATTGGGGCCG
ATCTTCGCATTCATTCTGTGTCTGATTATCACTTTGGGCCAGAACTACGAAGCGTTCCTG
AAAGATACCATTGACTGGGGCGGCGTAGCGGCAACGTATATTGGTATTCCGCTGTTCCTG
ATTATTTGGTTCGGCTACAAGCTGATTAAAGGAACTCACTTCGTACGCTACAGCGAAATG
AAGTTCCCGCAGAACGATAAGAAATAAGTTTCCTCCCTTCCTTGCTAAGCCCTCTCAACC
GAGAGGGCTTTTTCAATTCCATTTCCCTGACAAATCATGCGGATATAAAATTTAACATTT
GGATTGATAATTGTTATCGTTTGCATTATCGTTACGCCGCAATCAAAAAAGGCTGACAAA
TCAGAGGCTGTTCCGGCTTTCTGGGATGATCACCTGCATACAAATAAGTCCACCGCGATG
CTGCCGTACGCAATGGGACGTGAAGAAGATGTGAGCGATAACCCATTTTATTTTCGTAGT
TACCTCATGGAGATATGGAATGTTTAGGTTGAACCCTTTCGTACGGGTCGGGCTGTGTTT
GTCCGCTATTTCTTGTGCATGGCCTGTGTTAGCGGTCGATGATGATGGCGAAACGATGGT
TGTCACTGCATCTTCCGTTGAACAAAACCTTAAAGATGCACCCGCCAGTATCAGCGTCAT
TACCCAGGAAGACCTGCAGCGAAAACCGGTACAGAATCTGAAGGATGTCCTCAAAGAAGT
GCCTGGCGTACAACTGACGAACGAAGGGGATAACCGTAAGGGCGTTAGTATTCGTGGTCT
GGACAGCAGCTACACCCTGATTCTTGTCGACGGTAAACGCGTTAACTCCCGCAATGCCGT
CTTCCGCCACAATGATTTCGATCTGAACTGGATCCCGGTCGATTCCATCGAACGTATTGA
AGTGGTCCGTGGCCCGATGTCGTCGCTGTACGGTTCCGATGCGCTCGGCGGTGTAGTGAA
TATCATCACCAAAAAAATCGGTCAGAAATGGTCGGGTACCGTTACCGTCGATACCACCAT
TCAGGAACATCGCGATCGCGGTGATACCTATAACGGTCAGTTCTTTACCAGTGGACCATT
AATTGATGGTGTGCTGGGAATGAAAGCTTACGGCAGCCTGGCAAAACGTGAAAAGGATGA
CCCGCAAAACTCAACGACCACCGATACCGGAGAAACGCCGCGTATTGAAGGATTCTCCAG
CCGCGACGGCAATGTCGAATTTGCCTGGACACCGAATCAAAATCACGATTTTACTGCCGG
ATACGGTTTCGACCGTCAGGATCGTGATTCCGACTCGCTGGACAAAAACCGCCTGGAACG
CCAGAACTACTCCGTCAGCCATAATGGGCGTTGGGATTACGGCACCAGCGAACTGAAATA
CTACGGTGAGAAAGTCGAGAACAAAAACCCTGGCAACAGCAGCCCGATAACTTCCGAAAG
CAATACGGTCGACGGCAAATACACGTTGCCGCTGACGGCGATTAATCAGTTTCTCACGGT
TGGCGGTGAATGGCGTCACGACAAACTTAGCGATGCGGTGAACCTGACCGGGGGAACCAG
CTCCAAAACGTCTGCCAGCCAGTACGCGCTGTTTGTGGAAGATGAATGGCGGATCTTCGA
GCCGCTGGCGCTGACGACCGGCGTGCGTATGGACGATCACGAAACCTACGGTGAACACTG
GAGTCCGCGTGCCTACCTGGTTTATAACGCCACCGACACCGTAACGGTGAAAGGGGGCTG
GGCGACGGCATTTAAAGCGCCTTCTCTGTTGCAACTTAGCCCTGACTGGACGAGCAATTC
CTGCCGTGGCGCATGTAAGATTGTAGGTAGCCCGGATCTGAAACCAGAAACCAGCGAAAG
TTGGGAGCTGGGGCTGTACTACATGGGTGAAGAAGGCTGGCTGGAAGGGGTTGAATCCAG
CGTTACCGTTTTCCGTAACGATGTGAAAGATCGCATCAGCATCAGCCGTACGTCTGACGT
CAATGCTGCACCGGGCTACCAAAACTTTGTCGGTTTTGAGACGGGCGCTAACGGACGGCG
CATACCGGTATTTAGCTACTACAACGTTAACAAAGCTCGTATTCAGGGCGTGGAAACCGA
ACTGAAAATTCCGTTCAACGATGAATGGAAACTGTCACTCAACTACACCTATAACGATGG
TCGTGATGTCAGCAACGGCGAAAACAAACCGCTATCCGATCTGCCGTTCCATACCGCTAA
CGGTACGCTGGACTGGAAACCGCTGGCGCTGGAAGACTGGTCATTCTATGTTTCTGGTCA
CTATACCGGGCAGAAACGAGCCGACAGCGCGACGGCTAAAACACCGGGCGGTTATACCAT
CTGGAATACCGGCGCGGCCTGGCAGGTGACTAAAGACGTCAAACTGCGCGCAGGTGTGCT
GAACCTTGGCGACAAGGATCTCAGTCGTGACGACTACAGCTATAACGAAGACGGACGTCG
TTACTTTATGGCAGTGGATTATCGCTTCTGATGAGAAGATGCCCGGCGAACCGGGCGGAC
TTTCACTTCAGTAAATACTGCGCATGGAAGCGCAGGTGATCCTCTATAAAAGAGGCGATG
AAGTAGTAACTGTGATCATATCCCGGCTGAATACGCAGCGTCATCGGCCATGCTTTCTGG
CGCGCGGCTTCTGCAAGTACTGCAGGTTGCAGTTGGTCAGCAAGAAACTGATCGTTATCA
CCCTGATCGATAAGCGTCGGGATCGCATCCTGCGCGTTACTGGCATACATCAGCGCGCAA
CTGTCCCATTCCAGCCATGCATTTTTGTCCTCACCTAAATAGCGGCTAAACGCTTTGATT
CCCCACGGGACGCTGCACGGATTCACAATTGGCGCAAAGGCGGAAACGCTGGCGTATTTG
CCCGGGTTTTTCAGCGCCATAATCAGCGCACCGTGACCACCCATTGAATGACCGCTAATG
GCGCAGCGGTCGCTGACATTAAATTGCGACTGAATCAGCGCCGGTAATTCATCGCGCAGA
TAATCATACATCCGGTAATGCGTCGCCCACGGCGGTTGCGTGGCGTTAAGATAAAAGCCC
GCGCCCTGGCCTAAATCGTAGCCATCGTCGTTGGCAACCTGTTCACCGCGCGGGCTGGTG
TCTGGCATCACCAGTACAATCCCCAGTTCCGCCGCCACGCGCTGGGCACCCGCCTTGGTG
GTGAAGTTCTCGTCATTGCAGGTTAATCCGGAAAGCCAGTACAGCACTGGTGGCGGGGTG
TGATCACGAGGGGGTGGGAGAAAGATACTGAACGTCATCGGGCAGTTTAAGGTACTGGAG
TAGTGTCGCCAGCGTTGCTGCCAGCCTTCAAAACAGCGGTGCTCTTCGAGCATTTCCATG
CGTGGCTCCTTGTTGTGTTGTTTGCAATTTCTTCATCATACCGTTTATTCAATGTGCTGT
GAGTAACTTTCACTTCCGTATTTGCATAACGATGTTTTAACATCTGCTGATGAAAGGCAG
CGGCAATTACAATAATTATCGCTGTGAATACTGGATTATGTGCGCCGCCTCACGCACAAT
AATCAGGCTGTAAATCAGCTTAATAACTTTGCCCCCACGCAGGGCGGAGGCGTCACACCT
GCAGGAGAAATCATAAATGCCATCACTCAGTAAAGAAGCGGCCCTGGTTCATGAAGCGTT
AGTTGCGCGAGGACTGGAAACACCGCTGCGCCCGCCCGTGCATGAAATGGATAACGAAAC
GCGCAAAAGCCTTATTGCTGGTCATATGACCGAAATCATGCAGCTGCTGAATCTCGACCT
GGCTGATGACAGTTTGATGGAAACGCCGCATCGCATCGCTAAAATGTATGTCGATGAAAT
TTTCTCCGGTCTGGATTACGCCAATTTCCCGAAAATCACCCTCATTGAAAACAAAATGAA
GGTCGATGAAATGGTCACCGTGCGCGATATCACTCTGACCAGTACCTGTGAACACCATTT
TGTTACCATCGATGGCAAAGCGACGGTGGCTTATATCCCGAAAGATTCGGTGATCGGTCT
GTCAAAAATTAACCGTATCGTGCAGTTCTTTGCCCAGCGTCCGCAGGTGCAGGAACGTCT
GACGCAGCAAATTCTCATTGCGCTACAAACGCTGTTGGGCACCAATAACGTGGCTGTTTC
TATCGACGCGGTGCATTACTGCGTGAAGGCGCGTGGCATCCGCGATGCAACCAGTGCCAC
GACAACGACCTCTCTTGGTGGATTGTTCAAATCCAGTCAGAATACGCGCCACGAGTTTCT
GCGCGCTGTGCGTCATCACAACTGATTAAAAGGCAGGAACCATGGAGCGCAACGTCACGC
TCGATTTTGTTCGCGGCGTCGCCATTCTGGGGATCCTGCTATTAAACATCAGCGCCTTTG
GGCTACCAAAGGCGGCTTATCTTAATCCCGCCTGGTACGGCGCTATTACGCCGCAGGATG
CATGGACCTGGGCATTTCTCGATCTCATCGGCCAGGTGAAATTCCTCACGCTTTTTGCGC
TGCTGTTTGGTGCTGGCCTGCAAATGTTGCTGCCCCGTGGCAGACGCTGGATCCAGTCGC
GGTTAACGCTGTTAGTCTTGCTGGGCTTTATTCACGGTTTATTGTTCTGGGACGGCGATA
TTCTGCTGGCTTACGGGCTGGTGGGCTTAATCTGCTGGCGGCTGGTGCGCGATGCGCCAT
CGGTAAAAAGCCTGTTTAATACAGGCGTCATGCTTTATCTGGTGGGGCTTGGCGTTTTGC
TGTTATTGGGGTTGATTTCCGATACCCAGACCAGCCGCGCCTGGACGCCGGATGCATCGG
CTATTTTGTATGAAAAATACTGGAAGCTTCACGGCGGCGTTGAAGCGATCAGTAATCGTG
CCGATGGTGTTGGGAACAGTTTACTGGCACTGGGCGCACAGTATGGCTGGCAACTGGCTG
GGATGATGCTCATTGGTGCGGCGCTGATGCGCAGCGGCTGGCTGAAAGGGCAGTTCAGCT
TACGTCACTATCGTCGTACTGGTTTTGTGCTGGTGGCGATTGGGGTGATCATTAACCTTC
CTGCCATCGCCCTGCAATGGCGGCTGGACTGGGCATATCGCTGGTGCGCCTTCTTACTTC
AGATGCCGCGGGAACTGAGTGCACCGTTTCAGGCGATTGGCTATGCGTCGCTGTTTTATG
GTTTCTGGCCGCAATTGAGCCGCTTTAAGCTGGTGCTTGCGATCGCCTGCGTCGGACGGA
TGGCGCTGACCAACTATCTATTGCAAACGCTGATTTGTACCACGCTTTTTTATCACCTCG
GTTTGTTTATGCAGTTTGACCGTCTGGGATTGCTGGCGTTTGTTATTCCGGTATGGCTGG
CGAATATCCTCTTCTCTGTTATCTGGCTGCGTTACTTCCGCCAGGGGCCGGTGGAATGGC
TCTGGCGTCAGTTAACTTTGCGTGCTGCCGGACCGGCAATATCTAAAACATCAAGATAAC
GATCTGGATCACATTCGTTAACAAAACGGCTGTAACCGTTTCCATTGCTGTGACTCGATT
CACGAAGTCCTGTATTCAGTGCTGACAAAATAGCCGCCAGCAAGCAGTCATTTACTGCAA
TCTCATAACAGGTAGTGAATATGATCACCATTCGTGATGTAGCGCGTCAGGCTGGCGTCT
CTGTGGCAACGGTTTCCCGGGTGCTCAATAACAGCACGCTGGTCAGTGCCGACACGCGTG
AAGCAGTAATGAAAGCCGTGAGTGAGCTGGATTATCGGCCAAACGCCAATGCCCAGGCGC
TGGCAACTCAGGTTAGCGACACCATTGGCGTGGTGGTGATGGACGTTTCTGATGCGTTTT
TCGGCGCGCTGGTAAAAGCGGTGGATCTGGTCGCCCAGCAGCATCAGAAATACGTGCTAA
TCGGCAATAGCTATCATGAAGCGGAAAAAGAACGTCACGCCATTGAGGTGTTAATTCGCC
AGCGTTGTAATGCATTGATTGTTCACTCAAAAGCATTGAGTGACGATGAACTGGCGCAAT
TTATGGATAACATTCCCGGTATGGTGTTAATCAACCGCGTTGTGCCGGGGTACGCCCATC
GTTGCGTTTGCCTGGATAATCTCAGCGGTGCCCGAATGGCGACGCGCATGTTGCTGAATA
ACGGTCATCAACGTATTGGTTATCTTTCTTCCAGCCACGGCATTGAAGATGACGCCATGC
GTAAAGCAGGCTGGATGAGTGCGTTGAAAGAGCAGGATATTATTCCGCCGGAAAGCTGGA
TTGGCACTGGTACGCCGGACATGCCGGGCGGTGAGGCGGCGATGGTTGAACTGCTGGGGC
GCAATCTACAACTTACCGCTGTATTTGCTTATAACGACAATATGGCTGCTGGCGCACTGA
CAGCATTAAAAGATAATGGTATTGCGATTCCGTTACATCTCTCAATCATCGGTTTCGATG
ATATTCCCATCGCCCGTTACACCGACCCGCAATTAACGACCGTGCGTTATCCCATTGCTT
CAATGGCTAAATTAGCCACCGAACTGGCCTTGCAGGGGGCAGCAGGCAATATTGATCCTC
GTGCCAGCCACTGTTTTATGCCGACGTTAGTGCGTCGTCATTCTGTCGCAACGCGCCAGA
ATGCGGCGGCGATCACTAACTCAACAAATCAGGCGATGTAACCGCTTTCAATCTGTGAGT
GATTTCACAGTATCTTAACAATGTGATAGCTATGATTGCACCGTTTTAACGTTGTAACCC
GTATGTAACAGTGAATAATCACTTTCACCGAGGTAATAGCGTCATAACAACAATTAAAGC
CGTTTTCTGGAGCGTTACCGGGCACTGATGAATCCCCTAATGATTTTGGTAAAAATCATT
AAGTTAAGGTGGATACACATCTTGTCATATGATCAAATGGTTTCGCGAAAAATCAACTTG
AGACTTGGTATTCATTTTTCGTCTTGCGACGTTAAGAATCCGTATCTTCGAGTGCCCACA
CAGATTGTCTGATAAATTGTTAAAGAGCAGTTGCGACGCGGCTTTCAGCTCACTGTCGCG
AGGTGGCGTATATTACGCTTTCCTCTTTCAGAGTCAACCCTGAATTTCAGGATTTTTTCT
CTTCAACCGAACAGGCTGTTTGTGTGAAGTGATTCACATCCGCCGTGTCGATGGAGGCGC
ATTATAGGGAGTCGGCTCAGGAAGACAAGCGGAAAAATGCATTTTTATTTCAACCGCTCA
TCTTTTAATCATTACGCCGGTTTTTGCTGCTTTTTTATCGCTTGCGGCAGGTCTGCCAGG
CTATTTAACACCCAATCTGCCGCGTTTTCTGCTTCAGGTGTAATAGGTTTACCCGTACGC
ACCAGCACTTTTGTTCCCACGTTCGCCGCAGCCGCTGCCTGCATATCTTCTAATTTATCG
CCCACCATATAAGAGGCGGCCATATCAATATGCAAATAATCGCGTGCTGACAAAAGCATC
CCCGGATGTGGTTTGCGGCAATCGCAGACCTGGCGAAACTCTTCAACACTACCCTGCGGA
TGATGCGGGCAATAATAGATACCATCCAGATCGACATCGCGGTCCGCCAGCGACCAGTCC
ATCCACTCGGTCAGCGTTTCAAACTGTGCTTCAGTAAATTTACCGCGAGCAATGCCAGAC
TGGTTGGTTACTATCACCAGCGCAAAGCCCATTTTTTTCAGCTCGCGCATGGCGTCAATA
ACACCGTCGATAAATTCAAAGTTGTCGATCTCATGGACATAGCCGTGATCGACATTAATG
GTGCCATCACGGTCAAGAAAAATTGCGGGTACGCTCTTCGCCACCTTTTATAGCTCCTTA
ATAAGGCATGTGGCGCTAGTATCGCATGTTTCGACCTGCAAGAAAGTGCTCTTCGCATAA
ACCTGATTGATTTAGACGTCTGGATGCCTTAACATCCATTTCATTGACGGCGTTGCCCGT
TTCAGGCATTCGAAATGCCACGACTAACTTAATGACGATAATAAATATTCAATGATAAAA
CTTTCGAATATCACCAAAGTGTTCCACCAGGGCACCCGCACCATCCAGGCGTTGAACAAC
GTCAGCCTGCATGTGCCAACTGGACAAATTTATGGCGTTATCGGGGCCTCAGGCGCGGGT
AAGAGTACGCTTATACGTTGTGTAAACCTGCTGGAGCGCCCAACCGAGGGTAGCGTGCTG
GTCGATGGACAGGAACTGACCACGCTGTCAGAATCCGAGTTGACCAAAGCTCGCCGCCAG
ATTGGTATGATTTTCCAGCATTTTAACCTGCTCTCTTCGCGTACTGTTTTTGGCAACGTG
GCTCTGCCGCTGGAGCTGGACAACACACCGAAAGACGAGATCAAACGTCGCGTGACGGAA
TTGCTGTCATTGGTTGGTCTTGGCGATAAGCATGATAGCTACCCGTCGAATCTTTCCGGT
GGGCAGAAACAACGTGTGGCGATTGCCCGTGCATTAGCCAGCAATCCCAAAGTATTGCTG
TGTGATGAAGCCACCAGCGCGCTGGACCCGGCAACGACACGTTCTATTCTCGAACTGCTG
AAAGACATCAACCGCCGTCTGGGTTTGACGATTCTGTTGATCACTCACGAAATGGACGTT
GTGAAGCGCATTTGTGATTGCGTGGCGGTCATCAGCAATGGCGAACTGATCGAGCAGGAC
ACGGTAAGTGAAGTGTTCTCACATCCGAAAACGCCGCTGGCGCAGAAGTTTATTCAGTCA
ACCCTGCATCTGGATATCCCGGAAGATTACCAGGAACGTCTGCAAGCGGAGCCATTCACT
GACTGCGTGCCGATGCTGCGTCTGGAGTTTACCGGTCAATCGGTCGATGCCCCACTGCTT
TCTGAAACCGCGCGTCGTTTTAACGTCAACAACAACATTATTAGCGCGCAGATGGATTAC
GCCGGTGGCGTTAAGTTCGGCATCATGCTGACTGAAATGCATGGCACACAACAAGATACG
CAAGCCGCCATTGCCTGGCTGCAGGAACACCATGTAAAAGTAGAGGTACTGGGTTATGTC
TGAGCCGATGATGTGGCTGCTGGTTCGTGGCGTATGGGAAACGCTGGCAATGACCTTCGT
ATCCGGATTTTTTGGGTTTGTGATTGGTCTGCCGGTTGGCGTCCTGCTTTATGTCACGCG
TCCGGGGCAAATTATTGCTAACGCGAAGCTGTATCGTACCGTTTCTGCGATTGTGAACAT
TTTCCGTTCCATCCCGTTCATTATCTTGCTGGTATGGATGATTCCGTTTACCCGCGTTAT
TGTCGGTACATCGATTGGTTTGCAGGCAGCGATTGTTCCGTTAACCGTTGGCGCAGCGCC
GTTTATTGCCCGTATGGTCGAGAACGCTCTTCTGGAGATCCCAACCGGGTTAATTGAAGC
TTCCCGCGCAATGGGTGCCACTCCAATGCAGATCGTCCGTAAGGTGCTGTTACCGGAAGC
GTTGCCGGGTCTGGTGAATGCGGCAACTATCACCCTGATTACCCTGGTCGGTTATTCCGC
GATGGGTGGTGCAGTCGGTGCCGGTGGTTTAGGTCAGATTGGCTATCAGTATGGCTACAT
CGGCTACAACGCGACGGTTATGAATACGGTACTGGTATTGCTGGTCATTCTGGTTTATTT
AATTCAGTTCGCAGGCGACCGCATCGTCCGGGCTGTCACTCGCAAGTAACGTTCAACACA
ACATAAATAATTGAAGAAGGAATAAGGTATGGCGTTCAAATTCAAAACCTTTGCGGCAGT
GGGAGCCCTGATCGGATCACTGGCACTGGTAGGCTGCGGTCAGGATGAAAAAGATCCAAA
CCACATTAAAGTCGGCGTGATTGTTGGTGCCGAACAGCAGGTTGCAGAAGTCGCGCAGAA
AGTTGCGAAAGACAAATATGGCCTGGACGTTGAGCTGGTAACCTTCAACGACTATGTTCT
GCCAAACGAAGCATTGAGCAAAGGCGATATCGACGCCAACGCCTTCCAGCATAAACCGTA
CCTTGATCAGCAACTGAAAGATCGTGGCTACAAACTGGTCGCAGTAGGCAACACTTTTGT
TTATCCGATTGCTGGTTACTCCAAGAAAATCAAATCACTGGATGAACTGCAGGATGGTTC
GCAGGTTGCCGTGCCAAACGACCCAACTAACCTTGGTCGTTCACTGCTGCTGCTGCAAAA
AGTGGGCTTGATCAAACTGAAAGATGGCGTTGGCCTGCTGCCGACCGTACTTGATGTTGT
TGAGAACCCAAAAAATCTGAAAATTGTTGAGCTGGAAGCACCGCAGCTGCCTCGCTCTCT
GGACGACGCGCAAATCGCTCTGGCAGTTATCAATACCACCTATGCCAGCCAGATTGGCCT
GACTCCAGCGAAAGACGGTATCTTTGTCGAAGATAAAGACTCCCCGTACGTAAACCTGAT
CGTGACGCGTGAAGATAACAAAGACGCCGAGAACGTGAAGAAATTCGTCCAGGCTTATCA
GTCTGACGAAGTTTACGAAGCAGCAAACAAAGTGTTTAACGGCGGCGCTGTTAAAGGCTG
GTAATTTTTAGGCTGTTTCCACAATTTGTAATATCATTCAGGACGGGCGCTTGCCCGTCT
TGTCATTTTTACAAGCTCCTGATTCAATATTGACGTTTTGATCATACATTGAGGAAATAC
TATGCGTGCTTTACCGATCTGTTTAGTAGCACTCATGCTAAGCGGCTGTTCCATGTTAAG
CAGATCCCCTGTCGAACCCGTTCAAAGCACTGCACCCCAGCCGAAAGCGGAGCCTGCAAA
ACCGAAAGCGCCGCGCGCCACGCCGGTCCGAATTTATACCAATGCAGAAGAATTAGTCGG
CAAACCGTTCCGCGATCTCGGTGAAGTCAGTGGCGACTCTTGCCAGGCCTCTAATCAGGA
CTCTCCGCCGAGCATTCCAACCGCACGTAAGCGGATGCAAATCAACGCCTCTAAAATGAA
AGCCAATGCTGTATTACTGCATAGCTGCGAAGTCACCAGCGGTACGCCGGGCTGCTATCG
TCAGGCTGTATGTATCGGCTCTGCGCTTAACATTACGGCGAAATGAGCAGTTTCCAGTTC
GAGCAAATAGGCGTTATTCGCTCGCCCTATAAAGAAAAATTCGCCGTTCCGCGCCAGCCT
GGTCTGGTAAAAAGCGCCAACGGCGAACTGCATCTCATTGCTCCCTACAACCAGGCCGAC
GCCGTTCGCGGCCTGGAAGCATTCAGCCATTTATGGATCCTTTTCGTCTTTCATCAAACG
ATGGAAGGCGGCTGGCGTCCGACTGTGCGTCCGCCTCGTCTTGGCGGTAATGCCAGAATG
GGTGTTTTCGCTACGCGTTCCACTTTTCGCCCTAACCCAATTGGTATGTCGTTGGTAGAG
CTGAAAGAGGTTGTTTGCCATAAAGACAGCGTGATTCTGAAGCTCGGCAGTATGGATCTG
GTCGATGGTACGCCGGTAGTGGATATCAAACCGTATCTCCCCTTTGCTGAATCGCTTCCC
GATGCCTGTGCCAGCTATGCGCAAAGTGCGCCAGCGGCAGAGATGACGGTGAGTTTTACC
GCAGAGGTCGAAAAGCAGCTTTTGACGCTGGAGAAGCGTTATCCGCAGTTAACCCTGTTT
ATCCGCGAAGTACTGGCGCAAGACCCACGCCCGGCCTATCGTAAAGGTGAGGAAACGGGT
AAAACCTATGCCGTCTGGCTACATGATTTTAACGTTCGCTGGCGCGTCACCGACGCAGGT
TTTGAAGTCTTTGCGCTGGAACCGCGTTAAATTCACGCCCTTCTCTTTTGACATTTCTTT
TGCACTGGTAAACTAAATCACTTTTTTTGTCCCAGGCTCGCCTTGAGCCTGTTCTACCTT
CCAACTGGAACCGTAACAACATGCGTACTAGCCAATACCTGCTCTCCACTCTCAAGGAGA
CACCTGCCGACGCCGAGGTGATCAGCCATCAGCTGATGCTGCGCGCCGGGATGATCCGCA
AGCTGGCCTCCGGGTTATATACCTGGCTGCCGACCGGCGTGCGCGTTCTGAAAAAAGTCG
AAAACATCGTGCGTGAAGAGATGAACAACGCCGGTGCAATCGAGGTGTCGATGCCGGTGG
TTCAGCCAGCCGATTTGTGGCAAGAGAGTGGTCGTTGGGAACAGTACGGTCCGGAACTGC
TGCGTTTTGTTGACCGTGGCGAGCGTCCGTTCGTACTCGGCCCAACTCATGAAGAAGTTA
TCACTGACCTGATTCGTAACGAGCTTAGCTCTTACAAACAGCTGCCGCTGAACTTCTATC
AGATCCAGACCAAGTTCCGCGACGAAGTGCGTCCGCGTTTCGGCGTCATGCGTTCCCGCG
AATTCCTGATGAAAGATGCTTACTCTTTCCATACTTCTCAGGAATCCCTGCAGGAAACCT
ACGATGCAATGTATGCGGCCTACAGCAAAATCTTCAGCCGCATGGGGCTGGATTTCCGCG
CCGTACAGGCCGACACCGGTTCTATCGGCGGCAGCGCCTCTCACGAATTCCAGGTGCTGG
CGCAGAGCGGTGAAGACGATGTGGTCTTCTCCGACACCTCTGACTATGCAGCGAACATTG
AACTGGCAGAAGCTATCGCACCGAAAGAACCGCGCGCTGCTGCTACCCAGGAAATGACGC
TGGTTGATACGCCGAACGCGAAAACCATCGCGGAACTGGTTGAACAGTTCAATCTGCCGA
TTAAGAAAACGGTTAAGACTCTGCTGGTTAAAGCGGTTGAAGGCAGTAGCTTCCCGCTGG
TTGCGCTGCTGGTGCGCGGTGATCACGAGCTGAACGAAGTTAAAGCAGAAAAACTGCCGC
AGGTTGCAAGCCCGCTGACTTTCGCGACCGAAGAAGAAATTCGTGCCGTGGTTAAAGCCG
GTCCGGGTTCACTGGGTCCAGTAAACATGCCGATTCCGGTGGTGATTGACCGTACCGTTG
CGGCGATGAGTGATTTCGCTGCTGGTGCTAACATCGATGGTAAACACTACTTCGGTATCA
ACTGGGATCGCGATGTCGCTACCCCAGAAATTGCTGATATCCGCAACGTGGTGGCGGGCG
ATCCAAGCCCGGATGGTCAGGGTACGCTGCTGATCAAACGTGGTATCGAAGTCGGTCACA
TCTTCCAGCTGGGTACCAAGTACTCCGAAGCACTGAAAGCCTCCGTACAGGGTGAAGATG
GCCGTAACCAAATCCTGACTATGGGTTGCTACGGTATCGGCGTAACGCGCGTAGTAGCTG
CAGCAATTGAGCAGAACTACGACGAACGCGGCATCGTATGGCCTGACGCGATCGCACCGT
TCCAGGTAGCGATTCTGCCTATGAATATGCACAAGTCCTTCCGTGTACAAGAGCTGGCCG
AGAAGCTGTACAGCGAACTGCGTGCACAAGGTATCGAAGTCCTGCTGGATGACCGCAAAG
AGCGTCCGGGCGTGATGTTTGCTGATATGGAACTGATCGGTATTCCGCACACTATTGTGC
TGGGCGACCGTAACCTCGACAACGACGATATCGAATACAAATACCGTCGTAACGGCGAGA
AACAGTTAATTAAGACCGGTGACATCGTCGATTATCTGGTGAAACAGATTAAAGGCTGAT
GCCAGAAAGGGTCCTGAATTTCAGGACCCTTTTTTACAGGGATTGTATAAAATGGATAAA
CCAAAGGCATACTGCCGCCTGCTTCTCCCCTGCTTTCTTTTACTTTCGGCCTGTACCGTT
GATATCAGCCAGCCAGACTCCTCAGCCACAGCGATAGATACCGAGACGAAAACATGGGCT
GTCAAATTCCAGCATCAAAGCTCTTTCACCGAACAATCAATAAAAGAAATAACAGAACCT
GACCTCAAACCCGGCGATTTGCTGTTCTCCTCAAGTCTTGGGGTAACCTCATTTGGTATC
CGCGTCTTCAGCACTTCCTCAGTGAGTCACGTTGCAATCTATCTGGGTGATAACAACGTT
GCAGAAGCGACAGGGGCTGGCGTCCAGATTGTTTCCCTTAAAAAAGCGATGAAGCATAGC
GATAAGCTTTTCGTCTTACGAGTCCCGGATCTTACCCCGCAACAAGCCACAGAAATCACC
GCGTTCGCCAACAAAATTAAAGATAGCGGTTACAACTATCGCGGCATTGTCGAATTTATT
CCCTTTATGGTGACTCGCCAGATGTGCTCACTGAATCCGTTCTCCGAGGATTTTCGCCAA
CAGTGCGTCAGCGGCCTGGCGAAAGCGCAGTTAAGCAGTGTGGGCGAAGGAGACAAAAAG
TCGTGGTTTTGTTCGGAATTTGTCACTGATGCATTTGCCAAAGCCGGGCATCCGCTTACG
CTGGCGCAATCGGGCTGGATTAGCCCTGCCGATCTGATGCATATGCGTATTGGTGATGTC
TCTGCGTTTAAGCCAGAAACGCAGTTACAGTATGTTGGGCACCTGAAGCCAGGGATTTAT
ATCAAGGCGGGTCGCTTTGTTGGTTTGACTCAGTGATAAAGCCAGCCTCGTGCACAAAAT
GCCGGATGCGGCGTGAACGCCTTATCCGGCCTACAAAATCGTGCTAATTCAAAATGTTGC
ATTATATGCTGTAGGCCTGATAAGCGCAGCGCATCAGGCAATTTTGCGTTTGTTTCTGCC
TTAAGCAGGTTTACTGCCCCAAACTACTGCAATCCTGGTTCGGATAAAATTTACCCGCCG
TATCGGGCGCTAATACTTTGGTCGGCGCACCGGTATCCGGATTAGCCTCAAGCGTAAAGT
GACCTTCTACTGACAGTAACACCGGTTTTTCACTGTGCCCGCGCGCAGCCAGGTAGCCAC
GCTCCAGCTCTGCGTTATTCGCTACCATGAAACGTTTTCCGGTCGCGCAATCAGTGAAGG
TCGCCGCATCAGCCATATAAAAATACATGCCCCGCAGAGTCATCGGCGTCATGGGTAAAC
TGGATTGTGCCGCTTCCAGCGTATAGTTGAACTGCGATTCAATCGGTTTACCTTCACGAT
CGAGCATCTCCAGCGCATCGCCTTTCGCCCGATAATATGACTTTTCACCTTTGCTGTCGG
TTAATACCAGCTTGTCAGCGGTTCGCGCCCATGTACCGTAGGAAGCGAAGGAGGAAGGTT
CTTCACGAGCACCGAGATAACGCTCATTCATCACCCATGTTCCGTCTTTTTCGAGGAACA
GAGAGGTTTCGATTCCTTCGCAATCGGCACACGGCAGCACGCCGCGCCAACTTTGCGGCA
TCGGTTTCAGTTCGGCTGCCTGCGCCGGAGAAAGCGTATCGACTTCGGCCCGATTATTAC
AACCCATCAGAGTAAAGAGGCTGATTACAGCCATCGCTGTCACTATCGCTTTTTTCACCA
TCCATTCCTTCTTTTTATTCCCGACCGCTGCGCACTTTGCCGCGCATCGCCTTCACGCTT
GATTTTTGTGCTTTCGATGCCAGCCTGCGCTCTTTCGATGCACGGGTGGGCCGCGTGGGT
CGTCGGGCTTTTTGTTCTGTTGTTAATTCTTTAATCACAGCCACCAGCCGGGCCAGAGCT
GCTTCGCGGTTCAGTTCCTGACTGCGGTATTCCTGTGCCTTAATGACAATCACGCCATCA
CTGCTGATCAAATGATGGCTGGCGGCGAGCAGACGCTCTTTGTAATACTCTGGCAGGCTG
GACGCCCGAATGTCAAAACGCAGATGAATAGCCGTTGAGGTCTTATTAACATGCTGCCCG
CCCGCGCCCTGCGCACGAATGGCGGTGATCTCAAGCTCACCATCGGGAATAGCAACATGT
CGGGAAATCACAATCATGAAGGTTGTTGCCAGGCGGTTAAGTTCACTTCCAGATTATTCT
TATCATCCGATAACCAGATCACGCCATCCTGAATCGTTGCCTGCAGCGTCATGGTACGAT
CGGCAAAGGCGCTTACTTTCGCCAGTTGTTCATCGTCCAGATACCAGACGGAAAGATTGG
CAAACTGCACACATTTGCTCTGATTTTGCTGCCACCAGATTTGCGCCGCCCGACTATTAT
AGGTAAACAGCGCCACTTCTGCGGCCTGGGTGCAGGCTTTCTTAATCCGCCGCTCATCCG
GCAGCCCAGCTCAATCCACAAATCAATGCCCAGGTGATCGTTACGCAGCCACGCTTCCGG
CTCATCATCGGCACACAAACCACGGGTAAATTGCAGACGTTCATCAGCATATTTCAGCCA
CGCCAGCAAGCGCAGCATCATACGCTCCTGGGTTTCTGAAGGGTGGCGCGCCAGCGTCAG
AGAGGCATCGAGAAACTGGTTGCGGTCGAGATCGGCCACATTAACCGTCGCTTTATAAAT
TGTCGCTTTAAGCGCCATAAGAAAACTCCTTTCGAATCAGGAGGCCATTGTAACGGAATA
CGTGCAGTTGCGGCGCTGATATTGCAGAAATGAGTGTGGTATAGTCACCTTGCGAAACAG
AGTTTATCTTCGTAGGCTTAGACTTGCATCCACGGTTAAGTCAGAGTGCTGACAGGAGGG
CATGTGGAAAAATATTGTGAGTTAATACGCAAGCGGTACGCGGAAATCGCCAGCGGAGAC
TTAGGATACGTTCCGGACGCGCTGGGCTGCGTTTTGAAAGTGCTGAATGAAATGGCTGCC
GACGACGCCCTTTCTGAGGCTGTCAGGGAAAAAGCAGCATACGCTGCGGCAAACTTACTG
GTGAGCGATTATGTCAATGAATGATACGTATCAACCAATCAATTGTGATGATTACGATAA
TCTTGAGCTCGCCTGCCAGCATCATTTAATGCTGACACTTGAGCTGAAAGATGGCGAAAA
ATTGCAGGCAAAAGCCAGCGATTTAGTCTCCCGCAAAAATGTGGAGTATCTGGTCGTCGA
GGCCGCTGGCGAAACCCGTGAGCTACGTCTGGATAAAATTACCAGCTTTAGCCACCCGGA
AATCGGTACGGTGGTGGTGAGCGAGTCCTGATTGACTTTCGCCGGATGCGACGCTTAATG
CGTCATATCCGGCCTTCACTTAACTAAGCGTTTCGCTGCCAGACAAAACTTATGCCATTC
TCACCTTCAGCCACACCTTCTTGCGTCACAAATACCCCTGCCGCCGCAATCAGCGTTTCG
CCATAAAACAGCAGTGGCGTGGTGTCACGTAGCCACGGCGGCACGCCCAGCTCTTGCCAG
ATTTTCTTTAGCTTACGTCCGCCGTTACGCCCGACAATATGCAGCAATCCTGGCGCTTTG
AAACGCACGCTGACCGCTTCGTCTGCACGCGGAGGGCGAATATCGCCTCCCGCATTAAGC
TGTACACTTCCCAGCCCCGCCGGTAATTCCAGCGGTTGAAGCCACGTCTGCCACGGCACA
ATGTTTTCGCTTTGCCCGGTGACGGATTTAATCCACCACAGTTGCGACTGATAGCGTCGG
ATTTCAAACGCGCCCAAACGTAAACAGGGGGAGGCATCTTCCCGCGCCAGCGCCACTTCC
TGCCAGATCCGCCCCAACGCGTCGCGGGAAGGCATCGGTGCATTCTGCCCTGCAAGCCAG
CGGCGGATAATCGCCGCGCGGCGGGCATCACTCATCGCCAGCATTGGCGCAATCTGCAGC
GTCCTCTGCGGCGATTGACAGTGTGCTAAATCATCCGCCAGCAGTTCATCCAACAGGCTC
TCTTGTTCAGCGCAAAGTGCGGCGCTGCGGGCTGTTGCTTCGGCAAAATGCGGCCAACGC
TGCTGCAATAACGGCACTACGCGCAGGCGCAGAAAGTTACGATCGTATGAGTCGTCCTGA
TTACTTTCGTCTTCAATCCAGCGTAAACCATGCGCCAATGCCCACTGCGCCAGTTCCCCC
CGCGTGCGGGCAAGCAACGGGCGGATAAGCCGTGTTCCGGCAAACTCCGAAACTTCCGCC
ATAGCCGAAAGCCCGGCAGGGCCGCTACCGCGTTTTAGCGCCAGCAGAAAAGTTTCACAT
TGATCGTCGAGATGTTGCGCGGTGACCAGCACTTCACCGGGCAACAAGGTGCGGGCAAAT
GCCTGATAACGCGCCTGCCGCGCCTGGGCCTCAATGCCCAGTCCTTCTTGCGCAAGTTGC
ACGCGCTCGACCACCAGCGGCACCTGCCACTGTTGGCAGATGTTCTCGCAATGCCTAACC
CAGGCATCGGCATTGGCACTTAAACCGTGATGCACATGAATAGCGCGCAGAGTGACGCCC
GGATTTTCCGCCCGCCACTGCACCAACTGATGCAGCAGAACGGTGGAGTCAAGCCCGCCG
CTAAAGGCCACCAGAATCTGGCGTGAGGTGAGAAGTTGTCTATTGAGCGTGAGTGTCATG
ATGGTGCGATTTTACAGTAGCAATGCCCGGCACGTTACCGGGCAAATGCGGCGATGACAA
GCCTTACTGCTCATACAGTTCCAACGGCAGCCCGTCCGGATCGTTAAAGAACGTGAAGCG
TTTTTGCGTGTATGGATCGACACGGATGGCTTCACACTTCACGTTATGGCTTTCAAGGTG
CGCCACTGCCGCATCGATATCATCAACGCTAAAAGCCAGATGACGCAGGCCGCAAGCTTC
CGGTCGGCTGGGGCGCTCCGGCGGGAACGGAAATGAGAAAAGCTCAATCACATATTGCCC
ATTAAGCGCCAAATCCCCTTTCCACGAGTCGCGCGCTTCGCGATAGACTTCGCTTTGCAG
CGTGAAACCAAGAATATCGCAGTAGAAAGCTTTGCTCACCGCATAATCCGTCGCAATAAT
CGCAATATGGTGAACCTGTTTTAAACCCAGCATAACGTCTCCTTTATTTGTTAACAGCAC
GTTACTCGCCCGGAAGCCGCTCTGGCAAGTTATCCCGCCATTTTTAGGACTCGTACGCGG
TAAACGCCGTCTTCGTCCTGTTTCGCGCCGTGAATATCCGTTTCAAAACCGGGGTAATGT
TGCCCTACGGAACAAAGCATCAGTAGAAAATCGAGTACTGTGCGGCTCTCTTTGGTCAGC
ATTTCTCCAGGCATCAACAGCGGTACGCCCGGTGGATAAGGCAGGATCATATTTGCCGAT
ACTCTACCGACCAGTTGTTCCAGCGCAATGGTTTCTACTTCACCTTTAATCTGTCTCTGC
CATGCCTGATGTGGCGTCATGATCATTTCCGGCAAAGTATCGAATGCCCGCAACATCAAA
CCGGGAAGATCGTGTTTACGAATCAGCTTATGGATCCCTTGCGCCAGATCCTGAATACGC
ATATTGAGGTAGAAATCGGGATCTTCAGCATAGAGATCGGGTAGCATATTTTTGATCCGC
AGGTTGAGATCGTAAGAGCGCTTAAATTCCGTCAGCCCACGCAATAATCCCATTGCTTTG
GTTTTATCAATGCCAATACTAAAGAGAAACAGCAGGTTATAAGGGCCGGTTTTCTCTACT
ACGATCCCACGTTCGTCGAGGAATTTTGCCACCAGCGCCGCCGGGATCCCCTCCTCACTC
ATATTGCCCTGTTCGTCCATCCCCGGTGTCAAAATAGTGACTTTAACCGGATCGAGAAAC
ATATGATCGGCATCCGCATCGTTAAAGCCGTGCCACTGTTCGCCAGGCGCAACGGGCCAG
CATTCGGCTTCATCCACCTGCGGCGGTTGCCAGATATCGAAAAACCAACCGTCAGACTCT
TCCCGCAACCGCTGGACCTCTTTGCGAAAATGCAGAGCTCGTTCTACTGAACGATTAATC
AGCCGTTTGCCCGGATTACCACGCAGCATCGCCGCCGCCGTCTCAACCGAAGCAACAATG
GGATAACTGGGCGAGGTGGTGGTATGCATCATAAAGGCTTCGTTAAAGGCCTCTTCGTCA
TACTCGCCTTTAATGTGGATCAGCGAAGCCTGCGATAACGCCGCCAGCATTTTGTGGGTC
GATTGCGTTTCGAAGATCACTTTTCCCGCAACACGCTCGCCGCTCATACCACTTTTACCC
TGGTAGATCGGATGAAAATGGGTGTACGGCACCCAGGCGGAATCGAAGTGGATCGAGGGG
ACATCCAGCGTCTGTTTGATCCAGTCGGTGTTGTAGAGCAAGCCATCATAGGTGGAGTTG
GTGATCACCGCATGAACCGGCCATTGTGCCTGCGTGGTGGCAGCGACTTTCTCTTCGATG
CTGTCGCGAGTAAATTCACGGCGCGGGATCCCACCAAGAATCCCCAACGCATTACGCGTC
GGTTTCAGCCAGACTGGCACTACATCGTTCATCATCAACAGATGCGCCAGCGATTTATGA
CAATTGCGGTCGATCAACAGCGTGCTGCCGGATGGCGCGGCGTACATACCCACAATTTTG
TTCGACGTCGATGTTCCGTTGGTAACGATATAACTCTGTTCCGCGCCAAAAGTCCGCGCG
ATGTACTCTTCCGCTTCCAGATGTGGCCCGGTGTGGTCGAGCAACGAACCAAGCTCGGTG
ACCGAAATAGAGACATCAGCCTTAAGGGTATTCCCGCCGAAAAAATCATAAAACAGACAG
CCAACCGGGCTTTTTTGATATGCGGTGCCGCCCATATGACCCGGCGTACAAAAGGTGTAC
TTCCGCTCTTTGACGTAGGTAAACAAGGCTTTCGTGAACGGTGGGGTAATGTTATCAAGA
TATTCGTTGGTGTACTGACGCATACGAATAGCGATATCTTCCGCCTGCCCCAGCGCATAT
TCAAAAAACCAGAGCGCCATCCGCATATCCTGCACGCTGACATCCATCGTCGAGTGGGTG
TTGATGAAGGCATAAAGCGGGAGATATTCATTAAGCTGATTGATATCGCTACATAAATCG
AGACTGTACTCATCCCAGTCAAAAATCACGCCGCAAATTCGTGGGTTATGTTCGATAAAC
TTCAGCAAATCAACGCTGTTTTGTGGCCAGATAATCTGAAAGCCTTGCGCCACCAGCGCC
GACTCCAGTTCTTTGATGGGCTCATCTTTATAAAAGACGCCATGCGGTCCCATAATGGCA
ATGATGTTCATGTGTTCCTCCTGGAAAATCCTTCCTTAATCATAGCCTGCTCAAACCGTG
GCGATAAAAAAGGGCCACCGAAGTGACCCTTTTTCAGAACTTTTGCGAATTACGCGTAAC
CGTAGCTCATCAGGCGCTGATAACGACGATTTTTTAAATCTTCAGTGCTTAACACGTCGA
GATCGGCCAGATCCGCCAGCAGTTGCGCTTTCAACGATGCCGCCATCGCTTCCGGGTTAC
GGTGAGCACCACCCAGCGGTTCCGGGATGATGGAGTCGATCAGTTTTAGTTCTTTCAGAC
GCGGAGCGATGATACCCATCGCTTCAGCTGCCAGCGGTGCTTTGTCGGCGCTCTTCCACA
GAATGGACGCACAACCTTCCGGCGAGATAACGGAATAGGTGCTGTATTGCAGCATATTCA
CTTTATCGCCCACGCCAATCGCCAGCGCGCCGCCAGAACCACCTTCACCGATAACCGTAC
AAACTACCGGTACACCGAGGCGAGACATTTCACGCAGGTTGCGTGCAATAGCTTCAGACT
GACCGCGTTCTTCTGCGCCCACGCCCGGATAAGCCCCCGGGGTGTCGATAAAGGTGATGA
TTGGCATCTTAAAGCGTTCAGCCATTTGCATCAGACGCAGTGCTTTGCGGTAACCTTCTG
GCGCTGGCATACCAAAGTTACGGCGAATTTTTTCTTTGGTTTCACGACCTTTTTGATGAC
CAATGATCATCACCGGACGACCATCGAGACGGGCGATACCACCGACGATAGCTTTATCGT
CTGCATACGCGCGGTCGCCAGCCAGTTCGTCAAATTCATCAAATGCCAGGCGAACGTAAT
CCAGGGTATAAGGACGCTGTGGATGGCGTGCCAGTTGCGCAATCTGCCATGCACCGAGAT
CGGCGAAGATTTTACGCGTCAGTTCTACGCTTTTTTCACGCAGACGATGCACTTCTTCAT
CGATGTTAATATCCAGTTTCTCATCCTGACGGCTAACCGCAGTCAGAGAATCGATTTTCG
CTTCCAGCTCTGCAATCGGCTGTTCAAAATCAAGGAAATTCAGACTCATAGTATTCCTGT
ATTAGTCAAACTCCAGTTCCACCTGCTCCGAACCAATGAGGCCACGGAGATCGTTTAATA
AACGATCGCTCGGAGAGACACGCCACGTCGCGCCAAAACGCAACCGCGCGCGTGCATCCG
CCCTCTGATAGTAGAGATGTACTGGAATTGTCCCAGAGCGGTGGGGTTCCAGAGACTGAC
GGAGTCGGTTTAAAAGCTGGTCATCAATTTGCCTGTCCGTCAGCGAGATAGCAAGCCCGC
GAGCATATTTTTCCCGGGCTTCGTCAATATCCATCACTTCGCGAGCGGTCATTTTAAGCC
CACCGCTGAAGTCATCAAAGCTGACCTGTCCGCTGACGATAAGTATGCGGTCTTTTTCCA
GCAATTGCTGGTATTTATCCAGGGCGTCAGTAAACAACATCACTTCCAGCCGCCCGGAAC
GGTCATCCAGCGTGCAGATACCGATACGATTGCCGCGCTTGGTGACCATAACCCGCGCGG
CAACAACGAGCCCCGCAGCCGTGATGACTTTACCACGTTCTGTCGGGTGCATGTCTTTCA
GCCTTACGCCTCCGACATAACGCTCAATCTCTTTTAAATACTGGTTGATAGGGTGTCCGG
TCAGGTACAGGCCTAACGTTTCACGTTCCCCATCTAATACCACCTGCTCCGGCCACGGTT
GGCAGCTGGCGTAGGATTGTTCAATTTGTTCCGGTTCTTCGGCCAGCACGCCGAACATAT
CGGCCTGACCGATAGCTTCCGCTTTCGCGTGTTGATCTGCCGCTTTTAACGCATCACCCA
GCGAGTTCATCAGTGCCGCGCGGTGTGGCCCAAGACGGTCAAACGCCCCGGACATGATCA
GTTTTTCCAGCACCCGCCGGTTTAACTTTTTGGTGTCGGTTCGGGCGCAGAGATCAAACA
GTTCGCGGAAGTAGCCGCCTTTATTACGGGCTTCGATGATCGCCTCAATCGGACCTTCAC
CGACCCCTTTGATCGCGCCAATACCATACACGATTTCGCCGTCGTCGTTGACGTGGAAAT
GGTAAAGACCGGAGTTTATATCTGGTGGCAGGATTTTCAGCCCCATCCGCCAGCACTCAT
CCACCAGGCCCACCACCTTCTCGGTGTTGTCCATATCGGCGGTCATTACCGCCGCCATAA
ACTCTGCCGGATAGTGCGCTTTCAGCCATAATGTTTGATATGACACCAAAGCATAGGCCG
CAGAGTGCGATTTGTTAAATCCGTAACCAGCGAATTTCTCCACCAGGTCGAAGATTTTCA
TCGCCAGTTCGGCGTTGATTCCGTTCTTTTCTGCACCTTCAGCAAATACAGAACGCTGCT
TAGCCATCTCTTCCGGCTTTTTCTTACCCATCGCACGACGCAGCATATCCGCGCCACCGA
GGGTATAACCAGAGAGCACCTGCGCAATCTGCATGACCTGTTCCTGATACAGGATAATGC
CGTAGGTTGGCTCCAGTACTGGTTTCAGGCTTTCATGCTGCCACTGCACGTCCGGGTAGG
AAATCTCTTCGCGACCATGTTTACGGTCGATAAAGTTATCCACCATCCCTGATTGCAACG
GACCAGGGCGGAACAGTGCCACCAGTGCGATCATATCTTCGAAGCAGTCAGGTTGCAGAC
GCTTGATCAGGTCCTTCATGCCGCGCGATTCAAGCTGGAATACCGCCGTGGTTTCCGAGC
GTTGCAGCATGTCGAAGCTTTTCTTGTCATCCAGCGGGATCGCGGCGATATCCAGCGGCG
GCTCGCCATTCTTCGCCCGCCGCTTGTTGATCATCTCCAGCGCCCAGTTGATGATGGTGA
GCGTACGTAAACCAAGGAAGTCGAACTTCACCAGTCCGGCATATTCAACGTCGCTTTTAT
CAAACTGGGTGACCGGATGTTTGCCCTCTTCATCGCAATAAAGCGGCGCAAAATCGGTAA
TTTTGGTCGGCGCGATAACCACTCCACCGGCGTGCTTACCGGCGTTACGGGTGACCCCTT
CCAGTTTGCGCGCCATGTCGATCAGCGCCTTAACTTCTTCATCCGCTTCGTAGATTTCCG
GCAGCTGCGGCTCGGCTTCAAACGCTTTCGCCAGCGTCATGCCCGGATCGGGCGGGATCA
GTTTCGAGATACGGTCGACAAAGCCGTACGGATGCCCCAGCACGCGGCCTACGTCGCGGA
TCACCGCTTTCGCCGCCATCGTACCGAAGGTGATAATCTGCGATACCGCATCACGACCGT
ACATGTCCGCTACGTGCTCGATAACCTGGTCGCGTTTCTCCATACAGAAGTCAACGTCGA
AGTCAGGCATGGAGACACGTTCCGGGTTAAGGAAACGTTCGAACAGCAGGTCAAATTCCA
GCGGATCGAGGTCGGTGATTTTCAGCGCGTAGGCCACCAGTGAACCCGCACCGGAGCCAC
GGCCTGGCCCTACCGGTACGCCGTTATCTTTCGACCACTGGATAAATTCCATAACGATGA
GGAAGTAGCCCGGGAAGCCCATCTGGTTGATAACCTGAAGTTCAGTCTCCAGACGTTCGT
CATATTCCGGGCGGCGCTTAAGACGTTCTTCCTCATCAGGGAATAAAAAGGCCAGACGCT
CTTCCAGGCCTTCTTTTGCACGCTTGACCAGATAATCTTCGGTGCTCATGTCCCCGGTCG
GGAACTGCGGCAGGAAGTATTCACCCAGACGCACAGTTACGTTACAACGTTTGGCGATCT
CAACGGTGTTGGCAAGGGCTTCGGGGATGTCGGCAAACAGCTCGCACATCTCCTCTTCGC
TACGCATATATTGCTGCGGCGAATAGTTACGCGGGCGTTTAGGATCGTCGAGGGTAAAGC
CGTCGTGGATCGCGACGCGGATTTCGTGTGCGTCAAAGTCGCTGCTGTCGATAAAGCGCA
CATCGTTAGTCGCCACGACGGGCAAACCGCGCGCTTCCGCCAGTTCCACCGCCGCGTGCA
GATAGCTTTCTTCATCCGGCCTGCCGGTGCGGATCAGCTCGAGAAAATAGCGATCCGGGA
AGTGTTCTTCATAAAACGCGACACACTCATCTACCAGCGCGCTGTTGCCACGCAAAAGAC
TGCGTCCGACGTCGCCCATGCGCCCGCCGGAAAGAAGGATCAACCCTTCGTTTAATTCGA
TAAGCCAGTCGCGATCGATGATCGGCCCGGCGGCACCGTACCCGCGCTGATACGCTTTTG
AGATCAGCAACGTCAGATTCTGATAGCCGGTATTGTTCGCCGCCAGTACCGTCAGGTGGG
TTAACTCATCACCCAGCAGGTCGCACTGGACGTTAAAATCTGCCCCGACGATAGGCTTAA
TCCCTGCGCCATGTCCCGCTCCGTAGAACTTCACCAGACCGCAAAGGTTGGTGAAATCGG
TGATCGCCAGTGCTGGCATACCCAACGCCGCCGCCTTTTTTACCAGCGGTGCGGTTTTGG
CCAGGCCATCGATCATCGAGTAGTCGCTGTGCACCCGCAGGTGTACGAAACGTGGTTCAG
ACATCTTCAGATTCCGGTTTACTTAATCTCGACACAAGAATCAGGACGCAAGTCCCAGTG
CTCGTTTGACAGGCCCAAAGCTGCGACGATGATGTTCAGTCGCGCCATATTCAGCCAGTT
TTTCCAGATGAAAAGCGGTTGGATACCCTTTGTGTTGGGCAAAACCATATTGCGGGAAAA
CAATATCCAGCGCCGCCATTTCGGCGTCACGCGTCACTTTCGCCAGGATAGACGCGGCAC
TGATTTCCGGTACGCGGCTATCGCCTTTCACCACTGCCATCGAAGGCATCGGTAATTTCG
GGCAGCGGTTACCATCAATCAACACATATTCCGGCGCAATATGCAGCCCAGCAACGGCAC
GCTGCATCGCCAGCATGGTCGCATGTAAAATATTCAGTTCATCGATTTCGTGAGGTTCCG
CGCGGCCCAGACTCCAGCTCAACGCTTTCTCTTTGATCTCTTCACAGAGCGCCAGACGAC
GTTTTTCGCTCAGCTTTTTGGAATCATTCAGCCCGGCAATCGGGCGCGCCGGGTCGAGAA
TCACCGCAGCGGTGACGACCGCGCCAACTAACGGCCCGCGTCCGGCTTCATCCACACCCG
CAACCAGCTGCGTGTGCGGATAGACAAATTCGATCATTGTGCTAACTCCAGAACGGCTTG
TGCCGCCTGCTCATCGGCATTGCAGCGGATCTGCTGATGCAGTTCACGGAAGGTATCGTG
CATCGCGTGGCTGGTTTTCCCGTTCGCCAACAGCGGTAACAGCGCCGCAGCCAGTTTTTG
CGGCTCACACTCTTCCTGCAATAACTCTTTGACTAACTCTCTGCCCGCCAGCAGATTTGG
CAGCGAGACATAATCAGTTTTCACCAGACGCTTCGCCAACCAGAAAGTGAAAGGCTTCAT
GCGATACCCCACCACCATCGGGCATTTCGCCAGCATACACTCCAGTGCTGCCGTACCCGA
CGCCAGTAGCGCCGCATCGCTGGCAACCATCGCCTCACGGCCCATTCCATCCAGCAAATG
AACCGACAGGTCTGGCGCGACTGCAGCTTTGATGCGTTCAAACTGCTCGCGGCGTTTGGC
ATTCACCAGCGGCACCACGATTTCGAGATCTGGATATGTCTGGCGCAAAAGCTGGGCCGT
TTTCAGGAAATCGGCACTAAGCATTTCGACTTCTGCACCACGGCTGCCCGGCAACAATGC
CAGACAGTGGGCATCGTAAGGGATCCCCAGCACATCACGGGCACCATTTTTATCTGGATC
TAATGGCATGGCATCAGCCATGGTATGACCGATAAAGCGGCACGGTACGTTGTATTTGTC
ATAAAACGCTTTTTCGAAAGGCAGAAATGCGAGCACCAGATCGGTGGCTCTGCCTATTTT
GAAAACGCGTTTCTGTCGCCACGCCCAGACGGACGGACTGACGTAATGAATGGTTTTGAT
ACCCTGCTTTTTGAGGTTACCTTCAAGAGTAATATTGAAGTCAGGCGCATCAATACCGAC
AAAAACATCTGGCTTCAGTTCGCCAAAACGCTTTGTCAGATCGGCACGAATATGCAGTAA
GCGACGCAGACGACCGAGCACTTCAACAATGCCCATTACCGCCAGTTCTTCCATTTCGTA
CCAGGCTTCGCAGCCTTCAGCTTGCATTCGTGGCCCGGCAACACCAACAAAGCGGGCGTT
GGGCACACGTTCTTTCAGAGCGCGGATTAAACCGGCCCCCAGGATATCGCCGGAGGTTTC
TCCGGCGACCAGGGCAATCGTTAATGGACGCTGTTCAGTCATTAACGAATCAGACCGCGC
GTTGAGCGTGCAAAGAAATCGGTAAAGGCTTTCACTTCCGGATATGTTTCCGCCAGTTCA
GCAATTTCCGGTTTCACTTCATCGAGCGTTTTACCGCTACGATAAATCAGCTTATACGCA
TTGCGGATAGCGGTAATCGCCTCACGGCTGAATCCGCGGCGCTTCAGCCCTTCGATATTG
ACACCGAACGGCGTTGCGTGGTTACCCTGCGCAATGACATAAGGAGGGACGTCCTGCGCC
ACACCGGAGCAGCCGCCAACCATCACATGCGCACCAATGATGCAGAACTGATGGACTGCG
GTCATGCCGCCGATGATCGCGAAGTCGTCAACCGATACGTGACCCGCCAGCGTTGCGTTG
TTGGCGAGAATACAGCGGTTACCTACCGTACAATCGTGCGCAATGTGCGCGTTGATCATC
AGTAAGTTGTCGCTGCCCACCTTCGTCAATCCACCGCCCTGGACTGTGCCACGATGAATG
GTGACGCTTTCGCGAATGCGGTTACGATCGCCGATTTCCACACGGGTCGGTTCGCCAGCA
TATTTCAAATCCTGGTTAACTTCGCCGATGGAGGCGAACTGATAAATCTCATTATCGCGG
CCAATTTTAGTATGACCATTCACGACAACGTGAGATTTCAGTACGGTACCCTCACCAATT
TCGACATGGGGTCCAACGATACAAAAAGGACCAATGTGTGCGTTCGCGCCAATCGACGCG
CCCTCTTCCACAATGGCGGTTGGATGCACAAAGGCGGATTTATCAATCACGTATCAGGCC
TCCCGGCTACGAGCACACATCATCGTTGCTTCGCAAACTACTTTACCGTCGACCAGAGCA
ACCCCTTTAAAACGGGTCAGGCCGCGGCGCGTTTTTTCGAAAGTGACTTCCATGATCATT
TGATCGCCAGGCACGACCGGGCGCTTGAAGCGCGCTTCGTCAATACCGGCGAAGTAGTAC
AGCTCACCCGGTTCCAGTTTTCCTACGCTTTTAAACGCCAGAATACCTGTTGCCTGTGCC
ATTGCTTCCAGAATCAGCACACCCGGGAAAATCGGTTTTCCAGGGAAATGGCCCTGGAAG
AATGGCTCATTGACAGAGACATTTTTTACTGCGCGCAGAAAACGACCTTCTTCAAAATCC
AGCACGCGATCCACCAGTAAGAACGGGAAACGGTGCGGCAGAAGTTCTAAAATCTCTTCA
ATCTGCAGAGTATGAGTGTTAGTAGTCAAGATACTCTTCCTGTCAAAATATAAGAAACGA
CAATAATAACACGGCCTGCCGCAATCGTAAGAATGAGACAGGCCGTAAAGTTTGGCGAAC
AAAAGATGGAACGTTAGTCTTGTTGATTAACCTTGCGCTCAAGCGATTTCAGACGCTTGC
TCATGTCATCAATGTTCATCACCAGTGCAGCGGTTTTGCGCCAGACTTTGTTGGGTTGCA
GCGGAATGCCTGAGGAATAGACGCCTGGTTCAGTGATGGGACGCATCACCATACCCATGC
CCGTAACCGTCACTTTGTCGCATATTTCCATATGCCCGTTGATTACGCTGGCTCCGCCGA
TCATGCAGTAACGACCAATTTTCAGGCTGCCCGCCATAATGACGCCACCGGCAACCGCCG
TATTGTCGCCAATCACGACGTTATGTGCAATCTGGCACTGGTTATCAATGATCACGCCAT
TGCCAATAACCGTGTCATCCAGCGCGCCGCGATCGATGGTAGTGCAGGCACCGATCTCCA
CGCGATCGCCAATAATTACGCGACCAATCTGTGGGATCTTCACCCAGTTACCACGATCGT
TGGCATAACCAAAGCCGTCTGCGCCTACCACTGTTCCGGACTGGATCAGGCAATTCTGAC
CGATCTGGATCTCATGGTAAATGGTTACATTCGCCCAGAGACGCGAACCTGCACCGATTT
TGCTGTTTTTACCTACGAAGCAACCGGCACCGATAATCACGTTATCGCCCAGTTCAACGC
CGGACTCAATCACCGCGTTAGCGCCAATCGATACGTTGTTACCCAGCTTCGCCGTCGCGT
CGATCACTGCACTGGGTGCAATATTCTGCGCGGGCTGCGGCGTGGTATCTAAAATTTGCG
CCATGCGCGCGTAAGTCAGGTAGGGATTCTTCACTACCAGCGCGGCACTTTTCGCGAAAG
GAAGATCGTCCTGGGTCATGACAACCGCGGATGCCTGGCACAAGCCTAAATGCTCACGGT
ATTTTGGGTTAACCATGAACGTAATGTGACCTGTTTGTGCAGATTGCATGGACGCAACGC
CGGTGATGACGATATCGCCATCACCGTGTAGTTCTGCATCCAACTGCTGCGCTAAATCAG
CCAGTCGAATTGAAGGCATTACTTATTTAACCTGTTTCAGTACGTCGGCAGTGATGTCTT
TTACATCGCTGCTGTTGTAAGCAACGGCGTTTGCATCAACAACCAGATCGATATCCTGGC
TGTTGGCAACGGATTTCACAGCAGTCTGGATACGAGTAACCAGTTTGCCGCGTTCTTCGT
TGGAACGACGTGCGCGATCCTGCTCAAAAGCCTGCGCTTTCTGAGCAAAAGTCTGGCGCT
GAGCCATCACGTCTTTTTCCAGCTTAGTGCGATCGCTGCCCGCTTTCATGGACTGCAGCT
TTTTCATTTTAGCCTGCAGATCGGTTTCCATACGCTGCAGTTCGCTGGCACGGCCTTTGA
ACTCATTTTCCAGCGTGTTAGAAACACCGGTTTTCTGCGCTACCTGCTGGAACAGGCTGC
CCATGTTGACGATTGCAATTTTGTCAGCCGCCTGAGCAGATGTTGCCAGTGCTAAACCGA
GACCTGCAGCTAATAACCACTTTTTCACAATAAACTCCTTACCATCCCATTTGCACCGGA
GGGTGCAGTTCTTTGCGTGGCCCGGCGATCTTATATTGATCGCCTAAAGTCATCGCTACA
CTACCACTACATTCCTTTGTGGAGAACACTTACCAAGTTTTACCGATGTTAAACTGGAAC
TGTTCTGCCTTGTCTCCATCGTACTTTTTGAACGGCTGGGCGTAGGAGAACACCAACGGC
CCCAATGGGGACATCCATTGTAATGCGATACCCGCAGACATACGGATATTGCTTGGATCA
CTATAGTCCGGATATCCAGAATATTGGCTGGAATCCCAGTTTGTATCCCAAACGGTACCC
ATATCCCAGAAGAAGGAAGTACGAACCGAGTTAGCATACTTATCGCTAATAAACGGAGTC
GGGGTTATGAACTCGAGGCTGGCAACCGCCATGGCGTTACCGCCTACAGCATCATCCGAT
TTACACAGGTCTTTCGCGCCGTCCTGAGTCGCACATTCGTAATCATAGTCCGGATCATAA
TTACTGGCCTGATGCGGGAAGTAAACTGCTTTCGGACCAATGGTATTGGACTGGAAGCCA
CGGACGGTGCTGGAACCACCGGCATAGAAGTTCTCGTAGAACGGCATCTCTTTGCCGCCT
AAACCATCACCATAACCCCAGCGGGTACGACCCAGAACAACCCATTTGTGATCGTCATCG
ATCGGCACATAAGTCGCCGTGTCTAACGTCACTTTGTAGTATTCGTTATCCGATCCCGGA
ATGGTCACTTTACCGGTCAGGTTGACACGTGAACCATCTGTCGGGAAGTAACCACGGTCA
AGCTTGTTATAGGTCCAACCATAGTTGAACGTGAAGTCGTCTGTTTTGAAGCTGTTATCC
TGATCAGAGGTGCTCGGATGTTCACCCATAGAGTACAGATAACGCCACATCGCAACCTGA
GGCTGCATGTTGGACAGGGAGTTATGTACATAACCCAGACCTGCACGCAGCGAGTTATAT
TCGTTAATCGGGAAGCCCAACGTCACGTCTGTACCATAACTCTTGTTGGTATAGTCGGAC
AGGTCGGCGTCATCTGCCTGGAAGTCATTATAGAAGAGACGACCACCGAGGCTTACGCCA
TCTACGGTGAAGTACGGGTTGGTTACCGACAGTTCAGCATAGGTCTGGTAATCGTTTTTG
GTCCCGTTGATACCAACAGCATAACCTGTACCTAACCAGTTATCCTGTTGCACACCAGCC
TGGAAGCTCACGCCACTTTCAGTACCGTAACCAATACCAAAGTTGAAGCTACCGGTGTTG
CGCTCTTTTACCTTGTAGACTACATCAACCTGGTCCGGGCTACCCGGAACACGTTGGGTA
TCGGTATCGACAGTTTCAAAGAAGCCCAGACGATTCAGACGCTCCTTACCCTGATCGACC
AGATCGCTCCCCAGCCATGCACCTTCCATCTGACGCATTTCGCGACGCAGGACGGCATCT
TTCGAGGTATCGTTACCTTCAAAACGGATCTTACGCACGTAGAAACGGTTACCCGCATCA
ACGTTCACACGTAATTTAACGGTTTTGTCGGCATCGTTAATTTCGGGCATGGACTGTACG
CGCGGATAGGCATAACCATAGCGACCGAGAAGCTTTTTAATGTCATCTTCCATCTTGGTC
ACTTTGGTGCCGTTATACAGCTCACCCGGCTCGATCTTAGTCAGCTGCTCAATTTCAGCG
GAGTGCCCGGCAAGGTTGCCGCTCACTTCAACGCCAGAAAGCTTGTACTGATCGCCTTCG
GTGATGTTCACCGTGACGTAAATACCTTTTTTATCTGGCGTCAGACTGACCTGGGTAGAG
TCGATGTTGAAACGGGCATAACCGCGGTCCAGATAGTAGCTGCGCAGGGTTTCAAGGTCG
CCCGCCAGTTTCTGTTTCTGGTATTTACGATCGCCTACCACGTTCCACCACGGCACTTCG
TCACGCAGTTGGAAATGAGAGATCAGTTCGTCGGTGGTGAAAGCATGGTTACCAACAATG
TTAATTTGCTGGATTTCAGCTGACACACCTTCCTGGAACACCAGTTTTAGGTCAACACGG
TTGCGCGGCAGCGGGGTCACGACAGCTTTAACGCTGGCGCTATATTTACCGACGCTGTAG
TAGAAGTCTTCCAGACCTTTCTCGATATCGGCAATGGTGGTGCGATCGAGGGATTCGCCC
ACACGCACACCAGAAGCCTCGAGGTTTTGCTTCAGCATGTCATCTTTCACCGATTTGTTA
CCGGAGAAAGTAATGCTGGCAATGGTCGGACGTTCTTTTACCTGAACCAGAAGGGTATCA
CCATCACGAAGGACGCGAACATCCTCAAAGTTGCCGGTAGCAAACAGAGCGCGAATGGTA
TTACTGATATCTTCATCATTAACCGTGTCGCCTGTGCGCACCGGCATACTGAGGAGGGCC
GCACCAACGGCGACACGCTGAAGGCCTTCGAAATGAATATCTTTCACTACGAACCCTTCA
GCACCGTATACGGTGGCGCTGCTAAACAGCAGCGACGCTATGAGCAACTTTTTCATCGCC
ATCGTTATTATGCGTTCTTCCTAACTAACTCTCATAACCGAGAGAAATCATTGAAAAGTG
CAAGCCCCATTAACAGCACCAGCAGAATCGAGCCAATGCGATAACAAAAGTCTTGAACCC
GCTCGGATACCGGTCCGCCCTTGATCTTTTCGATCGCAAGGAACAGCAGATGCCCCCCGT
CAAGTACGGGCAACGGAAACAGGTTAATTATCCCTAAGTTCACGCTAATAAGCGCAAGAA
ACGGCAGGTAATAAACTACCCCGAGTTCCGCTGTCATCCCAGCCCCCTTGGCGATAGAGA
TCGGCCCACTGAGGTTGTTCAGTTTCACATCACCGGTGATCAATTTTCCCAGCATACTGA
CCGTCAGCTTCATCAGCTGCCACGTTTTGTCCGTGGCTTCGACGATGGCGTTGAACGGCC
CATACTGGCGTACAACTTTATACTCATCTGGCAAAGGAATGACTTTCGGCTCAATACCGA
CAAAACCAATCGCTTTACCATTACCCGGTTTACTCTCCGGGATTAATGTCAAAGACAAGG
GACTCCCCTGCCTTTCGATTTCTAACGCTAAGGATTTACCCGGGTTATCCCGGACAAGCA
TCACAAAGGTCACCCACTGCGTTAAGGGCTGACCATCGACTTTAACGATCCTGTCGCCTG
CTTGCAAACCTGCCTTGCTTGCCGCCGAGTTTGGCTGCACATTTTCCAGTACAGGTTCAA
TTTGCGGTCCACGAGGACGAATCCCCAGCGAAGATACCGGATCTTCTTTATCAGGCTCAA
ACGCCCAGTGACGTAAATCGAGCTTTACATCCCGCCGTTGGTCGCTGCCAAATGGCGCTA
CTGTAATGGTGGTGCTTTCATCGCCAATTTTATCGACCAACTGCAAACGCACAGCATCCC
AATCAGGCGTTTCGATACCATCTACGGCTTTTAGTTCCGTACCTGGTGCAATTTGTGCTT
CCGCAGCTATCGAATTGGCTGCTATTTCGCCAACCACCGGACGTACGCCAGGCACACCAA
TAATAAAAACCAGCCAGTAGGCAAAGATAGCAAAAATGAAGTTTGCAACCGGACCTGCGG
CAATAATCGCCGCTCGTTGGCCGACAGATTTATTATTGAAGGCATGGTGGCGGAGTTCCG
GAACGACCGGTTCTGCGCGCTCATCCAGCATTTTGACATAACCGCCCAGCGGGATCAGGG
CGATAACATATTCGGTACCGAGCTTATCAGTTCGCCGCCAGAGCGCCTTACCAAACCCTA
TTGAGAAACGCTCAACGCGAACACCACAACGCCGGGCAACCCAGAAATGACCAAATTCAT
GCACGGTGATAAGTACACCCAGTGCAACGATGAACGAAGCCAAATCCCAGAGAAAACTCA
GCATATTACCTTCCGTTAAAGCGTCCTGAATACCAGTAACAACAAGCAAGCAAAGACCGG
TACCGCAGCCGTCAGGCTATCAATACGATCTAAAATACCACCGTGTCCTGGAATTAAATG
ACCGCTGTCCTTAATTCCTGCTTCACGCTTAAACATACTCTCGGTCAGATCGCCGAGCAC
TGAGGCTAACGCTGCGACAATAGAGCAAATGAGTAAGGTGACGGGAGCGACGTCGAGATT
CGCCCACATGCCATAACCCCATGAGATTACCGCTGCGGTCGCTAGTCCACCTATAAAGCC
TTGCCAGGTTTTACCCGGAGAAACCTTCGGTGCCAGCTTATGTTTACCAAACAATTTGCC
AAACATATATGCGCCAGAGTCAGCGCCCCATACCAGGATCATGACATAGAGCAGCCATAT
TGCGCCACTGTAATGATTCTCGTCGTAGTGCCAGGCCCGTAACGCCAGCATGCCCCAGAA
GAAGGGAACAATGGTTAGCACGCCAAAAATAAGGCGCAATGTTTTAGAGTTACGCCAGAT
TGCTGCGGAATCTGGGTAAAACAGCACCAGCAATAGCGCGACAATCCACCAACCCAACGA
AGCCCAAAGTGAGATTTCAACCAGCGGTTGATGAATATTTCGGTGATATTCCGGCAACAG
AAAAAGCATCAGCGCCAACAATAACCCGCATAACACCGCCAACCATACTCGCTGCGAACG
AGTGGTAAAACCGCTAAGCTGTCCCCATTCCCACGCTGCCAGCATGCAGACCACCAGCGT
TACAATGGCGAACCCCACCGGCGGCAACAGAAACAACGCCGCGATGACGACGGGTATTAA
CACAAAAGCAGATATCAGGCGATACTTCAGCAAAAGCGACCCCCATCAGGCTGTTTCATC
ACCGGGCTCGGTGCCGCCGAAACGACGCTCTCGATTAGCAAAGGCATTTAACGCCCCTTC
AAAGTCTTGTTCATCGAAATCGGGCCAGAGAACATCTGTAAAGTAAAGTTCGGCATAGGC
AATTTGCCAAAGCAAAAAGTTACTAATGCGATGCTCCCCCCCAGTCCTAATTACTAAATC
TACAGGGGCCAGTTCATGCATACAGACATGCTGGTTTAGCATCTCTTCATCTATCTGATC
TGGTTGCAGGTTTCCTTGCTGCACCTTTTCAGCCAGTTGCCTGACTCCCTGGACTATATC
CCAACGTCCACCGTAGTTCGCCGCAATATTCAGCGTCAGACCGGTATTCCCGGCTGTTAG
CGCTTCAGATTTACGAATACGTTCTTGCAAACGCGAGTTAAAGCGACTGGTATCGCCAAT
AATACGCAGACGCACGTTATGTCGGTGCAGACTTTTTACTTCGCTATCGAGCGCCCACAC
AAACAGTTCCATTAACGCACTGACTTCCTGCGCTGGTCGGTTCCAGTTTTCACTACTAAA
GGCATACAGCGTTAACGCCTCAATACCGTTGTTGGCCGCAAAAGAGACAGCCCGGCGGAC
GGATTTTGCCCCGGCTTTATGCCCAAAGGCACGAATCTTCCCTTGCTTTTTTGCCCAGCG
ACCATTGCCGTCCATAATGATCGCAACATGACGGCAGCCATGCGCTGGCAATTTTTCGCT
AAGTGGTTGAGTAGCAGACAACATCACGCGTTTTTTATTCCCTGACAGGGTTTACGGTAC
TCAGGAATACTGAAGCCTATACAAAAAAAAGCCGTGTAAAACCACGGCATACCTGACCTT
ATAAAGCCAACTACTTACGATCAGATGGCGCAGACTATATCACTGAAGCCCTACGCTAAC
AAATAGCGCGACTCTCTGTAGCCGGATTATCCTCAGCTTGCGAGACGCATCACCTCTTTT
CTGGCGACTTCACGCGCGTTCGCATCAACAGATAACACATCGTCCACACATTGTGGTTCG
CGCATATCCATTTTTTCCAGTACGGATAAATTCAACGCAGCGATATCCGTAAAGCGGATT
TGTTGCGCAAGAAAAGCAGCAACGGTGATTTCGTTTGCGGCATTCAATGCTGTCGTCGCT
GCCTGACCTTGTTCGAACGCCTCCATCGCCAGTTTCAGGCATGGATAACGATCATAATCC
GGTGCGGCAAATGTCAACGCACTTAGTTTGCAAAAATCGAGCGGCTTCACGCCAGAGTTC
ACGCGATTCGGCCATGCCATGGTGTGGGCAATTGGCGTACGCATATCCGGTTCCCCCAGC
TGCGCCAGAACACTGCCGTCCTGATAGCGCACCATTGAGTGAATCACTGACTGCGGGTGA
ATCAGCACTTCCATCTGGCTGGCGCTGGCGTTAAACAGCCAACGCGCTTCAATGTATTCC
AGACCTTTGTTCATCATGGTAGCCGAATCGACAGAAATTTTACGTCCCATCGACCAGTTC
GGATGACGGCAGGCTTGATGGGGCGTCATTGTTGCCAAATCGCGCAATGGCGTCTCACGG
AAAGGGCCACCAGACCCGGTAAGTAAAATGGACACCACGCCATTTTGCTCAAGGTCAGCG
TATCCCAGATTATGCTGGATAGGTTGCGGTAAACTCTGAAAAATAGCGTTATGTTCGCTA
TCGACCGGTAACAATTGCGCTTTGCTCTGCTTTACGGCGTCCATAAACAGACGTCCGCAG
GTAACCAGTGATTCTTTATTGGCCAGCAAAATGGTTTTACCCGCGCGGATCGCAGCAAGC
GTAGGTAACAGCCCAGCAGCACCAACAATGGCTGCCATCACCTGATCAACCTCCTCAAGC
GCTGCCATATCGCAAGCGGCTTGTTGCCCACTTAAGACTTCGGCGCGGCTCCCCTGTTGC
TGTAGCATCGTTTTAAGAAGTTTCGCACTCGCTTCATCGTCCATTACGGCATAGCGGGGA
GAGAATTCCAGGCACTGTTCTACCATGCGAGTGACATTTTTGCCTGCCACCAGCGCAACT
ACGCGGAAGTGTTCGGGATTATGGCGCACCACGTCCAGCGTGCTGCAACCAATCGAGCCG
GTCGAGCCCAGAATGGTGAGTTGCTTCATGAAACATCCAGAGTTGAGACAGAATAAAAAG
CAAAACGCCGCCAGCCGATCCGCAAGGATCTACTAAGCGGCGTTTTTGTCGTTCAAGAAA
TCAGAACTGCATCAGTTCTGCTTCTTTGTCTGCCAGCGCCGCTTCAATTTTCTTGATTGC
AGCATCAGTCAGTTTCTGTACATCGTCCTGAGAACGGCGATCGTCGTCTTCGCTGATCTC
TTTATCTTTCAACAGTGCTTTCACTTTGTCGTTCGCGTCACGACGCACGTTACGTACTGC
AACACGCGCTTGTTCTGCTTCACCACGAACGATTTTGGTCAGATCTTTACGACGTTCTTC
CGTCAGCGGCGGCAGCGGAACACGGATGTCGCTACCCGCAGAGTTCGGGTTCAGGCCAAG
ATCGGACGCCATAATCGCTTTTTCAACGGCCGGAGACATTGAACGATCAAACACGTTGAT
TTTCAGAGTACGGGAATCTTCTACCGTTACGCTTGCCAGCTGACGCAGCGGCGTCGGCGT
GCCGTAATATTCCACGACAATGCCATCCAGCAGGCTGGGAGAAGCACGACCCGTGCGTAT
TTTGCTGATTTGGGTTTTGAACGCTTCTACGCATTTGTCCATGCGTACTTCAGCATCTTT
TCTGATATCGCTAATCACGTTACGAATCCTTGAAAACTTGTCTCAGTCAGACCAGACAGT
CACACACAGTGGAAGTGTGCTAAGTATAGCCCTGATTAAACATATTACGGGTAATCGTCT
GGATTATTAGGCTATTTTATTTGCCATTTTGGCCCCGGGCAGTGCTCGCCATCCTCACGT
ACTTTTGTACGCTCCGGTTGCTGCGCGCTGGCCGTGACCAAACTGCCTGCAACAATAACG
CCTTATAACCAGACTTACGCCCCCGCGATACTTATGCGGAATCTTACCCTTATTTATCCA
TCACGGGAATTATTCCGTGATTAAAGTCCCTTCTTTTTCACCCATTACCACACGGCGCAG
CGCACCCGGTTTGTTCATGTTGAAAACACGAATCGGTAATTTATGGTCACGAGCCAGCGT
GAAGGCCGCCAGGTCCATGACTTTCAGCTCTTTTTCCAGCACTTCGCTGTAAGTCAGTTG
CTCGTACATGGTTGCAGTTGGATCTTTCGCCGGATCAGCAGTAAACACGCCGTCAACTTT
GGTTGCTTTCAGCACCACATCGGCTTCAATTTCGATACCACGCAGGCAAGCTGCTGAGTC
GGTGGTAAAGAACGGGTTACCTGTACCGGCGGAGAGGATCACCACACGGTTGTTGCGCAA
CAGGCTGATAGCTTCTGCCCAACTGTAGCTGTCGCACACGCCATTCAATGGAATAGCGGA
CATCAGGCGAGCGTTCACATAGGCGCGGTGCAGTGCATCACGCATTGCCAGGCCGTTCAT
TACGGTCGCCAGCATCCCCATGTGGTCGCCCACAACGCGGTTCATACCCGCTTTCGCCAG
ACCAGCGCCACGGAACAGGTTACCCCCACCAATCACCACACCAACCTGAATACCCAGTTC
AACCAGTTCTTTGATTTCCTGAGCCATGCGATCCAGTATGCTTGCATCAATACCGAAGCC
TTCAGTGCCCTGCAGAGCTTCGCCACTCAACTTAAGCAGAATGCGTTTATAGACGGGTTT
TGCATTGGTAGCCATGTTTCTTTCCTGAGACTGTCAACGATTGAAATGAATTAATACTAG
CGACATTGTACGTCGCTATTCAGCGCAGCCCCACAAGGGTTAGCTGAATTTACAAGATGG
GCACAAAAAGAAGCCGCCCTCAGGCGGCTCCTTTTCGATGATTAAGACTGCTTGGACATC
GCAGCAACTTCTGCTGCAAAGTCAGTCTCAACTTTCTCGATGCCTTCACCTACTTCGAAG
CGGATGAAGCCAGTCACTTCAGCGTTATGCTCTTTCAGCAGCTGACCAACAGTTTTTGCC
GGTTCCATAACGAACGGCTGACCAGTCAGAGAAACTTCGCCGGTGAATTTCTTCATGCGG
CCTTCAACCATTTTCTCTGCGATTTCTTTCGGCTTACCAGACTGCATCGCGATATCCAGC
TGTACCTGGTATTCTTTTTCTACCACTTCAGCGGATACGTCTTCTGGTTTGATGAATTCT
GGCTTGCTTGCAGCAACGTGCATAGCGATGTGTTTAACCAGCTCTTCGTCAGCGCCTTTA
GCAGCAACCAGAACGCCGATACGCGCACCGTGCTGATAAGAACCCAGAACGTCGCCTTCC
AGCGCAGCAACGCGGCGAATGTTGATGTTTTCACCAATTTTCGCTACCAGCGCAACACGT
TCTTCTTCGAACTGTGCTTTCAGAACTTCAACGTCAGTGATTTTGCCAGCAACAGCTGCG
TCCAGAACTTTGTCTGCGAACGCCTGGAAACCAGCGTCTTTTGCAACGAAGTCAGTCTGG
CAGTTAACTTCCAGAATGATGCCGTAGTTGCCGTCGATTTTGGTTTTGATCACGCCGTCA
GCAGCAACGTTGCCTGCTTTTTTCGCTGCTTTAATAGCACCGGACTTACGCATGTTTTCG
ATTGCCAGCTCGATGTCGCCGTTAGCTTCAGTCAGTGCTTTTTTGCAATCCATCATGCCT
GCGCCAGTACGCTCACGCAGCTCTTTTACCAGGGATGCGGTAATTTCAGCCATTCTAAAA
TCCTCGGAGATGTGATCTGCCCGGCATTAAACCGCACAGATATAAAAGTGAAAAAGGGGG
CCATATGCAGGCCCCCTAACCAAACGTGTACTACCTGGTCTATAAGGGCTCTCCCCCTTC
ATATTTCGCGCCGCAGATGCGTTGTCTTCGCTCGCTCATCCCGGTCACTTACTGATGTAA
GCTCCCGGGAATTCTCGAGCTTGCCGCCTTTCTGCAACTCGAACTATTTTGGGGGAGTTA
TCAAGCCTTATTACTCAGCTTCTACGAAGCTTTCTTCCGCCTGGGAAGCCAGATCCTGAG
AACGGCCTTCACGTACGGTTGCAGCAACAGCGCCCAGGTACAGGGTCACAGCACGGATTG
CGTCGTCGTTACCCGGGATAACGAAGTCAACACCGTCCGGATCAGAGTTGGTATCAACGA
TAGCAAATACCGGAATACCCAGGTTGTTTGCTTCTTTGATAGCAATGTGTTCGTGGTCAG
CATCGATTACAAACAGAGCGTCCGGCAGACCGCCCATGTCTTTGATACCGCCCAGGCTGT
TTTCCAGTTTCTCCAGCTCACGAGTGCGCATCAGCGCTTCTTTCTTGGTCAGCTTGTCGA
AAGTACCGTCCTGAGACTGAGTTTCCAGGTCTTTCAGACGTTTGATGGACTGACGAACGG
TTTTCCAGTTAGTCAGCATACCGCCCAGCCAGCGATGGTTCACGAAGAACTGGTCGCAGC
TCAGAGCAGCGTCTTTCACCGCTTCGCTTGCAGCGCGTTTAGTACCAACGAAAAGGATTT
TACCTTTGCGAGAAGCAATCTTGTTCAGTTCAGCCAGAGCTTCGTTGAACATCGGTACAG
TTTTCTCAAGGTTGATGATGTGAACTTTGTTACGCGCACCGAAGATGAACGGCTTCATTT
TCGGGTTCCAGTAACGGGTCTGGTGACCGAAGTGAACACCAGCCTTGAGCATGTCGCGCA
TGGAAACAGTTGCCATGATTAAAACCTCTATATAAAAGTTGGGGTTATGCCTCCACGTAT
CCCATATTACCGACCCCAAAGGGCACCCCGGAATATGTGCCGATACGTGTGTGTTGTTAC
ACAAAGTGAGATTGTCGCTTCCGTCCAGTCTGTGTATACGAAATGGATCGGAAGTCCGGC
GCGCTTTATACCACAAATACGTCTGGGACACCAATAATTGTTGGCGCTGTGTACAGCATC
AGACGTCGAATTTTCTATTATAGAAAACCTTCAGTGGCACGTTTGGCGAAATTCAGAATG
ATTCTCAATTTGCCCGGGTGTGATACCATTGACGGCACTTACATATATATTGTCGGTATC
ACCGACGCTGATGGACAGAATTAATGGCTATCTCAATCAAGACCCCAGAAGATATCGAAA
AAATGCGCGTCGCTGGCCGACTGGCTGCCGAAGTGCTGGAGATGATCGAACCGTATGTTA
AACCGGGCGTCAGCACCGGCGAGCTGGATCGCATCTGTAATGATTACATTGTTAATGAAC
AACACGCGGTTTCTGCCTGCCTCGGCTATCACGGTTATCCGAAATCCGTTTGCATCTCAA
TTAATGAAGTGGTGTGCCACGGTATTCCGGACGATGCTAAGCTGCTGAAAGATGGCGATA
TCGTTAACATTGATGTCACCGTAATCAAAGATGGTTTCCACGGCGATACCTCGAAAATGT
TTATCGTCGGTAAGCCGACCATCATGGGCGAACGTCTGTGCCGTATCACGCAAGAAAGCC
TGTACCTGGCGCTACGCATGGTAAAACCAGGCATTAATCTGCGCGAAATCGGTGCGGCGA
TTCAGAAATTTGTCGAAGCAGAAGGCTTCTCCGTCGTTCGTGAATATTGCGGACACGGTA
TTGGTCGCGGCTTCCATGAAGAACCGCAGGTGCTGCACTATGACTCCCGTGAAACCAACG
TCGTACTGAAACCTGGGATGACGTTCACCATCGAGCCAATGGTCAACGCGGGTAAAAAAG
AGATCCGCACCATGAAAGATGGCTGGACGGTAAAAACCAAAGATCGCAGCTTGTCTGCAC
AATATGAGCATACTATTGTGGTGACTGATAACGGCTGCGAAATTCTGACGCTACGCAAGG
ATGACACCATCCCGGCGATAATCTCGCACGACGAATAAAATGAAGCCGGCGAATGCCGGC
TTTTTTAATGCGATAATTTAATCTTATGGGTGGCGCACAATGAATACCCTTCCAGAACAG
TACGCAAACACCGCTCTCCCCACCCTGCCCGGTCAACCGCAAAATCCATGCGCCTGGCCC
CGTGATGAATTAACCGTCGGTGGGATAAAAGCCCATATCGATACTTTCCAGCGTTGGCTG
GGTGATGCCTTTGACAATGGTATCTCCGCAGAACAGTTGATTGAGGCGCGTACCGAGTTT
ATCGACCAGCTCCTGCAACGATTATGGATTGAAGCGGGATTCAGCCAGATTGCCGACCTG
GCATTGGTCGCCGTCGGTGGCTACGGTCGTGGCGAGCTGCATCCACTTTCAGACGTCGAT
TTACTGATTTTAAGCCGTAAAAAGCTCCCGGACGATCAAGCGCAAAAAGTGGGCGAGCTG
TTAACGCTGCTCTGGGATGTAAAGCTGGAAGTCGGTCATAGTGTGCGCACGCTTGAAGAG
TGCATGCTGGAAGGGTTATCGGATTTAACCGTCGCCACCAATTTAATCGAATCCCGCTTA
TTAATTGGCGATGTTGCGCTGTTCCTCGAACTGCAAAAACATATTTTCAGCGAAGGATTC
TGGCCTTCCGACAAGTTCTACGCGGCGAAAGTTGAAGAACAGAACCAGCGCCATCAGCGT
TACCATGGCACCAGCTACAACCTTGAACCAGACATCAAAAGCAGCCCTGGCGGCTTGCGC
GATATCCACACTCTGCAATGGGTGGCCCGCCGTCATTTTGGCGCAACATCGCTGGATGAA
ATGGTCGGGTTTGGCTTCTTAACCTCAGCGGAGCGGGCGGAATTAAACGAATGTCTGCAT
ATATTGTGGCGTATTCGCTTTGCCCTGCATCTGGTCGTCAGCCGTTACGATAATCGCCTG
TTATTCGATCGCCAGCTTAGCGTCGCCCAGCGTCTGAATTACAGTGGCGAAGGTAACGAA
CCGGTCGAGCGGATGATGAAGGATTACTTCCGCGTGACACGCCGCGTCAGTGAACTCAAC
CAGATGCTGCTGCAACTGTTCGATGAAGCGATCCTCGCCCTTCCCGCCGACGAAAAACCC
CGTCCAATCGACGATGAGTTTCAGCTACGCGGTACGCTAATCGACCTGCGTGATGAAACA
CTATTTATGCGCCAGCCGGAAGCCATCTTGCGTATGTTCTACACCATGGTGCGCAACAGT
GCGATCACCGGCATTTACTCCACCACACTGCGCCAGTTACGCCATGCCCGTCGCCATCTG
CAACAACCGCTGTGTAATATTCCGGAAGCACGAAAACTGTTTTTGAGCATTCTGCGTCAC
CCCGGAGCGGTGCGGCGCGGGCTATTGCCAATGCATCGCCATAGCGTGCTCGGCGCGTAT
ATGCCGCAATGGTCGCATATCGTCGGGCAGATGCAGTTTGATCTGTTCCACGCCTACACG
GTGGATGAACATACTATCCGCGTGATGCTGAAACTGGAGAGTTTTGCCAGTGAAGAAACG
CGCCAGCGCCATCCGTTGTGTGTGGACGTCTGGCCGCGTCTACCGTCAACTGAGCTGATT
TTCATCGCCGCGCTGTTTCACGATATCGCCAAAGGACGCGGCGGCGACCATTCCATTCTC
GGTGCTCAGGATGTAGTGCATTTTACCGAACTCCACGGGCTGAACTCACGCGAAACACAG
CTGGTCGCCTGGCTGGTTCGCCAGCACTTGCTGATGTCGGTGACAGCTCAGCGTCGCGAT
ATTCAGGACCCGGAAGTCATCAAGCAGTTTGCCGAAGAAGTTCAAACGGAAAATCGTCTG
CGCTATCTGGTATGCCTGACAGTGGCTGACATTTGCGCCACCAACGAAACGCTGTGGAAT
AGCTGGAAGCAAAGTCTGTTGCGCGAACTCTATTTTGCCACCGAAAAACAGCTACGACGC
GGAATGCAAAACACGCCGGATATGCGCGAACGGGTTCGCCATCACCAACTCCAGGCGCTG
GCACTGCTGCGCATGGATAACATCGACGAAGAGGCGCTGCACCAAATTTGGTCACGCTGT
CGTGCTAACTATTTTGTCCGCCATAGCCCAAATCAACTGGCCTGGCATGCGCGCCATTTA
TTACAGCATGATTTAAGCAAACCGCTGGTATTGCTTAGTCCGCAGGCTACGCGTGGAGGC
ACCGAGATTTTTATCTGGAGCCCGGACCGCCCCTATCTGTTTGCCGCCGTCTGTGCCGAA
TTAGACCGCCGCAATTTAAGTGTTCACGACGCACAAATTTTCACCACTCGCGACGGTATG
GCGATGGATACCTTTATCGTGCTGGAACCCGATGGTAGCCCGCTATCCGCAGATCGCCAT
GAGGTTATTCGGTTTGGTCTGGAGCAAGTACTGACACAAAGTAGCTGGCAGCCACCACAG
CCGCGTCGTCAACCGGCTAAACTACGTCACTTTACTGTTGAAACCGAAGTGACGTTTTTG
CCTACCCATACCGACCGAAAATCATTCCTTGAGCTTATCGCGCTCGACCAGCCAGGACTG
CTGGCGAGAGTCGGGAAAATTTTTGCCGATCTGGGAATTTCGCTTCATGGCGCCCGAATT
ACAACCATTGGCGAGCGAGTAGAAGATTTATTCATAATTGCCACCGCTGACCGGCGTGCA
CTTAATAACGAGTTGCAGCAGGAAGTGCATCAGCGGTTGACAGAGGCCCTCAATCCAAAC
GATAAAGGGTGATGTGTTTACTGATATGAAAAGAGTTTAACAATGCAGCAGTTACAGAAC
ATTATTGAAACCGCTTTTGAACGCCGTGCCGAGATCACGCCAGCCAATGCAGACACCGTT
ACCCGCGAAGCGGTAAATCAGGTGATCACCCTGCTGGATTCCGGCGCACTGCGTGTAGCG
GAAAAAATTGACGGTCAGTGGGTGACGCATCAGTGGTTAAAAAAAGCGGTGCTGCTCTCT
TTCCGTATTAATGATAATCAGGTGATCGAAGGGGCAGAAAGCCGCTACTTCGACAAAGTG
CCGATGAAATTCGCCGACTACGACGAAGCACGTTTCCAGAAAGAAGGCTTCCGCGTTGTA
CCACCAGCGGCGGTACGTCAGGGTGCGTTTATTGCCCGTAACACCGTGCTGATGCCGTCT
TACGTCAACATCGGCGCATATGTTGATGAAGGCACGATGGTTGATACCTGGGCGACCGTC
GGTTCTTGTGCGCAGATTGGTAAAAACGTCCACCTTTCCGGTGGCGTGGGCATCGGCGGC
GTGCTGGAGCCGCTGCAGGCTAACCCGACCATTATTGAAGATAACTGCTTCATTGGCGCA
CGCTCTGAAGTGGTTGAAGGGGTGATTGTCGAAGAAGGTTCCGTCATCTCTATGGGCGTA
TACATTGGTCAGAGCACCCGTATTTACGACCGTGAAACCGGCGAAATCCACTACGGTCGC
GTTCCGGCGGGGTCTGTGGTTGTTTCAGGTAATCTGCCGTCAAAAGATGGCAAATACAGC
CTCTACTGTGCGGTTATCGTTAAGAAAGTTGACGCGAAAACTCGCGGTAAAGTTGGTATT
AACGAACTGCTGCGTACCATCGACTAAAAGTATGTACACGGGCAGCACGACGCTGCCCGA
TTGCTTTCTGGTTCAGAATAATTCGTCCTACTCATTCTTCCTCCCCCTTTTTTAAATACT
TTTTCATCTTGTTTCGGACTGTCATGTAATTCGCAAAACGAAGATAAATGTGCTAATCCA
TCCCATGGAATATCGCCACAATAAAGCAGGTAATTTTTTGATTTTTACGCCATGATAGAA
GTCTGGAAGAAAAAGGCTTTCTGCGATCACAGTCGAGCCGGGCGGGCCAGGCCAAATGCT
AAAATAAGCACAATTTACTGACTCATTTTGAGGTAACGCTATGTACGACAATCTGAAAAG
TCTGGGTATTACCAATCCTGAAGAAATTGATCGTTACAGCCTCCGGCAGGAAGCCAACAA
CGATATTCTGAAAATCTATTTCCAGAAAGACAAAGGCGAGTTTTTCGCCAAGAGCGTGAA
GTTTAAATATCCGCGTCAGCGTAAAACGGTCGTCGCTGATGGTGTGGGTCAGGGTTATAA
AGAAGTCCAGGAAATCAGCCCGAATCTACGGTATATCATTGATGAGCTTGATCAAATCTG
CCAGCATGACCGCAGCGAAGTTGATCTTAAGCGTAAGATCCTCGACGACTTACGTCACCT
GGAGTCAGTCGTAACCAATAAGATCAGCGAGATTGAAGCCGATCTGGAAAAACTAACGCG
TAAATAATCCCGAACTGACGGTTAACTCGGGCATTCCCCTCTCCCCTTCGGGCTGAGGGG
AATGAGCCAGCGCCGCCTCAACCTTAACGCATAACCTACCGCTCTTCATCCAGTTGTAAC
GCCACATACAGCAGCAACCTGTCATCAAAATTGCCCAAATCAAGCCCGGTCAGTTCCGAT
ATACGATTAAGCCGATACTCCAGAGTATTACGATGAATAAACAACGCCTTTGACGTTGCC
AGCGGTTGCACATTGTGACGAAACCACGCCGCCAGCGTTCGCCGCAGCAAGCCGTTATTG
TCCATCGCTTTCAGCCGCGCCAGCGGTCGCGCCAGTTCGTTGGCCTGCCAGTCGCCACGC
AAACTGTCGAGTAACACAGGTAACATCAGATCCTGATAAAAATAGCAGCGACTTTCTGGC
ATCCGCTGTTTACCCACCACCATCGTCGTTTTCGCCGTACGATAGGATCGGGCAATACTG
CCAGGACCAGTAAAATAGTTGCCCAGCGAAACGCGAAAACGCAGCTGGCCGTACTCTTTC
ATGCGGGTAATCAGTTGTTCAACTCGCTTACGATGATCTTCTGCATCCCAGCGCCCAAAA
GAGTTCAACGCCGGTTTCAACACCACCATTTCGGTTAGCGAGACAATCGCCACCAGATTA
TTACGCTCGGGCGTAGTCAGCGCATTTTGCAGTTGTTGTAACTCCGCCATTGCGCTGTCC
ACGCCAAGCTGACCGCTGTCGACCTCAACAATAGCCACTACTCGCGGTTGATTGAGATCG
ATCCCCAGCCGTTGCGCCCATTCAGTAAGTGCGGGAGTATTCTCCTCAGCCTGAATCAGG
TTCATCACCAGTTCTTCCCGCAAACGGCTATCCTGCGCCAACAGGTGCATCAACCGCGAC
TGTTCCAGCATCATTTCAGCCGTCATGCAGACCAGTTCGCCATATTTACGCAGGTTCTCT
GGTTCACCTGTCAGGCCAATTACGCCGACAATTTCACCTTCCAGCCGTAACGGTAGATTA
ATCCCCTGCCGCACACCGTGCAGATGACGTGCCACCGCGTCATCGATATCGACGACTCGT
CCCTGTGAAAGTACCAGCAATGCACCTTCGTGCAATTCACCAATACGCTCACGATCGCCG
CTGCCGATAATTCGCCCGCGGGCATCCATTACGTTGATATTGGTATCGATGATGCGCATG
GTACGTGCCACGATATCCTGCGCCATTTTGGTATCAAGATGCCAGCCAGCCATAAGTCCT
CCGTTATGCACGGCTTAGCATAAGGAAGTACGTAACGTACGGCATTGTGCAAATGCCTAA
AGGATGATGAAGATGTATGGAGTTGTGGTGAAGTTCACAGATTGTAAGGAGAACCCCTTC
CCGTTTTCAGGAAGGGGTTGAGGGAGATTACTGCATTAACAGGTAGATGGTGCTGTCGCC
GCGCTGAATGTTCAGTGCCAGCACAGACGGTTTGCTGTCGAGAACTTTACGCAGTTCAGC
GATGTTTTTCACTGCCTGCTGGTTCGCGCCAATAATCACATCACCTTTCTTCAGGCCGAT
CTGCGCAGCCGGAGTGCCCGTTTTCACGTTGTTCACTACCACGCCCTGATCTTTGCCTTT
GTTGCTCATCTCAGCACCTTCAATGCCGTTGAAGATGGAGCTGGAATCAACCTGATTCTG
GCTGCTCTGCTGCAGTTCCAGATTCACGTTGACCTGCTTACCGTCGCGCAGCAAGCCCAG
GGTCAGTTTGCTGCCCACCGGCATAGTACCCACCTGAGCACGCAGTGCGGCAAAGCTGCT
GATCGGCTTACCGTTCAGTGAGGTGATCACATCACCCGCTTTAATGCCCGCTTTTGCAGC
GGAGGAATTAGGCAGAACCTGGCTTACGAAAGCACCGCGCTGGGCGTCAACTTTCATCGC
TTTCGCCAGTTCGGAATTCAGCTCAGTCCCCATAATACCCAGCTCACCGCGTTTCACCTG
GCCGTATTCCACCATCTGCGAGGTCAGGTTTTTCACCATGTTGCTCGGGATAGCAAAACC
GATACCGATGTTGCCGCCGTCCGGTGCGAGGATCGCGGTGTTGATACCGATCAGTTCGCC
GTTCAGGTTAACCAGCGCACCACCGGAGTTACCACGGTTGATCGCTGCATCGGTCTGGAT
GAAGTTTTCGTAGTTTTCGGCATTCAGGCCGCTACGCCCCAGCGCAGAGACAATCCCGGA
AGTTACCGTCTCGCCCAGACCAAACGGGTTACCAATCGCTACGGTGTAATCACCCACGCG
CAGTGCATCAGAATCCGCCATCTTAATTGCGGTCAGGTTTTTCGGATTCTGGATTTGGAT
CAGCGCGATATCAGAGCGCGGATCTTTGCCAACCATCTTCGCGTCGAACTTACGGCCATC
GCTCAGTTGAACTTTAATGACCGTCGCGTTATCAACAACGTGGTTGTTGGTGACGACATA
GCCTTTATCGGCATCAATGATGACGCCGGAACCCAGCGCCATGAATTTCTGTTGCTGGCC
GCCACCATTACCGCCCTGGCCACCCTGGCAGAACGGAGAGCTCTGGAACGGAGAACCTTC
CTGGCAGAACGGAGAATCATCACCGAAGAACTGCTGGAAATTACGCGGCATACGCGGCGT
ATTAACGGTTGTGCTACCTTCTACGTTAATGCTGACCACTGAAGGCATCACCTTTTCGAG
CATCGGTGCAAGGCTTGGCATCTGCTGGGCTGTCGTTGCTGAAGAAGTCTCAGCCGCCGT
TGCAGAGAGCGGAGATAACGCCAAACCTAAACTCAGAGCCAGTGCACTCAGTGCTAATGT
GGTTTTTTTCATGTATTTCAGTCTCGATTAACAGATAACGCAAAATTGCTGTGTTCTTCA
GATTCGTTTTATAGCGCGAAGTTCCGAACTAAAGTTTCTGCAAAAGGTAAAAATTTATTG
TTCGTCTTTACAAAAGCCTGGTTATTGTTCTACGGCCATCAGACGTCGGTATTCATCCCA
CGCATAGAGGTCGGTCATACCGCTGATATAATCATGCAGCAGGCGGCAACGGTAATAATA
TTCCCATAGCGGAAACTCAGGAGAATCTGACGGTAATTTACTGACAGCTTCGACATAGGC
CAGCCGATGGCGCGTCGAGAGTTTGTGGAATAAGCGCGATTCAATAGGGAAACGTTTCAC
CCGTTCTTTTTCTACCAGTTCAGTAAAGTCTGATAACGACAGGCTTAATAAAGGACGATA
AATCTCTAATAATCCGCTAATGACCCGATAGCCCTGCAATTCAAGCTGCTCGACATCTGG
ATGGCTAAACACATGTTTTACAGCGACATTTTTATATAGCTTAAGAAGATCGCTGCATTC
GCTGGCATCTTCCAATAATGCATGATTAAACGTTCCGGCGAAAATCGCAGGCAGATTATC
AATAAATCGTTGTGCCGCGTAGGGTACCAGTTTATTTAGGGTATTTACCCGTAAATACAT
AAAAAACTGATCTTCCGTACTGCGGCTTAAACTATTTGAGCGTGATTTTTCCCAGGCATT
TTCAACCACTAGCGAAAAGAGCGAACCTTTCTCATGCTGACCCCACGCCTCGTGCAAATG
ATGATAAAGCTGCTCAACGGTAAATATTCTTTTCTCTACCGCATCTTCAAGGTCTGCCAC
ACAATAGGAGATGTCGTCGGCAGCTTCCATAATCCACGTTAATGGAAAACGACTGTAAAG
CGCCAAATTAAGTTCTTTACGCAACCGGGCAATATAGGCTTCTTCAGAAAGATAATAACC
CGGCTTTTTCATTAAATAGTGATGTGTCTCAGGCGTTTCGCCACGCCACCACGCCGGACG
GGTATATTTTAAAATACCGCCAACCTGTGCCCAGGTGAGATTCATCCTCATCAATGTATG
CACCAGACGAATGCCTTGTGCATTCCCCTCAAAATGACATAAGTCCTGACGAATCTTGCG
CCGCAGCTCGTTAAGCGGTTCTTCCCCGTCCCGTAAACGTAGTGCTGCCACGCTGCAGCG
ATCGTCAGTCAGAGGCTGGCTTTCGGCATCTTCCGGGTATAAACGCTGGCGAAACCAGTC
ATTTATCGCCGCTTCGCCAAAATGACCAAACGGCGGATTGCCGATATCGTGCATCAGGCA
TGACATCTCAACAATGCTTTCAAAAGGTCCGGTCAGTTCATCCAGGCCGTATGCTTCCAG
CAATTTAAGCTCTTTCAGACGGCTTAAAATTTCTTTGGCGATGTAGCGCCCCACCTGCTG
GACTTCCATCGAGTGGGTAAGACGCGTGCGCACGGCGGCATTGCGCTCCAGTGGAAAAAC
CTGGGTCTTTTGTTGCAGACGACGAATTGCCGGAGAGTTGATGATACGCCCGCGATCGCT
CTCGAAGATCCGCAGGATCTCATGTTCGGTTTTAACGCCCTGCGGTGAACGGTAACGACG
ATGCCAGTTTATTTTTTTTCGGAAATCAATCTGTGCCATGTCCTCTCCCGCGTGAGAAAT
ACGCTTCCCCGTAAGCGCATGGTAAACTATGCCTTCAAATCGGGCTTATCGCGAGTAAAT
CTATGAAAATCGGCATCATTGGTGCAATGGAAGAAGAAGTTACGCTACTGCGTGACAAAA
TCGAAAACCGTCAAACTATCAGTCTCGGCGGTTGCGAAATCTATACCGGCCAACTGAATG
GAACCGAGGTTGCGCTTCTGAAATCGGGCATCGGTAAAGTCGCTGCGGCGCTGGGTGCCA
CTTTGCTGTTGGAACACTGCAAGCCAGATGTGATTATTAACACCGGTTCTGCCGGTGGCC
TGGCACCAACGTTGAAAGTGGGCGATATCGTTGTCTCGGACGAAGCACGTTATCACGACG
CGGATGTCACGGCATTTGGTTATGAATACGGTCAGTTACCAGGCTGTCCGGCAGGCTTTA
AAGCTGACGATAAACTGATCGCTGCCGCTGAGGCCTGCATTGCCGAACTGAATCTTAACG
CTGTACGTGGCCTGATTGTTAGCGGCGACGCTTTCATCAACGGTTCTGTTGGTCTGGCGA
AAATCCGCCACAACTTCCCACAGGCCATTGCTGTAGAGATGGAAGCGACGGCAATCGCCC
ATGTCTGCCACAATTTCAACGTCCCGTTTGTTGTCGTACGCGCCATCTCCGACGTGGCCG
ATCAACAGTCTCATCTTAGCTTCGATGAGTTCCTGGCTGTTGCCGCTAAACAGTCCAGCC
TGATGGTTGAGTCACTGGTGCAGAAACTGGCACATGGCTAAGTCACTGTTCAGGGCGCTG
GTCGCCCTGTCTTTTCTCGCGCCACTGTGGCTCAACGCGGCACCGCGCGTCATCACGCTT
TCTCCCGCCAACACTGAACTTGCCTTTGCCGCCGGGATCACGCCGGTTGGGGTCAGCAGC
TATTCCGACTATCCTCCACAAGCGCAAAAGATTGAGCAGGTTTCCACCTGGCAGGGGATG
AATCTGGAACGCATTGTCGCGCTGAAACCCGATCTGGTGATTGCCTGGCGTGGAGGTAAT
GCCGAGCGGCAGGTTGACCAGCTGGCTTCGCTGGGAATAAAAGTGATGTGGGTCGATGCG
ACAAGCATTGAACAAATTGCCAATGCGTTACGTCAACTGGCCCCCTGGAGTCCGCAACCG
GATAAGGCCGAACAAGCCGCGCAATCCCTGCTGGATCAGTACGCGCAATTGAAAGCGCAA
TATGCTGATAAACCTAAAAAACGTGTTTTTCTGCAATTCGGCATTAATCCGCCATTTACC
AGTGGAAAAGAGTCGATTCAGAACCAGGTACTCGAAGTTTGTGGCGGAGAAAACATCTTT
AAAGACAGCCGGGTTCCCTGGCCGCAAGTTAGCCGCGAACAGGTGTTAGCACGCTCGCCA
CAGGCGATTGTCATTACAGGCGGACCGGACCAAATTCCTAAAATCAAACAATACTGGGGT
GAACAGCTCAAAATTCCCGTTATTCCTCTCACGAGTGACTGGTTTGAACGTGCAAGCCCA
CGTATTATCCTCGCTGCACAACAGCTCTGTAATGCGCTTTCACAGGTAGATTAGTGCCTG
ACCTTTTCAGGTGCTCAGTGGGGATTGAACAATGCTCGTCTATTGGCTGGATATAGTCGG
CACAGCGGTATTTGCCATCTCCGGCGTTTTGTTAGCCGGAAAATTGCGTATGGACCCTTT
TGGTGTTCTGGTATTGGGCGTGGTTACCGCAGTAGGCGGCGGGACAATTCGCGACATGGC
GCTGGATCACGGCCCGGTATTTTGGGTGAAAGATCCCACCGATCTGGTCGTTGCAATGGT
CACCAGCATGCTGACCATCGTGCTGGTGCGCCAGCCAAGACGCTTACCAAAATGGATGTT
GCCGGTGCTGGACGCCGTTGGTCTGGCGGTGTTTGTCGGCATTGGCGTGAATAAAGCCTT
TAATGCGGAAGCCGGTCCGTTAATCGCGGTTTGCATGGGCGTCATTACTGGCGTTGGCGG
CGGGATTATTCGTGATGTACTGGCCCGCGAGATCCCCATGATTTTACGTACAGAAATCTA
CGCAACAGCCTGTATTATCGGCGGTATTGTCCACGCTACGGCTTATTACACATTTTCCGT
ACCACTGGAAACAGCCAGTATGATGGGCATGGTCGTGACGCTATTGATTCGGCTGGCGGC
TATTCGTTGGCATCTTAAGCTACCGACGTTTGCGCTGGATGAGAATGGGCGTTGAAGAGA
GAAGATGTGCCGGATAGTTTATCCGGCACATGAACAACAGATTAGATGCTAAAGGAAGAA
CCGCAACCGCAGGTGCTTTTCGCGTTCGGGTTGGTCACGATGAAACGAGAACCTTCCAGT
CCTTCGGTGTAGTCAACGGAACCGCCGACCAGATATTGCAGGCTCATCGGATCAACCACC
AGGCCAACGCCCTGTTTTTCGATGGTCATATCGCCTTCGTTCACCTGATCATCAAAGGTG
AAACCATACTGGAAGCCGCTGCAACCGCCACCGGTGATATACACGCGTAATTTCAGATTC
GGGTTATCTTCGTCAGCGATCAGGCTTTTAACTTTGTTGGCTGCTGCGTCGGTAAACTCC
AGCGGCAGTGCTACGTCATCACTCATATTTTGCTCCAAACGACATCGGCAATTGGGCAAA
TTCTAACCCAATAATAATCGCCATTATCTAATACCCTGGTATTTCGTTCAAGTATTCTCG
CTGGCTGATGCGGCCTTGCTTCGCGCCAGTTGCTCAGCTTCCTGTTTTGCCAGCGTGCGC
GCAAGAATCGCCGAGTATAGCGGTTTCCCACCGGTAAATTGCGCTAATAGTGTTGCGCCA
AGACCGGTAATAATCATTGGCAAAATGAGCTGGTAGTTATCGGTCATCTCCAGAACCAGA
ATGATCCCCGTTAACGGCGCGCGAATAGATGCCGCCAGTAACGCCCCCATTCCGGCAATA
GCAAATGTCCCCGCCTCAAGGTGATATTGCGGAAACAGCTCAACGGCAACCATTCCGAAA
GCGGTTCCCAGCACAGTACCCAGCGCCAGCATCGGGGCAAAAATACCGCCCGGCGCGCCG
GAAGAGAAGCACAGTAAAGTGGTAATGACCCGCGCGACGAAGATAAACACCAGCATTCCC
ATGCTGAAATTCCCCGCGGTAGCGATAGGAATCAGGTTAAAACCGCCGCCCGACGTTGCT
GGTGCCACAAACCCCAGCAATCCACACAGACCGCCAATCGCACCACCCATCAGTACCCAT
TTGGTAATATTGCCGCCGTGCACACGGTGCAGCAAATCCTGCATTCCCAGCACCCATTTA
TTAAAAATAGGGCCGAAAATGCCAAAAATAATACCGAGGATCAGATAAAGCCACAGCGTA
TTAAGCGGCGCATCAGAAAGTTTACCGACGTCAATCAACGCAACTTCATGATTAAAAATC
CGGTACATAATGGTCGACATAATGACACCAATAAATACCGCTTTAATCGAAATTAACGTA
TAGCGAAACTGCGGACGCATCTCTTCGATAATAAACAAAATACCCGCCAGCGGCGCGTTA
AAGGCCGCCGCCAGCCCCGCAGCAGCACCGGTTGCCAGCAGCGTATGGCGAGCTTCATCA
CCTTTCAGGCGGAAAACATCGAGTACCATCCGCCCGATATTGCCGCCGATCTGCACGGTT
GGCCCTTCGCGCCCCAACACCATGCCTCCGCCGAGCGTCCCCAGCCCGCCAAAGAATTTC
ACCGGCAATACACGCCACCAGCGAACGGGACGTTGATCTTCCAGCGCCCCTTCAATTTCC
GGGATCCCCGAACCCCCTGCTTCCGGCGCGTATTTGCGCACCAAAAAGTAGCCGAACATC
GCCAGCAGCGCCGAACAGAGAAAAGCGACGGTTAACAGAAGCGGATAATTATCAGCAGTA
TGTACCAGCGCCCCCATACGTTGGTTCTGCAACCAGGCGACACCTTTGTCAAAAGCAACC
GCTGCCAGCCCGACAAGCGTGCCGACGACTGCCGCCATAAACAAAATGGCTAACGGGGTT
TTATCGCGCTCAAGAAGTTGGCGAATCAGTTGTCTGCGTCGCAGGCGCGCGGCCTGCGGT
GTTTCTAAAGAGGGAGTATCAGTTTTCATCCAATGATCACTTATTGGTCATACAAATAAG
ATGACGGCATTTTACTCGCACGTTCCATGAAAATCCTTTGCAAAGCGTAATGTTTCAAAT
GCACAAAACTTTTATACTCTAAGAACTCAGGATTGCACCAGTACAAGCAGCCTGATGTTT
GACGAGTATTTAACTTGTTATGAATAACATAGAATAGCAGCCATTCACTTTTTCTACGAA
TCAGGAACCCTCCATGAGTAAGTCTGAAAATCTTTACAGCGCAGCGCGCGAGCTGATCCC
TGGCGGTGTGAACTCCCCTGTTCGCGCCTTTACTGGCGTGGGCGGCACTCCACTGTTTAT
CGAAAAAGCGGACGGCGCTTATCTGTACGATGTTGATGGCAAAGCCTATATCGATTATGT
CGGTTCCTGGGGGCCGATGGTGCTGGGCCATAACCATCCGGCGATCCGCAATGCCGTGAT
TGAAGCCGCCGAGCGTGGTTTAAGCTTTGGTGCACCGACCGAAATGGAAGTGAGAATGGC
GCAACTGGTGACCGAACTGGTCCCGACCATGGATATGGTGCGCATGGTGAACTCCGGCAC
CGAGGCGACCATGAGCGCCATCCGCCTGGCCCGTGGTTTTACCGGTCGCGACAAAATTAT
TAAATTTGAAGGTTGTTACCACGGTCACGCTGACTGCCTGCTGGTAAAAGCCGGTTCTGG
CGCACTCACGTTAGGCCAGCCAAACTCGCCGGGCGTTCCGGCAGATTTCGCCAAACATAC
CTTAACCTGTACTTATAACGATCTGGCTTCTGTACGCGCCGCGTTTGAGCAATACCCGCA
AGAGATTGCCTGTATTATCGTCGAGCCGGTGGCAGGCAATATGAACTGTGTTCCGCCGCT
GCCAGAGTTCCTGCCAGGTCTGCGTGCGCTGTGTGACGAATTTGGCGCGTTGCTGATCAT
CGATGAAGTGATGACCGGTTTCCGCGTAGCGCTAGCTGGCGCACAGGATTATTACGGCGT
AGTGCCAGATTTAACCTGCCTCGGAAAAATCATCGGCGGTGGAATGCCGGTAGGCGCATT
CGGTGGTCGTCGTGATGTAATGGATGCGCTGGCCCCGACGGGTCCGGTCTATCAGGCGGG
TACGCTTTCCGGTAACCCAATTGCGATGGCAGCCGGTTTCGCCTGTCTGAATGAAGTCGC
GCAGCCGGGCGTTCACGAAACGCTGGATGAGCTGACAACACGTCTGGCAGAAGGTCTGCT
GGAAGCGGCAGAAGAAGCCGGAATTCCGCTGGTCGTTAACCACGTCGGTGGTATGTTCGG
TATCTTCTTTACCGACGCCGGGTCCGTGACGTGCTATCAGGATGTGATGGCCTGTGACGT
CGAGCGCTTTAAGCGTTTCTTCCATATGATGCTGGATGAAGGTGTTTACCTGGCACCGTC
AGCGTTTGAAGCGGGCTTTATGTCTGTGGCGCACAGCATGGAAGATATCAATAACACCAT
CGATGCTGCACGTCGGGTGTTTGCGAAGTTGTGATGATTTTGCCTCGCCCACCGGGCGAG
GCATTCTATTAACGGCTCTGCTTTCTCAACAAATAGATAAAATATGGCGCGCCGATAAAG
GTCGACAGCAGCCCCGCCGGGATCTGGAATGGAAACAGCACCATCCGCCCACACCAGTCA
GCGAATACCAGCAGTAAACCACCCACCAGCGCCGAAATTACGATGTGTGGCATCGTCCGT
CGAAAACCCATCATCCGCGCAATATGCGGTGCCATTAAACCAACAAAACTCAACGGTCCA
ATAGTCATCGTCGCGGTCGCCGTCAGGCAAGCCGCTAACAGCAGCAGCGCAATTCGCGTC
GGCGTCAGCGCCATTCCTACGGCTCGGGCGGTATCACCACCCAGCGGTAAAATGGTCAGC
CAGCGGCGGCACAGCGGGGTAATCGCCAGCAAAATCACCATCACAATTCCGGTGCGCCAG
ACCTGCGCATCGGTCGCGTTGTAGGTCGAACCGGAAATCCAGGTCAGCACTTGCGCCATT
CGCGGGTCACCGCTCGCCTGCAACATCATCAAAAGCATGGTGAATGCGGTACTTAACGCC
ATCCCCGCCAGTAACATACGGTGTGGGGAAAATCCACCGCGTCCGGCGGCGATCATAATG
ATCAACAGCGTCACCGCCGCCCCGAGACTGCCTGCGGGTAACAGCCAGCCAAAGGCATTA
CCCGGTACCAGAAACAGCATTAACACCACGCCAAACGCCGCGCCGGAGCTAATCCCCAGC
ACTTCCGGGCTTGCCATCGGGTTTCCGGTCAGCCGCTGAATAATACAGCCCGCCACCGCC
AGCATGACGCCCGCAAACAGCGCCGCCATAATTCGCGGCCAGCGCCAGGGCATTAAATCA
TCGAGCAACGCCCCGCTCGCCCACGTCCAGCCGTGCGCATCACGACCAAACGACAGCGCC
ACCACCACAGCCATCAACAGCAGCACGCCGCCCGCGAGGGCAAACGCCAGCACATGTTGG
CGTTCAGCCGCGACACGATCGTTGACCTTCATATCCGGCGCGCTAATGCTGCGTAAACGC
GGCAACAGCCACAGTAGCAGCGGCGCACCGATCAACGCAGTAACCGAACCGGTGGACACT
TCCATCCACACACGAGTCAGCCAGAGGATGATTTGATCGGAAAGCCAGAGGATCAGCGCC
CCAATCAGCGACGCCAGCATCAACCGTGGCAGCAGACGCCGCGCCCCCAGCATTTTTGCC
AGCAGCGGCGCGAACAACCCGATAAAGCCGATAATCCCTACCGCATTCACCAGCAGCGCA
CTGATGACAATCGCCAGCGACAGCGCCGCCAGACGCGCGAGCGACAAGGCCAGCCCGAGA
TTGCGCGCCACGCCATCATCAAGCCCCATCAGGGTTAACGGGCGAAGTAGCAATAACGTC
AGCATCACGCCGCCCAGCAGCTGCGGCCATAAACGCTCAACGCCGCCCCAGTCGGTTTGC
GTCAGCGTTCCAGTGCTCCACAGAAACATGCTTTGCAACTGGTCATGATGGAAGATAACC
AGTAATTGATTGATTGCCCCACAATAAAGGCTCACTACCAGCCCCGCGAGAATCAGCGTT
ACCGGCGACAGCCGTTTCCCCCACGCGACGCCAAAGACAATTAAGCCAACAACACAAGCC
CCTGCCAGCGCAGCAAACTGGCTCGCCATCGCACCAGGGATCGCCCAGAGCGTCGTGACG
GTAATCCCCAGTTGCGCGCCTGTAGCAACGCCCAACGTCGTCGGTTCCGCCAGCGGGTTA
CGCAGCACTTGCTGAAACAGCACGCCCACCAGCCCCAGGCCCGCGCCCACCAGCAGCGAA
ATCGCCAGACGCGGCAACAAGCTGTAGTGAAAAATCATCTGCTCGATGACGTCAATATCC
GGCGACCAGGCAGCCTGCGCCCACTGGCTACGCGGCAGCGCCTGCGAGAAGTTCATCCAG
GTGAGCGCCGTAGCGACAATCACTAACAGCGCCAGCAATAACGCCGGGAAAAGCGCAATT
CGTTTACTCACGCTTTACCTCCGATGGCGTTATCCAGAATACGCACAAAGTGCATTGCCG
AGAGCGTCGCACCATAAAACCAGACTGCAGGTACGCGCTGAAAGCGCCCTGTACGGACAA
ACGGCATGGCCTGCCACAGCGGGGTTGCCATTAGCGCATCCATGTCTTTGCTGTTGTCGT
GATCAAAACAGAGCACATCAACATCTTTATACGCCGCCAGACGATCGATACTGACGGCGG
TGCTGCCCCAGAAGTTGGTTTCCCCTTGCCAGGCATTTGGGATGCCGTACTCATCGAGAA
TTTCCTGGAACAAGCTGTTTGGCCCGAAGACCAACATATGGCGCGGATCGATAAGCGTCG
TCAGCAATAACGGGCGTGCACCACGCTTCACAAAGCGGGGTTTCATGCTGCGGATAAAGT
CTTCGTATTGCGCTAAATGCGTTTCCGCTGCGCTTTGCAGGTTAAGTAAATCTGCCATTT
CCGTCAGTGATTTACGCGCCATCGCCAGCGGCTGTTTGCCGTCGCTGAAGTTAAATCCGC
GCCCCGGCGCAATACGAGCCAGCATTTCTGGTGAAGGGCCATATCCTGCCGACCAGACCA
TAAACGACGGTTTCATTTCGGTCAGCAGTTCAAGGTTAGGTTCTGTGCGCAAACCGACGT
CAATCACCGATTCAGGTAACGGTGGTTCGCTAACCCACAGGCGATAGTTGATGGTGTCCG
CCACGCCATAAGGCACGATGCCGAGCGCCAGCAGTAATTCCACCGGCAACCACTCCAGCG
CCACAATACGATTGGGATCAATAGCCGCCGCGTGGGCGGCATTCATCTGCCATAACAACG
GAGAAAGCGCCATCGCCGTTAACAGTCGACGGCGCGAAATAAGAGGTAAGCCGCTCATCA
ATAAACAAAACTCACAGGTGCAGCACCCGCCGGATGCGGCAAAATACCCATCGGGATGCC
ATAAATCATTTCGAGGGTTTCGCCGCGCATAATTTCCGCAGGCGTTCCCTGAGCAATCAT
TTCACCGCCGCGCAGGGCGACCAGATAATCACAGTAGCGTGCCGCCATATTGATATCGTG
CAGCACGGCAATGACCGTCAGACCACGTTCCTGACTTAAACGGTGCACCAGCGCCAGCAC
ATCAACCTGGTGGGCGATATCCAACGCCGAGGTCGGTTCGTCGAGCAACAGACAACGGCT
ATCCTGCGCCACCAGCATGGCGATCCACGCCCGCTGACGCTCACCGCCAGAGAGACTATC
GACCAGCCGATGCGCCAGCGGTTTTAAGCCAACCAGCGAGATAGCTTCCTCAACTTTTTC
GCGATCTGCCGCACCAAAGCGCCCCAGCGCGCCATGCCACGGGTAACGACCAATCGCCAC
CAGTTCACGCACGGTCATCCCTTCTGCCGGAGGAAGCTGCTGCGGCAAATAAGCCACTTT
GCGGGCGAATGCTTTGCTACTCCAGCTTTCCAGCGGCTGGGCATCAAGAAGAATTTCACC
TTCTGACGGCGGCTGATGACGGCCCAACATTTTTAACAGCGTGGATTTACCAGAACCGTT
GTGACCAATCAAACCAGTCACTTTTCCGGCAGGAAAGGTTAACGACAGCGGATGCAAAAG
CGTGCGCCCTGGCACACGAAAGGAGATATTACGCAGTGCAAAAGTGGTATCGGAATGATT
CGTGTATTCCTGCATAACAGCCAACTTGTGAAACGGGCACGGAAATCCGTGCCCCAAAAG
AGAAATTAGAAACGGAAGGTTGCGGTTGCAACGACCTGACGTTCTGCGCCCCAGAAGCAG
CCATAAGTGTTAAAGCAGCTGGCGACGTATTCACGATCGAACAGGTTGTTAACATGCAGC
GCCACGTTGGAGCCAGCCATGCCGACTCGCGCCAGATCATAACGCACTAACGCATCCACG
ACCGTATAACTTCCCACTTTAAAGGAGTTAGCCGGATCACCATAGCTGGAGCCAGTATAA
CGACCACCGGTGCCCAGCGTCAGACCTGAAAGCGGACCGTCAAAGAAGGTATAGTCAGCC
CACAGCGAAGCCATGTGTTTTGGCACCTGTGCCGGCGTATTGCCTTTGTAGTTGGTGTCA
GTGGTGTATTCCGCGTCGGTGTAGGTGTAAGAACCAACTAAGTTAACACTCGCCGATAGT
GCCGCTTTCGCTTCCAGCTCTACGCCACGCGCACGAATCTCACCGCCTTCAACCGAGAAC
AGTGAACCGTTCGGATCCGCCATCAGGTTATTAGTTTTGGTAAGCTGATACAGTGCGCCA
GTCACCACAATTGGGCGATCTTCTGGCACATATTTCACGCCGACTTCATACTGTTTGCCT
TTCGAAGGTGCAAACAGATCGCCGTTTGCATCGGTCTGCGAAGCGGGTTCAAACGATTCA
CTGTAGCTGAAATAAGGCGTTACGCCGTTGTCGAACAGATAGTTAACACCGCCACGCCAG
GTGAACTGTTTATCATCGCGATCGGATTTATTACCGTAATCACGGTTGAAAGATGACTGA
TCGGCCCAGTCATAGCGACCGCCAAGCGTAACCAGCACTTTATCCCACTGCGCCTGATCC
TGAACATACAGACCGGTTTGTTTCTGTTTCAGCAGAACGCGGTATGGACCAGACGGATTT
GGGTGAGCGCCAAAATCAAAGTCACTACGGTCTAAATTATAGATATCAGATGGTGCAACT
GAACCGGCATATCCGAACCAGGAGTCGATGTCATTACGCATACGCATAAAGTCAACGCCA
GTCAGCAGAGTGTGATCCACTGAACCGGTTGCGAATTTGCTTTGCAACTGAGTATCAACA
GAGAAGTTTTCTAACTTCTCATTATCGATAACGTACTGACGAGTCAGTGTATGGCCCCAT
TGAGACTGCGGCACGTTGGCACATGGACTCGAAGAGGGGTTTGAGGAATAGAGAGGATCT
GAACACATGCCGTAGCCATATACGCTCTTTTGCGAAACTTTATTTTGCGCAAAGCGAAGG
TTCTGACGTACGGTAAAGGTGTCGTTAAATTCGTGGTCGAAGCTATAGCCAATCATCTTC
TCATTACGAGAATAGGTGTTGTTCTTCGCCCCTTCGTTAAAGTCTGTCGGCAGACGCTTA
CCGTTCGGCAGCGGCTCAACGGTTCCCTCTTTCGGCAACCAGCCGTAATAACCGGTTTCC
GGCTCGTTCTGGAAGTAAGAGAGGAAGGTGAAATTGGTTTTATCGTCTGGACGCCAGGTG
AACGCTGGCGCAATGGCATAACGCTGCTCTTCCGCGCCCTTTTGCTGGGCATTGGCAGAG
CGCGCAAGACCGGTCAGACGATAAGAGTAAACGCCGTCATCATCCAGCGCATCGCTGAAG
TCAAAACCGGTCTGGAACAGGCTGTCAGTACCGGCCTTAAACTGAACTTCTTTCAACGGT
TCAGTGGTCGGGCGCTTGCTGACCATGTTCAACAGGCCACCAGGGCTGCTTTTCCCATAC
AGCACGGAAACCGGGCCACGCATGATTTCAGCGCGCTCCAGCATATATGGGTCAATAACC
GCATCGTTATAGAAGTTGCCCTGCATCTTCAGGCCATTCAGATAGTTGTTCTGGCTTTGG
CCGTCAGCGGCAAATCCGCGGATGATCAGGTAATCGTAAGTGTTGGATGCGCCACGAGTT
CCCACGGCAACGCCAGGAGTGTAGCTAAGCGCTTCTTTTACCGACTTCGGCTGATGCAGC
GCCATCTCTTCGGCGGTCACAACAGAAATAGACTGTGGCACTTTTTGAATCGGCGTATCG
GTTTTAGTGCCGGTAGCTGACTGTCGCGCCGCAATAGTTGCAGCAGGCCCCCATGCGCTT
TCTTGCGGCGCAGGTGCAGCGGTAACGGTGATAGTGTCTTCTTTCGGTTCAACCGCTGCC
TGTGCATAAACAGACATGCCGCTAACCGCTGTGGCTACTACAACTGCGATTTTACGCAGT
GAGTGTTTTGGCTGAGCAGTTTTGGAACGCGCCATTGGTATATCTCTGATGTAAAGTGAA
TGATAACGTAAACGAGAATGATTATTATAAAGATAAGATAATATTCGAAACGCTGGCGGG
TTCGCAAGCGGTACGCAATCTGAGCGTTCCTGAAGGGTTAATAAACAACCAGATGAAAAG
AAAGGGTTAATACTTTAGGTGGGATGTTATTTTACCGGATGGCAACTCGCCATCCGGTAT
GTCACGTTTAGACGTTAATTACTACCAAACATATCCTTGATCCAACCGGCTACACCGTCG
CTGTCTTTCTGCTCTTGCTGAGCAGGTTGCTGTTGCGGCTGTTGCTGCGGCTGAGAAGAC
TGATCAAACGGATTGCCTGACGGCTGCTGCTGCATCTCACTCTGCTGGCACAGCGATTGC
GGATCGCTGGTCCAGACCGGCAAGACACGCATGCCACCGCTGCAAACAAAGTTGCCGTCG
TAGTCCACGCCCATATCTGCAATATCTTCTGGCGGAACAAGATTCAGCGGCGTTGGCGTC
TGGTTTGCCAGATAACGCTGATAAATCGACATTGCCCCGCTGGCACCATACAGTTTGGTC
GGCTGGTTGTTATCACGGCCGACCCAGGTGATGGTCACCGTACTGCCGTCAATGCCCGCA
AACCAGGTATCTACGTTATTGTTGGTAGTCCCTGTTTTCCCTGCCAGATGCAGGTTCGGG
TATTTCGCCCCAAGCTGACGACCCGTACCGCGTTGTACAACCTGCTGCATGGTCCATAGT
GTCAGATACGCCGCCTGCGCCGGAACAGCGCGTTCCGCCTGCGGGAAGCTCTGATACAGC
ACTTTGCCATCTTCCGCGATTACCGAACGCAGCGCAGAAAGCGGTGCACGGTTACCACCG
CTGGCGATGGTCTGGAATGCCTGCGCCACTTCGATTGGCGTTAAGTTCAACGCCCCCAGC
AGCATTGCCGGAACCGGATGCAACTGATCTTTCGGTACGCCCAGTTTAATCCAGGTATCC
GTAACCGCAGGCAGCCCCAGCGCCATCCCCAGATTTACCGTCGGCACGTTCATCGAACGG
GTCAACGCATCCACCAGCATCACTCTGCCGCTTTCGCTATAACGACGGTCATCATTCTGC
GGTGACCAGACCTGGCCATTCGGCTGACGCAGCGCAATTGGCGCATCCGCAATCCACGTA
TTCAGACGATAGATTTTCGGCTGGCTTAAGGCCGTCAGATAAGTCGCTGGTTTTGCAAGG
GAACCAATCGAACGACGCGCCTGCATCGCACGGTTGTAGCCCGCAAACTGCGGCTCAGAA
CCTCCGACCATCGCACGAACTTCACCACTAAAGCGGTCGACGACCACAATCGCGGTTTCC
AGATCGCTCAGCTTACGCTGTTTCTTCAGTGCCGGAATGCCTTCCACGGCGGCTTTTTCT
GCCGCGTCCTGGGCCACCGAGTCAAAGGTAGTGAAGATCTTCACGCCGGAGAGATCTTTT
ACCTTATCGCCTAATTTAGCCTGAAGCTCCTGACGCACCAGTTGCATAAAGGCTGGCTGA
GGAGAGATCACCCCACCGCGCGGCTGAACACCCAGCGAACGCGCACTCAACATGTCATAG
AGTTCTTGATCAATAATCTGTTGCTGTTGCAGCAGACGCAGTACCAGATTACGTCGCTCC
AGCGCCAGTTTCGGGTTACGCCACGGGTTGTAGATGGACGCTCCTTTCACCATACCGACT
AACAGCGCCTGCTGATCGAGGCTCAATTCTTCTACCGGGCGACCAAAGTAATACAAGCTC
GCCAGCGGGAAGCCACGGATTTCGTTGTCGCCACTCTGACCGAGATACACCTCGTTCATA
TACAGCTCAAGAATACGGTCTTTGCTGTAACGCGCGTCCATGATCAGCGCCATGTAGGCT
TCATTCGCTTTACGCCAGTAAGAGCGCTCGCTGGAGAGGAACAGGTTTTTCACCAGCTGT
TGCGTCAGCGTACTCGCTCCCTGCACCGTGCGTCCGGCGGTCAGGTTTGCCAGCACCGCA
CGTCCGATTGAGTAGAGACTGATCCCATCATGCTCGTAGAAATGACGGTCTTCTGTCGCC
AGCAAAGTATCCACCAGCAAATCCGGGAAACCACTGCGCGGCACAAACAAACGCTGCTCA
CCGTTTGGTGAGGAGATCATGGTGATCAGACGCGGATCAAGACGGAAGAAACCGAACTGA
CGGTTGTTCTCCATATTGACGATCGTCGCCAGATGATCGCCATCAAAGGTCAGACGCGCA
CGCACCTGCCCTTCTTTGCTGTCCGGAAAATCAAACGGACGGCGGATCATCTCAATGCTG
TTAGCCTGCACAGTAAATTCGCCAGGACGGGTCATTTTCGACACCTGACGATACTGTGTT
GCCTCCAGCAGCTTCACCATCTCGTTCTTGCTGATGGTCATGTCTGGCTCAAGGTTGACC
ATTCGACCATAAACTGCCGCAGGCAGTTGCCAGACCTTGCCATCAATACGGCTACGAATT
TTTTGATCGAGATAAACGCCGTAAATGGCGATCAGCACGGCAAAAACGATAGCCAGTTTT
AACAGCAGCCATAGCCAGCCGCGTTTGCCACGAGGCTTACGCCCTTTGCCTTTGCCCTTA
CCTTTGCGCGGCATCGGTTCTTCATCCTCATAGTCATCATAATCGTCGTAATCATCGTCA
TCTTCGTAACGACGACGGCTTACCTTTTGTTTGACCGGACGCGTCGGTTTCCCTTTGCGT
CCAATTGGCTCGCGGTCATTCCCGGCCATGCTTTTTCTCCGCAATATTCAGGCGCAAAAG
CCCGATTTTCTGTTCTTCTGTTACAAGACAGAAGAAGATATCTCTCAAAATTTGTGCTCG
ATCGGTCCCCTCTCCCTTGAGGGTGAGGGTGAACGTACGCGCTGATGCCCTCACCCCGGC
CCTCTCCCACAGGGAGAGGGAGAAAACCAACCTTACGAATACTTTTTCGTCCGTCGCGTC
GGTGCCGTGTTTGCCGGGTCGTCCGGCCAGACGTGTTTGGGATAACGCCCTTTCATCTCT
TTTTGCACCTCACGATACGCCCCTTTCCAGAAGGCCCCCAAATCACGCGTGATTTGCAGC
GGCCTTTGGGCAGGGGAAAGCAACTCCAGCACCAGCGGCACGCGCCCCTGAGCGATCGTC
GGATTGGTGGCCTCACCAAACATCTCCTGCATTCTCACCGCCAGCGCGGGCGGGTTATCT
TCATGATAACGAATGGCGATCCGGCTTCCCGTCGGCACAGTGTAATGCGCAGGCAATTCA
CTATCCAGACGTTGCTGCATTCCCCAATCAAGTAATCCGCGTAGTGCCTGATAAATGTCG
AGTGATTTCAGGCCGCGTAGTGAATGTACACCGGCCATATGTGGCAGCAGCCACGTTTCC
AGCGTCGCCAACAAACTTTCATCATCAACCGCTGGCCAGTCATATTCTGGCAACCACTTT
CCGGCGCATAACAAACGCAAGCGTAGCTGTTCCGCTTCCGCCGTCCAGTTGAGCACGCTT
AAACCTTTATCACGGATGCCGTTAAGCATCGCCTGATGCAACTCGTCTTCTGACGGTTTC
GCCAACGGCTGCACTTTCACCGTCAACTGACCGATTTGCAGCCGACGCCAGGCTTTCAGC
GTACCTTGCGCGTCATCCCATTCCACGGTGTCAGATTGCTGCACCAGCTGCGGACAGCGT
CGCACTAATTCATCAATATCGACCGGTAGCGCCAGTAAAATCCGCGCATCCGGCGAGGCG
CTGCCCTGCAATAATAACGGTGCGATCAACCATTCGTGGCGGCTTAGCGCGTCGTCGGCA
TCGAGCATCGCTCCCATGCCGTTTGCCAGTTGATAGCGTCCATCTTGCCCACGGCGGCGA
GCAATGCGATCGGCAAACGCCCCGGCAAGTAGCAGCGCGATAAGCGAACTGTCTGCCTCA
CCGCCGTATACGTTTAAGCGTTTTAACAGTTGCTGACTACGTTGCTGCCAGGCTGGCTGA
TTGCGCGAAAACACCACGCCCAGGTCACTATTGCCCATCCGTGGCGGCTCTTCGAGAATG
GCGGCAATTTTTGCCGCGGTAGCAGCTTCGTCGTCGCTCTTTGCGCTAACCAGCATTGCC
GCTAAACGCGGATCGTTACCCAGCGCTGCCATTTTTTGCCCCTGCGCACTAAGCCGTTCA
CCGTCCAGCGCCCCCAGCATCCGTAACAGGCGTTTCGCGGCCAGTAGATTCACCGTTGGC
GGTTGATCCAGCCAGCTCATCTGCGCCGGATCGCTGCATCCCCATTGCAGTAATTCCATC
AGCAAACCGGAAAGATCGCTTTGTAATATTTCCGGTTCACTTTGCGCCGCGGCGCGTTCT
GCTTGTTCCTTGGCGATTAAATGCAGGCAGATACCCGGCTCCAGACGCCCGGCGCGCCCG
GCACGCTGCGTCATCGACGCCTGACTGATTCGCTGAGTAATTAGTCGCGTAAGCCCTGTT
CGCGGATCAAAACGCGCCACCCTTTCCTGGGCGCAATCCACCACCAGACGAATACCTTCG
ATAGTTAAACTGGTTTCAGCAATATTGGTCGCCAGCACGACTTTGCGCATCCCTTGCGGT
GCCGGGAGGATCGCTTTTCGCTGATCGTTCAGCGACAACGCGCCATACAGCGGGCAGAGC
AACACATCACTGCCGATACGCGAAGCCAGTTGTTCCTGCACACGCTGAATTTCTCCGACG
CCCGGTAAAAATAACAGTAATGATCCACTTTCCTGACGCAGCATTTCGGCGGTCGCAACC
GCGACGGCTTCGTCAAAACGCTGATGGGCGGGCAGCGGTAAATAACGGCGTTCAACCGGA
AACGAGCGCCCTTCTGAGATGACGACGGGCGCTTCTGGTAGCATTTGTTGCAAGCGGTCG
TTGTCCAGCGTAGCCGACATAATCAGCAGTTTAAGGTCATCACGCAGACCTTGTTGCACA
TCGAGTAACAGCGCCAACGCCAAATCCGCCTGCAAGCTACGCTCATGAAATTCATCAAGG
ATCACCAATCCAACACCGCTCAACTCCGGGTCACGCTGGATCATCCGCGTCAGCACGCCT
TCGGTAACCACTTCCAGGCGGGTATTCGGCCCGACGCAGTTTTGCGCACGCATCCGGTAG
CCAACGGTATCGCCTGGCTTTTCGTTAAGCAGCTCCGCCAGCCGTTGCGCGACGTTACGC
GCCGCCAGACGCCGTGGCTCCAACAGGATAATTTTCCCGTTAATGCCGGGATGCGCCAGC
AGTTGCAGCGGCAGCCAGGTTGATTTCCCGGCCCCGGTCGGCGCACTTAATAATACCTGC
GGCGCACAATCGAGAGCGGTAAGTAATTCAGGTAAGACGGCAGCAACGGGCAACGACGAC
ACAAAACGCTCCAGAGGGTTAACATTCTTCGCGCCACATTGTAGCATCGCGGTAATTCAT
AACCGAGTGCCTCACATGTCTGAACCGCAACGTCTGTTCTTTGCTATCGACTTACCTGCA
GAAATCCGCGAACAGATTATCCACTGGCGCGCCACACACTTCCCACTTGAGGCGGGACGT
CCGGTCGCCGCCGATAATTTGCATCTGACTCTGGCATTTTTAGGCGAAGTGAGCGCCGAG
AAAGAGAAGGCGCTTTCTCTTTTAGCCGGACGGATTCGTCAACCTGGTTTCACACTCACG
CTTGATGACGCCGGACAATGGCTGCGTTCGCGTGTGGTGTGGTTAGGGATGCGTCAGCCT
CCACGCGGCTTAATCCAGCTGGCGAATATGCTCCGTTCACAGGCTGCCCGCAGCGGTTGT
TTTCAAAGCAATCGTCCGTTTCATCCACATATTACCTTATTGCGCGACGCCAGCGAGGCG
GTGACAATCCCGCCGCCAGGTTTTAACTGGTCGTATGCGGTGACGGAGTTCACCCTTTAC
GCCTCCTCGTTTGCCCGTGGACGCACACGCTACACGCCGCTAAAACGCTGGGCGCTAACG
CAATAACAAGGATTGTCGCAATGGAATTTTCTCCCCCTCTACAGCGCGCGACGCTAATTC
AGCGTTACAAACGTTTTTTAGCCGATGTGATCACACCCGATGGTCGCGAATTAACGCTAC
ACTGCCCGAATACGGGTGCGATGACCGGTTGTGCAACGCCTGGCGATACCGTCTGGTATT
CGACTTCAGACAACACCAAACGGAAATACCCACACACCTGGGAATTAACTCAAAGCCAGA
GTGGCGCATTTATTTGCGTCAACACGCTTTGGGCTAACAGGTTGACGAAAGAGGCTATCC
TTAATGAATCAATTTCAGAACTGTCAGGCTATAGCTCGCTGAAAAGCGAAGTAAAATACG
GCGCAGAACGCAGCCGTATTGACTTTATGTTGCAGGCGGATTCGCGTCCAGACTGCTATA
TTGAAGTGAAATCGGTTACGTTAGCGGAGAACGAACAGGGATATTTTCCCGATGCGGTCA
CTGAACGAGGTCAGAAACACCTTCGGGAGTTGATGAGCGTAGCGGCTGAAGGCCAGCGTG
CGGTTATCTTTTTCGCCGTGCTGCATTCAGCCATTACACGGTTTTCACCCGCGCGCCACA
TCGATGAGAAATACGCGCAACTATTGTCAGAAGCTCAACAGAGGGGGGTAGAAATTCTGG
CTTACAAAGCGGAAATTTCTGCTGAAGGCATGGCTCTTAAAAAATCACTGCCGGTTACAT
TGTAGTAAAGTAAGTAACTGGTTAATTTACATTCTGGTCGCGTGCGCAAATACGCTTTTC
CTCACACAGTTGTCAAGTGTTACGTTTAGATAATTGCTATCCGGAAAAGCATCTGCTATT
TATAGCGGCCTCATTTTTCCCCCGAACATGGGGATCGATAGTGCGTGTTAAGGAGAAGCA
ACATGCAAGAAGGGCAAAACCGTAAAACATCGTCCCTGAGTATTCTCGCCATCGCTGGGG
TGGAACCATATCAGGAGAAGCCGGGCGAAGAGTATATGAATGAAGCCCAGCTGGCGCACT
TCCGTCGTATTCTGGAAGCATGGCGTAATCAACTCAGGGATGAAGTCGATCGCACCGTTA
CACATATGCAGGATGAAGCAGCCAACTTCCCGGACCCGGTAGACCGTGCAGCCCAGGAAG
AAGAGTTCAGCCTCGAACTGCGTAACCGCGATCGCGAGCGTAAGCTGATCAAAAAGATCG
AGAAGACGCTGAAAAAAGTGGAAGACGAAGATTTCGGCTACTGCGAATCCTGCGGTGTTG
AAATTGGTATTCGCCGTCTGGAAGCGCGCCCGACAGCCGATCTGTGCATCGACTGCAAAA
CGCTGGCTGAAATTCGCGAAAAACAGATGGCTGGCTAATTACAGCCGTTCCATCACGTTT
ACCACAGGCGGGAAATGCTCCCGCCTTATTTTTTGTTCAAAGAGATGACAGACACACACT
ATATTGGCCGCTTCGCCCCCTCTCCTTCCGGCGAGCTTCATTTTGGTTCTCTGATTGCTG
CGCTTGGCAGCTATTTGCAGGCTCACGCCCGGCAAGGTCGCTGGCTGGTACGTATAGAAG
ATATCGACCCGCCTCGTGAAGTTCCCGGTGCCGCAGAAACTATCCTGCGCCAGCTGGAAC
ATTACGGCCTGCACTGGGACGGCGATGTTCTCTGGCAATCGCAACGTCACCACGCCTATC
GCGAAGCACTCGCCTGGTTACATGAGCAAGGACTAAGTTATTACTGCACCTGCACGCGTG
CACGTATTCAAAGCATTGGCGGTATTTACGACGGTCATTGCCGGGAATTGCATCATGGAC
CAGACAACGCCGCAGTGCGTATCCGCCAGCAGCATCCGGTCACCCAGTTTACTGACCTGC
TGCGAGGCATTATTCACGCCGACGAAAAACTGGCACGGGAAGATTTTATTATTCATCGCC
GTGATGGTTTGTTTGCCTATAACCTGGCGGTGGTGGTGGATGATCACTTCCAGGGTGTGA
GCGAAATTGTCCGCGGGGCAGATTTGATCGAACCGACAGTGCGGCAAATCTCGCTGTACC
AGCTTTTTGGCTGGAAAGTGCCAGATTACATTCATCTGCCGCTGGCGCTTAATCCACAAG
GCGCTAAACTTTCCAAGCAGAATCATGCGCCTGCGTTGCCGAAAGGCGATCCACGCCCGG
TACTAATCGCGGCACTTCAATTTCTGGGGCAGCAGGCAGAAGCACACTGGCAGGATTTCA
GCGTCGAGCAAATCCTTCAGTCAGCCGTCAAAAACTGGACGCTGACCGCCGTGCCTGAGT
CGGCAATTGTAAATTCAACATTCTCAAATGCGTCATGCTGAGCTATGATTAGCCGCTATT
TTTTTGTCCTGAATGATGTTTGACACTACCGAGGTGTACTATTTTTACCCGAGTCGCTAA
TTTTTGCCGCAAGGTGCTAAGCCGCGAGGAAAGCGAGGCTGAACAGGCAGTCGCCCGTCC
ACAGGTGACGGTGATCCCGCGTGAGCAGCATGCTATTTCCCGCAAAGATATCAGTGAAAA
TGCCCTGAAGGTAATGTACAGGCTCAATAAAGCGGGATACGAAGCCTGGCTGGTTGGCGG
CGGCGTGCGCGACCTGTTACTCGGCAAAAAGCCGAAAGATTTTGACGTAACCACTAACGC
CACGCCTGAGCAGGTGCGCAAACTGTTCCGTAACTGCCGCCTGGTGGGTCGCCGTTTCCG
TCTGGCTCATGTGATGTTTGGCCCGGAGATTATCGAAGTTGCGACCTTCCGTGGACACCA
CGAAGGTAACGTCAGCGACCGCACGACTTCCCAACGCGGGCAAAACGGCATGTTGCTGCG
CGACAACATTTTCGGCTCCATCGAAGAAGACGCCCAGCGCCGCGATTTTACTATCAACAG
CCTGTATTACAGCGTAGCGGATTTTACCGTCCGTGATTACGTTGGCGGTATGAAGGATCT
GAAGGACGGTGTTATCCGTCTGATTGGTAACCCGGAAACGCGCTACCGTGAAGATCCGGT
ACGTATGCTGCGCGCGGTACGTTTTGCCGCCAAATTGGGTATGCGCATCAGCCCGGAAAC
CGCAGAACCGATCCCTCGCCTCGCTACCCTGCTGAACGATATCCCACCAGCACGCCTGTT
TGAAGAATCGCTTAAACTGCTACAAGCGGGCTACGGTTACGAAACCTATAAGCTGCTGTG
TGAATATCATCTGTTCCAGCCGCTGTTCCCGACCATTACCCGCTACTTCACGGAAAATGG
CGACAGCCCGATGGAGCGGATCATTGAACAGGTGCTGAAGAATACCGATACGCGTATCCA
TAACGATATGCGCGTGAACCCGGCGTTCCTGTTTGCCGCCATGTTCTGGTACCCACTGCT
GGAGACGGCACAGAAGATCGCCCAGGAAAGCGGCCTGACCTATCACGACGCTTTCGCGCT
GGCGATGAACGACGTGCTGGACGAAGCCTGCCGTTCACTGGCAATCCCGAAACGCCTGAC
GACGTTAACCCGCGATATCTGGCAGTTGCAATTGCGTATGTCCCGACGTCAGGGTAAACG
CGCATGGAAACTGCTGGAGCATCCTAAGTTCCGTGCGGCTTATGACCTGTTGGCCTTGCG
AGCTGAAGTTGAACGTAACGCTGAATTGCAGCGTCTGGTGAAATGGTGGGGTGAGTTCCA
GGTTTCCGCGCCACCAGACCAAAAAGGGATGCTCAACGAGCTGGATGAAGAACCGTCACC
GCGTCGTCGTACTCGTCGTCCACGCAAACGCGCACCACGTCGTGAGGGTACCGCATGACA
GTGGCGTATATTGCCATAGGCAGCAATCTGGCCTCTCCGCTGGAGCAGGTCAATGCTGCC
TTGAAAGCATTAGGCGATATCCCTGAAAGCCACATTCTTGCCGTTTCTTCGTTTTACCGC
ACCCCACCGCTGGGGCCGCAAGATCAACCCGATTACTTAAACGCAGCCGTGGCGCTGAAA
ACCTCTCTTGCACCTGAAGAGTTACTCAATCACACTCAGCGTATTGAATTGCAGCAAGGT
CGCGTCCGTAAAGCTGAACGCTGGGGACCGCGCACACTCGATCTTGATATCATGTTGTTT
GGTAATGAAACCATTAATACCGAACGACTCACCGTTCCGCATTATGATATGAAGAATCGC
GGCTTTATGCTGTGGCCGCTGTTTGAGATTGCCCCGGAACTCGTGTTTCCTGATGGGGAG
ACATTACGTGAAATACTCACTTCGCTAGCAGTACCACAACCTGCCATCTGGTAATAGCTG
TATTATTTTATTTTCTTGACGAGAGGAATACAAAATGATACGGCTATTTCATCCACCAAG
AAAAAATTATTTTCTTATCTTACTCCTCACTTCCCCCCTTACATATTAAATATACTTAAT
TTACATTTTAGTTTTTTTTAATTCATTCATGAAATAGCACTTCATGCAAATAAATTAGGC
ATTTTTTGTTTAAACAACCTAAAATAACAACAATTCAATACACCACATAAATATATTCAC
ATCCGTGATAACTCACCCCTATTACATCCTCCAAAAACTTTGAGTAATATCCGCTCGCAA
TATTAATTTCATATAATTTTTGTAAGGATGCATGTAATGAAAAAAGCACTTCTCGCAGCC
GTTCTGGTTATGGCTTCTGGTTCCGCCCTGGCTGTAGATGGTGGTCATATCGACTTTAAC
GGTATGGTACAGTCCGGTACCTGTAAAGTGGGTGTGGTAGATACCGGTATGCACGGCATC
AGCACTGATGGCGTGGTTACCCTGGATACTGCAAATGTTACTGATAACTTTGCTGAAGTA
AGCGCTGCTGCTGTTGGTTTACTGCCGAAAGAGTTCATGATTTCTGTGGATTGCGAACCG
GGTAAAACAACTGCCCAGTTGACCATGGGTTCTGCAAGCTACGCGAACACCAGCGGCACC
CTGAACAACAATACCAATATCACGATTAACGGTATTCAACCGGCTCAGAACGTGAACATT
GCTGTTCATAACATGAAAAACAAAGCTGGCGCTGCTGAAATTAAGCAGGTCCATATGAAC
AATTCTTCTGAAATCCAGGAATTGACATTAGACGCACAAGGCAACGGTCAGTATGTGTTT
AACGCATCTTACGTTAAAGCACCGAACAGCCAGGCTGTTACTGCTGGTCACGTTACCACT
AACGCACTGTACACCATTACTTATCAGTAATTGATGGCGAATTGAGTATAGGGTTTGTCA
TCAGGCAAACCTTATTTTCGCTAATTTTATCTCAACACAGACAGCAAGGAGTGCTTATGT
TTCCCTTGGTTAAAAAAACGGTTAGTGCATTATTTGTGAGTACTCTGTTAGCCAGTACGC
CAGCATTCGCTGACATTATTATTTCCGGGACTCGTATCATTTATAACGCTGATAAAAAAG
ATGTTAACGTTCGTCTGGAAAATAAAGGGAATCGCCCCTTACTGATTCAGAACTGGTTGG
ACACCGGCAATGACAATGTCGACCCCAGCCAGATCAAAGTGCCCTTTACCTCTACGCCCC
CCGTTTCACGCGTGGAGCCAAAACGCGGGCAAACCGTAAAAGTAATGTATACCGGTGCAA
CAGCCCTACCTAAAGACCGGGAAAGTGTCTACTGGTTTAACGTGCTGGAAGTGCCGCCAA
AGCCGAAAGATGCCCAGGCTGACAAAAACTTACTACAACTGGCTTTCCGCACGCGCATCA
AACTTTTTTATCGCCCGAGCGGTTTGCAGGGTGAACCTGCTGAAGCGCCAGCAAAAATCA
CCTGGAAGTTGAACAACACGCAATTGCAGGCGAATAACCCAACGCCTTATTACGTGTCAT
TCAATGACGTCAAACTGGAAAGCGGCGGCAAAAGCTACAAAGTCGATTCCAGCATGATCG
CGCCGTTCAGTCAGGCAAGCTTTAGCGTAACGGGTCTGTCAGGTGGCGTTTCATCGGGCA
AAGTCGTGTTCCAGGCCATAAATGACTTTGGCGGCAATATCGATGGTTCAGCAACATTCT
AAAAAATAAACGGATTCTTTTAACATCGCCAGGAATGCAACCTTGTACCAGTTTACTCAT
CACAAAAGTCGTACACCGAAAAAAACGCTACTTGCGGCCTGTTGCGCCCTCCTTTATAGC
AGCAACGGTGCTGCGGCAGACACGGTGGAATATGACAGTTCCTTCTTAATGGGAACTGGC
TCATCAACCATTGATGTTAAACGCTATGCTCAAGGTAACCCGACACCGCCGGGTCTTTAT
AATGTCCGCGTGTTTGTAAACGGTCAGGCCACCTCCAGTTTAGAAATTCCGTTTGTGGAT
ATTGGTGAAAACAGCGCGGCGGCCTGTATTACCCGCAAAAACCTGGCGCAGTTACACATT
AAACAATCCGAACAGCTTGTGACCCTACTCGCCAGAGAAGGTGAAGAAGAAGACTGTCTT
GATCTGGCAAAGTCATACGATCAGGCCGAAGTTCAATTTGATGGCAGTGACCAGTATCTC
GATCTGACCATTCCTCAGGCCTATGTCCTGAAGAGCTATGGCGGCTACGTTGATCCTTCC
TTATGGGAGTCGGGAATTAACGCTGCCACGCTGTCGTATTCCTTGAACGCGTATCACACA
AGTTCAGAAGACAACAATAACGATAGTGTCTATGGCGCATTTAACTCAGGTATCAATTTA
GGTGCCTGGCATTTCCGTGCGCGCGGCAACTATAACTGGACAACAGATAGCGGCAGTGAT
TTCGATTTCCAGGATCGTTACCTACAGCGTGATATTCCGGCAATACGTTCACAGATAATC
ATGGGTGATGCCTACACCACCGGTGAAACGTTTGACTCTGTCAACGTCCGGGGTGTTCGC
CTGTACAGTGACAGCCGTATGCTGCCTTCTGCGTTAGCCAGCTACGCCCCGACCATTCGT
GGTGTGGCAAACTCTAACGCCAAAGTTACCGTGACGCAGAACGGCTATAAAATCTATGAA
ACCACCGTTCCGCCAGGTGAGTTTGTTATTGATGACATCAGCCCTTCCGGATTTGGTAGC
GAACTGGTTATTACCATTGAAGAAGCGGATGGTTCCAAACGTTCCTTTACGCAGCCCTTC
TCCTCCGTCGTGCAGATGCAGCGTCCTGGCGTGGGTCGTTGGGATTTCAGTGCCGGTAAA
GTTATTGATGACAGCCTGCGATCCGAACCTAATATGGGGCAAGCCTCTTATTACTATGGT
CTGAATAACCTCTTCACGGGTTACACCGGCATTCAGTTCACCGACAACAACTATCTTGCC
GGACTGTTAGGTGTGGGTATTAACACCAGCATCGGTGCTTTTGCGATGGACGTTACCCAT
TCCCGCGCTGAAATTCCGGATGATAAAACCTACCAGGGGCAAAGTTATCGCGTAACCTGG
AACAAACTTTTCCAGGATACCGGAACATCATTTAACCTGGCGGCTTACCGCTATTCCACC
CAGGATTACCTGGGCCTGCATGACGCGTTAGTCCTCATTGACGACGCGAAACATATGTCT
GCCGATGAAGACAAAAACACCATGCAGACATACTCACGCATGAAAAACCAGTTTACCGTC
AGCATCAACCAACCGTTGAACATCGCCTATGTCGATTACGGTTCGCTGTTTATTTCCGGT
AGCTGGACGGACTACTGGGCGGCGAACAATAGCAGGACTGAATATAACGTCGGTTACAGT
AAAAGCGTTTCGTGGGGTAGCTTCAGCGTTAACCTGCAACGTAGCTGGAATGAAGATGGC
GATAAAGATGACGCAATGTATGTCAGCGTTAGCGTGCCTTTTGAGAATATTTTCGGTGGC
AAACGCAAGACTTCCGGTTTCCGTAATTTAAATACTCAGCTCAATACCGATTTTGATGGT
TCACACCAGTTGAATATGAACAGTTCCGGTAGCAATGAAAGCGGCCAGGTGAACTATAGC
GTCAACACAGGTTATAGCATGGATAAAAATTACGGCGATCTAGCTTCTGTTGGCGGTTAT
CTCAACTATGAATCTGGGTTAGGCGGTATTTCCGCTTCGGCCTCTGCCTCTTCTGATAAT
AGCCAACAGTACTCCATCTCAACCGATGGCGGCTTTGTGTTACACAGCGGTGGTCTGACA
TTTACCAATAACAGTTTCAGCAGTAACGATACGCTGGTGTTAGTCAATGCCCCAGGCGCT
AAAGGCGCACGAGTCAATAACAGTAATAACGAAATCGATCGCTGGGGATATGCCGTAACG
TCCGCTGTCAGCCCATACCGTGAAAACCGCGTAGGCCTGAACATTGAGTCGCTGGAAAAC
GACGTAGAACTGAAAAGTACCAGCGCCACCACCGTACCACGTAGCGGGTCCGTTGTTTTG
ACCCGTTTTGAAACTGACGAAGGGCGTTCTGCCGTGCTGAATATTACCTCCAACACTGAC
AAACCGATTCCGTTTGCTGCGGAGGTTTACCAGGATGAAGTCATGATCGGCAGTATGGGC
CAGGGCGGTCAGGCATTTGTGCGTGGTATTAACGACAGTGGGGAATTAACCGTGCGCTGG
TTTGAAAACAACCAAACCGTGGACTGTAAGTTGCATTACCAGTTCCCGGCCCAGCCACAA
ACTCTGGGAAGCACTAACACCTTATTACTTAACAATCTTACCTGTCAGGTAGCAAAACAT
TAATATGGAAAATTCTATGAAAAGGATACTACTAACATCCGCGTTAATAGGCCTGGGTTT
ACCGGCAGTTGGCTCTGCAACAGATCTCAAAGTCGATTTTACGGCCACTGTACTCGCCAC
CACCTGTACGATAACCATTGAACAAGATGGTGGCCCCGTGGTGACCAGTAGCGGTAACGA
TGAATACAGCCTGACCATTCCTGATGTTGGCCTGGACAAAGTTGTCACTGGTGATGTTGC
AGCGCAAGCCAACTTTAAATTAAAGGCTAAAGATTGCAGCGATGGTTACTCAAAAATTTT
TACCACACTTACAGGAACGTCTGTTTCAGGCAAGTTGATTGTCAATGAAGCAAGCTCTGG
CGCTGCTGGTGTGGGTATGGGTATTAAGCGTAGAGATGCCGCAGACTCGGCTTTCTTCAC
GCCCAATAATACTGACAAATTTGAATGGTCTTCCGATGAGAAAACTAACGGTGTGCCTCT
GACCGTTGCACTGCGCGAAACCACGGCGGGAGCGGGACGCACCGGTGCGTTTCAGGCAAA
AGCCACCTTTAACTTCACCTACGAATAACAGGGACAGCCACCATGAAATTAAAAGTCATC
GCCACACTGATTGCTACTGTTGCCGTAGGTGCAAGCTTTAATTCAAATCTCGCCTATGCG
AGTACTACTTCTGCATCTTTAACCGTAAACAGTAACCTGACTATGGGTACCTGTAGTGCT
CAGGTTCTGGATTCCAGCAATAAAGCGACAGATACTGTTGCCCTGGGCAATGTTTATATT
TCTGAGTTAGCGGCAAAAAGCAAAGTGCAACCATTCAAAATCCGCTTCAGTGATTGTGCC
GGTCTTCCAGGGAAGAGTGCTCAACTCGTTTTAGCGCCCAGGCCTGGTACGGGTTGCGCT
GGCGGTCAGTCTAACACTGCCGGCTTTGCAAATTCAATTTCCTCCGGCGCTGGTGGTTCA
AGCAGAGCAGCGGTCGAAGTATGGACGACTACGACCCCCGAGGGAAGCGGCAGTCAGCAA
CTCAGTTGTGTTCAACGAAACGTCATCACGGTTGATCTTTCTAATGCCAGTACAACACAG
CCTTATGATTACGATTTAAGTGCGCGGATGATTATCGCCGATGGAAGAACGGTTAATGAT
GTATTACCGGGCGAGTTTCTTTCTCCCACCACCTTCACTATCACTTATCAGTAATAGCAG
ATAAGGATATTAGAATGCTATGCAGGCATCATAAATTTGTATGTTTTTTGGGGCTGGCAA
CAGCCCTCATAACGCCTTTTGCCTATGCTGGTCAGGATGTGAATCTCACCGCGCAGATTG
TCGCCAGTACCTGTCAGGTTGAAGTGAGTAATAATGGCGTGGTGGATCTCGGCAGTGTGA
CCCTGGACTATTTTGCCGACAACGTAACTCCAACAACGGATTATGCGGGTGGCAAGACGT
TTAATGTTAACGTGGTCGCCTGCGATAATATTCAAACGACCCAGTCGCAAATGAAATTAG
ATTTTCAGCCGCAGGCAGGTTCGCTTGCGCAGGTGAATAATCAAATTTTTAGTAATGAAT
ATGAACAGCAGGCTACCGGGGCAAAAAACGTCGGCATTGTAATATTTTCGGCACAGCCGA
ATCAGCAGACCTTTAACGTGCGGGGAACGGACGGTTCCTCAACGGCGATTTATTCTGTCG
CTCCAGGCAATGCTGTTCCGTCAACCTGGACCTTTTATTCCCGTATGCAACGGGTGAATA
ATGCTCTCCCACCCGAGTCGGGGATGGTGAGAAGCCAGGTTATTGTTAATGTTTCTTACG
AATAATAAGGATAATTATGCAAAGGAAAGGCAATAAACTGTTACGACAGTTATGCAGTGC
AATACTGTTATTTTTTATGTGCTCCTTGTCTGCATCTGCGATGGAATGTTATATAGAAAA
ATGGGCGGGGGGAACTTATGACATGGTCATAAACCCTGAGGTTGAAAGTATAACAACGCA
AATGGTATCTTCGCCACAAGAAATAAGCGACATGGTTCATGATACAAATATTAAACTTAA
GGACAGGAACGGTGAGACGATTGGATGTAAGTCCGATATAGGGGGTACTACTTCAGTACA
CTTTCTTAACACTGCGGATGCAGGTTTGTTATCAACCTATGTTTCGAAAGATAATGGCGC
ATTATTAAAAACAACAGTTCCTGGTATTGTCTACTCCGTAGAATTGGTATGTATAAGCTG
TGGTGCTGCAGATGAACTTGATTTAGTTTTACCTGCACAAAGCGGCGCAGATAACTTCAT
ACCGGCCAGCGATACCAAGTGGGCTTATGAATACAGTGACAACGACTGGTATTTGCGTTT
TCGTTTTTACTGGACGCCGGAATTTAAACCTCAAAATGGGGTTTTCGAAGGATATGCCTT
GCCAGGAAAAATTGCTTCCTGGTATATAGGTGATAATACCCAGGCATGGGTAAACTTTAC
TGTTCAGGATAGTGCCGTTCACTTTTACGTTGACCAACCAACCTGTTCAATGATTACCCT
GGATCAGGACAAAGGCAATGTGAGTGGCACAGAAATCCAGTTAGGTAACAGTTACGTATC
CGAAGTTAAAAATGGTCTTACCCGAGAAGTTCCCTTTGCTATCCGTGGTGAGTATTGTTA
TGCCAGCAAGATTACGGTTAAGCTGACGGCTGCAAATGCAGCCACTGACAAAAATCTGGT
GGGTAAAACAACTGGCTCTGCCACAGGCGTGGCTGTAAGAGTTAATTCAACTTATAATGA
TAGCAAAGTGTTATTAAAACCAGATGGCGTTGCTTCCATTGATTATAACTTCCCTGTCTG
GTCGAATAACTTGTTGTCATTCCCTTTTACAGCACAACTCGTCCCCGATGGCAGTGGTAA
ACCTATCGGAACAGGAACATTCTCCGGTAACGCGACCTTCTCCTTTACCTACGAATAAGT
AAAACGTTATTCCCTCCTCATCGCACCAGAGTTCTGCTCTGGTGCGAACGTTTTCCCCAC
ACTAAAAACCATTGCCCCCCTGATTTCGGCTGTTAGAATGCGAACAGATCTGACTTTAGC
CATCAGGACACGTTATGAAACCGACCACCATTGCTTCATTGCAAAAATGCAAACAGGAAA
AAAAACGTTTCGCGACCATCACCGCTTACGACTATAGCTTCGCCAAACTCTTTACCGATG
AAGGACTTAACGTCATGCTGGTAGGCGACTCGCTGGGCATGACGGTTCAGGGGCACGACT
CCACCCTGCCAGTTACCGTTGCTGATATCGCCTACCACACTGCCGCCGTACGTCGTGGCG
CGCCAAACTGCCTGTTGTTGGCTGACCTGCCGTTTATGGCGTATGCCACGCCGGAACAGG
CCTTTGAAAATGCCGCCACAGTAATGCGTGCCGGAGCCAATATGGTCAAAATCGAAGGTG
GCGCATGGCTGGTGGAAACCGTGCAGATGCTGACTGAACGCGCGGTTCCGGTATGTGGTC
ATTTAGGTTTAACGCCGCAGTCAGTGAACATTTTCGGCGGCTACAAAGTACAAGGGCGTG
GCGAGGCAGGCGATCAACTGCTCAGCGATGCATTAGCCTTAGAAGCCGCTGGTGCACAGT
TGCTGGTGCTGGAATGCGTACCAGTTGAACTGGCAAAACGTATTACCGAGGCGCTGGCTA
TTCCGGTTATCGGTATCGGCGCAGGTAACGTCACCGACGGGCAGATCCTCGTCATGCACG
ACGCCTTCGGTATTACTGGCGGTCATATCCCTAAATTTGCCAAAAATTTCCTTGCTGAAA
CGGGCGACATCCGCGCAGCTGTGCGGCAGTATATGGCTGAAGTGGAGTCCGGCGTATATC
CGGGCGAAGAACACAGTTTCCATTAAGGAGTCACGTTGTGTTAATTATCGAAACCCTGCC
GCTGCTGCGTCAGCAAATTCGCCGCCTGCGTATGGAAGGCAAGCGCGTGGCGCTGGTGCC
TACTATGGGTAACCTGCACGATGGCCATATGAAGCTGGTCGACGAAGCCAAAGCCCGCGC
CGATGTGGTCGTCGTCAGTATTTTCGTTAACCCAATGCAGTTTGACCGCCCGGAAGATCT
GGCACGTTATCCACGGACCTTGCAGGAAGACTGCGAAAAGCTAAACAAACGTAAAGTGGA
TTTAGTTTTCGCCCCTTCGGTAAAAGAGATCTACCCGAACGGTACTGAAACCCACACTTA
CGTTGACGTTCCTGGTCTTTCCACCATGCTGGAAGGTGCCAGCCGTCCTGGCCATTTTCG
CGGCGTTTCGACTATTGTCAGCAAGCTGTTCAACCTGGTCCAGCCGGACATCGCCTGCTT
CGGTGAAAAAGATTTTCAGCAACTGGCGCTGATCCGCAAAATGGTTGCTGATATGGGCTT
TGATATTGAGATTGTCGGTGTGCCAATTATGCGCGCCAAAGACGGTCTGGCGCTGAGTTC
CCGTAACGGTTATCTGACAGCGGAACAACGCAAAATTGCGCCCGGTCTGTACAAAGTTTT
AAGTTCAATTGCCGACAAATTGCAGGCTGGCGAACGGGATCTCGATGAAATTATTGCTAT
TGCCGGGCAAGAACTGAATGAAAAAGGCTTCCGCGCCGATGATATTCAGATTCGCGATGC
CGACACGTTGCTGGAAGTCTCTGAAACCAGCAAACGAGCTGTGATTCTGGTAGCCGCCTG
GCTTGGCGATGCCCGCCTGATCGACAACAAAATGGTCGAACTGGCGTAATACTTAACTGG
CGCTACGGCTGATGGCGCCAGTTATTAATTTGCCCTACGTCATGGCGATGACGTCTGTAA
GTGATTATTCATATCGCTGGCAATTTAGTTAGAGTTAATTAGCTTATCAATCTCTGTAAG
AGGTAAAGTTGTCACCTCTGCAACGTCTTCCCGAGACATCCCTTTACTTAGAAAACGCTG
GGCGAATTCCTGTCTTACCTTCTGGAGTTCCTCTTGATATCCCTTCTGAAATCCCTTCTC
TTCAAACCACTGCGCCAACGTCTGCCTGGTTTCTCTCCGTGTCTTTATTTCCATAGGTTC
CCTTAATTATCTGGTCAGTTAACAATAACAATTATCTGGCTATAACTGATGATGCAGACA
ACTTAGTTAATCAGCTTATCAATCTCGGCAAGGGGTAAATTTGCCATCTCTGCAACGTCT
TCCCGAGACATTCCTTTATTCAGAAGACGCAGGACGAATTCTTGCCTTTCCTCCTGTCTT
CCCCTCTCTTCAAACCACTGCGCCAGCGTCATCATAGACTCCCCTCCCGTTTCCCTGTCT
CTCAGCACACCATAAAACAAATCCGCTTGTTCAGTATGACCGCGTTGCAGCATATAGTTT
TGCATGGCAACTAACTGACTTCCGCTAGTGTACCCTTCGTCAATCAGCGTGACCAGTTGC
TCCAGCAATAACATTAAGTCGCGCTGGCGAATATGTTTTTGCAGTAGTTCGAGAATCGCA
ATCCGCCGATGTTGCATGATTTCGTCATCCGGTGTGATGGTGATATCCACCAGCGGGAAA
GGACTGTTATAGACGCGTCGCGCCAGCTCCGGAGAGTAAAACATATCAAACCAGCACATT
GAGAGCGGATAAGGTGTGGCCTCGCCCTGATAAAAGAGAATCGGCACTACCAGCGGTAGT
TTGTCGTGATCCGCCTCCAGATGCCGATGCATGGCGGCTATAGAATAACGCATCATGCGA
AAGGCCATTTTCTTATCCGGCTTGCTTTGGTGTTCAATCACAACATGCAGATAACCGGGA
TTGCCCTGCATTTGCACGGAATAGAGCACGTCCGTGCTGTGTCCTTTCAGGCTCTCTTCA
ATGAAACTCCCCGACTCTAAATGAAGCGTGTTGAGGTCACAAAGTTCGCGTAATTCCACT
GGCAAATGTATCTCCAGAAAGTCGCGAGCCGTCTCCGCATGCATTAAAAATTGTTTAAAT
ACCGCGTCATGCGGTGTAGTACTCGGTGCATCCATCTTCCCTGTCTTCCGTGTTGTCTTG
CGTGAAGGCAGTATCCAGCCAAGGCGCGCCGTCGTCAGCCACCTCTTTATTGTTTACCGA
GCAGCGTTCAGAGAAATATCAATTCGTTACAGGCGATACATGGCACACTTCGGCGCGGTA
CGCAAACTGCTGATGCAAATGCCGTCAGATGAGTAGACACTAAACAAAAATCGGGCAATA
CTGCGTGAGAATTTCCTCAAAGCAGGCACCGCCTGCTTCGTTAACGACAGGGTAGAAAGG
TAGAAGTTATGATTCGCACGATGCTGCAGGGCAAACTCCACCGCGTGAAAGTGACTCATG
CGGACCTGCACTATGAAGGTTCTTGCGCCATTGACCAGGATTTTCTTGACGCAGCCGGTA
TTCTCGAAAACGAAGCCATTGATATCTGGAATGTCACCAACGGCAAGCGTTTCTCCACTT
ATGCCATCGCGGCAGAACGCGGTTCGAGAATTATTTCTGTTAACGGTGCGGCGGCCCACT
GCGCCAGTGTCGGCGATATTGTCATCATCGCTAGCTTCGTTACCATGCCAGATGAAGAAG
CTCGCACCTGGCGACCCAACGTCGCCTATTTTGAAGGCGACAATGAAATGAAACGTACCG
CGAAAGCGATTCCGGTACAGGTTGCTTGATTGTTATCCCTGCGGCTGGTTACTCACCAGC
CGCGACATCGTCTCGAGCGAATCCGTTCTTAAGATATAAAGTCGTTTTAGTAACAACGGA
TTATCCCCCGGTTTTACTTTGCCTTTCATGGTTGTCACCGCCAAGTGAAATCCGGCATCG
TTTGCTGCCTTCACGGCTTTGTCATTAAATCCGCCAAACGGATACGAAAGATACCAGACA
TGCGGATTAAATTGCGCCAGAGCGCGGCGTGAACGTGCAAAATCAAACAGAATATTGTGC
TCACTACGACTCAGTAATATGGGGCGGCGATAGCCATCCACCCGATGCAAAAAATGGGTA
TGTGACTGAAAATCAAAAACATCGCGAATTTCGTTAAGCTCAGAAACGCTCATAAATTGC
AGCGATTTTGGGTTCCACTTCTGCGGGTGACGTTTGATGCGTGAGGTAACAATAAACGCC
GTCGCCTTCATGCCATATTGTTTCAACACAGGATACGCATAGCGGCTCACCGACTTGAGG
CCATCATCAAAGGTAATCACCACCGCTCGCGCAGGGAGATTGATCTTATTCTTCACGTAG
CCTTCCAGCTGCACCATGCTCAGTGTCGCGTATCCCCTGTCGCGCAGCCAGGCCATCTGG
TTATTGAAAGCGCGTACCGAGGTGGTCGTCGAAGTGTGGCGAAAACGGGTGTTTTCTTCG
TCGCGCAGAATATGATGATAGGTTAGCACCGGAAGGCCATTATCGGGTTGGGCATCCAGC
GCGCTGATATAGGCCAGTCGATCGCCAATACGGACCTGATACCAGGTTTGATTTAACCTG
TCTTTCAGTTTATGCAAAATCGGGTAGCGCAAATTGTCCGCCAGTACCCCAAATGGCGCA
CTGCCCACACTCGGCGCGTTATAGACCGGCGTATCTTTCCAGGTAACTAAGTTCTGATTA
CTCAGCGGCTTGTTGAGGTCACCCAAACCGTCTTCAACTTTTTGTCGCCCCTGAACCGGC
TCGAGATGCCCTTTATCGATAAACCCTTTACCAAAGCCAAAATTAAATGCGTAATAACTT
GCGGCAGTGGGCTCCACGGCAATGATTTGTCCGGCCCGAATATTCCCCACGGTCACCATC
TTGTCGCCAATTTGCGCCCAGACCGCAGCATTTTCGATGGTTTGCATATAACGGGCAGGT
AACGCGGCACTGACACTTGCGGTAAACAGCATCAGCAGGAGAATAACAGCTTGTTTGTAC
ATGAAAAAATAACCGAGGGTGAAACAACGCTTTTATTGTAGCAAAAGCGCTATAAGAATC
GTGGGTTAATACTCATACAAATTATGTTTGAGGACGAAAGGTGGATTTTTTTGTTGTTGG
TGCCAAAGACTACTCACCTCCGGCCCACCCAGTTCGACAATACGCTCGCGAAACTCTGAA
CTGGTCATGGTTTCACGGCAAGCCATCATCTGTTCAATTAACGGTAACGTGACACCAGAA
ATCACTTCGCAACGGGAGTGTTTGTGGCTTAATAATGAAGCCACGCGGTACGGTGGCGCT
CCGGCTATATCGGTTAAGAAGATGACACCCTCACCAGAGTCCGCTTCATGCAGAGCATCG
CACATCATGCGGCTGAGCATATTAGAGCTTAACCCACGCCAGAAATTCACGGCCCGGCAC
TGAAGAAGTGCCCCATGTTTTTTCTCCAGCGCATCCAGTATCTCTTGCGCCCGGTCATCG
TGACAGGTAATTACCCAACCTAACATCGCCTTCCTCCTTAGCCGAAAATCAGTCTACCCT
GACCATTGTTGATAAAGGGTGATAGCCGTCAAAACTCCTCTCCCCCAAATCCAGAGGAGA
GGAAATAGCCTTAGCTACGCAAACCACGTCCACGTTGGATCAGCGACCAACAGATCAAAT
AAAACGCCACAATAAAGACCACCAGTACGCCAAAGGTAGTGACCAGCGGAACATCATTGA
TACCGAGGAAGCCGTAGCGGAAACCACTGATCATATAAACGATTGGGTTCAGGTGCGACA
GCCCTTGCCAGAACGGCGGCAACAAAGTCAGTGAGTAAAAGACCCCACCCAAATACGTGA
GTGGCGTTAACACAAAGGTTGGCACCAGGCTGATGTCATCGAACGTTTTGGCAAACACAC
CGTTCAGCAAACCCGCAAGGGAGAACAACACCGCCGTGAGCACCAGGGTTAAGGCAACGA
ATACCCATGAATGCACCTGAAACGGCACAAAAAACAGTGAAATTGCCGTCACCAGAATGC
CAACAAACAGACCACGCGCCACGCCACCGCCGACATATCCGGCAATAATGACGTGAGTCG
GAACCGGCGCTACCAGCAGCTCTTCAATATTACGCTGGAATTTGGCACCAAAAAATGATG
ACGCGACGTTAGCGTAGGCGTTGGTGATCACCGACATCATGATCAGCCCCGGTACGATGA
ACTGCATGTAGCTGAAGCCATGCATATCGCCAATACGCGAACCAATCAGGTTACCGAAGA
TAATAAAGTAAAGGGTCATGGTGATGACTGGCGGCACCAGCGTCTGCACCCAGATACGCA
TAAAGCGATGGATCTCTTTCGCCCAGATGCTTTTTAGCGCCACCCAGTAAAGATGCATCA
TGCGCGATCTCCTTGTTTTTCATTAACCAGTGAAACAAACAGCTCTTCCAGACGGTTAGC
TTTGTTACGCATACTTAATACCTGAATGCCCTGCTCACTTAACTGCGTAAATACGCTGTT
GATCCCCTGCTCACGCAGCACTTCAACTTCCAGCGTCGCGGTATCGACCAGTCGATACTG
ATAGCCATCGAGCTTCGGTAACGGACTTTTCGGTGCGAGATCGAGAATAAAGGTTTCCGA
TTTCAGCTTCGCCAGCAGCGCCTTCATCGAGGTATTTTCCACCAGCTCACCATGTTGAAT
AATGCCGATATTGCGGCACAGCATTTCTGCTTCTTCCAGGTAGTGTGTGGTGAGAATGAT
GGTGGTGCCTTTGTCGTTTAAATCCTTCAAAAAGCCCCACATTGAGCGGCGAAGCTCAAT
ATCCACGCCTGCCGTTGGCTCGTCGAGAATCAGCAGTTTAGGTTCATGCATTAACGCACG
GGCAATCATTAAACGACGCTTCATCCCGCCCGATAACATGCGCGCACGTTCGTTGCGTTT
TCCCCATAAATCGAGCTGCTTAAGATACTTTTCGCTGCGGATGTACGCTTCTTTGCGCTC
CACGCCGTAGTACCCTGCCTGATTCACCACAATTTGCTGCACGGTTTCAAACGGGTTGAA
GTTAAATTCCTGCGGCACCAGTCCCAACTGACGTTTAGCGTTCACGACATCCTTCTCGAG
ATCGTAACCAAATACGCTGACCCGCCCGGAGGTTTTATTTACCAGAGAGCTGATAATACC
GATAGTGGTCGATTTCCCGGCCCCGTTCGGCCCGAGAAGCGCATAAAAATCACCCGCTTC
GACCTGCAAATCTATTCCACGAAGCGCCTGAACGCCGCCTGGATAGGTTTTTTTAAGCTG
TTGAAGTTCCAGTGCAATGGTCATAAATTTTTACTTACCTTACGTTCTTACACTTTATCT
GTGGTTTAAATCGTCCCGGAGTTGCCCTATATTAGCCAAACGTAATTATTTGGTTACAGG
TCGTTAACCTCCATGAAAGACATAGATACACTCATCAGCAACAATGCACTATGGTCAAAA
ATGCTGGTGGAAGAGGATCCCGGGTTTTTTGAGAAACTGGCACAAGCGCAAAAACCGCGC
TTTCTATGGATTGGATGTTCCGACAGTCGCGTTCCTGCAGAACGTTTAACCGGTCTTGAG
CCGGGCGAACTCTTTGTTCACCGTAATGTTGCTAACCTGGTCATTCACACCGACCTGAAC
TGCCTTTCCGTGGTTCAGTATGCAGTGGATGTACTCGAAGTTGAACACATTATTATCTGT
GGCCACTACGGTTGCGGCGGCGTACAAGCCGCAGTTGAAAACCCGGAACTGGGGCTTATC
AACAACTGGCTGCTGCATATCCGCGATATCTGGTTCAAACATAGCTCATTGCTCGGCGAA
ATGCCGCAAGAGCGCCGTCTGGATACCTTGTGTGAACTGAACGTCATGGAACAGGTGTAT
AACCTGGGCCACTCCACCATTATGCAATCAGCGTGGAAACGCGGGCAGAAAGTTACCATT
CACGGCTGGGCCTACGGTATTCACGACGGCTTGCTGCGTGATCTGGATGTCACAGCGACC
AACCGCGAAACCCTTGAGCAACGTTACCGTCATGGGATTTCCAACCTCAAGCTGAAACAC
GCCAACCACAAATAAAAATGCCATGCCGGATGCAACACATCCGGCAACTTCACACTTACT
CGTCCAGCAGAATCACTTTGCCGATATACGGCAGATGACGGTAACGCTGTGCGTAATCAA
TGCCGTAACCCACCACAAACTCATCCGGGATCGAGAAACCGATAAATTCTACCGGGACGT
TCACTTCACGACGGGACGGTTTATCCAGCAGCGTACAAATCGCCAGCGACTTCGGTTCGC
GCAGGCTTAAGATCTCACGCACTTTCGACAGTGTATTCCCCGAGTCGATGATATCTTCAA
CAATCAGCACGTCCTTGCCACGGATATCTTCATCCAGATCTTTGAGGATTTTCACATCAC
GGGTGGTGGACATGCCGCTACCGTAGCTGGAGGCGGTCATAAAGTCGACTTCATGAGATA
CCTGAACTTCACGGCACAGGTCCGCCATAAACATAAATGAGCCACGCAGCAGACCCACCA
GCACCATATCGCTGCCGCTGTCTTTGTAACGCTCAGTAATCTGACGACCCAGTTCGGCGA
TACGCGCTTTAATCTCCGCTTCGGGGATCATTACTTCTACAGTATGTTTCATATCTCTAA
CCATATGATTTAAAAACAAATCACTTCGCACGGGCAGGTTTTGGCACCGCAACAAAGCGC
AAGACACGCAGTATACCAGTAAAACTATTCATTCGCGGAATCTGTTAATAAAGCTCGAAT
TGTGATGACGGTCACACATGTTAAAACCTATAATTAATTGCTACTAAAATATTAATGAAT
TGAAATGGTGTCTCTTTATGGCAATTAACAATACAGGCTCGCGACGATTACTCGTCACGC
TAACAGCCCTTTTTGCAGCGCTTTGCGGGCTGTATCTACTCATTGGCGGAGGCTGGCTGG
TCGCGATTGGCGGCTCCTGGTACTACCCTATCGCTGGCCTTGTGATGCTCGGCGTCGCCT
GGATGCTGTGGCGCAGTAAACGTGCCGCGCTTTGGCTATACGCCGCCCTGCTGCTCGGCA
CCATGATTTGGGGCGTCTGGGAAGTTGGTTTCGACTTCTGGGCGCTGACTCCGCGCAGCG
ATATTCTGGTCTTCTTCGGCATCTGGCTGATCCTGCCGTTTGTCTGGCGTCGCCTGGTCA
TTCCTGCCAGCGGCGCAGTTGCCGCACTGGTGGTGGCACTGCTGATTAGCGGTAGTATCC
TGACCTGGGCCGGATTTAACGATCCGCAGGAAATCAACGGCACCTTAAGCGCCGATGCCA
CACCTGCGGAAGCTATCTCACCCGTTGCCGATCAGGACTGGCCTGCCTATGGTCGCAATC
AGGAAGGTCAACGCTTTTCACCTCTGAAACAAATTAACGCCGATAACGTCCATAATCTGA
AAGAAGCCTGGGTGTTCCGTACTGGCGATGTGAAGCAGCCGAACGATCCGGGCGAAATCA
CCAATGAAGTGACGCCGATTAAAGTGGGCGACACCCTTTACCTGTGTACCGCTCACCAGC
GCCTGTTTGCGCTCGATGCCGCCAGCGGCAAAGAGAAATGGCATTACGATCCTGAGCTGA
AAACTAACGAGTCTTTCCAGCACGTAACCTGCCGTGGCGTCTCTTATCATGAAGCCAAAG
CAGAAACGGCTTCGCCGGAAGTGATGGCGGATTGCCCGCGTCGTATCATTCTTCCGGTCA
ATGATGGTCGACTGATTGCGATTAACGCTGAAAACGGCAAACTGTGCGAAACCTTCGCCA
ATAAAGGCGTGCTCAATCTGCAAAGCAATATGCCAGACACCAAACCGGGTCTGTATGAAC
CGACTTCGCCACCGATTATCACCGATAAAACCATCGTGATGGCAGGTTCAGTTACCGATA
ACTTCTCAACCCGCGAAACGTCTGGTGTGATCCGTGGTTTTGATGTCAACACCGGGGAGC
TGCTGTGGGCTTTTGATCCGGGCGCGAAAGATCCGAACGCAATCCCGTCTGACGAACACA
CCTTTACCTTTAACTCGCCAAACTCGTGGGCACCAGCGGCCTATGACGCGAAGCTGGATC
TGGTGTATCTGCCGATGGGCGTGACCACGCCGGATATCTGGGGCGGTAACCGCACACCGG
AACAGGAACGTTATGCCAGCTCGATTCTGGCGCTGAATGCCACAACCGGGAAATTGGCGT
GGAGCTACCAGACCGTTCACCACGACCTGTGGGATATGGATCTTCCGGCACAGCCGACGC
TGGCGGACATCACCGTTAATGGTCAGAAAGTGCCAGTTATTTACGCTCCGGCGAAAACCG
GCAACATTTTTGTGCTCGATCGTCGCAATGGTGAACTGGTGGTTCCTGCCCCGGAAAAAC
CGGTTCCCCAAGGCGCTGCCAAAGGCGATTACGTAACCCCAACTCAACCGTTTTCTGAAC
TGAGCTTCCGTCCGACGAAAGATTTGAGCGGAGCGGATATGTGGGGCGCCACCATGTTTG
ACCAACTGGTGTGCCGCGTGATGTTCCACCAGATGCGCTATGAAGGCATTTTCACGCCGC
CATCTGAACAGGGTACGCTGGTCTTCCCTGGTAACCTGGGGATGTTCGAATGGGGCGGGA
TTTCTGTCGATCCGAATCGTGAAGTAGCAATTGCCAACCCAATGGCGCTGCCGTTTGTTT
CGAAACTGATCCCTCGCGGTCCGGGTAACCCAATGGAGCAGCCGAAAGATGCCAAAGGCA
CGGGTACGGAATCCGGCATTCAGCCACAGTACGGTGTACCGTATGGTGTCACGCTCAACC
CGTTCCTCTCACCATTTGGTCTGCCATGTAAACAGCCAGCATGGGGTTATATCTCGGCGC
TGGATCTGAAAACTAATGAAGTGGTGTGGAAGAAACGTATTGGTACGCCGCAGGACAGTA
TGCCGTTCCCGATGCCTGTACCGGTGCCGTTCAATATGGGTATGCCGATGCTGGGCGGGC
CAATCTCCACGGCGGGTAACGTGCTGTTTATCGCCGCTACGGCAGATAACTACCTGCGCG
CTTACAACATGAGCAACGGTGAAAAACTGTGGCAAGGTCGTTTACCAGCGGGTGGTCAGG
CGACGCCAATGACCTATGAAGTGAATGGTAAGCAGTATGTGGTGATCTCCGCAGGCGGTC
ACGGTTCATTTGGTACGAAGATGGGCGACTATATTGTGGCTTATGCGCTGCCGGATGATG
TGAAGTAAGACTTGCTCAGATTGCTGACAACGTGCGCGTTGTTCATGCCGGATGCGGCGT
GAACGCCTTATCCAGCCTACAAAATTGTGCAAAATCAATGGATTGCACAGGTAGCGTAGG
CCTGATAAGCGTAGCGCATCAGGCAGATTTGCGTTTGTCATCAGTTTAATGCCCGGAGAG
ATCCGGGCATATTCCCGAATACGGTCTTTTTATACCGTAAACCCTAACATCATCCCCGTA
TCTTCATGCTCCAGCAGATGGCAGTGCGCCATATAAGCATGTTCTTTCGGTGCGTCGTGA
TTAAACTTCACCAGCACTTCGCTGACATTACCTTCTACCTTAACGGTATCTTTCCAGCCC
GCGCGATGCGTCGCTGGCGGTTTGCCATTTTCTGACAAGATACGGAACTGCGTGCCGTGA
ATATGGAACGGATGCAGCATCATGTCGCCCACGCCAGAGATAACCCAACGTTCGTACTGC
CCTTTCGCCGCCGCAAACATCGGCTTATTCATATCAAACGCCTGACCGTTGATTTTATTG
GCATGGTGGAAATCGAACTTCCCGCCGTGGTTCATATGATTCATATTGCCGTGCCCCATA
TGGCCCATCATCTGGCTGTGATCCATTCCGGCCATCGCCTGATCGCCATATTTCTCCATT
AGCATCTGCATCCCCATCATATCTAGCATCGGGTCCATAGAAAGTTGCAGCTTGCGTACC
GTCAGCCCTTCCAGCGAAGGTAACGCAGGCAGGCTACTTAATGTGTCTGGCAAAGCACCG
GAGGCACTAATAGCAATCGGCTGAATCCGCATTACCGGATGCGGCTTGTCAAACGGCGCA
ATCGCCATCCCCATCTGGCTGACCGGCAGCGTCACCAGGTCAAAGGGTTTGTTGTCGTTA
ACCTCCACCAGCACTTCAAAACGCTCGCCCATCAGCACCGGCAGCTCGTTCACCTTCACC
GGTTCAGGTAGCAGACCACCGTCGCTGGCAATCACATAAAGCGGGCGATTGTCGCTGGTG
GCGAAATTGAGCGAGCGGGCATTACAGCCATTGAGCAAACGCAGGCGCAGCCAACCACGC
GGGGCAGCGTGTTGCGGGTAGATTGCACCGTTGGTCAGCAACGTATCGCCAAACCAGCCC
ACGGCGGCGGTCATCACATCCAGTTGATAATCAATCTGCCCGTCGGCGCTAAATTTCTTA
TCCTGAACGATCACCGGAACATCATCGATACCCCACTGTTTTGGCAGCATTAATTTCAGG
ATCTCGTCATCTTCAATTACCACCAGACCAGCCAGCCCCATCGCCACCTGTCGCCCGGTC
TTGCCATGTTGATGTGGATGGAACCAGCAGGTAGCGGCAGGTTGATCAACGTTCAACGTC
ACCGAGCGCTTGCCACCTGGCGGAATAATTCCCTGTGGGCCGCCGTCGACTTCACCCGGT
ACTTCCAGCCCGTGCCAGTGCAACGTCGTCTCTTCCGTCAGTTGGTTATAGATATCAACC
GTTACCGCTTTGCCGCGCTGTAATTTCACCGCCGGCCCCAACAGATTGCCGTTATAGCCC
CAGGTAGTTGCAGTTTTCTCGCCAAAGGTAGACTGACCTGCGCCAATAGTTAACTGAATG
CGATTACGGGCATCGGTCGTGAGCAAATCAGGGATCGGTAACGTTGGGCGTTCCGCCGCA
AAAACTGCACGGCTCCACAGTGGCAAGGCTGAAGCCACACCCAGTGCGACGGAATATTTC
AAGAAATCACGACGTTGCATAGTTATTTCCTTATTCTTAAGCAGGCGAAACAAAATCAAA
CGTTGAGCATAGTCCTTCCCCTTACGGGAAGGTCAAGCCGCAGACACAATTTAATCGACA
ATAATGGTCGTCGCCTCGCTCGCAGTGTGCTAACGTTTATCTTCTTTAAGCCCCTGGTAG
AAGCAATGAAGACGTTTTTCAGAACAGTGTTATTCGGCAGCCTGATGGCCGTTTGCGCAA
ACAGTTACGCGCTCAGCGAGTCTGAAGCCGAAGATATGGCCGATTTAACGGCAGTTTTTG
TCTTTCTGAAGAACGATTGTGGTTACCAGAACTTACCTAACGGGCAAATTCGTCGCGCAC
TGGTCTTTTTCGCCCAGCAAAACCAGTGGGATCTCAGTAATTACGACACCTTCGACATGA
AAGCTCTCGGTGAAGACAGCTACCGCGATCTCAGCGGCATTGGCATTCCCGTCGCTAAAA
AATGCAAAGCCCTGGCCCGCGATTCCTTAAGCCTGCTTGCCTACGTCAAATAATCCCTGA
TACCTTTTTGTAGAAATATTGACCGTGCATCCGCGGTCAATGTTAGCTATTATGTTGCGC
CCTTTTTTTACGGGTGTTAACAAAGGAGGTATCAACCCATGGCCGAAAAAAAACAGTGGC
ATGAAACGCTACACGACCAGTTTGGGCAGTACTTTGCAGTAGATAACGTTCTGTATCATG
AAAAGACCGATCACCAGGATTTGATCATTTTTGAGAACGCTGCATTTGGTCGCGTAATGG
CGCTGGATGGCGTAGTACAAACCACCGAACGCGACGAGTTTATCTATCATGAGATGATGA
CCCATGTTCCGCTACTGGCCCACGGTCACGCGAAACATGTGCTGATTATCGGCGGCGGCG
ACGGCGCCATGCTGCGTGAAGTGACCCGACATAAAAACGTTGAGTCAATCACGATGGTGG
AAATCGATGCGGGTGTCGTGTCGTTCTGCCGTCAATATCTGCCCAACCATAACGCCGGTA
GCTACGACGATCCGCGCTTTAAGCTGGTGATCGACGATGGCGTCAATTTCGTTAATCAAA
CCAGCCAGACCTTTGATGTTATTATCTCCGACTGCACCGATCCTATCGGGCCCGGCGAAA
GCCTTTTCACTTCGGCATTTTATGAAGGCTGCAAACGTTGCCTGAATCCTGGCGGTATCT
TCGTCGCACAAAACGGCGTCTGCTTTTTACAGCAGGAAGAAGCCATCGACAGCCATCGCA
AACTCAGCCATTACTTCAGCGACGTTGGCTTTTATCAGGCGGCGATCCCGACCTATTACG
GCGGTATCATGACTTTTGCATGGGCGACAGATAACGACGCCTTACGCCATCTCTCAACCG
AAATTATTCAGGCGCGTTTTCTCGCCTCTGGCCTGAAATGCCGTTATTACAATCCGGCAG
TCCATACGGCAGCTTTTGCCTTACCCCAGTATCTGCAAGACGCACTGGCTTCACAGCCGT
CCTAAGGAGAAGATAAGAAATTGAAAAAACTGAAACTGCATGGCTTTAATAATCTGACCA
AAAGTCTGAGTTTTTGTATTTACGATATCTGCTACGCCAAAACTGCCGAAGAGCGCGACG
GTTATATTGCTTATATCGATGAACTCTATAATGCCAACCGTCTGACCGAAATCCTGTCAG
AAACCTGTTCCATTATCGGGGCTAATATTCTTAACATCGCCCGCCAGGATTACGAACCAC
AGGGTGCCAGCGTCACTATTCTGGTGAGTGAAGAACCGGTTGACCCGAAACTCATCGACA
AAACAGAACACCCCGGCCCACTGCCAGAAACGGTCGTTGCCCATCTCGATAAAAGTCATA
TTTGCGTACATACCTACCCGGAAAGTCATCCTGAAGGCGGTTTATGTACCTTCCGCGCCG
ATATTGAAGTCTCTACCTGCGGCGTGATTTCTCCGCTGAAGGCGCTGAATTACCTGATCC
ACCAGCTTGAGTCCGATATCGTAACCATTGATTATCGCGTGCGCGGTTTTACCCGCGACA
TTAACGGTATGAAGCACTTTATCGACCATGAGATTAATTCGATTCAGAACTTTATGTCTG
ACGATATGAAGGCGCTGTATGACATGGTGGATGTAAACGTCTATCAGGAAAATATCTTCC
ATACCAAGATGTTGCTTAAAGAGTTCGACCTTAAGCACTACATGTTCCACACCAAACCGG
AAGATTTAACCGACAGCGAGCGCCAGGAAATTACCGCTGCGCTGTGGAAAGAGATGCGCG
AGATTTATTACGGGCGCAATATGCCAGCTGTTTAACGGCTCTGGCGGAGCTCCCAGGCTC
CGCCAGATTTATTTACTTCTGCTGCACGAAATTACGGTAAGCCGCCACCACCTGCAGAAA
ATCCTCAACGCCGCATAGCGACAGGCTTTCTTCGTCGTAGTAGTTCATCCCCTCTTCCAT
TTCATCGCCAGCGAATTCCAGTTGATTGGCGCGAACCATCACCTCTTCACCGTCCATCCA
CAGGGTGTATTCGTGCCCTGCCCGTTGCCAGGACCGTTCGCTACCTTTCAGTGCGTGCGC
TGCTTGTTCCACTTCATCAAGCAAGGCCAGGTTTTCTTTCACCTCTTCATTAAACCAGTG
CCCGACCACTTCATGCCCCATGGACATACGCACCTTTACCACTCCGGTAATATCGCGCAG
AAATTCGTAATCCATAGTGTGTTCCTCTGCTCCCGGCAATGCGCCGAAATCGCATTGCGC
CATTGATGTAATTATCGCAGCCTTACCGGAGAAAAACAGCGGAACGGCGATGGTTTAGAA
ATAAAAAATGCCCGGGAATCTCATTCACCGGGCATTGTGTCGTTTATGCGCAGCGCGTGC
GCTGACTTTTTAAACTGCAGTCTGGAAAATCACACCATCGGCTTTTTCAGTGTACTGAGA
AAGCTGGTTGAAGTTCAGGTAACGGTAAGTATCAACGGCAGTTTTATCCACCTGCGCCAC
GTAGGTCTGGTACTCTTCCGGCGTCGGCAGTTTGCCAATCAGCGCCGCAACAGCAGCCAG
TTCCGCAGAAGCCAGGAAGACATTCGCGCCAGTCCCCAGACGGTTCGGGAAGTTACGGGT
[truncated: 5,030,021 more chars]
