# Supplementary material for: Escherichia coli ST302: Genomic Analysis of Virulence Potential and Antimicrobial Resistance Mediated by Mobile Genetic Elements
Source: Front Microbiol. 2020 Jan 21;10:3098. doi: 10.3389/fmicb.2019.03098 (PMC6985150; doi:10.3389/fmicb.2019.03098)
Supplement: DATA S2 — ST302 SNP analysis. [file Data_Sheet_2.ZIP › SNP_Analysis/ST302_SNP/SNP_analysis/snippyout/ST302/F2_18C-Porcine-ST302.out/snps.csv]

CHROM	POS	TYPE	REF	ALT	EVIDENCE	FTYPE	STRAND	NT_POS	AA_POS	EFFECT	LOCUS_TAG	GENE	PRODUCT
EA2454	977	snp	T	C	C:29 T:0
EA2454	4901	snp	T	C	C:41 T:0
EA2454	5849	snp	C	T	T:41 C:0
EA2454	9874	ins	A	AAT	AAT:46 A:0
EA2454	10139	snp	A	G	G:69 A:0
EA2454	11382	snp	A	G	G:49 A:0
EA2454	11615	snp	T	G	G:28 T:1
EA2454	24420	snp	T	G	G:43 T:0
EA2454	25719	snp	T	C	C:64 T:0
EA2454	32987	snp	C	T	T:59 C:0
EA2454	34038	snp	C	T	T:63 C:0
EA2454	34494	snp	T	C	C:53 T:0
EA2454	36375	snp	C	A	A:49 C:0
EA2454	37550	snp	G	T	T:55 G:0
EA2454	37987	snp	T	C	C:59 T:0
EA2454	42059	snp	T	C	C:57 T:0
EA2454	48190	snp	C	A	A:34 C:0
EA2454	50851	snp	A	C	C:52 A:1
EA2454	53157	snp	C	T	T:48 C:0
EA2454	54992	snp	T	C	C:43 T:0
EA2454	55249	snp	C	A	A:61 C:0
EA2454	56628	snp	A	C	C:48 A:0
EA2454	58152	snp	T	C	C:58 T:0
EA2454	59959	snp	G	T	T:59 G:0
EA2454	64224	snp	C	A	A:66 C:0
EA2454	67315	snp	A	C	C:54 A:0
EA2454	69114	snp	A	C	C:80 A:0
EA2454	69595	snp	A	G	G:78 A:0
EA2454	71773	snp	G	A	A:92 G:0
EA2454	71896	snp	C	T	T:103 C:0
EA2454	74671	snp	A	G	G:103 A:0
EA2454	77252	snp	A	C	C:86 A:0
EA2454	80371	snp	C	T	T:43 C:0
EA2454	82347	snp	T	C	C:70 T:0
EA2454	84557	snp	T	G	G:65 T:0
EA2454	87412	snp	A	G	G:72 A:0
EA2454	88223	del	TTCAATATCAATATCAATA	T	T:58 TTCAATATCAATATCAATA:0
EA2454	88705	snp	C	T	T:101 C:0
EA2454	95737	del	CT	C	C:46 CT:0
EA2454	99924	snp	C	T	T:31 C:0
EA2454	101724	snp	A	C	C:79 A:0
EA2454	103925	snp	A	G	G:56 A:0
EA2454	105425	del	TA	T	T:27 TA:0
EA2454	111773	snp	C	G	G:47 C:0
EA2454	112615	snp	T	G	G:31 T:0
EA2454	113186	snp	C	T	T:38 C:0
EA2454	116969	snp	C	T	T:54 C:0
EA2454	117807	snp	C	T	T:70 C:1
EA2454	119029	snp	A	G	G:46 A:0
EA2454	120366	snp	C	A	A:43 C:0
EA2454	123376	snp	G	A	A:59 G:0
EA2454	124865	snp	T	C	C:58 T:0
EA2454	126504	snp	A	G	G:62 A:0
EA2454	128072	snp	A	G	G:69 A:0
EA2454	131613	snp	A	G	G:50 A:0
EA2454	131667	snp	G	A	A:50 G:0
EA2454	131768	snp	G	A	A:68 G:0
EA2454	132114	snp	T	C	C:59 T:0
EA2454	140951	snp	T	G	G:52 T:0
EA2454	145428	snp	T	C	C:76 T:0
EA2454	146087	snp	A	C	C:95 A:0
EA2454	147861	snp	C	T	T:46 C:0
EA2454	160440	snp	A	C	C:41 A:1
EA2454	163764	snp	C	T	T:77 C:0
EA2454	163798	snp	T	C	C:68 T:0
EA2454	163970	del	AT	A	A:73 AT:0
EA2454	166408	snp	T	C	C:86 T:0
EA2454	170380	snp	G	C	C:44 G:0
EA2454	170928	snp	C	T	T:40 C:0
EA2454	172664	snp	C	T	T:29 C:0
EA2454	174420	snp	A	G	G:66 A:0
EA2454	177572	snp	C	T	T:59 C:1
EA2454	183092	snp	C	T	T:62 C:0
EA2454	186323	snp	C	A	A:70 C:0
EA2454	186550	snp	T	C	C:58 T:0
EA2454	187941	snp	A	G	G:55 A:0
EA2454	190313	snp	T	C	C:54 T:0
EA2454	190570	snp	T	G	G:69 T:1
EA2454	205385	snp	G	T	T:41 G:0
EA2454	212904	snp	C	T	T:54 C:0
EA2454	216313	snp	C	T	T:59 C:0
EA2454	217635	snp	C	T	T:73 C:0
EA2454	220577	snp	G	A	A:53 G:0
EA2454	234965	snp	G	T	T:68 G:0
EA2454	239221	snp	A	G	G:42 A:0
EA2454	243559	snp	A	G	G:60 A:0
EA2454	245301	snp	C	T	T:52 C:0
EA2454	245648	snp	C	T	T:39 C:0
EA2454	248471	snp	T	C	C:55 T:0
EA2454	250111	snp	C	A	A:45 C:1
EA2454	251758	snp	T	C	C:23 T:0
EA2454	255306	snp	G	A	A:66 G:0
EA2454	260007	snp	C	A	A:43 C:0
EA2454	274429	snp	G	A	A:84 G:0
EA2454	275599	snp	G	A	A:74 G:0
EA2454	275686	del	GAGC	G	G:59 GAGC:0
EA2454	277376	snp	C	T	T:53 C:0
EA2454	277907	snp	G	T	T:47 G:0
EA2454	278848	snp	A	G	G:75 A:0
EA2454	280614	snp	C	T	T:49 C:0
EA2454	281916	snp	A	G	G:43 A:0
EA2454	282929	snp	C	T	T:48 C:0
EA2454	284131	snp	A	G	G:48 A:0
EA2454	285627	ins	A	AT	AT:120 A:0
EA2454	289582	snp	C	T	T:87 C:0
EA2454	290187	snp	C	A	A:65 C:0
EA2454	298055	snp	G	T	T:73 G:0
EA2454	298286	snp	T	C	C:72 T:0
EA2454	310181	snp	G	A	A:54 G:0
EA2454	311347	snp	G	A	A:55 G:0
EA2454	313034	snp	A	G	G:37 A:0
EA2454	313645	del	GC	G	G:50 GC:0
EA2454	316769	snp	C	A	A:64 C:0
EA2454	317106	snp	T	C	C:62 T:0
EA2454	334446	snp	T	C	C:58 T:0
EA2454	341041	snp	C	T	T:46 C:1
EA2454	343648	snp	G	A	A:80 G:0
EA2454	344966	snp	T	C	C:69 T:0
EA2454	350969	snp	A	G	G:47 A:0
EA2454	352054	snp	C	A	A:52 C:0
EA2454	352488	snp	A	C	C:86 A:0
EA2454	354964	snp	G	A	A:38 G:0
EA2454	359110	snp	C	T	T:53 C:0
EA2454	359344	snp	T	A	A:54 T:0
EA2454	359494	snp	G	A	A:54 G:0
EA2454	360484	snp	G	A	A:50 G:0
EA2454	361440	snp	G	A	A:47 G:0
EA2454	369429	snp	T	C	C:60 T:0
EA2454	371038	snp	A	G	G:84 A:0
EA2454	371150	snp	T	C	C:72 T:0
EA2454	378279	snp	G	A	A:44 G:0
EA2454	392511	snp	T	C	C:84 T:0
EA2454	393575	snp	A	G	G:44 A:0
EA2454	393743	snp	A	G	G:45 A:0
EA2454	396436	snp	C	A	A:54 C:0
EA2454	397444	snp	C	G	G:51 C:0
EA2454	401544	snp	C	T	T:59 C:0
EA2454	402042	snp	G	A	A:62 G:0
EA2454	407113	snp	A	G	G:65 A:0
EA2454	407887	snp	C	G	G:59 C:0
EA2454	408866	snp	T	C	C:45 T:0
EA2454	409424	snp	G	T	T:46 G:0
EA2454	409884	snp	T	G	G:60 T:1
EA2454	412599	snp	C	T	T:46 C:0
EA2454	413942	snp	G	A	A:77 G:0
EA2454	414943	snp	G	A	A:52 G:0
EA2454	415150	snp	G	A	A:49 G:0
EA2454	417355	snp	T	A	A:39 T:0
EA2454	428546	snp	G	A	A:54 G:0
EA2454	429895	snp	C	A	A:30 C:0
EA2454	430947	snp	T	C	C:63 T:0
EA2454	437474	snp	A	G	G:53 A:0
EA2454	440837	snp	C	A	A:57 C:0
EA2454	441911	snp	T	C	C:70 T:1
EA2454	443213	snp	A	G	G:83 A:0
EA2454	443268	snp	T	A	A:79 T:0
EA2454	445627	snp	G	T	T:45 G:0
EA2454	447459	snp	A	G	G:43 A:0
EA2454	448711	snp	A	G	G:56 A:0
EA2454	452556	snp	C	A	A:40 C:0
EA2454	452711	snp	T	A	A:39 T:0
EA2454	453785	snp	C	A	A:54 C:0
EA2454	457082	snp	C	T	T:42 C:0
EA2454	459248	snp	A	G	G:45 A:0
EA2454	464006	snp	A	C	C:67 A:0
EA2454	465826	snp	A	T	T:44 A:0
EA2454	465874	snp	G	A	A:40 G:0
EA2454	469328	snp	G	A	A:52 G:0
EA2454	472868	snp	A	C	C:41 A:0
EA2454	472911	snp	T	C	C:47 T:0
EA2454	474394	snp	G	A	A:55 G:0
EA2454	477552	snp	G	A	A:48 G:0
EA2454	478727	snp	C	A	A:34 C:0
EA2454	484002	snp	G	A	A:51 G:0
EA2454	484564	snp	A	G	G:110 A:0
EA2454	485779	snp	C	G	G:60 C:0
EA2454	488462	snp	G	A	A:69 G:0
EA2454	497400	snp	T	G	G:71 T:0
EA2454	497460	snp	T	G	G:63 T:0
EA2454	499083	snp	A	T	T:50 A:0
EA2454	499232	snp	G	T	T:43 G:0
EA2454	499875	snp	C	A	A:42 C:0
EA2454	502913	snp	G	A	A:55 G:0
EA2454	506352	snp	T	G	G:88 T:0
EA2454	506422	snp	G	A	A:111 G:1
EA2454	511266	snp	C	T	T:90 C:0
EA2454	511943	snp	A	G	G:135 A:0
EA2454	516039	snp	T	C	C:48 T:0
EA2454	517972	snp	G	A	A:45 G:0
EA2454	519811	snp	A	C	C:59 A:0
EA2454	523923	snp	C	G	G:40 C:0
EA2454	528123	snp	A	T	T:35 A:0
EA2454	529040	snp	C	T	T:57 C:0
EA2454	530275	snp	C	A	A:45 C:0
EA2454	531539	snp	G	A	A:71 G:0
EA2454	534151	snp	A	G	G:50 A:0
EA2454	537287	snp	G	C	C:73 G:0
EA2454	539426	snp	T	C	C:64 T:0
EA2454	543142	snp	C	T	T:44 C:0
EA2454	545737	snp	G	A	A:48 G:0
EA2454	546428	snp	A	C	C:39 A:0
EA2454	547798	snp	G	A	A:85 G:0
EA2454	549981	snp	C	T	T:30 C:0
EA2454	550654	snp	T	C	C:42 T:0
EA2454	552561	snp	C	T	T:35 C:0
EA2454	559017	snp	A	G	G:62 A:0
EA2454	561226	snp	G	A	A:28 G:0
EA2454	561259	snp	C	A	A:17 C:0
EA2454	561272	snp	T	A	A:15 T:0
EA2454	562933	snp	T	C	C:49 T:0
EA2454	562951	snp	C	T	T:51 C:0
EA2454	569748	complex	TATCG	CATCA	CATCA:69 TATCG:0
EA2454	571709	snp	A	G	G:91 A:0
EA2454	586152	snp	G	A	A:49 G:0
EA2454	595216	snp	T	A	A:86 T:0
EA2454	595654	snp	T	C	C:91 T:0
EA2454	597386	snp	A	G	G:73 A:0
EA2454	602583	snp	A	G	G:32 A:0
EA2454	606088	ins	G	GA	GA:63 G:0
EA2454	606400	snp	T	G	G:63 T:0
EA2454	610464	snp	A	C	C:63 A:1
EA2454	611188	snp	G	A	A:91 G:0
EA2454	611872	snp	A	G	G:114 A:0
EA2454	612410	snp	C	T	T:105 C:0
EA2454	612726	snp	A	G	G:62 A:0
EA2454	613906	snp	C	A	A:114 C:0
EA2454	613974	snp	C	T	T:110 C:0
EA2454	622741	snp	T	G	G:61 T:0
EA2454	623622	snp	C	T	T:46 C:0
EA2454	631335	snp	T	C	C:78 T:0
EA2454	634760	snp	G	T	T:69 G:0
EA2454	635649	snp	A	C	C:48 A:0
EA2454	635707	snp	C	A	A:41 C:0
EA2454	644101	snp	A	G	G:62 A:0
EA2454	644913	snp	T	C	C:65 T:0
EA2454	649668	snp	G	T	T:71 G:1
EA2454	653031	snp	C	T	T:42 C:0
EA2454	654968	snp	T	G	G:63 T:0
EA2454	665110	snp	C	G	G:56 C:0
EA2454	669330	snp	A	G	G:34 A:0
EA2454	674190	snp	T	G	G:61 T:0
EA2454	674305	snp	G	C	C:55 G:0
EA2454	683177	snp	T	G	G:39 T:0
EA2454	684313	snp	C	T	T:40 C:0
EA2454	685213	snp	G	A	A:44 G:0
EA2454	686003	snp	A	G	G:81 A:0
EA2454	686104	snp	G	C	C:78 G:0
EA2454	686464	ins	A	AT	AT:60 A:0
EA2454	687410	snp	A	G	G:34 A:0
EA2454	687596	snp	G	A	A:36 G:0
EA2454	690408	snp	A	G	G:40 A:0
EA2454	690611	snp	T	C	C:39 T:0
EA2454	704676	snp	C	T	T:52 C:0
EA2454	705263	snp	C	A	A:84 C:0
EA2454	707817	snp	C	T	T:44 C:0
EA2454	709632	snp	T	C	C:40 T:0
EA2454	710977	snp	A	G	G:49 A:0
EA2454	724890	snp	G	A	A:62 G:0
EA2454	731219	snp	T	G	G:70 T:0
EA2454	731329	snp	G	A	A:60 G:0
EA2454	737158	snp	C	T	T:57 C:0
EA2454	742876	snp	T	C	C:52 T:0
EA2454	748560	snp	G	C	C:55 G:0
EA2454	749156	snp	C	A	A:56 C:0
EA2454	753727	snp	T	C	C:62 T:0
EA2454	754601	snp	C	A	A:66 C:0
EA2454	755366	snp	A	G	G:43 A:0
EA2454	756040	snp	T	G	G:48 T:0
EA2454	758394	snp	C	T	T:42 C:0
EA2454	765032	snp	T	C	C:55 T:0
EA2454	769569	complex	CC	AA	AA:17 CC:0
EA2454	769716	complex	GGGCA	AGACG	AGACG:54 GGGCA:0
EA2454	769727	snp	G	C	C:63 G:0
EA2454	769759	snp	C	T	T:58 C:0
EA2454	769764	complex	CC	AACT	AACT:53 CC:0
EA2454	769777	snp	G	T	T:66 G:0
EA2454	769784	complex	ATC	GTA	GTA:62 ATC:0
EA2454	769823	snp	C	T	T:80 C:0
EA2454	769965	snp	T	G	G:58 T:0
EA2454	769976	snp	T	C	C:55 T:0
EA2454	770001	snp	T	C	C:50 T:0
EA2454	770022	complex	GCAGA	ACAGG	ACAGG:70 GCAGA:0
EA2454	770037	snp	C	T	T:69 C:0
EA2454	770046	snp	A	C	C:63 A:0
EA2454	770058	complex	TGGT	CGGC	CGGC:63 TGGT:0
EA2454	770751	snp	C	T	T:146 C:0
EA2454	770774	snp	A	G	G:149 A:0
EA2454	771044	snp	C	T	T:10 C:0
EA2454	774482	snp	G	A	A:36 G:0
EA2454	783857	snp	T	C	C:53 T:0
EA2454	784404	snp	C	T	T:60 C:0
EA2454	784434	snp	T	C	C:58 T:0
EA2454	784455	snp	A	T	T:63 A:0
EA2454	784542	snp	G	A	A:83 G:0
EA2454	784570	snp	A	C	C:94 A:0
EA2454	784592	snp	C	G	G:96 C:0
EA2454	784987	snp	T	C	C:100 T:0
EA2454	786559	snp	A	C	C:96 A:0
EA2454	788461	snp	G	T	T:51 G:1
EA2454	789417	snp	A	C	C:79 A:0
EA2454	793051	snp	A	G	G:44 A:0
EA2454	798552	snp	T	G	G:33 T:0
EA2454	805180	snp	A	T	T:58 A:0
EA2454	805481	snp	A	G	G:71 A:0
EA2454	811804	snp	T	C	C:47 T:0
EA2454	816627	snp	C	T	T:51 C:0
EA2454	816840	snp	G	T	T:56 G:0
EA2454	817446	snp	A	G	G:59 A:0
EA2454	817985	snp	T	G	G:52 T:0
EA2454	818649	snp	A	C	C:45 A:0
EA2454	820251	snp	G	T	T:31 G:0
EA2454	821110	snp	A	C	C:34 A:0
EA2454	828884	snp	T	C	C:79 T:0
EA2454	834575	ins	A	AT	AT:27 A:0
EA2454	839081	snp	G	A	A:32 G:0
EA2454	840204	snp	G	A	A:37 G:0
EA2454	841039	snp	A	G	G:45 A:0
EA2454	845338	snp	G	A	A:39 G:0
EA2454	848276	snp	G	A	A:39 G:0
EA2454	852695	snp	A	G	G:24 A:0
EA2454	854766	snp	G	T	T:44 G:0
EA2454	855868	snp	A	C	C:59 A:0
EA2454	856699	snp	A	T	T:71 A:0
EA2454	857444	snp	T	C	C:54 T:0
EA2454	857633	snp	A	T	T:48 A:0
EA2454	861588	snp	G	A	A:53 G:0
EA2454	863496	snp	A	G	G:51 A:0
EA2454	877501	snp	T	G	G:35 T:0
EA2454	891369	snp	A	G	G:78 A:0
EA2454	894538	snp	C	T	T:57 C:0
EA2454	899104	snp	T	A	A:54 T:0
EA2454	904482	snp	A	G	G:48 A:0
EA2454	904955	snp	G	T	T:62 G:0
EA2454	910030	snp	G	T	T:45 G:0
EA2454	911296	snp	C	T	T:82 C:0
EA2454	911716	snp	G	A	A:61 G:0
EA2454	918989	snp	G	A	A:77 G:0
EA2454	919060	snp	T	G	G:68 T:0
EA2454	924524	snp	C	T	T:39 C:0
EA2454	924579	snp	T	C	C:52 T:0
EA2454	930102	snp	A	G	G:53 A:0
EA2454	931665	snp	G	A	A:56 G:0
EA2454	934870	snp	G	A	A:83 G:0
EA2454	935073	ins	C	CAAAAAA	CAAAAAA:21 C:0
EA2454	936296	snp	C	T	T:66 C:0
EA2454	937614	snp	C	T	T:53 C:0
EA2454	938195	snp	A	G	G:47 A:0
EA2454	941489	snp	C	A	A:70 C:0
EA2454	945162	snp	A	G	G:48 A:0
EA2454	946875	snp	T	C	C:55 T:0
EA2454	948450	snp	T	C	C:56 T:0
EA2454	949221	snp	C	A	A:85 C:0
EA2454	949574	complex	CGCGTTTTTTTTCGCGT	TCGCGTTTTTTTTCGCG	TCGCGTTTTTTTTCGCG:18 CGCGTTTTTTTTCGCGT:0
EA2454	949641	ins	G	GTTTCCGCAATTT	GTTTCCGCAATTT:37 G:3
EA2454	951396	snp	G	A	A:44 G:0
EA2454	951474	snp	A	C	C:13 A:0
EA2454	953284	snp	T	A	A:41 T:0
EA2454	964577	snp	A	G	G:167 A:0
EA2454	964586	snp	A	G	G:348 A:1
EA2454	964604	snp	T	G	G:406 T:0
EA2454	964703	complex	TG	CA	CA:135 TG:0
EA2454	964710	snp	T	C	C:70 T:0
EA2454	983278	snp	T	G	G:26 T:0
EA2454	983325	complex	TCG	ACC	ACC:31 TCG:0
EA2454	983359	complex	GCATA	ACACT	ACACT:30 GCATA:0
EA2454	983371	snp	G	A	A:38 G:0
EA2454	983404	snp	T	C	C:44 T:0
EA2454	983426	snp	G	A	A:45 G:0
EA2454	983446	snp	A	C	C:44 A:0
EA2454	983525	snp	A	G	G:52 A:0
EA2454	983570	complex	CTGC	TTGT	TTGT:49 CTGC:0
EA2454	983840	snp	A	G	G:46 A:0
EA2454	983889	snp	G	A	A:41 G:0
EA2454	983901	snp	C	T	T:43 C:0
EA2454	983906	complex	TGGT	CGGC	CGGC:42 TGGT:0
EA2454	984038	snp	A	G	G:44 A:0
EA2454	984050	snp	G	T	T:45 G:0
EA2454	984129	complex	ACTCTGG	GCCCTGT	GCCCTGT:31 ACTCTGG:0
EA2454	984294	snp	G	A	A:46 G:0
EA2454	984305	complex	AGCA	TGCT	TGCT:41 AGCA:0
EA2454	984317	snp	A	G	G:42 A:0
EA2454	984344	snp	C	T	T:47 C:0
EA2454	984401	snp	A	T	T:31 A:0
EA2454	984422	complex	GCGCAAC	ACGCGAT	ACGCGAT:20 GCGCAAC:0
EA2454	984434	snp	G	A	A:19 G:0
EA2454	984440	snp	T	C	C:18 T:0
EA2454	989594	snp	T	A	A:21 T:0
EA2454	989710	complex	TGTC	CGTT	CGTT:37 TGTC:0
EA2454	989731	snp	G	A	A:44 G:0
EA2454	989794	complex	CATCA	TATCG	TATCG:49 CATCA:0
EA2454	989831	snp	G	A	A:45 G:0
EA2454	989932	snp	A	G	G:42 A:0
EA2454	989938	complex	AGAC	GGAT	GGAT:40 AGAC:0
EA2454	989989	snp	A	G	G:47 A:0
EA2454	990058	complex	GC	TT	TT:33 GC:0
EA2454	990100	snp	A	T	T:33 A:0
EA2454	990118	snp	T	A	A:29 T:0
EA2454	990124	snp	T	C	C:32 T:0
EA2454	990230	snp	T	C	C:51 T:0
EA2454	990400	snp	A	G	G:35 A:0
EA2454	990463	snp	A	G	G:36 A:0
EA2454	990562	snp	T	C	C:35 T:0
EA2454	990572	snp	G	A	A:32 G:0
EA2454	990627	snp	C	T	T:36 C:0
EA2454	990637	snp	G	A	A:35 G:0
EA2454	990685	snp	A	G	G:40 A:0
EA2454	990691	snp	G	T	T:42 G:0
EA2454	990697	snp	C	G	G:49 C:0
EA2454	990727	complex	GCGT	ACGG	ACGG:50 GCGT:0
EA2454	990742	snp	C	T	T:51 C:0
EA2454	990757	snp	A	G	G:53 A:0
EA2454	990763	complex	GCCA	ACCG	ACCG:50 GCCA:0
EA2454	990872	complex	TTT	GTA	GTA:31 TTT:0
EA2454	990880	complex	CAGTA	AAGCG	AAGCG:30 CAGTA:0
EA2454	990904	complex	CCCCAC	TGCCGT	TGCCGT:32 CCCCAC:0
EA2454	990925	snp	A	G	G:32 A:0
EA2454	990931	snp	A	G	G:30 A:0
EA2454	990970	snp	C	T	T:26 C:0
EA2454	991009	snp	T	G	G:37 T:0
EA2454	991060	snp	G	A	A:55 G:0
EA2454	991066	snp	A	G	G:55 A:0
EA2454	991169	snp	C	T	T:64 C:0
EA2454	991239	snp	A	C	C:54 A:0
EA2454	991259	mnp	CA	TC	TC:55 CA:0
EA2454	991311	snp	A	G	G:52 A:0
EA2454	991365	snp	A	G	G:57 A:0
EA2454	991386	snp	G	A	A:58 G:0
EA2454	991404	snp	A	G	G:58 A:0
EA2454	991428	snp	G	A	A:53 G:0
EA2454	991560	snp	C	T	T:51 C:0
EA2454	991590	snp	A	G	G:53 A:0
EA2454	991596	snp	G	A	A:55 G:0
EA2454	991611	snp	G	A	A:52 G:0
EA2454	991638	snp	C	A	A:50 C:0
EA2454	991686	snp	G	A	A:50 G:0
EA2454	991800	snp	C	T	T:50 C:0
EA2454	991983	snp	A	G	G:62 A:0
EA2454	992001	snp	T	C	C:60 T:0
EA2454	992040	snp	A	C	C:50 A:0
EA2454	992055	snp	G	A	A:45 G:0
EA2454	992231	snp	G	A	A:72 G:0
EA2454	992244	snp	C	T	T:67 C:0
EA2454	992692	snp	G	A	A:44 G:0
EA2454	992921	snp	C	T	T:30 C:0
EA2454	993116	snp	C	T	T:44 C:0
EA2454	994056	snp	A	G	G:49 A:0
EA2454	994074	snp	T	C	C:46 T:0
EA2454	994116	snp	G	A	A:43 G:0
EA2454	994311	snp	T	C	C:52 T:0
EA2454	994443	snp	A	G	G:41 A:0
EA2454	994617	snp	C	T	T:45 C:1
EA2454	994626	snp	G	T	T:47 G:0
EA2454	994884	snp	T	C	C:41 T:0
EA2454	994890	snp	T	C	C:44 T:0
EA2454	994998	snp	A	G	G:58 A:0
EA2454	995076	snp	A	G	G:47 A:0
EA2454	995109	snp	G	A	A:51 G:0
EA2454	995121	snp	T	A	A:51 T:0
EA2454	995151	complex	AGCC	CGCA	CGCA:46 AGCC:0
EA2454	995193	snp	A	G	G:54 A:0
EA2454	995575	snp	T	A	A:61 T:0
EA2454	996391	snp	G	C	C:39 G:0
EA2454	996427	snp	C	G	G:35 C:0
EA2454	996451	snp	C	G	G:39 C:0
EA2454	996466	snp	A	G	G:46 A:0
EA2454	996547	snp	T	C	C:62 T:0
EA2454	996653	snp	G	A	A:51 G:0
EA2454	996667	snp	T	C	C:47 T:0
EA2454	996676	snp	C	T	T:42 C:0
EA2454	996712	complex	TGGC	CGGT	CGGT:34 TGGC:0
EA2454	996751	snp	T	C	C:37 T:0
EA2454	996775	snp	G	A	A:37 G:0
EA2454	996850	snp	A	G	G:38 A:0
EA2454	996856	snp	T	C	C:37 T:0
EA2454	996886	snp	G	C	C:36 G:0
EA2454	996901	snp	G	C	C:32 G:0
EA2454	997000	snp	A	G	G:42 A:0
EA2454	997012	snp	G	A	A:41 G:0
EA2454	997024	snp	C	G	G:43 C:0
EA2454	997036	snp	T	C	C:42 T:0
EA2454	997180	complex	CGTG	TGTA	TGTA:51 CGTG:0
EA2454	997189	snp	A	G	G:55 A:0
EA2454	997480	snp	A	T	T:45 A:0
EA2454	997504	snp	A	C	C:37 A:0
EA2454	997510	snp	C	T	T:38 C:0
EA2454	997540	complex	TGGT	CGGC	CGGC:46 TGGT:0
EA2454	997555	snp	T	C	C:52 T:0
EA2454	997639	snp	C	T	T:36 C:0
EA2454	997654	snp	C	T	T:35 C:0
EA2454	997681	snp	G	A	A:31 G:0
EA2454	997708	snp	T	C	C:30 T:0
EA2454	997744	snp	G	A	A:35 G:0
EA2454	997756	snp	G	A	A:34 G:0
EA2454	997819	snp	G	A	A:26 G:0
EA2454	997834	snp	T	C	C:29 T:0
EA2454	997879	snp	A	G	G:27 A:0
EA2454	997918	snp	A	G	G:31 A:0
EA2454	997930	snp	C	T	T:32 C:0
EA2454	997987	snp	G	A	A:29 G:0
EA2454	998008	snp	C	T	T:34 C:0
EA2454	998014	complex	TGGT	CGGC	CGGC:32 TGGT:0
EA2454	998026	snp	G	A	A:33 G:0
EA2454	998158	snp	C	T	T:43 C:0
EA2454	998200	snp	A	C	C:45 A:0
EA2454	998404	snp	T	C	C:47 T:0
EA2454	998413	snp	G	A	A:44 G:0
EA2454	998510	snp	A	G	G:36 A:0
EA2454	998626	snp	T	C	C:50 T:0
EA2454	998880	complex	AACACA	CACC	CACC:58 AACACA:0
EA2454	998895	snp	C	A	A:68 C:0
EA2454	998908	snp	C	A	A:74 C:0
EA2454	999123	snp	C	T	T:88 C:0
EA2454	999159	snp	T	A	A:91 T:0
EA2454	999352	snp	G	A	A:99 G:0
EA2454	999750	snp	G	A	A:104 G:0
EA2454	999759	snp	A	G	G:108 A:0
EA2454	999829	snp	C	T	T:94 C:0
EA2454	999857	snp	A	T	T:118 A:0
EA2454	999924	snp	T	C	C:130 T:0
EA2454	1000250	snp	T	C	C:78 T:0
EA2454	1000365	snp	C	T	T:78 C:0
EA2454	1000385	snp	T	C	C:89 T:0
EA2454	1000493	snp	G	T	T:62 G:0
EA2454	1000664	snp	G	A	A:50 G:0
EA2454	1000840	snp	A	G	G:66 A:0
EA2454	1000929	snp	G	A	A:52 G:0
EA2454	1001211	snp	G	A	A:57 G:0
EA2454	1001318	snp	A	T	T:69 A:0
EA2454	1001337	snp	G	A	A:81 G:0
EA2454	1001375	snp	C	G	G:75 C:0
EA2454	1001516	snp	C	T	T:50 C:0
EA2454	1001557	snp	C	T	T:55 C:0
EA2454	1001617	snp	C	T	T:63 C:0
EA2454	1001665	snp	C	T	T:65 C:1
EA2454	1001689	complex	TAGT	CAGC	CAGC:59 TAGT:0
EA2454	1001899	snp	T	C	C:47 T:0
EA2454	1001941	snp	A	G	G:44 A:0
EA2454	1001956	complex	CAAT	AAAC	AAAC:44 CAAT:0
EA2454	1002058	snp	T	C	C:54 T:0
EA2454	1002091	snp	A	G	G:54 A:0
EA2454	1002109	snp	G	A	A:57 G:0
EA2454	1002145	snp	G	A	A:62 G:0
EA2454	1002160	snp	G	T	T:59 G:0
EA2454	1002181	snp	A	G	G:52 A:0
EA2454	1002196	snp	A	G	G:58 A:0
EA2454	1002217	complex	CAG	TAA	TAA:50 CAG:0
EA2454	1002277	snp	T	G	G:36 T:0
EA2454	1002406	snp	C	T	T:59 C:0
EA2454	1002450	complex	TAAATAATTAATATCT	AATTGATATCG	AATTGATATCG:28 TAAATAATTAATATCT:0
EA2454	1002492	complex	AA	CT	CT:34 AA:0
EA2454	1002518	complex	CAGTG	TAGTA	TAGTA:31 CAGTG:0
EA2454	1002529	complex	TTTTTATTCCAG	CTATTCTACCAC	CTATTCTACCAC:20 TTTTTATTCCAG:0
EA2454	1002556	snp	G	A	A:18 G:0
EA2454	1002569	snp	T	C	C:14 T:0
EA2454	1003091	snp	T	C	C:11 T:0
EA2454	1003104	complex	TACG	CACA	CACA:17 TACG:0
EA2454	1003118	snp	G	A	A:19 G:0
EA2454	1003129	snp	G	T	T:23 G:0
EA2454	1003138	snp	T	C	C:26 T:0
EA2454	1003170	snp	C	A	A:40 C:0
EA2454	1003180	snp	T	C	C:45 T:0
EA2454	1003192	snp	T	A	A:47 T:0
EA2454	1003200	complex	CAATTC	GGATTT	GGATTT:39 CAATTC:0
EA2454	1003216	complex	ACCAAC	TCCAGA	TCCAGA:34 ACCAAC:0
EA2454	1003228	complex	TGGATG	CCGATA	CCGATA:32 TGGATG:0
EA2454	1003245	snp	A	G	G:29 A:0
EA2454	1003251	complex	CTTT	TTTC	TTTC:26 CTTT:0
EA2454	1003269	snp	T	A	A:19 T:0
EA2454	1003425	complex	TACATG	CATATA	CATATA:13 TACATG:0
EA2454	1003452	snp	G	T	T:43 G:0
EA2454	1003464	snp	A	T	T:49 A:0
EA2454	1003476	snp	A	G	G:49 A:0
EA2454	1003484	snp	T	G	G:49 T:0
EA2454	1003521	complex	ACC	GTT	GTT:42 ACC:0
EA2454	1003542	complex	ATT	GTA	GTA:34 ATT:0
EA2454	1003554	complex	CTGCGAG	ATGAGGA	ATGAGGA:12 CTGCGAG:0
EA2454	1003755	snp	C	A	A:24 C:0
EA2454	1003796	snp	C	T	T:50 C:0
EA2454	1003824	snp	A	C	C:67 A:0
EA2454	1003842	complex	AGACTTC	GGATTTT	GGATTTT:63 AGACTTC:0
EA2454	1003858	snp	C	G	G:78 C:0
EA2454	1003877	snp	A	G	G:72 A:0
EA2454	1003882	complex	TT	GA	GA:65 TT:0
EA2454	1003894	snp	A	G	G:66 A:0
EA2454	1003917	complex	TTTAGTAG	ATTATTAA	ATTATTAA:48 TTTAGTAG:0
EA2454	1003950	complex	CTT	TTC	TTC:48 CTT:0
EA2454	1003995	complex	GTA	AAC	AAC:35 GTA:0
EA2454	1004003	snp	T	G	G:36 T:1
EA2454	1004008	snp	T	A	A:37 T:0
EA2454	1004014	snp	T	C	C:37 T:0
EA2454	1004023	complex	GTATCTTTAGA	TTATTTTTGAT	TTATTTTTGAT:32 GTATCTTTAGA:0
EA2454	1004043	snp	A	G	G:36 A:0
EA2454	1004121	complex	CTTTG	TTTTA	TTTTA:11 CTTTG:0
EA2454	1004163	complex	GCTTCTGCTATT	TCTTGTGTTATC	TCTTGTGTTATC:10 GCTTCTGCTATT:0
EA2454	1004182	complex	CCGG	TCGA	TCGA:17 CCGG:0
EA2454	1004201	snp	C	T	T:28 C:0
EA2454	1004211	complex	CACATA	AACACG	AACACG:31 CACATA:0
EA2454	1004225	complex	CTAAGG	TTAAAA	TTAAAA:31 CTAAGG:0
EA2454	1004236	snp	T	C	C:41 T:0
EA2454	1004308	snp	A	G	G:65 A:0
EA2454	1004348	snp	T	C	C:70 T:0
EA2454	1004471	snp	T	C	C:56 T:0
EA2454	1004521	snp	C	T	T:64 C:0
EA2454	1004537	snp	T	A	A:67 T:0
EA2454	1004690	snp	G	A	A:74 G:0
EA2454	1004774	snp	G	A	A:78 G:0
EA2454	1004790	snp	A	G	G:77 A:0
EA2454	1004801	snp	T	C	C:75 T:1
EA2454	1004904	snp	C	T	T:75 C:0
EA2454	1004946	snp	T	C	C:67 T:0
EA2454	1004951	snp	C	T	T:68 C:0
EA2454	1005037	snp	T	G	G:58 T:0
EA2454	1005062	snp	G	T	T:65 G:0
EA2454	1005089	snp	G	T	T:67 G:0
EA2454	1005131	snp	G	C	C:75 G:0
EA2454	1005199	snp	C	T	T:70 C:0
EA2454	1005243	snp	T	A	A:82 T:0
EA2454	1005263	snp	G	A	A:76 G:0
EA2454	1005296	snp	G	A	A:70 G:0
EA2454	1005336	snp	G	A	A:78 G:0
EA2454	1005347	snp	C	G	G:81 C:0
EA2454	1005353	snp	C	T	T:78 C:0
EA2454	1005404	snp	A	G	G:63 A:0
EA2454	1005437	complex	CTTAT	TTTAC	TTTAC:65 CTTAT:0
EA2454	1005567	snp	A	G	G:73 A:0
EA2454	1005624	mnp	TT	CC	CC:74 TT:0
EA2454	1005737	snp	A	T	T:73 A:0
EA2454	1005819	snp	G	A	A:65 G:0
EA2454	1005884	snp	T	C	C:74 T:0
EA2454	1005956	snp	T	G	G:63 T:0
EA2454	1006016	complex	ATAC	TTAT	TTAT:45 ATAC:0
EA2454	1006133	snp	T	C	C:52 T:0
EA2454	1006145	snp	A	G	G:49 A:0
EA2454	1006199	snp	C	T	T:58 C:0
EA2454	1006272	snp	G	A	A:56 G:0
EA2454	1006277	snp	T	G	G:58 T:0
EA2454	1006283	snp	C	T	T:58 C:0
EA2454	1006296	snp	G	A	A:62 G:0
EA2454	1006430	mnp	TC	AT	AT:59 TC:1
EA2454	1006482	snp	T	C	C:64 T:0
EA2454	1006489	complex	TAT	GAG	GAG:60 TAT:0
EA2454	1006575	snp	G	A	A:64 G:0
EA2454	1006584	snp	A	G	G:64 A:0
EA2454	1006770	snp	T	C	C:77 T:0
EA2454	1006788	snp	A	C	C:60 A:0
EA2454	1006812	snp	G	A	A:66 G:0
EA2454	1006833	snp	G	C	C:70 G:0
EA2454	1006847	snp	C	A	A:68 C:0
EA2454	1006863	snp	C	T	T:72 C:0
EA2454	1006922	snp	T	A	A:68 T:0
EA2454	1006936	snp	C	T	T:70 C:0
EA2454	1006947	snp	T	C	C:70 T:0
EA2454	1006994	snp	C	T	T:64 C:0
EA2454	1007029	snp	A	G	G:68 A:0
EA2454	1007067	complex	C	TG	TG:64 C:0
EA2454	1007078	complex	GT	TC	TC:66 GT:0
EA2454	1007097	mnp	TT	CC	CC:70 TT:0
EA2454	1007107	snp	A	T	T:67 A:0
EA2454	1007373	snp	A	C	C:38 A:0
EA2454	1007487	snp	C	T	T:35 C:0
EA2454	1007529	complex	TTCC	ATCT	ATCT:35 TTCC:0
EA2454	1007819	snp	C	T	T:57 C:0
EA2454	1007872	snp	C	T	T:82 C:0
EA2454	1007952	snp	T	C	C:83 T:0
EA2454	1007970	snp	C	A	A:80 C:0
EA2454	1008024	snp	T	C	C:77 T:0
EA2454	1008048	snp	C	T	T:69 C:0
EA2454	1008057	snp	A	G	G:70 A:0
EA2454	1008063	snp	A	G	G:68 A:0
EA2454	1008219	snp	T	C	C:65 T:0
EA2454	1008249	snp	G	A	A:70 G:0
EA2454	1008423	snp	T	C	C:61 T:0
EA2454	1008591	snp	G	A	A:53 G:0
EA2454	1008918	complex	TCAA	CCAG	CCAG:48 TCAA:0
EA2454	1009017	complex	TGGT	AGGC	AGGC:60 TGGT:0
EA2454	1009047	snp	T	C	C:51 T:0
EA2454	1009059	snp	A	G	G:53 A:0
EA2454	1009086	complex	AAACGCCACT	TAATGCTACC	TAATGCTACC:40 AAACGCCACT:0
EA2454	1009122	snp	C	T	T:53 C:0
EA2454	1009179	snp	G	A	A:62 G:0
EA2454	1009381	snp	A	G	G:65 A:0
EA2454	1009529	complex	TAAT	CAGC	CAGC:44 TAAT:0
EA2454	1009649	snp	A	G	G:44 A:0
EA2454	1009733	snp	A	G	G:53 A:0
EA2454	1009832	snp	A	G	G:59 A:1
EA2454	1009904	snp	G	A	A:70 G:0
EA2454	1009970	snp	T	C	C:54 T:0
EA2454	1010000	snp	A	G	G:58 A:0
EA2454	1010048	snp	T	A	A:48 T:0
EA2454	1010054	snp	C	T	T:49 C:0
EA2454	1010222	snp	A	G	G:89 A:0
EA2454	1010230	snp	A	G	G:82 A:0
EA2454	1010267	complex	GCGG	ACGA	ACGA:73 GCGG:0
EA2454	1010309	snp	A	G	G:54 A:0
EA2454	1010462	snp	G	A	A:56 G:0
EA2454	1010594	snp	G	A	A:62 G:1
EA2454	1010870	snp	A	G	G:66 A:0
EA2454	1010888	snp	G	A	A:77 G:0
EA2454	1010972	snp	A	G	G:90 A:0
EA2454	1010978	snp	C	T	T:93 C:0
EA2454	1010990	snp	G	A	A:90 G:0
EA2454	1011035	snp	G	A	A:72 G:0
EA2454	1011647	snp	T	A	A:45 T:1
EA2454	1011722	snp	T	A	A:54 T:0
EA2454	1011815	snp	G	T	T:52 G:0
EA2454	1012482	snp	G	A	A:80 G:0
EA2454	1012525	snp	G	A	A:48 G:0
EA2454	1012705	snp	C	T	T:78 C:0
EA2454	1012876	snp	C	T	T:64 C:0
EA2454	1012885	snp	C	A	A:68 C:0
EA2454	1012934	snp	G	A	A:71 G:0
EA2454	1013020	snp	C	T	T:63 C:0
EA2454	1013065	snp	G	T	T:59 G:0
EA2454	1013137	snp	C	G	G:61 C:0
EA2454	1013167	snp	A	G	G:57 A:0
EA2454	1013194	complex	CGCC	TGCG	TGCG:56 CGCC:0
EA2454	1013293	complex	GCCA	ACCG	ACCG:54 GCCA:0
EA2454	1013311	snp	T	C	C:64 T:0
EA2454	1013338	snp	T	C	C:65 T:0
EA2454	1013374	snp	G	A	A:64 G:0
EA2454	1013383	snp	G	A	A:57 G:0
EA2454	1013633	snp	A	G	G:47 A:0
EA2454	1013771	snp	C	T	T:64 C:0
EA2454	1013795	snp	G	A	A:71 G:0
EA2454	1013910	snp	C	T	T:40 C:0
EA2454	1013927	snp	T	C	C:41 T:0
EA2454	1013990	snp	A	G	G:49 A:0
EA2454	1014080	snp	G	T	T:58 G:0
EA2454	1014125	snp	C	T	T:56 C:1
EA2454	1014236	snp	G	A	A:44 G:0
EA2454	1014275	snp	G	A	A:36 G:0
EA2454	1014281	snp	A	G	G:38 A:0
EA2454	1014320	snp	A	G	G:38 A:0
EA2454	1014344	snp	G	A	A:36 G:0
EA2454	1014422	snp	T	C	C:52 T:0
EA2454	1014473	snp	C	T	T:46 C:0
EA2454	1014500	snp	C	G	G:43 C:0
EA2454	1014518	snp	G	C	C:45 G:0
EA2454	1014533	snp	G	C	C:41 G:0
EA2454	1014572	snp	T	C	C:40 T:0
EA2454	1014662	snp	A	G	G:46 A:0
EA2454	1014683	complex	GGCG	CGCT	CGCT:49 GGCG:0
EA2454	1014824	snp	C	T	T:68 C:0
EA2454	1014898	snp	T	C	C:62 T:0
EA2454	1014971	snp	T	C	C:75 T:0
EA2454	1015006	snp	C	T	T:68 C:0
EA2454	1015113	snp	T	C	C:66 T:0
EA2454	1015148	snp	A	G	G:78 A:0
EA2454	1015257	snp	C	T	T:73 C:0
EA2454	1015329	snp	C	T	T:66 C:0
EA2454	1015530	snp	A	G	G:46 A:0
EA2454	1015610	snp	C	T	T:46 C:0
EA2454	1015656	snp	G	A	A:41 G:0
EA2454	1015668	snp	A	T	T:42 A:0
EA2454	1015728	snp	A	G	G:48 A:0
EA2454	1015884	complex	AGGC	CGGT	CGGT:48 AGGC:0
EA2454	1016017	snp	G	A	A:62 G:0
EA2454	1016175	snp	A	G	G:59 A:0
EA2454	1016214	snp	G	T	T:37 G:0
EA2454	1016337	snp	T	G	G:44 T:0
EA2454	1016385	snp	T	G	G:62 T:0
EA2454	1016394	snp	G	A	A:70 G:0
EA2454	1016440	complex	GTT	ATC	ATC:60 GTT:0
EA2454	1016561	snp	T	C	C:62 T:0
EA2454	1016852	snp	C	A	A:77 C:0
EA2454	1017030	snp	T	C	C:66 T:0
EA2454	1017255	snp	T	C	C:54 T:0
EA2454	1017279	snp	T	C	C:60 T:0
EA2454	1017291	snp	A	G	G:61 A:0
EA2454	1017315	snp	T	C	C:61 T:0
EA2454	1017579	snp	G	A	A:48 G:0
EA2454	1017585	snp	C	T	T:48 C:0
EA2454	1017645	snp	G	A	A:51 G:0
EA2454	1017684	snp	T	A	A:48 T:0
EA2454	1017696	snp	T	G	G:47 T:0
EA2454	1017723	snp	C	T	T:50 C:0
EA2454	1017830	snp	A	G	G:67 A:0
EA2454	1017843	snp	C	A	A:66 C:0
EA2454	1017924	snp	C	T	T:81 C:0
EA2454	1017939	snp	G	A	A:72 G:0
EA2454	1017954	snp	C	T	T:66 C:0
EA2454	1017984	snp	G	A	A:68 G:0
EA2454	1018029	snp	C	T	T:63 C:0
EA2454	1018089	snp	C	T	T:71 C:0
EA2454	1018155	snp	A	G	G:55 A:0
EA2454	1018425	snp	C	G	G:53 C:0
EA2454	1018458	snp	C	T	T:47 C:0
EA2454	1018617	snp	T	C	C:48 T:0
EA2454	1018635	snp	C	G	G:50 C:0
EA2454	1018815	snp	C	T	T:48 C:0
EA2454	1018935	snp	G	A	A:63 G:0
EA2454	1019229	snp	A	C	C:57 A:0
EA2454	1019284	complex	TTGC	CGGCTG	CGGCTG:61 TTGC:0
EA2454	1019343	snp	T	C	C:62 T:0
EA2454	1019503	snp	C	T	T:58 C:0
EA2454	1019578	snp	T	G	G:44 T:0
EA2454	1019642	snp	C	A	A:53 C:0
EA2454	1019667	snp	G	A	A:53 G:0
EA2454	1019707	snp	A	T	T:49 A:0
EA2454	1019749	snp	G	A	A:46 G:0
EA2454	1019968	snp	A	T	T:49 A:0
EA2454	1019995	snp	G	A	A:42 G:0
EA2454	1020007	snp	G	A	A:44 G:0
EA2454	1020019	snp	G	A	A:39 G:0
EA2454	1020046	complex	TGGC	CGGT	CGGT:33 TGGC:0
EA2454	1020055	complex	TC	AT	AT:27 TC:0
EA2454	1020061	snp	C	G	G:27 C:0
EA2454	1020097	snp	C	T	T:37 C:0
EA2454	1020103	snp	A	G	G:36 A:0
EA2454	1020109	complex	TTTG	CTTC	CTTC:40 TTTG:0
EA2454	1020167	snp	T	G	G:55 T:0
EA2454	1020265	snp	T	A	A:11 T:0
EA2454	1020460	snp	T	C	C:14 T:0
EA2454	1020589	snp	C	A	A:61 C:0
EA2454	1020610	complex	ATTC	GTTT	GTTT:55 ATTC:0
EA2454	1020631	snp	T	C	C:39 T:0
EA2454	1020658	snp	G	T	T:40 G:0
EA2454	1020681	complex	AT	GC	GC:36 AT:0
EA2454	1020721	complex	CTGC	TTGT	TTGT:40 CTGC:0
EA2454	1020736	snp	A	C	C:49 A:0
EA2454	1020802	snp	C	T	T:40 C:0
EA2454	1020811	snp	G	A	A:42 G:0
EA2454	1020889	snp	G	A	A:43 G:0
EA2454	1020901	snp	C	T	T:44 C:0
EA2454	1020997	snp	A	G	G:56 A:0
EA2454	1021005	snp	A	C	C:57 A:0
EA2454	1021072	snp	T	C	C:52 T:0
EA2454	1021108	snp	A	G	G:52 A:0
EA2454	1021132	snp	A	G	G:41 A:0
EA2454	1021141	snp	G	A	A:39 G:0
EA2454	1021255	snp	T	A	A:60 T:0
EA2454	1021345	snp	G	A	A:51 G:0
EA2454	1021360	snp	C	T	T:46 C:0
EA2454	1021366	snp	C	T	T:42 C:1
EA2454	1021432	snp	G	A	A:57 G:0
EA2454	1021441	snp	T	C	C:52 T:0
EA2454	1021447	snp	G	C	C:53 G:0
EA2454	1021531	complex	AGTA	GGTG	GGTG:53 AGTA:0
EA2454	1022304	snp	G	A	A:46 G:0
EA2454	1022310	snp	A	G	G:48 A:0
EA2454	1022349	snp	A	T	T:61 A:0
EA2454	1022358	snp	C	T	T:58 C:0
EA2454	1022430	complex	GTTA	ACTG	ACTG:57 GTTA:0
EA2454	1022442	snp	C	T	T:53 C:0
EA2454	1022471	snp	A	T	T:46 A:0
EA2454	1022561	snp	A	G	G:29 A:0
EA2454	1022577	complex	AATG	CTACGCACA	CTACGCACA:22 AATG:0
EA2454	1022593	complex	AAGGC	GAGGT	GAGGT:36 AAGGC:0
EA2454	1022809	snp	C	T	T:45 C:0
EA2454	1022856	snp	A	G	G:42 A:0
EA2454	1022929	snp	A	G	G:48 A:0
EA2454	1022953	snp	C	A	A:48 C:1
EA2454	1023004	snp	G	T	T:58 G:0
EA2454	1023040	snp	A	G	G:51 A:0
EA2454	1023046	snp	A	G	G:52 A:0
EA2454	1023109	snp	T	C	C:52 T:0
EA2454	1023193	snp	A	G	G:44 A:0
EA2454	1023205	snp	A	G	G:44 A:0
EA2454	1023211	complex	GTCA	ATCG	ATCG:43 GTCA:0
EA2454	1023220	snp	T	C	C:49 T:0
EA2454	1023244	snp	C	T	T:53 C:0
EA2454	1023466	snp	A	G	G:36 A:0
EA2454	1023519	snp	C	T	T:42 C:0
EA2454	1023571	snp	T	C	C:50 T:0
EA2454	1023577	snp	G	T	T:52 G:0
EA2454	1023592	snp	A	G	G:55 A:0
EA2454	1023640	snp	G	A	A:48 G:0
EA2454	1023832	snp	C	T	T:55 C:0
EA2454	1023943	snp	T	C	C:65 T:0
EA2454	1024055	snp	T	C	C:75 T:0
EA2454	1024090	complex	GA	CC	CC:63 GA:0
EA2454	1024112	snp	G	A	A:66 G:0
EA2454	1024339	snp	G	A	A:64 G:0
EA2454	1024456	snp	C	T	T:62 C:0
EA2454	1024483	snp	C	A	A:62 C:0
EA2454	1024549	snp	A	C	C:69 A:0
EA2454	1024837	snp	G	A	A:69 G:0
EA2454	1024852	snp	T	G	G:71 T:0
EA2454	1024954	snp	T	C	C:70 T:0
EA2454	1024966	complex	ACTG	GCTT	GCTT:65 ACTG:0
EA2454	1025406	snp	A	G	G:43 A:0
EA2454	1025422	snp	C	T	T:51 C:0
EA2454	1025440	snp	G	A	A:45 G:0
EA2454	1025581	snp	T	C	C:58 T:0
EA2454	1025590	complex	CGCA	TGCG	TGCG:58 CGCA:0
EA2454	1025599	snp	C	G	G:61 C:0
EA2454	1025611	snp	C	T	T:61 C:0
EA2454	1025626	snp	G	A	A:56 G:0
EA2454	1025647	complex	TATG	AATA	AATA:51 TATG:0
EA2454	1025670	snp	G	A	A:48 G:1
EA2454	1025761	snp	G	A	A:50 G:0
EA2454	1025791	snp	G	A	A:64 G:0
EA2454	1025809	snp	T	C	C:58 T:0
EA2454	1025856	snp	G	A	A:60 G:0
EA2454	1025875	snp	A	G	G:52 A:0
EA2454	1025890	snp	T	C	C:53 T:0
EA2454	1025899	snp	C	T	T:56 C:0
EA2454	1025908	snp	T	C	C:53 T:0
EA2454	1025914	complex	CAA	TAG	TAG:44 CAA:0
EA2454	1025962	snp	G	A	A:49 G:0
EA2454	1026329	snp	A	C	C:28 A:0
EA2454	1026335	complex	TGAG	CGAA	CGAA:24 TGAG:0
EA2454	1026344	snp	C	T	T:24 C:0
EA2454	1026353	snp	G	A	A:26 G:0
EA2454	1026374	complex	ACCA	GCCG	GCCG:23 ACCA:0
EA2454	1026383	snp	C	A	A:25 C:0
EA2454	1026401	snp	A	G	G:23 A:0
EA2454	1026419	snp	T	C	C:29 T:0
EA2454	1026428	snp	G	A	A:28 G:0
EA2454	1026473	snp	G	A	A:28 G:0
EA2454	1026485	snp	T	C	C:33 T:0
EA2454	1026506	snp	G	A	A:42 G:0
EA2454	1026521	complex	TCGT	CCGC	CCGC:38 TCGT:0
EA2454	1026530	complex	AACT	TACC	TACC:37 AACT:0
EA2454	1026569	snp	A	G	G:33 A:0
EA2454	1026575	snp	A	G	G:35 A:0
EA2454	1026617	snp	G	C	C:36 G:0
EA2454	1026622	snp	G	T	T:36 G:0
EA2454	1026638	complex	AATT	GATA	GATA:32 AATT:0
EA2454	1026647	snp	T	C	C:40 T:0
EA2454	1026674	snp	G	A	A:50 G:0
EA2454	1026680	snp	G	A	A:51 G:0
EA2454	1026770	snp	A	G	G:40 A:0
EA2454	1026776	snp	G	A	A:36 G:0
EA2454	1026839	complex	GGTGT	AGTGC	AGTGC:33 GGTGT:0
EA2454	1026932	snp	T	C	C:40 T:0
EA2454	1026953	complex	GGTG	TGTT	TGTT:38 GGTG:0
EA2454	1026974	complex	GCCAATC	TCCGATA	TCCGATA:34 GCCAATC:0
EA2454	1026985	complex	GTAA	ACAG	ACAG:34 GTAA:0
EA2454	1026998	complex	AGCT	GGCC	GGCC:41 AGCT:0
EA2454	1027034	snp	C	T	T:43 C:0
EA2454	1027049	snp	A	G	G:46 A:0
EA2454	1027143	snp	C	A	A:26 C:0
EA2454	1027293	snp	A	G	G:40 A:0
EA2454	1027311	snp	C	T	T:38 C:0
EA2454	1027413	snp	G	A	A:37 G:0
EA2454	1027470	snp	T	C	C:45 T:0
EA2454	1027491	snp	G	A	A:42 G:0
EA2454	1027578	snp	A	G	G:32 A:0
EA2454	1027590	snp	T	A	A:36 T:0
EA2454	1027647	snp	A	G	G:32 A:0
EA2454	1027692	complex	GATA	AATG	AATG:35 GATA:0
EA2454	1027704	complex	TGAC	CGAA	CGAA:44 TGAC:0
EA2454	1027729	snp	G	T	T:50 G:1
EA2454	1027755	snp	A	C	C:44 A:0
EA2454	1027824	snp	G	T	T:38 G:0
EA2454	1027908	snp	T	G	G:36 T:0
EA2454	1028015	snp	G	A	A:44 G:0
EA2454	1028106	snp	G	A	A:52 G:0
EA2454	1028127	snp	A	G	G:52 A:0
EA2454	1028146	snp	C	T	T:47 C:0
EA2454	1028160	snp	T	C	C:46 T:0
EA2454	1028238	snp	G	A	A:37 G:0
EA2454	1028274	snp	A	G	G:39 A:0
EA2454	1028283	snp	A	G	G:37 A:0
EA2454	1028346	snp	A	G	G:46 A:0
EA2454	1028358	snp	C	G	G:48 C:0
EA2454	1028364	snp	A	G	G:49 A:0
EA2454	1028379	snp	A	G	G:55 A:0
EA2454	1028385	snp	G	A	A:63 G:0
EA2454	1028424	snp	G	T	T:67 G:0
EA2454	1028436	snp	A	G	G:67 A:0
EA2454	1028442	snp	T	G	G:68 T:0
EA2454	1028448	snp	G	A	A:68 G:0
EA2454	1028529	snp	A	T	T:53 A:0
EA2454	1028535	snp	G	A	A:47 G:0
EA2454	1028556	snp	C	T	T:40 C:0
EA2454	1028565	snp	C	T	T:39 C:0
EA2454	1028601	snp	A	G	G:40 A:0
EA2454	1028679	snp	T	C	C:48 T:0
EA2454	1028693	mnp	CG	TA	TA:46 CG:0
EA2454	1028774	snp	T	C	C:74 T:0
EA2454	1028781	snp	T	C	C:78 T:0
EA2454	1028896	snp	G	A	A:60 G:0
EA2454	1028914	complex	TAA	CAG	CAG:59 TAA:0
EA2454	1028965	snp	A	G	G:52 A:0
EA2454	1028971	snp	A	G	G:51 A:0
EA2454	1028977	complex	TCCC	ACCT	ACCT:48 TCCC:0
EA2454	1028986	snp	G	A	A:56 G:0
EA2454	1029004	snp	G	A	A:60 G:0
EA2454	1029025	snp	C	A	A:63 C:0
EA2454	1029043	snp	G	A	A:75 G:0
EA2454	1029052	snp	A	G	G:72 A:0
EA2454	1029058	complex	AATG	GATA	GATA:68 AATG:0
EA2454	1029067	complex	CGTGAGG	TGTCAGA	TGTCAGA:65 CGTGAGG:0
EA2454	1029085	snp	C	T	T:72 C:0
EA2454	1029325	snp	G	A	A:69 G:0
EA2454	1029388	snp	G	A	A:72 G:0
EA2454	1029397	snp	A	G	G:68 A:0
EA2454	1029406	snp	G	A	A:71 G:0
EA2454	1029421	snp	A	G	G:69 A:0
EA2454	1029460	snp	G	A	A:76 G:0
EA2454	1029526	snp	T	A	A:73 T:0
EA2454	1029532	snp	G	A	A:73 G:0
EA2454	1029568	complex	TGCA	CGCG	CGCG:61 TGCA:0
EA2454	1029670	snp	T	A	A:57 T:0
EA2454	1029694	snp	G	A	A:65 G:0
EA2454	1029816	snp	A	G	G:83 A:0
EA2454	1029901	snp	A	G	G:99 A:0
EA2454	1030004	complex	CTGGT	TTGGC	TTGGC:59 CTGGT:0
EA2454	1030266	snp	A	G	G:56 A:0
EA2454	1030314	snp	A	G	G:45 A:0
EA2454	1030443	snp	C	A	A:69 C:0
EA2454	1030611	snp	C	T	T:47 C:0
EA2454	1030626	snp	C	A	A:42 C:0
EA2454	1030645	snp	A	C	C:32 A:0
EA2454	1031488	snp	A	T	T:15 A:0
EA2454	1032037	snp	C	T	T:64 C:0
EA2454	1032370	snp	G	A	A:81 G:0
EA2454	1032916	snp	G	A	A:39 G:0
EA2454	1033048	snp	G	A	A:43 G:0
EA2454	1033258	snp	C	T	T:47 C:0
EA2454	1033280	snp	G	A	A:47 G:0
EA2454	1033357	snp	C	G	G:29 C:0
EA2454	1033426	snp	C	T	T:33 C:0
EA2454	1033434	snp	T	G	G:34 T:0
EA2454	1033441	snp	G	C	C:35 G:0
EA2454	1033480	complex	AGCC	GGCA	GGCA:36 AGCC:0
EA2454	1033570	snp	A	G	G:33 A:0
EA2454	1033731	snp	G	A	A:37 G:0
EA2454	1033741	snp	C	T	T:39 C:0
EA2454	1034035	snp	A	G	G:43 A:0
EA2454	1034080	snp	T	C	C:49 T:0
EA2454	1034095	snp	C	A	A:48 C:0
EA2454	1034218	snp	A	G	G:38 A:0
EA2454	1034269	snp	C	T	T:31 C:0
EA2454	1034274	snp	A	T	T:34 A:0
EA2454	1034282	snp	A	G	G:37 A:0
EA2454	1034379	snp	A	C	C:56 A:0
EA2454	1034713	snp	T	C	C:51 T:0
EA2454	1034746	complex	GCTG	ACTA	ACTA:59 GCTG:0
EA2454	1034755	snp	G	A	A:67 G:0
EA2454	1034761	snp	A	G	G:58 A:0
EA2454	1034815	complex	CTGGT	TTGAC	TTGAC:51 CTGGT:0
EA2454	1034889	snp	G	T	T:47 G:0
EA2454	1034956	complex	GAGT	AAGC	AAGC:48 GAGT:0
EA2454	1034964	snp	G	A	A:54 G:0
EA2454	1035037	snp	A	C	C:46 A:0
EA2454	1035058	snp	C	T	T:39 C:0
EA2454	1035073	snp	C	T	T:38 C:0
EA2454	1035106	snp	G	A	A:26 G:0
EA2454	1035130	snp	A	C	C:27 A:0
EA2454	1035169	snp	A	G	G:40 A:0
EA2454	1035193	snp	C	T	T:54 C:0
EA2454	1035211	snp	T	C	C:55 T:0
EA2454	1035217	snp	A	G	G:57 A:0
EA2454	1035226	snp	A	G	G:59 A:0
EA2454	1035232	snp	C	T	T:60 C:0
EA2454	1035241	complex	CGTC	TGTT	TGTT:59 CGTC:0
EA2454	1035259	snp	A	C	C:68 A:0
EA2454	1035316	snp	A	G	G:67 A:0
EA2454	1035328	snp	A	G	G:63 A:0
EA2454	1035337	snp	G	A	A:62 G:0
EA2454	1035346	snp	A	G	G:62 A:0
EA2454	1035364	complex	GTT	ATC	ATC:56 GTT:0
EA2454	1035379	complex	GCTA	ACTG	ACTG:57 GCTA:0
EA2454	1035427	snp	C	T	T:49 C:0
EA2454	1035439	snp	T	C	C:46 T:0
EA2454	1035507	snp	T	C	C:50 T:0
EA2454	1035753	snp	C	T	T:57 C:0
EA2454	1035975	snp	G	A	A:63 G:0
EA2454	1036254	snp	A	G	G:42 A:0
EA2454	1036473	snp	A	G	G:58 A:0
EA2454	1036515	snp	C	T	T:46 C:0
EA2454	1036707	snp	T	C	C:33 T:0
EA2454	1036712	snp	A	G	G:36 A:0
EA2454	1036859	snp	G	A	A:62 G:0
EA2454	1036971	snp	T	C	C:61 T:0
EA2454	1037052	snp	A	G	G:57 A:0
EA2454	1037510	complex	AGC	GGT	GGT:60 AGC:0
EA2454	1037532	snp	T	G	G:57 T:0
EA2454	1037793	snp	A	C	C:68 A:0
EA2454	1037808	snp	C	A	A:70 C:0
EA2454	1038081	snp	C	T	T:69 C:0
EA2454	1038089	snp	G	A	A:68 G:0
EA2454	1038273	snp	G	A	A:69 G:0
EA2454	1038350	snp	C	T	T:61 C:0
EA2454	1038937	complex	GGTG	TGTC	TGTC:43 GGTG:0
EA2454	1039012	snp	C	A	A:50 C:0
EA2454	1039024	snp	G	A	A:54 G:0
EA2454	1039186	snp	T	G	G:59 T:0
EA2454	1039462	snp	A	T	T:52 A:0
EA2454	1039501	snp	A	G	G:47 A:0
EA2454	1039522	snp	C	T	T:42 C:0
EA2454	1039552	snp	G	A	A:38 G:0
EA2454	1039564	snp	A	G	G:45 A:0
EA2454	1039621	complex	TCCG	CCCA	CCCA:44 TCCG:0
EA2454	1039660	snp	A	G	G:47 A:0
EA2454	1039774	snp	T	G	G:52 T:0
EA2454	1039895	snp	T	G	G:41 T:0
EA2454	1039930	del	ATTACTGCATAGCACTTT	A	A:22 ATTACTGCATAGCACTTT:0
EA2454	1040587	complex	ACCT	GCCG	GCCG:73 ACCT:0
EA2454	1040608	snp	G	A	A:65 G:0
EA2454	1040662	snp	G	A	A:65 G:0
EA2454	1040683	snp	G	A	A:63 G:0
EA2454	1040758	snp	A	G	G:64 A:0
EA2454	1040776	snp	T	C	C:61 T:0
EA2454	1040824	complex	CGGC	AGGG	AGGG:42 CGGC:0
EA2454	1040905	snp	A	C	C:51 A:0
EA2454	1040962	complex	AGAC	GGAT	GGAT:30 AGAC:0
EA2454	1041003	snp	C	A	A:20 C:0
EA2454	1042286	snp	C	T	T:12 C:0
EA2454	1042343	snp	G	A	A:37 G:0
EA2454	1042379	snp	T	A	A:48 T:0
EA2454	1042391	snp	G	A	A:49 G:0
EA2454	1042436	snp	T	C	C:41 T:0
EA2454	1042547	snp	C	A	A:55 C:0
EA2454	1042571	snp	A	G	G:55 A:0
EA2454	1042595	snp	G	A	A:52 G:0
EA2454	1042613	complex	CGCT	GGCC	GGCC:44 CGCT:0
EA2454	1042642	snp	C	T	T:57 C:0
EA2454	1042667	snp	G	A	A:56 G:0
EA2454	1042832	snp	C	A	A:44 C:0
EA2454	1042874	snp	T	A	A:47 T:0
EA2454	1043143	snp	A	G	G:61 A:0
EA2454	1043231	snp	A	C	C:72 A:0
EA2454	1043266	snp	G	A	A:79 G:0
EA2454	1043392	snp	T	G	G:73 T:0
EA2454	1043455	snp	G	A	A:77 G:0
EA2454	1043483	snp	A	G	G:57 A:0
EA2454	1043488	snp	C	T	T:56 C:0
EA2454	1043494	snp	C	T	T:53 C:0
EA2454	1043503	complex	ATTA	GCTG	GCTG:45 ATTA:0
EA2454	1043518	snp	C	T	T:42 C:0
EA2454	1043524	snp	C	G	G:27 C:0
EA2454	1043530	complex	AACGCTTGGTAACCACGAG	TACACTCGGCAATCATGAA	TACACTCGGCAATCATGAA:14 AACGCTTGGTAACCACGAG:0
EA2454	1043570	snp	A	C	C:31 A:0
EA2454	1043582	snp	C	T	T:25 C:0
EA2454	1043587	snp	A	G	G:25 A:0
EA2454	1043878	snp	G	A	A:63 G:0
EA2454	1043899	snp	A	G	G:58 A:0
EA2454	1043938	snp	G	T	T:55 G:0
EA2454	1043962	snp	T	C	C:61 T:0
EA2454	1044107	snp	G	A	A:58 G:0
EA2454	1044129	snp	T	C	C:51 T:0
EA2454	1044169	snp	T	C	C:47 T:0
EA2454	1044247	snp	T	C	C:43 T:0
EA2454	1044271	snp	T	C	C:48 T:0
EA2454	1044325	complex	AGTA	GGTG	GGTG:48 AGTA:0
EA2454	1044358	snp	A	G	G:55 A:0
EA2454	1044412	snp	C	T	T:61 C:0
EA2454	1044445	snp	C	T	T:54 C:1
EA2454	1044605	complex	AACAG	GACAA	GACAA:59 AACAG:0
EA2454	1044658	snp	T	C	C:49 T:0
EA2454	1044667	snp	T	G	G:53 T:0
EA2454	1044706	snp	C	T	T:51 C:0
EA2454	1044717	snp	G	A	A:54 G:0
EA2454	1044734	snp	A	G	G:52 A:0
EA2454	1044748	complex	AGAGC	GGAAA	GGAAA:38 AGAGC:0
EA2454	1044808	snp	C	G	G:56 C:0
EA2454	1044888	snp	T	A	A:47 T:0
EA2454	1044988	snp	T	A	A:54 T:0
EA2454	1045030	snp	G	A	A:58 G:0
EA2454	1045045	snp	A	G	G:55 A:0
EA2454	1045139	snp	A	T	T:64 A:0
EA2454	1045170	snp	T	C	C:54 T:0
EA2454	1045182	complex	TTTATTGG	CTTTTGT	CTTTTGT:46 TTTATTGG:0
EA2454	1045231	complex	AC	GA	GA:35 AC:0
EA2454	1045243	snp	A	G	G:37 A:0
EA2454	1045247	del	AAGCTC	A	A:28 AAGCTC:0
EA2454	1045259	snp	T	G	G:32 T:0
EA2454	1045627	snp	C	T	T:64 C:0
EA2454	1045784	snp	G	A	A:58 G:0
EA2454	1045855	complex	CCTGG	ACTGA	ACTGA:39 CCTGG:0
EA2454	1046012	snp	G	A	A:48 G:0
EA2454	1046044	snp	C	T	T:48 C:0
EA2454	1046050	complex	ACATGCA	TCACGCG	TCACGCG:42 ACATGCA:0
EA2454	1046061	complex	CCTCC	AATCT	AATCT:41 CCTCC:0
EA2454	1046108	snp	C	T	T:50 C:0
EA2454	1046157	snp	G	C	C:39 G:0
EA2454	1046167	snp	C	T	T:35 C:0
EA2454	1046192	complex	AAA	GAG	GAG:32 AAA:0
EA2454	1046215	snp	G	C	C:34 G:0
EA2454	1046233	snp	C	T	T:39 C:0
EA2454	1046239	snp	A	G	G:40 A:0
EA2454	1046290	snp	T	C	C:47 T:0
EA2454	1046314	snp	A	G	G:47 A:0
EA2454	1046329	snp	C	T	T:46 C:0
EA2454	1046408	snp	G	A	A:53 G:0
EA2454	1046419	snp	C	T	T:49 C:0
EA2454	1046425	snp	A	G	G:49 A:0
EA2454	1046437	complex	CGGA	TGGC	TGGC:46 CGGA:0
EA2454	1046446	snp	C	T	T:51 C:1
EA2454	1046497	snp	T	C	C:35 T:0
EA2454	1046510	snp	A	G	G:38 A:0
EA2454	1046524	snp	T	G	G:33 T:0
EA2454	1046539	complex	TC	CCGCCCAACGACAACGTTA	CCGCCCAACGACAACGTTA:18 TC:0
EA2454	1046593	snp	C	A	A:47 C:0
EA2454	1046602	snp	A	T	T:48 A:0
EA2454	1046779	snp	A	G	G:45 A:1
EA2454	1046842	snp	G	A	A:57 G:0
EA2454	1046890	snp	G	C	C:50 G:0
EA2454	1046935	snp	T	C	C:47 T:0
EA2454	1046986	snp	C	T	T:40 C:0
EA2454	1046998	snp	C	T	T:43 C:0
EA2454	1047016	snp	G	C	C:51 G:0
EA2454	1047137	snp	G	A	A:51 G:0
EA2454	1047190	snp	G	A	A:52 G:0
EA2454	1047217	snp	G	A	A:44 G:1
EA2454	1047283	snp	A	G	G:54 A:0
EA2454	1047304	snp	A	G	G:54 A:0
EA2454	1047354	complex	CG	TA	TA:37 CG:0
EA2454	1047374	snp	C	T	T:44 C:0
EA2454	1047379	snp	C	T	T:40 C:0
EA2454	1047400	snp	A	G	G:40 A:0
EA2454	1047416	snp	A	G	G:41 A:0
EA2454	1047445	snp	C	T	T:48 C:0
EA2454	1047508	snp	T	C	C:42 T:0
EA2454	1047520	snp	G	A	A:41 G:0
EA2454	1047547	complex	ACTC	GATA	GATA:29 ACTC:0
EA2454	1047571	snp	A	G	G:39 A:0
EA2454	1047602	snp	A	G	G:46 A:0
EA2454	1047616	complex	CGCG	TGCA	TGCA:45 CGCG:0
EA2454	1047674	snp	G	A	A:56 G:0
EA2454	1047745	snp	G	A	A:55 G:0
EA2454	1047834	snp	A	G	G:57 A:0
EA2454	1047894	snp	C	T	T:57 C:0
EA2454	1047939	snp	A	G	G:70 A:0
EA2454	1047951	snp	C	T	T:60 C:0
EA2454	1048005	snp	T	C	C:49 T:0
EA2454	1048047	complex	GT	AC	AC:37 GT:0
EA2454	1048062	snp	T	C	C:42 T:0
EA2454	1051652	snp	G	A	A:56 G:0
EA2454	1052435	snp	C	T	T:81 C:0
EA2454	1053345	complex	GCCCG	TCCC	TCCC:43 GCCCG:0
EA2454	1053700	snp	A	G	G:57 A:0
EA2454	1053814	snp	C	T	T:45 C:0
EA2454	1053873	snp	T	C	C:67 T:0
EA2454	1053931	snp	C	T	T:59 C:0
EA2454	1053973	snp	G	A	A:58 G:0
EA2454	1054078	snp	T	A	A:70 T:0
EA2454	1054099	snp	G	T	T:57 G:0
EA2454	1054213	snp	G	A	A:57 G:0
EA2454	1054264	snp	C	T	T:64 C:0
EA2454	1054270	snp	G	A	A:64 G:0
EA2454	1054276	snp	T	C	C:63 T:0
EA2454	1054315	snp	T	C	C:54 T:0
EA2454	1054372	snp	T	C	C:42 T:0
EA2454	1054393	snp	G	A	A:46 G:0
EA2454	1054462	snp	C	A	A:50 C:0
EA2454	1054699	snp	C	T	T:26 C:0
EA2454	1054758	snp	C	T	T:33 C:0
EA2454	1054882	snp	T	C	C:34 T:0
EA2454	1055114	snp	T	G	G:61 T:0
EA2454	1055170	snp	C	T	T:49 C:0
EA2454	1055371	snp	G	A	A:44 G:0
EA2454	1055413	snp	C	G	G:36 C:0
EA2454	1055650	snp	C	T	T:49 C:0
EA2454	1055698	snp	A	G	G:56 A:0
EA2454	1055818	snp	G	A	A:37 G:0
EA2454	1055875	snp	T	C	C:49 T:0
EA2454	1055905	snp	G	T	T:42 G:0
EA2454	1055962	snp	T	G	G:49 T:0
EA2454	1055971	complex	TCTGTTTGGTTGT	GTTTTTCGGCTGC	GTTTTTCGGCTGC:40 TCTGTTTGGTTGT:0
EA2454	1056124	snp	C	G	G:67 C:0
EA2454	1056130	snp	T	C	C:66 T:0
EA2454	1056139	snp	T	A	A:66 T:0
EA2454	1056145	snp	T	C	C:65 T:1
EA2454	1056160	snp	C	T	T:61 C:1
EA2454	1056196	snp	C	T	T:46 C:0
EA2454	1056202	snp	T	C	C:43 T:0
EA2454	1056211	complex	TGATGTAATT	CGATATAACA	CGATATAACA:26 TGATGTAATT:0
EA2454	1059646	snp	C	T	T:87 C:0
EA2454	1063175	del	CT	C	C:46 CT:0
EA2454	1067810	ins	T	TG	TG:55 T:0
EA2454	1072190	snp	G	A	A:57 G:0
EA2454	1073767	snp	A	G	G:54 A:0
EA2454	1075753	snp	A	G	G:80 A:0
EA2454	1078051	snp	T	C	C:65 T:0
EA2454	1079000	snp	T	C	C:40 T:0
EA2454	1083167	ins	A	AT	AT:60 A:0
EA2454	1085536	snp	A	G	G:30 A:0
EA2454	1093309	snp	A	G	G:35 A:0
EA2454	1095102	snp	T	C	C:48 T:0
EA2454	1103669	snp	T	C	C:79 T:0
EA2454	1109672	snp	T	C	C:52 T:0
EA2454	1127553	del	CG	C	C:37 CG:0
EA2454	1128458	snp	T	C	C:90 T:0
EA2454	1129086	snp	A	G	G:105 A:0
EA2454	1129220	snp	C	T	T:99 C:1
EA2454	1129342	snp	T	A	A:105 T:0
EA2454	1130101	snp	T	C	C:79 T:0
EA2454	1130209	snp	A	T	T:77 A:0
EA2454	1130924	snp	G	A	A:74 G:0
EA2454	1138215	snp	T	C	C:51 T:0
EA2454	1139565	del	CT	C	C:59 CT:0
EA2454	1140326	snp	A	G	G:53 A:0
EA2454	1144975	snp	T	C	C:68 T:0
EA2454	1147859	snp	G	A	A:64 G:0
EA2454	1150160	snp	T	A	A:84 T:0
EA2454	1150447	snp	G	A	A:62 G:0
EA2454	1151448	snp	T	C	C:53 T:0
EA2454	1153447	snp	T	C	C:48 T:0
EA2454	1153937	snp	G	A	A:41 G:0
EA2454	1160822	snp	A	T	T:41 A:0
EA2454	1162900	snp	T	C	C:32 T:0
EA2454	1167591	snp	C	T	T:51 C:0
EA2454	1167666	snp	T	C	C:66 T:0
EA2454	1174352	snp	T	C	C:63 T:0
EA2454	1175890	snp	G	T	T:64 G:0
EA2454	1177965	snp	C	T	T:79 C:0
EA2454	1186746	snp	T	C	C:33 T:0
EA2454	1190353	snp	G	T	T:58 G:0
EA2454	1195825	snp	A	G	G:49 A:0
EA2454	1200329	snp	C	T	T:45 C:0
EA2454	1200950	snp	G	T	T:30 G:0
EA2454	1202012	snp	G	A	A:59 G:0
EA2454	1203653	snp	C	T	T:83 C:0
EA2454	1211256	snp	T	C	C:73 T:0
EA2454	1211513	snp	T	C	C:61 T:0
EA2454	1218789	snp	A	G	G:65 A:0
EA2454	1219256	snp	C	T	T:59 C:0
EA2454	1219723	snp	A	T	T:64 A:0
EA2454	1221602	snp	C	A	A:40 C:0
EA2454	1235752	snp	A	G	G:25 A:0
EA2454	1236723	snp	T	C	C:62 T:0
EA2454	1240553	snp	C	T	T:64 C:0
EA2454	1242819	snp	C	T	T:61 C:0
EA2454	1244558	snp	G	A	A:55 G:0
EA2454	1244842	snp	G	A	A:67 G:0
EA2454	1245865	snp	C	T	T:60 C:0
EA2454	1246858	snp	C	T	T:52 C:0
EA2454	1248857	snp	C	T	T:78 C:0
EA2454	1248869	snp	C	T	T:88 C:0
EA2454	1255549	snp	A	G	G:66 A:0
EA2454	1258437	snp	G	A	A:41 G:0
EA2454	1309315	snp	T	C	C:53 T:0
EA2454	1312736	snp	C	A	A:50 C:0
EA2454	1314434	snp	T	C	C:76 T:0
EA2454	1315117	snp	C	T	T:76 C:0
EA2454	1316323	snp	G	C	C:56 G:0
EA2454	1317400	snp	G	A	A:51 G:0
EA2454	1318955	snp	T	C	C:66 T:0
EA2454	1320142	snp	C	A	A:93 C:0
EA2454	1320805	snp	A	G	G:85 A:0
EA2454	1322163	snp	T	C	C:43 T:0
EA2454	1322279	snp	G	T	T:56 G:0
EA2454	1322665	snp	T	C	C:37 T:0
EA2454	1331179	snp	T	G	G:48 T:1
EA2454	1334752	snp	C	T	T:44 C:0
EA2454	1335631	snp	T	G	G:48 T:0
EA2454	1340886	snp	A	C	C:64 A:0
EA2454	1345460	snp	T	G	G:63 T:0
EA2454	1345847	snp	T	C	C:45 T:0
EA2454	1350929	snp	G	T	T:49 G:0
EA2454	1351707	snp	G	C	C:42 G:0
EA2454	1355247	snp	G	C	C:48 G:0
EA2454	1358384	snp	A	G	G:57 A:0
EA2454	1360577	snp	A	G	G:61 A:0
EA2454	1365707	snp	C	T	T:60 C:0
EA2454	1371250	snp	T	C	C:41 T:0
EA2454	1373482	snp	T	C	C:81 T:0
EA2454	1373586	snp	T	G	G:68 T:1
EA2454	1378312	snp	T	C	C:56 T:0
EA2454	1382325	ins	G	GT	GT:65 G:0
EA2454	1387493	snp	A	G	G:48 A:0
EA2454	1394505	snp	A	G	G:71 A:0
EA2454	1395046	snp	T	C	C:66 T:0
EA2454	1395903	snp	T	G	G:80 T:0
EA2454	1401264	snp	A	G	G:32 A:0
EA2454	1404410	del	CA	C	C:28 CA:0
EA2454	1405766	snp	A	T	T:87 A:0
EA2454	1407659	snp	C	T	T:59 C:0
EA2454	1413069	snp	G	A	A:53 G:0
EA2454	1413295	snp	T	C	C:45 T:0
EA2454	1414326	snp	G	A	A:46 G:1
EA2454	1415609	snp	A	T	T:34 A:0
EA2454	1416501	snp	A	C	C:50 A:0
EA2454	1416578	snp	A	G	G:36 A:0
EA2454	1422407	snp	A	G	G:55 A:0
EA2454	1423035	snp	C	G	G:68 C:0
EA2454	1423055	snp	C	A	A:62 C:0
EA2454	1424795	snp	G	T	T:58 G:0
EA2454	1428495	snp	A	T	T:39 A:0
EA2454	1434550	snp	G	A	A:47 G:0
EA2454	1435223	snp	G	A	A:79 G:0
EA2454	1437290	snp	C	G	G:42 C:0
EA2454	1438627	snp	G	T	T:61 G:0
EA2454	1442298	snp	C	T	T:45 C:0
EA2454	1442781	snp	T	C	C:46 T:0
EA2454	1442832	snp	C	A	A:54 C:0
EA2454	1445619	snp	G	A	A:61 G:0
EA2454	1451144	snp	C	T	T:41 C:0
EA2454	1452075	snp	T	C	C:44 T:0
EA2454	1452446	snp	G	T	T:39 G:0
EA2454	1453646	snp	T	A	A:55 T:0
EA2454	1455169	snp	G	A	A:63 G:0
EA2454	1455326	snp	C	T	T:68 C:1
EA2454	1457731	snp	G	A	A:44 G:0
EA2454	1458467	snp	A	G	G:62 A:0
EA2454	1459664	snp	T	G	G:54 T:0
EA2454	1460332	snp	A	T	T:57 A:0
EA2454	1465284	snp	G	A	A:74 G:0
EA2454	1473808	snp	T	C	C:36 T:0
EA2454	1476139	snp	T	C	C:52 T:0
EA2454	1480258	snp	C	G	G:79 C:0
EA2454	1480708	snp	T	G	G:60 T:0
EA2454	1482449	snp	A	G	G:55 A:0
EA2454	1483731	snp	C	T	T:65 C:0
EA2454	1483915	snp	T	C	C:42 T:0
EA2454	1491226	snp	T	C	C:54 T:0
EA2454	1491674	snp	A	G	G:49 A:0
EA2454	1491774	snp	C	T	T:51 C:0
EA2454	1492527	ins	C	CA	CA:66 C:1
EA2454	1493837	snp	A	G	G:62 A:0
EA2454	1495581	snp	T	A	A:62 T:0
EA2454	1500517	ins	T	TA	TA:75 T:0
EA2454	1503865	snp	T	C	C:32 T:0
EA2454	1505571	snp	C	T	T:35 C:0
EA2454	1511157	snp	C	T	T:56 C:0
EA2454	1511208	snp	G	T	T:49 G:0
EA2454	1513734	snp	C	T	T:51 C:1
EA2454	1518451	complex	GGAAG	AAAAA	AAAAA:65 GGAAG:0
EA2454	1518523	snp	A	C	C:78 A:0
EA2454	1521514	snp	C	A	A:72 C:1
EA2454	1525679	snp	C	T	T:65 C:1
EA2454	1526178	snp	C	T	T:58 C:0
EA2454	1526724	snp	C	G	G:59 C:0
EA2454	1533339	snp	A	G	G:48 A:0
EA2454	1534292	snp	A	G	G:66 A:0
EA2454	1534747	del	TC	T	T:48 TC:0
EA2454	1537405	snp	G	C	C:44 G:0
EA2454	1547465	snp	G	T	T:39 G:0
EA2454	1548845	snp	T	C	C:66 T:0
EA2454	1549828	snp	T	C	C:44 T:0
EA2454	1549834	del	ACGCCATTG	A	A:34 ACGCCATTG:0
EA2454	1556519	snp	A	G	G:49 A:0
EA2454	1557966	snp	A	G	G:55 A:0
EA2454	1559525	snp	G	A	A:87 G:0
EA2454	1559541	snp	C	T	T:72 C:0
EA2454	1560679	snp	G	A	A:75 G:0
EA2454	1560828	snp	C	T	T:59 C:0
EA2454	1561649	snp	G	C	C:53 G:0
EA2454	1562488	snp	G	A	A:56 G:0
EA2454	1567321	snp	C	T	T:64 C:0
EA2454	1570233	snp	A	G	G:72 A:0
EA2454	1573803	snp	T	A	A:69 T:0
EA2454	1574124	snp	G	A	A:48 G:0
EA2454	1575613	snp	T	C	C:93 T:1
EA2454	1580233	snp	A	C	C:59 A:0
EA2454	1581265	snp	T	C	C:63 T:0
EA2454	1585075	snp	C	T	T:52 C:0
EA2454	1587379	snp	T	C	C:55 T:0
EA2454	1587792	snp	A	C	C:58 A:0
EA2454	1592505	snp	T	C	C:58 T:0
EA2454	1596047	snp	C	T	T:43 C:0
EA2454	1596282	snp	T	G	G:43 T:0
EA2454	1597496	snp	T	C	C:45 T:0
EA2454	1599599	snp	T	G	G:60 T:0
EA2454	1599906	snp	T	C	C:50 T:0
EA2454	1600258	snp	C	A	A:60 C:1
EA2454	1600919	snp	A	G	G:59 A:0
EA2454	1601028	del	AC	A	A:52 AC:0
EA2454	1602481	snp	C	T	T:40 C:0
EA2454	1610176	snp	G	A	A:58 G:0
EA2454	1610501	del	AT	A	A:55 AT:0
EA2454	1612435	snp	G	A	A:59 G:0
EA2454	1613406	snp	T	A	A:57 T:0
EA2454	1613463	snp	A	G	G:51 A:0
EA2454	1616260	snp	T	G	G:67 T:0
EA2454	1617684	snp	G	C	C:68 G:0
EA2454	1618779	snp	G	T	T:67 G:0
EA2454	1619165	snp	T	G	G:14 T:0
EA2454	1619178	snp	T	A	A:19 T:0
EA2454	1619184	snp	T	C	C:22 T:0
EA2454	1619194	complex	ATTTC	TTTTT	TTTTT:25 ATTTC:0
EA2454	1619213	snp	C	T	T:29 C:0
EA2454	1619310	snp	G	T	T:37 G:0
EA2454	1619341	snp	G	A	A:41 G:0
EA2454	1619470	snp	T	G	G:45 T:1
EA2454	1619530	snp	A	G	G:42 A:0
EA2454	1619683	snp	A	G	G:41 A:0
EA2454	1619695	complex	GT	AC	AC:34 GT:0
EA2454	1619713	complex	ACCG	CCCT	CCCT:31 ACCG:0
EA2454	1619739	snp	C	A	A:29 C:0
EA2454	1619761	snp	T	C	C:29 T:0
EA2454	1619773	snp	A	G	G:33 A:0
EA2454	1619938	snp	T	G	G:42 T:0
EA2454	1629068	snp	G	A	A:12 G:0
EA2454	1629119	complex	CGCA	AGCG	AGCG:21 CGCA:0
EA2454	1629149	complex	TGGCTATA	CGGTTATG	CGGTTATG:19 TGGCTATA:0
EA2454	1629240	snp	T	C	C:22 T:0
EA2454	1629285	complex	GTAC	ATAT	ATAT:38 GTAC:0
EA2454	1629295	complex	ACAAAAT	TCTAAAC	TCTAAAC:37 ACAAAAT:0
EA2454	1629306	snp	C	G	G:41 C:0
EA2454	1629375	snp	G	A	A:32 G:0
EA2454	1629399	snp	G	A	A:25 G:0
EA2454	1629404	snp	T	A	A:22 T:0
EA2454	1629412	complex	TGAG	AGAA	AGAA:21 TGAG:0
EA2454	1629423	complex	ATATA	GTATT	GTATT:20 ATATA:0
EA2454	1629435	snp	G	A	A:15 G:0
EA2454	1630990	snp	T	C	C:10 T:0
EA2454	1634228	snp	A	G	G:77 A:0
EA2454	1642291	snp	G	T	T:61 G:0
EA2454	1642336	snp	A	G	G:55 A:0
EA2454	1644685	snp	C	T	T:81 C:0
EA2454	1652108	snp	T	C	C:58 T:0
EA2454	1652374	snp	G	A	A:51 G:0
EA2454	1653298	snp	G	A	A:52 G:0
EA2454	1653997	snp	T	A	A:72 T:0
EA2454	1657570	snp	T	A	A:57 T:0
EA2454	1659343	snp	G	A	A:42 G:0
EA2454	1661029	snp	C	T	T:40 C:0
EA2454	1668656	snp	G	T	T:36 G:0
EA2454	1672568	snp	A	C	C:19 A:0
EA2454	1676378	snp	T	C	C:61 T:0
EA2454	1677845	snp	G	A	A:63 G:0
EA2454	1679266	snp	C	T	T:60 C:0
EA2454	1682457	snp	A	G	G:40 A:0
EA2454	1683346	snp	G	A	A:64 G:0
EA2454	1689622	snp	T	A	A:54 T:0
EA2454	1692931	ins	G	GC	GC:49 G:0
EA2454	1693738	snp	C	T	T:107 C:0
EA2454	1695261	snp	C	T	T:78 C:0
EA2454	1696803	snp	C	T	T:62 C:0
EA2454	1701163	snp	G	T	T:38 G:0
EA2454	1701919	snp	A	G	G:75 A:0
EA2454	1707192	snp	A	G	G:53 A:0
EA2454	1711064	snp	G	A	A:51 G:0
EA2454	1713864	snp	T	C	C:61 T:0
EA2454	1714697	snp	T	C	C:77 T:0
EA2454	1714900	snp	G	A	A:55 G:0
EA2454	1717835	snp	C	A	A:50 C:0
EA2454	1718788	snp	C	A	A:101 C:1
EA2454	1719996	snp	C	G	G:30 C:0
EA2454	1723434	snp	A	C	C:56 A:0
EA2454	1726655	snp	A	T	T:52 A:0
EA2454	1730329	snp	T	C	C:51 T:0
EA2454	1730717	snp	C	A	A:96 C:0
EA2454	1733418	snp	C	T	T:45 C:0
EA2454	1737561	snp	A	G	G:48 A:0
EA2454	1739772	del	CG	C	C:44 CG:0
EA2454	1743887	snp	C	T	T:49 C:0
EA2454	1745576	snp	T	C	C:52 T:0
EA2454	1748585	snp	A	C	C:28 A:1
EA2454	1757036	snp	C	G	G:34 C:0
EA2454	1763293	snp	T	C	C:45 T:0
EA2454	1770725	snp	T	C	C:55 T:0
EA2454	1783395	snp	C	A	A:34 C:0
EA2454	1784698	snp	A	G	G:69 A:0
EA2454	1786685	snp	T	C	C:44 T:0
EA2454	1786768	snp	T	C	C:43 T:0
EA2454	1790154	snp	G	T	T:40 G:0
EA2454	1794938	snp	T	G	G:31 T:0
EA2454	1795161	snp	A	G	G:55 A:0
EA2454	1796849	snp	T	G	G:65 T:0
EA2454	1799132	snp	G	A	A:42 G:0
EA2454	1802874	snp	A	G	G:30 A:0
EA2454	1803664	snp	T	C	C:52 T:0
EA2454	1820083	snp	T	C	C:43 T:0
EA2454	1824156	snp	T	C	C:23 T:0
EA2454	1824499	snp	T	C	C:27 T:0
EA2454	1825107	snp	G	A	A:50 G:0
EA2454	1832503	snp	C	T	T:30 C:0
EA2454	1832674	snp	A	C	C:42 A:0
EA2454	1835609	snp	T	G	G:34 T:0
EA2454	1844569	snp	A	G	G:54 A:0
EA2454	1856201	snp	T	G	G:69 T:0
EA2454	1858882	snp	T	G	G:99 T:0
EA2454	1859194	snp	G	T	T:103 G:0
EA2454	1860310	snp	T	C	C:34 T:0
EA2454	1865699	snp	C	T	T:61 C:0
EA2454	1875820	snp	G	T	T:56 G:0
EA2454	1877345	snp	T	C	C:37 T:0
EA2454	1880076	snp	G	A	A:64 G:0
EA2454	1880494	snp	A	G	G:69 A:0
EA2454	1881056	snp	C	G	G:39 C:0
EA2454	1886735	snp	G	A	A:57 G:0
EA2454	1887544	snp	A	G	G:34 A:0
EA2454	1890386	snp	T	C	C:60 T:0
EA2454	1901401	snp	G	A	A:50 G:0
EA2454	1902101	snp	G	A	A:50 G:0
EA2454	1902291	snp	G	C	C:68 G:0
EA2454	1905044	snp	G	A	A:51 G:0
EA2454	1907596	snp	G	A	A:46 G:0
EA2454	1909088	snp	T	C	C:84 T:0
EA2454	1911724	snp	C	T	T:61 C:0
EA2454	1912473	snp	A	T	T:94 A:0
EA2454	1918926	snp	G	A	A:36 G:0
EA2454	1929193	ins	T	TTTA	TTTA:47 T:0
EA2454	1931891	snp	C	T	T:59 C:0
EA2454	1932163	snp	G	A	A:57 G:0
EA2454	1942330	snp	T	C	C:37 T:0
EA2454	1943617	snp	C	T	T:61 C:0
EA2454	1945608	snp	T	C	C:41 T:0
EA2454	1950298	snp	T	G	G:53 T:0
EA2454	1951563	snp	A	T	T:45 A:0
EA2454	1954358	snp	G	A	A:60 G:0
EA2454	1955062	snp	G	A	A:80 G:0
EA2454	1958733	snp	T	C	C:49 T:0
EA2454	1968172	snp	T	C	C:56 T:0
EA2454	1970914	snp	A	T	T:15 A:0
EA2454	1970924	complex	CAA	ATC	ATC:15 CAA:0
EA2454	1970935	snp	C	A	A:20 C:0
EA2454	1975987	snp	G	A	A:61 G:0
EA2454	1979564	snp	A	G	G:40 A:0
EA2454	1980186	snp	C	T	T:43 C:0
EA2454	1981009	snp	G	A	A:59 G:0
EA2454	1983040	snp	T	A	A:61 T:0
EA2454	1991121	snp	T	C	C:35 T:0
EA2454	1995211	snp	T	C	C:81 T:0
EA2454	1995450	snp	C	T	T:37 C:0
EA2454	1997790	snp	G	A	A:47 G:0
EA2454	1997936	snp	C	T	T:48 C:0
EA2454	1998244	snp	C	A	A:59 C:0
EA2454	1999636	snp	A	G	G:59 A:0
EA2454	2001388	snp	G	A	A:78 G:0
EA2454	2007738	snp	A	G	G:46 A:0
EA2454	2010387	snp	G	A	A:59 G:0
EA2454	2023335	snp	A	C	C:36 A:0
EA2454	2027149	snp	G	A	A:46 G:0
EA2454	2036702	snp	C	T	T:60 C:0
EA2454	2037412	snp	G	T	T:63 G:0
EA2454	2038279	ins	A	AAC	AAC:59 A:0
EA2454	2041809	snp	A	G	G:52 A:0
EA2454	2044267	snp	C	T	T:45 C:0
EA2454	2045195	snp	G	A	A:61 G:1
EA2454	2045314	snp	T	G	G:60 T:0
EA2454	2046204	snp	T	C	C:36 T:0
EA2454	2049495	snp	G	A	A:34 G:0
EA2454	2049993	snp	G	T	T:54 G:0
EA2454	2050507	snp	C	T	T:48 C:0
EA2454	2052588	snp	C	A	A:50 C:0
EA2454	2055836	snp	A	G	G:63 A:0
EA2454	2057231	snp	C	T	T:57 C:0
EA2454	2057764	snp	G	A	A:53 G:1
EA2454	2059644	snp	G	A	A:76 G:0
EA2454	2060675	snp	A	G	G:55 A:0
EA2454	2062156	snp	T	C	C:80 T:0
EA2454	2063839	snp	T	C	C:70 T:0
EA2454	2067623	snp	C	T	T:59 C:0
EA2454	2068297	snp	T	G	G:62 T:0
EA2454	2070162	snp	T	C	C:72 T:0
EA2454	2071004	snp	G	A	A:62 G:0
EA2454	2078028	snp	A	G	G:54 A:0
EA2454	2078594	snp	A	C	C:60 A:0
EA2454	2079477	snp	A	G	G:89 A:0
EA2454	2080076	snp	G	A	A:107 G:0
EA2454	2088360	snp	A	G	G:70 A:0
EA2454	2088535	snp	C	G	G:83 C:0
EA2454	2089096	snp	G	A	A:54 G:0
EA2454	2091149	snp	T	C	C:47 T:0
EA2454	2093864	snp	G	T	T:65 G:0
EA2454	2094829	snp	T	C	C:66 T:0
EA2454	2095954	snp	G	A	A:58 G:0
EA2454	2096088	snp	A	G	G:50 A:0
EA2454	2096965	snp	G	A	A:117 G:0
EA2454	2102172	snp	A	T	T:34 A:0
EA2454	2102837	snp	G	A	A:38 G:0
EA2454	2102993	snp	T	C	C:46 T:0
EA2454	2105260	snp	T	G	G:32 T:0
EA2454	2106068	del	TG	T	T:33 TG:0
EA2454	2108215	snp	G	A	A:60 G:0
EA2454	2117468	snp	A	G	G:92 A:0
EA2454	2119737	snp	T	C	C:63 T:0
EA2454	2133730	snp	G	A	A:53 G:0
EA2454	2142320	snp	T	C	C:59 T:0
EA2454	2147622	snp	C	T	T:53 C:0
EA2454	2148878	snp	T	A	A:52 T:0
EA2454	2149924	snp	A	G	G:50 A:0
EA2454	2153116	snp	C	T	T:64 C:0
EA2454	2155859	snp	G	A	A:60 G:0
EA2454	2156623	snp	G	A	A:61 G:0
EA2454	2158889	snp	T	A	A:59 T:0
EA2454	2160086	snp	G	A	A:58 G:0
EA2454	2162365	snp	A	G	G:46 A:0
EA2454	2166869	snp	G	A	A:29 G:0
EA2454	2167985	snp	C	T	T:60 C:0
EA2454	2169376	snp	G	A	A:56 G:0
EA2454	2171579	snp	T	A	A:89 T:0
EA2454	2171889	snp	A	G	G:65 A:0
EA2454	2173082	snp	A	G	G:41 A:0
EA2454	2177349	snp	T	C	C:56 T:0
EA2454	2183355	snp	T	C	C:58 T:0
EA2454	2184344	snp	G	T	T:59 G:0
EA2454	2188277	snp	G	T	T:50 G:0
EA2454	2189381	snp	A	G	G:37 A:0
EA2454	2195062	snp	T	C	C:37 T:1
EA2454	2220538	snp	A	G	G:57 A:0
EA2454	2223729	snp	C	T	T:38 C:0
EA2454	2226298	snp	T	C	C:45 T:0
EA2454	2227619	snp	C	T	T:47 C:0
EA2454	2228600	snp	T	C	C:33 T:0
EA2454	2231411	snp	C	A	A:56 C:0
EA2454	2245025	snp	C	A	A:68 C:0
EA2454	2246386	snp	A	T	T:65 A:0
EA2454	2252185	snp	G	A	A:59 G:0
EA2454	2256445	snp	G	A	A:58 G:0
EA2454	2259197	snp	G	A	A:65 G:0
EA2454	2260121	snp	A	G	G:54 A:0
EA2454	2265279	snp	C	T	T:88 C:0
EA2454	2268389	snp	G	C	C:69 G:0
EA2454	2268433	snp	T	C	C:64 T:0
EA2454	2271416	snp	C	A	A:28 C:1
EA2454	2278342	snp	T	A	A:86 T:0
EA2454	2280681	snp	T	G	G:40 T:0
EA2454	2283117	snp	T	C	C:47 T:0
EA2454	2283880	snp	A	G	G:59 A:0
EA2454	2289041	snp	T	C	C:30 T:0
EA2454	2291863	snp	T	C	C:55 T:0
EA2454	2292571	snp	C	T	T:40 C:0
EA2454	2293649	snp	C	A	A:44 C:0
EA2454	2293725	snp	C	T	T:53 C:0
EA2454	2298963	snp	G	T	T:39 G:0
EA2454	2311767	snp	T	G	G:59 T:0
EA2454	2314156	snp	C	T	T:84 C:0
EA2454	2315103	snp	C	T	T:55 C:0
EA2454	2322703	snp	T	G	G:34 T:0
EA2454	2323208	snp	A	G	G:43 A:0
EA2454	2324838	snp	G	T	T:55 G:0
EA2454	2332571	snp	C	A	A:54 C:0
EA2454	2335946	ins	C	CA	CA:47 C:0
EA2454	2338673	snp	G	A	A:81 G:0
EA2454	2349078	snp	T	C	C:54 T:0
EA2454	2350339	snp	T	C	C:53 T:0
EA2454	2351375	snp	A	C	C:37 A:0
EA2454	2354110	snp	G	C	C:47 G:0
EA2454	2354351	snp	A	G	G:50 A:0
EA2454	2356836	snp	C	A	A:55 C:0
EA2454	2357132	snp	G	A	A:62 G:0
EA2454	2359024	snp	A	G	G:41 A:0
EA2454	2364340	snp	T	G	G:56 T:0
EA2454	2371672	snp	T	C	C:59 T:0
EA2454	2372914	snp	T	C	C:51 T:0
EA2454	2373209	snp	T	A	A:52 T:0
EA2454	2373982	snp	A	G	G:74 A:0
EA2454	2375309	snp	C	T	T:51 C:0
EA2454	2378304	snp	T	G	G:24 T:0
EA2454	2379341	snp	T	C	C:50 T:0
EA2454	2381932	snp	C	A	A:62 C:0
EA2454	2382380	snp	C	T	T:63 C:0
EA2454	2396147	snp	T	A	A:20 T:0
EA2454	2397205	snp	T	C	C:30 T:0
EA2454	2397603	snp	C	A	A:37 C:0
EA2454	2399010	snp	A	G	G:44 A:0
EA2454	2403442	snp	T	C	C:44 T:0
EA2454	2404831	snp	A	C	C:46 A:0
EA2454	2405136	snp	G	A	A:48 G:0
EA2454	2407359	snp	G	A	A:33 G:0
EA2454	2407449	snp	A	G	G:50 A:0
EA2454	2412014	snp	C	T	T:63 C:0
EA2454	2414433	snp	T	G	G:72 T:0
EA2454	2415138	snp	G	A	A:82 G:0
EA2454	2416531	snp	C	T	T:50 C:0
EA2454	2419574	del	CT	C	C:16 CT:0
EA2454	2423399	snp	T	G	G:44 T:0
EA2454	2424078	snp	A	G	G:40 A:0
EA2454	2428008	del	AT	A	A:68 AT:0
EA2454	2428499	snp	G	A	A:71 G:0
EA2454	2429149	snp	C	G	G:74 C:0
EA2454	2429573	snp	A	G	G:43 A:0
EA2454	2434305	snp	A	C	C:47 A:0
EA2454	2436415	snp	G	A	A:110 G:0
EA2454	2438443	ins	G	GCACCAT	GCACCAT:61 G:0
EA2454	2438685	snp	A	G	G:69 A:0
EA2454	2439096	snp	G	A	A:62 G:0
EA2454	2447662	snp	G	A	A:39 G:0
EA2454	2448724	snp	T	C	C:69 T:0
EA2454	2449435	snp	A	G	G:67 A:0
EA2454	2450258	snp	A	C	C:57 A:0
EA2454	2453744	snp	A	C	C:82 A:0
EA2454	2456063	snp	T	C	C:58 T:0
EA2454	2456498	snp	G	C	C:28 G:0
EA2454	2461974	snp	A	G	G:112 A:0
EA2454	2463039	snp	G	A	A:94 G:0
EA2454	2466179	snp	A	G	G:122 A:0
EA2454	2466917	snp	T	G	G:88 T:0
EA2454	2468021	snp	C	T	T:49 C:0
EA2454	2471216	snp	G	A	A:54 G:0
EA2454	2495584	snp	C	A	A:51 C:0
EA2454	2495743	snp	A	C	C:59 A:0
EA2454	2496339	del	CG	C	C:53 CG:0
EA2454	2498006	snp	G	A	A:91 G:0
EA2454	2501622	snp	G	A	A:50 G:0
EA2454	2509841	snp	A	G	G:65 A:0
EA2454	2511520	snp	G	A	A:49 G:0
EA2454	2518906	snp	A	C	C:65 A:0
EA2454	2520061	snp	T	C	C:51 T:0
EA2454	2521382	snp	C	T	T:52 C:0
EA2454	2522720	snp	A	C	C:47 A:0
EA2454	2524981	snp	T	G	G:41 T:0
EA2454	2528246	snp	T	C	C:71 T:0
EA2454	2528297	snp	A	G	G:47 A:0
EA2454	2538679	snp	T	C	C:74 T:0
EA2454	2542786	snp	A	G	G:87 A:0
EA2454	2545615	complex	CTC	ATA	ATA:42 CTC:0
EA2454	2546596	snp	C	T	T:50 C:0
EA2454	2549675	snp	T	C	C:75 T:0
EA2454	2549710	snp	G	A	A:63 G:0
EA2454	2552049	snp	G	A	A:51 G:0
EA2454	2555441	snp	A	G	G:54 A:0
EA2454	2557964	snp	G	C	C:36 G:0
EA2454	2558667	snp	G	A	A:48 G:0
EA2454	2559290	snp	C	A	A:114 C:0
EA2454	2561301	snp	A	G	G:79 A:0
EA2454	2561652	snp	T	C	C:93 T:0
EA2454	2564681	snp	C	A	A:68 C:0
EA2454	2570129	snp	G	A	A:56 G:0
EA2454	2570534	snp	A	C	C:48 A:0
EA2454	2574887	snp	G	T	T:62 G:0
EA2454	2577565	snp	G	A	A:43 G:0
EA2454	2579508	snp	T	G	G:54 T:0
EA2454	2584123	snp	A	G	G:63 A:0
EA2454	2586095	snp	C	T	T:55 C:0
EA2454	2587851	snp	A	T	T:95 A:0
EA2454	2588480	ins	G	GA	GA:95 G:0
EA2454	2589008	snp	T	C	C:108 T:0
EA2454	2589723	snp	T	C	C:102 T:0
EA2454	2589936	snp	T	A	A:102 T:0
EA2454	2592348	snp	C	T	T:38 C:0
EA2454	2593010	snp	T	C	C:52 T:0
EA2454	2593790	snp	C	T	T:69 C:0
EA2454	2596704	snp	T	C	C:60 T:0
EA2454	2597428	snp	T	C	C:49 T:0
EA2454	2598908	snp	T	C	C:55 T:1
EA2454	2599178	snp	C	T	T:45 C:0
EA2454	2602630	snp	C	T	T:61 C:0
EA2454	2612758	snp	A	G	G:66 A:0
EA2454	2617140	del	TA	T	T:62 TA:0
EA2454	2617467	snp	T	G	G:71 T:0
EA2454	2619420	snp	A	G	G:51 A:0
EA2454	2621655	snp	T	C	C:52 T:0
EA2454	2630081	snp	A	G	G:67 A:0
EA2454	2630145	snp	A	G	G:67 A:0
EA2454	2631943	snp	A	G	G:69 A:0
EA2454	2632096	snp	G	C	C:53 G:0
EA2454	2636460	snp	A	G	G:68 A:0
EA2454	2640648	snp	G	A	A:42 G:0
EA2454	2641059	snp	T	C	C:49 T:0
EA2454	2641515	snp	T	A	A:47 T:0
EA2454	2642324	snp	T	C	C:63 T:0
EA2454	2644202	snp	T	G	G:45 T:0
EA2454	2647238	snp	G	T	T:64 G:0
EA2454	2654413	del	GA	G	G:55 GA:0
EA2454	2655415	snp	T	G	G:66 T:0
EA2454	2658667	snp	A	C	C:42 A:0
EA2454	2660000	snp	A	G	G:76 A:0
EA2454	2662545	snp	A	G	G:32 A:0
EA2454	2669244	snp	C	T	T:36 C:0
EA2454	2675076	snp	A	C	C:37 A:0
EA2454	2675121	snp	G	A	A:33 G:0
EA2454	2697691	snp	C	T	T:50 C:0
EA2454	2697799	snp	T	C	C:51 T:0
EA2454	2704969	snp	G	A	A:84 G:0
EA2454	2707628	snp	T	C	C:65 T:0
EA2454	2720677	del	AACCTGC	A	A:17 AACCTGC:0
EA2454	2722619	snp	A	G	G:50 A:0
EA2454	2727881	snp	C	T	T:67 C:0
EA2454	2728742	snp	T	C	C:56 T:0
EA2454	2734446	snp	G	A	A:42 G:0
EA2454	2740814	snp	A	T	T:77 A:0
EA2454	2743080	snp	T	G	G:60 T:0
EA2454	2748304	snp	G	A	A:69 G:0
EA2454	2748849	del	GT	G	G:13 GT:0
EA2454	2748962	snp	C	T	T:52 C:0
EA2454	2749013	snp	T	C	C:51 T:0
EA2454	2749118	snp	T	C	C:77 T:0
EA2454	2749149	snp	T	G	G:72 T:0
EA2454	2749181	snp	C	T	T:72 C:0
EA2454	2749194	snp	T	A	A:66 T:0
EA2454	2749200	snp	A	G	G:69 A:1
EA2454	2749205	snp	T	G	G:68 T:1
EA2454	2749221	complex	CTG	TTA	TTA:60 CTG:0
EA2454	2749244	snp	G	C	C:74 G:0
EA2454	2749379	snp	G	T	T:85 G:0
EA2454	2749456	snp	C	G	G:68 C:0
EA2454	2749637	snp	C	T	T:99 C:0
EA2454	2749709	snp	C	A	A:100 C:0
EA2454	2749754	snp	G	A	A:99 G:0
EA2454	2749820	snp	T	C	C:87 T:0
EA2454	2749943	snp	A	G	G:79 A:0
EA2454	2749967	snp	A	G	G:88 A:0
EA2454	2750051	snp	T	C	C:98 T:0
EA2454	2750066	snp	T	C	C:93 T:0
EA2454	2750072	snp	G	A	A:91 G:0
EA2454	2750102	snp	T	G	G:79 T:0
EA2454	2750294	snp	C	T	T:105 C:0
EA2454	2750366	snp	A	G	G:102 A:0
EA2454	2750411	snp	G	T	T:90 G:0
EA2454	2750471	snp	T	A	A:82 T:0
EA2454	2750700	snp	T	C	C:72 T:0
EA2454	2750771	snp	C	T	T:77 C:0
EA2454	2750781	snp	A	G	G:80 A:0
EA2454	2750880	snp	C	T	T:64 C:0
EA2454	2750924	complex	TACG	AACA	AACA:53 TACG:0
EA2454	2751044	snp	T	C	C:37 T:0
EA2454	2751185	snp	T	A	A:53 T:0
EA2454	2751209	snp	T	C	C:45 T:0
EA2454	2751266	snp	T	C	C:51 T:0
EA2454	2751506	snp	T	A	A:54 T:0
EA2454	2751680	snp	A	G	G:48 A:0
EA2454	2751692	complex	CGGT	TGGC	TGGC:48 CGGT:0
EA2454	2751753	snp	T	G	G:46 T:0
EA2454	2752055	snp	G	C	C:53 G:0
EA2454	2752220	snp	T	C	C:46 T:0
EA2454	2752241	snp	C	A	A:48 C:0
EA2454	2752454	snp	C	T	T:65 C:0
EA2454	2752482	snp	G	A	A:54 G:0
EA2454	2752569	snp	C	T	T:45 C:0
EA2454	2752629	snp	T	C	C:48 T:0
EA2454	2752656	complex	CGTA	TGTG	TGTG:43 CGTA:0
EA2454	2752827	snp	G	C	C:64 G:0
EA2454	2753034	snp	T	C	C:60 T:0
EA2454	2753190	snp	C	G	G:62 C:0
EA2454	2753319	complex	TGCA	CGCT	CGCT:47 TGCA:0
EA2454	2753393	snp	G	A	A:20 G:0
EA2454	2753398	snp	C	T	T:18 C:0
EA2454	2753403	snp	G	C	C:12 G:0
EA2454	2753526	snp	A	G	G:37 A:0
EA2454	2753570	snp	T	G	G:66 T:0
EA2454	2753602	snp	T	A	A:66 T:0
EA2454	2753613	snp	T	A	A:65 T:0
EA2454	2753621	snp	C	A	A:68 C:0
EA2454	2753628	snp	A	G	G:65 A:0
EA2454	2753667	snp	C	A	A:62 C:0
EA2454	2753698	complex	AGT	TGA	TGA:55 AGT:0
EA2454	2753727	snp	T	C	C:52 T:0
EA2454	2753837	snp	T	C	C:59 T:0
EA2454	2753955	snp	A	G	G:64 A:0
EA2454	2754024	complex	AGTT	GGTC	GGTC:66 AGTT:0
EA2454	2754075	complex	GCTT	ACTC	ACTC:58 GCTT:0
EA2454	2754087	snp	A	G	G:59 A:0
EA2454	2754154	snp	G	A	A:65 G:0
EA2454	2754318	snp	G	A	A:56 G:0
EA2454	2754462	snp	T	C	C:50 T:0
EA2454	2754588	snp	G	A	A:48 G:0
EA2454	2754822	snp	G	A	A:65 G:0
EA2454	2755025	snp	C	T	T:97 C:0
EA2454	2755140	snp	G	T	T:91 G:0
EA2454	2755245	snp	G	C	C:61 G:0
EA2454	2755470	snp	G	A	A:67 G:0
EA2454	2755667	snp	T	C	C:63 T:0
EA2454	2755700	snp	T	C	C:56 T:0
EA2454	2755745	snp	T	C	C:52 T:0
EA2454	2755790	snp	A	T	T:45 A:0
EA2454	2755795	complex	AA	TT	TT:43 AA:0
EA2454	2755850	snp	C	T	T:54 C:0
EA2454	2755859	complex	GCCAGGT	TCCGGGC	TCCGGGC:47 GCCAGGT:0
EA2454	2755877	snp	G	C	C:55 G:0
EA2454	2755901	snp	G	A	A:48 G:0
EA2454	2755934	complex	CAAA	GAAG	GAAG:43 CAAA:0
EA2454	2755955	snp	T	C	C:45 T:0
EA2454	2755979	snp	G	A	A:49 G:0
EA2454	2755985	snp	C	T	T:49 C:0
EA2454	2755994	snp	T	C	C:48 T:0
EA2454	2756000	snp	C	G	G:50 C:0
EA2454	2756009	snp	G	T	T:47 G:0
EA2454	2756219	snp	A	C	C:64 A:0
EA2454	2756483	snp	T	C	C:51 T:0
EA2454	2756504	snp	C	T	T:54 C:0
EA2454	2756557	snp	C	T	T:64 C:0
EA2454	2756625	snp	C	T	T:70 C:0
EA2454	2756665	snp	T	C	C:65 T:0
EA2454	2756704	snp	C	T	T:83 C:0
EA2454	2756743	snp	T	C	C:79 T:0
EA2454	2756824	snp	G	A	A:49 G:0
EA2454	2756842	snp	A	G	G:49 A:0
EA2454	2756869	snp	A	G	G:42 A:0
EA2454	2756899	snp	C	T	T:42 C:0
EA2454	2757001	snp	G	A	A:56 G:0
EA2454	2757085	snp	C	G	G:61 C:0
EA2454	2757110	snp	C	T	T:59 C:0
EA2454	2757118	snp	A	G	G:62 A:0
EA2454	2757211	snp	A	G	G:42 A:0
EA2454	2757229	complex	GAAC	AAAT	AAAT:39 GAAC:0
EA2454	2757391	snp	T	C	C:42 T:0
EA2454	2757397	snp	C	T	T:48 C:0
EA2454	2757484	snp	C	T	T:44 C:0
EA2454	2757490	snp	A	G	G:39 A:0
EA2454	2757520	snp	T	C	C:39 T:0
EA2454	2757546	snp	A	C	C:37 A:0
EA2454	2757565	snp	C	T	T:35 C:0
EA2454	2757616	snp	G	A	A:38 G:0
EA2454	2757706	snp	T	C	C:33 T:0
EA2454	2757733	snp	T	C	C:35 T:0
EA2454	2757763	snp	C	T	T:32 C:0
EA2454	2757805	snp	T	C	C:43 T:0
EA2454	2757817	snp	T	C	C:47 T:0
EA2454	2757850	complex	CGACCCA	TGATCCG	TGATCCG:50 CGACCCA:0
EA2454	2757931	snp	T	C	C:65 T:0
EA2454	2757958	snp	A	G	G:54 A:0
EA2454	2757964	snp	G	C	C:55 G:0
EA2454	2758010	complex	CGC	TGT	TGT:37 CGC:0
EA2454	2758167	snp	T	G	G:73 T:0
EA2454	2758400	snp	A	G	G:60 A:0
EA2454	2758442	snp	A	G	G:59 A:0
EA2454	2758529	snp	T	C	C:46 T:0
EA2454	2758562	snp	T	G	G:41 T:0
EA2454	2758569	snp	C	T	T:41 C:0
EA2454	2758574	complex	AAGT	GAGC	GAGC:39 AAGT:0
EA2454	2758673	snp	C	T	T:61 C:0
EA2454	2758700	snp	T	C	C:57 T:0
EA2454	2758755	complex	TTA	CTG	CTG:50 TTA:0
EA2454	2758985	snp	C	T	T:72 C:0
EA2454	2759151	snp	A	G	G:88 A:0
EA2454	2759164	complex	TCAGTGGCTAT	CTGGTAGTTAC	CTGGTAGTTAC:58 TCAGTGGCTAT:0
EA2454	2759386	snp	C	G	G:87 C:0
EA2454	2759408	snp	C	T	T:83 C:0
EA2454	2759416	complex	AGACA	TTACC	TTACC:76 AGACA:0
[truncated: 3,093 more rows]
