# Supplementary material for: Escherichia coli ST302: Genomic Analysis of Virulence Potential and Antimicrobial Resistance Mediated by Mobile Genetic Elements
Source: Front Microbiol. 2020 Jan 21;10:3098. doi: 10.3389/fmicb.2019.03098 (PMC6985150; doi:10.3389/fmicb.2019.03098)
Supplement: DATA S2 — ST302 SNP analysis. [file Data_Sheet_2.ZIP › SNP_Analysis/ST302_SNP/SNP_analysis/snippyout/ST302/F2_18C-Porcine-ST302.out/snps.gff]

##gff-version 3
EA2454	snippy:4.3.6	variation	977	977	.	.	0	note=snp T=>C C:29 T:0
EA2454	snippy:4.3.6	variation	4901	4901	.	.	0	note=snp T=>C C:41 T:0
EA2454	snippy:4.3.6	variation	5849	5849	.	.	0	note=snp C=>T T:41 C:0
EA2454	snippy:4.3.6	variation	9874	9874	.	.	0	note=ins A=>AAT AAT:46 A:0
EA2454	snippy:4.3.6	variation	10139	10139	.	.	0	note=snp A=>G G:69 A:0
EA2454	snippy:4.3.6	variation	11382	11382	.	.	0	note=snp A=>G G:49 A:0
EA2454	snippy:4.3.6	variation	11615	11615	.	.	0	note=snp T=>G G:28 T:1
EA2454	snippy:4.3.6	variation	24420	24420	.	.	0	note=snp T=>G G:43 T:0
EA2454	snippy:4.3.6	variation	25719	25719	.	.	0	note=snp T=>C C:64 T:0
EA2454	snippy:4.3.6	variation	32987	32987	.	.	0	note=snp C=>T T:59 C:0
EA2454	snippy:4.3.6	variation	34038	34038	.	.	0	note=snp C=>T T:63 C:0
EA2454	snippy:4.3.6	variation	34494	34494	.	.	0	note=snp T=>C C:53 T:0
EA2454	snippy:4.3.6	variation	36375	36375	.	.	0	note=snp C=>A A:49 C:0
EA2454	snippy:4.3.6	variation	37550	37550	.	.	0	note=snp G=>T T:55 G:0
EA2454	snippy:4.3.6	variation	37987	37987	.	.	0	note=snp T=>C C:59 T:0
EA2454	snippy:4.3.6	variation	42059	42059	.	.	0	note=snp T=>C C:57 T:0
EA2454	snippy:4.3.6	variation	48190	48190	.	.	0	note=snp C=>A A:34 C:0
EA2454	snippy:4.3.6	variation	50851	50851	.	.	0	note=snp A=>C C:52 A:1
EA2454	snippy:4.3.6	variation	53157	53157	.	.	0	note=snp C=>T T:48 C:0
EA2454	snippy:4.3.6	variation	54992	54992	.	.	0	note=snp T=>C C:43 T:0
EA2454	snippy:4.3.6	variation	55249	55249	.	.	0	note=snp C=>A A:61 C:0
EA2454	snippy:4.3.6	variation	56628	56628	.	.	0	note=snp A=>C C:48 A:0
EA2454	snippy:4.3.6	variation	58152	58152	.	.	0	note=snp T=>C C:58 T:0
EA2454	snippy:4.3.6	variation	59959	59959	.	.	0	note=snp G=>T T:59 G:0
EA2454	snippy:4.3.6	variation	64224	64224	.	.	0	note=snp C=>A A:66 C:0
EA2454	snippy:4.3.6	variation	67315	67315	.	.	0	note=snp A=>C C:54 A:0
EA2454	snippy:4.3.6	variation	69114	69114	.	.	0	note=snp A=>C C:80 A:0
EA2454	snippy:4.3.6	variation	69595	69595	.	.	0	note=snp A=>G G:78 A:0
EA2454	snippy:4.3.6	variation	71773	71773	.	.	0	note=snp G=>A A:92 G:0
EA2454	snippy:4.3.6	variation	71896	71896	.	.	0	note=snp C=>T T:103 C:0
EA2454	snippy:4.3.6	variation	74671	74671	.	.	0	note=snp A=>G G:103 A:0
EA2454	snippy:4.3.6	variation	77252	77252	.	.	0	note=snp A=>C C:86 A:0
EA2454	snippy:4.3.6	variation	80371	80371	.	.	0	note=snp C=>T T:43 C:0
EA2454	snippy:4.3.6	variation	82347	82347	.	.	0	note=snp T=>C C:70 T:0
EA2454	snippy:4.3.6	variation	84557	84557	.	.	0	note=snp T=>G G:65 T:0
EA2454	snippy:4.3.6	variation	87412	87412	.	.	0	note=snp A=>G G:72 A:0
EA2454	snippy:4.3.6	variation	88223	88223	.	.	0	note=del TTCAATATCAATATCAATA=>T T:58 TTCAATATCAATATCAATA:0
EA2454	snippy:4.3.6	variation	88705	88705	.	.	0	note=snp C=>T T:101 C:0
EA2454	snippy:4.3.6	variation	95737	95737	.	.	0	note=del CT=>C C:46 CT:0
EA2454	snippy:4.3.6	variation	99924	99924	.	.	0	note=snp C=>T T:31 C:0
EA2454	snippy:4.3.6	variation	101724	101724	.	.	0	note=snp A=>C C:79 A:0
EA2454	snippy:4.3.6	variation	103925	103925	.	.	0	note=snp A=>G G:56 A:0
EA2454	snippy:4.3.6	variation	105425	105425	.	.	0	note=del TA=>T T:27 TA:0
EA2454	snippy:4.3.6	variation	111773	111773	.	.	0	note=snp C=>G G:47 C:0
EA2454	snippy:4.3.6	variation	112615	112615	.	.	0	note=snp T=>G G:31 T:0
EA2454	snippy:4.3.6	variation	113186	113186	.	.	0	note=snp C=>T T:38 C:0
EA2454	snippy:4.3.6	variation	116969	116969	.	.	0	note=snp C=>T T:54 C:0
EA2454	snippy:4.3.6	variation	117807	117807	.	.	0	note=snp C=>T T:70 C:1
EA2454	snippy:4.3.6	variation	119029	119029	.	.	0	note=snp A=>G G:46 A:0
EA2454	snippy:4.3.6	variation	120366	120366	.	.	0	note=snp C=>A A:43 C:0
EA2454	snippy:4.3.6	variation	123376	123376	.	.	0	note=snp G=>A A:59 G:0
EA2454	snippy:4.3.6	variation	124865	124865	.	.	0	note=snp T=>C C:58 T:0
EA2454	snippy:4.3.6	variation	126504	126504	.	.	0	note=snp A=>G G:62 A:0
EA2454	snippy:4.3.6	variation	128072	128072	.	.	0	note=snp A=>G G:69 A:0
EA2454	snippy:4.3.6	variation	131613	131613	.	.	0	note=snp A=>G G:50 A:0
EA2454	snippy:4.3.6	variation	131667	131667	.	.	0	note=snp G=>A A:50 G:0
EA2454	snippy:4.3.6	variation	131768	131768	.	.	0	note=snp G=>A A:68 G:0
EA2454	snippy:4.3.6	variation	132114	132114	.	.	0	note=snp T=>C C:59 T:0
EA2454	snippy:4.3.6	variation	140951	140951	.	.	0	note=snp T=>G G:52 T:0
EA2454	snippy:4.3.6	variation	145428	145428	.	.	0	note=snp T=>C C:76 T:0
EA2454	snippy:4.3.6	variation	146087	146087	.	.	0	note=snp A=>C C:95 A:0
EA2454	snippy:4.3.6	variation	147861	147861	.	.	0	note=snp C=>T T:46 C:0
EA2454	snippy:4.3.6	variation	160440	160440	.	.	0	note=snp A=>C C:41 A:1
EA2454	snippy:4.3.6	variation	163764	163764	.	.	0	note=snp C=>T T:77 C:0
EA2454	snippy:4.3.6	variation	163798	163798	.	.	0	note=snp T=>C C:68 T:0
EA2454	snippy:4.3.6	variation	163970	163970	.	.	0	note=del AT=>A A:73 AT:0
EA2454	snippy:4.3.6	variation	166408	166408	.	.	0	note=snp T=>C C:86 T:0
EA2454	snippy:4.3.6	variation	170380	170380	.	.	0	note=snp G=>C C:44 G:0
EA2454	snippy:4.3.6	variation	170928	170928	.	.	0	note=snp C=>T T:40 C:0
EA2454	snippy:4.3.6	variation	172664	172664	.	.	0	note=snp C=>T T:29 C:0
EA2454	snippy:4.3.6	variation	174420	174420	.	.	0	note=snp A=>G G:66 A:0
EA2454	snippy:4.3.6	variation	177572	177572	.	.	0	note=snp C=>T T:59 C:1
EA2454	snippy:4.3.6	variation	183092	183092	.	.	0	note=snp C=>T T:62 C:0
EA2454	snippy:4.3.6	variation	186323	186323	.	.	0	note=snp C=>A A:70 C:0
EA2454	snippy:4.3.6	variation	186550	186550	.	.	0	note=snp T=>C C:58 T:0
EA2454	snippy:4.3.6	variation	187941	187941	.	.	0	note=snp A=>G G:55 A:0
EA2454	snippy:4.3.6	variation	190313	190313	.	.	0	note=snp T=>C C:54 T:0
EA2454	snippy:4.3.6	variation	190570	190570	.	.	0	note=snp T=>G G:69 T:1
EA2454	snippy:4.3.6	variation	205385	205385	.	.	0	note=snp G=>T T:41 G:0
EA2454	snippy:4.3.6	variation	212904	212904	.	.	0	note=snp C=>T T:54 C:0
EA2454	snippy:4.3.6	variation	216313	216313	.	.	0	note=snp C=>T T:59 C:0
EA2454	snippy:4.3.6	variation	217635	217635	.	.	0	note=snp C=>T T:73 C:0
EA2454	snippy:4.3.6	variation	220577	220577	.	.	0	note=snp G=>A A:53 G:0
EA2454	snippy:4.3.6	variation	234965	234965	.	.	0	note=snp G=>T T:68 G:0
EA2454	snippy:4.3.6	variation	239221	239221	.	.	0	note=snp A=>G G:42 A:0
EA2454	snippy:4.3.6	variation	243559	243559	.	.	0	note=snp A=>G G:60 A:0
EA2454	snippy:4.3.6	variation	245301	245301	.	.	0	note=snp C=>T T:52 C:0
EA2454	snippy:4.3.6	variation	245648	245648	.	.	0	note=snp C=>T T:39 C:0
EA2454	snippy:4.3.6	variation	248471	248471	.	.	0	note=snp T=>C C:55 T:0
EA2454	snippy:4.3.6	variation	250111	250111	.	.	0	note=snp C=>A A:45 C:1
EA2454	snippy:4.3.6	variation	251758	251758	.	.	0	note=snp T=>C C:23 T:0
EA2454	snippy:4.3.6	variation	255306	255306	.	.	0	note=snp G=>A A:66 G:0
EA2454	snippy:4.3.6	variation	260007	260007	.	.	0	note=snp C=>A A:43 C:0
EA2454	snippy:4.3.6	variation	274429	274429	.	.	0	note=snp G=>A A:84 G:0
EA2454	snippy:4.3.6	variation	275599	275599	.	.	0	note=snp G=>A A:74 G:0
EA2454	snippy:4.3.6	variation	275686	275686	.	.	0	note=del GAGC=>G G:59 GAGC:0
EA2454	snippy:4.3.6	variation	277376	277376	.	.	0	note=snp C=>T T:53 C:0
EA2454	snippy:4.3.6	variation	277907	277907	.	.	0	note=snp G=>T T:47 G:0
EA2454	snippy:4.3.6	variation	278848	278848	.	.	0	note=snp A=>G G:75 A:0
EA2454	snippy:4.3.6	variation	280614	280614	.	.	0	note=snp C=>T T:49 C:0
EA2454	snippy:4.3.6	variation	281916	281916	.	.	0	note=snp A=>G G:43 A:0
EA2454	snippy:4.3.6	variation	282929	282929	.	.	0	note=snp C=>T T:48 C:0
EA2454	snippy:4.3.6	variation	284131	284131	.	.	0	note=snp A=>G G:48 A:0
EA2454	snippy:4.3.6	variation	285627	285627	.	.	0	note=ins A=>AT AT:120 A:0
EA2454	snippy:4.3.6	variation	289582	289582	.	.	0	note=snp C=>T T:87 C:0
EA2454	snippy:4.3.6	variation	290187	290187	.	.	0	note=snp C=>A A:65 C:0
EA2454	snippy:4.3.6	variation	298055	298055	.	.	0	note=snp G=>T T:73 G:0
EA2454	snippy:4.3.6	variation	298286	298286	.	.	0	note=snp T=>C C:72 T:0
EA2454	snippy:4.3.6	variation	310181	310181	.	.	0	note=snp G=>A A:54 G:0
EA2454	snippy:4.3.6	variation	311347	311347	.	.	0	note=snp G=>A A:55 G:0
EA2454	snippy:4.3.6	variation	313034	313034	.	.	0	note=snp A=>G G:37 A:0
EA2454	snippy:4.3.6	variation	313645	313645	.	.	0	note=del GC=>G G:50 GC:0
EA2454	snippy:4.3.6	variation	316769	316769	.	.	0	note=snp C=>A A:64 C:0
EA2454	snippy:4.3.6	variation	317106	317106	.	.	0	note=snp T=>C C:62 T:0
EA2454	snippy:4.3.6	variation	334446	334446	.	.	0	note=snp T=>C C:58 T:0
EA2454	snippy:4.3.6	variation	341041	341041	.	.	0	note=snp C=>T T:46 C:1
EA2454	snippy:4.3.6	variation	343648	343648	.	.	0	note=snp G=>A A:80 G:0
EA2454	snippy:4.3.6	variation	344966	344966	.	.	0	note=snp T=>C C:69 T:0
EA2454	snippy:4.3.6	variation	350969	350969	.	.	0	note=snp A=>G G:47 A:0
EA2454	snippy:4.3.6	variation	352054	352054	.	.	0	note=snp C=>A A:52 C:0
EA2454	snippy:4.3.6	variation	352488	352488	.	.	0	note=snp A=>C C:86 A:0
EA2454	snippy:4.3.6	variation	354964	354964	.	.	0	note=snp G=>A A:38 G:0
EA2454	snippy:4.3.6	variation	359110	359110	.	.	0	note=snp C=>T T:53 C:0
EA2454	snippy:4.3.6	variation	359344	359344	.	.	0	note=snp T=>A A:54 T:0
EA2454	snippy:4.3.6	variation	359494	359494	.	.	0	note=snp G=>A A:54 G:0
EA2454	snippy:4.3.6	variation	360484	360484	.	.	0	note=snp G=>A A:50 G:0
EA2454	snippy:4.3.6	variation	361440	361440	.	.	0	note=snp G=>A A:47 G:0
EA2454	snippy:4.3.6	variation	369429	369429	.	.	0	note=snp T=>C C:60 T:0
EA2454	snippy:4.3.6	variation	371038	371038	.	.	0	note=snp A=>G G:84 A:0
EA2454	snippy:4.3.6	variation	371150	371150	.	.	0	note=snp T=>C C:72 T:0
EA2454	snippy:4.3.6	variation	378279	378279	.	.	0	note=snp G=>A A:44 G:0
EA2454	snippy:4.3.6	variation	392511	392511	.	.	0	note=snp T=>C C:84 T:0
EA2454	snippy:4.3.6	variation	393575	393575	.	.	0	note=snp A=>G G:44 A:0
EA2454	snippy:4.3.6	variation	393743	393743	.	.	0	note=snp A=>G G:45 A:0
EA2454	snippy:4.3.6	variation	396436	396436	.	.	0	note=snp C=>A A:54 C:0
EA2454	snippy:4.3.6	variation	397444	397444	.	.	0	note=snp C=>G G:51 C:0
EA2454	snippy:4.3.6	variation	401544	401544	.	.	0	note=snp C=>T T:59 C:0
EA2454	snippy:4.3.6	variation	402042	402042	.	.	0	note=snp G=>A A:62 G:0
EA2454	snippy:4.3.6	variation	407113	407113	.	.	0	note=snp A=>G G:65 A:0
EA2454	snippy:4.3.6	variation	407887	407887	.	.	0	note=snp C=>G G:59 C:0
EA2454	snippy:4.3.6	variation	408866	408866	.	.	0	note=snp T=>C C:45 T:0
EA2454	snippy:4.3.6	variation	409424	409424	.	.	0	note=snp G=>T T:46 G:0
EA2454	snippy:4.3.6	variation	409884	409884	.	.	0	note=snp T=>G G:60 T:1
EA2454	snippy:4.3.6	variation	412599	412599	.	.	0	note=snp C=>T T:46 C:0
EA2454	snippy:4.3.6	variation	413942	413942	.	.	0	note=snp G=>A A:77 G:0
EA2454	snippy:4.3.6	variation	414943	414943	.	.	0	note=snp G=>A A:52 G:0
EA2454	snippy:4.3.6	variation	415150	415150	.	.	0	note=snp G=>A A:49 G:0
EA2454	snippy:4.3.6	variation	417355	417355	.	.	0	note=snp T=>A A:39 T:0
EA2454	snippy:4.3.6	variation	428546	428546	.	.	0	note=snp G=>A A:54 G:0
EA2454	snippy:4.3.6	variation	429895	429895	.	.	0	note=snp C=>A A:30 C:0
EA2454	snippy:4.3.6	variation	430947	430947	.	.	0	note=snp T=>C C:63 T:0
EA2454	snippy:4.3.6	variation	437474	437474	.	.	0	note=snp A=>G G:53 A:0
EA2454	snippy:4.3.6	variation	440837	440837	.	.	0	note=snp C=>A A:57 C:0
EA2454	snippy:4.3.6	variation	441911	441911	.	.	0	note=snp T=>C C:70 T:1
EA2454	snippy:4.3.6	variation	443213	443213	.	.	0	note=snp A=>G G:83 A:0
EA2454	snippy:4.3.6	variation	443268	443268	.	.	0	note=snp T=>A A:79 T:0
EA2454	snippy:4.3.6	variation	445627	445627	.	.	0	note=snp G=>T T:45 G:0
EA2454	snippy:4.3.6	variation	447459	447459	.	.	0	note=snp A=>G G:43 A:0
EA2454	snippy:4.3.6	variation	448711	448711	.	.	0	note=snp A=>G G:56 A:0
EA2454	snippy:4.3.6	variation	452556	452556	.	.	0	note=snp C=>A A:40 C:0
EA2454	snippy:4.3.6	variation	452711	452711	.	.	0	note=snp T=>A A:39 T:0
EA2454	snippy:4.3.6	variation	453785	453785	.	.	0	note=snp C=>A A:54 C:0
EA2454	snippy:4.3.6	variation	457082	457082	.	.	0	note=snp C=>T T:42 C:0
EA2454	snippy:4.3.6	variation	459248	459248	.	.	0	note=snp A=>G G:45 A:0
EA2454	snippy:4.3.6	variation	464006	464006	.	.	0	note=snp A=>C C:67 A:0
EA2454	snippy:4.3.6	variation	465826	465826	.	.	0	note=snp A=>T T:44 A:0
EA2454	snippy:4.3.6	variation	465874	465874	.	.	0	note=snp G=>A A:40 G:0
EA2454	snippy:4.3.6	variation	469328	469328	.	.	0	note=snp G=>A A:52 G:0
EA2454	snippy:4.3.6	variation	472868	472868	.	.	0	note=snp A=>C C:41 A:0
EA2454	snippy:4.3.6	variation	472911	472911	.	.	0	note=snp T=>C C:47 T:0
EA2454	snippy:4.3.6	variation	474394	474394	.	.	0	note=snp G=>A A:55 G:0
EA2454	snippy:4.3.6	variation	477552	477552	.	.	0	note=snp G=>A A:48 G:0
EA2454	snippy:4.3.6	variation	478727	478727	.	.	0	note=snp C=>A A:34 C:0
EA2454	snippy:4.3.6	variation	484002	484002	.	.	0	note=snp G=>A A:51 G:0
EA2454	snippy:4.3.6	variation	484564	484564	.	.	0	note=snp A=>G G:110 A:0
EA2454	snippy:4.3.6	variation	485779	485779	.	.	0	note=snp C=>G G:60 C:0
EA2454	snippy:4.3.6	variation	488462	488462	.	.	0	note=snp G=>A A:69 G:0
EA2454	snippy:4.3.6	variation	497400	497400	.	.	0	note=snp T=>G G:71 T:0
EA2454	snippy:4.3.6	variation	497460	497460	.	.	0	note=snp T=>G G:63 T:0
EA2454	snippy:4.3.6	variation	499083	499083	.	.	0	note=snp A=>T T:50 A:0
EA2454	snippy:4.3.6	variation	499232	499232	.	.	0	note=snp G=>T T:43 G:0
EA2454	snippy:4.3.6	variation	499875	499875	.	.	0	note=snp C=>A A:42 C:0
EA2454	snippy:4.3.6	variation	502913	502913	.	.	0	note=snp G=>A A:55 G:0
EA2454	snippy:4.3.6	variation	506352	506352	.	.	0	note=snp T=>G G:88 T:0
EA2454	snippy:4.3.6	variation	506422	506422	.	.	0	note=snp G=>A A:111 G:1
EA2454	snippy:4.3.6	variation	511266	511266	.	.	0	note=snp C=>T T:90 C:0
EA2454	snippy:4.3.6	variation	511943	511943	.	.	0	note=snp A=>G G:135 A:0
EA2454	snippy:4.3.6	variation	516039	516039	.	.	0	note=snp T=>C C:48 T:0
EA2454	snippy:4.3.6	variation	517972	517972	.	.	0	note=snp G=>A A:45 G:0
EA2454	snippy:4.3.6	variation	519811	519811	.	.	0	note=snp A=>C C:59 A:0
EA2454	snippy:4.3.6	variation	523923	523923	.	.	0	note=snp C=>G G:40 C:0
EA2454	snippy:4.3.6	variation	528123	528123	.	.	0	note=snp A=>T T:35 A:0
EA2454	snippy:4.3.6	variation	529040	529040	.	.	0	note=snp C=>T T:57 C:0
EA2454	snippy:4.3.6	variation	530275	530275	.	.	0	note=snp C=>A A:45 C:0
EA2454	snippy:4.3.6	variation	531539	531539	.	.	0	note=snp G=>A A:71 G:0
EA2454	snippy:4.3.6	variation	534151	534151	.	.	0	note=snp A=>G G:50 A:0
EA2454	snippy:4.3.6	variation	537287	537287	.	.	0	note=snp G=>C C:73 G:0
EA2454	snippy:4.3.6	variation	539426	539426	.	.	0	note=snp T=>C C:64 T:0
EA2454	snippy:4.3.6	variation	543142	543142	.	.	0	note=snp C=>T T:44 C:0
EA2454	snippy:4.3.6	variation	545737	545737	.	.	0	note=snp G=>A A:48 G:0
EA2454	snippy:4.3.6	variation	546428	546428	.	.	0	note=snp A=>C C:39 A:0
EA2454	snippy:4.3.6	variation	547798	547798	.	.	0	note=snp G=>A A:85 G:0
EA2454	snippy:4.3.6	variation	549981	549981	.	.	0	note=snp C=>T T:30 C:0
EA2454	snippy:4.3.6	variation	550654	550654	.	.	0	note=snp T=>C C:42 T:0
EA2454	snippy:4.3.6	variation	552561	552561	.	.	0	note=snp C=>T T:35 C:0
EA2454	snippy:4.3.6	variation	559017	559017	.	.	0	note=snp A=>G G:62 A:0
EA2454	snippy:4.3.6	variation	561226	561226	.	.	0	note=snp G=>A A:28 G:0
EA2454	snippy:4.3.6	variation	561259	561259	.	.	0	note=snp C=>A A:17 C:0
EA2454	snippy:4.3.6	variation	561272	561272	.	.	0	note=snp T=>A A:15 T:0
EA2454	snippy:4.3.6	variation	562933	562933	.	.	0	note=snp T=>C C:49 T:0
EA2454	snippy:4.3.6	variation	562951	562951	.	.	0	note=snp C=>T T:51 C:0
EA2454	snippy:4.3.6	variation	569748	569748	.	.	0	note=complex TATCG=>CATCA CATCA:69 TATCG:0
EA2454	snippy:4.3.6	variation	571709	571709	.	.	0	note=snp A=>G G:91 A:0
EA2454	snippy:4.3.6	variation	586152	586152	.	.	0	note=snp G=>A A:49 G:0
EA2454	snippy:4.3.6	variation	595216	595216	.	.	0	note=snp T=>A A:86 T:0
EA2454	snippy:4.3.6	variation	595654	595654	.	.	0	note=snp T=>C C:91 T:0
EA2454	snippy:4.3.6	variation	597386	597386	.	.	0	note=snp A=>G G:73 A:0
EA2454	snippy:4.3.6	variation	602583	602583	.	.	0	note=snp A=>G G:32 A:0
EA2454	snippy:4.3.6	variation	606088	606088	.	.	0	note=ins G=>GA GA:63 G:0
EA2454	snippy:4.3.6	variation	606400	606400	.	.	0	note=snp T=>G G:63 T:0
EA2454	snippy:4.3.6	variation	610464	610464	.	.	0	note=snp A=>C C:63 A:1
EA2454	snippy:4.3.6	variation	611188	611188	.	.	0	note=snp G=>A A:91 G:0
EA2454	snippy:4.3.6	variation	611872	611872	.	.	0	note=snp A=>G G:114 A:0
EA2454	snippy:4.3.6	variation	612410	612410	.	.	0	note=snp C=>T T:105 C:0
EA2454	snippy:4.3.6	variation	612726	612726	.	.	0	note=snp A=>G G:62 A:0
EA2454	snippy:4.3.6	variation	613906	613906	.	.	0	note=snp C=>A A:114 C:0
EA2454	snippy:4.3.6	variation	613974	613974	.	.	0	note=snp C=>T T:110 C:0
EA2454	snippy:4.3.6	variation	622741	622741	.	.	0	note=snp T=>G G:61 T:0
EA2454	snippy:4.3.6	variation	623622	623622	.	.	0	note=snp C=>T T:46 C:0
EA2454	snippy:4.3.6	variation	631335	631335	.	.	0	note=snp T=>C C:78 T:0
EA2454	snippy:4.3.6	variation	634760	634760	.	.	0	note=snp G=>T T:69 G:0
EA2454	snippy:4.3.6	variation	635649	635649	.	.	0	note=snp A=>C C:48 A:0
EA2454	snippy:4.3.6	variation	635707	635707	.	.	0	note=snp C=>A A:41 C:0
EA2454	snippy:4.3.6	variation	644101	644101	.	.	0	note=snp A=>G G:62 A:0
EA2454	snippy:4.3.6	variation	644913	644913	.	.	0	note=snp T=>C C:65 T:0
EA2454	snippy:4.3.6	variation	649668	649668	.	.	0	note=snp G=>T T:71 G:1
EA2454	snippy:4.3.6	variation	653031	653031	.	.	0	note=snp C=>T T:42 C:0
EA2454	snippy:4.3.6	variation	654968	654968	.	.	0	note=snp T=>G G:63 T:0
EA2454	snippy:4.3.6	variation	665110	665110	.	.	0	note=snp C=>G G:56 C:0
EA2454	snippy:4.3.6	variation	669330	669330	.	.	0	note=snp A=>G G:34 A:0
EA2454	snippy:4.3.6	variation	674190	674190	.	.	0	note=snp T=>G G:61 T:0
EA2454	snippy:4.3.6	variation	674305	674305	.	.	0	note=snp G=>C C:55 G:0
EA2454	snippy:4.3.6	variation	683177	683177	.	.	0	note=snp T=>G G:39 T:0
EA2454	snippy:4.3.6	variation	684313	684313	.	.	0	note=snp C=>T T:40 C:0
EA2454	snippy:4.3.6	variation	685213	685213	.	.	0	note=snp G=>A A:44 G:0
EA2454	snippy:4.3.6	variation	686003	686003	.	.	0	note=snp A=>G G:81 A:0
EA2454	snippy:4.3.6	variation	686104	686104	.	.	0	note=snp G=>C C:78 G:0
EA2454	snippy:4.3.6	variation	686464	686464	.	.	0	note=ins A=>AT AT:60 A:0
EA2454	snippy:4.3.6	variation	687410	687410	.	.	0	note=snp A=>G G:34 A:0
EA2454	snippy:4.3.6	variation	687596	687596	.	.	0	note=snp G=>A A:36 G:0
EA2454	snippy:4.3.6	variation	690408	690408	.	.	0	note=snp A=>G G:40 A:0
EA2454	snippy:4.3.6	variation	690611	690611	.	.	0	note=snp T=>C C:39 T:0
EA2454	snippy:4.3.6	variation	704676	704676	.	.	0	note=snp C=>T T:52 C:0
EA2454	snippy:4.3.6	variation	705263	705263	.	.	0	note=snp C=>A A:84 C:0
EA2454	snippy:4.3.6	variation	707817	707817	.	.	0	note=snp C=>T T:44 C:0
EA2454	snippy:4.3.6	variation	709632	709632	.	.	0	note=snp T=>C C:40 T:0
EA2454	snippy:4.3.6	variation	710977	710977	.	.	0	note=snp A=>G G:49 A:0
EA2454	snippy:4.3.6	variation	724890	724890	.	.	0	note=snp G=>A A:62 G:0
EA2454	snippy:4.3.6	variation	731219	731219	.	.	0	note=snp T=>G G:70 T:0
EA2454	snippy:4.3.6	variation	731329	731329	.	.	0	note=snp G=>A A:60 G:0
EA2454	snippy:4.3.6	variation	737158	737158	.	.	0	note=snp C=>T T:57 C:0
EA2454	snippy:4.3.6	variation	742876	742876	.	.	0	note=snp T=>C C:52 T:0
EA2454	snippy:4.3.6	variation	748560	748560	.	.	0	note=snp G=>C C:55 G:0
EA2454	snippy:4.3.6	variation	749156	749156	.	.	0	note=snp C=>A A:56 C:0
EA2454	snippy:4.3.6	variation	753727	753727	.	.	0	note=snp T=>C C:62 T:0
EA2454	snippy:4.3.6	variation	754601	754601	.	.	0	note=snp C=>A A:66 C:0
EA2454	snippy:4.3.6	variation	755366	755366	.	.	0	note=snp A=>G G:43 A:0
EA2454	snippy:4.3.6	variation	756040	756040	.	.	0	note=snp T=>G G:48 T:0
EA2454	snippy:4.3.6	variation	758394	758394	.	.	0	note=snp C=>T T:42 C:0
EA2454	snippy:4.3.6	variation	765032	765032	.	.	0	note=snp T=>C C:55 T:0
EA2454	snippy:4.3.6	variation	769569	769569	.	.	0	note=complex CC=>AA AA:17 CC:0
EA2454	snippy:4.3.6	variation	769716	769716	.	.	0	note=complex GGGCA=>AGACG AGACG:54 GGGCA:0
EA2454	snippy:4.3.6	variation	769727	769727	.	.	0	note=snp G=>C C:63 G:0
EA2454	snippy:4.3.6	variation	769759	769759	.	.	0	note=snp C=>T T:58 C:0
EA2454	snippy:4.3.6	variation	769764	769764	.	.	0	note=complex CC=>AACT AACT:53 CC:0
EA2454	snippy:4.3.6	variation	769777	769777	.	.	0	note=snp G=>T T:66 G:0
EA2454	snippy:4.3.6	variation	769784	769784	.	.	0	note=complex ATC=>GTA GTA:62 ATC:0
EA2454	snippy:4.3.6	variation	769823	769823	.	.	0	note=snp C=>T T:80 C:0
EA2454	snippy:4.3.6	variation	769965	769965	.	.	0	note=snp T=>G G:58 T:0
EA2454	snippy:4.3.6	variation	769976	769976	.	.	0	note=snp T=>C C:55 T:0
EA2454	snippy:4.3.6	variation	770001	770001	.	.	0	note=snp T=>C C:50 T:0
EA2454	snippy:4.3.6	variation	770022	770022	.	.	0	note=complex GCAGA=>ACAGG ACAGG:70 GCAGA:0
EA2454	snippy:4.3.6	variation	770037	770037	.	.	0	note=snp C=>T T:69 C:0
EA2454	snippy:4.3.6	variation	770046	770046	.	.	0	note=snp A=>C C:63 A:0
EA2454	snippy:4.3.6	variation	770058	770058	.	.	0	note=complex TGGT=>CGGC CGGC:63 TGGT:0
EA2454	snippy:4.3.6	variation	770751	770751	.	.	0	note=snp C=>T T:146 C:0
EA2454	snippy:4.3.6	variation	770774	770774	.	.	0	note=snp A=>G G:149 A:0
EA2454	snippy:4.3.6	variation	771044	771044	.	.	0	note=snp C=>T T:10 C:0
EA2454	snippy:4.3.6	variation	774482	774482	.	.	0	note=snp G=>A A:36 G:0
EA2454	snippy:4.3.6	variation	783857	783857	.	.	0	note=snp T=>C C:53 T:0
EA2454	snippy:4.3.6	variation	784404	784404	.	.	0	note=snp C=>T T:60 C:0
EA2454	snippy:4.3.6	variation	784434	784434	.	.	0	note=snp T=>C C:58 T:0
EA2454	snippy:4.3.6	variation	784455	784455	.	.	0	note=snp A=>T T:63 A:0
EA2454	snippy:4.3.6	variation	784542	784542	.	.	0	note=snp G=>A A:83 G:0
EA2454	snippy:4.3.6	variation	784570	784570	.	.	0	note=snp A=>C C:94 A:0
EA2454	snippy:4.3.6	variation	784592	784592	.	.	0	note=snp C=>G G:96 C:0
EA2454	snippy:4.3.6	variation	784987	784987	.	.	0	note=snp T=>C C:100 T:0
EA2454	snippy:4.3.6	variation	786559	786559	.	.	0	note=snp A=>C C:96 A:0
EA2454	snippy:4.3.6	variation	788461	788461	.	.	0	note=snp G=>T T:51 G:1
EA2454	snippy:4.3.6	variation	789417	789417	.	.	0	note=snp A=>C C:79 A:0
EA2454	snippy:4.3.6	variation	793051	793051	.	.	0	note=snp A=>G G:44 A:0
EA2454	snippy:4.3.6	variation	798552	798552	.	.	0	note=snp T=>G G:33 T:0
EA2454	snippy:4.3.6	variation	805180	805180	.	.	0	note=snp A=>T T:58 A:0
EA2454	snippy:4.3.6	variation	805481	805481	.	.	0	note=snp A=>G G:71 A:0
EA2454	snippy:4.3.6	variation	811804	811804	.	.	0	note=snp T=>C C:47 T:0
EA2454	snippy:4.3.6	variation	816627	816627	.	.	0	note=snp C=>T T:51 C:0
EA2454	snippy:4.3.6	variation	816840	816840	.	.	0	note=snp G=>T T:56 G:0
EA2454	snippy:4.3.6	variation	817446	817446	.	.	0	note=snp A=>G G:59 A:0
EA2454	snippy:4.3.6	variation	817985	817985	.	.	0	note=snp T=>G G:52 T:0
EA2454	snippy:4.3.6	variation	818649	818649	.	.	0	note=snp A=>C C:45 A:0
EA2454	snippy:4.3.6	variation	820251	820251	.	.	0	note=snp G=>T T:31 G:0
EA2454	snippy:4.3.6	variation	821110	821110	.	.	0	note=snp A=>C C:34 A:0
EA2454	snippy:4.3.6	variation	828884	828884	.	.	0	note=snp T=>C C:79 T:0
EA2454	snippy:4.3.6	variation	834575	834575	.	.	0	note=ins A=>AT AT:27 A:0
EA2454	snippy:4.3.6	variation	839081	839081	.	.	0	note=snp G=>A A:32 G:0
EA2454	snippy:4.3.6	variation	840204	840204	.	.	0	note=snp G=>A A:37 G:0
EA2454	snippy:4.3.6	variation	841039	841039	.	.	0	note=snp A=>G G:45 A:0
EA2454	snippy:4.3.6	variation	845338	845338	.	.	0	note=snp G=>A A:39 G:0
EA2454	snippy:4.3.6	variation	848276	848276	.	.	0	note=snp G=>A A:39 G:0
EA2454	snippy:4.3.6	variation	852695	852695	.	.	0	note=snp A=>G G:24 A:0
EA2454	snippy:4.3.6	variation	854766	854766	.	.	0	note=snp G=>T T:44 G:0
EA2454	snippy:4.3.6	variation	855868	855868	.	.	0	note=snp A=>C C:59 A:0
EA2454	snippy:4.3.6	variation	856699	856699	.	.	0	note=snp A=>T T:71 A:0
EA2454	snippy:4.3.6	variation	857444	857444	.	.	0	note=snp T=>C C:54 T:0
EA2454	snippy:4.3.6	variation	857633	857633	.	.	0	note=snp A=>T T:48 A:0
EA2454	snippy:4.3.6	variation	861588	861588	.	.	0	note=snp G=>A A:53 G:0
EA2454	snippy:4.3.6	variation	863496	863496	.	.	0	note=snp A=>G G:51 A:0
EA2454	snippy:4.3.6	variation	877501	877501	.	.	0	note=snp T=>G G:35 T:0
EA2454	snippy:4.3.6	variation	891369	891369	.	.	0	note=snp A=>G G:78 A:0
EA2454	snippy:4.3.6	variation	894538	894538	.	.	0	note=snp C=>T T:57 C:0
EA2454	snippy:4.3.6	variation	899104	899104	.	.	0	note=snp T=>A A:54 T:0
EA2454	snippy:4.3.6	variation	904482	904482	.	.	0	note=snp A=>G G:48 A:0
EA2454	snippy:4.3.6	variation	904955	904955	.	.	0	note=snp G=>T T:62 G:0
EA2454	snippy:4.3.6	variation	910030	910030	.	.	0	note=snp G=>T T:45 G:0
EA2454	snippy:4.3.6	variation	911296	911296	.	.	0	note=snp C=>T T:82 C:0
EA2454	snippy:4.3.6	variation	911716	911716	.	.	0	note=snp G=>A A:61 G:0
EA2454	snippy:4.3.6	variation	918989	918989	.	.	0	note=snp G=>A A:77 G:0
EA2454	snippy:4.3.6	variation	919060	919060	.	.	0	note=snp T=>G G:68 T:0
EA2454	snippy:4.3.6	variation	924524	924524	.	.	0	note=snp C=>T T:39 C:0
EA2454	snippy:4.3.6	variation	924579	924579	.	.	0	note=snp T=>C C:52 T:0
EA2454	snippy:4.3.6	variation	930102	930102	.	.	0	note=snp A=>G G:53 A:0
EA2454	snippy:4.3.6	variation	931665	931665	.	.	0	note=snp G=>A A:56 G:0
EA2454	snippy:4.3.6	variation	934870	934870	.	.	0	note=snp G=>A A:83 G:0
EA2454	snippy:4.3.6	variation	935073	935073	.	.	0	note=ins C=>CAAAAAA CAAAAAA:21 C:0
EA2454	snippy:4.3.6	variation	936296	936296	.	.	0	note=snp C=>T T:66 C:0
EA2454	snippy:4.3.6	variation	937614	937614	.	.	0	note=snp C=>T T:53 C:0
EA2454	snippy:4.3.6	variation	938195	938195	.	.	0	note=snp A=>G G:47 A:0
EA2454	snippy:4.3.6	variation	941489	941489	.	.	0	note=snp C=>A A:70 C:0
EA2454	snippy:4.3.6	variation	945162	945162	.	.	0	note=snp A=>G G:48 A:0
EA2454	snippy:4.3.6	variation	946875	946875	.	.	0	note=snp T=>C C:55 T:0
EA2454	snippy:4.3.6	variation	948450	948450	.	.	0	note=snp T=>C C:56 T:0
EA2454	snippy:4.3.6	variation	949221	949221	.	.	0	note=snp C=>A A:85 C:0
EA2454	snippy:4.3.6	variation	949574	949574	.	.	0	note=complex CGCGTTTTTTTTCGCGT=>TCGCGTTTTTTTTCGCG TCGCGTTTTTTTTCGCG:18 CGCGTTTTTTTTCGCGT:0
EA2454	snippy:4.3.6	variation	949641	949641	.	.	0	note=ins G=>GTTTCCGCAATTT GTTTCCGCAATTT:37 G:3
EA2454	snippy:4.3.6	variation	951396	951396	.	.	0	note=snp G=>A A:44 G:0
EA2454	snippy:4.3.6	variation	951474	951474	.	.	0	note=snp A=>C C:13 A:0
EA2454	snippy:4.3.6	variation	953284	953284	.	.	0	note=snp T=>A A:41 T:0
EA2454	snippy:4.3.6	variation	964577	964577	.	.	0	note=snp A=>G G:167 A:0
EA2454	snippy:4.3.6	variation	964586	964586	.	.	0	note=snp A=>G G:348 A:1
EA2454	snippy:4.3.6	variation	964604	964604	.	.	0	note=snp T=>G G:406 T:0
EA2454	snippy:4.3.6	variation	964703	964703	.	.	0	note=complex TG=>CA CA:135 TG:0
EA2454	snippy:4.3.6	variation	964710	964710	.	.	0	note=snp T=>C C:70 T:0
EA2454	snippy:4.3.6	variation	983278	983278	.	.	0	note=snp T=>G G:26 T:0
EA2454	snippy:4.3.6	variation	983325	983325	.	.	0	note=complex TCG=>ACC ACC:31 TCG:0
EA2454	snippy:4.3.6	variation	983359	983359	.	.	0	note=complex GCATA=>ACACT ACACT:30 GCATA:0
EA2454	snippy:4.3.6	variation	983371	983371	.	.	0	note=snp G=>A A:38 G:0
EA2454	snippy:4.3.6	variation	983404	983404	.	.	0	note=snp T=>C C:44 T:0
EA2454	snippy:4.3.6	variation	983426	983426	.	.	0	note=snp G=>A A:45 G:0
EA2454	snippy:4.3.6	variation	983446	983446	.	.	0	note=snp A=>C C:44 A:0
EA2454	snippy:4.3.6	variation	983525	983525	.	.	0	note=snp A=>G G:52 A:0
EA2454	snippy:4.3.6	variation	983570	983570	.	.	0	note=complex CTGC=>TTGT TTGT:49 CTGC:0
EA2454	snippy:4.3.6	variation	983840	983840	.	.	0	note=snp A=>G G:46 A:0
EA2454	snippy:4.3.6	variation	983889	983889	.	.	0	note=snp G=>A A:41 G:0
EA2454	snippy:4.3.6	variation	983901	983901	.	.	0	note=snp C=>T T:43 C:0
EA2454	snippy:4.3.6	variation	983906	983906	.	.	0	note=complex TGGT=>CGGC CGGC:42 TGGT:0
EA2454	snippy:4.3.6	variation	984038	984038	.	.	0	note=snp A=>G G:44 A:0
EA2454	snippy:4.3.6	variation	984050	984050	.	.	0	note=snp G=>T T:45 G:0
EA2454	snippy:4.3.6	variation	984129	984129	.	.	0	note=complex ACTCTGG=>GCCCTGT GCCCTGT:31 ACTCTGG:0
EA2454	snippy:4.3.6	variation	984294	984294	.	.	0	note=snp G=>A A:46 G:0
EA2454	snippy:4.3.6	variation	984305	984305	.	.	0	note=complex AGCA=>TGCT TGCT:41 AGCA:0
EA2454	snippy:4.3.6	variation	984317	984317	.	.	0	note=snp A=>G G:42 A:0
EA2454	snippy:4.3.6	variation	984344	984344	.	.	0	note=snp C=>T T:47 C:0
EA2454	snippy:4.3.6	variation	984401	984401	.	.	0	note=snp A=>T T:31 A:0
EA2454	snippy:4.3.6	variation	984422	984422	.	.	0	note=complex GCGCAAC=>ACGCGAT ACGCGAT:20 GCGCAAC:0
EA2454	snippy:4.3.6	variation	984434	984434	.	.	0	note=snp G=>A A:19 G:0
EA2454	snippy:4.3.6	variation	984440	984440	.	.	0	note=snp T=>C C:18 T:0
EA2454	snippy:4.3.6	variation	989594	989594	.	.	0	note=snp T=>A A:21 T:0
EA2454	snippy:4.3.6	variation	989710	989710	.	.	0	note=complex TGTC=>CGTT CGTT:37 TGTC:0
EA2454	snippy:4.3.6	variation	989731	989731	.	.	0	note=snp G=>A A:44 G:0
EA2454	snippy:4.3.6	variation	989794	989794	.	.	0	note=complex CATCA=>TATCG TATCG:49 CATCA:0
EA2454	snippy:4.3.6	variation	989831	989831	.	.	0	note=snp G=>A A:45 G:0
EA2454	snippy:4.3.6	variation	989932	989932	.	.	0	note=snp A=>G G:42 A:0
EA2454	snippy:4.3.6	variation	989938	989938	.	.	0	note=complex AGAC=>GGAT GGAT:40 AGAC:0
EA2454	snippy:4.3.6	variation	989989	989989	.	.	0	note=snp A=>G G:47 A:0
EA2454	snippy:4.3.6	variation	990058	990058	.	.	0	note=complex GC=>TT TT:33 GC:0
EA2454	snippy:4.3.6	variation	990100	990100	.	.	0	note=snp A=>T T:33 A:0
EA2454	snippy:4.3.6	variation	990118	990118	.	.	0	note=snp T=>A A:29 T:0
EA2454	snippy:4.3.6	variation	990124	990124	.	.	0	note=snp T=>C C:32 T:0
EA2454	snippy:4.3.6	variation	990230	990230	.	.	0	note=snp T=>C C:51 T:0
EA2454	snippy:4.3.6	variation	990400	990400	.	.	0	note=snp A=>G G:35 A:0
EA2454	snippy:4.3.6	variation	990463	990463	.	.	0	note=snp A=>G G:36 A:0
EA2454	snippy:4.3.6	variation	990562	990562	.	.	0	note=snp T=>C C:35 T:0
EA2454	snippy:4.3.6	variation	990572	990572	.	.	0	note=snp G=>A A:32 G:0
EA2454	snippy:4.3.6	variation	990627	990627	.	.	0	note=snp C=>T T:36 C:0
EA2454	snippy:4.3.6	variation	990637	990637	.	.	0	note=snp G=>A A:35 G:0
EA2454	snippy:4.3.6	variation	990685	990685	.	.	0	note=snp A=>G G:40 A:0
EA2454	snippy:4.3.6	variation	990691	990691	.	.	0	note=snp G=>T T:42 G:0
EA2454	snippy:4.3.6	variation	990697	990697	.	.	0	note=snp C=>G G:49 C:0
EA2454	snippy:4.3.6	variation	990727	990727	.	.	0	note=complex GCGT=>ACGG ACGG:50 GCGT:0
EA2454	snippy:4.3.6	variation	990742	990742	.	.	0	note=snp C=>T T:51 C:0
EA2454	snippy:4.3.6	variation	990757	990757	.	.	0	note=snp A=>G G:53 A:0
EA2454	snippy:4.3.6	variation	990763	990763	.	.	0	note=complex GCCA=>ACCG ACCG:50 GCCA:0
EA2454	snippy:4.3.6	variation	990872	990872	.	.	0	note=complex TTT=>GTA GTA:31 TTT:0
EA2454	snippy:4.3.6	variation	990880	990880	.	.	0	note=complex CAGTA=>AAGCG AAGCG:30 CAGTA:0
EA2454	snippy:4.3.6	variation	990904	990904	.	.	0	note=complex CCCCAC=>TGCCGT TGCCGT:32 CCCCAC:0
EA2454	snippy:4.3.6	variation	990925	990925	.	.	0	note=snp A=>G G:32 A:0
EA2454	snippy:4.3.6	variation	990931	990931	.	.	0	note=snp A=>G G:30 A:0
EA2454	snippy:4.3.6	variation	990970	990970	.	.	0	note=snp C=>T T:26 C:0
EA2454	snippy:4.3.6	variation	991009	991009	.	.	0	note=snp T=>G G:37 T:0
EA2454	snippy:4.3.6	variation	991060	991060	.	.	0	note=snp G=>A A:55 G:0
EA2454	snippy:4.3.6	variation	991066	991066	.	.	0	note=snp A=>G G:55 A:0
EA2454	snippy:4.3.6	variation	991169	991169	.	.	0	note=snp C=>T T:64 C:0
EA2454	snippy:4.3.6	variation	991239	991239	.	.	0	note=snp A=>C C:54 A:0
EA2454	snippy:4.3.6	variation	991259	991259	.	.	0	note=mnp CA=>TC TC:55 CA:0
EA2454	snippy:4.3.6	variation	991311	991311	.	.	0	note=snp A=>G G:52 A:0
EA2454	snippy:4.3.6	variation	991365	991365	.	.	0	note=snp A=>G G:57 A:0
EA2454	snippy:4.3.6	variation	991386	991386	.	.	0	note=snp G=>A A:58 G:0
EA2454	snippy:4.3.6	variation	991404	991404	.	.	0	note=snp A=>G G:58 A:0
EA2454	snippy:4.3.6	variation	991428	991428	.	.	0	note=snp G=>A A:53 G:0
EA2454	snippy:4.3.6	variation	991560	991560	.	.	0	note=snp C=>T T:51 C:0
EA2454	snippy:4.3.6	variation	991590	991590	.	.	0	note=snp A=>G G:53 A:0
EA2454	snippy:4.3.6	variation	991596	991596	.	.	0	note=snp G=>A A:55 G:0
EA2454	snippy:4.3.6	variation	991611	991611	.	.	0	note=snp G=>A A:52 G:0
EA2454	snippy:4.3.6	variation	991638	991638	.	.	0	note=snp C=>A A:50 C:0
EA2454	snippy:4.3.6	variation	991686	991686	.	.	0	note=snp G=>A A:50 G:0
EA2454	snippy:4.3.6	variation	991800	991800	.	.	0	note=snp C=>T T:50 C:0
EA2454	snippy:4.3.6	variation	991983	991983	.	.	0	note=snp A=>G G:62 A:0
EA2454	snippy:4.3.6	variation	992001	992001	.	.	0	note=snp T=>C C:60 T:0
EA2454	snippy:4.3.6	variation	992040	992040	.	.	0	note=snp A=>C C:50 A:0
EA2454	snippy:4.3.6	variation	992055	992055	.	.	0	note=snp G=>A A:45 G:0
EA2454	snippy:4.3.6	variation	992231	992231	.	.	0	note=snp G=>A A:72 G:0
EA2454	snippy:4.3.6	variation	992244	992244	.	.	0	note=snp C=>T T:67 C:0
EA2454	snippy:4.3.6	variation	992692	992692	.	.	0	note=snp G=>A A:44 G:0
EA2454	snippy:4.3.6	variation	992921	992921	.	.	0	note=snp C=>T T:30 C:0
EA2454	snippy:4.3.6	variation	993116	993116	.	.	0	note=snp C=>T T:44 C:0
EA2454	snippy:4.3.6	variation	994056	994056	.	.	0	note=snp A=>G G:49 A:0
EA2454	snippy:4.3.6	variation	994074	994074	.	.	0	note=snp T=>C C:46 T:0
EA2454	snippy:4.3.6	variation	994116	994116	.	.	0	note=snp G=>A A:43 G:0
EA2454	snippy:4.3.6	variation	994311	994311	.	.	0	note=snp T=>C C:52 T:0
EA2454	snippy:4.3.6	variation	994443	994443	.	.	0	note=snp A=>G G:41 A:0
EA2454	snippy:4.3.6	variation	994617	994617	.	.	0	note=snp C=>T T:45 C:1
EA2454	snippy:4.3.6	variation	994626	994626	.	.	0	note=snp G=>T T:47 G:0
EA2454	snippy:4.3.6	variation	994884	994884	.	.	0	note=snp T=>C C:41 T:0
EA2454	snippy:4.3.6	variation	994890	994890	.	.	0	note=snp T=>C C:44 T:0
EA2454	snippy:4.3.6	variation	994998	994998	.	.	0	note=snp A=>G G:58 A:0
EA2454	snippy:4.3.6	variation	995076	995076	.	.	0	note=snp A=>G G:47 A:0
EA2454	snippy:4.3.6	variation	995109	995109	.	.	0	note=snp G=>A A:51 G:0
EA2454	snippy:4.3.6	variation	995121	995121	.	.	0	note=snp T=>A A:51 T:0
EA2454	snippy:4.3.6	variation	995151	995151	.	.	0	note=complex AGCC=>CGCA CGCA:46 AGCC:0
EA2454	snippy:4.3.6	variation	995193	995193	.	.	0	note=snp A=>G G:54 A:0
EA2454	snippy:4.3.6	variation	995575	995575	.	.	0	note=snp T=>A A:61 T:0
EA2454	snippy:4.3.6	variation	996391	996391	.	.	0	note=snp G=>C C:39 G:0
EA2454	snippy:4.3.6	variation	996427	996427	.	.	0	note=snp C=>G G:35 C:0
EA2454	snippy:4.3.6	variation	996451	996451	.	.	0	note=snp C=>G G:39 C:0
EA2454	snippy:4.3.6	variation	996466	996466	.	.	0	note=snp A=>G G:46 A:0
EA2454	snippy:4.3.6	variation	996547	996547	.	.	0	note=snp T=>C C:62 T:0
EA2454	snippy:4.3.6	variation	996653	996653	.	.	0	note=snp G=>A A:51 G:0
EA2454	snippy:4.3.6	variation	996667	996667	.	.	0	note=snp T=>C C:47 T:0
EA2454	snippy:4.3.6	variation	996676	996676	.	.	0	note=snp C=>T T:42 C:0
EA2454	snippy:4.3.6	variation	996712	996712	.	.	0	note=complex TGGC=>CGGT CGGT:34 TGGC:0
EA2454	snippy:4.3.6	variation	996751	996751	.	.	0	note=snp T=>C C:37 T:0
EA2454	snippy:4.3.6	variation	996775	996775	.	.	0	note=snp G=>A A:37 G:0
EA2454	snippy:4.3.6	variation	996850	996850	.	.	0	note=snp A=>G G:38 A:0
EA2454	snippy:4.3.6	variation	996856	996856	.	.	0	note=snp T=>C C:37 T:0
EA2454	snippy:4.3.6	variation	996886	996886	.	.	0	note=snp G=>C C:36 G:0
EA2454	snippy:4.3.6	variation	996901	996901	.	.	0	note=snp G=>C C:32 G:0
EA2454	snippy:4.3.6	variation	997000	997000	.	.	0	note=snp A=>G G:42 A:0
EA2454	snippy:4.3.6	variation	997012	997012	.	.	0	note=snp G=>A A:41 G:0
EA2454	snippy:4.3.6	variation	997024	997024	.	.	0	note=snp C=>G G:43 C:0
EA2454	snippy:4.3.6	variation	997036	997036	.	.	0	note=snp T=>C C:42 T:0
EA2454	snippy:4.3.6	variation	997180	997180	.	.	0	note=complex CGTG=>TGTA TGTA:51 CGTG:0
EA2454	snippy:4.3.6	variation	997189	997189	.	.	0	note=snp A=>G G:55 A:0
EA2454	snippy:4.3.6	variation	997480	997480	.	.	0	note=snp A=>T T:45 A:0
EA2454	snippy:4.3.6	variation	997504	997504	.	.	0	note=snp A=>C C:37 A:0
EA2454	snippy:4.3.6	variation	997510	997510	.	.	0	note=snp C=>T T:38 C:0
EA2454	snippy:4.3.6	variation	997540	997540	.	.	0	note=complex TGGT=>CGGC CGGC:46 TGGT:0
EA2454	snippy:4.3.6	variation	997555	997555	.	.	0	note=snp T=>C C:52 T:0
EA2454	snippy:4.3.6	variation	997639	997639	.	.	0	note=snp C=>T T:36 C:0
EA2454	snippy:4.3.6	variation	997654	997654	.	.	0	note=snp C=>T T:35 C:0
EA2454	snippy:4.3.6	variation	997681	997681	.	.	0	note=snp G=>A A:31 G:0
EA2454	snippy:4.3.6	variation	997708	997708	.	.	0	note=snp T=>C C:30 T:0
EA2454	snippy:4.3.6	variation	997744	997744	.	.	0	note=snp G=>A A:35 G:0
EA2454	snippy:4.3.6	variation	997756	997756	.	.	0	note=snp G=>A A:34 G:0
EA2454	snippy:4.3.6	variation	997819	997819	.	.	0	note=snp G=>A A:26 G:0
EA2454	snippy:4.3.6	variation	997834	997834	.	.	0	note=snp T=>C C:29 T:0
EA2454	snippy:4.3.6	variation	997879	997879	.	.	0	note=snp A=>G G:27 A:0
EA2454	snippy:4.3.6	variation	997918	997918	.	.	0	note=snp A=>G G:31 A:0
EA2454	snippy:4.3.6	variation	997930	997930	.	.	0	note=snp C=>T T:32 C:0
EA2454	snippy:4.3.6	variation	997987	997987	.	.	0	note=snp G=>A A:29 G:0
EA2454	snippy:4.3.6	variation	998008	998008	.	.	0	note=snp C=>T T:34 C:0
EA2454	snippy:4.3.6	variation	998014	998014	.	.	0	note=complex TGGT=>CGGC CGGC:32 TGGT:0
EA2454	snippy:4.3.6	variation	998026	998026	.	.	0	note=snp G=>A A:33 G:0
EA2454	snippy:4.3.6	variation	998158	998158	.	.	0	note=snp C=>T T:43 C:0
EA2454	snippy:4.3.6	variation	998200	998200	.	.	0	note=snp A=>C C:45 A:0
EA2454	snippy:4.3.6	variation	998404	998404	.	.	0	note=snp T=>C C:47 T:0
EA2454	snippy:4.3.6	variation	998413	998413	.	.	0	note=snp G=>A A:44 G:0
EA2454	snippy:4.3.6	variation	998510	998510	.	.	0	note=snp A=>G G:36 A:0
EA2454	snippy:4.3.6	variation	998626	998626	.	.	0	note=snp T=>C C:50 T:0
EA2454	snippy:4.3.6	variation	998880	998880	.	.	0	note=complex AACACA=>CACC CACC:58 AACACA:0
EA2454	snippy:4.3.6	variation	998895	998895	.	.	0	note=snp C=>A A:68 C:0
EA2454	snippy:4.3.6	variation	998908	998908	.	.	0	note=snp C=>A A:74 C:0
EA2454	snippy:4.3.6	variation	999123	999123	.	.	0	note=snp C=>T T:88 C:0
EA2454	snippy:4.3.6	variation	999159	999159	.	.	0	note=snp T=>A A:91 T:0
EA2454	snippy:4.3.6	variation	999352	999352	.	.	0	note=snp G=>A A:99 G:0
EA2454	snippy:4.3.6	variation	999750	999750	.	.	0	note=snp G=>A A:104 G:0
EA2454	snippy:4.3.6	variation	999759	999759	.	.	0	note=snp A=>G G:108 A:0
EA2454	snippy:4.3.6	variation	999829	999829	.	.	0	note=snp C=>T T:94 C:0
EA2454	snippy:4.3.6	variation	999857	999857	.	.	0	note=snp A=>T T:118 A:0
EA2454	snippy:4.3.6	variation	999924	999924	.	.	0	note=snp T=>C C:130 T:0
EA2454	snippy:4.3.6	variation	1000250	1000250	.	.	0	note=snp T=>C C:78 T:0
EA2454	snippy:4.3.6	variation	1000365	1000365	.	.	0	note=snp C=>T T:78 C:0
EA2454	snippy:4.3.6	variation	1000385	1000385	.	.	0	note=snp T=>C C:89 T:0
EA2454	snippy:4.3.6	variation	1000493	1000493	.	.	0	note=snp G=>T T:62 G:0
EA2454	snippy:4.3.6	variation	1000664	1000664	.	.	0	note=snp G=>A A:50 G:0
EA2454	snippy:4.3.6	variation	1000840	1000840	.	.	0	note=snp A=>G G:66 A:0
EA2454	snippy:4.3.6	variation	1000929	1000929	.	.	0	note=snp G=>A A:52 G:0
EA2454	snippy:4.3.6	variation	1001211	1001211	.	.	0	note=snp G=>A A:57 G:0
EA2454	snippy:4.3.6	variation	1001318	1001318	.	.	0	note=snp A=>T T:69 A:0
EA2454	snippy:4.3.6	variation	1001337	1001337	.	.	0	note=snp G=>A A:81 G:0
EA2454	snippy:4.3.6	variation	1001375	1001375	.	.	0	note=snp C=>G G:75 C:0
EA2454	snippy:4.3.6	variation	1001516	1001516	.	.	0	note=snp C=>T T:50 C:0
EA2454	snippy:4.3.6	variation	1001557	1001557	.	.	0	note=snp C=>T T:55 C:0
EA2454	snippy:4.3.6	variation	1001617	1001617	.	.	0	note=snp C=>T T:63 C:0
EA2454	snippy:4.3.6	variation	1001665	1001665	.	.	0	note=snp C=>T T:65 C:1
EA2454	snippy:4.3.6	variation	1001689	1001689	.	.	0	note=complex TAGT=>CAGC CAGC:59 TAGT:0
EA2454	snippy:4.3.6	variation	1001899	1001899	.	.	0	note=snp T=>C C:47 T:0
EA2454	snippy:4.3.6	variation	1001941	1001941	.	.	0	note=snp A=>G G:44 A:0
EA2454	snippy:4.3.6	variation	1001956	1001956	.	.	0	note=complex CAAT=>AAAC AAAC:44 CAAT:0
EA2454	snippy:4.3.6	variation	1002058	1002058	.	.	0	note=snp T=>C C:54 T:0
EA2454	snippy:4.3.6	variation	1002091	1002091	.	.	0	note=snp A=>G G:54 A:0
EA2454	snippy:4.3.6	variation	1002109	1002109	.	.	0	note=snp G=>A A:57 G:0
EA2454	snippy:4.3.6	variation	1002145	1002145	.	.	0	note=snp G=>A A:62 G:0
EA2454	snippy:4.3.6	variation	1002160	1002160	.	.	0	note=snp G=>T T:59 G:0
EA2454	snippy:4.3.6	variation	1002181	1002181	.	.	0	note=snp A=>G G:52 A:0
EA2454	snippy:4.3.6	variation	1002196	1002196	.	.	0	note=snp A=>G G:58 A:0
EA2454	snippy:4.3.6	variation	1002217	1002217	.	.	0	note=complex CAG=>TAA TAA:50 CAG:0
EA2454	snippy:4.3.6	variation	1002277	1002277	.	.	0	note=snp T=>G G:36 T:0
EA2454	snippy:4.3.6	variation	1002406	1002406	.	.	0	note=snp C=>T T:59 C:0
EA2454	snippy:4.3.6	variation	1002450	1002450	.	.	0	note=complex TAAATAATTAATATCT=>AATTGATATCG AATTGATATCG:28 TAAATAATTAATATCT:0
EA2454	snippy:4.3.6	variation	1002492	1002492	.	.	0	note=complex AA=>CT CT:34 AA:0
EA2454	snippy:4.3.6	variation	1002518	1002518	.	.	0	note=complex CAGTG=>TAGTA TAGTA:31 CAGTG:0
EA2454	snippy:4.3.6	variation	1002529	1002529	.	.	0	note=complex TTTTTATTCCAG=>CTATTCTACCAC CTATTCTACCAC:20 TTTTTATTCCAG:0
EA2454	snippy:4.3.6	variation	1002556	1002556	.	.	0	note=snp G=>A A:18 G:0
EA2454	snippy:4.3.6	variation	1002569	1002569	.	.	0	note=snp T=>C C:14 T:0
EA2454	snippy:4.3.6	variation	1003091	1003091	.	.	0	note=snp T=>C C:11 T:0
EA2454	snippy:4.3.6	variation	1003104	1003104	.	.	0	note=complex TACG=>CACA CACA:17 TACG:0
EA2454	snippy:4.3.6	variation	1003118	1003118	.	.	0	note=snp G=>A A:19 G:0
EA2454	snippy:4.3.6	variation	1003129	1003129	.	.	0	note=snp G=>T T:23 G:0
EA2454	snippy:4.3.6	variation	1003138	1003138	.	.	0	note=snp T=>C C:26 T:0
EA2454	snippy:4.3.6	variation	1003170	1003170	.	.	0	note=snp C=>A A:40 C:0
EA2454	snippy:4.3.6	variation	1003180	1003180	.	.	0	note=snp T=>C C:45 T:0
EA2454	snippy:4.3.6	variation	1003192	1003192	.	.	0	note=snp T=>A A:47 T:0
EA2454	snippy:4.3.6	variation	1003200	1003200	.	.	0	note=complex CAATTC=>GGATTT GGATTT:39 CAATTC:0
EA2454	snippy:4.3.6	variation	1003216	1003216	.	.	0	note=complex ACCAAC=>TCCAGA TCCAGA:34 ACCAAC:0
EA2454	snippy:4.3.6	variation	1003228	1003228	.	.	0	note=complex TGGATG=>CCGATA CCGATA:32 TGGATG:0
EA2454	snippy:4.3.6	variation	1003245	1003245	.	.	0	note=snp A=>G G:29 A:0
EA2454	snippy:4.3.6	variation	1003251	1003251	.	.	0	note=complex CTTT=>TTTC TTTC:26 CTTT:0
EA2454	snippy:4.3.6	variation	1003269	1003269	.	.	0	note=snp T=>A A:19 T:0
EA2454	snippy:4.3.6	variation	1003425	1003425	.	.	0	note=complex TACATG=>CATATA CATATA:13 TACATG:0
EA2454	snippy:4.3.6	variation	1003452	1003452	.	.	0	note=snp G=>T T:43 G:0
EA2454	snippy:4.3.6	variation	1003464	1003464	.	.	0	note=snp A=>T T:49 A:0
EA2454	snippy:4.3.6	variation	1003476	1003476	.	.	0	note=snp A=>G G:49 A:0
EA2454	snippy:4.3.6	variation	1003484	1003484	.	.	0	note=snp T=>G G:49 T:0
EA2454	snippy:4.3.6	variation	1003521	1003521	.	.	0	note=complex ACC=>GTT GTT:42 ACC:0
EA2454	snippy:4.3.6	variation	1003542	1003542	.	.	0	note=complex ATT=>GTA GTA:34 ATT:0
EA2454	snippy:4.3.6	variation	1003554	1003554	.	.	0	note=complex CTGCGAG=>ATGAGGA ATGAGGA:12 CTGCGAG:0
EA2454	snippy:4.3.6	variation	1003755	1003755	.	.	0	note=snp C=>A A:24 C:0
EA2454	snippy:4.3.6	variation	1003796	1003796	.	.	0	note=snp C=>T T:50 C:0
EA2454	snippy:4.3.6	variation	1003824	1003824	.	.	0	note=snp A=>C C:67 A:0
EA2454	snippy:4.3.6	variation	1003842	1003842	.	.	0	note=complex AGACTTC=>GGATTTT GGATTTT:63 AGACTTC:0
EA2454	snippy:4.3.6	variation	1003858	1003858	.	.	0	note=snp C=>G G:78 C:0
EA2454	snippy:4.3.6	variation	1003877	1003877	.	.	0	note=snp A=>G G:72 A:0
EA2454	snippy:4.3.6	variation	1003882	1003882	.	.	0	note=complex TT=>GA GA:65 TT:0
EA2454	snippy:4.3.6	variation	1003894	1003894	.	.	0	note=snp A=>G G:66 A:0
EA2454	snippy:4.3.6	variation	1003917	1003917	.	.	0	note=complex TTTAGTAG=>ATTATTAA ATTATTAA:48 TTTAGTAG:0
EA2454	snippy:4.3.6	variation	1003950	1003950	.	.	0	note=complex CTT=>TTC TTC:48 CTT:0
EA2454	snippy:4.3.6	variation	1003995	1003995	.	.	0	note=complex GTA=>AAC AAC:35 GTA:0
EA2454	snippy:4.3.6	variation	1004003	1004003	.	.	0	note=snp T=>G G:36 T:1
EA2454	snippy:4.3.6	variation	1004008	1004008	.	.	0	note=snp T=>A A:37 T:0
EA2454	snippy:4.3.6	variation	1004014	1004014	.	.	0	note=snp T=>C C:37 T:0
EA2454	snippy:4.3.6	variation	1004023	1004023	.	.	0	note=complex GTATCTTTAGA=>TTATTTTTGAT TTATTTTTGAT:32 GTATCTTTAGA:0
EA2454	snippy:4.3.6	variation	1004043	1004043	.	.	0	note=snp A=>G G:36 A:0
EA2454	snippy:4.3.6	variation	1004121	1004121	.	.	0	note=complex CTTTG=>TTTTA TTTTA:11 CTTTG:0
EA2454	snippy:4.3.6	variation	1004163	1004163	.	.	0	note=complex GCTTCTGCTATT=>TCTTGTGTTATC TCTTGTGTTATC:10 GCTTCTGCTATT:0
EA2454	snippy:4.3.6	variation	1004182	1004182	.	.	0	note=complex CCGG=>TCGA TCGA:17 CCGG:0
EA2454	snippy:4.3.6	variation	1004201	1004201	.	.	0	note=snp C=>T T:28 C:0
EA2454	snippy:4.3.6	variation	1004211	1004211	.	.	0	note=complex CACATA=>AACACG AACACG:31 CACATA:0
EA2454	snippy:4.3.6	variation	1004225	1004225	.	.	0	note=complex CTAAGG=>TTAAAA TTAAAA:31 CTAAGG:0
EA2454	snippy:4.3.6	variation	1004236	1004236	.	.	0	note=snp T=>C C:41 T:0
EA2454	snippy:4.3.6	variation	1004308	1004308	.	.	0	note=snp A=>G G:65 A:0
EA2454	snippy:4.3.6	variation	1004348	1004348	.	.	0	note=snp T=>C C:70 T:0
EA2454	snippy:4.3.6	variation	1004471	1004471	.	.	0	note=snp T=>C C:56 T:0
EA2454	snippy:4.3.6	variation	1004521	1004521	.	.	0	note=snp C=>T T:64 C:0
EA2454	snippy:4.3.6	variation	1004537	1004537	.	.	0	note=snp T=>A A:67 T:0
EA2454	snippy:4.3.6	variation	1004690	1004690	.	.	0	note=snp G=>A A:74 G:0
EA2454	snippy:4.3.6	variation	1004774	1004774	.	.	0	note=snp G=>A A:78 G:0
EA2454	snippy:4.3.6	variation	1004790	1004790	.	.	0	note=snp A=>G G:77 A:0
EA2454	snippy:4.3.6	variation	1004801	1004801	.	.	0	note=snp T=>C C:75 T:1
EA2454	snippy:4.3.6	variation	1004904	1004904	.	.	0	note=snp C=>T T:75 C:0
EA2454	snippy:4.3.6	variation	1004946	1004946	.	.	0	note=snp T=>C C:67 T:0
EA2454	snippy:4.3.6	variation	1004951	1004951	.	.	0	note=snp C=>T T:68 C:0
EA2454	snippy:4.3.6	variation	1005037	1005037	.	.	0	note=snp T=>G G:58 T:0
EA2454	snippy:4.3.6	variation	1005062	1005062	.	.	0	note=snp G=>T T:65 G:0
EA2454	snippy:4.3.6	variation	1005089	1005089	.	.	0	note=snp G=>T T:67 G:0
EA2454	snippy:4.3.6	variation	1005131	1005131	.	.	0	note=snp G=>C C:75 G:0
EA2454	snippy:4.3.6	variation	1005199	1005199	.	.	0	note=snp C=>T T:70 C:0
EA2454	snippy:4.3.6	variation	1005243	1005243	.	.	0	note=snp T=>A A:82 T:0
EA2454	snippy:4.3.6	variation	1005263	1005263	.	.	0	note=snp G=>A A:76 G:0
EA2454	snippy:4.3.6	variation	1005296	1005296	.	.	0	note=snp G=>A A:70 G:0
EA2454	snippy:4.3.6	variation	1005336	1005336	.	.	0	note=snp G=>A A:78 G:0
EA2454	snippy:4.3.6	variation	1005347	1005347	.	.	0	note=snp C=>G G:81 C:0
EA2454	snippy:4.3.6	variation	1005353	1005353	.	.	0	note=snp C=>T T:78 C:0
EA2454	snippy:4.3.6	variation	1005404	1005404	.	.	0	note=snp A=>G G:63 A:0
EA2454	snippy:4.3.6	variation	1005437	1005437	.	.	0	note=complex CTTAT=>TTTAC TTTAC:65 CTTAT:0
EA2454	snippy:4.3.6	variation	1005567	1005567	.	.	0	note=snp A=>G G:73 A:0
EA2454	snippy:4.3.6	variation	1005624	1005624	.	.	0	note=mnp TT=>CC CC:74 TT:0
EA2454	snippy:4.3.6	variation	1005737	1005737	.	.	0	note=snp A=>T T:73 A:0
EA2454	snippy:4.3.6	variation	1005819	1005819	.	.	0	note=snp G=>A A:65 G:0
EA2454	snippy:4.3.6	variation	1005884	1005884	.	.	0	note=snp T=>C C:74 T:0
EA2454	snippy:4.3.6	variation	1005956	1005956	.	.	0	note=snp T=>G G:63 T:0
EA2454	snippy:4.3.6	variation	1006016	1006016	.	.	0	note=complex ATAC=>TTAT TTAT:45 ATAC:0
EA2454	snippy:4.3.6	variation	1006133	1006133	.	.	0	note=snp T=>C C:52 T:0
EA2454	snippy:4.3.6	variation	1006145	1006145	.	.	0	note=snp A=>G G:49 A:0
EA2454	snippy:4.3.6	variation	1006199	1006199	.	.	0	note=snp C=>T T:58 C:0
EA2454	snippy:4.3.6	variation	1006272	1006272	.	.	0	note=snp G=>A A:56 G:0
EA2454	snippy:4.3.6	variation	1006277	1006277	.	.	0	note=snp T=>G G:58 T:0
EA2454	snippy:4.3.6	variation	1006283	1006283	.	.	0	note=snp C=>T T:58 C:0
EA2454	snippy:4.3.6	variation	1006296	1006296	.	.	0	note=snp G=>A A:62 G:0
EA2454	snippy:4.3.6	variation	1006430	1006430	.	.	0	note=mnp TC=>AT AT:59 TC:1
EA2454	snippy:4.3.6	variation	1006482	1006482	.	.	0	note=snp T=>C C:64 T:0
EA2454	snippy:4.3.6	variation	1006489	1006489	.	.	0	note=complex TAT=>GAG GAG:60 TAT:0
EA2454	snippy:4.3.6	variation	1006575	1006575	.	.	0	note=snp G=>A A:64 G:0
EA2454	snippy:4.3.6	variation	1006584	1006584	.	.	0	note=snp A=>G G:64 A:0
EA2454	snippy:4.3.6	variation	1006770	1006770	.	.	0	note=snp T=>C C:77 T:0
EA2454	snippy:4.3.6	variation	1006788	1006788	.	.	0	note=snp A=>C C:60 A:0
EA2454	snippy:4.3.6	variation	1006812	1006812	.	.	0	note=snp G=>A A:66 G:0
EA2454	snippy:4.3.6	variation	1006833	1006833	.	.	0	note=snp G=>C C:70 G:0
EA2454	snippy:4.3.6	variation	1006847	1006847	.	.	0	note=snp C=>A A:68 C:0
EA2454	snippy:4.3.6	variation	1006863	1006863	.	.	0	note=snp C=>T T:72 C:0
EA2454	snippy:4.3.6	variation	1006922	1006922	.	.	0	note=snp T=>A A:68 T:0
EA2454	snippy:4.3.6	variation	1006936	1006936	.	.	0	note=snp C=>T T:70 C:0
EA2454	snippy:4.3.6	variation	1006947	1006947	.	.	0	note=snp T=>C C:70 T:0
EA2454	snippy:4.3.6	variation	1006994	1006994	.	.	0	note=snp C=>T T:64 C:0
EA2454	snippy:4.3.6	variation	1007029	1007029	.	.	0	note=snp A=>G G:68 A:0
EA2454	snippy:4.3.6	variation	1007067	1007067	.	.	0	note=complex C=>TG TG:64 C:0
EA2454	snippy:4.3.6	variation	1007078	1007078	.	.	0	note=complex GT=>TC TC:66 GT:0
EA2454	snippy:4.3.6	variation	1007097	1007097	.	.	0	note=mnp TT=>CC CC:70 TT:0
EA2454	snippy:4.3.6	variation	1007107	1007107	.	.	0	note=snp A=>T T:67 A:0
EA2454	snippy:4.3.6	variation	1007373	1007373	.	.	0	note=snp A=>C C:38 A:0
EA2454	snippy:4.3.6	variation	1007487	1007487	.	.	0	note=snp C=>T T:35 C:0
EA2454	snippy:4.3.6	variation	1007529	1007529	.	.	0	note=complex TTCC=>ATCT ATCT:35 TTCC:0
EA2454	snippy:4.3.6	variation	1007819	1007819	.	.	0	note=snp C=>T T:57 C:0
EA2454	snippy:4.3.6	variation	1007872	1007872	.	.	0	note=snp C=>T T:82 C:0
EA2454	snippy:4.3.6	variation	1007952	1007952	.	.	0	note=snp T=>C C:83 T:0
EA2454	snippy:4.3.6	variation	1007970	1007970	.	.	0	note=snp C=>A A:80 C:0
EA2454	snippy:4.3.6	variation	1008024	1008024	.	.	0	note=snp T=>C C:77 T:0
EA2454	snippy:4.3.6	variation	1008048	1008048	.	.	0	note=snp C=>T T:69 C:0
EA2454	snippy:4.3.6	variation	1008057	1008057	.	.	0	note=snp A=>G G:70 A:0
EA2454	snippy:4.3.6	variation	1008063	1008063	.	.	0	note=snp A=>G G:68 A:0
EA2454	snippy:4.3.6	variation	1008219	1008219	.	.	0	note=snp T=>C C:65 T:0
EA2454	snippy:4.3.6	variation	1008249	1008249	.	.	0	note=snp G=>A A:70 G:0
EA2454	snippy:4.3.6	variation	1008423	1008423	.	.	0	note=snp T=>C C:61 T:0
EA2454	snippy:4.3.6	variation	1008591	1008591	.	.	0	note=snp G=>A A:53 G:0
EA2454	snippy:4.3.6	variation	1008918	1008918	.	.	0	note=complex TCAA=>CCAG CCAG:48 TCAA:0
EA2454	snippy:4.3.6	variation	1009017	1009017	.	.	0	note=complex TGGT=>AGGC AGGC:60 TGGT:0
EA2454	snippy:4.3.6	variation	1009047	1009047	.	.	0	note=snp T=>C C:51 T:0
EA2454	snippy:4.3.6	variation	1009059	1009059	.	.	0	note=snp A=>G G:53 A:0
EA2454	snippy:4.3.6	variation	1009086	1009086	.	.	0	note=complex AAACGCCACT=>TAATGCTACC TAATGCTACC:40 AAACGCCACT:0
EA2454	snippy:4.3.6	variation	1009122	1009122	.	.	0	note=snp C=>T T:53 C:0
EA2454	snippy:4.3.6	variation	1009179	1009179	.	.	0	note=snp G=>A A:62 G:0
EA2454	snippy:4.3.6	variation	1009381	1009381	.	.	0	note=snp A=>G G:65 A:0
EA2454	snippy:4.3.6	variation	1009529	1009529	.	.	0	note=complex TAAT=>CAGC CAGC:44 TAAT:0
EA2454	snippy:4.3.6	variation	1009649	1009649	.	.	0	note=snp A=>G G:44 A:0
EA2454	snippy:4.3.6	variation	1009733	1009733	.	.	0	note=snp A=>G G:53 A:0
EA2454	snippy:4.3.6	variation	1009832	1009832	.	.	0	note=snp A=>G G:59 A:1
EA2454	snippy:4.3.6	variation	1009904	1009904	.	.	0	note=snp G=>A A:70 G:0
EA2454	snippy:4.3.6	variation	1009970	1009970	.	.	0	note=snp T=>C C:54 T:0
EA2454	snippy:4.3.6	variation	1010000	1010000	.	.	0	note=snp A=>G G:58 A:0
EA2454	snippy:4.3.6	variation	1010048	1010048	.	.	0	note=snp T=>A A:48 T:0
EA2454	snippy:4.3.6	variation	1010054	1010054	.	.	0	note=snp C=>T T:49 C:0
EA2454	snippy:4.3.6	variation	1010222	1010222	.	.	0	note=snp A=>G G:89 A:0
EA2454	snippy:4.3.6	variation	1010230	1010230	.	.	0	note=snp A=>G G:82 A:0
EA2454	snippy:4.3.6	variation	1010267	1010267	.	.	0	note=complex GCGG=>ACGA ACGA:73 GCGG:0
EA2454	snippy:4.3.6	variation	1010309	1010309	.	.	0	note=snp A=>G G:54 A:0
EA2454	snippy:4.3.6	variation	1010462	1010462	.	.	0	note=snp G=>A A:56 G:0
EA2454	snippy:4.3.6	variation	1010594	1010594	.	.	0	note=snp G=>A A:62 G:1
EA2454	snippy:4.3.6	variation	1010870	1010870	.	.	0	note=snp A=>G G:66 A:0
EA2454	snippy:4.3.6	variation	1010888	1010888	.	.	0	note=snp G=>A A:77 G:0
EA2454	snippy:4.3.6	variation	1010972	1010972	.	.	0	note=snp A=>G G:90 A:0
EA2454	snippy:4.3.6	variation	1010978	1010978	.	.	0	note=snp C=>T T:93 C:0
EA2454	snippy:4.3.6	variation	1010990	1010990	.	.	0	note=snp G=>A A:90 G:0
EA2454	snippy:4.3.6	variation	1011035	1011035	.	.	0	note=snp G=>A A:72 G:0
EA2454	snippy:4.3.6	variation	1011647	1011647	.	.	0	note=snp T=>A A:45 T:1
EA2454	snippy:4.3.6	variation	1011722	1011722	.	.	0	note=snp T=>A A:54 T:0
EA2454	snippy:4.3.6	variation	1011815	1011815	.	.	0	note=snp G=>T T:52 G:0
EA2454	snippy:4.3.6	variation	1012482	1012482	.	.	0	note=snp G=>A A:80 G:0
EA2454	snippy:4.3.6	variation	1012525	1012525	.	.	0	note=snp G=>A A:48 G:0
EA2454	snippy:4.3.6	variation	1012705	1012705	.	.	0	note=snp C=>T T:78 C:0
EA2454	snippy:4.3.6	variation	1012876	1012876	.	.	0	note=snp C=>T T:64 C:0
EA2454	snippy:4.3.6	variation	1012885	1012885	.	.	0	note=snp C=>A A:68 C:0
EA2454	snippy:4.3.6	variation	1012934	1012934	.	.	0	note=snp G=>A A:71 G:0
EA2454	snippy:4.3.6	variation	1013020	1013020	.	.	0	note=snp C=>T T:63 C:0
EA2454	snippy:4.3.6	variation	1013065	1013065	.	.	0	note=snp G=>T T:59 G:0
EA2454	snippy:4.3.6	variation	1013137	1013137	.	.	0	note=snp C=>G G:61 C:0
EA2454	snippy:4.3.6	variation	1013167	1013167	.	.	0	note=snp A=>G G:57 A:0
EA2454	snippy:4.3.6	variation	1013194	1013194	.	.	0	note=complex CGCC=>TGCG TGCG:56 CGCC:0
EA2454	snippy:4.3.6	variation	1013293	1013293	.	.	0	note=complex GCCA=>ACCG ACCG:54 GCCA:0
EA2454	snippy:4.3.6	variation	1013311	1013311	.	.	0	note=snp T=>C C:64 T:0
EA2454	snippy:4.3.6	variation	1013338	1013338	.	.	0	note=snp T=>C C:65 T:0
EA2454	snippy:4.3.6	variation	1013374	1013374	.	.	0	note=snp G=>A A:64 G:0
EA2454	snippy:4.3.6	variation	1013383	1013383	.	.	0	note=snp G=>A A:57 G:0
EA2454	snippy:4.3.6	variation	1013633	1013633	.	.	0	note=snp A=>G G:47 A:0
EA2454	snippy:4.3.6	variation	1013771	1013771	.	.	0	note=snp C=>T T:64 C:0
EA2454	snippy:4.3.6	variation	1013795	1013795	.	.	0	note=snp G=>A A:71 G:0
EA2454	snippy:4.3.6	variation	1013910	1013910	.	.	0	note=snp C=>T T:40 C:0
EA2454	snippy:4.3.6	variation	1013927	1013927	.	.	0	note=snp T=>C C:41 T:0
EA2454	snippy:4.3.6	variation	1013990	1013990	.	.	0	note=snp A=>G G:49 A:0
EA2454	snippy:4.3.6	variation	1014080	1014080	.	.	0	note=snp G=>T T:58 G:0
EA2454	snippy:4.3.6	variation	1014125	1014125	.	.	0	note=snp C=>T T:56 C:1
EA2454	snippy:4.3.6	variation	1014236	1014236	.	.	0	note=snp G=>A A:44 G:0
EA2454	snippy:4.3.6	variation	1014275	1014275	.	.	0	note=snp G=>A A:36 G:0
EA2454	snippy:4.3.6	variation	1014281	1014281	.	.	0	note=snp A=>G G:38 A:0
EA2454	snippy:4.3.6	variation	1014320	1014320	.	.	0	note=snp A=>G G:38 A:0
EA2454	snippy:4.3.6	variation	1014344	1014344	.	.	0	note=snp G=>A A:36 G:0
EA2454	snippy:4.3.6	variation	1014422	1014422	.	.	0	note=snp T=>C C:52 T:0
EA2454	snippy:4.3.6	variation	1014473	1014473	.	.	0	note=snp C=>T T:46 C:0
EA2454	snippy:4.3.6	variation	1014500	1014500	.	.	0	note=snp C=>G G:43 C:0
EA2454	snippy:4.3.6	variation	1014518	1014518	.	.	0	note=snp G=>C C:45 G:0
EA2454	snippy:4.3.6	variation	1014533	1014533	.	.	0	note=snp G=>C C:41 G:0
EA2454	snippy:4.3.6	variation	1014572	1014572	.	.	0	note=snp T=>C C:40 T:0
EA2454	snippy:4.3.6	variation	1014662	1014662	.	.	0	note=snp A=>G G:46 A:0
EA2454	snippy:4.3.6	variation	1014683	1014683	.	.	0	note=complex GGCG=>CGCT CGCT:49 GGCG:0
EA2454	snippy:4.3.6	variation	1014824	1014824	.	.	0	note=snp C=>T T:68 C:0
EA2454	snippy:4.3.6	variation	1014898	1014898	.	.	0	note=snp T=>C C:62 T:0
EA2454	snippy:4.3.6	variation	1014971	1014971	.	.	0	note=snp T=>C C:75 T:0
EA2454	snippy:4.3.6	variation	1015006	1015006	.	.	0	note=snp C=>T T:68 C:0
EA2454	snippy:4.3.6	variation	1015113	1015113	.	.	0	note=snp T=>C C:66 T:0
EA2454	snippy:4.3.6	variation	1015148	1015148	.	.	0	note=snp A=>G G:78 A:0
EA2454	snippy:4.3.6	variation	1015257	1015257	.	.	0	note=snp C=>T T:73 C:0
EA2454	snippy:4.3.6	variation	1015329	1015329	.	.	0	note=snp C=>T T:66 C:0
EA2454	snippy:4.3.6	variation	1015530	1015530	.	.	0	note=snp A=>G G:46 A:0
EA2454	snippy:4.3.6	variation	1015610	1015610	.	.	0	note=snp C=>T T:46 C:0
EA2454	snippy:4.3.6	variation	1015656	1015656	.	.	0	note=snp G=>A A:41 G:0
EA2454	snippy:4.3.6	variation	1015668	1015668	.	.	0	note=snp A=>T T:42 A:0
EA2454	snippy:4.3.6	variation	1015728	1015728	.	.	0	note=snp A=>G G:48 A:0
EA2454	snippy:4.3.6	variation	1015884	1015884	.	.	0	note=complex AGGC=>CGGT CGGT:48 AGGC:0
EA2454	snippy:4.3.6	variation	1016017	1016017	.	.	0	note=snp G=>A A:62 G:0
EA2454	snippy:4.3.6	variation	1016175	1016175	.	.	0	note=snp A=>G G:59 A:0
EA2454	snippy:4.3.6	variation	1016214	1016214	.	.	0	note=snp G=>T T:37 G:0
EA2454	snippy:4.3.6	variation	1016337	1016337	.	.	0	note=snp T=>G G:44 T:0
EA2454	snippy:4.3.6	variation	1016385	1016385	.	.	0	note=snp T=>G G:62 T:0
EA2454	snippy:4.3.6	variation	1016394	1016394	.	.	0	note=snp G=>A A:70 G:0
EA2454	snippy:4.3.6	variation	1016440	1016440	.	.	0	note=complex GTT=>ATC ATC:60 GTT:0
EA2454	snippy:4.3.6	variation	1016561	1016561	.	.	0	note=snp T=>C C:62 T:0
EA2454	snippy:4.3.6	variation	1016852	1016852	.	.	0	note=snp C=>A A:77 C:0
EA2454	snippy:4.3.6	variation	1017030	1017030	.	.	0	note=snp T=>C C:66 T:0
EA2454	snippy:4.3.6	variation	1017255	1017255	.	.	0	note=snp T=>C C:54 T:0
EA2454	snippy:4.3.6	variation	1017279	1017279	.	.	0	note=snp T=>C C:60 T:0
EA2454	snippy:4.3.6	variation	1017291	1017291	.	.	0	note=snp A=>G G:61 A:0
EA2454	snippy:4.3.6	variation	1017315	1017315	.	.	0	note=snp T=>C C:61 T:0
EA2454	snippy:4.3.6	variation	1017579	1017579	.	.	0	note=snp G=>A A:48 G:0
EA2454	snippy:4.3.6	variation	1017585	1017585	.	.	0	note=snp C=>T T:48 C:0
EA2454	snippy:4.3.6	variation	1017645	1017645	.	.	0	note=snp G=>A A:51 G:0
EA2454	snippy:4.3.6	variation	1017684	1017684	.	.	0	note=snp T=>A A:48 T:0
EA2454	snippy:4.3.6	variation	1017696	1017696	.	.	0	note=snp T=>G G:47 T:0
EA2454	snippy:4.3.6	variation	1017723	1017723	.	.	0	note=snp C=>T T:50 C:0
EA2454	snippy:4.3.6	variation	1017830	1017830	.	.	0	note=snp A=>G G:67 A:0
EA2454	snippy:4.3.6	variation	1017843	1017843	.	.	0	note=snp C=>A A:66 C:0
EA2454	snippy:4.3.6	variation	1017924	1017924	.	.	0	note=snp C=>T T:81 C:0
EA2454	snippy:4.3.6	variation	1017939	1017939	.	.	0	note=snp G=>A A:72 G:0
EA2454	snippy:4.3.6	variation	1017954	1017954	.	.	0	note=snp C=>T T:66 C:0
EA2454	snippy:4.3.6	variation	1017984	1017984	.	.	0	note=snp G=>A A:68 G:0
EA2454	snippy:4.3.6	variation	1018029	1018029	.	.	0	note=snp C=>T T:63 C:0
EA2454	snippy:4.3.6	variation	1018089	1018089	.	.	0	note=snp C=>T T:71 C:0
EA2454	snippy:4.3.6	variation	1018155	1018155	.	.	0	note=snp A=>G G:55 A:0
EA2454	snippy:4.3.6	variation	1018425	1018425	.	.	0	note=snp C=>G G:53 C:0
EA2454	snippy:4.3.6	variation	1018458	1018458	.	.	0	note=snp C=>T T:47 C:0
EA2454	snippy:4.3.6	variation	1018617	1018617	.	.	0	note=snp T=>C C:48 T:0
EA2454	snippy:4.3.6	variation	1018635	1018635	.	.	0	note=snp C=>G G:50 C:0
EA2454	snippy:4.3.6	variation	1018815	1018815	.	.	0	note=snp C=>T T:48 C:0
EA2454	snippy:4.3.6	variation	1018935	1018935	.	.	0	note=snp G=>A A:63 G:0
EA2454	snippy:4.3.6	variation	1019229	1019229	.	.	0	note=snp A=>C C:57 A:0
EA2454	snippy:4.3.6	variation	1019284	1019284	.	.	0	note=complex TTGC=>CGGCTG CGGCTG:61 TTGC:0
EA2454	snippy:4.3.6	variation	1019343	1019343	.	.	0	note=snp T=>C C:62 T:0
EA2454	snippy:4.3.6	variation	1019503	1019503	.	.	0	note=snp C=>T T:58 C:0
EA2454	snippy:4.3.6	variation	1019578	1019578	.	.	0	note=snp T=>G G:44 T:0
EA2454	snippy:4.3.6	variation	1019642	1019642	.	.	0	note=snp C=>A A:53 C:0
EA2454	snippy:4.3.6	variation	1019667	1019667	.	.	0	note=snp G=>A A:53 G:0
EA2454	snippy:4.3.6	variation	1019707	1019707	.	.	0	note=snp A=>T T:49 A:0
EA2454	snippy:4.3.6	variation	1019749	1019749	.	.	0	note=snp G=>A A:46 G:0
EA2454	snippy:4.3.6	variation	1019968	1019968	.	.	0	note=snp A=>T T:49 A:0
EA2454	snippy:4.3.6	variation	1019995	1019995	.	.	0	note=snp G=>A A:42 G:0
EA2454	snippy:4.3.6	variation	1020007	1020007	.	.	0	note=snp G=>A A:44 G:0
EA2454	snippy:4.3.6	variation	1020019	1020019	.	.	0	note=snp G=>A A:39 G:0
EA2454	snippy:4.3.6	variation	1020046	1020046	.	.	0	note=complex TGGC=>CGGT CGGT:33 TGGC:0
EA2454	snippy:4.3.6	variation	1020055	1020055	.	.	0	note=complex TC=>AT AT:27 TC:0
EA2454	snippy:4.3.6	variation	1020061	1020061	.	.	0	note=snp C=>G G:27 C:0
EA2454	snippy:4.3.6	variation	1020097	1020097	.	.	0	note=snp C=>T T:37 C:0
EA2454	snippy:4.3.6	variation	1020103	1020103	.	.	0	note=snp A=>G G:36 A:0
EA2454	snippy:4.3.6	variation	1020109	1020109	.	.	0	note=complex TTTG=>CTTC CTTC:40 TTTG:0
EA2454	snippy:4.3.6	variation	1020167	1020167	.	.	0	note=snp T=>G G:55 T:0
EA2454	snippy:4.3.6	variation	1020265	1020265	.	.	0	note=snp T=>A A:11 T:0
EA2454	snippy:4.3.6	variation	1020460	1020460	.	.	0	note=snp T=>C C:14 T:0
EA2454	snippy:4.3.6	variation	1020589	1020589	.	.	0	note=snp C=>A A:61 C:0
EA2454	snippy:4.3.6	variation	1020610	1020610	.	.	0	note=complex ATTC=>GTTT GTTT:55 ATTC:0
EA2454	snippy:4.3.6	variation	1020631	1020631	.	.	0	note=snp T=>C C:39 T:0
EA2454	snippy:4.3.6	variation	1020658	1020658	.	.	0	note=snp G=>T T:40 G:0
EA2454	snippy:4.3.6	variation	1020681	1020681	.	.	0	note=complex AT=>GC GC:36 AT:0
EA2454	snippy:4.3.6	variation	1020721	1020721	.	.	0	note=complex CTGC=>TTGT TTGT:40 CTGC:0
EA2454	snippy:4.3.6	variation	1020736	1020736	.	.	0	note=snp A=>C C:49 A:0
EA2454	snippy:4.3.6	variation	1020802	1020802	.	.	0	note=snp C=>T T:40 C:0
EA2454	snippy:4.3.6	variation	1020811	1020811	.	.	0	note=snp G=>A A:42 G:0
EA2454	snippy:4.3.6	variation	1020889	1020889	.	.	0	note=snp G=>A A:43 G:0
EA2454	snippy:4.3.6	variation	1020901	1020901	.	.	0	note=snp C=>T T:44 C:0
EA2454	snippy:4.3.6	variation	1020997	1020997	.	.	0	note=snp A=>G G:56 A:0
EA2454	snippy:4.3.6	variation	1021005	1021005	.	.	0	note=snp A=>C C:57 A:0
EA2454	snippy:4.3.6	variation	1021072	1021072	.	.	0	note=snp T=>C C:52 T:0
EA2454	snippy:4.3.6	variation	1021108	1021108	.	.	0	note=snp A=>G G:52 A:0
EA2454	snippy:4.3.6	variation	1021132	1021132	.	.	0	note=snp A=>G G:41 A:0
EA2454	snippy:4.3.6	variation	1021141	1021141	.	.	0	note=snp G=>A A:39 G:0
EA2454	snippy:4.3.6	variation	1021255	1021255	.	.	0	note=snp T=>A A:60 T:0
EA2454	snippy:4.3.6	variation	1021345	1021345	.	.	0	note=snp G=>A A:51 G:0
EA2454	snippy:4.3.6	variation	1021360	1021360	.	.	0	note=snp C=>T T:46 C:0
EA2454	snippy:4.3.6	variation	1021366	1021366	.	.	0	note=snp C=>T T:42 C:1
EA2454	snippy:4.3.6	variation	1021432	1021432	.	.	0	note=snp G=>A A:57 G:0
EA2454	snippy:4.3.6	variation	1021441	1021441	.	.	0	note=snp T=>C C:52 T:0
EA2454	snippy:4.3.6	variation	1021447	1021447	.	.	0	note=snp G=>C C:53 G:0
EA2454	snippy:4.3.6	variation	1021531	1021531	.	.	0	note=complex AGTA=>GGTG GGTG:53 AGTA:0
EA2454	snippy:4.3.6	variation	1022304	1022304	.	.	0	note=snp G=>A A:46 G:0
EA2454	snippy:4.3.6	variation	1022310	1022310	.	.	0	note=snp A=>G G:48 A:0
EA2454	snippy:4.3.6	variation	1022349	1022349	.	.	0	note=snp A=>T T:61 A:0
EA2454	snippy:4.3.6	variation	1022358	1022358	.	.	0	note=snp C=>T T:58 C:0
EA2454	snippy:4.3.6	variation	1022430	1022430	.	.	0	note=complex GTTA=>ACTG ACTG:57 GTTA:0
EA2454	snippy:4.3.6	variation	1022442	1022442	.	.	0	note=snp C=>T T:53 C:0
EA2454	snippy:4.3.6	variation	1022471	1022471	.	.	0	note=snp A=>T T:46 A:0
EA2454	snippy:4.3.6	variation	1022561	1022561	.	.	0	note=snp A=>G G:29 A:0
EA2454	snippy:4.3.6	variation	1022577	1022577	.	.	0	note=complex AATG=>CTACGCACA CTACGCACA:22 AATG:0
EA2454	snippy:4.3.6	variation	1022593	1022593	.	.	0	note=complex AAGGC=>GAGGT GAGGT:36 AAGGC:0
EA2454	snippy:4.3.6	variation	1022809	1022809	.	.	0	note=snp C=>T T:45 C:0
EA2454	snippy:4.3.6	variation	1022856	1022856	.	.	0	note=snp A=>G G:42 A:0
EA2454	snippy:4.3.6	variation	1022929	1022929	.	.	0	note=snp A=>G G:48 A:0
EA2454	snippy:4.3.6	variation	1022953	1022953	.	.	0	note=snp C=>A A:48 C:1
EA2454	snippy:4.3.6	variation	1023004	1023004	.	.	0	note=snp G=>T T:58 G:0
EA2454	snippy:4.3.6	variation	1023040	1023040	.	.	0	note=snp A=>G G:51 A:0
EA2454	snippy:4.3.6	variation	1023046	1023046	.	.	0	note=snp A=>G G:52 A:0
EA2454	snippy:4.3.6	variation	1023109	1023109	.	.	0	note=snp T=>C C:52 T:0
EA2454	snippy:4.3.6	variation	1023193	1023193	.	.	0	note=snp A=>G G:44 A:0
EA2454	snippy:4.3.6	variation	1023205	1023205	.	.	0	note=snp A=>G G:44 A:0
EA2454	snippy:4.3.6	variation	1023211	1023211	.	.	0	note=complex GTCA=>ATCG ATCG:43 GTCA:0
EA2454	snippy:4.3.6	variation	1023220	1023220	.	.	0	note=snp T=>C C:49 T:0
EA2454	snippy:4.3.6	variation	1023244	1023244	.	.	0	note=snp C=>T T:53 C:0
EA2454	snippy:4.3.6	variation	1023466	1023466	.	.	0	note=snp A=>G G:36 A:0
EA2454	snippy:4.3.6	variation	1023519	1023519	.	.	0	note=snp C=>T T:42 C:0
EA2454	snippy:4.3.6	variation	1023571	1023571	.	.	0	note=snp T=>C C:50 T:0
EA2454	snippy:4.3.6	variation	1023577	1023577	.	.	0	note=snp G=>T T:52 G:0
EA2454	snippy:4.3.6	variation	1023592	1023592	.	.	0	note=snp A=>G G:55 A:0
EA2454	snippy:4.3.6	variation	1023640	1023640	.	.	0	note=snp G=>A A:48 G:0
EA2454	snippy:4.3.6	variation	1023832	1023832	.	.	0	note=snp C=>T T:55 C:0
EA2454	snippy:4.3.6	variation	1023943	1023943	.	.	0	note=snp T=>C C:65 T:0
EA2454	snippy:4.3.6	variation	1024055	1024055	.	.	0	note=snp T=>C C:75 T:0
EA2454	snippy:4.3.6	variation	1024090	1024090	.	.	0	note=complex GA=>CC CC:63 GA:0
EA2454	snippy:4.3.6	variation	1024112	1024112	.	.	0	note=snp G=>A A:66 G:0
EA2454	snippy:4.3.6	variation	1024339	1024339	.	.	0	note=snp G=>A A:64 G:0
EA2454	snippy:4.3.6	variation	1024456	1024456	.	.	0	note=snp C=>T T:62 C:0
EA2454	snippy:4.3.6	variation	1024483	1024483	.	.	0	note=snp C=>A A:62 C:0
EA2454	snippy:4.3.6	variation	1024549	1024549	.	.	0	note=snp A=>C C:69 A:0
EA2454	snippy:4.3.6	variation	1024837	1024837	.	.	0	note=snp G=>A A:69 G:0
EA2454	snippy:4.3.6	variation	1024852	1024852	.	.	0	note=snp T=>G G:71 T:0
EA2454	snippy:4.3.6	variation	1024954	1024954	.	.	0	note=snp T=>C C:70 T:0
EA2454	snippy:4.3.6	variation	1024966	1024966	.	.	0	note=complex ACTG=>GCTT GCTT:65 ACTG:0
EA2454	snippy:4.3.6	variation	1025406	1025406	.	.	0	note=snp A=>G G:43 A:0
EA2454	snippy:4.3.6	variation	1025422	1025422	.	.	0	note=snp C=>T T:51 C:0
EA2454	snippy:4.3.6	variation	1025440	1025440	.	.	0	note=snp G=>A A:45 G:0
EA2454	snippy:4.3.6	variation	1025581	1025581	.	.	0	note=snp T=>C C:58 T:0
EA2454	snippy:4.3.6	variation	1025590	1025590	.	.	0	note=complex CGCA=>TGCG TGCG:58 CGCA:0
EA2454	snippy:4.3.6	variation	1025599	1025599	.	.	0	note=snp C=>G G:61 C:0
EA2454	snippy:4.3.6	variation	1025611	1025611	.	.	0	note=snp C=>T T:61 C:0
EA2454	snippy:4.3.6	variation	1025626	1025626	.	.	0	note=snp G=>A A:56 G:0
EA2454	snippy:4.3.6	variation	1025647	1025647	.	.	0	note=complex TATG=>AATA AATA:51 TATG:0
EA2454	snippy:4.3.6	variation	1025670	1025670	.	.	0	note=snp G=>A A:48 G:1
EA2454	snippy:4.3.6	variation	1025761	1025761	.	.	0	note=snp G=>A A:50 G:0
EA2454	snippy:4.3.6	variation	1025791	1025791	.	.	0	note=snp G=>A A:64 G:0
EA2454	snippy:4.3.6	variation	1025809	1025809	.	.	0	note=snp T=>C C:58 T:0
EA2454	snippy:4.3.6	variation	1025856	1025856	.	.	0	note=snp G=>A A:60 G:0
EA2454	snippy:4.3.6	variation	1025875	1025875	.	.	0	note=snp A=>G G:52 A:0
EA2454	snippy:4.3.6	variation	1025890	1025890	.	.	0	note=snp T=>C C:53 T:0
EA2454	snippy:4.3.6	variation	1025899	1025899	.	.	0	note=snp C=>T T:56 C:0
EA2454	snippy:4.3.6	variation	1025908	1025908	.	.	0	note=snp T=>C C:53 T:0
EA2454	snippy:4.3.6	variation	1025914	1025914	.	.	0	note=complex CAA=>TAG TAG:44 CAA:0
EA2454	snippy:4.3.6	variation	1025962	1025962	.	.	0	note=snp G=>A A:49 G:0
EA2454	snippy:4.3.6	variation	1026329	1026329	.	.	0	note=snp A=>C C:28 A:0
EA2454	snippy:4.3.6	variation	1026335	1026335	.	.	0	note=complex TGAG=>CGAA CGAA:24 TGAG:0
EA2454	snippy:4.3.6	variation	1026344	1026344	.	.	0	note=snp C=>T T:24 C:0
EA2454	snippy:4.3.6	variation	1026353	1026353	.	.	0	note=snp G=>A A:26 G:0
EA2454	snippy:4.3.6	variation	1026374	1026374	.	.	0	note=complex ACCA=>GCCG GCCG:23 ACCA:0
EA2454	snippy:4.3.6	variation	1026383	1026383	.	.	0	note=snp C=>A A:25 C:0
EA2454	snippy:4.3.6	variation	1026401	1026401	.	.	0	note=snp A=>G G:23 A:0
EA2454	snippy:4.3.6	variation	1026419	1026419	.	.	0	note=snp T=>C C:29 T:0
EA2454	snippy:4.3.6	variation	1026428	1026428	.	.	0	note=snp G=>A A:28 G:0
EA2454	snippy:4.3.6	variation	1026473	1026473	.	.	0	note=snp G=>A A:28 G:0
EA2454	snippy:4.3.6	variation	1026485	1026485	.	.	0	note=snp T=>C C:33 T:0
EA2454	snippy:4.3.6	variation	1026506	1026506	.	.	0	note=snp G=>A A:42 G:0
EA2454	snippy:4.3.6	variation	1026521	1026521	.	.	0	note=complex TCGT=>CCGC CCGC:38 TCGT:0
EA2454	snippy:4.3.6	variation	1026530	1026530	.	.	0	note=complex AACT=>TACC TACC:37 AACT:0
EA2454	snippy:4.3.6	variation	1026569	1026569	.	.	0	note=snp A=>G G:33 A:0
EA2454	snippy:4.3.6	variation	1026575	1026575	.	.	0	note=snp A=>G G:35 A:0
EA2454	snippy:4.3.6	variation	1026617	1026617	.	.	0	note=snp G=>C C:36 G:0
EA2454	snippy:4.3.6	variation	1026622	1026622	.	.	0	note=snp G=>T T:36 G:0
EA2454	snippy:4.3.6	variation	1026638	1026638	.	.	0	note=complex AATT=>GATA GATA:32 AATT:0
EA2454	snippy:4.3.6	variation	1026647	1026647	.	.	0	note=snp T=>C C:40 T:0
EA2454	snippy:4.3.6	variation	1026674	1026674	.	.	0	note=snp G=>A A:50 G:0
EA2454	snippy:4.3.6	variation	1026680	1026680	.	.	0	note=snp G=>A A:51 G:0
EA2454	snippy:4.3.6	variation	1026770	1026770	.	.	0	note=snp A=>G G:40 A:0
EA2454	snippy:4.3.6	variation	1026776	1026776	.	.	0	note=snp G=>A A:36 G:0
EA2454	snippy:4.3.6	variation	1026839	1026839	.	.	0	note=complex GGTGT=>AGTGC AGTGC:33 GGTGT:0
EA2454	snippy:4.3.6	variation	1026932	1026932	.	.	0	note=snp T=>C C:40 T:0
EA2454	snippy:4.3.6	variation	1026953	1026953	.	.	0	note=complex GGTG=>TGTT TGTT:38 GGTG:0
EA2454	snippy:4.3.6	variation	1026974	1026974	.	.	0	note=complex GCCAATC=>TCCGATA TCCGATA:34 GCCAATC:0
EA2454	snippy:4.3.6	variation	1026985	1026985	.	.	0	note=complex GTAA=>ACAG ACAG:34 GTAA:0
EA2454	snippy:4.3.6	variation	1026998	1026998	.	.	0	note=complex AGCT=>GGCC GGCC:41 AGCT:0
EA2454	snippy:4.3.6	variation	1027034	1027034	.	.	0	note=snp C=>T T:43 C:0
EA2454	snippy:4.3.6	variation	1027049	1027049	.	.	0	note=snp A=>G G:46 A:0
EA2454	snippy:4.3.6	variation	1027143	1027143	.	.	0	note=snp C=>A A:26 C:0
EA2454	snippy:4.3.6	variation	1027293	1027293	.	.	0	note=snp A=>G G:40 A:0
EA2454	snippy:4.3.6	variation	1027311	1027311	.	.	0	note=snp C=>T T:38 C:0
EA2454	snippy:4.3.6	variation	1027413	1027413	.	.	0	note=snp G=>A A:37 G:0
EA2454	snippy:4.3.6	variation	1027470	1027470	.	.	0	note=snp T=>C C:45 T:0
EA2454	snippy:4.3.6	variation	1027491	1027491	.	.	0	note=snp G=>A A:42 G:0
EA2454	snippy:4.3.6	variation	1027578	1027578	.	.	0	note=snp A=>G G:32 A:0
EA2454	snippy:4.3.6	variation	1027590	1027590	.	.	0	note=snp T=>A A:36 T:0
EA2454	snippy:4.3.6	variation	1027647	1027647	.	.	0	note=snp A=>G G:32 A:0
EA2454	snippy:4.3.6	variation	1027692	1027692	.	.	0	note=complex GATA=>AATG AATG:35 GATA:0
EA2454	snippy:4.3.6	variation	1027704	1027704	.	.	0	note=complex TGAC=>CGAA CGAA:44 TGAC:0
EA2454	snippy:4.3.6	variation	1027729	1027729	.	.	0	note=snp G=>T T:50 G:1
EA2454	snippy:4.3.6	variation	1027755	1027755	.	.	0	note=snp A=>C C:44 A:0
EA2454	snippy:4.3.6	variation	1027824	1027824	.	.	0	note=snp G=>T T:38 G:0
EA2454	snippy:4.3.6	variation	1027908	1027908	.	.	0	note=snp T=>G G:36 T:0
EA2454	snippy:4.3.6	variation	1028015	1028015	.	.	0	note=snp G=>A A:44 G:0
EA2454	snippy:4.3.6	variation	1028106	1028106	.	.	0	note=snp G=>A A:52 G:0
EA2454	snippy:4.3.6	variation	1028127	1028127	.	.	0	note=snp A=>G G:52 A:0
EA2454	snippy:4.3.6	variation	1028146	1028146	.	.	0	note=snp C=>T T:47 C:0
EA2454	snippy:4.3.6	variation	1028160	1028160	.	.	0	note=snp T=>C C:46 T:0
EA2454	snippy:4.3.6	variation	1028238	1028238	.	.	0	note=snp G=>A A:37 G:0
EA2454	snippy:4.3.6	variation	1028274	1028274	.	.	0	note=snp A=>G G:39 A:0
EA2454	snippy:4.3.6	variation	1028283	1028283	.	.	0	note=snp A=>G G:37 A:0
EA2454	snippy:4.3.6	variation	1028346	1028346	.	.	0	note=snp A=>G G:46 A:0
EA2454	snippy:4.3.6	variation	1028358	1028358	.	.	0	note=snp C=>G G:48 C:0
EA2454	snippy:4.3.6	variation	1028364	1028364	.	.	0	note=snp A=>G G:49 A:0
EA2454	snippy:4.3.6	variation	1028379	1028379	.	.	0	note=snp A=>G G:55 A:0
EA2454	snippy:4.3.6	variation	1028385	1028385	.	.	0	note=snp G=>A A:63 G:0
EA2454	snippy:4.3.6	variation	1028424	1028424	.	.	0	note=snp G=>T T:67 G:0
EA2454	snippy:4.3.6	variation	1028436	1028436	.	.	0	note=snp A=>G G:67 A:0
EA2454	snippy:4.3.6	variation	1028442	1028442	.	.	0	note=snp T=>G G:68 T:0
EA2454	snippy:4.3.6	variation	1028448	1028448	.	.	0	note=snp G=>A A:68 G:0
EA2454	snippy:4.3.6	variation	1028529	1028529	.	.	0	note=snp A=>T T:53 A:0
EA2454	snippy:4.3.6	variation	1028535	1028535	.	.	0	note=snp G=>A A:47 G:0
EA2454	snippy:4.3.6	variation	1028556	1028556	.	.	0	note=snp C=>T T:40 C:0
EA2454	snippy:4.3.6	variation	1028565	1028565	.	.	0	note=snp C=>T T:39 C:0
EA2454	snippy:4.3.6	variation	1028601	1028601	.	.	0	note=snp A=>G G:40 A:0
EA2454	snippy:4.3.6	variation	1028679	1028679	.	.	0	note=snp T=>C C:48 T:0
EA2454	snippy:4.3.6	variation	1028693	1028693	.	.	0	note=mnp CG=>TA TA:46 CG:0
EA2454	snippy:4.3.6	variation	1028774	1028774	.	.	0	note=snp T=>C C:74 T:0
EA2454	snippy:4.3.6	variation	1028781	1028781	.	.	0	note=snp T=>C C:78 T:0
EA2454	snippy:4.3.6	variation	1028896	1028896	.	.	0	note=snp G=>A A:60 G:0
EA2454	snippy:4.3.6	variation	1028914	1028914	.	.	0	note=complex TAA=>CAG CAG:59 TAA:0
EA2454	snippy:4.3.6	variation	1028965	1028965	.	.	0	note=snp A=>G G:52 A:0
EA2454	snippy:4.3.6	variation	1028971	1028971	.	.	0	note=snp A=>G G:51 A:0
EA2454	snippy:4.3.6	variation	1028977	1028977	.	.	0	note=complex TCCC=>ACCT ACCT:48 TCCC:0
EA2454	snippy:4.3.6	variation	1028986	1028986	.	.	0	note=snp G=>A A:56 G:0
EA2454	snippy:4.3.6	variation	1029004	1029004	.	.	0	note=snp G=>A A:60 G:0
EA2454	snippy:4.3.6	variation	1029025	1029025	.	.	0	note=snp C=>A A:63 C:0
EA2454	snippy:4.3.6	variation	1029043	1029043	.	.	0	note=snp G=>A A:75 G:0
EA2454	snippy:4.3.6	variation	1029052	1029052	.	.	0	note=snp A=>G G:72 A:0
EA2454	snippy:4.3.6	variation	1029058	1029058	.	.	0	note=complex AATG=>GATA GATA:68 AATG:0
EA2454	snippy:4.3.6	variation	1029067	1029067	.	.	0	note=complex CGTGAGG=>TGTCAGA TGTCAGA:65 CGTGAGG:0
EA2454	snippy:4.3.6	variation	1029085	1029085	.	.	0	note=snp C=>T T:72 C:0
EA2454	snippy:4.3.6	variation	1029325	1029325	.	.	0	note=snp G=>A A:69 G:0
EA2454	snippy:4.3.6	variation	1029388	1029388	.	.	0	note=snp G=>A A:72 G:0
EA2454	snippy:4.3.6	variation	1029397	1029397	.	.	0	note=snp A=>G G:68 A:0
EA2454	snippy:4.3.6	variation	1029406	1029406	.	.	0	note=snp G=>A A:71 G:0
EA2454	snippy:4.3.6	variation	1029421	1029421	.	.	0	note=snp A=>G G:69 A:0
EA2454	snippy:4.3.6	variation	1029460	1029460	.	.	0	note=snp G=>A A:76 G:0
EA2454	snippy:4.3.6	variation	1029526	1029526	.	.	0	note=snp T=>A A:73 T:0
EA2454	snippy:4.3.6	variation	1029532	1029532	.	.	0	note=snp G=>A A:73 G:0
EA2454	snippy:4.3.6	variation	1029568	1029568	.	.	0	note=complex TGCA=>CGCG CGCG:61 TGCA:0
EA2454	snippy:4.3.6	variation	1029670	1029670	.	.	0	note=snp T=>A A:57 T:0
EA2454	snippy:4.3.6	variation	1029694	1029694	.	.	0	note=snp G=>A A:65 G:0
EA2454	snippy:4.3.6	variation	1029816	1029816	.	.	0	note=snp A=>G G:83 A:0
EA2454	snippy:4.3.6	variation	1029901	1029901	.	.	0	note=snp A=>G G:99 A:0
EA2454	snippy:4.3.6	variation	1030004	1030004	.	.	0	note=complex CTGGT=>TTGGC TTGGC:59 CTGGT:0
EA2454	snippy:4.3.6	variation	1030266	1030266	.	.	0	note=snp A=>G G:56 A:0
EA2454	snippy:4.3.6	variation	1030314	1030314	.	.	0	note=snp A=>G G:45 A:0
EA2454	snippy:4.3.6	variation	1030443	1030443	.	.	0	note=snp C=>A A:69 C:0
EA2454	snippy:4.3.6	variation	1030611	1030611	.	.	0	note=snp C=>T T:47 C:0
EA2454	snippy:4.3.6	variation	1030626	1030626	.	.	0	note=snp C=>A A:42 C:0
EA2454	snippy:4.3.6	variation	1030645	1030645	.	.	0	note=snp A=>C C:32 A:0
EA2454	snippy:4.3.6	variation	1031488	1031488	.	.	0	note=snp A=>T T:15 A:0
EA2454	snippy:4.3.6	variation	1032037	1032037	.	.	0	note=snp C=>T T:64 C:0
EA2454	snippy:4.3.6	variation	1032370	1032370	.	.	0	note=snp G=>A A:81 G:0
EA2454	snippy:4.3.6	variation	1032916	1032916	.	.	0	note=snp G=>A A:39 G:0
EA2454	snippy:4.3.6	variation	1033048	1033048	.	.	0	note=snp G=>A A:43 G:0
EA2454	snippy:4.3.6	variation	1033258	1033258	.	.	0	note=snp C=>T T:47 C:0
EA2454	snippy:4.3.6	variation	1033280	1033280	.	.	0	note=snp G=>A A:47 G:0
EA2454	snippy:4.3.6	variation	1033357	1033357	.	.	0	note=snp C=>G G:29 C:0
EA2454	snippy:4.3.6	variation	1033426	1033426	.	.	0	note=snp C=>T T:33 C:0
EA2454	snippy:4.3.6	variation	1033434	1033434	.	.	0	note=snp T=>G G:34 T:0
EA2454	snippy:4.3.6	variation	1033441	1033441	.	.	0	note=snp G=>C C:35 G:0
EA2454	snippy:4.3.6	variation	1033480	1033480	.	.	0	note=complex AGCC=>GGCA GGCA:36 AGCC:0
EA2454	snippy:4.3.6	variation	1033570	1033570	.	.	0	note=snp A=>G G:33 A:0
EA2454	snippy:4.3.6	variation	1033731	1033731	.	.	0	note=snp G=>A A:37 G:0
EA2454	snippy:4.3.6	variation	1033741	1033741	.	.	0	note=snp C=>T T:39 C:0
EA2454	snippy:4.3.6	variation	1034035	1034035	.	.	0	note=snp A=>G G:43 A:0
EA2454	snippy:4.3.6	variation	1034080	1034080	.	.	0	note=snp T=>C C:49 T:0
EA2454	snippy:4.3.6	variation	1034095	1034095	.	.	0	note=snp C=>A A:48 C:0
EA2454	snippy:4.3.6	variation	1034218	1034218	.	.	0	note=snp A=>G G:38 A:0
EA2454	snippy:4.3.6	variation	1034269	1034269	.	.	0	note=snp C=>T T:31 C:0
EA2454	snippy:4.3.6	variation	1034274	1034274	.	.	0	note=snp A=>T T:34 A:0
EA2454	snippy:4.3.6	variation	1034282	1034282	.	.	0	note=snp A=>G G:37 A:0
EA2454	snippy:4.3.6	variation	1034379	1034379	.	.	0	note=snp A=>C C:56 A:0
EA2454	snippy:4.3.6	variation	1034713	1034713	.	.	0	note=snp T=>C C:51 T:0
EA2454	snippy:4.3.6	variation	1034746	1034746	.	.	0	note=complex GCTG=>ACTA ACTA:59 GCTG:0
EA2454	snippy:4.3.6	variation	1034755	1034755	.	.	0	note=snp G=>A A:67 G:0
EA2454	snippy:4.3.6	variation	1034761	1034761	.	.	0	note=snp A=>G G:58 A:0
EA2454	snippy:4.3.6	variation	1034815	1034815	.	.	0	note=complex CTGGT=>TTGAC TTGAC:51 CTGGT:0
EA2454	snippy:4.3.6	variation	1034889	1034889	.	.	0	note=snp G=>T T:47 G:0
EA2454	snippy:4.3.6	variation	1034956	1034956	.	.	0	note=complex GAGT=>AAGC AAGC:48 GAGT:0
EA2454	snippy:4.3.6	variation	1034964	1034964	.	.	0	note=snp G=>A A:54 G:0
EA2454	snippy:4.3.6	variation	1035037	1035037	.	.	0	note=snp A=>C C:46 A:0
EA2454	snippy:4.3.6	variation	1035058	1035058	.	.	0	note=snp C=>T T:39 C:0
EA2454	snippy:4.3.6	variation	1035073	1035073	.	.	0	note=snp C=>T T:38 C:0
EA2454	snippy:4.3.6	variation	1035106	1035106	.	.	0	note=snp G=>A A:26 G:0
EA2454	snippy:4.3.6	variation	1035130	1035130	.	.	0	note=snp A=>C C:27 A:0
EA2454	snippy:4.3.6	variation	1035169	1035169	.	.	0	note=snp A=>G G:40 A:0
EA2454	snippy:4.3.6	variation	1035193	1035193	.	.	0	note=snp C=>T T:54 C:0
EA2454	snippy:4.3.6	variation	1035211	1035211	.	.	0	note=snp T=>C C:55 T:0
EA2454	snippy:4.3.6	variation	1035217	1035217	.	.	0	note=snp A=>G G:57 A:0
EA2454	snippy:4.3.6	variation	1035226	1035226	.	.	0	note=snp A=>G G:59 A:0
EA2454	snippy:4.3.6	variation	1035232	1035232	.	.	0	note=snp C=>T T:60 C:0
EA2454	snippy:4.3.6	variation	1035241	1035241	.	.	0	note=complex CGTC=>TGTT TGTT:59 CGTC:0
EA2454	snippy:4.3.6	variation	1035259	1035259	.	.	0	note=snp A=>C C:68 A:0
EA2454	snippy:4.3.6	variation	1035316	1035316	.	.	0	note=snp A=>G G:67 A:0
EA2454	snippy:4.3.6	variation	1035328	1035328	.	.	0	note=snp A=>G G:63 A:0
EA2454	snippy:4.3.6	variation	1035337	1035337	.	.	0	note=snp G=>A A:62 G:0
EA2454	snippy:4.3.6	variation	1035346	1035346	.	.	0	note=snp A=>G G:62 A:0
EA2454	snippy:4.3.6	variation	1035364	1035364	.	.	0	note=complex GTT=>ATC ATC:56 GTT:0
EA2454	snippy:4.3.6	variation	1035379	1035379	.	.	0	note=complex GCTA=>ACTG ACTG:57 GCTA:0
EA2454	snippy:4.3.6	variation	1035427	1035427	.	.	0	note=snp C=>T T:49 C:0
EA2454	snippy:4.3.6	variation	1035439	1035439	.	.	0	note=snp T=>C C:46 T:0
EA2454	snippy:4.3.6	variation	1035507	1035507	.	.	0	note=snp T=>C C:50 T:0
EA2454	snippy:4.3.6	variation	1035753	1035753	.	.	0	note=snp C=>T T:57 C:0
EA2454	snippy:4.3.6	variation	1035975	1035975	.	.	0	note=snp G=>A A:63 G:0
EA2454	snippy:4.3.6	variation	1036254	1036254	.	.	0	note=snp A=>G G:42 A:0
EA2454	snippy:4.3.6	variation	1036473	1036473	.	.	0	note=snp A=>G G:58 A:0
EA2454	snippy:4.3.6	variation	1036515	1036515	.	.	0	note=snp C=>T T:46 C:0
EA2454	snippy:4.3.6	variation	1036707	1036707	.	.	0	note=snp T=>C C:33 T:0
EA2454	snippy:4.3.6	variation	1036712	1036712	.	.	0	note=snp A=>G G:36 A:0
EA2454	snippy:4.3.6	variation	1036859	1036859	.	.	0	note=snp G=>A A:62 G:0
EA2454	snippy:4.3.6	variation	1036971	1036971	.	.	0	note=snp T=>C C:61 T:0
EA2454	snippy:4.3.6	variation	1037052	1037052	.	.	0	note=snp A=>G G:57 A:0
EA2454	snippy:4.3.6	variation	1037510	1037510	.	.	0	note=complex AGC=>GGT GGT:60 AGC:0
EA2454	snippy:4.3.6	variation	1037532	1037532	.	.	0	note=snp T=>G G:57 T:0
EA2454	snippy:4.3.6	variation	1037793	1037793	.	.	0	note=snp A=>C C:68 A:0
EA2454	snippy:4.3.6	variation	1037808	1037808	.	.	0	note=snp C=>A A:70 C:0
EA2454	snippy:4.3.6	variation	1038081	1038081	.	.	0	note=snp C=>T T:69 C:0
EA2454	snippy:4.3.6	variation	1038089	1038089	.	.	0	note=snp G=>A A:68 G:0
EA2454	snippy:4.3.6	variation	1038273	1038273	.	.	0	note=snp G=>A A:69 G:0
EA2454	snippy:4.3.6	variation	1038350	1038350	.	.	0	note=snp C=>T T:61 C:0
EA2454	snippy:4.3.6	variation	1038937	1038937	.	.	0	note=complex GGTG=>TGTC TGTC:43 GGTG:0
EA2454	snippy:4.3.6	variation	1039012	1039012	.	.	0	note=snp C=>A A:50 C:0
EA2454	snippy:4.3.6	variation	1039024	1039024	.	.	0	note=snp G=>A A:54 G:0
EA2454	snippy:4.3.6	variation	1039186	1039186	.	.	0	note=snp T=>G G:59 T:0
EA2454	snippy:4.3.6	variation	1039462	1039462	.	.	0	note=snp A=>T T:52 A:0
EA2454	snippy:4.3.6	variation	1039501	1039501	.	.	0	note=snp A=>G G:47 A:0
EA2454	snippy:4.3.6	variation	1039522	1039522	.	.	0	note=snp C=>T T:42 C:0
EA2454	snippy:4.3.6	variation	1039552	1039552	.	.	0	note=snp G=>A A:38 G:0
EA2454	snippy:4.3.6	variation	1039564	1039564	.	.	0	note=snp A=>G G:45 A:0
EA2454	snippy:4.3.6	variation	1039621	1039621	.	.	0	note=complex TCCG=>CCCA CCCA:44 TCCG:0
EA2454	snippy:4.3.6	variation	1039660	1039660	.	.	0	note=snp A=>G G:47 A:0
EA2454	snippy:4.3.6	variation	1039774	1039774	.	.	0	note=snp T=>G G:52 T:0
EA2454	snippy:4.3.6	variation	1039895	1039895	.	.	0	note=snp T=>G G:41 T:0
EA2454	snippy:4.3.6	variation	1039930	1039930	.	.	0	note=del ATTACTGCATAGCACTTT=>A A:22 ATTACTGCATAGCACTTT:0
EA2454	snippy:4.3.6	variation	1040587	1040587	.	.	0	note=complex ACCT=>GCCG GCCG:73 ACCT:0
EA2454	snippy:4.3.6	variation	1040608	1040608	.	.	0	note=snp G=>A A:65 G:0
EA2454	snippy:4.3.6	variation	1040662	1040662	.	.	0	note=snp G=>A A:65 G:0
EA2454	snippy:4.3.6	variation	1040683	1040683	.	.	0	note=snp G=>A A:63 G:0
EA2454	snippy:4.3.6	variation	1040758	1040758	.	.	0	note=snp A=>G G:64 A:0
EA2454	snippy:4.3.6	variation	1040776	1040776	.	.	0	note=snp T=>C C:61 T:0
EA2454	snippy:4.3.6	variation	1040824	1040824	.	.	0	note=complex CGGC=>AGGG AGGG:42 CGGC:0
EA2454	snippy:4.3.6	variation	1040905	1040905	.	.	0	note=snp A=>C C:51 A:0
EA2454	snippy:4.3.6	variation	1040962	1040962	.	.	0	note=complex AGAC=>GGAT GGAT:30 AGAC:0
EA2454	snippy:4.3.6	variation	1041003	1041003	.	.	0	note=snp C=>A A:20 C:0
EA2454	snippy:4.3.6	variation	1042286	1042286	.	.	0	note=snp C=>T T:12 C:0
EA2454	snippy:4.3.6	variation	1042343	1042343	.	.	0	note=snp G=>A A:37 G:0
EA2454	snippy:4.3.6	variation	1042379	1042379	.	.	0	note=snp T=>A A:48 T:0
EA2454	snippy:4.3.6	variation	1042391	1042391	.	.	0	note=snp G=>A A:49 G:0
EA2454	snippy:4.3.6	variation	1042436	1042436	.	.	0	note=snp T=>C C:41 T:0
EA2454	snippy:4.3.6	variation	1042547	1042547	.	.	0	note=snp C=>A A:55 C:0
EA2454	snippy:4.3.6	variation	1042571	1042571	.	.	0	note=snp A=>G G:55 A:0
EA2454	snippy:4.3.6	variation	1042595	1042595	.	.	0	note=snp G=>A A:52 G:0
EA2454	snippy:4.3.6	variation	1042613	1042613	.	.	0	note=complex CGCT=>GGCC GGCC:44 CGCT:0
EA2454	snippy:4.3.6	variation	1042642	1042642	.	.	0	note=snp C=>T T:57 C:0
EA2454	snippy:4.3.6	variation	1042667	1042667	.	.	0	note=snp G=>A A:56 G:0
EA2454	snippy:4.3.6	variation	1042832	1042832	.	.	0	note=snp C=>A A:44 C:0
EA2454	snippy:4.3.6	variation	1042874	1042874	.	.	0	note=snp T=>A A:47 T:0
EA2454	snippy:4.3.6	variation	1043143	1043143	.	.	0	note=snp A=>G G:61 A:0
EA2454	snippy:4.3.6	variation	1043231	1043231	.	.	0	note=snp A=>C C:72 A:0
EA2454	snippy:4.3.6	variation	1043266	1043266	.	.	0	note=snp G=>A A:79 G:0
EA2454	snippy:4.3.6	variation	1043392	1043392	.	.	0	note=snp T=>G G:73 T:0
EA2454	snippy:4.3.6	variation	1043455	1043455	.	.	0	note=snp G=>A A:77 G:0
EA2454	snippy:4.3.6	variation	1043483	1043483	.	.	0	note=snp A=>G G:57 A:0
EA2454	snippy:4.3.6	variation	1043488	1043488	.	.	0	note=snp C=>T T:56 C:0
EA2454	snippy:4.3.6	variation	1043494	1043494	.	.	0	note=snp C=>T T:53 C:0
EA2454	snippy:4.3.6	variation	1043503	1043503	.	.	0	note=complex ATTA=>GCTG GCTG:45 ATTA:0
EA2454	snippy:4.3.6	variation	1043518	1043518	.	.	0	note=snp C=>T T:42 C:0
EA2454	snippy:4.3.6	variation	1043524	1043524	.	.	0	note=snp C=>G G:27 C:0
EA2454	snippy:4.3.6	variation	1043530	1043530	.	.	0	note=complex AACGCTTGGTAACCACGAG=>TACACTCGGCAATCATGAA TACACTCGGCAATCATGAA:14 AACGCTTGGTAACCACGAG:0
EA2454	snippy:4.3.6	variation	1043570	1043570	.	.	0	note=snp A=>C C:31 A:0
EA2454	snippy:4.3.6	variation	1043582	1043582	.	.	0	note=snp C=>T T:25 C:0
EA2454	snippy:4.3.6	variation	1043587	1043587	.	.	0	note=snp A=>G G:25 A:0
EA2454	snippy:4.3.6	variation	1043878	1043878	.	.	0	note=snp G=>A A:63 G:0
EA2454	snippy:4.3.6	variation	1043899	1043899	.	.	0	note=snp A=>G G:58 A:0
EA2454	snippy:4.3.6	variation	1043938	1043938	.	.	0	note=snp G=>T T:55 G:0
EA2454	snippy:4.3.6	variation	1043962	1043962	.	.	0	note=snp T=>C C:61 T:0
EA2454	snippy:4.3.6	variation	1044107	1044107	.	.	0	note=snp G=>A A:58 G:0
EA2454	snippy:4.3.6	variation	1044129	1044129	.	.	0	note=snp T=>C C:51 T:0
EA2454	snippy:4.3.6	variation	1044169	1044169	.	.	0	note=snp T=>C C:47 T:0
EA2454	snippy:4.3.6	variation	1044247	1044247	.	.	0	note=snp T=>C C:43 T:0
EA2454	snippy:4.3.6	variation	1044271	1044271	.	.	0	note=snp T=>C C:48 T:0
EA2454	snippy:4.3.6	variation	1044325	1044325	.	.	0	note=complex AGTA=>GGTG GGTG:48 AGTA:0
EA2454	snippy:4.3.6	variation	1044358	1044358	.	.	0	note=snp A=>G G:55 A:0
EA2454	snippy:4.3.6	variation	1044412	1044412	.	.	0	note=snp C=>T T:61 C:0
EA2454	snippy:4.3.6	variation	1044445	1044445	.	.	0	note=snp C=>T T:54 C:1
EA2454	snippy:4.3.6	variation	1044605	1044605	.	.	0	note=complex AACAG=>GACAA GACAA:59 AACAG:0
EA2454	snippy:4.3.6	variation	1044658	1044658	.	.	0	note=snp T=>C C:49 T:0
EA2454	snippy:4.3.6	variation	1044667	1044667	.	.	0	note=snp T=>G G:53 T:0
EA2454	snippy:4.3.6	variation	1044706	1044706	.	.	0	note=snp C=>T T:51 C:0
EA2454	snippy:4.3.6	variation	1044717	1044717	.	.	0	note=snp G=>A A:54 G:0
EA2454	snippy:4.3.6	variation	1044734	1044734	.	.	0	note=snp A=>G G:52 A:0
EA2454	snippy:4.3.6	variation	1044748	1044748	.	.	0	note=complex AGAGC=>GGAAA GGAAA:38 AGAGC:0
EA2454	snippy:4.3.6	variation	1044808	1044808	.	.	0	note=snp C=>G G:56 C:0
EA2454	snippy:4.3.6	variation	1044888	1044888	.	.	0	note=snp T=>A A:47 T:0
EA2454	snippy:4.3.6	variation	1044988	1044988	.	.	0	note=snp T=>A A:54 T:0
EA2454	snippy:4.3.6	variation	1045030	1045030	.	.	0	note=snp G=>A A:58 G:0
EA2454	snippy:4.3.6	variation	1045045	1045045	.	.	0	note=snp A=>G G:55 A:0
EA2454	snippy:4.3.6	variation	1045139	1045139	.	.	0	note=snp A=>T T:64 A:0
EA2454	snippy:4.3.6	variation	1045170	1045170	.	.	0	note=snp T=>C C:54 T:0
EA2454	snippy:4.3.6	variation	1045182	1045182	.	.	0	note=complex TTTATTGG=>CTTTTGT CTTTTGT:46 TTTATTGG:0
EA2454	snippy:4.3.6	variation	1045231	1045231	.	.	0	note=complex AC=>GA GA:35 AC:0
EA2454	snippy:4.3.6	variation	1045243	1045243	.	.	0	note=snp A=>G G:37 A:0
EA2454	snippy:4.3.6	variation	1045247	1045247	.	.	0	note=del AAGCTC=>A A:28 AAGCTC:0
EA2454	snippy:4.3.6	variation	1045259	1045259	.	.	0	note=snp T=>G G:32 T:0
EA2454	snippy:4.3.6	variation	1045627	1045627	.	.	0	note=snp C=>T T:64 C:0
EA2454	snippy:4.3.6	variation	1045784	1045784	.	.	0	note=snp G=>A A:58 G:0
EA2454	snippy:4.3.6	variation	1045855	1045855	.	.	0	note=complex CCTGG=>ACTGA ACTGA:39 CCTGG:0
EA2454	snippy:4.3.6	variation	1046012	1046012	.	.	0	note=snp G=>A A:48 G:0
EA2454	snippy:4.3.6	variation	1046044	1046044	.	.	0	note=snp C=>T T:48 C:0
EA2454	snippy:4.3.6	variation	1046050	1046050	.	.	0	note=complex ACATGCA=>TCACGCG TCACGCG:42 ACATGCA:0
EA2454	snippy:4.3.6	variation	1046061	1046061	.	.	0	note=complex CCTCC=>AATCT AATCT:41 CCTCC:0
EA2454	snippy:4.3.6	variation	1046108	1046108	.	.	0	note=snp C=>T T:50 C:0
EA2454	snippy:4.3.6	variation	1046157	1046157	.	.	0	note=snp G=>C C:39 G:0
EA2454	snippy:4.3.6	variation	1046167	1046167	.	.	0	note=snp C=>T T:35 C:0
EA2454	snippy:4.3.6	variation	1046192	1046192	.	.	0	note=complex AAA=>GAG GAG:32 AAA:0
EA2454	snippy:4.3.6	variation	1046215	1046215	.	.	0	note=snp G=>C C:34 G:0
EA2454	snippy:4.3.6	variation	1046233	1046233	.	.	0	note=snp C=>T T:39 C:0
EA2454	snippy:4.3.6	variation	1046239	1046239	.	.	0	note=snp A=>G G:40 A:0
EA2454	snippy:4.3.6	variation	1046290	1046290	.	.	0	note=snp T=>C C:47 T:0
EA2454	snippy:4.3.6	variation	1046314	1046314	.	.	0	note=snp A=>G G:47 A:0
EA2454	snippy:4.3.6	variation	1046329	1046329	.	.	0	note=snp C=>T T:46 C:0
EA2454	snippy:4.3.6	variation	1046408	1046408	.	.	0	note=snp G=>A A:53 G:0
EA2454	snippy:4.3.6	variation	1046419	1046419	.	.	0	note=snp C=>T T:49 C:0
EA2454	snippy:4.3.6	variation	1046425	1046425	.	.	0	note=snp A=>G G:49 A:0
EA2454	snippy:4.3.6	variation	1046437	1046437	.	.	0	note=complex CGGA=>TGGC TGGC:46 CGGA:0
EA2454	snippy:4.3.6	variation	1046446	1046446	.	.	0	note=snp C=>T T:51 C:1
EA2454	snippy:4.3.6	variation	1046497	1046497	.	.	0	note=snp T=>C C:35 T:0
EA2454	snippy:4.3.6	variation	1046510	1046510	.	.	0	note=snp A=>G G:38 A:0
EA2454	snippy:4.3.6	variation	1046524	1046524	.	.	0	note=snp T=>G G:33 T:0
EA2454	snippy:4.3.6	variation	1046539	1046539	.	.	0	note=complex TC=>CCGCCCAACGACAACGTTA CCGCCCAACGACAACGTTA:18 TC:0
EA2454	snippy:4.3.6	variation	1046593	1046593	.	.	0	note=snp C=>A A:47 C:0
EA2454	snippy:4.3.6	variation	1046602	1046602	.	.	0	note=snp A=>T T:48 A:0
EA2454	snippy:4.3.6	variation	1046779	1046779	.	.	0	note=snp A=>G G:45 A:1
EA2454	snippy:4.3.6	variation	1046842	1046842	.	.	0	note=snp G=>A A:57 G:0
EA2454	snippy:4.3.6	variation	1046890	1046890	.	.	0	note=snp G=>C C:50 G:0
EA2454	snippy:4.3.6	variation	1046935	1046935	.	.	0	note=snp T=>C C:47 T:0
EA2454	snippy:4.3.6	variation	1046986	1046986	.	.	0	note=snp C=>T T:40 C:0
EA2454	snippy:4.3.6	variation	1046998	1046998	.	.	0	note=snp C=>T T:43 C:0
EA2454	snippy:4.3.6	variation	1047016	1047016	.	.	0	note=snp G=>C C:51 G:0
EA2454	snippy:4.3.6	variation	1047137	1047137	.	.	0	note=snp G=>A A:51 G:0
EA2454	snippy:4.3.6	variation	1047190	1047190	.	.	0	note=snp G=>A A:52 G:0
EA2454	snippy:4.3.6	variation	1047217	1047217	.	.	0	note=snp G=>A A:44 G:1
EA2454	snippy:4.3.6	variation	1047283	1047283	.	.	0	note=snp A=>G G:54 A:0
EA2454	snippy:4.3.6	variation	1047304	1047304	.	.	0	note=snp A=>G G:54 A:0
EA2454	snippy:4.3.6	variation	1047354	1047354	.	.	0	note=complex CG=>TA TA:37 CG:0
EA2454	snippy:4.3.6	variation	1047374	1047374	.	.	0	note=snp C=>T T:44 C:0
EA2454	snippy:4.3.6	variation	1047379	1047379	.	.	0	note=snp C=>T T:40 C:0
EA2454	snippy:4.3.6	variation	1047400	1047400	.	.	0	note=snp A=>G G:40 A:0
EA2454	snippy:4.3.6	variation	1047416	1047416	.	.	0	note=snp A=>G G:41 A:0
EA2454	snippy:4.3.6	variation	1047445	1047445	.	.	0	note=snp C=>T T:48 C:0
EA2454	snippy:4.3.6	variation	1047508	1047508	.	.	0	note=snp T=>C C:42 T:0
EA2454	snippy:4.3.6	variation	1047520	1047520	.	.	0	note=snp G=>A A:41 G:0
EA2454	snippy:4.3.6	variation	1047547	1047547	.	.	0	note=complex ACTC=>GATA GATA:29 ACTC:0
EA2454	snippy:4.3.6	variation	1047571	1047571	.	.	0	note=snp A=>G G:39 A:0
EA2454	snippy:4.3.6	variation	1047602	1047602	.	.	0	note=snp A=>G G:46 A:0
EA2454	snippy:4.3.6	variation	1047616	1047616	.	.	0	note=complex CGCG=>TGCA TGCA:45 CGCG:0
EA2454	snippy:4.3.6	variation	1047674	1047674	.	.	0	note=snp G=>A A:56 G:0
EA2454	snippy:4.3.6	variation	1047745	1047745	.	.	0	note=snp G=>A A:55 G:0
EA2454	snippy:4.3.6	variation	1047834	1047834	.	.	0	note=snp A=>G G:57 A:0
EA2454	snippy:4.3.6	variation	1047894	1047894	.	.	0	note=snp C=>T T:57 C:0
EA2454	snippy:4.3.6	variation	1047939	1047939	.	.	0	note=snp A=>G G:70 A:0
EA2454	snippy:4.3.6	variation	1047951	1047951	.	.	0	note=snp C=>T T:60 C:0
EA2454	snippy:4.3.6	variation	1048005	1048005	.	.	0	note=snp T=>C C:49 T:0
EA2454	snippy:4.3.6	variation	1048047	1048047	.	.	0	note=complex GT=>AC AC:37 GT:0
EA2454	snippy:4.3.6	variation	1048062	1048062	.	.	0	note=snp T=>C C:42 T:0
EA2454	snippy:4.3.6	variation	1051652	1051652	.	.	0	note=snp G=>A A:56 G:0
EA2454	snippy:4.3.6	variation	1052435	1052435	.	.	0	note=snp C=>T T:81 C:0
EA2454	snippy:4.3.6	variation	1053345	1053345	.	.	0	note=complex GCCCG=>TCCC TCCC:43 GCCCG:0
EA2454	snippy:4.3.6	variation	1053700	1053700	.	.	0	note=snp A=>G G:57 A:0
EA2454	snippy:4.3.6	variation	1053814	1053814	.	.	0	note=snp C=>T T:45 C:0
EA2454	snippy:4.3.6	variation	1053873	1053873	.	.	0	note=snp T=>C C:67 T:0
EA2454	snippy:4.3.6	variation	1053931	1053931	.	.	0	note=snp C=>T T:59 C:0
EA2454	snippy:4.3.6	variation	1053973	1053973	.	.	0	note=snp G=>A A:58 G:0
EA2454	snippy:4.3.6	variation	1054078	1054078	.	.	0	note=snp T=>A A:70 T:0
EA2454	snippy:4.3.6	variation	1054099	1054099	.	.	0	note=snp G=>T T:57 G:0
EA2454	snippy:4.3.6	variation	1054213	1054213	.	.	0	note=snp G=>A A:57 G:0
EA2454	snippy:4.3.6	variation	1054264	1054264	.	.	0	note=snp C=>T T:64 C:0
EA2454	snippy:4.3.6	variation	1054270	1054270	.	.	0	note=snp G=>A A:64 G:0
EA2454	snippy:4.3.6	variation	1054276	1054276	.	.	0	note=snp T=>C C:63 T:0
EA2454	snippy:4.3.6	variation	1054315	1054315	.	.	0	note=snp T=>C C:54 T:0
EA2454	snippy:4.3.6	variation	1054372	1054372	.	.	0	note=snp T=>C C:42 T:0
EA2454	snippy:4.3.6	variation	1054393	1054393	.	.	0	note=snp G=>A A:46 G:0
EA2454	snippy:4.3.6	variation	1054462	1054462	.	.	0	note=snp C=>A A:50 C:0
EA2454	snippy:4.3.6	variation	1054699	1054699	.	.	0	note=snp C=>T T:26 C:0
EA2454	snippy:4.3.6	variation	1054758	1054758	.	.	0	note=snp C=>T T:33 C:0
EA2454	snippy:4.3.6	variation	1054882	1054882	.	.	0	note=snp T=>C C:34 T:0
EA2454	snippy:4.3.6	variation	1055114	1055114	.	.	0	note=snp T=>G G:61 T:0
EA2454	snippy:4.3.6	variation	1055170	1055170	.	.	0	note=snp C=>T T:49 C:0
EA2454	snippy:4.3.6	variation	1055371	1055371	.	.	0	note=snp G=>A A:44 G:0
EA2454	snippy:4.3.6	variation	1055413	1055413	.	.	0	note=snp C=>G G:36 C:0
EA2454	snippy:4.3.6	variation	1055650	1055650	.	.	0	note=snp C=>T T:49 C:0
EA2454	snippy:4.3.6	variation	1055698	1055698	.	.	0	note=snp A=>G G:56 A:0
EA2454	snippy:4.3.6	variation	1055818	1055818	.	.	0	note=snp G=>A A:37 G:0
EA2454	snippy:4.3.6	variation	1055875	1055875	.	.	0	note=snp T=>C C:49 T:0
EA2454	snippy:4.3.6	variation	1055905	1055905	.	.	0	note=snp G=>T T:42 G:0
EA2454	snippy:4.3.6	variation	1055962	1055962	.	.	0	note=snp T=>G G:49 T:0
EA2454	snippy:4.3.6	variation	1055971	1055971	.	.	0	note=complex TCTGTTTGGTTGT=>GTTTTTCGGCTGC GTTTTTCGGCTGC:40 TCTGTTTGGTTGT:0
EA2454	snippy:4.3.6	variation	1056124	1056124	.	.	0	note=snp C=>G G:67 C:0
EA2454	snippy:4.3.6	variation	1056130	1056130	.	.	0	note=snp T=>C C:66 T:0
EA2454	snippy:4.3.6	variation	1056139	1056139	.	.	0	note=snp T=>A A:66 T:0
EA2454	snippy:4.3.6	variation	1056145	1056145	.	.	0	note=snp T=>C C:65 T:1
EA2454	snippy:4.3.6	variation	1056160	1056160	.	.	0	note=snp C=>T T:61 C:1
EA2454	snippy:4.3.6	variation	1056196	1056196	.	.	0	note=snp C=>T T:46 C:0
EA2454	snippy:4.3.6	variation	1056202	1056202	.	.	0	note=snp T=>C C:43 T:0
EA2454	snippy:4.3.6	variation	1056211	1056211	.	.	0	note=complex TGATGTAATT=>CGATATAACA CGATATAACA:26 TGATGTAATT:0
EA2454	snippy:4.3.6	variation	1059646	1059646	.	.	0	note=snp C=>T T:87 C:0
EA2454	snippy:4.3.6	variation	1063175	1063175	.	.	0	note=del CT=>C C:46 CT:0
EA2454	snippy:4.3.6	variation	1067810	1067810	.	.	0	note=ins T=>TG TG:55 T:0
EA2454	snippy:4.3.6	variation	1072190	1072190	.	.	0	note=snp G=>A A:57 G:0
EA2454	snippy:4.3.6	variation	1073767	1073767	.	.	0	note=snp A=>G G:54 A:0
EA2454	snippy:4.3.6	variation	1075753	1075753	.	.	0	note=snp A=>G G:80 A:0
EA2454	snippy:4.3.6	variation	1078051	1078051	.	.	0	note=snp T=>C C:65 T:0
EA2454	snippy:4.3.6	variation	1079000	1079000	.	.	0	note=snp T=>C C:40 T:0
EA2454	snippy:4.3.6	variation	1083167	1083167	.	.	0	note=ins A=>AT AT:60 A:0
EA2454	snippy:4.3.6	variation	1085536	1085536	.	.	0	note=snp A=>G G:30 A:0
EA2454	snippy:4.3.6	variation	1093309	1093309	.	.	0	note=snp A=>G G:35 A:0
EA2454	snippy:4.3.6	variation	1095102	1095102	.	.	0	note=snp T=>C C:48 T:0
EA2454	snippy:4.3.6	variation	1103669	1103669	.	.	0	note=snp T=>C C:79 T:0
EA2454	snippy:4.3.6	variation	1109672	1109672	.	.	0	note=snp T=>C C:52 T:0
EA2454	snippy:4.3.6	variation	1127553	1127553	.	.	0	note=del CG=>C C:37 CG:0
EA2454	snippy:4.3.6	variation	1128458	1128458	.	.	0	note=snp T=>C C:90 T:0
EA2454	snippy:4.3.6	variation	1129086	1129086	.	.	0	note=snp A=>G G:105 A:0
EA2454	snippy:4.3.6	variation	1129220	1129220	.	.	0	note=snp C=>T T:99 C:1
EA2454	snippy:4.3.6	variation	1129342	1129342	.	.	0	note=snp T=>A A:105 T:0
EA2454	snippy:4.3.6	variation	1130101	1130101	.	.	0	note=snp T=>C C:79 T:0
EA2454	snippy:4.3.6	variation	1130209	1130209	.	.	0	note=snp A=>T T:77 A:0
EA2454	snippy:4.3.6	variation	1130924	1130924	.	.	0	note=snp G=>A A:74 G:0
EA2454	snippy:4.3.6	variation	1138215	1138215	.	.	0	note=snp T=>C C:51 T:0
EA2454	snippy:4.3.6	variation	1139565	1139565	.	.	0	note=del CT=>C C:59 CT:0
EA2454	snippy:4.3.6	variation	1140326	1140326	.	.	0	note=snp A=>G G:53 A:0
EA2454	snippy:4.3.6	variation	1144975	1144975	.	.	0	note=snp T=>C C:68 T:0
EA2454	snippy:4.3.6	variation	1147859	1147859	.	.	0	note=snp G=>A A:64 G:0
EA2454	snippy:4.3.6	variation	1150160	1150160	.	.	0	note=snp T=>A A:84 T:0
EA2454	snippy:4.3.6	variation	1150447	1150447	.	.	0	note=snp G=>A A:62 G:0
EA2454	snippy:4.3.6	variation	1151448	1151448	.	.	0	note=snp T=>C C:53 T:0
EA2454	snippy:4.3.6	variation	1153447	1153447	.	.	0	note=snp T=>C C:48 T:0
EA2454	snippy:4.3.6	variation	1153937	1153937	.	.	0	note=snp G=>A A:41 G:0
EA2454	snippy:4.3.6	variation	1160822	1160822	.	.	0	note=snp A=>T T:41 A:0
EA2454	snippy:4.3.6	variation	1162900	1162900	.	.	0	note=snp T=>C C:32 T:0
EA2454	snippy:4.3.6	variation	1167591	1167591	.	.	0	note=snp C=>T T:51 C:0
EA2454	snippy:4.3.6	variation	1167666	1167666	.	.	0	note=snp T=>C C:66 T:0
EA2454	snippy:4.3.6	variation	1174352	1174352	.	.	0	note=snp T=>C C:63 T:0
EA2454	snippy:4.3.6	variation	1175890	1175890	.	.	0	note=snp G=>T T:64 G:0
EA2454	snippy:4.3.6	variation	1177965	1177965	.	.	0	note=snp C=>T T:79 C:0
EA2454	snippy:4.3.6	variation	1186746	1186746	.	.	0	note=snp T=>C C:33 T:0
EA2454	snippy:4.3.6	variation	1190353	1190353	.	.	0	note=snp G=>T T:58 G:0
EA2454	snippy:4.3.6	variation	1195825	1195825	.	.	0	note=snp A=>G G:49 A:0
EA2454	snippy:4.3.6	variation	1200329	1200329	.	.	0	note=snp C=>T T:45 C:0
EA2454	snippy:4.3.6	variation	1200950	1200950	.	.	0	note=snp G=>T T:30 G:0
EA2454	snippy:4.3.6	variation	1202012	1202012	.	.	0	note=snp G=>A A:59 G:0
EA2454	snippy:4.3.6	variation	1203653	1203653	.	.	0	note=snp C=>T T:83 C:0
EA2454	snippy:4.3.6	variation	1211256	1211256	.	.	0	note=snp T=>C C:73 T:0
EA2454	snippy:4.3.6	variation	1211513	1211513	.	.	0	note=snp T=>C C:61 T:0
EA2454	snippy:4.3.6	variation	1218789	1218789	.	.	0	note=snp A=>G G:65 A:0
EA2454	snippy:4.3.6	variation	1219256	1219256	.	.	0	note=snp C=>T T:59 C:0
EA2454	snippy:4.3.6	variation	1219723	1219723	.	.	0	note=snp A=>T T:64 A:0
EA2454	snippy:4.3.6	variation	1221602	1221602	.	.	0	note=snp C=>A A:40 C:0
EA2454	snippy:4.3.6	variation	1235752	1235752	.	.	0	note=snp A=>G G:25 A:0
EA2454	snippy:4.3.6	variation	1236723	1236723	.	.	0	note=snp T=>C C:62 T:0
EA2454	snippy:4.3.6	variation	1240553	1240553	.	.	0	note=snp C=>T T:64 C:0
EA2454	snippy:4.3.6	variation	1242819	1242819	.	.	0	note=snp C=>T T:61 C:0
EA2454	snippy:4.3.6	variation	1244558	1244558	.	.	0	note=snp G=>A A:55 G:0
EA2454	snippy:4.3.6	variation	1244842	1244842	.	.	0	note=snp G=>A A:67 G:0
EA2454	snippy:4.3.6	variation	1245865	1245865	.	.	0	note=snp C=>T T:60 C:0
EA2454	snippy:4.3.6	variation	1246858	1246858	.	.	0	note=snp C=>T T:52 C:0
EA2454	snippy:4.3.6	variation	1248857	1248857	.	.	0	note=snp C=>T T:78 C:0
EA2454	snippy:4.3.6	variation	1248869	1248869	.	.	0	note=snp C=>T T:88 C:0
EA2454	snippy:4.3.6	variation	1255549	1255549	.	.	0	note=snp A=>G G:66 A:0
EA2454	snippy:4.3.6	variation	1258437	1258437	.	.	0	note=snp G=>A A:41 G:0
EA2454	snippy:4.3.6	variation	1309315	1309315	.	.	0	note=snp T=>C C:53 T:0
EA2454	snippy:4.3.6	variation	1312736	1312736	.	.	0	note=snp C=>A A:50 C:0
EA2454	snippy:4.3.6	variation	1314434	1314434	.	.	0	note=snp T=>C C:76 T:0
EA2454	snippy:4.3.6	variation	1315117	1315117	.	.	0	note=snp C=>T T:76 C:0
EA2454	snippy:4.3.6	variation	1316323	1316323	.	.	0	note=snp G=>C C:56 G:0
EA2454	snippy:4.3.6	variation	1317400	1317400	.	.	0	note=snp G=>A A:51 G:0
EA2454	snippy:4.3.6	variation	1318955	1318955	.	.	0	note=snp T=>C C:66 T:0
EA2454	snippy:4.3.6	variation	1320142	1320142	.	.	0	note=snp C=>A A:93 C:0
EA2454	snippy:4.3.6	variation	1320805	1320805	.	.	0	note=snp A=>G G:85 A:0
EA2454	snippy:4.3.6	variation	1322163	1322163	.	.	0	note=snp T=>C C:43 T:0
EA2454	snippy:4.3.6	variation	1322279	1322279	.	.	0	note=snp G=>T T:56 G:0
EA2454	snippy:4.3.6	variation	1322665	1322665	.	.	0	note=snp T=>C C:37 T:0
EA2454	snippy:4.3.6	variation	1331179	1331179	.	.	0	note=snp T=>G G:48 T:1
EA2454	snippy:4.3.6	variation	1334752	1334752	.	.	0	note=snp C=>T T:44 C:0
EA2454	snippy:4.3.6	variation	1335631	1335631	.	.	0	note=snp T=>G G:48 T:0
EA2454	snippy:4.3.6	variation	1340886	1340886	.	.	0	note=snp A=>C C:64 A:0
EA2454	snippy:4.3.6	variation	1345460	1345460	.	.	0	note=snp T=>G G:63 T:0
EA2454	snippy:4.3.6	variation	1345847	1345847	.	.	0	note=snp T=>C C:45 T:0
EA2454	snippy:4.3.6	variation	1350929	1350929	.	.	0	note=snp G=>T T:49 G:0
EA2454	snippy:4.3.6	variation	1351707	1351707	.	.	0	note=snp G=>C C:42 G:0
EA2454	snippy:4.3.6	variation	1355247	1355247	.	.	0	note=snp G=>C C:48 G:0
EA2454	snippy:4.3.6	variation	1358384	1358384	.	.	0	note=snp A=>G G:57 A:0
EA2454	snippy:4.3.6	variation	1360577	1360577	.	.	0	note=snp A=>G G:61 A:0
EA2454	snippy:4.3.6	variation	1365707	1365707	.	.	0	note=snp C=>T T:60 C:0
EA2454	snippy:4.3.6	variation	1371250	1371250	.	.	0	note=snp T=>C C:41 T:0
EA2454	snippy:4.3.6	variation	1373482	1373482	.	.	0	note=snp T=>C C:81 T:0
EA2454	snippy:4.3.6	variation	1373586	1373586	.	.	0	note=snp T=>G G:68 T:1
EA2454	snippy:4.3.6	variation	1378312	1378312	.	.	0	note=snp T=>C C:56 T:0
EA2454	snippy:4.3.6	variation	1382325	1382325	.	.	0	note=ins G=>GT GT:65 G:0
EA2454	snippy:4.3.6	variation	1387493	1387493	.	.	0	note=snp A=>G G:48 A:0
EA2454	snippy:4.3.6	variation	1394505	1394505	.	.	0	note=snp A=>G G:71 A:0
EA2454	snippy:4.3.6	variation	1395046	1395046	.	.	0	note=snp T=>C C:66 T:0
EA2454	snippy:4.3.6	variation	1395903	1395903	.	.	0	note=snp T=>G G:80 T:0
EA2454	snippy:4.3.6	variation	1401264	1401264	.	.	0	note=snp A=>G G:32 A:0
EA2454	snippy:4.3.6	variation	1404410	1404410	.	.	0	note=del CA=>C C:28 CA:0
EA2454	snippy:4.3.6	variation	1405766	1405766	.	.	0	note=snp A=>T T:87 A:0
EA2454	snippy:4.3.6	variation	1407659	1407659	.	.	0	note=snp C=>T T:59 C:0
EA2454	snippy:4.3.6	variation	1413069	1413069	.	.	0	note=snp G=>A A:53 G:0
EA2454	snippy:4.3.6	variation	1413295	1413295	.	.	0	note=snp T=>C C:45 T:0
EA2454	snippy:4.3.6	variation	1414326	1414326	.	.	0	note=snp G=>A A:46 G:1
EA2454	snippy:4.3.6	variation	1415609	1415609	.	.	0	note=snp A=>T T:34 A:0
EA2454	snippy:4.3.6	variation	1416501	1416501	.	.	0	note=snp A=>C C:50 A:0
EA2454	snippy:4.3.6	variation	1416578	1416578	.	.	0	note=snp A=>G G:36 A:0
EA2454	snippy:4.3.6	variation	1422407	1422407	.	.	0	note=snp A=>G G:55 A:0
EA2454	snippy:4.3.6	variation	1423035	1423035	.	.	0	note=snp C=>G G:68 C:0
EA2454	snippy:4.3.6	variation	1423055	1423055	.	.	0	note=snp C=>A A:62 C:0
EA2454	snippy:4.3.6	variation	1424795	1424795	.	.	0	note=snp G=>T T:58 G:0
EA2454	snippy:4.3.6	variation	1428495	1428495	.	.	0	note=snp A=>T T:39 A:0
EA2454	snippy:4.3.6	variation	1434550	1434550	.	.	0	note=snp G=>A A:47 G:0
EA2454	snippy:4.3.6	variation	1435223	1435223	.	.	0	note=snp G=>A A:79 G:0
EA2454	snippy:4.3.6	variation	1437290	1437290	.	.	0	note=snp C=>G G:42 C:0
EA2454	snippy:4.3.6	variation	1438627	1438627	.	.	0	note=snp G=>T T:61 G:0
EA2454	snippy:4.3.6	variation	1442298	1442298	.	.	0	note=snp C=>T T:45 C:0
EA2454	snippy:4.3.6	variation	1442781	1442781	.	.	0	note=snp T=>C C:46 T:0
EA2454	snippy:4.3.6	variation	1442832	1442832	.	.	0	note=snp C=>A A:54 C:0
EA2454	snippy:4.3.6	variation	1445619	1445619	.	.	0	note=snp G=>A A:61 G:0
EA2454	snippy:4.3.6	variation	1451144	1451144	.	.	0	note=snp C=>T T:41 C:0
EA2454	snippy:4.3.6	variation	1452075	1452075	.	.	0	note=snp T=>C C:44 T:0
EA2454	snippy:4.3.6	variation	1452446	1452446	.	.	0	note=snp G=>T T:39 G:0
EA2454	snippy:4.3.6	variation	1453646	1453646	.	.	0	note=snp T=>A A:55 T:0
EA2454	snippy:4.3.6	variation	1455169	1455169	.	.	0	note=snp G=>A A:63 G:0
EA2454	snippy:4.3.6	variation	1455326	1455326	.	.	0	note=snp C=>T T:68 C:1
EA2454	snippy:4.3.6	variation	1457731	1457731	.	.	0	note=snp G=>A A:44 G:0
EA2454	snippy:4.3.6	variation	1458467	1458467	.	.	0	note=snp A=>G G:62 A:0
EA2454	snippy:4.3.6	variation	1459664	1459664	.	.	0	note=snp T=>G G:54 T:0
EA2454	snippy:4.3.6	variation	1460332	1460332	.	.	0	note=snp A=>T T:57 A:0
EA2454	snippy:4.3.6	variation	1465284	1465284	.	.	0	note=snp G=>A A:74 G:0
EA2454	snippy:4.3.6	variation	1473808	1473808	.	.	0	note=snp T=>C C:36 T:0
EA2454	snippy:4.3.6	variation	1476139	1476139	.	.	0	note=snp T=>C C:52 T:0
EA2454	snippy:4.3.6	variation	1480258	1480258	.	.	0	note=snp C=>G G:79 C:0
EA2454	snippy:4.3.6	variation	1480708	1480708	.	.	0	note=snp T=>G G:60 T:0
EA2454	snippy:4.3.6	variation	1482449	1482449	.	.	0	note=snp A=>G G:55 A:0
EA2454	snippy:4.3.6	variation	1483731	1483731	.	.	0	note=snp C=>T T:65 C:0
EA2454	snippy:4.3.6	variation	1483915	1483915	.	.	0	note=snp T=>C C:42 T:0
EA2454	snippy:4.3.6	variation	1491226	1491226	.	.	0	note=snp T=>C C:54 T:0
EA2454	snippy:4.3.6	variation	1491674	1491674	.	.	0	note=snp A=>G G:49 A:0
EA2454	snippy:4.3.6	variation	1491774	1491774	.	.	0	note=snp C=>T T:51 C:0
EA2454	snippy:4.3.6	variation	1492527	1492527	.	.	0	note=ins C=>CA CA:66 C:1
EA2454	snippy:4.3.6	variation	1493837	1493837	.	.	0	note=snp A=>G G:62 A:0
EA2454	snippy:4.3.6	variation	1495581	1495581	.	.	0	note=snp T=>A A:62 T:0
EA2454	snippy:4.3.6	variation	1500517	1500517	.	.	0	note=ins T=>TA TA:75 T:0
EA2454	snippy:4.3.6	variation	1503865	1503865	.	.	0	note=snp T=>C C:32 T:0
EA2454	snippy:4.3.6	variation	1505571	1505571	.	.	0	note=snp C=>T T:35 C:0
EA2454	snippy:4.3.6	variation	1511157	1511157	.	.	0	note=snp C=>T T:56 C:0
EA2454	snippy:4.3.6	variation	1511208	1511208	.	.	0	note=snp G=>T T:49 G:0
EA2454	snippy:4.3.6	variation	1513734	1513734	.	.	0	note=snp C=>T T:51 C:1
EA2454	snippy:4.3.6	variation	1518451	1518451	.	.	0	note=complex GGAAG=>AAAAA AAAAA:65 GGAAG:0
EA2454	snippy:4.3.6	variation	1518523	1518523	.	.	0	note=snp A=>C C:78 A:0
EA2454	snippy:4.3.6	variation	1521514	1521514	.	.	0	note=snp C=>A A:72 C:1
EA2454	snippy:4.3.6	variation	1525679	1525679	.	.	0	note=snp C=>T T:65 C:1
EA2454	snippy:4.3.6	variation	1526178	1526178	.	.	0	note=snp C=>T T:58 C:0
EA2454	snippy:4.3.6	variation	1526724	1526724	.	.	0	note=snp C=>G G:59 C:0
EA2454	snippy:4.3.6	variation	1533339	1533339	.	.	0	note=snp A=>G G:48 A:0
EA2454	snippy:4.3.6	variation	1534292	1534292	.	.	0	note=snp A=>G G:66 A:0
EA2454	snippy:4.3.6	variation	1534747	1534747	.	.	0	note=del TC=>T T:48 TC:0
EA2454	snippy:4.3.6	variation	1537405	1537405	.	.	0	note=snp G=>C C:44 G:0
EA2454	snippy:4.3.6	variation	1547465	1547465	.	.	0	note=snp G=>T T:39 G:0
EA2454	snippy:4.3.6	variation	1548845	1548845	.	.	0	note=snp T=>C C:66 T:0
EA2454	snippy:4.3.6	variation	1549828	1549828	.	.	0	note=snp T=>C C:44 T:0
EA2454	snippy:4.3.6	variation	1549834	1549834	.	.	0	note=del ACGCCATTG=>A A:34 ACGCCATTG:0
EA2454	snippy:4.3.6	variation	1556519	1556519	.	.	0	note=snp A=>G G:49 A:0
EA2454	snippy:4.3.6	variation	1557966	1557966	.	.	0	note=snp A=>G G:55 A:0
EA2454	snippy:4.3.6	variation	1559525	1559525	.	.	0	note=snp G=>A A:87 G:0
EA2454	snippy:4.3.6	variation	1559541	1559541	.	.	0	note=snp C=>T T:72 C:0
EA2454	snippy:4.3.6	variation	1560679	1560679	.	.	0	note=snp G=>A A:75 G:0
EA2454	snippy:4.3.6	variation	1560828	1560828	.	.	0	note=snp C=>T T:59 C:0
EA2454	snippy:4.3.6	variation	1561649	1561649	.	.	0	note=snp G=>C C:53 G:0
EA2454	snippy:4.3.6	variation	1562488	1562488	.	.	0	note=snp G=>A A:56 G:0
EA2454	snippy:4.3.6	variation	1567321	1567321	.	.	0	note=snp C=>T T:64 C:0
EA2454	snippy:4.3.6	variation	1570233	1570233	.	.	0	note=snp A=>G G:72 A:0
EA2454	snippy:4.3.6	variation	1573803	1573803	.	.	0	note=snp T=>A A:69 T:0
EA2454	snippy:4.3.6	variation	1574124	1574124	.	.	0	note=snp G=>A A:48 G:0
EA2454	snippy:4.3.6	variation	1575613	1575613	.	.	0	note=snp T=>C C:93 T:1
EA2454	snippy:4.3.6	variation	1580233	1580233	.	.	0	note=snp A=>C C:59 A:0
EA2454	snippy:4.3.6	variation	1581265	1581265	.	.	0	note=snp T=>C C:63 T:0
EA2454	snippy:4.3.6	variation	1585075	1585075	.	.	0	note=snp C=>T T:52 C:0
EA2454	snippy:4.3.6	variation	1587379	1587379	.	.	0	note=snp T=>C C:55 T:0
EA2454	snippy:4.3.6	variation	1587792	1587792	.	.	0	note=snp A=>C C:58 A:0
EA2454	snippy:4.3.6	variation	1592505	1592505	.	.	0	note=snp T=>C C:58 T:0
EA2454	snippy:4.3.6	variation	1596047	1596047	.	.	0	note=snp C=>T T:43 C:0
EA2454	snippy:4.3.6	variation	1596282	1596282	.	.	0	note=snp T=>G G:43 T:0
EA2454	snippy:4.3.6	variation	1597496	1597496	.	.	0	note=snp T=>C C:45 T:0
EA2454	snippy:4.3.6	variation	1599599	1599599	.	.	0	note=snp T=>G G:60 T:0
EA2454	snippy:4.3.6	variation	1599906	1599906	.	.	0	note=snp T=>C C:50 T:0
EA2454	snippy:4.3.6	variation	1600258	1600258	.	.	0	note=snp C=>A A:60 C:1
EA2454	snippy:4.3.6	variation	1600919	1600919	.	.	0	note=snp A=>G G:59 A:0
EA2454	snippy:4.3.6	variation	1601028	1601028	.	.	0	note=del AC=>A A:52 AC:0
EA2454	snippy:4.3.6	variation	1602481	1602481	.	.	0	note=snp C=>T T:40 C:0
EA2454	snippy:4.3.6	variation	1610176	1610176	.	.	0	note=snp G=>A A:58 G:0
EA2454	snippy:4.3.6	variation	1610501	1610501	.	.	0	note=del AT=>A A:55 AT:0
EA2454	snippy:4.3.6	variation	1612435	1612435	.	.	0	note=snp G=>A A:59 G:0
EA2454	snippy:4.3.6	variation	1613406	1613406	.	.	0	note=snp T=>A A:57 T:0
EA2454	snippy:4.3.6	variation	1613463	1613463	.	.	0	note=snp A=>G G:51 A:0
EA2454	snippy:4.3.6	variation	1616260	1616260	.	.	0	note=snp T=>G G:67 T:0
EA2454	snippy:4.3.6	variation	1617684	1617684	.	.	0	note=snp G=>C C:68 G:0
EA2454	snippy:4.3.6	variation	1618779	1618779	.	.	0	note=snp G=>T T:67 G:0
EA2454	snippy:4.3.6	variation	1619165	1619165	.	.	0	note=snp T=>G G:14 T:0
EA2454	snippy:4.3.6	variation	1619178	1619178	.	.	0	note=snp T=>A A:19 T:0
EA2454	snippy:4.3.6	variation	1619184	1619184	.	.	0	note=snp T=>C C:22 T:0
EA2454	snippy:4.3.6	variation	1619194	1619194	.	.	0	note=complex ATTTC=>TTTTT TTTTT:25 ATTTC:0
EA2454	snippy:4.3.6	variation	1619213	1619213	.	.	0	note=snp C=>T T:29 C:0
EA2454	snippy:4.3.6	variation	1619310	1619310	.	.	0	note=snp G=>T T:37 G:0
EA2454	snippy:4.3.6	variation	1619341	1619341	.	.	0	note=snp G=>A A:41 G:0
EA2454	snippy:4.3.6	variation	1619470	1619470	.	.	0	note=snp T=>G G:45 T:1
EA2454	snippy:4.3.6	variation	1619530	1619530	.	.	0	note=snp A=>G G:42 A:0
EA2454	snippy:4.3.6	variation	1619683	1619683	.	.	0	note=snp A=>G G:41 A:0
EA2454	snippy:4.3.6	variation	1619695	1619695	.	.	0	note=complex GT=>AC AC:34 GT:0
EA2454	snippy:4.3.6	variation	1619713	1619713	.	.	0	note=complex ACCG=>CCCT CCCT:31 ACCG:0
EA2454	snippy:4.3.6	variation	1619739	1619739	.	.	0	note=snp C=>A A:29 C:0
EA2454	snippy:4.3.6	variation	1619761	1619761	.	.	0	note=snp T=>C C:29 T:0
EA2454	snippy:4.3.6	variation	1619773	1619773	.	.	0	note=snp A=>G G:33 A:0
EA2454	snippy:4.3.6	variation	1619938	1619938	.	.	0	note=snp T=>G G:42 T:0
EA2454	snippy:4.3.6	variation	1629068	1629068	.	.	0	note=snp G=>A A:12 G:0
EA2454	snippy:4.3.6	variation	1629119	1629119	.	.	0	note=complex CGCA=>AGCG AGCG:21 CGCA:0
EA2454	snippy:4.3.6	variation	1629149	1629149	.	.	0	note=complex TGGCTATA=>CGGTTATG CGGTTATG:19 TGGCTATA:0
EA2454	snippy:4.3.6	variation	1629240	1629240	.	.	0	note=snp T=>C C:22 T:0
EA2454	snippy:4.3.6	variation	1629285	1629285	.	.	0	note=complex GTAC=>ATAT ATAT:38 GTAC:0
EA2454	snippy:4.3.6	variation	1629295	1629295	.	.	0	note=complex ACAAAAT=>TCTAAAC TCTAAAC:37 ACAAAAT:0
EA2454	snippy:4.3.6	variation	1629306	1629306	.	.	0	note=snp C=>G G:41 C:0
EA2454	snippy:4.3.6	variation	1629375	1629375	.	.	0	note=snp G=>A A:32 G:0
EA2454	snippy:4.3.6	variation	1629399	1629399	.	.	0	note=snp G=>A A:25 G:0
EA2454	snippy:4.3.6	variation	1629404	1629404	.	.	0	note=snp T=>A A:22 T:0
EA2454	snippy:4.3.6	variation	1629412	1629412	.	.	0	note=complex TGAG=>AGAA AGAA:21 TGAG:0
EA2454	snippy:4.3.6	variation	1629423	1629423	.	.	0	note=complex ATATA=>GTATT GTATT:20 ATATA:0
EA2454	snippy:4.3.6	variation	1629435	1629435	.	.	0	note=snp G=>A A:15 G:0
EA2454	snippy:4.3.6	variation	1630990	1630990	.	.	0	note=snp T=>C C:10 T:0
EA2454	snippy:4.3.6	variation	1634228	1634228	.	.	0	note=snp A=>G G:77 A:0
EA2454	snippy:4.3.6	variation	1642291	1642291	.	.	0	note=snp G=>T T:61 G:0
EA2454	snippy:4.3.6	variation	1642336	1642336	.	.	0	note=snp A=>G G:55 A:0
EA2454	snippy:4.3.6	variation	1644685	1644685	.	.	0	note=snp C=>T T:81 C:0
EA2454	snippy:4.3.6	variation	1652108	1652108	.	.	0	note=snp T=>C C:58 T:0
EA2454	snippy:4.3.6	variation	1652374	1652374	.	.	0	note=snp G=>A A:51 G:0
EA2454	snippy:4.3.6	variation	1653298	1653298	.	.	0	note=snp G=>A A:52 G:0
EA2454	snippy:4.3.6	variation	1653997	1653997	.	.	0	note=snp T=>A A:72 T:0
EA2454	snippy:4.3.6	variation	1657570	1657570	.	.	0	note=snp T=>A A:57 T:0
EA2454	snippy:4.3.6	variation	1659343	1659343	.	.	0	note=snp G=>A A:42 G:0
EA2454	snippy:4.3.6	variation	1661029	1661029	.	.	0	note=snp C=>T T:40 C:0
EA2454	snippy:4.3.6	variation	1668656	1668656	.	.	0	note=snp G=>T T:36 G:0
EA2454	snippy:4.3.6	variation	1672568	1672568	.	.	0	note=snp A=>C C:19 A:0
EA2454	snippy:4.3.6	variation	1676378	1676378	.	.	0	note=snp T=>C C:61 T:0
EA2454	snippy:4.3.6	variation	1677845	1677845	.	.	0	note=snp G=>A A:63 G:0
EA2454	snippy:4.3.6	variation	1679266	1679266	.	.	0	note=snp C=>T T:60 C:0
EA2454	snippy:4.3.6	variation	1682457	1682457	.	.	0	note=snp A=>G G:40 A:0
EA2454	snippy:4.3.6	variation	1683346	1683346	.	.	0	note=snp G=>A A:64 G:0
EA2454	snippy:4.3.6	variation	1689622	1689622	.	.	0	note=snp T=>A A:54 T:0
EA2454	snippy:4.3.6	variation	1692931	1692931	.	.	0	note=ins G=>GC GC:49 G:0
EA2454	snippy:4.3.6	variation	1693738	1693738	.	.	0	note=snp C=>T T:107 C:0
EA2454	snippy:4.3.6	variation	1695261	1695261	.	.	0	note=snp C=>T T:78 C:0
EA2454	snippy:4.3.6	variation	1696803	1696803	.	.	0	note=snp C=>T T:62 C:0
EA2454	snippy:4.3.6	variation	1701163	1701163	.	.	0	note=snp G=>T T:38 G:0
EA2454	snippy:4.3.6	variation	1701919	1701919	.	.	0	note=snp A=>G G:75 A:0
EA2454	snippy:4.3.6	variation	1707192	1707192	.	.	0	note=snp A=>G G:53 A:0
EA2454	snippy:4.3.6	variation	1711064	1711064	.	.	0	note=snp G=>A A:51 G:0
EA2454	snippy:4.3.6	variation	1713864	1713864	.	.	0	note=snp T=>C C:61 T:0
EA2454	snippy:4.3.6	variation	1714697	1714697	.	.	0	note=snp T=>C C:77 T:0
EA2454	snippy:4.3.6	variation	1714900	1714900	.	.	0	note=snp G=>A A:55 G:0
EA2454	snippy:4.3.6	variation	1717835	1717835	.	.	0	note=snp C=>A A:50 C:0
EA2454	snippy:4.3.6	variation	1718788	1718788	.	.	0	note=snp C=>A A:101 C:1
EA2454	snippy:4.3.6	variation	1719996	1719996	.	.	0	note=snp C=>G G:30 C:0
EA2454	snippy:4.3.6	variation	1723434	1723434	.	.	0	note=snp A=>C C:56 A:0
EA2454	snippy:4.3.6	variation	1726655	1726655	.	.	0	note=snp A=>T T:52 A:0
EA2454	snippy:4.3.6	variation	1730329	1730329	.	.	0	note=snp T=>C C:51 T:0
EA2454	snippy:4.3.6	variation	1730717	1730717	.	.	0	note=snp C=>A A:96 C:0
EA2454	snippy:4.3.6	variation	1733418	1733418	.	.	0	note=snp C=>T T:45 C:0
EA2454	snippy:4.3.6	variation	1737561	1737561	.	.	0	note=snp A=>G G:48 A:0
EA2454	snippy:4.3.6	variation	1739772	1739772	.	.	0	note=del CG=>C C:44 CG:0
EA2454	snippy:4.3.6	variation	1743887	1743887	.	.	0	note=snp C=>T T:49 C:0
EA2454	snippy:4.3.6	variation	1745576	1745576	.	.	0	note=snp T=>C C:52 T:0
EA2454	snippy:4.3.6	variation	1748585	1748585	.	.	0	note=snp A=>C C:28 A:1
EA2454	snippy:4.3.6	variation	1757036	1757036	.	.	0	note=snp C=>G G:34 C:0
EA2454	snippy:4.3.6	variation	1763293	1763293	.	.	0	note=snp T=>C C:45 T:0
EA2454	snippy:4.3.6	variation	1770725	1770725	.	.	0	note=snp T=>C C:55 T:0
EA2454	snippy:4.3.6	variation	1783395	1783395	.	.	0	note=snp C=>A A:34 C:0
EA2454	snippy:4.3.6	variation	1784698	1784698	.	.	0	note=snp A=>G G:69 A:0
EA2454	snippy:4.3.6	variation	1786685	1786685	.	.	0	note=snp T=>C C:44 T:0
EA2454	snippy:4.3.6	variation	1786768	1786768	.	.	0	note=snp T=>C C:43 T:0
EA2454	snippy:4.3.6	variation	1790154	1790154	.	.	0	note=snp G=>T T:40 G:0
EA2454	snippy:4.3.6	variation	1794938	1794938	.	.	0	note=snp T=>G G:31 T:0
EA2454	snippy:4.3.6	variation	1795161	1795161	.	.	0	note=snp A=>G G:55 A:0
EA2454	snippy:4.3.6	variation	1796849	1796849	.	.	0	note=snp T=>G G:65 T:0
EA2454	snippy:4.3.6	variation	1799132	1799132	.	.	0	note=snp G=>A A:42 G:0
EA2454	snippy:4.3.6	variation	1802874	1802874	.	.	0	note=snp A=>G G:30 A:0
EA2454	snippy:4.3.6	variation	1803664	1803664	.	.	0	note=snp T=>C C:52 T:0
EA2454	snippy:4.3.6	variation	1820083	1820083	.	.	0	note=snp T=>C C:43 T:0
EA2454	snippy:4.3.6	variation	1824156	1824156	.	.	0	note=snp T=>C C:23 T:0
EA2454	snippy:4.3.6	variation	1824499	1824499	.	.	0	note=snp T=>C C:27 T:0
EA2454	snippy:4.3.6	variation	1825107	1825107	.	.	0	note=snp G=>A A:50 G:0
EA2454	snippy:4.3.6	variation	1832503	1832503	.	.	0	note=snp C=>T T:30 C:0
EA2454	snippy:4.3.6	variation	1832674	1832674	.	.	0	note=snp A=>C C:42 A:0
EA2454	snippy:4.3.6	variation	1835609	1835609	.	.	0	note=snp T=>G G:34 T:0
EA2454	snippy:4.3.6	variation	1844569	1844569	.	.	0	note=snp A=>G G:54 A:0
EA2454	snippy:4.3.6	variation	1856201	1856201	.	.	0	note=snp T=>G G:69 T:0
EA2454	snippy:4.3.6	variation	1858882	1858882	.	.	0	note=snp T=>G G:99 T:0
EA2454	snippy:4.3.6	variation	1859194	1859194	.	.	0	note=snp G=>T T:103 G:0
EA2454	snippy:4.3.6	variation	1860310	1860310	.	.	0	note=snp T=>C C:34 T:0
EA2454	snippy:4.3.6	variation	1865699	1865699	.	.	0	note=snp C=>T T:61 C:0
EA2454	snippy:4.3.6	variation	1875820	1875820	.	.	0	note=snp G=>T T:56 G:0
EA2454	snippy:4.3.6	variation	1877345	1877345	.	.	0	note=snp T=>C C:37 T:0
EA2454	snippy:4.3.6	variation	1880076	1880076	.	.	0	note=snp G=>A A:64 G:0
EA2454	snippy:4.3.6	variation	1880494	1880494	.	.	0	note=snp A=>G G:69 A:0
EA2454	snippy:4.3.6	variation	1881056	1881056	.	.	0	note=snp C=>G G:39 C:0
EA2454	snippy:4.3.6	variation	1886735	1886735	.	.	0	note=snp G=>A A:57 G:0
EA2454	snippy:4.3.6	variation	1887544	1887544	.	.	0	note=snp A=>G G:34 A:0
EA2454	snippy:4.3.6	variation	1890386	1890386	.	.	0	note=snp T=>C C:60 T:0
EA2454	snippy:4.3.6	variation	1901401	1901401	.	.	0	note=snp G=>A A:50 G:0
EA2454	snippy:4.3.6	variation	1902101	1902101	.	.	0	note=snp G=>A A:50 G:0
EA2454	snippy:4.3.6	variation	1902291	1902291	.	.	0	note=snp G=>C C:68 G:0
EA2454	snippy:4.3.6	variation	1905044	1905044	.	.	0	note=snp G=>A A:51 G:0
EA2454	snippy:4.3.6	variation	1907596	1907596	.	.	0	note=snp G=>A A:46 G:0
EA2454	snippy:4.3.6	variation	1909088	1909088	.	.	0	note=snp T=>C C:84 T:0
EA2454	snippy:4.3.6	variation	1911724	1911724	.	.	0	note=snp C=>T T:61 C:0
EA2454	snippy:4.3.6	variation	1912473	1912473	.	.	0	note=snp A=>T T:94 A:0
EA2454	snippy:4.3.6	variation	1918926	1918926	.	.	0	note=snp G=>A A:36 G:0
EA2454	snippy:4.3.6	variation	1929193	1929193	.	.	0	note=ins T=>TTTA TTTA:47 T:0
EA2454	snippy:4.3.6	variation	1931891	1931891	.	.	0	note=snp C=>T T:59 C:0
EA2454	snippy:4.3.6	variation	1932163	1932163	.	.	0	note=snp G=>A A:57 G:0
EA2454	snippy:4.3.6	variation	1942330	1942330	.	.	0	note=snp T=>C C:37 T:0
EA2454	snippy:4.3.6	variation	1943617	1943617	.	.	0	note=snp C=>T T:61 C:0
EA2454	snippy:4.3.6	variation	1945608	1945608	.	.	0	note=snp T=>C C:41 T:0
EA2454	snippy:4.3.6	variation	1950298	1950298	.	.	0	note=snp T=>G G:53 T:0
EA2454	snippy:4.3.6	variation	1951563	1951563	.	.	0	note=snp A=>T T:45 A:0
EA2454	snippy:4.3.6	variation	1954358	1954358	.	.	0	note=snp G=>A A:60 G:0
EA2454	snippy:4.3.6	variation	1955062	1955062	.	.	0	note=snp G=>A A:80 G:0
EA2454	snippy:4.3.6	variation	1958733	1958733	.	.	0	note=snp T=>C C:49 T:0
EA2454	snippy:4.3.6	variation	1968172	1968172	.	.	0	note=snp T=>C C:56 T:0
EA2454	snippy:4.3.6	variation	1970914	1970914	.	.	0	note=snp A=>T T:15 A:0
EA2454	snippy:4.3.6	variation	1970924	1970924	.	.	0	note=complex CAA=>ATC ATC:15 CAA:0
EA2454	snippy:4.3.6	variation	1970935	1970935	.	.	0	note=snp C=>A A:20 C:0
EA2454	snippy:4.3.6	variation	1975987	1975987	.	.	0	note=snp G=>A A:61 G:0
EA2454	snippy:4.3.6	variation	1979564	1979564	.	.	0	note=snp A=>G G:40 A:0
EA2454	snippy:4.3.6	variation	1980186	1980186	.	.	0	note=snp C=>T T:43 C:0
EA2454	snippy:4.3.6	variation	1981009	1981009	.	.	0	note=snp G=>A A:59 G:0
EA2454	snippy:4.3.6	variation	1983040	1983040	.	.	0	note=snp T=>A A:61 T:0
EA2454	snippy:4.3.6	variation	1991121	1991121	.	.	0	note=snp T=>C C:35 T:0
EA2454	snippy:4.3.6	variation	1995211	1995211	.	.	0	note=snp T=>C C:81 T:0
EA2454	snippy:4.3.6	variation	1995450	1995450	.	.	0	note=snp C=>T T:37 C:0
EA2454	snippy:4.3.6	variation	1997790	1997790	.	.	0	note=snp G=>A A:47 G:0
EA2454	snippy:4.3.6	variation	1997936	1997936	.	.	0	note=snp C=>T T:48 C:0
EA2454	snippy:4.3.6	variation	1998244	1998244	.	.	0	note=snp C=>A A:59 C:0
EA2454	snippy:4.3.6	variation	1999636	1999636	.	.	0	note=snp A=>G G:59 A:0
EA2454	snippy:4.3.6	variation	2001388	2001388	.	.	0	note=snp G=>A A:78 G:0
EA2454	snippy:4.3.6	variation	2007738	2007738	.	.	0	note=snp A=>G G:46 A:0
EA2454	snippy:4.3.6	variation	2010387	2010387	.	.	0	note=snp G=>A A:59 G:0
EA2454	snippy:4.3.6	variation	2023335	2023335	.	.	0	note=snp A=>C C:36 A:0
EA2454	snippy:4.3.6	variation	2027149	2027149	.	.	0	note=snp G=>A A:46 G:0
EA2454	snippy:4.3.6	variation	2036702	2036702	.	.	0	note=snp C=>T T:60 C:0
EA2454	snippy:4.3.6	variation	2037412	2037412	.	.	0	note=snp G=>T T:63 G:0
EA2454	snippy:4.3.6	variation	2038279	2038279	.	.	0	note=ins A=>AAC AAC:59 A:0
EA2454	snippy:4.3.6	variation	2041809	2041809	.	.	0	note=snp A=>G G:52 A:0
EA2454	snippy:4.3.6	variation	2044267	2044267	.	.	0	note=snp C=>T T:45 C:0
EA2454	snippy:4.3.6	variation	2045195	2045195	.	.	0	note=snp G=>A A:61 G:1
EA2454	snippy:4.3.6	variation	2045314	2045314	.	.	0	note=snp T=>G G:60 T:0
EA2454	snippy:4.3.6	variation	2046204	2046204	.	.	0	note=snp T=>C C:36 T:0
EA2454	snippy:4.3.6	variation	2049495	2049495	.	.	0	note=snp G=>A A:34 G:0
EA2454	snippy:4.3.6	variation	2049993	2049993	.	.	0	note=snp G=>T T:54 G:0
EA2454	snippy:4.3.6	variation	2050507	2050507	.	.	0	note=snp C=>T T:48 C:0
EA2454	snippy:4.3.6	variation	2052588	2052588	.	.	0	note=snp C=>A A:50 C:0
EA2454	snippy:4.3.6	variation	2055836	2055836	.	.	0	note=snp A=>G G:63 A:0
EA2454	snippy:4.3.6	variation	2057231	2057231	.	.	0	note=snp C=>T T:57 C:0
EA2454	snippy:4.3.6	variation	2057764	2057764	.	.	0	note=snp G=>A A:53 G:1
EA2454	snippy:4.3.6	variation	2059644	2059644	.	.	0	note=snp G=>A A:76 G:0
EA2454	snippy:4.3.6	variation	2060675	2060675	.	.	0	note=snp A=>G G:55 A:0
EA2454	snippy:4.3.6	variation	2062156	2062156	.	.	0	note=snp T=>C C:80 T:0
EA2454	snippy:4.3.6	variation	2063839	2063839	.	.	0	note=snp T=>C C:70 T:0
EA2454	snippy:4.3.6	variation	2067623	2067623	.	.	0	note=snp C=>T T:59 C:0
EA2454	snippy:4.3.6	variation	2068297	2068297	.	.	0	note=snp T=>G G:62 T:0
EA2454	snippy:4.3.6	variation	2070162	2070162	.	.	0	note=snp T=>C C:72 T:0
EA2454	snippy:4.3.6	variation	2071004	2071004	.	.	0	note=snp G=>A A:62 G:0
EA2454	snippy:4.3.6	variation	2078028	2078028	.	.	0	note=snp A=>G G:54 A:0
EA2454	snippy:4.3.6	variation	2078594	2078594	.	.	0	note=snp A=>C C:60 A:0
EA2454	snippy:4.3.6	variation	2079477	2079477	.	.	0	note=snp A=>G G:89 A:0
EA2454	snippy:4.3.6	variation	2080076	2080076	.	.	0	note=snp G=>A A:107 G:0
EA2454	snippy:4.3.6	variation	2088360	2088360	.	.	0	note=snp A=>G G:70 A:0
EA2454	snippy:4.3.6	variation	2088535	2088535	.	.	0	note=snp C=>G G:83 C:0
EA2454	snippy:4.3.6	variation	2089096	2089096	.	.	0	note=snp G=>A A:54 G:0
EA2454	snippy:4.3.6	variation	2091149	2091149	.	.	0	note=snp T=>C C:47 T:0
EA2454	snippy:4.3.6	variation	2093864	2093864	.	.	0	note=snp G=>T T:65 G:0
EA2454	snippy:4.3.6	variation	2094829	2094829	.	.	0	note=snp T=>C C:66 T:0
EA2454	snippy:4.3.6	variation	2095954	2095954	.	.	0	note=snp G=>A A:58 G:0
EA2454	snippy:4.3.6	variation	2096088	2096088	.	.	0	note=snp A=>G G:50 A:0
EA2454	snippy:4.3.6	variation	2096965	2096965	.	.	0	note=snp G=>A A:117 G:0
EA2454	snippy:4.3.6	variation	2102172	2102172	.	.	0	note=snp A=>T T:34 A:0
EA2454	snippy:4.3.6	variation	2102837	2102837	.	.	0	note=snp G=>A A:38 G:0
EA2454	snippy:4.3.6	variation	2102993	2102993	.	.	0	note=snp T=>C C:46 T:0
EA2454	snippy:4.3.6	variation	2105260	2105260	.	.	0	note=snp T=>G G:32 T:0
EA2454	snippy:4.3.6	variation	2106068	2106068	.	.	0	note=del TG=>T T:33 TG:0
EA2454	snippy:4.3.6	variation	2108215	2108215	.	.	0	note=snp G=>A A:60 G:0
EA2454	snippy:4.3.6	variation	2117468	2117468	.	.	0	note=snp A=>G G:92 A:0
EA2454	snippy:4.3.6	variation	2119737	2119737	.	.	0	note=snp T=>C C:63 T:0
EA2454	snippy:4.3.6	variation	2133730	2133730	.	.	0	note=snp G=>A A:53 G:0
EA2454	snippy:4.3.6	variation	2142320	2142320	.	.	0	note=snp T=>C C:59 T:0
EA2454	snippy:4.3.6	variation	2147622	2147622	.	.	0	note=snp C=>T T:53 C:0
EA2454	snippy:4.3.6	variation	2148878	2148878	.	.	0	note=snp T=>A A:52 T:0
EA2454	snippy:4.3.6	variation	2149924	2149924	.	.	0	note=snp A=>G G:50 A:0
EA2454	snippy:4.3.6	variation	2153116	2153116	.	.	0	note=snp C=>T T:64 C:0
EA2454	snippy:4.3.6	variation	2155859	2155859	.	.	0	note=snp G=>A A:60 G:0
EA2454	snippy:4.3.6	variation	2156623	2156623	.	.	0	note=snp G=>A A:61 G:0
EA2454	snippy:4.3.6	variation	2158889	2158889	.	.	0	note=snp T=>A A:59 T:0
EA2454	snippy:4.3.6	variation	2160086	2160086	.	.	0	note=snp G=>A A:58 G:0
EA2454	snippy:4.3.6	variation	2162365	2162365	.	.	0	note=snp A=>G G:46 A:0
EA2454	snippy:4.3.6	variation	2166869	2166869	.	.	0	note=snp G=>A A:29 G:0
EA2454	snippy:4.3.6	variation	2167985	2167985	.	.	0	note=snp C=>T T:60 C:0
EA2454	snippy:4.3.6	variation	2169376	2169376	.	.	0	note=snp G=>A A:56 G:0
EA2454	snippy:4.3.6	variation	2171579	2171579	.	.	0	note=snp T=>A A:89 T:0
EA2454	snippy:4.3.6	variation	2171889	2171889	.	.	0	note=snp A=>G G:65 A:0
EA2454	snippy:4.3.6	variation	2173082	2173082	.	.	0	note=snp A=>G G:41 A:0
EA2454	snippy:4.3.6	variation	2177349	2177349	.	.	0	note=snp T=>C C:56 T:0
EA2454	snippy:4.3.6	variation	2183355	2183355	.	.	0	note=snp T=>C C:58 T:0
EA2454	snippy:4.3.6	variation	2184344	2184344	.	.	0	note=snp G=>T T:59 G:0
EA2454	snippy:4.3.6	variation	2188277	2188277	.	.	0	note=snp G=>T T:50 G:0
EA2454	snippy:4.3.6	variation	2189381	2189381	.	.	0	note=snp A=>G G:37 A:0
EA2454	snippy:4.3.6	variation	2195062	2195062	.	.	0	note=snp T=>C C:37 T:1
EA2454	snippy:4.3.6	variation	2220538	2220538	.	.	0	note=snp A=>G G:57 A:0
EA2454	snippy:4.3.6	variation	2223729	2223729	.	.	0	note=snp C=>T T:38 C:0
EA2454	snippy:4.3.6	variation	2226298	2226298	.	.	0	note=snp T=>C C:45 T:0
EA2454	snippy:4.3.6	variation	2227619	2227619	.	.	0	note=snp C=>T T:47 C:0
EA2454	snippy:4.3.6	variation	2228600	2228600	.	.	0	note=snp T=>C C:33 T:0
EA2454	snippy:4.3.6	variation	2231411	2231411	.	.	0	note=snp C=>A A:56 C:0
EA2454	snippy:4.3.6	variation	2245025	2245025	.	.	0	note=snp C=>A A:68 C:0
EA2454	snippy:4.3.6	variation	2246386	2246386	.	.	0	note=snp A=>T T:65 A:0
EA2454	snippy:4.3.6	variation	2252185	2252185	.	.	0	note=snp G=>A A:59 G:0
EA2454	snippy:4.3.6	variation	2256445	2256445	.	.	0	note=snp G=>A A:58 G:0
EA2454	snippy:4.3.6	variation	2259197	2259197	.	.	0	note=snp G=>A A:65 G:0
EA2454	snippy:4.3.6	variation	2260121	2260121	.	.	0	note=snp A=>G G:54 A:0
EA2454	snippy:4.3.6	variation	2265279	2265279	.	.	0	note=snp C=>T T:88 C:0
EA2454	snippy:4.3.6	variation	2268389	2268389	.	.	0	note=snp G=>C C:69 G:0
EA2454	snippy:4.3.6	variation	2268433	2268433	.	.	0	note=snp T=>C C:64 T:0
EA2454	snippy:4.3.6	variation	2271416	2271416	.	.	0	note=snp C=>A A:28 C:1
EA2454	snippy:4.3.6	variation	2278342	2278342	.	.	0	note=snp T=>A A:86 T:0
EA2454	snippy:4.3.6	variation	2280681	2280681	.	.	0	note=snp T=>G G:40 T:0
EA2454	snippy:4.3.6	variation	2283117	2283117	.	.	0	note=snp T=>C C:47 T:0
EA2454	snippy:4.3.6	variation	2283880	2283880	.	.	0	note=snp A=>G G:59 A:0
EA2454	snippy:4.3.6	variation	2289041	2289041	.	.	0	note=snp T=>C C:30 T:0
EA2454	snippy:4.3.6	variation	2291863	2291863	.	.	0	note=snp T=>C C:55 T:0
EA2454	snippy:4.3.6	variation	2292571	2292571	.	.	0	note=snp C=>T T:40 C:0
EA2454	snippy:4.3.6	variation	2293649	2293649	.	.	0	note=snp C=>A A:44 C:0
EA2454	snippy:4.3.6	variation	2293725	2293725	.	.	0	note=snp C=>T T:53 C:0
EA2454	snippy:4.3.6	variation	2298963	2298963	.	.	0	note=snp G=>T T:39 G:0
EA2454	snippy:4.3.6	variation	2311767	2311767	.	.	0	note=snp T=>G G:59 T:0
EA2454	snippy:4.3.6	variation	2314156	2314156	.	.	0	note=snp C=>T T:84 C:0
EA2454	snippy:4.3.6	variation	2315103	2315103	.	.	0	note=snp C=>T T:55 C:0
EA2454	snippy:4.3.6	variation	2322703	2322703	.	.	0	note=snp T=>G G:34 T:0
EA2454	snippy:4.3.6	variation	2323208	2323208	.	.	0	note=snp A=>G G:43 A:0
EA2454	snippy:4.3.6	variation	2324838	2324838	.	.	0	note=snp G=>T T:55 G:0
EA2454	snippy:4.3.6	variation	2332571	2332571	.	.	0	note=snp C=>A A:54 C:0
EA2454	snippy:4.3.6	variation	2335946	2335946	.	.	0	note=ins C=>CA CA:47 C:0
EA2454	snippy:4.3.6	variation	2338673	2338673	.	.	0	note=snp G=>A A:81 G:0
EA2454	snippy:4.3.6	variation	2349078	2349078	.	.	0	note=snp T=>C C:54 T:0
EA2454	snippy:4.3.6	variation	2350339	2350339	.	.	0	note=snp T=>C C:53 T:0
EA2454	snippy:4.3.6	variation	2351375	2351375	.	.	0	note=snp A=>C C:37 A:0
EA2454	snippy:4.3.6	variation	2354110	2354110	.	.	0	note=snp G=>C C:47 G:0
EA2454	snippy:4.3.6	variation	2354351	2354351	.	.	0	note=snp A=>G G:50 A:0
EA2454	snippy:4.3.6	variation	2356836	2356836	.	.	0	note=snp C=>A A:55 C:0
EA2454	snippy:4.3.6	variation	2357132	2357132	.	.	0	note=snp G=>A A:62 G:0
EA2454	snippy:4.3.6	variation	2359024	2359024	.	.	0	note=snp A=>G G:41 A:0
EA2454	snippy:4.3.6	variation	2364340	2364340	.	.	0	note=snp T=>G G:56 T:0
EA2454	snippy:4.3.6	variation	2371672	2371672	.	.	0	note=snp T=>C C:59 T:0
EA2454	snippy:4.3.6	variation	2372914	2372914	.	.	0	note=snp T=>C C:51 T:0
EA2454	snippy:4.3.6	variation	2373209	2373209	.	.	0	note=snp T=>A A:52 T:0
EA2454	snippy:4.3.6	variation	2373982	2373982	.	.	0	note=snp A=>G G:74 A:0
EA2454	snippy:4.3.6	variation	2375309	2375309	.	.	0	note=snp C=>T T:51 C:0
EA2454	snippy:4.3.6	variation	2378304	2378304	.	.	0	note=snp T=>G G:24 T:0
EA2454	snippy:4.3.6	variation	2379341	2379341	.	.	0	note=snp T=>C C:50 T:0
EA2454	snippy:4.3.6	variation	2381932	2381932	.	.	0	note=snp C=>A A:62 C:0
EA2454	snippy:4.3.6	variation	2382380	2382380	.	.	0	note=snp C=>T T:63 C:0
EA2454	snippy:4.3.6	variation	2396147	2396147	.	.	0	note=snp T=>A A:20 T:0
EA2454	snippy:4.3.6	variation	2397205	2397205	.	.	0	note=snp T=>C C:30 T:0
EA2454	snippy:4.3.6	variation	2397603	2397603	.	.	0	note=snp C=>A A:37 C:0
EA2454	snippy:4.3.6	variation	2399010	2399010	.	.	0	note=snp A=>G G:44 A:0
EA2454	snippy:4.3.6	variation	2403442	2403442	.	.	0	note=snp T=>C C:44 T:0
EA2454	snippy:4.3.6	variation	2404831	2404831	.	.	0	note=snp A=>C C:46 A:0
EA2454	snippy:4.3.6	variation	2405136	2405136	.	.	0	note=snp G=>A A:48 G:0
EA2454	snippy:4.3.6	variation	2407359	2407359	.	.	0	note=snp G=>A A:33 G:0
EA2454	snippy:4.3.6	variation	2407449	2407449	.	.	0	note=snp A=>G G:50 A:0
EA2454	snippy:4.3.6	variation	2412014	2412014	.	.	0	note=snp C=>T T:63 C:0
EA2454	snippy:4.3.6	variation	2414433	2414433	.	.	0	note=snp T=>G G:72 T:0
EA2454	snippy:4.3.6	variation	2415138	2415138	.	.	0	note=snp G=>A A:82 G:0
EA2454	snippy:4.3.6	variation	2416531	2416531	.	.	0	note=snp C=>T T:50 C:0
EA2454	snippy:4.3.6	variation	2419574	2419574	.	.	0	note=del CT=>C C:16 CT:0
EA2454	snippy:4.3.6	variation	2423399	2423399	.	.	0	note=snp T=>G G:44 T:0
EA2454	snippy:4.3.6	variation	2424078	2424078	.	.	0	note=snp A=>G G:40 A:0
EA2454	snippy:4.3.6	variation	2428008	2428008	.	.	0	note=del AT=>A A:68 AT:0
EA2454	snippy:4.3.6	variation	2428499	2428499	.	.	0	note=snp G=>A A:71 G:0
EA2454	snippy:4.3.6	variation	2429149	2429149	.	.	0	note=snp C=>G G:74 C:0
EA2454	snippy:4.3.6	variation	2429573	2429573	.	.	0	note=snp A=>G G:43 A:0
EA2454	snippy:4.3.6	variation	2434305	2434305	.	.	0	note=snp A=>C C:47 A:0
EA2454	snippy:4.3.6	variation	2436415	2436415	.	.	0	note=snp G=>A A:110 G:0
EA2454	snippy:4.3.6	variation	2438443	2438443	.	.	0	note=ins G=>GCACCAT GCACCAT:61 G:0
EA2454	snippy:4.3.6	variation	2438685	2438685	.	.	0	note=snp A=>G G:69 A:0
EA2454	snippy:4.3.6	variation	2439096	2439096	.	.	0	note=snp G=>A A:62 G:0
EA2454	snippy:4.3.6	variation	2447662	2447662	.	.	0	note=snp G=>A A:39 G:0
EA2454	snippy:4.3.6	variation	2448724	2448724	.	.	0	note=snp T=>C C:69 T:0
EA2454	snippy:4.3.6	variation	2449435	2449435	.	.	0	note=snp A=>G G:67 A:0
EA2454	snippy:4.3.6	variation	2450258	2450258	.	.	0	note=snp A=>C C:57 A:0
EA2454	snippy:4.3.6	variation	2453744	2453744	.	.	0	note=snp A=>C C:82 A:0
EA2454	snippy:4.3.6	variation	2456063	2456063	.	.	0	note=snp T=>C C:58 T:0
EA2454	snippy:4.3.6	variation	2456498	2456498	.	.	0	note=snp G=>C C:28 G:0
EA2454	snippy:4.3.6	variation	2461974	2461974	.	.	0	note=snp A=>G G:112 A:0
EA2454	snippy:4.3.6	variation	2463039	2463039	.	.	0	note=snp G=>A A:94 G:0
EA2454	snippy:4.3.6	variation	2466179	2466179	.	.	0	note=snp A=>G G:122 A:0
EA2454	snippy:4.3.6	variation	2466917	2466917	.	.	0	note=snp T=>G G:88 T:0
EA2454	snippy:4.3.6	variation	2468021	2468021	.	.	0	note=snp C=>T T:49 C:0
EA2454	snippy:4.3.6	variation	2471216	2471216	.	.	0	note=snp G=>A A:54 G:0
EA2454	snippy:4.3.6	variation	2495584	2495584	.	.	0	note=snp C=>A A:51 C:0
EA2454	snippy:4.3.6	variation	2495743	2495743	.	.	0	note=snp A=>C C:59 A:0
EA2454	snippy:4.3.6	variation	2496339	2496339	.	.	0	note=del CG=>C C:53 CG:0
EA2454	snippy:4.3.6	variation	2498006	2498006	.	.	0	note=snp G=>A A:91 G:0
EA2454	snippy:4.3.6	variation	2501622	2501622	.	.	0	note=snp G=>A A:50 G:0
EA2454	snippy:4.3.6	variation	2509841	2509841	.	.	0	note=snp A=>G G:65 A:0
EA2454	snippy:4.3.6	variation	2511520	2511520	.	.	0	note=snp G=>A A:49 G:0
EA2454	snippy:4.3.6	variation	2518906	2518906	.	.	0	note=snp A=>C C:65 A:0
EA2454	snippy:4.3.6	variation	2520061	2520061	.	.	0	note=snp T=>C C:51 T:0
EA2454	snippy:4.3.6	variation	2521382	2521382	.	.	0	note=snp C=>T T:52 C:0
EA2454	snippy:4.3.6	variation	2522720	2522720	.	.	0	note=snp A=>C C:47 A:0
EA2454	snippy:4.3.6	variation	2524981	2524981	.	.	0	note=snp T=>G G:41 T:0
EA2454	snippy:4.3.6	variation	2528246	2528246	.	.	0	note=snp T=>C C:71 T:0
EA2454	snippy:4.3.6	variation	2528297	2528297	.	.	0	note=snp A=>G G:47 A:0
EA2454	snippy:4.3.6	variation	2538679	2538679	.	.	0	note=snp T=>C C:74 T:0
EA2454	snippy:4.3.6	variation	2542786	2542786	.	.	0	note=snp A=>G G:87 A:0
EA2454	snippy:4.3.6	variation	2545615	2545615	.	.	0	note=complex CTC=>ATA ATA:42 CTC:0
EA2454	snippy:4.3.6	variation	2546596	2546596	.	.	0	note=snp C=>T T:50 C:0
EA2454	snippy:4.3.6	variation	2549675	2549675	.	.	0	note=snp T=>C C:75 T:0
EA2454	snippy:4.3.6	variation	2549710	2549710	.	.	0	note=snp G=>A A:63 G:0
EA2454	snippy:4.3.6	variation	2552049	2552049	.	.	0	note=snp G=>A A:51 G:0
EA2454	snippy:4.3.6	variation	2555441	2555441	.	.	0	note=snp A=>G G:54 A:0
EA2454	snippy:4.3.6	variation	2557964	2557964	.	.	0	note=snp G=>C C:36 G:0
EA2454	snippy:4.3.6	variation	2558667	2558667	.	.	0	note=snp G=>A A:48 G:0
EA2454	snippy:4.3.6	variation	2559290	2559290	.	.	0	note=snp C=>A A:114 C:0
EA2454	snippy:4.3.6	variation	2561301	2561301	.	.	0	note=snp A=>G G:79 A:0
EA2454	snippy:4.3.6	variation	2561652	2561652	.	.	0	note=snp T=>C C:93 T:0
EA2454	snippy:4.3.6	variation	2564681	2564681	.	.	0	note=snp C=>A A:68 C:0
EA2454	snippy:4.3.6	variation	2570129	2570129	.	.	0	note=snp G=>A A:56 G:0
EA2454	snippy:4.3.6	variation	2570534	2570534	.	.	0	note=snp A=>C C:48 A:0
EA2454	snippy:4.3.6	variation	2574887	2574887	.	.	0	note=snp G=>T T:62 G:0
EA2454	snippy:4.3.6	variation	2577565	2577565	.	.	0	note=snp G=>A A:43 G:0
EA2454	snippy:4.3.6	variation	2579508	2579508	.	.	0	note=snp T=>G G:54 T:0
EA2454	snippy:4.3.6	variation	2584123	2584123	.	.	0	note=snp A=>G G:63 A:0
EA2454	snippy:4.3.6	variation	2586095	2586095	.	.	0	note=snp C=>T T:55 C:0
EA2454	snippy:4.3.6	variation	2587851	2587851	.	.	0	note=snp A=>T T:95 A:0
EA2454	snippy:4.3.6	variation	2588480	2588480	.	.	0	note=ins G=>GA GA:95 G:0
EA2454	snippy:4.3.6	variation	2589008	2589008	.	.	0	note=snp T=>C C:108 T:0
EA2454	snippy:4.3.6	variation	2589723	2589723	.	.	0	note=snp T=>C C:102 T:0
EA2454	snippy:4.3.6	variation	2589936	2589936	.	.	0	note=snp T=>A A:102 T:0
EA2454	snippy:4.3.6	variation	2592348	2592348	.	.	0	note=snp C=>T T:38 C:0
EA2454	snippy:4.3.6	variation	2593010	2593010	.	.	0	note=snp T=>C C:52 T:0
EA2454	snippy:4.3.6	variation	2593790	2593790	.	.	0	note=snp C=>T T:69 C:0
EA2454	snippy:4.3.6	variation	2596704	2596704	.	.	0	note=snp T=>C C:60 T:0
EA2454	snippy:4.3.6	variation	2597428	2597428	.	.	0	note=snp T=>C C:49 T:0
EA2454	snippy:4.3.6	variation	2598908	2598908	.	.	0	note=snp T=>C C:55 T:1
EA2454	snippy:4.3.6	variation	2599178	2599178	.	.	0	note=snp C=>T T:45 C:0
EA2454	snippy:4.3.6	variation	2602630	2602630	.	.	0	note=snp C=>T T:61 C:0
EA2454	snippy:4.3.6	variation	2612758	2612758	.	.	0	note=snp A=>G G:66 A:0
EA2454	snippy:4.3.6	variation	2617140	2617140	.	.	0	note=del TA=>T T:62 TA:0
EA2454	snippy:4.3.6	variation	2617467	2617467	.	.	0	note=snp T=>G G:71 T:0
EA2454	snippy:4.3.6	variation	2619420	2619420	.	.	0	note=snp A=>G G:51 A:0
EA2454	snippy:4.3.6	variation	2621655	2621655	.	.	0	note=snp T=>C C:52 T:0
EA2454	snippy:4.3.6	variation	2630081	2630081	.	.	0	note=snp A=>G G:67 A:0
EA2454	snippy:4.3.6	variation	2630145	2630145	.	.	0	note=snp A=>G G:67 A:0
EA2454	snippy:4.3.6	variation	2631943	2631943	.	.	0	note=snp A=>G G:69 A:0
EA2454	snippy:4.3.6	variation	2632096	2632096	.	.	0	note=snp G=>C C:53 G:0
EA2454	snippy:4.3.6	variation	2636460	2636460	.	.	0	note=snp A=>G G:68 A:0
EA2454	snippy:4.3.6	variation	2640648	2640648	.	.	0	note=snp G=>A A:42 G:0
EA2454	snippy:4.3.6	variation	2641059	2641059	.	.	0	note=snp T=>C C:49 T:0
EA2454	snippy:4.3.6	variation	2641515	2641515	.	.	0	note=snp T=>A A:47 T:0
EA2454	snippy:4.3.6	variation	2642324	2642324	.	.	0	note=snp T=>C C:63 T:0
EA2454	snippy:4.3.6	variation	2644202	2644202	.	.	0	note=snp T=>G G:45 T:0
EA2454	snippy:4.3.6	variation	2647238	2647238	.	.	0	note=snp G=>T T:64 G:0
EA2454	snippy:4.3.6	variation	2654413	2654413	.	.	0	note=del GA=>G G:55 GA:0
EA2454	snippy:4.3.6	variation	2655415	2655415	.	.	0	note=snp T=>G G:66 T:0
EA2454	snippy:4.3.6	variation	2658667	2658667	.	.	0	note=snp A=>C C:42 A:0
EA2454	snippy:4.3.6	variation	2660000	2660000	.	.	0	note=snp A=>G G:76 A:0
EA2454	snippy:4.3.6	variation	2662545	2662545	.	.	0	note=snp A=>G G:32 A:0
EA2454	snippy:4.3.6	variation	2669244	2669244	.	.	0	note=snp C=>T T:36 C:0
EA2454	snippy:4.3.6	variation	2675076	2675076	.	.	0	note=snp A=>C C:37 A:0
EA2454	snippy:4.3.6	variation	2675121	2675121	.	.	0	note=snp G=>A A:33 G:0
EA2454	snippy:4.3.6	variation	2697691	2697691	.	.	0	note=snp C=>T T:50 C:0
EA2454	snippy:4.3.6	variation	2697799	2697799	.	.	0	note=snp T=>C C:51 T:0
EA2454	snippy:4.3.6	variation	2704969	2704969	.	.	0	note=snp G=>A A:84 G:0
EA2454	snippy:4.3.6	variation	2707628	2707628	.	.	0	note=snp T=>C C:65 T:0
EA2454	snippy:4.3.6	variation	2720677	2720677	.	.	0	note=del AACCTGC=>A A:17 AACCTGC:0
EA2454	snippy:4.3.6	variation	2722619	2722619	.	.	0	note=snp A=>G G:50 A:0
EA2454	snippy:4.3.6	variation	2727881	2727881	.	.	0	note=snp C=>T T:67 C:0
EA2454	snippy:4.3.6	variation	2728742	2728742	.	.	0	note=snp T=>C C:56 T:0
EA2454	snippy:4.3.6	variation	2734446	2734446	.	.	0	note=snp G=>A A:42 G:0
EA2454	snippy:4.3.6	variation	2740814	2740814	.	.	0	note=snp A=>T T:77 A:0
EA2454	snippy:4.3.6	variation	2743080	2743080	.	.	0	note=snp T=>G G:60 T:0
EA2454	snippy:4.3.6	variation	2748304	2748304	.	.	0	note=snp G=>A A:69 G:0
EA2454	snippy:4.3.6	variation	2748849	2748849	.	.	0	note=del GT=>G G:13 GT:0
EA2454	snippy:4.3.6	variation	2748962	2748962	.	.	0	note=snp C=>T T:52 C:0
EA2454	snippy:4.3.6	variation	2749013	2749013	.	.	0	note=snp T=>C C:51 T:0
EA2454	snippy:4.3.6	variation	2749118	2749118	.	.	0	note=snp T=>C C:77 T:0
EA2454	snippy:4.3.6	variation	2749149	2749149	.	.	0	note=snp T=>G G:72 T:0
EA2454	snippy:4.3.6	variation	2749181	2749181	.	.	0	note=snp C=>T T:72 C:0
EA2454	snippy:4.3.6	variation	2749194	2749194	.	.	0	note=snp T=>A A:66 T:0
EA2454	snippy:4.3.6	variation	2749200	2749200	.	.	0	note=snp A=>G G:69 A:1
EA2454	snippy:4.3.6	variation	2749205	2749205	.	.	0	note=snp T=>G G:68 T:1
EA2454	snippy:4.3.6	variation	2749221	2749221	.	.	0	note=complex CTG=>TTA TTA:60 CTG:0
EA2454	snippy:4.3.6	variation	2749244	2749244	.	.	0	note=snp G=>C C:74 G:0
EA2454	snippy:4.3.6	variation	2749379	2749379	.	.	0	note=snp G=>T T:85 G:0
EA2454	snippy:4.3.6	variation	2749456	2749456	.	.	0	note=snp C=>G G:68 C:0
EA2454	snippy:4.3.6	variation	2749637	2749637	.	.	0	note=snp C=>T T:99 C:0
EA2454	snippy:4.3.6	variation	2749709	2749709	.	.	0	note=snp C=>A A:100 C:0
EA2454	snippy:4.3.6	variation	2749754	2749754	.	.	0	note=snp G=>A A:99 G:0
EA2454	snippy:4.3.6	variation	2749820	2749820	.	.	0	note=snp T=>C C:87 T:0
EA2454	snippy:4.3.6	variation	2749943	2749943	.	.	0	note=snp A=>G G:79 A:0
EA2454	snippy:4.3.6	variation	2749967	2749967	.	.	0	note=snp A=>G G:88 A:0
EA2454	snippy:4.3.6	variation	2750051	2750051	.	.	0	note=snp T=>C C:98 T:0
EA2454	snippy:4.3.6	variation	2750066	2750066	.	.	0	note=snp T=>C C:93 T:0
EA2454	snippy:4.3.6	variation	2750072	2750072	.	.	0	note=snp G=>A A:91 G:0
EA2454	snippy:4.3.6	variation	2750102	2750102	.	.	0	note=snp T=>G G:79 T:0
EA2454	snippy:4.3.6	variation	2750294	2750294	.	.	0	note=snp C=>T T:105 C:0
EA2454	snippy:4.3.6	variation	2750366	2750366	.	.	0	note=snp A=>G G:102 A:0
EA2454	snippy:4.3.6	variation	2750411	2750411	.	.	0	note=snp G=>T T:90 G:0
EA2454	snippy:4.3.6	variation	2750471	2750471	.	.	0	note=snp T=>A A:82 T:0
EA2454	snippy:4.3.6	variation	2750700	2750700	.	.	0	note=snp T=>C C:72 T:0
EA2454	snippy:4.3.6	variation	2750771	2750771	.	.	0	note=snp C=>T T:77 C:0
EA2454	snippy:4.3.6	variation	2750781	2750781	.	.	0	note=snp A=>G G:80 A:0
EA2454	snippy:4.3.6	variation	2750880	2750880	.	.	0	note=snp C=>T T:64 C:0
EA2454	snippy:4.3.6	variation	2750924	2750924	.	.	0	note=complex TACG=>AACA AACA:53 TACG:0
EA2454	snippy:4.3.6	variation	2751044	2751044	.	.	0	note=snp T=>C C:37 T:0
EA2454	snippy:4.3.6	variation	2751185	2751185	.	.	0	note=snp T=>A A:53 T:0
EA2454	snippy:4.3.6	variation	2751209	2751209	.	.	0	note=snp T=>C C:45 T:0
EA2454	snippy:4.3.6	variation	2751266	2751266	.	.	0	note=snp T=>C C:51 T:0
EA2454	snippy:4.3.6	variation	2751506	2751506	.	.	0	note=snp T=>A A:54 T:0
EA2454	snippy:4.3.6	variation	2751680	2751680	.	.	0	note=snp A=>G G:48 A:0
EA2454	snippy:4.3.6	variation	2751692	2751692	.	.	0	note=complex CGGT=>TGGC TGGC:48 CGGT:0
EA2454	snippy:4.3.6	variation	2751753	2751753	.	.	0	note=snp T=>G G:46 T:0
EA2454	snippy:4.3.6	variation	2752055	2752055	.	.	0	note=snp G=>C C:53 G:0
EA2454	snippy:4.3.6	variation	2752220	2752220	.	.	0	note=snp T=>C C:46 T:0
EA2454	snippy:4.3.6	variation	2752241	2752241	.	.	0	note=snp C=>A A:48 C:0
EA2454	snippy:4.3.6	variation	2752454	2752454	.	.	0	note=snp C=>T T:65 C:0
EA2454	snippy:4.3.6	variation	2752482	2752482	.	.	0	note=snp G=>A A:54 G:0
EA2454	snippy:4.3.6	variation	2752569	2752569	.	.	0	note=snp C=>T T:45 C:0
EA2454	snippy:4.3.6	variation	2752629	2752629	.	.	0	note=snp T=>C C:48 T:0
EA2454	snippy:4.3.6	variation	2752656	2752656	.	.	0	note=complex CGTA=>TGTG TGTG:43 CGTA:0
EA2454	snippy:4.3.6	variation	2752827	2752827	.	.	0	note=snp G=>C C:64 G:0
EA2454	snippy:4.3.6	variation	2753034	2753034	.	.	0	note=snp T=>C C:60 T:0
EA2454	snippy:4.3.6	variation	2753190	2753190	.	.	0	note=snp C=>G G:62 C:0
EA2454	snippy:4.3.6	variation	2753319	2753319	.	.	0	note=complex TGCA=>CGCT CGCT:47 TGCA:0
EA2454	snippy:4.3.6	variation	2753393	2753393	.	.	0	note=snp G=>A A:20 G:0
EA2454	snippy:4.3.6	variation	2753398	2753398	.	.	0	note=snp C=>T T:18 C:0
EA2454	snippy:4.3.6	variation	2753403	2753403	.	.	0	note=snp G=>C C:12 G:0
EA2454	snippy:4.3.6	variation	2753526	2753526	.	.	0	note=snp A=>G G:37 A:0
EA2454	snippy:4.3.6	variation	2753570	2753570	.	.	0	note=snp T=>G G:66 T:0
EA2454	snippy:4.3.6	variation	2753602	2753602	.	.	0	note=snp T=>A A:66 T:0
EA2454	snippy:4.3.6	variation	2753613	2753613	.	.	0	note=snp T=>A A:65 T:0
EA2454	snippy:4.3.6	variation	2753621	2753621	.	.	0	note=snp C=>A A:68 C:0
EA2454	snippy:4.3.6	variation	2753628	2753628	.	.	0	note=snp A=>G G:65 A:0
EA2454	snippy:4.3.6	variation	2753667	2753667	.	.	0	note=snp C=>A A:62 C:0
EA2454	snippy:4.3.6	variation	2753698	2753698	.	.	0	note=complex AGT=>TGA TGA:55 AGT:0
EA2454	snippy:4.3.6	variation	2753727	2753727	.	.	0	note=snp T=>C C:52 T:0
EA2454	snippy:4.3.6	variation	2753837	2753837	.	.	0	note=snp T=>C C:59 T:0
EA2454	snippy:4.3.6	variation	2753955	2753955	.	.	0	note=snp A=>G G:64 A:0
EA2454	snippy:4.3.6	variation	2754024	2754024	.	.	0	note=complex AGTT=>GGTC GGTC:66 AGTT:0
EA2454	snippy:4.3.6	variation	2754075	2754075	.	.	0	note=complex GCTT=>ACTC ACTC:58 GCTT:0
EA2454	snippy:4.3.6	variation	2754087	2754087	.	.	0	note=snp A=>G G:59 A:0
EA2454	snippy:4.3.6	variation	2754154	2754154	.	.	0	note=snp G=>A A:65 G:0
EA2454	snippy:4.3.6	variation	2754318	2754318	.	.	0	note=snp G=>A A:56 G:0
EA2454	snippy:4.3.6	variation	2754462	2754462	.	.	0	note=snp T=>C C:50 T:0
EA2454	snippy:4.3.6	variation	2754588	2754588	.	.	0	note=snp G=>A A:48 G:0
EA2454	snippy:4.3.6	variation	2754822	2754822	.	.	0	note=snp G=>A A:65 G:0
EA2454	snippy:4.3.6	variation	2755025	2755025	.	.	0	note=snp C=>T T:97 C:0
EA2454	snippy:4.3.6	variation	2755140	2755140	.	.	0	note=snp G=>T T:91 G:0
EA2454	snippy:4.3.6	variation	2755245	2755245	.	.	0	note=snp G=>C C:61 G:0
EA2454	snippy:4.3.6	variation	2755470	2755470	.	.	0	note=snp G=>A A:67 G:0
EA2454	snippy:4.3.6	variation	2755667	2755667	.	.	0	note=snp T=>C C:63 T:0
EA2454	snippy:4.3.6	variation	2755700	2755700	.	.	0	note=snp T=>C C:56 T:0
EA2454	snippy:4.3.6	variation	2755745	2755745	.	.	0	note=snp T=>C C:52 T:0
EA2454	snippy:4.3.6	variation	2755790	2755790	.	.	0	note=snp A=>T T:45 A:0
EA2454	snippy:4.3.6	variation	2755795	2755795	.	.	0	note=complex AA=>TT TT:43 AA:0
EA2454	snippy:4.3.6	variation	2755850	2755850	.	.	0	note=snp C=>T T:54 C:0
EA2454	snippy:4.3.6	variation	2755859	2755859	.	.	0	note=complex GCCAGGT=>TCCGGGC TCCGGGC:47 GCCAGGT:0
EA2454	snippy:4.3.6	variation	2755877	2755877	.	.	0	note=snp G=>C C:55 G:0
EA2454	snippy:4.3.6	variation	2755901	2755901	.	.	0	note=snp G=>A A:48 G:0
EA2454	snippy:4.3.6	variation	2755934	2755934	.	.	0	note=complex CAAA=>GAAG GAAG:43 CAAA:0
EA2454	snippy:4.3.6	variation	2755955	2755955	.	.	0	note=snp T=>C C:45 T:0
EA2454	snippy:4.3.6	variation	2755979	2755979	.	.	0	note=snp G=>A A:49 G:0
EA2454	snippy:4.3.6	variation	2755985	2755985	.	.	0	note=snp C=>T T:49 C:0
EA2454	snippy:4.3.6	variation	2755994	2755994	.	.	0	note=snp T=>C C:48 T:0
EA2454	snippy:4.3.6	variation	2756000	2756000	.	.	0	note=snp C=>G G:50 C:0
EA2454	snippy:4.3.6	variation	2756009	2756009	.	.	0	note=snp G=>T T:47 G:0
EA2454	snippy:4.3.6	variation	2756219	2756219	.	.	0	note=snp A=>C C:64 A:0
EA2454	snippy:4.3.6	variation	2756483	2756483	.	.	0	note=snp T=>C C:51 T:0
EA2454	snippy:4.3.6	variation	2756504	2756504	.	.	0	note=snp C=>T T:54 C:0
EA2454	snippy:4.3.6	variation	2756557	2756557	.	.	0	note=snp C=>T T:64 C:0
EA2454	snippy:4.3.6	variation	2756625	2756625	.	.	0	note=snp C=>T T:70 C:0
EA2454	snippy:4.3.6	variation	2756665	2756665	.	.	0	note=snp T=>C C:65 T:0
EA2454	snippy:4.3.6	variation	2756704	2756704	.	.	0	note=snp C=>T T:83 C:0
EA2454	snippy:4.3.6	variation	2756743	2756743	.	.	0	note=snp T=>C C:79 T:0
EA2454	snippy:4.3.6	variation	2756824	2756824	.	.	0	note=snp G=>A A:49 G:0
EA2454	snippy:4.3.6	variation	2756842	2756842	.	.	0	note=snp A=>G G:49 A:0
EA2454	snippy:4.3.6	variation	2756869	2756869	.	.	0	note=snp A=>G G:42 A:0
EA2454	snippy:4.3.6	variation	2756899	2756899	.	.	0	note=snp C=>T T:42 C:0
EA2454	snippy:4.3.6	variation	2757001	2757001	.	.	0	note=snp G=>A A:56 G:0
EA2454	snippy:4.3.6	variation	2757085	2757085	.	.	0	note=snp C=>G G:61 C:0
EA2454	snippy:4.3.6	variation	2757110	2757110	.	.	0	note=snp C=>T T:59 C:0
EA2454	snippy:4.3.6	variation	2757118	2757118	.	.	0	note=snp A=>G G:62 A:0
EA2454	snippy:4.3.6	variation	2757211	2757211	.	.	0	note=snp A=>G G:42 A:0
EA2454	snippy:4.3.6	variation	2757229	2757229	.	.	0	note=complex GAAC=>AAAT AAAT:39 GAAC:0
EA2454	snippy:4.3.6	variation	2757391	2757391	.	.	0	note=snp T=>C C:42 T:0
EA2454	snippy:4.3.6	variation	2757397	2757397	.	.	0	note=snp C=>T T:48 C:0
EA2454	snippy:4.3.6	variation	2757484	2757484	.	.	0	note=snp C=>T T:44 C:0
EA2454	snippy:4.3.6	variation	2757490	2757490	.	.	0	note=snp A=>G G:39 A:0
EA2454	snippy:4.3.6	variation	2757520	2757520	.	.	0	note=snp T=>C C:39 T:0
EA2454	snippy:4.3.6	variation	2757546	2757546	.	.	0	note=snp A=>C C:37 A:0
EA2454	snippy:4.3.6	variation	2757565	2757565	.	.	0	note=snp C=>T T:35 C:0
EA2454	snippy:4.3.6	variation	2757616	2757616	.	.	0	note=snp G=>A A:38 G:0
EA2454	snippy:4.3.6	variation	2757706	2757706	.	.	0	note=snp T=>C C:33 T:0
EA2454	snippy:4.3.6	variation	2757733	2757733	.	.	0	note=snp T=>C C:35 T:0
EA2454	snippy:4.3.6	variation	2757763	2757763	.	.	0	note=snp C=>T T:32 C:0
EA2454	snippy:4.3.6	variation	2757805	2757805	.	.	0	note=snp T=>C C:43 T:0
EA2454	snippy:4.3.6	variation	2757817	2757817	.	.	0	note=snp T=>C C:47 T:0
EA2454	snippy:4.3.6	variation	2757850	2757850	.	.	0	note=complex CGACCCA=>TGATCCG TGATCCG:50 CGACCCA:0
EA2454	snippy:4.3.6	variation	2757931	2757931	.	.	0	note=snp T=>C C:65 T:0
EA2454	snippy:4.3.6	variation	2757958	2757958	.	.	0	note=snp A=>G G:54 A:0
EA2454	snippy:4.3.6	variation	2757964	2757964	.	.	0	note=snp G=>C C:55 G:0
EA2454	snippy:4.3.6	variation	2758010	2758010	.	.	0	note=complex CGC=>TGT TGT:37 CGC:0
EA2454	snippy:4.3.6	variation	2758167	2758167	.	.	0	note=snp T=>G G:73 T:0
EA2454	snippy:4.3.6	variation	2758400	2758400	.	.	0	note=snp A=>G G:60 A:0
EA2454	snippy:4.3.6	variation	2758442	2758442	.	.	0	note=snp A=>G G:59 A:0
EA2454	snippy:4.3.6	variation	2758529	2758529	.	.	0	note=snp T=>C C:46 T:0
EA2454	snippy:4.3.6	variation	2758562	2758562	.	.	0	note=snp T=>G G:41 T:0
EA2454	snippy:4.3.6	variation	2758569	2758569	.	.	0	note=snp C=>T T:41 C:0
EA2454	snippy:4.3.6	variation	2758574	2758574	.	.	0	note=complex AAGT=>GAGC GAGC:39 AAGT:0
EA2454	snippy:4.3.6	variation	2758673	2758673	.	.	0	note=snp C=>T T:61 C:0
EA2454	snippy:4.3.6	variation	2758700	2758700	.	.	0	note=snp T=>C C:57 T:0
EA2454	snippy:4.3.6	variation	2758755	2758755	.	.	0	note=complex TTA=>CTG CTG:50 TTA:0
EA2454	snippy:4.3.6	variation	2758985	2758985	.	.	0	note=snp C=>T T:72 C:0
EA2454	snippy:4.3.6	variation	2759151	2759151	.	.	0	note=snp A=>G G:88 A:0
EA2454	snippy:4.3.6	variation	2759164	2759164	.	.	0	note=complex TCAGTGGCTAT=>CTGGTAGTTAC CTGGTAGTTAC:58 TCAGTGGCTAT:0
EA2454	snippy:4.3.6	variation	2759386	2759386	.	.	0	note=snp C=>G G:87 C:0
EA2454	snippy:4.3.6	variation	2759408	2759408	.	.	0	note=snp C=>T T:83 C:0
EA2454	snippy:4.3.6	variation	2759416	2759416	.	.	0	note=complex AGACA=>TTACC TTACC:76 AGACA:0
[truncated: 3,093 more rows]
