# Supplementary material for: Escherichia coli ST302: Genomic Analysis of Virulence Potential and Antimicrobial Resistance Mediated by Mobile Genetic Elements
Source: Front Microbiol. 2020 Jan 21;10:3098. doi: 10.3389/fmicb.2019.03098 (PMC6985150; doi:10.3389/fmicb.2019.03098)
Supplement: DATA S2 — ST302 SNP analysis. [file Data_Sheet_2.ZIP › SNP_Analysis/ST302_SNP/SNP_analysis/snippyout/ST302/FA0416-Human-ST302.out/snps.consensus.fa]

>EA2454
ACTTAGGATAGCCAACCATCAGATGCTGCATTTGCATAGTGCAATCTCCCCTTACTTATC
CGGAGGCAATTGCAATATCTCTGTGAACTTACACAGGGGGAGCTTTTACCTGAAATACGC
CACGGAGGCGGGTATGAAACTGGCAGTCGTCACTGGACAAATTGTTTGTACCGTACGCCA
TCACGGACTGGCGCATGACAAATTGCTGATGGTGGAAATGATTGATCCACAAGGTAATCC
TGACGGGCAATGCGCCGTCGCCATCGACAATATTGGCGCGGGAACCGGGGAGTGGGTGTT
ACTGGTGAGTGGCAGTTCCGCCCGCCAGGCGCATAAAAGCGAAACGTCACCGGTCGATCT
GTGCGTGATTGGCATTGTCGATGAGGTGGTGTCTGGCGGTCAGGTAATTTTCCACAAATA
AGGCAGAACATCATGAATCAACAGGATATTGAACAGGTGGTGAAAGCGGTACTGCTGAAA
ATGCAAAGCAGTGACACGCCGCCCGCCGCCGTTCATGAGATGGGCGTTTTCGCGTCCCTG
GATGACGCCGTTGCGGCAGCCAAAGTCGCCCAGCAAGGGTTAAAGAGCGTGGCAATGCGC
CAGTTAGCCATTGCTGCCATTCGTGAAGCAGGCGAAAAACACGCCAGAGATTTAGCGGAA
CTTGCCGTCAGTGAAACCGGCATGGGGCGCGTTGAAGATAAATTTGCAAAAAACGTCGCT
CAGGCGCGCGGCACACCAGGCGTTGAGTGCCTCTCTCCGCAAGTGCTGACTGGCGACAAC
GGCCTGACCCTAATTGAAAACGCACCCTGGGGCGTGGTGGCTTCGGTGACGCCGTCCACT
AACCCGGCGGCAACCGTAATTAACAACGCCATCAGCCTGATTGCCGCGGGCAACAGCGTC
ATTTTTGCCCCGCATCCGGCGGCGAAAAAAGTCTCCCAGCGGGCGATTACGCTGCTCAAC
CAGGCGATTGTTGCCGCAGGTGGGCCGGAAAACTTACTGGTTACTGTGGCAAATCCGGAT
ATCGAAACCGCGCAACGCTTGTTCAAGTTTCCGGGCATCGGCCTGCTGGTGGTGACCGGC
GGCGAAGCGGTAGTAGAAGCGGCGCGTAAACACACCAATAAACGTCTGATTGCCGCAGGC
GCTGGCAACCCGCCGGTAGTGGTGGATGAAACCGCTGACCTCGCCCGTGCTGCTCAGTCC
ATCGTTAAAGGCGCGTCTTTCGATAACAACATCATTTGTGCCGACGAAAAGGTACTGATT
GTTGTTGATAGCGTAGCCGATGAACTGATGCGTCTGATGGAAGGCCAGCACGCGGTGAAA
CTGACCGCAGAGCAGGCGCAGCAATTGCAACCGGTGTTGCTGAAAAATATCGACGAGCGC
GGAAAAGGTACCGTCAGCCGTGACTGGGTAGGTCGCGATGCAGGCAAAATCGCGGCGGCA
ATCGGCCTTAAAGTTCCGGAACAAACGCGATTGCTGTTTGTAGAAACCACCGCAGAACAT
CCGTTTGCCGTGACTGAACTGATGATGCCGGTGTTGCCCGTCGTGCGCGTCGCCAACGTG
GCGGATGCCATTGCGCTGGCGGTGAAACTGGAAGGCGGTTGCCACCACACGGCGGCAATG
CACTCGCGCAATATCGAGAACATGAACCAGATGGCGAATGCCATTGATACCAGCATTTTC
GTTAAGAACGGACCGTGCATTGCCGGGCTGGGGCTGGGCGGGGAAGGCTGGACCACCATG
ACCATCACCACGCCAACCGGTGAAGGGGTAACCAGCGCGCGTACGTTTGTCCGTCTGCGT
CGCTGTGTATTAGTCGATGCGTTTCGCATTGTTTAAGGAGTAACAGATGGCGCACGACGA
ACAATGGCTCACCCCACGTCTGCAAACGGCGGCAACGCTGTGTAACCAGACGCCCGCCGC
GACGGAATCTCCGCTGTGGCTGGGGGTGGATCTGGGCACCTGCGATGTGGTGTCGATGGT
TGTCGACCGCGACGGTCAGCCGGTGGCGGTATGCCTCGACTGGGCCGATGTGGTCCGCGA
CGGCATCGTCTGGGATTTCTTCGGCGCGGTCACCATTGTTCGTCGCCATCTCGACACGCT
CGAGCAGCAATTCGGTCGTCGTTTTAGCCATGCGGCGACTTCATTTCCTCCAGGTACGGA
CCCGCGTATTTCCATCAACGTGCTGGAGTCTGCCGGGCTGGAAGTGAGCCATGTGCTGGA
TGAGCCAACCGCAGTCGCGGATCTACTGCAACTGGATAACGCAGGCGTAGTGGATATCGG
CGGTGGCACTACCGGCATTGCCATCGTGAAAAAGGGCAAAGTGACGTACTCGGCGGATGA
AGCCACCGGCGGACATCACATCTCTCTGACTCTCGCCGGAAATCGCCGTATTTCGCTGGA
AGAGGCGGAGCAGTACAAGCGCGGTCACGGTGAAGAGATTTGGCCTGCGGTGAAACCGGT
GTACGAAAAAATGGCGGACATTGTCGCCCGGCATATTGAAGGGCAGGGCATTACTGATTT
ATGGCTGGCGGGCGGCTCTTGTATGCAACCGGGCGTGGCGGAACTGTTTCGCAAACAATT
CCCGGCGTTACAGGTGCATTTACCGCAGCACAGTTTGTTTATGACCCCGCTGGCAATCGC
CAGTAGTGGGCGAGAGAAAGCGGAGGGGCTATATGCAAAATGAATTGCAGACCGCGCTCT
TTCAGGCGTTCGATACCCTGAATCTGCAACGGGTAAAAACATTTAGCGTTCCACCGGTGA
CGCTTTGCGGTCCGGGCTCGGTGAGCAGTTGCGGACAGCAAGCGCAAACGCGTGGGCTGA
AACATCTGTTCGTGATGGCAGACAGCTTTTTGCATCAGGCAGGGATGACCGCCGGGATGA
CGCGTAGCCTGGCCGTTAAAGGTATCGCCATGACGCTCTGGCCATGTCCGGTGGGCGAAC
CGTGCATTACCGACGTGTGTGCAGCCGTGGCGCAGTTGCGTGAGTCAGGTTGTGACGGGG
TGATCGCATTTGGCGGCGGCTCGGTGCTGGATGCGGCGAAAGCCGTGGCGTTGCTGGTGA
CGAACCCGGATAGCACGCTGGCAGAGATGTCAGAAACCAGCGTTCTGCAACCGCGCTTGC
CGCTGATTGCCATTCCAACTACCGCCGGAACCGGCTCTGAAACCACCAATGTAACGGTGA
TTATCGACGCGGTGAGCGGGCGCAAGCAGGTGTTAGCCCATGCCTCGCTGATGCCGGATG
TGGCGATCCTCGACGCCGCATTGACCGAAGGTGTGCCGTCGCATGTCACGGCGATGACCG
GCATTGATGCGTTAACCCATGCCATTGAAGCATACAGCGCCCTGAACGCTACACCGTTTA
CCGACAGTCTGGCGATTGGTGCCATTGCGATGATTGGCAAATCGCTGCCGAAAGCGGTGG
GCTACGGTCACGACCTTGCCGCGCGCGAGAGCATGTTGCTGGCTTCATGTATGGCGGGAA
TGGCGTTTTCCAGTGCGGGTCTTGGGTTGTGCCACGCGATGGCGCATCAGCCGGGCGCGG
CGCTGCATATTCCGCACGGTCTGGCGAACGCTATGTTGCTGCCAACGGTGATGGAGTTTA
ACCGGATGGTATGTCGCGAACGCTTTAGTCAGATTGGTCGGGCACTGCGAACTAAAAAAT
CCGACGATCGTGACGCTATTAACGCGGTAAGTGAGCTGATTGCGGAAGTTGGGATTGGTA
AACGACTGGGCGATGTTGGCGCGACATCTGCGCATTACGGTGCATGGGCGCAGGCCGCGC
AGGAAGATATTTGTCTGCGCAGCAACCCGCGTACCGCCAGCCTGGAACAGATTGTCGGCC
TGTACGCGGCGGCGCAATAAATGCCGCGTCTTATCCGGTCTGTGGGATTGCACATGTAGT
GCGGATAAGGCTTCACGCAGCATCCGCTAATAAATAACAACTAACAGGGAGTAAAGGCGA
TGGGAATTAACGAAATCATCATGTACATCATGATGTTCTTTATGCTGATAGCTGCCGTAG
ACAGGATCCTGTCACAGTTCGGCGGTTCTGCTCGTTTCCTCGGTAAGTTCGGTAAAAGTA
TCGAAGGATCAGGCGGTCAGTTCGAAGAAGGCTTTATGGCAATGGGCGCTCTGGGTCTGG
CGATGGTCGGTATGACCGCGCTGGCACCGGTACTGGCTCACGTACTCGGGCCGGTAATTA
TCCCGGTTTACGAAATGCTCGGCGCAAACCCGTCAATGTTCGCCGGAACGCTGCTGGCGT
GCGATATGGGCGGCTTCTTCCTCGCCAAAGAGCTGGCGGGCGGCGACGTAGCAGCGTGGC
TATACTCTGGGTTAATTCTCGGGTCGATGATGGGGCCAACGATTGTGTTTTCCATTCCGG
TGGCGCTCGGCATTATCGAACCTTCTGACCGTCGTTATCTGGCGCTCGGCGTGCTGGCGG
GCATTGTGACCATTCCGATTGGTTGTATCGCTGGTGGTCTGGTAGCTATGTACTCCGGTG
TTCAGATCAACGGCCAGCCGGTGGAATTCACTTTCGCCCTGATCCTGATGAACATGATCC
CGGTGATCATTGTTGCGATTCTGGTGGCGCTGGGGCTGAAATTCATCCCGGAAAAAATGA
TCAACGGCTTCCAGATCTTCGCCAAATTCCTCGTTGCATTGATCACCCTCGGTCTTGCCG
CTGCGGTAGTGAAATTCCTGCTTGGCTGGGAACTGATCCCCGGTCTGGATCCTATCTTTA
TGGCCCCTGGCGATAAACCCGGTGAGGTGATGCGCGCCATTGAAGTTATCGGTTCTATCT
CCTGCGTTCTGTTAGGGGCGTATCCAATGGTGCTGCTGCTGACCCGCTGGTTTGAAAAAC
CGCTGATGAGCGTCGGTAAAGTGCTGAATATGAACAACATCGCGGCAGCCGGCATGGTGG
CAACGCTTGCCAACAACATCCCGATGTTCGGCATGATGAAGCAGATGGATACCCGCGGCA
AAGTCATCAACTGCGCCTTCGCCGTTTCCGCTGCTTTCGCCCTGGGCGACCACTTAGGCT
TCGCCGCTGCCAACATGAATGCCGTGATCTTCCCGATGATTGTCGGCAAGTTGATCGGCG
GCGTAACGGCGATTGGCGTGGCGATGATGCTGGTGCCAAAAGACGACGCGACCGCGGCTA
AAACCGAAGCGGAGGCACAATCGTGAACACTCGCCAGCTACTGAGCGTCGGTATCGATAT
CGGCACCACCACCACCCAGGTGATTTTCTCCCACCTGGAACTGGTTAACCGTGCGGCGGT
GTCGCAGGTGCCGCGCTACGAATTCATCAAACGCGAAATTAGCTGGCAAAGCCCGGTGTT
CTTTACCCCTGTCGATAAACAGGGTGGTTTAAAAGAAGCGGAACTGAAATCGCTGATTTT
AGAGCAATATCAGGCTGCGGGCATTGCGCCGGAAAGCGTTGATTCTGGTGCCATCATCAT
CACCGGTGAAAGCGCGAAAACCCGCAATGCTCGCCCGGCGGTGATGGCGCTCTCTCAGTC
GCTGGGCGATTTTGTCGTCGCCAGCGCCGGGCCGCACCTCGAATCCGTGATCGCCGGTCA
CGGTGCCGGGGCGAAAACCCTTTCTGAACAACGGCTGTGTCGGGTACTGAATATCGACAT
CGGCGGTGGCACCGCGAACTACGCCCTGTTCGATGCCGGAAAAATCAGCGGCACTGCCTG
CCTCAACGTCGGTGGTCGCCTGCTGGAAACCGACAGCCAGGGGCGCGTGGTTTACGCTCA
TAAACCGGGGCAGATGATTGTGGATGAGTGCTTCGGCGCAGGCACCGACGCCCGTTCGCT
GACCGGCGCGCAGCTGGTGCAGGTTACCCGGCGGATGGCAGAGCTGATTGTCGAAGTGAT
TGACGGAACGCTTTCGCCGCTCGCGCAGGCATTAATGCAAACCGGTTTGCTGCCCGCAGG
TGTTACGCCCGAAATCATTACGCTTTCTGGCGGCGTGGGCGAATGTTATCGCCACCAGCC
CGCCGACCCGTTCTGTTTTGCCGATATTGGCCCGCTTCTGGCAACGGCGCTGCATGACCA
TCCGCGCCTGCGTGAGATGAACGTGCAGTTTCCGGCGCAAACCGTACGCGCCACGGTGAT
TGGCGCGGGTGCACATACCCTTTCGCTCTCTGGCAGCACAATCTGGCTGGAGGGCGTACA
ACTGCCGCTGCGCAATTTGCCGGTGGCGATCCCGATTGATGAAACGGATCTGGTGAGTGC
CTGGCAACAGGCGCTGATTCAGCTGGATCTTGATCCCAAAACTGACGCGTACGTGCTGGC
GCTTCCCGCCTCGCTGCCTGTGCGTTACGCCGCGGTACTGACGGTCATCAACGCGTTGGT
CGATTTCGTCGCGCGTTTTCCGAATCCGCATCCCCTGCTGGTGGTGGCCGGGCAGGACTT
TGGTAAAGCTCTGGGCATGTTGTTGCGCCCACAGCTACAACAACTCCCGTTGGCAGTCAT
TGACGAAGTGATTGTCCGCGCGGGGGACTATATCGACATTGGTACGCCTCTTTTTGGCGG
ATCGGTTGTGCCGGTGACGGTGAAATCACTCGCATTTCCTTCCTGAGGGAACGACTTATG
AAACTAAAGACCACATTGTTCGGCAATGTATATCAGTTTAAGGATGTAAAAGAGGTGCTG
GCTAAAGCCAACGAACTGCGTTCGGGGGATGTGCTGGCGGGCGTTGCAGCGGCAAGCTCA
CAGGAGCGCGTGGCAGCAAAGCAGGTGTTGTCGGAAATGACCGTAGCGGACATCCGCAAT
AATCCGGTGATTGCCTATGAAGATGACTGCGTGACGCGGCTGATTCAGGACGATGTTAAC
GAAACGGCCTACAACCAGATTAAAAACTGGAGCATCAGCGAACTGCGTGAGTATGTGCTG
AGCGATGAAACCAGCGTGGACGACATTGCCTTTACCCGCAAAGGGCTGACCTCGGAAGTG
GTCGCGGCGGTAGCGAAGATTTGCTCCAACGCGGACCTGATCTACGGCGCGAAGAAAATG
CCGGTAATCAAAAAGGCCAATACCACCATCGGTATTCCGGGCACCTTTAGCGCCCGTTTG
CAGCCAAATGACACCCGTGACGACGTGCAAAGTATCGCCGCGCAAATCTACGAAGGGCTT
TCCTTCGGGGTGGGCGATGCGGTGATCGGCGTCAACCCGGTAACTGACGACGTGGAAAAC
TTAAGCCGCGTGCTGGACACCATCTATGGCGTGATCGACAAATTCAACATCCCAACTCAG
GGCTGCGTACTGGCGCACGTCACCACCCAGATCGAAGCGATTCGTCGTGGCGCACCAGGC
GGGCTGATTTTCCAGAGTATCTGTGGCAGTGAAAAAGGGCTGAAAGAGTTTGGCGTGGAA
CTGGCGATGCTCGACGAAGCGCGCGCAGTGGGTGCAGAGTTCAACCGTATCGCCGGGGAA
AACTGCCTCTACTTCGAAACCGGGCAAGGTTCGGCGCTGTCGGCGGGTGCCAACTACGGC
GCAGACCAGGTGACCATGGAAGCGCGTAACTACGGGCTGGCGCGTCATTACGATCCGTTT
ATCGTCAACACCGTGGTCGGCTTTATTGGGCCGGAGTATCTCTACAATGACCGCCAGATT
ATTCGTGCGGGCTTAGAAGATCACTTTATGGGCAAGCTGAGCGGCATCTCTATGGGCTGT
GACTGCTGTTACACCAACCACGCTGACGCTGACCAGAACCTCAACGAAAACCTGATGATC
CTGCTCGCCACCGCAGGCTGCAACTACATCATGGGGATGCCGCTGGGTGATGACATCATG
CTCAATTACCAGACCACCGCATTCCACGATACCGCCACTGTGCGTCAGTTACTCAACCTG
CGCCCGTCACCGGAGTTTGAACGCTGGCTGGAAAGCATGGGCATTATGGCAAACGGTCGC
CTGACCAAACGGGCGGGCGATCCGTCACTGTTCTTCTGATGACGCGGAGATAACACATCA
TGGATCAAAAACAGATTGAAGAAATTGTACGCAGCGTGATGGCGTCAATGGGACAAACGG
CCCCCGCGCCGTCAGAAGCAAAGTGCGCCACTACCACCTGTGCGGCACCGGTGACCTCGG
AAAGCTGTGCGCTGGATTTAGGTTCCGCTGAAGCAAAAGCGTGGATTGGTGTTGAAAACC
CGCATCGCGCAGACGTATTAACAGAACTGCGCCGCAGCACCGTGGCCCGCGTTTGTACCG
GTCGTGCCGGTCCGCGTCCGCGTACCCAGGCGCTGCTGCGTTTCCTGGCCGATCACTCTC
GTTCGAAAGATACCGTACTGAAAGAAGTGCCGGAAGAGTGGGTGAAAGCGCAGGGCTTGC
TGGAAGTACGCTCCGAAATTAGCGACAAAAATCTCTACCTGACTCGCCCGGATATGGGCC
GCCGCCTGTGTGCAGAAGCTGTTGAAGCGCTGAAAGCACAGTGTGTTGCTAATCCGGACG
TACAGGTCGTTATTTCTGATGGCCTGTCAACTGATGCGATCACAGTGAACTACGAAGAGA
TCCTGCCACCGCTGATGGCGGGCCTGAAACAGGCCGGGCTGAAAGTCGGTACACCATTCT
TTGTTCGTTATGGTCGCGTGAAGATTGAAGATCAGATCGGTGAGATCCTCGGCGCGAAAG
TAGTGATCCTGCTGGTGGGCGAACGTCCGGGGTTGGGTCAGTCAGAAAGCCTCTCCTGCT
ACGCCGTTTACTCGCCGCGTATGGCGACCACCGTTGAGGCCGATCGCACCTGTATCTCTA
ACATTCACCAGGGCGGCACGCCGCCGGTTGAAGCCGCAGCCGTCATTGTGGATTTGGCGA
AACGTATGCTGGAGCAGAAAGCATCCGGCATCAACATGACCCGATAAGGAGGCATCATGC
CAGCTTTAGATTTGATTCGACCGTCGGTAACCGCCATGCGGGTGATTGCCTCCGTTAACG
CCGAATTTGCGCGTGAACTGAAATTGCCGCCGCATATTCGTAGCCTCGGGCTGATTTCTG
CTGATTCCGATGACGTCACCTACATTGCCGCTGATGAAGCAACCAAACAGGCGATGGTCG
AAGTGGTGTATGGCCGCTCGCTGTATGCGGGCGCTGCACACGGCCCGTCACCGACTGCCG
GTGAAGTGCTGATTATGCTTGGTGGGCCAAACCCGGCGGAAGTGCGTGCAGGTCTGGATG
CGATGGTTGCGCATATTGAAAATGGCGCTGCTTTCCAGTGGGCTAATGATGCGCAAGATA
TGGCATTCCTGGCACATGTAGTTTCGCGTACCGGTTCTTATCTCTCATCAACCGCCGGGA
TCACGCTTGGCGATCCGATGGCGTATCTGGTGGCACCGCCGCTGGAAGCGACCTACGGCA
TTGATGCAGCGTTGAAATCTGCCGACGTACAGCTGGTGACCTATGTCCCGCCACCGTCTG
AAACTAACTACTCGGCAGCATTTTTAACCGGTAGCCAGGCAGCGTGTAAAGCGGCCTGTA
ACGCCTTTACCGATGCAGTGCTGGAAATCGCGCGTAATCCAATCCAGCGTGCGTAATGGA
GGTTGCCGATGATCAATGCACTGGGATTGCTGGAAGTGGACGGCATGGTCGCTGCGATAG
ATGCAGCGGATGCCATGCTCAAAGCAGCTAACGTTCGTCTGCTCAGTCACGAAGTGCTTG
ACCCTGGTCGCTTAACGCTGGTTGTGGAAGGCGATCTGGCGGCGTGTCGTGCTGCGCTGG
ACGCAGGTTGTGCTGCCGCGATGCGTACCGGGCGTGTCATCAGCCGTAAGGAGATCGGTC
GGCCAGACGATGACACCCAGTGGCTGGTTACTGGCTTTAACCGCCAGCCGAAGCAACCCG
TACAGGAACCCGACGCGCCAGTTATCGTCGCGGAATCTGCTGACGAGTTGTTGGCGCTGT
TAACATCAGTACGTCAGGGAATGACGGCAGGAGAAGTGGCTGCCCACTTTGGCTGGCCGC
TGGAAAAAGCCAGAAATGCGCTCGAACAGCTCTTTTCTGCCGGGACGTTACGTAAACGCA
GTAGTCGTTATCGTCTCAAGCCCCATTAACCTGTCGGAGGTGCCGGGTGTCCTACAACAC
CCGGCATTAACATCATGAAAAAGACCCGTACAGCCAATTTGCACCATCTTTATCATGAAC
CCTTACCCGAAAACCTGAAGCTCACGCCGAAGGTCGAAGTGGATAATGTTCATCAACGAC
AGACAACGGATGTCTATGAACATGCTTTAACGATTACCGCCTGGCAGCAGATTTACGATC
AGCTGCATCCGGGCAAGTTTCATGGTGAATTTACGGAAATTCTACTCGATGATATTCAGG
TTTTTCGTGAATACACCGGTCTGGCGCTGCGTCAGTCGTGTCTGGTCTGGCCGAACTCGT
TCTGGTTTGGCATTCCGGCGACGCGCGGTGAGCAGGGATTTATCGGTTCGCAATGTCTGG
GAAGCGCAGAAATAGCGACGCGCCCTGGTGGAACCGAGTTTGAATTAAGTACGCCGGACG
ATTACACGATCCTGGGCGTAGTGCTTTCTGAAGATGTCATCACCCGTCAGGCTAACTTTT
TGCATAATCCGGATCGGGTATTACATATGTTGCGTAGCCAGTCGGCGCTGGAAGTGAAAG
AGCAGCATAAAGCCGCGCTGTGGGGCTTTGTCCAACAGGCGCTGGCGACGTTTTGCGAGA
ACCCGGAAAATCTTCATCAGCCTGCAGTGCGAAAAGTGCTGGGGGATAATTTGCTAATGG
CGATGGGGGCGATGCTGGAAGAAGCGCAACCAATGGTGACGGCGGAAAGCATCAGTCATC
AGAGTTACCGTAGATTACTTTCCCGCGCCCGTGAATATGTGCTGGAAAACATGTCCGAAC
CGGTGACGGTGCTGGATTTGTGTAATCAACTGCATGTCAGCCGCCGCACGCTACAAAACG
CGTTTCACGCTATTTTAGGCATTGGCCCAAACGCGTGGCTGAAACGCATTCGCCTGAACG
CCGTACGCCGCGAACTGATAAGCCCGTGGTCGCAAAGCACAACGGTAAAAGACGCCGCCA
TGCAGTGGGGATTCTGGCATCTGGGGCAATTTGCCACGGATTACCAGCAGCTGTTTGCCG
AGAAGCCGTCGTTGACGTTGCATCAGCGGATGCGGGAATGGGGGTGAGGGAGTTACACCC
AATCCCTGACCTTAATAAACTCACTTAACGCCGCTTCTGGGCTGCCATCTTTTGGCTGAT
AATCATACTCCCAGCGTACCAGTGGCGGCATTGACATCAGGATCGACTCGGTGCGCCCGC
CAGTTTGCAGGCCAAACAGAGTGCCGCGATCCCAGACCAGATTGAACTCGACATAACGAC
CGCGACGGTAGAGCTGAAAATTGCGCTCGCGCTCGCCGTAGGCCATCGCTTTCCGTCGCT
CTACAATTGGTAAATAAGCGTCGGTGTAGCCTTTGCCTACCGCCTGCATAAAGGCAAAAC
AGTGGTCGAAATCTGGCGTGTTCAGATCATCAAAGAACAGCCCGCCAATACCGCGCTGTT
CGTTGCGATGTTTGAGGTAGAAGTAATCGTCGCACCATTTTTTGTAACGGGGATAAACGT
CTTCACCAAATGGCAGGCACAGGTCACGGGCGGTGCGGTGCCAGTGAATGGCATCTTCTT
CAAAACCATAGAAAGGGGTTAAATCGAAGCCGCCGCCAAACCACCAGACTGGCTCTGCAC
CCGGTTTTTCGGCAATAAAAAAGCGCACATTCGCGTGGCTGGTGGGAACATACGGGTTAT
GCGGATGCACTACCAGTGAAACGCCCATCGCCTCGAAACTGCGCCCGGCAAGTTCCGGGC
GATGAGCGGTGGCGGAAGCAGGCATCGCCTCACCATGGACATGTGAAAAGTTGACGCCCG
CCTGTTCGAAAACACCACCATTACGCAACACCCGGCTACGTCCGCCGCCGCCAGCTTCGC
GCTGCCAGCTATCTTCGACAAATTCTGTGCCATCGACGGCGGTCAGCTGCTGACAAATCG
TATCCTGAAGGTTGAGCAGAAACTGTTTAACCTGGTGTGCGTCGGGTTTCATAACTTATC
GCTTTTTCGAATGTGCTTTCTGGTTGTCGAACCAGTGGAAATAACTGATCACGCCTTCAG
CAATCGCTGTGGCGATTTTCTGACGAAACGCCGCCGTGCCTAACAGTCGCTCTTCTTCTG
GGTTGGTGATAAACGAGGTTTCCACCAGCACCGAAGGAACCGACGGCGATTTCAACACCA
CAAACGCGGCTTGTTCGGTGTTGCGGCTGTGCAGTTTATGCACCGGCTTAATCTTTTTCA
GAATATGCGAGCCGAGCGTCAGGCTGTTTTTAATAGTATCGGTTTGCACCAGATCAAACA
GCACTTGCTGCAATAGGTGATCCTTGTCAGTCGCCTTTTTACCGGCAACTTCATCGGCGC
GGTTTTCGCGTTCAGACAGGTATTTCGCCATTGCGCTACTTGCCCCACGGTTAGAGAGGG
CAAATACCGAAGCACCGGCAGCTTTCGGGTTGGTAAAGCCATCGGCATGAATTGACATAA
ACAGATCTGCGCCATGTTTATGGGCGATTTCAACGCGATCGTAAAGTGGGATAAACGTAT
CGCCAGAACGCGTTAAACGCGCATCAATCCCATGATTACGCAAAATGGAACGGACGTTTT
TAGCAATCGCCAGCACCACATGTTTTTCTTTCGAACCGTTGCGCCCGATCGCTCCGGTAT
CAATTCCGCCGTGGCCTGGATCGAGAACAACGACACGTTTGCCGCCAGATTTTTTGGCTT
TCGGCTTGCTGTGTCCGTTGCTGGTTTTTAAAGGTTCGTCTTTGGCGATGGCTTGCGACA
TTCCTGACAACGTCAGGGCAGCCAAACCGGCTTTCAGCACCTGGCGGCGCGAAGTGAGTG
TTTTTAGTGGTTTAAAAGTGCTCATACGGCCTGAGTTGTAATAATAAAGTTCCAGATGTT
ATATCGTATCGCGTAATCCGTTACGACCGTTTGCTGTTGAGAATTGTTTTACTTTTCATT
TCAATAGTTGACAACTCCCCATTATGCCACTTTTTCAACCGATTTTCGTCAGATATTGGC
TAATTCGACCGTTCACGCCATAATCAGCCTTTTAACCCGCAAAAAGGTAACGAATACCAT
GGAGATACGCGTATTTCGCCAGGAAGATTTCGAAGAGGTCATCACCCTTTGGGAGCGTTG
CGACTTGCTGCGTCCGTGGAACGATCCGGAAATGGACATCGAGCGTAAGATGAACCATGA
CGTCAGTTTGTTTCTGGTCGCTGAGGTGAACGGTGAAGTGGTCGGAACGGTGATGGGCGG
TTATGACGGGCATCGCGGGTCTGCTTATTATCTTGGCGTGCATCCAGAGTTTCGTGGGCG
TGGAATTGCCAATGCGTTGCTTAACCGGCTGGAGAAAAAGCTGATTGCTCGCGGCTGCCC
GAAAATTCAGATCAACGTGCCGGAAGATAACGACATGGTGCTCGGAATGTATGAACGCCT
GGGATATGAACACGCCGACGTGCTGAGTCTGGGTAAGCGTTTGATTGAAGATGAAGAGTA
CTGAGTTTCATCCTGTCCATTATGATGCGCACGGTCGCCTGCGTTTACCCTTGCTCTTCT
GGCTTGTGCTATTGCTTCAGGCGCGAACCTGGGTGCTGTTTGTTATTGCCGGTGCGTCGC
GCGAGCAGGGTACTGCGCTGCTAAATCTGTTTTATCCCGATCACGATAATTTCTGGCTGG
GGCTGATTCCTGGCATTCCGGCGGTGCTGGCGTTTTTGCTGAGTGGTCGGCGGGCTTCGT
TTCCCCGTATCTGGCATGTGCTCTATTTTCTGTTGCTGTTGGCGCAAGTGGTTTTACTTT
GCTGGCAACCGTGGCTGTGGCTGAACGGTGAATCCGTTAGCGGTTTCGGTCTGGCGCTGG
TAGTGGCGGATATTGTGGCATTAATCTGGCTGCTGACCAATCGACGTTTACGCGCTTGTT
TTAATGAAGTAAAAGAATAACGGCACTTTTTGGTGAATTTGCACTCCAAGCAACGTTATT
GAATAACCAAAGGAAGTGACATGAAATCGCTGCGTTTAATGTTATGCGCTATGCCATTGA
TGCTGACCGGCTGTTCCACGATGTCGTCAGTTAACTGGTCTGCCGCTAACCCGTGGAACT
GGTTTGGGTCGTCCACCAAAGTGAGCGAGCAGGGCGTTGGTGAATTAACGGCGTCCACAC
CACTGCAAGAACAAGCCATTGCCGATGCGCTTGATGGCGATTATCGCCTGCGCAGCGGAA
TGAAAACCGCGAACGGCAACGTGGTGCGCTTTTTTGAAGTGATGAAGGGCGACAACGTGG
CGATGGTGATTAACGGCGATCAAGGCACGATCAGTCGCATTGACGTGCTGGATAGCGATA
TTCCTGCTGACACCGGTGTTAAAATCGGTACACCGTTTAGCGACCTTTACAGCAAAGCAT
TTGGCAATTGCCAAAAAGCTGATGGTGATGATAATCGTGCCGTCGAATGTAAAGCCGAAG
GCAGTCAACATATTAGCTACCAGTTCAGCGGGGAATGGAGTGGTCCTGAAGGGTTAATGC
CTTCGGACGATACCCTGAAAAACTGGAAAGTCAGTAAAATTATCTGGCGGCGTTAATTTG
CGTCTGAACAAACCGCCGCCGCGAAAAAACACGTAAAATAGCGCTCAACAATGCCACGGA
TTGCGTGGCATTATTATTTTCAGGAGGAACAATGTCTCAGGTTCAGAGTGGCATTTTGCC
AGAACATTGCCGCGCGGCGATTTGGATCGAAGCCAACGTGAAAGGGGAAGTTGACGCCCT
GCGTGCGGCCAGTAAAACATTTGCCGACAAACTGGCAACTTTTGAAGCGAAATTCCCGGA
CGCGCATCTTGGTGCGGTGGTTGCCTTTGGTAACAACACCTGGCGCGCTCTGAGCGGCGG
CGTTGGGGCAGAAGAGCTGAAAGATTTTCCGGGCTACGGTAAAGGCCTTGCGCCGACCAC
CCAGTTCGATGTGTTGATCCACATTCTTTCTCTGCGTCACGACGTAAACTTCTCTGTCGC
CCAGGCGGCGATGGAAGCCTTTGGTGACTGCATTGAAGTGAAAGAAGAGATCCACGGCTT
CCGTTGGGTGGAAGAGCGTGACCTGAGCGGCTTTGTTGACGGTACAGAAAACCCGGCGGG
TGAAGAGACGCGTCGCGAAGTGGCGGTTATCAAAGACGGCGTGGATGCCGGCGGCAGCTA
TGTGTTTGTGCAGCGTTGGGAGCACAACCTGAAGCAGCTCAACCGGATGAGCGTTCACGA
TCAGGAGATGATGATCGGGCGCACCAAAGAGGCCAACGAAGAGATTGACGGCGACGAACG
TCCGGAAACCTCTCACCTCACCCGCGTTGATCTGAAAGAAGATGGCAAAGGGCTGAAGAT
TGTTCGCCAGAGCCTGCCGTACGGCACCGCCAGTGGCACTCACGGTCTGTACTTCTGCGC
CTACTGCGCGCGTCTGCATAACATTGAGCAGCAACTGCTGAGCATGTTTGGCGATACCGA
TGGTAAGCGTGATGCGATGTTGCGTTTCACCAAACCGGTAACCGGCGGCTATTATTTCGC
ACCGTCGCTGGACAAGTTGATGGCGCTGTAAGCGTTTCTGATTCATTGATTAAAGGCCAG
GCAGTAACATTACTGACTGGCCTTTTTATTACTTTTGCTTTAACGCCGCATACACCTGAT
CAACTACCCAACCATACGTTGCAATCGGCAGCTGACCGCTTTCGAACATATTGGGATTCT
TTTGCGGATCGGCAACCGGCGAATGTGGCTTGTTGCTTAACATCACAATCGCCATATGAT
TCACCGGATCGATAACGGTCACCGTTCCGGTCCAGCCAGTGTGACCGTAGGTTTGCGGGC
TTGCCAGCGTGCCAAACGTCGGCGTCATGGTGGCATTACCATTCACGCGCCAGCCGAGGC
CAAAAGTGGCATCTTCCTTAGAGCTGGTGGTGAACATCTTCACCGTTTCCGCACTGAACA
GCTGCACATCGCCATAGCCCCCGCCGTTCAGCATCGTTTGCATTAACACCGCAATATCGC
CGGTATTGGAAAACAAACCTGCGTGCCCGGAAACGCCGCCCATCGAATAAAAGGCTTTTT
CATCGTGCACCTGACCCCAGAGAGTGGAGGTGCGGATATTCGGGAAGTGGATCACTCCAT
CGCGGGTATTGCCGTTCAATTCCGTGGCGGCAATTTGTTGCGGTTTAAAGCCTTTCAGCA
GCGGGTTAAATACCGTATGTGTCAGGCCGAGCGGGCGATAAATCGACTCTTCAACATAGC
GGTCAAGCGGCTGACCGGTGACCGACTCGACGATAAATCCAAGCAGCATATAATCGACAT
CACTGTAAATATGCTTGCTGCCGGGCTGATACTCTAGCGGCGTGCGCTTGATCATCTCCA
GCGTCTGGCCTTTATCCTGGGAATATAACGCGCCCGCGACCGCTTTATTCGGATATTGTG
GGTCCGCCGGGAAACCGCCGCTGTGATGTAGCAGGTCAGAAATCCGCAGCGTGTTTTTGC
CTTTGATGGTGTCATTTGGACTATCGGCAAACCCCGAAATATATTTCGCAATCCGATCGT
CAGGATGCAGCTTGCCTTCGCTCATTAGCTTTTGCAGAGCAAAGTTAGTGGCGTACATTT
TGGTATTGGAAGCCAGGTCATACAGCGTCCCGGTGGTGGCTTTGACAGGCTGTTCCATCA
ATACGCTGCCATCGTACTTTTTCGCCGCTCCCCAGGCTTTGCGATACACAATCTGATTAT
CTTTTATAATCAGCAGGTTTACGCCGGGATAACCGGCGTCCACTTGCTGGCTAATCCAGC
GATCCATCTGGTTAAGCCGTTCGACGTTGAACCCTGCTTTCTCTGGCGAACTTTCTGTCA
GAACAGGGTATTTTGCGGCGCTGACGCTACAACTGACAGCCAGCAGAGAAAGATAGAGCA
TTGTCCGTTTCATAATATCAGTCCAGATTGACGTTACGGCAGCCAAAGAGCGTGGTGAAA
ATAAACCCGCAAACCCATGCCACCAGAATCCCACCTGCATATACCGCCATGGCCGGAAGG
ATGCCTTGCGCGGATGTCATCAGCGGCAGCGCCACCAGACCAGACGGCCCAAAGGCGCTG
TTTAAGCCCATCGGCAGACCCCACCAGGCTATCAGCCCGATAAACAAACCGCCCGCTGCG
CCGCCTAAACAGGCGGTAATAAACGGTTTCATGCGGGGCAGGGTGACGCCGTAAATCAGC
GGTTCGCCAACGCCCAGCAGACCAGGAATAATCGCCCCGCGTACCTGACTGCGTAATGCA
CTGTGCGGTTGCGCCCGCCAGTAGAGTGCCAGCGCCGCGCCCACCTGGCCCGCGCCTGCC
ATTGAAAGGATGGGAAATAAGCTGTTGAATCCCTGGCTGTCCATTAACGCGAGGTAAACA
GGAATAAAGCCCTGATGCACGCCAAATACCACGGCGATCAGGAACAGCCCGGCTAAAACC
GCACAACCGAGCGGATTACTGTTCAGGTGCATAAACAGCCACGACATACCTTCGAATAAC
CAGCCGCCCAGCGGCATAATGATCAGGTAGGCCAGCGTAGCGGTGATCAGTAGGGTGATT
AACGAGGTCAGCAGCATGTCGAGATCGTCCGGCATAAAGCGGCGCACCATGCCTTCAATG
CGAGCGCAGGCCCATGCGGCAATCAACACGCCGATAATATTGCCGCGCGGATCGATGGGC
AGACCAAAGAAATCGTGAAAACCGGCGTAGTAACCGGTGGTTGCAGCGGGGTTATAACCG
AGCAAAAAGAGTGCGGCAATAATTGCGCCATTGACGCCCGTGCCGCCAAATGCCTGGGCG
GCGTTATAGCCCACCAGAATCACCAGGAAGGTGAACAAACCTTTGCTGAACACCTTCATA
AAATTCAGCGCGTCGGGTAGCGTGCCCTGAGCATCTGCCGGAACGTGCATCACCGTGGCA
AATAACGTCGCTATCCCCAGCAGCAGACCGGCGGCAATAAAACCGGGGATAAGCGGCGTA
AAGATGGTGGCGAATTTAGCGAGAAATTGTTGCACGCCGGAGGTTTGTTTGGCTTTTAAC
TGACGTTTGTTCTGGGCGGCGATTTCTGCGGCATCCTGTACCGGTGCTTCTCCCAGCAGC
TCGCTCATCGCTTTTGCGGCACGATGCGCTTTACCAGGCCCAAAAACGACCTGCACCTGG
TCGCTGGTCAAAATGACGCCCTTCACGCCTTCCAGCGTTTTGATATTGGGATCAACCAGT
GAACTGTCATGTACACCCAGACGCAGGCGCGTCATACAGTTACCACAACTGGCGATATTT
CCCGGTCCGCCGACACGGGTAAGAATGGTGTTCAGAAGTTCACTGCTGATCTCTTTGACC
ATGGGTTATTCCTTGTCTAAAACCTGACGAATAAAGCCGCCGTGTTGATCCAGGCGTTTT
TTAGCTTCTGTGGCATCGAGATTTTTCAGCACCATCACAATGGCCGTTTTACAGTTGCGC
TCGCAGGCAATTAACGCCGCTTCCGCTTGTTCGGCATTACATCCGGTGGCGTTTTTAACG
ATATTGACCTGGCGCACATGCAGTTTTTCGTTGGTGGCGACCACATCGACCATCAGGTTG
CCGAACACTTTGCCGGATTTAATCATCAGCCCGGTGGAGAGCATATTGAGCACCAATTTC
TGCGCTGTACCTGCTTTCATCCGCGAAGAACCGGTAACCACTTCGGCACCTACAATCGGT
GTAATGGCAAACTCTGCGGTGGTTGAAACGGCGCTCCCCGGATTACAGGAAATTCCCACT
GTGCGGCAGCCGAGCTGGCGTGCGTATTCCAGTCCGGCAATTACATACGGCGTGCGACCA
CTGGCCGCAATACCAACCACCACATCCTGTGCCGTTAAATTAATATTTTTCAGATCGTTA
ACACCACCTTCCCGGCTATCTTCAGCGCCTTCCACCGCGTGCTGAATGGCATATTCGCCT
CCAGCAATCAAACCAACTACCAGACCCGGTTTCACGCCGTAGGTGGGCGGACATTCGCTG
GCATCCAGAATCCCCAGACGACCGGATGTTCCCGCACCGAGATAAATCAGACGACCGCCG
CCGCTTACCTGGGCGTGGATAACATCGATCGCCGCGGCGATATCCGGCAGTACGCGCTCA
ACGGCAAGCGGTACGGTTTTATCTTCATCGTTGATAATCCGGCACATTTCCAGCGTTGAT
ACGCGGTCAATTTCAGCCGAGGTGGCGTTCGAGCCTTCGGTAATCATCTTTTCAAGTTGC
ATCGGTGGTGACCTTACTATTTACGATCAAATAATTGCAGATGTATGGAATCATATATCC
CGAATTGACAGACTTAAAGGAATCATTGAGTCTACACTCGCAGAGTGTGAAGAGCGTCAT
AAGAACTTAAGCGGAATTTTTGCTGCCAGCCCAGGAGAGTGGAAGATGTTGTACCTGACG
AAAATACGCAATGCGGAAAGTGAATTTACCGAGAACGAGCAAAAAATTGCTGACTTTCTG
CGGGCCAACGTGAGTGAGCTGAAATCCGTCTCTTCGCGCAAGATGGCGAAACAGCTCGGC
ATCAGCCAGTCGAGTATTGTGAAATTTGCCCAGAAGCTCGGCGCGCAAGGATTTACTGAA
TTGCGTATGGCGTTAATTGGCGAATACAGTGCCAGCCGGGAGAAAACGAATGCCACGGCG
CTGCACCTGCACAGTTCGATTACCAGTGATGATTCGCTGGAAGTGATTGCCCGCAAATTG
AATCGCGAAAAAGAGCTGGCGCTGGATCAAACCTGTGCGTTGTTCGACTACGCGCGGATG
CAAAAAATCATTGAGGTCATCAGTAAAGCACCGTTTATCCAGATAACGGGCCTGGGCGGA
TCGGCGCTGGTGGGGCGCGATCTGTCGTTCAAACTGATGAAAATTGGCTATCGCGTGGCC
TGCGAAGCCGACACGCACGTACAAGCTACCGTTTCCCAGGCGTTGAAAAAAGGCGATGTA
CAAATCGCTATCTCTTACAGCGGCAGTAAAAAAGAGATTGTCTTGTGCGCAGAAGCGGCA
CGAAAGCAGGGGGCAACGGTGATTGCCATTACTTCTCTGGCTGACTCTCCGCTGCGGCGG
CTGGCGCATTTCACGCTCGATACCGTTTCCGGTGAAACCGAATGGCGTAGCTCGTCGATG
TCTACCCGCACGGCGCAAAATTCTGTTACCGATTTACTGTTTGTTGGTCTTGTGCAACTC
AATGATGTGGAGTCATTGAAAATGATTCAGCGCAGCAGTGAGCTAACACAACGCCTGAAA
TGATGCATAAAGCAGCGACTGGATTGAGATTTTCCTGAATTAGTGAGCTGATCCGCAGCA
ATATTTTGTTTATCCTGTATTTTCAGAGGGAATGGAGTGTAACGCTCTGTATTAACAAGG
AGAGCATTAAAATGGGTAAACTCACGGGCAAGACAGCACTGATTACGGGCGCATTGCAGG
GAATTGGCGAAGGAATTGCCAGAACTTTTGCGCGTCATGGCGCAAACCTAATCTTGCTGG
ATATCTCCCCTGAGATCGAAAAGCTGGCGGACGAACTGTGTGGTCGTGGTCATCGCTGTA
CGGCGGTTGTCGCCGATGTGCGTGACCCGGCGTCGGTAGCCGCAGCTATCAAACGCGCGA
AGGAAAAAGAAGGGCGCATTGATATCCTGGTGAATAACGCAGGCGTTTGTCGTCTGGGCA
GTTTCCTCGATATGAGCGATGACGATCGCGATTTCCATATTGATATCAATATTAAAGGCG
TATGGAACGTCACGAAGGCGGTGTTGCCGGAGATGATTGCCCGCAAAGATGGTCGCATTG
TGATGATGTCTTCAGTCACTGGCGATATGGTGGCCGATCCGGGTGAAACGGCGTATGCCT
TAACGAAAGCGGCGATTGTTGGCCTGACTAAATCGCTGGCGGTGGAGTACGCGCAGTCTG
GTATTCGCGTTAACGCCATCTGCCCGGGATACGTTCGCACGCCAATGGCGGAAAGCATTG
CCCGCCAGTCGAACCCGGAAGATCCAGAATCGGTGCTGACTGAAATGGCAAAAGCAATCC
CGCTGCGTCGCCTCGCCGATCCGCTGGAAGTCGGCGAACTGGCAGCCTTCCTCGCATCGG
ATGAATCAAGTTATTTAACCGGTACACAGAATGTGATTGATGGCGGCAGCACACTGCCGG
AGACGGTTAGCGTCGGCATCTGATTCACCTCTGTTTCCTCCCTGCATGTGTGGGGAGGAT
TTCGTCTTATTCCCTTTTCAACTTCCAAATCACCAAACGGTATATAAAACCGTTACTCCT
TTCACGTCCGTTATAAATATGATGGCTATTAGAAAGTCATTAAATTTATAAGGGTGCGCA
ATGGCCGTTAACTTACTGAAAAAGAACTCACTCGCGCTGGTCGCTTCTCTGCTGCTGGCG
GGCCATGTACAGGCAACGGAACTGCTGAACAGTTCTTATGACGTCTCCCGCGAGCTGTTT
GCCGCCCTGAACCCGCCGTTTGAGCAACAATGGGCCAAAGATAACGGCGGCGACAAACTG
ACGATAAAACAATCTCATGCCGGGTCATCAAAACAGGCGCTGGCAATTTTGCAGGGCTTA
AAAGCCGACGTTGTCACTTATAACCAGGTGACCGACGTACAAATTCTGCACGATAAAGGC
AAGCTTATCCCGGCGGACTGGCAGTCGCGCCTGCCGAATAATAGCTCGCCGTTCTACTCC
ACCATGGGCTTCCTGGTGCGTAAGGGCAACCCGAAGAATATCCACGACTGGAACGACCTG
GTGCGCTCCGACGTGAAGCTGATTTTCCCGAACCCGAAAACGTCGGGTAACGCGCGTTAT
ACCTATCTGGCGGCATGGGGCGCAGCGGATAAAGCTGACGGTGGCGACAAAGCCAAAACC
GAACAGTTTATGACCCAGTTCCTGAAAAACGTTGAAGTGTTCGATACTGGCGGTCGTGGC
GCGACCACCACTTTTGCCGAGCGCGGCCTGGGCGATGTGCTGATCAGCTTCGAGTCGGAA
GTGAACAACATCCGCAAACAGTATGAAGCGCAGGGCTTTGAAGTGGTGATTCCGAAAACC
AACATTCTGGCGGAATTCCCGGTGGCGTGGGTCGATAAAAACGTGCAGGCCAACGGTACG
GAAAAAGCAGCAAAAGCCTACCTGAACTGGCTCTACAGCCCGCAGGCGCAGACCATCATC
ACCGACTATTACTACCGCGTAAATAACCCGGAAGTCATGGACAAACTGAAAGATAAATTC
CCGCAGACCGAACTGTTCCGCGTGGAAGACAAATTTGGCTCCTGGCCGGAAGTGATGAAA
ACCCACTTCACCAGCGGCGGCGAGTTAGACAAGCTGTTAGCGGCGGGGCGTAACTGATGT
TTGCAGTTTCATCAAGACGCGTGCTGCCGGGCTTTACCTTAAGCCTCGGCACCAGTCTGC
TGTTTGTTTGCCTGATTTTGCTCCTGCCACTCTCCGCGCTGGTGATGCAGCTGGCCCAGA
TGAGCTGGGCGCAGTACTGGGAGGTGATCACCAACCCGCAGGTGGTCGCAGCCTACAAAG
TGACGCTGCTGTCGGCGTTTGTGGCATCGATTTTTAACGGCGTTTTCGGCCTGCTGATGG
CGTGGATCTTAACTCGTTATCGCTTCCCTGGCCGCACGCTGCTTGATGCGCTGATGGATT
TACCCTTTGCGCTGCCAACGGCAGTCGCCGGTTTAACGCTGGCCTCGCTCTTTTCCGTGA
ACGGTTTTTACGGTGAATGGCTGGCGAAGTTTGATATCAAAGTCACCTACACCTGGCTTG
GGATTGCGGTGGCGATGGCCTTTACCAGCATTCCGTTTGTGGTGCGTACCGTGCAGCCGG
TGCTGGAAGAGTTAGGCCCGGAATATGAAGAAGCGGCGGAAACGCTTGGTGCAACGCGCT
GGCAGAGTTTCTGCAAAGTGGTGCTGCCGGAACTTTCTCCGGCGCTGGTGGCGGGCGTGG
CGTTGTCGTTTACCCGTAGTCTTGGTGAGTTTGGCGCGGTGATATTTATCGCCGGGAACA
TCGCCTGGAAGACGGAAGTGACGTCGCTGATGATTTTTGTGCGCTTGCAGGAGTTTGATT
ACCCGGCAGCGAGCGCGATTGCTTCGGTGATCCTCGCGGCATCTCTGCTGCTGCTGTTCT
CAATTAACACTCTGCAAAGTCGCTTTGGTCGGCGTGTGGTAGGTCATTAATGGCGGAAGT
TACCCAATTGAAGCGTTATGACGCGCGCCCGATTAACTGGGGCAAATGGTTTCTGATTGG
CATCGGGATGCTGGTATCGGCGTTCATCCTGCTGGTGCCGATGATTTATATCTTCGTACA
GGCGTTCAGCAAAGGGCTGATGCCGGTTTTACAGAATCTGGCCGATCCGGATATGCTGCA
CGCCATCTGGCTGACGGTGATGATCGCGCTGATTGCCGTACCGGTAAACCTGGTGTTCGG
CATTCTGCTGGCCTGGCTGGTGACGCGCTTTAACTTCCCTGGACGCCAGTTACTGCTGAC
GCTACTGGACATTCCGTTTGCCGTATCGCCGGTGGTTGCCGGTCTGGTGTATCTGCTGTT
CTACGGCTCTAACGGCCCGCTCGGCGGCTGGCTGGATGAACATAATCTGCAAATTATGTT
CTCCTGGCCGGGAATGGTGCTGGTCACCATCTTTGTGACATGTCCGTTTGTGGTGCGCGA
GCTGGTGCCGGTGATGTTAAGCCAGGGCAGCCAGGAAGACGAAGCGGCGATTTTGCTTGG
CGCGTCTGGCTGGCAGATGTTCCGCCGTGTCACATTGCCGAACATCCGCTGGGCGCTGCT
TTATGGCGTAGTGCTGACCAACGCCCGCGCGATTGGCGAGTTTGGCGCGGTGTCGGTGGT
TTCCGGCTCGATTCGCGGCGAAACACTTTCGCTGCCGTTACAGATTGAATTGCTGGAGCA
GGACTACAACACCGTCGGCTCCTTTACCGCCGCCGCGCTGTTGACGCTGATGGCGATTAT
CACCCTGTTTTTAAAGAGTATGTTGCAGTGGCGTCTGGAGAATCAGGAAAAACGCGCGCA
GCAGGAGGAGCATCATGAGCATTGAGATTGCCAATATTAAGAAGTCTTTTGGTCGCACCC
AGGTGCTGAACGATATCTCACTGGATATTCCTTCAGGTCAGATGGTCGCGTTGCTGGGGC
CGTCCGGTTCCGGGAAAACCACGCTGCTGCGCATTATCGCCGGGCTGGAGCATCAAACCA
GCGGGCATATTCGCTTCCACGGCACCGACGTGAGCCGCCTGCACGCACGTGATCGTAAAG
TCGGTTTCGTGTTCCAGCATTACGCGCTGTTCCGCCATATGACGGTGTTCGACAATATCG
CTTTTGGCCTGACGGTGCTGCCGCGTCGCGAGCGCCCGAATGCCGCAGCCATCAAAGCGA
AAGTGACAAAATTGCTGGAAATGGTCCAGCTTGCCCATCTGGCGGATCGTTATCCGGCGC
AGCTTTCCGGCGGCCAGAAACAGCGCGTGGCGCTGGCGCGCGCGCTGGCTGTGGAACCGC
AAATTCTGCTGCTTGATGAACCGTTTGGCGCGCTGGATGCGCAGGTGCGTAAAGAGCTGC
GTCGCTGGCTGCGTCAACTCCATGAAGAACTAAAATTCACCAGCGTTTTTGTGACCCACG
ATCAGGAAGAAGCGACCGAAGTAGCTGATCGTGTAGTTGTGATGAGCCAGGGCAATATTG
AACAGGCTGACGCGCCGGATCAGGTATGGCGCGAACCGGCGACCCGTTTTGTGCTCGAAT
TTATGGGCGAAGTGAACCGCCTGCAGGGAACCATTCGCGGCGGGCAGTTCCATGTTGGCG
CGCATCGCTGGCCGCTGGGCTACACACCTGCATATCAGGGGCCGGTGGATCTCTTCCTGC
GCCCTTGGGAAGTGGATATCAGCCGCCGTACCAGCCTCGATTCGCCGCTGCCGGTACAGG
TACTGGAAGCCAGCCCGAAAGGTCACTACACCCAATTAGTGGTGCAGCCGCTGGGGTGGT
ACAACGAACCGCTGACGGTCGTGATGCATGGCGACGATGCCCCGCAGCGTGGCGAGCGTT
TATTCGTTGGTCTGCAACATGCGCGGCTGTATAACGGCGACGAGCGTATCGAAACCCGAG
ATGAGGAACTTGCTCTCGCACAAAGCGCCTGATAGGTTGAGTGAATGTTAAACGCCCGGA
GGCGCTTCCCGCGATCCGGGCTTTTTAATGGCAAGGTTTGTAACCTGTAGGCCTGATAAG
ACGCGCAAGCGTCGCATCAGGCAACACCACGTATGGATAGAGATCGTGAGTACATTAGAA
CAAACAATTGGCAATACACCTCTGGTGAAGTTGCAGCGAATGGGGCCGAATAACGGCAGT
GAAGTGTGGTTGAAACTGGAAGGCAATAACCCGGCAGGTTCGGTAAAAGATCGTGCGGCG
CTTTCGATGATCGTCGAGGCGGAAAAGCGCGGGGAAATTAAACCGGGTGATGTGTTAATC
GAAGCCACCAGTGGTAACACCGGCATTGCGCTGGCAATGATTGCCGCGCTTAAAGGCTAT
CGCATGAAATTGCTGATGCCCGACAACATGAGCCAGGAACGCCGTGCGGCGATGCGTGCT
TATGGTGCGGAACTGATTCTTGTCACCAAAGAGCAGGGCATGGAAGGTGCGCGCGATCTG
GCGCTGGAGATGGCGAATCGTGGTGAAGGAAAGCTGCTCGATCAGTTCAATAATCCCGAT
AACCCTTACGCCCATTACACCACTACCGGGCCGGAAATCTGGCAGCAAACTGGCGGGCGC
ATTACCCATTTTGTCTCCAGCATGGGAACAACCGGCACTATCACCGGCGTGTCACGCTTT
ATGCGCGAACAATCCAAACCGGTGACCATTGTCGGCCTGCAACCGGAAGAGGGCAGCAGC
ATTCCCGGCATTCGCCGCTGGCCTGCGGAATATCTGCCGGGGATTTTCAACGCTTCGCTG
ATGGATGAGGTGCTGGATATTCATCAGCGCGATGCGGAAAACACCATGCGCGAACTGGCA
GTGCGGGAAGGAATATTCTGTGGCGTCAGCTCCGGCGGCGCGGTTGCTGGAGCACTGCGG
GTGGCAAAAGCTAACCCTGGTGCGGTGGTGGTAGCGATCATCTGCGATCGTGGCGATCGC
TACCTTTCCACCGGGGTGTTTGGGGAAGAGCATTTTAGTCAGGGGGCGGGGATTTAAGAT
TATTGCGCAGGCACCGTTTTATCCGTCTGCGCAATTAACGCATGTAAAAAAGGCTGTGCA
TTCTCATCGCTCTTACCGGGCATCTTCACGATATACGGCTTCCCGGTAATCGATGATGAC
GAAGCAACCTTATCAATAAACTGCTCGGCAGTGTTAATGCGGTTACGGGTATTGCCGAGC
TTCAGACGCAGATGAGAAACCGCTTCATCGCAGGTATGTTCATCACCGTTGCGCACAAAT
ATCAAATCCTTTTTCTGTGCTAATCCCTCCAGCATGGCGTTGATGCGGGCTTCTTCATGG
GCAGTTAACTTCGCGTAAGCGGGGAGTGTCATTAGTAGTGTAATGACCAGACAAATGATT
TTCTTCATTGAATTACCTTATCCTTGTTTTGTGATAGCCGATTTGACTGCCAGAATCAGG
TAAAGTTTCGGTTGGAATACGATGAGGATCATCGGCAAGGAGAAAAAATTAAATGAGTAG
TTTGTTGTTGTTTAACGATAAGAGCAGGGCACTGCAGGCGGATATCGTCGCCGTGCAGTC
GCAGGTAGTGTACGGCAGCGTAGGCAACAGCATTGCGGTGCCTGCTATCAAACAGAACGG
TCTGAATGTCTTTGCCGTGCCGACGGTATTGCTGAGCAATACGCCGCATTATGACACTTT
CTACGGTGGTGCGATTCCGGACGAATGGTTTAGCGGCTATTTGCGTGCGCTTCAGGAGCG
TGATGCGCTGCGCCAACTTCGAGCTGTAACCACGGGCTATATGGGAACGGCATCGCAAAT
CAAAATCCTTGCCGAGTGGCTGACTGCGCTACGCAAAGACCATCCTGACCTATTGATCAT
GGTCGATCCGGTGATTGGCGATATTGATAGCGGAATTTATGTCAAACCTGACCTTCCCGA
GGCGTATCGACAATATTTACTGCCACTAGCGCAGGGAATTACCCCCAATATCTTTGAGCT
GGAAATCCTGACCGGTAAAAATTGCCGCGATCTCGACAGTGCCATTGCTGCCGCAAAAAG
TCTGCTTTCAGACACATTAAAATGGGTGGTGATTACCAGCGCCTCCGGTAATGAAGAAAA
TCAGGAGATGCAGGTGGTGGTGGTCACTGCCGACAGCGTGAATGTCATTTCCCATTCACG
GGTAAAAACCGACCTGAAAGGGACTGGCGACCTGTTTTGTGCTCAGCTTATCAGTGGTTT
GCTGAAAGGGAAGGCGTTAACCGATGCAGTGCACCGAGCGGGGTTGCGCGTACTGGAAGT
GATGCGCTACACCCAGCAGCATGAGAGCGATGAATTGATTTTGCCGCCGCTGGCGGAAGC
ATAAAAAAATGGCGCCGATGGGCGCCATTTTTCACTGCGGCAAGAATTACTTCTTGATGC
GGATAACCGGGGTTTCACCCACGGTTACGCTACCGGACAGTTTGATCAGTTCTTTGATTT
CGTCCATGTTGGAGATAACAACCGGAGTCAGGGTAGACTTGGCTTTCTCTTCCAGCAGCG
GCAGATCAAATTCAATGACAGTATCGCCAACTTTCACGCGCTGACCTTCTTCAGCAATAC
GCTTGAAGCCTTCGCCTTTCAGTTCAACGGTGTCGATACCGAAGTGGACGAACAGTTCAA
CGCCGCTATCAGATTCGATAGAGAATGCGTGGTTGGTTTCAAAGATTTTACCAATGGTAC
CGTCTACAGGCGCGACCATTTTGTTACCCGTTGGTTTGATAGCAATACCATCACCAACGA
TTTTTTCCGCAAAAACGACATCCGGCACGTCTTCGATATTGACGATCTCGCCAGAGAGCG
GAGCAATGATCTCAATAGTTCCGGTATCCTTCTTGTCGTCGGAAACCAGAGATTTCAGTT
TATCGAACAAACCCATGATCTTCTCCTAAGCAGTAAATTGGGCCGCATCTCGTGGATTAG
CAGATTGTTTTTTCTTCAATGAACTTGTTAACCAGCGTCATTAACTCGTCCGTTGTCGGT
TGAGCAAGAGCCTGCTCTGCTAACACCTTCGCATCTTCGAAGTTCGTGTTACGGATAATC
TTCTTAATGCGCGGGATAGAAATGGCGCTCATAGAGAATTCGTCCAGACCCATCCCCAGC
AACAGAAGTGTAGCACGTTCATCGCCAGCAAGCTCACCACACATGCCAGTCCATTTGCCT
TCAGCATGAGAAGCATCAATAACTTGCTTGATCAAGTTCAGCACGGACGGTGACATTGGC
TGGTAAAGGTGTGAAATCATATCATTACCACGGTCAACTGCCAGAGTGTACTGCGTTAAA
TCATTGGTGCCGATACTAAAGAAATCAACTTCTTTGGCTAAATGACGTGCAATTGTTGCG
GCAGCCGGTGTTTCCACCATTACGCCGATTTCAATTGACTCGTCAAACGCTTTACCTTCG
TCGCGCAGTTCCTGTTTGTAGATTTCGATCTCTTTGCGCAGTGCACGCACTTCTTCAACA
GAGATGATCATCGGGAACATAATGCGCAATTTACCGAAAGCCGAGGCACGCAGGATAGCG
CGGAGCTGATCGCGCAGGATCTCTTTACGATCCATTGCGATACGGATAGCGCGCCAGCCG
AGGAACGGGTTCTCTTCTTTCGGGAAGTTCATGTATGGCAGCTCTTTGTCGCCGCCGATG
TCCATGGTACGAACGATAACCGCCTGCGAGCCACACGCTTCAGCCACTGCTTTGTAAGCA
GCAAACTGTTCTTCTTCAGTGGGCAGCGCGTCGCGGTCCATGAACAGGAACTCAGTACGA
TACAGACCAACGCCTTCAGCGCCGTTACGCTCTGCACCTTCAACGTCACGAACCGTACCA
ATGTTAGCGCATACTTCTACCTGGTGACCGTCCAGCGTAATAGCTGGCAGATCTTTCAGT
TTAGCAAGCTCTGCTTTTTCAGAAGCCACTTGCTCCTGAACAGCGCGCATTTTATCAATA
ACTTCGTTGGTTGGATTGACGTAAACCTGATTATTTACGGCATCCAGAATCAGATAGTCG
TCATTTTTCACCTGAGAGGTGACGCTACCGGTACCCACGATAGCAGGTAGTTCCAGAGAA
CGCGCCATGATAGAGGTGTGGGAAGTACGGCCACCCGCGTCGGTGATGAAACCCAGCACC
TTCTTCAGGTTCAGCTGTGCGGTTTCGGACGGCGTCAGGTCAGCGGCAACCAGAATGACT
TCATCCTGAATGGCGCTCAGGTCGATAATCTTCAGGCCCAGGATGTTGCGCAGCAGGCGC
TTACCGATATCACGTACGTCAGCCGCACGTTCTTTCAGGTATTCATCATCCAGCTCTTCC
AGGGCAGAAGCCTGACCTTCGATAACTTCATGAGCAGCTGCGTCAGCTGTCATGTGCTTA
TCTTTAATCAGGGCTATGATTTCCTGCTCCAGCTCCTCATCTTCGAGCAGCATAATATGC
CCTTCAAAGATGGCTTCTTTTTCTTCACCGAACGTTTCACCAGCTTTCGTTTTGATCGTT
TCCAGCTGGGCTGATGCCTTGGCACGACCGCTCAGAAAACGTTCAACTTCCTGATCAACC
TGGTCGGCAGAAATTTTTTTCCGGTCAATGACAATTTCGTCTTCTTTCAGAAGCAGAGCT
TTACCGAAAGCGATACCCGGGGATGCTAAAATGCCTGAAATCATAACCCTACCTTACTTG
TGACTGATTTTTAAAAGAACCCGGGAAATTACTCGAGTTCCGCCATCAGTTTAACCAGAT
GTTCAACCGCTTTCTGCTCGTCTTCGCCTTCTGCGGAGATAGTCACAACGGTACCTTGAG
TCAGGCCCAGAGTCTGCAGTTTAAACAGGCTTTTCGCGCTGGCGCTTTTGCCGTTGGAAG
TCACAGTAATTTCAGAAGTGAAGCCCTTAGCTTCTTTTACAAACTGGGCAGCAGGGCGGG
TGTGCAGACCGTTCGGAGCGGTAATGGTAACTTCTTGCTGGAACATTGTATTTCCCCAAC
TTATAGGTTTAGTGTTGTGGAACTAAAGTCTAGCTTGGCGGTTCGACTTTAGCCTGTATT
GTTAGCGCCAGTTTTTAACAGACGCGACGCACGAAGAGCGCAATACAGTCCATTGCTGGC
GGGTGTTGACCGCTGACGTTTCGTACGTCATTAAACATTATGCCGCTAAAGGAAGAATTG
AACCAAATCATAAAATCGATTCAGCTTTGGCTTTTCCTGTAACGATTAATTTCGCGCATC
AAAATAATTAGTCTGGTTAAATACCAGTTCCGACAGGCTGAATCAATGCCAGGAGGGGCG
AAAGTTTGAAGCAGGCCACAAAAAAGCACCTAAAAAGGTGCTTTTTTACGCATTTTTAAC
AAGCTGGCATTACTGTTGCAGTTCTTTCTCAGTGAAGAGATCGGCAAACAATGCGGTGCT
TAAATAACGCTCACCCGATGACGGTAGAATAACCACAATATTCTTGTTGGTAAAGCTTTC
ATCTTCTTGTAGTTTCAACGCCGCAGCAACAGCTGCTCCAGAAGAGATACCTGCAAGAAT
ACCTTCTTCTTCCATCAGACGACGCGCGGTAGAAATGGCTTCTTCATTGGTAATGCCAAT
GACTTTATCGATCAGCTTGAGATCGAGGTTAGCCGGGATAAAACCAGCGCCAATACCCTG
AATTTTATGCGGGCCAGGTTTAATCTCTTCACCTGCCAGCGCCTGGGCGATAACTGGAGA
ATCGGTTGGCTCAACGGCGACAGAGATAAGATCGGTCTTGCCTTTGGTGCCTTTAATGTA
GCGGCTGACGCCGGTCAGCGTACCGCCAGTCCCAACGCCAGCAATAAATACATCAACCTG
ACCGTCGGTATCTTCCCAGATCTCCGGACCGGTGGTTTTTTCGTGAATTTCAGGGTTTGC
CGGATTGCTGAATTGTTGCAGCAGCAGGTATTTCTCTGGATTGCTGGCGACAATTTCTTC
TGCTTTTTGGATTGCGCCTTTCATGCCTTTAGCACCTTCGGTCAGCACCAGGTTTGCACC
TAACGCTTTCAGCAGCTTGCGGCGTTCAATACTCATGGTTTCTGGCATGGTCAGGGTGAG
TTTGTAACCGCGAGCGGCAGCTACATAGGCCAGTGCAATCCCGGTATTACCGCTGGTCGG
TTCAACCAGTTCAACGCCTGGTTTCAGCACGCCGCGCTTTTCGGCATCCCAAATCATGTT
GGCACCGATACGGCACTTAACGCTGAAGCTGGGGTTACGAGATTCCACCTTCGCCAGAAT
GCGTCCGTTACCGATGCGATTCAGGCGAACCAGCGGCGTGTGACCGATAGTCAGCGAGTT
ATCTTCAAAAATCTTACTCATGGCCTGTCCTTAACTGTATGAAATTGGGATACAACAGGT
AGCATACCCGCTCAGAGAATATGCGGAAGTAAGGATTTAGCATATCTATATACAGAAGGG
AAATAATGACATGCAAGATGGAATAAGGGGCGGCATAAGCCACCCCTGTTTCACACAAAC
GGTTTACAAAATAACCGGTAGATTGTTACCGCCACATCGCGTGTTTATCGCGATAGCAAT
CGACCCACATCGCCGTCGCGCCACAAACGGCAACGGGCATGATGAACAGATTAAGCAGCG
GGATCATCGTAAACAGGCTGGTTAAAGCACCAAACTGCATATTGGTGATTTTGCGTGTGC
GCAGGGCGGTGCGCATCTCTTTAAACGGCACTTTGTGGTTATCGAAGGGGTAATCGCAAT
ACTGGATGGCTAACATCCAGGCGCTAAACAGGAACCACAGTACCGGCGCGACGGTTTGCC
CAATACCAGGGATGAAGTAAAGAATTAGTAATACAATTGCGCGCGGCAGATACCAGGCAA
ATTTTTGCCATTCGCGTTTCATGATTCGCGGCACATCTTTCATGATACCGAAAATCCCGG
TATCTGGCGGTGTAGCGCCAGTCAATCGTGCTTCCAGTTGTTCAGCCAATAAACCGTTAA
ACGGAGCGGCAATCCAGTTAGCAATCGTGGAGAAGAAATAGCCAAACACTAACAGCACAG
AGATGACAGCCAGAGGCCACAACAGATAGCTCAGCCATTGTAACCAGTCCGGAACATAAC
TCATGAGAGTCGGGATCCAGACATCGAGTTGCGTAAAGAGCCACCAGAATGCGCCCCCCA
TCAACAAAATATTGACCAGCAGCGGTAAAATAACGAAACGCCGAATCCCAGGTTGCGAGA
CGAGCTTCCAGCCTTGCGCAAAATAGTAAAAACCGCTGCGTGGGGCAGATGTGAATGATG
AAACCATAATCAGGATGAGCTCCTTTTGACCAATCCCAGGAAAATTGTGCGTATTTTACC
GGGTAATTGCGCAATGGACAGTTAGGATATGTTCGAAAAAACAGCAAAAAGCACGATTTC
ATCTATCTTTGTGCTGTGAAAGTTAATAGTGCACTTGCACTTGAGGTAATCGGCAAATAC
TCTTAGTGAGTAAATGTTTGCCGTGGTGGCAAGGTGTTAGAACAACAGAGAATATAATGA
TGCAGGATTTGCGTCTGATATTAATCATTGTTGGCGCGATCGCCATAATCGCTTTACTGG
TACATGGTTTCTGGACCAGCCGTAAAGAACGATCTTCTATGTTCCGCGATCGGCCATTAA
AACGAATGAAGTCAAAACGTGACGACGATTCTTATGACGAGGATGTCGAAGATGATGAGG
GCGTTGGTGAGGTTCGTGTTCACCGCGTGAATCATGCCCCGGCTAACGCCCAGGAGCATG
AGGCTGCTCGTCCGTCGCCGCAACACCAGTACCAACCGCCTTATGCGTCTGCGCAGCCGC
GTCAACCGGTCCAGCAGCCGCCTGAAGCGCAGGTACCGCCGCAACATGCTCCGCGTCCAG
CGCAGCCGGTGCAGCAACCCGTGCAGCAGCCTGCCTATCAGCCGCAGCCTGAACAGCCGT
TGCAGCAGCCAGTTTCGCCACAGGTCGCGCCAGCGCCGCAGCCAGTGCATTCAGCACCGC
AACCTGCACAACAGGCTTTCCAGCCTGCAGAACCCGTAGCGGCACCACAGCCTGAGCCTG
TAGCGGAACCGGCTCCAGTTATGGATAAACCGAAGCGCAAAGAAGCGGTGATTATCATGA
ACGTCGCGGCGCATCACGGTAGCGAGCTAAACGGTGAACTGCTTCTTAACAGCATTCAAC
AAGCGGGCTTCATTTTTGGCGATATGAATATTTACCATCGTCATCTTAGCCCGGATGGCA
GCGGCCCGGCGTTATTCAGCCTGGCGAATATGGTGAAACCGGGAACCTTTGATCCTGAAA
TGAAGGATTTCACTACTCCGGGTGTCACTATCTTTATGCAGGTACCGTCTTACGGTGACG
AGCTGCAGAACTTCAAGCTGATGCTGCAATCTGCGCAGCATATTGCCGATGAAGTGGGCG
GTGTCGTGCTTGACGATCAGCGCCGTATGATGACTCCGCAGAAATTGCGCGAGTACCAGG
ACATCATCCGCGAAGTCAAAGACGCCAACGCCTGATACACTTAAGGCAAATTAACTCCTC
TTCGAACCCCCGCTTGTCGGGGGTTTTTAGCATTGATGGTGCGATATGGAATCAATCGAA
CAACAACTGACAGAACTGCGAACGACGCTTCGCCATCATGAATATCTTTATCATGTGATG
GATGCGCCGGAAATTCCCGACGCTGAATACGACAGGCTGATGCGCGAACTGCGCGAGCTG
GAAACCAAACATCCAGAACTGATTACGCCTGATTCGCCTACCCAACGTGTAGGTGCTGCG
CCGCTGGCGGCTTTCAGCCAGATTCGCCATGAAGTGCCAATGCTGTCGCTGGATAACGTT
TTTGATGAAGAAAGCTTTCTTGCTTTCAACAAACGTGTGCAGGACCGTCTGAAAAGCAAC
GAGAAAGTCACCTGGTGCTGTGAGCTGAAGCTGGATGGCCTTGCCGTCAGTATTCTGTAT
GAAAATGGCGTTTTAGTCAGTGCCGCGACCCGTGGCGATGGCACCACCGGGGAAGATATC
ACGTCTAATGTGCGTACTATTCGCGCCATTCCGCTGAAGCTGCACGGAGAGAATATCCCG
GCGCGTCTGGAAGTGCGTGGTGAAGTGTTCCTGCCGCAGGCGGGGTTCGAAAAGATTAAC
GAAGATGCGCGACGCACGGGCGGGAAAGTGTTTGCTAACCCACGTAATGCGGCAGCTGGT
TCACTGCGTCAGCTTGATCCGCGTATTACAGCGAAGCGACCGCTCACTTTTTTCTGCTAT
GGCGTTGGTGTTCTGGAAGGTGGCGAGCTGCCGGATACTCATCTTGGCCGTTTACTGCAA
TTTAAAAAGTGGGGGTTGCCGGTCAGCGATCGGGTAACGCTTTGTGAATCGGCGGAAGAA
GTGCTGGCGTTCTATCACAAAGTGGAAGAAGACCGCCCGACGCTGGGCTTTGATATCGAC
GGCGTGGTGATTAAGGTCAACTCACTGGAACAGCAGGAGCAGCTTGGCTTTGTCGCGCGT
GCCCCGCGCTGGGCGGTAGCGTTTAAATTCCCGGCGCAGGAGCAGATGACCTTTGTGCGT
GACGTCGAGTTTCAGGTTGGGCGTACTGGCGCGATTACGCCTGTTGCGCGTCTGGAACCT
GTCCATGTTGCTGGCGTGCTGGTGAGTAACGCAACCTTACACAATGCGGATGAAATCGAA
CGTCTTGGTTTACGCATTGGCGATAAAGTGGTGATTCGCCGCGCTGGCGACGTGATCCCG
CAGGTGGTTAACGTCGTGCTTTCTGAACGCCCGGAAGATACCCGTGAGGTTGTATTCCCG
ACGCATTGTCCGGTATGTGGTTCTGACGTTGAGCGTGTGGAAGGTGAAGCTGTTGCCCGC
TGTACCGGTGGCCTGATTTGCGGTGCGCAGCGTAAAGAGTCGCTGAAACACTTTGTTTCC
CGCCGTGCGATGGATGTTGACGGAATGGGCGACAAAATCATCGATCAGCTGGTTGAAAAA
GAATATGTCCACACTCCGGCGGATCTGTTCAAACTCACCGCAGGCAAACTTACCGGACTG
GAGCGTATGGGGCCAAAATCGGCACAAAACGTGGTTAACGCGCTGGAAAAAGCGAAAGAA
ACCACCTTTGCTCGCTTCCTCTATGCACTTGGCATCCGTGAAGTCGGCGAGGCCACCGCA
GCAGGTCTGGCGGCATATTTCGGCACGCTGGAAGCGCTGGAAGCCGCTTCGATTGAAGAA
CTGCAAAAGGTGCCTGATGTTGGCATTGTCGTTGCATCCCACGTTCACAACTTCTTTGCC
GAAGAAAGCAACCGCAATGTCATCAGCGAGCTGTTGGCGGAAGGTGTTCACTGGCCTGCG
CCGATCGTTATCAACGCGGAAGAGATTGACAGCCCGTTTGCTGGTAAAACCGTGGTGCTT
ACGGGCAGCTTAAGCCAGATGTCGCGTGATGACGCTAAAGCTCGACTGGTCGAACTGGGC
GCGAAAGTCGCGGGCAGCGTGTCGAAGAAAACCGATCTGGTGATAGCGGGTGAAGCTGCA
GGATCTAAACTGGCGAAGGCGCAGGAACTGGGCATTGAAGTCATCGACGAAGCGGAAATG
CTGCGTTTGCTGGGTAGCTGAGATGGAAAAAGAGCAGCTGATTGAAATAGCCAATACGAT
AATGCCGTTTGGCAAATACAAAGGGCGTCGCTTAATCGACCTGCCGGAGGAGTATCTGCT
GTGGTTTGCCCGCAAAGATGAGTTCCCGGCAGGGAAGCTCGGTGAGCTAATGCAAATCAC
GCTGCTGATTAAAACCGAGGGGCTGACGCAACTGGTCCAGCCCCTGAAGCGTCCGCTTTA
AGCTTTATCGGTGCTGCTTTCCTGCTGTGCCTGTAACTGTTCGGTCTGGCGTTTGTATCG
CCGCGCCAGCACCGCACAGACCATCAATTGGATCTGATGGAAAATCATCAGGGGCAGCAC
CATCATACCGATCACCGATGTGGGGAACAGAATGTTTGCCATCGGGATGCCATTTGCCAG
ACTCTTTTTCGAACCACAAAAGACGATAGTAATTTCATCTGCTTTATTGAAGCCTAGTCG
GCGTGCCATAAAGACGTTAACTACAATCACGATAGCCAGAAGAACGCAGCTGACCACCAC
GATAAACAGCAATGATCCCCAGCCAACTTTATGCCAGATACCATTAACGACGGCTTCGCT
GAACGCTGTATAAACCACCAACAGAATGGACGTCTGGTCAGTTTTCGCAATCCATTTTTT
ATTGCGCGACACCCAGTCACCAATCCACGGCCGGGAAAGATGCCCCAACACAAACGGCAG
CAACAGTTGCAGCATAATTTTACCGACCTGCTCAAGGCTGCCCCCTGCACCGTGAACATT
CATCACCAGGCCAACCAGCAATGGTGAAAGGAAAATCCCCAGCAGGCTGGATGCCGACGC
AGAACAAACCGCCGCCGCGACGTTACCGCCCGCCATTGACGTGAAGGCGATTGCAGACTG
CACGGTAGCCGGGAGAATGCACAAGTAGAGAAAACCGGAGTAGAGCATCGGGTCGACATT
TACCGGTTTCCACCAGGCAAACAGTACACCCAGAATCGGAAACAGCACGAAGGTGCTGCA
CATTACCCACAAATGCAGTCGCCAGTGACCACCGCCAGCAATAATCGCCTCACGCGACAA
CTTCGCGCCGTGCATAAAGAACAGCAGGGCAATAGCTGCGGTGGTCAGATGTTCAAAGAA
GGGGACGAAATCGCCTCTGGCCGGAAAGAAAGAGGCCAGCAACACCACCGTGATCAGGGT
TAAGGTGAAAGGATCGAGGATACGAAAAAGTTTCATAAAGACTCCAGATGATCGATGGTT
CTATTGTGCTTCTTCCAGTTTGAGAAATAAAATTGATTTATTGCATCCATTCATGAAGAA
AACAGATGAATTATTCTTTAAAACAGTTAAAGGTTTTCGTCACAGTAGCGCAGGAGAAAA
GTTTTAGTCGTGCAGGAGAGCGTATCGGCCTGAGCCAGTCGGCAGTAAGTCACAGTGTGA
AGGAGCTGGAAAATCATACAGGTGTTCGCCTGCTGGACAGAACCACGCGTGAAGTGGTAC
TTACAGATGCAGGGCAGCAGTTGGCTTTGCGTCTTGAGCGACTGCTGGATGAACTTAACA
GCACGTTGCGCGATACCGGGCGTATGGGGCAACAACTGAGCGGAAAAGTTCGGGTCGCTG
CCAGCCAGACCATTTCCGCGCATCTTATTCCGCAATGCATTGCTGAAAGCCATCGCCGCT
ATCCAGATATTCAGTTTGTCCTGCACGATCGTCCGCAGCAGTGGGTGATGGAAAGTATTC
GCCAGGGAGATGTCGACTTTGGCATCGTCATAGATCCAGGCCCAGTGGGCGATCTGCAAT
GTGAAGCGATTCTTTCCGAGCCTTTCTTTCTGCTTTGCCATCGCGATAGCGCTTTGGCCG
TGGAAGATTATGTACCCTGGCAGGCATTACAGGGAGCGAAATTGGTGTTGCAGGATTACG
CGTCAGGCAGCCGACCACTGATTGACGCAGCGCTGGCGCGCAATGGTATTCAGGCGAATA
TTGTGCAGGAGATTGGACATCCGGCGACGCTGTTCCCGATGGTAGCCGCAGGCATCGGCA
TCAGTATTCTTCCCGCACTGGCGCTACCATTGCCTGAAGGTAGCCCACTGGTGGTAAAGC
GCATTACGCCGGTGGTGGAACGCCAGTTGATGCTGGTGCGCAGGAAAAACCGTTCACTTT
CCACCGCCGCTGAAGCGTTATGGGACGTGGTACGAGACCAGGGCAATACGCTAATGGCTG
GGCGGGAAGGGGATCCGTTGTATCAGATATAGATATCGATATGAGTCGTATTTTCAACAG
GATTTAGAAGGGATACATTCAGAGACAAACGCTGCTCTTTCTCCTGCGCCTTTTCTGCCT
GCTGTCTCTGCAACTGCGCCAGTTGTGTTTCCAGTAGGGTGATTTGCTGTTGAATCAATT
CGGCCTGTTTTTGCTTGTCTTCAGCACTGCCGCTAGTGTCTACAATCTCTTTAATTTGTT
GAGTGAGTTTGATGATTTGCTGACTTATCCGCGCGATTTGTGAAGCAACATCGCTACCTT
GTGATGCCCTGTTACTACTCTGTGTTTGTATGGAAGGAATTGAAGTTGAAGAGATAGTGG
CCATTGTTCAGTCCTCGTCACTGTACGAGGTAATATCGGTAGAAGAACAAGGAACTTGAG
AAGAAAAATCAATCTTACAAATCGCAGATAGCAAAAAAGCGCCTTTAGGGCGCTTTTTTA
CATTGGTGGGTCGTGCAGGATGACTCGCTTCGCTCGCCCTTCGGGCCGTCGCCGCGAGCG
GCTCCGTTGTTTCGCTGCGCTCAACTCGAACCTGCTGCAGGTTCGAATCTTTGAGTATCG
CAGATAGCAAAAAAGCGCCTTTAGGGCGCCTTTTTACATTGGTGGGTCGTGCAGGATTCG
AACCTGCGACCAATTGATTAAAAGTCAACTGCTCTACCAACTGAGCTAACGACCCGAAGT
GGTGGGTGATGACGGGATCGAACCGCCGACCCCCTCCTTGTAAGGGAGGTGCTCTCCCAG
CTGAGCTAATCACCCACTTCTCAATTTCTTGCTACACGGCGGAGACTACATAAAGTAGTT
GGTGGGTGATGACGGGATCGAACCGCCGACCCCCTCCTTGTAAGGGAGGTGCTCTCCCAG
CTGAGCTAATCACCCCCGCTGTGTGGAGTCGCATTATAGGGAGAGTTCAAAATGAGTCAA
CGCATTTTCTAAAGAAATTGTTCGTTCGTCGTAAATTTAAGCAAGATGATCGCAAAACAG
ACCGTGTTGCGCAATTTGTCAACGAAAACAATAATGCGTAAGGTTGCAACCCGAACTACA
TTGAGGAATCAGGCGGGAGTGATAGAATATCGCCCACTCAATTTTTCCAGGATTTGCCGG
TTGTCGGCATCTTTCTAAACGTAAGGCCATTTCATGAAAATCAAAACTCGCTTCGCGCCA
AGCCCAACAGGCTATCTGCACGTTGGCGGCGCGCGTACTGCTCTTTACTCCTGGCTTTTT
GCACGTAATCACGGCGGTGAGTTCGTGCTGCGTATTGAAGACACCGATCTTGAGCGTTCC
ACGCCGGAAGCTATCGAAGCCATTATGGATGGCATGAACTGGCTGAGCCTGGAGTGGGAT
GAAGGTCCGTACTTCCAGACCAAACGTTTTGATCGCTACAACGCGGTGATCGATCAGATG
CTGGAAGAGGGCACAGCTTATAAATGCTATTGCTCTAAAGAGCGCCTGGAAGCGCTGCGC
GAAGAGCAAATGGCGAAAGGTGAGAAGCCGCGTTATGACGGTCGCTGCCGCCACAGTCAT
GAGCATCACGCTGATGATGAGCCGTGTGTCGTACGTTTTGCTAACCCGCAGGAAGGTTCT
GTTGTTTTTGACGATCAGATCCGTGGTCCGATCGAGTTCAGCAACCAGGAACTGGACGAT
CTTATTATCCGCCGTACCGATGGTTCCCCAACCTATAACTTCTGTGTGGTTGTCGATGAC
TGGGATATGGAAATCACCCACGTTATCCGTGGCGAAGACCATATCAACAACACGCCACGC
CAGATCAACATTCTTAAGGCCCTGAAAGCGCCGGTGCCGGTTTACGCGCACGTTTCTATG
ATCAACGGCGATGACGGTAAAAAACTGTCCAAACGTCACGGGGCGGTCAGCGTAATGCAG
TATCGTGACGACGGTTATTTGCCAGAAGCACTGCTGAACTATCTGGTGCGTCTGGGCTGG
TCCCACGGCGATCAGGAAATCTTCACTCGTGAAGAGATGATCAAATACTTCACCCTGAAT
GCCGTCAGCAAATCTGCCAGTGCGTTCAACACCGACAAGCTGCTGTGGCTGAACCATCAC
TACATTAACGCGCTGCCGCCGGAGTATGTTGCTACTCACTTACAGTGGCACATTGAGCAG
GAAAATATCGATACCCGTAACGGCCCGCAGCTGGCTGATCTGGTGAAACTGCTGGGCGAA
CGCTGCAAGACGCTGAAAGAGATGGCACAGAGCTGCCGTTATTTCTACGAAGATTTTGCA
GAGTTCGATGCCGACGCCGCGAAAAAACATCTGCGTCCGGTAGCGCGTCAGCCGCTGGAA
GTGGTTCGTGACAAACTGGCCGCGATTACTGACTGGACCGCTGAAAACGTTCATCACGCT
ATTCAGGCGACGGCGGATGAGCTGGAAGTGGGTATGGGTAAAGTTGGTATGCCGCTGCGT
GTCGCCGTAACCGGTGCGGGGCAGTCTCCAGCACTGGATGTTACCGTTCACGCGATCGGT
AAGACACGTAGCATTGAGCGTATCAACAAAGCGCTGGCTTTTATTGCTGAACGCGAAAAT
CAGCAGTAATTAGCGCATAAAAGACAAACGGCAGGAGAGAAACCCCTGCCGTTTTTTATT
TATGCTGATTCATTTATGTCGAGACGAGCCAGGAAATTACGAATTCCTTCGCGTGACAAA
AATTGCGCAACTTTTTCCTGCTCACTGTGAGTCATGTTGTCTATTGCGCTTATGATTTGT
CGATAAGCAGGAGTGCGAATCCCCGGTGCGTATTCGGCAAGGGGTTCTTCGGCTTCCAGA
AGCATCGGTGTGTTATGGAAGGCTGGCGTGTTCTGAATAAACTCGCAAACTTGCGTATCG
ACCAGAATAAGTCTGGCACGACCGCCTTTCACGCCGGGAAATTTTTCCGTTTTCCAGCCT
TTTTCTCTGATCCAACGGTTAACAGTTTGTTTAGCCACACCGAGGCATTCAGCCAGTTCT
TCGGTGGTCATTTTGTTGCGTAATCTTTTCATATTATTTGCTATCGCGAATCCCTAAGCG
TTGTAACAATCCGATAATCCCTTCCCGCAGAAGCAAGGATGTAAACTGTTTTTGTTCAAC
TGGCGTCATCTCTTTCGCCAGTGTCACCAGCAATACTTCAAGCGGCGCATCACCAGAAAG
GGCAGGCGCTTCTCCCTGACCTTCTGGACGTTCAGCATTACGAATATATTCACGAACCTG
TTCATTGACGTGAACCAGTCGGGCTTTGCCACCCTGGACGCCTGGTTTTGGTGACGTCGT
CCAGCCTTCCTTGCGTACCCATTTATTAATGGTCTGGCGGCTATAGCCGGTCAGTCTGGC
AAGTTCATCTGGTGTCATCCTCTCCTTGAACATAACAATTCCCTGAATGTATGTGGGTCT
ATTAGTAGTTCATTTTATAGCACCACTTTACAGGAAACCGTGACATGAATAACTACTGAA
TGCGAGCGGTTTTCCAAAATTGTTCATTTGCCTGATTTTTCAGCGATTGAAACTACACGT
TGCAATTTGCCGTTGACACATTCGGGCGGAATTCATATGATGCCGCCCGTCAACTCGACA
AGCTTTACGTGACGGGGCTATAGCTCAGCTGGGAGAGCGCTTGCATGGCATGCAAGAGGT
CAGCGGTTCGATCCCGCTTAGCTCCACCAAATTTTGCACCCAGCAAATTTGGTACGTAAA
CGCATCGTGGGGCTATAGCTCAGCTGGGAGAGCGCTTGCATGGCATGCAAGAGGTCAGCG
GTTCGATCCCGCTTAGCTCCACCAAATTTCCAACCCCCGCTGCAAAGCGGGGGTTTTTTG
TCTCTGCTTTTTGCCGCTTTTGTAATACAGTCTACGTCCGGGTTAGTGCCGCCTGGTGAA
AGCATCATTGGATGAAAAATCGGCAACAGGCTGGCCCCTGTTTGCTTCGCGATGCGAATA
AACTTATTATTTGTGTGCCTGAAAACCCCGATCAGTGAGAGTAGTGTACTCATGTTTGTG
GAGCATAACCTGATAAAAAATATCAAGATATTCACACTAGCGTTTACGCTCACCGTGGTA
CTTATTCAGCTATCCCGTTTTATTTCGCCACTTGCCATTATCCATTCCAGTTATATCTTT
CTGGCGTGGATGCCACTGTGCGTAATGCTGTCAATCTTGTTTATCTTTGGCTGGCGCGGT
GTCGTTCCCGTTTTATGCGGGATGTTTTGCACCAATCTGTGGAACTTTCATCTCTCTTTT
TTACAGACTGCGGTCATGCTCGGCAGCCAGACGTTTGTCGTGTTGTGTGCCTGCGCAATA
TTACGCTGGCAGCTGGGGACGCGTTGGCGTTATGGATTGACCAGCCGATATGTCTGGCAA
CGTCTGTTCTGGCTTGGTTTGGTGACGCCGATCGGCATCAAATGCAGCATGTATTTTGTG
GGGAGCTTCTTTGATTTCCCGCTAAAGATATCCACCTTTTTCGGCGATGCGGATGCCATT
TTCACGGTTGTTGATTTACTAAGCCTTTTCACCGCTGTGCTGATTTACAACATGCTTTTC
TACTATCTCACTCGCATGATTGTAAGTCCCCACTTTGCGCAGATATTGTGGCGCAGGGAT
ATCGCTCCGTCGTTGGGCAAAGAGAAACGCGCATTTACCTTAAGCTGGCTGGCAGCGTTA
AGCGTGCTGCTACTTCTGTTGTGCACACCTTATGAAAACGACTTTATTGCCGGTTACCTG
GTACCCGTTTTCTTCATCATCTTTACCCTCGGGGTCGGTAAGCTTCGCTATCCGTTTTTA
AATCTCACCTGGGCTGTTTCAACGCTTTGCCTGCTGAATTACAACCAGAACTTTTTGCAA
GGGGTGGAAACCGAATATTCGCTGGCATTTATTCTTGCGGTGCTGATTTCCTTTAGCGTT
TGCCTGCTCTATATGGTGCGCATTTATCATCGCAGTGAATGGCTTAATCGACGCTGGCAT
TTGCAGGCGCTGACCGATCCGTTAACGCTCCTACCCAATTTTCGTGCGTTGGAACAAGCG
CCGGAGCAAGAGGCGGGCAAGAGTTTTTGCTGCCTGCGCATTGATAATCTTGAGTTTATG
AGTCGTCATTACGGGTTAATGATGCGCGTTCACTGTATCCGATCAATTTACCGTACGCTG
CTGCCGTTGATGCAGGAAAACGAAAAGTTGTATCAATTGCCGGGTAGTGAACTGCTGTTA
GTGCTGAGCGGGCCGGAAACGGAAGGGCGACTCCAGCATATGGTTAACATCCTGAATAGT
CGGCAAATTCACTGGAACAATACCGGGCTGGATATGGGCTATGGTGCTGCCTGGGGGCGT
TTTGATGGAAATCAGGAAACCCTGCAACCCTTGTTGGGGCAGTTAAGCTGGCTGGCGGAG
CAATCCTGCGCACATCATCATGTGCTGGCGCTGGATAGCAGAGAGGAGATGGTTTCCGGG
CAGACCACTAAACAAGTGCTATTGCTGAATACCATTCGCACGGCGTTAGATCAGGGTGAT
TTGCTGCTCTACGCCCAGCCAATTCGCAACAAAGAGGGTGAAGGTTATGATGAGATCCTC
GCGCGACTGAAGTATGACGGCGGCATTATGACCCCGGATAAGTTTCTGCCCCTTATTGCT
CAGTTTAACCTTAGCGCGCGTTTTGATTTGCAAGTGCTGGAATCCTTGTTGAAGTGGCTG
GCAACACACCCTTGCGACAAAAAAGGCCCGCGCTTTTCAGTTAATTTAATGCCGCTCACG
CTGCTACAAAAGAATATTGCCGGGCGGATTATTCGTCTGTTTAAGCGTTATCACATCTCC
CCGCAGGCGGTCATTCTTGAGATCACCGAGGAGCAGGCGTTTTCTAACGCAGAAAGCAGC
ATGTACAACATCGAGCAACTGCATAAGTTTGGCTTCCGGATTGCGATTGATGACTTTGGC
ACCGGCTATGCCAACTACGAACGGTTAAAGCGTTTGCAGGCTGATATCATCAAAATTGAT
GGTGTCTTTGTGAAAGATATCGTCACGAATACGCTGGATGCGATGATTGTGAGATCAATT
ACCGATCTGGCGAAAGCGAAGTCATTGAGTGTGGTTGCGGAGTTTGTCGAGACGCAACAG
CAGCAGGCGTTATTGCATAAGCTCGGGGTGCAATATCTGCAAGGGTATTTGATTGGTCGC
CCGCAGCCATTAGCTGATTAACAGGCGTAAAAAAACCGGGGAATTATCCCCGGCTTTTTT
ATGTATGGTCTTACAGCACCAGTGCTGCGATTGACGCAGACAGCACACTCACCAGGGTAG
AGCCGTAAACCAGTTTCAGACCGAAGCGAGAAACCACGTTACCTTGCTCTTCATTCAGAC
CCTTAACTGCACCTGCGATAATCCCGATTGAAGAGAAGTTAGCGAAGGAAACCAGGAACA
CAGAGATGATGCCTTCAGCACGCGGAGAGAGCGTGTAAGCAATTTTCTGCAGATCCATCA
TCGCAACGAACTCGTTGGAAACCAGTTTGGTCGCCATGATACTGCCCACTTGCAGTGCTT
CGCTGGACGGAACACCCATCACCCATGCAATCGGATAGAAGATGTAGCCCAGGATGCCCT
GGAAGGAGATGCTGTAGCCAAACCAGCCAGTCACGGTGGCAAACAGTGCGTTCAACGCGG
CGATCAGGGCGATAAAGCCGATCAGCATCGCGGCAACGATAATGGCAACTTTGAAACCTG
CCAGAATGTATTCACCCAGCATTTCGAAGAAGCTCTGACCTTCGTGCAGGTTGGACATCT
GAATGTTTTCTTCACTGGCATCAACACGGTAAGGGTTGATCAGCGACAGCACGATAAAGG
TGCTGAACATGTTCAGTACCAGCGCCGCAACGACATATTTCGGCTCCAGCATGGTCATGT
ATGCACCAACGATGGACATAGATACGGTGGACATCGCCGTTGCTGCCATGGTGTACATAC
GATTGCGGGAGATTTTGCCGAGGATATCTTTATAGGCAATAAAGTTTTCAGACTGACCCA
GAATCAGAGAGCTGACGGCGTTAAAGGATTCCAGTTTGCCCATGCCGTTGACTTTGGAGA
GCAGGAAACCAATTGCGCGGATAATCACCGGCAACACGCGAATGTGCTGGAGAATACCGA
TCAGTGCAGAGATAAAGACGATTGGGCACAGCACTTTCAGGAAGAAGAATGCCAGGCCTT
GATCATTCATGCTACCAAAGACGAAGTTAGTCCCTTCGTTGGCAAATCCGAGCAGTTTTT
CGAACATTTCGGAGAAGCCTTTCACGAAGCCTAAACCAACGTCGGAGTTCAGGAAGAACC
ACGCCAGTAACACTTCGATAACAAGCAGTTGAATAACATAACGGATACGAATTTTTTTGC
GGTCGCTGCTTACCAGCAGTGCGAGAATCGCAACAACGGCAAGTGCCAGTACAAAATGAA
GGACGCGGTCCATATTTGCTCCAAATATGAGGCAGGTTAAATTTCCGTGCACATTCTATG
TAACATGGTTAAGGAAAACGAGATCTGACACACACTATAATGACGTCCTGTGACAAGCTT
CAAAAATAGTGAGCTGTCATACATTTCTGCTATGTTGTGTATGGAAGCTGAAAGTTATGT
AAATGTGCTAACATTAAACATAACCATAACATTCAAGTCATCAATCTTTTCGTAGTCATA
ATCCTGGTCTATCAGAGAAATCACCACAACCCATTTAAATGAATTTGATAATCATTCTCG
TTTGGCATAGCATGAAACATAGCAAAGGCTATGTTTTAGAGGCACAAGATGACGAACTAT
CGCGTTGAGAGTAGCAGCGGACGGGCGGCGCGCAAGATGAGGCTCGCATTAATGGGACCT
GCGTTCATTGCGGCGATTGGTTATATCGATCCCGGTAACTTTGCGACCAATATTCAGGCG
GGTGCCAGCTTCGGCTATCAGCTACTGTGGGTTGTCGTTTGGGCCAACCTGATGGCGATG
CTGATTCAGATCCTCTCTGCCAAACTAGGGATTGCCACCGGTAAAAATCTGGCGGAGCAG
ATTCGCGATCACTATCCGCGTCCCGTAGTGTGGTTCTATTGGGTTCAGGCAGAAATTATT
GCGATGGCAACCGACCTGGCGGAATTTATTGGTGCGGCGATCGGTTTTAAACTCATTCTT
GGTGTTTCGTTGTTGCAGGGCGCGGTGCTGACGGGGATCGCGACTTTCCTGATTTTAATG
CTGCAACGTCGCGGGCAAAAACCGCTGGAGAAAGTGATTGGCGGGTTACTGTTGTTTGTT
GCCGCGGCTTACATCGTCGAGTTGATTTTCTCCCAGCCTAACCTGGCGCAGCTGGGTAAA
GGAATGGTGATCCCGAGTTTACCTACTTCGGAGGCGGTCTTCCTGGCAGCAGGCGTGTTA
GGGGCGACGATTATGCCGCATGTGATTTATTTGCACTCTTCGCTCACTCAGCATTTACAT
GGCGGTTCGCGTCAACAACGTTATTCCGCCACCAAATGGGATGTGGCTATCGCCATGACT
ATTGCCGGTTTTGTCAATCTGGCGATGATGGCTACAGCTGCGGCGGCGTTCCACTTTTCT
GGTCATACTGGTGTTGCCGATCTTGATGAGGCTTATCTGACGCTGCAACCGCTGTTAAGC
CATGCTGCGGCAACGGTCTTTGGATTAAGCCTGGTTGCTGCCGGACTGTCCTCAACGGTG
GTGGGGACACTGGCGGGGCAGGTGGTGATGCAGGGCTTCATTCGCTTCCATATCCCGCTG
TGGGTGCGTCGTACAGTCACCATGTTGCCATCATTTATTGTCATTCTGATGGGATTAGAT
CCGACACGGATTCTGGTTATGAGTCAGGTACTGTTAAGTTTTGGCATCGCCCTGGCGCTG
GTTCCACTGCTGATTTTCACCAGTGACAGCAAGTTGATGGGCGATCTGGTGAACAGCAAA
CGCGTAAAACAGACAGGCTGGGTGATTGTAGTGCTGGTCGTGGCGCTGAATATCTGGTTG
TTGGTGGGGACGGCGCTGGGATTGTAGTTGAATGAGCGTCGCATCTGGCACTATTGGCGG
ATGCGGCGTAAACGCCTTATCCGCCTTACGCGTTAAAGAGCCGGTTTGTAGGCCTGATAA
GACGCACTAGCGTCGCATCAGGCCTTGTGCTCCATTGGCAAATGTGTTTAATGGCGGTGC
CCATGTCCGCGGCCTTTTCCGCGATGATCGTCACGATCGCGCCAGCCTTCACGATAGCCA
CGCTCATACGCTTTACGCTTATCCCAGCCACGATGATAGCCATTATCATGACGCCACCAG
CGGTTTTTGCGCCACTCATAATTGCGATGCCAGTAATCACGATCTCGCCAGTGACCACCG
TCCCAGTAATTACCGTAATGATCGCGATCGCCAATTTGTAATTTGATTGATGGCAGTAGG
GTGATTTCACCTGCGTTTGCTGCAAGCGGGGTAAATGCCATCAGGGCGGCCGCCAGAAAC
AGTGACCTGAACATTGTTATTCTCCTTCACGATCGAAGCCGTCAGCGGCCTGTTAACGCA
ATATTACGGGGAGGTAAAGCCCCGTATCATCGCCATAACTCTTAAATCATAAAGGAGAGC
ATTTTTTGTTAAACGTTATCGTGGGGTGGCTGTTGCTTCGGACGATTGACCATCATCATC
GGCTTACCTGCTAATAACAGCCATGCCGGAAGCATGACGATACAGAGCAGCGGTAGCAAT
GTGGTATTGGGTACAACGACTGCCGCCATAAAAAGACTTAACCAGCCATCGCGTGTTACC
ACCAGCACGATGCCGAGAATAGCGCAGGAAACGGTTATTGCCGCTGGAACGGCGGGGACG
TGCTCATGCAGCATCAACCCTAATGCCACGCCGACGAACACTGCCGGGAAAATTCGTCCA
CCGCGAAAGCCACTGGCGGCAGCAACGACCAGGGCGGTAAGTTTAATCACCGCCAGTAAA
AAGTAATCGCTGGTGCTGAAAGCCTGATTTGCCACCATCTGCTGCATCTCATCCAGTCCT
TTAAACAGCGAAACTGGTCCACCAATAACCCCCAGAATACCGAGAATAAATCCGCCAATA
CCCAGCACGAGCACCGGATTTTTCATTTGATGCATCATCGCGTGCAACCGTGGTAAGCAC
CATACGGCGACCATCCCTGCAGCGATGGCAATCGCCGCGACAATTGCACCGCTGAGAATA
TCGGTCATTTCCATCTGTCCGTAATGCGCAATGGGCAGTGAAAAATGGGGATGGAAAAAT
AATCCGGTAGTAAGTGCACCAGCTGCTGCCGCCATTAACGGCGCAAAAAGACGATCCCAT
AGCGGAACTTCACTACTGCCATTTAAGGTTTGCGAAAATATCAACGCCGCCGCAACAGGT
GTACCAAACAGCGCGCCGATGGTTCCGGCAGAGGCTAAAATAGTCCACTCCATTCGGTTG
ACGCGCGGTAACAGACGAGCGCCAATGGCAACCGCAAGGGCGATATTGACGGTCATGATC
GGATGTTCCGGCCCCAGGCTGACGCCGCCAGCAAGACCGAGAATTAATGCTACGATAAGT
CCTGGTAGCGCAGAGGGCGGAACCGGTGCGCCGATCAGCGGTTCACAGGCGGGGTCTGGT
CCGGCATGACCCTGGCTGAAACGGATAACCAACCCCACTGCAATACCCGTTAACGTTAAT
ACACCGATGATCCAGAGAGGTGAATCCTGGGCTATCCCCAGAGTTCCCGGCAGTCGTTGC
CAGAGCAAATTCTGTAATGCCGAGGCGATTTTCATCACCACAATCAGAATAAGACTGGAC
GCAATCCCAATTGCCACGGCGGGGAGCGATAATAACAACATGGTTCTGGCTCGCGGATGG
AGCATGTTCTATTCCTTATGCGGGGTCAGATACTTAGTTTGCCCAGCTTGCAAAAAGGCA
TCGCTGCAATTGGTGCTGAAACGATAAAGTAATTGTGTGACCCAGATCGATATTTACAGG
GAGCCTGCCTTTCCGGCGTTGTTGTTATGCCCCCAGGTATTTACAGTGTGAGAAAGAATT
ATTTTGACTTTAGCGGAGCAGTTGAAGAATGACAAAGTATGCATTAGTCGGTGATGTGGG
CGGCACCAACGCACGTCTTGCTCTGTGTGATATTGCCAGTGGTGAAATCTCGCAGGCTAA
GACCTATTCAGGGCTTGATTACCCCAGCCTCGAAGCGGTCATTCGCGTTTATCTTGAAGA
ACATAAGGTCGAGGTGAAAGACGGCTGTATTGCCATCGCTTGCCCGATTACCGGAGACTG
GGTGGCAATGACCAACCATACCTGGGCGTTCTCAATTGCCGAAATGAAAAAGAATCTCGG
TTTTAGCCATCTGGAAATTATTAACGATTTTACCGCTGTATCGATGGCGATTCCGATGCT
GAAAAAAGAGCATCTGATTCAGTTTGGTGGCGCAGAACCGGTAGAAGGTAAACCTATTGC
GGTTTACGGTGCCGGAACGGGGCTTGGGGTTGCGCATCTGGTCCATGTCGATAAGCGTTG
GGTAAGCTTGCCGGGCGAAGGCGGTCACGTTGATTTTGCGCCGAATAGTGAAGAAGAGGC
CATTATCCTCGAAATATTGCGTGCGGAAATTGGCCATGTTTCGGCGGAACGCGTGCTTTC
TGGCCCTGGGCTGGTGAATTTGTATCGCGCAATTGTGAAAGCTGACAACCGCCTGCCAGA
AAATCTCAAGCCAAAAGATATTACCGAACGCGCGCTGGCTGACAGCTGCACCGATTGCCG
CCGTGCGTTGTCGCTGTTTTGCGTCATTATGGGCCGTTTTGGCGGCAATCTGGCGCTCAA
TCTCGGGACATTTGGGGGCGTGTTTATTGCGGGCGGTATCGTGCCGCGCTTCCTTGAGTT
CTTCAAAGCCTCTGGTTTCCGTGCCGCATTTGAAGATAAAGGGCGCTTTAAAGAATATGT
CCATGATATTCCGGTGTATCTCATCGTCCATGACAATCCGGGTCTTCTCGGTTCCGGTGC
ACATTTACGCCAGACCTTAGGTCACATTCTGTAAATCCTTCCTGTTATATCGGGAGGTAA
CTCTCCCGATAATCTTTTAAATCATACAGTTAATTCAATTTTTCTTTGTGTCCCCTCACA
AGGCCGACCTGCGTCACACTTCCGTACAGCGGGATTAATTCTCCAGTAAATGCATTATTT
GTCTGGTAACGGCGATTTGTTTTGCACGTTCATAATTTCACTCGTCAACTATCACTGAAC
GAGGAATTAACGATGAGTAAGAAACTGATTGCATTATGTGCCTGCCCAATGGGCCTGGCT
CACACTTTTATGGCCGCTCAGGCGCTGGAAGAAGCGGCGGTAGAAGCCGGTTATGAAGTG
AAAATTGAAACCCAGGGCGCGGACGGTATCCAGAATCGCCTGACGGCGCAGGATATCGCC
GAAGCGACCATCATCATCCACTCCGTGGCAGTTATCCCGGAAGATAACGAACGTTTCGAA
TCACGCGACGTTTATGAAATCACTTTGCAGGACGCAATTAAAAACGCTGCGGGCATCATC
AAAGAAATCGAAGAGATGATTGCCTCTGAACAACAGTAATATTCGACAGGGATAATTGTT
ATGGCCATTAAAAAACGCAGTGCAACCGTTGTGCCTGGCGCATCCGGTGCGGCAGCGGCA
GTTAAGAATCCGCAGGCCTCTAAAAGCAGCTTCTGGGGTGAACTCCCGCAGCATGTGATG
TCAGGGATTTCACGCATGGTGCCGACCTTAATTATGGGCGGTGTGATCCTCGCTTTCAGC
CAGCTGATTGCTTATAGCTGGCTTAAAATTCCTGCTGATATCGGCATCATGGATGCTCTT
AATAGCGGGAAATTCTCCGGTTTCGACCTCTCCTTACTGAAATTTGCCTGGTTGTCGCAG
TCCTTCGGCGGCGTGTTGTTTGGTTTTGCCATTCCGATGTTTGCTGCTTTTGTGGCGAAC
TCTATCGGTGGCAAACTGGCGTTTCCGGCTGGTTTTATCGGCGGCTTGATGTCTACCCAG
CCGACGCAACTGCTGAACTTCGATCCCAGCACTATGCAATGGGCGACCTCTTCGCCGGTG
CCGTCCACCTTCATTGGTGCGCTGATTATTTCTATCGTTGCCGGTTACCTTGTGAAATGG
ATGAACCAGAAAATCCAGTTACCGGATTTCCTGTTAGCGTTCAAAACCACATTTTTGCTC
CCGATTCTTTCCGCCATTTTTGTCATGCTGGCGATGTACTACGTGATCACCCCCTTTGGC
GGCTGGATCAACGGTGGTATCCGTACCGTGCTGACTGCCGCAGGTGAGAAGGGCGCGCTA
ATGTATGCGATGGGGATCGCCGCGGCGACAGCAATCGACTTTGGTGGCCCGATCAACAAA
GCCGCAGGTTTCGTTGCCTTCAGCTTTACCACTGACCACGTATTACCGGTCACCGCACGT
TCTATCGCAATCGTTATTCCGCCGATTGGTCTGGGGCTGGCGACCATTATCGACCGTCGT
TTAACCGGCAAACGCCTGTTCAACGCTCAACTTTATCCGCAGGGTAAGACCGCCATGTTC
CTGGCGTTTATGGGGATTAGTGAGGGTGCGATTCCGTTTGCGCTGGAAAGCCCCATCACC
GCCATTCCGTCGTATATGGTCGGCGCGATTGTCGGCTCAACCGCCGCTGTCTGGCTGGGC
GCAGTGCAATGGTTCCCGGAATCCGCTATCTGGGCATGGCCGCTGGTCACTAACCTCGGC
GTCTACATGGCGGGGATCGCGCTGGGGGCAGTCATTACTGCGCTGATGGTGGTGTTCCTG
CGTCTGATGATGTTCCGTAAAGGCAAATTGTTAATCGATAGCCTGTAAGAAGGAAAATCC
AGATGACATTACTCGCTTCGCTGCGTGACTGGCTTAAGGCGCAACAACTGGATGCGGTGC
TTCTCTCCTCACGGCAGAACAAACAGCCGCATCTGGGGATCTCCACCGGATCAGGCTATG
TGCTGATTAGCCGTGAAAGTGCGCACATTCTGGTGGACTCGCGCTATTACGCGGATGTAG
AAGCCCGCACGCAAGGTTACCAGCTGCATTTGCTTGACGCGACGCACACGCTTACAACCA
TCGCCAGGCAAATCATTGCCGATGAGCAGTTGCAAACGCTCGGTTTTGAAGGCCAGCAGG
TGAGTTGGGAAACCGCGCACCGCTGGCAGTCTGAACTCAATGCGAAACTGGTTAGCGCCA
CGCCGGATGTGCTGCGGCAAATCAAAACGCCAGAGGAGGTGGAGAAAATCCGCCTTGCCT
GTGGGATTGCCGATCGCGGTGCAGAGCATATTCGCCGCTTTATTCAGGCGGGGATGAGCG
AGCGCGAGATAGCCGCTGAACTGGAGTGGTTTATGCGTCAGCAAGGCGCGGAAAAAGCCT
CTTTTGACACCATTGTCGCCAGTGGCTGGCGTGGGGCGCTGCCGCACGGCAAAGCCAGCG
ACAAGATTGTTGCAGCGGGCGAGTTTGTCACTCTCGATTTCGGTGCGCTGTATCAGGGCT
ACTGCTCTGATATGACGCGCACCTTGCTGGTGAATGGCGAAGGGGTGAGCGCCGAATCTC
ATCCGCTGTTTAACGTCTATCAGATTGTTTTGCAGGCACAGCTCGCAGCAATCTCTGCAA
TTCGCCCCGGCGTGCGCTGCCAGCAGGTTGACGACGCCGCGCGCCGGGTCATTACAGAAG
CCGGTTATGGCGACTATTTCGGTCATAACACCGGTCATGCTATCGGCATTGAAGTACACG
AAGATCCGCGCTTTTCACCGCGGGACACCACGACGCTACAGCCAGGCATGTTACTGACCG
TGGAGCCGGGGATTTATTTGCCAGGGCAAGGGGGCGTGCGCATCGAGGATGTTGTGCTGG
TCACCCCGCAAGGCGCAGAAGTGCTCTACGCCATGCCGAAAACAGTGTTGCTCACGGGAG
AGGCATAATGGATTTATCGCTATTGAAAGCGTTGAGCGAGGCAGATGCGATCGCCTCCTC
GGAACAGGAAGTGCGGCAGATCCTGCTGGAAGAAGCGGATCGCCTGCAAAAAGAAGTGCG
ATTTGATGGGCTGGGATCGGTGCTGATCCGCCTCAATGAATCGACAGGTCCGAAAGTGAT
GATCTGTGCGCATATGGACGAAGTTGGATTTATGGTGCGCAGTATCTCCCGCGAAGGCGC
AATTGATGTGCTGCCGGTTGGCAACGTGCGCATGGCTGCCCGCCAGCTGCAGCCGGTGCG
CATCACCACCCGTGAAGAGTGCAAAATTCCAGGCCTGCTTGACGGCGACCGGCAGGGGAA
TGACGTCAGCGCCATGCGCGTGGATATTGGCGCGCGCTCGTATGACGAAGTGATGCAGGC
GGGAATTCGTCCAGGCGATCGCGTCACGTTCGATACCACTTTTCAGGTTCTCCCCCACCA
GCGAGTGATGGGGAAAGCCTTTGATGACCGCCTTGGTTGCTATCTGCTGGTGACGTTACT
ATGTGAGCTGCACGACGCCGAACTGCCTGCGGAAGTGTGGCTGGTGGCAAGTTCCAGCGA
AGAGGTGGGATTACGCGGCGGGCAAACTGCCACCCGCGCGGTGTCGCCGGACGTCGCCAT
TGTGCTTGATACCGCCTGCTGGGCGAAAAACTTTGATTATGGCGCGGCTAACCATCGCCA
GATTGGTAACGGCCCGATGCTGGTGTTAAGCGACAAGTCGCTGATTGCGCCGCCAAAACT
TACCGCCTGGGTCGAAACCGTGGCGGCAGAAATTGGCGTGCCGTTGCAGGCAGATATGTT
CAGCAACGGCGGCACGGACGGCGGGGCGGTGCACTTAACCGGCACCGGCGTGCCCACAGT
GGTGATGGGGCCAGCAACCCGCCATGGACATTGCGCCGCATCGATTGCCGATTGCCGCGA
CATTTTGCAGATGCAGCAACTTTTATCTGCCCTGATTCAACGTCTTACGCGTGAGACGGT
TGTTCAACTGACGGATTTCAGATGATCTCCTGATTAACCCGGAGCGGTTATGCTAACGAT
TCAATTTCTCTGTCCTTTGCCTAACGGTCTTCATGCCCGTCCGGCGTGGGAACTTAAAGA
ACAGTGCAGCCAGTGGCAAAGCGAAATCACCTTCATCAACCATCGCCAGAACGCAAAGGC
CGATGCCAAAAGCTCGCTGGCGCTGATTGGCACCGGCACCTTATTTAATGACAGTTGCAG
CCTGAACATTAGCGGCAGCGATGAAGAGCAGGCGCGGCGCGTGCTGGAAGAGTACATCCA
GGTGTGCTTTATTGACAGCGACAGCGTTCAGCCAACGCAGGCAGAACTGACGGCGCATCC
GCTGCCGCGTTCATTAAGCCGCCTTAACCCGGATTTACTGTACGGCAATGTGCTGGCAAG
CGGCGTCGGCGTGGGTACGCTGACCCTGTTACAAAGCGACAGCCTCGACAGTTATCGGGC
AATCCCCGCCAGTGCGCAAGACTCCACCCGGCTGGAGCACAGCCAGGCAACGCTTGCCGA
GCAACTGAACCAGCAATTGCGTGAGCGTGACGGCGAAAGCAAAACTATCCTCAGCGCCCA
TTTGTCGCTGATTCAGGATGATGAGTTCGCGGGCAATATCCGTCGCCTGATGACAGAACA
GCATCAGGGGCTGGGGGCGGCGATCATCAGCAATATGGAGCAGGTTTGCGCCAAACTATC
TGCTTCTGCCAGCGATTATCTGCGCGAGCGGGTTAGCGACATTCGCGATATCAGCGAACA
GTTGCTGCATATCACCTGGCCGGAACTGAAGCCGCGCAACAATCTGGTGCTTGAAAAACC
GACCATTCTGGTGGCTGAAGATTTAACCCCAAGCCAGTTTTTGAGCCTTGATTTGAAAAA
TCTTGCGGGCATGATTCTGGAGAAAACCGGGCGCACCTCGCATACCCTGATTCTGGCCCG
CGCCTCGGCGATCCCGGTACTGAGCGGCCTGCCGCTGGATGCGATTGCCCGTTATGCCGG
GCAACCTGCAGTGCTTGACGCCCAGTGCGGCGTGCTGGCGATTAACCCGAATGACGCGGT
GAGCGGTTATTATCAGGTCGCGCAGACGCTGGCGGATAAACGCCAAAAACAACAGGCGCA
GGCTGCCGCGCAGCTGGCTTATTCCCGTGATAACAAGCGTATTGATATCGCGGCGAATAT
TGGCACCGCTCTGGAAGCGCCTGGCGCGTTTGCCAACGGCGCGGAAGGCGTCGGGCTGTT
CCGTACCGAAATGCTCTATATGGATCGCGACAGCGCGCCGGACGAGCAGGAGCAATTTGA
AGCCTACCAGCAGGTGCTACTGGCAGCGGGCGATAAGCCGATTATCTTCCGCACAATGGA
CATCGGAGGCGATAAAAGCATTCCTTATCTGAATATTCCCCAGGAAGAGAACCCGTTCCT
CGGCTATCGCGCGGTACGTATTTACCCGGAATTTGCTGGCCTGTTCCGCACTCAACTGCG
GGCCATTTTGCGCGCCGCCAGTTTCGGCAACGCCCAGTTGATGATCCCGATGGTCCACAG
CCTCGATCAGATCTTATGGGTGAAGGGCGAGATCCAAAAAGCGATCGTTGAGCTTAAGCG
CGATGGCCTGCGTCATGCAGAGACGATTACGCTGGGTATCATGGTGGAAGTGCCGTCGGT
GTGCTACATCATCGATCACTTCTGCGATGAGGTCGATTTCTTCAGTATCGGCTCCAACGA
TATGACCCAGTATCTTTATGCGGTCGATCGTAATAACCCGCGCGTATCGCCGCTATATAA
CCCGATTACGCCATCGTTCCTGCGCATGTTGCAGCAAATAGTTACCACTGCGCATCAGCG
GGGCAAATGGGTAGGCATTTGCGGTGAACTGGGAGGCGAAAGTCGTTACCTGCCGCTACT
GCTTGGGCTGGGCCTGGATGAGCTGAGTATGAGTAGCCCGCGCATTCCGGCGGTGAAAAG
CCAGCTTCGTCAACTGGATAGCGAGGCGTGTCGGGAACTGGCACGTCAGGCGTGTGAATG
TCGCAGCGCGCAGGAAATTGAAGCGTTACTCACCGCCTTTACGCCGGAAGAAGACGTTCG
CCCGCTGCTGGCGCTGGAGAATATCTTCGTTGATCAGGCCTTTAGCAATAAAGAGCAGGC
GATCCAGTTCCTGTGCGGTAACCTCGGCGTTAACGGGCGCACTGAACATCCGTTCGAGCT
GGAAGAGGATGTCTGGCAGCGGGAAGAGATTGTCACCACTGGCGTTGGCTTTGGCGTGGC
GATCCCGCACACCAAATCGCAGTGGATCCGTCATTCCAGTATCAGCATTGCCCGGCTGGT
GAAACCGGTTGACTGGCAGTCAGAAATGGGCGAAGTCGAACTGGTGATCATGCTGACGCT
GGGCGCTAACGAAGGGATGAATCATGTGAAAGTCTTCTCGCAGCTGGCGCGTAAACTGGT
GAATAAAAACTTCCGCCAGTCGTTGTTTGCCGCGCAAGATGCACAAAGTATCCTGACGCT
GCTGGAAACAGAATTAACCTTCTGACGTTAGCCCTGAAAACGGGCGCTGTACTCTCCCGG
CGTCAGACCAAACTGACGCCGGAAAACGCGACAAAAATAGTCGCTATCCGGAAAACCGCA
ACGCTGTGCCACTTCATGAATTGACAGATGATATTTCTGCAAAATCATCCTCGCCTTCGC
CATTCGCACCCAACGCACATACTCGATAAAACGCATCGTTCCATGCTGAGCAAACAGTTT
TGACAGATGATTGGGCGTGATATTAAAAAACTGCGCCACGCTCTCGCGGGTGAGCGGCTG
GGCATAATTATCCTGAACCCAGTTACAAATGCTGTGATAGAGAAAATCGCCGCGCGGCTG
CGAATTGCCCGGCGGCATATTCACCACGTTACGGCAAAGATGCAGCAAACTTAACACCAG
CGGCTGAATGATATTTTGCTCCAGCGGCGAACGGCTAAGATGGGTGAGGGCGGTAAGCAT
CGCTTCACCTTCACCGCGTTGCAGGCTGGGAAGCTGGATCTGGCGAGCAGGATGCAACAA
CGACGTGGTGCGGCTATCGTAAAACGATAACCCAAGCCAGGTCGGAGCGAACACCAGGCT
TAACAGCATCACCGGTTTGTTGTTGACCGGTAAATTAGCCGCGCGCGCCGGAATAAACAG
CATTTCTCCTTCCACCAAACGTTGCTGCTTTGCTTCCAGCAGATTGCCGTATTCGCCGCG
CAGCACGATATCCAGACGGGGAAAATCAATACATAAACTGCCCACCGGCAACGAGGCAGG
CTGGCTGGCAAAACAGACGCGCCCCAGTAGTTGCGGGTTAAGCACCAGGCCGCTGAACAG
ATCGGCGAAAAATTGTTGATCGGCGGGCAAGCCTGGTGCTTTCATGAAAGTTCCCGATTA
AAGATGCATTAACTGGCGAAATTCTTTTACTTTGCTGCGGCTGACTGGCACTTCAAAATC
CAGATCTTTCAGCCGCAGAATATAGGTGTTATTAAACCACGGTTCGATTTCGCGGATTTT
GTTCAGATTGACACAAAATGAGCGATGGCAGCGGAAAAAATGCGACGGCGGCAGTTTGCT
GCAAAATTCGGTAATGTTCATCGGCATTACGTAGGATTCACGCCGCGTATAGACAAAGGT
CATTTTCTCGTGCGCTTCGGCGTAATAGATATCGTTAATTGGCGTGACGATTATTCGCTC
ATCTTTCACCAGATTAATGGTGTCATTCTCACGCGTTACCGTCGCGGCAGGCGTGCTGCT
GGTCTGCTGTTGCTGCCAGGCCGCTTCCAGTTTTTGCAGCATCCCGGTAATGCGAGACTC
CTGATACGGTTTGAGAATGTAGTCAAACGCCTCAAGTTCAAACGCTTCTACCGCATGTTC
TTTCCACGCGGTGATGAACACAATAAACGGTTTATGGGCGAACTGGCTGATGTTTTGCGC
CAGCAACACACCATCCAGCGACGGAATATTGATATCCAGAAAAATGGCGTCGACGCGGTT
ATGCTGCAAAAACTTCAACACGTCCAGACCGTCGTCAAAGGTGCCGACAATCTCCATCTG
GCTGTGCTCTTTAATTAGCCAGCTCAGTTCCTGTTGTGCCAGGAATTCGTCTTCAACAAT
GATGACTTTCACAATATCACTCCGGCTCAAAGCAATAACGTAGCCTGTGAGGCGACTGGG
GTGCGTTGGTTAGGAATGTAAAACGCAATTTCCGTTCCTGGTTCCAGGCGGCGGATATGC
AGCCCCTCGCCATACAATAACTTCACGCGATGATGAACATTCAGCAGGCCAATTTTATTG
CCCGGCATTTCATTCGCTTCGACCCGCTCAATCACCTTTGGATCGATGCCGTGCCCGGTA
TCCCGCACCGCAATGCGTACCCGATTGCCGCACTCTGCAACGCTGATGGTGACAACGCCT
TTACCTTTGCAAGGCTGGATACCGTGGACAATGGCATTCTCCACCAACGGCTGGATCAGC
AGGCTGGGAATGCAGCAATTCACCTCTTCATCAATATCATAGATAACCGTCAGCTTGTCG
CCAAAGCGGGCCTGCTCAATGGCAATATAGTCTTTAATTTGATACAGCTCTTTTTTGATA
TCGATTTGCTCATCGTCTTTTAATTCAATGTTATAGCGCAGATAACGCGACAGATTAAAG
ATCAGCTGGCGAGCGGTATCCGGATTCAGACGGATCGACGATGAAATAGCGTTCAAAGCG
TTAAACAGGAAATGGGGATTAATTTTGCTTTGCAGGGCGCGAAGCTCTGCCTTATTTGCC
ATTTCACGTAGCTGCTCGGCGCGTGAAACCTCCAGTTGCGTGGAGATGATTTGCGACAGA
CCAACCGCCATTTCCTGTAATGACGAGGTTATCTGATGCGCGTGGCAGTAGTAAATTTTC
AGCGTTCCGGTCACAACGCCTTTCTCCCACAATGGGATCACCAGCATGGAATGAATCTCT
GGTGTGCGGTGGGCTTCATCATTGTTTTTAATGATGATTTTTCCGTAATTCATCGCCTGA
CGGGTAGTCGGGCTAATGAAGTCATCGCCATTCTGATAGTTATGTTCACCCACGCCAACA
TAGGCCAGCACATGATCGGTATTGGTAATCGCCACCGCATCGGCGTGAATGTCATCGCGA
ATAATTTCACAAACTTTGCGTAATGACTCGCTATTGACATGGCGAAACAGAGGTAGCGTT
TTGTTGGCGATATCCAGCGCCAACTTGGCCTGCCGCGCGGCGCTGGCCTCTTTTTCGCCC
TCAACGCTTTGCACCAGAAGCACAATAAAGCCGATACAGACGCTGCCGAGGATCATTGGA
ATCCCGATTTTAGAGACGATATCGATCCCCAACGCGGTAGTTGGTGCCCAGACAATCACC
AGAATCATGGTCAATGTTTCACACAACATGCCGCCGAGAATACCGACGCGCCAGCGCTGT
GCTTTGGGGATTTTCAGGTTGATCCAGCCCGATATACAACCAGCCAGAATGCTGGTGATA
AAGCAGGGGATCGCCGTCACGCCGCCGATATCAATTAAATAACGATGAATACCCGCAATC
ACGCCGGTAATGATGCCCACCCACGGGCCAAACAGAATCCCGCCGGACATCACCGCGATA
ATACGTACGTTCACCAGCGAGCCTTCTACGGGAACGCCGGACCAGGTGCTGAACAGGGCG
AACAGCGAGAAAATGGCGGTAACGGCGAGCAACTCTTTCGGTGAGTGTGCCGACTTGTGC
AACAGTTCGCGAAACAGGCGGATACGGATGAGAAAGAACAGGCAGATAAGCATTAACGCT
GCCCGATCGAAGACCGCCAGCAGCATGTTGAATATTTCGTGCACGGGTGACTCTGAATAA
GGATTAAACCTCTATGATAGGTAACCTGAAGGCTGATGACCAGCAGGCCGTTTTTGAGGA
AAAACCACAATTTAAAAAGGGGATTGATAGATAAATGGTGTATTAGCAATGCATCTCTTG
ATAATGCACTTCTGGTTAGTAAATTTATTGAAATTATTATGTTAATAAAATGAGTGGTAA
TTTTCTTGTTAGCGCAGATAAATTTCCTGTTTTTAAAGCAGAGTTCCTCATTTAACGTCA
TTAATAAAAATGTTCTAAAACGCTGGACAGACAGAAATTAATCAGGCTATTTTCAAAACA
GCCACCATCGTGGCAGCGTCGCTCGGACGGTCCGGGCGCTAACGTTAATCTGAGGAAATT
ATGGCTGACACTCGCCCTGAACGTCGCTTTACGCGCATTGATCGTCTCCCGCCCTATGTT
TTTAACATTACCGCTGAACTGAAAATGGCTGCGCGTCGGCGCGGCGAAGATATTATCGAT
TTCAGTATGGGTAACCCGGACGGTGCGACTCCGCCGCATATCGTCGAAAAATTATGTACT
GTGGCCCAGCGCCCGGACACGCATGGTTACTCCACTTCACGCGGTATTCCGCGGCTACGT
CGCGCCATTTCCCGCTGGTATCAGGATCGCTACGACGTTGAAATCGACCCGGAATCAGAA
GCCATCGTCACTATTGGTTCGAAAGAGGGCCTGGCGCATCTGATGCTGGCGACACTGGAT
CACGGTGACACAGTGCTGGTGCCGAATCCAAGTTACCCCATTCATATTTACGGCGCGGTG
ATTGCCGGGGCTCAGGTACGCTCAGTGCCGCTGGTGGAAGGTGTCGATTTCTTCAACGAA
CTGGAGCGCGCCATTCGTGAAAGTTATCCGAAACCGAAGATGATGATCCTCGGCTTCCCG
TCGAACCCAACCGCGCAATGCGTGGAACTGGAGTTCTTCGAAAAGGTTGTGGCGCTGGCG
AAACGCTACGATGTGCTGGTGGTCCATGACCTGGCCTATGCCGATATCGTCTACGATGGC
TGGAAAGCGCCGTCAATCATGCAGGTGCCGGGTGCACGCGATGTGGCGGTCGAGTTCTTT
ACGCTGTCGAAAAGCTACAACATGGCGGGCTGGCGTATCGGCTTTATGGTTGGCAACAAA
ACGCTGGTCAGCGCCCTGGCACGTATTAAAAGCTATCACGATTACGGCACCTTTACGCCG
TTGCAGGTGGCGGCGATTGCGGCACTCGAGGGCGATCAACAGTGCGTGCGCGACATTGCC
GAACAGTACAAACGCCGCCGTGATGTATTGGTTAAAGGGCTGCATGAAGCGGGCTGGATG
GTCGAAATGCCGAAGGCTTCGATGTATGTCTGGGCGAAAATCCCTGAACCTTACGCTGCC
ATGGGCTCGCTGGAGTTTGCCAAGAAATTACTTAACGAAGCGAAGGTTTGTGTCTCGCCG
GGGATCGGCTTTGGCGACTATGGTGATACGCATGTGCGCTTTGCACTGATTGAAAACCGC
GACCGTATTCGTCAGGCGATTCGTGGGATTAAAGCGATGTTCCGTGCCGACGGTTTACTA
CCCGCCAGCAGCAAACATATTCACGAAAACGCGGAATAAACACCGACCTCAGAAATGCAA
ACAGGAGCCTGATGGCTCCTGTTTTTCATTGCACAGTTTGCTTTTAGATCATCAGGGCAA
AAGTACCGGCCCAAACGATGACCATAAAAGAAATGCCCATAAAGAAATATTTCACTTTAC
ATCTCTCCGCGTAATTGCTGTTACGCCTGAATGACTTCATTACACCTGATACAGTGAGTT
GACACAGGGCAAAACGACCTTAAAAGTCCTGTATTTTACCGTGGGCATCACCCCAGAATT
CTGAGCTAAACTGCTCGAGACGGCGCTAATGTACGCCTAAAACTGAAACGAGACAAGAGG
CATTTTCTTATTTACTTTTAGTAACTTACAGGTGTCTCATATCGGCGACAGTTTAGTTTC
TGACGGTAATAATTAGATATTCAGCGAAGGAAAAAACCTTAAGAAAAAAGCCATAAAAAC
CATGAGGTTATTATGGCTTATGTGAGGAGGTAAAGAGTCAGAGCAGTTTGTTAAATGTAT
AACGACGATTCTCCCACCGGGCGCGTTTTAAAGCGACGGTGGATCCAGAGGTACTGCTCC
GGTGCGCGCATGATCTCTTTCTCGATAATCTTGTTCATATAGGCAGCGGCTTGATTTTCA
TCTGTCGGGTAGCCTTCCATCTCTGGGGTGATGAACAAACGATATCCGCTGTAATCCGCT
TTTCTTACCATCGTTACGGTCAACATGGCTGCGCCAGAGAGACGGGAGAGAACATAGGTG
CCATTGGTTGTGGCGACATTTTCTACCGCAAAGAACGGCGCGAAGGAGCTGCCTTTACGA
CCATAATCCTGATCGGGAGCAAACCATACCGCTTCACCTTTCTTCAGTGCACTGACAATG
CCGCGCAGATTATTTCTGCCGATCATCGCTTTGTTAGAGCGCATGCGACCACGGGTCTGC
ACCCATTCCATCAGCTGATTATTATGTGGACGATAGGTAGCCATCATTGGCTGACAAAGT
CCCATCACGCGGCCGCCCAGTTCCAGCGACATAAAATGGACGCCGACAACCATTACGCCG
CGATTTTGCATTTGTGCGCGTTTAAGGTTATCCAGCCCTTCAACATCAAACCATTTACGT
ACGCGACTGTCGGGCCAGAACCACGCCATGCCGGTTTCTACCAGCGCCATGCCGAGTGAA
CGAAAGTTTTCGGCAATCATCTTCTCGCGTTCTTCCGCAGAATGCTGCGGGAAGCAAAGT
TCCAGGTTTTTACGGGCGATAGATTCACGCCGTTTCAGGAATGGTCGCGCCATTGCGCCA
ATACGCGTGCCGAGAAAGCAGAGAACAGGATAAGGAAGCTGTACCCAAAGCCAGAGTACA
CCAAGCCCAAACCATGTGAGCCAGTAGCGAGGATGCAGAAACTCGCGGGAAAATTTGCAT
TGTGGAAACATAGTTACCTTCTGTAGATACGAATTGTTGTATCGCAGAAGATTCCATGTC
GACAGCGGTACACTCAATTGGTTGGGCCATCATGTACGACAATGGTTCCTGTAAAGAGTG
TAAAGACTAGTCAGGACATAACCACGAGGAGCATGAATGCGGTGGCTCTACTTTATCACT
GGCTGACTGCTTTCAGCTACTGATTATTAATCGTGCAAAGTAAAAAATTTTCCGCATGCA
ATAGTGTTGCATTTAACATGCTGTTTTCATTGATGCTTAGCAAAAATTGCCAGAGGGTAA
GGATTGTCTTACTATTAAAGTGACTGAAGTTACAGGTTTTTTAGCGCGGCAGGAGGTTGA
GCTATGATTTATTTATGGATGTTTCTCGCCCTGTGTATTGTCTGCGTAAGCGGATACATC
GGTCAGGTACTGAACGTGGTATCGGCGGTCTCTTCTTTCTTCGGCATGGTGATCCTCGCT
GCACTCATTTATTACTTCACCATGTGGTTAACTGGCGGTAATGAACTGGTGACGGGGATA
TTTATGTTTCTTGCCCCGGCTTGTGGCTTGATGATTCGCTTTATGGTGGGGTATGGCAGG
CGATAGTGGGTCAGGATGGCTCATTTGGGCAGGTGTTCACATCAGCATCAGACATGATTG
TTCACCTGCCAGGTGACAGACGCTATCGCACAGGATGAATAAGATAATTCGCCTTTGTCG
GAAAAGGGGGCGTGGTTTCTTCTGTGAGGTTTAATGGTGGCGCATCTTCTCTCATCTTAA
ACAAAATTGCCTGTGATGGCTGAATTTTTGTAGAGTGAGTTGTCGTCATCGCTGATGTTT
TTTCCGTCTCTTTATAGCTCCTCTCACTTCCACCACCAGAAATGGAAAATGCAAAAACAT
TGCATGCCATAATAGAGACCAATAAAAATAAGCTAAAAAGTATTAAGTTTACTTTCATAG
AAAGTTATCCTGAAAATGGTTCACTGAGAATGTACGATGTTATGGCTGTATTTACATATA
ATTAATCAATATTTACATCGATATAATAAATGACATCTCTTTGTGGTACATAAGAATAGT
TCTCTGTGACAGGAAGCATATTCCTACAATTGTAAGACTAAAATACTTCTTGCGATAATA
ACTACAACTGTAAGATAACCCTTTCAAAATGACCGTTGCTCTCTGATTTCTCATTTCATG
CTCACCCAATATGATGGCGGCGTTTTCTAAAACTGTTAAAGAATGAGGTAAGTATGAAAC
GTTTAATTATGGCCACGATGGTCACAGCAATTCTGGCATCTTCAACTGTATGGGCTGCTG
ATAATGCTCCGGTAGCGGCACAACAGCAAACTCAGCAAGTTCAGCAAACCCAGAAAACGG
CAGCGGCAGCAGAGCGTATCTCTGAACAAGGTTTATATGCGATGCGTGACGTGCAGGTAG
CGCGCCTGGCTCTGTTTCATGGCGATCCGGAAAAGGCAAAAGAACTGACCAATGAAGCTT
CCGCTTTGTTGTCAGATGACAGTACCGAATGGGCAAAGTTCGCTAAGCCAGGTAAAAAGA
CCAATCTCAATGATGACCAATATATTGTCATTAATGCATCTGTCGGAATTTCTGAGAGTT
ATGTAGCAACACCCGAAAAAGAAGCCGCGATAAAAATTGCCAATGAAAAAATGGCGAAAG
GGGATAAAAAGGGCGCAATGGAAGAGCTTCGCCTGGCCGGTGTTGGCGTAATGGAAAACC
AATATCTGATGCCGCTTAAACAGACTCGTAATGCACTTGCTGATGCGCAGAAACTGCTTG
ATAAAAAGCAATACTACGAGGCAAACCTGGCGCTTAAAGGTGCGGAAGATGGAATCATCG
TCGATAGCGAAGCACTGTTTGTGAACTAATGCTGACAGGCAGTATATTGAGGTAAAGGAT
TTAACTCCCTCCAGCCGACAATTTTTTATGACCACAATACGACAGGTTGTGGTCATAAAA
TTATTTGGCGCTCGCGGTTCTATAAACTCGCATTTTATATTCCTCAAAGTAAACCGCAAT
AATCCCGTGTCATCACAAATCATTTAATATGTTATATTTTATGGTACGCTTTAAAAAGCG
TAATCATACCCTTACTTGTAAATCACCGGCGCTTCTTACAGTTGTAAGAATAACATCACA
AATGTCGCGACTCTCTCTGATTACCACGAACCAATATTTATCATATTCTTCTTTTCGTCC
TCACTACTTACCATGCAGAAAGGAATTGGAAGTAGCGATGAAATGATTTTCAGTACTTGA
TACAGGAATGTGAAAATATCGAGTGCAGCTACGACGATATTTTGCGGATTATTTATAGAG
GCGTTATGCCTTAAATAAACGCTAAATTAACACATATTTAATTAACTAATAGGTATTGCT
ATGTCAACTCCACTTCAAGGAATTAAAGTTCTCGATTTCACCGGTGTGCAATCTGGCCCA
TCTTGTACTCAAATGCTGGCCTGGTTTGGCGCTGACGTCATTAAAATTGAACGCCCCGGC
GTTGGTGACGTAACGCGTCACCAGCTGCGAGATATTCCTGATATCGATGCGCTTTACTTC
ACCATGCTTAACAGTAACAAACGTTCTATTGAATTAAATACCAAAACAGCGGAAGGCAAA
GAGGTAATGGAAAAGCTGATCCGCGAAGCTGATATCTTAGTCGAGAACTTTCATCCAGGG
GCCATTGATCATATGGGCTTCACTTGGGAGCATATTCAAGAAATCAATCCACGTCTGATT
TTTGGTTCGATCAAAGGGTTTGATGAGTGTTCGCCTTATGTGAATGTAAAAGCCTATGAA
AACGTTGCTCAGGCAGCGGGTGGCGCGGCATCTACTACGGGTTTTTGGGACGGTCCGCCG
CTGGTAAGCGCTGCAGCGTTGGGTGACAGCAACACCGGAATGCATTTACTGATCGGTTTA
CTTGCTGCTTTGCTGCATCGAGAAAAAACGGGGCGTGGGCAACGAGTCACCATGTCAATG
CAGGATGCCGTATTGAACCTTTGCCGCGTGAAATTACGCGACCAGCAGCGTCTCGATAAA
TTGGGTTATCTGGAAGAATACCCGCAGTATCCGAATGGCACATTTGGTGATGCAGTTCCC
CGCGGTGGTAATGCGGGTGGTGGCGGTCAGCCTGGCTGGATCCTGAAATGTAAAGGCTGG
GAAACAGATCCTAACGCCTATATTTATTTCACTATTCAGGAGCAAAACTGGGAAAACACC
TGTAAAGCCATCGGCAAACCAGATTGGATTACCGATCCGGCATACAGTACAGCCCATGCC
CGACAGCCACATATTTTCGATATTTTTGCTGAAATCGAAAAATACACTGTCACTATTGAT
AAACATGAAGCGGTGGCCTATTTGACTCAGTTTGATATTCCTTGTGCACCGGTTTTAAGT
ATGAAAGAAATTTCACTTGATCCCTCTTTACGCCAAAGTGGCAGTGTTGTCGAAGTGGAA
CAACCGTTGCGTGGAAAATATCTGACAGTTGGTTGTCCAATGAAATTCTCTGCCTTTACG
CCAGATATTAAAGCTGCGCCGCTATTAGGTGAACATACCGCTGCTGTATTGCAGGAGCTG
GGTTATAGCGACGATGAAATTGCTGCAATGAAGCAAAACCACGCCATCTGATATTAACGG
GGGCTTCTGGCTCCCAATTTATAAAAATTTCGAGGTTATTAATCATGTCAGATCAACTTC
AAATGACAGATGGTATGCATATCATCGTTGAAGCATTAAAACAGAATAATATTGACACTA
TTTATGGTGTTGTAGGTATTCCTGTGACGGATATGGCGCGCCATGCCCAGGCGGAAGGCA
TTCGTTATATTGGTTTTCGTCATGAGCAGTCGGCAGGCTATGCCGCTGCGGCAAGCGGTT
TTCTTACCCAAAAACCAGGGATCTGCCTGACAGTGTCTGCGCCAGGATTCCTCAATGGTT
TGACCGCATTGGCCAACGCAACGGTAAATGGTTTTCCGATGATCATGATTAGCGGCTCCA
GCGACCGCGCGATCGTCGACCTACAGCAAGGTGATTATGAAGAGCTGGACCAAATGAATG
CGGCAAAACCGTATGCCAAAGCAGCATTTCGCGTTAATCAGCCGCAGGATCTTGGCATTG
CATTGGCACGCGCTATCCGGGTCTCGATATCGGGTCGCCCTGGCGGAGTTTATCTTGATT
TGCCAGCAAATGTCCTGGCCGCGACGATGGAAAAAGACGAAGCGTTAACCACGATTGTAA
AAGTTGAAAATCCGTCGCCAGCATTATTGCCATGCCCGAAGTCAGTCGCTAGCGCAATTT
CGCTTTTAGCAAAAGCTGAACGACCATTAGTTATCCTTGGCAAAGGCGCGGCGTATTCAC
AAGCTGATGAACAGCTTCGTGAATTTATTGAAAGTGCCCAGATTCCATTCCTGCCAATGT
CTATGGCGAAAGGGATCCTCGAAGATACGCATCCACTTTCTGCGGCAGCTGCGCGTTCGT
TTGCCCTGGCAAATGCTGACGTTGTCATGCTTGTTGGTGCACGACTGAATTGGTTACTGG
CACACGGTAAAAAAGGATGGGCGGCAGATACACAGTTTATTCAACTGGATATTGAACCGC
AGGAAATTGACAGCAACCGCCCCATTGCTGTGCCAGTCGTTGGTGATATTGCATCCAGTA
TGCAAGGTATGCTGGCAGAACTGAAACAAAACACATTTACGACTCCACTGGTATGGCGCG
ATATTTTAAATATCCACAAGCAGCAAAATGCACAAAAAATGCATGAAAAATTAAGTACAG
ATACCCAACCATTAAATTACTTTAATGCATTAAGTGCTGTGCGCGATGTATTGCGCGAGA
ACCAGGATATTTATTTAGTTAATGAAGGGGCAAATACCCTGGATAATGCACGAAATATTA
TTGATATGTATAAACCACGTCGTCGTCTGGATTGTGGTACCTGGGGTGTCATGGGCATCG
GTATGGGCTATGCCATCGGTGCTAGCGTGACTTCTGGTTCTCCGGTTGTCGCCATTGAAG
GTGATAGTGCTTTTGGTTTCAGTGGGATGGAAATTGAAACGATTTGTCGATATAACCTGC
CGGTAACGATCGTTATTTTTAATAATGGCGGCATCTACAGAGGAGACGGTGTTGATCTCA
GTGGCGCTGGTGCACCATCACCAACAGATCTGTTGCACCATGCAAGGTATGACAAATTAA
TGGATGCGTTTCGTGGCGTTGGCTATAACGTCACCACGACAGATGAACTTCGTCATGCTT
TAACCACCGGTATTCAGTCGCGCAAACCGACCATTATTAATGTGGTCATCGACCCTGCAG
CAGGAACTGAAAGTGGCCATATTACCAAACTGAACCCAAAACAAGTCGCTGGTAATTAAA
TACTGACATCGTCTCCTCTTGCCAACTCATTATGCGATGGTGAGGGGACCCTTATCGGAA
ATACTATTATGCTAACATTTTTTATTGGCGATTTATTGCCTATTATCGTAATCATGCTGT
TGGGTTATTTTAGCGGCAGACGAGAAACATTTTCAGAAGATCAAGCTCGGGCATTTAATA
AACTGGTATTAAACTACGCGCTTCCTGCGGCTCTATTTGTATCTATTACCCGGGCAAACA
GGGAAATGATTTTTGCGGACACTCGTCTGACCCTTGTATCACTTGTGGTTATTGTCGGAT
GTTTCTTTTTCTCCTGGTTCGGTTGCTACAAATTTTTTAAACGTACTCATGCAGAAGCAG
CTGTATGTGCATTAATTGCAGGTTCACCTACCATTGGATTCCTGGGGTTTGCAGTTCTCG
ATCCTATTTATGGTGATTCCGTATCAACAGGTTTTGTGGTAGCAATTATTTCTATTATTG
TTAACGCAATTACTATTCCTATTGGTCTGTATTTGCTGAATCCTTCCTCAGGAGCGGATG
GTAAGAAGAATAGTAATCTGAGCGCATTAATTTCTGCGGCAAAGGAGCCAGTTGTATGGG
CACCTGTTCTGGCAACGATCCTGGTGTTGGTTGGGGTAAAAATTCCGGCAGCATGGGACC
CAACCTTTAATCTGATTGCGAAGGCTAACTCAGGGGTAGCGGTATTCGCTGCGGGGTTGA
CTCTGGCTGCACATAAATTCGAGTTCAGTGCCGAAATTGCTTATAACACCTTCCTGAAGC
TGATTCTGATGCCACTGGCGCTGCTTCTCGTTGGTATGGCATGTCATTTGAACAGCGAAC
ATTTGCAGATGATGGTACTGGCAGGCGCATTACCGCCGGCATTCTCCGGAATCATTATTG
CCAGCCGGTTTAATGTCTACACCCGCACTGGTACAGCGTCATTGGCTGTGAGCGTACTGG
GCTTTGTCGTCACGGCTCCCTTGTGGATTTATGTCAGTCGACTGGTTTCATAATTAATCA
TGTTATTGATTTTACATAAATGCCGAAGTGTCTTTTCACCTTCGGCTTTTTTCAAGGCAT
AAGCAAATGACAATTAATGAAAGCAAAGGGCCGTTTGAAGGCTTATTAGTTATCGATATG
ACACATGTCCTTAATGGACCTTTCGGAACTCAACTTCTTTGTAATATGGGCGCAAGGGTA
ATTAAAGTTGAGCCGCCGGGCCATGGTGATGATACCCGCACATTTGGTCCCTATGTGGAT
GGACAGTCACTCTATTACAGTTTTATTAATCATGGCAAAGAGAGTGTGGTTCTTGATTTA
AAGAATGATCACGATAAAAGTATATTTATAAATATGCTTAAACAAGCTGATGTATTAGCT
GAGAATTTTCGCCCAGGTACAATGGAAAAACTAGGGTTTTCATGGGAAAGGTTACAAGAA
ATCAACCCGCGCCTCATATATGCTTCATCGTCAGGTTTCGGACATACCGGTCCGCTAAAA
GATGCTCCTGCCTACGATACCATCATTCAGGCAATGAGCGGGATAATGATGGAAACAGGG
TACCCTGATGCTCCGCCAGTGCGTGTTGGTACCTCTCTTGCGGATCTATGCGGCGGTGTC
TATTTATTCAGCGGAATAGTGAGTGCACTTTATGGCCGCGAAAAGAGCCAGAGAGGGGCG
CATGTCGATATAGCGATGTTTGATGCTACTCTGAGTTTTCTGGAGCACGGGCTGATGGCA
TATATCGCGACTGGGAAGTCACCACAACGTTTGGGAAATCGCCACCCCTACATGGCACCT
TTTGATGTTTTCGATACTCAGGATAAGCCGATTACGATTTGTTGTGGTAATGACAAGCTT
TTCTCTGCGTTATGCCAGGCACTGGAGCTTACGGAACTGGTTAATGATCCCAGATTTAGC
AGCAATATTTTACGCGTACAAAACCAGGCTATTCTTAAACAATATATTGAGCGGACGTTA
AAAACGCAGGCAGCTGAAGTTTGGTTAGCCAAAATACATGAAGTTGGTGTGCCCGTCGCG
CCGTTATTAAGTGTGGCTGAGGCCATTAATTTGCCACAAACTCAGGCGAGAAATATGTTG
ATTGAAGCCGGAGGAATAATGATGCCAGGTAATCCGATAAAAATCAGCGGCTGCGCGGAC
CCGCATGTTATGCCGGGAGCGGCAATGCTCGACCAGCATGGGGAACAAATTCGCCAGGAG
TTCTCATCATAAATGTAAGATGTGCTGGTAAATAGCTCCCACATTTGAACATTGTGGGAG
CCACTATTTAGTTATTTTGTTGACAGAAAACAGCAATCTCCTGGTCCAGCTCTGCAATGT
GTTCTTTTACAGAGTTCAGCAACTGAAGAATTTCAGGCTTACTGTCATCTGAAACAGGTG
TTATTTCTAACTGATGGCTAATATTAATCAACTTTTGCAAATTCAGGATGTTAGCCGCAC
CGTGGATGCGATGAATACATTGATGGAAAGTTCTGTTATCGCCAGCTTCTAGTGCATGAA
ACGCAGCGGGTAGATCTTTATGCGTTTCATGCTGGAAAGTCATGAGAATCTCCTGCATCA
GTTGTAGATCGTTCGCCGTATTATTTTTCAGGGCTTCGATATCAAGGTGGCGATACTGAG
GTGCAATATGCGCAACCTGGTGTAACTGACTTAAATGTGTTTTCAGTACATCCAGGGTCA
ACGGTTTGAACAAACATAAGTTCATGCCGCAATTTAACCCTTTTTCACGTTCGTTAGCCT
GTGCGTTGGCTGTAAGCCCCCAGATGGGTAAGGAAGAATTTTGCTCACGGAGTTTGCGAG
TCAACTCAAAACCATCCATATTCGGCATATTAACGTCAGTAATAAGCAGATCATAATGTT
GCATACTGACTTTGTGTAGCGCTTGCACACCATCAGTGGCTTCATCAACATCATATCCTA
ATAGATTTAGCTGGCGTTTGAGTAATAGCCTGTTGGTCGGATGATCATCCGCGATTAATA
TGCTCAACTTTTCAGGTAGTGTGATGGGTTGTTCTGCTTTTGCCTCGACAGTCGCCACTT
GTTGGATAATTTCTACCGGGATTGTGATCGTAAATGTTGTTCCTATGCCTGGATGACTTT
CTAATGACAAATCACCCTGCATGTTTTTAATTAATTCTTTGCAGATCATTAAGCCTAAAC
CAGAACCTGTTTGCTGACGACCTGCACTTGTTTGGCTATAGCGTTTAAACAGTTGTTGTT
GTTCTTCCTGCGATAATCCACTTCCAGAATCCATAATCGTCATTTTGATTACAGCGTGGT
TGTCATCAATGTGAACCAGGGAGGTCGTAATTTTTACTGCCCCCTCGGTGGTAAATTTGA
GAGCATTACTCAGTAAATTTGATAAGACCTGCTTAAACGCCTGAGGGTCGATCTTAACCA
GGTAATGTTCAGGAAACGTACTGCTGCAACTTAATGCGATCGATTTGCTTGCAGCAATCG
CACCGAAAGAGTGACAAGTGTTCTGGACTAAAGTAGGGATATCGACCCATTGTGGTTGAA
GTTGATAGTTACCCGATTCAATTTTGTCGACATCAAGGATTTCACCAATTAAGCCGAGGA
GTGATTGTCCGGTGGCGTAGGCAAGTGAAATCGCCTCCACCCGTTGCTCCTTGCTAAGAC
CAGAACCCGACAGAAGTTCCAGGAAGCCCATAATGGAGCTTATTGGTGTTCTTATTTCGT
GACTCATTGTTGCCAGAAACTGACTTTTTGCGACAGTTGCATTGATCGCTTTATTTCTCT
CTACTTCGAGTGCATGAATTAAATCACGCGTCTCGGTAATATCTTGCCAACCACAAATAT
AAACAGCATGATCGCTGGCTGGCAGATTGCATAATGTATGCCAGTGATTAATGCATCTTT
TCTCGATGCCATTATCAATTTCAAATACCTGTGTGTATATTGTTCGATTTTCTTTCGTTT
CTGCTGTGACTTCATGCGCATTAGAAAAAACATCTTTAAAGGGTGAGTCACTGTTTTCTA
ATGGTAACATTGCATTTTTGTAGTAATCAGCAGTGAAATAATGTTCAAATGCACTATTGT
GACTAATGACATTACCTTGCCAGTTTACAACATAAGTTGGATTCGGTAAGGAGTCCGAGA
GCGCTTTCCGGAATGATATTTGGTTTTCTAAATCACCCTGAATGACTTTACGACGACGAA
CTGAGCGTAACAGGTAGAATCCCCATAAAAGGCTACTGCCAACTAATAAAACGGATAATG
TCGTAACAATATAAAATTGCTCGCTATAGAGGTCCCATGTGTCAATGGTCACATTGGGCA
TTTTAATCCATTTTTCGGTCAGGCGCAGAACTTCGCTTGGGGGGATTGCATTCAGTGCTT
TATTAATAATATCCTTAAGTTCCGGTTCTCCGCGAGGAAAAGCGAACGAAAGCGATGCAT
TCGGAACGCCGGGAATAAGAAAATGATACAGTTCATTAGGATAGTAATGGTCGATCATGT
AACGCGAATTTAACTGTGTCGCGACCAGAGCATCAAGTTCACCTTCCTTGACCTTGTGAA
ATGCAGCGCTGGCGTTATCGACTTTTATCCACTCTACCTCCGGATACATCTCTTTTAATT
GCGAATGCAGCTCATAATAATATGGAATGGCAACTTTCATTCCTTTTTTTAATGTTTGTT
CACTGTCAGGCGCTTTTTGCATGACAAAAACGTAAGGCGTTGTTATGAAGGCTTCAGCAA
ATAAAACATTATTTTCTCTATCTTCACTATAAATAGCACCGGGTAATATATCCCATCCGC
CGGGATTCAGCTGTGTTCCAGCATGGATATTGTGTGAAACGGTGATCGGAGAAAAATTTA
AACCTGTTTGCAAAGTAATAATATTAAGAATATCCCCCATAACGCCCCGAACCGAGCCAT
TTTCATCCGTCATAGAATAGGGAGGGGAGTAAGGATTTTCCAGCACCTTTAAATCGGGAT
GCTGCTTAATCCATTGTTTTTCATGTTCAGTGAGTTCTAATAGTTTGTTCAGAAAGGCCA
GGTTTCCTGTATCAAGCCAATTTTGTGATACTTCATAGCGAACTTCATTTGTCAAAGCAT
CAACAAATCGATTGAGTACTTCATTAAGAACGACAGATTCTTTTCTGGTCAAGAAAAAAT
TATATTGACGCGGTGAGTTATAATATTTCACTACATTTAAGGAGTGAGTGAAATAGCGGG
AAATCATACTGCTGGTAATGATGTTACTACCAATAAAGTAATCATTCTGTCCGGCTGAGA
CGGATGCTAATGCCTGATATAAATTTGTAAAAGAGATAATTGTTGCTTTTGGAAATGATT
GATGAATGACCTCGTCAGGGGGATAATTTGCTACTCGAGCAATATTTACTGGTTTTGATG
AGGTAAGCGGTCGCATTGAATCGTGAAGGGTGGTGACGAGCGCCGGAAAGGTAATTATCA
GTGGTTTGGTTGCAGCAATGTCATCATTAAGAGGCGGCGAAGCAACTAAATGTGATAACA
CTATATCGACTTCACCTTCTTCCAGCGCGTCCATTGCTTTTTGATGATCGGCGTATTCCC
GGAGTGTTAGTTTGATATTTAACGCTCTTTTTAAAAGATTTAAATAATCAGCATTAATAC
CACGAACCCGTTGCTGCGAATCGGTATGCAACAACGTAGCCGTTTGGGACTTGTGTACTG
CAATCACAAGATTTTTTTTGCTCGCTAACCAACGTAATTCCTTGTTGCTCAGACGTAGTG
GATCAAGTGTGACACGGTTGTTACTACTGATGCCACGATATTCGATGTAATCTTCGTCTG
CGAAACTTATGGTCGACCAAAGACCACAACAGAGAAGAAAAATATAGGGTAAAAACTTCA
TGTGGTTAGCCGATTTTGTTACGTTGTGCGAATGTGTAAAGATCCATCAGTGATTTACAT
TCTAATTTTTCCATCAGGCGACTTTTATAAGTGCTGACAGTTTTGTTGCTGATGAACATT
TTTTCAGCAATGTCATTATTATCCTTGCCATCAAGAATATAGCGCATGACACTAATTTCT
TGTTTCGATAAGGAGTCGAGTTTTTGCTGGTCGGACGTTAAACTTCCAACAAACCGGTTG
AGAGAGAAGGGGAAATAGCAGTAGCCATTTTTTGCAGCTTCAATAGCCGCAATGATATTG
TTCATGCCTTCTTTTTTACTCACGAAACCATTAGCGCCAGCATCAGCACAATGTTTCCCG
TAAAAATGGTCATTTTTAGCGGAGACGATAATAATAATTCCGCTATATTGGCGCTTCCTC
AGCGTTTCTAACACCTGGATACCGTTAACTCCGGGGATATCGACATCAATGATGACGATA
TCAGGCTTAAGTGTTTCCACCCGCTGAACGGCACTTCCGCCTTCAGTCAACTCTGCTAAG
ATTTCAATATCGTTTTTGATCAATAAATTACGAATTGCTGCGATAGCAAGAGGATGGTCA
TCAATAATTATTGCGTTCATAGATTATTCCCTTTGCAATGAAGCATCTCCCTTCTCCCTG
TAGTAATACAGACATAAGGCATCATCTCATTTTCTCAATAAAAATAAGAAAATTTGAGCT
TCCTTTAAGATAATTCGACAAGTATACCATATAAATAGTCGGCATATATGAAATGTCAAC
AATAAAATCAGGGATTGTACCGATGATTTATAGTTTCACATTAGCACTATAAGTCTTCTC
ACTAATCCTACAGGCGTAAGAATTGTATTGCAAAAGCCACGGTTTAGTCCTCTGTTGTTT
TTTTTGCACCTCATTTAAATTAGGCCTCCAACGTTCCTGGGATAATGTGCAACACATGCA
CTGTGTTTGATATGAAGAATGAATACTCTTTTCATTCAATTCATAAATTTCATCTATGCG
AAATGAGAGATAAAAGTGGAACAGATTAATTCAAATAAAAAACATTCTAACAGAAGAAAA
TACTTTTCTTTATTGGCGGTAGTTTTATTTATTGCGTTTTCAGGTGCCTATGCCTATTGG
TCAATGGAATTAGAAGACATGATTAGTACAGATGACGCCTATGTCACGGGGAATGCAGAT
CCAATTTCTGCACAAGTCTCAGGTAGTGTCACTGTAGTTAATCATAAAGATACGAACTAC
GTTCGACAAGGTGACATTTTAGTTTCACTGGATAAAACTGATGCCACTATCGCACTCAAT
AAAGCTAAAAATAATCTGGCAAATATTGTTCGGCAAACGAATAAACTATACTTACAGGAT
AAACAATACAGTACCGAAGTCGCTTCAGCGCGTATTCAGTATCAACAATCTTTAGAAGAT
TATAACCGTCGAGTGCCGTTAGCGAAGCAGGGGGTTATTTCAAAAGAAACGCTGGAGCAT
ACCAAAGATACGTTAATAAGTAGCAAAGCGGCATTGAATGCCGCTATCCAGGCTTATAAA
GCGAATAAAGCTTTAGTAATGAACACACCATTAAACCGTCAGCCACAAGTCGTTGAAGCG
GCGGATGCAACTAAAGAAGCCTGGTTGGCGCTTAAACGTACGGATATTAAGAGTCCGGTT
ACCGGCTATATTGCCCAGAGAAGTGTTCAGGTCGGCGAAACAGTGAGCCCCGGACAATCG
TTAATGGCTGTCGTACCGGCACGTCAAATGTGGGTTAATGCCAACTTTAAAGAAACACAA
CTCACGGATGTACGGATTGGTCAATCGGTCAATATTATCAGCGATCTTTATGGTGAAAAT
GTTGTGTTTCATGGTCGGGTGACAGGGATCAATATGGGAACCGGCAATGCGTTCTCCTTA
TTACCTGCACAAAATGCGACAGGGAACTGGATCAAAATCGTTCAGCGTGTACCGGTTGAA
GTTTCTCTGGATCCAAAAGAACTCATGGAACACCCCTTGCGCATTGGTTTATCGATGACT
GCAACTATTGATACCAGGAACGAAGACATTGCTGAGATGCCTGATCTGGCTTCAACCGTG
ACCTCCATGCCTGCTTATACCAGTAAGGCTTTAGTTATCGATACCAGTCCGATAGAAAAA
GAAATTAGCAACATTATTTCGCATAATGGACAACTTTAATGGCAATCACTAAATCAACTC
CGGCACCATTAACCGGTGGGACGTTATGGTGCGTCACTATTGCATTGTCATTAGCGACAT
TTATGCAAATGTTGGATTCCACTATTTCTAACGTCGCAATACCGACAATATCTGGCTTTC
TGGGAGCATCAACAGACGAAGGTACCTGGGTTATCACCTCGTTTAGCGTAGCAAATGCCA
TTGCGATCCCTGTTACCGGCAGGCTGGCACAAAGAATAGGCGAATTAAGGTTATTTTTAC
TTTCAGTCACTTTTTTTTCGCTGTCTTCCTTAATGTGTAGTTTATCGACCAATCTTGATG
TGCTGATATTTTTTAGAGTCGTTCAGGGGTTAATGGCAGGGCCGTTAATTCCACTGTCAC
AGAGTTTATTATTAAGGAATTATCCACCAGAAAAAAGAACATTTGCTCTGGCATTATGGT
CAATGACCGTGATTATCGCTCCGATATGTGGGCCGATATTGGGCGGTTATATTTGTGATA
ACTTTAGCTGGGGTTGGATATTTTTAATCAATGTCCCTATGGGGGTTATCGTCCTGACAT
TATGCTTAACCTTACTTAAAGGAAGAGAAACTGAGACTTCACCGGTCAAAATGAATCTAC
CAGGACTGACCCTGTTAGTGCTTGGTGTTGGTGGCTTGCAAATTATGCTTGATAAAGGGC
GCGATCTGGATTGGTTCAACTCGAGTACAATAATAATATTAACAGTAGTATCAGTTATTT
CTCTGATCTCTTTAGTCATTTGGGAGTCAACCTCAGAGAACCCGATTCTTGATCTCAGTT
TGTTTAAGTCCCGTAATTTCACCATTGGTATTGTGAGTATCACATGCGCGTATTTATTTT
ACTCTGGAGCGATAGTCCTTATGCCGCAGTTACTCCAGGAAACAATGGGGTATAATGCGA
TTTGGGCTGGGCTTGCTTATGCGCCCATCGGCATCATGCCACTATTAATTTCACCTTTGA
TAGGATGTTATGGCAACAAAATAGACATGCGGTTGTTAGTGACATTTAGTTTTTTGATGT
ATGCGGTTTGCTATTACTGGCGTTCTGTGACATTTATGCCAACGATTGATTTTACAGGCA
TCATTTTGCCACAGTTTTTCCAGGGATTCGCCGTTGCCTGTTTCTTTTTACCCTTAACAA
CGATTTCGTTTTCAGGGTTGCCAGATAATAAATTTGCCAATGCCTCGAGTATGAGTAATT
TTTTTCGTACCTTGTCAGGATCAGTTGGTACGTCGTTGACAATGACGCTGTGGGGACGAC
GCGAATCGTTACACCATAGTCAGTTGACAGCAACCATCGATCAATTTAACCCCGTGTTTA
ATTCATCGTCACAAATTATGGATAAATACTATGGTTCGCTTTCAGGAGTTCTTAATGAAA
TTAATAATGAAATAACCCAGCAGTCACTTTCTATTTCTGCAAATGAGATTTTCCGTATGG
CGGCTATTGCTTTTATCTTACTTACGGTTTTGGTTTGGTTTGCGAAACCGCCGTTTACAG
CGAAAGGCGTTGGGTGATGGTAAAAGCAGGGGGTTATAGCGGGTAAGACCGGGGATCTTA
AGTCTGCGCCATCGGCAGCATCGCTCATCCAGGGAAAGGATGGCGATGCTGAATTGAAAA
TTAATTAGCGGCCTTTTGCCAGATATTGCTCCATCTCTTCTTCCGGCACCATTCCACCTC
CCGTCGCCCACACCAGATGAGTGGCATTACGCAGTTGTTCTGCGCTGCAACCGTGCATCT
GTTGGTAACTTACTGATGCGCACACGCGCTGAGGCCCGGCCATACCCGCCAGTGCCGAAG
GTTCAAGACGAATGCCTTCTTCCTGCGCCAGCCAGCCAAGCATGTTATACATGGTTTGAT
CGCTAAGGGTATAGAAGCCATCCAGTAGACGCTCCATTGCCCGCCCGACAAAGCCTGATG
CGCGACCAACTGCAAGGCCATCCGCTGCGGTAAGGTTGTCGATACCAATATCCTGAACAG
AAATCTGATCGTGTAATCCTGTATGGACGCCTAACAGCATACAAGGGGAGTGCGTTGGTT
CGGCAAAAAAGCAGTGAACATGATCGCCAAACGCCAGTTTAAGCCCGAATGCGACGCCAC
CAGGACCACCGCCAACACCACACGGCAGATAGACAAACAGAGGGTTATCAGCATCGACAA
TACGACCTTGCTCGGCAAATTGCGCTTTAAGACGCTGGCCAGCGACGGAATACCCAAGGA
ACAACGTGCGGGAATTTTCGTCATCAATAAAGAAACAGTTCGGGTCAGACTGCGCTGCTC
TACGTCCTTCCTCGACGGCAACACCATAATCTTGCTCATATTCCACGACCGTAACGCCAT
GGCTGCGCAGTTTCGCTTTTTTCCATGCCCGGGCATCAGCAGACATATGCACTGTCACCT
TAAAGCCAATGCGGGCGCTCATAATGCCGATTGATAACCCCAGATTTCCGGTTGAGCCCA
CAGCAATGCTGTATTGGCTAAAGAACTGTTTAAACTCCGGAGAAAGCAGTTTGCTGTAGT
CATCATCAAGCGTCAGCAACCCCGCTTCCAGAGCCAGTTTTTCTGCGTGTGCCAGGACTT
CATAAATCCCGCCGCGTGCTTTTATGGAGCCGGAAATGGGCAAATGGCTATCTTTTTTCA
GTAACAGTTGCCCGCTGATCGGTTGTTGATATTCCTTTTCCAGCCGTTTTTGCATAGCCG
GAATGGCAACCAGTTCTGATTCAATAATCCCCCCAGTGGCAGCAGTTTCAGGAAATGCTT
TTGTCAGATAGGGTGCAAAACGGGATAAGCGCGCATGGGCGTCCTGAACATCCTGTTCGG
TCAGGCCAACATAAGGTAAACCTTCAGCCAATGAGGTCGTGCCAGGATTAAACCAGGTGG
TTTCTTTAAGAGCAACCAGATCCTTTACCAACGGATACTGGGCGATGAGCGAGTTCATTT
TAGCGTTTTCCATAGTACGTCTCTTTGCGCTTAGATGATAAATGACAGCAGGAATGTGCC
CGCCAGAGCGACGACTGAAGCGATAAATGTCGCTGTCGTATAGTATTTAAATGTTTCATT
GAGCGTAGCGCCGCAATATTGCTTCACCAGCCAGAAAAGCGAGTCCGTAACGATAGTGCA
GCCAATTGCACCTGAACCGATAGCAATCGCAATAATTTCCGGGCTGATGTCGGGATACAG
CGGCAGCACAATGATCCATATTTATATTTTCTTCTCCAGGTTGGCGATGCCAGTTGGCAT
GTTTTACTTACTTGCCTATATGGTTACTCGTTGGCGAGAACAGAGGCGGAATTGGGGACA
ATTGGCCGGGAATTATTGTTATTTTTTATTGTATTGCCGTGTCAGGTGATAGGGCGTTGG
ATCTCGCCAGTGACGTCTGTTTCTGCTACAGTGCCCGTTTTACGACAAACGGCTTGGGTA
TGGCTTCATTAAAGGATGTCGCACGCCTGGCGGGAGTGTCGATGATGACAGTCTCCCGGG
TGATGCATAATGCAGAATCTGTGCGTCCTGCAACGCGTGACCGCGTATTGCAGGCAATCC
AGACCCTGAATTATGTTCCTGATCTTTCCGCCCGTAAGATGCGCGCTCAAGGACGTAAGC
CGTCGACTCTCGCCGTGCTGGCGCAGGACACTGCTACCACTCCTTTCTCTGTTGATATTC
TGCTTGCCATTGAGCAAACCGCCAGCGAGTTCGGCTGGAATAGTTTTTTAATCAATATTT
TTTCTGAAGATGACGCTGCCCGCGCGGCACGTCAGCTGCTTGCCCACCGTCCGGATGGCA
TTATCTATACTACAATGGGGCTGCGACATATCACGCTGCCTGAGTCTCTGTATGGTGAAA
ATATTGTATTGGCGAACTGTGTGGCGGATGACCCAGCGTTACCCAGTTATATCCCTGATG
ATTACACTGCACAATATGAATCAACACAGCATTTGCTCGCGGCGGGCTATCGTCAACCGT
TATGCTTCTGGCTACCGGAAAGTGCGTTGGCAACAGGGTATCGTCGGCAGGGATTTGAGC
AGGCCTGGCGTGATGCTGGACGAGATCTGGCTGAGGTGAAACAATTTCACATGGCAACAG
GTGATGATCACTACACCGATCTCGCAAGTTTACTCAATGACCACTTCAAATCGGGCAAAC
CAGATTTTGATGTTCTGATATGTGGTAACGATCGCGCAGCCTTTGTGGCTTATCAGGTTC
TCCTGGCGAAGGGGGTACGTATCCCGCAGGATGTCGCCGTAATGGGCTTTGATAATCTGG
TTGGCGTCGGGCATCTGTTTTTACCGCCGCTGACCACAATTCAGCTTCCACATGACATTA
TCGGGCGGGAAGCTGCATTGCATATTATTGAAGGTCGTGAAGGGGGAAGTGTGACGCGGA
TCCCTTGCCCGCTGTTGATCCGTTGTTCCACCTGATATTATGCTAACCCAGTTGCCAGAG
TGCTCCATGTTGCACCACAGCCACTCCGTGGGAGGCATAAAGCGACAGTTCCCGTTCTTC
TGGCTGCGGATAGATTCGACTACTCATCACCGCTTCCCCGTCGTTAATAAATACTTCCAC
GGATGATGTATCGATAAATATCCTTAGGGCGAGCGTCTCACCCTGCGGGAGGGGAATACT
ACGGTAGCCGTCTAAATTCTCGTGTGGGTAATACCGCCACAAAACAAGTCGCTCAGATTG
GTTATCAATATACAGCCGCATTCCAGTGCCGAGCTGTAATCCGTAATGTTCGGCATCACT
GTTCTTCAGCGCCCACTGCAACTGAATCTCAACTGCTTGCGCGTTTTCCTGCAAAACATA
TTTATTGCTGATTGTGCGGGGAGAGATAGATTGATGCTGCTGGCGTAACGACTCAGCTTC
GTGTACCGGGCGTTGTAGGAGTTTGCCATTGCTCTCTGATAGCTCGCGCGCCAGCGTCAT
GCAGCCTGCCCAGCCTTCACGTTTTGAGGGCATTGGCGATTCCCACATATCCATCCAGCC
GATAACAATACGCCGACCATCCTTCGCTACAAAGCTTTGTGGTGCATAAAAGTCATGCCC
GTTATCAAGTTCAGTAAAATGCCCGGATTGTGCAAAAAGTCGTCCTGGCGACCACATTCC
GGGTATTACGCCACTTTGAAAGCGATTTCGGTAACTGTATCCCTCGGCATTCATTCCCTG
CGGGGAAAACATCAGATAATGCTGATCGCCAAGGCTGAAAAAGTCCGGACATTCCCACAT
ATAGCTTTCACCCGCATCAGCGTGGGCCAGTACGCGATCGAAAGTCCATTCACGTAATGA
ACTGCCGCGATAAAGCAGGATCTGCCCCGTGTTGCCTGGGTCTTTCGCCCCGACTACCAT
CCACCATGAGTCGGCTTCACGCCACACTTTAGGATCGCGGAAGTGCATGATTCCTTCTGG
TGGAGTGAGGATCACACCCTGTTTCTCGAAATGAATACCATCCCGACTGGTAGCCAGACA
TTGTACTTCGCGAATTGCATCGTCATTACCTGCACCATCGAGCCAGACGTGTCCGGTGTA
GATAAGTGAGAGGACACCATTGTCATCGACAGCACTACCTGAAAAACACCCGTCTTTGTC
ATTATCGTCTCCTGGCGCTAGCGCAATAGGCTCATGCTGCCAGTGGATCATATCGTCGCT
GGTGGCATGTCCCCAGTGCATTGGCCCCCAGTGTTCGCTCATCGGGTGATGTTGATAAAA
CGCGTGATAACGATCGTTAAACCAGATCAGGCCGTTTGGATCGTTCATCCACCCGGCAGG
AGGCGCGAGGTGAAAATGGGGATAGAAAGTGTTACCCCGGTGCTCATGAAGTTTTGCTAG
TGCGTTTTGCGCCGCATGCAATCGAGATTGCGTCATTTTAATCATCCTGGTTAAGCAAAT
TTGGTGAATTGTTAACGTTAACTTTTATAAAAATAAAGTCCCTTACTTTCATAAATGCGA
TGAATATCACAAATGTTAACGTTAACTATGACATTTTGTGATCGAATATGCATGTTTTAG
TAAATCCATGACGATTTTGCGAAAAAGAGGTTTATCACTATGCGTAAGTCAGATGAATTT
AAGGGAAAAAAATGTCAGCCAAAGTATGGGTTTTAGGGGATGCGGTAGTAGATCTCTTGC
CAGAATCAGACGGCGCCTACTGCCTTGTCCTGGCGGCGCGCCAGCTAACGTTGCGGTGGG
AATCGCCAGATTAGGCGGAATAAGTGGGTTTATAGGTCGGGTCGGTGATGATCCTTTTGG
TGCGTTAATGCAAAGAACTCTGCTAACTGAGGGAGTCGATATCACGTATCTGAAGCAAGA
TGAATGGCACCGGACATCCACGGTGCTTGTCGATCTGAACGATCAAGGGGAACGTTCATT
TACGTTTATGGTTCGCCCCAGTGCCGATCTTTTTTTAGAGACGACAGACTTGCCCTGCTG
GCGACATGGCGAATGGTTACATCTCTGTTCAATTGCGTTGTCTGCCGAGCCTTCGCGTAC
CAGCGCATTTACTGCGATGACGGCGATCCGGCATGCCGGAGGTTTTGTCAGCTTCGATCC
CAATATTCGTGAAGATCTATGGCAAGACGAGCATTTGCTCCGCTTGTGTTTGCGGCAGGC
GCTACAACTGGCGGATGTCGTCAAGCTCTCGGAAGAAGAATGGCGACTTATCAGTGGAAA
AACACAGAACGATCGGGATATATGCGCCCTGGCAAAAGAGTATGAGATCGCCATGCTGTT
GGTGACTAAAGGTGCAGAAGGGGTGGTGGTCTGTTATCGAGGACAAGTTCACCATTTTGC
TGGAATGTCTGTGAATTGTGTCGATAGCACGGGGGCGGGAGATGCGTTCGTTGCCGGGTT
ACTCACAGGTCTGTCCTCTACGGGATTATCTACAGATGAGAGAGAAATGCGACGAATTAT
CGATCTCGCTCAACGTTGCGGAGCGCTTGCAGTAACGGCGAAAGGGGCAATGACAGCGCT
GCCATGTCGACAAGAACTGGAATAGTGAGAAGTAAACGGCGAAGTCGCTCTTATCTCTAA
ATAGGACGTGAATTTTTTAACGACAGGCAGGTAATTATGGCACTGAATATTCCATTCAGA
AATGCGTACTATCGTTTTGCATCCAGTTACTCATTTCTCTTTTTTATTTCCTGGTCGCTG
TGGTGGTCGTTATACGCTATTTGGCTGAAAGGACATCTAGGGTTGACAGGGACGGAATTA
GGTACACTTTATTCGGTCAACCAGTTTACCAGCATTCTATTTATGATGTTCTACGGCATC
GTTCAGGATAAAATCGGTCTGAAGAAACCGCTCATCTGGTGTATGAGTTTCATCCTGGTC
TTGATCGGACCGTTTATGATTTACGTTTATGAACCGTTACTGCAAAGCAATTTTTCTGTA
GGTCTAATTCTGGGGGCGCTCTTTTTTGGCTTGGGGTATCTGGCGGGATGCGGTTTGCTT
GACAGCTTCACCGAAAAAATGGCGCGAAATTTTCATTTCGAATATGGAACAGCGCGCGCC
TGGGGATCTTTTGGCTATGCTATTGGCGCGTTCTTTGCCGGCATATTTTTTAGTATCAGT
CCCCATATCAACTTCTGGTTGGTCTCGCTATTTGGCGCTGTATTTATGATGATCAACATG
TGTTTTAAAGACCAGGATCACCAGTGCGTAGCGGCGGATGCGGGAGGGGTAAAAAAAGAG
GATTTTATCGCAGTTTTCAAGGATCGAAACTTCTGGGTTTTCGTCATATTTATTGTGGGG
ACGTGGTCTTTCTATAACATTTTTGATCAACAACTCTTTCCTGTCTTTTATGCAGGTTTA
TTCGAATCACACGATGTAGGAACGCGCCTGTATGGTTATCTCAACTCATTCCAGGTGGTA
CTCGAAGCGCTGTGCATGGCGATTATTCCTTTCTTTGTGAATCGGGTAGGGCCAAAAAAT
GCATTACTTATCGGTGTTGTGATTATGGCGTTGCGTATCCTTTCCTGCGCGCTGTTCGTT
AACCCCTGGATTATTTCATTAGTGAAGTTGTTACATGCCATTGAGGTTCCACTTTGTGTC
ATATCCGTCTTCAAATACAGCGTGGCAAACTTTGATAAGCGCCTGTCGTCGACGATCTTT
CTGATTGGTTTTCAAATTGCCAGTTCGCTTGGGATTGTGCTGCTTTCAACGCCGACTGGG
ATACTCTTTGACCACGCAGGCTACCAGACAGTTTTCTTCGCAATTTCGGGTATTGTCTGC
CTGATGTTGCTATTTGGTATTTTCTTCTTGAGTAAAAAACGCGAGCAAATAGTTATGGAA
ACGCCTGTACCTTCAGCAATATAGACATAAACTTTTTCCGGTTGTTGTCGATATCTCCAT
ATCCCTCAACCGGAAAATAATAATACTAAAATGCTTAGGCCTGCTAATAATCGCCTAATC
CAAACACCTCATTCATGTTCTGGTACAGTCGCTCAAATGTACTCCGGATACACGGTTCGC
TGATTTCCAGGACATTGTCGTCATTCAGCGACCTGTCCCGTGTATTACGGGCCTGCGAAT
TCATCAAGGAATGCATTGCGGAGTGAAGTATCGAGTCACGCCATATTTCGCTATCAGGAT
TCTGTGTGATGGTTACATCGCCCGGCCCAGGGCTGTTTAGTCATCAGCGCTTTCTGACAG
TGCTGAGATTTCAACCTGTTGCAGTAAAAATGAGTAGATATAGGGCAAGTGTGCTGCCAA
ACCCATCTTTTACGGGGTGAAAGTAGATTTGGTTTGAAGGGTATCTGGTGTCCCCTGCAG
GAATCGAACCTGCAATTAGCCCTTAGGAGGGGCTCGTTATATCCATTTAACTAAGAGGAC
AATGCGGCATGAGTATACCCGCTAATGGACTGCGGGGTAAGTACGCTGCCGCTCGATTGC
TTAAACCCTCGCCATTTATGCCGGGTTTTTATCATTTTTCTTAATGTTTTCCGCACGTTC
TGCTTTTTGGCGTGCTTCTGCTTTGCGCTTGTTGCTCATGTCGTTACGGATCTGTGCATG
ACTCATTAACGCGAAGATAAAGGTGCCGCCGCAGATGTTCCCCGCTAAAGTAGGTAGTGC
GAAGGGCCAGATGAAATCGCTCCAGTGCAGCGTGCCGTTAAACACCAGATAGAGGATTTC
AACAGAACCGACAACGATGTGGGTGGTGTCACCCAGGGCAATAAGCCAGGTCATCAATAT
AATCACCACAATCTTTGCCGCACCCGCTGCAGGAAACATCCATACCATAGTGGCGATCAG
CCAGCCGGAAATGATCGCGTTGGCAAACATCTCGCTGGGGGTGTTCTTCATCACATCCAT
GCCGATATTGACAAATGCATCGCGAGTTTCTTCATTGAAGATTGGCATATATTCAAATGC
CCACGCCGCAATACCTGTCCCGAGAATATTACCCAGCAGCACGACGCCCCATAACCGCAT
AAGTAAGCCAACGTTGCTCATTGTCGGTTTTTGCATGACGGGTAGTACCGCAGTCACGGT
GTTTTCGGTAAATAATTGCTGGCGGGCCATAATGACGATAATAAAACCAAAGGTATAACC
GAGATTCTCCAGCAAGAAGCTGCCCGGCACACCTTCCAGTTCGACATGAAATATCCCTTT
TGCCAGTAATGAAGCGCCCATCGACAGACCCGCCGCAATGGCTGACCACAGTAGTGCCAT
TGCGTCGCGTTCCAGCTCTTTTTCACCATCCTGGCGGATATGCTCATGAATTGCCATCGC
CCGGGAGGGGAGTCGATCTTCATCTATTTCTATTTTTTTGCCACGCTCTTTTTCTTCGCT
CTCAACTTCAATTTCGTCGCTGTGTTGATCAATTTTGTCGTTGTCCATGGTCTCTTCTCT
TGAATTAGCACGTATAGCTAAAGCGTAGCGGCTTTTTTGCTCGCAACTGGCGGGAGTTAC
TCTGAAAATGTAGAAAAGGCCGCGTTTGCCTTTTTCTGTTTCCATAGAATCAAGTAGCCT
ACAGGGCGGCGATTACCAGGCTATGATCAAATCAGCAAATCAGGGCGTCTGGACATCAGT
TGACGTGCTGTTACAATCGCCCACACCTAAACAGGCGGATACGGTATCGTTCCGTCATGG
ATGGCAAACTGCATAAGCCATAAAAAAACAGGGAGACATTTATGAAGCTTCGCCTGTCGG
CGCTTGCTCTGGGAACTACGCTTCTGGTGGGGTGTGCGAGTTCCGGTACAGATCAGCAAG
GGCGTTCTGACCCGTTAGAAGGGTTCAACCGCACCATGTACAACTTCAACTTCAACGTAC
TAGACCCGTATATTGTTCGACCGGTCGCTGTCGCCTGGCGTGATTATGTTCCGCAACCGG
CGCGTAACGGTTTGAGCAACTTTACCGGCAACCTTGAAGAACCTGCGGTGATGGTTAACT
ACTTCTTGCAGGGCGACCCTTATCAGGGGATGGTCCACTTTACCCGCTTTTTCCTGAACA
CCATTTTGGGGATGGGCGGCTTTATTGATGTTGCAGGGATGGCGAACCCGAAACTGCAAC
GGACTGAACCTCACCGCTTCGGTAGTACGCTTGGTCATTATGGCGTGGGTTATGGGCCGT
ACGTTCAGTTACCATTCTACGGTAGCTTCACGCTGCGTGATGACGGTGGTGATATGGCGG
ATGGTCTTTACCCGGTTCTTTCCTGGTTGACCTGGCCGATGTCTGTGGGTAAATGGACGC
TTGAAGGGATCGAAACCCGCGCTCAGCTGCTGGATTCCGACGGTCTGCTGCGTCAGTCGT
CCGATCCTTATATTATGGTGCGCGAAGCGTACTTCCAGCGTCATGATTTCATCGCTAATG
GCGGCGAACTCAAACCGCAGGAAAATCCGAACGCGCAAGCGATTCAGGATGATTTAAAAG
ATATCGATTCTGAATAAGAAACAAATAAAAAAGGTGAGTCGCAAAACTCACCTTTTTTGT
TGTTATCCCTCAATTACCACAAGTAAAAGGAGATAAACCGACAATGACCCGGACGTAATG
ATGTAAAAATACTGATGTTCGTCACTGACTATTTCCGATATTCAGGCGTTGAAAAATCAA
AAAACTGGAAAAATAATTTTAAATATCATCAAAATTAACACCTGGCGCATATAGTTGATT
AATTTCATTTTGATATTCCGTCTGGCGATTTTGAAGCCTTTCTTCAATTTTACCTTCGAG
TTCCTTATAGTGCATATATATATTTTGAGAATGGTCAACGTTAACTTCGTTACCGAATAA
AGTAGAAACTATTTCTTTTGTATTCTTAAGTGTATATTTTCTATCATCCTCTTAATATTC
ATATCCTCTTGCTAGATTTGAAGGATTAAAAGCTTCGTTAGGTTCTCTCAGTCTTTCCCC
TTTGAGTTCGTTTACAACTTGATGATCGGGACCTGTTGCAAATGATTCTGCGATGATTGC
TTTACTGTGTTCAAACCACGCAGAAGCACTCCTGGCTTTTTTACTACAATATTGGGTGAG
ATTATCACCATCAATACGAAATCCTTTTTGAATGTGGTAGCCATCCTGATCGTAGTAACC
GAGAGATAAGTAATCATTTCCATTTTTATTTTTTATTACAATAGCGAGAGAGTCGCCTTT
TTTATCTTTACCGTACCAGGTAAATAAGCACGTTGGTTCGCTTTTCCCGCTCTCATCGAA
TTCCGTTACCGTATGTCTGAGTTTGTGTGATATTTTATCGAAGATAAAACTTGGATTTTC
ATCATATATTTCTTTTATTGCGCTGAAGATCATTTTCTTGTTATTGATATCATGAGTATT
CTCTACTATGTTTTCATTGATGATGGTTTGACCGACTTTTTTGTTTTCATCGTTCGCGGG
TGATTTTGTTGGTTCTTGATTTTCAATATCAATATCAATATCAATATCAAAAGTAATATC
GTCTGTATCATTGGAGTCAATACCAATATCACTACGATCATCAATACCACTAATAATAAT
ACCATCAGTAAATTCAGCATTATTTATATCATCATGAGTCTTCTCAACTATGTTGTCATT
AATGATAGTACGGACGAGTTCTTTGTCTTTATAACTCGCAGGTAATTTTATTGGTTCTTG
GTTGTCGATACCAATAGTAATATGGTCTGTATCATTGGAACCAATATTAATATAAGTAAC
TGAAGAATTATTGATATTTATTCTATCAGGATCGTCGTTTCCTCGTATGGCGTTTTTTAT
AAGCTCAAGTAGATGTTTAATACAGGTGCTTATTCCTTCCTTACCATTAAAAAGGTTTTT
GAACTCTTGTACTAATCCATTAACTTCATCATTGTTATTTTCATTGATGGATTCTGGGTA
AGCTGCGCTGGTATTGTTGATTGAAATAGATGGTAGCATGATTTTATTCCATGTTGATTG
ATTTGTTACAAATATATATTACCTAATGAAATAGACTATCAAAAAACGCTCATTTATTTA
GACCCTATCTTTAATTTGAGTGTATGAGCGCACAATAGCCAGGGTGGTTTGAGTATCCTG
GAAATTCAGAAAAGTAAACTCTTTGAGAAAGACGAGCAGAACGCCTGAAAATATGCCTTT
CCCTTCAGGTTTGTCTGTGGATACCACTTAATGATTTGAAAGGGCAAGCTACCATCAGGC
TGTTTGCAAAACTCAGGAGGCAAGCAATGAGGACACTACTTTCGGTGAAGTGGGGAAGTT
AAAGTCACCTGCATAGCAGGTGACTTTAACCAGGCGAACGCGTTATCAGAACGCGTAGTT
AAAGTTAGTACCGAACAGCCAGGCTTTACCTTCAGATTTAAAGGTATATGCTGCTGGCCC
TTCACCTTCAGTAAACTTCACATTCTGACCGTGCATATAAGATGCACCAACGTCAATGGA
TGCATCTTCATTAAATGCATAAGTCGCACCTGCACTTAACCACAGACGATCCTGATCTGG
GATAGAGATAGAACGTTTATCTGCCGGAACCGGGCTGTCATCGAATGCAATACCCGTACG
GAAGGTCCAGTTTTTATCGTGGTAGTAGGTTGTACCTAACGCGATACGGTAAGCATCCCG
GAAACCTTCGTCTTTATAGAACAGCGTTTGACCAGAGTCTCCTTTCGCTTTCAGTTCCTG
GAATTGACTCCAACTGGTATACGCCAGACTATAGTGGATAGCCCATTGTGGTGCGACACG
GTTATAGCCAGAAATTTCCCACATCTCAGGTAAATTCAGCGTTAAGGACCCATTTTGGGT
TGCACCCATTGTGCCATATGGTAAACCCATGCTACCCAAGATGTTGTTCAGATTTGGGTT
GATGGAGCTTTTGTAATCTCCTTCAAAGTCAATTTTCACTTCTGAACGATAGGTTAGGCC
CCAACGGTTATCTTTATCCAGTTCATAAAGAATACCGGCGTTCCAGCCGAATCCCCATTC
ATCACCCTTGAGATGAGCAATTTGCGAATCCGGTGTATTGATGCCGTTTGTCCAACTTTG
TGGCACGCCTTGCGCTATCAGTTGTTGGGAAAGCAATGGACCGAGTGAACCGGCAGTACG
CTCAATTTTTGCCTTAGCGTATACAGCATCAAAACCAAGACCAAAACTCCAGCTATTGTT
AAGGCGGTAGGCTCCGCTAAGGTTAAGGTTGATCGTCTGCAGATCGGTTTTACCGCCATA
GATTCCAGCAGCGTAGTTATCATTAAATTCCGTGGCCAGACCATAGTTCGAGGTAATAGA
AGCCCCCCAACCAAACAGATCGTTAATAGGTGCTACGAAATGTAGGTTAGGCACCCACGC
AGTTGGTGCAATATTATCTGCATCAGCACGCTGGCCCGTTAAATCGGAACGCCCAGAAAT
ATCTACATCCGGGTCAATATAAACCGCACCCGCAGAAAATGTCGGGCGGTCAAACATGGT
AATCAATGCGGGGTTACGGCTGACGTTACCTGCATCATCGGCAATTGCGCCTTCCCCTGA
ATAAGCCCGGCCCAGGCCAGAGGAAGAAAATTCGTTTAACTGAAAGCCTGCCGACCAGGC
CTGGGTGGAGATAAGTGCCACTGCGACTGCGAGAGCAGACTTTGTAAACAGGGTTTTCTG
GCTCATGACCATAACCTCAATGATTTATTTTTATACAAACTATGTTACGTGCTGTAACAG
GAGCGCGAAGTGTAGGGTCTGAGGTACATCTTAGAAATCAGACCAGTGGCGAGAGTATAG
GTCGGACCAGCTGGAATGTTGCAAGTATGTTTCTATCTTTTTTCAAATATGATCTAAGAA
ACGCGATCCAGCTGGCAAAATTTGGAGGTGGCGCACTCATGGATTCGGGTGAATTTTGTT
TTAGATCATTTTTAAGTGTGATTTCGGTCACTTATCCGATTTTGCAGAATTAACAACTGG
AGCAGCACTTTCCGGAAGCGTAAAATATCCACAACGTTTATCTGGCACCTTGGGTGCACA
TACAGAGGAAATCAACGATGAGTAAATGTAGTGCTGATGAAACCCCGGTTTGCTGCTGTA
TGGATGTTGGCACCATTATGGACAACTCCGACTGCACCGCGTCTTACAGCCGCGTGTTTG
CAAACCGCGCAGAAGCAGAACAAACGCTGGCGGCACTGACTGAGAAAGCCCGTAGCGTGG
AATCCGAACCGTGCAAAATCTCCCCGACTTTCACTGAAGAGTCTGATGGTGTGCGCCTGG
ATATCGATTTCACTTTTGCCTGCGAAGCTGAAATGCTGATCTTCCAGCTGGGTCTGCGTT
AATTCCTCTCGGGTACGTACGCCCCTGTCAGTTGCTGGCAGGGGCGTTTTCTTTTCTCTT
CTTCTTTTCTCTCTGTGTCATAGCTCCCACTTTCCCTTTTCTCCGCTTGGCTAAATGTAA
AAAAATGGTTAAGACCATGATCAGGTCAGACCACTTTATTTATTTTTTTACAGGGGAGTG
TTATGGGTCAGGTTTTACCGCTGGTTACCCGCCAGGGCGATCGTATCGCCATTGTTAGCG
GTTTACGTACGCCTTTTGCCCGCCAGGCGACGGCTTTTCATGGCATTCCCGCGGTTGATT
TAGGGAAGATGGTGGTAGGCGAACTGCTGGCACGCAGCGAGATCCCCGCCGAAGTGATTG
AACAACTGGTCTTTGGTCAGGTCGTACAAATGCCTGAAGCTCCCAACATTGCGCGTGAAA
TTGTTCTCGGTACTGGAATGAATGTGCATACCGATGCTTACAGCGTCAGCCGCGCTTGCG
CTACCAGTTTCCAGGCGGTTGCAAACGTCGCAGAAAGCCTGATGGCGGGGACTATCCGAG
CGGGGATTGCCGGTGGGGCAGATTCCTCTTCGGTATTGCCAATTGGCGTCAGTAAAAAAC
TGGCGCGCGTGCTGGTTGATGTCAACAAAGCCCGCACAATGAGCCAGCGTCTGAAACTCT
TCTCTCGCCTGCGTTTGCGCGACTTAATGCCCGTACCACCTGCGGTAGCAGAATATTCTA
CCGGCTTGCGGATGGGCGACACTGCAGAGCAAATGGCGAAAACCTACGGCATCACCCGAG
AACAGCAAGATGCATTAGCGCACCGTTCGCATCAGCGTGCCGCTCAGGCATGGTCAGACG
GAAAACTCAAAGAAGAGGTGATGACTGCCTTTATCCCTCCTTATAAACAACTGCTCGCGG
AAGACAACAATATTCACGGTAATTCCTCGCTTGCTGATTACGCAAAGCTGCGTCCGGCGT
TTGATCGTAAACACGGAACGGTAACGGCGGCGAACAGTACGCCGCTGACCGATGGCGCAG
CGGCGGTGATCCTGATGACTGAATCCCGGGCGAAAGAATTAGGGCTGGTACCGCTGGGAT
ATCTGCGCAGCTACGCATTTACCGCTATCGATGTCTGGCAGGACATGTTGCTCGGTCCAG
CCTGGTCAACACCGCTGGCGCTGGAGCGTGCCGGTTTGACGATGAGCGATCTGACATTGA
TCGATATGCACGAAGCCTTTGCAGCTCAGACACTGGCGAATATTCAGTTGCTGGGTAGTG
AACGTTTTGCTCGTGAAGCACTGGGGCGTGCACATGCCACTGGCGAAGTGGACGATAGCA
AATTTAACGTGCTTGGCGGTTCGATTGCTTACGGGCATCCCTTCGCGGCGACCGGCGCGC
GGATGATTACCCAGACATTGCATGAACTTCGCCGTCGCGGCGGTGGATTTGGTTTAGTTA
CCGCCTGTGCTGCTGGTGGGCTTGGCGCGGCAATGGTTCTGGAGGCGGAATAATGGAAAT
GACATCAGCGTTTACCCTTAATGTTCGTCTGGACAACATTGCCGTTATCACCATCGACGT
ACCGGGTGAGAAAATGAATACCCTGAAGGCGGAGTTTGCCTCGCAGGTGCGCGCCATTAT
TAAGCAACTCCGTGAAAACAAAGAGTTGCGAGGCGTGGTGTTTGTCTCCGCTAAACCGGA
CAACTTCATTGCTGGCGCAGACATCAACATGATCGGCAATTGCAAAACGGCGCAAGAAGC
GGAAGCTCTGGCGCGGCAGGGCCAACAGTTGATGGCGGAGATTCATGCTTTGCCCATTCA
GGTTATCGCGGCTATTCATGGCGCTTGCCTGGGTGGTGGGCTGGAGTTGGCGCTGGCGTG
CCACGGTCGCGTTTGTACTGACGATCCTAAAACGGTGCTCGGTTTGCCTGAAGTACAACT
TGGATTGTTACCCGGTTCAGGCGGCACCCAGCGTTTACCGCGTCTGATAGGCGTCAGCAC
AGCATTAGAGATGCTCCTCACCGGAAAACAACTTCGGGCGAAACAGGCATTAACGCTGGG
GCTGGTGGATGATGTTGTTCCGCACTCCATTCTGCTGGAAGCCGCTGTTGAGCTGGTAAA
GAAGGATCGCCCATCTTCCCGCCCTCTACCTGTACGCGAGCGTATTCTGGCGGGGCCGTT
AGGTCGTGCGCTGCTGTTCAAAATGGTCGGCAAGAAAACAGAACACAAAACTCAAGGCAA
TTATCCGGCGACAGAACGCATCCTGGAGGTTGTTGAAACGGGATTAGCGCAGGGCACCAG
CAGTGGCTATGACGCTGAAGCACGGGCGTTTGGCGAACTGGCGATGACGCCACAATCGCA
AGCTTTGCGTAGTATCTTTTTTGCCAGTACGGAAGTGAAGAAAGATCCCGGCAGTGATGC
GCCGCCTGCGCCATTAAACAGCGTGGGGATTTTAGGTGGTGGCTTGATGGGCGGCGGTAT
TGCTTATGTCACTGCTTGTAAAGCGGGGATTCCGGTCAGAATTAAAGATATCAACCCGCA
GGGCATAAATCATGCGCTGAAGTACAGTTGGGATCAGCTGGAGGGCAAAGTTCGCCGTCG
TCATCTCAAAGCCAGCGAACGTGACAAACAGCTGGCATTAATCTCCGGAACGACGGACTA
TCGCGGCTTTGCCCATCGCGATCTGATTATTGAAGCGGTGTTTGAAAATCTCGAATTGAA
ACAACAGATGGTGGCGGAAGTTGAGCAAAATTGCGCCGCTCATACCATCTTTGCTTCGAA
TACGTCATCTTTACCGATTGGTGATATCGCCGCTCACGCCACGCGACCTGAGCAAGTTAT
CGGCCTGCATTTCTTCAGTCCGGTGGAAAAAATGCCGCTGGTGGAGATTATTCCTCATGC
GGGTACATCAGCGCAAACCATCGCCACTACGGTAAAACTGGCGAAAAAACAGGGCAAAAC
GCCCATTGTCGTGCGTGACAAAGCCGGGTTTTACGTCAATCGCATCTTAGCGCCTTACAT
TAATGAAGCTATCCGCATGCTGACCGAAGGTGAACGGGTAGAGCACATTGATGCCGCGCT
AGTGAAATTTGGTTTTCCGGTAGGTCCAATCCAACTTTTGGATGAGGTAGGAATCGACAC
CGGGACTAAAATTATTCCTGTACTGGAAGCCGCTTATGGAGAACGTTTTAGCGCGCCTGC
AAATGTTGTTTCTTCAATTTTGAACGACGATCGCAAAGGCAGAAAAAATGGTCGGGGTTT
CTATCTTTATGGTCAGAAAGGGCGTAAAAGCAAAAAACAGGTCGATCCTGCCATTTACCC
GCTCATTGGCGCACAAGGGCAGGGGCGACTCTCCGCACCGCAGGTTGCTGAACGGTGTGT
GATGTTGATGCTGAATGAAGCAGTACGTTGTGTTGATGAGCAGGTTATCCGTAGCGTGCG
TGACGGGGATATTGGTGCGGTATTTGGCATTGGTTTTCCGCCATTTCTCGGTGGACCGTT
CCGCTATATCGATTCTCTCGGCGCGGGCGAAGTGGTTGCAATAATGCAACGACTTGCCAC
GCAGTATGGTTCCCGTTTTACCCCCTGTGAGCGTTTGGTCGAGATGGGCGAGCGTGGGGA
AAGTTTTTGGAAAACAACTGCAACTGACCTGCAATAAGAAGGTCAAAGCTATATGAATCC
GCGCTGAATGGCGGATAGTTGGTCAAAATGTAAACGCATATTGACTATACTTACGCCATT
GAGGTAAAAAACAGCGTTTCATTCGGTGAATGGATAAGGCACAATGCCGGCCACCGTTTT
CTTTCTCTGGTTTCAGATGAAAGAAAACGGGCGAATCTGGTTAACAAAAGCGGTGCAATA
TGCAAGTTTTTATCATGCGTCACGGCGACGCAGCCCTCGATGCCGCCAGTGATTCGGTTC
GTCCTCTGACTACTAATGGTTGTGACGAATCTCGCCTGATGGCGAACTGGCTGAAAGGTC
AAAAAGTGGAAATCGAACGCGTTCTGGTGAGCCCGTTCCTGCGAGCCGAGCAAACACTGG
AGGAAGTAGGGGATTGTCTGAACCTGCCTTCCAGTGCAGAAGTTCTGCCGGAGTTAACGC
CCTGCGGCGATGTTGGTCTGGTCAGTGCCTATTTGCAGGCGTTGACCAATGAAGGTGTTG
CTTCGGTGTTGGTTATCTCCCACTTACCGTTAGTTGGGTATCTGGTCGCCGAGTTATGTC
CGGGCGAAACGCCGCCTATGTTTACCACCTCGGCCATTGCCAGCGTCACGCTTGATGAAA
GCGGAAACGGCACATTCAACTGGCAGATGAGCCCGTGTAATCTGAAGATGGCGAAAGCTA
TCTGATTTGTTTGAAAAAATGCCCGATGTAAGCTGTACATCGGGCATTTGTCTTTTTGCA
ATAGTATAAATTCACTCAAAACCCTTCACGGAGTTGGTATGCTGCGATGATGATTTCATC
GCACTCTTTCCTCTGCTTCCCTATTAATTTCTGATGAAATGAGACTAAGCTGTAATATAT
TTTTACAAATTATAAAACTAATGGAATAATTAACAGTAAAAAAGAAATGATATTTTTGTG
TCTTGATTTAATATTATTTGTGATGCTTTAATATTATACCTTCAAAAAATACAATTTCAA
AATTAATCTAAGATTGTCTTTTTTTGTATACATTTCCCATAAATTTTAATTATGTAAAAG
ATGTTTTCTAAGCGTTTTATTTGTTTTTTATAAGTAAACTCTCAAAATTTTACCTTTTTG
ATTATATGTTAAGTACTCCTTAATTTACTGTTAAGTAAATATAAATTGAAACAATAAAGA
CAAAACATCACCATCCACCCACACCAAAGAATATCTTCTTATGCGACCTATTTTCTTGTT
AGTTAGATCGGATAGCTTATTCAATGGCTGAGTATAAATAATTGCTATTGACTGAATCAA
TGTATTGCAATGTTTATATTTTTAATTATTTATGGTTTAAGGACAAATAATGAGTAAGTT
TGTAAAAACAGCTATTGCTGCAACAATGGTAATGGGTGCGTTCGCTTCTACTTCAACAAT
CGCCGCTGGCAACAACGGTACAGCTCGTTTTTACGGCACCATTGAAGATTCCCCGTGCTC
CATCGTTCCTGATGATCACAAACTGGAAGTGGATATGGGTGACATTGGTTCGGGGATCCT
GAAAAATAACGGGACCTCCACGCCGAAAGCTTTCCAGATCCATCTGCAAGACTGCGTGTT
TGACACCCAGACAACCATGACAACGACCTTCACCGGTAACGCGTCCGCTACCAACAGCGG
CAATTACTACACCATTTACAATACCGACACCGGCGCGGCATTTAACAATGTCAGCCTGGC
GATTGGTGATGCTCAGGGGACCTTTTACAAAAGCGGTACGGGCATCAACCAGACAATTGT
AAAAGATACTGCCACCAACAAAGGCAAAGCGAAGCAGACGCTGGACTTTAAAGCCTGGCT
GGTGGGCGCTGCTGATGCGCCAGATTTGGGTAACTTCGAAGCCAACACGACTTTCCAGAT
TACTTATCTCTAAGTGATATCCCCATAGCCTTCGGCTATGGGGTTTTTTAAATGGAATTT
GCGCAAATTATAATAATTACGGATGGATACGTGCATGCCTGACGATTCTCTTTTCCGACT
GCGGGTGCTTCCCTGCTGCATTGCGCTGGCAATGTCAGGGTGTTATGTCAATGCCTGGGC
TGAAGATGAAATTCAGTTTGATTCCCGTTTCCTGGAGTTAAAAGGCGACACAAAAATCGA
TCTGAAGCGATTTTCCAGCCAGGGATATGTCGAACCTGGTAAATACAATTTACAGGTTCA
ACTAAATAAACAGCCGCTGGCGGAAGAATACGATATTTACTGGTACGCCTCTGAGAACGA
TGCCAGTAAAACCTATGCCTGCCTGACACCTGAACTGGTCGCTCAGTTTGGTTTAAAAGA
GGATGCGGCAAAAAAACTGCAATGGATCCACGACGGCAAATGTTTGAAACCCGGCCAGCT
GGAAGGCATTGATATTAAAGCTGACCTGAGTCAGTCAGCGTTAGTCATTTCATTACCCCA
GGCTTACCTTGAATATACCGACACCGACTGGGACCCACCTTCACGCTGGGATGACGGTAT
TTCTGGTTTAATTGCTGACTACAGTATTACCGCCCAGACACGACATGAAGAAAATGGCGG
GGATGACAGCAATGAAATTAGCGGCAACGGAACGGTTGGGGTTAACCTCGGCGCATGGCG
TCTGCGAGCCGACTGGCAGACCGACTACCAGCACAGCAAAAGCAATGATGAAGATGTTAT
CAACGGTGATGACACGCAAAAAAACTGGGAGTGGAGCCGCTACTACGCCTGGCGGGCTTT
ACCGTCGCTAAAAGCCAAACTTGGCCTTGGCGAAGACTACCTTAATTCTGATATTTTCGA
CGGCTTTAACTACGTGGGTGGCAGTATCAGCACCGACGATCAAATGTTGCCGCCGAATCT
GCGCGGCTATGCGCCGGATATCTCCGGCGTGGCGCACACCACCGCGAAAGTGACCGTCAG
CCAGATGGGCCGCGTGATTTACGAAACGCAGGTTCCGGCGGGGCCGTTCCGCATCCAGGA
TCTTGGCGATTCTGTCTCCGGTACACTGCACATCCGCATTGAAGAACAGAACGGCCAGGT
GCAGGAATATGACATCAACACCGCCTCGATGCCGTTCCTGACCCGCCCCGGTCAGGTGCG
CTATAAGCTGATGATGGGCCGCCCGCAGGAGTGGGGGCATCATGTTGAAGGTGGTTTCTT
CTCCGGCGGCGAAGCTTCATGGGGGATTGCCAACGGCTGGTCGCTCTACGGCGGAGCGCT
GGCAGATGAACACTATCAGTCGGCGGCGCTTGGCGTCGGTCGCGACCTGTCTGTCTTTGG
CGCAGTCGCCTTTGATATCACCCACTCGCATACCCGCCTGGATAAAGAGACCGCCTACGG
TAAAGGTTCACTGGACGGTAACTCGTTTCGCGTGAGCTATTCCAAAGACTTCGATGAACT
GAACAGCCGCGTCACTTTTGCCGGATACCGCTTCTCGGAAGAGAACTTCATGACCATGAG
CGAGTATCTCGATGCCAGCGACAGCGAAATGGTGCGCACTGGCAACGACAAAGAGATGTA
CACCGCCACCTACAACCAGAACTTCAGGGATGCCGGTGTGTCTGTTTATCTAAACTACAC
CCGCCATACCTACTGGGATCGCGACGAACAGACCAACTACAACGTCATGCTCTCGCACTA
CTTCAACCTGGGCAGTATCCGCAATATGAGTATTTCCATGACCGGATACCGCTACGAATA
TGACAACCGCGCCGATAAAGGTGTGTACATATCGCTCAGTATGCCGTGGGGCGACAGCAG
CACCATCAGCTATAACGGTAACTACGGCAGCGGTGCGGACAGCAGCCAGGTGGGGTATTT
CAGCCGTGTCGATGACGCAACCCACTACCAGTTGAACGTGGGAACCAGTGACAAACACTC
CAGCGTTGACGGCTATTACAGCCACGATGGTTCGCTGGCGCAGGTCGATCTCAGCGCCAA
CTACCATGAAGGGCAGTACACCTCGGCGGGCATTTCCTTACAGGGCGGCGCGACGCTCAC
CGCACAAGGTGGCGCGCTTCACCGTACCCAGAATATGGGCGGCACGCGTCTGCTGATTGA
TGCCGACGGCGTGGCTGGTGTTCCGGTAGAAGGAAATGGTGCGGCGGTTTACACCAATAT
GTTCGGTAAGGCCGTGGTGGCAGACGTCAACAACTACTACCGCAACCAGGCGTATATCGA
CCTTAACAACCTGCCGGAAAACGCCGAAGCCACCCAGTCCGTGGTGCAGGCGACGCTTAC
CGAAGGAGCCATTGGCTACCGTAAGTTTTCGGTTATCAGCGGGCAAAAAGCGATGGCGGT
ATTGCGCCTGCAAGATGGCAGTCATCCGCCGTTTGGCGCGGAAGTGAAAAATGACAACGC
GCAGAACGTCGGTCTGGTTGATGATGATGGCAACGTCTACCTCGCGGGTGTGAAACCTGG
CGAGCATATGACCGTTTCATGGGGCGGCGTGGCCCACTGTTATATTCATCTGCCGGACCC
ACTGCCTGCCGATCTGTTCAATGGCCTGTTATTGCCATGTCAGCAAACAGGGCCGATATC
TCCTTCGATGCCCAATGAAATTAAGCCGGTGATCCAGGAGCAGACCCAGCAGGTGATGCC
AACGGAAGCGCCGGTATCGGTATCCGCCAATTAACAACGTGATTAAGGAATGATCCATGA
CGAATCTATTTTGCTCTGCCAGAACGGCCGCAACGACGCTGGCGTTACTGATAACTGCCG
CCAGCCTGTCAGCACAGGCCTCTGTCACGCCGGACCGTACACGCCTGATTTTTAACGAAA
GTGATAAATCAATCAGTGTCACGCTGCGCAATAACGACCCGAAAATGCCGTATCTGGCAC
AAAGCTGGATGGAAGATGAACAGGGTAACAAGATTAGCTCGCCACTGACGGTACTGCCGC
CGGTGCAGCGCATCGATTCCATGATGAACGGTCAGGTGAAGGTACAGGGCATGCCGGATA
TCAACAAGCTGCCTGCCGACCGCGAGAGCGTGTTCTATTTCAACGTGCGTGAGATCCCGC
CGAAATCGAACAAACCCAACACGTTACAGATTGCGCTGCAAACGCGCATCAAGCTGTTCT
GGCGACCAAAGGCGCTGGAAAACGTCAGCATGAAAAATCCATGGCAGCATAAGGTGACCT
TAACCCGCAGCGGCCAGGAGTTTACTGTCAATAACCCGACGCCGTACTTCGTGGTTATCA
GTAACGCCAGCGCGCAGAAAAACGGCAATCCGGCAGCGGGATTTTCTCCCATGGTGATAT
CGCCAAAAACCTCCGTGCCGCTGAATGTCAAAATGGATAGCGTCCCGGTGCTGACCTACG
TCAACGACTATGGCGCGCGGATGCCGCTGTATTTTAAATGTGGTGGCGATACCTGCCAGG
TGGACGCAGAGCAGAGCCGCAAAGGCTGATGCCGGGAGAGCCATATGAAAATAATTTATC
TGGCGGTGTCGGGCATTGCGCTGCTGGCCTGGAATGTCGCCAGTGCAGAAACGAAACCCG
TCAACCTGGAACTCAGAGTCCTGGTGGATGCGCCGCCGCCCTGTACCGTGACCGGTAGTG
CAGTGGAGTTTGGCGATGTGCTGATCGCCAGTATCGATGGCAACAATTACCGCCAGAACG
CGGGCTATACCCTCGATTGTTCGGGGCGTCTGGCAGACGATCTGCGGATGCAACTGAAGG
GCACCACCACAACCGTGAACGGTGAAACTGTGCTGGATGCAGGCATTGCCGGGTTTGGCA
TCCGCATCGAAAACGCCGCCGATAACTCGCTGTTTTCCATTGGTGAAAATAACTGGACGC
CTTTTGCATTTAACTCTCTGCCGCAACTGAAGGCTGTGCCGGTAAAACAGAACGGCGTGC
AGCTCGCGCCAACGGAATTTAACGCCAGTATGACCATGGTGGTGGATTACCAATGAAACG
ACTCGCACTTTTCCTGATTTGGGGTGCCTGCGGGGGCGCTCTGGCCTCACCGGATATCAC
CTTTCACGGCACGCTGGTGTCGCCGCCTGCCTGCACCATCAACGAAGGCCAGACCATTGA
ACTGGAGTTTCGCGATGTACTTATCGACAGCATTGATGGCAACTACGCCCGCCAGGAGGT
GCCGTACACCATCAAATGTGACTCCGACGTTCGCAATGAGGCCTGGCAGATGACGCTCAC
CTGGACCGGGACGCAAACCAGCTACAACGATGCGGCAATCGAAACCGATGTTCCGGGATT
CGGGATTCAGCTTTTGCAAAACGGGCAACGTTTTCAGCTTAATACCCCACTGACCATCAA
TGCCACGGATTTGACACAAAAACCGAAGCTTGAGGCCGTTCCGGTTAAAGCGAGTGACGC
TGTTTTAAACGACGGCACGTTTTCAGCGTACGCAACATTACGGGTGGAATATCAATGAAG
ACAAATACCGGATGTGTGCTTCTGGCAAGCCTGATGCTCACCGCCAGCGGAACCACGTTG
GCGGCGGACAACCTGCATTTTTACGGCAACTTGTTAAGTAAATCCTGCACGCTGGTGGTG
GATGGTGAAGTGCTGGCGGAAGTGCATTTCCCGACCATCAGCAACCAGGATTTAACGGTG
GCGGGCCAGTCTTCCAGGGTGCAGGTGGTCTTTAAGTTGAAAGATTGCAAAGGCCCGGCG
GATTACCAGGTCAAAGTCACGCTGACCGGTACGGAAGATAGCGAACAGCCAGGTTTTCTG
GCGCTTGACCCGGCATCCAGCGCGCAAGGGGTAGGGATTGGTATGGAAAAGTCAGACGGT
ACCTGGGTGCCGCTTAACGATTCTGCCGGTGCCACCTTTAACCTCACTAACGGCGCGAAT
AGCCTCAATTTTAATGCCTGGTTGCAGGCGAAAAGCGGTCGTGAAGTGACTTCTGGTGAC
TTCACCGCCAGCCTGACTGCCACTTTTGAGTATATTTAAGATGAAGATAATACGAAACTT
TTTGGGGCTGTTGACGCTGATGGTGTTGAGCCTGACGGCTCAGGCACAGACATTTCAGAT
GTATACCCCTATGGGTGTACCAGGCGCTTTAGCCAGGATAATATTTACTCTGGAAGTTGT
TACCCCTGCAGGCGTTTATACAGGTACATATCAGTCGCGCGATCCCAGGATGCTTCTCGT
TGGCAATTTAACATTGTTAAGCTGGAATGGTCCATCTTCAATTCCTGCGCCAACTATTTA
TCTGGATCATTCGAACGAAATAAATATGTCAAATTGTCCCGGTCTTGCTGGCGTTCCCTC
CACCAACGGCAAAGGATGGGATTGTTATGCTGCTGATTTAAAAGTCACGGTAACAGGGGA
CGTGCAGGGGTGTCCATGGCTGGTTTCAACCCAGATTACCACTACGGACCTGGGAGATGT
GGGGGCTACCTATGTAGGTCCTAAATACAATAACTCCACCTGTCCATCAATCCCACTGAC
GACATATGATGTTTCCTGGGATGAGAATACGGTGATTCATAAAAAAACATTGAATCTGAA
ATCAACAGACGCCGTAGGGGGAATCATCGAGAAAACCCTGTCGACCTATTTAATGGAAAG
TGAGAGGCTGTGTGATGGTAGCCAGTTTGATCCTCGCGGGGCAAATTGCCGTTTTGTTTC
GCAGATGATCACTTTTACAGCATCAGGCTGCGACGATGCCAAAGTGACGGTGACGCCGGT
TCCGCATCCGATTACTGACAGGCAACTGCATGATATTGTGGTGCGCGTCGATGCCAGCGC
ATTGCAGCCTATTGATTCAACGTGTCGCTTCCAGTATGTGTTGAATATGTTCTAGCACAT
ACCAGCCTGGTGACAGGAGTTTACCAGGCTTTTTTTCTCTCATATTGGATAATTTGCCCT
ACCTGAACACATTTAGGCCGGATAAGGCGTTTACCCCGCATCCGGCATTCGATACCAGCA
TTCAGGGCGAAATGGCAAAACGCATCCGCCCCTAATATTCACGGTAACTCCGGCGGCAGC
CACTCTTCCACTTCAATCAACACTAACAACGCTGCATCTCCGCCGTACTCTTTCGGTGCC
TGGTGAAATGCCATTACATGCGGATGTTGCGCCAGCCACAGCGGCGTTTGCTGTTTCAAA
ATATGCTTCCCGTGCCCGTGCATTACGCATGCGCAAAACACATGTTCACGGCGGCAGGCG
GCAATCAACGCCCCCAGTTCCTGCTTGGCCTGCATTTGCGTCAAACCATGTAAATCGAGG
AAAAGCTCCGGTGAATAATCGCCGCGTCGCAACTTCTTCGCCTCAAAATGACTCACATCC
GGGCGGACATATTTCACCGGGCCTTCGGTATTCAATAACGGCTGAAACTCATCTGAGAAA
TAATGGCTGGCATCGGCCTGCTCCTGAATCAACCGTTTCACCGGCACTTCGCTGATTTTC
TTACGCTGCGGTCGGTGGACAATCGTGTCCTGCTTAATCTTGCGAGTCCCCGCCATCAAC
TGGCGAAACAGAGCCTGGTCCTCCTCGCTAAGTGTTGTTTTCTTTTTCATTTATCTGTCT
CTATTTCTAATTTTCCTACAGTTTACCCGACTCGTAGCGCAATCGATCGTTTTAAACGTA
TTTTTCCTCACTCACCGCGCGTGAATGCTGATTTATCGTCATCTTCGTGGCAAACTAGCC
GCCGAAATTATTGCGATCATGCCCTGGAGGAATACGTGGATAAAATTTTCGTTGATGAAG
CAGTTAATGAGCTGCAAACCATTCAGGACATGTTGCGCTGGTCGGTTAGCCGCTTCAGCG
CGGCAAATATCTGGTACGGTCACGGCACCGATAACCCGTGGGATGAAGCGGTACAATTGG
TGTTGCCGTCGCTCTACCTGCCGCTGGATATTCCGGAAGATATGCGCACCGCGCGTCTGA
CCTCCAGCGAAAAACATCGTATTGTTGAGCGCGTGATCCGCCGCGTCAACGAACGCATTC
CGGTGGCTTACCTGACCAATAAAGCATGGTTCTGCGGTCATGAATTTTACGTCGATGAAC
GTGTGCTGGTGCCGCGCTCGCCGATTGGTGAACTGATCAACAATAAATTTGCCGGGCTAA
TCAGCAAGCAACCGCAGCATATTTTAGATATGTGTACCGGTAGCGGCTGCATTGCCATTG
CCTGTGCTTATGCCTTCCCGGAAGCGGAAGTCGATGCGGTAGATATCTCTCCCGACGCGC
TGGCGGTTGCCGAACAGAACATCGAAGAACACGGTCTGATCCACAATGTCATACCGATTC
GTTCCGATCTGTTCCGTGATTTGCCGAAAGTGCAGTACGACTTGATCGTCACTAACCCGC
CGTATGTCGATGCGGAAGATATGTCCGACCTGCCAAACGAATACCATCACGAGCCAGAAC
TGGGCCTGGCATCTGGCACTGACGGCCTGAAACTGACGCGTCGCATTCTCGGTAACGCGG
CAGATTACCTTGCTGATGATGGTGTGCTGATTTGTGAAGTCGGCAACAGCATGGTACATC
TTATGGAACAATATCCGGATGTTCCGTTCACCTGGCTGGAGTTTGATAACGGCGGCGATG
GTGTGTTTATGCTCACCAAAGAGCAGCTGCTGGCGGCCCGTGAACATTTCGCGATTTATA
AAGATTAAGTAAACACGCAAACACAACAATAACGGAGCCGTGATGGCTGGAAACACAATT
GGACAACTCTTTCGCGTAACCACCTTCGGCGAATCGCACGGGCTGGCGCTTGGCTGCATC
GTCGATGGTGTTCCGCCAGGCATTCCGCTGACGGAAGCGGACCTGCAACATGACCTTGAT
CGTCGTCGCCCTGGGACATCGCGCTATACCACCCAGCGTCGTGAGCCAGATCAGGTCAAA
ATTCTCTCCGGTGTTTTTGAAGGTGTTACTACCGGCACCAGCATTGGTTTGTTGATCGAA
AATACCGATCAGCGTTCTCAGGATTATAGTGCGATTAAGGACGTTTTCCGTCCTGGCCAT
GCCGATTACACCTACGAACAAAAATACGGTCTGCGCGATTATCGCGGCGGTGGACGTTCT
TCCGCCCGCGAAACCGCCATGCGCGTGGCGGCAGGGGCGATTGCCAAAAAATATCTCGCC
GAGAAATTTGGTATTGAAATCCGCGGCTGCCTGACCCAGATGGGCGACATTCCGCTGGAA
ATCAAAGACTGGTCGCAGGTTGAACAAAATCCGTTCTTCTGCCCGGACCCGGACAAAATC
GACGCGTTAGATGAACTGATGCGCGCGCTGAAAAAAGAGGGCGACTCCATCGGCGCGAAA
GTCACCGTTGTAGCCAGTGGTGTCCCCGCCGGACTTGGCGAGCCGGTCTTTGACCGCCTG
GATGCCGACATCGCCCATGCGCTGATGAGCATCAACGCGGTGAAAGGCGTGGAAATTGGC
GACGGTTTTGACGTAGTGGCGCTGCGCGGCAGCCAGAATCGCGACGAAATCACCAAAGAC
GGTTTCCAGAGCAACCATGCGGGCGGCATTCTTGGCGGTATCAGCAGCGGGCAGCAAATC
ATTGCCCATATGGCGCTGAAACCGACCTCCAGCATTACCGTGCCGGGGCGCACCATTAAC
CGCTTTGGCGAAGAAGTTGAGATGATCACCAAAGGCCGTCACGATCCTTGTGTCGGGATC
CGCGCGGTGCCGATCGCTGAAGCGATGCTGGCGATCGTTTTAATGGATCACCTGCTACGG
CAGCGGGCGCAAAATGCCGATGTGAAGACTGATATTCCACGCTGGTAAAAAATGAACAAA
ACCGCGATTGCGCTGCTGGCCCTGCTTGCCAGTAGCGCCAGCCTGGCAGCGACGCCGTGG
CAAAAAATAACCCAACCTGTGCCGGGTAGCGCACAATCGATAGGCAGTTTTTCTAATGGC
TGTATCGTCGGCGCTGACACGCTGCCGATACAGTCCGAACATTATCAGGTCATGCGTACC
GATCAGCGTCGCTATTTCGGTCACCCGGACCTGGTGATGTTTATCCAGCGTCTGAGTAGC
CAGGTGAGCAATCTGGGCATGGGTACGGTGCTGATTGGCGATATGGGGATGCCCGCTGGT
GGGCGTTTCAACGGCGGTCATGCCAGCCACCAGACCGGACTGGATGTCGATATCTTTCTG
CAACTGCCGAAAACACGCTGGACCTCCGCGCAGCTCTTGCGCCCGCAAGCACTGGACTTA
GTTTCCCGCGACGGTAAACACGTTGTCCCCACGCTGTGGAAGCCAGAAATTTTCAGCTTG
ATCAAACTCGCCGCCCAGGACAAAGACGTCACACGCATTTTTGTTAATCCGGCGATTAAA
CAACAACTTTGCCTTGATGCGGGCACCGATCGCGACTGGTTGCGCAAAGTGCGACCCTGG
TTCCAGCATCGCGCGCATATGCATGTACGATTACGTTGTCCTGCCGATAGTCTGGAGTGT
GAAGATCAACCTTTACCGCCACCAGGCGATGGTTGCGGGGCAGAACTGCAAAGCTGGTTT
GAACCTCCAAAACCGGGAACAACAAAGCCTGAGAAGAAGACACCGCCTCCGTTGCCGCCT
TCCTGCCAGGCGCTACTGGATGAGCACGTGATCTAATGGAAACGTTTAATAGCTTGTTTA
TGGTTTCCCCGCTGTTGCTGGGAGTTCTCTTTTTTGTCGCCATGCTGGCGGGATTTATCG
ACTCGATTGCCGGTGGTGGTGGGTTACTCACGATTCCGGCATTAATGGCTGCGGGGATGT
CTCCCGCTAATGCGCTGGCAACCAATAAACTGCAAGCCTGCGGCGGCTCTATTTCCGCCA
CTATCTACTTTATTCGCCGCAAAGTGGTTAGTTTAAGCGATCAGAAACTCAATATCGCCA
TGACCTTTATCGGCTCAATGAGCGGCGCACTGCTGGTGCAATACGTTCAGGCTGATGTCT
TACGGCAGATTTTGCCCATTCTGGTGATTTGTATCGGCCTCTATTTCTTGCTGATGCCAA
AGCTGGGTGAAGAAGATCGCCAGCGCCGGATGTACGGTTTACCCTTCGCGTTAATTGCCG
GTGGCTGCGTCGGTTTTTACGACGGATTCTTTGGTCCGGCAGCCGGATCGTTTTACGCGC
TGGCCTTTGTTACGCTGTGCGGATTCAACCTCGCCAAAGCCACGGCTCACGCCAAATTAC
TTAACGCAACGTCAAACATCGGCGGTTTGCTGCTGTTTATTCTCGGCGGCAAAGTGATTT
GGGCGACGGGCTTTGTGATGCTGGTGGGGCAGTTCCTCGGCGCGCGCATGGGTTCAAGAC
TGGTGTTGAGCAAAGGACAAAAGCTGATCCGCCCGATGATTGTTATCGTCTCGGCGGTGA
TGAGTGCCAAATTACTTTACGATAGCCATGGACAGGAGATCCTCCACTGGTTGGGGATGA
ACTAATGAACAGTACACACCACTATGAGCAGTTGATTGAAATTTTTAATAGCTGCTTTGC
CGATGATTTTAATACCCGTCTGATTAAAGGCGACGACGAACCGATCTATCTTCCCGCTGA
AGCGGAAGTACCGTATAACCGAATCGTCTTTGCTCATGGCTTTTATGCCAGCGCAATTCA
TGAGATTTCGCACTGGTGTATTGCCGGAAAAGCGCGCCGTAAGCTGGTTGATTTCGGCTA
CTGGTATTGCCCGGACGGACGCGATGCCCAAACGCAAAGCCAGTTTGAAGATGTTGAAGT
GAAGCCGCAGGCGCTCGACTGGTTGTTCTGCGTGGCGGCGGGATATCCGTTTAACGTCAG
TTGCGACAATCTGGAAGGGGATTTCGAACCGGACCGCGTGGTGTTTCAACGGCGGGTACA
TGCGCAGGTGATGGATTATCTGGCAAATGGCATTCCGGAACGCCCGGCACGTTTCATTAA
AGCACTACAAAATTATTATCACACGCCGGAACTTACGGCGGAACAGTTCCCGTGGCCGGA
AGCGCTAAACTAAAGCCAGTGCCACGTTTTACAATGAGGAAAGAAGATGATCGCGGAGTT
TGAATCACGCATTCTGGCATTAATCGACGGTATGGTTGACCATGCCAGTGATGATGAGTT
GTTTGCCAGTGGGTATTTGCGTGGCCACCTGACATTAGCCATCGCAGAACTGGAAAGTGG
TGATGACCACTCCGCTCAGGCGGTGCATACGACCGTTAGCCAGAGTCTGGAAAAAGCCAT
TGGTGCTGGTGAATTGTCGCCGCGTGACCAGGCGCTGGTGACCGATATGTGGGAAAACCT
GTTTCAGCAGGCATCACAGCAGTAAGTTGCGGCGTCTGGAGCACCATGCCTGATGCGACG
CTTATCGCGTCTTATCAGGCCTACACGTCACACGTAGGTCGGATAAGGCGTTCACGCCGC
ATCCGACAAACAATGCCAAAGCTGGTTACCCAGCCTTAACTGCTTTACCCTTCAACAATT
TCCGCACCCATAACCGATTCGGATTTAACGCCGCCAGCGTACTGGCATCCATCGGAATCG
GTTCTTCACTCATCTGTGCCGCCAGAATCTCTGCGCACAGTGGGGCAGAACACAAACCAC
GCGAACCCAAAGCAGCAAGCATAAAGAGATCGTCATAAACCGGCGCGCTTACCGCCTTAT
CTTTCTGCTCCGCCAGCGACGCATATTCCACAAGTGTTGCCTCATAATCGGGAACATTAC
CTACCATTGGTAGATGATCGCGGGTGGCACAACGCACACCGCAGCGCGCCTCTTTCTCAC
TGATATCAACCTCTTTTGCCCACTGTGCCTGCGGGAAACAATCAATCAACCGCTGGCGAT
TCTGCTGCTGATCTTCATCACTGTACGTCGTATCTTCGCTGCCGCGATGATAACTGGCAC
CAATACAATGATGCTGATTCGCCGGATTTTGTGGCGTGAGATAACCGTCATAGCACAGCA
CCTGCTTCAGTTTTGCCAGTTCCGGTGTCGTCGGAATATGGCTGACCTGACCGGCAACCG
AATATACTGGCAGAGATGATGTTTGGCTGAAACGGCTGATTTGATGCCCGTTCGCCAGTA
CCACTACGCTGTGTGTTGCTTGCTGATCTCCTGCAAAATTCAACAACCAACAGTCATCCT
TACGGGATAAATCCTGTAACTGATATTGATAATAAATCTGCAACCCCTGCTGTTGCGCCA
GTTCCAGCACATTACGGGTCAGTTCTGCTGGGCACAGCCAACCACCTTGCGGATAAGTAA
TGCCGCTGCAATTTGTCGCAACGCCCGTAATTTGTTCAACCGCATTTGCCTCAACGGCTA
CAGCCAGTTCTTCGGGTAAATCCATTGACAACATCTGTGCGATTTTATGCTGGCTTTTCT
CATCCCAGCCTAACTGCGTGACGCCGCACCAGTCATGATCAAATTTAACGGGTAATTGGT
CGTAAAACCGACGAGCAAAAGTAAACGCATTAGAGAAAAAGCGGTTTAGCGCCTCATCGT
GTTTGCTTAATAACGGATACAACGCCCCCTGGCGATTGCCGGAAGCACCCAGCGCGGGGG
CTTCATCCGCGCAATAAAGCGTTACCTGCCAGCCGCGGCGTAATAACGCCAGCGACAACA
ACGCGCTGGCAATACCACCGCCGATAATCGCCGCTTCCAGTTTGCTGCTGCCCGTACGAT
TAAACCACGGCGTGGAGCAGGGGAGTGGTAATGTCTGTTCCATCACCCCACAAAGCATTT
CCCGTTTGCGCCCAAAGCCCTTACGTTTTTGCATCGTGAATCCGGCTTCCTGCAAACCGC
GGCGGACAAAACCGGCAGACGTAAATGTCGCCAGCGTGCCGCCTGGACGCGCCAACCTTG
CCATGGCGTTAAACAGATTTTGCGTCCACATATCCGGGTTTTTAGCTGGCGCAAAGCCGT
CCAGAAACCAGGCATCTACTTTTTGATTTAGAGAATCGTCCAGTTGGCTGGTCAGTTCAT
TAATATCGCCAAACCATAAATCCAGCGTCACGCGGCCTTCATCGAGTAATAAACGATGGC
AACCGGGCAAGGGCATTGGCCACTGCGCCTGAAGTTGTTCTGCCCACGGAGTCAGTTCCG
GCCAGTGTTGATGCGCTAAGGCTAAATCCGCACGGGTGAGGGGAAATTTCTCAAAACTAA
TGAAATGTAAGCGTTGTAATTGCGCTTGCGGATGCGCTTCGCGAAACTGATCAAATGCCT
GCCATAGCGTCAGGAAGTTTAATCCGGTGCCGAAGCCGCTCTCTGCTACCACAAACAGAG
GATGTGGATGTTCAGGAAAGCGTGCCTCTAATTGGTTACCTCCCAGAAAAACATAACGCG
TCTCTTCCAGCCCGTTATCGTTGGAAAAATAGACATCGTCAAAATCTCGGGAAACAGGTG
TACCCTCAGCATTAAATTCGAGGTTGGCAGGTTGTATGGAGTAGTGTTTCACGTAAGTTA
CTCGTCTTACAGGCGGTGGCTCGATCTTAGCGATGTGTGTAAGGCTGCGCAAATTTCTCT
ATTAATTGGCTGATCGGACTTGTTCGGCGTACAAGTGTACGCTATTGTGCATTCGAAACT
TACTCTATGTGCGACTTACAGAGGTATTGAATGAAACGTGCAGTGATTACTGGCCTGGGC
ATTGTTTCCAGCATCGGTAATAACCAGCAGGAAGTCCTGGCATCTCTGCGTGAAGGACGT
TCAGGGATCACTTTCTCTCAGGAGCTGAAGGATTCCGGCATGCGTAGCCACGTCTGGGGC
AACGTAAAACTGGATACCACTGGCCTCATTGACCGCAAAGTTGTGCGCTTTATGAGCGAC
GCATCCATTTATGCATTCCTTTCTATGGAGCAGGCAATCGCTGATGCGGGCCTCTCTCCG
GAAGCTTACCAGAATAACCCGCGCGTTGGCCTGATTGCAGGTTCCGGCGGCGGCTCCCCG
CGTTTCCAGGTGTTCGGCGCTGACGCAATGCGCGGCCCGCGCGGCCTGAAAGCGGTTGGC
CCGTATGTGGTCACCAAAGCGATGGCATCCGGCGTTTCTGCCTGCCTCGCCACCCCGTTT
AAAATTCATGGCGTTAACTACTCCATCAGCTCCGCGTGTGCGACTTCCGCACACTGTATC
GGTAACGCAGTAGAGCAGATCCAACTGGGCAAACAGGACATCGTGTTTGCTGGCGGCGGC
GAAGAGCTGTGCTGGGAAATGGCTTGCGAATTCGACGCGATGGGTGCGCTGTCTACTAAA
TACAACGACACCCCGGAAAAAGCCTCCCGTACTTACGATGCTCACCGTGACGGTTTTGTT
ATCGCTGGCGGCGGCGGTATGGTTGTGGTCGAAGAACTGGAACACGCGTTGGCACGTGGT
GCTCATATCTACGCTGAAATCGTTGGCTACGGCGCAACGTCTGATGGCGCAGACATGGTT
GCTCCATCTGGCGAAGGCGCAGTGCGCTGCATGAAGATGGCGATGCACGGTGTTGATACG
CCAATCGACTACCTGAACTCCCACGGTACTTCGACTCCGGTTGGCGACGTGAAAGAGCTG
GCTGCTATCCGTGAAGTGTTCGGCGATAAGAGCCCGGCGATTTCTGCAACCAAAGCCATG
ACCGGTCACTCTCTGGGCGCTGCTGGCGTACAGGAAGCTATCTACTCTCTGCTGATGCTG
GAACACGGCTTTATCGCCCCGAGCATCAACATTGAAGAGCTGGACGAGCAGGCTGCGGGT
CTGAATATCGTGACCGAAACGACCGATCGCGAACTGACCACCGTTATGTCTAACAGCTTC
GGCTTCGGCGGCACCAACGCCACGCTGGTAATGCGCAAGCTGAAAGATTAATTCGGAGTA
GGTCGGAGTAGGTCGGATAAGACGCGCCAGCGTCGCATCCGACGTTACGCGCCAATGCGG
CATTCGGCACTAACGCCAAAGGGAACCCGATGGTTCCCTTTTTCACATCATTGACAATCG
CCGCCTGTTCCAGGCAAACTTCCCGCTTTGTCGATTTCCTTCTGAAAAGACGTACGCGTT
AATTCCTGCCAACGCACCGTAACCCTGAAACCAGAGAGATGAGACGGGGATACTCCTCGC
CTTGCGCTGCATTCTGGAGTAATGCATGACTGCTGTAAGCCAAACCGAAACACGATCTTC
TGCCAATTTTTCGCTCTTCCGCATCGCTTTTGCGGTTTTTCTCACCTACATGACCGTAGG
GCTGCCGTTGCCGGTTATCCCGCTGTTTGTTCATCATGAACTGGGCTATGGCAATACCAT
GGTCGGCATTGCCGTCGGGATTCAGTTTCTGGCTACGGTGCTGACGCGTGGCTATGCCGG
GCGACTGGCCGATCAATATGGCGCAAAACGTTCGGCGCTTCAGGGGATGTTAGCTTGTGG
TCTGGCGGGGGGCGCGTTGCTGCTGGCGGCGATTTTGCCCGTCTCCGCACCGTTCAAATT
TGCCCTGTTGGTCGTCGGGCGTTTGATTCTTGGCTTTGGTGAAAGCCAGTTACTGACAGG
CGCTCTGACCTGGGGATTAGGCATCGTAGGGCCAAAACACTCTGGCAAAGTAATGTCATG
GAACGGAATGGCGATTTACGGTGCCCTCGCTGTTGGTGCACCGCTTGGCCTGTTGATTCA
TAGCCATTACGGTTTTGCCGCACTGGCGATCACCACAATGGCATTACCCTTACTGGCGTG
GGCCTGTAACGGCACAGTGCGCAAAGTACCGGCCCTGGCGGGAGAACGTCCATCGCTGTG
GAGCGTTGTCGGGCTTATCTGGAAACCAGGGTTAGGTCTGGCACTACAAGGCGTTGGTTT
TGCGGTTATCGGGACTTTCGTTTCGCTCTACTTTGCCAGCAAAGGATGGGCGATGGCGGG
CTTTACTCTTACCGCGTTTGGCGGGGCATTTGTCGTGATGCGCGTCATGTTTGGCTGGAT
GCCGGACCGTTTTGGCGGCGTGAAAGTGGCGATAGTCTCTCTGCTTGTAGAAACGGTGGG
CTTGTTGCTGCTCTGGCAAGCCTCGGGTGCGTGGGTCGCATTAGCGGGCGCGGCGTTAAC
CGGAGCCGGATGTTCGCTTATCTTTCCTGCGCTGGGCGTGGAGGTGGTTAAACGCGTCCC
CTCACAAGTTCGCGGCACCGCACTGGGCGGTTACGCCGCGTTTCAGGATATCGCCCTCGG
CGTCTCCGGGCCGCTGGCGGGAATGCTGGCGACCACGTTTGGTTACTCTTCGGTATTTCT
TGCCGGGGCGATCTCTGCAGTGCTGGGAATTATTGTCACGATACTGTCATTTCGTCGGGG
CTAACGAACCAGCCAGACCAGCATCAGGATAATCGCGACTAACAGTATCCACAGCGCGGG
ACGCGTTGCCATATTTTGCAACGTGTCCATCATCGGTGGAAAAGGATTAAGCAGCGGTTG
CATATCACGCGGATCAATCCCTTTAACCCGCCGTTGATAAAGCTGATTAAGAATATCCTC
GGCCTGGGCAGAAGAAAGCGATGATTGCGCAGAAAGGCCATATTTTTGCTGGATATATGC
CGATAACGCCGCCAGTTCACTGGCATCTAAAGGTTGTTTTAGCGCCATCTGTAGTGATTC
CAGCGTCGGCGTATTTTGCTGGCTTAGCGTCTGACGCGCCTGTAGCCAGGTCACCAGATG
GTTAAACAGTTTCGCTGGAATTAACTCGCCATCTTTCACCCCGGAAAGTTCCAGCATCGA
TTGCCAGATCTGTTTGCTGGGTTCCCCCGTTGCCGCCGCAAGTTTGGTCACCAGCTGTTT
GAGCGCATTGTGCTCCGCCGGTAATAAAGGACGATCGGTCGCCTCGCGCTGCTGCGGTTG
CGGAATAACCATCTTCCCTTCCTGCAACAGGGTTAGAATGGTTTTTAATTGCTCCGGTGA
GAGCTGATTCAGCGGCGTCTGACCAAAGTTATGACGGATATAATCCGTGACCGCCTGACG
ATTATTCCCCAGACGTAAATACTCCCCTAATTGCGCTAAAAGCTGGCGGGCAGAATGGCT
TTTTTGCGCGGCCAGCAGACGTTGCGCCAGATTATGCTCAGCGGCAGGGAAGTGACGCGA
AAGCAGCGGTGAATCTCCCGACAGACCAATATCGTGCCTGATACCCGCCCACAGTTCTGC
TCTTTGCTGTTGCGTCAGTGAGGTCACTTTCGTCATTAAGCTTTCCAGCGAAGTACGTTG
CTGACTGGATAAAGGCTGATTGCCCGCGCCAGACGGCAGGTTATCTCCCTGACCTGGTGG
TTGCCCAGGAGGAGGGCCGGAAATAGGTTGTATCATTACGTATCCTTATACCTGAAATCT
TCGCAAGTATGCCTGGCCGCGAGATTATGGCACACTTGTCCGGTTAACTCTCGTCTCATA
CAGGTAACACAAACGTGAAAATCCTTGTTGATGAAAATATGCCTTATGCCCGCGACTTAT
TTAGCCGTTTGGGTGAGGTGACCGCGGTTCCCGGGCGTCCAATCCCCGTCGCTCAACTGG
CAGACGCGGATGCGCTGATGGTGCGTTCGGTCACGAAAGTGAATGAATCTTTGCTGGCAG
GAAAACCCATTAAATTTGTTGGCACTGCCACTGCGGGGACCGACCATGTCGATGAAGCAT
GGTTGAAGCAGGCGGGAATTGGTTTTTCCGCTGCACCTGGCTGTAATGCGATTGCGGTGA
TGGAATATGTTTTCTCCTCCCTGCTGATGCTTGCCGAACGCGATGGATTTTCACTGCACG
AGCGTACCGTGGGGATCGTGGGCGTTGGTAACGTTGGACGTCGATTGCAGGCGCGACTGG
AAGCGTTAGGGATTAAAACCTTGCTTTGCGATCCGCCTCGCGCTGACCGTGGGGATGAGG
GTGATTTCCGCTCGCTGGATGAGTTAGTCCAGCGCGCGGATATTCTGACTTTCCATACGC
CACTCTTTAAAGATGGTCCGTACAAAACGCTACATCTGGCGGATGAAAAACTGATCCGTA
GCCTGAAGCCGGGAGCGATTCTGATTAACGCCTGCCGTGGCGCAGTCGTCGATAATACCG
CGCTGCTGACCTGCCTGAATGAAGGCCAGAAGTTAAGCGTGGTGCTGGATGTCTGGGAAG
GCGAGCCGGAACTTAATGTGGAATTGCTGACAAAAGTGGATATCGGCACGCCGCATATTG
CAGGCTATACCCTGGAAGGTAAAGCACGCGGTACTACGCAAGTGTTTGAAGCCTATAGCA
AGTTTATTGGGCATGAACAGCACGTTGCGCTGGATACATTACTGCCCGCGCCAGAGTTTG
GTCGCATTACGCTGCATGGCCCGCTCGATCAACCGACGCTGAAAAGGCTGGTGCATTTGG
TGTATGATGTGCGCCGCGATGACGCACCGCTGCGTAAAGTCGCCGGGATACCGGGTGAGT
TCGATAAACTGCGCAAAAACTATCTTGAGCGCCGTGAATGGTCATCTCTGTATGTAATTT
GTGATGACGCCAGTGCGGCATCATTGCTGTGTAAACTGGGTTTTAACGCCGTTCATCATC
CGGCACGTTAATCTCTTCTTCATGCTCTCTGCTGTAACATTGGCAGGGAGCTTTGCTATT
TCTGGAGTAAACCACCATGTCTGAAGGCTGGAACATTGCCGTCCTGGGCGCAACTGGCGC
TGTGGGCGAAGCCCTGCTTGAAACGCTGGCTGAACGTCAGTTCCCGGTTGGGGAAATTTA
TGCACTGGCACGTAACGAAAGCGCAGGCGAACAACTGCGCTTTGGTGGTAAAACAATCAC
CGTGCAGGATGCCGCTGAATTCGACTGGACGCAGGCGCAGCTGGCATTTTTTGTCGCAGG
CAAAGAAGCTACCGCTGCCTGGGTTGAAGAAGCGACCAACTCAGGTTGCCTGGTGATCGA
CAGCAGCGGACTGTTTGCTCTCGAACCAGACGTACCGCTGGTGGTGCCGGAAGTAAACCC
GTTTGTACTGACCGATTACCGCAACCGGAATGTCATCGCCGTACCGGACAGTCTGACCAG
CCAGTTGCTGGCGGCACTGAAACCGTTAATCGATCAGGGCGGTTTATCACGTATCAGCGT
TACCAGCCTGATTTCAGCCTCCGCCCAGGGCAAAAAAGCGGTCGATGCGTTAGCGGGGCA
GAGTGCGAAATTGCTCAACGGCATTCCGATTGACGAAGAAGATTTCTTCGGGCGTCAGCT
GGCGTTCAACATGCTGCCGTTACTGCCGGATAGCGAAGGTAGCGTGCGTGAAGAACGTCG
TATCGTTGACGAAGTACGCAAAATCCTGCAGGACGAAGGGCTGATGATTTCGGCAAGCGT
CGTCCAGGCACCGGTATTCTACGGTCATGCCCAGATGGTCAACTTTGAAGCACTGCGTCC
GCTGGCGGCAGAAGAAGCGCGTGATGCGTTTGCTCAGGGCGAAGATATTGTGCTCTCTGA
AGAGAACGAATTCCCGACTCAGGTAGGGGATGCTTCTGGTACGCCGCATCTTTCTGTTGG
CTGCGTGCGTAATGACTACGGTATGCCGGAGCAAGTCCAGTTCTGGTCGGTGGCCGATAA
CGTTCGCTTTGGCGGCGCGCTGATGGCAGTAAAAATCGCCGAGAAACTGGTGCAGGAGTA
TCTGTACTAATGTCCGACCAGCAACAACCGCCAGTTTATAAAATTGCGCTGGGCATTGAG
TACGACGGCAGTAAGTATTATGGCTGGCAACGGCAGAACGAAGTTCGCAGTGTGCAGGAG
AAGCTGGAAAAGGCGCTCTCCCAGGTGGCGAACGAACCCATCACCGTCTTCTGCGCCGGG
CGTACTGACGCAGGGGTACACGGTACCGGGCAGGTTGTGCATTTCGAAACAACCGCGCAG
CGCAAAGACGCTGCGTGGACGTTGGGCGTAAATGCGAATTTACCTGGTGACATCGCCGTG
CGTTGGGTTAAAGCTGTACCTGATGATTTTCATGCCCGATTTAGCGCCACGGCTCGCCGT
TATCGCTACATCATCTACAATCATCGGCTGCGCCCGGCGGTACTGAGTAAAGGGGTAACC
CATTTTTACGAACCGCTGGACGCTGAACGGATGCATCGGGCTGCGCAATGCTTGCTGGGC
GAGAATGATTTCACCTCGTTCCGTGCGGTGCAGTGCCAGTCCCGAACCCCGTGGCGCAAC
GTTATGCATATTAATGTCACGCGTCACGGTCCTTATGTGGTGGTAGATATCAAAGCGAAT
GCCTTTGTACATCATATGGTCAGGAATATTGTCGGCAGCCTGATGGAAGTCGGTGCCCAC
AACCAGCCGGAGAGCTGGATAGCAGAGTTGCTGGCGGCAAAGGACAGAACGCTGGCGGCA
GCAACGGCAAAAGCGGAAGGGCTGTATCTGGTCGCGGTGGATTACCCTGACCGGTATGAT
CTTCCAAAACCGCCAATGGGCCCGCTATTTCTGGCGGACTAACGAGAATAACGCTCGTAA
CATTTCAGGCTGTAGCCAACGTAGTTACAGCCTGAAAGATGACGAGTACAAGGCATAGGC
AAATATGGACCTGATTTATTTCCTCATCGATTTTATCCTGCACATTGACGTGCATCTGGC
AGAGCTGGTCGCGGAGTACGGCGTCTGGGTTTATGCCATTTTGTTCTTAATTTTGTTCTG
TGAAACCGGTCTGGTGGTAACGCCGTTTTTACCGGGTGATTCATTGCTGTTTGTTGCCGG
TGCGTTGGCATCACTGGAAACCAACGATCTCAACGTCCATATGATGGTGGTGCTGATGCT
GATCGCCGCGATTGTGGGTGACGCGGTCAATTACACTATCGGGCGGTTGTTCGGTGAAAA
GTTATTCAGTAATCCCAATTCGAAAATTTTCCGTCGCAGCTATCTCGACAAAACCCATCA
GTTTTATGAGAAACATGGCGGCAAAACGATTATTCTCGCCCGTTTTGTGCCGATCGTCAG
AACGTTCGCCCCGTTTGTTGCGGGAATGGGCCACATGTCGTACCGTCATTTCGCTGCTTA
TAACGTGATCGGCGCACTGTTGTGGGTACTGCTTTTTACCTACGCAGGCTATTTCTTCGG
TACAATCCCGATGGTTCAGGATAACCTTAAGCTGCTGATCGTCGGGATTATTGTGGTTTC
TATTTTGCCGGGCGTCATCGAAATAATCCGTCACAAACGCGCTGCGGCACGCGCCGCAAA
ATAAAAAGTAACTCAGCGGTTCGACCACTTTTTTATCCAAAGTTTCGGGCTGTTATGTTT
TAATGTGCAACATTCATGGTCTGTTGGGGGCAAAAATGGCATTATGCGTCCCCAAAGATA
AAACTGGCATCGAACCAGGTTCAGACAGAAAGGTCCCTAATGAGCTGGATTGAACGAATT
AAAAGCAACATTACTCCCACCCGCAAGGCGAGCATTCCTGAAGGGGTGTGGACTAAGTGT
GATAGCTGCGGTCAGGTTTTATACCGCGCTGAGCTGGAACGTAATCTTGAGGTCTGTCCG
AAGTGTGACCATCACATGCGTATGACAGCGCGTAATCGCCTGCATAGCCTGTTAGATGAA
GGAAGCCTTGTGGAGCTGGGTAGCGAGCTTGAGCCGAAAGATGTGCTGAAGTTTCGTGAC
TCCAAGAAGTATAAAGACCGTCTGGCATCTGCGCAGAAAGAAACCGGCGAAAAAGATGCG
CTGGTGGTGATGAAAGGCACTCTGTATGGAATGCCGGTTGTCGCTGCGGCATTCGAGTTC
GCCTTTATGGGCGGTTCAATGGGGTCTGTTGTGGGTGCACGTTTCGTGCGTGCCGTTGAG
CAGGCGCTGGAAGATAACTGCCCGCTGATCTGCTTCTCCGCCTCTGGTGGCGCACGTATG
CAGGAAGCACTGATGTCGCTGATGCAGATGGCGAAAACCTCTGCGGCACTGGCAAAAATG
CAGGAGCGCGGCTTGCCGTACATCTCCGTGCTGACCGACCCGACGATGGGCGGTGTTTCT
GCAAGTTTCGCCATGCTGGGCGATCTCAACATCGCTGAACCGAAAGCGTTAATCGGCTTT
GCCGGTCCGCGTGTTATCGAACAGACCGTTCGCGAAAAACTGCCGCCAGGATTCCAGCGC
AGTGAATTCCTGATCGAGAAAGGCGCGATCGACATGATCGTCCGTCGTCCGGAAATGCGC
CTGAAACTGGCGAGCATTCTGGCGAAGTTGATGAATCTGCCTGCGCCGAATCCTGAAGCG
CCGCGTGAAGGCGTAGTGGTACCCCCGGTACCGGATCAGGAACCTGAGGCCTGATAACTG
ATAAGGGCAGGGCCACTGGCTCTGCCCTTTTGCTATTCTCACCGTAACGAATCAGCGGAT
ACCATGATTATCAAACGCACTCCTCAAGCCGCGTCGCCTCTGGCTTCGTGGCTTTCTTAT
CTGGAAAACCTGCACAGTAAAACTATCGATCTCGGCCTTGAGCGCGTGAGCCAGGTCGCG
GCGCGTCTTGGCGTTCTGAAACCAGCGCCATTTGTGTTTACCGTTGCGGGTACGAATGGC
AAAGGCACCACCTGCCGTACGCTGGAGTCGATTCTGATGGCGGCAGGGTACAAAGTGGGC
GTCTACAGTTCGCCTCATCTGGTGCGTTATACCGAGCGCGTACGTGTGCAGGGTCAGGAA
TTGCCGGAATCGGCCCACACCGCCTCTTTTGCGGAGATTGAATCGGCACGCGGTGATATT
TCCCTGACCTATTTCGAGTACGGTACGCTGTCGGCGTTGTGGCTGTTCAAACAGGCACAA
CTTGACGTGGTGATTCTGGAAGTAGGGCTGGGCGGTCGTCTGGACGCAACCAATATTGTC
GACGCCGATGTCGCGGTAGTAACCAGTATTGCGCTGGATCATACCGACTGGCTGGGGCCA
GATCGCGAAAGTATTGGTCGCGAGAAAGCAGGCATCTTCCGCAGCGAAAAACCGGCAATT
GTCGGTGAGCCGGAAATGCCTTCTACCATTGCTGATGTGGCGCAGGAAAAAGGTGCACTG
TTACAACGTCGGGGCGTTGAGTGGAACTATTCCGTCACCGATCATTACTGGGCGTTTAGC
GATGCTCACGGCACGCTGGAAAATCTGCCGTTGCCGCTTGTCCCGCAACCGAATGCCGCA
ACGGCGCTGGCGGCACTGCGTGCCAGCGGGCTGGAGGTCAGTGAAAATGCCATTCGCGAC
GGGATTGCCAGCGCAATTTTGCCGGGACGTTTCCAGATTGTGAGCGAGTCGCCACGCGTT
ATTTTTGATGTCGCGCATAATCCACATGCGGCGGAATATCTCACCGGGCGTATGAAAGCG
CTACCGAAAAACGGGCGCGTGCTGGCGGTTATCGGTATGCTACATGATAAAGATATTGCC
GGAACTCTGGCCTGGTTGAAAAGCGTGGTTGATGACTGGTATTGTGCGCCACTGGAAGGG
CCGCGCGGTGCCACGGCAGAACAACTGCTTGAGCATTTGGGTAACGGCAAATCATTTGAT
AGCGTTGCGCAGGCATGGGATGCCGCAATGGCGGACGCTAAAGCGGAAGACACCGTGCTG
GTGTGTGGTTCTTTCCACACGGTCGCACATGTCATGGAAGTGATTGACGCGAGGAGAAGC
GGTGGCAAGTAAGTTTCAGAATCGGTTAGTGGGCACGATCGTGCTGGTGGCGCTGGGGGT
GATTGTACTTCCAGGGCTGCTGGACGGGCAGAAAAAACATTATCAGGATGAGTTTGCGGC
TATCCCGCTGGTTCCAAAAGCGGGCGATCGCGATGAGCCTGATATGATGCCAGCCGCCAC
CCAGGCGTTGCCGACGCAGCCGCCGGAAGGCGCAGCGGAAGAGGTGCGGGCAGGTGATGC
CGCAGCACCGTCGCTCGATCCGGCCACTATTGCAGCCAATAACACCGAGTTTGAACCGGA
ACCTGCACCGGTCGCGCCACCGAAGCCGAAACCGGTGGAGCCGCCTAAACCAAAGGTTGA
AGCACCACCTGCGCCGAAGCCAGAACCGAAGCCGGTCGTGGAAGAAAAAGCTGCACCGAC
GGGTAAAGCCTATGTTGTGCAACTGGGTGCGCTGAAAAATGCCGATAAAGTGAATGAAAT
TGTCGGTAAGCTGCGCGGTGCCGGTTATCGGGTTTATACGTCGCCATCCACGCCAGTGCA
GGGTAAAATTACCCGTATTCTGGTTGGGCCGGATGCCTCGAAAGATAAGCTGAAAGGTTC
GCTGGGTGAGTTGAAGCAACTTTCTGGCTTAAGTGGCGTGGTAATGGGCTATACGCCGAA
TTAATACGGTCTTGCCTGATGCGACGCTGGCGCGTCTTATCAGGCCTACGCAGGGGTAGA
ACCGTAGGTTGGATAAGGCGTTTACGCCGCATCCGACACGCATTGCACGATGCCGCAAAG
GCATAAAAAGTCGATGGCGTTGAATATTTTTTCAGCGCCATTTTTATTGATGCGCGGGAA
GGAAATCCCTACGCAAACGTTTTCTTTTTCTGTTAGAATGCGCCCCGAACAGGATGACAG
GGCGTAAAATCGTAGGACACATATGGTCTGGATTGATTACGCCATAATCGCGGTGATTGC
TTTTTCCTCTCTGGTTAGCCTGATCCGCGGCTTTGTTCGTGAAGCGTTATCGCTGGTGAC
ATGGGGTTGTGCTTTCTTTGTTGCCAGTCATTACTACACTTACCTGTCAGTCTGGTTTAC
GGGCTTTGAAGACGAACTGGTTCGAAATGGGATTGCCATCGCGGTACTGTTTATCGCTAC
CCTGATCGTTGGTGCTATCGTGAACTTCGTGATAGGCCAGTTGGTGGAGAAAACGGGGTT
GTCAGGCACCGATCGGGTGCTGGGCGTCTGTTTCGGTGCGTTGCGCGGTGTGTTGATTGT
TGCCGCCATTCTCTTCTTTCTCGACTCCTTTACCGGGGTGTCGAAAAGCGAAGACTGGAG
CAAATCACAGCTGATCCCGCAGTTCAGTTTTATCATCAGATGGTTTTTTGATTATCTGCA
AAGCTCGTCAAGTTTCTTGCCCAGAGCGTAAGTGCTCTGAGATGTGGCTTAACGAGGAAA
AAGACGTATGTGCGGTATTGTCGGTATCGCCGGTGTTATGCCGGTTAACCAGTCGATTTA
TGATGCCTTAACGGTGCTTCAGCATCGCGGTCAGGATGCCGCCGGCATCATCACCATAGA
TGCCAATAACTGCTTCCGTTTGCGTAAAGCGAACGGGCTGGTGAGCGATGTATTTGAAGC
TCGCCATATGCAGCGTTTGCAGGGCAATATGGGCATTGGTCATGTGCGTTACCCCACGGC
TGGCAGCTCCAGCGCCTCTGAAGCGCAGCCGTTTTACGTTAACTCTCCGTATGGCATTAC
GCTTGCCCACAACGGCAATCTGACCAACGCTCACGAGTTGCGTAAAAAACTGTTTGAAGA
AAAACGCCGCCACATCAACACCACTTCCGACTCGGAAATTCTGCTTAATATCTTCGCCAG
CGAGCTGGACAACTTCCGCCACTACCCGCTGGAAGCCGACAACATTTTCGCCGCCATCGC
TGCTACAAACCGCTTAATCCGCGGCGCGTATGCCTGTGTGGCGATGATTATCGGCCACGG
TATGGTTGCTTTCCGCGATCCTAACGGTATTCGTCCGCTGGTACTGGGAAAACGTGATAT
TGACGAGAACCGCACAGAATATATGGTCGCTTCCGAAAGCGTTGCGCTCGATACACTGGG
CTTTGATTTCCTGCGTGACGTCGCGCCTGGCGAAGCGATTTACATCACTGAAGAAGGGCA
GTTGTTTACCCGTCAATGTGCTGACAATCCGGTCAGCAATCCGTGCCTGTTTGAGTATGT
ATACTTTGCTCGCCCGGACTCGTTCATCGACAAAATTTCCGTTTACAGCGCGCGTGTGAA
TATGGGCACGAAGCTGGGCGAGAAAATTGCCCGCGAATGGGAAGATCTGGATATCGACGT
GGTGATCCCGATCCCGGAAACCTCGTGTGATATCGCGCTGGAAATTGCGCGTATTCTGGG
CAAACCGTACCGCCAGGGCTTCGTTAAAAACCGCTATGTTGGCCGCACCTTCATCATGCC
GGGCCAGCAGCTGCGTCGTAAGTCCGTGCGCCGTAAACTGAACGCCAACCGCGCCGAGTT
CCGCGATAAAAACGTCCTGCTGGTCGACGACTCCATCGTCCGTGGCACCACTTCTGAGCA
GATTATCGAGATGGCACGCGAAGCCGGAGCGAAGAAAGTGTACCTCGCTTCTGCGGCACC
GGAAATTCGCTTCCCGAACGTTTACGGTATCGATATGCCGAGCGCTACGGAACTGATCGC
TCACGGTCGCGAAGTAGATGAAATTCGCCAGATCATCGGTGCTGACGGGTTGATTTTCCA
GGATCTGAACGATCTGATCGAAGCCGTTCGCGCTGAAAACCCGGATATCCAGCAGTTTGA
ATGCTCGGTGTTCAACGGCGTCTACGTCACCAAAGATGTTGATCAGGGCTACCTCGATTT
CCTCGATACTTTACGTAATGACGACGCCAAAGCAGTGCAACGTCAGAACGAAGTGGAAAA
TCTCGAAATGCATAACGAAGGATGATGCCTTCGCTCAGGGTGCCGATCTGGCACCCTGAC
TTGCAACTCCCGCCGAAATCCTGCAAAGTCTGCCTGCAAGTCTGACAGGGCAACTATTTA
TGAAACGACTTATTGTGGGCATCAGCGGTGCCAGCGGCGCGATTTATGGCGTGCGTTTAT
TACAGGTTCTGCGCGATGTCACAGATATCGAAACGCATCTGGTAATGAGCCAGGCGGCGC
GCCAGACCTTATCCCTCGAAACGGATTTTTCCCTGCGCGAAGTGCAGGCGTTAGCCGATG
TCACGCACGATGCGCGCGATATTGCCGCCAGCATCTCTTCCGGTTCTTTCCAGACGTTGG
GGATGGTGATTTTACCCTGTTCAATCAAAACCCTGTCCGGCATTGTCCATAGCTATACTG
ATGGCTTACTGACCCGTGCGGCAGATGTTGTGCTGAAAGAGCGTCGCCCGTTGGTGCTCT
GCGTGCGTGAAACACCATTGCACTTAGGCCATCTGCGTTTAATGACGCAGGCAGCAGAAA
TCGGTGCGGTGATTATGCCTCCCGTTCCGGCGTTTTATCATCGCCCGCAATCCCTTGATG
ATGTGATAAATCAGACGGTTAATCGTGTTCTTGACCAGTTTGCGATAACCCTTCCTGAAG
ATCTCTTTGCCCGCTGGCAGGGCGCATAACTCCGCTGTTGCCCTGTTTCAGGGCAATTTT
GCAACCGCGATCAAATCCTCGACATTTTGTTTCTGCCATTCAATCGAAACGCTGCGATTC
AACCGCTATACCTGCTATCTTCAACTTTAGGACAATAATGCAACGTCTTATTAACATATT
TAACGTTGAATGTTATTGTTGTCGTCAAGATGGCATAAGACCTGCATGAAAGAGCCTGCA
AACACACAACACAATACACAACATAAAAAGCCATTTTTACTTGAGGGTTATGTATGAAGA
AGTCGATTCTCGCTCTGTCTTTGTTAGTCGGTCTCTCCGCAGCGGCTTCCAGCTATGCGG
CGCTACCGGAGACGGTACGTATCGGAACCGATACCACCTATGCGCCGTTCTCGTCGAAAG
ATGCTAAAGGTGATTTTGTTGGCTTTGATATCGATCTCGGTAACGAGATGTGCAAACGGA
TGCAGGTGAAATGTACCTGGGTTGCCAGTGACTTTGACGCGCTGATCCCCTCACTGAAAG
CGAAAAAAATCGACGCCATTATTTCGTCGCTCTCCATTACCGATAAACGTCAGCAGGAGA
TTGCTTTCTCCGACAAGTTGTACGCCGCAGATTCTCGTTTGATTGCCGCCAAAGGTTCGC
CGATTCAGCCAACGCTGGATTCACTGAAAGGTAAACATGTTGGTGTGCTGCAGGGATCAA
CCCAGGAAGCTTACGCTAACGAGACCTGGCGTAGCAAAGGTGTGGATGTGGTGGCCTATG
CCAACCAGGATTTGGTCTATTCCGATCTGGCTGCAGGACGTCTGGATGCTGCACTGCAGG
ATGAAGTTGCTGCCAGCGAAGGATTCCTCAAGCAACCTGCTGGTAAAGACTTCGCCTTTG
CTGGCTCATCAGTGAAAGACAAAAAATACTTCGGTGACGGCACCGGTGTAGGGCTACGTA
AAGATGATGCTGAACTGACGGCTGCCTTCAATAAGGCGCTTGGCGAGCTGCGTCAGGACG
GCACCTACGACAAGATGGCGAAAAAGTATTTTGACTTTAATGTCTACGGTGACTGATACG
TCGCAGGGAAGCTGTACCTGATGGAATGATCATCATGGTGCACGCCAGGTTTGTTGCACT
ATTGTGGTGCATTGAAATGCATACTTAAGCATTTTTAATGAAAAATAATACGTCTAACGG
GGCGGGATATTTTGCCTTGATGGTCAATTTTATGGCACGATAAGTGTAACAAACCTGTAA
ATATTCCCTATAAAAAGACTGTCAGTTGAGGACATTATGAAAAAACTGGTGCTATCGCTC
TCTCTGGTTCTGGCCTTCTCCAGCGCAACTGCGGCATTTGCTGCGATTCCGCAAAACATC
CGCATCGGTACCGACCCGACCTATGCGCCATTTGAATCAAAAAATTCACAAGGCGAACTG
GTTGGCTTCGATATCGATCTGGCAAAGGAATTATGCAAACGCATCAATACGCAATGTACG
TTTGTCGAAAATCCGCTGGATGCGTTAATCCCGTCCTTAAAAGCGAAGAAGATTGACGCC
ATCATGTCATCGCTTTCCATTACGGAAAAACGTCAGCAAGAAATAGCCTTCACCGACAAA
CTGTACGCTGCCGATTCTCGTCTGGTGGTGGCGAAAAATTCTGACATTCAGCCGACAGTC
GAGTCGCTGAAAGGCAAACGGGTAGGCGTATTGCAGGGCACCACCCAGGAGACGTTCGGT
AACGAACACTGGGCACCAAAAGGCATTGAAATCGTCTCGTATCAGGGGCAGGACAACATT
TATTCTGACCTGACTGCCGGACGTATTGATGCCGCGTTCCAGGATGAGGTCGCTGCCAGC
GAAGGTTTCCTTAAACAACCTGTCGGTAAAGATTACAAATTCGGTGGCCCGTCTGTTAAA
GATGAAAAACTGTTTGGCGTAGGGACCGGCATGGGCCTACGTAAAGAAGATAACGAACTG
CGCGAGGCACTGAACAAAGCCTTTGCCGAAATGCGCGCTGACGGTACTTACGAGAAATTA
GCGAAAAAGTACTTCGATTTTGATGTTTATGGTGGCTAATCGCCATCGGTGAAAGAAAGC
CCGCTCCCTTCGGGTAACCGGAGGGAGACAAGAGGCGGTAATTCACCACACACGACAGGA
CAGGCTGCATGTTGTATGGGTTTTCAGGTGTTATTTTACAGGGTGCGCTCGTCACGCTGG
AGCTGGCTATCAGCTCTGTAGTGCTCGCTGTAATCATCGGTTTAATTGGCGCTGGCGGTA
AGCTCTCTCAAAATCGGCTTTCGGGGCTGATTTTCGAAGGGTACACCACGCTGATTCGTG
GCGTGCCGGACTTAGTGTTGATGCTGCTGATTTTCTACGGTTTGCAGATTGCGCTAAACA
CGGTGACGGAGGCGATGGGCGTCGGGCAGATTGATATCGATCCGATGGTCGCTGGTATTA
TCACTCTCGGTTTTATCTACGGTGCTTATTTTACCGAAACGTTCCGTGGTGCTTTTATGG
CAGTGCCGAAAGGACATATAGAGGCGGCGACGGCGTTCGGTTTTACTCGTGGGCAAGTGT
TTCGGCGGATCATGTTTCCGGCGATGATGCGTTACGCCCTGCCAGGCATTGGCAACAACT
GGCAGGTGATCCTCAAATCTACCGCACTGGTTTCGTTACTCGGCCTGGAAGATGTGGTCA
AAGCCACGCAGCTGGCAGGCAAAAGTACCTGGGAACCGTTCTATTTCGCCATCGTCTGTG
GCGTGATTTACCTGGTTTTCACCACCGTTTCCAATGGTGTGCTGCTGTTCCTTGAGCGCC
GCTACTCCGTGGGTGTGAAGAGGGCTGACCTGTGATCGAAATCTTACATGAATACTGGAA
ACCGCTGCTGTGGACCGACGGTTATCGCTTTACTGGTGTGGCGATCACTCTGTGGCTGCT
TATTTTGTCGGTAGTGATAGGCGGAGTCCTGGCGCTGTTTCTGGCGATTGGTCGTGTCTC
CAGTAATAAATACATCCAGTTTCCAATCTGGTTATTTACCTATATTTTTCGCGGTACGCC
GCTGTATGTTCAGTTGCTGGTGTTCTATTCCGGCATGTATACGCTGGAGATTGTTAAGGG
GACCGAGTTTCTTAACGCCTTTTTCCGCAGTGGCCTGAACTGTACCGTGCTGGCGCTGAC
GCTTAACACCTGCGCTTACACTACCGAGATTTTTGCTGGGGCAATCCGTTCGGTTCCGCA
TGGGGAAATTGAAGCCGCCAGAGCCTATGGCTTCTCGACTTTTAAAATGTATCGCTGCAT
TATTTTGCCTTCTGCGCTGCGTATTGCGTTACCGGCATACAGCAACGAAGTGATCCTGAT
GCTGCACTCTACTGCGTTGGCATTTACTGCCACGGTGCCGGATCTGCTGAAAATAGCCCG
CGATATTAACGCCGCCACGTATCAACCTTTTACCGCCTTCGGCATTGCCGCGGTGCTCTA
TTTAATCATCTCTTATGTCCTGATCAGCCTCTTTCGCAGAGCGGAAAAACGCTGGTTGCA
GCATGTGAAACCTTCTTCAACGCACTGAGAATACGATGTCCGAGAATAAATTAAACGTTA
TCGATTTGCACAAACGCTATGGCGAACACGAAGTGCTGAAAGGGGTGTCACTGCAAGCGA
ATGCCGGAGATGTCATAAGCATCATCGGATCGTCGGGATCGGGGAAAAGTACCTTTCTGC
GCTGCATTAACTTCCTCGAAAAACCGAGTGAAGGGTCGATCGTGGTCAATGGCCAGACGA
TCAATCTGGTGCGCGGCAAAGACGGTCAACTCAAAGTCGCCGATAAAAATCAACTGCGCT
TACTGCGCACACGCCTGACGATGGTATTCCAGCACTTCAATCTCTGGAGCCATATGACGG
TGCTGGAAAACGTCATGGAAGCGCCGATTCAGGTGTTGGGCCTGAGCAAGCAGGAAGCGC
GCGAGCGGGCGGTGAAGTATCTGGCAAAAGTTGGGATAGACGAACGTGCACAGGGGAAAT
ATCCGGTGCATCTTTCCGGCGGTCAGCAACAGCGTGTTTCTATCGCGCGGGCGCTGGCGA
TGGAACCGGAAGTTTTACTGTTTGATGAACCTACCTCGGCGCTCGATCCTGAACTGGTAG
GCGAAGTGTTGCGCATTATGCAGCAACTGGCAGAAGAGGGGAAAACCATGGTGGTTGTGA
CTCACGAAATGGGCTTTGCTCGTCATGTTTCTACTCACGTCATTTTCCTCCATCAGGGGA
AAATAGAGGAAGAAGGCGCGCCGGAGCAGTTATTTGGCAACCCGCAAAGCCCTCGTCTGC
AACAGTTCCTTAAAGGTTCGCTGAAATAATTGCCTCTCCGGTGGCTAACGCTGCCGGAGT
ATTTTCAAGGGGAATTTGCGAGTCAGCTTCCGCTGAAATGTAAAAGTTGCAGTCCGCTAA
AAATACTTCTGAATTCGCTGTCCAAAGATAAAAACTGCCTGCTGCATTGGGTGTTAATCG
TGGTTATTGTCGCGTCATCTTAAATTTGAGGGGTGACGGAACGCCATGACAATATCGACA
ACTTCCACGCCGCATGATGCGGTATTTAAATCTTTTTTACGCCATCCAGACACCGCGCGG
GATTTTATTGATATTCATCTTCCCGCGCCGCTGCGCAAACTGTGAGATTTAACGACGCTT
AAACTGGAACCAAACAGTTTTATTGATGAAGACCTGCGGCAATATTATTCCGACCTCTTA
TGGTCTGTGAAAACGCAGGAGGGAGTGGGTTATATTTATGTAGTGATAGAGCACCAAAGT
AAGCCGGAAGAATTAATGGCTTTTCGCATGATGCGTTATTCCATTGCGGCAATGCAAAAC
CATCTTGATGCGGGCTATAAAGAGCTTCCATTGGTGATCCCGATGCTGTTTTATCATGGT
TGCAGAAGTCCTTATCCTTATTCACTCTGCTGGCTTGATGAATTTGCCGAGCCTGCGATT
GCCCGTAAAATATATTCATCGGCTTTTCCGTTGGTGGATATTACCGTGGTGCCGGATGAC
GAGATTATGCAACATCGCAAAATGGCGCTGTTGGAGTTAATTCAGAAACATATTCGTCAG
CGCGATCTGTTGGGATTAGTCGACCAAATTGTTTCGCTGCTAGTTACAGGGAACACTAAT
GACAGACAGCTAAAAGCCCTGTTTAATTATGTATTACAAACGGGAGATGCCCAGCGTTTC
CGTGCATTTATTGGTGAGATAGCAGAACGCGCACCACAGGAAAAGGAGAAACTGATGACC
ATTGCTGACAGATTACGTGAAGAAGGGCGGAATGATGGATTAATTCTTGGCAAACGCGAA
GAAGCCCTGCGTATTGCTCAGGAGATGCTGGATAGAGGTTTAGACCGAGAGTTAGTTATG
ATGGTGACCCGACTTTCACCAGACGATCTTATCGCGCAAAGCCACTAACCCTGTAACACC
GGGAGTTAACTGGCGGATGTTTGCAGTAAACCACATCAGCGAACGACATCCGCCAGCGCC
TCTTCTAAATCGTACCAACGAAACGCAAAACCCGCTTCTTCCAGCCGTTTAGGCAGCGCG
CGTTGTCCACCTAATACCAGTACTGAAGATTCGCCCATTAACAGCCGAATGGCGGTTGCG
GGGACGCGCAAAATAGCCGGGCGATGCAGCGCATGACCGAGCGCATGGGCAAATTGTTCA
TTGCGTATCGGGTAGGGCGAAACCATATTAAATGGCCCGCGCAGCTCGTTATCCAGCAGC
CAGAGAATGCCGTTGACCATATCATCGATATGAATCCAGGCCAGATACTGCCGACCGGAA
CCAATCGGCCCGCCCAGGCCAAGACGAAACGGCGGCAGCATTTTACCGAGAATACCGCCA
TCCGGTGCCAGCACTACGCCGGTACGCAGCAGGCACACTCGCGTTTTGTCACTTTGCGCC
CGGCAGGCAATTTCTTCCCAGCGGGCGCAGAGTTTATGGGTAAATTCGTTATGCGGCGGT
TCCTCTTCGGTAACCACCACTTCACCTAAGTCGCCATAATAGCCCGTTGCCGAGCCGGAA
ATGAGTACCGACGGTGGCGTGTCGCTGGCATTAATCAAATCGACCAGTTTTTGCGTGATA
TTCCAGCGGCTTTGGCAGAGACGCTCTTTTTGCTCGTGAGTCCAGCGTTTATCAGCAATC
GGTTCTCCGGCGAGGTTGATTACCGCATCAACGCCGTTGAGGTTGCTTTGATCGGCAAGC
CCTTGCCATAGCGTCACCTGCGGCCCGAGCACGGAACTGGCTTTCTGCGGGTTACGCGTC
ATTACCGTGATTTGATGGCCCAGCTCCAGCAAACGTGGAATCAAATGGCGACCAATTAAT
CCCGTCCCTCCGGTGATCACTATGTTCATGCAGCCTCCCGATATGGCGGTTAACGCTGCC
AGCTTAAGGTCATGGATACCGAATCGGCGTAGCGCAGCGCGTGCAGTTTATCGATCTCCA
CTTCAGCATACGTCACCCAGTGATGTTCACGTGCGATATCGAGCACATCCTGAGTTAATT
TTTCCAGCAAAGAGAAACGGTTATTCTCTACATGCTGAATAATGTTTTTCGTTACGGTGC
GATAATTCAGCGCATCGTTGATATCTTCGCTGGTGCGCGCTTTATCGGCGGGGTAGTGGA
TCGTCACATTGATAACAATATCCTGACGGTTGTTAATTTCTTCTTCCTTAATTCCGATAA
ATGTACGTAAACGAAGGTTCTTTATACGAATAATAGCGGCAGGTTGTGCCATTGCAGGTT
CTCCGTTGTTTTACTTAGGATGAAATAATACACGAGAACCTGTTTCTGTTAACTATCCGA
ACGCTCATCACCGAGTTGTGCTTTTAGCAGTGCCTGCCCAGTGGCAGGGCGCGAACGGAT
CCGCTCATGCCAGTTCTTGACTGCCGGATACATTGCGAGGTCAATTCGCTGGCGAGTCCA
GGCATTAACCCACGGCCAGCAGGCAATATCCGCAATGCTGTAGTTCTCACCTCCCAGCCA
GGGCGAGTTTTCCAGCCGCTTGTTCAGTACATGGTACAGGCGCTGAGTTTCAACCTGATA
ACGTTCAATAGCGTAAGGAATGGTTTGGGGGGCTGCGTGATTAAAATGATGATTTTGCCC
AAGCATCGGCCCCAGTCCGCCTACCTGCCAGAATAACCACTGTAATGTGGCGGCGCGCTC
ACGCGTTTCATGACTCAAAAAGAGTCCTGTTTTCTCAGCCAGATACAACAAAATGGCACC
AGATTCAAAGAGGCTTAGCGGTTCGCCGCCATCGGCTGGAGAATGATCAACAATTGCCGG
AATTTTGTTGTTAGGCGAAATGCGCAAAAATTCCGGGCGAAACTGACCGCCTTTCCCCAG
GTCTACCTTTATCAAGCGATAATCCAGCCCTGCTTCTTCGAGAAACAGCGTAATTTTGTG
GCCATTGGGTGTCGGGGCGAAATAGAGATCGATCATTGCAGCTCCGGTTGTCTAATCATC
TGAACACCACAAGTATAGAAAGCGCGGCGACTTGCGTGAGTATTCGTCACGTGACAGTGA
CAAAAAGGCTCTATAGTTTGATAGCCAGCCCCCTTTATTGCCGAGGACATAATGAGTAAA
CCCGCTATCACGCTTTGGTCAGATGCCCATTTTTTCTCCCCTTATGTGTTATCCGCCTGG
GTGGCGTTGCAGGAAAAAGGCCTGTCGTTTCATATCAAGACCATCGACCTCGACAGCGGT
GAACATTTGCAACCGACGTGGCAAGGTTACGGTCAGACACGCCGTGTGCCGTTATTACAA
ATCGATGATTTTGAGTTGAGTGAATCTTCTGCCATTGCGGAGTATCTGGAAGATCGATTT
GCGCCACCGACCTGGGAACGTATTTATCCGCTTGATTTAGAAAATCGTGCGCGTGCACGA
CAGATTCAGGCCTGGCTGCGCAGCGATCTGATGCCCATTCGCGAAGAGCGTCCGACGGAT
GTTGTCTTTGCGGGGGCGAAAAAAGCGCCACTAACGGCCGAGGGAAAAGCCAGTGCAGAG
AAACTGTTCGCGATGGCAGAACATTTGTTAGTACTGGGTCAGCCGAATTTATTTGGTGAA
TGGTGCATTGCTGATACTGATCTGGCGCTAATGATTAACCGCCTGGTACTACATGGCGAT
GAGGTGCCAGAACGCCTGGTGGATTATGCGACATTCCAGTGGCAGCGAGCGTCTGTCCAG
CGTTTTATTGCACTTTCAGCGAAGCAATCTGGCTGATAGCAACGACAGAATCCAGTATCA
TAGCTTACGTTTTTTCGACGAGGAGTGAGTGATGAAACTGATGTTTGCATCGGACATTCA
TGGGTCGTTACCGGCGACGGAACGTGTTCTGGAGTTGTTTGCCCAAAGCGGTGCCCAGTG
GCTGGTGATCCTTGGCGACGTGTTGAATCACGGCCCGCGTAATGCTTTACCGGAGGGTTA
CGCGCCAGCCAAAGTCGCTGAACGGCTTAATGAAGTGGCACATAAGGTTATCGCTGTGCG
CGGCAACTGCGACAGCGAAGTGGATCAAATGCTGCTGCATTTCCCGATAACCGCGCCGTG
GCAACAGGTATTACTGGAAAAACAACGTCTGTTTTTGACGCATGGTCATCTTTTTGGCCC
GGAAAATCTGCCTGCTTTAAACCAGAACGATGTGCTGGTTTACGGTCATACCCATCTGCC
AGTAGCAGAACAGCGGGGGGAGATTTTCCACTTCAACCCCGGCTCGGTGAGTATTCCGAA
AGGCGGTAATCCGGCGAGTTATGGCATGCTGGATAATGACGTACTTAGTGTAATCGCACT
CAATGATCAAAGTATCATTGCGCAGGTCGCGATTAATCCGTAATTTACCCACAACTCAAA
ATGCGCCGTAAGAGCGCCAGAAAAAGAAGGTTTCCTGATAATGGAACAGCGTCGTTTGGC
AAGTACTGAATGGGTGGATATTGTCAATGAAGAGAACGAAGTCATTGCACAAGCCAGCCG
GGAGCAAATGCGGGCACAGTGTCTGCGTCATCGTGCAACTTACATCGTCGTGCATGATGG
CATGGGCAAAATTCTGGTCCAGCGTCGTACCGAGACAAAAGACTTTTTACCCGGCATGTT
AGATGCGACCGCAGGCGGTGTGGTTCAGGCCGATGAGCAACTGCTGGAATCCGCGCGTCG
CGAAGCGGAAGAAGAGTTGGGCATTGCCGGTGTCCCCTTTGCCGAGCACGGGCAGTTCTA
TTTCGAAGATAAAAATTGCCGTGTCTGGGGCGCATTGTTCAGCTGCGTCTCTCACGGTCC
CTTCGCCCTACAGGAAGATGAAGTCAGTGAAGTTTGCTGGCTGACGCCGGAAGAAATCAC
CGCACGCTGCGATGAGTTCACTCCAGACTCGCTGAAAGCGCTAGCGTTGTGGATGAAGCG
CAATGCCAAAAATGAAGCCGTAGAGACTGAAACGGCAGAATGAAAAAAGAGCCGCAATTG
CGGCTCTTAACATTTTTAGTGGTAGCCCATCAACTGAGCGCCGATCACTACGACGCTGGA
CATAATAAACAGCAGTCCAAGTAGGGTCGCGCCCACCTTCAGCCAGTTACGGAAGTCCAC
CCTGCACACACCGAGCGTTGCCATTAACGAAGCTGAGGTTGGGTAAATGATGTGACTGAA
GCCATCACCAAACTGGAACGCCAGCACGGTAACCTGACGGTTAACACCGACCAGATCGCC
AAGCGGTGCCAGTAACGGCATGGTTAACGCCGCCTGACCAGAACCGGACGTCACGAAGAA
ATTAAATACCGCCTGGAAGAGCAACATAAACCAGGCCGCGACCGCGTTGTCCAGACCGCT
AATGGCATTGGCAATGCTGTTGAGGATAGTATTTAACACGCTGGCCTCACCTGCTTCACC
ATTACCAACCAGCAGCAAAATCCCTTTGGCGAAACCCACCAGCAGGGCAGGGGCGATCAT
CATTCGCGCCCCTTCGGTAAAGGATGAAGCCATGGTATTAACCGTCATGCCGTTAAGGCG
GAAAACAACGCCGATGATGCCAATCACCAGACCCATGGTGAAGAACTGGCTGGCAATTTC
TGGAATAAACCAGGCATTAACGATCACGCCCCAAATCACCCAGACCATTACGGCGGTCAG
GACAATCAATACCAGCCAGTCACCAAAGGTAAACGGACGTTGTTCAACATCCGCCTGCTT
TTCACGAAAGAAGTGGTCGGACTCATGCACGCGTGACAGAAGAGGATTCTTTTTCACTCG
TGAGGCGTAGACCATGGTAAAGATCAGGCCAATCAGAGTGGCGATAACCCACACCACGAT
GCGCAACCCGGAGCCAGAAAGCACCGGAACGCCGGCAATCCCCTGAGCAACGACCACACA
AAACGGGTTCATCCACGAACTGGCAAAACCGATTTGCGTGGCAATATAGGTCACCAGGAC
GGTGGTAATACTGTCATAGCCCAGCCGGACCATTAGCGGTGCGATGATAATGGCAAAGGC
GACGGCCTCTTCTCCCATACCAAATACCGCGCCGCCAAGTGAAAACAGAATAAACAGCGC
AGGAATAAAGAGAATTTCATTCCCGCGGGTATGGCGAATAAGCGCCAGGATACCGTTATC
AATGGTTCCTGTACGCATCACAATGCCAAACGCGCCGCCAATCACCAGCATAAACATGAT
GATGCCAACGGCTGTCCCGTATTTCGATCCTGAGGTTAACCCTTCAAACGGGAAGTTCAT
CAGGCCCGGGCGTTCATCGCCCGTCGTGAACAGCTGTACGCGGTGATACTCAGGTTCGCC
TGCTTCGTTAGTCAGAATGCGAAATGAGTGTGGATCTACGACTTTGCGTGTTTTTGTTTG
ACCATCAACCTGATACTGCACTTCCTGACTGTCAAACATCCCCACCGGAACTACCCAGGT
GGCAAGGCTGGTTAAAATAGCAACAAAAAAGATAATCACCAACGTATCGGGCATTGCCCA
TCTTCTTGTTGGTTTGGATTCAGTGATTGCGGACATAGCGCAAATATTCCCTTGCACAAA
ACAAAGTGGTAAGTATGCAAAGTGAGATGGCGCAATTCATTGATGCAGCGCAGTTAAGCA
AGATAATCAGAAAGGATTAATGCAAATTAAGAGAATAAAAAACCGGAAATAGTGACTATT
TCCGGTTCAGATATCCGCAGCGCAAAGCTGCGGATGATGACGAGGTTACTGCTGCTGTGC
AGACTGAATCGCAGTCAGCGCGATAGTGTAGACGATATCGTCAACCAGTGCGCCACGGGA
CAGGTCGTTAACCGGCTTGCGCATACCCTGCAGCATCGGCCCGATGGAGATCAGGTCGGC
AGAACGCTGTACCGCTTTGTAGGTGGTGTTACCGGTGTTCAGATCCGGGAAGATGAACAC
GGTAGCGCGACCTGCAACCGGAGAGTTCGGCGCTTTGGATTTCGCAACGTCAGCCATTAC
CGCAGCGTCGTACTGCAGCGGACCGTCGATCATCAGGTCAGGACGTTTTTCCTGCGCCAG
ACGAGTTGCTTCGCGAACTTTTTCTACGTCGCTACCTGCACCAGAAGTACCGGTGGAGTA
GGAGAGCATAGCAACGCGCGGTTCGATACCGAAGGCTGCAGCGGAATCAGCGGACTGAAT
CGCGATTTCTGCCAGCTGTTCTGCGGTCGGATCCGGGTTGATCGCACAGTCACCGTAAAC
GTAAACCTGTTCCGGCAGCAGCATGAAGAACACGGAAGATACCAGGGAGCTGCCCGGTGC
AGTTTTGATCAGCTGCAGCGGCGGACGGATGGTGTTTGCGGTAGTGTGAACAGCACCGGA
AACCAGACCATCAACTTCATCCTGTTCCAGCATCAGCGTACCGAGCACCACGTTGTCTTC
CAGCTGTTCGCGGGCAACGGTTTCGGTCATGCCTTTGTTCTTACGCAGCTCGACCAGACG
ACCAACATAGCTTTCGCGAACCACTTCTGGATCAACGATTTCAATGCCTGCACCCAGTTC
TACACCCTGAGACGCTGCAACACGGTTGATCTCTGCCGGATTACCCAGCAGTACGCAAGT
TGCGATACCACGTTCAGCACAGATAGCGGCTGCTTTAACGGTACGCGGTTCGTCACCTTC
CGGCAGTACGATACGTTTGCCCGCTTTGCGCGCAAGTTCAGTCAGCTGATAACGGAACGC
TGGCGGAGACAGACGACGGCTGCGCTCAGAAGTGGCAGTCAGAGAATCGATCCAGTCAGC
GTTGATGTAGTTAGCAACGTATTCCTGAACTTTCTCGATACGCTCGTGATCGTCAACTGG
AACTTCCAGGTTGAAGCTCTGCAGGCTCAGAGAAGTCTGCCAGGTGTTGGTGTTCACCAT
AAATACCGGCAGGCCGGTAGCGAAAGCACGTTCGCACAGTTTAGAAATGCGCGCGTCCAT
TTCGTAGCCGCCAGTCAGCAGCAGGGCACCGATTTCTACGCCGTTCATGGCAGCCAGGCA
AGCGGCAACCAGCACGTCAGGACGGTCTGCGGAAGTCACCAGCAGAGAACCGGCACGGAA
GTGCTCCAGCATGTGCGGAATGCTGCGTGCGCAGAAAGTGACGGATTTAACGCGGCGAGT
ATTGATGTCGCCTTCGTTGATGATGGTCGCATTCAGGTGGCGAGCCATATCGATCGCACG
AGTCGCGATCAGGTCAAAGCTCCACGGCACAGCGCCGAGAACCGGCAGCGGGCTGGATTC
TTGCAGCTTCGCCGGATCAACATTGTTTACTTTAGCTTTGGAAGAGTCGTCGAAAATCTC
GGACAGATCCGGGCGAGTACGACCCTGTTCATCAACCGGTGCGTTCAGTTTGTTAACGAT
AACGCCGGTGATGTTGGTGTTTTTGGCACCGCCGAAGCTGTTGCGGGTCAGTTCGATACG
CTCTTTCAGCTGTTCCGGGGTGTCAGTGCCCTGAGACATAACGAAGACGATTTCCGCATT
CAGCGTTTTAGCGATTTCGTAGTTCAGAGACTGGGCAAACTGGTGCTTACGTGTCGGGAC
CAGACCTTCAACCAGAACGACTTCAGCGTCTTTGGTGTTAGCGTGGTAGTTTGCGACGAT
CTCTTCCATCAGCACATCTTTCTGATTGCTGGAAAGCAGACCTTCAACGTAGCTCATTTT
CAGCGGTTCAGCGGCCGTCGTGGTGGAAGAGTTCGCACGCACGATAGTCGTAGTCTGATC
GGGCGCATCGCCACCGGTACGCGGCTGAGCGATAGGTTTGAAAACGCTCAGACGAACGCC
TTTGCGTTCCATTGCACGGATCACGCCAAGGCTGACGCTGGTCAGACCGACGCTGGTTCC
GGTAGGGATCAGCATAATAATACGGGACACGGTTTATCCTCTTTCGTTACCGCCGATTTG
GCGGGTTACAAAACAGCACCGCCAGCTGAGCTGGCGGTGTGAAATCAGGCAGTCAGGCGG
CTCGCGTCTTGCGCGATAACCAGTTCTTCGTTGGTTGGGATAACCACCGCAGGACGGGTA
CCTTCTTTGTTGATGAAACCAGATTTGCCGAAACGTGCAGCCAGGTTGCGTTCATGATCA
ACTTCAAAGCCCAGCACGCCCAGTTTGCCCAGAGACAGTTCACGAACCATCGCGGCATTT
TCACCGATACCACCGGTGAATACAACAGCGTCCAGACGACCATCCATCAGCGCAGTGTAG
GCACCGATGTATTTCGCCAGGCGGTGGCAGTAAACGTCCATTGCGCGCTTCGCGTCTTCT
TTCGTCGCGTAGTTGTCTTCAACATAGCGGCAGTCGCTGGTCACTTCGGTCAGACCCAGC
AGGCCAGACTCTTTGGTCAGCAGTTTGTTGATTGCGTCAACGCTCATGCCCAGGGTGTCG
TGCAGGTGGAAGATGATCGCCGGATCGATATCACCAGAACGGGTACCCATGACCAGACCT
TCCAGCGGGGTCAGGCCCATAGAGGTGTCAACGCATTTACCGTTGCGGATAGCAGAAACG
GAACCACCGTTGCCCAGGTGGCAGGTGATGATGTTCAGTTCTTCTACCGGTTTGTTCAGC
ATTTTTGCCGCTTCCTGGGTTACATAGAAGTGGCTGGTGCCGTGCGCGCCGTAACGACGG
ATGCCGTGCTCTTTGTACAGGTTGTACGGCAGGGCGTAGAGGTAAGACTCTTCCGGCATA
GTCTGGTGGAACGCGGTGTCAAATACAGCAACGTTTTTGTCTTTCAGCTGTGGGAAAGAT
TTCAGAGCTTCTTCGATACCGATCAGGTGAGCCGGGTTGTGCAGCGGTGCAAAAGAAGCT
GCATCTTTGATACCCTGAATAACAGACTCATCGATCACTACGGAGCTGGTATACTTTTCG
CCGCCGTGTACGATACGGTGACCGATAGCAGTCAGCTGCGCAGACAGTTCTGGTTTTTGT
GCCAGAATAGTATTAACGATAAAGTTGAGCGCTTCGCTGTGAGCGGCGCCTGCACCTAAA
GCCGCTTCCTGTTTATTGCCGTCCATTTTCCATTTGATACGTGCTTCGGGCAGGTGGAAA
CATTCGGCTAAACCAGAAAGGTACTCTTCACCATTTACTGCATCGATGATGGCAAATTTC
AGTGAAGAACTACCGCAGTTCAGAACCAGTACTAACTTACTCGACATGGAAGTACCTATA
ATTGATACGTGGCTAAAAAAACGTCAGGGAGCCATAGAGCGTAGCGCATGATGACACCGA
CATTTATGATTAACATCATGCACTGCAAATTTTTTTTGCATGATGGAAGAAATATCTTGA
GTCTATGCCATTTTGCGTAATTTTCAGCCAATGGCATAATGTATATGAATTTGACGACTC
AATGAATATGTACTACTTAGGCCTTCAGGCTGCTAAAGGATACCTGATAGTGGGTATGGA
AGACAAAATGTTTTGAACGTTGTCCCGCTGAGTTGTGAATTTGCACAAATTTTTGAATCT
TTATATGTGAAGTTGAGGTGAAGCATGTCAACGCCGGATAATCGTTCTGTTAATTTTTTT
AGCTTGTTTCGCCGGGGACAGCATTACTCAAAGACGTGGCCGCTGGAAAAACGCCTTGCC
CCGGTCTTTGTCGAAAATCGCGTTATCAAGATGACGCGTTATGCGATCCGTTTTATGCCG
CCGATCGCCGTATTTACTCTCTGCTGGCAGATTGCCCTGGGCGGTCAGCTTGGGCCGGCA
GTTGCCACCGCCCTGTTCGCCTTAAGTTTACCCATGCAGGGATTGTGGTGGCTGGGCAAG
CGTTCTGTCACGCCATTACCCCCTGCAATCCTCAACTGGTTTTATGAAGTTCGCGGTAAA
TTGCAGGAGTCTGGACAGGTGTTGGCACCCGTTGAAGGCAAGCCTGATTACCAGGCATTA
GCTGACACGCTTAAGCGCGCCTTCAAACAACTGGATAAAACTTTCCTTGATGATTTGTAA
TTGACCCCTGATTACGCATATAAAAGAAAGCATACTCAGCCTTCTTTTTTTTCACCGTAA
TAGAGTGATACAGGAGTCAACAATGGAAATGACCAACGCGCAACGTCTTATTTTGTCTAA
TCAGTACAAGATGATGACTATGCTCGATCCGGCAAATGCTGAACGTTACCGTCGCCTGCA
AACAATTATTGAGCGTGGTTATGGATTACAGATGCGTGAACTGGATCGCGAGTTTGGCGA
GCTGAAAGAAGAAACCTGCCGCACTATCATCGACATTATGGAGATGTATCATGCGTTGCA
TGTTTCCTGGTCTAATTTGCAGGACCAGCAATCCATCGATGAACGTCGTGTCACCTTCCT
CGGCTTTGACGCCGCCACTGAAGCACGTTACCTCGGTTATGTCCGCTTTATGGTTAATGT
GGAAGGGCGCTATACCCATTTTGACGCCGGAACTCACGGTTTTAACGCCCAGACGCCAAT
GTGGGAAAAATATCAGCGCATGCTTAATGTGTGGCATGCCTGCCCGCGTCAGTACCATTT
GAGCGCCAACGAAATTAATCAAATTATCAACGCCTGAGGAGGCCCGCGTGCGGTGCAAAG
GTTTTCTGTTTGATCTTGATGGAACGCTGGTGGATTCCCTGCCTGCGGTAGAACGGGCGT
GGAGCAACTGGGCCAGACGTCATGGGTTAGCGCCGGAAGAGGTGCTGGCTTTCATTCACG
GTAAACAGGCGATCACCTCTCTGCGCCATTTTATGGCGGGCAAATCCGAGGCTGATATTG
CCGCCGAGTTTACGCGTCTGGAGCAAATCGAGGCCACGGAAACCGAAGGTATTACCGCGC
TTCCGGGGGCAATCGCCTTACTCAATCATTTGAATAAAGCAGGTATTCCGTGGGCCATTG
TGACTTCTGGCTCCATGCCGGTAGCGCGAGCGCGCCATAAAATAGCTGGGCTTCCCGCAC
CAGAGGTGTTTGTAACCGCTGAGCGAGTGAAGCGCGGAAAACCAGAACCTGATGCGTATC
TGTTAGGTGCGCAGCTGCTGGGGCTTGCGCCGCAGGAGTGTGTGGTGGTGGAAGATGCTC
CCGCTGGCGTGCTTTCTGGCCTGGCGGCGGGTTGCCATGTCATTGCGGTTAACGCTCCGG
CAGATACCCCGCGCCTGAATGAGGTCGATTTGGTCCTCCACAGTCTGGAGCAAATTACTG
TGACTAAACAGCCAAATGGCGATGTTATTATTCAGTGAAACACCTGATCATGATTTAGCC
CCGTCTCGTCGGGGCTTTTTTATGGCAGAATCAAGTCATCCCCCTCAATTAACAAGGATA
AGTTGTGAACGGTGAATTGATTTGGGTTCTTTCATTACTGGCCGTTGCCATCGTCTTGTT
TGCGACGGGCAGAGTGCGTATGGATGCGGTCGCTTTGTTTGTTATTGTCGCGTTTGCATT
AAGCGGAACGCTGACAGTCCCAGAAGTATTTTCCGGCTTTTCTGATCCTAACGTTGTCCT
GATTGCCGCCTTGTTTATTATTGGCGATGGTTTGGTCCGTACCGGTGTTGCCACCGTAAT
GGGAACATGGCTGGTCAAAGTTGCGGGCAACAGTGAAATCAAAATGTTGGTTTTGTTGAT
GCTGACCGTCGCGGGGCTTGGCGCGTTTATGAGTTCAACCGGTGTTGTCGCTATCTTTAT
TCCCGTGGTGTTAAGCGTTGCCATGCGTATGCAAACGTCGCCGTCACGTCTGATGATGCC
GTTAAGTTTTGCCGGGCTGATTAGCGGCATGATGACGCTGGTGGCGACGCCGCCGAACCT
GGTAGTCAACAGTGAATTGCTGCGTGAAGGCTATCACGGCTTCAGTTTCTTTAGCGTAAC
ACCTATTGGCCTGGTCGTGCTGGTGCTGGGTATTTTGTATATGTTAGTGATGCGTTTCAT
GCTGAAAGGGGATACCCAGACCCCGCAGCGCGAAGGCTGGACGCGTCGAACCTTTCGCGA
TCTTATCCGTGAATATCGACTGACCGGGCGTGCGCGACGTCTGGCTATTCGCCCCGGATC
GCCAATGATTGGTCAACGGCTGGATGATCTCAAATTACGTGAGCGTTATGGCGCTAACGT
CATCGGTGTTGAACGCTGGCGGCGTTTTCGTCGCGTTATCGTGAACGTTAATGGGGTTTC
TGAATTTCGCGCGCGTGACGTTTTGCTTATTGATATGTCTGCGGCTGATGTCGATCTCCG
GCAATTTTGTAGTGAGCAATTGCTGGAGCCGATGGTACTGCGCGGCGAGTATTTTTCTGA
CCAGGCCCTTGATGTGGGCATGGCAGAGATTTCATTAATTCCTGAGTCAGAACTGATTGG
TAAATCGGTGCGCGAAATTGGTTTTCGTACACGCTACGGACTGAATGTGGTGGGGCTAAA
GCGCAATGGCGTGGCGCTGGAAGGTTCGCTGGCGGATGAGCCTCTGCTGCTGGGCGATAT
CATTCTGGTTGTGGGTAACTGGAAACTGATCGGTATGCTGGCCAAACAGGGCCGCGACTT
CGTAGCGCTGAACTTACCGGAAGAGGTGAGTGAAGCATCGCCCGCGCACAGCCAGGCACC
CCATGCCATTTTCTGTCTGGTGCTAATGGTGGCGTTAATGCTGACAGATGAAATTCCTAA
TCCTGTTGCCGCTATCATCGCCTGCCTGCTGATGGGGAAATTCCGCTGTATAGATGCTGA
AAGCGCCTATAAATCCATTCACTGGCCGAGCATTATTTTGATCGTTGGGATGATGCCGTT
TGCTGTGGCATTACAGAAAACGGGAGGTGTCGCGCTGGCGGTGAAAGGGCTGATGGACAT
TGGCGGTGGTTACGGGCCACATATGATGCTGGGTTGTTTGTTTGTCTTGTCGGCGGTTAT
TGGGCTATTTATCTCTAATACCGCGACGGCGGTGTTGATGGCTCCGATTGCGCTGGCTGC
TGCCAAAACGATGGGGGTGTCGCCTTATCCATTCGCGATGGTCGTGGCGATGGCAGCATC
CGCCGCCTTTATGACACCGGTTTCTTCACCGGTTAACACCCTGGTTTTAGGTCCGGGAAA
TTACAGCTTCAGTGACTTTGTGAAGTTGGGGGTACCGTTCACCATTATCGTGATGGCGGT
TTGTGTGGTGATGATCCCGATGCTGTTTCCGTTTTGACAAGAGCCTGATGTCGCATCCGG
CGCTTATTGCCTGATGCGACGCAGACTCCAGCTGCTTACAGCGGTGAATCCTGGCTAATC
TCATCGAGCGAAAGATGGAAGCTGGGAACAAATACTTCCATGAAGTAGTCCATCTCCTGG
CTGCGGCGCGCTTCAAGCGTCGCTTCCAGTCGCGTTTTTGCCAGCAAGAATTCATTATTT
CCGGCCGCGAGTTCTTCCAGACATTTCAGATATGCACACAGTGCATCTGCCTGTTTCACC
AACGATTTTTCTTCATCGCTATATGCATGCTCGTCAATTAACGGCGCAAAGATATCCCGC
AGCTCTTCCGGAACCATATCGACCAGTTTTTGCTGAGCGATTTTTTCAATAGCCTTGTAT
TCCTGAGCGATTTGCGAATTGAAGTATTTCACCGGAGTAGGGAGATCGCCGGTGAGCACT
TCTGAGGCATCGTGGTACATCGCCAGTAAAGCGATACGTTCGGCGTTGACATTACCGCCA
AATTTCCGATTTTTGATAGCTGCCAGCGCATGGGCGACCATCGCTACCTGCAAACTGTGT
TCGGACACATTTTCCGTCCGCACGTTGCGCATGAGCGGCCAGCGGTTAATGAGTTTCAGG
CGGGAGAGATGGGCAAAAAAATGGCTCTGTTTCATAGTGACCTTACGTATGATGACATCA
TCAGGTCATTGTGGCGGGATAACACTGCCGGATGCAATCTCCGGCAGTGAAATTAAGATT
ACAGCTGATGATAACCAGAAAGGAAACGCGCGAACTTGCTCAAAGACAGCTCGATATCAT
CGACACGCGGTAGCGTGACAATGCGGAAGTGATCCGGCCACGGCCAGTTGAATGCCGTCC
CTTGCACCAACAGAACTTTTTCCTGCAACAGGAAATCCAGCACCATTTTCTGATCGTCGT
GAATGTTAAAGCGTTTGGCGTCGATTTTCGGGAACATGTACAGCGCACCACGAGGTTTCA
CGCAGGAAACGCCCGGAATATCGTTGATCAATTCCCACGCGCGGTTACGCTGCTCATAAA
GACGACCGCCAGGGGTAATAAATTCACTGATGCTCTGATAACCACCCAGCGCGGTCTGAA
TGGCGTGTTGCGCAGGAACGTTAGCACACAGGCGCATTGAAGCCAGCATTTCCAGACCTT
CGATGTAGCCTTTGGCGTGTTTTTTCGGCCCGTTCAACACCATCCACCCCTGACGGAAGC
CTGCAACGCGGTACGTTTTCGACAGTCCATTAAAGGTAATGGTCAGCAGGTCAGGTGCCA
GCGGCGCAATTGAGTGATGCTCAGCGTCGTCGTAGAGAATTTTGTCATAAATTTCATCGG
CGAAGATAATGAGATTATGCTGACGTGCAATCTCCACAATCTCCATTAAAAGCTCTTTGG
AATATACCGCGCCGGTTGGGTTATTTGGGTTGATAATAACGATCCCACGCGTACGAGGCG
TAATTTTAGCGCGAATATCATCGAGGTCCGGGAACCAGTCAGAGGATTCATCGCAAAGAT
AATGCACCGCTTTACCGCTGGAAAGCGAAACCGCCGCGGTCCATAGTGGGTAATCTGGTG
CAGGAACCAACATTTCGTCCCCGCTGTTCAGCAATGCCTGCATTGCCTGAACGATAAGCT
CCGATACACCATTGCCGATGTAAATATCTTCCACGGTAACATCACGCATGCCACGAGCCT
GGTAGTGCTGCATGATGGCTTTACGCGCAGAGTAAAGACCTTTGGAATCGCAATACCCTT
GAGCTGTAGGCAGGTTGCGTATCACGTCAACGAGAATTTCATCTGGCGCGTCAAAACCGA
ACGGGGCTGGGTTGCCGATGTTCAGTTTCAGTACCTTGTTACCTTCTTCTTCCAGTCGTT
TTGCTTCTTTCAGCACCGGACCACGGATGTCATAACAGACATTCTCTAATTTGCTGGATT
TTTCAATGGGGGACATGAATCTTGACCTTTTTTGCTGTTATCGCCACTCCCTGCCGTGGA
AGTCAGCTTAGAACAATGTACTCCCCCAGGACGGTGTTTTGAAGGTCTGCAGAATAAGAT
TTTGCCAGAGGGGAAGGCTCGATTGTGCTGTTAATAACTTAATAATGACAAAATAATGAG
GAGTATATGCTTTACATACAATGTTATATAGTGAATTGTTCTGATTCTTAATTGTAAGTC
TGGTTTTTTTATCTGTAAGATAATTGTGTGAAAATGCCTCATTTAAGAATTCACTAATGA
AACGCGATGATGATATTTCCGCATTACGGAGAGTTTAACAGCGTGATGATTTCCGAGGTG
TCGCAATGGGGGCAAGGTGTGAAACTATTGTTAAGCGGAATTAATGAATGAGGATGATGC
TAATTAATTATTATTTAATATTCAAAAAGGTTTTGATGTGCTTATTAATAATAGAAGATT
ACTTTGCCTAACATAACATAACTTTGCATCAGATAATTCGCAATGACCCTTATAAATAAA
AGGTTTTTGGGGTAAAATGCTCGCATAAATGACGGATCCCTGCTCTTGATGCCGCCTCAC
CATTGCTGTTTGTACGTGTTCGCGTATGACCAGCGATGCTGCACGAGAGTGGAACAAGGA
CTCACATTTACATTTATACAAACACGCGCATGTCATAAATAGAAAAGAGTGAGTAACTTA
ATAGATATGCGATCCCTGAAGATATATTCTGTGATCTACTTCAGGCATTATAACGGAACA
ATGTGAGTCGCTTTTTTAGTGCAACTCATATGCATTTTTACTTTCGTCCGGGTTCCGGAT
GAAACTGCCAGGGAGGCACATTACAAATGGAATTGCTTGTTTGTGTGTGCACAGCATTAA
CCAGCTCAGTATGAGCCGCCAGTAAGTGATAATATATGATAAGTGCAAATCGTCCGATAA
TTAACCTCGACCTCGATCTGCTGAGAACATTTGTTGCTGTTGCCGATCTGAACACTTTTG
CTGCCGCAGCTGCCGCTGTGTGTCGTACTCAGTCCGCCGTAAGTCAGCAAATGCAGCGTC
TGGAACAACTCGTTGGGAAAGAACTGTTCGCTCGTCACGGTCGCAACAAACTGTTAACTG
AACATGGCATTCAACTTCTTGGTTACGCCAGGAAAATCCTGCGTTTTAATGATGAGGCCT
GCTCATCATTAATGTTCAGTAATCTTCAGGGCGTGTTAACTATCGGTGCTTCAGATGAAT
CTGCCGATACGATCTTACCTTTCCTGTTAAATCGCGTGAGTTCGGTTTATCCGAAATTAG
CGCTGGATGTCCGCGTTAAACGTAATGCCTATATGGCAGAAATGCTGGAATCCCAGGAAG
TGGATTTGATGGTAACCACCCATCGTCCTTCAGCGTTTAAGGCATTGAACCTGCGTACCT
CGCCAACACACTGGTACTGCGCAGCGGAATACGTATTGCAAAAAGGTGAGCCGATCCCTC
TTGTATTGCTGGATGATCCAAGTCCGTTTCGCGATATGGTGCTGGCGACGCTTAATAAAG
CAGATATTCCCTGGCGACTGGCTTATGTCGCCTCGACGCTTCCGGCCGTTCGTGCGGCAG
TGAAAGCCGGTCTTGGCGTGACGGCAAGGCCGGTCGAGATGATGAGTCCGGACTTGCGTG
TGCTGAGTGGAGTAGATGGCTTACCGCCGCTACCTGATACCGAATATTTGCTGTGCTATG
ACCCGTCCAGTAATAATGAGCTGGCCCAGGTGATCTATCAGGCGATGGAGAGCTACCATA
ATCCGTGGCAATACAGCCCAATATCTGCTCCGGAAGGGGATGATTCATTGTTGATTGAAA
GGGATATCGAGTAATCGACGGACGATAGATAATTCCTGAGACAATAGTGTAAAAAACGAG
CCGCTGGGGGTGTTTTAAACCCCAGCGGCTTTTTTTTAGTAAAGAACCTTCTTCACATCG
TGCAGAACGTACAAAACTGTTCATTTTTCAATCGCCAGAGATTCACGCCCCGTACGCACA
AATAATCGCCTGAAAAAAATCACCTGCTACAATGATGTTAAAAAATACGTAAATTTGTTG
CTGCGTTTTTGTTATGGAATGACAAAAGCGTGTCACAGATCAAGAAAATACTCTCTTTTG
GGGGGAGGAATCGACACAAATTCCTGTCAAAATAGACCCGTATTTTTTCCATTGCTTCAC
AACGGACACGATTCAACAACATCTAATTATCCTGGAGTCGTCAAGGATCTGGGGTGAAAG
GGCATTAAATGCTAATGGTGTTGATATTATGTGAACTAATGTGAAGAAACTTTTGTTAAA
GTTGACAAAAGGTTATAGAAAGGAGTAAAAGACCACATCAATTAGCTGTATAAAAGAATT
TCTACAGTGATTGTAAGGTTTTTTTTATTCCTCCCCATGAATCGATGTGGCGTCCATCTG
CCGTGAAGAGCAGTGAATCTGGCGCTACTTTTGATGAGTAAGCAATGAGTATGTCAACAT
CCACTGAAGTCATCGCTCATCACTGGGCATTCGCTATCTTTCTTATCGTTGCCATTGGCC
TGTGTTGCCTGATGCTGGTAGGCGGTTGGTTTTTAGGCGGTCGCGCACGCGCGAGGTCGA
AAAACGTGCCGTTTGAATCCGGTATCGACTCGGTCGGCTCCGCCCGCTTACGCCTGTCCG
CCAAGTTTTATCTGGTGGCCATGTTCTTCGTTATCTTCGACGTTGAAGCGCTGTATCTGT
TCGCATGGTCAACCTCTATCCGCGAAAGCGGCTGGGTAGGCTTTGTGGAAGCTGCAATTT
TTATTTTTGTGTTACTGGCAGGTCTGGTTTATCTGGTGCGTATTGGTGCGCTGGACTGGA
CGCCCGCGCGTTCACGCCGCGAGCGTATGAACCCGGAAACGAACAGTATCGCTAATCGTC
AACGCTAACCGCGAGGCATTAAGATGGATTATACGCTCACCCGCATAGATCCCAACGGTG
AGAACGACCGTTACCCCCTGCAAAAGCAGGAGATCGTAACCGACCCTCTGGAGCAAGAAG
TTAACAAAAACGTGTTTATGGGCAAGCTCAATGACATGGTTAACTGGGGTCGTAAAAACT
CAATTTGGCCGTATAACTTCGGTCTTTCCTGCTGTTACGTTGAGATGGTGACTTCGTTTA
CCGCGGTGCATGACGTGGCGCGTTTTGGCGCAGAAGTATTGCGTGCTTCGCCGCGTCAGG
CTGACCTGATGGTGGTTGCAGGAACCTGCTTTACCAAAATGGCACCGGTTATTCAGCGTC
TGTATGACCAGATGCTGGAACCAAAATGGGTTATCTCAATGGGTGCCTGTGCCAACTCTG
GTGGTATGTACGATATTTATTCCGTTGTGCAGGGCGTCGATAAATTCATCCCGGTTGATG
TGTATATCCCGGGCTGCCCGCCGCGTCCTGAAGCGTACATGCAGGCACTGATGCTGTTGC
AGGAATCTATCGGCAAAGAACGTCGTCCGCTCTCCTGGGTGGTTGGCGATCAGGGCGTTT
ATCGCGCCAATATGCAATCAGAGCGCGAACGCAAGCGCGGTGAACGCATTGCCGTAACCA
ACCTGCGTACACCTGACGAGATTTAATTTGCGCCTGTCGGCAAAGGGATTTTTCTTCGCT
TATTCCTAAATCTATTTCGCGAAGCTTACTGCGCCGACAGTCACCACGGACCATTTGCAA
TGGTGAACAATATGACCGACTTAACCGCGCAAGAACCCGCCTGGCAGACCCGCGATCATC
TTGATGATCCGGTAATTGGCGAACTGCGCAACCGTTTTGGGCCGGATGCCTTTACTGTTC
AGGCGACTCGCACCGGGGTTCCCGTTGTGTGGATCAAGCGTGAACAATTACTGGAAGTTG
GCGATTTCTTAAAGAAACTGCCGAAACCTTACGTCATGCTGTTTGACTTACACGGCATGG
ACGAACGTCTGCGCACACACCGCGAAGGGTTACCTGCCGCGGATTTTTCCGTTTTCTACC
ATCTGATTTCTATCGATCGTAACCGCGACATCATGCTGAAGGTGGCGTTGGCAGAAAACG
ACCTGCACGTACCGACCTTCACCAAACTGTTCCCGAACGCTAACTGGTATGAGCGTGAAA
CCTGGGATCTGTTTGGCATTACATTCGACGGTCACCCGAACCTGCGCCGCATCATGATGC
CGCAAACCTGGAAAGGTCACCCGCTGCGTAAAGATTACCCGGCGCGCGCTACCGAATTCT
CGCCGTTTGAGCTGACCAAAGCCAAACAGGATCTGGAGATGGAAGCCCTGACCTTCAAAC
CGGAAGAGTGGGGGATGAAGCGCGGCACCGAAAACGAGGACTTCATGTTCCTCAACCTCG
GCCCGAACCACCCGTCGGCGCACGGTGCTTTCCGTATCGTTTTGCAGCTTGATGGCGAAG
AGATTGTCGACTGCGTACCAGACATCGGTTACCACCACCGTGGTGCGGAGAAAATGGGCG
AACGCCAGTCCTGGCACAGCTACATTCCGTATACCGACCGTATCGAATACCTCGGCGGCT
GCGTTAACGAAATGCCTTACGTGCTGGCGGTAGAGAAACTGGCCGGGATCACCGTGCCGG
ATCGCGTTAACGTCATTCGCGTAATGCTCTCCGAACTGTTCCGCATCAACAGCCACCTGC
TGTATATCTCGACCTTTATTCAGGACGTCGGCGCAATGACGCCCGTGTTCTTCGCCTTTA
CCGATCGTCAGAAAATTTACGATCTGGTGGAAGCGATCACGGGTTTCCGTATGCACCCGG
CGTGGTTCCGTATTGGCGGCGTAGCGCACGACCTGCCGCGCGGCTGGGATCGCCTGCTGC
GTGAGTTCCTCGACTGGATGCCGAAACGTCTGGCGTCTTACGAGAAAGCGGCGCTGCAAA
ATACCATTCTGAAAGGTCGTTCCCAGGGCGTTGCCGCCTATGGCGCGAAAGAGGCGCTGG
AGTGGGGCACCACTGGCGCGGGCCTGCGTGCTACCGGGATTGACTTCGACGTGCGTAAGG
CGCGTCCTTATTCTGGCTATGAAAACTTCGACTTTGAAATCCCGGTTGGTGGTGGTGTTT
CTGACTGCTACACCCGCGTAATGCTGAAAGTGGAAGAGCTGCGCCAGAGTCTGCGCATTC
TTGAGCAGTGCCTCAACAACATGCCGGAAGGCCCGTTCAAAGCGGATCACCCGCTGACCA
CGCCACCGCCGAAAGAGCGCACGCTGCAACATATCGAAACCCTGATCACCCACTTCCTGC
AAGTGTCGTGGGGGCCGGTGATGCCTGCCAATGAATCTTTCCAGATGATTGAGGCGACCA
AGGGGATCAACAGTTACTACCTGACCAGCGACGGTAGCACCATGAGTTATCGCACTCGTA
TCCGCACGCCGAGTTATGCGCATTTGCAGCAAATTCCGGCGGCGATCCGCGGCAGCCTGG
TGTCTGACCTGATTGTTTATCTGGGCAGTATCGATTTTGTTATGTCAGATGTGGACCGCT
AATTATGCACGAGAATCAACAACCACAAACCGAGGCTTTTGAGCTGAGTGCGGCAGAGCG
TGAAGCGATTGAGCACGAGATGCACCACTACGAAGACCCGCGTGCGGCGTCCATTGAAGC
GCTGAAAATCGTTCAGAAGCAGCGTGGCTGGGTGCCGGATGGCGCGATCCACGCGATCGC
CGATGTGCTGGGTATTCCGGCGAGCGACGTCGAAGGCGTGGCAACGTTCTACAGCCAGAT
CTTCCGCCAGCCGGTTGGCCGCCATGTGATCCGTTATTGCGACAGCGTGGTCTGTCATAT
CAACGGTTACCAGGGTATTCAGGCGGCGCTCGAGAAAAAGCTAAACATCAAACCAGGGCA
AACGACATTTGACGGTCGCTTTACGCTGCTGCCAACTTGCTGCCTGGGGAACTGTGATAA
AGGGCCAAACATGATGATCGATGAGGACACTCACGCGCATCTGACCCCGGAAGCGATCCC
TGAACTGCTGGAGCGGTATAAATGAAAAACATTATCCGTACTCCCGAAACGCATCCGCTG
ACCTGGCGTCTGCGCGATGACAAACAGCCAGTGTGGCTGGACGAATACCGCAGCAAAAAC
GGTTACGAAGGCGCGCGTAAGGCGCTGACCGGGCTGTCTCCGGACGAAATCGTTAATCAG
GTAAAAGACGCTGGTCTGAAAGGGCGTGGCGGCGCGGGTTTCTCGACTGGCCTGAAATGG
AGCCTGATGCCGAAAGACGAATCCATGAACATCCGTTACCTGCTGTGTAACGCCGATGAA
ATGGAGCCAGGCACCTATAAAGACCGCCTGCTGATGGAGCAACTGCCGCACCTGCTGGTG
GAAGGCATGCTCATCTCCGCGTTTGCGCTGAAAGCTTACCGTGGCTATATCTTCCTGCGC
GGCGAATATATCGAAGCGGCAGTGAATCTACGCCGTGCCATTGCCGAAGCGACTGAAGCG
GGCTTGCTTGGCAAAAACATTATGGGAACAGGTTTCGACTTCGAACTGTTCGTCCATACC
GGGGCAGGGCGCTACATCTGCGGGGAAGAAACAGCGTTAATCAACTCCCTGGAAGGGCGT
CGTGCTAACCCGCGCTCGAAGCCTCCATTCCCGGCGACCTCCGGCGCATGGGGTAAACCG
ACCTGTGTCAACAACGTCGAAACCCTGTGTAACGTTCCGGCGATCCTCGCTAACGGCGTG
GAGTGGTATCAGAACATCTCGAAAAGTAAAGATGCTGGCACCAAGCTGATGGGCTTCTCC
GGTCGGGTGAAAAATCCGGGCCTGTGGGAACTGCCGTTTGGTACTACCGCGCGCGAGATC
CTCGAAGATTACGCCGGTGGTATGCGTGACGGTCTGAAATTCAAAGCCTGGCAGCCAGGC
GGCGCGGGCACCGACTTCCTGACCGAAGCGCACCTTGACCTGCCGATGGAATTCGAAAGT
ATCGGTAAAGCGGGAAGCCGTCTGGGTACGGCGCTGGCGATGGCGGTTGACCATGAGATC
AACATGGTGTCGCTGGTGCGTAACCTGGAAGAGTTTTTCGCCCGTGAGTCCTGCGGCTGG
TGTACGCCGTGCCGCGACGGTCTGCCGTGGAGCGTGAAAATTCTGCGTGCGCTGGAGCGT
GGTGAAGGTCAGCCGGGCGATATCGAAACACTTGAGCAACTGTGTCGATTCTTAGGCCCG
GGTAAAACTTTCTGTGCCCACGCACCTGGTGCAGTGGAGCCGTTACAGAGCGCCATCAAA
TATTTCCGCGAAGAATTTGAGGCGGGGATCAAACAGCCGTTCAGCAATACCCATTTGATT
AATGGGATTCAGCCGAACCTGCTGAAAGAGCGCTGGTAACCGAATTTCGATTAACGCTCA
GTCTCTGACTGAGAAAACTGGAAGCATGCTAATGGCTACAATTCATGTAGACGGCAAAGA
ATACGAGGTCAACGGAGCGGACAACCTGCTGGAAGCTTGTCTGTCTCTTGGCCTTGATAT
TCCTTACTTTTGCTGGCATCCGGCGCTGGGAAGCGTCGGTGCTTGCCGCCAGTGTGCGGT
GAAGCAATACCAAAACGCGGAAGACACGCGTGGTCGCCTGGTGATGTCCTGTATGACACC
GGCTTCCGATGGCACCTTTATTTCCATTGACGACGAAGAAGCGAAACAGTTCCGTGAAAG
TGTGGTCGAGTGGTTAATGACCAACCACCCGCACGACTGTCCGGTATGTGAAGAAGGCGG
TAACTGCCATCTTCAGGATATGACCGTGATGACCGGACACAGCTTCCGTCGCTACCGTTT
CACCAAACGTACCCACCGTAATCAGGATTTGGGACCGTTCATCTCTCACGAAATGAACCG
CTGCATCGCCTGCTACCGCTGCGTGCGTTACTACAAAGATTACGCTGACGGTACAGATCT
GGGCGTTTATGGCGCGCACGACAACGTCTACTTCGGTCGCCCGGAAGACGGCACGCTGGA
AAGCGAATTTTCCGGTAACCTGGTCGAAATTTGCCCGACTGGCGTATTTACCGACAAAAC
GCACTCCGAGCGTTACAACCGTAAATGGGATATGCAGTTTGCGCCGAGCATCTGCCAGCA
ATGTTCCATCGGCTGTAACATCAGCCCCGGTGAACGTTATGGCGAACTGCGTCGTATCGA
AAACCGTTACAACGGTACGGTAAACCACTACTTCCTCTGCGACCGTGGTCGTTTCGGTTA
CGGTTACGTCAACCTGAAGGATCGTCCGCGTCAGCCAGTACAGCGTCGTGGCGATGATTT
CATTACCCTCAACGCCGAACAGGCAATGCAGGGCGCGGCAGATATTCTGCGTCAGTCGAA
GAAAGTGATCGGTATTGGTTCTCCGCGTGCCAGCGTGGAAAGCAACTTTGCGCTGCGTGA
ACTGGTGGGCGAAGAAAACTTCTACACCGGTATCGCTCACGGTGAGCAGGAACGTCTGCA
ACTGGCGCTGAAAGTGCTGCGTGAAGGCGGCATTTATACTCCGGCTCTGCGCGAAATCGA
ATCTTACGATGCGGTACTGGTGCTGGGCGAAGACGTTACCCAGACCGGCGCGCGCGTCGC
GCTGGCAGTGCGTCAGGCGGTGAAAGGTAAAGCGCGCGAAATGGCGGCAGCACAGAAAGT
GGCTGACTGGCAGATTGCGGCAATCCTCAACATCGGTCAACGTGCGAAGCATCCGCTGTT
TGTTACCAACGTTGATGACACCCGTCTGGATGATATCGCGGCGTGGACTTACCGCGCACC
GGTTGAAGATCAGGCGCGTTTAGGTTTTGCCATCGCCCATGCGCTGGATAACTCTGCACC
AGCGGTTGACGGTATCGAACCTGAGCTGCAAAGCAAAATCGACGTCATCGTGCAGGCACT
GGCAGGTGCGAAGAAACCGTTGATTATCTCCGGGACGAACGCCGGTAGCGCTGAAGTAAT
TCAGGCTGCGGCTAACGTCGCGAAAGCCCTGAAAGGTCGCGGCGCTGACGTCGGTATCAC
CATGATTGCCCGTTCCGTCAACAGCATGGGGCTGGGCATTATGGGCGGTGGATCGCTTGA
AGAAGCGTTAACCGAACTGGAAACCGGACGCGCCGACGCGGTGGTGGTGCTGGAGAACGA
TCTGCATCGTCACGCATCCGCTACCTGCGTGAATGCTGCGCTGGCTAAAGCGCCGCTGGT
GATGGTGGTTGACCATCAACGCACAGCGATCATGGAAAACGCCCATCTGGTGCTTTCCGC
CGCCAGCTTTGCTGAAAGCGACGGTACAGTGATCAACAACGAAGGCCGCGCCCAACGTTT
CTTCCAGGTTTACGATCCGGCTTATTACGACAGCAAAACTGTCATGCTGGAAAGCTGGCG
CTGGTTACACTCGCTGCACAGCACTCTGCTGAGCCGTGAAGTGGACTGGACGCAGCTCGA
CCATGTGATTGACGCTGTTGTGGCGAAAATCCCGGAACTGGCAGGTATCAAAGATGCTGC
GCCGGATGCGACATTCCGTATTCGTGGGCAGAAACTGGCCCGTGAACCGCACCGTTACAG
CGGTCGTACCGCCATGCGCGCCAATATCAGCGTTCATGAGCCGCGTCAGCCGCAGGATAT
TGACACCATGTTCACCTTCTCGATGGAAGGTAACAACCAGCCGACCGCGCATCGTTCGCA
AGTGCCGTTTGCCTGGGCTCCGGGCTGGAACTCCCCGCAGGCGTGGAACAAATTCCAGGA
CGAAGTGGGCGGCAAACTGCGCTTTGGCGATCCGGGCGTGCGTCTGTTTGAAACCAGCGA
AAATGGTCTGGATTACTTCACCAGCGTACCGGCACGCTTCCAGCCGCAGGACGGGAAATG
GCGTATCGCGCCGTATTACCACCTGTTTGGCAGTGATGAATTGTCACAGCGTGCTCCGGT
CTTCCAGAGCCGTATGCCGCAGCCGTACATCAAACTCAACCCGGCAGATGCCGCGAAGTT
GGGTGTGAATGCAGGTACACGCGTCTCCTTTAGTTACGATGGCAACACGGTCACGCTGCC
GGTTGAAATCGCCGAAGGGCTGACGGCAGGGCAGGTGGGCTTGCCGATGGGTATGTCCGG
CATTGCTCCGGTGCTGGCTGGCGCGCATCTTGAGGATCTCAAGGAGGCACAACAATGAGT
TGGATATCACCGGAACTGATTGAGATCCTGCTGACCATCCTCAAAGCGGTGGTGATCCTG
CTGGTGGTTGTCACCTGCGGGGCATTCATGAGCTTTGGCGAACGTCGCCTGCTGGGTCTG
TTCCAGAACCGTTACGGACCTAACCGTGTTGGCTGGGGCGGTTCGCTCCAGCTGGTTGCG
GACATGATCAAAATGTTCTTTAAAGAAGACTGGATCCCGAAATTCTCGGATCGCGTCATC
TTTACCCTGGCACCGATGATTGCCTTTACCTCGTTGCTGCTGGCCTTTGCGATTGTGCCA
GTCAGCCCGGGTTGGGTGGTTGCCGACCTGAACATCGGGATTTTGTTCTTCCTGATGATG
GCTGGTCTGGCGGTTTACGCGGTGCTGTTTGCGGGCTGGTCAAGTAACAACAAATACTCG
CTGCTGGGTGCGATGCGTGCTTCTGCACAGACCCTGAGCTACGAAGTGTTCCTCGGGCTT
TCTCTGATGGGCGTGGTGGCGCAGGCCGGTTCATTCAACATGACCGACATCGTCAACAGC
CAGGCGCATGTGTGGAACGTCATCCCGCAATTCTTTGGTTTTATTACCTTTGCCATCGCG
GGTGTGGCGGTGTGTCACCGTCACCCGTTTGACCAGCCGGAAGCCGAGCAGGAACTGGCG
GATGGTTACCACATTGAATACTCCGGCATGAAGTTCGGTCTGTTCTTCGTGGGTGAGTAC
ATCGGGATTGTGACCATCTCTGCATTGATGGTGACGCTGTTCTTCGGTGGCTGGCAAGGC
CCGTTGTTACCGCCATTCATCTGGTTCGCGCTGAAAACCGCGTTCTTTATGATGATGTTC
ATTTTGATTCGTGCGTCGTTACCGCGTCCGCGTTATGACCAGGTAATGTCCTTCGGCTGG
AAAATCTGCCTGCCGCTGACGCTGATCAACTTGCTGGTAACGGCGGCTGTCATTCTCTGG
CAGGCGCAATAAGGGGCAATAAGACCATGACCTTAAAAGAATTGTTAGTAGGTTTCGGCA
CCCAGGTTCGTAGTATCTGGATGATCGGCCTGCACGCGTTCGCCAAACGCGAAACGCGAA
TGTACCCGGAAGAGCCGGTCTATCTGCCGCCCCGTTATCGTGGTCGTATCGTTCTGACCC
GCGACCCGGACGGCGAAGAGCGTTGCGTAGCCTGTAACCTCTGTGCGGTAGCCTGCCCGG
TCGGCTGTATCTCGCTGCAAAAAGCAGAAACCAAAGACGGTCGCTGGTATCCGGAATTTT
TCCGCATCAACTTCTCACGCTGCATTTTCTGTGGTCTGTGCGAAGAAGCCTGTCCGACCA
CGGCGATTCAGTTAACCCCGGATTTCGAAATGGGGGAATACAAGCGCCAGGATCTGGTTT
ACGAGAAAGAGGATCTGCTGATCTCCGGTCCGGGCAAATACCCGGAATATAACTTCTACC
GGATGGCAGGTATGGCAATCGACGGCAAAGATAAGGGCGAAGCAGAGAACGAAGCCAAGC
CTATCGACGTCAAGAGCCTGTTACCGTAAGGAGAGGAGCAATGGAGTTCGCTTTTTATAT
CTGTGGCCTGATAGCCATACTTGCGACCTTGCGAGTGATCACCCATACCAATCCGGTACA
CGCACTGCTGTACCTGATTATTTCGCTGCTGGCGATTTCTGGGGTGTTCTTCTCACTGGG
CGCTTACTTCGCCGGTGCGCTGGAAATTATCGTCTACGCGGGTGCCATTATGGTGCTGTT
CGTGTTCGTGGTGATGATGCTCAACCTGGGCGGTTCAGAAATCGAACAGGAACGCCAGTG
GCTGAAACCGCAGGTGTGGAGTGGTCCGGCAATTTTGTCGGCCATCATGCTGGTGGTGAT
TGTTTACGCCATCCTCGGTGTTAACGATCAGGGTATCGACGGTACGCCAATCAGTGCTAA
AGCAGTGGGTATTACGCTGTTCGGGCCTTACGTACTGGCGGTGGAACTGGCTTCTATGCT
GCTGCTCGCGGGTCTGGTTGTGGCCTTCCACGTCGGTCGTGAAGAGCGTGCGGGTGAAGT
GCTGAGCAATCGTAAAGACGACAGCGCGAAAAGAAAAACGGAGGAGCACGCATGATCCCC
TTACAACATGGACTGATCCTCGCGGCAATCTTATTCGTTCTTGGCTTAACCGGTCTGGTT
ATCCGTCGCAATCTGCTGTTTATGCTGATTGGTCTGGAAATCATGATTAACGCCTCCGCG
CTGGCCTTTGTGGTCGCCGGAAGCTACTGGGGCCAGACCGACGGTCAGGTGATGTACATT
CTCGCCATCAGCCTCGCGGCGGCAGAAGCGAGTATCGGCCTTGCGCTGCTGCTGCAACTT
CACCGTCGTCGCCAGAACCTGAACATCGATTCAGTAAGTGAGATGCGCGGATGAACATGC
TTGCCTTAACCATTATTTTGCCATTGATTGGCTTCGTCCTGCTGGCGTTCTCCCGTGGGC
GCTGGTCTGAAAACGTTTCGGCGATCGTCGGCGTTGGCTCTGTGGGCCTGGCGGCGCTGG
TAACCGCCTTTATCGGCGTTGATTTCTTCGCTAACGGCGAGCAGGCATACAGCCAGCCGC
TGTGGACGTGGATGTCGGTAGGCGACTTTAACATCGGTTTTAACCTGGTGCTGGACGGCC
TGTCGCTGACCATGCTCTCGGTGGTCACTGGTGTGGGTTTCCTGATCCACATGTACGCCT
CCTGGTATATGCGTGGTGAAGAGGGCTACTCTCGCTTCTTCGCCTACACCAACCTGTTCA
TCGCCAGCATGGTGGTTCTGGTGCTTGCCGATAACCTGCTGTTGATGTACCTCGGCTGGG
AAGGCGTGGGCCTGTGCTCCTATCTGCTGATCGGTTTCTATTACACCGATCCGAAGAATG
GCGCAGCGGCAATGAAAGCGTTCGTCGTGACCCGTGTGGGTGACGTGTTCCTCGCTTTCG
CGCTGTTCATTCTTTACAACGAACTGGACACCCTGAACTTCCGCGAAATGGTGGAACTGG
CACCAGCGCACTTTGCTGACGGCAATAACATGCTGATGTGGGCGACGCTGATGCTGCTGG
GCGGTGCGGTCGGTAAATCTGCGCAGTTGCCGTTGCAGACATGGCTTGCCGACGCGATGG
CGGGCCCGACGCCTGTCTCCGCGCTGATCCACGCCGCAACGATGGTAACCGCGGGTGTCT
ACCTGATCGCCCGTACCCACGGCCTGTTCCTGATGACCCCGGAAGTTCTGCATCTGGTGG
GTATTGTCGGGGCAGTTACGCTGCTGCTGGCCGGTTTTGCCGCGCTGGTACAGACCGACA
TCAAACGTGTTCTCGCTTACTCTACCATGAGCCAGATTGGCTACATGTTCCTCGCGCTTG
GCGTGCAGGCATGGGATGCGGCGATTTTCCACTTGATGACTCACGCGTTCTTTAAAGCGC
TGCTGTTCCTGGCATCCGGTTCCGTCATTCTGGCCTGCCATCACGAACAGAACATCTTCA
AGATGGGCGGTCTGCGTAAATCTATTCCGCTGGTTTATCTCTGCTTCCTGGTGGGTGGTG
CAGCACTGTCGGCACTGCCGCTGGTCACTGCGGGCTTCTTCAGTAAGGATGAGATCCTCG
CGGGTGCGATGGCGAATGGTCATATCAATCTGATGGTGGCAGGTCTGGTCGGTGCGTTTA
TGACCTCGCTCTACACCTTCCGTATGATTTTCATCGTCTTCCACGGAAAAGAACAAATTC
ACGCTCACGCCGTGAAAGGGGTAACTCACAGCCTGCCGCTGATTGTGCTGCTGATCCTTT
CCACCTTCGTTGGCGCACTGATTGTACCGCCGCTGCAGGGCGTGCTTCCGCAAACGACGG
AGCTGGCGCACGGCAGCATGTTGACCCTGGAAATTACCTCTGGCGTGGTCGCGGTGGTCG
GCATTCTGCTGGCTGCCTGGCTGTGGCTGGGTAAACGTACTCTGGTGACCTCCATCGCCA
ACAGTGCGCCGGGCCGTCTGCTGGGCACCTGGTGGTACAACGCCTGGGGCTTTGACTGGC
TGTACGACAAAGTGTTCGTCAAGCCGTTCCTGGGTATTGCCTGGTTGCTGAAACGCGATC
CGCTGAACGCAATGATGAACATTCCGGCGGTTCTTTCCCGCTTTGCAGGTAAAGGTCTGC
TGTTAAGCGAGAACGGCTATCTGCGCTGGTATGTGGCATCCATGAGCATCGGTGCGGTCG
TGGTGCTGGCACTGTTGATGGTATTGCGTTGAGTTAAGGATTGTGGGATTGCCCCTGGGC
ATATAAGAACGTAGGTCGGATAAGCCTCCTTCGCGGTGCATCCGACACTACCCCCAGTCC
GAAGAGAATTTTCTGTCGTGAGAATTCGTTGAAAATCCGGTCCTGACGGGACTTTTACAA
GGAATAAAGATCGCCATGTTACTACCCTGGCTAATATTAATTCCCTTTATCGGCGGCTTC
CTGTGCTGGCAGACCGAACGCTTTGGCGTCAAGGTGCCGCGCTGGATCGCGCTGATCACC
ATGGGATTGACGCTGGCGCTGTCGCTGCAACTGTGGTTGCAGGGCGGTTATTCACTGACG
CAATCCGCCGGAATTCCGCAGTGGCAGTCTGAATTCGACATGCCGTGGATCCCGCGTTTT
GGTATCTCTATTCATCTCGCCATTGACGGGCTGTCGCTGCTGATGGTCGTGCTGACCGGT
CTGCTCGGTGTGCTGGCGGTACTCTGTTCGTGGAAAGAGATCGAAAAATATCAGGGCTTC
TTCCACCTCAACCTGATGTGGATCCTGGGCGGCGTTATCGGCGTGTTCCTTGCCATCGAC
ATGTTCCTGTTCTTCTTCTTCTGGGAAATGATGCTGGTGCCGATGTACTTCCTGATCGCA
CTGTGGGGGCATAAAGCCTCTGACGGTAAAACGCGTATCACGGCGGCAACCAAGTTCTTC
ATTTACACCCAGGCGAGTGGTCTTGTGATGTTGATCGCCATCCTGGCGCTGGTTTTTGTT
CACTACAATGCGACCGGCGTCTGGACCTTCAACTATGAAGAGCTGCTGAATACGCCAATG
TCCAGTGGTGTGGAATATCTGTTGATGCTGGGCTTCTTCATCGCCTTCGCAGTCAAAATG
CCGGTGGTTCCGCTGCATGGCTGGCTGCCGGATGCGCACTCCCAGGCTCCGACCGCCGGT
TCCGTTGACCTCGCGGGGATCTTGCTGAAAACTGCCGCTTACGGTTTGCTGCGTTTCTCC
CTGCCGCTGTTCCCAAATGCGTCGGCAGAGTTCGCGCCAATCGCTATGTGGCTGGGTGTT
ATCGGCATCTTTTACGGTGCGTGGATGGCCTTCGCCCAGACCGATATCAAACGTCTGATC
GCCTACACCTCGGTTTCCCACATGGGCTTCGTGCTGATTGCTATCTACACCGGCAGCCAG
TTGGCCTACCAGGGCGCGGTAATCCAGATGATTGCGCACGGCTTGTCGGCGGCGGGTCTG
TTTATTCTCTGCGGTCAGCTTTATGAACGTATCCATACCCGCGACATGCGCATGATGGGC
GGTCTGTGGAGCAAGATGAAATGGCTGCCAGCACTGTCGCTGTTCTTTGCGGTGGCAACG
CTTGGGATGCCTGGCACCGGTAACTTCGTCGGCGAATTTATGATTCTGTTCGGCAGCTTC
CAGGTTGTCCCGGTGATTACCGTTATTTCTACCTTTGGGCTGGTCTTTGCATCTGTTTAT
TCGCTGGCGATGTTGCATCGTGCTTACTTCGGTAAAGCGAAAAGCCAGATTGCCAGCCAG
GAACTGCCAGGGATGTCGCTGCGTGAGCTGTTTATGATCCTGTTGCTGGTGGTGCTGCTG
GTACTGCTGGGCTTCTATCCGCAGCCGATTCTGGATACCTCGCACTCCGCGATTGGCAAT
ATCCAGCAGTGGTTTGTTAATTCCGTTACTACTACAAGGCCGTAAATCGCCATGACAATA
ACTCCACAAAACCTGATCGCACTGCTACCGTTGCTGATCGTCGGCTTGACGGTGGTGGTT
GTGATGCTCTCCATTGCGTGGCGACGCAATCATTTCCTCAACGCTACGCTCTCGGTTATT
GGGCTTAACGCGGCGCTGGTTTCGCTCTGGTTTGTCGGCCAGGCGGGCGCTATGGATGTT
ACGCCGCTGATGCGCGTTGATGGTTTCGCCATGCTTTACACCGGGCTGGTCCTGCTGGCG
AGCCTCGCCACCTGTACTTTCGCCTACCCGTGGCTTGAAGGCTATAACGACAACAAGGAT
GAGTTCTACCTGTTGGTGTTAATTGCCGCGCTGGGCGGGATCCTGCTGGCGAATGCCAAC
CATCTGGCGTCTCTGTTCCTCGGTATCGAACTGATCTCTTTGCCGCTGTTTGGCCTGGTC
GGTTACGCTTTCCGCCAGAAACGTTCGCTGGAAGCCAGTATCAAATACACCATCCTTTCT
GCCGCAGCGTCTTCTTTCCTGCTGTTTGGTATGGCGCTGGTGTATGCGCAGTCTGGCGAC
CTGTCGTTTGTCGCGTTGGGTAAAAACCTTGGCGACGGTATGCTCAACGAGCCGCTGTTG
CTGGCAGGTTTCGGCCTGATGATTGTTGGCCTCGGCTTCAAACTCTCTCTGGTGCCGTTC
CACCTGTGGACGCCAGACGTATACCAGGGCGCGCCTGCGCCGGTTTCCACTTTCCTGGCG
ACGGCGAGCAAAATCGCTATCTTCGGTGTGGTGATGCGTCTGTTCCTCTACGCACCGGTG
GGTGACAGCGAAGCGATTCGCGTAGTACTGGCGATTATCGCCTTTGCCTCCATCATCTTC
GGTAACCTGATGGCGTTGAGCCAGACCAACATCAAACGTCTGCTCGGTTACTCATCTATC
TCTCACCTCGGCTATCTGCTGGTGGCGCTGATTGCGCTGCAAACCGGCGAGATGTCGATG
GAAGCGGTAGGGGTTTACCTGGCCGGTTATCTGTTCAGCAGCCTCGGCGCGTTCGGCGTG
GTCAGCCTGATGTCCAGCCCGTATCGTGGCCCGGATGCTGATTCCCTGTTCTCTTACCGC
GGTCTGTTCTGGCATCGTCCGATCCTCGCGGCAGTGATGACGGTGATGATGCTGTCTCTG
GCCGGTATCCCGATGACGCTGGGCTTTATCGGTAAGTTCTACGTGCTGGCGGTCGGTGTC
CAGGCTCACTTGTGGTGGCTGGTGGGTGCCGTGGTTGTCGGTTCGGCAATCGGCCTTTAC
TACTACCTGCGCGTGGCGGTGAGTCTGTACCTGCACGCACCGGAACAACCGGGTCGCGAT
GTACCGTCAAACTGGCAGTACAGCGCGGGCGGTATCGTGGTGCTGATTTCTGCACTGTTG
GTACTGGTGCTGGGTGTATGGCCACAACCGCTGATTAGCATTGTGCGTTTGGCAATGCCG
CTGATGTAATCTGTTAGTTTGTAAGTCAGAAAGCCGCCGACATGCTCGGCGGTTTTTTTT
GGCGCTCTGACACCATCACCCAACAATAACCGTCAGCGCATGATTCCCTTGTCGCAGCAT
ACGTCGATACGCGCTAATCAGCTTTTCCATATCAAGCATGATCGAGGCAAAGAGTTGCCC
CTCTAACTCTTCTGAAAAGGTCACTCCCGGATAAATCTCCATTTCATTGAGTCGCTTAAT
GGAAAACTGTTTACGCAGCTCACTTCGATCCAGTGATTCCAGTCGGTCGATTGTCGCGGC
TAACTCCTGATTCCAGGTCAATCCCAGGAAGCCATCTATGCCATCTTCGAGGCTGTGTTC
ACCAAGCACGGCACGACTCAGCGGATCATTCTTCGCGGGATCAAAAGCAGAGGTGCCTGT
CAGCCCAAAGTGTAAAAAATCCCAGCGTTTATCAATATCCAGTCGGCGTAATCCTGAAAG
CGTGTCATGTATATTATCCATCAAAGGTTTTTCAGTAGACTCAAGCAGTTGGTTAATCTT
TTCTGAGTCAATTTCTGCAAAATAACCAATCATTCCCATTTATTTTTCCTCCATTGAATT
TCATGTTTCGCATCTTAAAACAGACGAGGGAAAATAAAATGTGCATGTCGCTTTTTCTGG
ACCCGCCTCGAGAAATTTTTATTATTTACTGTTGTATAACAAATTTATAACACCATCCAC
CACCTGAGCCATTTTCTGATAATTCAATCTGTCTGCGGTATCACCGGGCAAGTGGTATTG
TTTATTACGATAAAAAGCGGTGTCAGTAATCATTACGGCGGGAATATCGTGTTGCCAATA
ATTCAGGTGGTCAGAGAAATCAATACTGGGAATAAACCCTGGGGCATTCATAGAATAAAC
AGATAAATCCCGGGATGACAACAATGCCGCTTTTACCTGACGAACGGCGTTGATATCCTG
TATTCTGCCGACCAGGCAATAAAGTCCCCCCGATCGGGATAAAGCCAGGACATTGCGGGT
AAGGGTAATCCTGGCTACCAGGCGCAGAGTCGTAATAGCCAATCGGGGACGCCCTGCGCG
GTAACTCTGGCACCGCTACTGACAAAGACCTCTTTTATATACTCTACGGACCTATTCAGA
TTATCAATATTGTCGGCATTACGTGGATGCACAGCTTGTGTAAGATAACGAACTGTTTTT
TCTAATTGCTCAGGAATTACGTGTCGGGGCGTTGGCGATAATGCAGTGACCCAGGGTTGG
TAAAAATAATCAGAGGGAGTGAAAACAGAAATAATATAACAAAAGGAAAATTTTTTCATA
TGTAAATTATCAATAAAAGGCGTTATTTCATTATTATTTATAATGAATTATGAGCGTTTA
TTTTATTACACTTGGTAGAGATATACAAAAAGTGTTTTTTACAGTGGGTTCGCTATTTTT
AAAAAGGAATTTCTGTGAGGAATAAAAATATAATTATGTTATTTATTGGCAGATTGAATT
GACAAGTGGGGCAGAAATCTGAGGGTAAGAAAAGTCAGCAACTACAATCCACTACATCAA
CAGACCAGCAATCGCGTGCCGAGATACGCTGGAAATACCCGAAGATTGAACTGCAGGGTG
GTGTGACTGACATCAGTCAGTGATGACTTTTTAGCAAACTATGTTCGACCAGTCAGCATA
TTTGCTGACTGGTCGAATTAATTAACAATGATGTTAACTTACTCTTTTGCCTGATGCTCT
ATTTTGGGGTTGTGAGTGTTTTATTTCTAAGTCTCTATAATAATCATTGATATTTGCATC
GCCATATTTATCTAAATAACAATTTCTGTTTACCAGTCGATGTTGAAAATCAATTTCGTA
CTGCTCTTCTGCTGAATATTTTTTAAATCTGTCAGCATAGTTTTTTAATAACGTATAGGG
GGCGCTGTCAGAATTACTTTCCCTTTGTTCAATCACTTCCTGGGCTGCCATGCACACAAA
TGCACCGCAACTTTGGCTTAAGTATTGCTGAAGATCGGCATGTAAAAATATTATCTCGGG
TTCAGTTAAATGAACTTTTATATTATTATTCGACATTTCTCCCATGAGTTCAGAATTAAA
ACTATTAATGACACGCTTAAGTGAATTTTCTTTATCATGGCCTAGTGCGCGCAATGAGTT
GAATATGACGCATTTTATTTGTTGTGTATTATTTTTTTCATTTACTATTTTCTGTAGCGA
AACTAATATCCAGTGTCCGCCAGTATTTATGGGGAATAACTGGACTTCATTCGGCCATGA
TGGATCGCTCTTAATATTTTCATTGAGAGCGTCTTCCAGGTGAGTTCTGGTGGAGTAGGG
GACGTAGAGACCAGTAGGATAATTGACTTCAGTATTTTTTGCATTAGCGGCGATCTTCTG
AAGATAGCAATCTATTTCATCTGTGGTTAATTGACGATTTTTATCCCAGAAGTTTGTACC
ATCGCTCAGTTCATTATTCTCATCATTTAAAAGCACCTTCGAAAGCGACTGTTTTTTAGA
TATAAGAGGAATTTCATCACCGATAATTGTCATTAATTTCGAAGGGGAGAATAGCTTTTT
GAACAGGAGATCATCTGAATTATCCGGACCAGTTGGTTTAAGGTGGGAGTTGGTTGCGGT
ATGTGCCAAATTATATAATTTTAAACAGGCATTTTTAATAAGTCGGATAATCGATAGGGT
CTCATTTGTTGGGTTTCTAACAATATGGTAAAGAATATCTTCAGCTTTTTTTCCAAATTC
ATCATAACCTAACGCAATATTATGCAGTAACTCAATACTTTCTTCATCTCCGGATAACGC
TGTTTTTTTTAAAGACTGCAGTAATTCCTCGGTCACAGTAAATTTTTCTGCAAATGTCTG
ACTGAGTTGGGTTTGAGATAATTGACAATAATTGCTGACAACTGTAACCATCATATGCTC
CTTTTAGTTGCAAAGGTTGTGCTGAATGAAGATAAAAAGAGGCAACTTATTGCTCTGAAT
ATAGTGCGTAAGGAGATGAATAAATATCAAAAATCGCTCAATATGCCCGTGTGGGTGGAT
ATATGTAGCGCGGGTTGCGATAACAGGGCAAGTTTCGCCCTGTTTTTAATAATAAGCAGA
GTTAAACGTTAAACACGGTGAAATCATTCGCTAGTTCAGTCGCCGGGAAAATTGACCTGC
ATTCACGTAACAGGTGCTGACAACCTTTGTCATCATAGCGCGAGCTGACGTGGGTAATGA
TTAGCTTACCGACTCCAGCCTCACGGGCCAGTGTCGCAGCCTGGCGTGTAGAGCTATGAC
CGCGACTATTGGCTTTGGCTTCCATGGTTATATCCAGCGTCGCTTCGTGTACCATGACAT
CGACACCTTTAGCCAGGTCAAGTGCGGCATCGCAGGGGCCGGTATCGCCGAAAATAGCGA
GCGCTTTACCTGGCACTGGAGCAGCTAAGTAATCTGCGCCGTTAATCTGCCTTCCATCTT
CCAGCATGATTGTTTTGCCCGCTTTTAATTCCTGAAACAGTGGGCCAGGCGGTACGCCAG
CAGCTTTTAATGCCTGGGCATTTAATGCACCCGGTTTATCATGTTCTTCAATACGATAGC
CATAACATTCCAGTGGGTGTTCCATTGGATAAGCGGTCACTTTGCGCAGGCCATCATCGA
GAATTTCGCCAGCGCCAATTTCGACAATTTCCAGCGGATAATCGGTCCATGAGCCGCTAA
TCCGCAGCGCGGTCTCCACAAATTCACGGATACCTTGCGGACCATAAATCGTTAAGGGTT
GGACAATACCAGACATAGAACGACTGCACAGCAAGCCGGGTAAACCAAAGAGATGATCGC
CATGAAGGTGACTAATAAAAATCTTGTCTAGTTTTCCAGGGTTAAAGGCGGTATGCAGTA
GCTGATGCTGGGTGCCTTCACCGCAGTCAAACAACCAAAGACCGCTCTGGGTCGGATGTT
GCAGGTTAAGCAATATTGCCGTGACATTGCGCGTACGGGTTGGCACACCGGCTGAAGTAC
CTAAAAAAATTAATTCCATGAGTTCATCACGTTTCAAAAAATATTCCGGCTAGTATAAGG
CATACATCTAAAAGGAGAGCATTATGATTGAATGGCAAGATCTGCATCACTCTGAATTAT
CGGTTTCCCAGCTTTATGCCTTATTACAACTGCGTTGCGCGGTGTTTGTTGTCGAGCAGA
ATTGCCCTTATCAGGATATCGATGGTGATGATTTGACGGGGGATAATCGCCATATTCTCG
GTTGGAAAAATGATGAACTGGTGGCATATGCGAGGATTCTGAAAAGTGATGATGATCTTG
AGCCGGTCGTTATAGGTCGGGTGATTGTCAGTGAAGCGTTGCGTGGCGAAAAAGTGGGGC
AGCAACTGATGAGTAAAACCCTCGACACATGCACGCATCACTGGCCTGATAAGCCTGTTT
ACCTTGGGGCGCAGGCGCATCTGCAAAACTTCTACCAGAGTTTCGGTTTTATCCCTGTGA
CGGAGATCTATGAAGAAGATGGTATCCCACACATTGGGATGGCACGCGAGGTAATTCAGG
CGTAATCAATAACCCTTGTCTATAGTTAGTGACAGGTTTTACGCAAATGGAGAACGAGAA
TGTCTAATCAGTTTGGTGATACACGTATCGATGACGACCTGACGCTGCTTAGTGAAACAC
TGGAAGAGGTGCTCCGCTCCTCTGGCGATCCCGCCGATCAGAAATATGTTGAGCTGAAAG
CGCGTGCAGAAAAAGCGCTGGATGATGTGAAAAAACGGGTTAGCCAGGCTTCAGACAGTT
ATTACTATCGGGCGAAGCAGGCTGTTTATCGTGCTGATGACTACGTCCACGAAAAACCCT
GGCAGGGAATTGGTGTGGGTGCGGCCGTTGGGCTGGTACTAGGACTGTTGCTGGCACGCC
GTTAAAACCTCCCTACACCGGGGTACTGCATTTTTTTTGTAGTACCCCGTATAATGTGAG
GCTTTTAACAGGGAGAGGTCCGCGTGCAATCACTTACTACGGCGCTGGAAAATCTACTGC
GCCATTTGTCGCAAGAGATTCCGGTGACACCCGGCATTCGGGTTATCGATATTCCTTTCC
CTCTCAAAGACGCTTTTGATGCCTTGAGCTGGCTGGCCAGTCAGCAAACGTACCCGCAAT
TCTACTGGCAACAACGTAATGGTGATGAAGAAGCTGCCGTCCTGGGCGCGATTACCCGTT
TTACGTCGTTGGACCAGGCACAACGTTTTCTTCGCCAGCACCCGGAACACGCCGACTTAC
GCATTTGGGGGCTGAATGCGTTCGACCCGTCGCAGGGCAATTTACTTTTACCACGCCTGG
AATGGCGACGCTGTGGCGGTAAAGCCACGCTGCGGCTGACGCTATTCAGCGAAAGCTCCC
TTCAGCACGATGCGATTAAGGCAAGAGAATTTATCGCCACACTGGTGAGTATCAAGCCCT
TGCCTGGGTTACATTTAACCACTACGCGAGAACAACACTGGCCGGACAAAACGGGCTGGA
CGCAATTAATCGAACTGGCAACGAAAACCATCGCCGAAGGGGAGCTCGACAAAGTGGTGC
TTGCTCGGGCAACTGACCTGCATTTCGCAAGTCCGGTCAATGCGGCGGCGATGATGGCTG
CCAGTCGTCGACTGAATCTCAATTGCTACCATTTTTACATGGCCTTTGATGGCGAAAATG
CTTTTCTTGGCTCTTCACCGGAACGGTTATGGCGGCGGCGTGACAAAGCGCTGCGTACTG
AAGCGCTGGCGGGAACAGTAGCAAATCATCCTGATGATAAGCAGGCGCAGCAGTTAGGAG
AGTGGCTGATGGCGGATGATAAAAACCAGCGCGAGAACATGCTGGTGGTGGAAGATATCT
GCCAACGATTACAGGCCGATACCCAGACGCTGGATGTTTTACCGCCGCAGGTACTGCGTC
TGCGTAAAGTGCAGCATCTTCGCCGCTGTATCTGGACTTCACTCAACAAAGCGGATGATG
TGATCTGTTTACATCAGTTGCAGCCAACGGCAGCAGTTGCTGGCTTACCGCGCGATCTGG
CGCGACAGTTTATCGCCCGTCACGAACCGTTCACCCGAGAATGGTACGCCGGTTCTGCGG
GCTATCTCTCATTACAACAAAGCGAATTCTGCGTTTCCCTGCGCTCAGCAAAAATTAGCG
GCAATGTCGTGCGATTATATGCTGGCGCGGGCATTGTCCGTGGTTCCGACCCCGAGCAAG
AGTGGCAGGAAATCGACAACAAAGCGGCAGGGCTGCGTACTTTATTACAGATGGAATAGT
AATGAGTCGCATCATTACCGATTCATATCAATAATCTATTTTTGTAGCTCCTTATACTTA
GCCGCAATATTGATACCGGACAAACTCATGTCAGTAAGCGCATTTAACCGACGCTGGGCG
GCGGTCATTCTGGAAGCATTAACGCGTCACGGCGTCAGACACATCTGTATCGCCCCAGGC
TCGCGTTCTACACCGTTAACGTTAGCGGCGGCGGAGAATTCCGCATTCATTCACCACACC
CATTTCGATGAGCGTGGACTGGGGCATCTGGCGCTGGGGCTGGCGAAAGTCAGCAAGCAG
CCGGTGGCGGTGATTGTGACCTCCGGCACGGCGGTAGCAAATCTCTATCCTGCACTGATT
GAAGCTGGGTTAACCGGAGAAAAACTGATCCTGTTAACCGCCGATCGCCCGCCGGAGCTA
ATTGACTGCGGCGCGAATCAGGCGATTCGTCAGCCGGGAATGTTCGCCTCTCACCCCACG
CACAGTATTTCATTGCCGCGCCCGACCCAGGATATCCCCGCAAGTTGGCTGGTTTCTACC
ATCGACCATGCTCTCGGTACGCTTCATGCGGGCGGAGTCCATATCAACTGCCCGTTTGCT
GAACCGCTGTATGGCGAGATGGACGACACTGGGCTTAGCTGGCAACAGCGTCTGGGTGAC
TGGTGGCAGGATGATAAGCCGTGGCTGCGTGAAGCGCCTCGTCTGGAAAGTGAAAAACAG
CGCGACTGGTTCTTCTGGCGGCAAAAACGCGGCGTGGTGGTTGCCGGGCGCATGAGTGCG
GAAGAGGGCAAAAAAGTTGCACTGTGGGCGCAAACTCTTGGCTGGCCGCTGATTGGCGAC
GTGCTGTCGCAAACCGGACAGCCGCTGCCGTGTGCCGATCTTTGGTTAGGCAATGCCAAA
GCGACCAGCGAACTGCAACAGGCACAGATTGTGGTGCAACTGGGCAGCAGCCTGACGGGC
AAACGGCTCCTGCAATGGCAGGCAAGCTGTGAACCCGAAGAGTACTGGATTGTGGATGAC
ATCGAAGGGCGACTTGATCCGGCACACCATCGTGGACGCCGCTTAATTGCCAATATTGCC
GACTGGCTGGAGCTGCATCCGGCAGAAAAACGCCAGCCCTGGTGCGTTGAAATCCCGCGC
CTGGCAGAACAGGCAATGCAGGCGGTTATTGCCCGTCGCGATGCGTTTGGCGAAGCGCAA
CTGGCGCATCGCATCAGCGACTATCTGCCTGAACAGGGGCAATTGTTTGTTGGTAACAGC
CTGGTGGTACGTCTGATTGATGCGCTTTCGCAACTTCCAGCAGGTTACCCGGTGTACAGC
AACCGTGGGGCCAGCGGTATCGACGGACTGCTTTCTACTGCCGCCGGCGTTCAGCGTGCC
AGTGGCAAACCGACGCTGGCGATTGTGGGCGATCTCTCCGCACTTTACGATCTCAACGCG
CTGGCGTTATTGCGTCAGGTTTCCGCGCCGCTGGTATTAATTGTGGTGAATAACAACGGC
GGGCAAATTTTTTCGCTGTTGCCAACGCCGCAAAGCGAGCGCGAACGTTTCTATCTGATG
CCGCAAAACGTTCATTTTGAGCACGCCGCCGCGATGTTCGAGCTGAAATATCATCGTCCG
CAAAACTGGCAGGAACTTGAAACGGCACTTGCCGATGCCTGGCGCACGCCAACCACCACG
GTAATTGAAATGGTGGTTAACGACACCGATGGTGCGCAAACGCTCCAGCAACTTCTGGCG
CAGGTAAGCCATTTATGATCCTGCACGCGCAGGCAAAACACGGCAAACCAGGTTTACCCT
GGCTGGTGTTTTTGCACGGTTTTTCCGGCGATTGCCACGAATGGCAAGAAGTGGGCGAGG
CGTTTGCCGACTACTCACGGTTGTATGTTGATCTTCCCGGGCACGGTGGTTCGGCGGCGA
TTAGCGTCGATGGATTTGATGATGTCACCGACTTACTGCGTAAAACCCTGGTTAGTTACA
ACATCCTTAACTTCTGGCTGGTGGGGTACTCGCTTGGCGGACGGGTGGCGATGATGGCCG
CTTGCCAGGGGCTGGCGGGGCTTTGTGGGGTTATTGTCGAAGGCGGGCATCCGGGGCTGC
AAAATGCTGAACAACGTGCGGAACGTCAGCGTTCCGATCGCCAATGGGCGCAGCGTTTTC
GCACAGAACCGTTAACGGCGGTATTTGCCGACTGGTATCAACAGTCTGTTTTTGCCTCGC
TCAATGACGATCAACGCCGGGAGCTGGTGGCGTTGCGCAGCAACAATAATGGCGCAACCC
TTGCCGCCATGCTGGAGGCGACTTCTCTCGCCGTCCAGCCTGATTTACGTGCTAACCTTA
GCGCCCGCACATTTGCGTTTTATTATTTATGTGGTGAACGTGACAGCAAATTCCGCGCTC
TGGCGGCGGAACTGGCTGCCGACTGCCATGTCATTCCTCGCGCCGGACATAACGCGCATC
GGGAAAATCCCGCTGGCGTTATCGCAAGTCTGGCGCAGATCTTGCGTTTCTGACTAAAGG
ACACAATATGATTTATCCTGATGAAGCAATGCTTTACGCACCGGTTGAATGGCACGACTG
CTCCGAAGGTTTCGAGGACATTCGTTATGAAAAATCCACCGACGGTATCGCAAAAATCAC
CATTAATCGTCCGCAGGTGCGCAATGCCTTCCGTCCTCTGACGGTAAAAGAGATGATCCA
GGCACTGGCAGATGCGCGTTATGACGACAATATCGGCGTGATCATTCTGACTGGCGCAGG
CGATAAAGCGTTCTGCTCCGGTGGTGACCAGAAAGTGCGTGGTGATTACGGCGGCTATAA
AGATGATTCCGGCGTACATCACCTGAACGTGCTGGACTTCCAGCGTCAGATCCGTACCTG
TCCGAAACCGGTTGTCGCGATGGTGGCTGGCTACTCCATCGGCGGTGGTCACGTTCTGCA
CATGATGTGCGACCTGACTATCGCGGCAGATAATGCCATCTTCGGTCAGACTGGCCCGAA
AGTCGGTTCCTTCGACGGCGGCTGGGGCGCTTCCTACATGGCTCGTATCGTCGGGCAGAA
AAAAGCGCGTGAAATCTGGTTCCTGTGCCGTCAGTACGACGCAAAACAGGCGCTGGATAT
GGGCCTTGTGAACACCGTGGTACCGCTGGCGGATCTGGAAAAAGAAACCGTCCGTTGGTG
CCGCGAAATGCTGCAAAACAGCCCGATGGCGCTGCGCTGCCTGAAAGCTGCACTGAACGC
CGACTGTGACGGTCAGGCAGGTCTGCAGGAGCTGGCGGGCAACGCCACCATGCTGTTCTA
CATGACGGAAGAAGGTCAGGAAGGTCGCAACGCCTTCAACCAGAAACGTCAGCCTGATTT
CAGCAAATTTAAACGGAATCCGTAATGCGTAGCGCGCAGGTATACCGCTGGCAGATCCCC
ATGGACGCGGGGGTGGTTCTGCGCGACAGGCGGTTAAAAACCCGCGACGGGCTGTATGTT
TGCCTGCGTGAAGGCGAGCGCGAAGGGTGGGGGGAGATCTCCCCACTGCCGGGCTTCAGT
CAGGAAACCTGGGAAGAGGCGCAAAGTGTGCTGCTTGCCTGGGTAAATAACTGGCTGGCA
GGCGATTGCGAATTACCGCAGCTGCCTTCCGTCGCCTTTGGCGTAAGCTGTGCATTGGCG
GAGCTGGCAGATACGCTCCCGCAGGCGGCCAATTACCGTGTGGCACCACTGTGTAATGGC
GATCCTGACGATCTGATCCTCAAACTTGCTGATATGCCAGGCGAGAAAGTGGCGAAGGTC
AAAGTGGGATTGTACGAAGCCGTGCGCGACGGCATGGTGGTGAATCTGTTGCTGGAGGCA
ATTCCGGATCTGCATTTGCGTCTTGACGCGAATCGCGCCTGGACACCGCTGAAAGGCCAG
CAGTTTGCCAAATATGTTAACCCGGATTATCGCCACCGCATCGCGTTTCTCGAAGAGCCG
TGCAAAACCCGCGATGATTCGCGAGCGTTTGCCCGTGAAACCGGCATTGCCATTGCCTGG
GATGAAAGCTTGCGCGAGCCGGATTTTGCCTTTGTGGCTGAAGAGGGCGTGCGCGCGGTA
GTTATCAAACCCACGCTCACGGGCAGTCTGGAGAAAGTACGCGAGCAGGTACAGGCGGCG
CACGCGCTGGGGCTGACGGCGGTGATCAGTTCTTCCATTGAATCGAGCTTAGGCTTAACG
CAACTGGCGCGGATTGCCGCCTGGTTAACGCCGGACACCATTCCAGGGCTGGACACGCTG
GATCTAATGCAGGCGCAGCAGGTACGTCGCTGGCCGGGTAGCACGCTGCCTGTCGTGGAA
GTTGATGCACTGGAGCGGTTGTTATGATCTTCTCTGACTGGCCGTGGCGTCACTGGCGGC
AAGTGCGGGGAGAAGCCATCGCCTTACGTCTTAATGACGAGCAACTCAACTGGCGCGAGC
TTTGTGCTCGCGTCGATGAATTAGCCTCCGGCTTTGCGGCGCAGGGCGTAGTTGAGGGCA
GCGGCGTGATGTTGCGGGCGTGGAATACGCCGCAAACGCTGCTCGCCTGGCTGGCGTTAC
TGCAATGCGGGGCGCGGGTGTTGCCCGTGAACCCTCAGCTGCCGCAACCGTTGCTTGAAG
AATTGCTGCCCAATCTTACGCTGCAATTTGCGCTGGTGCCGGAAGGGGAAAACACGTTTC
CGGCGTTAGCGTCGCTGCACATTCAGCGGGTTGAAGGCGCACATGCCGCTGCGTGGCAGC
CGACGCGTCTGTGCTCAATGACGTTAACCTCTGGGTCCACTGGCTTGCCGAAAGCCGCTG
TTCATAATTACCAGGCTCATCTTGCCAGCGCCGAAGGGGTGTTATCGCTGATTCCGTTTG
GCGATCACGATGATTGGTTGCTCTCTTTACCGCTGTTTCACGTCTCCGGTCAGGGAATTA
TGTGGCGCTGGTTATACGCTGGTGCGCGGATGACGGTACGTGATAAACAGCCATTGGAGC
AAATGCTGGCAGGCTGTACTCACGCTTCACTGGTGCCAACACAACTCTGGCGTTTGCTGG
TTAACCGCAGTTCCGTTTCCCTGAAAGCGGTGTTACTTGGCGGCGCGGCTATCCCGGTCG
AGTTGACGGAACAGGCGCGCGAGCAGGGGATTCGTTGCTTTTGCGGCTATGGTCTGACCG
AGTTTGCCTCCACGGTGTGTGCGAAAGAAGCCGACGGCCTGGCAGACGTTGGTTCGCCGC
TGCCGGGTCGGGAAGTGAAAATCGTTAATAATGAAGTGTGGCTGCGGGCTGCCAGTATGG
CAGAAGGTTACTGGCGTAACGGGCAACTGGTTTCACTGGTTAATGACGAAGGCTGGTACG
CTACGCGCGATCGCGGTGAGATGCATAATGGCAAGCTGACCATTGTCGGACGTTTAGACA
ATCTATTCTTCAGTGGCGGAGAGGGTATTCAGCCGGAAGAAGTCGAGCGCGTAATTGCTG
CACATCCTGCGGTTTTGCAGGTGTTTATCGTCCCCGTTGCCGACAAGGAGTTTGGTCATC
GACCGGTGGCGGTGATGGAGTATGACCACGAGAGCGTTGATCTTAGTGAATGGGTGAAAG
ATAAGCTGGCCCGTTTTCAGCAACCGGTGCGTTGGTTAACGTTGCCGCCTGAACTGAAAA
ACGGCGGTATTAAAATTTCACGTCAGGCGCTAAAAGAGTGGGTGCAACGTCAGCAATAAT
TAACCCTCCGTTTCACTTCTCATTTCTGCCATTCCATTGCCGTTGATAAAGAGTTTATCT
GTTAATCTGTAAATTGATGTGAAAACTCTTAGCAAACAGGATAATGCAATGGAATGGCTG
GTCAAAAAATCGTGCTGCAATAAACAAGATAACAGACATGTACTTATGCTCTGCGATGCT
GGCGGCGCGATAAAAATGATCGCCGAAGTGAAGAGTGACTTCGCCGTGAAAGTGGGGGAT
TTACTCTCGCCTTTGCAGAATGCGCTTTATTGTATTAATCGTGAAAAGCTGCATACGGTG
AAAGTCCTCTCGGCAAGCAGTTATAGCCCCGATGAGTGGGAACGGCAGTGTAAAGCGGCA
GGGAAAACTCAGTAACGTTGTTTTGTCGTGGGCAGGAAAATCAGCATCAACCCGCTCATA
ATACAGGCTACTCCCAGTAGTGCTTTCAGCGAAAAAGTCCCTTCCCAGCCGGGAAGTACC
ATTGAAGCAATCCATACCAGCACATAACTCATACTGAGCAAGGCATAGGCTTTGCTTAGC
GCAAGTATATGTAGCGTTTTATACCAACAAAAAACGGAAAGCAGATAACCCAGCAGCCCG
AGTAACAGTATCCGGGCATCCAGGCCAAAAGCTAACAGCGTCGCGATAAAATCCCATAAG
TGCGTCATCGGCGGCAGATGACTCGCCGCAAAACCCAGGCTTAATTGCGCAGCTGAGGCA
ATAATGACGCTGAATAATCCCCACATCAGGCCCATTACACCGTACTCCCGAGGATCACAA
TGCCACCAATAATGAACGCCACCCCACACCAGTGACGCGGCGATACCGGTTCGTGCCACA
GTTTTACTGCAGCCAGCGTCACCCAGACAAAATTCAGACTTAACATCGGGTAGGCAATGC
CTACCGGTACGTTCTGCAAGACCAGCAGCCAGAGCACCATGGCAAGACCAAGACAAGCCA
GCGCCAGTCCCAGCCACAGCACGATATGTTTGCGCCGTTTGTTTATCGCCACAAAGCAGG
TTGCCTGTTTCTGACACAACTGCCCGGCAACGCTAAGCAAGCTGGCAAAGACTAATGTTA
GCCAGATCATTTGGGACGATACTGAATCAGCACCAGACGCTCCTGACGATCGATGGCATC
TGCGGGCGGAATGGCGAGACTGTTGATATCTTCATCGCGGTCAACCGAAAGCACGAGTGT
AATAATCCCCTCCTGACGATGTTGATTAAGCCAGTTTGCGAACTCATCACCGCTGACAAA
TCTCCCTTTCGCATCCGGATAATTAAGGCCGTATTTCAACTCACCTGTCTGGCGATACAT
GATGATGTCATCGCGTTGCAGGCTCCATGCCAGACCTGCGGCAACACCGACGCTATCAGT
AAGAATATAGCGGCTTGGCTGAAGTGATTCTTGTGTCATCTCGACAAAAAATTGCGGATG
TTTTCCTTCCATGACTCTGTCAGGAATTGAAAATCCTACCAGCAACGCCAGCCCCAGCGG
GCAAAGCGCGGCAAAAGACCAGGTCTTTTCGACGTTTGTTAAGGTGTACCAGCCGAAAAA
TGCCCATAGTGAAAAAATCGACCAGGCACAAAAGACTTTATAGCTCTCGAAGGTTTGCCA
CACCGGCGTGTTCATTGGTCCCCAGGGGGAGACCACAAATGTGGCAATAATGCCAGTGAC
GCCAAAAGCGATGTTAATCCAGCCATTAATCCGCAACGCCAGAGTATTATTTTTTGCTGC
CAGCAAAGCGTAATGCGCCATCAGCATTGCCAGAGGTGCAAAGCAGGAAAGAATATAGGT
GGGCAATTTACCTTTAGCGACGGAGAAAAACAGCAGCGGCATTATCGTCCAGCTCAACAA
ATAGACGGTTGCGGAATGCTTGCGGTTTTTCCAGCCTGCGTACAGTGCACCGGGGAGTAA
TCCCAGCCACGGCAGGCTACCGGCAATGATGACCGGCACGTAGTACCAGAACGGAGCTCT
ATGTTGGGCATCATCCAGTGCAAAGCGTTGAATATGCTCAACCCAGAAAAAATAGTGCCA
GAAGTCAGGCTCCCGCTGCGCTATCGCCAGTCCCCAGGGGAGAACCGTCAGTACGCAACT
GATAACCGCCAGCCAGCCGTAAATAAAGAGATCTTTCCAGCGTTTTTGCGTCGCTACCCA
TGGCAGTACGCTTAATACCGGCACGGCAAGGGCGAGAAAACCTTTGGTCATCACCCCCAT
GCCGCAGGTGATTCCCAGCAGTAAAAATCCTGCGCTTTTGCCTTTCCACGTCTGTGCCTG
CATTGCCAGCCAGAAGCTGCACATTCCCGCCACCAGCCAGAATGCAATAAACGGATCGAG
CACGGCATAAGTGCCGATGGCATAGACAATAAACAATGAGAGATAAATTACTGTGGCGAG
TAGAGCCAGACGTTTATCGCGCCATAAGCGCAGAGTAAACCAGGTCACCAGCGCGGCAGT
TAACAGGGTCGCAAAGATAACGCCTGCCCGCACACCAAAGTTATTCGCACCAAATAGCCA
TTGCCCAATGCTGTTAATCCAGTATCCAGCAATGGGTTTTTCAAAATAACGTAGCCCTAA
CAGATGGGGCACAATCCAGTCGCCGGATGCCAGCATTTCCCGACTGATTTCCGCATAACG
CGTTTCATCGGGTTGCCAGAGCAGACGCGTGCTGATCGGTAACAGGTAATAGCAGGCAAT
AAACGCGAAGAGGCCGATAAGGTAACGTACCGATTTCATCAGCGACTACCCGCAATTTGT
TGGCAACCCAGCCAGCCTTCACGTCCGGCAATATTTCCGCGAACAACTTGTCCGAGCGGC
AACGTCTCTGATAACAGTTCGCTTAAAGGGCAAAATGTCACGCCTTCCTGAGCTGCGCGT
TTGAGGAGATCCACAAAATTATGCTGATAAGCGCAGCCTTCAACTTCTGCATGAATGGTA
TAAACCGGCGTGCCTTTATCTCGCAGGATGCGGTTGAGTAACCAACCGTTAAAATCTTCT
GCTTTCACATCCCGACCAATCACTTCATCCCAAGTGGGTAAGGTCACCGGAATTTGCGCA
GTGCCAGGGTTTCCTGATTCGAGCAGTGGACGGAACGGCATGGCCCCACGACAATCGCTG
TTGTAGCGCAAATGGAACGCTTCTTTTGCTTCGATCACCTGCTGGTCGGCACGCCAGCCC
GCAGCGGCAGAACAGGTTACCGGTTGACCGATAATCTCTTCCAGGGTGCGAAGGCCGAGT
GCAATATCGTCGATCATTGTTTGCCGATCCCAGTTACCGCTATGGGCTTGCCAGGCATGG
TGATCCCAGGCGTGCAGGCCGACTTCGTGATGTTTAGCCGCTTCACGAATGATATCGGCA
TTGGCAGGACCAATCTCTTTACCTGGCCAGGCCGTACCTGCCAGTAAAATATCCCAGCCA
TAAAGCGATGCCGCGTTTGAGCGCAGCATCTTCCACAAAAACTGTGGCTTCACCAGTCGC
CAGAGATGGCGGCCCATATTGTCCGGGCCGACGCTGAAAAAAATGCTGGCCTGAATATTA
TGCTTACTCAAGATTTCCAGCAGACGCGGCACGCCTTCACGGGTGCCACGAAAGGTATCG
ACATCAATGCGTAAGCCTACTTTGGTCATGATGGTTTATCCGTAAGATCAACGGTGCGCA
GGAAGAAATCCAGCGTTTCGTCGATGGTTTCCTGCATATCAATTTTCGGCTCCCAGTCCA
GGCAGCGGTGGGCATTGCGGATGCTCGGTTTACGATGCTCTACGTCCTGATATCCTTTGC
CGTAGTAGCTGCTACTTTCGACAACGCGAAAGCCCGCAAACGGTGGGAAGTGATGGCGCA
GCGGATGTTTTTCGAAGCTCGCCAGCAGCATCTCGCCCAGTTCCTCAATGCTCGCTTCGT
TCTCAGGATTGCCAATGTTGATAATTTCGCCGTCGCAGCGATTTCCCACATTTTCGATAA
TGCGGTACAACGCCTCGATACCATCCCGGATATTAGTAAAGCAGCGTTTTTGTTTTCCGC
CATCAATCAGCTTAATCGGTGAACCTTCTACCAGATTGAGAATGAGTTGCGTAATAGCGC
GGGAGCTGCCGATTCGTGCCGCATTAAGGTTATCCAGTCGTGGTCCCATCCAGTTAAACG
GGCGGAAGAGGGTGAACTGTAAACCCTCTTTTTCGCCATAGGCCCAGATAACCCGATCAA
GTAATTGTTTTGACACCGAATAAATCCAGCGTGGTTTATTCACCGGGCCGACGATTAAAT
TAGAATGGTCCTCATCGAAGTATTTATCGCTACACATCCCATAAACTTCTGAAGTTGACG
GGAAGATGATTCGCTTACGGTACTTCACGCAGTAGCGGATAATGCGCAGATTCTCTTCAA
AATCGAGTTCAAATACGCGCAGCGGGTTGCGGGTATATTCAATCGGCGTGGCTATCGCCA
CCAGCGGCAAGACGACATCACATTTTTTGACGTGATACTCAATCCATTCGGAATGAATAC
TGATATCGCCTTCGACAAAGTGAAAATGCGGATGATTCAGAAAACGGCTTATCGCATCGC
TGCCAATATCCAGACCGTAAACTTCATAATGATCTTCGCGCAGCAGGCGTTCTGTCAGAT
GGTTGCCAATAAAGCCATTCACCCCGAGGATGAGTACCCGGGTACGGCGTCGGGCGGCAC
AGGCAGGCTGGCTATTCAAGCGTGAACCTTGCACTAGGCCCAGCGTCTGCGCTAATTGCG
AGCCCTGCATAGTAATGCCGTCGCCCGCCTGTCCGGTGACGATTTCCAGCGCGCCATCGC
CACAGGCAATCAGCAGTGGCGCAACAGAAATCACGCTCCCCGGCTGCGCTGCGGATGTAT
GAGGATGTACGCGTGACGACCAGACGGTGAATTTCTGATTGCCAGCATAGCTGAAGGCAC
CCGGCCACGGATCGGCAACGGCGCGGACCATGTTATGCAATACGGCTGCCGGTTTGTGCC
ACTCGAGGAAGCTATCTTCTGGTGTTCTGCGACCAAAACAGGTGGCTTCGTTCTCGCGTT
GGGCGATTTCCAGAATATTACCGTGTTTAATGGCGGGTAATGTCTGTTCCAGTAGCTGGC
GCGCGGCATGGCACAATTTATGATGCAGCGTAATAGCGATATCGTCTGGCGCAATGGCAA
TGCGCAGTTGCGCCACAATGGCCCCGGCATCGGCACGTTTCACCATTCGGTGCAATGTAA
CGCCAGTTTCCGTTTCACCGTTGACCAGCACCCAGTTCAGCGGCGCGCGACCACGATATT
TTGGTAACAGCGAACCATGCAGATTAAATGCACCTGCGGGAGCGAGCTGCAAAATTTCGT
CGCAAATAAGATGGCGATAATAAAAAGAGAAAATCACCTCTGGTGATAGTTGGGCAATGC
GTTCCACCCACAGCGGATGATTAACGTTATCCGGCGCATAAACCGGAATGCCTCTTTCCG
CTGCCAGACGAGCCACCGAACCATAAAAGGCTTTTTCACCGGGATTATCAGTATGGGTAA
AAATGGCGCTAATTTCGTAACCGGTAGCCAGCAGGGCTTCAATACCGAGGCATCCCATAT
CGTGGTAGGCAAAAACGACGGTTTTCATTATTCATTTTCCTTGCTGGATGGACGGATAAC
TTGCTGAACAAAATAGCGGGGGCGGGCGCGGACATCGGTGTAGATCCTGCCGATATATTC
ACCGAGTAATCCCATGCCGATAAACTGAGCGCCAATAAAAGTAAACAGCACGGCAAATAG
CATAAAGACGCCTTCTGCCGCCCATTGTGGTCCGAAGGTCAGGCGTAAAATCACCAGCAG
CACCGCAATGCTAAAACCTCCAATCGCAATAATGCTGCCGAGCAGACTCAGCATACGTAG
CGGCGTTGTGGTAAGGCAGGTCACCAGGTCGTACATCAAATTAATCAGGCGCATAAAACT
GTATTTGGATTCACCAAACTCACGCTCGGCATGATGCACTGGAATTTCAATGGCACGGCG
GGCGAAGATATTCGCCAGAATCGGGATAAAGGTGCTGCGTTCATGGCAGTGCAACATCGC
ATCGACAATATGACGGCGATAGGCGCGCAGCATACAACCGTAGTCACCCATCGCTTTGCC
GGTGGTGCGCTGAATAAGCCGGTTAATCATCTTCGAAGCGGTTTTACGAAACCAGCTGTC
CTGGCGGTTCTGGCGTACAGTCCCTACCACGTCGTAACCTTCATCGGCTTTTGCCACCAG
GCGGGGGATTTCTTCTGGCGGATTCTGGAGATCGGCATCAAGGGTAATAATTAAGTCGCC
AGTAACGTGACTGAATCCCGCCATAATCGCTGAATGTTGCCCGTAATTGCGGTTAAGCAA
AATAGACACAATATGGCTGTTCTCCGCTTGTGAGGCTTCGACCAGCATATGCGCGGAATT
ATCGCTACTGCCGTCATCAATCAGCAGGATCTCATACTCTTTCCCCAGTGATTCACAGGC
TGTGGTGGTGCGCCTGATTAATTCCGGTAAGCTTTCCTGCTCGTTATAAACGGGAATAAC
CACCGAGACTTTCTTAACAGGGTGGATTTCAAACATGGCTTATTGTCCTGCGAGTTGCTG
AAGGGCTGTGATGACGCGGTCGGCATCGGCGGTGGTCATATCCGGGAACAGCGGCAACGA
ACAGATGCGTTCGCTATTCCATTCGCTATTCGGTAACGACAGCGTGGGAAAACGCTCGCG
ATAATATTTTTGTGTGTGAGCGGCGCGGAAATGTAACCCGGTACCAATACCTCTTTCTTT
TAACGCTTCCATCAACGCATCGCGACTGATACCACAACGTTGTTCATCGACACGAATAAT
AAACAGATGCCAGGCGTGAACGTGCGGCCAGGCGGGAAGGCTTAATGGCTGAAAGGGGAG
AGCTGCCAGTGCTTGCTGATATTGCTGGGCAATTTCGCGCCGACGGGTGTTGAGGTGCTC
TAATTTGACTAACTGTGTCAGGGCAATCGCGGCGTTAATATCGGTCAGATTGTACTTATA
GCCCGGCGTTAAGACTTCAGCCTGCGGTACACGGCCCCAGGTTTGTCTGTCATAGGCATC
GACACCCAGACCGTGAAATTTCAGCATCCGTAGCTGGCGGGCAAGGTTTTCATTATCAGT
TACAATCAGGCCACCTTCAGCACAGGTAATATTTTTAATGGCATGAAATGAAAAAATAGC
GGTACCTTTTGCGCCAATATGTCGCCCTTTGTAATACGTACCTACGGCATGGGCAGCATC
TTCGATAACTGCGATGCCGTAACGTTCGCCAATGGCGCGAATGGCGTCAATATCTGCTGG
CGCACCGGCATAATGCACCGGAATGATGGCTTTAGTGCGTGGCGTAATGGCTGACTCGAT
AGCTTCAGGCGTGACCATCAGCGTATCGCGGTCGACATCCACCATTACCGGCGTTGCACC
CAACAAGGAAATCATATTGAGGGTTGAAACCCAGGTCAGGGAAGGCGTAATCACTTCATC
GCCCTTGCCAATTTCCAACGCCATTAGCGTGATATGCATTCCGGCGGTGGCTGAACTGAC
CGCGATGGCATGCTGATTTCCCGTCAACTGGCAAAAGGCTTGCTCAAGCGCCTGATTCTT
CGGACCGGTTGTGATCCAACCGGATTCGAGAACCTCTTTAACTGCAGCGAGTTCCTCCAC
GCCCATTGCTGGTCGCGAAAAAGGCAAAAATTCTGACATTGCTTTTCCTTCCGCCATTGA
ATACCTGTCCACTTATATTTGCTATAAAGAGTGTTGTGTATATTTTGCCATTTGGAGCGA
AATTTTAAGGATAGAATATTAACTTAACCTTAAGAAACTAATATTAGACGTAAATATTGA
AATTTTTATATTTTTTCTTATTTAGGCTTTGCATTTGGCAAAATTTTGAGGCATTTTGCC
GGCATCGCAGGATTTTTAATATTACACCAACTGCTAATTATCGCCAGAAATGTCGCTCAA
TTTCACGGTAATTGTCTGGTTGCGCTTGTCTATAGGTGGAGTTTACGTGTTAGCTTTTTG
CCGCTCTTCGTTGAAGTCAAAAAAATATTTCATCATTTTACTGGCGCTCGCTGCAATTGC
CGGACTGGGTACTCATGCTGCCTGGAGTAGCAATGGTTTGCCACGTATCGACAATAAAAC
ACTGGCCAGACTGGCACAGCAGCACCCGGTTGTCGTTTTGTTTCGCCATGCTGAACGTTG
CGATCGTTCAACCAATCAATGCTTGTCAGATAAAACAGGTATTACGGTCAAAGGTACCCA
GGATGCCCGAGAACTGGGCAACGCTTTTAGTGCTGATATCCCTGATTTCGATCTCTATTC
CAGTAATACCGTCCGGACCATTCAGTCGGCGACCTGGTTTTCAGCGGGTAAAAAATTGAC
GGTAGATAAACGACTTCTTCAGTGCGGTAATGAGATTTATAGTGCAATTAAGGACTTACA
AAGCAAAGCGCCTGATAAAAATATCGTTATTTTCACCCATAATCATTGCCTGACATATAT
TGCTAAAGATAAGCGTGATGCGACATTTAAACCTGATTATCTGGATGGTTTAGTCATGCA
TGTGGAAAAAGGCAAAGTTTATCTGGATGGGGAATTCGTTAACCACTAAATTTTCAATCT
GACAGCCAGTGATGGCTGTCATCATTGTTAAAGAAGACCTTTCAAACGTAACGTTTTTCG
GGTGGCAACATTCAAATCATAATGCACCAGATCTTCAGGTTTTACCCTCGCGTAGTCCTG
AAACTCTTCGTTTATTTTCACTTCTCGGTTGGCAGAAACGCAGTCAAAAATCAGGTAAAT
CATATAAATCTCTTCCTTGCGACCATCTGCATACGTCTTGGTGCGAATATCATCGCTGAA
GGTCCACGGCGTGATTTCTGTCAAAAGCAGCTGTTCTCCCAGTTCTTCGCGAATTTCGCG
GCGTAGTGCCTCTTCAATTCGTTCGCCGGGCTCCACGCCGCCACCCGAAAGCGCCCATTG
ACCGGGGAAAACGCCGCGATCGTCGGCCATTTTACACAGCAAATAAGCACCATCATTTTG
AATCAAAGGGCATACAATAGTCCGTTGTCGCACAGGGGTATTCCTTATAAATAAAAAGAA
ACCATGAGAATACGGTAACTCAGAAATATGTGAAAGTGACAGTAATCTCTTTTGCGATGA
TAACTGCACTTATTATTATTTTTGTGTGTATCGGTAAACTGTGTTTATTTTTTCGGCGTT
TAATTATTTAAGAAGTATTTAGTTACAATAAGTGACTAGATCCCTTTTTTCGCTCATTGA
ATCCTCTGCGCCAGGCAGTACAATCCCGCAGCTTTGGGAATTTTGATTAATTGCTTGTGG
GAAAGGGGATAATGAAAAAAATTGCGCTAGCAGGTCTGGCCGGAATGCTGTTGGTTTCTG
CATCGGTCAATGCAATGAGCATCAGCGGCCAGGCGGGTAAAGAATACACCAATATTGGTG
TCGGTTTTGGGACTGAATCGACGGGCCTGGCTTTAAGCGGTAACTGGACACATAACGACG
ACGACGGTGACGTCGCGGGCGTGGGGCTGGGGTTGAATCTGCCTCTCGGGCCGTTAATGG
CGACCGTTGGCGGAAAAGGCGTTTACACCAACCCGAATTACGGCGATGAAGGTTATGCCG
CAGCGGTAGGAGGTGGTTTGCAGTGGAAAATTGGCAACAGCTTCCGTTTGTTTGGCGAGT
ATTACTACTCTCCGGATTCGCTCTCCAGCGGTATTCAAAGTTATGAGGAAGCGAATGCTG
GCGCGCGTTACACCATTATGCGTCCAGTCAGTATTGAGGCGGGTTATCGCTACCTGAATC
TGTCGGGTAAAGACGGCAACCGCGACAACGCCGTGGCTGACGGCCCGTATGTTGGGGTTA
ACGCCAGTTTCTGATCCCTTCCGGCGCGGCATTCTGCCGCGCCATTCAGTTTCTTACTAC
GCCTTATCTCCCTTTGCGTTATAGTGATTCGATAACAAAAGCAGGAGATAACCATGTTAA
AAGTGGAAATGCTATCCACCGGGGATGAAGTGTTACACGGGCAAATCGTTGACACTAACG
CTGCCTGGCTGGCCGATTTTTTCTTTCATCAGGGGTTGCCATTATCTCGCCGCAATACGG
TGGGGGATAACCTTGATGACTTAGTCACCATTCTTCGCGAACGTAGTCAGCACGCCGATG
TGCTGATCGTTAACGGCGGGCTGGGACCGACCAGCGATGATTTAAGCGCACTCGCCGCTG
CGACAGCAAAAGGTGAAGGCCTGGTGTTGCATGCAGCCTGGCTCAAAGAGATGGAACGCT
ATTTCCACGAACGTGGACGAGTAATGGCACCGAGCAACCGTAAACAAGCGGAGCTTCCTG
CCAGTGCTGAATTTATCAATAACCCGGTAGGCACCGCCTGTGGTTTTGCCGTGCAGCTTA
ATCGTTGCCTGATGTTCTTTACCCCCGGCGTACCGTCAGAATTTAAGGTGATGGTCGAGC
ACGAAATCCTGCCGCGCCTGCGCGAGCGTTTTTCTTTACCACAGCCGCCGGTTTGCCTGC
GTTTGACTACCTTTGGTCGTTCGGAAAGCGATCTGGCACAAAGCCTGGACACTCTACAAC
TGCCGCCGGGCGTAACAATGGGCTATCGCTCCTCAATGCCGATCATCGAACTGAAACTCA
CCGGACCGGCAAGCGAGCAACAGGCGATGGAAAAACTGTGGCTGGACGTTAAACGTGTTG
CCGGACAGAGCGTGATTTTCGAAGGCACCGAAGGACTGCCCGCGCAAATCAGTCGCGAAT
TGCAAAACCGCCAGTTCAGCCTGACGTTGAGCGAGCAATTCACCGGTGGTTTATTGGCTT
TGCAACTTTCTCGCGCAGGTGCTCCATTGCTGGCGTGTGAAGTGGTTCCTTCACAGGAAG
AAACCCTGGCGCAAACTGCGCACTGGATTACAGAACGGCGGGCCAACCATTTTGCCGGGC
TGGCACTGGCTGTTTCGGGTTTCGAGAACGAGCATCTCAACTTTGCGCTAGCCACGCCAG
ATGGCACTTTCGCTCTGCGTGTGCGTTTCAGCACTACACGCTATAGCCTGGCTATCCGTC
AGGAAGTGTGCGCAATGATGGCACTGAATATGCTACGCCGTTGGTTAAACGGCCAGGACA
TTGCCAGTGAGCATGGCTGGATTGAGGTTGTTGAGTCGTTGATGCTGTCGCCACAGGGGG
CATGAAAGAGGCGCGCCGGGGAGAAGGCTTTTACCCGGCACGTTGTCGCATTCATTGCAG
GCTTAATGGAGCGAGATCGGCCTCGGTTAGCTGGGTTGTTGCCAGCACCAGGTCAAGATC
GATACCCTGCTCCAGCATGCGCAAGGCAATTTTAATGGCTTGTTCATGCATGCCTTGCTG
CAAACCTTCTAATTTACCTTCCTGCCAGCCAATTTGATGCCCTTCCTGCCTCAGCCGTTC
AGCAATAGTCATTAATCTCTCCTTTTGTAGTGGTGAACGTTCGGCAATCTCCTGAATAAA
ACGGGTGAAACGGGAGGTATCGCCGCATTGCAGCAGATAATTAAACAGTGTTTGTAGCTG
GCTGTCATTAGTGAAGCCTCTAACCAAAAGCGTGGTGATCCTGTCGACCATACCGATTAA
ATCGCGGTCGCGAATATGCTTTTGAATCAGTTCAAGCAGAGCTATACGCCGATGTTGCAT
GATCTCATCGTCAGGTACGATGGTGATATCCACCAACGGAAAAGCTTCGGTGTACAACTG
CCGGGCAAGTTGCGGACCGTCAAACTCATCCAGCCAGTTGAGTGAGTACGGGTAGGGCGA
GGTTTCGCCATGATAAAACAGCAACGGCACCACCAGCGGGACTCTGTCATAGCCTTTGTC
CAGGTGACGCTGCATGGCGGCAGTGGCATAGCGCATTAGCCGAAAAGCCATATTCTTTTC
TGCAGAGCTTTGATGTTCAATCACGCAGTAGATATAGCCGTCACCGTCGCTGGTTTCCAC
GGACCACAAAACATCCGAGTAGTAAGCGCGTAAACTTTTTTCAATAAAACTAGTGGGTTC
CAGGCGTAAGGTTTGCAGGTTGCAAAGCTTGCGCAGTGGTTCTGGTAAATGTATTTCGAG
AAAATCCCGTGCGGTTTCGGGTGTGAACATAAAGGTTTTAAATACTGCATCATGCGGGGA
GGAGGTTGTTGATTCGGTCATGGTTGTCCGTCACCTGATATTTATGATGACGCGACATTA
CGGTTATCCCAGGCCTTTGACATCTGCCAGTTTCAGCCTTTGCGAGACGTTTTCAGAGGA
ATTTTCACTGCGTTGCAACGCATACATTGGGCACGGAATCGTGTACGCAAAAATGCCCGG
TAACCACATGCTTACCGGGCATCAGAAAGGAGTTTAAGCCAGCGCCTGGGCCAGTAGCGT
AATCGGATGTTCGCAGCGAAGACTTGTGGACATCTCAATCTGCCATTTACAGGTTTCGCA
GTCGGTGACCACCAGATCTGCGCCGCTTTCTTCTATCTGGCGGAACAGTGGTGCGCCGAT
GGCTTGTGAGGTGGGGTAGTTCTCTTTTTTGAAACCGTAAGTACCCGCAATACCGCAGCA
CTGGGAATCCAGCACCGTTAACTCAAGCCCCGGGATGTTACGCAACAGCTCCAGGGTGTA
GAGCGTCCAGCCCATTTTTTCCATATGGCACGGAGTGTGATAAACCACTTTCAGCGGCAG
CGGTTTCAGCGGTAACGTTTTGCCTTCGTCCAGCTTGCGCCACAACCAGCGGGTCGCCAG
TTCGATATGATCGCGCAAGCCTTTGTTGTCGACATTCAGCACTTCCGGGTATTCGTCGCG
CAGGGCAAATGTACAGGTTGAGGAGGTGGCAATCACCGGAATGCCTTTTACTCCCACAGC
TTCGCGGATCGACTCTACATTCGTAATTGCCTGTTTGCGTGCTTTATCGGTAAAGCCGTT
GGCGATCAGCGGTACGCCGCAGCATTTTTCTTTGCTGAGCAGTTGTACACCGGTACCCAT
TGCGTTGAGCACTTTAATTAAATCTTTACCTAACTGCGGATGGTTGTAGTTAACGAAGCA
GCCGTGAAAGAAAGCGACCTGGTCTTTATACTGCGCTTGCTGAGCCGCCACGCTGCGATA
CCAGCGACGAAACGTGCCGAAGGAGTATTTCGGTAGCGTGCGGCGATGATCGATTTTTAA
CGCCGCATCAAGCAACTGCCGCACCGGTTTCAGCGAGGTAGCGGTGTTGACGATTGGTGC
GAACGGCGTGGAAACGCTACCCATCAGGTCGGTATGACTCAACACAAAATTACGCAGCGA
CGGGCGCGTGGTGTCATATTTCGCCCGCGCGCGCTGGATGATATCGCCAATCTTCACATC
GGACGGGCAGGAGACTTCACAACGTTTGCAGTTGATACAATATTTCAGCGCCTCGTCATA
CAGTGCGCCATCTTTTAAACGCAGACGCTCGCCATCCGGCCCGGCTTGTTTTGGCCCTGG
ATAACCGGGATTCACCCGGCTCACTGGGCAGGCGGTGGTGCAGACGGTGCACTTAATGCA
GTTTTCGAAGCTGGTGTCATTCATTGTTGGCCTCCTGCGCGTTGGGCAATCTGTTGAGCG
GCATGTAAAGCACTGACGGCACAAACACCGCCGCCGCATCCCTGGGCGATGGGATCAAAT
CCGCCCAGCACCGAACCGATGGCAAACAGGTTCTCAATGGTTTGCCCTGCCTGTGATGGG
CGTAGCGTCTTATCAGTGGTTACACCGAACTGCTGCCACGGTTGCGGCGCAAAAAAATCT
CCCTTATACCATTCACCCCGCGTGGCGGTTTGTAGCACATCAAGGCCGAGAATCGGCTCT
CGAATGCCGTTACGTTCCGCTACCAGTCCGCCACTAAAGAAACTGCCGCTGGCGAGAACC
GCGAAACGTGGACGTAGCGGGATATCGGCGTGATTGCGGGTCCAGATTTCATTCACTACG
CCATTTTTACAGGTCACTTTTTTCACTTCATCGCCCGGCATCCACACGCCACCCTGGCGC
ACAAACTGGCGCTGTAACTGGTTTTGCAGACGAATGCCCAGCACGGAAGGCGGCAGCGTT
GGCAAAAGCATCAGTGAACAAGGTAGTTTTTCATTCAACCAACGCCACAGTTTGTCATCG
GCCAGGCCGAAGCAGGCGGGCATCAGGATCATTTCGCAGGTATTGGCGACAGGAATAAGC
GCATCAAGTAACAGCGACCAGTTTTCTTCATTATCAAGGAAACGGGCGATATTCACCGCG
CGGAACTCGGTGGCGTTATTGCGCAGGACATCCAGTTCCGGCAGCTCTATTTCTGCGGTT
TCAACCGAAAGATCCAGTTCACGCAACGAAGCTGCCGCAAGGTGCGCCTGAAAATCCATC
AGCCCGCTTATCCCCACTACACATATCTTCTTCGCGGGTAGCGGCCAGACGGGGACTTCT
GGCGAACTTAACCAGGTTGCACGCAAAGTGCCGAGCGGGGTAACGCGCTGATGGGCCAGT
TCCACGCTGCCCTGCAATTGCGCACCGCTTTCAGCGATTAATGCCTGCGCCTGGCAAGCG
AGATCGAGCACGCGTTGTGGCCCGAGAAGAGAGTAAGGATGTGCAGGTGCCTGCTGACGC
AAAGATTCCAGTCCACTGTGAATGTCTGTCACCGCTTGACCATCTGGCAGATGGCTCAGC
AAATCCAGCGAACCGGATGAGAAATGCAGCGCGCTTTGACCACGCGTGACAATGGCACAG
CGCAGGCCGTGTTTTTGCAGTTGCAGGCCACAGAGTAATCCGGCGAGGCCGCCGCCCATA
ATGACAGTATCAAAGCGCATCTTTCTGCTCCTTCTCCAGACCACACAGTCCCTGATAAAC
CCAGCGGGTAAATTCGCTTTCGCGCAGTGCATCTCCCCAGGCGATGGGTTGCACGCCTTT
CCAGCGTTCGTTAAGGAAGGTGGAAAGTTGCTCGATAGATTGCGCGGACGTCGTGACGTT
AAAACGTTGCAGCAGTCCGGCAGCGCGGCAGGCGCAGAGTTCGCCCTGGCAGGTACCCAT
CCCCACACGGGTACGACGGCGTAAATCCAGCAGGCTATTAACGTTTAAATTTTCTACCGC
GTACTGCACTTCACCCGCAGTTACCGCTTCGCACTCACATACCAGGCTACGGTGCAGACG
GCCTTCGCTCAGCCAGGCAGGCGTGCGATCGCCATGACGATAAACCGCAGAACCGCGCAG
CGGGGCAGGCAGGGAGATGACTTTACGTAAGGTAACTTCAGCGGGTTCTTGTGAACCAGG
CAGTGCCAGATCGGCAGTCGTACAGGGGCGCGTGTTGCCCAGTTTGCGGCATACCGCGTC
GGTAGCCCATTCAGCCATCAGCCGATAGGTCATCAGTTTGCCACCGGTGATGGTGATAAA
TCCGTCCAGACCATCGCGTTCAGCATGGTCGAGCAGCACGATGCCACGGCTGACGTTACG
TCCGCTCGGGTCGTCATCGCTGGCAACCAGCGGGCGCACGCCAGAATAGGCCCGCAAAAT
GCGCGTTTTCGCCATCACGGGGGCCAGTTTTTCCCCTTCACGCAGCAGAATATCAACCTC
TTCTGCCGTCACTCGATTATCGTCAATCTCGTTGTAATCAATACGTAAAGAGGTGGTGCC
AATCAGCGAAATGGTATCGCCAGGCACCAGAATATCGGCGTCGGAAGGTTTACGGCAGCG
GTTGATCACATGCTGGTTAATGCGGTGATCCATGATCAGCAGCGATCCTTTCGCCGGGAA
CATGCGAATGCGCAGATCGGCATATTCGGCAATGTGTTGCCCCCAGATCCCAGCGGCATT
AACCACGACAGGTGCATGAAGGGCCTGAGTTTCGCCGGTGAGATGGTTACGTACACGAAC
ACCGCACACCGTCGCGCCTTCACGAATCAGTCCCGTGACTTCATGAGCGGTAAGGATAAC
GGCACCGTGTTCTTTGGCATCCAGCATGTTTGCTGCGGTCAGACGAAATGGATCAACGGT
GCCATCCGGAACTTTCACCGCGCCAATCAGTGCCGGGTTAACGGCAGGTTCGATAATGCG
CGCTTGCTGCGGGTCTATAGCTTCTGCGCTGATCCCTGCTTCTTCGCAGGCGCGAATAAA
AGTGGCCTGGAAGGAGAGGTCATCTTCCGGCAGGGTGATAAACAGGCCGTTGGTTGGTTC
AACGCAGTGACGTGCAATGCGTTTCAGGATCTGGTTTTCACTAATGCATTCGCGGGCCGA
TTCCGCATCGGTTACCGCATAGCGCGCACCGCTGTGCAGCAGGCCGTGGTTACGCCCGGT
GGCACCGGTTGCGATGTCGTGGCGCTCAACCAAAATCACGCGCAGCCCGCGCAGGGCACA
GTCGCGGGCAATCCCGGCTCCCGTTGCGCCGCCGCCAATGATAATCACGTCACTTGATTG
CGAGTCGCGAGTTTTCATTGTTATCCCTCTGAAGTTCGTTTTTTACCATTTAGCCATAGT
AAAAACATGAATTGTTTGATTTCGCGCATATTCGCTCATAATTCGAAAGTGAAACGTGAT
TTCATGCGTCATTTTGAACATTTTGTAAATCTTATTTAATAATGTGTGCGGCAATTCACA
TTTAATTTATGAATGTTTTCTTAACATCGCGGCAACTCAAGAAACGGCAGGTTCTCTCAC
TGAATCAGGCTGTTAATCATAAATAAGACCACGGGCCACGGAGGCTATCAATGTTGAGTA
TTTTTAAACCAGCGCCACACAAAGCGCGCTTACCTGCCGCGGAGATCGATCCGACTTATC
GTCGATTGCGCTGGCAAATTTTCTTGGGGATATTCTTTGGCTATGCTGCTTACTATTTGG
TTCGTAAGAACTTTGCGCTTGCTATGCCTTATCTGGTTGAGCAGGGATTCTCACGCGGTG
ATTTAGGTTTTGCCCTTTCGGGGATCTCGATTGCTTATGGATTTTCGAAATTCATCATGG
GTTCGGTATCGGATCGCTCGAATCCGCGCGTTTTCCTGCCCGCAGGTTTGATTCTGGCGG
CGACAGTGATGTTGTTTATGGGCTTTGTGCCATGGGCGACGTCGAGCATTGCGGTGATGT
TTGTACTGTTGTTCCTCTGCGGTTGGTTCCAGGGGATGGGGTGGCCGCCGTGTGGTCGTA
CTATGGTGCACTGGTGGTCGCAGAAAGAACGTGGCGGCATTGTGTCAGTGTGGAACTGTG
CGCACAACGTCGGTGGTGGTATTCCGCCGCTGCTGTTCCTGCTGGGGATGGCCTGGTTCA
ATGACTGGCACGCGGCGCTCTATATGCCCGCTTTTTGCGCCATTCTGGTGGCATTATTCG
CCTTTGCGATGATGCGCGATACCCCGCAATCCTGTGGCTTGCCGCCGATCGAAGAGTACA
AAAATGATTATCCGGACGACTATAACGAAAAAGCGGAACAGGAGCTGACCGCGAAGCAAA
TCTTCATGCAGTACGTGCTGCCGAACAAACTGCTGTGGTACATCGCCATCGCCAACGTGT
TCGTTTATCTGCTGCGTTACGGCATCCTCGACTGGTCACCGACTTATCTGAAAGAGGTTA
AGCATTTCGCGCTGGATAAATCCTCCTGGGCCTACTTCTTCTATGAGTATGCGGGTATTC
CGGGCACCCTGCTGTGCGGCTGGATGTCGGACAAAGTCTTCCGCGGTAACCGTGGGGCAA
CCGGCGTCTTCTTTATGACACTGGTGACCATCGCGACTATCGTTTACTGGATGAACCCGG
CAGGTAACCCAACCGTCGATATGATTTGTATGATTGTTATCGGCTTCCTGATCTACGGCC
CTGTGATGCTGATCGGTCTGCATGCGCTGGAACTGGCACCGAAAAAAGCGGCAGGAACGG
CAGCGGGCTTTACCGGTCTGTTTGGTTACCTGGGCGGTTCGGTGGCGGCGAGCGCGATTG
TTGGCTACACCGTGGACTTCTTCGGCTGGGATGGCGGCTTTATGGTAATGATTGGCGGCA
GCATTCTGGCGGTTATCTTGTTGATTGTTGTGATGATTGGCGAAAAACGTCGCCATCAGG
AATTACTGCAAAAACGCAACGGAGGCTAATGGCATGAAATTGACGCTGAAAAACCTTAGC
ATGGCGATCATGATGAGCACTATAGTCATGGGAAGCAGTGCAATGGCGGCGAACAGCAAC
GAAAAAATAGTCATCGCCCATCGCGGTGCCAGTGGATATTTGCCGGAGCATACGCTGCCA
GCAAAAGCGATGGCGTATGCGCAGGGAGCGGATTATCTGGAACAGGATTTGGTGATGACC
AAAGACGACCATCTGGTTGTTCTGCATGACCATTACCTCGATCGTGTTACTGATGTTGCC
GATCGTTTCCCGGATCGGGCGCGCAAAGACGGTCGTTACTACGCGATAGATTTCACGCTG
GATGAAATTAAGTCGCTGAAATTTACCGAAGGTTTCGATATTGAAAACGGTAAAAAAGTG
CAGACTTATCCGGGGCGTTTCCCAATGGGTAAGTCCGACTTCCGGGTGCACTCCTTTGAA
GAAGAGATTGAATTTGTTCAGGGGTTAAATCACTCTACCGGGAAAAATATCGGTATCTAT
CCAGAAATTAAAGCGCCGTGGTTCCATCATCAGGAAGGGAAGGATATTGCGGCAAAAACG
CTGGAAGTGCTGAAGAAATATGGTTACACCGGTAAGGACGACAAAGTTTATCTGCAATGC
TTTGATGCTGATGAACTGAAGCGTATTAAGAATGAGCTGGAACCTAAAATGGGTATGGAC
CTCAACCTGGTACAGCTGATTGCCTATACCGACTGGAACGAAACTCAGCAGAAACAACCG
GACGGAAGCTGGGTTAATTACAGCTATGACTGGATGTTTAAGCCGGGTGCCATGAAACAG
GTGGCGGAATATGCTGATGGTATTGGCCCAGATTACCATATGTTGATTGAGGAGACATCG
CAGCCGGGTAATATCAAACTCACTGGCATGGTGCAAGATGCTCAGCAGAATAAACTGGTA
GTGCATCCTTATACCGTGCGGTCAGATAAACTGCCTGAATACACTACTGATGTGAATCAG
TTATATGATGTTCTGTATAACAAAGCGGGTGTAAATGGGCTGTTTACTGATTTCCCTGAT
AAGGCAGTAAAATTCCTTAATAAAGAGTAATGCTACTGCAGGATGGCGTTCATGCGCCAT
CCTCAGCTAAAGCGAAATAATGCTACTACCGGTTATTCTATTCATTCACCTGAGCATCCT
GTTAAAAAAGATGCCAACATATTTGCGTAAAACTCATTTGTTAGGAAAGCTAACACTGGG
TATTGTTATTCTTTAAACAGTATGAATAGGGCTCAATAATAAATTGTAATGTAGTTTATA
ATATACAGTATTATTCGCATTTCGGGAAAGTAAAGAAAATATTAATGTATCTTATTAATT
TATCATATTGTTCTTGGGTGAATGCTGTTTGCACACCTTCAGGACAATACTCACCAGTAA
TAATCAGTTGCCCATTGCTGTGTTGTACCATTAAACCTTTTTTTTCCTTTGGATCTTCAA
ACTTAGAATTATCAAACGTGAAGATGTTATTTTCCTGTTTTGAGTAAGCAAAGAAATCTC
GTGTATAGCTGAAACTATCATTTATTAATGGTGCTAACTTTTTGTCGGCGATATCGATAA
GCTCACCACCTAATTTATTGATATATTTCATTTGGTTCAATTTTTTCTGCGCTTGTACAA
TTTGCTTGTAGGTGTTTTTAATTTCCTTAGAAGAATTCTTGAATTTATCATAGCGTTCCT
CGGAGGATGCGTATTTGTACCATTCTGTATTTTTCTCAGAATGTTGTAGCAGGTCTGCAT
ATTTTTTTTGATCGCTGTAAAGTTGACTTTTAATACTTTCCTCACTGCTGGTTTTATAAG
GCTTATCAGAGCTGTTTATTTTTGAAATGTCTTTTTCTGTCAGTGACTGGACCGTGTTGT
GGGTATTTTCTTTTGCAACATGCTCATTGATGATGTTAATTGCAGTTTCATATTCATTTA
AGTTTATTGTTCTTTGTGAAATAGACCCTTCTTTGCTTTCGATACTCAAAACACCTTCGT
TGTTTTCACCTCGGGTAAAGGTAAGGGTATAGGGTTCATAATCCGCTGCAAATTCATTTT
TATACGTTATGACATGCTCGACAAAATGTCTTATTGGTACGAAACCATAACTGTGAACGT
CAATTTTTTGGGTCTTGATACTATCAATTTCATCTGAGGCTTTCGTGAAAAAAGCCAATA
AATTAGCTATGTTGTCTGCTGAGGTTGATAACCCGAATCTACTTTGAGATATTTTTAGAA
ACTCATTGCAAAAAATCTCAAGTTTCGCGGTTTGTTGTGATTCTTTGTAAATTTCTGCTG
TTTGCAATTTATTATTTTGTAAAAGATTACAGCGAGATAATTGAATAGATGTATTTGGCA
TAAATGATTCCTTGTATTGTGAGTTAACAAGATACAATTTAATCTTTGCAGAATATATTC
ACTATCAAATTTAGCTCATTTTATTACGAAGACCTTTACGCATGTTAGAAAGTATCATTA
TTGTTAATAAACACGGTAATAAGTAACAAACAGATATTGATAACTTCCCTGACAAGTTAT
TAGGTATCCCACTTGAAGATTGAGAGTGGCTCCAGAGTAAACTGTGTACTGTTCGCCGGA
GTGTCATTACTCTCAACAATCGGTTTTGACAGTGAGTCGGGCGCTTCATACTGGTTTCTA
CCTGGAGTCATTGTCACTTCCCTAAACTGGATAAATATATATCGCTAATTCACAAAGTGG
ACCAAAATCAGGTGAAAACGAATTATTACGCCTGGTAAAGACTACAGGCCAACTAAGTGT
GGCGAATCAGGCAATCTTACATTTGTCATCAATCTCATGTCTTACATCAAATTTTTCCAC
TCACCACGAGTTGTTCCGTACACATTTGTAGTAAAAACAGTGGACTGCCTTCTACCGGCT
TTTCTTTAGCCAGCAACGAAATCTGTCGATAGAAGGTTGGTTCGAGAGGAACGGAACACA
ATTCATCTGCAATGGTTTTCAGCGTTAACTCTGGTAATAAGGCGATGCCTAATCCCTGTC
GAATAAAACTGATCGCTGTATCCGGGTGATTAAATTCATATTTTATCTGTGGGGTAATAT
TCTTTTCTTTAAATAGTGCCATAATGCTTAATTCATAGCGTCCTTTACTAATGATTAATG
GTTCACCCATTAATTCTTCCACTGTAATAGTGCTGTTTTTTGCCAGAGCATGGTTGGGCG
GTAACACTACGGTGAATTTATCCTGATAAATGGGCACGGAGTACATTCCGCTCACCGGAA
AATGAACAAAACCGGCATCAATGGATTCATTCTGAAGCGAATCAATAATCGCTGTGCTAT
TTTCCTCAAAAGGAATAATTTTTATATTCGGATGATGAATTTCAAAGTAGCGAATCACAA
CCGGTAAGATACAGGCGCAGACGCTGGGGAAACAACCAAGTCTCAGCGTTCTTTGAGGGT
TCTGCTTTTCCTGCTCGGCTATCTCTTTTACTGCGTTAACTTCCCGATTAATGGCGCGCA
GATGTTGCACAATGCGATGACCTGCTGTGGTCAGTTGTATAGCTTTACGGCGATCGCGTA
ACAGTATATTCACACCAAGTTCTTGTTCGAGGGCAGCAATTGCCTGACTTACCGCCGACT
GCGTCATGAACAATCGCTTGCTGGCTTCAGTAAAGCCACCGTAATCCAGCACGGCGAGTA
AAGAATTTATTTGGGTAAGAGTCATTAGAGTTTGCTAATCAATAATATTAAAACGATTAA
TTTCTCTAATAGCATGCCGCCATTTATACTTCTGTTCTGCAAAGTACATCACAATTTGAC
GCAACCGCAGTAACGGGAGTGTTGTCTGCGTGCGTCATCCTGACAGGCGGTAGGGTATGA
AAGAGAAGTTATGGACGAAGGATTTTTGGGCAATAACCATCATCAGCTTTATTATTTTCT
TCGTCTTTTATGTTTTACTAACATTGTTGCCAATTTATATCTCTGACCGCTTGCATGCCT
CTCCTGATAAAGCTGGTCTGCTGGTGACATTATTTTTAATTGCGGCGATTGTTATTCGAC
CCTTTGCCGGGCAATGGGTGGGTAAATATTCGAATAAAACTATTCTGGTGCTCTCTTCTC
TGGCCTTTTTGGTGGTCACTGCGCTGTATCCTTTTTGCCACTCAATAGAATCACTGCTTT
TTATTAGGGTGCTTCATGGTATTACCTTCGGGGTTATCACAACGGTAAAGGGAACGATTT
CCGCGCGGCTGATCCCGGCCTCCCGACGTGGGGAGGGCATCAGTTTTTTCTCTCTGGCAA
TGGGGCTGGCAATGGTGGTCGGGCCGTGGATTGGCCTGAATATGGCGCGCTGGGAGGCCT
TTAATATGGCTTTCTGGTTATGTACTGGCGTTGCGGCGGTGGGGATTATCCTGTCGCTGA
TTATGACCGTGCCGCCGGTTATCAGCCATGCCGACGGTTCAAAGCCAAAGATGGGCTTCG
CCGCCATGTTCGATCGCGCGGCATTGCCGTTTGCCATGGTTACATTCTTTATGACCTTTT
CGTATGCCGGGGTTTCTGCCTTTCTGGCGCTTTACGCCCGCGAACTTAATCTGATGTCGG
CGGCCAGTAATTTCCTGCTTTGCTACGCCATCTTCCTGATGATCTGCCGTACCTTTACCG
GCAATGTCTGCGACAAAAAAGGACCGAAATATGTGGTTTACCCTTGCCTTGTGTTCTTTA
CGGTAGGACTGGTGGTTTTCGGCTACACCCAGGGAAGCATAATGATGGTTGTTTCTGGCG
CGTTGATTGGTATCGGGTATGGTTCCGTGACGCCAGTTTTTCAGACGCAGATTATCAGTT
CAGTGGAACCGCATAAAATCGGTGTCGCAAACTCCCTCTTCTTCAATGCGATGGATGCAG
GCCTGGCGCTGGGAGCCTGTGTGATGGGGATGATGGTTGCACATACTGGCTACCGAATGA
TTTATCTGCTGGGCGCACTATTAGTGGTAGTGGCTGGTGGAGTCTATGCGCTGCAAATGA
AGGGTAAAAGCGGTGTCGCGCTAGTAGTGGCAAAAGAAATTCATTAATACGACACGTTTC
ATTAAGATTTTTCGCAGGTAACCACCTATAGTCATTGTCGTTAATAAAAAATGACAGGCG
ATAGGGTATGGCAGTTTCAGCAAAGCACGACGAATTTAATCACTGGTGGGCAACAGAGGG
CGACTGGGTTGAAGAGCCTAACTATCGCCGTAATGGTATGAGCGGGGTGCAATGCGTCGA
GCGCAACGGCAAAAAGCTATATGTAAAGCGCATGACGCATCATCTGTTTCATTCCGTACG
TTATCCTTTCGGCCGACCAACGATTGTCCGTGAGGTTGCGGTAATTAAAGAACTGGAACG
GGCCGGTGTCATCGTGCCGAAGATCGTTTTTGGTGAAGCGGTGAAAATTGAGGGTGAATG
GCGAGCGTTGCTGGTGACTGAAGATATGGCGGGGTTCATCAGCATTGCTGACTGGTATGC
CCAGCATGCAGTATCGCCTTATTCTGACGAAGTACGGCAAGCCATGTTGAAAGCAGTGGC
GCTGGCGTTTAAGAAAATGCATAGCATTAATCGTCAGCATGGCTGTTGTTATGTTCGCCA
TATCTATGTGAAAACAGAAGGTAAGGCAGAAGCTGGTTTTCTTGACCTGGAGAAAAGTCG
TCGCCGCTTGCGTCGCGATAAAGCGATTAATCATGACTTCCGCCAGCTGGAAAAATATCT
GGAGCCAATTCCCAAAGCGGACTGGGAGCAGGTGAAAGCGTATTACTACGCCATGTAATC
GTTGTAGGCCAGATAAGACGCATAAGCGTCGTATCTGGCACTACAACCAATTCACATCTC
GATTTCAATATCGCCTTTTGCCCGGCAACAACAGGGCAAAATTTCCCCCGGCTGAATAAA
GGCTAACGGTTCGGCAATCCAGTCTACCTGACCTGCGACCAGTCGGGTGCGACAGGAGCC
GCAGTAACCTTCGCGGCACTGGTACTCAACCGCCACATTGTGGGATTCCAGTGCCGCCAG
AAGGGAAGGGTGTTCATCCTGGCACAGCAGTTGTGTGCCAGTGATGCGCAGGGTAACGCG
AGCCATCAGAGCTGGAAGTTACTCAAATCGTCGGTGTCCACTTCCGAGTCAATCTGCCCG
ACCAGATAAGAACTGACTTCCACTTCCTGCGGAGCAACCTGCACGTTATCAGACACCAGC
CAGGTGTTGATCCACGGGATCGGGTTGGAGCGCGTCTGGAACGGCAGATCCAAACCGACT
GCCTGCATGCGGATATTGGTGATGTATTCAACGTACTGGCAGAGAATGTCTTTATTCAGA
CCAATCATCGAACCGTCACGGAACAGATAATCCGCCCAGTCTTTCTCTTGCTGTGCCGCC
TGGACAAACAGGTCATAGCACTCCTGCTTACATTCTTCGGCAATTTCCGCCATCTCCGGA
TCATCCGCACCGCTGCGCAGCAGATTCAGCATATGCTGAGTACCGGTCAGGTGCAGGGCT
TCGTCGCGGGCAATCAGGCGAATAATTTTGGCGTTACCTTCCATCAGCTCACGTTCAGCG
AATGCGAAAGAGCAGGCAAAGCTGACGTAGAAACGAATCGCTTCCAGCGCGTTAACGCTC
ATCAGGCAGAGATACAGTTTTTTCTTCAGCTCGCGCAGGCTAACGGTCACGGTTTTACCG
TTAACGGTGTGGGTGCCTTCGCCCAGCAGATGCCAGTAGCTGGTCATTTCGATCAGCTCA
TCGTAATAGCTGGAGATCCCTTCCGCACGTTTCTGGATCTGCTCGTTGGTGACGATATCG
TCAAACACAACAGACGGATCGTTAACGATATTACGAATGATATGAGTATAGGAACGGGAA
TGAATCGTTTCTGAGAACGCCCAGGTTTCGACCCAGGTTTCCAGTTCCGGAATAGAAATA
AGCGGCAATAGCGCCACGTTCGGGCTACGACCCTGAATGGAATCCAGCAGCGTCTGATAT
TTCAGGTTGCTGATAAAGATGTGTTTTTCGTGTTCAGGCAATGCCTGGTAATCAATACGG
TCACGAGAAACGTCAACTTCTTCCGGACGCCAGAAGAAAGAGAGCTGCTTTTCGATCAGC
TTTTCGAAGATGTCATATTTTTGCTGATCGTAGCGAGCCACGTTGACCGGCTGACCAAAG
AACATCGGTTCTTTGAGCTGATCATTTTTCGTCTGTGAAAAGGTGGTATATGCCATGAGT
GTGTCCTGTTGGGAGTTTAATGCCGGATAAGGCATTTTACGCCGCATCCTGTGCCTGATG
CGACGCTGGCGCGTCTTATCAGGCCTACAAACCGAGCCGTAGGCCGGATAAGGCGTTTAC
GCTGCATCCGGCACCCGGAGCCTGATGCGACGCTGGCGCGTCTTATCAGGCCTACAAACC
GAGCCGTAGGCCGGATAAGGCGTTTACGCCGCATCCGGCATCTCAATATCAGATCTTACA
TGCGCCGCTTTCGCAGCCATCGTCCTGGATTGACGGCACCAGATCGTCCTGCGCGTCTTC
AGCGCCGTCACGGGTGTTCTGATAATACAGCGTTTTGACCCCGAATTTGTAGGCGGTGAG
CAGGTCTTTCAGCAACTGCTGCATCGGCACTTTTCCTGACGGGAAACGTGACGGATCGTA
GTTGGTGTTAGCAGAGATCGACTGATCGATAAATTTCTGCATGATACCCACCAGTTGCAG
GTAGCCATCGTTACCCGGCATTTCCCACAGCAGCTCATAGGCGTCGTGCAGATGCTCGTA
GTCCGGCACCACCTGGCGCAGAATACCGTCTTTCGACGCTTTGATGCTGACGTAACCGCG
CGGCGGTTCAATACCGTTAGTGGCGTTAGAGATCTGCGAAGAAGTCTCGGACGGCATCAG
AGCAGAAAGCGTGGAGTTACGCAGGCCGTGCGTTTTGATTGACTCACGCAGAGCTTCCCA
GTCGTAATGCAGCGGCTCATTAGCGATGGTATCCAGATCTTTCTTATAGGTATCGATCGG
CAGGATCCCTTTCGCGTAAGTGGTTTCGTTAAACCACGGGCACGCGCCTTGCTCTTTCGC
CAGCTCATTAGACGCTTTCAGCAGGTAATACTGAATCGCTTCGAAGGTTTTATGCGTCAG
GTTGTTGGCGCTGCCGTCGGAGTAGCGTTTACCATGCTTCGCCAGGTAGTAAGCGAAGTT
GATCACACCAATACCCAGCGTACGACGACCCATCGCTCCACGTTTGGCGGCCGGGATCGG
GTAATCCTGATAATCCAGCAGCGCGTCAAGTGCACGAACCGCCAGAATTGCCAGCTCTTC
CAGTTCATCCAGGCTATTAATTGCGCCCAGGTTGAAAGCAGACAGCGTACACAGCGCGAT
TTCACCGTTCTCGTCGTTGACGTCGTTCAGCGGTTTGGTCGGCAGGGCTATCTCCAGGCA
CAGGTTAGACTGACGCACTGGCGCGATGGCCGGATCAAACGGGCTATGGGTATTGCAGTG
GTCAACGTTCTGAATATAGATACGACCGGTAGACGCACGTTCCTGCATCATCAGCGAGAA
CAGCTCAACGGCTTTCACACGCTGCTTGCGGATGCTGTCGTCTTTCTCATATTTGGTATA
CAGACGTTCAAACTCTTCCTGATCGGCGAAGAATGCGTCGTACAGCCCCGGTACGTCGGA
CGGGCTGAACAGGGTGATATCTTCACCTTTCAGCAGGCGGGTATACATCAGTTTGTTGAT
CTGTACCCCGTAGTCCATATGGCGCACGCGGTTGCCTTCCACACCACGGTTGTTTTTCAA
CACCAGCAGGCTTTCCACTTCCAGATGCCACATCGGGTAGAACAGCGTTGCCGCACCGCC
GCGCACACCGCCCTGAGAGCAGGATTTCACCGCAGTCTGGAAATGTTTGTAGAACGGAAT
GCAGCCGGTATGGAACGCTTCGCCACCGCGAATCGGGCTACCCAGCGCACGAATACGCCC
GGCGTTGATGCCGATCCCGGCACGCTGGGAAACATATTTCACAATCGCGCTGGAGGTGGC
GTTGATGGAATCCAGGCTGTCGCCGCACTCGATCAGTACGCAGGAGCTGAACTGACGAGT
CGGGGTACGCACGCCGGACATGATTGGCGTCGGCAGCGAAATTTTAAATGTGGAAACCGC
GTCGTAAAAACGCTTCACATATTGCAGGCGCGTTTCACGCGGGTAGTTCGAGAACAGGCA
CGCGGCAACCAGAATATAAAGGAACTGGGCGCTTTCGTAGATTTCGCCGGTCACGCGGTT
CTGTACCAGATATTTGCCTTCCAGTTGCTTAACGGCAGCATAAGAGAAGGTCATATCACG
GTCGTGATCGATAAACGTGTCCATCTGCTTGAACTCTTCTTCCGTGTAGTCTTCCAGCAG
ATGATTATCGTATTTGCCCATCTCGACCATTTTCACCACGTGGTCGTACAGCGCAGGCGG
CTCAAACTGGCCGTAGGCTTTTTTACGCAGGTGGAAGATCGCCAGGCGCGCGGCGAGATA
CTGATAATCCGGCGCATCACGGGAGATCAGGTCTGCGGCAGCCTTGATAATAGTTTCGTG
GATGTCAGAGGTCTTGATACCGTCATAAAACTGAATGTGGGAGCGCAGCTCGACCTGGGA
AATCGAAACGTTATGCAGTCCTTCTGCCGCCCAATCCAGAACGCGATGGATTTTGTCGAG
ATTGATGCGCTCTGTGCTACCGTCGCGCTTTGTCACCAGCAGATTCTGATTCATGTATGT
CGTACCTGTTTTTGGAATTCTTTCCGCAATAGTTTCGTGCAGACTACCTGTAGTACGGGA
AGCTGCTTAGAACACTATATATAGGGGGTATGTTTGGGATTCACTGCAAGATAGTGTGAA
AATGGCCCTCTTGCAAGTGCATAACTTTGTGGATAACTCAGGAAGGAAAAAGTGGCTTTC
GCGCACCTTAGGTCAGACAAGGTGTCCGGGAAAGTCAATGGGAAGAGAAAAATTTGTTAA
AAATAACTGTTCGGCGATTTCTTGAACGGCAGAATAGGTTGGATAAATTGATATAGATGG
TTTATTAATCTTTTTGCTAATGATTGCAAAAATTGATCTAAGCACGAGTCATCACATAAT
CTGATGTATCAGTTGTGGTCAATATATAAGCGAATGTAAGCGATTGTTGATGTCGAAATG
GTTGTTTTCTATTCGGTTATTGTTAAATGCGAAGCCATTTTGTTAATTTACCTTATATTA
TAAGAAAATTATTCATTACTTTAATTTAGTTTAAATATAACTGGTATCCCTTAAGGTTAT
TAACTTGAATTATGACGCACTGATACTATTCATCAAATAATAACAAAATAGCTATTGCAT
CGGGTTGGACAATTTACAAAAGAAAGATAACCCATATTGTATAATGCGTTTAAATATGCC
GTCTTATATAAAATGATGGTCAGATTAATATGCGAATTATTTTTCTACGCAAGGAGTATC
TATCTTTACTCCCGTCAATGATTGCGTCTCTCTTCTCTGCTAATGGCATTGCGGCAGTCA
CTGATTCATGCCAGGGATATGATATCAAAGCGAGTTGCCAGGCCAGCAGGCAAAGCCTTG
CAGGCATTACGCAGGACTGGAGCATCGCCGATGGGCAATGGCTGGTTTTTTCGGATATGA
CCAATAATGCCAGCGGTGGGGCCGTATTTTTGCAACAAGGAGCGGAATTTACATTATCAC
CAGAAAATGAAACTGGAATGACTCTGTTTGCCAATAACACCGTTTCAGGAGAATATAATA
ACGGCGGGGCAATATTTGCTAAAGAAAACTCAACGCTGAATCTTACGGATGTTATTTTTT
CTGGTAACGTCGCAGGCGGCTATGGTGGCGCAATCTATTCTTCTGGTACTAACGATACCG
GTGCCATCGATTTACGTGTCACTAACGCCGTGTTTCGCAATAACATCGCTAATGACGGCA
AAGGTGGTGCAATTTATACCATCAATAATGATATCTATTTAAGTGATGATGTTTTTAACA
ATAACCAGGCATATACATCAACAAGTTACAGTGATGGCGATGGCGGCGCAATCGATGTCA
CAGATAATAATAGCGACAGCAAGCATCCTTCAGGTTATACGATAATAAATAACACTGCCT
TTACAAATAACACTGCCGAAGGTTATGGCGGGGCGATATATACCAATAGCGCGACGGCTC
CCTATCTTATTGATATTTCTGTTGATGACAGCTACAGCCAGAACGGAGGCGTGTTAGTCG
ATGAGAACAATAGCGCAGCAGGCTATGGAGATGGTCCTTCCTCTGCGGCGGGTGGCTTTA
TGTATCTCGGCTTAAGTGAAGTTACATTTGATATTGCCGACGGAAAAACGCTGGTTATTG
GCAATACAGAGAATGACGGAGCTGTTGACTCTATTGCTGGTACCGGGTTAATCACCAAAA
CAGGTTCCGGCGATCTGGTACTTAATGCAGATAACAATGACTTTACTGGTGAGATGCAGA
TTGAAAACGGTGAAGTTACCCTGGGCCGCAGCAACTCCCTGATGAATGTCGGCGATACGC
ATTGCCAGGACGATCCGCAAGACTGCTACGGTCTGACGATAGGGAGTATTGATAAGTACC
AGAATCAGGCAGAGCTAAATGTTGGCTCCACCCAACAAACCTTTGTGCACTCATTGACGG
GCTTTCAGAATGGCACTTTAAATATCGATGCTGGTGGCAATGTTACTGTTAATGAAGGCA
GTTTTGCTGGCACCATCGAAGGTGCTGGTCAGCTCACCATTGCGCAAAACGGCAGCTATG
TGCTGGCGGGAGCGTCGTCGATGGCGCTAACCGGCGATATAGTCGTTGATGATGGTGCGG
TGCTTTCGCTGGAAGGCGACGCGGCAGATCTTGCCGCTCTCCAGGACGATCCGCAGTCGA
TCGTGTTAAACGGCGGTGTGCTCGATCTCTCTGATTTCTCCACCTGGCAGAGCGGTACAT
CATACAAAGATGGCCTTGAAGTCAGCGGCAGCAGCGGAACGGTTATCGGCAGTCAGGATG
TGGTAGATCTTGCAGGCGGAAACGATATGCATATCGGCGGTGACGGGAAAGATGGCGTCT
ACGTGGTGATCGATGCGGGTGACGGGCAGGTCCGCCTGGCAAATGACAATCAATACCTCG
GCACAACGCAAATCGCCTCCGGTACGCTGATGGTGAGCGACAACTCGCAGCTTGGAGATA
CCCATTACAACCGCCAGGTTATCTTTACCGATAATCAACAAGAAAGCGTGATGGAGATTA
CTGCCAATGTCGATACTCGCTTTACAACGACTGAGCATGGGCGTGATATTGAAATGCGCG
CCGACGGTGAAGTGGCAGTTGATGCGGGGGTAGACACGCAGTGGGGCGTACTGATGGCTG
ACAGCAGCGGGCAGCATCAGGATGAGGGTAGCACATTGACGAAAACGGGGGCGGGTACGC
TGGAGCTGACCGCCAGCGGTACAACGCAGTCGGCGGTACGTGTCGAAGAAGGCACCCTGA
AAGGTGATGTTGCTGATATCCTTCCTTATGCTTCGTCACTGTGGGTTGGTGATGGGGCAA
CGTTCGTTACTGGCGCGGATCAGGATATTCAGTCAATTGATGCTATTTCCAGCGGCACTA
TTGACATCAGCGATGGTACGGTTTTGCGCCTGACCGGGCAGGATACTTCCGTCGCCCTTA
ATGCCTCACTGTTTAACGGCGATGGGACGCTGGTGAATGCCACCGATGGTGTGACGTTGA
CAGGTGAGCTTAATACCAACCTTGAAACTGACAGCCTGACTTATCTTTCCAACGTGACGG
TTAATGGCAATCTGACCAATACGTCCGGTGCGGTTAGCCTGCAAAATGGCGTCGCTGGCG
ATACGCTGACGGTAAACGGTGATTATACCGGCGGCGGTACGCTACTGCTCGATAGCGAAT
TAAACGGCGATGACTCGGTAAGCGATCAATTGGTGATGAACGGTAATACTGCTGGCAACA
CAACTGTGGTGGTTAACTCCATTACAGGGATTGGTGAGCCGACATCGACAGGCATTAAAG
TGGTTGATTTCGCAGCTGATCCCACGCAGTTTCAAAACAATGCGCAGTTCAGTCTGGCAG
GCAGTGGCTACGTCAACATGGGAGCGTATGACTACACGCTGGTGGAAGATAACAACGACT
GGTATCTGCGATCGCAAGAAGTAACGCCGCCATCGCCACCTGATCCAGACCCGGACCCAA
CCCCCGATCCTGACCCAACACCCGATCCAATCCCCGCTTACCAGCCGGTGCTGAATGCCA
AAGTTGGCGGTTATCTCAATAACCTGCGGGCGGCAAATCAGGCGTTTGTGATGGAGCGAC
GCGATCACGCTGGTGGCGATGGTCAGACGCTGAATTTACGTGTTATCGGCGGACGTTATC
ATTACACGGCGGCAGGGCAACTGGCTCAGCATGAAGACACTTCTACGGTGCAGCTAAGCG
GCGATCTGTTTAGCGGGCGCTGGGGCGATGATGGCGAGTGGATGCTTGGGATTGTAGGTG
GCTACAGCGATAACCAGGGCGACAGCCGCTCGAATCTGACCGGAACTCGCGCCGATAACC
AGAACCACGGTTATGCCGTTGGGCTAACCTCAAGCTGGTTTCAGCACGGTAATCAGAAGC
AGGGGGCCTGGCTGGATAACTGGCTGCAATACGCGTGGTTTAACAATGATGTTTCCGAAC
AAGACGATGGCGCGGATCATTACCATTCGTCGGGGATTATCGCCTCGCTGGAAGCCGGGT
ATCAATGGTTACCGGGGCGTGGTGTGGTGATTGAACCGCAGGCGCAGGTGATTTATCAGG
GCGTGCAGCAGGATGATTTTACCGCCGCTAACCGTGCGCGCGTGTCACAATCGCAGGGTG
ATGATATTCAGACGCGGCTGGGTTTACACAGCGAATGGCGTACCGCTGTTCATGTCATAC
CAACATTAGATCTGAATTATTATCACGATCCCCATTCGACGGAAATTGAAGAGGATGGCA
GCACTATCAGTGACGATGCGGTGAAGCAACGGGGTGAAATAAAAGTGGGAGTCACGGGCA
ATATCAGTCAGCGAGTGTCCCTGCGCGGCAGCGTGGCGTGGCAGAAAGGGAGTGATGATT
TTGCCCAGACGGCAGGATTTTTGTCGATGACGGTGAAATGGTAATCGCTGTCTGACCATC
ACTATTGCCGGATGCGGCGTAAACGCCTTATCTGGCCTACGGAGAGCATTTGTAGGCCTG
ATAAGACGCGGCAAGCGTCGCATCAGGCATTGGCGCGGTTGCCGGATGAATCCAAACAAC
AACCTCACTTATTCTGCGTGTGCAGCATATAGTTCACATCCACGCCGGGGCCGAGTTTAA
AAGAATTAGTGATCGGGTTGTAATGTAGCCCGGTTATATGTCGCTCTTTAAGGCTTGTCT
GATCTACCCAGCCAAGCAGCTCTGCCGGTTTAATAAACTTCTTCACATCATGCGTGCCTT
TGGGCACCATGCGCAAAATATATTCCGCGCCAACCACCGCCATCAGCCATGACTTGCCGT
TGCGGTTAAGCGTCGAGAAAAAGACATCGCCGCCCGGTTTCACCAGTTGCGCACAGGCTC
TGACTACTGACTGCGGATCGGGGACGTGCTCCAGCATCTCCATGCAGGTCACCACATCAT
ACTGCCCGGCATGTTTTGCCGCGTGCTCTTCCACGGTTTCCTGCACGTAATCCACCTGAA
TGCCGCTTTCCAGCGCGTGCAGCTTTGCCACCTGCAATGGCTCAAAGCCCATATCCAGAC
CGGTCACCGTCGCGCCTTCGCGCGCCATACTCTCGGCCAGAATGCCGCCGCCACAACCGA
CATCGAGCACCTTTTTGCCAAATAAACCGCCAGCACGCTCGGCAATATAGCCCAGACGTA
GCGGATTAATGCGGTGCAACGGTTTGAACTCACCTTCAAGATCCCACCAGCGGGAGGCGA
CGGCTTCAAATTTAGCGATCTCTTCGTGGTCTACGTTATGGTTTACCGGCGATTTTTCGG
CATTCATTGGCACTTCTACTCCGTAATTGGCAAGACAAACGAGTATATCAGGCATTGGAT
GTGAATAAAGCGTATAGGTTTACCTCAAACTGCGCGGCTGTGTTATAATTTGCGACCTTT
GAATCCGGGATACAGTAGAGGGATAGCGGTTAGATGAGCGACCTTGCGAGAGAAATTACA
CCGGTCAACATTGAGGAAGAGCTGAAGAGCTCCTATCTGGATTATGCGATGTCGGTCATT
GTTGGCCGTGCGCTGCCAGATGTCCGAGATGGCCTGAAACCGGTACACCGTCGCGTACTT
TACGCCATGAACGTACTAGGCAATGACTGGAACAAAGCCTATAAAAAATCTGCCCGTGTC
GTTGGTGACGTAATCGGTAAATACCATCCCCATGGTGACTTGGCGGTTTATGACACGATC
GTCCGTATGGCGCAGCCATTCTCGCTGCGTTACATGCTGGTAGACGGTCAGGGTAACTTC
GGTTCCATCGACGGCGACTCTGCGGCGGCAATGCGTTATACGGAAATCCGTCTGGCGAAA
ATTGCCCATGAACTGATGGCCGATCTCGAAAAAGAGACGGTCGATTTCGTTGATAACTAT
GACGGCACGGAAAAAATTCCGGACGTCATGCCAACCAAAATTCCTAACCTGCTGGTGAAC
GGTTCTTCCGGTATCGCCGTAGGTATGGCAACCAACATCCCGCCGCACAACCTGACGGAA
GTCATCAACGGTTGTCTGGCGTATATCGATGATGAAGACATCAGCATTGAAGGGCTGATG
GAATACATCCCGGGGCCGGACTTCCCGACGGCGGCAATCATTAACGGTCGTCGCGGTATT
GAAGAAGCTTACCGTACCGGTCGCGGCAAGGTATATATCCGCGCCCGTGCTGAAGTGGAA
GTTGACGCCAAAACCGGACGTGAAACCATTATCGTCCACGAAATTCCGTATCAGGTAAAC
AAAGCGCGCCTGATCGAGAAGATTGCGGAACTGGTAAAAGAAAAACGCGTGGAAGGCATC
AGCGCGCTGCGTGACGAGTCTGACAAAGACGGTATGCGCATCGTGATTGAAGTGAAACGC
GATGCGGTCGGTGAAGTTGTGCTCAACAACCTCTACTCCCAGACCCAGTTGCAGGTTTCT
TTCGGTATCAACATGGTGGCATTGCACCATGGTCAGCCGAAGATCATGAACCTGAAAGAC
ATCATCGCGGCGTTTGTTCGTCACCGCCGTGAAGTGGTGACCCGTCGTACTATTTTCGAA
CTGCGTAAAGCTCGCGATCGTGCTCATATCCTTGAAGCATTAGCCGTGGCGCTGGCGAAC
ATCGACCCGATCATCGAACTGATCCGTCATGCGCCGACGCCTGCAGAAGCGAAAACTGCG
CTGGTTGCTAATCCGTGGCAGCTGGGCAACGTTGCCGCGATGCTCGAACGTGCTGGCGAC
GATGCTGCGCGTCCGGAATGGCTGGAGCCAGAGTTCGGCGTGCGTGATGGTCTGTACTAC
CTGACCGAACAGCAAGCTCAGGCGATTCTGGATCTGCGTTTGCAGAAACTGACCGGCCTT
GAGCACGAAAAACTGCTCGACGAATACAAAGAGCTGCTGGATCAGATCGCGGAACTGCTG
CGTATTCTTGGTAGCGCCGATCGTCTGATGGAAGTGATCCGTGAAGAGCTGGAGCTGGTT
CGTGAACAGTTCGGTGACAAACGTCGTACTGAAATCACCGCCAACAGCGCAGACATCAAC
CTGGAAGATCTGATCACCCAGGAAGATGTGGTCGTGACGCTCTCTCACCAGGGCTACGTT
AAATATCAGCCGCTTTCTGAATACGAAGCGCAGCGTCGTGGCGGGAAAGGTAAATCTGCC
GCACGTATTAAAGAAGAAGACTTTATCGACCGACTGCTGGTGGCGAACACGCACGACCAT
ATTCTGTGCTTCTCCAGCCGTGGTCGCGTCTATTCGATGAAAGTTTACCAGTTGCCGGAG
GCCACTCGTGGCGCGCGCGGTCGTCCGATCGTCAACCTGCTGCCGCTGGAGCAGGACGAA
CGTATCACCGCGATCCTGCCGGTGACCGAGTTTGAAGAAGGCGTGAAAGTCTTCATGGCG
ACCGCTAACGGTACTGTGAAGAAAACCGTCCTCACCGAGTTCAACCGTCTGCGTACCGCC
GGTAAAGTGGCGATCAAACTGGTTGAAGGCGATGAGCTGATCGGCGTTGACCTGACCAGC
GGCGAAGACGAAGTAATGCTGTTCTCCGCCGAAGGTAAAGTGGTGCGCTTTAAAGAGTCT
TCTGTCCGTGCGATGGGCTGCAACACCACCGGTGTTCGCGGTATTCGTTTAGGCGAAGGT
GATAAAGTCGTCTCTCTGATCGTGCCTCGTGGCGATGGCGCAATCCTCACCGCAACGCAG
AACGGTTATGGTAAACGTACCGCAGTGGCGGAATACCCGACTAAGTCGCGTGCGACGAAA
GGGGTTATCTCCATCAAGGTTACCGAACGTAACGGTTTAGTGGTTGGCGCGGTGCAGGTA
GATGATTGCGATCAGATCATGATGATCACCGACGCCGGTACGCTGGTACGTACTCGCGTT
TCAGAAATCAGCATCGTGGGCCGTAACACCCAGGGCGTGATCCTCATCCGTACTGCGGAA
GATGAAAACGTAGTGGGTCTGCAACGTGTTGCTGAACCGGTTGACGAGGAAGATCTGGAC
ACCATCGACGGCAGTGCCGCGGAAGGGGACGATGAAATCGCTCCGGAAGTGGACGTTGAC
GACGAGCCAGAAGAAGAATAATTTTACTTCTTCATGTCAAAAGGGAGCTATCTCCCTTGT
TTGAATTGAAAAGTCCAGGCTGCAAAGTCTGGGCTTTTGTCGTATTAGGGCACGGTAAAG
TTTGGCTGTGCCCGTAAAAAATGGCTGGCTATACACAAGGAATGTGGCAATGAGTGGTGA
AAAAAAGCGAAAGGCTGGCGGTTCTATGGTCTTGTAGGTTTTGGCGCAATAGCACTGCTT
TCCGCTGGCGTCTGGGCGTTGCAATATGCTGGCAGTGGGCCAGAAAAAACGTTGTCGCCG
CTGGTGGTGCACAACAATCTGCAAATCGATCTCAATGAGCCGGACCTCTTTCTCGACAGC
GACTCTCTGAGCCAGCTTCCCAAAGATCTCCTCACCATTCCGTTTCTCCACGATGTTCTG
AGTGAAGATTTCGTTTTCTATTATCAGAATCATGCCGATCGTCTGGGCATTGAAGGCAGC
ATTCGCCGCATTGTCTATGAACACGATCTCACGCTGAAAGATAAGCTCTTTTCGTCACTC
TTAGATCAGCCCGCGCAGGCGGCGCTATGGCACGATAAACAAGGCCATCTTTCACATTAC
ATAGTGCTGATCCAGCGCAGTGGTTTAAGCAAACTGCTGGAGCCATTGTTGTTTGCCGCT
ACCAGCGACAGCCAGTTAAGCAAAACGGAAATCAGTAGCATCAAGATAAATAGTGAAACT
ATTCCTGTTTATCAGTTGCGCTATAACGGTAATAACGCCCTGATGTTCGCGACATATCAG
GACAAGATGCTGGTGTTTTCCAGCACGGATATGCTGTTTAAAGATGATCAGCAGGATACC
GAAGCCACGGCGATCGCAAGTGATTTGTTGAGCGGCAAAAAACGCTGGCAAGCCAGCTTT
GGCCTGGAAGAGCGTGCTGCCGAAAAAACGCCAGTACGCCAGCGCATCGTGGCCAGCGCC
AGGTTGCTGGGTTTTGGCTACCAGCGGTTAATGCCTTCTTTTGCTGGCGTACGCTTCGAA
ATGGGTAACGACGGCTGGCACAGTTTTGTGGCGTTAAATGATGAATCCGCCAGCGTAGAT
GCCAGTTTCGATTTTACGCCGGTCTGGAACAGTATGCCTGCCGGGGCCAGCTTCTGTGTG
GCGGTGCCGTATTCACACGGTATTGCCGAAGAGATGCTTTCGCACATCAGCCAGGAAAAC
GATAAGCTGAATGGGGCGTTAGACGGTGCCGCGGGGCTGTGCTGGTATGAAGACTCAAAA
TTGCAAACCCCGCTGTTTGTCGGTCAGTTTGATGGCACTGCCGAACAGGCGCAATTGCCA
GGGAAACTGTTTACGCAAAATATTGGTGCGCACGAAAGCAAAGCGCCAGAAGGTGTTTTG
CCGGTAAGCCAGACTCAGCAGGGCGAAGCGCAAATCTGGCGTCGCGAAGTGAGTTCCCGA
TACGGTCAGTATCTGAAAGCGCAGGCGGCGCAACCCGATCAATTAATGTCGGATTATTTT
TTCCGCGTGTCGCTGGCGATGCAAAACAAAACGCTGCTTTTCTCCCTCGATGACACGCTG
GTTAATAACGCCCTGCAAACACTGAATAAAACCCGCCCGGCAATGGTAGATGTAATACCC
ACTGATGGCATCGTTCCGCTCTATATCAATCCACAAGGAATGGCGAAACTGCTGCGTAAC
GAAACGCTGACCAGTCTGCCGAAGAATCTCGAACCGGTTTTTTATAACGCCGCACAAACT
TTATTAATGCCGAAGCTGGACGCTTTATCTCAACAACCGCGTTATGTCATGAAGCTGGCC
CAGATGGAACCCGGTGTCGCCTGGCAGTGGCTACCCATAACTTGGCAGCCGCTATGAGAC
ACGGGCTGCTGGCGCTGATTTGCTGGCTGTGTTGTGTTGTTGCCCATAGCGAAATGCTGA
ATGTCGAACAATCCGGGCTGTTTCGCGCCTGGTTTGTACGCATTGCACAGGAACAGCTCC
GCCAGGGGCCAAGTCCACGCTGGTATCAGCAGGATTGTGCGGGCCTGGTGCGATTTGCAG
CGAACGAGGCGCTGAAAGTTCACGACAGTAAATGGCTAAAAAGTAACGGGTTATCTAACC
AGTATTTGCCGCCAGAGATGTCGCTAACACCTGAACAGCGTCAACTGGCGCAAAACTGGA
ATCAGGGGAACGGGAAAACCGGCCCCTACGTGACCGCGATTAATTTGATTCAGTACAACA
GCCAGTTTATTGGCCAGGACATAAACCAGGCGCTGCCTGGCGATATGATTTTTTTCGATC
AGGGCGATGCCCAGCACTTAATGGTCTGGATGGGGCGTTACGTCATCTACCACACCGGAA
GCGCCACGAAAACTGACAACGGAATGCGCGCAGTCAGTCTGCAACAACTTATGACATGGA
AGGACCCCCGATGGATACCCAACGATTCCAATCCCAATTTCATTGGCATTTATCGTTTAA
ATTTTCTGGCGCGATAGCAGCGTGCTTGTCCCTGTCTCTTGTGGGAACAGGGCTTGCTAA
TGCTGATGATTCGCTTCCTTCCAGTAACTATGCGCCGCCCGCAGGGGGAACATTCTTTTT
GCTTGCTGACAGCAGTTTTAGCAGCAGTGAAGAGGCGAAAGTGCGACTGGAAGCGCCGGG
GCGTGATTATCGGCGCTATCAGATGGAAGAGTACGGCGGTGTGGACGTTCGCCTGTATCG
TATTCCTGACCCGATGGCATTTTTGCGCCAGCAGAAAAACCTGCATCGCATTGTGGTGCA
ACCGCAATATCTGGGCGACGGGCTGAACAATACGCTGACCTGGCTGTGGGATAACTGGTA
CGGCAAATCTCGCCGCGTGATGCAGCGTACTTTCTCTTCTCAGTCACGGCAGAATGTGAC
TCAGGCATTACCCGAATTACATCTCGGCAATGCCATTATTAAACCTTCCCGTTATGTACA
GAACAACCAGTTTTCCCCGCTGAAAAAATATCCCCTGGTGGAACAGTTCCGTTATCCACT
ATGGCAGGCTAAACCGGTCGAGCCGCAGCAAGGGGTAAAACTGGAAGGCGCATCCAGCAA
TTTCATCTCGCCGCAGCCGGGTAACATTTATATTCCTCTCGGCCAACAAGAGCCGGGACT
GTACCTCGTCGAGGCGATGGTTGGTGGGTATCGGGCGACGACGGTGGTGTTTGTTTCCGA
TACCGTGGCGCTTAGCAAAGTGTCAGGCAAAGAGCTTCTGGTGTGGACCGCGGGTAAAAA
ACAGGGTGAAGCGAAGCCAGGCTCAGAGATCTTGTGGACTGACGGTCTTGGCGTGATGAC
CCGCGGTGTGACCGATGACAGCGGTACCTTGCAGTTACAACATATATCGCCAGAACGTTC
ATACATTCTGGGTAAGGATGCCGAAGGCGGCGTTTTTGTCTCCGAGAACTTCTTCTACGA
AAGCGAAATCTACAACACCCGCTTGTATATTTTTACCGATCGCCCGCTATATCGCGCAGG
CGATCGTGTCGATGTTAAAGTGATGGGCCGCGAGTTCCACGATCCGTTGCATTCATCCCC
CATCGTCAGCGCCCCGGCGAAGCTTTCGGTGCTGGACGCCAACGGCAGTCTGTTGCAAAC
CGTCGATGTCACGCTGGATGCGCGCAATGGCGGGCAGGGAAGTTTCCGCCTGCCAGAAAA
TGCCGTTGCCGGAGGTTATGAGTTACGTCTTGCTTACCGCAATCAGGTCTATAGCAGTAG
TTTTCGCGTAGCCAACTATATCAAGCCACATTTCGAGATTGGTTTAGCTCTCGACAAAAA
AGAGTTCAAAACTGGCGAAGCGGTCAGCGGCAAACTGCAACTGCTCTACCCGGATGGTGA
GCCGGTAAAAGATGCCCGCGTGCAGTTAAGTTTGCGCGCTCAGCAATTATCAATGGTCGG
TAACGATTTGCGTTATGCCGGACGTTTCCCCGTGTCGCTGGAAGGCAGTGAAACGGTGTC
CGACGATAGCGGTCATGTGGCGTTAAATCTCCCCGCCGCCGATAAACCAAGCCGCTATTT
GTTAACCGTCTCCGCCAGTGACGGCGCGGCGTATCGCGTCACCACCACCAAAGAGATCCT
CATTGAACGCGGCCTGGCGCATTACTCTTTAAGTACCGCCGCACAATACAGTAATAGCGG
CGAGTCGGTTGTGTTCCGTTATGCCGCGCTGGAATCTTCAAAACAGGTTCCTGTTACGTA
TGAATGGTTGCGTCTCGAAGACCGCACGAGCCATAGCGGAGAGCTACCGTCAGGCGGCAA
ATCCTTTACCGTCAATTTCGCTAAACCTGGCAACTACAATCTGACATTACGCGATAAAGA
CGGCTTAATTCTCGCTGGGTTAAGTCATGCCGTCAGCGGTAAGGGCAGCATGTCGCATAC
TGGTACGGTAGATATCGTGGCAGATAAAACGCTGTACCAGCCTGGCGAAACCGCGAAGAT
GCTGATTACCTTTCCGGAGCCAATTGATGAAGCATTATTGACGCTGGAACGCGATCGCGT
GGAACAGCAGTCGCTGCTTTCGCATCCGGCAAACTGGCTAACGCTACAACGTTTAAACGA
TACCCAGTATGAAGCCCGGGTTCCAGTGAGCAATTCCTTTGCGCCTAACATCACTTTTTC
GGTGCTGTATACCCGTAACGGTCAGTACAGTTTTCAGAATGCCGGGATCAAAGTTGCCGT
TCCCCAGCTGGATATCCGGGTGAAAACGGACAAAACCCATTACCAGCCTGGTGAACTGGT
CAATGTCGAATTAACCTCGTCGCTGAAAGGTAAACCTGTTTCTGCGCAGCTAACGGTAGG
CGTGGTCGATGAAATGATCTACGCGCTGCAACCAGAAATCGCGCCGAATATCGGCAAATT
TTTCTATCCGCTGGGGCGTAACAATGTGCGTACCAGCTCCAGTCTGTCGTTTATCAGCTA
CGACCAGGCGCTCTCCAACGAGCCGGTTGCGCCTGGCGCAACTAACCGCAGCGAGCGGCG
AGTAAAAATGCTTGAACGTCCACGGCGTGAAGAGGTGGATACCGCGGCATGGATGCCGTC
ACTCACAACCGATAAACAAGGCAAAGCGTATTTCACGTTCCTGATGCCTGATTCGTTAAC
CCGCTGGCGTATCACCGCGCGTGGGATGAACGGCGACGGGCTGGTCGGGCAGGGGCGTGC
TTATCTGCGTTCGGAAAAAAATCTCTACATGAAGTGGAGTATGCCAACTGTGTATCGCGT
GGGCGACAAACCGGCGGCAGGACTGTTTATCTTCAGTCAGCAGGATAACGAACCGGTGGC
GCTGGTGACTAAATTTGCAGGCGCTGAGATGCGCCAGACGCTGACGCTGCACAAAGGGGC
GAATTATATTTCGCTGACGCAGAATATTCAGCAATCTGGCTTGTTAAGTGCAGAACTGCA
ACAAAATGGGCAAGTGCAGGACAGCATTAGCACAAAACTGTCTTTTGTGGATAACAGCTG
GCCCGTTGAACAGCAGAAAAATATCATGCTCGGTGGTGGCGATAACGCGCTGATGTTGCC
CGAGCAGGCGAGCAATATCCGGCTACAAAGTAGTGAAACGCCGCAGGAGATTTTCCGCAA
CAATCTTGATGCGTTAGTCGATGAACCGTGGGGTGGGGTGATCAACACCGGTAGCCGTCT
GATCCCGCTCAGTCTCGCCTGGCGTTCGCTTGCCGATCATCAAAGTGCCGCCGCTAACGA
CATTCGTCAGATGATTCAGGATAACCGTCTGCGGCTGATGCAACTGGCGGGGCCCGGAGC
GCGCTTTACCTGGTGGGGTGAAGATGGCAATGGTGACGCCTTCCTTACGGCATGGGCATG
GTACGCCGACTGGCAGGCCAGCCAGGCGCTCGGCGTAACGCAACAACCGGAATACTGGCA
GCATATGCTCGACAGTTATGCCGAGCAGGCAGATAACATGCCGTTATTGCATCGGGCGCT
GGTGCTGGCGTGGGCACAGGAGATGAATCTGCCGTGCAAAACGTTGTTGAAAGGGTTGGA
TGAAGCTATCGCCCGGCGCGGAACTAAAACTGAAGATTTCTCTGAGGAAGCCCCCCGCGA
TATCAATGACAGCCTGATCCTCGATACACCGGAATCTCCACTGGCAGATGCGGTGGCAAA
CGTCTTAACCATGACGTTGCTGAAAAAAGCGCAGTTGAAGTCCACGGTGATGCCACAGGT
TCAGCAATATGCGTGGGATAAAGCGGCAAACAGCAATCAGCCGCTGGCGCACACGGTTGT
GCTGCTCAATAGCGGGGGCGACGCTACCCAGGCGGCTGCTATTTTAAGTGGTTTGACCGC
TGAGCAATCTACTATTGAGCGCGCGCTGGCCATGAACTGGCTGGCGAAATATATGGCGAC
AATGCCTCCAGTTGTTTTGCCTGCGCCTGCGGGCGCATGGGCCAAACATAAGTTAACTGG
AGGGGGCGAATACTGGCGTTGGGTTGGTCAGGGCGTGCCGGACATTCTCTCTTTTGGTGA
CGAATTATCGCCGCAAAATGTGCAGGTCCGCTGGCATGAACCGGCAAAAACGGCTCAACA
AAGTAACATTCCGGTGACCGTTGAACGCCAGTTGTATCGGCTTATCCCCGGTGAAGAAGA
GATGAGCTTTACTCTGCAGCCGGTGACCAGCAATGAGATTGACAGCGATGCGCTGTATCT
CGATGAAATTACGCTTACCAGCGAGCAGGATGCAGTTCTGCGCTATGGTCAGGTGGAAGT
ACCGCTCCCGCCGGGAGCCGACGTTGAGCGCACAACATGGGGCATTTCAGTCAATAAACC
CAACGCCGCGAAACAGCAGGGGCAATTGCTGGAAAAAGCGCGTAATGAAATGGGCGAACT
GGCCTATATGGTGCCGGTGAAAGAACTGACGGGAACGGTCACTTTCCGCCATTTGCTGCG
CTTCTCGCAAAAAGGGCAATTCGTTCTGCCTCCTGCTCGTTATGTGCGTTCCTATGCACC
TGCGCAGCAAAGTGTTGCGGCAGGGAGCGAATGGCCCGGGATGCAGGTGAAATAAGTGAA
CTGGCGCAGAATCGTCTGGCTATTGGCGTTGGTTACTCTGCCAACGCTTGCGGAGGAGAC
GCCGTTACAACTGGCACTGCGTGGTGCGCAGCACGATCAACTGTATCAGCTGTCGTCATC
AGGCGTGACCAAAGCCTCGACATTACCTGACTCGCTCACCACGCCGTTAGGGAGTTTGTG
GAAACTGTATGTTTACGCCTGGCTGGAGGATACCCATCAACCGGAGCAGCCCTACCAGTG
TCGCGGAAACTCCCCGGAAGAGGTTTATTGTTGTCAGGCTGGGGAGAGCATAACGCGCGA
TACCGCGCTGGTACGTTCCTGTGGGCTCTATTTTGCGCCGCAGCGGTTGCATATTGGCGC
AGATGTGTGGGGGCAATACTGGTAACAGCGTCAGGCACCTGCGTGGTTAGCGTCTCTTAC
TACGCTGAAGCCAGAAACCTCGGTAACGGTTAAATCGCTGCTTGATTCATTAGCGACGTT
ACCTGCGCAAAACAAAGCTCAGGAAGTCTTACTGGAAGTGGTGCTGGACGAGGCGAAAAT
CGGTGTCGCATCCATGCTCGGTAGTCGGGTTCGGGTGAAAACCTGGAGCTGGTTTGCCGA
TGATAAACAGGAAATCCGTCAGGGTGGTTTTGCCGGCTGGTTAACCGATGGTACACCGCT
GTGGGTTACTGGCAGTGGCACCAGCAAAACGGTACTGACCCGTTATGCGACGGTGCTTAA
TCGGGTTTTGCCAGTGCCGACACAAGTTGCCAGTGGGCAATGTGTAGAGGTGGAGCTATT
TGCCCGCTATCCGCTGAAGAAAATCACAGCGGAAAAGAGTACGACGTCAGTAAAACCCGG
CGTACTTAATGGGCGCTATCGTGTGACATTTGCCAATGGTAACCACATTACGTTTGTCAG
CCACGGTGAGACGACCTTACTGACCGAAAAGGGCAAACTGAAATTGCAGTCGCATCTCGA
TCGTGAAGAGTACGTTGCCAGAGTTCTGGATCGCGAGGCGAAAAGTACGCCACCTGAGGC
AGCGAAAGCCATGACCGTGGCGATACGCACTTTTTTACAGCAAAACGCCAATCGGGAAGG
CGATTGCCTGACCATCCCCGACAGCAGCGCCACGCAGCGTGTTTCTGCTTTGCCAGCGAC
CACGGGGGCGCGAACGATGACCGCCTGGACGCAGGATCTCATCTATGCGGGCGATCCGGT
TCATTATCACGGCAGTCGCGCTACCGAAGGGACGCTTTCCTGGCGGCAAGCCATGGCCCA
GGCCGGGCAGGGAGAGCGTTACGACCAGATACTCGCGTTTGCTTATCCCGACAACAGCCT
TAGCCGCTGGGGAGCGCCACGCTCAACCTGTCAGTTATTACCCAAAGCGAAAGCCTGGCT
GGCGAAAAAAATGCCGCAGTGGCGGCGTATATTAGAAGGCGAGACGGGGTACAACGAACC
AGACGTGTTTGCGGTCTGTCGTTTAGTCTCAGGTTTCCCCTATACCGATCGGCAGCAGAA
ACGGCTGTTTATTCGTAACTTCTTTACGCTTCAGGATCGGCTGGATTTAACCCATGAGTA
TCTGCACCTGGCCTTTGATGGTTATCCCACCGGGCTTGATGAGAACTATATCGAAACGCT
GACCCGACAATTATTAATGGACTAATGCTATGCGAAAGATTTTTCTTCCGTTGTTACTGG
TGGCACTTTCGCCTGTCGCTCACAGTGAAGGTGTGCAGGAAGTCGAGATTGACGCACCGC
TCTCTGGCTGGCATCCGGCAGAGGGCGAAGATGCCAGTTTTTCACAATCGATCAATTACC
CGGCGTCGTCCGTCAACATGGCAGATGATCAAAATATCTCAGCGCAGATCCGCGGCAAAA
TAAAGAATTATGCTGCGGCGGGTAAAGTTCAGCAGGGCCGGCTGGTGGTCAACGGTGCCA
GTATGCCGCAGAGAGTTGAATCCGATGGTTCATTTGCACGCCCTTATATTTTCACTGAAG
GCAGCAACAGCGTGCAGGTCATCAGCCCGGATGGGCAAAGCCGACAAAAAATGCAGTTTT
ACTCAACGCCGGGTACAGGAACGATTCGTGCACGTTTACGGCTGGTTCTCTCGTGGGATA
CGGACAATACCGATCTCGATCTCCATGTTGTCACGCCCGATGGAGAACACGCCTGGTACG
GTAACACCGTGCTGAAAAACAGTGGTGCACTGGATATGGATGTCACGACGGGGTATGGAC
CCGAGATTTTCGCCATGCCAGCACCAGTTCACGGGCGCTATCAGGTGTATATCAACTACT
ATGGTGGGCGCAGCGAAACGGAATTGACGACCGCCCAACTGACGCTGATTACCGATGAAG
GATCGGTCAATGAGAAACAGGAAACATTTATTGTACCGATGCGTAATGCTGGCGAGCTGA
CGCTGGTGAAAAGTTTTGACTGGTGATTAATGGGGTTACCTTCGCCGTCGATGTTCAAGA
AAACACCCGATAACTTTCGCTATCGGGTGTTTTTATTGATTAATTCAACCGTTCAATCAC
CATCGCAATTCCCTGGCCGCCACCAATGCACAGTGTTGCCAGCCCCAGCGTTTTATCGCG
TGCCTGCATGGCATGTAATAGTGTGACCAGAATACGAGCACCACTGGCACCGATAGGATG
CCCGAGCGCGATGGCCCCGCCGTTGACATTCACTTTCTCAGAATCAAAGCCCAGGGTTTT
CCCAACGGCAAGGAACTGTGCAGCAAATGCTTCATTAGCCTCAATGAGATCAATATCCGC
CAGTTGCAGCCCCGCCAGTTGTAACGCTTTTTGCGTGGCAGGTACTGGACCCATACCCAT
CAATGCGGGGGGCACGCCACCGCTGGCATAACTTTTAATGCGAGCCAGGGGGGTAAGGCC
TGCTGCCAGCGCCGCAGATTCTTCCATAATCACCAGAGCGGCAGCACCGTCGTTAATACC
AGACGCGTTCCCGGCGGTGACTGTTCCTGCTTTATCGAAGGCCGGGCGCAATGCGCCTAA
CGCTTCAGTCGTAGAATCCGCTTTCGGGAATTCGTCTTGACTGAAGACGAAGGTTTTCTT
CCGAGTGACAACATTTACCGGGACGATTTCGGCTGTAAAAGCACCGGACTCAATTGCGGC
TGCCGCTTTACGCTGTGAATGCAGCGCCAGTTCATCCTGCATTTCTCGGGTAATTCCGTA
CTCTTTGGCCACGTTCTCGGCGGTAATCCCCATATGATAACCATGGGTGGCGCACATCAG
ACCATCGCGCAGGATTACGTCATAAACCTGTCCGTCTCCAAGACGATAACCAGAGCGTGC
TTTTGCATCGAGTAAGTAGGGCGCTAAACTCATATTTTCCATACCCCCCACCACAATGCT
TTGCGCCTGACCTGCCTGAATTGCCTGGGCGGCAAGCGCCACACTTTTAAGACCCGAACC
ACACACTTTATTGACCGTGAATCCGCACACCGTTTCTGCCAGCCCGCTTTTTAACAGTGC
CTGACGTGCCGGATTTTGCCCCAACCCGGCTTGCAACACGTTACCCATAATCACTTCATC
AATGTGTAGTGAATCGATTTTTGCACGTTCAATGGCGGCTTTAATTACTGTCGCCCCCAG
GTCGATGGCGCTGGTGGAAGCGAGTGAACCGTTAAAACTACCGATAGCAGTACGTACCGC
ACTGACGATGACACAATTTTTCATTTTTTATTCCTTCTGTCTGTAGGGGGGCCGTCAGAA
CAGCGTTAAACCAATGACGAAAATGACGCCGGAGAAGAGCAGGGCAGTGATGCAATAGCC
CATGATGTCGCGGACACCGAGTCCGGCGATTGCCAGTGCTGGCAGCGCCCAGAATGGTTG
TGCCATGTTCATCCATTGCTCGCCGTAGGCGATCGCCATTACCGATTTACCGAGATCAGC
GCCCAGCGCCTGGGCTGCGGGTATCACGAAAGGTCCCTGAATAACCCAGTGACCGCCGCC
AGACGGAACGGCGAAGTTAATCAGTGCAGAACTAAAAAAGGTCATTACCGGGAAGGTGTC
TTTGTTCGCAACATTGATGAAGAATTCGGTAATGAGTCCGCCCAGACCGGAATGCTCCAT
CATCAGTTGGATCCCAGCGTAGAAGGGGAATTGCACCAGAATACCGGCGGTACTGCGTGC
TGCCGCGCTGATAGCACGCATATAAGCCATTGGCGTTTTATGTAGCAGCAGACCCGCAAT
CATAAACATCAGGTTGACGGTATTGATGGTGATGTTGAAGCCATGTTCGCTGAAGTACAT
CGCCAGGTAAGCGATACCGAGTGCGCCGATGATCAACGTCAGAATGCGGCTTTCTTCCAG
TCGCTCGGACGGTGGAGCATCTTTCGGTAGCTGCTTTTGAAAATCAGCCTCTTCCATGAG
TAGTTTTGGATCGATACTCACCACGTCAGACGGTTTTGGCATCATCATGCGGGTGATAAA
TGGCATCACCACAATCAACGCCACAGTGATGAAAATGTTAAAACCACTGAACAGAGTATC
GCCCACCGGGATCAGCCCGGCGATATGCTCAACCGGGTTGCCCGGTGTTGCAGCCAACAG
AGGCATTGATCCAGAGAAGCCGCCACCCCAGGTGAGAAAACCAATGTAGGCGCAGGCAAT
GAGCAACGGATAATCAGAACCGGGGACTCGCCGGGCGACTTCACGGGCAAACATTGCGCC
GACAACCAAACCAAATCCCCAGTTGATGACACAAGCGACTGAACCGAAGAAAGTGACCAG
CATGACGCCCTGTACGGGCGTCTTTGCGGCGGAGGCGGCAGTACGCAGCAAACTTTTCAC
CGGAGCAGAGCTGGCAAGGGCATGACCGGTAACGATGATAAGCGCCATCTGCATACCAAA
CGCCAGCAAGTTCCAGAAACCGTCACCCCACATTTTCACCATGCTGATCGGCGTTTGTGG
TGTTAACCAAAGCGCGATCACGAATGTTAGCAATGTCAGCAACATGGCAAAGATCAGTGG
ATCGGGAAGCCACCGGCTGACAAAACGCGTCATAAAACGCGATATGCGACCAATCATAAA
TCACCCCGTTGCGTATTCAGATCGGCGGCGACTTCAAACCGAGCTTCTGTTTTGGCACGC
ACGGTAGCTAAATCACACCCGTCGGCAATTTCGGTGAGCCACATTTTGCCGTCAATAAAA
CGAAAGACAGCCAGTTCAGTAACCAGCATATGCACCGCATGTTGCGCAGTGAGTGGCATG
GTGCAGCGGCGCAAAATTTTTGCTGAACCATCTTTGGCGCAATGTTCCATGGCGATGATC
ACTTTGCGCGACCCGGTCACCAGATCCATCGCGCCACCCATACCGGGCACCATTTTCCCA
GGCACTACCCAGTTCGCGAGGTTTGCTTCTTCGTCTACTTGCAAACCGCCGAGCACGCAG
GCATTAATATGACCGCCGCGGATTAGCGCAAATGACATGGCGCTATCAAACATGGCTGCA
CCGGGTAAAATACCGCACGGTTGTCCGCCAGCGTTCACCAGATCTGGATGCGCTGTCGTG
ACCGGGCCTAAACCGAGGAAGCCGTTTTCCGATTGCAGAGTGATATGAATACCCTCCGGT
AAATAATTGGCGACCATTGTGGGTAAACCGATCCCTAAGTTAACGATGTCACCATCACGA
AGCTCTTGCGCCACACGGCGCGCAATACGTTGTTTCGCGTCCATTATTTGCTCTCCTGTG
AAACGATGATGTGGTCGATAACGGCACCAGGGGTGACAATATGGTCAGGTTGCAGCTCGC
CGGTTTCGACAAGTTCATCTGGCTCTACCAGCGTGATATCAGCCGCAAGGGCTATCAGGG
GGTTAAAGTTGCGGGCGCTAAGTTGATAGGTCAGGTTGCCAAGTGTGTCGCAACGATGAG
CGCGAATTAGCGCCAGGTCGGCGCGCAGTGGGCGTTCGAGCAGCCAGGTTTTACCGTCGA
GTGTCAGTGTCTGTTTGCCTTCCTCTACGACGGTGCCGACACCCGTTGGGGTGAGAAAAC
CACCAAGTCCAGCTCCACCACAGCGAATTTGCTCGATTAGCGTACCTTGCGGCACCAGAA
CGACGTCCATCTCACCAGATATCATGCGCCGACCTATTTCCGGGTTGGTGCCGATATGTG
AAGCAATCACTTTGCGGACTCGACCATTGACGATGAGCGGACCGATGCCGGTATCAACAA
ACGCGGTATCATTGGCTATCAATGTCAGGTCGCGAACACCAGATTCCAGTAATGCTTCAA
CCAGGCGGGATGGAGTGCCAATCCCCATAAATCCGCCCACCATGATGGTCATGCCGTCAC
GAAAGAAGCCGGTGGCGTCTTGTAATGTCATCAATTTTGTTTTCATTTTTTATCCCTCTT
GCATACACCGTTGTGGGTACAGTCAGGGAATAGCAAGGGGAGTGCCAGAATGAGATTATT
GGATGTTTTTATTTAACTAATTGAATAGAAAAGGATAAATTAGATGGGGATTCATAAGGA
GAATGAGCTGCTATGCAGAAAATTGCGCACTGTGCAAATTTCTGCATAGCAAGTTTTGGT
GTTATACATCCGCCGGATCGATACCGTATTCCTGGAGTTTATACATCAATGCACGGCGAC
TGATGCCCAGCATTAAAGCAGTGCGGGTTCGGTTTCCTTCTTGTTGTTCCAGCACTTCCA
TAATGATGCGTTTTTCGACGCGTTTAATTTCCTCTTTTAAATTACGCTCTCCGACAGGGG
CTGTTTTTACCTCGCCAGCATTACAGACTGGCTGACGAATCTGCGGCGGAAGATCCTCAG
AAAAAATGATCGGGCCTGAATTCATCACGACGGCGCGTTCAATAACGTTGGAAAGCTCTC
GAATATTTCCCGGCCATGACCAGGCGGTAAGCAGTGACATTGCCATCGGATCGATGTCGA
TAATATCGCGCTGATTCTCACTACTGAATTTTTGCAAAAAGTGATTAGCTAACAGGGAAA
TATCTTCCCGGCGATCGCGCAGAGGCGGCAGTATTAAATGAATAACGTTAAGGCGATAAA
AGAGATCTTCACGGAAGGTGCCTTCTTTTACCATTGCCTGCAAGTCGCGGTTGGTGGCAG
CAATGATGCGGATATCAACTTTTATGGTCTGATGGCCGCCAATCCGTTCAAATTCCCGTT
CCTGCAGAATGCGTAGTAATTTGGCTTGCAGTACCAGCGGCATTTCGCCAATTTCGTCGA
GGAGCAGAGTACCTTCGTTGGCACGTTCAAATAATCCCTGACGCAAGGTTTGTGCACCAG
TAAATGCACCTTTTTCATGACCAAACAGTTCACTTTCGAGCAACGATTCCGGCAGCGCCG
CGCAGTTGACTTTAATGAACGGCCCCTTTGCCCGCCGCGAATTGTAGTGAATCGCTCTGG
CAATCAACTCTTTCCCGGTGCCGCTTTCACCGCTAATCAAGACGCTGGCCTGAGAAAGGG
CAATTTTGGCGGTGTCTTTGCAGATATCCATCATCGCCGGGCTGTTGGTGAGAATGTGCC
CCCATTGCCAGCTGGTGCTCAGTGCCTGGTGCAGATGACGGATCTCTTTTTTCATTGACT
GGAGTTGTAAAGCGCGCTGAACGATTAAATTCAACTCATCGAGATCAAACGGTTTAATAA
CATAGTCGAAGGCCCCGCAGCGTAGCGCTTCGACGGCGGTTTCCACTTCAGCATAGGCCG
TCATCAGAATAACGGGTGTCCGGGTCTCATTACTGCGCATCTCCTTTAGTGCCTTGATGC
CGTCCATCTCTGGCATGCGGATATCCATCAACACCACGTCAGGGTGAATATCAGCAAACA
GGTGTAATGCTGTGCGTCCGTTGTTCGCACAATGTGTTTCGAAACCTTGTAGTGCAAAAG
CGGTGCTCAGCATACGGCGAACATTATCTTCATCATCCACAATAAGGATGCGATTAATAG
CAGTCATACAGTCTGATTTCCCTGCGGGTTGATTGGTAAAATAAGCGTGAAGGTTGCGCC
GTAGCCCGGCAAACTGGCGACGCGAATATCACCCTGATGGGCATTAATGATGCGTTGACT
TAACGCCAGACCAAGCCCGGTTCCTGAGGCTTTGGTGGTGAAAAAGGGATCGAAGATCTT
TTTTTGCAGCGAGAGATCAATGCCACAGCCGTTGTCCTCTATCGAAATGGCCTGTTGTGA
GTCGCTGTATTGCCAGGTTTGAATGCGAATTTTCCCTCGTGCGCTGATAGCCTGGACGGC
ATTGATCAGGATATTCAGTAGTACCTGTTTGAGCAGTTCACGATCGGCGTTAATCGGGTT
TAATTCATTATCCAGTTCGCTTATGAAGTCGACCCGCGCTTGTACGCCGGCGGTTTGTAC
CAGTACCAGAGTTTCTTCAACCAATGCATTGAGACTGACTTGTTGCCATTGACTGTGGCG
TGGACGTGAAAATTCGAGCAATTGCTGAATAACTTTGTTAATTGAATCGATTTCTTTGAG
TACTACGGACAGATATTCCTGATGTATTAGGTCGCTGGTTTGTTGGCGCAAGATCTGTAC
ATAACCACGAATAGCCGTTAGCGGATTACGTACTTCATGCGCGACGCCAGCCATCAGCTC
ACCCAGTGTGGCGAGGCGTTCTGCTTGCGCCATGCGGCGCTGGGTTTCTTTGCGGGCAGT
TAAATCAGAGAAAATAACCAAAGCACCTATCATTTCACCATGCGTGTTATGAATACGACT
GGTAGTGACACTGAGTTCAATGGTGCGGTCACGGCCTGGAAAACTGATCTCCAGCGCTAC
ATGTTCGGTGCCATGTTCCAGCGTATCCAGTACTGGACTGTAGAACTGAGTATTGTCGAA
CAACATGGAGTAAGGCTGCCCTACCAGTTCATGACGTTGATAGCCAGTGATGACTTCTGC
TGCCGGGTTCATGGTGGTTACATCACCCTGGCGGTCAATGGCAATGACGCCATCGGCAGC
GTTTTCAATAATCAGATCGTTAAGTGTCCGCGTTTCACGCAGTGCCTGGGCGAGGTTGTT
AACACTCTGACTGATTTGCCCCATTTCACCGGGCAATTGTGGTAATCGAGTGGGAATATT
TTGTGCCAGAGTCGAGAGGCCATCGGTGATGATATCAATATTGGCGCTCAGGCGACGGGA
GAAAAGGACAATCAACAGCAGGCTTATCAGCAAACCGGCGGTGAGCACAATGATAATCCT
CACATCCATTTTCCAGGCCTGGCGGCGAATATCTTCGGTTAATTCATTGGCCCAGATATA
GCCGAGAATTTCACCATTACGCTCAATGGGGAGCATTGAATTCAAAATATCGCCGCGCAC
CTGCCTGCCTGAATAAACCAAAGGGGTATTTGTACGCATGACTTCGCGACCAGGGTGATC
TGCGGCAATGGTAACGCCCACATTATTCTGATATAGCGCTGAAGGCGCGTAGGTGATTAT
CGCATCCAGCGTTTTGTTGTAATAACCAGCGCCGATGCCAGGGAAGGCGTGAGTGATATT
TTCGGTAATGGGGGCAAGTTCTGCATTTAATGCGCGGATACGCTCCTCACGTGGTAAGTC
GATGTAGAGATCATAGCGATCGCCTAGTGCCTGATTAAGCAGGTTGACCACGGCAGAAAG
TTTTTTCTCTTTTTCAGATAAGACTGCTGAACGTCCTTCCGTTTCTACGATATAACCAAT
AGTAAGCGTTGGGACAATGACCATCAGGATTGCCATCAGGATCATTTGATTGCGTAAGCG
GCGTGGATAAATCCACTTCATATAATGCATGCTGAAATCCACTAGTCTTGTCCGGTATAT
GACGATTATCAGAGGTTAAGGTGATGATTTCTCGGCGGTGTATCATATTCCAGAGAAGAG
AGAACATTGCGGTAACACGCTTTTACCGCTACCTTAACCACACTCCATCGGTCACCTGAG
GCGGAGCTTCGCCCCTTTGAAATACCTTGCTTCTTTTCGTACAACCCTGAAAGCCTCGCG
CTACATGTTCAGAGCATTGGCGTTAGTGCTCTGGCTGTTGATTGCTTTTTCATCCGTTTT
TTACATCGTTAATGCGTTACATCAGCGAGAATCGGAAATTCGTCAGGAATTTAATCTGAG
TTCCGATCAGGCTCAGCGCTTTATTCAACGCACCTCTGATGTGATGAAAGAGCTGAAGTA
CATCGCTGAAAATCGCTTATCGGCAGAAAACGGTGTGCTTTCCCCGCGTGGACGAGAAAC
GCAGGCGGATGTGCCTGCGTTTGAACCGCTGTTTGCCGACTCCGATTGTTCCGCAATGAG
TAACACCTGGCGAGGTTCTCTGGAGTCATTGGCGTGGTTTATGCGCTACTGGCGCGATAA
TTTTTCTGCGGCTTACGATCTCAACCGGGTATTTTTAATCGGCAGCGATAACCTCTGCAT
GGCCAATTTCGGTCTGCGTGATATGCCAGTGGAACGCGATACCGCGTTGAAAGCTTTGCA
TGAACGCATCAATAAATATCGAAATGCACCACAAGATGATAGCGGCAGTAACCTCTACTG
GATCAGCGAAGGTCCGCGCCCTGGCGTCGGGTATTTTTACGCGTTGACGCCAGTTTATCT
GGCGAACCGGTTGCAGGCGCTTTTGGGTGTCGAGCAGACCATCCGGATGGAGAACTTTTT
CTTACCTGGTACGTTGCCGATGGGGGTTACCATTCTTGATGAAAATGGTCATACCCTGAT
TTCGCTTACCGGACCAGAAAGTAAAATTAAGGGCGATCCTCGCTGGATGCAGGAACGCTC
CTGGTTTGGCTATACGGAAGGGTTCCGGGAGCTGGTGCTGAAGAAAAATCTGCCACCCTC
ATCGCTAAGCATCGTGTATTCGGTGCCGGTTGATAAGGTGCTGGAACGCATTCGCATGTT
GATCCTTAACGCAATTTTGCTGAATGTGCTTGCTGGAGCTGCATTGTTTACTCTCGAGCG
GATGTACGAGCGGCGTATTTTCATTCCGGCGGAAAGCGACGCCCTGAGACTGGAAGAACA
TGAGCAGTTTAACCGCAAGATTGTCGCCTCCGCGCCAGTGGGTATCTGTATTTTGCGTAC
CGCAGATGGCGTCAATATTTTAAGTAACGAACTGGCGCATACCTATCTCAATATGCTTAC
GCATGAGGACCGCCAACGGCTGACACAAATTATCTGTGGGCAGCAGGTCAATTTTGTTGA
TGTCCTGACCAGCAACAATACCAATCTGCAAATCAGCTTCGTCCATTCGCGCTATCGTAA
TGAAAACGTGGCCATTTGTGTGCTGGTGGATGTTTCTTCGCGCGTGAAGATGGAAGAGTC
GTTGCAGGAGATGGCACAAGCAGCGGAACAGGCGAGCCAGTCAAAATCGATGTTCCTTGC
CACCGTCAGTCATGAGCTGCGAACGCCGCTGTATGGCATTATCGGTAACCTGGATCTGTT
GCAAACCAAAGAGTTACCGAAAGGCGTCGATCGTCTGGTGACGGCAATGAACAACTCTTC
CAGCCTGTTGTTGAAAATTATCAGCGATATTCTCGATTTCTCGAAGATTGAATCGGAACA
GTTGAAGATCGAACCGCGTGAGTTTTCACCGCGTGAAGTGATGAACCACATCACCGCCAA
CTATTTACCGCTGGTGGTACGCAAGCAGTTAGGCTTGTACTGCTTTATTGAACCGGATGT
GCCAGTGGCCTTAAATGGCGACCCGATGCGTTTACAGCAGGTCATCTCCAATCTGTTGAG
TAACGCCATAAAATTCACCGATACCGGCTGTATAGTTTTGCATGTTCGCGCTGATGGCGA
TTATCTCTCTATCCGTGTTCGCGATACCGGCGTGGGGATTCCGGCGAAAGAAGTGGTGCG
CTTGTTTGATCCCTTCTTCCAGGTCGGAACGGGCGTACAGCGAAACTTCCAGGGGACCGG
TCTGGGTCTGGCGATTTGTGAAAAACTGATCAGCATGATGGACGGCGATATCTCGGTAGA
TTCAGAACCGGGAATGGGCAGCCAGTTTACCGTGCGTATTCCGTTGTACGGCGCTCAGTA
CCCGCAGAAAAAAGGCGTGGAAGGGTTGAGTGGTAAACGCTGCTGGCTGGCGGTCCGCAA
TGCGTCGCTCTGTCAGTTCCTGGAAACCAGTTTGCAGCGCAGCGGCATCGTCGTAACAAC
ATACGAAGGGCAGGAACCGACTCCCGAAGATGTGTTAATCACTGACGAGGTAGTGAGTAA
AAAATGGCAGGGCAGAGCGGTAGTGACCTTCTGTCGTCGACATATTGGTATTCCGCTGGA
GAAAGCGCCAGGGGAGTGGGTACACAGTGTGGCTGCCCCGCATGAGCTACCGGCATTGTT
GGCGCGTATTTATTTGATCGAGATGGAGAGCGACGATCCTGCTAACGCTCTGCCGTCGAC
GGACAAAGCGGTCAGCGATAATGACGATATGATGATTCTGGTCGTGGATGATCATCCGAT
TAACCGACGTCTGCTGGCAGATCAGTTGGGATCGTTGGGCTATCAATGTAAAACCGCGAA
TGATGGCGTCGATGCGCTTAATGTACTTAGCAAGAATCATATTGATATCGTGCTTAGCGA
CGTCAACATGCCAAATATGGATGGTTACCGCTTGACGCAACGCATTCGTCAGTTGGGACT
GACGTTGCCGGTAATCGGAGTAACTGCTAATGCGTTGGCTGAAGAGAAGCAGCGGTGTCT
GGAGTCCGGTATGGACAGCTGCCTGTCGAAGCCGGTAACGCTGGATGTAATAAAACAGAC
GCTGACGGTATATGCCGAGAGGGTCAGGAAATCGCGGGAATCGTAGGACGGATAAGGCGT
TTACGCCGCATCTGGCATTCAGTGCAAATGCCAGATGCGACGCTGACGCCTCTTATCTGG
CCTACTTTAATGTAATCTGTTGAAATAATGGGAATCGTAGGCCGGATAAGGCGTTTACGC
CGCATCCGGCAATCGGTGCAAATGCCAGATAAGACACTAACGCGTCTTATCTGGCCTACA
GATGATTAGTCTTTATCTGCCGGACTTAAGGTCACAGAAGAGAGATAATTCAGCAGGGCG
ATATCGTTCTCGACACCCAGCTTCATCATCGCAGATTTCTTCTGGCTACTGATGGTTTTA
ATACTGCGGTTCAGCTTTTTAGCGATCTCGGTCACCAGGAAGCCTTCCGCAAACAGGCGC
AGAACTTCACTCTCTTTTGGCGAGAGACGCTTGTCACCGTAACCACCAGCACTGATTTTT
TCCAACAGGCGAGAAACGCTTTCCGGGGTAAATTTCTTCCCTTTCTGCAGCGCGGCGAGA
GCTTTCGGCAGATCGGTCGGTGCACCTTGTTTCAGCACGATCCCTTCGATATCCAGATCC
AATACCGCACTAAGAATCGCCGGGTTGTTGTTCATAGTCAGAACAATGATCGACAGGCTT
GGGAAATGGCGCTTGATGTACTTGATTAAGGTAATGCCATCGCCGTACTTATCGCCAGGC
ATGGAGAGATCGGTAATCAACACATGCGCATCCAGTTTCGGCAGGTTGTTGATCAGTGCT
GTAGAGTCTTCAAATTCGCCGACAACATTCACCCACTCAATTTGCTCAAGTGATTTGCGA
ATACCGAACAAGACTATCGGATGGTCATCGGCAATAATTACGTTCATATTGTTCATGTAA
TAGGCTACCTTGCTACAGCAAGCTCTTGACATAACTGTCAATGTCGCTGATGTATTTTTC
TATTCCTGGAACATCCTTCTCACGAATCAGATGTTCTAGCGTTTCACATAACTGCTTGCC
GGGTACCAGATTTAGCATGGCAAATACGCCTTTAAGACGATGAGCCGTTTGGGCTAACGC
AGCAAAGTCACTGGTTGCTGCTTCAGTATACAGCCTCTTAACATCATCCGGTACTGTGTC
TACAAAGAGCGCATAATAGCCGCTGGCATGGAGTTGCGCATTTTCATCTCCGCCCAGAGG
CGATTCTGTCACCTCTTCCTGCGCCAGTTGCACTTCAATTAATTGTAAGACCGCTTCCTG
CATAGCGTTGCTCATATTGAAGTTGACGCACAATTGACCAGGCCCAATTTCCCGTACGCC
AGACTCATCATCGCTTAAAAGCAAGCCAGAGGCAGTAAGATTAGACGGATTATCCGTTAA
AAAGATATCATAATCTTGACTAATTAATCTTTCATCGGGTGTGATACAGGTTGCACCCCA
ATTTTCTAACTGGCGAGTGACAATATTCCGAATTTCTGCCGAAGTAACATCCACCATTAC
GCAGACATCATCCAGTAAACGCTCTTCTTCCTCTTCAACTTCCGGGTCAGCTGCGAGCAT
TTTGATATGCACAGAGTAGCGTGTACCAAGCCCATCCCGCGTTTTGATGTTTAAATGACC
GCCCAGTTTACGTGCCAGTTGATCGCTCAGCCAGAATGCCAGCGGGTCCGCCTTGCCATA
GCGATCGTTTTGGGTCTGGTTGATAAACGGGAAGTGCAAATTATCCATTTCATGAATGCT
TACGCCTTCTCCGGTGTCCAGAATGCGGAACGTCAGGCGGTCTTCGGAGGACTCATCCTG
ATCAACCTCAAGGGTGATTTTTCCCAATTGCGTTGAGGTCACGGCATATTGCATCAGTAG
CAGCAAAATACGTCGTAAGGCATCGCGATCGCCACGGCGCATATCGTGTGCTTTCAGATG
ATTGTTAATCAGCAGTTGCAGACCTTTACGCTTGATGGCAGGCAACACTGAAGGCACAAC
TTCATCAATTAAATCCTGCACGGAGAACAGCACCGTCTCACTTTTCCAGCTATCGTCCGC
AAGCATGTTCGCTAACTGTATTTCATCGACCAGCCGCACCAGCACATCTGCCTGATTCGC
CAGTTGTTTGCTTTCCGGGGCGTTGAGTTTAGCCGCGCTCTCCGCCAGGGACTGTGCAGG
TTCTTTCAGCGCATCGCCAATGTTTTTCATAAAGGTCATCCGCCCCTGCTGGTTTTTCTC
ATACAGACGCTGCGCCTGCTTGAGTTTCTTGTTTACCAGCACTTCGCGATCCTGATCGCG
AATAATGAAAATTTGTGTGCGCGGCGCGACCTGGCTGCGGAACATGCGGATCTCATACAG
CTCGTTATTGATCGTCGCCTGAATAATCCCCTGATGCTGTTCCGCCATGGTGGTGATGTT
TTGCAGATTCAAATGCGGCAGCAAATGATCGGCAATTTTGTTACTTATGACAGTGCGGTT
CGATTCCTGATCGTGAACCAGCAGGCCGAGCGGCAGCAGTGAGACTATCTCTTCATTGAT
TGCCCGTAAAATGCGCAATTCGTTATTGACCGCCGTGTTGGGTAGACTTTCTGTACTGCG
ACTGGAGAAATGGCGAAATGTGGTATAGCCAAATAACGCCAGCGCCAGCAAACCGATGTT
CAGCAGCAGTGGCAGCAGAATGTTTTGCAACGTATCCAGCAATAAGGTGCCATAAGGAAC
CTGCCAGACCAGGCGCATATCAGTAGAGTTGAGTGCCGAGGAGATTTCAATCTTCGTACT
GTTAAAGTGGATACTGACGCTATCCGTCCCTTCTTTCTCATTATCATTGTTTCCCGTTGC
CGTCGCGTCTGGCTCAAGGCGGAAACTGTCCAGCGGCATACCCGGTGGGATCAAATCATT
AATCGGCAGATCAAAAGCCACGACCGTTGCCAGATGTCCTGGCTGGTTAAAGGTAGTACG
CAAGGTAAAGTAATGACCGTTCTGCCAGGCCAGGCGGCGCATGTTAGAAAAACTTTCGCG
TTCATCGAGGGCGTTGGCCTGTTGCAACATCTCTGCACGACGTGAATCAACAATGTCACT
GACGGTCGATTCTTTAAATCCGGAGGTGAGATCTTTGAGGGGCAGGGTTGAGATCAGTAC
CAGACTGTTATCCTGACCATTCAGGTAATACATTGACCACGGTACATTTTCTGCGCCCCA
CAATGTATCCAGATAAGTGGACATCCGTTGAGTCATCTCAAGCGTTGAGTTGTCGTGAGA
GCCAAAGATTAACGCTTCCGTTTTGCGGCGCGGTTTTTCCAGATAGTAGACATCCTGTTT
CAGGCGCGTCTCTTGTAAACCTTCGCCGGAGGAGGGGGAGGTCGTCGCGGCAATGTTGTC
GTAGATCTGCCAGGTCACGTAACGCCAGGTATCGACGCGCTTTTGGATTGCGTGGGTAAT
GTCGACAATCTGGTAACTTTTATCTTTCAGCCAGGCGTTAACGGCGCTTTGTACCATTAC
ACCCATCGTCACCAGTAACACAATGATCAACAGTAAAAAGAAGCGGGTAATGCTCCCGGG
TAGGAGTGAAAAGCGGGTCGTGGCCGTTGTCTCTTTCTGACGCATTCGTGTTTATGACCT
GTTAAAACTTCGCGAAGTGATAGGGCAGTATAAAGGGTACAGTGTGAAATTCCAGACTCT
TACCTGATTGATGATTCTCTATTCTCCTGTGATATTTATCATCCTGTATGGGGGGAAATA
GATGTACAAGCGCCATTTTGCTGTACAAATAACCTACGAAAAGCCCAACGAAATTAATCG
CAAATAAACGAAAATTGCTGGAAATTATGCTGATGTTAATTATTTGTGAAATGGTTAACA
AGCGTTATAGTTTTTCTCTGGTAGCACAGAATAATGAAAAGTGTGTAAAGAAGGGTAAAA
AAAACCGGATGCGAGGCATCCGGTTGAAATAGGGGTAAACAGACATTCAGAAATGAATGA
CGGTAATAAATAAAGTTAATGATGATAGCGGGAGTTATTCTAGTTGCGAGTGAAGGTTTT
GTTTTGACATTCAGTGCTGTCAAATACTTAAGAATAAGTTATTGATTTTAACCTTGAATT
ATTATTGCTTGATGTTAGGTGCTTATTTCGCCATTCCGCAATAATCTTAAAAAGTTCCCT
TGCATTTACATTTTGAAACATCTATAGCGATAAATGAAACATCTTAAAAGTTTTAGTATC
ATATTCGTGTTGGATTATTCTGCATTTTTGGGGAGAATGGACTTGCCGACTGATTAATGA
GGGTTAATCAGTATGCAGTGGCATAAAAAAGCAAATAAAGGCATATAACAGAGGGTTAAT
AACATGAAAGTTAAAGTACTGTCCCTCCTGGTCCCAGCTCTGCTGGTAGCAGGCGCAGCA
AACGCTGCTGAAGTTTACAACAAAGACGGCAACAAATTAGATCTGTACGGTAAAGTAGAC
GGCCTGCACTATTTCTCTGACAACAAGTCAGAAGACGGCGACCAGACCTATGTACGTCTT
GGTTTCAAAGGCGAAACTCAGGTTACTGACCAGCTGACCGGTTACGGCCAGTGGGAATAT
CAGATCCAGGGCAATACCTCTGAAGACAACAAAGAAAACTCCTGGACCCGTGTGGCATTC
GCAGGTCTGAAATTCCAGGATGTTGGTTCTTTCGACTACGGTCGTAACTACGGCGTTGTT
TACGACGTAACTTCCTGGACCGACGTACTGCCAGAATTCGGTGGTGACACTTACGGTTCT
GACAACTTCATGCAGCAGCGTGGTAACGGCTTCGCGACCTACCGTAACACTGACTTCTTC
GGGCTGGTTGATGGCCTGAACTTTGCTGTTCAGTACCAGGGCAAAAATGGTAGAGTAAGC
GGCGAAGGCATGACCAACAATGGTCGTGGTGCTCTGCGTCAGAATGGCGACGGTGTCGGC
GGATCTATCACTTATGATTACGAAGGCTTCGGTATCGGTGCTGCAGTTTCCAGCTCCAAA
CGTACTGATGCTCAGAACACCGCTGCTTACATCGGTAACGGCGACCGTGCTGAAACCTAC
ACTGGTGGTCTGAAATACGATGCTAACAACATCTACCTGGCTGCTCAGTACACCCAGACC
TACAACGCAACTCGCGTAGGTTCCCTGGGTTGGGCGAACAAAGCACAGAACTTCGAAGCT
GTTGCTCAGTACCAGTTCGACTTCGGTCTGCGCCCGTCTGTAGCATACCTGCAGTCTAAA
GGTAAAAACCTGGGCACCATCGGTACTCGTAACTACGACGACGAAGATATCCTGAAATAT
GTTGATGTTGGTGCAACCTACTACTTCAACAAAAACATGTCCACCTACGTTGACTACAAA
ATCAACCTGCTGGACGACAACCAGTTCACTCGTGACGCTGGCATCAACACTGATAACATC
GTAGCTCTGGGTCTGGTTTACCAGTTCTAATCTCGATTGATATCGAACAAAGGGCCTGCG
GGCCCTTTTTTCATTGTTTTCAGCGTACAAACTCAGTTTTTTGGTGTACTCTTGCGACCG
TTCGCATGAGGATAATCACGTATGGAAATAAGCTTTACCCGCGTGGCACTGCTGGCTGCC
GCGCTCTTCTTTGTTGGTTGCGATCAAAAACCACAACCCGCCAAAACCCACGCTACTGAA
GTTACCGTTCTTGAAGGCAAAACCATGGGTACCTTCTGGCGTGCCAGCATCCCGGGCATT
GATGCCAAACGCAGTGCCGAACTTAAAGAAAAGATTCAGACCCAGCTGGACGCCGACGAT
CAGCTGCTTTCGACCTATAAAAAAGATTCCGCGCTGATGCGCTTTAACGACTCGCAAAGT
TTGTCGCCGTGGCCGGTAAGTGAAGCGATGGCCGATATCGTCACCACCTCGCTGCGCATT
GGCGCAAGGACCGATGGTGCGATGGATATAACCGTCGGGCCGCTGGTGAATCTGTGGGGC
TTTGGCCCGGAACAACAGCCGGTTCAAATTCCGAGCCAGGAACAGATCGATGCGATGAAA
GCCAAAACCGGCTTACAGCACCTGACGGTCATTAATCAGTCGCATCAGCAATATCTGCAA
AAAGACCTGCCGGATTTATATGTCGATCTCTCCACCGTCGGTGAAGGTTATGCGGCGGAT
CACCTGGCACGCTTGATGGAGCAGGAAGGGATTTCCCGCTATCTGGTGTCGGTGGGCGGC
GCGCTGAACAGCCGTGGTATGAACGGTGAAGGCCTGCCGTGGCGGGTAGCGATTCAAAAA
CCAACCGATAAAGAAAACGCGGTTCAGGCTGTGGTGGATATCAACGGTCATGGGATTAGC
ACCTCTGGCAGCTACCGTAACTATTACGAATTGGACGGCAAACGTCTTTCCCATGTTATC
GATCCGCAAACCGGGCGTCCCATCGAACACAATCTGGTATCCGTGACGGTGATTGCTCCG
ACGGCGCTGGAAGCCGATGCCTGGGATACTGGCTTGATGGTACTCGGGCCGGAGAAAGCC
AAAGAGGTTGTTCGCCGGGAAGGGCTGGCGGTTTATATGATCACCAAAGAAGGCGATAGC
TTTAAAACCTGGATGTCACCACAGTTTAAAAGCTTCCTTGTCAGCGAAAAAAATTAAAGC
GCAAGATTGTTGGTTTTTGCGTGATGGTGACCGGGCAGACTAAAGGCTATCCTTAACCAG
GGAGCTGATTATGAAAAACGCCACATGCTTAACTGACGATCAACGCTGGCAATCTGTCTT
AGCCCGCGACCCGAATGCCGACGGCGAATTCGTTTTCGCCGTGCGCACCACAGGCATCTT
TTGCCGTCCGTCTTGCCGCGCCAGACATGCCTTGCGGGAAAATGTCTCCTTCTACGCAAA
TGCCAGCGAGGCACTCGCCGCCGGATTTCGCCCCTGCAAACGCTGCCAACCTGATAAAGC
CAATGCCCAGCAACATCGGTTGGATAAAATCACCCACGCGTGTCGACTGCTGGAACAGGA
AACGCCTGTAACGTTGGAAGCCTTAGCTGACCAGGTGGCGATGAGTCCATTTCATCTACA
TCGGTTGTTTAAAGCGACTACCGGAATGACGCCTAAAGCCTGGCAACAGGCCTGGCGCGC
TCGCCGTTTGCGCGAATCGCTGGCGAAAGGGGAGAGCGTGACGACGTCTATTCTTAACGC
CGGATTCCCCGACAGCAGCAGTTACTACCGCAAAGCTGACGAAACGCTGGGCATGACGGC
TAAACAATTCCGTCACGGTGGCGAAAATCTGGCGGTGCGTTACGCGCTGGCTGATTGTGA
GCTGGGTCGTTGCCTGGTGGCAGAAAGCGAGCGGGGGATTTGCGCGATATTGCTGGGCGA
TGATGACGCGACATTAATCAGCGAGTTGCAGCAGATGTTTCCCGCTGCCGACAACGCGCC
TGCCGATCTGATGTTTCAGCAACATGTGCGTGAAGTGATCGCCAGCCTCAATCAACGCGA
TACGCCGCTGACGTTACCGCTGGATATTCGCGGCACTGCTTTTCAGCAACAAGTCTGGCA
GGCACTGCGCACGATACCTTGCGGTGAAACCGTCAGTTATCAGCAACTGGCTAACGCCAT
CGGCAAACCGAAAGCGGTACGGGCCGTTGCAAGTGCCTGTGCCGCCAACAAGCTGGCTAT
CGTTATACCCTGTCATCGGGTAGTACGCGGTGATGGATCGCTTTCAGGTTACCGCTGGGG
CGCGTCGCGCAAAGCGCAACTGCTGCGCCGCGAAGCTGAGAATGAGGAGAGGTAATGTTG
GATCTGTTTGCCGATGCTGAACCGTGGCAAGAGCCACTGGCGGCTGGTGCGGTAATTTTA
CGGCGTTTTGCTTTTAATGCTGCGGAGCAACTGATCCGCGATATTAATGACGTTGCCAGC
CAGTCGCCGTTTCGCCAGATGGTCACCCCCGGGGGATATACCATGTCGGTGGCGATGACC
AACTGTGGGCATCTGGGCTGGACGACCCATCGGCAAGGTTATCTCTATTCGCCCATTGAT
CCGCAAACAAATAAACCGTGGCCCGCCATGCCGCAGAGTTTTCATAATTTATGTCAACGT
GCGGCTACGGCGGCGGGCTATCCAGATTTCCAGCCAGATGCTTGTCTTATCAACCGCTAC
GCTCCTGGCGCGAAACTGTCGCTGCATCAGGATAAAGACGAACCGGATCTGCGCGCGCCA
ATTGTTTCTGTTTCTCTGGGCTTACCCGCTATTTTTCAATTTGGCGGCCTGAAACGAAAT
GATCCGCTAAAACGATTGTTGTTGGAACATGGCGATGTGGTGGTATGGGGCGGTGAATCG
CGGCTGTTTTATCACGGCATTCAACCGCTGAAAGCGGGGTTTCATCCACTCACCGGCGAC
TGCCGTTACAACCTGACATTCCGTCAGGCAGGTAAAAAAGAATAAAAATAAGAATTATTA
TTGCTGTGCGCGCGAAGATGTTTAAACTGCGGGCTGTAATTCATTGTCCGGGTTTTCTGC
ATGGAACTTCTTGTACTTGTCTGGCGGCAGTATCGCTGGCCATTTATCAGTGTGATGGCG
CTAAGCCTCGCCAGTGCGGCTTTAGGCATTGGCTTAATTGCTTTTATCAATCAGCGCCTT
ATCGAAACGGCGGATACCAGTCTGCTGGTGTTGCCGGAGTTTCTGGGATTATTGCTGCTG
TTGATGGCAGTCACTCTCGGATCGCAACTGGCGCTCACCACTTTGGGGCATCACTTCGTT
TACCGACTGCGTAGTGAATTTATCAAGCGGATTCTGGATACCCACGTCGAGCGCATTGAA
CAACTCGGTAGCGCCTCGTTGCTGGCGGGATTAACCAGCGATGTGCGCAATATCACCATT
GCTTTTGTGCGTCTGCCGGAACTGGTGCAGGGGATCATTCTCACTATCGGTTCCGCGGCG
TATCTGTGGATGCTGTCGGGCAAAATGTTGCTGGTAACGGCTATCTGGATGGCAGTCACC
ATCTGGGGCGGTTTTGTGCTGGTGGCGCGGGTGTACAAACATATGGCGACCCTGCGTGAA
ACCGAAGACAAGCTGTACACGGATTTTCAAACCGTACTCGAAGGGCGCAAAGAGCTGACT
CTGAACCGGGAACGCGCCGAGTATGTGTTTAACAACCTCTACATTCCTGATGCGCAAGAG
TATCGCCATCATATTATTCGCGCAGACACCTTCCATCTTAGTGCCGTGAACTGGTCAAAC
ATCATGATGCTGGGCGCAATCGGTCTGGTGTTCTGGATGGCGAACAGTCTCGGTTGGGCT
GATACCAACGTTGCCGCGACCTATTCGTTGACGTTGTTATTCCTGCGTACGCCGCTGCTT
TCGGCGGTTGGCGCATTGCCGACGCTGCTGACGGCGCAGGTGGCGTTTAACAAGCTGAAC
AAATTCGCGCTCGCGCCTTTCAAAGCAGAGTTTCCGCGCCCGCAGGCGTTTCCCAACTGG
CAAACGCTGGAGCTGCGTAACGTGATGTTTGCTTATCAGGATAACGCGTTTTCCGTTGGT
CCGATTAATCTCACCATCAAACGTGGCGAGCTGCTGTTTCTGATTGGCGGCAACGGTAGC
GGAAAATCGACGCTGGCGATGTTGTTGACGGGCTTGTATCAGCCACAAAGCGGCGAAATC
TTGCTGGATGGCAAACCTGTCAGCGGCGAACAACCGGAAGATTATCGCAAACTGTTTTCG
GCAGTGTTTACCGATGTCTGGCTGTTTGATCAACTGCTGGGGCCGGAGGGTAAACCCGCT
AACCCGCAACTGGTTGAGAAGTGGCTGGCGCAGCTGAAAATGGCTCATAAGCTTGAGTTA
AGCAACGGGCGTATTGCTAACCTGAAGTTATCAAAAGGGCAGAAAAAACGCGTGGCGCTG
TTGCTGGCGCTGGCAGAAGAACGCGATATTATCCTGCTGGATGAATGGGCGGCGGATCAG
GATCCACACTTCCGTCGTGAGTTTTATCAGGTGTTGCTGCCGCTGATGCAGGAGATGGGT
AAAACTATTTTCGCCATCAGTCATGATGATCATTACTTTATCCACGCCGACCGCCTGCTG
GAGATGCGCAACGGGCAACTTAGCGAGCTGACGGGCGAAGAGCGCGATGCCGCTTCGCGT
GATGCCGTTGCCCGGACGGCATAATATTACGACGCTGACCTGGCGGACTGCTGCCGCCAG
GTCAATATGCTAAAAATCCCTTCATTTCTAATAACCCTATAATTAATCAACGAAATTATA
ATGTTTCTAAAATTAGAATATAATTTATAAACATTATTTAAATGTTGTTACTTAAGTGTT
ACCGTTGATGCCGCGCAAATCTCACCTGCAATAAAGCGACTAAAAGTAAGGCATTAACAA
GATGAAAAAAGTGACTGCCATGCTCTTCTCGATGGCCGTGGGGCTTAATGCCGTTTCGAT
GGCGGCAAAAGCGAAAGCGTCCGAGGAGCAGGAAACTGATGTACTGTTGATTGGCGGCGG
CATTATGAGCGCCACGTTGGGGACCTATTTACGCGAGCTGGAGCCTGAATGGTCGATGAC
CATGGTGGAGCGCCTGGAGGGTGTCGCGCAGGAGAGTTCGAACGGCTGGAATAACGCCGG
AACCGGGCATTCTGCACTGATGGAACTGAACTACACCCCGCAAAACGCCGATGGCAGCAT
CAGTATTGAAAAAGCAGTCGCCATTAACGAAGCATTTCAGATTTCCCGCCAGTTCTGGGC
GCACCAGGTCGAGCGCGGCGTGCTGCGTACTCCGCGTTCATTTATCAATACCGTTCCGCA
TATGAGCTTTGTCTGGGGCGAGGATAACGTTAATTTCCTGCGCGCCCGTTACGCCGCGTT
GCAACAAAGCTCGCTGTTTCGCGGTATGCGTTACTCTGAAGATCACGCGCAGATCAAAGA
GTGGGCACCGTTAGTGATGGAAGGGCGCGATCCGCAACAGAAAGTGGCAGCCACGCGTAC
GGAAATTGGTACCGATGTGAACTACGGCGAGATCACCCGCCAGTTAATTGCTTCCTTGCA
GAAGAAATCTAACTTCTCGCTGCAACTCAGCAGCGAAGTCCGCGCCCTAAAGCGTAATGA
CGATAACACCTGGACCGTTACCGTTGCCGATCTGAAAAATGGCACTGCACAGAACATCCG
TGCGAAATTTGTCTTTATCGGCGCGGGCGGTGCGGCACTGAAGCTGTTACAGGAATCGGG
GATTCCGGAAGCGAAAGACTACGCCGGTTTCCCGGTGGGCGGTCAGTTCCTTGTTTCGGA
AAACCCGGACGTGGTTAATCACCATCTGGCGAAGGTTTACGGTAAAGCATCCGTTGGCGC
ACCACCGATGTCGGTTCCGCATATCGATACCCGTGTTCTGGACGGTAAACGCGTAGTGCT
GTTTGGGCCATTTGCCACCTTCTCAACCAAATTCCTCAAAAACGGTTCATTGTGGGATCT
GATGAGTTCCACCACCACCTCTAACGTGATGCCGATGATGCACGTCGGGCTGGATAATTT
CGATCTGGTGAAATATCTGGTGAGTCAGGTGATGTTGAGTGAAGAGGATCGTTTTGAAGC
GTTGAAAGAGTACTATCCGCAAGCGAAAAAAGAGGACTGGCGTTTGTGGCAAGCGGGGCA
GCGTGTGCAGATTATCAAGCGTGATGCCGATAAAGGTGGTGTACTGCGTCTGGGTACTGA
AGTGGTCAGTGACCAGCAAGGAACCATTGCCGCGCTCCTGGGGGCATCGCCAGGGGCGTC
AACCGCCGCGCCGATTATGTTGAATCTGCTGGAAAAAGTATTTGGCGATCGCGTTTCCAG
CCCGCAATGGCAGGCTACGTTGAAAGCGATCGTTCCGTCTTATGGACGCAAGCTGAACGG
TGATGTAGCGGCAACAGAACGCGAGTTGCAGTACACCAGCGAAGTGCTGGGGCTGAAATA
CGACAAACCGCAAGCAGCAGATAGTACGCCGAAACCGCAGCTGAAACCGCAACCCGTTCA
AAAAGAAGTGGCGGATATTGCGTTGTAATGATGTGCCACATCCGGCATGGTATGCCGGAT
GTGGCGTATGCTGATAAGACGCGCCAGCGTCGCATCAGGCAACCGGCTCGGGCGTTAGAT
GTTGGATGCGGCGTAACCGCCTTATCCAACCTACGGGGTGGAGCACTTCACAGCGGTGTA
GGCCTGATAAGACGCGTCAGCGTCGCATCAGGCAACCGGCTCGGACGTTGGATGTCGGAT
GCGGCGTAACCGCCTTATCCGACCTACGGGGTGGAGCACTTCACAGCGGTGTAGGCCTGA
TAAGACGCGCCAGCGTCGCATCAGGCAACCGGCTCGGGCGTTAGATGTCGGATGCGGCGT
GACCGCTTTATCCAACCTACGGGGTGCCGCACTTCACGGCAGTTTAGCGAACTACCGCGT
TGTCAATCTTCTCTTCCGCCTTCCAGACGCGGTACTTCACATCTACATTGTCTGGCGTAT
ACACCACGATCGGCAGCTTGCTGTTGTAACGCAGCATTCCAGCATCACCCAGATACGCGG
TGACAAATTTCTTCTCTTTTTTGCCATCCGGGCAGGCCATCATCGTCGAAACCGGGGAAC
TGACTTTATCAAAGACATAATAATCATAGCCCCAGCCTTCCAGCGTTTTGCTTTCCAGCT
TCCCGCCGAGACGATGCAAATTGCAATCGACTTCCAGCGTCTGACCGATTAACAGTTCTA
CTTTCAGGGTAGATTCCTCTTCTTGCGGGGTTAACTGAATCACCTGACGCTTCATGCCTT
TTTCAGCTTGTGGATAAGGCGCGATTTTTTCCAGTGGCTGGACGCTCTCTGCCGCCCAGG
CGGAAGTGGTGGCGAAAGCGGCAAACAATACTGCAGGTAGAATGGTCTTCATTTTTTGCT
TTCCTTCTTCATTTATAGGTTTGCACCGATGATGTCGCTGAAGGTTAACATATTCATCAG
ATTTATTAATTTGCTTTATGAATAACTTAAAGAATATTCAGACAATTTTACCTGCTCTTT
TAGTGTTAAATTCTGATGAGAGAGCAAACCAGCAGAAATATCTCTGGTGAATTAATCGCT
ATATAAATATATTTATAACCATTTGAAATGTGAGCAAAAGCCCGTTTTTGCCACGCTTCC
CGCCACTCTTTTGATCCTGCTACAGGTTTTACCTCGATCGGGGTATGCATCTTTGACACA
TCCTTTAATATCTTAGCGGCTATAAAAATGGCTTATTAATTATGCGGTTTATTTGGTCGC
TCTCAATTTTCAGAGCGCGTTAATGATGGAAGGTCAATGTGAAGATTGATGCATCCCGTC
GGGGCATACTCACTGGTCGCTGGCGCAAAGCCAGTAACGGTATCCGTCCGCCCTGGTCCG
GTGATGAATCTCATTTTCTGACCCATTGCACCCGCTGCGACGCTTGTATTAATGCTTGTG
AAAACAACATTCTGCAACGCGGCGCGGGCGGCTATCCGAGCGTTAATTTCAAAAATAACG
AGTGCAGCTTCTGTTACGCCTGCGCGCAGGCTTGCCCCGAATCGCTATTTTCTCCGCGCC
ACACCAGGGCCTGGGATTTGCAGTTCACCATTGGGGACGCGTGCCTGGCGTATCTGTCAG
TTGAATGCCGCCGCTGTCAGGATAGCTGTGAGCCAATGGCAATTATCTTTCGCCCGACGC
TCTCCGGGATCTACCAGCCGCAACTTAATAGCCAACTTTGCAACGGATGTGGAGCATGTG
CAGCCAGCTGTCCGGTATCAGCCATAACTGCGGAGTATCTCCATGCACACTAACTGGCAA
GTTTGCAGCCTGGTCGTGCAGGCCAAAAGCGAACGAATTTCAGACATCAGCACCCAACTG
AACGCCTTTCCCGGCTGTGAAGTTGCTGTCAGCGACGCGCCGAGCGGTCAGTTGATTGTG
GTGGTGGAAGCAGAAGACAGCGAAACGCTGATCCAAACCATTGAGTCAGTACGCAACGTA
GAGGGCGTGCTGGCGGTGTCGCTGGTTTATCACCAGCAGGAAGAGCAAGGTGAGGAAACA
CCATGAAACTCAGTCGTCGTAGCTTTATGAAAGCTAACGCCGTTGCGGCCGCTGCGGCGG
CTGCCGGTCTCAGCGTGCCGGGCGTTGCCCGCGCCGTTGTTGGTCAGCAGGAAGCCATCA
AATGGGATAAAGCGCCGTGCCGTTTCTGCGGTACTGGTTGCGGCGTTCTGGTCGGAACGC
AGCAGGGGCGTGTGGTGGCCTGTCAGGGCGACCCGGACGCACCGGTTAACCGTGGCCTGA
ACTGCATTAAGGGCTATTTCCTGCCCAAGATCATGTACGGTAAAGACCGTTTGACGCAGC
CGCTGCTGCGTATGAAAAACGGTAAATATGACAAAGAAGGCGAATTTACCCCAATCACCT
GGGATCAGGCCTTCGATGTGATGGAAGAGAAATTCAAAACCGCCCTGAAAGAAAAAGGGC
CGGAATCGATCGGTATGTTCGGTTCTGGTCAGTGGACTATCTGGGAAGGTTATGCCGCGT
CCAAGCTGTTTAAAGCGGGCTTCCGTTCGAACAACATCGACCCGAACGCGCGTCACTGTA
TGGCGTCGGCAGTAGTTGGCTTTATGCGTACCTTTGGTATGGATGAGCCGATGGGCTGCT
ATGACGACATCGAGCAGGCTGACGCGTTTGTGCTGTGGGGCGCAAACATGGCGGAAATGC
ACCCGATCCTCTGGTCGCGCATCACTAACCGTCGTCTCTCTAACCAGAACGTCACCGTGG
CGGTGCTTTCTACCTACCAGCATCGTAGCTTCGAGCTGGCGGATAACGGCATCATCTTTA
CTCCGCAATCTGACCTGGTGATCCTGAACTACATCGCCAACTATATCATTCAAAACAATG
CGATAAATCAGGACTTCTTCAGCAAGCACGTCAACCTGCGCAAAGGTGCGACGGACATCG
GCTACGGTTTACGTCCGACCCATCCGCTGGAAAAAGCAGCGAAGAATCCGGGTTCTGATG
CTTCCGAACCGATGAGCTTTGAAGATTACAAAGCCTTCGTTGCTGAGTATACGCTGGAAA
AAACCGCTGAAATGACCGGCGTGCCGAAAGACCAGTTAGAACAACTGGCGCAGCTGTATG
CCGATCCGAACAAGAAAGTCATCTCCTACTGGACGATGGGCTTCAACCAGCATACCCGTG
GTGTGTGGGCCAACAACCTGGTCTACAACCTGCACCTGCTGACCGGCAAAATTTCCCAGC
CGGGTTGCGGTCCGTTCTCCCTGACCGGGCAGCCTTCCGCGTGTGGTACTGCGCGTGAAG
TGGGCACCTTTGCCCACCGTCTGCCCGCGGACATGGTGGTGACTAACGAGAAACACCGTG
ATATCTGCGAGAAGAAGTGGAATATCCCGAGCGGCACCATTCCGGCGAAAATCGGTCTGC
ACGCGGTGGCACAAGACCGTGCGCTGAAAGACGGCAAGCTGAATGTTTACTGGACTATGT
GTACCAACAACATGCAGGCCGGGCCGAACATCAATGAAGAGCGTATGCCGGGCTGGCGCG
ATCCGCGCAACTTCATCATCGTCTCCGATCCGTATCCGACAGTCAGTGCGCTGGCCGCCG
ACTTGATCCTGCCGACCGCAATGTGGGTAGAGAAAGAGGGCGCTTACGGTAACGCCGAAC
GCCGTACTCAGTTCTGGCGTCAGCAGGTACAGGCACCGGGCGAAGCGAAATCGGATCTCT
GGCAGTTAGTCCAGTTCTCCCGCCGCTTCAAAACTGAAGAAGTATGGCCGGAAGAGCTGC
TGGCGAAGAAACCGGAACTGCGTGGCAAAACGCTGTACGAAGTTCTGTATGCCACCCCCG
AAGTGAGCAAATTCCCGGTATCCGAACTGGCGGAAGATCAGCTGAACGATGAATCCCGCG
AGCTGGGCTTCTATCTGCAAAAAGGGTTGTTCGAAGAGTACGCATGGTTTGGTCGCGGTC
ACGGTCACGATCTCGCGCCGTTCGATGACTACCACAAAGCGCGCGGTCTGCGCTGGCCGG
TGGTGAACGGTAAAGAAACGCAGTGGCGTTACAGCGAAGGTAACGACCCGTACGTGAAAG
CGGGCGAAGGCTATAAGTTCTACGGTAAACCGGATGGTAAAGCGGTGATCTTCGCGCTGC
CGTTCGAACCGGCGGCGGAAGCACCGGATGAAGAGTACGACCTGTGGCTCTCTACCGGAC
GCGTCCTGGAGCACTGGCACACCGGCAGTATGACTCGCCGTGTGCCGGAACTGCACCGTG
CCTTCCCGGAAGCGGTCCTGTTTATTCACCCGTTGGATGCGAAAGCGCGCGATCTGCGCC
GTGGCGACAAAGTGAAAGTGGTTTCTCGCCGTGGCGAAGTGATCTCGATTGTCGAAACGC
GCGGTCGTAACCGTCCGCCGCAGGGCCTGGTGTACATGCCGTTCTTCGACGCCGCACAGC
TGGTTAACAAACTAACGCTGGACGCGACCGATCCGCTCTCGAAAGAGACGGACTTCAAGA
AGTGCGCGGTCAAACTGGAGAAGGTGTAAGCCATTATGTCCCGGTCAGCGAAACCTCAAA
ATGGTCGCCGCCGCTTTCTGCGCGATGTCGTTCGCACAGCAGGCGGGCTGACTGCCGTGG
GTGTGGCGCTGGGGTTACAACAGCAAACCGCACGCGCATCTGGCGTGCGGTTGCGCCCGC
CCGGAGCCATAAACGAGAACGCCTTTGCCAGTGCCTGTGTGCGTTGCGGTCAGTGTGTTC
AGGCTTGCCCTTACGACACCTTAAAACTGGCGACGCTGGCCTCTGGCCTGTCGGCGGGCA
CGCCATATTTTGTCGCACGGGATATTCCTTGCGAAATGTGTGAGGACATTCCGTGCGCCA
AAGTGTGCCCGAGCGGTGCGCTGGATCGTGAGATTGAATCGATCGACGACGCGCGGATGG
GGCTGGCGGTACTGGTGGACCAGGAAAACTGTCTCAACTTTCAGGGGCTGCGCTGCGATG
TTTGTTATCGCGAATGCCCGAAAATTGATGAGGCCATCACCCTGGAGCTGGAGCGCAACA
CGCGTACCGGTAAGCACGCCCGCTTTCTGCCGACGGTTCACAGCGACGCCTGTACCGGTT
GCGGTAAGTGCGAAAAAGTGTGCGTGCTGGAACAACCGGCAATCAAGGTGTTACCGCTGT
CACTGGCGAAAGGGGAGTTAGGTCACCATTACCGCTTCGGCTGGCTGGAGGGGAACAATG
GCAAATCGTAAACGTGACGCCGGGCGCGAGGCGCTGGAGAAAAAAGGCTGGTGGCGCAGT
CACCGTTGGCTGGTGTTACGTCGCCTTTGTCAGTTCTTCGTGCTGGGGATGTTTTTGAGC
GGTCCGTGGTTTGGTGTGTGGATCTTGCACGGCAACTACAGCAGTAGCCTGTTATTCGAC
ACCGTTCCGCTGACCGATCCGCTGATGACGCTGCAAAGTCTTGCCAGCGGTCATCTGCCT
GCCACGGTGGCGTTGACCGGTGCGGTGATTATCACCGTGCTCTACGCCCTGGCAGGAAAG
CGATTATTTTGCAGCTGGGTCTGCCCGCTGAACCCGATTACCGACTTAGCGAACTGGTTA
CGCAGGCGCTTTGACCTCAATCAGTCTGCGACGATCCCTCGCCACATTCGCTACGTACTG
TTGGTGGTCATTCTGCTGGGATCGGCCTTAACTGGCACGCTCATCTGGGAATGGATCAAC
CCCGTTTCTCTGATGGGGCGTAGCCTGGTAATGGGCTTCGGCAGCGGCGCGCTGCTTATT
GTCGCGCTGTTTTTATTTGATCTACTGGTCGTTGAACACGGCTGGTGCGGGCACATTTGT
CCGGTTGGCGCGCTGTATGGCGTGCTGGGTAGCAAAGGTGTGATTACCGTTGCGGCCAGC
GATCGGCAGAAATGTAACCGCTGTATGGATTGTTTTCATGTTTGCCCGGAACCGCATGTG
CTACGTGCCCCGGTGCTGGATGAACAAAGCCCGGTGCAGGTCACCAGCCGCGATTGCATG
ACGTGCGGTCGCTGCGTGGATGTCTGTTCTGAGGATGTATTTACAATAACTACACGATGG
AGTTCGGGAGCGAAATCATGAAAAGCCATGACCTGAAGAAAGCGCTGTGTCAATGGACGG
CGATGCTGGCCCTGGTGGTAAGCGGCGCGGTTTGGGCGGCTAATGGCGTCGATTTTAGCC
AGTCGCCGGAAGTATCCGGGACGCAGGAAGGGGCCATTCGGATGCCAAAAGAGCAGGATC
GGATGCCGCTGAACTATGTGAATCAGCCGCCAATGATCCCGCATAGCGTTGAAGGTTATC
AGGTAACGACCAATACCAACCGCTGCTTGCAGTGCCACGGTGTCGAAAGCTATCGCACCA
CTGGCGCGCCGCGTATCAGTCCTACTCACTTTATGGACAGCGACGGCAAAGTGGGCGCGG
AAGTGGCTCCGCGTCGTTATTTCTGTCTGCAATGTCACGTACCGCAGGCCGATACCGCGC
CAATCGTGGGGAATACCTTTACCCCATCAAAAGGTTACGGGAAATAAGAGGTTATTATGG
GAAATTCTGACCGTAAGCCTGGTCTGATTAAGCGCCTGTGGAAATGGTGGCGTACCCCCA
GCCGTCTGGCGCTGGGGACGCTGCTGTTGATCGGTTTTGTCGGCGGCATCGTCTTCTGGG
GCGGCTTTAACACCGGAATGGAAAAAGCCAATACCGAGGAGTTCTGCATTAGCTGCCACG
AAATGCGTAACACGGTGTATCAGGAATACATGGATTCCGTGCACTACAACAACCGTAGCG
GCGTCCGTGCGACCTGTCCGGATTGTCACGTTCCGCACGAGTTTGTGCCGAAGATGATAC
GCAAGCTCAAAGCAAGTAAAGAGCTGTATGGTAAAATTTTTGGCGTTATTGACACGCCGC
AGAAATTTGAAGCTCATCGCCTGACGATGGCACAGAATGAGTGGCGGCGCATGAAGGACA
ATAACTCGCAGGAGTGCCGTAACTGTCACAACTTCGAGTATATGGATACAACCGCCCAGA
AATCGGTTGCCGCGAAGATGCATGACCAGGCGGTGAAAGATGGGCAAACCTGTATTGATT
GCCATAAAGGGATAGCGCACAAGCTGCCCGATATGCGTGAAGTCGAGCCAGGTTTTTAAC
AGGGTTATTGCGTGGGTATGCTTGAAGCCAGAGAGTTACTTTGTGAGCGGGATGAACGAA
CCTTATTTAGTGGCTTGTCATTTACGCTGAACGCAGGAGAGTGGGTACAAATCACCGGTA
GCAACGGCGCGGGGAAGACAACGCTTCTCCGTTTGCTGACGGGGTTGTCTCGCCCTGACG
CAGGCGAGGTTCTCTGGCAAGGGCAGCCCTTGCATCAGGTACGCGACAGCTACCATCAAA
ACCTGTTATGGATAGGCCATCAGCCGGGGATCAAAACCCGGCTGACGGCGTTAGAAAATC
TGCACTTTTATCATCGCGATGGCGATACCGCACAATGTCTGGAAGCCCTGGCGCAGGCCG
GGCTTGTCGGATTCGAAGATATTCCGGTAAATCAACTTTCTGCCGGGCAACAACGCCGCG
TCGCTTTAGCGCGTCTGTGGCTGACCCGTGCCACGTTATGGATCCTCGACGAGCCTTTTA
CCGCGATTGACGTCAACGGCGTCGATCGTCTGACCCAGCGTATGGCGCAGCATACGGAGC
AGGGGGGGATTGTGATTCTGACTACCCACCAGCCGCTCAACGTTGCTGAAAGTAAAATTC
GCCGCATTTCACTGACGCAAACGAGGGCCGTATGATGTTCTGGCGCATTTTCCGTCTTGA
GCTGCGCGTAGCGTTTCGCCATAGCGCCGAAATCGCCAACCCGCTGTGGTTCTTCCTGAT
TGTAATTACCCTTTTTCCGCTCAGTATCGGTCCGGAGCCGCAACTGCTGGCGCGTATTGC
ACCGGGCATTATCTGGGTTGCAGCCCTGCTTTCATCCTTGCTGGCGCTGGAACGACTGTT
CCGTGACGATTTGCAGGACGGCAGTCTTGAACAATTGATGTTGTTGCCGTTACCCTTGCC
CGCCGTTGTGCTGGCGAAGGTGATGGCGCACTGGATGGTAACCGGTCTGCCGTTACTCAT
CCTTTCGCCACTGGTAGCAATGCTACTGGGAATGGATGTTTATGGCTGGCAAGTGATGGC
GCTGACGCTGCTGCTGGGAACGCCTACGCTTGGCTTTCTCGGTGCACCGGGCGTGGCGCT
GACAGTGGGACTTAAACGCGGTGGTGTGCTGCTCAGCATACTGGTGTTACCGCTGACTAT
CCCATTACTCATCTTTGCCACCGCCGCGATGGACGCGGCTTCCATGCATTTGCCCGTTGA
CGGGTATCTGGCAATTTTAGGCGCGTTGCTGGCAGGCACCGCGACATTAAGTCCTTTTGC
GACGGCGGCAGCGTTACGAATCAGCATTCAATAACGCTGGATTACTGATTTTTGTTCGAG
TCTGGTATCGAAACTATGTGGAAAACACTGCATCAACTGGCGATCCCACCACGGCTGTAT
CAAATCTGTGGCTGGTTTATACCGTGGCTGGCAATTGCCAGTGTGGTCGTGCTTACCGTC
GGCTGGATCTGGGGATTCGGCTTTGCTCCGGCTGATTATCAACAGGGAAATAGCTACCGC
ATTATTTACCTGCATGTGCCTGCGGCGATCTGGTCGATGGGCATTTATGCATCAATGGCG
GTGGCGGCGTTTATTGGCCTTGTCTGGCAGATGAAAATGGCCAACCTGGCGGTGGCGGCG
ATGGCCCCCATTGGTGCCGTGTTTACCTTTATTGCCCTGGTTACCGGCTCTGCATGGGGA
AAACCGATGTGGGGCACCTGGTGGGTATGGGATGCACGTCTGACTTCTGAACTGGTGCTG
CTGTTTTTGTATGTGGGTGTGATTGCCCTGTGGCACGCCTTCGACGACCGCCGTCTGGCG
GGCCGTGCGGCAGGTATCCTGGTGCTGATTGGCGTGGTGAATCTGCCGATTATTCATTAC
TCCGTTGAGTGGTGGAACACCCTGCATCAGGGATCAACGCGGATGCAGCAAAGTATCGAT
CCGGCGATGCGTTCGCCGCTGCGCTGGTCGATTTTTGGCTTCCTGCTCCTGTCTGCCACG
CTGACGCTGATGCGGATGCGGAATTTGATTTTGCTGATGGAAAAACGCCGTCCGTGGGTG
AGTGAACTGATACTGAAAAGAGGCCGTAAATGACCCCTGCATTTGCTTCCTGGAATGAAT
TTTTCGCAATGGGCGGTTACGCCTTTTTTGTCTGGCTGGCGGTGGTGATGACCGTTATTC
CGCTGGTGGTTTTGGTCGTGCACTCGGTGATGCAGCATCGCGCAATTCTGCGTGGTGTGG
CGCAACAGCGGGCGCGTGAGGCGCGTTTACGTGCTGCGCAACAGCAGGAGGCTGCATGAA
TATTCGCCGTAAAAACCGCTTGTGGATTGCCTGTGCCGTGTTGGCAGGGCTGGCGCTGAC
TATCGGTCTGGTGCTATATGCGCTGCGCTCGAATATCGATCTCTTTTATACGCCGGGGGA
AATTCTCTACGGCAAGCGTGAAACTCAGCAGATGCCGGAAGTCGGTCAGCGTCTGCGCGT
TGGCGGGATGGTGATGCCGGGTAGCGTGCAGCGCGATCCCAATTCGCTGAAAGTGACCTT
CACCATTTACGATGCTGAAGGCTCAGTGGATGTCTCTTACGAAGGCATTTTGCCGGATCT
GTTCCGTGAAGGGCAGGGCGTTGTGGTGCAGGGCGAGCTGGAAAAAGGCAATCATATCCT
CGCAAAAGAAGTGCTGGCGAAACATGATGAAAACTACACGCCGCCAGAAGTTGAGAAAGC
GATGGAAGCTAACCACCGTCGCCCGGCGAGTGTTTATAAGGACCCAGCATCATGATGCCG
GAAATTGGTAACGGGCTGCTGTGCCTGGCGTTAGGGATTGCGCTGCTGCTGTCCGTGTAT
CCGCTATGGGGCGTGGCGCGCGGAGATGCGCGCATGATGGCGTCTTCCCGCTTGTTTGCC
TGGCTGCTGTTTATGTCTGTGGCTGGCGCATTTCTGGTGCTGGTCAATGCTTTCGTGGTC
AACGACTTTACCGTCACCTATGTTGCCAGCAACTCCAATACCCAGCTTCCGGTGTGGTAT
CGCGTGGCGGCTACCTGGGGCGCACATGAAGGCTCACTGCTGCTGTGGGTGCTGCTGATG
AGCGGCTGGACCTTTGCGGTGGCGATTTTTAGTCAGCGTATTCCGCTGGATATTGTGGCC
CGCGTACTGGCGATAATGGGGATGGTCAGCGTCGGCTTTTTGCTGTTCATTCTCTTTACC
TCTAACCCATTCTCACGCACGCTGCCGAACTTCCCGATTGAAGGGCGCGATCTTAACCCG
CTGTTACAGGATCCGGGGCTGATCTTCCATCCGCCTCTGCTTTATATGGGGTACGTGGGT
TTCTCGGTGGCGTTTGCTTTTGCCATTGCTTCTTTGCTGAGCGGGCGTCTGGACAGCACT
TATGCGCGTTTTACTCGTCCGTGGACGCTGGCGGCGTGGATTTTCCTGACGCTCGGCATT
GTGCTCGGTTCCGCATGGGCTTATTACGAACTCGGCTGGGGTGGCTGGTGGTTCTGGGAT
CCGGTAGAAAACGCCTCGTTTATGCCGTGGCTGGTGGGGACTGCGCTGATGCACTCACTG
GCGGTCACTGAACAACGCGCCAGCTTCAAAGCGTGGACATTACTGCTGGCAATCAGTGCC
TTCTCGTTGTGTCTGTTGGGGACTTTCCTCGTGCGTTCCGGCGTGCTGGTATCGGTACAC
GCGTTTGCGTCTGATCCGGCGCGCGGTATGTTTATCCTCGCCTTTATGGTGCTGGTGATT
GGCGGTTCGCTGCTGCTGTTTGCCGCGCGTGGACACAAAGTTCGCTCACGCGTAAACAAT
GCGCTGTGGTCGCGGGAATCTTTGCTGTTAGCGAACAACGTTTTGCTGGTCGCCGCGATG
CTGGTAGTGTTGCTGGGGACGCTGCTGCCGCTGGTGCACAAGCAACTGGGACTGGGCAGT
ATTTCGATTGGCGAACCGTTCTTCAACACCATGTTTACCTGGCTGATGGTGCCGTTTGCG
CTACTGCTTGGTGTCGGTCCTCTGGTGCGCTGGGGGCGCGATCGCCCACGTAAAATCCGC
AATTTATTGATTATCGCCTTCATCTCTACGCTGGTGCTGTCTCTGCTGCTGCCGTGGCTG
TTCGAAAGCAAAGTTGTGGCGATGACGGTGCTCGGCCTGGCAATGGCCTGCTGGATTGCG
GTGCTGGCAATTGCGGAAGCTGTGCTGCGTATTTCACGCGGCACGAAAACCACCTTCAGT
TATTGGGGGATGGTGGCGGCTCACCTGGGGCTGGCAGTGACAATTGTTGGCATTGCCTTT
AGTCAGAACTACAGTGTTGAGCGTGATGTGCGCATGAAGTCCGGCGATAGCGTCGATATT
CATGAATATCGCTTCACCTTCCGTGATGTCAAAGAGGTGACTGGCCCGAACTGGCGTGGC
GGTGTGGCGACTATCGGCGTAACGCGAGAGGGTAAACCGGAAACAGTGCTGTATGCGGAA
AAACGTTATTACAACACTGCCGGGTCGATGATGACCGAAGCGGCGATTGACGGTGGCATC
ACGCGTGACCTGTACGCCGCGCTCGGTGAAGAGCTGGAAAACGGCGCGTGGGCTGTGCGT
CTTTACTACAAACCGTTTGTTCGCTGGATTTGGGCGGGCGGGCTGATGATGGCGTTGGGC
GGACTGCTGTGTCTGTTTGATCCTCGCTATCGTAAGCGCGTAAGTCCGCAAAAAACTGCG
CCGGAGGCTGTATGAAGCGCAAAGTATTGTTAATTCCGTTGATTATCTTCCTGGCGATTG
CCGCGGCGCTGCTGTGGCAGCTGGCGCGTAATGCCGAAGGGGATGATCCGACCAATCTGG
AATCGGCGCTCATTGGCAAGCCAGTGCCGAAGTTTCGCCTCGAATCACTGGACAATCCGG
GGCAGTTTTATCAGGCGGATGTGCTGACTCAGGGCAAACCAGTGCTGCTTAACGTCTGGG
CGACCTGGTGTCCGACCTGCCGTGCGGAACATCAATATCTGAATCAGCTTTCTGCGCAGG
GCATCCGCGTGGTCGGCATGAACTATAAAGACGATCGCCAGAAGGCAATCAGCTGGCTGA
AAGAGCTGGGCAATCCTTACGCGCTAAGCCTGTTTGATGGCGATGGCATGTTAGGGCTGG
ATCTCGGTGTCTATGGCGCGCCAGAAACGTTCCTTATTGACGGCAACGGCATCATTCGCT
ATCGCCATGCGGGCGATCTCAATCCTCGCGTCTGGGAGGAAGAGATCAAGCCGCTGTGGG
AGAAATACAGTAAGGAGGCCGCACAATGAGGTTTTTATTGGGCGTGCTGATGCTGATGAT
CTCCGGCTCAGCGCTGGCGACCATCGACGTGTTGCAGTTTAAAGATGAAGCACAGGAACA
ACAGTTCCGTCAGCTCACTGAAGAACTGCGCTGCCCGAAATGCCAGAACAACAGCATTGC
CGATTCCAACTCGATGATTGCCACCGACCTGCGTCAGAAAGTGTATGAACTGATGCAGGA
AGGTAAAAGTAAAAAAGAGATTGTCGATTATATGGTGGCACGTTACGGCAACTTCGTCAC
TTACGATCCGCCGTTAACGCCGCTGACCGTGCTGCTGTGGGTGCTGCCAGTAGTGGCTAT
TGGCATTGGCGGTTGGGTCATATACGCCCGCTCGCGGCGTCGGGTACGCGTGGTGCCGGA
AGCGTTTCCTGAACAAAGCGTGCCGGAAGGTAAGCGTGCCGGATATGTTGTTTATCTGCC
GGGTATTGTGGTGGCGTTAATTGTGGCTGGCGTCAGCTACTACCAGACTGGCAATTATCA
GCAGGTGAAAATCTGGCAGCAGGCCACGGCACAGGCTCCGGCGTTGCTGGACAGGGCGCT
GGATCCGAAAGCCGATCCGCTCAACGAAGAAGAGATGTCGCGTCTTGCGCTGGGGATGCG
TACTCAACTGCAAAAAAATCCGGGAGATATAGAAGGCTGGATTATGTTGGGCCGCGTTGG
CATGGCGCTGGGTAACGTCAGTATCGCCACCGATGCATACGCCACTGCGTATCGCCTCGA
TCCGAAGAATAGCGATGCCGCACTGGGATACGCTGAAGCGTTGACACGTTCATCTGATCC
CAACGACAACCGCCTCGGCGGCGAACTGCTGCGCCAGTTGGTGAGAAGCGACCACAGCAA
TATCCGTGTGTTAAGCATGTATGCGTTTAATGCCTTTGAGCAGCAGCGATTTGGCGAAGC
CGTTGCCGCGTGGGAGATGATGTTGAAACTCTTACCTGCCAACGATACTCGCCGTGCGGT
GATTGAACGTAGTATCGCGCAGGCGATGCAACATTTGTCGCCGCAGGAGAGTAAATAAAA
AGTGGCCCGATGGTGATGCCATCAGGCCAGACTGATGACAAAGTGCGCTTAGTTTATGCC
GGATGCGGCGTGAACGCCTTATCCGGCCTACAAAATCGTGTGAATTCAATAAATTGATCG
ATCCGCGTAGGCCTGATAAGCGTAGCGCATCAGGCAGTTTTGCGTTTGTCATAAATCTCA
GCCCGATGATAAATCCATCGGGCTATTTTTATTGTGCCCCGCGTTGTTGCAGGAACAGAA
TGGTGGCCGCCACGCGTGAGCGGACATTGAGTTTACGCAGCAGATTGCGAATATGTACTT
TTACTGTCTGCTCGGAAATATTCAATACCGAGGCAATCTGTTTATTTGACAGCCCCTGTG
CCAGCTCGTGCAGAACATCCAGCTCGCGCTCCGTCAGCACGCTGAAGGGATCTTCTTCCG
CGCCAAACATTTCACGTTCACGTAAGTACTGATTGACGCGTTCGCTAAAGACTTTGCTGC
CTTTCGCTCCGGCACGAATCGCTTCCAGCGATACTTCCGGGTCGCTGTCTTTCAACAGAT
AACCGTCTGCGCCTGCGTCTATCAGCGCAAAGACATCGCTGGAGGCATCGGATACGGTCA
GGATAATAATTTGCGCGGTAACGCCATCCCTGCGCAAGGCATTGAGGGTATCCAGGCCAC
TCATACCTTTCATATTGAGATCCAGCAAGATCACGTCGATATCCAGTCTATTCGCCAGAT
CGATAGCGCTCGCGCCGTCGCCCGCTTCGGCGACCACTTCAAAGCCAGGATCAAGCTCCA
GTAACTGACGAACACCGCGTCGCATAAGTGGATGATCATCCACAATCATCACCTGAAAAG
GCGTTGCTTCAGGCATAGTAGTCTCCTGAGGTTTTATTAGAATCATTATGTTTGAGCGTA
GCGTTGGTAACGCTACCAGGCGCGTGAATGTTACCCCATTTTATGTATGGACATGTAGTG
AAAACTACAACCTTGTCCTTCGCTTTGGCATCATTTTCATTATAAAGACGGAATTTTGCA
TCAGCTTCTCATCAAGAAAAACAACTAAAAAATCAATCACAATACTTGTGCATTTCTTTA
AACAGTTTTTAAAAACTGACTCCGGGTATGGAGCTATGGGTATTTTCTGTACCCAATGCT
TTTAACAGCAATTAATTTCATAGGATGAAAGCTCAATGCATCAATCTGGTTCTGTTTCTC
TTTGTCGTTCCGCAATATCTGTTCTGGTGGCTACAGCGTTATATTCACCCATAGCATTGG
CATCAACAGTTGAGTATGGTGAGACAGTTGATGGTGTTGTCCTGGAAAAAGATATCCAGC
TGGTTTATGGGATCGCCAATAATACGAAAATCAATCCTGGCGGAGAACAGCATATTAAAG
AATTTGGTGTAAGTAATAATACTGAAATTAACGGAGGGTATCAGTACATTGAAATGAATG
GCGCCGCAGAATACTCAGTATTAAATGACGGTTATCAAATTGTTCAAATGGGTGGCGCGG
CAAACCAGACTACGCTCAATAATGGTGTGCTACAGGTTTATGGCGCAGCGAATGATCCCA
CGATTAAAGGCGGGCGCTTAATCGTTGAAAAAGATGGGGGGGCCGTCTTTGTCGCTATCG
AAAAGGGAGGACTACTGGAGGTTAAAGAGGGGGGATTTGTATTTGCGGTAGATCAGAAAG
CAGGCGGTGCTATTAAAACAACCACGCGGGCCATGGAGGTATTCGGAACAAACCGTCTCG
GTCAGTTCGATATCAAGAATGGTATTGCTAATAATATGTTGTTGGAAAACGGCGGAAGTT
TGCGAGTTGAAGAAAATGACTTCGCTTATAATACCACTGTGGATAGTGGCGGCTTACTGG
AGGTTATGGATGGCGGGACTGCAACTGGCGTTGATAAAAAAGCAGGCGGGAAATTAATTG
TCTCAACGAATGCGCTGGAAGTGAGTGGTACAAACAGTAAAGGCCAATTTAGTATAAAAG
ATGGTGTGTCAAAAAATTATGAACTGGATGATGGTTCCGGGCTCATTGTTATGGAGGACA
CGCAGGCCATTGACACTATCCTTGATGAGCATGCCACTATGCAATCGCTGGGAAAGGATA
CTGGTACGAAAGTGCAGGCAAATGCGGTATATGATCTCGGTCGATCAGACCAGAATGGAA
GTATCACGTATTCCTCAAAAGCCATCTCTGAAAATATGGTAATCAACAATGGCCGCGCTA
ATGTCTGGGCTGGCACAATGGTTAACGTGTCAGTCAGAGGGAATGATGGCATTCTTGAGG
TCATGAAGCCGCAAATAAATTATGCACCTGCTATGTTGGTGGGTAAGGTAGTGGTTTCTG
AGGGCGCTTCTTTTAGAACGCATGGTGCCGTGGATACCAGCAAAGCGGACGTTTCGCTCG
AAAATAGCGCATGGACCATCATTGCTGATATCACTACGACGAACCAAAACACCCGCCTCA
ACTTAGCCAACCTTGTGATGTCTGGCGCAAATGTGATTATGATGGCTGAGACAGTGACTC
GTTCATCTGTGACAGCAAGTGCGGAAAATTTCATAACGTTGACCACCAATACCCTGTCGG
GAAACGGCAATTTTTATATGCGTACCGATATGGCCAATCATCAGAGCGATCAGCTTAACG
TCACTGGCCAGGCAACAGGTGATTTCAAAATATTTGTGACGGACACGGGGGCCAGCCCGG
CAGCAGGTGATAGCCTTACACTGGTAACAACGGGCGGCGGTGATGCTGCATTTACGTTGG
GCAATGCCGGAGGCGTTGTTGATATCGGTACGTATGAATATACCTTGCTGGATAATGGCA
ACCATAGCTGGAGCCTCGCAGAGAATCGCGCGCAAATTACCCCTTCAACCACTGATGTGC
TGAACATGGCAGCAGCACAACCGCTGGTATTTGATGCAGAACTGGACACCGTGCGTGAGC
GTCTTGGTAGCGTAAAAGGCGTTAATTACGATACGGCGATGTGGAGTTCGGCAATTAACA
CCCGCAACAACGTGACCACTGATGCGGGAGCTGGCTTTGAGCAAACATTGACGGGGCTGA
CGCTCGGTATCGATAGCCGTTTCTCCCGTGAAGAAAGCAGCACAATTCGCGGCTTGTTCT
TTGGTTACTCTCATTCTGATATTGGTTTTGATCGCGGCGGCAAAGGTAATGTCGATAGCT
ATACCCTGGGGGCTTATGCCGGTTGGGAGCATCAGAACGGTGCCTATGTTGATGGAGTGG
TGAAAGTTGATCGTTTTGCCAACACCATCCATGGCAAGATGAGTAATGGGGCAACAGCGT
TTGGCGATTACAGTAGTAACGGCGCGGGTGCTCATGTCGAGAGCGGGTTCCGTTGGGTTG
ACGGATTGTGGAGTGTTAGACCCTATCTGGCCTTTACCGGCTTTACCACAGATGGTCAGG
ACTACACGTTATCAAACGGCATGCGCGCTGATGTGGGAAATACCCGGATATTACGCGCTG
AAGCGGGAACGGCGGTAAGCTATCACATGGACCTGCAAAATGGTACGACGCTGGAACCCT
GGCTGAAAGCCGCCGTACGTCAGGAATACGCCGATTCTAACCAGGTGAAAGTTAATGACG
ATGGCAAATTTAATAATGATGTGGCTGGAACCCGTGGCGTTTATCAGGCTGGGATAAGGT
CATCGTTTACCCCGACGTTAAGCGGTCATTTGTCAGTCAGCTATGGCAATGGCGCAGGGG
TAGAATCGCCGTGGAATACTCAGGCGGGAGTGGTCTGGACGTTCTGATAACAGAAAATAA
ACAGGCCGTGATGTGTCGCGGTCTGTTTATCTAATTAATTGCAGATATAAAAAAAAACCA
ACCGTAAAGGTTGGTTTTTTCTTGGGATTTTTGGTCGGCACGAGAGGATTTGAACCTCCG
ACCCCCGACACCCCATGACGGTGCGCTACCAGGCTGCGCTACGTGCCGACTCGTGGCTGC
TAATACTACCGTTTTCCACACCGATTGCAAGTAAGATATTTTGCTAACTGATTTATAATT
AATCAGTTAGCGATAAAACGCTTCTCGTCTGTCAGTACTTGCAATAACAAACTTAACTGT
GGTTTTTCATCTTTCACTCTTTCACCACGTAAGTTGTAAGTGCGGTATTTACCGTTATTG
TTCAGCACCAGCGTCTTTTTCGGGGTGGTTATTGCCAGCGTATCGTTATCCGCTGCGGTT
ACCCAGTAATGACGGCGTTGAGGGTTGAACAAATCCTGACCTTGCGAATATTCGCTGGCA
GGTGTGCTGACATGTAGCAGGCGTTGCATCAGCGTCGTCATCAGATCGGTATGATCAGTC
AGCGCATTAATACGCTGCGCCGGCGTGCCTGGCCAGTGAATCACTAATGGCACCTGCAGA
TGACCGTGGGACCAGTCAAAGGTTTCTTCCTCTTCGCTCAGTGGAATACCCCGACCGGCA
GTGATAATTACAACCGTATTGTCCAGTTTGCCAGAATCACGCAGTACATTGAGCACGCGG
TTGATCTGGTCATCGACATTGCCTGCCGCCCGGCTATATTTCCGTGCAAATGCCTGCTGA
TTGCTGTCGTCAATGTTAGTACCATTGAAAGAAACCCACGAGAACCAGCGGTTATCTTCT
TGTGCGTAGCGTCCCAGCCAGTTGATCCACTGCGTGGCGGTCTGCTCGTCGGATTGGGTG
CGTACGCTCGGCATCGAGAAGTCTGACAACAATGCCTGGCGATACAGCGGGCTGGTAAAG
CCATCTGATGAGAATAACCCCAGCTGATAGCCTTGCTGATTAAGCGCAGTAATTAATGCC
GCAGGCGTACGGGTCGACAGAATGCCGTCCATATAGCTCGGCGAGATGCCATAGAACAGG
CCAAAGATGCCGTTGTCTGTAGTGTTGCCGGAGCTCATATGGCGCGTGAACGAAATATTT
TGCTCAGCAAAACCTGCCAGCGCAGGCATCTGCTTCTCGAAGCGTGAGTAGTTCAGGCCA
TCGACAGTAATCAATAGCACATTCTGCCCGGTGCCCATATCGCGATAGCGCAGTTCGCTT
AACGGATACTGAACGGAAACGGCGTCTGGATTACCTTGCTCAATAAGACGGCGTTGATAC
TCCTGCGCATCAAGCAGACCATGCTTCTCAAGAAAACGTCGCGCCGTCATCGGGTACGAA
AGCGGCAGGTTAGCGCGCTGCATGGTGATCGGGCGATAGAAGTTGGCATCGGCCCAGATA
TACACCACATGCGAGGCGATAAAGGCGATAAATAAGAATGCGGCCAGCGGACGCGCGAAG
CGCCGACGACGCGTCAGGCTGCGCAGCTTTTGCCAGCTCCACGTCGCAAACACCAGTTCA
AGCAATAAAATAACCGGCACGCTAATGAACATCAGCTGCCAGTCGCGCGCCATCTCATTT
TCGTCTGGATTAATAACCAGTTGCCAGACGATGGGATTAAGATGGAGATGGAAACGAGTA
AAGACTTCGCTATCGATCAGTAATAGCGTCATTCCCGCCGTTGCCAGAATGACGGACAAA
AACCTCATCAGCCTCTGGGAGCCGACGATAAAGGTCAGCGGGAAGAGGATCAGCAAATAG
GTGGCGAAGACCAGGAAGCTGAAATGGCCGATAATGCTTACGTAGGAATAAATGCGACCA
GCAAGCGTTGTCGGCCAGTCGGCGATAAACAGGTAACGGCTGCCAATGACGAGCGAAAGC
AGAATATTGAACAGTGCAAACCAGTGCCCCCAACTGACCATTTGGGAGACTTTTTCACGG
TAGCGCTGACGATGAGTTACCATAACCTGTTATCTGTTTCCCTTAGTGCGCTTTTTCTTC
GTTGATAGAGGACTGTAAGGCGCGGGCAAAAGAGTTGGCAATTGCCTGGCGTTGGGCCGG
GGCAATGCTGGTGTTGATAAGGTTAGTGACCATGTTGCCTAACACCATCAGGGAAAGGTC
GGTCGGAGCCTTATGTTTTTCCAGTACGTTGAGCAGCTCTGCGAGCAATTGTTCAACCTG
TTCATCACTGTAGCGGGAAATTTGTGGCATAAATCGAAATCAGTTAGTTGATGAAAGGGC
AACATATTACCGTAGCAACGGTTTTTTTTCTGCTTTTTTATGCGTTAAATCATTCTCGTT
ACGCTGCCTTCTGTAAAATGACCGCCATCTTTTATTGCGTCGCTTAACCGGCGGTGGTTG
AATACCGCCCGGTCTTAAAGGAGAGTTTATCATGAGTCTGGATATCAACCAGATTGCTCT
GCACCAGCTTATCAAGCGTGATGAGCAGAACCTTGAGCTGGTGTTGCGCGATTCATTGCT
GGAACCGACAGAAACCGTCGTTGAGATGGTGGCAGAACTGCATCGGGTCTATAGCGCCAA
AAATAAAGCTTACGGCTTGTTTAGCGAAGAGAGTGAACTGGCGCAGACGCTGCGCTTACA
GCGTCAGGGCGAAGAGGACTTTCTGGCATTTAGCCGCGCGGCAACCGGCCGCCTGCGTGA
CGAATTAGCGAAATATCCTTTTGCTGACGGTGGATTCGTGCTGTTTTGCCACTACCGTTA
TCTGGCGGTGGAGTATCTGCTGGTGGCAGTCCTGAGCAACCTGAGCAGTATGCGCGTTAA
CGAAAATCTCGACATCAACCCAACCCATTATCTTGATATCAATCATGCGGATATTGTTGC
GCGTATCGATTTAACCGAATGGGAAACCAATCCAGAGTCGACCCGCTATCTCACTTTCCT
GAAAGGGAGAGTAGGGCGCAAAGTGGCGGATTTCTTTATGGATTTCCTCGGGGCCAGCGA
AGGATTGAACGCGAAAGCGCAAAACCGTGGGCTGTTGCAAGCGGTTGATGATTTCACTGC
CGAAGCACAACTGGATAAAGCAGAGCGACAGAACGTGCGCCAGCAGGTTTATAGCTACTG
TAATGAGCAGCTGCAGGCAGGCGAAGAGATTGAACTGGAATCGCTGTCGAAAGAGCTGGC
AGGCGTAAGCGAAGTGAGCTTCACGGAGTTTGCGGCTGAAAAAGGCTACGAACTGGAAGA
GAGCTTCCCGGCAGACCGTAGCACACTGCGTCAGTTGACAAAGTTTGCCGGTAGCGGCGG
TGGCTTGACTATTAACTTTGATGCGATGCTGTTAGGTGAGCGGATTTTCTGGGATCCAGC
AACCGATACCCTGACCATTAAAGGCACGCCGCCGAATTTGCGCGACCAATTGCAGCGCCG
GACGTCTGGCGGCAATTAATCGGTTTTGTGTTCTGAATGCCAGATGCGGCGTGAACGCCT
TATCTGGCCTGCAAAAAATAGCAATACCGTAATCAGGCATAATCTGCAGATACAAAAAAC
CCCGCCGGAGCGGGGTTTTTTACAACTTATTCAGCAATTAAGCGCGAACGAAGTCGATGT
GCTGCAGCTTCGGTTTGTACGGGTGACGCTGTACGTCCTGAGCTTTAACTTTGATTTCTT
TACCGTCAACAACGATGGTCAGAACTTCGCTGTAGAATTCAGCTTTAGCTTGCATGTTCA
TGACTTTGTCGTGATCCAGCTCGATAGCCAGCGGTGCTTCTTTGCCACCGTAGATGATTG
CCGGGAACTTGTTAGCGGCACGCAGGCGGCGGCTCGCACCCTTACCCTGCTCTTTACGTA
CTTCTGCGTTGATAGTAAACATTTCTTTCTCTCTTAAATTAATCCTGCTACAGGCGACCC
AGCAACAGGTAAGTGATCTGCTTTGCGTATGCAAAAGCGGGCGAGATTCTATACTCAATC
GCCTTATACATCAATCAAAACTACCATTAACCGCGTAATTCGTGCGCCCGACGAAAACGA
CCTTCGTAATCGAACACTTTTTCACGCACTTGCCAGTACTGACCTTTCATGCGGGCGACG
ACAAAATCCGGATGTCGCAGTAAGGCTTGCTGGGCGAGGATATCGGCGGCGGTGATCCAG
CGCAGAGGGATGCCCGGTGTGCGCGTATGCGGGCGGATAAAAAGCTGCTCGAAAGCAGTT
CGCTGGGCGGGCGTTTGCAGACGGAAACGCTCACTCACATCCGCGCCGTCTTCATCGTAA
TAGGTGATTTTCAACCATTCGCCTTTCTCGTCGTGCCCATGCTGCAAAGACATGCCGCTA
CAGCGTAATACCAGCGCATCTTTCAGTCGTAGCGCCGCTTTTAACATATCATCCGGATCA
ACCAGTACCGTGTCACATTCGCGGCAGCGGCGAGCGGCAATATCATTTTCTGCGTTACAT
TGCGGGCAATTTTTAAAACGGAAACGGAAGTCACACTGTTCGCGATGACCGTCGTCATCT
TCAAACCATCCCTGACAGCGGCGACCAAAGTGTTCAATCAATGTCCCGTCGGCGGTCGTT
TTCCCCCAAAAGGTGTTGGCAAAACCGCAGGCAGGGCAGAAAACCTGTACCGGAACGTTG
TCACTTTTGCCTTTCGGTGTACCAACTTCCGGCGCGTAGAGATCGTGAGGATTACCCGCA
TAATCAAGAATTAAACAATCAGTCTTGCCCGGAGCGAGACGCAGACCGCGCCCGACAATT
TGTTGGTAAAGACTCACTGATTCGGTAGGGCGCAGAATGGCGATAAGATCGACGTGCGGG
GCGTCAAATCCGGTGGTCAGTACCGCGACGTTGACCAGATAGCGAAAACGCTGGGCTTTA
AAATCTTCAATTAACACATCGCGCTCAGCGCCGGGGGTGTCGCCAGTAATCAGTGCAGCA
TCTTCGGCGGGTAGTAATCCCACAATCTCTTTTGCGTGTTCAACGGTGGCGGCGAAAATC
ATCACCCCTTTGCGCGTTGCAGCAAACTCCATAATCTGGCTGATGATGTGCGGGGTAATA
CGTTGTTGTTTTTTTAGCTCGCGGTTGAGATCGGCTTCGCTGAACAGCCCATTACTCTGT
GCCTGCAAGCGGCTGAAATCGTATTGCACTACTGGCATATCCAGTCGTTCTGGCGGCGTC
AGATAGCCGTGTTTAATCATATAACGCAGCGGCAGTTCATAAATGCAGTCACGGAAAAGG
GCTTTCTCATCGCCGCGTACCATGCCGTGATAATGGAACTGGTAGATCCAGCCTTTGCCC
AGTCGAAAAGGCGTGGCAGTCAGCCCCAGCAGGCGTAAGTGGGGATTCACTTTTGTCAGG
TGAGTGAGGATTTGCTGATACTGGCTCTCTTCATCGTCACCAATACGGTGACATTCATCG
ACAATCAACAGCGAAAATTCACCCTGAAAGGCATCAAGATTACGGGCGACCGACTGCACG
CTGCCAAATACCACTTTACCGTGGCTCTCTTTGCGCTTTAGCCCGGCGGCAAAAATATCG
GCTTCCAGCCCCAGCGCCTGATACTTTGCATGGTTTTGCGCCACCAGTTCTTTAACGTGT
GCCAGCACCAGCACGCGACCACGAGCCAGCCGCGCAAGTTCCGCTATCACCAGGCTTTTA
CCTGCACCGGTGGGCAGCACGATAACGGCAGGGGTTTTATGACGACGAAAATGGTTGAGC
GTGGCATCCACGGCTTCTTGCTGATATGGGCGGAGTGTAAAAATCATGGTCTCGCGTAGG
TAGATTATTCTGCTAATAGTATGCCACGGTTCTTTTTCCCTTGAGGGAAGTTATTAGACC
GCTATACTGGGCAGACAACAGTTCAGATTTTCGGGTCAATGCCCGACCTCCGTTTTTACA
GGCAAAATCACACACATGCGACTTGATAAATTTATCGCACAGCAACTCGGCGTTAGCCGT
GCTATTGCCGGGCGTGAAATCCGCGGCAATCGTGTCACCGTCGATGGCGAAATCGTCCGT
AATGCAGCGTTCAAACTGCTTCCTGAACATGATGTCGCTTACGATGGCAACCCACTGGCG
CAGCAACACGGTCCACGTTACTTCATGCTCAATAAGCCTCAGGGCTATGTTTGCTCCACG
GACGACCCTGATCACCCAACGGTGCTCTATTTTCTAGATGAACCAGTGGCGTGGAAACTG
CACGCCGCAGGGCGGCTGGATATCGATACCACCGGTCTGGTACTAATGACAGATGATGGT
CAGTGGTCACACCGCATTACTTCTCCGCGCCATCATTGCGAGAAGACTTATCTGGTGACG
CTGGAATCACCCGTAGCTGACGATACGGCAGAGCAATTTGCTAAAGGCGTGCAGCTGCAT
AACGAAAAAGATCTCACTAAGCCGGCGGTGCTGGAAGTGATTACCCCAACGCAGGTTCGT
CTGACCATCAGCGAAGGGCGTTATCATCAGGTGAAACGCATGTTCGCCGCCGTGGGTAAC
CATGTGGTTGAGCTGCATCGTGAACGTATTGGCGGCATTACGCTGGATGCTGATTTAGCC
CCCGGTGAATATCGTCCGTTAACTGAAGAAGAAATTGCCAGCGTCGTCTAACTTTTCAAT
GACTTTCAGGAGCCCGTTGTGACCACCCGACAGCATTCGTCGTTTGCTATTGTTTTTATC
CTTGGCCTGCTGGCCATGTTGATGCCGCTGTCGATTGATATGTATCTGCCCGCGCTACCG
GTAATTTCAGCGCAGTTTGGCGTACCGGCGGGCAGTACGCAGATGACCCTCAGTACTTAT
ATTCTGGGCTTTGCGTTGGGGCAGTTAATCTACGGGCCGATGGCAGACAGCTTCGGGCGT
AAGCCGGTGGTTCTTGGCGGTACGCTGGTGTTTGCCGCCGCCGCGGTGGCGTGTGCGTTG
GCACAAACCATCGATCAGCTGATTGTGATGCGTTTCTTCCACGGGCTGGCGGCGGCTGCG
GCCAGCGTGGTTATCAACGCCTTGATGCGTGATATCTACCCGAAAGAAGAGTTCTCGCGG
ATGATGTCGTTTGTCATGCTGGTGACAACCATTGCACCGCTGATGGCACCGATAGTTGGC
GGCTGGGTGCTGGTGTGGCTGAGCTGGCATTACATCTTCTGGATCCTCGCCGTGGCGGCG
ATTCTGGCTTCGGCAATGATCTTCTTTCTGATCAAAGAAACCTTACCACCGGAGCGTCGC
CAGCCTTTTCACATTCGTACCACTATTGGTAACTTTGCGGCGCTGTTCCGTCATAAGCGT
GTCCTGAGTTATATGCTGGCCAGTGGTTTCAGCTTTGCCGGGATGTTCTCGTTCTTAAGC
GCCGGACCGTTTGTCTACATTGAAATTAACCACGTCGCGCCGGAAAACTTTGGTTATTAC
TTTGCACTAAACATTGTTTTCCTGTTCGTGATGACCATCTTTAATAGCCGCTTCGTCCGC
CGTATTGGCGCGTTAAATATGTTCCGCTCGGGGTTGTGGATACAATTTATTATGGCAGCG
TGGATGGTCATCAGTGCGCTGCTGGGGCTGGGATTTTGGTCGCTGGTGGTTGGCGTTGCG
GCGTTTGTGGGCTGCGTGTCGATGGTGTCATCCAATGCGATGGCGGTCATTCTTGATGAG
TTTCCCCATATGGCGGGAACGGCATCTTCACTGGCAGGAACCTTCCGTTTTGGCATAGGG
GCAATTGTTGGCGCATTGCTTTCTCTTGCGACCTTTAACTCTGCATGGCCGATGATTTGG
TCAATTGCATTCTGCGCAACCAGCTCCATTCTCTTCTGTCTGTACGCCAGTCGGCCGAAA
AAACGGTGATCTATTGCACAACGAGGAAGCTAAAAGGCTTCCTTTGTTGATGCATGTCAA
CCACAAATCTATCATTCCCCCGATATATGTTTATTTTATGTAAAATCAATTTATGTAAAA
AGTCACATCATTGTAGTTAAAAAGGTTGAGTTAGATCGCAGAAACGGGTACATATAGCCC
CGCAAACGTGACCACGCCCGCAGATATTACTTAAATCAGAGCCATAGAGGCCACGCAGGC
GAGGCATCAATCTTTACGATCTGTATAAAGACGGATTGTTGATGATGTGTTAAAATTGAT
GTAAACAAATTGTGAAGTAAATGTGCTTCCGGGGAAAATAAGTGACTTCATTACAACTCT
CAATCGTCCATCGACTGCCGCAGAACTATCGCTGGTCTGCTGGTTTCGCAGGTTCGAAGG
TTGAACCGATTCCGCAAAATGGACCGTGCGGTGACAACAGCCTGGTGGCGCTTAAATTGC
TTAGCCCGGATGGTGATAATGCATGGTCGGTGATGTATAAACTAAGCCAGGCGTTAAGCG
ACATCGAAGTTCCATGTTCGGTGCTGGAGTGTGAAGGTGAGCCGTGCCTGTTTGTAAATC
GCCAGGACGAGTTTGCTGCAACATGCCGATTGAAAAATTTTGGTGTGGCAATTGCCGAAC
CCTTTTCAAACTACAATCCTTTTTAAGCGTCAGCTCAACGCCAGTAGCTGACGCGTATAC
TCCTGCTGCGGTGTGGCAAACACGCGCGCGCACGGTCCTTGTTCCACTACTTCCCCTTGT
CGCAGTACGATAACCTGATGACATAACGCGCGGACAACGTGCAAATCATGGCTGATAAAC
AAATAGGCCAGTTGATGCTTTTGTTGCAATGATTTCAATAGCGTCAATATTTGCGCCTGT
ACCGTTTTGTCGAGTGATGATGTCGGTTCATCAAGTATGATCAGCGAGGGCTTAAGAATT
AATGCCCTGGCAATCGCAATACGTTGTCGCTGACCACCAGAGAACTCCGCCGGATAACGG
TGGCGTGTTTCAGGATCTAATCCCACTTCATGCATCACGGCTATCACTTGTTGTTCGCGT
TGTGCGGCAGAAAGCGTCGGCTGGTGAACCCGTAAGCCTTCCTCAATAATCTGCAAAACG
TTGAGTCGTGGGTTGAGCGAGGAGTTTGGATCCTGAAATACCACCTGAATGCGATGACGA
ATAGGTAACAGCTGGCGGCGATTTAAATTTTGCAGTGGCTGACCGTCAAAGACGATGCTG
CCCTGAGAATTAATCAGTCGCAGCAGCGCCAGTCCCGTCGTGCTTTTCCCGGAACCGGAC
TCGCCCACTAAACCCAGTGTTTCACCCGCCCGTAGCGTAAAACTGATGTTTTTCACCACC
ACATTATGATCCACAATGCGCTTCAAGATCCCTTTGCGAATGGGGAAGGCAACCTGAAGC
TGTTCAACATCCAGCAACGTTGAGGCAGGTTCTGGCAACGGCACCGGGTCGCCTGACGGT
TCACTGTTGAGTAGCTTTTGTGTGTAAGGATGAGTGGGTGAGGCAAATAGCGTAGCGGCG
TTATTTTGCTCGACACAGCGACCATTTTGCATTACCGCCACGCGGTGGGCCAGTTTTCTG
ACAATGCTGAGGTTATGAGTAATAAACAGCATGCCCATATTCAGCTCGCCTTGCAGTTCG
CGCAACAGCTGTAAAATCTGCGCCTGGACAGAGACGTCCAGTGCGGTGGTTGGTTCATCG
GCAATTAATAATTCCGGTCGCGTTAACAGCGCCATCGCAATCATCACCCGCTGGCGTTCG
CCGCCGGAGAGCTGATGCGGATAATCTGTCAGCCGTTTTGCCGCCTGGCGGATACCGACG
CGATCAAGGCAGTTAAGAATTTCGCCACGAGCCGCTTCCCGACGCATCCCGCGGTGGAGT
GAAAGCACTTCATAAAGCTGTTTTTCCAGGGTATGCAATGGATTTAACGACACCATCGGC
TCCTGAAAAATCATGGCGATCTTATTACCGCGTACACCGCGCAACGTTTGATCGCTGGCA
TGAAGCAGCGATTCGCCATGAAAACGAATATCGCCGGAGAGATATTCAACCGGCGGGGAA
GGGAGCAGACGTAAAATTGACAGCGCGGTAACGCTTTTGCCAGAACCTGACTCACCCACC
AGCGCCAGCGTTTCGCCAGCCTCAATCTGTAGTGAAACATCATTGACTACTGTACGTACG
GTTTGCTGATGGCGAAAACCCACCGACAAATTTTCAATCGCTAACAGAGTTTGCGTCATG
CTACACCGCCTTATTAGGATCAAATGCGTCGCGGACGGCTTCACCAATAAAGATCAGCAA
AGACAATAATATCGCCACCAACAAGAAGGCGGTGATCCCAAGCCACGGAGCCTGAAGGTT
ATTTTTCCCTTGTAACAGCAGTTCACCGAGTGACGGTGAACCGAGCGGCAGACCGAAGCC
GAGGAAATCGAGTGAGGTCAGGGTGGTTATCGAACTACATAAAATAAACGGTAAAAAGGT
GAGCGTAGCGACCATGGCATTAGGCAACATATGACGCAGGATGATACTGCGATCGCTGAC
GCCAAGTGCCTGCGCCGCACGAATGTAGTCGAAATTACGGGTACGTAAAAACTCCGCCCG
CACCACGCCGACCAGACTCATCCAGCCAAACAAGACAGTAATTGCCAGCAGCCACCAGAA
GTTAGGCTGTACGACGCTGGAAAGTAAAATAATCAAAAACAGCGTCGGCATCCCCGACCA
TACTTCAATAAAGCGTTGCCCCCAGAGATCGACTTTACCGCCGTAATAGCCTTGTAGCGC
CCCCGCCAGCACGCCCATCACGCTGGAACAGAGAGTCAGCATCAGGCCAAACAGAACCGA
GATCCGCGTGCCATAGAGAATACGTGCCAGCACATCGCCGCCGTTGGCATCCGTTCCCAG
CCAGTTTTGCCGGGAGGGTGGAGAAGGGAAGGGCTTATCGGTAGCAAAGTTGATACTGGT
AGCACCAAAGCGAATCGGTGCCCACAGTACCCAGCCATTATTTTCCAGCCGTTGTTTCAG
CCACGGGTCCTGATAATCAGCCTGACTTGCCAGCGGGCCGCCAAAATCGCTTTCGCTGTA
GTTTTTCAATAAAGGGAAATACCAACTGCCGTCATAACGTACCAGCAACGGTTTATCGTT
GGCGATAAGCTCAGAACACAAACTCAAACCAAACAAGACGAGGAAAATCCATAACGACCA
GTAGCCGCGACGGTTATGACGAAAACGCGCCCAACGGGCCTGATTGACGGGGCTGAGTCG
CGACATTAACGTCCCTCAAAATCTATACGCGGATCGACCAGCGTATAGCTGATATCACTG
ACAATATTCAGCAGCAGGCCAATCAGGGTGAAAATATACAAGGTACCAAACATTACAGGA
TAATCGCGCGAGACGGTCGCTTCGTAGCCCAGTAAGCCAAGACCATTGAGTGAAAACATC
ACCTCAATCAGCAGCGAGCCGGTAAAAAACATGCTGATAAACGTCGCCGGAAAACCAGCA
ATCACCAGCAGCATGGCGTTGCGGAACACATGTTTCCAGAGAATGTTTTTCTCACTTACC
CCTTTCGCACGCGCGGTCACCACGTATTGCTTGCGCACTTCATCAAGGAATGAGTTTTTG
GTCAGCATGGTCAGCGCTGCAAAGCCACCAATCACCGTCGCCAGCACCGGCAGCGTGATA
TGCCATAGATAATCGGTGATTTTCTGATACCACGGCAGCGAATCAAAGTTAGCGGAAACC
AGGCCGCGTAGAGGGAACAGGTCGAAATAGCTGCCGCCTGCGAAGAAGACAATCAGCAGG
ATGGCAAACAAAAAGGCCGGAATGGCGTAGCCGATGATGATAAATGCGCTACTCCAGACG
TCAAAGCGGCTCCCATTATAAACAGCTTTGCGAATGCCTAACGGAATCGACACCAGATAG
ATAATCAGCGTGCTCCACAATCCGAGGGTGATGGAAACCGGCAGACTGTCTTTAATCAGC
GTCAGCACCGAGGCGCTGCGAAACAGGCTATCGCCAAAATCAAAGCGGATGTAGTCCCAG
AGCATTTTGAAGTAACGTTCGTGGATCGGCTTATCGAAACCGTAGCGATGAGTGATCTCG
GCGATCACTTCTGGATCTAATCCGCGTCCGCCACGGTAATTACTGTCGCTGATATTACCG
ACGCCCGTTTGCGCATGGCTGGCGCGAACGCCTTCACCGCCTGCGCCGGGTAATACTCCG
GCATTACCAAACTCAATGGCGGCGATGGCCTGGTCGACCGGACCGCCAGGCGCAATTTGC
ACGATGAAAAAGTTGATAGTGATAATCGCCCATAACGTTGGGATCACCAGCAACAGACGG
CGAATCAGATATGCGCCCATCTACTCTCCCTGTTGTCTGGCTGACGGCAGTTTGGCCGCT
TTATTAACGTCATACCACCAGGTATCGATACCCAGGCTGTAAACAGGGCGTACAGCGGGT
TGGGAGAATTTATCCCACCAGGCGAGACGGTCTTCCGCCATGTACCACATTGGCAGCATG
TAATAATTCCACGTTAATACGCGATCCAGTGCTCGCCCTAACGGCAGTAATTTTTCTTTA
TTTCCCTGCGCGGCAATAATTTGGTTGATCAGCGAGTCGATAACCGGGCTTTGCACGCCG
GGGGCATTATAAGTGGAATTGATATATTCCGATGACCAGGAAATCTGTAAATCGGAACTG
GGCCACGGCATCGCCCGCCATACGCGCGGCATCATGTCATAGTCGCGACTGCGCATGCGG
TTGGTGATTTGCGAGTTATCCAACTTGCGAATGTCCATGTTGATACCCAGCCGTTGCAGG
CTGTGCTGGAACGGCAATACCCACTGACTATTGCTGCTTGCGGGAAGCAATAATTCAAAG
CTGAGTGGCTGACCCGTTGTGGCATTAACGCGTTGCTGACCCTTCAGCACCCAGCCCGCT
TCGTTGAGAAGTTTGTCGGCTTTTAACAGGTTGTCACGATCGTAGCCATCGCCTTTAGAT
ACCGGCGGCTGGTAGATTTGTGTGAAGACTTCTGACGGTAGATCTTTTTTCATTGGTGCC
AGAAGCACCAGCTCCGCGGCGTCGGGGTAATTTCTGGCCGCGTATTCGGTATTCTGAAAA
TAACTGTTCGTGCGACTCCAGGCATTGTAAAACAACGCCTTGTTCATCCATTCAAAGTCA
AAGGCGAGAGTGATCGCTTCCCGGACCCGGCGATCGCTGAATACCGGACGTTGGATATTA
AACGCCAGCCAGCGCGTATCCTGGGCTGATTCGTTCTTTTGCTCATCTTTGATGATGTAT
TTTTTATCGAAATTTTTACCGGTATAACGCGTGGCCCAGTTTTTAGCGTCGTTTTCCATA
CGCAAATCAAAGGCACCTGCTTTAAACGCTTCAAAGGCGACGTTATCATCGAGGTAATAA
TCGTAGCGAATGGTGTCGAAATTCCAGCGTCCACGGTTTACCGGTAAGTTTGCTGCCCAG
TAATCTTTCACGCGGGAATAGACAATATTTTGCCCCATTTTCCAGGACGTAATGCGGTAC
GGACCACTGGCAAGCGGAGGCGTGGCGAGCGGATCGCTAAGTTTGTGATCCTTCCAGTAC
TTTTCTGGAAATACCGGCAGCGAAAACAGACTCAACATATCTTCTTTGCCGGGTTTAGCT
AACTCAATGCGCACGGTTAACGGCGCAATGGCTTTGACGGTGGTGCCTTTGTAGACCAGA
CGAAATTGCGGCACGCCTTCGGTCATAAATTTTTGAAAAGTAAACTCTACATCGCGGGCA
GTAATGGGCGAACCATCATGAAAACGGGCGCGCGGATTAATAGCGACCTCCACCCAGGAA
TAATCGTCAGCATAGCGTGCACTTTCAGCAATCAGCGGGTAATAACTGCCTGGTTCGTCA
TCGGAAGTCGTAAATAGCGTGTCGTACAACTGCTCGGTGCGTGCGCCCGGGTTGCCGCGC
AGTGCATAGCGGTTGAAATTATCGAAGGTGCCGAGGGCTGACAACGTTATCTGCCCACCT
TTTGGCGCGGCGGGGTTCACATAATCAAAATGGTTGAAATTAAACGCGTACCGGGGGGCG
CCCAGCACGGCAAAGGCATAGCTTTCCTTGATAGCCTGCGCCTGCGCACCGAAGGTGAAC
AGAGCGATAAACAGCAGCAGTATGCGCACAATCATCTGCAACGGATTTCCTTTTACTCAT
CATTAGCCGCAATCCGGCATGCTTTCACTATGAATAATAAGGGACGTAAGCACACCTTAC
CACTGCGGCCTATACGGTTTCTTCAGCCAGCGAACAAAATCGTCCAGCGGTAACGGGCGA
CTAATCCAGTAGCCTTGCATGAAATTAACGCCGCGTTCGCTTAGCCATCGCGCTTGTTCC
GGCGTTTCGACCCCTTCAGCAACTGTCAGCATATTGAGACGTTTCGCCAGCGTCAGCACC
GCGTCAAGTACGGGTGAAGTGATCGTTTCCGTACCGATGGCGTTGATAAATCCACGGTCA
ATTTTCAGATAATCGAGCGTAAAACGCTCAAGATAGATAAGCGCGCTGTGCCCGGTGCCG
AAGTCATCAATAGCAATTTCTATGCCGACCGAGTGCAGCCAGGCGAAGAGTTGTGTGGCT
TCTTGCTCTTTCAGCATATCGCGCTCGGTAATTTCCAGCACAATCTGGAAATGGTGTGCG
GGTAGGGAGGTGAGCAGTTTCTGGATATCTGCTTTAAAGCTTTCGCTGTGCAGATGGTCC
GGCGCAATGTTAATGCCAAATTTGACGCCTACCGGCAGCACTTTTTCTAATTCTGCGGCA
TCGCGGGCAATTAACTCAAACAGGTGCTGAGTCAGCGGTACAATCATCTTTTGCGATTCG
GCAAAGTTAATGAAGGCATCCGGGGGAATTTCTCCCGCGACAGGATGCCGCCAGCGTAGC
AGTACTTCCAGGCCCGTTACTCGCAAAGCTTGTGTATCCACCACCGGTTGATACGCCACG
TAAAATTGTTCGCGCTTGATGGCGGTCATGATTTCTCTGCCGGGGCGCATACGTACGCTC
ATCAGGTAATAGCAGAGCAGGCCAACGACAGTTCCACTCATGCCGCCCAGTAAAAATGCG
TACCACACATCGTTCCATGTCCAGTCATCTGCATAAAGCCGAACGGTCAGAGGAATGCCC
GCAATTTTAGTTTCACGGACTGGCATGTCGGTTAATTCGTTAACGTTCATCAAACGTGAA
GAAAAGGTAGATAGCGCAGTATTGCCAATAATGAGGGCGACGCCATCGTAATCTTCCTGC
CGTGAACTATAAAAGAGTGAAGGCGTCAGGTTGAGATTCAGAGCGGCAAAGACGCCGCTA
TTTTTCAGCAAAGGGTTGCGATACCAGATGACGATTGCGGGTTTGTTCGGCACCATCGGC
GTGCCGGGTAAGATCGCCATATCGACATTTTTATTAATGTCGAGCGCCGGAATCAATTCA
TTGAGTGGAATGTCCATCTCACCGGTCGCAGATGAACAGAATGTTTTTTTATCTTTCACC
AGCACAAACGTTCGGACATTCATGCTAAACGCCGCGCGGGCGGTCAGTTCGGGGTTAGCT
TGCTGGCAGGTATCTAAGGTCAGCGGCTGGAGCCGGTCAGTAGTGGATTTCAGGTCGGCA
AAATAGGTATCGAGATACTTTTGTACGTCGGTAATCAGTGTGTCGTATTTGACTTCGTGC
TTATGCCAGGCCACTAAAAACTGAAGGCAACTCACCAGTATCGCAATCATTACGCCTGCA
ACAATGCAGGTAAGCAGGAGCTTACGTCCAGAATTGGGAGCGCGTATGAACATGATTCCG
TTAATTTCCTGAAATTACGACAACATTTAAAAGATAACAATGACCGGACTATAGCCTGGA
TCAAGACGCGGAAACATCATTTTCTCTGATGAATGAAAACAAAAAAGCACTGCCTAAGCA
GTGCTTTCAGTTAACTCGTCAGGATAGCCAAGGGATTGCATCCAAACGGTTTATTAGCTG
CGGCTGAGAACCCGGCGTGCTTCGTTGTAACGCTTCTTCCAGTACGGTTCATTCATGCTG
GAAATAATAACACCACTGCTGGTGGAAGCATGGACAAACTGATTGTTGCCGATATAAATA
CCGACATGGCGTCCCGTTGAACCGGCACGGAACAGAACTAAATCACCCGTACGCAAATTA
CTGCGGGAAACAGATTTACCCATTTCCTGCTGTTCGTAAGTCGAACGCGGAAGTTCTAAG
CCAAATTGCTCACGGAATGTACGCTGTACGAAACCAGAACAATCGATACCTTTTTTAGTG
CTGCCGCCCAGACGATAACGTACGCCTTTCCAGTCAGCATACTGATCCATAATTCGCGAT
TTTACGTCGACATTACGAACCAGGTTTTCAAATTCATCCTGAGAAGCTTGCAGTGATGAT
GTTTCACTACCCACTGCACGTGTCTCAGGATGCATATTCTTTGCGGTGTTATTTGCACTA
CATGCAGAAAGCAGAACCGCTACTGCAATCGCGGGGATCCCGCGCAAGATATATCTCAAA
ATCGGTTGAGATTTGACCATGTTGTTTGTTTTCCCTTGAAGTCCTTAACGACAAATATCG
TTATAAAAAAATGCCAAGCGACACGAGACTAATTACCTGGGCATGTTGAAACAATTCCTT
AAGGCCAAATCTGTGGACTAACGCACAAAATTATATGCTGTGAGGATAATCTACCGCCGA
GGCAAAACGAGTTCGAGATTACCCGATTGGTGCGGTCTTGGCGAGCGGTTTTACATGATT
TTTTATAAGAAAAAGTGATACAGAAAGTTAATAAGCGGGATTGCTCAATTAAAGTACGAT
TGAGTGAAACGCATGCAATCCATTCATTTACTTAGAGAATGATTTTTGCTTTCGATGCAT
GAAAGCACGGTGCGCATCATCAGGATTATCCTCACTATAAAAATAAACCTGATGATGTTA
ATTACTGTGAGTTATTTGTTTTGGAAATGTTTGTTTTTTCCCGGTAGTGATTTGTCAAAA
AAGGTGATTAATCGATCACTTAATGGCGTCAGCAACACCCAGGGCAAACCGATCAATATC
ACGGTCATCGAACCGACAATGATGTCAGTAAACCAGTGTGCGCCAATCATTACTCTGGGA
AACGCAAAAACCACAAAAATAATAAGGGCGATAAGACCTGCAACTTTGCCGAAATAACGC
CACATGAATGCCGAAAAAATAAGCAGCATCATGCCGTGATCGCCGGGAAAGCTATCTCGT
GAGGCATCTTTCGTGGGGACAGAGAGCAGTTCGCTGACGCGGTTAATATCGGTAAAAGTC
AATGTTGGGCTGGCCCGTTTTACAGGAATTAATGCCTGACCCAGCTGGTTTAATACCACT
GCAGTTAATAGCATGACCAGACCAATAATCACGATACGTCGTCTGCCTGGGGCGTTTTCT
TTCAGCCAGAAACTCAGCATCAACATTCCCATCGCCAGCAGTGAACAACCGTCGAAAGCG
CGATTGTTGGTCAATGCAACCAGCCACAAAAAGGCCTTACTTTCGACCAGTTTCTGATTA
AAGAAATAAAAAATATCCGCATCAATCGGCAACCAGAATCCATGATTAACGGGAATATAC
CAGGAAAGAAACAGCGCGAGGCCGACAATATTCAACAACACTATTTGCGGCAAATTTTTA
ATCATATTTTCTCTAATTATCTTACTGAAAAACGCAGGCAACCTTACGCGGTAGTCGCTA
AACGAAGCTTCAACAGCGCGCTCTGCAAGGCATTCCAGTCAGCTTCGCTGCTGGAAATCA
GCTCAATACGGCTGTCCGGTGGCGCAACGTTTTGCGTTTCAATGTGCAGGTCATCGCCCT
GACGGTTGATTCGCACCAGCCCTTCGGGAATACGCAGCACGCCTTTGACGCGTTCCACCG
GTGCAAGTCGCGCCCATTCCAGAATGCCAATGGTGTCGAATACCGTATCAGCGTCGAATA
TCCAGCCGCAGGCCTGATATCCTTGCCCGCTGTTCAGACTGCGACGCCAGCGTTGATGCT
CTGGCAGGCTTAACGCTGCTAACCCTTTTTTCACGACATGCTGATGAGAATGCGCGGCGC
TGGCGGGCAACTCGGCTAAATTGCGACGCGGCAAATCCAGAAGATGACCGTCAACTTTCC
CATGCTCACTGTGAATTAATTGCCGATCGCCACCATTTTGCTGCCACCAGCGCTGTAGCG
CTTGCTCGCTTTCAGGTGTCGCACGGTCGGATTTATTGGCGACAATGATGTCTGCGGCAG
CCAGCTGGTCACGGAAGTTTTCATTGCTGGCGCTTTTTTCGTCCAGCAGCAGGCGTGGAT
CGAGAATGCACAACGTGGCGCGCAGATCTATCCACGGTTCATAGACTGGTGCGGTTAACA
GATCGAGGATCTGTTTCGGATGGCCCAGCCCGGTCGGCTCTATCAACAAGCGGTCTGGTT
TTCCCTGACGCAGTAAGGTATTCAACCCTACCTGCATGGGTAAACCATTAACGCAGCACA
TGCAGCCGCCGGGGATCTCTTTCAGCAATGCGCCGCTATCGGCGAGCAAAGCACCATCAA
TTCCGACTTCCCCAAATTCATTAACCAGTACCGCCCATTTTTCGTTGGGATCTTTATGGG
CTAACAGATGAAGAATCGACGTAGTTTTCCCGCTGCCGAGAAAACCGGTGATGAGGTTGG
TCCTGGTCACAACGGCTCCGCAATACTCTGATAAGTTAACTGAGCGTTAATCCTGGCTAA
AAACGGCAGAAAAGAGAAGGGGAGAGCGGACGAAGGTGAGCTTCATCCGCTTTAACCGCA
GAAATCGTTAAATTTTGAGGGTGTTTAATAGCGCCTGATGCGCGCCGAATTGTGCGATTT
GTTGCCAGGCTTGTTCGATAGCCTGCACAAAATGCGGGTTATCTGGCAGATCATCACCGA
AAACTTCACGCAGGGAAAGCAGGGCGGTGACGCGTTGCTCACTGCTGCTGCCCGCAACAA
GATCGCGAATTTTATCGCTAAGCGGATCGCGAACATCAATGGCATTTCCGGCATCATCAA
CGCCGCTGACGTAACGCATCCAGCCTGCAACGCCTAATGCCAGCAACGACCAGTCCGTTT
CGCGCCCCAGATGTATGCGAATACCTGCCAGCATACGTTGCGGTAATTTCTGGCTGCCAT
CCATCGCGATTTGCCAGGTCTTATGTTTCAGCGCCGGATTAGCAAAACGTGCAATTAACT
TATCCGCATATTGTGTTAAATCGACATCTTTAATTTGCAGTGTCGGCGCTTGCTCATCCA
GCATTAATGTTCTGGCAGCATGGCGAAATGCGCGATCCTGCATGCAATCACTGATATGGG
CGAATCCTGAGAGGTAACCCAGATAAGCGAGAAAAGAGTGGCTGCCATTAAGCATACGCA
GTTTCATCTCTTCCCATGGCAGGACATCATTCACCATTTGTACACCTGCGACTTCCCAGG
CAGGACGCCCAGCGACGAAGTTATCTTCCACCACCCACTGGATAAACGGTTCGCAGCTAA
TCGCGCAGGGATCATTTACCCCCAGATGCTGGCTGATTTCTGCCAGTGATTCGTCGGTTG
CAGCCGGAACAATGCGGTCGACCATGGTTCCCGGAAAACTGACGTGTTCTTTTATCCACC
CGGCGAGTTCTGGCGAACGTTTTTCTGCCATTCCCAGCACCGCGTTTTTCACCACATGGC
CATTGTCGGGAATATTGTCGCAGGAGAGCACGGTAAACGGTGTAAGGCCGCGCTCACGGC
GGCGTTTCAGTGCTTCGACGAGAATACCTGGCGCGGAGTGAGGTTCTTCAGGGTTTTGTA
GATCGTGAATAATCCGCGGATTGCTGGTGTCGAGTGCACCGGTGGACGGGTCAATACAAT
AGCCTTTTTCGGTAATCGTCAGGGAAACAATTGCCACCTGTGGCTCGCAAAATTTCTCAA
TAATTGCCGCTAAGGAATCCAGTTTTGCATTCAGGCATTCGTGAACGGCACCGACAATTA
TCGCCTGATTGCCGTCCGCCCCTTTCTCCAGCACGGTGTATAAATGGTTCTGTGCGCGGA
GCTGGCTCATCAGTTGATCACCGCTGAACAAGCTGATTTCACAGATCCCCCAGTCACCGC
CCTGGGCATTCAGCACACGATCGGTCAGTAACGCCTGATGTGCGCGGTGAAAGGCTCCAA
AGCCAAAATGAACGATACGTGATTGCAACTGCTGGCGATCGTAGCGTGGAGCGTGTACAT
GATGCGGGAGCGTAACGGAGGCGATTGTATTCATAGGAGTCACGTCTTAGTAACGATTAA
TTAACAATGACAGTGTAAAGTTATATGACAGCAATTGAAATTGGTCTGGATTGTTAATGC
GATGAAGTGTGAGGGCGATCAATCAACGAGTGAAAATTGAGGGCGTAAGGTGTTCAGGAA
GCGCAAAATAGAAGATTGGTATAATAAATTAAAAAAGGGACAGCCTGAGCTATCCCTTTT
CTGCATGCGGCTGAAGTTAGTCAGCACGACCCATATAACGGCGTTCTTCGATATGGATAC
GAATTTTTTCGCCCGGGCTTAAGTATTCTGGTACCTGAATCACCAGACCAGTGCTCAATG
TCGCCGGTTTGTTACGGGCGCTGGCAGATGCCCCTTTGATGCCTGGTGCAGTTTCAACGA
TTTCCAGATCAACGGTCTGCGGCAGCTCAAGCGCCAGCAGTTGACCGTCCCAGGTCAGCA
CCTGCATGTCCGGCATGCCGCCCTCTGGCATAAACAGCAACTCTTCTTCAATCTGATCTT
TGGTGAAGGTATACGGGGTATAGTCTTCTTTATCCATAAAGACATATTCGTTGCCATCGA
CATAGGAGAAGTCAACGTAACGGCGGGTCAGCGTCACGGTGTCAACGATATCATCTCCTT
TGAAACGCTCTTCTACTTTCAGCCCGGTACGGACATCAGAAAAACGCATTTTGTACAGCG
TAGCGGCACCGCGGGCAGTGGGCGACTGAATATCAATGTCCTTAACCAGCAGCAGTTTGC
CGTTGTAATTCAGTACCATACCTTTTTTAATTTCGTTCGCTCTTGGCATCGAAAAATTCC
TGTAGTCGAAAATGTCAAAAATATCGCGACAAAGTACTCGCGACGGGCCTTTCGGGCAAG
TGGTATTCGCACTTTTGCTAGTGCAAAAAAGGTGGTACTGTGCGCGCTCATCAATCCGGT
GGTTAACCTTAAGAGAACAACGTATGGAATGCCGTCCGGGTTGCGGGGCGTGTTGCACTG
CCCCTTCAATTTCCAGCCCTATTCCCGGTATGCCAGATGGCAAGCCCGCCAATACGCCCT
GCATTCAGCTTGATGAACAGCAACGCTGTAAAATTTTCACCTCGCCACTGCGACCGAAAG
TCTGTGCAGGCTTACAAGCCAGCGCTGAAATGTGTGGTAACTCGCGTCAGCAGGCCATGA
CCTGGCTTATCGATCTGGAAATGTTGACCGCGCCTTAAACATCTTTAATCCGCAGTAAGC
AAAACAGAGTGGCGATAATCATCACCATCGCAAACCAGAACACAGCGTGATAATTCCAGA
TCTCGGCGACGATGCCCGCCACTGATCCTGCGATGATCCAGCCCACGCGCGACGTGTTGG
TATAGAGCGTGGTGGCTGAACCTGCCTGACCGGGCATCAAATCCTGAAAATAGAGCATCC
CGATGCCGCCCAGAATGCCAATAAAAATAGCATTTAGCAGCTGCAAGCCCAACAGAATGA
TAGGTGAATGCGCCATCAGCATTCCTGCGTAAAAACAGACGCCACCCACGGCAGCAACGC
GCATTAAGAAACGCTTACCCAGACGTTTGGCGAAATATCCGGCAATCAACATCGTCGGGA
TTTCCAGCCCGGCGGCGGTCCCCATCATCACACCGGCCAGTTTCTCGGGAAGATGCAGTT
CGTTGATAATAAATAGCGGCATGTTGATGATGTACAGACTGTTCGAGCCCCACATCAATG
TACAAATGACAAACAGCAGCAGCGTATCGCGACGGTTACGGCGCGGCGCTTCAACCGTGC
CGGTCGCCAACGGAAGCTCTTTTTGCATCGACGGTAAAAACAGCCACACCATCACGCCGC
AAACAATAAATGCTACCGCTGCGCTCAGATACATTACCGTAAAGCTGAAACCCATCGCTA
AGGCATAAGCCAGCGGTGGGCCAATGACCCATGCCAGTGAAACCTGAGCGCGTAAAAAAG
AGCTGAACATCACCGCCTCACGTCCGGTTTTGTCGGCATGTTCACGGGCAAGGGCAAACA
TTTGCGGGTTAGCGGTCGAGCCAAAGCTGCTAAGAAAGACGCCAACGAATAGCAACACAA
AGTAGTTGCGATTCCAGGCAAAAAGGGTGCAGGCCAGCACGCCTAACAGGCAGCAAAAGA
CAATCAGCGATTTGCGATCGCCGCGCTTATCAGAGCGCCCGGCGAGAAACTGACTCACCA
GAATCCCAATGACAGCGCTGCCGGTAAAGAAGAATCCCACCATCGCCGGACGGGCATGTA
CTTCATCGGTAAGAAAAATACTGAGTGTCGGGGTTTGCAGAGCGCCCGCAATACCGGTGA
GAAAGGCAACGATTAAAAACGCCGTCGAGGTCAGGTCAAACGATTTCGCGCTGGAGACTG
CGGGGGAGTTATGCATGCTGGTCGATCATTGGAAGAGGAAGACGCGGAGTTTACGCTGCT
TGTCAGAAAATAAACAGACAGCGAAATCAAAAGCGCCACGAATAATCAAAATGCCATTTC
ACTGTTGCTGATTGGCTGCTGACGCTGCTGAAATGAAATTGCTGATAACGGATTTTTCCA
TCAGTAGTTCGGAAAAATGACAAAAAATTGTGCAGCACATCAAACTTTTGCTCATAACTT
TACGGCTTTCCTTGCGTGCTGAAACAGAAGTATTATGCTTTCTTGAAACGTTTCAGCGCG
ATCTTGTCTTTAACCCTAAGCCAGGTTGGCGCTTTTTTTCTCATAGAAGCTGAATCGTTT
CAATTCAGCAAGAGAGGAGAACTATGTTCCAGTTATCCGTACAGGACATCCATCCGGGCG
AAAAGGCCGGAGGCAAAGAAGAGGCGATTCGCCAGGTCGCTGCGGCGCTGGTGCAGGCCG
GTAATGTAGCAGAAGGCTACGTCAATGGCATGCTGGCGCGCGAACAGCAAACCTCAACGT
TCCTCGGCAATGGTATTGCTATTCCACACGGCACTACCGACACCCGCGATCAGGTGCTGA
AAACCGGCGTTCAGGTATTTCAGTTCCCGGAAGGCGTCACTTGGGGTGACGGTCAGGTAG
CGTACGTAGCGATCGGTATTGCTGCCAGCTCGGATGAGCATCTGGGCCTGCTACGCCAGC
TGACCCACGTACTGAGCGATGATTCCGTTGCTGAACAACTGAAGTCAGCAACAACAGCAG
AAGAACTTCGCGCATTGCTGATGGGCGAAAAGCAGAGTGAGCAGCTGAAGCTCGACAACG
AAATGCTGACACTGGATATCGTCGCCAGCGATCTGCTGACTCTTCAGGCGCTGAACGCTG
CGCGTCTGAAAGAAGCGGGGGCAGTTGACGCCACTTTCGTCACCAAAGCCATCAATGAAC
AACCGCTGAACCTCGGACAGGGCATCTGGCTGAGCGATAGCGCCGAAGGCAATTTGCGTA
GCGCGATTGCGGTAAGCCGTGCGGCAAATGCTTTTGATGTGGACGGCGAAACGGCAGCCA
TGCTGGTGAGTGTGGCGATGAATGACGATCAGCCCATTGCGGTTCTTAAGCGTCTCGCTG
ATTTGTTGCTCGACAATAAAGCTGACCGCTTGCTGAAAGCGGATGCGGCAACGTTGCTGG
CGCTGCTGACCAGCGATGATGCGCCGACCGACGACGTGTTAAGCGCGGAGTTTGTGGTGC
GCAATGAACACGGCCTGCATGCTCGTCCAGGTACCATGCTGGTCAACACCATTAAACAAT
TTAACAGTGATATTACCGTGACAAACCTTGATGGTACCGGCAAACCGGCAAACGGACGTA
GTCTGATGAAAGTTGTGGCACTTGGCGTTAAGAAAGGTCATCGCCTACGCTTTACCGCCC
AGGGTGCAGATGCTGAACAGGCGCTGAAAGCAATCGGCGACGCTATCGCTGCTGGTCTTG
GGGAGGGCGCATAATGAGCAGACGTGTTGCTACTATCACCCTTAATCCGGCTTATGACCT
TGTTGGTTTCTGCCCGGAAATTGAACGCGGCGAAGTGAACCTGGTGAAAACCACCGGTCT
GCATGCGGCGGGTAAAGGCATCAACGTGGCCAAAGTATTAAAAGACCTGGGAATTGATGT
CACCGTTGGCGGCTTCCTCGGTAAAGACAATCAGGATGGTTTTCAGCAACTGTTCAGCGA
GCTGGGCATTGCCAACCGTTTCCAGGTTGTACAGGGGCGCACCCGAATTAACGTTAAGCT
GACGGAAAAAGACGGCGAAGTGACTGACTTCAACTTCTCGGGTTTTGAAGTCACTCCCGC
CGACTGGGAACGCTTTGTGACTGATTCTCTGAGCTGGCTCGGTCAGTTCGATATGGTCTG
TGTCAGCGGAAGCTTACCGTCAGGCGTCAGCCCGGAAGCGTTCACCGACTGGATGACTCG
CCTGCGTAGTCAGTGTCCTTGCATTATCTTTGATAGTAGCCGTGAAGCGTTAGTAGCAGG
TTTGAAAGCGGCACCGTGGCTGGTGAAACCTAACCGCCGCGAGCTGGAAATCTGGGCAGG
CCGTAAACTGCCTGAAATGAAAGATGTGATTGAAGCTGCGCATGCGCTGCGTGAACAAGG
TATTGCGCATGTCGTTATTTCACTGGGTGCCGAAGGCGCGCTTTGGGTTAATGCCTCCGG
CGAATGGATCGCCAAACCACCGTCAGTCGATGTCGTAAGCACCGTTGGCGCAGGGGATTC
TATGGTTGGTGGCCTGATTTATGGCTTGCTAATGCGTGAATCCAGTGAACACACACTGCG
TCTGGCGACTGCTGTTGCAGCCCTGGCGGTAAGTCAAAGCAATGTGGGTATTACCGATCG
TCCGCAGTTGGCCGCAATGATGGCGCGCGTCGACTTACAACCTTTTAACTGACAGCAGGA
GAGGCATAATGAAAACGCTGCTGATTATTGACGCTAATCTCGGTCAGGCACGCGCCTATA
TGGCGAAGACCCTGCTGGGCGCGGCGGCGCGAAAAGCAAAACTGGAAATCATCGACAATC
CGAACGACGCAGAAATGGCGATTGTTCTCGGTGATTCCATCCCGAATGACAGCGCGCTGA
ACGGTAAAAATGTCTGGCTGGGCGATATTTCCCGGGCAGTTGCGCACCCTGAGCTGTTCC
TGAGTGAAGCCAAAGGCCATGCGAAACCTTACACTGCGCCGGTCGCTGCGACAGCACCGG
TTGCCGCCAGCGGTCCGAAACGCGTAGTTGCGGTGACTGCTTGCCCGACTGGCGTAGCAC
ACACCTTTATGGCGGCTGAAGCCATTGAAACCGAAGCGAAAAAACGTGGCTGGTGGGTGA
AAGTTGAAACCCGTGGTTCTGTTGGTGCGGGTAATGCAATCACCCCCGAAGAAGTAGCCG
CAGCGGATCTGGTGATTGTGGCGGCAGATATCGAAGTGGATCTGGCGAAATTTGCGGGTA
AACCGATGTATCGCACCTCTACCGGTCTGGCGCTGAAGAAAACCGCGCAGGAACTGGATA
AAGCGGTTGCTGAAGCAACGCCGTATGAACCGGCGGGCAAAGCTCAAACGGCGACCACTG
AAGGTAAGAAAGAGAGTGCAGGCGCTTATCGTCACTTGCTGACGGGCGTCTCTTACATGC
TGCCGATGGTCGTTGCAGGTGGTCTGTGTATCGCGCTTTCTTTTGCTTTTGGTATCGAAG
CGTTTAAAGAGCCGGGTACGTTGGCAGCGGCGCTGATGCAGATTGGTGGTGGTTCAGCCT
TTGCGCTGATGGTGCCGGTACTGGCAGGTTACATTGCCTTCTCCATTGCCGATCGTCCGG
GTCTCACGCCGGGTCTGATTGGCGGTATGCTGGCGGTCAGCACCGGTTCTGGCTTCATTG
GCGGTATTATTGCGGGCTTCCTGGCTGGTTACATTGCGAAGTTAATCAGTACGCAACTGA
AACTGCCACAGAGTATGGAGGCGCTGAAACCGATCCTGATCATTCCGCTAATTTCCAGTC
TGGTGGTCGGTCTGGCGATGATCTACCTGATCGGTAAACCGGTTGCTGGCATTCTCGAAG
GGTTGACTCACTGGCTGCAGACCATGGGGACTGCGAATGCGGTTCTGCTGGGGGCGATCC
TCGGTGGCATGATGTGTACTGACATGGGCGGTCCGGTAAATAAAGCAGCGTACGCATTCG
GTGTGGGTCTGCTGAGTACTCAAACCTATGGCCCGATGGCGGCGATTATGGCGGCAGGTA
TGGTGCCACCGCTGGCAATGGGCCTGGCAACAATGGTGGCGCGTCGCAAATTCGACAAAG
CGCAGCAGGAAGGTGGCAAAGCCGCTCTGGTACTGGGACTGTGCTTTATTTCGGAAGGTG
CAATTCCGTTTGCTGCTCGTGATCCGATGCGTGTGCTGCCGTGCTGTATCGTGGGTGGGG
CGCTGACTGGCGCAATCTCAATGGCGATTGGTGCGAAACTGATGGCACCGCACGGTGGTC
TGTTTGTTCTGCTGATCCCTGGCGCTATTACGCCGGTACTGGGTTACCTGGTAGCAATTA
TTGCCGGTACGCTGGTGGCGGGTTTGGCCTATGCCTTCCTGAAACGTCCGGAAGTGGACG
CAGTAGCGAAAGCCGCGTAATAAAAGGTGTGTTACAGGGCAGAAATTTACTGCCCTGTAT
CATTGGATGAGCGCAAAGAGAATGACCGGTTTGTGAATGTAATTTTATGAATTTAAATGG
TTTTATCTTTCAGTAGAAACCTGAAACGTTCATCAAATACTAAGGTTATTTCCTCAAGGG
CAGATTCTTTTCTGCCCTTTTTTAGTGTTCATGTTCTGTGCATCCCGTCACAAATTCCTC
GCTTTTGTAATTCAGGCATTTAATCGCATTTTGTGAGCCTGCTCAAATCTGCCTATTTTG
CCTCTCTGGCGGTAATTTACTTTACGTAAAACATGCATACTATGAGCACATGTTTAAATA
TGAACACATGTTTAAACCGTCTTTGCAGTATCTATATTCTTGTGGATTGACAGGGTTGGT
AATTTTTTACCAGAGGACGTGCTATGCGCGAAAAGGATTATGTCGTAATTATAGGTTCGG
CGAATATTGATGTCGCCGGATATTCACATGAATCATTAAATTATGCGGATTCAAATCCAG
GTAAAATAAAATTTACGCCTGGTGGAGTAGGGCGCAATATTGCACAAAACCTGGCGTTGC
TGGGTAACAAAGCCTGGCTACTGAGCGCCGTAGGCAGTGATTTTTATGGTCAATCGCTGC
TAACGCAAACCAATCAATCAGGCGTTTATGTCGATAAATGCCTGATTGTGCCGGGAGAAA
ATACGTCGAGTTATTTATCATTACTCGATAATACCGGTGAAATGCTGGTTGCTATAAATG
ACATGAATATTAGCAACGCTATTACAGCTGAATATCTCGCACAGCACCGTGAATTTATTC
AGAGGGCAAAGGTCATTGTCGCGGACTGTAATATCAGTGAAGAGGCACTGGCATGGATTC
TGGATAATGCCGCCAACGTACCTGTATTTGTCGATCCGGTTTCCGCGTGGAAATGTGTCA
AAGTGCACGACCGTCTAAATCAGATCCACACTCTCAAGCCAAACCGCCTTGAAGCGGAAA
CCCTGAGTGGGATTGCGCTGTCAGGGCGTGAAGATGTGGCAAAAGTTGCTGCCTGGTTCC
ATCAACATGGCCTGAACCGACTGGTATTGAGCATGGGCGGCGATGGCGTTTATTACAGTG
ATATCAGCGGTGAAAGTGGCTGGTCTGCCCCGATCAAAACCAATGTTATTAATGTTACCG
GAGCGGGCGATGCCATGATGGCGGGACTTGCTTCGTGTTGGGTAGACGGAATGCCGTTTG
CCGAATCTGTTCGTTTCGCACAGGGATGTTCGTCAATGGCGCTCTCCTGTGAATACACCA
ATAACCCCGATTTATCGATTGCCAACGTTATATCGTTAGTGGAGAACGCAGAATGTCTGA
ATTAAAAATTTCCCCTGAATTATTACAAATTTCCCCGGAAGTGCAGGACGCTTTAAAAAA
CAAAAAACCGGTTGTGGCGCTGGAATCGACCATTATTTCTCACGGGATGCCGTTCCCACA
AAATGCCCAGACCGCAATTGAAGTTGAAGAACTATTCGTAAACAGGGCGCTGTACCTGCC
ACTATCGCCATTATTGGCGGCGTGATGAAAGTGGGTTTAAGCAAAGAAGAAATTGAATTA
CTGGGTCGTGAAGGGCATAACGTGACCAAAGTTAGTCGTCGCGATTTACCTTTTGTTGTT
GCCGCCGGAAAAAATGGCGCAACCACTGTGGCTTCAACGATGATTATTGCGGCGCTTGCC
GGAATTAAAGTATTTGCCACCGGGGGAATTGGTGGTGTGCATCGCGGGGCGGAACATACC
TTCGATATTTCTGCCGATTTGCAAGAACTGGCAAATACTAATGTCACCGTTGTTTGTGCC
GGGGCGAAATCTATTCTCGATTTAGGATTAACCACTGAGTATTTAGAAACCTTCGGTGTG
CCGTTAATTGGCTATCAGACTAAAGCGCTGCCTGCGTTTTTCTGCCGTACCAGCCCGTTT
GACGTCAGCATTCGTCTCGACAGCGCCTGTGAAATTGCCCGTGCAATGGCGGTGAAATGG
CAAAGCGGGCTGAACGGTGGCCTCGTGGTAGCGAACCCGATCCCGGAACAGTTTGCGATG
CCAGAACACACTATCAATGCGGCGATCGATCAGGCGGTAGCTGAAGCGCAGGGTGTTATT
GGTAAAGAAAGTACGCCATTCCTGCTGGCGCGCGTTGCTGAACTGACCGGCGGTGACAGC
CTGAAATCCAACATCCAACTGGTGTTCAACAACGCCATTCTGGCGAGTGAAATTGCCAAA
GAATACCAGCGTCTCGCGGGTTAATTTCTGACGGGCAGAAAGCCGTCGCCCGTACTCATC
AAACATACCAAAACCTGGCGCTGACGCCGGGTTTACTGGCATGAAGGGAAAATCATTATG
GACATAATGAGAAGTGTTGTGGGGATGGTGGTGTTACTGGCAATAGCATTTCTGTTGTCA
GTGAATAAAAAGAGCATCAGTTTGCGTACGGTTGGAGCCGCACTACTGCTGCAAATTGCT
ATTGGTGGCATCATGCTCTATTTTCCGCCGGGAAAGTGGGCTGTAGAACAGGCGGCATTA
GGCGTTCATAAAGTGATGTCTTACAGTGATGCCGGTAGCGCCTTCATTTTTGGTTCGCTG
GTCGGGCCGAAAATGGATGTCCTCTTTGACGGTGCGGGTTTTATCTTCGCCTTTCGCGTA
CTCCCGGCGATTATCTTCGTCACTGCGCTCATTAGTCTGCTGTACTACATTGGCGTGATG
GGGCTGCTGATTCGCATCCTTGGCAGCATTTTCCAGAAAGCCCTCAACATCAGCAAAATC
GAATCTTTTGTTGCGGTTACCACTATTTTCCTCGGGCAAAATGAGATCCCGGCGATCGTT
AAACCGTTTATCGATCGCATGAATCGCAACGAGTTGTTTACCGCAATTTGTAGCGGGATG
GCGTCCATTGCGGGTTCGATGATGATTGGTTATGCCGGAATGGGCGTACCAATTGACTAC
CTGTTGGCGGCATTGCTGATGGCGATCCCCGGCGGTATTTTGTTTGCACGTATTCTTAGT
CCGGCAACCGAGCCTTCGCAGGTCACATTTGAAAATCTGTCGTTCAGTGAAACGCCGCCA
AAAAGCTTTATCGAAGCGGCGGCGAGCGGTGCGATGACCGGGTTGAAAATCGCCGCCGGT
GTGGCGACGGTGGTAATGGCGTTTGTCGCAATTATTGCGCTGATTAATGGCATTATCGGC
GGAATTGGCGGCTGGTTTGGTTTTACCAATGCTTCTCTGGAAAGTATTTTTGGCTATGTG
CTGGCACCGCTGGCGTGGATCATGGGTGTGGACTGGAGTGATGCTAACCTTGCGGGTAGC
CTGATTGGGCAGAAACTGGCGATTAACGAATTCGTCGCTTACCTGAGTTTCTCCCCATAC
CTGCAAACGGGCGGCACGCTGGGAGTGAAAACCATTGCGATTATCTCCTTTGCGCTTTGT
GGTTTTGCTAACTTTGGTTCTATCGGTGTTGTCGTTGGCGCATTTTCGGCTATTTCGCCA
AAACGTGCACCGGAAATCGCCCAGCTTGGTTTACGGGCGCTGGCAGCAGCAACGCTTTCC
AACCTGATGAGCGCGACCATTGCCGGGTTCTTTATTGGTTTAGCTTGAGTTTCATTGCCG
GATGTACTCGCTTATTAAGCGTTGCATCCGGCAATCGCGCTATTGCAAATAATTTTTACT
GCATCATCCCGGAGAATTTATTCTCCGGGTCCATCTCCAGCGCCAGTCCTGACAACTGCC
TTTTGTTTTTAATGAGATACCCTTTCTTGCTTTTAATTAATAAACCGTCGTGAATGAATT
GCGCGAGAACATATAAAAGATGTCGATAAGAAACGCCTAAATACTCTGCCGCTTGCGTAT
GCTTTTCGTGATAAAGATCACCTTCTTGTGAGAGTAATATAAATGCTGCCAGGCGATTCA
CTAACGGAAATGATTGGTTCTGAGTTAAAGAAACAATATTACGATAATTTTTATGACTTA
AGGTGACGCAAAGTTTTCGTAAAAATAGGGTGTCGTTTAATAACAGCGGACGGTAATGTT
TCATAGGGAGCGCAAGGCACCAACACTCTTCAATCGCCTGTACTGCACGTGGTTCATGGT
CTTTATCGATTAACTCAATCTCGCCAATAAAACAGGGGGCGGCAAAGAAATCGATCAGCG
ACACGCGACCATTAGCTAGCGTGGCGTAAAGCCTGGCGCGGCCTCGCGTCAGGTAAAACA
GCCAGGACGGCTGTTGCCCTTCCTGCACAATGTAGTCACGCGCTAAAAAATGAAACAGCC
GCGTATCGGCTGAAACATCCGTTAAAAAGCAATCCTTAAACGCGGATTCACTCATCAATT
GCAGCTTAAGATCATTATTGTGGATTTCTTTCACGATGTTTATCCGCTGTGAGATTTCTC
ATATTTAGCATACGTACGCTGTTGTTAAGATTCAATCATCGGCCCGGTCGAAATTTCTTT
GCTGTAGAAAAAATAACGCAACTGGAAACAGAGGAAATAAACAATGGAAAAGAGAAAAAT
TATTCTGGATTGTGATCCGGGTCATGATGATGCTATTGCTATAATGATGGCGGCGAAACA
TCCGGCGATTGATTTATTAGGTATCACCATTGTTGCGGGTAATCAGACGCTTGATAAAAC
ATTAATTAATGGCCTGAATGTTTGCCAGAAACTGGAGATTAATGTTCCGGTTTATGCGGG
GATGCCGCAACCCATTATGCGTCAACAAATCGTTGCCGATAATATTCACGGTGAAACCGG
ACTGGATGGCCCGGTATTCGAGCCGCTGACCCGCCAGGCAGAAAGTACCCACGCGGTGAA
ATACATCATTGATACCCTGATGGCAAGCGATGGCGATATCACTCTGGTGCCGGTTGGTCC
GTTGTCAAATATCGCGGTGGCAATGCGTATGCAACCCGCAATCCTGCCCAAAATCCGTGA
AATTGTGCTAATGGGCGGCGCTTACGGTACAGGCAACTTCACGCCATCTGCCGAGTTCAA
CATCTTTGCTGACCCGGAAGCCGCACGCGTGGTGTTCACCTCTGGCGTTCCATTAGTGAT
GATGGGCCTCGATCTCACCAACCAGACCGTTTGCACCCCGGACGTGATTGCACGAATGGA
AAGGGCAGGCGGCCCTGCCGGAGAGCTGTTCAGCGACATCATGAACTTCACTCTCAAAAC
CCAGTTCGAAAACTACGGCCTGGCTGGCGGCCCGGTGCACGACGCCACCTGCATCGGTTA
TCTGATTAACCCTGATGGCATTAAAACCCAGGAGATGTACGTCGAAGTGGACGTCAACAG
TGGCCCTTGCTATGGGCGTACCGTCTGCGACGAGCTGGGCGTTCTTGGCAAGCCCGCTAA
TACCAAAGTCGGCATCACTATTGATACCGACTGGTTCTGGGGCTTAGTCGAAGAGTGCGT
GCGCGGCTACATCAAAACCCATTAAGTGTTGATAACAAGCCGGGTCAGTATCGCAAGATG
CAGGCCCGGCTATTTCTGAGGGGCAGAAAGCCGTCGCCCAATATGACATGAAGAGATAAT
AACTATGGATGTCATGAGAAGTGTTCTGGGAATGGTGGTATTGCTGACGATTGCGTTTTT
ACTGTCAGTAAACAAGAAGAAGATCAGCCTGCGTACCGTTGGCGCGGCGTTAGTGTTACA
GGTTGTGATTGGCGGGATTATGCTTTGGTTACCGCCAGGGCGTTGGGTCGCTGAAAAAGT
CGCTTTTGGCGTGCATAAAGTGATGGCGTACAGCGACGCGGGTAGCGCATTTATCTTCGG
TTCGCTGGTCGGGCCGAAAATGGACACGCTGTTTGATGGCGCAGGATTTATCTTTGGTTT
CAGGGTGTTACCGGCAATTATCTTCGTCACCGCGCTGGTGAGTATTCTCTATTACATCGG
TGTGATGGGGATCTTAATTCGCATTCTCGGCGGTATATTCCAGAAAGCATTAAATATCAG
CAAGATCGAGTCATTCGTCGCGGTCACTACCATTTTCCTCGGGCAAAACGAAATTCCGGC
GATCGTCAAACCCTTTATCGATCGTCTGAATCGCAATGAATTATTTACAGCGATTTGTAG
TGGCATGGCCTCGATTGCTGGTTCGACAATGATTGGTTACGCCGCACTGGGCGTACCTGT
GGAATATTTGCTGGCGGCATCGTTAATGGCGATCCCCGGCGGGATCTTGTTTGCCCGCAT
GCTAAGCCCGGCTACGGAATCTTCACAGGTTTCCTTTAATAACCTCTCTTTCACCGAAAC
ACCGCCAAAAAGCATTATTGAAGCGGCAGCGACAGGGGCGATGACCGGGCTGAAAATCGC
TGCGGGTGTGGCAACAGTGGTGATGGCATTTGTTGCCATCATTGCGTTAATTAACGGTAT
TATCGGCGGCGTAGGCGGCTGGTTTGGTTTTGAACATGCCTCGCTGGAGTCCATTTTAGG
TTACCTGCTGGCCCCACTGGCGTGGGTAATGGGTGTTGACTGGAGTGATGCGAATCTTGC
CGGGAGTTTGATTGGACAGAAACTGGCAATAAATGAATTTGTCGCTTATCTCAATTTCTC
ACCCTATCTGCAAACGGCTGACACGCTGGATGCTAAAACCGTGGCGATTATTTCCTTCGC
GTTGTGCGGTTTCGCTAACTTTGGTTCTATCGGGGTGGTGGTGGGGGCGTTTTCTGCGGT
TGCGCCACACCGTGCGCCGGAAATCGCCCAGCTTGGTTTACGCGCGCTGGCGGCGGCGAC
ACTTTCTAACCTGATGAGTGCCACCATTGCCGGGTTCTTTATTGGTTTAGCGTAGTGTGC
GATTTATGAGCCGGATTAGATGCGGTCAAGCGTCGAATCCGGCAACATTGTTACACCATT
GGCACTAATGACAGCGCGTTATCGGCAGACAGGGTAGGGTTGTTTAAGCTGCCGCTGGCG
CGTGAAATTGCCGCGCAGGCCATCGCAAAACGGGCGCTGTCACGGAAATTGTTTCCCTCC
AGAAAGCTATATACCAGGCCCGCCATAAAACCATCGTCAGCACCAAAACTGTCTACTGTC
GTATGCGCTGGTGCGGTCAGCAAAAATTGTTCACCATCCTTTTCGCTGCAATAAACTGAC
TCATCGGGCAAATAAACAAACAGTTGCTGAACACCTTGCTGATGCAACGCATTCACTGCG
GCATTACGGTCAGCATCGCTGGTGATCGCCTGTCCCCATAAAATTTCCAGCTCCGGTAAA
GTGGGTTTCAGGGTGTGAATATGCGCCAGCCAGGGTTTGATTTTGCCCGCTTTGAATTCT
GAAACGGTATCGACAAACACCGGGATTTGATCAGCGAGGGTAAAGACCCATTCCAGCGCC
TCGGCTGTCAGGTTGCAATCAGCCAGTACCACGCCCGCATGACGAAGTAAATCGCGCGAC
CCGTTCAGTAGTTGCGGTGTCAACTGTTCCAGCAGATGGGTATCGTTAATCGCCAGCACG
GTTTGATCGTCTCGATTGGCAATTGCCAGATACGTCGATGTGCTTTGACCATGTAAACGA
ACGCAGCCGGAGACATTCACGCCGGCACGGCGCGTTTCTTCCAGGAGCATTTCGCCATAA
AAGTCATCGCCAATCACTGAAAGCAAATGGACGTCGCGGCCTAACAGCGCCAGATTGTGG
GCGATATTGCGTCCAACGCCGCCTGCCGAGCAATGAATTGTACCGGGATGAGAAGCCGCT
TGCGGGTAACGGATATCCGCCATCCCGCGAATATCCATATTGATTGTCCCCACCACTACG
CAGTATTCCTGCTCGGTGAGAATGTAACCTTTGCTTTTAATCCGCCCTTTGCGCATTAAA
TCCATAATATGCGCCGCAACGCGCGAACGACTGATTTGCAGCATGTCCGCAATTTCGTTC
TGCTGAATCAGCGGGTTACGCCGTAAAATTGCAAGGATCTCCTTTTCCCGGTTATTCATC
TTCAAGCAACCGCTTTTTCAGTTTGTTGCGCTTTCAGCCAGGCGATCTCTTCTGCCCAGA
TATCCGGGTTAATGGTTTCAAGGATCAGCGGAATGCCGTCGAAACGGTCGTCCTGCATGA
TCCAGCGGAACGCATCATGACCGATATTGCCTTCACCGAGGCTATGATGGCGGTCAACGC
GGCTGCCAAAGGTGCTTTTCGCATCGTTAAGGTGCATCCCGCGCAGATACTTAAAGCCGA
CAATACGGGCAAAATCAGCGAACGTTTTCTCGCATTCGGCTGGAGTACGCAAATCATACC
CGGCAGCGAAAGCATGGCAGGTATCAATGCAGATGCCGACACGGGATTTATCTTCCACGC
CGTCGATAATCGCCGCGAGATGTTCGAATTTAAACCCTAAGTTACTGCCCTGACCGGCGG
TGTTTTCAATCACCGCGGTCACACCTTGAGTTTTATCCAGCGCAATGTTGATGGATTCGG
CAATACGCGCAAGGCAATCCTCTTCTGAAATCTGCATCAGATGGCTGCCAGGGTGGAAGT
TGAGCAAAGAAAGCCCCAGTTGTTCGCAACGCTGCATTTCATCTATAAAGGCATCGCGCG
ATTTTTCCAGAGCTTCAGTGACCGGATGTCCGAGGTTAATCAGATAGCTGTCGTGGGGAA
GAATTTGCGCCGATGTGTAGTGATATTTTTCACAGGCGGCTTTGAATTCATCGATGGTTT
GCGTCGTGAGCGGTGCGGCACGCCACTGACGTTGGTTTTTGGTGAACAAGGCAAACGCGG
TTGCGTCGATTTCGGCGGCGCGAATTGCGGCATTTGCCAGACCGCCAGCAGCACTAACGT
GCGCTCCAATGTATTTCATGCGAGGACTCCTGTTAAACCCGCTGGAGGAAAACGGCAATG
ATAGCGGGTTAACAGGAGCAAGATGTAGTGGTTTATGCGATGACGCTTTGAATCACATAG
TTAATCGCACCACCACCAACAATCAGCCAGGCAAACAGTACCAGTGCCATCAGCAGAGGT
TTCGCCCCAGCTTTTTTCAGCGCGCTGACGTGAGTGGTCAGACCCAGCGCCGCCATCGCC
ATTGCCAGCAGGAAGGTATCCAGCGTTACCAGCATGTTCACCACGCTCTGCGGTAACAGG
TGGAACGAGTTAAAGATGGCAACTACGATGAACAAGATGGCAAACCACGGAATAGTGATT
TTGCTTTTCTCGCCGCTGTTCGCCCCAGACAGCTGTTTAACACGCGCCGCCAGCAGGATG
AGGAACGGAGCCAGCATCATCACGCGCAGCATTTTGGAAATAACTGCTGCGTTTTCCGCA
TCCGGGCTGATGGCATGACCTGCCGCCACCACCTGCGCCACTTCGTGCACAGTAGAACCA
ATGTAGATACCGAAAGTTTCCGGACTAAACCATTGAGACATCAGCGGATATATCGCCGGG
TAGAGGAAAATCGCGACGGTCCCGAAGATAACAACGGTTGCAACAGCCACGGTTACTTTA
CTGGCTTCCGCTTTCACTACCGGCTCAGTCGCCAGTACCGCGGCAGCACCACAGATACTG
CTACCGGCACCGATCAACCAGCTGGTGTGCTTATCCAGACCAAACACTTTCTGCCCCAGG
AAGCAAGCCAGCAGGAAGGTACTGGACAGCGTCAACACGTCAATGATGATCCCACTGATA
CCGACATCGGCAATTTGCGAGAACGTCAGACGGAAGCCATAAAGAATGATACCCAGACGT
AATAAATATTGCTTGGCAAACAGCACACCACCGTCACAGCTTTTCCAGATGTGCGGATAG
ATGGTGTTGCCTAAAACCATCCCCAACAAGATTGCGAGGGTGAGGGCACTAAACCCGGCA
CCCGCAACCGCGGGAATGGAACCACCCCACAGGGCGACCCCGGTGATAACTGCACTCAGG
GCTAACCCCGGAATAAAATGCCACAGTGTACGATGTTGTTTCTGTAAGGTGATATTCGTC
ATAACCCTCTCCTTTAACCGGGCATAAGGTTACGACTAACTGGTTTAAAAATAAAATTGA
TTATATATTTATAATTAATCTTTATAAGTGGTAAGCGACTATGCACATCACCCTCCGGCA
GTTGGAAGTTTTTGCAGAAGTATTGAAAAGTGGATCAACCACCCAGGCGTCGGTGATGCT
GGCGTTGTCGCAATCAGCAGTGAGCGCAGCCTTGACCGACCTGGAAGGGCAGCTTGGCGT
TCAACTGTTTGATCGCGTGGGGAAAAGACTGGTTGTTAATGAACACGGGCGGCTGCTCTA
TCCGCGTGCGTTGGCATTGCTTGAACAGGCGGTTGAAATCGAACAACTGTTTCGCGAAGA
CAACGGCGCGATTCGTATCTATGCCAGTAGTACCATCGGTAACTACATTCTGCCTGCAGT
TATCGCCCGTTATCGCCATGATTATCCGCAGTTGCCGATTGAACTTAGCGTTGGGAACAG
CCAGGACGTGATGCAAGCGGTGCTGGATTTCCGCGTTGATATTGGCTTTATTGAAGGACC
GTGCCACAGCACTGAAATCATTTCTGAACCGTGGCTGGAAGACGAGCTGGTGGTTTTCGC
CGCGCCGACTTCGCCGTTGGCCCGTGGTCCGGTCACCTTAGAACAGCTGGCCGCTGCGCC
GTGGATCCTGCGTGAACGCGGTTCCGGCACGCGGGAGATTGTCGATTATCTGTTGCTGTC
ACATTTACCGAAGTTTGAGATGGCGATGGAATTAGGTAACTCCGAGGCAATCAAACATGC
GGTGCGTCATGGGTTGGGAATTAGTTGCCTGTCGCGACGGGTGATTGAAGACCAATTGCA
GGCAGGCACATTAAGTGAAGTTGCGGTCCCTCTGCCGCGCCTGATGCGTACGTTGTGGCG
TATACATCATCGGCAAAAACACCTTTCCAACGCGCTACGGCGCTTTCTGGACTATTGCGA
TCCCGCAAATGTGCCGCGTTAAGTTGCTGTACAAGAACATGCTGGTGCTGTGTCGATTTC
GTGACGCAGCGCCTTCAGCATGCATTCGCCAGAAAAGAGATTGGCTGCTTTACTTATAAT
CCCTGGGCGATCATGAAGGTGTCTTATAACCGTGTATTTCTGCCGGAAGGATTGCCAATC
GTCTGCTACAATCGCGCCTCATTTTTTAGATGGATAGCATTTTTGTATGGTTTCCGAAAC
TAAAACCACAGAAGCGCCGGGCTTACGCCGTGAATTAAAGGCGCGTCACCTGACGATGAT
TGCCATTGGCGGTTCCATCGGTACAGGTCTTTTTGTTGCCTCTGGCGCAACGATTTCTCA
GGCAGGTCCGGGCGGGGCATTGCTCTCGTATATGCTGATTGGCCTGATGGTTTACTTCCT
GATGACCAGTCTCGGTGAACTGGCTGCATATATGCCGGTTTCCGGTTCGTTTGCCACTTA
CGGTCAGAACTATGTTGAAGAAGGCTTTGGCTTCGCGCTGGGCTGGAACTACTGGTACAA
CTGGGCGGTGACTATCGCCGTTGACCTGGTTGCAGCTCAGCTGGTCATGAGCTGGTGGTT
CCCGGATACACCGGGCTGGATCTGGAGTGCGTTGTTCCTCGGCGTTATCTTCCTGCTGAA
CTACATCTCTGTTCGCGGCTTTGGTGAAGCGGAATACTGGTTCTCACTGATCAAAGTCAC
GACAGTTATTGTCTTTATCATCGTTGGCGTGCTGATGATTATCGGTATCTTCAAAGGCGC
GCAGCCTGCGGGCTGGAGCAACTGGACAATCGGCGAAGCGCCGTTTGCTGGTGGTTTTGC
GGCGATGATCGGCGTAGCTATGATTGTCGGCTTCTCTTTCCAGGGAACCGAGCTGATCGG
TATTGCTGCAGGCGAGTCCGAAGATCCGGCGAAAAACATTCCACGCGCGGTACGTCAGGT
GTTCTGGCGAATCCTGTTGTTCTATGTGTTCGCGATTCTGATTATCAGCCTGATTATTCC
GTACACCGATCCGAGCCTGCTGCGTAACGATGTTAAAGACATCAGCGTTAGTCCGTTCAC
CCTGGTGTTCCAGCATGCGGGTCTGCTCTCTGCGGCGGCGGTGATGAACGCAGTTATTCT
GACGGCGGTGCTGTCAGCGGGTAACTCCGGTATGTATGCGTCTACTCGTATGCTGTACAC
CCTGGCGTGTGACGGTAAAGCGCCGCGCATTTTCGCTAAACTGTCGCGTGGTGGCGTGCC
GCGTAATGCGCTGTATGCGACGACGGTGATTGCCGGTCTGTGCTTCCTGACCTCCATGTT
TGGCAACCAGACGGTATACCTGTGGCTGCTGAATACCTCCGGGATGACCGGTTTTATCGC
CTGGCTGGGGATTGCCATTAGCCACTATCGCTTCCGTCGCGGTTACGTATTGCAGGGACA
CGACATTAACGATCTGCCGTACCGTTCAGGTTTCTTCCCATTGGGGCCGATCTTCGCATT
CATTCTGTGTCTGATTATCACTTTGGGCCAGAACTACGAAGCGTTCCTGAAAGATACCAT
TGACTGGGGCGGCGTAGCGGCAACGTATATTGGTATTCCGCTGTTCCTGATTATTTGGTT
CGGCTACAAGCTGATTAAAGGAACTCACTTCGTACGCTACAGCGAAATGAAGTTCCCGCA
GAACGATAAGAAATAAGTTTCCTCCCTTCCTTGCTAAGCCCTCTCAACCGAGAGGGCTTT
TTCAATTCCATTTCCCTGACAAATCATGCGGATATAAAATTTAACATTTGGATTGATAAT
TGTTATCGTTTGCATTATCGTTACGCCGCAATCAAAAAAGGCTGACAAATCAGAGGCTGT
TCCGGCTTTCTGGGATGATCACCTGCATACAAATAAGTCCACCGCGATGCTGCCGTACGC
AAGGGGACGTGAAGAAGATGTGAGCGATAACCCATTTTATTTTCGTAGTTACCTCATGGA
GATATGGAATGTTTAGGTTGAACCCTTTCGTACGGGTCGGGCTGTGTTTGTCCGCTATTT
CTTGTGCATGGCCTGTGTTAGCGGTCGATGATGATGGCGAAACGATGGTTGTCACTGCAT
CTTCCGTTGAACAAAACCTTAAAGATGCACCCGCCAGTATCAGCGTCATTACCCAGGAAG
ACCTGCAGCGAAAACCGGTACAGAATCTGAAGGATGTCCTCAAAGAAGTGCCTGGCGTAC
AACTGACGAATGAAGGGGATAACCGTAAGGGCGTTAGTATTCGTGGTCTGGACAGCAGCT
ACACCCTGATTCTTGTCGACGGTAAACGCGTTAACTCCCGCAATGCCGTCTTCCGCCACA
ATGATTTCGATCTGAACTGGATCCCGGTCGATTCCATCGAACGTATTGAAGTGGTCCGTG
GCCCGATGTCGTCGCTGTACGGTTCCGATGCGCTCGGCGGTGTAGTGAATATCATCACCA
AAAAAATCGGTCAGAAATGGTCGGGTACCGTTACCGTCGATACCACCATTCAGGAACATC
GCGATCGCGGTGATACCTATAACGGTCAGTTCTTTACCAGTGGACCATTAATTGATGGTG
TGCTGGGAATGAAAGCTTACGGCAGCCTGGCAAAACGTGAAAAGGATGACCCGCAAAACT
CAACGACCACCGATACCGGAGAAACGCCGCGTATTGAAGGATTCTCCAGCCGCGACGGCA
ATGTCGAATTTGCCTGGACACCGAATCAAAATCACGATTTTACTGCCGGATACGGTTTCG
ACCGTCAGGATCGTGATTCCGACTCGCTGGACAAAAACCGCCTGGAACGCCAGAACTACT
CCGTCAGCCATAATGGGCGTTGGGATTACGGCACCAGCGAACTGAAATACTACGGTGAGA
AAGTCGAGAACAAAAACCCTGGCAACAGCAGCCCGATAACTTCCGAAAGCAATACGGTCG
ACGGCAAATACACGTTGCCGCTGACGGCGATTAATCAGTTTCTCACGGTTGGCGGTGAAT
GGCGTCACGACAAACTTAGCGATGCGGTGAACCTGACCGGGGGAACCAGCTCCAAAACGT
CTGCCAGCCAGTACGCGCTGTTTGTGGAAGATGAATGGCGGATCTTCGAGCCGCTGGCGC
TGACGACCGGCGTGCGTATGGACGATCACGAAACCTACGGTGAACACTGGAGTCCGCGTG
CCTACCTGGTTTATAACGCCACCGACACCGTAACGGTGAAAGGGGGCTGGGCGACGGCAT
TTAAAGCGCCTTCTCTGTTGCAACTTAGCCCTGACTGGACGAGCAATTCCTGCCGTGGCG
CATGTAAGATTGTAGGTAGCCCGGATCTGAAACCAGAAACCAGCGAAAGTTGGGAGCTGG
GGCTGTACTACATGGGTGAAGAAGGCTGGCTGGAAGGGGTTGAATCCAGCGTTACCGTTT
TCCGTAACGATGTGAAAGATCGCATCAGCATCAGCCGTACGTCTGACGTCAATGCTGCAC
CGGGCTACCAAAACTTTGTCGGTTTTGAGACGGGCGCTAACGGACGGCGCATACCGGTAT
TTAGCTACTACAACGTTAACAAAGCTCGTATTCAGGGCGTGGAAACCGAACTGAAAATTC
CGTTCAACGATGAATGGAAACTGTCACTCAACTACACCTATAACGATGGTCGTGATGTCA
GCAACGGCGAAAACAAACCGCTATCCGATCTGCCGTTCCATACCGCTAACGGTACGCTGG
ACTGGAAACCGCTGGCGCTGGAAGACTGGTCATTCTATGTTTCTGGTCACTATACCGGGC
AGAAACGAGCCGACAGCGCGACGGCTAAAACACCGGGCGGTTATACCATCTGGAATACCG
GCGCGGCCTGGCAGGTGACTAAAGACGTCAAACTGCGCGCAGGTGTGCTGAACCTTGGCG
ACAAGGATCTCAGTCGTGACGACTACAGCTATAACGAAGACGGACGTCGTTACTTTATGG
CAGTGGATTATCGCTTCTGATGAGAAGATGCCCGGCGAACCGGGCGGACTTTCACTTCAG
TAAATACTGCGCATGGAAGCGCAGGTGATCCTCTATAAAAGAGGCGATGAAGTAGTAACT
GTGATCATATCCCGGCTGAATACGCAGCGTCATCGGCCATGCTTTCTGGCGCGCGGCTTC
TGCAAGTACTGCAGGTTGCAGTTGGTCAGCAAGAAACTGATCGTTATCACCCTGATCGAT
AAGCGTCGGGATCGCATCCTGCGCGTTACTGGCATACATCAGCGCGCAACTGTCCCATTC
CAGCCATGCATTTTTGTCCTCACCTAAATAGCGGCTAAACGCTTTGATTCCCCACGGGAC
GCTGCACGGATTCACAATTGGCGCAAAGGCGGAAACGCTGGCGTATTTGCCCGGGTTTTT
CAGCGCCATAATCAGCGCACCGTGACCACCCATTGAATGACCGCTAATGGCGCAGCGGTC
GCTGACATTAAATTGCGACTGAATCAGCGCCGGTAATTCATCGCGCAGATAATCATACAT
CCGGTAATGCGTCGCCCACGGCGGTTGCGTGGCGTTAAGATAAAAGCCCGCGCCCTGGCC
TAAATCGTAGCCATCGTCGTTGGCAACCTGTTCACCGCGCGGGCTGGTGTCTGGCATCAC
CAGTACAATCCCCAGTTCCGCCGCCACGCGCTGGGCACCCGCCTTGGTGGTGAAGTTCTC
GTCATTGCAGGTTAATCCGGAAAGCCAGTACAGCACTGGTGGCGGGGTGTGATCACGAGG
GGGTGGGAGAAAGATACTGAACGTCATCGGGCAGTTTAAGGTACTGGAGTAGTGTCGCCA
GCGTTGCTGCCAGCCTTCAAAACAGCGGTGCTCTTCGAGCATTTCCATGCGTGGCTCCTT
GTTGTGTTGTTTGCAATTTCTTCATCATACCGTTTATTCAATGTGCTGTGAGTAACTTTC
ACTTCCGTATTTGCATAACGATGTTTTAACATCTGCTGATGAAAGGCAGCGGCAATTACA
ATAATTATCGCTGTGAATACTGGATTATGTGCGCCGCCTCACGCACAATAATCAGGCTGT
AAATCAGCTTAATAACTTTGCCCCCACGCAGGGCGGAGGCGTCACACCTGCAGGAGAAAT
CATAAATGCCATCACTCAGTAAAGAAGCGGCCCTGGTTCATGAAGCGTTAGTTGCGCGAG
GACTGGAAACACCGCTGCGCCCGCCCGTGCATGAAATGGATAACGAAACGCGCAAAAGCC
TTATTGCTGGTCATATGACCGAAATCATGCAGCTGCTGAATCTCGACCTGGCTGATGACA
GTTTGATGGAAACGCCGCATCGCATCGCTAAAATGTATGTCGATGAAATTTTCTCCGGTC
TGGATTACGCCAATTTCCCGAAAATCACCCTCATTGAAAACAAAATGAAGGTCGATGAAA
TGGTCACCGTGCGCGATATCACTCTGACCAGTACCTGTGAACACCATTTTGTTACCATCG
ATGGCAAAGCGACGGTGGCTTATATCCCGAAAGATTCGGTGATCGGTCTGTCAAAAATTA
ACCGTATCGTGCAGTTCTTTGCCCAGCGTCCGCAGGTGCAGGAACGTCTGACGCAGCAAA
TTCTCATTGCGCTACAAACGCTGTTGGGCACCAATAACGTGGCTGTTTCTATCGACGCGG
TGCATTACTGCGTGAAGGCGCGTGGCATCCGCGATGCAACCAGTGCCACGACAACGACCT
CTCTTGGTGGATTGTTCAAATCCAGTCAGAATACGCGCCACGAGTTTCTGCGCGCTGTGC
GTCATCACAACTGATTAAAAGGCAGGAACCATGGAGCGCAACGTCACGCTCGATTTTGTT
CGCGGCGTCGCCATTCTGGGGATCCTGCTATTAAACATCAGCGCCTTTGGGCTACCAAAG
GCGGCTTATCTTAATCCCGCCTGGTACGGCGCTATTACGCCGCAGGATGCATGGACCTGG
GCATTTCTCGATCTCATCGGCCAGGTGAAATTCCTCACGCTTTTTGCGCTGCTGTTTGGT
GCTGGCCTGCAAATGTTGCTGCCCCGTGGCAGACGCTGGATCCAGTCGCGGTTAACGCTG
TTAGTCTTGCTGGGCTTTATTCACGGTTTATTGTTCTGGGACGGCGATATTCTGCTGGCT
TACGGGCTGGTGGGCTTAATCTGCTGGCGGCTGGTGCGCGATGCGCCATCGGTAAAAAGC
CTGTTTAATACAGGCGTCATGCTTTATCTGGTGGGGCTTGGCGTTTTGCTGTTATTGGGG
TTGATTTCCGATACCCAGACCAGCCGCGCCTGGACGCCGGATGCATCGGCTATTTTGTAT
GAAAAATACTGGAAGCTTCACGGCGGCGTTGAAGCGATCAGTAATCGTGCCGATGGTGTT
GGGAACAGTTTACTGGCACTGGGCGCACAGTATGGCTGGCAACTGGCTGGGATGATGCTC
ATTGGTGCGGCGCTGATGCGCAGCGGCTGGCTGAAAGGGCAGTTCAGCTTACGTCACTAT
CGTCGTACTGGTTTTGTGCTGGTGGCGATTGGGGTGATCATTAACCTTCCTGCCATCGCC
CTGCAATGGCGGCTGGACTGGGCATATCGCTGGTGCGCCTTCTTACTTCAGATGCCGCGG
GAACTGAGTGCACCGTTTCAGGCGATTGGCTATGCGTCGCTGTTTTATGGTTTCTGGCCG
CAATTGAGCCGCTTTAAGCTGGTGCTTGCGATCGCCTGCGTCGGACGGATGGCGCTGACC
AACTATCTATTGCAAACGCTGATTTGTACCACGCTTTTTTATCACCTCGGTTTGTTTATG
CAGTTTGACCGTCTGGGATTGCTGGCGTTTGTTATTCCGGTATGGCTGGCGAATATCCTC
TTCTCTGTTATCTGGCTGCGTTACTTCCGCCAGGGGCCGGTGGAATGGCTCTGGCGTCAG
TTAACTTTGCGTGCTGCCGGACCGGCAATATCTAAAACATCAAGATAACGATCTGGATCA
CATTCGTTAACAAAACGGCTGTAACCGTTTCCATTGCTGTGACTCGATTCACGAAGTCCT
GTATTCAGTGCTGACAAAATAGCCGCCAGCAAGCAGTCATTTACTGCAATCTCATAACAG
GTAGTGAATATGATCACCATTCGTGATGTAGCGCGTCAGGCTGGCGTCTCTGTGGCAACG
GTTTCCCGGGTGCTCAATAACAGCACGCTGGTCAGTGCCGACACGCGTGAAGCAGTAATG
AAAGCCGTGAGTGAGCTGGATTATCGGCCAAACGCCAATGCCCAGGCGCTGGCAACTCAG
GTTAGCGACACCATTGGCGTGGTGGTGATGGACGTTTCTGATGCGTTTTTCGGCGCGCTG
GTAAAAGCGGTGGATCTGGTCGCCCAGCAGCATCAGAAATACGTGCTAATCGGCAATAGC
TATCATGAAGCGGAAAAAGAACGTCACGCCATTGAGGTGTTAATTCGCCAGCGTTGTAAT
GCATTGATTGTTCACTCAAAAGCATTGAGTGACGATGAACTGGCGCAATTTATGGATAAC
ATTCCCGGTATGGTGTTAATCAACCGCGTTGTGCCGGGGTACGCCCATCGTTGCGTTTGC
CTGGATAATCTCAGCGGTGCCCGAATGGCGACGCGCATGTTGCTGAATAACGGTCATCAA
CGTATTGGTTATCTTTCTTCCAGCCACGGCATTGAAGATGACGCCATGCGTAAAGCAGGC
TGGATGAGTGCGTTGAAAGAGCAGGATATTATTCCGCCGGAAAGCTGGATTGGCACTGGT
ACGCCGGACATGCCGGGCGGTGAGGCGGCGATGGTTGAACTGCTGGGGCGCAATCTACAA
CTTACCGCTGTATTTGCTTATAACGACAATATGGCTGCTGGCGCACTGACAGCATTAAAA
GATAATGGTATTGCGATTCCGTTACATCTCTCAATCATCGGTTTCGATGATATTCCCATC
GCCCGTTACACCGACCCGCAATTAACGACCGTGCGTTATCCCATTGCTTCAATGGCTAAA
TTAGCCACCGAACTGGCCTTGCAGGGGGCAGCAGGCAATATTGATCCTCGTGCCAGCCAC
TGTTTTATGCCGACGTTAGTGCGTCGTCATTCTGTCGCAACGCGCCAGAATGCGGCGGCG
ATCACTAACTCAACAAATCAGGCGATGTAACCGCTTTCAATCTGTGAGTGATTTCACAGT
ATCTTAACAATGTGATAGCTATGATTGCACCGTTTTAACGTTGTAACCCGTATGTAACAG
TGAATAATCACTTTCACCGAGGTAATAGCGTCATAACAACAATTAAAGCCGTTTTCTGGA
GCGTTACCGGGCACTGATGAATCCCCTAATGATTTTGGTAAAAATCATTAAGTTAAGGTG
GATACACATCTTGTCATATGATCAAATGGTTTCGCGAAAAATCAACTTGAGACTTGGTAT
TCATTTTTCGTCTTGCGACGTTAAGAATCCGTATCTTCGAGTGCCCACACAGATTGTCTG
ATAAATTGTTAAAGAGCAGTTGCGACGCGGCTTTCAGCTCACTGTCGCGAGGTGGCGTAT
ATTACGCTTTCCTCTTTCAGAGTCAACCCTGAATTTCAGGATTTTTTCTCTTCAACCGAA
CAGGCTGTTTGTGTGAAGTGATTCACATCCGCCGTGTCGATGGAGGCGCATTATAGGGAG
TCGGCTCAGGAAGACAAGCGGAAAAATGCATTTTTATTTCAACCGCTCATCTTTTAATCA
TTACGCCGGTTTTTGCTGCTTTTTTATCGCTTGCGGCAGGTCTGCCAGGCTATTTAACAC
CCAATCTGCCGCGTTTTCTGCTTCAGGTGTAATAGGTTTACCCGTACGCACCAGCACTTT
TGTTCCCACGTTCGCCGCAGCCGCTGCCTGCATATCTTCTAATTTATCGCCCACCATATA
AGAGGCGGCCATATCAATATGCAAATAATCGCGTGCTGACAAAAGCATCCCCGGATGTGG
TTTGCGGCAATCGCAGACCTGGCGAAACTCTTCAACACTACCCTGCGGATGATGCGGGCA
ATAATAGATACCATCCAGATCGACATCGCGGTCCGCCAGCGACCAGTCCATCCACTCGGT
CAGCGTTTCAAACTGTGCTTCAGTAAATTTACCGCGAGCAATGCCAGACTGGTTGGTTAC
TATCACCAGCGCAAAGCCCATTTTTTTCAGCTCGCGCATGGCGTCAATAACACCGTCGAT
AAATTCAAAGTTGTCGATCTCATGGACATAGCCGTGATCGACATTAATGGTGCCATCACG
GTCAAGAAAAATTGCGGGTACGCTCTTCGCCACCTTTTATAGCTCCTTAATAAGGCATGT
GGCGCTAGTATCGCATGTTTCGACCTGCAAGAAAGTGCTCTTCGCATAAACCTGATTGAT
TTAGACGTCTGGATACCTTAACATCCATTTCATTGACGGCGTTGCCCGTTTCAGGCATTC
GAAATGCCACGACTAACTTAATGACGATAATAAATATTCAATGATAAAACTTTCGAATAT
CACCAAAGTGTTCCACCAGGGCACCCGCACCATCCAGGCGTTGAACAACGTCAGCCTGCA
TGTGCCAACTGGACAAATTTATGGCGTTATCGGGGCCTCAGGCGCGGGTAAGAGTACGCT
TATACGTTGTGTAAACCTGCTGGAGCGCCCAACCGAGGGTAGCGTGCTGGTCGATGGACA
GGAACTGACCACGCTGTCAGAATCCGAGTTGACCAAAGCTCGCCGCCAGATTGGTATGAT
TTTCCAGCATTTTAACCTGCTCTCTTCGCGTACTGTTTTTGGCAACGTGGCTCTGCCGCT
GGAGCTGGACAACACACCGAAAGACGAGATCAAACGTCGCGTGACGGAATTGCTGTCATT
GGTTGGTCTTGGCGATAAGCATGATAGCTACCCGTCGAATCTTTCCGGTGGGCAGAAACA
ACGTGTGGCGATTGCCCGTGCATTAGCCAGCAATCCCAAAGTATTGCTGTGTGATGAAGC
CACCAGCGCGCTGGACCCGGCAACGACACGTTCTATTCTCGAACTGCTGAAAGACATCAA
CCGCCGTCTGGGTTTGACGATTCTGTTGATCACTCACGAAATGGACGTTGTGAAGCGCAT
TTGTGATTGCGTGGCGGTCATCAGCAATGGCGAACTGATCGAGCAGGACACGGTAAGTGA
AGTGTTCTCACATCCGAAAACGCCGCTGGCGCAGAAGTTTATTCAGTCAACCCTGCATCT
GGATATCCCGGAAGATTACCAGGAACGTCTGCAAGCGGAGCCATTCACTGACTGCGTGCC
GATGCTGCGTCTGGAGTTTACCGGTCAATCGGTCGATGCCCCACTGCTTTCTGAAACCGC
GCGTCGTTTTAACGTCAACAACAACATTATTAGCGCGCAGATGGATTACGCCGGTGGCGT
TAAGTTCGGCATCATGCTGACTGAAATGCATGGCACACAACAAGATACGCAAGCCGCCAT
TGCCTGGCTGCAGGAACACCATGTAAAAGTAGAGGTACTGGGTTATGTCTGAGCCGATGA
TGTGGCTGCTGGTTCGTGGCGTATGGGAAACGCTGGCAATGACCTTCGTATCCGGATTTT
TTGGGTTTGTGATTGGTCTGCCGGTTGGCGTCCTGCTTTATGTCACGCGTCCGGGGCAAA
TTATTGCTAACGCGAAGCTGTATCGTACCGTTTCTGCGATTGTGAACATTTTCCGTTCCA
TCCCGTTCATTATCTTGCTGGTATGGATGATTCCGTTTACCCGCGTTATTGTCGGTACAT
CGATTGGTTTGCAGGCAGCGATTGTTCCGTTAACCGTTGGCGCAGCGCCGTTTATTGCCC
GTATGGTCGAGAACGCTCTTCTGGAGATCCCAACCGGGTTAATTGAAGCTTCCCGCGCAA
TGGGTGCCACTCCAATGCAGATCGTCCGTAAGGTGCTGTTACCGGAAGCGTTGCCGGGTC
TGGTGAATGCGGCAACTATCACCCTGATTACCCTGATCGGTTATTCCGCGATGGGTGGTG
CAGTCGGTGCCGGTGGTTTAGGTCAGATTGGCTATCAGTATGGCTACATCGGCTACAACG
CGACGGTTATGAATACGGTACTGGTATTGCTGGTCATTCTGGTTTATTTAATTCAGTTCG
CAGGCGACCGCATCGTCCGGGCTGTCACTCGCAAGTAACGTTCAACACAACATAAATAAT
TGAAGAAGGAATAAGGTATGGCGTTCAAATTCAAAACCTTTGCGGCAGTGGGAGCCCTGA
TCGGATCACTGGCACTGGTAGGCTGCGGTCAGGATGAAAAAGATCCAAACCACATTAAAG
TCGGCGTGATTGTTGGTGCCGAACAGCAGGTTGCAGAAGTCGCGCAGAAAGTTGCGAAAG
ACAAATATGGCCTGGACGTTGAGCTGGTAACCTTCAACGACTATGTTCTGCCAAACGAAG
CATTGAGCAAAGGCGATATCGACGCCAACGCCTTCCAGCATAAACCGTACCTTGATCAGC
AACTGAAAGATCGTGGCTACAAACTGGTCGCAGTAGGCAACACTTTTGTTTATCCGATTG
CTGGTTACTCCAAGAAAATCAAATCACAGGATGAACTGCAGGATGGTTCGCAGGTTGCCG
TGCCAAACGACCCAACTAACCTTGGTCGTTCACTGCTGCTGCTGCAAAAAGTGGGCTTGA
TCAAACTGAAAGATGGCGTTGGCCTGCTGCCGACCGTACTTGATGTTGTTGAGAACCCAA
AAAATCTGAAAATTGTTGAGCTGGAAGCACCGCAGCTGCCTCGCTCTCTGGACGACGCGC
AAATCGCTCTGGCAGTTATCAATACCACCTATGCCAGCCAGATTGGCCTGACTCCAGCGA
AAGACGGTATCTTTGTCGAAGATAAAGACTCCCCGTACGTAAACCTGATCGTGACGCGTG
AAGATAACAAAGACGCCGAGAACGTGAAGCAATTCGTCCAGGCTTATCAGTCTGACGAAG
TTTACGAAGCAGCAAACAAAGTGTTTAACGGCGGCGCTGTTAAAGGCTGGTAATTTTTAG
GCTGTTTCCACAATTTGTAATATCATTCAGGACGGGCGCTTGCCCGTCTTGTCATTTTTA
CAAGCTCCTGATTCAATATTGACGTTTTGATCATACATTGAGGAAATACTATGCGTGCTT
TACCGATCTGTTTAGTAGCACTCATGCTAAGCGGCTGTTCCATGTTAAGCAGATCCCCTG
TCGAACCCGTTCAAAGCACTGCACCCCAGCCGAAAGCGGAGCCTGCAAAACCGAAAGCGC
CGCGCGCCACGCCGGTCCGAATTTATACCAATGCAGAAGAATTAGTCGGCAAACCGTTCC
GCGATCTCGGTGAAGTCAGTGGCGACTCTTGCCAGGCCTCTAATCAGGACTCTCCGCCGA
GCATTCCAACCGCACGTAAGCGGATGCAAATCAACGCCTCTAAAATGAAAGCCAATGCTG
TATTACTGCATAGCTGCGAAGTCACCAGCGGTACGCCGGGCTGCTATCGTCAGGCTGTAT
GTATCGGCTCTGCGCTTAACATTACGGCGAAATGAGCAGTTTCCAGTTCGAGCAAATAGG
CGTTATTCGCTCGCCCTATAAAGAAAAATTCGCCGTTCCGCGCCAGCCTGGTCTGGTAAA
AAGCGCCAACGGCGAACTGCATCTCATTGCTCCCTACAACCAGGCCGACGCCGTTCGCGG
CCTGGAAGCATTCAGCCATTTATGGATCCTTTTCGTCTTTCATCAAACGATGGAAGGCGG
CTGGCGTCCGACTGTGCGTCCGCCTCGTCTTGGCGGTAATGCCAGAATGGGTGTTTTCGC
TACGCGTTCCACTTTTCGCCCTAACCCAATTGGTATGTCGTTGGTAGAGCTGAAAGAGGT
TGTTTGCCATAAAGACAGCGTGATTCTGAAGCTCGGCAGTATGGATCTGGTCGATGGTAC
GCCGGTAGTGGATATCAAACCGTATCTCCCCTTTGCTGAATCGCTTCCCGATGCCTGTGC
CAGCTATGCGCAAAGTGCGCCAGCGGCAGAGATGACGGTGAGTTTTACCGCAGAGGTCGA
AAAGCAGCTTTTGACGCTGGAGAAGCGTTATCCGCAGTTAACCCTGTTTATCCGCGAAGT
ACTGGCGCAAGACCCACGCCCGGCCTATCGTAAAGGTGAGGAAACGGGTAAAACCTATGC
CGTCTGGCTACATGATTTTAACGTTCGCTGGCGCGTCACCGACGCAGGTTTTGAAGTCTT
TGCGCTGGAACCGCGTTAAATTCACGCCCTTCTCTTTTGACATTTCTTTTGCACTGGTAA
ACTAAATCACTTTTTTTGTCCCAGGCTCGCCTTGAGCCTGTTCTACCTTCCAACTGGAAC
CGTAACAACATGCGTACTAGCCAATACCTGCTCTCCACTCTCAAGGAGACACCTGCCGAC
GCCGAGGTGATCAGCCATCAGCTGATGCTGCGCGCCGGGATGATCCGCAAGCTGGCCTCC
GGGTTATATACCTGGCTGCCGACCGGCGTGCGCGTTCTGAAAAAAGTCGAAAACATCGTG
CGTGAAGAGATGAACAACGCCGGTGCAATCGAGGTGTCGATGCCGGTGGTTCAGCCAGCC
GATTTGTGGCAAGAGAGTGGTCGTTGGGAACAGTACGGTCCGGAACTGCTGCGTTTTGTT
GACCGTGGCGAGCGTCCGTTCGTACTCGGCCCAACTCATGAAGAAGTTATCACTGACCTG
ATTCGTAACGAGCTTAGCTCTTACAAACAGCTGCCGCTGAACTTCTATCAGATCCAGACC
AAGTTCCGCGACGAAGTGCGTCCGCGTTTCGGCGTCATGCGTTCCCGCGAATTCCTGATG
AAAGATGCTTACTCTTTCCATACTTCTCAGGAATCCCTGCAGGAAACCTACGATGCAATG
TATGCGGCCTACAGCAAAATCTTCAGCCGCATGGGGCTGGATTTCCGCGCCGTACAGGCC
GACACCGGTTCTATCGGCGGCAGCGCCTCTCACGAATTCCAAGTGCTGGCGCAGAGCGGT
GAAGACGATGTGGTCTTCTCCGACACCTCTGACTATGCAGCGAACATTGAACTGGCAGAA
GCTATCGCGCCGAAAGAACCGCGCGCTGCTGCTACCCAGGAAATGACGCTGGTTGATACG
CCGAACGCGAAAACCATCGCGGAACTGGTTGAACAGTTCAATCTGCCGATTAAGAAAACG
GTTAAGACTCTGCTGGTTAAAGCGGTTGAAGGCAGTAGCTTCCCGCTGGTTGCGCTGCTG
GTGCGCGGTGATCACGAGCTGAACGAAGTTAAAGCAGAAAAACTGTCGCAGGTTGCAAGC
CCGCTGACTTTCGCGACCGAAGAAGAAATTCGTGCCGTGGTTAAAGCCGGTCCGGGTTCA
CTGGGTCCAGTAAACATGCCGATTCCGGTGGTGATTGACCGTACCGTTGCGGCGATGAGT
GATTTCGCTGCTGGTGCTAACATCGATGGTAAACACTACTTCGGTATCAACTGGGATCGC
GATGTCGCTACCCCAGAAATTGCTGATATCCGCAACGTGGTGGCGGGCGATCCAAGCCCG
GATGGTCAGGGTACGCTGCTGATCAAACGTGGTATCGAAGTCGGTCACATCTTCCAGCTG
GGTACCAAGTACTCCGAAGCACTGAAAGCCTCCGTACAGGGTGAAGATGGCCGTAACCAA
ATCCTGACTATGGGTTGCTACGGTATCGGCGTAACGCGCGTAGTAGCTGCAGCAATTGAG
CAGAACTACGACGAACGCGGCATCGTATGGCCTGACGCGATCGCACCGTTCCAGGTAGCG
ATTCTGCCTATGAATATGCACAAGTCCTTCCGTGTACAAGAGCTGGCCGAGAAGCTGTAC
AGCGAACTGCGTGCACAAGGTATCGAAGTCCTGCTGGATGACCGCAAAGAGCGTCCGGGC
GTGATGTTTGCTGATATGGAACTGATCGGTATTCCGCACACTATTGTGCTGGGCGACCGT
AACCTCGACAACGACGATATCGAATACAAATACCGTCGTAACGGCGAGAAACAGTTAATT
AAGACCGGTGACATCGTCGATTATCTGGTGAAACAGATTAAAGGCTGATGCCAGAAAGGG
TCCTGAATTTCAGGCCCCTTTTTTACAGGGATTGTATAAAATGGATAAACCAAAGGCATA
CTGCCGCCTGCTTCTCCCCTGCTTTCTTTTACTTTCGGCCTGTACCGTTGATATCAGCCA
GCCAGACTCCTCAGCCACAGCGATAGATACCGAGGCGAAAACATGGGCTGTCAAATTCCA
GCATCAAAGCTCTTTCACCGAACAATCAATAAAAGAAATAACAGAACCTGACCTCAAACC
CGGCGATTTGCTGTTCTCCTCAAGTCTTGGGGTAACCTCATTTGGTATCCGCGTCTTCAG
CACTTCCTCAGTGAGTCACGTTGCAATCTATCTGGGTGATAACAACGTTGCAGAAGCGAC
AGGGGCTGGCGTCCAGATTGTTTCCCTTAAAAAAGCGATGAAGCATAGCGATAAGCTTTT
CGTCTTACGAGTCCCGGATCTTACCCCGCAACAAGCCACAGAAATCACCGCGTTCGCCAA
CAAAATTAAAGATAGCGGTTACAACTATCGCGGCATTGTCGAATTTATTCCCTTTATGGT
GACTCGCCAGATGTGCTCACTGAATCCGTTCTCCGAGGATTTTCGCCAACAGTGCGTCAG
CGGCCTGGCGAAAGCGCAGTTAAGCAGTGTGGGCGAAGGAGACAAAAAGTCGTGGTTTTG
TTCGGAATTTGTCACTGATGCATTTGCCAAAGCCGGGCATCCGCTTACGCTGGCGCAATC
GGGCTGGATTAGCCCTGCCGATCTGATGCATATGCGTATTGGTGATGTCTCTGCGTTTAA
GCCAGAAACGCAGTTACAGTATGTTGGGCACCTGAATCCAGGGATTTATATCAAGGCGGG
TCGCTTTGTTGGTTTGACTCAGTGATAAAGCCAGCCTCGTGCACAAAATGCCGGATGCGG
CGTGAACGCCTTATCCGGCCTACAAAATCGTGCTAATTCAAAATGTTGCATTATATGCTG
TAGGCCTGATAAGCGCAGCGCATCAGGCAATTTTGCGTTTGTTTCTGCCTTAAGCAGGTT
TACTGCCCCAAACTACTGCAATCCTGGTTCGGATAAAATTTACCCGCCGTATCGGGCGCT
AATACTTTGGTCGGCGCACCGGTATCCGGATTAGCCTCAAGCGTAAAGTGACCTTCTACT
GACAGTAACACCGGTTTTTCACTGTGCCCGCGCGCAGCCAGGTAGCCACGCTCCAGCTCT
GCGTTATTCGCTACCATGAAACGTTTTCCGGTCGCGCAATCAGTGAAGGTCGCCGCATCA
GCCATATAAAAATACATGCCCCGCAGAGTCATCGGCGTCATGGGTAAACTGGATTGTGCC
GCTTCCAGCGTATAGTTGAACTGCGATTCAATCGGTTTACCTTCACGATCGAGCATCTCC
AGCGCATCGCCTTTCGCCCGATAATATGACTTTTCACCTTTGCTGTCGGTTAATACCAGC
TTGTCAGCGGTTCGCGCCCATGTACCGTAGGAAGCGAAGGAGGAAGGTTCTTCACGAGCA
CCGAGATAACGCTCATTCATCACCCATGTTCCGTCTTTTTCGAGGAACAGAGAGGTTTCG
ATTCCTTCGCAATCGGCACACGGCAGCACGCCGCGCCAACTTTGCGGCATCGGTTTCAGT
TCGGCTGCCTGCGCCGGAGAAAGCGTATCGACTTCGGCCCGATTATTACAACCCATCAGA
GTAAAGAGGCTGATTACAGCCATCGCTGTCACTATCGCTTTTTTCACCATCCATTCCTTC
TTTTTATTCCCGACCGCTGCGCACTTTGCCGCGCATCGCCTTCACGCTTGATTTTTGTGC
TTTCGATGCCAGCCTGCGCTCTTTCGATGCACGGGTGGGCCGCGTGGGTCGTCGGGCTTT
TTGTTCTGTTGTTAATTCTTTAATCACAGCCACCAGCCGGGCCAGAGCTGCTTCGCGGTT
CAGTTCCTGACTGCGGTATTCCTGTGCCTTAATGACAATCACGCCATCACTGCTGATCAA
ATGATGGCTGGCGGCGAGCAGACGCTCTTTGTAATACTCTGGCAGGCTGGACGCCCGAAT
GTCAAAACGCAGATGAATAGCCGTTGAGGTCTTATTAACATGCTGCCCGCCCGCGCCCTG
CGCACGAATGGCGGTGATCTCAAGCTCACCATCGGGAATAGCAACATGTCGGGAAATCAC
AATCATGAAGGTTGTTGCCAGGCGGTTAAGTTCACTTCCAGATTATTCTTATCATCCGAT
AACCAGATCACGCCATCCTGAATCGTTGCCTGCAGCGTCATGGTACGATCGGCAAAGGCG
CTTACTTTCGCCAGTTGTTCATCGTCCAGATACCAGACGGAAAGATTGGCAAACTGCACA
CATTTGCTCTGATTTTGCTGCCACCAGATTTGCGCCGCCCGACTATTATAGGTAAACAGC
GCCACTTCTGCGGCCTGGGTGCAGGCTTTCTTAATCCGCCGCTCATCCGGCAGCCCCAGC
TCAATCCACAAATCAATGCCCAGGTGATCGTTACGCAGCCACGCTTCCGGCTCATCATCG
GCACACAAACCACGGGTAAATTGCAGACGTTCATCAGCATATTTCAGCCACGCCAGCAAG
CGCAGCATCATACGCTCCTGGGTTTCTGAAGGGTGGCGCGCCAGCGTCAGAGAGGCATCG
AGAAACTGGTTGCGGTCGAGATCGGCCACATTAACCGTCGCTTTATAAATTGTCGCTTTA
AGCGCCATAAGAAAACTCCTTTCGAATCAGGAGGCCATTGTAACGGAATACGTGCAGTTG
CGGCGCTGATATTGCAGAAATGAGTGTGGTATAGTCACCTTGCGAAACAGAGTTTATCTT
CGTAGGCTTAGACTTGCATCCACGGTTAAGTCAGAGTGCTGACAGGAGGGCATGTGGAAA
AATATTGTGAGTTAATACGCAAGCGGTACGCGGAAATCGCCAGCGGAGACTTAGGATACG
TTCCGGACGCGCTGGGCTGCGTTTTGAAAGTGCTGAATGAAATGGCTGCCGACGACGCCC
TTTCTGAGGCTGTCAGGGAAAAAGCAGCATACGCTGCGGCAAACTTACTGGTGAGCGATT
ATGTCAATGAATGATACGTATCAACCAATCAATTGTGATGATTACGATAATCTTGAGCTC
GCCTGCCAGCATCATTTAATGCTGACACTTGAGCTGAAAGATGGCGAAAAATTGCAGGCA
AAAGCCAGCGATTTAGTCTCCCGCAAAAATGTGGAGTTTCTGGTCGTCGAGGCCGCTGGC
GAAACCCGTGAGCTACGTCTGGATAAAATTACCAGCTTTAGCCACCCGGAAATCGGTACG
GTGGTGGTGAGCGAGTCCTGATTGACTTTCGCCGGATGCGACGCTTAATGCGTCATATCC
GGCCTTCACTTAACTAAGCGTTTCGCTGCCAGACAAAACTTATGCCATTCTCACCTTCAG
CCACACCTTCTTGCGTCACAAATACCCCTGCCGCCGCAATCAGCGTTTCGCCATAAAACA
GCAGTGGCGTGGTGTCACGTAGCCACGGCGGCACGCCCAGCTCTTGCCAGATTTTCTTTA
GCTTACGTCCGCCGTTACGCCCGACAATATGCAGCAATCCTGGCGCTTTGAAACGCACGC
TGACCGCTTCGTCTGCACGCGGAGGGCGAATATCGCCTCCCGCATTAAGCTGTACACTTC
CCAGCCCCGCCGGTAATTCCAGCGGTTGAAGCCACGTCTGCCACGGCACAATGTTTTCGC
TTTGCCCGGTGACGGATTTAATCCACCACAGTTGCGACTGATAGCGTCGGATTTCAAACG
CGCCCAAACGTAAACAGGGGGAGGCATCTTCCCGCGCCAGCGCCACTTCCTGCCAGATCC
GCCCCAACGCGTCGCGGGAAGGCATCGGTGCATTCTGCCCTGCAAGCCAGCGGCGGATAA
TCGCCGCGCGGCGGGCATCACTCATCGCCAGCATTGGCGCAATCTGCAGCGTCCTCTGCG
GCGATTGACAATGTGCTAAATCATCCGCCAGCAGTTCATCCAACAGGCTCTCTTGTTCAG
CGCAAAGTGCGGCGCTGCGGGCTGTTGCTTCGGCAAAATGCGGCCAACGCTGCTGCAATA
ACGGCACTACGCGCAGGCGCAGAAAGTTACGATCGTATGAGTCGTCCTGATTACTTTCGT
CTTCAATCCAGCGTAAACCATGCGCCAATGCCCACTGCGCCAGTTCCCCCCGCGTGCGGG
CAAGCAACGGGCGGATAAGCCGTGTTCCGGCAAACTCCGAAACTTCCGCCATAGCCGAAA
GCCCGGCAGGGCCGCTACCGCGTTTTAGCGCCAGCAGAAAAGTTTCACATTGATCGTCGA
GATGTTGCGCGGTGACCAGCACTTCACCGGGCAACAAGGTGCGGGCAAATGCCTGATAAC
GCGCCTGCCGCGCCTGGGCCTCAATGCCCAGTCCTTCTTGCGCAAGTTGCACGCGCTCGA
CCACCAGCGGCACCTGCCACTGTTGGCAGATGTTCTCGCAATGCCTAACCCAGGCATCGG
CATTGGCACTTAAACCGTGATGCACATGAATAGCGCGCAGAGTGACGCCCGGATTTTCCG
CCCGCCACTGCACCAACTGATGCAGCAGAACGGTGGAGTCAAGCCCGCCGCTAAAGGCCA
CCAGAATCTGGCGTGAGGTGAGAAGTTGTCTATTGAGCGTGAGTGTCATGATGGTGCGAT
TTTACAGTAGCAATGCCCGGCACGTTACCGGGCAAATGCGGCGATGACAAGCCTTACTGC
TCATACAGTTCCAACGGCAGCCCGTCCGGATCGTTAAAGAACGTGAAGCGTTTTTGCGTG
TATGGATCGACACGGATGGCTTCACACTTCACGTTATGGCTTTCAAGGTGCGCCACTGCC
GCATCGATATCATCAACGCTAAAAGCCAGATGACGCAGGCCGCAAGCTTCCGGTCGGCTG
GGGCGCTCCGGCGGGAACGGAAATGAGAAAAGCTCAATCACATATTGCCCATTAAGCGCC
AAATCCCCTTTCCACGAGTCGCGCGCTTCGCGATAGACTTCGCTTTGCAGCGTGAAACCA
AGAATATCGCAGTAGAAAGCTTTGCTCACCGCATAATCCGTCGCAATAATCGCAATATGG
TGAACCTGTTTTAAACCCAGCATAACGTCTCCTTTATTTGTTAACAGCACGTTACTCGCC
CGGAAGCCGCTCTGGCAAGTTATCCCGCCATTTTTAGGACTCGTACGCGGTAAACGCCGT
CTTCGTCCTGTTTCGCGCCGTGAATATCCGTTTCAAAACCGGGGTAATGTTGCCCTACGG
AACAAAGCATCAGTAGAAAATCGAGTACTGTGCGGCTCTCTTTGGTCAGCATTTCTCCAG
GCATCAACAGCGGTACGCCCGGTGGATAAGGCAGGATCATATTTGCCGATACTCTACCGA
CCAGTTGTTCCAGCGCAATGGTTTCTACTTCACCTTTAATCTGTCTCTGCCATGCCTGAT
GTGGCGTCATGATCATTTCCGGCAAAGTATCGAATGCCCGCAACATCAAACCGGGAAGAT
CGTGTTTACGAATCAGCTTATGGATCCCTTGCGCCAGATCCTGAATACGCATATTGCGGT
AGAAATCGGGATCTTCAGCATAGAGATCGGGTAGCATATTTTTGATCCGCAGGTTGAGAT
CGTAAGAGCGCTTAAATTCCGTCAGCCCACGCAATAATCCCATTGCTTTGGTTTTATCAA
TGCCAATACTAAAGAGAAACAGCAGGTTATAAGGGCCGGTTTTCTCTACTACGATCCCAC
GTTCGTCGAGGAATTTTGCCACCAGCGCCGCCGGGATCCCCTCCTCACTCATATTGCCCT
GTTCGTCCATCCCCGGTGTCAAAATAGTGACTTTAACCGGATCGAGAAACATATGATCGG
CATCCGCATCGTTAAAGCCGTGCCACTGTTCGCCAGGCGCAACGGGCCAGCATTCGGCTT
CATCCACCTGCGGCGGTTGCCAGATATCGAAAAACCAACCGTCAGACTCTTCCCGCAACC
GCTGGACCTCTTTGCGAAAATGCAGAGCTCGTTCTACTGAACGATTAATCAGCCGTTTGC
CCGGATTACCACGCAGCATCGCCGCCGCCGTCTCAACCGAAGCAACAATGGGATAACTGG
GCGAGGTGGTGGTATGCATCATAAAGGCTTCGTTAAAGGCCTCTTCGTCATACTCGCCTT
TAATGTGGATCAGCGAAGCCTGCGATAACGCCGCCAGCATTTTGTGGGTCGATTGCGTTT
CGAAGATCACTTTTCCCGCAACACGCTCGCCGCTCATACCACTTTTACCCTGGTAGATCG
GATGAAAATGGGTGTACGGCACCCAGGCGGAATCGAAGTGGATCGAGGGGACATCCAGCG
TCTGTTTGATCCAGTCGGTGTTGTAGAGCAAGCCATCATAGGTGGAGTTGGTGATCACCG
CATGAACCGGCCATTGTGCCTGCGTGGTGGCAGCGACTTTCTCTTCGATGCTGTCGCGAG
TAAATTCACGGCGCGGGATCCCACCAAGAATCCCCAACGCATTACGCGTCGGTTTCAGCC
AGACTGGCACTACATCGTTCATCATCAACAGATGCGCCAGCGATTTATGACAATTGCGGT
CGATCAACAGCGTGCTGCCGGATGGCGCGGCGTACATACCCACAATTTTGTTCGACGTCG
ATGTTCCGTTGGTAACGATATAACTCTGTTCCGCGCCAAAAGTCCGCGCGATGTACTCTT
CCGCTTCCAGATGTGGCCCGGTGTGGTCGAGCAACGAACCAAGCTCGGTGACCGAAATAG
AGACATCAGCCTTAAGGGTATTCCCGCCGAAAAAATCATAAAACAGACAGCCAACCGGGC
TTTTTTGATATGCGGTGCCGCCCATATGACCCGGCGTACAAAAGGTGTACTTCCGCTCTT
TGACGTAGGTAAACAAGGCTTTCGTGAACGGTGGGGTAATGTTATCAAGATATTCGTTGG
TGTACTGACGCATACGAATAGCGATATCTTCCGCCTGCCCCAGCGCATATTCAAAAAACC
AGAGCGCCATCCGCATATCCTGCACGCTGACATCCATCGTCGAGTGGGTGTTGATGAAGG
CATAAAGCGGGAGATATTCATTAAGCTGATTGATATCGCTACATAAATCGAGACTGTACT
CATCCCAGTCAAAAATCACGCCGCAAATTCGTGGGTTATGTTCGATAAACTTCAGCAAAT
CAACGCTGTTTTGTGGCCAGATAATCTGAAAGCCTTGCGCCACCAGCGCCGACTCCAGTT
CTTTGATGGGCTCATCTTTATAAAAGACGCCATGCGGTCCCATAATGGCAATGATGTTCA
TGTGTTCCTCCTGGAAAATCCTTCCTTAATCATAGCCTGCTCAAACCGTGGCGATAAAAA
AGGGCCACCGAAGTGACCCTTTTTCAGAACTTTTGCGAATTACGCGTAACCGTAGCTCAT
CAGGCGCTGATAACGACGATTTTTTAAATCTTCAGTGCTTAACACGTCGAGATCGGCCAG
ATCCGCCAGCAGTTGCGCTTTCAACGATGCCGCCATCGCTTCCGGGTTACGGTGAGCACC
ACCCAGCGGTTCCGGGATGATGGAGTCGATCAGTTTTAGTTCTTTCAGACGCGGAGCGAT
GATACCCATCGCTTCAGCTGCCAGCGGTGCTTTGTCGGCGCTCTTCCACAGAATGGACGC
ACAACCTTCCGGCGAGATAACGGAATAGGTGCTGTATTGCAGCATATTCACTTTATCGCC
CACGCCAATCGCCAGCGCGCCGCCAGAACCACCTTCACCGATAACCGTACAAACTACCGG
TACACCGAGGCGAGACATTTCACGCAGGTTGCGTGCAATAGCTTCAGACTGACCGCGTTC
TTCTGCGCCCACGCCCGGATAAGCCCCCGGGGTGTCGATAAAGGTGATGATTGGCATCTT
AAAGCGTTCAGCCATTTGCATCAGACGCAGTGCTTTGCGGTAACCTTCTGGCGCTGGCAT
ACCAAAGTTACGGCGAATTTTTTCTTTGGTTTCACGACCTTTTTGATGACCAATGATCAT
CACCGGACGACCATCGAGACGGGCGATACCACCGACGATAGCTTTATCGTCTGCATACGC
GCGGTCGCCAGCCAGTTCGTCAAATTCATCAAATCCCAGGCGAACGTAATCCAGGGTATA
AGGACGCTGTGGATGGCGTGCCAGTTGCGCAATCTGCCATGCACCGAGATCGGCGAAGAT
TTTACGCGTCAGTTCTACGCTTTTTTCACGCAGACGATGCACTTCTTCATCGATGTTAAT
ATCCAGTTTCTCATCCTGACGGCTAACCGCAGTCAGAGAATCGATTTTCGCTTCCAGCTC
TGCAATCGGCTGTTCAAAATCAAGGAAATTCAGACTCATAGTATTCCTGTATTAGTCAAA
CTCCAGTTCCACCTGCTCCGAACCAATGAGGCCACGGAGATCGTTTAATAAACGATCGCT
CGGAGAGACACGCCACGTCGCGCCAAAACGCAACCGCGCGCGTGCATCCGCCCTCTGATA
GTAGAGATGTACTGGAATTGTCCCAGAGCGGTGGGGTTCCAGAGACTGACGGAGTCGGTT
TAAAAGCTGGTCATCAATTTGCCTGTCCGTCAGCGAGATAGCAAGCCCGCGAGCATATTT
TTCCCGGGCTTCGTCAATATCCATCACTTCGCGAGCGGTCATTTTAAGCCCACCGCTGAA
GTCATCAAAGCTGACCTGTCCGCTGACGATAAGTATGCGGTCTTTTTCCAGCAATTGCTG
GTATTTATCCAGGGCGTCAGTAAACAACATCACTTCCAGCCGCCCGGAACGGTCATCCAG
CGTGCAGATACCGATACGATTGCCGCGCTTGGTGACCATAACCCGCGCGGCAACAACGAG
CCCCGCAGCCGTGATGACTTTACCACGTTCTGTCGGGTGCATGTCTTTCAGCCTTACGCC
TCCGACATAACGCTCAATCTCTTTTAAATACTGGTTGATAGGGTGTCCGGTCAGGTACAG
GCCTAACGTTTCACGTTCCCCATCTAATACCACCTGCTCCGGCCACGGTTGGCAGCTGGC
GTAGGATTGTTCAATTTGTTCCGGTTCTTCGGCCAGCACGCCGAACATATCGGCCTGACC
GATAGCTTCCGCTTTCGCGTGTTGATCTGCCGCTTTTAACGCATCACCCAGCGAGTTCAT
CAGTGCCGCGCGGTGTGGCCCAAGACGGTCAAACGCCCCGGACATGATCAGTTTTTCCAG
CACCCGCCGGTTTAACTTTTTGGTGTCGGTTCGGGCGCAGAGATCAAACAGTTCGCGGAA
GTAGCCGCCTTTATTACGGGCTTCGATGATCGCCTCAATCGGACCTTCACCGACCCCTTT
GATCGCGCCAATACCATACACGATTTCGCCGTCGTCGTTGACGTGGAAATGGTAAAGACC
GGAGTTTATATCTGGTGGCAGGATTTTCAGCCCCATCCGCCAGCACTCATCCACCAGGCC
CACCACCTTCTCGGTGTTGTCCATATCGGCGGTCATTACCGCCGCCATAAACTCTGCCGG
ATAGTGCGCTTTCAGCCATAATGTTTGATATGACACCAAAGCATAGGCCGCAGAGTGCGA
TTTGTTAAATCCGTAACCAGCGAATTTCTCCACCAGGTCGAAGATTTTCATCGCCAGTTC
GGCGTTGATTCCGTTCTTTTCTGCACCTTCAGCAAATACAGAACGCTGCTTAGCCATCTC
TTCCGGCTTTTTCTTACCCATCGCACGACGCAGCATATCCGCGCCACCGAGGGTATAACC
AGAGAGCACCTGCGCAATCTGCATGACCTGTTCCTGATACAGGATAATGCCGTAGGTTGG
CTCCAGTACTGGTTTCAGGCTTTCATGCTGCCACTGCACGTCCGGGTAGGAAATCTCTTC
GCGACCATGTTTACGGTCGATAAAGTTATCCACCATCCCTGATTGCAACGGACCAGGGCG
GAACAGTGCCACCAGTGCGATCATATCTTCGAAGCAGTCAGGTTGCAGACGCTTGATCAG
GTCCTTCATGCCGCGCGATTCAAGCTGGAATACCGCCGTGGTTTCCGAGCGTTGCAGCAT
GTCGAAGCTTTTCTTGTCATCCAGCGGGATCGCGGCGATATCCAGCGGCGGCTCGCCATT
CTTCGCCCGCCGCTTGTTGATCATCTCCAGCGCCCAGTTGATGATGGTGAGCGTACGTAA
ACCAAGGAAGTCGAACTTCACCAGTCCGGCATATTCAACGTCGCTTTTATCAAACTGGGT
GACCGGATGTTTGCCCTCTTCATCGCAATAAAGCGGCGCAAAATCGGTAATTTTGGTCGG
CGCGATAACCACTCCACCGGCGTGCTTACCGGCGTTACGGGTGACCCCTTCCAGTTTGCG
AGCCATGTCGATCAGCGCCTTAACTTCTTCATCCGCTTCGTAGATTTCCGGCAGCTGCGG
CTCGGCTTCAAACGCTTTCGCCAGCGTCATGCCCGGATCGGGCGGGATCAGTTTCGAGAT
ACGGTCGACAAAGCCGTACGGATGCCCCAGCACGCGGCCTACGTCGCGGATCACCGCTTT
CGCCGCCATCGTACCGAAGGTGATAATCTGCGATACCGCATCACGACCGTACATGTCCGC
TACGTGCTCGATAACCTGGTCGCGTTTCTCCATACAGAAGTCAACGTCGAAGTCAGGCAT
GGAGACACGTTCCGGGTTAAGGAAACGTTCGAACAGCAGGTCAAATTCCAGCGGATCGAG
GTCGGTGATTTTCAGCGCGTAGGCCACCAGTGAACCCGCACCGGAGCCACGGCCTGGCCC
TACCGGTACGCCGTTATCTTTCGACCACTGGATAAATTCCATAACGATGAGGAAGTAGCC
CGGGAAGCCCATCTGGTTGATAACCTGAAGTTCAGTCTCCAGACGTTCGTCATATTCCGG
GCGGCGCTTAAGACGTTCTTCCTCATCAGGGAATAAAAAGGCCAGACGCTCTTCCAGGCC
TTCTTTTGCACGCTTGACCAGATAATCTTCGGTGCTCATGTCCCCGGTCGGGAACTGCGG
CAGGAAGTATTCACCCAGACGCACAGTTACGTTACAACGTTTGGCGATCTCAACGGTGTT
GGCAAGGGCTTCGGGGATGTCGGCAAACAGCTCGCACATCTCCTCTTCGCTACGCATATA
TTGCTGCGGCGAATAGTTACGCGGGCGTTTAGGATCGTCGAGGGTAAAGCCGTCGTGGAT
CGCGACGCGGATTTCGTGTGCGTCAAAGTCGCTGCTGTCGATAAAGCGCACATCGTTAGT
CGCCACGACGGGCAAACCGCGCACTTCCGCCAGTTCCACCGCCGCGTGCAGATAGCTTTC
TTCATCCGGCCTGCCGGTGCGGATCAGCTCGAGAAAATAGCGATCCGGGAAGTGTTCTTC
ATAAAACGCGACACACTCATCTACCAGCGCGCTGTTGCCACGCAAAAGACTGCGTCCGAC
GTCGCCCATGCGCCCGCCGGAAAGAAGGATCAACCCTTCGTTTAATTCGATAAGCCAGTC
GCGATCGATGATCGGCCCGGCGGCACCGTACCCGCGCTGATACGCTTTTGAGATCAGCAA
CGTCAGATTCTGATAGCCGGTATTGTTCGCCGCCAGTACCGTCAGGTGGGTTAACTCATC
ACCCAGCAGGTCGCACTGGACGTTAAAATCTGCCCCGACGATAGGCTTAATCCCTGCGCC
ATGTCCCGCTCCGTAGAACTTCACCAGACCGCAAAGGTTGGTGAAATCGGTGATCGCCAG
TGCTGGCATACCCAACGCCGCCGCCTTTTTTACCAGCGGTGCGGTTTTGGCCAGGCCATC
GATCATCGAGTAGTCGCTGTGCACCCGCAGGTGTACGAAACGTGGTTCAGACATCTTCAG
ATTCCGGTTTACTTAATCTCGACACAAGAATCAGGACGCAAGTCCCAGTGCTCGTTTGAC
AGGCCCAAAGCTGCGACGATGATGTTCAGTCGCGCCATATTCAGCCAGTTTTTCCAGATG
AAAAGCGGTTGGATACCCTTTGTGTTGGGCAAAACCATATTGCGGGAAAACAATATCCAG
CGCCGCCATTTCGGCGTCACGCGTCACTTTCGCCAGGATAGACGCGGCACTGATTTCCGG
TACGCGGCTATCGCCTTTCACCACTGCCATCGAAGGCATCGGTAATTTCGGGCAGCGGTT
ACCATCAATCAACACATATTCCGGCGCAATATGCAGCCCAGCAACGGCACGCTGCATCGC
CAGCATGGTCGCATGTAAAATATTCAGTTCATCGATTTCGTGAGGTTCCGCGCGGCCCAG
ACTCCAGCTCAACGCTTTCTCTTTGATCTCTTCACAGAGCGCCAGACGACGTTTTTCGCT
CAGCTTTTTGGAATCATTCAGCCCGGCAATCGGGCGCGCCGGGTCGAGAATCACCGCAGC
GGTGACGACCGCGCCAACTAACGGCCCGCGTCCGGCTTCATCCACACCCGCAACCAGCTG
CGTGTGCGGATAGACAAATTCGATCATTGTGCTAACTCCAGAACGGCTTGTGCCGCCTGC
TCATCGGCATTGCAGCGGATCTGCTGATGCAGTTCACGGAAGGTATCGTGCATCGCGTGG
CTGGTTTTCCCGTTCGCCAACAGCGGTAACAGCGCCGCAGCCAGTTTTTGCGGCTCACAC
TCTTCCTGCAATAACTCTTTGACTAACTCTCTGCCCGCCAGCAGATTTGGCAGCGAGACA
TAATCAGTTTTCACCAGACGCTTCGCCAACCAGAAAGTGAAAGGCTTCATGCGATACCCC
ACCACCATCGGGCATTTCGCCAGCATACACTCCAGTGCTGCCGTACCCGACGCCAGTAGC
GCCGCATCGCTGGCAACCATCGCCTCACGGCCCATTCCATCCAGCAAATGAACCGACAGG
TCTGGCGCGACTGCAGCTTTGATGCGTTCAAACTGCTCGCGGCGTTTGGCATTCACCAGC
GGCACCACGATTTCGAGATCTGGATATGTCTGGCGCAAAAGCTGGGCCGTTTTCAGGAAA
TCGACACTAAGCATTTCGACTTCTGCACCACGGCTGCCCGGCAACAATGCCAGACAGTGG
GCATCGTAAGGGATCCCCAGCACATCACGGGCACCATTTTTATCTGGATCTAATGGCATG
GCATCAGCCATGGTATGACCGATAAAGCGGCACGGTACGTTGTATTTGTCATAAAACGCT
TTTTCGAAAGGCAGAAATGCGAGCACCAGATCGGTGGCTCTGCCTATTTTGAAAACGCGT
TTCTGTCGCCACGCCCAGACGGACGGACTGACGTAATGAATGGTTTTGATACCCTGCTTT
TTGAGGTTACCTTCAAGAGTAATATTGAAGTCAGGCGCATCAATACCGACAAAAACATCT
GGCTTCAGTTCGCCAAAACGCTTTGTCAGATCGGCACGAATATGCAGTAAGCGACGCAGA
CGACCGAGCACTTCAACAATGCCCATTACCGCCAGTTCTTCCATTTCGTACCAGGCTTCG
CAGCCTTCAGCTTGCATTCGTGGCCCGGCAACACCAACAAAGCGGGCGTTGGGCACACGT
TCTTTCAGAGCGCGGATTAAACCGGCCCCCAGGATATCGCCGGAGGTTTCTCCGGCGACC
AGGGCAATCGTTAATGGACGCTGTTCAGTCATTAACGAATCAGACCGCGCGTTGAGCGTG
CAAAGAAATCGGTAAAGGCTTTCACTTCCGGATATGTTTCCGCCAGTTCAGCAATTTCCG
GTTTCACTTCATCGAGCGTTTTACCGCTACGATAAATCAGCTTATACGCATTGCGGATAG
CGGTAATCGCCTCACGGCTGAATCCGCGGCGCTTCAGCCCTTCGATATTGACACCGAACG
GCGTTGCGTGGTTACCCTGCGCAATGACATAAGGAGGGACGTCCTGCGCCACACCGGAGC
AGCCGCCAACCATCACATGCGCACCAATGATGCAGAACTGATGGACTGCGGTCATGCCGC
CGATGATCGCGAAGTCGTCAACCGATACGTGACCCGCCAGCGTTGCGTTGTTGGCGAGAA
TACAGCGGTTACCTACCGTACAATCGTGCGCAATGTGCGCGTTGATCATCAGTAAGTTGT
CGCTGCCCACCTTCGTCAATCCACCGCCCTGGACTGTGCCACGATGAATGGTGACGCTTT
CGCGAATGCGGTTACGATCGCCGATTTCCACACGGGTCGGTTCGCCAGCATATTTCAAAT
CCTGGTTAACTTCGCCGATGGAGGCGAACTGATAAATCTCATTATCGCGGCCAATTTTAG
TATGACCATTCACGACAACGTGAGATTTCAGTACGGTACCCTCACCAATTTCGACATGGG
GTCCAACGATACAAAAAGGACCAATGTGTGCGTTCGCGCCAATCGACGCGCCCTCTTCCA
CAATGGCGGTTGGATGCACAAAGGCGGATTTATCAATCACGTATCAGGCCTCCCGGCTAC
GAGCACACATCATCGTTGCTTCGCAAACTACTTTACCGTCGACCAGAGCAACCCCTTTAA
AACGGGTCAGGCCGCGGCGCGTTTTTTCGAAAGTGACTTCCATGATCATTTGATCGCCAG
GCACGACCGGGCGCTTGAAGCGCGCTTCGTCAATACCGGCGAAGTAGTACAGCTCACCCG
GTTCCAGTTTTCCTACGCTTTTAAACGCCAGAATACCTGTTGCCTGTGCCATTGCTTCCA
GAATCAGCACACCCGGGAAAATCGGTTTTCCAGGGAAATGGCCCTGGAAGAATGGCTCAT
TGACAGAGACATTTTTTACTGCGCGCAGAAAACGACCTTCTTCAAAATCCAGCACGCGAT
CCACCAGTAAGAACGGGAAACGGTGCGGCAGAAGTTCTAAAATCTCTTCAATCTGCAGAG
TATGAGTGTTAGTAGTCAAGATACTCTTCCTGTCAAAATATAAGAAACGACAATAATAAC
ACGGCCTGCCGCAATCGTAAGAATGAGACAGGCCGTAAAGTTTGGCGAACAAAAGATGGA
ACGTTAGTCTTGTTGATTAACCTTGCGCTCAAGCGATTTCAGACGCTTGCTCATGTCATC
AATGTTCATCACCAGTGCAGCGGTTTTGCGCCAGACTTTGTTGGGTTGCAGCGGAATGCC
TGAGGAATAGACGCCTGGTTCAGTGATGGGACGCATCACCATACCCATGCCCGTAACCGT
CACTTTGTCGCATATTTCCATATGCCCGTTGATTACGCTGGCTCCGCCGATCATGCAGTA
ACGACCAATTTTCAGGCTGCCCGCCATAATGACGCCACCGGCAACCGCCGTATTGTCGCC
AATCACGACGTTATGTGCAATCTGGCACTGGTTATCAATGATCACGCCATTGCCAATAAC
CGTGTCATCCAGCGCGCCGCGATCGATGGTAGTGCAGGCACCGATCTCCACGCGATCGCC
AATAATTACGCGACCAATCTGTGGGATCTTCACCCAGTTACCACGATCGTTGGCATAACC
AAAGCCGTCTGCGCCTACCACTGTTCCGGACTGGATCAGGCAATTCTGACCGATCTGGAT
CTCATGGTAAATGGTTACATTCGCCCAGAGACGCGAACCTGCACCGATTTTGCTGTTTTT
ACCTACGAAGCAACCGGCACCGATAATCACGTTATCGCCCAGTTCAACGCCGGACTCAAT
CACCGCGTTAGCGCCAATCGATACGTTGTTACCCAGCTTCGCCGTCGCGTCGATCACTGC
ACTGGGTGCAATATTCTGCGCGGGCTGCGGCGTGGTATCTAAAATTTGCGCCATGCGCGC
GTAAGTCAGGTAGGGATTCTTCACTACCAGCGCGGCACTTTTCGCGAAAGGAAGATCGTC
CTGGGTCATGACAACCGCGGATGCCTGGCACAAGCCTAAATGCTCACGGTATTTTGGGTT
AACCATGAACGTAATGTGACCTGTTTGTGCAGATTGCATGGACGCAACGCCGGTGATGAC
GATATCGCCATCACCGTGTAGTTCTGCATCCAACTGCTGCGCTAAATCAGCCAGTCGAAT
TGAAGGCATTACTTATTTAACCTGTTTCAGTACGTCGGCAGTGATGTCTTTTACATCGCT
GCTGTTGTAAGCAACGGCGTTTGCATCAACAACCAGATCGATATCCTGGCTGTTGGCAAC
GGATTTCACAGCAGTCTGGATACGAGTAACCAGTTTGCCGCGTTCTTCGTTGGAACGACG
TGCGCGATCCTGCTCAAAAGCCTGCGCTTTCTGAGCAAAAGTCTGGCGCTGAGCCATCAC
GTCTTTTTCCAGCTTAGTGCGATCGCTGCCCGCTTTCATGGACTGCAGCTTTTTCATTTT
AGCCTGCAGATCGGTTTCCATACGCTGCAGTTCGCTGGCACGGCCTTTGAACTCATTTTC
CAGCGTGTTAGAAACACCGGTTTTCTGCGCTACCTGCTGGAACAGGCTGCCCATGTTGAC
GATTGCAATTTTGTCAGCCGCCTGAGCAGATGTTGCCAGTGCTAACCCGAGACCTGCAGC
TAATAACCACTTTTTCACAATAAACTCCTTACCATCCCATTTGCACCGGAGGGTGCAGTT
CTTTGCGTGGCCCGGCGATCTTATATTGATCGCCTAAAGTCATCGCTACACTACCACTAC
ATTCCTTTGTGGAGAACACTTACCAAGTTTTACCGATGTTAAACTGGAACTGTTCTGCCT
TGTCTCCATCGTACTTTTTGAACGGCTGGGCGTAGGAGAACACCAACGGCCCCAATGGGG
ACATCCATTGTAATGCGATACCCGCAGACATACGGATATTGCTTGGATCACTATAGTCCG
GATATCCAGAATATTGGCTGGAATCCCAGTTTGTATCCCAAACGGTACCCATATCCCAGA
AGAAGGAAGTACGAACCGAGTTAGCATACTTATCGCTAATAAACGGAGTCGGGGTTATGA
ACTCGAGGCTGGCAACCGCCATGGCGTTACCGCCTACAGCATCATCCGATTTACACAGGT
CTTTCGCGCCGTCCTGAGTCGCACATTCGTAATCATAGTCCGGATCATAATTACTGGCCT
GATGCGGGAAGTAAACTGCTTTCGGACCAATGGTATTGGACTGGAAGCCACGGACGGTGC
TGGAACCACCGGCATAGAAGTTCTCGTAGAACGGCATCTCTTTGCCGCCTAAACCATCAC
CATAACCCCAGCGGGTACGACCCAGAACAACCCATTTGTGATCGTCATCGATCGGCACAT
AAGTCGCCGTGTCTAACGTCACTTTGTAGTATTCGTTATCCGATCCCGGAATGGTCACTT
TACCGGTCAGGTTGACACGTGAACCATCTGTCGGGAAGTAACCACGGTCAAGCTTGTTAT
AGGTCCAACCATAGTTGAACGTGAAGTCGTCTGTTTTGAAGCTGTTATCCTGATCAGAGG
TGCTCGGATGTTCACCCATAGAGTACAGATAACGCCACATCGCAACCTGAGGCTGCATGT
TGGACAGGGAGTTATGTACATAACCCAGACCTGCACGCAGCGAGTTATATTCGTTAATCG
GGAAGCCCAACGTCACGTCTGTACCATAACTCTTGTTGGTATAGTCGGACAGGTCGGCGT
CATCTGCCTGGAAGTCATTATAGAAGAGACGACCACCGAGGCTTACGCCATCTACGGTGA
AGTACGGGTTGGTTACCGACAGTTCAGCATAGGTCTGGTAATCGTTTTTGGTCCCGTTGA
TACCAACAGCATAACCTGTACCTAACCAGTTATCCTGTTGCACACCAGCCTGGAAGCTCA
CGCCACTTTCAGTACCGTAACCAATACCAAAGTTGAAGCTACCGGTGTTGCGCTCTTTTA
CCTTGTAGACTACATCAACCTGGTCCGGGCTACCCGGAACACGTTGGGTATCGGTATCGA
CAGTTTCAAAGAAGCCCAGACGATTCAGACGCTCCTTACCCTGATCGACCAGATCGCTCC
CCAGCCATGCACCTTCCATCTGACGCATTTCGCGACGCAGGACGGCATCTTTCGAGGTAT
CGTTACCTTCAAAACGGATCTTACGCACGTAGAAACGGTTACCCGCATCAACGTTCACAC
GTAATTTAACGGTTTTGTCGGCATCGTTAATTTCGGGCATGGACTGTACGCGCGGATAGG
CATAACCATAGCGACCGAGAAGCTTTTTAATGTCATCTTCCATCTTGGTCACTTTGGTGC
CGTTATACAGCTCACCCGGCTCGATCTTAGTCAGCTGCTCAATTTCAGCGGAGTGCCCGG
CAAGGTTGCCGCTCACTTCAACGCCAGAAAGCTTGTACTGATCGCCTTCGGTGATGTTCA
CCGTGACGTAAATACCTTTTTTATGTGGCGTCAGACTGACCTGGGTAGAGTCGATGTTGA
AACGGGCATAACCGCGGTCCAGATAGTAGCTGCGCAGGGTTTCAAGGTCGCCCGCCAGTT
TCTGTTTCTGGTATTTACGATCGCCTACCACGTTCCACCACGGCACTTCGTCACGCAGTT
GGAAATGAGAGATCAGTTCGTCGGTGGTGAAAGCATGGTTACCAACAATGTTAATTTGCT
GGATTTCAGCTGACACACCTTCCTGGAACACCAGTTTTAGGTCAACACGGTTGCGCGGCA
GCGGGGTCACGACAGCTTTAACGCTGGCGCTATATTTACCGACGCTGTAGTAGAAGTCTT
CCAGACCTTTCTCGATATCGGCAATGGTGGTGCGATCGAGGGATTCGCCCACACGCACAC
CAGAAGCCTCGAGGTTTTGCTTCAGCATGTCATCTTTCACCGATTTGTTACCGGAGAAAG
TAATGCTGGCAATGGTCGGACGTTCTTTTACCTGAACCAGAAGGGTATCACCATCACGAA
GGACGCGAACATCCTCAAAGTTGCCGGTAGCAAACAGAGCGCGAATGGTATTACTGATAT
CTTCATCATTAACCGTGTCGCCTGTGCGCACCGGCATACTGAGGAGGGCCGCACCAACGG
CGACACGCTGAAGGCCTTCGAAATGAATATCTTTCACTACGAACCCTTCAGCACCGTATA
CGGTGGCGCTGCTAAACAGCAGCGACGCTATGAGCAACTTTTTCATCGCCATCGTTATTA
TGCGTTCTTCCTAACTAACTCTCATAACCGAGAGAAATCATTGAAAAGTGCAAGCCCCAT
TAACAGCACCAGCAGAATCGAGCCAATGCGATAACAAAAGTCTTGAACCCGCTCGGATAC
CGGTCCGCCCTTGATCTTTTCGATCGCAAGGAACAGCAGATGCCCCCCGTCAAGTACGGG
CAACGGAAACAGGTTAATTATCCCTAAGTTCACGCTAATAAGCGCAAGAAACGGCAGGTA
ATAAACTACCCCGAGTTCCGCTGTCATCCCAGCCCCCTTGGCGATAGAGATCGGCCCACT
GAGGTTGTTCAGTTTCACATCACCGGTGATCAATTTTCCCAGCATACTGACCGTCAGCTT
CATCAGCTGCCACGTTTTGTCCGTGGCTTCGACGATGGCGTTGAACGGCCCATACTGGCG
TACAACTTTATACTCATCTGGCAAAGGAATGACTTTCGGCTCAATACCGACAAAACCAAT
CGCTTTACCATTACCCGGTTTACTCTCCGGGATTAATGTCAAAGACAAGGGACTCCCCTG
CCTTTCGATTTCTAACGCTAAGGATTTACCCGGGTTATCCCGGACAAGCATCACAAAGGT
CACCCACTGCGTTAAGGGCTGACCATCGACTTTAACGATCCTGTCGCCTGCTTGCAAACC
TGCCTTGCTTGCCGCCGAGTTTGGCTGCACATTTTCCAGTACAGGTTCAATTTGCGGTCC
ACGAGGACGAATCCCCAGCGAAGATACCGGATCTTCTTTATCAGGCTCAAACGCCCAGTG
ACGTAAATCGAGCTTTACATCCCGCCGTTGGTCGCTGCCAAATGGCGCTACTGTAATGGT
GGTGCTTTCATCGCCAATTTTATCGACCAACTGCAAACGCACAGCATCCCAATCAGGCGT
TTCGATACCATCTACGGCTTTTAGTTCCGTACCTGGTGCAATTTGTGCTTCCGCAGCTAT
CGAATTGGCTGCTATTTCGCCAACCACCGGACGTACGCCAGGCACACCAATAATAAAAAC
CAGCCAGTAGGCAAAGATAGCAAAAATGAAGTTTGCAACCGGACCTGCGGCAATAATCGC
CGCTCGTTGGCCGACAGATTTATTATTGAAGGCATGGTGGCGGAGTTCCGGAACGACCGG
TTCTGCGCGCTCATCCAGCATTTTGACATAACCGCCCAGCGGGATCAGGGCGATAACATA
TTCGGTACCGAGCTTATCAGTTCGCCGCCAGAGCGCCTTACCAAACCCTATTGAGAAACG
CTCAACGCGAACACCACAACGCCGGGCAACCCAGAAATGACCAAATTCATGCACGGTGAT
AAGTACACCCAGTGCAACGATGAACGAAGCCAAATCCCAGAGAAAACTCAGCATATTACC
TTCCGTTAAAGCGTCCTGAATACCAGTAACAACAAGCAAGCAAAGACCGGTACCGCAGCC
GTCAGGCTATCAATACGATCTAAAATACCACCGTGTCCTGGAATTAAATGACCGCTGTCC
TTAATTCCTGCTTCACGCTTAAACATACTCTCGGTCAGATCGCCGAGCACTGAGGCTAAC
GCTGCGACAATAGAGCAAATGAGTAAGGTGACGGGAGCGACGTCGAGATTCGCCCACATG
CCATAACCCCATGAGATTACCGCTGCGGTCGCTAGTCCACCTATAAAGCCTTGCCAGGTT
TTACCCGGAGAAACCTTCGGTGCCAGCTTATGTTTACCAAACAATTTGCCAAACATATAT
GCGCCAGAGTCAGCGCCCCATACCAGGATCATGACATAGAGCAGCCATATTGCGCCACTG
TAATGATTCTCGTCGTAGTGCCAGGCCCGTAACGCCAGCATGCCCCAGAAGAAGGGAACA
ATGGTTAGCACGCCAAAAATAAGGCGCAATGTTTTAGAGTTACGCCAGATTGCTGCGGAA
TCTGGGTAAAACAGCACCAGCAATAGCGCGACAATCCACCAACCCAACGAAGCCCAAAGT
GAGATTTCAACCAGCGGTTGATGAATATTTCGGTGATATTCCGGCAACAGAAAAAGCATC
AGCGCCAACAATAACCCGCATAACACCGCCAACCATACTCGCTGCGAACGAGTGGTAAAA
CCGCTAAGCTGTCCCCATTCCCACGCTGCCAGCATGCAGACCACCAGCGTTACAATGGCG
AACCCCACCGGCGGCAACAGAAACAACGCCGCGATGACGACGGGTATTAACACAAAAGCA
GATATCAGGCGATACTTCAGCAAAAGCGACCCCCATCAGGCTGTTTCATCACCGGGCTCG
GTGCCGCCGAAACGACGCTCTCGATTAGCAAAGGCATTTAACGCCCCTTCAAAGTCTTGT
TCATCGAAATCGGGCCAGAGAACATCTGTAAAGTAAAGTTCGGCATAGGCAATTTGCCAA
AGCAAAAAGTTACTAATGCGATGCTCCCCCCCAGTCCTAATTACTAAATCTACAGGGGCC
AGTTCATGCATACAGACATGCTGGTTTAGCATCTCTTCATCTATCTGATCTGGTTGCAGG
TTTCCTTGCTGCACCTTTTCAGCCAGTTGCCTGACTCCCTGGACTATATCCCAACGTCCA
CCGTAGTTCGCCGCAATATTCAGCGTCAGACCGGTATTCCCGGCTGTTAGCGCTTCAGAT
TTACGAATACGTTCTTGCAAACGCGAGTTAAAGCGACTGGTATCGCCAATAATACGCAGA
CGCACGTTATGTCGGTGCAGACTTTTTACTTCGCTATCGAGCGCCCACACAAACAGTTCC
ATTAACGCACTGACTTCCTGCGCTGGTCGGTTCCAGTTTTCACTACTAAAGGCATACAGC
GTTAACGCCTCAATACCGTTGTTGGCCGCAAAAGAGACAGCCCGGCGGACGGATTTTGCC
CCGGCTTTATGCCCAAAGGCACGAATCTTCCCTTGCTTTTTTGCCCAGCGACCATTGCCG
TCCATAATGATCGCAACATGACGGCAGCCATGCGCTGGCAATTTTTCGCTAAGTGGTTGA
GTAGCAGACAACATCACGCGTTTTTTATTCCCTGACAGGGTTTACGGTACTCAGGAATAC
TGAAGCCTATACAAAAAAAAGCCGTGTAAAACCACGGCATACCTGACCTTATAAAGCCAA
CTACTTACGATCAGATGGCGCAGACTATATCACTGAAGCCCTACGCTAACAAATAGCGCG
ACTCTCTGTAGCCGGATTATCCTCAGCTTGCGAGACGCATCACCTCTTTTCTGGCGACTT
CACGCGCGTTCGCATCAACAGATAACACATCGTCCACACATTGTGGTTCGCGCATATCCA
TTTTTTCCAGTACGGATAAATTCAACGCAGCGATATCCGTAAAGCGGATTTGTTGCGCAA
GAAAAGCAGCAACGGTGATTTCGTTTGCGGCATTCAATGCTGTCGTCGCTGCCTGACCTT
GTTCGAACGCCTCCATCGCCAGTTTCAGGCATGGATAACGATCATAATCCGGTGCGGCAA
ATGTCAACGCACTTAGTTTGCAAAAATCGAGCGGCTTCACGCCAGAGTTCACGCGATTCG
GCCATGCCATGGTGTGGGCAATTGGCGTACGCATATCCGGTTCCCCCAGCTGCGCCAGAA
CACTGCCGTCCTGATAGCGCACCATTGAGTGAATCACTGACTGCGGGTGAATCAGCACTT
CCATCTGGCTGGCGCTGGCGTTAAACAGCCAACGCGCTTCAATGTATTCCAGACCTTTGT
TCATCATGGTAGCCGAATCGACAGAAATTTTACGTCCCATCGACCAGTTCGGATGACGGC
AGGCTTGATGGGGCGTCATTGTTGCCAAATCGCGCAATGGCGTCTCACGGAAAGGGCCAC
CAGACCCGGTAAGTAAAATGGACACCACGCCATTTTGCTCAAGGTCAGCGTATCCCAGAT
TATGCTGGATAGGTTGCGGTAAACTCTGAAAAATAGCGTTATGTTCGCTATCGACCGGTA
ACAATTGCGCTTTGCTCTGCTTTACGGCGTCCATAAACAGACGTCCGCAGGTAACCAGTG
ATTCTTTATTGGCCAGCAAAATGGTTTTACCCGCGCGGATCGCAGCAAGCGTAGGTAACA
GCCCAGCAGCACCAACAATGGCTGCCATCACCTGATCAACCTCCTCAAGCGCTGCCATAT
CGCAAGCGGCTTGTTGCCCACTTAAGACTTCGGTGCGGCTCCCCTGTTGCTGTAGCATCG
TTTTAAGAAGTTTCGCACTCGCTTCATCGTCCATTACGGCATAGCGGGGAGAGAATTCCA
GGCACTGTTCTACCATGCGAGTGACATTTTTGCCTGCCACCAGCGCAACTACGCGGAAGT
GTTCGGGATTATGGCGCACCACGTCCAGCGTGCTGCAACCAATCGAGCCGGTCGAGCCCA
GAATGGTGAGTTGCTTCATGAAACATCCAGAGTTGAGACAGAATAAAAAGCAAAACGCCG
CCAGCCGATCCGCAAGGATCTACTAAGCGGCGTTTTTGTCGTTCAAGAAATCAGAACTGC
ATCAGTTCTGCTTCTTTGTCTGCCAGCGCCGCTTCAATTTTCTTGATTGCAGCATCAGTC
AGTTTCTGTACATCGTCCTGAGCACGGCGATCGTCGTCTTCGCTGATCTCTTTATCTTTC
AACAGTGCTTTCACTTTGTCGTTCGCGTCACGACGCACGTTACGTACTGCAACACGCGCT
TGTTCTGCTTCACCACGAACGATTTTGGTCAGATCTTTACGACGTTCTTCCGTCAGCGGC
GGCAGCGGAACACGGATGTCGCTACCCGCAGAGTTCGGGTTCAGGCCAAGATCGGACGCC
ATAATCGCTTTTTCAACGGCCGGAGACATTGAACGATCAAACACGTTGATTTTCAGAGTA
CGGGAATCTTCTACCGTTACGCTTGCCAGCTGACGCAGCGGCGTCGGCGTGCCGTAATAT
TCCACGACAATGCCATCCAGCAGGCTGGGAGAAGCACGACCCGTGCGTATTTTGCTGATT
TGGGTTTTGAACGCTTCTACGCATTTGTCCATGCGTACTTCAGCATCTTTTCTGATATCG
CTAATCACGTTACGAATCCTTGAAAACTTGTCTCAGTCAGACCAGACAGTCACACACAGT
GGAAGTGTGCTAAGTATAGCCCTGATTAAACATATTACGGGTAATCGTCTGGATTATTAG
GCTATTTTATTTGCCATTTTGGCCCCGGGCAGTGCTCGCCATCCTCACGTACTTTTGTAC
GCTCCGGTTGCTGCGCGCTGGCCGTGACCAAACTGCCTGCAACAATAACGCCTTATAACC
AGACTTACGCCCCCGCGATACTTATGCGGAATCTTACCCTTATTTATCCATCACGGGAAT
TATTCCGTGATTAAAGTCCCTTCTTTTTCACCCATTACCACACGGCGCAGCGCACCCGGT
TTGTTCATGTTGAAAACACGAATCGGTAATTTATGGTCACGAGCCAGCGTGAAGGCCGCC
AGGTCCATGACTTTCAGCTCTTTTTCCAGCACTTCGCTGTAAGTCAGTTGCTCGTACATG
GTTGCAGTTGGATCTTTCGCCGGATCAGCAGTAAACACGCCGTCAACTTTGGTTGCTTTC
AGCACCACATCGGCTTCAATTTCGATACCACGCAGGCAAGCTGCAGAGTCGGTGGTAAAG
AACGGGTTACCTGTACCGGCGGAGAGGATCACCACACGGTTGTTGCGCAACAGGCTGATA
GCTTCTGCCCAACTGTAGCTGTCGCACACGCCATTCAATGGAATAGCGGACATCAGGCGA
GCGTTCACATAGGCGCGGTGCAGTGCATCACGCATTGCCAGGCCGTTCATTACGGTCGCC
AGCATCCCCATGTGGTCGCCCACAACGCGGTTCATACCCGCTTTCGCCAGACCAGCGCCA
CGGAACAGGTTACCCCCACCAATCACCACACCAACCTGAATACCCAGTTCAACCAGTTCT
TTGATTTCCTGAGCCATGCGATCCAGTATGCTTGCATCAATACCGAAGCCTTCAGTGCCC
TGCAGAGCTTCGCCACTCAACTTAAGCAGAATGCGTTTATAGACGGGTTTTGCATTGGTA
GCCATGTTTCTTTCCTGAGACTGTCAACGATTGAAATGAATTAATACTAGCGACATTGTA
CGTCGCTATTCAGCGCAGCCCCACAAGGGTTAGCTGAATTTACAAGATGGGCACAAAAAG
AAGCCGCCCTCAGGCGGCTCCTTTTCGATGATTAAGACTGCTTGGACATCGCAGCAACTT
CTGCTGCAAAGTCAGTCTCAACTTTCTCGATGCCTTCACCTACTTCGAAGCGGATGAAGC
CAGTCACTTCAGCGTTATGCTCTTTCAGCAGCTGACCAACAGTTTTTGCCGGTTCCATAA
CGAACGGCTGACCAGTCAGAGAAACTTCGCCGGTGAATTTCTTCATGCGGCCTTCAACCA
TTTTCTCTGCGATTTCTTTCGGCTTACCAGACTGCATCGCGATATCCAGCTGTACCTGGT
ATTCTTTTTCTACCACTTCAGCGGATACGTCTTCTGGTTTGATGAATTCTGGCTTGCTTG
CAGCAACGTGCATAGCGATGTGTTTAACCAGCTCTTCGTCAGCGCCTTTAGCAGCAACCA
GAACGCCGATACGCGCACCGTGCTGATAAGAACCCAGAACGTCGCCTTCCAGCGCAGCAA
CGCGGCGAATGTTGATGTTTTCACCAATTTTCGCTACCAGCGCAACACGTTCTTCTTCGA
ACTGTGCTTTCAGAACTTCAACGTCAGTGATTTTGCCAGCAACAGCTGCGTCCAGAACTT
TGTCTGCGAACGCCTGGAAACCAGCGTCTTTTGCAACGAAGTCAGTCTGGCAGTTAACTT
CCAGAATGATGCCGTAGTTGCCGTCGATTTTGGTTTTGATCACGCCGTCAGCAGCAACGT
TGCCTGCTTTTTTCGCTGCTTTAATAGCACCGGACTTACGCATGTTTTCGATTGCCAGCT
CGATGTCGCCGTTAGCTTCAGTCAGTGCTTTTTTGCAATCCATCATGCCTGCGCCAGTAC
GCTCACGCAGCTCTTTTACCAGGGATGCGGTAATTTCAGCCATTCTAAAATCCTCGGAGA
TGTGATCTGCCCGGCATTAAACCGCACAGATATAAAAGTGAAAAAGGGGGCCATATGCAG
GCCCCCTAACCAAACGTGTACTACCTGGTCTATAAGGGCTCTCCCCCTTCATATTTCGCG
CCGCAGATGCGTTGTCTTCGCTCGCTCATCCCGGTCACTTACTGATGTAAGCTCCCGGGA
ATTCTCGAGCTTGCCGCCTTTCTGCAACTCGAACTATTTTGGGGGAGTTATCAAGCCTTA
TTACTCAGCTTCTACGAAGCTTTCTTCCGCCTGGGAAGCCAGATCCTGAGAACGGCCTTC
ACGTACGGTTGCAGCAACAGCGCCCAGGTACAGGGTCACAGCACGGATTGCGTCGTCGTT
ACCCGGGATAACGAAGTCAACACCGTCCGGATCAGAGTTGGTATCAACGATAGCAAATAC
CGGAATACCCAGGTTGTTTGCTTCTTTGATAGCAATGTGTTCGTGGTCAGCATCGATTAC
AAACAGAGCGTCCGGCAGACCGCCCATGTCTTTGATACCGCCCAGGCTGTTTTCCAGTTT
CTCCAGCTCACGAGTGCGCATCAGCGCTTCTTTCTTGGTCAGCTTGTCGAAAGTACCGTC
CTGAGACTGAGTTTCCAGGTCTTTCAGACGTTTGATGGACTGACGAACGGTTTTCCAGTT
AGTCAGCATACCGCCCAGCCAGCGATGGTTCACGAAGAACTGGTCGCAGCTCAGAGCAGC
GTCTTTCACCGCTTCGCTTGCAGCGCGTTTAGTACCAACGAAAAGGATTTTACCTTTGCG
AGAAGCAATCTTGTTCAGTTCAGCCAGAGCTTCGTTGAACATCGGTACAGTTTTCTCAAG
GTTGATGATGTGAACTTTGTTACGCGCACCGAAGATGAACGGCTTCATTTTCGGGTTCCA
GTAACGGGTCTGGTGACCGAAGTGAACACCAGCCTTGAGCATGTCGCGCATGGAAACAGT
TGCCATGATTAAAACCTCTATATAAAAGTTGGGGTTATGCCTCCACGTATCCCATATTAC
CGACCCCAAAGGGCACCCCGGAATATGTGCCGATACGTGTGTGTTGTTACACAAAGTGAG
ATTGTCGCTTCCGTCCAGTCTGTGTATACGAAATGGATCGGAAGTCCGGCGCGCTTTATA
CCACAAATACGTCTGGGACACCAATAATTGTTGGCGCTGTGTACAGCATCAGACGTCGAA
TTTTCTATTATAGAAAACCTTCAGTGGCACGTTTGGCGAAATTCAGAATGATTCTCAATT
TGCCCGGGTGTGATACCATTGACGGCACTTACATATATATTGTCGGTATCACCGACGCTG
ATGGACAGAATTAATGGCTATCTCAATCAAGACCCCAGAAGATATCGAAAAAATGCGCGT
CGCTGGCCGACTGGCTGCCGAAGTGCTGGAGATGATCGAACCGTATGTTAAACCGGGCGT
CAGCACCGGCGAGCTGGATCGCATCTGTAATGATTACATTGTTAATGAACAACACGCGGT
TTCTGCCTGCCTCGGCTATCACGGTTATCCGAAATCCGTTTGCATCTCAATTAATGAAGT
GGTGTGCCACGGTATTCCGGACGATGCTAAGCTGCTGAAAGATGGCGATATCGTTAACAT
TGATGTCACCGTAATCAAAGATGGTTTCCACGGCGATACCTCGAAAATGTTTATCGTCGG
TAAGCCGACCATCATGGGCGAACGTCTGTGCCGTATCACGCAAGAAAGCCTGTACCTGGC
GCTACGCATGGTAAAACCAGGCATTAATCTGCGCGAAATCGGTGCGGCGATTCAGAAATT
TGTCGAAGCAGAAGGCTTCTCCGTCGTTCGTGAATATTGCGGACACGGTATTGGTCGCGG
CTTCCATGAAGAACCGCAGGTGCTGCACTATGACTCCCGTGAAACCAACGTCGTACTGAA
ACCTGGGATGACGTTCACCATCGAGCCAATGGTCAACGCGGGTAAAAAAGAGATCCGCAC
CATGAAAGATGGCTGGACGGTAAAAACCAAAGATCGCAGCTTGTCTGCACAATATGAGCA
TACTATTGTGGTGACTGATAACGGCTGCGAAATTCTGACGCTACGCAAGGATGACACCAT
CCCGGCGATAATCTCGCACGACGAATAAAATGAAGCCGGCGAATGCCGGCTTTTTTAATG
CGATAATTTAATCTTATGGGTGGCGCACAATGAATACCCTTCCAGAACAGTACGCAAACA
CCGCTCTCCCCACCCTGCCCGGTCAACCGCAAAATCCATGCGCCTGGCCCCGTGATGAAT
TAACCGTCGGTGGGATAAAAGCCCATATCGATACTTTCCAGCGTTGGCTGGGTGATGCCT
TTGACAATGGTATCTCCGCAGAACAGTTGATTGAGGCGCGTACCGAGTTTATCGACCAGC
TCCTGCAACGATTATGGATTGAAGCGGGATTCAGCCAGATTGCCGACCTGGCATTGGTCG
CCGTCGGTGGCTACGGTCGTGGCGAGCTGCATCCACTTTCAGACGTCGATTTACTGATTT
TAAGCCGTAAAAAGCTCCCGGACGATCAAGCGCAAAAAGTGGGCGAGCTGTTAACGCTGC
TCTGGGATGTAAAGCTGGAAGTCGGTCATAGTGTGCGCACGCTTGAAGAGTGCATGCTGG
AAGGGTTATCGGATTTAACCGTCGCCACCAATTTAATCGAATCCCGCTTATTAATTGGCG
ATGTTGCGCTGTTCCTCGAACTGCAAAAACATATTTTCAGCGAAGGATTCTGGCCTTCCG
ACAAGTTCTACGCGGCGAAAGTTGAAGAACAGAACCAGCGCCATCAGCGTTACCATGGCA
CCAGCTACAACCTTGAACCAGACATCAAAAGCAGCCCTGGCGGCTTGCGCGATATCCACA
CTCTGCAATGGGTGGCCCGCCGTCATTTTGGCGCAACATCGCTGGATGAAATGGTCGGGT
TTGGCTTCTTAACCTCAGCGGAGCGAGCGGAATTAAACGAATGTCTGCATATATTGTGGC
GTATTCGCTTTGCCCTGCATCTGGTCGTCAGCCGTTACGATAATCGCCTGTTATTCGATC
GCCAGCTTAGCGTCGCCCAGCGTCTGAATTACAGTGGCGAAGGTAACGAACCGGTCGAGC
GGATGATGAAGGATTACTTCCGCGTGACACGCCGCGTCAGTGAACTCAACCAGATGCTGC
TGCAACTGTTCGATGAAGCGATCCTCGCCCTTCCCGCCGACGAAAAACCCCGTCCAATCG
ACGATGAGTTTCAGCTACGCGGTACGCTAATCGACCTGCGTGATGAAACACTATTTATGC
GCCAGCCGGAAGCCATCTTGCGTATGTTCTACACCATGGTGCGCAACAGTGCGATCACCG
GCATTTACTCCACCACACTGCGCCAGTTACGCCATGCCCGTCGCCATCTGCAACAACCGC
TGTGTAATATTCCGGAAGCACGAAAACTGTTTTTGAGCATTCTGCGTCACCCCGGAGCGG
TGCGGCGCGGGCTATTGCCAATGCATCGCCATAGCGTGCTCGGCGCGTATATGCCGCAAT
GGTCGCATATCGTCGGGCAGATGCAGTTTGATCTGTTCCACGCCTACACGGTGGATGAAC
ATACTATCCGCGTGATGCTGAAACTGGAGAGTTTTGCCAGTGAAGAAACGCGCCAGCGCC
ATCCGTTGTGTGTGGACGTCTGGCCGCGCCTACCGTCAACTGAGCTGATTTTCATCGCCG
CGCTGTTTCACGATATCGCCAAAGGACGCGGCGGCGACCATTCCATTCTCGGTGCTCAGG
ATGTAGTGCATTTTACCGAACTCCACGGGCTGAACTCACGCGAAACACAGCTGGTCGCCT
GGCTGGTTCGCCAGCACTTGCTGATGTCGGTGACAGCTCAGCGTCGCGATATTCAGGACC
CGGAAGTCATCAAGCAGTTTGCCGAAGAAGTTCAAACGGAAAATCGTCTGCGCTATCTGG
TATGCCTGACAGTGGCTGACATTTGCGCCACCAACGAAACGCTGTGGAATAGCTGGAAGC
AAAGTCTGTTGCGCGAACTCTATTTTGCCACCGAAAAACAGCTACGACGCGGAATGCAAA
ACACGCCGGATATGCGCGAACGGGTTCGCCATCACCAACTCCAGGCGCTGGCACTGCTGC
GCATGGATAACATCGACGAAGAGGCGCTGCACCAAATTTGGTCACGCTGTCGTGCTAACT
ATTTTGTCCGCCATAGCCCAAATCAACTGGCCTGGCATGCGCGCCATTTATTACAGCATG
ATTTAAGCAAACCGCTGGTATTGCTTAGTCCGCAGGCTACGCGTGGAGGCACCGAGATTT
TTATCTGGAGCCCGGACCGCCCCTATCTGTTTGCCGCCGTCTGTGCCGAATTAGACCGCC
GCAATTTAAGTGTTCACGACGCACAAATTTTCACCACTCGCGACGGTATGGCGATGGATA
CCTTTATCGTGCTGGAACCCGATGGTAGCCCGCTATCCGCAGATCGCCATGAGGTTATTC
GGTTTGGTCTGGAGCAAGTACTGACACAAAGTAGCTGGCAGCCACCACAGCCGCGTCGTC
AACCGGCTAAACTACGTCACTTTACTGTTGAAACCGAAGTGACGTTTTTGCCTACCCATA
CCGACCGAAAATCATTCCTTGAGCTTATCGCGCTCGACCAGCCAGGACTGCTGGCGAGAG
TCGGGAAAATTTTTGCCGATCTGGGAATTTCGCTTCATGGCGCCCGAATTACAACCATTG
GCGAGCGAGTAGAAGATTTATTCATAATTGCCACCGCTGACCGGCGTGCACTTAATAACG
AGTTGCAGCAGGAAGTGCATCAGCGGTTGACAGAGGCCCTCAATCCAAACGATAAAGGGT
GATGTGTTTACTGATATGAAAAGAGTTTAACAATGCAGCAGTTACAGAACATTATTGAAA
CCGCTTTTGAACGCCGTGCCGAGATCACGCCAGCCAATGCAGACACCGTTACCCGCGAAG
CGGTAAATCAGGTGATCACCCTGCTGGATTCCGGCGCACTGCGTGTAGCGGAAAAAATTG
ACGGTCAGTGGGTGACGCATCAGTGGTTAAAAAAAGCGGTGCTGCTCTCTTTCCGTATTA
ATGATAATCAGGTGATCGAAGGGGCAGAAAGCCGCTACTTCGACAAAGTGCCGATGAAAT
TCGCCGACTACGACGAAGCACGTTTCCAGAAAGAAGGCTTCCGCGTTGTACCACCAGCGG
CGGTACGTCAGGGTGCGTTTATTGCCCGTAACACCGTGCTGATGCCGTCTTACGTCAACA
TCGGCGCATATGTTGATGAAGGCACGATGGTTGATACCTGGGCGACCGTCGGTTCTTGTG
CGCAGATTGGTAAAAACGTCCACCTTTCCGGTGGCGTGGGCATCGGCGGCGTGCTGGAGC
CGCTGCAGGCTAACCCGACCATTATTGAAGATAACTGCTTCATTGGCGCACGCTCTGAAG
TGGTTGAAGGGGTGATTGTCGAAGAAGGTTCCGTCATCTCTATGGGCGTATACATTGGTC
AGAGCACCCGTATTTACGACCGTGAAACCGGCGAAATCCACTACGGTCGCGTTCCGGCGG
GGTCTGTGGTTGTTTCAGGTAATCTGCCGTCAAAAGATGGCAAATACAGCCTCTACTGTG
CGGTTATCGTTAAGAAAGTTGACGCGAAAACTCGCGGTAAAGTTGGTATTAACGAACTGC
TGCGTACCATCGACTAAAAGTATGTACACGGGCAGCACGACGCTGCCCGATTGCTTTCTG
GTTCAGAATAATTCGTCCTACTCATTCTTCCTCCCCCTTTTTTAAATACTTTTTCATCTT
GTTTCGGACTGTCATGTAATTCACAAAACGAAGATAAATGTGCTAATCCATCCCATGGAA
TATCGCCACAATAAAGCAGGTAATTTTTTGATTTTTACGCCATGATAGAAGTCTGGAAGA
AAAAGGCTTTCTGCGATCACAGTCGAGCCGGGCGGGCCAGGCCAAATGCTAAAATAAGCA
CAATTTACTGACTCATTTTGAGGTAACGCTATGTACGACAATCTGAAAAGTCTGGGTATT
ACCAATCCTGAAGAAATTGATCGTTACAGCCTCCGGCAGGAAGCCAACAACGATATTCTG
AAAATCTATTTCCAGAAAGACAAAGGCGAGTTTTTCGCCAAGAGCGTGAAGTTTAAATAT
CCGCGTCAGCGTAAAACGGTCGTCGCTGATGGTGTGGGTCAGGGTTATAAAGAAGTCCAG
GAAATCAGCCCGAATCTACGGTATATCATTGATGAGCTTGATCAAATCTGCCAGCGTGAC
CGCAGCGAAGTTGATCTTAAGCGTAAGATCCTCGACGACTTACGTCACCTGGAGTCAGTC
GTAACCAATAAGATCAGCGAGATTGAAGCCGATCTGGAAAAACTAACGCGTAAATAATCC
CGAACTGACGGTTAACTCGGGCATTCCCCTCTCCCCTTCGGGCTGAGGGGAATGAGCCAG
CGCCGCCTCAACCTTAACGCATAACCTACCGCTCTTCATCCAGTTGTAACGCCACATACA
GCAGCAACCTGTCATCAAAATTGCCCAAATCAAGCCCGGTCAGTTCCGATATACGATTAA
GCCGATACTCCAGAGTATTACGATGAATAAACAACGCCTTTGACGTTGCCAGCGGTTGCA
CATTGTGACGAAACCACGCCGCCAGCGTTCGCCGCAGCAAGCCGTTATTGTCCATCGCTT
TCAGCCGCGCCAGCGGTCGCGCCAGTTCGTTGGCCTGCCAGTCGCCACGCAAACTGTCGA
GTAACACAGGTAACATCAGATCCTGATAAAAATAGCAGCGACTTTCTGGCATCCGCTGTT
TACCCACCACCATCGTCGTTTTCGCCGTACGATAGGATCGGGCAATACTGCCAGGACCAG
TAAAATAGTTGCCCAGCGAAACGCGAAAACGCAGCTGGCCGTACTCTTTCATGCGGGTAA
TCAGTTGTTCAACTCGCTTACGATGATCTTCTGCATCCCAGCGCCCAAAAGAGTTCAACG
CCGGTTTCAACACCACCATTTCGGTTAGCGAGACAATCGCCACCAGATTATTACGCTCGG
GCGTAGTCAGCGCATTTTGCAGTTGTTGTAACTCCGCCATTGCGCTGTCCACGCCAAGCT
GACCGCTGTCGACCTCAACAATAGCCACTACTCGCGGTTGATTGAGATCGATCCCCAGCC
GTTGCGCCCATTCAGTAAGTGCGGGAGTATTCTCCTCAGCCTGAATCAGGTTCATCACCA
GTTCTTCCCGCAAACGGCTATCCTGCGCCAACAGGTGCATCAACCGCGACTGTTCCAGCA
TCATTTCAGCCGTCATGCAGACCAGTTCGCCATATTTACGCAGGTTCTCTGGTTCACCTG
TCAGGCCAATTACGCCGACAATTTCACCTTCCAGCCGTAACGGTAGATTAATCCCCTGCC
GCACACCGTGCAGATGACGTGCCACCGCGTCATCGATATCGACGACTCGTCCCTGTGAAA
GTACCAGCAATGCACCTTCGTGCAATTCACCAATACGCTCACGATCGCCGCTGCCGATAA
TTCGCCCGCGGGCATCCATTACGTTGATATTGGTATCGATGATGCGCATGGTACGTGCCA
CGATATCCTGCGCCATTTTGGTATCAAGATGCCAGCCATAAGTCCTCCGTTATGCACGGC
TTAGCATAAGGAAGTACGTAACGTACGGCATTGTGCAAATGCCTAAAGGATGATGAAGAT
GTATGGAGTTGTGGTGAAGTTCACAGATTGTAAGGAGAACCCCTTCCCGTTTTCAGGAAG
GGGTTGAGGGAGATTACTGCATTAACAGGTAGATGGTGCTGTCGCCGCGCTGAATGTTCA
GTGCCAGCACAGACGGTTTGCTGTCGAGAACTTTACGCAGTTCAGCGATGTTTTTCACTG
CCTGCTGGTTCGCGCCAATAATCACATCACCTTTCTTCAGGCCGATCTGCGCAGCCGGAG
TGCCCGTTTTCACGTTGTTCACTACCACGCCCTGATCTTTGCCTTTGTTGCTCATCTCAG
CACCTTCAATGCCGTTGAAGATGGAGCTGGAATCAACCTGATTCTGGCTGCTCTGCTGCA
GTTCCAGATTCACGTTGACCTGCTTACCGTCGCGCAGCAAGCCCAGGGTCAGTTTGCTGC
CCACCGGCATAGTACCCACCTGAGCACGCAGTGCGGCAAAGCTGCTGATCGGCTTACCGT
TCAGTGAGGTGATCACATCACCCGCTTTAATGCCCGCTTTTGCAGCGGAGGAATTAGGCA
GAACCTGGCTTACGAAAGCACCGCGCTGGGCGTCAACTTTCATCGCTTTCGCCAGTTCGG
AATTCAGCTCAGTCCCCATAATACCCAGCTCACCGCGTTTCACCTGGCCGTATTCCACCA
TCTGCGAGGTCAGGTTTTTCACCATGTTGCTCGGGATAGCAAAACCGATACCGATGTTGC
CGCCGTCCGGTGCGAGGATCGCGGTGTTGATACCGATCAGTTCGCCGTTCAGGTTAACCA
GCGCACCACCGGAGTTACCACGGTTGATCGCTGCATCGGTCTGGATGAAGTTTTCGTAGT
TTTCGGCATTCAGGCCGCTACGCCCCAGCGCAGAGACAATCCCGGAAGTTACCGTCTCGC
CCAGACCAAACGGGTTACCAATCGCTACGGTGTAATCACCCACGCGCAGTGCATCAGAAT
CCGCCATCTTAATTGCGGTCAGGTTTTTCGGATTCTGGATTTGGATCAGCGCGATATCAG
AGCGCGGATCTTTGCCAACCATCTTCGCGTCGAACTTACGGCCATCGCTCAGTTGAACTT
TAATGACCGTCGCGTTATCAACAACGTGGTTGTTGGTGACGACATAGCCTTTATCGGCAT
CAATGATGACGCCGGAACCCAGCGCCATGAATTTCTGTTGCTGGCCGCCACCATTACCGC
CCTGGCCACCCTGGCAGAACGGAGAGCTCTGGAACGGAGAACCTTCCTGGCAGAACGGAG
AATCATCACCGAAGAACTGCTGGAAATTACGCGGCATACGCGGCGTATTAACGGTTGTGC
TACCTTCTACGTTAATGCTGACCACTGAAGGCATCACCTTTTCGAGCATCGGTGCAAGGC
TTGGCATCTGCTGGGCTGTCGTTGCTGAAGAAGTCTCAGCCGCCGTTGCAGAGAGCGGAG
ATAACGCCAAACCTAAACTCAGAGCCAGTGCACTCAGTGCTAATGTGGTTTTTTTCATGT
ATTTCAGTCTCGATTAACAGATAACGCAAAATTGCTGTGTTCTTCAGATTCGTTTTATAG
CGCGAAGTTCCGAACTAAAGTTTCTGCAAAAGGTAAAAATTTATTGTTCGTCTTTACAAA
AGCCTGGTTATTGTTCTACGGCCATCAGACGTCGGTATTCATCCCACGCATAGAGGTCGG
TCATACCGCTGATATAATCCTGCAGCAGGCGGCAACGGTAATAATATTCCCATAGCGGAA
ACTCAGGAGAATCTGACGGTAATTTACTGACAGCTTCGACATAGGCCAGCCGATGGCGCG
TCGAGAGTTTGTGGAATAAGCGCGATTCAATAGGGAAACGTTTCACCCGTTCTTTTTCTA
CCAGTTCAGTAAAGTCTGATAACGACAGGCTTAATAAAGGACGATAAATCTCTAATAATC
CGCTAATGACCCGATAGCCCTGCAATTCAAGCTGCTCGACATCTGGATGGCTAAACACAT
GTTTTACAGCGACATTTTTATATAGCTTAAGAAGATCGCTGCATTCGCTGGCATCTTCCA
ATAATGCATGATTAAACGTTCCGGCGAAAATCGCAGGCAGATTATCAATAAATCGTTGTG
CCGCGTAGGGTACCAGTTTATTTAGGGTATTTACCCGTAAATACATAAAAAACTGATCTT
CCGTACTGCGGCTTAAACTATTTGAGCGTGATTTTTCCCAGGCATTTTCAACCACTAGCG
AAAAGAGCGAACCTTTCTCATGCTGACCCCACGCCTCGTGCAAATGATGATAAAGCTGCT
CAACGGTAAATATTCTTTTCTCTACCGCATCTTCAAGGTCTGCCACACAATAGGAGATGT
CGTCGGCAGCTTCCATAATCCACGTTAATGGAAAACGACTGTAAAGCGCCAAATTAAGTT
CTTTACGCAACCGGGCAATATAGGCTTCTTCAGAAAGATAATAACCCGGCTTTTTCATTA
AATAGTGATGTGTCTCAGGCGTTTCGCCACGCCACCACGCCGGACGGGTATATTTTAAAA
TACCGCCAACCTGTGCCCAGGTGAGATTCATCCTCATCAATGTATGCACCAGACGAATGC
CTTGTGCATTCCCCTCAAAATGACATAAGTCCTGACGAATCTTGCGCCGCAGCTCGTTAA
GCGGTTCTTCCCCGTCCCGTAAACGTAGTGCTGCCACGCTGCAGCGATCGTCAGTCAGAG
GCTGGCTTTCGGCATCTTCCGGGTATAAACGCTGGCGAAACCAGTCATTTATCGCCGCTT
CGCCAAAATGACCAAACGGCGGATTGCCGATATCGTGCATCAGGCATGACATCTCAACAA
TGCTTTCAAAAGGTCCGGTCAGTTCATCCAGGCCGTATGCTTCCAGCAATTTAAGCTCTT
TCAGACGGCTTAAAATTTCTTTGGCGATGTAGCGCCCCACCTGCTGGACTTCCATCGAGT
GGGTAAGACGCGTGCGCACGGCGGCATTGCGCTCCAGTGGAAAAACCTGGGTCTTTTGTT
GCAGACGACGAATTGCCGGAGAGTTGATGATACGCCCGCGATCGCTCTCGAAGATCCGCA
GGATCTCATGTTCGGTTTTAACGCCCTGCGGTGAACGGTAACGACGATGCCAGTTTATTT
TTTTTCGGAAATCAATCTGTGCCATGTCCTCTCCCGCGTGAGAAATACGCTTCCCCGTAA
GCGCATGGTAAACTATGCCTTCAAATCGGGCTTATCGCGAGTAAATCTATGAAAATCGGC
ATCATTGGTGCAATGGAAGAAGAAGTTACGCTACTGCGTGACAAAATCGAAAACCGTCAA
ACTATCAGTCTCGGCGGTTGCGAAATCTATACCGGCCAACTGAATGGAACCGAGGTTGCG
CTTCTGAAATCGGGCATCGGTAAAGTCGCTGCGGCGCTGGGTGCCACTTTGCTGTTGGAA
CACTGCAAGCCAGATGTGATTATTAACACCGGTTCTGCCGGTGGCCTGGCACCAACGTTG
AAAGTGGGCGATATCGTTGTCTCGGACGAAGCACGTTATCACGACGCGGATGTCACGGCA
TTTGGTTATGAATACGGTCAGTTACCAGGCTGTCCGGCAGGCTTTAAAGCTGACGATAAA
CTGATCGCTGCCGCTGAGGCCTGCATTGCCGAACTGAATCTTAACGCTGTACGTGGCCTG
ATTGTTAGCGGCGACGCTTTCATCAACGGTTCTGTTGGTCTGGCGAAAATCCGCCACAAC
TTCCCACAGGCCATTGCTGTAGAGATGGAAGCGACGGCAATCGCCCATGTCTGCCACAAT
TTCAACGTCCCGTTTGTTGTCGTACGCGCCATCTCCGACGTGGCCGATCAACAGTCTCAT
CTTAGCTTCGATGAGTTCCTGGCTGTTGCCGCTAAACAGTCCAGCCTGATGGTTGAGTCA
CTGGTGCAGAAACTGGCACATGGCTAAGTCACTGTTCAGGGCGCTGGTCGCCCTGTCTTT
TCTCGCGCCACTGTGGCTCAACGCGGCACCGCGCGTCATCACGCTTTCTCCCGCCAACAC
TGAACTTGCCTTTGCCGCCGGGATCACGCCGGTTGGGGTCAGCAGCTATTCCGACTATCC
TCCACAAGCGCAAAAGATTGAGCAGGTTTCCACCTGGCAGGGGATGAATCTGGAACGCAT
TGTCGCGCTGAAACCCGATCTGGTGATTGCCTGGCGTGGAGGTAATGCCGAGCGGCAGGT
TGACCAGCTGGCTTCGCTGGGAATAAAAGTGATGTGGGTCGATGCGACAAGCATTGAACA
AATTGCCAATGCGTTACGTCAACTGGCCCCCTGGAGTCCGCAACCGGATAAGGCCGAACA
AGCCGCGCAATCCCTGCTGGATCAGTACGCGCAATTGAAAGCGCAATATGCTGATAAACC
TAAAAAACGTGTTTTTCTGCAATTCGGCATTAATCCGCCATTTACCAGTGGAAAAGAGTC
GATTCAGAACCAGGTACTCGAAGTTTGTGGCGGAGAAAACATCTTTAAAGACAGCCGGGT
TCCCTGGCCGCAAGTTAGCCGCGAACAGGTGTTAGCACGCTCGCCACAGGCGATTGTCAT
TACAGGCGGACCGGACCAAATTCCTAAAATCAAACAATACTGGGGTGAACAGCTCAAAAT
TCCCGTTATTCCTCTCACGAGTGACTGGTTTGAACGTGCAAGCCCACGTATTATCCTCGC
TGCACAACAGCTCTGTAATGCGCTTTCACAGGTAGATTAGTGCCTGACCTTTTCAGGTGC
TCAGTGGGGATTGAACAATGCTCGTCTATTGGCTGGATATAGTCGGCACAGCGGTATTTG
CCATCTCCGGCGTTTTGTTAGCCGGAAAATTGCGTATGGACCCTTTTGGTGTTCTGGTAT
TGGGCGTGGTTACCGCAGTAGGCGGCGGGACAATTCGCGACATGGCGCTGGATCACGGCC
CGGTATTTTGGGTGAAAGATCCCACCGATCTGGTCGTTGCAATGGTCACCAGCATGCTGA
CCATCGTGCTGGTGCGCCAGCCAAGACGCTTACCAAAATGGATGTTGCCGGTGCTGGACG
CCGTTGGTCTGGCGGTGTTTGTCGGCATTGGCGTGAATAAAGCCTTTAATGCGGAAGCCG
GTCCGTTAATCGCGGTTTGCATGGGCGTCATTACTGGCGTTGGCGGCGGGATTATTCGTG
ATGTACTGGCCCGCGAGATCCCCATGATTTTACGTACAGAAATCTACGCAACAGCCTGTA
TTATCGGCGGTATTGTCCACGCTACGGCTTATTACACATTTTCCGTACCACTGGAAACAG
CCAGTATGATGGGCATGGTCGTGACGCTATTGATTCGGCTGGCGGCTATTCGTTGGCATC
TTAAGCTACCGACGTTTGCGCTGGATGAGAATGGGCGTTGAAGAGAGAAGATGTGCCGGA
TAGTTTATCCGGCACATGAACAACAGATTAGATGCTAAAGGAAGAACCGCAACCGCAGGT
GCTTTTCGCGTTCGGGTTGGTCACGATGAAACGAGAACCTTCCAGTCCTTCGGTGTAGTC
AACGGAACCGCCGACCAGATATTGCAGGCTCATCGGATCAACCACCAGGCCAACGCCCTG
TTTTTCGATGGTCATATCGCCTTCGTTCACCTGATCATCAAAGGTGAAACCATACTGGAA
GCCGCTGCAACCGCCACCGGTGATATACACGCGTAATTTCAGATTCGGGTTATCTTCGTC
AGCGATCAGGCTTTTAACTTTGTTGGCTGCTGCGTCGGTAAACTCCAGCGGCAGTGCTAC
GTCATCACTCATATTTTGCTCCAAACGACATCGGCAATTGGGCAAATTCTAACCCAATAA
TAATCGCCATTATCTAATACCCTGGTATTTCGTTCAAGTATTCTCGCTGGCTGATGCGGC
CTTGCTTCGCGCCAGTTGCTCAGCTTCCTGTTTTGCCAGCGTGCGCGCAAGAATCGCCGA
GTATAGCGGTTTCCCACCGGTAAATTGCGCTAATAGTGTTGCGCCAAGACCGGTAATAAT
CATTGGCAAAATGAGCTGGTAGTTATCGGTCATCTCCAGAACCAGAATGATCCCCGTTAA
CGGCGCGCGAATAGATGCCGCCAGTAACGCCCCCATTCCGGCAATAGCAAATGTCCCCGC
CTCAAGGTGATATTGCGGAAACAGCTCAACGGCAACCATTCCGAAAGCGGTTCCCAGCAC
AGTACCCAGCGCCAGCATCGGGGCAAAAATACCGCCCGGCGCGCCGGAAGAGAAGCACAG
TAAAGTGGTAATGACCCGCGCGACGAAGATAAACACCAGCATTCCCATGCTGAAATTCCC
CGCGGTAGCGATAGGAATCAGGTTAAAACCGCCGCCCGACGTTGCTGGTGCCACAAACCC
CAGCAATCCACACAGACCGCCAATCGCACCACCCATCAGTACCCATTTGGTAATATTGCC
GCCGTGCACACGGTGCAGCAAATCCTGCATTCCCAGCACCCATTTATTAAAAATAGGGCC
GAAAATGCCAAAAATAATACCGAGGATCAGATAAAGCCACAGCGTATTAAGCGGCGCATC
AGAAAGTTTACCGACGTCAATCAACGCAACTTCATGATTAAAAATCCGGTACATAATGGT
CGACATAATGACACCAATAAATACCGCTTTAATCGAAATTAACGTATAGCGAAACTGCGG
ACGCATCTCTTCGATAATAAACAAAATACCCGCCAGCGGCGCGTTAAAGGCCGCCGCCAG
CCCCGCAGCAGCACCGGTTGCCAGCAGCGTATGGCGAGCTTCATCACCTTTCAGGCGGAA
AACATCGAGTACCATCCGCCCGATATTGCCGCCGATCTGCACGGTTGGCCCTTCGCGCCC
CAACACCATGCCTCCGCCGAGCGTCCCCAGCCCGCCAAAGAATTTCACCGGCAATACACG
CCACCAGCGAACGGGACGTTGATCTTCCAGCGCCCCTTCAATTTCCGGGATCCCCGAACC
CCCTGCTTCCGGCGCGTATTTGCGCACCAAAAAGTAGCCGAACATCGCCAGCAGCGCCGA
ACAGAGAAAAGCGACGGTTAACAGAAGCGGATAATTATCAGCAGTATGTACCAGCGCCCC
CATACGTTGGTTCTGCAACCAGGCGACACCTTTGTCAAAAGCAACCGCTGCCAGCCCGAC
AAGCGTGCCGACGACTGCCGCCATAAACAAAATGGCTAACGGGGTTTTATCGCGCTCAAG
AAGTTGGCGAATCAGTTGTCTGCGTCGCAGGCGCGCGGCCTGCGGTGTTTCTAAAGAGGG
AGTATCAGTTTTCATCCAATGATCACTTATTGGTCATACAAATAAGATGACGGCATTTTA
CTCGCACGTTCCATGAAAATCCTTTGCAAAGCGTAATGTTTCAAATGCACAAAACTTTTA
TACTCTAAGAAATCAGGATTGCACCAGTACAAGCAGCCTGATGTTTGACGAGTATTTAAC
TTGTTATGAATAACATAGAATAGCAGCCATTCACTTTTTCTACGAATCAGGAACCCTCCA
TGAGTAAGTCTGAAAATCTTTACAGCGCAGCGCGCGAGCTGATCCCTGGCGGTGTGAACT
CCCCTGTTCGCGCCTTTACTGGCGTGGGCGGCACTCCACTGTTTATCGAAAAAGCGGACG
GCGCTTATCTGTACGATGTTGATGGCAAAGCCTATATCGATTATGTCGGTTCCTGGGGGC
CGATGGTGCTGGGCCATAACCATCCGGCGATCCGCAATGCCGTGATTGAAGCCGCCGAGC
GTGGTTTAAGCTTTGGTGCACCGACCGAAATGGAAGTGAGAATGGCGCAACTGGTGACCG
AACTGGTCCCGACCATGGATATGGTGCGCATGGTGAACTCCGGCACCGAGGCGACCATGA
GCGCCATCCGCCTGGCCCGTGGTTTTACCGGTCGCGACAAAATTATTAAATTTGAAGGTT
GTTACCACGGTCACGCTGACTGCCTGCTGGTAAAAGCCGGTTCTGGCGCACTCACGTTAG
GCCAGCCAAACTCGCCGGGCGTTCCGGCAGATTTCGCCAAACATACCTTAACCTGTACTT
ATAACGATCTGGCTTCTGTACGCGCCGCGTTTGAGCAATACCCGCAAGAGATTGCCTGTA
TTATCGTCGAGCCGGTGGCAGGCAATATGAACTGTGTTCCGCCGCTGCCAGAGTTCCTGC
CAGGTCTGCGTGCGCTGTGTGACGAATTTGGCGCGTTGCTGATCATCGATGAAGTGATGA
CCGGTTTCCGCGTAGCGCTAGCTGGCGCACAGGATTATTACGGCGTAGTGCCAGATTTAA
CCTGCCTCGGAAAAATCATCGGCGGTGGAATGCCGGTAGGCGCATTCGGTGGTCGTCGTG
ATGTAATGGATGCGCTGGCCCCGACGGGTCCGGTCTATCAGGCGGGTACGCTTTCCGGTA
ACCCAATTGCGATGGCAGCCGGTTTCGCCTGTCTGAATGAAGTCGCGCAGCCGGGCGTTC
ACGAAACGCTGGATGAGCTGACAACACGTCTGGCAGAAGGTCTGCTGGAAGCGGCAGAAG
AAGCCGGAATTCCGCTGGTCGTTAACCACGTCGGTGGTATGTTCGGTATCTTCTTTACCG
ACGCCGGGTCCGTGACGTGCTATCAGGATGTGATGGCCTGTGACGTCGAGCGCTTTAAGC
GTTTCTTCCATATGATGCTGGATGAAGGTGTTTACCTGGCACCGTCAGCGTTTGAAGCGG
GCTTTATGTCTGTGGCGCACAGCATGGAAGATATCAATAACACCATCGATGCTGCACGTC
GGGTGTTTGCGAAGTTGTGATGATTTTGCCTCGCCCACCGGGCGAGGCATTCTATTAACG
GCTCTGCTTTCTCAACAAATAGATAAAATATGGCGCGCCGATAAAGGTCGACAGCAGCCC
CGCCGGGATCTGGAATGGAAACAGCACCATCCGCCCACACCAGTCAGCGAATACCAGCAG
TAAACCACCCACCAGCGCCGAAATTACGATGTGTGGCATCGTCCGTCGAAAACCCATCAT
CCGCGCAATATGCGGTGCCATTAAACCAACAAAACTCAACGGTCCAATAGTCATCGTCGC
GGTCGCCGTCAGGCAAGCCGCTAACAGCAGCAGCGCAATTCGCGTCGGCGTCAGCGCCAT
TCCTACGGCTCGGGCGGTATCACCACCCAGCGGTAAAATGGTCAGCCAGCGGCGGCACAG
CGGGGTAATCGCCAGCAAAATCACCATCACAATTCCGGTGCGCCAGACCTGCGCATCGGT
CGCGTTGTAGGTCGAACCGGAAATCCAGGTCAGCACTTGCGCCATTCGCGGGTCACCGCT
CGCCTGCAACATCATCAAAAGCATGGTGAATGCGGTACTTAACGCCATCCCCGCCAGTAA
CATACGGTGTGGGGAAAATCCACCGCGTCCGGCGGCGATCATAATGATCAACAGCGTCAC
CGCCGCCCCGAGACTGCCTGCGGGTAACAGCCAGCCAAAGGCATTACCCGGTACCAGAAA
CAGCATTAACACCACGCCAAACGCCGCGCCGGAGCTAATCCCCAGCACTTCCGGGCTTGC
CATCGGGTTTCCGGTCAGCCGCTGAATAATACAGCCCGCCACCGCCAGCATGACGCCCGC
AAACAGCGCCGCCATAATTCGCGGCCAGCGCCAGGGCATTAAATCATCGAGCAACGCCCC
GCTCGCCCACGTCCAGCCGTGCGCATCACGACCAAACGACAGCGCCACCACCACAGCCAT
CAACAGCAGCACGCCGCCCGCGAGGGCAAACGCCAGCACATGTTGGCGTTCAGCCGCGAC
ACGATCGTTGACCTTCATATCCGGCGCGCTAATGCTGCGTAAACGCGGCAACAGCCACAG
TAGCAGCGGCGCACCGATCAACGCAGTGACCGAACCGGTGGACACTTCCATCCACACACG
AGTCAGCCAGAGGATGATTTGATCGGAAAGCCAGAGGATCAGCGCCCCAATCAGCGACGC
CAGCATCAACCGTGGCAGCAGACGCCGCGCCCCCAGCATTTTTGCCAGCAGCGGCGCGAA
CAACCCGATAAAGCCGATAATCCCTACCGCATTCACCAGCAGCGCACTGATGACAATCGC
CAGCGACAGCGCCGCCAGACGCGCGAGCGACAAGGCCAGCCCGAGATTGCGCGCCACGCC
ATCATCAAGCCCCATCAGGGTTAACGGGCGAAGTAGCAATAACGTCAGCATCACGCCGCC
CAGCAGCTGCGGCCATAAACGCTCAACGCCGCCCCAGTCGGTTTGCGTCAGCGTTCCAGT
GCTCCACAGAAACATGCTTTGCAACTGGTCATGATGGAAGATAACCAGTAATTGATTGAT
TGCCCCACAATAAAGGCTCACTACCAGCCCCGCGAGAATCAGCGTTACCGGCGACAGCCG
TTTCCCCCACGCGACGCCAAAGACAATTAAGCCAACAACACAAGCCCCTGCCAGCGCAGC
AAACTGGCTCGCCATCGCACCAGGGATCGCCCAGAGCGTCGTGACGGTAATCCCCAGTTG
CGCGCCTGTAGCAACGCCCAACGTCGTCGGTTCCGCCAGCGGGTTACGCAGCACTTGCTG
AAACAGCACGCCCACCAGCCCCAGGCCCGCGCCCACCAGCAGCGAAATCGCCAGACGCGG
CAACAAGCTGTAGTGAAAAATCATCTGCTCGATGACGTCAATATCCGGCGACCAGGCAGC
CTGCGCCCACTGGCTACGCGGCAGCGCCTGCGAGAAGTTCATCCAGGTGAGCGCCGTAGC
GACAATCACTAACAGCGCCAGCAATAACGCCGGGAAAAGCGCAATTCGTTTACTCACGCT
TTACCTCCGATGGCGTTATCCAGAATACGCACAAAGTGCATTGCCGAGAGCGTCGCACCA
TAAAACCAGACTGCAGGTACGCGCTGAAAGCGCCCTGTACGGACAAACGGCATGGCCTGC
CACAGCGGGGTTGCCATTAGCGCATCCATGTCTTTGCTGTTGTCGTGATCAAAACAGAGC
ACATCAACATCTTTATACGCCGCCAGACGATCGATACTGACGGCGGTGCTGCCCCAGAAG
TTGGTTTCCCCTTGCCAGGCATTTGGGATGCCGTACTCATCGAGAATTTCCTGGAACAAG
CTGTTTGGCCCGAAGACCAACATATGGCGCGGATCGATAAGCGTCGTCAGCAATAACGGG
CGTGCACCACGCTTCACAAAGCGGGGTTTCATGCTGCGGATAAAGTCTTCGTATTGCGCT
AAATGCGTTTCCACTGCGCTTTGCAGATTAAGTAAATCTGCCATTTCCGTCAGTGATTTA
CGCGCCATCGCCAGCGGCTGTTTGCCGTCGCTGAAGTTAAATCCGCGCCCCGGCGCAATA
CGAGCCAGCATTTCTGGTGAAGGGCCATATCCTGCCGACCAGACCATAAACGACGGTTTC
ATTTCGGTCAGCAGTTCAAGGTTAGGTTCTGTGCGCAAACCGACGTCAATCACCGATTCA
GGTAACGGTGGTTCGCTAACCCACAGGCGATAGTTGATGGTGTCCGCCACGCCATAAGGC
ACGATGCCGAGCGCCAGCAGTAATTCCACCGGCAACCACTCCAGCGCCACAATACGATTG
GGATCAATAGCCGCCGCGTGGGCGGCATTCATCTGCCATAACAACGGAGAAAGCGCCATC
GCCGTTAACAGTCGACGGCGCGAAATAAGAGGTAAGCCGCTCATCAATAAACAAAACTCA
CAGGTGCAGCACCCGCCGGATGCGGCAAAATACCCATCGGGATGCCATAAATCATTTCGA
GGGTTTCGCCGCGCATAATTTCCGCAGGCGTTCCCTGAGCAATCATTTCACCGCCGCGCA
GGGCGACCAGATAATCACAGTAGCGTGCCGCCATATTGATATCGTGCAGCACGGCAATGA
CCGTCAGACCACGTTCCTGACTTAAACGGTGCACCAGCGCCAGCACATCAACCTGGTGGG
CGATATCCAACGCCGAGGTCGGTTCGTCGAGCAACAGACAACGGCTATCCTGCGCCACCA
GCATGGCGATCCACGCCCGCTGACGCTCACCGCCAGAGAGACTATCGACCAGCCGATGCG
CCAGCGGTTTTAAGCCAACCAGCGAGATAGCTTCCTCAACTTTTTCGCGATCTGCCGCAC
CAAAGCGCCCCAGCGCGCCATGCCACGGGTAACGACCAATCGCCACCAGTTCACGCACGG
TCATCCCTTCTGCCGGAGGAAGCTGCTGCGGCAAATAAGCCACTTTGCGGGCGAATGCTT
TGCTACTCCAGCTTTCCAGCGGCTGGGCATCAAGAAGAATTTCACCTTCTGACGGCGGCT
GATGACGGCCCAACATTTTTAACAGCGTGGATTTACCAGAACCGTTGTGACCAATCAAAC
CAGTCACTTTTCCGGCAGGAAAGGTTAACGACAGCGGATGCAAAAGCGTGCGCCCTGGCA
CACGAAAGGAGATATTACGCAGTGCAAAAGTGGTATCGGAATGATTCGTGTATTCCTGCA
TAACAGCCAACTTGTGAAACGGGCACGGAAATCCGTGCCCCAAAAGAGAAATTAGAAACG
GAAGGTTGCGGTTGCAACGACCTGACGTTCTGCGCCCCAGAAGCAGCCATAAGTGTTAAA
GCAGCTGGCGACGTATTCACGATCGAACAGGTTGTTAACATGCAGCGCCACGTTGGAGCC
AGCCATGCCGACTCGCGCCAGATCATAACGCACTAACGCATCCACGACCGTATAACTTCC
CACTTTAAAGGAGTTAGCCGGATCACCATAGCTGGAGCCAGTATAACGACCACCGGTGCC
CAGCGTCAGACCTGAAAGCGGACCGTCAAAGAAGGTATAGTCAGCCCACAGCGAAGCCAT
GTGTTTTGGCACCTGTGCCGGCGTATTGCCTTTGTAGTTGGTGTCAGTGGTGTATTCCGC
GTCGGTGTAGGTGTAAGAACCAACTAAGTTAACACTCGCCGATAGTGCCGCTTTCGCTTC
CAGCTCTACGCCACGCGCACGAATCTCACCGCCTTCAACCGAGAACAGTGAACCGTTCGG
ATCCGCCATCAGGTTATTAGTTTTGGTAAGCTGATACAGTGCGCCAGTCACCACAATTGG
GCGATCTTCTGGCACATATTTCACGCCGACTTCATACTGTTTGCCTTTCGAAGGTGCAAA
CAGATCGCCGTTTGCATCGGTCTGCGAAGCGGGTTCAAACGATTCACTGTAGCTGAAATA
AGGCGTTACGCCGTTGTCGAACAGATAGTTAACACCGCCACGCCAGGTGAACTGTTTATC
ATCGCGATCGGATTTATTACCGTAATCACGGTTGAAAGATGACTGATCGGCCCAGTCATA
GCGACCGCCAAGCGTAACCAGCACTTTATCCCACTGCGCCTGATCCTGAACATACAGACC
GGTTTGTTTCTGTTTCAGCAGAACGCGGTATGGACCAGACGGATTTGGGTGAGCGCCAAA
ATCAAAGTCACTACGGTCTAAATTATAGATATCAGATGGTGCAACTGAACCGGCATATCC
GAACCAGGAGTCGATGTCATTACGCATACGCATAAAGTCAACGCCAGTCAGCAGAGTGTG
ATCCACTGAACCGGTTGCGAATTTGCTTTGCAACTGAGTATCAACAGAGAAGTTTTCTAA
CTTCTCATTATCGATAACGTACTGACGAGTCAGTGTATGGCCCCATTGAGACTGCGGCAC
GTTGGCACATGGACTCGAAGAGGGGTTTGAGGAATAGAGAGGATCTGAACACATGCCGTA
GCCATATACGCTCTTTTGCGAAACTTTATTTTGCGCAAAGCGAAGGTTCTGACGTACGGT
AAAGGTGTCGTTAAATTCGTGGTCGAAGCTATAGCCAATCATCTTCTCATTACGAGAATA
GGTGTTGTTCTTCGCCCCTTCGTTAAAGTCTGTCGGCAGACGCTTACCGTTCGGCAGCGG
CTCAACGGTTCCCTCTTTCGGCAACCAGCCGTAATAACCGGTTTCCGGCTCGTTCTGGAA
GTAAGAGAGGAAGGTGAAATTGGTTTTATCGTCCGGACGCCAGGTGAACGCTGGCGCAAT
GGCATAACGCTGCTCTTCCGCGCCCTTTTGCTGGGCATTGGCAGAGCGCGCAAGACCGGT
CAGACGATAAGAGTAAACGCCGTCATCATCCAGCGCATCGCTGAAGTCAAAACCGGTCTG
GAACAGGCTGTCAGTACCGGCCTTAAACTGAACTTCTTTCAACGGTTCAGTGGTCGGGCG
CTTGCTGACCATGTTCAACAGGCCACCTGGGCTGCTTTTCCCATACAGCACGGAAACCGG
GCCACGCATGATTTCAGCGCGCTCCAGCATATATGGGTCAATAACCGCATCGTTATAGAA
GTTGCCCTGCATCTTCAGGCCATTCAGATAGTTGTTCTGGCTTTGGCCGTCAGCGGCGAA
TCCGCGGATGATCAGGTAATCGTAAGTGTTGGATGCGCCACGAGTTCCCACGGCAACGCC
AGGAGTGTAGCTAAGCGCTTCTTTTACCGACTTCGGCTGATGCAGCGCCATCTCTTCGGC
GGTCACAACAGAAATAGACTGTGGCACTTTTTGAATCGGCGTATCGGTTTTAGTGCCGGT
AGCTGACTGTCGCGCCGCAATAGTTGCAGCAGGCCCCCATGCGCTTTCTTGCGGCGCAGG
TGCAGCGGTAACGGTGATAGTGTCTTCTTTCGGTTCAACCGCTGCCTGTGCATAAACAGA
CATGCCGCTAACCGCTGTGGCTACTACAACTGCGATTTTACGCAGTGAGTGTTTTGGCTG
AGCAGTTTTGGAACGCGCCATTGGTATATCTCTGATGTAAAGTGAATGATAATGTAAACA
AGAATGATTATTATAAAGATAAGATAATATTCGAAACGCTGGCGGGTTCGCAAGCGGTAC
GCAATCTGAGCGTTCCTGAAGGGTTAATAAACAACCAGATGAAAAGAAAGGGTTAATACT
TTAGGTGGGATGTTATTTTACCGGATGGCAACTCGCCATCCGGTATGTCACGTTTAGACG
TTAATTACTACCAAACATATCCTTGATCCAACCGGCTACACCGTCGCTGTCTTTCTGCTC
TTGCTGAGCAGGTTGCTGTTGCGGCTGTTGCTGCGGCTGAGAAGACTGATCAAACGGATT
GCCTGACGGCTGCTGCTGCATCTCACTCTGCTGGCACAGCGATTGCGGATCGCTGGTCCA
GACCGGCAAGACACGCATGCCACCGCTGCAAACAAAGTTGCCGTCGTAGTCCACGCCCAT
ATCTGCAATATCTTCTGGCGGAACAAGATTCAGCGGCGTTGGCGTCTGGTTTGCCAGATA
ACGCTGATAAATCGACATTGCCCCGCTGGCACCATACAGTTTGGTCGGCTGGTTGTTATC
ACGGCCGACCCAGGTGATGGTCACCGTGCTGCCGTCAATGCCCGCAAACCAGGTATCTAC
GTTATTGTTGGTAGTCCCTGTTTTCCCTGCCAGATGCAGGTTCGGGTATTTCGCCCCAAG
CTGACGACCCGTACCGCGTTGTACAACCTGCTGCATGGTCCATAGTGTCAGATACGCCGC
CTGCGCCGGAACAGCGCGTTCCGCCTGCGGGAAGCTCTGATACAGCACTTTGCCATCTTC
CGCGATTACCGAACGCAGCGCAGAAAGCGGTGCACGGTTACCACCGCTGGCGATGGTCTG
GAATGCCTGCGCCACTTCGATTGGCGTTAAGTTCAACGCCCCCAGCAGCATTGCCGGAAC
CGGATGCAACTGATCTTTCGGTACGCCCAGTTTAATCCAGGTATCCGTAACCGCAGGCAG
CCCCAGCGCCATCCCCAGATTTACCGTCGGCACGTTCATCGAACGGGTCAACGCATCCAC
CAGCATCACTCTGCCGCTTTCGCTATAACGACGGTCATCATTCTGCGGTGACCAGACCTG
GCCATTCGGCTGACGCAGCGCAATTGGCGCATCCGCAATCCACGTATTCAGACGATAGAT
TTTCGGCTGGCTTAAGGCCGTCAGATAAGTCGCTGGTTTTGCAAGGGAACCAATCGAACG
ACGCGCCTGCATCGCACGGTTGTAGCCCGCAAACTGCGGCTCAGAACCTCCGACCATCGC
ACGAACTTCACCACTAAAGCGGTCGACGACCACAATCGCGGTTTCCAGATCGCTCAGCTT
ACGCTGTTTCTTCAGTGCCGGAATGCCTTCCACGGCGGCTTTTTCTGCCGCGTCCTGGGC
CACCGAGTCAAAGGTAGTGAAGATCTTCACGCCGGAGAGATCTTTTACCTTATCGCCTAA
TTTAGCCTGAAGCTCCTGACGCACCAGTTGCATAAAGGCTGGCTGAGGAGAGATCACCCC
ACCGCGCGGCTGAACACCCAGCGGACGCGCACTCAACATGTCATAGAGTTCTTGATCAAT
AATCTGTTGCTGTTGCAGCAGACGCAGTACCAGATTACGTCGCTCCAGCGCCAGTTTCGG
GTTACGCCACGGGTTGTAGATGGACGCTCCTTTCACCATACCGACTAACAGCGCCTGCTG
ATCGAGGCTCAATTCTTCTACCGGGCGACCAAAGTAATACAAGCTCGCCAGCGGGAAGCC
ACGGATTTCGTTGTCGCCACTCTGACCGAGATACACCTCGTTCATATACAGCTCAAGAAT
ACGGTCTTTGCTGTAACGCGCGTCCATGATCAGCGCCATGTAGGCTTCATTCGCTTTACG
CCAGTAAGAGCGCTCGCTGGAGAGGAACAGGTTTTTCACCAGCTGTTGCGTCAGCGTACT
CGCTCCCTGCACCGTGCGTCCGGCGGTCAGGTTTGCCAGCACCGCACGTCCGATTGAGTA
GAGACTGATCCCATCATGCTCGTAGAAATGACGGTCTTCTGTCGCCAGCAAAGTATCCAC
CAGCAAATCCGGGAAACCACTGCGCGGCACAAACAAACGCTGCTCACCGTTTGGTGAGGA
GATCATGGTGATCAGACGCGGATCAAGACGGAAGAAACCGAACTGACGGTTGTTCTCCAT
ATTGACGATCGTCGCCAGATGATCGCCATCAAAGGTCAGACGCGCACGCACCTGCCCTTC
TTTGCTGTCCGGAAAATCAAACGGACGGCGGATCATCTCAATGCTGTTAGCCTGCACAGT
AAATTCGCCAGGACGGGTCATTTTCGACACCTGACGATACTGTGTTGCCTCCAGCAGCTT
CACCATCTCGTTCTTGCTGATGGTCATGTCTGGCTCAAGGTTGACCATTCGACCATAAAC
TGCCGCAGGCAGTTGCCAGACCTTGCCATCAATACGGCTACGAATTTTTTGATCGAGATA
AACGCCGTAAATGGCGATCAGCACGGCAAAAACGATAGCCAGTTTTAACAGCAGCCATAG
CCAGCCGCGTTTGCCACGAGGCTTACGCCCTTTGCCTTTGCCCTTACCTTTGCGCGGCAT
CGGTTCTTCATCCTCATAGTCATCATAATCGTCGTAATCATCGTCATCTTCGTAACGACG
ACGGCTTACCTTTTGTTTGACCGGACGCGTCGGTTTCCCTTTGCGTCCAATTGGCTCGCG
GTCATTCCCGGCCATGCTTTTTCTCCGCAATATTCAGGCGCAAAAGCCCGATTTTCTGTT
CTTCTGTTACAAGACAGAAGAAGATATCTCTCAAAATTTGTGCTCGATCGGTCCCCTCTC
CCTTGAGGGTGAGGGTGAACGTACGCGCTGATGCCCTCACCCCGGCCCTCTCCCACAGGG
AGAGGGAGAAAACCAACCTTACGAATACTTTTTCGTCCGTCGCGTCGGTGCCGTGTTTGC
CGGGTCGTCCGGCCAGACGTGTTTGGGATAACGCCCTTTCATCTCTTTTTGCACCTCACG
ATACGCCCCTTTCCAGAAGGCCCCCAAATCACGCGTGATTTGCAGCGGCCTTTGGGCAGG
GGAAAGCAACTCCAGCACCAGCGGCACGCGCCCCTGAGCGATCGTCGGATTGGTGGCCTC
ACCAAACATCTCCTGCATTCTCACCGCCAGCGCGGGCGGGTTATCTTCATGATAACGAAT
GGCGATCCGGCTTCCCGTCGGCACAGTGTAATGCGCAGGCAATTCACTATCCAGACGTTG
CTGCATTCCCCAATCAAGTAATCCGCGTAGTGCCTGATAAATGTCGAGTGATTTCAGGCC
GCGTAGTGAATGTACACCGGCCATATGTGGCAGCAGCCACGTTTCCAGCGTCGCCAACAA
ACTTTCATCATCAACCGCTGGCCAGTCATATTCTGGCAACCACTTTCCGGCGCATAACAA
ACGCAAGCGTAGCTGTTCCGCTTCCGCCGTCCAGTTGAGCACGCTTAAACCTTTATCACG
GATGCCGTTAAGCATCGCCTGATGCAACTCGTCTTCTGACGGTTTCGCCAACGGCTGCAC
TTTCACCGTCAACTGACCGATTTGCAGCCGACGCCAGGCTTTCAGCGTACCTTGCGCGTC
ATCCCATTCCACGGTGTCAGATTGCTGCACCAGCTGCGGACAGCGTCGCACTAATTCATC
AATATCGACCGGTAGCGCCAGTAAAATCCGCGCATCCGGCGAGGCGCTGCCCTGCAATAA
TAACGGTGCGATCAACCATTCGTGGCGGCTTAGCGCGTCGTCGGCATCGAGCATCGCTCC
CATGCCGTTTGCCAGTTGATAGCGTCCATCTTGCCCACGGCGGCGAGCAATGCGATCGGC
AAACGCCCCGGCAAGTAGCAGCGCGATAAGCGAACTGTCTGCCTCACCGCCGTATACGTT
TAAGCGTTTTAACAGTTGCTGACTACGTTGCTGCCAGGCTGGCTGATTGCGCGAAAACAC
CACGCCCAGGTCACTATTGCCCATCCGTGGCGGCTCTTCGAGAATGGCGGCAATTTTTGC
CGCGGTAGCAGCTTCGTCGTCGCTCTTTGCGCTAACCAGCATTGCCGCTAAACGCGGATC
GTTACCCAGCGCTGCCATTTTTTGCCCCTGCGCACTAAGCCGTTCACCGTCCAGCGCCCC
CAGCATCCGTAACAGGCGTTTCGCGGCCAGTAGATTCACCGTTGGCGGTTGATCCAGCCA
GCTCATCTGCGCCGGATCGCTGCATCCCCATTGCAGTAATTCCATCAGCAAACCGGAAAG
ATCGCTTTGTAATATTTCCGGTTCACTTTGCGCCGCGGCGCGTTCTGCTTGTTCCTTGGC
GATTAAATGCAGGCAGATACCCGGCTCCAGACGCCCGGCGCGCCCGGCACGCTGCGTCAT
CGACGCCTGACTGATTCGCTGAGTAATTAGTCGCGTAAGCCCTGTTCGCGGATCAAAACG
CGCCACCCTTTCCTGGGCGCAATCCACCACCAGACGAATACCTTCGATAGTTAAACTGGT
TTCAGCAATATTGCTCGCCAGCACGACTTTGCGCATCCCTTGCGGTGCCGGGAGGATCGC
TTTTCGCTGATCGTTCAGCGACAACGCGCCATACAGCGGGCAGAGCAACACATCACTGCC
GATACGCGAAGCCAGTTGTTCCTGCACACGCTGAATTTCTCCGACGCCCGGTAAAAATAA
CAGTAATGATCCACTTTCCTGACGCAGCATTTCGGCGGTCGCAACCGCGACGGCTTCGTC
AAAACGCTGATGGGCGGGCAGCGGTAAATAACGGCGTTCAACCGGAAACGAGCGCCCTTC
TGAGATGACGACGGGCGCTTCTGGTAGCATTTGTTGCAAGCGGTCGTTGTCCAGCGTAGC
CGACATAATCAGCAGTTTAAGGTCATCACGCAGACCTTGTTGCACATCGAGTAACAGCGC
CAACGCCAAATCCGCCTGCAAGCTACGCCCATGAAATTCATCAAGGATCACCAATCCAAC
ACCGCTCAACTCCGGGTCACGCTGGATCATCCGCGTCAGCACGCCTTCGGTAACCACTTC
CAGGCGGGTATTCGGCCCGACGCAGTTTTGCGCACGCATCCGGTAGCCAACGGTATCGCC
TGGCTTTTCGTTAAGCAGCTCCGCCAGCCGTTGCGCGACGTTACGCGCCGCCAGACGCCG
TGGCTCCAACAGGATAATTTTCCCGTTAATGCCGGGATGCGCCAGCAGTTGCAGCGGCAG
CCAGGTTGATTTCCCGGCCCCGGTCGGCGCACTTAATAATACCTGCGGCGCACAATCGAG
AGCGGTAAGTAATTCAGGTAAGACGGCAGCAACGGGCAACGACGACACAAAACGCTCCAG
AGGGTTAACATTCTTCGCGCCACATTGTAGCATCGCGGTAATTCATAACCGAGTGCCTCA
CATGTCTGAACCGCAACGTCTGTTCTTTGCTATCGACTTACCTGCAGAAATCCGCGAACA
GATTATCCACTGGCGCGCCACACACTTCCCACTTGAGGCGGGACGTCCGGTCGCCGCCGA
TAATTTGCATCTGACTCTGGCATTTTTAGGCGAAGTGAGCGCCGAGAAAGAGAAGGCGCT
TTCTCTTTTAGCCGGACGGATTCGTCAACCTGGTTTCACACTCACGCTTGATGACGCCGG
ACAATGGCTGCGTTCGCGTGTGGTGTGGTTAGGGATGCGTCAGCCTCCACGCGGCTTAAT
CCAGCTGGCGAATATGCTCCGTTCACAGGCTGCCCGCAGCGGTTGTTTTCAAAGCAATCG
TCCGTTTCATCCACATATTACCTTATTGCGCGACGCCAGCGAGGCGGTGACAATCCCGCC
GCCAGGTTTTAACTGGTCGTATGCGGTGACGGAGTTCACCCTTTACGCCTCCTCGTTTGC
CCGTGGACGCACACGCTACACGCCGCTAAAACGCTGGGCGCTAACGCAATAACAAGGATT
GTCGCAATGGAATTTTCTCCCCCTCTACAGCGCGCGACGCTAATTCAGCGTTACAAACGT
TTTTTAGCCGATGTGATCACACCCGATGGTCGCGAATTAACGCTACACTGCCCGAATACG
GGTGCGATGACCGGTTGTGCAACGCCTGGCGATACCGTCTGGTATTCGACTTCAGACAAC
ACCAAACGGAAATACCCACACACCTGGGAATTAACTCAAAGCCAGAGTGGCGCATTTATT
TGCGTCAACACGCTTTGGGCTAACAGGTTGACGAAAGAGGCTATCCTTAATGAATCAATT
TCAGAACTGTCAGGCTATAGCTCGCTGAAAAGCGAAGTAAAATACGGCGCAGAACGCAGC
CGTATTGACTTTATGTTGCAGGCGGATTCGCGTCCAGACTGCTATATTGAAGTGAAATCG
GTTACGTTAGCGGAGAACGAACAGGGATATTTTCCCGATGCGGTCACTGAACGAGGTCAG
AAACACCTTCGGGAGTTGATGAGCGTAGAGGCTGAAGGCCAGCGTGCGGTTATCTTTTTC
GCCGTGCTGCATTCAGCCATTACACGGTTTTCACCCGCGCGCCACATCGATGAGAAATAC
GCGCAACTATTGTCAGAAGCTCAACAGAGGGGGGTAGAAATTCTGGCTTACAAAGCGGAA
ATTTCTGCTGAAGGCATGGCTCTTAAAAAATCACTGCCGGTTACATTGTAGTAAAGTAAG
TAACTGGTTAATTTACATTCTGGTCGCGTGCGCAAATACGCTTTTCCTCACACAGTTGTC
AAGTGTTACGTTTAGATAATTGCTATCCGGAAAAGCATCTGCTATTTATAGCGGCCTCAT
TTTTCCCCCGAACATGGGGATCGATAGTGCGTGTTAAGGAGAAGCAACATGCAAGAAGGG
CAAAACCGTAAAACATCGTCCCTGAGTATTCTCGCCATCGCTGGGGTGGAACCATATCAG
GAGAAGCCGGGCGAAGAGTATATGAATGAAGCCCAGCTGGCGCACTTCCGTCGTATTCTG
GAAGCATGGCGTAATCAACTCAGGGATGAAGTCGATCGCACCGTTACACATATGCAGGAT
GAAGCAGCCAACTTCCCGGACCCGGTAGACCGTGCAGCCCAGGAAGAAGAGTTCAGCCTC
GAACTGCGTAACCGCGATCGCGAGCGTAAGCTGATCAAAAAGATCGAGAAGACGCTGAAA
AAAGTGGAAGACGAAGATTTCGGCTACTGCGAATCCTGCGGTGTTGAAATTGGTATTCGC
CGTCTGGAAGCGCGCCCGACAGCCGATCTGTGCATCGACTGCAAAACGCTGGCTGAAATT
CGCGAAAAACAGATGGCTGGCTAATTACAGCCGTTCCATCACGTTTACCACAGGCGGGAA
ATGCTCCCGCCTTATTTTTTGTTCAAAGAGATGACAGACACACACTATATTGGCCGCTTC
GCCCCCTCTCCTTCCGGCGAGCTTCATTTTGGTTCTCTGATTGCTGCGCTTGGCAGCTAT
TTGCAGGCTCACGCCCGGCAAGGTCGCTGGCTGGTACGTATAGAAGATATCGACCCGCCT
CGTGAAGTTCCCGGTGCCGCAGAAACTATCCTGCGCCAGCTGGAACATTACGGCCTGCAC
TGGGACGGCGATGTTCTCTGGCAATCGCAACGTCACCACGCCTATCGCGAAGCACTCGCC
TGGTTACATGAGCAAGGACTAAGTTATTACTGCACCTGCACGCGTGCACGTATTCAAAGC
ATTGGCGGTATTTACGACGGTCATTGCCGGGAATTGCATCATGGACCAGACAACGCCGCA
GTGCGTATCCGCCAGCAGCATCCGGTCACCCAGTTTACTGACCTGCTGCGAGGCATTATT
CACGCCGACGAAAAACTGGCACGGGAAGATTTTATTATTCATCGCCGTGATGGTTTGTTT
GCCTATAACCTGGCGGTGGTGGTGGATGATCACTTCCAGGGTGTGAGCGAAATTGTCCGC
GGGGCAGATTTGATCGAACCGACAGTGCGGCAAATCTCGCTGTACCAGCTTTTTGGCTGG
AAAGTGCCAGATTACATTCATCTGCCGCTGGCGCTTAATCCACAAGGCGCTAAACTTTCC
AAGCAGAATCATGCGCCTGCGTTGCCGAAAGGCGATCCACGCCCGGTACTAATCGCGGCA
CTTCAATTTCTGGGGCAGCAGGCAGAAGCACACTGGCAGGATTTCAGCGTCGAGCAAATC
CTTCAGTCAGCCGTCAAAAACTGGACGCTGACCGCCGTGCCTGAGTCGGCAATTGTAAAT
TCAACATTCTCAAATGCGTCATGCTGAGCTATGATTAGCCGCTATTTTTTTGTCCTGAAT
GATGTTTGACACTACCGAGGTGTACTATTTTTACCCGAGTCGCTAATTTTTGCCGCAAGG
TGCTAAGCCGCGAGGAAAGCGAGGCTGAACAGGCAGTCGCCCGTCCACAGGTGACGGTGA
TCCCGCGTGAGCAGCATGCTATTTCCCGCAAAGATATCAGTGAAAATGCCCTGAAGGTAA
TGTACAGGCTCAATAAAGCGGGATACGAAGCCTGGCTGGTTGGCGGCGGCGTGCGCGACC
TGTTACTCGGCAAAAAGCCGAAAGATTTTGACGTAACCACTAACGCCACGCCTGAGCAGG
TGCGCAAACTGTTCCGTAACTGCCGCCTGGTGGGTCGCCGTTTCCGTCTGGCTCATGTGA
TGTTTGGCCCGGAGATTATCGAAGTTGCGACCTTCCGTGGACACCACGAAGGTAACGTCA
GCGACCGCACGACTTCCCAACGCGGGCAAAACGGCATGTTGCTGCGCGACAACATTTTCG
GCTCCATCGAAGAAGACGCCCAGCGCCGCGATTTTACTATCAACAGCCTGTATTACAGCG
TAGCGGATTTTACCGTCCGTGATTACGTTGGCGGTATGAAGGATCTGAAGGACGGTGTTA
TCCGTCTGATTGGTAACCCGGAAACGCGCTACCGTGAAGATCCGGTACGTATGCTGCGCG
CGGTACGTTTTGCCGCCAAATTGGGTATGCGCATCAGCCCGGAAACCGCAGAACCGATCC
CTCGCCTCGCTACCCTGCTGAACGATATCCCACCAGCACGCCTGTTTGAAGAATCGCTTA
AACTGCTACAAGCGGGCTACGGTTACGAAACCTATAAGCTGCTGTGTGAATATCATCTGT
TCCAGCCGCTGTTCCCGACCATTACCCGCTACTTCACGGAAAATGGCGACAGCCCGATGG
AGCGGATCATTGAACAGGTGCTGAAGAATACCGATACGCGTATCCATAACGATATGCGCG
TGAACCCGGCGTTCCTGTTTGCCGCCATGTTCTGGTACCCACTGCTGGAGACGGCACAGA
AGATCGCCCAGGAAAGCGGCCTGACCTATCACGACGCTTTCGCGCTGGCGATGAACGACG
TGCTGGACGAAGCCTGCCGTTCACTGGCAATCCCGAAACGCCTGACGACGTTAACCCGCG
ATATCTGGCAGTTGCAATTGCGTATGTCCCGACGTCAGGGTAAACGCGCATGGAAACTGC
TGGAGCATCCTAAGTTCCGTGCGGCTTATGACCTGTTGGCCTTGCGAGCTGAAGTTGAAC
GTAACGCTGAATTGCAGCGTCTGGTGAAATGGTGGGGTGAGTTCCAGGTTTCCGCGCCAC
CAGACCAAAAAGGGATGCTCAACGAGCTGGATGAAGAACCGTCACCGCGTCGTCGTACTC
GTCGTCCACGCAAACGCGCACCACGTCGTGAGGGTACCGCATGACAGTGGCGTATATTGC
CATAGGCAGCAATCTGGCCTCTCCGCTGGAGCAGGTCAATGCTGCCTTGAAAGCATTAGG
CGATATCCCTGAAAGCCACATTCTTGCCGTTTCTTCGTTTTACCGCACCCCACCGCTGGG
GCCGCAAGATCAACCCGATTACTTAAACGCAGCCGTGGCGCTGAAAACCTCTCTTGCACC
TGAAGAGTTACTCAATCACACTCAGCGTATTGAATTGCAGCAAGGTCGCGTCCGTAAAGC
TGAACGCTGGGGACCGCGCACACTCGATCTTGATATCATGTTGTTTGGTAATGAAACCAT
TAATACCGAACGACTCACCGTTCCGCATTATGATATGAAGAATCGCGGCTTTATGCTGTG
GCCGCTGTTTGAGATTGCCCCGGAACTCGTGTTTCCTGATGGGGAGACATTACGTGAAAT
ACTCACTTCGCTAGCAGTACCACAACCTGCCATCTGGTAATAGCTGTATTATTTTATTTT
CTTGACGAGAGGAATACAAAATGATACGGCTATTTCATCCACCAAGAAAAAATTATTTTC
TTATCTTACTCCTCACTTCCCCCCTTACATATTAAATATACTTAATTTACATTTTAGTTT
TTTTAATTCATTCATGAAATAGCACTTCATGCAAATAAATTAGGCATTTTTTGTTTAAAC
AACCTAAAATAACAACAATTCAATACACCACATAAATATATTCACATCCGTGATAACTCC
CCCCTATTACATCCTCCAAAAACTTTGAGTAATATCCGCTCGCAATATTAATTTCATATA
ATTTTTGTAAGGATGCATGTAATGAAAAAAGCACTTCTCGCAGCCGTTCTGGTTATGGCT
TCTGGTTCCGCCCTGGCTGTAGATGGTGGTCATATCGACTTTAACGGTATGGTACAGTCC
GGTACCTGTAAAGTGGGTGTGGTAGATACCGGTATGCACGGCATCAGCACTGATGGCGTG
GTTACCCTGGATACTGCAAATGTTACTGATAACTTTGCTGAAGTAAGCGCTGCTGCTGTT
GGTTTACTGCCGAAAGAGTTCATGATTTCTGTGGATTGCGAACCGGGTAAAACAACTGCC
CAGTTGACCATGGGTTCTGCAAGCTACGCGAACACCAGCGGCACCCTGAACAACAATACC
AATATCACGATTAACGGTATTCAACCGGCTCAGAACGTGAACATTGCTGTTCATAACATG
AAAAACAAAGCTGGCGCTGCTGAAATTAAGCAGGTCCATATGAACAATTCTTCTGAAATC
CAGGAATTGACATTAGACGCACAAGGCAACGGTCAGTATGTGTTTAACGCATCTTACGTT
AAAGCACCGAACAGCCAGGCTGTTACTGCTGGTCACGTTACCACTAACGCACTGTACACC
ATTACTTATCAGTAATTGATAGCGAATTGAGTATAGGGTTTGTCATCAGGCAAACCTTAT
TTTCGCTAATTTTATCTCAACACAGACAGCAAGGAGTGCTTATGTTTCCCTTGGTTAAAA
AAACGGTTAGTGCATTATTTGTGAGTACTCTGTTAGCCAGTACGCCAGCATTCGCTGACA
TTATTATTTCCGGGACTCGTATCATTTATAACGCTGATAAAAAAGATGTTAACGTTCGTC
TGGAAAATAAAGGGAATCGCCCCTTACTGATTCAGAACTGGTTGGACACCGGCAATGACA
ATGTCGACCCCAGCCAGATCAAAGTGCCCTTTACCTCTACGCCCCCCGTTTCACGCGTGG
AGCCAAAACGCGGGCAAACCGTAAAAGTAATGTATACCGGTGCAACAGCCCTACCTAAAG
ACCGGGAAAGTGTCTACTGGTTTAACGTGCTGGAAGTGCCGCCAAAGCCGAAAGATGCCC
AGGCTGACAAAAACTTACTACAACTGGCTTTCCGCACGCGCATCAAACTTTTTTATCGCC
CGAGCGGTTTGCAGGGTGAACCTGCTGAAGCGCCAGCAAAAATCACCTGGAAGTTGAACA
ACACGCAATTGCAGGCGAATAACCCAACGCCTTATTACGTGTCATTCAATGACGTCAAAC
TGGAAAGCGGCGGCAAAAGCTACAAAGTCGATTCCAGCATGATCGCGCCGTTCAGTCAGG
CAAGCTTTAGCGTAACGGGTCTGTCAGGTGGCGTTTCATCGGGCAAAGTCGTGTTCCAGG
CCATAAATGACTTTGGCGGCAATATCGATGGTTCAGCAACATTCTAAAAAATAAACGGAT
TCTTTTAACATCGCCAGGAATGCAACCTTGTACCAGTTTACTCATCACAAAAGTCGTACA
CCGAAAAAAACGCTACTTGCGGCCTGTTGCGCCCTCCTTTATAGCAGCAACGGTGCTGCG
GCAGACACGGTGGAATATGACAGTTCCTTCTTAATGGGAACTGGCTCATCAACCATTGAT
GTTAAACGCTATGCTCAAGGTAACCCGACACCGCCGGGTCTTTATAATGTCCGCGTGTTT
GTAAACGGTCAGGCCACCTCCAGTTTAGAAATTCCGTTTGTGGATATTGGTGAAAACAGC
GCGGCGGCCTGTATTACCCGCAAAAACCTGGCGCAGTTACACATTAAACAATCCGAACAG
CTTGTGACCCTACTCGCCAGAGAAGGTGAAGAAGAAGACTGTCTTGATCTGGCAAAGTCA
TACGATCAGGCCGAAGTTCAATTTGATGGCAGTGACCAGTATCTCGATCTGACCATTCCT
CAGGCCTATGTCCTGAAGAGCTATGGCGGCTACGTTGATCCTTCCTTATGGGAGTCGGGA
ATTAACGCTGCCACGCTGTCGTATTCCTTGAACGCGTATCACACAAGTTCAGAAGACAAC
AATAACGATAGTGTCTATGGCGCATTTAACTCAGGTATCAATTTAGGTGCCTGGCATTTC
CGTGCGCGCGGCAACTATAACTGGACAACAGATAGCGGCAGTGATTTCGATTTCCAGGAT
CGTTACCTACAGCGTGATATTCCGGCAATACGTTCACAGATAATCATGGGTGATGCCTAC
ACCACCGGTGAAACGTTTGACTCTGTCAACGTCCGGGGTGTTCGCCTGTACAGTGACAGC
CGTATGCTGCCTTCTGCGTTAGCCAGCTACGCCCCGACCATTCGTGGTGTGGCAAACTCT
AACGCCAAAGTTACCGTGACGCAGAACGGCTATAAAATCTATGAAACCACCGTTCCGCCA
GGTGAGTTTGTTATTGATGACATCAGCCCTTCCGGATTTGGTAGCGAACTGGTTATTACC
ATTGAAGAAGCGGATGGTTCCAAACGTTCCTTTACGCAGCCCTTCTCCTCCGTCGTGCAG
ATGCAGCGTCCTGGCGTGGGTCGTTGGGATTTCAGTGCCGGTAAAGTTATTGATGACAGC
CTGCGATCCGAACCTAATATGGGGCAAGCCTCTTATTACTATGGTCTGAATAACCTCTTC
ACGGGTTACACCGGCATTCAGTTCACCGACAACAACTATCTTGCCGGACTGTTAGGTGTG
GGTATTAACACCAGCATCGGTGCTTTTGCGATGGACGTTACCCATTCCCGCGCTGAAATT
CCGGATGATAAAACCTACCAGGGGCAAAGTTATCGCGTAACCTGGAACAAACTTTTCCAG
GATACCGGAACATCATTTAACCTGGCGGCTTACCGCTATTCCACCCAGGATTACCTGGGC
CTGCATGACGCGTTAGTCCTCATTGACGACGCGAAACATATGTCTGCCGATGAAGACAAA
AACACCATGCAGACATACTCACGCATGAAAAACCAGTTTACCGTCAGCATCAACCAACCG
TTGAACATCGCCTATGTCGATTACGGTTCGCTGTTTATTTCCGGTAGCTGGACGGACTAC
TGGGCGGCGAACAATAGCAGGACTGAATATAACGTCGGTTACAGTAAAAGCGTTTCGTGG
GGTAGCTTCAGCGTTAACCTGCAACGTAGCTGGAATGAAGATGGCGATAAAGATGACGCA
ATGTATGTCAACGTTAGCGTGCCTTTTGAGAATATTTTCGGTGGCAAACGCAAGACTTCC
GGTTTCCGTAATTTAAATACTCAGCTCAATACCGATTTTGATGGTTCACACCAGTTGAAT
ATGAACAGTTCCGGTAGCAATGAAAGCGGCCAGGTGAACTATAGCGTCAACACAGGTTAT
AGCATGGATAAAAATTACGGCGATCTAGCTTCTGTTGGCGGTTATCTCAACTATGAATCT
GGGTTAGGCGGTATTTCCGCTTCGGCCTCTGCCTCTTCTGATAATAGCCAACAGTACTCC
ATCTCAACCGATGGCGGCTTTGTGTTACACAGCGGTGGTCTGACATTTACCAATAACAGT
TTCAGCAGTAACGATACGCTGGTGTTAGTCAATGCCCCAGGCGCTAAAGGCGCACGAGTC
AATAACAGTAATAACGAAATCGATCGCTGGGGATATGCCGTAACGTCCGCTGTCAGCCCA
TACCGTGAAAACCGCGTAGGCCTGAACATTGAGTCGCTGGAAAACGACGTAGAACTGAAA
AGTACCAGCGCCACCACCGTACCACGTAGCGGGTCCGTTGTTTTGACCCGTTTTGAAACT
GACGAAGGGCGTTCTGCCGTGCTGAATATTACCTCCAACACTGACAAACCGATTCCGTTT
GCTGCGGAGGTTTACCAGGATGAAGTCATGATCGGCAGTATGGGCCAGGGCGGTCAGGCA
TTTGTGCGTGGTATTAACGACAGTGGGGAATTAACCGTGCGCTGGTTTGAAAACAACCAA
ACCGTGGACTGTAAGTTGCATTACCAGTTCCCGGCCCAGCCACAAACTCTGGGAAGCACT
AACACCTTATTACTTAACAATCTTACCTGTCAGGTAGCAAAACATTAATATGGAAAATTC
TATGAAAAGGATACTACTAACATCCGCGTTAATAGGCCTGGGTTTACCGGCAGTTGGCTC
TGCAACAGATCTCAAAGTCGATTTTACGGCCACTGTACTCGCCACCACCTGTACGATAAC
CATTGAACAAGATGGTGGCCCCGTGGTGACCAGTAGCGGTAACGATGAATACAGCCTGAC
CATTCCTGATGTTGGCCTGGACAAAGTTGTCACTGGTGATGTTGCAGCGCAAGCCAACTT
TAAATTAAAGGCTAAAGATTGCAGCGATGGTTACTCAAAAATTTTTACCACACTTACAGG
AACGTCTGTTTCAGGCAAGTTGATTGTCAATGAAGCAAGCTCTGGCGCTGCTGGTGTGGG
TATGGGTATTAAGCGTAGAGATGCCGCAGACTCGGCTTTCTTCACGCCCAATAATACTGA
CAAATTTGAATGGTCTTCCGATGAGAAAACTAACGGTGTGCCTCTGACCGTTGCACTGCG
CGAAACCACGGCGGGAGCGGGACGCACCGGTGCGTTTCAGGCAAAAGCCACCTTTAACTT
CACCTACGAATAACAGGGACAGCCACCATGAAATTAAAAGTCATCGCCACACTGATTGCT
ACTGTTGCCGTAGGTGCAAGCTTTAATTCAAATCTCGCCTATGCGAGTACTACTTCTGCA
TCTTTAACCGTAAACAGTAACCTGACTATGGGTACCTGTAGTGCTCAGGTTCTGGATTCC
AGCAATAAAGCGACAGATACTGTTGCCCTGGGCAATGTTTATATTTCTGAGTTAGCGGCA
AAAAGCAAAGTGCAACCATTCAAAATCCGCTTCAGTGATTGTGCCGGTCTTCCAGGGAAG
AGTGCTCAACTCGTTTTAGCGCCCAGGCCTGGTACGGGTTGCGCTGGCGGTCAGTCTAAC
ACTGCCGGCTTTGCAAATTCAATTTCCTCCGGCGCTGGTGGTTCAAGCAGAGCAGCGGTC
GAAGTATGGACGACTACGCCCCCCGAGGGAAGCGGCAGTCAGCAACTCAGTTGTGTTCAA
CGAAACGTCATCACGGTTGATCTTTCTAATGCCAGAACAACACAGCCTTATGATTACGAT
TTAAGTGCGCGGATGATTATCGCCGATGGAAGAACGGTTAATGATGTATTACCGGGCGAG
TTTCTTTCTCCCACCACCTTCACTATCACTTATCAGTAATAGCAGATAAGGATATTAGAA
TGCTATGCAGGCATCATAAATTTGTATGTTTTTTGGGGCTGGCAACAGCCCTCATAACGC
CTTTTGCCTATGCTGGTCAGGATGTGAATCTCACCGCGCAGATTGTCGCCAGTACCTGTC
AGGTTGAAGTGAGTAATAATGGCGTGGTGGATCTCGGCAGTGTAACCCTGGACTATTTTG
CCGACAACGTAACTCCAACAACGGATTATGCGGGTGGCAAGACGTTTAATGTTAACGTGG
TCGCCTGCGATAATATTCAAACGACCCAGTCGCAAATGAAATTAGATTTTCAGCCGCAGG
CAGGTTCGCTTGCGCAGGTGAATAATCAAATTTTTAGTAATGAATATGAACAGCAGGCTA
CCGGGGCAAAAAACGTCGGCATTGTAATATTTTCGGCACAGCCGAATCAGCAGACCTTTA
ACGTGCGGGGAACGGACGGTTCCTCAACGGCGATTTATTCTGTCGCTCCAGGCAATGCTG
TTCCGTCAACCTGGACCTTTTATTCCCGTATGCAACGGGTGAATAATGCTCTCCCACCCG
AGTCGGGGATGGTGAGAAGCCAGGTTATTGTTAATGTTTCTTACGAATAATAAGGATAAT
TATGCAAAGGAAAGGCAATAAACTGTTACGACAGTTATGCAGTGCAATACTGTTATTTTT
TATGTGCTCCTTGTCTGCATCTGCGATGGAATGTTATATAGAAAAATGGGCGGGGGGAAC
TTATGACATGGTCATAAACCCTGAGGTTGAAAGTATAACAACGCAAATGGTATCTTCGCC
ACAAGAAATAAGCGACATGGTTCATGATACAAATATTAAACTTAAGGACAGGAACGGTGA
GACGATTGGATGTAAGTCCGATATAGGGGGTACTACTTCAGTACACTTTCTTAACACTGC
GGATGCAGGTTTGTTATCAACCTATGTTTCGAAAGATAATGGCGCATTATTAAAAACAAC
AGTTCCTGGTATTGTCTACTCCGTAGAATTGGTATGTATAAGCTGTGGTGCTGCAGATGA
ACTTGATTTAGTTTTACCTGCACAAAGCGGCGCAGATAACTTCATACCGGCCAGCGATAC
CAAGTGGGCTTATGAATACAGTGACAACGACTGGTATTTGCGTTTTCGTTTTTACTGGAC
GCCGGAATTTAAACCTCAAAATGGGGTTTTCGAAGGATATGCCTTGCCAGGAAAAATTGC
TTCCTGGTATATAGGTGATAATACCCAGGCATGGGTAAACTTTACTGTTCAGGATAGTGC
CGTTCACTTTTACGTTGACCAACCAACCTGTTCAATGATTACCCTGGATCAGGACAAAGG
CAATGTGAGTGGCACAGAAATCCAGTTAGGTAACAGTTACGTATCCGAAGTTAAAAATGG
TCTTACCCGAGAAGTTCCCTTTGCTATCCGTGGTGAGTATTGTTATGCCAGCAAGATTAC
GGTTAAGCTGACGGCTGCAAATGCAGCCACTGACAAAAATCTGGTGGGTAAAACAACTGG
CTCTGCCACAGGCGTGGCTGTAAGAGTTAATTCAACTTATAATGATAGCAAAGTGTTATT
AAAACCAGATGGCGTTGCTTCCATTGATTATAACTTCCCTGTCTGGTCGAATAACTTGTT
GTCATTCCCTTTTACAGCACAACTCGTCCCCGATGGCAGTGGTAAACCTATCGGAACAGG
AACATTCTCCGGTAACGCGACCTTCTCCTTTACCTACGAATAAGTAAAACGTTATTCCCT
CCTCATCGCACCAGAGTTCTGCTCTGGTGCGAACGTTTTCCCCACACTAAAAACCATTGC
CCCCCTGATTTCGGCTGTTAGAATGCGAACAGATCTGACTTTAGCCATCAGGACACGTTA
TGAAACCGACCACCATTGCTTCATTGCAAAAATGCAAACAGGAAAAAAAACGTTTCGCGA
CCATCACCGCTTACGACTATAGCTTCGCCAAACTCTTTACCGATGAAGGACTTAACGTCA
TGCTGGTAGGCGACTCGCTGGGCATGACGGTTCAGGGGCACGACTCCACCCTGCCAGTTA
CCGTTGCTGATATCGCCTACCACACTGCCGCCGTACGTCGTGGCGCGCCAAACTGCCTGT
TGTTGGCTGACCTGCCGTTTATGGCGTATGCCACGCCGGAACAGGCCTTTGAAAATGCCG
CCACAGTAATGCGTGCCGGAGCCAATATGGTCAAAATCGAAGGTGGCGCATGGCTGGTGG
AAACCGTGCAGATGCTGACTGAACGCGCGGTTCCGGTATGTGGTCATTTAGGTTTAACGC
CGCAGTCAGTGAACATTTTCGGCGGCTACAAAGTACAAGGGCGTGGCGAGGCAGGCGATC
AACTGCTCAGCGATGCATTAGCCTTAGAAGCCGCTGGTGCACAGTTGCTGGTGCTGGAAT
GCGTACCAGTTGAACTGGCAAAACGTATTACCGAGGCGCTGGCTATTCCGGTTATCGGTA
TCGGCGCAGGTAACGTCACCGACGGGCAGATCCTCGTCATGCACGACGCCTTCGGTATTA
CTGGCGGTCATATCCCTAAATTTGCCAAAAATTTCCTTGCTGAAACGGGCGACATCCGCG
CGGCTGTGCGGCAGTATATGGCTGAAGTGGAGTCCGGCGTATATCCGGGCGAAGAACACA
GTTTCCATTAAGGAGTCACGTTGTGTTAATTATCGAAACCCTGCCGCTGCTGCGTCAGCA
AATTCGCCGCCTGCGTATGGAAGGCAAGCGCGTGGCGCTGGTGCCTACTATGGGTAACCT
GCACGATGGCCATATGAAGCTGGTCGACGAAGCCAAAGCCCGCGCCGATGTGGTCGTCGT
CAGTATTTTCGTTAACCCAATGCAGTTTGACCGCCCGGAAGATCTGGCACGTTATCCACG
GACCTTGCAGGAAGACTGCGAAAAGCTAAACAAACGTAAAGTGGATTTAGTTTTCGCCCC
TTCGGTAAAAGAGATCTACCCGAACGGTACTGAAACCCACACTTACGTTGACGTTCCTGG
TCTTTCCACCATGCTGGAAGGTGCCAGCCGTCCTGGCCATTTTCGCGGCGTTTCGACTAT
TGTCAGCAAGCTGTTCAACCTGGTCCAGCCGGACATCGCCTGCTTCGGTGAAAAAGATTT
TCAGCAACTGGCGCTGATCCGCAAAATGGTTGCTGATATGGGCTTTGATATTGAGATTGT
CGGTGTGCCAATTATGCGCGCCAAAGACGGTCTGGCGCTGAGTTCCCGTAACGGTTATCT
GACAGCGGAACAACGCAAAATTGCGCCCGGTCTGTACAAAGTTTTAAGTTCAATTGCCGA
CAAATTGCAGGCTGGCGAACGGGATCTCGATGAAATTATTGCTATTGCCGGGCAAGAACT
GAATGAAAAAGGCTTCCGCGCCGATGATATTCAGATTCGCGATGCCGACACGTTGCTGGA
AGTCTCTGAAACCAGCAAACGAGCTGTGATTCTGGTAGCCGCCTGGCTTGGCGATGCCCG
CCTGATCGACAACAAAATGGTCGAACTGGCGTAATACTTAACTGGCGCTACGGCTGATGG
CGCCAGTTATTAATTTGCCCTACGTCATGGCGATGACGTCTGTAAGTGATTATTCATATC
GCTGGCAATTTAGTTAGAGTTAATTAGCTTATCAATCTCTGTAAGAGGTAAAGTTGTCAC
CTCTGCAACGTCTTCCCGAGACATCCCTTTACTTAGAAAACGCTGGGCGAATTCCTGTCT
TACCTTCTGGAGTTCCTCTTGATATCCCTTCTGAAATCCCTTCTCTTCAAACCACTGCGC
CAACGTCTGCCTGGTTTCTCTCCGTGTCTTTATTTCCATAGGTTCCCTTAATTATCTGGT
CAGTTAACAATAACAATTATCTGGCTATAACTGATGATGCAGACAACTTAGTTAATCAGC
TTATCAATCTCGGCAAGGGGTAAATTTGCCATCTCTGCAACGTCTTCCCGAGACATTCCT
TTATTCAGAAGACGCAGGACGAATTCTTGCCTTTCCTCCTGTCTTCCCCTCTCTTCAAAC
CACTGCGCCAGCGTCATCATAGACTCCCCTCCCGTTTCCCTGTCTCTCAGCACACCATAA
AACAAATCCGCTTGTTCAGTATGACCGCGTTGCAGCATATAGTTTTGCATGGCAACTAAC
TGACTTCCGCTAGTGTACCCTTCGTCAATCAGCGTGACCAGTTGCTCCAGCAATAACATT
AAGTCGCGCTGGCGAATATGTTTTTGCAGTAGTTCGAGAATCGCAATCCGCCGATGTTGC
ATGATTTCGTCATCCGGTGTGATGGTGATATCCACCAGCGGGAAAGGACTGTTATAGACG
CGTCGCGCCAGCTCCGGAGAGTAAAACATATCAAACCAGCACATTGAGAGCGGATAAGGT
GTGGCCTCGCCCTGATAAAAGAGAATCGGCACTACCAGCGGTAGTTTGTCGTGATCCGCC
TCCAGATGCCGATGCATGGCGGCTATAGAATAACGCATCATGCGAAAGGCCATTTTCTTA
TCCGGCTTGCTTTGGTGTTCAATCACAACATGCAGATAACCGGGATTGCCCTGCATTTGC
ACGGAATAGAGCACGTCCGTGCTGTGTCCTTTCAGGCTCTCTTCAATGAAACTCCCCGAC
TCTAAATGAAGCGTGTTGAGGTCACAAAGTTCGCGTAATTCCACTGGCAAATGTATCTCC
AGAAAGTCGCGAGCCGTCTCCGCATGCATTAAAAATTGTTTAAATACCGCGTCATGCGGT
GTAGTACTCGGTGCATCCATCTTCCCTGTCTTCCGTGTTGTCTTGCGTGAAGGCAGTATC
CAGCCAAGGCGCGCCGTCGTCAGCCACCTCTTTATTGTTTACCGAGCAGCGTTCAGAGAA
ATATCAATTCGTTACAGGCGATACATGGCACACTTCGGCGCGGTACGCAAACTGCTGATG
CAAATGCCGTCAGATGAGTAGACACTAAACAAAAATCGGGCAATACTGCGTGAGAATTTC
CTCAAAGCAGGCACCGCCTGCTTCGTTAACGACAGGGTAGAAAGGTAGAAGTTATGATTC
GCACGATGCTGCAGGGCAAACTCCACCGCGTGAAAGTGACTCATGCGGACCTGCACTATG
AAGGTTCTTGCGCCATTGACCAGGATTTTCTTGACGCAGCCGGTATTCTCGAAAACGAAG
CCATTGATATCTGGAATGTCACCAACGGCAAGCGTTTCTCCACTTATGCCATCACGGCAG
AACGCGGTTCGAGAATTATTTCTGTTAACGGTGCGGCGGCCCACTGCGCCAGTGTCGGCG
ATATTGTCATCATCGCTAGCTTCGTTACCATGCCAGATGAAGAAGCTCGCACCTGGCGAC
CCAACGTCGCCTATTTTGAAGGCGACAATGAAATGAAACGTACCGCGAAAGCGATTCCGG
TACAGGTTGCTTGATTGTTATCCCTGCGGCTGGTTACTCACCAGCCGCGACATCGTCTCG
AGCGAATCCGTTCTTAAGATATAAAGTCGTTTTAGTAACAACGGATTATCCCCCGGTTTT
ACTTTGCCTTTCATGGTTGTCACCGCCAAGTGAAATCCGGCATCGTTTGCTGCCTTCACG
GCTTTGTCATTAAATCCGCCAAACGGATACGAAAGATACCAGACATGCGGATTAAATTGC
GCCAGAGCGCGGCGTGAACGTGCAAAATCAAACAGAATATTGTGCTCACTACGACTCAGT
AATATGGGGCGGCGATAGCCATCCACCCGATGCAAAAAATGAGTATGTGACTGAAAATCA
AAAACATCGCGAATTTCGTTAAGCTCAGAAACGCTCATAAATTGCAGCGATTTTGGGTTC
CACTTCTGCGGGTGACGTTTGATGCGTGAGGTAACAATAAACGCCGTCGCCTTCATGCCA
TATTGTTTCAACACAGGATACGCATAGCGGCTCACCGACTTGAGGCCATCATCAAAGGTA
ATCACCACCGCTCGCGCAGGGAGATTGATCTTATTCTTCACGTAGCCTTCCAGCTGCACC
ATGCTCAGTGTCGCGTATCCCCTGTCGCGCAGCCAGGCCATCTGGTTATTGAAAGCGCGT
ACCGAGGTGGTCGTCGAAGTGTGGCGAAAACGGGTGTTTTCTTCGTCGCGCAGAATATGA
TGATAGGTTAGCACCGGAAGGCCATTATCGGGTTGGGCATCCAGCGCGCTGATATAGGCC
AGTCGATCGCCAATACGGACCTGATACCAGGTTTGATTTAACCTGTTTTTCAGTTTATGC
AAAATCGGGTAGCGCAAATTGTCCGCCAGTACCCCAAATGGCGCACTGCCCACACTCGGC
GCGTTATAGACCGGCGTATCTTTCCAGGTAACTAAGTTCTGATTACTCAGCGGCTTGTTG
AGGTCACCCAAACCGTCTTCAACTTTTTGTCGCCCCTGAACCGGCTCGAGATGCCCTTTA
TCGATAAACCCTTTACCAAAGCCAAAATTAAATGCGTAATAACTTGCGGCAGTGGGCTCC
ACGGCAATGATTTGTCCGGCCCGAATATTCCCCACGGTCACCATCTTGTCGCCAATTTGC
GCCCAGACCGCAGCATTTTCGATGGTTTGCATATAACGGGCAGGTAACGCGGCACTGACA
CTTGCGGTAAACAGCATCAGCAGGAGAATAACAGCTTGTTTGTACATGAAAAAATAACCG
AGGGTGAAACAACGCTTTTATTGTAGCAAAAGCGCTATAAGAATCGTGGGTTAATACTCA
TACAAATTATGTTTGAGGACGAAAGGTGGATTTTTTTGTTGTTGGTGCCAAAGACTACTC
ACCTTCGGCCCACCCAGTTCGACAATACGCTCGCGAAACTCTGAACTGGTCATGGTTTCA
CGGCAAGCCATCATCTGTTCAATTAACGGTAACGTGACACCAGAAATCACTTCGCAACGG
GAGTGTTTGTGGCTTAATAATGAAGCCACGCGGTACGGTGGCGCTCCGGCTATATCGGTT
AAGAAGATGACACCCTCACCAGAGTCCGCTTCATGCAGAGCATCGCACATCATGCGGCTG
AGCATATTAGAGCTTAACCCACGCCAGAAATTCACGGCCCGGCACTGAAGAAGTGCCCCA
TGTTTTTTCTCCAGCGCATCCAGTATCTCTTGCGCCCGGTCATCGTGACAGGTAATTACC
CAACCTAACATCGCCTTCCTCCTTAGCCGAAAATCAGTCTACCCTGACCATTGTTGATAA
AGGGTGATAGCCGTCAAAACTCCTCTCCCCCAAATCCAGAGGAGAGGAAATAGCCTTAGC
TACGCAAACCACGTCCACGTTGGATCAGCGACCAACAGATCAAATAAAACGCCACAATAA
AGACCACCAGTACGCCAAAGGTAGTGACCAGCGGAACATCATTGATACCGAGGAAGCCGT
AGCGGAAACCACTGATCATATAAACGATTGGGTTCAGGTGCGACAGCCCTTGCCAGAACG
GCGGCAACAAAGTCAGTGAGTAAAAGACCCCACCCAAATACGTGAGTGGCGTTAACACAA
AGGTTGGCACCAGGCTGATGTCATCGAACGTTTTGGCAAACACACCGTTCAGCAAACCCG
CAAGGGAGAACAACACCGCCGTGAGCACCAGGGTTAAGGCAACGAATACCCATGAATGCA
CCTGAAACGGCACAAAAAACAGTGAAATTGCCGTCACCAGAATGCCAACAAACAGACCAC
GCGCCACGCCACCGCCGACATATCCGGCAATAATGACGTGAGTCGGAACCGGCGCTACCA
GCAGCTCTTCAATATTACGCTGGAATTTGGCACCAAAAAATGATGACGCGACGTTAGCGT
AGGCGTTGGTGATCACCGACATCATGATCAGCCCCGGTACGATGAACTGCATGTAGCTGA
AGCCATGCATATCGCCAATACGCGAACCAATCAGGTTACCGAAGATAATAAAGTAAAGGG
TCATGGTGATGACTGGCGGCACCAGCGTCTGCACCCAGATACGCATAAAGCGATGGATCT
CTTTCGCCCAGATGCTTTTTAGCGCCACCCAGTAAAGATGCATCATGCGCGATCTCCTTG
TTTTTCATTAACCAGTGAAACAAACAGCTCTTCCAGACGGTTAGCTTTGTTACGCATACT
TAATACCTGAATGCCCTGCTCACTTAACTGCGTAAATACGCTGTTGATCCCCTGCTCACG
CAGCACTTCAACTTCCAGCGTCGCGGTATCGACCAGTCGATACTGATAGCCATCGAGCTT
CGGTAACGGACTTTTCGGTGCGAGATCGAGAATAAAGGTTTCCGATTTCAGCTTCGCCAG
CAGCGCCTTCATCGAGGTATTTTCCACCAGCTCACCATGTTGAATAATGCCGATATTGCG
GCACAGCATTTCTGCTTCTTCCAGGTAGTGTGTGGTGAGAATGATGGTGGTGCCTTTGTC
GTTTAAATCCTTCAAAAAGCCCCACATTGAGCGGCGAAGCTCAATATCCACGCCTGCCGT
TGGCTCGTCGAGAATCAGCAGTTTAGGTTCATGCATTAACGCACGGGCAATCATTAAACG
ACGCTTCATCCCGCCCGATAACATGCGCGCACGTTCGTTGCGTTTTCCCCATAAATCGAG
CTGCTTAAGATACTTTTCGCTGCGGATGTACGCTTCTTTGCGCTCCACGCCGTAGTACCC
TGCCTGATTCACCACAATTTGCTGCACGGTTTCAAACGGGTTGAAGTTAAATTCCTGCGG
CACCAGTCCCAACTGACGTTTAGCGTTCACGACATCCTTCTCGAGATCGTAACCAAATAC
GCTGACCCGCCCGGAGGTTTTATTTACCAGAGAGCTGATAATACCGATAGTGGTCGATTT
CCCGGCCCCGTTCGGCCCGAGAAGCGCATAAAAATCACCCGCTTCGACCTGCAAATCTAT
TCCACGAAGCGCCTGAACGCCGCCTGGATAGGTTTTTTTAAGCTGTTGAAGTTCCAGTGC
AATGGTCATAAATTTTTACTTACCTTACGTTCTTACACTTTATCTGTGGTTTAAATCGTC
CCGGAGTTGCCCTATATTAGCCAAACGTAATTATTTGGTTACAGGTCGTTAACCTCCATG
AAAGACATAGATACACTCATCAGCAACAATGCACTATGGTCAAAAATGCTGGTGGAAGAG
GATCCCGGGTTTTTTGAGAAACTGGCACAAGCGCAAAAACCGCGCTTTCTATGGATTGGA
TGTTCCGACAGTCGCGTTCCTGCAGAACGTTTAACCGGTCTTGAGCCGGGCGAACTCTTT
GTTCACCGTAATGTTGCTAACCTGGTCATTCACACCGACCTGAACTGCCTTTCCGTGGTT
CAGTATGCAGTGGATGTACTCGAAGTTGAACACATTATTATCTGTGGCCACTACGGTTGC
GGCGGCGTACAAGCCGCAGTTGAAAACCCGGAACTGGGGCTTATCAACAACTGGCTGCTG
CATATCCGCGATATCTGGTTCAAACATAGCTCATTGCTCGGCGAAATGCCGCAAGAGCGC
CGTCTGGATACCTTGTGTGAACTGAACGTCATGGAACAGGTGTATAACCTGGGCCACTCC
ACCATTATGCAATCAGCGTGGAAACGCGGGCAGAAAGTTACCATTCACGGCTGGGCCTAC
GGTATTCACGACGGCTTGCTGCGTGATCTAGATGTCACAGCGACCAACCGCGAAACCCTT
GAGCAACGTTACCGTCATGGGATTTCCAACCTCAAGCTGAAACACGCCAACCACAAATAA
AAATGCCATGCCGGATGCAACACATCCGGCAACTTCACACTTACTCGTCCAGCAGAATCA
CTTTGCCGATATACGGCAGATGACGGTAACGCTGTGCGTAATCAATGCCGTAACCCACCA
CAAACTCATCCGGGATCGAGAAACCGATAAATTCTACCGGGACGTTCACTTCACGACGGG
ACGGTTTATCCAGCAGCGTACAAATCGCCAGCGACTTCGGTTCGCGCAGGCTTAAGATCT
CACGCACTTTCGACAGTGTATTCCCCGAGTCGATGATATCTTCAACAATCAGCACGTCCT
TGCCACGGATATCTTCATCCAGATCTTTGAGGATTTTCACATCACGGGTGGTGGACATGC
CGCTACCGTAGCTGGAGGCGGTCATAAAGTCGACTTCATGAGATACCTGAACTTCACGGC
ACAGGTCCGCCATAAACATAAATGAGCCACGCAGCAGACCCACCAGCACCATATCGCTGC
CGCTGTCTTTGTAACGCTCAGTAATCTGACGACCCAGTTCGGCGATACGCGCTTTAATCT
CCGCTTCGGGGATCATTACTTCTACAGTATGTTTCATATCTCTAACCATATGATTTAAAA
ACAAATCACTTCGCACGGGCAGGTTTTGGCACCGCAACAAAGCGCAAGACACGCAGTATA
CCAGTAAAACTATTCATTCGCAGAATCTGTTAATAAAGCTCGAATTGTGATGACGGTCAC
ACATGTTAAAACCTATAATTAATTGCTACTAAAATATTAATGAATTGAAATGGTGTCTCT
TTATGGCAATTAACAATACAGGCTCGCGACGATTACTCGTCACGCTAACAGCCCTTTTTG
CAGCGCTTTGCGGGCTGTATCTACTCATTGGCGGAGGCTGGCTGGTCGCGATTGGCGGCT
CCTGGTACTACCCTATCGCTGGCCTTGTGATGCTCGGCGTCGCCTGGATGCTGTGGCGCA
GTAAACGTGCCGCGCTTTGGCTATACGCCGCCCTGCTGCTCGGCACCATGATTTGGGGCG
TCTGGGAAGTTGGTTTCGACTTCTGGGCGCTGACTCCGCGCAGCGATATTCTGGTCTTCT
TCGGCATCTGGCTGATCCTGCCGTTTGTCTGGCGTCGCCTGGTCATTCCTGCCAGCGGCG
CAGTTGCCGCACTGGTGGTGGCACTGCTGATTAGCGGTAGTATCCTGACCTGGGCCGGAT
TTAACGATCCGCAGGAAATCAACGGCACCTTAAGCGCCGATGCCACACCTGCGGAAGCTA
TCTCACCCGTTGCCGATCAGGACTGGCCTGCCTATGGTCGCAATCAGGAAGGTCAACGCT
TTTCACCTCTGAAACAAATTAACGCCGATAACGTCCATAATCTGAAAGAAGCCTGGGTGT
TCCGTACTGGCGATGTGAAGCAGCCGAACGATCCGGGCGAAATCACCAATGAAGTGACGC
CGATTAAAGTGGGCGACACCCTTTACCTGTGTACCGCTCACCAGCGCCTGTTTGCGCTCG
ATGCCGCCAGCGGCAAAGAGAAATGGCATTACGATCCTGAGCTGAAAACTAACGAGTCTT
TCCAGCACGTAACCTGCCGTGGCGTCTCTTATCATGAAGCCAAAGCAGAAACGGCTTCGC
CGGAAGTGATGGCGGATTGCCCGCGTCGTATCATTCTTCCGGTCAATGATGGTCGACTGA
TTGCGATTAACGCTGAAAACGGCAAACTGTGCGAAACCTTCGCCAATAAAGGCGTGCTCA
ATCTGCAAAGCAATATGCCAGACACCAAACCGGGTCTGTATGAACCGACTTCGCCACCGA
TTATCACCGATAAAACCATCGTGATGGCAGGTTCAGTTACCGATAACTTCTCAACCCGCG
AAACGTCTGGTGTGATCCGTGGTTTTGATGTCAACACCGGGGAGCTGCTGTGGGCTTTTG
ATCCGGGCGCGAAAGATCCGAACGCAATCCCGTCTGACGAACACACCTTTACCTTTAACT
CGCCAAACTCGTGGGCACCAGCGGCCTATGACGCGAAGCTGGATCTGGTGTATCTGCCGA
TGGGCGTGACCACGCCGGATATCTGGGGCGGTAACCGCACACCGGAACAGGAACGTTATG
CCAGCTCGATTCTGGCGCTGAATGCCACAACCGGGAAATTGGCGTGGAGCTACCAGACCG
TTCACCACGACCTGTGGGATATGGATCTTCCGGCACAGCCGACGCTGGCGGACATCACCG
TTAATGGTCAGAAAGTGCCAGTTATTTACGCTCCGGCGAAAACCGGCAACATTTTTGTGC
TCGATCGTCGCAATGGTGAACTGGTGGTTCCTGCCCCGGAAAAACCGGTTCCCCAAGGCG
CTGCCAAAGGCGATTACGTAACCCCAACTCAACCGTTTTCTGAACTGAGCTTCCGTCCGA
CGAAAGATTTGAGCGGAGCGGATATGTGGGGCGCCACCATGTTTGACCAACTGGTGTGCC
GCGTGATGTTCCACCAGATGCGCTATGAAGGCATTTTCACGCCGCCATCTGAACAGGGTA
CGCTGGTCTTCCCTGGTAACCTGGGGATGTTCGAATGGGGCGGGATTTCTGTCGATCCGA
ATCGTGAAGTAGCAATTGCCAACCCAATGGCGCTGCCGTTTGTTTCGAAACTGATCCCTC
GCGGTCCGGGTAACCCAATGGAGCAGCCGAAAGATGCCAAAGGCACGGGTACGGAATCCG
GCATTCAGCCACAGTACGGTGTACCGTATGGTGTCACGCTCAACCCGTTCCTCTCACCAT
TTGGTCTGCCATGTAAACAGCCAGCATGGGGTTATATCTCGGCGCTGGATCTGAAAACTA
ATGAAGTGGTGTGGAAGAAACGTATTGGTACGCCGCAGGACAGTATGCCGTTCCCGATGC
CTGTACCGGTGCCGTTCAATATGGGTATGCCGATGCTGGGCGGGCCAATCTCCACGGCGG
GTAACGTGCTGTTTATCGCCGCTACGGCAGATAACTACCTGCGCGCTTACAACATGAGCA
ACGGTGAAAAACTGTGGCAAGGTCGTTTACCAGCGGGTGGTCAGGCGACGCCAATGACCT
ATGAAGTGAATGGTAAGCAGTATGTGGTGATCTCCGCAGGCGGTCACGGTTCATTTGGTA
CGAAGATGGGCGACTATATTGTGGCTTATGCGCTGCCGGATGATGTGAAGTAAGACTTGC
TCAGATTGCTGACAACGTGCGCGTTGTTCATGCCGGATGCGGCGTGAACGCCTTATCCAG
CCTACAAAATTGTGCAAAATCAATGGATTGCACAGGTAGCGTAGGCCTGATAAGCGTAGC
GCATCAGGCAGATTTGCGTTTGTCATCAGTTTAATGCCCGGAGAGATCCGGGCATATTCC
CGAATACGGTCTTTTTATACCGTAAACCCTAACATCATCCCCGTATCTTCATGCTCCAGC
AGATGGCAGTGCGCCATATAAGCATGTTCTTTCGGTGCGTCGTGATTAAACTTCACCAGC
ACTTCGCTGACATTACCTTCTACCTTAACGGTATCTTTCCAGCCCGCGCGATGCGTCGCT
GGCGGTTTGCCATTTTCTGACAAGATACGGAACTGCGTGCCGTGAATATGGAACGGATGC
AGCATCATGTCGCCCACGCCAGAGATAACCCAACGTTCGTACTGCCCTTTCGCCGCCGCA
AACATCGGCTTATTCATATCAAACGCCTGACCGTTGATTTTATTGGCATGGTGGAAATCG
AACTTCCCGCCGTGGTTCATATGATTCATATTGCCGTGCCCCATATGGCCCATCATCTGG
CTGTGATCCATTCCGGCCATCGCCTGATCGCCATATTTCTCCATTAGCATCTGCATCCCC
ATCATATCTAGCATCGGGTCCATAGAAAGTTGCAGCTTGCGTACCGTCAGCCCTTCCAGC
GAAGGTAACGCAGGCAGGCTACTTAATGTGTCTGGCAAAGCACCGGAGGCACTAATAGCA
ATCGGCTGAATCCGCATTACCGGATGCGGCTTGTCAAACGGCGCAATCGCCATCCCCATC
TGGCTGACCGGCAGCGTCACCAGGTCAAAGGGTTTGTTGTCGTTAACCTCCACCAGCACT
TCAAAACGCTCGCCCATCAGCACCGGCAGCTCGTTCACCTTCACCGGTTCAGGTAGCAGA
CCACCGTCGCTGGCAATCACATAAAGCGGGCGATTGTCGCTGGTGGCGAAATTGAGCGAG
CGGGCATTACAGCCATTGAGCAAACGCAGGCGCAGCCAACCACGCGGGGCAGCGTGTTGC
GGGTAGATTGCACCGTTGGTCAGCAACGTATCGCCAAACCAGCCCACGGCGGCGGTCATC
ACATCCAGTTGATAATCAATCTGCCCGTCGGCGCTAAATTTCTTATCCTGAACGATCACC
GGAACATCATCGATACCCCACTGTTTTGGCAGCATTAATTTCAGGATCTCGTCATCTTCA
ATTACCACCAGACCAGCCAGCCCCATCGCCACCTGTCGCCCGGTCTTGCCATGTTGATGT
GGATGGAACCAGCAGGTAGCGGCAGGTTGATCAACGTTCAACGTCACCGAGCGCTTGCCA
CCTGGCGGAATAATTCCCTGTGGGCCGCCGTCGACTTCACCCGGTACTTCCAGCCCGTGC
CAGTGCAACGTCGTCTCTTCCGTCAGTTGGTTATAGATATCAACCGTTACCGCTTTGCCG
CGCTGTAATTTCACCGCCGGCCCCAACAGATTGCCGTTATAGCCCCAGGTAGTTGCAGTT
TTCTCGCCAAAGGTAGACTGACCTGCGCCAATAGTTAACTGAATGCGATTACGGGCATCG
GTCGTGAGCAAATCAGGGATCGGTAACGTTGGGCGTTCCGCCGCAAAAACTGCACGGCTC
CACAGTGGCAAGGCTGAAGCCACACCCAGTGCGACGGAATATTTCAAGAAATCACGACGT
TGCATAGTTATTTCCTTATTCTTAAGCAGGCGAAACAAAATCAAACGTTGAGCATAGTCC
TTCCCCTTACGGGAAGGTCAAGCCGCAGACACAATTTAATCGACAATAATGGTCGTCGCC
TCGCTCGCAGTGTGCTAACGTTTATCTTCTTTAAGCCCCTGGTAGAAGCAATGAAGACGT
TTTTCAGAACAGTGTTATTCGGCAGCCTGATGGCCGTTTGCGCAAACAGTTACGCGCTCA
GCGAGTCTGAAGCCGAAGATATGGCCGATTTAACGGCAGTTTTTGTCTTTCTGAAGAACG
ATTGTGGTTACCAGAACTTACCTAACGGGCAAATTCGTCGCGCACTGGTCTTTTTCGCCC
AGCAAAACCAGTGGGATCTCAGTAATTACGACACCTTCGACATGAAAGCTCTCGGTGAAG
ACAGCTACCGCGATCTCAGCGGCATTGGCATTCCCGTCGCTAAAAAATGCAAAGCCCTGG
CCCGCGATTCCTTAAGCCTGCTTGCCTACGTCAAATAATCCCTGATACCTTTTTGTAGAA
ATATTGACCGTGCATCCGCGGTCAATGTTAGCTATTATGTTGCGCCCTTTTTTTACGGGT
GTTAACAAAGGAGGTATCAACCCATGGCCGAAAAAAAACAGTGGCATGAAACGCTACACG
ACCAGTTTGGGCAGTACTTTGCAGTAGATAACGTTCTGTATCATGAAAAGACCGATCACC
AGGATTTGATCATTTTTGAGAACGCTGCATTTGGTCGCGTAATGGCGCTGGATGGCGTAG
TACAAACCACCGAACGCGACGAGTTTATCTATCATGAGATGATGACCCATGTTCCGCTAC
TGGCCCACGGTCACGCGAAACATGTGCTGATTATCGGCGGCGGCGACGGCGCCATGCTGC
GTGAAGTGACCCGACATAAAAACGTTGAGTCAATCACGATGGTGGAAATCGATGCGGGTG
TCGTGTCGTTCTGCCGTCAATATCTGCCCAACCATAACGCCGGTAGCTACGACGATCCGC
GCTTTAAGCTGGTGATCGACGATGGCGTCAATTTCGTTAATCAAACCAGCCAGACCTTTG
ATGTTATTATCTCCGACTGCACCGATCCTATCGGGCCCGGCGAAAGCCTTTTCACTTCGG
CATTTTATGAAGGCTGCAAACGTTGCCTGAATCCTGGCGGTATCTTCGTCGCACAAAACG
GCGTCTGCTTTTTACAGCAGGAAGAAGCCATCGACAGCCATCGCAAACTCAGCCATTACT
TCAGCGACGTTGGCTTTTATCAGGCGGCGATCCCGACCTATTACGGCGGTATCATGACTT
TTGCATGGGCGACAGATAACGACGCCTTACGCCATCTCTCAACCGAAATTATTCAGGCGC
GTTTTCTCGCCTCTGGCCTGAAATGCCGTTATTACAATCCGGCAGTCCATACGGCAGCTT
TTGCCTTACCCCAGTATCTGCAAGACGCACTGGCTTCACAGCCGTCCTAAGGAGAAGATA
AGAAATTGAAAAAACTGAAACTGCATGGCTTTAATAATCTGACCAAAAGTCTGAGTTTTT
GTATTTACGATATCTGCTACGCCAAAACTGCCGAAGAGCGCGACGGTTATATTGCTTATA
TCGATGAACTCTATAATGCCAACCGTCTGACCGAAATCCTGTCAGAAACCTGTTCCATTA
TCGGGGCTAATATTCTTAACATCGCCCGCCAGGATTACGAACCACAGGGTGCCAGCGTCA
CTATTCTGGTGAGTGAAGAACCGGTTGACCCGAAACTCATCGACAAAACAGAACACCCCG
GCCCACTGCCAGAAACGGTCGTTGCCCATCTCGATAAAAGTCATATTTGCGTACATACCT
ACCCGGAAAGTCATCCTGAAGGCGGTTTATGTACCTTCCGCGCCGATATTGAAGTCTCTA
CCTGCGGCGTGATTTCTCCGCTGAAGGCGCTGAATTACCTGATCCACCAGCTTGAGTCCG
ATATCGTAACCATTGATTATCGCGTGCGCGGTTTTACCCGCGACATTAACGGTATGAAGC
ACTTTATCGACCATGAGATTAATTCGATTCAGAACTTTATGTCTGACGATATGAAGGCGC
TGTATGACATGGTGGATGTAAACGTCTATCAGGAAAATATCTTCCATACCAAGATGTTGC
TTAAAGAGTTCGACCTTAAGCACTACATGTTCCACACCAAACCGGAAGATTTAACCGACA
GCGAGCGCCAGGAAATTACCGCTGCGCTGTGGAAAGAGATGCGCGAGATTTATTACGGGC
GCAATATGCCAGCTGTTTAACGGCTCTGGCGGAGCTCCCAGGCTCCGCCAGATTTATTTA
CTTCTGCTGCACGAAATTACGGTAAGCCGCCACCACCTGCAGAAAATCCTCAACGCCGCA
TAGCGACAGGCTTTCTTCGTCGTAGTAGTTCATCCCCTCTTCCATTTCATCGCCAGCGAA
TTCCAGTTGATTGGCGCGAACCATCACCTCTTCACCGTCCATCCACAGGGTGTATTCGTG
CCCTGCCCGTTGCCAGGACCGTTCGCTACCTTTCAGTGCGTGCGCTGCTTGTTCCACTTC
ATCAAGCAAGGCCAGGTTTTCTTTCACCTCTTCATTAAACCAGTGCCCGACCACTTCATG
CCCCATGGACATACGCACCTTTACCACTCCGGTAATATCGCGCAGAAATTCGTAATCCAT
AGTGTGTTCCTCTGCTCCCGGCAATGCGCCGAAATCGCATTGCGCCATTGATGTAATTAT
CGCAGCCTTACCGGAGAAAAACAGCGGAACGGCGATGGTTTAGAAATAAAAAATGCCCGG
GAATCTCATTCACCGGGCATTGTGTCGTTTATGCGCAGCGCGTGCGCTGACTTTTTAAAC
TGCAGTCTGGAAAATCACACCATCGGCTTTTTCAGTGTACTGAGAAAGCTGGTTGAAGTT
CAGGTAACGGTAAGTATCAACGGCAGTTTTATCCACCTGCGCCACGTAGGTCTGGTACTC
TTCCGGCGTCGGCAGTTTGCCAATCAGCGCCGCAACAGCAGCCAGTTCCGCAGAAGCCAG
GAAGACATTCGCGCCAGTCCCCAGACGGTTCGGGAAGTTACGGGTCGAGGTGGAAACCAC
[truncated: 5,029,794 more chars]
