# Supplementary material for: Escherichia coli ST302: Genomic Analysis of Virulence Potential and Antimicrobial Resistance Mediated by Mobile Genetic Elements
Source: Front Microbiol. 2020 Jan 21;10:3098. doi: 10.3389/fmicb.2019.03098 (PMC6985150; doi:10.3389/fmicb.2019.03098)
Supplement: DATA S2 — ST302 SNP analysis. [file Data_Sheet_2.ZIP › SNP_Analysis/ST302_SNP/SNP_analysis/snippyout/ST302/FA0416-Human-ST302.out/snps.csv]

CHROM	POS	TYPE	REF	ALT	EVIDENCE	FTYPE	STRAND	NT_POS	AA_POS	EFFECT	LOCUS_TAG	GENE	PRODUCT
EA2454	749	snp	A	G	G:38 A:0
EA2454	977	snp	T	C	C:17 T:0
EA2454	2877	snp	C	A	A:49 C:0
EA2454	4901	snp	T	C	C:52 T:0
EA2454	5064	snp	A	G	G:32 A:0
EA2454	5594	snp	C	A	A:31 C:0
EA2454	8504	snp	C	A	A:60 C:0
EA2454	9241	snp	C	T	T:34 C:0
EA2454	9683	snp	G	T	T:62 G:0
EA2454	11382	snp	A	G	G:37 A:0
EA2454	11615	snp	T	G	G:40 T:0
EA2454	16529	snp	C	T	T:47 C:0
EA2454	18716	snp	G	A	A:65 G:0
EA2454	19283	snp	C	T	T:56 C:1
EA2454	24420	snp	T	G	G:22 T:0
EA2454	25719	snp	T	C	C:42 T:0
EA2454	30275	snp	C	T	T:45 C:0
EA2454	33245	snp	G	T	T:42 G:0
EA2454	34494	snp	T	C	C:40 T:0
EA2454	36375	snp	C	A	A:60 C:0
EA2454	36951	snp	T	G	G:59 T:0
EA2454	37757	snp	G	A	A:56 G:0
EA2454	37987	snp	T	C	C:59 T:0
EA2454	38677	snp	A	C	C:34 A:0
EA2454	41857	snp	T	C	C:51 T:0
EA2454	44496	snp	G	T	T:52 G:0
EA2454	48190	snp	C	A	A:48 C:0
EA2454	48201	snp	T	A	A:46 T:0
EA2454	49192	snp	T	G	G:68 T:0
EA2454	50495	snp	C	T	T:39 C:0
EA2454	50851	snp	A	C	C:54 A:0
EA2454	51400	snp	C	T	T:53 C:0
EA2454	53157	snp	C	T	T:49 C:0
EA2454	54525	snp	T	A	A:31 T:0
EA2454	54992	snp	T	C	C:37 T:0
EA2454	56269	snp	T	C	C:36 T:0
EA2454	56628	snp	A	C	C:31 A:0
EA2454	58152	snp	T	C	C:54 T:0
EA2454	59415	snp	C	T	T:50 C:0
EA2454	59954	snp	T	A	A:57 T:0
EA2454	61686	snp	C	A	A:60 C:0
EA2454	61856	snp	A	G	G:74 A:0
EA2454	67315	snp	A	C	C:48 A:0
EA2454	68202	snp	A	G	G:88 A:0
EA2454	68735	snp	A	T	T:81 A:0
EA2454	69374	snp	A	T	T:52 A:0
EA2454	69595	snp	A	G	G:61 A:0
EA2454	73302	snp	G	A	A:66 G:0
EA2454	73628	snp	T	G	G:45 T:0
EA2454	74671	snp	A	G	G:43 A:0
EA2454	75553	snp	G	A	A:88 G:0
EA2454	76545	snp	G	A	A:77 G:0
EA2454	77346	snp	C	T	T:64 C:0
EA2454	82511	del	CG	C	C:50 CG:0
EA2454	83654	snp	C	A	A:59 C:0
EA2454	83706	snp	C	T	T:67 C:0
EA2454	84557	snp	T	G	G:55 T:0
EA2454	85103	snp	G	A	A:30 G:0
EA2454	87412	snp	A	G	G:50 A:0
EA2454	88223	del	TTCAATATCAATATCAATA	T	T:17 TTCAATATCAATATCAATA:0
EA2454	88282	snp	T	C	C:73 T:0
EA2454	90096	snp	T	A	A:67 T:0
EA2454	91235	snp	T	C	C:67 T:0
EA2454	92015	snp	G	A	A:53 G:0
EA2454	93093	snp	A	C	C:53 A:0
EA2454	93133	snp	A	C	C:56 A:0
EA2454	94250	snp	T	C	C:49 T:0
EA2454	95589	snp	T	C	C:34 T:0
EA2454	95626	snp	C	T	T:25 C:0
EA2454	95698	snp	T	C	C:22 T:0
EA2454	95734	snp	C	T	T:18 C:0
EA2454	95793	snp	A	G	G:25 A:0
EA2454	95830	snp	C	T	T:24 C:0
EA2454	95854	snp	G	A	A:26 G:0
EA2454	96463	snp	C	T	T:69 C:0
EA2454	97055	snp	C	A	A:45 C:0
EA2454	97811	snp	C	T	T:43 C:0
EA2454	99180	snp	G	T	T:68 G:0
EA2454	101541	snp	A	G	G:33 A:0
EA2454	104045	snp	G	A	A:42 G:0
EA2454	106273	snp	C	T	T:39 C:0
EA2454	111773	snp	C	G	G:36 C:0
EA2454	112602	snp	C	T	T:29 C:0
EA2454	114259	snp	G	A	A:32 G:0
EA2454	116260	snp	C	T	T:55 C:0
EA2454	117419	snp	T	C	C:33 T:0
EA2454	124865	snp	T	C	C:65 T:0
EA2454	126504	snp	A	G	G:59 A:0
EA2454	131613	snp	A	G	G:44 A:0
EA2454	131667	snp	G	A	A:36 G:0
EA2454	133953	snp	C	T	T:55 C:0
EA2454	134828	snp	A	C	C:51 A:0
EA2454	140951	snp	T	G	G:45 T:0
EA2454	144441	snp	C	A	A:91 C:0
EA2454	145428	snp	T	C	C:51 T:0
EA2454	146087	snp	A	C	C:83 A:0
EA2454	146572	snp	A	G	G:73 A:0
EA2454	147126	snp	C	T	T:38 C:0
EA2454	153405	snp	C	T	T:33 C:0
EA2454	156220	snp	T	G	G:58 T:0
EA2454	157367	snp	G	A	A:44 G:0
EA2454	158623	snp	C	T	T:84 C:0
EA2454	161661	snp	C	T	T:79 C:0
EA2454	162646	snp	C	T	T:23 C:0
EA2454	163798	snp	T	C	C:50 T:0
EA2454	163970	del	AT	A	A:37 AT:0
EA2454	164297	snp	C	T	T:60 C:0
EA2454	165649	snp	C	T	T:66 C:0
EA2454	170333	snp	C	T	T:22 C:0
EA2454	171781	snp	C	T	T:52 C:0
EA2454	174420	snp	A	G	G:51 A:0
EA2454	175505	snp	G	T	T:76 G:0
EA2454	176813	snp	G	A	A:61 G:0
EA2454	177774	snp	C	T	T:52 C:0
EA2454	178495	snp	C	T	T:55 C:0
EA2454	184074	snp	A	C	C:44 A:0
EA2454	186550	snp	T	C	C:55 T:0
EA2454	187172	snp	C	A	A:60 C:0
EA2454	187941	snp	A	G	G:32 A:0
EA2454	190313	snp	T	C	C:34 T:0
EA2454	190604	snp	C	T	T:46 C:0
EA2454	190823	snp	G	A	A:76 G:0
EA2454	196598	snp	C	T	T:108 C:0
EA2454	197805	snp	C	T	T:70 C:0
EA2454	197892	snp	C	T	T:78 C:0
EA2454	199191	del	AT	A	A:25 AT:0
EA2454	199219	snp	C	T	T:10 C:0
EA2454	204163	snp	C	T	T:58 C:0
EA2454	204250	snp	C	T	T:57 C:0
EA2454	207302	snp	C	T	T:76 C:0
EA2454	209698	snp	C	T	T:57 C:0
EA2454	209847	del	AG	A	A:49 AG:0
EA2454	211504	snp	C	T	T:37 C:0
EA2454	211521	snp	G	A	A:39 G:0
EA2454	212068	snp	A	C	C:46 A:0
EA2454	213327	snp	A	G	G:47 A:0
EA2454	214871	snp	G	T	T:41 G:0
EA2454	217065	snp	C	T	T:60 C:0
EA2454	217813	snp	C	T	T:35 C:0
EA2454	220032	snp	G	A	A:78 G:0
EA2454	220392	snp	T	G	G:40 T:0
EA2454	220577	snp	G	A	A:53 G:0
EA2454	222087	snp	C	T	T:67 C:0
EA2454	222361	snp	A	G	G:71 A:0
EA2454	222778	snp	G	A	A:33 G:1
EA2454	225955	snp	T	G	G:70 T:0
EA2454	227599	snp	C	A	A:47 C:0
EA2454	230399	snp	C	T	T:56 C:0
EA2454	233181	snp	T	C	C:66 T:0
EA2454	233235	snp	A	G	G:70 A:0
EA2454	234256	snp	C	A	A:53 C:0
EA2454	239199	snp	T	C	C:34 T:0
EA2454	239221	snp	A	G	G:37 A:0
EA2454	241578	snp	T	C	C:53 T:0
EA2454	244668	snp	T	C	C:44 T:0
EA2454	245301	snp	C	T	T:40 C:0
EA2454	245953	snp	G	A	A:54 G:0
EA2454	246850	snp	T	C	C:45 T:0
EA2454	248471	snp	T	C	C:60 T:0
EA2454	248849	snp	C	T	T:34 C:0
EA2454	251923	snp	C	T	T:34 C:0
EA2454	254440	snp	C	T	T:77 C:1
EA2454	255292	snp	A	G	G:47 A:0
EA2454	256442	snp	C	T	T:68 C:0
EA2454	257208	snp	C	T	T:58 C:0
EA2454	259268	snp	G	A	A:72 G:0
EA2454	259777	snp	C	T	T:69 C:0
EA2454	268722	snp	G	A	A:65 G:0
EA2454	268949	snp	C	T	T:67 C:0
EA2454	269495	snp	C	A	A:30 C:0
EA2454	270040	snp	C	T	T:30 C:0
EA2454	271185	snp	C	A	A:40 C:0
EA2454	272479	complex	TT	GG	GG:33 TT:0
EA2454	272615	snp	A	T	T:83 A:0
EA2454	275599	snp	G	A	A:52 G:0
EA2454	275686	del	GAGC	G	G:49 GAGC:0
EA2454	277305	snp	G	A	A:36 G:0
EA2454	277907	snp	G	T	T:58 G:0
EA2454	278291	snp	C	A	A:45 C:0
EA2454	278848	snp	A	G	G:45 A:0
EA2454	281250	snp	C	T	T:33 C:0
EA2454	281498	snp	A	G	G:36 A:1
EA2454	284131	snp	A	G	G:42 A:0
EA2454	285627	ins	A	AT	AT:72 A:0
EA2454	286733	del	GA	G	G:31 GA:0
EA2454	287343	del	TAGCTGA	T	T:47 TAGCTGA:0
EA2454	288225	snp	C	T	T:31 C:0
EA2454	289718	del	GA	G	G:66 GA:0
EA2454	293047	snp	C	T	T:52 C:0
EA2454	293197	snp	G	A	A:36 G:0
EA2454	294088	snp	T	C	C:51 T:0
EA2454	298286	snp	T	C	C:44 T:0
EA2454	298363	snp	C	T	T:67 C:0
EA2454	305507	snp	G	A	A:65 G:1
EA2454	307088	snp	G	A	A:89 G:0
EA2454	307680	snp	T	A	A:40 T:0
EA2454	308042	snp	A	C	C:56 A:0
EA2454	310094	snp	G	A	A:41 G:0
EA2454	310398	snp	C	T	T:38 C:0
EA2454	311207	snp	A	C	C:54 A:0
EA2454	312009	snp	G	T	T:56 G:0
EA2454	313034	snp	A	G	G:36 A:0
EA2454	314410	snp	A	T	T:36 A:0
EA2454	315163	snp	G	A	A:23 G:0
EA2454	317106	snp	T	C	C:41 T:0
EA2454	319327	snp	G	C	C:57 G:0
EA2454	321573	snp	C	A	A:30 C:0
EA2454	322495	snp	G	A	A:37 G:0
EA2454	324216	snp	G	A	A:52 G:0
EA2454	327678	snp	A	C	C:61 A:0
EA2454	329517	snp	C	G	G:49 C:0
EA2454	334855	snp	A	C	C:68 A:0
EA2454	335897	snp	T	A	A:51 T:0
EA2454	340318	snp	G	A	A:60 G:0
EA2454	343195	snp	G	A	A:43 G:0
EA2454	344966	snp	T	C	C:77 T:0
EA2454	345002	del	TGCCA	T	T:77 TGCCA:0
EA2454	346796	snp	A	C	C:73 A:0
EA2454	350969	snp	A	G	G:52 A:0
EA2454	352054	snp	C	A	A:39 C:0
EA2454	356329	snp	G	A	A:45 G:0
EA2454	356343	snp	G	A	A:48 G:0
EA2454	359909	snp	C	T	T:69 C:0
EA2454	359916	snp	G	A	A:67 G:0
EA2454	364430	snp	G	C	C:37 G:0
EA2454	364865	snp	T	C	C:57 T:0
EA2454	366365	snp	C	A	A:51 C:0
EA2454	369429	snp	T	C	C:44 T:0
EA2454	370233	del	GT	G	G:31 GT:0
EA2454	370357	snp	A	C	C:56 A:0
EA2454	371150	snp	T	C	C:57 T:0
EA2454	373608	snp	G	A	A:64 G:0
EA2454	375476	snp	A	C	C:64 A:0
EA2454	375553	snp	T	A	A:52 T:0
EA2454	375861	snp	G	A	A:79 G:0
EA2454	380911	snp	G	A	A:39 G:0
EA2454	381439	snp	G	A	A:70 G:0
EA2454	381924	snp	C	T	T:65 C:0
EA2454	382482	snp	C	T	T:62 C:0
EA2454	385327	snp	G	A	A:71 G:0
EA2454	386099	snp	G	A	A:66 G:0
EA2454	392511	snp	T	C	C:72 T:0
EA2454	393575	snp	A	G	G:60 A:0
EA2454	393743	snp	A	G	G:56 A:0
EA2454	396055	snp	T	C	C:59 T:0
EA2454	396458	snp	G	A	A:64 G:0
EA2454	397444	snp	C	G	G:44 C:0
EA2454	400978	snp	C	T	T:24 C:0
EA2454	405500	snp	C	A	A:48 C:0
EA2454	407023	snp	A	C	C:74 A:0
EA2454	407113	snp	A	G	G:92 A:0
EA2454	407887	snp	C	G	G:63 C:0
EA2454	409884	snp	T	G	G:61 T:0
EA2454	412377	snp	A	C	C:51 A:0
EA2454	412632	snp	A	G	G:46 A:0
EA2454	415692	snp	G	A	A:20 G:0
EA2454	418538	snp	C	T	T:55 C:0
EA2454	420347	snp	A	C	C:41 A:0
EA2454	420707	snp	A	C	C:64 A:0
EA2454	423123	snp	T	C	C:64 T:0
EA2454	430947	snp	T	C	C:51 T:0
EA2454	432665	snp	A	C	C:54 A:0
EA2454	437474	snp	A	G	G:55 A:0
EA2454	438148	snp	G	T	T:54 G:0
EA2454	440837	snp	C	A	A:54 C:0
EA2454	441911	snp	T	C	C:53 T:0
EA2454	443213	complex	ACTTTTTTAATAATTAATTTATATGTTTAATGCATT	GCTTTTTTTTAATAATTAATTTATATGTTTAATGCATC	GCTTTTTTTTAATAATTAATTTATATGTTTAATGCATC:26 ACTTTTTTAATAATTAATTTATATGTTTAATGCATT:0
EA2454	444428	snp	G	A	A:73 G:0
EA2454	447459	snp	A	G	G:36 A:0
EA2454	448711	snp	A	G	G:71 A:0
EA2454	449063	snp	T	C	C:51 T:0
EA2454	449600	snp	C	A	A:44 C:0
EA2454	452246	snp	A	C	C:38 A:0
EA2454	452711	snp	T	A	A:37 T:0
EA2454	453943	snp	G	T	T:47 G:0
EA2454	457082	snp	C	T	T:32 C:0
EA2454	459248	snp	A	G	G:53 A:0
EA2454	460233	snp	G	A	A:73 G:0
EA2454	460261	snp	G	A	A:66 G:0
EA2454	464086	ins	C	CA	CA:53 C:0
EA2454	465826	snp	A	T	T:50 A:0
EA2454	466128	snp	A	T	T:68 A:0
EA2454	467184	snp	C	T	T:76 C:0
EA2454	472911	snp	T	C	C:47 T:0
EA2454	477552	snp	G	A	A:35 G:0
EA2454	478727	snp	C	A	A:64 C:2
EA2454	479208	snp	C	T	T:62 C:0
EA2454	481815	snp	T	G	G:38 T:0
EA2454	482454	snp	C	T	T:37 C:0
EA2454	483311	snp	T	G	G:43 T:0
EA2454	483564	snp	C	A	A:34 C:0
EA2454	484571	snp	G	A	A:84 G:0
EA2454	485779	snp	C	G	G:121 C:0
EA2454	485836	snp	G	A	A:120 G:0
EA2454	485957	snp	T	C	C:81 T:0
EA2454	489881	snp	G	A	A:57 G:0
EA2454	493601	snp	C	A	A:51 C:0
EA2454	497207	snp	C	A	A:59 C:0
EA2454	497400	snp	T	G	G:37 T:0
EA2454	497439	snp	T	C	C:47 T:0
EA2454	497460	snp	T	G	G:40 T:0
EA2454	500218	snp	G	A	A:70 G:1
EA2454	503007	snp	G	A	A:57 G:0
EA2454	506352	snp	T	G	G:71 T:0
EA2454	506884	del	TA	T	T:58 TA:0
EA2454	507718	ins	G	GA	GA:29 G:0
EA2454	507750	snp	A	C	C:39 A:0
EA2454	508877	snp	G	A	A:38 G:0
EA2454	511307	snp	C	T	T:90 C:0
EA2454	511943	snp	A	G	G:86 A:0
EA2454	512076	del	TA	T	T:76 TA:0
EA2454	512740	snp	C	T	T:78 C:0
EA2454	517655	snp	C	T	T:67 C:0
EA2454	518663	snp	G	A	A:54 G:0
EA2454	519811	snp	A	C	C:42 A:0
EA2454	520384	snp	C	A	A:49 C:0
EA2454	523923	snp	C	G	G:37 C:0
EA2454	524002	snp	C	T	T:38 C:0
EA2454	528123	snp	A	T	T:35 A:0
EA2454	530600	snp	G	T	T:53 G:0
EA2454	531874	snp	C	T	T:68 C:0
EA2454	531927	snp	T	A	A:57 T:0
EA2454	532052	snp	G	A	A:54 G:0
EA2454	534151	snp	A	G	G:55 A:0
EA2454	535476	snp	C	A	A:55 C:0
EA2454	536338	snp	C	T	T:45 C:0
EA2454	537287	snp	G	C	C:75 G:0
EA2454	538268	del	GC	G	G:50 GC:0
EA2454	538864	snp	G	A	A:65 G:0
EA2454	539426	snp	T	C	C:70 T:0
EA2454	539532	snp	C	A	A:59 C:0
EA2454	542430	snp	A	T	T:51 A:0
EA2454	546428	snp	A	C	C:31 A:0
EA2454	547086	snp	A	C	C:40 A:0
EA2454	549063	snp	A	G	G:93 A:0
EA2454	550156	snp	C	T	T:43 C:1
EA2454	550654	snp	T	C	C:44 T:0
EA2454	552561	snp	C	T	T:56 C:0
EA2454	554466	snp	A	G	G:67 A:0
EA2454	554830	snp	G	A	A:90 G:0
EA2454	556108	snp	G	C	C:73 G:0
EA2454	559017	snp	A	G	G:50 A:0
EA2454	561226	snp	G	A	A:23 G:0
EA2454	562933	snp	T	C	C:35 T:0
EA2454	563413	snp	G	A	A:43 G:0
EA2454	564605	snp	T	G	G:59 T:0
EA2454	569362	del	GTCC	G	G:31 GTCC:0
EA2454	569691	snp	C	T	T:65 C:0
EA2454	570422	snp	C	T	T:60 C:0
EA2454	573172	snp	T	G	G:45 T:0
EA2454	577678	snp	C	T	T:86 C:0
EA2454	579241	snp	C	T	T:73 C:0
EA2454	580223	snp	C	T	T:54 C:0
EA2454	586529	snp	G	T	T:43 G:0
EA2454	586722	snp	C	T	T:41 C:0
EA2454	588129	snp	C	T	T:76 C:0
EA2454	589102	snp	T	C	C:60 T:0
EA2454	589319	snp	G	A	A:40 G:0
EA2454	589335	snp	A	G	G:36 A:0
EA2454	595654	snp	T	C	C:51 T:0
EA2454	597386	snp	A	G	G:78 A:0
EA2454	597988	snp	A	G	G:105 A:0
EA2454	598918	snp	C	A	A:31 C:0
EA2454	598973	snp	T	G	G:35 T:0
EA2454	600783	snp	T	G	G:106 T:0
EA2454	602583	snp	A	G	G:36 A:0
EA2454	605227	snp	C	A	A:105 C:0
EA2454	605299	snp	A	G	G:87 A:0
EA2454	605439	snp	C	A	A:75 C:0
EA2454	606088	ins	G	GA	GA:100 G:0
EA2454	608651	snp	T	G	G:20 T:0
EA2454	610464	snp	A	C	C:77 A:0
EA2454	612031	snp	T	C	C:62 T:0
EA2454	612726	snp	A	G	G:58 A:0
EA2454	613444	ins	G	GCAA	GCAA:109 G:0
EA2454	613906	snp	C	A	A:87 C:0
EA2454	615321	snp	G	A	A:50 G:0
EA2454	615886	snp	G	A	A:32 G:0
EA2454	618954	snp	T	G	G:25 T:0
EA2454	622099	snp	C	T	T:46 C:0
EA2454	622741	snp	T	G	G:61 T:0
EA2454	627598	snp	G	A	A:75 G:0
EA2454	631335	snp	T	C	C:85 T:0
EA2454	632317	snp	A	T	T:48 A:0
EA2454	633668	snp	T	C	C:23 T:0
EA2454	633800	snp	C	A	A:53 C:0
EA2454	634772	snp	G	T	T:67 G:0
EA2454	635649	snp	A	C	C:52 A:0
EA2454	637713	snp	C	A	A:53 C:0
EA2454	641601	snp	A	C	C:47 A:0
EA2454	644101	snp	A	G	G:64 A:0
EA2454	644913	snp	T	C	C:64 T:0
EA2454	649659	snp	T	C	C:83 T:0
EA2454	652389	snp	A	T	T:48 A:0
EA2454	657614	snp	G	A	A:81 G:0
EA2454	658193	snp	C	T	T:34 C:0
EA2454	658970	snp	T	C	C:75 T:0
EA2454	660468	snp	C	A	A:51 C:0
EA2454	660863	snp	C	T	T:75 C:0
EA2454	660999	snp	C	T	T:76 C:0
EA2454	664195	snp	G	A	A:56 G:1
EA2454	665946	snp	G	A	A:63 G:0
EA2454	666857	snp	C	G	G:30 C:0
EA2454	668427	snp	T	G	G:111 T:0
EA2454	669330	snp	A	G	G:46 A:0
EA2454	674033	snp	C	T	T:78 C:1
EA2454	674305	snp	G	C	C:75 G:0
EA2454	675340	snp	C	T	T:55 C:0
EA2454	679653	snp	A	G	G:92 A:0
EA2454	681959	snp	T	C	C:102 T:0
EA2454	681970	snp	G	A	A:98 G:0
EA2454	683177	snp	T	G	G:61 T:0
EA2454	683886	snp	C	T	T:37 C:0
EA2454	685406	snp	C	T	T:35 C:0
EA2454	686003	snp	A	G	G:64 A:0
EA2454	686104	snp	G	C	C:56 G:0
EA2454	687373	snp	G	A	A:47 G:0
EA2454	687410	snp	A	G	G:39 A:0
EA2454	687536	snp	C	A	A:33 C:0
EA2454	688277	snp	A	C	C:121 A:0
EA2454	690408	snp	A	G	G:53 A:0
EA2454	690611	snp	T	C	C:28 T:0
EA2454	691761	snp	C	T	T:79 C:0
EA2454	698300	snp	A	T	T:73 A:0
EA2454	698327	snp	A	G	G:62 A:0
EA2454	701549	snp	C	T	T:95 C:0
EA2454	705263	snp	C	A	A:116 C:0
EA2454	708965	snp	C	T	T:78 C:0
EA2454	709632	snp	T	C	C:56 T:0
EA2454	710706	snp	C	T	T:53 C:0
EA2454	710977	snp	A	G	G:66 A:0
EA2454	713997	snp	C	A	A:81 C:0
EA2454	719989	snp	A	T	T:50 A:0
EA2454	721973	snp	C	T	T:55 C:0
EA2454	725151	snp	G	A	A:51 G:0
EA2454	726930	snp	G	T	T:96 G:0
EA2454	730776	snp	G	A	A:72 G:0
EA2454	731219	snp	T	G	G:71 T:0
EA2454	731329	snp	G	A	A:53 G:0
EA2454	732275	snp	G	A	A:70 G:0
EA2454	734642	snp	T	C	C:38 T:0
EA2454	736137	snp	C	T	T:68 C:0
EA2454	740948	snp	C	G	G:92 C:0
EA2454	743512	snp	G	A	A:53 G:0
EA2454	746000	snp	C	T	T:65 C:0
EA2454	746060	snp	C	T	T:57 C:1
EA2454	747597	snp	G	C	C:50 G:0
EA2454	748435	snp	G	A	A:46 G:0
EA2454	748560	snp	G	C	C:54 G:0
EA2454	753727	snp	T	C	C:40 T:3
EA2454	754152	snp	T	G	G:68 T:2
EA2454	754782	snp	C	T	T:83 C:0
EA2454	755366	snp	A	G	G:46 A:0
EA2454	756040	snp	T	G	G:52 T:0
EA2454	756857	snp	T	G	G:45 T:0
EA2454	758394	snp	C	T	T:40 C:0
EA2454	758587	snp	C	T	T:39 C:0
EA2454	759931	snp	C	T	T:37 C:0
EA2454	765032	snp	T	C	C:61 T:0
EA2454	765166	snp	C	T	T:55 C:0
EA2454	769685	snp	G	A	A:19 G:0
EA2454	770322	complex	GAGGC	CTGGT	CTGGT:13 GAGGC:0
EA2454	770418	complex	TCA	GCG	GCG:13 TCA:0
EA2454	770428	snp	C	T	T:11 C:0
EA2454	770575	mnp	TA	CG	CG:17 TA:0
EA2454	770671	snp	A	G	G:11 A:0
EA2454	770688	complex	TGTATGC	GGTGTGT	GGTGTGT:21 TGTATGC:0
EA2454	770715	snp	A	G	G:21 A:0
EA2454	770721	snp	A	G	G:19 A:0
EA2454	770735	snp	G	A	A:18 G:0
EA2454	770751	snp	C	T	T:18 C:0
EA2454	771049	complex	TTAACTTA	AAATTTTG	AAATTTTG:14 TTAACTTA:0
EA2454	774332	complex	GTCCACC	ATCTACT	ATCTACT:17 GTCCACC:0
EA2454	774347	snp	A	G	G:31 A:0
EA2454	774395	snp	G	A	A:47 G:0
EA2454	774422	snp	T	C	C:49 T:0
EA2454	774445	snp	G	T	T:30 G:0
EA2454	774568	snp	C	A	A:50 C:0
EA2454	774627	snp	T	G	G:48 T:0
EA2454	774657	snp	T	G	G:44 T:0
EA2454	774700	snp	T	G	G:42 T:0
EA2454	774727	complex	CGA	TGC	TGC:36 CGA:0
EA2454	774827	snp	G	A	A:36 G:0
EA2454	774875	snp	T	G	G:31 T:0
EA2454	774887	snp	G	A	A:35 G:0
EA2454	774962	snp	A	G	G:13 A:0
EA2454	774974	snp	T	A	A:12 T:0
EA2454	774983	snp	T	C	C:13 T:0
EA2454	775021	snp	T	C	C:19 T:0
EA2454	775121	snp	A	G	G:41 A:0
EA2454	775252	snp	G	A	A:52 G:0
EA2454	775264	snp	T	G	G:55 T:0
EA2454	775279	snp	C	A	A:56 C:0
EA2454	775294	snp	G	A	A:62 G:0
EA2454	775303	snp	A	G	G:55 A:0
EA2454	775339	snp	A	T	T:53 A:0
EA2454	775350	snp	A	G	G:54 A:0
EA2454	775395	snp	C	T	T:72 C:0
EA2454	775469	snp	A	G	G:72 A:0
EA2454	775502	snp	T	A	A:68 T:0
EA2454	775514	complex	AGGC	CGGT	CGGT:64 AGGC:0
EA2454	775537	snp	A	G	G:72 A:0
EA2454	775592	snp	T	C	C:85 T:0
EA2454	775847	snp	C	T	T:59 C:0
EA2454	775916	snp	T	C	C:49 T:0
EA2454	775921	snp	A	G	G:51 A:0
EA2454	775957	complex	CTC	GTT	GTT:61 CTC:0
EA2454	776002	snp	G	A	A:62 G:0
EA2454	776011	snp	T	C	C:63 T:0
EA2454	776020	complex	GCCG	ACCA	ACCA:60 GCCG:0
EA2454	776031	snp	A	G	G:60 A:0
EA2454	776058	snp	G	A	A:61 G:0
EA2454	776068	snp	A	G	G:59 A:0
EA2454	776077	complex	GAATT	ATATC	ATATC:49 GAATT:0
EA2454	776107	snp	G	T	T:69 G:0
EA2454	776119	snp	T	G	G:66 T:0
EA2454	776498	snp	A	T	T:100 A:0
EA2454	776783	snp	A	C	C:51 A:0
EA2454	776869	snp	C	T	T:48 C:0
EA2454	777308	snp	C	T	T:100 C:0
EA2454	777558	snp	A	G	G:82 A:0
EA2454	777763	del	TC	T	T:93 TC:0
EA2454	777773	snp	A	C	C:86 A:0
EA2454	777820	snp	A	C	C:89 A:0
EA2454	778067	snp	G	A	A:62 G:0
EA2454	778154	snp	A	G	G:34 A:0
EA2454	778192	snp	G	A	A:24 G:0
EA2454	778810	snp	A	C	C:84 A:0
EA2454	778824	mnp	TC	CT	CT:81 TC:1
EA2454	778975	snp	C	T	T:74 C:0
EA2454	779637	snp	C	A	A:78 C:0
EA2454	779769	ins	T	TA	TA:39 T:0
EA2454	779842	snp	C	A	A:71 C:0
EA2454	779888	snp	A	G	G:86 A:0
EA2454	780197	snp	A	C	C:123 A:0
EA2454	780651	snp	A	G	G:132 A:0
EA2454	780785	snp	A	G	G:136 A:0
EA2454	780797	snp	A	G	G:125 A:0
EA2454	780804	snp	A	G	G:128 A:0
EA2454	781128	snp	C	G	G:81 C:0
EA2454	781724	del	GTTTACCTGATTCGGGTAAGTGCC	G	G:17 GTTTACCTGATTCGGGTAAGTGCC:0
EA2454	783318	del	GC	G	G:60 GC:0
EA2454	784626	snp	G	A	A:55 G:0
EA2454	792970	snp	C	T	T:49 C:0
EA2454	793051	snp	A	G	G:43 A:0
EA2454	796926	snp	G	A	A:41 G:0
EA2454	804225	snp	T	A	A:43 T:0
EA2454	805481	snp	A	G	G:54 A:0
EA2454	807876	snp	G	T	T:53 G:0
EA2454	811549	snp	C	T	T:73 C:0
EA2454	813446	snp	G	A	A:36 G:0
EA2454	815518	snp	A	G	G:54 A:0
EA2454	817088	snp	G	T	T:52 G:0
EA2454	817446	snp	A	G	G:49 A:0
EA2454	817985	snp	T	G	G:28 T:0
EA2454	818649	snp	A	C	C:41 A:0
EA2454	819830	snp	G	T	T:35 G:0
EA2454	821110	snp	A	C	C:49 A:0
EA2454	822250	snp	G	A	A:39 G:0
EA2454	825235	del	GCGCATCCGGCAT	G	G:51 GCGCATCCGGCAT:0
EA2454	829636	snp	G	T	T:67 G:0
EA2454	830335	snp	C	T	T:42 C:0
EA2454	830637	snp	T	G	G:92 T:0
EA2454	832051	snp	A	T	T:29 A:0
EA2454	832382	snp	G	A	A:46 G:0
EA2454	832596	del	AGCGT	A	A:36 AGCGT:0
EA2454	833584	snp	C	A	A:41 C:0
EA2454	833658	snp	A	C	C:40 A:0
EA2454	834488	snp	T	C	C:29 T:0
EA2454	834575	ins	A	AT	AT:31 A:0
EA2454	837160	snp	A	C	C:74 A:0
EA2454	838094	snp	A	C	C:52 A:0
EA2454	839497	snp	T	A	A:22 T:0
EA2454	841908	snp	C	A	A:33 C:0
EA2454	845081	snp	G	A	A:44 G:0
EA2454	848036	snp	G	A	A:44 G:0
EA2454	852415	snp	G	T	T:33 G:0
EA2454	852695	snp	A	G	G:49 A:0
EA2454	856143	snp	C	A	A:61 C:0
EA2454	856699	snp	A	T	T:40 A:0
EA2454	860485	snp	G	A	A:33 G:0
EA2454	860740	snp	C	T	T:49 C:0
EA2454	861257	snp	G	A	A:35 G:0
EA2454	862190	snp	T	C	C:52 T:0
EA2454	863496	snp	A	G	G:54 A:0
EA2454	864447	snp	G	A	A:44 G:0
EA2454	865819	snp	T	G	G:60 T:0
EA2454	866649	snp	A	C	C:37 A:0
EA2454	867427	snp	C	T	T:49 C:0
EA2454	875102	snp	G	A	A:56 G:0
EA2454	875313	snp	T	C	C:44 T:0
EA2454	875685	snp	A	G	G:49 A:0
EA2454	876895	snp	C	A	A:43 C:0
EA2454	877031	snp	G	A	A:31 G:0
EA2454	882358	snp	C	T	T:32 C:0
EA2454	883189	snp	G	A	A:29 G:0
EA2454	887404	snp	C	T	T:46 C:1
EA2454	889463	snp	G	A	A:83 G:0
EA2454	889695	snp	A	T	T:70 A:0
EA2454	891216	snp	A	C	C:84 A:0
EA2454	892965	snp	G	T	T:32 G:0
EA2454	893180	snp	G	T	T:43 G:0
EA2454	893994	snp	A	T	T:52 A:0
EA2454	894437	snp	A	G	G:58 A:0
EA2454	894538	snp	C	T	T:44 C:0
EA2454	898882	snp	C	T	T:62 C:0
EA2454	902918	snp	G	A	A:53 G:0
EA2454	903527	snp	G	A	A:51 G:0
EA2454	903996	snp	T	C	C:51 T:0
EA2454	904482	snp	A	G	G:37 A:0
EA2454	906503	snp	C	T	T:68 C:0
EA2454	907381	snp	C	A	A:35 C:0
EA2454	911740	snp	G	T	T:76 G:0
EA2454	916891	snp	C	A	A:63 C:0
EA2454	919060	snp	T	G	G:71 T:0
EA2454	921834	snp	G	A	A:59 G:0
EA2454	922709	snp	C	T	T:84 C:0
EA2454	924579	snp	T	C	C:56 T:0
EA2454	927419	snp	G	A	A:41 G:0
EA2454	928814	snp	G	C	C:34 G:0
EA2454	930102	snp	A	G	G:42 A:0
EA2454	933541	snp	G	A	A:46 G:0
EA2454	937614	snp	C	T	T:46 C:0
EA2454	938195	snp	A	G	G:51 A:0
EA2454	941489	snp	C	A	A:46 C:0
EA2454	941829	snp	T	A	A:69 T:0
EA2454	945162	snp	A	G	G:67 A:0
EA2454	946638	snp	T	G	G:64 T:0
EA2454	946875	snp	T	C	C:58 T:0
EA2454	947237	snp	G	A	A:44 G:0
EA2454	949189	snp	G	A	A:63 G:0
EA2454	949220	ins	G	GA	GA:71 G:0
EA2454	949610	snp	C	A	A:12 C:1
EA2454	949618	snp	C	T	T:14 C:0
EA2454	950190	snp	G	T	T:66 G:0
EA2454	951474	snp	A	C	C:11 A:0
EA2454	952105	snp	C	T	T:11 C:0
EA2454	952161	complex	ATTCTGT	TTTCCAG	TTTCCAG:11 ATTCTGT:0
EA2454	953284	snp	T	A	A:18 T:0
EA2454	953324	snp	G	A	A:32 G:0
EA2454	954055	complex	CCGG	GCAC	GCAC:44 CCGG:0
EA2454	962096	snp	A	C	C:17 A:0
EA2454	962158	snp	C	T	T:26 C:0
EA2454	962176	snp	C	T	T:18 C:0
EA2454	962188	snp	A	G	G:13 A:0
EA2454	962197	snp	T	C	C:11 T:0
EA2454	963555	snp	A	G	G:10 A:0
EA2454	963569	complex	CCA	TCC	TCC:13 CCA:0
EA2454	963588	complex	GCA	ACG	ACG:24 GCA:0
EA2454	963600	snp	G	A	A:29 G:0
EA2454	963620	snp	C	T	T:40 C:0
EA2454	963646	snp	A	T	T:40 A:0
EA2454	981566	del	TC	T	T:32 TC:0
EA2454	981609	snp	T	A	A:54 T:0
EA2454	981682	snp	T	A	A:40 T:0
EA2454	981692	snp	A	G	G:35 A:0
EA2454	981702	snp	G	A	A:29 G:0
EA2454	981741	snp	A	C	C:18 A:0
EA2454	986640	snp	G	A	A:71 G:0
EA2454	989712	snp	T	C	C:41 T:0
EA2454	990058	snp	G	T	T:65 G:0
EA2454	994161	snp	G	A	A:42 G:0
EA2454	995293	snp	T	C	C:69 T:1
EA2454	996660	snp	A	G	G:52 A:0
EA2454	998219	snp	G	A	A:72 G:0
EA2454	999667	snp	G	A	A:82 G:1
EA2454	1001022	snp	A	C	C:44 A:0
EA2454	1001396	snp	C	T	T:60 C:0
EA2454	1001425	snp	A	G	G:50 A:0
EA2454	1011339	snp	C	T	T:56 C:0
EA2454	1012801	snp	C	T	T:52 C:0
EA2454	1016651	snp	G	A	A:53 G:0
EA2454	1018623	snp	G	T	T:66 G:0
EA2454	1022926	snp	A	G	G:52 A:0
EA2454	1023979	snp	T	C	C:52 T:0
EA2454	1026843	snp	T	C	C:50 T:0
EA2454	1028534	snp	C	T	T:40 C:0
EA2454	1029538	snp	C	T	T:46 C:0
EA2454	1029559	del	CA	C	C:36 CA:0
EA2454	1029670	snp	T	A	A:30 T:0
EA2454	1031919	snp	C	A	A:86 C:0
EA2454	1034198	snp	T	G	G:56 T:0
EA2454	1035530	snp	T	G	G:45 T:0
EA2454	1037288	snp	A	C	C:78 A:0
EA2454	1037848	snp	G	A	A:59 G:0
EA2454	1039888	snp	A	C	C:45 A:0
EA2454	1041944	snp	G	A	A:63 G:0
EA2454	1044717	snp	G	A	A:61 G:0
EA2454	1044888	snp	T	A	A:51 T:0
EA2454	1046955	snp	G	A	A:45 G:0
EA2454	1047757	snp	A	G	G:71 A:0
EA2454	1047884	snp	C	T	T:51 C:0
EA2454	1050751	snp	T	G	G:48 T:0
EA2454	1052435	snp	C	T	T:78 C:0
EA2454	1053565	snp	G	A	A:65 G:0
EA2454	1055114	snp	T	G	G:53 T:0
EA2454	1056456	snp	A	C	C:52 A:0
EA2454	1060810	snp	G	A	A:78 G:0
EA2454	1062738	snp	T	C	C:78 T:0
EA2454	1064483	snp	G	A	A:49 G:0
EA2454	1065884	snp	G	A	A:38 G:0
EA2454	1067764	snp	A	G	G:74 A:0
EA2454	1067810	ins	T	TG	TG:47 T:0
EA2454	1073767	snp	A	G	G:68 A:0
EA2454	1075844	snp	A	G	G:12 A:0
EA2454	1076508	snp	T	G	G:32 T:0
EA2454	1076681	snp	G	T	T:53 G:0
EA2454	1079000	snp	T	C	C:44 T:0
EA2454	1079639	snp	G	A	A:74 G:0
EA2454	1080544	snp	C	T	T:39 C:0
EA2454	1084034	snp	G	A	A:42 G:0
EA2454	1086753	snp	A	C	C:45 A:0
EA2454	1086768	snp	A	T	T:41 A:0
EA2454	1089065	snp	G	A	A:31 G:0
EA2454	1093309	snp	A	G	G:47 A:0
EA2454	1094834	del	TA	T	T:33 TA:0
EA2454	1095132	snp	T	C	C:47 T:0
EA2454	1096870	snp	C	A	A:52 C:0
EA2454	1098620	snp	A	G	G:32 A:0
EA2454	1102928	snp	G	A	A:74 G:0
EA2454	1103669	snp	T	C	C:76 T:0
EA2454	1104480	snp	A	G	G:66 A:0
EA2454	1104729	snp	G	A	A:54 G:0
EA2454	1107647	snp	C	T	T:48 C:0
EA2454	1109672	snp	T	C	C:41 T:0
EA2454	1109903	del	TA	T	T:61 TA:0
EA2454	1111172	snp	G	A	A:65 G:0
EA2454	1113010	snp	A	C	C:100 A:0
EA2454	1113160	snp	C	T	T:44 C:0
EA2454	1113344	snp	G	A	A:49 G:0
EA2454	1116997	snp	G	C	C:69 G:0
EA2454	1117351	snp	A	T	T:47 A:0
EA2454	1122378	snp	C	T	T:55 C:0
EA2454	1125113	snp	G	A	A:74 G:0
EA2454	1127311	snp	C	G	G:59 C:0
EA2454	1127645	snp	G	T	T:44 G:0
EA2454	1129291	snp	G	A	A:76 G:0
EA2454	1129384	snp	G	C	C:62 G:0
EA2454	1129472	snp	A	T	T:43 A:0
EA2454	1130101	snp	T	C	C:44 T:0
EA2454	1130210	snp	G	A	A:40 G:0
EA2454	1130595	snp	A	G	G:55 A:0
EA2454	1130627	snp	A	G	G:48 A:0
EA2454	1130762	snp	C	T	T:60 C:0
EA2454	1135615	snp	G	A	A:38 G:0
EA2454	1135881	snp	C	T	T:54 C:0
EA2454	1138215	snp	T	C	C:61 T:0
EA2454	1139316	snp	A	G	G:49 A:0
EA2454	1139565	del	CT	C	C:43 CT:1
EA2454	1139685	snp	A	C	C:57 A:0
EA2454	1140326	snp	A	G	G:65 A:0
EA2454	1143431	snp	G	A	A:77 G:0
EA2454	1144534	snp	T	C	C:32 T:0
EA2454	1144975	snp	T	C	C:57 T:0
EA2454	1145030	snp	T	C	C:37 T:0
EA2454	1145328	snp	C	A	A:48 C:0
EA2454	1146345	snp	T	G	G:54 T:0
EA2454	1147289	snp	G	T	T:55 G:0
EA2454	1151448	snp	T	C	C:59 T:0
EA2454	1153447	snp	T	C	C:62 T:0
EA2454	1156361	snp	G	A	A:46 G:0
EA2454	1157990	snp	G	A	A:72 G:1
EA2454	1158642	snp	G	A	A:63 G:0
EA2454	1159315	snp	C	T	T:59 C:0
EA2454	1160172	snp	G	C	C:46 G:0
EA2454	1160822	snp	A	T	T:50 A:0
EA2454	1162900	snp	T	C	C:35 T:0
EA2454	1163629	snp	A	C	C:67 A:0
EA2454	1163886	snp	C	T	T:49 C:0
EA2454	1167666	snp	T	C	C:45 T:0
EA2454	1168086	del	CA	C	C:39 CA:0
EA2454	1170565	snp	C	A	A:59 C:0
EA2454	1171440	snp	G	A	A:52 G:0
EA2454	1172578	snp	C	T	T:78 C:0
EA2454	1172716	snp	C	A	A:82 C:0
EA2454	1172787	snp	G	A	A:79 G:0
EA2454	1173180	snp	T	G	G:86 T:0
EA2454	1174325	snp	T	A	A:45 T:0
EA2454	1174352	snp	T	C	C:50 T:0
EA2454	1175596	snp	T	C	C:51 T:0
EA2454	1179085	snp	G	A	A:58 G:0
EA2454	1179979	snp	A	G	G:53 A:0
EA2454	1183946	snp	T	G	G:52 T:0
EA2454	1186463	snp	C	T	T:77 C:0
EA2454	1186746	snp	T	C	C:50 T:0
EA2454	1187404	snp	A	C	C:61 A:0
EA2454	1190353	snp	G	T	T:33 G:0
EA2454	1190718	snp	C	A	A:41 C:0
EA2454	1194043	snp	G	A	A:35 G:0
EA2454	1195414	snp	C	T	T:53 C:0
EA2454	1198856	snp	T	C	C:36 T:0
EA2454	1200881	snp	C	T	T:34 C:0
EA2454	1204303	snp	C	T	T:79 C:0
EA2454	1207826	snp	C	T	T:73 C:0
EA2454	1208016	snp	T	C	C:95 T:0
EA2454	1211256	snp	T	C	C:78 T:0
EA2454	1211373	snp	G	T	T:76 G:0
EA2454	1212376	del	CG	C	C:28 CG:0
EA2454	1216907	snp	C	T	T:90 C:0
EA2454	1218789	snp	A	G	G:41 A:0
EA2454	1229894	snp	G	T	T:68 G:0
EA2454	1230133	snp	C	T	T:52 C:0
EA2454	1233937	snp	C	T	T:66 C:0
EA2454	1234548	snp	T	C	C:60 T:0
EA2454	1235752	snp	A	G	G:83 A:0
EA2454	1236723	snp	T	C	C:40 T:0
EA2454	1238000	snp	C	T	T:71 C:0
EA2454	1238062	snp	C	T	T:77 C:0
EA2454	1241055	snp	T	C	C:41 T:0
EA2454	1242119	snp	A	T	T:62 A:0
EA2454	1242171	snp	A	T	T:54 A:0
EA2454	1242214	snp	C	T	T:50 C:0
EA2454	1242313	complex	TGG	GGA	GGA:57 TGG:0
EA2454	1242346	snp	T	C	C:70 T:0
EA2454	1242370	snp	A	G	G:68 A:0
EA2454	1242385	snp	C	T	T:69 C:0
EA2454	1242432	complex	CAT	TAC	TAC:60 CAT:0
EA2454	1242505	snp	T	G	G:46 T:0
EA2454	1242523	snp	G	A	A:47 G:0
EA2454	1242571	snp	G	A	A:48 G:0
EA2454	1242655	snp	A	G	G:61 A:0
EA2454	1242667	snp	T	C	C:58 T:0
EA2454	1242688	snp	T	C	C:51 T:0
EA2454	1242694	snp	T	C	C:55 T:0
EA2454	1242724	snp	C	G	G:52 C:0
EA2454	1242769	snp	G	A	A:58 G:0
EA2454	1242781	snp	A	G	G:60 A:0
EA2454	1242862	snp	C	G	G:57 C:0
EA2454	1242913	snp	A	G	G:52 A:0
EA2454	1242922	complex	ACCC	GCCT	GCCT:49 ACCC:0
EA2454	1242940	snp	T	C	C:41 T:0
EA2454	1242981	snp	T	C	C:37 T:1
EA2454	1243048	snp	T	C	C:42 T:0
EA2454	1243198	snp	A	G	G:51 A:0
EA2454	1243255	snp	T	C	C:54 T:0
EA2454	1243393	snp	G	C	C:58 G:0
EA2454	1244009	snp	A	G	G:46 A:0
EA2454	1244063	snp	G	T	T:30 G:0
EA2454	1244075	snp	G	T	T:28 G:0
EA2454	1244135	snp	T	C	C:53 T:0
EA2454	1244195	complex	TCTG	CCTC	CCTC:53 TCTG:0
EA2454	1244213	snp	G	T	T:50 G:0
EA2454	1244237	complex	CGCGCGT	TGCACGC	TGCACGC:35 CGCGCGT:0
EA2454	1244279	snp	C	T	T:33 C:0
EA2454	1244380	snp	G	A	A:55 G:0
EA2454	1244649	snp	G	A	A:44 G:0
EA2454	1245109	snp	G	A	A:69 G:0
EA2454	1245210	snp	T	G	G:74 T:0
EA2454	1245259	snp	T	C	C:54 T:0
EA2454	1245265	snp	C	T	T:50 C:0
EA2454	1245274	snp	A	C	C:49 A:0
EA2454	1245538	snp	C	A	A:37 C:1
EA2454	1245581	snp	A	C	C:47 A:0
EA2454	1245925	snp	A	T	T:61 A:0
EA2454	1245963	snp	A	G	G:60 A:0
EA2454	1246040	snp	A	C	C:64 A:0
EA2454	1246048	snp	C	A	A:74 C:0
EA2454	1246078	snp	G	A	A:87 G:0
EA2454	1246100	snp	C	T	T:85 C:0
EA2454	1246408	snp	A	G	G:36 A:0
EA2454	1246477	snp	T	C	C:44 T:0
EA2454	1246517	snp	T	C	C:47 T:0
EA2454	1246552	snp	T	G	G:48 T:0
EA2454	1246600	snp	C	T	T:62 C:0
EA2454	1246658	snp	A	T	T:61 A:0
EA2454	1246671	snp	T	G	G:52 T:0
EA2454	1246681	snp	A	T	T:61 A:0
EA2454	1246703	snp	A	C	C:53 A:0
EA2454	1246779	snp	T	A	A:57 T:0
EA2454	1246808	snp	A	T	T:62 A:0
EA2454	1246841	snp	C	T	T:60 C:0
EA2454	1246864	snp	G	A	A:55 G:0
EA2454	1246888	snp	T	C	C:55 T:0
EA2454	1246955	snp	G	A	A:48 G:0
EA2454	1246967	snp	C	T	T:51 C:0
EA2454	1246973	snp	G	A	A:55 G:0
EA2454	1247014	complex	CA	GC	GC:55 CA:0
EA2454	1247075	snp	G	A	A:58 G:0
EA2454	1247184	snp	C	T	T:56 C:0
EA2454	1247189	snp	T	C	C:54 T:0
EA2454	1247216	snp	A	T	T:53 A:0
EA2454	1247243	snp	A	C	C:52 A:0
EA2454	1247567	snp	C	T	T:49 C:0
EA2454	1247669	snp	A	G	G:55 A:0
EA2454	1247708	snp	T	C	C:56 T:0
EA2454	1247829	snp	T	C	C:44 T:0
EA2454	1247844	snp	C	T	T:47 C:0
EA2454	1247864	snp	C	A	A:52 C:0
EA2454	1247872	mnp	GT	AC	AC:51 GT:0
EA2454	1248028	snp	A	G	G:58 A:0
EA2454	1248043	snp	A	G	G:56 A:0
EA2454	1248088	complex	AATTG	GATTT	GATTT:44 AATTG:0
EA2454	1248165	complex	GG	AA	AA:54 GG:0
EA2454	1248187	del	CGTG	C	C:53 CGTG:0
EA2454	1248313	snp	T	A	A:41 T:0
EA2454	1248852	snp	A	G	G:95 A:0
EA2454	1248871	snp	A	G	G:93 A:0
EA2454	1249242	complex	GCA	ACG	ACG:67 GCA:0
EA2454	1249329	snp	G	A	A:84 G:0
EA2454	1249636	snp	G	A	A:88 G:0
EA2454	1249888	snp	A	C	C:30 A:0
EA2454	1250089	snp	T	G	G:36 T:0
EA2454	1250776	snp	G	A	A:82 G:0
EA2454	1250868	snp	C	T	T:98 C:0
EA2454	1250874	snp	G	A	A:90 G:0
EA2454	1250931	snp	T	C	C:75 T:0
EA2454	1251482	snp	A	C	C:85 A:0
EA2454	1251724	snp	G	A	A:74 G:1
EA2454	1251793	snp	C	T	T:87 C:1
EA2454	1251889	snp	C	T	T:84 C:0
EA2454	1251895	snp	T	C	C:71 T:0
EA2454	1251988	complex	TGCACTTGGC	CGCGCTCGGT	CGCGCTCGGT:39 TGCACTTGGC:0
EA2454	1252045	snp	T	C	C:37 T:0
EA2454	1252156	snp	G	A	A:30 G:0
EA2454	1252174	snp	A	G	G:21 A:0
EA2454	1252201	snp	T	C	C:24 T:0
EA2454	1252210	snp	T	C	C:24 T:0
EA2454	1252366	snp	G	C	C:46 G:0
EA2454	1252417	snp	G	A	A:55 G:0
EA2454	1252429	snp	G	A	A:55 G:0
EA2454	1253265	snp	T	G	G:44 T:0
EA2454	1253430	snp	G	A	A:46 G:0
EA2454	1253517	snp	T	C	C:42 T:0
EA2454	1253619	snp	A	C	C:60 A:0
EA2454	1253700	complex	TGAT	CGAC	CGAC:41 TGAT:0
EA2454	1254135	snp	A	G	G:81 A:0
EA2454	1254162	snp	C	T	T:84 C:0
EA2454	1254225	snp	T	C	C:63 T:0
EA2454	1254309	snp	C	T	T:78 C:0
EA2454	1254368	snp	T	C	C:77 T:0
EA2454	1254812	snp	C	T	T:41 C:0
EA2454	1255044	snp	T	G	G:54 T:0
EA2454	1255080	snp	T	C	C:50 T:0
EA2454	1255245	snp	A	G	G:50 A:0
EA2454	1255251	snp	G	C	C:50 G:0
EA2454	1255414	snp	T	C	C:42 T:0
EA2454	1255505	snp	G	A	A:77 G:0
EA2454	1255549	snp	A	G	G:73 A:0
EA2454	1256188	complex	TACGTGT	CACATGC	CACATGC:52 TACGTGT:0
EA2454	1256263	snp	T	C	C:62 T:0
EA2454	1256374	complex	AT	GTTG	GTTG:40 AT:0
EA2454	1256506	snp	C	T	T:52 C:0
EA2454	1256581	snp	G	C	C:42 G:0
EA2454	1256617	snp	G	A	A:49 G:0
EA2454	1256659	complex	TATGCGT	AATACGA	AATACGA:50 TATGCGT:0
EA2454	1256788	snp	G	C	C:37 G:0
EA2454	1256851	snp	A	G	G:55 A:0
EA2454	1256860	snp	A	G	G:57 A:0
EA2454	1257333	snp	C	T	T:67 C:0
EA2454	1257600	snp	G	A	A:70 G:0
EA2454	1257615	snp	A	C	C:63 A:0
EA2454	1257625	snp	A	T	T:61 A:0
EA2454	1257636	snp	C	T	T:62 C:0
EA2454	1257648	snp	C	T	T:59 C:0
EA2454	1257657	snp	C	A	A:55 C:0
EA2454	1257753	snp	C	T	T:56 C:0
EA2454	1257807	snp	A	G	G:47 A:0
EA2454	1257864	snp	C	T	T:50 C:0
EA2454	1258050	snp	T	C	C:45 T:0
EA2454	1258083	snp	C	T	T:56 C:0
EA2454	1258098	snp	A	G	G:59 A:0
EA2454	1258134	snp	T	G	G:52 T:0
EA2454	1258653	snp	A	G	G:42 A:0
EA2454	1258681	snp	T	C	C:45 T:0
EA2454	1258722	snp	T	C	C:58 T:0
EA2454	1258728	snp	T	C	C:60 T:0
EA2454	1258743	snp	G	C	C:49 G:0
EA2454	1258761	snp	A	G	G:57 A:0
EA2454	1258963	snp	G	A	A:81 G:0
EA2454	1258984	snp	T	C	C:89 T:0
EA2454	1259007	snp	G	A	A:87 G:0
EA2454	1259078	snp	C	T	T:74 C:0
EA2454	1259088	mnp	CA	TG	TG:66 CA:0
EA2454	1259094	snp	G	A	A:71 G:0
EA2454	1259103	complex	CTA	TTG	TTG:73 CTA:0
EA2454	1259119	snp	A	G	G:85 A:0
EA2454	1259124	snp	T	G	G:87 T:0
EA2454	1259200	complex	CA	TG	TG:79 CA:0
EA2454	1259310	snp	A	G	G:93 A:0
EA2454	1259406	snp	G	A	A:63 G:0
EA2454	1259565	snp	A	G	G:61 A:0
EA2454	1259601	snp	T	C	C:55 T:0
EA2454	1259625	snp	T	C	C:50 T:0
EA2454	1259637	snp	C	T	T:38 C:0
EA2454	1259772	complex	TGGT	AGGC	AGGC:35 TGGT:0
EA2454	1259781	snp	T	A	A:46 T:0
EA2454	1259793	complex	CCGTTT	ACGCTA	ACGCTA:39 CCGTTT:0
EA2454	1260209	snp	G	A	A:56 G:0
EA2454	1260689	snp	G	C	C:57 G:0
EA2454	1261876	snp	A	C	C:42 A:0
EA2454	1262125	del	TA	T	T:44 TA:0
EA2454	1264013	snp	G	A	A:50 G:0
EA2454	1271061	snp	T	G	G:48 T:0
EA2454	1271712	snp	T	G	G:50 T:0
EA2454	1272023	snp	C	A	A:30 C:0
EA2454	1272090	snp	T	C	C:31 T:0
EA2454	1272808	snp	C	T	T:62 C:0
EA2454	1272885	snp	G	A	A:49 G:0
EA2454	1272930	snp	T	C	C:53 T:0
EA2454	1273072	snp	C	A	A:54 C:0
EA2454	1273428	snp	C	T	T:49 C:0
EA2454	1274943	snp	G	T	T:96 G:0
EA2454	1275421	snp	C	T	T:49 C:0
EA2454	1276678	snp	T	G	G:25 T:0
EA2454	1277401	snp	G	T	T:42 G:0
EA2454	1280415	snp	T	A	A:51 T:0
EA2454	1280572	snp	C	A	A:66 C:0
EA2454	1302583	snp	G	A	A:49 G:0
EA2454	1303945	snp	G	T	T:62 G:0
EA2454	1306594	snp	C	T	T:59 C:0
EA2454	1307521	snp	G	T	T:71 G:0
EA2454	1309315	snp	T	C	C:37 T:0
EA2454	1310829	ins	C	CCAGCCACGTTGT	CCAGCCACGTTGT:13 C:1
EA2454	1312640	snp	T	A	A:61 T:0
EA2454	1312912	snp	C	T	T:46 C:0
EA2454	1314014	snp	C	T	T:53 C:0
EA2454	1316648	snp	A	G	G:33 A:0
EA2454	1317400	snp	G	A	A:40 G:0
EA2454	1317963	snp	G	A	A:54 G:0
EA2454	1320024	snp	G	A	A:50 G:0
EA2454	1320282	snp	C	A	A:45 C:0
EA2454	1320805	snp	A	G	G:39 A:0
EA2454	1322163	snp	T	C	C:41 T:0
EA2454	1322665	snp	T	C	C:30 T:0
EA2454	1322994	snp	G	C	C:54 G:0
EA2454	1331179	snp	T	G	G:58 T:0
EA2454	1332489	snp	T	A	A:42 T:0
EA2454	1334598	snp	G	A	A:70 G:0
EA2454	1335374	snp	G	A	A:50 G:0
EA2454	1335631	snp	T	G	G:44 T:0
EA2454	1336281	snp	C	T	T:48 C:0
EA2454	1337824	snp	G	A	A:45 G:0
EA2454	1338014	snp	C	A	A:37 C:0
EA2454	1340886	snp	A	C	C:82 A:0
EA2454	1345269	snp	G	A	A:44 G:0
EA2454	1345460	snp	T	G	G:56 T:0
EA2454	1345847	snp	T	C	C:55 T:0
EA2454	1348317	snp	C	T	T:83 C:0
EA2454	1348897	snp	C	T	T:52 C:0
EA2454	1349164	snp	T	A	A:38 T:0
EA2454	1349308	snp	T	G	G:26 T:0
EA2454	1351707	snp	G	C	C:45 G:0
EA2454	1352900	snp	G	A	A:39 G:0
EA2454	1353793	snp	C	T	T:30 C:0
EA2454	1358384	snp	A	G	G:26 A:0
EA2454	1359526	snp	T	C	C:54 T:0
EA2454	1360577	snp	A	G	G:34 A:0
EA2454	1364098	snp	C	A	A:63 C:0
EA2454	1364526	snp	G	T	T:36 G:0
EA2454	1364939	snp	T	C	C:45 T:0
EA2454	1368097	snp	C	T	T:37 C:0
EA2454	1371250	snp	T	C	C:41 T:0
EA2454	1371701	snp	G	T	T:45 G:0
EA2454	1372535	snp	C	T	T:46 C:0
EA2454	1372915	snp	T	A	A:36 T:0
EA2454	1373482	snp	T	C	C:46 T:0
EA2454	1373955	snp	T	G	G:42 T:0
EA2454	1374456	snp	G	A	A:57 G:0
EA2454	1378312	snp	T	C	C:61 T:0
EA2454	1379647	snp	T	C	C:35 T:0
EA2454	1382325	ins	G	GT	GT:42 G:0
EA2454	1382832	snp	G	A	A:50 G:0
EA2454	1387493	snp	A	G	G:34 A:0
EA2454	1388233	snp	C	T	T:41 C:0
EA2454	1388245	snp	A	C	C:45 A:0
EA2454	1388756	del	GAACCGTTA	G	G:27 GAACCGTTA:0
EA2454	1389636	snp	C	T	T:40 C:0
EA2454	1390838	snp	C	T	T:41 C:0
EA2454	1392166	snp	G	A	A:60 G:0
EA2454	1394015	snp	G	A	A:51 G:0
EA2454	1394505	snp	A	G	G:70 A:0
EA2454	1394928	snp	C	T	T:82 C:1
EA2454	1395169	snp	G	A	A:58 G:0
EA2454	1395933	snp	A	T	T:49 A:0
EA2454	1396368	ins	A	AT	AT:46 A:0
EA2454	1399163	snp	A	T	T:58 A:0
EA2454	1401264	snp	A	G	G:50 A:0
EA2454	1402805	snp	C	T	T:61 C:0
EA2454	1403366	snp	C	T	T:93 C:0
EA2454	1404418	ins	C	CCCCA	CCCCA:31 C:1
EA2454	1404490	ins	C	CG	CG:58 C:0
EA2454	1405719	snp	G	A	A:94 G:1
EA2454	1412805	snp	C	T	T:43 C:0
EA2454	1413295	snp	T	C	C:36 T:0
EA2454	1413932	snp	C	A	A:34 C:0
EA2454	1415888	del	CA	C	C:41 CA:0
EA2454	1416404	snp	G	T	T:45 G:0
EA2454	1416501	snp	A	C	C:37 A:0
EA2454	1418202	snp	G	A	A:48 G:0
EA2454	1422407	snp	A	G	G:38 A:0
EA2454	1422598	snp	G	A	A:56 G:0
EA2454	1426430	snp	G	A	A:60 G:0
EA2454	1427623	snp	T	C	C:38 T:0
EA2454	1428495	snp	A	T	T:23 A:0
EA2454	1430360	snp	A	C	C:56 A:0
EA2454	1432280	snp	C	T	T:47 C:0
EA2454	1435223	snp	G	A	A:46 G:0
EA2454	1437310	snp	C	T	T:41 C:0
EA2454	1438672	snp	A	G	G:67 A:0
EA2454	1438897	snp	G	A	A:70 G:0
EA2454	1439109	snp	C	T	T:74 C:0
EA2454	1439881	snp	G	A	A:45 G:0
EA2454	1448487	snp	G	A	A:46 G:0
EA2454	1448613	snp	C	T	T:47 C:0
EA2454	1450268	snp	T	C	C:43 T:0
EA2454	1451589	snp	C	A	A:52 C:0
EA2454	1452075	snp	T	C	C:61 T:0
EA2454	1452484	snp	A	C	C:50 A:0
EA2454	1454046	snp	C	T	T:30 C:0
EA2454	1454953	snp	C	T	T:62 C:0
EA2454	1455169	snp	G	A	A:61 G:0
EA2454	1455464	snp	C	T	T:52 C:0
EA2454	1457363	snp	C	T	T:26 C:0
EA2454	1458467	snp	A	G	G:23 A:0
EA2454	1459664	snp	T	G	G:51 T:0
EA2454	1465676	ins	T	TC	TC:62 T:0
EA2454	1467642	snp	C	G	G:97 C:0
EA2454	1467830	snp	G	T	T:109 G:0
EA2454	1476139	snp	T	C	C:30 T:0
EA2454	1478494	snp	G	C	C:30 G:0
EA2454	1479473	snp	T	C	C:42 T:0
EA2454	1480708	snp	T	G	G:89 T:0
EA2454	1482112	snp	G	T	T:36 G:0
EA2454	1482871	snp	C	A	A:56 C:0
EA2454	1484872	snp	C	A	A:33 C:0
EA2454	1486671	snp	A	C	C:37 A:0
EA2454	1488874	snp	C	T	T:37 C:1
EA2454	1489958	snp	C	T	T:64 C:0
EA2454	1490185	snp	C	T	T:27 C:0
EA2454	1491226	snp	T	C	C:42 T:0
EA2454	1491674	snp	A	G	G:38 A:0
EA2454	1492263	snp	A	C	C:54 A:0
EA2454	1492527	ins	C	CA	CA:50 C:0
EA2454	1495581	snp	T	A	A:37 T:0
EA2454	1501602	snp	C	T	T:40 C:0
EA2454	1502972	snp	G	A	A:39 G:0
EA2454	1504094	snp	C	T	T:52 C:0
EA2454	1505419	snp	G	A	A:36 G:0
EA2454	1506412	snp	T	C	C:71 T:0
EA2454	1511244	snp	C	G	G:61 C:0
EA2454	1512766	snp	G	A	A:70 G:0
EA2454	1516885	snp	G	A	A:57 G:0
EA2454	1516969	snp	A	G	G:60 A:0
EA2454	1517437	snp	T	C	C:93 T:0
EA2454	1518455	snp	G	A	A:55 G:0
EA2454	1521514	snp	C	A	A:47 C:0
EA2454	1521733	snp	A	G	G:45 A:0
EA2454	1522866	snp	A	T	T:45 A:0
EA2454	1525679	snp	C	T	T:58 C:1
EA2454	1530539	snp	T	A	A:68 T:0
EA2454	1532264	snp	G	T	T:63 G:0
EA2454	1533339	snp	A	G	G:56 A:0
EA2454	1534292	snp	A	G	G:59 A:0
EA2454	1534629	snp	A	G	G:28 A:1
EA2454	1535288	snp	G	A	A:32 G:0
EA2454	1536940	snp	C	T	T:58 C:0
EA2454	1538797	snp	G	A	A:28 G:0
EA2454	1542034	snp	A	G	G:46 A:0
EA2454	1543910	snp	T	G	G:38 T:0
EA2454	1544768	del	GT	G	G:53 GT:0
EA2454	1544958	snp	C	T	T:59 C:0
EA2454	1547465	snp	G	T	T:49 G:0
EA2454	1548222	snp	G	A	A:43 G:0
EA2454	1548845	snp	T	C	C:58 T:0
EA2454	1549828	snp	T	C	C:43 T:0
EA2454	1549834	del	ACGCCATTG	A	A:30 ACGCCATTG:0
EA2454	1549884	snp	C	T	T:38 C:0
EA2454	1550347	snp	C	T	T:40 C:0
EA2454	1553013	snp	G	T	T:62 G:0
EA2454	1553329	snp	T	A	A:43 T:0
EA2454	1556519	snp	A	G	G:47 A:0
EA2454	1557381	snp	G	C	C:59 G:0
EA2454	1557966	snp	A	G	G:67 A:0
EA2454	1558095	snp	G	A	A:72 G:0
EA2454	1559525	snp	G	A	A:57 G:0
EA2454	1559542	snp	T	C	C:54 T:0
EA2454	1560679	snp	G	A	A:40 G:0
EA2454	1561400	snp	T	G	G:39 T:0
EA2454	1561721	snp	C	T	T:61 C:0
EA2454	1561865	snp	A	T	T:38 A:0
EA2454	1562488	snp	G	A	A:57 G:0
EA2454	1564845	snp	C	T	T:43 C:0
EA2454	1569692	snp	C	T	T:51 C:0
EA2454	1570233	snp	A	G	G:53 A:0
EA2454	1572176	snp	G	C	C:35 G:0
EA2454	1572713	snp	C	G	G:44 C:0
EA2454	1572959	snp	C	T	T:33 C:0
EA2454	1573777	snp	G	A	A:48 G:0
EA2454	1573803	snp	T	A	A:47 T:0
EA2454	1575548	snp	T	C	C:61 T:0
EA2454	1576203	del	CCGCCGGGAATGGT	C	C:40 CCGCCGGGAATGGT:0
EA2454	1577536	snp	G	A	A:35 G:0
EA2454	1582491	snp	C	T	T:38 C:0
EA2454	1585906	snp	A	G	G:45 A:0
EA2454	1587185	complex	AA	GT	GT:32 AA:0
EA2454	1587706	snp	T	A	A:46 T:0
EA2454	1587792	snp	A	C	C:43 A:0
EA2454	1591352	snp	C	T	T:39 C:0
EA2454	1591444	snp	C	T	T:55 C:0
EA2454	1592505	snp	T	C	C:41 T:0
EA2454	1593199	snp	A	C	C:63 A:0
EA2454	1596282	snp	T	G	G:49 T:0
EA2454	1597496	snp	T	C	C:51 T:0
EA2454	1598748	snp	C	T	T:21 C:0
EA2454	1598881	snp	C	T	T:32 C:0
EA2454	1598906	snp	A	G	G:31 A:0
EA2454	1599013	snp	G	A	A:39 G:0
EA2454	1599906	snp	T	C	C:55 T:0
EA2454	1600919	snp	A	G	G:65 A:0
EA2454	1605077	snp	G	A	A:65 G:0
EA2454	1605269	snp	T	C	C:65 T:0
EA2454	1606254	snp	T	C	C:45 T:0
EA2454	1607538	snp	C	T	T:47 C:0
EA2454	1610209	snp	T	A	A:61 T:0
EA2454	1612435	snp	G	A	A:51 G:0
EA2454	1613406	snp	T	A	A:62 T:0
EA2454	1613463	snp	A	G	G:54 A:0
EA2454	1613804	snp	T	C	C:91 T:0
EA2454	1614409	snp	G	T	T:53 G:0
EA2454	1616447	snp	G	T	T:52 G:0
EA2454	1616475	snp	A	G	G:54 A:0
EA2454	1616872	snp	G	T	T:53 G:0
EA2454	1617011	del	AG	A	A:38 AG:0
EA2454	1617684	snp	G	C	C:52 G:0
EA2454	1617963	snp	T	C	C:65 T:0
EA2454	1618194	snp	C	T	T:61 C:0
EA2454	1619963	snp	A	C	C:27 A:2
EA2454	1619995	snp	A	G	G:33 A:0
EA2454	1620001	snp	T	C	C:34 T:0
EA2454	1620013	snp	G	A	A:38 G:0
EA2454	1620028	snp	T	C	C:33 T:0
EA2454	1620040	snp	T	C	C:35 T:0
EA2454	1620052	snp	T	C	C:32 T:0
EA2454	1620063	snp	A	G	G:31 A:0
EA2454	1620111	snp	A	T	T:40 A:0
EA2454	1620124	snp	G	A	A:42 G:0
EA2454	1620139	snp	C	T	T:41 C:0
EA2454	1620196	snp	C	T	T:35 C:0
EA2454	1620203	complex	TGA	CGG	CGG:25 TGA:0
EA2454	1620238	complex	GTCA	ATCG	ATCG:33 GTCA:0
EA2454	1620250	snp	G	A	A:39 G:0
EA2454	1620255	snp	T	C	C:36 T:0
EA2454	1620304	snp	A	G	G:44 A:0
EA2454	1620313	snp	A	G	G:35 A:0
EA2454	1620322	del	ATCTTCCTCTTCC	A	A:17 ATCTTCCTCTTCC:0
EA2454	1620374	complex	ATTTT	GTTTG	GTTTG:29 ATTTT:0
EA2454	1620403	snp	A	T	T:28 A:0
EA2454	1620427	snp	T	A	A:19 T:0
EA2454	1620503	snp	C	A	A:40 C:0
EA2454	1620785	snp	T	C	C:53 T:0
EA2454	1620819	snp	A	G	G:42 A:0
EA2454	1620828	snp	T	C	C:42 T:0
EA2454	1620915	snp	A	T	T:49 A:0
EA2454	1621047	snp	C	G	G:47 C:0
EA2454	1621140	snp	C	A	A:50 C:0
EA2454	1621305	snp	G	T	T:55 G:0
EA2454	1621340	snp	A	G	G:49 A:0
EA2454	1621358	snp	G	A	A:52 G:0
EA2454	1621385	snp	C	T	T:72 C:0
EA2454	1622009	snp	C	T	T:60 C:0
EA2454	1622024	snp	T	G	G:68 T:0
EA2454	1622095	snp	C	T	T:69 C:0
EA2454	1622100	snp	A	G	G:72 A:0
EA2454	1622123	snp	C	T	T:63 C:0
EA2454	1622132	snp	A	G	G:70 A:0
EA2454	1622163	ins	G	GC	GC:59 G:0
EA2454	1624169	snp	A	G	G:59 A:0
EA2454	1624244	snp	C	T	T:42 C:0
EA2454	1624279	complex	GT	TC	TC:41 GT:0
EA2454	1624285	snp	A	C	C:43 A:0
EA2454	1624316	snp	C	A	A:41 C:0
EA2454	1624351	mnp	GT	TC	TC:30 GT:0
EA2454	1624391	snp	A	C	C:23 A:0
EA2454	1624869	snp	T	C	C:40 T:0
EA2454	1624905	snp	C	A	A:42 C:0
EA2454	1624956	snp	C	T	T:41 C:0
EA2454	1624998	complex	CCCG	TCCA	TCCA:47 CCCG:0
EA2454	1625007	snp	A	G	G:51 A:0
EA2454	1625089	snp	C	T	T:65 C:0
EA2454	1625102	complex	GCAAA	ACAAG	ACAAG:54 GCAAA:0
EA2454	1625124	snp	C	T	T:52 C:0
EA2454	1625175	snp	T	C	C:41 T:0
EA2454	1625184	complex	TGGC	CGGT	CGGT:43 TGGC:0
EA2454	1625235	snp	A	G	G:52 A:0
EA2454	1625262	snp	A	C	C:58 A:0
EA2454	1625502	snp	G	A	A:31 G:0
EA2454	1625526	snp	T	G	G:35 T:0
EA2454	1625541	snp	T	C	C:39 T:0
EA2454	1625589	snp	C	T	T:44 C:0
EA2454	1625832	complex	CGCACAC	TGCGCAT	TGCGCAT:36 CGCACAC:0
EA2454	1625853	snp	T	G	G:39 T:0
EA2454	1625859	complex	AGTA	GGTG	GGTG:36 AGTA:0
EA2454	1625867	snp	C	T	T:40 C:0
EA2454	1625874	snp	T	C	C:41 T:0
EA2454	1625895	snp	A	G	G:51 A:0
EA2454	1625960	snp	A	G	G:32 A:0
EA2454	1625967	snp	G	C	C:30 G:0
EA2454	1625972	snp	A	G	G:31 A:0
EA2454	1625984	snp	T	C	C:26 T:0
EA2454	1626010	snp	G	A	A:30 G:0
EA2454	1626136	snp	T	C	C:43 T:0
EA2454	1626152	snp	A	C	C:36 A:0
EA2454	1626163	snp	C	A	A:34 C:0
EA2454	1626180	snp	A	C	C:30 A:0
EA2454	1626189	complex	ACTGG	GCTGA	GCTGA:30 ACTGG:0
EA2454	1629086	complex	AGTA	TGTT	TGTT:12 AGTA:0
EA2454	1629101	snp	C	A	A:19 C:0
EA2454	1629119	snp	C	G	G:26 C:0
EA2454	1629125	complex	GTGT	ATGC	ATGC:27 GTGT:0
EA2454	1629156	snp	A	G	G:36 A:0
EA2454	1629237	snp	T	A	A:44 T:0
EA2454	1629255	snp	G	A	A:38 G:0
EA2454	1629285	complex	GTAC	ATAT	ATAT:34 GTAC:0
EA2454	1629295	complex	ACA	TCT	TCT:34 ACA:0
EA2454	1629306	snp	C	G	G:37 C:0
EA2454	1629336	snp	T	G	G:30 T:0
EA2454	1629354	snp	T	G	G:35 T:0
EA2454	1629399	snp	G	A	A:30 G:0
EA2454	1629435	snp	G	T	T:32 G:0
EA2454	1629538	snp	A	C	C:61 A:0
EA2454	1629565	snp	A	G	G:62 A:0
EA2454	1629718	snp	A	G	G:72 A:0
EA2454	1629890	snp	G	A	A:40 G:0
EA2454	1630016	snp	T	C	C:69 T:0
EA2454	1630105	snp	G	A	A:49 G:0
EA2454	1630127	snp	A	C	C:55 A:0
EA2454	1630223	snp	C	T	T:62 C:0
EA2454	1630430	snp	C	T	T:58 C:0
EA2454	1630549	snp	G	A	A:65 G:0
EA2454	1630763	snp	C	T	T:59 C:0
EA2454	1630769	snp	C	T	T:59 C:0
EA2454	1630778	snp	T	C	C:53 T:0
EA2454	1630818	snp	C	A	A:49 C:0
EA2454	1630872	snp	G	A	A:40 G:0
EA2454	1630941	complex	AAGA	GGAG	GGAG:31 AAGA:0
EA2454	1632262	snp	A	C	C:34 A:0
EA2454	1632564	snp	G	A	A:34 G:0
EA2454	1634228	snp	A	G	G:74 A:0
EA2454	1635708	snp	C	A	A:57 C:0
EA2454	1638039	snp	A	C	C:48 A:0
EA2454	1638456	snp	T	C	C:46 T:1
EA2454	1638642	snp	T	A	A:56 T:1
EA2454	1642336	snp	A	G	G:47 A:0
EA2454	1644810	snp	G	A	A:41 G:0
EA2454	1645477	snp	C	T	T:56 C:0
EA2454	1647005	snp	A	G	G:42 A:0
EA2454	1647462	snp	A	C	C:72 A:0
EA2454	1648147	snp	C	T	T:30 C:0
EA2454	1651964	snp	G	A	A:42 G:0
EA2454	1652108	snp	T	C	C:37 T:0
EA2454	1652131	snp	G	C	C:19 G:0
EA2454	1652374	snp	G	A	A:35 G:0
EA2454	1654162	ins	G	GA	GA:57 G:0
EA2454	1654772	ins	T	TTCA	TTCA:39 T:1
EA2454	1655290	snp	G	A	A:41 G:0
EA2454	1657561	snp	C	A	A:49 C:0
EA2454	1659970	snp	G	A	A:41 G:0
EA2454	1661566	snp	A	C	C:46 A:0
EA2454	1664379	snp	C	T	T:65 C:0
EA2454	1665113	snp	G	T	T:59 G:0
EA2454	1665162	ins	A	AT	AT:56 A:0
EA2454	1670538	del	AT	A	A:39 AT:0
EA2454	1670730	snp	A	C	C:37 A:0
EA2454	1673870	snp	C	A	A:45 C:0
EA2454	1674571	snp	T	A	A:31 T:0
EA2454	1674924	snp	G	A	A:51 G:0
EA2454	1676378	snp	T	C	C:30 T:0
EA2454	1681770	snp	C	T	T:47 C:0
EA2454	1682457	snp	A	G	G:42 A:0
EA2454	1685597	snp	G	A	A:46 G:0
EA2454	1686778	snp	A	T	T:54 A:0
EA2454	1689622	snp	T	A	A:72 T:0
EA2454	1694398	snp	G	A	A:54 G:0
EA2454	1694816	snp	G	A	A:26 G:0
EA2454	1700087	snp	A	G	G:55 A:1
EA2454	1701919	snp	A	G	G:50 A:0
EA2454	1704088	del	TC	T	T:35 TC:0
EA2454	1707192	snp	A	G	G:66 A:0
EA2454	1707349	snp	G	A	A:68 G:0
EA2454	1711369	snp	A	C	C:33 A:0
EA2454	1713490	snp	G	A	A:82 G:0
EA2454	1714697	snp	T	C	C:51 T:0
EA2454	1718495	snp	A	G	G:46 A:0
EA2454	1719094	snp	C	T	T:74 C:0
EA2454	1719132	snp	G	A	A:92 G:0
EA2454	1719223	snp	T	C	C:74 T:0
EA2454	1719365	snp	G	A	A:60 G:0
EA2454	1719996	snp	C	G	G:36 C:0
EA2454	1720125	snp	T	G	G:43 T:0
EA2454	1726434	snp	G	A	A:39 G:0
EA2454	1728411	snp	C	A	A:44 C:0
EA2454	1730329	snp	T	C	C:46 T:0
EA2454	1730565	snp	A	G	G:61 A:0
EA2454	1732884	snp	C	T	T:43 C:0
EA2454	1733801	snp	A	G	G:52 A:0
EA2454	1733830	snp	C	T	T:55 C:0
EA2454	1734280	snp	T	C	C:78 T:0
EA2454	1735944	snp	T	C	C:78 T:0
EA2454	1737561	snp	A	G	G:26 A:0
EA2454	1739303	snp	C	A	A:55 C:0
EA2454	1739750	snp	C	A	A:31 C:0
EA2454	1739772	del	CG	C	C:30 CG:0
EA2454	1740920	snp	T	C	C:41 T:0
EA2454	1741057	del	CT	C	C:55 CT:0
EA2454	1742389	del	CT	C	C:64 CT:0
EA2454	1742867	snp	C	A	A:109 C:0
EA2454	1744504	snp	C	A	A:66 C:0
EA2454	1745576	snp	T	C	C:97 T:0
EA2454	1747318	snp	A	G	G:48 A:0
EA2454	1747764	snp	G	T	T:76 G:0
EA2454	1748585	snp	A	C	C:50 A:0
EA2454	1749020	snp	G	A	A:47 G:0
EA2454	1751369	snp	G	T	T:40 G:0
EA2454	1753731	snp	C	A	A:83 C:0
EA2454	1754099	snp	C	T	T:61 C:0
EA2454	1754334	snp	G	T	T:53 G:0
EA2454	1758804	snp	C	T	T:50 C:0
EA2454	1760948	snp	C	T	T:43 C:0
EA2454	1763293	snp	T	C	C:46 T:0
EA2454	1763765	snp	A	C	C:64 A:0
EA2454	1765053	snp	C	A	A:68 C:0
EA2454	1766306	snp	G	A	A:53 G:0
EA2454	1774059	snp	T	C	C:90 T:0
EA2454	1776284	snp	C	A	A:40 C:0
EA2454	1778875	snp	A	T	T:92 A:0
EA2454	1784266	snp	G	A	A:66 G:0
EA2454	1786685	snp	T	C	C:45 T:0
EA2454	1790794	snp	C	T	T:86 C:0
EA2454	1792380	snp	A	T	T:51 A:0
EA2454	1793632	snp	C	T	T:37 C:0
EA2454	1793692	snp	A	G	G:40 A:0
EA2454	1794694	snp	C	T	T:38 C:0
EA2454	1794938	snp	T	G	G:34 T:0
EA2454	1795161	snp	A	G	G:42 A:0
EA2454	1796286	snp	C	T	T:32 C:0
EA2454	1797038	snp	G	A	A:63 G:0
EA2454	1797134	snp	C	T	T:75 C:0
EA2454	1797582	snp	G	A	A:57 G:0
EA2454	1799132	snp	G	A	A:51 G:0
EA2454	1802874	snp	A	G	G:39 A:0
EA2454	1803664	snp	T	C	C:66 T:0
EA2454	1806558	snp	C	T	T:65 C:0
EA2454	1807013	snp	G	A	A:46 G:0
EA2454	1811872	snp	C	A	A:37 C:0
EA2454	1812648	snp	C	T	T:34 C:0
EA2454	1816606	snp	T	G	G:60 T:0
EA2454	1816768	snp	T	G	G:56 T:0
EA2454	1818659	snp	G	A	A:44 G:0
EA2454	1820083	snp	T	C	C:37 T:0
EA2454	1824156	snp	T	C	C:55 T:0
EA2454	1824499	snp	T	C	C:33 T:0
EA2454	1825107	snp	G	A	A:45 G:0
EA2454	1825254	snp	T	C	C:34 T:0
EA2454	1832674	snp	A	C	C:67 A:0
EA2454	1834426	snp	G	A	A:42 G:2
EA2454	1837269	snp	G	A	A:72 G:1
EA2454	1839661	snp	A	G	G:10 A:0
EA2454	1840912	snp	G	A	A:55 G:0
EA2454	1842140	snp	G	T	T:62 G:0
EA2454	1842943	snp	C	A	A:50 C:0
EA2454	1844569	snp	A	G	G:77 A:0
EA2454	1845748	snp	C	T	T:54 C:0
EA2454	1846086	snp	T	C	C:56 T:0
EA2454	1849504	snp	T	A	A:68 T:0
EA2454	1860062	snp	T	A	A:15 T:0
EA2454	1860994	snp	A	G	G:58 A:0
EA2454	1864193	snp	C	T	T:78 C:0
EA2454	1866481	snp	A	C	C:50 A:0
EA2454	1867061	snp	C	A	A:65 C:0
EA2454	1868594	snp	G	A	A:75 G:0
EA2454	1869510	snp	G	A	A:68 G:0
EA2454	1872573	snp	G	T	T:43 G:0
EA2454	1874405	snp	G	T	T:89 G:1
EA2454	1875863	snp	G	T	T:40 G:0
EA2454	1877345	snp	T	C	C:30 T:0
EA2454	1878504	snp	G	A	A:62 G:0
EA2454	1880076	snp	G	A	A:91 G:0
EA2454	1881056	snp	C	G	G:46 C:0
EA2454	1881314	snp	G	A	A:34 G:0
EA2454	1881961	snp	T	G	G:43 T:0
EA2454	1884976	snp	C	T	T:49 C:0
EA2454	1885596	del	AAAATCC	A	A:35 AAAATCC:0
EA2454	1885754	snp	G	A	A:40 G:0
EA2454	1886082	complex	A	CC	CC:37 A:1
EA2454	1887544	snp	A	G	G:33 A:0
EA2454	1888942	snp	C	T	T:38 C:0
EA2454	1889434	snp	C	T	T:44 C:0
EA2454	1890195	del	AG	A	A:69 AG:0
EA2454	1890386	snp	T	C	C:54 T:0
EA2454	1892424	snp	G	A	A:65 G:0
EA2454	1897434	snp	G	A	A:55 G:0
EA2454	1900614	snp	T	C	C:110 T:0
EA2454	1901045	snp	G	A	A:94 G:0
EA2454	1902291	snp	G	C	C:111 G:0
EA2454	1903679	snp	T	A	A:43 T:0
EA2454	1903986	snp	A	C	C:32 A:0
EA2454	1904791	snp	G	A	A:55 G:0
EA2454	1905086	snp	G	A	A:50 G:0
EA2454	1905385	snp	G	A	A:85 G:0
EA2454	1906491	snp	A	C	C:42 A:0
EA2454	1907509	snp	C	T	T:65 C:0
EA2454	1909088	snp	T	C	C:101 T:0
EA2454	1912473	snp	A	G	G:78 A:0
EA2454	1916554	snp	G	A	A:49 G:0
EA2454	1923970	snp	G	A	A:66 G:0
EA2454	1924972	snp	A	C	C:65 A:0
EA2454	1925505	snp	C	T	T:46 C:0
EA2454	1929193	ins	T	TTTA	TTTA:22 T:0
EA2454	1934905	snp	G	T	T:39 G:0
EA2454	1936040	snp	A	G	G:10 A:0
EA2454	1945608	snp	T	C	C:55 T:0
EA2454	1946808	snp	C	T	T:73 C:0
EA2454	1947499	snp	A	T	T:48 A:0
EA2454	1949271	snp	C	A	A:51 C:0
EA2454	1950298	snp	T	G	G:69 T:0
EA2454	1952317	snp	G	A	A:109 G:0
EA2454	1952745	snp	A	G	G:69 A:0
EA2454	1952895	snp	G	A	A:85 G:0
EA2454	1952951	snp	C	T	T:115 C:0
EA2454	1954720	snp	T	C	C:110 T:1
EA2454	1955463	snp	A	C	C:77 A:0
EA2454	1956379	snp	C	T	T:58 C:0
EA2454	1958733	snp	T	C	C:36 T:0
EA2454	1960339	snp	C	T	T:63 C:0
EA2454	1970914	snp	A	T	T:16 A:0
EA2454	1970924	complex	CAA	ATC	ATC:17 CAA:0
EA2454	1970935	snp	C	A	A:23 C:0
EA2454	1979564	snp	A	G	G:41 A:0
EA2454	1980186	snp	C	T	T:29 C:0
EA2454	1981261	snp	A	G	G:42 A:0
EA2454	1983279	snp	T	A	A:46 T:0
EA2454	1983802	snp	T	C	C:31 T:0
EA2454	1984834	snp	C	A	A:41 C:0
EA2454	1986170	snp	G	T	T:62 G:0
EA2454	1987026	snp	A	T	T:61 A:0
EA2454	1989793	snp	G	A	A:71 G:0
EA2454	1990345	snp	A	T	T:53 A:0
EA2454	1991121	snp	T	C	C:38 T:0
EA2454	1992752	snp	G	A	A:37 G:0
EA2454	1995211	snp	T	C	C:46 T:0
EA2454	1997249	snp	C	T	T:52 C:0
EA2454	1997790	snp	G	A	A:35 G:0
EA2454	1997936	snp	C	T	T:49 C:0
EA2454	1998697	snp	A	G	G:45 A:0
EA2454	1999636	snp	A	G	G:63 A:0
EA2454	1999856	snp	G	A	A:53 G:0
EA2454	2000837	snp	C	T	T:52 C:0
EA2454	2002646	snp	G	A	A:58 G:0
EA2454	2004630	snp	C	T	T:99 C:0
EA2454	2005104	snp	G	T	T:99 G:0
EA2454	2005391	snp	C	T	T:69 C:0
EA2454	2007738	snp	A	G	G:44 A:0
EA2454	2012217	snp	G	T	T:25 G:0
EA2454	2012966	snp	T	G	G:44 T:0
EA2454	2013320	complex	GG	AA	AA:66 GG:0
EA2454	2014040	snp	C	T	T:46 C:0
EA2454	2022049	snp	A	C	C:44 A:0
EA2454	2023335	snp	A	C	C:35 A:0
EA2454	2023644	snp	C	A	A:51 C:0
EA2454	2025122	snp	A	C	C:43 A:0
EA2454	2026705	snp	G	A	A:36 G:0
EA2454	2027149	snp	G	A	A:30 G:0
EA2454	2028093	snp	G	T	T:51 G:0
EA2454	2028503	snp	T	A	A:55 T:0
EA2454	2029759	snp	A	C	C:59 A:0
EA2454	2030904	snp	C	T	T:65 C:0
EA2454	2033069	snp	T	A	A:50 T:0
EA2454	2034153	snp	G	A	A:40 G:0
EA2454	2034971	snp	G	A	A:73 G:0
EA2454	2036364	snp	G	A	A:44 G:0
EA2454	2082207	snp	T	C	C:26 T:0
EA2454	2085821	snp	T	G	G:65 T:0
EA2454	2086397	snp	A	T	T:57 A:0
EA2454	2088085	del	GATTGATATTAAGC	G	G:34 GATTGATATTAAGC:0
EA2454	2088535	snp	C	G	G:43 C:0
EA2454	2088809	snp	A	G	G:30 A:0
EA2454	2089868	snp	T	A	A:50 T:0
EA2454	2091553	snp	T	A	A:57 T:0
EA2454	2094829	snp	T	C	C:53 T:0
EA2454	2096088	snp	A	G	G:61 A:0
EA2454	2096321	snp	A	C	C:29 A:0
EA2454	2099847	snp	A	G	G:38 A:0
EA2454	2100200	snp	G	A	A:28 G:0
EA2454	2100304	snp	T	C	C:27 T:0
EA2454	2102993	snp	T	C	C:29 T:0
EA2454	2107020	snp	G	A	A:41 G:0
EA2454	2112567	snp	C	T	T:44 C:0
EA2454	2113002	snp	G	A	A:47 G:0
EA2454	2114046	snp	G	A	A:43 G:0
EA2454	2114612	snp	G	T	T:58 G:0
EA2454	2116857	snp	G	A	A:40 G:0
EA2454	2117468	snp	A	G	G:66 A:0
EA2454	2119737	snp	T	C	C:78 T:0
EA2454	2120021	snp	A	C	C:60 A:0
EA2454	2121377	snp	G	C	C:33 G:0
EA2454	2122365	snp	C	T	T:15 C:0
EA2454	2123227	snp	A	C	C:38 A:0
EA2454	2123354	snp	T	A	A:47 T:0
EA2454	2124248	snp	A	C	C:55 A:0
EA2454	2127170	snp	C	T	T:60 C:0
EA2454	2135404	snp	T	C	C:63 T:0
EA2454	2135511	snp	G	A	A:42 G:0
EA2454	2135616	snp	C	A	A:44 C:0
EA2454	2142320	snp	T	C	C:46 T:1
EA2454	2144564	snp	C	T	T:56 C:1
EA2454	2149433	snp	A	G	G:71 A:0
EA2454	2149924	snp	A	G	G:53 A:0
EA2454	2155585	snp	T	G	G:39 T:0
EA2454	2156075	snp	C	T	T:57 C:0
EA2454	2156358	snp	A	T	T:57 A:0
EA2454	2158851	snp	C	T	T:44 C:0
EA2454	2161578	snp	C	T	T:39 C:0
EA2454	2162247	snp	A	C	C:48 A:0
EA2454	2162365	snp	A	G	G:39 A:0
EA2454	2167241	del	GATCGGC	G	G:29 GATCGGC:0
EA2454	2168639	snp	G	A	A:42 G:0
EA2454	2171889	snp	A	G	G:57 A:0
EA2454	2172151	del	ACCC	A	A:41 ACCC:0
EA2454	2173107	del	TCGGAAAA	T	T:40 TCGGAAAA:0
EA2454	2174492	ins	C	CAA	CAA:51 C:0
EA2454	2174776	snp	T	C	C:48 T:0
EA2454	2176774	snp	G	A	A:71 G:0
EA2454	2177349	snp	T	C	C:52 T:0
EA2454	2178758	snp	C	T	T:47 C:0
EA2454	2178776	snp	C	T	T:44 C:0
EA2454	2180368	snp	G	A	A:47 G:0
EA2454	2180437	snp	A	G	G:43 A:0
EA2454	2183355	snp	T	C	C:42 T:0
EA2454	2186284	snp	A	G	G:65 A:0
EA2454	2187664	complex	A	CC	CC:17 A:0
EA2454	2188444	snp	G	A	A:76 G:0
EA2454	2189381	snp	A	G	G:58 A:0
EA2454	2189503	snp	G	A	A:48 G:0
EA2454	2189631	complex	AAGAAACCCTTTTTA	GATAAAATCCTTTAG	GATAAAATCCTTTAG:17 AAGAAACCCTTTTTA:0
EA2454	2189660	complex	GCAAAATTAC	ATAAATTTAT	ATAAATTTAT:20 GCAAAATTAC:0
EA2454	2189687	snp	A	T	T:27 A:0
EA2454	2189693	snp	G	A	A:23 G:0
EA2454	2189701	snp	G	A	A:21 G:0
EA2454	2189711	snp	G	A	A:21 G:0
EA2454	2189753	snp	A	T	T:25 A:0
EA2454	2189762	snp	C	A	A:24 C:0
EA2454	2189771	complex	AC	GT	GT:14 AC:0
EA2454	2189780	snp	G	T	T:10 G:0
EA2454	2189796	complex	CCCTA	TCCTG	TCCTG:13 CCCTA:0
EA2454	2189809	snp	G	A	A:12 G:0
EA2454	2189839	complex	AGGA	CGGC	CGGC:19 AGGA:0
EA2454	2189852	snp	C	T	T:21 C:0
EA2454	2189936	snp	T	C	C:79 T:0
EA2454	2189975	snp	A	G	G:129 A:0
EA2454	2190020	snp	C	T	T:120 C:0
EA2454	2190245	snp	A	C	C:54 A:0
EA2454	2190251	complex	AATGACC	CACGACA	CACGACA:44 AATGACC:0
EA2454	2190272	snp	A	G	G:50 A:0
EA2454	2190281	complex	CCGA	TCGG	TCGG:48 CCGA:0
EA2454	2190290	snp	C	T	T:62 C:0
EA2454	2190299	snp	A	C	C:63 A:0
EA2454	2191378	snp	C	A	A:12 C:0
EA2454	2191387	snp	A	G	G:17 A:0
EA2454	2191431	snp	G	A	A:25 G:1
EA2454	2191438	snp	C	T	T:23 C:0
EA2454	2191447	snp	T	C	C:21 T:2
EA2454	2191468	snp	G	A	A:16 G:0
EA2454	2192326	snp	G	A	A:68 G:0
EA2454	2194779	snp	C	T	T:48 C:0
EA2454	2195062	snp	T	C	C:40 T:0
EA2454	2204680	snp	C	T	T:99 C:0
EA2454	2205177	snp	C	T	T:74 C:0
EA2454	2206399	snp	C	T	T:73 C:0
EA2454	2206549	snp	T	G	G:58 T:0
EA2454	2208471	snp	T	C	C:59 T:0
EA2454	2212055	snp	C	T	T:48 C:0
EA2454	2218465	snp	G	A	A:36 G:1
EA2454	2218767	snp	A	G	G:61 A:0
EA2454	2220332	snp	C	T	T:95 C:0
EA2454	2221484	snp	C	T	T:59 C:0
EA2454	2225502	snp	A	G	G:58 A:0
EA2454	2226298	snp	T	C	C:51 T:1
EA2454	2228600	snp	T	C	C:30 T:0
EA2454	2229560	snp	C	G	G:38 C:0
EA2454	2231021	snp	G	A	A:67 G:0
EA2454	2235929	snp	G	A	A:53 G:0
EA2454	2238720	snp	C	T	T:57 C:0
EA2454	2245025	snp	C	A	A:62 C:0
EA2454	2256443	complex	TGG	AGA	AGA:74 TGG:0
EA2454	2259197	snp	G	A	A:56 G:0
EA2454	2259386	snp	C	T	T:72 C:0
EA2454	2265528	del	CT	C	C:79 CT:0
EA2454	2265571	del	CA	C	C:65 CA:0
EA2454	2265688	snp	C	T	T:92 C:0
EA2454	2266472	snp	A	T	T:91 A:0
EA2454	2267719	snp	T	C	C:69 T:0
EA2454	2268389	snp	G	C	C:58 G:0
EA2454	2270220	snp	T	C	C:56 T:0
EA2454	2271600	snp	A	T	T:35 A:0
EA2454	2271906	snp	T	G	G:40 T:0
EA2454	2272981	snp	C	T	T:68 C:0
EA2454	2273547	snp	T	A	A:43 T:0
EA2454	2283117	snp	T	C	C:62 T:0
EA2454	2283880	snp	A	G	G:43 A:0
EA2454	2285031	snp	C	T	T:36 C:0
EA2454	2286918	snp	G	A	A:57 G:0
EA2454	2288758	snp	A	T	T:57 A:0
EA2454	2289041	snp	T	C	C:37 T:0
EA2454	2289128	snp	G	C	C:48 G:0
EA2454	2289653	snp	C	T	T:46 C:0
EA2454	2291165	snp	C	T	T:88 C:0
EA2454	2291863	snp	T	C	C:51 T:0
EA2454	2292791	snp	G	T	T:37 G:0
EA2454	2293167	snp	C	T	T:33 C:0
EA2454	2293375	snp	T	G	G:70 T:0
EA2454	2293544	snp	G	A	A:95 G:0
EA2454	2294309	snp	G	A	A:69 G:0
EA2454	2295787	snp	C	T	T:70 C:0
EA2454	2297399	del	TG	T	T:58 TG:2
EA2454	2298963	snp	G	T	T:56 G:0
EA2454	2301511	snp	G	A	A:34 G:0
EA2454	2302558	snp	A	T	T:67 A:0
EA2454	2307590	del	CT	C	C:59 CT:0
EA2454	2307975	snp	C	T	T:61 C:0
EA2454	2309612	snp	A	G	G:40 A:0
EA2454	2310887	snp	G	T	T:46 G:0
EA2454	2311767	snp	T	G	G:48 T:0
EA2454	2312011	snp	C	T	T:47 C:0
EA2454	2316595	snp	G	T	T:66 G:0
EA2454	2319681	snp	A	T	T:48 A:0
EA2454	2322361	snp	A	G	G:36 A:0
EA2454	2323136	snp	G	A	A:76 G:0
EA2454	2327635	snp	C	T	T:41 C:0
EA2454	2329711	snp	C	T	T:71 C:0
EA2454	2330264	snp	A	C	C:55 A:0
EA2454	2333594	snp	G	A	A:51 G:0
EA2454	2335946	ins	C	CA	CA:38 C:0
EA2454	2338673	snp	G	A	A:52 G:0
EA2454	2342922	snp	C	A	A:63 C:0
EA2454	2344890	snp	C	G	G:62 C:0
EA2454	2346106	snp	G	A	A:80 G:0
EA2454	2346692	snp	A	G	G:77 A:0
EA2454	2347121	del	TA	T	T:61 TA:0
EA2454	2348261	snp	G	A	A:60 G:0
EA2454	2349078	snp	T	C	C:63 T:0
EA2454	2349944	snp	A	C	C:74 A:0
EA2454	2350339	snp	T	C	C:51 T:0
EA2454	2351375	snp	A	C	C:38 A:0
EA2454	2353553	del	TG	T	T:58 TG:0
EA2454	2354351	snp	A	G	G:64 A:0
EA2454	2357977	snp	C	T	T:62 C:0
EA2454	2359024	snp	A	G	G:41 A:0
EA2454	2360677	del	AT	A	A:63 AT:0
EA2454	2361785	snp	T	C	C:59 T:0
EA2454	2362408	snp	G	T	T:111 G:0
EA2454	2363284	snp	C	T	T:54 C:0
EA2454	2364340	snp	T	G	G:57 T:0
EA2454	2364946	snp	A	G	G:27 A:0
EA2454	2369782	snp	G	A	A:68 G:0
EA2454	2369893	snp	T	C	C:82 T:0
EA2454	2371672	snp	T	C	C:64 T:0
EA2454	2372088	snp	C	T	T:54 C:0
EA2454	2372914	snp	T	C	C:67 T:0
EA2454	2373304	snp	T	C	C:57 T:0
EA2454	2373982	snp	A	G	G:96 A:0
EA2454	2377308	snp	C	T	T:67 C:0
EA2454	2378822	snp	C	T	T:39 C:0
EA2454	2379195	snp	G	T	T:70 G:0
EA2454	2380291	snp	C	T	T:43 C:0
EA2454	2385431	snp	T	C	C:43 T:0
EA2454	2386199	snp	C	G	G:54 C:0
EA2454	2387523	snp	C	T	T:45 C:0
EA2454	2387966	snp	G	A	A:64 G:0
EA2454	2390356	snp	G	A	A:71 G:0
EA2454	2391472	snp	G	A	A:79 G:0
EA2454	2397205	snp	T	C	C:35 T:0
EA2454	2397217	snp	G	C	C:28 G:0
EA2454	2397730	snp	C	T	T:30 C:0
EA2454	2398457	snp	C	T	T:45 C:0
EA2454	2398699	snp	C	T	T:60 C:0
EA2454	2400209	snp	C	T	T:17 C:0
EA2454	2400785	snp	C	T	T:39 C:0
EA2454	2403442	snp	T	C	C:62 T:0
EA2454	2404743	snp	C	T	T:40 C:0
EA2454	2405136	snp	G	A	A:51 G:0
EA2454	2405409	snp	G	A	A:69 G:0
EA2454	2405910	snp	G	A	A:61 G:1
EA2454	2407449	snp	A	G	G:28 A:0
EA2454	2408858	snp	C	A	A:58 C:0
EA2454	2411747	snp	G	A	A:47 G:0
EA2454	2412819	snp	A	T	T:89 A:0
EA2454	2414038	snp	A	C	C:54 A:0
EA2454	2416531	snp	C	T	T:56 C:0
EA2454	2419556	snp	C	T	T:37 C:0
EA2454	2424078	snp	A	G	G:24 A:0
EA2454	2426455	snp	G	A	A:36 G:0
EA2454	2428008	del	AT	A	A:85 AT:0
EA2454	2428389	del	TA	T	T:55 TA:0
EA2454	2428499	snp	G	A	A:46 G:0
EA2454	2428549	snp	A	G	G:59 A:0
EA2454	2430822	snp	T	G	G:77 T:0
EA2454	2432718	snp	A	T	T:82 A:0
EA2454	2435300	snp	G	A	A:47 G:0
EA2454	2438685	snp	A	G	G:82 A:0
EA2454	2439096	snp	G	A	A:83 G:0
EA2454	2439148	snp	C	A	A:70 C:0
EA2454	2442698	snp	C	A	A:68 C:0
EA2454	2444568	snp	C	T	T:49 C:0
EA2454	2444886	snp	C	T	T:51 C:0
EA2454	2444898	snp	G	A	A:40 G:0
EA2454	2448565	snp	A	G	G:71 A:0
EA2454	2449435	snp	A	G	G:53 A:0
EA2454	2449736	snp	C	A	A:61 C:0
EA2454	2450255	complex	GGGA	TGGC	TGGC:59 GGGA:0
EA2454	2450783	snp	A	G	G:42 A:0
EA2454	2451274	snp	A	C	C:51 A:0
EA2454	2452455	snp	G	A	A:36 G:0
EA2454	2453950	snp	G	A	A:54 G:0
EA2454	2456065	snp	G	T	T:50 G:1
EA2454	2461170	snp	G	A	A:67 G:0
EA2454	2461974	snp	A	G	G:87 A:0
EA2454	2462477	snp	G	A	A:89 G:0
EA2454	2463088	snp	T	C	C:57 T:1
EA2454	2465709	snp	C	A	A:60 C:0
EA2454	2469570	snp	G	A	A:53 G:0
EA2454	2471185	snp	T	C	C:62 T:0
EA2454	2472827	snp	G	A	A:69 G:0
EA2454	2474714	snp	T	C	C:41 T:0
EA2454	2483538	snp	C	T	T:53 C:0
EA2454	2484819	snp	G	A	A:49 G:0
EA2454	2485824	snp	G	A	A:50 G:0
EA2454	2487775	snp	C	T	T:48 C:0
EA2454	2491225	snp	G	A	A:39 G:0
EA2454	2493206	snp	G	A	A:63 G:0
EA2454	2495743	snp	A	C	C:59 A:0
EA2454	2496184	snp	T	C	C:47 T:0
EA2454	2499546	snp	A	C	C:18 A:0
EA2454	2499555	snp	T	C	C:21 T:0
EA2454	2499561	snp	A	G	G:23 A:0
EA2454	2499570	complex	CTCC	TTCT	TTCT:26 CTCC:0
EA2454	2499612	complex	TT	CG	CG:37 TT:0
EA2454	2499641	snp	T	A	A:20 T:0
EA2454	2499654	snp	C	T	T:16 C:0
EA2454	2499681	snp	T	A	A:11 T:0
EA2454	2501091	snp	C	T	T:58 C:0
EA2454	2501790	snp	G	T	T:95 G:0
EA2454	2506538	snp	G	A	A:59 G:0
EA2454	2507403	snp	G	A	A:26 G:0
EA2454	2511114	del	CA	C	C:34 CA:1
EA2454	2511997	snp	T	A	A:46 T:0
EA2454	2513620	ins	A	AT	AT:40 A:0
EA2454	2514275	snp	C	A	A:77 C:0
EA2454	2518613	snp	T	A	A:53 T:0
EA2454	2518906	snp	A	C	C:41 A:0
EA2454	2520123	snp	G	A	A:52 G:0
EA2454	2521382	snp	C	T	T:60 C:0
EA2454	2522720	snp	A	C	C:58 A:0
EA2454	2524981	snp	T	G	G:52 T:0
EA2454	2526344	snp	G	A	A:39 G:0
EA2454	2527605	snp	G	A	A:51 G:0
EA2454	2528246	snp	T	C	C:102 T:0
EA2454	2529210	snp	C	T	T:47 C:0
EA2454	2529750	snp	G	A	A:38 G:0
EA2454	2531515	snp	G	A	A:80 G:0
EA2454	2533068	snp	G	A	A:44 G:0
EA2454	2533833	snp	G	A	A:51 G:0
EA2454	2534281	snp	A	T	T:43 A:0
EA2454	2537846	snp	G	A	A:45 G:0
EA2454	2538679	snp	T	C	C:112 T:0
EA2454	2539182	snp	G	A	A:71 G:0
EA2454	2540970	snp	A	G	G:63 A:0
EA2454	2542786	snp	A	G	G:71 A:0
EA2454	2543092	snp	A	G	G:63 A:0
EA2454	2543214	snp	C	T	T:70 C:0
EA2454	2543593	snp	C	T	T:69 C:0
EA2454	2549211	snp	T	C	C:55 T:1
EA2454	2551020	snp	A	G	G:30 A:0
EA2454	2551822	snp	G	A	A:46 G:0
EA2454	2552744	snp	G	A	A:45 G:0
EA2454	2555441	snp	A	G	G:51 A:0
EA2454	2557964	snp	G	C	C:53 G:0
EA2454	2559290	snp	C	A	A:78 C:0
EA2454	2561668	snp	C	T	T:25 C:0
EA2454	2561674	ins	G	GT	GT:18 G:0
EA2454	2568527	snp	T	G	G:55 T:0
EA2454	2569892	snp	C	A	A:51 C:0
EA2454	2572421	snp	C	T	T:39 C:0
EA2454	2572966	snp	T	A	A:28 T:0
EA2454	2574597	snp	T	C	C:67 T:0
EA2454	2574725	del	GA	G	G:42 GA:0
EA2454	2574887	snp	G	T	T:57 G:0
EA2454	2576957	snp	G	A	A:40 G:0
EA2454	2577544	snp	C	A	A:53 C:0
EA2454	2579159	snp	G	A	A:67 G:0
EA2454	2579686	snp	C	T	T:45 C:0
EA2454	2583768	snp	G	A	A:56 G:0
EA2454	2586095	snp	C	T	T:38 C:0
EA2454	2587940	snp	G	A	A:52 G:0
EA2454	2588480	complex	G	AA	AA:53 G:0
EA2454	2593010	snp	T	C	C:51 T:0
EA2454	2593361	snp	G	A	A:64 G:0
EA2454	2594142	snp	C	T	T:72 C:0
EA2454	2596704	snp	T	C	C:51 T:0
EA2454	2597428	snp	T	C	C:30 T:0
EA2454	2598783	snp	A	G	G:59 A:0
EA2454	2598908	snp	T	C	C:45 T:0
EA2454	2601203	snp	C	T	T:91 C:0
EA2454	2601235	snp	A	G	G:92 A:0
EA2454	2601345	snp	C	A	A:60 C:0
EA2454	2601612	snp	A	C	C:48 A:0
EA2454	2604095	snp	G	T	T:32 G:0
EA2454	2607459	snp	C	T	T:51 C:0
EA2454	2610906	snp	C	T	T:54 C:0
EA2454	2616619	snp	C	T	T:46 C:0
EA2454	2617140	del	TA	T	T:76 TA:0
EA2454	2621655	snp	T	C	C:48 T:0
EA2454	2624323	snp	C	T	T:54 C:0
EA2454	2625953	snp	G	T	T:66 G:0
EA2454	2626432	snp	C	T	T:51 C:0
EA2454	2627377	snp	C	G	G:73 C:0
EA2454	2628804	snp	C	T	T:39 C:0
EA2454	2630145	snp	A	G	G:65 A:0
EA2454	2631943	complex	ACGGA	GCGGT	GCGGT:62 ACGGA:0
EA2454	2632096	snp	G	C	C:68 G:0
EA2454	2634985	snp	C	T	T:81 C:0
EA2454	2636460	snp	A	G	G:57 A:0
EA2454	2636765	snp	C	T	T:32 C:0
EA2454	2637016	snp	G	A	A:46 G:0
EA2454	2637403	snp	C	T	T:29 C:0
EA2454	2638193	snp	C	T	T:68 C:0
EA2454	2639106	snp	G	A	A:74 G:0
EA2454	2639353	snp	A	G	G:59 A:0
EA2454	2641059	snp	T	C	C:60 T:0
EA2454	2641783	snp	C	T	T:56 C:0
EA2454	2642324	snp	T	C	C:41 T:0
EA2454	2643580	snp	T	G	G:54 T:0
EA2454	2643769	snp	T	A	A:59 T:0
EA2454	2644202	snp	T	G	G:33 T:0
EA2454	2645845	snp	C	T	T:59 C:0
EA2454	2646060	snp	C	T	T:74 C:0
EA2454	2650333	snp	C	T	T:77 C:0
EA2454	2654413	del	GA	G	G:20 GA:0
EA2454	2655705	snp	T	C	C:18 T:0
EA2454	2658667	snp	A	C	C:72 A:0
EA2454	2660000	snp	A	G	G:55 A:0
EA2454	2662545	snp	A	G	G:50 A:0
EA2454	2665770	snp	T	A	A:56 T:0
EA2454	2666660	snp	C	T	T:85 C:0
EA2454	2668806	snp	C	A	A:33 C:0
EA2454	2669244	snp	C	T	T:29 C:0
EA2454	2670669	snp	C	T	T:51 C:0
EA2454	2671426	snp	G	A	A:57 G:0
EA2454	2672475	ins	G	GCAAGACAT	GCAAGACAT:31 G:0
EA2454	2672737	snp	A	T	T:32 A:0
EA2454	2675076	snp	A	C	C:52 A:0
EA2454	2678338	snp	C	T	T:32 C:0
EA2454	2679525	snp	A	G	G:38 A:0
EA2454	2679677	snp	A	G	G:44 A:0
EA2454	2682591	snp	G	A	A:65 G:0
EA2454	2683225	snp	G	A	A:43 G:0
EA2454	2688622	snp	G	A	A:63 G:0
EA2454	2690614	snp	T	G	G:56 T:0
EA2454	2694352	snp	C	T	T:55 C:0
EA2454	2695142	snp	G	A	A:50 G:0
EA2454	2697799	snp	T	C	C:63 T:0
EA2454	2699698	snp	G	C	C:47 G:0
EA2454	2702136	snp	G	A	A:76 G:0
EA2454	2702516	snp	G	A	A:59 G:0
EA2454	2704077	snp	C	T	T:43 C:0
EA2454	2707628	snp	T	C	C:49 T:0
EA2454	2708526	snp	C	T	T:55 C:0
EA2454	2710397	snp	T	C	C:49 T:0
EA2454	2713178	snp	T	A	A:42 T:0
EA2454	2714383	snp	G	A	A:71 G:0
EA2454	2715216	snp	T	G	G:53 T:0
EA2454	2720677	ins	A	AACCTGCACCTGC	AACCTGCACCTGC:10 A:0
EA2454	2721277	snp	C	T	T:83 C:0
EA2454	2721619	snp	C	T	T:59 C:0
EA2454	2722619	snp	A	G	G:63 A:0
EA2454	2727863	snp	G	T	T:44 G:0
EA2454	2729045	snp	G	A	A:60 G:0
EA2454	2729269	snp	A	G	G:40 A:0
EA2454	2732508	snp	C	T	T:67 C:1
EA2454	2733436	snp	C	A	A:63 C:0
EA2454	2734446	snp	G	A	A:46 G:0
EA2454	2735381	snp	T	C	C:69 T:0
EA2454	2738374	snp	C	T	T:73 C:0
EA2454	2743080	snp	T	G	G:62 T:0
EA2454	2748849	del	GT	G	G:22 GT:0
EA2454	2749522	snp	G	A	A:106 G:0
EA2454	2749561	snp	C	A	A:104 C:0
EA2454	2749816	snp	C	T	T:124 C:1
EA2454	2751381	snp	T	C	C:43 T:0
EA2454	2755025	snp	C	T	T:88 C:0
EA2454	2755245	snp	G	C	C:64 G:0
EA2454	2757485	snp	C	T	T:41 C:1
EA2454	2760370	snp	A	G	G:57 A:0
EA2454	2760379	snp	A	G	G:54 A:0
EA2454	2762552	snp	A	T	T:38 A:0
EA2454	2763065	snp	A	G	G:66 A:0
EA2454	2763927	snp	G	A	A:52 G:0
EA2454	2763983	snp	T	G	G:45 T:0
EA2454	2764720	snp	G	A	A:75 G:0
EA2454	2769868	snp	G	A	A:54 G:0
[truncated: 3,791 more rows]
