# Supplementary material for: Escherichia coli ST302: Genomic Analysis of Virulence Potential and Antimicrobial Resistance Mediated by Mobile Genetic Elements
Source: Front Microbiol. 2020 Jan 21;10:3098. doi: 10.3389/fmicb.2019.03098 (PMC6985150; doi:10.3389/fmicb.2019.03098)
Supplement: DATA S2 — ST302 SNP analysis. [file Data_Sheet_2.ZIP › SNP_Analysis/ST302_SNP/SNP_analysis/snippyout/ST302/FA0416-Human-ST302.out/snps.txt]

DateTime	2019-04-24T16:07:17
ReadFiles	/home/cjreid/Data/ST302_reads/FA0416-Human-ST302.R1.fastq.gz /home/cjreid/Data/ST302_reads/FA0416-Human-ST302.R2.fastq.gz
Reference	/home/cjreid/Data/ST302_reads/EA2454.fa
ReferenceSize	5341018
Software	snippy 4.3.6
Variant-COMPLEX	651
Variant-DEL	114
Variant-INS	61
Variant-MNP	25
Variant-SNP	4939
VariantTotal	5790
