# Supplementary material for: Escherichia coli ST302: Genomic Analysis of Virulence Potential and Antimicrobial Resistance Mediated by Mobile Genetic Elements
Source: Front Microbiol. 2020 Jan 21;10:3098. doi: 10.3389/fmicb.2019.03098 (PMC6985150; doi:10.3389/fmicb.2019.03098)
Supplement: DATA S2 — ST302 SNP analysis. [file Data_Sheet_2.ZIP › SNP_Analysis/ST302_SNP/SNP_analysis/snippyout/ST302/FA5537-ND-ST302.out/snps.consensus.fa]

>EA2454
ACTTAGGATAGCCAACCATCAGATGCTGCATTTGCATAGTGCAATCTCCCCTTACTTATC
CGGAGGCAATTGCAATATCTCTGTGAACTTACACAGGGGGAGCTTTTACCTGAAATACGC
CACGGAGGCGGGTATGAAACTGGCAGTCGTCACTGGACAAATTGTTTGTACCGTACGCCA
TCACGGACTGGCGCATGACAAATTGCTGATGGTGGAAATGATTGATCCACAAGGTAATCC
TGACGGGCAATGCGCCGTCGCCATCGACAATATTGGCGCGGGAACCGGGGAGTGGGTGTT
ACTGGTGAGTGGCAGTTCCGCCCGCCAGGCGCATAAAAGCGAAACGTCACCGGTCGATCT
GTGCGTGATTGGCATTGTCGATGAGGTGGTGTCTGGCGGTCAGGTAATTTTCCACAAATA
AGGCAGAACATCATGAATCAACAGGATATTGAACAGGTGGTGAAAGCGGTACTGCTGAAA
ATGCAAAGCAGTGACACGCCGCCCGCCGCCGTTCATGAGATGGGCGTTTTCGCGTCCCTG
GATGACGCCGTTGCGGCAGCCAAAGTCGCCCAGCAAGGGTTAAAGAGCGTGGCAATGCGC
CAGTTAGCCATTGCTGCCATTCGTGAAGCAGGCGAAAAACACGCCAGAGATTTAGCGGAA
CTTGCCGTCAGTGAAACCGGCATGGGGCGCGTTGAAGATAAATTTGCAAAAAACGTCGCT
CAGGCGCGCGGCACACCAGGCGTTGAGTGCCTCTCTCCGCAAGTGCTGACTGGCGACAAC
GGCCTGACCCTAATTGAAAACGCACCCTGGGGCGTGGTGGCTTCGGTGACGCCGTCCACT
AACCCGGCGGCAACCGTAATTAACAACGCCATCAGCCTGATTGCCGCGGGCAACAGCGTC
ATTTTTGCCCCGCATCCGGCGGCGAAAAAAGTCTCCCAGCGGGCGATTACGCTGCTCAAC
CAGGCGATTGTTGCCGCAGGTGGGCCGGAAAACTTACTGGTTACTGTGGCAAATCCGGAT
ATCGAAACCGCGCAACGCTTGTTCAAGTTTCCGGGCATCGGCCTGCTGGTGGTGACCGGC
GGCGAAGCGGTAGTAGAAGCGGCGCGTAAACACACCAATAAACGTCTGATTGCCGCAGGC
GCTGGCAACCCGCCGGTAGTGGTGGATGAAACCGCTGACCTCGCCCGTGCTGCTCAGTCC
ATCGTTAAAGGCGCGTCTTTCGATAACAACATCATTTGTGCCGACGAAAAGGTACTGATT
GTTGTTGATAGCGTAGCCGATGAACTGATGCGTCTGATGGAAGGCCAGCACGCGGTGAAA
CTGACCGCAGAGCAGGCGCAGCAATTGCAACCGGTGTTGCTGAAAAATATCGACGAGCGC
GGAAAAGGTACCGTCAGCCGTGACTGGGTAGGTCGCGATGCAGGCAAAATCGCGGCGGCA
ATCGGCCTTAAAGTTCCGGAACAAACGCGATTGCTGTTTGTAGAAACCACCGCAGAACAT
CCGTTTGCCGTGACTGAACTGATGATGCCGGTGTTGCCCGTCGTGCGCGTCGCCAACGTG
GCGGATGCCATTGCGCTGGCGGTGAAACTGGAAGGCGGTTGCCACCACACGGCGGCAATG
CACTCGCGCAATATCGAGAACATGAACCAGATGGCGAATGCCATTGATACCAGCATTTTC
GTTAAGAACGGACCGTGCATTGCCGGGCTGGGGCTGGGCGGGGAAGGCTGGACCACCATG
ACCATCACCACGCCAACCGGTGAAGGGGTAACCAGCGCGCGTACGTTTGTCCGTCTGCGT
CGCTGTGTATTAGTCGATGCGTTTCGCATTGTTTAAGGAGTAACAGATGGCGCACGACGA
ACAATGGCTCACCCCACGTCTGCAAACGGCGGCAACGCTGTGTAACCAGACGCCCGCCGC
GACGGAATCTCCGCTGTGGCTGGGGGTGGATCTGGGCACCTGCGATGTGGTGTCGATGGT
TGTCGACCGCGACGGTCAGCCGGTGGCGGTATGCCTCGACTGGGCCGATGTGGTCCGCGA
CGGCATCGTCTGGGATTTCTTCGGCGCGGTCACCATTGTTCGTCGCCATCTCGACACGCT
CGAGCAGCAATTCGGTCGTCGTTTTAGCCATGCGGCGACTTCATTTCCTCCAGGTACGGA
CCCGCGTATTTCCATCAACGTGCTGGAGTCTGCCGGGCTGGAAGTGAGCCATGTGCTGGA
TGAGCCAACCGCAGTCGCGGATCTACTGCAACTGGATAACGCAGGCGTAGTGGATATCGG
CGGTGGCACTACCGGCATTGCCATCGTGAAAAAGGGCAAAGTGACGTACTCGGCGGATGA
AGCCACCGGCGGACATCACATCTCTCTGACTCTCGCCGGAAATCGCCGTATTTCGCTGGA
AGAGGCGGAGCAGTACAAGCGCGGTCACGGTGAAGAGATTTGGCCTGCGGTGAAACCGGT
GTACGAAAAAATGGCGGACATTGTCGCCCGGCATATTGAAGGGCAGGGCATTACTGATTT
ATGGCTGGCGGGCGGCTCTTGTATGCAACCGGGCGTGGCGGAACTGTTTCGCAAACAATT
CCCGGCGTTACAGGTGCATTTACCGCAGCACAGTTTGTTTATGACCCCGCTGGCAATCGC
CAGTAGTGGGCGAGAGAAAGCGGAGGGGCTATATGCAAAATGAATTGCAGACCGCGCTCT
TTCAGGCGTTCGATACCCTGAATCTGCAACGGGTAAAAACATTTAGCGTTCCACCGGTGA
CGCTTTGCGGTCCGGGCTCGGTGAGCAGTTGCGGACAGCAAGCGCAAACGCGTGGGCTGA
AACATCTGTTCGTGATGGCAGACAGCTTTTTGCATCAGGCAGGGATGACCGCCGGGCTGA
CGCGTAGCCTGGCCGTTAAAGGTATCGCCATGACGCTCTGGCCATGTCCGGTGGGCGAAC
CGTGCATTACCGACGTGTGTGCAGCCGTGGCGCAGTTGCGTGAGTCAGGTTGTGACGGGG
TGATCGCATTTGGCGGCGGCTCGGTGCTGGATGCGGCGAAAGCCGTGGCGTTGCTGGTGA
CGAACCCGGATAGCACGCTGGCAGAGATGTCAGAAACCAGCGTTCTGCAACCGCGCTTGC
CGCTGATTGCCATTCCAACTACCGCCGGAACCGGCTCTGAAACCACCAATGTAACGGTGA
TTATCGACGCGGTGAGCGGGCGCAAGCAGGTGTTAGCCCATGCCTCGCTGATGCCGGATG
TGGCGATCCTCGACGCCGCATTGACCGAAGGTGTGCCGTCGCATGTCACGGCGATGACCG
GCATTGATGCGTTAACCCATGCCATTGAAGCATACAGCGCCCTGAACGCTACACCGTTTA
CCGACAGTCTGGCGATTGGTGCCATTGCGATGATTGGCAAATCGCTGCCGAAAGCGGTGG
GCTACGGTCACGACCTTGCCGCGCGCGAGAGCATGTTGCTGGTTTCATGTATGGCGGGAA
TGGCGTTTTCCAGTGCGGGTCTTGGGTTGTGCCACGCGATGGCGCATCAGCCGGGCGCGG
CGCTGCATATTCCGCACGGTCTGGCGAACGCTATGTTGCTGCCAACGGTGATGGAGTTTA
ACCGGATGGTATGTCGCGAACGCTTTAGTCAGATTGGTCGGGCACTGCGAACTAAAAAAT
CCGACGATCGTGACGCTATTAACGCGGTAAGTGAGCTGATTGCGGAAGTTGGGATTGGTA
AACGACTGGGCGATGTTGGCGCGACATCTGCGCATTACGGTGCATGGGCGCAGGCCGCGC
AGGAAGATATTTGTCTGCGCAGCAACCCGCGTACCGCCAGCCTGGAACAGATTGTCGGCC
TGTACGCGGCGGCGCAATAAATGCCGCGTCTTATCCGGTCTGTGGGATTGCACATGTAGT
GCGGATAAGGCTTCACGCAGCATCCGCTAATAAATAACAACTAACAGGGAGTAAAGGCGA
TGGGAATTAACGAAATCATCATGTACATCATGATGTTCTTTATGCTGATAGCTGCCGTAG
ACAGGATCCTGTCACAGTTCGGCGGTTCTGCTCGTTTCCTCGGTAAGTTCGGTAAAAGTA
TCGAAGGATCAGGCGGTCAGTTCGAAGAAGGCTTTATGGCAATGGGCGCTCTGGGTCTGG
CGATGGTCGGTATGACCGCGCTGGCACCGGTACTGGCTCACGTACTCGGGCCGGTAATTA
TCCCGGTTTACGAAATGCTCGGCGCAAACCCGTCAATGTTCGCCGGAACGCTGCTGGCGT
GCGATATGGGCGGCTTCTTCCTCGCCAAAGAGCTGGCGGGCGGCGACGTAGCAGCGTGGC
TATACTCTGGGTTAATTCTCGGGTCGATGATGGGGCCAACGATTGTGTTTTCCATTCCGG
TGGCGCTCGGCATTATCGAACCTTCTGACCGTCGTTATCTGGCGCTCGGCGTGCTGGCGG
GCATTGTGACCATTCCGATTGGTTGTATCGCTGGTGGTCTGGTAGCTATGTACTCCGGTG
TTCAGATCAACGGCCAGCCGGTGGAATTCACTTTCGCCCTGATCCTGATGAACATGATCC
CGGTGATCATTGTTGCGATTCTGGTGGCGCTGGGGCTGAAATTCATCCCGGAAAAAATGA
TCAACGGCTTCCAGATCTTCGCCAAATTCCTCGTTGCATTGATCACCCTCGGTCTTGCCG
CTGCGGTAGTGAAATTCCTGCTTGGCTGGGAACTGATCCCCGGTCTGGATCCTATCTTTA
TGGCCCCTGGCGATAAACCCGGTGAGGTGATGCGCGCCATTGAAGTTATCGGTTCTATCT
CCTGCGTTCTGTTAGGGGCGTATCCAATGGTGCTGCTGCTGACCCGCTGGTTTGAAAAAC
CGCTGATGAGCGTCGGTAAAGTGCTGAATATGAACAACATCGCGGCAGCCGGCATGGTGG
CAACGCTTGCCAACAACATCCCGATGTTCGGCATGATGAAGCAGATGGATACCCGCGGCA
AAGTCATCAACTGCGCCTTCGCCGTTTCCGCTGCTTTCGCCCTGGGCGACCACTTAGGCT
TCGCCGCTGCCAACATGAATGCCATGATCTTCCCGATGATTGTCGGCAAGTTGATCGGCG
GCGTAACGGCGATTGGCGTGGCGATGATGCTGGTGCCAAAAGACGACGCGACCGCGGCTA
AAACCGAAGCGGAGGCACAATCGTGAACACTCGCCAGCTACTGAGCGTCGGTATCGATAT
CGGCACCACCACCACCCAGGTGATTTTCTCCCACCTGGAACTGGTTAACCGTGCGGCGGT
GTCGCAGGTGCCGCGCTACGAATTCATCAAACGCGAAATTAGCTGGCAAAGCCCGGTGTT
CTTTACCCCTGTCGATAAACAGGGTGGTTTAAAAGAAGCGGAACTGAAATCGCTGATTTT
AGAGCAATATCAGGCTGCGGGCATTGCGCCGGAAAGCGTTGATTCTGGTGCCATCATCAT
CACCGGTGAAAGCGCGAAAACCCGCAATGCTCGCCCGGCGGTGATGGCGCTCTCTCAGTC
GCTGGGCGATTTTGTCGTCGCCAGCGCCGGGCCGCACCTCGAATCCGTGATCGCCGGTCA
CGGTGCCGGGGCGCAAACCCTTTCTGAACAACGGCTGTGTCGGGTACTGAATATCGACAT
CGGCGGTGGCACCGCGAACTACGCCCTGTTCGATGCCGGAAAAATCAGCGGCACTGCCTG
CCTCAACGTCGGTGGTCGCCTGCTGGAAACCGACAGCCAGGGGCGCGTGGTTTACGCTCA
TAAACCGGGGCAGATGATTGTGGATGAGTGCTTCGGCGCAGGCACCGACGCCCGTTCGCT
GACCGGCGCGCAGCTGGTGCAGGTTACCCGGCGGATGGCAGAGCTGATTGTCGAAGTGAT
TGACGGAACGCTTTCGCCGCTCGCGCAGGCATTAATGCAAACCGGTTTGCTGCCCGCAGG
TGTTACGCCCGAAATCATTACGCTTTCTGGCGGCGTGGGCGAATGTTATCGCCACCAGCC
CGCCGACCCGTTCTGTTTTGCCGATATTGGCCCGCTTCTGGCAACGGCGCTGCATGACCA
TCCGCGCCTGCGTGAGATGAACGTGCAGTTTCCGGCGCAAACCGTACGCGCCACGGTGAT
TGGCGCGGGTGCACATACCCTTTCGCTCTCTGGCAGCACAATCTGGCTGGAGGGCGTACA
ACTGCCGCTGCGCAATTTGCCGGTGGCGATCCCGATTGATGAAACGGATCTGGTGAGTGC
CTGGCAACAGGCGCTGATTCAGCTGGATCTTGATCCCAAAACTGACGCGTACGTGCTGGC
GCTTCCCGCCTCGCTGCCTGTGCGTTACGCCGCGGTACTGACGGTCATCAACGCGTTGGT
CGATTTCGTCGCGCGTTTTCCGAATCCGCATCCCCTGCTGGTGGTGGCCGGGCAGGACTT
TGGTAAAGCTCTGGGCATGTTGTTGCGCCCACAGCTACAACAACTCCCGTTGGCAGTCAT
TGACGAAGTGATTGTCCGCGCGGGGGACTATATCGACATTGGTACGCCTCTTTTTGGCGG
ATCGGTTGTGCCGGTGACGGTGAAATCACTCGCATTTCCTTCCTGAGGGAACGACTTATG
AAACTAAAGACCACATTGTTCGGCAATGTATATCAGTTTAAGGATGTAAAAGAGGTGCTG
GCTAAAGCCAACGAACTGCGTTCGGGGGATGTGCTGGCGGGCGTTGCAGCGGCAAGCTCA
CAGGAGCGCGTGGCAGCAAAGCAGGTGTTGTCGGAAATGACCGTAGCGGACATCCGCAAT
AATCCGGTGATTGCCTATGAAGATGACTGCGTGACGCGGCTGATTCAGGACGATGTTAAC
GAAACGGCCTACAACCAGATTAAAAACTGGAGCATCAGCGAACTGCGTGAGTATGTGCTG
AGCGATGAAACCAGCGTGGACGACATTGCCTTTACCCGCAAAGGGCTGACCTCGGAAGTG
GTCGCGGCGGTAGCGAAGATTTGCCCCAACGCGGACCTGATCTACGGCGCGAAGAAAATG
CCGGTAATCAAAAAGGCCAATACCACCATCGGTATTCCGGGCACCTTTAGCGCCCGTTTG
CAGCCAAATGACACCCGTGACGACGTGCAAAGTATCGCCGCGCAAATCTACGAAGGGCTT
TCCTTCGGGGTGGGCGATGCGGTGATCGGCGTCAACCCGGTAACTGACGACGTGGAAAAC
TTAAGCCGCGTGCTGGACACCATCTATGGCGTGATCGACAAATTCAACATCCCAACTCAG
GGCTGCGTACTGGCGCACGTCACCACCCAGATCGAAGCGATTCGTCGTGGCGCACCAGGC
GGGCTGATTTTCCAGAGTATCTGTGGCAGTGAAAAAGGGCTGAAAGAGTTTGGCGTGGAA
CTGGCGATGCTCGACGAAGCGCGCGCAGTGGGTGCAGAGTTCAACCGTATCGCCGGGGAA
AACTGCCTCTACTTCGAAACCGGGCAAGGTTCGGCGCTGTCGGCGGGTGCCAACTACGGC
GCAGACCAGGTGACCATGGAAGCGCGTAACTACGGGCTGGCGCGTCATTACGATCCGTTT
ATCGTCAACACCGTGGTCGGCTTTATTGGGCCGGAGTATCTCTACAATGACCGCCAGATT
ATTCGTGCGGGCTTAGAAGATCACTTTATGGGCAAGCTGAGCGGCATCTCTATGGGCTGT
GACTGCTGTTACACCAACCACGCTGACGCTGACCAGAACCTCAACGAAAACCTGATGATC
CTGCTCGCCACCGCAGGCTGCAACTACATCATGGGGATGCCGCTGGGTGATGACATCATG
CTCAATTACCAGACCACCGCATTCCACGATACCGCCACTGTGCGTCAGTTACTCAACCTG
CGCCCGTCACCGGAGTTTGAACGCTGGCTGGAAAGCATGGGCATTATGGCAAACGGTCGC
CTGACCAAACGGGCGGGCGATCCGTCACTGTTCTTCTGATGACGCGGAGATAACACATCA
TGGATCAAAAACAGATTGAAGAAATTGTACGCAGCGTGATGGCGTCAATGGGACAAACGG
CCCCCGCGCCGTCAGAAGCAAAGTGCGCCACTACCACCTGTGCGGCACCGGTGACCTCGG
AAAGCTGTGCGCTGGATTTAGGTTCCGCTGAAGCAAAAGCGTGGATTGGTGTTGAAAACC
CGCATCGCGCAGACGTATTAACAGAACTGCGCCGCAGCACCGTGGCCCGCGTTTGTACCG
GTCGTGCCGGTCCGCGTCCGCGTACCCAGGCGCTGCTGCGTTTCCTGGCCGATCACTCTC
GTTCGAAAGATACCGTACTGAAAGAAGTGCCGGAAGAGTGGGTGAAAGCGCAGGGCTTGC
TGGAAGTACGCTCCGAAATTAGCGACAAAAATCTCTACCTGACTCGCCCGGATATGGGGC
GCCGCCTGTGTGCAGAAGCTGTTGAAGCGCTGAAAGCACAGTGTGTTGCTAATCCGGACG
TACAGGTCGTTATTTCTGATGGCCTGTCAACTGATGCGATCACCGTGAACTACGAAGAGA
TCCTGCCACCGCTGATGGCGGGCCTGAAACAGGCCGGGCTGAAAGTCGGTACACCATTCT
TTGTTCGTTATGGTCGCGTGAAGATTGAAGATCAGATCGGTGAGATCCTCGGCGCGAAAG
TAGTGATCCTGCTGGTGGGCGAACGTCCGGGGTTGGGTCAGTCAGAAAGCCTCTCCTGCT
ACGCCGTTTACTCGCCGCGTATGGCGACCACCGTTGAGGCCGATCGCACCTGTATCTCTA
ACATTCACCAGGGCGGCACGCCGCCGGTTGAAGCCGCAGCCGTCATTGTGGATTTGGCGA
AACGTATGCTGGAGCAGAAAGCATCCGGCATCAACATGACCCGATAAGGAGGCATCATGC
CAGCTTTAGATTTGATTCGACCGTCGGTAACCGCCATGCGGGTGATTGCCTCCGTTAACG
CCGAATTTGCGCGTGAACTGAAATTGCCGCCGCATATTCGTAGCCTCGGGCTGATTTCTG
CTGATTCCGATGATGTCACCTACATTGCCGCTGATGAAGCAACCAAACAGGCGATGGTCG
AAGTGGTGTATGGCCGCTCGCTGTATGCGGGCGCTGCACACGGCCCGTCACCGACTGCCG
GTGAAGTGCTGATTATGCTTGGTGGGCCAAACCCGGCGGAAGTGCGTGCAGGTCTGGATG
CGATGGTTGCGCATATTGAAAATGGCGCTGCTTTCCAGTGGGCTAATGATGCGCAAGATA
CGGCATTCCTGGCACATGTAGTTTCGCGTACCGGTTCTTATCTCTCATCAACCGCCGGGA
TCACGCTTGGCGATCCGATGGCGTATCTGGTGGCACCGCCGCTGGAAGCGACCTACGGCA
TTGATGCAGCGTTGAAATCTGCCGACGTACAGCTGGTGACCTATGTCCCGCCACCGTCTG
AAACTAACTACTCGGCAGCATTTTTAACCGGTAGCCAGGCAGCGTGTAAAGCGGCCTGTA
ACGCCTTTACCGATGCAGTGCTGGAAATCGCGCGTAATCCAATCCAGCGTGCGTAATGGA
GGTTGCCGATGATCAATGCACTGGGATTGCTGGAAGTGGACGGCATGGTCGCTGCGATAG
ATGCAGCGGATGCCATGCTCAAAGCAGCTAACGTTCGTCTGCTCAGTCACGAAGTGCTTG
ACCCTGGTCGCTTAACGCTGGTGGTGGAAGGCGATCTGGCGGCGTGTCGTGCTGCGCTGG
ACGCAGGTTGTGCTGCCGCGATGCGTACCGGGCGTGTCATCAGCCGTAAGGAGATCGGTC
GGCCAGACGATGACACCCAGTGGCTGGTTACTGGCTTTAACCGCCAGCCGAAGCAACCCG
TACAGGAACCCGACGCGCCAGTTATCGTCGCGGAATCTGCTGACGAGTTGTTGGCGCTGT
TAACATCAGTACGTCAGGGAATGACGGCAGGAGAAGTGGCTGCCCACTTTGGCTGGCCGC
TGGAAAAAGCCAGAAATGCGCTCGAACAGCTCTTTTCTGCCGGGACGTTACGTAAACGCA
GTAGTCGTTATCGTCTCAAGCCCCATTAACCTGTCGGAGGTGCCGGGTGTCCTACAACAC
CCGGCATTAACATCATGAAAAAGACCCGTACAGCCAATTTGCACCATCTTTATCATGAAC
CCTTACCCGAAAACCTGAAGCTCACGCCGAAGGTCGAAGTGGATAATGTTCATCAACGAC
AGACAACGGATGTCTATGAACATGCTTTAACGATTACCGCCTGGCAGCAGATTTACGATC
AGCTGCATCCGGGCAAGTTTCATGGTGAATTTACGGAAATTCTACTCGATGATATTCAGG
TTTTTCGTGAATACACCGGTCTGGCGCTGCGTCAGTCGTGTCTGGTCTGGCCGAACTCGT
TCTGGTTTGGCATTCCGGCGACGCGCGGTGAGCAGGGATTTATCGGTTCGCAATGTCTGG
GAAGCGCAGAAATAGCGACGCGCCCTGGTGGAACCGAGTTTGAATTAAGTACGCCGGACG
ATTACACGATCCTGGGCGTAGTGCTTTCTGAAGATGTCATCACCCGTCAGGCTAACTTTT
TGCATAATCCGGATCGGGTATTACATATGTTGCGTAGCCAGTCGGCGCTGGAAGTGAAAG
AGCAGCATAAAGCCGCGCTGTGGGGCTTTGTCCAACAGGCGCTGGCGACGTTTTGCGAGA
ACCCGGAAAATCTTCATCAGCCTGCAGTGCGAAAAGTGCTGGGGGATAATTTGCTAATGG
CGATGGGGGCGATGCTGGAAGAAGCGCAACCAATGGTGACGGCGGAAAGCATCAGTCATC
AGAGTTACCGTAGATTACTTTCCCGCGCCCGTGAATATGTGCTGGAAAACATGTCCGAAC
CGGTGACGGTGCTGGATTTGTGTAATCAACTGCATGTCAGCCGCCGCACGCTACAAAACG
CGTTTCACGCTATTTTAGGCATTGGCCCAAACGCGTGGCTGAAACGCATTCGCCTGAACG
CCGTACGCCGCGAACTGATAAGCCCGTGGTCGCAAAGCACAACGGTAAAAGACGCCGCCA
TGCAGTGGGGATTCTGGCATCTGGGGCAATTTGCCACGGATTACCAGCAGCTGTTTGCCG
AGAAGCCGTCGTTGACGTTGCATCAGCGGATGCGGGAATGGGGGTGAGGGAGTTACACCC
AATCCCTGACCTTAATAAACTCACTTAACGCCGCTTCTGGGCTGCCATCTTTTGGCTGAT
AATCATACTCCCAGCGTACCAGTGGCGGCATTGACATCAGGATCGACTCGGTGCGCCCGC
CAGTTTGCAGGCCAAACAGAGTGCCGCGATCCCAGACCAGATTGAACTCGACATAACGAC
CGCGACGGTAGAGCTGAAAATTGCGCTCGCGCTCGCCGTAGGCCATCGCTTTCCGTCGCT
CTACAATTGGTAAATAAGCGTCGGTGTAGCCTTTGCCTACCGCCTGCATAAAGGCAAAAC
AGTGGTCGAAATCTGGCGTGTTCAGATCATCAAAGAACAGCCCGCCAATACCGCGCTGTT
CGTTGCGATGTTTGAGGTAGAAGTAATCGTCGCACCATTTTTTGTAACGGGGATAAACGT
CTTCACCAAATGGCAGGCACAGGTCACGGGCGGTGCGGTGCCAGTGAATGGCATCTTCTT
CAAAACCATAGAAAGGGGTTAAATCGAAGCCGCCGCCAAACCACCAGACTGGCTCTGCAC
CCGGTTTTTCGGCAATAAAAAAGCGCACATTCGCGTGGCTGGTGGGAACATACGGGTTAT
GCGGATGCACTACCAGTGAAACGCCCATCGCCTCGAAACTGCGCCCGGCAAGTTCCGGGC
GATGAGCGGTGGCGGAAGCAGGCATCGCCTCACCATGGACATGTGAAAAGTTGACGCCCG
CCTGTTCGAAAACACCACCATTACGCAACACCCGGCTACGTCCGCCGCCGCCAGCTTCGC
GCTGCCAGCTATCTTCGACAAATTCTGTGCCATCGACGGCGGTCAGCTGCTGACAAATCG
TATCCTGAAGGTTGAGCAGAAACTGTTTAACCTGGTGTGCGTCGGGTTTCATAACTTATC
GCTTTTTCGAATGTGCTTTCTGGTTGTCGAACCAGTGGAAATAACTGATCACGCCTTCAG
CAATCGCTGTGGCGATTTTCTGACGAAACGCCGCCGTGCCTAACAGTCGCTCTTCTTCTG
GGTTGGTGATAAACGAGGTTTCCACCAGCACCGAAGGAACCGACGGCGATTTCAACACCA
CAAACGCGGCTTGTTCGGTGTTGCGGCTGTGCAGTTTATGCACCGGCTTAATCTTTTTCA
GAATATGCGAGCCGAGCGTCAGGCTGTTTTTAATAGTATCGGTTTGCACCAGATCAAACA
GCACTTGCTGCAATAGGTGATCCTTGTCAGTCGCCTTTTTACCGGCAACTTCATCGGCGC
GGTTTTCGCGTTCAGACAGGTATTTCGCCATTGCGCTACTTGCCCCACGGTTAGAGAGGG
CAAATACCGAAGCACCGGCAGCTTTCGGGTTGGTAAAGCCATCGGCATGAATTGACATAA
ACAGATCTGCGCCATGTTTATGGGCGATTTCAACGCGATCGTAAAGTGGGATAAACGTAT
CGCCAGAACGCGTTAAACGCGCATCAATCCCATGATTACGCAAAATGGAACGGACGTTTT
TAGCAATCGCCAGCACCACATGTTTTTCTTTCGAACCGTTGCGCCCGATCGCTCCGGTAT
CAATTCCGCCGTGGCCTGGATCGAGAACAACGACACGTTTGCCGCCAGATTTTTTGGCTT
TCGGCTTGCTGTGTCCGTTGCTGGTTTTTAAAGGTTCGTCTTTGGCGATGGCTTGCGACA
TTCCTGACAACGTCAGGGCAGCCAAACCGGCTTTCAGCACCTGGCGGCGCGAAGTGAGTG
TTTTTAGTGGTTTAAAAGTGCTCATACGGCCTGAGTTGTAATAATAAAGTTCCAGATGTT
ATATCGTATCGCGTAATCCGTTACGACCGTTTGCTGTTGAGAATTGTTTTACTTTTCATT
TCAATAGTTGACAACTCCCCATTATGCCACTTTTTCAACCGATTTTCGTCAGATATTGGC
TAATTCGACCGTTCACGCCATAATCAGCCTTTTAACCCGCAAAAAGGTAACGAATACCAT
GGAGATACGCGTATTTCGCCAGGAAGATTTCGAAGAGGTCATCACCCTTTGGGAGCGTTG
CGACTTGCTGCGTCCGTGGAACGATCCGGAAATGGACATCGAGCGTAAGATGAACCATGA
CGTCAGTTTGTTTCTGGTCGCTGAGGTGAACGGTGAAGTGGTCGGAACGGTGATGGGCGG
TTATGACGGGCATCGCGGGTCTGCTTATTATCTTGGCGTGCATCCAGAGTTTCGTGGGCG
TGGAATTGCCAATGCGTTGCTTAACCGGCTGGAGAAAAAGCTGATTGCTCGCGGCTGCCC
GAAAATTCAGATCAACGTGCCGGAAGATAACGACATGGTGCTCGGAATGTATGAACGCCT
GGGATATGAACACGCCGACGTGCTGAGTCTGGGTAAGCGTTTGATTGAAGATGAAGAGTA
CTGAGTTTCATCCTGTCCATTATGATGCGCACGGTCGCCTGCGTTTACCCTTGCTCTTCT
GGCTTGTGCTATTGCTTCAGGCGCGAACCTGGGTGCTGTTTGTTATTGCCGGTGCGTCGC
GCGAGCAGGGTACTGCGCTGCTAAATCTGTTTTATCCCGATCACGATAATTTCTGGCTGG
GGCTGATTCCTGGCATTCCGGCGGTGCTGGCGTTTTTGCTGAGTGGTCGGCGGGCTTCGT
TTCCCCGTATCTGGCATGTGCTCTATTTTCTGTTGCTGTTGGCGCAAGTGGTTTTACTTT
GCTGGCAACCGTGGCTGTGGCTGAACGGTGAATCCGTTAGCGGTTTCGGTCTGGCGCTGG
TAGTGGCGGATATTGTGGCATTAATCTGGCTGCTGACCAATCGACGTTTACGCGCTTGTT
TTAATGAAGTAAAAGAATAACGGCACTTTTTGGTGAATTTGCACTCCAAGCAACGTTATT
GAATAACCAAAGGAAGTGACATGAAATCGCTGCGTTTAATGTTATGCGCTATGCCATTGA
TGCTGACCGGCTGTTCCACGATGTCGTCAGTTAACTGGTCTGCCGCTAACCCGTGGAACT
GGTTTGGGTCGTCCACCAAAGTGAGCGAGCAGGGCGTTGGTGAATTAACGGCGTCCACAC
CACTGCAAGAACAAGCCATTGCCGATGCGCTTGATGGCGATTATCGCCTGCGCAGCGGAA
TGAAAACCGCGAACGGCAACGTGGTGCGCTTTTTTGAAGTGATGAAGGGCGACAACGTGG
CGATGGTGATTAACGGCGATCAAGGCACGATCAGTCGCATTGACGTGCTGGATAGCGATA
TTCCTGCTGACACCGGTGTTAAAATCGGTACACCGTTTAGCGACCTTTACAGCAAAGCAT
TTGGCAATTGCCAAAAAGCTGATGGTGATGATAATCGTGCCGTCGAATGTAAAGCCGAAG
GCAGTCAACATATTAGCTACCAGTTCAGCGGGGAATGGAGTGGTCCTGAAGGGTTAATGC
CTTCGGACGATACCCTGAAAAACTGGAAAGTCAGTAAAATTATCTGGCGGCGTTAATTTG
CGTCTGAACAAACCGCCGCCGCGAAAAAACACGTAAAATAGCGCTCAACAATGCCACGGA
TTGCGTGGCATTATTATTTTCAGGAGGAACAATGTCTCAGGTTCAGAGTGGCATTTTGCC
AGAACATTGCCGCGCGGCGATTTGGATCGAAGCCAACGTGAAAGGGGAAGTTGACGCCCT
GCGTGCGGCCAGTAAAACATTTGCCGACAAACTGGCAACTTTTGAAGCGAAATTCCCGGA
CGCGCATCTTGGTGCGGTGGTTGCCTTTGGTAACAACACCTGGCGCGCTCTGAGCGGCGG
CGTTGGGGCAGAAGAGCTGAAAGATTTTCCGGGCTACGGTAAAGGCCTTGCGCCGACCAC
CCAGTTCGATGTGTTGATCCACATTCTTTCTCTGCGTCACGACGTAAACTTCTCTGTCGC
CCAGGCGGCGATGGAAGCCTTTGGTGACTGCATTGAAGTGAAAGAAGAGATCCACGGCTT
CCGTTGGGTGGAAGAGCGTGACCTGAGCGGCTTTGTTGACGGTACAGAAAACCCGGCGGG
TGAAGAGACGCGTCGCGAAGTGGCGGTTATCAAAGACGGCGTGGATGCCGGCGGCAGCTA
TGTGTTTGTGCAGCGTTGGGAGCACAACCTGAAGCAGCTCAACCGGATGAGCGTTCACGA
TCAGGAGATGATGATCGGGCGCACCAAAGAGGCCAACGAAGAGATTGACGGCGACGAACG
TCCGGAAACCTCTCACCTCACCCGCGTTGATCTGAAAGAAGATGGCAAAGGGCTGAAGAT
TGTTCGCCAGAGCCTGCCGTACGGCACCGCCAGTGGCACTCACGGTCTGTACTTCTGCGC
CTACTGCGCGCGTCTGCATAACATTGAGCAGCAACTGCTGAGCATGTTTGGCGATACCGA
TGGTAAGCGTGATGCGATGTTGCGTTTCACCAAACCGGTAACCGGCGGCTATTATTTCGC
ACCGTCGCTGGACAAGTTGATGGCGCTGTAAGCGTTTCTGATTCATTGATTAAAGGCCAG
GCAGTAACATTACTGACTGGCCTTTTTATTACTTTTGCTTTAACGCCGCATACACCTGAT
CAACTACCCAACCATACGTTGCAATCGGCAGCTGACCGCTTTCGAACATATTGGGATTCT
TTTGCGGATCGGCAACCGGCGAATGTGGCTTGTTGCTTAACATCACAATCGCCATATGAT
TCACCGGATCGATAACGGTCACCGTTCCGGTCCAGCCAGTGTGACCGTAGGTTTGCGGGC
TTGCCAGCGTGCCAAACGTCGGCGTCATGGTGGCATTACCATTCACGCGCCAGCCGAGGC
CAAAAGTGGCATCTTCCTTAGAGCTGGTGGTGAACATCTTCACCGTTTCCGCACTGAACA
GCTGCACATCGCCATAGCCCCCGCCGTTCAGCATCGTTTGCATTAACACCGCAATATCGC
CGGTATTGGAAAACAAACCTGCGTGCCCGGAAACGCCGCCCATCGAATAAAAGGCTTTTT
CATCGTGCACCTGACCCCAGAGAGTGGAGGTGCGGATATTCGGGAAGTGGATCACTCCAT
CGCGGGTATTGCCGTTCAATTCCGTGGCGGCAATTTGTTGCGGTTTAAAGCCTTTCAGCA
GCGGGTTAAATACCGTATGTGTCAGGCCGAGCGGGCGATAAATCGACTCTTCAACATAGC
GGTCAAGCGGCTGACCGGTGACCGACTCGACGATAAATCCAAGCAGCATATAATCGACAT
CACTGTAAATATGCTTGCTGCCGGGCTGATACTCTAGCGGCGTGCGCTTGATCATCTCCA
GCGTCTGGCCTTTATCCTGGGAATATAACGCGCCCGCGACCGCTTTATTCGGATATTGTG
GGTCCGCCGGGAAACCGCCGCTGTGATGCAGCAGGTCAGAAATCCGCAGCGTGTTTTTGC
CTTTGATGGTGTCATTTGGACTATCGGCAAACCCCGAAATATATTTCGCAATCCGATCGT
CAGGATGCAGCTTGCCTTCGCTCATTAGCTTTTGCAGAGCAAAGTTAGTGGCGTACATTT
TGGTATTGGAAGCCAGGTCATACAGCGTCCCGGTGGTGGCTTTGACAGGCTGTTCCATCA
ATACGCTGCCATCGTACTTTTTCGCCGCTCCCCAGGCTTTGCGATACACAATCTGATTAT
CTTTTATAATCAGCAGGTTTACGCCGGGATAACCGGCGTCCACTTGCTGGCTAATCCAGC
GATCCATCTGGTTAAGCCGTTCGACGTTGAACCCTGCTTTCTCTGGCGAACTTTCTGTCA
GAACAGGGTATTTTGCGGCGCTGACGCTACAACTGACAGCCAGCAGAGAAAGATAGAGCA
TTGTCCGTTTCATAATATCAGTCCAGATTGACGTTACGGCAGCCAAAGAGCGTGGTGAAA
ATAAACCCGCAAACCCATGCCACCAGAATCCCACCTGCATATACCGCCATGGCCGGAAGG
ATGCCTTGCGCGGATGTCATCAGCGGCAGCGCCACCAGACCAGACGGCCCAAAGGCGCTG
TTTAAGCCCATCGGCAGACCCCACCAGGCTATCAGCCCGATAAACAAACCGCCCGCTGCG
CCGCCTAAACAGGCGGTAATAAACGGTTTCATGCGGGGCAGGGTGACGCCGTAAATCAGC
GGTTCGCCAACGCCCAGCAGACCAGGAATAATCGCCCCGCGTACCTGACTGCGTAATGCA
CTGTGCGGTTGCGCCCGCCAGTAGAGTGCCAGCGCCGCGCCCACCTGGCCCGCGCCTGCC
ATTGAAAGGATGGGAAATAAGCTGTTGAATCCCTGGCTGTCCATTAACGCGAGGTAAACA
GGAATAAAGCCCTGATGCACGCCAAATACCACGGCGATCAGGAACAGCCCGGCTAAAACC
GCACAACCGAGCGGATTACTGTTCAGGTGCATAAACAGCCACGACATACCTTCGAATAAC
CAGCCGCCCAGCGGCATAATGATCAGGTAGGCCAGCGTAGCGGTGATCAGTAGGGTGATT
AACGAGGTCAGCAGCATGTCGAGATCGTCCGGCATAAAGCGGCGCACCATGCCTTCAATG
CGAGCGCAGGCCCATGCGGCAATCAACACGCCGATAATATTGCCGCGCGGATCGATGGGC
AGACCAAAGAAATCGTGAAAACCGGCGTAGTAACCGGTGGTTGCAGCGGGGTTATAACCG
AGCAAAAAGAGTGCGGCAATAATTGCGCCATTGACGCCCGTGCCGCCAAATGCCTGGGCG
GCGTTATAGCCCACCAGAATCACCAGGAAGGTGAACAAACCTTTGCTGAACACCTTCATA
AAATTCAGCGCGTCGGGTAGCGTGCCCTGAGCATCTGCCGGAACGTGCATCACCGTGGCA
AATAACGTCGCTATCCCCAGCAGCAGACCGGCGGCAATAAAACCGGGGATAAGCGGCGTA
AAGATGGTGGCGAATTTAGCGAGAAATTGTTGCACGCCGGAGGTTTGTTTGGCTTTTAAC
TGACGTTTGTTCTGGGCGGCGATTTCTGCGGCATCCTGTACCGGTGCTTCTCCCAGCAGC
TCGCTCATCGCTTTTGCGGCACGATGCGCTTTACCAGGCCCAAAAACGACCTGCACCTGG
TCGCTGGTCAAAATGACGCCCTTCACGCCTTCCAGCGTTTTGATATTGGGATCAACCAGT
GAACTGTCATGTACACCCAGACGCAGGCGCGTCATACAGTTACCACAACTGGCGATATTT
CCCGGTCCGCCGACACGGGTAAGAATGGTGTTCAGAAGTTCACTGCTGATCTCTTTGACC
ATGGGTTATTCCTTGTCTAAAACCTGACGAATAAAGCCGCCGTGTTGATCCAGGCGTTTT
TTAGCTTCTGTGGCATCGAGATTTTTCAGCACCATCACAATGGCCGTTTTACAGTTGCGC
TCGCAGGCAATTAACGCCGCTTCCGCTTGTTCGGCATTACATCCGGTGGCGTTTTTAACG
ATATTGACCTGGCGCACATGCAGTTTTTCGTTGGTGGCGACCACATCGACCATCAGGTTG
CCGAACACTTTGCCGGATTTAATCATCAGCCCGGTGGAGAGCATATTGAGCACCAGTTTC
TGCGCTGTACCTGCTTTCATCCGCGAAGAACCGGTAACCACTTCGGCACCTACAATCGGT
GTAATGGCAAACTCTGCGGTGGTTGAAACGGCGCTCCCCGGATTACAGGAAATTCCCACT
GTGCGGCAGCCGAGCTGGCGTGCGTATTCCAGTCCGGCAATTACATACGGCGTGCGACCA
CTGGCCGCAATACCAACCACCACATCCTGTGCTGTTAAATTAATATTTTTCAGATCGTTA
ACACCACCTTCCCGGCTATCTTCAGCGCCTTCCACCGCGTGCTGAATGGCATATTCGCCT
CCAGCAATCAAACCAACTACCAGACCCGGTTTCACGCCGTAGGTGGGCGGACATTCGCTG
GCATCCAGAATCCCCAGACGACCGGATGTTCCCGCACCGAGATAAATCAGACGACCGCCG
CCGCTTACCTGGGCGTGGATAACATCGATCGCCGCGGCGATATCCGGCAGTACGCGCTCA
ACGGCAAGCGGTACGGTTTTATCTTCATCGTTGATAATCCGGCACATTTCCAGCGTTGAT
ACGCGGTCAATTTCAGCCGAGGCGGCGTTCGAGCCTTCGGTAATCATCTTTTCAAGTTGC
ATCGGTGGTGACCTTACTATTTACGATCAAATAATTGCAGATGTATGGAATCATATATCC
CGAATTGACAGACTTAAAGGAATCATTGAGTCTACACTCGCAGAGTGTGAAGAGCGTCAT
AAGAACTTAAGCGGAATTTTTGCTGCCAGCCCAGGAGAGTGGAAGATGTTGTACCTGACG
AAAATACGCAATGCGGAAAGTGAATTTACCGAGAACGAGCAAAAAATTGCTGACTTTCTG
CGGGCCAACGTGAGTGAGCTGAAATCCGTCTCTTCGCGCAAGATGGCGAAACAGCTCGGC
ATCAGCCAGTCGAGTATTGTGAAATTTGCCCAGAAGCTCGGCGCGCAAGGATTTACTGAA
TTGCGTATGGCGTTAATTGGCGAATACAGTGCCAGCCGGGAGAAAACGAATGCCACGGCG
CTGCACCTGCACAGTTCGATTACCAGTGATGATTCGCTGGAAGTGATTGCCCGCAAATTG
AATCGCGAAAAAGAGCTGGCGCTGGATCAAACCTGTGCGTTGTTCGACTACGCGCGGATG
CAAAAAATCATTGAGGTCATCAGTAAAGCACCGTTTATCCAGATAACGGGCCTGGGCGGA
TCGGCGCTGGTGGGGCGCGATCTGTCGTTCAAACTGATGAAAATTGGCTATCGCGTGGCC
TGCGAAGCCGACACGCACGTACAAGCTACCGTTTCCCAGGCGTTGAAAAAAGGCGATGTA
CAAATCGCTATCTCTTACAGCGGCAGTAAAAAAGAGATTGTCTTGTGCGCAGAAGCGGCA
CGAAAGCAGGGGGCAACGGTGATTGCCATTACTTCTCTGGCTGACTCTCCGCTGCGGCGG
CTGGCGCATTTCACGCTCGATACCGTTTCCGGTGAAACCGAATGGCGTAGCTCGTCGATG
TCTACCCGCACGGCGCAAAATTCTGTTACCGATTTACTGTTTGTTGGTCTTGTGCAACTC
AATGATGTGGAGTCATTGAAAATGATTCAGCGCAGCAGTGAGCTAACACAACGCCTGAAA
TGATGCATAAAGCAGCGACTGGATTGAGATTTTCCTGAATTAGTGAGCTGATCCGCAGCA
ATATTTTGTTTATCCTGTATTTTCAGAGGGAATGGAGTGTAACGCTCTGTATTAACAAGG
AGAGCATTAAAATGGGTAAACTCACGGGCAAGACAGCACTGATTACGGGCGCATTGCAGG
GAATTGGCGAAGGAATTGCCAGAACTTTTGCGCGTCATGGCGCAAACCTAATCTTGCTGG
ATATCTCCCCTGAGATCGAAAAGCTGGCGGACGAACTGTGTGGTCGTGGTCATCGCTGTA
CGGCGGTTGTCGCCGATGTGCGTGACCCGGCGTCGGTAGCCGCAGCTATCAAACGCGCGA
AGGAAAAAGAAGGGCGCATTGATATCCTGGTGAATAACGCAGGCGTTTGTCGTCTGGGCA
GTTTCCTCGATATGAGCGATGACGATCGCGATTTCCATATTGATATCAATATTAAAGGCG
TATGGAACGTCACGAAGGCGGTGTTGCCGGAGATGATTGCCCGCAAAGATGGTCGCATTG
TGATGATGTCTTCAGTCACTGGCGATATGGTGGCCGATCCGGGTGAAACGGCGTATGCCT
TAACGAAAGCGGCGATTGTTGGCCTGACTAAATCGCTGGCGGTGGAGTACGCGCAGTCTG
GTATTCGCGTTAACGCCATCTGCCCGGGATACGTTCGCACGCCAATGGCGGAAAGCATTG
CCCGCCAGTCGAACCCGGAAGATCCAGAATCGGTGCTGACTGAAATGGCAAAAGCAATCC
CGCTGCGTCGCCTCGCCGATCCGCTGGAAGTCGGCGAACTGGCAGCCTTCCTCGCATCGG
ATGAATCAAGTTATTTAACCGGTACACAGAATGTGATTGATGGCGGCAGCACACTGCCGG
AGACGGTTAGCGTCGGCATCTGATTCACCTCTGTTTCCTCCCTGCATGTGTGGGGAGGAT
TTCGTCTTATTCCCTTTTCAACTTCCAAATCACCAAACGGTATATAAAACCGTTACTCCT
TTCACGTCCGTTATAAATATGATGGCTATTAGAAAGTCATTAAATTTATAAGGGTGCGCA
ATGGCCGTTAACTTACTGAAAAAGAACTCACTCGCGCTGGTCGCTTCTCTGCTGCTGGCG
GGCCATGTACAGGCAACGGAACTGCTGAACAGTTCTTATGACGTCTCCCGCGAGCTGTTT
GCCGCCCTGAACCCGCCGTTTGAGCAACAATGGGCCAAAGATAACGGCGGCGACAAACTG
ACGATAAAACAATCTCATGCCGGGTCATCAAAACAGGCGCTGGCAATTTTGCAGGGCTTA
AAAGCCGACGTTGTCACTTATAACCAGGTGACCGACGTACAAATTCTGCACGATAAAGGC
AAGCTTATCCCGGCGGACTGGCAGTCGCGCCTGCCGAATAATAGCTCGCCGTTCTACTCC
ACCATGGGCTTCCTGGTGCGTAAGGGCAACCCGAAGAATATCCACGACTGGAACGACCTG
GTGCGCTCCGACGTGAAGCTGATTTTCCCGAACCCGAAAACGTCGGGTAACGCGCGTTAT
ACCTATCTGGCGGCATGGGGCGCAGCGGATAAAGCTGACGGTGGCGACAAAGCCAAAACC
GAACAGTTTATGACCCAGTTCCTGAAAAACGTTGAAGTGTTCGATACTGGCGGTCGTGGC
GCGACCACCACTTTTGCCGAGCGCGGCCTGGGCGATGTGCTGATCAGCTTCGAGTCGGAA
GTGAACAACATCCGCAAACAGTATGAAGCGCAGGGCTTTGAAGTGGTGATTCCGAAAACC
AACATTCTGGCGGAATTCCCGGTGGCGTGGGTCGATAAAAACGTGCAGGCCAACGGTACG
GAAAAAGCAGCAAAAGCCTACCTGAACTGGCTCTACAGCCCGCAGGCGCAGACCATCATC
ACCGACTATTACTACCGCGTAAATAACCCGGAAGTCATGGACAAACTGAAAGATAAATTC
CCGCAGACCGAACTGTTCCGCGTGGAAGACAAATTTGGCTCCTGGCCGGAAGTGATGAAA
ACCCACTTCACCAGCGGCGGCGAGTTAGACAAGCTGTTAGCGGCGGGGCGTAACTGATGT
TTGCAGTTTCATCAAGACGCGTGCTGCCGGGCTTTACCTTAAGCCTCGGCACCAGTCTGC
TGTTTGTTTGCCTGATTTTGCTCCTGCCACTCTCCGCGCTGGTGATGCAGCTGGCCCAGA
TGAGCTGGGCGCAGTACTGGGAGGTGATCACCAACCCGCAGGTGGTCGCAGCCTACAAAG
TGACGCTGCTGTCGGCGTTTGTGGCATCGATTTTTAACGGCGTTTTCGGCCTGCTGATGG
CGTGGATCTTAACTCGTTATCGCTTCCCTGGCCGCACGCTGCTTGATGCGCTGATGGATT
TACCCTTTGCGCTGCCAACGGCAGTCGCCGGTTTAACGCTGGCCTCGCTCTTTTCCGTGA
ACGGTTTTTACGGTGAATGGCTGGCGAAGTTTGATATCAAAGTCACCTACACCTGGCTTG
GGATTGCGGTGGCGATGGCCTTTACCAGCATTCCGTTTGTGGTGCGTACCGTGCAGCCGG
TGCTGGAAGAGTTAGGCCCGGAATATGAAGAAGCGGCGGAAACGCTTGGTGCAACGCGCT
GGCAGAGTTTCTGCAAAGTGGTGCTGCCGGAACTTTCTCCGGCGCTGGTGGCGGGCGTGG
CGTTGTCGTTTACCCGTAGTCTTGGTGAGTTTGGCGCGGTGATATTTATCGCCGGGAACA
TCGCCTGGAAGACGGAAGTGACGTCGCTGATGATTTTTGTGCGCTTGCAGGAGTTTGATT
ACCCGGCAGCGAGCGCGATTGCTTCGGTGATCCTCGCGGCATCTCTGCTGCTGCTGTTCT
CAATTAACACTCTGCAAAGTCGCTTTGGTCGGCGTGTGGTAGGTCATTAATGGCGGAAGT
TACCCAATTGAAGCGTTATGACGCGCGCCCGATTAACTGGGGCAAATGGTTTCTGATTGG
CATCGGGATGCTGGTATCGGCGTTCATCCTGCTGGTGCCGATGATTTATATCTTCGTACA
GGCGTTCAGCAAAGGGCTGATGCCGGTTTTACAGAATCTGGCCGATCCGGATATGCTGCA
CGCCATCTGGCTGACGGTGATGATCGCGCTGATTGCCGTACCGGTAAACCTGGTGTTCGG
CATTCTGCTGGCCTGGCTGGTGACGCGCTTTAACTTCCCTGGACGCCAGTTACTGCTGAC
GCTACTGGACATTCCGTTTGCCGTATCGCCGGTGGTTGCCGGTCTGGTGTATCTGCTGTT
CTACGGCTCTAACGGCCCGCTCGGCGGCTGGCTGGATGAACATAATCTGCAAATTATGTT
CTCCTGGCCGGGAATGGTGCTGGTCACCATCTTTGTGACATGTCCGTTTGTGGTGCGCGA
GCTGGTGCCGGTGATGTTAAGCCAGGGCAGCCAGGAAGACGAAGCGGCGATTTTGCTTGG
CGCGTCTGGCTGGCAGATGTTCCGCCGTGTCACATTGCCGAACATCCGCTGGGCGCTGCT
TTATGGCGTAGTGCTGACCAACGCCCGCGCGATTGGCGAGTTTGGCGCGGTGTCGGTGGT
TTCCGGCTCGATTCGCGGCGAAACACTTTCGCTGCCGTTACAGATTGAATTGCTGGAGCA
GGACTACAACACCGTCGGCTCCTTTACCGCCGCCGCGCTGTTGACGCTGATGGCGATTAT
CACCCTGTTTTTAAAGAGTATGTTGCAGTGGCGTCTGGAGAATCAGGAAAAACGCGCGCA
GCAGGAGGAGCATCATGAGCATTGAGATTGCCAATATTAAGAAGTCTTTTGGTCGCACCC
AGGTGCTGAACGATATCTCACTGGATATTCCTTCAGGTCAGATGGTCGCGTTGCTGGGGC
CGTCCGGTTCCGGGAAAACCACGCTGCTGCGCATTATCGCCGGGCTGGAGCATCAAACCA
GCGGGCATATTCGCTTCCACGGCACCGACGTGAGCCGCCTGCACGCACGTGATCGTAAAG
TCGGTTTCGTGTTCCAGCATTACGCGCTGTTCCGCCATATGACGGTGTTCGACAATATCG
CTTTTGGCCTGACGGTGCTGCCGCGTCGCGAGCGCCCGAATGCCGCAGCCATCAAAGCGA
AAGTGACAAAATTGCTGGAAATGGTCCAGCTTGCCCATCTGGCGGATCGTTATCCGGCGC
AGCTTTCCGGCGGCCAGAAACAGCGCGTGGCGCTGGCGCGCGCGCTGGCTGTGGAACCGC
AAATTCTGCTGCTTGATGAACCGTTTGGCGCGCTGGATGCGCAGGTGCGTAAAGAGCTGC
GTCGCTGGCTGCGTCAACTCCATGAAGAACTAAAATTCACCAGCGTTTTTGTGACCCACG
ATCAGGAAGAAGCGACCGAAGTAGCTGATCGTGTAGTTGTGATGAGCCAGGGCAATATTG
AACAGGCTGACGCGCCGGATCAGGTATGGCGCGAACCGGCGACCCGTTTTGTGCTCGAAT
TTATGGGCGAAGTGAACCGCCTGCAGGGAACCATTCGCGGCGGGCAGTTCCATGTTGGCG
CGCATCGCTGGCCGCTGGGCTACACACCTGCATATCAGGGGCCGGTGGATCTCTTCCTGC
GCCCTTGGGAAGTGGATATCAGCCGCCGTACCAGCCTCGATTCGCCGCTGCCGGTACAGG
TACTGGAAGCCAGCCCGAAAGGTCACTACACCCAATTAGTGGTGCAGCCGCTGGGGTGGT
ACAACGAACCGCTGACGGTCGTGATGCATGGCGACGATGCCCCGCAGCGTGGCGAGCGTT
TATTCGTTGGTCTGCAACATGCGCGGCTGTATAACGGCGACGAGCGTATCGAACCCCGAG
ATGAGGAACTTGCTCTCGCACAAAGCGCCTGATAGGTTGAGTGAATGTTAAACGCCCGGA
GGCGCTTCCCGCGATCCGGGCTTTTTAATGGCAAGGTTTGTAACCTGTAGGCCTGATAAG
ACGCGCAAGCGTCGCATCAGGCAACACCACGTATGGATAGAGATCGTGAGTACATTAGAA
CAAACAATTGGCAATACACCTCTGGTGAAGTTGCAGCGAATGGGGCCGAATAACGGCAGT
GAAGTGTGGTTGAAACTGGAAGGCAATAACCCGGCAGGTTCGGTAAAAGATCGTGCGGCG
CTTTCGATGATCGTCGAGGCGGAAAAGCGCGGGGAAATTAAACCGGGTGATGTGTTAATC
GAAGCCACCAGTGGTAACACCGGCATTGCGCTGGCAATGATTGCCGCGCTTAAAGGCTAT
CGCATGAAATTGCTGATGCCCGACAACATGAGCCAGGAACGCCGTGCGGCGATGCGTGCT
TATGGTGCGGAACTGATTCTTGTCACCAAAGAGCAGGGCATGGAAGGTGCGCGCGATCTG
GCGCTGGAGATGGCGAATCGTGGTGAAGGAAAGCTGCTCGATCAGTTCAATAATCCCGAT
AACCCTTACGCCCATTACACCACTACCGGGCCGGAAATCTGGCAGCAAACTGGCGGGCGC
ATTACCCATTTTGTCTCCAGCATGGGAACAACCGGCACTATCACCGGCGTGTCACGCTTT
ATGCGCGAACAATCCAAACCGGTGACCATTGTCGGCCTGCAACCGGAAGAGGGCAGCAGC
ATTCCCGGCATTCGCCGCTGGCCTGCGGAATATCTGCCGGGGATTTTCAACGCTTCGCTG
ATGGATGAGGTGCTGGATATTCATCAGCGCGATGCGGAAAACACCATGCGCGAACTGGCA
GTGCGGGAAGGAATATTCTGTGGCGTCAGCTCCGGCGGCGCGGTTGCTGGAGCACTGCGG
GTGGCAAAAGCTAACCCTGGTGCGGTGGTGGTAGCGATCATCTGCGATCGTGGCGATCGC
TACCTTTCCACCGGGGTGTTTGGGGAAGAGCATTTTAGTCAGGGGGCGGGGATTTAAGAT
TATTGCGCAGGCACCGTTTTATCCGTCTGCGCAATTAACGCATGTAAAAAAGGCTGTGCA
TTCTCATCGCTCTTACCGGGCATCTTCACGATATACGGCTTCCCGGTAATCGATGATGAC
GAAGCAACCTTATCAATAAACTGCTCGGCAGTGTTAATGCGGTTACGGGTATTGCCGAGC
TTCAGACGCAGATGAGAAACCGCTTCATCGCAGGTATGTTCATCACCGTTGCGCACAAAT
ATCAAATCCTTTTTCTGTGCTAATCCCTCCAGCATGGCGTTGATGCGGGCTTCTTCATGG
GCAGTTAACTTCGCGTAAGCGGGGAGTGTCATTAGTAGTGTAATGACCAGACAAATGATT
TTCTTCATTGAATTACCTTATCCTTGTTTTGTGATAGCCGATTTGACTGCCAGAATCAGG
TAAAGTTTCGGTTGGAATACGATGAGGATCATCGGCAAGGAGAAAAAATTAAATGAGTAG
TTTGTTGTTGTTTAACGATAAGAGCAGGGCACTGCAGGCGGATATCGTCGCCGTGCAGTC
GCAGGTAGTGTACGGCAGCGTAGGCAACAGCATTGCGGTGCCTGCTATCAAACAGAACGG
TCTGAATGTCTTTGCCGTGCCGACGGTATTGCTGAGCAATACGCCGCATTATGACACTTT
CTACGGTGGTGCGATTCCGGACGAATGGTTTAGCGGCTATTTGCGTGCGCTTCAGGAGCG
TGATGCGCTGCGCCAACTTCGAGCTGTAACCACGGGCTATATGGGAACGGCATCGCAAAT
CAAAATCCTTGCCGAGTGGCTGACTGCGCTACGCAAAGACCATCCTGACCTATTGATCAT
GGTCGATCCGGTGATTGGCGATATTGATAGCGGAATTTATGTCAAACCTGACCTTCCCGA
GGCGTATCGACAATATTTACTGCCACTAGCGCAGGGAATTACCCCCAATATCTTTGAGCT
GGAAATCCTGACCGGTAAAAATTGCCGCGATCTCGACAGTGCCATTGCTGCCGCAAAAAG
TCTGCTTTCAGACACATTAAAATGGGTGGTGATTACCAGCGCCTCCGGTAATGAAGAAAA
TCAGGAGATGCAGGTGGTGGTGGTCACTGCCGACAGCGTGAATGTCATTTCCCATTCACG
GGTAAAAACCGACCTGAAAGGGACTGGCGACCTGTTTTGTGCTCAGCTTATCAGTGGTTT
GCTGAAAGGGAAGGCGTTAACCGATGCAGTGCACCGAGCGGGGTTGCGCGTACTGGAAGT
GATGCGCTACACCCAGCAGCATGAGAGCGATGAATTGATTTTGCCGCCGCTGGCGGAAGC
ATAAAAAAATGGCGCCGATGGGCGCCATTTTTCACTGCGGCAAGAATTACTTCTTGATGC
GGATAACCGGGGTTTCACCCACGGTTACGCTACCGGACAGTTTGATCAGTTCTTTGATTT
CGTCCATGTTGGAGATAACAACCGGAGTCAGGGTAGACTTGGCTTTCTCTTCCAGCAGCG
GCAGATCAAATTCAATGACAGTATCGCCAACTTTCACGCGCTGACCTTCTTCAGCAATAC
GCTTGAAGCCTTCGCCTTTCAGTTCAACGGTGTCGATACCGAAGTGGACGAACAGTTCAA
CGCCGCTATCAGATTCGATAGAGAATGCGTGGTTGGTTTCAAAGATTTTACCAATGGTAC
CGTCTACAGGCGCGACCATTTTGTTACCCGTTGGTTTGATAGCAATACCATCACCAACGA
TTTTTTCCGCAAAAACGACATCCGGCACGTCTTCGATATTGACGATCTCGCCAGAGAGCG
GAGCAATGATCTCAATAGTTCCGGTATCCTTCTTGTCGTCGGAAACCAGAGATTTCAGTT
TATCGAACAAACCCATGATCTTCTCCTAAGCAGTAAATTGGGCCGCATCTCGTGGATTAG
CAGATTGTTTTTTCTTCAATGAACTTGTTAACCAGCGTCATTAACTCGTCCGTTGTCGGT
TGAGCAAGAGCCTGCTCTGCTAACACCTTCGCATCTTCGAAGTTCGTGTTACGGATAATC
TTCTTAATGCGCGGGATAGAAATGGCGCTCATAGAGAATTCGTCCAGACCCATCCCCAGC
AACAGAAGTGTAGCACGTTCATCGCCAGCAAGCTCACCACACATGCCAGTCCATTTGCCT
TCAGCATGAGAAGCATCAATAACTTGCTTGATCAAGTTCAGCACGGACGGTGACATTGGC
TGGTAAAGATGTGAAATCATATCATTACCACGGTCAACTGCCAGAGTGTACTGCGTTAAA
TCATTGGTGCCGATACTAAAGAAATCAACTTCTTTGGCTAAATGACGTGCAATTGTTGCG
GCAGCCGGTGTTTCCACCATTACGCCGATTTCAATTGACTCGTCAAACGCTTTACCTTCG
TCGCGCAGTTCCTGTTTGTAGATTTCGATCTCTTTGCGCAGTGCACGCACTTCTTCAACA
GAGATGATCATCGGGAACATAATGCGCAATTTACCGAAAGCCGAGGCACGCAGGATAGCG
CGGAGCTGATCGCGCAGGATCTCTTTACGATCCATTGCGATACGGATAGCGCGCCAGCCG
AGGAACGGGTTCTCTTCTTTCGGGAAGTTCATGTATGGCAGCTCTTTGTCGCCGCCGATG
TCCATGGTACGAACGATAACCGCCTGCGAGCCACACGCTTCAGCCACTGCTTTGTAAGCA
GCAAACTGTTCTTCTTCAGTGGGCAGCGCGTCGCGGTCCATGAACAGGAACTCAGTACGA
TACAGACCAACGCCTTCAGCGCCGTTACGCTCTGCACCTTCAACGTCACGAACCGTACCA
ATGTTAGCGCATACTTCTACCTGGTGACCGTCCAGCGTAATAGCTGGCAGATCTTTCAGT
TTAGCAAGCTCTGCTTTTTCAGAAGCCACTTGCTCCTGAACAGCGCGCATTTTATCAATA
ACTTCGTTGGTTGGATTGACGTAAACCTGATTATTTACGGCATCCAGAATCAGATAGTCG
TCATTTTTCACCTGAGAGGTGACGCTACCGGTACCCACGATAGCAGGTAGTTCCAGAGAA
CGCGCCATGATAGAGGTGTGGGAAGTACGGCCACCCGCGTCGGTGATGAAACCCAGCACC
TTCTTCAGGTTCAGCTGTGCGGTTTCGGACGGCGTCAGGTCAGCGGCAACCAGAATGACT
TCATCCTGAATGGCGCTCAGGTCGATAATCTTCAGGCCCAGGATGTTGCGCAGCAGGCGC
TTACCGATATCACGTACGTCAGCCGCACGTTCTTTCAGGTATTCATCATCCAGCTCTTCC
AGGGCAGAAGCCTGACCTTCGATAACTTCATGAGCAGCTGCGTCAGCTGTCATGTGCTTA
TCTTTAATCAGGGCTATGATTTCCTGCTCCAGCTCCTCATCTTCGAGCAGCATAATATGC
CCTTCAAAGATGGCTTCTTTTTCTTCACCGAACGTTTCACCAGCTTTCGTTTTGATCGTT
TCCAGCTGGGCTGATGCCTTGGCACGACCGCTCAGAAAACGTTCAACTTCCTGATCAACC
TGGTCGGCAGAAATTTTTTTCCGGTCAATGACAATTTCGTCTTCTTTCAGAAGCAGAGCT
TTACCGAAAGCGATACCCGGGGATGCTAAAATGCCTGAAATCATAACCCTACCTTACTTG
TGACTGATTTTTAAAAGAACCCGGGAAATTACTCGAGTTCCGCCATCAGTTTAACCAGAT
GTTCAACCGCTTTCTGCTCGTCTTCGCCTTCTGCGGAGATAGTCACAACGGTACCTTGAG
TCAGGCCCAGAGTCTGCAGTTTAAACAGGCTTTTCGCGCTGGCGCTTTTGCCGTTGGAAG
TCACAGTAATTTCAGAAGTGAAGCCCTTAGCTTCTTTTACAAACTGGGCAGCAGGGCGGG
TGTGCAGACCGTTCGGAGCGGTAATGGTAACTTCTTGCTGGAACATTGTATTTCCCCAAC
TTATAGGTTTAGTGTTGTGGAACTAAAGTCTAGCCTGGCGGTTCGACTTTAGCCTGTATT
GTTAGCGCCAGTTTTTAACAGACGCGACGCACGAAGAGCGCAATACAGTCCATTGCTGGC
GGGTGTTGACCGCTGACGTTTCGTACGTCATTAAACATTATGCCGCTAAAGGAAGAATTG
AACCAAATCATAAAATCGATTCAGCTTTGGCTTTTCCTGTAACGATTAATTTCGCGCATC
AAAATAATTAGTCTGGTTAAATACCAGTTCCGACAGGCTGAATCAATGCCAGGAGGGGCG
AAAGTTTGAAGCAGGCCACAAAAAAGCACCTAAAAAGGTGCTTTTTTACGCATTTTTAAC
AAGCTGGCATTACTGTTGCAGTTCTTTCTCAGTGAAGAGATCGGCAAACAATGCGGTGCT
TAAATAACGCTCACCCGATGACGGTAGAATAACCACAATATTCTTGTTGGTAAAGCTTTC
ATCTTCTTGTAGTTTCAACGCCGCAGCAACAGCTGCTCCAGAAGAGATACCTGCAAGAAT
ACCTTCTTCTTCCATCAGACGACGCGCGGTAGAAATGGCTTCTTCATTGGTAATGCCAAT
GACTTTATCGATCAGCTTGAGATCGAGGTTAGCCGGGATAAAACCAGCGCCAATACCCTG
AATTTTATGCGGGCCAGGTTTAATCTCTTCACCTGCCAGCGCCTGGGCGATAACTGGAGA
ATCGGTTGGCTCAACGGCGACAGAGATAAGATCGGTCTTGCCTTTGGTGCCTTTAATGTA
GCGGCTGACGCCGGTCAGCGTACCTCCAGTCCCAACGCCAGCAATAAATACATCAACCTG
ACCGTCGGTATCTTCCCAGATCTCCGGACCGGTGGTTTTTTCGTGAATTTCAGGGTTTGC
CGAATTGCTGAATTGTTGCAGCAGCAGGTATTTCTCTGGATTGCTGGCGACAATTTCTTC
TGCTTTTTGGATTGCGCCTTTCATGCCTTTAGCACCTTCGGTCAGCACCAGGTTTGCACC
TAACGCTTTCAGCAGCTTGCGGCGTTCAATACTCATGGTTTCTGGCATGGTCAGGGTGAG
TTTGTAACCGCGAGCGGCAGCTACATAGGCCAGTGCAATCCCGGTATTACCGCTGGTCGG
TTCAACCAGTTCAACGCCTGGTTTCAGCACGCCGCGCTTTTCGGCATCCCAAATCATGTT
GGCACCGATACGGCACTTAACGCTGAAGCTGGGGTTACGAGATTCCACCTTCGCCAGAAT
GCGTCCGTTACCGATGCGATTCAGGCGAACCAGCGGCGTGTGACCGATAGTCAGCGAGTT
ATCTTCAAAAATCTTACTCATGGCCTGTCCTTAACTGTATGAAATTGGGATACAACAGGT
AGCATACCCGCTCAGAGAATATGTGGAAGTAAGGATTTAGCATATCTATATACAGAAGGG
AAATAATGACATGCAAGATGGAATAAGGGGCGGCATAAGCCACCCCTGTTTCACACAAAC
GGTTTACAAAATAACCGGTAGATTGTTACCGCCACATCGCGTGTTTATCGCGATAGCAAT
CGACCCACATCGCCGTCGCGCCACAAACGGCAACGGGCATGATGAACAGATTAAGCAGCG
GGATCATCGTAAACAGGCTGGTTAAAGCACCAAACTGCATATTGGTGATTTTGCGTGTGC
GCAGGGCGGTGCGCATCTCTTTAAACGGCACTTTGTGGTTATCGAAGGGGTAATCGCAAT
ACTGGATGGCTAACATCCAGGCGCTAAACAGGAACCACAGTACCGGCGCGACGGTTTGCC
CAATACCAGGGATGAAGTAAAGAATTAGTAATACAATTGCGCGCGGCAGATACCAGGCAA
ATTTTTGCCATTCGCGTTTCATGATTCGCGGCACATCTTTCATGATACCGAAAATCCCGG
TATCTGGCGGTGTAGCGCCAGTCAATCGTGCTTCCAGTTGTTCAGCCAATAAACCGTTAA
ACGGAGCGGCAATCCAGTTAGCAATCGTGGAGAAGAAATAGCCAAACACTAACAGCACAG
AGATGACAGCCAGAGGCCACAACAGATAGCTCAGCCATTGTAACCAGTCCGGAACATAAC
TCATGAGAGTCGGGATCCAGACATCGAGTTGCGTAAAGAGCCACCAGAATGCGCCCCCCA
TCAACAAAATATTGACCAGCAGCGGTAAAATAACGAAACGCCGAATCCCAGGTTGCGAGA
CGAGCTTCCAGCCTTGCGCAAAATAGTAAAAACCGCTGCGTGGGGCAGATGTGAATGATG
AAACCATAATCAGGATGAGCTCCTTTTGACCAATCCCAGGAAAATTGTGCGTATTTTACC
GGGTAATTGCGCAATGGACAGTTAGGATATGTTCGAAAAAACAGCAAAAAGCACGATTTC
ATCTATCTTTGTGCTGTGAAAGTTAATAGTGCACTTGCACTTGAGGTAATCGGCAAATAC
TCTTAGTGAGTAAATGTTTGCCGTGGTGGCAAGGTGTTAGAACAACAGAGAATATAATGA
TGCAGGATTTGCGTCTGATATTAATCATTGTTGGCGCGATCGCCATAATCGCTTTACTGG
TACATGGTTTCTGGACCAGCCGTAAAGAACGATCTTCTATGTTCCGCGATCGGCCATTAA
AACGAATGAAGTCAAAACGTGACGACGATTCTTATGACGAGGATGTCGAAGATGATGAGG
GCGTTGGTGAGGTTCGTGTTCACCGCGTGAATCATGCCCCGGCTAACGCCCAGGAGCATG
AGGCTGCTCGTCCGTCGCCGCAACACCAGTACCAACCGCCTTATGCGTCTGCGCAGCCGC
GTCAACCGGTCCAGCAGCCGCCTGAAGCGCAGGTACCGCCGCAACATGCTCCGCGTCCAG
CGCAGCCGGTGCAGCAACCCGTGCAGCAGCCTGCCTATCAGCCGCAGCCTGAACAGCCGT
TGCAGCAGCCAGTTTCGCCACAGGTCGCGCCAGCGCCGCAGCCAGTGCATTCAGCACCGC
AACCGGCACAACAGGCTTTCCAGCCTGCAGAACCCGTAGCGGCACCACAGCCTGAGCCTG
TAGCGGAACCGGCTCCAGTTATGGATAAACCGAAGCGCAAAGAAGCGGTGATTATCATGA
ACGTCGCGGCGCATCACGGTAGCGAGCTAAACGGTGAACTGCTTCTTAACAGCATTCAAC
AAGCGGGCTTCATTTTTGGCGATATGAATATTTACCATCGTCATCTTAGCCCGGATGGCA
GCGGCCCGGCGTTATTCAGCCTGGCGAATATGGTGAAACCGGGAACCTTTGATCCTGAAA
TGAAGGATTTCACTACTCCGGGTGTCACTATCTTTATGCAGGTACCGTCTTACGGTGACG
AGCTGCAGAACTTCAAGCTGATGCTGCAATCTGCGCAGCATATTGCCGATGAAGTGGGCG
GTGTCGTGCTTGACGATCAGCGCCGTATGATGACTCCGCAGAAATTGCGCGAGTACCAGG
ACATCATCCGCGAAGTCAAAGACGCCAACGCCTGATACACTTAAGGCAAATTAACTCCTC
TTCGAACCCCCGCTTGTCGGGGGTTTTTAGCATTGATGGTGCGATATGGAATCAATCGAA
CAACAACTGACAGAACTGCGAACGACGCTTCGCCATCATGAATATCTTTATCATGTGATG
GATGCGCCGGAAATTCCCGACGCTGAATACGACAGGCTGATGCGCGAACTGCGCGAGCTG
GAAACCAAACATCCAGAACTGATTACGCCTGATTCGCCTACCCAACGTGTAGGTGCTGCG
CCGCTGGCGGCTTTCAGCCAGATTCGCCATGAAGTGCCAATGCTGTCGCTGGATAACGTT
TTTGATGAAGAAAGCTTTCTTGCTTTCAACAAACGTGTGCAGGACCGTCTGAAAAGCAAC
GAGAAAGTCACCTGGTGCTGTGAGCTGAAGCTGGATGGCCTTGCCGTCAGTATTCTGTAT
GAAAATGGCGTTTTAGTCAGTGCCGCGACCCGTGGCGATGGCACCACCGGGGAAGATATC
ACGTCTAATGTGCGTACTATTCGCGCCATTCCGCTGAAGCTGCACGGAGAGAATATCCCG
GAGCGTCTGGAAGTGCGTGGTGAAGTGTTCCTGCCGCAGGCGGGGTTCGAAAAGATTAAC
GAAGATGCGCGACGCACGGGCGGGAAAGTGTTTGCTAACCCACGTAATGCGGCAGCTGGT
TCACTGCGTCAGCTTGATCCGCGTATTACAGCGAAGCGACCGCTCACTTTTTTCTGCTAT
GGCGTTGGTGTTCTGGAAGGTGGCGAGCTGCCGGATACTCATCTTGGCCGTTTACTGCAA
TTTAAAAAGTGGGGGTTGCCGGTCAGCGATCGGGTAACGCTTTGTGAATCGGCGGAAGAA
GTGCTGGCGTTCTATCACAAAGTGGAAGAAGACCGCCCGACGCTGGGCTTTGATATCGAC
GGCGTGGTGATTAAGGTCAACTCACTGGAACAGCAGGAGCAGCTTGGCTTTGTCGCGCGT
GCCCCGCGCTGGGCGGTAGCGTTTAAATTCCCGGCGCAGGAGCAGATGACCTTTGTGCGT
GACGTCGAGTTTCAGGTTGGGCGTACTGGCGCGATTACGCCTGTTGCGCGTCTGGAACCT
GTCCATGTTGCTGGCGTGCTGGTGAGTAACGCAACCTTACACAATGCGGATGAAATCGAA
CGTCTTGGTTTACGCATTGGCGATAAAGTGGTGATTCGCCGCGCTGGCGACGTGATCCCG
CAGGTGGTTAACGTCGTGCTTTCTGAACGCCCGGAAGATACCCGTGAGGTTGTATTCCCG
ACGCATTGTCCGGTATGTGGTTCTGACGTTGAGCGTGTGGAAGGTGAAGCTGTTGCCCGC
TGTACCGGTGGCCTGATTTGCGGTGCGCAGCGTAAAGAGTCGCTGAAACACTTTGTTTCC
CGCCGTGCGATGGATGTTGACGGAATGGGCGACAAAATCATCGATCAGCTGGTTGAAAAA
GAATATGTCCACACTCCGGCGGATCTGTTCAAACTCACCGCAGGCAAACTTACCGGACTG
GAGCGTATGGGGCCAAAATCGGCACAAAACGTGGTTAACGCGCTGGAAAAAGCGAAAGAA
ACCACCTTTGCTCGCTTCCTCTATGCACTTGGCATCCGTGAAGTCGGCGAGGCCACCGCA
GCAGGTCTGGCGGCATATTTCGGCACGCTGGAAGCGCTGGAAGCCGCTTCGATTGAAGAA
CTGCAAAAGGTGCCTGATGTTGGCATTGTCGTTGCATCCCACGTTCACAACTTCTTTGCC
GAAGAAAGCAACCGCAATGTCATCAGCGAGCTGTTGGCGGAAGGTGTTCACTGGCCTGCG
CCGATCGTTATCAACGCGGAAGAGATTGACAGCCCGTTTGCTGGTAAAACCGTGGTGCTT
ACGGGCAGCTTAAGCCAGATGTCGCGTGATGACGCTAAAGCTCGACTGGTCGAACTGGGC
GCGAAAGTCGCGGGCAGCGTGTCGAAGAAAACCGATCTGGTGATAGCGGGTGAAGCTGCA
GGATCTAAACTGGCGAAGGCGCAGGAACTGGGCATTGAAGTCATCGACGAAGCGGAAATG
CTGCGTTTGCTGGGTAGCTGAGATGGAAAAAGAGCAGCTGATTGAAATAGCCAATACGAT
AATGCCGTTTGGCAAATACAAAGGGCGTCGCTTAATCGACCTGCCGGAGGAGTATCTGCT
GTGGTTTGCCCGCAAAGATGAGTTCCCGGCAGGGAAGCTCGGTGAGCTAATGCAAATCAC
GCTGCTGATTAAAACCGAGGGGCTGACGCAACTGGTCCAGCCCCTGAAGCGTCCGCTTTA
AGCTTTATCGGTGCTGCTTTCCTGCTGTGCCTGTAACTGTTCGGTCTGGCGTTTGTATCG
CCGCGCCAGCACCGCACAGACCATCAATTGGATCTGATGGAAAATCATCAGGGGCAGCAC
CATCATACCGATCACCGATGTGGGGAACAGAATGTTTGCCATCGGGATGCCATTTGCCAG
ACTCTTTTTCGAACCACAAAAGACGATAGTAATTTCATCTGCTTTATTGAAGCCTAGTCG
GCGTGCCATAAAGACGTTAACTACAATCACGATAGCCAGAAGAACGCAGCTGACCACCAC
GATAAACAGCAATGATCCCCAGCCAACTTTATGCCAGATACCATTAACGACGGCTTCGCT
GAACGCTGTATAAACCACCAACAGAATGGACGTCTGGTCAGTTTTCGCAATCCATTTTTT
ATTGCGCGACACCCAGTCACCAATCCACGGCCGGGAAAGATGCCCCAACACAAACGGCAG
CAACAGTTGCAGCATAATTTTACCGACCTGCTCAAGGCTGCCCCCTGCACCGTGAACATT
CATCACCAGGCCAACCAGCAATGGTGAAAGGAAAATCCCCAGCAGGCTGGATGCCGACGC
AGAACAAACCGCCGCCGCGACGTTACCGCCCGCCATTGACGTGAAGGCGATTGCAGACTG
CACGGTAGCCGGGAGAATGCACAAGTAGAGAAAACCGGAGTAGAGCATCGGGTCGACATT
TACCGGTTTCCACCAGGCAAACAGTACACCCAGAATCGGAAACAGCACGAAGGTGCTGCA
CATTACCCACAAATGCAGTCGCCAGTGACCACCGCCAGCAATAATCGCCTCACGCGACAA
CTTCGCGCCGTGCATAAAGAACAGCAGGGCAATAGCTGCGGTGGTCAGATTTTCAAAGAA
GGGGACGAAATCGCCTCTGGCCGGAAAGAAAGAGGCCAGCAACACCACCGTGATCAGGGT
TAAGGTGAAAGGATCGAGGATACGAAAAAGTTTCATAAAGACTCCAGATGATCGATGGTT
CTATTGTGCTTCTTCCAGTTTGAGAAATAAAATTGATTTATTGCATCCATTCATGAAGAA
AACAGATGAATTATTCTTTAAAACAGTTAAAGGTTTTCGTCACAGTAGCGCAGGAGAAAA
GTTTTAGTCGTGCAGGAGAGCGTATCGGCCTGAGCCAGTCGGCAGTAAGTCACAGTGTGA
AGGAGCTGGAAAATCATACAGGTGTTCGCCTGCTGGACAGAACCACGCGTGAAGTGGTAC
TTACAGATGCAGGGCAGCAGTTGGCTTTGCGTCTTGAGCGACTGCTGGATGAACTTAACA
GCACGTTGCGCGATACCGGGCGTATGGGGCAACAACTGAGCGGAAAAGTTCGGGTCGCTG
CCAGCCAGACCATTTCCGCGCATCTTATTCCGCAATGCATTGCTGAAAGCCATCGCCGCT
ATCCAGATATTCAGTTTGTCCTGCACGATCGTCCGCAGCAGTGGGTGATGGAAAGTATTC
GCCAGGGAGATGTCGACTTTGGCATCGTCATAGATCCAGGCCCAGTGGGCGATCTGCAAT
GTGAAGCGATTCTTTCCGAGCCTTTCTTTCTGCTTTGCCATCGCGATAGCGCTTTGGCCG
TGGAAGATTATGTACCCTGGCAGGCATTACAGGGAGCGAAATTGGTGTTGCAGGATTACG
CGTCAGGCAGCCGACCGCTGATTGACGCAGCGCTGGCGCGCAATGGTATTCAGGCGAATA
TTGTGCAGGAGATTGGACATCCGGCGACGCTGTTCCCGATGGTAGCCGCAGGCATCGGCA
TCAGTATTCTTCCCGCACTGGCGCTACCATTGCCTGAAGGTAGCCCACTGGTGGTAAAGC
GCATTACGCCGGTGGTGGAACGCCAGTTGATGCTGGTGCGCAGGAAAAACCGTTCACTTT
CCACCGCCGCTGAAGCGTTATGGGACGTGGTACGAGACCAGGGCAATACGCTAATGGCTG
GGCGGGAAGGGGATCCGTTGTATCAGATATAGATATCGATATGAGTCGTATTTTCAACAG
GATTTAGAAGGGATACATTCAGAGACAAACGCTGCTCTTTCTCCTGCGCCTTTTCTGCCT
GCTGTCTCTGCAACTGCGCCAGTTGTGTTTCCAGTAGGGTGATTTGCTGTTGAATCAATT
CGGCCTGTTTTTGCTTGTCTTCAGCACTGCCGCTAGTGTCTACAATCTCTTTAATTTGTT
GAGTGAGTTTGATGATTTGCTGACTTATCCGCGCGATTTGTGAAGCAACATCGCTACCTT
GTGATGCCCTGTTACTACTCTGTGTTTGTATGGAAGGAATTGAAGTTGAAGAGATAGTGG
CCATTGTTCAGTCCTCGTCACTGTACGAGGTAATATCGGTAGAAGAACAAGGAACTTGAG
AAGAAAAATCAATCTTACAAATCGCAGATAGCAAAAAAGCGCCTTTAGGGCGCTTTTTTA
CATTGGTGGGTCGTGCAGGATGACTCGCTTCGCTCGCCCTTCGGGCCGTCGCCGCGAGCG
GCTCCGTTGTTTCGCTGCGCTCAACTCGAACCTGCTGCAGGTTCGAATCTTTGAGTATCG
CAGATAGCAAAAAAGCGCCTTTAGGGCGCCTTTTTACATTGGTGGGTCGTGCAGGATTCG
AACCTGCGACCAATTGATTAAAAGTCAACTGCTCTACCAACTGAGCTAACGACCCGAAGT
GGTGGGTGATGACGGGATCGAACCGCCGACCCCCTCCTTGTAAGGGAGGTGCTCTCCCAG
CTGAGCTAATCACCCACTTCTCAATTTCTTGCTACACGGCGGAGACTACATAAAGTAGTT
GGTGGGTGATGACGGGATCGAACCGCCGACCCCCTCCTTGTAAGGGAGGTGCTCTCCCAG
CTGAGCTAATCACCCCCGCTGTGTGGAGTCGCATTATAGGGAGAGTTCAAAATGAGTCAA
CGCATTTTCTAAAGAAATTGTTCGTTCGTCGTAAATTTAAGCAAGATGATCGCAAAACAG
ACCGTGTTGCGCAATTTGTCAACGAAAACAATAATGCGTAAGGTTGCAACCCGAACTACA
TTGAGGAATCAGGCGGGAGTGATAGAATATCGCCCACTCAATTTTTCCAGGATTTGCCGG
TTGTCGGCATCTTTCTAAACGTAAGGCCATTTCATGAAAATCAAAACTCGCTTCGCGCCA
AGCCCAACAGGCTATCTGCACGTTGGCGGCGCGCGTACTGCTCTTTACTCCTGGCTTTTT
GCACGTAATCACGGCGGTGAGTTCGTGCTGCGTATTGAAGACACCGATCTTGAGCGTTCC
ACGCCGGAAGCTATCGAAGCCATTATGGATGGCATGAACTGGCTGAGCCTGGAGTGGGAT
GAAGGTCCGTACTTCCAGACCAAACGTTTTGATCGCTACAACGCGGTGATCGATCAGATG
CTGGAAGAGGGCACAGCTTATAAATGCTATTGCTCTAAAGAGCGCCTGGAAGCGCTGCGC
GAAGAGCAAATGGCGAAAGGTGAGAAGCCGCGTTATGACGGTCGCTGCCGCCACAGTCAT
GAGCATCACGCTGATGATGAGCCGTGTGTCGTACGTTTTGCTAACCCGCAGGAAGGTTCT
GTTGTTTTTGACGATCAGATCCGTGGTCCGATCGAGTTCAGCAACCAGGAACTGGACGAT
CTTATTATCCGCCGTACCGATGGTTCCCCAACCTATAACTTCTGTGTGGTTGTCGATGAC
TGGGATATGGAAATCACCCACGTTATCCGTGGCGAAGACCATATCAACAACACGCCACGC
CAGATCAACATTCTTAAGGCCCTGAAAGCGCCGGTGCCGGTTTACGCGCACGTTTCTATG
ATCAACGGCGATGACGGTAAAAAACTGTCCAAACGTCACGGGGCGGTCAGCGTAATGCAG
TATCGTGACGACGGTTATTTGCCAGAAGCACTGCTGAACTATCTGGTGCGTCTGGGCTGG
TCCCACGGCGATCAGGAAATCTTCACTCGTGAAGAGATGATCAAATACTTCACCCTGAAT
GCCGTCAGCAAATCTGCCAGTGCGTTCAACACCGACAAGCTGCTGTGGCTGAACCATCAC
TACATTAACGCGCTGCCGCCGGAGTATGTTGCTACTCACTTACAGTGGCACATTGAGCAG
GAAAATATCGATACCCGTAACGGCCCGCAGCTGGCTGATCTGGTGAAACTGCTGGGCGAA
CGCTGCAAGACGCTGAAAGAGATGGCACAGAGCTGCCGTTATTTCTACGAAGATTTTGCA
GAGTTCGATGCCGACGCCGCGAAAAAACATCTGCGTCCGGTAGCGCGTCAGCCGCTGGAA
GTGGTTCGTGACAAACTGGCCGCGATTACTGACTGGACCGCTGAAAACGTTCATCACGCT
ATTCAGGCGACGGCGGATGAGCTGGAAGTGGGTATGGGTAAAGTTGGTATGCCGCTGCGT
GTCGCCGTAACCGGTGCGGGGCAGTCTCCAGCACTGGATGTTACCGTTCACGCGATCGGT
AAGACACGTAGCATTGAGCGTATCAACAAAGCGCTGGCTTTTATTGCTGAACGCGAAAAT
CAGCAGTAATTAGCGCATAAAAGACAAACGGCAGGAGAGAAACCCCTGCCGTTTTTTATT
TATGCTGATTCATTTATGTCGAGACGAGCCAGGAAATTACGAATTCCTTCGCGTGACAAA
AATTGCGCAACTTTTTCCTGCTCACTGTGAGTCATGTTGTCTATTGCGCTTATGATTTGT
CGATAAGCAGGAGTGCGAATCCCCGGTGCGTATTCGGCAAGGGGTTCTTCGGCTTCCAGA
AGCATCGGTGTGTTATGGAAGGCTGGCGTGTTCTGAATAAACTCGCAAACTTGCGTATCG
ACCAGAATAAGTCTGGCACGACCGCCTTTCACGCCGGGAAATTTTTCCGTTTTCCAGCCT
TTTTCTCTGATCCAACGGTTAACAGTTTGTTTAGCCACACCGAGGCATTCAGCCAGTTCT
TCGGTGGTCATTTTGTTGCGTAATCTTTTCATATTATTTGCTATCGCGAATCCCTAAGCG
TTGTAACAATCCGATAATCCCTTCCCGCAGAAGCAAGGATGTAAACTGTTTTTGTTCAAC
TGGCGTCATCTCTTTCGCCAGTGTCACCAGCAATACTTCAAGCGGCGCATCACCAGAAAG
GGCAGGCGCTTCTCCCTGACCTTCTGGACGTTCAGCATTACGAATATATTCACGAACCTG
TTCATTGACGTGAACCAGTCGGGCTTTGCCACCCTGGACGCCTGGTTTTGGTGACGTCGT
CCAGCCTTCCTTGCGTACCCATTTATTAATGGTCTGGCGGCTATAGCCGGTCAGTCTGGC
AAGTTCATCTGGTGTCATCCTCTCCTTGAACATAACAATTCCCTGAATGTATGTGGGTCT
ATTAGTAGTTCATTTTATAGCACCACTTTACAGGAAACCGTGACATGAATAACTACTGAA
TGCGAGCGGTTTTCCAAAATTGTTCATTTGCCTGATTTTTCAGCGATTGAAACTACACGT
TGCAATTTGCCGTTGACACATTCGGGCGGAATTCATATGATGCCGCCCGTCAACTCGACA
AGCTTTACGTGACGGGGCTATAGCTCAGCTGGGAGAGCGCTTGCATGGCATGCAAGAGGT
CAGCGGTTCGATCCCGCTTAGCTCCACCAAATTTTGCACCCAGCAAATTTGGTACGTAAA
CGCATCGTGGGGCTATAGCTCAGCTGGGAGAGCGCTTGCATGGCATGCAAGAGGTCAGCG
GTTCGATCCCGCTTAGCTCCACCAAATTTCCAACCCTCGCTGCAAAGCGGGGGTTTTTTG
TCTCTGCTTTTTGCCGCTTTTGTAATACAGTCTACGTCCGGGTTAGTGCCGCCTGGTGAA
AGCATCATTGGATGAAAAATCGGCAACAGGCTGGCCCCTGTTTGCTTCGCGATGCGAATA
AACTTATTATTTGTGTGCCTGAAAACCCCGATCAGTGAGAGTAGTGTACTCATGTTTGTG
GAGCATAACCTGATAAAAAATATCAAGATATTCACACTAGCGTTTACGCTCACCGTGGTA
CTTATTCAGCTATCCCGTTTTATTTCGCCACTTGCCATTATCCATTCCAGTTATATCTTT
CTGGCGTGGATGCCACTGTGCGTAATGCTGTCAATCTTGTTTATCTTTGGCTGGCGCGGT
GTCGTTCCCGTTTTATGCGGGATGTTTTGCACCAATCTGTGGAACTTTCATCTCTCTTTT
TTACAGACTGCGGTCATGCTCGGCAGCCAGACGTTTGTCGTGTTGTGTGCCTGCGCAATA
TTACGCTGGCAGCTGGGGACGCGTTGGCGTTATGGATTGACCAGCCGATATGTCTGGCAA
CGTCTGTTCTGGCTTGGTTTGGTGACGCCGATCGGCATCAAATGCAGCATGTATTTTGTG
GGGAGCTTCTTTGATTTCCCGCTAAAGATATCCACCTTTTTCGGCGATGCGGATGCCATT
TTCACGGTTGTTGATTTACTAAGCCTTTTCACCGCTGTGCTGATTTACAACATGCTTTTC
TACTATCTCACTCGCATGATTGTAAGTCCCCACTTTGCGCAGATATTGTGGCGCAGGGAT
ATCGCTCCGTCGTTGGGCAAAGAGAAACGCGCATTTACCTTAAGCTGGCTGGCAGCGTTA
AGCGTGCTGCTACTTCTGTTGTGCACACCTTATGAAAACGACTTTATTGCCGGTTACCTG
GTACCCGTTTTCTTCATCATCTTTACCCTCGGGGTCGGTAAGCTTCGCTATCCGTTTTTA
AATCTCACCTGGGCTGTTTCAACGCTTTGCCTGCTGAATTACAACCAGAACTTTTTGCAA
GGGGTGGAAACCGAATATTCGCTGGCATTTATTCTTGCGGTGCTGATTGCCTTTAGCGTT
TGCCTGCTCTATATGGTGCGCATTTATCATCGCAGTGAATGGCTTAATCGACGCTGGCAT
TTGCAGGCGCTGACCGATCCGTTAACGCTCCTACCCAATTTTCGTGCCTTGGAACAAGCG
CCGGAGCAAGAGGCGGGCAAGAGTTTTTGCTGCCTGCGCATTGATAATCTTGAGTTTATG
AGTCGTCATTACGGGTTAATGATGCGCGTTCACTGTATCCGATCAATTTACCGTACGCTG
CTGCCGTTGATGCAGGAAAACGAAAAGTTGTATCAATTGCCGGGTAGTGAACTGCTGTTA
GTGCTGAGCGGGCCGGAAACGGAAGGGCGACTCCAGCATATGGTTAACATCCTGAATAGT
CGGCAAATTCACTGGAACAATACCGGGCTGGATATGGGCTATGGTGCTGCCTGGGGGCGT
TTTGATGGAAATCAGGAAACCCTGCAACCCTTGTTGGGGCAGTTAAGCTGGCTGGCGGAG
CAATCCTGCGCACATCATCATGTGCTGGCGCTGGATAGCAGAGAGGAGATGGTTTCCGGG
CAGACCACTAAACAAGTGCTATTGCTGAATACCATTCGCACGGCGTTAGATCAGGGTGAT
TTGCTGCTCTACGCCCAGCCAATTCGCAACAAAGAGGGTGAAGGTTATGATGAGATCCTC
GCGCGACTGAAGTATGACGGCGGCATTATGACCCCGGATAAGTTTCTGCCCCTTATTGCT
CAGTTTAACCTTAGCGCGCGTTTTGATTTGCAAGTGCTGGAATCCTTGTTGAAGTGGCTG
GCAACACACCCTTGCGACAAAAAAGGCCCGCGCTTTTCAGTTAATTTAATGCCGCTCACG
CTGCTACAAAAGAATATTGCCGGGCGGATTATTCGTCTGTTTAAGCGTTATCACATCTCC
CCGCAGGCGGTCATTCTTGAGATCACCGAGGAGCAGGCGTTTTCTAACGCAGAAAGCAGC
ATGTACAACATCGAGCAACTGCATAAGTTTGGCTTCCGGATTGCGATTGATGACTTTGGC
ACCGGCTATGCCAACTACGAACGGTTAAAGCGTTTGCAGGCTGATATCATCAAAATTGAT
GGTGTCTTTGTGAAAGATATCGTCACGAATACGCTGGATGCGATGATTGTGAGATCAATT
ACCGATCTGGCGAAAGCGAAGTCATTGAGTGTGGTTGCGGAGTTTGTCGAGACGCAACAG
CAGCAGGCGTTATTGCATAAGCTCGGGGTGCAATATCTGCAAGGGTATTTGATTGGTCGC
CCGCAGCCATTAGCTGATTAACAGGCGTAAAAAAACCGGGGAATTATCCCCGGCTTTTTT
ATGTATGGTCTTACAGCACCAGTGCTGCGATTGACGCAGACAGCACACTCACCAGGGTAG
AGCCGTAAACCAGTTTCAGACCGAAGCGAGAAACCACGTTACCTTGCTCTTCATTCAGAC
CCTTAACTGCACCTGCGATAATCCCGATTGAAGAGAAGTTAGCGAAGGAAACCAGGAACA
CAGAGATGATGCCTTCAGCACGCGGAGAGAGCGTGGAAGCAATTTTCTGCAGATCCATCA
TCGCAACGAACTCGTTGGAAACCAGTTTGGTCGCCATGATACTGCCCACTTGCAGTGCTT
CGCTGGACGGAACACCCATCACCCATGCAATCGGATAGAAGATGTAGCCCAGGATGCCCT
GGAAGGAGATGCTGTAGCCAAACCAGCCAGTCACGGTGGCAAACAGTGCGTTCAACGCGG
CGATCAGGGCGATAAAGCCGATCAGCATCGCGGCAACGATAATGGCAACTTTGAAACCTG
CCAGAATGTATTCACCCAGCATTTCGAAGAAGCTCTGACCTTCGTGCAGGTTGGACATCT
GAATGTTTTCTTCACTGGCATCAACACGGTAAGGGTTGATCAGCGACAGCACGATAAAGG
TGCTGAACATGTTCAGTACCAGCGCCGCAACGACATATTTCGGCTCCAGCATGGTCATGT
ATGCACCAACGATGGACATAGATACGGTGGACATCGCCGTTGCTGCCATGGTGTACATAC
GATTGCGGGAGATTTTGCCGAGGATATCTTTATAGGCAATAAAGTTTTCAGACTGACCCA
GAATCAGAGAGCTGACGGCGTTAAAGGATTCCAGTTTGCCCATGCCGTTGACTTTGGAGA
GCAGGAAACCAATTGCGCGGATAATCACCGGCAACACGCGAATGTGCTGGAGAATACCGA
TCAGTGCAGAGATAAAGACGATTGGGCACAGCACTTTCAGGAAGAAGAATGCCAGGCCTT
GATCATTCATGCTACCAAAGACGAAGTTAGTCCCTTCGTTGGCAAATCCGAGCAGTTTTT
CGAACATTTCGGAGAAGCCTTTCACGAAGCCTAAACCAACGTCGGAGTTCAGGAAGAACC
ACGCCAGTAACACTTCGATAACAAGCAGTTGAATAACATAACGGATACGAATTTTTTTGC
GGTCGCTGCTTACCAGCAGTGCGAGAATCGCAACAACGGCAAGTGCCAGTACAAAATGAA
GGACGCGGTCCATATTTGCTCCAAATATGAGGCAGGTTAAATTTCCGTGCACATTCTATG
TAACATGGTTAAGGAAAACGAGATCTGACACACACTATAATGACGTCCTGTGACAAGCTT
CAAAAATAGTGAGCTGTCATACATTTCTGCTATGTTGTGTATGGAAGCTGAAAGTTATGT
AAATGTGCTAACATTAAACATAACCATAACATTCAAGTCATCAATCTTTTCGTAGTCATA
ATCCTGGTCTATCAGAGAAATCACCACAACCCATTTAAATGAATTTGATAATCATTCTCG
TTTGGCATAGCATGAAACATAGCAAAGGCTATGTTTTAGAGGCACAAGATGACGAACTAT
CGCGTTGAGAGTAGCAGCGGACGGGCGGCGCGCAAGATGAGGCTCGCATTAATGGGACCT
GCGTTCATTGCGGCGATTGGTTATATCGATCCCGGTAACTTTGCGACCAATATTCAGGCG
GGTGCCAGCTTCGGCTATCAGCTACTGTGGGTTGTCGTTTGGGCCAACCTGATGGCGATG
CTGATTCAGATCCTCTCTGCCAAACTAGGGATTGCCACCGGTAAAAATCTGGCGGAGCAG
ATTCGCGATCACTATCCGCGTCCCGTAGTGTGGTTCTATTGGGTTCAGGCAGAAATTATT
GCGATGGCAACCGACCTGGCGGAATTTATTGGTGCGGCGATCGGTTTTAAACTCATTCTT
GGTGTTTCGTTGTTGCAGGGCGCGGTGCTGACGGGGATCGCGACTTTCCTGATTTTAATG
CTGCAACGTCGCGGGCAAAAACCGCTGGAGAAAGTGATTGGCGGGTTACTGTTGTTTGTT
GCCGCGGCTTACATCGTCGAGTTGATTTTCTCCCAGCCTAACCTGGCGCAGCTGGGTAAA
GGAATGGTGATCCCGAGTTTACCTACTTCGGAGGCGGTCTTCCTGGCAGCAGGCGTGTTA
GGGGCGACGATTATGCCGCATGTGATTTATTTGCACTCTTCGCTCACTCAGCATTTACAT
GGCGGTTCGCGTCAACAACGTTATTCCGCCACCAAATGGGATGTGGCTATCGCCATGACT
ATTGCCGGTTTTGTCAATCTGGCGATGATGGCTACAGCTGCGGCGGCGTTCCACTTTTCT
GGTCATACTGGTGTTGCCGATCTTGATGAGGCTTATCTGACGCTGCAACCGCTGTTAAGC
CATGCTGCGGCAACGGTCTTTGGATTAAGCCTGGTTGCTGCCGGACTGTCCTCAACGGTG
GTGGGGACACTGGCGGGGCAGGTGGTGATGCAGGGCTTCATTCGCTTCCATATCCCGCTG
TGGGTGCGTCGTACAGTCACCATGTTGCCATCATTTATTGTCATTCTGATGGGATTAGAT
CCGACACGGATTCTGGTTATGAGTCAGGTACTGTTAAGTTTTGGCATCGCCCTGGCGCTG
GTTCCACTGCTGATTTTCACCAGTGACAGCAAGTTGATGGGCGATCTGGTGAACAGCAAA
CGCGTAAAACAGACAGGCTGGGTGATTGTAGTGCTGGTCGTGGCGCTGAATATCTGGTTG
TTGGTGGGGACGGCGCTGGGATTGTAGTTGAATGAGCGTCGCATCTGGCACTATTGGCGG
ATGCGGCGTAAACGCCTTATCCGCCTTACGCGTTAAAGAGCCGGTTTGTAGGCCTGATAA
GACGCACTAGCGTCGCATCAGGCCTTGTGCTCCATTGGCAAATGTGTTTAATGGCGGTGC
CCATGTCCGCGGCCTTTTCCGCGATGATCGTCACGATCGCGCCAGCCTTCACGATAGCCA
CGCTCATACGCTTTACGCTTATCCCAGCCACGATGATAGCCATTATCATGACGCCACCAG
CGGTTTTTGCGCCACTCATAATTGCGATGCCAGTAATCACGATCTCGCCAGTGACCACCG
TCCCAGTAATTACCGTAATGATCGCGATCGCCAATTTGTAATTTGATTGATGGCAGTAGG
GTGATTTCACCTGCGTTTGCTGCAAGCGGGGTAAATGCCATCAGGGCGGCCGCCAGAAAC
AGTGACCTGAACATTGTTATTCTCCTTCACGATCGAAGCCGTCAGCGGCCTGTTAACGCA
ATATTACGGGGAGGTAAAGCCCCGTATCATCGCCATAACTCTTAAATCATAAAGGAGAGC
ATTTTTTGTTAAACGTTATCGTGGGGTGGCTGTTGCTTCGGACGATTGACCATCATCATC
GGCTTACCTGCTAATAACAGCCATGCCGGAAGCATGACGATACAGAGCAGCGGTAGCAAT
GTGGTATTGGGTACAACGACTGCCGCCATAAAAAGACTTAACCAGCCATCGCGTGTTACC
ACCAGCACGATGCCGAGAATAGCGCAGGAAACGGTTATTGCCGCTGGAACGGCGGGGACG
TGCTCATGCAGCATCAACCCTAATGCCACGCCGACGAACACTGCCGGGAAAATTCGTCCA
CCGCGAAAGCCACTGGCGGCAGCAACGACCAGGGCGGTAAGTTTAATCACCGCCAGTAAA
AAGTAATCGCTGGTGCTGAAAGCCTGATTTGCCACCATCTGCTGCATCTCATCCAGTCCT
TTAAACAGCGAAACTGGTCCACCAATAACCCCCAGAATACCGAGAATAAATCCGCCAATA
CCCAGCACGAGCACCGGATTTTTCATTTGATGCATCATCGCGTGCAACCGTGGTAAGCAC
CATACGGCGACCATCCCTGCTGCGATGGCAATCGCCGCGACAATTGCACCGCTGAGAATA
TCGGTCATTTCCATCTGTCCGTAATGCGCAATGGGCAGTGAAAAATGGGGATGGAAAAAT
AATCCGGTAGTAAGTGCACCAGCTGCTGCCGCCATTAACGGCGCAAAAAGACGATCCCAT
AGCGGAACTTCACTACTGCCATTTAAGGTTTGCGAAAATATCAACGCCGCCGCAACAGGT
GTACCAAACAGCGCGCCGATGGTTCCGGCAGAGGCTAAAATAGTCCACTCCATTCGGTTG
ACGCGCGGTAACAGACGAGCGCCAATGGCAACCGCAAGGGCGATATTGACGGTCATGATC
GGATGTTCCGGCCCCAGGCTGACGCCGCCAGCAAGACCGAGAATTAATGCTACGATAAGT
CCTGGTAGCGCAGAGGGCGGAACCGGTGCGCCGATCAGCGGTTCACAGGCGGGGTCTGGT
CCGGCATGACCCTGGCTGAAACGGATAACCAACCCCACTGCAATACCCGTTAACGTTAAT
ACACCGATGATCCAGAGAGGTGAATCCTGGGCTATCCCCAGAGTTCCCGGCAGTCGTTGC
CAGAGCAAATTCTGTAATGCCGAGGCGATTTTCATCACCACAATCAGAATAAGACTGGAC
GCAATCCCAATTGCCACGGCGGGGAGCGATAATAACAACATGGTTCTGGCTCGCGGATGG
AGCATGTTCTATTCCTTATGCGGGGTCAGATACTTAGTTTGCCCAGCTTGCAAAAAGGCA
TCGCTGCAATTGGTGCTGAAACGATAAAGTAATTGTGTGACCCAGATCGATATTTACAGG
GAGCCTGCCTTTCCGGCGTTGTTGTTATGCCCCCAGGTATTTACAGTGTGAGAAAGAATT
ATTTTGACTTTAGCGGAGCAGTTGAAGAATGACAAAGTATGCATTAGTCGGTGATGTGGG
CGGCACCAACGCACGTCTTGCTCTGTGTGATATTGCCAGTGGTGAAATCTCGCAGGCTAA
GACCTATTCAGGGCTTGATTACCCCAGCCTCGAAGCGGTCATTCGCGTTTATCTTGAAGA
ACATAAGGTCGAGGTGAAAGACGGCTGTATTGCCATCGCTTGCCCGATTACCGGAGACTG
GGTGGCAATGACCAACCATACCTGGGCGTTCTCAATTGCCGAAATGAAAAAGAATCTCGG
TTTTAGCCATCTGGAAATTATTAACGATTTTACCGCTGTATCGATGGCGATTCCGATGCT
GAAAAAAGAGCATCTGATTCAGTTTGGTGGCGCAGAACCGGTAGAAGGTAAACCTATTGC
GGTTTACGGTGCCGGAACGGGGCTTGGGGTTGCGCATCTGGTCCATGTCGATAAGCGTTG
GGTAAGCTTGCCGGGCGAAGGCGGTCACGTTGATTTTGCGCCGAATAGTGAAGAAGAGGC
CATTATCCTCGAAATATTGCGTGCGGAAATTGGCCATGTTTCGGCGGAACGCGTGCTTTC
TGGCCCTGGGCTGGTGAATTTGTATCGCGCAATTGTGAAAGCTGACAACCGCCTGCCAGA
AAATCTCAAGCCAAAAGATATTACCGAACGCGCGCTGGCTGACAGCTGCACCGATTGCCG
CCGTGCGTTGTCGCTGTTTTGCGTCATTATGGGCCGTTTTGGCGGCAATCTGGCGCTCAA
TCTCGGGACATTTGGGGGCGTGTTTATTGCGGGCGGTATCGTGCCGCGCTTCCTTGAGTT
CTTCAAAGCCTCTGGTTTCCGTGCCGCATTTGAAGATAAAGGGCGCTTTAAAGAATATGT
CCATGATATTCCGGTGTATCTCATCGTCCATGACAATCCGGGTCTTCTCGGTTCCGGTGC
ACATTTACGCCAGACCTTAGGTCACATTCTGTAAATCCTTCCTGTTATATCGGGAGGTAA
CTCTCCCGATAATCTTTTAAATCATACAGTTAATTCAATTTTTCTTTGTGTCCCCTCACA
AGGCCGACCTGCGTCACACTTCCGTACAGCGGGATTAATTCTCCAGTAAATGCATTATTT
GTCTGGTAACGGCGATTTGTTTTGCACGTTCATAATTTCACTCGTCAACTATCACTGAAC
GAGGAATTAACGATGAGTAAGAAACTGATTGCATTATGTGCCTGCCCAATGGGCCTGGCT
CACACTTTTATGGCCGCTCAGGCGCTGGAAGAAGCGGCGGTAGAAGCCGGTTATGAAGTG
AAAATTGAAACCCAGGGCGCGGACGGTATCCAGAATCGCCTGACGGCGCAGGATATCGCC
GAAGCGACCATCATCATCCACTCCGTGGCAGTTACCCCGGAAGATAACGAACGTTTCGAA
TCACGCGACGTTTATGAAATCACTTTGCAGGACGCAATTAAAAACGCTGCGGGCATCATC
AAAGAAATCGAAGAGATGATTGCCTCTGAACAACAGTAATATTCGACAGGGATAATTGTT
ATGGCCATTAAAAAACGCAGTGCAACCGTTGTGCCTGGCGCATCCGGTGCGGCAGCGGCA
GTTAAGAATCCGCAGGCCTCTAAAAGCAGCTTCTGGGGTGAACTCCCGCAGCATGTGATG
TCAGGGATTTCACGCATGGTGCCGACCTTAATTATGGGCGGTGTGATCCTCGCTTTCAGC
CAGCTGATTGCTTATAGCTGGCTTAAAATTCCTGCTGATATCGGCATCATGGATGCTCTT
AATAGCGGGAAATTCTCCGGTTTCGACCTCTCCTTACTGAAATTTGCCTGGTTGTCGCAG
TCCTTCGGCGGCGTGTTGTTTGGTTTTGCCATTCCGATGTTTGCTGCTTTTGTGGCGAAC
TCTATCGGTGGCAAACTGGCGTTTCCGGCTGGTTTTATCGGCGGCTTGATGTCTACCCAG
CCGACGCAACTGCTGAACTTCGATCCCAGCACTATGCAATGGGCGACCTCTTCGCCGGTG
CCGTCCACCTTCATTGGTGCGCTGATTATTTCTATCGTTGCCGGTTACCTTGTGAAATGG
ATGAACCAGAAAATCCAGTTACCGGATTTCCTGTTAGCGTTCAAAACCACATTTTTGCTC
CCGATTCTTTCCGCCATTTTTGTCATGCTGGCGATGTACTACGTGATCACCCCCTTTGGC
GGCTGGATCAACGGTGGTATCCGTACCGTGCTGACTGCCGCAGGTGAGAAGGGCGCGCTA
ATGTATGCGATGGGGATCGCCGCGGCGACAGCAATCGACCTTGGTGGCCCGATCAACAAA
GCCGCAGGTTTCGTTGCCTTCAGCTTTACCACTGACCACGTATTACCGGTCACCGCACGT
TCTATCGCAATCGTTATTCCGCCGATTGGTCTGGGGCTGGCGACCATTATCGACCGTCGT
TTAACCGGCAAACGCCTGTTCAACGCTCAACTTTATCCGCAGGGTAAGACCGCCATGTTC
CTGGCGTTTATGGGGATTAGTGAGGGTGCGATTCCGTTTGCGCTGGAAAGCCCCATCACC
GCCATTCCGTCGTATATGGTCGGCGCGATTGTCGGCTCAACCGCCGCTGTCTGGCTGGGC
GCAGTGCAATGGTTCCCGGAATCCGCTATCTGGGCATGGCCGCTGGTCACTAACCTCGGC
GTCTACATGGCGGGGATCGCGCTGGGGGCAGTCATTACTGCGCTGATGGTGGTGTTCCTG
CGTCTGATGATGTTCCGTAAAGGCAAATTGTTAATCGATAGCCTGTAAGAAGGAAAATCC
AGATGACATTACTCGCTTCGCTGCGTGACTGGCTTAAGGCGCAACAACTGGATGCGGTGC
TTCTCTCCTCACGGCAGAACAAACAGCCGCATCTGGGGATCTCCACCGGATCAGGCTATG
TGCTGATTAGCCGTGAAAGTGCGCACATTCTGGTGGACTCGCGCTATTACGCGGATGTAG
AAGCCCGCACGCAAGGTTACCAGCTGCATTTGCTTGACGCGACGCACACGCTTACAACCA
TCGCCAGGCAAATCATTGCCGATGAGCAGTTGCAAACGCTCGGTTTTGAAGGCCAGCAGG
TGAGTTGGGAAACCGCGCACCGCTGGCAGTCTGAACTCAATGCGAAACTGGTTAGCGCCA
CGCCGGATGTGCTGCGGCAAATCAAAACGCCAGAGGAGGTGGAGAAAATCCGCCTTGCCT
GTGGGATTGCCGATCGCGGTGCAGAGCATATTCGCCGCTTTATTCAGGCGGGGATGAGCG
AGCGCGAGATAGCCGCTGAACTGGAGTGGTTTATGCGTCAGCAAGGCGCGGAAAAAGCCT
CTTTTGACACCATTGTCGCCAGTGGCTGGCGTGGGGCGCTGCCGCACGGCAAAGCCAGCG
ACAAGATTGTTGCAGCGGGCGAGTTTGTCACTCTCGATTTCGGTGCGCTGTATCAGGGCT
ACTGCTCTGATATGACGCGCACCTTGCTGGTGAATGGCGAAGGGGTGAGCGCCGAATCTC
ATCCGCTGTTTAACGTCTATCAGATTGTTTTGCAGGCACAGCTCGCAGCAATCTCTGCAA
TTCGCCCCGGCGTGCGCTGCCAGCAGGTTGACGACGCCGCGCGCCGGGTCATTACAGAAG
CCGGTTATGGCGACTATTTCGGTCATAACACCGGTCATGCTATCGGCATTGAAGTACACG
AAGATCCGCGCTTTTCACCGCGGGACACCACGACGCTACAGCCAGGCATGTTACTGACCG
TGGAGCCGGGGATTTATTTGCCAGGGCAAGGGGGCGTGCGCATCGAGGATGTTGTGCTGG
TCACCCCGCAAGGCGCAGAAGTGCTCTACGCCATGCCGAAAACAGTGTTGCTCACGGGAG
AGGCATAATGGATTTATCGCTATTGAAAGCGTTGAGCGAGGCAGATGCGATCGCCTCCTC
GGAACAGGAAGTGCGGCAGATCCTGCTGGAAGAAGCGGATCGCCTGCAAAAAGAAGTGCG
ATTTGATGGGCTGGGATCGGTGCTGATCCGCCTCAATGAATCGACAGGTCCGAAAGTGAT
GATCTGTGCGCATATGGACGAAGTTGGATTTATGGTGCGCAGTATCTCCCGCGAAGGCGC
AATTGATGTGCTGCCGGTTGGCAACGTGCGCATGGCTGCCCGCCAGCTGCAGCCGGTGCG
CATCACCACCCGTGAAGAGTGCAAAATTCCAGGCCTGCTTGACGGCGACCGGCAGGGGAA
TGACGTCAGCGCCATGCGCGTGGATATTGGCGCGCGCTCGTATGACGAAGTGATGCAGGC
GGGAATTCGTCCAGGCGATCGCGTCACGTTCGATACCACTTTTCAGGTTCTCCCCCACCA
GCGAGTGATGGGGAAAGCCTTTGATGACCGCCTTGGTTGCTATCTGCTGGTGACGTTACT
ATGTGAGCTGCACGACGCCGAACTGCCTGCGGAAGTGTGGCTGGTGGCAAGTTCCAGCGA
AGAGGTGGGATTACGCGGCGGGCAAACTGCCACCCGCGCGGTGTCGCCGGACGTCGCCAT
TGTGCTTGATACCGCCTGCTGGGCGAAAAACTTTGATTATGGCGCGGCTAACCATCGCCA
GATTGGTAACGGCCCGATGCTGGTGTTAAGCGACAAGTCGCTGATTGCGCCGCCAAAACT
TACCGCCTGGGTCGAAACCGTGGCGGCAGAAATTGGCGTGCCGTTGCAGGCAGATATGTT
CAGCAACGGCGGCACGGACGGCGGGGCGGTGCACTTAACCGGCACCGGCGTGCCCACAGT
GGTGATGGGGCCAGCAACCCGCCATGGACATTGCGCCGCATCGATTGCCGATTGCCGCGA
CATTTTGCAGATGCAGCAACTTTTATCTGCCCTGATTCAACGTCTTACGCGTGAGACGGT
TGTTCAACTGACGGATTTCAGATGATCTCCTGATTAACCCGGAGCGGTTATGCTAACGAT
TCAATTTCTCTGTCCTTTGCCTAACGGTCTTCATGCCCGTCCGGCGTGGGAACTTAAAGA
ACAGTGCAGCCAGTGGCAAAGCGAAATCACCTTCATCAACCATCGCCAGAACGCAAAGGC
CGATGCCAAAAGCTCGCTGGCGCTGATTGGCACCGGCACCTTATTTAATGACAGTTGCAG
CCTGAACATTAGCGGCAGCGATGAAGAGCAGGCGCGGCGCGTGCTGGAAGAGTACATCCA
GGTGTGCTTTATTGACAGCGACAGCGTTCAGCCAACGCAGGCAGAACTGACGGCGCATCC
GCTGCCGCGTTCATTAAGCCGCCTTAACCCGGATTTACTGTACGGCAATGTGCTGGCAAG
CGGCGTCGGCGTGGGTACGCTGACCCTGTTACAAAGCGACAGCCTCGACAGTTATCGGGC
AATCCCCGCCAGTGCGCAAGACTCCACCCGGCTGGAGCACAGCCTGGCAACGCTTGCCGA
GCAACTGAACCAGCAATTGCGTGAGCGTGACGGCGAAAGCAAAACTATCCTCAGCGCCCA
TTTGTCGCTGATTCAGGATGATGAGTTCGCGGGCAATATCCGTCGCCTGATGACAGAACA
GCATCAGGGGCTGGGGGCGGCGATCATCAGCAATATGGAGCAGGTTTGCGCCAAACTATC
TGCTTCTGCCAGCGATTATCTGCGCGAGCGGGTTAGCGACATTCGCGATATCAGCGAACA
GTTGCTGCATATCACCTGGCCGGAACTGAAGCCGCGCAACAATCTGGTGCTTGAAAAACT
GACCATTCTGGTGGCTGAAGATTTAACCCCAAGCCAGTTTTTGAGCCTTGATTTGAAAAA
TCTTGCGGGCATGATTCTGGAGAAAACCGGGCGCACCTCGCATACCCTGATTCTGGCCCG
CGCCTCGGCGATCCCGGTACTGAGCGGCCTGCCGCTGGATGCGATTGCCCGTTATGCCGG
GCAACCTGCAGTGCTTGACGCCCAGTGCGGCGTGCTGGCGATTAACCCGAATGACGCGGT
GAGCGGTTATTATCAGGTCGCGCAGACGCTGGCGGATAAACGCCAAAAACAACAGGCGCA
GGCTGCCGCGCAGCTGGCTTATTCCCGTGATAACAAGCGTATTGATATCGCGGCGAATAT
TGGCACCGCTCTGGAAGCGCCTGGCGCGTTTGCCAACGGCGCGGAAGGCGTCGGGCTGTT
CCGTACCGAAATGCTCTATATGGATCGCGACAGCGCGCCGGACGAGCAGGAGCAATTTGA
AGCCTACCAGCAGGTGCTACTGGCAGCGGGCGATAAGCCGATTATCTTCCGCACAATGGA
CATCGGAGGCGATAAAAGCATTCCTTATCTGAATATTCCCCAGGAAGAGAACCCGTTCCT
CGGCTATCGCGCGGTACGTATTTACCCGGAATTTGCTGGCCTGTTCCGCACTCAACTGCG
GGCCATTTTGCGCGCCGCCAGTTTCGGCAACGCCCAGTTGATGATCCCGATGGTCCACAG
CCTCGATCAGATCTTATGGGTGAAGGGCGAGATCCAAAAAGCGATCGTTGAGCTTAAGCG
CGATGGCCTGCGTCATGCAGAGACGATTACGCTGGGTATCATGGTGGAAGTGCCGTCGGT
GTGCTACATCATCGATCACTTCTGCGATGAGGTCGATTTCTTCAGTATCGGCTCCAACGA
TATGACCCAGTATCTTTATGCGGTCGATCGTAATAACCCGCGCGTATCGCCGCTATATAA
CCCGATTACGCCATCGTTCCTGCGCATGTTGCAGCAAATAGTTACCACTGCGCATCAGCG
GGGCAAATGGGTAGGCATTTGCGGTGAACTGGGAGGCGAAAGTCGTTACCTGCCGCTACT
GCTTGGGCTGGGCCTGGATGAGCTGAGTATGAGTAGCCCGCGCATTCCGGCGGTGAAAAG
CCAGCTTCGTCAACTGGATAGCGAGGCGTGTCGGGAACTGGCACGTCAGGCGTGTGAATG
TCGCAGCGCGCAGGAAATTGAAGCGTTACTCACCGCCTTTACGCCGGAAGAAGACGTTCG
CCCGCTGCTGGCGCTGGAGAATATCTTCGTTGATCAGGCCTTTAGCAATAAAGAGCAGGC
GATCCAGTTCCTGTGCGGTAACCTCGGCGTTAACGGGCGCACTGAACATCCGTTCGAGCT
GGAAGAGGATGTCTGGCAGCGGGAAGAGATTGTCACCACTGGCGTTGGTTTTGGCGTGGC
GATCCCGCACACCAAATCGCAGTGGATCCGTCATTCCAGTATCAGCATTGCCCGGCTGGT
GAAACCGGTTGACTGGCAGTCAGAAATGGGCGAAGTCGAACTGGTGATCATGCTGACGCT
GGGCGCTAACGAAGGGATGAATCATGTGAAAGTCTTCTCGCAGCTGGCGCGTAAACTGGT
GAATAAAAACTTCCGCCAGTCGTTGTTTGCCGCGCAAGATGCACAAAGTATCCTGACGCT
GCTGGAAACAGAATTAACCTTCTGACGTTAGCCCTGAAAACGGGCGCTGTACTCTCCCGG
CGTCAGACCAAACTGACGCCGGAAAACGCGACAAAAATAGTCGCTATCCGGAAAACCGCA
ACGCTGTGCCACTTCATGAATTGACAGATGATATTTCTGCAAAATCATCCTCGCCTTCGC
CATTCGCACCCAACGCACATACTCGATAAAACGCATCGTTCCATGCTGAGCAAACAGTTT
TGACAGATGATTGGGCGTGATATTAAAAAACTGCGCCACGCTCTCGCGGGTGAGCGGCTG
GGCATAATTATCCTGAACCCAGTTACAAATGCTGTGATAGAGAAAATCGCCGCGCGGCTG
CGAATTGCCCGGCGGCATATTCACCACGTTACGGCAAAGATGCAGCAAACTTAACACCAG
CGGCTGAATGATATTTTGCTCCAGCGGCGAACGGCTAAGATGGGTGAGGGCGGTAAGCAT
CGCTTCACCTTCACCGCGTTGCAGGCTGGGAAGCTGGATCTGGCGAGCAGGATGCAACAA
CGACGTGGTGCGGCTATCGTAAAACGATAACCCAAGCCAGGTCGGAGCGAACACCAGGCT
TAACAGCATCACCGGTTTGTTGTTGACCGGTAAATTAGCCGCGCGCGCCGGAATAAACAG
CATTTCTCCTTCCACCAAACGTTGCTGCTTTGCTTCCAGCAGATTGCCGTATTCGCCGCG
CAGCACGATATCCAGACGGGGAAAATCAATACATAAACTGCCCACCGGCAACGAGGCAGG
CTGGCTGGCAAAACAGACGCGCCCCAGTAGTTGCGGGTTAAGCACCAGGCCGCTGAACAG
ATCGGCGAAAAATTGTTGATCGGCGGGCAAGCCTGGTGCTTTCATGAAAGTTCCCGATTA
AAGATGCATTAACTGGCGAAATTCTTTTACTTTGCTGCGGCTGACTGGCACTTCAAAATC
CAGATCTTTCAGCCGCAGAATATAGGTGTTATTAAACCACGGTTCGATTTCGCGGATTTT
GTTCAGATTGACACAAAATGAGCGATGGCAGCGGAAAAAATGCGACGGCGGCAGTTTGCT
GCAAAATTCGGTAATGTTCATCGGCATTACGTAGGATTCACGCCGCGTATAGACAAAGGT
CATTTTCTCGTGCGCTTCGGCGTAATAGATATCGTTAATTGGCGTGACGATTATTCGCTC
ATCTTTCACCAGATTAATGGTGTCATTCTCACGCGTTACCGTCGCGGCAGGCGTGCTGCT
GGTCTGCTGTTGCTGCCAGGCCGCTTCCAGTTTTTGCAGCATCCCGGTAATGCGAGACTC
CTGATACGGTTTGAGAATGTAGTCAAACGCCTCAAGTTCAAACGCTTCTACCGCATGTTC
TTTCCACGCGGTGATGAACACAATAAACGGTTTATGGGCGAACTGGCTGATGTTTTGCGC
CAGCAACACACCATCCAGCGACGGAATATTGATATCCAGAAAAATGGCGTCGACGCGGTT
ATGCTGCAAAAACTTCAACACGTCCAGACCGTCGTCAAAGGTGCCGACAATCTCCATCTG
GCTGTGCTCTTTAATTAGCCAGCTCAGTTCCTGTTGTGCCAGGAATTCGTCTTCAACAAT
GATGACTTTCACAATATCACTCCGGCTCAAAGCAATAACGTAGCCTGTGAGGCGACTGGG
GTGCGTTGGTTAGGAATGTAAAACGCAATTTCCGTTCCTGGTTCCAGGCGGCGGATATGC
AGCCCCTCGCCATACAATAACTTCACGCGATGATGAACATTCAGCAGGCCAATTTTATTG
CCCGGCATTTCATTCGCTTCGACCCGCTCAATCACCTTTGGATCGATGCCGTGCCCGGTA
TCCCGCACCGCAATGCGTACCCGATTGCCGCACTCTGCAACGCTGATGGTGACAACGCCT
TTACCTTTGCAAGGCTGGATACCGTGGACAATGGCATTCTCCACCAACGGCTGGATCAGC
AGGCTGGGAATGCAGCAATTCACCTCTTCATCAATATCATAGATAACCGTCAGCTTGTCG
CCAAAGCGGGCCTGCTCAATGGCAATATAGTCTTTAATTTGATACAGCTCTTTTTTGATA
TCGATTTGCTCATCGTCTTTTAATTCAATGTTATAGCGCAGATAACGCGACAGATTAAAG
ATCAGCTGGCGAGCGGTATCCGGATTCAGACGGATCGACGATGAAATAGCGTTCAAAGCG
TTAAACAGGAAATGGGGATTAATTTTGCTTTGCAGGGCGCGAAGCTCTGCCTTATTTGCC
ATTTCACGTAGCTGCTCGGCGCGTGAAACCTCCAGTTGCGTGGAGATGATTTGCGACAGA
CCAACCGCCATTTCCTGTAATGACGAGGTTATCTGATGCGCGTGGCAGTAGTAAATTTTC
AGCGTTCCGGTCACAACGCCTTTCTCCCACAATGGGATCACCAGCATGGAATGAATCTCT
GGTGTGCGGTGGGCTTCATCATTGTTTTTAATGATGATTTTTCCGTAATTCATCGCCTGA
CGGGTAGTCGGGCTAATGAAGTCATCGCCATTCTGATAGTTATGTTCACCCACGCCAACA
TAGGCCAGCACATGATCGGTATTGGTAATCGCCACCGCATCGGCGTGAATGTCATCGCGA
ATAATTTCACAAACTTTGCGTAATGACTCGCTATTGACATGGCGAAACAGAGGTAGCGTT
TTGTTGGCGATATCCAGCGCCAACTTGGCCTGCCGCGCGGCGCTGGCCTCTTTTTCGCCC
TCAACGCTTTGCACCAGAAGCACAATAAAGCCGATACAGACGCTGCCGAGGATCATTGGA
ATCCCGATTTTAGAGACGATATCGATCCCCAACGCGGTAGTTGGTGCCCAGACAATCACC
AGAATCATGGTCAACGTTTCACACAACATGCCGCCGAGAATACCGACGCGCCAGCGCTGT
GCTTTGGGGATTTTCAGGTTGATCCAGCCCGATATACAACCAGCCAGAATGCTGGTGATA
AAGCAGGGGATCGCCGTCACGCCGCCGATATCAATTAAATAACGATGAATACCCGCAATC
ACGCCGGTAATGATGCCCACCCACGGGCCAAACAGAATCCCGCCGGACATCACCGCGATA
ATACGTACGTTCACCAGCGAGCCTTCTACGGGAACGCCGGACCAGGTGCTGAACAGGGCG
AACAGCGAGAAAATGGCGGTAACGGCGAGCAACTCTTTCGGTGAGTGTGCCGACTTGTGC
AACAGTTCGCGAAACAGGCGGATACGGATGAGAAAGAACAGGCAGATAAGCATTAACGCT
GCCCGATCGAAGACCGCCAGCAGCATGTTGAATATTTCGTGCACGGGTGACTCTGAATAA
GGATTAAACCTCTATGATAGGTAACCTGAAGGCTGATGACCAGCAGGCCGTTTTTGAGGA
AAAACCACAATTTTAAAAGGGGATTGATAGATAAATGGTGTATTAGCAATGCATCTCTTG
ATAATGCACTTCTGGTTAGTAAATTTATTGAAATTATTATGTTAATAAAATGAGTGGTAA
TTTTCTTGTTAGCGCAGATAAATTTCCTGTTTTTAAAGCAGAGTTCCTCATTTAACGTCA
TTAATAAAAATGTTCTAAAACGCTGGACAGACAGAAATTAATCAGGCTATTTTCAAAACA
GCCACCATCGTGGCAGCGTCGCTCGGACGGTCCGGGCGCTAACGTTAATCTGAGGAAATT
ATGGCTGACACTCGCCCTGAACGTCGCTTTACGCGCATTGATCGTCTCCCGCCCTATGTT
TTTAACATTACCGCTGAACTGAAAATGGCTGCGCGTCGGCGCGGCGAAGATATTATCGAT
TTCAGTATGGGTAACCCGGACGGTGCGACTCCGCCGCATATCGTCGAAAAATTATGTACT
GTGGCCCAGCGCCCGGACACGCATGGTTACTCCACTTCACGCGGTATTCCGCGGCTACGT
CGCGCCATTTCCCGCTGGTATCAGGATCGCTACGACGTTGAAATCGACCCGGAATCAGAA
GCCATCGTCACTATTGGTTCGAAAGAGGGCCTGGCGCATCTGATGCTGGCGACACTGGAT
CACGGTGACACAGTGCTGGTGCCGAATCCAAGTTACCCCATTCATATTTACGGCGCGGTG
ATTGCCGGGGCTCAGGTACGCTCAGTGCCGCTGGTGGAAGGTGTCGATTTCTTCAACGAA
CTGGAGCGCGCCATTCGTGAAAGTTATCCGAAACCGAAGATGATGATCCTCGGCTTCCCG
TCGAACCCAACCGCGCAATGCGTGGAACTGGAGTTCTTCGAAAAGGTTGTGGCGCTGGCG
AAACGCTACGATGTGCTGGTGGTCCATGACCTGGCCTATGCCGATATCGTCTACGATGGC
TGGAAAGCGCCGTCAATCATGCAGGTGCCGGGTGCACGCGATGTGGCGGTCGAGTTCTTT
ACGCTGTCGAAAAGCTACAACATGGCGGGCTGGCGTATCGGCTTTATGGTTGGCAACAAA
ACGCTGGTCAGCGCCCTGGCACGTATTAAAAGCTATCACGATTACGGCACCTTTACGCCG
TTGCAGGTGGCGGCGATTGCGGCACTCGAGGGCGATCAACAGTGCGTGCGCGACATTGCC
GAACAGTACAAACGCCGCCGTGATGTATTGGTTAAAGGGCTGCATGAAGCGGGCTGGATG
GTCGAAATGCCGAAGGCTTCGATGTATGTCTGGGCGAAAATCCCTGAACCTTACGCTGCC
ATGGGCTCGCTGGAGTTTGCCAAGAAATTACTTAACGAAGCGAAGGTTTGTGTCTCGCCG
GGGATCGGCTTTGGCGACTATGGTGATACGCATGTGCGCTTTGCACTGATTGAAAACCGC
GACCGTATTCGTCAGGCGATTCGTGGGATTAAAGCGATGTTCCGTGCCGACGGTTTACTA
CCCGCCAGCAGCAAACATATTCACGAAAACGCGGAATAAACACCGACCTCAGAAATGCAA
ACAGGAGCCTGATGGCTCCTGTTTTTCATTGCACAGTTTGCTTTTAGATCATCAGGGCAA
AAGTACCGGCCCAAACGATGACCATAAAAGAAATGCCCATAAAGAAATATTTCACTTTAC
ATCTCTCCGCGTAATTGCTGTTACGCCTGAATGACTTCATTACACCTGATACAGTGAGTT
GACACCGGGCAAAACGACCTTAAAAGTCCTGTATTTTACCGTGGGCATCACCCCAGAATT
CTGAGCTAAACTGCTCGAGACGGCGCTAATGTACGCCTAAAACTGAAACGAGACAAGAGG
CATTTTCTTATTTACTTTTAGTAACTTACAGGTGTCTCATATCGGCGACAGTTTAATTTC
TGACGGTAATAATTAGATATTCAGCGAAGGAAAAAACCTTAAGAAAAAAGCCATAAAAAC
CATGAGGTTATTATGGCTTATGTGAGGAGGTAAAGAGTCAGAGCAGTTTGTTAAATGTAT
AACGACGATTCTCCCACCGGGCGCGTTTTAAAGCGACGGTGGATCCAGAGGTACTGCTCC
GGTGCGCGCATGATCTCTTTCTCGATAATCTTGTTCATATAGGCAGCGGCTTGATTTTCA
TCTGTCGGGTAGCCTTCCATCTCTGGGGTGATGAACAAACGATATCCGCTGTAATCCGCT
TTTCTTACCATCGTTACGGTCAACATGGCTGCGCCAGAGAGACGGGAGAGAACATAGGTG
CCATTGGTTGTGGCGACATTTTCTACCGCAAAGAACGGCGCGAAGGAGCTGCCTTTACGA
CCATAATCCTGATCGGGAGCAAACCATACCGCTTCACCTTTCTTCAGTGCACTGACAATG
CCGCGCAGATTATTTCTGCCGATCATCGCTTTGTTAGAGCGCATGCGACCACGGGTCTGC
ACCCATTCCATCAGCTGATTATTATGTGGACGATAGGTAGCCATCATTGGCTGACAAAGT
CCCATCACGCGGCCGCCCAGTTCCAGCGACATAAAATGGACGCCGACAACCATTACGCCG
CGATTTTGCATTTGTGCGCGTTTAAGGTTATCCAGCCCTTCAACATCAAACCATTTACGT
ACGCGACTGTCGGGCCAGAACCACGCCATGCCGGTTTCTACCAGCGCCATGCCGAGTGAA
CGAAAGTTTTCGGCAATCATCTTCTCGCGTTCTTCCGCAGAATGCTGCGGGAAGCAAAGT
TCCAGGTTTTTACGGGCGATAGATTCACGCCGTTTCAGGAATGGTCGCGCCATTGCGCCA
ATACGCGTGCCGAGAAAGCAGAGAACAGGATAAGGAAGCTGTACCCAAAGCCAGAGTACA
CCAAGCCCAAACCATGTGAGCCAGTAGCGAGGATGCAGAAACTCGCGGGAAAATTTGCAT
TGTGGAAACATAGTTACCTTCTGTAGATACGAATTGTTGTATCGCAGAAGATTCCATGTC
GACAGCGGTACACTCAATTGGTTGGGCCATCATGTACGACAATGGTTCCTGTAAAGAGTG
TAAAGACTAGTCAGGACATAACCACGAGGAGCATGAATGCGGTGGCTCTACTTTATCACT
GGCTGACTGCTTTCAGCTACTGATTATTAATCGTGCAAAGTAAAAAATTTTCCGCATGCA
ATAGTGTTGCATTTAACATGCTGTTTTCATTGATGCTTAGCAAAAATTGCCAGAGGGTAA
GGATTGTCTTACTATTAAAGTGACTGAAGTTACAGGTTTTTTAGCGCGGCAGGAGGTTGA
GCTATGATTTATTTATGGATGTTTCTCGCCTTGTGTATTGTCTGCGTAAGCGGATACATC
GGTCAGGTACTGAACGTGGTATCGGCGGTCTCTTCTTTCTTCGGCATGGTGATCCTCGCT
GCACTCATTTATTACTTCACCATGTGGTTAACTGGCGGTAATGAACTGGTGACGGGGATA
TTTATGTTTCTTGCCCCGGCTTGTGGCTTGATGATTCGCTTTATGGTGGGGTATGGCAGG
CGATAGTGGGTCAGGATGGCTCATTTGGGCAGGTGTTCACATCAGCATCAGACATGATTG
TTCACCTGCCAGGTGACAGACGCTATCGCACAGGATGAATAAGATAATTCGCCTTTGTCG
GAAAAGGGGGCGTGGTTTCTTCTGTGAGGTTTAATGGTGGCGCATCTTCTCTCATCTTAA
ACAAAATTGCCTGTGATGGCTGAATTTTTGTAGAGTGAGTTGTCGTCATCGCTGATGTTT
TTTCCGTCTCTTTATAGCTCCTCTCACTTCCACCACCAGAAATGGAAAATGCAAAAACAT
TGCATGCCATAATAGAGACCAATAAAAATAAGCTAAAAAGTATTAAGTTTACTTTCATAG
AAAGTTATCCTGAAAATGGTTCACTGAGAATGTACGATGTTATGGCTGTATTTACATATA
ATTAATCAATATTTACATCGATATAATAAATGACATCTCTTTGTGGTACATAAGAATAGT
TCTCTGTGACAGGAAGCATATTCCTACAATTGTAAGACTAAAATACTTCTTGCGATAATA
ACTACAACTGTAAGATAACCCTTTCAAAATGACCGTTGCTCTCTGATTTCTCATTTCATG
CTCACCCAATATGATGGCGGCGTTTTCTAAAACTGTTAAAGAATGAGGTAAGTATGAAAC
GTTTAATTATGGCCACGATGGTCACAGCAATTCTGGCATCTTCAACTGTATGGGCTGCTG
ATAATGCTCCGGTAGCGGCACAACAGCAAACTCAGCAAGTTCAGCAAACCCAGAAAACGG
CAGCGGCAGCAGAGCGTATCTCTGAACAAGGTTTATATGCGATGCGTGACGTGCAGGTAG
CGCGCCTGGCTCTGTTTCATGGCGATCCGGAAAAGGCAAAAGAACTGACCAATGAAGCTT
CCGCTTTGTTGTCAGATGACAGTACCGAATGGGCAAAGTTCGCTAAGCCAGGTAAAAAGA
CCAATCTCAATGATGACCAATATATTGTCATTAATGCATCTGTCGGAATTTCTGAGAGTT
ATGTAGCAACACCCGAAAAAGAAGCCGCGATAAAAATTGCCAATGAAAAAATGGCGAAAG
GGGATAAAAAGGGCGCAATGGAAGAGCTTCGCCTGGCCGGTGTTGGCGTAATGGAAAACC
AATATCTGATGCCGCTTAAACAGACTCGTAATGCACTTGCTGATGCGCAGAAACTGCTTG
ATAAAAAGCAATACTACGAGGCAAACCTGGCGCTTAAAGGTGCGGAAGATGGAATCATCG
TCGATAGCGAAGCACTGTTTGTGAACTAATGCTGACAGGCAGTATATTGAGGTAAAGGAT
TTAACTCCCTCCAGCCGACAATTTTTTATGACCACAATACGACAGGTTGTGGTCATAAAA
TTATTTGGCGCTCGCGGTTCTATAAACTCGCATTTTATATTCCTCAAAGTAAACCGCAAT
AATCCCGTGTCATCACAAATCATTTAATATGTTATATTTTATGGTACGCTTTAAAAAGCG
TAATCATACCCTTACTTGTAAATCACCGGCGCTTCTTACAGTTGTAAGAATAACATCACA
AATGTCGCGACTCTCTCTGATTACCACGAACCAATATTTATCATATTCTTCTTTTCGTCC
TCACTACTTACCATGCAGAAAGGAATTGGAAGTAGCGATGAAATGATTTTCAGTACTTGA
TACAGGAATGTGAAAATATCGAGTGCAGCTACGACGATATTTTGCGGATTATTTATAGAG
GCGTTATGCCTTAAATAAACGCTAAATTAACACATATTTAATTAACTAATAGGTATTGCT
ATGTCAACTCCACTTCAAGGAATTAAAGTTCTCGATTTCACCGGTGTGCAATCTGGCCCA
TCTTGTACTCAAATGCTGGCCTGGTTTGGCGCTGACGTCATTAAAATTGAACGCCCCGGC
GTTGGTGACGTAACGCGTCACCAGCTGCGAGATATTCCTGATATCGATGCGCTTTACTTC
ACCATGCTTAACAGTAACAAACGTTCTATTGAATTAAATACCAAAACAGCGGAAGGCAAA
GAGGTAATGGAAAAGCTGATCCGCGAAGCTGATATCTTAGTCGAGAACTTTCATCCAGGG
GCCATTGATCATATGGGCTTCACTTGGGAGCATATTCAAGAAATCAATCCACGTCTGATT
TTTGGTTCGATCAAAGGGTTTGATGAGTGTTCGCCTTATGTGAATGTAAAAGCCTATGAA
AACGTTGCTCAGGCAGCGGGTGGCGCGGCATCTACTACGGGTTTTTGGGACGGTCCGCCG
CTGGTAAGCGCTGCAGCGTTGGGTGACAGCAACACCGGAATGCATTTACTGATCGGTTTA
CTTGCTGCTTTGCTGCATCGAGAAAAAACGGGGCGTGGGCAACGAGTCACCATGTCAATG
CAGGATGCCGTATTGAACCTTTGCCGCGTGAAATTACGCGACCAGCAGCGTCTCGATAAA
TTGGGTTATCTGGAAGAATACCCGCAGTATCCGAATGGCACATTTGGTGATGCAGTTCCC
CGCGGTGGTAATGCGGGTGGTGGCGGTCAGCCTGGCTGGATCCTGAAATGTAAAGGCTGG
GAAACAGATCCTAACGCCTATATTTATTTCACTATTCAGGAGCAAAACTGGGAAAACACC
TGTAAAGCCATCGGCAAACCAGATTGGATTACCGATCCGGCATACAGTACAGCCCATGCC
CGACAGCCACATATTTTCGATATTTTTGCTGAAATCGAAAAATACACTGTCACTATTGAT
AAACATGAAGCGGTGGCCTATTTGACTCAGTTTGATATTCCTTGTGCACCGGTTTTAAGT
ATGAAAGAAATTTCACTTGATCCCTCTTTACGCCAAAGTGGCAGTGTTGTCGAAGTGGAA
CAACCGTTGCGTGGAAAATATCTGACAGTTGGTTGTCCAATGAAATTCTCTGCCTTTACG
CCAGATATTAAAGCTGCGCCGCTATTAGGTGAACATACCGCTGCTGTATTGCAGGAGCTG
GGTTATAGCGACGATGAAATTGCTGCAATGAAGCAAAACCACGCCATCTGATATTAACGG
GGGCTTCTGGCTCCCAATTTATAAAAATTTCGAGGTTATTAATCATGTCAGATCAACTTC
AAATGACAGATGGTATGCATATCATCGTTGAAGCATTAAAACAGAATAATATTGACACTA
TTTATGGTGTTGTAGGTATTCCTGTGACGGATATGGCGCGCCATGCCCAGGCGGAAGGCA
TTCGTTATATTGGTTTTCGTCATGAGCAGTCGGCAGGCTATGCCGCTGCGGCAAGCGGTT
TTCTTACCCAAAAACCAGGGATCTGCCTGACAGTGTCTGCGCCAGGATTCCTCAATGGTT
TGACCGCATTGGCCAACGCAACGGTAAATGGTTTTCCGATGATCATGATTAGCGGCTCCA
GCGACCGCGCGATCGTCGACCTACAGCAAGGTGATTATGAAGAGCTGGACCAAATGAATG
CGGCAAAACCGTATGCCAAAGCAGCATTTCGCGTTAATCAGCCGCAGGATCTTGGCATTG
CATTGGCACGCGCTATCCGGGTCTCGATATCGGGTCGCCCTGGCGGAGTTTATCTTGATT
TGCCAGCAAATGTCCTGGCCGCGACGATGGAAAAAGACGAAGCGTTAACCACGATTGTAA
AAGTTGAAAATCCGTCGCCAGCATTATTGCCATGCCCGAAGTCAGTCGCTAGCGCAATTT
CGCTTTTAGCAAAAGCTGAACGACCATTAGTTATCCTTGGCAAAGGCGCGGCGTATTCAC
AAGCTGATGAACAGCTTCGTGAATTTATTGAAAGTGCCCAGATTCCATTCCTGCCAATGT
CTATGGCGAAAGGGATCCTCGAAGATACGCATCCACTTTCTGCGGCAGCTGCGCGTTCGT
TTGCCCTGGCAAATGCTGACGTTGTCATGCTTGTTGGTGCACGACTGAATTGGTTACTGG
CACACGGTAAAAAAGGATGGGCGGCAGATACACAGTTTATTCAACTGGATATTGAACCGC
AGGAAATTGACAGCAACCGCCCCATTGCTGTGCCAGTCGTTGGTGATATTGCATCCAGTA
TGCAAGGTATGCTGGCAGAACTGAAACAAAACACATTTACGACTCCACTGGTATGGCGCG
ATATTTTAAATATCCACAAGCAGCAAAATGCACAAAAAATGCATGAAAAATTAAGTACAG
ATACCCAACCATTAAATTACTTTAATGCATTAAGTGCTGTGCGCGATGTATTGCGCGAGA
ACCAGGATATTTATTTAGTTAATGAAGGGGCAAATACCCTGGATAATGCACGAAATATTA
TTGATATGTATAAACCACGTCGTCGTCTGGATTGTGGTACCTGGGGTGTCATGGGCATCG
GTATGGGCTATGCCATCGGTGCTAGCGTGACTTCTGGTTCTCCGGTTGTCGCCATTGAAG
GTGATAGTGCTTTTGGTTTCAGTGGGATGGAAATTGAAACGATTTGTCGATATAACCTGC
CGGTAACGATCGTTATTTTTAATAATGGCGGCATCTACAGAGGAGACGGTGTTGATCTCA
GTGGCGCTGGTGCACCATCACCAACAGATCTGTTGCACCATGCAAGGTATGACAAATTAA
TGGATGCGTTTCGTGGCGTTGGCTATAACGTCACCACGACAGATGAACTTCGTCATGCTT
TAACCACCGGTATTCAGTCGCGCAAACCGACCATTATTAATGTGGTCATCGACCCTGCAG
CAGGAACTGAAAGTGGCCATATTACCAAACTGAACCCAAAACAAGTCGCTGGTAATTAAA
TACTGACATCGTCTCCTCTTGCCAACTCATTATGCGATGGTGAGGGGACCCTTATCGGAA
ATACTATTATGCTAACATTTTTTATTGGCGATTTATTGCCTATTATCGTAATCATGCTGT
TGGGTTATTTTAGCGGCAGACGAGAAACATTTTCAGAAGATCAAGCTCGGGCATTTAATA
AACTGGTATTAAACTACGCGCTTCCTGCGGCTCTATTTGTATCTATTACCCGGGCAAACA
GGGAAATGATTTTTGCGGACACTCGTCTGACCCTTGTATCACTTGTGGTTATTGTCGGAT
GTTTCTTTTTCTCCTGGTTCGGTTGCTACAAATTTTTTAAACGTACTCATGCAGAAGCAG
CTGTATGTGCATTAATTGCAGGTTCACCTACCATTGGATTCCTGGGGTTTGCAGTTCTCG
ATCCTATTTATGGTGATTCCGTATCAACAGGTTTAGTGGTAGCAATTATTTCTATTATTG
TTAACGCAATTACTATTCCTATTGGTCTGTATTTGCTGAATCCTTCCTCAGGAGCGGATG
GTAAGAAGAATAGTAATCTGAGCGCATTAATTTCTGCGGCAAAGGAGCCAGTTGTATGGG
CACCTGTTCTGGCAACGATCCTGGTGTTGGTTGGGGTAAAAATTCCGGCAGCATGGGACC
CAACCTTTAATCTGATTGCGAAGGCTAACTCAGGGGTAGCGGTATTCGCTGCGGGGTTGA
CTCTGGCTGCACATAAATTCGAGTTCAGTGCCGAAATTGCTTATAACACCTTCCTGAAGC
TGATTCTGATGCCACTGGCGCTGCTTCTCGTTGGTATGGCATGTCATTTGAACAGCGAAC
ATTTGCAGATGATGGTACTGGCAGGCGCATTACCGCCGGCATTCTCCGGAATCATTATTG
CCAGCCGGTTTAATGTCTACACCCGCACTGGTACAGCGTCATTGGCTGTGAGCGTACTGG
GCTTTGTCGTCACGGCTCCCTTGTGGATTTATGTCAGTCGACTGGTTTCATAATTAATCA
TGTTATTGATTTTACATAAATGCCGAAGTGTCTTTTCACCTTCGGCTTTTTTCAAGGCAT
AAGCAAATGACAAATAATGAAAGCAAAGGGCCGTTTGAAGGCTTATTAGTTATCGATATG
ACACATGTCCTTAATGGACCTTTCGGAACTCAACTTCTTTGTAATATGGGCGCAAGGGTA
ATTAAAGTTGAGCCGCCGGGCCATGGTGATGATACCCGCACATTTGGTCCCTATGTGGAT
GGACAGTCACTCTATTACAGTTTTATTAATCATGGCAAAGAGAGTGTGGTTCTTGATTTA
AAGAATGATCACGATAAAAGTATATTTATAAATATGCTTAAACAAGCTGATGTATTAGCT
GAGAATTTTCGCCCAGGTACAATGGAAAAACTAGGGTTTTCATGGGAAAGGTTACAAGAA
ATCAACCCGCGCCTCATATATGCTTCATCGTCAGGTTTCGGACATACCGGTCCGCTAAAA
GATGCTCCTGCCTACGATACCATCATTCAGGCAATGAGCGGGATAATGATGGAAACAGGG
TACCCTGATGCTCCGCCAGTGCGTGTTGGTACCTCTCTTGCGGATCTATGCGGCGGTGTC
TATTTATTCAGCGGAATAGTGAGTGCACTTTATGGCCGCGAAAAGAGCCAGAGAGGGGCG
CATGTCGATATAGCGATGTTTGATGCTACTCTGAGTTTTCTGGAGCACGGGCTGATGGCA
TATATCGCGACTGGGAAGTCACCACAACGTTTGGGAAATCGCCACCCCTACATGGCACCT
TTTGATGTTTTCGATACTCAGGATAAGCCGATTACGATTTGTTGTGGTAATGACAAGCTT
TTCTCTGCGTTATGCCAGGCACTGGAGCTTACGGAACTGGTTAATGATCCCAGATTTAGC
AGCAATATTTTACGCGTACAAAACCAGGCTATTCTTAAACAATATATTGAGCGGACGTTA
AAAACGCAGGCAGCTGAAGTTTGGTTAGCCAAAATACATGAAGTTGGTGTGCCCGTCGCG
CCGTTATTAAGTGTGGCTGAGGCCATTAATTTGCCACAAACTCAGGCGAGAAATATGTTG
ATTGAAGCCGGAGGAATAATGATGCCAGGTAATCCGATAAAAATCAGCGGCTGCGCGGAC
CCGCATGTTATGCCGGGAGCGGCAATGCTCGACCAGCATGGGGAACAAATTCGCCAGGAG
TTCTCATCATAAATGTAAGATGTGCTGGTAAATAGCTCCCACATTTGAACATTGTGGGAG
CCACTATTTAGTTATTTTGTTGACAGAAAACAGCAATCTCCTGGTCCAGCTCTGCAATGT
GTTCTTTTACAGAGTTCAGCAACTGAAGAATTTCAGGCTTACTGTCATCTGAAACAGGTG
TTATTTCTAACTGATGGCTAATATTAATCAACTTTTGCAAATTCAGGATGTTAGCCGCAC
CGTGGATGCGATGAATACATTGATGGAAAGTTCTGTTATCGCCAGCTTCTAGTGCATGAA
ACGCAGCGGGTAGATCTTTATGCGTTTCATGCTGGAAAGTCATGAGAATCTCCTGCATCA
GTTGTAGATCGTTCGCCGTATTATTTTTCAGGGCTTCGATATCAAGGTGGCGATACTGAG
GTGCAATATGCGCAACCTGGTGTAACTGACTTAAATGTGTTTTCAGTACATCCAGGGTCA
ACGGTTTGAACAAACATAAGTTCATGCCGCAATTTAACCCTTTTTCACGTTCGTTAGCCT
GTGCGTTGGCTGTAAGCCCCCAGATGGGTAAGGAAGAATTTTGCTCACGGAGTTTGCGAG
TCAACTCAAAACCATCCATATTCGGCATATTAACGTCAGTAATAAGCAGATCATAATGTT
GCATACTGACTTTGTGTAGCGCTTGCACACCATCAGTGGCTTCATCAACATCATATCCTA
ATAGATTTAGCTGGCGTTTGAGTAATAGCCTGTTGGTCGGATGATCATCCGCGATTAATA
TGCTCAACTTTTCAGGTAGTGTGATGGGTTGTTCTGCTTTTGCCTCGACAGTCGCCACTT
GTTGGATAATTTCTACCGGGATTGTGATCGTAAATGTTGTTCCTATGCCTGGATGACTTT
CTAATGACAAATCACCCTGCATGTTTTTAATTAATTCTTTGCAGATCATTAAGCCTAAAC
CAGAACCTGTTTGCTGACGACCTGCACTTGTTTGGCTATAGCGTTTAAACAGTTGTTGTT
GTTCTTCCTGCGATAATCCACTTCCAGAATCCATAATCGTCATTTTGATTACAGCGTGGT
TGTCATCAATGTGAACCAGGGAGGTCGTAATTTTTACTGCCCCCTCGGTGGTAAATTTGA
GAGCATTACTCAGTAAATTTGATAAGACCTGCTTAAACGCCTGAGGGTCGATCTTAACCA
GGTAATGTTCAGGAAACGTACTGCTGCAACTTAATGCGATCGATTTGCTTGCAGCAATCG
CACCGAAAGAGTGACAAGTGTTCTGGACTAAAGTAGGGATATCGACCCATTGTGGTTGAA
GTTGATAGTTACCCGATTCAATTTTGTCGACATCAAGGATTTCACCAATTAAGCCGAGGA
GTGATTGTCCGGTGGCGTAGGCAAGTGAAATCGCCTCCACCCGTTGCTCCTTGCTAAGAC
CAGAACCCGACAGAAGTTCCAGGAAGCCCATAATGGAGCTTATTGGTGTTCTTATTTCGT
GACTCATTGTTGCCAGAAACTGACTTTTTGCGACAGTTGCATTGATCGCTTTATTTCTCT
CTACTTCGAGTGCATGAATTAAATCACGCGTCTCGGTAATATCTTGCCAACCACAAATAT
AAACAGCATGATCGCTGGCTGGCAGATTGCATAATGTATGCCAGTGATTAATGCATCTTT
TCTCGATGCCATTATCAATTTCAAATACCTGTGTGTATATTGTTCGATTTTCTTTCGTTT
CTGCTGTGACTTCATGCGCATTAGAAAAAACATCTTTAAAGGGTGAGTCACTGTTTTCTA
ATGGTAACATTGCATTTTTGTAGTAATCAGCAGTGAAATAATGTTCAAATGCACTATTGT
GACTAATGACATTACCTTGCCAGTTTACAACATAAGTTGGATTCGGTAAGGAGTCCGAGA
GCGCTTTCCGGAATGATATTTGGTTTTCTAAATCACCCTGAATGACTTTACGACGACGAA
CTGAGCGTAACAGGTAGAATCCCCATAAAAGGCTACTGCCAACTAATAAAACGGATAATG
TCGTAACAATATAAAATTGCTCGCTATAGAGGTCCCATGTGTCAATGGTCACATTGGGCA
TTTTAATCCATTTTTCGGTCAGGCGCAGAACTTCGCTTGGGGGGATTGCATTCAGTGCTT
TATTAATAATATCCTTAAGTTCCGGTTCTCCGCGAGGAAAAGCGAACGAAAGCGATGCAT
TCGGAACGCCGGGAATAAGAAAATGATACAGTTCATTAGGATAGTAATGGTCGATCATGT
AACGCGAATTTAACTGTGTCGCGACCAGAGCATCAAGTTCACCTTCCTTGACCTTGTGAA
ATGCAGCGCTGGCGTTATCGACTTTTATCCACTCTACCTCCGGATACATCTCTTTTAATT
GCGAATGCAGCTCATAATAATATGGAATGGCAACTTTCATTCCTTTTTTTAATGTTTGTT
CACTGTCAGGCGCTTTTTGCATGACAAAAACGTAAGGCGTTGTTATGAAGGCTTCAGCAA
ATAAAACATTATTTTCTCTATCTTCACTATAAATAGCACCGGGTAATATATCCCATCCGC
CGGGATTCAGCTGTGTTCCAGCATGGATATTGTGTGAAACGGTGATCGGAGAAAAATTTA
AACCTGTTTGCAAAGTAATAATATTAAGAATATCCCCCATAACGCCCCGAACCGAGCCAT
TTTCATCCGTCATAGAATAGGGAGGGGAGTAAGGATTTTCCAGCACCTTTAAATCGGGAT
GCTGCTTAATCCATTGTTTTTCATGTTCAGTGAGTTCTAATGGTTTGTTCAGAAAGGCCA
GGTTTCCTGTATCAAGCCAATTTTGTGATACTTCATAGCGAACTTCATTTGTCAAAGCAT
CAACAAATCGATTGAGTACTTCATTAAGAACGACAGATTCTTTTCTGGTCAAGAAAAAAT
TATATTGACGCGGTGAGTTATAATATTTCACTACATTTAAGGAGTGAGTGAAATAGCGGG
AAATCATACTGCTGGTAATGATGTTACTACCAATAAAGTAATCATTCTGTCCGGCTGAGA
CGGATGCTAATGCCTGATATAAATTTGTAAAAGAGATAATTGTTGCTTTTGGAAATGATT
GATGAATTACCTCGTCAGGGGGATAATTTGCTACTCGAGCAATATTTACTGGTTTTGATG
AGGTAAGCGGTCGCATTGAATCGTGAAGGGTGGTGACGAGCGCCGGAAAGGTAATTATCA
GTGGTTTGGTTGCAGCAATGTCATCATTAAGAGGCGGCGAAGCAACTAAATGTGATAACA
CTATATCGACTTCACCTTCTTCCAGCGCGTCCATTGCTTTTTGATGATCGGCGTATTCCC
GGAGTGTTAGTTTGATATTTAACGCTCTTTTTAAAAGATTTAAATAATCAGCATTAATAC
CACGAACCCGTTGCTGCGAATCGGTATGCAACAACGTAGCCGTTTGGGACTTGTGTACTG
CAATCACAAGATTTTTTTTGCTCGCTAACCAACGTAATTCCTTGTTGCTCAGACGTAGTG
GATCAAGTGTGACACGGTTGTTACTACTGATGCCACGATATTCGATGTAATCTTCGTCTG
CGAAACTTATGGTCGACCAAAGACCACAACAGAGAAGAAAAATATAGGGTAAAAACTTCA
TGTGGTTAGCCGATTTTGTTACGTTGTGCGAATGTGTAAAGATCCATCAGTGATTTACAT
TCTAATTTTTCCATCAGGCGACTTTTATAAGTGCTGACAGTTTTGTTGCTGATGAACATT
TTTTCAGCAATGTCATTATTATCCTTGCCATCAAGAATATAGCGCATGACACTAATTTCT
TGTTTCGATAAGGAGTCGAGTTTTTGCTGGTCGGACGTTAAACTTCCAACAAACCGGTTG
AGAGAGAAGGGGAAATAGCAGTAGCCATTTTTTGCAGCTTCAATAGCCGCAATGATATTG
TTCATGCCTTCTTTTTTACTCACGAAACCATTAGCGCCAGCATCAGCACAATGTTTCCCG
TAAAAATGGTCATTTTTAGCGGAGACGATAATAATAATTCCGCTATATTGGCGCTTCCTC
AGCGTTTCTAACACCTGGATACCGTTAACTCCGGGGATATCGACATCAATGATGACGATA
TCAGGCTTAAGTGTTTCCACCCGCTGAACGGCACTTCCGCCTTCAGTCAACTCTGCTAAG
ATTTCAATATCGTTTTTGATCAATAAATTACGAATTGCTGCGATAGCAAGAGGATGGTCA
TCAATAATTATTGCGTTCATAGATTATTCCCTTTGCAATGAAGCATCTCCCTTCTCCCTG
TAGTAATACAGACATAAGGCATCATCTCATTTTCTCAATAAAAATAAGAAAATTTGAGCT
TCCTTTAAGATAATTCGACAAGTATACCATATAAATAGTCGGCATATATGAAATGTCAAC
AATAAAATCAGGGATTGTACCGATGATTTATAGTTTCACATTAGCACTATAAGTCTTCTC
ACTAATCCTACAGGCGTAAGAATTGTATTGCAAAAGCCACGGTTTAGTCCTCTGTTGTTT
TTTTTGCACCTCATTTAAATTAGGCCTCCAACGTTCCTGGGATAATGTGCAACACATGCA
CTGTGTTTGATATGAAGAATGAATACTCTTTTCATTCAATTCATAAATTTCATCTATGCG
AAATGAGAGATAAAAGTGGAACAGATTAATTCAAATAAAAAACATTCTAACAGAAGAAAA
TACTTTTCTTTATTGGCGGTAGTTTTATTTATTGCGTTTTCAGGTGCCTATGCCTATTGG
TCAATGGAATTAGAAGACATGATTAGTACAGATGACGCCTATGTCACGGGGAATGCAGAT
CCAATTTCTGCACAAGTCTCAGGTAGTGTCACTGTAGTTAATCATAAAGATACGAACTAC
GTTCGACAAGGTGACATTTTAGTTTCACTGGATAAAACTGATGCCACTATCGCACTCAAT
AAAGCTAAAAATAATCTGGCAAATATTGTTCGGCAAACGAATAAACTATACTTACAGGAT
AAACAATACAGTGCCGAAGTCGCTTCAGCGCGTATTCAGTATCAACAATCTTTAGAAGAT
TATAACCGTCGAGTGCCGTTAGCGAAGCAGGGGGTTATTTCAAAAGAAACGCTGGAGCAT
ACCAAAGATACGTTAATAAGTAGCAAAGCGGCATTGAATGCCGCTATCCAGGCTTATAAA
GCGAATAAAGCTTTAGTAATGAACACACCATTAAACCGTCAGCCACAAGTCGTTGAAGCG
GCGGATGCAACTAAAGAAGCCTGGTTGGCGCTTAAACGTACGGATATTAAGAGTCCGGTT
ACCGGCTATATTGCCCAGAGAAGTGTTCAGGTCGGCGAAACAGTGAGCCCCGGACAATCG
TTAATGGCTGTCGTACCGGCACGTCAAATGTGGGTTAATGCCAACTTTAAAGAAACACAA
CTCACGGATGTACGGATTGGTCAATCGGTCAATATTATCAGCGATCTTTATGGTGAAAAT
GTTGTGTTTCATGGTCGGGTGACAGGGATCAATATGGGAACCGGCAATGCGTTCTCCTTA
TTACCTGCACAAAATGCGACAGGGAACTGGATCAAAATCGTTCAGCGTGTACCGGTTGAA
GTTTCTCTGGATCCAAAAGAACTCATGGAACACCCCTTGCGCATTGGTTTATCGATGACT
GCAACTATTGATACCAGGAACGAAGACATTGCTGAGATGCCTGATCTGGCTTCAACCGTG
ACCTCCATGCCTGCTTATACCAGTAAGGCTTTAGTTATCGATACCAGTCCGATAGAAAAA
GAAATTAGCAACATTATTTCGCATAATGGACAACTTTAATGGCAATCACTAAATCAACTC
CGGCACCATTAACCGGTGGGACGTTATGGTGCGTCACTATTGCATTGTCATTAGCGACAT
TTATGCAAATGTTGGATTCCACTATTTCTAACGTCGCAATACCGACAATATCTGGCTTTC
TGGGAGCATCAACAGACGAAGGTACCTGGGTTATCACCTCGTTTGGCGTAGCAAATGCCA
TTGCGATCCCTGTTACCGGCAGGCTGGCACAAAGAATAGGCGAATTAAGGTTATTTTTAC
TTTCAGTCACTTTTTTTTCGCTGTCTTCCTTAATGTGTAGTTTATCGACCAATCTTGATG
TGCTGATATTTTTTAGAGTCGTTCAGGGGTTAATGGCAGGGCCGTTAATTCCACTGTCAC
AGAGTTTATTATTAAGGAATTATCCACCAGAAAAAAGAACATTTGCTCTGGCATTATGGT
CAATGACCGTGATTATCGCTCCGATATGTGGGCCGATATTGGGCGGTTATATTTGTGATA
ACTTTAGCTGGGGTTGGATATTTTTAATCAATGTCCCTATGGGGGTTATCGTCCTGACAT
TATGCTTAACCTTACTTAAAGGAAGAGAAACTGAGACTTCACCGGTCAAAATGAATCTAC
CAGGACTGACCCTGTTAGTGCTTGGTGTTGGTGGCTTGCAAATTATGCTTGATAAAGGGC
GCGATCTGGATTGGTTCAACTCGAGTACAATAATAATATTAACAGTAGTATCAGTTATTT
CTCTGATCTCTTTAGTCATTTGGGAGTCAACCTCAGAGAACCCGATTCTTGATCTCAGTT
TGTTTAAGTCCCGTAATTTCACCATTGGTATTGTGAGTATCACATGCGCGTATTTATTTT
ACTCTGGAGCGATAGTCCTTATGCCGCAGTTACTCCAGGAAACAATGGGGTATAATGCGA
TTTGGGCTGGGCTTGCTTATGCGCCCATCGGCATCATGCCACTATTAATTTCACCTTTGA
TAGGACGTTATGGCAACAAAATAGACATGCGGTTGTTAGTGACATTTAGTTTTTTGATGT
ATGCGGTTTGCTATTACTGGCGTTCTGTGACATTTATGCCAACGATTGATTTTACAGGCA
TCATTTTGCCACAGTTTTTCCAGGGATTCGCCGTTGCCTGTTTCTTTTTACCCTTAACAA
CGATTTCGTTTTCAGGGTTGCCAGATAATAAATTTGCCAATGCCTCGAGTATGAGTAATT
TTTTTCGTACCTTGTCAGGATCAGTTGGTACGTCGTTGACAATGACGCTGTGGGGACGAC
GCGAATCGTTACACCATAGTCAGTTGACAGCAACCATCGATCAATTTAACCCCGTGTTTA
ATTCATCGTCACAAATTATGGATAAATACTATGGTTCGCTTTCAGGAGTTCTTAATGAAA
TTAATAATGAAATAACCCAGCAGTCACTTTCTATTTCTGCAAATGAGATTTTCCGTATGG
CGGCTATTGCTTTTATCTTACTTACGGTTTTGGTTTGGTTTGCGAAACCGCCGTTTACAG
CGAAAGGCGTTGGGTGATGGTAAAAGCAGGGGGTTATAGCGGGTAAGACCGGGGATCTTA
AGTCTGCGCCATCGGCAGCATCGCTCATCCAGGGAAAGGATGGCGATGCTGAATTGAAAA
TTAATTAGCGGCCTTTTGCCAGATATTGCTCCATCTCTTCTTCCGGCACCATTCCACCTC
CCGTCGCCCACACCAGATGAGTGGCATTACGCAGTTGTTCTGCGCTGCAACCGTGCATCT
GTTGGTAACTTACTGATGCGCACACGCGCTGAGGCCCGGCCATACCCGCCAGTGCCGAAG
GTTCAAGACGAATGCCTTCTTCCTGCGCCAGCCAGCCAAGCATGTTATACATGGTTTGAT
CGCTAAGGGTATAGAAGCCATCCAGTAGACGCTCCATTGCCCGCCCGACAAAGCCTGATG
CGCGACCAACTGCAAGGCCATCCGCTGCGGTAAGGTTGTCGATACCAATATCCTGAACAG
AAATCTGATCGTGTAATCCTGTATGGACGCCTAACAGCATACAAGGGGAGTGCGTTGGTT
CGGCAAAAAAGCAGTGAACATGATCGCCAAACGCCAGTTTAAGCCCGAATGCGACGCCAC
CAGGACCACCGCCAACACCACACGGCAGATAGACAAACAGAGGGTTATCAGCATCGACAA
TACGACCTTGCTCGGCAAATTGCGCTTTAAGACGCTGGCCAGCGACGGAATACCCAAGGA
ACAACGTGCGGGAATTTTCGTCATCAATAAAGAAACAGTTCGGGTCAGACTGCGCTGCTC
TACGTCCTTCCTCGACGGCAACACCATAATCTTGCTCATATTCCACGACCGTAACGCCAT
GGCTGCGCAGTTTCGCTTTTTTCCATGCCCGGGCATCAGCAGACATATGCACTGTCACCT
TAAAGCCAATGCGGGCGCTCATAATGCCGATTGATAACCCCAGATTTCCGGTTGAGCCCA
CAGCAATGCTGTATTGGCTAAAGAACTGTTTAAACTCCGGAGAAAGCAGTTTGCTGTAGT
CATCATCAAGCGTCAGCAACCCCGCTTCCAGAGCCAGTTTTTCTGCGTGTGCCAGGACTT
CATAAATCCCGCCGCGTGCTTTTATGGAGCCGGAAATGGGCAAATGGCTATCTTTTTTCA
GTAACAGTTGCCCGCTGATCGGTTGTTGATATTCCTTTTCCAGCCGTTTTTGCATAGCCG
GAATGGCAACCAGTTCTGATTCAATAATCCCCCCAGTAGCAGCAGTTTCAGGAAATGCTT
TTGTCAGATAGGGTGCAAAACGGGATAAGCGCGCATGGGCGTCCTGAACATCCTGTTCGG
TCAGGCCAACATAAGGTAAACCTTCAGCCAATGAGGTCGTGCCAGGATTAAACCAGGTGG
TTTCTTTAAGAGCAACCAGATCCTTTACCAACGGATACTGGGCGATGAGCGAGTTCATTT
TAGCGTTTTCCATAGTACGTCTCTTTGCGCTTAGATGATAAATGACAGCAGGAATGTGCC
CGCCAGAGCGACGACTGAAGCGATAAATGTCGCTGTCGTATAGTATTTAAATGTTTCATT
GAGCGTAGCGCCGCAATATTGCTTCACCAGCCAGAAAAGCGAGTCCGTAACGATAGTGCA
GCCAATTGCACCTGAACCGATAGCAATCGCAATAATTTCCGGGCTGATGTCGGGATACAG
CGGCAGCACAATGATCCATATTTATATTTTCTTCTCCAGGTTGGCGATGCCAGTTGGCAT
GTTTTACTTACTTGCCTATATGGTTACTCGTTGGCGAGAACAGAGGCGGAATTGGGGACA
ATTGGCCGGGAATTATTGTTATTTTTTATTGTATTGCCGTGTCAGGTGATAGGGCGTTGG
ATCTCGCCAGTGACGTCTGTTTCTGCTACAGTGCCCGTTTTACGACAAACGGCTTGGGTA
TGGCTTCATTAAAGGATGTCGCACGCCTGGCGGGAGTGTCGATGATGACAGTCTCCCGGG
TGATGCATAATGCAGAATCTGTGCGTCCTGCAACGCGTGACCGCGTATTGCAGGCAATCC
AGACCCTGAATTATGTTCCTGATCTTTCCGCCCGTAAGATGCGCGCTCAAGGACGTAAGC
CGTCGACTCTCGCCGTGCTGGCGCAGGACACTGCTACCACTCCTTTCTCTGTTGATATTC
TGCTTGCCATTGAGCAAACCGCCAGCGAGTTCGGCTGGAATAGTTTTTTAATCAATATTT
TTTCTGAAGATGACGCTGCCCGCGCGGCACGTCAGCTGCTTGCCCACCGTCCGGATGGCA
TTATCTATACTACAATGGGGCTGCGACATATCACGCTGCCTGAGTCTCTGTATGGTGAAA
ATATTGTATTGGCGAACTGTGTGGCGGATGACCCAGCGTTACCCAGTTATATCCCTGATG
ATTACACTGCACAATATGAATCAACACAGCATTTGCTCGCGGCGGGCTATCGTCAACCGT
TATGCTTCTGGCTACCGGAAAGTGCGTTGGCAACAGGGTATCGTCGGCAGGGATTTGAGC
AGGCCTGGCGTGATGCTGGACGAGATCTGGCTGAGGTGAAACAATTTCACATGGCAACAG
GTGATGATCACTACACCGATCTCGCAAGTTTACTCAATGACCACTTCAAATCGGGCAAAC
CAGATTTTGATGTTCTGATATGTGGTAACGATCGCGCAGCCTTTGTGGCTTATCAGGTTC
TCCTGGCGAAGGGGGTACGTATCCCGCAGGATGTCGCCGTAATGGGCTTTGATAATCTGG
TTGGCGTCGGGCATCTGTTTTTACCGCCGCTGACCACAATTCAGCTTCCACATGACATTA
TCGGGCGGGAAGCTGCATTGCATATTATTGAAGGTCGTGAAGGGGGAAGTGTGACGCGGA
TCCCTTGCCCGCTGTTGATCCGTTGTTCCACCTGATATTATGCTAACCCAGTTGCCAGAG
TGCTCCATGTTGCACCACAGCCACTCCGTGGGAGGCATAAAGCGACAGTTCCCGTTCTTC
TGGCTGCGGATAGATTCGACTACTCATCACCGCTTCCCCGTCGTTAATAAATACTTCCAC
GGATGATGTATCGATAAATATCCTTAGGGCGAGCGTCTCACCCTGCGGGAGGGGAATACT
ACGGTAGCCGTCTAAATTCTCGTGTGGGTAATACCGCCACAAAACAAGTCGCTCAGATTG
GTTATCAATATACAGCCGCATTCCAGTGCCGAGCTGTAATCCGTAATGTTCGGCATCACT
GTTCTTCAGCGCCCACTGCAACTGAATCTCAACTGCTTGCGCGTTTTCCTGCAAAACATA
TTTATTGCTGATTGTGCGGGGAGAGATAGATTGATGCTGCTGGCGTAACGACTCAGCTTC
GTGTACCGGGCGTTGTAGGAGTTTGCCATTGCTCTCTGATAGCTCGCGCGCCAGCGTCAT
GCAGCCTGCCCAGCCTTCACGTTTTGAGGGCATTGGCGATTCCCACATATCCATCCAGCC
GATAACAATACGCCGACCATCCTTCGCTACAAAGCTTTGTGGTGCATAAAAGTCATGCCC
GTTATCAAGTTCAGTAAAATGCCCGGATTGTGCAAAAAGTCGTCCTGGCGACCACATTCC
GGGTATTACGCCACTTTGAAAGCGATTTCGGTAACTGTATCCCTCGGCATTCATTCCCTG
CGGGGAAAACATCAGATAATGCTGATCGCCAAGGCTGAAAAAGTCCGGACATTCCCACAT
ATAGCTTTCACCCGCATCAGCGTGGGCCAGTACGCGATCGAAAGTCCATTCACGTAATGA
ACTGCCGCGATAAAGCAGGATCTGCCCCGTGTTGCCTGGGTCTTTCGCCCCGACTACCAT
CCACCATGAGTCGGCTTCACGCCACACTTTAGGATCGCGGAAGTGCATGATTCCTTCTGG
TGGAGTGAGGATCACACCCTGTTTCTCGAAATGAATACCATCCCGACTGGTAGCCAGACA
TTGTACTTCGCGAATTGCATCGTCATTACCTGCACCATCGAGCCAGACGTGTCCGGTGTA
GATAAGTGAGAGGACACCATTGTCATCGACAGCACTACCTGAAAAACACCCGTCTTTGTC
ATTATCGTCTCCTGGCGCTAGCGCAATAGGCTCATGCTGCCAGTGGATCATATCGTCGCT
GGTGGCATGTCCCCAGTGCATTGGCCCCCAGTGTTCGCTCATCGGGTGATGTTGATAAAA
CGCGTGATAACGATCGTTAAACCAGATCAGGCCGTTTGGATCGTTCATCCACCCGGCAGG
AGGCGCGAGGTGAAAATGGGGATAGAAAGTGTTACCCCGGTGCTCATGAAGTTTTGCTAG
TGCGTTTTGCGCCGCATGCAATCGAGATTGCGTCATTTTAATCATCCTGGTTAAGCAAAT
TTGGTGAATTGTTAACGTTAACTTTTATAAAAATAAAGTCCCTTACTTTCATAAATGCGA
TGAATATCACAAATGTTAACGTTAACTATGACATTTTGTGATCGAATATGCATGTTTTAG
TAAATCCATGACGATTTTGCGAAAAAGAGGTTTATCACTATGCGTAAGTCAGATGAATTT
AAGGGAAAAAAATGTCAGCCAAAGTATGGGTTTTAGGGGATGCGGTAGTAGATCTCTTGC
CAGAATCAGACGGGCGCCTACTGCCTTGTCCTGGCGGCGCGCCAGCTAACGTTGCGGTGG
GAATCGCCAGATTAGGCGGAATAAGTGGGTTTATAGGTCGGGTCGGTGATGATCCTTTTG
GTGCGTTAATGCAAAGAACTCTGCTAACTGAGGGAGTCGATATCACGTATCTGAAGCAAG
ATGAATGGCACCGGACATCCACGGTGCTTGTCGATCTGAACGATCAAGGGGAACGTTCAT
TTACGTTTATGGTTCGCCCCAGTGCCGATCTTTTTTTAGAGACGACAGACTTGCCCTGCT
GGCGACATGGCGAATGGTTACATCTCTGTTCAATTGCGTTGTCTGCCGAGCCTTCGCGTA
CCAGCGCATTTACTGCGATGACGGCGATCCGGCATGCCGGAGGTTTTGTCAGCTTCGATC
CCAATATTCGTGAAGATCTATGGCAAGACGAGCATTTGCTCCGCTTGTGTTTGCGGCAGG
CGCTACAACTGGCGGATGTCGTCAAGCTCTCGGAAGAAGAATGGCGACTTATCAGTGGAA
AAACACAGAACGATCGGGATATATGCGCCCTGGCAAAAGAGTATGAGATCGCCATGCTGT
TGGTGACTAAAGGTGCAGAAGGGGTGGTGGTCTGTTATCGAGGACAAGTTCACCATTTTG
CTGGAATGTCTGTGAATTGTGTCGATAGCACGGGGGCGGGAGATGCGTTCGTTGCCGGGT
TACTCACAGGTCTGTCCTCTACGGGATTATCTACAGATGAGAGAGAAATGCGACGAATTA
TCGATCTCGCTCAACGTTGCGGAGCGCTTGCAGTAACGGCGAAAGGGGCAATGACAGCGC
TGCCATGTCGACAAGAACTGGAATAGTGAGAAGTAAACGGCGAAGTCGCTCTTATCTCTA
AATAGGACGTGAATTTTTTAACGACAGGCAGGTAATTATGGCACTGAATATTCCATTCAG
AAATGCGTACTATCGTTTTGCATCCAGTTACTCATTTCTCTTTTTTATTTCCTGGTCGCT
GTGGTGGTCGTTATACGCTATTTGGCTGAAAGGACATCTAGGGTTGACAGGGACGGAATT
AGGTACACTTTATTCGGTCAACCAGTTTACCAGCATTCTATTTATGATGTTCTACGGCAT
CGTTCAGGATAAACTCGGTCTGAAGAAACCGCTCATCTGGTGTATGAGTTTCATCCTGGT
CTTGACCGGACCGTTTATGATTTACGTTTATGAACCGTTACTGCAAAGCAATTTTTCTGT
AGGTCTAATTCTGGGGGCGCTCTTTTTTGGCTTGGGGTATCTGGCGGGATGCGGTTTGCT
TGACAGCTTCACCGAAAAAATGGCGCGAAATTTTCATTTCGAATATGGAACAGCGCGCGC
CTGGGGATCTTTTGGCTATGCTATTGGCGCGTTCTTTGCCGGCATATTTTTTAGTATCAG
TCCCCATATCAACTTCTGGTTGGTCTCGCTATTTGGCGCTGTATTTATGATGATCAACAT
GTGTTTTAAAGACCAGGATCACCAGTGCGTAGCGGCGGATGCGGGAGGGGTAAAAAAAGA
GGATTTTATCGCAGTTTTCAAGGATCGAAACTTCTGGGTTTTCGTCATATTTATTGTGGG
GACGTGGTCTTTCTATAACATTTTTGATCAACAACTCTTTCCTGTCTTTTATGCAGGTTT
ATTCGAATCACACGATGTAGGAACGCGCCTGTATGGTTATCTCAACTCATTCCAGGTGGT
ACTCGAAGCGCTGTGCATGGCGATTATTCCTTTCTTTGTGAATCGGGTAGGGCCAAAAAA
TGCATTACTTATCGGTGTTGTGATTATGGCGTTGCGTATCCTTTCCTGCGCGCTGTTCGT
TAACCCCTGGATTATTTCATTAGTGAAGTTGTTACATGCCATTGAGGTTCCACTTTGTGT
CATATCCGTCTTCAAATACAGCGTGGCAAACTTTGATAAGCGCCTGTCGTCGACGATCTT
TCTGATTGGTTTTCAAATTGCCAGTTCGCTTGGGATTGTGCTGCTTTCAACGCCGACTGG
GATACTCTTTGACCACGCAGGCTACCAGACAGTTTTCTTCGCAATTTCGGGTATTGTCTG
CCTGATGTTGCTATTTGGTATTTTCTTCTTGAGTAAAAAACGCGAGCAAATAGTTATGGA
AACGCCTGTACCTTCAGCAATATAGACATAAACTTTTTCCGGTTGTTGTCGATATCTCCA
TATCCCTCAACCGGAAAATAATAATACTAAAATGCTTAGGCCTGCTAATAATCGCCTAAT
CCAAACACCTCATTCATGTTCTGGTACAGTCGCTCAAATGTACTCCGGATACACGGTTCG
CTGATTTCCAGGACATTGTCGTCATTCAGCGACCTGTCCCGTGTATTACGGGCCTGCGAA
TTCATCAAGGAATGCATTGCGGAGTGAAGTATCGAGTCACGCCATATTTCGCTATCAGGA
TTCTGTGTGATGGTTACATCGCCCGGCCCAGGGCTGTTTAGTCATCAGCGCTTTCTGACA
GTGCTGAGATTTCAACCTGTTGCAGTAAAAATGAGTAGATATAGGGCAAGTGTGCTGCCA
AACCCATCTTTTACGGGGTGAAGGTAGATTTGGTTTGAAGGGTATCTGGTGTCCCCTGCA
GGAATCGAACCTGCAATTAGCCCTTAGGAGGGGCTCGTTATATCCATTTAACTAAGAGGA
CAATGCGGCATGAGTATACCCGCTAATGGACTGCGGGGTAAGTACGCTGCCGCTCGATTG
CTTAAACCCTCGCCATTTATGCCGGGTTTTTATCATTTTTCTTAATGTTTTCCGCACGTT
CTGCTTTTTGGCGTGCTTCTGCTTTGCGCTTGTTGCTCATGTCGTTACGGATCTGTGCAT
GACTCATTAACGCGAAGATAAAGGTGCCGCCGCAGATGTTCCCCGCTAAAGTAGGTAGTG
CGAAGGGCCAGATGAAATCGCTCCAGTGCAGCGTGCCGTTAAACACCAGATAGAGGATTT
CAACAGAACCGACAACGATGTGGGTGGTGTCACCCAGGGCAATAAGCCAGGTCATCAATA
TAATCACCACAATCTTTGCCGCACCCGCTGCAGGAAACATCCATACCATAGTGGCGATCA
GCCAGCCGGAAATGATCGCGTTGGCAAACATCTCGCTGGGGGTGTTCTTCATCACATCCA
TGCCGATATTGACAAATGCATCGCGAGTTTCTTCATTGAAGATTGGCATATATTCAAATG
CCCACGCCGCAATACCTGTCCCGAGAATATTACCCAGCAGCACGACGCCCCATAACCGCA
TAAGTAAGCCAACGTTGCTCATTGTCGGTTTTTGCATGACGGGTAGTACCGCAGTCACGG
TGTTTTCGGTAAATAATTGCTGGCGGGCCATAATGACGATAATAAAACCAAAGGTATAAC
CGAGATTCTCCAGCAAGAAGCTGCCCGGCACACCTTCCAGTTCGACATGAAATATCCCTT
TTGCCAGTAATGAAGCGCCCATCGACAGACCCGCCGCAATGGCTGACCACAGTAGTGCCA
TTGCGTCGCGTTCCAGCTCTTTTTCACCATCCTGGCGGATATGCTCATGAATTGCCATCG
CCCGGGAGGGGAGTCGATCTTCATCTATTTCTATTTTTTTGCCACGCTCTTTTTCTTCGC
TCTCAACTTCAATTTCGTCGCTGTGTTGATCAATTTTGTCGTTGTCCATGGTCTCTTCTC
TTGAATTAGCACGTATAGCTAAAGCGTAGCGGCTTTTTTGCTCGCAACTGGCGGGAGTTA
CTCTGAAAATGTAGAAAAGGCCGCGTTTGCCTTTTTCTGTTTCCATAGAATCAAGTAGCC
TACAGGGCGGCGATTACCAGGCTATGATCAAATCAGCAAATCAGGGCGTCTGGACATCAG
TTGACGTGCTGTTACAATCGCCCACACCTAAACAGGCGGATACGGTATCGTTCCGTCATG
GATGGCAAACTGCATAAGCCATAAAAAAACAGGGAGACATTTATGAAGCTTCGCCTGTCG
GCGCTTGCTCTGGGAACTACGCTTCTGGTGGGGTGTGCGAGTTCCGGTACAGATCAGCAA
GGGCGTTCTGACCCGTTAGAAGGGTTCAACCGCACCATGTACAACTTCAACTTCAACGTA
CTAGACCCGTATATTGTTCGACCGGTCGCTGTCGCCTGGCGTGATTATGTTCCGCAACCG
GCGCGTAACGGTTTGAGCAACTTTACCGGCAACCTTGAAGAACCTGCGGTGATGGTTAAC
TACTTCTTGCAGGGCGACCCTTATCAGGGGATGGTCCACTTTACCCGCTTTTTCCTGAAC
ACCATTTTGGGGATGGGCGGCTTTATTGATGTTGCAGGGATGGCGAACCCGAAACTGCAA
CGGACTGAACCTCACCGCTTCGGTAGTACGCTTGGTCATTATGGCGTGGGTTATGGGCCG
TACGTTCAGTTACCATTCTACGGTAGCTTCACGCTGCGTGATGACGGTGGTGATATGGCG
GATGGTCTTTACCCGGTTCTTTCCTGGTTGACCTGGCCGATGTCTGTGGGTAAATGGACG
CTTGAAGGGATCGAAACCCGCGCTCAGCTGCTGGATTCCGACGGTCTGCTGCGTCAGTCG
TCCGATCCTTATATTATGGTGCGCGAAGCGTACTTCCAGCGTCATGATTTCATCGCTAAT
GGCGGCGAACTCAAACCGCAGGAAAATCCGAACGCGCAAGCGATTCAGGATGATTTAAAA
GATATCGATTCTGAATAAGAAACAAATAAAAAAGGTGAGTCGCAAAACTCACCTTTTTTG
TTGTTATCCCTCAATTACCACAAGTAAAAGGAGATAAACCGACAATGACCCGGACGTAAT
GATGTAAAAATACTGATGTTCGTCACTGACTATTTCCGATATTCAGGCGTTGAAAAATCA
AAAAACTGGAAAAATAATTTTAAATATCATCAAAATTAACACCTGGCGCATATAGTTGAT
TAATTTCATTTTGATATTCCGTCTGGCGATTTTGAAGCCTTTCTTCAATTTTACCTTCGA
GTTCCTTATAGTGCATATATATATTTTGAGAATGGTCAACGTTAACTTCGTTACCGAATA
AAGTAGAAACTATTTCTTTTGTATTCTTAAGTGTATATTTTCTATCATCCTCTTAATATT
CATATCCTCTTGCTAGATTTGAAGGATTAAAAGCTTCGTTAGGTTCTCTCAGTCTTTCCC
CTTTGAGTTCGTTTACAACTTGATGATCGGGACCTGTTGCAAATGATTCTGCGATGATTG
CTTTACTGTGTTCAAACCACGCAGAAGCACTCCTGGCTTTTTTACTACAATATTGGGTGA
GATTATCACCATCAATACGAAATCCTTTTTGAATGTGGTAGCCATCCTGATCGTAGTAAC
CGAGAGATAAGTAATCATTTCCATTTTTATTTTTTATTACAATAGCGAGAGAGTCGCCTT
TTTTATCTTTACCGTACCAGGTAAATAAGCACGTTGGTTCGCTTTTCCCGCTCTCATCGA
ATTCCGTTACCGTATGTCTGAGTTTGTGTGATATTTTATCGAAGATAAAACTTGGATTTT
CATCATATATTTCTTTTATTGCGCTGAAGATCATTTTCTTGTTATTGATATCATGAGTAT
TCTCTACTATGTTTTCATTGATGATGGTTTGACCGACTTTTTTGTTTTCATCGTTCGCGG
GTGATTTTGTTGGTTCTTGATTTTCAATATCAATATCAATATCAAAAGTAATATCGTCTG
TATCATTGGAGTCAATACCAATATCACTACGATCATCAATACCACTAATAATAATACCAT
CAGTAAATTCAGCATTATTTATATCATCATGAGTCTTCTCAACTATGTTGTCATTAATGA
TAGTACGGACGAGTTCTTTGTCTTTATAACTCGCAGGTAATTTTATTGGTTCTTGGTTGT
CGATACCAATAGTAATATGGTCTGTATCATTGGAACCAATATTAATATAAGTAACTGAAG
AATTATTGATATTTATTCTATCAGGATCGTCGTTTCCTCGTATGGCGTTTTTTATAAGCT
CAAGTAGATGTTTAATACAGGTGCTTATTCCTTCCTTACCATTAAAAAGGTTTTTGAACT
CTTGTACTAATCCATTAACTTCATCATTGTTATTTTCATTGATGGATTCTGGGTAAGCTG
CGCTGGTATTGTTGATTGAAATAGATGGTAGCATGATTTTATTCCATGTTGATTGATTTG
TTACAAATATATATTACCTAATGAAATAGACTATCAAAAAACGCTCATTTATTTAGACCC
TATCTTTAATTTGAGTGTATGAGCGCACAATAGCCAGGGTGGTTTGAGTATCCTGGAAAT
TCAGAAAAGTAAACTCTTTGAGAAAGACGAGCAGAACGCCTGAAAATATGCCTTTCCCTT
CAGGTTTGTCTGTGGATACCACTTAATGATTTGAAAGGGCAAGCTACCATCAGGCTGTTT
GCAAAACTCAGGAGGCAAGCAATGAGGACACTACTTTCGGTGAAGTGGGGAAGTTAAAGT
CACCTGCATAGCAGGTGACTTTAACCAGGCGAACGCGTTATCAGAACGCGTAGTTAAAGT
TAGTACCGAACAGCCAGGCTTTACCTTCAGATTTAAAGGTATATGCTGCTGGCCCTTCAC
CTTCAGTAAACTTCACATTCTGACCGTGCATATAAGATGCACCAACGTCAATGGATGCAT
CTTCATTAAATGCATAAGTCGCACCTGCACTTAACCACAGACGATCCTGATCTGGGATAG
AGATAGAACGTTTATCTGCCGGAACCGGGCTGTCATCGAATGCAATACCCGTACGGAAGG
TCCAGTTTTTATCGTGGTAGTAGGTTGTACCTAACGCGATACGGTAAGCATCCCGGAAAC
CTTCGTCTTTATAGAACAGCGTTTGACCAGAGTCTCCTTTCGCTTTCAGTTCCTGGAATT
GACTCCAACTGGTATACGCCAGACTATAGTGGATAGCCCATTGTGGTGCGACACGGTTAT
AGCCAGAAATTTCCCACATCTCAGGTAAATTCAGCGTTAAGGACCCATTTTGGGTTGCAC
CCATTGTGCCATATGGTAAACCCATGCTACCCAAGATGTTGTTCAGATTTGGGTTGATGG
AGCTTTTGTAATCTCCTTCAAAGTCAATTTTCACTTCTGAACGATAGGTTAGGCCCCAAC
GGTTATCTTTATCCAGTTCATAAAGAATACCGGCGTTCCAGCCGAATCCCCATTCATCAC
CCTTGAGATGAGCAATTTGCGAATCCGGTGTATTGATGCCGTTTGTCCAACTTTGTGGCA
CGCCTTGCGCTATCAGTTGTTGGGAAAGCAATGGACCGAGTGAACCGGCAGTACGCTCAA
TTTTTGCCTTAGCGTATACAGCATCAAAACCAAGACCAAAACTCCAGCTATTGTTAAGGC
GGTAGGCTCCGCTAAGGTTAAGGTTGATCGTCTGCAGATCGGTTTTACCGCCATAGATTC
CAGCAGCGTAGTTATCATTAAATTCCGTGGCCAGACCATAGTTCGAGGTAATAGAAGCCC
CCCAACCAAACTGATCGTTAATAGGTGCTACGAAATGTAGGTTAGGCACCCACGCAGTTG
GTGCAATATTATCTGCATCAGCACGCTGGCCCGTTAAATCGGAACGCCCAGAAATATCTA
CATCCGGGTCAATATAAACCGCACCCGCAGAAAATGTCGGGCGGTCAAACATGGTAATCA
ATGCGGGGTTACGGCTGACGTTACCTGCATCATCGGCAATTGCGCCTTCCCCTGAATAAG
CCCGGCCCAGGCCAGAGGAAGAAAATTCGTTTAACTGAAAGCCTGCCGACCAGGCCTGGG
TGGAGATAAGTGCCACTGCGACTGCGAGAGCAGACTTTGTAAACAGGGTTTTCTGGCTCA
TGACCATAACCTCAATGATTTATTTTTATACAAACTATGTTACGTGCTGTAACAGGAGCG
CGAAGTGTAGGGTCTGAGGTACATCTTAGAAATCAGACCAGTGGCGAGAGTATAGGTCGG
ACCAGCTGGAATGTTGCAAGTATGTTTCTATCTTTTTTCAAATATGATCTAAGAAACGCG
ATCCAGCTGGCAAAATTTGGAGGTGGCGCACTCATGGATTCGGGTGAATTTTGTTTTAGA
TCATTTTTAAGTGTGATTTCGGTCACTTATCCGATTTTGCAGAATTAACAACTGGAGCAG
CACTTTCCGGAAGCGTAAAATATCCACAACGTTTATCTGGCACCTTGGGTGCACATACAG
AGGAAATCAACGATGAGTAAATGTAGTGCTGATGAAACCCCGGTTTGCTGCTGTATGGAT
GTTGGCACCATTATGGACAACTCCGACTGCACCGCGTCTTACAGCCGCGTGTTTGCAAAC
CGCGCAGAAGCAGAACAAACGCTGGCGGCACTGACTGAGAAAGCCCGTAGCGTGGAATCC
GAACCGTGCAAAATCTCCCCGACTTTCACTGAAGAGTCTGATGGTGTGCGCCTGGATATC
GATTTCACTTTTGCCTGCGAAGCTGAAATGCTGATCTTCCAGCTGGGTCTGCGTTAATTC
CTCTCGGGTACGTACGCCCCTGTCAGTTGCTGGCAGGGGCGTTTTCTTTTCTCTTCTTCT
TTTCTCTCTGTGTCATAGCTCCCACTTTCCCTTTTCTCCGCTTGGCTAAATGTAAAAAAA
TGGTTAAGACTATGATCAGGTCAGACCACTTTATTTATTTTTTTACAGGGGAGTGTTATG
GGTCAGGTTTTACCGCTGGTTACCCGCCAGGGCGATCGTATCGCCATTGTTAGCGGTTTA
CGTACGCCTTTTGCCCGCCAGGCGACGGCTTTTCATGGCATTCCCGCGGTTGATTTAGGG
AAGATGGTGGTAGGCGAACTGCTGGCACGCAGCGAGATCCCCGCCGAAGTGATTGAACAA
CTGGTCTTTGGTCAGGTCGTACAAATGCCTGAAGCTCCCAACATTGCGCGTGAAATTGTT
CTCGGTACTGGAATGAATGTGCATACCGATGCTTACAGCGTCAGCCGCGCTTGCGCTACC
AGTTTCCAGGCGGTTGCAAACGTCGCAGAAAGCCTGATGGCGGGGACTATCCGAGCGGGG
ATTGCCGGTGGGGCAGATTCCTCTTCGGTATTGCCAATTGGCGTCAGTAAAAAACTGGCG
CGCGTGCTGGTTGATGTCAACAAAGCCCGCACAATGAGCCAGCGTCTGAAACTCTTCTCT
CGCCTGCGTTTGCGCGACTTAATGCCCGTACCACCTGCGGTAGCAGAATATTCTACCGGC
TTGCGGATGGGCGACACTGCAGAGCAAATGGCGAAAACCTACGGCATCACCCGAGAACAG
CAAGATGCATTAGCGCACCGTTCGCATCAGCGTGCCGCTCAGGCATGGTCAGACGGAAAA
CTCAAAGAAGAGGTGATGACTGCCTTTATCCCTCCTTATAAACAACTGCTCGCGGAAGAC
AACAATATTCGCGGTAATTCCTCGCTTGCTGATTACGCAAAGCTGCGTCCGGCGTTTGAT
CGTAAACACGGAACGGTAACGGCGGCGAACAGTACGCCGCTGACCGATGGCGCAGCGGCG
GTGATCCTGATGACTGAATCCCGGGCGAAAGAATTAGGGCTGGTACCGCTGGGATATCTG
CGCAGCTACGCATTTACCGCTATCGATGTCTGGCAGGACATGTTGCTCGGTCCAGCCTGG
TCAACACCGCTGGCGCTGGAGCGTGCCGGTTTGACGATGAGCGATCTGACATTGATCGAT
ATGCACGAAGCCTTTGCAGCTCAGACACTGGCGAATATTCAGTTGCTGGGTAGTGAACGT
TTTGCTCGTGAAGCACTGGGGCGTGCACATGCCACTGGCGAAGTGGACGATAGCAAATTT
AACGTGCTTGGCGGTTCGATTGCTTACGGGCATCCCTTCGCGGCGACCGGCGCGCGGATG
ATTACCCAGACATTGCATGAACTTCGCCGTCGCGGCGGTGGATTTGGTTTAGTTACCGCC
TGTGCTGCTGGTGGGCTTGGCGCGGCAATGGTTCTGGAGGCGGAATAATGGAAATGACAT
CAGCGTTTACCCTTAATGTTCGTCTGGACAACATTGCCGTTATCACCATCGACGTACCGG
GTGAGAAAATGAATACCCTGAAGGCGGAGTTTGCCTCGCAGGTGCGCGCCATTATTAAGC
AACTCCGTGAAAACAAAGAGTTGCGAGGCGTGGTGTTTGTCTCCGCTAAACCGGACAACT
TCATTGCTGGCGCAGACATCAACATGATCGGCAATTGCAAAACGGCGCAAGAAGCGGAAG
CTCTGGCGCGGCAGGGCCAACAGTTGATGGCGGAGATTCATGCTTTGCCCATTCAGGTTA
TCGCGGCTATTCATGGCGCTTGCCTGGGTGGTGGGCTGGAGTTGGCGCTGGCGTGCCACG
GTCGCGTTTGTACTGACGATCCTAAAACGGTGCTCGGTTTGCCTGAAGTACAACTTGGAT
TGTTACCCGGTTCAGGCGGCACCCAGCGTTTACCGCGTCTGATAGGCGTCAGCACAGCAT
TAGAGATGATCCTCACCGGAAAACAACTTCGGGCGAAACAGGCATTAAAGCTGGGGCTGG
TGGATGATGTTGTTCCGCACTCCATTCTGCTGGAAGCCGCTGTTGAGCTGGTAAAGAAGG
ATCGCCCATCTTCCCGCCCTCTACCTGTACGCGAGCGTATTCTGGCGGGGCCGTTAGGTC
GTGCGCTGCTGTTCAAAATGGTCGGCAAGAAAACAGAACACAAAACTCAAGGCAATTATC
CGGCGACAGAACGCATCCTGGAGGTTGTTGAAACGGGATTAGCGCAGGGCACCAGCAGTG
GCTATGACGCTGAAGCACGGGCGTTTGGCGAACTGGCGATGACGCCACAATCGCAAGCTT
TGCGTAGTATCTTTTTTGCCAGTACGGAAGTGAAGAAAGATCCCGGCAGTGATGCGCCGC
CTGCGCCATTAAACAGCGTGGGGATTTTAGGTGGTGGCTTGATGGGCGGCGGTATTGCTT
ATGTCACTGCTTGTAAAGCGGGGATTCCGGTCAGAATTAAAGATATCAACCCGCAGGGCA
TAAATCATGCGCTGAAGTACAGTTGGGATCAGCTGGAGGGCAAAGTTCGCCGTCGTCATC
TCAAAGCCAGCGAACGTGACAAACAGCTGGCATTAATCTCCGGAACGACGGACTATCGCG
GCTTTGCCCATCGCGATCTGATTATTGAAGCGGTGTTTGAAAATCTCGAATTGAAACAAC
AGATGGTGGCGGAAGTTGAGCAAAATTGCGCCGCTCATACCATCTTTGCTTCGAATACGT
CATCTTTACCGATTGGTGATATCGCCGCTCACGCCACGCGACCTGAGCAAGTTATCGGCC
TGCATTTCTTCAGTCCGGTGGAAAAAATGCCGCTGGTGGAGATTATTCCTCATGCGGGTA
CATCAGCGCAAACCATCGCCACTACGGTAAAACTGGCGAAAAAACAGGGCAAAACGCCCA
TTGTCGTGCGTGACAAAGCCGGGTTTTACGTCAATCGCATCTTAGCGCCTTACATTAATG
AAGCTATCCGCATGCTGACCGAAGGTGAACGGGTAGAGCACATTGATGCCGCGCTAGTGA
AATTTGGTTTTCCGGTAGGTCCAATCCAACTTTTGGATGAGGTAGGAATCGACACCGGGA
CTAAAATTATTCCTGTACTGGAAGCCGCTTATGGAGAACGTTTTAGCGCGCCTGCAAATG
TTGTTTCTTCAATTTTGAACGACGATCGCAAAGGCAGAAAAAATGGTCGGGGTTTCTATC
TTTATGGTCAGAAAGGGCGTAAAAGCAAAAAACAGGTCGATCCTGCCATTTACCCGCTCA
TTGGCGCACAAGGGCAGGGGCGACTCTCCGCACCGCAGGTTGCTGAACGGTGTGTGATGT
TGATGCTGAATGAAGCAGTACGTTGTGTTGATGAGCAGGTTATCCGTAGCGTGCGTGACG
GGGATATTGGTGCGGTATTTGGCATTGGTTTTCCGCCATTTCTCGGTGGACCGTTCCGCT
ATATCGATTCTCTCGGCGCGGGCGAAGTGGTTGCAATAATGCAACGACTTGCCACGCAGT
ATGGTTCCCGTTTTACCCCCTGTGAGCGTTTGGTCGAGATGGGCGAGCGTGGGGAAAGTT
TTTGGAAAACAACTGCAACTGACCTGCAATAAGAAGGTCAAAGCTATATGAATCCGCGCT
GAATGGCGGATAGTTGGTCAAAATGTAAACGCATATTGACTATACTTACGCCATTGAGGT
AAAAAACAGCGTTTCATTCGGTGAATGGATAAGGCACAATGCCGGCCACCGTTTTCTTTC
TCTGGTTTCAGATGAAAGAAAACGGGCGAATCTGGTTAACAAAAGCGGTGCAATATGCAA
GTTTTTATCATGCGTCACGGCGACGCAGCCCTCGATGCCGCCAGTGATTCGGTTCGTCCT
CTGACTACTAATGGTTGTGACGAATCTCGCCTGATGGCGAACTGGCTGAAAGGTCAAAAA
GTGGAAATCGAACGCGTTCTGGTGAGCCCGTTCCTGCGAGCCGAGCAAACACTGGAGGAA
GTAGGGGATTGTCTGAACCTGCCTTCCAGTGCAGAAGTTCTGCCGGAGTTAACGCCCTGC
GGCGATGTTGGTCTGGTCAGTGCCTATTTGCAGGCGTTGACCAATGAAGGTGTTGCTTCG
GTGTTGGTTATCTCCCACTTACCGTTAGTTGGGTATCTGGTCGCCGAGTTATGTCCGGGC
GAAACGCCGCCTATGTTTACCACCTCGGCCATTGCCAGCGTCACGCTTGATGAAAGTGGA
AACGGCACATTCAACTGGCAGATGAGCCCGTGTAATCTGAAGATGGCGAAAGCTATCTGA
TTTGTTTGAAAAAATGCCCGATGTAAGCTGTACATCGGGCATTTGTCTTTTTGCAATAGT
ATAAATTCACTCAAAACCCTTCACGGAGTTGGTATGCTGCGATGATGATTTCATCGCACT
CTTTCCTCTGCTTCCCTATTAATTTCTGATGAAATGAGACTAAGTTGTAATATATTTTTA
CAAATTATAAAACTAATGGAACAATTAACAGTAAAAAAGAAATGATATTTTTGTGTCTTG
ATTTAATATTATTGTGATGCTTTAATATTATATCTTCAAAAAATACAATTTCAAAATTAA
TCTAAGATCGTCTTTTTTGTATACATTTCCCATAAATTTTAATTATGTAAAAGATGTTTT
CTAAGCATTTTATTTGTTTTTTATAAGTAAACTCTCAAAATTTCACCTTTTTGATTATAT
GTTAAGTGCTCCTTAATTTACTGTTAAGTAAATATAAATTGAAACAATAAAGACAAAACA
TCACCATCCACCCACACCAAAGAATATCTTCTTATGCGACCTATTTTCTTGTTAGTTAGA
TCGGATAGCTTATTCAATGGCTGAGTATAAATAATTGCTATTGACTGAATCAATGTATTG
CAATGTTTATATTTTTAATTATTTATGGTTTAAGGACAAATAATGAGTAAGTTTGTAAAA
ACAGCTATTGCTGCAACAATGGTAATGGGTGCGTTCGCTTCTACTTCAACAATCGCCGCT
GGCAACAACGGTACAGCTCGTTTTTACGGCACCATTGAAGATTCCCCGTGCTCCATCGTT
CCTGATGATCACAAACTGGAAGTGGATATGGGTGACATTGGTTCGGGGATCCTGAAAAAT
AACGGGACCTCCACGCCGAAAGCTTTCCAGATCCATCTGCAAGACTGCGTGTTTGACACC
CAGACAACCATGACAACGACCTTCACCGGTAACGCGTCCGCTACCAACAGCGGCAATTAC
TACACCATTTACAATACCGACACCGGCGCGGCATTTAACAATGTCAGCCTGGCGATTGGT
GATGCTCAGGGGACCTCTTACAAAAGCGGTACGGGCATCAACCAGACAATTGTAAAAGAT
ACTGCCACCAACAAAGGCAAAGCGAAGCAGACGCTGGACTTTAAAGCCTGGCTGGTGGGC
GCTGCTGATGCGCCAGATTTGGGTAACTTCGAAGCCAACACGACTTTCCAGATTACTTAT
CTCTAAGTGATATCCCCATAGCCTTCGGCTATGGGGTTTTTTAAATGGAATTTGCGCAAA
TTATAATAATTACGGATGGATACGTGCATGCCTGACGATTCTCTTTTCCGACTGCGGGTG
CTTCCCTGCTGCATTGCGCTGGCAATGTCAGGGTGTTATGTCAATGCCTGGGCTGAAGAT
GAAATTCAGTTTGATTCCCGTTTCCTGGAGTTAAAAGGCGACACAAAAATCGATCTGAAG
CGATTTTCCAGCCAGGGATATGTCGAACCTGGTAAATACAATTTACAGGTTCAACTAAAT
AAACAGCCGCTGGCGGAAGAATACGATATTTACTGGTACGCCTCTGAGAACGATGCCAGT
AAAACCTATGCCTGCCTGACACCTGAACTGGTCGCTCAGTTTGGTTTAAAAGAGGATGCG
GCAAAAAACCTGCAATGGATCCACGACGGCAAATGTTTGAAACCCGGCCAGCTGGAAGGC
ATTGATATTAAAGCTGACCTGAGTCAGTCAGCGTTAGTCATTTCATTACCCCAGGCTTAC
CTTGAATATACCGACACCGACTGGGACCCACCTTCACGCTGGGATGACGGTATTTCTGGT
TTAATTGCTGACTACAGTATTACCGCCCAGACACGACATGAAGAAAATGGCGGGGATGAC
AGCAATGAAATTAGCGGCAACGGAATGGTTGGGGTTAACCTCGGCGCATGGCGTCTGCGA
GCCGACTGGCAGACCGACTACCAGCACAGCAAAAGCAATGATGAAGATGTTATCAACGGT
GATGACACGCAAAAAAACTGGGAGTGGAGCCGCTACTACGCCTGGCGGGCTTTACCGTCG
CTAAAAGCCAAACTTGGCCTTGGCGAAGACTACCTTAATTCTGATATTTTCGACGGCTTT
AACTACGTGGGTGGCAGTATCAGCACCGACGATCAAATGTTGCCGCCGAATCTGCGCGGC
TATGCGCCGGATATCTCCGGCGTGGCGCACACCACCGCGAAAGTGACCGTCAGCCAGATG
GGCCGCGTGATTTACGAAACGCAGGTTCCGGCGGGGCCGTTCCGCATCCAGGATCTTGGC
GATTCTGTCTCCGGTACACTGCACATCCGCATTGAAGAACAGAACGGCCAGGTGCAGGAA
TATGACATCAACACCGCCTCGATGCCGTTCCTGACCCGCCCCGGCCAGGTGCGCTATAAG
CTGATGATGGGCCGCCCGCAGGAGTGGGGGCATCATGTTGAAGGTGGTTTCTTCTCCGGC
GGCGAAGCTTCATGGGGGATTGCCAACGGCTGGTCGCTCTACGGCGGAGCGCTGGCAGAT
GAACACTATCAGTCGGCGGCGCTTGGCGTCGGTCGCGACCTGTCTGTCTTTGGCGCAGTC
GCCTTTGATATCACCCACTCGCATACCCGCCTGGATAAAGAGACCGCCTACGGTAAAGGT
TCACTGGACGGTAACTCGTTTCGCGTGAGCTATTCCAAAGACTTCGATGAACTGAACAGC
CGCGTCACTTTTGCCGGATACCGCTTCTCGGAAGAGAACTTCATGACCATGAGCGAGTAT
CTCGATGCCAGCGACAGCGAAATGGTGCGCACTGGCAACGACAAAGAGATGTACACCGCC
ACCTACAACCAGAACTTCAGGGATGCCGGTGTGTCTGTTTATCTAAACTACACCCGCCAT
ACCTACTGGGATCGCGACGAACAGACCAACTACAACGTCATGCTCTCGCACTACTTCAAC
CTGGGCAGTATCCGCAATATGAGTATTTCCATGACCGGATACCGCTACGAATATGACAAC
CGCGCCGATAAAGGTGTGTACATATCGCTCAGTATGCCGTGGGGCGACAGCAGCACCATC
AGCTATAACGGTAACTACGGCAGCGGTGCGGACAGCAGCCAGGTGGGGTATTTCAGCCGT
GTCGATGACGCAACCCACTACCAGTTGAACGTGGGAACCAGTGACAAACACTCCAGCGTT
GACGGCTATTACAGCCACGATGGTTCGCTGGCGCAGGTCGATCTCAGCGCCAACTACCAT
GAAGGGCAGTACACCTCGGCGGGCATTTCCTTACAGGGCGGCGCGACGCTCACCGCACAA
GGTGGCGCGCTTCACCGTACCCAGAATATGGGCGGCACGCGTCTGCTGATTGATGCCGAC
GGCGTGGCTGGTGTTCCGGTAGAAGGAAATGGTGCGGCGGTTTACACCAATATGTTCGGT
AAGGCCGTGGTGGCAGACGTCAACAACTACTACCGCAACCAGGCGTATATCGACCTTAAC
AACCTGCCGGAAAACGCCGAAGCCACCCAGTCCGTGGTGCAGGCGACGCTTACCGAAGGA
GCCATTGGCTACCGTAAGTTTTCGGTTATCAGCGGGCAAAAAGCGATGGCGGTATTGCGC
CTGCAAGATGGCAGTCATCCGCCGTTTGGCGCGGAAGTGAAAAATGACAACGCGCAGAAC
GTCGGTCTGGTTGATGATGATGGCAACGTCTACCTCGCGGGTGTGAAACCTGGCGAGCAT
ATGACCGTTTCATGGGGCGGCGTGGCCCACTGTGATATTCATCTGCCGGACCCACTGCCT
GCCGATCTGTTCAATGGCCTGTTATTGCCATGTCAGCAAACAGGGCCGATATCTCCTTCG
ATGCCCAATGAAATTAAGCCGGTGATCCAGGAGCAGACCCAGCAGGTGATGCCAACGGAA
GCGCCGGTATCGGTATCCGCCAATTAACAACGTGATTAAGGAATGATCCATGACGAATCT
ATTTTGCTCTGCCAGAACGGCCGCAACGACGCTGGCGTTACTGATAACTGCCGCCAGCCT
GTCAGCACAGGCCTCTGTCACGCCGGACCGTACACGCCTGATTTTTAACGAAAGTGATAA
ATCAATCAGTGTCACGCTGCGCAATAACGACCCGAAAATGCCGTATCTGGCACAAAGCTG
GATGGAAGATGAACAGGGTAACAAGATTAGCTCGCCACTGACGGTACTGCCGCCGGTGCA
GCGCATCGATTCCATGATGAACGGTCAGGTGAAGGTACAGGGCATGCCGGATATCAACAA
GCTGCCTGCCGACCGCGAGAGCGTGTTCTATTTCAACGTGCGTGAGATCCCGCCGAAATC
GAACAAACCCAACACGTTACAGATTGCGCTGCAAACGCGCATCAAGCTGTTCTGGCGACC
AAAGGCGCTGGAAAACGTCAGCATGAAAAATCCATGGCAGCATAAGGTGACCTTAACCCG
CAGCGGCCAGGAGTTTACTGTCAATAACCCGACGCCGTACTTCGTGGTTATCAGTAACGC
CAGCGCGCAGAAAAACGGCAATCCGGCAGCGGGATTTTCTCCCATGGTGATATCGCCAAA
AACCTCCGTGCCGCTGAATGTCAAAATGGATAGCGTCCCGGTGCTGACCTACGTCAACGA
CTATGGCGCGCGGATGCCGCTGTATTTTAAATGTGGTGGCGATACCTGCCAGGTGGACGC
AGAGCAGAGCCGCAAAGGCTGATGCCGGGAGAGCCATATGAAAATAATTTATCTGGCGGT
GTCGGGCATTGCGCTGCTGGCCTGGAATGTCGCCAGTGCAGAAACGAAACCCGTCAACCT
GGAACTCAGAGTCCTGGTGGATGCGCCGCCGCCCTGTACCGTGACCGGTAGTGCAGTGGA
GTTTGGCGATGTGCTGATCGCCAGTATCGATGGCAACAATTACCGCCAGAACGCGGGCTA
TACCCTCGATTGTTCGGGGCGTCTGGCAGACGATCTGCGGATGCAACTGAAGGGCACCAC
CACAACCGTGAACGGTGAAACTGTGCTGGATGCAGGCATTGCCGGGTTTGGCATCCGCAT
CGAAAACGCCGCCGATAACTCGCTGTTTTCCATTGGTGAAAATAACTGGACGCCTTTTGC
ATTTAACTCTCTGCCGCAACTGAAGGCTGTGCCGGTAAAACAGAACGGCGTGCAGCTCGC
GCCAACGGAATTTAACGCCAGTATGACCATGGTGGTGGATTACCAATGAAACGACTCGCA
CTTTTCCTGATTTGGGGTGCCTGCGGGGGCGCTCTGGCCTCACCGGATATCACCTTTCAC
GGCACGCTGGTGTCGCCGCCTGCCTGCACCATCAACGAAGGCCAGACCATTGAACTGGAG
TTTCGCGATGTACTTATCGACAGCATTGATGGCAACTACGCCCGCCAGGAGGTGCCGTAC
ACCATCAAATGTGACTCCGACGTTCGCAATGAGGCCTGGCAGATGACGCTCACCTGGACC
GGGACGCAAACCAGCTACAACGATGCGGCAATCGAAACCGATGTTCCGGGATTCGGGATT
CAGCTTTTGCAAAACGGGCAACGTTTTCAGCTTAATACCCCACTGACCATCAATGCCACG
GATTTGACACAAAAACCGAAGCTTGAGGCCGTTCCGGTTAAAGCGAGTGACGCTGTTTTA
AACGACGGCACGTTTTCAGCGTACGCAACATTACGGGTGGAATATCAATGAAGACAAATA
CCGGATGTGTGCTTCTGGCAAGCCTGATGCTCACCGCCAGCGGAACCACGTTGGCGGCGG
ACAACCTGCATTTTTACGGCAACTTGTTAAGTAAATCCTGCACGCTGGTGGTGGATGGTG
AAGTGCTGGCGGAAGTGCATTTCCCGACCATCAGCAACCAGGATTTAACGGTGGCGGGCC
AGTCTTCCAGGGTGCAGGTGGTCTTTAAGTTGAAAGATTGCAAAGGCCCGGCGGATTACC
AGGTCAAAGTCACGCTGACCGGTACGGAAGATAGCGAACAGCCAGGTTTTCTGGCGCTTG
ACCCGGCATCCAGCGCGCAAGGGGTAGGGATTGGTATGGAAAAGTCAGACGGTACCTGGG
TGCCGCTTAACGATTCTGCCGGTGCCACCTTTAACCTCACTAACGGCGCGAATAACCTCA
ATTTTAATGCCTGGTTGCAGGCGAAAAGCGGTCGTGAAGTGACTTCTGGTGACTTCACCG
CAGCCTGACTGCCACTTTTGAGTATATTTAAGATGAAGATAATACGAAACTTTTTGGGGC
TGTTGACGCTGATGGTGTTGAGCCTGACGGCTCAGGCACAGACATTTCAGATGTATACCC
CTATGGGTGTACCAGGCGCTTTAGCCAGGATAATATTTACTCTGGAAGTTGTTACCCCTG
CAGGCGTTTATACAGGTACATATCAGTCGCGCGATCCCAGGATGCTTCTCGTTGGCAATT
TAACATTGTTAAGCTGGAATGGTCCATCTTCAATTCCTGCGCCAACTATTTATCTGGATC
ATTCGAACGAAATAAATATGTCAAATTGTCCCGGTCTTGCTGGCGTTCCCTCCACCAACG
GCAAAGGATGGGATTGTTATGCTGCTGATTTAAAAGTCACGGTAACAGGGGACGTGCAGG
GGTGTCCATGGCTGGTTTCAACCCAGATTACCACTACGGACCTGGGAGATGTGGGGGCTA
CCTATGTAGGTCCTAAATACAATAACTCCACCTGTCCATCAATCCCACTGACGACATATG
ATGTTTCCTGGGATGAGAATACGGTGATTCATAAAAAAACATTGAATCTGAAATCAACAG
ACGCCGTAGGGGGAATCATCGAGAAAACCCTGTCGACCTATTTAATGGAAAGTGAGAGGC
TGTGTGATGGTAGCCAGTTTGATCCTCGCGGGGCAAATTGCCGTTTTGTTTCGCAGATGA
TCACTTTTACAGCATCAGGCTGCGACGATGCCAAAGTGACGGTGACGCCGGTTCCGCATC
CGATTACTGACAGGCAACTGCATGATATTGTGGTGCGCGTCGATGCCAGCGCATTGCAGC
CTATTGATTCAACGTGTCGCTTCCAGTATGTGTTGAATATGTTCTAGCACATACCAGCCT
GGTGACAGGAGTTTACCAGGCTTTTTTTCTCTCATATTGGATAATTTGCCCTACCTGAAC
ACATTTAGGCCGGATAAGGCGTTTACCCCGCATCCGGCATTCGATACCAGCATTCAGGGC
GAAATGGCAAAACGCATCCGCCCCTAATATTCACGGTAACTCCGGCGGCAGCCACTCTTC
CACTTCAATCAACACTAACAACGCTGCATCTCCGCCGTACTCTTTCGGTGCCTGGTGAAA
TGCCATTACATGCGGATGTTGCGCCAGCCACAGCGGCGTTTGCTGTTTCAAAATATGCTT
CCCGTGCCCGTGCATTACGCATGCGCAAAACACATGTTCACGGCGGCAGGCGGCAATCAA
CGCCCCCAGTTCCTGCTTGGCCTGCATTTGCGTCAAACCATGTAAATCGAGGAAAAGCTC
CGGTGAATAATCGCCGCGTCGCAACTTCTTCGCCTCAAAATGACTCACATCCGGGCGGAC
ATATTTCACCGGGCCTTCGGTATTCAATAACGGCTGAAACTCATCTGAGAAATAATGGCT
GGCATCGGCCTGCTCCTGAATCAACCGTTTCACCGGCACTTCGCTGATTTTCTTACGCTG
CGGTCGGTGGACAATCGTGTCCTGCTTAATCTTGCGAGTCCCCGCCATCAACTGGCGAAA
CAGAGCCTGGTCCTCCTCGCTAAGTGTTGTTTTCTTTTTCATTTATCTGTCTCTATTTCT
AATTTTCCTACAGTTTACCCGACTCGTAGCGCAATCGATCGTTTTAAACGTATTTTTCCT
CACTCACCGCGCGTGAATGCTGATTTATCGTCATCTTCGTGGCAAACTAGCCGCCGAAAT
TATTGCGATCATGCCCTGGAGGAATACGTGGATAAAATTTTCGTTGATGAAGCAGTTAAT
GAGCTGCAAACCATTCAGGACATGTTGCGCTGGTCGGTTAGCCGCTTCAGCGCGGCAAAT
ATCTGGTACGGTCACGGCACCGATAACCCGTGGGATGAAGCGGTACAATTGGTGTTGCCG
TCGCTCTACCTGCCGCTGGATATTCCGGAAGATATGCGCACCGCGCGTCTGACCTCCAGC
GAAAAACATCGTATTGTTGAGCGCGTGATCCGCCGCGTCAACGAACGCATTCCGGTGGCT
TACCTGACCAATAAAGCATGGTTCTGCGGTCATGAATTTTACGTCGATGAACGTGTGCTG
GTGCCGCGCTCGCCGATTGGTGAACTGATCAACAATAAATTTGCCGGGCTAATCAGCAAG
CAACCGCAGCATATTTTAGATATGTGTACCGGTAGCGGCTGCATTGCCATTGCCTGTGCT
TATGCCTTCCCGGAAGCGGAAGTCGATGCGGTAGATATCTCTCCCGACGCGCTGGCGGTT
GCCGAACAGAACATCGAAGAACACGGTCTGATCCACAATGTCATACCGATTCGTTCCGAT
CTGTTCCGTGATTTGCCGAAAGTGCAGTACGACTTGATCGTCACTAACCCGCCGTATGTC
GATGCGGAAGATATGTCCGACCTGCCAAACGAATACCGTCACGAGCCAGAACTGGGCCTG
GCATCTGGCACTGACGGCCTGAAACTGACGCGTCGCATTCTCGGTAACGCGGCAGATTAC
CTTGCTGATGATGGTGTGCTGATTTGTGAAGTCGGCAACAGCATGGTACATCTTATGGAA
CAATATCCGGATGTTCCGTTCACCTGGCTGGAGTTTGATAACGGCGGCGATGGTGTGTTT
ATGCTCACCAAAGAGCAGCTGCTGGCGGCCCGTGAACATTTCGCGATTTATAAAGATTAA
GTAAACACGCAAACACAACAATAACGGAGCCGTGATGGCTGGAAACACAATTGGACAACT
CTTTCGCGTAACCACCTTCGGCGAATCGCACGGGCTGGCGCTTGGCTGCATCGTCGATGG
TGTTCCGCCAGGCATTCCGCTGACGGAAGCGGACCTGCAACATGACCTTGATCGTCGTCG
CCCTGGGACATCGCGCTATACCACCCAGCGTCGTGAGCCAGATCAGGTCAAAATTCTCTC
CGGTGTTTTTGAAGGTGTTACTACCGGCACCAGCATTGGTTTGTTGATCGAAAATACCGA
TCAGCGTTCTCAGGATTATAGTGCGATTAAGGACGTTTTCCGTCCTGGCCATGCCGATTA
CACCTACGAACAAAAATACGGTCTGCGCGATTATCGCGGCGGTGGACGTTCTTCCGCCCG
CGAAACCGCCATGCGCGTGGCGGCAGGGGCGATTGCCAAAAAATATCTCGCCGAGAAATT
TGGTATTGAAATCCGCGGCTGCCTGACCCAGATGGGCGACATTCCGCTGGAAATCAAAGA
CTGGTCGCAGGTTGAACAAAATCCGTTCTTCTGCCCGGACCCGGACAAAATCGACGCGTT
AGATGAACTGATGCGCGCGCTGAAAAAAGAGGGCGACTCCATCGGCGCGAAAGTCACCGT
TGTAGCCAGTGGTGTCCCCGCCGGACTTGGCGAGCCGGTCTTTGACCGCCTGGATGCCGA
CATCGCCCATGCGCTGATGAGCATCAACGCGGTGAAAGGCGTGGAAATTGGCGACGGTTT
TGACGTAGTGGCGCTGCGCGGCAGCCAGAATCGCGACGAAATCACCAAAGACGGTTTCCA
GAGCAACCATGCGGGCGGCATTCTTGGCGGTATCAGCAGCGGGCAGCAAATCATTGCCCA
TATGGCGCTGAAACCGACCTCCAGCATTACCGTGCCGGGGCGCACCATTAACCGCTTTGG
CGAAGAAGTTGAGATGATCACCAAAGGCCGTCACGATCCTTGTGTCGGGATCCGCGCTGT
GCCGATCGCTGAAGCGATGCTGGCGATCGTTTTAATGGATCACCTGCTACGGCAGCGGGC
GCAAAATGCCGATGTGAAGACTGATATTCCACGCTGGTAAAAAATGAACAAAACCGCGAT
TGCGCTGCTGGCCCTGCTTGCCAGTAGCGCCAGCCTGGCAGCGACGCCGTGGCAAAAAAT
AACCCAACCTGTGCCGGGTAGCGCACAATCGATAGGCAGTTTTTCTAATGGCTGTATCGT
CGGCGCTGACACGCTGCCGATACAGTCCGAACATTATCAGGTCATGCGTACCGATCAGCG
TCGCTATTTCGGTCACCCGGACCTGGTGATGTTTATCCAGCGTCTGAGTAGCCAGGTGAG
CAATCTGGGCATGGGTACGGTGCTGATTGGCGATATGGGGATGCCCGCTGGTGGGCGTTT
CAACGGCGGTCATGCCAGCCACCAGACCGGACTGGATGTCGATATCTTTCTGCAACTGCC
GAAAACACGCTGGACCTCCGCGCAGCTCTTGCGCCCGCAAGCACTGGACTTAGTTTCCCG
CGACGGTAAACACGTTGTCCCCACGCTGTGGAAGCCAGAAATTTTCAGCTTGATCAAACT
CGCCGCCCAGGACAAAGACGTCACACGCATTTTTGTTAATCCGGCGATTAAACAACAACT
TTGCCTTGATGCGGGCACCGATCGCGACTGGTTGCGCAAAGTGCGACCCTGGTTCCAGCA
TCGCGCGCATATGCATGTACGATTACGTTGTCCTGCCGATAGTCTGGAGTGTGAAGATCA
ACCTTTACCGCCACCAGGCGATGGTTGCGGGGCAGAACTGCAAAGCTGGTTTGAACCTCC
AAAACCGGGAACAACAAAGCCTGAGAAGAAGACACCGCCTCCGTTGCCGCCTTCCTGCCA
GGCGCTACTGGATGAGCACGTGATCTAATGGAAACGTTTAATAGCCTGTTTATGGTTTCC
CCGCTGTTGCTGGGAGTTCTCTTTTTTGTCGCCATGCTGGCGGGATTTATCGACTCGATT
GCCGGTGGTGGTGGGTTACTCACGATTCCGGCATTAATGGCTGCGGGGATGTCTCCCGCT
AATGCGCTGGCAACCAATAAACTGCAAGCCTGCGGCGGCTCTATTTCCGCCACTATCTAC
TTTATTCGCCGCAAAGTGGTTAGTTTAAGCGATCAGAAACTCAATATCGCCATGACCTTT
ATCGGCTCAATGAGCGGCGCACTGCTGGTGCAATACGTTCAGGCTGATGTCTTACGGCAG
ATTTTGCCCATTCTGGTGATTTGTATCGGCCTCTATTTCTTGCTGATGCCAAAGCTGGGT
GAAGAAGATCGCCAGCGCCGGATGTACGGTTTACCCTTCGCGTTAATTGCCGGTGGCTGC
GTCGGTTTTTACGACGGATTCTTTGGTCCGGCAGCCGGATCGTTTTACGCGCTGGCCTTT
GTTACGCTGTGCGGATTCAACCTCGCCAAAGCCACGGCTCACGCCAAATTACTTAACGCA
ACGTCAAACATCGGCGGTTTGCTGCTGTTTATTCTCGGCGGCAAAGTGATTTGGGCGACG
GGCTTTGTGATGCTGGTGGGGCAGTTCCTCGGCGCGCGCATGGGTTCAAGACTGGTGTTG
AGCAAAGGACAAAAGCTGATCCGCCCGATGATTGTTATCGTCTCGGCGGTGATGAGTGCC
AAATTACTTTACGATAGCCATGGACAGGAGATCCTCCACTGGTTGGGGATGAACTAATGA
ACAGTACACACCACTATGAGCAGTTGATTGAAATTTTTAATAGCTGCTTTGCCGATGATT
TTAATACCCGTCTGATTAAAGGCGACGACGAACCGATCTATCTTCCCGCTGAAGCGGAAG
TACCGTATAACCGAATCGTCTTTGCTCATGGCTTTTATGCCAGCGCAATTCATGAGATTT
CGCACTGGTGTATTGCCGGAAAAGCGCGCCGTAAGCTGGTTGATTTCGGCTACTGGTATT
GCCCGGACGGACGCGATGCCCAAACGCAAAGCCAGTTTGAAGATGTTGAAGTGAAGCCGC
AGGCGCTCGACTGGTTGTTCTGCGTGGCGGCGGGATATCCGTTTAACGTCAGTTGCGACA
ATCTGGAAGGGGATTTCGAACCGGACCGCGTGGTGTTTCAACGGCGGGTACATGCGCAGG
TGATGGATTATCTGGCAAATGGCATTCCGGAACGCCCGGCACGTTTCATTAAAGCACTAC
AAAATTATTATCACACGCCGGAACTTACGGCGGAACAGTTCCCGTGGCCGGAAGCGCTAA
ACTAAAGCCAGTGCCACGTTTTACAATGAGGAAAGAAGATGATCGCGGAGTTTGAATCAC
GCATTCTGGCATTAATCGACGGTATGGTTGACCATGCCAGTGATGATGAGTTGTTTGCCA
GTGGGTATTTGCGTGGCCACCTGACATTAGCCATCGCAGAACTGGAAAGTGGTGATGACC
ACTCCGCTCAGGCGGTGCATACGACCGTTAGCCAGAGTCTGGAAAAAGCCATTGGTGCTG
GTGAATTGTCGCCGCGTGACCAGGCGCTGGTGACCGATATGTGGGAAAACCTGTTTCAGC
AGGCATCACAGCAGTAAGTTGCGGCGTCTGGAGCACCATGCCTGATGCGACGCTTATCGC
GTCTTATCAGGCCTACACGTCACACGTAGGTCGGATAAGGCGTTCACGCCGCATCCGACA
AACAATGCCAAAGCTGGTTACCCAGCCTTAACTGCTTTACCCTTCAACAATTTCCGCACC
CATAACCGATTCGGATTTAACGCCGCCAGCGTACTGGCATCCATCGGAATCGGTTCTTCA
CTCATCTGTGCCGCCAGAATCTCTGCGCACAGTGGGGCAGAACACAAACCACGCGAACCC
AAAGCAGCAAGCATAAAGAGATCGTCATAAACCGGCGCGCTTACCGCCTTATCTTTCTGC
TCCGCCAGCGACGCATATTCCACAAGTGTTGCCTCATAATCGGGAACATTACCTACCATT
GGTAGATGATCGCGGGTGGCACAACGCACACCGCAGCGCGCCTCTTTCTCACTGATATCA
ACCTCTTTTGCCCACTGTGCCTGCGGGAAACAATCAATCAACCGCTGGCGATTCTGCTGC
TGATCTTCATCACTGTACGTCGTATCTTCGCTGCCGCGATGATAACTGGCACCAATACAA
TGATGCTGATTCGCCGGATTTTGTGGCGTGAGATAACCGTCATAGCACAGCACCTGCTTC
AGTTTTGCCAGTTCCGGTGTCGTCGGAATATGGCTGACCTGACCGGCAACCGAATATACT
GGCAGAGATGATGTTTGGCTGAAACGGCTGATTTGATGCCCGTTCGCCAGTACCACTACG
CTGTGTGTTGCTTGCTGATCTCCTGCAAAATTCAACAACCAACAGTCATCCTTACGGGAT
AAATCCTGTAACTGATATTGATAATAAATCTGCAACCCCTGCTGTTGCGCCAGTTCCAGC
ACATTACGGGTCAGTTCTGCTGGGCACAGCCAACCACCTTGCGGATAAGTAATGCCGCTG
CAATTTGTCGCAACGCCCGTAATTTGTTCAACCGCATTTGCCTCAACGGCTACAGCCAGT
TCTTCGGGTAAATCCATTGACAACATCTGTGCGATTTTATGCTGGCTTTTCTCATCCCAG
CCTAACTGCGTGACGCCGCACCAGTCATGATCAAATTTAACGGGTAATTGGTCGTAAAAC
CGACGAGCAAAAGTAAACGCATTAGAGAAAAAGCGGTTTAGCGCCTCATCGTGTTTGCTT
AATAACGGATACAACGCCCCCTGGCGATTGCCGGAAGCACCCAGCGCGGGGGCTTCATCC
GCGCAATAAAGCGTTACCTGCCAGCCGCGGCGTAATAACGCCAGCGACAACAACGCGCTG
GCAATACCACCGCCGATAATCGCCGCTTCCAGTTTGCTGCTGCCCGTACGATTAAACCAC
GGCGTGGAGCAAGGGAGTGGTAATGTCTGTTCCATCACCCCACAAAGCATTTCCCGTTTG
CGCCCAAAGCCCTTACGTTTTTGCATCGTGAATCCGGCTTCCTGCAAACCGCGGCGGACA
AAACCGGCAGACGTAAATGTCGCCAGCGTGCCGCCTGGACGCGCCAACCTTGCCATGGCG
TTAAACAGATTTTGCGTCCACATATCCGGGTTTTTAGCTGGCGCAAAGCCGTCCAGAAAC
CAGGCATCTACTTTTTGATTTAGAGAATCGTCCAGTTGGCTGGTCAGTTCATTAATATCG
CCAAACCATAAATCCAGCATCACGCGGCCTTCATCGAGTAATAAACGATGGCAACCGGGC
AAGGGCATTGGCCACTGCGCCTGAAGTTGTTCTGCCCACGGAGTCAGTTCCGGCCAGTGT
TGATGCGCTAAGGCTAAATCCGCACGGGTGAGGGGAAATTTCTCAAAACTAATGAAATGT
AAGCGTTGTAATTGCGCTTGCGGATGCGCTTCGCGAAACTGATCAAATGCCTGCCATAGC
GTCAGGAAGTTTAATCCGGTGCCGAAGCCGCTCTCTGCTACCACAAACAGAGGATGTGGA
TGTTCAGGAAAGCGTGCCTCTAATTGGTTACCTCCCAGAAAAACATAACGCGTCTCTTCC
AGCCCGTTATCGTTGGAAAAATAGACATCGTCAAAATCTCGGGAAACAGGTGTACCCTCA
GCATTAAATTCGAGGTTGGCAGGTTGTATGGAGTAGTGTTTCACGTAAGTTACTCGTCTT
ACAGGCGGTGGCTCGATCTTAGCGATGTGTGTAAGGCTGCGCAAATTTCTCTATTAATTG
GCTGATCGGACTTGTTCGGCGTACAAGTGTACGCTATTGTGCATTCGAAACTTACTCTAT
GTGCGACTTACAGAGGTATTGAATGAAACGTGCAGTGATTACTGGCCTGGGCATTGTTTC
CAGCATCGGTAATAACCAGCAGGAAGTCCTGGCATCTCTGCGTGAAGGACGTTCAGGGAT
CACTTTCTCTCAGGAGCTGAAGGATTCCGGCATGCGTAGCCACGTCTGGGGCAACGTAAA
ACTGGATACCACTGGCCTCATTGACCGCAAAGTTGTGCGCTTTATGAGCGACGCATCCAT
TTATGCATTCCTTTCTATGGAGCAGGCAATCGCTGATGCGGGCCTCTCTCCGGAAGCTTA
CCAGAATAACCCGCGCGTTGGCCTGATTGCAGGTTCCGGCGGCGGCTCCCCGCGTTTCCA
GGTGTTCGGCGCTGACGCAATGCGCGGCCCGCGCGGCCTGAAAGCGGTTGGCCCGTATGT
GGTCACCAAAGCGATGGCATCCGGCGTTTCTGCCTGCCTCGCCACCCCGTTTAAAATTCA
TGGCGTTAACTACTCCATCAGCTCCGCGTGTGCGACTTCCGCACACTGTATCGGTAACGC
AGTAGAGCAGATCCAACTGGGCAAACAGGACATCGTGTTTGCTGGCGGCGGCGAAGAGCT
GTGCTGGGAAATGGCTTGCGAATTCGACGCGATGGGTGCGCTGTCTACTAAATACAACGA
CACCCCGGAAAAAGCCTCCCGTACTTACGATGCTCACCGTGACGGTTTTGTTATCGCTGG
CGGCGGCGGTATGGTTGTGGTCGAAGAACTGGAACACGCGTTGGCACGTGGTGCTTATAT
CTACGCTGAAATCGTTGGCTACGGCGCAACGTCTGATGGCGCAGACATGGTTGCTCCATC
TGGCGAAGGCGCAGTGCGCTGCATGAAGATGGCGATGCACGGTGTTGATACGCCAATCGA
CTACCTGAACTCCCACGGTACTTCGACTCCGGTTGGCGACGTGAAAGAGCTGGCTGCTAT
CCGTGAAGTGTTCGGCGATAAGAGCCCGGCGATTTCTGCAACCAAAGCCATGACCGGTCA
CTCTCTGGGCGCTGCTGGCGTACAGGAAGCTATCTACTCTCTGCTGATGCTGGAACACGG
CTTTATCGCCCCGAGCATCAACATTGAAGAGCTGGACGAGCAGGCTGCGGGTCTGAATAT
CGTGACCGAAACGACCGATCGCGAACTGACCACCGTTATGTCTAACAGCTTCGGCTTCGG
CGGCACCAACGCCACGCTGGTAATGCGCAAGCTGAAAGATTAATTCGGAGTAGGTCGGAG
TAGGTCGGATAAGACGCGCCAGCGTCGCATCCGACGTTACGCGCCAATGCGGCATTCGGC
ACTAACGCCAAAGGGAACCCGATGGTTCCCTTTTTCACATCATTGACAATCGCCGCCTGT
TCCAGGCAAACTTCCCGCTTTGTCGATTTCCTTCTGAAAAGACGTACGCGTTAATTCCTG
CCAACGCACCGTAACCCTGAAACCAGAGAGATGAGACGGGGATACTCCTCGCCTTGCGCT
GCATTCTGGAGTAATGCATGACTGCTGTAAGCCAAACCGAAACACGATCTTCTGCCAATT
TTTCGCTCTTCCGCATCGCTTTTGCGGTTTTTCTCACCTACATGACCGTAGGGCTGCCGT
TGCCGGTTATCCCGCTGTTTGTTCATCATGAACTGGGCTATGGCAATACCATGGTCGGCA
TTGCCGTCGGGATTCAGTTTCTGGCTACGGTGCTGACGCGTGGCTATGCCGGGCGACTGG
CCGATCAATATGGCGCAAAACGTTCGGCGCTTCAGGGGATGTTAGCTTGTGGTCTGGCGG
GGGGCGCGTTGCTGCTGGCGGCGATTTTGCCCGTCTCCGCACCGTTCAAATTTGCCCTGT
TGGTCGTCGGGCGTTTGATTCTTGGCTTTGGTGAAAGCCAGTTACTGACAGGCGCTCTGA
CCTGGGGATTAGGCATCGTAGGGCCAAAACACTCTGGCAAAGTAATGTCATGGAACGGAA
TGGCGATTTACGGTGCCCTCGCTGTTGGTGCACCGCTTGGCCTGTTGATTCATAGCCATT
ACGGTTTTGCCGCACTGGCGATCACCACAATGGCATTACCCTTACTGGCGTGGGCCTGTA
ACGGCACAGTGCGCAAAGTACCGGCCCTGGCAGGAGAACGTCCATCGCTGTGGAGCGTTG
TCGGGCTTATCTGGAAACCAGGGTTAGGTCTGGCACTACAAGGCGTTGGTTTTGCGGTTA
TCGGGACTTTCGTTTCGCTCTACTTTGCCAGCAAAGGATGGGCGATGGCGGGCTTTACTC
TTACCGCGTTTGGCGGGGCATTTGTCGTGATGCGCGTCATGTTTGGCTGGATGCCGGACC
GTTTTGGCGGCGTGAAAGTGGCGATAGTCTCTCTGCTTGTAGAAACGGTGGGCTTGTTGC
TGCTCTGGCAAGCCCCGGGTGCGTGGGTCGCATTAGCGGGCGCGGCGTTAACCGGAGCCG
GATGTTCGCTTATCTTTCCTGCGCTGGGCGTGGAGGTGGTTAAACGCGTCCCCTCACAAG
TTCGCGGCACCGCACTGGGCGGTTACGCCGCGTTTCAGGATATCGCCCTCGGCGTCTCCG
GGCCGCTGGCGGGAATGCTGGCGACCACGTTTGGTTACTCTTCGGTATTTCTTGCCGGGG
CGATCTCTGCAGTGCTGGGAATTATTGTCACGATACTGTCATTTCGTCGGGGCTAACGAA
CCAGCCAGACCAGCATCAGGATAATCGCGACTAACAGTATCCACAGCGCGGGACGCGTTG
CCATATTTTGCAACGTGTCCATCATCGGTGGAAAAGGATTAAGCAGCGGTTGCATATCAC
GCGGATCAATCCCTTTAACCCGCCGTTGATAAAGCTGATTAAGAATATCCTCGGCCTGGG
CAGAAGAAAGCGATGATTGCGCAGAAAGGCCATATTTTTGCTGGATATATGCCGATAACG
CCGCCAGTTCACTGGCATCTAAAGGTTGTTTTAGCGCCATCTGTAGTGATTCCAGCGTCG
GCGTATTTTGCTGGCTTAGCGTCTGACGCGCCTGTAGCCAGGTCACCAGATGGTTAAACA
GTTTCGCTGGAATTAACTCGCCATCTTTCACCCCGGAAAGTTCCAGCATCGATTGCCAGA
TCTGTTTGCTGGGTTCCCCCGTTGCCGCCGCAAGTTTGGTCACCAGCTGTTTGAGCGCAT
TGTGCTCCGCCGGTAATAAAGGACGATCGGTCGCCTCGCGCTGCTGCGGTTGCGGAATAA
CCATCTTCCCTTCCTGCAACAGGGTTAGAATGGTTTTTAATTGCTCCGGTGAGAGCTGAT
TCAGCGGCGTCTGACCAAAGTTATGACGGATATAATCCGTGACCGCCTGACGATTATTCC
CCAGACGTAAATACTCCCCTAATTGCGCTAAAAGCTGGCGGGCAGAATGGCTTTTTTGCG
CGGCCAGCAGACGTTGCGCCAGATTATGCTCAGCGGCAGGGAAGTGACGCGAAAGCAGCG
GTGAATCTCCCGACAGACCAATATCGTGCCTGATACCCGCCCACAGTTCTGCTCTTTGCT
GTTGCGTCAGTGAGGTCACTTTCGTCATTAAGCTTTCCAGCGAAGTACGTTGCTGACTGG
ATAAAGGCTGATTGCCCGCGCCAGACGGCAGGTTATCTCCCTGACCTGGTGGTTGCCCAG
GAGGAGGGCCGGAAATAGGTTGTATCATTACGTATCCTTATACCTGAAATCTTCGCAAGT
ATGCCTGGCCGCGAGATTATGGCACACTTGTCCGGTTAACTCTCGTCTCATACAGGTAAC
ACAAACGTGAAAATCCTTGTTGATGAAAATATGCCTTATGCCCGCGACTTATTTAGCCGT
TTGGGTGAGGTGACCGCGGTTCCCGGGCGTCCAATCCCCGTCGCTCAACTGGCAGACGCG
GATGCGCTGATGGTGCGTTCGGTCACGAAAGTGAATGAATCTTTGCTGGCAGGAAAACCC
ATTAAATTTGTTGGCACTGCCACTGCGGGGACCGACCATGTCGATGAAGCATGGTTGAAG
CAGGCGGGAATTGGTTTTTCCGCTGCACCTGGCTGTAATGCGATTGCGGTGGTGGAATAT
GTTTTCTCCTCCCTGCTGATGCTTGCCGAACGCGATGGATTTTCACTGCACGAGCGTACC
GTGGGGATCGTGGGCGTTGGTAACGTTGGACGTCGATTGCAGGCGCGACTGGAAGCGTTA
GGGATTAAAACCTTGCTTTGCGATCCGCCTCGCGCTGACCGTGGGGATGAGGGTGATTTC
CGCTCGCTGGATGAGTTAGTCCAGCGCGCGGATATTCTGACTTTCCATACGCCACTCTTT
AAAGATGGTCCGTACAAAACGCTACATCTGGCGGATGAAAAACTGATCCGTAGCCTGAAG
CCGGGAGCGATTCTGATTAACGCCTGCCGTGGCGCAGTCGTCGATAATACCGCGCTGCTG
ACCTGCCTGAATGAAGGCCAGAAGTTAAGCGTGGTGCTGGATGTCTGGGAAGGCGAGCCG
GAACTTAATGTGGAATTGCTGACAAAAGTGGATATCGGCACGCCGCATATTGCAGGCTAT
ACCCTGGAAGGTAAAGCACGCGGTACTACGCAAGTGTTTGAAGCCTATAGCAAGTTTATT
GGGCATGAACAGCACGTTGCGCTGGATACATTACTGCCCGCGCCAGAGTTTGGTCGCATT
ACGCTGCATGGCCCGCTCGATCAACCGACGCTGAAAAGGCTGGTGCATTTGGTGTATGAT
GTGCGCCGCGATGACGCACCGCTGCGTAAAGTCGCCGGGATACCGGGTGAGTTCGATAAA
CTGCGCAAAAACTATCTTGAGCGCCGTGAATGGTCATCTCTGTATGTAATTTGTGATGAC
GCCAGTGCGGCATCATTGCTGTGTAAACTGGGTTTTAACGCCGTTCATCATCCGGCACGT
TAATCTCTTCTTCATGCTCTCTGCTGTAACATTGGCAGGGAGCTTTGCTATTTCTGGAGT
AAACCACCATGTCTGAAGGCTGGAACATTGCCGTCCTGGGCGCAACTGGCGCTGTGGGCG
AAGCCCTGCTTGAAACGCTGGCTGAACGTCAGTTCCCGGTTGGGGAAATTTATGCACTGG
CACGTAACGAAAGCGCAGGCGAACAACTGCGCTTTGGTGGTAAAACAATCACCGTGCAGG
ATGCCGCTGAATTCGACTGGACGCAGGCGCAGCTGGCATTTTTTGTCGCAGGCAAAGAAG
CTACCGCTGCCTGGGTTGAAGAAGCGACCAACTCAGGTTGCCTGGTGATCGACAGCAGCG
GACTGTTTGCTCTCGAACCAGACGTACCGCTGGTGGTGCCGGAAGTAAACCCGTTTGTAC
TGACCGATTACCGCAACCGGAATGTCATCGCCGTACCGGACAGTCTGACCAGCCAGTTGC
TGGCGGCACTGAAACCGTTAATCGATCAGGGCGGTTTATCACGTATCAGCGTTACCAGCC
TGATTTCAGCCTCCGCCCAGGGCAAAAAAGCGGTCGATGCGTTAGCGGGGCAGAGTGCGA
AATTGCTCAACGGCATTCCGATTGACGAAGAAGATTTCTTCGGGCGTCAGCTGGCGTTCA
ACATGCTGCCGTTACTGCCGGATAGCGAAGGTAGCGTGCGTGAAGAACGTCGTATCGTTG
ACGAAGTACGCAAAATCCTGCAGGACGAAGGGCTGATGATTTCGGCAAGCGTCGTCCAGG
CACCGGTATTCTACGGTCATGCCCAGATGGTCAACTTTGAAGCACTGCGTCCGCTGGCGG
CAGAAGAAGCGCGTGATGCGTTTGCTCAGGGCGAAGATATTGTGCTCTCTGAAGAGAACG
AATTCCCGACTCAGGTAGGGGATGCTTCTGGTACGCCGCATCTTTCTGTTGGCTGCGTGC
GTAATGACTACGGTATGCCGGAGCAAGTCCAGTTCTGGTCGGTGGCCGATAACGTTCGCT
TTGGCGGCGCGCTGATGGCAGTAAAAATCGCCGAGAAACTGGTGCAGGAGTATCTGTACT
AATGTCCGACCAGCAACAACCGCCAGTTTATAAAATTGCGCTGGGCATTGAGTACGACGG
CAGTAAGTATTACGGCTGGCAACGGCAGAACGAAGTTCGCAGTGTGCAGGAGAAGCTGGA
AAAGGCGCTCTCCCAGGTGGCGAACGAACCCATCACCGTCTTCTGCGCCGGGCGTACTGA
CGCAGGGGTACACGGTACCGGGCAGGTTGTGCATTTCGAAACAACCGCGCAGCGCAAAGA
CGCTGCGTGGACGTTGGGCGTAAATGCGAATTTACCTGGTGACATCGCCGTGCGTTGGGT
TAAAGCTGTACCTGATGATTTTCATGCCCGATTTAGCGCCACGGCTCGCCGTTATCGCTA
CATCATCTACAATCATCGGCTGCGCCCGGCGGTACTGAGTAAAGGGGTAACCCATTTTTA
CGAACCGCTGGACGCTGAACGGATGCATCGGGCTGCGCAATGCTTGCTGGGCGAGAATGA
TTTCACCTCGTTCCGTGCGGTGCAGTGCCAGTCCCGAACCCCGTGGCGCAACGTTATGCA
TATTAATGTCACGCGTCACGGTCCTTATGTGGTGGTAGATATCAAAGCGAATGCCTTTGT
ACATCATATGGTCAGGAATATTGTCGGCAGCCTGATGGAAGTCGGTGCCCACAACCAGCC
GGAGAGCTGGATAGCAGAGTTGCTGGCGGCAAAGGACAGAACGCTGGCGGCAGCAACGGC
AAAAGCGGAAGGGCTGTATCTGGTCGCGGTGGATTACCCTGACCGGTATGATCTTCCAAA
ACCGCCAATGGGCCCGCTATTTCTGGCGGACTAACGAGAATAACGCTCGTAACATTTCAG
GCTGTAGCCAACGTAGTTACAGCCTGAAAGATGACGAGTACAAGGCATAGGCAAATATGG
ACCTGATTTATTTCCTCATCGATTTTATCCTGCACATTGACGTGCATCTGGCAGAGCTGG
TCGCGGAGTACGGCGTCTGGGTTTATGCCATTTTGTTCTTAATTTTGTTCTGTGAAACCG
GTCTGGTGGTAACGCCGTTTTTACCGGGTGATTCATTGCTGTTTGTTGCCGGTGCGTTGG
CATCACTGGAAACCAACGATCTCAACGTCCATATGATGGTGGTGCTGATGCTGATCGCCG
CGATTGTGGGTGACGCGGTCAATTACACTATCGGGCGGTTGTTCGGTGAAAAGTTATTCA
GTAATCCCAATTCGAAAATTTTCCGTCGCAGTTATCTCGACAAAACCCATCAGTTTTATG
AGAAACATGGCGGCAAAACGATTATTCTCGCCCGTTTTGTGCCGATCGTCAGAACGTTCG
CCCCGTTTGTTGCGGGAATGGGCCACATGTCGTACCGTCATTTCGCTGCTTATAACGTGA
TCGGCGCACTGTTGTGGGTACTGCTTTTTACCTACGCAGGCTATTTCTTCGGTACAATCC
CGATGGTTCAGGATAACCTTAAGCTGCTGATCGTCGGGATTATTGTGGTTTCTATTTTGC
CGGGCGTCATCGAAATAATCCGTCACAAACGCGCTGCGGCACGCGCCGCAAAATAAAAAG
TAACTCAGCGGTTCGACCACTTTTTTATCCAAAGTTTCGGGCTGTTATGTTTTAATGTGC
AACATTCATGGTCTGTTGGGGGCAAAAATGGCATTATGCGTCCCCAAAGATAAAACTGGC
ATCGAACCAGGTTCAGACAGAAAGGTCCCTAATGAGCTGGATTGAACGAATTAAAAGCAA
CATTACTCCCACCCGCAAGGCGAGCATTCCTGAAGGGGTGTGGACTAAGTGTGATAGCTG
CGGTCAGGTTTTATACCGCGCTGAGCTGGAACGTAATCTTGAGGTCTGTCCGAAGTGTGA
CCATCACATGCGTATGACAGCGCGTAATCGCCTGCATAGCCTGTTAGATGAAGGAAGCCT
TGTGGAGCTGGGTAGCGAGCTTGAGCCGAAAGATGTGCTGAAGTTTCGTGACTCCAAGAA
GTATAAAGACCGTCTGGCATCTGCGCAGAAAGAAACCGGCGAAAAAGATGCGCTGGTGGT
GATGAAAGGCACTCTGTATGGAATGCCGGTTGTCGCTGCGGCATTCGAGTTCGCCTTTAT
GGGCGGTTCAATGGGGTCTGTTGTGGGTGCACGTTTCGTGCGTGCCGTTGAGCAGGCGCT
GGAAGATAACTGCCCGCTGATCTGCTTCTCCGCCTCTGGTGGCGCACGTATGCAGGAAGC
ACTGATGTCGCTGATGCAGATGGCGAAAACCTCTGCGGCACTGGCAAAAATGCAGGAGCG
CGGCTTGCCGTACATCTCCGTGCTGACCGACCCGACGATGGGCGGTGTTTCTGCAAGTTT
CGCCATGCTGGGCGATCTCAACATCGCTGAACCGAAAGCGTTAATCGGCTTTGCCGGTCC
GCGTGTTATCGAACAGACCGTTCGCGAAAAACTGCCGCCAGGATTCCAGCGCAGTGAATT
CCTGATCGAGAAAGGCGCGATCGACATGATCGTCCGTCGTCCGGAAATGCGCCTGAAACT
GGCGAGCATTCTGGCGAAGTTGATGAATCTGCCTGCGCCGAATCCTGAAGCGCCGCGTGA
AGGCGTAGTGGTACCCCCGGTACCGGATCAGGAACCTGAGGCCTGATAACTGATAAGGGC
AGGGCCACTGGCTCTGCCCTTTTGCTATTCTCACCGTAACGAATCAGCGGATACCATGAT
TATCAAACGCACTCCTCAAGCCGCGTCGCCTCTGGCTTCGTGGCTTTCTTATCTGGAAAA
CCTGCACAGTAAAACTATCGATCTCGGCCTTGAGCGCGTGAGCCAGGTCGCGGCGCGTCT
TGGCGTTCTGAAACCAGCGCCATTTGTGTTTACCGTTGCGGGTACGAATGGCAAAGGCAC
CACCTGCCGTACGCTGGAGTCGATTCTGATGGCGGCAGGGTACAAAGTGGGCGTCTACAG
TTCGCCTCATCTGGTGCGTTATACCGAGCGCGTACGTGTGCAGGGTCAGGAATTGCCGGA
ATCGGCCCACACCGCCTCTTTTGCGGAGATTGAATCGGCACGCGGTGATATTTCCCTGAC
CTATTTCGAGTACGGTACGCTGTCGGCGTTGTGGCTGTTCAAACAGGCACAACTTGACGT
GGTGATTCTGGAAGTAGGGCTGGGCGGTCGTCTGGACGCAACCAATATTGTCGACGCCGA
TGTCGCGGTAGTAACCAGTATTGCGCTGGATCATACCGACTGGCTGGGGCCAGATCGCGA
AAGTATTGGTCGCGAGAAAGCAGGCATCTTCCGCAGCGAAAAACCGGCAATTGTCGGTGA
GCCGGAAATGCCTTCTACCATTGCTGATGTGGCGCAGGAAAAAGGTGCACTGTTACAACG
TCGGGGCGTTGAGTGGAACTATTCCGTCACCGATCATTACTGGGCGTTTAGCGATGCTCA
CGGCACGCTGGAAAATCTGCCGTTGCCGCTTGTCCCGCAACCGAATGCCGCAACGGCGCT
GGCGGCACTGCGTGCCAGCGGGCTGGAGGTCAGTGAAAATGCCATTCGCGACGGGATTGC
CAGCGCAATTTTGCCGGGACGTTTCCAGATTGTGAGCGAGTCGCCACGCGTTATTTTTGA
TGTCGCGCATAATCCACATGCGGCGGAATATCTCACCGGGCGTATGAAAGCGCTACCGAA
AAACGGGCGCGTGCTGGCGGTTATCGGTATGCTACATGATAAAGATATTGCCGGAACTCT
GGCCTGGTTGAAAAGCGTGGTTGATGACTGGTATTGTGCGCCACTGGAAGGGCCGCGCGG
TGCCACGGCAGAACAACTGCTTGAGCATTTGGGTAACGGCAAATCATTTGATAGCGTTGC
GCAGGCATGGGATGCCGCAATGGCGGACGCTAAAGCGGAAGACACCGTGCTGGTGTGTGG
TTCTTTCCACACGGTCGCACATGTCATGGAAGTGATTGACGCGAGGAGAAGCGGTGGCAA
GTAAGTTTCAGAATCGGTTAGTGGGCACGATCGTGCTGGTGGCGCTGGGGGTGATTGTAC
TTCCAGGGCTGCTGGACGGGCAGAAAAAACATTATCAGGATGAGTTTGCGGCTATCCCGC
TGGTTCCAAAAGCGGGCGATCGCGATGAGCCTGATATGATGCCAGCCGCCACCCAGGCGT
TGCCGACGCAGCCGCCGGAAGGCGCAGCGGAAGAGGTGCGGGCAGGTGATGCCGCAGCAC
CGTCGCTCGATCCGGCCACTATTGCAGCCAATAACACCGAGTTTGAACCGGAACCTGCAC
CGGTCGCGCCACCGAAGCCGAAACCGGTGGAGCCGCCTAAACCAAAGGTTGAAGCACCAC
CTGCGCCGAAGCCAGAACCGAAGCCGGTCGTGGAAGAAAAAGCTGCACCGACGGGTAAAG
CCTATGTTGTGCAACTGGGTGCGCTGAAAAATGCCGATAAAGTGAATGAAATTGTCGGTA
AGCTGCGCGGTGCCGGTTATCGGGTTTATACGTCGCCATCCACGCCAGTGCAGGGTAAAA
TTACCCGTATTCTGGTTGGGCCGGATGCCTCGAAAGATAAGCTGAAAGGTTCGCTGGGTG
AGTTGAAGCAACTTTCTGGCTTAAGTGGCGTGGTAATGGGCTATACGCCGAATTAATACG
GTCTTGCCTGATGCGACGCTGGCGCGTCTTATCAGGCCTACGCAGGGGTAGAACCGTAGG
TTGGATAAGGCGTTTACGCCGCATCCGACACGCATTGCACGATGCCGCAAAGGCATAAAA
AGTCGATGGCGTTGAATATTTTTTCAGCGCCATTTTTATTGATGCGCGGGAAGGAAATCC
CTACGCAAACGTTTTCTTTTTCTGTTAGAATGCGCCCCGAACAGGATGACAGGGCGTAAA
ATCGTAGGACACATATGGTCTGGATTGATTACGCCATAATCGCGGTGATTGCTTTTTCCT
CTCTGGTTAGCCTGATCCGCGGCTTTGTTCGTGAAGCGTTATCGCTGGTGACATGGGGTT
GTGCTTTCTTTGTTGCCAGTCATTACTACACTTACCTGTCAGTCTGGTTTACGGGCTTTG
AAGACGAACTGGTTCGAAATGGGATTGCCATCGCGGTACTGTTTATCGCTACCCTGATCG
TTGGTGCTATCGTGAACTTCGTGATAGGCCAGTTGGTGGAGAAAACGGGGTTGTCAGGCA
CCGATCGGGTGCTGGGCGTCTGTTTCGGTGCGTTGCGCGGTGTGTTGATTGTTGCCGCCA
TTCTCTTCTTTCTCGACTCCTTTACCGGGGTGTCGAAAAGCGAAGACTGGAGCAAATCAC
AGCTGATCCCGCAGTTCAGTTTTATCATCAGATGGTTTTTTGATTATCTGCAAAGCTCGT
CAAGTTTCTTGCCCAGAGCGTAAGTGCTCTGAGATGTGGCTTAACGAGGAAAAAGACGTA
TGTGCGGTATTGTCGGTATCGCCGGTGTTATGCCGGTTAACCAGTCGATTTATGATGCCT
TAACGGTGCTTCAGCATCGCGGTCAGGATGCCGCCGGCATCATCACCATAGATGCCAATA
ACTGCTTCCGTTTGCGTAAAGCGAACGGGCTGGTGAGCGATGTATTTGAAGCTCGCCATA
TGCAGCGTTTGCAGGGCAATATGGGCATTGGTCATGTGCGTTACCCCACGGCTGGCAGCT
CCAGCGCCTCTGAAGCGCAGCCGTTTTACGTTAACTCTCCGTATGGCATTACGCTTGCCC
ACAACGGCAATCTGACCAACGCTCACGAGTTGCGTAAAAAACTGTTTGAAGAAAAACGCC
GCCACATCAACACCACTTCCGACTCGGAAATTCTGCTTAATATCTTCGCCAGCGAGCTGG
ACAACTTCCGCCACTACCCGCTGGAAGCCGACAACATTTTCGCCGCCATCGCTGCTACAA
ACCGCTTAATCCGCGGCGCGTATGCCTGTGTGGCGATGATTATCGGCCACGGTATGGTTG
CTTTCCGCGATCCTAACGGTATTCGTCCGCTGGTACTGGGAAAACGTGATATTGACGAGA
ACCGCACAGAATATATGGTCGCTTCCGAAAGCGTTGCGCTCGATACACTGGGCTTTGATT
TCCTGCGTGACGTCGCGCCTGGCGAAGCGATTTACATCACTGAAGAAGGGCAGTTGTTTA
CCCGTCAATGTGCTGACAATCCGGTCAGCAATCCGTGCCTGTTTGAGTATGTATACTTTG
CTCGCCCGGACTCGTTCATCGACAAAATTTCCGTTTACAGCGCGCGTGTGAATATGGGCA
CGAAGCTGGGCGAGAAAATTGCCCGCGAATGGGAAGATCTGGATATCGACGTGGTGATCC
CGATCCCGGAAACCTCGTGTGATATCGCGCTGGAAATTGCGCGTATTCTGGGCAAACCGT
ACCGCCAGGGCTTCGTTAAAAACCGCTATGTTGGCCGCACCTTCATCATGCCGGGCCAGC
AGCTGCGTCGTAAGTCCGTGCGCCGTAAACTGAACGCCAACCGCGCCGAGTTCCGCGATA
AAAACGTCCTGCTGGTCGACGACTCCATCGTCCGTGGCACCACTTCTGAGCAGATTATCG
AGATGGCACGCGAAGCCGGAGCGAAGAAAGTGTACCTCGCTTCTGCGGCACCGGAAATTC
GCTTCCCGAACGTTTACGGTATCGATATGCCGAGCGCTACGGAACTGATCGCTCACGGTC
GCGAAGTAGATGAAATTCGCCAGATCATCGGTGCTGACGGGTTGATTTTCCAGGATCTGA
ACGATCTGATCGAAGCCGTTCGCGCTGAAAACCCGGATATCCAGCAGTTTGAATGCTCGG
TGTTCAACGGCGTCTACGTCACCAAAGATGTTGATCAGGGCTACCTCGATTTCCTCGATA
CTTTACGTAATGACGACGCCAAAGCAGTGCAACGTCAGAACGAAGTGGAAAATCTCGAAA
TGCATAACGAAGGATGATGCCTTCGCTCAGGGTGCCGATCTGGCACCCTGACTTGCAACT
CCCGCCGAAATCCTGCAAAGTCTGCCTGCAAGTCTGACAGGGCAACTATTTATGAAACGA
CTTATTGTGGGCATCAGCGGTGCCAGCGGCGCGATTTATGGCGTGCGTTTATTACAGGTT
CTGCGCGATGTCACAGATATCGAAACGCATCTGGTAATGAGCCAGGCGGCGCGCCAGACC
TTATCCCTCGAAACGGATTTTTCCCTGCGCGAAGTGCAGGCGTTAGCCGATGTCACGCAC
GATGCGCGCGATATTGCCGCCAGCATCTCTTCCGGTTCTTTCCAGACGTTGGGGATGGTG
ATTTTACCCTGTTCAATCAAAACCCTGTCCGGCATTGTCCATAGCTATACTGATGGCTTA
CTGACCCGTGCGGCAGATGTTGTGCTGAAAGAGCGTCGCCCGTTGGTGCTCTGCGTGCGT
GAAACACCATTGCACTTAGGCCATCTGCGTTTAATGACGCAGGCAGCAGAAATCGGTGCG
GTGATTATGCCTCCCGTTCCGGCGTTTTATCATCGCCCGCAATCCCTTGATGATGTGATA
AATCAGACGGTTAATCGTGTTCTTGACCAGTTTGCGATAACCCTTCCTGAAGATCTCTTT
GCCCGCTGGCAGGGCGCATAACTCCGCTGTTGCCCTGTTTCAGGGCAATTTTGCAACCGC
GATCAAATCCTCGACATTTTGTTTCTGCCATTCAATCGAAACGCTGCGATTCAACCGCTA
TACCTGCTATCTTCAACTTTAGGACAATAATGCAACGTCTTATTAACATATTTAACGTTG
AATGTTATTGTTGTCGTCAAGATGGCATAAGACCTGCATGAAAGAGCCTGCAAACACACA
ACACAATACACAACATAAAAAGCCATTTTTACTTGAGGGTTATGTATGAAGAAGTCGATT
CTCGCTCTGTCTTTGTTAGTCGGTCTCTCCGCAGCGGCTTCCAGCTATGCGGCGCTACCG
GAGACGGTACGTATCGGAACCGATACCACCTATGCGCCGTTCTCGTCGAAAGATGCTAAA
GGTGATTTTGTTGGCTTTGATATCGATCTCGGTAACGAGATGTGCAAACGGATGCAGGTG
AAATGTACCTGGGTTGCCAGTGACTTTGACGCGCTGATCCCCTCACTGAAAGCGAAAAAA
ATCGACGCCATTATTTCGTCGCTCTCCATTACCGATAAACGTCAGCAGGAGATTGCTTTC
TCCGACAAGTTGTACGCCGCAGATTCTCGTTTGATTGCCGCCAAAGGTTCGCCGATTCAG
CCAACGCTGGATTCACTGAAAGGTAAACATGTTGGTGTGCTGCAGGGATCAACCCAGGAA
GCTTACGCTAACGAGACCTGGCGTAGCAAAGGTGTGGATGTGGTGGCCTATGCCAACCAG
GATTTGGTCTATTCCGATCTGGCTGCAGGACGTCTGGATGCTGCACTGCAGGATGAAGTT
GCTGCCAGCGAAGGATTCCTCAAGCAACCTGCTGGTAAAGACTTCGCCTTTGCTGGCTCA
TCAGTGAAAGACAAAAAATACTTCGGTGACGGCACCGGTGTAGGGCTACGTAAAGATGAT
GCTGAACTGACGGCTGCCTTCAATAAGGCGCTTGGCGAGCTGCGTCAGGACGGCACCTAC
GACAAGATGGCGAAAAAGTATTTTGACTTTAATGTCTACGGTGACTGATACGTCGCAGGG
AAGCTGTACCTGATGGAATGATCATCATGGTGCACGCCAGGTTTGTTGCACTATTGTGGT
GCATTGAAATGCATACTTAAGCATTTTTAATGAAAAATAATACGTCTAACGGGGCGGGAT
ATTTTGCCTTGATGGTCAATTTTATGGCACGATAAGTGTAACAAACCTGTAAATATTCCC
TATAAAAAGACTGTCAGTTGAGGACATTATGAAAAAACTGGTGCTATCGCTCTCTCTGGT
TCTGGCCTTCTCCAGCGCAACTGCGGCATTTGCTGCGATTCCGCAAAACATCCGCATCGG
TACCGACCCGACCTATGCGCCATTTGAATCAAAAAATTCACAAGGCGAACTGGTTGGCTT
CGATATCGATCTGGCAAAGGAATTATGCAAACGCATCAATACGCAATGTACGTTTGTCGA
AAATCCGCTGGATGCGTTAATCCCGTCCTTAAAAGCGAAGAAGATTGACGCCATCATGTC
ATCGCTTTCCATTACGGAAAAACGTCAGCAAGAAATAGCCTTCACCGACAAACTGTACGC
TGCCGATTCTCGTCTGGTGGTGGCGAAAAATTCTGACATTCAGCCGACAGTCGAGTCGCT
GAAAGGCAAACGGGTAGGCGTATTGCAGGGCACCACCCAGGAGACGTTCGGTAACGAACA
CTGGGCACCAAAAGGCATTGAAATCGTCTCGTATCAGGGGCAGGACAACATTTATTCTGA
CCTGACTGCCGGACGTATTGATGCCGCGTTCCAGGATGAGGTCGCTGCCAGCGAAGGTTT
CCTTAAACAACCTGTCGGTAAAGATTACAAATTCGGTGGCCCGTCTGTTAAAGATGAAAA
ACTGTTTGGCGTAGGGACCGGCATGGGCCTACGTAAAGAAGATAACGAACTGCGCGAGGC
ACTGAACAAAGCCTTTGCCGAAATGCGCGCTGACGGTACTTACGAGAAATTAGCGAAAAA
GTACTTCGATTTTGATGTTTATGGTGGCTAATCGCCATCGGTGAAAGAAAGCCCGCTCCC
TTCGGGTAACCGGAGGGAGACAAGAGGCGGTAATTCACCACACACGACAGGACAGGCTGC
ATGTTGTATGGGTTTTCAGGTGTTATTTTACAGGGTGCGCTCGTCACGCTGGAGCTGGCT
ATCAGCTCTGTAGTGCTCGCTGTAATCATCGGTTTAATTGGCGCTGGCGGTAAGCTCTCT
CAAAATCGGCTTTCGGGGCTGATTTTCGAAGGGTACACCACGCTGATTCGTGGCGTGCCG
GACTTAGTGTTGATGCTGCTGATTTTCTACGGTTTGCAGATTGCGCTAAACACGGTGACG
GAGGCGATGGGCGTCGGGCAGATTGATATCGATCCGATGGTCGCTGGTATTATCACTCTC
GGTTTTATCTACGGTGCTTATTTTACCGAAACGTTCCGTGGTGCTTTTATGGCAGTGCCG
AAAGGACATATAGAGGCGGCGACGGCGTTCGGTTTTACTCGTGGGCAAGTGTTTCGGCGG
ATCATGTTTCCGGCGATGATGCGTTACGCCCTGCCAGGCATTGGCAACAACTGGCAGGTG
ATCCTCAAATCTACCGCACTGGTTTCGTTACTCGGCCTGGAAGATGTGGTCAAAGCCACG
CAGCTGGCAGGCAAAAGTACCTGGGAACCGTTCTATTTCGCCATCGTCTGTGGCGTGATT
TACCTGGTTTTCACCACCGTTTCCAATGGTGTGCTGCTGTTCCTTGAGCGCCGCTACTCC
GTGGGTGTGAAGAGGGCTGACCTGTGATCGAAATCTTACATGAATACTGGAAACCGCTGC
TGTGGACCGACGGTTATCGCTTTACTGGTGTGGCGATCACTCTGTGGCTGCTTATTTTGT
CGGTAGTGATAGGCGGAGTCCTGGCGCTGTTTCTGGCGATTGGTCGTGTCTCCAGTAATA
AATACATCCAGTTTCCAATCTGGTTATTTACCTATATTTTTCGCGGTACGCCGCTGTATG
TTCAGTTGCTGGTGTTCTATTCCGGCATGTATACGCTGGAGATTGTTAAGGGGACCGAGT
TTCTTAACGCCTTTTTCCGCAGTGGCCTGAACTGTACCGTGCTGGCGCTGACGCTTAACA
CCTGCGCTTACACTACCGAGATTTTTGCTGGGGCAATCCGTTCGGTTCCGCATGGGGAAA
TTGAAGCCGCCAGAGCCTATGGCTTCTCGACTTTTAAAATGTATCGCTGCATTATTTTGC
CTTCTGCGCTGCGTATTGCGTTACCGGCATACAGCAACGAAGTGATCCTGATGCTGCACT
CTACTGCGTTGGCATTTACTGCCACGGTGCCGGATCTGCTGAAAATAGCCCGCGATATTA
ACGCCGCCACGTATCAACCTTTTACCGCCTTCGGCATTGCCGCGGTGCTCTATTTAATCA
TCTCTTATGTCCTGATCAGCCTCTTTCGCAGAGCGGAAAAACGCTGGTTGCAGCATGTGA
AACCTTCTTCAACGCACTGAGAATACGATGTCCGAGAATAAATTAAACGTTATCGATTTG
CACAAACGCTATGGCGAACACGAAGTGCTGAAAGGGGTGTCACTGCAAGCGAATGCCGGA
GATGTCATAAGCATCATCGGATCGTCGGGATCGGGGAAAAGTACCTTTCTGCGCTGCATT
AACTTCCTCGAAAAACCGAGTGAAGGGTCGATCGTGGTCAATGGCCAGACGATCAATCTG
GTGCGCGGCAAAGACGGTCAACTCAAAGTCGCCGATAAAAATCAACTGCGCTTACTGCGC
ACACGCCTGACGATGGTATTCCAGCACTTCAATCTCTGGAGCCATATGACGGTGCTGGAA
AACGTCATGGAAGCGCCGATTCAGGTGTTGGGCCTGAGCAAGCAGGAAGCGCGCGAGCGG
GCGGTGAAGTATCTGGCAAAAGTTGGGATAGACGAACGTGCACAGGGGAAATATCCGGTG
CATCTTTCCGGCGGTCAGCAACAGCGTGTTTCTATCGCGCGGGCGCTGGCGATGGAACCG
GAAGTTTTACTGTTTGATGAACCTACCTCGGCGCTCGATCCTGAACTGGTAGGCGAAGTG
TTGCGCATTATGCAGCAACTGGCAGAAGAGGGGAAAACCATGGTGGTTGTGACTCACGAA
ATGGGCTTTGCTCGTCATGTTTCTACTCACGTCATTTTCCTCCATCAGGGGAAAATAGAG
GAAGAAGGCGCGCCGGAGCAGTTATTTGGCAACCCGCAAAGCCCTCGTCTGCAACAGTTC
CTTAAAGGTTCGCTGAAATAATTGCCTCTCCGGTGGCTAACGCTGCCGGAGTATTTTCAA
GGGGAATTTGCGAGTCAGCTTCCGCTGAAATGTAAAAGTTGCAGTCCGCTAAAAATACTT
CTGAATTCGCTGTCCAAAGATAAAAACTGCCTGCTGCATTGGGTGTTAATCGTGGTTATT
GTCGCGTCATCTTAAATTTGAGGGGTGACGGAACGCCATGACAATATCGACAACTTCCAC
GCCGCATGATGCGGTATTTAAATCTTTTTTACGCCATCCAGACACCGCGCGGGATTTTAT
TGATATTCATCTTCCCGCGCCGCTGCGCAAACTGTGAGATTTAACGACGCTTAAACTGGA
ACCAAACAGTTTTATTGATGAAGACCTGCGGCAATATTATTCCGACCTCTTATGGTCTGT
GAAAACGCAGGAGGGAGTGGGTTATATTTATGTAGTGATAGAGCACCAAAGTAAGCCGGA
AGAATTAATGGCTTTTCGCATGATGCGTTATTCCATTGCGGCAATGCAAAACCATCTTGA
TGCGGGCTATAAAGAGCTTCCATTGGTGATCCCGATGCTGTTTTATCATGGTTGCAGAAG
TCCTTATCCTTATTCACTCTGCTGGCTTGATGAATTTGCCGAGCCTGCGATTGCCCGTAA
AATATATTCATCGGCTTTTCCGTTGGTGGATATTACCGTGGTGCCGGATGACGAGATTAT
GCAACATCGCAAAATGGCGCTGTTGGAGTTAATTCAGAAACATATTCGTCAGCGCGATCT
GTTGGGATTAGTCGACCAAATTGTTTCGCTGCTAGTTACAGGGAACACTAATGACAGACA
GCTAAAAGCCCTGTTTAATTATGTATTACAAACGGGAGATGCCCAGCGTTTCCGTGCATT
TATTGGTGAGATAGCAGAACGCGCACCACAGGAAAAGGAGAAACTGATGACCATTGCTGA
CAGATTACGTGAAGAAGGGCGGAATGATGGATTAATTCTTGGCAAACGCGAAGAAGCCCT
GCGTATTGCTCAGGAGATGCTGGATAGAGGTTTAGACCGAGAGTTAGTTATGATGGTGAC
CCGACTTTCACCAGACGATCTTATCGCGCAAAGCCACTAACCCTGTAACACCGGGAGTTA
ACTGGCGGATGTTTGCAGTAAACCACATCAGCGAACGACATCCGCCAGCGCCTCTTCTAA
ATCGTACCAACGAAACGCAAAACCCGCTTCTTCCAGCCGTTTAGGCAGCGCGCGTTGTCC
ACCTAATACCAGTACTGAAGATTCGCCCATTAACAGCCGAATGGCGGTTGCGGGGACGCG
CAAAATAGCCGGGCGATGCAGCGCATGACCGAGCGCATGGGCAAATTGTTCATTGCGTAT
CGGGTAGGGCGAAACCATATTAAATGGCCCGCGCAGCTCGTTATCCAGCAGCCAGAGAAT
GCCGTTGACCATATCATCGATATGAATCCAGGCCAGATACTGCCGACCGGAACCAATCGG
CCCGCCCAGGCCAAGACGAAACGGCGGCAGCATTTTACCGAGAATACCGCCATCCGGTGC
CAGCACTACGCCGGTACGCAGCAGGCACACTCGCGTTTTGTCACTTTGCGCCCGGCAGGC
AATTTCTTCCCAGCGGGCGCAGAGTTTATGGGTAAATTCGTTATGCGGCGGTTCCTCTTC
GGTAACCACCACTTCACCTAAGTCGCCATAATAGCCCGTTGCCGAGCCGGAAATGAGTAC
CGACGGTGGCGTGTCGCTGGCATTAATCAAATCGACCAGTTTTTGCGTGATATTCCAGCG
GCTTTGGCAGAGACGCTCTTTTTGCTCGTGAGTCCAGCGTTTATCAGCAATCGGTTCTCC
GGCGAGGTTGATTACCGCATCAACGCCGTTGAGGTTGCTTTGATCGGCAAGCCCTTGCCA
TAGCGTCACCTGCGGCCCGAGCACGGAACTGGCTTTCTGCGGGTTACGCGTCATTACCGT
GATTTGATGGCCCAGCTCCAGCAAACGTGGAATCAAATGGCGACCAATTAATCCCGTCCC
TCCGGTGATCACTATGTTCATGCAGCCTCCCGATATGGCGGTTAACGCTGCCAGCTTAAG
GTCATGGATACCGAATCGGCGTAGCGCAGCGCGTGCAGTTTATCGATCTCCACTTCAGCA
TACGTCACCCAGTGATGTTCACGTGCGATATCGAGCACATCCTGAGTTAATTTTTCCAGC
AAAGAGAAACGGTTATTCTCTACATGCTGAATAATGTTTTTCGTTACGGTGCGATAATTC
AGCGCATCGTTGATATCTTCGCTGGTGCGCGCTTTATCGGCGGGGTAGTGGATCGTCACA
TTGATAACAATATCCTGACGGTTGTTAATTTCTTCTTCCTTAATTCCGATAAATGTACGT
AAACGAAGGTTCTTTATACGAATAATAGCGGCAGGTTGTGCCATTGCAGGTTCTCCGTTG
TTTTACTTAGGATGAAATAATACACGAGAACCTGTTTCTGTTAACTATCCGAACGCTCAT
CACCGAGTTGTGCTTTTAGCAGTGCCTGCCCAGTGGCAGGGCGCGAACGGATCCGCTCAT
GCCAGTTCTTGACTGCCGGATACATTGCGAGGTCAATTCGCTGGCGAGTCCAGGCATTAA
CCCACGGCCAGCAGGCAATATCCGCAATGCTGTAGTTCTCACCTCCCAGCCAGGGCGAGT
TTTCCAGCCGCTTGTTCAGTACATGGTACAGGCGCTGAGTTTCAACCTGATAACGTTCAA
TAGCGTAAGGAATGGTTTGGGGGGCTGCGTGATTAAAATGATGATTTTGCCCAAGCATCG
GCCCCAGTCCGCCTACCTGCCAGAATAACCACTGTAATGTGGCGGCGCGCTCACGCGTTT
CATGACTCAAAAAGAGTCCTGTTTTCTCAGCCAGATACAACAAAATGGCACCAGATTCAA
AGAGGCTTAGCGGTTCGCCGCCATCGGCTGGAGAATGATCAACAATTGCCGGAATTTTGT
TGTTAGGCGAAATGCGCAAAAATTCCGGGCGAAACTGACCGCCTTTCCCCAGGTCTACCT
TTATCAAGCGATAATCCAGCCCTGCTTCTTCGAGAAACAGCGTAATTTTGTGGCCATTGG
GTGTCGGGGCGAAATAGAGATCGATCATTGCAGCTCCGGTTGTCTAATCATCTGAACACC
ACAAGTATAGAAAGCGCGGCGACTTGCGTGAGTATTCGTCACGTGACAGTGACAAAAAGG
CTCTATAGTTTGATAGCCAGCCCCCTTTATTGCCGAGGACATAATGAGTAAACCCGCTAT
CACGCTTTGGTCAGATGCCCATTTTTTCTCCCCTTATGTGTTATCCGCCTGGGTGGCGTT
GCAGGAAAAAGGCCTGTCGTTTCATATCAAGACCATCGACCTCGACAGCGGTGAACATTT
GCAACCGACGTGGCAAGGTTACGGTCAGACACGCCGTGTGCCGTTATTACAAATCGATGA
TTTTGAGTTGAGTGAATCTTCTGCCATTGCGGAGTATCTGGAAGATCGATTTGCGCCACC
GACCTGGGAACGTATTTATCCGCTTGATTTAGAAAATCGTGCGCGTGCACGACAGATTCA
GGCCTGGCTGCGCAGCGATCTGATGCCCATTCGCGAAGAGCGTCCGACGGATGTTGTCTT
TGCGGGGGCGAAAAAAGCGCCACTAACGGCCGAGGGAAAAGCCAGTGCAGAGAAACTGTT
CGCGATGGCAGAACATTTGTTAGTACTGGGTCAGCCGAATTTATTTGGTGAATGGTGCAT
TGCTGATACTGATCTGGCGCTAATGATTAACCGCCTGGTACTACATGGCGATGAGGTGCC
AGAACGCCTGGTGGATTATGCGACATTCCAGTGGCAGCGAGCGTCTGTCCAGCGTTTTAT
TGCACTTTCAGCGAAGCAATCTGGCTGATAGCAACGACAGAATCCAGTATCATAGCTTAC
GTTTTTTCGACGAGGAGTGAGTGATGAAACTGATGTTTGCATCGGACATTCATGGGTCGT
TACCGGCGACGGAACGTGTTCTGGAGTTGTTTGCCCAAAGCGGTGCCCAGTGGCTGGTGA
TCCTTGGCGACGTGTTGAATCACGGCCCGCGTAATGCTTTACCGGAGGGTTACGCGCCAG
CCAAAGTCGCTGAACGGCTTAATGAAGTGGCACATAAGGTTATCGCTGTGCGCGGCAACT
GCGACAGCGAAGTGGATCAAATGCTGCTGCATTTCCCGATAACCGCGCCGTGGCAACAGG
TATTACTGGAAAAACAACGTCTGTTTTTGACGCATGGTCATCTTTTTGGCCCGGAAAATC
TGCCTGCTTTAAACCAGAACGATGTGCTGGTTTACGGTCATACCCATCTGCCAGTAGCAG
AACAGCGGGGGGAGATTTTCCACTTCAACCCCGGCTCGGTGAGTATTCCGAAAGGCGGTA
ATCCGGCGAGTTATGGCATGCTGGATAATGACGTACTTAGTGTAATCGCACTCAATGATC
AAAGTATCATTGCGCAGGTCGCGATTAATCCGTAATTTACCCACAACTCAAAATGCGCCG
TAAGAGCGCCAGAAAAAGAAGGTTTCCTGATAATGGAACAGCGTCGTTTGGCAAGTACTG
AATGGGTGGATATTGTCAATGAAGAGAACGAAGTCATTGCACAAGCCAGCCGGGAGCAAA
TGCGGGCACAGTGTCTGCGTCATCGTGCAACTTACATCGTCGTGCATGATGGCATGGGCA
AAATTCTGGTCCAGCGTCGTACCGAGACAAAAGACTTTTTACCCGGCATGTTAGATGCGA
CCGCAGGCGGTGTGGTTCAGGCCGATGAGCAACTGCTGGAATCCGCGCGTCGCGAAGCGG
AAGAAGAGTTGGGCATTGCCGGTGTCCCCTTTGCCGAGCACGGGCAGTTCTATTTCGAAG
ATAAAAATTGCCGTGTCTGGGGCGCATTGTTCAGCTGCGTCTCTCACGGTCCCTTCGCCC
TACAGGAAGATGAAGTCAGTGAAGTTTGCTGGCTGACGCCGGAAGAAATCACCGCACGCT
GCGATGAGTTCACTCCAGACTCGCTGAAAGCGCTAGCGTTGTGGATGAAGCGCAATGCCA
AAAATGAAGCCGTAGAGACTGAAACGGCAGAATGAAAAAAGAGCCGCAATTGCGGCTCTT
AACATTTTTAGTGGTAGCCCATCAACTGAGCGCCGATCACTACGACGCTGGACATAATAA
ACAGCAGTCCAAGTAGGGTCGCGCCCACCTTCAGCCAGTTACGGAAGTCCACCCTGCACA
CACCGAGCGTTGCCATTAACGAAGCTGAGGTTGGGTAAATGATGTGACTGAAGCCATCAC
CAAACTGGAACGCCAGCACGGTAACCTGACGGTTAACACCGACCAGATCGCCAAGCGGTG
CCAGTAACGGCATGGTTAACGCCGCCTGACCAGAACCGGACGTCACGAAGAAATTAAATA
CCGCCTGGAAGAGCAACATAAACCAGGCCGCGACCGCGTTGTCCAGACCGCTAATGGCAT
TGGCAATGCTGTTGAGGATAGTATTTAACACGCTGGCCTCACCTGCTTCACCATTACCAA
CCAGCAGCAAAATCCCTTTGGCGAAACCCACCAGCAGGGCAGGGGCGATCATCATTCGCG
CCCCTTCGGTAAAGGATGAAGCCATGGTATTAACCGTCATGCCGTTAAGGCGGAAAACAA
CGCCGATGATGCCAATCACCAGACCCATGGTGAAGAACTGGCTGGCAATTTCTGGAATAA
ACCAGGCATTAACGATCACGCCCCAAATCACCCAGACCATTACGGCGGTCAGGACAATCA
ATACCAGCCAGTCACCAAAGGTAAACGGACGTTGTTCAACATCCGCCTGCTTTTCACGAA
AGAAGCGGTCGGACTCATGCACGCGTGACAGAAGAGGATTCTTTTTCACTCGTGAGGCGT
AGACCATGGTAAAGATCAGGCCAATCAGAGTGGCGATAACCCACACCACGATGCGCAACC
CGGAGCCAGAAAGCACCGGAACGCCGGCAATCCCCTGAGCAACGACCACACAAAACGGGT
TCATCCACGAACTGGCAAAACCGATTTGCGTGGCAATATAGGTCACCAGGACGGTGGTAA
TACTGTCATAGCCCAGCCGGACCATTAGCGGTGCGATGATAATGGCAAAGGCGACGGCAT
CTTCTCCCATACCAAATACCGCGCCGCCAAGTGAAAACAGAATAAACAGCGCAGGAATAA
AGAGAATTTCATTCCCGCGGGTATGGCGAATAAGCGCCAGGATACCGTTATCAATGGTTC
CTGTACGCATCACAATGCCAAACGCGCCGCCAATCACCAGCATAAACATGATGATGCCAA
CGGCTGTCCCGTATTTCGATCCTGAGGTTAACCCTTCAAACGGGAAGTTCATCAGGCCCG
GGCGTTCATCGCCCGTCGTGAACAGCTGTACGCGGTGATACTCAGGTTCGCCTGCTTCGT
TAGTCAGAATGCGAAATGAGTGTGGATCTACGACTTTGCGTGTTTTTGTTTGACCATCAA
CCTGATACTGCACTTCCTGACTGTCAAACATCCCCACCGGAACTACCCAGGTGGCAAGGC
TGGTTAAAATAGCAACAAAAAAGATAATCACCAACGTATCGGGCATTGCCCATCTTCTTG
TTGGTTTGGATTCAGTGATTGCGGACATAGCGCAAATATTCCCTTGCACAAAACAAAGTG
GTAAGTATGCAAAGTGAGATGGCGCAATTCATTGATGCAGCGCAGTTAAGCAAGATAATC
AGAAAGGATTAATGCAAATTAAGAGAATAAAAAACCGGAAATAGTGACTATTTCCGGTTC
AGATATCCGCAGCGCAAAGCTGCGGATGATGACGAGGTTACTGCTGCTGTGCAGACTGAA
TCGCAGTCAGCGCGATAGTGTAGACGATATCGTCAACCAGTGCGCCACGGGACAGGTCGT
TAACCGGCTTGCGCATACCCTGCAGCATCGGCCCGATGGAGATCAGGTCGGCAGAACGCT
GTACCGCTTTGTAGGTGGTGTTACCGGTGTTCAGATCCGGGAAGATGAACACGGTAGCGC
GACCTGCAACCGGAGAGTTCGGCGCTTTGGATTTCGCAACGTCAGCCATTACCGCAGCGT
CGTACTGCAGCGGACCGTCGATCATCAGGTCAGGACGTTTTTCCTGCGCCAGACGAGTTG
CTTCGCGAACTTTTTCTACGTCGCTACCTGCACCAGAAGTACCGGTGGAGTAGGAGAGCA
TAGCAACGCGCGGTTCGATACCGAAGGCTGCAGCGGAATCAGCGGACTGAATCGCGATTT
CTGCCAGCTGTTCTGCGGTCGGATCCGGGTTGATCGCACAGTCACCGTAAACGTAAACCT
GTTCCGGCAGCAGCATGAAGAACACGGAAGATACCAGGGAGCTGCCCGGTGCAGTTTTGA
TCAGCTGCAGCGGCGGACGGATGGTGTTTGCGGTAGTGTGAACAGCACCGGAAACCAGAC
CATCAACTTCATCCTGTTCCAGCATCAGCGTACCGAGCACCACGTTGTCTTCCAGCTGTT
CGCGGGCAACGGTTTCGGTCATGCCTTTGTTCTTACGCAGCTCGACCAGACGACCAACAT
AGCTTTCGCGAACCACTTCTGGATCAACGATTTCAATGCCTGCACCCAGTTCTACACCCT
GAGACGCTGCAACACGGTTGATCTCTGCCGGATTACCCAGCAGTACGCAAGTTGCGATAC
CACGTTCAGCACAGATAGCGGCTGCTTTAACGGTACGCGGTTCGTCACCTTCCGGCAGTA
CGATACGTTTGCCCGCTTTGCGCGCAAGTTCAGTCAGCTGATAACGGAACGCTGGCGGAG
ACAGACGACGGCTGCGCTCAGAAGTGGCAGTCAGAGAATCGATCCAGTCAGCGTTGATGT
AGTTAGCAACGTATTCCTGAACTTTCTCGATACGCTCGTGATCGTCAACTGGAACTTCCA
GGTTGAAGCTCTGCAGGCTCAGAGAAGTCTGCCAGGTGTTGGTGTTCACCATAAATACCG
GCAGGCCGGTAGCGAAAGCACGTTCGCACAGTTTAGAAATGCGCGCGTCCATTTCGTAGC
CGCCAGTCAGCAGCAGGGCACCGATTTCTACGCCGTTCATGGCAGCCAGGCAAGCGGCAA
CCAGCACGTCAGGACGGTCTGCGGAAGTCACCAGCAGAGAACCGGCACGGAAGTGCTCCA
GCATGTGCGGAATGCTGCGTGCGCAGAAAGTGACGGATTTAACGCGGCGAGTATTGATGT
CGCCTTCGTTGATGATGGTCGCATTCAGGTGGCGAGCCATATCGATCGCACGAGTCGCGA
TCAGGTCAAAGCTCCACGGCACAGCGCCGAGAACCGGCAGCGGGCTGGATTCTTGCAGCT
TCGCCGGATCAACATTGTTTACTTTAGCTTTGGAAGAGTCGTCGAAAATCTCGGACAGAT
CCGGGCGAGTACGACCCTGTTCATCAACCGGTGCGTTCAGTTTGTTAACGATAACGCCGG
TGATGTTGGTGTTTTTGGCACCGCCGAAGCTGTTGCGGGTCAGTTCGATACGCTCTTTCA
GCTGTTCCGGGGTGTCAGTGCCCTGAGACATAACGAAGACGATTTCCGCATTCAGCGTTT
TAGCGATTTCGTAGTTCAGAGACTGGGCAAACTGGTGCTTACGTGTCGGGACCAGACCTT
CAACCAGAACGACTTCAGCGTCTTTGGTGTTAGCGTGGTAGTTTGCGACGATCTCTTCCA
TCAGCACATCTTTCTGATTGCTGGAAAGCAGACCTTCAACGTAGCTCATTTTCAGCGGTT
CAGCGGCCGTCGTGGTGGAAGAGTTCGCACGCACGATAGTCGTAGTCTGATCGGGCGCAT
CGCCACCGGTACGCGGCTGAGCGATAGGTTTGAAAACGCTCAGACGAACGCCTTTGCGTT
CCATTGCACGGATCACGCCAAGGCTGACGCTGGTCAGACCGACGCTGGTTCCGGTAGGGA
TCAGCATAATAATACGGGACACGGTTTATCCTCTTTCGTTACCGCCGATTTGGCGGGTTA
CAAAACAGCACCGCCAGCTGAGCTGGCGGTGTGAAATCAGGCAGTCAGGCGGCTCGCGTC
TTGCGCGATAACCAGTTCTTCGTTGGTTGGGATAACCACCGCAGGACGGGTACCTTCTTT
GTTGATGAAACCAGATTTGCCGAAACGTGCAGCCAGGTTGCGTTCATGATCAACTTCAAA
GCCCAGCACGCCCAGTTTGCCCAGAGACAGTTCACGAACCATCGCGGCATTTTCACCGAT
ACCACCGGTGAATACAACAGCGTCCAGACGACCATCCATCAGCGCAGTGTAGGCACCGAT
GTATTTCGCCAGGCGGTGGCAGTAAACGTCCATTGCGCGCTTCGCGTCTTCTTTCGTCGC
GTAGTTGTCTTCAACATAGCGGCAGTCGCTGGTCACTTCGGTCAGACCCAGCAGGCCAGA
CTTTTTGGTCAGCAGTTTGTTGATTGCGTCAACGCTCATGCCCAGGGTGTCGTGCAGGTG
GAAGATGATCGCCGGATCGATATCACCAGAACGGGTACCCATGACCAGACCTTCCAGCGG
GGTCAGGCCCATAGAGGTGTCAACGCATTTACCGTTGCGGATAGCAGAAACGGAACCACC
GTTGCCCAGGTGGCAGGTGATGATGTTCAGTTCTTCTACCGGTTTGTTCAGCATTTTTGC
CGCTTCCTGGGTTACATAGAAGTGGCTGGTGCCGTGCGCGCCGTAACGACGGATGCCGTG
CTCTTTGTACAGGTTGTACGGCAGGGCGTAGAGGTAAGACTCTTCCGGCATAGTCTGGTG
GAACGCGGTGTCAAATACAGCAACGTTTTTGTCTTTCAGCTGTGGGAAAGATTTCAGAGC
TTCTTCGATACCGATCAGGTGAGCCGGGTTGTGCAGCGGTGCAAAAGAAGCTGCATCTTT
GATCCCCTGAATAACAGACTCATCGATCACTACGGAGCTGGTATACTTTTCGCCGCCGTG
TACGATACGGTGACCGATAGCAGTCAGCTGCGCAGACAGTTCTGGTTTTTGTGCCAGAAT
AGTATTAACGATAAAGTTGAGCGCTTCGCTGTGAGCGGCGCCTGCACCTAAAGCCGCTTC
CTGTTTATTGCCGTCCATTTTCCATTTGATACGTGCTTCGGGCAGGTGGAAACATTCGGC
TAAACCAGAAAGGTACTCTTCACCATTTACTGCATCGATGATGGCAAATTTCAGTGAAGA
ACTACCGCAGTTCAGAACCAGTACTAACTTACTCGACATGGAAGTACCTATAATTGATAC
GTGGCTAAAAAAACGTCAGGGAGCCATAGAGCGTAGCGCATGATGACACCGACATTTATG
ATTAACATCATGCACTGCAAATTTTTTTTGCATGATGGAAGAAATATCTTGAGTCTATGC
CATTTTGCGTAATTTTCAGCCAATGGCATAATGTATATGAATTTGACGACTCAATGAATA
TGTACTACTTAGGCCTTCAGGCTGCTAAAGGATACCTGATAGTGGGTATGGAAGACAAAA
TGTTTTGAACGTTGTCCCGCTGAGTTGTGAATTTGCACAAATTTTTGAATCTTTATATGT
GAAGTTGAGGTGAAGCATGTCAACGCCGGATAATCGTTCTGTTAATTTTTTTAGCTTGTT
TCGCCGGGGACAGCATTACTCAAAGACGTGGCCGCTGGAAAAACGCCTTGCCCCGGTCTT
TGTCGAAAATCGCGTTATCAAGATGACGCGTTATGCGATCCGTTTTATGCCGCCGATCGC
CGTATTTACTCTCTGCTGGCAGATTGCCCTGGGCGGTCAGCTTGGGCCGGCAGTTGCCAC
CGCCCTGTTCGCCTTAAGTTTACCCATGCAGGGATTGTGGTGGCTGGGCAAGCGTTCTGT
CACGCCATTACCCCCTGCAATCCTCAACTGGTTTTATGAAGTTCGCGGTAAATTGCAGGA
GTCTGGACAGGTGTTGGCACCCGTTGAAGGCAAGCCTGATTACCAGGCATTAGCTGACAC
GCTTAAGCGCGCCTTCAAACAACTGGATAAAACTTTCCTTGATGATTTGTAATTGACCCC
TGATTACGCATATAAAAGAAAGCATACTCAGCCTTCTTTTTTTTCACCGTAATAGAGTGA
TACAGGAGTCAACAATGGAAATGACCAACGCGCAACGTCTTATTTTGTCTAATCAGTACA
AGATGATGACTATGCTCGATCCGGCAAATGCTGAACGTTACCGTCGCCTGCAAACAATTA
TTGAGCGTGGTTATGGATTACAGATGCGTGAACTGGATCGCGAGTTTGGCGAGCTGAAAG
AAGAAACCTGCCGCACTATCATCGACATTATGGAGATGTATCATGCGTTGCATGTTTCCT
GGTCTAATTTGCAGGACCAGCAATCCATCGATGAACGTCGTGTCACCTTCCTCGGCTTTG
ACGCCGCCACTGAAGCACGTTACCTCGGTTATGTCCGCTTTATGGTTAATGTGGAAGGGC
GCTATACCCATTTTGACGCCGGAACTCACGGTTTTAACGCCCAGACGCCAATGTGGGAAA
AATATCAGCGCATGCTTAATGTGTGGCATGCCTGCCCGCGTCAGTACCATTTGAGCGCCA
ACGAAATTAATCAAATTATCAACGCCTGAGGAGGCCCGCGTGCGGTGCAAAGGTTTTCTG
TTTGATCTTGATGGAACGCTGGTGGATTCCCTGCCTGCGGTAGAACGGGCGTGGAGCAAC
TGGGCCAGACGTCATGGGTTAGCGCCGGAAGAGGTGCTGGCTTTCATTCACGGTAAACAG
GCGATCACCTCTCTGCGCCATTTTATGGCGGGCAAATCCGAGGCTGATATTGCCGCCGAG
TTTACGCGTCTGGAGCAAATCGAGGCCACGGAAACCGAAGGTATTACCGCGCTTCCGGGG
GCAATCGCCTTACTCAATCATTTGAATAAAGCAGGTATTCCGTGGGCCATTGTGACTTCT
GGCTCCATGCCGGTAGCGCGAGCGCGCCATAAAATAGCTGGGCTTCCCGCACCAGAGGTG
TTTGTAACCGCTGAGCGAGTGAAGCGCGGAAAACCAGAACCTGATGCGTATCTGTTAGGT
GCGCAGCTGCTGGGGCTTGCGCCGCAGGAGTGTGTGGTGGTGGAAGATGCTCCCGCTGGC
GTGCTTTCTGGCCTGGCGGCGGGTTGCCATGTCATTGCGGTTAACGCTCCGGCAGATACC
CCGCGCCTGAATGAGGTCGATTTGGTCCTCCACAGTCTGGAGCAAATTACTGTGACTAAA
CAGCCAAATGGCGATGTTATTATTCAGTGAAACACCTGATCATGATTTAGCCCCGTCTCG
TCGGGGCTTTTTTATGGCAGAATCAAGTCATCCCCCTCAATTAACAAGGATAAGTTGTGA
ACGGTGAATTGATTTGGGTTCTTTCATTACTGGCCGTTGCCATCGTCTTGTTTGCGACGG
GCAGAGTGCGTATGGATGCGGTCGCTTTGTTTGTTATTGTCGCGTTTGCATTAAGCGGAA
CGCTGACAGTCCCAGAAGTATTTTCCGGCTTTTCTGATCCTAACGTTGTCCTGATTGCCG
CCTTGTTTATTATTGGCGATGGTTTGGTCCGTACCGGTGTTGCCACCGTAATGGGAACAT
GGCTGGTCAAAGTTGCGGGCAACAGTGAAATCAAAATGTTGGTTTTGTTGATGCTGACCG
TCGCGGGGCTTGGCGCGTTTATGAGTTCAACCGGTGTTGTCGCTATCTTTATTCCCGTGG
TGTTAAGCGTTGCCATGCGTATGCAAACGTCGCCGTCACGTCTGATGATGCCGTTAAGTT
TTGCCGGGCTGATTAGCGGCATGATGACGCTGGTGGCGACGCCGCCGAACCTGGTAGTCA
ACAGTGAATTGCTGCGTGAAGGCTATCACGGCTTCAGTTTCTTTAGCGTAACACCTATTG
GCCTGGTCGTGCTGGTGCTGGGTATTTTGTATATGTTAGTGATGCGTTTCATGCTGAAAG
GGGATACCCAGACCCCGCAGCGCGAAGGCTGGACGCGTCGAACCTTTCGCGATCTTATCC
GTGAATATCGACTGACCGGGCGTGCGCGACGTCTGGCTATTCGCCCCGGATCGCCAATGA
TTGGTCAACGGCTGGATGATCTCAAATTACGTGAGCGTTATGGCGCTAACGTCATCGGTG
TTGAACGCTGGCGGCGTTTTCGTCGCGTTATCGTGAACGTTAATGGGGTTTCTGAATTTC
GCGCGCGTGACGTTTTGCTTATTGATATGTCTGCGGCTGATGTCGATCTCCGGCAATTTT
GTAGTGAGCAATTGCTGGAGCCGATGGTACTGCGCGGCGAGTATTTTTCTGACCAGGCCC
TTGATGTGGGCATGGCAGAGATTTCATTAATTCCTGAGTCAGAACTGATTGGTAAATCGG
TGCGCGAAATTGGTTTTCGTACACGCTACGGACTGAATGTGGTGGGGCTAAAGCGCAATG
GCGTGGCGCTGGAAGGTTCGCTGGCGGATGAGCCTCTGCTGCTGGGCGATATCATTCTGG
TTGTGGGTAACTGGAAACTGATCGGTATGCTGGCCAAACAGGGCCGCGACTTCGTAGCGC
TGAACTTACCGGAAGAGGTGAGTGAAGCATCGCCCGCGCACAGCCAGGCACCCCATGCCA
TTTTCTGTCTGGTGCTAATGGTGGCGTTAATGCTGACAGATGAAATTCCTAATCCTGTTG
CCGCTATCATCGCCTGCCTGCTGATGGGGAAATTCCGCTGTATAGATGCTGAAAGCGCCT
ATAAATCCATTCACTGGCCGAGCATTATTTTGATCGTTGGGATGATGCCGTTTGCTGTGG
CATTACAGAAAACGGGAGGTGTCGCGCTGGCGGTGAAAGGGCTGATGGACATTGGCGGTG
GTTACGGGCCACATATGATGCTGGGTTGTTTGTTTGTCTTGTCGGCGGTTATTGGGCTAT
TTATCTCTAATACCGCGACGGCGGTGTTGATGGCTCCGATTGCGCTGGCTGCTGCCAAAA
CGATGGGGGTGTCGCCTTATCCATTCGCGATGGTCGTGGCGATGGCAGCATCCGCCGCCT
TTATGACACCGGTTTCTTCACCGGTTAACACCCTGGTTTTAGGTCCGGGAAATTACAGCT
TCAGTGACTTTGTGAAGTTGGGGGTACCGTTCACCATTATCGTGATGGCGGTTTGTGTGG
TGATGATCCCGATGCTGTTTCCGTTTTGACAAGAGCCTGATGTCGCATCCGGCGCTTATT
GCCTGATGCGACGCAGACTCCAGCTGCTTACAGCGGTGAATCCTGGCTAATCTCATCGAG
CGAAAGATGGAAGCTGGGAACAAATACTTCCATGAAGTAGTCCATCTCCTGGCTGCGGCG
CGCTTCAAGCGTCGCTTCCAGTCGCGTTTTTGCCAGCAAGAATTCATTATTTCCGGCCGC
GAGTTCTTCCAGACATTTCAGATATGCACACAGTGCATCTGCCTGTTTCACCAACGATTT
TTCTTCATCGCTATATGCATGCTCGTCAATTAACGGCGCAAAGATATCCCGCAGCTCTTC
CGGAACCATATCGACCAGTTTTTGCTGAGCGATTTTTTCAATAGCCTTGTATTCCTGAGC
GATTTGCGAATTGAAGTATTTCACCGGAGTAGGGAGATCGCCGGTGAGCACTTCTGAGGC
ATCGTGGTACATCGCCAGTAAAGCGATACGTTCGGCGTTGACATTACTGCCAAATTTCCG
ATTTTTGATAGCTGCCAGCGCATGGGCGACCATCGCTACCTGCAAACTGTGTTCGGACAC
ATTTTCCGTCCGCACGTTGCGCATGAGCGGCCAGCGGTTAATGAGTTTCAGGCGGGAGAG
ATGGGCAAAAAAATGGCTCTGTTTCATAGTGACCTTACGTATGATGACATCATCAGGTCA
TTGTGGCGGGATAACACTGCCGGATGCAATCTCCGGCAGTGAAATTAAGATTACAGCTGA
TGATAACCAGAAAGGAAACGCGCGAACTTGCTCAAAGACAGCTCGATATCATCGACACGC
GGTAGCGTGACAATGCGGAAGTGATCCGGCCACGGCCAGTTGAATGCCGTCCCTTGCACC
AACAGAACTTTTTCCTGCAACAGGAAATCCAGCACCATTTTCTGATCGTCGTGAATGTTA
AAGCGTTTGGCGTCGATTTTCGGGAACATGTACAGCGCACCACGAGGTTTCACGCAGGAA
ACGCCCGGAATATCGTTGATCAATTCCCACGCGCGGTTACGCTGCTCATAAAGACGACCG
CCAGGGGTAATAAATTCACTGATGCTCTGATAACCACCCAGCGCGGTCTGAATGGCGTGT
TGCGCAGGAACGTTAGCACACAGGCGCATTGAAGCCAGCATTTCCAGACCTTCGATGTAG
CCTTTGGCGTGTTTTTTCGGCCCGTTCAACACCATCCACCCCTGACGGAAGCCTGCAACG
CGGTACGTTTTCGACAGTCCATTAAAGGTAATGGTCAGCAGGTCAGGTGCCAGCGGCGCA
ATTGAGTGATGCTCAGCGTCGTCGTAGAGAATTTTGTCATAAATTTCATCGGCGAAGATA
ATGAGATTATGCTGACGTGCAATCTCCACAATCTCCATTAAAAGCTCTTTGGAATATACC
GCGCCGGTTGGGTTATTTGGGTTGATAATAACGATCCCACGCGTACGAGGCGTAATTTTA
GCGCGAATATCATCGAGGTCCGGGAACCAGTCAGAGGATTCATCGCAAAGATAATGCACC
GCTTTACCGCTGGAAAGCGAAACCGCCGCGGTCCATAGTGGGTAATCTGGTGCAGGAACC
AACATTTCGTCCCCGCTGTTCAGCAATGCCTGCATTGCCTGAACGATAAGCTCCGATACA
CCATTGCCGATGTAAATATCTTCCACGGTAACATCACGCATGCCACGAGCCTGGTAGTGC
TGCATGATGGCTTTACGCGCAGAGTAAAGACCTTTGGAATCGCAATACCCTTGAGCTGTA
GGCAGGTTGCGTATCACGTCAACGAGAATTTCATCTGGCGCGTCAAAACCGAACGGGGCT
GGGTTGCCGATGTTCAGTTTCAGTACCTTGTTACCTTCTTCTTCCAGTCGTTTTGCTTCT
TTCAGCACCGGACCACGGATGTCATAACAGACATTCTCTAATTTGCTGGATTTTTCAATG
GGGGACATGAATCTTGACCTTTTTTGCTGTTATCGCCACTCCCTGCCGTGGAAGTCAGCT
TAGAACAATGTACTCCCCCAGGACGGTGTTTTGAAGGTCTGCAGAATAAGATTTTGCCAG
AGGGGAAGGCTCGATTGTGCTGTTAATAACTTAATAATGACAAAATAATGAGGCGTATAT
GCTTTACATACAATGTTATATAGTGAATTGTTCTGATTCTTAATTGTAAGTCTGGTTTTT
TTATCTGTAAGATAATTGTGTGAAAATGCCTCATTTAAGAATTCACTAATGAAACGCGAT
GATGATATTTCCGCATTACGGAGAGTTTAACAGCGTGATGATTTCCGAGGTGTCGCAATG
GGGGCAAGGTGTGAAACTATTGTTAAGCGGAATTAATGAATGAGGATGATGCTAATTAAT
TATTATTTAATATTCAAAAAGGTTTTGATGTGCTTATTAATAATAGAAGATTACTTTGCC
TAACATAACATAACTTTGCATCAGATAATTCGCAATGACCCTTATAAATAAAAGGTTTTT
GGGGTAAAATGCTCGCATAAATGACGGATCCCTGCTCTTGATGCCGCCTCACCATTGCTG
TTTGTACGTGTTCGCATATGACCAGCGATGCTGCACGAGAGTGGAACAAGGACTCACATT
TACATTTATACAAACACGCGCATGTCATAAATAGAAAAGAGTGAGTAACTTAATAGATAT
GCGATCCCTGAAGATATATTCTGTGATCTACTTCAGGCATTATAACGGAACAATGTGAGT
CGCTTTTTTAGTGCAACTCATATGCATTTTTACTTTCGTCCGGGTTCCGGATGAAACTGC
CAGGGAGGCACATTACAAATGGAATTGCTTGTTTGTGTGTGCACAGCATTAACCAGCTCA
GTATGAGCCGCCAGTAAGTGATAATATATGATAAGTGCAAATCGTCCGATAATTAACCTC
GACCTCGATCTGCTGAGAACATTTGTTGCTGTTGCCGATCTGAACACTTTTGCTGCCGCA
GCTGCCGCTGTGTGTCGTACTCAGTCCGCCGTAAGTCAGCAAATGCAGCGTCTGGAACAA
CTCGTTGGGAAAGAACTGTTCGCTCGTCACGGTCGCAACAAACTGTTAACTGAACATGGC
ATTCAACTTCTTGGTTACGCCAGGAAAATCCTGCGTTTTAATGATGAGGCCTGCTCATCA
TTAATGTTCAGTAATCTTCAGGGCGTGTTAACTATCGGTGCTTCAGATGAATCTGCCGAT
ACGATCTTACCTTTCCTGTTAAATCGCGTGAGTTCGGTTTATCCGAAATTAGCGCTGGAT
GTCCGCGTTAAACGTAATGCCTATATGGCAGAAATGCTGGAATCCCAGGAAGTGGATTTG
ATGGTAACCACCCATCGTCCTTCAGCGTTTAAGGCATTGAACCTGCGTACCTCGCCAACA
CACTGGTACTGCGCAGCGGAATACGTATTGCAAAAAGGTGAGCCGATCCCTCTTGTATTG
CTGGATGATCCAAGTCCGTTTCGCGATATGGTGCTGGCGACGCTTAATAAAGCAGATATT
CCCTGGCGACTGGCTTATGTCGCCTCGACGCTTCCGGCCGTTCGTGCGGCAGTGAAAGCC
GGTCTTGGCGTGACGGCAAGGCCGGTCGAGATGATGAGTCCGGACTTGCGTGTGCTGAGT
GGAGTAGATGGCTTACCGCCGCTACCTGATACCGAATATTTGCTGTGCTATGACCCGTCC
AGTAATAATGAGCTGGCCCAGGTGATCTATCAGGCGATGGAGAGCTACCATAATCCGTGG
CAATACAGCCCAATATCTGCTCCGGAAGGGGATGATTCATTGTTGATTGAAAGGGATATC
GAGTAATCGACGGACGATAGATAATTCCTGAGACAATAGTGTAAAAAACGAGCCGCTGGG
GGTGTTTTAAACCCCAGCGGCTTTTTTTTAGTAAAGAACCTTCTTCACATCGTGCAGAAC
GTACAAAACTGTTCATTTTTCAATCGCCAGAGATTCACGCCCCGTACGCACAAATAATCG
CCTGAAAAAAATCACCTGCTACAATGATGTTAAAAAATACGTAAATTTGTTGCTGCGTTT
TTGTTATGGAATGACAAAAGCGTGTCACAGATCAAGAAAATACTCTCTTTTGGGGGGAGG
AATCGACACAAATTCCTGTCAAAATAGACCCGTATTTTTTCCATTGCTTCACAACGGACA
CGATTCAACAACATCTAATTATCCTGGAGTCGTCAAGGATCTGGGGTGAAAGGGCATTAA
ATGCTAATGGTGTTGATATTATGTAAACTAATGTGAAGAAACTTTTGTTAAAGTTGACAA
AAGGTTATAGAAAGGAGTAAAAGACCACATCAATTAGCTGTATAAAAGAATTTCTACAGT
GATTGTAAGGTTTTTTTTATTCCTCCCCATGAATCGATGTGGCGTCCATCTGCCGTGAAG
AGCAGTGAATCTGGCGCTACTTTTGATGAGTAAGCAATGAGTATGTCAACATCCACTGAA
GTCATCGCTCATCACTGGGCATTCGCTATCTTTCTTATCGTTGCCATTGGCCTGTGTTGC
CTGATGCTGGTAGGCGGTTGGTTTTTAGGCGGTCGCGCACGCGCGAGGTCGAAAAACGTG
CCGTTTGAATCCGGTATCGACTCGGTCGGCTCCGCCCGCTTACGCCTGTCCGCCAAGTTT
TATCTGGTGGCCATGTTCTTCGTTATCTTCGACGTTGAAGCGCTGTATCTGTTCGCATGG
TCAACCTCTATCCGCGAAAGCGGCTGGGTAGGCTTTGTGGAAGCTGCAATTTTTATTTTT
GTGTTACTGGCAGGTCTGGTTTATCTGGTGCGTATTGGCGCGCTGGACTGGACGCCCGCG
CGTTCACGCCGCGAGCGTATGAACCCGGAAACGAACAGTATCGCTAATCGTCAACGCTAA
CCGCGAGGCATTAAGATGGATTATACGCTCACCCGCATAGATCCCAACGGTGAGAACGAC
CGTTACCCCCTGCAAAAGCAGGAGATCGTAACCGACCCTCTGGAGCAAGAAGTTAACAAA
AACGTGTTTATGGGCAAGCTCAATGACATGGTTAACTGGGGTCGTAAAAACTCAATTTGG
CCGTATAACTTCGGTCTTTCCTGCTGTTACGTTGAGATGGTGACTTCGTTTACCGCGGTG
CATGACGTGGCGCGTTTTGGCGCAGAAGTATTGCGTGCTTCGCCGCGTCAGGCTGACCTG
ATGGTGGTTGCAGGAACCTGCTTTACCAAAATGGCACCGGTTATTCAGCGTCTGTATGAC
CAGATGCTGGAACCAAAATGGGTTATCTCAATGGGTGCCTGTGCCAACTCTGGTGGTATG
TACGATATTTATTCCGTTGTGCAGGGCGTCGATAAATTCATCCCGGTTGATGTGTATATC
CCGGGCTGCCCGCCGCGTCCTGAAGCGTACATGCAGGCACTGATGCTGTTGCAGGAATCT
ATCGGCAAAGAACGTCGTCCGCTCTCCTGGGTGGTTGGCGATCAGGGCGTTTATCGCGCC
AATATGCAATCAGAGCGCGAACGCAAGCGCGGTGAACGCATTGCCGTAACCAACCTGCGT
ACACCTGACGAGATTTAATTTGCGCCTGTCGGCAAAGGGATTTTTCTTCGCTTATTCCTA
AATCTATTTCGCGAAGCTTACTGCGCCGACAGTCACCACGGACCATTTGCAATGGTGAAC
AATATGACCGACTTAACCGCGCAAGAACCCGCCTGGCAGACCCGCGATCATCTTGATGAT
CCGGTAATTGGCGAACTGCGCAACCGTTTTGGGCCGGATGCCTTTACTGTTCAGGCGACT
CGCACCGGGGTTCCCGTTGTGTGGATCAAGCGTGAACAATTACTGGAAGTTGGCGATTTC
TTAAAGAAACTGCCGAAACCTTACGTCATGCTGTTTGACTTACACGGCATGGACGAACGT
CTGCGCACACACCGCGAAGGGTTACCTGCCGCGGATTTTTCCGTTTTCTACCATCTGATT
TCTATCGATCGTAACCGCGACATCATGCTGAAGGTGGCGTTGGCAGAAAACGACCTGCAC
GTACCGACCTTCACCAAACTGTTCCCGAACGCTAACTGGTATGAGCGTGAAACCTGGGAT
CTGTTTGGCATTACATTCGACGGTCACCCGAACCTGCGCCGCATCATGATGCCGCAAACC
TGGAAAGGTCACCCGCTGCGTAAAGATTACCCGGCGCGCGCTACCGAATTCTCGCCGTTT
GAGCTGACCAAAGCCAAACAGGATCTGGAGATGGAAGCCCTGACCTTCAAACCGGAAGAG
TGGGGGATGAAGCGCGGCACCGAAAACGAGGACTTCATGTTCCTCAACCTCGGCCCGAAC
CACCCGTCGGCGCACGGTGCTTTCCGTATCGTTTTGCAGCTTGATGGCGAAGAGATTGTC
GACTGCGTACCAGACATCGGTTACCACCACCGTGGTGCGGAGAAAATGGGCGAACGCCAG
TCCTGGCACAGCTACATTCCGTATACCGACCGTATCGAATACCTCGGCGGCTGCGTTAAC
GAAATGCCTTACGTGCTGGCGGTAGAGAAACTGGCCGGGATCACCGTGCCGGATCGCGTT
AACGTCATTCGCGTAATGCTCTCCGAACTGTTCCGCATCAACAGCCACCTGCTGTATATC
TCGACCTTTATTCAGGACGTCGGCGCAATGACGCCCGTGTTCTTCGCCTTTACCGATCGT
CAGAAAATTTACGATCTGGTGGAAGCGATCACGGGTTTCCGTATGCACCCGGCGTGGTTC
CGTATTGGCGGCGTAGCGCACGACCTGCCGCGCGGCTGGGATCGCCTGCTGCGTGAGTTC
CTCGACTGGATGCCGAAACGTCTGGCGTCTTACGAGAAAGCGGCGCTGCAAAATACCATT
CTGAAAGGTCGTTCCCAGGGCGTTGCCGCCTATGGCGCGAAAGAGGCGCTGGAGTGGGGC
ACCACTGGCGCGGGCCTGCGTGCTACCGGGATTGACTTCGACGTGCGTAAGGCGCGTCCT
TATTCTGGCTATGAAAACTTCGACTTTGAAATCCCGGTTGGTGGTGGTGTTTCTGACTGC
TACACCCGCGTAATGCTGAAAGTGGAAGAGCTGCGCCAGAGTCTGCGCATTCTTGAGCAG
TGCCTCAACAACATGCCGGAAGGCCCGTTCAAAGCGGATCACCCGCTGACCACGCCACCG
CCGAAAGAGCGCACGCTGCAACATATCGAAACCCTGATCACCCACTTCCTGCAAGTGTCG
TGGGGGCCGGTGATGCCTGCCAATGAATCTTTCCAGATGATTGAGGCGACCAAGGGGATC
AACAGTTACTACCTGACCAGCGACGGTAGCACCATGAGTTATCGCACTCGTATCCGCACG
CCGAGTTATGCGCATTTGCAGCAAATTCCGGCGGCGATCCGCGGCAGCCTGGTGTCTGAC
CTGATTGTTTATCTGGGCAGTATCGATTTTGTTATGTCAGATGTGGACCGCTAATTATGC
ACGAGAATCAACAACCACAAACCGAGGCTTTTGAGCTGAGTGCGGCAGAGCGTGAAGCGA
TTGAGCACGAGATGCACCACTACGAAGACCCGCGTGCGGCGTCCATTGAAGCGCTGAAAA
TCGTTCAGAAGCAGCGTGGCTGGGTGCCGGATGGCGCGATCCACGCGATCGCCGATGTGC
TGGGTATTCCGGCGAGCGACGTCGAAGGCGTGGCAACGTTCTACAGCCAGATCTTCCGCC
AGCCGGTTGGCCGCCATGTGATCCGTTATTGCGACAGCGTGGTCTGTCATATCAACGGTT
ACCAGGGTATTCAGGCGGCGCTCGAGAAAAAGCTAAACATCAAACCAGGGCAAACGACAT
TTGACGGTCGCTTTACGCTGCTGCCAACTTGCTGCCTGGGGAACTGTGATAAAGGGCCAA
ACATGATGATCGATGAGGACACTCACGCGCATCTGACCCCGGAAGCGATCCCTGAACTGC
TGGAGCGGTATAAATGAAAAACATTATCCGTACTCCCGAAACGCATCCGCTGACCTGGCG
TCTGCGCGATGACAAACAGCCAGTGTGGCTGGACGAATACCGCAGCAAAAACGGTTACGA
AGGCGCGCGTAAGGCGCTGACCGGGCTGTCTCCGGACGAAATCGTTAATCAGGTAAAAGA
CGCTGGTCTGAAAGGGCGTGGCGGCGCGGGTTTCTCGACTGGCCTGAAATGGAGCCTGAT
GCCGAAAGACGAATCCATGAACATCCGTTACCTGCTGTGTAACGCCGATGAAATGGAGCC
AGGCACCTATAAAGACCGCCTGCTGATGGAGCAACTGCCGCACCTGCTGGTGGAAGGCAT
GCTCATCTCCGCGTTTGCGCTGAAAGCTTACCGTGGCTATATCTTCCTGCGCGGCGAATA
TATCGCAGCGGCAGTGAATCTACGCCGTGCCATTGCCGAAGCGACTGAAGCGGGCTTGCT
TGGCAAAAACATTATGGGAACAGGTTTCGACTTCGAACTGTTCGTCCATACCGGGGCAGG
GCGCTACATCTGCGGGGAAGAAACAGCGTTAATCAACTCCCTGGAAGGGCGTCGTGCTAA
CCCGCGCTCGAAGCCTCCATTCCCGGCGACCTCCGGCGCATGGGGTAAACCGACCTGTGT
CAACAACGTCGAAACCCTGTGTAACGTTCCGGCGATCCTCGCTAACGGCGTGGAGTGGTA
TCAGAACATCTCGAAAAGTAAAGATGCTGGCACCAAGCTGATGGGCTTCTCCGGTCGGGT
GAAAAATCCGGGCCTGTGGGAACTGCCGTTTGGTACTACCGCGCGCGAGATCCTCGAAGA
TTACGCCGGTGGTATGCGTGACGGTCTGAAATTCAAAGCCTGGCAGCCAGGCGGCGCGGG
CACCGACTTCCTGACCGAAGCGCACCTTGACCTGCCGATGGAATTCGAAAGTATCGGTAA
AGCGGGAAGCCGTCTGGGTACGGCGCTGGCGATGGCGGTTGACCATGAGATCAACATGGT
GTCGCTGGTGCGTAACCTGGAAGAGTTTTTCGCCCGTGAGTCCTGCGGCTGGTGTACGCC
GTGCCGCGACGGTCTGCCGTGGAGCGTGAAAATTCTGCGTGCGCTGGAGCGTGGTGAAGG
TCAGCCGGGCGATATCGAAACACTTGAGCAACTGTGTCGATTCTTAGGCCCGGGTAAAAC
TTTCTGTGCCCACGCACCTGGTGCAGTGGAGCCGTTACAGAGCGCCATCAAATATTTCCG
CGAAGAATTTGAGGCGGGGATCAAACAGCCGTTCAGCAATACCCATTTGATTAATGGGAT
TCAGCCGAACCTGCTGAAAGAGCGCTGGTAACCGAATTTCGATTAACGCTCAGTCTCTGA
CTGAGAAAACTGGAAGCATGCTAATGGCTACAATTCATGTAGACGGCAAAGAATACGAGG
TCAACGGAGCGGACAACCTGCTGGAAGCTTGTCTGTCTCTTGGCCTTGATATTCCTTACT
TTTGCTGGCATCCGGCGCTGGGAAGCGTCGGTGCTTGCCGCCAGTGTGCGGTGAAGCAAT
ACCAAAACGCGGAAGACACGCGTGGTCGCCTGGTGATGTCCTGTATGACACCGGCTTCCG
ATGGCACCTTTATTTCCATTGACGACGAAGAAGCGAAACAGTTCCGTGAAAGTGTGGTCG
AGTGGTTAATGACCAACCACCCGCACGACTGTCCGGTATGTGAAGAAGGCGGTAACTGCC
ATCTTCAGGATATGACCGTGATGACCGGACACAGCTTCCGTCGCTACCGTTTCACCAAAC
GTACCCACCGTAATCAGGATTTGGGACCGTTCATCTCTCACGAAATGAACCGCTGCATCG
CCTGCTACCGCTGCGTGCGTTACTACAAAGATTACGCTGACGGTACAGATCTGGGCGTTT
ATGGCGCGCACGACAACGTCTACTTCGGTCGCCCGGAAGACGGCACGCTGGAAAGCGAAT
TTTCCGGTAACCTGGTCGAAATTTGCCCGACTGGCGTATTTACCGACAAAACGCACTCCG
AGCGTTACAACCGTAAATGGGATATGCAGTTTGCGCCGAGCATCTGCCAGCAATGTTCCA
TCGGCTGTAACATCAGCCCCGGTGAACGTTATGGCGAACTGCGTCGTATCGAAAACCGTT
ACAACGGTACGGTAAACCACTACTTCCTCTGCGACCGTGGTCGTTTCGGTTACGGTTACG
TCAACCTGAAGGATCGTCCGCGTCAGCCAGTACAGCGTCGTGGCGATGATTTCATTACCC
TCAACGCCGAACAGGCAATGCAGGGCGCGGCAGATATTCTGCGTCAGTCGAAGAAAGTGA
TCGGTATTGGTTCTCCGCGTGCCAGCGTGGAAAGCAACTTTGCGCTGCGTGAACTGGTGG
GCGAAGAAAACTTCTACACCGGTATCGCTCACGGTGAGCAGGAACGTCTGCAACTGGCGC
TGAAAGTGCTGCGTGAAGGCGGCATTTATACTCCGGCTCTGCGCGAAATCGAATCTTACG
ATGCGGTACTGGTGCTGGGCGAAGACGTTACCCAGACCGGCGCGCGCGTCGCGCTGGCAG
TGCGTCAGGCGGTGAAAGGTAAAGCGCGCGAAATGGCGGCAGCACAGAAAGTGGCTGACT
GGCAGATTGCGGCAATCCTCAACATCGGTCAACGTGCGAAGCATCCGCTGTTTGTTACCA
ACGTTGATGACACCCGTCTGGATGATATCGCGGCGTGGACTTACCGCGCACCGGTTGAAG
ATCAGGCGCGTTTAGGTTTTGCCATCGCCCATGCGCTGGATAACTCTGCACCAGCGGTTG
ACGGTATCGAACCTGAGCTGCAAAGCAAAATCGACGTCATCGTGCAGGCACTGGCAGGTG
CGAAGAAACCGTTGATTATCTCCGGGACGAACGCCGGTAGCGCTGAAGTAATTCAGGCTG
CGGCTAACGTCGCGAAAGCCCTGAAAGGTCGCGGCGCTGACGTCGGTATCACCATGATTG
CCCGTTCCGTCAACAGCATGGGGCTGGGCATTATGGGCGGTGGATCGCTTGAAGAAGCGT
TAACCGAACTGGAAACCGGACGCGCCGACGCGGTGGTGGTGCTGGAGAACGATCTGCATC
GTCACGCATCCGCTACCCGCGTGAATGCTGCGCTGGCTAAAGCGCCGCTGGTGATGGTGG
TTGACCATCAACGCACAGCGATCATGGAAAACGCCCATCTGGTGCTTTCCGCCGCCAGCT
TTGCTGAAAGCGACGGTACAGTGATCAACAACGAAGGCCGCGCCCAACGTTTCTTCCAGG
TTTACGATCCGGCTTATTACGACAGCAAAACTGTCATGCTGGAAAGCTGGCGCTGGTTAC
ACTCGCTGCACAGCACTCTGCTGAGCCGTGAAGTGGACTGGACGCAGCTCGACCATGTGA
TTGACGCTGTTGTGGCGAAAATCCCGGAACTGGCAGGTATCAAAGATGCTGCGCCGGATG
CGACATTCCGTATTCGTGGGCAGAAACTGGCCCGTGAACCGCACCGTTACAGCGGTCGTA
CCGCCATGCGCGCCAATATCAGCGTTCATGAGCCGCGTCAGCCGCAGGATATTGACACCA
TGTTCACCTTCTCGATGGAAGGTAACAACCAGCCGACCGCGCATCGTTCGCAAGTGCCGT
TTGCCTGGGCTCCGGGCTGGAACTCCCCGCAGGCGTGGAACAAATTCCAGGACGAAGTGG
GCGGCAAACTGCGCTTTGGCGATCCGGGCGTGCGTCTGTTTGAAACCAGCGAAAATGGTC
TGGATTACTTCACCAGCGTACCGGCACGCTTCCAGCCGCAGGACGGGAAATGGCGTATCG
CGCCGTATTACCACCTGTTTGGCAGTGATGAATTGTCACAGCGTGCTCCGGTCTTCCAGA
GCCGTATGCCGCAGCCGTACATCAAACTCAACCCGGCAGATGCCGCGAAGTTGGGTGTGA
ATGCAGGTACACGCGTCTCCTTTAGTTACGATGGCAACACGGTCACGCTGCCGGTTGAAA
TCGCCGAAGGGCTGACGGCAGGGCAGGTGGGCTTGCCGATGGGTATGTCCGGCATTGCTC
CGGTGCTGGCTGGCGCGCATCTTGAGGATCTCAAGGAGGCACAACAATGAGTTGGATATC
ACCGGAACTGATTGAGATCCTGCTGACCATCCTCAAAGCGGTGGTGATCCTGCTGGTGGT
TGTCACCTGCGGGGCATTCATGAGCTTTGGCGAACGTCGCCTGCTGGGTCTGTTCCAGAA
CCGTTACGGACCTAACCGTGTTGGCTGGGGCGGTTCGCTCCAGCTGGTTGCGGACATGAT
CAAAATGTTCTTTAAAGAAGACTGGATCCCGAAATTCTCGGATCGCGTCATCTTTACCCT
GGCACCGATGATTGCCTTTACCTCGTTGCTGCTGGCCTTTGCGATTGTGCCAGTCAGCCC
GGGTTGGGTGGTTGCCGACCTGAACATCGGGATTTTGTTCTTCCTGATGATGGCTGGTCT
GGCGGTTTACGCGGTGCTGTTTGCGGGCTGGTCAAGTAACAACAAATACTCGCTGCTGGG
TGCGATGCGTGCTTCTGCACAGACCCTGAGCTACGAAGTGTTCCTCGGGCTTTCTCTGAT
GGGCGTGGTGGCGCAGGCCGGTTCATTCAACATGACCGACATCGTCAACAGCCAGGCGCA
TGTGTGGAACGTCATCCCGCAATTCTTTGGTTTTATTACCTTTGCCATCGCGGGTGTGGC
GGTGTGTCACCGTCACCCGTTTGACCAGCCGGAAGCCGAGCAGGAACTGGCGGATGGTTA
CCACATTGAATACTCCGGCATGAAGTTCGGTCTGTTCTTCGTGGGTGAGTACATCGGGAT
TGTGACCATCTCTGCATTGATGGTGACGCTGTTCTTCGGTGGCTGGCAAGGCCCGTTGTT
ACCGCCATTCATCTGGTTCGCGCTGAAAACCGCGTTCTTTATGATGATGTTCATTTTGAT
TCGTGCGTCGTTACCGCGTCCGCGTTATGACCAGGTAATGTCCTTCGGCTGGAAAATCTG
CCTGCCGCTGACGCTGATCAACTTGCTGGTAACGGCGGCTGTCATTCTCTGGCAGGCGCA
ATAAGGGGCAATAAGACCATGACCTTAAAAGAATTGTTAGTAGGTTTCGGCACCCAGGTT
CGTAGTATCTGGATGATCGGCCTGCACGCGTTCGCCAAACGCGAAACGCGAATGTACCCG
GAAGAGCCGGTCTATCTGCCGCCCCGTTATCGTGGTCGTATCGTTCTGACCCGCGACCCG
GACGGCGAAGAGCGTTGCGTAGCCTGTAACCTCTGTGCGGTAGCCTGCCCGGTCGGCTGT
ATCTCGCTGCAAAAAGCAGAAACCAAAGACGGTCGCTGGTATCCGGAATTTTTCCGCATC
AACTTCTCACGCTGCATTTTCTGTGGTCTGTGCGAAGAAGCCTGTCCGACCACGGCGATT
CAGTTAACCCCGGATTTCGAAATGGGGGAATACAAGCGCCAGGATCTGGTTTACGAGAAA
GAGGATCTGCTGATCTCCGGTCCGGGCAAATACCCGGAATATAACTTCTACCGGATGGCA
GGTATGGCAATCGACGGCAAAGATAAGGGCGAAGCAGAGAACGAAGCCAAGCCTATCGAC
GTCAAGAGCCTGTTACCGTAAGGAGAGGAGCAATGGAGTTCGCTTTTTATATCTGTGGCC
TGATAGCCATACTTGCGACCTTGCGAGTGATCACCCATACCAATCCGGTACACGCACTGC
TGTACCTGATTATTTCGCTGCTGGCGATTTCTGGGGTGTTCTTCTCACTGGGCGCTTACT
TCGCCGGTGCGCTGGAAATTATCGTCTACGCGGGTGCCATTATGGTGCTGTTCGTGTTCG
TGGTGATGATGCTCAACCTGGGCGGTTCAGAAATCGAACAGGAACGCCAGTGGCTGAAAC
CGCAGGTGTGGATTGGTCCGGCAATTTTGTCGGCCATCATGCTGGTGGTGATTGTTTACG
CCATCCTCGGTGTTAACGATCAGGGTATCGACGGTACGCCAATCAGTGCTAAAGCAGTGG
GTATTACGCTGTTCGGGCCTTACGTACTGGCGGTGGAACTGGCTTCTATGCTGCTGCTCG
CGGGTCTGGTTGTGGCCTTCCACGTCGGTCGTGAAGAGCGTGCGGGTGAAGTGCTGAGCA
ATCGTAAAGACGACAGCGCGAAAAGAAAAACGGAGGAGCACGCATGATCCCCTTACAACA
TGGACTGATCCTCGCGGCAATCTTATTCGTTCTTGGCTTAACCGGTCTGGTTATCCGTCG
CAATCTGCTGTTTATGCTGATTGGTCTGGAAATCATGATTAACGCCTCCGCGCTGGCCTT
TGTGGTCGCCGGAAGCTACTGGGGCCAGACCGACGGTCAGGTGATGTACATTCTCGCCAT
CAGCCTCGCGGCGGCAGAAGCGAGTATCGGCCTTGCGCTGCTGCTGCAACTTCACCGTCG
TCGCCAGAACCTGAACATCGATTCAGTAAGTGAGATGCGCGGATGAACATGCTTGCCTTA
ACCATTATTTTGCCATTGATTGGCTTCGTCCTGCTGGCGTTCTCCCGTGGGCGCTGGTCT
GAAAACGTTTCGGCGATCGTCGGCGTTGGCTCTGTGGGCCTGGCGGCGCTGGTAACCGCC
TTTATCGGCGTTGATTTCTTCGCTAACGGCGAGCAGGCATACAGCCAGCCGCTGTGGACG
TGGATGTCGGTAGGCGACTTTAACATCGGTTTTAACCTGGTGCTGGACGGCCTGTCGCTG
ACCATGCTCTCGGTGGTCACTGGTGTGGGTTTCCTGATCCACATGTACGCCTCCTGGTAT
ATGCGTGGTGAAGAGGGCTACTCTCGCTTCTTCGCCTACACCAACCTGTTCATCGCCAGC
ATGGTGGTTCTGGTGCTTGCCGATAACCTGCTGTTGATGTACCTCGGCTGGGAAGGCGTG
GGCCTGTGCTCCTATCTGCTGATCGGTTTCTATTACACCGATCCGAAGAATGGCGCAGCG
GCAATGAAAGCGTTCGTCGTGACCCGTGTGGGTGACGTGTTCCTCGCTTTCGCGCTGTTC
ATTCTTTACAACGAACTGGGCACCCTGAACTTCCGCGAAATGGTGGAACTGGCACCAGCG
CACTTTGCTGACGGCAATAACATGCTGATGTGGGCGACGCTGATGCTGCTGGGCGGTGCG
GTCGGTAAATCTGCGCAGTTGCCGTTGCAGACATGGCTTGCCGACGCGATGGCGGGCCCG
ACGCCTGTCTCCGCGCTGATCCACGCCGCAACGATGGTAACCGCGGGTGTCTACCTGATC
GCCCGTACCCACGGCCTGTTCCTGATGACCCCGGAAGTTCTGCATCTGGTGGGTATTGTC
GGGGCAGTTACGCTGCTGCTGGCCGGTTTTGCCGCGCTGGTACAGACCGACATCAAACGT
GTTCTCGCTTACTCTACCATGAGCCAGATTGGCTACATGTTCCTCGCGCTTGGCGTGCAG
GCATGGGATGCGGCGATTTTCCACTTGATGACTCACGCGTTCTTTAAAGCGCTGCTGTTC
CTGGCATCCGGTTCCGTCATTCTGGCCTGCCATCACGAACAGAACATCTTCAAGATGGGC
GGTCTGCGTAAATCTATTCCGCTGGTTTATCTCTGCTTCCTGGTGGGTGGTGCAGCACTG
TCGGCACTGCCGCTGGTCACTGCGGGCTTCTTCAGTAAGGATGAGATCCTCGCGGGTGCG
ATGGCGAATGGTCATATCAATCTGATGGTGGCAGGTCTGGTCGGTGCGTTTATGACCTCG
CTCTACACCTTCCGTATGATTTTCATCGTCTTCCACGGAAAAGAACAAATTCACGCTCAC
GCCGTGAAAGGGGTAACTCACAGCCTGCCGCTGATTGTGCTGCTGATCCTTTCCACCTTC
GTTGGCGCACTGATTGTACCGCCGCTGCAGGGCGTGCTTCCGCAAACGACGGAGCTGGCG
CACGGCAGCATGTTGACCCTGGAAATTACCTCTGGCGTGGTCGCGGTGGTCGGCATTCTA
CTGGCTGCCTGGCTGTGGCTGGGTAAACGTACTCTGGTGACCTCCATCGCCAACAGTGCG
CCGGGCCGTCTGCTGGGCACCTGGTGGTACAACGCCTGGGGCTTTGACTGGCTGTACGAC
AAAGTGTTCGTCAAGCCGTTCCTGGGTATTGCCTGGTTGCTGAAACGCGATCCGCTGAAC
GCAATGATGAACATTCCGGCGGTTCTTTCCCGCTTTGCAGGTAAAGGTCTGCTGTTAAGC
GAGAACGGCTATCTGCGCTGGTATGTGGCATCCATGAGCATCGGTGCGGTCGTGGTGCTG
GCACTGTTGATGGTACTGCGTTGAGTTAAGGATTGTGGGATTGCCCCTGGGCATATAAGA
ACGTAGGTCGGATAAGCCTCCTTCGCGGTGCATCCGACACTACCCCCAGTCCGAAGAGAA
TTTTCTGTCGTGAGAATTCGTTGAAAATCCGGTCCTGACGGGACTTTTACAAGGAATAAA
GATCGCCATGTTACTACCCTGGCTAATATTAATTCCCTTTATCGGCGGCTTCCTGTGCTG
GCAGACCGAACGCTTTGGCGTCAAGGTGCCGCGCTGGATCGCGCTGATCACCATGGGATT
GACGCTGGCGCTGTCGCTGCAACTGTGGTTGCAGGGCGGTTATTCACTGACGCAATCCGC
CGGAATTCCGCAGTGGCAGTCTGAATTCGACATGCCGTGGATCCCGCGTTTTGGTATCTC
TATTCATCTCGCCATTGACGGGCTGTCGCTGCTGATGGTCGTGCTGACCGGTCTGCTCGG
TGTGCTGGCGGTACTCTGTTCGTGGAAAGAGATCGAAAAATATCAGGGCTTCTTCCACCT
CAACCTGATGTGGATCCTGGGCGGCGTTATCGGCGTGTTCCTTGCCATCGACATGTTCCT
GTTCTTCTTCTTCTGGGAAATGATGCTGGTGCCGATGTACTTCCTGATCGCACTGTGGGG
GCATAAAGCCTCTGACGGTAAAACGCGTATCACGGCGGCAACCAAGTTCTTCATTTACAC
CCAGGCGAGTGGTCTTGTGATGTTGATCGCCATCCTGGCGCTGGTTTTTGTTCACTACAA
TGCGACCGGCGTCTGGACCTTCAACTATGAAGAGCTGCTGAATACGCCAATGTCCAGTGG
TGTGGAATATCTGTTGATGCTGGGCTTCTTCATCGCCTTCGCAGTCAAAATGCCGGTGGT
TCCGCTGCATGGCTGGCTGCCGGATGCGCACTCCCAGGCTCCGACCGCCGGTTCCGTTGA
CCTCGCGGGGATCTTGCTGAAAACTGCCGCTTACGGTTTGCTGCGTTTCTCCCTGCCGCT
GTTCCCAAATGCGTCGGCAGAGTTCGCGCCAATCGCTATGTGGCTGGGTGTTATCGGCAT
CTTTTACGGTGCGTGGATGGCCTTCGCCCAGACCGATATCAAACGTCTGATCGCCTACAC
CTCGGTTTCCCACATGGGCTTCGTGCTGATTGCTATCTACACCGGCAGCCAGTTGGCCTA
CCAGGGCGCGGTAATCCAGATGATTGCGCACGGCTTGTCGGCGGCGGGTCTGTTTATTCT
CTGCGGTCAGCTTTATGAACGTATCCATACCCGCGACATGCGCATGATGGGCGGTCTGTG
GAGCAAGATGAAATGGCTGCCAGCACTGTCGCTGTTCTTTGCGGTGGCAACGCTTGGGAT
GCCTGGCACCGGTAACTTCGTCGGCGAATTTATGATTCTGTTCGGCAGCTTCCAGGTTGT
CCCGGTGATTACCGTTATTTCTACCTTTGGGCTGGTCTTTGCATCTGTTTATTCGCTGGC
GATGTTGCATCGTGCTTACTTCGGTAAAGCGAAAAGCCAGATTGCCAGCCAGGAACTGCC
AGGGATGTCGCTGCGTGAGCTGTTTATGATCCTGTTGCTGGTGGTGCTGCTGGTACTGCT
GGGCTTCTATCCGCAGCCGATTCTGGATACCTCGCACTCCGCGATTGGCAATATCCAGCA
GTGGTTTGTTAATTCCGTTACTACTACAAGGCCGTAAATCGCCATGACAATAACTCCACA
AAACCTGATCGCACTGCTACCGTTGCTGATCGTCGGCTTGACGGTGGTGGTTGTGATGCT
CTCCATTGCGTGGCGACGCAATCATTTCCTCAACGCTACGCTCTCGGTTATTGGGCTTAA
CGCGGCGCTGGTTTCGCTCTGGTTTGTCGGCCAGGCGGGCGCTATGGATGTTACGCCGCT
GATGCGCGTTGATGGTTTCGCCATGCTTTACACCGGGCTGGTCCTGCTGGCGAGCCTCGC
CACCTGTACTTTCGCCTACCCGTGGCTTGAAGGCTATAACGACAACAAGGATGAGTTCTA
CCTGTTGGTGTTAATTGCCGCGCTGGGCGGGATCCTGCTGGCGAATGCCAACCATCTGGC
GTCTCTGTTCCTCGGTATCGAACTGATCTCTTTGCCGCTGTTTGGCCTGGTCGGTTACGC
TTTCCGCCAGAAACGTTCGCTGGAAGCCAGTATCAAATACACCATCCTTTCTGCCGCAGC
GTCTTCTTTCCTGCTGTTTGGTATGGCGCTGGTGTATGCGCAGTCTGGCGACCTGTCGTT
TGTCGCGTTGGGTAAAAACCTTGGCGACGGTATGCTCAACGAGCCGCTGTTGCTGGCAGG
TTTCGGCCTGATGATTGTTGGCCTCGGCTTCAAACTCTCTCTGGTGCCGTTCCACCTGTG
GACGCCAGACGTATACCAGGGCGCGCCTGCGCCGGTTTCCACTTTCCTGGCGACGGCGAG
CAAAATCGCTATCTTCGGTGTGGTGATGCGTCTGTTCCTCTACGCACCGGTGGGTGACAG
CGAAGCGATTCGCGTAGTACTGGCGATTATCGCCTTTGCCTCCATCATCTTCGGTAACCT
GATGGCGTTGAGCCAGACCAACATCAAACGTCTGCTCGGTTACTCATCTATCTCTCACCT
CGGCTATCTGCTGGTGGCGCTGATTGCGCTGCAAACCGGCGAGATGTCGATGGAAGCGGT
AGGGGTTTACCTGGCCGGTTATCTGTTCAGCAGCCTCGGCGCGTTCGGCGTGGTCAGCCT
GATGTCCAGCCCGTATCGTGGCCCGGATGCTGATTCCCTGTTCTCTTACCGCGGTCTGTT
CTGGCATCGTCCGATCCTCGCGGCAGTGATGACGGTGATGATGCTGTCTCTGGCCGGTAT
CCCGATGACGCTGGGCTTTATCGGTAAGTTCTACGTGCTGGCGGTCGGTGTCCAGGCTCA
CTTGTGGTGGCTGGTGGGTGCCGTGGTTGTCGGTTCGGCAATCGGCCTTTACTACTACCT
GCGCGTGGCGGTGAGTCTGTACCTGCACGCACCGGAACAACCGGGTCGCGATGCACCGTC
AAACTGGCAGTACAGCGCGGGCGGTATCGTGGTGCTGATTTCTGCACTGTTGGTACTGGT
GCTGGGTGTATGGCCACAACCGCTGATTAGCATTGTGCGTTTGGCAATGCCGCTGATGTA
ATCTGTTAGTTTGTAAGTCAGAAAGCCGCCGACATGCTCGGCGGTTTTTTTTGGCGCTCT
GACACCATCACCCAACAATAACCGTCAGCGCATGATTCCCTTGTCGCAGCATACGTCGAT
ACGCGCTAATCAGCTTTTCCATATCAAGCATGATCGAGGCAAAGAGTTGCCCCTCTAACT
CTTCTGAAAAGGTCACTCCCGGATAAATCTCCATTTCATTGAGTCGCTTAATGGAAAACT
GTTTACGCAGCTCACTTCGATCCAGTGATTCCAGTCGGTCGATTGTCGCGGCTAACTCCT
GATTCCAGGTCAATCCCAGGAAGCCATCTATGCCATCTTCGAGGCTGTGTTCACCAAGCA
CGGCACGACTCAGCGGATCATTCTTCGCGGGATCAAAAGCAGAGGTGCCTGTCAGCCCAA
AGTGTAAAAAATCCCAGCGTTTATCAATATCCAGTCGGCGTAATCCTGAAAGCGTGTCAT
GTATATTATCCATCAAAGGTTTTTCAGTAGACTCAAGCAGTTGGTTAATCTTTTCTGAGT
CAATTTCTGCAAAATAACCAATCATTCCCATTTATTTTTCCTCCATTGAATTTCATGTTT
CGCATCTTAAAACAGACGAGGGAAAATAAAATGTGCATGTCGCTTTTTCTGGACCCGCCT
CGAGAAATTTTTATTATTTACTGTTGTATAACAAATTTATAACACCATCCACCACCTGAG
CCATTTTCTGATAATTCAATATGTCTGCGGTATCACCGGGCAAGTGGTATTGTTTATTAC
GATAAAAAGCGGTGTCAGTAATCATTACGGCGGGAATATCGTGTTGCCAATAATTCAGGT
GGTCAGAGAAATCAATACCGGGAATAAACCCTGGGGCATTCATAGAATAAACAGATAAAT
CCCGGGATGACAACAATGCCGCTTTTACCTGACGAACGGCGTTGATATCCTGTATTCTGC
CGACCAGGCAATAAAGTCCCCCCGATCGGGATAAAGCCAGGACATTGCGGGTAAGGGTAA
TCCTGGCTACCAGGCGCAGAGTCGTAATAGCCAATCGGGGACGCCCTGCGCGGTAACTCT
GGCACCGCTACTGACAAAGACCTCTTTTATATACTCTACGGACCTATTCAGATTATCAAT
ATTGTCGGCATTACGTGGATGCACAGCTTGTGTAAGATAACGAACTGTTTTTTCTAATTG
CTCAGGAATTACGTGTCGGGGCGTTGGCGATAATGCAGTGACCCAGGGTTGGTAAAAATA
ATCAGAGGGAGTGAAAACAGAAATAATATAACAAAAGGAAAATTTTTTCATATGTAAATT
ATCAATAAAAGGCGTTATTTCATTATTATTTATAATGAATTATGAGCGTTTATTTTATTA
CACTTGGTAGAGATATACAAAAAGTGTTTTTTACAGTGGGTTCGCTATTTTTAAAAAGGA
ATTTCTGTGAGGAATAAAAATATAATTATGTTATTTATTGGCAGATTGAATTGACAAGTG
GGGCAGAAATCTGAGGGTAAGAAAAGTCAGCAACTACAATCCACTACATCAACAGACCAG
CAATCGCGTGCCGAGATACGCTGGAAATACCCGAAGATTGAACTGCAGGGTGGTGTGACT
GACATCAGTCAGTGATGACTTTTTAGCAAACTATGTTCGACCAGTCAGCATATTTGCTGA
CTGGTCGAATTAATTAACAATGATGTTAACTTACTCTTTTGCCTGATGCTCTATTTTGGG
GTTGTGAGTGTTTTATTTCTAAGTCTCTATAATAATCATTGATATTTGCATCGCCATATT
TATCTAAATAACAATTTCTGTTTACCAGTCGATGTTGAAAATCAATTTCGTACTGCTCTT
CTGCTGAATATTTTTTAAATCTGTCAGCATAGTTTTTTAATAACGTATAGGGGGCGCTGT
CAGAATTACTTTCCCTTTGTTCAATCACTTCCTGGGCTGCCATGCACACAAATGCACCGC
AACTTTGGCTTAAGTATTGCTGAAGATCGGCATGTAAAAATATTATCTCGGGTTCAGTTA
AATGAACTTTTATATTATTATTCGACATTTCTCCCATGAGTTCAGAATTAAAACTATTAA
TGACACGCTTAAGTGAATTTTCTTTATCATGGCCTAGTGCGCGCAATGAGTTGAATATGA
CGCATTTTATTTGTTGTGTATTATTTTTTCATTTACTATTTTCTGTAGCGAAACTAATAT
CCAGTGTCCGCCAGTATTTATGGGGAATAACTGGACTTCATTCGGCCATGATGGATCGCT
CTTAATATTTTCATTGAGAGCGTCTTCCAGGTGAGTTCTGGTGGAGTAGGGGACGTAGAG
ACCAGTAGGATAATTGACTTCAGTATTTTTTGCATTAGCGGCGATCTTCTGAAGATAGCA
ATCTATTTCATCTGTGGTTAATTGACGATTTTTATCCCAGAAGTTTGTACCATCGCTCAG
TTCATTATTCTCATCATTTAAAAGCACCTTCGAAAGCGACTGTTTTTCAGATATAAGAGG
AATTTCATCACCGATAATTGTCATTAATTTCGAAGGGGAGAATAGCTTTTTGAACAGGAG
ATCATCTGAATTATCCGGACCAGTTGGTTTAAGGTGGGAGTTGGTTGCGGTATGTGCCAA
ATTATATAATTTTAAACAGGCATTTTTAATAAGTCGGATAATCGATAGGGTCTCATTTGT
TGGGTTTCTAACAATATGGTAAAGAATATCTTCAGCTTTTTTTCCAAATTCATCATAACC
TAACGCAATATTATGCAGTAACTCAATACTTTCTTCATCTCCGGATAACGCTGTTTTTTT
TAAAGACTGCAGTAATTCCTCGGTCACAGTAAATTTTTCTGCAAATGTCTGACTGAGTTG
GGTTTGAGATAATTGACAATAATTGCTGACAACTGTAACCATCATATGCTCCTTTTAGTT
GCAAAGGTTGTGCTGAATGAAGATAAAAAGAGGCAACTTATTGCTCTGAATATAGTGCGT
AAGGAGATGAATAAATATCAAAAATCGCTCAATATGCCCGTGTGGGTGGATATATGTAGC
GCGGGTTGCGATAACAGGGCAAGTTTCGCCCTGTTTTTAATAATAAGCAGAGTTAAACGT
TAAACACGGTGAAATCATTCGCTAGTTCAGTCGCCGGGAAAATTGACCTGCATTCACGTA
ACAGGTGCTGACAACCTTTGTCATCATAGCGCGAGCTGACGTGGGTAATGATTAGCTTAC
CGACTCCAGCCTCACGGGCCAGTGTCGCAGCCTGGCGTGTAGAGCTATGACCGCGACTAT
TGGCTTTGGCTTCCATGGTTATATCCAGCGTCGCTTCGTGTACCATGACATCGACACCTT
TAGCCAGGTCAAGTGCGGCATCGCAGGGGCCGGTATCGCCGAAAATAGCGAGCGCTTTAC
CTGGCACTGGAGCAGCTAAGTAATCTGCGCCGTTAATCTGCCTTCCATCTTCCAGCATGA
TTGTTTTGCCCGCTTTTAATTCCTGAAACAGTGGGCCAGGCGGTACGCCAGCAGCTTTTA
ATGCCTGGGCATTTAATGCACCCGGTTTATCATGTTCTTCAATACGATAGCCATAACATT
CCAGTGGGTGTTCCATTGGATAAGCGGTCACTTTGCGCAGGCCATCATCGAGAATTTCGC
CAGCGCCAATTTCGACAATTTCCAGCGGATAATCGGTCCATGAGCCGCTAATCCGCAGCG
CGGTCTCCACAAATTCACGGATACCTTGCGGACCATAAATCGTTAAGGGTTGGACAATAC
CAGACATAGAACGACTGCACAGCAAGCCGGGTAAACCAAAGAGATGATCGCCATGAAGGT
GACTAATAAAAATCTTGTCCAGTTTTCCAGGGTTAAAGGCGGTATGCAGTAGCTGATGCT
GGGTGCCTTCACCGCAGTCAAACAACCAAAGACCGCTCTGGGTCGGATGTTGCAGGTTAA
GCAATATTGCCGTGACATTGCGCGTACGGGTTGGCACACCGGCTGAAGTACCTAAAAAAA
TTAATTCCATGAGTTCATCACGTTTCAAAAAATATTCCGGCTAGTATAAGGCATACATCT
AAAAGGAGAGCATTATGATTGAATGGCAAGATCTGCATCACTCTGAATTATCGGTTTCCC
AGCTTTATGCCTTATTACAACTGCGTTGCGCGGTGTTTGTTGTCGAGCAGAATTGCCCTT
ATCAGGATATCGATGGTGATGATTTGACGGGGGATAATCGCCATATTCTCGGTTGGAAAA
ATGATGAACTGGTGGCATATGCGAGGATTCTGAAAAGTGATGATGATCTTGAGCCGGTCG
TTATAGGTCGGGTGATTGTCAGTGAAGCGTTGCGTGGCGAAAAAGTGGGGCAGCAACTGA
TGAGTAAAACCCTCGACACATGCACGCATCACTGGCCTGATAAGCCTGTTTACCTTGGGG
CGCAGGCGCATCTGCAAAACTTCTACCAGAGTTTCGGTTTTATCCCTGTGACGGAGATCT
ATGAAGAAGATGGTATCCCACACATTGGGATGGCACGCGAGGTAATTCAGGCGTAATCAA
TAACCCTTGTCTATAGTTAGTGACAGGTTTTACGCAAATGGAGAACGAGAATGTCTAATC
AGTTTGGTGATACACGTATCGATGACGACCTGACGCTGCTTAGTGAAACACTGGAAGAGG
TGCTCCGCTCCTCTGGCGATCCCGCCGATCAGAAATATGTTGAGCTGAAAGCGCGTGCAG
AAAAAGCGCTGGATGATGTGAAAAAACGGGTTAGCCAGGCTTCAGACAGTTATTACTATC
GGGCGAAGCAGGCTGTTTATCGTGCTGATGACTACGTCCACGAAAAACCCTGGCAGGGAA
TTGGTGTGGGTGCGGCCGTTGGGCTGGTACTAGGACTGTTGCTGGCACGCCGTTAAAACC
TCCCTACACCGGGGTACTGCATTTTTTTTGTAGTACCCCGTATAATGTGAGGCTTTTAAC
AGGGAGAGGTCCGCGTGCAATCACTTACTACGGCGCTGGAAAATCTACTGCGCCATTTGT
CGCAAGAGATTCCGGTGACACCCGGCATTCGGGTTATCGATATTCCTTTCCCTCTCAAAG
ACGCTTTTGATGCCTTGAGCTGGCTGGCCAGTCAGCAAACGTACCCGCAATTCTACTGGC
AACAACGTAATGGTGATGAAGAAGCTGCCGTCCTGGGCGCGATTACCCGTTTTACGTCGT
TGGACCAGGCACAACGTTTTCTTCGCCAGCACCCGGAACACGCCGACTTACGCATTTGGG
GGCTGAATGCGTTCGACCCGTCGCAGGGCAATTTACTTTTACCACGCCTGGAATGGCGAC
GCTGTGGCGGTAAAGCCACGCTGCGGCTGACGCTATTCAGCGAAAGCTCCCTTCAGCACG
ATGCGATTAAGGCAAGAGAATTTATCGCCACACTGGTGAGTATCAAGCCCTTGCCTGGGT
TACATTTAACCACTACGCGAGAACAACACTGGCCGGACAAAACGGGCTGGACGCAATTAA
TCGAACTGGCAACGAAAACCATCGCCGAAGGGGAGCTCGACAAAGTGGTGCTTGCTCGGG
CAACTGACCTGCATTTCGCAAGTCCGGTCAATGCGGCGGCGATGATGGCTGCCAGTCGTC
GACTGAATCTCAATTGCTACCATTTTTACATGGCCTTTGATGGCGAAAATGCTTTTCTTG
GCTCTTCACCGGAACGGTTATGGCGGCGGCGTGACAAAGCGCTGCGTACTGAAGCGCTGG
CGGGAACAGTAGCAAATCATCCTGATGATAAGCAGGCGCAGCAGTTAGGAGAGTGGCTGA
TGGCGGATGATAAAAACCAGCGCGAGAACATGCTGGTGGTGGAAGATATCTGCCAACGAT
TACAGGCCGATACCCAGACGCTGGATGTTTTACCGCCGCAGGTACTGCGTCTGCGTAAAG
TGCAGCATCTTCGCCGCTGTATCTGGACTTCACTCAACAAAGCGGATGATGTGATCTGTT
TACATCAGTTGCAGCCAACGGCAGCAGTTGCTGGCTTACCGCGCGATCTGGCGCGACAGT
TTATCGCCCGTCACGAACCGTTCACCCGAGAATGGTACGCCGGTTCTGCGGGCTATCTCT
CATTACAACAAAGCGAATTCTGCGTTTCCCTGCGCTCAGCAAAAATTAGCGGCAATGTCG
TGCGATTATATGCTGGCGCGGGCATTGTCCGTGGTTCCGACCCCGAGCAAGAGTGGCAGG
AAATCGACAACAAAGCGGCAGGGCTGCGTACTTTATTACAGATGGAATAGTAATGAGTCG
CATCATTACCGATTCATATCAATAATCTATTTTTGTAGCTCCTTATACTTAGCCGCAATA
TTGATACCGGACAAACTCATGTCAGTAAGCGCATTTAACCGACGCTGGGCGGCGGTCATT
CTGGAAGCATTAACGCGTCACGGCGTCAGACACATCTGTATCGCCCCAGGCTCGCGTTCT
ACACCGTTAACGTTAGCGGCGGCGGAGAATTCCGCATTCATTCACCACACCCATTTCGAT
GAGCGTGGACTGGGGCATCTGGCGCTGGGGCTGGCGAAAGTCAGCAAGCAGCCGGTGGCG
GTGATTGTGACCTCCGGCACGGCGGTAGCAAATCTCTATCCTGCACTGATTGAAGCTGGG
TTAACCGGAGAAAAACTGATCCTGTTAACCGCCGATCGCCCGCCGGAGCTAATTGACTGC
GGCGCGAATCAGGCGATTCGTCAGCCGGGAATGTTCGCCTCTCACCCCACGCACAGTATT
TCATTGCCGCGCCCGACCCAGGATATCCCCGCAAGTTGGCTGGTTTCTACCATCGACCAT
GCTCTCGGTACGCTTCATGCGGGCGGAGTCCATATCAACAGCCCGTTTGCTGAACCGCTG
TATGGCGAGATGGACGACACTGGGCTTAGCTGGCAACAGCGTCTGGGTGACTGGTGGCAG
GATGATAAGCCGTGGCTGCGTGAAGCGCCTCGTCTGGAAAGTGAAAAACAGCGCGACTGG
TTCTTCTGGCGGCAAAAACGCGGCGTGGTGGTTGCCGGGCGCATGAGTGCGGAAGAGGGC
AAAAAAGTTGCACTGTGGGCGCAAACTCTTGGCTGGCCGCTGATTGGCGACGTGCTGTCG
CAAACCGGACAGCCGCTGCCGTGTGCCGATCTTTGGTTAGGCAATGCCAAAGCGACCAGC
GAACTGCAACAGGCACAGATTGTGGTGCAACTGGGCAGCAGCCTGACGGGCAAACGGCTC
CTGCAATGGCAGGCAAGCTGTGAACCCGAAGAGTACTGGATTGTGGATGACATCGAAGGG
CGACTTGATCCGGCACACCATCGTGGACGCCGCTTAATTGCCAATATTGCCGACTGGCTG
GAGCTGCATCCGGCAGAAAAACGCCAGCCCTGGTGCGTTGAAATCCCGCGCCTGGCAGAA
CAGGCAATGCAGGCGGTTATTGCCCGTCGCGATGCGTTTGGCGAAGCGCAACTGGCGCAT
CGCATCAGCGACTATCTGCCTGAACAGGGGCAATTGTTTGTTGGTAACAGCCTGGTGGTA
CGTCTGATTGATGCGCTTTCGCAACTTCCAGCAGGTTACCCGGTGTACAGCAACCGTGGG
GCCAGCGGTATCGACGGACTGCTTTCTACTGCCGCCGGCGTTCAGCGTGCCAGTGGCAAA
CCGACGCTGGCGATTGTGGGCGATCTCTCCGCACTTTACGATCTCAACGCGCTGGCGTTA
TTGCGTCAGGTTTCCGCGCCGCTGGTATTAATTGTGGTGAATAACAACGGCGGGCAAATT
TTTTCGCTGTTGCCAACGCCGCAAAGCGAGCGCGAACGTTTCTATCTGATGCCGCAAAAC
GTTCATTTTGAGCACGCCGCCGCGATGTTCGAGCTGAAATATCATCGTCCGCAAAACTGG
CAGGAACTTGAAACGGCACTTGCCGATGCCTGGCGCACGCCAACCACCACGGTAATTGAA
ATGGTGGTTAACGACACCGATGGTGCGCAAACGCTCCAGCAACTTCTGGCGCAGGTAAGC
CATTTATGATCCTGCACGCGCAGGCAAAACACGGCAAACCAGGTTTACCCTGGCTGGTGT
TTTTGCACGGTTTTTCCGGCGATTGCCACGAATGGCAAGAAGTGGGCGAGGCGTTTGCCG
ACTACTCACGGTTGTATGTTGATCTTCCCGGGCACGGTGGTTCGGCGGCGATTAGCGTCG
ATGGATTTGATGATGTCACCGACTTACTGCGTAAAACCCTGGTTAGTTACAACATCCTTA
ACTTCTGGCTGGTGGGGTACTCGCTTGGCGGACGGGTGGCGATGATGGCCGCTTGCCAGG
GGCTGGCGGGGCTTTGTGGGGTTATTGTCGAAGGCGGGCATCCGGGGCTGCAAAATGCTG
AACAACGTGCGGAACGTCAGCGTTCCGATCGCCAATGGGCGCAGCGTTTTCGCACAGAAC
CGTTAACGGCGGTATTTGCCGACTGGTATCAACAGTCTGTTTTTGCCTCGCTCAATGACG
ATCAACGCCGGGAGCTGGTGGCGCTGCGCAGCAACAATAATGGCGCAACCCTTGCCGCCA
TGCTGGAGGCGACTTCTCTCGCCGTCCAGCCTGATTTACGTGCTAACCTTAGCGCCCGCA
CATTTGCGTTTTATTATTTATGTGGTGAACGTGACAGCAAATTCCGCGCTCTGGCGGCGG
AACTGGCTGCCGACTGCCATGTCATTCCTCGCGCCGGACATAACGCGCATCGGGAAAATC
CCGCTGGCGTTATCGCAAGTCTGGCGCAGATCTTGCGTTTCTGACTAAAGGACACAATAT
GATTTATCCTGATGAAGCAATGCTTTACGCACCGGTTGAATGGCACGACTGCTCCGAAGG
TTTCGAGGACATTCGTTATGAAAAATCCACCGACGGTATCGCAAAAATCACCATTAATCG
TCCGCAGGTGCGCAATGCCTTCCGTCCTCTGACGGTAAAAGAGATGATCCAGGCACTGGC
AGATGCGCGTTATGACGACAATATCGGCGTGATCATTCTGACTGGCGCAGGCGATAAAGC
GTTCTGCTCCGGTGGTGACCAGAAAGTGCGTGGTGATTACGGCGGCTATAAAGATGATTC
CGGCGTACATCACCTGAACGTGCTGGACTTCCAGCGTCAGATCCGTACCTGTCCGAAACC
GGTTGTCGCGATGGTGGCTGGCTACTCCATCGGCGGTGGTCACGTTCTGCACATGATGTG
CGACCTGACTATCGCGGCAGATAATGCCATCTTCGGTCAGACTGGCCCGAAAGTCGGTTC
CTTCGACGGCGGCTGGGGCGCTTCCTACATGGCTCGTATCGTCGGGCAGAAAAAAGCGCG
TGAAATCTGGTTCCTGTGCCGTCAGTACGACGCAAAACAGGCGCTGGATATGGGCCTTGT
GAACACCGTGGTACCGCTGGCGGATCTGGAAAAAGAAACCGTCCGTTGGTGCCGCGAAAT
GCTGCAAAACAGCCCGATGGCGCTGCGCTGCCTGAAAGCTGCACTGAACGCCGACTGTGA
CGGTCAGGCAGGTCTGCAGGAGCTGGCGGGCAACGCCACCATGCTGTTCTACATGACGGA
AGAAGGTCAGGAAGGTCGCAACGCCTTCAACCAGAAACGTCAGCCTGATTTCAGCAAATT
TAAACGGAATCCGTAATGCGTAGCGCGCAGGTATACCGCTGGCAGATCCCCATGGACGCG
GGGGTGGTTCTGCGCGACAGGCGGTTAAAAACCCGCGACGGGCTGTATGTTTGCCTGCGT
GAAGGCGAGCGCGAAGGGTGGGGGGAGATCTCCCCACTGCCGGGCTTCAGTCAGGAAACC
TGGGAAGAGGCGCAAAGTGTGCTGCTTGCCTGGGTAAATAACTGGCTGGCAGGCGATTGC
GAATTACCGCAGCTGCCTTCCGTCGCCTTTGGCGTAAGCTGTGCATTGGCGGAGCTGGCA
GATACGCTCCCGCAGGCGGCCAATTACCGTGCGGCACCACTGTGTAATGGCGATCCTGAC
GATCTGATCCTCAAACTTGCTGATATGCCAGGCGAGAAAGTGGCGAAGGTCAAAGTGGGA
TTGTACGAAGCCGTGCGCGACGGCATGGTGGTGAATCTGTTGCTGGAGGCAATTCCGGAT
CTGCATTTGCGTCTTGACGCGAATCGCGCCTGGACACCGCTGAAAGGCCAGCAGTTTGCC
AAATATGTTAACCCGGATTATCGCCACCGCATCGCGTTTCTCGAAGAGCCGTGCAAAACC
CGCGATGATTCGCGAGCGTTTGCCCGTGAAACCGGCATTGCCATTGCCTGGGATGAAAGC
TTGCGCGAGCCGGATTTTGCCTTTGTGGCTGAAGAGGGCGTGCGCGCGGTAGTTATCAAA
CCCACGCTCACGGGCAGTCTGGAGAAAGTACGCGAGCAGGTACAGGCGGCGCACGCGCTG
GGGCTGACGGCGGTGATCAGTTCTTCCATTGAATCGAGCTTAGGCTTAACGCAACTGGCG
CGGATTGCCGCCTGGTTAACGCCGGACACCATTCCAGGGCTGGACACGCTGGATCTAATG
CAGGCGCAGCAGGTACGTCGCTGGCCGGGTAGCACGCTGCCTGTCGTGGAAGTTGATGCA
CTGGAGCGGTTGTTATGATCTTCTCTGACTGGCCGTGGCGTCACTGGCGGCAAGTGCGGG
GAGAAGCCATCGCCTTACGTCTTAATGACGAGCAACTCAACTGGCGCGAGCTTTGTGCTC
GCGTCGATGAATTAGCCTCCGGCTTTGCGGCGCAGGGCGTAGTTGAGGGCAGCGGCGTGA
TGTTGCGGGCGTGGAATACGCCGCAAACGCTGCTCGCCTGGCTGGCGTTACTGCAATGCG
GGGCGCGGGTGTTGCCCGTGAACCCTCAGCTGCCGCAACCGTTGCTTGAAGAATTGCTGC
CCAATCTTACGCTGCAATTTGCGCTGGTGCCGGAAGGGGAAAACACGTTTCCGGCGTTAG
CGTCGCTGCACATTCAGCGGGTTGAAGGCGCACATGCCGCTGCGTGGCAGCCGACGCGTC
TGTGCTCAATGACGTTAACCTCTGGGTCCACTGGCTTGCCGAAAGCCGCTGTTCATAATT
ACCAGGCTCATCTTGCCAGCGCCGAAGGGGTGTTATCGCTGATTCCGTTTGGCGATCACG
ATGATTGGTTGCTCTCTTTACCGCTGTTTCACGTCTCCGGTCAGGGAATTATGTGGCGCT
GGTTATACGCTGGTGCGCGGATGACGGTACGTGATAAACAGCCATTGGAGCAAATGCTGG
CAGGCTGTACTCACGCTTCACTGGTGCCAACACAACTCTGGCGTTTGCTGGTTAACCGCA
GTTCCGTTTCCCTGAAAGCGGTGTTACTTGGCGGCGCGGCTATCCCGGTCGAGTTGACGG
AACAGGCGCGCGAGCAGGGGATTCGTTGCTTTTGCGGCTATGGTCTGACCGAGTTTGCCT
CCACGGTGTGTGCGAAAGAAGCCGACGGCCTGGCAGACGTTGGTTCGCCGCTGCCGGGTC
GGGAAGTGAAAATCGTTAATAATGAAGTGTGGCTGCGGGCTGCCAGTATGGCAGAAGGTT
ACTGGCGTAACGGGCAACTGGTTTCACTGGTTAATGACGAAGGCTGGTACGCTACGCGCG
ATCGCGGTGAGATGCATAATGGCAAGCTGACCATTGTCGGACGTTTAGACAATCTATTCT
TCAGTGGCGGAGAGGGTATTCAGCCGGAAGAAGTCGAGCGCGTAATTGCTGCACATCCTG
CGGTTTTGCAGGTGTTTATCGTCCCCGTTGCCGACAAGGAGTTTGGTCATCGACCGGTGG
CGGTGATGGAGTATGACCACGAGAGCGTTGATCTTAGTGAATGGGTGAAAGATAAGCTGG
CCCGTTTTCAGCAACCGGTGCGTTGGTTAACGTTGCCGCCTGAACTGAAAAACGGCGGTA
TTAAAATTTCACGTCAGGCGCTAAAAGAGTGGGTGCAACGTCAGCAATAATTAACCCTCC
GTTTCACTTCTCATTTCTGCCATTCCATTGCCGTTGATAAAGAGTTTATCTGTTAATCTG
TAAATTGATGTGAAAACTCTTAGCAAACAGGATAATGCAATGGAATGGCTGGTCAAAAAA
TCGTGCTGCAATAAACAAGATAACAGACATGTACTTATGCTCTGCGATGCTGGCGGCGCG
ATAAAAATGATCGCCGAAGTGAAGAGTGACTTCGCCGTGAAAGTGGGGGATTTACTCTCG
CCTTTGCAGAATGCGCTTTATTGTATTAATCGTGAAAAGCTGCATACGGTGAAAGTCCTC
TCGGCAAGCAGTTATAGCCCCGATGAGTGGGAACGGCAGTGTAAAGCGGCAGGGAAAACT
CAGTAACGTTGTTTTGTCGTGGGCAGGAAAATCAGCATCAACCCGCTCATAATACAGGCT
ACTCCCAGTAGTGCTTTCAGCGAAAAAGTCCCTTCCCAGCCGGGAAGTACCATTGAAGCA
ATCCATACCAGCACATAACTCATACTGAGCAAGGCATAGGCTTTGCTTAGCGCAAGTATA
TGTAGCGTTTTATACCAACAAAAAACGGAAAGCAGATAACCCAGCAGCCCGAGTAACAGT
ATCCGGGCATCCAGGCCAAAAGCTAACAGCGTCGCGATAAAATCCCATAAGTGCGTCATC
GGCGGCAGATGACTCGCCGCAAAACCCAGGCTTAATTGCGCAGCTGAGGCAATAATGACG
CTGAATAATCCCCACATCAGGCCCATTACACCGTACTCCCGAGGATCACAATGCCACCAA
TAATGAACGCCACCCCACACCAGTGACGCGGCGATACCGGTTCGTGCCACAGTTTTACTG
CAGCCAGCGTCACCCAGACAAAATTCAGACTTAACATCGGGTAGGCAATGCCTACCGGTA
CGTTCTGCAAGACCAGCAGCCAGAGCACCATGGCAAGACCAAGACAAGCCAGCGCCAGTC
CCAGCCACAGCACGATATGTTTGCGCCGTTTGTTTATCGCCACAAAGCAGGTTGCCTGTT
TCTGACACAACTGCCCGGCAACGCTAAGCAAGCTGGCAAAGACTAATGTTAGCCAGATCA
TTTGGGACGATACTGAATCAGCACCAGACGCTCCTGACGATCGATGGCATCTGCGGGCGG
AATGGCGAGACTGTTGATATCTTCATCGCGGTCAACCGAAAGCACGAGTGTAATAATCCC
CTCCTGACGATGTTGATTAAGCCAGTTTGCGAACTCATCACCGCTGACAAATCTCCCTTT
CGCATCCGGATAATTAAGGCCGTATTTCAACTCACCTGTCTGGCGATACATGATGATGTC
ATCGCGTTGCAGGCTCCATGCCAGACCTGCGGCAACACCGACGCTATCAGTAAGAATATA
GCGGCTTGGCTGAAGTGATTCTTGTGTCATCTCGACAAAAAATTGCGGATGTTTTCCTTC
CATGACTCTGTCAGGAATTGAAAATCCTACCAGCAACGCCAGCCCCAGCGGGCAAAGCGC
GGCAAAAGACCAGGTCTTTTCGACGTTTGTTAAGGTGTACCAGCCGAAAAATGCCCATAG
TGAAAAAATCGACCAGGCACAAAAGACTTTATAGCTCTCGAAGGTTTGCCACACCGGCGT
GTTCATTGGTCCCCAGGGGGAGACCACAAATGTGGCAATAATGCCAGTGACGCCAAAAGC
GATGTTAATCCAGCCATTAATCCGCAACGCCAGAGGATTATTTTTTGCTGCCAGCAAAGC
GTAATGCGCCATCAGCATTGCCAGAGGTGCAAAGCAGGAAAGAATATAGGTGGGCAATTT
ACCTTTAGCGACGGAGAAAAACAGCAGCGGCATTATCGTCCAGCTCAACAAATAGACGGT
TGCGGAATGCTTGCGGTTTTTCCAGCCTGCGTACAGTGCACCGGGGAGTAATCCCAGCCA
CGGCAGGCTACCGGCAATGATGACCGGCACGTAGTACCAGAACGGAGCTCTATGTTGGGC
ATCATCCAGTGCAAAGCGTTGAATATGCTCAACCCAGAAAAAATAGTGCCAGAAGTCAGG
CTCCCGCTGCGCTATCGCCAGTCCCCAGGGGAGAACCGTCAGTACGCAACTGATAACCGC
CAGCCAGCCGTAAATAAAGAGATCTTTCCAGCGTTTTTGCGTCGCTACCCATGGCAGTAC
GCTTAATACCGGCACGGCAAGGGCGAGAAAACCTTTGGTCATCACCCCCATGCCGCAGGT
GATTCCCAGCAGTAAAAATCCTGCGCTTTTGCCTTTCCACGTCTGTGCCTGCATTGCCAG
CCAGAAGCTGCACATTCCCGCCACCAGCCAGAATGCAATAAACGGATCGAGCACGGCATA
AGTGCCGATGGCATAGACAATAAACAATGAGAGATAAATTACTGTGGCGAGTAGAGCCAG
ACGTTTATCGCGCCATAAGCGCAGAGTAAACCAGGTCACCAGCGCGGCAGTTAACAGGGT
CGCAAAGATAACGCCTGCCCGCACACCAAAGTTATTCGCACCAAATAGCCATTGCCCAAT
GCTGTTAATCCAGTATCCAGCAATGGGTTTTTCAAAATAACGTAGCCCTAACAGATGGGG
CACAATCCAGTCGCCGGATGCCAGCATTTCCCGACTGATTTCCGCATAACGCGTTTCATC
GGGTTGCCAGAGCAGACGCGTGCTGATCGGTAACAGGTAATAGCAGGCAATAAACGCGAA
GAGGCCGATAAGGTAACGTACCGATTTCATCAGCGACTACCCGCAATTTGTTGGCAACCC
AGCCAGCCTTCACGTCCGGCAATATTTCCGCGAACAACTTGTCCGAGCGGCAACGTCTCT
GATAACAGTTCGCTTAAAGGGCAAAATGTCACGCCTTCCTGAGCTGCGCGTTTGAGGAGA
TCCACAAAATTATGCTGATAAGCGCAGCCTTCAACTTCTGCATGAATGGTATAAACCGGC
GTGCCTTTATCTCGCAGGATGCGGTTGAGTAACCAACCGTTAAAATCTTCTGCTTTCACA
TCCCGACCAATCACTTCATCCCAGGTGGGTAAGGTCACCGGAATTTGCGCAGTGCCAGGG
TTTCCTGATTCGAGCAGTGGACGGAACGGCATGGCCCCACGACAATCGCTGTTGTAGCGC
AAATGGAACGCTTCTTTTGCTTCGATCACCTGCTGGTCGGCACGCCAGCCCGCAGCGGCA
GAACAGGTTACCGGTTGACCGATAATCTCTTCCAGGGTGCGAAGGCCGAGTGCAATATCG
TCGATCATTGTTTGCCGATCCCAGTTACCGCTATGGGCTTGCCAGGCATGGTGATCCCAG
GCGTGCAGGCCGACTTCGTGATGTTTAGCCGCTTCACGAATGATATCGGCATTGGCAGGA
CCAATCTCTTTACCTGGCCAGGCCGTACCTGCCAGTAAAATATCCCAGCCATAAAGCGAT
GCCGCGTTTGAGCGCAGCATCTTCCACAAAAACTGTGGCTTCACCAGTCGCCAGAGATGG
CGGCCCATATTGTCCGGGCCGACGCTGAAAAAAATGCTGGCCTGAATATTATGCTTACTC
AAGATTTCCAGCAGACGCGGCACGCCTTCACGGGTGCCACGAAAGATATCGACATCAATG
CGTAAGCCTACTTTGGTCATGATGGTTTATCCGTAAGATCAACGGTGCGCAGGAAGAAAT
CCAGCGTTTCGTCGATGGTTTCCTGCATATCAATTTTCGGCTCCCAGTCCAGGCAGCGGT
GGGCATTGCGGATGCTCGGTTTACGATGCTCTACGTCCTGATATCCTTTGCCGTAGTAGC
TGCTACTTTCGACAACGCGAAAGCCCGCAAACGGTGGGAAGTGATGGCGCAGCGGATGTT
TTTCGAAGCTCGCCAGCAGCATCTCGCCCAGTTCCTCAATGCTCGCTTCGTTCTCAGGAT
TGCCAATGTTGATAATTTCGCCGTCGCAGCGATTTCCCACATTTTCGATAATGCGGTACA
ACGCCTCGATACCATCCCGGATATCAGTAAAGCAGCGTTTTTGTTTTCCGCCATCAATCA
GCTTAATCGGTGAACCTTCTACCAGATTGAGAATGAGTTGCGTAATAGCGCGGGAGCTGC
CGATTCGTGCCGCATTAAGGTTATCCAGTCGTGGTCCCATCCAGTTAAACGGGCGGAAGA
GGGTGAACTGTAAACCCTCTTTTTCGCCATAGGCCCAGATAACCCGATCAAGTAATTGTT
TTGACACCGAATAAATCCAGCGTGGTTTATTCACCGGGCCGACGATTAAATTAGAATGGT
CCTCATCGAAGTATTTATCGCTACACATCCCATAAACTTCTGAAGTTGACGGGAAGATGA
TTCGCTTACGGTACTTCACGCAGTAGCGGATAATGCGCAGATTCTCTTCAAAATCGAGTT
CAAATACGCGCAGCGGGTTGCGGGTATATTCAATCGGCGTGGCTATCGCCACCAGCGGCA
AGACGACATCACATTTTTTGACGTGATACTCAATCCATTCGGAATGAATACTGATATCGC
CTTCGACAAAGTGAAAATGCGGATGATTCAGAAAACGGCTTATCGCATCGCTGCCAATAT
CCAGACCGTAAACTTCATAATGATCTTCGCGCAGCAGGCGTTCTGTCAGATGGTTGCCAA
TAAAGCCATTCACCCCGAGGATGAGTACCCGGGTACGGCGTCGGGCGGCACAGGCAGGCT
GGCTATTCAAGCGTGAACCTTGCACCAGGCCCAGCGTCTGCGCTAATTGCGAGCCCTGCA
TAGTAATGCCGTCGCCCGCCTGTCCGGTGACGATTTCCAGCGCGCCATCGCCACAGGCAA
TCAGCAGTGGCGCAACAGAAATCACGCTCCCCGGCTGCGCTGCGGATGTATGAGGATGTA
CGCGTGACGACCAGACGGTGAATTTCTGATTGCCAGCATAGCTGAAGGCACCCGGCCACG
GATCGGCAACGGCGCGGACCATGTTATGCAATACGGCTGCCGGTTTGTGCCACTCGAGGA
AGCTATCTTCTGGTGTTCTGCGACCAAAACAGGTGGCTTCGTTCTCGCGTTGGGCGATTT
CCAGAATATTACCGTGTTTAATGGCGGGTAATGTCTGTTCCAGTAGCTGGCGCGCGGCAT
GGCACAATTTATGATGCAGCGTAATAGCGATATCGTCTGGCGCAATGGCAATGCGCAGTT
GCGCCACAATGGCCCCGGCATCGGCACGTTTCACCATTCGGTGCAATGTAACGCCAGTTT
CCGTTTCACCGTTGACCAGCACCCAGTTCAGCGGCGCGCGACCACGATATTTTGGTAACA
GCGAACCATGCAGATTAAATGCACCTGCGGGAGCGAGCTGCAAAATTTCGTCGCAAATAA
GATGGCGATAATAAAAAGAGAAAATCACCTCTGGTGATAGTTGGGCAATGCGTTCCACCC
ACAGCGGATGATTAACGTTATCCGGCGCATAAACCGGAATGCCTCTTTCCGCTGCCAGAC
GAGCCACCGAACCATAAAAGGCTTTTTCACCGGGATTATCAGTATGGGTAAAAATGGCGC
TAATTTCGTAACCGGTAGCCAGCAGGGCTTCAATACCGAGGCATCCCATATCGTGGTAGG
CAAAAACGACGGTTTTCATTATTCATTTTCCTTGCTGGATGGACGGATAACTTGCTGAAC
AAAATAGCGGGGGCGGGCGCGGACATCGGTGTAGATCCTGCCGATATATTCACCGAGTAA
TCCCATGCCGATAAACTGAGCGCCAATAAAAGTAAACAGCACGGCAAATAGCATAAAGAC
GCCTTCTGCCGCCCATTGTGGTCCGAAGGTCAGGCGTAAAATCACCAGCAGCACCGCAAT
GCTAAAACCTCCAATCGCAATAATGCTGCCGAGCAGACTCAGCATACGTAGCGGCGTTGT
GGTAAGGCAGGTCACCAGGTCGTACATCAAATTAATCAGGCGCATAAAACTGTATTTGGA
TTCACCAAACTCACGCTCGGCATGATGCACTGGAATTTCAATGGCACGGCGGGCGAAGAT
ATTCGCCAGAATCGGGATAAAGGTGCTGCGTTCATGGCAGTGCAACATCGCATCGACAAT
ATGACGGCGATAGGCGCGCAGCATACAACCGTAGTCACCCATCGCTTTGCCGGTGGTGCG
CTGAATAAGCCGGTTAATCATCTTCGAAGCGGTTTTACGAAACCAGCTGTCCTGGCGGTT
CTGGCGTACAGTCCCTACCACGTCGTAACCTTCATCGGCTTTTGCCACCAGGCGGGGGAT
TTCTTCTGGCGGATTCTGGAGATCGGCATCAAGGGTAATAATTAAGTCGCCAGTAACGTG
ACTGAATCCCGCCATAATCGCTGAATGTTGCCCGTAATTGCGGTTAAGCAAAATAGACAC
AATATGGCTGTTCTCCGCTTGTGAGGCTTCGACCAGCATATGCGCGGAATTATCGCTACT
GCCGTCATCAATCAGCAGGATCTCATACTCTTTCCCCAGTGATTCACAGGCTGTGGTGGT
GCGCCTGATTAATTCCGGTAAGCTTTCCTGCTCGTTATAAACGGGAATAACCACCGAGAC
TTTCTTAACAGGGTGGATTTCAAACATGGCTTATTGTCCTGCGAGTTGCTGAAGGGCTGT
GATGACGCGGTCGGCATCGGCGGTGGTCATATCCGGGAACAGCGGCAACGAACAGATGCG
TTCGCTATTCCATTCGCTATTCGGTAACGACAGCGTGGGAAAACGCTCGCGATAATATTT
TTGTGTGTGAGCGGCGCGGAAATGTAACCCGGTACCAATACCTCTTTCTTTTAACGCTTC
CATCAACGCATCGCGACTGATACCACAACGTTGTTCATCGACACGAATAATAAACAGATG
CCAGGCGTGAACGTGCGGCCAGGCGGGAAGGCTTAATGGCTGAAAGGGGAGAGCTGCCAG
TGCTTGCTGATATTGCTGGGCAATTTCGCGCCGACGGGTGTTGAGGTGCTCTAATTTGAC
TAACTGTGTCAGGGCAATCGCGGCGTTAATATCGGTCAGATTGTACTTATAGCCCGGCGT
TAAGACTTCAGCCTGCGGTACACGGCCCCAGGTTTGTCTGTCATAGGCATCGACACCCAG
ACCGTGAAATTTCAGCATCCGTAGCTGGCGGGCAAGGTTTTCATTATCAGTTACAATCAG
GCCACCTTCAGCACAGGTAATATTTTTAATGGCATGAAATGAAAAAATAGCGGTACCTTT
TGCGCCAATATGTCGCCCTTTGTAATACGTACCTACGGCATGGGCAGCATCTTCGATAAC
TGCGATGCCGTAACGTTCGCCAATGGCGCGAATGGCGTCAATATCTGCTGGCGCACCGGC
ATAATGCACCGGAATGATGGCTTTAGTGCGTGGCGTAATGGCTGACTCGATAGCTTCAGG
CGTGACCATCAGCGTATCGCGGTCGACATCCACCATTACCGGCGTTGCACCCAACAAGGA
AATCATATTGAGGGTTGAAACCCAGGTCAGGGAAGGCGTAATCACTTCATCGCCCTTGCC
AATTTCCAACGCCATTAGCGTGATATGCATTCCGGCGGTGGCTGAACTGACCGCGATGGC
ATGCTGATTTCCCGTCAACTGGCAAAAGGCTTGCTCAAGCGCCTGATTCTTCGGACCGGT
TGTGATCCAACCGGATTCGAGAACCTCTTTAACTGCAGCGAGTTCCTCCACGCCCATTGC
TGGTCGCGAAAAAGGCAAAAATTCTGACATTGCTTTTCCTTCCGCCATTGAATACCTGTC
CACTTATATTTGCTATAAAGAGTGTTGTGTATATTTTGCCATTTGGAGCGAAATTTTAAG
GATAGAATATTAACTTAACCTTAAGAAACTAATATTAGACGTAAATATTGAAATTTTTAT
ATTTTTTCTTATTTAGGCTTTGCATTTGGCAAAATTTTGAGGCATTTTGCCGGCATCGCA
GGATTTTTAATATTACACCAACTGCTAATTATCGCCAGAAATGTCGCTCAATTTCACGGT
AATTGTCTGGTTGCGCTTGTCTATAGGTGGAGTTTACGTGTTAGCTTTTTGCCGCTCTTC
GTTGAAGTCAAAAAAATATTTCATCATTTTACTGGCGCTCGCTGCAATTGCCGGACTGGG
TACTCATGCTGCCTGGAGTAGCAATGGTTTGCCACGTATCGACAATAAAACACTGGCCAG
ACTGGCACAGCAGCACCCGGTTGTCGTTTTGTTTCGCCATGCTGAACGTTGCGATCGTTC
AACCAATCAATGCTTGTCAGATAAAACAGGTATTACGGTCAAAGGTACCCAGGATGCCCG
AGAACTGGGCAACGCTTTTAGTGCTGATATCCCTGATTTCGATCTCTATTCCAGTAATAC
CGTCCGGACCATTCAGTCGGCGACCTGGTTTTCAGCGGGTAAAAAATTGACGGTAGATAA
ACGACTTCTTCAGTGCGGTAATGAGATTTATAGTGCAATTAAGGACTTACAAAGCAAAGC
GCCTGATAAAAATATCGTTATTTTCACCCATAATCATTGCCTGACATATATTGCTAAAGA
TAAGCGTGATGCGACATTTAAACCTGATTATCTGGATGGTTTAGTCATGCATGTGGAAAA
AGGCAAAGTTTATCTGGATGGGGAATTCGTTAACCACTAAATTTTCAATCTGACAGCCAG
TGATGGCTGTCATCATTGTTAAAGAAGACCTTTCAAACGTAACGTTTTTCGGGTGGCAAC
ATTCAAATCATAATGCACCAGATCTTCAGGTTTTACCCTCGCGTAGTCCTGAAACTCTTC
GTTTATTTTCACTTCTCGGTTGGCAGAAACGCAGTCAAAAATCAGGTAAATCATATAAAT
CTCTTCCTTGCGACCATCTGCATACGTCTTGGTGCGAATATCATCGCTGAAGGTCCACGG
CGTGATTTCTGTCAAAAGCAGCTGTTCTCCCAGTTCTTCGCGAATTTCGCGGCGTAGTGC
CTCTTCAATTCGTTCGCCGGGCTCCACGCCGCCACCCGAAAGCGCCCATTGACCGGGGAA
AACGCCGCGATCGTCGGCCATTTTACACAGCAAATAAGCACCATCATTTTGAATCAAAGG
GCATACAATAGTCCGTTGTCGCACAGGGGTATTCCTTATAAATAAAAAGAAACCATGAGA
ATACGGTAACTCAGAAATATGTGAAAGTGACAGTAATCTCTTTTGCGATGATAACTGCAC
TTATTATTATTTTTGTGTGTATCGGTAAACTGTGTTTATTTTTTCGGCGTTTAATTATTT
AAGAAGTATTTAGTTACAATAAGTGACTAGATCCCTTTTTTCGCTCATTGAATCCTCTGC
GCCAGGCAGTACAATCCCGCAGCTTTGGGAATTTTGATTAATTGCTTGTGGGAAAGGGGA
TAATGAAAAAAATTGCGCTAGCAGGTCTGGCCGGAATGCTGTTGGTTTCTGCATCGGTCA
ATGCAATGAGCATCAGCGGCCAGGCGGGTAAAGAATACACCAATATTGGTGTCGGTTTTG
GGACTGAATCGACGGGCCTGGCTTTAAGCGGTAACTGGACACATAACGACGACGACGGTG
ACGTCGCGGGCGTGGGGCTGGGGTTGAATCTGCCTCTCGGGCCGTTAATGGCGACCGTTG
GCGGAAAAGGCGTTTACACCAACCCGAATTACGGCGATGAAGGTTATGCCGCAGCGGTAG
GAGGTGGTTTGCAGTGGAAAATTGGCAACAGCTTCCGTTTGTTTGGCGAGTATTACTACT
CTCCGGATTCGCTCTCCAGCGGTATTCAAAGTTATGAGGAAGCGAATGCTGGCGCGCGTT
ACACCATTATGCGTCCAGTCAGTATTGAGGCGGGTTATCGCTACCTGAATCTGTCGGGTA
AAGACGGCAACCGCGACAACGCCGTGGCTGACGGCCCGTATGTTGGGGTTAACGCCAGTT
TCTGATCCCTTCCGGCGCGGCATTCAGTTTCTTACTACGCCTTATCTCCCTTTGCGTTAT
AGTGATTCGATAACAAAAGCAGGAGATAACCATGTTAAAAGTGGAAATACTATCCACCGG
GGATGAAGTGTTACACGGGCAAATCGTTGACACTAACGCTGCCTGGCTGGCCGATTTTTT
CTTTCATCAGGGGTTGCCATTATCTCGCCGCAATACGGTGGGGGATAACCTTGATGACTT
AGTCACCATTCTTCGCGAACGTAGTCAGCACGCCGATGTGCTGATCGTTAACGGCGGGCT
GGGACCGACCAGCGATGATTTAAGCGCACTCGCCGCTGCGACAGCAAAAGGTGAAGGCCT
GGTGTTGCATGAAGCCTGGCTCAAAGAGATGGAACGCTATTTCCACGAACGTGGACGAGT
AATGGCACCGAGCAACCGTAAACAAGCGGAGCTTCCTGCCAGTGCTGAATTTATCAATAA
CCCGGTAGGCACCGCCTGTGGTTTTGCCGTGCAGCTTAATCGTTGCCTGATGTTCTTTAC
CCCCGGCGTACCGTCAGAATTTAAGGTGATGGTCGAGCACGAAATCCTGCCGCGCCTGCG
CGAGCGTTTTTCTTTACCACAGCCGCCGGTTTGCCTGCGTTTGACTACCTTTGGTCGTTC
GGAAAGCGATCTGGCACAAAGCCTGGACACTCTACAACTGCCGCCGGGCGTAACAATGGG
CTATCGCTCCTCAATGCCGATCATCGAACTGAAACTCACCGGACCGGCAAGCGAGCAACA
GGCGATGGAAAAACTGTGGCTGGACGTTAAACGTGTTGCCGGACAGAGCGTGATTTTCGA
AGGCACCGAAGGACTGCCCGCGCAAATCAGTCGCGAATTGCAAAACCGCCAGTTCAGCCT
GACGTTGAGCGAGCAATTCACCGGTGGTTTATTGGCTTTGCAACTTTCTCGCGCAGGTGC
TCCATTGCTGGCGTGTGAAGTGGTTCCTTCACAGGAAGAAACCCTGGCGCAAACTGCGCA
CTGGATTACAGAACGGCGGGCCAACCATTTTGCCGGGCTGGCACTGGCTGTTTCGGGTTT
CGAGAACGAGCATCTCAACTTTGCGCTAGCCACGCCAGATGGCACTTTCGCTCTGCGTGT
GCGTTTCAGCACTACACGCTATAGCCTGGCTATCCGTCAGGAAGTGTGCGCAATGATGGC
ACTGAATATGCTACGCCGTTGGTTAAACGGCCAGGACATTGCCAGTGAGCATGGCTGGAT
TGAGGTTGTTGAGTCGTTGATGCTGTCGCCACAGGGGGCATGAAAGAGGCGCGCCGGGGA
GAAGGCTTTTACCCGGCACGTTGTCGCATTCATTGCAGGCTTAATGGAGCGAGATCGGCC
TCGGTTAGCTGGGTTGTTGCCAGCACCAGGTCAAGATCGATACCCATGCTCCAGCATGCG
CAAGGCAATTTTAATGGCTTGTTCATGCATGCCTTGCTGCAAACCTTCTAATTTACCTTC
CTGCCAGCCAATTTGATGCCCTTCCTGCCTCAGCCGTTCAGCAATAGTCATTAATCTCTC
CTTTTGTAGTGGTGAACGTTCGGCAATCTCCTGAATAAAACGGGTGAAACGGGAGGTATC
GCCGCATTGCAGCAGATAATTAAACAGTGTTTGTAGCTGGCTGTCATTAGTGAAGCCTCT
AACCAAAAGCGTGGTGATCCTGTCGACCATACCGATTAAATCGCGGTCGCGAATATGCTT
TTGAATCAGTTCAAGCAGAGCTATACGCCGATGTTGCATGATCTCATCGTCAGGTACGAT
GGTGATATCCACCAACGGAAAAGCTTCGGTGTACAACTGCCGGGCAAGTTGCGGACCGTC
AAACTCATCCAGCCAGTTGAGTGAGTACGGGTAGGGCGAGGTTTCGCCATGATAAAACAG
CAACGGCACCACCAGCGGGACTCTGTCATAGCCTTTGTCCAGGTGACGCTGCATGGCGGC
AGTGGCATAGCGCATTAGCCGAAAAGCCATATTCTTTTCTGCAGAGCTTTGATGTTCAAT
CACGCAGTAGATATAGCCGTCACCGTCGCTGGTTTCCACGGACCACAAAACATCCGAGTA
GTAAGCGCGTAAACTTTTTTCAATAAAACTAGTGGGTTCCAGGCGTAAGGTTTGCAGGTT
GCAAAGCTTGCGCAGTGGTTCTGGTAAATGTATTTCGAGAAAATCCCGTGCGGTTTCGGG
TGTGAACATAAAGGTTTTAAATACTGCATCATGCGGGGAGGAGGTTGTTGATTCGGTCAT
GGTTGTCCGTCACCTGATATTTATGATGACGCGACATTACGGTTATCCCAGGCCTTTGAC
ATCTGCCAGTTTCAGCCTTTGCGAGACGTTTTCAGAGGAATTTTCACTGCGTTGCAACGC
ATACATTGGGCACGGAATCGTGTACGCAAAAATGCCCGGTAACCACATGCTTACCGGGCA
TCAGAAAGGAGTTTAAGCCAGCGCCTGGGCCAGTAGCGTAATCGGATGTTCGCAGCGAAG
ACTTGTGGACATCTCAATCTGCCATTTACAGGTTTCGCAGTCGGTGACCACCAGATCTGC
GCCGCTTTCTTCTATCTGGCGGAACAGTGGTGCGCCGATGGCTTGTGAGGTGGGGTAGTT
CTCTTTTTTGAAACCGTAAGTACCCGCAATACCGCAGCACTGGGAATCCAGCACCGTTAA
CTCAAGCCCCGGGATGTTACGCAACAGCTCCAGGGTGTAGAGCGTCCAGCCCATTTTTTC
CATATGGCACGGAGTGTGATAAACCACTTTCAGCGGCAGCGGTTTCAGCGGTAACGTTTT
GCCTTCGTCCAGCTTGCGCCACAACCAGCGGGTCGCCAGTTCGATATGATCGCGCAAGCC
TTTGTTGTCGACATTCAGCACTTCCGGGTATTCGTCGCGCAGGGCAAATGTACAGGTTGA
GGAGGTGGCAATCACCGGAATGCCTTTTACTCCCACAGCTTCGCGGATCGACTCTACATT
CGTAATTGCCTGTTTGCGTGCTTTATCGGTAAAGCCGTTGGCGATCAGCGGTACGCCGCA
GCATTTTTCTTTGCTGAGCAGTTGTACACCGGTACCCATTGCGTTGAGCACTTTAATTAA
ATCTTTACCTAACTGCGGATGGTTGTAGTTAACGAAGCAGCCGTGAAAGAAAGCGACCTG
GTCTTTATACTGCGCTTGCTGAGCCGCCACGCTGCGATACCAGCGACGAAACGTGCCGAA
GGAGTATTTCGGTAGCGTGCGGCGATGATCGATTTTTAACGCCGCATCAAGCAACTGCCG
CACCGGTTTCAGCGAGGTAGCGGTGTTGACGATTGGTGCGAACGGCGTGGAAACGCTACC
CATCAGGTCGGTATGACTCAACACAAAATTACGCAGCGACGGGCGCGTGGTGTCATATTT
CGCCCGCGCGCGCTGGATGATACCGCCAATCTTCACATCGGACGGGCAGGCGACTTCACA
ACGTTTGCAGTTGATACAATATTTCAGCGCCTCGTCATACAGTGCGCCATCTTTTAAACG
CAGACGCTCGCCATCCGGCCCGGCTTGTTTTGGCCCTGGATAACCGGGATTCACCCGGCT
CACTGGGCAGGCGGTGGTGCAGACGGTGCACTTAATGCAGTTTTCGAAGCTGGTGTCATT
CATTGTTGGCCTCCTGCGCGTTGGGCAATCTGTTGAGCGGCATGTAAAGCACTGACGGCA
CAAACACCGCCGCCGCATCCCTGGGCGATGGGATCAAATCCGCCCAGCACCGAACCGATG
GCAAACAGGTTCTCAATGGTTTGCCCTGCCTGTGATGGGCGTAGCGTCTTATCAGTGGTT
ACACCGAACTGCTGCCACGGTTGCGGCGCAAAAAAATCTCCCTTATACCATTCACCCCGC
GTGGCGGTTTGTAGCACATCAAGGCCGAGAATCGGCTCTCGAATGCCGTTACGTTCCGCT
ACCAGTCCGCCACTAAAGAAACTGCCGCTGGCGAGAACCGCGAAACGTGGACGTAGCGGG
ATATCGGCGTGATTGCGGGTCCAGATTTCATTCACTACGCCATTTTTACAGGTCACTTTT
TTCACTTCATCGCCCGGCATCCACACGCCACCCTGGCGCACAAACTGGCGCTGTAACTGG
TTTTGCAGACGAATGCCCAGCACGGAAGGCGGCAGCGTTGGCAAAAGCATCAGTGAACAA
GGTAGTTTTTCATTCAACCAACGCCACAGTTTGTCATCGGCCAGGCCGAAGCAGGCGGGC
ATCAGGATCATTTCGCAGGTATTGGCGACAGGAATAAGCGCATCAAGTAACAGCGACCAG
TTTTCTTCATTATCAAGGAAACGGGCGATATTCACCGCGCGGAACTCGGTGGCGTTATTG
CGCAGGACATCCAGTTCCGGCAGCTCTATTTCTGCGGTTTCAACCGAAAGATCCAGTTCA
CGCAACGAAGCTGCCGCAAGGTGCGCCTGAAAATCCATCAGCCCGCTTATCCCCACTACA
CATATCTTCTTCGCGGGTAGCGGCCAGACGGGGACTTCTGGCGAACTTAACCAGGTTGCA
CGCAAAGTGCCGAGCGGGGTAACGCGCTGATGGGCCAGTTCCACGCTGCCCTGCAATTGC
GCACCGCTTTCAGCGATTAATGCCTGCGCCTGGCAAGCGAGATCGAGCACGCGTTGTGGC
CCGAGAAGAGAGTAAGGATGTGCAGGTGCCTGCTGACGCAAAGATTCCAGTCCACTGTGA
ATGTCTGTCACCGCTTGACCATCTGGCAGATGGCTCAGCAAATCCAGCGAACCGGATGAG
AAATGCAGCGCGCTTTGACCACGCGTGACAATGGCACAGCGCAGGCCGTGTTTTTGCAGT
TGCAGGCCACAGAGTAATCCGGCGAGGCCGCCGCCCATAATGACAGTATCAAAGCGCATC
TTTCTGCTCCTTCTCCAGACCACACAGTCCCTGATAAACCCAGCGGGTAAATTCGCTTTC
GCGCAGTGCATCTCCCCAGGCGATGGGTTGCACGCCTTTCCAGCGTTCGTTAAGGAAGGT
GGAAAGTTGCTCGATAGATTGCGCGGACGTCGTGACGTTAAAACGTTGCAGCAGTCCGGC
AGCGCGGCAGGCGCAGAGTTCGCCCTGGCAGGTACCCATCCCCACACGGGTACGACGGCG
TAAATCCAGCAGGCTATTAACGTTTAAATTTTCTACCGCGTACTGCACTTCACCCGCAGT
TACCGCTTCGCACTCACATACCAGGCTACGGTGCAGACGGCCTTCGCTCAGCCAGGCAGG
CGTGCGATCGCCATGACGATAAACCGCAGAACCGCGCAGCGGGGCAGGCAGGGAGATGAC
TTTACGTAAGGTAACTTCAGCGGGTTCTTGTGAACCAGGCAGTGCCAGATCGGCAGTCGT
ACAGGGGCGCGTGTTGCCCAGTTTGCGGCATACCGCGTCGGTAGCCCATTCAGCCATCAG
CCGATAGGTCATCAGTTTGCCACCGGTGATGGTGATAAATCCGTCCAGACCATCGCGTTC
AGCATGGTCGAGCAGCACGATGCCACGGCTGACGTTACGTCCGCTCGGGTCGTCATCGCT
GGCAACCAGCGGGCGCACGCCAGAATAGGCCCGCAAAATGCGCGTTTTCGCCATCACGGG
GGCCAGTTTTTCCCCTTCACGCAGCAGAATATCAACCTCTTCTGCCGTCACTCGATTATC
GTCAATCTCGTTGTAATCAATACGTAAAGAGGTGGTGCCAATCAGCGAAATGGTATCGCC
AGGCACCAGAATATCGGCGTCGGAAGGTTTACGGCAGCGGTTGATCACATGCTGGTTAAT
GCGGTGATCCATGATCAGCAGCGATCCTTTCGCCGGGAACATGCGAATGCGCAGATCGGC
ATATTCGGCAATGTGTTGCCCCCAGATCCCAGCGGCATTAACCACGACAGGTGCATGAAG
GGCCTGAGTTTCGCCGGTGAGATGGTTACGTACACGAACACCGCACACCGTCGCGCCTTC
ACGAATCAGTCCCGTGACTTCATGAGCGGTAAGGATAACGGCACCGTGTTCTTTGGCATC
CAGCATGTTTGCTGCGGTCAGACGAAATGGATCAACGGTGCCATCCGGAACTTTCACCGC
GCCAATCAGTGCCGGGTTAACGGCAGGTTCGATAATGCGCGCTTGCTGCGGGTCTATAGC
TTCTGCGCTGATCCCTGCTTCTTCGCAGGCGCGAATAAAAGTGGCCTGGAAGGAGAGGTC
ATCTTCCGGCAGGGTGATAAACAGGCCGTTGGTTGGTTCAACGCAGTGACGTGCAATGCG
TTTCAGGATCTGGTTTTCACTAATGCATTCGCGGGCCGATTCCGCATCGGTTACCGCATA
GCGCGCACCGCTGTGCAGCAGGCCGTGGTTACGCCCGGTGGCACCGGTTGCGATGTCGTG
GCGCTCAACCAAAATCACGCGCAGCCCGCGCAGGGCACAGTCGCGGGCAATCCCGGCTCC
CGTTGCGCCGCCGCCAATGATAATCACGTCACTTGATTGCGAGTCGCGAGTTTTCATTGT
TATCCCTCTGAAGTTCGTTTTTTACCATTTAGCCATAGTAAAAACATGAATTGTTTGATT
TCGCGCATATTCGCTCATAATTCGAAAGTGAAACGTGATTTCATGCGTCATTTTGAACAT
TTTGTAAATCTTATTTAATAATGTGTGTGGCAATTCACATTTAATTTATGAATGTTTTCT
TAACATCGCGGCAACTCAAGAAACGGCAGGTTCTCTCACTGAATCAGGCTGTTAATCATA
AATAAGACCACGGGCCACGGAGGCTATCAATGTTGAGTATTTTTAAACCAGCGCCACACA
AAGCGCGCTTACCTGCCGCGGAGATCGATCCGACTTATCGTCGATTGCGCTGGCAAATTT
TCCTGGGGATATTCTTTGGCTATGCTGCTTACTATTTGGTTCGTAAGAACTTTGCGCTTG
CTATGCCTTATCTGGTTGAGCAGGGATTCTCACGCGGTGATTTAGGTTTTGCCCTTTCGG
GGATCTCGATTGCTTATGGATTTTCGAAATTCATCATGGGTTCGGTATCGGATCGCTCGA
ATCCGCGCGTTTTCCTGCCCGCAGGTTTGATTCTGGCGGCGGCAGTGATGTTGTTTATGG
GCTTTGTGCCATGGGCGACGTCGAGCATTGCGGTGATGTTTGTACTGTTGTTCCTCTGCG
GTTGGTTCCAGGGGATGGGGTGGCCGCCGTGTGGTCGTACTATGGTGCACTGGTGGTCGC
AGAAAGAACGTGGCGGCATTGTGTCAGTGTGGAACTGTGCGCACAACGTCGGTGGTGGTA
TTCCGCCGCTGCTGTTCCTGCTGGGGATGGCCTGGTTCAATGACTGGCACGCGGCGCTCT
ATATGCCCGCTTTTTGCGCCATTCTGGTGGCATTATTCGCCTTTGCGATGATGCGCGATA
CCCCGCAATCCTGTGGCTTGCCGCCGATCGAAGAGTACAAAAATGATTATCCGGACGACT
ATAACGAAAAAGCGGAACAGGAGCTGACCGCGAAGCAAATCTTCATGCAGTACGTGCTGC
CGAACAAACTGCTGTGGTACATCGCCATCGCCAACGTGTTCGTTTATCTGCTGCGTTACG
GCATCCTCGACTGGTCACCGACTTATCTGAAAGAGGTTAAGCATTTCGCGCTGGATAAAT
CCTCCTGGGCCTACTTCTTCTATGAGTATGCGGGTATTCCGGGCACCCTGCTGTGCGGCT
GGATGTCGGACAAAGTCTTCCGCGGTAACCGTGGGGCAACCGGCGTCTTCTTTATGACAC
TGGTGACCATCGCGACTATCGTTTACTGGATGAACCCGGCAGGTAACCCAACCGTCGATA
TGATTTGTATGATTGTTATCGGCTTCCTGATCTACGGCCCTGTGATGCTGATCGGTCTGC
ATGCGCTGGAACTGGCACCGAAAAAAGCGGCAGGAACGGCAGCGGGCTTTACCGGTCTGT
TTGGTTACCTGGGCGGTTCGGTGGCGGCGAGCGCGATTGTTGGCTACACCGTGGACTTCT
TCGGCTGGGATGGCGGCTTTATGGTAATGATTGGCGGCAGCATTCTGGCGGTTATCTTGT
TGATTGTTGTGATGATTGGCGAAAAACGTCGCCATCAGGAATTACTGCAAAAACGCAACG
GAGGCTAATGGCATGAAATTGACGCTGAAAAACCTTAGCATGGCGATCATGATGAGCACT
ATAGTCATGGGAAGCAGTGCAATGGCGGCAAACAGCAACGAAAAAATAGTCATCGCCCAT
CGCGGTGCCAGTGGATATTTGCCGGAGCATACGCTGCCAGCAAAAGCGATGGCGTATGCG
CAGGGAGCGGATTATCTGGAACAGGATTTGGTGATGACCAAAGACGACCATCTGGTTGTT
CTGCATGACCATTACCTCGATCGTGTTACTGATGTTGCCGATCGTTTCCCGGATCGGGCG
CGCAAAGACGGTCGTTACTACGCGATAGATTTCACGCTGGATGAAATTAAGTCGCTGAAA
TTTACCGAAGGTTTCGATATTGAAAACGGTAAAAAAGTGCAGACTTATCCGGGGCGTTTC
CCAATGGGTAAGTCCGACTTCCGGGTGCACTCCTTTGAAGAAGAGATTGAATTTGTTCAG
GGGTTAAATCACTCTACCGGGAAAAATATCGGTATCTATCCAGAAATTAAAGCGCCGTGG
TTCCATCATCAGGAAGGGAAGGATATTGCGGCAAAAACGCTGGAAGTGCTGAAGAAATAT
GGTTACACCGGTAAGGACGACAAAGTTTATCTGCAATGCTTTGATGCTGATGAACTGAAG
CGTATTAAGAATGAGCTGGAACCTAAAATGGGTATGGACCTCAACCTGGTACAGCTGATT
GCCTATACCGACTGGAACGAAACTCAGCAGAAACAACCGGACGGAAGCTGGGTTAATTAC
AGCTATGACTGGATGTTTAAGCCGGGTGCCATGAAACAGGTGGCGGAATATGCTGATGGT
ATTGGCCCAGATTACCATATGTTGATTGAGGAGACATCGCAGCCGGGTAATATCAAACTC
ACTGGCATGGTGCAAGATGCTCAGCAGAATAAACTGGTAGTGCATCCTTATACCGTGCGG
TCAGATAAACTGCCTGAATACACTACTGATGTGAATCAGTTATATGATGTTCTGTATAAC
AAAGCGGGTGTAAATGGGCTGTTTACTGATTTCCCTGATAAGGCAGTAAAATTCCTTAAT
AAAGAGTAATGCTACTGCAGGATGGCGTTCATGCGCCATCCTCAGCTAAAGCGAAATAAT
GCTACTACCGGTTATTCTATTCATTCACCTGAGCATCCTGTTAAAAAAGATGCCAACATA
TTTGCGTAAAACTCATTTGTTAGGAAAGCTAACACTGGGTATTGTTATTCTTTAAACAGT
ATGAATAGGGCTCAATAATAAATTGTAATGTAGTTTATAATATACAGTATTATTCGCATT
TCGGGAAAGTAAAGAAAATATTAATGTATCTTATTAATTTATCATATTGTTCTTGGGTGA
ATGCTGTTTGCACACCTTCAGGACAATACTCACCAGTAATAATCAGTTGCCCATTGCTGT
GTTGTACCATTAAACCTTTTTTTTCCTTTGGATCTTCAAACTTAGAATTATCAAACGTGA
AGATGTTATTTTCCTGTTTTGAGTAAGCAAAGAAATCTCGTGTATAGCTGAAACTATCAT
TTATTAATGGTGCTAACTTTTTGTCGGCGATATCGATAAGCTCACCACCTAATTTATTGA
TATATTTCATTTGGTTCAATTTTTTCTGCGCTTGTACAATTTGCTTGTAGGTGTTTTTAA
TTTCCTTAGAAGAATTCTTGAATTTATCATAGCGTTCCTCGGAGGATGCGTATTTGTACC
ATTCTGTATTTTTCTCAGAATGTTGTAGCAGGTCTGCATATTTTTTTTGATCGCTGTAAA
GTTGACTTTTAATACTTTCCTCACTGCTGGTTTTATAAGGCTTATCAGAGCTGTTTATTT
TTGAAATGTCTTTTTCTGTCAGTGACTGGACCGTGTTGTGGGTATTTTCTTTTGCAACAT
GCTCATTGATGATGTTAATTGCAGTTTCATATTCATTTAAGTTTATTGTTCTTTGTGAAA
TAGACCCTTCTTTGCTTTCGATACTCAAAACACCTTCGTTGTTTTCACCTCGGGTAAAGG
TAAGGGTATAGGGTTCATAATCCGCTGCAAATTCATTTTTATACGTTATGACATGCTCGA
CAAAATGTCTTATTGGTACGAAACCATAACTGTGAACGTCAATTTTTTGGGTCTTGATAC
TATCAATTTCATCTGAGGCTTTCGTGAAAAAAGCCAATAAATTAGCTATGTTGTCTGCTG
AGGTTGATAACCCGAATCTACTTTGAGATATTTTTAGAAACTCATTGCAAAAAATCTCAA
GTTTCGCGGTTTGTTGTGATTCTTTGTAAATTTCTGCTGTTTGCAATTTATTATTTTGTA
AAAGATTACAGCGAGATAATTGAATAGATGTATTTGGCATAAATGATTCCTTGTATTGTG
AGTTAACAAGATACAATTTAATCTTTGCAGAATATATTCACTATCAAATTTAGCTCATTT
TATTACGAAGACCTTTACGCATGTTAGAAAGTATCATTATTGTTAATAAACACGGTAATA
AGTAACAAACAGATATTGATAACTTCCCTGACAAGTTATTAGGTATCCCACTTGAAGATT
GAGAGTGGCTCCAGAGTAAACTGTGTACTGTTCGCCGGAGTGTCATTACTCTCAACAATC
GGTTTTGACAGTGAGTCGGGCGCTTCATACTGGTTTCTACCTGGAGTCATTGTCACTTCC
CTAAACTGGATAAATATATATCGCTAATTCACAAAGTGGACCAAAATCAGGTGAAAACGA
ATTATTACGCCTGGTAAAGACTACAGGCCAACTAAGTGTGGCGAATCAGGCAATCTTACA
TTTGTCATCAATCTCATGTCTTACATCAAATTTTTCCACTCACCACGAGTTGTTCCGTAC
ACATTTGTAGTAAAAACAGTGGACTGCCTTCTACCGGCTTTTCTTTAGCCAGCAACGAAA
TCTGTCGATAGAAGGTTGGTTCGAGAGGAACGGAACACAATTCATCTGCAATGGTTTTCA
GCGTTAACTCTGGTAATAAGGCGATGCCTAATCCCTGTCGAATAAAACTGATCGCTGTAT
CCGGGTGATTAAATTCATATTTTATCTGTGGGGTAATATTCTTTTCTTTAAATAGTGCCA
TAATGCTTAATTCATAGCGTCCTTTACTAATGATTAATGGTTCACCCATTAATTCTTCCA
CTGTAATAGTGCTGTTTTTTGCCAGAGCATGGTTGGGCGGTAACACTACGGTGAATTTAT
CCTGATAAATGGGCACGGAGTACATTCCGCTCACCGGAAAATGAACAAAACCGGCATCAA
TGGATTCATTCTGAAGCGAATCAATAATCGCTGTGCTATTTTCCTCAAAAGGAATAATTT
TTATATTCGGATGATGAATTTCAAAGTAGCGAATCACAACCGGTAAGATACAGGCGCAGA
CGCTGGGGAAACAACCAAGTCTCAGCGTTCTTTGAGGGTTCTGCTTTTCCTGCTCGGCTA
TCTCTTTTACTGCGTTAACTTCCCGATTAATGGCGCGCAGATGTTGCACAATGCGATGAC
CTGCTGTGGTCAGTTGTATAGCTTTACGGCGATCGCGTAACAGTATATTCACACCAAGTT
CTTGTTCGAGGGCAGCAATTGCCTGACTTACCGCCGACTGCGTCATGAACAATCGCTTGC
TGGCTTCAGTAAAGCCACCGTAATCCAGCACGGCGAGTAAAGAATTTATTTGGGTAAGAG
TCATTAGAGTTTGCTAATCAATAATATTAAAACGATTAATTTCTCTAATAGCATGCCGCC
ATTTATACTTCTGTTCTGCAAAGTACATCACAATTTGACGCAACCGCAGTAACGGGAGTG
TTGTCTGCGTGCGTCATCCTGACAGGCGGTAGGGTATGAAAGAGAAGTTATGGACGAAGG
ATTTTTGGGCAATAACCATCATCAGCTTTATTATTTTCTTCGTCTTTTATGTTTTACTAA
CATTGTTGCCAATTTATATCTCTGACCGCTTGCATGCCTCTCCTGATAAAGCTGGTCTGC
TGGTGACATTATTTTTAATTGCGGCGATTGTTATTCGACCCTTTGCCGGGCAATGGGTGG
GTAAATATTCGAATAAAACTATTCTGGTGCTCTCTTCTCTGGCCTTTTTGGTGGTCACTG
CGCTGTATCCTTTTTGCCACTCAATAGAATCACTGCTTTTTATTAGGGTGCTTCATGGTA
TTACCTTCGGGGTTATCACAACGGTAAAGGGAACGATTTCCGCGCGGCTGATCCCGGCCT
CCCGACGTGGGGAGGGCATCAGTTTTTTCTCTCTGGCAATGGGGCTGGCAATGGTGGTCG
GGCCGTGGATTGGCCTGAATATGGCGCGCTGGGAGGCCTTTAATATGGCTTTCTGGTTAT
GTACTGGCGTTGCGGCGGTGGGGATTATCCTGTCGCTGATTATGACCGTGCCGCCGGTTA
TCAGCCATGCCGACGGTTCAAAGCCAAAGATGGGCTTCGCCGCCATGTTCGATCGCGCGG
CATTGCCGTTTGCCATGGTTACATTCTTTATGACCTTTTCGTATGCCGGGGTTTCTGCCT
TTCTGGCGCTTTACGCCCGCGAACTTAATCTGATGTCGGCGGCCAGTAATTTCCTGCTTT
GCTACGCCATCTTCCTGATGATCTGCCGTACCTTTACCGGCAATGTCTGCGACAAAAAAG
GACCGAAATATGTGGTTTACCCTTGCCTTGTGTTCTTTACGGTAGGACTGGTGGTTCTCG
GCTACACCCAGGGAAGCATAATGATGGTTGTTTCTGGCGCGTTGATTGGTATCGGGTATG
GTTCCGTGACGCCAGTTTTTCAGACGCAGATTATCAGTTCAGTGGAACCGCATAAAATCG
GTGTCGCAAACTCCCTCTTCTTCAATGCGATGGATGCAGGCCTGGCGCTGGGAGCCTGTG
TGATGGGGATGATGGTTGCACATACTGGCTACCGAATGATTTATCTGCTGGGCGCACTAT
TAGTGGTAGTGGCTGGTGGAGTCTATGCGCTGCAAATGAAGGGTAAAAGCGGTGTCGCGC
TAGTAGTGGCAAAAGAAATTCATTAATACGACACGTTTCATTAAGATTTTTCGCAGGTAA
CCACCTATAGTCATTGTCGTTAATAAAAAATGACAGGCGATAGGGTATGGCAGTTTCAGC
AAAGCACGACGAATTTAATCACTGGTGGGCAACAGAGGGCGACTGGGTTGAAGAGCCTAA
CTATCGCCGTAATGGTATGAGCGGGGTGCAATGCGTCGAGCGCAACGGCAAAAAGCTATA
TGTAAAGCGCATGACGCATCATCTGTTTCATTCCGTACGTTATCCTTTCGGCCGACCAAC
GATTGTCCGTGAGGTTGCGGTAATTAAAGAACTGGAACGGGCCGGTGTCATCGTGCCGAA
GATCGTTTTTGGTGAAGCGGTGAAAATTGAGGGTGAATGGCGAGCGTTGCTGGTGACTGA
AGATATGGCGGGGTTCATCAGCATTGCTGACTGGTATGCCCAGCATGCAGTATCGCCTTA
TTCTGACGAAGTACGGCAAGCCATGTTGAAAGCAGTGGCGCTGGCGTTTAAGAAAATGCA
TAGCATTAATCGTCAGCATGGCTGTTGTTATGTTCGCCATATCTATGTGAAAACAGAAGG
TAAGGCAGAAGCTGGTTTTCTTGACCTGGAGAAAAGTCGTCGCCGCTTGCGTCGCGATAA
AGCGATTAATCATGACTTCCGCCAGCTGGAAAAATATCTGGAGCCAATTCCCAAAGCGGA
CTGGGAGCAGGTGAAAGCGTATTACTACGCCATGTAATCGTTGTAGGCCAGATAAGACGC
ATAAGCGTCGTATCTGGCACTACAACCAATTCACATCTCGATTTCAATATCGCCTTTTGC
CCGGCAACAACAGGGCAAAATTTCCCCCGGCTGAATAAAGGCTAACGGTTCGGCAATCCA
GTCCACCTGACCTGCGACCAGTCGGGTGCGACAGGAGCCGCAGTAACCTTCGCGGCACTG
GTACTCAACCGCCACATTGTGGGATTCCAGCGCCGCCAGAAGGGAAGGGTGTTCATCCTG
GCACAGCAGTTGTGTGCCAGTGATGCGCAGGGTAACGCGAGCCATCAGAGCTGGAAGTTA
CTCAAATCGTCGGTGTCCACTTCCGAGTCAATCTGCCCGACCAGATAAGAACTGACTTCC
ACTTCCTGCGGAGCAACCTGCACGTTATCAGACACCAGCCAGGTGTTGATCCACGGGATC
GGGTTGGAGCGCGTCTGGAACGGCAGATCCAAACCGACTGCCTGCATGCGGATATTGGTG
ATGTATTCAACGTACTGGCAGAGAATGTCTTTATTCAGACCAATCATCGAACCGTCACGG
AACAGATAATCCGCCCAGTCTTTCTCTTGCTGTGCCGCCTGGACAAACAGGTCATAGCAC
TCCTGCTTACATTCTTCGGCAATTTCCGCCATCTCCGGATCATCCGCACCGCTGCGCAGC
AGATTCAGCATATGCTGAGTACCGGTCAGGTGCAGGGCTTCGTCGCGGGCAATCAGGCGA
ATAATTTTGGCGTTACCTTCCATCAGCTCACGTTCAGCGAATGCGAAAGAGCAGGCAAAG
CTGACGTAGAAACGAATCGCTTCCAGCGCGTTAACGCTCATCAGGCAGAGATACAGTTTT
TTCTTCAGCTCGCGCAGGCTAACGGTCACGGTTTTACCGTTAACGGTGTGGGTGCCTTCG
CCCAGCAGATGCCAGTAGCTGGTCATTTCGATCAGCTCATCGTAATAGCTGGAGATCCCT
TCCGCACGTTTCTGGATCTGCTCGTTGGTGACGATATCGTCAAACACAACAGACGGATCG
TTAACGATATTACGAATGATATGAGTATAGGAACGGGAATGAATCGTTTCTGAGAACGCC
CAGGTTTCGACCCAGGTTTCCAGTTCCGGAATAGAAATAAGCGGCAATAGCGCCACGTTC
GGGCTACGACCCTGAATGGAATCCAGCAGCGTCTGATATTTCAGGTTGCTGATAAAGATG
TGTTTTTCGTGTTCAGGCAATGCCTGGTAATCAATACGGTCACGAGAAACGTCAACTTCT
TCCGGACGCCAGAAGAAAGAGAGCTGCTTTTCGATCAGCTTTTCGAAGATGTCATATTTT
TGCTGATCGTAGCGAGCCACGTTGACCGGCTGACCAAAGAACATCGGTTCTTTGAGCTGA
TCATTTTTCGTCTGTGAAAAGGTGGTATATGCCATGAGTGTGTCCTGTTGGGAGTTTAAT
GCCGGATAAGGCATTTTACGCCGCATCCTGTGCCTGATGCGACGCTGGCGCGTCTTATCA
GGCCTACAAATCCGAGCCGTAGGCCGGATAAGGCGTTCACGCTGCATCCGGCACCCGGAG
CCTGATGCGACGCTGGCGCGTCTTATCAGGCCTACAAACCGAGCCGTAGGCCGGATAAGG
CGTTTACGCCGCATCCGGCATCTCAATATCAGATCTTACATGCGCCGCTTTCGCAGCCAT
CGTCCTGGATTGACGGCACCAGATCGTCCTGCGCGTCTTCAGCGCCGTCACGGGTGTTCT
GATAATACAGCGTTTTGACCCCGAATTTGTAGGCGGTGAGCAGGTCTTTCAGCAACTGCT
GCATCGGCACTTTTCCTGACGGGAAACGTGACGGATCGTAGTTGGTGTTAGCAGAGATCG
ACTGATCGATAAATTTCTGCATGATACCCACCAGTTGCAGGTAGCCATCGTTACCCGGCA
TTTCCCACAGCAGCTCATAGGCGTCGTGCAGATGCTCGTAGTCCGGCACCACCTGGCGCA
GAATACCGTCTTTCGACGCTTTGATGCTGACGTAACCGCGCGGCGGTTCAATACCGTTAG
TGGCGTTAGAGATCTGCGAAGAAGTCTCGGACGGCATCAGAGCAGAAAGCGTGGAGTTAC
GCAGGCCGTGCGTTTTGATTGACTCACGCAGAGCTTCCCAGTCGTAATGCAGCGGCTCAT
TAGCGATGGTATCCAGATCTTTCTTATAGGTATCGATCGGCAGGATCCCTTTCGCGTAAG
TGGTTTCGTTAAACCACGGGCACGCGCCTTGCTCTTTCGCCAGCTCATTAGACGCTTTCA
GCAGGTAATACTGAATCGCTTCGAAGGTTTTATGCGTCAGGTTGTTGGCGCTGCCGTCGG
AGTAGCGTTTACCATGCTTCGCCAGGTAGTAAGCGAAGTTGATCACACCAATACCCAGCG
TACGACGACCCATCGCTCCACGTTTGGCGGCCGGGATCGGGTAATCCTGATAATCCAGCA
GCGCGTCAAGTGCACGAACCGCCAGAATTGCCAGCTCTTCCAGTTCATCCAGGCTATTAA
TTGCGCCCAGGTTGAAAGCAGACAGCGTACACAGCGCGATTTCACCGTTCTCGTCGTTGA
CGTCGTTCAGCGGTTTGGTCGGCAGGGCTATCTCCAGGCACAGGTTAGACTGACGCACTG
GCGCGATGGCCGGATCAAACGGGCTATGGGTATTGCAGTGGTCAACGTTCTGAATATAGA
TACGACCGGTAGACGCACGTTCCTGCATCATCAGCGAGAACAGCTCAACGGCTTTCACAC
GCTGCTTGCGGATGCTGTCGTCTTTCTCATATTTGGTATACAGACGTTCAAACTCTTCCT
GATCGGCGAAGAATGCGTCGTACAGCCCCGGTACGTCGGACGGGCTGAACAGGGTGATAT
CTTCACCTTTCAGCAGGCGGGTATACATCAGTTTGTTGATCTGTACCCCGTAGTCCATAT
GGCGCACGCGGTTGCCTTCCACACCACGGTTGTTTTTCAACACCAGCAGGCTTTCCACTT
CCAGATGCCACATCGGGTAGAACAGCGTTGCCGCACCGCCGCGCACACCGCCCTGAGAGC
AGGATTTCACCGCAGTCTGGAAATGTTTGTAGAACGGAATGCAGCCGGTATGGAACGCTT
CGCCACCGCGAATCGGGCTACCCAGCGCACGAATACGCCCGGCGTTGATGCCGATCCCGG
CACGCTGGGAAACATATTTCACAATCGCGCTGGAGGTGGCGTTGATGGAATCCAGGCTGT
CGCCGCACTCGATCAGTACGCAGGAGCTGAACTGACGAGTCGGGGTACGCACGCCGGACA
TGATTGGCGTCGGCAGCGAAATTTTAAATGTGGAAACCGCGTCGTAAAAACGCTTCACAT
ATTGCAGGCGCGTTTCACGCGGGTAGTTCGAGAACAGGCACGCGGCAACCAGAATATAAA
GGAACTGGGCGCTTTCGTAGATTTCGCCGGTCACGCGGTTCTGTACCAGATATTTGCCTT
CCAGTTGCTTAACGGCAGCATAAGAGAAGGTCATATCACGGTCGTGATCGATAAACGTGT
CCATCTGCTTGAACTCTTCTTCCGTGTAGTCTTCCAGCAGATGATTATCGTATTTGCCCA
TCTCGACCATTTTCACCACGTGGTCGTACAGCGCAGGCGGCTCAAACTGGCCGTAGGCTT
TTTTACGCAGGTGGAAGATCGCCAGGCGCGCGGCGAGATACTGATAATCCGGCGCATCAC
GGGAGATCAGGTCTGCGGCAGCCTTGATAATAGTTTCGTGGATGTCAGAGGTCTTGATAC
CGTCATAAAACTGAATGTGGGAGCGCAGCTCGACCTGGGAAATCGAAACGTTATGCAGTC
CTTCTGCCGCCCAATCCAGAACGCGATGGATTTTGTCGAGATTGATGCGCTCTGTGCTAC
CGTCGCGCTTTGTCACCAGCAGATTCTGATTCATGTATGTCGTACCTGTTTTTGGAATTC
TTTCCGCAATAGTTTCGTGCAGACTACCTGTAGTACGGGAAGCTGCTTAGAACACTATAT
ATAGGGGGTATGTTTGGGATTCACTGCAAGATAGTGTGAAAATGGCCCTCTTGCAAGTGC
ATAACTTTGTGGATAACTCAGGAAGGAAAAAGTGGCTTTCGCGCACCTTAGGTCAGACAA
GGTGTCCGGGAAAGTCAATGGGAAGAGAAAAATTTGTTAAAAATAACTGTTCGGCGATTT
CTTGAACGGCAGAATAGGTTGGATAAATTGATATAGATGGTTTATTAATCTTTTTGCTAA
TGATTGCAAAAATTGATCTAAGCACGAGTCATCACATAATCTGATGTATCAGTTGTGGTC
AATATATAAGCGAATGTAAGCGATTGTTGATGTCGAAATGGTTGTTTTCTATTCGGTTAT
TGTTAAATGCGAAGCCATTTTGTTAATTTACCTTATATTATAAGAAAATTATTCATTACT
TTAATTTAGTTTAAATATAACTGGTATCCCTTAAGGTTATTAACTTGAATTATGACGCAC
TGATACTATTCATCAAATAATAACAAAATAGCTATTGCATCGGGTTGGACAATTTACAAA
AGAAAGATAACCCATATTGTATAATGCGTTTAAATATGCCGTCTTATATAAAATGATGGT
CAGATTAATATGCGAATTATTTTTCTACGCAAGGAGTATCTATCTTTACTCCCGTCAATG
ATTGCGTCTCTCTTCTCTGCTAATGGCATTGCGGCAGTCACTGATTCATGCCAGGGATAT
GATATCAAAGCGAGTTGCCAGGCCAGCAGGCAAAGCCTTGCAGGCATTACGCAGGACTGG
AGCATCGCCGATGGGCAATGGCTGGTTTTTTCGGATATGACCAATAATGCCAGCGGTGGG
GCCGTATTTTTGCAACAAGGAGCGGAATTTACATTATCACCAGAAAATGAAACTGGAATG
ACTCTGTTTGCCAATAACACCGTTTCAGGAGAATATAATAACGGCGGGGCAATATTTGCT
AAAGAAAACTCAACGCTGAATCTTACGGATGTTATTTTTTCTGGTAACGTCGCAGGCGGC
TATGGTGGCGCAATCTATTCTTCTGGTACTAACGATACCGGTGCCATCGATTTACGTGTC
ACTAACGCCGTGTTTCGCAATAACATCGCTAATGACGGCAAAGGTGGTGCAATTTATACC
ATCAATAATGATATCTATTTAAGTGATGATGTTTTTAACAATAACCAGGCATATACATCA
ACAAGTTACAGTGATGGCGATGGCGGCGCAATCGATGTCACAGATAATAATAGCGACAGC
AAGCATCCTTCAGGTTATACGATAATAAATAACACTGCCTTTACAAATAACACTGCCGAA
GGTTATGGCGGGGCGATATATACCAATAGCGCGACGGCTCCCTATCTTATTGATATTTCT
GTTGATGACAGCTACAGCCAGAACGGAGGCGTGTTAGTCGATGAGAACAATAGCGCAGCA
GGCTATGGAGATGGTCCTTCCTCTGCGGCGGGTGGCTTTATGTATCTCGGCTTAAGTGAA
GTTACATTTGATATTGCCGACGGAAAAACGCTGGTTATTGGCAATACAGAGAATGACGGA
GCTGTTGACTCTATTGCTGGTACCGGGTTAATCACCAAAACAGGTTCCGGCGATCTGGTA
CTTAATGCAGATAACAATGACTTTACTGGTGAGATGCAGATTGAAAACGGTGAAGTTACC
CTGGGCCGCAGCAACTCCCTGATGAATGTCGGCGATACGCATTGCCAGGACGATCCGCAA
GACTGCTACGGTCTGACGATAGGGAGTATTGATAAGTACCAGAATCAGGCAGAGCTAAAT
GTTGGCTCCACCCAACAAACCTTTGTGCACTCATTGACGGGCTTTCAGAATGGCACTTTA
AATATCGATGCTGGTGGCAATGTTACTGTTAATGAAGGCAGTTTTGCTGGCACCATCGAA
GGTGCTGGTCAGCTCACCATTGCGCAAAACGGCAGCTATGTGCTGGCGGGAGCGTCGTCG
ATGGCGCTAACCGGCGATATAGTCGTTGATGATGGTGCGGTGCTTTCGCTGGAAGGCGAC
GCGGCAGATCTTGCCGCTCTCCAGGACGATCCGCAGTCGATCGTGTTAAACGGCGGTGTG
CTCGATCTCTCTGATTTCTCCACCTGGCAGAGCGGTACATCATACAAAGATGGCCTTGAA
GTCAGCGGCAGCAGCGGAACGGTTATCGGCAGTCAGGATGTGGTAGATCTTGCAGGCGGA
AACGATATGCATATCGGCGGTGACGGGAAAGATGGCGTCTACGTGGTGATCGATGCGGGT
GACGGGCAGGTCCGCCTGGCAAATGACAATCAATACCTCGGCACAACGCAAATCGCCTCC
GGTACGCTGATGGTGAGCGACAACTCGCAGCTTGGAGATACCCATTACAACCGCCAGGTT
ATCTTTACCGATAATCAACAAGAAAGCGTGATGGAGATTACTGCCAATGTCGATACTCGC
TCTACAACGACTGAGCATGGGCGTGATATTGAAATGCGCGCCGACGGTGAAGTGGCAGTT
GATGCGGGGGTAGACACGCAGTGGGGCGCACTGATGGCTGACAGCAGCGGGCAGCATCAG
GATGAGGGTAGCACATTGACGAAAACGGGGGCGGGTACGCTGGAGCTGACCGCCAGCGGT
ACAACGCAGTCGGCGGTACGTGTCGAAGAAGGCACCCTGAAAGGTGATGTTGCTGATATC
CTTCCTTATGCTTCGTCACTGTGGGTTGGTGATGGGGCAACGTTCGTTACTGGCGCGGAT
CAGGATATTCAGTCAATTGATGCTATTTCCAGCGGCACTATTGACATCAGCGATGGTACG
GTTTTGCGCCTGACCGGGCTGGATACTTCCGTCGCCCTTAATGCCTCACTGTTTAACGGC
GATGGGACGCTGGTGAATGCCACCGATGGTGTGACGTTGACAGGTGAGCTTAATACCAAC
CTTGAAACTGACAGCCTGACTTATCTTTCCAACGTGACGGTTAATGGCAATCTGACCAAT
ACGTCCGGTGCGGTTAGCCTGCAAAATGGCGTCGCTGGCGATACGCTGACGGTAAACGGT
GATTATACCGGCGGCGGTACGCTACTGCTCGATAGCGAATTAAACGGCGATGACTCGGTA
AGCGATCAATTGGTGATGAACGGTAATACTGCTGGCAACACAACTGTGGTGGTTAACTCC
ATTACAGGGATTGGTGAGCCGACATCGACAGGCATTAAAGTGGTTGATTTCGCAGCTGAT
CCCACGCAGTTTCAAAACAATGCGCAGTTCAGTCTGGCAGGCAGTGGCTACGTCAACATG
GGAGCGTATGACTACACGCTGGTGGAAGATAACAACGACTGGTATCTGCGATCGCAAGAA
GTAACGCCGCCATCGCCACCTGATCCAGACCCGGACCCAACCCCCGATCCTGACCCAACA
CCCGATCCAATCCCCGCTTACCAGCCGGTGCTGAATGCCAAAGTTGGCGGTTATCTCAAT
AACCTGCGGGCGGCAAATCAGGCGTTTGTGATGGAGCGACGCGATCACGCTGGTGGCGAT
GGTCAGACGCTGAATTTACGTGTTATCGGCGGACGTTATCATTACACGGCGGCAGGGCAA
CTGGCTCAGCATGAAGACACTTCTACGGTGCAGCTAAGCGGCGATCTGTTTAGCGGGCGC
TGGGGCGATGATGGCGAGTGGATGCTTGGGATTGTAGGTGGCTACAGCGATAACCAGGGC
GACAGCCGCTCGAATCTGACCGGAACTCGCGCCGATAACCAGAACCACGGTTATGCCGTT
GGGCTAACCTCAAGCTGGTTTCAGCACGGTAATCAGAAGCAGGGGGCCTGGCTGGATAAC
TGGCTGCAATACGCGTGGTTTAACAATGATGTTTCCGAACAAGACGATGGCGCGGATCAT
TACCATTCGTCGGGGATTATCGCCTCGCTGGAAGCCGGGTATCAATGGTTACCGGGGCGT
GGTGTGGTGATTGAACCGCAGGCGCAGGTGATTTATCAGGGCGTGCAGCAGGATGATTTT
ACCGCCGCTAACCGTGCGCGCGTGTCACAATCGCAGGGTGATGATATTCAGACGCGGCTG
GGTTTACACAGCGAATGGCGTACCGCTGTTCATGTCATACCAACATTAGATCTGAATTAT
TATCACGATCCCCATTCGACGGAAATTGAAGAGGATGGCAGCACTATCAGTGACGATGCG
GTGAAGCAACGGGGTGAAATAAAAGTGGGAGTCACGGGCAATATCAGTCAGCGAGTGTCC
CTGCGCGGCAGCGTGGCGTGGCAGAAAGGGAGTGATGATTTTGCCCAGACGGCAGGATTT
TTGTCGATGACGGTGAAATGGTAATCGCTGTCTGACCATCACTATTGCCGGATGCGGCGT
AAACGCCTTATCTGGCCTACGGAGAGCATTTGTAGGCCTGATAAGACGCGGCAAGCGTCG
CATCAGGCATTGGCGCGGTTGCCGGATGAATCCAAACAACAACCTCACTTATTCTGCGTG
TGCAGCATATAGTTCACATCCACGCCGGGGCCGAGTTTAAAAGAATTAGTGATCGGGTTG
TAATGTAGCCCGGTTATATGTCGCTCTTTAAGGCTTGTCTGATCTACCCAGCCAAGCAGC
TCTGCCGGTTTAATAAACTTCTTCACATCATGCGTGCCTTTGGGCACCATGCGCAAAATA
TATTCCGCGCCAACCACCGCCATCAGCCATGACTTGCCGTTGCGGTTAAGCGTCGAGAAA
AAGACATCGCCGCCCGGTTTCACCAGTTGCGCACAGGCTCTGACTACTGACTGCGGATCG
GGGACGTGCTCCAGCATCTCCATGCAGGTCACCACATCATACTGCCCGGCATGTTTTGCC
GCGTGCTCTTCCACGGTTTCCTGCACGTAATCCACCTGAATGCCGCTTTCCAGCGCGTGC
AGCTTTGCCACCTGCAATGGCTCAAAGCCCATATCCAGACCGGTCACCGTCGCGCCTTCG
CGCGCCATACTCTCGGCCAGAATGCCGCCGCCACAACCGACATCGAGCACCTTTTTGCCA
AATAAACCGCCAGCACGCTCGGCAATATAGCCCAGACGTAGCGGATTAATGCGGTGCAAC
GGTTTGAACTCACCTTCAAGATCCCACCAGCGGGAGGCGACGGCTTCAAATTTAGCGATC
TCTTCGTGGTCTACGTTATGGTTTACCGGCGATTTTTCGGCATTCATTGGCACTTCTACT
CCGTAATTGGCAAGACAAACGAGTATATCAGGCATTGGATGTGAATAAAGCGTATAGGTT
TACCTCAAACTGCGCGGCTGTGTTATAATTTGCGACCTTTGAATCCGGGATACAGTAGAG
GGATAGCGGTTAGATGAGCGACCTTGCGAGAGAAATTACACCGGTCAACATTGAGGAAGA
GCTGAAGAGCTCCTATCTGGATTATGCGATGTCGGTCATTGTTGGCCGTGCGCTGCCAGA
TGTCCGAGATGGCCTGAAACCGGTACACCGTCGCGTACTTTACGCCATGAACGTACTAGG
CAATGACTGGAACAAAGCCTATAAAAAATCTGCCCGTGTCGTTGGTGACGTAATCGGTAA
ATACCATCCCCATGGTGACTTGGCGGTTTATGACACGATCGTCCGTATGGCGCAGCCATT
CTCGCTGCGTTACATGCTGGTAGACGGTCAGGGTAACTTCGGTTCCATCGACGGCGACTC
TGCGGCGGCAATGCGTTATACGGAAATCCGTCTGGCGAAAATTGCCCATGAACTGATGGC
CGATCTCGAAAAAGAGACGGTCGATTTCGTTGATAACTATGACGGCACGGAAAAAATTCC
GGACGTCATGCCAACCAAAATTCCTAACCTGCTGGTGAACGGTTCTTCCGGTATCGCCGT
AGGTATGGCAACCAACATCCCGCCGCACAACCTGACGGAAGTCATCAACGGTTGTCTGGC
GTATATCGATGATGAAGACATCAGCATTGAAGGGCTGATGGAATACATCCCGGGGCCGGA
CTTCCCGACGGCGGCAATCATTAACGGTCGTCGCGGTATTGAAGAAGCTTACCGTACCGG
TCGCGGCAAGGTATATATCCGCGCCCGTGCTGAAGTGGAAGTTGACGCCAAAACCGGACG
TGAAACCATTATCGTCCACGAAATTCCGTATCAGGTAAACAAAGCGCGCCTGATCGAGAA
GATTGCGGAACTGGTAAAAGAAAAACGCGTGGAAGGCATCAGCGCGCTGCGTGACGAGTC
TGACAAAGACGGTATGCGCATCGTGATTGAAGTGAAACGCGATGCGGTCGGTGAAGTTGT
GCTCAACAACCTCTACTCCCAGACCCAGTTGCAGGTTTCTTTCGGTATCAACATGGTGGC
ATTGCACCATGGTCAGCCGAAGATCATGAACCTGAAAGACATCATCGCGGCGTTTGTTCG
TCACCGCCGTGAAGTGGTGACCCGTCGTACTATTTTCGAACTGCGTAAAGCTCGCGATCG
TGCTCATATCCTTGAAGCATTAGCCGTGGCGCTGGCGAACATCGACCCGATCATCGAACT
GATCCGTCATGCGCCGACGCCTGCAGAAGCGAAAACTGCGCTGGTTGCTAATCCGTGGCA
GCTGGGCAACGTTGCCGCGATGCTCGAACGTGCTGGCGACGATGCTGCGCGTCCGGAATG
GCTGGAGCCAGAGTTCGGCGTGCGTGATGGTCTGTACTACCTGACCGAACAGCAAGCTCA
GGCGATTCTGGATCTGCGTTTGCAGAAACTGACCGGCCTTGAGCACGAAAAACTGCTCGA
CGAATACAAAGAGCTGCTGGATCAGATCGCGGAACTGCTGCGTATTCTTGGTAGCGCCGA
TCGTCTGATGGAAGTGATCCGTGAAGAGCTGGAGCTGGTTCGTGAACAGTTCGGTGACAA
ACGTCGTACTGAAATCACCGCCAACAGCGCAGACATCAACCTGGAAGATCTGATCACCCA
GGAAGATGTGGTCGTGACGCTCTCTCACCAGGGCTACGTTAAATATCAGCCGCTTTCTGA
ATACGAAGCGCAGCGTCGTGGCGGGAAAGGTAAATCTGCCGCACGTATTAAAGAAGAAGA
CTTTATCGACCGACTGCTGGTGGCGAACACGCACGACCATATTCTGTGCTTCTCCAGCCG
TGGTCGCGTCTATTCGATGAAAGTTTACCAGTTGCCGGAGGCCACTCGTGGCGCGCGCGG
TCGTCCGATCGTCAACCTGCTGCCGCTGGAGCAGGACGAACGTATCACCGCGATCCTGCC
GGTGACCGAGTTTGAAGAAGGCGTGAAAGTCTTCATGGCGACCGCTAACGGTACTGTGAA
GAAAACCGTCCTCACCGAGTTCAACCGTCTGCGTACCGCCGGTAAAGTGGCGATCAAACT
GGTTGAAGGCGATGAGCTGATCGGCGTTGACCTGACCAGCGGCGAAGACGAAGTAATGCT
GTTCTCCGCCGAAGGTAAAGTGGTGCGCTTTAAAGAGTCTTCTGTCCGTGCGATGGGCTG
CAACACCACCGGTGTTCGCGGTATTCGTTTAGGCGAAGGTGATAAAGTCGTCTCTCTGAT
CGTGCCTCGTGGCGATGGCGCAATCCTCACCGCAACGCAGAACGGTTATGGTAAACGTAC
CGCAGTGGCGGAATACCCGACTAAGTCGCGTGCGACGAAAGGGGTTATCTCCATCAAGGT
TACCGAACGTAACGGTTTAGTGGTTGGCGCGGTGCAGGTAGATGATTGCGATCAGATCAT
GATGATCACCGACGCCGGTACGCTGGTACGTACTCGCGTTTCAGAAATCAGCATCGTGGG
CCGTAACACCCAGGGCGTGATCCTCATCCGTACTGCGGAAGATGAAAACGTAGTGGGTCT
GCAACGTGTTGCTGAACCGGTTGACGAGGAAGATCTGGACACCATCGACGGCAGTGCCGC
GGAAGGGGACGATGAAATCGCTCCGGAAGTGGACGTTGACGACGAGCCAGAAGAAGAATA
ATTTTACTTCTTCATGCCAAAAGGGAGCTATCTCCCTTGTTTGAATTGAAAAGTCCAGGC
TGCAAAGTCTGGGCTTTTGTCGTATTAGGGCACGGTAAAGTTTGGCTGTGCCCGTAAAAA
ATGGCTGGCTATACACAAGGAATGTGGCAATGAGTGGTGAAAAAAGGCGAAAGGCTGGCG
GTTCTATGGTCTTGTAGGTTTTGGCGCAATAGCACTGCTTTCCGCTGGCGTCTGGGCGTT
GCAATATGCTGGCAGTGGGCCAGAAAAAACGTTGTCGTCGCTGGTGGTGCACAACAATCT
GCAAATCGATCTCAATGAGCCGGACCTCTTTCTCGACAGCGACTCTCTGAGCCAGCTTCC
CAAAGATCTCCTCACCATTCCGTTTCTCCACGATGTTCTGAGTGAAGATTTCGTTTTCTA
TTATCAGAATCATGCCGATCGTCTGGGCATTGAAGGCAGCATTCGCCGCATTGTCTATGA
ACACGATCTCACGCTGAAAGATAAGCTCTTTTCGTCACTCTTAGATCAGCCCGCGCAGGC
GGCGCTATGGCACGATAAACAAGGCCATCTTTCACATTACATAGTGCTGATCCAGCGCAG
TGGTTTAAGCAAACTGCTGGAGCCATTGTTGTTTGCCGCTACCAGCGACAGCCAGTTAAG
CAAAACGGAAATCAGTAGCATCAAGATAAATAGTGAAACTATTCCTGTTTATCAGTTGCG
CTATAACGGTAATAACGCCCTGATGTTCGCGACATATCAGGACAAGATGCTGGTGTTTTC
CAGCACGGATATGCTGTTTAAAGATGATCAGCAGGATACCGAAGCCACGGCGATCGCAAG
TGATTTGTTGAGCGGCAAAAAACGCTGGCAAGCCAGCTTTGGCCTGGAAGAGCGTGCTGC
CGAAAAAACGCCAGTACGCCAGCGCATCGTGGCCAGCGCCAGGTTGCTGGGTTTTGGCTA
CCAGCGGTTAATGCCTTCTTTTGCTGGCGTACGCTTCGAAATGGGTAACGACGGCTGGCA
CAGTTTTGTGGCGTTAAATGATGAATCCGCCAGCGTAGATGCCAGTTTCGATTTTACGCC
GGTCTGGAACAGTATGCCTGCCGGGGCCAGCTTCTGTGTGGCGGTGCCGTATTCACACGG
TATTGCCGAAGAGATGCTTTCGCACATCAGCCAGGAAAACGATAAGCTGAATGGGGCGTT
AGACGGTGCCGCGGGGCTGTGCTGGTATGAAGACTCAAAATTGCAAACCCCGCTGTTTGT
CGGTCAGTTTGATGGCACTGCCGAACAGGCGCAATTGCCAGGGAAACTGTTTACGCAAAA
TATTGGTGCGCACGAAAGCAAAGCGCCAGAAGGTGTTTTGCCGGTAAGCCAGACTCAGCA
GGGCGAAGCGCAAATCTGGCGTCGCGAAGTGAGTTCCCGATACGGTCAGTATCTGAAAGC
GCAGGCGGCGCAACCCGATCAATTAATGTCGGATTATTTTTTCCGCGTGTCGCTGGCGAT
GCAAAACAAAACGCTGCTTTTCTCCCTCGATGACACGCTGGTTAATAACGCCCTGCAAAC
ACTGAATAAAACCCGCCCGGCAATGGTAGATGTAATACCCACTGATGGCATCGTTCCGCT
CTATATCAATCCACAAGGAATGGCGAAACTGCTGCGTAACGAAACGCTGACCAGTCTGCC
GAAGAATCTCGAACCGGTTTTTTATAACGCCGCACAAACTTTATTAATGCCGAAGCTGGA
CGCTTTATCTCAACAACCGCGTTATGTCATGAAGCTGGCCCAGATGGAACCCGGTGTCGC
CTGGCAGTGGCTACCCATAACCTGGCAGCCGCTATGAGGCACGGGCTGCTGGCGCTGATT
TGCTGGCTGTGTTGTGTTGTTGCCCATAGCGAAATGCTGAATGTCGAACAATCCGGGCTG
TTTCGCGCCTGGTTTGTACGCATTGCACAGGAACAGCTCCGCCAGGGGCCAAGTCCACGC
TGGTATCAGCAGGATTGTGCGGGCCTGGTGCGATTTGCAGCGAACGAGGCGCTGAAAGTT
CACGACAGTAAATGGCTAAAAAGTAACGGGTTATCTAACCAGTATTTGCCGCCAGAGATG
TCGCTAACACCTGAACAGCGTCAACTGGCGCAAAACTGGAATCAGGGGAACGGGAAAACC
GGCCCCTACGTGACCGCGATTAATTTGATTCAGTACAACAGCCAGTTTATTGGCCAGGAC
ATAAACCAGGCGCTGCCTGGCGATATGATTTTTTTCGATCAGGGCGATGCCCAGCACTTA
ATGGTCTGGATGGGGCGTTACGTCATCTACCACACCGGAAGCGCCACGAAAACTGACAAC
GGAATGCGCGCAGTCAGTCTGCAACAACTTATGACATGGAAGGACACCCGATGGATACCC
AACGATTCCAATCCCAATTTCATTGGCATTTATCGTTTAAATTTTCTGGCGCGATAGCAG
CGTGCTTGTCCCTGTCTCTTGTGGGAACAGGGCTTGCTAATGCTGATGATTCGCTTCCTT
CCAGTAACTATGCGCCGCCCGCAGGGGGAACATTCTTTTTGCTTGCTGACAGCAGTTTTA
GCAGCAGTGAAGAGGCGAAAGTGCGACTGGAAGCGCCGGGGCGTGATTATCGGCGCTATC
AGATGGAAGAGTACGGCGGTGTGGACGTTCGCCTGTATCGTATTCCTGACCCGATGGCAT
TTTTGCGCCAGCAGAAAAACCTGCATCGCATTGTGGTGCAACCGCAATATCTGGGCGACG
GGCTGAACAATACGCTGACCTGGCTGTGGGATAACTGGTACGGCAAATCTCGCCGCGTGA
TGCAGCGTACTTTCTCTTCTCAGTCACGGCAGAATGTGACTCAGGCATTACCCGAATTAC
ATCTCGGCAATGCCATTATTAAACCTTCCCGTTATGTACAGAACAACCAGTTTTCCCCGC
TGAAAAAATATCCCCTGGTGGAACAGTTCCGTTATCCACTATGGCAGGCTAAACCGGTCG
AGCCGCAGCAAGGGGTAAAACTGGAAGGCGCATCCAGCAATTTCATCTCGCCGCAGCCGG
GTAACATTTATATTCCTCTCGGCCAACAAGAGCCGGGACTGTACCTCGTCGAGGCGATGG
TTGGTGGGTATCGGGCGACGACGGTGGTGTTTGTTTCCGATACCGTGGCGCTTAGCAAAG
TGTCAGGCAAAGAGCTTCTGGTGTGGACCGCGGGTAAAAAACAGGGTGAAGCGAAGCCAG
GCTCAGAGATCTTGTGGACTGACGGTCTTGGCGTGATGACCCGCGGTGTGACCGATGACA
GCGGTACCTTGCAGTTACAACATATATCGCCAGAACGTTCATACATTCTGGGTAAGGATG
CCGAAGGCGGCGTTTTTGTCTCCGAGAACTTCTTCTACGAAAGCGAAATCTACAACACCC
GCTTGTATATTTTTACCGATCGCCCGCTATATCGCGCAGGCGATCGTGTCGATGTTAAAG
TGATGGGCCGCGAGTTCCACGATCCGTTGCATTCATCCCCCATCGTCAGCGCCCCGGCGA
AGCTTTCGGTGCTGGACGCCAACGGCAGTCTGTTGCAAACCGTCGATGTCACGCTGGATG
CGCGCAATGGCGGGCAGGGAAGTTTCCGCCTGCCAGAAAATGCCGTTGCCGGAGGTTATG
AGTTACGTCTTGCTTACCGCAATCAGGTCTATAGCAGTAGTTTTCGCGTAGCCAACTATA
TCAAGCCACATTTCGAGATTGGTTTAGCTCTCGACAAAAAAGAGTTCAAAACTGGCGAAG
CGGTCAGCGGCAAACTGCAACTGCTCTACCCGGATGGTGAGCCGGTAAAAGATGCCCGCG
TGCAGTTAAGTTTGCGCGCTCAGCAATTATCAATGGTCGGTAACGATTTGCGTTATGCCG
GACGTTTCCCCGTGTCGCTGGAAGGCAGTGAAACGGTGTCCGACGATAGCGGTCATGTGG
CGTTAAATCTCCCCGCCGCCGATAAACCAAGCCGCTATTTGTTAACCGTCTCCGCCAGTG
ACGGCGCGGCGTATCGCGTCACCACCACCAAAGAGATCCTCATTGAACGCGGCCTGGCGC
ATTACTCTTTAAGTACCGCCGCACAATACAGTAATAGCGGCGAGTCGGTTGTGTTCCGTT
ATGCCGCGCTGGAATCTTCAAAACAGGTTCCTGTTACGTATGAATGGTTGCGTCTCGAAG
ACCGCACGAGCCATAGCGGAGAGCTACCGTCAGGCGGCAAATCCTTTACCGTCAATTTCG
CTAAACCTGGCAACTACAATCTGACATTACGCGATAAAGACGGCTTAATTCTCGCTGGGT
TAAGTCATGCCGTCAGCGGTAAGGGCAGCATGTCGCATACTGGTACGGTAGATATCGTGG
CAGATAAAACGCTGTACCAGCCTGGCGAAACCGCGAAGATGCTGATTACCTTTCCGGAGC
CAATTGATGAAGCATTATTGACGCTGGAACGCGATCGCGTGGAACAGCAGTCGCTGCTTT
CGCATCCGGCAAACTGGCTAACGCTACAACGTTTAAACGATACCCAGTATGAAGCCCGGG
TTCCAGTGAGCAATTCCTTTGCGCCTAACATCACTTTTTCGGTGCTGTATACCCGTAACG
GTCAGTACAGTTTTCAGAATGCCGGGATCAAAGTTGCCGTTCCCCAGCTGGATATCCGGG
TGAAAACGGACAAAACCCATTACCAGCCTGGTGAACTGGTCAATGTCGAATTAACCTCGT
CGCTGAAAGGTAAACCTGTTTCTGCGCAGCTAACGGTAGGCGTGGTCGATGAAATGATCT
ACGCGCTGCAACCAGAAATCGCGCCGAATATCGGCAAATTTTTCTATCCGCTGGGGCGTA
ACAATGTGCGTACCAGCTCCAGTCTGTCGTTTATCAGCTACGACCAGGCGCTCTCCAACG
AGCCGGTTGCGCCTGGCGCAACTAACCGCAGCGAGCGGCGAGTAAAAATGCTTGAACGTC
CACGGCGTGAAGAGGTGGATACCGCGGCATGGATGCCGTCACTCACAACCGATAAACAAG
GCAAAGCGTATTTCACGTTCCTGATGCCTGATTCGTTAACCCGCTGGCGTATCACCGCGC
GTGGGATGAACGGCGACGGGCTGGTCGGGCAGGGGCGTGCTTATCTGCGTTCGGAAAAAA
ATCTCTACATGAAGTGGAGTATGCCAACGGTGTATCGCGTGGGCGACAAACCGGCGGCAG
GACTGTTTATCTTCAGTCAGCAGGATAACGAACCGGTGGCGCTGGTGACTAAATTTGCAG
GCGCTGAGATGCGCCAGACGCTGACGCTGCACAAAGGGGCGAATTATATTTCGCTGACGC
AGAATATTCAGCAATCTGGCTTGTTAAGTGCAGAACTGCAACAAAATGGGCAAGTGCAGG
ACAGCATTAGCACAAAACTGTCTTTTGTGGATAACAGCTGGCCCGTTGAACAGCAGAAAA
ATATCATGCTCGGTGGTGGCGATAACGCGCTGATGTTGCCCGAGCAGGCGAGCAATATCC
GGCTACAAAGTAGTGAAACGCCGCAGGAGATTTTCCGCAACAATCTTGATGCGTTAGTCG
ATGAACCGTGGGGTGGGGTGATCAACACCGGTAGCCGTCTGATCCCGCTCAGTCTCGCCT
GGCGTTCGCTTGCCGATCATCAAAGTGCCGCCGCTAACGACATTCGTCAGATGATTCAGG
ATAACCGTCTGCGGCTGATGCAACTGGCGGGGCCCGGAGCGCGCTTTACCTGGTGGGGTG
AAGATGGCAATGGTGACGCCTTCCTTACGGCATGGGCATGGTACGCCGACTGGCAGGCCA
GCCAGGCGCTCGGCGTAACGCAACAACCGGAATACTGGCAGCATATGCTCGACAGTTATG
CCGAGCAGGCAGATAACATGCCGTTATTGCATCGGGCGCTGGTGCTGGCGTGGGCACAGG
AGATGAATCTGCCGTGCAAAACGTTGTTGAAAGGGTTGGATGAAGCTATCGCCCGGCGCG
GAACTAAAACTGAAGATTTCTCTGAGGAAGCCCCCCGCGATATCAATGACAGCCTGATCC
TCGATACACCGGAATCTCCACTGGCAGATGCGGTGGCAAACGTCTTAACCATGACGTTGC
TGAAAAAAGCGCAGTTGAAGTCCACGGTGATGCCACAGGTTCAGCAATATGCGTGGGATA
AAGCGGCAAACAGCAATCAGCCGCTGGCGCACACGGTTGTGCTGCTCAATAGCGGGGGCG
ACGCTACCCAGGCGGCTGCTATTTTAAGTGGTTTGACCGCTGAGCAATCTACTATTGAGC
GCGCGCTGGCCATGAACTGGCTGGCGAAATATATGGCGACAATGCCTCCAGTTGTTTTGC
CTGCGCCTGCGGGCGCATGGGCCAAACATAAGTTAACTGGAGGGGGCGAATACTGGCGTT
GGGTTGGTCAGGGCGTGCCGGACATTCTCTCTTTTGGTGACGAATTATCGCCGCAAAATG
TGCAGGTCCGCTGGCATGAACCGGCAAAAACGGCTCAACAAAGTAACATTCCGGTGACCG
TTGAACGCCAGTTGTATCGGCTTATCCCCGGTGAAGAAGAGATGAGCTTTACTCTGCAGC
CGGTGACCAGCAATGAGATTGACAGCGATGCGCTGTATCTCGATGAAATTACGCTTACCA
GCGAGCAGGATGCAGTTCTGCGCTATGGTCAGGTGGAAGTACCGCTCCCGCCGGGAGCCG
ACGTTGAGCGCACAACATGGGGCATTTCAGTCAATAAACCCAACGCCGCGAAACAGCAGG
GGCAATTGCTGGAAAAAGCGCGTAATGAAATGGGCGAACTGGCCTATATGGTGCCGGTGA
AAGAACTGACGGGAACGGTCACTTTCCGCCATTTGCTGCGCTTCTCGCAAAAAGGGCAAT
TCGTTCTGCCTCCTGCTCGTTATGTGCGTTCCTATGCACCTGCGCAGCAAAGTGTTGCGG
CAGGGAGCGAATGGCCCGGGATGCAGGTGAAATAAGTGAACTGGCGCAGAATCGTCTGGC
TATTGGCGTTGGTTACTCTGCCAACGCTTGCGGAGGAGACGCCGTTACAACTGGCACTGC
GTGGTGCGCAGCACGATCAACTGTATCAGCTGTCGTCATCAGGCGTGACCAAAGCCTCGA
CATTACCTGACTCGCTCACCACGCCGTTAGGGAGTTTGTGGAAACTGTATGTTTACGCCT
GGCTGGAGGATACCCATCAACCGGAGCAGCCCTACCAGTGTCGCGGAAACTCCCCGGAAG
AGGTTTATTGTTGTCAGGCTGGGGAGAGCATAACGCGCGATACCGCGCTGGTACGTTCCT
GTGGGCTCTATTTTGCGCCGCAGCGGTTGCATATTGGCGCAGATGTGTGGGGGCAATACT
GGCAACAGCGTCAGGCACCTGCGTGGTTAGCGTCTCTTACTACGCTGAAGCCAGAAACCT
CGGTAACGGTTAAATCGCTGCTTGATTCATTAGCGACGTTACCTGCGCAAAACAAAGCTC
AGGAAGTCTTACTGGAAGTGGTGCTGGACGAGGCGAAAATCGGTGTCGCATCCATGCTCG
GTAGTCGGGTTCGGGTGAAAACCTGGAGCTGGTTTGCCGATGATAAACAGGAAATCCGTC
AGGGTGGTTTTGCCGGCTGGTTAACCGATGGTACACCGCTGTGGGTTACTGGCAGTGGCA
CCAGCAAAACGGTACTGACCCGTTATGCGACGGTGCTTAATCGGGTTTTGCCAGTGCCGA
CACAAGTTGCCAGTGGGCAATGTGTAGAGGTGGAGCTATTTGCCCGCTATCCGCTGAAGA
AAATCACAGCGGAAAAGAGTACGACGTCAGTAAAACCCGGCGTACTTAATGGGCGCTATC
GTGTGACATTTGCCAATGGTAACCACATTACGTTTGTCAGCCACGGTGAGACGACCTTAC
TGACCGAAAAGGGCAAACTGAAATTGCAGTCGCATCTCGATCGTGAAGAGTACGTTGCCA
GAGTTCTGGATCGCGAGGCGAAAAGTACGCCACCTGAGGCAGCGAAAGCCATGACCGTGG
CGATACGCACTTTTTTACAGCAAAACGCCAATCGGGAAGACGATTGCCTGACCATCCCCG
ACAGCAGCGCCACGCAGCGTGTTTCTGCTTCGCCAGCGACCACGGGGGCGCGAACGATGA
CCGCCTGGACGCAGGATCTCATCTATGCGGGCGATCCGGTTCATTATCACGGCAGTCGCG
CTACCGAAGGGACGCTTTCCTGGCGGCAAGCCATGGCCCAGGCCGGGCAGGGAGAGCGTT
ACGACCAGATACTCGCGTTTGCTTATCCCGACAACAGCCTTAGCTGCTGGGGAGCGCCAC
GCTCAACCTGTCAGTTATTACCCAAAGCGAAAGCCTGGCTGGCGAAAAAAATGCCGCAGT
GGCGGCGTATATTAGAAGGCGAGACGGGGTACAACGAACCAGACGTGTTTGCGGTCTGTC
GTTTAGTCTCAGGTTTCCCCTATACCGATCGGCAGCAGAAACGGCTGTTTATTCGTAACT
TCTTTACGCTTCAGGATCGGCTGGATTTAACCCATGAGTATCTGCACCTGGCCTTTGATG
GTTATCCCACCGGGCTTGATGAGAACTATATCGAAACGCTGACCCGACAATTATTAATGG
ACTAATGCTATGCGAAAGATTTTTCTTCCGTTGTTACTGGTGGCACTTTCGCCTGTCGCT
CACAGTGAAGGTGTGCAGGAAGTCGAGATTGACGCACCGCTCTCTGGCTGGCATCCGGCA
GAGGGCGAAGATGCCAGTTTTTCACAATCGATCAATTACCCGGCGTCGTCCGTCAACATG
GCAGATGATCAAAATATCTCAGCGCAGATCCGCGGCAAAATAAAGAATTATGCTGCGGCG
GGTAAAGTTCAGCAGGGCCGGCTGGTGGTCAACGGTGCCAGTATGCCGCAGAGAGTTGAA
TCCGATGGTTCATTTGCACGCCCTTATATTTTCACTGAAGGCAGCAACAGCGTGCAGGTC
ATCAGCCCGGATGGGCAAAGCCGACAAAAAATGCAGTTTTACTCAACGCCGGGTACAGGA
ACGATTCGTGCACGTTTACGGCTGGTTCTCTCGTGGGATACGGACAATACCGATCTCGAT
CTCCATGTTGTCACGCCCGATGGAGAACACGCCTGGTACGGTAACACCGTGCTGAAAAAC
AGTGGTGCACTGGATATGGATGTCACGACGGGGTATGGACCCGAGATTTTCGCCATGCCA
GCACCAGTTCACGGGCGCTATCAGGTGTATATCAACTACTATGGTGGGCGCAGCGAAACG
GAATTGACGACCGCCCAACTGACGCTGATTACCGATGAAGGATCGGTCAATGAGAAACAG
GAAACATTTATTGTACCGATGCGTAATGCTGGCGAGCGGACGCTGGTGAAAAGTTTTGAC
TGGTGATTAATGGGGTTACCTTCGCCGTCGATGTTCAAGAAAACACCCGATAACTTTCGC
TATCGGGTGTTTTTATTGATTAATTCAACCGTTCAATCACCATCGCAATTCCCTGGCCGC
CACCAATGCACAGTGTTGCCAGCCCCAGCGTTTTATCGCGTGCCTGCATGGCATGTAATA
GTGTGACCAGAATACGAGCACCACTGGCACCGATAGGATGCCCGAGCGCGATGGCCCCGC
CGTTGACATTCACTTTCTCAGAATCAAAGCCCAGGGTTTTCCCAACGGCAAGGAACTGTG
CAGCAAATGCTTCATTAGCCTCAATGAGATCAATATCCGCCAGTTGCAGCCCCGCCAGTT
GTAACGCTTTTTGCGTGGCAGGTACTGGACCCATACCCATCAATGCGGGGGGCACGCCAC
CGCTGGCATAACTTTTAATGCGAGCCAGGGGGGTAAGGCCTGCTGCCAGCGCCGCAGATT
CTTCCATAATCACCAGAGCGGCAGCACCGTCGTTAATACCAGACGCGTTCCCGGCGGTGA
CTGTTCCTGCTTTATCGAAGGCCGGGCGCAATGCGCCTAACGCTTCAGTCGTAGAATCCG
CTTTCGGGAATTCGTCTTGACTGAAGACGAAGGTTTTCTTCCGAGTGACAACATTTACCG
GGACGATTTCGGTTGTAAAAGCACCGGACTCAATTGCGGCTGCCGCTTTACGCTGTGAAT
GCAGCGCCAGTTCATCCTGCATTTCTCGGGTAATTCCGTACTCTTTGGCCACGTTCTCGG
CGGTAATCCCCATATGATAACCATGGGTGGCGCACATCAGACCATCGCGCAGGATTACGT
CATAAACCTGTCCGTCTCCAAGACGATAACCAGAGCGTGCTTTTGCATCGAGTAAGTAGG
GCGCTAAACTCATATTTTCCATACCCCCCGCCACAATGCTTTGCGCCTGACCTGCCTGAA
TTGCCTGGGCGGCAAGCGCCACACTTTTAAGACCCGAACCACACACTTTATTGACCGTGA
ATCCGCACACCGTTTCTGCCAGCCCGCTTTTTAACAGTGCCTGACGTGCCGGATTTTGCC
CCAACCCGGCTTGCAACACGTTACCCATAATCACTTCATCAATGTGTAGTGAATCGATTT
TTGCACGTTCAATGGCGGCTTTAATTACTGTCGCCCCCAGGTCGATGGCGCTGGTGGAAG
CGAGTGAACCGTTAAAACTACCGATAGCAGTACGTACCGCACTGACGATGACACAATTTT
TCATTTTTTATTCCTTCTGTCTGTAGGGGTGCCGTCAGAACAGCGTTAAACCAATGACGA
AAATGACGCCGGAGAAGAGCAGGGCAGTGATGCAATAGCCCATGATGTCGCGGACACCGA
GTCCGGCGATTGCCAGTGCTGGCAGCGCCCAGAATGGTTGTGCCATGTTCATCCATTGCT
CGCCGTAGGCGATCGCCATTACCGATTTACCGAGATCAGCGCCCAGCGCCTGGGCTGCGG
GTATCACGAAAGGTCCCTGAATAACCCAGTGACCGCCGCCAGACGGAACGGCGAAGTTAA
TCAGTGCAGAACTAAAAAAGGTCATTACCGGGAAGGTGTCTTTGTTCGCAACATTGATGA
AGAATTCGGTAATGAGTCCGCCCAGACCGGAATGCTCCATCATCAGTTGGATCCCAGCGT
AGAAGGGGAATTGCACCAGAATACCGGCGGTACTGCGTGCTGCCGCGCTGATAGCACGCA
TATAAGCCATTGGCGTTTTATGTAGCAGCAGACCCGCAATCATAAACATCAGGTTGACGG
TATTGATGGTGATGTTGAAGCCATGTTCGCTGAAGTACATCGCCAGGTAAGCGATACCGA
GTGCGCCGATGATCAACGTCAGAATGCGGCTTTCTTCCAGTCGCTCGGACGGTGGAGCAT
CTTTCGGTAGCTGCTTTTGAAAATCAGCCTCTTCCATGAGTAGTTTTGGATCGATACTCA
CCACGTCAGACGGTTTTGGCATCATCATGCGGGTGATAAATGGCATCACCACAATCAATG
CCACAGTGATGAAAATGTTAAAACCACTGAACAGAGTATCGCCCACCGGGATCAGCCCGG
CGATATGCTCAACCGGGTTGCCCGGTGTTGCAGCCAACAGAGGCATTGATCCAGAGAAGC
CGCCACCCCAGGTGAGAAAACCAATGTAGGCGCAGGCAATGAGCAACGGATAATCAGAAC
CGGGGACTCGCCGGGCGACTTCACGGGCAAACATTGCGCCGACAACCAAACCAAATCCCC
AGTTGATGACACAAGCGACTGAACCGAAGAAAGTGACCAGCATGACGCCCTGTACGGGCG
TCTTTGCGGCGGAGGCGGCAGTACGCAGCAAACTTTTCACCGGAGCAGAGCTGGCAAGGG
CATGACCGGTAACGATGATAAGCGCCATCTGCATACCAAACGCCAGCAAGTTCCAGAAAC
CGTCACCCCACATTTTCACCATGCTGATCGGCGTTTGTGGTGTTAACCAAAGCGCGATCA
CGAATGTTAGCAATGTCAGCAACATGGCAAAGATCAGTGGATCGGGAAGCCACCGGCTGA
CAAAACGCGTCATAAAACGCGATATGCGACCAATCATAAATCACCCCGTTGCGTATTCAG
ATCGGCGGCGACTTCAAACCGAGCTTCTGTTTTGGCACGCACGGTAGCTAAATCACACCC
GTCGGCAATTTCGGTGAGCCACATTTTGCCGTCAATAAAACGAAAGACAGCCAGTTCAGT
AACCAGCATATGCACCGCATGTTGCGCAGTGAGTGGCATGGTGCAGCGGCGCAAAATTTT
TGCTGAACCATCTTTGGCGCAATGTTCCATGGCGATGATCACTTTGCGCGACCCGGTCAC
CAGATCCATCGCGCCACCCATACCGGGCACCATTTTCCCAGGCACTACCCAGTTCGCGAG
GTTTGCTTCTTCGTCTACTTGAAAACCGCCGAGCACGCAGGCATCAATATGACCGCCGCG
GATTAGCGCAAATGACATGGCGCTATCAAACATGGCTGCACCGGGTAAAATACCGCACGG
TTGTCCGCCAGCGTTCACCAGATCTGGATGCGCTGTCGTGACCGGGCCTAAACCGAGGAA
GCCGTTTTCCGATTGCAGAGTGATATGAATACCCTCCGGTAAATAATTGGCGACCATTGT
GGGTAAACCGATCCCTAAGTTAACGATGTCACCATCACGAAGCTCTTGCGCCACACGGCG
CGCAATACGTTGTTTCACATCCATTATTTGCTCTCCTGTGAAACGATGATGTGGTCGATA
ACGGCACCAGGGGTGACAATATGGTCAGGTTGCAGCTCGCCGGTTTCGACAAGTTCATCT
GGCTCTACCAGCGTGATATCAGCCGCAAGGGCTATCAGGGGGTTAAAGTTGCGGGCGCTA
AGTTGATAGGTCAGGTTGCCAAGTGTGTCGCAACGATGAGCGCGAATTAGCGCCAGGTCG
GCGCGCAGTGGGCGTTCGAGCAGCCAGGTTTTACCGTCGAGTGTCAGTGTCTGTTTGCCT
TCCTCTACGACGGTGCCGACACCCGTTGGGGTGAGAAAACCACCAAGTCCAGCTCCACCA
CAGCGAATTTGCTCGATTAGCGTACCTTGCGGCACCAGAACGACGTCCATCTCACCAGAT
ATCATGCGCCGACCTGTTTCCGGGTTGGTGCCGATATGTGAAGCAATCACTTTGCGGACT
CGACCATTGACGATGAGCGGACCGATGCCGGTATCAACAAACGCGGTATCATTGGCTATC
AATGTCAGGTCGCGAACACCAGATTCCAGTAATGCTTCAACCAGGCGGGATGGAGTGCCA
ATCCCCATAAATCCGCCCACCATGATGGTCATGCCGTCACGAAAGAAGCCGGTGGCGTCT
TGTAATGTCATCAATTTTGTTTTCATTTTTTATCCCTCTTGCATACACCGTTGTGGGTAC
AGTCAGGGAATAGCAAGGGGAGTGCCAGAATGAGATTATTGGATGTTTTTATTTAACTAA
TTGAATAGAAAAGGATAAATTAGATGGGGATTCATAAGGAGAATGAGCTGCTATGCAGAA
AATTGCGCACTGTGCAAATTTCTGCATAGCAAGTTTTGGTGTTATACATCCGCCGGATCG
ATACCGTATTCCTGGAGTTTATACATCAATGCACGGCGACTGATGCCCAGCATTAAAGCA
GTGCGGGTTCGGTTTCCTTCTTGTTGTTCCAGCACTTCCATAATGATGCGTTTTTCGACG
CGTTTAATTTCCTCTTTTAAATTACGCTCTCCGACAGGGGCTGTTTTTACCTCGCCAGCA
TTACAGACTGGCTGACGAATCTGCGGCGGAAGATCCTCAGAAAAAATGATCGGGCCTGAA
TTCATCACGACGGCGCGTTCAATAACGTTGGAAAGCTCTCGAATATTTCCCGGCCATGAC
CAGGCGGTAAGCAGTGACATTGCCATCGGATCGATGTCGATAATATCGCGCTGATTCTCA
CTACTGAATTTTTGCAAAAAGTGATTAGCTAACAGGGAAATATCTTCCCGGCGATCGCGC
AGAGGCGGCAGTATTAAATGAATAACGTTAAGGCGATAAAAGAGATCTTCACGGAAGGTG
CCTTCTTTTACCATTGCCTGCAAGTCGCGGTTGGTGGCAGCAATGATGCGGATATCAACT
TTTATGGTCTGATGGCCGCCAATCCGTTCAAATTCCCGTTCCTGCAGAATGCGTAGTAAT
TTGGCTTGCAGTACCAGCGGCATTTCGCCAATTTCGTCGAGGAGCAGAGTACCTTCGTTG
GCACGTTCAAATAATCCCTGACGCAAGGTTTGTGCACCAGTAAATGCACCTTTTTCATGA
CCAAACAGTTCACTTTCGAGCAACGATTCCGGCAGCGCCGCGCAGTTGACTTTAATGAAC
GGCCCCTTTGCCCGCCGCGAATTGTAGTGAATCGCTCTGGCAATCAACTCTTTCCCGGTG
CCGCTTTCACCGCTAATCAAGACGCTGGCCTGAGAAAGGGCAATTTTGGCGGTGTCTTTG
CAGATATCCATCATCGCCGGGCTGTTGGTGAGAATGTGCCCCCATTGCCAGCTGGTGCTC
AGTGCCTGGTGCAGATGACGGATCTCTTTTTTCATTGACTGGAGTTGTAAAGCGCGCTGA
ACGATTAAATTCAACTCATCGAGATCAAACGGTTTAATAACATAGTCGAAGGCCCCGCAG
CGTAGCGCTTCGACGGCGGTTTCCACTTCAGCATAGGCCGTCATCAGAATAACGGGTGTC
CGGGTCTCATTACTGCGCATCTCCTTTAGTGCCTTGATGCCGTCCATCTCTGGCATGCGG
ATATCCATCAACACCACGTCAGGGTGAATATCAGCAAACAGGTGTAATGCTGTGCGTCCG
TTGTTCGCACAATGTGTTTCGAAACCTTGTAGTGCAAAAGCGGTGCTCAGCATACGGCGA
ACATTATCTTCATCATCCACAATAAGGATGCGATTAATAGCAGTCATACAGTCTGATTTC
CCTGCGGGTTGATTGGTAAAATAAGCGTGAAGGTTGCGCCGTAGCCCGGCAAACTGGCGA
CGCGAATATCACCCTGATGGGCATTAATGATGCGTTGACTTAACGCCAGACCAAGCCCGG
TTCCTGAGGCTTTGGTGGTGAAAAAGGGATCGAAGATCTTTTTTTGCAGCGAGAGATCAA
TGCCACAGCCGTTGTCCTCTATCGAAATGGCCTGTTGTGAGTCGCTGTATTGCCAGGTTT
GAATGCGAATTTTCCCTCGTGCGCTGATAGCCTGGACGGCATTGATCAGGATATTCAGTA
GTACCTGTTTGAGCAGTTCACGATCGGCGTTAATCGGGTTTAATTCATTATCCAGTTCGC
TTATGAAGTCGACCCGCGCTTGTACGCCGGCGGTTTGTACCAGTACCAGAGTTTCTTCAA
CCAATGCATTGAGACTGACTTGTTGCCATTGACTGTGGCGTGGACGTGAAAATTCGAGCA
ATTGCTGAATAACTTTGTTAATTGAATCGATTTCTTTGAGTACTACGGACAGATATTCCT
GATGTATTAGGTCGCTGGTTTGTTGGCGCAAGATCTGTACATAACCACGAATAGCCGTTA
GCGGATTACGTACTTCATGCGCGACGCCAGCCATCAGCTCACCCAGTGTGGCGAGGCGTT
CTGCTTGCGCCATGCGGCGCTGGGTTTCTTTGCGGGCAGTTAAATCAGAGAAAATAACCA
AAGCACCTATCATTTCACCATGCGTGTTATGAATACGACTGGTAGTGACACTGAGTTCAA
TGGTGCGGTCACGGCCTGGAAAACTGATCTCCAGCGCTACATGTTCGGTGCCATGTTCCA
GCGTATCCAGTACTGGACTGTAGAACTGAGTATTGTCGAACAACATGGAGTAAGGCTGCC
CTACCAGTTCATGACGTTGATAGCCAGTGATGACTTCTGCTGCCGGGTTCATGGTGGTTA
CATCACCCTGGCGGTCAATGGCAATGACGCCATCGGCAGCGTTTTCAATAATCAGATCGT
TAAGTGTCCGCGTTTCACGCAGTGCCTGGGCGAGGTTGTTAACACTCTGACTGATTTGCC
CCATTTCACCGGGCAATTGTGGTAATCGAGTGGGAATATTTTGTGCCAGAGTCGAGAGGC
CATCGGTGATGATATCAATATTGGCGCTCAGGCGACGGGAGAAAAGGACAATCAACAGCA
GGCTTATCAGCAAACCGGCGGTGAGCACAATGATAATCCTCACATCCATTTTCCAGGCCT
GGCGGCGAATATCTTCGGTTAATTCATTGGCCCAGATATAGCCGAGAATTTCACCATTAC
GCTCAATGGGGATCATTGAATTCAAAATATCGCCGCGCACCTGCCTGCCTGAATAAACCA
AAGGGGTATTTGTACGCATGACTTCGCGACCAGGGTGATCTGCGGCAATGGTAACGCCCA
CATTATTCTGATATAGCGCTGAAGGCGCGTAGGTGATTATCGCATCCAGCGTTTTGTTGT
AATAACCAGCGCCGATGCCAGGGAAGGCGTGAGTGATATTTTCGGTAATGGGGGCAAGTT
CTGCATTTAATGCGCGGATACGCTCCTCACGTGGTAAGTCGATGTAGAGATCATAGCGAT
CGCCTAGTGCCTGATTAAGCAGGTTGACCACGGCAGAAAGTTTTTTCTCTTTTTCAGATA
AGACTGCTGAACGTCCTTCCGTTTCTACGATATAACCAATAGTAAGCGTTGGGACAATGA
CCATCAGGATTGCCATCAGGATCATTTGATTGCGTAAGCGGCGTGGATAAATCCACTTCA
TATAATGCATGCTGAAATCCACTAGTCTTGTCCGGTATATGACGATTATCAGAGGTTAAG
GTGATGATTTCTCGGCGGTGTATCATATTCCAGAGAAGAGAGAACATTGCGGTAACACGC
TTTTACCGCTACCTTAACCACACTCCATCGGTCACCTGAGGCGGAGCTTCGCCCCTTTGA
AATACCTTGCTTCTTTTCGTACAACCCTGAAAGCCTCGCGCTACATGTTCAGAGCATTGG
CGTTAGTGCTCTGGCTGTTGATTGCTTTTTCATCCGTTTTTTACATCGTTAATGCGTTAC
ATCAGCGAGAATCGGAAATTCGTCAGGAATTTAATCTGAGTTCCGATCAGGCTCAGCGCT
TTATTCAACGCACCTCTGATGTGATGAAAGAGCTGAAGTACATCGCTGAAAATCGCTTAT
CGGCAGAAAACGGTGTGCTTTCCCCGCGTGGACGAGAAACGCAGGCGGATGTGCCTGCGT
TTGAACCGCTGTTTGCCGACTCCGATTGTTCCGCAATGAGTAACACCTGGCGAGGTTCTC
TGGAGTCATTGGCGTGGTTTATGCGCTACTGGCGCGATAATTTTTCTGCGGCTTACGATC
TCAACCGGGTATTTTTAATCGGCAGCGATAACCTCTGCATGGCCAATTTCGGTCTGCGTG
ATATGCCAGTGGAACGCGATACCGCGTTGAAAGCTTTGCATGAACGCATCAATAAATATC
GAAATGCACCACAAGATGATAGCGGCAGTAACCTCTACTGGATCAGCGAAGGTCCGCGCC
CTGGCGTCGGGTATTTTTACGCGTTGACGCCAGTTTATCTGGCGAACCGGTTGCAGGCGC
TTTTGGGTGTCGAGCAGACCATCCGGATGGAGAACTTTTTCTTACCTGGTACGTTGCCGA
TGGGGGTTACCATTCTTGATGAAAATGGTCATACCCTGATTTCGCTTACCGGACCAGAAA
GTAAAATTAAGGGCGATCCTCGCTGGATGCAGGAACGCTCCTGGTTTGGCTATACGGAAG
GGTTCCGGGAGCTGGTGCTGAAGAAAAATCTGCCACCCTCATCGCTAAGCATCGTGTATT
CGGTGCCGGTTGATAAGGTGCTGGAACGCATTCGCATGTTGATCCTTAACGCAATTTTGC
TGAATGTGCTTGCTGGAGCTGCATTGTTTACTCTCGCGCGGATGTACGAGCGGCGTATTT
TCATTCCGGCGGAAAGCGACGCCCTGAGACTGGAAGAACATGAGCAGTTTAACCGCAAGA
TTGTCGCCTCCGCGCCAGTGGGTATCTGTATTTTGCGTACCGCAGATGGCGTCAATATTT
TAAGTAACGAACTGGCGCATACCTATCTCAATATGCTTACGCATGAGGACCGCCAACGGC
TGACACAAATTATCTGTGGGCAGCAGGTCAATTTTGTTGATGTCCTGACCAGCAACAATA
CCAATCTGCAAATCAGCTTCGTCCATTCGCGCTATCGTAATGAAAACGTGGCCATTTGTG
TGCTGGTGGATGTTTCTTCGCGCGTGAAGATGGAAGAGTCGTTGCAGGAGATGGCACAAG
CAGCGGAACAGGCGAGCCAGTCAAAATCGATGTTCCTTGCCACCGTCAGTCATGAGCTGC
GAACGCCGCTGTATGGCATTATCGGTAACCTGGATCTGTTGCAAACCAAAGAGTTACCGA
AAGGCGTCGATCGTCTGGTGACGGCAATGAACAACTCTTCCAGCCTGTTGTTGAAAATTA
TCAGCGATATTCTCGATTTCTCGAAGATTGAATCGGAACAGTTGAAGATCGAACCGCGTG
AGTTTTCACCGCGTGAAGTGATGAACCACATCACCGCCAACTATTTACCGCTGGTGGTAC
GCAAGCAGTTAGGCTTGTACTGCTTTATTGAACCGGATGTGCCAGTGGCCTTAAATGGCG
ACCCGATGCGTTTACAGCAGGTCATCTCCAATCTGTTGAGTAACGCCATAAAATTCACCG
ATACCGGCTGTATAGTTTTGCATGTTCGCGCTGATGGCGATTATCTCTCTATCCGTGTTC
GCGATACCGGCGTGGGGATTCCGGCGAAAGAAGTGGTGCGCTTGTTTGATCCCTTCTTCC
AGGTCGGAACGGGCGTACAGCGAAACTTCCAGGGGACCGGTCTGGGTCTGGCGATTTGTG
AAAAACTGATCAGCATGATGGACGGCGATATCTCGGTAGATTCAGAACCGGGAATGGGCA
GCCAGTTTACCGTGCGTATTCCGTTGTACGGCGCTCAGTACCCGCAGAAAAAAGGCGTGG
AAGGGTTGAGTGGTAAACGCTGCTGGCTGGCGGTCCGCAATGCGTCGCTCTGTCAGTTCC
TGGAAACCAGTTTGCAGCGCAGCGGCATCGTCGTAACAACATACGAAGGGCAGGAACCGA
CTCCCGAAGATGTGTTAATCACTGACGAGGTAGTGAGTAAAAAATGGCAGGGCAGAGCGG
TAGTGACCTTCTGTCGTCGACATATTGGTATTCCGCTGGAGAAAGCGCCAGGGGAGTGGG
TACACAGTGTGGCTGCCCCGCATGAGCTACCGGCATTGTTGGCGCGTATTTATTTGATCG
AGATGGAGAGCGACGATCCTGCTAACGCTCTGCCGTCGACGGACAAAGCGGTCAGCGATA
ATGACGATATGATGATTCTGGTCGTGGATGATCATCCGATTAACCGACGTCTGCTGGCAG
ATCAGTTGGGATCGTTGGGCTATCAATGTAAAACCGCGAATGATGGCGTCGATGCGCTTA
ATGTACTTAGCAAGAATCATATTGATATCGTGCTTAGCGACGTCAACATGCCAAATATGG
ATGGTTACCGCTTGACGCAACGCATTCGTCAGTTGGGACTGACGTTGCCGGTAATCGGAG
TAACTGCTAATGCGTTGGCTGAAGAGAAGCAGCGGTGTCTGGAGTCCGGTATGGACAGCT
GCCTGTCGAAGCCGGTAACGCTGGATGTAATAAAACAGACGCTGACGGTATATGCCGAGA
GGGTCAGGAAATCGCGGGAATCGTAGGACGGATAAGGCGTTTACGCCGCATCTGGCATTC
AGTGCAAATGCCAGATGCGACGCTGACGCCTCTTATCTGGCCTACTTTAATGTAATCTGT
TGAAATAATGGGAATCGTAGGCCGGATAAGGCGTTTACGCCGCATCCGGCAATCGGTGCA
AATGCCAGATAAGACACTAACGCGTCTTATCTGGCCTACAGATGATTAGTCTTTATCTGC
CGGACTTAAGGTCACAGAAGAGAGATAATTCAGCAGGGCGATATCGTTCTCGACACCCAG
CTTCATCATCGCAGATTTCTTCTGGCTACTGATGGTTTTAATACTGCGGTTCAGCTTTTT
AGCGATCTCGGTCACCAGGAAGCCTTCCGCAAACAGGCGCAGAACTTCACTCTCTTTTGG
CGAGAGACGCTTGTCACCGTAACCACCAGCACTGATTTTTTCCAACAGGCGAGAAACGCT
TTCCGGGGTAAATTTCTTCCCTTTCTGCAGCGCGGCGAGAGCTTTCGGCAGATCGGTCGG
TGCACCTTGTTTCAGCACGATCCCTTCGATATCCAGATCCAATACCGCACTAAGAATCGC
CGGGTTGTTGTTCATAGTCAGAACAATGATCGACAGGCTTGGGAAATGGCGCTTGATGTA
CTTGATTAAGGTAATGCCATCGCCGTACTTATCGCCAGGCATGGAGAGATCGGTAATCAA
CACATGCGCATCCAGTTTCGGCAGGTTGTTGATCAGTGCTGTAGAGTCTTCAAATTCGCC
GACAACATTCACCCACTCAATTTGCTCAAGTGATTTGCGAATACCGAACAAGACTATCGG
ATGGTCATCGGCAATAATTACGTTCATATTGTTCATGTAATAGGCTACCTTGCTACAGCA
AGCTCTTGACATAACTGTCAATGTCGCTGATGTATTTTTCTATTCCTGGAACATCCTTCT
CACGAATCAGATGTTCCAGCGTTTCACATAACTGCTTGCCGGGTACCAGATTTAGCATGG
CAAATACGCCTTTAAGACGATGAGCCGTTTGGGCTAACGCAGCAAAGTCACTGGTTGCTG
CTTCAGTATACAGCCTCTTAACATCATCCGGTACTGTGTCTACAAAGAGCGCATAATAGC
CGCTGGCATGGAGTTGCGCATTTTCATCTCCGCCCAGAGGCGATTCTGTCACCTCTTCCT
GCGCCAGTTGCACTTCAATTAATTGTAAGACCGCTTCCTGCATAGCGTTGCTCATATTGA
AGTTGACGCACAATTGACCAGGCCCAATTTCCCGTACGCCAGACTCATCATCGCTTAAAA
GCAAGCCAGAGGCAGTAAGATTAGACGGATTATCCGTTAAAAAGATATCATAATCTTGAC
TAATTAATCTTTCATCGGGTGTGATACAGGTTGCACCCCAATTTTCTAACTGGCGAGTGA
CAATATTCCGAATTTCTGCCGAAGTAACATCCACCATTACGCAGACATCATCCAGTAAAC
GCTCTTCTTCCTCTTCAACTTCCGGGTCAGCTGCGAGCATTTTGATATGCACAGAGTAGC
GTGTACCAAGCCCATCCCGCGTTTTGATGTTTAAATGACCGCCCAGTTTACGTGCCAGTT
GATCGCTCAGCCAGAATGCCAGCGGGTCCGCCTTGCCATAGCGATCGTTTTGGGTCTGGT
TGATAAACGGGAAGTGCAAATTATCCATTTCATGAATGCTTACGCCTTCTCCGGTGTCCA
GAATGCGGAACGTCAGGCGGTCTTCGGAGGACTCATCCTGATCAACCTCAAGGGTGATTT
TTCCCAATTGCGTTGAGGTCACGGCATATTGCATCAGTAGCAGCAAAATACGTCGTAAGG
CATCGCGATCGCCACGGCGCATATCGTGTGCTTTCAGATGATTGTTAATCAGCAGTTGCA
GACCTTTACGCTTGATGGCAGGCAACACTGAAGGCACAACTTCATCAATTAAATCCTGCA
CGGAGAACAGCACCGTCTCACTTTTCCAGCTATCGTCCGCAAGCATGTTCGCTAACTGTA
TTTCATCGACCAGCCGCACCAGCACATCTGCCTGATTCGCCAGTTGTTTGCTTTCCGGGG
CGTTGAGTTTAGCCGCGCTCTCCGCCAGGGACTGTGCAGGTTCTTTCAGCGCATCGCCAA
TGTTTTTCATAAAGGTCATCCGCCCCTGCTGGTTTTTCTCATACAGACGCTGCGCCTGCT
TGAGTTTCTTGTTTACCAGCACTTCGCGATCCTGATCGCGAATAATGAAAATTTGTGTGC
GCGGCGCGACCTGGCTGCGGAACATGCGGATCTCATACAGCTCGTTATTGATCGTCGCCT
GAATAATCCCCTGATGCTGTTCCGCCATGGTGGTGATGTTTTGCAGATTCAAATGCGGCA
GCAAATGATCGGCAATTTTGTTACTTATGACAGTGCGGTTCGATTCCTGATCGTGAACCA
GCAGGCCGAGCGGCAGCAGTGAGACTATCTCTTCATTGATTGCCCGTAAAATGCGCAATT
CGTTATTGACCGCCGTGTTGGGTAGACTTTCTGTACTGCGACTGGAGAAATGGCGAAATG
TGGTATAGCCAAATAACGCCAGCGCCAGCAAACCGATGTTCAGCAGCAGTGGCAGCAGAA
TGTTTTGCAACGTATCCAGCAATAAGGTGCCATAAGGAACCTGCCAGACCAGGCGCATAT
CAGTAGAGTTGAGTGCCGAGGAGATTTCAATCTTCGTACTGTTAAAGTGGATACTGACGC
TATCCGTCCCTTCTTTCTCATTATCATTGTTTCCCGTTGCCGTCGCGTCTGGCTCAAGGC
GGAAACTGTCCAGCGGCATACCCGGTGGGATCAAATCATTAATCGGCAGATCAAAAGCCA
CGACCGTTGCCAGATGTCCTGGCTGGTTAAAGGTAGTACGCAAGGTAAAGTAATGACCGT
TCTGCCAGGCCAGGCGGCGCATGTTAGAAAAACTTTCGCGTTCATCGAGGGCGTTGGCCT
GTTGCAACATCTCTGCACGACGTGAATCAACAATGTCACTGACGGTCGATTCTTTAAATC
CGGAGGTGAGATCTTTGAGGGACAGGGTTGAGATCAGTACCAGACTGTTATCCTGACCAT
TCAGGTAATACATTGACCACGGTACATTTTCTGCGCCCCACAATGTATCCAGATAAGTGG
ACATCCGTTGAGTCATCTCAAGCGTTGAGTTGTCGTGAGAGCCAAAGATTAACGCTTCCG
TTTTGCGGCGCGGTTTTTCCAGATAGTAGACATCCTGTTTCAGGCGCGTCTCTTGTAAAC
CTTCGCCGGAGGAGGGGGAGGTCGTCGCGGCAATGTTGTCGTAGATCTGCCAGGTCACGT
AACGCCAGGTATCGACGCGCTTTTGGATTGCGTGGGTAATGTCGACAATCTGGTAACTTT
TATCTTTCAGCCAGGCGTTAACGGCGCTTTGTACCATTACACCCATCGTCACCAGTAACA
CAATGATCAACAGTAAAAAGAAGCGGGTAATGCTCCCGGGTAGGAGTGAAAAGCGGGTCG
TGGCCGTTGTCTCTTTCTGACGCATTCGTGTTTATGACCTGTTAAAACTTCGCGAAGTGA
TAGGGCAGTATAAAGGGTACAGTGTGAAATTCCAGACTCTTACCTGATTGATGATTCTCT
ATTCTCCTGTGATATTTATCATCCTGTATGGGGGGAAATAGATGTACAAGCGCCATTTTG
CTGTACAAATAACCTACGAAAAGCCCAACGAAATTAATTGCAAATAAACGAAAATTGCTG
GAAATTATGCTGATGTTAATTATTTGTGAAATAGTTAACAAGCGTTATAGTTTTTCTCTG
GTAGCACAGAATAATGAAAAGTGTGTAAAGAAGGGTAAAAAAAACCGGATGCGAGGCATC
CGGTTGAAATAGGGGTAAACAGACATTCAGAAATGAATGACGGTAATAAATAAAGTTAAT
GATGATAGCGGGAGTTATTCTAGTTGCGAGTGAAGGTTTTGTTTTGACATTCAGTGCTGT
CAAATACTTAAGAATAAGTTATTGATTTTAACCTTGAATTATTATTGCTTGATGTTAGGT
GCTTATTTCGCCATTCCGCAATAATCTTAAAAAGTTCCCTTGCATTTACATTTTGAAACA
TCTATAGCGATAAATGAAACATCTTAAAAGTTTTAGTATCATATTCGTGTTGGATTATTC
TGCATTTTTGGGGAGAATGGACTTGCCGACTGATTAATGAGGGTTAATCAGTATGCAGTG
GCATAAAAAAGCAAATAAAGGCATATAACAGAGGGTTAATAACATGAAAGTTAAAGTACT
GTCTCTCTTGGTCCCAGCTCTGCTGGTAGCAGGCGCAGCAAACGCTGCTGAAGTTTACAA
CAAAGACGGCAACAAATTAGATCTGTACGGTAAAGTAGACGGCCTGCACTATTTCTCTGA
CAACAAGTCAGAAGACGGCGACCAGACCTATGTACGTCTTGGTTTCAAAGGCGAAACTCA
GGTTACTGACCAGCTGACCGGTTACGGCCAGTGGGAATATCAGATCCAGGGCAATACCTC
TGAAGACAACAAAGAAAACTCCTGGACCCGTGTGGCATTCGCAGGTCTGAAATTCCAGGA
TGTTGGTTCTTTCGACTACGGTCGTAACTACGGCGTTGTTTACGACGTAACTTCCTGGAC
CGACGTACTGCCAGAATTCGGTGGTGACACTTACGGTTCTGACAACTTCATGCAGCAGCG
TGGTAACGGCTTCGCGACCTACCGTAACACTGACTTCTTCGGGCTGGTTGATGGCCTGAA
CTTTGCTGTTCAGTACCAGGGCAAAAATGGTAGCGTAAGCGGCGAAGGCATGACCAACAA
TGGTCGTGGTGCTCTGCGTCAGAATGGCGACGGTGTCGGCGGATCTATCACTTATGATTA
CGAAGGCTTCGGTATCGGTGCTGCAGTTTCCAGCTCCAAACGTACTGATGCTCAGAACAC
CGCTGCTTACATCGGTAACGGCGACCGTGCTGAAACCTACACTGGTGGTCTGAAATACGA
TGCTAACAACATCTACCTGGCTGCTCAGTACACCCAGACCTACAACGCAACTCGCGTAGG
TTCCCTGGGTTGGGCGAACAAAGCACAGAACTTCGAAGCTGTTGCTCAGTACCAGTTCGA
CTTCGGTCTGCGCCCGTCTGTAGCATACCTGCAGTCTAAAGGTAAAAACCTGGGCACCAT
CGGTACTCGTAACTACGACGACGAAGATATCCTGAAATATGTTGATGTTGGTGCAACCTA
CTACTTCAACAAAAACATGTCCACCTACGTTGACTACAAAATCAACCTGCTGGACGACAA
CCAGTTCACTCGTGACGCTGGCATCAACACTGATAACATCGTAGCTCTGGGTCTGGTTTA
CCAGTTCTAATCTCGATTGATATCGAACAAAGGGCCTGCGGGCCCTTTTTTCATTGTTTT
CAGCGTACAAACTCAGTTTTTTGGTGTACTCTTGCGACCGTTCGCATGAGGATAATCACG
TATGGAAATAAGCTTTACCCGCGTGGCACTGCTGGCTGCCGCGCTCTTCTTTGTTGGTTG
CGATCAAAAACCACAACCCGCCAAAACCCACGCTACTGAAGTTACCGTTCTTGAAGGCAA
AACCATGGGTACCTTCTGGCGTGCCAGCATCCCGGGCATTGATGCCAAACGCAGTGCCGA
ACTTAAAGAAAAGATTCAGACCCAGCTGGACGCCGACGATCAGCTGCTTTCGACCTATAA
AAAAGATTCCGCGCTGATGCGCTTTAACGACTCGCAAAGTTTGTCGCCGTGGCCGGTAAG
TGAAGCGATGGCCGATATCGTCACCACCTCGCTGCGCATTGGCGCAAGGACCGATGGTGC
GATGGATATAACCGTCGGGCCGCTGGTGAATCTGTGGGGCTTTGGCCCGGAACAACAGCC
GGTTCAAATTCCGAGCCAGGAACAGATCGATGCGATGAAAGCCAAAACCGGCTTACAGCA
CCTGACGGTCATTAATCAGTCGCATCAGCAATATCTGCAAAAAGACCTGCCGGATTTATA
TGTCGATCTCTCCACCGTCGGTGAAGGTTATGCGGCGGATCACCTGGCACGCTTGATGGA
GCAGGAAGGGATTTCCCGCTATCTGGTGTCGGTGGGCGGCGCGCTGAACAGCCGTGGTAT
GAACGGTGAAGGCCTGCCGTGGCGGGTAGCGATTCAAAAACCAACCGATAAAGAAAACGC
GGTTCAGGCTGTGGTGGATATCAACGGTCATGGGATTAGCACCTCTGGCAGCTACCGTAA
CTATTACGAATTGGACGGCAAACGTCTTTCCCATGTTATCGATCCGCAAACCGGGCGTCC
CATCGAACACAATCTGGTATCCGTGACGGTGATTGCTCCGACGGCGCTGGAAGCCGATGC
CTGGGATACTGGCTTGATGGTACTCGGGCCGGAGAAAGCCAAAGAGGTTGTTCGCCGGGA
AGGGCTGGCGGTTTATATGATCACCAAAGAAGGCGATAGCTTTAAAACCTGGATGTCACC
ACAGTTTAAAAGCTTCCTTGTCAGCGAAAAAAATTAAAGCGCAAGATTGTTGGTTTTTGC
GTGATGGTGACCGGGCAGACTAAAGGCTATCCTTAACCAGGGAGCTGATTATGAAAAACG
CCACATGCTTAACTGACGATCAACGCTGGCAATCTGTCTTAGCCCGCGACCCGAATGCCG
ACGGCGAATTCGTTTTCGCCGTGCGCACCACAGGCATCTTTTGCCGTCCGTCTTGCCGCG
CCAGACATGCCTTGCGGGAAAATGTCTCCTTCTACGCAAATGCCAGCGAGGCACTCGCCG
CCGGATTTCGCCCCTGCAAACGCTGCCAACCTGATAAAGCCAATGCCCAGCAACATCGGT
TGGATAAAATCACCCACGCGTGTCGACTGCTGGAACAGGAAACGCCTGTAACGTTGGAAG
CCTTAGCTGACCAGGTGGCGATGAGTCCATTTCATCTACATCGGTTGTTTAAAGCGACTA
CCGGAATGACGCCTAAAGCCTGGCAACAGGCCTGGCGCGCTCGCCGTTTGCGCGAATCGC
TGGCGAAAGGGGAGAGCGTGACGACGTCTATTCTTAACGCCGGATTCCCCGACAGCAGCA
GTTACTACCGCAAAGCTGACGAAACGCTGGGCATGACGGCTAAACAATTCCGTCACGGTG
GCGAAAATCTGGCGGTGCGTTACGCGCTGGCTGATTGTGAGCTGGGTCGTTGCCTGGTGG
CAGAAAGCGAGCGGGGGATTTGCGCGATATTGCTGGGCGATGATGACGCGACATTAATCA
GCGAGTTGCAGCAGATGTTTCCCGCTGCCGACAACGCGCCTGCCGATCTGATGTTTCAGC
AACATGTGCGTGAAGTGATCGCCAGCCTCAATCAACGCGATACGCCGCTGACGTTACCGC
TGGATATTCGCGGCACTGCTTTTCAGCAACAAGTCTGGCAGGCACTGCGCACGATACCTT
GCGGTGAAACCGTCAGTTATCAGCAACTGGCTAACGCCATCGGCAAACCGAAAGCGGTAC
GGGCCGTTGCAAGTGCCTGTGCCGCCAACAAGCTGGCTATCGTTATACCCTGTCATCGGG
TAGTACGCGGTGATGGATCGCTTTCAGGTTACCGCTGGGGCGCGTCGCGCAAAGCGCAAC
TGCTGCGCCGCGAAGCTGAGAATGAGGAGAGGTAATGTTGGATCTGTTTGCCGATGCTGA
ACCGTGGCAAGAGCCACTGGCGGCTGGTGCGGTAATTTTACGGCGTTTTGCTTTTAATGC
TGCGGAGCAACTGATCCGCGATATTAATGACGTTGCCAGCCAGTCGCCGTTTCGCCAGAT
GGTCACCCCCGGGGGATATACCATGTCGGTGGCGATGACCAACTGTGGGCATCTGGGCTG
GACGACCCATCGGCAAGGTTATCTCTATTCGCCCATTGATCCGCAAACAAATAAACCGTG
GCCCGCCATGCCGCAGAGTTTTCATAATTTATGTCAACGTGCGGCTACGGCGGCGGGCTA
TCCAGATTTCCAGCCAGATGCTTGTCTTATCAACCGCTACGCTCCTGGCGCGAAACTGTC
GCTGCATCAGGATAAAGACGAACCGGATCTGCGCGCGCCAATTGTTTCTGTTTCTCTGGG
CTTACCCGCTATTTTTCAATTTGGCGGCCTGAAACGAAATGATCCGCTAAAACGATTGTT
GTTGGAACATGGCGATGTGGTGGTATGGGGCGGTGAATCGCGGCTGTTTTATCACGGCAT
TCAACCGCTGAAAGCGGGGTTTCATCCACTCACCGGCGACTGCCGTTACAACCTGACATT
CCGTCAGGCAGGTAAAAAAGAATAAAAATAAGAATTATTATTGCTGTGCGCGCGAAGATG
TTTAAACTGCGGGCTGTAATTCATTGTCCGGGTTTTCTGCATGGAACTTCTTGTACTTGT
CTGGCGGCAGTATCGCTGGCCATTTATCAGTGTGATGGCGCTAAGCCTCGCCAGTGCGGC
TTTAGGCATTGGCTTAATTGCTTTTATCAATCAGCGCCTTATCGAAACGGCGGATACCAG
TCTGCTGGTGTTGCCGGAGTTTCTGGGATTATTGCTGCTGTTGATGGCAGTCACTCTCGG
ATCGCAACTGGCGCTCACCACTTTGGGGCATCACTTCGTTTACCGACTGCGTAGTGAATT
TATCAAGCGGATTCTGGATACCCACGTCGAGCGCATTGAACAACTCGGTAGCGCCTCGTT
GCTGGCGGGATTAACCAGCGATGTGCGCAATATCACCATTGCTTTTGTGCGTCTGCCGGA
ACTGGTGCAGGGGATCATTCTCACTATCGGTTCCGCGGCGTATCTGTGGATGCTGTCGGG
CAAAATGTTGCTGGTAACGGCTATCTGGATGGCAGTCACCATCTGGGGCGGTTTTGTGCT
GGTGGCGCGGGTGTACAAACATATGGCGACCCTGCGTGAAACCGAAGACAAGCTGTACAC
GGATTTTCAAACCGTACTCGAAGGGCGCAAAGAGCTGACTCTGAACCGGGAACGCGCCGA
GTATGTGTTTAACAACCTCTACATTCCTGATGCGCAAGAGTATCGCCATCATATTATTCG
CGCAGACACCTTCCATCTTAGTGCCGTGAACTGGTCAAACATCATGATGCTGGGCGCAAT
CGGTCTGGTGTTCTGGATGGCGAACAGTCTCGGTTGGGCTGATACCAACGTTGCCGCGAC
CTATTCGTTGACGTTGTTATTCCTGCGTACGCCGCTGCTTTCGGCGGTTGGCGCATTGCC
GACGCTGCTGACGGCGCAGGTGGCGTTTAACAAGCTGAACAAATTCGCGCTCGCGCCTTT
CAAAGCAGAGTTTCCGCGCCCGCAGGCGTTTCCCAACTGGCAAACGCTGGAGCTGCGTAA
CGTGATGTTTGCTTATCAGGATAACGCGTTTTCCGTTGGTCCGATTAATCTCACCATCAA
ACGTGGCGAGCTGCTGTTTCTGATTGGCGGCAACGGTAGCGGAAAATCGACGCTGGCGAT
GTTGTTGACGGGCTTGTATCAGCCACAAAGCGGCGAAATCTTGCTGGATGGCAAACCTGT
CAGCGGCGAACAACCGGAAGATTATCGCAAACTGTTTTCGGCAGTGTTTACCGATGTCTG
GCTGTTTGATCAACTGCTGGGGCCGGAGGGTAAACCCGCTAACCCGCAACTGGTTGAGAA
GTGGCTGGCGCAGCTGAAAATGGCTCATAAGCTTGAGTTAAGCAACGGGCGTATTGTTAA
CCTGAAGTTATCAAAAGGGCAGAAAAAACGCGTGGCGCTGTTGCTGGCGCTGGCAGAAGA
ACGCGATATTATCCTGCTGGATGAATGGGCGGCGGATCAGGATCCACACTTCCGTCGTGA
GTTTTATCAGGTGTTGCTGCCGCTGATGCAGGAGATGGGTAAAACTATTTTCGCCATCAG
TCATGATGATCATTACTTTATCCACGCCGACCGCCTGCTGGAGATGCGCAACGGGCAACT
TAGCGAGCTGACGGGCGAAGAGCGCGATGCCGCTTCGCGTGATGCCGTTGCCCGGACGGC
ATAATATTACGACGCTGACCTGGCGGACTGCTGCCGCCAGGTCAATATGCTAAAAATCCC
TTCATTTCTAATAACCCTATAATTAATCAACGAAATTATAATGTTTCTAAAATTAGAATA
TAATTTATAAACATTATTTAAATGTTGTTACTTAAGTGTTACCGTTGATGCCGCGCAAAT
CTCACCTGCAATAAAGCGACTAAAAGTAAGGCATTAACAAGATGAAAAAAGTGACTGCCA
TGCTCTTCTCGATGGCCGTGGGGCTTAATGCCGTTTCGATGGCGGCAAAAGCGAAAGCGT
CCGAGGAGCAGGAAACTGATGTACTGTTGATTGGCGGCGGCATTATGAGCGCCACGTTGG
GGACCTATTTACGCGAGCTGGAGCCTGAATGGTCGATGACCATGGTGGAGCGCCTGGAGG
GTGTCGCGCAGGAGAGTTCGAACGGCTGGAATAACGCCGGAACCGGGCATTCTGCACTGA
TGGAACTGAACTACACCCCGCAAAACGCCGATGGCAGCATCAGTATTGAAAAAGCAGTCG
CCATTAACGAAGCATTTCAGATTTCCCGCCAGTTCTGGGCGCACCAGGTCGAGCGCGGCG
TGCTGCGTACTCCGCGTTCATTTATCAATACCGTTCCGCATATGAGCTTTGTCTGGGGCG
AGGATAACGTTAATTTCCTGCGCGCCCGTTACGCCGCGTTGCAACAAAGCTCGCTGTTTC
GCGGTATGCGTTACTCTGAAGATCACGCGCAGATCAAAGAGTGGGCACCGTTAGTGATGG
AAGGGCGCGATCCGCAACAGAAAGTGGCAGCCACGCGTACGGAAATTGGTACCGATGTGA
ACTACGGCGAGATCACCCGCCAGTTAATTGCTTCCTTGCAGAAGAAATCTAACTTCTCGC
TGCAACTCAGCAGCGAAGTCCGCGCCCTAAAGCGTAATGACGATAACACCTGGACCGTTA
CCGTTGCCGATCTGAAAAATGGCACTGCACAGAACATCCGTGCGAAATTTGTCTTTATCG
GCGCGGGCGGTGCGGCACTGAAGCTGTTACAGGAATCGGGGATTCCGGAAGCGAAAGACT
ACGCCGGTTTCCCGGTGGGCGGTCAGTTCCTTGTTTCGGAAAACCCGGACGTGGTTAATC
ACCATCTGGCGAAGGTTTACGGTAAAGCATCCGTTGGCGCACCACCGATGTCGGTTCCGC
ATATCGATACCCGTGTTCTGGACGGTAAACGCGTAGTGCTGTTTGGGCCATTTGCCACCT
TCTCAACCAAATTCCTCAAAAACGGTTCATTGTGGGATCTGATGAGTTCCACCACCACCT
CTAACGTGATGCCGATGATGCACGTCGGGCTGGATAATTTCGATCTGGTGAAATATCTGG
TGAGTCAGGTGATGTTGAGTGAAGAGGATCGTTTTGAAGCGTTGAAAGAGTACTATCCGC
AAGCGAAAAAAGAGGACTGGCGTTTGTGGCAAGCGGGGCAGCGTGTGCAGATTATCAAGC
GTGATGCCGATAAAGGTGGTGTACTGCGTCTGGGTACTGAAGTGGTCAGTGACCAGCAAG
GAACCATTGCCGCGCTCCTGGGGGCATCGCCAGGGGCGTCAACCGCCGCGCCGATTATGT
TGAATCTGCTGGAAAAAGTATTTGGCGATCGCGTTTCCAGCCCGCAATGGCAGGCTACGT
TGAAAGCGATCGTTCCGTCTTATGGACGCAAGCTGAACGGTGATGTAGCGGCAACAGAAC
GCGAGTTGCAGTACACCAGCGAAGTGCTGGGGCTGAAATACGACAAACCGCAAGCAGCAG
ATAGTACGCCGAAACCGCAGCTGAAACCGCAACCCGTTCAAAAAGAAGTGGCGGATATTG
CGTTGTAATGATGTGCCACATCCGGCATGGTATGCCGGATGTGGCGTATGCTGATAAGAC
GCGCCAGCGTCGCATCAGGCAACCGGCTCGGGCGTTAGATGTTGGATGCGGCGTAACCGC
CTTATCCAACCTACGGGGTGGAGCACTTCACAGCGGTGTAGGCCTGATAAGACGCGTCAG
CGTCGCATCAGGCAACCGGCTCGGACGTTGGATGTCGGATGCGGCGTAACCGCCTTATCC
GACCTACGGGGTGGAGCACTTCACAGCGGTGTAGGCCTGATAAGACGCGCCAGCGTCGCA
TCAGGCAACCGGCTCGGGCGTTAGATGTCGGATGCGGCGTGACCGCTTTATCCAACCTAC
GGGGTGCCGCACTTCACGGCAGTTTAGCGAACTACCGCGTTGTCAATCTTCTCTTCCGCC
TTCCAGACGCGGTACTTCACATCTACATTGTCTGGCGTATACACCACGATCGGCAGCTTG
CTGTTGTAACGCAGCATTCCAGCATCACCCAGATACGCGGTGACAAATTTCTTCTCTTTT
TTGCCATCCGGGCAGGCCATCATCGTCGAAACCGGGGAACTGACTTTATCAAAGACATAA
TAATCATAGCCCCAGCCTTCCAGCGTTTTGCTTTCCAGCTTCCCGCCGAGACGATGCAAA
TTGCAATCGACTTCCAGCGTCTGACCGATTAACAGTTCTACTTTCAGGGTAGATTCCTCT
TCTTGCGGGGTTAACTGAATCACCTGACGCTTCATGCCTTTTTCAGCTTGTGGATAAGGC
GCGATTTTTTCCAGTGGCTGGACGCTCTCTGCCGCCCAGGCGGAAGTGGTGGCGAAAGCG
GCAAACAATACTGCAGGTAGAATGGTCTTCATTTTTTGCTTTCCTTCTTCATTTATAGGT
TTGCACCGATGATGTCGCTGAAGGTTAACATATTCATCAGATTTATTAATTTGCTTTATG
AATAACTTAAAGAATATTCAGACAATTTTACCTGCTCTTTTAGTGTTAAATTCTGATGAG
AGAGCAAACCAGCAGAAATATCTCTGGTGAATTAATTGCTATATAAATATATTTATAACC
ATTTGAAATGTGAGCAAAAGCCCGTTTTTGCCACGCTTCCCGCCACTCTTTTGATCCTGC
TACAGGTTTTACCTCGATCGGGGTATGCATCTTTGACACATCCTTTAATATCTTAGCGGC
TATAAAAATGGCTTATTAATTATGCGGTTTATTTGGTCGCTCTCAATTTTCAGAGCGCGT
TAATGATGGAAGGTCAATGTGAAGATTGATGCATCCCGTCGGGGCATACTCACTGGTCGC
TGGCGCAAAGCCAGTAACGGTATCCGTCCGCCCTGGTCCGGTGATGAATCTCATTTTCTG
ACCCATTGCACCCGCTGCGACGCTTGTATTAATGCTTGTGAAAACAACATTCTGCAACGC
GGCGCGGGCGGCTATCCGAGCGTTAATTTCAAAAATAACGAGTGCAGCTTCTGTTACGCC
TGCGCGCAGGCTTGCCCCGAATCGCTATTTTCTCCGCGCCACACCAGGGCCTGGGATTTG
CAGTTCACCATTGGGGACGCGTGCCTGGCGTATCTGTCAGTTGAATGCCGCCGCTGTCAG
GATAGCTGTGAGCCAATGGCAATTATCTTTCGCCCGACGCTCTCCGGGATCTACCAGCCG
CAACTTAATAGCCAACTTTGCAACGGATGTGGAGCATGTGCAGCCAGCTGTCCGGTATCA
GCCATAACTGCGGAGTATCTCCATGCACACTAACTGGCAAGTTTGCAGCCTGGTCGTGCA
GGCCAAAAGCGAACGAATTTCAGACATCAGCACCCAACTGAACGCCTTTCCCGGCTGTGA
AGTTGCTGTCAGCGACGCGCCGAGCGGTCAGTTGATTGTGGTGGTGGAAGCAGAAGACAG
CGAAACGCTGATCCAAACCATTGAGTCAGTACGCAACGTAGAGGGCGTGCTGGCGGTGTC
GCTGGTTTATCACCAGCAGGAAGAGCAAGGTGAGGAAACACCATGAAACTCAGTCGTCGT
AGCTTTATGAAAGCTAACGCCGTTGCGGCCGCTGCGGCGGCTGCCGGTCTCAGCGTGCCG
GGCGTTGCCCGCGCCGTTGTTGGTCAGCAGGAAGCCATCAAATGGGATAAAGCGCCGTGC
CGTTTCTGCGGTACTGGTTGCGGCGTTCTGGTCGGAACGCAGCAGGGGCGTGTGGTGGCC
TGTCAGGGCGACCCGGACGCACCGGTTAACCGTGGCCTGAACTGCATTAAGGGCTATTTC
CTGCCCAAGATCATGTACGGTAAAGACCGTTTGACGCAGCCGCTGCTGCGTATGAAAAAC
GGTAAATATGACAAAGAAGGCGAATTTACCCCAATCACCTGGGATCAGGCCTTCGATGTG
ATGGAAGAGAAATTCAAAACCGCCCTGAAAGAAAAAGGGCCGGAATCGATCGGTATGTTC
GGTTCTGGTCAGTGGACTATCTGGGAAGGTTATGCCGCGTCCAAGCTGTTTAAAGCGGGC
TTCCGTTCGAACAACATCGACCCGAACGCGCGTCACTGTATGGCGTCGGCAGTAGTTGGC
TTTATGCGTACCTTTGGTATGGATGAGCCGATGGGCTGCTATGACGACATCGAGCAGGCT
GACGCGTTTGTGCTGTGGGGCGCAAACATGGCGGAAATGCACCCGATCCTCTGGTCGCGC
ATCACTAACCGTCGTCTCTCTAACCAGAACGTCACCGTGGCGGTGCTTTCTACCTACCAG
CATCGTAGCTTCGAGCTGGCGGATAACGGCATCATCTTTACTCCGCAATCTGACCTGGTG
ATCCTGAACTACATCGCCAACTATATCATTCAAAACAATGCGATAAATCAGGACTTCTTC
AGCAAGCACGTCAACCTGCGCAAAGGTGCGACGGACATCGGCTACGGTTTACGTCCGACC
CATCCGCTGGAAAAAGCAGCGAAGAATCCGGGTTCTGATGCTTCCGAACCGATGAGCTTT
GAAGATTACAAAGCCTTCGTTGCTGAGTATACGCTGGAAAAAACCGCTGAAATGACCGGC
GTGCCGAAAGACCAGTTAGAACAACTGGCGCAGCTGTATGCCGATCCGAACAAGAAAGTC
ATCTCCTACTGGACGATGGGCTTCAACCAGCATACCCGTGGTGTGTGGGCCAACAACCTG
GTCTACAACCTGCACCTGCTGACCGGCAAAATTTCCCAGCCGGGTTGCGGTCCGTTCTCC
CTGACCGGGCAGCCTTCCGCGTGTGGTACTGCGCGTGAAGTGGGCACCTTTGCCCACCGT
CTGCCTGCGGACATGGTGGTGACTAACGAGAAACACCGTGATATCTGCGAGAAGAAGTGG
AATATCCCGAGCGGCACCATTCCGGCGAAAATCGGTCTGCACGCGGTGGCACAAGACCGT
GCGCTGAAAGACGGCAAGCTGAATGTTTACTGGACTATGTGTACCAACAACATGCAGGCC
GGGCCGAACATCAATGAAGAGCGTATGCCGGGCTGGCGCGATCCGCGCAACTTCATCATC
GTCTCCGATCCGTATCCGACAGTCAGTGCGCTGGCCGCCGACTTGATCCTGCCGACCGCA
ATGTGGGTAGAGAAAGAGGGCGCTTACGGTAACGCCGAACGCCGTACTCAGTTCTGGCGT
CAGCAGGTACAGGCACCGGGCGAAGCGAAATCGGATCTCTGGCAGTTAGTCCAGTTCTCC
CGCCGCTTCAAAACTGAAGAAGTATGGCCGGAAGAGCTGCTGGCGAAGAAACCGGAACTG
CGTGGCAAAACGCTGTACGAAGTTCTGTATGCCACCCCCGAAGTGAGCAAATTCCCGGTA
TCCGAACTGGCGGAAGATCAGCTGAACGATGAATCCCGCGAGCTGGGCTTCTATCTGCAA
AAAGGGTTGTTCGAAGAGTACGCATGGTTTGGTCGCGGTCACGGTCACGATCTCGCGCCG
TTCGATGACTACCACAAAGCGCGCGGTCTGCGCTGGCCGGTGGTGAACGGTAAAGAAACG
CAGTGGCGTTACAGCGAAGGTAACGACCCGTACGTGAAAGCGGGCGAAGGCTATAAGTTC
TACGGTAAACCGGATGGTAAAGCGGTGATCTTCGCGCTGCCGTTCGAACCGGCGGCGGAA
GCACCGGATGAAGAGTACGACCTGTGGCTCTCTACCGGACGCGTCCTGGAGCACTGGCAC
ACCGGCAGTATGACTCGCCGTGTGCCGGAACTGCACCGTGCCTTCCCGGAAGCGGTCCTG
TTTATTCACCCGTTGGATGCGAAAGCGCGCGATCTGCGCCGTGGCGACAAAGTGAAAGTG
GTTTCTCGCCGTGGCGAAGTGATCTCGATTGTCGAAACGCGCGGTCGTAACCGTCCGCCG
CAGGGCCTGGTGTACATGCCGTTCTTCGACGCCGCACAGCTGGTTAACAAACTAACGCTG
GACGCGACCGATCCGCTCTCGAAAGAGACGGACTTCAAGAAGTGCGCGGTCAAACTGGAG
AAGGTGTAAGCCATTATGTCCCGGTCAGCGAAACCTCAAAATGGTCGCCGCCGCTTTCTG
CGCGATGTCGTTCGCACAGCAGGCGGGCTGGCTGCCGTGGGTGTGGCGCTGGGGTTACAA
CAGCAAACCGCACGCGCATCTGGCGTGCGGTTGCGCCCGCCCGGAGCCATAAACGAGAAC
GCCTTTGCCAGTGCCTGTGTGCGTTGCGGTCAGTGTGTTCAGGCTTGCCCTTACGACACC
TTAAAACTGGCGACGCTGGCCTCTGGCCTGTCGGCGGGCACGCCATATTTTGTCGCACGG
GATATTCCTTGCGAAATGTGTGAGGACATTCCGTGCGCCAAAGTGTGCCCGAGCGGTGCG
CTGGATCGTGAGATTGAATCGATCGACGACGCGCGGATGGGGCTGGCGGTACTGGTGGAC
CAGGAAAACTGTCTCAACTTTCAGGGGCTGCGCTGCGATGTTTGTTATCGCGAATGCCCG
AAAATTGATGAGGCCATCACCCTGGAGCTGGAGCGCAACACGCGTACCGGTAAGCACGCC
CGCTTTCTGCCGACGGTTCACAGCGACGCCTGTACCGGTTGCGGTAAGTGCGAAAAAGTG
TGCGTGCTGGAACAACCGGCAATCAAGGTGTTACCGCTGTCACTGGCGAAAGGGGAGTTA
GGTCACCATTACCGCTTCGGCTGGCTGGAGGGGAACAATGGCAAATCGTAAACGTGACGC
CGGGCGCGAGGCGCTGGAGAAAAAAGGCTGGTGGCGCAGTCACCGTTGGCTGGTGTTACG
TCGCCTTTGTCAGTTCTTCGTGCTGGGGATGTTTTTGAGCGGTCCGTGGTTTGGTGTGTG
GATCTTGCACGGCAACTACAGCAGTAGCCTGTTATTCGACACCGTTCCGCTGACCGATCC
GCTGATGACGCTGCAAAGTCTTGCCAGCGGTCATCTGCCTGCCACGGTGGCGTTGACCGG
TGCGGTGATTATCACCGTGCTCTACGCCCTGGCAGGAAAGCGATTATTTTGCAGCTGGGT
CTGCCCGCTGAACCCGATTACCGACTTAGCGAACTGGTTACGCAGGCGCTTTGACCTCAA
TCAGTCTGCGACGATCCCTCGCCACATTCGCTACGTACTGTTGGTGGTCATTCTGCTGGG
ATCGGCCTTAACTGGCACGCTCATCTGGGAATGGATCAACCCCGTTTCTCTGATGGGGCG
TAGCCTGGTAATGGGCTTCGGCAGCGGCGCGCTGCTTATTGTCGCGCTGTTTTTATTTGA
TCTACTGGTCGTTGAACACGGCTGGTGCGGGCACATTTGTCCGGTTGGCGCGCTGTATGG
CGTGCTGGGTAGCAAAGGTGTGATTACCGTTGCGGCCAGCGATCGGCAGAAATGTAACCG
CTGTATGGATTGTTTTCATGTTTGCCCGGAACCGCATGTGCTACGTGCCCCGGTGCTGGA
TGAACAAAGCCCGGTGCAGGTCACCAGCCGCGATTGCATGACGTGCGGTCGCTGCGTGGA
TGTCTGTTCTGAGGATGTATTTACAATAACTACACGATGGAGTTCGGGAGCGAAATCATG
AAAAGCCATGACCTGAAGAAAGCGCTGTGTCAATGGACGGCGATGCTGGCCCTGGTGGTA
AGCGGCGCGGTTTGGGCGGCTAATGGCGTCGATTTTAGCCAGTCGCCGGAAGTATCCGGG
ACGCAGGAAGGGGCCATTCGGATGCCAAAAGAGCAGGATCGGATGCCGCTGAACTATGTG
AATCAGCCGCCAATGATCCCGCATAGCGTTGAAGGTTATCAGGTAACGACCAATACCAAC
CGCTGCTTGCAGTGCCACGGTGTCGAAAGCTATCGCACCACTGGCGCGCCGCGTATCAGT
CCTACTCACTTTATGGACAGCGACGGCAAAGTGGGCGCGGAAGTGGCTCCGCGTCGTTAT
TTCTGTCTGCAATGTCACGTACCGCAGGCCGATACCGCGCCAATCGTGGGGAATACCTTT
ACCCCATCAAAAGGTTACGGGAAATAAGAGGTTATTATGGGAAATTCTGACCGTAAGCCT
GGTCTGATTAAGCGCCTGTGGAAATGGTGGCGTACCCCCAGCCGTCTGGCGCTGGGGACG
CTGCTGTTGATCGGTTTTGTCGGCGGCATCGTCTTCTGGGGCGGCTTTAACACCGGAATG
GAAAAAGCCAATACCGAGGAGTTCTGCATTAGCTGCCACGAAATGCGTAACACGGTGTAT
CAGGAATACATGGATTCCGTGCACTACAACAACCGTAGCGGCGTCCGTGCGACCTGTCCG
GATTGTCACGTTCCGCACGAGTTTGTGCCGAAGATGATACGCAAGCTCAAAGCAAGTAAA
GAGCTGTATGGTAAAATTTTTGGCGTTATTGACACGCCGCAGAAATTTGAAGCTCATCGC
CTGACGATGGCACAGAATGAGTGGCGGCGCATGAAGGACAATAACTCGCAGGAGTGCCGT
AACTGTCACAACTTCGAGTATATGGATACAACCGCCCAGAAATCGGTTGCCGCGAAGATG
CATGACCAGGCGGTGAAAGATGGGCAAACCTGTATTGATTGCCATAAAGGGATAGCGCAC
AAGCTGCCCGATATGCGTGAAGTCGAGCCAGGTTTTTAACAGGGTTATTGCGTGGGTATG
CTTGAAGCCAGAGAGTTACTTTGTGAGCGGGATGAACGAACCTTATTTAGTGGCTTGTCA
TTTACGCTGAACGCAGGAGAGTGGGTACAAATCACCGGTAGCAACGGCGCGGGGAAGACA
ACGCTTCTCCGTTTGCTGACGGGGTTGTCTCGCCCTGACGCAGGCGAGGTTCTCTGGCAA
GGGCAGCCCTTGCATCAGGTACGCGACAGCTACCATCAAAACCTGTTATGGATAGGCCAT
CAGCCGGGGATCAAAACCCGGCTGACGGCGTTAGAAAATCTGCACTTTTATCATCGCGAT
GGCGATACCGCACAATGTCTGGAAGCCCTGGCGCAGGCCGGGCTTGCCGGATTCGAAGAT
ATTCCGGTAAATCAACTTTCTGCCGGGCAACAACGCCGCGTCGCTTTAGCGCGTCTGTGG
CTGACCCGTGCCACGTTATGGATCCTCGACGAGCCTTTTACCGCGATTGACGTCAACGGC
GTCGATCGTCTGACCCAGCGTATGGCGCAGCATACGGAGCAGGGGGGGATTGTGATTCTG
ACTACCCACCAGCCGCTCAACGTTGCTGAAAGTAAAATTCGCCGCATTTCACTGACGCAA
ACGAGGGCCGTATGATGTTCTGGCGCATTTTCCGTCTTGAGCTGCGCGTAGCGTTTCGCC
ATAGCGCCGAAATCGCCAACCCGCTGTGGTTCTTCCTGATTGTAATTACCCTTTTTCCGC
TCAGTATCGGTCCGGAGCCGCAACTGCTGGCGCGTATTGCACCGGGCATTATCTGGGTTG
CAGCCCTGCTTTCATCCTTGCTGGCGCTGGAACGACTGTTCCGTGACGATTTGCAGGACG
GCAGTCTTGAACAATTGATGTTGTTGCCGTTACCCTTGCCCGCCGTTGTGCTGGCGAAGG
TGATGGCGCACTGGATGGTAACCGGTCTGCCGTTACTCATCCTTTCGCCACTGGTAGCAA
TGCTACTGGGAATGGATGTTTATGGCTGGCAAGTGATGGCGCTGACGCTGCTGCTGGGAA
CGCCTACGCTTGGCTTTCTCGGTGCACCGGGCGTGGCGCTGACAGTGGGACTTAAACGCG
GTGGTGTGCTGCTCAGCATACTGGTGTTACCGCTGACTATCCCATTACTCATCTTTGCCA
CCGCCGCGATGGACGCGGCTTCCATGCATTTGCCCGTTGACGGGTATCTGGCAATTTTAG
GCGCGTTGCTGGCAGGCACCGCGACATTAAGTCCTTTTGCGACGGCGGCAGCGTTACGAA
TCAGCATTCAATAACGCTGGATTACTGATTTTTGTTCGAGTCTGGTATCGAAACTATGTG
GAAAACACTGCATCAACTGGCGATCCCACCACGGCTGTATCAAATCTGTGGCTGGTTTAT
ACCGTGGCTGGCAATTGCCAGTGTGGTCGTGCTTACCGTCGGCTGGATCTGGGGATTCGG
CTTTGCTCCGGCTGATTATCAACAGGGAAATAGCTACCGCATTATTTACCTGCATGTGCC
TGCGGCGATCTGGTCGATGGGCATTTATGCATCAATGGCGGTGGCGGCGTTTATTGGCCT
TGTCTGGCAGATGAAAATGGCCAACCTGGCGGTGGCGGCGATGGCCCCCATTGGTGCCGT
GTTTACCTTTATTGCCCTGGTTACCGGCTCTGCATGGGGAAAACCGATGTGGGGCACCTG
GTGGGTATGGGATGCACGTCTGACTTCTGAACTGGTGCTGCTGTTTTTGTATGTGGGTGT
GATTGCCCTGTGGCACGCCTTCGACGACCGCCGTCTGGCGGGCCGTGCGGCAGGTATCCT
GGTGCTGATTGGCGTGGTGAATCTGCCGATTATTCATTACTCCGTTGAGTGGTGGAACAC
CCTGCATCAGGGATCAACGCGGATGCAGCAAAGTATCGATCCGGCGATGCGTTCGCCGCT
GCGCTGGTCGATTTTTGGCTTCCTGCTCCTGTCTGCCACGCTGACGCTGATGCGGATGCG
GAATTTGATTTTGCTGATGGAAAAACGCCGTCCGTGGGTGAGTGAACTGATACTGAAAAG
AGGCCGTAAATGACCCCTGCATTTGCTTCCTGGAATGAATTTTTCGCAATGGGCGGTTAC
GCCTTTTTTGTCTGGCTGGCGGTGGTGATGACCGTTATTCCGCTGGTGGTTTTGGTCGTG
CACTCGGTGATGCAGCATCGCGCAATTCTGCGTGGTGTGGCGCAACAGCGGGCGCGTGAG
GCGCGTTTACGTGCTGCGCAACAGCAGGAGGCTGCATGAATATTCGCCGTAAAAACCGCT
TGTGGATTGCCTGTGCCGTGTTGGCAGGGCTGGCGCTGACTATCGGTCTGGTGCTATATG
CGCTGCGCTCGAATATCGATCTCTTTTATACGCCGGGGGAAATTCTCTACGGCAAGCGTG
AAACTCAGCAGATGCCGGAAGTCGGTCAGCGTCTGCGCGTTGGCGGGATGGTGATGCCGG
GTAGCGTGCAGCGCGATCCCAATTCGCTGAAAGTGACCTTCACCATTTACGATGCTGAAG
GCTCAGTGGATGTCTCTTACGAAGGCATTTTGCCGGATCTGTTCCGTGAAGGGCAGGGCG
TTGTGGTGCAGGGCGAGCTGGAAAAAGGCAATCATATCCTCGCAAAAGAAGTGCTGGCGA
AACATGATGAAAACTACACGCCGCCAGAAGTTGAGAAAGCGATGGAAGCTAACCACCGTC
GCCCGGCGAGTGTTTATAAGGACCCAGCATCATGATGCCGGAAATTGGTAACGGGCTGCT
GTGCCTGGCGTTAGGGATTGCGCTGCTGCTGTCCGTGTATCCGCTATGGGGCGTGGCGCG
CGGAGATGCGCGCATGATGGCGTCTTCCCGCTTGTTTGCCTGGCTGCTGTTTATGTCTGT
GGCTGGCGCATTTCTGGTGCTGGTCAATGCTTTCGTGGTCAACGACTTTACCGTCACCTA
TGTTGCCAGCAACTCCAATACCCAGCTTCCGGTGTGGTATCGCGTGGCGGCTACCTGGGG
CGCACATGAAGGCTCACTGCTGCTGTGGGTGCTGCTGATGAGCGGCTGGACCTTTGCGGT
GGCGATTTTTAGTCAGCGTATTCCGCTGGATATTGTGGCCCGCGTACTGGCGATAATGGG
GATGGTCAGCGTCGGCTTTTTGCTGTTCATTCTCTTTACCTCTAACCCATTCTCACGCAC
GCTGCCGAACTTCCCGATTGAAGGGCGCGATCTTAACCCGCTGTTACAGGATCCGGGGCT
GATCTTCCATCCGCCTCTGCTTTATATGGGGTACGTGGGTTTCTCGGTGGCGTTTGCTTT
TGCCATTGCTTCTTTGCTGAGCGGGCGTCTGGACAGCACTTATGCGCGTTTTACTCGTCC
GTGGACGCTGGCGGCGTGGATTTTCCTGACGCTCGGCATTGTGCTCGGTTCCGCATGGGC
CTATTACGAACTCGGCTGGGGTGGCTGGTGGTTCTGGGATCCGGTAGAAAACGCCTCGTT
TATGCCGTGGCTGGTGGGGACTGCGCTGATGCACTCACTGGCGGTCACTGAACAACGCGC
CAGCTTCAAAGCGTGGACATTACTGCTGGCAATCAGTGCCTTCTCGTTGTGTCTGTTGGG
GACTTTCCTCGTGCGTTCCGGCGTGCTGGTATCGGTACACGCGTTTGCGTCTGATCCGGC
GCGCGGTATGTTTATCCTCGCCTTTATGGTGCTGGTGATTGGCGGTTCGCTGCTGCTGTT
TGCCGCGCGTGGACACAAAGTTCGCTCACGCGTAAACAATGCGCTGTGGTCGCGGGAATC
TTTGCTGTTAGCGAACAACGTTTTGCTGGTCGCCGCGATGCTGGTAGTGTTGCTGGGGAC
GCTGCTGCCGCTGGTGCACAAGCAACTGGGACTGGGCAGTATTTCGATTGGCGAACCGTT
CTTCAACACCATGTTTACCTGGCTGATGGTGCCGTTTGCGCTACTGCTTGGTGTCGGTCC
TCTGGTGCGCTGGGGGCGCGATCGCCCACGTAAAATCCGCAATTTATTGATTATCGCCTT
CATCTCTACGCTGGTGCTGTCTCTGCTGCTGCCGTGGCTGTTCGAAAGCAAAGTTGTGGC
GATGACGGTGCTCGGCCTGGCAATGGCCTGCTGGATTGCGGTGCTGGCAATTGCGGAAGC
TGTGCTGCGTATTTCACGCGGCACGAAAACCACCTTCAGTTATTGGGGGATGGTGGCGGC
TCACCTGGGGCTGGCAGTGACAATTGTTGGCATTGCCTTTAGTCAGAACTACAGTGTTGA
GCGTGATGTGCGCATGAAGTCCGGCGATAGCGTCGATATTCATGAATATCGCTTCACCTT
CCGTGATGTCAAAGAGGTGACTGGCCCGAACTGGCGTGGCGGTGTGGCGACTATCGGCGT
AACGCGAGAGGGTAAACCGGAAACAGTGCTGTATGCGGAAAAACGTTATTACAACACTGC
CGGGTCGATGATGACCGAAGCGGCGATTGACGGTGGCATCACGCGTGACCTGTACGCCGC
GCTCGGTGAAGAGCTGGAAAACGGCGCGTGGGCTGTGCGTCTTTACTACAAACCGTTTGT
TCGCTGGATTTGGGCGGGCGGGCTGATGATGGCGTTGGGCGGACTGCTGTGTCTGTTTGA
TCCTCGCTATCGTAAGCGCGTAAGTCCGCAAAAAACTGCGCCGGAGGCTGTATGAAGCGC
AAAGTATTGTTAATTCCGTTGATTATCTTCCTGGCGATTGCCGCGGCGCTGCTGTGGCAG
CTGGCGCGTAATGCCGAAGGGGATGATCCGACCAATCTGGAATCGGCGCTCATTGGCAAG
CCAGTGCCGAAGTTTCGCCTCGAATCACTGGACAATCCGGGGCAGTTTTATCAGGCGGAT
GTGCTGACTCAGGGCAAACCAGTGCTGCTTAACGTCTGGGCGACCTGGTGTCCGACCTGC
CGTGCGGAACATCAATATCTGAATCAGCTTTCTGCGCAGGGCATCCGCGTGGTCGGCATG
AACTATAAAGACGATCGCCAGAAGGCAATCAGCTGGCTGAAAGAGCTGGGCAATCCTTAC
GCGCTAAGCCTGTTTGATGGCGATGGCATGTTAGGGCTGGATCTCGGTGTCTATGGCGCG
CCAGAAACGTTCCTTATTGACGGCAACGGCATCATTCGCTATCGCCATGCGGGCGATCTC
AATCCTCGCGTCTGGGAGGAAGAGATCAAGCCGCTGTGGGAGAAATACAGTAAGGAGGCC
GCACAATGAGGTTTTTATTGGGCGTGCTGATGCTGATGATCTCCGGCTCAGCGCTGGCGA
CCATCGACGTGTTGCAGTTTAAAGATGAAGCACAGGAACAACAGTTCCGTCAGCTCACTG
AAGAACTGCGCTGCCCGAAATGCCAGAACAACAGCATTGCCGATTCCAACTCGATGATTG
CCACCGACCTGCGTCAGAAAGTGTATGAACTGATGCAGGAAGGTAAAAGTAAAAAAGAGA
TTGTCGATTATATGGTGGCACGTTACGGCAACTTCGTCACTTACGATCCGCCGTTAACGC
CGCTGACCGTGCTGCTGTGGGTGCTGCCAGTAGTGGCTATTGGCATTGGCGGTTGGGTCA
TATACGCCCGCTCGCGGCGTCGGGTACGCGTGGTGCCGGAAGCGTTTCCTGAACAAAGCG
TGCCGGAAGGTAAGCGTGCCGGATATGTTGTTTATCTGCCGGGTATTGTGGTGGCGTTAA
TTGTGGCTGGCGTCAGCTACTACCAGACTGGCAATTATCAGCAGGTGAAAATCTGGCAGC
AGGCCACGGCACAGGCTCCGGCGTTGCTGGACAGGGCGCTGGATCCGAAAGCCGATCCGC
TCAACGAAGAAGAGATGTCGCGTCTTGCGCTGGGGATGCGTACTCAACTGCAAAAAAATC
CGGGAGATATAGAAGGCTGGATTATGTTGGGCCGCGTTGGCATGGCGCTGGGTAACGCCA
GTATCGCCACCGATGCATATGCCACTGCGTATCGCCTCGATCCGAAGAATAGCGATGCCG
CACTGGGATACGCTGAAGCGTTGACACGTTCATCTGATCCCAACGACAACCGCCTCGGCG
GCGAACTGCTGCGCCAGTTGGTGAGAAGCGACCACAGCAATATCCGTGTGTTAAGCATGT
ATGCGTTTAATGCCTTTGAGCAGCAGCGATTTGGCGAAGCCGTTGCCGCGTGGGAGATGA
TGTTGAAACTCTTACCTGCCAACGATACTCGCCGTGCGGTGATTGAACGTAGTATCGCGC
AGGCGATGCAACATTTGTCGCCGCAGGAGAGTAAATAAAAAGTGGCCCGATGGTGATGCC
ATCAGGCCAGACTGATGACAAAGTGCGCTTAGTTTATGCCGGATGCGGCGTGAACGCCTT
ATCCGGCCTACAAAATCGTGTGAATTCAATAAATTGATCGATCCGCGTAGGCCTGATAAG
CGTAGCGCATCAGGCAGTTTTGCGTTTGTCATAAATCTCAGCCCGATGATAAATCCATCG
GGCTATTTTTATTGTGCCCCGCGTTGTTGCAGGAACAGAATGGTGGCCGCCACGCGTGAG
CGGACATTGAGTTTACGCAGCAGATTGCGAATATGTACTTTTACTGTCTGCTCGGAAATA
TTCAATACCGAGGCAATCTGTTTATTTGACAGCCCCTGTGCCAGCTCGTGCAGAACATCC
AGCTCGCGCTCCGTCAGCACGCTGAAGGGATCTTCTTCCGCGCCAAACATTTCACGTTCA
CGTAAGTACTGATTGACGCGTTCGCTAAAGACTTTGCTGCCTTTCGCTCCGGCACGAATC
GCTTCCAGCAATACTTCCGGGTCGCTGTCTTTCAACAGATAACCGTCTGCGCCTGCGTCT
ATCAGCGCAAAGACATCGCTGGAGGCATCGGATACGGTCAGGATAATAATTTGCGCGGTA
ACGCCATCCCTGCGCAAGGCATTGAGGGTATCCAGGCCACTCATACCTTTCATATTGAGA
TCCAGCAAGATCACGTCGATATCCAGTCTATTCGCCAGATCGATAGCGCTCGCGCCGTCG
CCCGCTTCGGCGACCACTTCAAAGCCAGGATCAAGCTCCAGTAACTGACGAACACCGCGT
CGCATAAGTGGATGATCATCCACAATCATCACCTGAAAAGGCGTTGCTTCAGGCATAGTA
GTCTCCTGAGGTTTTATTAGAATCATTATGTTTGAGCGTAGCGTTGGTAACGCTACCAGG
CGCGTGAATGTTACCCCATTTTATGTATGGACATGTAGTGAAAACTACAACCTTGTCCTT
CGCTTTGGCATCATTTTCATTATAAAGACGGAATTTTGCATCAGCTTCTCATCAAGAAAA
ACAACTAAAAAATCAATCACAATACTTGTGCATTTCTTTAAACAGTTTTTAAAAACTGAC
TCCGGGTATGGAGCTATGGGTATTTTCTGTACCCAATGCTTTTAACAGCAATTTATTTCA
TAGGATGAAAGCTCAATGCATCAATCTGGTTCTGTTTCTCTTTGTCGTTCCGCAATATCT
GTTCTGGTGGCTACAGCGTTATATTCACCCATAGCATTGGCATCAACAGTTGAGTATGGT
GAGACAGTTGATGGTGTTGTCCTGGAAAAAGATATCCAGCTGGTTTATGGGATCGCCAAT
AATACGAAAATCAATCCTGGCGGAGAACAGCATATTAAAGAATTTGGTGTAAGTAATAAT
ACTGAAATTAACGGAGGGTATCAGTACATTGAAATGAATGGCGCCGCAGAATACTCAGTA
TTAAATGACGGTTATCAAATTGTTCAAATGGGTGGCGCGGCAAACCAGACTACGCTCAAT
AATGGTGTGCTACAGGTTTATGGCGCAGCGAATGATCCCACGATTAAAGGCGGGCGCTTA
ATCGTTGAAAAAGATGGGGGGGCCGTCTTTGTCGCTATCGAAAAGGGAGGACTACTGGAG
GTTAAAGAGGGGGGATTTGCATTTGCGGTAGATCAGAAAGCAGGCGGTGCTATTAAAACA
ACCACGCGGGCCATGGAGGTATTCGGAACAAACCGTCTCGGTCAGTTCGATATCAAGAAT
GGTATTGCTAATAATATGTTGTTGGAAAACGGCGGAAGTTTGCGAGTTGAAGAAAATGAC
TTCGCTTATAATACCACTGTGGATAGTGGCGGCTTACTGGAGGTTATGGATGGCGGGACT
GCAACTGGCGTTGATAAAAAAGCAGGCGGGAAATTAATTGTCTCAACGAATGCGCTGGAA
GTGAGTGGTACAAACAGTAAAGGCCAATTTAGTATAAAAGATGGTGTGTCAAAAAATTAT
GAACTGGATGATGGTTCCGGGCTCATTGTTATGGAGGACACGCAGGCCATTGACACTATC
CTTGATGAGCATGCCACTATGCAATCGCTGGGAAAGGATACTGGTACGAAAGTGCAGGCA
AATGCGGTATATGATCTCGGTCGATCAGACCAGAATGGAAGTATCACGTATTCCTCAAAA
GCCATCTCTGAAAATATGGTAATCAACAATGGCCGCGCTAATGTCTGGGCTGGCACAATG
GTTAACGTGTCAGTCAGAGGGAATGATGGCATTCTTGAGGTCATGAAGCCGCAAATAAAT
TATGCACCTGCTATGTTGGTGGGTAAGGTAGTGGTTTCTGAGGGCGCTTCTTTTAGAACG
CATGGTGCCGTGGATACCAGCAAAGCGGACGTTTCGCTCGAAAATAGCGCATGGACCATC
ATTGCCGATATCACTACGACGAACCAAAACACCCGCCTCAACTTAGCCAACCTTGTGATG
TCTGGCGCAAATGTGATTATGATGGCTGAGACAGTGACTCGTTCATCTGTGACAGCAAGT
GCGGAAAATTTCATAACGTTGACCACCAATACCCTGTCGGGAAACGGCAATTTTTATATG
CGTACCGATATGGCCAATCATCAGAGCGATCAGCTTAACGTCACTGGCCAGGCAACAGGT
GATTTCAAAATATTTGTGACGGACACGGGGGCCAGCCCGGCAGCAGGTGATAGCCTTACA
CTGGTAACAACGGGCGGCGGTGATGCTGCATTTACGTTGGGCAATGCCGGAGGCGTTGTT
GATATCGGTACGTATGAATATACCTTGCTGGATAATGGCAACCATAGCTGGAGCCTCGCA
GAGAATCGCGCGCAAATTACCCCTTCAACCACTGATGTGCTGAACATGGCAGCAGCACAA
CCGCTGGTATTTGATGCAGAACTGGACACCGTGCGTGAGCGTCTTGGTAGCGTAAAAGGC
GTTAATTACGATACGGCGATGTGGAGTTCGGCAATTAACACCCGCAACAACGTGACCACT
GATGCGGGAGCTGGCTTTGAGCAAACATTGACGGGGCTGACGCTCGGTATCGATAGCCGT
TTCTCCCGTGAAGAAAGCAGCACAATTCGCGGCTTGTTCTTTGGTTACTCTCATTCTGAT
ATTGGTTTTGATCGCGGCGGCAAAGGTAATGTCGATAGCTATACCCTGGGGGCTTATGCC
GGTTGGGAGCATCAGAACGGTGCCTATGTTGATGGAGTGGTGAAAGTTGATCGTTTTGCC
AACACCATCCATGGCAAGATGAGTAATGGGGCAACAGCGTTTGGCGATTACAGTAGTAAC
GGCGCGGGTGCTCATGTCGAGAGCGGGTTCCGTTGGGTTGACGGATTGTGGAGTGTTAGA
CCCTATCTGGCCTTTACCGGCTTTACCACAGATGGTCAGGACTACACGTTATCAAACGGC
ATGCGCGCTGATGTGGGAAATACCCGGATATTACGCGCTGAAGCGGGAACGGCGGTAAGC
TATCACATGGACCTGCAAAATGGTACGACGCTGGAACCCTGGCTGAAAGCCGCCGTACGT
CAGGAATACGCCGATTCTAACCAGGTGAAAGTTAATGACGATGGCAAATTTAATAATGAT
GTGGCTGGAACCCGTGGCGTTTATCAGGCTGGGATAAGGTCATCGTTTACCCCGACGTTA
AGCGGTCATTTGTCAGTCAGCTATGGCAATGGCGCAGGGGTAGAATCGCCGTGGAATACT
CAGGCGGGAGTGGTCTGGACGTTCTGATAACAGAAAATAAACAGGCCGTGATGTGTCGCG
GTCTGTTTATCTAATTAATTGCAGATATAAAAAAAAACCAACCGTAAAGGTTGGTTTTTT
CTTGGGATTTTTGGTCGGCACGAGAGGATTTGAACCTCCGACCCCCGACACCCCATGACG
GTGCGCTACCAGGCTGCGCTACGTGCCGACTCGTGGCTGCTAATACTACCGTTTTCCACA
CCGATTGCAAGTAAGATATTTTGCTAACTGATTTATAATTAATCAGTTAGCGATAAAACG
CTTCTCGTCTGTCAGTACTTGCAATAACAAACTTAACTGTGGTTTTTCATCTTTCACTCT
TTCACCACGTAAGTTGTAAGTGCGGTATTTACCGTTATTGTTCAGCACCAGCGTCTTTTT
CGGGGTGGTTATTGCCAGCGTATCGTTATCCGCTGCGGTTACCCAGTAATGACGGCGTTG
AGGGTTGAACAAATCCTGACCTTGCGAATATTCGCTGGCAGGTGTGCTGACATGTAGCAG
GCGTTGCATCAGCGTCGTCATCAGATCGGTATGATCAGTCAGCGCATTAATACGCTGCGC
CGGCGTGCCTGGCCAGTGAATCACTAATGGCACCTGCAGATGACCGTGGGACCAGTCAAA
GGTTTCTTCCTCTTCGCTCAGTGGAATACCCCGACCGGCAGTGATAATTACAACCGTATT
GTCCAGTTTGCCAGAATCACGCAGTGCATTGAGCACGCGGTTGATCTGGTCATCGACATT
GCCTGCCGCCCGGCTATATTTCCGTGCAAATGCCTGCTGATTGCTGTCGTCAATGTTAGT
ACCATTGAAAGAAACCCACGAGAACCAGCGGTTATCTTCTTGTGCGTAGCGTCCCAGCCA
GTTGATCCACTGCGTGGCGGTCTGCTCGTCGGATTGGGTGCGTACGCTCGGCATCGAGAA
GTCTGACAACAATGCCTGGCGATACAGCGGGCTGGTAAAGCCATCTGATGAGAATAACCC
CAGCTGATAGCCTTGCTGATTAAGCGCAGTAATTAATGCCGCAGGCGTACGGGTCGACAG
AATGCCGTCCATATAGCTCGGCGAGATGCCATAGAACAGGCCAAAGATGCCGTTGTCTGT
AGTGTTGCCGGAGCTCATATGGCGCGTGAACGAAATATTTTGCTCAGCAAAACCTGCCAG
CGCAGGCATCTGCTTCTCGAAGCGTGAGTAGTTCAGGCCATCGACAGTAATCAACAGCAC
ATTCTGCCCGGTGCCCATATCGCGATAGCGCAGTTCGCTTAACGGATACTGAACGGAAAC
GGCGTCTGGATTACCTTGCTCAATAAGACGGCGTTGATACTCCTGCGCATCAAGCAGACC
ATGCTTCTCAAGAAAACGTCGCGCCGTCATCGGGTACGAAAGCGGCAGGTTAGCGCGCTG
CATGGTGATCGGGCGATAGAAGTTGGCATCGGCCCAGATATACACCACATGCGAGGCGAT
AAAGGCGATAAATAAGAATGCGGCCAGCGGACGCGCGAAGCGCCGACGACGCGTCAGGCT
GCGCAGCTTTTGCCAGCTCCACGTCGCAAACACCAGTTCAAGCAATAAAATAACCGGCAC
GCTAATGAACATCAGCTGCCAGTCGCGCGCCATCTCATTTTCGTCTGGATTAATAACCAG
TTGCCAGACGATGGGATTAAGATGGAGATGGAAACGAGTAAAGACTTCGCTATCGATCAG
TAATAGCGTCATTCCCGCCGTTGCCAGAATGACGGACAAAAACCTCATCAGCCTCTGGGA
GCCGACGATAAAGGTCAGCGGGAAGAGGATCAGCAAATAGGTGGCGAAGACCAGGAAGCT
GAAATGGCCGATAATGCTTACGTAGGAATAAATGCGACCAGCAAGCGTTGTCGGCCAGTC
GGCGATAAACAGGTAACGGCTGCCAATGACGAGCGAAAGCAGAATATTGAACAGTGCAAA
CCAGTGCCCCCAACTGACCATTTGGGAGACTTTTTCACGGTAGCGCTGACGATGAGTTAC
CATAACCTGTTATCTGTTTCCCTTAGTGCGCTTTTTCTTCGTTGATAGAGGACTGTAAGG
CGCGGGCAAAAGAGTTGGCAATTGCCTGGCGTTGGGCCGGGGCAATGCTGGTGTTGATAA
GGTTAGTGACCATGTTGCCTAACACCATCAGGGAAAGGTCGGTCGGAGCCTTATGTTTTT
CCAGTACGTTGAGCAGCTCTGCGAGCAATTGTTCAACCTGTTCATCACTGTAGCGGGAAA
TTTGTGGCATAAATCGAAATCAGTTAGTTGATGAAAGGGCAACATATTACCGTAGCAACG
GTTTTTTTTCTGCTTTTTTATGCGTTAAATCATTCTCGTTACGCTGCCTTCTGTAAAATG
ACCGCCATCTTTTATTGCGTCGCTTAACCGGCGGTGGTTGAATACCGCCCGGTCTTAAAG
GAGAGTTTATCATGAGTCTGGATATCAACCAGATTGCTCTGCACCAGCTTATCAAGCGTG
ATGAGCAGAACCTTGAGCTGGTGTTGCGCGATTCATTGCTGGAACCGACAGAAACCGTCG
TTGAGATGGTGGCAGAACTGCATCGGGTCTATAGCGCCAAAAATAAAGCTTACGGCTTGT
TTAGCGCAGAGAGTGAACTGGCGCAGACGCTGCGCTTACAGCGTCAGGGCGAAGAGGACT
TTCTGGCATTTAGCCGCGCGGCAACCGGCCGCCTGCGTGACGAATTAGCGAAATATCCTT
TTGCTGACGGTGGATTCGTGCTGTTTTGCCACTACCGTTATCTGGCGGTGGAGTATCTGC
TGGTGGCAGTCCTGAGCAACCTGAGCAGTATGCGCGTTAACGAAAATCTCGACATCAACC
CAACCCATTATCTTGATATCAATCATGCGGATATTGTTGCGCGTATCGATTTAACCGAAT
GGGAAACCAATCCAGAGTCGACCCGCTATCTCACTTTCCTGAAAGGGAGAGTAGGGCGCA
AAGTGGCGGATTTCTTTATGGATTTCCTCGGGGCCAGCGAAGGATTGAACGCGAAAGCGC
AAAACCGTGGGCTGTTGCAAGCGGTTGATGATTTCACTGCCGAAGCACAACTGGATAAAG
CAGAGCGACAGAACGTGCGCCAGCAGGTTTATAGCTACTGTAATGAGCAGCTGCAGGCAG
GCGAAGAGATTGAACTGGAATCGCTGTCGAAAGAGCTGGCAGGCGTAAGCGAAGTGAGCT
TCACGGAGTTTGCGGCTGAAAAAGGCTACGAACTGGAAGAGAGCTTCCCGGCAGACCGTA
GCACACTGCGTCAGTTGACAAAGTTTGCCGGTAGCGGCGGTGGCTTGACTATTAACTTTG
ATGCGATGCTGTTAGGTGAGCGGATTTTCTGGGATCCAGCAACCGATACCCTGACCATTA
AAGGCACGCCGCCGAATTTGCGCGACCAATTGCAGCGCCGGACGTCTGGCGGCAATTAAT
CGGTTTTGTGTTCTGAATGCCAGATGCGGCGTGAACGCCTTATCTGGCCTGCAAAAAATA
GCAATACCGTAATCAGGCATAATCTGCAGATACAAAAAACCCCGCCGGAGCGGGGTTTTT
TACAACTTATTCAGCAATTAAGCGCGAACGAAGTCGATGTGCTGCAGCTTCGGTTTGTAC
GGGTGACGCTGTACGTCCTGAGCTTTAACTTTGATTTCTTTACCGTCAACAACGATGGTC
AGAACTTCGCTGTAGAATTCAGCTTTAGCTTGCATGTTCATGACTTTGTCGTGATCCAGC
TCGATAGCCAGCGGTGCTTCTTTGCCACCGTAGATGATTGCCGGGAACTTGTTAGCGGCA
CGCAGGCGGCGGCTCGCACCCTTACCCTGCTCTTTACGTACTTCTGCGTTGATAGTAAAC
ATTTCTTTCTCTCTTAAATTAATCCTGCTACAGGCGACCCAGCAACAGGTAAGTGATCTG
CTTTGCGTATGCAAAAGCGGGCGAGATTCTATACTCAATCGCCTTATACATCAATCAAAA
CTACCATTAACCGCGTAATTCGTGCGCCCGACGAAAACGACCTTCGTAATCGAACACTTT
TTCACGCACTTGCCAGTACTGACCTTTCATGCGGGCGACGACAAAATCCGGATGTCGCAG
TAAGGCTTGCTGGGCGAGGATATCGGCGGCGGTGATCCAGCGCAGAGGGATGCCCGGTGT
GCGCGTATGCGGGCGGATAAAAAGCTGCTCGAAAGCAGTTCGCTGGGCGGGCGTTTGCAG
ACGGAAACGCTCACTCACATCCGCGCCGTCTTCATCGTAATAGGTGATTTTCAACCATTC
GCCTTTCTCGTCGTGCCCATGCTGCAAAGACATGCCGCTACAGCGTAATACCAGCGCATC
TTTCAGTCGTAGCGCCGCTTTTAACATATCATCCGGATCAACCAGTACCGTGTCACATTC
GCGGCAGCGGCGAGCGGCAATATCATTTTCTGCGTTACATTGCGGGCAATTTTTAAAACG
GAAACGGAAGTCACACTGTTCGCGATGACCGTCGTCATCTTCAAACCATCCCTGACAGCG
GCGACCAAAGTGTTCAATCAATGTCCCGTCGGCGGTCGTTTTCCCCCAAAAGGTGTTGGC
AAAACCGCAGGCAGGGCAGAAAACCTGTACCGGAACGTTGTCACTTTTGCCTTTCGGTGT
ACCAACTTCCGGCGCGTAGAGATCGTGAGGATTACCCGCATAATCAAGAATTAAACAATC
AGTCTTGCCCGGAGCGAGACGCAGACCGCGCCCGACAATTTGTTGGTAAAGACTCACTGA
TTCGGTAGGGCGCAGAATGGCGATAAGATCGACGTGCGGGGCGTCAAATCCGGTGGTCAG
TACCGCGACGTTGACCAGATAGCGAAAACGCTGGGCTTTAAAATCTTCAATTAACACATC
GCGCTCAGCGCCGGGGGTGTCGCCAGTAATCAGTGCAGCATCTTCGGCGGGTAGTAATCC
CACAATCTCTTTTGCGTGTTCAACGGTGGCGGCGAAAATCATCACCCCTTTGCGCGTTGC
AGCAAACTCCATAATCTGGCTGATGATGTGCGGGGTAATACGTTGTTGTTTTTTTAGCTC
GCGGTTGAGATCGGCTTCGCTGAACAGCCCATTACTCTGTGCCTGCAAGCGGCTGAAATC
GTATTGCACTACTGGCATATCCAGTCGTTCTGGCGGCGTCAGATAGCCGTGTTTAATCAT
ATAACGCAGCGGCAGTTCATAAATGCAGTCACGGAAAAGGGCTTTCTCATCGCCGCGTAC
CATGCCGTGATAATGGAACTGGTAGATCCAGCCTTTGCCCAGTCGAAAAGGCGTGGCAGT
CAGCCCCAGCAGGCGTAAGTGGGGATTCACTTTTGTCAGGTGAGTGAGGATTTGCTGATA
CTGGCTCTCTTCATCGTCACCAATACGGTGACATTCATCGACAATCAACAGCGAAAATTC
ACCCTGAAAGGCATCAAGATTACGGGCGACCGACTGCACGCTGCCAAATACCACTTTACC
GTGGCTCTCTTTGCGCTTTAGCCCGGCGGCAAAAATATCGGCTTCCAGCCCCAGCGCCTG
ATACTTTGCATGGTTTTGCGCCACCAGTTCTTTAACGTGTGCCAGCACCAGCACGCGACC
ACGAGCCAGCCGCGCAAGTTCCGCTATCACCAGGCTTTTACCTGCACCGGTGGGCAGCAC
GATAACGGCAGGGGTTTTATGACGACGAAAATGGTTGAGCGTGGCATCCACGGCTTCTTG
CTGATATGGGCGGAGTGTAAAAATCATGGTCTCGCGTAGGTAGATTATTCTGCTAATAGT
ATGCCACGGTTCTTTTTCCCTTGAGGGAAGTTATTAGACCGCTATACTGGGCAGACAACA
GTTCAGATTTTCGGGTCAATGCCCGACCTCCGTTTTTACAGGCAAAATCACACACATGCG
ACTTGATAAATTTATCGCACAGCAACTCGGCGTTAGCCGTGCTATTGCCGGGCGTGAAAT
CCGCGGCAATCGTGTCACCGTCGATGGCGAAATCGTCCGTAATGCAGCGTTCAAACTGCT
TCCTGAACATGATGTCGCTTACGATGGCAACCCACTGGCGCAGCAACACGGTCCACGTTA
CTTCATGCTCAATAAGCCTCAGGGCTATGTTTGCTCCACGGACGACCCTGATCACCCAAC
GGTGCTCTATTTTCTAGATGAACCAGTGGCGTGGAAACTGCACGCCGCAGGGCGGCTGGA
TATCGATACCACCGGTCTGGTACTAATGACAGATGATGGTCAGTGGTCACACCGCATTAC
TTCTCCGCGCCATCATTGCGAGAAGACTTATCTGGTGACGCTGGAATCACCCGTAGCTGA
CGATACGGCAGAGCAATTTGCTAAAGGCGTGCAGCTGCATAACGAAAAAGATCTCACTAA
GCCGGCGGTGCTGGAAGTGATTACCCCAACGCAGGTTCGTCTGACCATCAGCGAAGGGCG
TTATCATCAGGTGAAACGCATGTTCGCCGCCGTGGGTAACCATGTGGTTGAGCTGCATCG
TGAACGTATTGGCGGCATTACGCTGGATGCTGATTTAGCCCCCGGTGAATATCGTCCGTT
AACTGAAGAAGAAATTGCCAGCGTCGTCTAACTTTTCAATGACTTTCAGGAGCCCGTTGT
GACCACCCGACAGCATTCGTCGTTTGCTATTGTTTTTATCCTTGGCCTGCTGGCCATGTT
GATGCCGCTGTCGATTGATATGTATCTGCCCGCGCTACCGGTAATTTCAGCGCAGTTTGG
CGTACCGGCGGGCAGTACGCAGATGACCCTCAGTACTTATATTCTGGGCTTTGCGTTGGG
GCAGTTAATCTACGGGCCGATGGCAGACAGCTTCGGGCGTAAGCCGGTGGTTCTTGGCGG
TACGCTGGTGTTTGCCGCCGCCGCGGTGGCGTGTGCGTTGGCACAAACCATCGATCAGCT
GATTGTGATGCGTTTCTTCCACGGGCTGGCGGCGGCTGCGGCCAGCGTGGTTATCAACGC
CTTGATGCGTGATATCTACCCGAAAGAAGAGTTCTCGCGGATGATGTCGTTTGTCATGCT
GGTGACAACCATTGCACCGCTGATGGCACCGATAGTTGGCGGCTGGGTGCTGGTGTGGCT
GAGCTGGCATTACATCTTCTGGATCCTCGCCGTGGCGGCGATTCTGGCTTCGGCAATGAT
CTTCTTTCTGATCAAAGAAACCTTACCACCGGAGCGTCGCCAGCCTTTTCACATTCGTAC
CACTATTGGTAACTTTGCGGCGCTGTTCCGTCATAAGCGTGTCCTGAGTTATATGCTGGC
CAGTGGTTTCAGCTTTGCCGGGATGTTCTCGTTCTTAAGCGCCGGACCGTTTGTCTACAT
TGAAATTAACCACGTCGCGCCGGAAAACTTTGGTTATTACTTTGCACTAAACATTGTTTT
CCTGTTCGTGATGACCATCTTTAATAGCCGCTTCGTCCGCCGTATTGGCGCGTTAAATAT
GTTCCGCTCGGGGTTGTGGATACAATTTATTATGGCAGCGTGGATGGTCATCAGTGCGCT
GCTGGGGCTGGGATTTTGGTCGCTGGTGGTTGGCGTTGCGGCGTTTGTGGGCTGCGTGTC
GATGGTGTCATCCAATGCGATGGCGGTCATTCTTGATGAGTTTCCCCATATGGCGGGAAC
GGCATCTTCACTGGCAGGAACCTTCCGTTTTGGCATAGGGGCAATTGTTGGCGCATTGCT
TTCTCTTGCGACCTTTAACTCTGCATGGCCGATGATTTGGTCAATTGCATTCTGCGCAAC
CAGCTCCATTCTCTTCTGTCTGTACGCCAGTCGGCCGAAAAAACGGTGATCTATTGCACA
ACGAGGAAGCTAAAAGGCTTCCTTTGTTGATGCATGTCAACCACAAATCTATCATTCCCC
CGATATATGTTTATTTTATGTAAAATCAATTTATGTAAAAAGTCACATCATTGTAGTTAA
AAAGGTTGAGTTAGATCGCAGAAACGGGTACATATAGCCCCGCAAACGTGACCACGCCCG
CAGATATTACTTAAATCAGAGCCATAGAGGCCACGCAGGCGAGGCATCAATCTTTACGAT
CTGTATAAAGACGGATTGTTGATGATGTGTTAAAATTGATGTAAACAAATTGTGAAGTAA
ATGTGCTTCCGGGGAAAATAAGTGACTTCATTACAACTCTCAATCGTCCATCGACTGCCG
CAGAACTATCGCTGGTCTGCTGGTTTCGCAGGTTCGAAGGTTGAACCGATTCCGCAAAAT
GGACCGTGCGGTGACAACAGCCTGGTGGCGCTTAAATTGCTTAGCCCGGATGGTGATAAT
GCATGGTCGGTGATGTATAAACTAAGCCAGGCGTTAAGCGACATCGAAGTTCCATGTTCG
GTGCTGGAGTGTGAAGGTGAGCCGTGCCTGTTTGTAAATCGCCAGGACGAGTTTGCTGCA
ACATGCCGATTGAAAAATTTTGGTGTGGCAATTGCCGAACCCTTTTCAAACTACAATCCT
TTTTAAGCGTCAGCTCAACGCCAGTAGCTGACGCGTATACTCCTGCTGCGGTGTGGCAAA
CACGCGCGCGCACGGTCCTTGTTCCACTACTTCCCCTTGTCGCAGTACGATAACCTGATG
ACATAACGCGCGGACAACGTGCAAATCATGGCTGATAAACAAATAGGCCAGTTGATGCTT
TTGTTGCAATGATTTCAATAGCGTCAATATTTGCGCCTGTACCGTTTTGTCGAGTGATGA
TGTCGGTTCATCAAGTATGATCAGCGAGGGCTTAAGAATTAATGCCCTGGCAATCGCAAT
ACGTTGTCGCTGACCACCAGAGAACTCCGCCGGATAACGGTGGCGTGTTTCAGGATCTAA
TCCCACTTCATGCATCACGGCTATCACTTGTTGTTCGCGTTGTGCGGCAGAAAGCGTCGG
CTGGTGAACCCGTAAGCCTTCCTCAATAATCTGCAAAACGTTGAGTCGTGGGTTGAGCGA
GGAGTTTGGATCCTGAAATACCACCTGAATGCGATGACGAATAGGTAACAGCTGGCGGCG
ATTTAAATTTTGCAGTGGCTGACCGTCAAAGACGATGCTGCCCTGAGAATTAATCAGTCG
CAGCAGCGCCAGTCCCGTCGTGCTTTTCCCGGAACCGGACTCGCCCACTAAACCCAGTGT
TTCACCCGCCCGTAGCGTAAAACTGATGTTTTTCACCACCACATTATGATCCACAATGCG
CTTCAAGATCCCTTTGCGAATGGGGAAGGCAACCTGAAGCTGTTCAACATCCAGCAACGT
TGAGGCAGGTTCTGGCAACGGCACCGGGTCGCCTGACGGTTCACTGTTGAGTAGCTTTTG
TGTGTAAGGATGAGTGGGTGAGGCAAATAGCGTAGCGGCGTTATTTTGCTCGACACAGCG
ACCATTTTGCATTACCGCCACGCGGTGGGCCAGTTTTCTGACAATGCTGAGGTTATGAGT
AATAAACAGCATGCCCATATTCAGCTCGCCTTGCAGTTCGCGCAACAGCTGTAAAATCTG
CGCCTGGACAGAGACGTCCAGTGCGGTGGTTGGTTCATCGGCAATTAATAATTCCGGTCG
CGTTAACAGCGCCATCGCAATCATCACCCGCTGGCGTTCGCCGCCGGAGAGCTGATGCGG
ATAATCTGTCAGCCGTTTTGCCGCCTGGCGGATACCGACGCGATCAAGGCAGTTAAGAAT
TTCGCCACGAGCCGCTTCCCGACGCATCCCGCGGTGGAGTGAAAGCACTTCATAAAGCTG
TTTTTCCAGGGTATGCAATGGATTTAACGACACCATCGGCTCCTGAAAAATCATGGCGAT
CTTATTACCGCGTACACCGCGCAACGTTTGATCGCTGGCATGAAGCAGCGATTCGCCATG
AAAACGAATATCGCCGGAGAGATATTCAACCGGCGGGGAAGGGAGCAGACGTAAAATTGA
CAGCGCGGTAACGCTTTTGCCAGAACCTGACTCACCCACCAGCGCCAGCGTTTCGCCAGC
CTCAATCTGTAGTGAAACATCATTGACTACTGTACGTACGGTTTGCTGATGGCGAAAACC
CACCGACAAATTTTCAATCGCTAACAGAGTTTGCGTCATGCTACACCGCCTTATTAGGAT
CAAATGCGTCGCGGACGGCTTCACCAATAAAGATCAGCAAAGACAATAATATCGCCACCG
ACAAGAAGGCGGTGATCCCAAGCCACGGAGCCTGAAGGTTATTTTTCCCTTGTAACAGCA
GTTCACCGAGTGACGGTGAACCGAGCGGCAGACCGAAGCCGAGGAAATCGAGTGAGGTCA
GGGTGGTTATCGAACTACATAAAATAAACGGTAAAAAGGTGAGCGTAGCGACCATGGCAT
TAGGCAACATATGACGCAGGATGATACTGCGATCGCTGACGCCAAGCGCCTGCGCCGCAC
GAATGTAGTCGAAATTACGGGTACGTAAAAACTCCGCCCGCACCACGCCGACCAGACTCA
TCCAGCCAAACAAGACAGTAATTGCCAGCAGCCACCAGAAGTTAGGCTGTACGACGCTGG
AAAGTAAAATAATCAAAAACAGCGTCGGCATCCCCGACCATACTTCAATAAAGCGTTGCC
CCCAGAGATCGACTTTACCGCCGTAATAGCCTTGTAGCGCCCCCGCCAGCACGCCCATCA
CGCTGGAACAGAGAGTCAGCATCAGGCCAAACAGAACCGAGATCCGCGTGCCATAGAGAA
TACGTGCCAGCACATCGCCGCCGTTGGCATCCGTTCCCAGCCAGTTTTGCCGGGAGGGTG
GAGAAGGGAAGGGCTTATCGGTAGCAAAGTTGATACTGGTAGCACCAAAGCGAATCGGTG
CCCACAGTACCCAGCCATTATTTTCCAGCCGTTGTTTCAGCCACGGGTCCTGATAATCAG
CCTGACTTGCCAGCGGGCCGCCAAAATCGCTTTCGCTGTAGTTTTTCAATAACGGGAAAT
ACCAACTGCCGTCATAACGTACCAGCAACGGTTTATCGTTGGCGATAAGCTCAGAACACA
AACTCAAACCAAACAAGACGAGGAAAATCCATAACGACCAGTAGCCGCGACGGTTATGAC
GAAAACGCGCCCAACGGGCCTGATTGACGGGGCTGAGTCGCGACATTAACGTCCCTCAAA
ATCTATACGCGGATCGACCAGCGTATAGCTGATATCACTGACAATATTCAGCAGCAGGCC
AATCAGGGTGAAAATATACAAGGTACCAAACATTACAGGATAATCGCGCGAGACGGTCGC
TTCGTAGCCCAGTAAGCCAAGACCATTGAGTGAAAACATCACCTCAATCAGCAGCGAGCC
GGTAAAAAACATGCTGATAAACGTCGCCGGAAAACCAGCAATCACCAGCAGCATGGCGTT
GCGGAACACATGTTTCCAGAGAATGTTTTTCTCACTTACCCCTTTCGCACGCGCGGTCAC
CACGTATTGCTTGCGCACTTCATCAAGGAATGAGTTTTTGGTCAGCATGGTCAGCGCCGC
AAAGCCACCAATCACCGTCGCCAGCACCGGCAGCGTGATATGCCATAGATAATCGGTGAT
TTTCTGATACCACGGCAGCGAATCAAAGTTAGCGGAAACCAGGCCGCGTAGAGGGAACAG
GTCGAAATAGCTGCCGCCTGCGAAGAAGACAATCAGCAGGATGGCAAACAAAAAGGCCGG
AATGGCGTAGCCGATGATGATAAATGCGCTACTCCAGACGTCAAAGCGGCTCCCATTATA
AACAGCTTTGCGAATGCCTAACGGAATCGACACCAGATAGATAATCAGCGTGCTCCACAA
TCCGAGGGTGATGGAAACCGGCAGACTGTCTTTAATCAGCGTCAGCACCGAGGCGCTGCG
AAACAGGCTATCGCCAAAATCAAAGCGGATGTAGTCCCAGAGCATTTTGAAGTAACGTTC
GTGGATCGGCTTATCGAAACCGTAGCGATGAGTGATCTCGGCGATCACTTCTGGATCTAA
TCCGCGTCCGCCACGGTAATTACTGTCGCTGATATTACCGACGCCCGTTTGCGCATGGCT
GGCGCGAACGCCTTCACCGCCTGCGCCGGGTAATACTCCGGCATTACCAAACTCAATGGC
GGCGATGGCCTGGTCGACCGGACCGCCAGGCGCAATTTGCACGATGAAAAAGTTGATAGT
GATAATCGCCCATAACGTTGGGATCACCAGCAACAGACGGCGAATCAGATATGCGCCCAT
CTACTCTCCCTGTTGTCTGGCTGACGGCAGTTTGGCCGCTTTATTAACGTCATACCACCA
GGTATCGATACCCAGGCTGTAAACAGGGCGTACAGCGGGTTGGGAGAATTTATCCCACCA
GGCGAGACGGTCTTCCGCCATGTACCACATTGGCAGCATGTAATAATTCCACGTTAATAC
GCGATCCAGTGCTCGCCCTAACGGCAGTAATTTTTCTTTATTTCCCTGCGCGGCAATAAT
TTGGTTGATCAGCGAGTCGATAACCGGGCTTTGCACGCCGGGGGCATTATAAGTGGAATT
GATATATTCCGATGACCAGGAAATCTGTAAATCGGAACTGGGCCACGGCATTGCCCGCCA
TACGCGCGGCATCATGTCATAGTCGCGACTGCGCATGCGGTTGGTGATTTGCGAGTTATC
CACCTTGCGAATGTCCATGTTGATACCCAGCCGTTGCAGGCTGTGCTGGAACGGCAATAC
CCACTGACTATTGCTGCTTGCGGGAAGCAATAATTCAAAGCTGAGTGGCTGACCCGTTGT
GGCATTAACGCGTTGCTGACCCTTCAGCACCCAGCCCGCTTCGTTGAGAAGTTTGTCGGC
TTTTAACAGGTTGTCACGATCGTAGCCATCGCCTTTAGATACCGGCGGCTGGTAGATTTG
TGTGAAGACTTCTGACGGTAGATCTTTTTTCATTGGTGCCAGAAGCACCAGCTCCGCGGC
GTCGGGGTAATTTCTGGCCGCGTATTCGGTATTCTGAAAATAACTGTTCGTGCGACTCCA
GGCATTGTAAAACAACGCCTTGTTCATCCATTCAAAGTCAAAGGCGAGAGTGATCGCTTC
CCGGACCCGGCGATCGCTGAATACCGGACGTTGGATATTAAACGCCAGCCAGCGCGTATC
CTGGGCTGATTCGTTCTTTTGCTCATCTTTGATGATGTATTTTTTATCGAAATTTTTACC
GGTATAACGCGTGGCCCAGTTTTTAGCGTCGTTTTCCATACGCAAATCAAAGGCACCTGC
TTTAAACGCTTCAAAGGCGACGTTATCATCGAGGTAATAATCGTAGCGAATGGTGTCGAA
ATTCCAGCGTCCACGGTTTACCGGTAAGTTTGCTGCCCAGTAATCTTTCACGCGGGAATA
GACAATATTTTGCCCCATTTTCCAGGACGTAATGCGGTACGGACCACTGGCAAGCGGAGG
CGTGGCGAGCGGATCGCTAAGTTTGTGATCCTTCCAGTACTTTTCTGGAAATACCGGCAG
CGAAAACAGACTCAACATATCTTCTTTGCCGGGTTTAGCTAACTCAATGCGCACGGTTAA
CGGCGCAATGGCTTTGACGGTGGTGCCTTTGTAGACCAGACGAAATTGCGGCACGCCTTC
GGTCATAAATTTTTGAAAAGTAAACTCTACATCGCGGGCAGTAATGGGCGAACCATCATG
AAAACGGGCGCGCGGATTAATAGCGACCTCCACCCAGGAATAATCGTCAGCATAGCGTGC
ACTTTCAGCAATCAGCGGGTAATAACTGCCTGGTTCGTCATCGGAAGTCGTAAATAGCGT
GTCGTACAACTGCTCGGTGCGTGCGCCCGGGTTGCCGCGCAGTGCATAGCGGTTGAAATT
ATCGAAGGTGCCGAGGGCTGACAACGTTATCTGCCCACCTTTTGGCGCGGCGGGGTTCAC
ATAATCAAAATGGTTGAAATTAAACGCGTACCGGGGTTCGCCCAGCACGGCAAAGGCATA
GCTTTCCTTGATAGCCTGCGCCTGCGCACCGAAGGTGAACAGAGCGATAAACAGCAGCAG
TATGCGCACAATCATCTGCAACGGATTTCCTTTTACTCATCATTAGCCGCAATCCGGCAT
GCTTTCACTATGAATAATAAGGGACGTAAGCACACCTTACCACTGCGGCCTATACGGTTT
CTTCAGCCAGCGAACAAAATCGTCCAGCGGTAACGGGCGACTAATCCAGTAGCCTTGCAT
GAAATTAACGCCGCGTTCGCTTAGCCATCGCGCTTGTTCCGGCGTTTCGACCCCTTCAGC
AACTGTCAGCATATTGAGACGTTTCGCCAGCGTCAGCACCGCGTCAAGTACGGGTGAAGT
GATCGTTTCCGTACCGATGGCGTTGATAAATCCACGGTCAATTTTCAGATAATCGAGCGT
AAAACGCTCAAGATAGATAAGCGCGCTGTGCCCGGTGCCGAAGTCATCAATAGCAATTTC
TATGCCGACCGAGTGCAGCCAGGCGAAGAGTTGTGTGGCTTCTTGCTCTTTCAGCATATC
GCGCTCGGTAATTTCCAGCACAATCTGGAAATGGTGGGGTAGGGAGGTGAGCAGTTTCTG
GATATCTGCTTTAAAGCTTTCGCTGTGCAGATGGTCCGGCGCAATGTTAATGCCAAATTT
GACGCCTACCGGCAGCACTTTTTCTAATTCTGCGGCATCGCGGGCAATTAACTCAAACAG
GTGCTGAGTCAGCGGTACAATCATCTTTTGCGATTCGGCAAAGTTAATGAAGGCATCCGG
GGGAATTTCTCCCGCGACAGGATGCCGCCAGCGTAGCAGTACTTCCAGGCCCGTTACTCG
CAAAGCTTGTGTATCCACCACCGGTTGATACGCCACGTAAAATTGTTCGCGCTTGATGGC
GGTCATGATTTCTCTGCCGGGGCGCATACGTACGCTCATCAGGTAATAGCAGAGCAGGCC
AACGACAGTTCCACTCATGCCGCCCAGTAAAAATGCGTACCACACATCGTTCCATGTCCA
GTCATCTGCATAAAGCCGAACGGTCAGAGGAATGCCCGCAATTTTAGTTTCACGGACTGG
CATGTCGGTTAATTCGTTAACGTTCATCAAACGTGAAGAAAAGGTAGATAGCGCAGTATT
GCCAATAATGAGGGCGACGCCATCGTAATCTTCCTGCCGTGAACTATAAAAGAGTGAAGG
CGTCAGGTTGAGATTCAGAGCGGCAAAGACGCCGCTATTTTTCAGCAAAGGGTTGCGATA
CCAGATGACGATTGCGGGTTTGTTCGGCACCATCGGCGTGCCGGGTAAGATCGCCATATC
GACATTTTTATTAATGTCGAGCGCCGGAATCAATTCATTGAGTGGAATGTCCATCTCACC
GGTCGCAGATGAACAGAATGTTTTTTTATCTTTCACCAGCACAAACGTTCGGACATTCAT
GCTAAACGCCGCGCGGGCGGTCAGTTCGGGGTTAGCTTGCTGGCAGGTATCTAAGGTCAG
CGGCTGGAGCCGGTCAGTAGTGGATTTCAGGTCGGCAAAATAGGTATCGAGATACTTTTG
TACGTCGGTAATCAGTGTGTCGTATTTGACTTCGTGCTTATGCCAGGCCACTAAAAACTG
AAGGCAACTCACCAGTATCGCAATCATTACGCCTGCAACAATGCAGGTAAGCAGGAGCTT
ACGTCCAGAATTGGGAGCGCGTATGAACATGATTCCGTTAATTTCCTGAAATTACGACAA
CATTTAAAAGATAACAATGACCGGACTATAGCCTGGATCAAGACGCGGAAACATCATTTT
CTCTGATGAATGAAAACAAAAAAGCACTGCCTAAGCAGTGCTTTCAGTTAACTCGTCAGG
ATAGCCAAGGGATTGCATCCAAACGGTTTATTAGCTGCGGCTGAGAACCCGGCGTGCTTC
GTTGTAACGCTTCTTCCAGTACGGTTCATTCATGCTGGAAATAATAACACCACTGCTGGT
GGAAGCATGGACAAACTGATTGTTGCCGATATAAATACCGACATGGCGTCCCGTTGAACC
GGCACGGAACAGAACTAAATCACCCGTACGCAAATTACTGCGGGAAACAGATTTACCCAT
TTCCTGCTGTTCGTAAGTCGAACGCGGAAGTTCTAAGCCAAATTGCTCACGGAATGTACG
CTGTACGAAACCAGAACAATCGATACCTTTTTTAGTGCTGCCGCCCAGACGATAACGTAC
GCCTTTCCAGTCAGCATACTGATCCATAATTCGCGATTTTACGTCGACATTACGAACCAG
GTTTTCAAATTCATCCTGAGAAGCTTGCAGTGATGATGTTTCACTACCCACTGCACGTGT
CTCAGGATGCATATTCTTTGCGGTGTTATTTGCACTACATGCAGAAAGCAGAACCGCTAC
TGCAATCGCGGGGATCCCGCGCAAGATATATCTCAAAATCGGTTGAGATTTGACCATGTT
GTTTGTTTTCCCTTGAAGTCCTTAACGACAAATATCGTTATAAAAAAATGCCAAGCGACA
CGAGACTAATTACCTGGGCATGTTGAAACAATTCCTTAAGGCCAAATCTGTGGACTAACG
CACAAAATTATATGCTGTGAGGATAATCTACCGCCGAGGCAAAACGAGTTCGAGATTACC
CGATTGGTGCGGTCTTGGCGAGCGGTTTTACATGATTTTTTATAAGAAAAAGTGATACAG
AAAGTTAATAAGCGGGATTGCTCAATTAAAGTACGATTGAGTGAAACGCATGCAATCCAT
TCATTTACTTAGAGAATGATTTTTGCTTTCGATGCATGAAAGCACGGTGCGCATCATCAG
GATTATCCTCACTATAAAAATAAACCTGATGATGTTAATTACTGTGAGTTATTTGTTTTG
GAAATGTTTGTTTTTTCCCGGTAGTGATTTGTCAAAAAAGGTGATTAATCGATCACTTAA
TGGCGTCAGCAACACCCAGGGCAAACCGATCAATATCACGGTCATCGAACCGACAATGAT
GTCAGTAAACCAGTGTGCGCCAATCATTACTCTGGGAAACGCAAAAACCACAAAAATAAT
AAGGGCGATAAGACCTGCAACTTTGCCGAAATAACGCCACATGAATGCCGAAAAAATAAG
CAGCATCATGCCGTGATCGCCGGGAAAGCTATCTCGTGAGGCATCTTTCGTGGGGACAGA
GAGCAGTTCGCTGACGCGGTTAATATCGGTAAAAGTCAATGTTGGGCTGGCCCGTTTTAC
AGGAATTAATGCCTGACCCAGCTGGTTTAATACCACTGCAGTTAATAGCATGACCAGACC
AATAATCACGATACGTCGTCTGCCTGGGGCGTTTTCTTTCAGCCAGAAACTCAGCATCAA
CATTCCCATCGCCAGCAGTGAACAACCGTCGAAAGCGCGATTGTTGGTCAATGCAACCAG
CCACAAAAAGGCCTTACTTTCGACCAGTTTCTGATTAAAGAAATAAAAAATATCCGCATC
AATCGGCAACCAGAATCCATGATTAACGGGAATATACCAGGAAAGAAACAGCGCGAGGCC
GACAATATTCAACAACACTATTTGCGGCAAATTTTTAATCATATTTTCTCTAATTATCTT
ACTGAAAAACGCAGGCAACCTTACGCGGTAGTCGCTAAACGAAGCTTCAACAGCGCGCTC
TGCAAGGCATTCCAGTCAGCTTCGCTGCTGGAAATCAGCTCAATACGGCTGTCCGGTGGC
GCAACGTTTTGCGTTTCAATGTGCAGGTCATCGCCCTGACGGTTGATTCGCACCAGCCCT
TCGGGAATACGCAGCACGCCTTTGACGCGTTCCACCGGTGCAAGTCGCGCCCATTCCAGA
ATGCCAATGGTGTCGAATACCGTATCAGCGTCGAATATCCAGCCGCAGGCCTGATATCCT
TGCCCGCTGTTCAGACTGCGACGCCAGCGTTGATGCTCTGGCAGGCTTAACGCTGCTAAC
CCTTTTTTCACGACATGCTGATGAGAATGCGCGGCGCTGGCGGGCAACTCGGCTAAATTG
CGACGCGGCAAATCCAGAAGATGACCGTCAACTTTCCCATGCTCACTGTGAATTAATTGC
CGATCGCCACCATTTTGCTGCCACCAGCGCTGTAGCGCTTGCTCGCTTTCAGGTGTCGCA
CGGTCGGATTTATTGGCGACAATGATGTCTGCGGCAGCCAGCTGGTCACGGAAGTTTTCA
TTGCTGGTGCTTTTTTCGTCCAGCAGCAGGCGTGGATCGAGAATGCACAACGTGGCGCGC
AGATCTATCCACGGTTCATAGACTGGTGCGGTTAACAGATCGAGGATCTGTTTCGGATGG
CCCAGCCCGGTCGGCTCTATCAACAAGCGGTCTGGTTTTCCCTGACGCAGTAAGGTATTC
AACCCTACCTGCATGGGTAAACCATTAACGCAGCACATGCAGCCGCCGGGGATCTCTTTC
AGCAATGCGCCGCTATCGGCGAGCAAAGCACCATCAATTCCGACTTCCCCAAATTCATTA
ACCAGTACCGCCCATTTTTCGTTGGGATCTTTATGGGCTAACAGATGAAGAATCGACGTA
GTTTTCCCGCTGCCGAGAAAACCGGTGATGAGGTTGGTCCTGGTCACAACGGCTCCGCAA
TACTCTGATAAGTTAACTGAGCGTTAATCCTGGCTAAAAACGGCAGAAAAGAGAAGGGGA
GAGCGGACGAAGGTGAGCTTCATCCGCTTTAACCGCAGAAATCGTTAAATTTTGAGGGTG
TTTAATAGCGCCTGATGCGCGCCGAATTGTGCGATTTGTTGCCAGGCTTGTTCGATGGCC
TGCACAAAATGCGGGTTATCTGGCAGATCATCACCGAAAACTTCACGCAGGGAAAGCAGG
GCGGTGACGCGTTGCTCACTGCTGCTGCCCGCAACAAGATCGCGAATTTTATCGCTAAGC
GGATCGCGAACATCAATGGCATTTCCGGCATCATCAACGCCGCTGACGTAACGCATCCAG
CCTGCAACGCCTAATGCCAGCAACGACCAGTCCGTTTCGCGCCCCAGATGTATGCGAATA
CCTGCCAGCATACGTTGCGGTAATTTCTGGCTGCCATCCATCGCGATTTGCCAGGTCTTA
TGTTTCAGCGCCGGATTAGCAAAACGTGCAATTAACTTATCCGCATATTGTGTTAAATCG
ACATCTTTAATTTGCAGTGTCGGCGCTTGCTCATCCAGCATTAATGTTCTGGCAGCATGG
CGAAATGCGCGATCCTGCATGCAATCACTGATATGGGCGAATCCTGAGAGGTAACCCAGA
TAAGCGAGAAAAGAGTGGCTGCCATTAAGCATACGCAGTTTCATCTCTTCCCATGGCAGG
ACATCATTCACCATTTGTACACCTGCGACTTCCCAGGCAGGACGCCCAGCGACGAAGTTA
TCTTCCACCACCCACTGGATAAACGGTTCGCAGCTAATCGCGCAGGGATCATTTACCCCC
AGATGCTGGCTGATTTCTGCCAGTGATTCGTCGGTTGCAGCCGGAACAATGCGGTCGACC
ATGGTTCCCGGAAAACTGACGTGTTCTTTTATCCACCCGGCGAGTTCTGGCGAACGTTTT
TCTGCCATTCCCAGCACCGCGTTTTTCACCACATGGCCATTGTCGGGAATATTGTCGCAG
GAGAGCACGGTAAACGGTGTAAGGCCGCGCTCACGGCGGCGTTTCAGTGCTTCGACGAGA
ATACCTGGCGCGGAGTGAGGTTCTTCAGGGTTTTGTAGATCGTGAATAATCCGCGGATTG
CTGGTGTCGAGTGCACCGGTGGCCGGGTCAATACAATAGCCTTTTTCGGTAATCGTCAGG
GAAACAATTGCCACCTGTGGCTCGCAAAATTTCTCAATAATTGCCGCTAAGGAATCCAGT
TTTGCATTCAGGCATTCGTGAACGGCACCGACAATTATCGCCTGATTGCCGTCCGCCCCT
TTCTCCAGCACGGTGTATAAATGGTTCTGTGCGCGGAGCTGGCTCATCAGTTGATCACCG
CTGAACAAGCTGATTTCACAGATCCCCCAGTCACCGCCCTGGGCATTCAGCACACGATCG
GTCAGTAACGCCTGATGTGCGCGGTGAAAGGCTCCAAAGCCAAAATGAACGATACGTGAT
TGCAACTGCTGGCGATCGTAGCGTGGAGCGTGTACATGATGCGGGAGCGTAACGGAGGCG
ATTGTATTCATAGGAGTCACGTCTTAGTAACGATTAATTAACAATGACAGTGTAAAGTTA
TATGACAGCAATTGAAATTGGTCTGGATTGTTAATGCGATGAAGTGTGAGGGCGATCAAT
CAACGAGTGAAAATTGAGGGCGTAAGGTGTTCAGGAAGCGCAAAATAGAAGATTGGTATA
ATAAATTAAAAAAGGGACAGCCTGAGCTATCCCTTTTCTGCATGCGGCTGAAGTTAGTCA
GCACGACCCATATAACGGCGTTCTTCGATATGGATACGAATTTTTTCGCTCGGGCTTAAG
TATTCTGGTACCTGAATCACCAGACCAGTGCTCAATGTCGCCGGTTTGTTACGGGCGCTG
GCAGATGCCCCTTTGATGCCTGGTGCAGTTTCAACGATTTCCAGATCAACGGTCTGCGGC
AGCTCAAGCGCCAGCAGTTGACCGTCCCAGGTCAGCACCTGCATGTCCGGCATGCCGCCC
TCTGGCATAAACAGCAACTCTTCTTCAATCTGATCTTTGGTGAAGGTATACGGGGTATAG
TCTTCTTTATCCATAAAGACATATTCGTTGCCATCGACATAGGAGAAGTCAACGTAACGG
CGGGTCAGCGTCACGGTGTCAACGATATCATCTCCTTTGAAACGCTCTTCTACTTTCAGC
CCGGTACGGACATCAGAAAAACGCATTTTGTACAGCGTAGCGGCACCGCGGGCAGTGGGC
GACTGAATATCAATGTCCTTAACCAGCAGCAGTTTGCCGTTGTAATTCAGTACCATACCT
TTTTTAATTTCGTTCGCTCTTGGCATCGAAAAATTCCTGTAGTCGAAAATGTCAAAAATA
TCGCGACAAAGTACTCGCGACGGGCCTTTCGGGCAAGTGGTATTCGCACTTTTGCTAGTG
CAAAAAAGGTGGTACTGTGCGCGCTCATCAATCCGGTGGTTAACCTTAAGAGAACAACGT
ATGGAATGCCGTCCGGGTTGCGGGGCGTGTTGCACTGCCCCTTCAATTTCCAGCCCTATT
CCCGGTATGCCAGATGGCAAGCCCGCCAATACGCCCTGCATTCAGCTTGATGAACAGCAA
CGCTGTAAAATTTTCACCTCGCCACTGCGACCGAAAGTCTGTGCAGGCTTACAAGCCAGC
GCTGAAATGTGTGGTAACTCGCGTCAGCAGGCCATGACCTGGCTTATCGATCTGGAAATG
TTGACCGCGCCTTAAACATCTTTAATCCGCAGTAAGCAAAACAGAGTGGCGATAATCATC
ACCATCGCAAACCAGAACACAGCGTGATAATTCCAGATCTCGGCGACGATGCCCGCCACT
GATCCTGCGATGATCCAGCCCACGCGCGACGTGTTGGTATAGAGCGTGGTGGCTGAACCT
GCCTGACCGGGCATCAAATCCTGAAAATAGAGCATCCCGATGCCGCCCAGAATGCCAATA
AAAATAGCATTTAGCAGCTGCAAGCCCAACAGAATGATAGGTGAATGCGCCATCAGCATT
CCTGCGTAAAAACAGACGCCACCCACGGCAGCAACGCGCATTAAGAAACGCTTACCCAGA
CGTTTGGCGAAATATCCGGCAATCAACATCGTCGGGATTTCCAGCCCGGCGGCGGTCCCC
ATCATCACACCGGCCAGTTTCTCGGGAAGATGCAGTTCGTTGATAATAAATAGCGGCATG
TTGATGATGTACAGACTGTTCGAGCCCCACATCAATGTACAAATGACAAACAGCAGCAGC
GTATCGCGACGGTTACGGCGCGGCGCTTCAACCGTGCCGGTCGCCAACGGAAGCTCTTTT
TGCATCGACGGTAAAAACAGCCACACCATCACGCCGCAAACAATAAATGCTACCGCTGCG
CTCAGATACATTACCGTAAAGCTGAAACCCATCGCTAAGGCATAAGCCAGCGGTGGGCCA
ATGACCCATGCCAGTGAAACCTGAGCGCGTAAAAAAGAGCTGAACATCACCGCCTCACGT
CCGGTTTTGTCGGCATGTTCACGGGCAAGGGCAAACATTTGCGGGTTAGCGGTCGAGCCA
AAGCTGCTAAGAAAGACGCCAACGAATAGCAACACAAAGTAGTTGCGATTCCAGGCAAAA
AGGGTGCAGGCCAGCACGCCTAACAGGCAGCAAAAGACAATCAGCGATTTGCGATCGCCG
CGCTTATCAGAGCGCCCGGCGAGAAACTGACTCACCAGAATCCCAATGACAGCGCTGCCG
GTAAAGAAGAATCCCACCATCGCCGGACGGGCATGTACTTCATCGGTAAGAAAAATACTG
AGTGTCGGGGTTTGCAGAGCGCCCGCAATACCGGTGAGAAAGGCAACGATTAAAAACGCC
GTCGAGGTCAGGTCAAACGATTTCGCGCTGGAGACTGCGGGGGAGTTATGCATGCTGGTC
GATCATTGGAAGAGGAAGACGCGGAGTTTACGCTGCTTGTCAGAAAATAAACAGACAGCG
AAATCAAAAGCGCCACGAATAATCAAAATGCCATTTCACTGTTGCTGATTGGCTGCTGAC
GCTGCTGAAATGAAATTGCTGATAACGGATTTTTCCATCAGCAGTTCGGAAAAATGACAA
AAAATTGTGCAGCACATCAAACTTTTGCTCATAACTTTACGGCTTTCCTTGCGTGCTGAA
ACAGAAGTATTATGCTTTCTTGAAACGTTTCAGCGCGATCTTGTCTTTAACCCTAAGCCA
GGTTGGCGCTTTTTTTCTCATAGAAGCTGAATCGTTTCAATTCAGCAAGAGAGGAGAACT
ATGTTCCAGTTATCCGTACAGGACATCCATCCGGGCGAAAAGGCCGGAGACAAAGAAGAG
GCGATTCGCCAGGTCGCTGCGGCGCTGGTGCAGGCCGGTAATGTAGCAGAAGGCTACGTC
AATGGCATGCTGGCGCGCGAACAGCAAACCTCAACGTTCCTCGGCAATGGTATTGCTATT
CCACACGGCACTACCGACACCCGCGATCAGGTGCTGAAAACCGGCGTTCAGGTATTTCAG
TTCCCGGAAGGCGTCACTTGGGGTGACGGTCAGGTAGCGTACGTAGCGATCGGTATTGCT
GCCAGCTCGGATGAGCATCTGGGCCTGCTACGCCAGCTGACCCACGTACTGAGCGATGAT
TCCGTTGCTGAACAACTGAAGTCAGCAACAACAGCAGAAGAACTTCGCGCATTGCTGATG
GGCGAAAAGCAGAGTGAGCAGCTGAAGCTCGACAACGAAATGCTGACACTGGATATCGTC
GCCAGCGATCTGCTGACTCTTCAGGCGCTGAACGCTGCGCGTCTGAAAGAAGCGGGGGCA
GTTGACGCCACTTTCGTCACCAAAGCCATCAATGAACAACCGCTGAACCTCGGACAGGGC
ATCTGGCTGAGCGATAGCGCCGAAGGCAATTTGCGTAGCGCGATTGCGGTAAGCCGTGCG
GCAAATGCTTTTGATGTGGACGGCGAAACGGCAGCCATGCTGGTGAGTGTGGCGATGAAT
GACGATCAGCCCATTGCGGTTCTTAAGCGTCTCGCTGATTTGTTGCTCGACAATAAAGCT
GACCGCTTGCTGAAAGCGGATGCGGCAACGTTGCTGGCGCTGCTGACCAGCGATGATGCG
CCGACCGACGACGTGTTAAGCGCGGAGTTTGTGGTGCGCAATGAACACGGCCTGCATGCT
CGTCCAGGTACCATGCTGGTCAACACCATTAAACAATTTAACAGTGATATTACCGTGACA
AACCTTGATGGTACCGGCAAACCGGCAAACGGACGTAGTCTGATGAAAGTTGTGGCACTT
GGCGTTAAGAAAGGTCATCGCCTACGCTTTACCGCCCAGGGTGCAGATGCTGAACAGGCG
CTGAAAGCAATCGGCGACGCTATCGCTGCTGGTCTTGGGGAGGGCGCATAATGAGCAGAC
GTGTTGCTACTATCACCCTTAATCCGGCTTATGACCTTGTTGGTTTCTGCCCGGAAATTG
AACGCGGCGAAGTGAACTTGGTGAAAACCACCGGTCTGCATGCGGCGGGTAAAGGCATCA
ACGTGGCCAAAGTATTAAAAGACCTGGGAATTGATGTCACCGTTGGCGGCTTCCTCGGTA
AAGACAATCAGGATGGTTTTCAGCAACTGTTCAGCGAGCTGGGCATTGCCAACCGTTTCC
AGGTTGTACAGGGGCGCACCCGAATTAACGTTAAGCTGACGGAAAAAGACGGCGAAGTGA
CTGACTTCAACTTCTCGGGTTTTGAAGTCACTCCCGCCGACTGGGAACGCTTTGTGACTG
ATTCTCTGAGCTGGCTCGGTCAGTTCGATATGGTCTGTGTCAGCGGAAGCTTACCGTCAG
GCGTCAGCCCGGAAGCGTTCACCGACTGGATGACTCGCCTGCGTAGTCAGTGTCCTTGCA
TTATCTTTGATAGTAGCCGTGAAGCGTTAGTAGCAGGTTTGAAAGCGGCACCGTGGCTGG
TGAAACCTAACCGCCGCGAGCTGGAAATCTGGGCAGGCCGTAAACTGCCTGAAATGAAAG
ATGTGATTGAAGCTGCGCATGCGCTGCGTGAACAAGGTATTGCGCATGTCGTTATTTCAC
TGGGTGCCGAAGGCGCGCTTTGGGTTAATGCCTCCGGCGAATGGATCGCCAAACCACCGT
CAGTCGATGTCGTAAGCACCGTTGGCGCAGGGGATTCTATGGTTGGTGGCCTGATTTATG
GCTTGCTAATGCGTGAATCCAGTGAACACACACTGCGTCTGGCGACTGCTGTTGCAGCCC
TGGCGGTAAGTCAAAGCAATGTGGGTATTACCGATCGTCCGCAGTTGGCCGCAATGATGG
CGCGCGTCGACTTACAACCTTTTAACTGACAGCAGGAGAGGCATAATGAAAACGCTGCTG
ATTATTGACGCTAATCTCGGTCAGGCACGCGCCTATATGGCGAAGACCCTGCTGGGCGCG
GCGGCGCGAAAAGCAAAACTGGAAATCATCGACAATCCGAACGACGCAGAAATGGCGATT
GTTCTCGGTGATTCCATCCCGAATGACAGCGCGCTGAACGGTAAAAATGTCTGGCTGGGC
GATATTTCCCGGGCAGTTGCGCACCCTGAGCTGTTCCTGAGTGAAGCCAAAGGCCATGCG
AAACCTTACACTGCGCCGGTCGCTGCGACAGCACCGGTTGCCGCCAGCGGTCCGAAACGC
GTAGTTGCGGTGACTGCTTGCCCGACTGGCGTAGCACACACCTTTATGGCGGCTGAAGCC
ATTGAAACCGAAGCGAAAAAACGTGGCTGGTGGGTGAAAGTTGAAACCCGTGGTTCTGTT
GGTGCGGGTAATGCAATCACCCCCGAAGAAGTAGCCGCAGCGGATCTGGTGATTGTGGCG
GCAGATATCGAAGTGGATCTGGCGAAATTTGCGGGTAAACCGATGTATCGCACCTCTACC
GGTCTGGCGCTGAAGAAAACCGCGCAGGAACTGGATAAAGCGGTTGCTGAAGCAACGCCG
TATGAACCGGCGGGCAAAGCTCAAACGGCGACCACTGAAGGTAAGAAAGAGAGTGCAGGC
GCTTATCGTCACTTGCTGACGGGCGTCTCTTACATGCTGCCGATGGTCGTTGCAGGTGGT
CTGTGTATCGCGCTTTCTTTTGCTTTTGGTATCGAAGCGTTTAAAGAGCCGGGTACGTTG
GCAGCGGCGCTGATGCAGATTGGTGGTGGTTCAGCCTTTGCGCTGATGGTGCCGGTACTG
GCAGGTTACATTGCCTTCTCCATTGCCGATCGTCCGGGTCTCACGCCGGGTCTGATTGGC
GGTATGCTGGCGGTCAGCACCGGTTCTGGCTTCATTGGCGGTATTATTGCGGGCTTCCTG
GCTGGTTACATTGCGAAGTTAATCAGTACGCAACTGAAACTGCCACAGAGTATGGAGGCG
CTGAAACCGATCCTGATCATTCCGCTAATTTCCAGTCTGGTGGTCGGTCTGGCGATGATC
TACCTGATCGGTAAACCGGTTGCTGGCATTCTCGAAGGGTTGACTCACTGGCTGCAGACC
ATGGGGACTGCGAATGCGGTTCTGCTGGGGGCGATCCTCGGTGGCATGATGTGTACTGAC
ATGGGCGGTCCGGTAAATAAAGCAGCGTACGCATTCGGTGTGGGTCTGCTGAGTACTCAA
ACCTATGGCCCGATGGCGGCGATTATGGCGGCAGGTATGGTGCCACCGCTGGCAATGGGC
CTGGCAACAATGGTGGCGCGTCGCAAATTCGACAAAGCGCAGCAGGAAGGTGGCAAAGCC
GCTCTGGTACTGGGACTGTGCTTTATTTCGGAAGGTGCAATTCCGTTTGCTGCTCGTGAT
CCGATGCGTGTGCTGCCGTGCTGTATCGTGGGTGGGGCGCTGACTGGCGCAATCTCAATG
GCGATTGGTGCGAAACTGATGGCACCGCACGGTGGTCTGTTTGTTCTGCTGATCCCTGGC
GCTATTACGCCGGTACTGGGTTACCTGGTAGCAATTATTGCCGGTACGCTGGTGGCGGGT
TTGGCCTATGCCTTCCTGAAACGTCCGGAAGTGGACGCAGTAGCGAAAGCCGCGTAATAA
AAGGTGTGTTACAGGGCAGAAATTTACTGCCCTGTATCATTGGATGAGCGCAAAGAGAAT
GACCGGTTTGTGAATGTAATTTTATGAATTTAAATGGTTTTATCTTTCAGTAGAAACCTG
AAACGTTCATCAAATACTAAGGTTATTTCCTCAAGGGCAGATTCTTTTCTGCCCTTTTTT
AGTGTTCATGTTCTGTGCATCCCGTCACAAATTCCTCGCTTTTGTAATTCAGGCATTTAA
TCGCATTTTGTGAGCCTGCTCAAATCTGCCTATTTTGCCTCTCTGGCGGTAATTTACTTT
ACGTAAAACATGCATACTATGAGCACATGTTTAAATATGAACACATGTTTAAACCGTCTT
TGCAGTATCTATATTCTTGTGGATTGACAGGGTTGGTAATTTTTTACCAGAGGACGTGCT
ATGCGCGAAAAGGATTATGTCGTAATTATAGGTTCGGCGAATATTGATGTCGCCGGATAT
TCACATGAATCATTAAATTATGCGGATTCAAATCCAGGTAAAATAAAATTTACGCCTGGT
GGAGTAGGGCGCAATATTGCACAAAACCTGGCGTTGCTGGGTAACAAAGCCTGGCTACTG
AGCGCCGTAGGCAGTGATTTTTATGGTCAATCGCTGCTAACGCAAACCAATCAATCAGGC
GTTTATGTCGATAAATGCCTGATTGTGCCGGGAGAAAATACGTCGAGTTATTTATCATTA
CTCGATAATACCGGTGAAATGCTGGTTGCTATAAATGACATGAATATTAGCAACGCTATT
ACAGCTGAATATCTCGCACAGCACCGTGAATTTATTCAGAGGGCAAAGGTCATTGTCGCG
GACTGTAATATCAGTGAAGAGGCACTGGCATGGATTCTGGATAATGCCGCCAACGTACCT
GTATTTGTCGATCCGGTTTCCGCGTGGAAATGTGTCAAAGTGCACGACCGTCTAAATCAG
ATCCACACTCTCAAGCCAAACCGCCTTGAAGCGGAAACCCTGAGTGGGATTGCGCTGTCA
GGGCGTGAAGATGTGGCAAAAGTTGCTGCCTGGTTCCATCAACATGGCCTGAACCGACTG
GTATTGAGCATGGGCGGCGATGGCGTTTATTACAGTGATATCAGCGGTGAAAGTGGCTGG
TCTGCCCCGATCAAAACCAATGTTATTAATGTTACCGGAGCGGGCGATGCCATGATGGCG
GAACTTGCTTCGTGTTGGGTAGACGGAATGCCGTTTGCCGAATCTGTTCGTTTCGCACAG
GGATGTTCGTCAATGGCGCTCTCCTGTGAATACACCAATAACCCCGATTTATCGATTGCC
AACGTTATATCGTTAGTGGAGAACGCAGAATGTCTGAATTAAAAATTTCCCCTGAATTAT
TACAAATTTCCCCGGAAGTGCAGGACGCGTTAAAAAACAAAAAACCGGTTGTGGCGCTGG
AATCGACCATTATTTCTCACGGGATGCCGTTCCCACAAAATGCCCAGACCGCAATTGAAG
TTGAAGAAACTATTCGTAAACAGGGCGCTGTACCTGCCACTATCGCCATTATTGGCGGCG
TGATGAAAGTGGGTTTAAGCAAAGAAGAAATTGAATTACTGGGTCGTGAAGGGCATAACG
TGACCAAAGTTAGTCGTCGCGATTTACCTTTTGTTGTTGCCGCCGGAAAAAATGGCGCAA
CCACTGTGGCTTCAACGATGATTATTGCGGCGCTTGCCGGAATTAAAGTATTTGCCACCG
GGGGAATTGGTGGTGTGCATCGCGGGGCGGAACATACCTTCGATATTTCTGCCGATTTGC
AAGAACTGGCAAATACTAATGTCACCGTTGTTTGTGCCGGGGCGAAATCTATTCTCGATT
TAGGATTAACCACTGAGTATTTAGAAACCTTCGGTGTGCCGTTAATTGGCTATCAGACTA
AAGCGCTGCCTGCGTTTTTCTGCCGTACCAGCCCGTTTGACGTCAGCATTCGTCTCGACA
GCGCCTGTGAAATTGCCCGTGCAATGGCGGTGAAATGGCAAAGCGGGCTGAACGGTGGCC
TCGTGGTAGCGAACCCGATCCCGGAACAGTTTGCGATGCCAGAACACACTATCAATGCGG
CGATCGATCAGGCGGTAGCTGAAGCTGAAGCGCAGGGTGTTATTGGTAAAGAAAGTACGC
CATTCCTGCTGGCGCGCGTTGCTGAACTGACCGGCGGTGACAGCCTGAAATCCAACATCC
AACTGGTGTTCAACAACGCCATTCTGGCGAGTGAAATTGCCAAAGAATACCAGCGTCTCG
CGGGTTAATTTCTGACGGGCAGAAAGCCGTCGCCCGTACTCATCAAACATACCAAAACCT
GGCGCTGACGCCGGGTTTACTGGCATGAAGGGAAAATCATTATGGACATAATGAGAAGTG
TTGTGGGGATGGTGGTGTTACTGGCAATAGCATTTCTGTTGTCAGTGAATAAAAAGAGCA
TCAGTTTGCGTACGGTTGGAGCCGCACTACTGCTGCAAATTGCTATTGGTGGCATCATGC
TCTATTTTCCGCCGGGAAAGTGGGCTGTAGAACAGGCGGCATTAGGCGTTCATAAAGTGA
TGTCTTACAGTGATGCCGGTAGCGCCTTCATTTTTGGTTCGCTGGTCGGGCCGAAAATGG
ATGTCCTCTTTGACGGTGCGGGTTTTATCTTCGCCTTTCGCGTACTCCCGGCGATTATCT
TCGTCACTGCGCTCATTAGTCTGCTGTACTACATTGGCGTGATGGGGCTGCTGATTCGCA
TCCTTGGCAGCATTTTCCAGAAAGCCCTCAACATCAGCAAAATCGAATCTTTTGTTGCGG
TTACCACTATTTTCCTCGGGCAAAATGAGATCCCGGCGATCGTTAAACCGTTTATCGATC
GCATGAATCGCAACGAGTTGTTTACCGCAATTTGTAGCGGGATGGCGTCCATTGCGGGTT
CGATGATGATTGGTTATGCCGGAATGGGCGTACCAATTGACTACCTGTTGGCGGCATCGC
TGATGGCGATCCCCGGCGGTATTTTGTTTGCACGTATTCTTAGTCCGGCAACCGAGCCTT
CGCAGGTCACATTTGAAAATCTGTCGTTCAGTGAAACGCCGCCAAAAAGCTTTATCGAAG
CGGCGGCGAGCGGTGCGATGACCGGGTTGAAAATCGCCGCCGGTGTGGCGACGGTGGTAA
TGGCGTTTGTCGCAATTATTGCGCTGATTAATGGCATTATCGGCGGAATTGGCGGCTGGT
TTGGTTTTACCAATGCTTCTCTGGAAAGTATTTTTGGCTATGTGCTGGCACCGCTGGCGT
GGATCATGGGTGTGGACTGGAGTGATGCTAACCTTGCGGGTAGCCTGATTGGGCAGAAAC
TGGCGATTAACGAATTCGTCGCTTACCTGAGTTTCTCCCCATACCTGCAAACGGGCGGCA
CGCTGGGAGTGAAAACCATTGCGATTATCTCCTTTGCGCTTTGTGGTTTTGCTAACTTTG
GTTCTATCGGTGTTGTCGTTGGCGCATTTTCGGCTATTTCGCCAAAACGTGCACCGGAAA
TCGCCCAGCTTGGTTTACGGGCGCTGGCAGCAGCAACGCTTTCCAACCTGATGAGCGCGA
CCATTGCCGGGTTCTTTATTGGTTTAGCTTGAGTTTCATTGCTGGATGTACTCGCTTATT
AAGCGTTGCATCCGGCAATCGCGCTATTGCAAATAATTTTTACTGCATCATCCCGGAGAA
TTTATTCTCCGGGTCCATCTCCAGCGCCAGTCCTGACAACTGCCTTTTGTTTTTAATGAG
ATACCCTTTCTTGCTTTTAATTAATAAACCGTCGTGAATGAATTGCGCGAGAACATATAA
AAGATGTCGATAAGAAACGCCTAAATACTCTGCCGCTTGCGTATGCTTTTCGTGATAAAG
ATCACCTTCTTGTGAGAGTAATATAAATGCTGCCAGGCGATTCACTAACGGAAATGATTG
GTTCTGAGTTAAAGAAACAATATTACGATAATTTTTATGACTTAAGGTGACGCAAAGTTT
TCGTAAAAATAGGGTGTCGTTTAATAACAGCGGACGGTAATGTTTCATAGGGAGCGCAAG
GCACCAACACTCTTCAATCGCCTGTACTGCACGTGGTTCATGGTCTTTATCGATTAACTC
AATCTCGCCAATAAAACAGGGGGCGGCAAAGAAATCGATCAGCGACACGCGACCATTAGC
TAGCGTGGCGTAAAGCCTGGCGCGGCCTCGCGTCAGGTAAAACAGCCAGGACGGCTGTTG
CCCTTCCTGCACAATGTAGTCACGCGCTAAAAAATGAAACAGCCGCGTATCGGCTGAAAC
ATCCGTTAAAAAGCAATCCTTAAACGCGGATTCACTCATCAATTGCAGCTTAAGATCATT
ATTGTGGATTTCTTTCACGATGTTTATCCGCTGTGAGATTTCTCATATTTAGCATACGTA
CGCTGTTGTTAAGATTCAATCATCGGCCCGGTCGAAATTTCTTTGCTGTAGAAAAAAATA
ACGCAACTGGAAACAGAGGAAATAAACAATGGAAAAGAGAAAAATTATTCTGGATTGTGA
TCCGGGTCATGATGATGCTATTGCTATAATGATGGCGGCGAAACATCCGGCGATTGATTT
ATTAGGTATCACCATTGTTGCGGGTAATCAGACGCTTGATAAAACATTAATTAATGGCCT
GAATGTTTGCCAGAAACTGGAGATTAATGTTCCGGTTTATGCGGGGATGCCGCAACCCAT
TATGCGTCAACAAATCGTTGCCGATAATATTCACGGTGAAACCGGACTGGATGGCCCGGT
ATTCGAGCCGCTGACCCGCCAGGCAGAAAGTACCCACGCGGTGAAATACATCATTGATAC
CCTGATGGCAAGCGATGGCGATATCACTCTGGTGCCGGTTGGTCCGTTGTCAAATATCGC
GGTGGCAATGCGTATGCAACCCGCAATCCTGCCCAAAATCCGTGAAATTGTGCTAATGGG
CGGCGCTTACGGTACAGGCAACTTCACGCCATCTGCCGAGTTCAACATCTTTGCTGACCC
GGAAGCCGCACGCGTGGTGTTCACCTCTGGCGTTCCATTAGTGATGATGGGCCTCGATCT
CACCAACCAGACCGTTTGCACCCCGGACGTGATTGCACGAATGGAAAGGGCAGGCGGCCC
TGCCGGAGAGCTGTTCAGCGACATCATGAACTTCACTCTCAAAACCCAGTTCGAAAACTA
CGGCCTGGCTGGCGGCCCGGTGCACGACGCCACCTGCATCGGTTATCTGATTAACCCTGA
TGGCATTAAAACCCAGGAGATGTACGTCGAAGTGGACGTCAACAGTGGCCCTTGCTATGG
GCGTACCGTCTGCGACGAGCTGGGCGTTCTTGGCAAGCCCGCTAATACCAAAGTCGGCAT
CACTATTGATACCGACTGGTTCTGGGGCTTAGTCGAAGAGTGCGTGCGCGGCTACATCAA
AACCCATTAAGTGTTGATAACAAGCCGGGTCAGTATCGCAAGATGCAGGCCCGGCTATTT
CTGAGGGGCAGAAAGCCGTCGCCCAATATGACATGAAGAGATAATAACTATGGATGTCAT
GAGAAGTGTTCTGGGAATGGTGGTATTGCTGACGATTGCGTTTTTACTGTCAGTAAACAA
GAAGAAGATCAGCCTGCGTACCGTTGGCGCGGCGTTAGTGTTACAGGTTGTGATTGGCGG
GATTATGCTTTGGTTACCGCCAGGGCGTTGGGTCGCTGAAAAAGTCGCTTTTGGCGTGCA
TAAAGTGATGGCGTACAGCGACGCGGGTAGCGCATTTATCTTCGGTTCGCTGGTCGGGCC
GAAAATGGACACGCTGTTTGATGGCGCAGGATTTATCTTTGGTTTCAGGGTGTTACCGGC
AATTATCTTCGTCACCGCGCTGGTGAGTATTCTCTATTACATCGGTGTGATGGGGATCTT
AATTCGCATTCTCGGCGGTATATTCCAGAAAGCATTAAATATCAGCAAGATCGAGTCATT
CGTCGCGGTCACTACCATTTTCCTCGGGCAAAACGAAATTCCGGCGATCGTCAAACCCTT
TATCGATCGTCTGAATCGCAATGAATTATTTACAGCGATTTGTAGTGGCATGGCCTCGAT
TGCTGGTTCGACAATGATTGGTTACGCCGCACTGGGCGTACCTGTGGAATATTTGCTGGC
GGCATCGTTAATGGCGATCCCCGGCGGGATCTTGTTTGCCCGCATGCTAAGCCCGGCTAC
GGAATCTTCACAGGTTTCCTTTAATAACCTCTCTTTCACCGAAACACCGCCAAAAAGCAT
TATTGAAGCGGCAGCGACAGGGGCGATGACCGGGCTGAAAATCGCTGCGGGTGTGGCAAC
AGTGGTGATGGCATTTGTTGCCATCATTGCGTTAATTAACGGTATTATCGGCGGCGTAGG
CGGCTGGTTTGGTTTTGAACATGCCTCGCTGGAGTCCATTTTAGGTTACCTGCTGGCCCC
ACTGGCGTGGGTAATGGGTGTTGACTGGAGTGATGCGAATCTTGCCGGGAGTTTGATTGG
ACAGAAACTGGCAATAAATGAATTTGTCGCTTATCTCAATTTCTCACCCTATCTGCAAAC
GGCTGACACGCTGGATGCTAAAACCGTGGCGATTATTTCCTTCGCGTTGTGCGGTTTCGC
TAACTTTGGTTCTATCGGGGTGGTGGTGGGGGCGTTTTCTGCGGTTGCGCCACACCGTGC
GCCGGAAATCGCCCAGCTTGGTTTACGCGCGCTGGCGGCGGCGACACTTTCTAACCTGAT
GAGTGCCACCATTGCCGGGTTCTTTATTGGTTTAGCGTAGTGTGCGATTTATGAGCCGGA
TTAGATGCGGTCAAGCGTCGAATCCGGCAACATTGTTACACCATTGGCACTAATGACAGC
GCGTTATCGGCAGACAGGGTAGGGTTGTTTAAGCTGCCGCTGGCGCGTGAAATTGCCGCG
CAGGCCATCGCAAAACGGGCGCTGTCACGGAAATTGTTTCCCTCCAGAAAGCTATATACC
AGGCCCGCCATAAAACCATAGTCAGCACCAAAACTGTCTACTGTCGTATGCGCTGGTGCG
GTCAGCAAAAATTGTTCACCATCCTTTTCGCTGCAATAAACTGACTCATCGGGCAAATAA
ACAAACAGTTGCTGAACACCTTGCTGATGCAACGCATTCACTGCGGCATTACGGTCAGCA
TCGCTGGTGATCGCCTGTCCCCATAAAATTTCCAGCTCCGGTAAAGTGGGTTTCAGGGTG
TGAATATGCGCCAGCCAGGGTTTGATTTTGCCCGCTTTGAATTCTGAAACGGTATCGACA
AACACCGGGATTTGATCAGCGAGGGTAAAGACCCATTCCAGCGCCTCGGCTGTCAGGTTG
CAATCAGCCAGTACCACGCCCGCATGACGAAGTAAATCGCGCGACCCGTTCAGTAGTTGC
GGTGTCAACTGTTCCAGCAGATGGGTATCGTTAATCGCCAGCACGGTTTGATCGTCTCGA
TTGGCAATTGCCAGATACGTCGATGTGCTTTGACCATGTAAACGAACGCAGCCGGAGACA
TTCACGCCGGCACGGCGCGTTTCTTCCAGGAGCATTTCGCCATAAAAGTCATCGCCAATC
ACTGAAAGCAAATGGACGTCGCGGCCTAACAGCGCCAGATTGTGGGCGATATTGCGTCCA
ACGCCGCCTGCCGAGCAATGAATTGTACCGGGATGAGAAGCCGCTTGCGGGTAACGGATA
TCCGCCATCCCGCGAATATCCATATTGATTGTCCCCACCACTACGCAGTATTCCTGCTCG
GTGAGAATGTAACCTTTGCCTTTAATCCGCCCTTTGCGCATTAAATCCATAATATGCGCC
GCAACGCGCGAACGACTGATTTGCAGCATGTCCGCAATTTCGTTCTGCTGAATCAGCGGG
TTACGCCGTAAAATTGCAAGGATCTCCTTTTCCCGGTTATTCATCTTCAGGCAACCGCTT
TTTCAGTTTGTTGCGCTTTCAGCCAGGCGATCTCTTCTGCCCAGATATCCGGGTTAATGG
TTTCAAGGATCAGCGGAATGCCGTCGAAACGGTCGTCCTGCATGATCCAGCGGAACGCAT
CATGACCGATATTGCCTTCACCGAGGCTATGATGGCGGTCAACGCGGCTGCCAAAGGTGC
TTTTCGCATCGTTAAGGTGCATCCCGCGCAGATACTTAAAGCCGACAATACGGGCAAAAT
CAGCGAACGTTTTCTCGCATTCGGCTGGAGTACGCAAATCATACCCGGCAGCGAAAGCAT
GGCAGGTATCAATGCAGATGCCGACACGGGATTTATCTTCCACGCCGTCGATAATCGCCG
CGAGATGTTCGAATTTAAACCCTAAGTTACTGCCCTGACCGGCGGTGTTTTCAATCACCG
CGGTCACACCTTGAGTTTTATCCAGCGCAATGTTGATGGATTCGGCAATACGCGCAAGGC
AATCCTCTTCTGAAATCTGCATCAGATGGCTGCCAGGGTGGAAGTTGAGCAAAGAAAGCC
CCAGTTGTTCGCAACGCTGCATTTCATCTATAAAGGCATCGCGCGATTTTTCCAGAGCTT
CAGTGACCGGATGTCCGAGGTTAATCAGATAGCTGTCGTGGGGAAGAATTTGCGCCGATG
TGTAGTGATATTTTTCACAGGCGGCTTTGAATTCATCGATGGTTTGCGTCGTGAGCGGTG
CGGCACGCCACTGACGTTGGTTTTTGGTGAACAAGGCAAACGCGGTTGCGTCGATTTCGG
CGGCGCGAATTGCGGCATTTGCCAGACCGCCAGCAGCACTAACGTGCGCTCCAATGTATT
TCATGCTAGGACTCCTGTTAAACCCGCTGGAGGAAAACGGTAATGATAGCGGGTTAACAG
GAGCAAGATGTAGTGGTTTATGCGATGACGCTTTGAATCACATAGTTAATCGCACCACCA
CCAACAATCAGCCAGGCAAACAGTACCAGTGCCATCAGCAGAGGTTTCGCCCCAGCTTTT
TTCAGCGCGCTGACGTGAGTGGTCAGACCCAGCGCCGCCATCGCCATTGCCAGCAGGAAG
GTATCCAGCGTTACCAGCATGTTCACCACGCTCTGCGGTAACAGGTGGAACGAGTTAAAG
ATGGCAACTACGATGAACAAGATGGCAAACCACGGAATAGTGATTTTGCTTTTCTCGCCG
CTGTTCGCCCCAGACAGCTGTTTAACACGCGCCGCCAGCAGGATGAGGAACGGAGCCAGC
ATCATCACGCGCAGCATTTTGGAAATAACTGCTGCGTTTTCCGCATCCGGGCTGATGGCA
TGACCTGCCGCCACCACCTGCGCCACTTCGTGCACAGTAGAACCAATGTAGATACCGAAA
GTTTCCGGACTAAACCATTGAGACATCAGCGGATATATCGCCGGGTAGAGGAAAATCGCG
ACGGTCCCGAAGATAACAACGGTTGCAACAGCCACGGTTACTTTACTGGCTTCCGCTTTC
ACTACCGGCTCAGTCGCCAGTACCGCGGCAGCACCACAGATACTGCTACCGGCACCGATC
AACCAGCTGGTGTGCTTATCCAGACCAAACACTTTCTGCCCCAGGAAGCAAGCCAGCAGG
AAGGTACTGGACAGCGTCAACACGTCAATGATGATCCCACTGATACCGACATCGGCAATT
TGCGAGAACGTCAGACGGAAGCCATAAAGAATGATACCCAGACGTAATAAATATTGCTTG
GCAAACAGCACACCACCGTCACAGCTTTTCCAGATGTGCGGATAGATGGTGTTGCCTAAA
ACCATCCCCAACAAGATTGCGAGGGTGAGGGCACTAAACCCGGCACCCGCAACCGCGGGA
ATGGAACCACCCCACAGGGCGACCCCGGTGATAACTGCACTCAGGGCTAACCCCGGAATA
AAATGCCACAGTGTACGATGTTGTTTCTGTAAGGTGATATTCGTCATAACCCTCTCCTTT
AACCGGGCATAAGGTTACGACTAACTGGTTTAAAAATAAAATTGATTATATATTTATAAT
TAATCTTTATAAGTGGTAAGCGACTATGCACATCACCCTCCGGCAGTTGGAAGTTTTTGC
AGAAGTATTGAAAAGTGGATCAACCACCCAGGCGTCGGTGATGCTGGCGTTGTCGCAATC
AGCAGTGAGCGCAGCCTTGACCGACCTAGAAGGGCAGCTTGGCGTTCAACTGTTTGATCG
CGTGGGGAAAAGACTGGTTGTTAATGAACACGGGCGGCTGCTCTATCCGCGTGCGTTGGC
ATTGCTTGAACAGGCGGTTGAAATCGAACAACTGTTTCGCGAAGACAACGGCGCGATTCG
TATCTATGCCAGTAGTACCATCGGTAACTACATTCTGCCTGCAGTTATCGCCCGTTATCG
CCATGATTATCCGCAGTTGCCGATTGAACTTAGCGTTGGGAACAGCCAGGACGTGATGCA
AGCGGTGCTGGATTTCCGCGTTGATATTGGCTTTATTGAAGGACCGTGCCACAGCACTGA
AATCATTTCTGAACCGTGGCTGGAAGACGAGCTGGTGGTTTTCGCCGCGCCGACTTCGCC
GTTGGCCCGTGGTCCGGTCACCTTAGAACAGCTGGCCGCTGCGCCGTGGATCCTGCGTGA
ACGCGGTTCCGGCACGCGGGAGATTGTCGATTATCTGTTGCTGTCACATTTACCGAAGTT
TGAGATGGCGATGGAATTAGGTAACTCCGAGGCAATCAAACATGCGGTGCGTCATGGGTT
GGGAATTAGTTGCCTGTCGCGACGGGTGATTGAAGACCAATTGCAGGCAGGCACATTAAG
TGAAGTTGCGGTCCCTCTGCCGCGCCTGATGCGTACGTTGTGGCGTATACATCATCGGCA
AAAACACCTTTCCAACGCGCTACGGCGCTTTCTGGACTATTGCGATCCCGCAAATGTGCC
GCGTTAAGTTGCTGTACAAGAACATGCTGGTGCTGTGTCGATTTCGTGACGCAGCGCCTT
CAGCATGCATTCGCCAGAAAAGAGATTGGCTGCTTTACTTATAATCCCTGGGCGATCATG
AAGGTGTCTTATAACCGTGTATTTCTGCCGGAAGGATTGCCAATCGTCTGCTACAATCGC
GCCTCATTTTTTAGATGGATAGCATTTTTGTATGGTTTCCGAAACTAAAACCACAGAAGC
GCCGGGCTTACGCCGTGAATTAAAGGCGCGTCACCTGACGATGATTGCCATTGGCGGTTC
CATCGGTACAGGTCTTTTTGTTGCCTCTGGCGCAACGATTTCTCAGGCAGGTCCGGGCGG
GGCATTGCTCTCGTATATGCTGATTGGCCTGATGGTTTACTTCCTGATGACCAGTCTCGG
TGAACTGGCTGCATATATGCCGGTTTCCGGTTCGTTTGCCACTTACGGTCAGAACTATGT
TGAAGAAGGCTTTGGCTTCGCGCTGGGCTGGAACTACTGGTACAACTGGGCGGTGACTAT
CGCCGTTGACCTGGTTGCAGCTCAGCTGGTCATGAGCTGGTGGTTCCCGGATACACCGGG
CTGGATCTGGAGTGCGTTGTTCCTCGGCGTTATCTTCCTGCTGAACTACATCTCTGTTCG
CGGCTTTGGTGAAGCGGAATACTGGTTCTCACTGATCAAAGTCACGACAGTTATTGTCTT
TATCATCGTTGGCGTGCTGATGATTATCGGTATCTTCAAAGGCGCGCAGCCTGCGGGCTG
GAGCAACTGGACAATCGGCGAAGCGCCGTTTGCTGGTGGTTTTGCGGCGATGATCGGCGT
AGCTATGATTGTCGGCTTCTCTTTCCAGGGAACCGAGCTGATCGGTATTGCTGCAGGCGA
GTCCGAAGATCCGGCGAAAAACATTCCACGCGCGGTACGTCAGGTGTTCTGGCGAATCCT
GTTGTTCTATGTGTTCGCGATTCTGATTATCAGCCTGATTATTCCGTACACCGATCCGAG
CCTGCTGCGTAACGATGTTAAAGACATCAGCGTTAGTCCGTTCACCCTGGTGTTCCAGCA
TGCGGGTCTGCTCTCTGCGGCGGCGGTGATGAACGCAGTTATTCTGACGGCGGTGCTGTC
AGCGGGTAACTCCGGTATGTATGCGTCTACTCGTATGCTGTACACCCTGGCGTGTGACGG
TAAAGCGCCGCGCATTTTCGCTAAACTGTCGCGTGGTGGCGTGCCGCGTAATGCGCTGTA
TGCGACGACGGTGATTGCCGGTCTGTGCTTCCTGACCTCCATGTTTGGCAACCAGACGGT
ATACCTGTGGCTGCTGAATACCTCCGGGATGACCGGTTTTATCGCCTGGCTGGGGATTGC
CATTAGCCACTATCGCTTCCGTCGCGGTTACGTATTGCAGGGACACGACATTAACGATCT
GCCGTACCGTTCAGGTTTCTTCCCATTGGGGCCGATCTTCGCATTCATTCTGTGTCTGAT
TATCACTTTGGGCCAGAACTACGAAGCGTTCCTGAAAGATACCATTGACTGGGGCGGCGT
AGCGGCAACGTATATTGGTATTCCGCTGTTCCTGATTATTTGGTTCGGCTACAAGCTGAT
TAAAGGAACTCACTTCGTACGCTACAGCGAAATGAAGTTCCCGCAGAACGATAAGAAATA
AGTTTCCTCCCTTCCTTGCTAAGCCCTCTCAACCGAGAGGGCTTTTTCAATTCCATTTCC
CTGACAAATCATGCGGATATAAAATTTAACATTTGGATTGATAATTGTTATCGTTTGCAT
TATCGTTACGCCGCAATCAAAAAAGGCTGACAAATCAGAGGCTGTTCCGGCTTTCTGGGA
TGATCACCTGCATACAAATAAGTCCACCGCGATGCTGCCGTACGCAAGGGGACGTGAAGA
AGATGTGAGCGATAACCCATTTTATTTTCGTAGTTACCTCATGGAGATATGGAATGTTTA
GGTTGAACCCTTTCGTACGGGTCGGGCTGTGTTTGTCCGCTATTTCTTGTGCATGGCCTG
TGTTAGCGGTCGATGATGATGGCGAAACGATGGTTGTCACTGCATCTTCCGTTGAACAAA
ACCTTAAAGATGCACCCGCCAGTATCAGCGTCATTACCCAGGAAGACCTGCAGCGAAAAC
CGGTACAGAATCTGAAGGATGTCCTCAAAGAAGTGCCTGGCGTACAACTGACGAACGAAG
GGGATAACCGTAAGGGCGTTAGTATTCGTGGTCTGGACAGCAGCTACACCCTGATTCTTG
TCGACGGTAAACGCGTTAACTCCCGCAATGCCGTCTTCCGCCACAATGATTTCGATCTGA
ACTGGATCCCGGTCGATTCCATCGAACGTATTGAAGTGGTCCGTGGCCCGATGTCGTCGC
TGTACGGTTCCGATGCGCTCGGCGGTGTAGTGAATATCATCACCAAAAAAATCGGTCAGA
AATGGTCGGGTACCGTTACCGTCGATACCACCATTCAGGAACATCGCGATCGCGGTGATA
CCTATAACGGTCAGTTCTTTACCAGTGGACCATTAATTGATGGTGTGCTGGGAATGAAAG
CTTACGGCAGCCTGGCAAAACGTGAAAAGGATGACCCGCAAAACTCAACGACCACCGATA
CCGGAGAAACGCCGCGTATTGAAGGATTCTCCAGCCGCGACGGCAATGTCGAATTTGCCT
GGACACCGAATCAAAATCACGATTTTACTGCCGGATACGGTTTCGACCGTCAGGATCGTG
ATTCCGACTCGCTGGACAAAAACCGCCTGGAACGCCAGAACTACTCCGTCAGCCATAATG
GGCGTTGGGATTACGGCACCAGCGAACTGAAATACTACGGTGAGAAAGTCGAGAACAAAA
ACCCTGGCAACAGCAGCCCGATAACTTCCGAAAGCAATACGGTCGACGGCAAATACACGT
TGCCGCTGACGGCGATTAATCAGTTTCTCACGGTTGGCGGTGAATGGCGTCACGACAAAC
TTAGCGATGCGGTGAACCTGACCGGGGGAACCAGCTCCAAAACGTCTGCCAGCCAGTACG
CGCTGTTTGTGGAAGATGAATGGCGGATCTTCGAGCCGCTGGCGCTGACGACCGGCGTGC
GTATGGACGATCACGAAACCTACGGTGAACACTGGAGTCCGCGTGCCTACCTGGTTTATA
ACGCCACCGACACCGTAACGGTGAAAGGGGGCTGGGCGACGGCATTTAAAGCGCCTTCTC
TGTTGCAACTTAGCCCTGACTGGACGAGCAATTCCTGCCGTGGCGCATGTAAGATTGTAG
GTAGCCCGGATCTGAAACCAGAAACCAGCGAAAGTTGGGAGCTGGGGCTGTACTACATGG
GTGAAGAAGGCTGGCTGGAAGGGGTTGAATCCAGCGTTACCGTTTTCCGTAACGATGTGA
AAGATCGCATCAGCATCAGCCGTACGTCTGACGTCAATGCTGCACCGGGCTACCAAAACT
TTGTCGGTTTTGAGACGGGCGCTAACGGACGGCGCATACCGGTATTTAGCTACTACAACG
TTAACAAAGCTCGTATTCAGGGCGTGGAAACCGAACTGAAAATTCCGTTCAACGATGAAT
GGAAACTGTCACTCAACTACACCTATAACGATGGTCGTGATGTCAGCAACGGCGAAAACA
AACCGCTATCCGATCTGCCGTTCCATACCGCTAACGGTACGCTGGACTGGAAACCGCTGG
CGCTGGAAGACTGGTCATTCTATGTTTCTGGTCACTATACCGGGCAGAAACGAGCCGACA
GCGCGACGGCTAAAACACCGGGCGGTTATACCATCTGGAATACCGGCGCGGCCTGGCAGG
TGACTAAAGACGTCAAACTGCGCGCAGGTGTGCTGAACCTTGGCGACAAGGATCTCAGTC
GTGACGACTACAGCTATAACGAAGACGGACGTCGTTACTTTATGGCAGTGGATTATCGCT
TCTGATGAGAAGATGCCCGGCGAACCGGGCGGACTTTCACTTCAGTAAATACTGCGCATG
GAAGCGCAGGTGATCCTCTATAAAAGAGGCGATGAAGTAGTAACTGTGATCATATCCCGG
CTGAATACGCAGCGTCATCGGCCATGCTTTCTGGCGCGCGGCTTCTGCAAGTACTGCAGG
TTGCAGTTGGTCAGCAAGAAACTGATCGTTATCACCCTGATCGATAAGCGTCGGGATCGC
ATCCTGCGCGTTACTGGCATACATCAGCGCGCAACTGTCCCATTCCAGCCATGCATTTTT
GTCCTCACCTAAATAGCGGCTAAACGCTTTGATTCCCCACGGGACGCTGCACGGATTCAC
AATTGGCGCAAAGGCGGAAACGCTGGCGTATTTGCCCGGGTTTTTCAGCGCCATAATCAG
CGCACCGTGACCACCCATTGAATGACCGCTAATGGCGCAGCGGTCGCTGACATTAAATTG
CGACTGAATCAGCGCCGGTAATTCATCGCGCAGATAATCATACATCCGGTAATGCGTCGC
CCACGGCGGTTGCGTGGCGTTAAGATAAAAGCCCGCGCCCTGGCCTAAATCGTAGCCATC
GTCGTTGGCAACCTGTTCACCGCGCGGGCTGGTGTCTGGCATCACCAGTACAATCCCCAG
TTCCGCCGCCACGCGCTGGGCACCCGCCTTGGTGGTGAAGTTCTCGTCATTGCAGGTTAA
TCCGGAAAGCCAGTACAGCACTGGTGGCGGGGTGTGATCACGAGGGGGTGGGAGAAAGAT
ACTGAACGTCATCGGGCAGTTTAAGGTACTGGAGTAGTGTCGCCAGCGTTGCTGCCAGCC
TTCAAAACAGCGGTGCTCTTCGAGCATTTCCATGCGTGGCTCCTTGTTGTGTTGTTTGCA
ATTTCTTCATCATACCGTTTATTCAATGTGCTGTGAGTAACTTTCACTTCCGTATTTGCA
TAACGATGTTTTAACATCTGCTGATGAAAGGCAGCGGCAATTACAATAATTATCGCTGTG
AATACTGGATTATGTGCGCCGCCTCACGCACAATAATCAGGCTGTAAATCAGCTTAATAA
CTTTGCCCCCACGCAGGGCGGAGGCGTCACACCTGCAGGAGAAATCATAAATGCCATCAC
TCAGTAAAGAAGCGGCCCTGGTTCATGAAGCGTTAGTTGCGCGAGGACTGGAAACACCGC
TGCGCCCGCCCGTGCATGAAATGGATAACGAAACGCGCAAAAGCCTTATTGCTGGTCATA
TGACCGAAATCATGCAGCTGCTGAATCTCGACCTGGCTGATGACAGTTTGATGGAAACGC
CGCATCGCATCGCTAAAATGTATGTCGATGAAATTTTCTCCGGTCTGGATTACGCCAATT
TCCCGAAAATCACCCTCATTGAAAACAAAATGAAGGTCGATGAAATGGTCACCGTGCGCG
ATATCACTCTGACCAGTACCTGTGAACACCATTTTGTTACCATCGATGGCAAAGCGACGG
TGGCTTATATCCCGAAAGATTCGGTGATCGGTCTGTCAAAAATTAACCGTATCGTGCAGT
TCTTTGCCCAGCGTCCGCAGGTGCAGGAACGTCTGACGCAGCAAATTCTCATTGCGCTAC
AAACGCTGTTGGGCACCAATAACGTGGCTGTTTCTATCGACGCGGTGCATTACTGCGTGA
AGGCGCGTGGCATCCGCGATGCAACCAGTGCCACGACAACGACCTCTCTTGGTGGATTGT
TCAAATCCAGTCAGAATACGCGCCACGAGTTTCTGCGCGCTGTGCGTCATCACAACTGAT
TAAAAGGCAGGAACCATGGAGCGCAACGTCACGCTCGATTTTGTTCGCGGCGTCGCCATT
CTGGGGATCCTGCTATTAAACATCAGCGCCTTTGGGCTACCAAAGGCGGCTTATCTTAAT
CCCGCCTGGTACGGCGCTATTACGCCGCAGGATGCATGGACCTGGGCATTTCTCGATCTC
ATCGGCCAGGTGAAATTCCTCACGCTTTTTGCGCTGCTGTTTGGTGCTGGCCTGCAAATG
TTGCTGCCCCGTGGCAGACGCTGGATCCAGTCGCGGTTAACGCTGTTAGTCTTGCTGGGC
TTTATTCACGGTTTATTGTTCTGGGACGGCGATATTCTGCTGGCTTACGGGCTGGTGGGC
TTAATCTGCTGGCGGCTGGTGCGCGATGCGCCATCGGTAAAAAGCCTGTTTAATACAGGC
GTCATGCTTTATCTGGTGGGGCTTGGCGTTTTGCTGTTATTGGGGTTGATTTCCGATACC
CAGACCAGCCGCGCCTGGACGCCGGATGCATCGGCTATTTTGTATGAAAAATACTGGAAG
CTTCACGGCGGCGTTGAAGCGATCAGTAATCGTGCCGATGGTGTTGGGAACAGTTTACTG
GCACTGGGCGCACAGTATGGCTGGCAACTGGCTGGGATGATGCTCATTGGTGCGGCGCTG
ATGCGCAGCGGCTGGCTGAAAGGGCAGTTCAGCTTACGTCACTATCGTCGTACTGGTTTT
GTGCTGGTGGCGATTGGGGTGATCATTAACCTTCCTGCCATCGCCCTGCAATGGCGGCTG
GACTGGGCATATCGCTGGTGCGCCTTCTTACTTCAGATGCCGCGGGAACTGAGTGCACCG
TTTCAGGCGATTGGCTATGCGTCGCTGTTTTATGGTTTCTGGCCGCAATTGAGCCGCTTT
AAGCTGGTGCTTGCGATCGCCTGCGTCGGACGGATGGCGCTGACCAACTATCTATTGCAA
ACGCTGATTTGTACCACGCTTTTTTATCACCTCGGTTTGTTTATGCAGTTTGACCGTCTG
GGATTGCTGGCGTTTGTTATTCCGGTATGGCTGGCGAATATCCTCTTCTCTGTTATCTGG
CTGCGTTACTTCCGCCAGGGGCCGGTGGAATGGCTCTGGCGTCAGTTAACTTTGCGTGCT
GCCGGACCGGCAATATCTAAAACATCAAGATAACGATCTGGATCACATTCGTTAACAAAA
CGGCTGTAACCGTTTCCATTGCTGTGACTCGATTCACGAAGTCCTGTATTCAGTGCTGAC
AAAATAGCCGCCAGCAAGCAGTCATTTACTGCAATCTCATAACAGGTAGTGAATATGATC
ACCATTCGTGATGTAGCGCGTCAGGCTGGCGTCTCTGTGGCAACGGTTTCCCGGGTGCTC
AATAACAGCACGCTGGTCAGTGCCGACACGCGTGAAGCAGTAATGAAAGCCGTGAGTGAG
CTGGATTATCGGCCAAACGCCAATGCCCAGGCGCTGGCAACTCAGGTTAGCGACACCATT
GGCGTGGTGGTGATGGACGTTTCTGATGCGTTTTTCGGCGCGCTGGTAAAAGCGGTGGAT
CTGGTCGCCCAGCAGCATCAGAAATACGTGCTAATCGGCAATAGCTATCATGAAGCGGAA
AAAGAACGTCACGCCATTGAGGTGTTAATTCGCCAGCGTTGTAATGCATTGATTGTTCAC
TCAAAAGCATTGAGTGACGATGAACTGGCGCAATTTATGGATAACATTCCCGGTATGGTG
TTAATCAACCGCGTTGTGCCGGGGTACGCCCATCGTTGCGTTTGCCTGGATAATCTCAGC
GGTGCCCGAATGGCGACGCGCATGTTGCTGAATAACGGTCATCAACGTATTGGTTATCTT
TCTTCCAGCCACGGCATTGAAGATGACGCCATGCGTAAAGCAGGCTGGATGAGTGCGTTG
AAAGAGCAGGATATTATTCCGCCGGAAAGCTGGATTGGCACTGGTACGCCGGACATGCCG
GGCGGTGAGGCGGCGATGGTTGAACTGCTGGGGCGCAATCTACAACTTACCGCTGTATTT
GCTTATAACGACAATATGGCTGCTGGCGCACTGACAGCATTAAAAGATAATGGTATTGCG
ATTCCGTTACATCTCTCAATCATCGGTTTCGATGATATTCCCATCGCCCGTTACACCGAC
CCGCAATTAACGACCGTGCGTTATCCCATTGCTTCAATGGCTAAATTAGCCACCGAACTG
GCCTTGCAGGGGGCAGCAGGCAATATTGATCCTCGTGCCAGCCACTGTTTTATGCCGACG
TTAGTGCGTCGTCATTCTGTCGCAACGCGCCAGAATGCGGCGGCGATCACTAACTCAACA
AATCAGGCGATGTAACCGCTTTCAATCTGTGAGTGATTTCACAGTATCTTAACAATGTGA
TAGCTATGATTGCACCGTTTTAACGTTGTAACCCGTATGTAACAGTGAATAATCACTTTC
ACCGAGGTAATAGCGTCATAACAACAATTAAAGCCGTTTTCTGGAGCGTTACCGGGCACT
GATGAATCCCCTAATGATTTTGGTAAAAATCATTAAGTTAAGGTGGATACACATCTTGTC
ATATGATCAAATGGTTTCGCGAAAAATCAACTTGAGACTTGGTATTCATTTTTCGTCTTG
CGACGTTAAGAATCCGTATCTTCGAGTGCCCACACAGATTGTCTGATAAATTGTTAAAGA
GCAGTTGCGACGCGGCTTTCAGCTCACTGTCGCGAGGTGGCGTATATTACGCTTTCCTCT
TTCAGAGTCAACCCTGAATTTCAGGATTTTTCTCTTCAACCGAACAGGCTGTTTGTGTGA
AGTGATTCACATCCGCCGTGTCGATGGAGGCGCATTATAGGGAGTCGGCTCAGGAAGACA
AGCGGAAAAATGCATTTTTATTTCAACCGCTCATCTTTTAATCATTACGCCGGTTTTTGC
TGCTTTTTTATCGCTTGCGGCAGGTCTGCCAGGCTATTTAACACCCAATCTGCCGCGTTT
TCTGCTTCAGGTGTAATAGGTTTACCCGTACGCACCAGCACTTTTGTTCCCACGTTCGCC
GCAGCCGCTGCCTGCATATCTTCTAATTTATCGCCCACCATATAAGAGGCGGCCATATCA
ATATGCAAATAATCGCGTGCTGACAAAAGCATCCCCGGATGTGGTTTGCGGCAATCGCAG
ACCTGGCGAAACTCTTCAACACTACCCTGCGGATGATGCGAGCAATAATAGATACCATCC
AGATCGACATCGCGGTCCGCCAGCGACCAGTCCATCCACTCGGTCAGCGTTTCAAACTGT
GCTTCAGTAAATTTACCGCGAGCAATGCCAGACTGGTTGGTTACTATCACCAGCGCAAAG
CCCATTTTTTTCAGCTCGCGCATGGCGTCAATAACACCGTCGATAAATTCAAAGTTGTCG
ATCTCATGGACATAGCCGTGATCGACATTAATGGTGCCATCACGGTCAAGAAAAATTGCG
GGTACGCTCTTCGCCACCTTTTATAGCTCCTTAATAAGGCATGTGGCGCTAGTATCGCAT
GTTTCGACCTGCAAGAAAGTGCTCTTCGCATAAACCTGATTGATTTAGACGTCTGGATGC
CTTAACATCCATTTCATTGACGGCGTTGCCCGTTTCAGGCATTCGAAATGCCACGACTAA
CTTAATGACGATAATAAATATTCAATGATAAAACTTTCGAATATCACCAAAGTGTTCCAC
CAGGGCACCCGCACCATCCAGGCGTTGAACAACGTCAGCCTGCATGTGCCAACTGGACAA
ATTTATGGCGTTATCGGGGCCTCAGGCGCGGGTAAGAGTACGCTTATACGTTGTGTAAAC
CTGCTGGAGCGCCCAACCGAGGGTAGCGTGCTGGTCGATGGACAGGAACTGACCACGCTG
TCAGAATCCGAGTTGACCAAAGCTCGCCGCCAGATTGGTATGATTTTCCAGCATTTTAAC
CTGCTCTCTTCGCGTACTGTTTTTGGCAACGTGGCTCTGCCGCTGGAGCTGGACAACACA
CCGAAAGACGAGATCAAACGTCGCGTGACGGAATTGCTGTCATTGGTTGGTCTTGGCGAT
AAGCATGATAGCTACCCGTCGAATCTTTCCGGTGGGCAGAAACAACGTGTGGCGATTGCC
CGTGCATTAGCCAGCAATCCCAAAGTATTGCTGTGTGATGAAGCCACCAGCGCGCTGGAC
CCGGCAACGACACGTTCTATTCTCGAACTGCTGAAAGACATCAACCGCCGTCTGGGTTTG
ACGATTCTGTTGATCACTCACGAAATGGACGTTGTGAAGCGCATTTGTGATTGCGTGGCG
GTCATCAGCAATGGCGAACTGATCGAGCAGGACACGGTAAGTGAAGTGTTCTCACATCCG
AAAACGCCGCTGGCGCAGAAGTTTATTCAGTCAACCCTGCATCTGGATATCCCGGAAGAT
TACCAGGAACGTCTGCAAGCGGAGCCATTCACTGACTGCGTGCCGATGCTGCGTCTGGAG
TTTACCGGTCAATCGGTCGATGCCCCACTGCTTTCTGAAACCGCGCGTCGTTTTAACGTC
AACAACAACATTATTAGCGCGCAGATGGATTACGCCGGTGGCGTTAAGTTCGGCATCATG
CTGACTGAAATGCATGGCACACAACAAGATACGCAAGCCGCCATTGCCTGGCTGCAGGAA
CACCATGTAAAAGTAGAGGTACTGGGTTATGTCTGAGCCGATGATGTGGCTGCTGGTTCG
TGGCGTATGGGAAACGCTGGCAATGACCTTCGTATCCGGATTTTTTGGGTTTGTGATTGG
TCTGCCGGTTGGCGTCCTGCTTTATGTCACGCGTCCGGGGCAAATTATTGCTAACGCGAA
GCTGTATCGTACCGTTTCTGCGATTGTGAACATTTTCCGTTCCATCCCGTTCATTATCTT
GCTGGTATGGATGATTCCGTTTACCCGCGTTATTGTCGGTACATCGATTGGTTTGCAGGC
AGCGATTGTTCCGTTAACCGTTGGCGCAGCGCCGTTTATTGCCCGTATGGTCGAGAACGC
TCTTCTGGAGATCCCAACCGGGTTAATTGAAGCTTCCCGCGCAATGGGTGCCACTCCAAT
GCAGATCGTCCGTAAGGTGCTGTTACCGGAAGCGTTGCCGGGTCTGGTGAATGCGGCAAC
TATCACCCTGATTACCCTGGTCGGTTATTCCGCGATGGGTGGTGCAGTCGGTGCCGGTGG
TTTAGGTCAGATTGGCTATCAGTATGGCTACATCGGCTACAACGCGACGGTTATGAATAC
GGTACTGGTATTGCTGGTCATTCTGGTTTATTTAATTCAGTTCGCAGGCGACCGCATCGT
CCGGGCTGTCACTCGCAAGTAACGTTCAACACAACATAAATAATTGAAGAAGGAATAAGG
TATGGCGTTCAAATTCAAAACCTTTGCGGCAGTGGGAGCCCTGATCGGATCACTGGCACT
GGTAGGCTGCGGTCAGGATGAAAAAGATCCAAACCACATTAAAGTCGGCGTGATTGTTGG
TGCCGAACAGCAGGTTGCAGAAGTCGCGCAGAAAGTTGCGAAAGACAAATATGGCCTGGA
CGTTGAGCTGGTAACCTTCAACGACTATGTTCTGCCAAACGAAGCATTGAGCAAAGGCGA
TATCGACGCCAACGCCTTCCAGCATAAACCGTACCTTGATCAGCAACTGAAAGATCGTGG
CTACAAACTGGTCGCAGTAGGCAACACTTTTGTTTATCCGATTGCTGGTTACTCCAAGAA
AATCAAATCACTGGATGAACTGCAGGATGGTTCGCAGGTTGCCGTGCCAAACGACCCAAC
TAACCTTGGTCGTTCACTGCTGCTGCTGCAAAAAGTGGGCTTGATCAAACTGAAAGATGG
CGTTGGCCTGCTGCCGACCGTACTTGATGTTGTTGAGAACCCAAAAAATCTGAAAATTGT
TGAGCTGGAAGCACCGCAGCTGCCTCGCTCTCTGGACGACGCGCAAATCGCTCTGGCAGT
TATCAATACCACCTATGCCAGCCAGATTGGCCTGACTCCAGCGAAAGACGGTATCTTTGT
CGAAGATAAAGACTCCCCGTACGTAAACCTGATCGTGACGCGTGAAGATAACAAAGACGC
CGAGAACGTGAAGAAATTCGTCCAGGCTTATCAGTCTGACGAAGTTTACGAAGCAGCAAA
CAAAGTGTTTAACGGCGGCGCTGTTAAAGGCTGGTAATTTTTAGGCTGTTTCCACAATTT
GTAATATCATTCAGGACGGGCGCTTGCCCGTCTTGTCATTTTTACAAGCTCCTGATTCAA
TATTGACGTTTTGATCATACATTGAGGAAATACTATGCGTGCTTTACCGATCTGTTTAGT
AGCACTCATGCTAAGCGGCTGTTCCATGTTAAGCAGATCCCCTGTCGAACCCGTTCAAAG
CACTGCACCCCAGCCGAAAGCGGAGCCTGCAAAACCGAAAGCGCCGCGCGCCACGCCGGT
CCGAATTTATACCAATGCAGAAGAATTAGTCGGCAAACCGTTCCGCGATCTCGGTGAAGT
CAGTGGCGACTCTTGCCAGGCCTCTAATCAGGACTCTCCGCCGAGCATTCCAACCGCACG
TAAGCGGATGCAAATCAACGCCTCTAAAATGAAAGCCAATGCTGTATTACTGCATAGCTG
CGAAGTCACCAGCGGTACGCCGGGCTGCTATCGTCAGGCTGTATGTATCGGCTCTGCGCT
TAACATTACGGCGAAATGAGCAGTTTCCAGTTCGAGCAAATAGGCGTTATTCGCTCGCCC
TATAAAGAAAAATTCGCCGTTCCGCGCCAGCCTGGTCTGGTAAAAAGCGCCAACGGCGAA
CTGCATCTCATTGCTCCCTACAACCAGGCCGACGCCGTTCGCGGCCTGGAAGCATTCAGC
CATTTATGGATCCTTTTCGTCTTTCATCAAACGATGGAAGGCGGCTGGCGTCCGACTGTG
CGTCCGCCTCGTCTTGGCGGTAATGCCAGAATGGGTGTTTTCGCTACGCGTTCCACTTTT
CGCCCTAACCCAATTGGTATGTCGTTGGTAGAGCTGAAAGAGGTTGTTTGCCATAAAGAC
AGCGTGATTCTGAAGCTCGGCAGTATGGATCTGGTCGATGGTACGCCGGTAGTGGATATC
AAACCGTATCTCCCCTTTGCTGAATCGCTTCCCGATGCCTGTGCCAGCTATGCGCAAAGT
GCGCCAGCGGCAGAGATGACGGTGAGTTTTACCGCAGAGGTCGAAAAGCAGCTTTTGACG
CTGGAGAAGCGTTATCCGCAGTTAACCCTGTTTATCCGCGAAGTACTGGCGCAAGACCCA
CGCCCGGCCTATCGTAAAGGTGAGGAAACGGGTAAAACCTATGCCGTCTGGCTACATGAT
TTTAACGTTCGCTGGCGCGTCACCGACGCAGGTTTTGAAGTCTTTGCGCTGGAACCGCGT
TAAATTCACGCCCTTCTCTTTTGACATTTCTTTTGCACTGGTAAACTAAATCACTTTTTT
TGTCCCAGGCTCGCCTTGAGCCTGTTCTACCTTCCAACTGGAACCGTAACAACATGCGTA
CTAGCCAATACCTGCTCTCCACTCTCAAGGAGACACCTGCCGACGCCGAGGTGATCAGCC
ATCAGCTGATGCTGCGCGCCGGGATGATCCGCAAGCTGGCCTCCGGGTTATATACCTGGC
TGCCGACCGGCGTGCGCGTTCTGAAAAAAGTCGAAAACATCGTGCGTGAAGAGATGAACA
ACGCCGGTGCAATCGAGGTGTCGATGCCGGTGGTTCAGCCAGCCGATTTGTGGCAAGAGA
GTGGTCGTTGGGAACAGTACGGTCCGGAACTGCTGCGTTTTGTTGACCGTGGCGAGCGTC
CGTTCGTACTCGGCCCAACTCATGAAGAAGTTATCACTGACCTGATTCGTAACGAGCTTA
GCTCTTACAAACAGCTGCCGCTGAACTTCTATCAGATCCAGACCAAGTTCCGCGACGAAG
TGCGTCCGCGTTTCGGCGTCATGCGTTCCCGCGAATTCCTGATGAAAGATGCTTACTCTT
TCCATACTTCTCAGGAATCCCTGCAGGAAACCTACGATGCAATGTATGCGGCCTACAGCA
AAATCTTCAGCCGCATGGGGCTGGATTTCCGCGCCGTACAGGCCGACACCGGTTCTATCG
GCGGCAGCGCCTCTCACGAATTCCAGGTGCTGGCGCAGAGCGGTGAAGACGATGTGGTCT
TCTCCGACACCTCTGACTATGCAGCGAACATTGAACTGGCAGAAGCTATCGCGCCGAAAG
AACCGCGCGCTGCTGCTACCCAGGAAATGACGCTGGTTGATACGCCGAACGCGAAAACCA
TCGCGGAACTGGTTGAACAGTTCAATCTGCCGATTAAGAAAACGGTTAAGACTCTGCTGG
TTAAAGCGGTTGAAGGCAGTAGCTTCCCGCTGGTTGCGCTGCTGGTGCGCGGTGATCACG
AGCTGAACGAAGTTAAAGCAGAAAAACTGCCGCAGGTTGCAAGCCCGCTGACTTTCGCGA
CCGAAGAAGAAATTCGTGCCGTGGTTAAAGCCGGTCCGGGTTCACTGGGTCCAGTAAACA
TGCCGATTCCGGTGGTGATTGACCGTACCGTTGCGGCGATGAGTGATTTCGCTGCTGGTG
CTAACATCGATGGTAAACACTACTTCGGTATCAACTGGGATCGCGATGTCGCTACCCCAG
AAATTGCTGATATCCGCAACGTGGTGGCGGGCGATCCAAGCCCGGATGGTCAGGGTACGC
TGCTGATCAAACGTGGTATCGAAGTCGGTCACATCTTCCAGCTGGGTACCAAGTACTCCG
AAGCACTGAAAGCCTCCGTACAGGGTGAAGATGGCCGTAACCAAATCCTGACTATGGGTT
GCTACGGTATCGGCGTAACGCGCGTAGTAGCTGCAGCAATTGAGCAGAACTACGACGAAC
GCGGCATCGTATGGCCTGACGCGATCGCACCGTTCCAGGTAGCGATTCTGCCTATGAATA
TGCACAAGTCCTTCCGTGTACAAGAGCTGGCCGAGAAGCTGTACAGCGAACTGCGTGCAC
AAGGTATCGAAGTCCTGCTGGATGACCGCAAAGAGCGTCCGGGCGTGATGTTTGCTGATA
TGGAACTGATCGGTATTCCGCACACTATTGTGCTGGGCGACCGTAACCTCGACAACGACG
ATATCGAATACAAATACCGTCGTAACGGCGAGAAACAGTTAATTAAGACCGGTGACATCG
TCGATTATCTGGTGAAACAGATTAAAGGCTGATGCCAGAAAGGGTCCTGAATTTCAGGAC
CCTTTTTTACAGGGATTGTATAAAATGGATAAACCAAAGGCATACTGCCGCCTGCTTCTC
CCCTGCTTTCTTTTACTTTCGGCCTGTACCGTTGATATCAGCCAGCCAGACTCCTCAGCC
ACAGCGATAGATACCGAGGCGAAAACATGGGCTGTCAAATTCCAGCATCAAAGCTCTTTC
ACCGAACAATCAATAAAAGAAATAACAGAACCTGACCTCAAACCCGGCGATTTGCTGTTC
TCCTCAAGTCTTGGGGTAACCTCATTTGGTATCCGCGTCTTCAGCACTTCCTCAGTGAGT
CACGTTGCAATCTATCTGGGTGATAACAACGTTGCAGAAGCGACAGGGGCTGGCGTCCAG
ATTGTTTCCCTTAAAAAAGCGATGAAGCATAGCGATAAGCTTTTCGTCTTACGAGTCCCG
GATCTTACCCCGCAACAAGCCACAGAAATCACCGCGTTCGCCAACAAAATTAAAGATAGC
GGTTACAACTATCGCGGCATTGTCGAATTTATTCCCTTTATGGTGACTCGCCAGATGTGC
TCACTGAATCCGTTCTCCGAGGATTTTCGCCAACAGTGCGTCAGCGGCCTGGCGAAAGCG
CAGTTAAGCAGTGTGGGCGAAGGAGACAAAAAGTCGTGGTTTTGTTCGGAATTTGTCACT
GATGCATTTGCCAAAGCCGGGCATCCGCTTACGCTGGCGCAATCGGGCTGGATTAGCCCT
GCCGATCTGATGCATATGCGTATTGGTGATGTCTCTGCGTTTAAGCCAGAAACGCAGTTA
CAGTATGTTGGGCACCTGAAGCCAGGGATTTATATCAAGGCGGGTCGCTTTGTTGGTTTG
ACTCAGTGATAAAGCCAGCCTCGTGCACAAAATGCCGGATGCGGCGTGAACGCCTTATCC
GGCCTACAAAATCGTGCTAATTCAAAATGTTGCATTATATGCTGTAGGCCTGATAAGCGC
AGCGCATCAGGCAATTTTGCGTTTGTTTCTGCCTTAAGCAGGTTTACTGCCCCAAACTAC
TGCAATCCTGGTTCGGATAAAATTTACCCGCCGTATCGGGCGCTAATACTTTGGTCGGCG
CACCGGTATCCGGATTAGCCTCAAGCGTAAAGTGACCTTCTACTGACAGTAACACCGGTT
TTTCACTGTGCCCGCGCGCAGCCAGGTAGCCACGCTCCAGCTCTGCGTTATTCGCTACCA
TGAAACGTTTTCCGGTCGCGCAATCAGTGAAGGTCGCCGCATCAGCCATATAAAAATACA
TGCCCCGCAGAGTCATCGGCGTCATGGGTAAACTGGATTGTGCCGCTTCCAGCGTATAGT
TGAACTGCGATTCAATCGGTTTACCTTCACGATCGAGCATCTCCAGCGCATCGCCTTTCG
CCCGATAATATGACTTTTCACCTTTGCTGTCGGTTAATACCAGCTTGTCAGCGGTTCGCG
CCCATGTACCGTAGGAAGCGAAGGAGGAAGGTTCTTCACGAGCACCGAGATAACGCTCAT
TCATCACCCATGTTCCGTCTTTTTCGAGGAACAGAGAGGTTTCGATTCCTTCGCAATCGG
CACACGGCAGCACGCCGCGCCAACTTTGCGGCATCGGTTTCAGTTCGGCTGCCTGCGCCG
GAGAAAGCGTATCGACTTCGGCCCGATTATTACAACCCATCAGAGTAAAGAGGCTGATTA
CAGCCATCGCTGTCACTATCGCTTTTTTCACCATCCATTCCTTCTTTTTATTCCCGACCG
CTGCGCACTTTGCCGCGCATCGCCTTCACGCTTGATTTTTGTGCTTTCGATGCCAGCCTG
CGCTCTTTCGATGCACGGGTGGGCCGCGTGGGTCGTCGGGCTTTTTGTTCTGTTGTTAAT
TCTTTAATCACAGCCACCAGCCGGGCCAGAGCTGCTTCGCGGTTCAGTTCCTGACTGCGG
TATTCCTGTGCCTTAATGACAATCACGCCATCACTGCTGATCAAATGATGGCTGGCGGCG
AGCAGACGCTCTTTGTAATACTCTGGCAGGCTGGACGCCCGAATGTCAAAACGCAGATGA
ATAGCCGTTGAGGTCTTATTAACATGCTGCCCGCCCGCGCCCTGCGCACGAATGGCGGTG
ATCTCAAGCTCACCATCGGGAATAGCAACATGTCGGGAAATCACAATCATGAAGGTTGTT
GCCAGGCGGTTAAGTTCACTTCCAGATTATTCTTATCATCCGATAACCAGATCACGCCAT
CCTGAATCGTTGCCTGCAGCGTCATGGTACGATCGGCAAAGGCGCTTACTTTCGCCAGTT
GTTCATCGTCCAGATACCAGACGGAAAGATTGGCAAACTGCACACATTTGCTCTGATTTT
GCTGCCACCAGATTTGCGCCGCCCGACTATTATAGGTAAACAGCGCCACTTCTGCGGCCT
GGGTGCAGGCTTTCTTAATCCGCCGCTCATCCGGCAGCCCCAGCTCAATCCACAAATCAA
TGCCCAGGTGATCGTTACGCAGCCACGCTTCCGGCTCATCATCGGCACACAAACCACGGG
TAAATTGCAGACGTTCATCAGCATATTTCAGCCACGCCAGCAAGCGCAGCATCATACGCT
CCTGGGTTTCTGAAGGGTGGCGCGCCAGCGTCAGAGAGGCATCGAGAAACTGGTTGCGGT
CGAGATCGGCCACATTAACCGTCGCTTTATAAATTGTCGCTTTAAGCGCCATAAGAAAAC
TCCTTTCGAATCAGGAGGCCATTGTAACGGAATACGTGCAGTTGCGGCGCTGATATTGCA
GAAATGAGTGTGGTATAGTCACCTTGCGAAACAGAGTTTATCTTCGTAGGCTTAGACTTG
CATCCACGGTTAAGTCAGAGTGCTGACAGGAGGGCATGTGGAAAAATATTGTGAGTTAAT
ACGCAAGCGGTACGCGGAAATCGCCAGCGGAGACTTAGGATACGTTCCGGACGCGCTGGG
CTGCGTTTTGAAAGTGCTGAATGAAATGGCTGCCGACGACGCCCTTTCTGAGGCTGTCAG
GGAAAAAGCAGCATACGCTGCGGCAAACTTACTGGTGAGCGATTATGTCAATGAATGATA
CGTATCAACCAATCAATTGTGATGATTACGATAATCTTGAGCTCGCCTGCCAGCATCATT
TAATGCTGACACTTGAGCTGAAAGATGGCGAAAAATTGCAGGCAAAAGCCAGCGATTTAG
TCTCCCGCAAAAATGTGGAGTATCTGGTCGTCGAGGCCGCTGGCGAAACCCGTGAGCTAC
GTCTGGATAAAATTACCAGCTTTAGCCACCCGGAAATCGGTACGGTGGTGGTGAGCGAGT
CCTGATTGACTTTCGCCGGATGCGACGCTTAATGCGTCATATCCGGCCTTCACTTAACTA
AGCGTTTCGCTGCCAGACAAAACTTATGCCATTCTCACCTTCAGCCACACCTTCTTGCGT
CACAAATACCCCTGCCGCCGCAATCAGCGTTTCGCCATAAAACAGCAGTGGCGTGGTGTC
ACGTAGCCACGGCGGCACGCCCAGCTCTTGCCAGATTTTCTTTAGCTTACGTCCGCCGTT
ACGCCCGACAATATGCAGCAATCCTGGCGCTTTGAAACGCACGCTGACCGCTTCGTCTGC
ACGCGGAGGGCGAATATCGCCTCCCGCATTAAGCTGTACACTTCCCAGCCCCGCCGGTAA
TTCCAGCGGTTGAAGCCACGTCTGCCACGGCACAATGTTTTCGCTTTGCCCGGTGACGGA
TTTAATCCACCACAGTTGCGACTGATAGCGTCGGATTTCAAACGCGCCCAAACGTAAACA
GGGGGAGGCATCTTCCCGCGCCAGCGCCACTTCCTGCCAGATCCGCCCCAACGCGTCGCG
GGAAGGCATCGGTGCATTCTGCCCTGCAAGCCAGCGGCGGATAATCGCCGCGCGGCGGGC
ATCACTCATCGCCAGCATTGGCGCAATCTGCAGCGTCCTCTGCGGCGATTGACAGTGTGC
TAAATCATCCGCCAGCAGTTCATCCAACAGGCTCTCTTGTTCAGCGCAAAGTGCGGCGCT
GCGGGCTGTTGCTTCGGCAAAATGCGGCCAACGCTGCTGCAATAACGGCACTACGCGCAG
GCGCAGAAAGTTACGATCGTATGAGTCGTCCTGATTACTTTCGTCTTCAATCCAGCGTAA
ACCATGCGCCAATGCCCACTGCGCCAGTTCCCCCCGCGTGCGGGCAAGCAACGGGCGGAT
AAGCCGTGTTCCGGCAAACTCCGAAACTTCCGCCATAGCCGAAAGCCCGGCAGGGCCGCT
ACCGCGTTTTAGCGCCAGCAGAAAAGTTTCACATTGATCGTCGAGATGTTGCGCGGTGAC
CAGCACTTCACCGGGCAACAAGGTGCGGGCAAATGCCTGATAACGCGCCTGCCGCGCCTG
GGCCTCAATGCCCAGTCCTTCTTGCGCAAGTTGCACGCGCTCGACCACCAGCGGCACCTG
CCACTGTTGGCAGATGTTCTCGCAATGCCTAACCCAGGCATCGGCATTGGCACTTAAACC
GTGATGCACATGAATAGCGCGCAGAGTGACGCCCGGATTTTCCGCCCGCCACTGCACCAA
CTGATGCAGCAGAACGGTGGAGTCAAGCCCGCCGCTAAAGGCCACCAGAATCTGGCGTGA
GGTGAGAAGTTGTCTATTGAGCGTGAGTGTCATGATGGTGCGATTTTACAGTAGCAATGC
CCGGCACGTTACCGGGCAAATGCGGCGATGACAAGCCTTACTGCTCATACAGTTCCAACG
GCAGCCCGTCCGGATCGTTAAAGAACGTGAAGCGTTTTTGCGTGTATGGATCGACACGGA
TGGCTTCACACTTCACGTTATGGCTTTCAAGGTGCGCCACTGCCGCATCGATATCATCAA
CGCTAAAAGCCAGATGACGCAGGCCGCAAGCTTCCGGTCGGCTGGGGCGCTCCGGCGGGA
ACGGAAATGAGAAAAGCTCAATCACATATTGCCCATTAAGCGCCAAATCCCCTTTCCACG
AGTCGCGCGCTTCGCGATAGACTTCGCTTTGCAGCGTGAAACCAAGAATATCGCAGTAGA
AAGCTTTGCTCACCGCATAATCCGTCGCAATAATCGCAATATGGTGAACCTGTTTTAAAC
CCAGCATAACGTCTCCTTTATTTGTTAACAGCACGTTACTCGCCCGGAAGCCGCTCTGGC
AAGTTATCCCGCCATTTTTAGGACTCGTACGCGGTAAACGCCGTCTTCGTCCTGTTTCGC
GCCGTGAATATCCGTTTCAAAACCGGGGTAATGTTGCCCTACGGAACAAAGCATCAGTAG
AAAATCGAGTACTGTGCGGCTCTCTTTGGTCAGCATTTCTCCAGGCATCAACAGCGGTAC
GCCCGGTGGATAAGGCAGGATCATATTTGCCGATACTCTACCGACCAGTTGTTCCAGCGC
AATGGTTTCTACTTCACCTTTAATCTGTCTCTGCCATGCCTGATGTGGCGTCATGATCAT
TTCCGGCAAAGTATCGAATGCCCGCAACATCAAACCGGGAAGATCGTGTTTACGAATCAG
CTTATGGATCCCTTGCGCCAGATCCTGAATACGCATATTGCGGTAGAAATCGGGATCTTC
AGCATAGAGATCGGGTAGCATATTTTTGATCCGCAGGTTGAGATCGTAAGAGCGCTTAAA
TTCCGTCAGCCCACGCAATAATCCCATTGCTTTGGTTTTATCAATGCCAATACTAAAGAG
AAACAGCAGGTTATAAGGGCCGGTTTTCTCTACTACGATCCCACGTTCGTCGAGGAATTT
TGCCACCAGCGCCGCCGGGATCCCCTCCTCACTCATATTGCCCTGTTCGTCCATCCCCGG
TGTCAAAATAGTGACTTTAACCGGATCGAGAAACATATGATCGGCATCCGCATCGTTAAA
GCCGTGCCACTGTTCGCCAGGCGCAACGGGCCAGCATTCGGCTTCATCCACCTGCGGCGG
TTGCCAGATATCGAAAAACCAACCGTCAGACTCTTCCCGCAACCGCTGGACCTCTTTGCG
AAAATGCAGAGCTCGTTCTACTGAACGATTAATCAGCCGTTTGCCCGGATTACCACGCAG
CATCGCCGCCGCCGTCTCAACCGAAGCAACAATGGGATAACTGGGCGAGGTGGTGGTATG
CATCATAAAGGCTTCGTTAAAGGCCTCTTCGTCATACTCGCCTTTAATGTGGATCAGCGA
AGCCTGCGATAACGCCGCCAGCATTTTGTGGGTCGATTGCGTTTCGAAGATCACTTTTCC
CGCAACACGCTCGCCGCTCATACCACTTTTACCCTGGTAGATCGGATGAAAATGGGTGTA
CGGCACCCAGGCGGAATCGAAGTGGATCGAGGGGACATCCAGCGTCTGTTTGATCCAGTC
GGTGTTGTAGAGCAAGCCATCATAGGTGGAGTTGGTGATCACCGCATGAACCGGCCATTG
TGCCTGCGTGGTGGCAGCGACTTTCTCTTCGATGCTGTCGCGAGTAAATTCACGGCGCGG
GATCCCACCAAGAATCCCCAACGCATTACGCGTCGGTTTCAGCCAGACTGGCACTACATC
GTTCATCATCAACAGATGCGCCAGCGATTTATGACAATTGCGGTCGATCAACAGCGTGCT
GCCGGATGGCGCGGCGTACATACCCACAATTTTGTTCGACGTCGATGTTCCGTTGGTAAC
GATATAACTCTGTTCCGCGCCAAAAGTCCGCGCGATGTACTCTTCCGCTTCCAGATGTGG
CCCGGTGTGGTCGAGCAACGAACCAAGCTCGGTGACCGAAATAGAGACATCAGCCTTAAG
GGTATTCCCGCCGAAAAAATCATAAAACAGACAGCCAACCGGGCTTTTTTGATATGCGGT
GCCGCCCATATGACCCGGCGTACAAAAGGTGTACTTCCGCTCTTTGACGTAGGTAAACAA
GGCTTTCGTGAACGGTGGGGTAATGTTATCAAGATATTCGTTGGTGTACTGACGCATACG
AATAGCGATATCTTCCGCCTGCCCCAGCGCATATTCAAAAAACCAGAGCGCCATCCGCAT
ATCCTGCACGCTGACATCCATCGTCGAGTGGGTGTTGATGAAGGCATAAAGCGGGAGATA
TTCATTAAGCTGATTGATATCGCTACATAAATCGAGACTGTACTCATCCCAGTCAAAAAT
CACGCCGCAAATTCGTGGGTTATGTTCGATAAACTTCAGCAAATCAACGCTGTTTTGTGG
CCAGATAATCTGAAAGCCTTGCGCCACCAGCGCCGACTCCAGTTCTTTGATGGGCTCATC
TTTATAAAAGACGCCATGCGGTCCCATAATGGCAATGATGTTCATGTGTTCCTCCTGGAA
AATCCTTCCTTAATCATAGCCTGCTCAAACCGTGGCGATAAAAAAGGGCCACCGAAGTGA
CCCTTTTTCAGAACTTTTGCGAATTACGCGTAACCGTAGCTCATCAGGCGCTGATAACGA
CGATTTTTTAAATCTTCAGTGCTTAACACGTCGAGATCGGCCAGATCCGCCAGCAGTTGC
GCTTTCAACGATGCCGCCATCGCTTCCGGGTTACGGTGAGCACCACCCAGCGGTTCCGGG
ATGATGGAGTCGATCAGTTTTAGTTCTTTCAGACGCGGAGCGATGATACCCATCGCTTCA
GCTGCCAGCGGTGCTTTGTCGGCGCTCTTCCACAGAATGGACGCACAACCTTCCGGCGAG
ATAACGGAATAGGTGCTGTATTGCAGCATATTCACTTTATCGCCCACGCCAATCGCCAGC
GCGCCGCCAGAACCACCTTCACCGATAACCGTACAAACTACCGGTACACCGAGGCGAGAC
ATTTCACGCAGGTTGCGTGCAATAGCTTCAGACTGACCGCGTTCTTCTGCGCCCACGCCC
GGATAAGCCCCCGGGGTGTCGATAAAGGTGATGATTGGCATCTTAAAGCGTTCAGCCATT
TGCATCAGACGCAGTGCTTTGCGGTAACCTTCTGGCGCTGGCATACCAAAGTTACGGCGA
ATTTTTTCTTTGGTTTCACGACCTTTTTGATGACCAATGATCATCACCGGACGACCATCG
AGACGGGCGATACCACCGACGATAGCTTTATCGTCTGCATACGCGCGGTCGCCAGCCAGT
TCGTCAAATTCATCAAATGCCAGGCGAACGTAATCCAGGGTATAAGGACGCTGTGGATGG
CGTGCCAGTTGCGCAATCTGCCATGCACCGAGATCGGCGAAGATTTTACGCGTCAGTTCT
ACGCTTTTTTCACGCAGACGATGCACTTCTTCATCGATGTTAATATCCAGTTTCTCATCC
TGACGGCTAACCGCAGTCAGAGAATCGATTTTCGCTTCCAGCTCTGCAATCGGCTGTTCA
AAATCAAGGAAATTCAGACTCATAGTATTCCTGTATTAGTCAAACTCCAGTTCCACCTGC
TCCGAACCAATGAGGCCACGGAGATCGTTTAATAAACGATCGCTCGGAGAGACACGCCAC
GTCGCGCCAAAACGCAACCGCGCGCGTGCATCCGCCCTCTGATAGTAGAGATGTACTGGA
ATTGTCCCAGAGCGGTGGGGTTCCAGAGACTGACGGAGTCGGTTTAAAAGCTGGTCATCA
ATTTGCCTGTCCGTCAGCGAGATAGCAAGCCCGCGAGCATATTTTTCCCGGGCTTCGTCA
ATATCCATCACTTCGCGAGCGGTCATTTTAAGCCCACCGCTGAAGTCATCAAAGCTGACC
TGTCCGCTGACGATAAGTATGCGGTCTTTTTCCAGCAATTGCTGGTATTTATCCAGGGCG
TCAGTAAACAACATCACTTCCAGCCGCCCGGAACGGTCATCCAGCGTGCAGATACCGATA
CGATTGCCGCGCTTGGTGACCATAACCCGCGCGGCAACAACGAGCCCCGCAGCCGTGATG
ACTTTACCACGTTCTGTCGGGTGCATGTCTTTCAGCCTTACGCCTCCGACATAACGCTCA
ATCTCTTTTAAATACTGGTTGATAGGGTGTCCGGTCAGGTACAGGCCTAACGTTTCACGT
TCCCCATCTAATACCACCTGCTCCGGCCACGGTTGGCAGCTGGCGTAGGATTGTTCAATT
TGTTCCGGTTCTTCGGCCAGCACGCCGAACATATCGGCCTGACCGATAGCTTCCGCTTTC
GCGTGTTGATCTGCCGCTTTTAACGCATCACCCAGCGAGTTCATCAGTGCCGCGCGGTGT
GGCCCAAGACGGTCAAACGCCCCGGACATGATCAGTTTTTCCAGCACCCGCCGGTTTAAC
TTTTTGGTGTCGGTTCGGGCGCAGAGATCAAACAGTTCGCGGAAGTAGCCGCCTTTATTA
CGGGCTTCGATGATCGCCTCAATCGGACCTTCACCGACCCCTTTGATCGCGCCAATACCA
TACACGATTTCGCCGTCGTCGTTGACGTGGAAATGGTAAAGACCGGAGTTTATATCTGGT
GGCAGGATTTTCAGCCCCATCCGCCAGCACTCATCCACCAGGCCCACCACCTTCTCGGTG
TTGTCCATATCGGCGGTCATTACCGCCGCCATAAACTCTGCCGGATAGTGCGCTTTCAGC
CATAATGTTTGATATGACACCAAAGCATAGGCCGCAGAGTGCGATTTGTTAAATCCGTAA
CCAGCGAATTTCTCCACCAGGTCGAAGATTTTCATCGCCAGTTCGGCGTTGATTCCGTTC
TTTTCTGCACCTTCAGCAAATACAGAACGCTGCTTAGCCATCTCTTCCGGCTTTTTCTTA
CCCATCGCACGACGCAGCATATCCGCGCCACCGAGGGTATAACCAGAGAGCACCTGCGCA
ATCTGCATGACCTGTTCCTGATACAGGATAATGCCGTAGGTTGGCTCCAGTACTGGTTTC
AGGCTTTCATGCTGCCACTGCACGTCCGGGTAGGAAATCTCTTCGCGACCATGTTTACGG
TCGATAAAGTTATCCACCATCCCTGATTGCAACGGACCAGGGCGGAACAGTGCCACCAGT
GCGATCATATCTTCGAAGCAGTCAGGTTGCAGACGCTTGATCAGGTCCTTCATGCCGCGC
GATTCAAGCTGGAATACCGCCGTGGTTTCCGAGCGTTGCAGCATGTCGAAGCTTTTCTTG
TCATCCAGCGGGATCGCGGCGATATCCAGCGGCGGCTCGCCATTCTTCGCCCGCCGCTTG
TTGATCATCTCCAGCGCCCAGTTGATGATGGTGAGCGTACGTAAACCAAGGAAGTCGAAC
TTCACCAGTCCGGCATATTCAACGTCGCTTTTATCAAACTGGGTGACCGGATGTTTGCCC
TCTTCATCGCAATAAAGCGGCGCAAAATCGGTAATTTTGGTCGGCGCGATAACCACTCCA
CCGGCGTGCTTACCGGCGTTACGGGTGACCCCTTCCAGTTTGCGCGCCATGTCGATCAGC
GCCTTAACTTCTTCATCCGCTTCGTAGATTTCCGGCAGCTGCGGCTCGGCTTCAAACGCT
TTCGCCAGCGTCATGCCCGGATCGGGCGGGATCAGTTTCGAGATACGGTCGACAAAGCCG
TACGGATGCCCCAGCACGCGGCCTACGTCGCGGATCACCGCTTTCGCCGCCATCGTACCG
AAGGTGATAATCTGCGATACCGCATCACGACCGTACATGTCCGCTACGTGCTCGATAACC
TGGTCGCGTTTCTCCATACAGAAGTCAACGTCGAAGTCAGGCATGGAGACACGTTCCGGG
TTAAGGAAACGTTCGAACAGCAGGTCAAATTCCAGCGGATCGAGGTCGGTGATTTTCAGC
GCGTAGGCCACCAGTGAACCCGCACCGGAGCCACGGCCTGGCCCTACCGGTACGCCGTTA
TCTTTCGACCACTGGATAAATTCCATAACGATGAGGAAGTAGCCCGGGAAGCCCATCTGG
TTGATAACCTGAAGTTCAGTCTCCAGACGTTCGTCATATTCCGGGCGGCGCTTAAGACGT
TCTTCCTCATCAGGGAATAAAAAGGCCAGACGCTCTTCCAGGCCTTCTTTTGCACGCTTG
ACCAGATAATCTTCGGTGCTCATGTCCCCGGTCGGGAACTGCGGCAGGAAGTATTCACCC
AGACGCACAGTTACGTTACAACGTTTGGCGATCTCAACGGTGTTGGCAAGGGCTTCGGGG
ATGTCGGCAAACAGCTCGCACATCTCCTCTTCGCTACGCATATATTGCTGCGGCGAATAG
TTACGCGGGCGTTTAGGATCGTCGAGGGTAAAGCCGTCGTGGATCGCGACGCGGATTTCG
TGTGCGTCAAAGTCGCTGCTGTCGATAAAGCGCACATCGTTAGTCGCCACGACGGGCAAA
CCGCGCGCTTCCGCCAGTTCCACCGCCGCGTGCAGATAGCTTTCTTCATCCGGCCTGCCG
GTGCGGATCAGCTCGAGAAAATAGCGATCCGGGAAGTGTTCTTCATAAAACGCGACACAC
TCATCTACCAGCGCGCTGTTGCCACGCAAAAGACTGCGTCCGACGTCGCCCATGCGCCCG
CCGGAAAGAAGGATCAACCCTTCGTTTAATTCGATAAGCCAGTCGCGATCGATGATCGGC
CCGGCGGCACCGTACCCGCGCTGATACGCTTTTGAGATCAGCAACGTCAGATTCTGATAG
CCGGTATTGTTCGCCGCCAGTACCGTCAGGTGGGTTAACTCATCACCCAGCAGGTCGCAC
TGGACGTTAAAATCTGCCCCGACGATAGGCTTAATCCCTGCGCCATGTCCCGCTCCGTAG
AACTTCACCAGACCGCAAAGGTTGGTGAAATCGGTGATCGCCAGTGCTGGCATACCCAAC
GCCGCCGCCTTTTTTACCAGCGGTGCGGTTTTGGCCAGGCCATCGATCATCGAGTAGTCG
CTGTGCACCCGCAGGTGTACGAAACGTGGTTCAGACATCTTCAGATTCCGGTTTACTTAA
TCTCGACACAAGAATCAGGACGCAAGTCCCAGTGCTCGTTTGACAGGCCCAAAGCTGCGA
CGATGATGTTCAGTCGCGCCATATTCAGCCAGTTTTTCCAGATGAAAAGCGGTTGGATAC
CCTTTGTGTTGGGCAAAACCATATTGCGGGAAAACAATATCCAGCGCCGCCATTTCGGCG
TCACGCGTCACTTTCGCCAGGATAGACGCGGCACTGATTTCCGGTACGCGGCTATCGCCT
TTCACCACTGCCATCGAAGGCATCGGTAATTTCGGGCAGCGGTTACCATCAATCAACACA
TATTCCGGCGCAATATGCAGCCCAGCAACGGCACGCTGCATCGCCAGCATGGTCGCATGT
AAAATATTCAATTCATCGATTTCGTGAGGTTCCGCGCGGCCCAGACTCCAGCTCAACGCT
TTCTCTTTGATCTCTTCACAGAGCGCCAGACGACGTTTTTCGCTCAGCTTTTTGGAATCA
TTCAGCCCGGCAATCGGGCGCGCCGGGTCGAGAATCACCGCAGCGGTGACGACCGCGCCA
ACTAACGGCCCGCGTCCGGCTTCATCCACACCCGCAACCAGCTGCGTGTGCGGATAGACA
AATTCGATCATTGTGCTAACTCCAGAACGGCTTGTGCCGCCTGCTCATCGGCATTGCAGC
GGATCTGCTGATGCAGTTCACGGAAGGTATCGTGCATCGCGTGGCTGGTTTTCCCGTTCG
CCAACAGCGGTAACAGCGCCGCAGCCATTTTTTGCGGCTCACACTCTTCCTGCAATAACT
CTTTGACTAACTCTCTGCCCGCCAGCAGATTTGGCAGCGAGACATAATCAGTTTTCACCA
GACGCTTCGCCAACCAGAAAGTGAAAGGCTTCATGCGATACCCCACCACCATCGGGCATT
TCGCCAGCATACACTCCAGTGCTGCCGTACCCGACGCCAGTAGCGCCGCATCGCTGGCAA
CCATCGCCTCACGGCCCATTCCATCCAGCAAATGAACCGACAGGTCTGGCGCGACTGCAG
CTTTGATGCGTTCAAACTGCTCGCGGCGTTTGGCATTCACCAGCGGCACCACGATTTCGA
GATCTGGATATGTCTGGCGCAAAAGCTGGGCCGTTTTCAGGAAATCGGCACTAAGCATTT
CGACTTCTGCACCACGGCTGCCCGGCAACAATGCCAGACAGTGGGCATCGTAAGGGATCC
CCAGCACATCACGGGCACCATTTTTATCTGGATCTAATGGCATGGCATCAGCCATGGTAT
GACCGATAAAGCGGCACGGTACGTTGTATTTGTCATAAAACGCTTTTTCGAAAGGCAGAA
ATGCGAGCACCAGATCGGTGGCTCTGCCTATTTTGAAAACGCGTTTCTGTCGCCACGCCC
AGACGGACGGACTGACGTAATGAATGGTTTTGATACCCTGCTTTTTGAGGTTACCTTCAA
GAGTAATATTGAAGTCAGGCGCATCAATACCGACAAAAACATCTGGCTTCAGTTCGCCAA
AACGCTTTGTCAGATCGGCACGAATATGCAGTAAGCGACGCAGACGACCGAGCACTTCAA
CAATGCCCATTACCGCCAGTTCTTCCATTTCGTACCAGGCTTCGCAGCCTTCAGCTTGCA
TTCGTGGCCCGGCAACACCAACAAAGCGGGCGTTGGGCACACGTTCTTTCAGAGCGCGGA
TTAAACCGGCCCCCAGGATATCGCCGGAGGTTTCTCCGGCGACCAGGGCAATCGTTAATG
GACGCTGTTCAGTCATTAACGAATCAGACCGCGCGTTGAGCGTGCAAAGAAATCGGTAAA
GGCTTTCACTTCCGGATATGTTTCCGCCAGTTCAGCAATTTCCGGTTTCACTTCATCGAG
CGTTTTACCGCTACGATAAATCAGCTTATACGCATTGCGGATAGCGGTAATCGCCTCACG
GCTGAATCCGCGGCGCTTCAGCCCTTCGATATTGACACCGAACGGCGTTGCGTGGTTACC
CTGCGCAATGACATAAGGAGGGACGTCCTGCGCCACACCGGAGCAGCCGCCAACCATCAC
ATGCGCACCAATGATGCAGAACTGATGGACTGCGGTCATGCCGCCGATGATCGCGAAGTC
GTCAACCGATACGTGACCCGCCAGCGTTGCGTTGTTGGCGAGAATACAGCGGTTACCTAC
CGTACAATCGTGCGCAATGTGCGCGTTGATCATCAGTAAGTTGTCGCTGCCCACCTTCGT
CAATCCACCGCCCTGGACTGTGCCACGATGAATGGTGACGCTTTCGCGAATGCGGTTACG
ATCGCCGATTTCCACACGGGTCGGTTCGCCAGCATATTTCAAATCCTGGTTAACTTCGCC
GATGGAGGCGAACTGATAAATCTCATTATCGCGGCCAATTTTAGTATGACCATTCACGAC
AACGTGAGATTTCAGTACGGTACCCTCACCAATTTCGACATGGGGTCCAACGATACAAAA
AGGACCAATGTGTGCGTTCGCGCCAATCGACGCGCCCTCTTCCACAATGGCGGTTGGATG
CACAAAGGCGGATTTATCAATCACGTATCAGGCCTCCCGGCTACGAGCACACATCATCGT
TGCTTCGCAAACTACTTTACCGTCGACCAGAGCAACCCCTTTAAAACGGGTCAGGCCGCG
GCGCGTTTTTTCGAAAGTGACTTCCATGATCATTTGATCGCCAGGCACGACCGGGCGCTT
GAAGCGCGCTTCGTCAATACCGGCGAAGTAGTACAGCTCACCCGGTTCCAGTTTTCCTAC
GCTTTTAAACGCCAGAATACCTGTTGCCTGTGCCATTGCTTCCAGAATCAGCACACCCGG
GAAAATCGGTTTTCCAGGGAAATGGCCCTGGAAGAATGGCTCATTGACAGAGACATTTTT
TACTGCGCGCAGAAAACGACCTTCTTCAAAATCCAGCACGCGATCCACCAGTAAGAACGG
GAAACGGTGCGGCAGAAGTTCTAAAATCTCTTCAATCTGCAGAGTATGAGTGTTAGTAGT
CAAGATACTCTTCCTGTCAAAATATAAGAAACGACAATAATAACACGGCCTGCCGCAATC
GTAAGAATGAGACAGGCCGTAAAGTTTGGCGAACAAAAGATGGAACGTTAGTCTTGTTGA
TTAACCTTGCGCTCAAGCGATTTCAGACGCTTGCTCATGTCATCAATGTTCATCACCAGT
GCAGCGGTTTTGCGCCAGACTTTGTTGGGTTGCAGCGGAATGCCTGAGGAATAGACGCCT
GGTTCAGTGATGGGACGCATCACCATACCCATGCCCGTAACCGTCACTTTGTCGCATATT
TCCATATGCCCGTTGATTACGCTGGCTCCGCCGATCATGCAGTAACGACCAATTTTCAGG
CTGCCCGCCATAATGACGCCACCGGCAACCGCCGTATTGTCGCCAATCACGACGTTATGT
GCAATCTGGCACTGGTTATCAATGATCACGCCATTGCCAATAACCGTGTCATCCAGCGCG
CCGCGATCGATGGTAGTGCAGGCACCGATCTCCACGCGATCGCCAATAATTACGCGACCA
ATCTGTGGGATCTTCACCCAGTTACCACGATCGTTGGCATAACCAAAGCCGTCTGCGCCT
ACCACTGTTCCGGACTGGATCAGGCAATTCTGACCGATCTGGATCTCATGGTAAATGGTT
ACATTCGCCCAGAGACGCGAACCTGCACCGATTTTGCTGTTTTTACCTACGAAGCAACCG
GCACCGATAATCACGTTATCGCCCAGTTCAACGCCGGACTCAATCACCGCGTTAGCGCCA
ATCGATACGTTGTTACCCAGCTTCGCCGTCGCGTCGATCACTGCACTGGGTGCAATATTC
TGCGCGGGCTGCGGCGTGGTATCTAAAATTTGCGCCATGCGCGCGTAAGTCAGGTAGGGA
TTCTTCACTACCAGCGCGGCACTTTTCGCGAAAGGAAGATCGTCCTGGGTCATGACAACC
GCGGATGCCTGGCACAAGCCTAAATGCTCACGGTATTTTGGGTTAACCATGAACGTAATG
TGACCTGTTTGTGCAGATTGCATGGACGCAACGCCGGTGATGACGATATCGCCATCACCG
TGTAGTTCTGCATCCAACTGCTGCGCTAAATCAGCCAGTCGAATTGAAGGCATTACTTAT
TTAACCTGTTTCAGTACGTCGGCAGTGATGTCTTTTACATCGCTGCTGTTGTAAGCAACG
GCGTTTGCATCAACAACCAGATCGATATCCTGGCTGTTGGCAACGGATTTCACAGCAGTC
TGGATACGAGTAACCAGTTTGCCGCGTTCTTCGTTGGAACGACGTGCGCGATCCTGCTCA
AAAGCCTGCGCTTTCTGAGCAAAAGTCTGGCGCTGAGCCATCACGTCTTTTTCCAGCTTA
GTGCGATCGCTGCCCGCTTTCATGGACTGCAGCTTTTTCATTTTAGCCTGCAGATCGGTT
TCCATACGCTGCAGTTCGCTGGCACGGCCTTTGAACTCATTTTCCAGCGTGTTAGAAACA
CCGGTTTTCTGCGCTACCTGCTGGAACAGGCTGCCCATGTTGACGATTGCAATTTTGTCA
GCGGCCTGAGCAGATGTTGCCAGTGCTAAACCGAGACCTGCAGCTAATAACCACTTTTTC
ACAATAAACTCCTTACCATCCCATTTGCACCGGAGGGTGCAGTTCTTTGCGTGGCCCGGC
GATCTTATATTGATCGCCTAAAGTCATCGCTACACTACCACTACATTCCTTTGTGGAGAA
CACTTACCAAGTTTTACCGATGTTAAACTGGAACTGTTCTGCCTTGTCTCCATCGTACTT
TTTGAACGGCTGGGCGTAGGAGAACACCAACGGCCCCAATGGGGATATCCATTGTAATGC
GATACCCGCAGACATACGGATATTGCTTGGATCACTATAGTCCGGATATCCAGAATATTG
GCTGGAATCCCAGTTTGTATCCCAAACGGTACCCATATCCCAGAAGAAGGAAGTACGAAC
CGAGTTAGCATACTTATCGCTAATAAACGGAGTCGGGGTTATGAACTCGAGGCTGGCAAC
CGCCATGGCGTTACCGCCTACAGCATCATCCGATTTACACAGGTCTTTCGCGCCGTCCTG
AGTCGCACATTCGTAATCATAGTCCGGATCATAATTACTGGCCTGATGCGGGAAGTAAAC
TGCTTTCGGACCAATGGTATTGGACTGGAAGCCACGGACGGTGCTGGAACCACCGGCATA
GAAGTTCTCGTAGAACGGCATCTCTTTGCCGCCTAAACCATCACCATAACCCCAGCGGGT
ACGACCCAGAACAACCCATTTGTGATCGTCATCGATCGGCACATAAGTCGCCGTGTCTAA
CGTCACTTTGTAGTATTCGTTATCCGATCCCGGAATGGTCACTTTACCGGTCAGGTTGAC
ACGTGAACCATCTGTCGGGAAGTAACCACGGTCAAGCTTGTTATAGGTCCAACCATAGTT
GAACGTGAAGTCGTCTGTTTTGAAGCTGTTATCCTGATCAGAGGTGCTCGGATGTTCACC
CATAGAGTACAGATAACGCCACATCGCAACCTGAGGCTGCATGTTGGACAGGGAGTTATG
TACATAACCCAGACCTGCACGCAGCGAGTTATATTCGTTAATCGGGAAGCCCAACGTCAC
GTCTGTACCATAACTCTTGTTGGTATAGTCGGACAGGTCGGCGTCATCTGCCTGGAAGTC
ATTATAGAAGAGACGACCACCGAGGCTTACGCCATCTACGGTGAAGTACGGGTTGGTTAC
CGACAGTTCAGCATAGGTCTGGTAATCGTTTTTGGTCCCGTTGATACCAACAGCATAACC
TGTACCTAACCAGTTATCCTGTTGCACACCAGCCTGGAAGCTCACGCCACTTTCAGTACC
GTAACCAATACCAAAGTTGAAGCTACCGGTGTTGCGCTCTTTTACCTTGTAGACTACATC
AACCTGGTCCGGGCTACCCGGAACACGTTGGGTATCGGTATCGACAGTTTCAAAGAAGCC
CAGACGATTCAGACGCTCCTTACCCTGATCGACCAGATCGCTCCCCAGCCATGCACCTTC
CATCTGACGCATTTCGCGACGCAGGACGGCATCTTTCGAGGTATCGTTACCTTCAAAACG
GATCTTACGCACGTAGAAACGGTTACCCGCATCAACGTTCACACGTAATTTAACGGTTTT
GTCGGCATCGTTAATTTCGGGCATGGACTGTACGCGCGGATAGGCATAACCATAGCGACC
GAGAAGCTTTTTAATGTCATCTTCCATCTTGGTCACTTTGGTGCCGTTATACAGCTCACC
CGGCTCGATCTTAGTCAGCTGCTCAATTTCAGCGGAGTGCCCGGCAAGGTTGCCGCTCAC
TTCAACGCCAGAAAGCTTGTACTGATCGCCTTCGGTGATGTTCACCGTGACGTAAATACC
TTTTTTATCTGGCGTCAGACTGACCTGGGTAGAGTCGATGTTGAAACGGGCATAACCGCG
GTCCAGATAGTAGCTGCGCAGGGTTTCAAGGTCGCCCGCCAGTTTCTGTTTCTGGTATTT
ACGATCGCCTACCACGTTCCACCACGGCACTTCGTCACGCAGTTGGAAATGAGAGATCAG
TTCGTCGGTGGTGAAAGCATGGTTACCAACAATGTTAATTTGCTGGATTTCAGCTGACAC
ACCTTCCTGGAACACCAGTTTTAGGTCAACACGGTTGCGCGGCAGCGGGGTCACGACAGC
TTTAACGCTGGCGCTATATTTACCGACGCTGTAGTAGAAGTCTTCCAGACCTTTCTCGAT
ATCGGCAATGGTGGTGCGATCGAGGGATTCGCCCACACGCACACCAGAAGCCTCGAGGTT
TTGCTTCAGCATGTCATCTTTCACCGATTTGTTACCGGAGAAAGTAATGCTGGCAATGGT
CGGACGTTCTTTTACCTGAACCAGAAGGGTATCACCATCACGAAGGACGCGAACATCCTC
AAAGTTGCCGGTAGCAAACAGAGCGCGAATGGTATTACTGATATCTTCATCATTAACCGT
GTCGCCTGTGCGCACCGGCATACTGAGGAGGGCCGCACCAACGGCGACACGCTGAAGGCC
TTCGAAATGAATATCTTTCACTACGAACCCTTCAGCACCGTATACGGTGGCGCTGCTAAA
CAGCAGCGACGCTATGAGCAACTTTTTCATCGCCATCGTTATTATGCGTTCTTCCTAACT
AACTCTCATAACCGAGAGAAATCATTGAAAAGTGCAAGCCCCATTAACAGCACCAGCAGA
ATCGAGCCAATGCGATAACAAAAGTCTTGAACCCGCTCGGATACCGGTCCGCCCTTGATC
TTTTCGATCGCAAGGAACAGCAGATGCCCCCCGTCAAGTACGGGCAACGGAAACAGGTTA
ATTATCCCTAAGTTCACGCTAATAAGCGCAAGAAACGGCAGGTAATAAACTACCCCGAGT
TCCGCTGTCATCCCAGCCCCCTTGGCGATAGAGATCGGCCCACTGAGGTTGTTCAGTTTC
ACATCACCGGTGATCAATTTTCCCAGCATACTGACCGTCAGCTTCATCAGCTGCCACGTT
TTGTCCGTGGCTTCGACGATGGCGTTGAACGGCCCATACTGGCGTACAACTTTATACTCA
TCTGGCAAAGGAATGACTTTCGGCTCAATACCGACAAAACCAATCGCTTTACCATTACCC
GGTTTACTCTCCGGGATTAATGTCAAAGACAAGGGACTCCCCTGCCTTTCGATTTCTAAC
GCTAAGGATTTACCCGGGTTATCCCGGACAAGCATCACAAAGGTCACCCACTGCGTTAAG
GGCTGACCATCGACTTTAACGATCCTGTCGCCTGCTTGCAAACCTGCCTTGCTTGCCGCC
GAGTTTGGCTGCACATTTTCCAGTACAGGTTCAATTTGCGGTCCACGAGGACGAATCCCC
AGCGAAGATACCGGATCTTCTTTATCAGGCTCAAACGCCCAGTGACGTAAATCGAGCTTT
ACATCCCGCCGTTGGTCGCTGCCAAATGGCGCTACTGTAATGGTGGTGCTTTCATCGCCA
ATTTTATCGACCAACTGCAAACGCACAGCATCCCAATCAGGCGTTTCGATACCATCTACG
GCTTTTAGTTCCGTACCTGGTGCAATTTGTGCTTCCGCAGCTATCGAATTGGCTGCTATT
TCGCCAACCACCGGACGTACGCCAGGCACACCAATAATAAAAACCAGCCAGTAGGCAAAG
ATAGCAAAAATGAAGTTTGCAACCGGACCTGCGGCAATAATCGCCGCTCGTTGGCCGACA
GATTTATTATTGAAGGCATGGTGGCGGAGTTCCGGAACGACCGGTTCTGCGCGCTCATCC
AGCATTTTGACATAACCGCCCAGCGGGATCAGGGCGATAACATATTCGGTACCGAGCTTA
TCAGTTCGCCGCCAGAGCGCCTTACCAAACCCTATTGAGAAACGCTCAACGCGAACACCA
CAACGCCGGGCAACCCAGAAATGACCAAATTCATGCACGGTGATAAGTACACCCAGTGCA
ACGATGAACGAAGCCAAATCCCAGAGAAAACTCAGCATATTACCTTCCGTTAAAGCATCC
TGAATACCAGTAACAACAAGCAAGCAAAGACCGGTACCGCAGCCGTCAGGCTATCAATAC
GATCTAAAATACCACCGTGTCCTGGAATTAAATGACCGCTGTCCTTAATTCCTGCTTCAC
GCTTAAACATACTCTCGGTCAGATCGCCGAGCACTGAGGCTAACGCTGCGACAATAGAGC
AAATGAGTAAGGTGACGGGAGCGACGTCGAGATTCGCCCACATGCCATAACCCCATGAGA
TTACCGCTGCGGTCGCTAGTCCACCTATAAAGCCTTGCCAGGTTTTACCCGGAGAAACCT
TCGGTGCCAGCTTATGTTTACCAAACAATTTGCCAAACATATATGCGCCAGAGTCAGCGC
CCCATACCAGGATCATGACATAGAGCAGCCATATTGCGCCACTGTAATGATTCTCGTCGT
AGTGCCAGGCCCGTAACGCCAGCATGCCCCAGAAGAAGGGAACAATGGTTAGCACGCCAA
AAATAAGGCGCAATGTTTTAGAGTTACGCCAGATTGCTGCGGAATCTGGGTAAAACAGCA
CCAGCAATAGCGCGACAATCCACCAACCCAACGAAGCCCAAAGTGAGATTTCAACCAGCG
GTTGATGAATATTTCGGTGATATTCCGGCAACAGAAAAAGCATCAGCGCCAACAATAACC
CGCATAACACCGCCAACCATACTCGCTGCGAACGAGTGGTAAAACCGCTAAGCTGTCCCC
ATTCCCACGCTGCCAGCATGCAGACCACCAGCGTTACAATGGCGAACCCCACCGGCGGCA
ACAGAAACAACGCCGCGATGACGACGGGTATTAACACAAAAGCAGATATCAGGCGATACT
TCAGCAAAAGCGACCCCCATCAGGCTGTTTCATCACCGGGCTCGGTGCCGCCGAAACGAC
GCTCTCGATTAGCAAAGGCATTTAACGCCCCTTCAAAGTCTTGTTCATCGAAATCGGGCC
AGAGAACATCTGTAAAGTAAAGTTCGGCATAGGCAATTTGCCAAAGCAAAAAGTTACTAA
TGCGATGCTCCCCCCCAGTCCTAATTACTAAATCTACAGGGGCCAGTTCATGCATACAGA
CATGCTGGTTTAGCATCTCTTCATCTATCTGATCTGGTTGCAGGTTTCCTTGCTGCACCT
TTTCAGCCAGTTGCCTGACTCCCTGGACTATATCCCAACGTCCACCGTAGTTCGCCGCAA
TATTCAGCGTCAGACCGGTATTCCCGGCTGTTAGCGCTTCAGATTTACGAATACGTTCTT
GCAAACGCGAGTTAAAGCGACTGGTATCGCCAATAATACGCAGACGCACGTTATGTCGGT
GCAGACTTTTTACTTCGCTATCGAGCGCCCACACAAACAGTTCCATTAACGCACTGACTT
CCTGCGCTGGTCGGTTCCAGTTTTCACTACTAAAGGCATACAGCGTTAACGCCTCAATAC
CGTTGTTGGCCGCAAAAGAGACAGCCCGGCGGACGGATTTTGCCCCGGCTTTATGCCCAA
AGGCACGAATCTTCCCTTGCTTTTTTGCCCAGCGACCATTGCCGTCCATAATGATCGCAA
CATGACGGCAGCCATGCGCTGGCAATTTTTCGCTAAGTGGTTGAGTAGCAGACAACATCA
CGCGTTTTTTATTCCCTGACAGGGTTTACGGTACTCAGGAATACTGAAGCCTATACAAAA
AAAAGCCGTGTAAAACCACGGCATACCTGACCTTATAAAGCCAACTACTTACGATCAGAT
GGCGCAGACTATATCACTGAAGCCCTACGCTAACAAATAGCGCGACTCTCTGTAGCCGGA
TTATCCTCAGCTTGCGAGACGCATCACCTCTTTTCTGGCGACTTCACGCGCGTTCGCATC
AACAGATAACACATCGTCCACACATTGTGGTTCGCGCATATCCATTTTTTCCAGTACGGA
TAAATTCAACGCAGCGATATCCGTAAAGCGGATTTGTTGCGCAAGAAAAGCAGCAACGGT
GATTTCGTTTGCGGCATTCAATGCTGTCGTCGCTGCCTGACCTTGTTCGAACGCCTCCAT
CGCCAGTTTCAGGCATGGATAACGATCATAATCCGGTGCGGCAAATGTCAACGCACTTAG
TTTGCAAAAATCGAGCGGCTTCACGCCAGAGTTCACGCGATTCGGCCATGCCATGGTGTG
GGCAATTGGCGTACGCATATCCGGTTCCCCCAGCTGCGCCAGAACACTGCCGTCCTGATA
GCGCACCATTGAGTGAATCACTGACTGCGGGTGAATCAGCACTTCCATCTGGCTGGCGCT
GGCGTTAAACAGCCAACGCGCTTCAATGTATTCCAGACCTTTGTTCATCATGGTAGCCGA
ATCGACAGAAATTTTACGTCCCATCGACCAGTTCGGATGACGGCAGGCTTGATGGGGCGT
CATTGTTGCCAAATCGCGCAATGGCGTCTCACGGAAAGGGCCACCAGACCCGGTAAGTAA
AATGGACACCACGCCATTTTGCTCAAGGTCAGCGTATCCCAGATTATGCTGGATAGGTTG
CGGTAAACTCTGAAAAATAGCGTTATGTTCGCTATCGACCGGTAACAATTGCGCTTTGCT
CTGCTTTACGGCGTCCATAAACAGACGTCCGCAGGTAACCAGTGATTCTTTATTGGCCAG
CAAAATGGTTTTACCCGCGCGGATCGCAGCAAGCGTAGGTAACAGCCCAGCAGCACCAAC
AATGGCTGCCATCACCTGATCAACCTCCTCAAGCGCTGCCATATCGCAAGCGGCTTGTTG
CCCACTTAAGACTTCGGTGCGGCTCCCCTGTTGCTGTAGCATCGTTTTAAGAAGTTTCGC
ACTCGCTTCATCGTCCATTACGGCATAGCGGGGAGAGAATTCCAGGCACTGTTCTACCAT
GCGAGTGACATTTTTGCCTGCCACCAGCGCAACTACGCGGAAGTGTTCGGGATTATGGCG
CACCACGTCCAGCGTGCTGCAACCAATCGAGCCGGTCGAGCCCAGAATGGTGAGTTGCTT
CATGAAACATCCAGAGTTGAGACAGAATAAAAAGCAAAACGCCGCCAGCCGATCCGCAAG
GATCTACTAAGCGGCGTTTTTGTCGTTCAAGAAATCAGAACTGCATCAGTTCTGCTTCTT
TGTCTGCCAGCGCCGCTTCAATTTTCTTGATTGCAGCATCAGTCAGTTTCTGTACATCGT
CCTGAGAACGGCGATCGTCGTCTTCGCTGATCTCTTTATCTTTCAACAGTGCTTTCACTT
TGTCGTTCGCGTCACGACGCACGTTACGTACTGCAACACGCGCTTGTTCTGCTTCACCAC
GAACGATTTTGGTCAGATCTTTACGACGTTCTTCCGTCAGCGGCGGCAGCGGAACACGGA
TGTCGCTACCCGCAGAGTTCGGGTTCAGGCCAAGATCGGACGCCATAATCGCTTTTTCAA
CGGCCGGAGACATTGAACGATCAAACACGTTGATTTTCAGAGTACGGGAATCTTCTACCG
TTACGCTTGCCAGCTGACGCAGCGGCGTCGGCGTGCCGTAATATTCCACGACAATGCCAT
CCAGCAGGCTGGGAGAAGCACGACCCGTGCGTATTTTGCTGATTTGGGTTTTGAACGCTT
CTACGCATTTGTCCATGCGTACTTCAGCATCTTTTCTGATATCGCTAATCACGTTACGAA
TCCTTGAAAACTTGTCTCAGTCAGACCAGACAGTCACACACAGTGGAAGTGTGCTAAGTA
TAGCCCTGGTTAAACATATTACGGGTAATCGTCTGGATTATTAGGCTATTTTATTTGCCA
TTTTGGCCCCGGGCAGTGCTCGCCATCCTCACGTACTTTTGTACGCTCCGGTTGCTGCGC
GCTGGCCGTGACCAAACTGCCTGCAACAATAACGCCTTATAACCAGACTTACGCCCCCGC
GATACTTATGCGGAATCTTACCCTTATTTATCCATCACGGGAATTATTCCGTGATTAAAG
TCCCTTCTTTTTCACCCATTACCACACGGCGCAGCGCACCCGGTTTGTTCATGTTGAAAA
CACGAATCGGTAATTTATGGTCACGAGCCAGCGTGAAGGCCGCCAGGTCCATGACTTTCA
GCTCTTTTTCCAGCACTTCGCTGTAAGTCAGTTGCTCGTACATGGTTGCAGTTGGATCTT
TCGCCGGATCAGCAGTAAACACGCCGTCAACTTTGGTTGCTTTCAGCACCACATCGGCTT
CAATTTCGATACCACGCAGGCAAGCTGCTGAGTCGGTGGTAAAGAACGGGTTACCTGTAC
CGGCGGAGAGGATCACCACACGGTTGTTGCGCAACAGGCTGATAGCTTCTGCCCAACTGT
AGCTGTCGCACACGCCATTCAATGGAATAGCGGACATCAGGCGAGCGTTCACATAGGCGC
GGTGCAGTGCATCACGCATTGCCAGGCCGTTCATTACGGTCGCCAGCATCCCCATGTGGT
CGCCCACAACGCGGTTCATACCCGCTTTCGCCAGACCAGCGCCACGGAACAGGTTACCCC
CACCAATCACCACACCAACCTGAATACCCAGTTCAACCAGTTCTTTGATTTCCTGAGCCA
TGCGATCCAGTATGCTTGCATCAATACCGAAGCCTTCAGTGCCCTGCAGAGCTTCGCCAC
TCAACTTAAGCAGAATGCGTTTATAGACGGGTTTTGCATTGGTAGCCATGTTTCTTTCCT
GAGACTGTCAACGATTGAAATGAATTAATACTAGCGACATTGTACGTCGCTATTCAGCGC
AGCCCCACAAGGGTTAGCTGAATTTACAAGATGGGCACAAAAAGAAGCCGCCCTCAGGCG
GCTCCTTTTCGATGATTAAGACTGCTTGGACATCGCAGCAACTTCTGCTGCAAAGTCAGT
CTCAACTTTCTCGATGCCTTCACCTACTTCGAAGCGGATGAAGCCAGTCACTTCAGCGTT
ATGCTCTTTCAGCAGCTGACCAACAGTTTTTGCCGGTTCCATAACGAACGGCTGACCAGT
CAGAGAAACTTCGCCGGTGAATTTCTTCATGCGGCCTTCAACCATTTTCTCTGCGATTTC
TTTCGGCTTACCAGACTGCATCGCGATATCCAGCTGTACCTGGTATTCTTTTTCTACCAC
TTCAGCGGATACGTCTTCTGGTTTGATGAATTCTGGCTTGCTTGCAGCAACGTGCATAGC
GATGTGTTTAACCAGCTCTTCGTCAGCGCCTTTAGCAGCAACCAGAACGCCGATACGCGC
ACCGTGCTGATAAGAACCCAGAACGTCGCCTTCCAGCGCAGCAACGCGGCGAATGTTGAT
GTTTTCACCAATTTTCGCTACCAGCGCAACACGTTCTTCTTCGAACTGTGCTTTCAGAAC
TTCAACGTCAGTGATTTTGCCAGCAACAGCTGCGTCCAGAACTTTGTCTGCGAACGCCTG
GAAACCAGCGTCTTTTGCAACGAAGTCAGTCTGGCAGTTAACTTCCAGAATGATGCCGTA
GTTGCCGTCGATTTTGGTTTTGATCACGCCGTCAGCAGCAACGTTGCCTGCTTTTTTCGC
TGCTTTAATAGCACCGGACTTACGCATGTTTTCGATTGCCAGCTCGATGTCGCCGTTAGC
TTCAGTCAGTGCTTTTTTGCAATCCATCATGCCTGCGCCAGTACGCTCACGCAGCTCTTT
TACCAGGGATGCGGTAATTTCAGCCATTCTAAAATCCTCGGAGATGTGATCTGCCCGGCA
TTAAACCGCACAGATATAAAAGTGAAAAAGGGGGCCATATGCAGGCCCCCTAACCAAACG
TGTACTACCTGGTCTATAAGGGCTCTCCCCCTTCATATTTCGCGCCGCAGATGCGTTGTC
TTCGCTCGCTCATCCCGGTCACTTACTGATGTAAGCTCCCGGGAATTCTCGAGCTTGCCG
CCTTTCTGCAACTCGAACTATTTTGGGGGAGTTATCAAGCCTTATTACTCAGCTTCTACG
AAGCTTTCTTCCGCCTGGGAAGCCAGATCCTGAGAACGGCCTTCACGTACGGTTGCAGCA
ACAGCGCCCAGGTACAGGGTCACAGCACGGATTGCGTCGTCGTTACCCGGGATAACGAAG
TCAACACCGTCCGGATCAGAGTTGGTATCAACGATAGCAAATACCGGAATACCCAGGTTG
TTTGCTTCTTTGATAGCAATGTGTTCGTGGTCAGCATCGATTACAAACAGAGCGTCCGGC
AGACCGCCCATGTCTTTGATACCGCCCAGGCTGTTTTCCAGTTTCTCCAGCTCACGAGTG
CGCATCAGCGCTTCTTTCTTGGTCAGCTTGTCGAAAGTACCGTCCTGAGACTGAGTTTCC
AGGTCTTTCAGACGTTTGATGGACTGACGAACGGTTTTCCAGTTAGTCAGCATACCGCCC
AGCCAGCGATGGTTCACGAAGAACTGGTCGCAGCTCAGAGCAGCGTCTTTCACCGCTTCG
CTTGCAGCGCGTTTAGTACCAACGAAAAGGATTTTACCTTTGCGAGAAGCAATCTTGTTC
AGTTCAGCCAGAGCTTCGTTGAACATCGGTACAGTTTTCTCAAGGTTGATGATGTGAACT
TTGTTACGCGCACCGAAGATGAACGGCTTCATTTTCGGGTTCCAGTAACGGGTCTGGTGA
CCGAAGTGAACACCAGCCTTGAGCATGTCGCGCATGGAAACAGTTGCCATGATTAAAACC
TCTATATAAAAGTTGGGGTTATGCCTCCACGTATCCCATATTACCGACCCCAAAGGGCAC
CCCGGAATATGTGCCGATACGTGTGTGTTGTTACACAAAGTGAGATTGTCGCTTCCGTCC
AGTCTGTGTATACGAAATGGATCGGAAGTCCGGCGCGCTTTATACCACAAATACGTCTGG
GACACCAATAATTGTTGGCGCTGTGTACAGCATCAGACGTCGAATTTTCTATTATAGAAA
ACCTTCAGTGGCACGTTTGGCGAAATTCAGAATGATTCTCAATTTGCCCGGGTGTGATAC
CATTGACGGCACTTACATATATATTGTCGGTATCACCGACGCTGATGGACAGAATTAATG
GCTATCTCAATCAAGACCCCAGAAGATATCGAAAAAATGCGCGTCGCTGGCCGACTGGCT
GCCGAAGTGCTGGAGATGATCGAACCGTATGTTAAACCGGGCGTCAGCACCGGCGAGCTG
GATCGCATCTGTAATGATTACATTGTTAATGAACAACACGCGGTTTCTGCCTGCCTCGGC
TATCACGGTTATCCGAAATCCGTTTGCATCTCAATTAATGAAGTGGTGTGCCACGGTATT
CCGGACGATGCTAAGCTGCTGAAAGATGGCGATATCGTTAACATTGATGTCACCGTAATC
AAAGATGGTTTCCACGGCGATACCTCGAAAATGTTTATCGTCGGTAAGCCGACCATCATG
GGCGAACGTCTGTGCCGTATCACGCAAGAAAGCCTGTACCTGGCGCTACGCATGGTAAAA
CCAGGCATTAATCTGCGCGAAATCGGTGCGGCGATTCAGAAATTTGTCGAAGCAGAAGGC
TTCTCCGTCGTTCGTGAATATTGCGGACACGGTATTGGTCGCGGCTTCCATGAAGAACCG
CAGGTGCTGCACTATGACTCCCGTGAAACCAACGTCGTACTGAAACCTGGGATGACGTTC
ACCATCGAGCCAATGGTCAACGCGGGTAAAAAAGAGATCCGCACCATGAAAGATGGCTGG
ACGGTAAAAACCAAAGATCGCAGCTTGTCTGCACAATATGAGCATACTATTGTGGTGACT
GATAACGGCTGCGAAATTCTGACGCTACGCAAGGATGACACCATCCCGGCGATAATCTCG
CACGACGAATAAAATGAAGCCGGCGAATGCCGGCTTTTTTAATGCGATAATTTAATCTTA
TGGGTGGCGCACAATGAATACCCTTCCAGAACAGTACGCAAACACCGCTCTCCCCACCCT
GCCCGGTCAACCGCAAAATCCATGCGCCTGGCCCCGTGATGAATTAACCGTCGGTGGGAT
AAAAGCCCATATCGATACTTTCCAGCGTTGGCTGGGTGATGCCTTTGACAATGGTATCTC
CGCAGAACAGTTGATTGAGGCGCGTACCGAGTTTATCGACCAGCTCCTGCAACGATTATG
GATTGAAGCGGGATTCAGCCAGATTGCCGACCTGGCATTGGTCGCCGTCGGTGGCTACGG
TCGTGGCGAGCTGCATCCACTTTCAGACGTCGATTTACTGATTTTAAGCCGTAAAAAGCT
CCCGGACGATCAAGCGCAAAAAGTGGGCGAGCTGTTAACGCTGCTCTGGGATGTAAAGCT
GGAAGTCGGTCATAGTGTGCGCACGCTTGAAGAGTGCATGCTGGAAGGGTTATCGGATTT
AACCGTCGCCACCAATTTAATCGAATCCCGCTTATTAATTGGCGATGTTGCGCTGTTCCT
CGAACTGCAAAAACATATTTTCAGCGAAGGATTCTGGCCTTCCGACAAGTTCTACGCGGC
GAAAGTTGAAGAACAGAACCAGCGCCATCAGCGTTACCATGGCACCAGCTACAACCTTGA
ACCAGACATCAAAAGCAGCCCTGGCGGCTTGCGCGATATCCACACTCTGCAATGGGTGGC
CCGCCGTCATTTTGGCGCAACATCGCTGGATGAAATGGTCGGGTTTGGCTTCTTAACCTC
AGCGGAGCGGGCGGAATTAAACGAATGTCTGCATATATTGTGGCGTATTCGCTTTGCCCT
GCATCTGGTCGTCAGCCGTTACGATAATCGCCTGTTATTCGATCGCCAGCTTAGCGTCGC
CCAGCGTCTGAATTACAGTGGCGAAGGTAACGAACCGGTCGAGCGGATGATGAAGGATTA
CTTCCGCGTGACACGCCGCGTCAGTGAACTCAACCAGATGCTGCTGCAACTGTTCGATGA
AGCGATCCTCGCCCTTCCCGCCGACGAAAAACCCCGTCCAATCGACGATGAGTTTCAGCT
ACGCGGTACGCTAATCGACCTGCGTGATGAAACACTATTTATGCGCCAGCCGGAAGCCAT
CTTGCGTATGTTCTACACCATGGTGCGCAACAGTGCGATCACCGGCATTTACTCCACCAC
ACTGCGCCAGTTACGCCATGCCCGTCGCCATCTGCAACAACCGCTGTGTAATATTCCGGA
AGCACGAAAACTGTTTTTGAGCATTCTGCGTCACCCCGGAGCGGTGCGGCGCGGGCTATT
GCCAATGCATCGCCATAGCGTGCTCGGCGCGTATATGCCGCAATGGTCGCATATCGTCGG
GCAGATGCAGTTTGATCTGTTCCACGCCTACACGGTGGATGAACATACTATCCGCGTGAT
GCTGAAACTGGAGAGTTTTGCCAGTGAAGAAACGCGCCAGCGCCATCCGTTGTGTGTGGA
CGTCTGGCCGCGCCTACCGTCAACTGAGCTGATTTTCATCGCCGCGCTGTTTCACGATAT
CGCCAAAGGACGCGGCGGCGACCATTCCATTCTCGGTGCTCAGGATGTAGTGCATTTTAC
CGAACTCCACGGGCTGAACTCACGCGAAACACAGCTGGTCGCCTGGCTGGTTCGCCAGCA
CTTGCTGATGTCGGTGACAGCTCAGCGTCGCGATATTCAGGACCCGGAAGTCATCAAGCA
GTTTGCCGAAGAAGTTCAAACGGAAAATCGTCTGCGCTATCTGGTATGCCTGACAGTGGC
TGACATTTGCGCCACCAACGAAACGCTGTGGAATAGCTGGAAGCAAAGTCTGTTGCGCGA
ACTCTATTTTGCCACCGAAAAACAGCTACGACGCGGAATGCAAAACACGCCGGATATGCG
CGAACGGGTTCGCCATCACCAACTCCAGGCGCTGGCACTGCTGCGCATGGATAACATCGA
CGAAGAGGCGCTGCACCAAATTTGGTCACGCTGTCGTGCTAACTATTTTGTCCGCCATAG
CCCAAATCAACTGGCCTGGCATGCGCGCCATTTATTACAGCATGATTTAAGCAAACCGCT
GGTATTGCTTAGTCCGCAGGCTACGCGTGGAGGCACCGAGATTTTTATCTGGAGCCCGGA
CCGCCCCTATCTGTTTGCCGCCGTCTGTGCCGAATTAGACCGCCGCAATTTAAGTGTTCA
CGACGCACAAATTTTCACCACTCGCGACGGTATGGCGATGGATACCTTTATCGTGCTGGA
ACCCGATGGTAGCCCGCTATCCGCAGATCGCCATGAGGTTATTCGGTTTGGTCTGGAGCA
AGTACTGACACAAAGTAGCTGGCAGCCACCACAGCCGCGTCGTCAACCGGCTAAACTACG
TAACTTTACTGTTGAAACCGAAGTGACGTTTTTGCCTACCCATACCGACCGAAAATCATT
CCTTGAGCTTATCGCGCTCGACCAGCCAGGACTGCTGGCGAGAGTCGGGAAAATTTTTGC
CGATCTGGGAATTTCGCTTCATGGCGCCCGAATTACAACCATTGGCGAGCGAGTAGAAGA
TTTATTCATAATTGCCACCGCTGACCGGCGTGCACTTAATAACGAGTTGCAGCAGGAAGT
GCATCAGCGGTTGACAGAGGCCCTCAATCCAAACGATAAAGGGTGATGTGTTTACTGATA
TGAAAAGAGTTTAACAATGCAGCAGTTACAGAACATTATTGAAACCGCTTTTGAACGCCG
TGCCGAGATCACGCCAGCCAATGCAGACACCGTTACCCGCGAAGCGGTAAATCAGGTGAT
CACCCTGCTGGATTCCGGCGCACTGCGTGTAGCGGAAAAAATTGACGGTCAGTGGGTGAC
GCATCAGTGGTTAAAAAAAGCGGTGCTGCTCTCTTTCCGTATTAATGATAATCAGGTGAT
CGAAGGGGCAGAAAGCCGCTACTTCGACAAAGTGCCGATGAAATTCGCCGACTACGACGA
AGCACGTTTCCAGAAAGAAGGCTTCCGCGTTGTACCACCAGCGGCGGTACGTCAGGGTGC
GTTTATTGCCCGTAACACCGTGCTGATGCCGTCTTACGTCAACATCGGCGCATATGTTGA
TGAAGGCACGATGGTTGATACCTGGGCGACCGTCGGTTCTTGTGCGCAGATTGGTAAAAA
CGTCCACCTTTCCGGTGGCGTGGGCATCGGCGGCGTGCTGGAGCCGCTGCAGGCTAACCC
GACCATTATTGAAGATAACTGCTTCATTGGCGCACGCTCTGAAGTGGTTGAAGGGGTGAT
TGTCGAAGAAGGTTCCGTCATCTCTATGGGCGTATACATTGGTCAGAGCACCCGTATTTA
CGACCGTGAAACCGGCGAAATCCACTACGGTCGCGTTCCGGCGGGGTCTGTGGTTGTTTC
AGGTAATCTGCCGTCAAAAGATGGCAAATACAGCCTCTACTGTGCGGTTATCGTTAAGAA
AGTTGACGCGAAAACTCGCGGTAAAGTTGGTATTAACGAACTGCTGCGTACCATCGACTA
AAAGTATGTACACGGGCAGCACGACGCTGCCCGATTGCTTTCTGGTTCAGAATAATTCGT
CCTACTCATTCTTCCTCCCCCTTTTTTAAATACTTTTTCATCTTGTTTCGGACTGTCATG
TAATTCGCAAAACGAAGATAAATGTGCTAATCCATCCCATGGAATATCGCCACAATAAAG
CAGGTAATTTTTTTATTTTTACGCCATGATAGAAGTCTGGAAGAAAAAGGCTTTCTGCGA
TCACAGTCGAGCCGGGCGGGCCAGGCCAAATGCTAAAATAAGCACAATTTACTGACTCAT
TTTGAGGTAACGCTATGTACGACAATCTGAAAAGTCTGGGTATTACCAATCCTGAAGAAA
TTGATCGTTACAGCCTCCGGCAGGAAGCCAACAACGATATTCTGAAAATCTATTTCCAGA
AAGACAAAGGCGAGTTTTTCGCCAAGAGCGTGAAGTTTAAATATCCGCGTCAGCGTAAAA
CGGTCGTCGCTGATGGTGTGGGTCAGGGTTATAAAGAAGTCCAGGAAATCAGCCCGAATC
TACGGTATATCATTGATGAGCTTGATCAAATCTGCCAGCGTGACCGCAGCGAAGTTGATC
TTAAGCGTAAGATCCTCGACGACTTACGTCACCTGGAGTCAGTCGTAACCAATAAGATCA
GCGAGATTGAAGCCGATCTGGAAAAACTAACGCGTAAATAATCCCGAACTGACGGTTAAC
TCGGGCATTCCCCTCTCCCCTTCGGGCTGAGGGGAATGAGCCAGCGCCGCCTCAACCTTA
ACGCATAACCTACCGCTCTTCATCCAGTTGTAACGCCACATACAGCAGCAACCTGTCATC
AAAATTGCCCAAATCAAGCCCGGTCAGTTCCGATATACGATTAAGCCGATACTCCAGAGT
ATTACGATGAATAAACAACACCTTTGACGTTGCCAGCGGTTGCACATTGTGACGAAACCA
CGCCGCCAGCGTTCGCCGCAGCAAGCCGTTATTGTCCATCGCTTTCAGCCGCGCCAGCGG
TCGCGCCAGTTCGTTGGCCTGCCAGTCGCCACGCAAACTGTCGAGTAACACAGGTAACAT
CAGATCCTGATAAAAATAGCAGCGACTTTCTGGCATCCGCTGTTTACCCACCACCATCGT
CGTTTTCGCCGTACGATAGGATCGGGCAATACTGCCAGGACCAGTAAAATAGTTGCCCAG
CGAAACGCGAAAACGCAGCTGGCCGTACTCTTTCATGCGGGTAATCAGTTGTTCAACTCG
CTTACGATGATCTTCTGCATCCCAGCGCCCAAAAGAGTTCAACGCCGGTTTCAACACCAC
CATTTCGGTTAGCGAGACAATCGCCACCAGATTATTACGCTCGGGCGTAGTCAGCGCATT
TTGCAGTTGTTGTAACTCCGCCATTGCGCTGTCCACGCCAAGCTGACCGCTGTCGACCTC
AACAATAGCCACTACTCGCGGTTGATTGAGATCGATCCCCAGCCGTTGCGCCCATTCAGT
AAGTGCGGGAGTATTCTCCTCAGCCTGAATCAGGTTCATCACCAGTTCTTCCCGCAAACG
GCTATCCTGCGCCAACAGGTGCATCAACCGCGACTGTTCCAGCATCATTTCAGCCGTCAT
GCAGACCAGTTCGCCATATTTACGCAGGTTCTCTGGTTCACCTGTCAGGCCAATTACGCC
GACAATTTCACCTTCCAGCCGTAACGGTAGATTAATCCCCTGCCGCACACCGTGCAGATG
ACGTGCCACCGCGTCATCGATATCGACGACTCGTCCCTGTGAAAGTACCAGCAATGCACC
TTCGTGCAATTCACCAATACGCTCACGATCGCCGCTGCCGATAATTCGCCCGCGGGCATC
CATTACGTTGATATTGGTATCGATGATGCGCATGGTACGTGCCACGATATCCTGCGCCAT
TTTGGTATCAAGATGCCAGCCAGCCATAAGTCCTCCGTTATGCACGGCTTAGCATAAGGA
AGTACGTAACGTACGGCATTGTGCAAATGCCTAAAGGATGATGAAGATGTATGGAGTTGT
GGTGAAGTTCACAGATTGTAAGGAGAACCCCTTCCCGTTTTCAGGAAGGGGTTGAGGGAG
ATTACTGCATTAACAGGTAGATGGTGCTGTCGCCGCGCTGAATGTTCAGTGCCAGCACAG
ACGGTTTGCTGTCGAGAACTTTACGCAGTTCAGCGATGTTTTTCACTGCCTGCTGGTTCG
CGCCAATAATCACATCACCTTTCTTCAGGCCGATCTGCGCAGCCGGAGTGCCCGTTTTCA
CGTTGTTCACTACCACGCCCTGATCTTTGCCTTTGTTGCTCATCTCAGCACCTTCAATGC
CGTTGAAGATGGAGCTGGAATCAACCTGATTCTGGCTGCTCTGCTGCAGTTCCAGATTCA
CGTTGACCTGCTTACCGTCGCGCAGCAAGCCCAGGGTCAGTTTGCTGCCCACCGGCATAG
TACCCACCTGAGCACGCAGTGCGGCAAAGCTGCTGATCGGCTTACCGTTCAGTGAGGTGA
TCACATCACCCGCTTTAATGCCCGCTTTTGCAGCGGAGGAATTAGGCAGAACCTGGCTTA
CGAAAGCACCGCGCTGGGCGTCAACTTTCATCGCTTTCGCCAGTTCGGAATTCAGCTCAG
TCCCCATAATACCCAGCTCACCGCGTTTCACCTGGCCGTATTCCACCATCTGCGAGGTCA
GGTTTTTCACCATGTTGCTCGGGATAGCAAAACCGATACCGATGTTGCCGCCGTCCGGTG
CGAGGATCGCGGTGTTGATACCGATCAGTTCGCCGTTCAGGTTAACCAGCGCACCACCGG
AGTTACCACGGTTGATCGCTGCATCGGTCTGGATGAAGTTTTCGTAGTTTTCGGCATTCA
GGCCGCTACGCCCCAGCGCAGAGACAATCCCGGAAGTTACCGTCTCGCCCAGACCAAACG
GGTTACCAATCGCTACGGTGTAATCACCCACGCGCAGTGCATCAGAATCCGCCATCTTAA
TTGCGGTCAGGTTTTTCGGATTCTGGATTTGGATCAGCGCGATATCAGAGCGCGGATCTT
TGCCAACCATCTTCGCGTCGAACTTACGGCCATCGCTCAGTTGAACTTTAATGACCGTCG
CGTTATCAACAACGTGGTTGTTGGTGACGACATAGCCTTTATCGGCATCAATGATGACGC
CGGAACCCAGCGCCATGAATTTCTGTTGCTGGCCGCCACCATTACCGCCCTGGCCACCCT
GGCAGAACGGAGAGCTCTGGAACGGAGAACCTTCCTGGCAGAACGGAGAATCATCACCGA
AGAACTGCTGGAAATTACGCGGCATACGCGGCGTATTAACGGTTGTGCTACCTTCTACGT
TAATGCTGACCACTGAAGGCATCACCTTTTCGAGCATCGGTGCAAGGCTTGGCATCTGCT
GGGCTGTCGTTGCTGAAGAAGTCTCAGCCGCCGTTGCAGAGAGCGGAGATAACGCCAAAC
CTAAACTCAGAGCCAGTGCACTCAGTGCTAATGTGGTTTTTTTCATGTATTTCAGTCTCG
ATTAACAGATAACGCAAAATTGCTGTGTTCTTCAGATTCGTTTTATAGCGCGAAGTTCCG
AACTAAAGTTTCTGCAAAAGGTAAAAATTTATTGTTCGTCTTTACAAAAGCCTGGTTATT
GTTCTACGGCCATCAGACGTCGGTATTCATCCCACGCATAGAGGTCGGTCATACCGCTGA
TATAATCCTGCAGCAGGCGGCAACGGTAATAATATTCCCATAGCGGAAACTCAGGAGAAT
CTGACGGTAATTTACTGACAGCTTCGACATAGGCCAGCCGATGGCGCGTCGAGAGTTTGT
GGAATAAGCGCGATTCAATAGGGAAACGTTTCACCCGTTCTTTTTCTACCAGTTCAGTAA
AGTCTGATAACGACAGGCTTAATAAAGGACGATAAATCTCTAATAATCCGCTAATGACCC
GATAGCCCTGCAATTCAAGCTGCTCGACATCTGGATGGCTAAACACATGTTTTACAGCGA
CATTTTTATATAGCTTAAGAAGATCGCTGCATTCGCTGGCATCTTCCAATAATGCATGAT
TAAACGTTCCGGCGAAAATCGCAGGCAGATTATCAATAAATCGTTGTGCCGCGTAGGGTA
CCAGTTTATTTAGGGTATTTACCCGTAAATACATAAAAAACTGATCTTCCGTACTGCGGC
TTAAACTATTTGAGCGTGATTTTTCCCAGGCATTTTCAACCACTAGCGAAAAGAGCGAAC
CTTTCTCATGCTGACCCCACGCCTCGTGCAAATGATGATAAAGCTGCTCAACGGTAAATA
TTCTTTTCTCTACCGCATCTTCAAGGTCTGCCACACAATAGGAGATGTCGTCGGCAGCTT
CCATAATCCACGTTAATGGAAAACGACTGTAAAGCGCCAAATTAAGTTCTTTACGCAACC
GGGCAATATAGGCTTCTTCAGAAAGATAATAACCCGGCTTTTTCATTAAATAGTGATGTG
TCTCAGGCGTTTCGCCACGCCACCACGCCGGACGGGTATATTTTAAAATACCGCCAACCT
GTGCCCAGGTGAGATTCATCCTCATCAATGTATGCACCAGACGAATGCCTTGTGCATTCC
CCTCAAAATGACATAAGTCCTGACGAATCTTGCGCCGCAGCTCGTTAAGCGGTTCTTCCC
CGTCCCGTAAACGTAGTGCTGCCACGCTGCAGCGATCGTCAGTCAGAGGCTGGCTTTCGG
CATCTTCCGGGTATAAACGCTGGCGAAACCAGTCATTTATCGCCGCTTCGCCAAAATGAC
CAAACGGCGGATTGCCGATATCGTGCATCAGGCATGACATCTCAACAATGCTTTCAAAAG
GTCCGGTCAGTTCATCCAGGCCGTATGCTTCCAGCAATTTAAGCTCTTTCAGACGGCTTA
AAATTTCTTTGGCGATGTAGCGCCCCACCTGCTGGACTTCCATCGAGTGGGTAAGACGCG
TGCGCACGGCGGCATTGCGCTCCAGTGGAAAAACCTGGGTCTTTTGTTGCAGACGACGAA
TTGCCGGAGAGTTGATGATACGCCCGCGATCGCTCTCGAAGATCCGCAGGATCTCATGTT
CGGTTTTAACGCCCTGCGGTGAACGGTAACGACGATGCCAGTTTATTTTTTTTCGGAAAT
CAATCTGTGCCATGTCCTCTCCCGCGTGAGAAATACGCTTCCCCGTAAGCGCATGGTAAA
CTATGCCTTCAAATCGGGCTTATCGCGAGTAAATCTATGAAAATCGGCATCATTGGTGCA
ATGGAAGAAGAAGTTACGCTACTGCGTGACAAAATCGAAAACCGTCAAACTATCAGTCTC
GGCGGTTGCGAAATCTATACCGGCCAACTGAATGGAACCGAGGTTGCGCTTCTGAAATCG
GGCATCGGTAAAGTCGCTGCGGCGCTGGGTGCCACTTTGCTGTTGGAACACTGCAAGCCA
GATGTGATTATTAACACCGGTTCTGCCGGTGGCCTGGCACCAACGTTGAAAGTGGGCGAT
ATCGTTGTCTCGGACGAAGCACGTTATCACGACGCGGATGTCACGGCATTTGGTTATGAA
TACGGTCAGTTACCAGGCTGTCCGGCAGGCTTTAAAGCTGACGATAAACTGATCGCTGCC
GCTGAGGCCTGCATTGCCGAACTGAATCTTAACGCTGTACGTGGCCTGATTGTTAGCGGC
GACGCTTTCATCAACGGTTCTGTTGGTCTGGCGAAAATCCGCCACAACTTCCCACAGGCC
ATTGCTGTAGAGATGGAAGCGACGGCAATCGCCCATGTCTGCCACAATTTCAACGTCCCG
TTTGTTGTCGTACGCGCCATCTCCGACGTGGCCGATCAACAGTCTCATCTTAGCTTCGAT
GAGTTCCTGGCTGTTGCCGCTAAACAGTCCAGCCTGATGGTTGAGTCACTGGTGCAGAAA
CTGGCACATGGCTAAGTCACTGTTCAGGGCGCTGGTCGCCCTGTCTTTTCTCGCGCCACT
GTGGCTCAACGCGGCACCGCGCGTCATCACGCTTTCTCCCGCCAACACTGAACTTGCCTT
TGCCGCCGGGATCACGCCGGTTGGGGTCAGCAGCTATTCCGACTATCCTCCACAAGCGCA
AAAGATTGAGCAGGTTTCCACCTGGCAGGGGATGAATCTGGAACGCATTGTCGCGCTGAA
ACCCGATCTGGTGATTGCCTGGCGTGGAGGTAATGCCGAGCGGCAGGTTGACCAGCTGGC
TTCGCTGGGAATAAAAGTGATGTGGGTCGATGCGACAAGCATTGAACAAATTGCCAATGC
GTTACGTCAACTGGCCCCCTGGAGTCCGCAACCGGATAAGGCCGAACAAGCCGCGCAATC
CCTGCTGGATCAGTACGCGCAATTGAAAGCGCAATATGCTGATAAACCTAAAAAACGTGT
TTTTCTGCAATTCGGCATTAATCCGCCATTTACCAGTGGAAAAGAGTCGATTCAGAACCA
GGTACTCGAAGTTTGTGGCGGAGAAAACATCTTTAAAGACAGCCGGGTTCCCTGGCCGCA
AGTTAGCCGCGAACAGGTGTTAGCACGCTCGCCACAGGCGATTGTCATTACAGGCGGACC
GGACCAAATTCCTAAAATCAAACAATACTGGGGTGAACAGCTCAAAATTCCCGTTATTCC
TCTCACGAGTGACTGGTTTGAACGTGCAAGCCCACGTATTATCCTCGCTGCACAACAGCT
CTGTAATGCGCTTTCACAGGTAGATTAGTGCCTGACCTTTTCAGGTGCTCAGTGGGGATT
GAACAATGCTCGTCTATTGGCTGGATATAGTCGGCACAGCGGTATTTGCCATCTCCGGCG
TTTTGTTAGCCGGAAAATTGCGTATGGACCCTTTTGGTGTTCTGGTATTGGGCGTGGTTA
CCGCAGTAGGCGGCGGGACAATTCGCGACATGGCGCTGGATCACGGCCCGGTATTTTGGG
TGAAAGATCCCACCGATCTGGTCGTTGCAATGGTCACCAGCATGCTGACCATCGTGCTGG
TGCGCCAGCCAAGACGCTTACCAAAATGGATGTTGCCGGTGCTGGACGCCGTTGGTCTGG
CGGTGTTTGTCGGCATTGGCGTGAATAAAGCCTTTAATGCGGAAGCCGGTCCGTTAATCG
CGGTTTGCATGGGCGTCATTACTGGCGTTGGCGGCGGGATTATTCGTGATGTACTGGCCC
GCGAGATCCCCATGATTTTACGTACAGAAATCTACGCAACAGCCTGTATTATCGGCGGTA
TTGTCCACGCTACGGCTTATTACACATTTTCCGTACCACTGGAAACAGCCAGTATGATGG
GCATGGTCGTGACGCTATTGATTCGGCTGGCGGCTATTCGTTGGCATCTTAAGCTACCGA
CGTTTGCGCTGGATGAGAATGGGCGTTGAAGAGAGAAGATGTGCCGGATAGTTTATCCGG
CACATGAACAACAGATTAGATGCTAAAGGAAGAACCGCAACCGCAGGTGCTTTTCGCGTT
CGGGTTGGTCACGATGAAACGAGAACCTTCCAGTCCTTCGGTGTAGTCAACGGAACCGCC
GACCAGATATTGCAGGCTCATCGGATCAACCACCAGGCCAACGCCCTGTTTTTCGATGGT
CATATCGCCTTCGTTCACCTGATCATCAAAGGTGAAACCATACTGGAAGCCGCTGCAACC
GCCACCGGTGATATACACGCGTAATTTCAGATTCGGGTTATCTTCGTCAGCGATCAGGCT
TTTAACTTTGTTGGCTGCTGCGTCGGTAAACTCCAGCGGCAGTGCTACGTCATCACTCAT
ATTTTGCTCCAAACGACATCGGCAATTGGGCAAATTCTAACCCAATAATAATCGCCATTA
TCTAATACCCTGGTATTTCGTTCAAGTATTCTCGCTGGCTGATGCGGCCTTGCTTCGCGC
CAGTTGCTCAGCTTCCTGTTTTGCCAGCGTGCGCGCAAGAATCGCCGAGTATAGCGGTTT
CCCACCGGTAAATTGCGCTAATAGTGTTGCGCCAAGACCGGTAATAATCATTGGCAAAAT
GAGCTGGTAGTTATCGGTCATCTCCAGAACCAGAATGATCCCCGTTAACGGCGCGCGAAT
AGATGCCGCCAGTAACGCCCCCATTCCGGCAATAGCAAATGTCCCCGCCTCAAGGTGATA
TTGCGGAAACAGCTCAACGGCAACCATTCCGAAAGCGGTTCCCAGCACAGTACCCAGCGC
CAGCATCGGGGCAAAAATACCGCCCGGCGCGCCGGAAGAGAAGCACAGTAAAGTGGTAAT
GACCCGCGCGACGAAGATAAACACCAGCATTCCCATGCTGAAATTCCCCGCGGTAGCGAT
AGGAATCAGGTTAAAACCGCCGCCCGACGTTGCTGGTGCCACAAACCCCAGCAATCCACA
CAGACCGCCAATCGCACCACCCATCAGTACCCATTTGGTAATATTGCCGCCGTGCACACG
GTGCAGCAAATCCTGCATTCCCAGCACCCATTTATTAAAAATAGGGCCGAAAATGCCAAA
AATAATACCGAGGATCAGATAAAGCCACAGCGTATTAAGCGGCGCATCAGAAAGTTTACC
GACGTCAATCAACGCAACTTCATGATTAAAAATCCGGTACATAATGGTCGACATAATGAC
ACCAATAAATACCGCTTTAATCGAAATTAACGTATAGCGAAACTGCGGACGCATCTCTTC
GATAATAAACAAAATACCCGCCAGCGGCGCGTTAAAGGCCGCCGCCAGCCCCGCAGCAGC
ACCGGTTGCCAGCAGCGTATGGCGAGCTTCATCACCTTTCAGGCGGAAAACATCGAGTAC
CATCCGCCCGATATTGCCGCCGATCTGCACGGTTGGCCCTTCGCGCCCCAACACCATGCC
TCCGCCGAGCGTCCCCAGCCCGCCAAAGAATTTCACCGGCAATACACGCCACCAGCGAAC
GGGACGTTGATCTTCCAGCGCCCCTTCAATTTCCGGGATCCCCGACCCCCCTGCTTCCGG
CGCGTATTTGCGCACCAAAAAGTAGCCGAACATCGCCAGCAGCGCCGAACAGAGAAAAGC
GACGGTTAACAGAAGCGGATAATTATCAGCAGTATGTACCAGCGCCCCCATACGTTGGTT
CTGCAACCAGGCGACACCTTTGTCAAAAGCAACCGCTGCCAGCCCGACAAGCGTGCCGAC
GACTGCCGCCATAAACAAAATGGCTAACGGGGTTTTATCGCGCTCAAGAAGTTGGCGAAT
CAGTTGTCTGCGTCGCAGGCGCGCGGCCTGCGGTGTTTCTAAAGAGGGAGTATCAGTTTT
CATCCAATGATCACTTATTGGTCATACAAATAAGATGACGGCATTTTACTCGCACGTTCC
ATGAAAATCCTTTGCAAAGCGTAATGTTTCAAATGCACAAAACTTTTATACTCTAAGAAA
TCAGGATTGCACCAGTACAAGCAGCCTGATGTTTGACGAGTATTTAACTTGTTATGAATA
ACATAGAATAGCAGCCATTCACTTTTTCTACGAATCAGGAACCCTCCATGAGTAAGTCTG
AAAATCTTTACAGCGCAGCGCGCGAGCTGATCCCTGGCGGTGTGAACTCCCCTGTTCGCG
CCTTTACTGGCGTGGGCGGCACTCCACTGTTTATCGAAAAAGCGGACGGCGCTTATCTGT
ACGATGTTGATGGCAAAGCCTATATCGATTATGTCGGTTCCTGGGGGCCGATGGTGCTGG
GCCATAACCATCCGGCGATCCGCAATGCCGTGATTGAAGCCGCCGAGCGTGGTTTAAGCT
TTGGTGCACCGACCGAAATGGAAGTGAGAATGGCGCAACTGGTGACCGAACTGGTCCCGA
CCATGGATATGGTGCGCATGGTGAACTCCGGCACCGAGGCGACCATGAGCGCCATCCGCC
TGGCCCGTGGTTTTACCGGTCGCGACAAAATTATTAAATTTGAAGGTTGTTACCACGGTC
ACGCTGACTGCCTGCTGGTAAAAGCCGGTTCTGGCGCACTCACGTTAGGCCAGCCAAACT
CGCCGGGCGTTCCGGCAGATTTCGCCAAACATACCTTAACCTGTACTTATAACGATCTGG
CTTCTGTACGCGCCGCGTTTGAGCAATACCCGCAAGAGATTGCCTGTATTATCGTCGAGC
CGGTGGCAGGCAATATGAACTGTGTTCCGCCGCTGCCAGAGTTCCTGCCAGGTCTGCGTG
CGCTGTGTGACGAATTTGGCGCGTTGCTGATCATCGATGAAGTGATGACCGGTTTCCGCG
TAGCGCTAGCTGGCGCACAGGATTATTACGGCGTAGTGCCAGATTTAACCTGCCTCGGAA
AAATCATCGGCGGTGGAATGCCGGTAGGCGCATTCGGTGGTCGTCGTGATGTAATGGATG
CGCTGGCCCCGACGGGTCCGGTCTATCAGGCGGGTACGCTTTCCGGTAACCCAATTGCGA
TGGCAGCCGGTTTCGCCTGTCTGAATGAAGTCGCGCAGCCGGGCGTTCACGAAACGCTGG
ATGAGCTGACAACACGTCTGGCAGAAGGTCTGCTGGAAGCGGCAGAAGAAGCCGGAATTC
CGCTGGTCGTTAACCACGTCGGTGGTATGTTCGGTATCTTCTTTACCGACGCCGGGTCCG
TGACGTGCTATCAGGATGTGATGGCCTGTGACGTCGAGCGCTTTAAGCGTTTCTTCCATA
TGATGCTGGATGAAGGTGTTTACCTGGCACCGTCAGCGTTTGAAGCGGGCTTTATGTCTG
TGGCGCACAGCATGGAAGATATCAATAACACCATCGATGCTGCACGTCGGGTGTTTGCGA
AGTTGTGATGATTTTGCCTCGCCCACCGGGCGAGGCATTCTATTAACGGCTCTGCTTTCT
CAACAAATAGATAAAATATGGCGCGCCGATAAAGGTCGACAGCAGCCCCGCCGGGATCTG
GAATGGAAACAGCACCATCCGCCCACACCAGTCAGCGAATACCAGCAGTAAACCACCCAC
CAGCGCCGAAATTACGATGTGTGGCATCGTCCGTCGAAAACCCATCATCCGCGCAATATG
CGGTGCCATTAAACCAACAAAACTCAACGGTCCAATAGTCATCGTCGCGGTCGCCGTCAG
GCAAGCCGCTAACAGCAGCAGCGCAATTCGCGTCGGCGTCAGCGCCATTCCTACGGCTCG
GGCGGTATCACCACCCAGCGGTAAAATGGTCAGCCAGCGGCGGCACAGCGGGGTAATCGC
CAGCAAAATCACCATCACAATTCCGGTGCGCCAGACCTGCGCATCGGTCGCGTTGTAGGT
CGAACCGGAAATCCAGGTCAGCACTTGCGCCATTCGCGGGTCACCGCTCGCCTGCAACAT
CATCAAAAGCATGGTGAATGCGGTACTTAACGCCATCCCCGCCAGTAACATACGGTGTGG
GGAAAATCCACCGCGTCCGGCGGCGATCATAATGATCAACAGCGTCACCGCCGCCCCGAG
ACTGCCTGCGGGTAACAGCCAGCCAAAGGCATTACCCGGTACCAGAAACAGCATTAACAC
CACGCCAAACGCCGCGCCGGAGCTAATCCCCAGCACTTCCGGGCTTGCCATCGGGTTTCC
GGTCAGCCGCTGAATAATACAGCCCGCCACCGCCAGCATGACGCCCGCAAACAGCGCCGC
CATAATTCGCGGCCAGCGCCAGGGCATTAAATCATCGAGCAACGCCCCGCTCGCCCACGT
CCAGCCGTGCGCATCACGACCAAACGACAGCGCCACCACCACAGCCATCAACAGCAGCAC
GCCGCCCGCGAGGGCAAACGCCAGCACATGTTGGCGTTCAGCCGCGACACGATCGTTGAC
CTTCATATCCGGCGCGCTAATGCTGCGTAAACGCGGCAACAGCCACAGTAGCAGCGGCGC
ACCGATCAACGCAGTGACCGAACCGGTGGACACTTCCATCCACACACGAGTCAGCCAGAG
GATGATTTGATCGGAAAGCCAGAGGATCAGCGCCCCAATCAGCGACGCCAGCATCAACCG
TGGCAGCAGACGCCGCGCCCCCAGCATTTTTGCCAGCAGCGGCGCGAACAACCCGATAAA
GCCGATAATCCCTACCGCATTCACCAGCAGCGCACTGATGACAATCGCCAGCGACAGCGC
CGCCAGACGCGCGAGCGACAAGGCCAGCCCGAGATTGCGCGCCACGCCATCATCAAGCCC
CATCAGGGTTAACGGGCGAAGTAGCAATAACGTCAGCATCACGCCGCCCAGCAGCTGCGG
CCATAAACGCTCAACGCCGCCCCAGTCGGTTTGCGTCAGCGTTCCAGTGCTCCACAGAAA
CATGCTTTGCAACTGGTCATGATGGAAGATAACCAGTAATTGATTGATTGCCCCACAATA
AAGGCTCACTACCAGCCCCGCGAGAATCAGCGTTACCGGCGACAGCCGTTTCCCCCACGC
GACGCCAAAGACAATTAAGCCAACAACACAAGCCCCTGCCAGCGCAGCAAACTGGCTCGC
CATCGCACCAGGGATCGCCCAGAGCGTCGTGACGGTAATCCCCAGTTGCGCGCCTGTAGC
AACGCCCAACGTCGTCGGTTCCGCCAGCGGGTTACGCAGCACTTGCTGAAACAGCACGCC
CACCAGCCCCAGGCCCGCGCCCACCAGCAGCGAAATCGCCAGACGCGGCAACAAGCTGTA
GTGAAAAATCATCTGCTCGATGACGTCAATATCCGGCGACCAGGCAGCCTGCGCCCACTG
GCTACGCGGCAGCGCCTGCGAGAAGTTCATCCAGGTGAGCGCCGTAGCGACAATCACTAA
CAGCGCCAGCAATAACGCCGGGAAAAGCGCAATTCGTTTACTCACGCTTTACCTCCGATG
GCGTTATCCAGAATACGCACAAAGTGCATTGCCGAGAGCGTCGCACCATAAAACCAGACT
GCAGGTACGCGCTGAAAGCGCCCTGTACGGACAAACGGCATGGCCTGCCACAGCGGGGTT
GCCATTAGCGCATCCATGTCTTTGCTGTTGTCGTGATCAAAACAGAGCACATCAACATCT
TTATACGCCGCCAGACGATCGATACTGACGGCGGTGCTGCCCCAGAAGTTGGTTTCCCCT
TGCCAGGCATTTGGGATGCCGTACTCATCGAGAATTTCCTGGAACAAGCTGTTTGGCCCG
AAGACCAACATATGGCGCGGATCGATAAGCGTCGTCAGCAATAACGGGCGTGCACCACGC
TTCACAAAGCGGGGTTTCATGCTGCGGATAAAGTCTTCGTATTGCGCTAAATGCGTTTCC
GCTGCGCTTTGCAGGTTAAGTAAATCTGCCATTTCCGTCAGTGATTTACGCGCCATCGCC
AGCGGCTGTTTGCCGTCGCTGAAGTTAAATCCGCGCCCCGGCGCAATACGAGCCAGCATT
TCTGGTGAAGGGCCATATCCTGCCGACCAGACCATAAACGACGGTTTCATTTCGGTCAGC
AGTTCAAGGTTAGGTTCTGTGCGCAAACCGACGTCAATCACCGATTCAGGTAACGGTGGT
TCGCTAACCCACAGGCGATAGTTGATGGTGTCCGCCACGCCATAAGGCACGATGCCGAGC
GCCAGCAGTAATTCCACCGGCAACCACTCCAGCGCCACAATACGATTGGGATCAATAGCC
GCCGCGTGGGCGGCATTCATCTGCCATAACAACGGAGAAAGCGCCATCGCCGTTAACAGT
CGACGGCGCGAAATAAGAGGTAAGCCGCTCATCAATAAACAAAACTCACAGGTGCAGCAC
CCGCCGGATGCGGCAAAATACCCATCGGGATGCCATAAATCATTTCGAGGGTTTCGCCGC
GCATAATTTCCGCAGGCGTTCCCTGAGCAATCATTTCACCGCCGCGCAGGGCGACCAGAT
AATCACAGTAGCGTGCCGCCATATTGATATCGTGCAGCACGGCAATGACCGTCAGACCAC
GTTCCTGACTTAAACGGTGCACCAGCGCCAGCACATCAACCTGGTGGGCGATATCCAACG
CCGAGGTCGGTTCGTCGAGCAACAGACAACGGCTATCCTGCGCCACCAGCATGGCGATCC
ACGCCCGCTGACGCTCACCGCCAGAGAGACTATCGACCAGCCGATGCGCCAGCGGTTTTA
AGCCAACCAGCGAGATAGCTTCCTCAACTTTTTCGCGATCTGCCGCACCAAAGCGCCCCA
GCGCGCCATGCCACGGGTAACGACCAATCGCCACCAGTTCACGCACGGTCATCCCTTCTG
CCGGAGGAAGCTGCTGCGGCAAATAAGCCACTTTGCGGGCGAATGCTTTGCTACTCCAGC
TTTCCAGCGGCTGGGCATCAAGAAGAATTTCACCTTCTGACGGCGGCTGATGACGGCCCA
ACATTTTTAACAGCGTGGATTTACCAGAACCGTTGTGACCAATCAAACCAGTCACTTTTC
CGGCAGGAAAGGTTAACGACAGCGGATGCAAAAGCGTGCGCCCTGGCACACGAAAGGAGA
TATTACGCAGTGCAAAAGTGGTATCGGAATGATTCGTGTATTCCTGCATAACAGCCAACT
TGTGAAACGGGCACGGAAATCCGTGCCCCAAAAGAGAAATTAGAAACGGAAGGTTGCGGT
TGCAACGACCTGACGTTCTGCGCCCCAGAAGCAGCCATAAGTGTTAAAGCAGCTGGCGAC
GTATTCACGATCGAACAGGTTGTTAACATGCAGCGCCACGTTGGAGCCAGCCATGCCGAC
TCGCGCCAGATCATAACGCACTAACGCATCCACGACCGTATAACTTCCCACTTTAAAGGA
GTTAGCCGGATCACCATAGCTGGAGCCAGTATAACGACCACCGGTGCCCAGCGTCAGACC
TGAAAGCGGACCGTCAAAGAAGGTATAGTCAGCCCACAGCGAAGCCATGTGTTTTGGCAC
CTGTGCCGGCGTATTGCCTTTGTAGTTGGTGTCAGTGGTGTATTCCGCGTCGGTGTAGGT
GTAAGAACCAACTAAGTTAACACTCGCCGATAGTGCCGCTTTCGCTTCCAGCTCTACGCC
ACGCGCACGAATCTCACCGCCTTCAACCGAGAACAGTGAACCGTTCGGATCCGCCATCAG
GTTATTAGTTTTGGTAAGCTGATACAGTGCGCCAGTCACCACAATTGGGCGATCTTCTGG
CACATATTTCACGCCGACTTCATACTGTTTGCCTTTCGAAGGTGCAAACAGATCGCCGTT
TGCATCGGTCTGCGAAGCGGGTTCAAACGATTCACTGTAGCTGAAATAAGGCGTTACGCC
GTTGTCGAACAGATAGTTAACACCGCCACGCCAGGTGAACTGTTTATCATCGCGATCGGA
TTTATTACCGTAATCACGGTTGAAAGATGACTGATCGGCCCAGTCATAGCGACCGCCAAG
CGTAACCAGCACTTTATCCCACTGCGCCTGATCCTGAACATACAGACCGGTTTGTTTCTG
TTTCAGCAGAACGCGGTATGGACCAGACGGATTTGGGTGAGCGCCAAAATCAAAGTCACT
ACGGTCTAAATTATAGATATCAGATGGTGCAACTGAACCGGCATATCCGAACCAGGAGTC
GATGTCATTACGCATACGCATAAAGTCAACGCCAGTCAGCAGAGTGTGATCCACTGAACC
GGTTGCGAATTTGCTTTGCAACTGAGTATCAACAGAGAAGTTTTCTAACTTCTCATTATC
GATAACGTACTGACGAGTCAGTGTATGGCCCCATTGAGACTGCGGCACGTTGGCACATGG
ACTCGAAGAGGGGTTTGAGGAATAGAGAGGATCTGAACACATGCCGTAGCCATATACGCT
CTTTTGCGAAACTTTATTTTGCGCAAAGCGAAGGTTCTGACGTACGGTAAAGGTGTCGTT
AAATTCGTGGTCGAAGCTATAGCCAATCATCTTCTCATTACGAGAATAGGTGTTGTTCTT
CGCCCCTTCGTTAAAGTCTGTCGGCAGACGCTTACCGTTCGGCAGCGGCTCAACGGTTCC
CTCTTTCGGCAACCAGCCGTAATAACCGGTTTCCGGCTCGTTCTGGAAGTAAGAGAGGAA
GGTGAAATTGGTTTTATCGTCCGGACGCCAGGTGAACGCTGGCGCAATGGCATAACGCTG
CTCTTCCGCGCCCTTTTGCTGGGCATTGGCAGAGCGCGCAAGACCGGTCAGACGATAAGA
GTAAACGCCGTCATCATCCAGCGCATCGCTGAAGTCAAAACCGGTCTGGAACAGGCTGTC
AGTACCGGCCTTAAACTGAACTTCTTTCAACGGTTCAGTGGTCGGGCGCTTGCTGACCAT
GTTCAACAGGCCACCTGGGCTGCTTTTCCCATACAGCACGGAAACCGGGCCACGCATGAT
TTCAGCGCGCTCCAGCATATATGGGTCAATAACCGCATCGTTATAGAAGTTGCCCTGCAT
CTTCAGGCCATTCAGATAGTTGTTCTGGCTTTGGCCGTCAGCGGCGAATCCGCGGATGAT
CAGGTAATCGTAAGTGTTGGATGCGCCACGAGTTCCCACGGCAACGCCAGGAGTGTAGCT
AAGCGCTTCTTTTACCGACTTCGGCTGATGCAGCGCCATCTCTTCGGCGGTCACAACAGA
AATAGACTGTGGCACTTTTTGAATCGGCGTATCGGTTTTAGTGCCGGTAGCTGACTGTCG
CGCCGCAATAGTTGCAGCAGGCCCCCATGCGCTTTCTTGCGGCGCAGGTGCAGCGGTAAC
GGTGATAGTGTCTTCTTTCGGTTCAACCGCTGCCTGTGCATAAACAGACATGCCGCTAAC
CGCTGTGGCTACTACAACTGCGATTTTACGCAGTGAGTGTTTTGGCTGAGCAGTTTTGGA
ACGCGCCATTGGTATATCTCTGATGTAAAGTGAATGATAACGTAAACGAGAATGATTATT
ATAAAGATAAGATAATATTCGAAACGCTGGCGGGTTCGCAAGCGGTACGCAATCTGAGCG
TTCCTGAAGGGTTAATAAACAACCAGATGAAAAGAAAGGGTTAATACTTTAGGTGGGATG
TTATTTTACCGGATGGCAACTCGCCATCCGGTATGTCACGTTTAGACGTTAATTACTACC
AAACATATCCTTGATCCAACCGGCTACACCGTCGCTGTCTTTCTGCTCTTGCTGAGCAGG
TTGCTGTTGCGGCTGTTGCTGCGGCTGAGAAGACTGATCAAACGGATTGCCTGACGGCTG
CTGCTGCATCTCACTCTGCTGGCACAGCGATTGCGGATCGCTGGTCCAGACCGGCAAGAC
ACGCATGCCACCGCTGCAAACAAAGTTGCCGTCGTAGTCCACGCCCATATCTGCAATATC
TTCTGGCGGAACAAGATTCAGCGGCGTTGGCGTCTGGTTTGCCAGATAACGCTGATAAAT
CGACATTGCCCCGCTGGCACCATACAGTTTGGTCGGCTGGTTGTTATCACGGCCGACCCA
GGTGATGGTCACCGTGCTGCCGTCAATGCCCGCAAACCAGGTATCTACGTTATTGTTGGT
AGTCCCTGTTTTCCCTGCCAGATGCAGGTTCGGGTATTTCGCCCCAAGCTGACGACCCGT
ACCGCGTTGTACAACCTGCTGCATGGTCCATAGTGTCAGATACGCCGCCTGCGCCGGAAC
AGCGCGTTCCGCCTGCGGGAAGCTCTGATACAGCACTTTGCCATCTTCCGCGATTACCGA
ACGCAGCGCAGAAAGCGGTGCACGGTTACCACCGCTGGCGATGGTCTGGAATGCCTGCGC
CACTTCGATTGGCGTTAAGTTCAACGCCCCCAGCAGCATTGCCGGAACCGGATGCAACTG
ATCTTTCGGTACGCCCAGTTTAATCCAGGTATCCGTAACCGCAGGCAGCCCCAGCGCCAT
CCCCAGATTTACCGTCGGCACGTTCATCGAACGGGTCAACGCATCCACCAGCATCACTCT
GCCGCTTTCGCTATAACGACGGTCATCATTCTGCGGTGACCAGACCTGGCCATTCGGCTG
ACGCAGCGCAATTGGCGCATCCGCAATCCACGTATTCAGACGATAGATTTTCGGCTGGCT
TAAGGCCGTCAGATAAGTCGCTGGTTTTGCAAGGGAACCAATCGAACGACGCGCCTGCAT
CGCACGGTTGTAGCCCGCAAACTGCGGCTCAGAACCTCCGACCATCGCACGAACTTCACC
ACTAAAGCGGTCGACGACCACAATCGCGGTTTCCAGATCGCTCAGCTTACGCTGTTTCTT
CAGTGCCGGAATGCCTTCCACGGCGGCTTTTTCTGCCGCGTCCTGGGCCACCGAGTCAAA
GGTAGTGAAGATCTTCACGCCGGAGAGATCTTTTACCTTATCGCCTAATTTAGCCTGAAG
CTCCTGACGCACCAGTTGCATAAAGGCTGGCTGAGGAGAGATCACCCCACCGCGCGGCTG
AACACCCAGCGGACGCGCACTCAACATGTCATAGAGTTCTTGATCAATAATCTGTTGCTG
TTGCAGCAGACGCAGTACCAGATTACGTCGCTCCAGCGCCAGTTTCGGGTTACGCCACGG
GTTGTAGATGGACGCTCCTTTCACCATACCGACTAACAGCGCCTGCTGATCGAGGCTCAA
TTCTTCTACCGGGCGACCAAAGTAATACAAGCTCGCCAGCGGGAAGCCACGGATTTCGTT
GTCGCCACTCTGACCGAGATACACCTCGTTCATATACAGCTCAAGAATACGGTCTTTGCT
GTAACGCGCGTCCATGATCAGCGCCATGTAGGCTTCATTCGCTTTACGCCAGTAAGAGCG
CTCGCTGGAGAGGAACAGGTTTTTCACCAGCTGTTGCGTCAGCGTACTCGCTCCCTGCAC
CGTGCGTCCGGCGGTCAGGTTTGCCAGCACCGCACGTCCGATTGAGTAGAGACTGATCCC
ATCATGCTCGTAGAAATGACGGTCTTCTGTCGCCAGCAAAGTATCCACCAGCAAATCCGG
GAAACCACTGCGCGGCACAAACAAACGCTGCTCACCGTTTGGTGAGGAGATCATGGTGAT
CAGACGCGGATCAAGACGGAAGAAACCGAACTGACGGTTGTTCTCCATATTGACGATCGT
CGCCAGATGATCGCCATCAAAGGTCAGACGCGCACGCACCTGCCCTTCTTTGCTGTCCGG
AAAATCAAACGGACGGCGGATCATCTCAATGCTGTTAGCCTGCACAGTAAATTCGCCAGG
ACGGGTCATTTTCGACACCTGACGATACTGTGTTGCCTCCAGCAGCTTCACCATCTCGTT
CTTGCTGATGGTCATGTCTGGCTCAAGGTTGACCATTCGACCATAAACTGCCGCAGGCAG
TTGCCAGACCTTGCCATCAATACGGCTACGAATTTTTTGATCGAGATAAACGCCGTAAAT
GGCGATCAGCACGGCAAAAACGATAGCCAGTTTTAACAGCAGCCATAGCCAGCCGCGTTT
GCCACGAGGCTTACGCCCTTTGCCTTTGCCCTTACCTTTGCGCGGCATCGGTTCTTCATC
CTCATAGTCATCATAATCGTCGTAATCATCGTCATCTTCGTAACGACGACGGCTTACCTT
TTGTTTGACCGGACGCGTCGGTTTCCCTTTGCGTCCAATTGGCTCGCGGTCATTCCCGGC
CATGCTTTTTCTCCGCAATATTCAGGCGCAAAAGCCCGATTTTCTGTTCTTCTGTTACAA
GACAGAAGAAGATATCTCTCAAAATTTGTGCTCGATCGGTCCCCTCTCCCTTGAGGGTGA
GGGTGAACGTACGCGCTGATGCCCTCACCCCGGCCCTCTCCCACAGGGAGAGGGAGAAAA
CCAACCTTACGAATACTTTTTCGTCCGTCGCGTCGGTGCCGTGTTTGCCGGGTCGTCCGG
CCAGACGTGTTTGGGATAACGCCCTTTCATCTCTTTTTGCACCTCACGATACGCCCCTTT
CCAGAAGGCCCCCAAATCACGCGTGATTTGCAGCGGCCTTTGGGCAGGGGAAAGCAACTC
CAGCACCAGCGGCACGCGCCCCTGAGCGATCGTCGGATTGGTGGCCTCACCAAACATCTC
CTGCATTCTCACCGCCAGCGCGGGCGGGTTATCTTCATGATAACGAATGGCGATCCGGCT
TCCCGTCGGCACAGTGTAATGCGCAGGCAATTCACTATCCAGACGTTGCTGCATTCCCCA
ATCAAGTAATCCGCGTAGTGCCTGATAAATGTCGAGTGATTTCAGGCCGCGTAGTGAATG
TACACCGGCCATATGTGGCAGCAGCCACGTTTCCAGCGTCGCCAACAAACTTTCATCATC
AACCGCTGGCCAGTCATATTCTGGCAACCACTTTCCGGCGCATAACAAACGCAAGCGTAG
CTGTTCCGCTTCCGCCGTCCAGTTGAGCACGCTTAAACCTTTATCACGGATGCCGTTAAG
CATCGCCTGATGCAACTCGTCTTCTGACGGTTTCGCCAACGGCTGCACTTTCACCGTCAA
CTGACCGATTTGCAGCCGACGCCAGGCTTTCAGCGTACCTTGCGCGTCATCCCATTCCAC
GGTGTCAGATTGCTGCACCAGCTGCGGACAGCGTCGCACTAATTCATCAATATCGACCGG
TAGCGCCAGTAAAATCCGCGCATCCGGCGAGGCGCTGCCCTGCAATAATAACGGTGCGAT
CAACCATTCGTGGCGGCTTAGCGCGTCGTCGGCATCGAGCATCGCTCCCATGCCGTTTGC
CAGTTGATAGCGTCCATCTTGCCCACGGCGGCGAGCAATGCGATCGGCAAACGCCCCGGC
AAGTAGCAGCGCGATAAGCGAACTGTCTGCCTCACCGCCGTATACGTTTAAGCGTTTTAA
CAGTTGCTGACTACGTTGCTGCCAGGCTGGCTGATTGCGCGAAAACACCACGCCCAGGTC
ACTATTGCCCATCCGTGGCGGCTCTTCGAGAATGGCGGCAATTTTTGCCGCGGTAGCAGC
TTCGTCGTCGCTCTTTGCGCTAACCAGCATTGCCGCTAAACGCGGATCGTTACCCAGCGC
TGCCATTTTTTGCCCCTGCGCACTAAGCCGTTCACCGTCCAGCGCCCCCAGCATCCGTAA
CAGGCGTTTCGCGGCCAGTAGATTCACCGTTGGCGGTTGATCCAGCCAGCTCATCTGCGC
CGGATCGCTGCATCCCCATTGCAGTAATTCCATCAGCAAACCGGAAAGATCGCTTTGTAA
TATTTCCGGTTCACTTTGCGCCGCGGCGCGTTCTGCTTGTTCCTTGGCGATTAAATGCAG
GCAGATACCCGGCTCCAGACGCCCGGCGCGCCCGGCACGCTGCGTCATCGACGCCTGACT
GATTCGCTGAGTAATTAGTCGCGTAAGCCCTGTTCGCGGATCAAAACGCGCCACCCTTTC
CTGGGCGCAATCCACCACCAGACGAATACCTTCGATAGTTAAACTGGTTTCAGCAATATT
GGTCGCCAGCACGACTTTGCGCATCCCTTGCGGTGCCGGGAGGATCGCTTTTCGCTGATC
GTTCAGCGACAACGCGCCATACAGCGGGCAGAGCAACACATCACTGCCGATACGCGAAGC
CAGTTGTTCCTGCACACGCTGAATTTCTCCGACGCCCGGTAAAAATAACAGTAATGATCC
ACTTTCCTGACGCAGCATTTCGGCGGTCGCAACCGCGACGGCTTCGTCAAAACGCTGATG
GGCGGGCAGCGGTAAATAACGGCGTTCAACCGGAAACGAGCGCCCTTCTGAGATGACGAC
GGGCGCTTCTGGTAGCATTTGTTGCAAGCGGTCGTTGTCCAGCGTAGCCGACATAATCAG
CAGTTTAAGGTCATCACGCAGACCTTGTTGCACATCGAGTAACAGCGCCAACGCCAAATC
CGCCTGCAAGCTACGCTCATGAAATTCATCAAGGATCACCAATCCAACACCGCTCAACTC
CGGGTCACGCTGGATCATCCGCGTCAGCACGCCTTCGGTAACCACTTCCAGGCGGGTATT
CGGCCCGACGCAGTTTTGCGCACGCATCCGGTAGCCAACGGTATCGCCTGGCTTTTCGTT
AAGCAGCTCCGCCAGCCGTTGCGCGACGTTACGCGCCGCCAGACGCCGTGGCTCCAACAG
GATAATTTTCCCGTTAATGCCGGGATGCGCCAGCAGTTGCAGCGGCAGCCAGGTTGATTT
CCCGGCCCCGGTCGGCGCACTTAATAATACCTGCGGCGCACAATCGAGAGCGGTAAGTAA
TTCAGGTAAGACGGCAGCAACGGGCAACGACGACACAAAACGCTCCAGAGGGTTAACATT
CTTCGCGCCACATTGTAGCATCGCGGTAATTCATAACCGAGTGCCTCACATGTCTGAACC
GCAACGTCTGTTCTTTGCTATCGACTTACCTGCAGAAATCCGCGAACAGATTATCCACTG
GCGCGCCACACACTTCCCACTTGAGGCGGGACGTCCGGTCGCCGCCGATAATTTGCATCT
GACTCTGGCATTTTTAGGCGAAGTGAGCGCCGAGAAAGAGAAGGCGCTTTCTCTTTTAGC
CGGACGGATTCGTCAACCTGGTTTCACACTCACGCTTGATGACGCCGGACAATGGCTGCG
TTCGCGTGTGGTGTGGTTAGGGATGCGTCAGCCTCCACGCGGCTTAATCCAGCTGGCGAA
TATGCTCCGTTCACAGGCTGCCCGCAGCGGTTGTTTTCAAAGCAATCGTCCGTTTCATCC
ACATATTACCTTATTGCGCGACGCCAGCGAGGCGGTGACAATCCCGCCGCCAGGTTTTAA
CTGGTCGTATGCGGTGACGGAGTTCACCCTTTACGCCTCCTCGTTTGCCCGTGGACGCAC
ACGCTACACGCCGCTAAAACGCTGGGCGCTAACGCAATAACAAGGATTGTCGCAATGGAA
TTTTCTCCCCCTCTACAGCGCGCGACGCTAATTCAGCGTTACAAACGTTTTTTAGCCGAT
GTGATCACACCCGATGGTCGCGAATTAACGCTACACTGCCCGAATACGGGTGCGATGACC
GGTTGTGCAACGCCTGGCGATACCGTCTGGTATTCGACTTCAGACAACACCAAACGGAAA
TACCCACACACCTGGGAATTAACTCAAAGCCAGAGTGGCGCATTTATTTGCGTCAACACG
CTTTGGGCTAACAGGTTGACGAAAGAGGCTATCCTTAATGAATCAATTTCAGAACTGTCA
GGCTATAGCTCGCTGAAAAGCGAAGTAAAATACGGCGCAGAACGCAGCCGTATTGACTTT
ATGTTGCAGGCGGATTCGCGTCCAGACTGCTATATTGAAGTGAAATCGGTTACGTTAGCG
GAGAACGAACAGGGATATTTTCCCGATGCGGTCACTGAACGAGGTCAGAAACACCTTCGG
GAGTTGATGAGCGTAGCGGCTGAAGGCCAGCGTGCGGTTATCTTTTTCGCCGTGCTGCAT
TCAGCCATTACACGGTTTTCACCCGCGCGCCACATCGATGAGAAATACGCGCAACTATTG
TCAGAAGCTCAACAGAGGGGGGTAGAAATTCTGGCTTACAAAGCGGAAATTTCTGCTGAA
GGCATGGCTCTTAAAAAATCACTGCCGGTTACATTGTAGTAAAGTAAGTAACTGGTTAAT
TTACATTCTGGTCGCGTGCGCAAATACGCTTTTCCTCACACAGTTGTCAAGTGTTACGTT
TAGATAATTGCTATCCGGAAAAGCATCTGCTATTTATAGCGGCCTCATTTTTCCCCCGAA
CATGGGGATCGATAGTGCGTGTTAAGGAGAAGCAACATGCAAGAAGGGCAAAACCGTAAA
ACATCGTCCCTGAGTATTCTCGCCATCGCTGGGGTGGAACCATATCAGGAGAAGCCGGGC
GAAGAGTATATGAATGAAGCCCAGCTGGCGCACTTCCGTCGTATTCTGGAAGCATGGCGT
AATCAACTCAGGGATGAAGTCGATCGCACCGTTACACATATGCAGGATGAAGCAGCCAAC
TTCCCGGACCCGGTAGACCGTGCAGCCCAGGAAGAAGAGTTCAGCCTCGAACTGCGTAAC
CGCGATCGCGAGCGTAAGCTGATCAAAAAGATCGAGAAGACGCTGAAAAAAGTGGAAGAC
GAAGATTTCGGCTACTGCGAATCCTGCGGTGTTGAAATTGGTATTCGCCGTCTGGAAGCG
CGCCCGACAGCCGATCTGTGCATCGACTGCAAAACGCTGGCTGAAATTCGCGAAAAACAG
ATGGCTGGCTAATTACAGCCGTTCCATCACGTTTACCACAGGCGGGAAATGCTCCCGCCT
TATTTTTTGTTCAAAGAGATGACAGACACACACTATATTGGCCGCTTCGCCCCCTCTCCT
TCCGGCGAGCTTCATTTTGGTTCTCTGATTGCTGCGCTTGGCAGCTATTTGCAGGCTCAC
GCCCGGCAAGGTCGCTGGCTGGTACGTATAGAAGATATCGACCCGCCTCGTGAAGTTCCC
GGTGCCGCAGAAACTATCCTGCGCCAGCTGGAACATTACGGCCTGCACTGGGACGGCGAT
GTTCTCTGGCAATCGCAACGTCACCACGCCTATCGCGAAGCACTCGCCTGGTTACATGAG
CAAGGACTAAGTTATTACTGCACCTGCACGCGTGCACGTATTCAAAGCATTGGCGGTATT
TACGACGGTCATTGCCGGGAATTGCATCATGGACCAGACAACGCCGCAGTGCGTATCCGC
CAGCAGCATCCGGTCACCCAGTTTACTGACCTGCTGCGAGGCATTATTCACGCCGACGAA
AAACTGGCACGGGAAGATTTTATTATTCATCGCCGTGATGGTTTGTTTGCCTATAACCTG
GCGGTGGTGGTGGATGATCACTTCCAGGGTGTGAGCGAAATTGTCCGCGGGGCAGATTTG
ATCGAACCGACAGTGCGGCAAATCTCGCTGTACCAGATTTTTGGCTGGAAAGTGCCAGAT
TACATTCATCTGCCGCTGGCGCTTAATCCACAAGGCGCTAAACTTTCCAAGCAGAATCAT
GCGCCTGCGTTGCCGAAAGGCGATCCACGCCCGGTACTAATCGCGGCACTTCAATTTCTG
GGGCAGCAGGCAGAAGCACACTGGCAGGATTTCAGCGTCGAGCAAATCCTTCAGTCAGCC
GTCAAAAACTGGACGCTGACCGCCGTGCCTGAGTCGGCAATTGTAAATTCAACATTCTCA
AATGCGTCATGCTGAGCTATGATTAGCCGCTATTTTTTTGTCCTGAATGATGTTTGACAC
TACCGAGGTGTACTATTTTTACCCGAGTCGCTAATTTTTGCCGCAAGGTGCTAAGCCGCG
AGGAAAGCGAGGCTGAACAGGCAGTCGCCCGTCCACAGGTGACGGTGATCCCGCGTGAGC
AGCATGCTATTTCCCGCAAAGATATCAGTGAAAATGCCCTGAAGGTAATGTACAGGCTCA
ATAAAGCGGGATACGAAGCCTGGCTGGTTGGCGGCGGCGTGCGCGACCTGTTACTCGGCA
AAAAGCCGAAAGATTTTGACGTAACCACTAACGCCACGCCTGAGCAGGTGCGCAAACTGT
TCCGTAACTGCCGCCTGGTGGGTCGCCGTTTCCGTCTGGCTCATGTGATGTTTGGCCCGG
AGATTATCGAAGTTGCGACCTTCCGTGGACACCACGAAGGTAACGTCAGCGACCGCACGA
CTTCCCAACGCGGGCAAAACGGCATGTTGCTGCGCGACAACATTTTCGGCTCCATCGAAG
AAGACGCCCAGCGCCGCGATTTTACTATCAACAGCCTGTATTACAGCGTAGCGGATTTTA
CCGTCCGTGATTACGTTGGCGGTATGAAGGATCTGAAGGACGGTGTTATCCGTCTGATTG
GTAACCCGGAAACGCGCTACCGTGAAGATCCGGTACGTATGCTGCGCGCGGTACGTTTTG
CCGCCAAATTGGGTATGCGCATCAGCCCGGAAACCGCAGAACCGATCCCTCGCCTCGCTA
CCCTGCTGAACGATATCCCACCAGCACGCCTGTTTGAAGAATCGCTTAAACTGCTACAAG
CGGGCTACGGTTACGAAACCTATAAGCTGCTGTGTGAATATCATCTGTTCCAGCCGCTGT
TCCCGACCATTACCCGCTACTTCACGGAAAATGGCGACAGCCCGATGGAGCGGATCATTG
AACAGGTGCTGAAGAATACCGATACGCGTATCCATAACGATATGCGCGTGAACCCGGCGT
TCCTGTTTGCCGCCATGTTCTGGTACCCACTGCTGGAGACGGCACAGAAGATCGCCCAGG
AAAGCGGCCTGACCTATCACGACGCTTTCGCGCTGGCGATGAACGACGTGCTGGACGAAG
CCTGCCGTTCACTGGCAATCCCGAAACGCCTGACGACGTTAACCCGCGATATCTGGCAGT
TGCAATTGCGTATGTCCCGACGTCAGGGTAAACGCGCATGGAAACTGCTGGAGCATCCTA
AGTTCCGTGCGGCTTATGACCTGTTGGCCTTGCGAGCTGAAGTTGAACGTAACGCTGAAT
TGCAGCGTCTGGTGAAATGGTGGGGTGAGTTCCAGGTTTCCGCGCCACCAGACCAAAAAG
GGATGCTCAACGAGCTGGATGAAGAACCGTCACCGCGTCGTCGTACTCGTCGTCCACGCA
AACGCGCACCACGTCGTGAGGGTACCGCATGACAGTGGCGTATATTGCCATAGGCAGCAA
TCTGGCCTCTCCGCTGGAGCAGGTCAATGCTGCCTTGAAAGCATTAGGCGATATCCCTGA
AAGCCACATTCTTGCCGTTTCTTCGTTTTACCGCACCCCACCGCTGGGGCCGCAAGATCA
ACCCGATTACTTAAACGCAGCCGTGGCGCTGAAAACCTCTCTTGCACCTGAAGAGTTACT
CAATCACACTCAGCGTATTGAATTGCAGCAAGGTCGCGTCCGTAAAGCTGAACGCTGGGG
ACCGCGCACACTCGATCTTGATATCATGTTGTTTGGTAATGAAACCATTAATACCGAACG
ACTCACCGTTCCGCATTATGATATGAAGAATCGCGGCTTTATGCTGTGGCCGCTGTTTGA
GATTGCCCCGGAACTCGTGTTTCCTGATGGGGAGACATTACGTGAAATACTCACTTCGCT
AGCAGTACCACAACCTGCCATCTGGTAATAGCTGTATTATTTTATTTTCTTGACGAGAGG
AATACAAAATGATACGGCTATTTCATCCACCAAGAAAAAATTATTTTCTTATCTTACTCC
TCACTTCCCCCCTTACATATTAAATATACTTAATTTACATTTTAGTTTTTTTTAATTCAT
TCATGAAATAGCACTTCATGCAAATAAATTAGGCATTTTTTGTTTAAACAACCTAAAATA
ACAACAATTCAATACACCACATAAATATATTCACATCCGTGATAACTCACCCCTATTACA
TCCTCCAAAAACTTTGAGTAATATCCGCTCGCAATATTAATTTCATATAATTTTTGTAAG
GATGCATGTAATGAAAAAAGCACTTCTCGCAGCCGTTCTGGTTATGGCTTCTGGTTCCGC
CCTGGCTGTAGATGGTGGTCATATCGACTTTAACGGTATGGTACAGTCCGGTACCTGTAA
AGTGGGTGTGGTAGATACCGGTATGCACGGCATCAGCACTGATGGCGTGGTTACCCTGGA
TACTGCAAATGTTACTGATAACTTTGCTGAAGTAAGCGCTGCTGCTGTTGGTTTACTGCC
GAAAGAGTTCATGATTTCTGTGGATTGCGAACCGGGTAAAACAACTGCCCAGTTGACCAT
GGGTTCTGCAAGCTACGCGAACACCAGCGGCACCCTGAACAACAATACCAATATCACGAT
TAACGGTATTCAACCGGCTCAGAACGTGAACATTGCTGTTCATAACATGAAAAACAAAGC
TGGCGCTGCTGAAATTAAGCAGGTCCATATGAACAATTCTTCTGAAATCCAGGAATTGAC
ATTAGACGCACAAGGCAACGGTCAGTATGTGTTTAACGCATCTTACGTTAAAGCACCGAA
CAGCCAGGCTGTTACTGCTGGTCACGTTACCACTAACGCACTGTACACCATTACTTATCA
GTAATTGATGGCGAATTGAGTATAGGGTTTGTCATCAGGCAAACCTTATTTTCGCTAATT
TTATCTCAACACAGACAGCAAGGAGTGCTTATGTTTCCCTTGGTTAAAAAAACGGTTAGT
GCATTATTTGTGAGTACTCTGTTAGCCAGTACGCCAGCATTCGCTGACATTATTATTTCC
GGGACTCGTATCATTTATAACGCTGATAAAAAAGATGTTAACGTTCGTCTGGAAAATAAA
GGGAATCGCCCCTTACTGATTCAGAACTGGTTGGACACCGGCAATGACAATGTCGACCCC
AGCCAGATCAAAGTGCCCTTTACCTCTACGCCCCCCGTTTCACGCGTGGAGCCAAAACGC
GGGCAAACCGTAAAAGTAATGTATACCGGTGCAACAGCCCTACCTAAAGACCGGGAAAGT
GTCTACTGGTTTAACGTGCTGGAAGTGCCGCCAAAGCCGAAAGATGCCCAGGCTGACAAA
AACTTACTACAACTGGCTTTCCGCACGCGCATCAAACTTTTTTATCGCCCGAGCGGTTTG
CAGGGTGAACCTGCTGAAGCGCCAGCAAAAATCACCTGGAAGTTGAACAACACGCAATTG
CAGGCGAATAACCCAACGCCTTATTACGTGTCATTCAATGACGTCAAACTGGAAAGCGGC
GGCAAAAGCTACAAAGTCGATTCCAGCATGATCGCGCCGTTCAGTCAGGCAAGCTTTAGC
GTAACGGGTCTGTCAGGTGGCGTTTCATCGGGCAAAGTCGTGTTCCAGGCCATAAATGAC
TTTGGCGGCAATATCGATGGTTCAGCAACATTCTAAAAAATAAACGGATTCTTTTAACAT
CGCCAGGAATGCAACCTTGTACCAGTTTACTCATCACAAAAGTCGTACACCGAAAAAAAC
GCTACTTGCGGCCTGTTGCGCCCTCCTTTATAGCAGCAACGGTGCTGCAGCAGACACGGT
GTAATATGACAGTTCCTTCTTAATGGGAACTGGCTCATCAACCATTGATGTTAAACGCTA
TGCTCAAGGTAACCCGACACCGCCGGGTCTTTATAATGTCCGCGTGTTTGTAAACGGTCA
GGCCACCTCCAGTTTAGAAATTCCGTTTGTGGATATTGGTGAAAACAGCGCGGCGGCCTG
TATTACCCGCAAAAACCTGGCGCAATTACACATTAAACAATCCGAACAGCTTGTGACCCT
ACTCGCCAGAGAAGGTGAAGAAGAAGACTGTCTTGATCTGGCAAAGTCATACGATCAGGC
CGAAGTTCAATTTGATGGCAGTGACCAGTATCTCGATCTGACCATTCCTCAGGCCTATGT
CCTGAAGAGCTATGGCGGCTACGTTGATCCTTCCTTATGGGAGTCGGGAATTAACGCTGC
CACGCTGTCGTATTCCTTGAACGCGTATCACACAAGTTCAGAAGACAACAATAACGATAG
TGTCTATGGCGCATTTAACTCAGGTATCAATTTAGGTGCCTGGCATTTCCGTGCGCGCGG
CAACTATAACTGGACAACAGATAGCGGCAGTGATTTCGATTTCCAGGATCGTTACCTACA
GCGTGATATTCCGGCAATACGTTCACAGATAATCATGGGTGATGCCTACACCACCGGTGA
AACGTTTGACTCTGTCAACGTCCGGGGTGTTCGCCTGTACAGTGACAGCCGTATGCTGCC
TTCTGCGTTAGCCAGCTACGCCCCGACCATTCGTGGTGTGGCAAACTCTAACGCCAAAGT
TACCGTGACGCAGAACGGCTATAAAATCTATGAAACCACCGTTCCGCCAGGTGAGTTTGT
TATTGATGACATCAGCCCTTCCGGATTTGGTAGCGAACTGGTTATTACCATTGAAGAAGC
GGATGGTTCCAAACGTTCCTTTACGCAGCCCTTCTCCTCCGTCGTGCAGATGCAGCGTCC
TGGCGTGGGTCGTTGGGATTTCAGTGCCGGTAAAGTTATTGATGACAGCCTGCGATCCGA
ACCTAATATGGGGCAAGCCTCTTATTACTATGGTCTGAATAACCTCTTCACGGGTTACAC
CGGCATTCAGTTCACCGACAACAACTATCTTGCCGGACTGTTAGGTGTGGGTATTAACAC
CAGCATCGGTGCTTTTGCGATGGACGTTACCCATTCCCGCGCTGAAATTCCGGATGATAA
AACCTACCAGGGGCAAAGTTATCGCGTAACCTGGAACAAACTTTTCCAGGATACCGGAAC
ATCATTTAACCTGGCGGCTTACCGCTATTCCACCCAGGATTACCTGGGCCTGCATGACGC
GTTAGTCCTCATTGACGACGCGAAACATATGTCTGCCGATGAAGACAAAAACACCATGCA
GACATACTCACGCATGAAAAACCAGTTTACCGTCAGCATCAACCAACCGTTGAACATCGC
CTATGTCGATTACGGTTCGCTGTTTATTTCCGGTAGCTGGACGGACTACTGGGCGGCGAA
CAATAGCAGGACTGAATATAACGTCGGTTACAGTAAAAGCGTTTCGTGGGGTAGCTTCAG
CGTTAACCTGCAACGTAGCTGGAATGAAGATGGCGATAAAGATGACGCAATGTATGTCAG
CGTTAGCGTGCCTTTTGAGAATATTTTCGGTGGCAAACGCAAGACTTCCGGTTTCCGTAA
TTTAAATACTCAGCTCAATACCGATTTTGATGGTTCACACCAGTTGAATATGAACAGTTC
CGGTAGCAATGAAAGCGGCCAGGTGAACTATAGCGTCAACACAGGTTATAGCATGGATAA
AAATTACGGCGATCTAGCTTCTGTTGGCGGTTATCTCAACTATGAATCTGGGTTAGGCGG
TATTTCCGCTTCGGCCTCTGCCTCTTCTGATAATAGCCAACAGTACTCCATCTCAACCGA
TGGCGGCTTTGTGTTACACAGCGGTGGTCTGACATTTACCAATAACAGTTTCAGCAGTAA
CGATACGCTGGTGTTAGTCAATGCCCCAGGCGCTAAAGGCGCACGAGTCAATAACAGTAA
TAACGAAATCGATCGCTGGGGATATGCCGTAACGTCCGCTGTCAGCCCATACCGTGAAAA
CCGCGTAGGCCTGAACATTGAGTCGCTGGAAAACGACGTAGAACTGAAAAGTACCAGCGC
CACCACCGTACCACGTAGCGGGTCCGTTGTTTTGACCCGTTTTGAAACTGACGAAGGGCG
TTCTGCCGTGCTGAATATTACCTCCAACACTGACAAACCGATTCCGTTTGCTGCGGAGGT
TTACCAGGATGAAGTCATGATCGGCAGTATGGGCCAGGGCGGTCAGGCATTTGTGCGTGG
TATTAACGACAGTGGGGAATTAACCGTGCGCTGGTTTGAAAACAACCAAACCGTGGACTG
TAAGTTGCATTACCAGTTCCCGGCCCAGCCACAAACTCTGGGAAGCACTAACACCTTATT
ACTTAACAATCTTACCTGTCAGGTAGCAAAACATTAATATGGAAAATTCTATGAAAAGGA
TACTACTAACATCCGCGTTAATAGGCCTGGGTTTACCGGCAGTTGGCTCTGCAACAGATC
TCAAAGTCGATTTTACGGCCACTGTACTCGCCACCACCTGTACGATAACCATTGAACAAG
ATGGTGGCCCCGTGGTGACCAGTAGCGGTAACGATGAATACAGCCTGACCATTCCTGATG
TTGGCCTGGACAAAGTTGTCACTGGTGATGTTGCAGCGCAAGCCAACTTTAAATTAAAGG
CTAAAGATTGCAGCGATGGTTACTCAAAAATTTTTACCACACTTACAGGAACGTCTGTTT
CAGGCAAGTTGATTGTCAATGAAGCAAGCTCTGGCGCTGCTGGTGTGGGTATGGGTATTA
AGCGTAGAGATGCCGCAGACTCGGCTTTCTTCACGCCCAATAATACTGACAAATTTGAAT
GGTCTTCCGATGAGAAAACTAACGGTGTGCCTCTGACCGTTGCACTGCGCGAAACCACGG
CGGGAGCGGGACGCACCGGTGCGTTTCAGGCAAAAGCCACCTTTAACTTCACCTACGAAT
AACAGGGACAGCCACCATGAAATTAAAAGTCATCGCCACACTGATTGCTACTGTTGCCGT
AGGTGCAAGCTTTAATTCAAATCTCGCCTATGCGAGTACTACTTCTGCATCTTTAACCGT
AAACAGTAACCTGACTATGGGTACCTGTAGTGCTCAGGTTCTGGATTCCAGCAATAAAGC
GACAGATACTGTTGCCCTGGGCAATGTTTATATTTCTGAGTTAGCGGCAAAAAGCAAAGT
GCAACCATTCAAAATCCGCTTCAGTGATTGTGCCGGTCTTCCAGGGAAGAGTGCTCAACT
CGTTTTAGCGCCCAGGCCTGGTACGGGTTGCGCTGGCGGTCAGTCTAACACTGCCGGCTT
TGCAAATTCAATTTCCTCCGGCGCTGGTGGTTCAAGCAGAGCAGCGGTCGAAGTATGGAC
GACTACGACCCCCGAGGGAAGCGGCAGTCAGCAACTCAGTTGTGTTCAACGAAACGTCAT
CACGGTTGATCTTTCTAATGCCAGTACAACACAGCCTTATGATTACGATTTAAGTGCGCG
GATGATTATCGCCGATGGAAGAACGGTTAATGATGTATTACCGGGCGAGTTTCTTTCTCC
CACCACCTTCACTATCACTTATCAGTAATAGCAGATAAGGATATTAGAATGCTATGCAGG
CATCATAAATTTGTATGTTTTTTGGGGCTGGCAACAGCCCTCATAACGCCTTTTGCCTAT
GCTGGTCAGGATGTGAATCTCACCGCGCAGATTGTCGCCAGTACCTGTCAGGTTGAAGTG
AGTAATAATGGCGTGGTGGATCTCGGCAGTGTGACCCTGGACTATTTTGCCGACAACGTA
ACTCCAACAACGGATTATGCGGGTGGCAAGACGTTTAATGTTAACGTGGTCGCCTGCGAT
AATATTCAAACGACCCAGTCGCAAATGAAATTAGATTTTCAGCCGCAGGCAGGTTCGCTT
GCGCAGGTGAATAATCAAATTTTTAGTAATGAATATGAACAGCAGGCTACCGGGGCAAAA
AACGTCGGCATTGTAATATTTTCGGCACAGCCGAATCAGCAGACCTTTAACGTGCGGGGA
ACGGACGGTTCCTCAACGGCGATTTATTCTGTCGCTCCAGGCAATGCTGTTCCGTCAACC
TGGACCTTTTATTCCCGTATGCAACGGGTGAATAATGCTCTCCCACCCGAGTCGGGGATG
GTGAGAAGCCAGGTTATTGTTAATGTTTCTTACGAATAATAAGGATAATTATGCAAAGGA
AAGGCAATAAACTGTTACGACAGTTATGCAGTGCAATACTGTTATTTTTTATGTGCTCCT
TGTCTGCATCTGCGATGGAATGTTATATAGAAAAATGGGCGGGGGGAACTTATGACATGG
TCATAAACCCTGAGGTTGAAAGTATAACAACGCAAATGGTATCTTCGCCACAAGAAATAA
GCGACATGGTTCATGATACAAATATTAAACTTAAGGACAGGAACGGTGAGACGATTGGAT
GTAAGTCCGATATAGGGGGTACTACTTCAGTACACTTTCTTAACACTGCGGATGCAGGTT
TGTTATCAACCTATGTTTCGAAAGATAATGGCGCATTATTAAAAACAACAGTTCCTGGTA
TTGTCTACTCCGTAGAATTGGTATGTATAAGCTGTGGTGCTGCAGATGAACTTGATTTAG
TTTTACCTGCACAAAGCGGCGCAGATAACTTCATACCGGCCAGCGATACCAAGTGGGCTT
ATGAATACAGTGACAACGACTGGTATTTGCGTTTTCGTTTTTACTGGACGCCGGAATTTA
AACCTCAAAATGGGGTTTTCGAAGGATATGCCTTGCCAGGAAAAATTGCTTCCTGGTATA
TAGGTGATAATACCCAGGCATGGGTAAACTTTACTGTTCAGGATAGTGCCGTTCACTTTT
ACGTTGACCAACCAACCTGTTCAATGATTACCCTGGATCAGGACAAAGGCAATGTGAGTG
GCACAGAAATCCAGTTAGGTAACAGTTACGTATCCGAAGTTAAAAATGGTCTTACCCGAG
AAGTTCCCTTTGCTATCCGTGGTGAGTATTGTTATGCCAGCAAGATTACGGTTAAGCTGA
CGGCTGCAAATGCAGCCACTGACAAAAATCTGGTGGGTAAAACAACTGGCTCTGCCACAG
GCGTGGCTGTAAGAGTTAATTCAACTTATAATGATAGCAAAGTGTTATTAAAACCAGATG
GCGTTGCTTCCATTGATTATAACTTCCCTGTCTGGTCGAATAACTTGTTGTCATTCCCTT
TTACAGCACAACTCGTCCCCGATGGCAGTGGTAAACCTATCGGAACAGGAACATTCTCCG
GTAACGCGACCTTCTCCTTTACCTACGAATAAGTAAAACGTTATTCCCTCCTCATCGCAC
CAGAGTTCTGCTCTGGTGCGAACGTTTTCCCCACACTAAAAACCATTGCCCCCCTGATTT
CGGCTGTTAGAATGCGAACAGATCTGACTTTAGCCATCAGGACACGTTATGAAACCGACC
ACCATTGCTTCATTGCAAAAATGCAAACAGGAAAAAAAACGTTTCGCGACCATCACCGCT
TACGACTATAGCTTCGCCAAACTCTTTACCGATGAAGGACTTAACGTCATGCTGGTAGGC
GACTCGCTGGGCATGACGGTTCAGGGGCACGACTCCACCCTGCCAGTTACCGTTGCTGAT
ATCGCCTACCACACTGCCGCCGTACGTCGTGGCGCGCCAAACTGCCTGTTGTTGGCTGAC
CTGCCGTTTATGGCGTATGCCACGCCGGAACAGGCCTTTGAAAATGCCGCCACAGTAATG
CGTGCCGGAGCCAATATGGTCAAAATCGAAGGTGGCGCATGGCTGGTGGAAACCGTGCAG
ATGCTGACTGAACGCGCGGTTCCGGTATGTGGTCATTTAGGTTTAACGCCGCAGTCAGTG
AACATTTTCGGCGGCTACAAAGTACAAGGGCGTGGCGAGGCAGGCGATCAACTGCTCAGC
GATGCATTAGCCTTAGAAGCCGCTGGTGCACAGTTGCTGGTGCTGGAATGCGTACCAGTT
GAACTGGCAAAACGTATTACCGAGGCGCTGGCTATTCCGGTTATCGGTATCGGCGCAGGT
AACGTCACCGACGGGCAGATCCTCGTCATGCACGACGCCTTCGGTATTACTGGCGGTCAT
ATCCCTAAATTTGCCAAAAATTTCCTTGCTGAAACGGGCGACATCCGCGCGGCTGTGCGG
CAGTATATGGCTGAAGTGGAGTCCGGCGTATATCCGGGCGAAGAACACAGTTTCCATTAA
GGAGTCACGTTGTGTTAATTATCGAAACCCTGCCGCTGCTGCGTCAGCAAATTCGCCGCC
TGCGTATGGAAGGCAAGCGCGTGGCGCTGGTGCCTACTATGGGTAACCTGCACGATGGCC
ATATGAAGCTGGTCGACGAAGCCAAAGCCCGCGCCGATGTGGTCGTCGTCAGTATTTTCG
TTAACCCAATGCAGTTTGACCGCCCGGAAGATCTGGCACGTTATCCACGGACCTTGCAGG
AAGACTGCGAAAAGCTAAACAAACGTAAAGTGGATTTAGTTTTCGCCCCTTCGGTAAAAG
AGATCTACCCGAACGGTACTGAAACCCACACTTACGTTGACGTTCCTGGTCTTTCCACCA
TGCTGGAAGGTGCCAGCCGTCCTGGCCATTTTCGCGGCGTTTCGACTATTGTCAGCAAGC
TGTTCAACCTGGTCCAGCCGGACATCGCCTGCTTCGGTGAAAAAGATTTTCAGCAACTGG
CGCTGATCCGCAAAATGGTTGCTGATATGGGCTTTGATATTGAGATTGTCGGTGTGCCAA
TTATGCGCGCCAAAGACGGTCTGGCGCTGAGTTCCCGTAACGGTTATCTGACAGCGGAAC
AACGCAAAATTGCGCCCGGTCTGTACAAAGTTTTAAGTTCAATTGCCGACAAATTGCAGG
CTGGCGAACGGGATCTCGATGAAATTATTGCTATTGCCGGGCAAGAACTGAATGAAAAAG
GCTTCCGCGCCGATGATATTCAGATTCGCGATGCCGACACGTTGCTGGAAGTCTCTGAAA
CCAGCAAACGAGCTGTGATTCTGGTAGCCGCCTGGCTTGGCGATGCCCGCCTGATCGACA
ACAAAATGGTCGAACTGGCGTAATACTTAACTGGCGCTACGGCTGATGGCGCCAGTTATT
AATTTGCCCTACGTCATGGCGATGACGTCTGTAAGTGATTATTCATATCGCTGGCAATTT
AGTTAGAGTTAATTAGCTTATCAATCTCTGTAAGAGGTAAAGTTGTCACCTCTGCAACGT
CTTCCCGAGACATCCCTTTACTTAGAAAACGCTGGGCGAATTCCTGTCTTACCTTCTGGA
GTTCCTCTTGATATCCCTTCTGAAATCCCTTCTCTTCAAACCACTGCGCCAACGTCTGCC
TGGTTTCTCTCCGTGTCTTTATTTCCATAGGTTCCCTTAATTATCTGGTCAGTTAACAAT
AACAATTATCTGGCTATAACTGATGATGCAGACAACTTAGTTAATCAGCTTATCAATCTC
GGCAAGGGGTAAATTTGCCATCTCTGCAACGTCTTCCCGAGACATTCCTTTATTCAGAAG
ACGCAGGACGAATTCTTGCCTTTCCTCCTGTCTTCCCCTCTCTTCAAACCACTGCGCCAG
CGTCATCATAGACTCCCCTCCCGTTTCCCTGTCTCTCAGCACACCATAAAACAAATCCGC
TTGTTCAGTATGACCGCGTTGCAGCATATAGTTTTGCATGGCAACTAACTGACTTCCGCT
AGTGTACCCTTCGTCAATCAGCGTGACCAGTTGCTCCAGCAATAACATTAAGTCGCGCTG
GCGAATATGTTTTTGCAGTAGTTCGAGAATCGCAATCCGCCGATGTTGCATGATTTCGTC
ATCCGGTGTGATGGTGATATCCACCAGCGGGAAAGGACTGTTATAGACGCGTCGCGCCAG
CTCCGGAGAGTAAAACATATCAAACCAGCACATTGAGAGCGGATAAGATGTGGCCTCGCC
CTGATAAAAGAGAATCGGCACTACCAGCGGTAGTTTGTCGTGATCCGCCTCCAGATGCCG
ATGCATGGCGGCTATAGAATAACGCATCATGCGAAAGGCCATTTTCTTATCCGGCTTGCT
TTGGTGTTCAATCACAACATGCAGATAACCGGGATTGCCCTGCATTTGCACGGAATAGAG
CACGTCCGTGCTGTGTCCTTTCAGGCTCTCTTCAATGAAACTCCCCGACTCTAAATGAAG
CGTGTTGAGGTCACAAAGTTCGCGTAATTCCACTGGCAAATGTATCTCCAGAAAGTCGCG
AGCCGTCTCCGCATGCATTAAAAATTGTTTAAATACCGCGTCATGCGGTGTAGTACTCGG
TGCATCCATCTTCCCTGTCTTCCGTGTTGTCTTGCGTGAAGGCAGTATCCAGCCAAGGCG
CGCCGTCGTCAGCCACCTCTTTATTGTTTACCGAGCAGCGTTCAGAGAAATATCAATTCG
TTACAGGCGATACATGGCACACTTCGGCGCGGTACGCAAACTGCTGATGCAAATGCCGTC
AGATGAGTAGACACTAAACAAAAATCGGGCAATACTGCGTGAGAATTTCCTCAAAGCAGG
CACCGCCTGCTTCGTTAACGACAGGGTAGAAAGGTAGAAGTTATGATTCGCACGATGCTG
CAGGGCAAACTCCACCGCGTGAAAGTGACTCATGCGGACCTGCACTATGAAGGTTCTTGC
GCCATTGACCAGGATTTTCTTGACGCAGCCGGTATTCTCGAAAACGAAGCCATTGATATC
TGGAATGTCACCAACGGCAAGCGTTTCTCCACTTATGCCATCGCGGCAGAACGCGGTTCG
AGAATTATTTCTGTTAACGGTGCGGCGGCCCACTGCGCCAGTGTCGGCGATATTGTCATC
ATCGCTAGCTTCGTTACCATGCCAGATGAAGAAGCTCGCACCTGGCGACCCAACGTCGCC
TATTTTGAAGGCGACAATGAAATGAAACGTACCGCGAAAGCGATTCCGGTACAGGTTGCT
TGATTGTTATCCCTGCGGCTGGTTACTCACCAGCCGCGACATCGTCTCGAGCGAATCCGT
TCTTAAGATATAAAGTCGTTTTAGTAACAACGGATTATCCCCCGGTTTTACTTTGCCTTT
CATGGTTGTCACCGCCAAGTGAAATCCGGCATCGTTTGCTGCCTTCACGGCTTTGTCATT
AAATCCGCCAAACGGATACGAAAGATACCAGACATGCGGATTAAATTGCGCCAGAGCGCG
GCGTGAACGTGCAAAATCAAACAGAATATTGTGCTCACTACGACTCAGTAATATGGGGCG
GCGATAGCCATCCACCCGATGCAAAAAATGGGTATGTGACTGAAAATCAAAAACATCGCG
AATTTCGTTAAGCTCAGAAACGCTCATAAATTGCAGCGATTTTGGGTTCCACTTCTGCGG
GTGACGTTTGATGCGTGAGGTAACAATAAACGCCGTCGCCTTCATGCCATATTGTTTCAA
CACAGGATACGCATAGCGGCTCACCGACTTGAGGCCATCATCAAAGGTAATCACCACCGC
TCGCGCAGGGAGATTGATCTTATTCTTCACGTAGCCTTCCAGCTGCACCATGCTCAGTGT
CGCGTATCCCCTGTCGCGCAGCCAGGCCATCTGGTTATTGAAAGCGCGTACCGAGGTGGT
CGTCGAAGTGTGGCGAAAACGGGTGTTTTCTTCGTCGCGCAGAATATGATGATAGGTTAG
CACCGGAAGGCCATTATCGGGTTGGGCATCCAGCGCGCTGATATAGGCCAGTCGATCGCC
AATACGGACCTGATACCAGGTTTGATTTAACCTGTCTTTCAGTTTATGCAAAATCGGGTA
GCGCAAATTGTCCGCCAGTACCCCAAATGGCGCACTGCCCACACTCGGCGCGTTATAGAC
CGGCGTATCTTTCCAGGTAACTAAGTTCTGATTACTCAGCGGCTTGTTGAGGTCACCCAA
ACCGTCTTCAACTTTTTGTCGCCCCTGAACCGGCTCGAGATGCCCTTTATCGATAAACCC
TTTACCAAAGCCAAAATTAAATGCGTAATAACTTGCGGCAGTGGGCTCCACGGCAATGAT
TTGTCCGGCCCGAATATTCCCCACGGTCACCATCTTGTCGCCAATTTGCGCCCAGACCGC
AGCATTTTCGATGGTTTGCATATAACGGGCAGGTAACGCGGCACTGACACTTGCGGTAAA
CAGCATCAGCAGGAGAATAACAGCTTGTTTGTACATGAAAAAATAACCGAGGGTGAAACA
ACGCTTTTATTGTAGCAAAAGCGCTATAAGAATCGTGGGTTAATACTCATACAAATTATG
TTTGAGGACGAAAGGTGGATTTTTTTGTTGTTGGTGCCAAAGACTACTCACCTCCGGCCC
ACCCAGTTCGACAATACGCTCGCGAAACTCTGAACTGGTCATGGTTTCACGGCAAGCCAT
CATCTGTTCAATTAACGGTAACGTGACACCAGAAATCACTTCGCAACGGGAGTGTTTGTG
GCTTAATAATGAAGCCACGCGGTACGGTGGCGCTCCGGCTATATCGGTTAAGAAGATGAC
ACCCTCACCAGAGTCCGCTTCATGCAGAGCATCGCACATCATGCGGCTGAGCATATTAGA
GCTTAACCCACGCCAGAAATTCACGGCCCGGCACTGAAGAAGTGCCCCATGTTTTTTCTC
CAGCGCATCCAGTATCTCTTGCGCCCGGTCATCGTGACAGGTAATTACCCAACCTAACAT
CGCCTTCCTCCTTAGCCGAAAATCAGTCTACCCTGACCATTGTTGATAAAGGGTGATAGC
CGTCAAAACTCCTCTCCCCCAAATCCAGAGGAGAGGAAATAGCCTTAGCTACGCAAACCA
CGTCCACGTTGGATCAGCGACCAACAGATCAAATAAAACGCCACAATAAAGACCACCAGT
ACGCCAAAGGTAGTGACCAGCGGAACATCATTGATACCGAGGAAGCCGTAGCGGAAACCA
CTGATCATATAAACGATTGGGTTCAGGTGCGACAGCCCTTGCCAGAACGGCGGCAACAAA
GTCAGTGAGTAAAAGACCCCACCCAAATACGTGAGTGGCGTTAACACAAAGGTTGGCACC
AGGCTGATGTCATCGAACGTTTTGGCAAACACACCGTTCAGCAAACCCGCAAGGGAGAAC
AACACCGCCGTGAGCACCAGGGTTAAGGCAACGAATACCCATGAATGCACCTGAAACGGC
ACAAAAAACAGTGAAATTGCCGTCACCAGAATGCCAACAAACAGACCACGCGCCACGCCA
CCGCCGACATATCCGGCAATAATGACGTGAGTCGGAACCGGCGCTACCAGCAGCTCTTCA
ATATTACGCTGGAATTTGGCACCAAAAAATGATGACGCGACGTTAGCGTAGGCGTTGGTG
ATCACCGACATCATGATCAGCCCCGGTACGATGAACTGCATGTAGCTGAAGCCATGCATA
TCGCCAATACGCGAACCAATCAGGTTACCGAAGATAATAAAGTAAAGGGTCATGGTGATG
ACTGGCGGCACCAGCGTCTGCACCCAGATACGCATAAAGCGATGGATCTCTTTCGCCCAG
ATGCTTTTTAGCGCCACCCAGTAAAGATGCATCATGCGCGATCTCCTTGTTTTTCATTAA
CCAGTGAAACAAACAGCTCTTCCAGACGGTTAGCTTTGTTACGCATACTTAATACCTGAA
TGCCCTGCTCACTTAACTGCGTAAATACGCTGTTGATCCCCTGCTCACGCAGCACTTCAA
CTTCCAGCGTCGCGGTATCGACCAGTCGATACTGATAGCCATCGAGCTTCGGTAACGGAC
TTTTCGGTGCGAGATCGAGAATAAAGGTTTCCGATTTCAGCTTCGCCAGCAGCGCCTTCA
TCGAGGTATTTTCCACCAGCTCACCATGTTGAATAATGCCGATATTGCGGCACAGCATTT
CTGCTTCTTCCAGGTAGTGAGTGGTGAGAATGATGGTGGTGCCTTTGTCGTTTAAATCCT
TCAAAAAGCCCCACATTGAGCGGCGAAGCTCAATATCCACGCCTGCCGTTGGCTCGTCGA
GAATCAGCAGTTTAGGTTCATGCATTAACGCACGGGCAATCATTAAACGACGCTTCATCC
CGCCCGATAACATGCACGCACGTTCGTTGCGTTTTCCCCATAAATCGAGCTGCTTAAGAT
ACTTTTCGCTGCGGATGTACGCTTCTTTGCGCTCCACGCCGTAGTACCCTGCCTGATTCA
CCACAATTTGCTGCACGGTTTCAAACGGGTTGAAGTTAAATTCCTGCGGCACCAGTCCCA
ACTGACGTTTAGCGTTCACGACATCCTTCTCGAGATCGTAACCAAATACGCTGACCCGCC
CGGAGGTTTTATTTACCAGAGAGCTGATAATACCGATAGTGGTCGATTTCCCGGCCCCGT
TCGGCCCGAGAAGCGCATAAAAATCACCCGCTTCGACCTGCAAATCTATTCCACGAAGCG
CCTGAACGCCGCCTGGATAGGTTTTTTTAAGCTGTTGAAGTTCCAGTGCAATGGTCATAA
ATTTTTACTTACCTTACGTTCTTACACTTTATCTGTGGTTTAAATCGTCCCGGAGTTGCC
CTATATTAGCCAAACGTAATTATTTGGTTACAGGTCGTTAACCTCCATGAAAGACATAGA
TACACTCATCAGCAACAATGCACTATGGTCAAAAATGCTGGTGGAAGAGGATCCCGGGTT
TTTTGAGAAACTGGCACAAGCGCAAAAACCGCGCTTTCTATGGATTGGATGTTCCGACAG
TCGCGTTCCTGCAGAACGTTTAACCGGTCTTGAGCCGGGCGAACTCTTTGTTCACCGTAA
TGTTGCTAACCTGGTCATTCACACCGACCTGAACTGCCTTTCCGTGGTTCAGTATGCAGT
GGATGTACTCGAAGTTGAACACATTATTATCTGTGGCCACTACGGTTGCGGCGGCGTACA
AGCCGCAGTTGAAAACCCGGAACTGGGGCTTATCAACAACTGGCTGCTGCATATCCGCGA
TATCTGGTTCAAACATAGCTCATTGCTCGGCGAAATGCCGCAAGAGCGCCGTCTGGATAC
CTTGTGTGAACTGAACGTCATGGAACAGGTGTATAACCTGGGCCACTCCACCATTATGCA
ATCAGCGTGGAAACGCGGGCAGAAAGTTACCATTCACGGCTGGGCCTACGGTATTCACGA
CGGCTTGCTGCGTGATCTGGATGTCACAGCGACCAACCGCGAAACCCTTGAGCAACGTTA
CCGTCATGGGATTTCCAACCTCAAGCTGAAACACGCCAACCACAAATAAAAATGCCATGC
CGGATGCAACACATCCGGCAACTTCACACTTACTCGTCCAGCAGAATCACTTTGCCGATA
TACGGCAGATGACGGTAACGCTGTGCGTAATCAATGCCGTAACCCACCACAAACTCATCC
GGGATCGAGAAACCGATAAATTCTACCGGGACGTTCACTTCACGACGGGACGGTTTATCC
AGCAGCGTACAAATCGCCAGCGACTTCGGTTCGCGCAGGCTTAAGATCTCACGCACTTTC
GACAGTGTATTCCCCGAGTCGATGATATCTTCAACAATCAGCACGTCCTTGCCACGGATA
TCTTCATCCAGATCTTTGAGGATTTTCACATCACGGGTGGTGGACATGCCGCTACCGTAG
CTGGAGGCGGTCATAAAGTCGACTTCATGAGATACCTGAACTTCACGGCACAGGTCCGCC
ATAAACATAAATGAGCCACGCAGCAGACCCACCAGCACCATATCGCTGCCGCTGTCTTTG
TAACGCTCAGTAATCTGACGACCCAGTTCGGCGATACGCGCTTTAATCTCCGCTTCGGGG
ATCATTACTTCTACAGTATGTTTCATATCTCTAACCATATGATTTAAAAACAAATCACTT
CGCACGGGCAGGTTTTGGCACCGCAACAAAGCGCAAGACACGCAGTATACCAGTAAAACT
ATTCATTCGCGGAATCTGTTAATAAAGCTCGAATTGTGATGACGGTCACATATGTTAAAA
CCTATAATTAATTGCTACTAAAATATTAATGAATTGAAATGGTGTCTCTTTATGGCAATT
AACAATACAGGCTCGCGACGATTACTCGTCACGCTAACAGCCCTTTTTGCAGCGCTTTGC
GGGCTGTATCTACTCATTGGCGGAGGCTGGCTGGTCGCGATTGGCGGCTCCTGGTACTAC
CCTATCGCTGGCCTTGTGATGCTCGGCGTCGCCTGGATGCTGTGGCGCAGTAAACGTGCC
GCGCTTTGGCTATACGCCGCCCTGCTGCTCGGCACCATGATTTGGGGCGTCTGGGAAGTT
GGTTTCGACTTCTGGGCGCTGACTCCGCGCAGCGATATTCTGGTCTTCTTCGGCATCTGG
CTGATCCTGCCGTTTGTCTGGCGTCGCCTGGTCATTCCTGCCAGCGGCGCAGTTGCCGCA
CTGGTGGTGGCACTGCTGATTAGCGGTAGTATCCTGACCTGGGCCGGATTTAACGATCCG
CAGGAAATCAACGGCACCTTAAGCGCCGATGCCACACCTGCGGAAGCTATCTCACCCGTT
GCCGATCAGGACTGGCCTGCCTATGGTCGCAATCAGGAAGGTCAACGCTTTTCACCTCTG
AAACAAATTAACGCCGATAACGTCCATAATCTGAAAGAAGCCTGGGTGTTCCGTACTGGC
GATGTGAAGCAGCCGAACGATCCGGGCGAAATCACCAATGAAGTGACGCCGATTAAAGTG
GGCGACACCCTTTACCTGTGTACCGCTCACCAGCGCCTGTTTGCGCTCGATGCCGCCAGC
GGCAAAGAGAAATGGCATTACGATCCTGAGCTGAAAACTAACGAGTCTTTCCAGCACGTA
ACCTGCCGTGGCGTCTCTTATCATGAAGCCAAAGCAGAAACGGCTTCGCCGGAAGTGATG
GCGGATTGCCCGCGTCGTATCATTCTTCCGGTCAATGATGGTCGACTGATTGCGATTAAC
GCTGAAAACGGCAAACTGTGCGAAACCTTCGCCAATAAAGGCGTGCTCAATCTGCAAAGC
AATATGCCAGACACCAAACCGGGTCTGTATGAACCGACTTCGCCACCGATTATCACCGAT
AAAACCATCGTGATGGCAGGTTCAGTTACCGATAACTTCTCAACCCGCGAAACGTCTGGT
GTGATCCGTGGTTTTGATGTCAACACCGGGGAGCTGCTGTGGGCTTTTGATCCGGGCGCG
AAAGATCCGAACGCAATCCCGTCTGACGAACACACCTTTACCTTTAACTCGCCAAACTCG
TGGGCACCAGCGGCCTATGACGCGAAGCTGGATCTGGTGTATCTGCCGATGGGCGTGACC
ACGCCGGATATCAGGGGCGGTAACCGCACACCGGAACAGGAACGTTATGCCAGCTCGATT
CTGGCGCTGAATGCCACAACCGGGAAATTGGCGTGGAGCTACCAGACCGTTCACCACGAC
CTGTGGGATATGGATCTTCCGGCACAGCCGACGCTGGCGGACATCACCGTTAATGGTCAG
AAAGTGCCAGTTATTTACGCTCCGGCGAAAACCGGCAACATTTTTGTGCTCGATCGTCGC
AATGGTGAACTGGTGGTTCCTGCCCCGGAAAAACCGGTTCCCCAAGGCGCTGCCAAAGGC
GATTACGTAACCCCAACTCAACCGTTTTCTGAACTGAGCTTCCGTCCGACGAAAGATTTG
AGCGGAGCGGATATGTGGGGCGCCACCATGTTTGACCAACTGGTGTGCCGCGTGATGTTC
CACCAGATGCGCTATGAAGGCATTTTCACGCCGCCATCTGAACAGGGTACGCTGGTCTTC
CCTGGTAACCTGGGGATGTTCGAATGGGGCGGGATTTCTGTCGATCCGAATCGTGAAGTA
GCAATTGCCAACCCAATGGCGCTGCCGTTTGTTTCGAAACTGATCCCTCGCGGTCCGGGT
AACCCAATGGAGCAGCCGAAAGATGCCAAAGGCACGGGTACGGAATCCGGCATTCAGCCA
CAGTACGGTGTACCGTATGGTGTCACGCTCAACCCGTTCCTCTCACCATTTGGTCTGCCA
TGTAAACAGCCAGCATGGGGTTATATCTCGGCGCTGGATCTGAAAACTAATGAAGTGGTG
TGGAAGAAACGTATTGGTACGCCGCAGGACAGTATGCCGTTCCCGATGCCTGTACCGGTG
CCGTTCAATATGGGTATGCCGATGCTGGGCGGGCCAATCTCCACGGCGGGTAACGTGCTG
TTTATCGCCGCTACGGCAGATAACTACCTGCGCGCTTACAACATGAGCAACGGTGAAAAA
CTGTGGCAAGGTCGTTTACCAGCGGGTGGTCAGGCGACGCCAATGACCTATGAAGTGAAT
GGTAAGCAGTATGTGGTGATCTCCGCAGGCGGTCACGGTTCATTTGGTACGAAGATGGGC
GACTATATTGTGGCTTATGCGCTGCCGGATGATGTGAAGTAAGACTTGCTCAGATTGCTG
ACAACGTGCGCGTTGTTCATGCCGGATGCGGCGTGAACGCCTTATCCAGCCTACAAAATT
GTGCAAAATCAATGGATTGCACAGGTAGCGTAGACCTGATAAGCGTAGCGCATCAGGCAG
ATTTGCGTTTGTCATCAGTTTAATGCCCGGAGAGATCCGGGCATATTCCCGAATACGGTC
TTTTTATACCGTAAACCCTAACATCATCCCCGTATCTTCATGCTCCAGCAGATGGCAGTG
CGCCATATAAGCATGTTCTTTCGGTGCGTCGTGATTAAACTTCACCAGCACTTCGCTGAC
ATTACCTTCTACCTTAACGGTATCTTTCCAGCCCGCGCGATGCGTCGCTGGCGGTTTGCC
ATTTTCTGACAAGATACGGAACTGCGTGCCGTGAATATGGAACGGATGCAGCATCATGTC
GCCCACGCCAGAGATAACCCAACGTTCGTACTGCCCTTTCGCCGCCGCAAACATCGGCTT
ATTCATATCAAACGCCTGACCGTTGATTTTATTGGCATGGTGGAAATCGAACTTCCCGCC
GTGGTTCATATGATTCATATTGCCGTGCCCCATATGGCCCATCATCTGGCTGTGATCCAT
TCCGGCCATCGCCTGATCGCCATATTTCTCCATTAGCATCTGCATCCCCATCATATCTAG
CATCGGGTCCATAGAAAGTTGCAGCTTGCGTACCGTCAGCCCTTCCAGCGAAGGTAACGC
AGGCAGGCTACTTAATGTGTCTGGCAAAGCACCGGAGGCACTAATAGCAATCGGCTGAAT
CCGCATTACCGGATGCGGCTTGTCAAACGGCGCAATCGCCATCCCCATCTGGCTGACCGG
CAGCGTCACCAGGTCAAAGGGTTTGTTGTCGTTAACCTCCACCAGCACTTCAAAACGCTC
GCCCATCAGCACCGGCAGCTCGTTCACCTTCACCGGTTCAGGTAGCAGACCACCGTCGCT
GGCAATCACATAAAGCGGGCGATTGTCGCTGGTGGCGAAATTGAGCGAGCGGGCATTACA
GCCATTGAGCAAACGCAGGCGCAGCCAACCACGCGGGGCAGCGTGTTGCGGGTAGATTGC
ACCGTTGGTCAGCAACGTATCGCCAAACCAGCCCACGGCGGCGGTCATCACATCCAGTTG
ATAATCAATCTGCCCGTCGGCGCTAAATTTCTTATCCTGAACGATCACCGGAACATCATC
GATACCCCACTGTTTTGGCAGCATTAATTTCAGGATCTCGTCATCTTCAATTACCACCAG
ACCAGCCAGCCCCATCGCCACCTGTCGCCCGGTCTTGCCATGTTGATGTGGATGGAACCA
GCAGGTAGCGGCAGGTTGATCAACGTTCAACGTCACCGAGCGCTTGCCACCTGGCGGAAT
AATTCCCTGTGGGCCGCCGTCGACTTCACCCGGTACTTCCAGCCCGTGCCAGTGCAACGT
CGTCTCTTCCGTCAGTTGGTTATAGATATCAACCGTTACCGCTTTGCCGCGCTGTAATTT
CACCGCCGGCCCCAACAGATTGCCGTTATAGCCCCAGGTAGTTGCAGTTTTCTCGCCAAA
GGTAGACTGACCTGCGCCAATAGTTAACTGAATGCGATTACGGGCATCGGTCGTGAGCAA
ATCAGGGATCGGTAACGTTGGGCGTTCCGCCGCAAAAACTGCACGGCTCCACAGTGGCAA
GGCTGAAGCCACACCCAGTGCGACGGAATATTTCAAGAAATCACGACGTTGCATAGTTAT
TTCCTTATTCTTAAGCAGGCGAAACAAAATCAAACGTTGAGCATAGTCCTTCCCCTTACG
GGAAGGTCAAGCCGCAGACACAATTTAATCGACAATAATGGTCGTCGCCTCGCTCGCAGT
GTGCTAACGTTTATCTTCTTTAAGCCCCTGGTAGAAGCAATGAAGACGTTTTTCAGAACA
GTGTTATTCGGCAGCCTGATGGCCGTTTGCGCAAACAGTTACGCGCTCAGCGAGTCTGAA
GCCGAAGATATGGCCGATTTAACGGCAGTTTTTGTCTTTCTGAAGAACGATTGTGGTTAC
CAGAACTTACCTAACGGGCAAATTCGTCGCGCACTGGTCTTTTTCGCCCAGCAAAACCAG
TGGGATCTCAGTAATTACGACACCTTCGACATGAAAGCTCTCGGTGAAGACAGCTACCGC
GATCTCAGCGGCATTGGCATTCCCGTCGCTAAAAAATGCAAAGCCCTGGCCCGCGATTCC
TTAAGCCTGCTTGCCTACGTCAAATAATCCCTGATACCTTTTTGTAGAAATATTGACCGT
GCATCCGCGGTCAATGTTAGCTATTATGTTGCGCCCTTTTTTTACGGGTGTTAACAAAGG
AGGTATCAACCCATGGCCGAAAAAAAACAGTGGCATGAAACGCTACACGACCAGTTTGGG
CAGTACTTTGCAGTAGATAACGTTCTGTATCATGAAAAGACCGATCACCAGGATTTGATC
ATTTTTGAGAACGCTGCATTTGGTCGCGTAATGGCGCTGGATGGCGTAGTACAAACCACC
GAACGCGACGAGTTTATCTATCATGAGATGATGACCCATGTTCCGCTACTGGCCCACGGT
CACGCGAAACATGTGCTGATTATCGGCGGCGGCGACGGCGCCATGCTGCGTGAAGTGACC
CGACATAAAAACGTTGAGTCAATCACGATGGTGGAAATCGATGCGGGTGTCGTGTCGTTC
TGCCGTCAATATCTGCCCAACCATAACGCCGGTAGCTACGACGATCCGCGCTTTAAGCTG
GTGATCGACGATGGCGTCAATTTCGTTAATCAAACCAGCCAGACCTTTGATGTTATTATC
TCCGACTGCACCGATCCTATCGGGCCCGGCGAAAGCCTTTTCACTTCGGCATTTTATGAA
GGCTGCAAACGTTGCCTGAATCCTGGCGGTATCTTCGTCGCACAAAACGGCGTCTGCTTT
TTACAGCAGGAAGAAGCCATCGACAGCCATCGCAAACTCAGCCATTACTTCAGCGACGTT
GGCTTTTATCAGGCGGCGATCCCGACCTATTACGGCGGTATCATGACTTTTGCATGGGCG
ACAGATAACGACGCCTTACGCCATCTCTCAACCGAAATTATTCAGGCGCGTTTTCTCGCC
TCTGGCCTGAAATGCCGTTATTACAATCCGGCAGTCCATACGGCAGCTTTTGCCTTACCC
CAGTATCTGCAAGACGCACTGGCTTCACAGCCGTCCTAAGGAGAAGATAAGAAATTGAAA
AAACTGAAACTGCATGGCTTTAATAATCTGACCAAAAGTCTGAGTTTTTGTATTTACGAT
ATCTGCTACGCCAAAACTGCCGAAGAGCGCGACGGTTATATTGCTTATATCGATGAACTC
TATAATGCCAACCGTCTGACCGAAATCCTGTCAGAAACCTGTTCCATTATCGGGGCTAAT
ATTCTTAACATCGCCCGCCAGGATTACGAACCACAGGGTGCCAGCGTCACTATTCTGGTG
AGTGAAGAACCGGTTGACCCGAAACTCATCGACAAAACAGAACACCCCGGCCCACTGCCA
GAAACGGTCGTTGCCCATCTCGATAAAAGTCATATTTGCGTACATACCTACCCGGAAAGT
CATCCTGAAGGCGGTTTATGTACCTTCCGCGCCGATATTGAAGTCTCTACCTGCGGCGTG
ATTTCTCCGCTGAAGGCGCTGAATTACCTGATCCACCAGCTTGAGTCCGATATCGTAACC
ATTGATTATCGCGTGCGCGGTTTTACCCGCGACATTAACGGTATGAAGCACTTTATCGAC
CATGAGATTAATTCGATTCAGAACTTTATGTCTGACGATATGAAGGCGCTGTATGACATG
GTGGATGTAAACGTCTATCAGGAAAATATCTTCCATACCAAGATGTTGCTTAAAGAGTTC
GACCTTAAGCACTACATGTTCCACACCAAACCGGAAGATTTAACCGACAGCGAGCGCCAG
GAAATTACCGCTGCGCTGTGGAAAGAGATGCGCGAGATTTATTACGGGCGCAATATGCCA
GCTGTTTAACGGCTCTGGCGGAGCTCCCAGGCTCCGCCAGATTTATTTACTTCTGCTGCA
CGAAATTACGGTAAGCCGCCACCACCTGCAGAAAATCCTCAACGCCGCATAGCGACAGGC
TTTCTTCGTCGTAGTAGTTCATCCCCTCTTCCATTTCATCGCCAGCGAATTCCAGTTGAT
TGGCGCGAACCATCACCTCTTCACCGTCCATCCACAGGGTGTATTCGTGCCCTGCCCGTT
GCCAGGACCGTTCGCTACCTTTCAGTGCGTGCGCTGCTTGTTCCACTTCATCAAGCAAGG
CCAGGTTTTCTTTCACCTCTTCATTAAACCAGTGCCCGACCACTTCATGCCCCATGGACA
TACGCACCTTTACCACTCCGGTAATATCGCGCAGAAATTCGTAATCCATAGTGTGTTCCT
CTGCTCCCGGCAATGCGCCGAAATCGCATTGCGCCATTGATGTAATTATCGCAGCCTTAC
CGGAGAAAAACAGCGGAACGGCGATGGTTTAGAAATAAAAAATGCCCGGGAATCTCATTC
ACCGGGCATTGTGTCGTTTATGCGCAGCGCGTGCGCTGACTTTTTAAACTGCAGTCTGGA
AAATCACACCATCGGCTTTTTCAGTGTACTGAGAAAGCTGGTTGAAGTTCAGGTAACGGT
AAGTATCAACGGCAGTTTTATCCACCTGCGCCACGTAGGTCTGGTACTCTTCCGGCGTCG
GCAGTTTGCCAATCAGCGCCGCAACAGCAGCCAGTTCCGCAGAAGCCAGGAAGACATTCG
CGCCAGTCCCCAGACGGTTCGGGAAGTTACGGGTCGAGGTGGAAACCACCGTCGCGCCGT
[truncated: 5,029,915 more chars]
