# Supplementary material for: Escherichia coli ST302: Genomic Analysis of Virulence Potential and Antimicrobial Resistance Mediated by Mobile Genetic Elements
Source: Front Microbiol. 2020 Jan 21;10:3098. doi: 10.3389/fmicb.2019.03098 (PMC6985150; doi:10.3389/fmicb.2019.03098)
Supplement: DATA S2 — ST302 SNP analysis. [file Data_Sheet_2.ZIP › SNP_Analysis/ST302_SNP/SNP_analysis/snippyout/ST302/FA5537-ND-ST302.out/snps.csv]

CHROM	POS	TYPE	REF	ALT	EVIDENCE	FTYPE	STRAND	NT_POS	AA_POS	EFFECT	LOCUS_TAG	GENE	PRODUCT
EA2454	749	snp	A	G	G:43 A:0
EA2454	977	snp	T	C	C:43 T:0
EA2454	3463	snp	C	T	T:56 C:1
EA2454	4901	snp	T	C	C:55 T:0
EA2454	6985	snp	T	C	C:55 T:0
EA2454	8399	snp	C	G	G:55 C:0
EA2454	9014	snp	C	T	T:44 C:1
EA2454	11382	snp	A	G	G:49 A:0
EA2454	11615	snp	T	G	G:61 T:0
EA2454	18933	snp	C	T	T:51 C:0
EA2454	24420	snp	T	G	G:50 T:0
EA2454	25194	snp	A	C	C:50 A:1
EA2454	25719	snp	T	C	C:59 T:0
EA2454	28509	snp	G	A	A:70 G:3
EA2454	31045	snp	G	T	T:48 G:2
EA2454	31143	snp	G	A	A:61 G:2
EA2454	31644	snp	C	T	T:54 C:1
EA2454	34322	snp	C	A	A:57 C:0
EA2454	34494	snp	T	C	C:51 T:0
EA2454	36375	snp	C	A	A:44 C:0
EA2454	37987	snp	T	C	C:41 T:0
EA2454	38677	snp	A	C	C:33 A:0
EA2454	42949	snp	T	G	G:67 T:5
EA2454	43068	snp	G	C	C:58 G:0
EA2454	48190	snp	C	A	A:54 C:0
EA2454	49192	snp	T	G	G:57 T:0
EA2454	50851	snp	A	C	C:62 A:0
EA2454	53157	snp	C	T	T:53 C:0
EA2454	54840	snp	C	T	T:64 C:1
EA2454	54992	snp	T	C	C:54 T:0
EA2454	56628	snp	A	C	C:59 A:0
EA2454	58152	snp	T	C	C:71 T:0
EA2454	63271	snp	C	T	T:65 C:0
EA2454	67315	snp	A	C	C:69 A:0
EA2454	68202	snp	A	G	G:79 A:0
EA2454	69595	snp	A	G	G:78 A:0
EA2454	74671	snp	A	G	G:67 A:0
EA2454	79118	snp	G	A	A:48 G:1
EA2454	84557	snp	T	G	G:71 T:0
EA2454	87412	snp	A	G	G:70 A:0
EA2454	88223	del	TTCAATATCAATATCAATATCAATA	T	T:24 TTCAATATCAATATCAATATCAATA:0
EA2454	88282	snp	T	C	C:45 T:0
EA2454	94250	snp	T	C	C:70 T:0
EA2454	95361	snp	C	T	T:45 C:0
EA2454	95675	del	AT	A	A:47 AT:0
EA2454	95737	del	CT	C	C:33 CT:0
EA2454	97312	snp	C	T	T:44 C:0
EA2454	101606	del	GC	G	G:54 GC:0
EA2454	105325	snp	G	T	T:50 G:1
EA2454	109299	snp	G	A	A:45 G:0
EA2454	109606	snp	G	A	A:53 G:0
EA2454	110963	snp	C	T	T:51 C:2
EA2454	111773	snp	C	G	G:60 C:0
EA2454	112319	snp	G	A	A:51 G:2
EA2454	124865	snp	T	C	C:62 T:0
EA2454	126504	snp	A	G	G:55 A:0
EA2454	131613	snp	A	G	G:59 A:0
EA2454	131667	snp	G	A	A:58 G:0
EA2454	134246	snp	C	A	A:45 C:1
EA2454	134828	snp	A	C	C:60 A:0
EA2454	137550	snp	C	T	T:52 C:1
EA2454	138031	snp	A	C	C:51 A:1
EA2454	140951	snp	T	G	G:56 T:0
EA2454	142815	snp	C	T	T:53 C:1
EA2454	144883	snp	G	A	A:66 G:3
EA2454	145428	snp	T	C	C:67 T:0
EA2454	146087	snp	A	C	C:67 A:0
EA2454	150693	snp	A	C	C:54 A:0
EA2454	158307	snp	G	A	A:50 G:4
EA2454	162528	snp	C	A	A:66 C:0
EA2454	163798	snp	T	C	C:68 T:0
EA2454	163970	del	ATT	A	A:46 ATT:0
EA2454	168669	snp	T	A	A:35 T:3
EA2454	174420	snp	A	G	G:47 A:0
EA2454	177375	snp	G	A	A:53 G:2
EA2454	183709	del	GCATTCTGCCGCGC	G	G:36 GCATTCTGCCGCGC:0
EA2454	183811	snp	G	A	A:56 G:2
EA2454	185127	ins	C	CA	CA:46 C:0
EA2454	186550	snp	T	C	C:50 T:0
EA2454	187144	snp	T	C	C:58 T:1
EA2454	187941	snp	A	G	G:55 A:0
EA2454	190313	snp	T	C	C:65 T:0
EA2454	190389	snp	C	T	T:61 C:3
EA2454	191951	snp	G	A	A:50 G:0
EA2454	204541	snp	A	T	T:57 A:0
EA2454	207302	snp	C	T	T:57 C:0
EA2454	209840	del	GA	G	G:48 GA:1
EA2454	209960	snp	C	T	T:55 C:1
EA2454	213327	snp	A	G	G:50 A:0
EA2454	217762	snp	G	A	A:72 G:1
EA2454	218007	snp	C	T	T:54 C:0
EA2454	219080	snp	T	G	G:62 T:3
EA2454	219775	snp	C	T	T:57 C:2
EA2454	220577	snp	G	A	A:35 G:0
EA2454	221141	snp	C	T	T:42 C:1
EA2454	222064	snp	C	A	A:44 C:2
EA2454	222359	snp	G	A	A:42 G:0
EA2454	232504	snp	G	A	A:59 G:2
EA2454	233746	complex	CCTCC	TCTCT	TCTCT:45 CCTCC:0
EA2454	239221	snp	A	G	G:67 A:0
EA2454	241578	snp	T	C	C:30 T:2
EA2454	242419	snp	C	T	T:55 C:0
EA2454	245301	snp	C	T	T:44 C:0
EA2454	246850	snp	T	C	C:48 T:0
EA2454	248471	snp	T	C	C:60 T:0
EA2454	254462	snp	C	T	T:53 C:2
EA2454	255936	snp	A	T	T:61 A:0
EA2454	261169	snp	A	C	C:54 A:2
EA2454	271114	snp	C	T	T:55 C:1
EA2454	272615	snp	A	T	T:68 A:0
EA2454	273078	del	GTGC	G	G:39 GTGC:1
EA2454	275599	snp	G	A	A:49 G:0
EA2454	275686	del	GAGC	G	G:55 GAGC:0
EA2454	276716	snp	C	T	T:66 C:0
EA2454	277907	snp	G	T	T:67 G:0
EA2454	278848	snp	A	G	G:76 A:0
EA2454	278978	snp	C	T	T:56 C:0
EA2454	282666	snp	C	T	T:54 C:0
EA2454	284131	snp	A	G	G:58 A:0
EA2454	285627	ins	A	AT	AT:67 A:1
EA2454	286429	snp	G	A	A:59 G:0
EA2454	286636	snp	T	G	G:55 T:2
EA2454	288870	snp	C	T	T:67 C:0
EA2454	292267	snp	C	A	A:48 C:1
EA2454	294054	snp	G	T	T:56 G:0
EA2454	295395	snp	G	A	A:51 G:1
EA2454	298286	snp	T	C	C:48 T:0
EA2454	304693	del	AT	A	A:27 AT:0
EA2454	305129	snp	G	A	A:70 G:0
EA2454	313034	snp	A	G	G:51 A:0
EA2454	317106	snp	T	C	C:58 T:0
EA2454	323459	snp	G	A	A:44 G:0
EA2454	323836	snp	G	T	T:60 G:1
EA2454	327651	snp	C	G	G:52 C:1
EA2454	327934	snp	C	T	T:56 C:1
EA2454	331665	snp	G	A	A:69 G:0
EA2454	335397	snp	A	G	G:44 A:1
EA2454	341930	snp	C	A	A:58 C:0
EA2454	343262	snp	G	T	T:74 G:0
EA2454	343988	snp	G	A	A:57 G:0
EA2454	344966	snp	T	C	C:51 T:0
EA2454	346796	snp	A	C	C:58 A:0
EA2454	350969	snp	A	G	G:49 A:0
EA2454	367885	snp	C	A	A:64 C:0
EA2454	369429	snp	T	C	C:42 T:0
EA2454	371038	snp	A	G	G:81 A:0
EA2454	371150	snp	T	C	C:69 T:0
EA2454	371977	snp	G	A	A:56 G:0
EA2454	371990	snp	G	T	T:55 G:0
EA2454	372193	snp	G	A	A:51 G:0
EA2454	380076	snp	G	A	A:60 G:2
EA2454	384068	snp	T	A	A:66 T:1
EA2454	384244	snp	G	A	A:57 G:2
EA2454	386139	snp	C	T	T:66 C:2
EA2454	387481	snp	T	A	A:68 T:0
EA2454	388702	snp	G	A	A:46 G:0
EA2454	392511	snp	T	C	C:57 T:0
EA2454	393575	snp	A	G	G:63 A:0
EA2454	393743	snp	A	G	G:51 A:1
EA2454	396055	snp	T	C	C:55 T:0
EA2454	397444	snp	C	G	G:61 C:0
EA2454	407113	snp	A	G	G:51 A:0
EA2454	407887	snp	C	G	G:55 C:0
EA2454	409884	snp	T	G	G:44 T:0
EA2454	411520	snp	T	A	A:45 T:3
EA2454	411572	snp	T	C	C:51 T:2
EA2454	413502	del	CG	C	C:68 CG:1
EA2454	416393	snp	T	A	A:54 T:0
EA2454	416875	snp	G	A	A:86 G:1
EA2454	425636	snp	A	G	G:60 A:1
EA2454	430947	snp	T	C	C:64 T:0
EA2454	437474	snp	A	G	G:48 A:0
EA2454	438119	ins	T	TG	TG:69 T:1
EA2454	438577	snp	G	A	A:64 G:0
EA2454	440837	snp	C	A	A:57 C:0
EA2454	441911	snp	T	C	C:59 T:0
EA2454	441944	snp	A	G	G:69 A:0
EA2454	443213	snp	A	G	G:52 A:0
EA2454	447459	snp	A	G	G:45 A:0
EA2454	448711	snp	A	G	G:66 A:0
EA2454	449737	snp	A	C	C:56 A:2
EA2454	451164	snp	G	A	A:68 G:0
EA2454	452711	snp	T	A	A:50 T:0
EA2454	453153	snp	G	A	A:40 G:0
EA2454	454953	snp	T	C	C:59 T:1
EA2454	455482	ins	G	GTCGC	GTCGC:31 G:2
EA2454	457082	snp	C	T	T:49 C:0
EA2454	459248	snp	A	G	G:57 A:0
EA2454	465826	snp	A	T	T:58 A:0
EA2454	468099	snp	G	A	A:55 G:2
EA2454	472911	snp	T	C	C:57 T:0
EA2454	477552	snp	G	A	A:49 G:0
EA2454	477965	snp	G	T	T:67 G:1
EA2454	478067	del	GA	G	G:54 GA:1
EA2454	478727	snp	C	A	A:52 C:0
EA2454	478958	del	CG	C	C:49 CG:0
EA2454	485022	snp	G	A	A:49 G:2
EA2454	485082	snp	T	G	G:54 T:0
EA2454	485779	snp	C	G	G:67 C:0
EA2454	486093	snp	C	T	T:39 C:0
EA2454	492568	ins	C	CA	CA:23 C:1
EA2454	496818	snp	T	A	A:64 T:2
EA2454	497400	snp	T	G	G:61 T:0
EA2454	497460	snp	T	G	G:64 T:0
EA2454	501060	snp	A	G	G:38 A:1
EA2454	506352	snp	T	G	G:58 T:0
EA2454	506381	snp	G	T	T:53 G:0
EA2454	510234	snp	T	A	A:57 T:0
EA2454	511943	snp	A	G	G:69 A:0
EA2454	512076	del	TA	T	T:50 TA:0
EA2454	519811	snp	A	C	C:69 A:0
EA2454	523715	snp	T	G	G:54 T:3
EA2454	523923	snp	C	G	G:52 C:0
EA2454	528123	snp	A	T	T:67 A:0
EA2454	534151	snp	A	G	G:60 A:0
EA2454	537287	snp	G	C	C:69 G:0
EA2454	539426	snp	T	C	C:56 T:0
EA2454	543679	snp	G	A	A:65 G:1
EA2454	546117	snp	C	T	T:43 C:0
EA2454	546428	snp	A	C	C:52 A:0
EA2454	547138	snp	T	A	A:62 T:0
EA2454	549063	snp	A	G	G:54 A:0
EA2454	550654	snp	T	C	C:63 T:0
EA2454	552561	snp	C	T	T:62 C:0
EA2454	554463	complex	GTCA	ATCG	ATCG:48 GTCA:0
EA2454	559017	snp	A	G	G:57 A:0
EA2454	559470	snp	T	C	C:58 T:0
EA2454	561226	snp	G	A	A:14 G:0
EA2454	561259	snp	C	A	A:14 C:0
EA2454	561272	snp	T	A	A:13 T:0
EA2454	562933	snp	T	C	C:46 T:0
EA2454	565030	snp	T	C	C:44 T:1
EA2454	571989	snp	C	T	T:61 C:1
EA2454	575654	snp	T	C	C:59 T:0
EA2454	588790	snp	T	G	G:76 T:1
EA2454	589102	snp	T	C	C:74 T:0
EA2454	589335	snp	A	G	G:45 A:0
EA2454	589738	snp	A	T	T:53 A:0
EA2454	590181	ins	T	TA	TA:59 T:0
EA2454	591286	snp	G	T	T:50 G:0
EA2454	595654	snp	T	C	C:65 T:0
EA2454	597386	snp	A	G	G:56 A:0
EA2454	602583	snp	A	G	G:52 A:0
EA2454	606088	ins	G	GA	GA:45 G:0
EA2454	606231	snp	T	C	C:50 T:0
EA2454	609793	snp	C	T	T:69 C:0
EA2454	610464	snp	A	C	C:71 A:0
EA2454	610623	snp	G	A	A:61 G:4
EA2454	611872	snp	A	G	G:69 A:0
EA2454	612726	snp	A	G	G:65 A:0
EA2454	613561	snp	T	C	C:68 T:2
EA2454	613906	snp	C	A	A:53 C:0
EA2454	614432	snp	A	T	T:83 A:1
EA2454	622741	snp	T	G	G:47 T:0
EA2454	623335	snp	C	A	A:45 C:2
EA2454	625047	snp	T	G	G:63 T:2
EA2454	631335	snp	T	C	C:57 T:0
EA2454	632104	snp	C	T	T:46 C:2
EA2454	635649	snp	A	C	C:59 A:0
EA2454	639663	snp	C	T	T:63 C:1
EA2454	644101	snp	A	G	G:51 A:0
EA2454	644913	snp	T	C	C:47 T:0
EA2454	656155	snp	T	G	G:52 T:1
EA2454	657820	snp	G	T	T:51 G:1
EA2454	660524	snp	G	A	A:47 G:1
EA2454	669330	snp	A	G	G:48 A:0
EA2454	674305	snp	G	C	C:55 G:0
EA2454	677981	snp	T	G	G:58 T:0
EA2454	679527	snp	G	A	A:71 G:0
EA2454	679653	snp	A	G	G:66 A:0
EA2454	681652	snp	C	A	A:37 C:2
EA2454	683177	snp	T	G	G:59 T:0
EA2454	686003	snp	A	G	G:62 A:0
EA2454	686104	snp	G	C	C:60 G:0
EA2454	687410	snp	A	G	G:53 A:0
EA2454	690408	snp	A	G	G:47 A:0
EA2454	690611	snp	T	C	C:47 T:0
EA2454	694775	snp	C	T	T:48 C:1
EA2454	697887	snp	T	C	C:57 T:1
EA2454	698327	snp	A	G	G:51 A:0
EA2454	705263	snp	C	A	A:72 C:0
EA2454	709632	snp	T	C	C:62 T:0
EA2454	710977	snp	A	G	G:59 A:0
EA2454	712612	snp	T	G	G:52 T:1
EA2454	715745	snp	T	G	G:48 T:0
EA2454	726867	snp	C	T	T:54 C:2
EA2454	728053	snp	A	G	G:57 A:2
EA2454	729913	snp	G	A	A:71 G:3
EA2454	731219	snp	T	G	G:41 T:0
EA2454	731329	snp	G	A	A:40 G:0
EA2454	733335	snp	C	T	T:58 C:0
EA2454	735016	snp	T	C	C:57 T:0
EA2454	746284	snp	C	T	T:58 C:1
EA2454	747621	snp	C	A	A:57 C:3
EA2454	748560	snp	G	C	C:49 G:0
EA2454	751988	snp	C	T	T:37 C:2
EA2454	753727	snp	T	C	C:57 T:0
EA2454	755366	snp	A	G	G:54 A:2
EA2454	756040	snp	T	G	G:70 T:0
EA2454	758394	snp	C	T	T:49 C:0
EA2454	765032	snp	T	C	C:59 T:0
EA2454	770110	snp	T	A	A:78 T:0
EA2454	770938	mnp	AG	GA	GA:76 AG:0
EA2454	771794	snp	G	C	C:83 G:0
EA2454	774045	del	GA	G	G:57 GA:0
EA2454	774920	snp	A	T	T:50 A:2
EA2454	778154	snp	A	G	G:86 A:0
EA2454	780346	snp	A	G	G:34 A:1
EA2454	780357	snp	C	T	T:42 C:1
EA2454	780376	complex	TC	CT	CT:53 TC:0
EA2454	780385	snp	G	A	A:62 G:1
EA2454	780418	complex	ATCAACG	TTCGATA	TTCGATA:77 ATCAACG:0
EA2454	780430	complex	GATT	AAGA	AAGA:77 GATT:0
EA2454	780442	snp	C	T	T:87 C:0
EA2454	780457	snp	A	G	G:94 A:0
EA2454	780478	snp	G	T	T:93 G:0
EA2454	780492	snp	C	A	A:81 C:0
EA2454	780506	complex	TGT	GGC	GGC:80 TGT:0
EA2454	780520	snp	C	A	A:77 C:0
EA2454	780618	snp	A	C	C:102 A:0
EA2454	780624	mnp	TG	AA	AA:100 TG:0
EA2454	780642	snp	A	G	G:111 A:0
EA2454	780651	snp	A	G	G:116 A:0
EA2454	780735	complex	GCGC	ACGG	ACGG:125 GCGC:0
EA2454	780750	snp	G	A	A:132 G:0
EA2454	780756	snp	C	A	A:134 C:0
EA2454	780780	snp	G	A	A:127 G:0
EA2454	780785	snp	A	G	G:134 A:0
EA2454	780797	snp	A	G	G:141 A:0
EA2454	780804	snp	A	G	G:142 A:0
EA2454	780813	snp	C	T	T:141 C:0
EA2454	780834	snp	T	C	C:138 T:0
EA2454	780852	snp	A	T	T:142 A:0
EA2454	780906	snp	C	T	T:123 C:1
EA2454	780913	snp	T	A	A:123 T:1
EA2454	780939	complex	GGCC	TGCA	TGCA:116 GGCC:0
EA2454	780966	snp	G	A	A:99 G:1
EA2454	781080	snp	A	G	G:107 A:1
EA2454	781128	snp	C	G	G:125 C:0
EA2454	781170	snp	T	A	A:113 T:0
EA2454	781226	snp	A	G	G:116 A:0
EA2454	781242	snp	T	C	C:115 T:0
EA2454	781264	snp	A	G	G:112 A:8
EA2454	786559	snp	A	C	C:58 A:0
EA2454	787809	snp	G	A	A:58 G:0
EA2454	788461	snp	G	T	T:38 G:0
EA2454	788478	del	GC	G	G:32 GC:2
EA2454	789417	snp	A	C	C:66 A:0
EA2454	790703	snp	A	C	C:71 A:0
EA2454	793051	snp	A	G	G:71 A:0
EA2454	793067	snp	G	A	A:67 G:3
EA2454	796255	snp	G	A	A:53 G:0
EA2454	796276	snp	C	A	A:54 C:0
EA2454	800237	snp	G	A	A:46 G:0
EA2454	802510	snp	G	T	T:54 G:0
EA2454	802895	snp	G	A	A:78 G:1
EA2454	803079	snp	G	A	A:46 G:0
EA2454	805105	snp	A	C	C:54 A:0
EA2454	805200	snp	G	A	A:59 G:0
EA2454	805481	snp	A	G	G:71 A:0
EA2454	817038	del	CA	C	C:56 CA:4
EA2454	817446	snp	A	G	G:64 A:0
EA2454	817985	snp	T	G	G:44 T:0
EA2454	818649	snp	A	C	C:61 A:0
EA2454	819976	snp	C	T	T:56 C:1
EA2454	821110	snp	A	C	C:64 A:0
EA2454	822872	snp	C	T	T:44 C:0
EA2454	823756	snp	G	A	A:62 G:2
EA2454	825661	snp	A	C	C:51 A:0
EA2454	830653	snp	A	C	C:66 A:0
EA2454	831717	snp	G	T	T:65 G:1
EA2454	834488	snp	T	C	C:52 T:0
EA2454	834575	ins	A	AT	AT:34 A:0
EA2454	839497	snp	T	A	A:42 T:0
EA2454	844687	snp	G	A	A:38 G:0
EA2454	849124	snp	G	A	A:61 G:1
EA2454	849614	snp	G	A	A:33 G:1
EA2454	850239	snp	C	T	T:37 C:0
EA2454	852695	snp	A	G	G:44 A:0
EA2454	856001	snp	G	A	A:47 G:0
EA2454	856304	snp	G	A	A:55 G:0
EA2454	856699	snp	A	T	T:61 A:0
EA2454	857021	snp	A	G	G:57 A:0
EA2454	863496	snp	A	G	G:46 A:0
EA2454	864446	snp	T	C	C:54 T:0
EA2454	869546	snp	C	T	T:43 C:3
EA2454	875313	snp	T	C	C:60 T:0
EA2454	880933	snp	G	A	A:54 G:1
EA2454	889463	snp	G	A	A:60 G:0
EA2454	894538	snp	C	T	T:51 C:0
EA2454	899525	ins	G	GC	GC:51 G:0
EA2454	904482	snp	A	G	G:63 A:0
EA2454	906890	snp	G	A	A:51 G:1
EA2454	919060	snp	T	G	G:72 T:0
EA2454	924579	snp	T	C	C:57 T:0
EA2454	930102	snp	A	G	G:65 A:0
EA2454	933541	snp	G	A	A:51 G:2
EA2454	937614	snp	C	T	T:54 C:0
EA2454	938195	snp	A	G	G:54 A:0
EA2454	938496	snp	C	A	A:51 C:1
EA2454	940273	del	GC	G	G:45 GC:0
EA2454	941489	snp	C	A	A:64 C:0
EA2454	945162	snp	A	G	G:44 A:0
EA2454	946875	snp	T	C	C:65 T:0
EA2454	949221	snp	C	A	A:67 C:0
EA2454	949618	complex	CTTTCGCGTTTTTTTT	TTTC	TTTC:18 CTTTCGCGTTTTTTTT:0
EA2454	949641	snp	G	T	T:31 G:0
EA2454	953284	snp	T	A	A:75 T:0
EA2454	953802	snp	A	T	T:14 A:0
EA2454	953998	snp	G	A	A:49 G:0
EA2454	962176	snp	C	T	T:49 C:0
EA2454	962197	snp	T	C	C:61 T:0
EA2454	962206	snp	A	C	C:61 A:0
EA2454	962263	snp	G	A	A:59 G:0
EA2454	962289	snp	G	T	T:57 G:0
EA2454	962367	snp	T	C	C:60 T:0
EA2454	962383	mnp	GC	TG	TG:58 GC:0
EA2454	962400	del	GCAGGT	G	G:44 GCAGGT:0
EA2454	962433	snp	C	T	T:54 C:0
EA2454	962440	snp	T	C	C:52 T:0
EA2454	962460	mnp	AGT	TTG	TTG:48 AGT:0
EA2454	962499	snp	A	G	G:49 A:0
EA2454	962516	snp	T	C	C:43 T:0
EA2454	962541	snp	T	G	G:38 T:0
EA2454	962550	snp	T	C	C:37 T:0
EA2454	962563	snp	A	G	G:45 A:0
EA2454	962606	complex	CGGTTGGCA	AGGTGGGCG	AGGTGGGCG:48 CGGTTGGCA:0
EA2454	962695	snp	A	G	G:67 A:0
EA2454	962748	snp	A	G	G:55 A:0
EA2454	962781	mnp	TGA	ACT	ACT:52 TGA:0
EA2454	962823	snp	A	G	G:50 A:0
EA2454	962845	snp	G	A	A:46 G:0
EA2454	962859	snp	A	T	T:40 A:0
EA2454	962864	mnp	TT	GG	GG:39 TT:0
EA2454	962874	snp	A	G	G:40 A:0
EA2454	962895	snp	A	G	G:38 A:0
EA2454	962910	snp	G	A	A:46 G:0
EA2454	962960	snp	A	G	G:50 A:0
EA2454	963036	snp	A	G	G:63 A:0
EA2454	963081	complex	TCCAGC	CCCGGT	CCCGGT:56 TCCAGC:0
EA2454	963144	complex	CACCGGA	TACTGGT	TACTGGT:58 CACCGGA:0
EA2454	963184	snp	A	T	T:64 A:2
EA2454	963273	snp	G	A	A:62 G:0
EA2454	963338	snp	T	C	C:65 T:0
EA2454	963390	snp	A	G	G:60 A:0
EA2454	963396	snp	C	T	T:63 C:0
EA2454	963465	snp	T	C	C:48 T:0
EA2454	963480	snp	G	A	A:45 G:3
EA2454	963513	complex	GCGC	ACGT	ACGT:39 GCGC:1
EA2454	963525	snp	T	C	C:48 T:0
EA2454	963555	snp	A	G	G:43 A:3
EA2454	963590	snp	A	G	G:46 A:2
EA2454	963600	snp	G	A	A:44 G:0
EA2454	963654	snp	A	G	G:47 A:1
EA2454	963706	snp	A	G	G:52 A:0
EA2454	963751	complex	GCCC	ACCT	ACCT:47 GCCC:1
EA2454	963769	snp	C	T	T:49 C:1
EA2454	963790	snp	A	C	C:49 A:0
EA2454	963796	complex	TCCATCG	GCCGTCA	GCCGTCA:47 TCCATCG:0
EA2454	963811	snp	C	T	T:43 C:0
EA2454	963879	snp	G	A	A:23 G:0
EA2454	964577	snp	A	G	G:25 A:0
EA2454	964586	snp	A	G	G:36 A:0
EA2454	964604	snp	T	G	G:36 T:0
EA2454	964625	complex	TCCT	CCCA	CCCA:36 TCCT:0
EA2454	964671	snp	A	G	G:36 A:0
EA2454	964703	complex	TG	CA	CA:30 TG:0
EA2454	964710	snp	T	C	C:28 T:0
EA2454	981566	del	TC	T	T:15 TC:0
EA2454	981609	snp	T	A	A:43 T:0
EA2454	981682	snp	T	A	A:56 T:0
EA2454	981692	snp	A	G	G:51 A:0
EA2454	981702	snp	G	A	A:45 G:0
EA2454	981741	snp	A	C	C:27 A:0
EA2454	983899	snp	T	C	C:49 T:1
EA2454	986640	snp	G	A	A:56 G:0
EA2454	987362	snp	T	A	A:56 T:0
EA2454	989167	snp	G	A	A:71 G:0
EA2454	989367	snp	A	T	T:54 A:1
EA2454	990058	snp	G	T	T:50 G:0
EA2454	990418	snp	C	T	T:60 C:1
EA2454	1001425	snp	A	G	G:76 A:0
EA2454	1002890	snp	C	T	T:59 C:0
EA2454	1003603	snp	A	G	G:73 A:0
EA2454	1003611	snp	C	A	A:76 C:0
EA2454	1015834	snp	A	G	G:55 A:2
EA2454	1021949	del	TCGAAGA	T	T:39 TCGAAGA:2
EA2454	1023793	snp	C	T	T:53 C:0
EA2454	1025817	snp	G	A	A:55 G:0
EA2454	1026843	snp	T	C	C:47 T:0
EA2454	1027956	snp	G	A	A:61 G:1
EA2454	1029670	snp	T	A	A:65 T:0
EA2454	1042978	snp	G	A	A:43 G:1
EA2454	1043191	snp	C	T	T:51 C:0
EA2454	1044717	snp	G	A	A:67 G:0
EA2454	1044888	snp	T	A	A:55 T:0
EA2454	1047640	snp	G	A	A:53 G:0
EA2454	1050102	snp	G	A	A:63 G:1
EA2454	1050746	snp	T	C	C:49 T:0
EA2454	1052435	snp	C	T	T:72 C:0
EA2454	1052621	snp	C	A	A:45 C:0
EA2454	1055114	snp	T	G	G:50 T:0
EA2454	1055414	snp	C	T	T:53 C:0
EA2454	1062982	snp	C	T	T:56 C:2
EA2454	1066947	snp	T	C	C:54 T:1
EA2454	1067810	ins	T	TG	TG:63 T:1
EA2454	1068806	snp	C	T	T:71 C:0
EA2454	1072860	snp	G	A	A:52 G:0
EA2454	1073559	snp	T	A	A:62 T:0
EA2454	1073767	snp	A	G	G:50 A:0
EA2454	1074029	snp	G	C	C:41 G:0
EA2454	1075753	snp	A	G	G:73 A:0
EA2454	1077208	snp	G	A	A:76 G:1
EA2454	1078828	snp	A	C	C:36 A:1
EA2454	1079000	snp	T	C	C:63 T:0
EA2454	1083045	snp	G	A	A:64 G:1
EA2454	1088099	snp	C	T	T:52 C:1
EA2454	1093309	snp	A	G	G:56 A:0
EA2454	1097356	snp	G	A	A:48 G:2
EA2454	1097467	snp	C	T	T:52 C:1
EA2454	1098620	snp	A	G	G:48 A:0
EA2454	1099453	snp	G	T	T:63 G:1
EA2454	1100113	snp	G	A	A:60 G:3
EA2454	1101458	snp	A	C	C:24 A:0
EA2454	1102661	snp	G	A	A:75 G:0
EA2454	1103332	snp	G	A	A:71 G:1
EA2454	1103669	snp	T	C	C:85 T:0
EA2454	1104984	snp	C	T	T:55 C:0
EA2454	1105586	snp	A	G	G:37 A:0
EA2454	1107899	snp	G	A	A:63 G:3
EA2454	1109672	snp	T	C	C:53 T:0
EA2454	1118913	snp	C	T	T:81 C:2
EA2454	1126572	snp	C	T	T:43 C:0
EA2454	1127119	snp	T	G	G:58 T:0
EA2454	1127311	snp	C	G	G:57 C:0
EA2454	1128458	snp	T	C	C:84 T:0
EA2454	1130101	snp	T	C	C:55 T:0
EA2454	1130623	snp	A	G	G:66 A:0
EA2454	1137206	snp	A	T	T:57 A:0
EA2454	1138215	snp	T	C	C:51 T:0
EA2454	1138883	snp	C	T	T:54 C:0
EA2454	1139565	del	CT	C	C:49 CT:0
EA2454	1139685	snp	A	C	C:62 A:0
EA2454	1140206	snp	C	T	T:59 C:0
EA2454	1140326	snp	A	G	G:73 A:0
EA2454	1144975	snp	T	C	C:61 T:0
EA2454	1145018	del	AT	A	A:45 AT:0
EA2454	1149182	snp	C	T	T:54 C:1
EA2454	1151448	snp	T	C	C:45 T:0
EA2454	1153019	snp	G	A	A:68 G:2
EA2454	1153447	snp	T	C	C:53 T:0
EA2454	1160822	snp	A	T	T:58 A:0
EA2454	1162900	snp	T	C	C:63 T:0
EA2454	1163629	snp	A	C	C:70 A:0
EA2454	1167644	snp	C	T	T:41 C:1
EA2454	1167666	snp	T	C	C:48 T:0
EA2454	1168533	snp	A	C	C:61 A:0
EA2454	1173180	snp	T	G	G:63 T:0
EA2454	1173574	snp	C	T	T:61 C:0
EA2454	1174340	snp	A	G	G:55 A:0
EA2454	1174352	snp	T	C	C:58 T:0
EA2454	1175022	snp	A	G	G:58 A:0
EA2454	1178845	snp	A	G	G:58 A:0
EA2454	1185789	snp	C	T	T:50 C:1
EA2454	1186746	snp	T	C	C:56 T:0
EA2454	1188186	snp	C	T	T:54 C:2
EA2454	1190353	snp	G	T	T:60 G:0
EA2454	1191178	snp	C	T	T:58 C:0
EA2454	1191842	snp	G	A	A:56 G:1
EA2454	1201573	snp	C	T	T:53 C:3
EA2454	1201978	snp	C	T	T:62 C:0
EA2454	1202219	snp	C	T	T:54 C:3
EA2454	1204294	snp	C	A	A:78 C:0
EA2454	1206487	snp	A	G	G:63 A:0
EA2454	1206863	snp	G	A	A:46 G:0
EA2454	1211256	snp	T	C	C:54 T:0
EA2454	1213346	snp	G	A	A:46 G:0
EA2454	1216445	snp	A	C	C:66 A:0
EA2454	1218789	snp	A	G	G:58 A:0
EA2454	1227370	snp	T	A	A:57 T:2
EA2454	1228055	snp	C	T	T:54 C:0
EA2454	1229906	snp	A	G	G:49 A:0
EA2454	1232819	snp	A	C	C:64 A:0
EA2454	1234548	snp	T	C	C:71 T:0
EA2454	1235752	snp	A	G	G:54 A:0
EA2454	1236723	snp	T	C	C:67 T:0
EA2454	1238020	snp	G	A	A:65 G:0
EA2454	1240664	snp	C	T	T:62 C:1
EA2454	1242995	snp	T	G	G:65 T:1
EA2454	1248859	snp	C	A	A:51 C:1
EA2454	1248869	snp	C	T	T:53 C:1
EA2454	1255549	snp	A	G	G:43 A:0
EA2454	1261109	snp	G	A	A:51 G:2
EA2454	1261876	snp	A	C	C:58 A:0
EA2454	1264824	snp	A	C	C:75 A:1
EA2454	1269483	snp	T	G	G:55 T:1
EA2454	1271061	snp	T	G	G:59 T:0
EA2454	1272090	snp	T	C	C:54 T:0
EA2454	1272896	snp	G	A	A:51 G:1
EA2454	1272930	snp	T	C	C:49 T:0
EA2454	1273072	snp	C	A	A:51 C:0
EA2454	1273834	snp	C	T	T:68 C:2
EA2454	1274920	snp	T	G	G:57 T:1
EA2454	1274943	snp	G	T	T:49 G:0
EA2454	1276996	snp	C	A	A:40 C:0
EA2454	1277132	snp	G	T	T:52 G:0
EA2454	1278681	snp	C	T	T:44 C:1
EA2454	1278689	snp	T	C	C:46 T:1
EA2454	1278780	snp	C	T	T:47 C:2
EA2454	1280572	snp	C	A	A:54 C:0
EA2454	1282553	snp	T	C	C:58 T:0
EA2454	1288723	snp	G	T	T:58 G:2
EA2454	1289659	snp	C	T	T:64 C:1
EA2454	1294678	snp	A	T	T:51 A:0
EA2454	1297315	snp	T	G	G:43 T:0
EA2454	1297886	snp	C	T	T:41 C:1
EA2454	1298966	snp	C	T	T:69 C:3
EA2454	1300511	del	GC	G	G:10 GC:0
EA2454	1306374	snp	G	T	T:60 G:1
EA2454	1308914	snp	G	A	A:64 G:1
EA2454	1309315	snp	T	C	C:32 T:0
EA2454	1312640	snp	T	A	A:54 T:0
EA2454	1317400	snp	G	A	A:55 G:0
EA2454	1320805	snp	A	G	G:50 A:0
EA2454	1321941	snp	A	T	T:55 A:0
EA2454	1322163	snp	T	C	C:65 T:0
EA2454	1322665	snp	T	C	C:39 T:0
EA2454	1322681	snp	C	T	T:38 C:0
EA2454	1324727	snp	C	T	T:61 C:0
EA2454	1325308	snp	G	A	A:42 G:1
EA2454	1329424	snp	G	A	A:64 G:2
EA2454	1331179	snp	T	G	G:54 T:0
EA2454	1334810	snp	C	T	T:58 C:1
EA2454	1335631	snp	T	G	G:48 T:0
EA2454	1340886	snp	A	C	C:45 A:0
EA2454	1341226	snp	G	A	A:61 G:1
EA2454	1345460	snp	T	G	G:65 T:0
EA2454	1345847	snp	T	C	C:54 T:0
EA2454	1348897	snp	C	T	T:53 C:0
EA2454	1350390	snp	T	C	C:61 T:0
EA2454	1350805	snp	G	T	T:64 G:0
EA2454	1350994	snp	G	C	C:48 G:0
EA2454	1351159	snp	C	A	A:55 C:1
EA2454	1351707	snp	G	C	C:64 G:0
EA2454	1354507	snp	C	T	T:64 C:1
EA2454	1356176	snp	G	A	A:66 G:2
EA2454	1358384	snp	A	G	G:48 A:0
EA2454	1360577	snp	A	G	G:50 A:0
EA2454	1367509	snp	C	T	T:50 C:0
EA2454	1371250	snp	T	C	C:51 T:0
EA2454	1373482	snp	T	C	C:69 T:0
EA2454	1378312	snp	T	C	C:53 T:0
EA2454	1382325	ins	G	GT	GT:37 G:0
EA2454	1383170	snp	C	T	T:54 C:0
EA2454	1385263	snp	C	A	A:57 C:0
EA2454	1387493	snp	A	G	G:43 A:0
EA2454	1388245	snp	A	C	C:51 A:0
EA2454	1388756	ins	G	GAACCGTTA	GAACCGTTA:28 G:2
EA2454	1394505	snp	A	G	G:50 A:0
EA2454	1396448	snp	T	G	G:46 T:0
EA2454	1399939	snp	A	G	G:44 A:1
EA2454	1401055	snp	G	A	A:43 G:1
EA2454	1401264	snp	A	G	G:54 A:0
EA2454	1405648	snp	T	A	A:62 T:2
EA2454	1413295	snp	T	C	C:57 T:0
EA2454	1416501	snp	A	C	C:44 A:0
EA2454	1422407	snp	A	G	G:66 A:0
EA2454	1423591	snp	A	C	C:48 A:0
EA2454	1428495	snp	A	T	T:44 A:0
EA2454	1435223	snp	G	A	A:49 G:0
EA2454	1441016	snp	G	A	A:44 G:1
EA2454	1443436	snp	T	C	C:75 T:0
EA2454	1443911	snp	C	T	T:57 C:0
EA2454	1445406	snp	G	T	T:57 G:1
EA2454	1445619	snp	G	A	A:61 G:0
EA2454	1446012	snp	T	C	C:45 T:1
EA2454	1446804	snp	G	T	T:46 G:0
EA2454	1450758	snp	T	G	G:55 T:1
EA2454	1452075	snp	T	C	C:53 T:0
EA2454	1452129	snp	T	A	A:55 T:1
EA2454	1455169	snp	G	A	A:58 G:0
EA2454	1458467	snp	A	G	G:53 A:0
EA2454	1459664	snp	T	G	G:39 T:0
EA2454	1462030	snp	C	T	T:48 C:0
EA2454	1465104	ins	G	GCCTATTA	GCCTATTA:39 G:1
EA2454	1466045	snp	C	T	T:43 C:1
EA2454	1467065	snp	A	T	T:73 A:0
EA2454	1469205	ins	A	ACT	ACT:56 A:2
EA2454	1476139	snp	T	C	C:53 T:0
EA2454	1480708	snp	T	G	G:54 T:1
EA2454	1481186	snp	C	T	T:48 C:2
EA2454	1485960	snp	C	T	T:55 C:0
EA2454	1489754	del	GCGGCACCATTGCCAGACCGCCTTC	G	G:20 GCGGCACCATTGCCAGACCGCCTTC:1
EA2454	1491226	snp	T	C	C:61 T:0
EA2454	1491674	snp	A	G	G:67 A:0
EA2454	1495581	snp	T	A	A:45 T:0
EA2454	1496916	snp	C	T	T:51 C:0
EA2454	1499077	snp	G	A	A:67 G:0
EA2454	1500517	ins	T	TA	TA:72 T:0
EA2454	1506412	snp	T	C	C:40 T:0
EA2454	1510538	snp	G	A	A:53 G:0
EA2454	1513030	snp	T	G	G:42 T:0
EA2454	1517898	snp	A	C	C:54 A:1
EA2454	1518455	snp	G	A	A:55 G:0
EA2454	1520538	snp	G	T	T:49 G:0
EA2454	1521327	del	AG	A	A:47 AG:0
EA2454	1521514	snp	C	A	A:38 C:0
EA2454	1522481	snp	A	G	G:47 A:1
EA2454	1525679	snp	C	T	T:59 C:0
EA2454	1527228	snp	G	C	C:44 G:0
EA2454	1528804	snp	C	T	T:49 C:0
EA2454	1533339	snp	A	G	G:47 A:0
EA2454	1534292	snp	A	G	G:74 A:0
EA2454	1538313	snp	T	C	C:44 T:1
EA2454	1540719	snp	C	T	T:59 C:0
EA2454	1547465	snp	G	T	T:40 G:0
EA2454	1548845	snp	T	C	C:62 T:0
EA2454	1549024	snp	G	A	A:72 G:1
EA2454	1549828	snp	T	C	C:57 T:0
EA2454	1549834	del	ACGCCATTG	A	A:46 ACGCCATTG:0
EA2454	1552706	snp	C	T	T:51 C:2
EA2454	1556519	snp	A	G	G:46 A:0
EA2454	1557698	snp	A	G	G:44 A:0
EA2454	1557966	snp	A	G	G:53 A:0
EA2454	1559525	snp	G	A	A:59 G:0
EA2454	1560679	snp	G	A	A:54 G:0
EA2454	1562488	snp	G	A	A:50 G:0
EA2454	1568544	snp	C	T	T:46 C:0
EA2454	1570233	snp	A	G	G:51 A:0
EA2454	1571981	snp	T	G	G:52 T:1
EA2454	1572176	snp	G	C	C:36 G:0
EA2454	1572215	snp	C	T	T:31 C:0
EA2454	1572563	snp	C	A	A:62 C:2
EA2454	1572713	snp	C	G	G:46 C:0
EA2454	1572970	snp	A	G	G:33 A:0
EA2454	1573803	snp	T	A	A:48 T:0
EA2454	1576710	snp	C	T	T:50 C:0
EA2454	1585906	snp	A	G	G:52 A:0
EA2454	1586462	snp	A	C	C:57 A:1
EA2454	1587792	snp	A	C	C:54 A:0
EA2454	1587844	snp	C	T	T:63 C:0
EA2454	1592505	snp	T	C	C:56 T:0
EA2454	1592854	snp	G	T	T:58 G:0
EA2454	1596170	snp	T	G	G:60 T:0
EA2454	1596282	snp	T	G	G:54 T:0
EA2454	1597496	snp	T	C	C:43 T:0
EA2454	1598906	snp	A	G	G:38 A:0
EA2454	1599804	snp	T	C	C:45 T:0
EA2454	1599906	snp	T	C	C:55 T:0
EA2454	1600216	snp	C	T	T:61 C:0
EA2454	1600919	snp	A	G	G:54 A:0
EA2454	1601060	snp	C	T	T:52 C:3
EA2454	1606254	snp	T	C	C:52 T:0
EA2454	1610209	snp	T	A	A:51 T:0
EA2454	1612435	snp	G	A	A:57 G:0
EA2454	1613406	snp	T	A	A:39 T:0
EA2454	1613463	snp	A	G	G:49 A:0
EA2454	1613776	snp	C	T	T:55 C:1
EA2454	1614409	snp	G	T	T:72 G:0
EA2454	1616396	snp	C	A	A:52 C:0
EA2454	1616428	snp	G	T	T:63 G:0
EA2454	1616872	snp	G	T	T:43 G:0
EA2454	1617684	snp	G	C	C:55 G:0
EA2454	1619097	complex	CAGCACT	GACAGCC	GACAGCC:14 CAGCACT:0
EA2454	1619109	snp	T	A	A:34 T:0
EA2454	1620052	snp	T	C	C:58 T:0
EA2454	1620909	snp	C	T	T:14 C:1
EA2454	1620915	snp	A	T	T:16 A:0
EA2454	1620945	snp	C	T	T:32 C:3
EA2454	1621026	snp	A	G	G:54 A:1
EA2454	1621037	complex	CCGCA	TTGCT	TTGCT:47 CCGCA:1
EA2454	1621050	snp	T	C	C:60 T:0
EA2454	1621065	snp	C	T	T:56 C:0
EA2454	1621073	snp	C	T	T:50 C:0
EA2454	1621137	snp	T	A	A:49 T:0
EA2454	1621188	complex	GTTAGCG	ATTGGCT	ATTGGCT:28 GTTAGCG:0
EA2454	1621200	snp	C	T	T:27 C:0
EA2454	1621221	snp	C	T	T:24 C:0
EA2454	1621227	snp	T	A	A:22 T:1
EA2454	1624005	snp	T	A	A:12 T:0
EA2454	1624047	snp	C	T	T:28 C:0
EA2454	1624074	snp	T	C	C:34 T:0
EA2454	1624086	snp	C	T	T:44 C:0
EA2454	1624119	snp	T	A	A:56 T:0
EA2454	1624130	snp	G	A	A:59 G:0
EA2454	1624137	snp	T	C	C:56 T:0
EA2454	1624153	snp	T	A	A:52 T:0
EA2454	1624159	snp	T	C	C:54 T:0
EA2454	1624217	snp	A	G	G:27 A:0
EA2454	1624256	snp	T	A	A:15 T:0
EA2454	1624262	snp	A	C	C:12 A:0
EA2454	1624263	snp	A	G	G:11 A:0
EA2454	1625151	snp	G	T	T:13 G:0
EA2454	1625175	complex	TCCG	CCCA	CCCA:23 TCCG:0
EA2454	1625193	snp	G	A	A:30 G:0
EA2454	1625205	snp	C	T	T:32 C:1
EA2454	1625235	snp	A	G	G:38 A:1
EA2454	1625258	complex	AACTA	GACTC	GACTC:51 AACTA:0
EA2454	1625280	snp	A	T	T:49 A:0
EA2454	1625298	snp	A	G	G:49 A:0
EA2454	1625361	snp	T	A	A:51 T:0
EA2454	1625376	snp	G	T	T:48 G:0
EA2454	1625382	snp	T	C	C:50 T:0
EA2454	1625390	snp	G	A	A:51 G:0
EA2454	1625406	complex	AGGC	TGGT	TGGT:45 AGGC:0
EA2454	1625417	snp	G	A	A:42 G:0
EA2454	1625424	snp	G	A	A:43 G:0
EA2454	1625430	snp	G	A	A:43 G:0
EA2454	1625455	snp	G	A	A:36 G:0
EA2454	1625460	snp	A	T	T:40 A:0
EA2454	1625475	complex	CGGT	AGGA	AGGA:38 CGGT:0
EA2454	1625505	snp	A	T	T:36 A:0
EA2454	1625519	snp	G	A	A:38 G:0
EA2454	1625559	snp	G	A	A:43 G:0
EA2454	1625589	snp	C	A	A:42 C:0
EA2454	1625637	snp	T	C	C:41 T:0
EA2454	1625649	mnp	CG	TC	TC:43 CG:0
EA2454	1625658	snp	T	C	C:45 T:0
EA2454	1625688	complex	TGTC	CATT	CATT:44 TGTC:0
EA2454	1625787	snp	G	A	A:57 G:0
EA2454	1625826	snp	T	C	C:45 T:0
EA2454	1625835	snp	A	G	G:54 A:0
EA2454	1625853	snp	T	G	G:51 T:0
EA2454	1625874	snp	T	C	C:46 T:0
EA2454	1625895	snp	A	G	G:40 A:0
EA2454	1625922	snp	T	C	C:32 T:0
EA2454	1625946	snp	T	A	A:31 T:0
EA2454	1625960	snp	A	G	G:33 A:0
EA2454	1625984	snp	T	C	C:36 T:0
EA2454	1625995	complex	TGCGCAAT	GGAACAAC	GGAACAAC:32 TGCGCAAT:0
EA2454	1626008	snp	A	T	T:29 A:0
EA2454	1626017	complex	CAAC	GAGA	GAGA:30 CAAC:0
EA2454	1626031	snp	G	A	A:28 G:0
EA2454	1626042	snp	T	C	C:36 T:0
EA2454	1626118	snp	A	G	G:26 A:0
EA2454	1626136	snp	T	C	C:19 T:0
EA2454	1626159	complex	GCCCC	ATCAA	ATCAA:18 GCCCC:0
EA2454	1626180	complex	AGAC	CGAT	CGAT:13 AGAC:0
EA2454	1629068	snp	G	A	A:12 G:0
EA2454	1629080	snp	T	C	C:14 T:1
EA2454	1629119	complex	CGCA	AGCG	AGCG:24 CGCA:0
EA2454	1629149	complex	TGGCTATA	CGGTTATG	CGGTTATG:30 TGGCTATA:0
EA2454	1629200	snp	T	C	C:49 T:0
EA2454	1629240	snp	T	C	C:44 T:0
EA2454	1629285	complex	GTAC	ATAT	ATAT:53 GTAC:0
EA2454	1629295	complex	ACAAAAT	TCTAAAC	TCTAAAC:52 ACAAAAT:0
EA2454	1629306	snp	C	G	G:55 C:0
EA2454	1629375	snp	G	A	A:43 G:0
EA2454	1629399	snp	G	A	A:34 G:0
EA2454	1629404	snp	T	A	A:29 T:0
EA2454	1629412	complex	TGAG	AGAA	AGAA:23 TGAG:0
EA2454	1629423	complex	ATATA	GTATT	GTATT:19 ATATA:0
EA2454	1629435	snp	G	A	A:19 G:0
EA2454	1634228	snp	A	G	G:55 A:1
EA2454	1635532	snp	C	T	T:63 C:0
EA2454	1636697	snp	G	A	A:50 G:0
EA2454	1642336	snp	A	G	G:59 A:0
EA2454	1649490	snp	G	A	A:53 G:0
EA2454	1652108	snp	T	C	C:36 T:0
EA2454	1652374	snp	G	A	A:34 G:1
EA2454	1659009	snp	G	A	A:40 G:1
EA2454	1659022	del	TC	T	T:35 TC:1
EA2454	1676378	snp	T	C	C:51 T:0
EA2454	1682457	snp	A	G	G:59 A:0
EA2454	1684777	snp	G	A	A:53 G:1
EA2454	1686461	snp	T	C	C:50 T:2
EA2454	1686833	snp	G	A	A:76 G:0
EA2454	1689232	snp	G	A	A:36 G:3
EA2454	1689622	snp	T	A	A:37 T:0
EA2454	1689667	snp	T	G	G:39 T:0
EA2454	1694053	snp	T	G	G:77 T:0
EA2454	1694216	snp	C	T	T:55 C:0
EA2454	1694816	snp	G	A	A:52 G:0
EA2454	1699212	snp	A	G	G:50 A:0
EA2454	1700087	snp	A	G	G:65 A:0
EA2454	1701919	snp	A	G	G:73 A:0
EA2454	1707192	snp	A	G	G:62 A:0
EA2454	1708237	snp	G	A	A:60 G:2
EA2454	1714697	snp	T	C	C:58 T:0
EA2454	1719996	snp	C	G	G:48 C:0
EA2454	1722850	snp	G	A	A:43 G:0
EA2454	1725216	snp	C	T	T:56 C:2
EA2454	1726599	snp	C	T	T:55 C:1
EA2454	1729248	snp	G	T	T:56 G:1
EA2454	1730329	snp	T	C	C:61 T:0
EA2454	1734280	snp	T	C	C:50 T:0
EA2454	1737512	snp	G	C	C:52 G:0
EA2454	1737561	snp	A	G	G:48 A:0
EA2454	1739772	del	CG	C	C:59 CG:0
EA2454	1740254	ins	G	GC	GC:45 G:2
EA2454	1740996	snp	T	G	G:49 T:3
EA2454	1742867	snp	C	A	A:70 C:0
EA2454	1745576	snp	T	C	C:56 T:0
EA2454	1748585	snp	A	C	C:77 A:0
EA2454	1749279	snp	C	T	T:49 C:0
EA2454	1760209	snp	G	A	A:63 G:0
EA2454	1763293	snp	T	C	C:66 T:0
EA2454	1770945	snp	T	C	C:54 T:0
EA2454	1773777	snp	T	G	G:62 T:5
EA2454	1778142	snp	G	T	T:63 G:0
EA2454	1779062	snp	C	T	T:48 C:2
EA2454	1780154	snp	G	A	A:52 G:2
EA2454	1784313	snp	G	C	C:63 G:0
EA2454	1786479	snp	C	T	T:61 C:1
EA2454	1786685	snp	T	C	C:56 T:0
EA2454	1789418	snp	G	A	A:42 G:2
EA2454	1794938	snp	T	G	G:48 T:0
EA2454	1795161	snp	A	G	G:59 A:0
EA2454	1796165	snp	C	T	T:46 C:2
EA2454	1796413	snp	C	G	G:56 C:2
EA2454	1797285	snp	C	T	T:46 C:0
EA2454	1799132	snp	G	A	A:51 G:0
EA2454	1802874	snp	A	G	G:41 A:0
EA2454	1803664	snp	T	C	C:42 T:0
EA2454	1803867	snp	G	T	T:55 G:1
EA2454	1805082	snp	C	T	T:50 C:0
EA2454	1806140	snp	C	G	G:57 C:3
EA2454	1810221	snp	C	T	T:47 C:0
EA2454	1816210	snp	A	G	G:70 A:0
EA2454	1817851	snp	T	A	A:49 T:0
EA2454	1818849	snp	A	G	G:56 A:0
EA2454	1820083	snp	T	C	C:66 T:0
EA2454	1820178	snp	G	A	A:65 G:0
EA2454	1824156	snp	T	C	C:55 T:0
EA2454	1824499	snp	T	C	C:46 T:0
EA2454	1824627	snp	T	C	C:38 T:1
EA2454	1825107	snp	G	A	A:56 G:0
EA2454	1825274	del	GT	G	G:54 GT:0
EA2454	1825520	snp	A	T	T:64 A:0
EA2454	1826522	snp	C	T	T:45 C:1
EA2454	1832674	snp	A	C	C:58 A:0
EA2454	1833825	snp	G	A	A:54 G:2
EA2454	1839500	snp	C	T	T:37 C:0
EA2454	1843097	snp	T	C	C:64 T:0
EA2454	1844569	snp	A	G	G:42 A:0
EA2454	1847705	snp	C	A	A:63 C:0
EA2454	1849504	snp	T	A	A:69 T:0
EA2454	1851226	snp	T	A	A:44 T:3
EA2454	1853661	snp	G	A	A:58 G:0
EA2454	1873267	snp	G	A	A:50 G:0
EA2454	1875844	snp	T	C	C:60 T:0
EA2454	1877345	snp	T	C	C:42 T:0
EA2454	1880076	snp	G	A	A:76 G:0
EA2454	1880427	snp	A	T	T:56 A:0
EA2454	1881056	snp	C	G	G:35 C:0
EA2454	1882679	snp	C	T	T:56 C:1
EA2454	1882816	snp	C	T	T:53 C:0
EA2454	1886082	snp	A	C	C:50 A:2
EA2454	1886403	snp	A	C	C:48 A:2
EA2454	1887544	snp	A	G	G:47 A:0
EA2454	1890386	snp	T	C	C:59 T:0
EA2454	1893189	snp	T	C	C:51 T:2
EA2454	1901038	snp	G	A	A:60 G:0
EA2454	1902291	snp	G	C	C:63 G:0
EA2454	1905980	snp	C	T	T:54 C:1
EA2454	1908577	snp	G	A	A:75 G:3
EA2454	1909088	snp	T	C	C:36 T:0
EA2454	1910791	snp	C	A	A:68 C:0
EA2454	1911710	snp	G	A	A:66 G:1
EA2454	1912473	snp	A	G	G:72 A:0
EA2454	1915352	snp	G	A	A:57 G:0
EA2454	1922848	snp	A	C	C:66 A:2
EA2454	1923192	snp	G	T	T:80 G:1
EA2454	1924336	snp	G	A	A:71 G:0
EA2454	1929166	snp	C	A	A:69 C:1
EA2454	1929193	ins	T	TTTA	TTTA:48 T:0
EA2454	1935002	snp	G	A	A:74 G:0
EA2454	1943816	snp	G	A	A:61 G:0
EA2454	1945608	snp	T	C	C:60 T:0
EA2454	1947499	snp	A	T	T:50 A:0
EA2454	1950298	snp	T	G	G:52 T:0
EA2454	1952310	snp	A	G	G:67 A:2
EA2454	1952951	snp	C	T	T:71 C:0
EA2454	1958733	snp	T	C	C:59 T:0
EA2454	1960341	snp	T	A	A:45 T:0
EA2454	1960620	snp	G	T	T:46 G:1
EA2454	1970713	snp	G	T	T:33 G:0
EA2454	1979564	snp	A	G	G:56 A:0
EA2454	1980186	snp	C	T	T:61 C:0
EA2454	1981261	snp	A	G	G:66 A:0
EA2454	1985819	snp	C	G	G:57 C:0
EA2454	1986170	snp	G	T	T:85 G:0
EA2454	1986333	snp	C	A	A:67 C:0
EA2454	1991121	snp	T	C	C:63 T:0
EA2454	1992128	snp	G	T	T:75 G:0
EA2454	1993746	snp	G	A	A:55 G:3
EA2454	1994834	snp	G	A	A:65 G:0
EA2454	1995211	snp	T	C	C:71 T:0
EA2454	1997790	snp	G	A	A:53 G:0
EA2454	1997936	snp	C	T	T:51 C:0
EA2454	1998697	snp	A	G	G:48 A:0
EA2454	1999636	snp	A	G	G:61 A:0
EA2454	2004630	snp	C	T	T:82 C:0
EA2454	2007738	snp	A	G	G:43 A:0
EA2454	2019044	snp	G	A	A:72 G:0
EA2454	2022103	snp	C	T	T:54 C:1
EA2454	2023105	snp	C	A	A:16 C:0
EA2454	2023117	snp	G	T	T:18 G:0
EA2454	2023335	snp	A	C	C:54 A:0
EA2454	2023644	snp	C	A	A:52 C:0
EA2454	2027149	snp	G	A	A:41 G:0
EA2454	2028282	snp	C	T	T:52 C:2
EA2454	2029759	snp	A	C	C:53 A:0
EA2454	2035670	snp	C	T	T:57 C:1
EA2454	2038119	snp	C	T	T:64 C:1
EA2454	2038279	ins	A	AAC	AAC:66 A:0
EA2454	2041809	snp	A	G	G:54 A:0
EA2454	2046204	snp	T	C	C:65 T:0
EA2454	2055836	snp	A	G	G:68 A:0
EA2454	2059644	snp	G	A	A:45 G:0
EA2454	2060675	snp	A	G	G:48 A:0
EA2454	2062156	snp	T	C	C:69 T:0
EA2454	2063839	snp	T	C	C:42 T:0
EA2454	2064750	snp	T	C	C:10 T:0
EA2454	2068297	snp	T	G	G:53 T:0
EA2454	2070162	snp	T	C	C:50 T:0
EA2454	2076167	snp	G	A	A:49 G:0
EA2454	2078028	snp	A	G	G:56 A:0
EA2454	2078477	snp	T	G	G:45 T:0
EA2454	2079477	snp	A	G	G:53 A:0
EA2454	2079564	snp	G	A	A:54 G:0
EA2454	2079621	ins	C	CA	CA:43 C:0
EA2454	2080676	del	GA	G	G:66 GA:0
EA2454	2088535	snp	C	G	G:56 C:0
EA2454	2088809	snp	A	G	G:54 A:0
EA2454	2094829	snp	T	C	C:66 T:0
EA2454	2096088	snp	A	G	G:49 A:0
EA2454	2101104	snp	G	T	T:61 G:1
EA2454	2102993	snp	T	C	C:50 T:0
EA2454	2103890	snp	C	G	G:58 C:0
EA2454	2113023	snp	C	T	T:53 C:0
EA2454	2116349	snp	G	A	A:45 G:1
EA2454	2117468	snp	A	G	G:54 A:0
EA2454	2118915	snp	C	A	A:45 C:0
EA2454	2119737	snp	T	C	C:60 T:0
EA2454	2121720	snp	G	T	T:39 G:0
EA2454	2128518	snp	G	T	T:46 G:3
EA2454	2128672	snp	G	T	T:51 G:1
EA2454	2128856	snp	A	G	G:45 A:2
EA2454	2129844	snp	C	T	T:45 C:0
EA2454	2129955	snp	C	T	T:44 C:0
EA2454	2136789	snp	T	C	C:56 T:1
EA2454	2137173	snp	G	A	A:76 G:1
EA2454	2140202	snp	A	C	C:58 A:0
EA2454	2142320	snp	T	C	C:62 T:0
EA2454	2143064	snp	G	A	A:48 G:2
EA2454	2149924	snp	A	G	G:51 A:0
EA2454	2150990	snp	G	A	A:58 G:0
EA2454	2155585	snp	T	G	G:61 T:0
EA2454	2159309	snp	G	A	A:45 G:0
EA2454	2159726	snp	C	T	T:59 C:0
EA2454	2162131	snp	G	A	A:55 G:0
EA2454	2162140	snp	G	A	A:60 G:0
EA2454	2162365	snp	A	G	G:59 A:0
EA2454	2165822	snp	C	T	T:75 C:0
EA2454	2170845	snp	G	C	C:55 G:1
EA2454	2171889	snp	A	G	G:56 A:0
EA2454	2174776	snp	T	C	C:53 T:0
EA2454	2176646	snp	G	A	A:58 G:0
EA2454	2177349	snp	T	C	C:57 T:0
EA2454	2180437	snp	A	G	G:44 A:0
EA2454	2183355	snp	T	C	C:57 T:0
EA2454	2188481	snp	C	T	T:47 C:3
EA2454	2189381	snp	A	G	G:62 A:0
EA2454	2194683	snp	G	A	A:59 G:0
EA2454	2195062	snp	T	C	C:57 T:0
EA2454	2199450	snp	T	C	C:47 T:2
EA2454	2199937	snp	A	G	G:66 A:1
EA2454	2200954	snp	C	T	T:61 C:2
EA2454	2205522	snp	C	T	T:39 C:0
EA2454	2208469	snp	T	C	C:60 T:0
EA2454	2211762	del	AG	A	A:52 AG:0
EA2454	2211929	snp	A	C	C:64 A:0
EA2454	2214997	snp	T	C	C:39 T:0
EA2454	2217705	snp	C	T	T:59 C:0
EA2454	2219331	snp	A	G	G:76 A:0
EA2454	2226088	snp	T	C	C:50 T:0
EA2454	2226298	snp	T	C	C:71 T:0
EA2454	2228600	snp	T	C	C:50 T:0
EA2454	2229269	snp	G	A	A:70 G:1
EA2454	2231783	snp	G	A	A:50 G:2
EA2454	2241190	snp	A	C	C:59 A:1
EA2454	2241418	snp	G	A	A:53 G:1
EA2454	2245025	snp	C	A	A:60 C:0
EA2454	2256445	snp	G	A	A:52 G:0
EA2454	2259197	snp	G	A	A:53 G:0
EA2454	2264243	snp	T	A	A:78 T:2
EA2454	2264678	snp	A	G	G:65 A:1
EA2454	2268389	snp	G	C	C:57 G:0
EA2454	2269067	snp	T	C	C:57 T:0
EA2454	2272408	snp	G	T	T:49 G:1
EA2454	2274105	snp	C	T	T:60 C:0
EA2454	2277880	snp	A	G	G:47 A:0
EA2454	2280911	snp	A	G	G:66 A:2
EA2454	2283117	snp	T	C	C:59 T:0
EA2454	2283880	snp	A	G	G:55 A:0
EA2454	2288758	snp	A	T	T:69 A:0
EA2454	2289041	snp	T	C	C:52 T:0
EA2454	2289818	snp	G	A	A:16 G:1
EA2454	2291772	snp	C	T	T:59 C:0
EA2454	2291863	snp	T	C	C:67 T:0
EA2454	2298963	snp	G	T	T:47 G:0
EA2454	2301511	snp	G	A	A:53 G:0
EA2454	2303912	snp	C	T	T:56 C:0
EA2454	2311767	snp	T	G	G:68 T:1
EA2454	2315924	del	CA	C	C:35 CA:0
EA2454	2322351	snp	T	C	C:24 T:0
EA2454	2327184	snp	T	G	G:71 T:2
EA2454	2329111	snp	G	A	A:48 G:2
EA2454	2334790	snp	T	C	C:45 T:2
EA2454	2335946	ins	C	CA	CA:56 C:0
EA2454	2337392	del	AT	A	A:47 AT:0
EA2454	2338392	del	AT	A	A:54 AT:1
EA2454	2338673	snp	G	A	A:78 G:0
EA2454	2346712	snp	T	C	C:57 T:1
EA2454	2346847	snp	G	T	T:56 G:0
EA2454	2347121	del	TA	T	T:58 TA:1
EA2454	2349078	snp	T	C	C:50 T:0
EA2454	2349296	snp	G	A	A:41 G:0
EA2454	2349332	snp	G	A	A:46 G:0
EA2454	2350339	snp	T	C	C:60 T:1
EA2454	2351375	snp	A	C	C:55 A:0
EA2454	2351782	snp	C	T	T:54 C:0
EA2454	2354351	snp	A	G	G:47 A:0
EA2454	2354399	snp	C	T	T:50 C:0
EA2454	2357327	snp	G	A	A:46 G:0
EA2454	2358895	snp	G	A	A:51 G:0
EA2454	2359024	snp	A	G	G:50 A:0
EA2454	2362813	snp	C	T	T:66 C:0
EA2454	2364340	snp	T	G	G:53 T:0
EA2454	2367752	snp	G	A	A:44 G:3
EA2454	2371672	snp	T	C	C:55 T:0
EA2454	2371842	snp	A	G	G:63 A:2
EA2454	2372805	snp	G	T	T:47 G:1
EA2454	2372914	snp	T	C	C:46 T:0
EA2454	2373982	snp	A	G	G:67 A:0
EA2454	2385431	snp	T	C	C:52 T:0
EA2454	2387648	snp	C	T	T:47 C:2
EA2454	2390045	snp	C	T	T:48 C:2
EA2454	2390583	snp	A	G	G:65 A:2
EA2454	2395236	snp	C	T	T:55 C:0
EA2454	2399185	del	GCGCCAT	G	G:41 GCGCCAT:1
EA2454	2403185	snp	C	T	T:46 C:1
EA2454	2403442	snp	T	C	C:53 T:0
EA2454	2405136	snp	G	A	A:50 G:0
EA2454	2407449	snp	A	G	G:61 A:0
EA2454	2411669	snp	A	G	G:64 A:0
EA2454	2412013	snp	G	A	A:62 G:2
EA2454	2416531	snp	C	T	T:51 C:0
EA2454	2419556	snp	C	T	T:57 C:0
EA2454	2424078	snp	A	G	G:43 A:0
EA2454	2428008	del	AT	A	A:56 AT:0
EA2454	2428499	snp	G	A	A:50 G:0
EA2454	2437976	snp	G	T	T:54 G:1
EA2454	2438685	snp	A	G	G:88 A:0
EA2454	2439096	snp	G	A	A:58 G:0
EA2454	2439122	snp	G	A	A:56 G:3
EA2454	2439457	snp	A	G	G:71 A:0
EA2454	2445012	snp	G	A	A:57 G:2
EA2454	2449435	snp	A	G	G:66 A:0
EA2454	2450258	snp	A	C	C:69 A:0
EA2454	2451274	snp	A	C	C:55 A:0
EA2454	2452692	snp	T	A	A:33 T:0
EA2454	2457448	snp	G	A	A:66 G:0
EA2454	2460416	snp	C	T	T:49 C:1
EA2454	2461974	snp	A	G	G:70 A:0
EA2454	2463137	snp	G	A	A:71 G:0
EA2454	2465490	snp	T	C	C:83 T:0
EA2454	2467127	snp	C	T	T:49 C:2
EA2454	2472327	snp	A	G	G:48 A:2
EA2454	2474009	snp	G	A	A:70 G:2
EA2454	2480703	snp	C	T	T:59 C:0
EA2454	2482997	snp	G	A	A:56 G:0
EA2454	2486949	snp	C	G	G:74 C:0
EA2454	2490425	snp	T	C	C:57 T:1
EA2454	2491224	snp	T	G	G:60 T:0
EA2454	2495743	snp	A	C	C:55 A:0
EA2454	2500405	snp	C	T	T:40 C:0
EA2454	2501376	snp	G	C	C:56 G:0
EA2454	2501616	snp	C	G	G:70 C:0
EA2454	2507610	snp	G	A	A:67 G:1
EA2454	2509582	snp	G	A	A:69 G:0
EA2454	2511114	del	CA	C	C:48 CA:0
EA2454	2513025	snp	A	G	G:62 A:1
EA2454	2517121	del	TC	T	T:63 TC:0
EA2454	2518728	snp	C	T	T:96 C:1
EA2454	2518906	snp	A	C	C:69 A:0
EA2454	2520770	snp	G	T	T:73 G:1
EA2454	2521382	snp	C	T	T:50 C:0
EA2454	2522720	snp	A	C	C:61 A:0
EA2454	2524981	snp	T	G	G:61 T:0
EA2454	2526802	snp	C	T	T:43 C:1
EA2454	2528246	snp	T	C	C:85 T:0
EA2454	2538679	snp	T	C	C:66 T:0
EA2454	2542786	snp	A	G	G:64 A:0
EA2454	2545121	snp	C	T	T:57 C:1
EA2454	2549137	snp	T	C	C:61 T:3
EA2454	2555441	snp	A	G	G:59 A:0
EA2454	2557964	snp	G	C	C:41 G:0
EA2454	2559290	snp	C	A	A:68 C:0
EA2454	2561008	snp	C	T	T:78 C:2
EA2454	2574887	snp	G	T	T:61 G:0
EA2454	2575684	snp	G	T	T:57 G:1
EA2454	2576037	snp	G	T	T:45 G:1
EA2454	2586095	snp	C	T	T:56 C:0
EA2454	2588080	snp	T	C	C:72 T:0
EA2454	2588771	snp	A	G	G:64 A:0
EA2454	2589008	snp	T	C	C:67 T:0
EA2454	2593010	snp	T	C	C:68 T:0
EA2454	2593479	snp	C	T	T:70 C:2
EA2454	2594067	snp	T	G	G:52 T:1
EA2454	2596704	snp	T	C	C:43 T:0
EA2454	2597428	snp	T	C	C:68 T:0
EA2454	2598783	snp	A	G	G:64 A:0
EA2454	2598908	snp	T	C	C:58 T:0
EA2454	2599359	snp	C	T	T:43 C:0
EA2454	2602336	snp	A	T	T:62 A:3
EA2454	2602481	snp	G	A	A:64 G:3
EA2454	2603698	snp	C	T	T:53 C:0
EA2454	2614529	snp	G	A	A:42 G:0
EA2454	2617140	del	TA	T	T:43 TA:0
EA2454	2621038	snp	G	C	C:57 G:3
EA2454	2621655	snp	T	C	C:51 T:0
EA2454	2622104	snp	G	T	T:55 G:0
EA2454	2624675	snp	C	T	T:50 C:0
EA2454	2629941	snp	T	G	G:59 T:0
EA2454	2630145	snp	A	G	G:60 A:0
EA2454	2630810	snp	A	G	G:54 A:0
EA2454	2631943	snp	A	G	G:78 A:0
EA2454	2632096	snp	G	C	C:79 G:0
EA2454	2634039	snp	C	T	T:74 C:0
EA2454	2636460	snp	A	G	G:54 A:0
EA2454	2641059	snp	T	C	C:48 T:0
EA2454	2642324	snp	T	C	C:61 T:0
EA2454	2644202	snp	T	G	G:52 T:0
EA2454	2647738	snp	G	A	A:50 G:0
EA2454	2652053	snp	C	T	T:54 C:1
EA2454	2654413	del	GA	G	G:47 GA:0
EA2454	2658667	snp	A	C	C:56 A:0
EA2454	2660000	snp	A	G	G:54 A:0
EA2454	2662385	del	GTAGGTTATGTGCTGGCA	G	G:27 GTAGGTTATGTGCTGGCA:0
EA2454	2662545	snp	A	G	G:57 A:0
EA2454	2664979	snp	T	C	C:65 T:0
EA2454	2665363	snp	C	T	T:75 C:1
EA2454	2669244	snp	C	T	T:36 C:0
EA2454	2672665	snp	C	T	T:25 C:0
EA2454	2675076	snp	A	C	C:37 A:0
EA2454	2679677	snp	A	G	G:47 A:0
EA2454	2680818	snp	G	A	A:53 G:3
EA2454	2685857	snp	A	G	G:58 A:3
EA2454	2697799	snp	T	C	C:72 T:0
EA2454	2701561	snp	G	A	A:61 G:1
EA2454	2705003	snp	C	T	T:76 C:1
EA2454	2707628	snp	T	C	C:55 T:0
EA2454	2722619	snp	A	G	G:63 A:0
EA2454	2723186	snp	G	T	T:49 G:1
EA2454	2723402	snp	G	A	A:59 G:0
EA2454	2726186	snp	G	A	A:54 G:1
EA2454	2734446	snp	G	A	A:42 G:0
EA2454	2740345	snp	G	A	A:65 G:0
EA2454	2740816	snp	T	C	C:65 T:0
EA2454	2743080	snp	T	G	G:57 T:0
EA2454	2748849	del	GT	G	G:17 GT:0
EA2454	2752165	snp	G	T	T:66 G:1
EA2454	2754730	snp	G	A	A:51 G:0
EA2454	2755025	snp	C	T	T:69 C:0
EA2454	2755245	snp	G	C	C:51 G:0
EA2454	2757917	snp	C	T	T:36 C:0
EA2454	2760370	snp	A	G	G:57 A:1
EA2454	2762656	snp	T	G	G:60 T:0
EA2454	2763065	snp	A	G	G:78 A:0
EA2454	2763122	snp	G	A	A:84 G:2
EA2454	2763983	snp	T	G	G:57 T:0
EA2454	2766553	snp	C	T	T:55 C:1
EA2454	2771595	snp	T	A	A:48 T:0
EA2454	2774852	snp	A	G	G:64 A:0
EA2454	2774940	ins	A	ATATCTT	ATATCTT:44 A:3
EA2454	2775069	snp	A	G	G:70 A:0
EA2454	2788030	snp	C	T	T:85 C:0
EA2454	2791703	ins	C	CA	CA:59 C:0
EA2454	2793323	snp	T	C	C:58 T:0
EA2454	2794067	snp	A	G	G:69 A:0
EA2454	2800274	snp	A	G	G:44 A:0
EA2454	2800374	snp	G	A	A:45 G:0
EA2454	2803019	snp	A	C	C:44 A:0
EA2454	2807063	snp	T	C	C:60 T:0
EA2454	2808747	snp	A	G	G:63 A:0
EA2454	2808849	snp	T	C	C:73 T:1
EA2454	2809435	snp	G	C	C:54 G:0
EA2454	2815762	snp	A	G	G:45 A:0
EA2454	2816107	snp	C	A	A:61 C:0
EA2454	2821018	snp	G	A	A:14 G:0
EA2454	2821038	complex	ACTCG	CCTCA	CCTCA:10 ACTCG:0
EA2454	2825517	snp	G	C	C:72 G:0
EA2454	2826312	snp	G	A	A:50 G:0
EA2454	2829323	snp	G	A	A:59 G:0
EA2454	2829690	snp	G	C	C:50 G:0
EA2454	2830144	snp	C	T	T:50 C:0
EA2454	2834856	snp	A	G	G:49 A:0
EA2454	2837636	snp	T	C	C:61 T:0
EA2454	2837652	snp	A	G	G:63 A:0
EA2454	2843028	snp	C	G	G:45 C:0
EA2454	2846074	snp	A	G	G:36 A:3
EA2454	2847080	snp	T	C	C:43 T:0
EA2454	2850370	snp	A	C	C:49 A:0
EA2454	2850573	snp	C	T	T:62 C:0
EA2454	2851743	snp	T	A	A:42 T:0
EA2454	2852300	snp	T	C	C:57 T:0
EA2454	2854302	snp	G	A	A:59 G:0
EA2454	2855068	snp	C	A	A:56 C:0
EA2454	2855484	snp	T	C	C:53 T:0
EA2454	2860024	snp	T	G	G:50 T:0
EA2454	2865701	snp	T	C	C:49 T:0
EA2454	2866690	snp	G	A	A:60 G:0
EA2454	2870908	snp	C	T	T:41 C:1
EA2454	2872360	snp	A	G	G:61 A:0
EA2454	2876151	snp	T	C	C:79 T:0
EA2454	2876549	snp	T	C	C:79 T:1
EA2454	2877998	snp	C	T	T:52 C:0
EA2454	2878547	snp	G	T	T:53 G:0
EA2454	2881008	snp	G	C	C:72 G:0
EA2454	2883184	snp	T	C	C:58 T:0
EA2454	2886666	snp	A	G	G:48 A:1
EA2454	2887967	snp	T	C	C:54 T:0
EA2454	2891311	snp	T	C	C:63 T:0
EA2454	2891496	snp	G	A	A:46 G:2
EA2454	2892438	snp	A	C	C:50 A:0
EA2454	2897061	snp	A	G	G:57 A:2
EA2454	2900274	snp	G	T	T:55 G:2
EA2454	2901111	snp	A	G	G:53 A:0
EA2454	2903547	snp	C	A	A:41 C:0
EA2454	2905871	snp	A	G	G:57 A:0
EA2454	2908556	snp	G	A	A:66 G:0
EA2454	2911538	snp	C	T	T:51 C:1
EA2454	2912364	snp	G	A	A:37 G:0
EA2454	2924842	snp	C	T	T:50 C:2
EA2454	2927920	snp	T	C	C:50 T:0
EA2454	2929873	snp	T	A	A:66 T:1
EA2454	2931389	snp	T	G	G:66 T:0
EA2454	2932901	snp	C	T	T:66 C:1
EA2454	2934279	snp	A	G	G:59 A:0
EA2454	2936695	snp	A	G	G:60 A:0
EA2454	2936840	snp	A	G	G:52 A:2
EA2454	2937585	snp	A	G	G:46 A:0
EA2454	2939135	ins	A	AT	AT:37 A:1
EA2454	2940019	snp	C	A	A:45 C:1
EA2454	2941498	snp	G	A	A:43 G:0
EA2454	2942637	snp	C	A	A:38 C:2
EA2454	2944014	snp	T	G	G:56 T:0
EA2454	2945610	snp	G	A	A:59 G:0
EA2454	2949959	snp	G	T	T:53 G:1
EA2454	2952105	complex	AG	GA	GA:47 AG:0
EA2454	2952133	del	AT	A	A:36 AT:0
EA2454	2954775	snp	T	C	C:215 T:0
EA2454	2956003	snp	T	A	A:51 T:0
EA2454	2957495	ins	T	TA	TA:53 T:0
EA2454	2959121	snp	T	A	A:71 T:0
EA2454	2959641	snp	T	C	C:56 T:0
EA2454	2959885	snp	A	G	G:71 A:1
EA2454	2960351	del	GT	G	G:58 GT:0
EA2454	2961206	snp	G	A	A:57 G:0
EA2454	2961539	snp	A	G	G:61 A:0
EA2454	2963100	snp	G	A	A:56 G:0
EA2454	2967930	snp	A	G	G:64 A:0
EA2454	2969025	del	TA	T	T:73 TA:0
EA2454	2969936	snp	G	A	A:75 G:0
EA2454	2973622	snp	G	A	A:69 G:0
EA2454	2976471	snp	G	A	A:55 G:0
EA2454	2977817	snp	G	A	A:71 G:0
EA2454	2978308	snp	G	A	A:63 G:4
EA2454	2981338	ins	C	CA	CA:43 C:1
EA2454	2982636	snp	G	A	A:57 G:1
EA2454	2987116	snp	T	A	A:54 T:0
EA2454	2988598	snp	A	T	T:50 A:0
EA2454	2990638	snp	T	C	C:51 T:0
EA2454	2990883	snp	G	A	A:55 G:1
EA2454	2994480	snp	T	G	G:60 T:0
EA2454	2995599	snp	T	C	C:59 T:0
EA2454	2997484	snp	G	A	A:39 G:1
EA2454	2998717	snp	A	G	G:53 A:0
EA2454	2999923	snp	G	A	A:43 G:0
EA2454	2999976	snp	C	G	G:39 C:0
EA2454	3001693	snp	G	A	A:57 G:3
EA2454	3002747	snp	G	A	A:60 G:2
EA2454	3012253	snp	A	C	C:56 A:1
EA2454	3016415	snp	C	T	T:70 C:2
EA2454	3017369	snp	T	C	C:82 T:0
EA2454	3018371	snp	C	T	T:13 C:0
EA2454	3018866	snp	G	A	A:67 G:0
EA2454	3019039	snp	C	A	A:61 C:1
EA2454	3019334	snp	T	C	C:56 T:0
EA2454	3020251	snp	T	C	C:58 T:0
EA2454	3020265	snp	G	A	A:57 G:3
EA2454	3020309	snp	A	G	G:44 A:2
EA2454	3020345	snp	T	A	A:30 T:2
EA2454	3029425	snp	G	A	A:57 G:0
EA2454	3030447	snp	C	T	T:61 C:0
EA2454	3030873	snp	C	T	T:58 C:0
EA2454	3031948	snp	C	T	T:47 C:0
EA2454	3032015	snp	A	C	C:53 A:0
EA2454	3034003	snp	T	G	G:38 T:0
EA2454	3034753	snp	G	A	A:53 G:0
EA2454	3040546	snp	G	C	C:49 G:0
EA2454	3041125	snp	T	G	G:49 T:0
EA2454	3041658	snp	C	T	T:54 C:1
EA2454	3042404	snp	T	A	A:54 T:2
EA2454	3043945	snp	A	T	T:48 A:1
EA2454	3044311	snp	C	T	T:52 C:1
EA2454	3046123	snp	C	T	T:50 C:0
EA2454	3048915	snp	G	A	A:48 G:2
EA2454	3049217	snp	G	A	A:45 G:0
EA2454	3052301	snp	C	T	T:50 C:0
EA2454	3052334	snp	G	T	T:52 G:0
EA2454	3052652	snp	T	C	C:59 T:0
EA2454	3052992	snp	G	C	C:56 G:0
EA2454	3054734	snp	T	C	C:66 T:0
EA2454	3056593	del	TATG	T	T:67 TATG:0
EA2454	3056863	snp	T	G	G:61 T:0
EA2454	3057242	snp	A	G	G:62 A:0
EA2454	3059019	snp	G	T	T:51 G:2
EA2454	3059689	snp	A	T	T:56 A:0
EA2454	3059698	snp	A	T	T:50 A:0
EA2454	3060682	del	TG	T	T:47 TG:2
EA2454	3062076	snp	C	T	T:55 C:0
EA2454	3062431	snp	A	G	G:64 A:0
EA2454	3089096	snp	T	C	C:60 T:0
EA2454	3090338	snp	T	G	G:53 T:1
EA2454	3091335	snp	T	C	C:39 T:0
EA2454	3091625	snp	G	A	A:55 G:2
EA2454	3093850	snp	T	C	C:72 T:2
EA2454	3099129	snp	T	C	C:64 T:0
EA2454	3100586	snp	T	C	C:63 T:0
EA2454	3101552	snp	G	A	A:49 G:1
EA2454	3101721	snp	C	T	T:58 C:3
EA2454	3101851	snp	A	G	G:59 A:0
EA2454	3102426	snp	G	A	A:54 G:1
EA2454	3102717	snp	T	C	C:59 T:0
EA2454	3103884	snp	C	T	T:61 C:4
EA2454	3109017	snp	C	T	T:64 C:0
EA2454	3112595	ins	C	CG	CG:47 C:0
EA2454	3112890	snp	A	G	G:39 A:0
EA2454	3115102	snp	G	A	A:51 G:2
EA2454	3115226	snp	C	A	A:45 C:0
EA2454	3115749	snp	T	A	A:50 T:0
EA2454	3117020	snp	C	G	G:62 C:0
EA2454	3120654	snp	T	C	C:65 T:0
EA2454	3122672	snp	T	G	G:58 T:0
EA2454	3125212	snp	A	G	G:57 A:0
EA2454	3127544	snp	C	T	T:64 C:2
EA2454	3129270	snp	T	C	C:47 T:0
EA2454	3133556	snp	G	T	T:46 G:0
EA2454	3135617	snp	A	C	C:57 A:0
EA2454	3140777	snp	T	C	C:42 T:0
EA2454	3149336	snp	C	T	T:56 C:0
EA2454	3154924	snp	G	A	A:70 G:6
EA2454	3158282	snp	G	A	A:47 G:2
EA2454	3158876	snp	G	A	A:54 G:0
EA2454	3175254	snp	T	C	C:79 T:0
EA2454	3181315	snp	T	C	C:59 T:0
EA2454	3181655	snp	T	C	C:62 T:0
EA2454	3183174	snp	C	T	T:54 C:1
EA2454	3184847	snp	C	T	T:67 C:1
EA2454	3184893	snp	T	C	C:71 T:0
EA2454	3186349	snp	C	T	T:66 C:0
EA2454	3188469	snp	T	C	C:77 T:0
EA2454	3188675	snp	T	A	A:66 T:0
EA2454	3189537	snp	G	T	T:82 G:0
EA2454	3189816	snp	G	A	A:63 G:3
EA2454	3191289	ins	C	CA	CA:58 C:0
EA2454	3192534	snp	T	G	G:71 T:0
EA2454	3193163	snp	T	C	C:73 T:0
EA2454	3196063	snp	T	C	C:90 T:0
EA2454	3197243	snp	T	C	C:59 T:0
EA2454	3202011	snp	G	T	T:52 G:1
EA2454	3202255	snp	A	G	G:59 A:0
EA2454	3202854	snp	C	A	A:51 C:0
EA2454	3211809	snp	T	C	C:59 T:0
EA2454	3213292	snp	A	C	C:70 A:0
EA2454	3214012	snp	T	C	C:38 T:0
EA2454	3215231	snp	C	A	A:57 C:0
EA2454	3217453	snp	G	A	A:51 G:1
EA2454	3218193	snp	T	G	G:57 T:0
EA2454	3218486	snp	C	A	A:45 C:0
EA2454	3218535	snp	G	A	A:45 G:0
EA2454	3219322	snp	C	A	A:69 C:1
EA2454	3220493	snp	G	A	A:58 G:1
EA2454	3224798	snp	A	G	G:45 A:0
EA2454	3225442	snp	G	A	A:52 G:1
EA2454	3226603	snp	C	G	G:60 C:0
EA2454	3227459	snp	C	T	T:57 C:1
EA2454	3228112	snp	A	G	G:53 A:0
EA2454	3229214	snp	C	T	T:52 C:1
EA2454	3234010	snp	A	T	T:52 A:0
EA2454	3237622	snp	G	A	A:42 G:0
EA2454	3239326	snp	T	A	A:55 T:2
EA2454	3242340	snp	A	G	G:64 A:0
EA2454	3242394	snp	C	T	T:59 C:2
EA2454	3260256	del	GT	G	G:42 GT:0
EA2454	3263384	snp	T	C	C:63 T:0
EA2454	3268326	snp	G	A	A:62 G:0
EA2454	3270859	snp	C	T	T:64 C:0
EA2454	3271358	snp	T	C	C:75 T:0
EA2454	3271995	snp	T	G	G:64 T:0
EA2454	3272561	snp	G	T	T:66 G:0
EA2454	3277152	snp	C	T	T:69 C:1
EA2454	3277904	snp	C	A	A:32 C:0
EA2454	3281767	ins	G	GC	GC:52 G:0
EA2454	3285026	snp	G	A	A:57 G:1
EA2454	3286471	snp	C	T	T:75 C:1
EA2454	3297740	snp	A	G	G:65 A:0
EA2454	3298712	snp	G	A	A:41 G:1
EA2454	3302868	snp	T	G	G:51 T:0
EA2454	3305295	snp	A	G	G:40 A:0
EA2454	3305988	snp	G	C	C:69 G:0
EA2454	3309561	snp	T	C	C:83 T:0
EA2454	3310504	snp	T	C	C:11 T:0
EA2454	3310578	snp	A	G	G:11 A:0
EA2454	3310993	snp	G	T	T:65 G:0
EA2454	3315651	snp	C	T	T:47 C:0
EA2454	3315930	snp	C	T	T:58 C:0
EA2454	3315951	snp	A	G	G:58 A:0
EA2454	3316403	snp	G	A	A:50 G:3
EA2454	3322228	snp	T	C	C:45 T:0
EA2454	3339564	del	CTCAGAT	C	C:48 CTCAGAT:0
EA2454	3339669	snp	C	T	T:65 C:0
EA2454	3339706	snp	G	T	T:64 G:1
EA2454	3340001	snp	G	T	T:44 G:0
EA2454	3363780	snp	T	C	C:46 T:1
EA2454	3370712	snp	C	T	T:46 C:0
EA2454	3372955	snp	A	C	C:47 A:0
EA2454	3374533	snp	G	T	T:58 G:0
EA2454	3376228	snp	A	G	G:59 A:0
EA2454	3381441	snp	A	G	G:53 A:0
EA2454	3384239	snp	G	T	T:67 G:0
EA2454	3385781	snp	G	C	C:70 G:0
EA2454	3387527	snp	G	A	A:63 G:0
EA2454	3387556	snp	T	A	A:59 T:0
EA2454	3396121	snp	A	C	C:52 A:3
EA2454	3399287	snp	G	A	A:61 G:0
EA2454	3399374	snp	T	C	C:61 T:0
EA2454	3399944	del	AC	A	A:54 AC:0
EA2454	3404817	snp	G	A	A:51 G:0
EA2454	3407862	snp	T	C	C:51 T:0
EA2454	3408603	snp	C	T	T:66 C:1
EA2454	3409575	snp	G	A	A:11 G:0
EA2454	3416393	snp	G	A	A:32 G:0
EA2454	3419190	snp	G	T	T:70 G:2
EA2454	3426445	snp	T	C	C:59 T:0
EA2454	3426608	snp	G	T	T:73 G:2
EA2454	3428770	snp	C	T	T:50 C:0
EA2454	3430430	snp	T	G	G:72 T:2
EA2454	3434970	snp	A	T	T:52 A:1
EA2454	3437740	snp	G	A	A:57 G:1
EA2454	3439696	snp	T	A	A:60 T:0
EA2454	3440338	snp	C	T	T:50 C:0
EA2454	3441887	snp	T	C	C:63 T:0
EA2454	3441936	snp	A	G	G:57 A:0
EA2454	3442425	snp	C	T	T:70 C:5
EA2454	3451444	snp	C	T	T:63 C:0
EA2454	3452783	snp	T	C	C:60 T:0
EA2454	3458029	snp	A	T	T:62 A:1
EA2454	3458808	snp	C	T	T:72 C:0
EA2454	3459421	ins	C	CTT	CTT:15 C:0
EA2454	3462462	snp	T	C	C:72 T:0
EA2454	3462699	snp	A	G	G:49 A:0
EA2454	3464527	snp	C	T	T:51 C:0
EA2454	3526016	snp	G	A	A:52 G:0
EA2454	3527982	ins	G	GA	GA:48 G:0
EA2454	3532345	snp	A	G	G:48 A:1
EA2454	3536376	snp	T	C	C:62 T:0
EA2454	3539749	snp	T	C	C:34 T:0
EA2454	3541017	snp	C	G	G:42 C:0
EA2454	3541034	snp	A	T	T:42 A:0
EA2454	3545718	snp	G	A	A:62 G:2
EA2454	3547586	snp	T	C	C:51 T:0
EA2454	3547948	snp	T	C	C:72 T:0
EA2454	3548625	snp	G	C	C:41 G:0
EA2454	3549378	snp	G	A	A:49 G:1
EA2454	3549557	snp	C	G	G:56 C:1
EA2454	3550771	snp	G	A	A:69 G:2
EA2454	3554241	complex	GCCG	ACCA	ACCA:13 GCCG:0
EA2454	3554281	snp	T	C	C:14 T:0
EA2454	3554302	snp	G	T	T:24 G:0
EA2454	3555243	snp	G	T	T:70 G:1
EA2454	3556358	snp	T	A	A:56 T:2
EA2454	3559833	snp	C	A	A:55 C:1
EA2454	3562860	snp	T	A	A:51 T:2
EA2454	3566015	snp	T	C	C:77 T:0
EA2454	3566442	snp	G	A	A:60 G:0
EA2454	3566551	snp	G	T	T:60 G:1
EA2454	3570388	snp	C	T	T:50 C:0
EA2454	3574087	snp	A	T	T:62 A:0
EA2454	3574182	snp	C	T	T:60 C:0
EA2454	3575497	snp	C	T	T:48 C:0
EA2454	3577922	snp	A	G	G:48 A:0
EA2454	3579202	snp	G	T	T:52 G:0
EA2454	3581527	snp	C	T	T:61 C:1
EA2454	3586999	snp	G	T	T:55 G:0
EA2454	3588154	snp	A	G	G:83 A:0
EA2454	3589084	del	TTG	T	T:60 TTG:0
EA2454	3589782	snp	G	A	A:73 G:0
EA2454	3590214	snp	T	C	C:64 T:0
EA2454	3592640	snp	T	C	C:57 T:0
EA2454	3595770	snp	T	G	G:52 T:0
EA2454	3596724	snp	C	A	A:52 C:0
EA2454	3599412	snp	G	A	A:48 G:0
EA2454	3602253	snp	C	A	A:51 C:0
EA2454	3602569	snp	C	A	A:46 C:0
EA2454	3605333	snp	T	G	G:62 T:0
EA2454	3605451	snp	C	T	T:59 C:0
EA2454	3606636	snp	A	G	G:36 A:0
EA2454	3611073	snp	A	G	G:53 A:0
EA2454	3613661	snp	G	A	A:54 G:0
EA2454	3615292	snp	T	G	G:57 T:0
EA2454	3615330	snp	A	C	C:66 A:0
EA2454	3628177	snp	C	T	T:60 C:3
EA2454	3628344	snp	C	T	T:65 C:4
EA2454	3628517	snp	A	G	G:59 A:0
EA2454	3632526	snp	C	A	A:63 C:0
EA2454	3633379	snp	C	G	G:69 C:0
EA2454	3634246	snp	A	T	T:70 A:0
EA2454	3634750	snp	C	T	T:74 C:0
EA2454	3637785	snp	T	C	C:56 T:0
EA2454	3638418	snp	G	A	A:52 G:0
EA2454	3640661	snp	A	G	G:65 A:0
EA2454	3643420	snp	G	A	A:42 G:0
EA2454	3644076	snp	A	C	C:45 A:1
EA2454	3645952	snp	G	A	A:46 G:0
EA2454	3645978	snp	G	A	A:49 G:0
EA2454	3653182	snp	A	C	C:18 A:0
EA2454	3654530	snp	C	T	T:69 C:2
EA2454	3657942	snp	T	G	G:54 T:0
EA2454	3658831	snp	A	G	G:52 A:2
EA2454	3662284	snp	A	G	G:62 A:0
EA2454	3665749	snp	G	A	A:49 G:0
EA2454	3671359	snp	G	A	A:14 G:0
EA2454	3681840	snp	G	T	T:49 G:0
EA2454	3682843	snp	T	G	G:50 T:0
EA2454	3685381	snp	A	G	G:70 A:1
EA2454	3690798	snp	G	A	A:52 G:0
EA2454	3690835	snp	T	G	G:50 T:0
EA2454	3692726	snp	A	G	G:52 A:0
EA2454	3698625	snp	G	T	T:44 G:1
EA2454	3700744	snp	A	C	C:46 A:1
EA2454	3700974	snp	T	C	C:38 T:0
EA2454	3701518	snp	C	T	T:65 C:0
EA2454	3701536	snp	T	C	C:61 T:2
EA2454	3701756	snp	A	G	G:42 A:0
EA2454	3703345	snp	C	T	T:39 C:0
EA2454	3708037	snp	G	A	A:58 G:0
EA2454	3708538	snp	G	T	T:48 G:0
EA2454	3711140	snp	G	A	A:62 G:1
EA2454	3717930	snp	G	A	A:55 G:0
EA2454	3723048	snp	C	T	T:61 C:2
EA2454	3723243	snp	C	T	T:49 C:1
EA2454	3723268	snp	C	G	G:55 C:0
EA2454	3726578	snp	G	A	A:56 G:1
EA2454	3732121	snp	A	G	G:74 A:0
EA2454	3732271	ins	A	ATCACCT	ATCACCT:40 A:4
EA2454	3733930	snp	G	A	A:51 G:0
EA2454	3735311	snp	G	A	A:53 G:1
EA2454	3739482	snp	A	G	G:49 A:0
EA2454	3741477	snp	C	T	T:64 C:0
EA2454	3749924	snp	G	A	A:74 G:0
EA2454	3750262	del	GAA	G	G:37 GAA:0
EA2454	3750813	snp	G	C	C:71 G:0
EA2454	3755386	snp	C	T	T:76 C:0
EA2454	3756054	snp	T	C	C:71 T:0
EA2454	3758574	snp	G	T	T:64 G:0
EA2454	3759726	snp	G	C	C:61 G:0
EA2454	3760117	snp	A	G	G:59 A:0
EA2454	3762493	snp	A	T	T:73 A:0
EA2454	3762934	snp	G	A	A:57 G:0
EA2454	3763208	snp	A	G	G:65 A:1
EA2454	3766157	snp	G	A	A:57 G:0
EA2454	3770075	snp	G	T	T:59 G:0
EA2454	3772277	snp	T	A	A:39 T:0
EA2454	3775531	snp	G	C	C:56 G:0
EA2454	3778376	snp	A	C	C:60 A:0
EA2454	3780221	snp	C	A	A:51 C:2
EA2454	3790843	snp	G	A	A:72 G:0
EA2454	3793091	snp	C	T	T:46 C:1
EA2454	3794870	snp	C	T	T:52 C:0
EA2454	3795140	snp	T	C	C:40 T:0
EA2454	3796004	snp	G	A	A:52 G:0
EA2454	3803222	snp	C	T	T:58 C:2
EA2454	3806381	snp	C	T	T:61 C:0
EA2454	3806429	ins	T	TGCCGCCA	TGCCGCCA:49 T:0
EA2454	3806455	snp	G	A	A:61 G:0
EA2454	3807575	snp	A	G	G:64 A:0
EA2454	3807927	snp	C	T	T:54 C:0
EA2454	3808806	snp	C	G	G:64 C:0
EA2454	3810928	snp	T	G	G:61 T:0
EA2454	3815430	snp	T	C	C:48 T:0
EA2454	3816604	snp	C	T	T:62 C:0
EA2454	3817327	del	TA	T	T:60 TA:0
EA2454	3817795	snp	A	T	T:41 A:0
EA2454	3817819	complex	AGC	CGT	CGT:43 AGC:0
EA2454	3817832	snp	C	A	A:40 C:0
EA2454	3817838	complex	AGGTGC	GATAAGGCGT	GATAAGGCGT:32 AGGTGC:0
EA2454	3820481	ins	A	AGTAATC	AGTAATC:39 A:1
EA2454	3822478	snp	A	G	G:68 A:1
EA2454	3823827	snp	G	T	T:58 G:0
EA2454	3824263	snp	T	A	A:54 T:0
EA2454	3829760	del	CT	C	C:64 CT:2
EA2454	3834340	snp	C	T	T:31 C:0
EA2454	3837457	snp	C	A	A:41 C:0
EA2454	3837669	snp	A	G	G:53 A:0
EA2454	3838289	snp	C	T	T:69 C:1
EA2454	3839236	snp	T	G	G:60 T:0
EA2454	3839586	snp	G	A	A:72 G:1
EA2454	3840206	snp	C	T	T:49 C:0
EA2454	3842198	ins	C	CT	CT:41 C:0
EA2454	3842325	ins	C	CA	CA:53 C:0
EA2454	3844395	snp	T	C	C:64 T:0
EA2454	3844764	snp	T	G	G:53 T:0
EA2454	3845850	snp	C	T	T:55 C:1
EA2454	3851565	complex	TAAACA	CAGATG	CAGATG:16 TAAACA:0
EA2454	3851580	complex	AC	TT	TT:22 AC:0
EA2454	3851623	snp	C	T	T:50 C:0
EA2454	3851632	complex	GAAG	AAAA	AAAA:59 GAAG:0
EA2454	3851667	snp	A	G	G:74 A:0
EA2454	3851703	snp	A	G	G:85 A:0
EA2454	3851770	complex	TAGCC	CAGCG	CAGCG:86 TAGCC:0
EA2454	3851842	snp	C	T	T:95 C:0
EA2454	3851858	complex	CCC	TCT	TCT:87 CCC:0
EA2454	3851865	complex	CCAGT	GCAGC	GCAGC:85 CCAGT:0
EA2454	3851884	complex	CTT	ACCCC	ACCCC:73 CTT:0
EA2454	3851901	snp	C	T	T:85 C:0
EA2454	3851915	complex	TAATCA	CAACCAG	CAACCAG:74 TAATCA:0
EA2454	3851938	del	GA	G	G:71 GA:0
EA2454	3851976	snp	T	G	G:87 T:0
EA2454	3852607	complex	CCGTT	TCGTC	TCGTC:230 CCGTT:0
EA2454	3852799	snp	A	G	G:208 A:0
EA2454	3852999	snp	T	C	C:183 T:0
EA2454	3853739	snp	T	G	G:21 T:1
EA2454	3853744	snp	G	A	A:16 G:0
EA2454	3854040	complex	ATC	TTT	TTT:14 ATC:0
EA2454	3854059	complex	GGTTC	TGTCT	TGTCT:14 GGTTC:0
EA2454	3854068	complex	AAAAATTAACATGATT	CAAAGTAAATGCGATA	CAAAGTAAATGCGATA:14 AAAAATTAACATGATT:0
EA2454	3854090	snp	A	C	C:33 A:0
EA2454	3854107	snp	A	G	G:45 A:0
EA2454	3854128	mnp	CC	TA	TA:56 CC:0
EA2454	3854134	snp	A	G	G:56 A:0
EA2454	3854140	snp	T	A	A:56 T:0
EA2454	3854159	snp	T	C	C:72 T:0
EA2454	3854206	snp	G	A	A:106 G:0
EA2454	3854212	snp	C	T	T:113 C:0
EA2454	3854218	snp	A	T	T:122 A:0
EA2454	3854281	snp	A	G	G:115 A:0
EA2454	3854337	snp	G	A	A:99 G:0
EA2454	3854347	snp	C	A	A:86 C:0
EA2454	3854412	snp	T	A	A:43 T:0
EA2454	3854428	complex	GTTG	CTTC	CTTC:45 GTTG:0
EA2454	3854442	complex	AAGAA	CAGAG	CAGAG:52 AAGAA:0
EA2454	3854458	snp	C	T	T:50 C:4
EA2454	3854465	snp	A	G	G:49 A:4
EA2454	3854476	complex	TC	AA	AA:45 TC:4
EA2454	3854551	complex	GTCTGAA	TTCTCTC	TTCTCTC:15 GTCTGAA:0
EA2454	3854563	snp	T	C	C:15 T:0
EA2454	3855822	complex	GCA	CAG	CAG:133 GCA:2
EA2454	3855884	snp	C	T	T:210 C:0
EA2454	3856015	ins	T	TA	TA:218 T:0
EA2454	3856047	complex	AAAG	GAAA	GAAA:264 AAAG:0
EA2454	3856149	snp	T	A	A:287 T:0
EA2454	3856242	snp	T	A	A:256 T:0
EA2454	3858690	complex	AGCC	CGCT	CGCT:165 AGCC:0
EA2454	3858705	complex	TGGT	CGGC	CGGC:169 TGGT:0
EA2454	3858717	snp	G	T	T:168 G:0
EA2454	3863406	snp	T	C	C:211 T:1
EA2454	3863481	complex	CAGG	TAAA	TAAA:181 CAGG:0
EA2454	3863490	snp	C	G	G:201 C:0
EA2454	3863532	complex	ATCG	GTCA	GTCA:180 ATCG:0
EA2454	3863559	snp	G	A	A:185 G:0
EA2454	3863700	snp	G	A	A:205 G:0
EA2454	3863732	snp	A	G	G:204 A:0
EA2454	3863740	snp	T	C	C:199 T:0
EA2454	3863840	snp	T	C	C:217 T:0
EA2454	3863865	complex	ACG	GCA	GCA:201 ACG:0
EA2454	3863900	snp	T	G	G:203 T:0
EA2454	3863924	snp	A	T	T:185 A:0
EA2454	3863957	snp	T	C	C:206 T:0
EA2454	3863966	snp	G	A	A:204 G:0
EA2454	3864034	snp	A	C	C:214 A:0
EA2454	3864046	snp	C	T	T:222 C:1
EA2454	3864070	mnp	GC	AA	AA:226 GC:0
EA2454	3864181	snp	C	T	T:223 C:0
EA2454	3864199	complex	TCCTGGA	GCCCGGT	GCCCGGT:222 TCCTGGA:0
EA2454	3864220	snp	A	G	G:246 A:0
EA2454	3864227	snp	A	G	G:251 A:1
EA2454	3864307	snp	A	T	T:218 A:0
EA2454	3865110	snp	T	C	C:229 T:0
EA2454	3865119	snp	A	C	C:235 A:0
EA2454	3865769	snp	A	G	G:61 A:0
EA2454	3865796	snp	A	G	G:78 A:0
EA2454	3865854	snp	A	G	G:85 A:0
EA2454	3865931	snp	A	G	G:128 A:0
EA2454	3866184	snp	A	G	G:34 A:0
EA2454	3866250	snp	C	G	G:12 C:0
EA2454	3866260	complex	CGGG	AGGC	AGGC:17 CGGG:0
EA2454	3866269	snp	T	C	C:27 T:0
EA2454	3866278	snp	T	C	C:31 T:0
EA2454	3866284	snp	G	C	C:39 G:0
EA2454	3866302	snp	T	C	C:47 T:0
EA2454	3866312	snp	A	G	G:54 A:0
EA2454	3866320	complex	CTTC	ATTT	ATTT:60 CTTC:0
EA2454	3866335	snp	T	G	G:69 T:0
EA2454	3866365	snp	C	A	A:89 C:0
EA2454	3866373	mnp	TT	CG	CG:95 TT:0
EA2454	3866383	snp	T	C	C:98 T:0
EA2454	3866395	snp	C	T	T:95 C:0
EA2454	3866419	snp	T	G	G:94 T:0
EA2454	3866489	snp	G	A	A:48 G:0
EA2454	3866503	snp	G	T	T:44 G:0
EA2454	3866512	complex	CTGTTTCA	TTGCTTCC	TTGCTTCC:33 CTGTTTCA:0
EA2454	3866530	complex	CGATGC	TGAAGG	TGAAGG:27 CGATGC:0
EA2454	3866543	snp	T	C	C:25 T:0
EA2454	3866552	snp	A	C	C:12 A:0
EA2454	3866560	snp	T	C	C:11 T:0
EA2454	3867326	complex	TAGCCGG	AAACCGC	AAACCGC:141 TAGCCGG:0
EA2454	3867905	snp	T	G	G:118 T:0
EA2454	3868787	snp	A	G	G:125 A:10
EA2454	3868801	snp	C	T	T:128 C:9
EA2454	3868810	complex	GTCGAACCGTTTTA	TTCTAATCGTCTTG	TTCTAATCGTCTTG:108 GTCGAACCGTTTTA:1
EA2454	3868845	snp	T	C	C:125 T:0
EA2454	3868909	snp	T	G	G:107 T:0
EA2454	3868914	complex	GTGAGATA	ACGGGATG	ACGGGATG:101 GTGAGATA:0
EA2454	3868927	snp	T	C	C:112 T:0
EA2454	3868942	mnp	TT	CC	CC:111 TT:1
EA2454	3869009	complex	CCTGAT	ACC	ACC:84 CCTGAT:0
EA2454	3869026	complex	AAG	TAA	TAA:127 AAG:3
EA2454	3869038	snp	G	A	A:141 G:4
EA2454	3869102	snp	A	G	G:139 A:5
EA2454	3869140	snp	A	C	C:149 A:5
EA2454	3869165	snp	A	T	T:162 A:1
EA2454	3869195	snp	C	T	T:145 C:1
EA2454	3869216	snp	A	G	G:131 A:3
EA2454	3869252	snp	T	C	C:148 T:1
EA2454	3869339	complex	CGCC	TGCT	TGCT:124 CGCC:1
EA2454	3869348	snp	A	G	G:129 A:1
EA2454	3869360	snp	G	A	A:132 G:1
EA2454	3869366	snp	C	T	T:140 C:1
EA2454	3869411	snp	C	A	A:138 C:1
EA2454	3869547	snp	A	C	C:130 A:0
EA2454	3869555	snp	C	G	G:133 C:0
EA2454	3869591	snp	T	C	C:136 T:0
EA2454	3869604	snp	C	T	T:137 C:1
EA2454	3869750	snp	G	A	A:34 G:0
EA2454	3869970	snp	G	T	T:44 G:0
EA2454	3870037	snp	T	C	C:96 T:1
EA2454	3870152	complex	CAGA	AAGG	AAGG:114 CAGA:0
EA2454	3870199	snp	C	T	T:127 C:0
EA2454	3870306	complex	ACACA	GCACG	GCACG:122 ACACA:0
EA2454	3870424	snp	C	T	T:128 C:0
EA2454	3871047	complex	GGA	AGG	AGG:156 GGA:0
EA2454	3871083	snp	T	C	C:169 T:1
EA2454	3871146	snp	A	G	G:170 A:0
EA2454	3871705	snp	T	C	C:137 T:2
EA2454	3871741	snp	C	T	T:136 C:2
EA2454	3871816	snp	A	G	G:123 A:2
EA2454	3871837	snp	C	T	T:124 C:0
EA2454	3871864	snp	G	A	A:120 G:2
EA2454	3871945	snp	G	T	T:117 G:0
EA2454	3871957	snp	T	C	C:116 T:0
EA2454	3872008	snp	C	T	T:120 C:0
EA2454	3872110	snp	T	C	C:117 T:1
EA2454	3872128	mnp	CT	GC	GC:117 CT:1
EA2454	3872134	snp	A	G	G:111 A:2
EA2454	3872167	snp	C	T	T:111 C:2
EA2454	3872560	snp	C	T	T:168 C:0
EA2454	3872599	snp	G	A	A:168 G:0
EA2454	3872721	mnp	TG	CA	CA:135 TG:0
EA2454	3872778	snp	C	T	T:127 C:0
EA2454	3872799	complex	AACCA	GACCC	GACCC:111 AACCA:0
EA2454	3872862	snp	G	A	A:126 G:0
EA2454	3873006	snp	A	G	G:107 A:0
EA2454	3873171	snp	C	T	T:121 C:0
EA2454	3873180	snp	A	G	G:123 A:0
EA2454	3873261	snp	G	A	A:158 G:0
EA2454	3873282	snp	C	T	T:167 C:0
EA2454	3873309	snp	C	T	T:154 C:0
EA2454	3873396	snp	T	C	C:151 T:0
EA2454	3873417	snp	C	A	A:137 C:0
EA2454	3873549	snp	T	C	C:162 T:0
EA2454	3873594	snp	G	A	A:152 G:0
EA2454	3873609	snp	A	G	G:147 A:0
EA2454	3873636	snp	G	A	A:168 G:0
EA2454	3873750	snp	T	C	C:157 T:0
EA2454	3873786	snp	G	A	A:146 G:0
EA2454	3874008	snp	A	G	G:122 A:3
EA2454	3874017	snp	C	A	A:125 C:4
EA2454	3874068	snp	T	C	C:129 T:3
EA2454	3874077	snp	G	A	A:134 G:4
EA2454	3874083	snp	T	C	C:131 T:4
EA2454	3874128	snp	A	G	G:127 A:2
EA2454	3874140	snp	A	C	C:124 A:0
EA2454	3874209	snp	C	T	T:118 C:1
EA2454	3874221	snp	T	C	C:123 T:0
EA2454	3874248	snp	G	A	A:114 G:0
EA2454	3874254	snp	G	A	A:117 G:1
EA2454	3874266	snp	T	G	G:118 T:0
EA2454	3874278	snp	T	C	C:122 T:1
EA2454	3874329	complex	GGCG	AGCA	AGCA:119 GGCG:1
EA2454	3874350	snp	C	T	T:128 C:0
EA2454	3874393	snp	T	A	A:129 T:1
EA2454	3874455	snp	C	T	T:120 C:1
EA2454	3874464	snp	C	T	T:112 C:0
EA2454	3874500	snp	C	T	T:116 C:0
EA2454	3874551	mnp	AAGA	TCAG	TCAG:110 AAGA:0
EA2454	3874566	snp	A	C	C:111 A:1
EA2454	3874580	snp	G	C	C:102 G:0
EA2454	3874587	snp	G	C	C:96 G:0
EA2454	3874599	snp	C	A	A:85 C:1
EA2454	3874650	complex	TGGCG	CGGCT	CGGCT:28 TGGCG:1
EA2454	3874741	complex	GATA	AATG	AATG:12 GATA:0
EA2454	3874749	snp	C	T	T:18 C:0
EA2454	3874767	snp	G	A	A:35 G:0
EA2454	3874824	snp	A	G	G:81 A:0
EA2454	3874839	snp	G	T	T:97 G:0
EA2454	3874851	snp	C	T	T:103 C:0
EA2454	3874866	complex	CCAGC	TCAGT	TCAGT:115 CCAGC:0
EA2454	3874887	snp	C	T	T:126 C:0
EA2454	3874893	complex	AAAA	GAAG	GAAG:116 AAAA:0
EA2454	3874913	snp	A	T	T:118 A:0
EA2454	3874996	snp	C	T	T:117 C:0
EA2454	3875022	snp	G	A	A:130 G:0
EA2454	3875037	snp	G	A	A:122 G:0
EA2454	3875046	snp	C	A	A:126 C:0
EA2454	3875073	snp	C	A	A:125 C:0
EA2454	3875091	snp	C	T	T:115 C:1
EA2454	3875100	snp	T	G	G:120 T:0
EA2454	3875106	snp	G	C	C:115 G:0
EA2454	3875118	snp	T	G	G:118 T:0
EA2454	3875128	complex	GTG	ATA	ATA:115 GTG:0
EA2454	3875157	snp	T	G	G:132 T:0
EA2454	3875169	complex	GGACATC	CGATATT	CGATATT:118 GGACATC:0
EA2454	3875205	complex	GGGG	TGGT	TGGT:115 GGGG:0
EA2454	3875232	snp	T	C	C:111 T:1
EA2454	3875241	snp	G	A	A:115 G:0
EA2454	3875328	complex	CCGAGGC	TAAAGGG	TAAAGGG:99 CCGAGGC:0
EA2454	3875340	complex	CGGA	AGGT	AGGT:105 CGGA:2
EA2454	3875354	snp	G	A	A:117 G:1
EA2454	3875370	snp	A	G	G:116 A:2
EA2454	3875383	complex	GGAA	AGAG	AGAG:124 GGAA:2
EA2454	3875403	complex	ACAA	GCAG	GCAG:129 ACAA:2
EA2454	3875437	snp	A	G	G:115 A:1
EA2454	3875460	snp	A	G	G:97 A:1
EA2454	3875465	snp	G	C	C:94 G:1
EA2454	3875505	snp	G	T	T:110 G:0
EA2454	3875514	snp	A	G	G:107 A:0
EA2454	3875523	snp	G	A	A:100 G:0
EA2454	3875536	complex	CAC	TAT	TAT:68 CAC:0
EA2454	3875549	complex	ATTGTATG	GCTGTTTTT	GCTGTTTTT:44 ATTGTATG:0
EA2454	3875572	complex	AAAA	GATG	GATG:49 AAAA:0
EA2454	3875580	complex	GCT	ACC	ACC:48 GCT:0
EA2454	3875597	snp	G	A	A:66 G:0
EA2454	3875612	complex	CATT	TATC	TATC:62 CATT:0
EA2454	3875632	snp	A	G	G:58 A:0
EA2454	3875638	complex	GGAG	AGAA	AGAA:55 GGAG:0
EA2454	3875652	snp	G	A	A:74 G:1
EA2454	3875660	snp	C	G	G:77 C:0
EA2454	3875665	complex	GCTTTATT	TCTTCATA	TCTTCATA:78 GCTTTATT:0
EA2454	3875688	snp	T	C	C:102 T:1
EA2454	3875702	complex	ATTT	GTTC	GTTC:109 ATTT:1
EA2454	3875727	snp	C	A	A:121 C:1
EA2454	3875732	snp	G	A	A:121 G:2
EA2454	3875747	complex	ATTC	GTTT	GTTT:122 ATTC:1
EA2454	3875772	mnp	CT	AC	AC:122 CT:1
EA2454	3875792	snp	A	G	G:125 A:1
EA2454	3875801	snp	G	A	A:122 G:0
EA2454	3875811	snp	C	T	T:122 C:0
EA2454	3875853	snp	A	G	G:87 A:1
EA2454	3876104	complex	CA	TG	TG:14 CA:0
EA2454	3876119	snp	C	T	T:33 C:0
EA2454	3876146	snp	C	T	T:55 C:1
EA2454	3877989	snp	T	C	C:153 T:0
EA2454	3879225	snp	G	T	T:121 G:0
EA2454	3881618	snp	A	G	G:204 A:0
EA2454	3881650	snp	C	T	T:191 C:1
EA2454	3881666	snp	G	C	C:170 G:0
EA2454	3881732	snp	A	C	C:168 A:0
EA2454	3881743	snp	T	C	C:169 T:0
EA2454	3881858	snp	T	C	C:183 T:0
EA2454	3881876	complex	GGCA	CGCC	CGCC:171 GGCA:0
EA2454	3881990	complex	GATA	TATC	TATC:157 GATA:0
EA2454	3882005	snp	A	G	G:168 A:0
EA2454	3885384	snp	C	G	G:171 C:0
EA2454	3885390	snp	T	A	A:135 T:0
EA2454	3885906	snp	T	C	C:137 T:2
EA2454	3886011	snp	A	G	G:102 A:1
EA2454	3886016	snp	G	A	A:103 G:0
EA2454	3886305	snp	T	C	C:208 T:1
EA2454	3886328	snp	A	G	G:204 A:0
EA2454	3886617	complex	GCTTG	ACTTA	ACTTA:146 GCTTG:12
EA2454	3886630	del	TA	T	T:139 TA:0
EA2454	3888966	snp	A	C	C:95 A:0
EA2454	3889072	snp	A	G	G:60 A:0
EA2454	3889125	complex	TGGCG	AGGTA	AGGTA:14 TGGCG:0
EA2454	3889134	snp	A	G	G:15 A:0
[truncated: 1,892 more rows]
