# Supplementary material for: Escherichia coli ST302: Genomic Analysis of Virulence Potential and Antimicrobial Resistance Mediated by Mobile Genetic Elements
Source: Front Microbiol. 2020 Jan 21;10:3098. doi: 10.3389/fmicb.2019.03098 (PMC6985150; doi:10.3389/fmicb.2019.03098)
Supplement: DATA S2 — ST302 SNP analysis. [file Data_Sheet_2.ZIP › SNP_Analysis/ST302_SNP/SNP_analysis/snippyout/ST302/FA5537-ND-ST302.out/snps.gff]

##gff-version 3
EA2454	snippy:4.3.6	variation	749	749	.	.	0	note=snp A=>G G:43 A:0
EA2454	snippy:4.3.6	variation	977	977	.	.	0	note=snp T=>C C:43 T:0
EA2454	snippy:4.3.6	variation	3463	3463	.	.	0	note=snp C=>T T:56 C:1
EA2454	snippy:4.3.6	variation	4901	4901	.	.	0	note=snp T=>C C:55 T:0
EA2454	snippy:4.3.6	variation	6985	6985	.	.	0	note=snp T=>C C:55 T:0
EA2454	snippy:4.3.6	variation	8399	8399	.	.	0	note=snp C=>G G:55 C:0
EA2454	snippy:4.3.6	variation	9014	9014	.	.	0	note=snp C=>T T:44 C:1
EA2454	snippy:4.3.6	variation	11382	11382	.	.	0	note=snp A=>G G:49 A:0
EA2454	snippy:4.3.6	variation	11615	11615	.	.	0	note=snp T=>G G:61 T:0
EA2454	snippy:4.3.6	variation	18933	18933	.	.	0	note=snp C=>T T:51 C:0
EA2454	snippy:4.3.6	variation	24420	24420	.	.	0	note=snp T=>G G:50 T:0
EA2454	snippy:4.3.6	variation	25194	25194	.	.	0	note=snp A=>C C:50 A:1
EA2454	snippy:4.3.6	variation	25719	25719	.	.	0	note=snp T=>C C:59 T:0
EA2454	snippy:4.3.6	variation	28509	28509	.	.	0	note=snp G=>A A:70 G:3
EA2454	snippy:4.3.6	variation	31045	31045	.	.	0	note=snp G=>T T:48 G:2
EA2454	snippy:4.3.6	variation	31143	31143	.	.	0	note=snp G=>A A:61 G:2
EA2454	snippy:4.3.6	variation	31644	31644	.	.	0	note=snp C=>T T:54 C:1
EA2454	snippy:4.3.6	variation	34322	34322	.	.	0	note=snp C=>A A:57 C:0
EA2454	snippy:4.3.6	variation	34494	34494	.	.	0	note=snp T=>C C:51 T:0
EA2454	snippy:4.3.6	variation	36375	36375	.	.	0	note=snp C=>A A:44 C:0
EA2454	snippy:4.3.6	variation	37987	37987	.	.	0	note=snp T=>C C:41 T:0
EA2454	snippy:4.3.6	variation	38677	38677	.	.	0	note=snp A=>C C:33 A:0
EA2454	snippy:4.3.6	variation	42949	42949	.	.	0	note=snp T=>G G:67 T:5
EA2454	snippy:4.3.6	variation	43068	43068	.	.	0	note=snp G=>C C:58 G:0
EA2454	snippy:4.3.6	variation	48190	48190	.	.	0	note=snp C=>A A:54 C:0
EA2454	snippy:4.3.6	variation	49192	49192	.	.	0	note=snp T=>G G:57 T:0
EA2454	snippy:4.3.6	variation	50851	50851	.	.	0	note=snp A=>C C:62 A:0
EA2454	snippy:4.3.6	variation	53157	53157	.	.	0	note=snp C=>T T:53 C:0
EA2454	snippy:4.3.6	variation	54840	54840	.	.	0	note=snp C=>T T:64 C:1
EA2454	snippy:4.3.6	variation	54992	54992	.	.	0	note=snp T=>C C:54 T:0
EA2454	snippy:4.3.6	variation	56628	56628	.	.	0	note=snp A=>C C:59 A:0
EA2454	snippy:4.3.6	variation	58152	58152	.	.	0	note=snp T=>C C:71 T:0
EA2454	snippy:4.3.6	variation	63271	63271	.	.	0	note=snp C=>T T:65 C:0
EA2454	snippy:4.3.6	variation	67315	67315	.	.	0	note=snp A=>C C:69 A:0
EA2454	snippy:4.3.6	variation	68202	68202	.	.	0	note=snp A=>G G:79 A:0
EA2454	snippy:4.3.6	variation	69595	69595	.	.	0	note=snp A=>G G:78 A:0
EA2454	snippy:4.3.6	variation	74671	74671	.	.	0	note=snp A=>G G:67 A:0
EA2454	snippy:4.3.6	variation	79118	79118	.	.	0	note=snp G=>A A:48 G:1
EA2454	snippy:4.3.6	variation	84557	84557	.	.	0	note=snp T=>G G:71 T:0
EA2454	snippy:4.3.6	variation	87412	87412	.	.	0	note=snp A=>G G:70 A:0
EA2454	snippy:4.3.6	variation	88223	88223	.	.	0	note=del TTCAATATCAATATCAATATCAATA=>T T:24 TTCAATATCAATATCAATATCAATA:0
EA2454	snippy:4.3.6	variation	88282	88282	.	.	0	note=snp T=>C C:45 T:0
EA2454	snippy:4.3.6	variation	94250	94250	.	.	0	note=snp T=>C C:70 T:0
EA2454	snippy:4.3.6	variation	95361	95361	.	.	0	note=snp C=>T T:45 C:0
EA2454	snippy:4.3.6	variation	95675	95675	.	.	0	note=del AT=>A A:47 AT:0
EA2454	snippy:4.3.6	variation	95737	95737	.	.	0	note=del CT=>C C:33 CT:0
EA2454	snippy:4.3.6	variation	97312	97312	.	.	0	note=snp C=>T T:44 C:0
EA2454	snippy:4.3.6	variation	101606	101606	.	.	0	note=del GC=>G G:54 GC:0
EA2454	snippy:4.3.6	variation	105325	105325	.	.	0	note=snp G=>T T:50 G:1
EA2454	snippy:4.3.6	variation	109299	109299	.	.	0	note=snp G=>A A:45 G:0
EA2454	snippy:4.3.6	variation	109606	109606	.	.	0	note=snp G=>A A:53 G:0
EA2454	snippy:4.3.6	variation	110963	110963	.	.	0	note=snp C=>T T:51 C:2
EA2454	snippy:4.3.6	variation	111773	111773	.	.	0	note=snp C=>G G:60 C:0
EA2454	snippy:4.3.6	variation	112319	112319	.	.	0	note=snp G=>A A:51 G:2
EA2454	snippy:4.3.6	variation	124865	124865	.	.	0	note=snp T=>C C:62 T:0
EA2454	snippy:4.3.6	variation	126504	126504	.	.	0	note=snp A=>G G:55 A:0
EA2454	snippy:4.3.6	variation	131613	131613	.	.	0	note=snp A=>G G:59 A:0
EA2454	snippy:4.3.6	variation	131667	131667	.	.	0	note=snp G=>A A:58 G:0
EA2454	snippy:4.3.6	variation	134246	134246	.	.	0	note=snp C=>A A:45 C:1
EA2454	snippy:4.3.6	variation	134828	134828	.	.	0	note=snp A=>C C:60 A:0
EA2454	snippy:4.3.6	variation	137550	137550	.	.	0	note=snp C=>T T:52 C:1
EA2454	snippy:4.3.6	variation	138031	138031	.	.	0	note=snp A=>C C:51 A:1
EA2454	snippy:4.3.6	variation	140951	140951	.	.	0	note=snp T=>G G:56 T:0
EA2454	snippy:4.3.6	variation	142815	142815	.	.	0	note=snp C=>T T:53 C:1
EA2454	snippy:4.3.6	variation	144883	144883	.	.	0	note=snp G=>A A:66 G:3
EA2454	snippy:4.3.6	variation	145428	145428	.	.	0	note=snp T=>C C:67 T:0
EA2454	snippy:4.3.6	variation	146087	146087	.	.	0	note=snp A=>C C:67 A:0
EA2454	snippy:4.3.6	variation	150693	150693	.	.	0	note=snp A=>C C:54 A:0
EA2454	snippy:4.3.6	variation	158307	158307	.	.	0	note=snp G=>A A:50 G:4
EA2454	snippy:4.3.6	variation	162528	162528	.	.	0	note=snp C=>A A:66 C:0
EA2454	snippy:4.3.6	variation	163798	163798	.	.	0	note=snp T=>C C:68 T:0
EA2454	snippy:4.3.6	variation	163970	163970	.	.	0	note=del ATT=>A A:46 ATT:0
EA2454	snippy:4.3.6	variation	168669	168669	.	.	0	note=snp T=>A A:35 T:3
EA2454	snippy:4.3.6	variation	174420	174420	.	.	0	note=snp A=>G G:47 A:0
EA2454	snippy:4.3.6	variation	177375	177375	.	.	0	note=snp G=>A A:53 G:2
EA2454	snippy:4.3.6	variation	183709	183709	.	.	0	note=del GCATTCTGCCGCGC=>G G:36 GCATTCTGCCGCGC:0
EA2454	snippy:4.3.6	variation	183811	183811	.	.	0	note=snp G=>A A:56 G:2
EA2454	snippy:4.3.6	variation	185127	185127	.	.	0	note=ins C=>CA CA:46 C:0
EA2454	snippy:4.3.6	variation	186550	186550	.	.	0	note=snp T=>C C:50 T:0
EA2454	snippy:4.3.6	variation	187144	187144	.	.	0	note=snp T=>C C:58 T:1
EA2454	snippy:4.3.6	variation	187941	187941	.	.	0	note=snp A=>G G:55 A:0
EA2454	snippy:4.3.6	variation	190313	190313	.	.	0	note=snp T=>C C:65 T:0
EA2454	snippy:4.3.6	variation	190389	190389	.	.	0	note=snp C=>T T:61 C:3
EA2454	snippy:4.3.6	variation	191951	191951	.	.	0	note=snp G=>A A:50 G:0
EA2454	snippy:4.3.6	variation	204541	204541	.	.	0	note=snp A=>T T:57 A:0
EA2454	snippy:4.3.6	variation	207302	207302	.	.	0	note=snp C=>T T:57 C:0
EA2454	snippy:4.3.6	variation	209840	209840	.	.	0	note=del GA=>G G:48 GA:1
EA2454	snippy:4.3.6	variation	209960	209960	.	.	0	note=snp C=>T T:55 C:1
EA2454	snippy:4.3.6	variation	213327	213327	.	.	0	note=snp A=>G G:50 A:0
EA2454	snippy:4.3.6	variation	217762	217762	.	.	0	note=snp G=>A A:72 G:1
EA2454	snippy:4.3.6	variation	218007	218007	.	.	0	note=snp C=>T T:54 C:0
EA2454	snippy:4.3.6	variation	219080	219080	.	.	0	note=snp T=>G G:62 T:3
EA2454	snippy:4.3.6	variation	219775	219775	.	.	0	note=snp C=>T T:57 C:2
EA2454	snippy:4.3.6	variation	220577	220577	.	.	0	note=snp G=>A A:35 G:0
EA2454	snippy:4.3.6	variation	221141	221141	.	.	0	note=snp C=>T T:42 C:1
EA2454	snippy:4.3.6	variation	222064	222064	.	.	0	note=snp C=>A A:44 C:2
EA2454	snippy:4.3.6	variation	222359	222359	.	.	0	note=snp G=>A A:42 G:0
EA2454	snippy:4.3.6	variation	232504	232504	.	.	0	note=snp G=>A A:59 G:2
EA2454	snippy:4.3.6	variation	233746	233746	.	.	0	note=complex CCTCC=>TCTCT TCTCT:45 CCTCC:0
EA2454	snippy:4.3.6	variation	239221	239221	.	.	0	note=snp A=>G G:67 A:0
EA2454	snippy:4.3.6	variation	241578	241578	.	.	0	note=snp T=>C C:30 T:2
EA2454	snippy:4.3.6	variation	242419	242419	.	.	0	note=snp C=>T T:55 C:0
EA2454	snippy:4.3.6	variation	245301	245301	.	.	0	note=snp C=>T T:44 C:0
EA2454	snippy:4.3.6	variation	246850	246850	.	.	0	note=snp T=>C C:48 T:0
EA2454	snippy:4.3.6	variation	248471	248471	.	.	0	note=snp T=>C C:60 T:0
EA2454	snippy:4.3.6	variation	254462	254462	.	.	0	note=snp C=>T T:53 C:2
EA2454	snippy:4.3.6	variation	255936	255936	.	.	0	note=snp A=>T T:61 A:0
EA2454	snippy:4.3.6	variation	261169	261169	.	.	0	note=snp A=>C C:54 A:2
EA2454	snippy:4.3.6	variation	271114	271114	.	.	0	note=snp C=>T T:55 C:1
EA2454	snippy:4.3.6	variation	272615	272615	.	.	0	note=snp A=>T T:68 A:0
EA2454	snippy:4.3.6	variation	273078	273078	.	.	0	note=del GTGC=>G G:39 GTGC:1
EA2454	snippy:4.3.6	variation	275599	275599	.	.	0	note=snp G=>A A:49 G:0
EA2454	snippy:4.3.6	variation	275686	275686	.	.	0	note=del GAGC=>G G:55 GAGC:0
EA2454	snippy:4.3.6	variation	276716	276716	.	.	0	note=snp C=>T T:66 C:0
EA2454	snippy:4.3.6	variation	277907	277907	.	.	0	note=snp G=>T T:67 G:0
EA2454	snippy:4.3.6	variation	278848	278848	.	.	0	note=snp A=>G G:76 A:0
EA2454	snippy:4.3.6	variation	278978	278978	.	.	0	note=snp C=>T T:56 C:0
EA2454	snippy:4.3.6	variation	282666	282666	.	.	0	note=snp C=>T T:54 C:0
EA2454	snippy:4.3.6	variation	284131	284131	.	.	0	note=snp A=>G G:58 A:0
EA2454	snippy:4.3.6	variation	285627	285627	.	.	0	note=ins A=>AT AT:67 A:1
EA2454	snippy:4.3.6	variation	286429	286429	.	.	0	note=snp G=>A A:59 G:0
EA2454	snippy:4.3.6	variation	286636	286636	.	.	0	note=snp T=>G G:55 T:2
EA2454	snippy:4.3.6	variation	288870	288870	.	.	0	note=snp C=>T T:67 C:0
EA2454	snippy:4.3.6	variation	292267	292267	.	.	0	note=snp C=>A A:48 C:1
EA2454	snippy:4.3.6	variation	294054	294054	.	.	0	note=snp G=>T T:56 G:0
EA2454	snippy:4.3.6	variation	295395	295395	.	.	0	note=snp G=>A A:51 G:1
EA2454	snippy:4.3.6	variation	298286	298286	.	.	0	note=snp T=>C C:48 T:0
EA2454	snippy:4.3.6	variation	304693	304693	.	.	0	note=del AT=>A A:27 AT:0
EA2454	snippy:4.3.6	variation	305129	305129	.	.	0	note=snp G=>A A:70 G:0
EA2454	snippy:4.3.6	variation	313034	313034	.	.	0	note=snp A=>G G:51 A:0
EA2454	snippy:4.3.6	variation	317106	317106	.	.	0	note=snp T=>C C:58 T:0
EA2454	snippy:4.3.6	variation	323459	323459	.	.	0	note=snp G=>A A:44 G:0
EA2454	snippy:4.3.6	variation	323836	323836	.	.	0	note=snp G=>T T:60 G:1
EA2454	snippy:4.3.6	variation	327651	327651	.	.	0	note=snp C=>G G:52 C:1
EA2454	snippy:4.3.6	variation	327934	327934	.	.	0	note=snp C=>T T:56 C:1
EA2454	snippy:4.3.6	variation	331665	331665	.	.	0	note=snp G=>A A:69 G:0
EA2454	snippy:4.3.6	variation	335397	335397	.	.	0	note=snp A=>G G:44 A:1
EA2454	snippy:4.3.6	variation	341930	341930	.	.	0	note=snp C=>A A:58 C:0
EA2454	snippy:4.3.6	variation	343262	343262	.	.	0	note=snp G=>T T:74 G:0
EA2454	snippy:4.3.6	variation	343988	343988	.	.	0	note=snp G=>A A:57 G:0
EA2454	snippy:4.3.6	variation	344966	344966	.	.	0	note=snp T=>C C:51 T:0
EA2454	snippy:4.3.6	variation	346796	346796	.	.	0	note=snp A=>C C:58 A:0
EA2454	snippy:4.3.6	variation	350969	350969	.	.	0	note=snp A=>G G:49 A:0
EA2454	snippy:4.3.6	variation	367885	367885	.	.	0	note=snp C=>A A:64 C:0
EA2454	snippy:4.3.6	variation	369429	369429	.	.	0	note=snp T=>C C:42 T:0
EA2454	snippy:4.3.6	variation	371038	371038	.	.	0	note=snp A=>G G:81 A:0
EA2454	snippy:4.3.6	variation	371150	371150	.	.	0	note=snp T=>C C:69 T:0
EA2454	snippy:4.3.6	variation	371977	371977	.	.	0	note=snp G=>A A:56 G:0
EA2454	snippy:4.3.6	variation	371990	371990	.	.	0	note=snp G=>T T:55 G:0
EA2454	snippy:4.3.6	variation	372193	372193	.	.	0	note=snp G=>A A:51 G:0
EA2454	snippy:4.3.6	variation	380076	380076	.	.	0	note=snp G=>A A:60 G:2
EA2454	snippy:4.3.6	variation	384068	384068	.	.	0	note=snp T=>A A:66 T:1
EA2454	snippy:4.3.6	variation	384244	384244	.	.	0	note=snp G=>A A:57 G:2
EA2454	snippy:4.3.6	variation	386139	386139	.	.	0	note=snp C=>T T:66 C:2
EA2454	snippy:4.3.6	variation	387481	387481	.	.	0	note=snp T=>A A:68 T:0
EA2454	snippy:4.3.6	variation	388702	388702	.	.	0	note=snp G=>A A:46 G:0
EA2454	snippy:4.3.6	variation	392511	392511	.	.	0	note=snp T=>C C:57 T:0
EA2454	snippy:4.3.6	variation	393575	393575	.	.	0	note=snp A=>G G:63 A:0
EA2454	snippy:4.3.6	variation	393743	393743	.	.	0	note=snp A=>G G:51 A:1
EA2454	snippy:4.3.6	variation	396055	396055	.	.	0	note=snp T=>C C:55 T:0
EA2454	snippy:4.3.6	variation	397444	397444	.	.	0	note=snp C=>G G:61 C:0
EA2454	snippy:4.3.6	variation	407113	407113	.	.	0	note=snp A=>G G:51 A:0
EA2454	snippy:4.3.6	variation	407887	407887	.	.	0	note=snp C=>G G:55 C:0
EA2454	snippy:4.3.6	variation	409884	409884	.	.	0	note=snp T=>G G:44 T:0
EA2454	snippy:4.3.6	variation	411520	411520	.	.	0	note=snp T=>A A:45 T:3
EA2454	snippy:4.3.6	variation	411572	411572	.	.	0	note=snp T=>C C:51 T:2
EA2454	snippy:4.3.6	variation	413502	413502	.	.	0	note=del CG=>C C:68 CG:1
EA2454	snippy:4.3.6	variation	416393	416393	.	.	0	note=snp T=>A A:54 T:0
EA2454	snippy:4.3.6	variation	416875	416875	.	.	0	note=snp G=>A A:86 G:1
EA2454	snippy:4.3.6	variation	425636	425636	.	.	0	note=snp A=>G G:60 A:1
EA2454	snippy:4.3.6	variation	430947	430947	.	.	0	note=snp T=>C C:64 T:0
EA2454	snippy:4.3.6	variation	437474	437474	.	.	0	note=snp A=>G G:48 A:0
EA2454	snippy:4.3.6	variation	438119	438119	.	.	0	note=ins T=>TG TG:69 T:1
EA2454	snippy:4.3.6	variation	438577	438577	.	.	0	note=snp G=>A A:64 G:0
EA2454	snippy:4.3.6	variation	440837	440837	.	.	0	note=snp C=>A A:57 C:0
EA2454	snippy:4.3.6	variation	441911	441911	.	.	0	note=snp T=>C C:59 T:0
EA2454	snippy:4.3.6	variation	441944	441944	.	.	0	note=snp A=>G G:69 A:0
EA2454	snippy:4.3.6	variation	443213	443213	.	.	0	note=snp A=>G G:52 A:0
EA2454	snippy:4.3.6	variation	447459	447459	.	.	0	note=snp A=>G G:45 A:0
EA2454	snippy:4.3.6	variation	448711	448711	.	.	0	note=snp A=>G G:66 A:0
EA2454	snippy:4.3.6	variation	449737	449737	.	.	0	note=snp A=>C C:56 A:2
EA2454	snippy:4.3.6	variation	451164	451164	.	.	0	note=snp G=>A A:68 G:0
EA2454	snippy:4.3.6	variation	452711	452711	.	.	0	note=snp T=>A A:50 T:0
EA2454	snippy:4.3.6	variation	453153	453153	.	.	0	note=snp G=>A A:40 G:0
EA2454	snippy:4.3.6	variation	454953	454953	.	.	0	note=snp T=>C C:59 T:1
EA2454	snippy:4.3.6	variation	455482	455482	.	.	0	note=ins G=>GTCGC GTCGC:31 G:2
EA2454	snippy:4.3.6	variation	457082	457082	.	.	0	note=snp C=>T T:49 C:0
EA2454	snippy:4.3.6	variation	459248	459248	.	.	0	note=snp A=>G G:57 A:0
EA2454	snippy:4.3.6	variation	465826	465826	.	.	0	note=snp A=>T T:58 A:0
EA2454	snippy:4.3.6	variation	468099	468099	.	.	0	note=snp G=>A A:55 G:2
EA2454	snippy:4.3.6	variation	472911	472911	.	.	0	note=snp T=>C C:57 T:0
EA2454	snippy:4.3.6	variation	477552	477552	.	.	0	note=snp G=>A A:49 G:0
EA2454	snippy:4.3.6	variation	477965	477965	.	.	0	note=snp G=>T T:67 G:1
EA2454	snippy:4.3.6	variation	478067	478067	.	.	0	note=del GA=>G G:54 GA:1
EA2454	snippy:4.3.6	variation	478727	478727	.	.	0	note=snp C=>A A:52 C:0
EA2454	snippy:4.3.6	variation	478958	478958	.	.	0	note=del CG=>C C:49 CG:0
EA2454	snippy:4.3.6	variation	485022	485022	.	.	0	note=snp G=>A A:49 G:2
EA2454	snippy:4.3.6	variation	485082	485082	.	.	0	note=snp T=>G G:54 T:0
EA2454	snippy:4.3.6	variation	485779	485779	.	.	0	note=snp C=>G G:67 C:0
EA2454	snippy:4.3.6	variation	486093	486093	.	.	0	note=snp C=>T T:39 C:0
EA2454	snippy:4.3.6	variation	492568	492568	.	.	0	note=ins C=>CA CA:23 C:1
EA2454	snippy:4.3.6	variation	496818	496818	.	.	0	note=snp T=>A A:64 T:2
EA2454	snippy:4.3.6	variation	497400	497400	.	.	0	note=snp T=>G G:61 T:0
EA2454	snippy:4.3.6	variation	497460	497460	.	.	0	note=snp T=>G G:64 T:0
EA2454	snippy:4.3.6	variation	501060	501060	.	.	0	note=snp A=>G G:38 A:1
EA2454	snippy:4.3.6	variation	506352	506352	.	.	0	note=snp T=>G G:58 T:0
EA2454	snippy:4.3.6	variation	506381	506381	.	.	0	note=snp G=>T T:53 G:0
EA2454	snippy:4.3.6	variation	510234	510234	.	.	0	note=snp T=>A A:57 T:0
EA2454	snippy:4.3.6	variation	511943	511943	.	.	0	note=snp A=>G G:69 A:0
EA2454	snippy:4.3.6	variation	512076	512076	.	.	0	note=del TA=>T T:50 TA:0
EA2454	snippy:4.3.6	variation	519811	519811	.	.	0	note=snp A=>C C:69 A:0
EA2454	snippy:4.3.6	variation	523715	523715	.	.	0	note=snp T=>G G:54 T:3
EA2454	snippy:4.3.6	variation	523923	523923	.	.	0	note=snp C=>G G:52 C:0
EA2454	snippy:4.3.6	variation	528123	528123	.	.	0	note=snp A=>T T:67 A:0
EA2454	snippy:4.3.6	variation	534151	534151	.	.	0	note=snp A=>G G:60 A:0
EA2454	snippy:4.3.6	variation	537287	537287	.	.	0	note=snp G=>C C:69 G:0
EA2454	snippy:4.3.6	variation	539426	539426	.	.	0	note=snp T=>C C:56 T:0
EA2454	snippy:4.3.6	variation	543679	543679	.	.	0	note=snp G=>A A:65 G:1
EA2454	snippy:4.3.6	variation	546117	546117	.	.	0	note=snp C=>T T:43 C:0
EA2454	snippy:4.3.6	variation	546428	546428	.	.	0	note=snp A=>C C:52 A:0
EA2454	snippy:4.3.6	variation	547138	547138	.	.	0	note=snp T=>A A:62 T:0
EA2454	snippy:4.3.6	variation	549063	549063	.	.	0	note=snp A=>G G:54 A:0
EA2454	snippy:4.3.6	variation	550654	550654	.	.	0	note=snp T=>C C:63 T:0
EA2454	snippy:4.3.6	variation	552561	552561	.	.	0	note=snp C=>T T:62 C:0
EA2454	snippy:4.3.6	variation	554463	554463	.	.	0	note=complex GTCA=>ATCG ATCG:48 GTCA:0
EA2454	snippy:4.3.6	variation	559017	559017	.	.	0	note=snp A=>G G:57 A:0
EA2454	snippy:4.3.6	variation	559470	559470	.	.	0	note=snp T=>C C:58 T:0
EA2454	snippy:4.3.6	variation	561226	561226	.	.	0	note=snp G=>A A:14 G:0
EA2454	snippy:4.3.6	variation	561259	561259	.	.	0	note=snp C=>A A:14 C:0
EA2454	snippy:4.3.6	variation	561272	561272	.	.	0	note=snp T=>A A:13 T:0
EA2454	snippy:4.3.6	variation	562933	562933	.	.	0	note=snp T=>C C:46 T:0
EA2454	snippy:4.3.6	variation	565030	565030	.	.	0	note=snp T=>C C:44 T:1
EA2454	snippy:4.3.6	variation	571989	571989	.	.	0	note=snp C=>T T:61 C:1
EA2454	snippy:4.3.6	variation	575654	575654	.	.	0	note=snp T=>C C:59 T:0
EA2454	snippy:4.3.6	variation	588790	588790	.	.	0	note=snp T=>G G:76 T:1
EA2454	snippy:4.3.6	variation	589102	589102	.	.	0	note=snp T=>C C:74 T:0
EA2454	snippy:4.3.6	variation	589335	589335	.	.	0	note=snp A=>G G:45 A:0
EA2454	snippy:4.3.6	variation	589738	589738	.	.	0	note=snp A=>T T:53 A:0
EA2454	snippy:4.3.6	variation	590181	590181	.	.	0	note=ins T=>TA TA:59 T:0
EA2454	snippy:4.3.6	variation	591286	591286	.	.	0	note=snp G=>T T:50 G:0
EA2454	snippy:4.3.6	variation	595654	595654	.	.	0	note=snp T=>C C:65 T:0
EA2454	snippy:4.3.6	variation	597386	597386	.	.	0	note=snp A=>G G:56 A:0
EA2454	snippy:4.3.6	variation	602583	602583	.	.	0	note=snp A=>G G:52 A:0
EA2454	snippy:4.3.6	variation	606088	606088	.	.	0	note=ins G=>GA GA:45 G:0
EA2454	snippy:4.3.6	variation	606231	606231	.	.	0	note=snp T=>C C:50 T:0
EA2454	snippy:4.3.6	variation	609793	609793	.	.	0	note=snp C=>T T:69 C:0
EA2454	snippy:4.3.6	variation	610464	610464	.	.	0	note=snp A=>C C:71 A:0
EA2454	snippy:4.3.6	variation	610623	610623	.	.	0	note=snp G=>A A:61 G:4
EA2454	snippy:4.3.6	variation	611872	611872	.	.	0	note=snp A=>G G:69 A:0
EA2454	snippy:4.3.6	variation	612726	612726	.	.	0	note=snp A=>G G:65 A:0
EA2454	snippy:4.3.6	variation	613561	613561	.	.	0	note=snp T=>C C:68 T:2
EA2454	snippy:4.3.6	variation	613906	613906	.	.	0	note=snp C=>A A:53 C:0
EA2454	snippy:4.3.6	variation	614432	614432	.	.	0	note=snp A=>T T:83 A:1
EA2454	snippy:4.3.6	variation	622741	622741	.	.	0	note=snp T=>G G:47 T:0
EA2454	snippy:4.3.6	variation	623335	623335	.	.	0	note=snp C=>A A:45 C:2
EA2454	snippy:4.3.6	variation	625047	625047	.	.	0	note=snp T=>G G:63 T:2
EA2454	snippy:4.3.6	variation	631335	631335	.	.	0	note=snp T=>C C:57 T:0
EA2454	snippy:4.3.6	variation	632104	632104	.	.	0	note=snp C=>T T:46 C:2
EA2454	snippy:4.3.6	variation	635649	635649	.	.	0	note=snp A=>C C:59 A:0
EA2454	snippy:4.3.6	variation	639663	639663	.	.	0	note=snp C=>T T:63 C:1
EA2454	snippy:4.3.6	variation	644101	644101	.	.	0	note=snp A=>G G:51 A:0
EA2454	snippy:4.3.6	variation	644913	644913	.	.	0	note=snp T=>C C:47 T:0
EA2454	snippy:4.3.6	variation	656155	656155	.	.	0	note=snp T=>G G:52 T:1
EA2454	snippy:4.3.6	variation	657820	657820	.	.	0	note=snp G=>T T:51 G:1
EA2454	snippy:4.3.6	variation	660524	660524	.	.	0	note=snp G=>A A:47 G:1
EA2454	snippy:4.3.6	variation	669330	669330	.	.	0	note=snp A=>G G:48 A:0
EA2454	snippy:4.3.6	variation	674305	674305	.	.	0	note=snp G=>C C:55 G:0
EA2454	snippy:4.3.6	variation	677981	677981	.	.	0	note=snp T=>G G:58 T:0
EA2454	snippy:4.3.6	variation	679527	679527	.	.	0	note=snp G=>A A:71 G:0
EA2454	snippy:4.3.6	variation	679653	679653	.	.	0	note=snp A=>G G:66 A:0
EA2454	snippy:4.3.6	variation	681652	681652	.	.	0	note=snp C=>A A:37 C:2
EA2454	snippy:4.3.6	variation	683177	683177	.	.	0	note=snp T=>G G:59 T:0
EA2454	snippy:4.3.6	variation	686003	686003	.	.	0	note=snp A=>G G:62 A:0
EA2454	snippy:4.3.6	variation	686104	686104	.	.	0	note=snp G=>C C:60 G:0
EA2454	snippy:4.3.6	variation	687410	687410	.	.	0	note=snp A=>G G:53 A:0
EA2454	snippy:4.3.6	variation	690408	690408	.	.	0	note=snp A=>G G:47 A:0
EA2454	snippy:4.3.6	variation	690611	690611	.	.	0	note=snp T=>C C:47 T:0
EA2454	snippy:4.3.6	variation	694775	694775	.	.	0	note=snp C=>T T:48 C:1
EA2454	snippy:4.3.6	variation	697887	697887	.	.	0	note=snp T=>C C:57 T:1
EA2454	snippy:4.3.6	variation	698327	698327	.	.	0	note=snp A=>G G:51 A:0
EA2454	snippy:4.3.6	variation	705263	705263	.	.	0	note=snp C=>A A:72 C:0
EA2454	snippy:4.3.6	variation	709632	709632	.	.	0	note=snp T=>C C:62 T:0
EA2454	snippy:4.3.6	variation	710977	710977	.	.	0	note=snp A=>G G:59 A:0
EA2454	snippy:4.3.6	variation	712612	712612	.	.	0	note=snp T=>G G:52 T:1
EA2454	snippy:4.3.6	variation	715745	715745	.	.	0	note=snp T=>G G:48 T:0
EA2454	snippy:4.3.6	variation	726867	726867	.	.	0	note=snp C=>T T:54 C:2
EA2454	snippy:4.3.6	variation	728053	728053	.	.	0	note=snp A=>G G:57 A:2
EA2454	snippy:4.3.6	variation	729913	729913	.	.	0	note=snp G=>A A:71 G:3
EA2454	snippy:4.3.6	variation	731219	731219	.	.	0	note=snp T=>G G:41 T:0
EA2454	snippy:4.3.6	variation	731329	731329	.	.	0	note=snp G=>A A:40 G:0
EA2454	snippy:4.3.6	variation	733335	733335	.	.	0	note=snp C=>T T:58 C:0
EA2454	snippy:4.3.6	variation	735016	735016	.	.	0	note=snp T=>C C:57 T:0
EA2454	snippy:4.3.6	variation	746284	746284	.	.	0	note=snp C=>T T:58 C:1
EA2454	snippy:4.3.6	variation	747621	747621	.	.	0	note=snp C=>A A:57 C:3
EA2454	snippy:4.3.6	variation	748560	748560	.	.	0	note=snp G=>C C:49 G:0
EA2454	snippy:4.3.6	variation	751988	751988	.	.	0	note=snp C=>T T:37 C:2
EA2454	snippy:4.3.6	variation	753727	753727	.	.	0	note=snp T=>C C:57 T:0
EA2454	snippy:4.3.6	variation	755366	755366	.	.	0	note=snp A=>G G:54 A:2
EA2454	snippy:4.3.6	variation	756040	756040	.	.	0	note=snp T=>G G:70 T:0
EA2454	snippy:4.3.6	variation	758394	758394	.	.	0	note=snp C=>T T:49 C:0
EA2454	snippy:4.3.6	variation	765032	765032	.	.	0	note=snp T=>C C:59 T:0
EA2454	snippy:4.3.6	variation	770110	770110	.	.	0	note=snp T=>A A:78 T:0
EA2454	snippy:4.3.6	variation	770938	770938	.	.	0	note=mnp AG=>GA GA:76 AG:0
EA2454	snippy:4.3.6	variation	771794	771794	.	.	0	note=snp G=>C C:83 G:0
EA2454	snippy:4.3.6	variation	774045	774045	.	.	0	note=del GA=>G G:57 GA:0
EA2454	snippy:4.3.6	variation	774920	774920	.	.	0	note=snp A=>T T:50 A:2
EA2454	snippy:4.3.6	variation	778154	778154	.	.	0	note=snp A=>G G:86 A:0
EA2454	snippy:4.3.6	variation	780346	780346	.	.	0	note=snp A=>G G:34 A:1
EA2454	snippy:4.3.6	variation	780357	780357	.	.	0	note=snp C=>T T:42 C:1
EA2454	snippy:4.3.6	variation	780376	780376	.	.	0	note=complex TC=>CT CT:53 TC:0
EA2454	snippy:4.3.6	variation	780385	780385	.	.	0	note=snp G=>A A:62 G:1
EA2454	snippy:4.3.6	variation	780418	780418	.	.	0	note=complex ATCAACG=>TTCGATA TTCGATA:77 ATCAACG:0
EA2454	snippy:4.3.6	variation	780430	780430	.	.	0	note=complex GATT=>AAGA AAGA:77 GATT:0
EA2454	snippy:4.3.6	variation	780442	780442	.	.	0	note=snp C=>T T:87 C:0
EA2454	snippy:4.3.6	variation	780457	780457	.	.	0	note=snp A=>G G:94 A:0
EA2454	snippy:4.3.6	variation	780478	780478	.	.	0	note=snp G=>T T:93 G:0
EA2454	snippy:4.3.6	variation	780492	780492	.	.	0	note=snp C=>A A:81 C:0
EA2454	snippy:4.3.6	variation	780506	780506	.	.	0	note=complex TGT=>GGC GGC:80 TGT:0
EA2454	snippy:4.3.6	variation	780520	780520	.	.	0	note=snp C=>A A:77 C:0
EA2454	snippy:4.3.6	variation	780618	780618	.	.	0	note=snp A=>C C:102 A:0
EA2454	snippy:4.3.6	variation	780624	780624	.	.	0	note=mnp TG=>AA AA:100 TG:0
EA2454	snippy:4.3.6	variation	780642	780642	.	.	0	note=snp A=>G G:111 A:0
EA2454	snippy:4.3.6	variation	780651	780651	.	.	0	note=snp A=>G G:116 A:0
EA2454	snippy:4.3.6	variation	780735	780735	.	.	0	note=complex GCGC=>ACGG ACGG:125 GCGC:0
EA2454	snippy:4.3.6	variation	780750	780750	.	.	0	note=snp G=>A A:132 G:0
EA2454	snippy:4.3.6	variation	780756	780756	.	.	0	note=snp C=>A A:134 C:0
EA2454	snippy:4.3.6	variation	780780	780780	.	.	0	note=snp G=>A A:127 G:0
EA2454	snippy:4.3.6	variation	780785	780785	.	.	0	note=snp A=>G G:134 A:0
EA2454	snippy:4.3.6	variation	780797	780797	.	.	0	note=snp A=>G G:141 A:0
EA2454	snippy:4.3.6	variation	780804	780804	.	.	0	note=snp A=>G G:142 A:0
EA2454	snippy:4.3.6	variation	780813	780813	.	.	0	note=snp C=>T T:141 C:0
EA2454	snippy:4.3.6	variation	780834	780834	.	.	0	note=snp T=>C C:138 T:0
EA2454	snippy:4.3.6	variation	780852	780852	.	.	0	note=snp A=>T T:142 A:0
EA2454	snippy:4.3.6	variation	780906	780906	.	.	0	note=snp C=>T T:123 C:1
EA2454	snippy:4.3.6	variation	780913	780913	.	.	0	note=snp T=>A A:123 T:1
EA2454	snippy:4.3.6	variation	780939	780939	.	.	0	note=complex GGCC=>TGCA TGCA:116 GGCC:0
EA2454	snippy:4.3.6	variation	780966	780966	.	.	0	note=snp G=>A A:99 G:1
EA2454	snippy:4.3.6	variation	781080	781080	.	.	0	note=snp A=>G G:107 A:1
EA2454	snippy:4.3.6	variation	781128	781128	.	.	0	note=snp C=>G G:125 C:0
EA2454	snippy:4.3.6	variation	781170	781170	.	.	0	note=snp T=>A A:113 T:0
EA2454	snippy:4.3.6	variation	781226	781226	.	.	0	note=snp A=>G G:116 A:0
EA2454	snippy:4.3.6	variation	781242	781242	.	.	0	note=snp T=>C C:115 T:0
EA2454	snippy:4.3.6	variation	781264	781264	.	.	0	note=snp A=>G G:112 A:8
EA2454	snippy:4.3.6	variation	786559	786559	.	.	0	note=snp A=>C C:58 A:0
EA2454	snippy:4.3.6	variation	787809	787809	.	.	0	note=snp G=>A A:58 G:0
EA2454	snippy:4.3.6	variation	788461	788461	.	.	0	note=snp G=>T T:38 G:0
EA2454	snippy:4.3.6	variation	788478	788478	.	.	0	note=del GC=>G G:32 GC:2
EA2454	snippy:4.3.6	variation	789417	789417	.	.	0	note=snp A=>C C:66 A:0
EA2454	snippy:4.3.6	variation	790703	790703	.	.	0	note=snp A=>C C:71 A:0
EA2454	snippy:4.3.6	variation	793051	793051	.	.	0	note=snp A=>G G:71 A:0
EA2454	snippy:4.3.6	variation	793067	793067	.	.	0	note=snp G=>A A:67 G:3
EA2454	snippy:4.3.6	variation	796255	796255	.	.	0	note=snp G=>A A:53 G:0
EA2454	snippy:4.3.6	variation	796276	796276	.	.	0	note=snp C=>A A:54 C:0
EA2454	snippy:4.3.6	variation	800237	800237	.	.	0	note=snp G=>A A:46 G:0
EA2454	snippy:4.3.6	variation	802510	802510	.	.	0	note=snp G=>T T:54 G:0
EA2454	snippy:4.3.6	variation	802895	802895	.	.	0	note=snp G=>A A:78 G:1
EA2454	snippy:4.3.6	variation	803079	803079	.	.	0	note=snp G=>A A:46 G:0
EA2454	snippy:4.3.6	variation	805105	805105	.	.	0	note=snp A=>C C:54 A:0
EA2454	snippy:4.3.6	variation	805200	805200	.	.	0	note=snp G=>A A:59 G:0
EA2454	snippy:4.3.6	variation	805481	805481	.	.	0	note=snp A=>G G:71 A:0
EA2454	snippy:4.3.6	variation	817038	817038	.	.	0	note=del CA=>C C:56 CA:4
EA2454	snippy:4.3.6	variation	817446	817446	.	.	0	note=snp A=>G G:64 A:0
EA2454	snippy:4.3.6	variation	817985	817985	.	.	0	note=snp T=>G G:44 T:0
EA2454	snippy:4.3.6	variation	818649	818649	.	.	0	note=snp A=>C C:61 A:0
EA2454	snippy:4.3.6	variation	819976	819976	.	.	0	note=snp C=>T T:56 C:1
EA2454	snippy:4.3.6	variation	821110	821110	.	.	0	note=snp A=>C C:64 A:0
EA2454	snippy:4.3.6	variation	822872	822872	.	.	0	note=snp C=>T T:44 C:0
EA2454	snippy:4.3.6	variation	823756	823756	.	.	0	note=snp G=>A A:62 G:2
EA2454	snippy:4.3.6	variation	825661	825661	.	.	0	note=snp A=>C C:51 A:0
EA2454	snippy:4.3.6	variation	830653	830653	.	.	0	note=snp A=>C C:66 A:0
EA2454	snippy:4.3.6	variation	831717	831717	.	.	0	note=snp G=>T T:65 G:1
EA2454	snippy:4.3.6	variation	834488	834488	.	.	0	note=snp T=>C C:52 T:0
EA2454	snippy:4.3.6	variation	834575	834575	.	.	0	note=ins A=>AT AT:34 A:0
EA2454	snippy:4.3.6	variation	839497	839497	.	.	0	note=snp T=>A A:42 T:0
EA2454	snippy:4.3.6	variation	844687	844687	.	.	0	note=snp G=>A A:38 G:0
EA2454	snippy:4.3.6	variation	849124	849124	.	.	0	note=snp G=>A A:61 G:1
EA2454	snippy:4.3.6	variation	849614	849614	.	.	0	note=snp G=>A A:33 G:1
EA2454	snippy:4.3.6	variation	850239	850239	.	.	0	note=snp C=>T T:37 C:0
EA2454	snippy:4.3.6	variation	852695	852695	.	.	0	note=snp A=>G G:44 A:0
EA2454	snippy:4.3.6	variation	856001	856001	.	.	0	note=snp G=>A A:47 G:0
EA2454	snippy:4.3.6	variation	856304	856304	.	.	0	note=snp G=>A A:55 G:0
EA2454	snippy:4.3.6	variation	856699	856699	.	.	0	note=snp A=>T T:61 A:0
EA2454	snippy:4.3.6	variation	857021	857021	.	.	0	note=snp A=>G G:57 A:0
EA2454	snippy:4.3.6	variation	863496	863496	.	.	0	note=snp A=>G G:46 A:0
EA2454	snippy:4.3.6	variation	864446	864446	.	.	0	note=snp T=>C C:54 T:0
EA2454	snippy:4.3.6	variation	869546	869546	.	.	0	note=snp C=>T T:43 C:3
EA2454	snippy:4.3.6	variation	875313	875313	.	.	0	note=snp T=>C C:60 T:0
EA2454	snippy:4.3.6	variation	880933	880933	.	.	0	note=snp G=>A A:54 G:1
EA2454	snippy:4.3.6	variation	889463	889463	.	.	0	note=snp G=>A A:60 G:0
EA2454	snippy:4.3.6	variation	894538	894538	.	.	0	note=snp C=>T T:51 C:0
EA2454	snippy:4.3.6	variation	899525	899525	.	.	0	note=ins G=>GC GC:51 G:0
EA2454	snippy:4.3.6	variation	904482	904482	.	.	0	note=snp A=>G G:63 A:0
EA2454	snippy:4.3.6	variation	906890	906890	.	.	0	note=snp G=>A A:51 G:1
EA2454	snippy:4.3.6	variation	919060	919060	.	.	0	note=snp T=>G G:72 T:0
EA2454	snippy:4.3.6	variation	924579	924579	.	.	0	note=snp T=>C C:57 T:0
EA2454	snippy:4.3.6	variation	930102	930102	.	.	0	note=snp A=>G G:65 A:0
EA2454	snippy:4.3.6	variation	933541	933541	.	.	0	note=snp G=>A A:51 G:2
EA2454	snippy:4.3.6	variation	937614	937614	.	.	0	note=snp C=>T T:54 C:0
EA2454	snippy:4.3.6	variation	938195	938195	.	.	0	note=snp A=>G G:54 A:0
EA2454	snippy:4.3.6	variation	938496	938496	.	.	0	note=snp C=>A A:51 C:1
EA2454	snippy:4.3.6	variation	940273	940273	.	.	0	note=del GC=>G G:45 GC:0
EA2454	snippy:4.3.6	variation	941489	941489	.	.	0	note=snp C=>A A:64 C:0
EA2454	snippy:4.3.6	variation	945162	945162	.	.	0	note=snp A=>G G:44 A:0
EA2454	snippy:4.3.6	variation	946875	946875	.	.	0	note=snp T=>C C:65 T:0
EA2454	snippy:4.3.6	variation	949221	949221	.	.	0	note=snp C=>A A:67 C:0
EA2454	snippy:4.3.6	variation	949618	949618	.	.	0	note=complex CTTTCGCGTTTTTTTT=>TTTC TTTC:18 CTTTCGCGTTTTTTTT:0
EA2454	snippy:4.3.6	variation	949641	949641	.	.	0	note=snp G=>T T:31 G:0
EA2454	snippy:4.3.6	variation	953284	953284	.	.	0	note=snp T=>A A:75 T:0
EA2454	snippy:4.3.6	variation	953802	953802	.	.	0	note=snp A=>T T:14 A:0
EA2454	snippy:4.3.6	variation	953998	953998	.	.	0	note=snp G=>A A:49 G:0
EA2454	snippy:4.3.6	variation	962176	962176	.	.	0	note=snp C=>T T:49 C:0
EA2454	snippy:4.3.6	variation	962197	962197	.	.	0	note=snp T=>C C:61 T:0
EA2454	snippy:4.3.6	variation	962206	962206	.	.	0	note=snp A=>C C:61 A:0
EA2454	snippy:4.3.6	variation	962263	962263	.	.	0	note=snp G=>A A:59 G:0
EA2454	snippy:4.3.6	variation	962289	962289	.	.	0	note=snp G=>T T:57 G:0
EA2454	snippy:4.3.6	variation	962367	962367	.	.	0	note=snp T=>C C:60 T:0
EA2454	snippy:4.3.6	variation	962383	962383	.	.	0	note=mnp GC=>TG TG:58 GC:0
EA2454	snippy:4.3.6	variation	962400	962400	.	.	0	note=del GCAGGT=>G G:44 GCAGGT:0
EA2454	snippy:4.3.6	variation	962433	962433	.	.	0	note=snp C=>T T:54 C:0
EA2454	snippy:4.3.6	variation	962440	962440	.	.	0	note=snp T=>C C:52 T:0
EA2454	snippy:4.3.6	variation	962460	962460	.	.	0	note=mnp AGT=>TTG TTG:48 AGT:0
EA2454	snippy:4.3.6	variation	962499	962499	.	.	0	note=snp A=>G G:49 A:0
EA2454	snippy:4.3.6	variation	962516	962516	.	.	0	note=snp T=>C C:43 T:0
EA2454	snippy:4.3.6	variation	962541	962541	.	.	0	note=snp T=>G G:38 T:0
EA2454	snippy:4.3.6	variation	962550	962550	.	.	0	note=snp T=>C C:37 T:0
EA2454	snippy:4.3.6	variation	962563	962563	.	.	0	note=snp A=>G G:45 A:0
EA2454	snippy:4.3.6	variation	962606	962606	.	.	0	note=complex CGGTTGGCA=>AGGTGGGCG AGGTGGGCG:48 CGGTTGGCA:0
EA2454	snippy:4.3.6	variation	962695	962695	.	.	0	note=snp A=>G G:67 A:0
EA2454	snippy:4.3.6	variation	962748	962748	.	.	0	note=snp A=>G G:55 A:0
EA2454	snippy:4.3.6	variation	962781	962781	.	.	0	note=mnp TGA=>ACT ACT:52 TGA:0
EA2454	snippy:4.3.6	variation	962823	962823	.	.	0	note=snp A=>G G:50 A:0
EA2454	snippy:4.3.6	variation	962845	962845	.	.	0	note=snp G=>A A:46 G:0
EA2454	snippy:4.3.6	variation	962859	962859	.	.	0	note=snp A=>T T:40 A:0
EA2454	snippy:4.3.6	variation	962864	962864	.	.	0	note=mnp TT=>GG GG:39 TT:0
EA2454	snippy:4.3.6	variation	962874	962874	.	.	0	note=snp A=>G G:40 A:0
EA2454	snippy:4.3.6	variation	962895	962895	.	.	0	note=snp A=>G G:38 A:0
EA2454	snippy:4.3.6	variation	962910	962910	.	.	0	note=snp G=>A A:46 G:0
EA2454	snippy:4.3.6	variation	962960	962960	.	.	0	note=snp A=>G G:50 A:0
EA2454	snippy:4.3.6	variation	963036	963036	.	.	0	note=snp A=>G G:63 A:0
EA2454	snippy:4.3.6	variation	963081	963081	.	.	0	note=complex TCCAGC=>CCCGGT CCCGGT:56 TCCAGC:0
EA2454	snippy:4.3.6	variation	963144	963144	.	.	0	note=complex CACCGGA=>TACTGGT TACTGGT:58 CACCGGA:0
EA2454	snippy:4.3.6	variation	963184	963184	.	.	0	note=snp A=>T T:64 A:2
EA2454	snippy:4.3.6	variation	963273	963273	.	.	0	note=snp G=>A A:62 G:0
EA2454	snippy:4.3.6	variation	963338	963338	.	.	0	note=snp T=>C C:65 T:0
EA2454	snippy:4.3.6	variation	963390	963390	.	.	0	note=snp A=>G G:60 A:0
EA2454	snippy:4.3.6	variation	963396	963396	.	.	0	note=snp C=>T T:63 C:0
EA2454	snippy:4.3.6	variation	963465	963465	.	.	0	note=snp T=>C C:48 T:0
EA2454	snippy:4.3.6	variation	963480	963480	.	.	0	note=snp G=>A A:45 G:3
EA2454	snippy:4.3.6	variation	963513	963513	.	.	0	note=complex GCGC=>ACGT ACGT:39 GCGC:1
EA2454	snippy:4.3.6	variation	963525	963525	.	.	0	note=snp T=>C C:48 T:0
EA2454	snippy:4.3.6	variation	963555	963555	.	.	0	note=snp A=>G G:43 A:3
EA2454	snippy:4.3.6	variation	963590	963590	.	.	0	note=snp A=>G G:46 A:2
EA2454	snippy:4.3.6	variation	963600	963600	.	.	0	note=snp G=>A A:44 G:0
EA2454	snippy:4.3.6	variation	963654	963654	.	.	0	note=snp A=>G G:47 A:1
EA2454	snippy:4.3.6	variation	963706	963706	.	.	0	note=snp A=>G G:52 A:0
EA2454	snippy:4.3.6	variation	963751	963751	.	.	0	note=complex GCCC=>ACCT ACCT:47 GCCC:1
EA2454	snippy:4.3.6	variation	963769	963769	.	.	0	note=snp C=>T T:49 C:1
EA2454	snippy:4.3.6	variation	963790	963790	.	.	0	note=snp A=>C C:49 A:0
EA2454	snippy:4.3.6	variation	963796	963796	.	.	0	note=complex TCCATCG=>GCCGTCA GCCGTCA:47 TCCATCG:0
EA2454	snippy:4.3.6	variation	963811	963811	.	.	0	note=snp C=>T T:43 C:0
EA2454	snippy:4.3.6	variation	963879	963879	.	.	0	note=snp G=>A A:23 G:0
EA2454	snippy:4.3.6	variation	964577	964577	.	.	0	note=snp A=>G G:25 A:0
EA2454	snippy:4.3.6	variation	964586	964586	.	.	0	note=snp A=>G G:36 A:0
EA2454	snippy:4.3.6	variation	964604	964604	.	.	0	note=snp T=>G G:36 T:0
EA2454	snippy:4.3.6	variation	964625	964625	.	.	0	note=complex TCCT=>CCCA CCCA:36 TCCT:0
EA2454	snippy:4.3.6	variation	964671	964671	.	.	0	note=snp A=>G G:36 A:0
EA2454	snippy:4.3.6	variation	964703	964703	.	.	0	note=complex TG=>CA CA:30 TG:0
EA2454	snippy:4.3.6	variation	964710	964710	.	.	0	note=snp T=>C C:28 T:0
EA2454	snippy:4.3.6	variation	981566	981566	.	.	0	note=del TC=>T T:15 TC:0
EA2454	snippy:4.3.6	variation	981609	981609	.	.	0	note=snp T=>A A:43 T:0
EA2454	snippy:4.3.6	variation	981682	981682	.	.	0	note=snp T=>A A:56 T:0
EA2454	snippy:4.3.6	variation	981692	981692	.	.	0	note=snp A=>G G:51 A:0
EA2454	snippy:4.3.6	variation	981702	981702	.	.	0	note=snp G=>A A:45 G:0
EA2454	snippy:4.3.6	variation	981741	981741	.	.	0	note=snp A=>C C:27 A:0
EA2454	snippy:4.3.6	variation	983899	983899	.	.	0	note=snp T=>C C:49 T:1
EA2454	snippy:4.3.6	variation	986640	986640	.	.	0	note=snp G=>A A:56 G:0
EA2454	snippy:4.3.6	variation	987362	987362	.	.	0	note=snp T=>A A:56 T:0
EA2454	snippy:4.3.6	variation	989167	989167	.	.	0	note=snp G=>A A:71 G:0
EA2454	snippy:4.3.6	variation	989367	989367	.	.	0	note=snp A=>T T:54 A:1
EA2454	snippy:4.3.6	variation	990058	990058	.	.	0	note=snp G=>T T:50 G:0
EA2454	snippy:4.3.6	variation	990418	990418	.	.	0	note=snp C=>T T:60 C:1
EA2454	snippy:4.3.6	variation	1001425	1001425	.	.	0	note=snp A=>G G:76 A:0
EA2454	snippy:4.3.6	variation	1002890	1002890	.	.	0	note=snp C=>T T:59 C:0
EA2454	snippy:4.3.6	variation	1003603	1003603	.	.	0	note=snp A=>G G:73 A:0
EA2454	snippy:4.3.6	variation	1003611	1003611	.	.	0	note=snp C=>A A:76 C:0
EA2454	snippy:4.3.6	variation	1015834	1015834	.	.	0	note=snp A=>G G:55 A:2
EA2454	snippy:4.3.6	variation	1021949	1021949	.	.	0	note=del TCGAAGA=>T T:39 TCGAAGA:2
EA2454	snippy:4.3.6	variation	1023793	1023793	.	.	0	note=snp C=>T T:53 C:0
EA2454	snippy:4.3.6	variation	1025817	1025817	.	.	0	note=snp G=>A A:55 G:0
EA2454	snippy:4.3.6	variation	1026843	1026843	.	.	0	note=snp T=>C C:47 T:0
EA2454	snippy:4.3.6	variation	1027956	1027956	.	.	0	note=snp G=>A A:61 G:1
EA2454	snippy:4.3.6	variation	1029670	1029670	.	.	0	note=snp T=>A A:65 T:0
EA2454	snippy:4.3.6	variation	1042978	1042978	.	.	0	note=snp G=>A A:43 G:1
EA2454	snippy:4.3.6	variation	1043191	1043191	.	.	0	note=snp C=>T T:51 C:0
EA2454	snippy:4.3.6	variation	1044717	1044717	.	.	0	note=snp G=>A A:67 G:0
EA2454	snippy:4.3.6	variation	1044888	1044888	.	.	0	note=snp T=>A A:55 T:0
EA2454	snippy:4.3.6	variation	1047640	1047640	.	.	0	note=snp G=>A A:53 G:0
EA2454	snippy:4.3.6	variation	1050102	1050102	.	.	0	note=snp G=>A A:63 G:1
EA2454	snippy:4.3.6	variation	1050746	1050746	.	.	0	note=snp T=>C C:49 T:0
EA2454	snippy:4.3.6	variation	1052435	1052435	.	.	0	note=snp C=>T T:72 C:0
EA2454	snippy:4.3.6	variation	1052621	1052621	.	.	0	note=snp C=>A A:45 C:0
EA2454	snippy:4.3.6	variation	1055114	1055114	.	.	0	note=snp T=>G G:50 T:0
EA2454	snippy:4.3.6	variation	1055414	1055414	.	.	0	note=snp C=>T T:53 C:0
EA2454	snippy:4.3.6	variation	1062982	1062982	.	.	0	note=snp C=>T T:56 C:2
EA2454	snippy:4.3.6	variation	1066947	1066947	.	.	0	note=snp T=>C C:54 T:1
EA2454	snippy:4.3.6	variation	1067810	1067810	.	.	0	note=ins T=>TG TG:63 T:1
EA2454	snippy:4.3.6	variation	1068806	1068806	.	.	0	note=snp C=>T T:71 C:0
EA2454	snippy:4.3.6	variation	1072860	1072860	.	.	0	note=snp G=>A A:52 G:0
EA2454	snippy:4.3.6	variation	1073559	1073559	.	.	0	note=snp T=>A A:62 T:0
EA2454	snippy:4.3.6	variation	1073767	1073767	.	.	0	note=snp A=>G G:50 A:0
EA2454	snippy:4.3.6	variation	1074029	1074029	.	.	0	note=snp G=>C C:41 G:0
EA2454	snippy:4.3.6	variation	1075753	1075753	.	.	0	note=snp A=>G G:73 A:0
EA2454	snippy:4.3.6	variation	1077208	1077208	.	.	0	note=snp G=>A A:76 G:1
EA2454	snippy:4.3.6	variation	1078828	1078828	.	.	0	note=snp A=>C C:36 A:1
EA2454	snippy:4.3.6	variation	1079000	1079000	.	.	0	note=snp T=>C C:63 T:0
EA2454	snippy:4.3.6	variation	1083045	1083045	.	.	0	note=snp G=>A A:64 G:1
EA2454	snippy:4.3.6	variation	1088099	1088099	.	.	0	note=snp C=>T T:52 C:1
EA2454	snippy:4.3.6	variation	1093309	1093309	.	.	0	note=snp A=>G G:56 A:0
EA2454	snippy:4.3.6	variation	1097356	1097356	.	.	0	note=snp G=>A A:48 G:2
EA2454	snippy:4.3.6	variation	1097467	1097467	.	.	0	note=snp C=>T T:52 C:1
EA2454	snippy:4.3.6	variation	1098620	1098620	.	.	0	note=snp A=>G G:48 A:0
EA2454	snippy:4.3.6	variation	1099453	1099453	.	.	0	note=snp G=>T T:63 G:1
EA2454	snippy:4.3.6	variation	1100113	1100113	.	.	0	note=snp G=>A A:60 G:3
EA2454	snippy:4.3.6	variation	1101458	1101458	.	.	0	note=snp A=>C C:24 A:0
EA2454	snippy:4.3.6	variation	1102661	1102661	.	.	0	note=snp G=>A A:75 G:0
EA2454	snippy:4.3.6	variation	1103332	1103332	.	.	0	note=snp G=>A A:71 G:1
EA2454	snippy:4.3.6	variation	1103669	1103669	.	.	0	note=snp T=>C C:85 T:0
EA2454	snippy:4.3.6	variation	1104984	1104984	.	.	0	note=snp C=>T T:55 C:0
EA2454	snippy:4.3.6	variation	1105586	1105586	.	.	0	note=snp A=>G G:37 A:0
EA2454	snippy:4.3.6	variation	1107899	1107899	.	.	0	note=snp G=>A A:63 G:3
EA2454	snippy:4.3.6	variation	1109672	1109672	.	.	0	note=snp T=>C C:53 T:0
EA2454	snippy:4.3.6	variation	1118913	1118913	.	.	0	note=snp C=>T T:81 C:2
EA2454	snippy:4.3.6	variation	1126572	1126572	.	.	0	note=snp C=>T T:43 C:0
EA2454	snippy:4.3.6	variation	1127119	1127119	.	.	0	note=snp T=>G G:58 T:0
EA2454	snippy:4.3.6	variation	1127311	1127311	.	.	0	note=snp C=>G G:57 C:0
EA2454	snippy:4.3.6	variation	1128458	1128458	.	.	0	note=snp T=>C C:84 T:0
EA2454	snippy:4.3.6	variation	1130101	1130101	.	.	0	note=snp T=>C C:55 T:0
EA2454	snippy:4.3.6	variation	1130623	1130623	.	.	0	note=snp A=>G G:66 A:0
EA2454	snippy:4.3.6	variation	1137206	1137206	.	.	0	note=snp A=>T T:57 A:0
EA2454	snippy:4.3.6	variation	1138215	1138215	.	.	0	note=snp T=>C C:51 T:0
EA2454	snippy:4.3.6	variation	1138883	1138883	.	.	0	note=snp C=>T T:54 C:0
EA2454	snippy:4.3.6	variation	1139565	1139565	.	.	0	note=del CT=>C C:49 CT:0
EA2454	snippy:4.3.6	variation	1139685	1139685	.	.	0	note=snp A=>C C:62 A:0
EA2454	snippy:4.3.6	variation	1140206	1140206	.	.	0	note=snp C=>T T:59 C:0
EA2454	snippy:4.3.6	variation	1140326	1140326	.	.	0	note=snp A=>G G:73 A:0
EA2454	snippy:4.3.6	variation	1144975	1144975	.	.	0	note=snp T=>C C:61 T:0
EA2454	snippy:4.3.6	variation	1145018	1145018	.	.	0	note=del AT=>A A:45 AT:0
EA2454	snippy:4.3.6	variation	1149182	1149182	.	.	0	note=snp C=>T T:54 C:1
EA2454	snippy:4.3.6	variation	1151448	1151448	.	.	0	note=snp T=>C C:45 T:0
EA2454	snippy:4.3.6	variation	1153019	1153019	.	.	0	note=snp G=>A A:68 G:2
EA2454	snippy:4.3.6	variation	1153447	1153447	.	.	0	note=snp T=>C C:53 T:0
EA2454	snippy:4.3.6	variation	1160822	1160822	.	.	0	note=snp A=>T T:58 A:0
EA2454	snippy:4.3.6	variation	1162900	1162900	.	.	0	note=snp T=>C C:63 T:0
EA2454	snippy:4.3.6	variation	1163629	1163629	.	.	0	note=snp A=>C C:70 A:0
EA2454	snippy:4.3.6	variation	1167644	1167644	.	.	0	note=snp C=>T T:41 C:1
EA2454	snippy:4.3.6	variation	1167666	1167666	.	.	0	note=snp T=>C C:48 T:0
EA2454	snippy:4.3.6	variation	1168533	1168533	.	.	0	note=snp A=>C C:61 A:0
EA2454	snippy:4.3.6	variation	1173180	1173180	.	.	0	note=snp T=>G G:63 T:0
EA2454	snippy:4.3.6	variation	1173574	1173574	.	.	0	note=snp C=>T T:61 C:0
EA2454	snippy:4.3.6	variation	1174340	1174340	.	.	0	note=snp A=>G G:55 A:0
EA2454	snippy:4.3.6	variation	1174352	1174352	.	.	0	note=snp T=>C C:58 T:0
EA2454	snippy:4.3.6	variation	1175022	1175022	.	.	0	note=snp A=>G G:58 A:0
EA2454	snippy:4.3.6	variation	1178845	1178845	.	.	0	note=snp A=>G G:58 A:0
EA2454	snippy:4.3.6	variation	1185789	1185789	.	.	0	note=snp C=>T T:50 C:1
EA2454	snippy:4.3.6	variation	1186746	1186746	.	.	0	note=snp T=>C C:56 T:0
EA2454	snippy:4.3.6	variation	1188186	1188186	.	.	0	note=snp C=>T T:54 C:2
EA2454	snippy:4.3.6	variation	1190353	1190353	.	.	0	note=snp G=>T T:60 G:0
EA2454	snippy:4.3.6	variation	1191178	1191178	.	.	0	note=snp C=>T T:58 C:0
EA2454	snippy:4.3.6	variation	1191842	1191842	.	.	0	note=snp G=>A A:56 G:1
EA2454	snippy:4.3.6	variation	1201573	1201573	.	.	0	note=snp C=>T T:53 C:3
EA2454	snippy:4.3.6	variation	1201978	1201978	.	.	0	note=snp C=>T T:62 C:0
EA2454	snippy:4.3.6	variation	1202219	1202219	.	.	0	note=snp C=>T T:54 C:3
EA2454	snippy:4.3.6	variation	1204294	1204294	.	.	0	note=snp C=>A A:78 C:0
EA2454	snippy:4.3.6	variation	1206487	1206487	.	.	0	note=snp A=>G G:63 A:0
EA2454	snippy:4.3.6	variation	1206863	1206863	.	.	0	note=snp G=>A A:46 G:0
EA2454	snippy:4.3.6	variation	1211256	1211256	.	.	0	note=snp T=>C C:54 T:0
EA2454	snippy:4.3.6	variation	1213346	1213346	.	.	0	note=snp G=>A A:46 G:0
EA2454	snippy:4.3.6	variation	1216445	1216445	.	.	0	note=snp A=>C C:66 A:0
EA2454	snippy:4.3.6	variation	1218789	1218789	.	.	0	note=snp A=>G G:58 A:0
EA2454	snippy:4.3.6	variation	1227370	1227370	.	.	0	note=snp T=>A A:57 T:2
EA2454	snippy:4.3.6	variation	1228055	1228055	.	.	0	note=snp C=>T T:54 C:0
EA2454	snippy:4.3.6	variation	1229906	1229906	.	.	0	note=snp A=>G G:49 A:0
EA2454	snippy:4.3.6	variation	1232819	1232819	.	.	0	note=snp A=>C C:64 A:0
EA2454	snippy:4.3.6	variation	1234548	1234548	.	.	0	note=snp T=>C C:71 T:0
EA2454	snippy:4.3.6	variation	1235752	1235752	.	.	0	note=snp A=>G G:54 A:0
EA2454	snippy:4.3.6	variation	1236723	1236723	.	.	0	note=snp T=>C C:67 T:0
EA2454	snippy:4.3.6	variation	1238020	1238020	.	.	0	note=snp G=>A A:65 G:0
EA2454	snippy:4.3.6	variation	1240664	1240664	.	.	0	note=snp C=>T T:62 C:1
EA2454	snippy:4.3.6	variation	1242995	1242995	.	.	0	note=snp T=>G G:65 T:1
EA2454	snippy:4.3.6	variation	1248859	1248859	.	.	0	note=snp C=>A A:51 C:1
EA2454	snippy:4.3.6	variation	1248869	1248869	.	.	0	note=snp C=>T T:53 C:1
EA2454	snippy:4.3.6	variation	1255549	1255549	.	.	0	note=snp A=>G G:43 A:0
EA2454	snippy:4.3.6	variation	1261109	1261109	.	.	0	note=snp G=>A A:51 G:2
EA2454	snippy:4.3.6	variation	1261876	1261876	.	.	0	note=snp A=>C C:58 A:0
EA2454	snippy:4.3.6	variation	1264824	1264824	.	.	0	note=snp A=>C C:75 A:1
EA2454	snippy:4.3.6	variation	1269483	1269483	.	.	0	note=snp T=>G G:55 T:1
EA2454	snippy:4.3.6	variation	1271061	1271061	.	.	0	note=snp T=>G G:59 T:0
EA2454	snippy:4.3.6	variation	1272090	1272090	.	.	0	note=snp T=>C C:54 T:0
EA2454	snippy:4.3.6	variation	1272896	1272896	.	.	0	note=snp G=>A A:51 G:1
EA2454	snippy:4.3.6	variation	1272930	1272930	.	.	0	note=snp T=>C C:49 T:0
EA2454	snippy:4.3.6	variation	1273072	1273072	.	.	0	note=snp C=>A A:51 C:0
EA2454	snippy:4.3.6	variation	1273834	1273834	.	.	0	note=snp C=>T T:68 C:2
EA2454	snippy:4.3.6	variation	1274920	1274920	.	.	0	note=snp T=>G G:57 T:1
EA2454	snippy:4.3.6	variation	1274943	1274943	.	.	0	note=snp G=>T T:49 G:0
EA2454	snippy:4.3.6	variation	1276996	1276996	.	.	0	note=snp C=>A A:40 C:0
EA2454	snippy:4.3.6	variation	1277132	1277132	.	.	0	note=snp G=>T T:52 G:0
EA2454	snippy:4.3.6	variation	1278681	1278681	.	.	0	note=snp C=>T T:44 C:1
EA2454	snippy:4.3.6	variation	1278689	1278689	.	.	0	note=snp T=>C C:46 T:1
EA2454	snippy:4.3.6	variation	1278780	1278780	.	.	0	note=snp C=>T T:47 C:2
EA2454	snippy:4.3.6	variation	1280572	1280572	.	.	0	note=snp C=>A A:54 C:0
EA2454	snippy:4.3.6	variation	1282553	1282553	.	.	0	note=snp T=>C C:58 T:0
EA2454	snippy:4.3.6	variation	1288723	1288723	.	.	0	note=snp G=>T T:58 G:2
EA2454	snippy:4.3.6	variation	1289659	1289659	.	.	0	note=snp C=>T T:64 C:1
EA2454	snippy:4.3.6	variation	1294678	1294678	.	.	0	note=snp A=>T T:51 A:0
EA2454	snippy:4.3.6	variation	1297315	1297315	.	.	0	note=snp T=>G G:43 T:0
EA2454	snippy:4.3.6	variation	1297886	1297886	.	.	0	note=snp C=>T T:41 C:1
EA2454	snippy:4.3.6	variation	1298966	1298966	.	.	0	note=snp C=>T T:69 C:3
EA2454	snippy:4.3.6	variation	1300511	1300511	.	.	0	note=del GC=>G G:10 GC:0
EA2454	snippy:4.3.6	variation	1306374	1306374	.	.	0	note=snp G=>T T:60 G:1
EA2454	snippy:4.3.6	variation	1308914	1308914	.	.	0	note=snp G=>A A:64 G:1
EA2454	snippy:4.3.6	variation	1309315	1309315	.	.	0	note=snp T=>C C:32 T:0
EA2454	snippy:4.3.6	variation	1312640	1312640	.	.	0	note=snp T=>A A:54 T:0
EA2454	snippy:4.3.6	variation	1317400	1317400	.	.	0	note=snp G=>A A:55 G:0
EA2454	snippy:4.3.6	variation	1320805	1320805	.	.	0	note=snp A=>G G:50 A:0
EA2454	snippy:4.3.6	variation	1321941	1321941	.	.	0	note=snp A=>T T:55 A:0
EA2454	snippy:4.3.6	variation	1322163	1322163	.	.	0	note=snp T=>C C:65 T:0
EA2454	snippy:4.3.6	variation	1322665	1322665	.	.	0	note=snp T=>C C:39 T:0
EA2454	snippy:4.3.6	variation	1322681	1322681	.	.	0	note=snp C=>T T:38 C:0
EA2454	snippy:4.3.6	variation	1324727	1324727	.	.	0	note=snp C=>T T:61 C:0
EA2454	snippy:4.3.6	variation	1325308	1325308	.	.	0	note=snp G=>A A:42 G:1
EA2454	snippy:4.3.6	variation	1329424	1329424	.	.	0	note=snp G=>A A:64 G:2
EA2454	snippy:4.3.6	variation	1331179	1331179	.	.	0	note=snp T=>G G:54 T:0
EA2454	snippy:4.3.6	variation	1334810	1334810	.	.	0	note=snp C=>T T:58 C:1
EA2454	snippy:4.3.6	variation	1335631	1335631	.	.	0	note=snp T=>G G:48 T:0
EA2454	snippy:4.3.6	variation	1340886	1340886	.	.	0	note=snp A=>C C:45 A:0
EA2454	snippy:4.3.6	variation	1341226	1341226	.	.	0	note=snp G=>A A:61 G:1
EA2454	snippy:4.3.6	variation	1345460	1345460	.	.	0	note=snp T=>G G:65 T:0
EA2454	snippy:4.3.6	variation	1345847	1345847	.	.	0	note=snp T=>C C:54 T:0
EA2454	snippy:4.3.6	variation	1348897	1348897	.	.	0	note=snp C=>T T:53 C:0
EA2454	snippy:4.3.6	variation	1350390	1350390	.	.	0	note=snp T=>C C:61 T:0
EA2454	snippy:4.3.6	variation	1350805	1350805	.	.	0	note=snp G=>T T:64 G:0
EA2454	snippy:4.3.6	variation	1350994	1350994	.	.	0	note=snp G=>C C:48 G:0
EA2454	snippy:4.3.6	variation	1351159	1351159	.	.	0	note=snp C=>A A:55 C:1
EA2454	snippy:4.3.6	variation	1351707	1351707	.	.	0	note=snp G=>C C:64 G:0
EA2454	snippy:4.3.6	variation	1354507	1354507	.	.	0	note=snp C=>T T:64 C:1
EA2454	snippy:4.3.6	variation	1356176	1356176	.	.	0	note=snp G=>A A:66 G:2
EA2454	snippy:4.3.6	variation	1358384	1358384	.	.	0	note=snp A=>G G:48 A:0
EA2454	snippy:4.3.6	variation	1360577	1360577	.	.	0	note=snp A=>G G:50 A:0
EA2454	snippy:4.3.6	variation	1367509	1367509	.	.	0	note=snp C=>T T:50 C:0
EA2454	snippy:4.3.6	variation	1371250	1371250	.	.	0	note=snp T=>C C:51 T:0
EA2454	snippy:4.3.6	variation	1373482	1373482	.	.	0	note=snp T=>C C:69 T:0
EA2454	snippy:4.3.6	variation	1378312	1378312	.	.	0	note=snp T=>C C:53 T:0
EA2454	snippy:4.3.6	variation	1382325	1382325	.	.	0	note=ins G=>GT GT:37 G:0
EA2454	snippy:4.3.6	variation	1383170	1383170	.	.	0	note=snp C=>T T:54 C:0
EA2454	snippy:4.3.6	variation	1385263	1385263	.	.	0	note=snp C=>A A:57 C:0
EA2454	snippy:4.3.6	variation	1387493	1387493	.	.	0	note=snp A=>G G:43 A:0
EA2454	snippy:4.3.6	variation	1388245	1388245	.	.	0	note=snp A=>C C:51 A:0
EA2454	snippy:4.3.6	variation	1388756	1388756	.	.	0	note=ins G=>GAACCGTTA GAACCGTTA:28 G:2
EA2454	snippy:4.3.6	variation	1394505	1394505	.	.	0	note=snp A=>G G:50 A:0
EA2454	snippy:4.3.6	variation	1396448	1396448	.	.	0	note=snp T=>G G:46 T:0
EA2454	snippy:4.3.6	variation	1399939	1399939	.	.	0	note=snp A=>G G:44 A:1
EA2454	snippy:4.3.6	variation	1401055	1401055	.	.	0	note=snp G=>A A:43 G:1
EA2454	snippy:4.3.6	variation	1401264	1401264	.	.	0	note=snp A=>G G:54 A:0
EA2454	snippy:4.3.6	variation	1405648	1405648	.	.	0	note=snp T=>A A:62 T:2
EA2454	snippy:4.3.6	variation	1413295	1413295	.	.	0	note=snp T=>C C:57 T:0
EA2454	snippy:4.3.6	variation	1416501	1416501	.	.	0	note=snp A=>C C:44 A:0
EA2454	snippy:4.3.6	variation	1422407	1422407	.	.	0	note=snp A=>G G:66 A:0
EA2454	snippy:4.3.6	variation	1423591	1423591	.	.	0	note=snp A=>C C:48 A:0
EA2454	snippy:4.3.6	variation	1428495	1428495	.	.	0	note=snp A=>T T:44 A:0
EA2454	snippy:4.3.6	variation	1435223	1435223	.	.	0	note=snp G=>A A:49 G:0
EA2454	snippy:4.3.6	variation	1441016	1441016	.	.	0	note=snp G=>A A:44 G:1
EA2454	snippy:4.3.6	variation	1443436	1443436	.	.	0	note=snp T=>C C:75 T:0
EA2454	snippy:4.3.6	variation	1443911	1443911	.	.	0	note=snp C=>T T:57 C:0
EA2454	snippy:4.3.6	variation	1445406	1445406	.	.	0	note=snp G=>T T:57 G:1
EA2454	snippy:4.3.6	variation	1445619	1445619	.	.	0	note=snp G=>A A:61 G:0
EA2454	snippy:4.3.6	variation	1446012	1446012	.	.	0	note=snp T=>C C:45 T:1
EA2454	snippy:4.3.6	variation	1446804	1446804	.	.	0	note=snp G=>T T:46 G:0
EA2454	snippy:4.3.6	variation	1450758	1450758	.	.	0	note=snp T=>G G:55 T:1
EA2454	snippy:4.3.6	variation	1452075	1452075	.	.	0	note=snp T=>C C:53 T:0
EA2454	snippy:4.3.6	variation	1452129	1452129	.	.	0	note=snp T=>A A:55 T:1
EA2454	snippy:4.3.6	variation	1455169	1455169	.	.	0	note=snp G=>A A:58 G:0
EA2454	snippy:4.3.6	variation	1458467	1458467	.	.	0	note=snp A=>G G:53 A:0
EA2454	snippy:4.3.6	variation	1459664	1459664	.	.	0	note=snp T=>G G:39 T:0
EA2454	snippy:4.3.6	variation	1462030	1462030	.	.	0	note=snp C=>T T:48 C:0
EA2454	snippy:4.3.6	variation	1465104	1465104	.	.	0	note=ins G=>GCCTATTA GCCTATTA:39 G:1
EA2454	snippy:4.3.6	variation	1466045	1466045	.	.	0	note=snp C=>T T:43 C:1
EA2454	snippy:4.3.6	variation	1467065	1467065	.	.	0	note=snp A=>T T:73 A:0
EA2454	snippy:4.3.6	variation	1469205	1469205	.	.	0	note=ins A=>ACT ACT:56 A:2
EA2454	snippy:4.3.6	variation	1476139	1476139	.	.	0	note=snp T=>C C:53 T:0
EA2454	snippy:4.3.6	variation	1480708	1480708	.	.	0	note=snp T=>G G:54 T:1
EA2454	snippy:4.3.6	variation	1481186	1481186	.	.	0	note=snp C=>T T:48 C:2
EA2454	snippy:4.3.6	variation	1485960	1485960	.	.	0	note=snp C=>T T:55 C:0
EA2454	snippy:4.3.6	variation	1489754	1489754	.	.	0	note=del GCGGCACCATTGCCAGACCGCCTTC=>G G:20 GCGGCACCATTGCCAGACCGCCTTC:1
EA2454	snippy:4.3.6	variation	1491226	1491226	.	.	0	note=snp T=>C C:61 T:0
EA2454	snippy:4.3.6	variation	1491674	1491674	.	.	0	note=snp A=>G G:67 A:0
EA2454	snippy:4.3.6	variation	1495581	1495581	.	.	0	note=snp T=>A A:45 T:0
EA2454	snippy:4.3.6	variation	1496916	1496916	.	.	0	note=snp C=>T T:51 C:0
EA2454	snippy:4.3.6	variation	1499077	1499077	.	.	0	note=snp G=>A A:67 G:0
EA2454	snippy:4.3.6	variation	1500517	1500517	.	.	0	note=ins T=>TA TA:72 T:0
EA2454	snippy:4.3.6	variation	1506412	1506412	.	.	0	note=snp T=>C C:40 T:0
EA2454	snippy:4.3.6	variation	1510538	1510538	.	.	0	note=snp G=>A A:53 G:0
EA2454	snippy:4.3.6	variation	1513030	1513030	.	.	0	note=snp T=>G G:42 T:0
EA2454	snippy:4.3.6	variation	1517898	1517898	.	.	0	note=snp A=>C C:54 A:1
EA2454	snippy:4.3.6	variation	1518455	1518455	.	.	0	note=snp G=>A A:55 G:0
EA2454	snippy:4.3.6	variation	1520538	1520538	.	.	0	note=snp G=>T T:49 G:0
EA2454	snippy:4.3.6	variation	1521327	1521327	.	.	0	note=del AG=>A A:47 AG:0
EA2454	snippy:4.3.6	variation	1521514	1521514	.	.	0	note=snp C=>A A:38 C:0
EA2454	snippy:4.3.6	variation	1522481	1522481	.	.	0	note=snp A=>G G:47 A:1
EA2454	snippy:4.3.6	variation	1525679	1525679	.	.	0	note=snp C=>T T:59 C:0
EA2454	snippy:4.3.6	variation	1527228	1527228	.	.	0	note=snp G=>C C:44 G:0
EA2454	snippy:4.3.6	variation	1528804	1528804	.	.	0	note=snp C=>T T:49 C:0
EA2454	snippy:4.3.6	variation	1533339	1533339	.	.	0	note=snp A=>G G:47 A:0
EA2454	snippy:4.3.6	variation	1534292	1534292	.	.	0	note=snp A=>G G:74 A:0
EA2454	snippy:4.3.6	variation	1538313	1538313	.	.	0	note=snp T=>C C:44 T:1
EA2454	snippy:4.3.6	variation	1540719	1540719	.	.	0	note=snp C=>T T:59 C:0
EA2454	snippy:4.3.6	variation	1547465	1547465	.	.	0	note=snp G=>T T:40 G:0
EA2454	snippy:4.3.6	variation	1548845	1548845	.	.	0	note=snp T=>C C:62 T:0
EA2454	snippy:4.3.6	variation	1549024	1549024	.	.	0	note=snp G=>A A:72 G:1
EA2454	snippy:4.3.6	variation	1549828	1549828	.	.	0	note=snp T=>C C:57 T:0
EA2454	snippy:4.3.6	variation	1549834	1549834	.	.	0	note=del ACGCCATTG=>A A:46 ACGCCATTG:0
EA2454	snippy:4.3.6	variation	1552706	1552706	.	.	0	note=snp C=>T T:51 C:2
EA2454	snippy:4.3.6	variation	1556519	1556519	.	.	0	note=snp A=>G G:46 A:0
EA2454	snippy:4.3.6	variation	1557698	1557698	.	.	0	note=snp A=>G G:44 A:0
EA2454	snippy:4.3.6	variation	1557966	1557966	.	.	0	note=snp A=>G G:53 A:0
EA2454	snippy:4.3.6	variation	1559525	1559525	.	.	0	note=snp G=>A A:59 G:0
EA2454	snippy:4.3.6	variation	1560679	1560679	.	.	0	note=snp G=>A A:54 G:0
EA2454	snippy:4.3.6	variation	1562488	1562488	.	.	0	note=snp G=>A A:50 G:0
EA2454	snippy:4.3.6	variation	1568544	1568544	.	.	0	note=snp C=>T T:46 C:0
EA2454	snippy:4.3.6	variation	1570233	1570233	.	.	0	note=snp A=>G G:51 A:0
EA2454	snippy:4.3.6	variation	1571981	1571981	.	.	0	note=snp T=>G G:52 T:1
EA2454	snippy:4.3.6	variation	1572176	1572176	.	.	0	note=snp G=>C C:36 G:0
EA2454	snippy:4.3.6	variation	1572215	1572215	.	.	0	note=snp C=>T T:31 C:0
EA2454	snippy:4.3.6	variation	1572563	1572563	.	.	0	note=snp C=>A A:62 C:2
EA2454	snippy:4.3.6	variation	1572713	1572713	.	.	0	note=snp C=>G G:46 C:0
EA2454	snippy:4.3.6	variation	1572970	1572970	.	.	0	note=snp A=>G G:33 A:0
EA2454	snippy:4.3.6	variation	1573803	1573803	.	.	0	note=snp T=>A A:48 T:0
EA2454	snippy:4.3.6	variation	1576710	1576710	.	.	0	note=snp C=>T T:50 C:0
EA2454	snippy:4.3.6	variation	1585906	1585906	.	.	0	note=snp A=>G G:52 A:0
EA2454	snippy:4.3.6	variation	1586462	1586462	.	.	0	note=snp A=>C C:57 A:1
EA2454	snippy:4.3.6	variation	1587792	1587792	.	.	0	note=snp A=>C C:54 A:0
EA2454	snippy:4.3.6	variation	1587844	1587844	.	.	0	note=snp C=>T T:63 C:0
EA2454	snippy:4.3.6	variation	1592505	1592505	.	.	0	note=snp T=>C C:56 T:0
EA2454	snippy:4.3.6	variation	1592854	1592854	.	.	0	note=snp G=>T T:58 G:0
EA2454	snippy:4.3.6	variation	1596170	1596170	.	.	0	note=snp T=>G G:60 T:0
EA2454	snippy:4.3.6	variation	1596282	1596282	.	.	0	note=snp T=>G G:54 T:0
EA2454	snippy:4.3.6	variation	1597496	1597496	.	.	0	note=snp T=>C C:43 T:0
EA2454	snippy:4.3.6	variation	1598906	1598906	.	.	0	note=snp A=>G G:38 A:0
EA2454	snippy:4.3.6	variation	1599804	1599804	.	.	0	note=snp T=>C C:45 T:0
EA2454	snippy:4.3.6	variation	1599906	1599906	.	.	0	note=snp T=>C C:55 T:0
EA2454	snippy:4.3.6	variation	1600216	1600216	.	.	0	note=snp C=>T T:61 C:0
EA2454	snippy:4.3.6	variation	1600919	1600919	.	.	0	note=snp A=>G G:54 A:0
EA2454	snippy:4.3.6	variation	1601060	1601060	.	.	0	note=snp C=>T T:52 C:3
EA2454	snippy:4.3.6	variation	1606254	1606254	.	.	0	note=snp T=>C C:52 T:0
EA2454	snippy:4.3.6	variation	1610209	1610209	.	.	0	note=snp T=>A A:51 T:0
EA2454	snippy:4.3.6	variation	1612435	1612435	.	.	0	note=snp G=>A A:57 G:0
EA2454	snippy:4.3.6	variation	1613406	1613406	.	.	0	note=snp T=>A A:39 T:0
EA2454	snippy:4.3.6	variation	1613463	1613463	.	.	0	note=snp A=>G G:49 A:0
EA2454	snippy:4.3.6	variation	1613776	1613776	.	.	0	note=snp C=>T T:55 C:1
EA2454	snippy:4.3.6	variation	1614409	1614409	.	.	0	note=snp G=>T T:72 G:0
EA2454	snippy:4.3.6	variation	1616396	1616396	.	.	0	note=snp C=>A A:52 C:0
EA2454	snippy:4.3.6	variation	1616428	1616428	.	.	0	note=snp G=>T T:63 G:0
EA2454	snippy:4.3.6	variation	1616872	1616872	.	.	0	note=snp G=>T T:43 G:0
EA2454	snippy:4.3.6	variation	1617684	1617684	.	.	0	note=snp G=>C C:55 G:0
EA2454	snippy:4.3.6	variation	1619097	1619097	.	.	0	note=complex CAGCACT=>GACAGCC GACAGCC:14 CAGCACT:0
EA2454	snippy:4.3.6	variation	1619109	1619109	.	.	0	note=snp T=>A A:34 T:0
EA2454	snippy:4.3.6	variation	1620052	1620052	.	.	0	note=snp T=>C C:58 T:0
EA2454	snippy:4.3.6	variation	1620909	1620909	.	.	0	note=snp C=>T T:14 C:1
EA2454	snippy:4.3.6	variation	1620915	1620915	.	.	0	note=snp A=>T T:16 A:0
EA2454	snippy:4.3.6	variation	1620945	1620945	.	.	0	note=snp C=>T T:32 C:3
EA2454	snippy:4.3.6	variation	1621026	1621026	.	.	0	note=snp A=>G G:54 A:1
EA2454	snippy:4.3.6	variation	1621037	1621037	.	.	0	note=complex CCGCA=>TTGCT TTGCT:47 CCGCA:1
EA2454	snippy:4.3.6	variation	1621050	1621050	.	.	0	note=snp T=>C C:60 T:0
EA2454	snippy:4.3.6	variation	1621065	1621065	.	.	0	note=snp C=>T T:56 C:0
EA2454	snippy:4.3.6	variation	1621073	1621073	.	.	0	note=snp C=>T T:50 C:0
EA2454	snippy:4.3.6	variation	1621137	1621137	.	.	0	note=snp T=>A A:49 T:0
EA2454	snippy:4.3.6	variation	1621188	1621188	.	.	0	note=complex GTTAGCG=>ATTGGCT ATTGGCT:28 GTTAGCG:0
EA2454	snippy:4.3.6	variation	1621200	1621200	.	.	0	note=snp C=>T T:27 C:0
EA2454	snippy:4.3.6	variation	1621221	1621221	.	.	0	note=snp C=>T T:24 C:0
EA2454	snippy:4.3.6	variation	1621227	1621227	.	.	0	note=snp T=>A A:22 T:1
EA2454	snippy:4.3.6	variation	1624005	1624005	.	.	0	note=snp T=>A A:12 T:0
EA2454	snippy:4.3.6	variation	1624047	1624047	.	.	0	note=snp C=>T T:28 C:0
EA2454	snippy:4.3.6	variation	1624074	1624074	.	.	0	note=snp T=>C C:34 T:0
EA2454	snippy:4.3.6	variation	1624086	1624086	.	.	0	note=snp C=>T T:44 C:0
EA2454	snippy:4.3.6	variation	1624119	1624119	.	.	0	note=snp T=>A A:56 T:0
EA2454	snippy:4.3.6	variation	1624130	1624130	.	.	0	note=snp G=>A A:59 G:0
EA2454	snippy:4.3.6	variation	1624137	1624137	.	.	0	note=snp T=>C C:56 T:0
EA2454	snippy:4.3.6	variation	1624153	1624153	.	.	0	note=snp T=>A A:52 T:0
EA2454	snippy:4.3.6	variation	1624159	1624159	.	.	0	note=snp T=>C C:54 T:0
EA2454	snippy:4.3.6	variation	1624217	1624217	.	.	0	note=snp A=>G G:27 A:0
EA2454	snippy:4.3.6	variation	1624256	1624256	.	.	0	note=snp T=>A A:15 T:0
EA2454	snippy:4.3.6	variation	1624262	1624262	.	.	0	note=snp A=>C C:12 A:0
EA2454	snippy:4.3.6	variation	1624263	1624263	.	.	0	note=snp A=>G G:11 A:0
EA2454	snippy:4.3.6	variation	1625151	1625151	.	.	0	note=snp G=>T T:13 G:0
EA2454	snippy:4.3.6	variation	1625175	1625175	.	.	0	note=complex TCCG=>CCCA CCCA:23 TCCG:0
EA2454	snippy:4.3.6	variation	1625193	1625193	.	.	0	note=snp G=>A A:30 G:0
EA2454	snippy:4.3.6	variation	1625205	1625205	.	.	0	note=snp C=>T T:32 C:1
EA2454	snippy:4.3.6	variation	1625235	1625235	.	.	0	note=snp A=>G G:38 A:1
EA2454	snippy:4.3.6	variation	1625258	1625258	.	.	0	note=complex AACTA=>GACTC GACTC:51 AACTA:0
EA2454	snippy:4.3.6	variation	1625280	1625280	.	.	0	note=snp A=>T T:49 A:0
EA2454	snippy:4.3.6	variation	1625298	1625298	.	.	0	note=snp A=>G G:49 A:0
EA2454	snippy:4.3.6	variation	1625361	1625361	.	.	0	note=snp T=>A A:51 T:0
EA2454	snippy:4.3.6	variation	1625376	1625376	.	.	0	note=snp G=>T T:48 G:0
EA2454	snippy:4.3.6	variation	1625382	1625382	.	.	0	note=snp T=>C C:50 T:0
EA2454	snippy:4.3.6	variation	1625390	1625390	.	.	0	note=snp G=>A A:51 G:0
EA2454	snippy:4.3.6	variation	1625406	1625406	.	.	0	note=complex AGGC=>TGGT TGGT:45 AGGC:0
EA2454	snippy:4.3.6	variation	1625417	1625417	.	.	0	note=snp G=>A A:42 G:0
EA2454	snippy:4.3.6	variation	1625424	1625424	.	.	0	note=snp G=>A A:43 G:0
EA2454	snippy:4.3.6	variation	1625430	1625430	.	.	0	note=snp G=>A A:43 G:0
EA2454	snippy:4.3.6	variation	1625455	1625455	.	.	0	note=snp G=>A A:36 G:0
EA2454	snippy:4.3.6	variation	1625460	1625460	.	.	0	note=snp A=>T T:40 A:0
EA2454	snippy:4.3.6	variation	1625475	1625475	.	.	0	note=complex CGGT=>AGGA AGGA:38 CGGT:0
EA2454	snippy:4.3.6	variation	1625505	1625505	.	.	0	note=snp A=>T T:36 A:0
EA2454	snippy:4.3.6	variation	1625519	1625519	.	.	0	note=snp G=>A A:38 G:0
EA2454	snippy:4.3.6	variation	1625559	1625559	.	.	0	note=snp G=>A A:43 G:0
EA2454	snippy:4.3.6	variation	1625589	1625589	.	.	0	note=snp C=>A A:42 C:0
EA2454	snippy:4.3.6	variation	1625637	1625637	.	.	0	note=snp T=>C C:41 T:0
EA2454	snippy:4.3.6	variation	1625649	1625649	.	.	0	note=mnp CG=>TC TC:43 CG:0
EA2454	snippy:4.3.6	variation	1625658	1625658	.	.	0	note=snp T=>C C:45 T:0
EA2454	snippy:4.3.6	variation	1625688	1625688	.	.	0	note=complex TGTC=>CATT CATT:44 TGTC:0
EA2454	snippy:4.3.6	variation	1625787	1625787	.	.	0	note=snp G=>A A:57 G:0
EA2454	snippy:4.3.6	variation	1625826	1625826	.	.	0	note=snp T=>C C:45 T:0
EA2454	snippy:4.3.6	variation	1625835	1625835	.	.	0	note=snp A=>G G:54 A:0
EA2454	snippy:4.3.6	variation	1625853	1625853	.	.	0	note=snp T=>G G:51 T:0
EA2454	snippy:4.3.6	variation	1625874	1625874	.	.	0	note=snp T=>C C:46 T:0
EA2454	snippy:4.3.6	variation	1625895	1625895	.	.	0	note=snp A=>G G:40 A:0
EA2454	snippy:4.3.6	variation	1625922	1625922	.	.	0	note=snp T=>C C:32 T:0
EA2454	snippy:4.3.6	variation	1625946	1625946	.	.	0	note=snp T=>A A:31 T:0
EA2454	snippy:4.3.6	variation	1625960	1625960	.	.	0	note=snp A=>G G:33 A:0
EA2454	snippy:4.3.6	variation	1625984	1625984	.	.	0	note=snp T=>C C:36 T:0
EA2454	snippy:4.3.6	variation	1625995	1625995	.	.	0	note=complex TGCGCAAT=>GGAACAAC GGAACAAC:32 TGCGCAAT:0
EA2454	snippy:4.3.6	variation	1626008	1626008	.	.	0	note=snp A=>T T:29 A:0
EA2454	snippy:4.3.6	variation	1626017	1626017	.	.	0	note=complex CAAC=>GAGA GAGA:30 CAAC:0
EA2454	snippy:4.3.6	variation	1626031	1626031	.	.	0	note=snp G=>A A:28 G:0
EA2454	snippy:4.3.6	variation	1626042	1626042	.	.	0	note=snp T=>C C:36 T:0
EA2454	snippy:4.3.6	variation	1626118	1626118	.	.	0	note=snp A=>G G:26 A:0
EA2454	snippy:4.3.6	variation	1626136	1626136	.	.	0	note=snp T=>C C:19 T:0
EA2454	snippy:4.3.6	variation	1626159	1626159	.	.	0	note=complex GCCCC=>ATCAA ATCAA:18 GCCCC:0
EA2454	snippy:4.3.6	variation	1626180	1626180	.	.	0	note=complex AGAC=>CGAT CGAT:13 AGAC:0
EA2454	snippy:4.3.6	variation	1629068	1629068	.	.	0	note=snp G=>A A:12 G:0
EA2454	snippy:4.3.6	variation	1629080	1629080	.	.	0	note=snp T=>C C:14 T:1
EA2454	snippy:4.3.6	variation	1629119	1629119	.	.	0	note=complex CGCA=>AGCG AGCG:24 CGCA:0
EA2454	snippy:4.3.6	variation	1629149	1629149	.	.	0	note=complex TGGCTATA=>CGGTTATG CGGTTATG:30 TGGCTATA:0
EA2454	snippy:4.3.6	variation	1629200	1629200	.	.	0	note=snp T=>C C:49 T:0
EA2454	snippy:4.3.6	variation	1629240	1629240	.	.	0	note=snp T=>C C:44 T:0
EA2454	snippy:4.3.6	variation	1629285	1629285	.	.	0	note=complex GTAC=>ATAT ATAT:53 GTAC:0
EA2454	snippy:4.3.6	variation	1629295	1629295	.	.	0	note=complex ACAAAAT=>TCTAAAC TCTAAAC:52 ACAAAAT:0
EA2454	snippy:4.3.6	variation	1629306	1629306	.	.	0	note=snp C=>G G:55 C:0
EA2454	snippy:4.3.6	variation	1629375	1629375	.	.	0	note=snp G=>A A:43 G:0
EA2454	snippy:4.3.6	variation	1629399	1629399	.	.	0	note=snp G=>A A:34 G:0
EA2454	snippy:4.3.6	variation	1629404	1629404	.	.	0	note=snp T=>A A:29 T:0
EA2454	snippy:4.3.6	variation	1629412	1629412	.	.	0	note=complex TGAG=>AGAA AGAA:23 TGAG:0
EA2454	snippy:4.3.6	variation	1629423	1629423	.	.	0	note=complex ATATA=>GTATT GTATT:19 ATATA:0
EA2454	snippy:4.3.6	variation	1629435	1629435	.	.	0	note=snp G=>A A:19 G:0
EA2454	snippy:4.3.6	variation	1634228	1634228	.	.	0	note=snp A=>G G:55 A:1
EA2454	snippy:4.3.6	variation	1635532	1635532	.	.	0	note=snp C=>T T:63 C:0
EA2454	snippy:4.3.6	variation	1636697	1636697	.	.	0	note=snp G=>A A:50 G:0
EA2454	snippy:4.3.6	variation	1642336	1642336	.	.	0	note=snp A=>G G:59 A:0
EA2454	snippy:4.3.6	variation	1649490	1649490	.	.	0	note=snp G=>A A:53 G:0
EA2454	snippy:4.3.6	variation	1652108	1652108	.	.	0	note=snp T=>C C:36 T:0
EA2454	snippy:4.3.6	variation	1652374	1652374	.	.	0	note=snp G=>A A:34 G:1
EA2454	snippy:4.3.6	variation	1659009	1659009	.	.	0	note=snp G=>A A:40 G:1
EA2454	snippy:4.3.6	variation	1659022	1659022	.	.	0	note=del TC=>T T:35 TC:1
EA2454	snippy:4.3.6	variation	1676378	1676378	.	.	0	note=snp T=>C C:51 T:0
EA2454	snippy:4.3.6	variation	1682457	1682457	.	.	0	note=snp A=>G G:59 A:0
EA2454	snippy:4.3.6	variation	1684777	1684777	.	.	0	note=snp G=>A A:53 G:1
EA2454	snippy:4.3.6	variation	1686461	1686461	.	.	0	note=snp T=>C C:50 T:2
EA2454	snippy:4.3.6	variation	1686833	1686833	.	.	0	note=snp G=>A A:76 G:0
EA2454	snippy:4.3.6	variation	1689232	1689232	.	.	0	note=snp G=>A A:36 G:3
EA2454	snippy:4.3.6	variation	1689622	1689622	.	.	0	note=snp T=>A A:37 T:0
EA2454	snippy:4.3.6	variation	1689667	1689667	.	.	0	note=snp T=>G G:39 T:0
EA2454	snippy:4.3.6	variation	1694053	1694053	.	.	0	note=snp T=>G G:77 T:0
EA2454	snippy:4.3.6	variation	1694216	1694216	.	.	0	note=snp C=>T T:55 C:0
EA2454	snippy:4.3.6	variation	1694816	1694816	.	.	0	note=snp G=>A A:52 G:0
EA2454	snippy:4.3.6	variation	1699212	1699212	.	.	0	note=snp A=>G G:50 A:0
EA2454	snippy:4.3.6	variation	1700087	1700087	.	.	0	note=snp A=>G G:65 A:0
EA2454	snippy:4.3.6	variation	1701919	1701919	.	.	0	note=snp A=>G G:73 A:0
EA2454	snippy:4.3.6	variation	1707192	1707192	.	.	0	note=snp A=>G G:62 A:0
EA2454	snippy:4.3.6	variation	1708237	1708237	.	.	0	note=snp G=>A A:60 G:2
EA2454	snippy:4.3.6	variation	1714697	1714697	.	.	0	note=snp T=>C C:58 T:0
EA2454	snippy:4.3.6	variation	1719996	1719996	.	.	0	note=snp C=>G G:48 C:0
EA2454	snippy:4.3.6	variation	1722850	1722850	.	.	0	note=snp G=>A A:43 G:0
EA2454	snippy:4.3.6	variation	1725216	1725216	.	.	0	note=snp C=>T T:56 C:2
EA2454	snippy:4.3.6	variation	1726599	1726599	.	.	0	note=snp C=>T T:55 C:1
EA2454	snippy:4.3.6	variation	1729248	1729248	.	.	0	note=snp G=>T T:56 G:1
EA2454	snippy:4.3.6	variation	1730329	1730329	.	.	0	note=snp T=>C C:61 T:0
EA2454	snippy:4.3.6	variation	1734280	1734280	.	.	0	note=snp T=>C C:50 T:0
EA2454	snippy:4.3.6	variation	1737512	1737512	.	.	0	note=snp G=>C C:52 G:0
EA2454	snippy:4.3.6	variation	1737561	1737561	.	.	0	note=snp A=>G G:48 A:0
EA2454	snippy:4.3.6	variation	1739772	1739772	.	.	0	note=del CG=>C C:59 CG:0
EA2454	snippy:4.3.6	variation	1740254	1740254	.	.	0	note=ins G=>GC GC:45 G:2
EA2454	snippy:4.3.6	variation	1740996	1740996	.	.	0	note=snp T=>G G:49 T:3
EA2454	snippy:4.3.6	variation	1742867	1742867	.	.	0	note=snp C=>A A:70 C:0
EA2454	snippy:4.3.6	variation	1745576	1745576	.	.	0	note=snp T=>C C:56 T:0
EA2454	snippy:4.3.6	variation	1748585	1748585	.	.	0	note=snp A=>C C:77 A:0
EA2454	snippy:4.3.6	variation	1749279	1749279	.	.	0	note=snp C=>T T:49 C:0
EA2454	snippy:4.3.6	variation	1760209	1760209	.	.	0	note=snp G=>A A:63 G:0
EA2454	snippy:4.3.6	variation	1763293	1763293	.	.	0	note=snp T=>C C:66 T:0
EA2454	snippy:4.3.6	variation	1770945	1770945	.	.	0	note=snp T=>C C:54 T:0
EA2454	snippy:4.3.6	variation	1773777	1773777	.	.	0	note=snp T=>G G:62 T:5
EA2454	snippy:4.3.6	variation	1778142	1778142	.	.	0	note=snp G=>T T:63 G:0
EA2454	snippy:4.3.6	variation	1779062	1779062	.	.	0	note=snp C=>T T:48 C:2
EA2454	snippy:4.3.6	variation	1780154	1780154	.	.	0	note=snp G=>A A:52 G:2
EA2454	snippy:4.3.6	variation	1784313	1784313	.	.	0	note=snp G=>C C:63 G:0
EA2454	snippy:4.3.6	variation	1786479	1786479	.	.	0	note=snp C=>T T:61 C:1
EA2454	snippy:4.3.6	variation	1786685	1786685	.	.	0	note=snp T=>C C:56 T:0
EA2454	snippy:4.3.6	variation	1789418	1789418	.	.	0	note=snp G=>A A:42 G:2
EA2454	snippy:4.3.6	variation	1794938	1794938	.	.	0	note=snp T=>G G:48 T:0
EA2454	snippy:4.3.6	variation	1795161	1795161	.	.	0	note=snp A=>G G:59 A:0
EA2454	snippy:4.3.6	variation	1796165	1796165	.	.	0	note=snp C=>T T:46 C:2
EA2454	snippy:4.3.6	variation	1796413	1796413	.	.	0	note=snp C=>G G:56 C:2
EA2454	snippy:4.3.6	variation	1797285	1797285	.	.	0	note=snp C=>T T:46 C:0
EA2454	snippy:4.3.6	variation	1799132	1799132	.	.	0	note=snp G=>A A:51 G:0
EA2454	snippy:4.3.6	variation	1802874	1802874	.	.	0	note=snp A=>G G:41 A:0
EA2454	snippy:4.3.6	variation	1803664	1803664	.	.	0	note=snp T=>C C:42 T:0
EA2454	snippy:4.3.6	variation	1803867	1803867	.	.	0	note=snp G=>T T:55 G:1
EA2454	snippy:4.3.6	variation	1805082	1805082	.	.	0	note=snp C=>T T:50 C:0
EA2454	snippy:4.3.6	variation	1806140	1806140	.	.	0	note=snp C=>G G:57 C:3
EA2454	snippy:4.3.6	variation	1810221	1810221	.	.	0	note=snp C=>T T:47 C:0
EA2454	snippy:4.3.6	variation	1816210	1816210	.	.	0	note=snp A=>G G:70 A:0
EA2454	snippy:4.3.6	variation	1817851	1817851	.	.	0	note=snp T=>A A:49 T:0
EA2454	snippy:4.3.6	variation	1818849	1818849	.	.	0	note=snp A=>G G:56 A:0
EA2454	snippy:4.3.6	variation	1820083	1820083	.	.	0	note=snp T=>C C:66 T:0
EA2454	snippy:4.3.6	variation	1820178	1820178	.	.	0	note=snp G=>A A:65 G:0
EA2454	snippy:4.3.6	variation	1824156	1824156	.	.	0	note=snp T=>C C:55 T:0
EA2454	snippy:4.3.6	variation	1824499	1824499	.	.	0	note=snp T=>C C:46 T:0
EA2454	snippy:4.3.6	variation	1824627	1824627	.	.	0	note=snp T=>C C:38 T:1
EA2454	snippy:4.3.6	variation	1825107	1825107	.	.	0	note=snp G=>A A:56 G:0
EA2454	snippy:4.3.6	variation	1825274	1825274	.	.	0	note=del GT=>G G:54 GT:0
EA2454	snippy:4.3.6	variation	1825520	1825520	.	.	0	note=snp A=>T T:64 A:0
EA2454	snippy:4.3.6	variation	1826522	1826522	.	.	0	note=snp C=>T T:45 C:1
EA2454	snippy:4.3.6	variation	1832674	1832674	.	.	0	note=snp A=>C C:58 A:0
EA2454	snippy:4.3.6	variation	1833825	1833825	.	.	0	note=snp G=>A A:54 G:2
EA2454	snippy:4.3.6	variation	1839500	1839500	.	.	0	note=snp C=>T T:37 C:0
EA2454	snippy:4.3.6	variation	1843097	1843097	.	.	0	note=snp T=>C C:64 T:0
EA2454	snippy:4.3.6	variation	1844569	1844569	.	.	0	note=snp A=>G G:42 A:0
EA2454	snippy:4.3.6	variation	1847705	1847705	.	.	0	note=snp C=>A A:63 C:0
EA2454	snippy:4.3.6	variation	1849504	1849504	.	.	0	note=snp T=>A A:69 T:0
EA2454	snippy:4.3.6	variation	1851226	1851226	.	.	0	note=snp T=>A A:44 T:3
EA2454	snippy:4.3.6	variation	1853661	1853661	.	.	0	note=snp G=>A A:58 G:0
EA2454	snippy:4.3.6	variation	1873267	1873267	.	.	0	note=snp G=>A A:50 G:0
EA2454	snippy:4.3.6	variation	1875844	1875844	.	.	0	note=snp T=>C C:60 T:0
EA2454	snippy:4.3.6	variation	1877345	1877345	.	.	0	note=snp T=>C C:42 T:0
EA2454	snippy:4.3.6	variation	1880076	1880076	.	.	0	note=snp G=>A A:76 G:0
EA2454	snippy:4.3.6	variation	1880427	1880427	.	.	0	note=snp A=>T T:56 A:0
EA2454	snippy:4.3.6	variation	1881056	1881056	.	.	0	note=snp C=>G G:35 C:0
EA2454	snippy:4.3.6	variation	1882679	1882679	.	.	0	note=snp C=>T T:56 C:1
EA2454	snippy:4.3.6	variation	1882816	1882816	.	.	0	note=snp C=>T T:53 C:0
EA2454	snippy:4.3.6	variation	1886082	1886082	.	.	0	note=snp A=>C C:50 A:2
EA2454	snippy:4.3.6	variation	1886403	1886403	.	.	0	note=snp A=>C C:48 A:2
EA2454	snippy:4.3.6	variation	1887544	1887544	.	.	0	note=snp A=>G G:47 A:0
EA2454	snippy:4.3.6	variation	1890386	1890386	.	.	0	note=snp T=>C C:59 T:0
EA2454	snippy:4.3.6	variation	1893189	1893189	.	.	0	note=snp T=>C C:51 T:2
EA2454	snippy:4.3.6	variation	1901038	1901038	.	.	0	note=snp G=>A A:60 G:0
EA2454	snippy:4.3.6	variation	1902291	1902291	.	.	0	note=snp G=>C C:63 G:0
EA2454	snippy:4.3.6	variation	1905980	1905980	.	.	0	note=snp C=>T T:54 C:1
EA2454	snippy:4.3.6	variation	1908577	1908577	.	.	0	note=snp G=>A A:75 G:3
EA2454	snippy:4.3.6	variation	1909088	1909088	.	.	0	note=snp T=>C C:36 T:0
EA2454	snippy:4.3.6	variation	1910791	1910791	.	.	0	note=snp C=>A A:68 C:0
EA2454	snippy:4.3.6	variation	1911710	1911710	.	.	0	note=snp G=>A A:66 G:1
EA2454	snippy:4.3.6	variation	1912473	1912473	.	.	0	note=snp A=>G G:72 A:0
EA2454	snippy:4.3.6	variation	1915352	1915352	.	.	0	note=snp G=>A A:57 G:0
EA2454	snippy:4.3.6	variation	1922848	1922848	.	.	0	note=snp A=>C C:66 A:2
EA2454	snippy:4.3.6	variation	1923192	1923192	.	.	0	note=snp G=>T T:80 G:1
EA2454	snippy:4.3.6	variation	1924336	1924336	.	.	0	note=snp G=>A A:71 G:0
EA2454	snippy:4.3.6	variation	1929166	1929166	.	.	0	note=snp C=>A A:69 C:1
EA2454	snippy:4.3.6	variation	1929193	1929193	.	.	0	note=ins T=>TTTA TTTA:48 T:0
EA2454	snippy:4.3.6	variation	1935002	1935002	.	.	0	note=snp G=>A A:74 G:0
EA2454	snippy:4.3.6	variation	1943816	1943816	.	.	0	note=snp G=>A A:61 G:0
EA2454	snippy:4.3.6	variation	1945608	1945608	.	.	0	note=snp T=>C C:60 T:0
EA2454	snippy:4.3.6	variation	1947499	1947499	.	.	0	note=snp A=>T T:50 A:0
EA2454	snippy:4.3.6	variation	1950298	1950298	.	.	0	note=snp T=>G G:52 T:0
EA2454	snippy:4.3.6	variation	1952310	1952310	.	.	0	note=snp A=>G G:67 A:2
EA2454	snippy:4.3.6	variation	1952951	1952951	.	.	0	note=snp C=>T T:71 C:0
EA2454	snippy:4.3.6	variation	1958733	1958733	.	.	0	note=snp T=>C C:59 T:0
EA2454	snippy:4.3.6	variation	1960341	1960341	.	.	0	note=snp T=>A A:45 T:0
EA2454	snippy:4.3.6	variation	1960620	1960620	.	.	0	note=snp G=>T T:46 G:1
EA2454	snippy:4.3.6	variation	1970713	1970713	.	.	0	note=snp G=>T T:33 G:0
EA2454	snippy:4.3.6	variation	1979564	1979564	.	.	0	note=snp A=>G G:56 A:0
EA2454	snippy:4.3.6	variation	1980186	1980186	.	.	0	note=snp C=>T T:61 C:0
EA2454	snippy:4.3.6	variation	1981261	1981261	.	.	0	note=snp A=>G G:66 A:0
EA2454	snippy:4.3.6	variation	1985819	1985819	.	.	0	note=snp C=>G G:57 C:0
EA2454	snippy:4.3.6	variation	1986170	1986170	.	.	0	note=snp G=>T T:85 G:0
EA2454	snippy:4.3.6	variation	1986333	1986333	.	.	0	note=snp C=>A A:67 C:0
EA2454	snippy:4.3.6	variation	1991121	1991121	.	.	0	note=snp T=>C C:63 T:0
EA2454	snippy:4.3.6	variation	1992128	1992128	.	.	0	note=snp G=>T T:75 G:0
EA2454	snippy:4.3.6	variation	1993746	1993746	.	.	0	note=snp G=>A A:55 G:3
EA2454	snippy:4.3.6	variation	1994834	1994834	.	.	0	note=snp G=>A A:65 G:0
EA2454	snippy:4.3.6	variation	1995211	1995211	.	.	0	note=snp T=>C C:71 T:0
EA2454	snippy:4.3.6	variation	1997790	1997790	.	.	0	note=snp G=>A A:53 G:0
EA2454	snippy:4.3.6	variation	1997936	1997936	.	.	0	note=snp C=>T T:51 C:0
EA2454	snippy:4.3.6	variation	1998697	1998697	.	.	0	note=snp A=>G G:48 A:0
EA2454	snippy:4.3.6	variation	1999636	1999636	.	.	0	note=snp A=>G G:61 A:0
EA2454	snippy:4.3.6	variation	2004630	2004630	.	.	0	note=snp C=>T T:82 C:0
EA2454	snippy:4.3.6	variation	2007738	2007738	.	.	0	note=snp A=>G G:43 A:0
EA2454	snippy:4.3.6	variation	2019044	2019044	.	.	0	note=snp G=>A A:72 G:0
EA2454	snippy:4.3.6	variation	2022103	2022103	.	.	0	note=snp C=>T T:54 C:1
EA2454	snippy:4.3.6	variation	2023105	2023105	.	.	0	note=snp C=>A A:16 C:0
EA2454	snippy:4.3.6	variation	2023117	2023117	.	.	0	note=snp G=>T T:18 G:0
EA2454	snippy:4.3.6	variation	2023335	2023335	.	.	0	note=snp A=>C C:54 A:0
EA2454	snippy:4.3.6	variation	2023644	2023644	.	.	0	note=snp C=>A A:52 C:0
EA2454	snippy:4.3.6	variation	2027149	2027149	.	.	0	note=snp G=>A A:41 G:0
EA2454	snippy:4.3.6	variation	2028282	2028282	.	.	0	note=snp C=>T T:52 C:2
EA2454	snippy:4.3.6	variation	2029759	2029759	.	.	0	note=snp A=>C C:53 A:0
EA2454	snippy:4.3.6	variation	2035670	2035670	.	.	0	note=snp C=>T T:57 C:1
EA2454	snippy:4.3.6	variation	2038119	2038119	.	.	0	note=snp C=>T T:64 C:1
EA2454	snippy:4.3.6	variation	2038279	2038279	.	.	0	note=ins A=>AAC AAC:66 A:0
EA2454	snippy:4.3.6	variation	2041809	2041809	.	.	0	note=snp A=>G G:54 A:0
EA2454	snippy:4.3.6	variation	2046204	2046204	.	.	0	note=snp T=>C C:65 T:0
EA2454	snippy:4.3.6	variation	2055836	2055836	.	.	0	note=snp A=>G G:68 A:0
EA2454	snippy:4.3.6	variation	2059644	2059644	.	.	0	note=snp G=>A A:45 G:0
EA2454	snippy:4.3.6	variation	2060675	2060675	.	.	0	note=snp A=>G G:48 A:0
EA2454	snippy:4.3.6	variation	2062156	2062156	.	.	0	note=snp T=>C C:69 T:0
EA2454	snippy:4.3.6	variation	2063839	2063839	.	.	0	note=snp T=>C C:42 T:0
EA2454	snippy:4.3.6	variation	2064750	2064750	.	.	0	note=snp T=>C C:10 T:0
EA2454	snippy:4.3.6	variation	2068297	2068297	.	.	0	note=snp T=>G G:53 T:0
EA2454	snippy:4.3.6	variation	2070162	2070162	.	.	0	note=snp T=>C C:50 T:0
EA2454	snippy:4.3.6	variation	2076167	2076167	.	.	0	note=snp G=>A A:49 G:0
EA2454	snippy:4.3.6	variation	2078028	2078028	.	.	0	note=snp A=>G G:56 A:0
EA2454	snippy:4.3.6	variation	2078477	2078477	.	.	0	note=snp T=>G G:45 T:0
EA2454	snippy:4.3.6	variation	2079477	2079477	.	.	0	note=snp A=>G G:53 A:0
EA2454	snippy:4.3.6	variation	2079564	2079564	.	.	0	note=snp G=>A A:54 G:0
EA2454	snippy:4.3.6	variation	2079621	2079621	.	.	0	note=ins C=>CA CA:43 C:0
EA2454	snippy:4.3.6	variation	2080676	2080676	.	.	0	note=del GA=>G G:66 GA:0
EA2454	snippy:4.3.6	variation	2088535	2088535	.	.	0	note=snp C=>G G:56 C:0
EA2454	snippy:4.3.6	variation	2088809	2088809	.	.	0	note=snp A=>G G:54 A:0
EA2454	snippy:4.3.6	variation	2094829	2094829	.	.	0	note=snp T=>C C:66 T:0
EA2454	snippy:4.3.6	variation	2096088	2096088	.	.	0	note=snp A=>G G:49 A:0
EA2454	snippy:4.3.6	variation	2101104	2101104	.	.	0	note=snp G=>T T:61 G:1
EA2454	snippy:4.3.6	variation	2102993	2102993	.	.	0	note=snp T=>C C:50 T:0
EA2454	snippy:4.3.6	variation	2103890	2103890	.	.	0	note=snp C=>G G:58 C:0
EA2454	snippy:4.3.6	variation	2113023	2113023	.	.	0	note=snp C=>T T:53 C:0
EA2454	snippy:4.3.6	variation	2116349	2116349	.	.	0	note=snp G=>A A:45 G:1
EA2454	snippy:4.3.6	variation	2117468	2117468	.	.	0	note=snp A=>G G:54 A:0
EA2454	snippy:4.3.6	variation	2118915	2118915	.	.	0	note=snp C=>A A:45 C:0
EA2454	snippy:4.3.6	variation	2119737	2119737	.	.	0	note=snp T=>C C:60 T:0
EA2454	snippy:4.3.6	variation	2121720	2121720	.	.	0	note=snp G=>T T:39 G:0
EA2454	snippy:4.3.6	variation	2128518	2128518	.	.	0	note=snp G=>T T:46 G:3
EA2454	snippy:4.3.6	variation	2128672	2128672	.	.	0	note=snp G=>T T:51 G:1
EA2454	snippy:4.3.6	variation	2128856	2128856	.	.	0	note=snp A=>G G:45 A:2
EA2454	snippy:4.3.6	variation	2129844	2129844	.	.	0	note=snp C=>T T:45 C:0
EA2454	snippy:4.3.6	variation	2129955	2129955	.	.	0	note=snp C=>T T:44 C:0
EA2454	snippy:4.3.6	variation	2136789	2136789	.	.	0	note=snp T=>C C:56 T:1
EA2454	snippy:4.3.6	variation	2137173	2137173	.	.	0	note=snp G=>A A:76 G:1
EA2454	snippy:4.3.6	variation	2140202	2140202	.	.	0	note=snp A=>C C:58 A:0
EA2454	snippy:4.3.6	variation	2142320	2142320	.	.	0	note=snp T=>C C:62 T:0
EA2454	snippy:4.3.6	variation	2143064	2143064	.	.	0	note=snp G=>A A:48 G:2
EA2454	snippy:4.3.6	variation	2149924	2149924	.	.	0	note=snp A=>G G:51 A:0
EA2454	snippy:4.3.6	variation	2150990	2150990	.	.	0	note=snp G=>A A:58 G:0
EA2454	snippy:4.3.6	variation	2155585	2155585	.	.	0	note=snp T=>G G:61 T:0
EA2454	snippy:4.3.6	variation	2159309	2159309	.	.	0	note=snp G=>A A:45 G:0
EA2454	snippy:4.3.6	variation	2159726	2159726	.	.	0	note=snp C=>T T:59 C:0
EA2454	snippy:4.3.6	variation	2162131	2162131	.	.	0	note=snp G=>A A:55 G:0
EA2454	snippy:4.3.6	variation	2162140	2162140	.	.	0	note=snp G=>A A:60 G:0
EA2454	snippy:4.3.6	variation	2162365	2162365	.	.	0	note=snp A=>G G:59 A:0
EA2454	snippy:4.3.6	variation	2165822	2165822	.	.	0	note=snp C=>T T:75 C:0
EA2454	snippy:4.3.6	variation	2170845	2170845	.	.	0	note=snp G=>C C:55 G:1
EA2454	snippy:4.3.6	variation	2171889	2171889	.	.	0	note=snp A=>G G:56 A:0
EA2454	snippy:4.3.6	variation	2174776	2174776	.	.	0	note=snp T=>C C:53 T:0
EA2454	snippy:4.3.6	variation	2176646	2176646	.	.	0	note=snp G=>A A:58 G:0
EA2454	snippy:4.3.6	variation	2177349	2177349	.	.	0	note=snp T=>C C:57 T:0
EA2454	snippy:4.3.6	variation	2180437	2180437	.	.	0	note=snp A=>G G:44 A:0
EA2454	snippy:4.3.6	variation	2183355	2183355	.	.	0	note=snp T=>C C:57 T:0
EA2454	snippy:4.3.6	variation	2188481	2188481	.	.	0	note=snp C=>T T:47 C:3
EA2454	snippy:4.3.6	variation	2189381	2189381	.	.	0	note=snp A=>G G:62 A:0
EA2454	snippy:4.3.6	variation	2194683	2194683	.	.	0	note=snp G=>A A:59 G:0
EA2454	snippy:4.3.6	variation	2195062	2195062	.	.	0	note=snp T=>C C:57 T:0
EA2454	snippy:4.3.6	variation	2199450	2199450	.	.	0	note=snp T=>C C:47 T:2
EA2454	snippy:4.3.6	variation	2199937	2199937	.	.	0	note=snp A=>G G:66 A:1
EA2454	snippy:4.3.6	variation	2200954	2200954	.	.	0	note=snp C=>T T:61 C:2
EA2454	snippy:4.3.6	variation	2205522	2205522	.	.	0	note=snp C=>T T:39 C:0
EA2454	snippy:4.3.6	variation	2208469	2208469	.	.	0	note=snp T=>C C:60 T:0
EA2454	snippy:4.3.6	variation	2211762	2211762	.	.	0	note=del AG=>A A:52 AG:0
EA2454	snippy:4.3.6	variation	2211929	2211929	.	.	0	note=snp A=>C C:64 A:0
EA2454	snippy:4.3.6	variation	2214997	2214997	.	.	0	note=snp T=>C C:39 T:0
EA2454	snippy:4.3.6	variation	2217705	2217705	.	.	0	note=snp C=>T T:59 C:0
EA2454	snippy:4.3.6	variation	2219331	2219331	.	.	0	note=snp A=>G G:76 A:0
EA2454	snippy:4.3.6	variation	2226088	2226088	.	.	0	note=snp T=>C C:50 T:0
EA2454	snippy:4.3.6	variation	2226298	2226298	.	.	0	note=snp T=>C C:71 T:0
EA2454	snippy:4.3.6	variation	2228600	2228600	.	.	0	note=snp T=>C C:50 T:0
EA2454	snippy:4.3.6	variation	2229269	2229269	.	.	0	note=snp G=>A A:70 G:1
EA2454	snippy:4.3.6	variation	2231783	2231783	.	.	0	note=snp G=>A A:50 G:2
EA2454	snippy:4.3.6	variation	2241190	2241190	.	.	0	note=snp A=>C C:59 A:1
EA2454	snippy:4.3.6	variation	2241418	2241418	.	.	0	note=snp G=>A A:53 G:1
EA2454	snippy:4.3.6	variation	2245025	2245025	.	.	0	note=snp C=>A A:60 C:0
EA2454	snippy:4.3.6	variation	2256445	2256445	.	.	0	note=snp G=>A A:52 G:0
EA2454	snippy:4.3.6	variation	2259197	2259197	.	.	0	note=snp G=>A A:53 G:0
EA2454	snippy:4.3.6	variation	2264243	2264243	.	.	0	note=snp T=>A A:78 T:2
EA2454	snippy:4.3.6	variation	2264678	2264678	.	.	0	note=snp A=>G G:65 A:1
EA2454	snippy:4.3.6	variation	2268389	2268389	.	.	0	note=snp G=>C C:57 G:0
EA2454	snippy:4.3.6	variation	2269067	2269067	.	.	0	note=snp T=>C C:57 T:0
EA2454	snippy:4.3.6	variation	2272408	2272408	.	.	0	note=snp G=>T T:49 G:1
EA2454	snippy:4.3.6	variation	2274105	2274105	.	.	0	note=snp C=>T T:60 C:0
EA2454	snippy:4.3.6	variation	2277880	2277880	.	.	0	note=snp A=>G G:47 A:0
EA2454	snippy:4.3.6	variation	2280911	2280911	.	.	0	note=snp A=>G G:66 A:2
EA2454	snippy:4.3.6	variation	2283117	2283117	.	.	0	note=snp T=>C C:59 T:0
EA2454	snippy:4.3.6	variation	2283880	2283880	.	.	0	note=snp A=>G G:55 A:0
EA2454	snippy:4.3.6	variation	2288758	2288758	.	.	0	note=snp A=>T T:69 A:0
EA2454	snippy:4.3.6	variation	2289041	2289041	.	.	0	note=snp T=>C C:52 T:0
EA2454	snippy:4.3.6	variation	2289818	2289818	.	.	0	note=snp G=>A A:16 G:1
EA2454	snippy:4.3.6	variation	2291772	2291772	.	.	0	note=snp C=>T T:59 C:0
EA2454	snippy:4.3.6	variation	2291863	2291863	.	.	0	note=snp T=>C C:67 T:0
EA2454	snippy:4.3.6	variation	2298963	2298963	.	.	0	note=snp G=>T T:47 G:0
EA2454	snippy:4.3.6	variation	2301511	2301511	.	.	0	note=snp G=>A A:53 G:0
EA2454	snippy:4.3.6	variation	2303912	2303912	.	.	0	note=snp C=>T T:56 C:0
EA2454	snippy:4.3.6	variation	2311767	2311767	.	.	0	note=snp T=>G G:68 T:1
EA2454	snippy:4.3.6	variation	2315924	2315924	.	.	0	note=del CA=>C C:35 CA:0
EA2454	snippy:4.3.6	variation	2322351	2322351	.	.	0	note=snp T=>C C:24 T:0
EA2454	snippy:4.3.6	variation	2327184	2327184	.	.	0	note=snp T=>G G:71 T:2
EA2454	snippy:4.3.6	variation	2329111	2329111	.	.	0	note=snp G=>A A:48 G:2
EA2454	snippy:4.3.6	variation	2334790	2334790	.	.	0	note=snp T=>C C:45 T:2
EA2454	snippy:4.3.6	variation	2335946	2335946	.	.	0	note=ins C=>CA CA:56 C:0
EA2454	snippy:4.3.6	variation	2337392	2337392	.	.	0	note=del AT=>A A:47 AT:0
EA2454	snippy:4.3.6	variation	2338392	2338392	.	.	0	note=del AT=>A A:54 AT:1
EA2454	snippy:4.3.6	variation	2338673	2338673	.	.	0	note=snp G=>A A:78 G:0
EA2454	snippy:4.3.6	variation	2346712	2346712	.	.	0	note=snp T=>C C:57 T:1
EA2454	snippy:4.3.6	variation	2346847	2346847	.	.	0	note=snp G=>T T:56 G:0
EA2454	snippy:4.3.6	variation	2347121	2347121	.	.	0	note=del TA=>T T:58 TA:1
EA2454	snippy:4.3.6	variation	2349078	2349078	.	.	0	note=snp T=>C C:50 T:0
EA2454	snippy:4.3.6	variation	2349296	2349296	.	.	0	note=snp G=>A A:41 G:0
EA2454	snippy:4.3.6	variation	2349332	2349332	.	.	0	note=snp G=>A A:46 G:0
EA2454	snippy:4.3.6	variation	2350339	2350339	.	.	0	note=snp T=>C C:60 T:1
EA2454	snippy:4.3.6	variation	2351375	2351375	.	.	0	note=snp A=>C C:55 A:0
EA2454	snippy:4.3.6	variation	2351782	2351782	.	.	0	note=snp C=>T T:54 C:0
EA2454	snippy:4.3.6	variation	2354351	2354351	.	.	0	note=snp A=>G G:47 A:0
EA2454	snippy:4.3.6	variation	2354399	2354399	.	.	0	note=snp C=>T T:50 C:0
EA2454	snippy:4.3.6	variation	2357327	2357327	.	.	0	note=snp G=>A A:46 G:0
EA2454	snippy:4.3.6	variation	2358895	2358895	.	.	0	note=snp G=>A A:51 G:0
EA2454	snippy:4.3.6	variation	2359024	2359024	.	.	0	note=snp A=>G G:50 A:0
EA2454	snippy:4.3.6	variation	2362813	2362813	.	.	0	note=snp C=>T T:66 C:0
EA2454	snippy:4.3.6	variation	2364340	2364340	.	.	0	note=snp T=>G G:53 T:0
EA2454	snippy:4.3.6	variation	2367752	2367752	.	.	0	note=snp G=>A A:44 G:3
EA2454	snippy:4.3.6	variation	2371672	2371672	.	.	0	note=snp T=>C C:55 T:0
EA2454	snippy:4.3.6	variation	2371842	2371842	.	.	0	note=snp A=>G G:63 A:2
EA2454	snippy:4.3.6	variation	2372805	2372805	.	.	0	note=snp G=>T T:47 G:1
EA2454	snippy:4.3.6	variation	2372914	2372914	.	.	0	note=snp T=>C C:46 T:0
EA2454	snippy:4.3.6	variation	2373982	2373982	.	.	0	note=snp A=>G G:67 A:0
EA2454	snippy:4.3.6	variation	2385431	2385431	.	.	0	note=snp T=>C C:52 T:0
EA2454	snippy:4.3.6	variation	2387648	2387648	.	.	0	note=snp C=>T T:47 C:2
EA2454	snippy:4.3.6	variation	2390045	2390045	.	.	0	note=snp C=>T T:48 C:2
EA2454	snippy:4.3.6	variation	2390583	2390583	.	.	0	note=snp A=>G G:65 A:2
EA2454	snippy:4.3.6	variation	2395236	2395236	.	.	0	note=snp C=>T T:55 C:0
EA2454	snippy:4.3.6	variation	2399185	2399185	.	.	0	note=del GCGCCAT=>G G:41 GCGCCAT:1
EA2454	snippy:4.3.6	variation	2403185	2403185	.	.	0	note=snp C=>T T:46 C:1
EA2454	snippy:4.3.6	variation	2403442	2403442	.	.	0	note=snp T=>C C:53 T:0
EA2454	snippy:4.3.6	variation	2405136	2405136	.	.	0	note=snp G=>A A:50 G:0
EA2454	snippy:4.3.6	variation	2407449	2407449	.	.	0	note=snp A=>G G:61 A:0
EA2454	snippy:4.3.6	variation	2411669	2411669	.	.	0	note=snp A=>G G:64 A:0
EA2454	snippy:4.3.6	variation	2412013	2412013	.	.	0	note=snp G=>A A:62 G:2
EA2454	snippy:4.3.6	variation	2416531	2416531	.	.	0	note=snp C=>T T:51 C:0
EA2454	snippy:4.3.6	variation	2419556	2419556	.	.	0	note=snp C=>T T:57 C:0
EA2454	snippy:4.3.6	variation	2424078	2424078	.	.	0	note=snp A=>G G:43 A:0
EA2454	snippy:4.3.6	variation	2428008	2428008	.	.	0	note=del AT=>A A:56 AT:0
EA2454	snippy:4.3.6	variation	2428499	2428499	.	.	0	note=snp G=>A A:50 G:0
EA2454	snippy:4.3.6	variation	2437976	2437976	.	.	0	note=snp G=>T T:54 G:1
EA2454	snippy:4.3.6	variation	2438685	2438685	.	.	0	note=snp A=>G G:88 A:0
EA2454	snippy:4.3.6	variation	2439096	2439096	.	.	0	note=snp G=>A A:58 G:0
EA2454	snippy:4.3.6	variation	2439122	2439122	.	.	0	note=snp G=>A A:56 G:3
EA2454	snippy:4.3.6	variation	2439457	2439457	.	.	0	note=snp A=>G G:71 A:0
EA2454	snippy:4.3.6	variation	2445012	2445012	.	.	0	note=snp G=>A A:57 G:2
EA2454	snippy:4.3.6	variation	2449435	2449435	.	.	0	note=snp A=>G G:66 A:0
EA2454	snippy:4.3.6	variation	2450258	2450258	.	.	0	note=snp A=>C C:69 A:0
EA2454	snippy:4.3.6	variation	2451274	2451274	.	.	0	note=snp A=>C C:55 A:0
EA2454	snippy:4.3.6	variation	2452692	2452692	.	.	0	note=snp T=>A A:33 T:0
EA2454	snippy:4.3.6	variation	2457448	2457448	.	.	0	note=snp G=>A A:66 G:0
EA2454	snippy:4.3.6	variation	2460416	2460416	.	.	0	note=snp C=>T T:49 C:1
EA2454	snippy:4.3.6	variation	2461974	2461974	.	.	0	note=snp A=>G G:70 A:0
EA2454	snippy:4.3.6	variation	2463137	2463137	.	.	0	note=snp G=>A A:71 G:0
EA2454	snippy:4.3.6	variation	2465490	2465490	.	.	0	note=snp T=>C C:83 T:0
EA2454	snippy:4.3.6	variation	2467127	2467127	.	.	0	note=snp C=>T T:49 C:2
EA2454	snippy:4.3.6	variation	2472327	2472327	.	.	0	note=snp A=>G G:48 A:2
EA2454	snippy:4.3.6	variation	2474009	2474009	.	.	0	note=snp G=>A A:70 G:2
EA2454	snippy:4.3.6	variation	2480703	2480703	.	.	0	note=snp C=>T T:59 C:0
EA2454	snippy:4.3.6	variation	2482997	2482997	.	.	0	note=snp G=>A A:56 G:0
EA2454	snippy:4.3.6	variation	2486949	2486949	.	.	0	note=snp C=>G G:74 C:0
EA2454	snippy:4.3.6	variation	2490425	2490425	.	.	0	note=snp T=>C C:57 T:1
EA2454	snippy:4.3.6	variation	2491224	2491224	.	.	0	note=snp T=>G G:60 T:0
EA2454	snippy:4.3.6	variation	2495743	2495743	.	.	0	note=snp A=>C C:55 A:0
EA2454	snippy:4.3.6	variation	2500405	2500405	.	.	0	note=snp C=>T T:40 C:0
EA2454	snippy:4.3.6	variation	2501376	2501376	.	.	0	note=snp G=>C C:56 G:0
EA2454	snippy:4.3.6	variation	2501616	2501616	.	.	0	note=snp C=>G G:70 C:0
EA2454	snippy:4.3.6	variation	2507610	2507610	.	.	0	note=snp G=>A A:67 G:1
EA2454	snippy:4.3.6	variation	2509582	2509582	.	.	0	note=snp G=>A A:69 G:0
EA2454	snippy:4.3.6	variation	2511114	2511114	.	.	0	note=del CA=>C C:48 CA:0
EA2454	snippy:4.3.6	variation	2513025	2513025	.	.	0	note=snp A=>G G:62 A:1
EA2454	snippy:4.3.6	variation	2517121	2517121	.	.	0	note=del TC=>T T:63 TC:0
EA2454	snippy:4.3.6	variation	2518728	2518728	.	.	0	note=snp C=>T T:96 C:1
EA2454	snippy:4.3.6	variation	2518906	2518906	.	.	0	note=snp A=>C C:69 A:0
EA2454	snippy:4.3.6	variation	2520770	2520770	.	.	0	note=snp G=>T T:73 G:1
EA2454	snippy:4.3.6	variation	2521382	2521382	.	.	0	note=snp C=>T T:50 C:0
EA2454	snippy:4.3.6	variation	2522720	2522720	.	.	0	note=snp A=>C C:61 A:0
EA2454	snippy:4.3.6	variation	2524981	2524981	.	.	0	note=snp T=>G G:61 T:0
EA2454	snippy:4.3.6	variation	2526802	2526802	.	.	0	note=snp C=>T T:43 C:1
EA2454	snippy:4.3.6	variation	2528246	2528246	.	.	0	note=snp T=>C C:85 T:0
EA2454	snippy:4.3.6	variation	2538679	2538679	.	.	0	note=snp T=>C C:66 T:0
EA2454	snippy:4.3.6	variation	2542786	2542786	.	.	0	note=snp A=>G G:64 A:0
EA2454	snippy:4.3.6	variation	2545121	2545121	.	.	0	note=snp C=>T T:57 C:1
EA2454	snippy:4.3.6	variation	2549137	2549137	.	.	0	note=snp T=>C C:61 T:3
EA2454	snippy:4.3.6	variation	2555441	2555441	.	.	0	note=snp A=>G G:59 A:0
EA2454	snippy:4.3.6	variation	2557964	2557964	.	.	0	note=snp G=>C C:41 G:0
EA2454	snippy:4.3.6	variation	2559290	2559290	.	.	0	note=snp C=>A A:68 C:0
EA2454	snippy:4.3.6	variation	2561008	2561008	.	.	0	note=snp C=>T T:78 C:2
EA2454	snippy:4.3.6	variation	2574887	2574887	.	.	0	note=snp G=>T T:61 G:0
EA2454	snippy:4.3.6	variation	2575684	2575684	.	.	0	note=snp G=>T T:57 G:1
EA2454	snippy:4.3.6	variation	2576037	2576037	.	.	0	note=snp G=>T T:45 G:1
EA2454	snippy:4.3.6	variation	2586095	2586095	.	.	0	note=snp C=>T T:56 C:0
EA2454	snippy:4.3.6	variation	2588080	2588080	.	.	0	note=snp T=>C C:72 T:0
EA2454	snippy:4.3.6	variation	2588771	2588771	.	.	0	note=snp A=>G G:64 A:0
EA2454	snippy:4.3.6	variation	2589008	2589008	.	.	0	note=snp T=>C C:67 T:0
EA2454	snippy:4.3.6	variation	2593010	2593010	.	.	0	note=snp T=>C C:68 T:0
EA2454	snippy:4.3.6	variation	2593479	2593479	.	.	0	note=snp C=>T T:70 C:2
EA2454	snippy:4.3.6	variation	2594067	2594067	.	.	0	note=snp T=>G G:52 T:1
EA2454	snippy:4.3.6	variation	2596704	2596704	.	.	0	note=snp T=>C C:43 T:0
EA2454	snippy:4.3.6	variation	2597428	2597428	.	.	0	note=snp T=>C C:68 T:0
EA2454	snippy:4.3.6	variation	2598783	2598783	.	.	0	note=snp A=>G G:64 A:0
EA2454	snippy:4.3.6	variation	2598908	2598908	.	.	0	note=snp T=>C C:58 T:0
EA2454	snippy:4.3.6	variation	2599359	2599359	.	.	0	note=snp C=>T T:43 C:0
EA2454	snippy:4.3.6	variation	2602336	2602336	.	.	0	note=snp A=>T T:62 A:3
EA2454	snippy:4.3.6	variation	2602481	2602481	.	.	0	note=snp G=>A A:64 G:3
EA2454	snippy:4.3.6	variation	2603698	2603698	.	.	0	note=snp C=>T T:53 C:0
EA2454	snippy:4.3.6	variation	2614529	2614529	.	.	0	note=snp G=>A A:42 G:0
EA2454	snippy:4.3.6	variation	2617140	2617140	.	.	0	note=del TA=>T T:43 TA:0
EA2454	snippy:4.3.6	variation	2621038	2621038	.	.	0	note=snp G=>C C:57 G:3
EA2454	snippy:4.3.6	variation	2621655	2621655	.	.	0	note=snp T=>C C:51 T:0
EA2454	snippy:4.3.6	variation	2622104	2622104	.	.	0	note=snp G=>T T:55 G:0
EA2454	snippy:4.3.6	variation	2624675	2624675	.	.	0	note=snp C=>T T:50 C:0
EA2454	snippy:4.3.6	variation	2629941	2629941	.	.	0	note=snp T=>G G:59 T:0
EA2454	snippy:4.3.6	variation	2630145	2630145	.	.	0	note=snp A=>G G:60 A:0
EA2454	snippy:4.3.6	variation	2630810	2630810	.	.	0	note=snp A=>G G:54 A:0
EA2454	snippy:4.3.6	variation	2631943	2631943	.	.	0	note=snp A=>G G:78 A:0
EA2454	snippy:4.3.6	variation	2632096	2632096	.	.	0	note=snp G=>C C:79 G:0
EA2454	snippy:4.3.6	variation	2634039	2634039	.	.	0	note=snp C=>T T:74 C:0
EA2454	snippy:4.3.6	variation	2636460	2636460	.	.	0	note=snp A=>G G:54 A:0
EA2454	snippy:4.3.6	variation	2641059	2641059	.	.	0	note=snp T=>C C:48 T:0
EA2454	snippy:4.3.6	variation	2642324	2642324	.	.	0	note=snp T=>C C:61 T:0
EA2454	snippy:4.3.6	variation	2644202	2644202	.	.	0	note=snp T=>G G:52 T:0
EA2454	snippy:4.3.6	variation	2647738	2647738	.	.	0	note=snp G=>A A:50 G:0
EA2454	snippy:4.3.6	variation	2652053	2652053	.	.	0	note=snp C=>T T:54 C:1
EA2454	snippy:4.3.6	variation	2654413	2654413	.	.	0	note=del GA=>G G:47 GA:0
EA2454	snippy:4.3.6	variation	2658667	2658667	.	.	0	note=snp A=>C C:56 A:0
EA2454	snippy:4.3.6	variation	2660000	2660000	.	.	0	note=snp A=>G G:54 A:0
EA2454	snippy:4.3.6	variation	2662385	2662385	.	.	0	note=del GTAGGTTATGTGCTGGCA=>G G:27 GTAGGTTATGTGCTGGCA:0
EA2454	snippy:4.3.6	variation	2662545	2662545	.	.	0	note=snp A=>G G:57 A:0
EA2454	snippy:4.3.6	variation	2664979	2664979	.	.	0	note=snp T=>C C:65 T:0
EA2454	snippy:4.3.6	variation	2665363	2665363	.	.	0	note=snp C=>T T:75 C:1
EA2454	snippy:4.3.6	variation	2669244	2669244	.	.	0	note=snp C=>T T:36 C:0
EA2454	snippy:4.3.6	variation	2672665	2672665	.	.	0	note=snp C=>T T:25 C:0
EA2454	snippy:4.3.6	variation	2675076	2675076	.	.	0	note=snp A=>C C:37 A:0
EA2454	snippy:4.3.6	variation	2679677	2679677	.	.	0	note=snp A=>G G:47 A:0
EA2454	snippy:4.3.6	variation	2680818	2680818	.	.	0	note=snp G=>A A:53 G:3
EA2454	snippy:4.3.6	variation	2685857	2685857	.	.	0	note=snp A=>G G:58 A:3
EA2454	snippy:4.3.6	variation	2697799	2697799	.	.	0	note=snp T=>C C:72 T:0
EA2454	snippy:4.3.6	variation	2701561	2701561	.	.	0	note=snp G=>A A:61 G:1
EA2454	snippy:4.3.6	variation	2705003	2705003	.	.	0	note=snp C=>T T:76 C:1
EA2454	snippy:4.3.6	variation	2707628	2707628	.	.	0	note=snp T=>C C:55 T:0
EA2454	snippy:4.3.6	variation	2722619	2722619	.	.	0	note=snp A=>G G:63 A:0
EA2454	snippy:4.3.6	variation	2723186	2723186	.	.	0	note=snp G=>T T:49 G:1
EA2454	snippy:4.3.6	variation	2723402	2723402	.	.	0	note=snp G=>A A:59 G:0
EA2454	snippy:4.3.6	variation	2726186	2726186	.	.	0	note=snp G=>A A:54 G:1
EA2454	snippy:4.3.6	variation	2734446	2734446	.	.	0	note=snp G=>A A:42 G:0
EA2454	snippy:4.3.6	variation	2740345	2740345	.	.	0	note=snp G=>A A:65 G:0
EA2454	snippy:4.3.6	variation	2740816	2740816	.	.	0	note=snp T=>C C:65 T:0
EA2454	snippy:4.3.6	variation	2743080	2743080	.	.	0	note=snp T=>G G:57 T:0
EA2454	snippy:4.3.6	variation	2748849	2748849	.	.	0	note=del GT=>G G:17 GT:0
EA2454	snippy:4.3.6	variation	2752165	2752165	.	.	0	note=snp G=>T T:66 G:1
EA2454	snippy:4.3.6	variation	2754730	2754730	.	.	0	note=snp G=>A A:51 G:0
EA2454	snippy:4.3.6	variation	2755025	2755025	.	.	0	note=snp C=>T T:69 C:0
EA2454	snippy:4.3.6	variation	2755245	2755245	.	.	0	note=snp G=>C C:51 G:0
EA2454	snippy:4.3.6	variation	2757917	2757917	.	.	0	note=snp C=>T T:36 C:0
EA2454	snippy:4.3.6	variation	2760370	2760370	.	.	0	note=snp A=>G G:57 A:1
EA2454	snippy:4.3.6	variation	2762656	2762656	.	.	0	note=snp T=>G G:60 T:0
EA2454	snippy:4.3.6	variation	2763065	2763065	.	.	0	note=snp A=>G G:78 A:0
EA2454	snippy:4.3.6	variation	2763122	2763122	.	.	0	note=snp G=>A A:84 G:2
EA2454	snippy:4.3.6	variation	2763983	2763983	.	.	0	note=snp T=>G G:57 T:0
EA2454	snippy:4.3.6	variation	2766553	2766553	.	.	0	note=snp C=>T T:55 C:1
EA2454	snippy:4.3.6	variation	2771595	2771595	.	.	0	note=snp T=>A A:48 T:0
EA2454	snippy:4.3.6	variation	2774852	2774852	.	.	0	note=snp A=>G G:64 A:0
EA2454	snippy:4.3.6	variation	2774940	2774940	.	.	0	note=ins A=>ATATCTT ATATCTT:44 A:3
EA2454	snippy:4.3.6	variation	2775069	2775069	.	.	0	note=snp A=>G G:70 A:0
EA2454	snippy:4.3.6	variation	2788030	2788030	.	.	0	note=snp C=>T T:85 C:0
EA2454	snippy:4.3.6	variation	2791703	2791703	.	.	0	note=ins C=>CA CA:59 C:0
EA2454	snippy:4.3.6	variation	2793323	2793323	.	.	0	note=snp T=>C C:58 T:0
EA2454	snippy:4.3.6	variation	2794067	2794067	.	.	0	note=snp A=>G G:69 A:0
EA2454	snippy:4.3.6	variation	2800274	2800274	.	.	0	note=snp A=>G G:44 A:0
EA2454	snippy:4.3.6	variation	2800374	2800374	.	.	0	note=snp G=>A A:45 G:0
EA2454	snippy:4.3.6	variation	2803019	2803019	.	.	0	note=snp A=>C C:44 A:0
EA2454	snippy:4.3.6	variation	2807063	2807063	.	.	0	note=snp T=>C C:60 T:0
EA2454	snippy:4.3.6	variation	2808747	2808747	.	.	0	note=snp A=>G G:63 A:0
EA2454	snippy:4.3.6	variation	2808849	2808849	.	.	0	note=snp T=>C C:73 T:1
EA2454	snippy:4.3.6	variation	2809435	2809435	.	.	0	note=snp G=>C C:54 G:0
EA2454	snippy:4.3.6	variation	2815762	2815762	.	.	0	note=snp A=>G G:45 A:0
EA2454	snippy:4.3.6	variation	2816107	2816107	.	.	0	note=snp C=>A A:61 C:0
EA2454	snippy:4.3.6	variation	2821018	2821018	.	.	0	note=snp G=>A A:14 G:0
EA2454	snippy:4.3.6	variation	2821038	2821038	.	.	0	note=complex ACTCG=>CCTCA CCTCA:10 ACTCG:0
EA2454	snippy:4.3.6	variation	2825517	2825517	.	.	0	note=snp G=>C C:72 G:0
EA2454	snippy:4.3.6	variation	2826312	2826312	.	.	0	note=snp G=>A A:50 G:0
EA2454	snippy:4.3.6	variation	2829323	2829323	.	.	0	note=snp G=>A A:59 G:0
EA2454	snippy:4.3.6	variation	2829690	2829690	.	.	0	note=snp G=>C C:50 G:0
EA2454	snippy:4.3.6	variation	2830144	2830144	.	.	0	note=snp C=>T T:50 C:0
EA2454	snippy:4.3.6	variation	2834856	2834856	.	.	0	note=snp A=>G G:49 A:0
EA2454	snippy:4.3.6	variation	2837636	2837636	.	.	0	note=snp T=>C C:61 T:0
EA2454	snippy:4.3.6	variation	2837652	2837652	.	.	0	note=snp A=>G G:63 A:0
EA2454	snippy:4.3.6	variation	2843028	2843028	.	.	0	note=snp C=>G G:45 C:0
EA2454	snippy:4.3.6	variation	2846074	2846074	.	.	0	note=snp A=>G G:36 A:3
EA2454	snippy:4.3.6	variation	2847080	2847080	.	.	0	note=snp T=>C C:43 T:0
EA2454	snippy:4.3.6	variation	2850370	2850370	.	.	0	note=snp A=>C C:49 A:0
EA2454	snippy:4.3.6	variation	2850573	2850573	.	.	0	note=snp C=>T T:62 C:0
EA2454	snippy:4.3.6	variation	2851743	2851743	.	.	0	note=snp T=>A A:42 T:0
EA2454	snippy:4.3.6	variation	2852300	2852300	.	.	0	note=snp T=>C C:57 T:0
EA2454	snippy:4.3.6	variation	2854302	2854302	.	.	0	note=snp G=>A A:59 G:0
EA2454	snippy:4.3.6	variation	2855068	2855068	.	.	0	note=snp C=>A A:56 C:0
EA2454	snippy:4.3.6	variation	2855484	2855484	.	.	0	note=snp T=>C C:53 T:0
EA2454	snippy:4.3.6	variation	2860024	2860024	.	.	0	note=snp T=>G G:50 T:0
EA2454	snippy:4.3.6	variation	2865701	2865701	.	.	0	note=snp T=>C C:49 T:0
EA2454	snippy:4.3.6	variation	2866690	2866690	.	.	0	note=snp G=>A A:60 G:0
EA2454	snippy:4.3.6	variation	2870908	2870908	.	.	0	note=snp C=>T T:41 C:1
EA2454	snippy:4.3.6	variation	2872360	2872360	.	.	0	note=snp A=>G G:61 A:0
EA2454	snippy:4.3.6	variation	2876151	2876151	.	.	0	note=snp T=>C C:79 T:0
EA2454	snippy:4.3.6	variation	2876549	2876549	.	.	0	note=snp T=>C C:79 T:1
EA2454	snippy:4.3.6	variation	2877998	2877998	.	.	0	note=snp C=>T T:52 C:0
EA2454	snippy:4.3.6	variation	2878547	2878547	.	.	0	note=snp G=>T T:53 G:0
EA2454	snippy:4.3.6	variation	2881008	2881008	.	.	0	note=snp G=>C C:72 G:0
EA2454	snippy:4.3.6	variation	2883184	2883184	.	.	0	note=snp T=>C C:58 T:0
EA2454	snippy:4.3.6	variation	2886666	2886666	.	.	0	note=snp A=>G G:48 A:1
EA2454	snippy:4.3.6	variation	2887967	2887967	.	.	0	note=snp T=>C C:54 T:0
EA2454	snippy:4.3.6	variation	2891311	2891311	.	.	0	note=snp T=>C C:63 T:0
EA2454	snippy:4.3.6	variation	2891496	2891496	.	.	0	note=snp G=>A A:46 G:2
EA2454	snippy:4.3.6	variation	2892438	2892438	.	.	0	note=snp A=>C C:50 A:0
EA2454	snippy:4.3.6	variation	2897061	2897061	.	.	0	note=snp A=>G G:57 A:2
EA2454	snippy:4.3.6	variation	2900274	2900274	.	.	0	note=snp G=>T T:55 G:2
EA2454	snippy:4.3.6	variation	2901111	2901111	.	.	0	note=snp A=>G G:53 A:0
EA2454	snippy:4.3.6	variation	2903547	2903547	.	.	0	note=snp C=>A A:41 C:0
EA2454	snippy:4.3.6	variation	2905871	2905871	.	.	0	note=snp A=>G G:57 A:0
EA2454	snippy:4.3.6	variation	2908556	2908556	.	.	0	note=snp G=>A A:66 G:0
EA2454	snippy:4.3.6	variation	2911538	2911538	.	.	0	note=snp C=>T T:51 C:1
EA2454	snippy:4.3.6	variation	2912364	2912364	.	.	0	note=snp G=>A A:37 G:0
EA2454	snippy:4.3.6	variation	2924842	2924842	.	.	0	note=snp C=>T T:50 C:2
EA2454	snippy:4.3.6	variation	2927920	2927920	.	.	0	note=snp T=>C C:50 T:0
EA2454	snippy:4.3.6	variation	2929873	2929873	.	.	0	note=snp T=>A A:66 T:1
EA2454	snippy:4.3.6	variation	2931389	2931389	.	.	0	note=snp T=>G G:66 T:0
EA2454	snippy:4.3.6	variation	2932901	2932901	.	.	0	note=snp C=>T T:66 C:1
EA2454	snippy:4.3.6	variation	2934279	2934279	.	.	0	note=snp A=>G G:59 A:0
EA2454	snippy:4.3.6	variation	2936695	2936695	.	.	0	note=snp A=>G G:60 A:0
EA2454	snippy:4.3.6	variation	2936840	2936840	.	.	0	note=snp A=>G G:52 A:2
EA2454	snippy:4.3.6	variation	2937585	2937585	.	.	0	note=snp A=>G G:46 A:0
EA2454	snippy:4.3.6	variation	2939135	2939135	.	.	0	note=ins A=>AT AT:37 A:1
EA2454	snippy:4.3.6	variation	2940019	2940019	.	.	0	note=snp C=>A A:45 C:1
EA2454	snippy:4.3.6	variation	2941498	2941498	.	.	0	note=snp G=>A A:43 G:0
EA2454	snippy:4.3.6	variation	2942637	2942637	.	.	0	note=snp C=>A A:38 C:2
EA2454	snippy:4.3.6	variation	2944014	2944014	.	.	0	note=snp T=>G G:56 T:0
EA2454	snippy:4.3.6	variation	2945610	2945610	.	.	0	note=snp G=>A A:59 G:0
EA2454	snippy:4.3.6	variation	2949959	2949959	.	.	0	note=snp G=>T T:53 G:1
EA2454	snippy:4.3.6	variation	2952105	2952105	.	.	0	note=complex AG=>GA GA:47 AG:0
EA2454	snippy:4.3.6	variation	2952133	2952133	.	.	0	note=del AT=>A A:36 AT:0
EA2454	snippy:4.3.6	variation	2954775	2954775	.	.	0	note=snp T=>C C:215 T:0
EA2454	snippy:4.3.6	variation	2956003	2956003	.	.	0	note=snp T=>A A:51 T:0
EA2454	snippy:4.3.6	variation	2957495	2957495	.	.	0	note=ins T=>TA TA:53 T:0
EA2454	snippy:4.3.6	variation	2959121	2959121	.	.	0	note=snp T=>A A:71 T:0
EA2454	snippy:4.3.6	variation	2959641	2959641	.	.	0	note=snp T=>C C:56 T:0
EA2454	snippy:4.3.6	variation	2959885	2959885	.	.	0	note=snp A=>G G:71 A:1
EA2454	snippy:4.3.6	variation	2960351	2960351	.	.	0	note=del GT=>G G:58 GT:0
EA2454	snippy:4.3.6	variation	2961206	2961206	.	.	0	note=snp G=>A A:57 G:0
EA2454	snippy:4.3.6	variation	2961539	2961539	.	.	0	note=snp A=>G G:61 A:0
EA2454	snippy:4.3.6	variation	2963100	2963100	.	.	0	note=snp G=>A A:56 G:0
EA2454	snippy:4.3.6	variation	2967930	2967930	.	.	0	note=snp A=>G G:64 A:0
EA2454	snippy:4.3.6	variation	2969025	2969025	.	.	0	note=del TA=>T T:73 TA:0
EA2454	snippy:4.3.6	variation	2969936	2969936	.	.	0	note=snp G=>A A:75 G:0
EA2454	snippy:4.3.6	variation	2973622	2973622	.	.	0	note=snp G=>A A:69 G:0
EA2454	snippy:4.3.6	variation	2976471	2976471	.	.	0	note=snp G=>A A:55 G:0
EA2454	snippy:4.3.6	variation	2977817	2977817	.	.	0	note=snp G=>A A:71 G:0
EA2454	snippy:4.3.6	variation	2978308	2978308	.	.	0	note=snp G=>A A:63 G:4
EA2454	snippy:4.3.6	variation	2981338	2981338	.	.	0	note=ins C=>CA CA:43 C:1
EA2454	snippy:4.3.6	variation	2982636	2982636	.	.	0	note=snp G=>A A:57 G:1
EA2454	snippy:4.3.6	variation	2987116	2987116	.	.	0	note=snp T=>A A:54 T:0
EA2454	snippy:4.3.6	variation	2988598	2988598	.	.	0	note=snp A=>T T:50 A:0
EA2454	snippy:4.3.6	variation	2990638	2990638	.	.	0	note=snp T=>C C:51 T:0
EA2454	snippy:4.3.6	variation	2990883	2990883	.	.	0	note=snp G=>A A:55 G:1
EA2454	snippy:4.3.6	variation	2994480	2994480	.	.	0	note=snp T=>G G:60 T:0
EA2454	snippy:4.3.6	variation	2995599	2995599	.	.	0	note=snp T=>C C:59 T:0
EA2454	snippy:4.3.6	variation	2997484	2997484	.	.	0	note=snp G=>A A:39 G:1
EA2454	snippy:4.3.6	variation	2998717	2998717	.	.	0	note=snp A=>G G:53 A:0
EA2454	snippy:4.3.6	variation	2999923	2999923	.	.	0	note=snp G=>A A:43 G:0
EA2454	snippy:4.3.6	variation	2999976	2999976	.	.	0	note=snp C=>G G:39 C:0
EA2454	snippy:4.3.6	variation	3001693	3001693	.	.	0	note=snp G=>A A:57 G:3
EA2454	snippy:4.3.6	variation	3002747	3002747	.	.	0	note=snp G=>A A:60 G:2
EA2454	snippy:4.3.6	variation	3012253	3012253	.	.	0	note=snp A=>C C:56 A:1
EA2454	snippy:4.3.6	variation	3016415	3016415	.	.	0	note=snp C=>T T:70 C:2
EA2454	snippy:4.3.6	variation	3017369	3017369	.	.	0	note=snp T=>C C:82 T:0
EA2454	snippy:4.3.6	variation	3018371	3018371	.	.	0	note=snp C=>T T:13 C:0
EA2454	snippy:4.3.6	variation	3018866	3018866	.	.	0	note=snp G=>A A:67 G:0
EA2454	snippy:4.3.6	variation	3019039	3019039	.	.	0	note=snp C=>A A:61 C:1
EA2454	snippy:4.3.6	variation	3019334	3019334	.	.	0	note=snp T=>C C:56 T:0
EA2454	snippy:4.3.6	variation	3020251	3020251	.	.	0	note=snp T=>C C:58 T:0
EA2454	snippy:4.3.6	variation	3020265	3020265	.	.	0	note=snp G=>A A:57 G:3
EA2454	snippy:4.3.6	variation	3020309	3020309	.	.	0	note=snp A=>G G:44 A:2
EA2454	snippy:4.3.6	variation	3020345	3020345	.	.	0	note=snp T=>A A:30 T:2
EA2454	snippy:4.3.6	variation	3029425	3029425	.	.	0	note=snp G=>A A:57 G:0
EA2454	snippy:4.3.6	variation	3030447	3030447	.	.	0	note=snp C=>T T:61 C:0
EA2454	snippy:4.3.6	variation	3030873	3030873	.	.	0	note=snp C=>T T:58 C:0
EA2454	snippy:4.3.6	variation	3031948	3031948	.	.	0	note=snp C=>T T:47 C:0
EA2454	snippy:4.3.6	variation	3032015	3032015	.	.	0	note=snp A=>C C:53 A:0
EA2454	snippy:4.3.6	variation	3034003	3034003	.	.	0	note=snp T=>G G:38 T:0
EA2454	snippy:4.3.6	variation	3034753	3034753	.	.	0	note=snp G=>A A:53 G:0
EA2454	snippy:4.3.6	variation	3040546	3040546	.	.	0	note=snp G=>C C:49 G:0
EA2454	snippy:4.3.6	variation	3041125	3041125	.	.	0	note=snp T=>G G:49 T:0
EA2454	snippy:4.3.6	variation	3041658	3041658	.	.	0	note=snp C=>T T:54 C:1
EA2454	snippy:4.3.6	variation	3042404	3042404	.	.	0	note=snp T=>A A:54 T:2
EA2454	snippy:4.3.6	variation	3043945	3043945	.	.	0	note=snp A=>T T:48 A:1
EA2454	snippy:4.3.6	variation	3044311	3044311	.	.	0	note=snp C=>T T:52 C:1
EA2454	snippy:4.3.6	variation	3046123	3046123	.	.	0	note=snp C=>T T:50 C:0
EA2454	snippy:4.3.6	variation	3048915	3048915	.	.	0	note=snp G=>A A:48 G:2
EA2454	snippy:4.3.6	variation	3049217	3049217	.	.	0	note=snp G=>A A:45 G:0
EA2454	snippy:4.3.6	variation	3052301	3052301	.	.	0	note=snp C=>T T:50 C:0
EA2454	snippy:4.3.6	variation	3052334	3052334	.	.	0	note=snp G=>T T:52 G:0
EA2454	snippy:4.3.6	variation	3052652	3052652	.	.	0	note=snp T=>C C:59 T:0
EA2454	snippy:4.3.6	variation	3052992	3052992	.	.	0	note=snp G=>C C:56 G:0
EA2454	snippy:4.3.6	variation	3054734	3054734	.	.	0	note=snp T=>C C:66 T:0
EA2454	snippy:4.3.6	variation	3056593	3056593	.	.	0	note=del TATG=>T T:67 TATG:0
EA2454	snippy:4.3.6	variation	3056863	3056863	.	.	0	note=snp T=>G G:61 T:0
EA2454	snippy:4.3.6	variation	3057242	3057242	.	.	0	note=snp A=>G G:62 A:0
EA2454	snippy:4.3.6	variation	3059019	3059019	.	.	0	note=snp G=>T T:51 G:2
EA2454	snippy:4.3.6	variation	3059689	3059689	.	.	0	note=snp A=>T T:56 A:0
EA2454	snippy:4.3.6	variation	3059698	3059698	.	.	0	note=snp A=>T T:50 A:0
EA2454	snippy:4.3.6	variation	3060682	3060682	.	.	0	note=del TG=>T T:47 TG:2
EA2454	snippy:4.3.6	variation	3062076	3062076	.	.	0	note=snp C=>T T:55 C:0
EA2454	snippy:4.3.6	variation	3062431	3062431	.	.	0	note=snp A=>G G:64 A:0
EA2454	snippy:4.3.6	variation	3089096	3089096	.	.	0	note=snp T=>C C:60 T:0
EA2454	snippy:4.3.6	variation	3090338	3090338	.	.	0	note=snp T=>G G:53 T:1
EA2454	snippy:4.3.6	variation	3091335	3091335	.	.	0	note=snp T=>C C:39 T:0
EA2454	snippy:4.3.6	variation	3091625	3091625	.	.	0	note=snp G=>A A:55 G:2
EA2454	snippy:4.3.6	variation	3093850	3093850	.	.	0	note=snp T=>C C:72 T:2
EA2454	snippy:4.3.6	variation	3099129	3099129	.	.	0	note=snp T=>C C:64 T:0
EA2454	snippy:4.3.6	variation	3100586	3100586	.	.	0	note=snp T=>C C:63 T:0
EA2454	snippy:4.3.6	variation	3101552	3101552	.	.	0	note=snp G=>A A:49 G:1
EA2454	snippy:4.3.6	variation	3101721	3101721	.	.	0	note=snp C=>T T:58 C:3
EA2454	snippy:4.3.6	variation	3101851	3101851	.	.	0	note=snp A=>G G:59 A:0
EA2454	snippy:4.3.6	variation	3102426	3102426	.	.	0	note=snp G=>A A:54 G:1
EA2454	snippy:4.3.6	variation	3102717	3102717	.	.	0	note=snp T=>C C:59 T:0
EA2454	snippy:4.3.6	variation	3103884	3103884	.	.	0	note=snp C=>T T:61 C:4
EA2454	snippy:4.3.6	variation	3109017	3109017	.	.	0	note=snp C=>T T:64 C:0
EA2454	snippy:4.3.6	variation	3112595	3112595	.	.	0	note=ins C=>CG CG:47 C:0
EA2454	snippy:4.3.6	variation	3112890	3112890	.	.	0	note=snp A=>G G:39 A:0
EA2454	snippy:4.3.6	variation	3115102	3115102	.	.	0	note=snp G=>A A:51 G:2
EA2454	snippy:4.3.6	variation	3115226	3115226	.	.	0	note=snp C=>A A:45 C:0
EA2454	snippy:4.3.6	variation	3115749	3115749	.	.	0	note=snp T=>A A:50 T:0
EA2454	snippy:4.3.6	variation	3117020	3117020	.	.	0	note=snp C=>G G:62 C:0
EA2454	snippy:4.3.6	variation	3120654	3120654	.	.	0	note=snp T=>C C:65 T:0
EA2454	snippy:4.3.6	variation	3122672	3122672	.	.	0	note=snp T=>G G:58 T:0
EA2454	snippy:4.3.6	variation	3125212	3125212	.	.	0	note=snp A=>G G:57 A:0
EA2454	snippy:4.3.6	variation	3127544	3127544	.	.	0	note=snp C=>T T:64 C:2
EA2454	snippy:4.3.6	variation	3129270	3129270	.	.	0	note=snp T=>C C:47 T:0
EA2454	snippy:4.3.6	variation	3133556	3133556	.	.	0	note=snp G=>T T:46 G:0
EA2454	snippy:4.3.6	variation	3135617	3135617	.	.	0	note=snp A=>C C:57 A:0
EA2454	snippy:4.3.6	variation	3140777	3140777	.	.	0	note=snp T=>C C:42 T:0
EA2454	snippy:4.3.6	variation	3149336	3149336	.	.	0	note=snp C=>T T:56 C:0
EA2454	snippy:4.3.6	variation	3154924	3154924	.	.	0	note=snp G=>A A:70 G:6
EA2454	snippy:4.3.6	variation	3158282	3158282	.	.	0	note=snp G=>A A:47 G:2
EA2454	snippy:4.3.6	variation	3158876	3158876	.	.	0	note=snp G=>A A:54 G:0
EA2454	snippy:4.3.6	variation	3175254	3175254	.	.	0	note=snp T=>C C:79 T:0
EA2454	snippy:4.3.6	variation	3181315	3181315	.	.	0	note=snp T=>C C:59 T:0
EA2454	snippy:4.3.6	variation	3181655	3181655	.	.	0	note=snp T=>C C:62 T:0
EA2454	snippy:4.3.6	variation	3183174	3183174	.	.	0	note=snp C=>T T:54 C:1
EA2454	snippy:4.3.6	variation	3184847	3184847	.	.	0	note=snp C=>T T:67 C:1
EA2454	snippy:4.3.6	variation	3184893	3184893	.	.	0	note=snp T=>C C:71 T:0
EA2454	snippy:4.3.6	variation	3186349	3186349	.	.	0	note=snp C=>T T:66 C:0
EA2454	snippy:4.3.6	variation	3188469	3188469	.	.	0	note=snp T=>C C:77 T:0
EA2454	snippy:4.3.6	variation	3188675	3188675	.	.	0	note=snp T=>A A:66 T:0
EA2454	snippy:4.3.6	variation	3189537	3189537	.	.	0	note=snp G=>T T:82 G:0
EA2454	snippy:4.3.6	variation	3189816	3189816	.	.	0	note=snp G=>A A:63 G:3
EA2454	snippy:4.3.6	variation	3191289	3191289	.	.	0	note=ins C=>CA CA:58 C:0
EA2454	snippy:4.3.6	variation	3192534	3192534	.	.	0	note=snp T=>G G:71 T:0
EA2454	snippy:4.3.6	variation	3193163	3193163	.	.	0	note=snp T=>C C:73 T:0
EA2454	snippy:4.3.6	variation	3196063	3196063	.	.	0	note=snp T=>C C:90 T:0
EA2454	snippy:4.3.6	variation	3197243	3197243	.	.	0	note=snp T=>C C:59 T:0
EA2454	snippy:4.3.6	variation	3202011	3202011	.	.	0	note=snp G=>T T:52 G:1
EA2454	snippy:4.3.6	variation	3202255	3202255	.	.	0	note=snp A=>G G:59 A:0
EA2454	snippy:4.3.6	variation	3202854	3202854	.	.	0	note=snp C=>A A:51 C:0
EA2454	snippy:4.3.6	variation	3211809	3211809	.	.	0	note=snp T=>C C:59 T:0
EA2454	snippy:4.3.6	variation	3213292	3213292	.	.	0	note=snp A=>C C:70 A:0
EA2454	snippy:4.3.6	variation	3214012	3214012	.	.	0	note=snp T=>C C:38 T:0
EA2454	snippy:4.3.6	variation	3215231	3215231	.	.	0	note=snp C=>A A:57 C:0
EA2454	snippy:4.3.6	variation	3217453	3217453	.	.	0	note=snp G=>A A:51 G:1
EA2454	snippy:4.3.6	variation	3218193	3218193	.	.	0	note=snp T=>G G:57 T:0
EA2454	snippy:4.3.6	variation	3218486	3218486	.	.	0	note=snp C=>A A:45 C:0
EA2454	snippy:4.3.6	variation	3218535	3218535	.	.	0	note=snp G=>A A:45 G:0
EA2454	snippy:4.3.6	variation	3219322	3219322	.	.	0	note=snp C=>A A:69 C:1
EA2454	snippy:4.3.6	variation	3220493	3220493	.	.	0	note=snp G=>A A:58 G:1
EA2454	snippy:4.3.6	variation	3224798	3224798	.	.	0	note=snp A=>G G:45 A:0
EA2454	snippy:4.3.6	variation	3225442	3225442	.	.	0	note=snp G=>A A:52 G:1
EA2454	snippy:4.3.6	variation	3226603	3226603	.	.	0	note=snp C=>G G:60 C:0
EA2454	snippy:4.3.6	variation	3227459	3227459	.	.	0	note=snp C=>T T:57 C:1
EA2454	snippy:4.3.6	variation	3228112	3228112	.	.	0	note=snp A=>G G:53 A:0
EA2454	snippy:4.3.6	variation	3229214	3229214	.	.	0	note=snp C=>T T:52 C:1
EA2454	snippy:4.3.6	variation	3234010	3234010	.	.	0	note=snp A=>T T:52 A:0
EA2454	snippy:4.3.6	variation	3237622	3237622	.	.	0	note=snp G=>A A:42 G:0
EA2454	snippy:4.3.6	variation	3239326	3239326	.	.	0	note=snp T=>A A:55 T:2
EA2454	snippy:4.3.6	variation	3242340	3242340	.	.	0	note=snp A=>G G:64 A:0
EA2454	snippy:4.3.6	variation	3242394	3242394	.	.	0	note=snp C=>T T:59 C:2
EA2454	snippy:4.3.6	variation	3260256	3260256	.	.	0	note=del GT=>G G:42 GT:0
EA2454	snippy:4.3.6	variation	3263384	3263384	.	.	0	note=snp T=>C C:63 T:0
EA2454	snippy:4.3.6	variation	3268326	3268326	.	.	0	note=snp G=>A A:62 G:0
EA2454	snippy:4.3.6	variation	3270859	3270859	.	.	0	note=snp C=>T T:64 C:0
EA2454	snippy:4.3.6	variation	3271358	3271358	.	.	0	note=snp T=>C C:75 T:0
EA2454	snippy:4.3.6	variation	3271995	3271995	.	.	0	note=snp T=>G G:64 T:0
EA2454	snippy:4.3.6	variation	3272561	3272561	.	.	0	note=snp G=>T T:66 G:0
EA2454	snippy:4.3.6	variation	3277152	3277152	.	.	0	note=snp C=>T T:69 C:1
EA2454	snippy:4.3.6	variation	3277904	3277904	.	.	0	note=snp C=>A A:32 C:0
EA2454	snippy:4.3.6	variation	3281767	3281767	.	.	0	note=ins G=>GC GC:52 G:0
EA2454	snippy:4.3.6	variation	3285026	3285026	.	.	0	note=snp G=>A A:57 G:1
EA2454	snippy:4.3.6	variation	3286471	3286471	.	.	0	note=snp C=>T T:75 C:1
EA2454	snippy:4.3.6	variation	3297740	3297740	.	.	0	note=snp A=>G G:65 A:0
EA2454	snippy:4.3.6	variation	3298712	3298712	.	.	0	note=snp G=>A A:41 G:1
EA2454	snippy:4.3.6	variation	3302868	3302868	.	.	0	note=snp T=>G G:51 T:0
EA2454	snippy:4.3.6	variation	3305295	3305295	.	.	0	note=snp A=>G G:40 A:0
EA2454	snippy:4.3.6	variation	3305988	3305988	.	.	0	note=snp G=>C C:69 G:0
EA2454	snippy:4.3.6	variation	3309561	3309561	.	.	0	note=snp T=>C C:83 T:0
EA2454	snippy:4.3.6	variation	3310504	3310504	.	.	0	note=snp T=>C C:11 T:0
EA2454	snippy:4.3.6	variation	3310578	3310578	.	.	0	note=snp A=>G G:11 A:0
EA2454	snippy:4.3.6	variation	3310993	3310993	.	.	0	note=snp G=>T T:65 G:0
EA2454	snippy:4.3.6	variation	3315651	3315651	.	.	0	note=snp C=>T T:47 C:0
EA2454	snippy:4.3.6	variation	3315930	3315930	.	.	0	note=snp C=>T T:58 C:0
EA2454	snippy:4.3.6	variation	3315951	3315951	.	.	0	note=snp A=>G G:58 A:0
EA2454	snippy:4.3.6	variation	3316403	3316403	.	.	0	note=snp G=>A A:50 G:3
EA2454	snippy:4.3.6	variation	3322228	3322228	.	.	0	note=snp T=>C C:45 T:0
EA2454	snippy:4.3.6	variation	3339564	3339564	.	.	0	note=del CTCAGAT=>C C:48 CTCAGAT:0
EA2454	snippy:4.3.6	variation	3339669	3339669	.	.	0	note=snp C=>T T:65 C:0
EA2454	snippy:4.3.6	variation	3339706	3339706	.	.	0	note=snp G=>T T:64 G:1
EA2454	snippy:4.3.6	variation	3340001	3340001	.	.	0	note=snp G=>T T:44 G:0
EA2454	snippy:4.3.6	variation	3363780	3363780	.	.	0	note=snp T=>C C:46 T:1
EA2454	snippy:4.3.6	variation	3370712	3370712	.	.	0	note=snp C=>T T:46 C:0
EA2454	snippy:4.3.6	variation	3372955	3372955	.	.	0	note=snp A=>C C:47 A:0
EA2454	snippy:4.3.6	variation	3374533	3374533	.	.	0	note=snp G=>T T:58 G:0
EA2454	snippy:4.3.6	variation	3376228	3376228	.	.	0	note=snp A=>G G:59 A:0
EA2454	snippy:4.3.6	variation	3381441	3381441	.	.	0	note=snp A=>G G:53 A:0
EA2454	snippy:4.3.6	variation	3384239	3384239	.	.	0	note=snp G=>T T:67 G:0
EA2454	snippy:4.3.6	variation	3385781	3385781	.	.	0	note=snp G=>C C:70 G:0
EA2454	snippy:4.3.6	variation	3387527	3387527	.	.	0	note=snp G=>A A:63 G:0
EA2454	snippy:4.3.6	variation	3387556	3387556	.	.	0	note=snp T=>A A:59 T:0
EA2454	snippy:4.3.6	variation	3396121	3396121	.	.	0	note=snp A=>C C:52 A:3
EA2454	snippy:4.3.6	variation	3399287	3399287	.	.	0	note=snp G=>A A:61 G:0
EA2454	snippy:4.3.6	variation	3399374	3399374	.	.	0	note=snp T=>C C:61 T:0
EA2454	snippy:4.3.6	variation	3399944	3399944	.	.	0	note=del AC=>A A:54 AC:0
EA2454	snippy:4.3.6	variation	3404817	3404817	.	.	0	note=snp G=>A A:51 G:0
EA2454	snippy:4.3.6	variation	3407862	3407862	.	.	0	note=snp T=>C C:51 T:0
EA2454	snippy:4.3.6	variation	3408603	3408603	.	.	0	note=snp C=>T T:66 C:1
EA2454	snippy:4.3.6	variation	3409575	3409575	.	.	0	note=snp G=>A A:11 G:0
EA2454	snippy:4.3.6	variation	3416393	3416393	.	.	0	note=snp G=>A A:32 G:0
EA2454	snippy:4.3.6	variation	3419190	3419190	.	.	0	note=snp G=>T T:70 G:2
EA2454	snippy:4.3.6	variation	3426445	3426445	.	.	0	note=snp T=>C C:59 T:0
EA2454	snippy:4.3.6	variation	3426608	3426608	.	.	0	note=snp G=>T T:73 G:2
EA2454	snippy:4.3.6	variation	3428770	3428770	.	.	0	note=snp C=>T T:50 C:0
EA2454	snippy:4.3.6	variation	3430430	3430430	.	.	0	note=snp T=>G G:72 T:2
EA2454	snippy:4.3.6	variation	3434970	3434970	.	.	0	note=snp A=>T T:52 A:1
EA2454	snippy:4.3.6	variation	3437740	3437740	.	.	0	note=snp G=>A A:57 G:1
EA2454	snippy:4.3.6	variation	3439696	3439696	.	.	0	note=snp T=>A A:60 T:0
EA2454	snippy:4.3.6	variation	3440338	3440338	.	.	0	note=snp C=>T T:50 C:0
EA2454	snippy:4.3.6	variation	3441887	3441887	.	.	0	note=snp T=>C C:63 T:0
EA2454	snippy:4.3.6	variation	3441936	3441936	.	.	0	note=snp A=>G G:57 A:0
EA2454	snippy:4.3.6	variation	3442425	3442425	.	.	0	note=snp C=>T T:70 C:5
EA2454	snippy:4.3.6	variation	3451444	3451444	.	.	0	note=snp C=>T T:63 C:0
EA2454	snippy:4.3.6	variation	3452783	3452783	.	.	0	note=snp T=>C C:60 T:0
EA2454	snippy:4.3.6	variation	3458029	3458029	.	.	0	note=snp A=>T T:62 A:1
EA2454	snippy:4.3.6	variation	3458808	3458808	.	.	0	note=snp C=>T T:72 C:0
EA2454	snippy:4.3.6	variation	3459421	3459421	.	.	0	note=ins C=>CTT CTT:15 C:0
EA2454	snippy:4.3.6	variation	3462462	3462462	.	.	0	note=snp T=>C C:72 T:0
EA2454	snippy:4.3.6	variation	3462699	3462699	.	.	0	note=snp A=>G G:49 A:0
EA2454	snippy:4.3.6	variation	3464527	3464527	.	.	0	note=snp C=>T T:51 C:0
EA2454	snippy:4.3.6	variation	3526016	3526016	.	.	0	note=snp G=>A A:52 G:0
EA2454	snippy:4.3.6	variation	3527982	3527982	.	.	0	note=ins G=>GA GA:48 G:0
EA2454	snippy:4.3.6	variation	3532345	3532345	.	.	0	note=snp A=>G G:48 A:1
EA2454	snippy:4.3.6	variation	3536376	3536376	.	.	0	note=snp T=>C C:62 T:0
EA2454	snippy:4.3.6	variation	3539749	3539749	.	.	0	note=snp T=>C C:34 T:0
EA2454	snippy:4.3.6	variation	3541017	3541017	.	.	0	note=snp C=>G G:42 C:0
EA2454	snippy:4.3.6	variation	3541034	3541034	.	.	0	note=snp A=>T T:42 A:0
EA2454	snippy:4.3.6	variation	3545718	3545718	.	.	0	note=snp G=>A A:62 G:2
EA2454	snippy:4.3.6	variation	3547586	3547586	.	.	0	note=snp T=>C C:51 T:0
EA2454	snippy:4.3.6	variation	3547948	3547948	.	.	0	note=snp T=>C C:72 T:0
EA2454	snippy:4.3.6	variation	3548625	3548625	.	.	0	note=snp G=>C C:41 G:0
EA2454	snippy:4.3.6	variation	3549378	3549378	.	.	0	note=snp G=>A A:49 G:1
EA2454	snippy:4.3.6	variation	3549557	3549557	.	.	0	note=snp C=>G G:56 C:1
EA2454	snippy:4.3.6	variation	3550771	3550771	.	.	0	note=snp G=>A A:69 G:2
EA2454	snippy:4.3.6	variation	3554241	3554241	.	.	0	note=complex GCCG=>ACCA ACCA:13 GCCG:0
EA2454	snippy:4.3.6	variation	3554281	3554281	.	.	0	note=snp T=>C C:14 T:0
EA2454	snippy:4.3.6	variation	3554302	3554302	.	.	0	note=snp G=>T T:24 G:0
EA2454	snippy:4.3.6	variation	3555243	3555243	.	.	0	note=snp G=>T T:70 G:1
EA2454	snippy:4.3.6	variation	3556358	3556358	.	.	0	note=snp T=>A A:56 T:2
EA2454	snippy:4.3.6	variation	3559833	3559833	.	.	0	note=snp C=>A A:55 C:1
EA2454	snippy:4.3.6	variation	3562860	3562860	.	.	0	note=snp T=>A A:51 T:2
EA2454	snippy:4.3.6	variation	3566015	3566015	.	.	0	note=snp T=>C C:77 T:0
EA2454	snippy:4.3.6	variation	3566442	3566442	.	.	0	note=snp G=>A A:60 G:0
EA2454	snippy:4.3.6	variation	3566551	3566551	.	.	0	note=snp G=>T T:60 G:1
EA2454	snippy:4.3.6	variation	3570388	3570388	.	.	0	note=snp C=>T T:50 C:0
EA2454	snippy:4.3.6	variation	3574087	3574087	.	.	0	note=snp A=>T T:62 A:0
EA2454	snippy:4.3.6	variation	3574182	3574182	.	.	0	note=snp C=>T T:60 C:0
EA2454	snippy:4.3.6	variation	3575497	3575497	.	.	0	note=snp C=>T T:48 C:0
EA2454	snippy:4.3.6	variation	3577922	3577922	.	.	0	note=snp A=>G G:48 A:0
EA2454	snippy:4.3.6	variation	3579202	3579202	.	.	0	note=snp G=>T T:52 G:0
EA2454	snippy:4.3.6	variation	3581527	3581527	.	.	0	note=snp C=>T T:61 C:1
EA2454	snippy:4.3.6	variation	3586999	3586999	.	.	0	note=snp G=>T T:55 G:0
EA2454	snippy:4.3.6	variation	3588154	3588154	.	.	0	note=snp A=>G G:83 A:0
EA2454	snippy:4.3.6	variation	3589084	3589084	.	.	0	note=del TTG=>T T:60 TTG:0
EA2454	snippy:4.3.6	variation	3589782	3589782	.	.	0	note=snp G=>A A:73 G:0
EA2454	snippy:4.3.6	variation	3590214	3590214	.	.	0	note=snp T=>C C:64 T:0
EA2454	snippy:4.3.6	variation	3592640	3592640	.	.	0	note=snp T=>C C:57 T:0
EA2454	snippy:4.3.6	variation	3595770	3595770	.	.	0	note=snp T=>G G:52 T:0
EA2454	snippy:4.3.6	variation	3596724	3596724	.	.	0	note=snp C=>A A:52 C:0
EA2454	snippy:4.3.6	variation	3599412	3599412	.	.	0	note=snp G=>A A:48 G:0
EA2454	snippy:4.3.6	variation	3602253	3602253	.	.	0	note=snp C=>A A:51 C:0
EA2454	snippy:4.3.6	variation	3602569	3602569	.	.	0	note=snp C=>A A:46 C:0
EA2454	snippy:4.3.6	variation	3605333	3605333	.	.	0	note=snp T=>G G:62 T:0
EA2454	snippy:4.3.6	variation	3605451	3605451	.	.	0	note=snp C=>T T:59 C:0
EA2454	snippy:4.3.6	variation	3606636	3606636	.	.	0	note=snp A=>G G:36 A:0
EA2454	snippy:4.3.6	variation	3611073	3611073	.	.	0	note=snp A=>G G:53 A:0
EA2454	snippy:4.3.6	variation	3613661	3613661	.	.	0	note=snp G=>A A:54 G:0
EA2454	snippy:4.3.6	variation	3615292	3615292	.	.	0	note=snp T=>G G:57 T:0
EA2454	snippy:4.3.6	variation	3615330	3615330	.	.	0	note=snp A=>C C:66 A:0
EA2454	snippy:4.3.6	variation	3628177	3628177	.	.	0	note=snp C=>T T:60 C:3
EA2454	snippy:4.3.6	variation	3628344	3628344	.	.	0	note=snp C=>T T:65 C:4
EA2454	snippy:4.3.6	variation	3628517	3628517	.	.	0	note=snp A=>G G:59 A:0
EA2454	snippy:4.3.6	variation	3632526	3632526	.	.	0	note=snp C=>A A:63 C:0
EA2454	snippy:4.3.6	variation	3633379	3633379	.	.	0	note=snp C=>G G:69 C:0
EA2454	snippy:4.3.6	variation	3634246	3634246	.	.	0	note=snp A=>T T:70 A:0
EA2454	snippy:4.3.6	variation	3634750	3634750	.	.	0	note=snp C=>T T:74 C:0
EA2454	snippy:4.3.6	variation	3637785	3637785	.	.	0	note=snp T=>C C:56 T:0
EA2454	snippy:4.3.6	variation	3638418	3638418	.	.	0	note=snp G=>A A:52 G:0
EA2454	snippy:4.3.6	variation	3640661	3640661	.	.	0	note=snp A=>G G:65 A:0
EA2454	snippy:4.3.6	variation	3643420	3643420	.	.	0	note=snp G=>A A:42 G:0
EA2454	snippy:4.3.6	variation	3644076	3644076	.	.	0	note=snp A=>C C:45 A:1
EA2454	snippy:4.3.6	variation	3645952	3645952	.	.	0	note=snp G=>A A:46 G:0
EA2454	snippy:4.3.6	variation	3645978	3645978	.	.	0	note=snp G=>A A:49 G:0
EA2454	snippy:4.3.6	variation	3653182	3653182	.	.	0	note=snp A=>C C:18 A:0
EA2454	snippy:4.3.6	variation	3654530	3654530	.	.	0	note=snp C=>T T:69 C:2
EA2454	snippy:4.3.6	variation	3657942	3657942	.	.	0	note=snp T=>G G:54 T:0
EA2454	snippy:4.3.6	variation	3658831	3658831	.	.	0	note=snp A=>G G:52 A:2
EA2454	snippy:4.3.6	variation	3662284	3662284	.	.	0	note=snp A=>G G:62 A:0
EA2454	snippy:4.3.6	variation	3665749	3665749	.	.	0	note=snp G=>A A:49 G:0
EA2454	snippy:4.3.6	variation	3671359	3671359	.	.	0	note=snp G=>A A:14 G:0
EA2454	snippy:4.3.6	variation	3681840	3681840	.	.	0	note=snp G=>T T:49 G:0
EA2454	snippy:4.3.6	variation	3682843	3682843	.	.	0	note=snp T=>G G:50 T:0
EA2454	snippy:4.3.6	variation	3685381	3685381	.	.	0	note=snp A=>G G:70 A:1
EA2454	snippy:4.3.6	variation	3690798	3690798	.	.	0	note=snp G=>A A:52 G:0
EA2454	snippy:4.3.6	variation	3690835	3690835	.	.	0	note=snp T=>G G:50 T:0
EA2454	snippy:4.3.6	variation	3692726	3692726	.	.	0	note=snp A=>G G:52 A:0
EA2454	snippy:4.3.6	variation	3698625	3698625	.	.	0	note=snp G=>T T:44 G:1
EA2454	snippy:4.3.6	variation	3700744	3700744	.	.	0	note=snp A=>C C:46 A:1
EA2454	snippy:4.3.6	variation	3700974	3700974	.	.	0	note=snp T=>C C:38 T:0
EA2454	snippy:4.3.6	variation	3701518	3701518	.	.	0	note=snp C=>T T:65 C:0
EA2454	snippy:4.3.6	variation	3701536	3701536	.	.	0	note=snp T=>C C:61 T:2
EA2454	snippy:4.3.6	variation	3701756	3701756	.	.	0	note=snp A=>G G:42 A:0
EA2454	snippy:4.3.6	variation	3703345	3703345	.	.	0	note=snp C=>T T:39 C:0
EA2454	snippy:4.3.6	variation	3708037	3708037	.	.	0	note=snp G=>A A:58 G:0
EA2454	snippy:4.3.6	variation	3708538	3708538	.	.	0	note=snp G=>T T:48 G:0
EA2454	snippy:4.3.6	variation	3711140	3711140	.	.	0	note=snp G=>A A:62 G:1
EA2454	snippy:4.3.6	variation	3717930	3717930	.	.	0	note=snp G=>A A:55 G:0
EA2454	snippy:4.3.6	variation	3723048	3723048	.	.	0	note=snp C=>T T:61 C:2
EA2454	snippy:4.3.6	variation	3723243	3723243	.	.	0	note=snp C=>T T:49 C:1
EA2454	snippy:4.3.6	variation	3723268	3723268	.	.	0	note=snp C=>G G:55 C:0
EA2454	snippy:4.3.6	variation	3726578	3726578	.	.	0	note=snp G=>A A:56 G:1
EA2454	snippy:4.3.6	variation	3732121	3732121	.	.	0	note=snp A=>G G:74 A:0
EA2454	snippy:4.3.6	variation	3732271	3732271	.	.	0	note=ins A=>ATCACCT ATCACCT:40 A:4
EA2454	snippy:4.3.6	variation	3733930	3733930	.	.	0	note=snp G=>A A:51 G:0
EA2454	snippy:4.3.6	variation	3735311	3735311	.	.	0	note=snp G=>A A:53 G:1
EA2454	snippy:4.3.6	variation	3739482	3739482	.	.	0	note=snp A=>G G:49 A:0
EA2454	snippy:4.3.6	variation	3741477	3741477	.	.	0	note=snp C=>T T:64 C:0
EA2454	snippy:4.3.6	variation	3749924	3749924	.	.	0	note=snp G=>A A:74 G:0
EA2454	snippy:4.3.6	variation	3750262	3750262	.	.	0	note=del GAA=>G G:37 GAA:0
EA2454	snippy:4.3.6	variation	3750813	3750813	.	.	0	note=snp G=>C C:71 G:0
EA2454	snippy:4.3.6	variation	3755386	3755386	.	.	0	note=snp C=>T T:76 C:0
EA2454	snippy:4.3.6	variation	3756054	3756054	.	.	0	note=snp T=>C C:71 T:0
EA2454	snippy:4.3.6	variation	3758574	3758574	.	.	0	note=snp G=>T T:64 G:0
EA2454	snippy:4.3.6	variation	3759726	3759726	.	.	0	note=snp G=>C C:61 G:0
EA2454	snippy:4.3.6	variation	3760117	3760117	.	.	0	note=snp A=>G G:59 A:0
EA2454	snippy:4.3.6	variation	3762493	3762493	.	.	0	note=snp A=>T T:73 A:0
EA2454	snippy:4.3.6	variation	3762934	3762934	.	.	0	note=snp G=>A A:57 G:0
EA2454	snippy:4.3.6	variation	3763208	3763208	.	.	0	note=snp A=>G G:65 A:1
EA2454	snippy:4.3.6	variation	3766157	3766157	.	.	0	note=snp G=>A A:57 G:0
EA2454	snippy:4.3.6	variation	3770075	3770075	.	.	0	note=snp G=>T T:59 G:0
EA2454	snippy:4.3.6	variation	3772277	3772277	.	.	0	note=snp T=>A A:39 T:0
EA2454	snippy:4.3.6	variation	3775531	3775531	.	.	0	note=snp G=>C C:56 G:0
EA2454	snippy:4.3.6	variation	3778376	3778376	.	.	0	note=snp A=>C C:60 A:0
EA2454	snippy:4.3.6	variation	3780221	3780221	.	.	0	note=snp C=>A A:51 C:2
EA2454	snippy:4.3.6	variation	3790843	3790843	.	.	0	note=snp G=>A A:72 G:0
EA2454	snippy:4.3.6	variation	3793091	3793091	.	.	0	note=snp C=>T T:46 C:1
EA2454	snippy:4.3.6	variation	3794870	3794870	.	.	0	note=snp C=>T T:52 C:0
EA2454	snippy:4.3.6	variation	3795140	3795140	.	.	0	note=snp T=>C C:40 T:0
EA2454	snippy:4.3.6	variation	3796004	3796004	.	.	0	note=snp G=>A A:52 G:0
EA2454	snippy:4.3.6	variation	3803222	3803222	.	.	0	note=snp C=>T T:58 C:2
EA2454	snippy:4.3.6	variation	3806381	3806381	.	.	0	note=snp C=>T T:61 C:0
EA2454	snippy:4.3.6	variation	3806429	3806429	.	.	0	note=ins T=>TGCCGCCA TGCCGCCA:49 T:0
EA2454	snippy:4.3.6	variation	3806455	3806455	.	.	0	note=snp G=>A A:61 G:0
EA2454	snippy:4.3.6	variation	3807575	3807575	.	.	0	note=snp A=>G G:64 A:0
EA2454	snippy:4.3.6	variation	3807927	3807927	.	.	0	note=snp C=>T T:54 C:0
EA2454	snippy:4.3.6	variation	3808806	3808806	.	.	0	note=snp C=>G G:64 C:0
EA2454	snippy:4.3.6	variation	3810928	3810928	.	.	0	note=snp T=>G G:61 T:0
EA2454	snippy:4.3.6	variation	3815430	3815430	.	.	0	note=snp T=>C C:48 T:0
EA2454	snippy:4.3.6	variation	3816604	3816604	.	.	0	note=snp C=>T T:62 C:0
EA2454	snippy:4.3.6	variation	3817327	3817327	.	.	0	note=del TA=>T T:60 TA:0
EA2454	snippy:4.3.6	variation	3817795	3817795	.	.	0	note=snp A=>T T:41 A:0
EA2454	snippy:4.3.6	variation	3817819	3817819	.	.	0	note=complex AGC=>CGT CGT:43 AGC:0
EA2454	snippy:4.3.6	variation	3817832	3817832	.	.	0	note=snp C=>A A:40 C:0
EA2454	snippy:4.3.6	variation	3817838	3817838	.	.	0	note=complex AGGTGC=>GATAAGGCGT GATAAGGCGT:32 AGGTGC:0
EA2454	snippy:4.3.6	variation	3820481	3820481	.	.	0	note=ins A=>AGTAATC AGTAATC:39 A:1
EA2454	snippy:4.3.6	variation	3822478	3822478	.	.	0	note=snp A=>G G:68 A:1
EA2454	snippy:4.3.6	variation	3823827	3823827	.	.	0	note=snp G=>T T:58 G:0
EA2454	snippy:4.3.6	variation	3824263	3824263	.	.	0	note=snp T=>A A:54 T:0
EA2454	snippy:4.3.6	variation	3829760	3829760	.	.	0	note=del CT=>C C:64 CT:2
EA2454	snippy:4.3.6	variation	3834340	3834340	.	.	0	note=snp C=>T T:31 C:0
EA2454	snippy:4.3.6	variation	3837457	3837457	.	.	0	note=snp C=>A A:41 C:0
EA2454	snippy:4.3.6	variation	3837669	3837669	.	.	0	note=snp A=>G G:53 A:0
EA2454	snippy:4.3.6	variation	3838289	3838289	.	.	0	note=snp C=>T T:69 C:1
EA2454	snippy:4.3.6	variation	3839236	3839236	.	.	0	note=snp T=>G G:60 T:0
EA2454	snippy:4.3.6	variation	3839586	3839586	.	.	0	note=snp G=>A A:72 G:1
EA2454	snippy:4.3.6	variation	3840206	3840206	.	.	0	note=snp C=>T T:49 C:0
EA2454	snippy:4.3.6	variation	3842198	3842198	.	.	0	note=ins C=>CT CT:41 C:0
EA2454	snippy:4.3.6	variation	3842325	3842325	.	.	0	note=ins C=>CA CA:53 C:0
EA2454	snippy:4.3.6	variation	3844395	3844395	.	.	0	note=snp T=>C C:64 T:0
EA2454	snippy:4.3.6	variation	3844764	3844764	.	.	0	note=snp T=>G G:53 T:0
EA2454	snippy:4.3.6	variation	3845850	3845850	.	.	0	note=snp C=>T T:55 C:1
EA2454	snippy:4.3.6	variation	3851565	3851565	.	.	0	note=complex TAAACA=>CAGATG CAGATG:16 TAAACA:0
EA2454	snippy:4.3.6	variation	3851580	3851580	.	.	0	note=complex AC=>TT TT:22 AC:0
EA2454	snippy:4.3.6	variation	3851623	3851623	.	.	0	note=snp C=>T T:50 C:0
EA2454	snippy:4.3.6	variation	3851632	3851632	.	.	0	note=complex GAAG=>AAAA AAAA:59 GAAG:0
EA2454	snippy:4.3.6	variation	3851667	3851667	.	.	0	note=snp A=>G G:74 A:0
EA2454	snippy:4.3.6	variation	3851703	3851703	.	.	0	note=snp A=>G G:85 A:0
EA2454	snippy:4.3.6	variation	3851770	3851770	.	.	0	note=complex TAGCC=>CAGCG CAGCG:86 TAGCC:0
EA2454	snippy:4.3.6	variation	3851842	3851842	.	.	0	note=snp C=>T T:95 C:0
EA2454	snippy:4.3.6	variation	3851858	3851858	.	.	0	note=complex CCC=>TCT TCT:87 CCC:0
EA2454	snippy:4.3.6	variation	3851865	3851865	.	.	0	note=complex CCAGT=>GCAGC GCAGC:85 CCAGT:0
EA2454	snippy:4.3.6	variation	3851884	3851884	.	.	0	note=complex CTT=>ACCCC ACCCC:73 CTT:0
EA2454	snippy:4.3.6	variation	3851901	3851901	.	.	0	note=snp C=>T T:85 C:0
EA2454	snippy:4.3.6	variation	3851915	3851915	.	.	0	note=complex TAATCA=>CAACCAG CAACCAG:74 TAATCA:0
EA2454	snippy:4.3.6	variation	3851938	3851938	.	.	0	note=del GA=>G G:71 GA:0
EA2454	snippy:4.3.6	variation	3851976	3851976	.	.	0	note=snp T=>G G:87 T:0
EA2454	snippy:4.3.6	variation	3852607	3852607	.	.	0	note=complex CCGTT=>TCGTC TCGTC:230 CCGTT:0
EA2454	snippy:4.3.6	variation	3852799	3852799	.	.	0	note=snp A=>G G:208 A:0
EA2454	snippy:4.3.6	variation	3852999	3852999	.	.	0	note=snp T=>C C:183 T:0
EA2454	snippy:4.3.6	variation	3853739	3853739	.	.	0	note=snp T=>G G:21 T:1
EA2454	snippy:4.3.6	variation	3853744	3853744	.	.	0	note=snp G=>A A:16 G:0
EA2454	snippy:4.3.6	variation	3854040	3854040	.	.	0	note=complex ATC=>TTT TTT:14 ATC:0
EA2454	snippy:4.3.6	variation	3854059	3854059	.	.	0	note=complex GGTTC=>TGTCT TGTCT:14 GGTTC:0
EA2454	snippy:4.3.6	variation	3854068	3854068	.	.	0	note=complex AAAAATTAACATGATT=>CAAAGTAAATGCGATA CAAAGTAAATGCGATA:14 AAAAATTAACATGATT:0
EA2454	snippy:4.3.6	variation	3854090	3854090	.	.	0	note=snp A=>C C:33 A:0
EA2454	snippy:4.3.6	variation	3854107	3854107	.	.	0	note=snp A=>G G:45 A:0
EA2454	snippy:4.3.6	variation	3854128	3854128	.	.	0	note=mnp CC=>TA TA:56 CC:0
EA2454	snippy:4.3.6	variation	3854134	3854134	.	.	0	note=snp A=>G G:56 A:0
EA2454	snippy:4.3.6	variation	3854140	3854140	.	.	0	note=snp T=>A A:56 T:0
EA2454	snippy:4.3.6	variation	3854159	3854159	.	.	0	note=snp T=>C C:72 T:0
EA2454	snippy:4.3.6	variation	3854206	3854206	.	.	0	note=snp G=>A A:106 G:0
EA2454	snippy:4.3.6	variation	3854212	3854212	.	.	0	note=snp C=>T T:113 C:0
EA2454	snippy:4.3.6	variation	3854218	3854218	.	.	0	note=snp A=>T T:122 A:0
EA2454	snippy:4.3.6	variation	3854281	3854281	.	.	0	note=snp A=>G G:115 A:0
EA2454	snippy:4.3.6	variation	3854337	3854337	.	.	0	note=snp G=>A A:99 G:0
EA2454	snippy:4.3.6	variation	3854347	3854347	.	.	0	note=snp C=>A A:86 C:0
EA2454	snippy:4.3.6	variation	3854412	3854412	.	.	0	note=snp T=>A A:43 T:0
EA2454	snippy:4.3.6	variation	3854428	3854428	.	.	0	note=complex GTTG=>CTTC CTTC:45 GTTG:0
EA2454	snippy:4.3.6	variation	3854442	3854442	.	.	0	note=complex AAGAA=>CAGAG CAGAG:52 AAGAA:0
EA2454	snippy:4.3.6	variation	3854458	3854458	.	.	0	note=snp C=>T T:50 C:4
EA2454	snippy:4.3.6	variation	3854465	3854465	.	.	0	note=snp A=>G G:49 A:4
EA2454	snippy:4.3.6	variation	3854476	3854476	.	.	0	note=complex TC=>AA AA:45 TC:4
EA2454	snippy:4.3.6	variation	3854551	3854551	.	.	0	note=complex GTCTGAA=>TTCTCTC TTCTCTC:15 GTCTGAA:0
EA2454	snippy:4.3.6	variation	3854563	3854563	.	.	0	note=snp T=>C C:15 T:0
EA2454	snippy:4.3.6	variation	3855822	3855822	.	.	0	note=complex GCA=>CAG CAG:133 GCA:2
EA2454	snippy:4.3.6	variation	3855884	3855884	.	.	0	note=snp C=>T T:210 C:0
EA2454	snippy:4.3.6	variation	3856015	3856015	.	.	0	note=ins T=>TA TA:218 T:0
EA2454	snippy:4.3.6	variation	3856047	3856047	.	.	0	note=complex AAAG=>GAAA GAAA:264 AAAG:0
EA2454	snippy:4.3.6	variation	3856149	3856149	.	.	0	note=snp T=>A A:287 T:0
EA2454	snippy:4.3.6	variation	3856242	3856242	.	.	0	note=snp T=>A A:256 T:0
EA2454	snippy:4.3.6	variation	3858690	3858690	.	.	0	note=complex AGCC=>CGCT CGCT:165 AGCC:0
EA2454	snippy:4.3.6	variation	3858705	3858705	.	.	0	note=complex TGGT=>CGGC CGGC:169 TGGT:0
EA2454	snippy:4.3.6	variation	3858717	3858717	.	.	0	note=snp G=>T T:168 G:0
EA2454	snippy:4.3.6	variation	3863406	3863406	.	.	0	note=snp T=>C C:211 T:1
EA2454	snippy:4.3.6	variation	3863481	3863481	.	.	0	note=complex CAGG=>TAAA TAAA:181 CAGG:0
EA2454	snippy:4.3.6	variation	3863490	3863490	.	.	0	note=snp C=>G G:201 C:0
EA2454	snippy:4.3.6	variation	3863532	3863532	.	.	0	note=complex ATCG=>GTCA GTCA:180 ATCG:0
EA2454	snippy:4.3.6	variation	3863559	3863559	.	.	0	note=snp G=>A A:185 G:0
EA2454	snippy:4.3.6	variation	3863700	3863700	.	.	0	note=snp G=>A A:205 G:0
EA2454	snippy:4.3.6	variation	3863732	3863732	.	.	0	note=snp A=>G G:204 A:0
EA2454	snippy:4.3.6	variation	3863740	3863740	.	.	0	note=snp T=>C C:199 T:0
EA2454	snippy:4.3.6	variation	3863840	3863840	.	.	0	note=snp T=>C C:217 T:0
EA2454	snippy:4.3.6	variation	3863865	3863865	.	.	0	note=complex ACG=>GCA GCA:201 ACG:0
EA2454	snippy:4.3.6	variation	3863900	3863900	.	.	0	note=snp T=>G G:203 T:0
EA2454	snippy:4.3.6	variation	3863924	3863924	.	.	0	note=snp A=>T T:185 A:0
EA2454	snippy:4.3.6	variation	3863957	3863957	.	.	0	note=snp T=>C C:206 T:0
EA2454	snippy:4.3.6	variation	3863966	3863966	.	.	0	note=snp G=>A A:204 G:0
EA2454	snippy:4.3.6	variation	3864034	3864034	.	.	0	note=snp A=>C C:214 A:0
EA2454	snippy:4.3.6	variation	3864046	3864046	.	.	0	note=snp C=>T T:222 C:1
EA2454	snippy:4.3.6	variation	3864070	3864070	.	.	0	note=mnp GC=>AA AA:226 GC:0
EA2454	snippy:4.3.6	variation	3864181	3864181	.	.	0	note=snp C=>T T:223 C:0
EA2454	snippy:4.3.6	variation	3864199	3864199	.	.	0	note=complex TCCTGGA=>GCCCGGT GCCCGGT:222 TCCTGGA:0
EA2454	snippy:4.3.6	variation	3864220	3864220	.	.	0	note=snp A=>G G:246 A:0
EA2454	snippy:4.3.6	variation	3864227	3864227	.	.	0	note=snp A=>G G:251 A:1
EA2454	snippy:4.3.6	variation	3864307	3864307	.	.	0	note=snp A=>T T:218 A:0
EA2454	snippy:4.3.6	variation	3865110	3865110	.	.	0	note=snp T=>C C:229 T:0
EA2454	snippy:4.3.6	variation	3865119	3865119	.	.	0	note=snp A=>C C:235 A:0
EA2454	snippy:4.3.6	variation	3865769	3865769	.	.	0	note=snp A=>G G:61 A:0
EA2454	snippy:4.3.6	variation	3865796	3865796	.	.	0	note=snp A=>G G:78 A:0
EA2454	snippy:4.3.6	variation	3865854	3865854	.	.	0	note=snp A=>G G:85 A:0
EA2454	snippy:4.3.6	variation	3865931	3865931	.	.	0	note=snp A=>G G:128 A:0
EA2454	snippy:4.3.6	variation	3866184	3866184	.	.	0	note=snp A=>G G:34 A:0
EA2454	snippy:4.3.6	variation	3866250	3866250	.	.	0	note=snp C=>G G:12 C:0
EA2454	snippy:4.3.6	variation	3866260	3866260	.	.	0	note=complex CGGG=>AGGC AGGC:17 CGGG:0
EA2454	snippy:4.3.6	variation	3866269	3866269	.	.	0	note=snp T=>C C:27 T:0
EA2454	snippy:4.3.6	variation	3866278	3866278	.	.	0	note=snp T=>C C:31 T:0
EA2454	snippy:4.3.6	variation	3866284	3866284	.	.	0	note=snp G=>C C:39 G:0
EA2454	snippy:4.3.6	variation	3866302	3866302	.	.	0	note=snp T=>C C:47 T:0
EA2454	snippy:4.3.6	variation	3866312	3866312	.	.	0	note=snp A=>G G:54 A:0
EA2454	snippy:4.3.6	variation	3866320	3866320	.	.	0	note=complex CTTC=>ATTT ATTT:60 CTTC:0
EA2454	snippy:4.3.6	variation	3866335	3866335	.	.	0	note=snp T=>G G:69 T:0
EA2454	snippy:4.3.6	variation	3866365	3866365	.	.	0	note=snp C=>A A:89 C:0
EA2454	snippy:4.3.6	variation	3866373	3866373	.	.	0	note=mnp TT=>CG CG:95 TT:0
EA2454	snippy:4.3.6	variation	3866383	3866383	.	.	0	note=snp T=>C C:98 T:0
EA2454	snippy:4.3.6	variation	3866395	3866395	.	.	0	note=snp C=>T T:95 C:0
EA2454	snippy:4.3.6	variation	3866419	3866419	.	.	0	note=snp T=>G G:94 T:0
EA2454	snippy:4.3.6	variation	3866489	3866489	.	.	0	note=snp G=>A A:48 G:0
EA2454	snippy:4.3.6	variation	3866503	3866503	.	.	0	note=snp G=>T T:44 G:0
EA2454	snippy:4.3.6	variation	3866512	3866512	.	.	0	note=complex CTGTTTCA=>TTGCTTCC TTGCTTCC:33 CTGTTTCA:0
EA2454	snippy:4.3.6	variation	3866530	3866530	.	.	0	note=complex CGATGC=>TGAAGG TGAAGG:27 CGATGC:0
EA2454	snippy:4.3.6	variation	3866543	3866543	.	.	0	note=snp T=>C C:25 T:0
EA2454	snippy:4.3.6	variation	3866552	3866552	.	.	0	note=snp A=>C C:12 A:0
EA2454	snippy:4.3.6	variation	3866560	3866560	.	.	0	note=snp T=>C C:11 T:0
EA2454	snippy:4.3.6	variation	3867326	3867326	.	.	0	note=complex TAGCCGG=>AAACCGC AAACCGC:141 TAGCCGG:0
EA2454	snippy:4.3.6	variation	3867905	3867905	.	.	0	note=snp T=>G G:118 T:0
EA2454	snippy:4.3.6	variation	3868787	3868787	.	.	0	note=snp A=>G G:125 A:10
EA2454	snippy:4.3.6	variation	3868801	3868801	.	.	0	note=snp C=>T T:128 C:9
EA2454	snippy:4.3.6	variation	3868810	3868810	.	.	0	note=complex GTCGAACCGTTTTA=>TTCTAATCGTCTTG TTCTAATCGTCTTG:108 GTCGAACCGTTTTA:1
EA2454	snippy:4.3.6	variation	3868845	3868845	.	.	0	note=snp T=>C C:125 T:0
EA2454	snippy:4.3.6	variation	3868909	3868909	.	.	0	note=snp T=>G G:107 T:0
EA2454	snippy:4.3.6	variation	3868914	3868914	.	.	0	note=complex GTGAGATA=>ACGGGATG ACGGGATG:101 GTGAGATA:0
EA2454	snippy:4.3.6	variation	3868927	3868927	.	.	0	note=snp T=>C C:112 T:0
EA2454	snippy:4.3.6	variation	3868942	3868942	.	.	0	note=mnp TT=>CC CC:111 TT:1
EA2454	snippy:4.3.6	variation	3869009	3869009	.	.	0	note=complex CCTGAT=>ACC ACC:84 CCTGAT:0
EA2454	snippy:4.3.6	variation	3869026	3869026	.	.	0	note=complex AAG=>TAA TAA:127 AAG:3
EA2454	snippy:4.3.6	variation	3869038	3869038	.	.	0	note=snp G=>A A:141 G:4
EA2454	snippy:4.3.6	variation	3869102	3869102	.	.	0	note=snp A=>G G:139 A:5
EA2454	snippy:4.3.6	variation	3869140	3869140	.	.	0	note=snp A=>C C:149 A:5
EA2454	snippy:4.3.6	variation	3869165	3869165	.	.	0	note=snp A=>T T:162 A:1
EA2454	snippy:4.3.6	variation	3869195	3869195	.	.	0	note=snp C=>T T:145 C:1
EA2454	snippy:4.3.6	variation	3869216	3869216	.	.	0	note=snp A=>G G:131 A:3
EA2454	snippy:4.3.6	variation	3869252	3869252	.	.	0	note=snp T=>C C:148 T:1
EA2454	snippy:4.3.6	variation	3869339	3869339	.	.	0	note=complex CGCC=>TGCT TGCT:124 CGCC:1
EA2454	snippy:4.3.6	variation	3869348	3869348	.	.	0	note=snp A=>G G:129 A:1
EA2454	snippy:4.3.6	variation	3869360	3869360	.	.	0	note=snp G=>A A:132 G:1
EA2454	snippy:4.3.6	variation	3869366	3869366	.	.	0	note=snp C=>T T:140 C:1
EA2454	snippy:4.3.6	variation	3869411	3869411	.	.	0	note=snp C=>A A:138 C:1
EA2454	snippy:4.3.6	variation	3869547	3869547	.	.	0	note=snp A=>C C:130 A:0
EA2454	snippy:4.3.6	variation	3869555	3869555	.	.	0	note=snp C=>G G:133 C:0
EA2454	snippy:4.3.6	variation	3869591	3869591	.	.	0	note=snp T=>C C:136 T:0
EA2454	snippy:4.3.6	variation	3869604	3869604	.	.	0	note=snp C=>T T:137 C:1
EA2454	snippy:4.3.6	variation	3869750	3869750	.	.	0	note=snp G=>A A:34 G:0
EA2454	snippy:4.3.6	variation	3869970	3869970	.	.	0	note=snp G=>T T:44 G:0
EA2454	snippy:4.3.6	variation	3870037	3870037	.	.	0	note=snp T=>C C:96 T:1
EA2454	snippy:4.3.6	variation	3870152	3870152	.	.	0	note=complex CAGA=>AAGG AAGG:114 CAGA:0
EA2454	snippy:4.3.6	variation	3870199	3870199	.	.	0	note=snp C=>T T:127 C:0
EA2454	snippy:4.3.6	variation	3870306	3870306	.	.	0	note=complex ACACA=>GCACG GCACG:122 ACACA:0
EA2454	snippy:4.3.6	variation	3870424	3870424	.	.	0	note=snp C=>T T:128 C:0
EA2454	snippy:4.3.6	variation	3871047	3871047	.	.	0	note=complex GGA=>AGG AGG:156 GGA:0
EA2454	snippy:4.3.6	variation	3871083	3871083	.	.	0	note=snp T=>C C:169 T:1
EA2454	snippy:4.3.6	variation	3871146	3871146	.	.	0	note=snp A=>G G:170 A:0
EA2454	snippy:4.3.6	variation	3871705	3871705	.	.	0	note=snp T=>C C:137 T:2
EA2454	snippy:4.3.6	variation	3871741	3871741	.	.	0	note=snp C=>T T:136 C:2
EA2454	snippy:4.3.6	variation	3871816	3871816	.	.	0	note=snp A=>G G:123 A:2
EA2454	snippy:4.3.6	variation	3871837	3871837	.	.	0	note=snp C=>T T:124 C:0
EA2454	snippy:4.3.6	variation	3871864	3871864	.	.	0	note=snp G=>A A:120 G:2
EA2454	snippy:4.3.6	variation	3871945	3871945	.	.	0	note=snp G=>T T:117 G:0
EA2454	snippy:4.3.6	variation	3871957	3871957	.	.	0	note=snp T=>C C:116 T:0
EA2454	snippy:4.3.6	variation	3872008	3872008	.	.	0	note=snp C=>T T:120 C:0
EA2454	snippy:4.3.6	variation	3872110	3872110	.	.	0	note=snp T=>C C:117 T:1
EA2454	snippy:4.3.6	variation	3872128	3872128	.	.	0	note=mnp CT=>GC GC:117 CT:1
EA2454	snippy:4.3.6	variation	3872134	3872134	.	.	0	note=snp A=>G G:111 A:2
EA2454	snippy:4.3.6	variation	3872167	3872167	.	.	0	note=snp C=>T T:111 C:2
EA2454	snippy:4.3.6	variation	3872560	3872560	.	.	0	note=snp C=>T T:168 C:0
EA2454	snippy:4.3.6	variation	3872599	3872599	.	.	0	note=snp G=>A A:168 G:0
EA2454	snippy:4.3.6	variation	3872721	3872721	.	.	0	note=mnp TG=>CA CA:135 TG:0
EA2454	snippy:4.3.6	variation	3872778	3872778	.	.	0	note=snp C=>T T:127 C:0
EA2454	snippy:4.3.6	variation	3872799	3872799	.	.	0	note=complex AACCA=>GACCC GACCC:111 AACCA:0
EA2454	snippy:4.3.6	variation	3872862	3872862	.	.	0	note=snp G=>A A:126 G:0
EA2454	snippy:4.3.6	variation	3873006	3873006	.	.	0	note=snp A=>G G:107 A:0
EA2454	snippy:4.3.6	variation	3873171	3873171	.	.	0	note=snp C=>T T:121 C:0
EA2454	snippy:4.3.6	variation	3873180	3873180	.	.	0	note=snp A=>G G:123 A:0
EA2454	snippy:4.3.6	variation	3873261	3873261	.	.	0	note=snp G=>A A:158 G:0
EA2454	snippy:4.3.6	variation	3873282	3873282	.	.	0	note=snp C=>T T:167 C:0
EA2454	snippy:4.3.6	variation	3873309	3873309	.	.	0	note=snp C=>T T:154 C:0
EA2454	snippy:4.3.6	variation	3873396	3873396	.	.	0	note=snp T=>C C:151 T:0
EA2454	snippy:4.3.6	variation	3873417	3873417	.	.	0	note=snp C=>A A:137 C:0
EA2454	snippy:4.3.6	variation	3873549	3873549	.	.	0	note=snp T=>C C:162 T:0
EA2454	snippy:4.3.6	variation	3873594	3873594	.	.	0	note=snp G=>A A:152 G:0
EA2454	snippy:4.3.6	variation	3873609	3873609	.	.	0	note=snp A=>G G:147 A:0
EA2454	snippy:4.3.6	variation	3873636	3873636	.	.	0	note=snp G=>A A:168 G:0
EA2454	snippy:4.3.6	variation	3873750	3873750	.	.	0	note=snp T=>C C:157 T:0
EA2454	snippy:4.3.6	variation	3873786	3873786	.	.	0	note=snp G=>A A:146 G:0
EA2454	snippy:4.3.6	variation	3874008	3874008	.	.	0	note=snp A=>G G:122 A:3
EA2454	snippy:4.3.6	variation	3874017	3874017	.	.	0	note=snp C=>A A:125 C:4
EA2454	snippy:4.3.6	variation	3874068	3874068	.	.	0	note=snp T=>C C:129 T:3
EA2454	snippy:4.3.6	variation	3874077	3874077	.	.	0	note=snp G=>A A:134 G:4
EA2454	snippy:4.3.6	variation	3874083	3874083	.	.	0	note=snp T=>C C:131 T:4
EA2454	snippy:4.3.6	variation	3874128	3874128	.	.	0	note=snp A=>G G:127 A:2
EA2454	snippy:4.3.6	variation	3874140	3874140	.	.	0	note=snp A=>C C:124 A:0
EA2454	snippy:4.3.6	variation	3874209	3874209	.	.	0	note=snp C=>T T:118 C:1
EA2454	snippy:4.3.6	variation	3874221	3874221	.	.	0	note=snp T=>C C:123 T:0
EA2454	snippy:4.3.6	variation	3874248	3874248	.	.	0	note=snp G=>A A:114 G:0
EA2454	snippy:4.3.6	variation	3874254	3874254	.	.	0	note=snp G=>A A:117 G:1
EA2454	snippy:4.3.6	variation	3874266	3874266	.	.	0	note=snp T=>G G:118 T:0
EA2454	snippy:4.3.6	variation	3874278	3874278	.	.	0	note=snp T=>C C:122 T:1
EA2454	snippy:4.3.6	variation	3874329	3874329	.	.	0	note=complex GGCG=>AGCA AGCA:119 GGCG:1
EA2454	snippy:4.3.6	variation	3874350	3874350	.	.	0	note=snp C=>T T:128 C:0
EA2454	snippy:4.3.6	variation	3874393	3874393	.	.	0	note=snp T=>A A:129 T:1
EA2454	snippy:4.3.6	variation	3874455	3874455	.	.	0	note=snp C=>T T:120 C:1
EA2454	snippy:4.3.6	variation	3874464	3874464	.	.	0	note=snp C=>T T:112 C:0
EA2454	snippy:4.3.6	variation	3874500	3874500	.	.	0	note=snp C=>T T:116 C:0
EA2454	snippy:4.3.6	variation	3874551	3874551	.	.	0	note=mnp AAGA=>TCAG TCAG:110 AAGA:0
EA2454	snippy:4.3.6	variation	3874566	3874566	.	.	0	note=snp A=>C C:111 A:1
EA2454	snippy:4.3.6	variation	3874580	3874580	.	.	0	note=snp G=>C C:102 G:0
EA2454	snippy:4.3.6	variation	3874587	3874587	.	.	0	note=snp G=>C C:96 G:0
EA2454	snippy:4.3.6	variation	3874599	3874599	.	.	0	note=snp C=>A A:85 C:1
EA2454	snippy:4.3.6	variation	3874650	3874650	.	.	0	note=complex TGGCG=>CGGCT CGGCT:28 TGGCG:1
EA2454	snippy:4.3.6	variation	3874741	3874741	.	.	0	note=complex GATA=>AATG AATG:12 GATA:0
EA2454	snippy:4.3.6	variation	3874749	3874749	.	.	0	note=snp C=>T T:18 C:0
EA2454	snippy:4.3.6	variation	3874767	3874767	.	.	0	note=snp G=>A A:35 G:0
EA2454	snippy:4.3.6	variation	3874824	3874824	.	.	0	note=snp A=>G G:81 A:0
EA2454	snippy:4.3.6	variation	3874839	3874839	.	.	0	note=snp G=>T T:97 G:0
EA2454	snippy:4.3.6	variation	3874851	3874851	.	.	0	note=snp C=>T T:103 C:0
EA2454	snippy:4.3.6	variation	3874866	3874866	.	.	0	note=complex CCAGC=>TCAGT TCAGT:115 CCAGC:0
EA2454	snippy:4.3.6	variation	3874887	3874887	.	.	0	note=snp C=>T T:126 C:0
EA2454	snippy:4.3.6	variation	3874893	3874893	.	.	0	note=complex AAAA=>GAAG GAAG:116 AAAA:0
EA2454	snippy:4.3.6	variation	3874913	3874913	.	.	0	note=snp A=>T T:118 A:0
EA2454	snippy:4.3.6	variation	3874996	3874996	.	.	0	note=snp C=>T T:117 C:0
EA2454	snippy:4.3.6	variation	3875022	3875022	.	.	0	note=snp G=>A A:130 G:0
EA2454	snippy:4.3.6	variation	3875037	3875037	.	.	0	note=snp G=>A A:122 G:0
EA2454	snippy:4.3.6	variation	3875046	3875046	.	.	0	note=snp C=>A A:126 C:0
EA2454	snippy:4.3.6	variation	3875073	3875073	.	.	0	note=snp C=>A A:125 C:0
EA2454	snippy:4.3.6	variation	3875091	3875091	.	.	0	note=snp C=>T T:115 C:1
EA2454	snippy:4.3.6	variation	3875100	3875100	.	.	0	note=snp T=>G G:120 T:0
EA2454	snippy:4.3.6	variation	3875106	3875106	.	.	0	note=snp G=>C C:115 G:0
EA2454	snippy:4.3.6	variation	3875118	3875118	.	.	0	note=snp T=>G G:118 T:0
EA2454	snippy:4.3.6	variation	3875128	3875128	.	.	0	note=complex GTG=>ATA ATA:115 GTG:0
EA2454	snippy:4.3.6	variation	3875157	3875157	.	.	0	note=snp T=>G G:132 T:0
EA2454	snippy:4.3.6	variation	3875169	3875169	.	.	0	note=complex GGACATC=>CGATATT CGATATT:118 GGACATC:0
EA2454	snippy:4.3.6	variation	3875205	3875205	.	.	0	note=complex GGGG=>TGGT TGGT:115 GGGG:0
EA2454	snippy:4.3.6	variation	3875232	3875232	.	.	0	note=snp T=>C C:111 T:1
EA2454	snippy:4.3.6	variation	3875241	3875241	.	.	0	note=snp G=>A A:115 G:0
EA2454	snippy:4.3.6	variation	3875328	3875328	.	.	0	note=complex CCGAGGC=>TAAAGGG TAAAGGG:99 CCGAGGC:0
EA2454	snippy:4.3.6	variation	3875340	3875340	.	.	0	note=complex CGGA=>AGGT AGGT:105 CGGA:2
EA2454	snippy:4.3.6	variation	3875354	3875354	.	.	0	note=snp G=>A A:117 G:1
EA2454	snippy:4.3.6	variation	3875370	3875370	.	.	0	note=snp A=>G G:116 A:2
EA2454	snippy:4.3.6	variation	3875383	3875383	.	.	0	note=complex GGAA=>AGAG AGAG:124 GGAA:2
EA2454	snippy:4.3.6	variation	3875403	3875403	.	.	0	note=complex ACAA=>GCAG GCAG:129 ACAA:2
EA2454	snippy:4.3.6	variation	3875437	3875437	.	.	0	note=snp A=>G G:115 A:1
EA2454	snippy:4.3.6	variation	3875460	3875460	.	.	0	note=snp A=>G G:97 A:1
EA2454	snippy:4.3.6	variation	3875465	3875465	.	.	0	note=snp G=>C C:94 G:1
EA2454	snippy:4.3.6	variation	3875505	3875505	.	.	0	note=snp G=>T T:110 G:0
EA2454	snippy:4.3.6	variation	3875514	3875514	.	.	0	note=snp A=>G G:107 A:0
EA2454	snippy:4.3.6	variation	3875523	3875523	.	.	0	note=snp G=>A A:100 G:0
EA2454	snippy:4.3.6	variation	3875536	3875536	.	.	0	note=complex CAC=>TAT TAT:68 CAC:0
EA2454	snippy:4.3.6	variation	3875549	3875549	.	.	0	note=complex ATTGTATG=>GCTGTTTTT GCTGTTTTT:44 ATTGTATG:0
EA2454	snippy:4.3.6	variation	3875572	3875572	.	.	0	note=complex AAAA=>GATG GATG:49 AAAA:0
EA2454	snippy:4.3.6	variation	3875580	3875580	.	.	0	note=complex GCT=>ACC ACC:48 GCT:0
EA2454	snippy:4.3.6	variation	3875597	3875597	.	.	0	note=snp G=>A A:66 G:0
EA2454	snippy:4.3.6	variation	3875612	3875612	.	.	0	note=complex CATT=>TATC TATC:62 CATT:0
EA2454	snippy:4.3.6	variation	3875632	3875632	.	.	0	note=snp A=>G G:58 A:0
EA2454	snippy:4.3.6	variation	3875638	3875638	.	.	0	note=complex GGAG=>AGAA AGAA:55 GGAG:0
EA2454	snippy:4.3.6	variation	3875652	3875652	.	.	0	note=snp G=>A A:74 G:1
EA2454	snippy:4.3.6	variation	3875660	3875660	.	.	0	note=snp C=>G G:77 C:0
EA2454	snippy:4.3.6	variation	3875665	3875665	.	.	0	note=complex GCTTTATT=>TCTTCATA TCTTCATA:78 GCTTTATT:0
EA2454	snippy:4.3.6	variation	3875688	3875688	.	.	0	note=snp T=>C C:102 T:1
EA2454	snippy:4.3.6	variation	3875702	3875702	.	.	0	note=complex ATTT=>GTTC GTTC:109 ATTT:1
EA2454	snippy:4.3.6	variation	3875727	3875727	.	.	0	note=snp C=>A A:121 C:1
EA2454	snippy:4.3.6	variation	3875732	3875732	.	.	0	note=snp G=>A A:121 G:2
EA2454	snippy:4.3.6	variation	3875747	3875747	.	.	0	note=complex ATTC=>GTTT GTTT:122 ATTC:1
EA2454	snippy:4.3.6	variation	3875772	3875772	.	.	0	note=mnp CT=>AC AC:122 CT:1
EA2454	snippy:4.3.6	variation	3875792	3875792	.	.	0	note=snp A=>G G:125 A:1
EA2454	snippy:4.3.6	variation	3875801	3875801	.	.	0	note=snp G=>A A:122 G:0
EA2454	snippy:4.3.6	variation	3875811	3875811	.	.	0	note=snp C=>T T:122 C:0
EA2454	snippy:4.3.6	variation	3875853	3875853	.	.	0	note=snp A=>G G:87 A:1
EA2454	snippy:4.3.6	variation	3876104	3876104	.	.	0	note=complex CA=>TG TG:14 CA:0
EA2454	snippy:4.3.6	variation	3876119	3876119	.	.	0	note=snp C=>T T:33 C:0
EA2454	snippy:4.3.6	variation	3876146	3876146	.	.	0	note=snp C=>T T:55 C:1
EA2454	snippy:4.3.6	variation	3877989	3877989	.	.	0	note=snp T=>C C:153 T:0
EA2454	snippy:4.3.6	variation	3879225	3879225	.	.	0	note=snp G=>T T:121 G:0
EA2454	snippy:4.3.6	variation	3881618	3881618	.	.	0	note=snp A=>G G:204 A:0
EA2454	snippy:4.3.6	variation	3881650	3881650	.	.	0	note=snp C=>T T:191 C:1
EA2454	snippy:4.3.6	variation	3881666	3881666	.	.	0	note=snp G=>C C:170 G:0
EA2454	snippy:4.3.6	variation	3881732	3881732	.	.	0	note=snp A=>C C:168 A:0
EA2454	snippy:4.3.6	variation	3881743	3881743	.	.	0	note=snp T=>C C:169 T:0
EA2454	snippy:4.3.6	variation	3881858	3881858	.	.	0	note=snp T=>C C:183 T:0
EA2454	snippy:4.3.6	variation	3881876	3881876	.	.	0	note=complex GGCA=>CGCC CGCC:171 GGCA:0
EA2454	snippy:4.3.6	variation	3881990	3881990	.	.	0	note=complex GATA=>TATC TATC:157 GATA:0
EA2454	snippy:4.3.6	variation	3882005	3882005	.	.	0	note=snp A=>G G:168 A:0
EA2454	snippy:4.3.6	variation	3885384	3885384	.	.	0	note=snp C=>G G:171 C:0
EA2454	snippy:4.3.6	variation	3885390	3885390	.	.	0	note=snp T=>A A:135 T:0
EA2454	snippy:4.3.6	variation	3885906	3885906	.	.	0	note=snp T=>C C:137 T:2
EA2454	snippy:4.3.6	variation	3886011	3886011	.	.	0	note=snp A=>G G:102 A:1
EA2454	snippy:4.3.6	variation	3886016	3886016	.	.	0	note=snp G=>A A:103 G:0
EA2454	snippy:4.3.6	variation	3886305	3886305	.	.	0	note=snp T=>C C:208 T:1
EA2454	snippy:4.3.6	variation	3886328	3886328	.	.	0	note=snp A=>G G:204 A:0
EA2454	snippy:4.3.6	variation	3886617	3886617	.	.	0	note=complex GCTTG=>ACTTA ACTTA:146 GCTTG:12
EA2454	snippy:4.3.6	variation	3886630	3886630	.	.	0	note=del TA=>T T:139 TA:0
EA2454	snippy:4.3.6	variation	3888966	3888966	.	.	0	note=snp A=>C C:95 A:0
EA2454	snippy:4.3.6	variation	3889072	3889072	.	.	0	note=snp A=>G G:60 A:0
EA2454	snippy:4.3.6	variation	3889125	3889125	.	.	0	note=complex TGGCG=>AGGTA AGGTA:14 TGGCG:0
EA2454	snippy:4.3.6	variation	3889134	3889134	.	.	0	note=snp A=>G G:15 A:0
[truncated: 1,892 more rows]
