# Supplementary material for: Escherichia coli ST302: Genomic Analysis of Virulence Potential and Antimicrobial Resistance Mediated by Mobile Genetic Elements
Source: Front Microbiol. 2020 Jan 21;10:3098. doi: 10.3389/fmicb.2019.03098 (PMC6985150; doi:10.3389/fmicb.2019.03098)
Supplement: DATA S2 — ST302 SNP analysis. [file Data_Sheet_2.ZIP › SNP_Analysis/ST302_SNP/SNP_analysis/snippyout/ST302/IA1186-Poultry-ST302.out/snps.gff]

##gff-version 3
EA2454	snippy:4.3.6	variation	749	749	.	.	0	note=snp A=>G G:88 A:0
EA2454	snippy:4.3.6	variation	977	977	.	.	0	note=snp T=>C C:71 T:0
EA2454	snippy:4.3.6	variation	2877	2877	.	.	0	note=snp C=>A A:70 C:0
EA2454	snippy:4.3.6	variation	4380	4380	.	.	0	note=del GTGGCGCTCGGCATTATCGAACCTTCTGACCGTCGTTATC=>G G:32 GTGGCGCTCGGCATTATCGAACCTTCTGACCGTCGTTATC:0
EA2454	snippy:4.3.6	variation	4901	4901	.	.	0	note=snp T=>C C:76 T:0
EA2454	snippy:4.3.6	variation	5064	5064	.	.	0	note=snp A=>G G:75 A:0
EA2454	snippy:4.3.6	variation	5594	5594	.	.	0	note=snp C=>A A:48 C:0
EA2454	snippy:4.3.6	variation	8504	8504	.	.	0	note=snp C=>A A:74 C:0
EA2454	snippy:4.3.6	variation	9241	9241	.	.	0	note=snp C=>T T:69 C:0
EA2454	snippy:4.3.6	variation	9683	9683	.	.	0	note=snp G=>T T:98 G:1
EA2454	snippy:4.3.6	variation	11382	11382	.	.	0	note=snp A=>G G:54 A:0
EA2454	snippy:4.3.6	variation	11615	11615	.	.	0	note=snp T=>G G:61 T:0
EA2454	snippy:4.3.6	variation	16529	16529	.	.	0	note=snp C=>T T:69 C:0
EA2454	snippy:4.3.6	variation	18716	18716	.	.	0	note=snp G=>A A:82 G:0
EA2454	snippy:4.3.6	variation	19283	19283	.	.	0	note=snp C=>T T:92 C:0
EA2454	snippy:4.3.6	variation	24420	24420	.	.	0	note=snp T=>G G:87 T:0
EA2454	snippy:4.3.6	variation	25719	25719	.	.	0	note=snp T=>C C:78 T:0
EA2454	snippy:4.3.6	variation	30275	30275	.	.	0	note=snp C=>T T:47 C:0
EA2454	snippy:4.3.6	variation	33245	33245	.	.	0	note=snp G=>T T:91 G:0
EA2454	snippy:4.3.6	variation	34494	34494	.	.	0	note=snp T=>C C:74 T:0
EA2454	snippy:4.3.6	variation	36375	36375	.	.	0	note=snp C=>A A:92 C:2
EA2454	snippy:4.3.6	variation	36951	36951	.	.	0	note=snp T=>G G:66 T:0
EA2454	snippy:4.3.6	variation	37757	37757	.	.	0	note=snp G=>A A:80 G:1
EA2454	snippy:4.3.6	variation	37987	37987	.	.	0	note=snp T=>C C:78 T:0
EA2454	snippy:4.3.6	variation	38677	38677	.	.	0	note=snp A=>C C:67 A:1
EA2454	snippy:4.3.6	variation	41857	41857	.	.	0	note=snp T=>C C:66 T:0
EA2454	snippy:4.3.6	variation	44496	44496	.	.	0	note=snp G=>T T:119 G:1
EA2454	snippy:4.3.6	variation	45787	45787	.	.	0	note=snp A=>G G:75 A:0
EA2454	snippy:4.3.6	variation	48190	48190	.	.	0	note=snp C=>A A:45 C:0
EA2454	snippy:4.3.6	variation	48201	48201	.	.	0	note=snp T=>A A:52 T:0
EA2454	snippy:4.3.6	variation	49192	49192	.	.	0	note=snp T=>G G:93 T:0
EA2454	snippy:4.3.6	variation	50495	50495	.	.	0	note=snp C=>T T:73 C:0
EA2454	snippy:4.3.6	variation	50851	50851	.	.	0	note=snp A=>C C:85 A:0
EA2454	snippy:4.3.6	variation	51400	51400	.	.	0	note=snp C=>T T:79 C:0
EA2454	snippy:4.3.6	variation	53157	53157	.	.	0	note=snp C=>T T:99 C:2
EA2454	snippy:4.3.6	variation	54525	54525	.	.	0	note=snp T=>A A:81 T:0
EA2454	snippy:4.3.6	variation	54992	54992	.	.	0	note=snp T=>C C:77 T:0
EA2454	snippy:4.3.6	variation	56269	56269	.	.	0	note=snp T=>C C:70 T:0
EA2454	snippy:4.3.6	variation	56628	56628	.	.	0	note=snp A=>C C:81 A:0
EA2454	snippy:4.3.6	variation	58152	58152	.	.	0	note=snp T=>C C:100 T:1
EA2454	snippy:4.3.6	variation	59415	59415	.	.	0	note=snp C=>T T:31 C:0
EA2454	snippy:4.3.6	variation	59954	59954	.	.	0	note=snp T=>A A:19 T:0
EA2454	snippy:4.3.6	variation	61686	61686	.	.	0	note=snp C=>A A:40 C:1
EA2454	snippy:4.3.6	variation	61856	61856	.	.	0	note=snp A=>G G:48 A:0
EA2454	snippy:4.3.6	variation	67315	67315	.	.	0	note=snp A=>C C:91 A:0
EA2454	snippy:4.3.6	variation	68202	68202	.	.	0	note=snp A=>G G:76 A:0
EA2454	snippy:4.3.6	variation	68735	68735	.	.	0	note=snp A=>T T:63 A:0
EA2454	snippy:4.3.6	variation	69374	69374	.	.	0	note=snp A=>T T:51 A:0
EA2454	snippy:4.3.6	variation	69595	69595	.	.	0	note=snp A=>G G:13 A:0
EA2454	snippy:4.3.6	variation	73302	73302	.	.	0	note=snp G=>A A:41 G:0
EA2454	snippy:4.3.6	variation	73628	73628	.	.	0	note=snp T=>G G:50 T:0
EA2454	snippy:4.3.6	variation	74671	74671	.	.	0	note=snp A=>G G:53 A:0
EA2454	snippy:4.3.6	variation	75553	75553	.	.	0	note=snp G=>A A:60 G:0
EA2454	snippy:4.3.6	variation	76545	76545	.	.	0	note=snp G=>A A:81 G:0
EA2454	snippy:4.3.6	variation	77346	77346	.	.	0	note=snp C=>T T:45 C:1
EA2454	snippy:4.3.6	variation	82511	82511	.	.	0	note=del CG=>C C:75 CG:0
EA2454	snippy:4.3.6	variation	83654	83654	.	.	0	note=snp C=>A A:61 C:0
EA2454	snippy:4.3.6	variation	83706	83706	.	.	0	note=snp C=>T T:60 C:1
EA2454	snippy:4.3.6	variation	84557	84557	.	.	0	note=snp T=>G G:71 T:0
EA2454	snippy:4.3.6	variation	85103	85103	.	.	0	note=snp G=>A A:10 G:0
EA2454	snippy:4.3.6	variation	90096	90096	.	.	0	note=snp T=>A A:85 T:0
EA2454	snippy:4.3.6	variation	91235	91235	.	.	0	note=snp T=>C C:68 T:0
EA2454	snippy:4.3.6	variation	92015	92015	.	.	0	note=snp G=>A A:74 G:0
EA2454	snippy:4.3.6	variation	93093	93093	.	.	0	note=snp A=>C C:71 A:0
EA2454	snippy:4.3.6	variation	93133	93133	.	.	0	note=snp A=>C C:79 A:0
EA2454	snippy:4.3.6	variation	94250	94250	.	.	0	note=snp T=>C C:90 T:0
EA2454	snippy:4.3.6	variation	96463	96463	.	.	0	note=snp C=>T T:78 C:0
EA2454	snippy:4.3.6	variation	97055	97055	.	.	0	note=snp C=>A A:71 C:0
EA2454	snippy:4.3.6	variation	97811	97811	.	.	0	note=snp C=>T T:53 C:0
EA2454	snippy:4.3.6	variation	99180	99180	.	.	0	note=snp G=>T T:93 G:0
EA2454	snippy:4.3.6	variation	101541	101541	.	.	0	note=snp A=>G G:59 A:1
EA2454	snippy:4.3.6	variation	104045	104045	.	.	0	note=snp G=>A A:72 G:0
EA2454	snippy:4.3.6	variation	106273	106273	.	.	0	note=snp C=>T T:72 C:0
EA2454	snippy:4.3.6	variation	111773	111773	.	.	0	note=snp C=>G G:93 C:0
EA2454	snippy:4.3.6	variation	112602	112602	.	.	0	note=snp C=>T T:84 C:1
EA2454	snippy:4.3.6	variation	114259	114259	.	.	0	note=snp G=>A A:62 G:2
EA2454	snippy:4.3.6	variation	116260	116260	.	.	0	note=snp C=>T T:110 C:0
EA2454	snippy:4.3.6	variation	117419	117419	.	.	0	note=snp T=>C C:82 T:1
EA2454	snippy:4.3.6	variation	124865	124865	.	.	0	note=snp T=>C C:47 T:0
EA2454	snippy:4.3.6	variation	126504	126504	.	.	0	note=snp A=>G G:78 A:0
EA2454	snippy:4.3.6	variation	131613	131613	.	.	0	note=snp A=>G G:69 A:0
EA2454	snippy:4.3.6	variation	131667	131667	.	.	0	note=snp G=>A A:73 G:0
EA2454	snippy:4.3.6	variation	133953	133953	.	.	0	note=snp C=>T T:77 C:1
EA2454	snippy:4.3.6	variation	134828	134828	.	.	0	note=snp A=>C C:24 A:0
EA2454	snippy:4.3.6	variation	140951	140951	.	.	0	note=snp T=>G G:73 T:0
EA2454	snippy:4.3.6	variation	145428	145428	.	.	0	note=snp T=>C C:66 T:0
EA2454	snippy:4.3.6	variation	146087	146087	.	.	0	note=snp A=>C C:57 A:0
EA2454	snippy:4.3.6	variation	146572	146572	.	.	0	note=snp A=>G G:61 A:0
EA2454	snippy:4.3.6	variation	147126	147126	.	.	0	note=snp C=>T T:63 C:1
EA2454	snippy:4.3.6	variation	153405	153405	.	.	0	note=snp C=>T T:86 C:0
EA2454	snippy:4.3.6	variation	156220	156220	.	.	0	note=snp T=>G G:82 T:0
EA2454	snippy:4.3.6	variation	157367	157367	.	.	0	note=snp G=>A A:73 G:0
EA2454	snippy:4.3.6	variation	158623	158623	.	.	0	note=snp C=>T T:82 C:0
EA2454	snippy:4.3.6	variation	161661	161661	.	.	0	note=snp C=>T T:81 C:0
EA2454	snippy:4.3.6	variation	164297	164297	.	.	0	note=snp C=>T T:26 C:0
EA2454	snippy:4.3.6	variation	165649	165649	.	.	0	note=snp C=>T T:60 C:0
EA2454	snippy:4.3.6	variation	170333	170333	.	.	0	note=snp C=>T T:23 C:0
EA2454	snippy:4.3.6	variation	171781	171781	.	.	0	note=snp C=>T T:66 C:1
EA2454	snippy:4.3.6	variation	174420	174420	.	.	0	note=snp A=>G G:88 A:0
EA2454	snippy:4.3.6	variation	175505	175505	.	.	0	note=snp G=>T T:97 G:0
EA2454	snippy:4.3.6	variation	176813	176813	.	.	0	note=snp G=>A A:93 G:0
EA2454	snippy:4.3.6	variation	177774	177774	.	.	0	note=snp C=>T T:97 C:0
EA2454	snippy:4.3.6	variation	178495	178495	.	.	0	note=snp C=>T T:85 C:1
EA2454	snippy:4.3.6	variation	181896	181896	.	.	0	note=snp T=>A A:32 T:0
EA2454	snippy:4.3.6	variation	184074	184074	.	.	0	note=snp A=>C C:48 A:0
EA2454	snippy:4.3.6	variation	186550	186550	.	.	0	note=snp T=>C C:86 T:0
EA2454	snippy:4.3.6	variation	187172	187172	.	.	0	note=snp C=>A A:93 C:2
EA2454	snippy:4.3.6	variation	187941	187941	.	.	0	note=snp A=>G G:68 A:0
EA2454	snippy:4.3.6	variation	190313	190313	.	.	0	note=snp T=>C C:31 T:0
EA2454	snippy:4.3.6	variation	190604	190604	.	.	0	note=snp C=>T T:56 C:1
EA2454	snippy:4.3.6	variation	190823	190823	.	.	0	note=snp G=>A A:86 G:1
EA2454	snippy:4.3.6	variation	196598	196598	.	.	0	note=snp C=>T T:78 C:0
EA2454	snippy:4.3.6	variation	197805	197805	.	.	0	note=snp C=>T T:62 C:0
EA2454	snippy:4.3.6	variation	197892	197892	.	.	0	note=snp C=>T T:63 C:0
EA2454	snippy:4.3.6	variation	204163	204163	.	.	0	note=snp C=>T T:56 C:0
EA2454	snippy:4.3.6	variation	204250	204250	.	.	0	note=snp C=>T T:56 C:1
EA2454	snippy:4.3.6	variation	207302	207302	.	.	0	note=snp C=>T T:72 C:0
EA2454	snippy:4.3.6	variation	209698	209698	.	.	0	note=snp C=>T T:103 C:0
EA2454	snippy:4.3.6	variation	209847	209847	.	.	0	note=del AG=>A A:59 AG:0
EA2454	snippy:4.3.6	variation	211504	211504	.	.	0	note=snp C=>T T:95 C:0
EA2454	snippy:4.3.6	variation	211521	211521	.	.	0	note=snp G=>A A:94 G:1
EA2454	snippy:4.3.6	variation	212068	212068	.	.	0	note=snp A=>C C:79 A:0
EA2454	snippy:4.3.6	variation	213327	213327	.	.	0	note=snp A=>G G:74 A:0
EA2454	snippy:4.3.6	variation	214871	214871	.	.	0	note=snp G=>T T:78 G:0
EA2454	snippy:4.3.6	variation	217065	217065	.	.	0	note=snp C=>T T:111 C:0
EA2454	snippy:4.3.6	variation	217813	217813	.	.	0	note=snp C=>T T:86 C:0
EA2454	snippy:4.3.6	variation	220032	220032	.	.	0	note=snp G=>A A:80 G:0
EA2454	snippy:4.3.6	variation	220392	220392	.	.	0	note=snp T=>G G:81 T:0
EA2454	snippy:4.3.6	variation	220577	220577	.	.	0	note=snp G=>A A:96 G:0
EA2454	snippy:4.3.6	variation	222087	222087	.	.	0	note=snp C=>T T:79 C:0
EA2454	snippy:4.3.6	variation	222361	222361	.	.	0	note=snp A=>G G:96 A:1
EA2454	snippy:4.3.6	variation	222778	222778	.	.	0	note=snp G=>A A:66 G:0
EA2454	snippy:4.3.6	variation	225955	225955	.	.	0	note=snp T=>G G:74 T:0
EA2454	snippy:4.3.6	variation	227599	227599	.	.	0	note=snp C=>A A:80 C:1
EA2454	snippy:4.3.6	variation	230399	230399	.	.	0	note=snp C=>T T:91 C:0
EA2454	snippy:4.3.6	variation	233181	233181	.	.	0	note=snp T=>C C:39 T:0
EA2454	snippy:4.3.6	variation	233235	233235	.	.	0	note=snp A=>G G:37 A:0
EA2454	snippy:4.3.6	variation	234256	234256	.	.	0	note=snp C=>A A:97 C:1
EA2454	snippy:4.3.6	variation	239199	239199	.	.	0	note=snp T=>C C:51 T:0
EA2454	snippy:4.3.6	variation	239221	239221	.	.	0	note=snp A=>G G:51 A:0
EA2454	snippy:4.3.6	variation	241578	241578	.	.	0	note=snp T=>C C:61 T:1
EA2454	snippy:4.3.6	variation	244668	244668	.	.	0	note=snp T=>C C:83 T:0
EA2454	snippy:4.3.6	variation	245301	245301	.	.	0	note=snp C=>T T:74 C:0
EA2454	snippy:4.3.6	variation	245953	245953	.	.	0	note=snp G=>A A:95 G:2
EA2454	snippy:4.3.6	variation	246850	246850	.	.	0	note=snp T=>C C:75 T:0
EA2454	snippy:4.3.6	variation	248471	248471	.	.	0	note=snp T=>C C:74 T:0
EA2454	snippy:4.3.6	variation	248849	248849	.	.	0	note=snp C=>T T:83 C:1
EA2454	snippy:4.3.6	variation	251923	251923	.	.	0	note=snp C=>T T:56 C:0
EA2454	snippy:4.3.6	variation	254440	254440	.	.	0	note=snp C=>T T:90 C:0
EA2454	snippy:4.3.6	variation	254482	254482	.	.	0	note=snp A=>C C:85 A:0
EA2454	snippy:4.3.6	variation	255292	255292	.	.	0	note=snp A=>G G:98 A:0
EA2454	snippy:4.3.6	variation	256442	256442	.	.	0	note=snp C=>T T:49 C:0
EA2454	snippy:4.3.6	variation	257208	257208	.	.	0	note=snp C=>T T:84 C:0
EA2454	snippy:4.3.6	variation	259268	259268	.	.	0	note=snp G=>A A:123 G:1
EA2454	snippy:4.3.6	variation	259777	259777	.	.	0	note=snp C=>T T:103 C:0
EA2454	snippy:4.3.6	variation	268722	268722	.	.	0	note=snp G=>A A:66 G:0
EA2454	snippy:4.3.6	variation	268949	268949	.	.	0	note=snp C=>T T:53 C:0
EA2454	snippy:4.3.6	variation	269495	269495	.	.	0	note=snp C=>A A:67 C:0
EA2454	snippy:4.3.6	variation	270040	270040	.	.	0	note=snp C=>T T:46 C:0
EA2454	snippy:4.3.6	variation	272479	272479	.	.	0	note=mnp TT=>GG GG:71 TT:1
EA2454	snippy:4.3.6	variation	272615	272615	.	.	0	note=snp A=>T T:71 A:1
EA2454	snippy:4.3.6	variation	275599	275599	.	.	0	note=snp G=>A A:56 G:0
EA2454	snippy:4.3.6	variation	275686	275686	.	.	0	note=del GAGC=>G G:48 GAGC:0
EA2454	snippy:4.3.6	variation	277305	277305	.	.	0	note=snp G=>A A:70 G:0
EA2454	snippy:4.3.6	variation	277907	277907	.	.	0	note=snp G=>T T:81 G:0
EA2454	snippy:4.3.6	variation	278291	278291	.	.	0	note=snp C=>A A:81 C:0
EA2454	snippy:4.3.6	variation	278848	278848	.	.	0	note=snp A=>G G:42 A:0
EA2454	snippy:4.3.6	variation	281250	281250	.	.	0	note=snp C=>T T:64 C:0
EA2454	snippy:4.3.6	variation	281498	281498	.	.	0	note=snp A=>G G:65 A:0
EA2454	snippy:4.3.6	variation	284131	284131	.	.	0	note=snp A=>G G:61 A:0
EA2454	snippy:4.3.6	variation	285627	285627	.	.	0	note=ins A=>AT AT:45 A:0
EA2454	snippy:4.3.6	variation	286733	286733	.	.	0	note=del GA=>G G:31 GA:0
EA2454	snippy:4.3.6	variation	287343	287343	.	.	0	note=del TAGCTGA=>T T:55 TAGCTGA:0
EA2454	snippy:4.3.6	variation	288225	288225	.	.	0	note=snp C=>T T:71 C:0
EA2454	snippy:4.3.6	variation	289718	289718	.	.	0	note=del GA=>G G:49 GA:0
EA2454	snippy:4.3.6	variation	293047	293047	.	.	0	note=snp C=>T T:80 C:0
EA2454	snippy:4.3.6	variation	293197	293197	.	.	0	note=snp G=>A A:80 G:0
EA2454	snippy:4.3.6	variation	294088	294088	.	.	0	note=snp T=>C C:85 T:0
EA2454	snippy:4.3.6	variation	297887	297887	.	.	0	note=del CCTGACAAATCATGCGGATATAAAATTTAACATTTGGATTGATAATTGTTATCGTTTGCATTATCGTTACGCCGCAATCAAAAAAGG=>C C:13 CCTGACAAATCATGCGGATATAAAATTTAACATTTGGATTGATAATTGTTATCGTTTGCATTATCGTTACGCCGCAATCAAAAAAGG:0
EA2454	snippy:4.3.6	variation	298286	298286	.	.	0	note=snp T=>C C:40 T:0
EA2454	snippy:4.3.6	variation	298363	298363	.	.	0	note=snp C=>T T:53 C:0
EA2454	snippy:4.3.6	variation	304693	304693	.	.	0	note=del AT=>A A:29 AT:0
EA2454	snippy:4.3.6	variation	305507	305507	.	.	0	note=snp G=>A A:44 G:0
EA2454	snippy:4.3.6	variation	307088	307088	.	.	0	note=snp G=>A A:66 G:0
EA2454	snippy:4.3.6	variation	307680	307680	.	.	0	note=snp T=>A A:78 T:0
EA2454	snippy:4.3.6	variation	308042	308042	.	.	0	note=snp A=>C C:63 A:1
EA2454	snippy:4.3.6	variation	310094	310094	.	.	0	note=snp G=>A A:59 G:0
EA2454	snippy:4.3.6	variation	310398	310398	.	.	0	note=snp C=>T T:68 C:1
EA2454	snippy:4.3.6	variation	311207	311207	.	.	0	note=snp A=>C C:83 A:0
EA2454	snippy:4.3.6	variation	312009	312009	.	.	0	note=snp G=>T T:76 G:0
EA2454	snippy:4.3.6	variation	313034	313034	.	.	0	note=snp A=>G G:60 A:0
EA2454	snippy:4.3.6	variation	314410	314410	.	.	0	note=snp A=>T T:62 A:2
EA2454	snippy:4.3.6	variation	315163	315163	.	.	0	note=snp G=>A A:94 G:0
EA2454	snippy:4.3.6	variation	317106	317106	.	.	0	note=snp T=>C C:67 T:0
EA2454	snippy:4.3.6	variation	319327	319327	.	.	0	note=snp G=>C C:72 G:0
EA2454	snippy:4.3.6	variation	321573	321573	.	.	0	note=snp C=>A A:77 C:2
EA2454	snippy:4.3.6	variation	322495	322495	.	.	0	note=snp G=>A A:71 G:1
EA2454	snippy:4.3.6	variation	324216	324216	.	.	0	note=snp G=>A A:80 G:0
EA2454	snippy:4.3.6	variation	327678	327678	.	.	0	note=snp A=>C C:102 A:1
EA2454	snippy:4.3.6	variation	329517	329517	.	.	0	note=snp C=>G G:93 C:0
EA2454	snippy:4.3.6	variation	334855	334855	.	.	0	note=snp A=>C C:68 A:0
EA2454	snippy:4.3.6	variation	335897	335897	.	.	0	note=snp T=>A A:116 T:1
EA2454	snippy:4.3.6	variation	340318	340318	.	.	0	note=snp G=>A A:72 G:1
EA2454	snippy:4.3.6	variation	343195	343195	.	.	0	note=snp G=>A A:51 G:1
EA2454	snippy:4.3.6	variation	344966	344966	.	.	0	note=snp T=>C C:89 T:0
EA2454	snippy:4.3.6	variation	345002	345002	.	.	0	note=del TGCCA=>T T:84 TGCCA:0
EA2454	snippy:4.3.6	variation	346796	346796	.	.	0	note=snp A=>C C:69 A:0
EA2454	snippy:4.3.6	variation	350969	350969	.	.	0	note=snp A=>G G:52 A:0
EA2454	snippy:4.3.6	variation	352054	352054	.	.	0	note=snp C=>A A:48 C:0
EA2454	snippy:4.3.6	variation	356329	356329	.	.	0	note=snp G=>A A:94 G:0
EA2454	snippy:4.3.6	variation	356343	356343	.	.	0	note=snp G=>A A:91 G:0
EA2454	snippy:4.3.6	variation	359909	359909	.	.	0	note=snp C=>T T:13 C:0
EA2454	snippy:4.3.6	variation	359916	359916	.	.	0	note=snp G=>A A:11 G:0
EA2454	snippy:4.3.6	variation	364430	364430	.	.	0	note=snp G=>C C:66 G:1
EA2454	snippy:4.3.6	variation	364865	364865	.	.	0	note=snp T=>C C:65 T:0
EA2454	snippy:4.3.6	variation	366365	366365	.	.	0	note=snp C=>A A:85 C:0
EA2454	snippy:4.3.6	variation	369429	369429	.	.	0	note=snp T=>C C:97 T:0
EA2454	snippy:4.3.6	variation	371150	371150	.	.	0	note=snp T=>C C:17 T:0
EA2454	snippy:4.3.6	variation	373608	373608	.	.	0	note=snp G=>A A:123 G:0
EA2454	snippy:4.3.6	variation	375476	375476	.	.	0	note=snp A=>C C:64 A:0
EA2454	snippy:4.3.6	variation	375553	375553	.	.	0	note=snp T=>A A:69 T:0
EA2454	snippy:4.3.6	variation	375861	375861	.	.	0	note=snp G=>A A:45 G:0
EA2454	snippy:4.3.6	variation	380911	380911	.	.	0	note=snp G=>A A:73 G:0
EA2454	snippy:4.3.6	variation	381439	381439	.	.	0	note=snp G=>A A:97 G:0
EA2454	snippy:4.3.6	variation	381924	381924	.	.	0	note=snp C=>T T:85 C:0
EA2454	snippy:4.3.6	variation	382482	382482	.	.	0	note=snp C=>T T:59 C:0
EA2454	snippy:4.3.6	variation	385327	385327	.	.	0	note=snp G=>A A:124 G:1
EA2454	snippy:4.3.6	variation	386099	386099	.	.	0	note=snp G=>A A:20 G:0
EA2454	snippy:4.3.6	variation	392511	392511	.	.	0	note=snp T=>C C:89 T:0
EA2454	snippy:4.3.6	variation	393575	393575	.	.	0	note=snp A=>G G:76 A:0
EA2454	snippy:4.3.6	variation	393743	393743	.	.	0	note=snp A=>G G:114 A:0
EA2454	snippy:4.3.6	variation	396055	396055	.	.	0	note=snp T=>C C:38 T:0
EA2454	snippy:4.3.6	variation	396458	396458	.	.	0	note=snp G=>A A:53 G:0
EA2454	snippy:4.3.6	variation	397444	397444	.	.	0	note=snp C=>G G:68 C:0
EA2454	snippy:4.3.6	variation	400978	400978	.	.	0	note=snp C=>T T:32 C:2
EA2454	snippy:4.3.6	variation	407023	407023	.	.	0	note=snp A=>C C:62 A:0
EA2454	snippy:4.3.6	variation	407113	407113	.	.	0	note=snp A=>G G:64 A:1
EA2454	snippy:4.3.6	variation	407887	407887	.	.	0	note=snp C=>G G:92 C:0
EA2454	snippy:4.3.6	variation	409884	409884	.	.	0	note=snp T=>G G:87 T:0
EA2454	snippy:4.3.6	variation	412377	412377	.	.	0	note=snp A=>C C:74 A:0
EA2454	snippy:4.3.6	variation	412632	412632	.	.	0	note=snp A=>G G:73 A:0
EA2454	snippy:4.3.6	variation	415692	415692	.	.	0	note=snp G=>A A:58 G:1
EA2454	snippy:4.3.6	variation	418538	418538	.	.	0	note=snp C=>T T:81 C:0
EA2454	snippy:4.3.6	variation	420347	420347	.	.	0	note=snp A=>C C:95 A:0
EA2454	snippy:4.3.6	variation	420707	420707	.	.	0	note=snp A=>C C:93 A:0
EA2454	snippy:4.3.6	variation	423123	423123	.	.	0	note=snp T=>C C:83 T:0
EA2454	snippy:4.3.6	variation	430947	430947	.	.	0	note=snp T=>C C:112 T:0
EA2454	snippy:4.3.6	variation	432665	432665	.	.	0	note=snp A=>C C:63 A:0
EA2454	snippy:4.3.6	variation	437474	437474	.	.	0	note=snp A=>G G:72 A:0
EA2454	snippy:4.3.6	variation	438148	438148	.	.	0	note=snp G=>T T:28 G:1
EA2454	snippy:4.3.6	variation	440837	440837	.	.	0	note=snp C=>A A:41 C:0
EA2454	snippy:4.3.6	variation	441911	441911	.	.	0	note=snp T=>C C:15 T:0
EA2454	snippy:4.3.6	variation	444428	444428	.	.	0	note=snp G=>A A:87 G:1
EA2454	snippy:4.3.6	variation	447459	447459	.	.	0	note=snp A=>G G:59 A:0
EA2454	snippy:4.3.6	variation	448711	448711	.	.	0	note=snp A=>G G:58 A:0
EA2454	snippy:4.3.6	variation	449063	449063	.	.	0	note=snp T=>C C:96 T:0
EA2454	snippy:4.3.6	variation	449600	449600	.	.	0	note=snp C=>A A:73 C:0
EA2454	snippy:4.3.6	variation	452246	452246	.	.	0	note=snp A=>C C:61 A:1
EA2454	snippy:4.3.6	variation	452711	452711	.	.	0	note=snp T=>A A:53 T:0
EA2454	snippy:4.3.6	variation	453943	453943	.	.	0	note=snp G=>T T:63 G:1
EA2454	snippy:4.3.6	variation	457082	457082	.	.	0	note=snp C=>T T:47 C:1
EA2454	snippy:4.3.6	variation	459248	459248	.	.	0	note=snp A=>G G:73 A:0
EA2454	snippy:4.3.6	variation	460233	460233	.	.	0	note=snp G=>A A:68 G:0
EA2454	snippy:4.3.6	variation	460261	460261	.	.	0	note=snp G=>A A:66 G:2
EA2454	snippy:4.3.6	variation	464086	464086	.	.	0	note=ins C=>CA CA:82 C:0
EA2454	snippy:4.3.6	variation	465826	465826	.	.	0	note=snp A=>T T:86 A:0
EA2454	snippy:4.3.6	variation	466128	466128	.	.	0	note=snp A=>T T:98 A:0
EA2454	snippy:4.3.6	variation	467184	467184	.	.	0	note=snp C=>T T:74 C:0
EA2454	snippy:4.3.6	variation	472911	472911	.	.	0	note=snp T=>C C:65 T:0
EA2454	snippy:4.3.6	variation	477552	477552	.	.	0	note=snp G=>A A:81 G:0
EA2454	snippy:4.3.6	variation	478727	478727	.	.	0	note=snp C=>A A:82 C:0
EA2454	snippy:4.3.6	variation	479208	479208	.	.	0	note=snp C=>T T:81 C:0
EA2454	snippy:4.3.6	variation	481815	481815	.	.	0	note=snp T=>G G:58 T:0
EA2454	snippy:4.3.6	variation	482454	482454	.	.	0	note=snp C=>T T:64 C:0
EA2454	snippy:4.3.6	variation	483311	483311	.	.	0	note=snp T=>G G:88 T:0
EA2454	snippy:4.3.6	variation	483564	483564	.	.	0	note=snp C=>A A:92 C:0
EA2454	snippy:4.3.6	variation	485779	485779	.	.	0	note=snp C=>G G:80 C:0
EA2454	snippy:4.3.6	variation	485836	485836	.	.	0	note=snp G=>A A:74 G:0
EA2454	snippy:4.3.6	variation	485957	485957	.	.	0	note=snp T=>C C:52 T:0
EA2454	snippy:4.3.6	variation	489881	489881	.	.	0	note=snp G=>A A:86 G:1
EA2454	snippy:4.3.6	variation	493601	493601	.	.	0	note=snp C=>A A:78 C:1
EA2454	snippy:4.3.6	variation	497207	497207	.	.	0	note=snp C=>A A:14 C:0
EA2454	snippy:4.3.6	variation	497400	497400	.	.	0	note=snp T=>G G:14 T:0
EA2454	snippy:4.3.6	variation	497439	497439	.	.	0	note=snp T=>C C:17 T:0
EA2454	snippy:4.3.6	variation	497460	497460	.	.	0	note=snp T=>G G:20 T:0
EA2454	snippy:4.3.6	variation	500218	500218	.	.	0	note=snp G=>A A:106 G:1
EA2454	snippy:4.3.6	variation	503007	503007	.	.	0	note=snp G=>A A:100 G:0
EA2454	snippy:4.3.6	variation	506884	506884	.	.	0	note=del TA=>T T:16 TA:0
EA2454	snippy:4.3.6	variation	508877	508877	.	.	0	note=snp G=>A A:20 G:0
EA2454	snippy:4.3.6	variation	511307	511307	.	.	0	note=snp C=>T T:68 C:0
EA2454	snippy:4.3.6	variation	511943	511943	.	.	0	note=snp A=>G G:41 A:0
EA2454	snippy:4.3.6	variation	512076	512076	.	.	0	note=del TA=>T T:33 TA:0
EA2454	snippy:4.3.6	variation	512740	512740	.	.	0	note=snp C=>T T:68 C:0
EA2454	snippy:4.3.6	variation	517655	517655	.	.	0	note=snp C=>T T:79 C:0
EA2454	snippy:4.3.6	variation	518663	518663	.	.	0	note=snp G=>A A:76 G:0
EA2454	snippy:4.3.6	variation	519811	519811	.	.	0	note=snp A=>C C:63 A:0
EA2454	snippy:4.3.6	variation	520384	520384	.	.	0	note=snp C=>A A:67 C:0
EA2454	snippy:4.3.6	variation	523923	523923	.	.	0	note=snp C=>G G:33 C:0
EA2454	snippy:4.3.6	variation	524002	524002	.	.	0	note=snp C=>T T:29 C:0
EA2454	snippy:4.3.6	variation	528123	528123	.	.	0	note=snp A=>T T:65 A:1
EA2454	snippy:4.3.6	variation	530600	530600	.	.	0	note=snp G=>T T:76 G:0
EA2454	snippy:4.3.6	variation	532052	532052	.	.	0	note=snp G=>A A:15 G:0
EA2454	snippy:4.3.6	variation	534151	534151	.	.	0	note=snp A=>G G:77 A:0
EA2454	snippy:4.3.6	variation	535476	535476	.	.	0	note=snp C=>A A:92 C:0
EA2454	snippy:4.3.6	variation	536338	536338	.	.	0	note=snp C=>T T:76 C:2
EA2454	snippy:4.3.6	variation	537287	537287	.	.	0	note=snp G=>C C:24 G:0
EA2454	snippy:4.3.6	variation	538268	538268	.	.	0	note=del GC=>G G:92 GC:0
EA2454	snippy:4.3.6	variation	538864	538864	.	.	0	note=snp G=>A A:94 G:2
EA2454	snippy:4.3.6	variation	539426	539426	.	.	0	note=snp T=>C C:85 T:0
EA2454	snippy:4.3.6	variation	539532	539532	.	.	0	note=snp C=>A A:90 C:1
EA2454	snippy:4.3.6	variation	542430	542430	.	.	0	note=snp A=>T T:53 A:3
EA2454	snippy:4.3.6	variation	546428	546428	.	.	0	note=snp A=>C C:48 A:0
EA2454	snippy:4.3.6	variation	547086	547086	.	.	0	note=snp A=>C C:38 A:1
EA2454	snippy:4.3.6	variation	549063	549063	.	.	0	note=snp A=>G G:60 A:0
EA2454	snippy:4.3.6	variation	550156	550156	.	.	0	note=snp C=>T T:69 C:0
EA2454	snippy:4.3.6	variation	550654	550654	.	.	0	note=snp T=>C C:68 T:0
EA2454	snippy:4.3.6	variation	552561	552561	.	.	0	note=snp C=>T T:80 C:1
EA2454	snippy:4.3.6	variation	554466	554466	.	.	0	note=snp A=>G G:94 A:0
EA2454	snippy:4.3.6	variation	554830	554830	.	.	0	note=snp G=>A A:88 G:1
EA2454	snippy:4.3.6	variation	556108	556108	.	.	0	note=snp G=>C C:71 G:0
EA2454	snippy:4.3.6	variation	559017	559017	.	.	0	note=snp A=>G G:87 A:0
EA2454	snippy:4.3.6	variation	561226	561226	.	.	0	note=snp G=>A A:71 G:1
EA2454	snippy:4.3.6	variation	561259	561259	.	.	0	note=snp C=>A A:74 C:2
EA2454	snippy:4.3.6	variation	561272	561272	.	.	0	note=snp T=>A A:69 T:1
EA2454	snippy:4.3.6	variation	562933	562933	.	.	0	note=snp T=>C C:71 T:0
EA2454	snippy:4.3.6	variation	563413	563413	.	.	0	note=snp G=>A A:72 G:0
EA2454	snippy:4.3.6	variation	564605	564605	.	.	0	note=snp T=>G G:47 T:0
EA2454	snippy:4.3.6	variation	569691	569691	.	.	0	note=snp C=>T T:12 C:0
EA2454	snippy:4.3.6	variation	570422	570422	.	.	0	note=snp C=>T T:89 C:0
EA2454	snippy:4.3.6	variation	573172	573172	.	.	0	note=snp T=>G G:52 T:0
EA2454	snippy:4.3.6	variation	573477	573477	.	.	0	note=snp C=>T T:24 C:0
EA2454	snippy:4.3.6	variation	577678	577678	.	.	0	note=snp C=>T T:86 C:0
EA2454	snippy:4.3.6	variation	579241	579241	.	.	0	note=snp C=>T T:85 C:0
EA2454	snippy:4.3.6	variation	580223	580223	.	.	0	note=snp C=>T T:76 C:0
EA2454	snippy:4.3.6	variation	586529	586529	.	.	0	note=snp G=>T T:86 G:0
EA2454	snippy:4.3.6	variation	586722	586722	.	.	0	note=snp C=>T T:81 C:0
EA2454	snippy:4.3.6	variation	588129	588129	.	.	0	note=snp C=>T T:81 C:1
EA2454	snippy:4.3.6	variation	589102	589102	.	.	0	note=snp T=>C C:74 T:0
EA2454	snippy:4.3.6	variation	589319	589319	.	.	0	note=snp G=>A A:74 G:0
EA2454	snippy:4.3.6	variation	589335	589335	.	.	0	note=snp A=>G G:75 A:0
EA2454	snippy:4.3.6	variation	595654	595654	.	.	0	note=snp T=>C C:20 T:0
EA2454	snippy:4.3.6	variation	597386	597386	.	.	0	note=snp A=>G G:88 A:0
EA2454	snippy:4.3.6	variation	597988	597988	.	.	0	note=snp A=>G G:88 A:0
EA2454	snippy:4.3.6	variation	598918	598918	.	.	0	note=snp C=>A A:89 C:0
EA2454	snippy:4.3.6	variation	598973	598973	.	.	0	note=snp T=>G G:70 T:0
EA2454	snippy:4.3.6	variation	600783	600783	.	.	0	note=snp T=>G G:112 T:0
EA2454	snippy:4.3.6	variation	602583	602583	.	.	0	note=snp A=>G G:58 A:0
EA2454	snippy:4.3.6	variation	605227	605227	.	.	0	note=snp C=>A A:41 C:1
EA2454	snippy:4.3.6	variation	605299	605299	.	.	0	note=snp A=>G G:59 A:0
EA2454	snippy:4.3.6	variation	605439	605439	.	.	0	note=snp C=>A A:67 C:2
EA2454	snippy:4.3.6	variation	606088	606088	.	.	0	note=ins G=>GA GA:50 G:0
EA2454	snippy:4.3.6	variation	608651	608651	.	.	0	note=snp T=>G G:19 T:1
EA2454	snippy:4.3.6	variation	610464	610464	.	.	0	note=snp A=>C C:94 A:0
EA2454	snippy:4.3.6	variation	613444	613444	.	.	0	note=ins G=>GCAA GCAA:54 G:0
EA2454	snippy:4.3.6	variation	613906	613906	.	.	0	note=snp C=>A A:20 C:0
EA2454	snippy:4.3.6	variation	615321	615321	.	.	0	note=snp G=>A A:48 G:0
EA2454	snippy:4.3.6	variation	615886	615886	.	.	0	note=snp G=>A A:86 G:0
EA2454	snippy:4.3.6	variation	618954	618954	.	.	0	note=snp T=>G G:65 T:0
EA2454	snippy:4.3.6	variation	622099	622099	.	.	0	note=snp C=>T T:84 C:0
EA2454	snippy:4.3.6	variation	622741	622741	.	.	0	note=snp T=>G G:109 T:0
EA2454	snippy:4.3.6	variation	627598	627598	.	.	0	note=snp G=>A A:82 G:1
EA2454	snippy:4.3.6	variation	631335	631335	.	.	0	note=snp T=>C C:87 T:0
EA2454	snippy:4.3.6	variation	632317	632317	.	.	0	note=snp A=>T T:85 A:0
EA2454	snippy:4.3.6	variation	633668	633668	.	.	0	note=snp T=>C C:64 T:0
EA2454	snippy:4.3.6	variation	633800	633800	.	.	0	note=snp C=>A A:63 C:0
EA2454	snippy:4.3.6	variation	634772	634772	.	.	0	note=snp G=>T T:87 G:0
EA2454	snippy:4.3.6	variation	635649	635649	.	.	0	note=snp A=>C C:43 A:0
EA2454	snippy:4.3.6	variation	637713	637713	.	.	0	note=snp C=>A A:77 C:1
EA2454	snippy:4.3.6	variation	641601	641601	.	.	0	note=snp A=>C C:39 A:0
EA2454	snippy:4.3.6	variation	644101	644101	.	.	0	note=snp A=>G G:76 A:0
EA2454	snippy:4.3.6	variation	644913	644913	.	.	0	note=snp T=>C C:57 T:0
EA2454	snippy:4.3.6	variation	649659	649659	.	.	0	note=snp T=>C C:42 T:0
EA2454	snippy:4.3.6	variation	652389	652389	.	.	0	note=snp A=>T T:84 A:0
EA2454	snippy:4.3.6	variation	657614	657614	.	.	0	note=snp G=>A A:117 G:0
EA2454	snippy:4.3.6	variation	658193	658193	.	.	0	note=snp C=>T T:80 C:0
EA2454	snippy:4.3.6	variation	658970	658970	.	.	0	note=snp T=>C C:62 T:0
EA2454	snippy:4.3.6	variation	660468	660468	.	.	0	note=snp C=>A A:46 C:0
EA2454	snippy:4.3.6	variation	660863	660863	.	.	0	note=snp C=>T T:66 C:0
EA2454	snippy:4.3.6	variation	660999	660999	.	.	0	note=snp C=>T T:51 C:0
EA2454	snippy:4.3.6	variation	664195	664195	.	.	0	note=snp G=>A A:68 G:0
EA2454	snippy:4.3.6	variation	665946	665946	.	.	0	note=snp G=>A A:76 G:0
EA2454	snippy:4.3.6	variation	666857	666857	.	.	0	note=snp C=>G G:86 C:0
EA2454	snippy:4.3.6	variation	668427	668427	.	.	0	note=snp T=>G G:71 T:1
EA2454	snippy:4.3.6	variation	669330	669330	.	.	0	note=snp A=>G G:71 A:0
EA2454	snippy:4.3.6	variation	674033	674033	.	.	0	note=snp C=>T T:53 C:0
EA2454	snippy:4.3.6	variation	674305	674305	.	.	0	note=snp G=>C C:66 G:0
EA2454	snippy:4.3.6	variation	675340	675340	.	.	0	note=snp C=>T T:55 C:0
EA2454	snippy:4.3.6	variation	679653	679653	.	.	0	note=snp A=>G G:23 A:0
EA2454	snippy:4.3.6	variation	681959	681959	.	.	0	note=snp T=>C C:64 T:1
EA2454	snippy:4.3.6	variation	681970	681970	.	.	0	note=snp G=>A A:62 G:0
EA2454	snippy:4.3.6	variation	683177	683177	.	.	0	note=snp T=>G G:92 T:0
EA2454	snippy:4.3.6	variation	683886	683886	.	.	0	note=snp C=>T T:88 C:0
EA2454	snippy:4.3.6	variation	685406	685406	.	.	0	note=snp C=>T T:41 C:0
EA2454	snippy:4.3.6	variation	686003	686003	.	.	0	note=snp A=>G G:42 A:0
EA2454	snippy:4.3.6	variation	686104	686104	.	.	0	note=snp G=>C C:47 G:0
EA2454	snippy:4.3.6	variation	687373	687373	.	.	0	note=snp G=>A A:80 G:0
EA2454	snippy:4.3.6	variation	687410	687410	.	.	0	note=snp A=>G G:74 A:0
EA2454	snippy:4.3.6	variation	687536	687536	.	.	0	note=snp C=>A A:70 C:0
EA2454	snippy:4.3.6	variation	688277	688277	.	.	0	note=snp A=>C C:80 A:0
EA2454	snippy:4.3.6	variation	690408	690408	.	.	0	note=snp A=>G G:96 A:0
EA2454	snippy:4.3.6	variation	690611	690611	.	.	0	note=snp T=>C C:84 T:0
EA2454	snippy:4.3.6	variation	691761	691761	.	.	0	note=snp C=>T T:44 C:0
EA2454	snippy:4.3.6	variation	692641	692641	.	.	0	note=snp T=>G G:51 T:2
EA2454	snippy:4.3.6	variation	698300	698300	.	.	0	note=snp A=>T T:49 A:0
EA2454	snippy:4.3.6	variation	698327	698327	.	.	0	note=snp A=>G G:49 A:1
EA2454	snippy:4.3.6	variation	701549	701549	.	.	0	note=snp C=>T T:76 C:0
EA2454	snippy:4.3.6	variation	705263	705263	.	.	0	note=snp C=>A A:56 C:0
EA2454	snippy:4.3.6	variation	708965	708965	.	.	0	note=snp C=>T T:72 C:0
EA2454	snippy:4.3.6	variation	709632	709632	.	.	0	note=snp T=>C C:96 T:0
EA2454	snippy:4.3.6	variation	710706	710706	.	.	0	note=snp C=>T T:82 C:0
EA2454	snippy:4.3.6	variation	710977	710977	.	.	0	note=snp A=>G G:58 A:0
EA2454	snippy:4.3.6	variation	719989	719989	.	.	0	note=snp A=>T T:68 A:0
EA2454	snippy:4.3.6	variation	721973	721973	.	.	0	note=snp C=>T T:85 C:0
EA2454	snippy:4.3.6	variation	725151	725151	.	.	0	note=snp G=>A A:98 G:2
EA2454	snippy:4.3.6	variation	726930	726930	.	.	0	note=snp G=>T T:82 G:0
EA2454	snippy:4.3.6	variation	730776	730776	.	.	0	note=snp G=>A A:76 G:0
EA2454	snippy:4.3.6	variation	731219	731219	.	.	0	note=snp T=>G G:71 T:0
EA2454	snippy:4.3.6	variation	731329	731329	.	.	0	note=snp G=>A A:75 G:0
EA2454	snippy:4.3.6	variation	732275	732275	.	.	0	note=snp G=>A A:87 G:0
EA2454	snippy:4.3.6	variation	734642	734642	.	.	0	note=snp T=>C C:35 T:0
EA2454	snippy:4.3.6	variation	736137	736137	.	.	0	note=snp C=>T T:53 C:0
EA2454	snippy:4.3.6	variation	740948	740948	.	.	0	note=snp C=>G G:32 C:0
EA2454	snippy:4.3.6	variation	743512	743512	.	.	0	note=snp G=>A A:94 G:0
EA2454	snippy:4.3.6	variation	746000	746000	.	.	0	note=snp C=>T T:60 C:0
EA2454	snippy:4.3.6	variation	746060	746060	.	.	0	note=snp C=>T T:58 C:0
EA2454	snippy:4.3.6	variation	747597	747597	.	.	0	note=snp G=>C C:57 G:0
EA2454	snippy:4.3.6	variation	748435	748435	.	.	0	note=snp G=>A A:77 G:0
EA2454	snippy:4.3.6	variation	748560	748560	.	.	0	note=snp G=>C C:88 G:0
EA2454	snippy:4.3.6	variation	753727	753727	.	.	0	note=snp T=>C C:54 T:10
EA2454	snippy:4.3.6	variation	754152	754152	.	.	0	note=snp T=>G G:76 T:2
EA2454	snippy:4.3.6	variation	754782	754782	.	.	0	note=snp C=>T T:75 C:0
EA2454	snippy:4.3.6	variation	755366	755366	.	.	0	note=snp A=>G G:83 A:0
EA2454	snippy:4.3.6	variation	756040	756040	.	.	0	note=snp T=>G G:57 T:0
EA2454	snippy:4.3.6	variation	756857	756857	.	.	0	note=snp T=>G G:78 T:1
EA2454	snippy:4.3.6	variation	758394	758394	.	.	0	note=snp C=>T T:64 C:0
EA2454	snippy:4.3.6	variation	758587	758587	.	.	0	note=snp C=>T T:63 C:0
EA2454	snippy:4.3.6	variation	759931	759931	.	.	0	note=snp C=>T T:49 C:0
EA2454	snippy:4.3.6	variation	765032	765032	.	.	0	note=snp T=>C C:85 T:0
EA2454	snippy:4.3.6	variation	765166	765166	.	.	0	note=snp C=>T T:99 C:0
EA2454	snippy:4.3.6	variation	774332	774332	.	.	0	note=complex GTCCACC=>ATCTACT ATCTACT:10 GTCCACC:0
EA2454	snippy:4.3.6	variation	774347	774347	.	.	0	note=snp A=>G G:15 A:0
EA2454	snippy:4.3.6	variation	774395	774395	.	.	0	note=snp G=>A A:23 G:0
EA2454	snippy:4.3.6	variation	774422	774422	.	.	0	note=snp T=>C C:26 T:0
EA2454	snippy:4.3.6	variation	774445	774445	.	.	0	note=snp G=>T T:29 G:0
EA2454	snippy:4.3.6	variation	774568	774568	.	.	0	note=snp C=>A A:42 C:0
EA2454	snippy:4.3.6	variation	774627	774627	.	.	0	note=snp T=>G G:48 T:0
EA2454	snippy:4.3.6	variation	774657	774657	.	.	0	note=snp T=>G G:45 T:0
EA2454	snippy:4.3.6	variation	774700	774700	.	.	0	note=snp T=>G G:47 T:1
EA2454	snippy:4.3.6	variation	774727	774727	.	.	0	note=complex CGA=>TGC TGC:51 CGA:0
EA2454	snippy:4.3.6	variation	774827	774827	.	.	0	note=snp G=>A A:45 G:0
EA2454	snippy:4.3.6	variation	774875	774875	.	.	0	note=snp T=>G G:30 T:0
EA2454	snippy:4.3.6	variation	774887	774887	.	.	0	note=snp G=>A A:27 G:0
EA2454	snippy:4.3.6	variation	774962	774962	.	.	0	note=snp A=>G G:11 A:0
EA2454	snippy:4.3.6	variation	775121	775121	.	.	0	note=snp A=>G G:28 A:0
EA2454	snippy:4.3.6	variation	775252	775252	.	.	0	note=snp G=>A A:60 G:0
EA2454	snippy:4.3.6	variation	775264	775264	.	.	0	note=snp T=>G G:60 T:0
EA2454	snippy:4.3.6	variation	775279	775279	.	.	0	note=snp C=>A A:60 C:0
EA2454	snippy:4.3.6	variation	775294	775294	.	.	0	note=snp G=>A A:64 G:0
EA2454	snippy:4.3.6	variation	775303	775303	.	.	0	note=snp A=>G G:56 A:0
EA2454	snippy:4.3.6	variation	775339	775339	.	.	0	note=snp A=>T T:76 A:0
EA2454	snippy:4.3.6	variation	775350	775350	.	.	0	note=snp A=>G G:77 A:0
EA2454	snippy:4.3.6	variation	775395	775395	.	.	0	note=snp C=>T T:62 C:0
EA2454	snippy:4.3.6	variation	775469	775469	.	.	0	note=snp A=>G G:69 A:0
EA2454	snippy:4.3.6	variation	775502	775502	.	.	0	note=snp T=>A A:82 T:0
EA2454	snippy:4.3.6	variation	775514	775514	.	.	0	note=complex AGGC=>CGGT CGGT:75 AGGC:0
EA2454	snippy:4.3.6	variation	775537	775537	.	.	0	note=snp A=>G G:77 A:0
EA2454	snippy:4.3.6	variation	775592	775592	.	.	0	note=snp T=>C C:83 T:0
EA2454	snippy:4.3.6	variation	775847	775847	.	.	0	note=snp C=>T T:91 C:0
EA2454	snippy:4.3.6	variation	775916	775916	.	.	0	note=snp T=>C C:88 T:0
EA2454	snippy:4.3.6	variation	775921	775921	.	.	0	note=snp A=>G G:92 A:0
EA2454	snippy:4.3.6	variation	775957	775957	.	.	0	note=complex CTC=>GTT GTT:87 CTC:0
EA2454	snippy:4.3.6	variation	776002	776002	.	.	0	note=snp G=>A A:86 G:0
EA2454	snippy:4.3.6	variation	776011	776011	.	.	0	note=snp T=>C C:86 T:0
EA2454	snippy:4.3.6	variation	776020	776020	.	.	0	note=complex GCCG=>ACCA ACCA:85 GCCG:0
EA2454	snippy:4.3.6	variation	776031	776031	.	.	0	note=snp A=>G G:92 A:0
EA2454	snippy:4.3.6	variation	776058	776058	.	.	0	note=snp G=>A A:86 G:0
EA2454	snippy:4.3.6	variation	776068	776068	.	.	0	note=snp A=>G G:90 A:0
EA2454	snippy:4.3.6	variation	776077	776077	.	.	0	note=complex GAATT=>ATATC ATATC:86 GAATT:0
EA2454	snippy:4.3.6	variation	776107	776107	.	.	0	note=snp G=>T T:88 G:0
EA2454	snippy:4.3.6	variation	776119	776119	.	.	0	note=snp T=>G G:85 T:1
EA2454	snippy:4.3.6	variation	776498	776498	.	.	0	note=snp A=>T T:26 A:0
EA2454	snippy:4.3.6	variation	776783	776783	.	.	0	note=snp A=>C C:15 A:0
EA2454	snippy:4.3.6	variation	777308	777308	.	.	0	note=snp C=>T T:72 C:0
EA2454	snippy:4.3.6	variation	777558	777558	.	.	0	note=snp A=>G G:56 A:1
EA2454	snippy:4.3.6	variation	777773	777773	.	.	0	note=snp A=>C C:10 A:0
EA2454	snippy:4.3.6	variation	777820	777820	.	.	0	note=snp A=>C C:13 A:0
EA2454	snippy:4.3.6	variation	778810	778810	.	.	0	note=snp A=>C C:59 A:0
EA2454	snippy:4.3.6	variation	778824	778824	.	.	0	note=mnp TC=>CT CT:61 TC:0
EA2454	snippy:4.3.6	variation	778975	778975	.	.	0	note=snp C=>T T:60 C:0
EA2454	snippy:4.3.6	variation	779888	779888	.	.	0	note=snp A=>G G:14 A:0
EA2454	snippy:4.3.6	variation	780197	780197	.	.	0	note=snp A=>C C:70 A:0
EA2454	snippy:4.3.6	variation	780651	780651	.	.	0	note=snp A=>G G:180 A:1
EA2454	snippy:4.3.6	variation	780785	780785	.	.	0	note=snp A=>G G:139 A:1
EA2454	snippy:4.3.6	variation	780797	780797	.	.	0	note=snp A=>G G:132 A:1
EA2454	snippy:4.3.6	variation	780804	780804	.	.	0	note=snp A=>G G:137 A:0
EA2454	snippy:4.3.6	variation	781128	781128	.	.	0	note=snp C=>G G:126 C:1
EA2454	snippy:4.3.6	variation	781724	781724	.	.	0	note=del GTTTACCTGATTCGGGTAAGTGCC=>G G:34 GTTTACCTGATTCGGGTAAGTGCC:0
EA2454	snippy:4.3.6	variation	782854	782854	.	.	0	note=snp T=>A A:38 T:0
EA2454	snippy:4.3.6	variation	783318	783318	.	.	0	note=del GC=>G G:56 GC:0
EA2454	snippy:4.3.6	variation	784626	784626	.	.	0	note=snp G=>A A:83 G:2
EA2454	snippy:4.3.6	variation	792970	792970	.	.	0	note=snp C=>T T:62 C:0
EA2454	snippy:4.3.6	variation	793051	793051	.	.	0	note=snp A=>G G:54 A:0
EA2454	snippy:4.3.6	variation	796926	796926	.	.	0	note=snp G=>A A:83 G:0
EA2454	snippy:4.3.6	variation	804225	804225	.	.	0	note=snp T=>A A:42 T:0
EA2454	snippy:4.3.6	variation	805481	805481	.	.	0	note=snp A=>G G:65 A:0
EA2454	snippy:4.3.6	variation	807876	807876	.	.	0	note=snp G=>T T:59 G:0
EA2454	snippy:4.3.6	variation	811549	811549	.	.	0	note=snp C=>T T:56 C:0
EA2454	snippy:4.3.6	variation	813446	813446	.	.	0	note=snp G=>A A:26 G:0
EA2454	snippy:4.3.6	variation	815518	815518	.	.	0	note=snp A=>G G:58 A:0
EA2454	snippy:4.3.6	variation	817088	817088	.	.	0	note=snp G=>T T:41 G:0
EA2454	snippy:4.3.6	variation	817446	817446	.	.	0	note=snp A=>G G:55 A:0
EA2454	snippy:4.3.6	variation	817985	817985	.	.	0	note=snp T=>G G:73 T:0
EA2454	snippy:4.3.6	variation	818649	818649	.	.	0	note=snp A=>C C:61 A:0
EA2454	snippy:4.3.6	variation	819830	819830	.	.	0	note=snp G=>T T:106 G:1
EA2454	snippy:4.3.6	variation	821110	821110	.	.	0	note=snp A=>C C:54 A:0
EA2454	snippy:4.3.6	variation	822250	822250	.	.	0	note=snp G=>A A:54 G:0
EA2454	snippy:4.3.6	variation	825235	825235	.	.	0	note=del GCGCATCCGGCAT=>G G:63 GCGCATCCGGCAT:0
EA2454	snippy:4.3.6	variation	829636	829636	.	.	0	note=snp G=>T T:81 G:0
EA2454	snippy:4.3.6	variation	830335	830335	.	.	0	note=snp C=>T T:47 C:0
EA2454	snippy:4.3.6	variation	830637	830637	.	.	0	note=snp T=>G G:61 T:0
EA2454	snippy:4.3.6	variation	832051	832051	.	.	0	note=snp A=>T T:76 A:0
EA2454	snippy:4.3.6	variation	832382	832382	.	.	0	note=snp G=>A A:61 G:0
EA2454	snippy:4.3.6	variation	832596	832596	.	.	0	note=del AGCGT=>A A:53 AGCGT:0
EA2454	snippy:4.3.6	variation	833584	833584	.	.	0	note=snp C=>A A:76 C:1
EA2454	snippy:4.3.6	variation	833658	833658	.	.	0	note=snp A=>C C:61 A:0
EA2454	snippy:4.3.6	variation	834488	834488	.	.	0	note=snp T=>C C:76 T:0
EA2454	snippy:4.3.6	variation	834575	834575	.	.	0	note=ins A=>AT AT:56 A:0
EA2454	snippy:4.3.6	variation	837160	837160	.	.	0	note=snp A=>C C:68 A:1
EA2454	snippy:4.3.6	variation	838094	838094	.	.	0	note=snp A=>C C:72 A:0
EA2454	snippy:4.3.6	variation	839497	839497	.	.	0	note=snp T=>A A:53 T:0
EA2454	snippy:4.3.6	variation	841908	841908	.	.	0	note=snp C=>A A:59 C:0
EA2454	snippy:4.3.6	variation	845081	845081	.	.	0	note=snp G=>A A:52 G:0
EA2454	snippy:4.3.6	variation	848036	848036	.	.	0	note=snp G=>A A:103 G:1
EA2454	snippy:4.3.6	variation	852415	852415	.	.	0	note=snp G=>T T:44 G:0
EA2454	snippy:4.3.6	variation	852695	852695	.	.	0	note=snp A=>G G:63 A:0
EA2454	snippy:4.3.6	variation	856143	856143	.	.	0	note=snp C=>A A:80 C:0
EA2454	snippy:4.3.6	variation	856699	856699	.	.	0	note=snp A=>T T:11 A:0
EA2454	snippy:4.3.6	variation	860485	860485	.	.	0	note=snp G=>A A:91 G:0
EA2454	snippy:4.3.6	variation	860740	860740	.	.	0	note=snp C=>T T:86 C:0
EA2454	snippy:4.3.6	variation	861257	861257	.	.	0	note=snp G=>A A:67 G:1
EA2454	snippy:4.3.6	variation	862190	862190	.	.	0	note=snp T=>C C:91 T:1
EA2454	snippy:4.3.6	variation	863496	863496	.	.	0	note=snp A=>G G:52 A:0
EA2454	snippy:4.3.6	variation	864447	864447	.	.	0	note=snp G=>A A:46 G:1
EA2454	snippy:4.3.6	variation	865819	865819	.	.	0	note=snp T=>G G:67 T:0
EA2454	snippy:4.3.6	variation	866649	866649	.	.	0	note=snp A=>C C:52 A:0
EA2454	snippy:4.3.6	variation	867427	867427	.	.	0	note=snp C=>T T:17 C:0
EA2454	snippy:4.3.6	variation	875102	875102	.	.	0	note=snp G=>A A:74 G:0
EA2454	snippy:4.3.6	variation	875313	875313	.	.	0	note=snp T=>C C:78 T:0
EA2454	snippy:4.3.6	variation	875685	875685	.	.	0	note=snp A=>G G:71 A:0
EA2454	snippy:4.3.6	variation	876895	876895	.	.	0	note=snp C=>A A:70 C:2
EA2454	snippy:4.3.6	variation	877031	877031	.	.	0	note=snp G=>A A:76 G:0
EA2454	snippy:4.3.6	variation	882358	882358	.	.	0	note=snp C=>T T:63 C:0
EA2454	snippy:4.3.6	variation	883189	883189	.	.	0	note=snp G=>A A:82 G:1
EA2454	snippy:4.3.6	variation	887404	887404	.	.	0	note=snp C=>T T:84 C:0
EA2454	snippy:4.3.6	variation	889463	889463	.	.	0	note=snp G=>A A:43 G:0
EA2454	snippy:4.3.6	variation	891216	891216	.	.	0	note=snp A=>C C:54 A:0
EA2454	snippy:4.3.6	variation	892965	892965	.	.	0	note=snp G=>T T:65 G:0
EA2454	snippy:4.3.6	variation	893180	893180	.	.	0	note=snp G=>T T:73 G:0
EA2454	snippy:4.3.6	variation	893994	893994	.	.	0	note=snp A=>T T:59 A:0
EA2454	snippy:4.3.6	variation	894437	894437	.	.	0	note=snp A=>G G:68 A:0
EA2454	snippy:4.3.6	variation	894538	894538	.	.	0	note=snp C=>T T:59 C:0
EA2454	snippy:4.3.6	variation	898882	898882	.	.	0	note=snp C=>T T:87 C:2
EA2454	snippy:4.3.6	variation	902918	902918	.	.	0	note=snp G=>A A:73 G:0
EA2454	snippy:4.3.6	variation	903527	903527	.	.	0	note=snp G=>A A:27 G:0
EA2454	snippy:4.3.6	variation	903996	903996	.	.	0	note=snp T=>C C:48 T:0
EA2454	snippy:4.3.6	variation	904482	904482	.	.	0	note=snp A=>G G:66 A:2
EA2454	snippy:4.3.6	variation	906503	906503	.	.	0	note=snp C=>T T:43 C:1
EA2454	snippy:4.3.6	variation	907381	907381	.	.	0	note=snp C=>A A:61 C:1
EA2454	snippy:4.3.6	variation	911740	911740	.	.	0	note=snp G=>T T:83 G:0
EA2454	snippy:4.3.6	variation	916891	916891	.	.	0	note=snp C=>A A:94 C:0
EA2454	snippy:4.3.6	variation	919060	919060	.	.	0	note=snp T=>G G:33 T:0
EA2454	snippy:4.3.6	variation	921834	921834	.	.	0	note=snp G=>A A:78 G:0
EA2454	snippy:4.3.6	variation	922709	922709	.	.	0	note=snp C=>T T:88 C:1
EA2454	snippy:4.3.6	variation	924579	924579	.	.	0	note=snp T=>C C:68 T:0
EA2454	snippy:4.3.6	variation	927419	927419	.	.	0	note=snp G=>A A:67 G:0
EA2454	snippy:4.3.6	variation	927966	927966	.	.	0	note=snp G=>A A:80 G:0
EA2454	snippy:4.3.6	variation	928814	928814	.	.	0	note=snp G=>C C:41 G:0
EA2454	snippy:4.3.6	variation	930102	930102	.	.	0	note=snp A=>G G:81 A:0
EA2454	snippy:4.3.6	variation	933541	933541	.	.	0	note=snp G=>A A:47 G:0
EA2454	snippy:4.3.6	variation	937614	937614	.	.	0	note=snp C=>T T:82 C:1
EA2454	snippy:4.3.6	variation	938195	938195	.	.	0	note=snp A=>G G:45 A:0
EA2454	snippy:4.3.6	variation	941489	941489	.	.	0	note=snp C=>A A:83 C:0
EA2454	snippy:4.3.6	variation	941829	941829	.	.	0	note=snp T=>A A:66 T:0
EA2454	snippy:4.3.6	variation	945162	945162	.	.	0	note=snp A=>G G:94 A:0
EA2454	snippy:4.3.6	variation	946638	946638	.	.	0	note=snp T=>G G:70 T:1
EA2454	snippy:4.3.6	variation	946875	946875	.	.	0	note=snp T=>C C:87 T:1
EA2454	snippy:4.3.6	variation	947237	947237	.	.	0	note=snp G=>A A:75 G:0
EA2454	snippy:4.3.6	variation	949189	949189	.	.	0	note=snp G=>A A:63 G:0
EA2454	snippy:4.3.6	variation	949220	949220	.	.	0	note=ins G=>GA GA:43 G:1
EA2454	snippy:4.3.6	variation	952032	952032	.	.	0	note=snp G=>A A:13 G:0
EA2454	snippy:4.3.6	variation	952074	952074	.	.	0	note=snp T=>A A:33 T:1
EA2454	snippy:4.3.6	variation	952110	952110	.	.	0	note=snp T=>C C:46 T:0
EA2454	snippy:4.3.6	variation	952131	952131	.	.	0	note=snp T=>C C:47 T:0
EA2454	snippy:4.3.6	variation	952177	952177	.	.	0	note=snp C=>T T:55 C:0
EA2454	snippy:4.3.6	variation	952194	952194	.	.	0	note=snp G=>A A:47 G:0
EA2454	snippy:4.3.6	variation	952206	952206	.	.	0	note=snp T=>C C:49 T:0
EA2454	snippy:4.3.6	variation	952215	952215	.	.	0	note=complex CACGCCG=>AACACCT AACACCT:46 CACGCCG:0
EA2454	snippy:4.3.6	variation	952255	952255	.	.	0	note=snp A=>T T:49 A:0
EA2454	snippy:4.3.6	variation	952281	952281	.	.	0	note=snp A=>T T:47 A:0
EA2454	snippy:4.3.6	variation	952313	952313	.	.	0	note=complex TCTGA=>GCTGG GCTGG:31 TCTGA:0
EA2454	snippy:4.3.6	variation	952332	952332	.	.	0	note=complex GACA=>AACC AACC:22 GACA:0
EA2454	snippy:4.3.6	variation	952341	952341	.	.	0	note=snp T=>G G:24 T:0
EA2454	snippy:4.3.6	variation	952346	952346	.	.	0	note=mnp TC=>CA CA:21 TC:0
EA2454	snippy:4.3.6	variation	952362	952362	.	.	0	note=complex CTTGTGA=>TTTCTGG TTTCTGG:17 CTTGTGA:0
EA2454	snippy:4.3.6	variation	952373	952373	.	.	0	note=complex CGG=>TAA TAA:17 CGG:0
EA2454	snippy:4.3.6	variation	952384	952384	.	.	0	note=complex TCA=>CCG CCG:17 TCA:0
EA2454	snippy:4.3.6	variation	952392	952392	.	.	0	note=complex TGCACCATCCTTCACCAC=>GCCCCCGTTTTTGACAAT GCCCCCGTTTTTGACAAT:16 TGCACCATCCTTCACCAC:0
EA2454	snippy:4.3.6	variation	952428	952428	.	.	0	note=snp A=>C C:28 A:0
EA2454	snippy:4.3.6	variation	953284	953284	.	.	0	note=snp T=>A A:112 T:0
EA2454	snippy:4.3.6	variation	953471	953471	.	.	0	note=snp G=>A A:50 G:0
EA2454	snippy:4.3.6	variation	953513	953513	.	.	0	note=snp G=>C C:31 G:0
EA2454	snippy:4.3.6	variation	953539	953539	.	.	0	note=snp T=>C C:19 T:1
EA2454	snippy:4.3.6	variation	953558	953558	.	.	0	note=snp G=>A A:16 G:0
EA2454	snippy:4.3.6	variation	953576	953576	.	.	0	note=snp T=>C C:10 T:0
EA2454	snippy:4.3.6	variation	953655	953655	.	.	0	note=snp A=>T T:15 A:0
EA2454	snippy:4.3.6	variation	953866	953866	.	.	0	note=snp C=>T T:11 C:0
EA2454	snippy:4.3.6	variation	953875	953875	.	.	0	note=snp A=>G G:11 A:0
EA2454	snippy:4.3.6	variation	953884	953884	.	.	0	note=snp T=>C C:19 T:0
EA2454	snippy:4.3.6	variation	953932	953932	.	.	0	note=complex ATCT=>CTCC CTCC:48 ATCT:1
EA2454	snippy:4.3.6	variation	953998	953998	.	.	0	note=snp G=>A A:120 G:0
EA2454	snippy:4.3.6	variation	954538	954538	.	.	0	note=snp C=>T T:20 C:0
EA2454	snippy:4.3.6	variation	958527	958527	.	.	0	note=snp G=>A A:16 G:0
EA2454	snippy:4.3.6	variation	958533	958533	.	.	0	note=snp A=>G G:16 A:0
EA2454	snippy:4.3.6	variation	958542	958542	.	.	0	note=snp A=>G G:17 A:0
EA2454	snippy:4.3.6	variation	958547	958547	.	.	0	note=complex CG=>TC TC:17 CG:0
EA2454	snippy:4.3.6	variation	958605	958605	.	.	0	note=complex GAGCC=>CAGCG CAGCG:26 GAGCC:0
EA2454	snippy:4.3.6	variation	958617	958617	.	.	0	note=snp G=>A A:30 G:0
EA2454	snippy:4.3.6	variation	958633	958633	.	.	0	note=snp T=>G G:35 T:0
EA2454	snippy:4.3.6	variation	958653	958653	.	.	0	note=snp C=>T T:34 C:0
EA2454	snippy:4.3.6	variation	958659	958659	.	.	0	note=del GA=>G G:34 GA:0
EA2454	snippy:4.3.6	variation	958682	958682	.	.	0	note=complex GT=>C C:33 GT:0
EA2454	snippy:4.3.6	variation	958695	958695	.	.	0	note=complex GG=>AA AA:32 GG:0
EA2454	snippy:4.3.6	variation	958711	958711	.	.	0	note=snp G=>A A:30 G:0
EA2454	snippy:4.3.6	variation	958725	958725	.	.	0	note=complex GGGGCAGA=>CGGTTAAG CGGTTAAG:27 GGGGCAGA:0
EA2454	snippy:4.3.6	variation	958750	958750	.	.	0	note=snp T=>A A:27 T:0
EA2454	snippy:4.3.6	variation	958756	958756	.	.	0	note=snp A=>C C:25 A:0
EA2454	snippy:4.3.6	variation	958783	958783	.	.	0	note=snp A=>G G:21 A:0
EA2454	snippy:4.3.6	variation	958801	958801	.	.	0	note=snp G=>A A:18 G:0
EA2454	snippy:4.3.6	variation	958810	958810	.	.	0	note=snp G=>C C:15 G:0
EA2454	snippy:4.3.6	variation	959592	959592	.	.	0	note=snp A=>G G:22 A:0
EA2454	snippy:4.3.6	variation	959602	959602	.	.	0	note=snp A=>G G:25 A:0
EA2454	snippy:4.3.6	variation	959671	959671	.	.	0	note=complex AGGACTGGCTGTATCAGC=>CATT CATT:35 AGGACTGGCTGTATCAGC:0
EA2454	snippy:4.3.6	variation	959701	959701	.	.	0	note=snp C=>T T:38 C:0
EA2454	snippy:4.3.6	variation	959714	959714	.	.	0	note=complex ACT=>GCC GCC:39 ACT:0
EA2454	snippy:4.3.6	variation	959738	959738	.	.	0	note=snp G=>A A:41 G:0
EA2454	snippy:4.3.6	variation	959751	959751	.	.	0	note=snp A=>C C:54 A:0
EA2454	snippy:4.3.6	variation	959760	959760	.	.	0	note=snp G=>A A:57 G:0
EA2454	snippy:4.3.6	variation	959766	959766	.	.	0	note=snp G=>A A:60 G:0
EA2454	snippy:4.3.6	variation	959771	959771	.	.	0	note=snp T=>C C:60 T:0
EA2454	snippy:4.3.6	variation	959776	959776	.	.	0	note=snp A=>G G:60 A:0
EA2454	snippy:4.3.6	variation	959786	959786	.	.	0	note=complex CGAT=>AGA AGA:54 CGAT:0
EA2454	snippy:4.3.6	variation	959810	959810	.	.	0	note=snp G=>A A:58 G:0
EA2454	snippy:4.3.6	variation	959819	959819	.	.	0	note=snp A=>G G:58 A:0
EA2454	snippy:4.3.6	variation	959825	959825	.	.	0	note=snp T=>C C:59 T:0
EA2454	snippy:4.3.6	variation	959831	959831	.	.	0	note=complex CGTGCCG=>TGTTCCC TGTTCCC:53 CGTGCCG:0
EA2454	snippy:4.3.6	variation	959843	959843	.	.	0	note=complex CGTCT=>AGTCC AGTCC:54 CGTCT:0
EA2454	snippy:4.3.6	variation	959870	959870	.	.	0	note=snp T=>C C:58 T:0
EA2454	snippy:4.3.6	variation	959885	959885	.	.	0	note=snp T=>A A:57 T:0
EA2454	snippy:4.3.6	variation	959939	959939	.	.	0	note=snp A=>G G:75 A:0
EA2454	snippy:4.3.6	variation	960073	960073	.	.	0	note=snp C=>T T:66 C:0
EA2454	snippy:4.3.6	variation	960088	960088	.	.	0	note=snp T=>C C:59 T:0
EA2454	snippy:4.3.6	variation	960095	960095	.	.	0	note=mnp CT=>TC TC:55 CT:0
EA2454	snippy:4.3.6	variation	960117	960117	.	.	0	note=complex GCA=>TGTG TGTG:47 GCA:0
EA2454	snippy:4.3.6	variation	960127	960127	.	.	0	note=complex CG=>ATAGCT ATAGCT:46 CG:0
EA2454	snippy:4.3.6	variation	960140	960140	.	.	0	note=snp A=>G G:60 A:0
EA2454	snippy:4.3.6	variation	960148	960148	.	.	0	note=snp C=>T T:65 C:0
EA2454	snippy:4.3.6	variation	960157	960157	.	.	0	note=snp C=>T T:62 C:1
EA2454	snippy:4.3.6	variation	960162	960162	.	.	0	note=snp T=>G G:61 T:0
EA2454	snippy:4.3.6	variation	960167	960167	.	.	0	note=del TA=>T T:59 TA:0
EA2454	snippy:4.3.6	variation	960274	960274	.	.	0	note=snp G=>A A:71 G:0
EA2454	snippy:4.3.6	variation	960334	960334	.	.	0	note=complex CTACAAA=>ACACGAG ACACGAG:64 CTACAAA:0
EA2454	snippy:4.3.6	variation	960406	960406	.	.	0	note=snp C=>T T:70 C:0
EA2454	snippy:4.3.6	variation	960427	960427	.	.	0	note=snp C=>T T:75 C:0
EA2454	snippy:4.3.6	variation	960447	960447	.	.	0	note=complex CGT=>TGG TGG:73 CGT:0
EA2454	snippy:4.3.6	variation	960469	960469	.	.	0	note=snp G=>A A:79 G:0
EA2454	snippy:4.3.6	variation	960506	960506	.	.	0	note=snp A=>G G:72 A:0
EA2454	snippy:4.3.6	variation	960551	960551	.	.	0	note=snp C=>A A:71 C:0
EA2454	snippy:4.3.6	variation	960556	960556	.	.	0	note=complex GACC=>AAGG AAGG:68 GACC:0
EA2454	snippy:4.3.6	variation	960570	960570	.	.	0	note=snp C=>T T:63 C:1
EA2454	snippy:4.3.6	variation	960591	960591	.	.	0	note=complex TACTCAGGGGC=>AGAACAAAGGT AGAACAAAGGT:53 TACTCAGGGGC:0
EA2454	snippy:4.3.6	variation	960619	960619	.	.	0	note=complex CCTG=>GATA GATA:52 CCTG:0
EA2454	snippy:4.3.6	variation	960637	960637	.	.	0	note=snp G=>T T:52 G:0
EA2454	snippy:4.3.6	variation	960650	960650	.	.	0	note=snp C=>G G:47 C:0
EA2454	snippy:4.3.6	variation	960655	960655	.	.	0	note=snp C=>G G:46 C:0
EA2454	snippy:4.3.6	variation	960674	960674	.	.	0	note=snp T=>G G:42 T:0
EA2454	snippy:4.3.6	variation	960688	960688	.	.	0	note=snp A=>G G:35 A:0
EA2454	snippy:4.3.6	variation	960695	960695	.	.	0	note=snp G=>A A:34 G:0
EA2454	snippy:4.3.6	variation	960703	960703	.	.	0	note=snp C=>G G:28 C:0
EA2454	snippy:4.3.6	variation	960745	960745	.	.	0	note=snp G=>A A:11 G:0
EA2454	snippy:4.3.6	variation	961231	961231	.	.	0	note=snp C=>A A:12 C:0
EA2454	snippy:4.3.6	variation	986640	986640	.	.	0	note=snp G=>A A:67 G:0
EA2454	snippy:4.3.6	variation	989712	989712	.	.	0	note=snp T=>C C:77 T:0
EA2454	snippy:4.3.6	variation	990058	990058	.	.	0	note=snp G=>T T:78 G:0
EA2454	snippy:4.3.6	variation	994161	994161	.	.	0	note=snp G=>A A:65 G:1
EA2454	snippy:4.3.6	variation	995293	995293	.	.	0	note=snp T=>C C:106 T:0
EA2454	snippy:4.3.6	variation	996660	996660	.	.	0	note=snp A=>G G:90 A:1
EA2454	snippy:4.3.6	variation	998219	998219	.	.	0	note=snp G=>A A:95 G:0
EA2454	snippy:4.3.6	variation	999667	999667	.	.	0	note=snp G=>A A:51 G:0
EA2454	snippy:4.3.6	variation	1001022	1001022	.	.	0	note=snp A=>C C:72 A:0
EA2454	snippy:4.3.6	variation	1001396	1001396	.	.	0	note=snp C=>T T:14 C:0
EA2454	snippy:4.3.6	variation	1001425	1001425	.	.	0	note=snp A=>G G:18 A:0
EA2454	snippy:4.3.6	variation	1011339	1011339	.	.	0	note=snp C=>T T:68 C:1
EA2454	snippy:4.3.6	variation	1012801	1012801	.	.	0	note=snp C=>T T:98 C:0
EA2454	snippy:4.3.6	variation	1016651	1016651	.	.	0	note=snp G=>A A:71 G:0
EA2454	snippy:4.3.6	variation	1018623	1018623	.	.	0	note=snp G=>T T:56 G:1
EA2454	snippy:4.3.6	variation	1022926	1022926	.	.	0	note=snp A=>G G:95 A:0
EA2454	snippy:4.3.6	variation	1023979	1023979	.	.	0	note=snp T=>C C:86 T:0
EA2454	snippy:4.3.6	variation	1026843	1026843	.	.	0	note=snp T=>C C:39 T:0
EA2454	snippy:4.3.6	variation	1027154	1027154	.	.	0	note=snp C=>T T:80 C:1
EA2454	snippy:4.3.6	variation	1028534	1028534	.	.	0	note=snp C=>T T:83 C:0
EA2454	snippy:4.3.6	variation	1029538	1029538	.	.	0	note=snp C=>T T:77 C:0
EA2454	snippy:4.3.6	variation	1029559	1029559	.	.	0	note=del CA=>C C:61 CA:0
EA2454	snippy:4.3.6	variation	1029670	1029670	.	.	0	note=snp T=>A A:77 T:1
EA2454	snippy:4.3.6	variation	1031919	1031919	.	.	0	note=snp C=>A A:103 C:0
EA2454	snippy:4.3.6	variation	1034198	1034198	.	.	0	note=snp T=>G G:84 T:1
EA2454	snippy:4.3.6	variation	1037848	1037848	.	.	0	note=snp G=>A A:133 G:0
EA2454	snippy:4.3.6	variation	1038410	1038410	.	.	0	note=snp A=>G G:72 A:0
EA2454	snippy:4.3.6	variation	1039888	1039888	.	.	0	note=snp A=>C C:94 A:0
EA2454	snippy:4.3.6	variation	1041944	1041944	.	.	0	note=snp G=>A A:11 G:0
EA2454	snippy:4.3.6	variation	1044717	1044717	.	.	0	note=snp G=>A A:59 G:1
EA2454	snippy:4.3.6	variation	1044888	1044888	.	.	0	note=snp T=>A A:71 T:0
EA2454	snippy:4.3.6	variation	1046955	1046955	.	.	0	note=snp G=>A A:82 G:0
EA2454	snippy:4.3.6	variation	1047757	1047757	.	.	0	note=snp A=>G G:82 A:0
EA2454	snippy:4.3.6	variation	1047884	1047884	.	.	0	note=snp C=>T T:90 C:0
EA2454	snippy:4.3.6	variation	1050751	1050751	.	.	0	note=snp T=>G G:67 T:0
EA2454	snippy:4.3.6	variation	1052435	1052435	.	.	0	note=snp C=>T T:59 C:0
EA2454	snippy:4.3.6	variation	1053565	1053565	.	.	0	note=snp G=>A A:94 G:0
EA2454	snippy:4.3.6	variation	1055114	1055114	.	.	0	note=snp T=>G G:68 T:0
EA2454	snippy:4.3.6	variation	1056456	1056456	.	.	0	note=snp A=>C C:88 A:1
EA2454	snippy:4.3.6	variation	1060810	1060810	.	.	0	note=snp G=>A A:97 G:0
EA2454	snippy:4.3.6	variation	1062738	1062738	.	.	0	note=snp T=>C C:60 T:1
EA2454	snippy:4.3.6	variation	1064483	1064483	.	.	0	note=snp G=>A A:71 G:0
EA2454	snippy:4.3.6	variation	1065884	1065884	.	.	0	note=snp G=>A A:88 G:0
EA2454	snippy:4.3.6	variation	1067764	1067764	.	.	0	note=snp A=>G G:13 A:0
EA2454	snippy:4.3.6	variation	1073767	1073767	.	.	0	note=snp A=>G G:112 A:0
EA2454	snippy:4.3.6	variation	1076508	1076508	.	.	0	note=snp T=>G G:63 T:0
EA2454	snippy:4.3.6	variation	1076681	1076681	.	.	0	note=snp G=>T T:51 G:0
EA2454	snippy:4.3.6	variation	1079000	1079000	.	.	0	note=snp T=>C C:67 T:0
EA2454	snippy:4.3.6	variation	1079639	1079639	.	.	0	note=snp G=>A A:91 G:0
EA2454	snippy:4.3.6	variation	1080544	1080544	.	.	0	note=snp C=>T T:92 C:0
EA2454	snippy:4.3.6	variation	1084034	1084034	.	.	0	note=snp G=>A A:103 G:0
EA2454	snippy:4.3.6	variation	1086753	1086753	.	.	0	note=snp A=>C C:78 A:0
EA2454	snippy:4.3.6	variation	1086768	1086768	.	.	0	note=snp A=>T T:87 A:0
EA2454	snippy:4.3.6	variation	1089065	1089065	.	.	0	note=snp G=>A A:71 G:0
EA2454	snippy:4.3.6	variation	1093309	1093309	.	.	0	note=snp A=>G G:77 A:0
EA2454	snippy:4.3.6	variation	1094834	1094834	.	.	0	note=del TA=>T T:14 TA:0
EA2454	snippy:4.3.6	variation	1095132	1095132	.	.	0	note=snp T=>C C:37 T:0
EA2454	snippy:4.3.6	variation	1096870	1096870	.	.	0	note=snp C=>A A:83 C:1
EA2454	snippy:4.3.6	variation	1098620	1098620	.	.	0	note=snp A=>G G:68 A:0
EA2454	snippy:4.3.6	variation	1102928	1102928	.	.	0	note=snp G=>A A:67 G:0
EA2454	snippy:4.3.6	variation	1103669	1103669	.	.	0	note=snp T=>C C:50 T:0
EA2454	snippy:4.3.6	variation	1104480	1104480	.	.	0	note=snp A=>G G:77 A:0
EA2454	snippy:4.3.6	variation	1104729	1104729	.	.	0	note=snp G=>A A:62 G:0
EA2454	snippy:4.3.6	variation	1107647	1107647	.	.	0	note=snp C=>T T:66 C:0
EA2454	snippy:4.3.6	variation	1109672	1109672	.	.	0	note=snp T=>C C:89 T:0
EA2454	snippy:4.3.6	variation	1109903	1109903	.	.	0	note=del TA=>T T:61 TA:0
EA2454	snippy:4.3.6	variation	1111172	1111172	.	.	0	note=snp G=>A A:95 G:0
EA2454	snippy:4.3.6	variation	1113160	1113160	.	.	0	note=snp C=>T T:16 C:0
EA2454	snippy:4.3.6	variation	1113344	1113344	.	.	0	note=snp G=>A A:65 G:0
EA2454	snippy:4.3.6	variation	1116997	1116997	.	.	0	note=snp G=>C C:84 G:0
EA2454	snippy:4.3.6	variation	1117351	1117351	.	.	0	note=snp A=>T T:79 A:0
EA2454	snippy:4.3.6	variation	1122378	1122378	.	.	0	note=snp C=>T T:116 C:1
EA2454	snippy:4.3.6	variation	1125113	1125113	.	.	0	note=snp G=>A A:88 G:1
EA2454	snippy:4.3.6	variation	1127311	1127311	.	.	0	note=snp C=>G G:117 C:0
EA2454	snippy:4.3.6	variation	1127645	1127645	.	.	0	note=snp G=>T T:79 G:0
EA2454	snippy:4.3.6	variation	1129291	1129291	.	.	0	note=snp G=>A A:26 G:0
EA2454	snippy:4.3.6	variation	1129384	1129384	.	.	0	note=snp G=>C C:12 G:0
EA2454	snippy:4.3.6	variation	1129472	1129472	.	.	0	note=snp A=>T T:13 A:0
EA2454	snippy:4.3.6	variation	1130101	1130101	.	.	0	note=snp T=>C C:35 T:0
EA2454	snippy:4.3.6	variation	1130210	1130210	.	.	0	note=snp G=>A A:24 G:0
EA2454	snippy:4.3.6	variation	1130627	1130627	.	.	0	note=snp A=>G G:11 A:0
EA2454	snippy:4.3.6	variation	1130762	1130762	.	.	0	note=snp C=>T T:21 C:0
EA2454	snippy:4.3.6	variation	1135615	1135615	.	.	0	note=snp G=>A A:60 G:0
EA2454	snippy:4.3.6	variation	1135881	1135881	.	.	0	note=snp C=>T T:72 C:1
EA2454	snippy:4.3.6	variation	1138215	1138215	.	.	0	note=snp T=>C C:92 T:0
EA2454	snippy:4.3.6	variation	1139316	1139316	.	.	0	note=snp A=>G G:73 A:0
EA2454	snippy:4.3.6	variation	1139565	1139565	.	.	0	note=del CT=>C C:47 CT:0
EA2454	snippy:4.3.6	variation	1139685	1139685	.	.	0	note=snp A=>C C:41 A:0
EA2454	snippy:4.3.6	variation	1140326	1140326	.	.	0	note=snp A=>G G:68 A:0
EA2454	snippy:4.3.6	variation	1143431	1143431	.	.	0	note=snp G=>A A:94 G:1
EA2454	snippy:4.3.6	variation	1145328	1145328	.	.	0	note=snp C=>A A:39 C:1
EA2454	snippy:4.3.6	variation	1146345	1146345	.	.	0	note=snp T=>G G:80 T:0
EA2454	snippy:4.3.6	variation	1147289	1147289	.	.	0	note=snp G=>T T:73 G:0
EA2454	snippy:4.3.6	variation	1151448	1151448	.	.	0	note=snp T=>C C:86 T:0
EA2454	snippy:4.3.6	variation	1153447	1153447	.	.	0	note=snp T=>C C:89 T:0
EA2454	snippy:4.3.6	variation	1156361	1156361	.	.	0	note=snp G=>A A:60 G:0
EA2454	snippy:4.3.6	variation	1157990	1157990	.	.	0	note=snp G=>A A:86 G:0
EA2454	snippy:4.3.6	variation	1158642	1158642	.	.	0	note=snp G=>A A:67 G:0
EA2454	snippy:4.3.6	variation	1159315	1159315	.	.	0	note=snp C=>T T:75 C:0
EA2454	snippy:4.3.6	variation	1160172	1160172	.	.	0	note=snp G=>C C:61 G:0
EA2454	snippy:4.3.6	variation	1160822	1160822	.	.	0	note=snp A=>T T:80 A:0
EA2454	snippy:4.3.6	variation	1162900	1162900	.	.	0	note=snp T=>C C:62 T:0
EA2454	snippy:4.3.6	variation	1163629	1163629	.	.	0	note=snp A=>C C:73 A:0
EA2454	snippy:4.3.6	variation	1163886	1163886	.	.	0	note=snp C=>T T:43 C:0
EA2454	snippy:4.3.6	variation	1164333	1164333	.	.	0	note=del GCAGGCACGAGGATTCAC=>G G:31 GCAGGCACGAGGATTCAC:0
EA2454	snippy:4.3.6	variation	1167666	1167666	.	.	0	note=snp T=>C C:68 T:1
EA2454	snippy:4.3.6	variation	1168086	1168086	.	.	0	note=del CA=>C C:49 CA:0
EA2454	snippy:4.3.6	variation	1170565	1170565	.	.	0	note=snp C=>A A:39 C:0
EA2454	snippy:4.3.6	variation	1171440	1171440	.	.	0	note=snp G=>A A:79 G:0
EA2454	snippy:4.3.6	variation	1172578	1172578	.	.	0	note=snp C=>T T:82 C:0
EA2454	snippy:4.3.6	variation	1172716	1172716	.	.	0	note=snp C=>A A:83 C:2
EA2454	snippy:4.3.6	variation	1172787	1172787	.	.	0	note=snp G=>A A:79 G:0
EA2454	snippy:4.3.6	variation	1173180	1173180	.	.	0	note=snp T=>G G:88 T:0
EA2454	snippy:4.3.6	variation	1173697	1173697	.	.	0	note=ins G=>GTAGAGTCCGCCCACTGCATCACGCGTACA GTAGAGTCCGCCCACTGCATCACGCGTACA:17 G:0
EA2454	snippy:4.3.6	variation	1174352	1174352	.	.	0	note=snp T=>C C:42 T:0
EA2454	snippy:4.3.6	variation	1175596	1175596	.	.	0	note=snp T=>C C:106 T:1
EA2454	snippy:4.3.6	variation	1179085	1179085	.	.	0	note=snp G=>A A:80 G:2
EA2454	snippy:4.3.6	variation	1179979	1179979	.	.	0	note=snp A=>G G:34 A:0
EA2454	snippy:4.3.6	variation	1183946	1183946	.	.	0	note=snp T=>G G:83 T:0
EA2454	snippy:4.3.6	variation	1186463	1186463	.	.	0	note=snp C=>T T:73 C:2
EA2454	snippy:4.3.6	variation	1186746	1186746	.	.	0	note=snp T=>C C:98 T:0
EA2454	snippy:4.3.6	variation	1187404	1187404	.	.	0	note=snp A=>C C:64 A:0
EA2454	snippy:4.3.6	variation	1190353	1190353	.	.	0	note=snp G=>T T:30 G:0
EA2454	snippy:4.3.6	variation	1190718	1190718	.	.	0	note=snp C=>A A:68 C:1
EA2454	snippy:4.3.6	variation	1194043	1194043	.	.	0	note=snp G=>A A:71 G:0
EA2454	snippy:4.3.6	variation	1195414	1195414	.	.	0	note=snp C=>T T:92 C:1
EA2454	snippy:4.3.6	variation	1198856	1198856	.	.	0	note=snp T=>C C:55 T:2
EA2454	snippy:4.3.6	variation	1200881	1200881	.	.	0	note=snp C=>T T:65 C:0
EA2454	snippy:4.3.6	variation	1204303	1204303	.	.	0	note=snp C=>T T:11 C:0
EA2454	snippy:4.3.6	variation	1207826	1207826	.	.	0	note=snp C=>T T:105 C:3
EA2454	snippy:4.3.6	variation	1208016	1208016	.	.	0	note=snp T=>C C:102 T:0
EA2454	snippy:4.3.6	variation	1211256	1211256	.	.	0	note=snp T=>C C:98 T:0
EA2454	snippy:4.3.6	variation	1211373	1211373	.	.	0	note=snp G=>T T:102 G:0
EA2454	snippy:4.3.6	variation	1212376	1212376	.	.	0	note=del CG=>C C:27 CG:0
EA2454	snippy:4.3.6	variation	1216907	1216907	.	.	0	note=snp C=>T T:89 C:0
EA2454	snippy:4.3.6	variation	1229894	1229894	.	.	0	note=snp G=>T T:98 G:0
EA2454	snippy:4.3.6	variation	1230133	1230133	.	.	0	note=snp C=>T T:90 C:0
EA2454	snippy:4.3.6	variation	1233937	1233937	.	.	0	note=snp C=>T T:112 C:2
EA2454	snippy:4.3.6	variation	1234548	1234548	.	.	0	note=snp T=>C C:76 T:0
EA2454	snippy:4.3.6	variation	1235752	1235752	.	.	0	note=snp A=>G G:115 A:0
EA2454	snippy:4.3.6	variation	1236723	1236723	.	.	0	note=snp T=>C C:74 T:1
EA2454	snippy:4.3.6	variation	1238000	1238000	.	.	0	note=snp C=>T T:45 C:0
EA2454	snippy:4.3.6	variation	1238062	1238062	.	.	0	note=snp C=>T T:52 C:0
EA2454	snippy:4.3.6	variation	1241055	1241055	.	.	0	note=snp T=>C C:78 T:0
EA2454	snippy:4.3.6	variation	1242119	1242119	.	.	0	note=snp A=>T T:65 A:0
EA2454	snippy:4.3.6	variation	1242171	1242171	.	.	0	note=snp A=>T T:68 A:0
EA2454	snippy:4.3.6	variation	1242214	1242214	.	.	0	note=snp C=>T T:62 C:0
EA2454	snippy:4.3.6	variation	1242313	1242313	.	.	0	note=complex TGG=>GGA GGA:64 TGG:0
EA2454	snippy:4.3.6	variation	1242346	1242346	.	.	0	note=snp T=>C C:66 T:0
EA2454	snippy:4.3.6	variation	1242370	1242370	.	.	0	note=snp A=>G G:67 A:0
EA2454	snippy:4.3.6	variation	1242432	1242432	.	.	0	note=complex CAT=>TAC TAC:74 CAT:0
EA2454	snippy:4.3.6	variation	1242505	1242505	.	.	0	note=snp T=>G G:88 T:0
EA2454	snippy:4.3.6	variation	1242523	1242523	.	.	0	note=snp G=>A A:87 G:0
EA2454	snippy:4.3.6	variation	1242571	1242571	.	.	0	note=snp G=>A A:86 G:1
EA2454	snippy:4.3.6	variation	1242655	1242655	.	.	0	note=snp A=>G G:82 A:2
EA2454	snippy:4.3.6	variation	1242667	1242667	.	.	0	note=snp T=>C C:88 T:0
EA2454	snippy:4.3.6	variation	1242688	1242688	.	.	0	note=snp T=>C C:75 T:1
EA2454	snippy:4.3.6	variation	1242694	1242694	.	.	0	note=snp T=>C C:77 T:0
EA2454	snippy:4.3.6	variation	1242724	1242724	.	.	0	note=snp C=>G G:66 C:1
EA2454	snippy:4.3.6	variation	1242769	1242769	.	.	0	note=snp G=>A A:78 G:0
EA2454	snippy:4.3.6	variation	1242781	1242781	.	.	0	note=snp A=>G G:79 A:0
EA2454	snippy:4.3.6	variation	1242862	1242862	.	.	0	note=snp C=>G G:83 C:0
EA2454	snippy:4.3.6	variation	1242913	1242913	.	.	0	note=snp A=>G G:85 A:0
EA2454	snippy:4.3.6	variation	1242922	1242922	.	.	0	note=complex ACCC=>GCCT GCCT:84 ACCC:0
EA2454	snippy:4.3.6	variation	1242940	1242940	.	.	0	note=snp T=>C C:83 T:0
EA2454	snippy:4.3.6	variation	1242981	1242981	.	.	0	note=snp T=>C C:80 T:1
EA2454	snippy:4.3.6	variation	1243048	1243048	.	.	0	note=snp T=>C C:80 T:0
EA2454	snippy:4.3.6	variation	1243198	1243198	.	.	0	note=snp A=>G G:66 A:0
EA2454	snippy:4.3.6	variation	1243255	1243255	.	.	0	note=snp T=>C C:62 T:0
EA2454	snippy:4.3.6	variation	1243393	1243393	.	.	0	note=snp G=>C C:84 G:0
EA2454	snippy:4.3.6	variation	1244009	1244009	.	.	0	note=snp A=>G G:86 A:1
EA2454	snippy:4.3.6	variation	1244063	1244063	.	.	0	note=snp G=>T T:71 G:1
EA2454	snippy:4.3.6	variation	1244075	1244075	.	.	0	note=snp G=>T T:77 G:0
EA2454	snippy:4.3.6	variation	1244135	1244135	.	.	0	note=snp T=>C C:77 T:0
EA2454	snippy:4.3.6	variation	1244195	1244195	.	.	0	note=complex TCTG=>CCTC CCTC:67 TCTG:0
EA2454	snippy:4.3.6	variation	1244213	1244213	.	.	0	note=snp G=>T T:66 G:2
EA2454	snippy:4.3.6	variation	1244237	1244237	.	.	0	note=complex CGCGCGT=>TGCACGC TGCACGC:65 CGCGCGT:0
EA2454	snippy:4.3.6	variation	1244279	1244279	.	.	0	note=snp C=>T T:78 C:0
EA2454	snippy:4.3.6	variation	1244380	1244380	.	.	0	note=snp G=>A A:74 G:0
EA2454	snippy:4.3.6	variation	1244649	1244649	.	.	0	note=snp G=>A A:74 G:0
EA2454	snippy:4.3.6	variation	1245109	1245109	.	.	0	note=snp G=>A A:77 G:2
EA2454	snippy:4.3.6	variation	1245210	1245210	.	.	0	note=snp T=>G G:92 T:0
EA2454	snippy:4.3.6	variation	1245259	1245259	.	.	0	note=snp T=>C C:109 T:0
EA2454	snippy:4.3.6	variation	1245265	1245265	.	.	0	note=snp C=>T T:114 C:1
EA2454	snippy:4.3.6	variation	1245274	1245274	.	.	0	note=snp A=>C C:118 A:0
EA2454	snippy:4.3.6	variation	1245538	1245538	.	.	0	note=snp C=>A A:79 C:0
EA2454	snippy:4.3.6	variation	1245581	1245581	.	.	0	note=snp A=>C C:85 A:0
EA2454	snippy:4.3.6	variation	1245925	1245925	.	.	0	note=snp A=>T T:78 A:0
EA2454	snippy:4.3.6	variation	1245963	1245963	.	.	0	note=snp A=>G G:64 A:0
EA2454	snippy:4.3.6	variation	1246040	1246040	.	.	0	note=snp A=>C C:73 A:0
EA2454	snippy:4.3.6	variation	1246048	1246048	.	.	0	note=snp C=>A A:74 C:0
EA2454	snippy:4.3.6	variation	1246078	1246078	.	.	0	note=snp G=>A A:70 G:0
EA2454	snippy:4.3.6	variation	1246100	1246100	.	.	0	note=snp C=>T T:78 C:0
EA2454	snippy:4.3.6	variation	1246408	1246408	.	.	0	note=snp A=>G G:87 A:0
EA2454	snippy:4.3.6	variation	1246477	1246477	.	.	0	note=snp T=>C C:88 T:0
EA2454	snippy:4.3.6	variation	1246517	1246517	.	.	0	note=snp T=>C C:87 T:0
EA2454	snippy:4.3.6	variation	1246552	1246552	.	.	0	note=snp T=>G G:76 T:1
EA2454	snippy:4.3.6	variation	1246600	1246600	.	.	0	note=snp C=>T T:76 C:1
EA2454	snippy:4.3.6	variation	1246658	1246658	.	.	0	note=snp A=>T T:75 A:0
EA2454	snippy:4.3.6	variation	1246671	1246671	.	.	0	note=snp T=>G G:79 T:0
EA2454	snippy:4.3.6	variation	1246681	1246681	.	.	0	note=snp A=>T T:95 A:0
EA2454	snippy:4.3.6	variation	1246703	1246703	.	.	0	note=snp A=>C C:83 A:0
EA2454	snippy:4.3.6	variation	1246779	1246779	.	.	0	note=snp T=>A A:83 T:0
EA2454	snippy:4.3.6	variation	1246808	1246808	.	.	0	note=snp A=>T T:97 A:0
EA2454	snippy:4.3.6	variation	1246841	1246841	.	.	0	note=snp C=>T T:92 C:1
EA2454	snippy:4.3.6	variation	1246864	1246864	.	.	0	note=snp G=>A A:102 G:0
EA2454	snippy:4.3.6	variation	1246888	1246888	.	.	0	note=snp T=>C C:96 T:0
EA2454	snippy:4.3.6	variation	1246955	1246955	.	.	0	note=snp G=>A A:84 G:0
EA2454	snippy:4.3.6	variation	1246967	1246967	.	.	0	note=snp C=>T T:86 C:0
EA2454	snippy:4.3.6	variation	1246973	1246973	.	.	0	note=snp G=>A A:83 G:0
EA2454	snippy:4.3.6	variation	1247014	1247014	.	.	0	note=mnp CA=>GC GC:71 CA:0
EA2454	snippy:4.3.6	variation	1247075	1247075	.	.	0	note=snp G=>A A:70 G:0
EA2454	snippy:4.3.6	variation	1247184	1247184	.	.	0	note=snp C=>T T:81 C:0
EA2454	snippy:4.3.6	variation	1247189	1247189	.	.	0	note=snp T=>C C:85 T:0
EA2454	snippy:4.3.6	variation	1247216	1247216	.	.	0	note=snp A=>T T:82 A:0
EA2454	snippy:4.3.6	variation	1247243	1247243	.	.	0	note=snp A=>C C:85 A:0
EA2454	snippy:4.3.6	variation	1247414	1247414	.	.	0	note=complex CGGGCC=>A A:66 CGGGCC:0
EA2454	snippy:4.3.6	variation	1247567	1247567	.	.	0	note=snp C=>T T:79 C:0
EA2454	snippy:4.3.6	variation	1247669	1247669	.	.	0	note=snp A=>G G:65 A:0
EA2454	snippy:4.3.6	variation	1247708	1247708	.	.	0	note=snp T=>C C:67 T:0
EA2454	snippy:4.3.6	variation	1247829	1247829	.	.	0	note=snp T=>C C:92 T:0
EA2454	snippy:4.3.6	variation	1247844	1247844	.	.	0	note=snp C=>T T:94 C:0
EA2454	snippy:4.3.6	variation	1247864	1247864	.	.	0	note=snp C=>A A:93 C:0
EA2454	snippy:4.3.6	variation	1247872	1247872	.	.	0	note=mnp GT=>AC AC:89 GT:0
EA2454	snippy:4.3.6	variation	1248028	1248028	.	.	0	note=snp A=>G G:78 A:1
EA2454	snippy:4.3.6	variation	1248043	1248043	.	.	0	note=snp A=>G G:82 A:0
EA2454	snippy:4.3.6	variation	1248088	1248088	.	.	0	note=complex AATTG=>GATTT GATTT:72 AATTG:0
EA2454	snippy:4.3.6	variation	1248165	1248165	.	.	0	note=mnp GG=>AA AA:71 GG:0
EA2454	snippy:4.3.6	variation	1248187	1248187	.	.	0	note=del CGTG=>C C:57 CGTG:0
EA2454	snippy:4.3.6	variation	1248313	1248313	.	.	0	note=snp T=>A A:76 T:0
EA2454	snippy:4.3.6	variation	1248852	1248852	.	.	0	note=snp A=>G G:84 A:0
EA2454	snippy:4.3.6	variation	1248871	1248871	.	.	0	note=snp A=>G G:75 A:0
EA2454	snippy:4.3.6	variation	1249242	1249242	.	.	0	note=complex GCA=>ACG ACG:46 GCA:0
EA2454	snippy:4.3.6	variation	1249329	1249329	.	.	0	note=snp G=>A A:78 G:1
EA2454	snippy:4.3.6	variation	1249636	1249636	.	.	0	note=snp G=>A A:86 G:1
EA2454	snippy:4.3.6	variation	1249888	1249888	.	.	0	note=snp A=>C C:83 A:0
EA2454	snippy:4.3.6	variation	1250089	1250089	.	.	0	note=snp T=>G G:91 T:0
EA2454	snippy:4.3.6	variation	1250776	1250776	.	.	0	note=snp G=>A A:83 G:3
EA2454	snippy:4.3.6	variation	1250868	1250868	.	.	0	note=snp C=>T T:99 C:1
EA2454	snippy:4.3.6	variation	1250874	1250874	.	.	0	note=snp G=>A A:96 G:1
EA2454	snippy:4.3.6	variation	1250931	1250931	.	.	0	note=snp T=>C C:97 T:0
EA2454	snippy:4.3.6	variation	1251482	1251482	.	.	0	note=snp A=>C C:94 A:2
EA2454	snippy:4.3.6	variation	1251724	1251724	.	.	0	note=snp G=>A A:108 G:2
EA2454	snippy:4.3.6	variation	1251793	1251793	.	.	0	note=snp C=>T T:115 C:0
EA2454	snippy:4.3.6	variation	1251889	1251889	.	.	0	note=snp C=>T T:102 C:0
EA2454	snippy:4.3.6	variation	1251895	1251895	.	.	0	note=snp T=>C C:91 T:0
EA2454	snippy:4.3.6	variation	1251988	1251988	.	.	0	note=complex TGCACTTGGC=>CGCGCTCGGT CGCGCTCGGT:66 TGCACTTGGC:0
EA2454	snippy:4.3.6	variation	1252045	1252045	.	.	0	note=snp T=>C C:64 T:0
EA2454	snippy:4.3.6	variation	1252156	1252156	.	.	0	note=snp G=>A A:54 G:1
EA2454	snippy:4.3.6	variation	1252174	1252174	.	.	0	note=snp A=>G G:50 A:0
EA2454	snippy:4.3.6	variation	1252201	1252201	.	.	0	note=snp T=>C C:53 T:0
EA2454	snippy:4.3.6	variation	1252210	1252210	.	.	0	note=snp T=>C C:58 T:0
EA2454	snippy:4.3.6	variation	1252366	1252366	.	.	0	note=snp G=>C C:95 G:0
EA2454	snippy:4.3.6	variation	1252417	1252417	.	.	0	note=snp G=>A A:95 G:0
EA2454	snippy:4.3.6	variation	1252429	1252429	.	.	0	note=snp G=>A A:98 G:1
EA2454	snippy:4.3.6	variation	1253265	1253265	.	.	0	note=snp T=>G G:88 T:0
EA2454	snippy:4.3.6	variation	1253430	1253430	.	.	0	note=snp G=>A A:79 G:1
EA2454	snippy:4.3.6	variation	1253517	1253517	.	.	0	note=snp T=>C C:77 T:0
EA2454	snippy:4.3.6	variation	1253619	1253619	.	.	0	note=snp A=>C C:85 A:0
EA2454	snippy:4.3.6	variation	1253700	1253700	.	.	0	note=complex TGAT=>CGAC CGAC:95 TGAT:0
EA2454	snippy:4.3.6	variation	1254135	1254135	.	.	0	note=snp A=>G G:113 A:0
EA2454	snippy:4.3.6	variation	1254162	1254162	.	.	0	note=snp C=>T T:106 C:1
EA2454	snippy:4.3.6	variation	1254225	1254225	.	.	0	note=snp T=>C C:96 T:0
EA2454	snippy:4.3.6	variation	1254309	1254309	.	.	0	note=snp C=>T T:97 C:0
EA2454	snippy:4.3.6	variation	1254368	1254368	.	.	0	note=snp T=>C C:88 T:0
EA2454	snippy:4.3.6	variation	1254812	1254812	.	.	0	note=snp C=>T T:90 C:1
EA2454	snippy:4.3.6	variation	1255044	1255044	.	.	0	note=snp T=>G G:79 T:0
EA2454	snippy:4.3.6	variation	1255080	1255080	.	.	0	note=snp T=>C C:79 T:0
EA2454	snippy:4.3.6	variation	1255245	1255245	.	.	0	note=snp A=>G G:67 A:0
EA2454	snippy:4.3.6	variation	1255251	1255251	.	.	0	note=snp G=>C C:71 G:0
EA2454	snippy:4.3.6	variation	1255414	1255414	.	.	0	note=snp T=>C C:62 T:0
EA2454	snippy:4.3.6	variation	1255505	1255505	.	.	0	note=snp G=>A A:68 G:1
EA2454	snippy:4.3.6	variation	1255549	1255549	.	.	0	note=snp A=>G G:74 A:0
EA2454	snippy:4.3.6	variation	1256188	1256188	.	.	0	note=complex TACGTGT=>CACATGC CACATGC:74 TACGTGT:0
EA2454	snippy:4.3.6	variation	1256263	1256263	.	.	0	note=snp T=>C C:79 T:0
EA2454	snippy:4.3.6	variation	1256374	1256374	.	.	0	note=complex AT=>GTTG GTTG:78 AT:0
EA2454	snippy:4.3.6	variation	1256506	1256506	.	.	0	note=snp C=>T T:87 C:0
EA2454	snippy:4.3.6	variation	1256581	1256581	.	.	0	note=snp G=>C C:80 G:0
EA2454	snippy:4.3.6	variation	1256617	1256617	.	.	0	note=snp G=>A A:72 G:0
EA2454	snippy:4.3.6	variation	1256659	1256659	.	.	0	note=complex TATGCGT=>AATACGA AATACGA:68 TATGCGT:0
EA2454	snippy:4.3.6	variation	1256788	1256788	.	.	0	note=snp G=>C C:83 G:1
EA2454	snippy:4.3.6	variation	1256851	1256851	.	.	0	note=snp A=>G G:80 A:1
EA2454	snippy:4.3.6	variation	1256860	1256860	.	.	0	note=snp A=>G G:89 A:0
EA2454	snippy:4.3.6	variation	1257333	1257333	.	.	0	note=snp C=>T T:102 C:0
EA2454	snippy:4.3.6	variation	1257600	1257600	.	.	0	note=snp G=>A A:89 G:0
EA2454	snippy:4.3.6	variation	1257615	1257615	.	.	0	note=snp A=>C C:88 A:2
EA2454	snippy:4.3.6	variation	1257625	1257625	.	.	0	note=snp A=>T T:91 A:0
EA2454	snippy:4.3.6	variation	1257636	1257636	.	.	0	note=snp C=>T T:98 C:0
EA2454	snippy:4.3.6	variation	1257648	1257648	.	.	0	note=snp C=>T T:96 C:0
EA2454	snippy:4.3.6	variation	1257657	1257657	.	.	0	note=snp C=>A A:101 C:1
EA2454	snippy:4.3.6	variation	1257753	1257753	.	.	0	note=snp C=>T T:98 C:1
EA2454	snippy:4.3.6	variation	1257807	1257807	.	.	0	note=snp A=>G G:88 A:0
EA2454	snippy:4.3.6	variation	1257864	1257864	.	.	0	note=snp C=>T T:80 C:0
EA2454	snippy:4.3.6	variation	1258050	1258050	.	.	0	note=snp T=>C C:79 T:0
EA2454	snippy:4.3.6	variation	1258083	1258083	.	.	0	note=snp C=>T T:80 C:0
EA2454	snippy:4.3.6	variation	1258098	1258098	.	.	0	note=snp A=>G G:80 A:0
EA2454	snippy:4.3.6	variation	1258134	1258134	.	.	0	note=snp T=>G G:71 T:0
EA2454	snippy:4.3.6	variation	1258653	1258653	.	.	0	note=snp A=>G G:71 A:1
EA2454	snippy:4.3.6	variation	1258681	1258681	.	.	0	note=snp T=>C C:79 T:0
EA2454	snippy:4.3.6	variation	1258722	1258722	.	.	0	note=snp T=>C C:77 T:0
EA2454	snippy:4.3.6	variation	1258728	1258728	.	.	0	note=snp T=>C C:79 T:0
EA2454	snippy:4.3.6	variation	1258743	1258743	.	.	0	note=snp G=>C C:77 G:0
EA2454	snippy:4.3.6	variation	1258761	1258761	.	.	0	note=snp A=>G G:69 A:0
EA2454	snippy:4.3.6	variation	1258963	1258963	.	.	0	note=snp G=>A A:27 G:0
EA2454	snippy:4.3.6	variation	1258984	1258984	.	.	0	note=snp T=>C C:23 T:0
EA2454	snippy:4.3.6	variation	1259007	1259007	.	.	0	note=snp G=>A A:13 G:0
EA2454	snippy:4.3.6	variation	1259103	1259103	.	.	0	note=complex CTA=>TTG TTG:10 CTA:0
EA2454	snippy:4.3.6	variation	1259119	1259119	.	.	0	note=snp A=>G G:11 A:0
EA2454	snippy:4.3.6	variation	1259124	1259124	.	.	0	note=snp T=>G G:11 T:0
EA2454	snippy:4.3.6	variation	1259200	1259200	.	.	0	note=mnp CA=>TG TG:20 CA:0
EA2454	snippy:4.3.6	variation	1259310	1259310	.	.	0	note=snp A=>G G:46 A:0
EA2454	snippy:4.3.6	variation	1259406	1259406	.	.	0	note=snp G=>A A:59 G:0
EA2454	snippy:4.3.6	variation	1259565	1259565	.	.	0	note=snp A=>G G:72 A:1
EA2454	snippy:4.3.6	variation	1259601	1259601	.	.	0	note=snp T=>C C:84 T:0
EA2454	snippy:4.3.6	variation	1259625	1259625	.	.	0	note=snp T=>C C:84 T:0
EA2454	snippy:4.3.6	variation	1259637	1259637	.	.	0	note=snp C=>T T:85 C:2
EA2454	snippy:4.3.6	variation	1259772	1259772	.	.	0	note=complex TGGT=>AGGC AGGC:66 TGGT:0
EA2454	snippy:4.3.6	variation	1259781	1259781	.	.	0	note=snp T=>A A:69 T:2
EA2454	snippy:4.3.6	variation	1259793	1259793	.	.	0	note=complex CCGTTT=>ACGCTA ACGCTA:56 CCGTTT:0
EA2454	snippy:4.3.6	variation	1260209	1260209	.	.	0	note=snp G=>A A:114 G:1
EA2454	snippy:4.3.6	variation	1260689	1260689	.	.	0	note=snp G=>C C:82 G:1
EA2454	snippy:4.3.6	variation	1261876	1261876	.	.	0	note=snp A=>C C:51 A:0
EA2454	snippy:4.3.6	variation	1262125	1262125	.	.	0	note=del TA=>T T:46 TA:0
EA2454	snippy:4.3.6	variation	1264013	1264013	.	.	0	note=snp G=>A A:59 G:0
EA2454	snippy:4.3.6	variation	1271061	1271061	.	.	0	note=snp T=>G G:79 T:1
EA2454	snippy:4.3.6	variation	1271712	1271712	.	.	0	note=snp T=>G G:72 T:1
EA2454	snippy:4.3.6	variation	1272023	1272023	.	.	0	note=snp C=>A A:86 C:0
EA2454	snippy:4.3.6	variation	1272090	1272090	.	.	0	note=snp T=>C C:78 T:0
EA2454	snippy:4.3.6	variation	1272808	1272808	.	.	0	note=snp C=>T T:41 C:0
EA2454	snippy:4.3.6	variation	1272885	1272885	.	.	0	note=snp G=>A A:51 G:0
EA2454	snippy:4.3.6	variation	1272930	1272930	.	.	0	note=snp T=>C C:60 T:0
EA2454	snippy:4.3.6	variation	1273072	1273072	.	.	0	note=snp C=>A A:56 C:1
EA2454	snippy:4.3.6	variation	1273428	1273428	.	.	0	note=snp C=>T T:87 C:0
EA2454	snippy:4.3.6	variation	1274943	1274943	.	.	0	note=snp G=>T T:115 G:0
EA2454	snippy:4.3.6	variation	1275421	1275421	.	.	0	note=snp C=>T T:80 C:2
EA2454	snippy:4.3.6	variation	1276678	1276678	.	.	0	note=snp T=>G G:49 T:0
EA2454	snippy:4.3.6	variation	1277401	1277401	.	.	0	note=snp G=>T T:71 G:0
EA2454	snippy:4.3.6	variation	1280415	1280415	.	.	0	note=snp T=>A A:94 T:0
EA2454	snippy:4.3.6	variation	1280572	1280572	.	.	0	note=snp C=>A A:117 C:0
EA2454	snippy:4.3.6	variation	1302583	1302583	.	.	0	note=snp G=>A A:78 G:1
EA2454	snippy:4.3.6	variation	1303945	1303945	.	.	0	note=snp G=>T T:75 G:1
EA2454	snippy:4.3.6	variation	1306594	1306594	.	.	0	note=snp C=>T T:68 C:0
EA2454	snippy:4.3.6	variation	1307521	1307521	.	.	0	note=snp G=>T T:91 G:0
EA2454	snippy:4.3.6	variation	1309315	1309315	.	.	0	note=snp T=>C C:56 T:1
EA2454	snippy:4.3.6	variation	1310829	1310829	.	.	0	note=ins C=>CCAGCCACGTTGT CCAGCCACGTTGT:27 C:0
EA2454	snippy:4.3.6	variation	1312640	1312640	.	.	0	note=snp T=>A A:67 T:0
EA2454	snippy:4.3.6	variation	1312912	1312912	.	.	0	note=snp C=>T T:78 C:0
EA2454	snippy:4.3.6	variation	1314014	1314014	.	.	0	note=snp C=>T T:51 C:0
EA2454	snippy:4.3.6	variation	1316648	1316648	.	.	0	note=snp A=>G G:43 A:0
EA2454	snippy:4.3.6	variation	1317400	1317400	.	.	0	note=snp G=>A A:51 G:0
EA2454	snippy:4.3.6	variation	1317963	1317963	.	.	0	note=snp G=>A A:58 G:2
EA2454	snippy:4.3.6	variation	1320024	1320024	.	.	0	note=snp G=>A A:68 G:0
EA2454	snippy:4.3.6	variation	1320282	1320282	.	.	0	note=snp C=>A A:54 C:0
EA2454	snippy:4.3.6	variation	1320805	1320805	.	.	0	note=snp A=>G G:60 A:0
EA2454	snippy:4.3.6	variation	1322163	1322163	.	.	0	note=snp T=>C C:56 T:0
EA2454	snippy:4.3.6	variation	1322665	1322665	.	.	0	note=snp T=>C C:60 T:0
EA2454	snippy:4.3.6	variation	1322994	1322994	.	.	0	note=snp G=>C C:74 G:0
EA2454	snippy:4.3.6	variation	1331179	1331179	.	.	0	note=snp T=>G G:31 T:0
EA2454	snippy:4.3.6	variation	1332489	1332489	.	.	0	note=snp T=>A A:62 T:0
EA2454	snippy:4.3.6	variation	1334598	1334598	.	.	0	note=snp G=>A A:78 G:1
EA2454	snippy:4.3.6	variation	1335374	1335374	.	.	0	note=snp G=>A A:50 G:0
EA2454	snippy:4.3.6	variation	1335631	1335631	.	.	0	note=snp T=>G G:79 T:0
EA2454	snippy:4.3.6	variation	1336281	1336281	.	.	0	note=snp C=>T T:73 C:0
EA2454	snippy:4.3.6	variation	1337824	1337824	.	.	0	note=snp G=>A A:86 G:0
EA2454	snippy:4.3.6	variation	1338014	1338014	.	.	0	note=snp C=>A A:79 C:0
EA2454	snippy:4.3.6	variation	1340886	1340886	.	.	0	note=snp A=>C C:48 A:0
EA2454	snippy:4.3.6	variation	1345269	1345269	.	.	0	note=snp G=>A A:75 G:0
EA2454	snippy:4.3.6	variation	1345460	1345460	.	.	0	note=snp T=>G G:57 T:0
EA2454	snippy:4.3.6	variation	1345847	1345847	.	.	0	note=snp T=>C C:63 T:0
EA2454	snippy:4.3.6	variation	1348317	1348317	.	.	0	note=snp C=>T T:48 C:0
EA2454	snippy:4.3.6	variation	1348897	1348897	.	.	0	note=snp C=>T T:73 C:1
EA2454	snippy:4.3.6	variation	1349164	1349164	.	.	0	note=snp T=>A A:76 T:0
EA2454	snippy:4.3.6	variation	1349308	1349308	.	.	0	note=snp T=>G G:59 T:0
EA2454	snippy:4.3.6	variation	1351707	1351707	.	.	0	note=snp G=>C C:35 G:1
EA2454	snippy:4.3.6	variation	1352900	1352900	.	.	0	note=snp G=>A A:64 G:0
EA2454	snippy:4.3.6	variation	1353793	1353793	.	.	0	note=snp C=>T T:72 C:1
EA2454	snippy:4.3.6	variation	1358384	1358384	.	.	0	note=snp A=>G G:19 A:0
EA2454	snippy:4.3.6	variation	1359526	1359526	.	.	0	note=snp T=>C C:88 T:0
EA2454	snippy:4.3.6	variation	1360577	1360577	.	.	0	note=snp A=>G G:72 A:0
EA2454	snippy:4.3.6	variation	1364098	1364098	.	.	0	note=snp C=>A A:75 C:0
EA2454	snippy:4.3.6	variation	1364526	1364526	.	.	0	note=snp G=>T T:68 G:1
EA2454	snippy:4.3.6	variation	1364939	1364939	.	.	0	note=snp T=>C C:67 T:0
EA2454	snippy:4.3.6	variation	1368097	1368097	.	.	0	note=snp C=>T T:85 C:0
EA2454	snippy:4.3.6	variation	1371250	1371250	.	.	0	note=snp T=>C C:51 T:0
EA2454	snippy:4.3.6	variation	1371701	1371701	.	.	0	note=snp G=>T T:77 G:0
EA2454	snippy:4.3.6	variation	1372535	1372535	.	.	0	note=snp C=>T T:95 C:0
EA2454	snippy:4.3.6	variation	1372915	1372915	.	.	0	note=snp T=>A A:60 T:0
EA2454	snippy:4.3.6	variation	1373482	1373482	.	.	0	note=snp T=>C C:56 T:0
EA2454	snippy:4.3.6	variation	1373955	1373955	.	.	0	note=snp T=>G G:73 T:0
EA2454	snippy:4.3.6	variation	1374456	1374456	.	.	0	note=snp G=>A A:81 G:0
EA2454	snippy:4.3.6	variation	1378312	1378312	.	.	0	note=snp T=>C C:59 T:0
EA2454	snippy:4.3.6	variation	1379647	1379647	.	.	0	note=snp T=>C C:83 T:0
EA2454	snippy:4.3.6	variation	1382325	1382325	.	.	0	note=ins G=>GT GT:47 G:0
EA2454	snippy:4.3.6	variation	1382832	1382832	.	.	0	note=snp G=>A A:67 G:0
EA2454	snippy:4.3.6	variation	1387493	1387493	.	.	0	note=snp A=>G G:69 A:1
EA2454	snippy:4.3.6	variation	1388233	1388233	.	.	0	note=snp C=>T T:45 C:1
EA2454	snippy:4.3.6	variation	1388245	1388245	.	.	0	note=snp A=>C C:48 A:0
EA2454	snippy:4.3.6	variation	1388756	1388756	.	.	0	note=del GAACCGTTA=>G G:35 GAACCGTTA:0
EA2454	snippy:4.3.6	variation	1389636	1389636	.	.	0	note=snp C=>T T:81 C:0
EA2454	snippy:4.3.6	variation	1390838	1390838	.	.	0	note=snp C=>T T:79 C:1
EA2454	snippy:4.3.6	variation	1392166	1392166	.	.	0	note=snp G=>A A:79 G:0
EA2454	snippy:4.3.6	variation	1394015	1394015	.	.	0	note=snp G=>A A:55 G:0
EA2454	snippy:4.3.6	variation	1394505	1394505	.	.	0	note=snp A=>G G:69 A:0
EA2454	snippy:4.3.6	variation	1394928	1394928	.	.	0	note=snp C=>T T:69 C:0
EA2454	snippy:4.3.6	variation	1395169	1395169	.	.	0	note=snp G=>A A:80 G:0
EA2454	snippy:4.3.6	variation	1395933	1395933	.	.	0	note=snp A=>T T:52 A:0
EA2454	snippy:4.3.6	variation	1396368	1396368	.	.	0	note=ins A=>AT AT:61 A:1
EA2454	snippy:4.3.6	variation	1399163	1399163	.	.	0	note=snp A=>T T:56 A:0
EA2454	snippy:4.3.6	variation	1401264	1401264	.	.	0	note=snp A=>G G:77 A:0
EA2454	snippy:4.3.6	variation	1402805	1402805	.	.	0	note=snp C=>T T:81 C:0
EA2454	snippy:4.3.6	variation	1403366	1403366	.	.	0	note=snp C=>T T:62 C:0
EA2454	snippy:4.3.6	variation	1404418	1404418	.	.	0	note=ins C=>CCCCA CCCCA:21 C:1
EA2454	snippy:4.3.6	variation	1404490	1404490	.	.	0	note=ins C=>CG CG:59 C:0
EA2454	snippy:4.3.6	variation	1405719	1405719	.	.	0	note=snp G=>A A:41 G:0
EA2454	snippy:4.3.6	variation	1412805	1412805	.	.	0	note=snp C=>T T:71 C:0
EA2454	snippy:4.3.6	variation	1413295	1413295	.	.	0	note=snp T=>C C:49 T:0
EA2454	snippy:4.3.6	variation	1413932	1413932	.	.	0	note=snp C=>A A:50 C:0
EA2454	snippy:4.3.6	variation	1415888	1415888	.	.	0	note=del CA=>C C:73 CA:0
EA2454	snippy:4.3.6	variation	1416404	1416404	.	.	0	note=snp G=>T T:66 G:0
EA2454	snippy:4.3.6	variation	1416501	1416501	.	.	0	note=snp A=>C C:66 A:0
EA2454	snippy:4.3.6	variation	1418202	1418202	.	.	0	note=snp G=>A A:58 G:0
EA2454	snippy:4.3.6	variation	1422065	1422065	.	.	0	note=snp T=>A A:47 T:0
EA2454	snippy:4.3.6	variation	1422407	1422407	.	.	0	note=snp A=>G G:84 A:0
EA2454	snippy:4.3.6	variation	1422598	1422598	.	.	0	note=snp G=>A A:72 G:1
EA2454	snippy:4.3.6	variation	1426430	1426430	.	.	0	note=snp G=>A A:46 G:0
EA2454	snippy:4.3.6	variation	1427623	1427623	.	.	0	note=snp T=>C C:85 T:0
EA2454	snippy:4.3.6	variation	1428495	1428495	.	.	0	note=snp A=>T T:77 A:0
EA2454	snippy:4.3.6	variation	1430360	1430360	.	.	0	note=snp A=>C C:78 A:1
EA2454	snippy:4.3.6	variation	1432280	1432280	.	.	0	note=snp C=>T T:45 C:0
EA2454	snippy:4.3.6	variation	1435223	1435223	.	.	0	note=snp G=>A A:66 G:0
EA2454	snippy:4.3.6	variation	1437310	1437310	.	.	0	note=snp C=>T T:74 C:0
EA2454	snippy:4.3.6	variation	1438147	1438147	.	.	0	note=del CTGCGACAAAGTGCGTTCATTCCTTGACGATGCGCAGGCACAGCAAGCAGAACTGATTCGCGGGTCGAATGGACCAGCCGGAGAGGGATATTATGT=>C C:10 CTGCGACAAAGTGCGTTCATTCCTTGACGATGCGCAGGCACAGCAAGCAGAACTGATTCGCGGGTCGAATGGACCAGCCGGAGAGGGATATTATGT:0
EA2454	snippy:4.3.6	variation	1438672	1438672	.	.	0	note=snp A=>G G:84 A:0
EA2454	snippy:4.3.6	variation	1438897	1438897	.	.	0	note=snp G=>A A:51 G:1
EA2454	snippy:4.3.6	variation	1439109	1439109	.	.	0	note=snp C=>T T:68 C:0
EA2454	snippy:4.3.6	variation	1439881	1439881	.	.	0	note=snp G=>A A:74 G:0
EA2454	snippy:4.3.6	variation	1442531	1442531	.	.	0	note=snp A=>C C:72 A:1
EA2454	snippy:4.3.6	variation	1442757	1442757	.	.	0	note=snp G=>A A:80 G:1
EA2454	snippy:4.3.6	variation	1443080	1443080	.	.	0	note=del CG=>C C:22 CG:1
EA2454	snippy:4.3.6	variation	1443259	1443259	.	.	0	note=snp C=>T T:30 C:0
EA2454	snippy:4.3.6	variation	1443292	1443292	.	.	0	note=snp A=>G G:28 A:0
EA2454	snippy:4.3.6	variation	1443454	1443454	.	.	0	note=snp G=>A A:16 G:0
EA2454	snippy:4.3.6	variation	1443471	1443471	.	.	0	note=snp G=>T T:17 G:0
EA2454	snippy:4.3.6	variation	1443754	1443754	.	.	0	note=snp T=>A A:53 T:0
EA2454	snippy:4.3.6	variation	1445619	1445619	.	.	0	note=snp G=>A A:94 G:0
EA2454	snippy:4.3.6	variation	1448487	1448487	.	.	0	note=snp G=>A A:82 G:1
EA2454	snippy:4.3.6	variation	1448613	1448613	.	.	0	note=snp C=>T T:68 C:1
EA2454	snippy:4.3.6	variation	1450268	1450268	.	.	0	note=snp T=>C C:59 T:1
EA2454	snippy:4.3.6	variation	1451589	1451589	.	.	0	note=snp C=>A A:96 C:0
EA2454	snippy:4.3.6	variation	1452075	1452075	.	.	0	note=snp T=>C C:82 T:0
EA2454	snippy:4.3.6	variation	1452484	1452484	.	.	0	note=snp A=>C C:77 A:0
EA2454	snippy:4.3.6	variation	1454046	1454046	.	.	0	note=snp C=>T T:66 C:0
EA2454	snippy:4.3.6	variation	1454953	1454953	.	.	0	note=snp C=>T T:73 C:0
EA2454	snippy:4.3.6	variation	1455169	1455169	.	.	0	note=snp G=>A A:94 G:0
EA2454	snippy:4.3.6	variation	1455464	1455464	.	.	0	note=snp C=>T T:99 C:2
EA2454	snippy:4.3.6	variation	1457363	1457363	.	.	0	note=snp C=>T T:65 C:0
EA2454	snippy:4.3.6	variation	1458467	1458467	.	.	0	note=snp A=>G G:61 A:1
EA2454	snippy:4.3.6	variation	1459664	1459664	.	.	0	note=snp T=>G G:81 T:0
EA2454	snippy:4.3.6	variation	1465676	1465676	.	.	0	note=ins T=>TC TC:46 T:1
EA2454	snippy:4.3.6	variation	1467642	1467642	.	.	0	note=snp C=>G G:30 C:0
EA2454	snippy:4.3.6	variation	1467830	1467830	.	.	0	note=snp G=>T T:49 G:0
EA2454	snippy:4.3.6	variation	1476139	1476139	.	.	0	note=snp T=>C C:62 T:0
EA2454	snippy:4.3.6	variation	1477902	1477902	.	.	0	note=snp G=>T T:77 G:0
EA2454	snippy:4.3.6	variation	1478494	1478494	.	.	0	note=snp G=>C C:53 G:0
EA2454	snippy:4.3.6	variation	1479473	1479473	.	.	0	note=snp T=>C C:52 T:0
EA2454	snippy:4.3.6	variation	1480708	1480708	.	.	0	note=snp T=>G G:74 T:2
EA2454	snippy:4.3.6	variation	1482112	1482112	.	.	0	note=snp G=>T T:57 G:0
EA2454	snippy:4.3.6	variation	1482871	1482871	.	.	0	note=snp C=>A A:73 C:1
EA2454	snippy:4.3.6	variation	1483990	1483990	.	.	0	note=snp C=>T T:70 C:0
EA2454	snippy:4.3.6	variation	1484872	1484872	.	.	0	note=snp C=>A A:25 C:0
EA2454	snippy:4.3.6	variation	1486671	1486671	.	.	0	note=snp A=>C C:94 A:0
EA2454	snippy:4.3.6	variation	1488874	1488874	.	.	0	note=snp C=>T T:68 C:0
EA2454	snippy:4.3.6	variation	1489958	1489958	.	.	0	note=snp C=>T T:62 C:0
EA2454	snippy:4.3.6	variation	1490185	1490185	.	.	0	note=snp C=>T T:69 C:0
EA2454	snippy:4.3.6	variation	1491226	1491226	.	.	0	note=snp T=>C C:47 T:0
EA2454	snippy:4.3.6	variation	1491674	1491674	.	.	0	note=snp A=>G G:89 A:0
EA2454	snippy:4.3.6	variation	1492263	1492263	.	.	0	note=snp A=>C C:78 A:0
EA2454	snippy:4.3.6	variation	1492527	1492527	.	.	0	note=ins C=>CA CA:59 C:0
EA2454	snippy:4.3.6	variation	1495581	1495581	.	.	0	note=snp T=>A A:65 T:0
EA2454	snippy:4.3.6	variation	1501602	1501602	.	.	0	note=snp C=>T T:25 C:0
EA2454	snippy:4.3.6	variation	1502972	1502972	.	.	0	note=snp G=>A A:68 G:0
EA2454	snippy:4.3.6	variation	1504094	1504094	.	.	0	note=snp C=>T T:86 C:0
EA2454	snippy:4.3.6	variation	1505419	1505419	.	.	0	note=snp G=>A A:61 G:0
EA2454	snippy:4.3.6	variation	1506412	1506412	.	.	0	note=snp T=>C C:61 T:0
EA2454	snippy:4.3.6	variation	1511244	1511244	.	.	0	note=snp C=>G G:109 C:0
EA2454	snippy:4.3.6	variation	1512766	1512766	.	.	0	note=snp G=>A A:72 G:0
EA2454	snippy:4.3.6	variation	1516885	1516885	.	.	0	note=snp G=>A A:19 G:0
EA2454	snippy:4.3.6	variation	1516969	1516969	.	.	0	note=snp A=>G G:25 A:0
EA2454	snippy:4.3.6	variation	1517437	1517437	.	.	0	note=snp T=>C C:32 T:0
EA2454	snippy:4.3.6	variation	1518455	1518455	.	.	0	note=snp G=>A A:54 G:0
EA2454	snippy:4.3.6	variation	1521514	1521514	.	.	0	note=snp C=>A A:46 C:0
EA2454	snippy:4.3.6	variation	1521733	1521733	.	.	0	note=snp A=>G G:48 A:0
EA2454	snippy:4.3.6	variation	1522866	1522866	.	.	0	note=snp A=>T T:85 A:0
EA2454	snippy:4.3.6	variation	1525679	1525679	.	.	0	note=snp C=>T T:69 C:0
EA2454	snippy:4.3.6	variation	1530539	1530539	.	.	0	note=snp T=>A A:59 T:0
EA2454	snippy:4.3.6	variation	1532264	1532264	.	.	0	note=snp G=>T T:44 G:0
EA2454	snippy:4.3.6	variation	1533339	1533339	.	.	0	note=snp A=>G G:85 A:1
EA2454	snippy:4.3.6	variation	1534292	1534292	.	.	0	note=snp A=>G G:46 A:0
EA2454	snippy:4.3.6	variation	1534629	1534629	.	.	0	note=snp A=>G G:55 A:0
EA2454	snippy:4.3.6	variation	1535288	1535288	.	.	0	note=snp G=>A A:36 G:0
EA2454	snippy:4.3.6	variation	1536940	1536940	.	.	0	note=snp C=>T T:53 C:0
EA2454	snippy:4.3.6	variation	1538797	1538797	.	.	0	note=snp G=>A A:70 G:0
EA2454	snippy:4.3.6	variation	1542034	1542034	.	.	0	note=snp A=>G G:66 A:0
EA2454	snippy:4.3.6	variation	1543910	1543910	.	.	0	note=snp T=>G G:53 T:0
EA2454	snippy:4.3.6	variation	1544768	1544768	.	.	0	note=del GT=>G G:74 GT:0
EA2454	snippy:4.3.6	variation	1544958	1544958	.	.	0	note=snp C=>T T:84 C:0
EA2454	snippy:4.3.6	variation	1548222	1548222	.	.	0	note=snp G=>A A:73 G:0
EA2454	snippy:4.3.6	variation	1548845	1548845	.	.	0	note=snp T=>C C:86 T:0
EA2454	snippy:4.3.6	variation	1549828	1549828	.	.	0	note=snp T=>C C:74 T:1
EA2454	snippy:4.3.6	variation	1549834	1549834	.	.	0	note=del ACGCCATTG=>A A:66 ACGCCATTG:0
EA2454	snippy:4.3.6	variation	1549884	1549884	.	.	0	note=snp C=>T T:74 C:0
EA2454	snippy:4.3.6	variation	1550347	1550347	.	.	0	note=snp C=>T T:53 C:0
EA2454	snippy:4.3.6	variation	1553013	1553013	.	.	0	note=snp G=>T T:63 G:0
EA2454	snippy:4.3.6	variation	1553329	1553329	.	.	0	note=snp T=>A A:61 T:0
EA2454	snippy:4.3.6	variation	1556519	1556519	.	.	0	note=snp A=>G G:69 A:0
EA2454	snippy:4.3.6	variation	1557381	1557381	.	.	0	note=snp G=>C C:82 G:0
EA2454	snippy:4.3.6	variation	1557966	1557966	.	.	0	note=snp A=>G G:79 A:0
EA2454	snippy:4.3.6	variation	1558095	1558095	.	.	0	note=snp G=>A A:67 G:2
EA2454	snippy:4.3.6	variation	1559525	1559525	.	.	0	note=snp G=>A A:53 G:0
EA2454	snippy:4.3.6	variation	1559542	1559542	.	.	0	note=snp T=>C C:53 T:0
EA2454	snippy:4.3.6	variation	1560679	1560679	.	.	0	note=snp G=>A A:87 G:0
EA2454	snippy:4.3.6	variation	1561400	1561400	.	.	0	note=snp T=>G G:76 T:0
EA2454	snippy:4.3.6	variation	1561721	1561721	.	.	0	note=snp C=>T T:74 C:0
EA2454	snippy:4.3.6	variation	1561865	1561865	.	.	0	note=snp A=>T T:85 A:0
EA2454	snippy:4.3.6	variation	1562488	1562488	.	.	0	note=snp G=>A A:65 G:0
EA2454	snippy:4.3.6	variation	1564845	1564845	.	.	0	note=snp C=>T T:60 C:0
EA2454	snippy:4.3.6	variation	1569692	1569692	.	.	0	note=snp C=>T T:69 C:0
EA2454	snippy:4.3.6	variation	1570233	1570233	.	.	0	note=snp A=>G G:66 A:0
EA2454	snippy:4.3.6	variation	1572176	1572176	.	.	0	note=snp G=>C C:72 G:0
EA2454	snippy:4.3.6	variation	1572713	1572713	.	.	0	note=snp C=>G G:49 C:0
EA2454	snippy:4.3.6	variation	1572959	1572959	.	.	0	note=snp C=>T T:56 C:0
EA2454	snippy:4.3.6	variation	1573777	1573777	.	.	0	note=snp G=>A A:46 G:0
EA2454	snippy:4.3.6	variation	1573803	1573803	.	.	0	note=snp T=>A A:40 T:0
EA2454	snippy:4.3.6	variation	1575548	1575548	.	.	0	note=snp T=>C C:66 T:0
EA2454	snippy:4.3.6	variation	1576203	1576203	.	.	0	note=del CCGCCGGGAATGGT=>C C:63 CCGCCGGGAATGGT:0
EA2454	snippy:4.3.6	variation	1577536	1577536	.	.	0	note=snp G=>A A:85 G:2
EA2454	snippy:4.3.6	variation	1582491	1582491	.	.	0	note=snp C=>T T:67 C:0
EA2454	snippy:4.3.6	variation	1585906	1585906	.	.	0	note=snp A=>G G:106 A:0
EA2454	snippy:4.3.6	variation	1587185	1587185	.	.	0	note=mnp AA=>GT GT:65 AA:0
EA2454	snippy:4.3.6	variation	1587706	1587706	.	.	0	note=snp T=>A A:66 T:0
EA2454	snippy:4.3.6	variation	1587792	1587792	.	.	0	note=snp A=>C C:66 A:0
EA2454	snippy:4.3.6	variation	1591352	1591352	.	.	0	note=snp C=>T T:64 C:0
EA2454	snippy:4.3.6	variation	1591444	1591444	.	.	0	note=snp C=>T T:66 C:0
EA2454	snippy:4.3.6	variation	1592505	1592505	.	.	0	note=snp T=>C C:53 T:0
EA2454	snippy:4.3.6	variation	1593199	1593199	.	.	0	note=snp A=>C C:69 A:0
EA2454	snippy:4.3.6	variation	1596282	1596282	.	.	0	note=snp T=>G G:77 T:1
EA2454	snippy:4.3.6	variation	1597496	1597496	.	.	0	note=snp T=>C C:42 T:0
EA2454	snippy:4.3.6	variation	1598748	1598748	.	.	0	note=snp C=>T T:62 C:3
EA2454	snippy:4.3.6	variation	1598881	1598881	.	.	0	note=snp C=>T T:73 C:0
EA2454	snippy:4.3.6	variation	1598906	1598906	.	.	0	note=snp A=>G G:74 A:0
EA2454	snippy:4.3.6	variation	1599013	1599013	.	.	0	note=snp G=>A A:64 G:0
EA2454	snippy:4.3.6	variation	1599906	1599906	.	.	0	note=snp T=>C C:51 T:0
EA2454	snippy:4.3.6	variation	1600919	1600919	.	.	0	note=snp A=>G G:80 A:0
EA2454	snippy:4.3.6	variation	1605077	1605077	.	.	0	note=snp G=>A A:106 G:0
EA2454	snippy:4.3.6	variation	1605269	1605269	.	.	0	note=snp T=>C C:99 T:0
EA2454	snippy:4.3.6	variation	1606254	1606254	.	.	0	note=snp T=>C C:86 T:0
EA2454	snippy:4.3.6	variation	1607538	1607538	.	.	0	note=snp C=>T T:97 C:0
EA2454	snippy:4.3.6	variation	1610209	1610209	.	.	0	note=snp T=>A A:51 T:0
EA2454	snippy:4.3.6	variation	1612435	1612435	.	.	0	note=snp G=>A A:78 G:0
EA2454	snippy:4.3.6	variation	1613406	1613406	.	.	0	note=snp T=>A A:29 T:0
EA2454	snippy:4.3.6	variation	1613463	1613463	.	.	0	note=snp A=>G G:33 A:0
EA2454	snippy:4.3.6	variation	1613804	1613804	.	.	0	note=snp T=>C C:51 T:0
EA2454	snippy:4.3.6	variation	1614409	1614409	.	.	0	note=snp G=>T T:78 G:0
EA2454	snippy:4.3.6	variation	1616447	1616447	.	.	0	note=snp G=>T T:66 G:0
EA2454	snippy:4.3.6	variation	1616475	1616475	.	.	0	note=snp A=>G G:72 A:0
EA2454	snippy:4.3.6	variation	1616872	1616872	.	.	0	note=snp G=>T T:65 G:0
EA2454	snippy:4.3.6	variation	1617011	1617011	.	.	0	note=del AG=>A A:64 AG:1
EA2454	snippy:4.3.6	variation	1617684	1617684	.	.	0	note=snp G=>C C:69 G:0
EA2454	snippy:4.3.6	variation	1617963	1617963	.	.	0	note=snp T=>C C:63 T:0
EA2454	snippy:4.3.6	variation	1618194	1618194	.	.	0	note=snp C=>T T:66 C:0
EA2454	snippy:4.3.6	variation	1619109	1619109	.	.	0	note=snp T=>A A:11 T:0
EA2454	snippy:4.3.6	variation	1619136	1619136	.	.	0	note=snp T=>C C:20 T:0
EA2454	snippy:4.3.6	variation	1619178	1619178	.	.	0	note=snp T=>A A:30 T:0
EA2454	snippy:4.3.6	variation	1619184	1619184	.	.	0	note=snp T=>C C:32 T:0
EA2454	snippy:4.3.6	variation	1619194	1619194	.	.	0	note=complex ATTTC=>TTTTT TTTTT:30 ATTTC:0
EA2454	snippy:4.3.6	variation	1619213	1619213	.	.	0	note=snp C=>T T:34 C:0
EA2454	snippy:4.3.6	variation	1619275	1619275	.	.	0	note=complex TCGC=>GCGT GCGT:47 TCGC:0
EA2454	snippy:4.3.6	variation	1619314	1619314	.	.	0	note=snp G=>A A:63 G:0
EA2454	snippy:4.3.6	variation	1619347	1619347	.	.	0	note=snp G=>A A:56 G:0
EA2454	snippy:4.3.6	variation	1619359	1619359	.	.	0	note=snp C=>T T:61 C:0
EA2454	snippy:4.3.6	variation	1619368	1619368	.	.	0	note=snp G=>A A:60 G:0
EA2454	snippy:4.3.6	variation	1619386	1619386	.	.	0	note=snp G=>T T:56 G:0
EA2454	snippy:4.3.6	variation	1619394	1619394	.	.	0	note=snp C=>T T:57 C:0
EA2454	snippy:4.3.6	variation	1619407	1619407	.	.	0	note=snp C=>T T:61 C:2
EA2454	snippy:4.3.6	variation	1619425	1619425	.	.	0	note=snp T=>C C:62 T:0
EA2454	snippy:4.3.6	variation	1619472	1619472	.	.	0	note=snp G=>C C:60 G:0
EA2454	snippy:4.3.6	variation	1619479	1619479	.	.	0	note=snp T=>C C:58 T:1
EA2454	snippy:4.3.6	variation	1619503	1619503	.	.	0	note=snp T=>C C:58 T:0
EA2454	snippy:4.3.6	variation	1619524	1619524	.	.	0	note=complex GTGTAGA=>ATGCAGG ATGCAGG:50 GTGTAGA:0
EA2454	snippy:4.3.6	variation	1619539	1619539	.	.	0	note=snp G=>A A:59 G:0
EA2454	snippy:4.3.6	variation	1619572	1619572	.	.	0	note=complex GCCA=>ACCG ACCG:53 GCCA:0
EA2454	snippy:4.3.6	variation	1619587	1619587	.	.	0	note=snp G=>T T:54 G:0
EA2454	snippy:4.3.6	variation	1619602	1619602	.	.	0	note=snp C=>T T:50 C:0
EA2454	snippy:4.3.6	variation	1619608	1619608	.	.	0	note=complex CAGATGGTTTTTT=>TAAGTGATTCTTC TAAGTGATTCTTC:44 CAGATGGTTTTTT:0
EA2454	snippy:4.3.6	variation	1619677	1619677	.	.	0	note=snp A=>G G:57 A:0
EA2454	snippy:4.3.6	variation	1619683	1619683	.	.	0	note=complex AGAT=>GGAA GGAA:50 AGAT:0
EA2454	snippy:4.3.6	variation	1619696	1619696	.	.	0	note=complex TTC=>CTT CTT:53 TTC:0
EA2454	snippy:4.3.6	variation	1619752	1619752	.	.	0	note=snp G=>A A:47 G:0
EA2454	snippy:4.3.6	variation	1619761	1619761	.	.	0	note=snp T=>C C:47 T:0
EA2454	snippy:4.3.6	variation	1619773	1619773	.	.	0	note=snp A=>T T:50 A:0
EA2454	snippy:4.3.6	variation	1619806	1619806	.	.	0	note=snp A=>G G:45 A:0
EA2454	snippy:4.3.6	variation	1619813	1619813	.	.	0	note=complex TGA=>AGG AGG:46 TGA:0
EA2454	snippy:4.3.6	variation	1619830	1619830	.	.	0	note=complex ACA=>GCT GCT:44 ACA:0
EA2454	snippy:4.3.6	variation	1619848	1619848	.	.	0	note=complex GGA=>AGC AGC:47 GGA:0
EA2454	snippy:4.3.6	variation	1619882	1619882	.	.	0	note=snp T=>C C:45 T:0
EA2454	snippy:4.3.6	variation	1619910	1619910	.	.	0	note=snp C=>T T:41 C:0
EA2454	snippy:4.3.6	variation	1619916	1619916	.	.	0	note=snp T=>G G:42 T:0
EA2454	snippy:4.3.6	variation	1619923	1619923	.	.	0	note=snp A=>G G:40 A:0
EA2454	snippy:4.3.6	variation	1619929	1619929	.	.	0	note=snp A=>C C:40 A:0
EA2454	snippy:4.3.6	variation	1619934	1619934	.	.	0	note=complex TGCCT=>CGCCG CGCCG:39 TGCCT:0
EA2454	snippy:4.3.6	variation	1619943	1619943	.	.	0	note=snp C=>T T:38 C:0
EA2454	snippy:4.3.6	variation	1619963	1619963	.	.	0	note=snp A=>C C:36 A:0
EA2454	snippy:4.3.6	variation	1619995	1619995	.	.	0	note=snp A=>G G:48 A:0
EA2454	snippy:4.3.6	variation	1620001	1620001	.	.	0	note=snp T=>C C:47 T:0
EA2454	snippy:4.3.6	variation	1620013	1620013	.	.	0	note=snp G=>A A:47 G:0
EA2454	snippy:4.3.6	variation	1620028	1620028	.	.	0	note=snp T=>C C:44 T:0
EA2454	snippy:4.3.6	variation	1620040	1620040	.	.	0	note=snp T=>C C:45 T:0
EA2454	snippy:4.3.6	variation	1620052	1620052	.	.	0	note=snp T=>C C:46 T:0
EA2454	snippy:4.3.6	variation	1620063	1620063	.	.	0	note=snp A=>G G:49 A:0
EA2454	snippy:4.3.6	variation	1620111	1620111	.	.	0	note=snp A=>T T:52 A:0
EA2454	snippy:4.3.6	variation	1620124	1620124	.	.	0	note=snp G=>A A:57 G:0
EA2454	snippy:4.3.6	variation	1620139	1620139	.	.	0	note=snp C=>T T:61 C:0
EA2454	snippy:4.3.6	variation	1620196	1620196	.	.	0	note=snp C=>T T:56 C:0
EA2454	snippy:4.3.6	variation	1620203	1620203	.	.	0	note=complex TGA=>CGG CGG:52 TGA:0
EA2454	snippy:4.3.6	variation	1620238	1620238	.	.	0	note=complex GTCA=>ATCG ATCG:48 GTCA:0
EA2454	snippy:4.3.6	variation	1620250	1620250	.	.	0	note=snp G=>A A:50 G:0
EA2454	snippy:4.3.6	variation	1620255	1620255	.	.	0	note=snp T=>C C:47 T:0
EA2454	snippy:4.3.6	variation	1620304	1620304	.	.	0	note=snp A=>G G:53 A:0
EA2454	snippy:4.3.6	variation	1620313	1620313	.	.	0	note=snp A=>G G:49 A:0
EA2454	snippy:4.3.6	variation	1620322	1620322	.	.	0	note=del ATCTTCCTCTTCC=>A A:34 ATCTTCCTCTTCC:0
EA2454	snippy:4.3.6	variation	1620374	1620374	.	.	0	note=complex ATTTT=>GTTTG GTTTG:47 ATTTT:0
EA2454	snippy:4.3.6	variation	1620403	1620403	.	.	0	note=snp A=>T T:49 A:0
EA2454	snippy:4.3.6	variation	1620427	1620427	.	.	0	note=snp T=>A A:51 T:0
EA2454	snippy:4.3.6	variation	1620503	1620503	.	.	0	note=snp C=>A A:49 C:0
EA2454	snippy:4.3.6	variation	1620785	1620785	.	.	0	note=snp T=>C C:72 T:0
EA2454	snippy:4.3.6	variation	1620819	1620819	.	.	0	note=snp A=>G G:72 A:0
EA2454	snippy:4.3.6	variation	1620828	1620828	.	.	0	note=snp T=>C C:70 T:0
EA2454	snippy:4.3.6	variation	1620915	1620915	.	.	0	note=snp A=>T T:70 A:0
EA2454	snippy:4.3.6	variation	1621047	1621047	.	.	0	note=snp C=>G G:76 C:0
EA2454	snippy:4.3.6	variation	1621140	1621140	.	.	0	note=snp C=>A A:70 C:1
EA2454	snippy:4.3.6	variation	1621305	1621305	.	.	0	note=snp G=>T T:73 G:1
EA2454	snippy:4.3.6	variation	1621340	1621340	.	.	0	note=snp A=>G G:72 A:0
EA2454	snippy:4.3.6	variation	1621358	1621358	.	.	0	note=snp G=>A A:77 G:0
EA2454	snippy:4.3.6	variation	1621385	1621385	.	.	0	note=snp C=>T T:86 C:0
EA2454	snippy:4.3.6	variation	1622009	1622009	.	.	0	note=snp C=>T T:47 C:0
EA2454	snippy:4.3.6	variation	1622024	1622024	.	.	0	note=snp T=>G G:49 T:0
EA2454	snippy:4.3.6	variation	1622095	1622095	.	.	0	note=snp C=>T T:48 C:0
EA2454	snippy:4.3.6	variation	1622100	1622100	.	.	0	note=snp A=>G G:49 A:0
EA2454	snippy:4.3.6	variation	1622123	1622123	.	.	0	note=snp C=>T T:41 C:0
EA2454	snippy:4.3.6	variation	1622132	1622132	.	.	0	note=snp A=>G G:40 A:0
EA2454	snippy:4.3.6	variation	1622163	1622163	.	.	0	note=ins G=>GC GC:28 G:0
EA2454	snippy:4.3.6	variation	1624169	1624169	.	.	0	note=snp A=>G G:42 A:0
EA2454	snippy:4.3.6	variation	1624244	1624244	.	.	0	note=snp C=>T T:44 C:0
EA2454	snippy:4.3.6	variation	1624279	1624279	.	.	0	note=complex GT=>TC TC:33 GT:0
EA2454	snippy:4.3.6	variation	1624285	1624285	.	.	0	note=snp A=>C C:33 A:0
EA2454	snippy:4.3.6	variation	1624316	1624316	.	.	0	note=snp C=>A A:29 C:0
EA2454	snippy:4.3.6	variation	1624351	1624351	.	.	0	note=complex GT=>TC TC:21 GT:0
EA2454	snippy:4.3.6	variation	1624391	1624391	.	.	0	note=snp A=>C C:11 A:0
EA2454	snippy:4.3.6	variation	1624869	1624869	.	.	0	note=snp T=>C C:33 T:0
EA2454	snippy:4.3.6	variation	1624905	1624905	.	.	0	note=snp C=>A A:41 C:0
EA2454	snippy:4.3.6	variation	1624956	1624956	.	.	0	note=snp C=>T T:50 C:0
EA2454	snippy:4.3.6	variation	1624998	1624998	.	.	0	note=complex CCCG=>TCCA TCCA:57 CCCG:0
EA2454	snippy:4.3.6	variation	1625007	1625007	.	.	0	note=snp A=>G G:59 A:0
EA2454	snippy:4.3.6	variation	1625089	1625089	.	.	0	note=snp C=>T T:56 C:0
EA2454	snippy:4.3.6	variation	1625102	1625102	.	.	0	note=complex GCAAA=>ACAAG ACAAG:55 GCAAA:0
EA2454	snippy:4.3.6	variation	1625124	1625124	.	.	0	note=snp C=>T T:58 C:0
EA2454	snippy:4.3.6	variation	1625175	1625175	.	.	0	note=snp T=>C C:72 T:0
EA2454	snippy:4.3.6	variation	1625184	1625184	.	.	0	note=complex TGGC=>CGGT CGGT:73 TGGC:0
EA2454	snippy:4.3.6	variation	1625235	1625235	.	.	0	note=snp A=>G G:87 A:0
EA2454	snippy:4.3.6	variation	1625262	1625262	.	.	0	note=snp A=>C C:94 A:0
EA2454	snippy:4.3.6	variation	1625502	1625502	.	.	0	note=snp G=>A A:89 G:0
EA2454	snippy:4.3.6	variation	1625526	1625526	.	.	0	note=snp T=>G G:82 T:1
EA2454	snippy:4.3.6	variation	1625541	1625541	.	.	0	note=snp T=>C C:76 T:1
EA2454	snippy:4.3.6	variation	1625589	1625589	.	.	0	note=snp C=>T T:79 C:0
EA2454	snippy:4.3.6	variation	1625832	1625832	.	.	0	note=complex CGCACAC=>TGCGCAT TGCGCAT:65 CGCACAC:0
EA2454	snippy:4.3.6	variation	1625853	1625853	.	.	0	note=snp T=>G G:64 T:0
EA2454	snippy:4.3.6	variation	1625859	1625859	.	.	0	note=complex AGTA=>GGTG GGTG:56 AGTA:0
EA2454	snippy:4.3.6	variation	1625867	1625867	.	.	0	note=snp C=>T T:60 C:0
EA2454	snippy:4.3.6	variation	1625874	1625874	.	.	0	note=snp T=>C C:58 T:0
EA2454	snippy:4.3.6	variation	1625895	1625895	.	.	0	note=snp A=>G G:55 A:0
EA2454	snippy:4.3.6	variation	1625960	1625960	.	.	0	note=snp A=>G G:51 A:1
EA2454	snippy:4.3.6	variation	1625967	1625967	.	.	0	note=snp G=>C C:52 G:0
EA2454	snippy:4.3.6	variation	1625972	1625972	.	.	0	note=snp A=>G G:50 A:0
EA2454	snippy:4.3.6	variation	1625984	1625984	.	.	0	note=snp T=>C C:47 T:0
EA2454	snippy:4.3.6	variation	1626010	1626010	.	.	0	note=snp G=>A A:52 G:0
EA2454	snippy:4.3.6	variation	1626136	1626136	.	.	0	note=snp T=>C C:36 T:1
EA2454	snippy:4.3.6	variation	1626152	1626152	.	.	0	note=snp A=>C C:33 A:0
EA2454	snippy:4.3.6	variation	1626163	1626163	.	.	0	note=snp C=>A A:30 C:0
EA2454	snippy:4.3.6	variation	1626180	1626180	.	.	0	note=snp A=>C C:28 A:0
EA2454	snippy:4.3.6	variation	1626189	1626189	.	.	0	note=complex ACTGG=>GCTGA GCTGA:25 ACTGG:0
EA2454	snippy:4.3.6	variation	1626258	1626258	.	.	0	note=complex GATCCAG=>AATTGAA AATTGAA:10 GATCCAG:0
EA2454	snippy:4.3.6	variation	1626270	1626270	.	.	0	note=snp C=>A A:10 C:0
EA2454	snippy:4.3.6	variation	1629119	1629119	.	.	0	note=snp C=>G G:11 C:0
EA2454	snippy:4.3.6	variation	1629125	1629125	.	.	0	note=complex GTGT=>ATGC ATGC:11 GTGT:0
EA2454	snippy:4.3.6	variation	1629156	1629156	.	.	0	note=snp A=>G G:11 A:0
EA2454	snippy:4.3.6	variation	1629237	1629237	.	.	0	note=snp T=>A A:17 T:0
EA2454	snippy:4.3.6	variation	1629255	1629255	.	.	0	note=snp G=>A A:18 G:0
EA2454	snippy:4.3.6	variation	1629285	1629285	.	.	0	note=complex GTAC=>ATAT ATAT:24 GTAC:0
EA2454	snippy:4.3.6	variation	1629295	1629295	.	.	0	note=complex ACA=>TCT TCT:24 ACA:0
EA2454	snippy:4.3.6	variation	1629306	1629306	.	.	0	note=snp C=>G G:23 C:0
EA2454	snippy:4.3.6	variation	1629336	1629336	.	.	0	note=snp T=>G G:18 T:0
EA2454	snippy:4.3.6	variation	1629354	1629354	.	.	0	note=snp T=>G G:14 T:0
EA2454	snippy:4.3.6	variation	1629399	1629399	.	.	0	note=snp G=>A A:12 G:0
EA2454	snippy:4.3.6	variation	1629538	1629538	.	.	0	note=snp A=>C C:19 A:0
EA2454	snippy:4.3.6	variation	1629565	1629565	.	.	0	note=snp A=>G G:23 A:0
EA2454	snippy:4.3.6	variation	1629718	1629718	.	.	0	note=snp A=>G G:51 A:0
EA2454	snippy:4.3.6	variation	1629890	1629890	.	.	0	note=snp G=>A A:50 G:0
EA2454	snippy:4.3.6	variation	1630016	1630016	.	.	0	note=snp T=>C C:44 T:0
EA2454	snippy:4.3.6	variation	1630105	1630105	.	.	0	note=snp G=>A A:49 G:0
EA2454	snippy:4.3.6	variation	1630127	1630127	.	.	0	note=snp A=>C C:50 A:2
EA2454	snippy:4.3.6	variation	1630223	1630223	.	.	0	note=snp C=>T T:49 C:0
EA2454	snippy:4.3.6	variation	1630430	1630430	.	.	0	note=snp C=>T T:59 C:0
EA2454	snippy:4.3.6	variation	1630549	1630549	.	.	0	note=snp G=>A A:49 G:0
EA2454	snippy:4.3.6	variation	1630763	1630763	.	.	0	note=snp C=>T T:41 C:0
EA2454	snippy:4.3.6	variation	1630769	1630769	.	.	0	note=snp C=>T T:40 C:0
EA2454	snippy:4.3.6	variation	1630778	1630778	.	.	0	note=snp T=>C C:37 T:0
EA2454	snippy:4.3.6	variation	1630818	1630818	.	.	0	note=snp C=>A A:30 C:0
EA2454	snippy:4.3.6	variation	1630872	1630872	.	.	0	note=snp G=>A A:27 G:0
EA2454	snippy:4.3.6	variation	1630941	1630941	.	.	0	note=complex AAGA=>GGAG GGAG:19 AAGA:0
EA2454	snippy:4.3.6	variation	1632262	1632262	.	.	0	note=snp A=>C C:57 A:0
EA2454	snippy:4.3.6	variation	1632564	1632564	.	.	0	note=snp G=>A A:51 G:0
EA2454	snippy:4.3.6	variation	1634228	1634228	.	.	0	note=snp A=>G G:85 A:0
EA2454	snippy:4.3.6	variation	1635708	1635708	.	.	0	note=snp C=>A A:74 C:0
EA2454	snippy:4.3.6	variation	1638039	1638039	.	.	0	note=snp A=>C C:52 A:0
EA2454	snippy:4.3.6	variation	1638456	1638456	.	.	0	note=snp T=>C C:34 T:0
EA2454	snippy:4.3.6	variation	1638642	1638642	.	.	0	note=snp T=>A A:15 T:0
EA2454	snippy:4.3.6	variation	1642336	1642336	.	.	0	note=snp A=>G G:78 A:0
EA2454	snippy:4.3.6	variation	1644810	1644810	.	.	0	note=snp G=>A A:65 G:0
EA2454	snippy:4.3.6	variation	1645477	1645477	.	.	0	note=snp C=>T T:71 C:0
EA2454	snippy:4.3.6	variation	1647005	1647005	.	.	0	note=snp A=>G G:85 A:0
EA2454	snippy:4.3.6	variation	1647462	1647462	.	.	0	note=snp A=>C C:63 A:0
EA2454	snippy:4.3.6	variation	1648147	1648147	.	.	0	note=snp C=>T T:74 C:0
EA2454	snippy:4.3.6	variation	1651964	1651964	.	.	0	note=snp G=>A A:60 G:0
EA2454	snippy:4.3.6	variation	1652108	1652108	.	.	0	note=snp T=>C C:23 T:0
EA2454	snippy:4.3.6	variation	1652131	1652131	.	.	0	note=snp G=>C C:18 G:0
EA2454	snippy:4.3.6	variation	1652143	1652143	.	.	0	note=complex G=>TAT TAT:10 G:0
EA2454	snippy:4.3.6	variation	1652374	1652374	.	.	0	note=snp G=>A A:43 G:0
EA2454	snippy:4.3.6	variation	1654772	1654772	.	.	0	note=ins T=>TTCA TTCA:53 T:2
EA2454	snippy:4.3.6	variation	1655290	1655290	.	.	0	note=snp G=>A A:64 G:0
EA2454	snippy:4.3.6	variation	1657561	1657561	.	.	0	note=snp C=>A A:115 C:0
EA2454	snippy:4.3.6	variation	1659970	1659970	.	.	0	note=snp G=>A A:88 G:0
EA2454	snippy:4.3.6	variation	1661566	1661566	.	.	0	note=snp A=>C C:73 A:0
EA2454	snippy:4.3.6	variation	1664379	1664379	.	.	0	note=snp C=>T T:83 C:0
EA2454	snippy:4.3.6	variation	1665113	1665113	.	.	0	note=snp G=>T T:74 G:0
EA2454	snippy:4.3.6	variation	1665162	1665162	.	.	0	note=ins A=>AT AT:80 A:0
EA2454	snippy:4.3.6	variation	1670538	1670538	.	.	0	note=del AT=>A A:52 AT:0
EA2454	snippy:4.3.6	variation	1670730	1670730	.	.	0	note=snp A=>C C:61 A:0
EA2454	snippy:4.3.6	variation	1673870	1673870	.	.	0	note=snp C=>A A:61 C:0
EA2454	snippy:4.3.6	variation	1674571	1674571	.	.	0	note=snp T=>A A:83 T:0
EA2454	snippy:4.3.6	variation	1674924	1674924	.	.	0	note=snp G=>A A:97 G:0
EA2454	snippy:4.3.6	variation	1676378	1676378	.	.	0	note=snp T=>C C:80 T:0
EA2454	snippy:4.3.6	variation	1681770	1681770	.	.	0	note=snp C=>T T:75 C:0
EA2454	snippy:4.3.6	variation	1682457	1682457	.	.	0	note=snp A=>G G:53 A:0
EA2454	snippy:4.3.6	variation	1685597	1685597	.	.	0	note=snp G=>A A:52 G:0
EA2454	snippy:4.3.6	variation	1689622	1689622	.	.	0	note=snp T=>A A:79 T:0
EA2454	snippy:4.3.6	variation	1694398	1694398	.	.	0	note=snp G=>A A:82 G:0
EA2454	snippy:4.3.6	variation	1694816	1694816	.	.	0	note=snp G=>A A:72 G:0
EA2454	snippy:4.3.6	variation	1700087	1700087	.	.	0	note=snp A=>G G:68 A:1
EA2454	snippy:4.3.6	variation	1701919	1701919	.	.	0	note=snp A=>G G:88 A:0
EA2454	snippy:4.3.6	variation	1707192	1707192	.	.	0	note=snp A=>G G:63 A:0
EA2454	snippy:4.3.6	variation	1707349	1707349	.	.	0	note=snp G=>A A:62 G:1
EA2454	snippy:4.3.6	variation	1711369	1711369	.	.	0	note=snp A=>C C:53 A:0
EA2454	snippy:4.3.6	variation	1713490	1713490	.	.	0	note=snp G=>A A:85 G:1
EA2454	snippy:4.3.6	variation	1714697	1714697	.	.	0	note=snp T=>C C:62 T:0
EA2454	snippy:4.3.6	variation	1718495	1718495	.	.	0	note=snp A=>G G:20 A:0
EA2454	snippy:4.3.6	variation	1719094	1719094	.	.	0	note=snp C=>T T:32 C:0
EA2454	snippy:4.3.6	variation	1719132	1719132	.	.	0	note=snp G=>A A:29 G:0
EA2454	snippy:4.3.6	variation	1719223	1719223	.	.	0	note=snp T=>C C:23 T:0
EA2454	snippy:4.3.6	variation	1719365	1719365	.	.	0	note=snp G=>A A:16 G:0
EA2454	snippy:4.3.6	variation	1719996	1719996	.	.	0	note=snp C=>G G:59 C:0
EA2454	snippy:4.3.6	variation	1720125	1720125	.	.	0	note=snp T=>G G:49 T:0
EA2454	snippy:4.3.6	variation	1726434	1726434	.	.	0	note=snp G=>A A:86 G:0
EA2454	snippy:4.3.6	variation	1728411	1728411	.	.	0	note=snp C=>A A:56 C:0
EA2454	snippy:4.3.6	variation	1730329	1730329	.	.	0	note=snp T=>C C:119 T:0
EA2454	snippy:4.3.6	variation	1730565	1730565	.	.	0	note=snp A=>G G:66 A:0
EA2454	snippy:4.3.6	variation	1732884	1732884	.	.	0	note=snp C=>T T:80 C:0
EA2454	snippy:4.3.6	variation	1733801	1733801	.	.	0	note=snp A=>G G:87 A:1
EA2454	snippy:4.3.6	variation	1733830	1733830	.	.	0	note=snp C=>T T:82 C:0
EA2454	snippy:4.3.6	variation	1734280	1734280	.	.	0	note=snp T=>C C:79 T:0
EA2454	snippy:4.3.6	variation	1735944	1735944	.	.	0	note=snp T=>C C:80 T:0
EA2454	snippy:4.3.6	variation	1737561	1737561	.	.	0	note=snp A=>G G:77 A:0
EA2454	snippy:4.3.6	variation	1739303	1739303	.	.	0	note=snp C=>A A:54 C:0
EA2454	snippy:4.3.6	variation	1739750	1739750	.	.	0	note=snp C=>A A:62 C:0
EA2454	snippy:4.3.6	variation	1739772	1739772	.	.	0	note=del CG=>C C:63 CG:0
EA2454	snippy:4.3.6	variation	1742389	1742389	.	.	0	note=del CT=>C C:61 CT:0
EA2454	snippy:4.3.6	variation	1742867	1742867	.	.	0	note=snp C=>A A:65 C:0
EA2454	snippy:4.3.6	variation	1744504	1744504	.	.	0	note=snp C=>A A:30 C:0
EA2454	snippy:4.3.6	variation	1745576	1745576	.	.	0	note=snp T=>C C:73 T:0
EA2454	snippy:4.3.6	variation	1747318	1747318	.	.	0	note=snp A=>G G:71 A:0
EA2454	snippy:4.3.6	variation	1747764	1747764	.	.	0	note=snp G=>T T:83 G:0
EA2454	snippy:4.3.6	variation	1748585	1748585	.	.	0	note=snp A=>C C:65 A:0
EA2454	snippy:4.3.6	variation	1749020	1749020	.	.	0	note=snp G=>A A:65 G:0
EA2454	snippy:4.3.6	variation	1751369	1751369	.	.	0	note=snp G=>T T:58 G:0
EA2454	snippy:4.3.6	variation	1753731	1753731	.	.	0	note=snp C=>A A:53 C:0
EA2454	snippy:4.3.6	variation	1754099	1754099	.	.	0	note=snp C=>T T:58 C:0
EA2454	snippy:4.3.6	variation	1754334	1754334	.	.	0	note=snp G=>T T:54 G:0
EA2454	snippy:4.3.6	variation	1758804	1758804	.	.	0	note=snp C=>T T:75 C:0
EA2454	snippy:4.3.6	variation	1760948	1760948	.	.	0	note=snp C=>T T:85 C:0
EA2454	snippy:4.3.6	variation	1763293	1763293	.	.	0	note=snp T=>C C:64 T:0
EA2454	snippy:4.3.6	variation	1763765	1763765	.	.	0	note=snp A=>C C:82 A:0
EA2454	snippy:4.3.6	variation	1765053	1765053	.	.	0	note=snp C=>A A:79 C:4
EA2454	snippy:4.3.6	variation	1766306	1766306	.	.	0	note=snp G=>A A:66 G:0
EA2454	snippy:4.3.6	variation	1774059	1774059	.	.	0	note=snp T=>C C:66 T:0
EA2454	snippy:4.3.6	variation	1776284	1776284	.	.	0	note=snp C=>A A:47 C:1
EA2454	snippy:4.3.6	variation	1778875	1778875	.	.	0	note=snp A=>T T:69 A:0
EA2454	snippy:4.3.6	variation	1784266	1784266	.	.	0	note=snp G=>A A:57 G:1
EA2454	snippy:4.3.6	variation	1786685	1786685	.	.	0	note=snp T=>C C:78 T:0
EA2454	snippy:4.3.6	variation	1790794	1790794	.	.	0	note=snp C=>T T:57 C:1
EA2454	snippy:4.3.6	variation	1792380	1792380	.	.	0	note=snp A=>T T:81 A:0
EA2454	snippy:4.3.6	variation	1793632	1793632	.	.	0	note=snp C=>T T:61 C:0
EA2454	snippy:4.3.6	variation	1793692	1793692	.	.	0	note=snp A=>G G:61 A:0
EA2454	snippy:4.3.6	variation	1794694	1794694	.	.	0	note=snp C=>T T:89 C:1
EA2454	snippy:4.3.6	variation	1794938	1794938	.	.	0	note=snp T=>G G:85 T:0
EA2454	snippy:4.3.6	variation	1795161	1795161	.	.	0	note=snp A=>G G:79 A:0
EA2454	snippy:4.3.6	variation	1796286	1796286	.	.	0	note=snp C=>T T:35 C:0
EA2454	snippy:4.3.6	variation	1797134	1797134	.	.	0	note=snp C=>T T:72 C:1
EA2454	snippy:4.3.6	variation	1797582	1797582	.	.	0	note=snp G=>A A:80 G:0
EA2454	snippy:4.3.6	variation	1799132	1799132	.	.	0	note=snp G=>A A:60 G:0
EA2454	snippy:4.3.6	variation	1802874	1802874	.	.	0	note=snp A=>G G:59 A:0
EA2454	snippy:4.3.6	variation	1803664	1803664	.	.	0	note=snp T=>C C:86 T:0
EA2454	snippy:4.3.6	variation	1806558	1806558	.	.	0	note=snp C=>T T:93 C:0
EA2454	snippy:4.3.6	variation	1807013	1807013	.	.	0	note=snp G=>A A:81 G:0
EA2454	snippy:4.3.6	variation	1811872	1811872	.	.	0	note=snp C=>A A:60 C:0
EA2454	snippy:4.3.6	variation	1812648	1812648	.	.	0	note=snp C=>T T:91 C:0
EA2454	snippy:4.3.6	variation	1816606	1816606	.	.	0	note=snp T=>G G:48 T:0
EA2454	snippy:4.3.6	variation	1816768	1816768	.	.	0	note=snp T=>G G:38 T:0
EA2454	snippy:4.3.6	variation	1818659	1818659	.	.	0	note=snp G=>A A:61 G:0
EA2454	snippy:4.3.6	variation	1820083	1820083	.	.	0	note=snp T=>C C:86 T:0
EA2454	snippy:4.3.6	variation	1824156	1824156	.	.	0	note=snp T=>C C:59 T:0
EA2454	snippy:4.3.6	variation	1824499	1824499	.	.	0	note=snp T=>C C:68 T:1
EA2454	snippy:4.3.6	variation	1825107	1825107	.	.	0	note=snp G=>A A:28 G:1
EA2454	snippy:4.3.6	variation	1832674	1832674	.	.	0	note=snp A=>C C:85 A:1
EA2454	snippy:4.3.6	variation	1834426	1834426	.	.	0	note=snp G=>A A:41 G:0
EA2454	snippy:4.3.6	variation	1837269	1837269	.	.	0	note=snp G=>A A:106 G:0
EA2454	snippy:4.3.6	variation	1840912	1840912	.	.	0	note=snp G=>A A:70 G:0
EA2454	snippy:4.3.6	variation	1842140	1842140	.	.	0	note=snp G=>T T:94 G:0
EA2454	snippy:4.3.6	variation	1842943	1842943	.	.	0	note=snp C=>A A:89 C:0
EA2454	snippy:4.3.6	variation	1844569	1844569	.	.	0	note=snp A=>G G:93 A:1
EA2454	snippy:4.3.6	variation	1845748	1845748	.	.	0	note=snp C=>T T:53 C:1
EA2454	snippy:4.3.6	variation	1846086	1846086	.	.	0	note=snp T=>C C:65 T:0
EA2454	snippy:4.3.6	variation	1849504	1849504	.	.	0	note=snp T=>A A:100 T:0
EA2454	snippy:4.3.6	variation	1860062	1860062	.	.	0	note=snp T=>A A:24 T:0
EA2454	snippy:4.3.6	variation	1860994	1860994	.	.	0	note=snp A=>G G:59 A:0
EA2454	snippy:4.3.6	variation	1864193	1864193	.	.	0	note=snp C=>T T:57 C:0
EA2454	snippy:4.3.6	variation	1866481	1866481	.	.	0	note=snp A=>C C:63 A:2
EA2454	snippy:4.3.6	variation	1867061	1867061	.	.	0	note=snp C=>A A:81 C:0
EA2454	snippy:4.3.6	variation	1868594	1868594	.	.	0	note=snp G=>A A:63 G:0
EA2454	snippy:4.3.6	variation	1869510	1869510	.	.	0	note=snp G=>A A:98 G:0
EA2454	snippy:4.3.6	variation	1872573	1872573	.	.	0	note=snp G=>T T:80 G:1
EA2454	snippy:4.3.6	variation	1874405	1874405	.	.	0	note=snp G=>T T:22 G:0
EA2454	snippy:4.3.6	variation	1875863	1875863	.	.	0	note=snp G=>T T:108 G:0
EA2454	snippy:4.3.6	variation	1877345	1877345	.	.	0	note=snp T=>C C:66 T:0
EA2454	snippy:4.3.6	variation	1878504	1878504	.	.	0	note=snp G=>A A:69 G:0
EA2454	snippy:4.3.6	variation	1880076	1880076	.	.	0	note=snp G=>A A:72 G:0
EA2454	snippy:4.3.6	variation	1881056	1881056	.	.	0	note=snp C=>G G:60 C:0
EA2454	snippy:4.3.6	variation	1881314	1881314	.	.	0	note=snp G=>A A:63 G:0
EA2454	snippy:4.3.6	variation	1881961	1881961	.	.	0	note=snp T=>G G:56 T:1
EA2454	snippy:4.3.6	variation	1884976	1884976	.	.	0	note=snp C=>T T:75 C:2
EA2454	snippy:4.3.6	variation	1885596	1885596	.	.	0	note=del AAAATCC=>A A:32 AAAATCC:0
EA2454	snippy:4.3.6	variation	1885754	1885754	.	.	0	note=snp G=>A A:32 G:0
EA2454	snippy:4.3.6	variation	1886082	1886082	.	.	0	note=complex A=>CC CC:18 A:0
EA2454	snippy:4.3.6	variation	1887544	1887544	.	.	0	note=snp A=>G G:91 A:0
EA2454	snippy:4.3.6	variation	1888942	1888942	.	.	0	note=snp C=>T T:66 C:1
EA2454	snippy:4.3.6	variation	1889434	1889434	.	.	0	note=snp C=>T T:70 C:0
EA2454	snippy:4.3.6	variation	1890195	1890195	.	.	0	note=del AG=>A A:80 AG:0
EA2454	snippy:4.3.6	variation	1890386	1890386	.	.	0	note=snp T=>C C:105 T:0
EA2454	snippy:4.3.6	variation	1892424	1892424	.	.	0	note=snp G=>A A:101 G:2
EA2454	snippy:4.3.6	variation	1897434	1897434	.	.	0	note=snp G=>A A:88 G:0
EA2454	snippy:4.3.6	variation	1901045	1901045	.	.	0	note=snp G=>A A:103 G:0
EA2454	snippy:4.3.6	variation	1902291	1902291	.	.	0	note=snp G=>C C:70 G:0
EA2454	snippy:4.3.6	variation	1903679	1903679	.	.	0	note=snp T=>A A:56 T:0
EA2454	snippy:4.3.6	variation	1903986	1903986	.	.	0	note=snp A=>C C:82 A:0
EA2454	snippy:4.3.6	variation	1904791	1904791	.	.	0	note=snp G=>A A:71 G:0
EA2454	snippy:4.3.6	variation	1905086	1905086	.	.	0	note=snp G=>A A:72 G:0
EA2454	snippy:4.3.6	variation	1905385	1905385	.	.	0	note=snp G=>A A:81 G:1
EA2454	snippy:4.3.6	variation	1906491	1906491	.	.	0	note=snp A=>C C:100 A:0
EA2454	snippy:4.3.6	variation	1907509	1907509	.	.	0	note=snp C=>T T:74 C:2
EA2454	snippy:4.3.6	variation	1909088	1909088	.	.	0	note=snp T=>C C:70 T:0
EA2454	snippy:4.3.6	variation	1912473	1912473	.	.	0	note=snp A=>G G:84 A:0
EA2454	snippy:4.3.6	variation	1916554	1916554	.	.	0	note=snp G=>A A:56 G:2
EA2454	snippy:4.3.6	variation	1923970	1923970	.	.	0	note=snp G=>A A:64 G:0
EA2454	snippy:4.3.6	variation	1924972	1924972	.	.	0	note=snp A=>C C:90 A:2
EA2454	snippy:4.3.6	variation	1925505	1925505	.	.	0	note=snp C=>T T:83 C:0
EA2454	snippy:4.3.6	variation	1929193	1929193	.	.	0	note=ins T=>TTTA TTTA:32 T:0
EA2454	snippy:4.3.6	variation	1934905	1934905	.	.	0	note=snp G=>T T:68 G:0
EA2454	snippy:4.3.6	variation	1936040	1936040	.	.	0	note=snp A=>G G:10 A:0
EA2454	snippy:4.3.6	variation	1945608	1945608	.	.	0	note=snp T=>C C:71 T:0
EA2454	snippy:4.3.6	variation	1946808	1946808	.	.	0	note=snp C=>T T:88 C:0
EA2454	snippy:4.3.6	variation	1947499	1947499	.	.	0	note=snp A=>T T:86 A:0
EA2454	snippy:4.3.6	variation	1949271	1949271	.	.	0	note=snp C=>A A:83 C:0
EA2454	snippy:4.3.6	variation	1950298	1950298	.	.	0	note=snp T=>G G:98 T:0
EA2454	snippy:4.3.6	variation	1952317	1952317	.	.	0	note=snp G=>A A:80 G:0
EA2454	snippy:4.3.6	variation	1952745	1952745	.	.	0	note=snp A=>G G:32 A:0
EA2454	snippy:4.3.6	variation	1952895	1952895	.	.	0	note=snp G=>A A:34 G:0
EA2454	snippy:4.3.6	variation	1952951	1952951	.	.	0	note=snp C=>T T:38 C:0
EA2454	snippy:4.3.6	variation	1954720	1954720	.	.	0	note=snp T=>C C:41 T:0
EA2454	snippy:4.3.6	variation	1956379	1956379	.	.	0	note=snp C=>T T:80 C:0
EA2454	snippy:4.3.6	variation	1958733	1958733	.	.	0	note=snp T=>C C:72 T:0
EA2454	snippy:4.3.6	variation	1960339	1960339	.	.	0	note=snp C=>T T:80 C:0
EA2454	snippy:4.3.6	variation	1970935	1970935	.	.	0	note=snp C=>A A:12 C:0
EA2454	snippy:4.3.6	variation	1979564	1979564	.	.	0	note=snp A=>G G:77 A:0
EA2454	snippy:4.3.6	variation	1980186	1980186	.	.	0	note=snp C=>T T:53 C:0
EA2454	snippy:4.3.6	variation	1981261	1981261	.	.	0	note=snp A=>G G:92 A:1
EA2454	snippy:4.3.6	variation	1983279	1983279	.	.	0	note=snp T=>A A:100 T:0
EA2454	snippy:4.3.6	variation	1983802	1983802	.	.	0	note=snp T=>C C:83 T:1
EA2454	snippy:4.3.6	variation	1984834	1984834	.	.	0	note=snp C=>A A:73 C:1
EA2454	snippy:4.3.6	variation	1986170	1986170	.	.	0	note=snp G=>T T:56 G:1
EA2454	snippy:4.3.6	variation	1987026	1987026	.	.	0	note=snp A=>T T:44 A:0
EA2454	snippy:4.3.6	variation	1989793	1989793	.	.	0	note=snp G=>A A:73 G:0
EA2454	snippy:4.3.6	variation	1990345	1990345	.	.	0	note=snp A=>T T:26 A:0
EA2454	snippy:4.3.6	variation	1991121	1991121	.	.	0	note=snp T=>C C:52 T:0
EA2454	snippy:4.3.6	variation	1992752	1992752	.	.	0	note=snp G=>A A:71 G:0
EA2454	snippy:4.3.6	variation	1995211	1995211	.	.	0	note=snp T=>C C:32 T:0
EA2454	snippy:4.3.6	variation	1997249	1997249	.	.	0	note=snp C=>T T:72 C:0
EA2454	snippy:4.3.6	variation	1997790	1997790	.	.	0	note=snp G=>A A:65 G:0
EA2454	snippy:4.3.6	variation	1997936	1997936	.	.	0	note=snp C=>T T:63 C:0
EA2454	snippy:4.3.6	variation	1998697	1998697	.	.	0	note=snp A=>G G:56 A:1
EA2454	snippy:4.3.6	variation	1999636	1999636	.	.	0	note=snp A=>G G:92 A:0
EA2454	snippy:4.3.6	variation	1999856	1999856	.	.	0	note=snp G=>A A:86 G:0
EA2454	snippy:4.3.6	variation	2000837	2000837	.	.	0	note=snp C=>T T:76 C:0
EA2454	snippy:4.3.6	variation	2002646	2002646	.	.	0	note=snp G=>A A:98 G:0
EA2454	snippy:4.3.6	variation	2004630	2004630	.	.	0	note=snp C=>T T:74 C:0
EA2454	snippy:4.3.6	variation	2005104	2005104	.	.	0	note=snp G=>T T:49 G:0
EA2454	snippy:4.3.6	variation	2007738	2007738	.	.	0	note=snp A=>G G:73 A:0
EA2454	snippy:4.3.6	variation	2012217	2012217	.	.	0	note=snp G=>T T:37 G:0
EA2454	snippy:4.3.6	variation	2012966	2012966	.	.	0	note=snp T=>G G:94 T:0
EA2454	snippy:4.3.6	variation	2013320	2013320	.	.	0	note=mnp GG=>AA AA:88 GG:0
EA2454	snippy:4.3.6	variation	2014040	2014040	.	.	0	note=snp C=>T T:50 C:0
EA2454	snippy:4.3.6	variation	2022049	2022049	.	.	0	note=snp A=>C C:47 A:0
EA2454	snippy:4.3.6	variation	2022670	2022670	.	.	0	note=del TATCCAGCCCATTTGCATTTTATCGAGTGCGAAAGCCTGGGCGATGCCACCCGCCGCAATGCCAGCCGCCTGAAG=>T T:20 TATCCAGCCCATTTGCATTTTATCGAGTGCGAAAGCCTGGGCGATGCCACCCGCCGCAATGCCAGCCGCCTGAAG:0
EA2454	snippy:4.3.6	variation	2023335	2023335	.	.	0	note=snp A=>C C:82 A:0
EA2454	snippy:4.3.6	variation	2023644	2023644	.	.	0	note=snp C=>A A:75 C:0
EA2454	snippy:4.3.6	variation	2025122	2025122	.	.	0	note=snp A=>C C:91 A:0
EA2454	snippy:4.3.6	variation	2026705	2026705	.	.	0	note=snp G=>A A:65 G:0
EA2454	snippy:4.3.6	variation	2027149	2027149	.	.	0	note=snp G=>A A:49 G:0
EA2454	snippy:4.3.6	variation	2028093	2028093	.	.	0	note=snp G=>T T:85 G:0
EA2454	snippy:4.3.6	variation	2028503	2028503	.	.	0	note=snp T=>A A:78 T:0
EA2454	snippy:4.3.6	variation	2029759	2029759	.	.	0	note=snp A=>C C:24 A:0
EA2454	snippy:4.3.6	variation	2030904	2030904	.	.	0	note=snp C=>T T:84 C:1
EA2454	snippy:4.3.6	variation	2033069	2033069	.	.	0	note=snp T=>A A:74 T:0
EA2454	snippy:4.3.6	variation	2034153	2034153	.	.	0	note=snp G=>A A:87 G:0
EA2454	snippy:4.3.6	variation	2034971	2034971	.	.	0	note=snp G=>A A:118 G:3
EA2454	snippy:4.3.6	variation	2036364	2036364	.	.	0	note=snp G=>A A:75 G:2
EA2454	snippy:4.3.6	variation	2082207	2082207	.	.	0	note=snp T=>C C:73 T:0
EA2454	snippy:4.3.6	variation	2085821	2085821	.	.	0	note=snp T=>G G:81 T:0
EA2454	snippy:4.3.6	variation	2086397	2086397	.	.	0	note=snp A=>T T:49 A:0
EA2454	snippy:4.3.6	variation	2088085	2088085	.	.	0	note=del GATTGATATTAAGC=>G G:15 GATTGATATTAAGC:0
EA2454	snippy:4.3.6	variation	2088809	2088809	.	.	0	note=snp A=>G G:15 A:0
EA2454	snippy:4.3.6	variation	2089868	2089868	.	.	0	note=snp T=>A A:62 T:0
EA2454	snippy:4.3.6	variation	2091553	2091553	.	.	0	note=snp T=>A A:81 T:2
EA2454	snippy:4.3.6	variation	2094829	2094829	.	.	0	note=snp T=>C C:66 T:0
EA2454	snippy:4.3.6	variation	2096088	2096088	.	.	0	note=snp A=>G G:50 A:0
EA2454	snippy:4.3.6	variation	2096321	2096321	.	.	0	note=snp A=>C C:19 A:0
EA2454	snippy:4.3.6	variation	2099847	2099847	.	.	0	note=snp A=>G G:35 A:0
EA2454	snippy:4.3.6	variation	2100200	2100200	.	.	0	note=snp G=>A A:25 G:0
EA2454	snippy:4.3.6	variation	2100304	2100304	.	.	0	note=snp T=>C C:26 T:0
EA2454	snippy:4.3.6	variation	2102993	2102993	.	.	0	note=snp T=>C C:56 T:0
EA2454	snippy:4.3.6	variation	2107020	2107020	.	.	0	note=snp G=>A A:72 G:0
EA2454	snippy:4.3.6	variation	2112567	2112567	.	.	0	note=snp C=>T T:62 C:0
EA2454	snippy:4.3.6	variation	2113002	2113002	.	.	0	note=snp G=>A A:59 G:0
EA2454	snippy:4.3.6	variation	2114046	2114046	.	.	0	note=snp G=>A A:74 G:0
EA2454	snippy:4.3.6	variation	2114612	2114612	.	.	0	note=snp G=>T T:79 G:1
EA2454	snippy:4.3.6	variation	2116857	2116857	.	.	0	note=snp G=>A A:85 G:0
EA2454	snippy:4.3.6	variation	2117468	2117468	.	.	0	note=snp A=>G G:42 A:0
EA2454	snippy:4.3.6	variation	2119737	2119737	.	.	0	note=snp T=>C C:65 T:0
EA2454	snippy:4.3.6	variation	2120021	2120021	.	.	0	note=snp A=>C C:21 A:0
EA2454	snippy:4.3.6	variation	2121377	2121377	.	.	0	note=snp G=>C C:83 G:0
EA2454	snippy:4.3.6	variation	2122365	2122365	.	.	0	note=snp C=>T T:68 C:0
EA2454	snippy:4.3.6	variation	2123227	2123227	.	.	0	note=snp A=>C C:60 A:2
EA2454	snippy:4.3.6	variation	2123354	2123354	.	.	0	note=snp T=>A A:74 T:2
EA2454	snippy:4.3.6	variation	2124248	2124248	.	.	0	note=snp A=>C C:71 A:0
EA2454	snippy:4.3.6	variation	2127170	2127170	.	.	0	note=snp C=>T T:101 C:0
EA2454	snippy:4.3.6	variation	2135404	2135404	.	.	0	note=snp T=>C C:54 T:1
EA2454	snippy:4.3.6	variation	2135511	2135511	.	.	0	note=snp G=>A A:62 G:1
EA2454	snippy:4.3.6	variation	2135616	2135616	.	.	0	note=snp C=>A A:63 C:1
EA2454	snippy:4.3.6	variation	2142320	2142320	.	.	0	note=snp T=>C C:39 T:8
EA2454	snippy:4.3.6	variation	2144564	2144564	.	.	0	note=snp C=>T T:62 C:3
EA2454	snippy:4.3.6	variation	2149433	2149433	.	.	0	note=snp A=>G G:33 A:0
EA2454	snippy:4.3.6	variation	2149924	2149924	.	.	0	note=snp A=>G G:72 A:0
EA2454	snippy:4.3.6	variation	2155585	2155585	.	.	0	note=snp T=>G G:76 T:0
EA2454	snippy:4.3.6	variation	2156075	2156075	.	.	0	note=snp C=>T T:76 C:1
EA2454	snippy:4.3.6	variation	2156358	2156358	.	.	0	note=snp A=>T T:34 A:0
EA2454	snippy:4.3.6	variation	2158851	2158851	.	.	0	note=snp C=>T T:82 C:0
EA2454	snippy:4.3.6	variation	2161578	2161578	.	.	0	note=snp C=>T T:81 C:0
EA2454	snippy:4.3.6	variation	2162247	2162247	.	.	0	note=snp A=>C C:65 A:0
EA2454	snippy:4.3.6	variation	2162365	2162365	.	.	0	note=snp A=>G G:60 A:0
EA2454	snippy:4.3.6	variation	2167241	2167241	.	.	0	note=del GATCGGC=>G G:53 GATCGGC:0
EA2454	snippy:4.3.6	variation	2168639	2168639	.	.	0	note=snp G=>A A:69 G:0
EA2454	snippy:4.3.6	variation	2172151	2172151	.	.	0	note=del ACCC=>A A:55 ACCC:0
EA2454	snippy:4.3.6	variation	2173107	2173107	.	.	0	note=del TCGGAAAA=>T T:60 TCGGAAAA:0
EA2454	snippy:4.3.6	variation	2174776	2174776	.	.	0	note=snp T=>C C:41 T:0
EA2454	snippy:4.3.6	variation	2176774	2176774	.	.	0	note=snp G=>A A:28 G:0
EA2454	snippy:4.3.6	variation	2177349	2177349	.	.	0	note=snp T=>C C:65 T:0
EA2454	snippy:4.3.6	variation	2178758	2178758	.	.	0	note=snp C=>T T:85 C:0
EA2454	snippy:4.3.6	variation	2178776	2178776	.	.	0	note=snp C=>T T:88 C:0
EA2454	snippy:4.3.6	variation	2180368	2180368	.	.	0	note=snp G=>A A:75 G:2
EA2454	snippy:4.3.6	variation	2180437	2180437	.	.	0	note=snp A=>G G:69 A:1
EA2454	snippy:4.3.6	variation	2183355	2183355	.	.	0	note=snp T=>C C:55 T:0
EA2454	snippy:4.3.6	variation	2186284	2186284	.	.	0	note=snp A=>G G:89 A:0
EA2454	snippy:4.3.6	variation	2187664	2187664	.	.	0	note=snp A=>C C:38 A:0
EA2454	snippy:4.3.6	variation	2188444	2188444	.	.	0	note=snp G=>A A:104 G:0
EA2454	snippy:4.3.6	variation	2189381	2189381	.	.	0	note=snp A=>G G:59 A:0
EA2454	snippy:4.3.6	variation	2189503	2189503	.	.	0	note=snp G=>A A:32 G:0
EA2454	snippy:4.3.6	variation	2189701	2189701	.	.	0	note=snp G=>A A:11 G:0
EA2454	snippy:4.3.6	variation	2189711	2189711	.	.	0	note=snp G=>A A:12 G:0
EA2454	snippy:4.3.6	variation	2189753	2189753	.	.	0	note=snp A=>T T:14 A:0
EA2454	snippy:4.3.6	variation	2189762	2189762	.	.	0	note=snp C=>A A:14 C:0
EA2454	snippy:4.3.6	variation	2189771	2189771	.	.	0	note=complex AC=>GT GT:13 AC:0
EA2454	snippy:4.3.6	variation	2189780	2189780	.	.	0	note=complex GGCAGAAAT=>TGCATACAC TGCATACAC:14 GGCAGAAAT:0
EA2454	snippy:4.3.6	variation	2189796	2189796	.	.	0	note=complex CCCTA=>TCCTG TCCTG:17 CCCTA:0
EA2454	snippy:4.3.6	variation	2189809	2189809	.	.	0	note=snp G=>A A:17 G:0
EA2454	snippy:4.3.6	variation	2189814	2189814	.	.	0	note=complex TGCAA=>CGTAG CGTAG:16 TGCAA:0
EA2454	snippy:4.3.6	variation	2189839	2189839	.	.	0	note=complex AGGA=>CGGC CGGC:23 AGGA:0
EA2454	snippy:4.3.6	variation	2189852	2189852	.	.	0	note=snp C=>T T:24 C:0
EA2454	snippy:4.3.6	variation	2189936	2189936	.	.	0	note=snp T=>C C:54 T:0
EA2454	snippy:4.3.6	variation	2189975	2189975	.	.	0	note=snp A=>G G:85 A:0
EA2454	snippy:4.3.6	variation	2190020	2190020	.	.	0	note=snp C=>T T:99 C:1
EA2454	snippy:4.3.6	variation	2190245	2190245	.	.	0	note=snp A=>C C:105 A:0
EA2454	snippy:4.3.6	variation	2190251	2190251	.	.	0	note=complex AATGACC=>CACGACA CACGACA:102 AATGACC:0
EA2454	snippy:4.3.6	variation	2190272	2190272	.	.	0	note=snp A=>G G:100 A:0
EA2454	snippy:4.3.6	variation	2190281	2190281	.	.	0	note=complex CCGA=>TCGG TCGG:99 CCGA:0
EA2454	snippy:4.3.6	variation	2190290	2190290	.	.	0	note=snp C=>T T:110 C:1
EA2454	snippy:4.3.6	variation	2190299	2190299	.	.	0	note=snp A=>C C:112 A:0
EA2454	snippy:4.3.6	variation	2190561	2190561	.	.	0	note=snp G=>A A:10 G:0
EA2454	snippy:4.3.6	variation	2191262	2191262	.	.	0	note=snp T=>C C:10 T:0
EA2454	snippy:4.3.6	variation	2191269	2191269	.	.	0	note=snp A=>G G:12 A:0
EA2454	snippy:4.3.6	variation	2191354	2191354	.	.	0	note=snp A=>G G:17 A:0
EA2454	snippy:4.3.6	variation	2191378	2191378	.	.	0	note=snp C=>A A:19 C:2
EA2454	snippy:4.3.6	variation	2191387	2191387	.	.	0	note=snp A=>G G:30 A:0
EA2454	snippy:4.3.6	variation	2191431	2191431	.	.	0	note=snp G=>A A:30 G:1
EA2454	snippy:4.3.6	variation	2191438	2191438	.	.	0	note=snp C=>T T:26 C:1
EA2454	snippy:4.3.6	variation	2191468	2191468	.	.	0	note=snp G=>A A:25 G:0
EA2454	snippy:4.3.6	variation	2191485	2191485	.	.	0	note=snp C=>T T:25 C:0
EA2454	snippy:4.3.6	variation	2191495	2191495	.	.	0	note=snp C=>T T:19 C:0
EA2454	snippy:4.3.6	variation	2191501	2191501	.	.	0	note=complex GCGC=>ACGT ACGT:16 GCGC:0
EA2454	snippy:4.3.6	variation	2191524	2191524	.	.	0	note=snp G=>C C:15 G:0
EA2454	snippy:4.3.6	variation	2191532	2191532	.	.	0	note=complex TG=>CT CT:15 TG:0
EA2454	snippy:4.3.6	variation	2191552	2191552	.	.	0	note=snp G=>C C:11 G:0
EA2454	snippy:4.3.6	variation	2192326	2192326	.	.	0	note=snp G=>A A:88 G:0
EA2454	snippy:4.3.6	variation	2194779	2194779	.	.	0	note=snp C=>T T:73 C:1
EA2454	snippy:4.3.6	variation	2195062	2195062	.	.	0	note=snp T=>C C:80 T:0
EA2454	snippy:4.3.6	variation	2204680	2204680	.	.	0	note=snp C=>T T:79 C:0
EA2454	snippy:4.3.6	variation	2205177	2205177	.	.	0	note=snp C=>T T:89 C:0
EA2454	snippy:4.3.6	variation	2206399	2206399	.	.	0	note=snp C=>T T:77 C:1
EA2454	snippy:4.3.6	variation	2206549	2206549	.	.	0	note=snp T=>G G:93 T:0
EA2454	snippy:4.3.6	variation	2208471	2208471	.	.	0	note=snp T=>C C:18 T:0
EA2454	snippy:4.3.6	variation	2212055	2212055	.	.	0	note=snp C=>T T:72 C:0
EA2454	snippy:4.3.6	variation	2218465	2218465	.	.	0	note=snp G=>A A:47 G:0
EA2454	snippy:4.3.6	variation	2218767	2218767	.	.	0	note=snp A=>G G:29 A:0
EA2454	snippy:4.3.6	variation	2220332	2220332	.	.	0	note=snp C=>T T:66 C:1
EA2454	snippy:4.3.6	variation	2221484	2221484	.	.	0	note=snp C=>T T:77 C:0
EA2454	snippy:4.3.6	variation	2225502	2225502	.	.	0	note=snp A=>G G:38 A:0
EA2454	snippy:4.3.6	variation	2226298	2226298	.	.	0	note=snp T=>C C:99 T:2
EA2454	snippy:4.3.6	variation	2228600	2228600	.	.	0	note=snp T=>C C:66 T:0
EA2454	snippy:4.3.6	variation	2229560	2229560	.	.	0	note=snp C=>G G:58 C:0
EA2454	snippy:4.3.6	variation	2231021	2231021	.	.	0	note=snp G=>A A:103 G:1
EA2454	snippy:4.3.6	variation	2235929	2235929	.	.	0	note=snp G=>A A:58 G:1
EA2454	snippy:4.3.6	variation	2238720	2238720	.	.	0	note=snp C=>T T:45 C:0
EA2454	snippy:4.3.6	variation	2245025	2245025	.	.	0	note=snp C=>A A:69 C:0
EA2454	snippy:4.3.6	variation	2256443	2256443	.	.	0	note=complex TGG=>AGA AGA:16 TGG:0
EA2454	snippy:4.3.6	variation	2259197	2259197	.	.	0	note=snp G=>A A:79 G:0
EA2454	snippy:4.3.6	variation	2259386	2259386	.	.	0	note=snp C=>T T:84 C:0
EA2454	snippy:4.3.6	variation	2265528	2265528	.	.	0	note=del CT=>C C:38 CT:0
EA2454	snippy:4.3.6	variation	2265571	2265571	.	.	0	note=del CA=>C C:36 CA:0
EA2454	snippy:4.3.6	variation	2265688	2265688	.	.	0	note=snp C=>T T:48 C:0
EA2454	snippy:4.3.6	variation	2266472	2266472	.	.	0	note=snp A=>T T:78 A:0
EA2454	snippy:4.3.6	variation	2267719	2267719	.	.	0	note=snp T=>C C:92 T:0
EA2454	snippy:4.3.6	variation	2268389	2268389	.	.	0	note=snp G=>C C:59 G:0
EA2454	snippy:4.3.6	variation	2270220	2270220	.	.	0	note=snp T=>C C:74 T:0
EA2454	snippy:4.3.6	variation	2271600	2271600	.	.	0	note=snp A=>T T:65 A:0
EA2454	snippy:4.3.6	variation	2271906	2271906	.	.	0	note=snp T=>G G:75 T:0
EA2454	snippy:4.3.6	variation	2272981	2272981	.	.	0	note=snp C=>T T:104 C:1
EA2454	snippy:4.3.6	variation	2273547	2273547	.	.	0	note=snp T=>A A:61 T:1
EA2454	snippy:4.3.6	variation	2283117	2283117	.	.	0	note=snp T=>C C:73 T:0
EA2454	snippy:4.3.6	variation	2283880	2283880	.	.	0	note=snp A=>G G:128 A:0
EA2454	snippy:4.3.6	variation	2285031	2285031	.	.	0	note=snp C=>T T:45 C:0
EA2454	snippy:4.3.6	variation	2286918	2286918	.	.	0	note=snp G=>A A:68 G:1
EA2454	snippy:4.3.6	variation	2288758	2288758	.	.	0	note=snp A=>T T:81 A:0
EA2454	snippy:4.3.6	variation	2289041	2289041	.	.	0	note=snp T=>C C:38 T:0
EA2454	snippy:4.3.6	variation	2289128	2289128	.	.	0	note=snp G=>C C:51 G:0
EA2454	snippy:4.3.6	variation	2289653	2289653	.	.	0	note=snp C=>T T:54 C:0
EA2454	snippy:4.3.6	variation	2291165	2291165	.	.	0	note=snp C=>T T:76 C:1
EA2454	snippy:4.3.6	variation	2291863	2291863	.	.	0	note=snp T=>C C:49 T:0
EA2454	snippy:4.3.6	variation	2292791	2292791	.	.	0	note=snp G=>T T:75 G:0
EA2454	snippy:4.3.6	variation	2293167	2293167	.	.	0	note=snp C=>T T:42 C:0
EA2454	snippy:4.3.6	variation	2293375	2293375	.	.	0	note=snp T=>G G:65 T:0
EA2454	snippy:4.3.6	variation	2293544	2293544	.	.	0	note=snp G=>A A:72 G:0
EA2454	snippy:4.3.6	variation	2294309	2294309	.	.	0	note=snp G=>A A:37 G:0
EA2454	snippy:4.3.6	variation	2295787	2295787	.	.	0	note=snp C=>T T:97 C:1
EA2454	snippy:4.3.6	variation	2297399	2297399	.	.	0	note=del TG=>T T:66 TG:0
EA2454	snippy:4.3.6	variation	2298963	2298963	.	.	0	note=snp G=>T T:34 G:0
EA2454	snippy:4.3.6	variation	2301511	2301511	.	.	0	note=snp G=>A A:75 G:1
EA2454	snippy:4.3.6	variation	2302558	2302558	.	.	0	note=snp A=>T T:93 A:0
EA2454	snippy:4.3.6	variation	2307590	2307590	.	.	0	note=del CT=>C C:43 CT:0
EA2454	snippy:4.3.6	variation	2307975	2307975	.	.	0	note=snp C=>T T:64 C:0
EA2454	snippy:4.3.6	variation	2309612	2309612	.	.	0	note=snp A=>G G:85 A:0
EA2454	snippy:4.3.6	variation	2310887	2310887	.	.	0	note=snp G=>T T:67 G:0
EA2454	snippy:4.3.6	variation	2311767	2311767	.	.	0	note=snp T=>G G:84 T:0
EA2454	snippy:4.3.6	variation	2312011	2312011	.	.	0	note=snp C=>T T:87 C:0
EA2454	snippy:4.3.6	variation	2316595	2316595	.	.	0	note=snp G=>T T:45 G:0
EA2454	snippy:4.3.6	variation	2319681	2319681	.	.	0	note=snp A=>T T:85 A:0
EA2454	snippy:4.3.6	variation	2323136	2323136	.	.	0	note=snp G=>A A:92 G:2
EA2454	snippy:4.3.6	variation	2327635	2327635	.	.	0	note=snp C=>T T:68 C:0
EA2454	snippy:4.3.6	variation	2329711	2329711	.	.	0	note=snp C=>T T:73 C:1
EA2454	snippy:4.3.6	variation	2330264	2330264	.	.	0	note=snp A=>C C:70 A:0
EA2454	snippy:4.3.6	variation	2333594	2333594	.	.	0	note=snp G=>A A:71 G:0
EA2454	snippy:4.3.6	variation	2335946	2335946	.	.	0	note=ins C=>CA CA:92 C:1
EA2454	snippy:4.3.6	variation	2338673	2338673	.	.	0	note=snp G=>A A:36 G:0
EA2454	snippy:4.3.6	variation	2342922	2342922	.	.	0	note=snp C=>A A:68 C:0
EA2454	snippy:4.3.6	variation	2344890	2344890	.	.	0	note=snp C=>G G:74 C:0
EA2454	snippy:4.3.6	variation	2346106	2346106	.	.	0	note=snp G=>A A:112 G:0
EA2454	snippy:4.3.6	variation	2348333	2348333	.	.	0	note=complex ACCA=>TCCT TCCT:14 ACCA:0
EA2454	snippy:4.3.6	variation	2349078	2349078	.	.	0	note=snp T=>C C:65 T:0
EA2454	snippy:4.3.6	variation	2349944	2349944	.	.	0	note=snp A=>C C:89 A:0
EA2454	snippy:4.3.6	variation	2350339	2350339	.	.	0	note=snp T=>C C:91 T:0
EA2454	snippy:4.3.6	variation	2351375	2351375	.	.	0	note=snp A=>C C:91 A:0
EA2454	snippy:4.3.6	variation	2353553	2353553	.	.	0	note=del TG=>T T:68 TG:0
EA2454	snippy:4.3.6	variation	2354351	2354351	.	.	0	note=snp A=>G G:94 A:0
EA2454	snippy:4.3.6	variation	2357977	2357977	.	.	0	note=snp C=>T T:107 C:1
EA2454	snippy:4.3.6	variation	2359024	2359024	.	.	0	note=snp A=>G G:95 A:0
EA2454	snippy:4.3.6	variation	2360677	2360677	.	.	0	note=del AT=>A A:95 AT:0
EA2454	snippy:4.3.6	variation	2361785	2361785	.	.	0	note=snp T=>C C:31 T:0
EA2454	snippy:4.3.6	variation	2362408	2362408	.	.	0	note=snp G=>T T:26 G:0
EA2454	snippy:4.3.6	variation	2362654	2362654	.	.	0	note=snp G=>A A:28 G:0
EA2454	snippy:4.3.6	variation	2363284	2363284	.	.	0	note=snp C=>T T:85 C:0
EA2454	snippy:4.3.6	variation	2364340	2364340	.	.	0	note=snp T=>G G:95 T:0
EA2454	snippy:4.3.6	variation	2364946	2364946	.	.	0	note=snp A=>G G:56 A:0
EA2454	snippy:4.3.6	variation	2369782	2369782	.	.	0	note=snp G=>A A:13 G:0
EA2454	snippy:4.3.6	variation	2369893	2369893	.	.	0	note=snp T=>C C:38 T:0
EA2454	snippy:4.3.6	variation	2371672	2371672	.	.	0	note=snp T=>C C:97 T:0
EA2454	snippy:4.3.6	variation	2372088	2372088	.	.	0	note=snp C=>T T:116 C:0
EA2454	snippy:4.3.6	variation	2372914	2372914	.	.	0	note=snp T=>C C:66 T:0
EA2454	snippy:4.3.6	variation	2373304	2373304	.	.	0	note=snp T=>C C:79 T:1
EA2454	snippy:4.3.6	variation	2373982	2373982	.	.	0	note=snp A=>G G:71 A:0
EA2454	snippy:4.3.6	variation	2377308	2377308	.	.	0	note=snp C=>T T:69 C:0
EA2454	snippy:4.3.6	variation	2378822	2378822	.	.	0	note=snp C=>T T:66 C:0
EA2454	snippy:4.3.6	variation	2379195	2379195	.	.	0	note=snp G=>T T:79 G:0
EA2454	snippy:4.3.6	variation	2380291	2380291	.	.	0	note=snp C=>T T:82 C:0
EA2454	snippy:4.3.6	variation	2385431	2385431	.	.	0	note=snp T=>C C:76 T:0
EA2454	snippy:4.3.6	variation	2386199	2386199	.	.	0	note=snp C=>G G:100 C:0
EA2454	snippy:4.3.6	variation	2387523	2387523	.	.	0	note=snp C=>T T:69 C:0
EA2454	snippy:4.3.6	variation	2387966	2387966	.	.	0	note=snp G=>A A:82 G:0
EA2454	snippy:4.3.6	variation	2390356	2390356	.	.	0	note=snp G=>A A:72 G:0
EA2454	snippy:4.3.6	variation	2391472	2391472	.	.	0	note=snp G=>A A:64 G:1
EA2454	snippy:4.3.6	variation	2397205	2397205	.	.	0	note=snp T=>C C:48 T:0
EA2454	snippy:4.3.6	variation	2397217	2397217	.	.	0	note=snp G=>C C:46 G:0
EA2454	snippy:4.3.6	variation	2397730	2397730	.	.	0	note=snp C=>T T:72 C:1
EA2454	snippy:4.3.6	variation	2398457	2398457	.	.	0	note=snp C=>T T:101 C:0
EA2454	snippy:4.3.6	variation	2398699	2398699	.	.	0	note=snp C=>T T:88 C:0
EA2454	snippy:4.3.6	variation	2400209	2400209	.	.	0	note=snp C=>T T:41 C:0
EA2454	snippy:4.3.6	variation	2400785	2400785	.	.	0	note=snp C=>T T:85 C:0
EA2454	snippy:4.3.6	variation	2403442	2403442	.	.	0	note=snp T=>C C:85 T:0
EA2454	snippy:4.3.6	variation	2404743	2404743	.	.	0	note=snp C=>T T:31 C:0
EA2454	snippy:4.3.6	variation	2405136	2405136	.	.	0	note=snp G=>A A:64 G:0
EA2454	snippy:4.3.6	variation	2405409	2405409	.	.	0	note=snp G=>A A:61 G:0
EA2454	snippy:4.3.6	variation	2405910	2405910	.	.	0	note=snp G=>A A:62 G:1
EA2454	snippy:4.3.6	variation	2407449	2407449	.	.	0	note=snp A=>G G:62 A:0
EA2454	snippy:4.3.6	variation	2408858	2408858	.	.	0	note=snp C=>A A:56 C:0
EA2454	snippy:4.3.6	variation	2411747	2411747	.	.	0	note=snp G=>A A:52 G:4
EA2454	snippy:4.3.6	variation	2412819	2412819	.	.	0	note=snp A=>T T:70 A:0
EA2454	snippy:4.3.6	variation	2414038	2414038	.	.	0	note=snp A=>C C:71 A:0
EA2454	snippy:4.3.6	variation	2416531	2416531	.	.	0	note=snp C=>T T:79 C:1
EA2454	snippy:4.3.6	variation	2424078	2424078	.	.	0	note=snp A=>G G:45 A:0
EA2454	snippy:4.3.6	variation	2426455	2426455	.	.	0	note=snp G=>A A:84 G:0
EA2454	snippy:4.3.6	variation	2428008	2428008	.	.	0	note=del AT=>A A:22 AT:0
EA2454	snippy:4.3.6	variation	2430822	2430822	.	.	0	note=snp T=>G G:74 T:0
EA2454	snippy:4.3.6	variation	2432718	2432718	.	.	0	note=snp A=>T T:101 A:0
EA2454	snippy:4.3.6	variation	2435300	2435300	.	.	0	note=snp G=>A A:21 G:0
EA2454	snippy:4.3.6	variation	2438685	2438685	.	.	0	note=snp A=>G G:82 A:0
EA2454	snippy:4.3.6	variation	2439096	2439096	.	.	0	note=snp G=>A A:52 G:0
EA2454	snippy:4.3.6	variation	2439148	2439148	.	.	0	note=snp C=>A A:47 C:0
EA2454	snippy:4.3.6	variation	2442698	2442698	.	.	0	note=snp C=>A A:101 C:0
EA2454	snippy:4.3.6	variation	2444568	2444568	.	.	0	note=snp C=>T T:89 C:0
EA2454	snippy:4.3.6	variation	2444886	2444886	.	.	0	note=snp C=>T T:102 C:0
EA2454	snippy:4.3.6	variation	2444898	2444898	.	.	0	note=snp G=>A A:107 G:0
EA2454	snippy:4.3.6	variation	2448565	2448565	.	.	0	note=snp A=>G G:110 A:0
EA2454	snippy:4.3.6	variation	2449435	2449435	.	.	0	note=snp A=>G G:82 A:0
EA2454	snippy:4.3.6	variation	2449736	2449736	.	.	0	note=snp C=>A A:79 C:1
EA2454	snippy:4.3.6	variation	2450255	2450255	.	.	0	note=complex GGGA=>TGGC TGGC:73 GGGA:0
EA2454	snippy:4.3.6	variation	2450783	2450783	.	.	0	note=snp A=>G G:62 A:0
EA2454	snippy:4.3.6	variation	2451274	2451274	.	.	0	note=snp A=>C C:72 A:0
EA2454	snippy:4.3.6	variation	2452455	2452455	.	.	0	note=snp G=>A A:98 G:0
EA2454	snippy:4.3.6	variation	2453106	2453106	.	.	0	note=snp G=>A A:100 G:1
EA2454	snippy:4.3.6	variation	2453950	2453950	.	.	0	note=snp G=>A A:103 G:0
EA2454	snippy:4.3.6	variation	2456065	2456065	.	.	0	note=snp G=>T T:76 G:0
EA2454	snippy:4.3.6	variation	2461170	2461170	.	.	0	note=snp G=>A A:65 G:0
EA2454	snippy:4.3.6	variation	2461974	2461974	.	.	0	note=snp A=>G G:26 A:0
EA2454	snippy:4.3.6	variation	2462477	2462477	.	.	0	note=snp G=>A A:23 G:0
EA2454	snippy:4.3.6	variation	2463088	2463088	.	.	0	note=snp T=>C C:47 T:0
EA2454	snippy:4.3.6	variation	2469570	2469570	.	.	0	note=snp G=>A A:78 G:0
EA2454	snippy:4.3.6	variation	2471185	2471185	.	.	0	note=snp T=>C C:93 T:0
EA2454	snippy:4.3.6	variation	2472827	2472827	.	.	0	note=snp G=>A A:108 G:2
EA2454	snippy:4.3.6	variation	2474714	2474714	.	.	0	note=snp T=>C C:46 T:0
EA2454	snippy:4.3.6	variation	2483538	2483538	.	.	0	note=snp C=>T T:36 C:1
EA2454	snippy:4.3.6	variation	2484819	2484819	.	.	0	note=snp G=>A A:101 G:2
EA2454	snippy:4.3.6	variation	2485824	2485824	.	.	0	note=snp G=>A A:82 G:1
EA2454	snippy:4.3.6	variation	2487775	2487775	.	.	0	note=snp C=>T T:79 C:1
EA2454	snippy:4.3.6	variation	2491225	2491225	.	.	0	note=snp G=>A A:96 G:1
EA2454	snippy:4.3.6	variation	2493206	2493206	.	.	0	note=snp G=>A A:73 G:0
EA2454	snippy:4.3.6	variation	2495743	2495743	.	.	0	note=snp A=>C C:69 A:1
EA2454	snippy:4.3.6	variation	2496184	2496184	.	.	0	note=snp T=>C C:89 T:0
EA2454	snippy:4.3.6	variation	2498235	2498235	.	.	0	note=complex TTTACC=>CTTGTT CTTGTT:12 TTTACC:0
EA2454	snippy:4.3.6	variation	2498257	2498257	.	.	0	note=complex AAT=>GTC GTC:12 AAT:0
EA2454	snippy:4.3.6	variation	2498266	2498266	.	.	0	note=complex AAATCTCT=>GAATCCCCC GAATCCCCC:12 AAATCTCT:0
EA2454	snippy:4.3.6	variation	2498285	2498285	.	.	0	note=snp G=>A A:14 G:0
EA2454	snippy:4.3.6	variation	2498293	2498293	.	.	0	note=complex GT=>AC AC:14 GT:0
EA2454	snippy:4.3.6	variation	2498299	2498299	.	.	0	note=snp A=>C C:14 A:0
EA2454	snippy:4.3.6	variation	2498309	2498309	.	.	0	note=complex TGAG=>AGAA AGAA:14 TGAG:0
EA2454	snippy:4.3.6	variation	2498320	2498320	.	.	0	note=snp T=>G G:13 T:0
EA2454	snippy:4.3.6	variation	2498341	2498341	.	.	0	note=snp T=>A A:11 T:1
EA2454	snippy:4.3.6	variation	2498365	2498365	.	.	0	note=complex GTT=>ATAA ATAA:11 GTT:0
EA2454	snippy:4.3.6	variation	2498372	2498372	.	.	0	note=complex CCTA=>ACTT ACTT:11 CCTA:0
EA2454	snippy:4.3.6	variation	2498384	2498384	.	.	0	note=complex CA=>TC TC:12 CA:0
EA2454	snippy:4.3.6	variation	2498400	2498400	.	.	0	note=complex AGG=>TAA TAA:13 AGG:0
EA2454	snippy:4.3.6	variation	2498457	2498457	.	.	0	note=complex GTATT=>ACATC ACATC:19 GTATT:0
EA2454	snippy:4.3.6	variation	2498473	2498473	.	.	0	note=snp G=>A A:27 G:0
EA2454	snippy:4.3.6	variation	2498480	2498480	.	.	0	note=snp A=>G G:29 A:0
EA2454	snippy:4.3.6	variation	2498491	2498491	.	.	0	note=del TC=>T T:26 TC:0
EA2454	snippy:4.3.6	variation	2498504	2498504	.	.	0	note=complex CATGA=>TATGG TATGG:32 CATGA:0
EA2454	snippy:4.3.6	variation	2498527	2498527	.	.	0	note=snp G=>A A:36 G:0
EA2454	snippy:4.3.6	variation	2498550	2498550	.	.	0	note=snp C=>T T:40 C:1
EA2454	snippy:4.3.6	variation	2498562	2498562	.	.	0	note=snp C=>A A:42 C:0
EA2454	snippy:4.3.6	variation	2498571	2498571	.	.	0	note=snp C=>A A:41 C:0
EA2454	snippy:4.3.6	variation	2498577	2498577	.	.	0	note=complex CAAA=>AAAG AAAG:38 CAAA:0
EA2454	snippy:4.3.6	variation	2498592	2498592	.	.	0	note=snp T=>A A:48 T:0
EA2454	snippy:4.3.6	variation	2498601	2498601	.	.	0	note=snp C=>T T:47 C:0
EA2454	snippy:4.3.6	variation	2498607	2498607	.	.	0	note=snp T=>A A:45 T:0
EA2454	snippy:4.3.6	variation	2498721	2498721	.	.	0	note=complex TGCT=>AGCC AGCC:67 TGCT:0
EA2454	snippy:4.3.6	variation	2498730	2498730	.	.	0	note=snp G=>A A:66 G:0
EA2454	snippy:4.3.6	variation	2498745	2498745	.	.	0	note=snp C=>T T:70 C:0
EA2454	snippy:4.3.6	variation	2498752	2498752	.	.	0	note=complex CTC=>ATG ATG:66 CTC:0
EA2454	snippy:4.3.6	variation	2498780	2498780	.	.	0	note=snp A=>T T:64 A:1
EA2454	snippy:4.3.6	variation	2498790	2498790	.	.	0	note=snp G=>A A:64 G:0
EA2454	snippy:4.3.6	variation	2498813	2498813	.	.	0	note=complex TAAGTC=>CGAGTT CGAGTT:61 TAAGTC:0
EA2454	snippy:4.3.6	variation	2498826	2498826	.	.	0	note=snp T=>C C:69 T:0
EA2454	snippy:4.3.6	variation	2498832	2498832	.	.	0	note=snp C=>T T:71 C:0
EA2454	snippy:4.3.6	variation	2498842	2498842	.	.	0	note=snp G=>A A:72 G:1
EA2454	snippy:4.3.6	variation	2498934	2498934	.	.	0	note=snp C=>T T:82 C:0
EA2454	snippy:4.3.6	variation	2498973	2498973	.	.	0	note=snp G=>A A:76 G:0
EA2454	snippy:4.3.6	variation	2498986	2498986	.	.	0	note=snp C=>T T:76 C:0
EA2454	snippy:4.3.6	variation	2499012	2499012	.	.	0	note=mnp TC=>CT CT:78 TC:0
EA2454	snippy:4.3.6	variation	2499033	2499033	.	.	0	note=snp A=>C C:78 A:1
EA2454	snippy:4.3.6	variation	2499042	2499042	.	.	0	note=snp C=>T T:85 C:0
EA2454	snippy:4.3.6	variation	2499048	2499048	.	.	0	note=snp T=>C C:84 T:0
EA2454	snippy:4.3.6	variation	2499078	2499078	.	.	0	note=snp C=>T T:86 C:1
EA2454	snippy:4.3.6	variation	2499084	2499084	.	.	0	note=mnp AG=>CA CA:86 AG:0
EA2454	snippy:4.3.6	variation	2499090	2499090	.	.	0	note=snp T=>C C:86 T:0
EA2454	snippy:4.3.6	variation	2499096	2499096	.	.	0	note=snp A=>T T:82 A:0
EA2454	snippy:4.3.6	variation	2499137	2499137	.	.	0	note=snp T=>A A:90 T:0
EA2454	snippy:4.3.6	variation	2499150	2499150	.	.	0	note=snp T=>C C:90 T:0
EA2454	snippy:4.3.6	variation	2499159	2499159	.	.	0	note=snp T=>C C:89 T:0
EA2454	snippy:4.3.6	variation	2499174	2499174	.	.	0	note=snp C=>T T:89 C:0
EA2454	snippy:4.3.6	variation	2499183	2499183	.	.	0	note=snp C=>A A:90 C:0
EA2454	snippy:4.3.6	variation	2499210	2499210	.	.	0	note=complex AATC=>CATT CATT:91 AATC:0
EA2454	snippy:4.3.6	variation	2499249	2499249	.	.	0	note=snp C=>T T:86 C:0
EA2454	snippy:4.3.6	variation	2499258	2499258	.	.	0	note=snp A=>G G:76 A:0
EA2454	snippy:4.3.6	variation	2499265	2499265	.	.	0	note=snp C=>T T:81 C:0
EA2454	snippy:4.3.6	variation	2499273	2499273	.	.	0	note=snp T=>C C:80 T:0
EA2454	snippy:4.3.6	variation	2499278	2499278	.	.	0	note=snp G=>A A:80 G:0
EA2454	snippy:4.3.6	variation	2499285	2499285	.	.	0	note=mnp AG=>GA GA:78 AG:0
EA2454	snippy:4.3.6	variation	2499327	2499327	.	.	0	note=snp A=>G G:87 A:0
EA2454	snippy:4.3.6	variation	2499342	2499342	.	.	0	note=complex GCGA=>ACGG ACGG:83 GCGA:0
EA2454	snippy:4.3.6	variation	2499357	2499357	.	.	0	note=complex GCCG=>ACCA ACCA:82 GCCG:0
EA2454	snippy:4.3.6	variation	2499366	2499366	.	.	0	note=snp T=>A A:84 T:0
EA2454	snippy:4.3.6	variation	2499375	2499375	.	.	0	note=complex TATTAT=>CATTGC CATTGC:79 TATTAT:0
EA2454	snippy:4.3.6	variation	2499393	2499393	.	.	0	note=snp G=>A A:83 G:1
EA2454	snippy:4.3.6	variation	2499417	2499417	.	.	0	note=complex TCCCC=>CCCTT CCCTT:75 TCCCC:0
EA2454	snippy:4.3.6	variation	2499438	2499438	.	.	0	note=complex AAAT=>GAAC GAAC:76 AAAT:0
EA2454	snippy:4.3.6	variation	2499447	2499447	.	.	0	note=snp C=>T T:74 C:0
EA2454	snippy:4.3.6	variation	2499453	2499453	.	.	0	note=snp A=>G G:75 A:0
EA2454	snippy:4.3.6	variation	2499468	2499468	.	.	0	note=snp A=>G G:73 A:0
EA2454	snippy:4.3.6	variation	2499474	2499474	.	.	0	note=snp T=>C C:74 T:0
EA2454	snippy:4.3.6	variation	2499483	2499483	.	.	0	note=snp A=>C C:70 A:0
EA2454	snippy:4.3.6	variation	2499492	2499492	.	.	0	note=complex ACTTGGA=>GCTGGGG GCTGGGG:62 ACTTGGA:0
EA2454	snippy:4.3.6	variation	2499522	2499522	.	.	0	note=snp T=>C C:52 T:0
EA2454	snippy:4.3.6	variation	2499546	2499546	.	.	0	note=snp A=>C C:41 A:0
EA2454	snippy:4.3.6	variation	2499555	2499555	.	.	0	note=snp T=>C C:40 T:0
EA2454	snippy:4.3.6	variation	2499561	2499561	.	.	0	note=snp A=>G G:37 A:0
EA2454	snippy:4.3.6	variation	2499570	2499570	.	.	0	note=snp C=>T T:35 C:0
EA2454	snippy:4.3.6	variation	2499576	2499576	.	.	0	note=snp C=>T T:35 C:0
EA2454	snippy:4.3.6	variation	2499587	2499587	.	.	0	note=snp T=>C C:33 T:0
EA2454	snippy:4.3.6	variation	2499603	2499603	.	.	0	note=snp G=>A A:28 G:0
EA2454	snippy:4.3.6	variation	2499613	2499613	.	.	0	note=complex TCC=>GCT GCT:26 TCC:0
EA2454	snippy:4.3.6	variation	2499624	2499624	.	.	0	note=snp T=>G G:24 T:1
EA2454	snippy:4.3.6	variation	2499648	2499648	.	.	0	note=snp C=>G G:10 C:0
EA2454	snippy:4.3.6	variation	2501091	2501091	.	.	0	note=snp C=>T T:42 C:0
EA2454	snippy:4.3.6	variation	2501790	2501790	.	.	0	note=snp G=>T T:38 G:0
EA2454	snippy:4.3.6	variation	2506538	2506538	.	.	0	note=snp G=>A A:70 G:0
EA2454	snippy:4.3.6	variation	2507403	2507403	.	.	0	note=snp G=>A A:31 G:0
EA2454	snippy:4.3.6	variation	2511114	2511114	.	.	0	note=del CA=>C C:38 CA:0
EA2454	snippy:4.3.6	variation	2511997	2511997	.	.	0	note=snp T=>A A:60 T:0
EA2454	snippy:4.3.6	variation	2513620	2513620	.	.	0	note=ins A=>AT AT:50 A:1
EA2454	snippy:4.3.6	variation	2514275	2514275	.	.	0	note=snp C=>A A:74 C:0
EA2454	snippy:4.3.6	variation	2518906	2518906	.	.	0	note=snp A=>C C:20 A:0
EA2454	snippy:4.3.6	variation	2520123	2520123	.	.	0	note=snp G=>A A:73 G:0
EA2454	snippy:4.3.6	variation	2520559	2520559	.	.	0	note=del GTTGGCATAAAGCGGCTGGCAATCTCATCGGCAACCGGACGACGCGACACCATCGACAGGCCAAAATCCCCCTGCACAGCA=>G G:13 GTTGGCATAAAGCGGCTGGCAATCTCATCGGCAACCGGACGACGCGACACCATCGACAGGCCAAAATCCCCCTGCACAGCA:0
EA2454	snippy:4.3.6	variation	2521382	2521382	.	.	0	note=snp C=>T T:63 C:1
EA2454	snippy:4.3.6	variation	2522720	2522720	.	.	0	note=snp A=>C C:51 A:0
EA2454	snippy:4.3.6	variation	2524981	2524981	.	.	0	note=snp T=>G G:65 T:0
EA2454	snippy:4.3.6	variation	2526344	2526344	.	.	0	note=snp G=>A A:62 G:0
EA2454	snippy:4.3.6	variation	2527605	2527605	.	.	0	note=snp G=>A A:89 G:1
EA2454	snippy:4.3.6	variation	2528246	2528246	.	.	0	note=snp T=>C C:56 T:1
EA2454	snippy:4.3.6	variation	2529210	2529210	.	.	0	note=snp C=>T T:55 C:0
EA2454	snippy:4.3.6	variation	2529750	2529750	.	.	0	note=snp G=>A A:88 G:1
EA2454	snippy:4.3.6	variation	2531515	2531515	.	.	0	note=snp G=>A A:101 G:0
EA2454	snippy:4.3.6	variation	2533068	2533068	.	.	0	note=snp G=>A A:74 G:0
EA2454	snippy:4.3.6	variation	2533833	2533833	.	.	0	note=snp G=>A A:114 G:0
EA2454	snippy:4.3.6	variation	2534281	2534281	.	.	0	note=snp A=>T T:85 A:0
EA2454	snippy:4.3.6	variation	2537846	2537846	.	.	0	note=snp G=>A A:84 G:1
[truncated: 3,992 more rows]
