# Supplementary material for: Escherichia coli ST302: Genomic Analysis of Virulence Potential and Antimicrobial Resistance Mediated by Mobile Genetic Elements
Source: Front Microbiol. 2020 Jan 21;10:3098. doi: 10.3389/fmicb.2019.03098 (PMC6985150; doi:10.3389/fmicb.2019.03098)
Supplement: DATA S2 — ST302 SNP analysis. [file Data_Sheet_2.ZIP › SNP_Analysis/ST302_SNP/SNP_analysis/snippyout/ST302/IA1729-Canine-ST302.out/snps.csv]

CHROM	POS	TYPE	REF	ALT	EVIDENCE	FTYPE	STRAND	NT_POS	AA_POS	EFFECT	LOCUS_TAG	GENE	PRODUCT
EA2454	977	snp	T	C	C:87 T:0
EA2454	4901	snp	T	C	C:166 T:0
EA2454	11382	snp	A	G	G:188 A:0
EA2454	11615	snp	T	G	G:146 T:0
EA2454	18822	snp	A	G	G:174 A:0
EA2454	19381	snp	C	T	T:225 C:0
EA2454	22484	snp	C	T	T:119 C:0
EA2454	22955	snp	G	A	A:130 G:0
EA2454	24420	snp	T	G	G:143 T:0
EA2454	25719	snp	T	C	C:245 T:0
EA2454	29082	snp	A	T	T:315 A:0
EA2454	34494	snp	T	C	C:134 T:0
EA2454	36375	snp	C	A	A:198 C:0
EA2454	37550	snp	G	T	T:235 G:0
EA2454	37987	snp	T	C	C:179 T:0
EA2454	38677	snp	A	C	C:95 A:0
EA2454	38902	snp	A	G	G:108 A:0
EA2454	41873	snp	G	T	T:153 G:3
EA2454	42905	snp	T	G	G:182 T:0
EA2454	42911	snp	C	A	A:189 C:1
EA2454	48190	snp	C	A	A:195 C:0
EA2454	49672	snp	C	A	A:134 C:0
EA2454	50851	snp	A	C	C:150 A:0
EA2454	51521	snp	C	T	T:209 C:0
EA2454	53157	snp	C	T	T:262 C:0
EA2454	53772	snp	T	G	G:139 T:0
EA2454	54992	snp	T	C	C:194 T:0
EA2454	56628	snp	A	C	C:110 A:0
EA2454	58152	snp	T	C	C:202 T:0
EA2454	59959	snp	G	T	T:114 G:0
EA2454	65206	snp	G	A	A:115 G:0
EA2454	67315	snp	A	C	C:120 A:0
EA2454	69595	snp	A	G	G:93 A:0
EA2454	71896	snp	C	T	T:125 C:0
EA2454	74671	snp	A	G	G:118 A:0
EA2454	80371	snp	C	T	T:129 C:1
EA2454	81213	snp	G	T	T:220 G:0
EA2454	84557	snp	T	G	G:118 T:0
EA2454	86028	snp	C	T	T:188 C:0
EA2454	86305	snp	G	T	T:164 G:0
EA2454	87412	snp	A	G	G:23 A:0
EA2454	88705	snp	C	T	T:103 C:0
EA2454	93722	snp	C	T	T:113 C:0
EA2454	94636	snp	C	T	T:200 C:0
EA2454	95711	snp	C	T	T:10 C:0
EA2454	95792	snp	C	T	T:16 C:0
EA2454	98200	snp	A	G	G:148 A:0
EA2454	99924	snp	C	T	T:113 C:0
EA2454	100587	snp	G	T	T:170 G:0
EA2454	101724	snp	A	C	C:183 A:0
EA2454	105773	snp	A	G	G:128 A:0
EA2454	111773	snp	C	G	G:141 C:0
EA2454	119029	snp	A	G	G:155 A:0
EA2454	123376	snp	G	A	A:146 G:0
EA2454	124865	snp	T	C	C:200 T:0
EA2454	126504	snp	A	G	G:156 A:0
EA2454	128903	snp	A	G	G:170 A:0
EA2454	131613	snp	A	G	G:180 A:0
EA2454	131667	snp	G	A	A:145 G:0
EA2454	140951	snp	T	G	G:110 T:2
EA2454	145428	snp	T	C	C:192 T:0
EA2454	146087	snp	A	C	C:200 A:2
EA2454	163798	snp	T	C	C:43 T:0
EA2454	163970	del	AT	A	A:26 AT:0
EA2454	166894	snp	T	G	G:126 T:0
EA2454	167773	snp	G	T	T:180 G:0
EA2454	172664	snp	C	T	T:110 C:0
EA2454	173304	snp	C	T	T:157 C:1
EA2454	174420	snp	A	G	G:142 A:0
EA2454	181477	snp	G	T	T:148 G:0
EA2454	181677	snp	G	T	T:47 G:0
EA2454	185127	ins	C	CA	CA:210 C:0
EA2454	186550	snp	T	C	C:105 T:0
EA2454	187941	snp	A	G	G:122 A:0
EA2454	188826	snp	C	T	T:149 C:0
EA2454	190313	snp	T	C	C:73 T:0
EA2454	192742	snp	A	T	T:255 A:0
EA2454	212390	snp	C	T	T:175 C:0
EA2454	217635	snp	C	T	T:236 C:1
EA2454	220577	snp	G	A	A:211 G:0
EA2454	220684	snp	T	C	C:196 T:0
EA2454	239221	snp	A	G	G:128 A:0
EA2454	245301	snp	C	T	T:204 C:1
EA2454	246285	snp	G	T	T:168 G:0
EA2454	248471	snp	T	C	C:239 T:0
EA2454	254506	snp	T	A	A:232 T:0
EA2454	255537	snp	C	T	T:181 C:0
EA2454	259013	snp	A	G	G:195 A:0
EA2454	267088	snp	C	T	T:209 C:0
EA2454	267736	snp	C	A	A:167 C:0
EA2454	268752	snp	G	A	A:203 G:0
EA2454	271991	snp	T	G	G:132 T:0
EA2454	275599	snp	G	A	A:104 G:0
EA2454	275686	del	GAGC	G	G:65 GAGC:0
EA2454	276026	snp	C	T	T:65 C:0
EA2454	277907	snp	G	T	T:186 G:0
EA2454	278848	snp	A	G	G:51 A:0
EA2454	280058	snp	T	C	C:146 T:0
EA2454	284131	snp	A	G	G:154 A:0
EA2454	285247	ins	G	GAAATTT	GAAATTT:137 G:0
EA2454	285627	ins	A	AT	AT:135 A:0
EA2454	286856	snp	G	A	A:93 G:0
EA2454	288026	snp	A	C	C:128 A:0
EA2454	288991	complex	CTTT	TTTC	TTTC:65 CTTT:0
EA2454	289050	snp	T	C	C:112 T:0
EA2454	289137	complex	TTGT	CTGC	CTGC:95 TTGT:0
EA2454	289188	snp	G	A	A:85 G:0
EA2454	289242	snp	A	G	G:92 A:0
EA2454	289260	snp	G	C	C:113 G:0
EA2454	289326	snp	C	A	A:185 C:0
EA2454	289332	complex	TACT	CACC	CACC:159 TACT:0
EA2454	289341	snp	T	C	C:176 T:0
EA2454	289594	snp	A	T	T:137 A:0
EA2454	289640	snp	G	A	A:162 G:0
EA2454	289704	snp	A	T	T:86 A:0
EA2454	289718	del	GA	G	G:55 GA:0
EA2454	289839	complex	GATT	AATA	AATA:162 GATT:0
EA2454	289854	snp	T	C	C:159 T:0
EA2454	289860	snp	C	T	T:186 C:0
EA2454	289866	snp	T	A	A:174 T:1
EA2454	289962	snp	A	G	G:126 A:0
EA2454	290058	complex	TACCCAC	CACTCAT	CACTCAT:141 TACCCAC:0
EA2454	290076	snp	C	T	T:196 C:0
EA2454	290134	complex	TTG	CTT	CTT:178 TTG:0
EA2454	290172	snp	A	G	G:151 A:0
EA2454	290262	snp	T	C	C:186 T:0
EA2454	290283	snp	G	A	A:205 G:0
EA2454	290292	complex	CTCT	ATCC	ATCC:169 CTCT:0
EA2454	290364	complex	ACGA	TCGG	TCGG:161 ACGA:0
EA2454	290388	snp	T	C	C:156 T:0
EA2454	290433	snp	C	G	G:143 C:0
EA2454	290454	snp	G	T	T:158 G:0
EA2454	290610	snp	T	C	C:219 T:0
EA2454	290640	snp	C	A	A:215 C:0
EA2454	290655	snp	C	A	A:212 C:0
EA2454	290717	complex	TCA	CCG	CCG:167 TCA:0
EA2454	290739	snp	C	T	T:194 C:0
EA2454	290752	snp	G	T	T:205 G:1
EA2454	290793	snp	A	C	C:222 A:0
EA2454	290916	snp	T	C	C:148 T:1
EA2454	290928	snp	G	C	C:165 G:0
EA2454	291036	snp	G	T	T:114 G:0
EA2454	291045	snp	G	A	A:110 G:0
EA2454	291057	complex	CACGCTG	TACCTTA	TACCTTA:70 CACGCTG:0
EA2454	291072	snp	C	T	T:160 C:0
EA2454	291144	snp	T	C	C:245 T:0
EA2454	291165	snp	C	T	T:194 C:0
EA2454	291174	snp	C	A	A:188 C:0
EA2454	291189	snp	A	C	C:204 A:0
EA2454	291240	snp	T	C	C:104 T:0
EA2454	291273	snp	G	A	A:124 G:0
EA2454	291387	snp	A	G	G:159 A:0
EA2454	291400	snp	T	C	C:126 T:0
EA2454	291414	snp	G	A	A:144 G:0
EA2454	291429	snp	C	T	T:138 C:0
EA2454	291449	complex	GCATGC	ACCTGT	ACCTGT:97 GCATGC:0
EA2454	291465	snp	T	A	A:121 T:0
EA2454	291477	snp	A	G	G:114 A:0
EA2454	291537	complex	GGCA	CGCT	CGCT:102 GGCA:0
EA2454	291552	snp	G	A	A:111 G:0
EA2454	291573	complex	TGCG	CGCA	CGCA:96 TGCG:0
EA2454	291609	complex	CATC	AATA	AATA:74 CATC:0
EA2454	291621	snp	A	G	G:98 A:0
EA2454	291645	complex	AGGC	TGGT	TGGT:89 AGGC:0
EA2454	291705	snp	C	T	T:127 C:0
EA2454	291720	snp	A	G	G:122 A:0
EA2454	291729	snp	T	G	G:132 T:0
EA2454	291833	complex	ACACGCTG	GCACTCTC	GCACTCTC:86 ACACGCTG:0
EA2454	291852	snp	C	T	T:93 C:0
EA2454	291908	snp	T	G	G:58 T:1
EA2454	291975	snp	C	G	G:48 C:0
EA2454	291993	snp	A	G	G:35 A:0
EA2454	291999	complex	TAACC	CAACT	CAACT:29 TAACC:0
EA2454	292079	snp	C	T	T:21 C:0
EA2454	292088	snp	A	C	C:35 A:1
EA2454	292124	snp	C	A	A:115 C:0
EA2454	292175	snp	T	C	C:131 T:0
EA2454	292193	complex	CAT	TAC	TAC:134 CAT:0
EA2454	292214	snp	A	G	G:145 A:0
EA2454	292221	complex	TTGTTTCCCTCC	CTGTATCCTTCA	CTGTATCCTTCA:77 TTGTTTCCCTCC:0
EA2454	292304	snp	T	C	C:170 T:0
EA2454	292325	snp	A	T	T:143 A:0
EA2454	292400	snp	C	T	T:178 C:0
EA2454	292414	snp	C	T	T:181 C:0
EA2454	292506	snp	G	T	T:127 G:0
EA2454	292561	snp	G	C	C:151 G:0
EA2454	292766	snp	T	C	C:132 T:0
EA2454	292868	snp	G	A	A:130 G:0
EA2454	292898	snp	A	G	G:148 A:0
EA2454	292907	snp	A	C	C:142 A:0
EA2454	292916	complex	TGCC	CGCT	CGCT:135 TGCC:0
EA2454	292951	snp	C	A	A:182 C:0
EA2454	293057	snp	C	G	G:225 C:0
EA2454	293102	snp	A	G	G:124 A:0
EA2454	293200	snp	A	T	T:106 A:0
EA2454	293263	snp	A	G	G:158 A:0
EA2454	293272	snp	A	G	G:165 A:0
EA2454	293435	snp	A	G	G:145 A:0
EA2454	293449	snp	A	C	C:141 A:0
EA2454	293455	snp	C	T	T:142 C:0
EA2454	293526	snp	T	C	C:134 T:0
EA2454	293533	snp	A	G	G:146 A:0
EA2454	293620	snp	A	T	T:169 A:0
EA2454	293629	snp	G	T	T:156 G:0
EA2454	293752	snp	T	C	C:111 T:0
EA2454	293839	snp	G	A	A:159 G:1
EA2454	295413	snp	T	G	G:161 T:0
EA2454	295650	snp	C	T	T:170 C:0
EA2454	295992	snp	G	T	T:196 G:2
EA2454	296004	snp	C	T	T:219 C:1
EA2454	296339	snp	T	A	A:200 T:0
EA2454	296802	snp	T	A	A:240 T:2
EA2454	296808	snp	C	T	T:235 C:0
EA2454	297129	snp	T	C	C:220 T:0
EA2454	297228	snp	T	C	C:186 T:0
EA2454	297486	snp	T	C	C:187 T:0
EA2454	297501	snp	C	G	G:177 C:0
EA2454	297613	snp	T	C	C:199 T:0
EA2454	297690	snp	C	T	T:214 C:0
EA2454	297729	snp	T	C	C:196 T:0
EA2454	298022	complex	C	AA	AA:93 C:0
EA2454	298240	snp	T	G	G:175 T:0
EA2454	298249	snp	C	T	T:179 C:0
EA2454	298264	snp	C	T	T:147 C:0
EA2454	298286	snp	T	C	C:174 T:0
EA2454	298414	snp	C	T	T:182 C:0
EA2454	298426	snp	T	C	C:149 T:0
EA2454	298444	snp	T	G	G:154 T:1
EA2454	298666	snp	T	C	C:254 T:0
EA2454	299380	snp	G	A	A:187 G:0
EA2454	299446	snp	A	G	G:183 A:0
EA2454	299497	snp	G	T	T:198 G:0
EA2454	299575	snp	C	T	T:161 C:0
EA2454	299605	snp	T	C	C:185 T:0
EA2454	299632	snp	C	T	T:191 C:0
EA2454	299758	mnp	AC	GA	GA:125 AC:0
EA2454	299773	snp	T	C	C:210 T:0
EA2454	299836	snp	C	T	T:245 C:0
EA2454	299899	snp	T	G	G:259 T:0
EA2454	299920	snp	A	C	C:217 A:0
EA2454	300016	snp	T	C	C:185 T:0
EA2454	300252	snp	T	C	C:232 T:0
EA2454	300276	snp	A	C	C:219 A:0
EA2454	300282	snp	T	C	C:204 T:0
EA2454	300293	mnp	GT	AC	AC:155 GT:0
EA2454	300300	snp	A	G	G:194 A:0
EA2454	300315	snp	G	A	A:226 G:0
EA2454	300321	snp	A	G	G:244 A:0
EA2454	300375	snp	C	T	T:269 C:0
EA2454	300425	snp	G	T	T:212 G:0
EA2454	300483	snp	G	C	C:199 G:0
EA2454	300494	snp	C	T	T:198 C:0
EA2454	300501	snp	G	A	A:192 G:0
EA2454	300507	snp	G	A	A:190 G:0
EA2454	300549	snp	A	G	G:196 A:0
EA2454	300596	snp	T	C	C:204 T:0
EA2454	300666	snp	G	A	A:192 G:1
EA2454	300681	snp	C	T	T:190 C:0
EA2454	300722	complex	GTTCA	TTTCG	TTTCG:173 GTTCA:0
EA2454	300777	complex	CACG	TACC	TACC:155 CACG:0
EA2454	300858	snp	G	A	A:199 G:0
EA2454	300873	complex	GGGT	TGGA	TGGA:167 GGGT:0
EA2454	300923	snp	A	C	C:152 A:1
EA2454	301564	snp	T	C	C:184 T:0
EA2454	301612	snp	T	C	C:232 T:0
EA2454	301657	complex	TATC	CATT	CATT:140 TATC:0
EA2454	301717	snp	C	T	T:233 C:0
EA2454	301736	snp	T	C	C:205 T:0
EA2454	301759	complex	TTCT	CTCG	CTCG:184 TTCT:0
EA2454	302008	snp	C	G	G:173 C:0
EA2454	302024	snp	T	C	C:179 T:2
EA2454	302042	snp	C	T	T:194 C:0
EA2454	302056	snp	A	G	G:178 A:0
EA2454	302069	snp	C	T	T:182 C:0
EA2454	302081	snp	C	T	T:196 C:0
EA2454	302123	snp	G	A	A:186 G:0
EA2454	302135	snp	T	G	G:179 T:2
EA2454	302202	snp	C	T	T:140 C:0
EA2454	302244	snp	C	T	T:121 C:0
EA2454	302373	snp	T	C	C:154 T:0
EA2454	302384	complex	TAC	CAG	CAG:142 TAC:0
EA2454	302495	snp	G	C	C:191 G:0
EA2454	302540	snp	T	A	A:187 T:0
EA2454	302650	snp	T	C	C:163 T:0
EA2454	302683	snp	G	A	A:145 G:0
EA2454	302696	snp	A	G	G:135 A:0
EA2454	302708	snp	C	T	T:127 C:0
EA2454	302723	snp	G	A	A:132 G:0
EA2454	302744	snp	A	G	G:133 A:0
EA2454	302783	snp	T	C	C:145 T:0
EA2454	302894	snp	T	C	C:132 T:0
EA2454	302915	snp	G	T	T:147 G:0
EA2454	302924	snp	T	C	C:100 T:0
EA2454	302929	mnp	GAT	AGC	AGC:95 GAT:0
EA2454	303028	snp	G	A	A:171 G:0
EA2454	303476	snp	C	T	T:156 C:0
EA2454	303533	snp	A	G	G:182 A:0
EA2454	303575	snp	A	G	G:202 A:0
EA2454	303867	snp	A	G	G:198 A:0
EA2454	303968	snp	T	C	C:234 T:0
EA2454	304001	snp	T	C	C:198 T:0
EA2454	304012	snp	C	T	T:219 C:0
EA2454	304109	snp	T	G	G:198 T:0
EA2454	304199	snp	T	C	C:187 T:0
EA2454	304214	snp	G	A	A:189 G:0
EA2454	304367	mnp	CA	TG	TG:184 CA:0
EA2454	304378	snp	T	C	C:180 T:0
EA2454	312992	snp	C	T	T:82 C:0
EA2454	313034	snp	A	G	G:109 A:0
EA2454	313922	snp	G	A	A:194 G:0
EA2454	317106	snp	T	C	C:129 T:0
EA2454	328787	snp	T	G	G:340 T:0
EA2454	332708	snp	C	T	T:178 C:0
EA2454	344966	snp	T	C	C:247 T:0
EA2454	348047	snp	C	A	A:156 C:0
EA2454	350137	snp	C	T	T:168 C:0
EA2454	350563	snp	C	T	T:150 C:0
EA2454	350969	snp	A	G	G:172 A:0
EA2454	352054	snp	C	A	A:99 C:1
EA2454	362739	del	TTGAGGG	T	T:106 TTGAGGG:0
EA2454	369429	snp	T	C	C:221 T:0
EA2454	371038	snp	A	G	G:314 A:0
EA2454	371150	snp	T	C	C:207 T:0
EA2454	376932	snp	G	A	A:314 G:0
EA2454	382085	snp	T	C	C:146 T:0
EA2454	383169	snp	A	C	C:211 A:1
EA2454	388160	snp	A	C	C:399 A:0
EA2454	390573	snp	G	A	A:174 G:0
EA2454	391067	snp	T	G	G:207 T:0
EA2454	392511	snp	T	C	C:229 T:0
EA2454	393575	snp	A	G	G:210 A:0
EA2454	393743	snp	A	G	G:297 A:0
EA2454	397444	snp	C	G	G:169 C:0
EA2454	398396	snp	C	T	T:202 C:0
EA2454	407113	snp	A	G	G:353 A:0
EA2454	407887	snp	C	G	G:267 C:0
EA2454	409884	snp	T	G	G:197 T:2
EA2454	411290	snp	A	T	T:209 A:0
EA2454	412599	snp	C	T	T:184 C:0
EA2454	417355	snp	T	A	A:186 T:0
EA2454	423435	snp	C	A	A:180 C:0
EA2454	429193	snp	C	T	T:198 C:0
EA2454	430947	snp	T	C	C:219 T:1
EA2454	437474	snp	A	G	G:160 A:0
EA2454	440837	snp	C	A	A:242 C:1
EA2454	441911	snp	T	C	C:65 T:0
EA2454	442423	snp	G	A	A:186 G:0
EA2454	443213	snp	A	G	G:20 A:0
EA2454	443237	snp	G	A	A:24 G:0
EA2454	443268	snp	T	A	A:29 T:0
EA2454	444160	snp	C	T	T:261 C:0
EA2454	447459	snp	A	G	G:160 A:0
EA2454	448711	snp	A	G	G:155 A:0
EA2454	448932	snp	T	G	G:274 T:0
EA2454	450849	snp	A	T	T:49 A:0
EA2454	452711	snp	T	A	A:119 T:1
EA2454	454084	del	TGCTGTGGCAGGC	T	T:115 TGCTGTGGCAGGC:0
EA2454	457082	snp	C	T	T:124 C:0
EA2454	457893	snp	C	A	A:199 C:1
EA2454	459248	snp	A	G	G:231 A:0
EA2454	463635	snp	G	T	T:243 G:2
EA2454	465826	snp	A	T	T:231 A:0
EA2454	471709	snp	A	G	G:192 A:0
EA2454	472911	snp	T	C	C:167 T:0
EA2454	473611	snp	A	G	G:216 A:0
EA2454	474484	snp	G	A	A:241 G:1
EA2454	475511	snp	T	A	A:188 T:0
EA2454	477552	snp	G	A	A:154 G:0
EA2454	478727	snp	C	A	A:273 C:3
EA2454	484564	snp	A	G	G:65 A:0
EA2454	485759	snp	C	T	T:374 C:0
EA2454	485779	snp	C	G	G:423 C:0
EA2454	488462	snp	G	A	A:219 G:0
EA2454	497400	snp	T	G	G:35 T:0
EA2454	497460	snp	T	G	G:122 T:0
EA2454	498706	snp	G	A	A:226 G:0
EA2454	506352	snp	T	G	G:59 T:0
EA2454	511943	snp	A	G	G:165 A:0
EA2454	517520	snp	G	A	A:297 G:0
EA2454	518900	snp	G	A	A:273 G:0
EA2454	519811	snp	A	C	C:154 A:0
EA2454	523923	snp	C	G	G:115 C:0
EA2454	527663	snp	T	A	A:133 T:1
EA2454	528096	snp	C	T	T:157 C:0
EA2454	528123	snp	A	T	T:163 A:1
EA2454	531431	snp	A	G	G:141 A:0
EA2454	531539	snp	G	A	A:200 G:0
EA2454	534151	snp	A	G	G:182 A:0
EA2454	537287	snp	G	C	C:99 G:0
EA2454	539426	snp	T	C	C:256 T:0
EA2454	543142	snp	C	T	T:207 C:0
EA2454	546428	snp	A	C	C:223 A:0
EA2454	548687	snp	A	G	G:195 A:0
EA2454	550155	snp	G	T	T:195 G:1
EA2454	550654	snp	T	C	C:198 T:0
EA2454	552561	snp	C	T	T:204 C:0
EA2454	559017	snp	A	G	G:184 A:0
EA2454	560855	snp	G	A	A:178 G:0
EA2454	561226	snp	G	A	A:49 G:0
EA2454	562933	snp	T	C	C:167 T:0
EA2454	569495	snp	G	A	A:212 G:0
EA2454	571709	snp	A	G	G:208 A:0
EA2454	571951	snp	C	A	A:108 C:0
EA2454	572642	snp	C	T	T:19 C:0
EA2454	583662	snp	T	A	A:219 T:0
EA2454	590181	ins	T	TA	TA:46 T:0
EA2454	595216	snp	T	A	A:132 T:1
EA2454	595654	snp	T	C	C:75 T:0
EA2454	595785	snp	T	C	C:98 T:0
EA2454	597386	snp	A	G	G:290 A:0
EA2454	602583	snp	A	G	G:212 A:0
EA2454	602608	snp	C	T	T:223 C:0
EA2454	603196	snp	T	C	C:137 T:0
EA2454	606088	ins	G	GA	GA:242 G:0
EA2454	610464	snp	A	C	C:300 A:2
EA2454	610851	snp	C	T	T:325 C:0
EA2454	611188	snp	G	A	A:193 G:0
EA2454	611872	snp	A	G	G:84 A:0
EA2454	612726	snp	A	G	G:51 A:0
EA2454	613659	snp	G	A	A:187 G:0
EA2454	613906	snp	C	A	A:110 C:0
EA2454	621505	snp	C	T	T:220 C:0
EA2454	622741	snp	T	G	G:262 T:1
EA2454	631335	snp	T	C	C:300 T:1
EA2454	635649	snp	A	C	C:191 A:1
EA2454	644101	snp	A	G	G:212 A:0
EA2454	644770	snp	G	T	T:238 G:0
EA2454	644913	snp	T	C	C:268 T:0
EA2454	646569	snp	G	A	A:215 G:1
EA2454	650009	snp	C	T	T:193 C:0
EA2454	653031	snp	C	T	T:151 C:0
EA2454	653975	del	CGCTCATCGTG	C	C:136 CGCTCATCGTG:0
EA2454	661455	snp	A	C	C:190 A:0
EA2454	665110	snp	C	G	G:165 C:0
EA2454	669330	snp	A	G	G:188 A:0
EA2454	670954	snp	C	T	T:229 C:0
EA2454	674305	snp	G	C	C:272 G:0
EA2454	677753	snp	G	A	A:177 G:0
EA2454	678422	snp	C	T	T:186 C:1
EA2454	683177	snp	T	G	G:172 T:1
EA2454	686003	snp	A	G	G:188 A:0
EA2454	686104	snp	G	C	C:164 G:0
EA2454	687410	snp	A	G	G:203 A:1
EA2454	690408	snp	A	G	G:226 A:0
EA2454	690611	snp	T	C	C:155 T:0
EA2454	693295	snp	C	T	T:221 C:0
EA2454	705171	snp	C	T	T:247 C:0
EA2454	705263	snp	C	A	A:238 C:0
EA2454	707477	snp	C	T	T:275 C:0
EA2454	709632	snp	T	C	C:221 T:0
EA2454	710977	snp	A	G	G:190 A:0
EA2454	724929	snp	A	G	G:238 A:0
EA2454	729583	snp	G	A	A:205 G:0
EA2454	730566	snp	C	T	T:293 C:0
EA2454	731219	snp	T	G	G:321 T:0
EA2454	731329	snp	G	A	A:311 G:0
EA2454	732941	snp	A	G	G:60 A:0
EA2454	737158	snp	C	T	T:240 C:0
EA2454	746522	snp	T	C	C:323 T:1
EA2454	746983	snp	A	T	T:241 A:0
EA2454	747674	snp	T	G	G:192 T:1
EA2454	748560	snp	G	C	C:206 G:0
EA2454	753727	snp	T	C	C:189 T:0
EA2454	755366	snp	A	G	G:175 A:0
EA2454	756040	snp	T	G	G:171 T:1
EA2454	758394	snp	C	T	T:155 C:0
EA2454	765032	snp	T	C	C:278 T:0
EA2454	767310	snp	C	T	T:159 C:0
EA2454	770498	snp	A	G	G:60 A:1
EA2454	770503	snp	T	C	C:66 T:0
EA2454	770521	complex	CCGC	TCGA	TCGA:63 CCGC:0
EA2454	770751	snp	C	T	T:287 C:0
EA2454	770774	snp	A	G	G:182 A:0
EA2454	770938	complex	AG	GA	GA:34 AG:0
EA2454	770972	complex	GGGCGTGACTT	CGGAGTTACTC	CGGAGTTACTC:17 GGGCGTGACTT:0
EA2454	770992	snp	G	A	A:33 G:0
EA2454	771044	snp	C	T	T:49 C:0
EA2454	771049	complex	TTAACTTA	AAATTTTG	AAATTTTG:46 TTAACTTA:0
EA2454	771086	complex	AAT	CGG	CGG:11 AAT:0
EA2454	773286	snp	A	C	C:23 A:0
EA2454	778154	snp	A	G	G:83 A:0
EA2454	778161	snp	G	A	A:71 G:0
EA2454	778504	snp	A	C	C:30 A:0
EA2454	780129	snp	C	T	T:198 C:0
EA2454	780793	snp	A	C	C:20 A:0
EA2454	786559	snp	A	C	C:134 A:0
EA2454	786570	snp	G	A	A:167 G:0
EA2454	788461	snp	G	T	T:159 G:0
EA2454	789417	snp	A	C	C:170 A:1
EA2454	791956	snp	G	A	A:159 G:0
EA2454	793051	snp	A	G	G:136 A:1
EA2454	797963	snp	C	T	T:297 C:0
EA2454	799162	snp	G	A	A:169 G:0
EA2454	804247	snp	G	A	A:118 G:0
EA2454	804998	snp	A	C	C:145 A:0
EA2454	805162	snp	G	A	A:197 G:1
EA2454	805481	snp	A	G	G:152 A:0
EA2454	811804	snp	T	C	C:43 T:0
EA2454	817446	snp	A	G	G:162 A:0
EA2454	817985	snp	T	G	G:135 T:0
EA2454	818649	snp	A	C	C:140 A:0
EA2454	820251	snp	G	T	T:128 G:0
EA2454	821110	snp	A	C	C:204 A:1
EA2454	834575	ins	A	AT	AT:83 A:1
EA2454	836515	snp	G	T	T:270 G:0
EA2454	839497	snp	T	A	A:226 T:1
EA2454	842772	snp	C	T	T:111 C:0
EA2454	843890	snp	C	T	T:253 C:0
EA2454	844850	snp	A	C	C:145 A:1
EA2454	846335	snp	G	T	T:121 G:3
EA2454	848455	snp	G	T	T:174 G:0
EA2454	850201	snp	G	T	T:205 G:6
EA2454	852695	snp	A	G	G:148 A:0
EA2454	853768	snp	A	G	G:205 A:0
EA2454	855440	snp	G	T	T:204 G:1
EA2454	856699	snp	A	T	T:40 A:0
EA2454	863496	snp	A	G	G:200 A:0
EA2454	874702	snp	T	C	C:249 T:0
EA2454	879121	snp	C	A	A:142 C:0
EA2454	894538	snp	C	T	T:175 C:0
EA2454	896090	snp	C	T	T:145 C:0
EA2454	897566	del	ACGTCAC	A	A:157 ACGTCAC:0
EA2454	904482	snp	A	G	G:164 A:1
EA2454	904955	snp	G	T	T:190 G:0
EA2454	907900	snp	A	C	C:164 A:1
EA2454	910897	snp	A	G	G:216 A:0
EA2454	912171	snp	G	A	A:187 G:0
EA2454	919060	snp	T	G	G:131 T:0
EA2454	921266	snp	G	A	A:304 G:0
EA2454	922830	snp	G	T	T:239 G:0
EA2454	924524	snp	C	T	T:120 C:0
EA2454	924579	snp	T	C	C:197 T:0
EA2454	927563	snp	C	T	T:134 C:0
EA2454	930102	snp	A	G	G:155 A:0
EA2454	936248	snp	A	C	C:189 A:0
EA2454	937614	snp	C	T	T:188 C:0
EA2454	938195	snp	A	G	G:166 A:0
EA2454	941489	snp	C	A	A:210 C:0
EA2454	944490	snp	C	T	T:216 C:0
EA2454	945162	snp	A	G	G:254 A:0
EA2454	946875	snp	T	C	C:179 T:0
EA2454	949221	snp	C	A	A:185 C:0
EA2454	949577	del	GT	G	G:10 GT:0
EA2454	951474	snp	A	C	C:30 A:0
EA2454	953284	snp	T	A	A:98 T:0
EA2454	953332	snp	T	C	C:79 T:8
EA2454	953505	snp	T	C	C:92 T:1
EA2454	953513	snp	G	C	C:106 G:1
EA2454	953539	snp	T	C	C:128 T:0
EA2454	953576	snp	T	C	C:43 T:0
EA2454	958993	complex	ACGCA	GCGCG	GCGCG:54 ACGCA:0
EA2454	959053	complex	ACCGCCA	GCTGTCC	GCTGTCC:10 ACCGCCA:0
EA2454	960140	complex	AT	GC	GC:34 AT:0
EA2454	960146	snp	T	C	C:38 T:0
EA2454	960163	snp	G	A	A:47 G:0
EA2454	960167	del	TA	T	T:57 TA:1
EA2454	960192	snp	G	A	A:90 G:0
EA2454	960212	complex	AG	CGT	CGT:48 AG:0
EA2454	960239	snp	T	C	C:18 T:0
EA2454	960286	snp	G	A	A:83 G:0
EA2454	960292	snp	T	C	C:127 T:0
EA2454	960303	del	GAACGA	G	G:126 GAACGA:0
EA2454	960358	snp	A	G	G:304 A:0
EA2454	960367	snp	C	T	T:325 C:0
EA2454	960381	complex	TGCG	GGCA	GGCA:240 TGCG:0
EA2454	960392	snp	G	A	A:259 G:1
EA2454	960449	snp	T	G	G:233 T:0
EA2454	960463	snp	G	A	A:212 G:1
EA2454	960506	snp	A	G	G:225 A:0
EA2454	960520	snp	G	A	A:215 G:0
EA2454	960528	complex	GCCGT	ATCGG	ATCGG:162 GCCGT:0
EA2454	960547	snp	A	G	G:123 A:0
EA2454	960570	snp	C	T	T:16 C:0
EA2454	960601	snp	C	T	T:22 C:0
EA2454	960619	complex	CC	GA	GA:68 CC:0
EA2454	960658	snp	C	T	T:180 C:0
EA2454	960688	snp	A	G	G:150 A:0
EA2454	960695	snp	G	A	A:160 G:0
EA2454	960703	snp	C	G	G:151 C:0
EA2454	960721	snp	G	A	A:131 G:0
EA2454	960729	complex	CCGGATGCT	TCGGGTGCC	TCGGGTGCC:133 CCGGATGCT:0
EA2454	960762	complex	TCA	CCT	CCT:149 TCA:0
EA2454	960782	del	GAA	G	G:109 GAA:0
EA2454	960788	ins	G	GTA	GTA:115 G:0
EA2454	960799	snp	T	C	C:188 T:0
EA2454	960811	snp	G	A	A:187 G:0
EA2454	960860	complex	GCCACT	TGCACC	TGCACC:52 GCCACT:0
EA2454	960877	snp	C	T	T:46 C:1
EA2454	961160	complex	CTTTGC	TTGTGT	TTGTGT:10 CTTTGC:0
EA2454	961186	snp	C	T	T:202 C:0
EA2454	961206	snp	G	T	T:286 G:0
EA2454	961232	snp	G	A	A:275 G:0
EA2454	961240	snp	T	A	A:233 T:0
EA2454	961252	mnp	TG	AC	AC:102 TG:0
EA2454	961270	snp	A	G	G:14 A:0
EA2454	961392	snp	G	A	A:278 G:0
EA2454	961418	mnp	TA	GG	GG:377 TA:1
EA2454	961439	snp	G	A	A:498 G:1
EA2454	961448	snp	A	G	G:493 A:1
EA2454	961458	snp	G	A	A:440 G:0
EA2454	961503	snp	C	T	T:445 C:0
EA2454	961535	snp	T	A	A:432 T:0
EA2454	961563	complex	TTGT	ATGC	ATGC:321 TTGT:0
EA2454	961579	complex	AAT	CAG	CAG:309 AAT:0
EA2454	961638	snp	G	A	A:315 G:0
EA2454	961656	snp	C	T	T:358 C:1
EA2454	961707	snp	T	C	C:363 T:0
EA2454	961852	complex	AATATCGGAA	GATGCCAGGG	GATGCCAGGG:67 AATATCGGAA:0
EA2454	961877	snp	T	A	A:111 T:0
EA2454	961893	snp	A	G	G:125 A:0
EA2454	961901	snp	C	A	A:130 C:0
EA2454	961920	snp	G	T	T:163 G:0
EA2454	961970	snp	A	G	G:140 A:0
EA2454	961985	snp	G	A	A:140 G:0
EA2454	961994	complex	GA	AT	AT:129 GA:0
EA2454	962003	del	GC	G	G:131 GC:0
EA2454	962081	snp	G	A	A:73 G:0
EA2454	962114	snp	C	G	G:220 C:0
EA2454	962287	snp	C	G	G:186 C:0
EA2454	962400	del	GCAGGT	G	G:241 GCAGGT:0
EA2454	962440	snp	T	C	C:349 T:0
EA2454	962516	snp	T	C	C:339 T:0
EA2454	962537	snp	A	T	T:361 A:0
EA2454	962559	complex	GATGA	TATGG	TATGG:299 GATGA:0
EA2454	962754	snp	T	C	C:267 T:0
EA2454	962765	mnp	TA	CG	CG:240 TA:0
EA2454	962781	mnp	TGA	GCT	GCT:210 TGA:0
EA2454	962805	snp	G	A	A:284 G:0
EA2454	962823	snp	A	G	G:299 A:0
EA2454	962845	snp	G	A	A:324 G:0
EA2454	962895	snp	A	G	G:326 A:0
EA2454	962960	snp	A	G	G:298 A:0
EA2454	962982	snp	A	G	G:299 A:0
EA2454	963003	snp	T	C	C:318 T:0
EA2454	963009	snp	A	G	G:310 A:0
EA2454	963024	snp	T	G	G:317 T:0
EA2454	963030	snp	A	G	G:286 A:0
EA2454	963036	snp	A	G	G:314 A:0
EA2454	963081	complex	TCCAGC	CCCGGT	CCCGGT:254 TCCAGC:0
EA2454	963150	snp	A	T	T:272 A:0
EA2454	963184	snp	A	T	T:310 A:2
EA2454	963204	snp	G	T	T:355 G:0
EA2454	963219	snp	G	A	A:334 G:1
EA2454	963261	complex	AGA	TGG	TGG:258 AGA:0
EA2454	963273	snp	G	A	A:295 G:0
EA2454	963285	snp	A	C	C:243 A:0
EA2454	963312	snp	A	G	G:266 A:0
EA2454	963336	complex	GGT	AGC	AGC:272 GGT:0
EA2454	963374	snp	C	G	G:230 C:0
EA2454	963390	snp	A	G	G:227 A:0
EA2454	963396	snp	C	T	T:242 C:0
EA2454	963414	snp	C	T	T:199 C:0
EA2454	963465	snp	T	C	C:175 T:0
EA2454	963513	snp	G	A	A:185 G:0
EA2454	963525	snp	T	C	C:173 T:0
EA2454	963555	snp	A	G	G:213 A:0
EA2454	963590	snp	A	G	G:205 A:0
EA2454	963747	snp	T	C	C:218 T:0
EA2454	963757	snp	A	G	G:210 A:0
EA2454	963916	snp	A	G	G:54 A:0
EA2454	963922	complex	GTGACCT	ATGCCCG	ATGCCCG:15 GTGACCT:0
EA2454	964577	snp	A	G	G:11 A:0
EA2454	964586	snp	A	G	G:33 A:0
EA2454	964604	snp	T	G	G:46 T:0
EA2454	964615	snp	T	A	A:55 T:0
EA2454	964628	snp	T	A	A:70 T:0
EA2454	964671	snp	A	G	G:75 A:0
EA2454	964703	complex	TG	CA	CA:31 TG:0
EA2454	964710	snp	T	C	C:30 T:0
EA2454	980177	snp	T	C	C:15 T:0
EA2454	980185	complex	AA	GG	GG:19 AA:0
EA2454	980197	complex	AACG	TGCA	TGCA:25 AACG:0
EA2454	980211	snp	T	G	G:49 T:0
EA2454	980275	complex	TCAG	GCGT	GCGT:20 TCAG:0
EA2454	980283	complex	GCCAT	ACCAC	ACCAC:20 GCCAT:0
EA2454	980292	complex	AC	GT	GT:20 AC:0
EA2454	980311	snp	T	A	A:63 T:0
EA2454	980320	snp	A	G	G:73 A:0
EA2454	980348	complex	TCA	CCG	CCG:142 TCA:0
EA2454	980370	complex	TAA	CCG	CCG:135 TAA:0
EA2454	980380	snp	G	A	A:164 G:0
EA2454	980390	snp	A	T	T:183 A:0
EA2454	980399	snp	A	G	G:165 A:0
EA2454	980414	snp	G	A	A:177 G:0
EA2454	980457	complex	TGGGAGC	CGGGTGT	CGGGTGT:181 TGGGAGC:0
EA2454	980470	snp	A	G	G:202 A:0
EA2454	980495	snp	A	G	G:176 A:0
EA2454	980513	snp	A	G	G:121 A:0
EA2454	980522	complex	ACAGCG	TCGGTA	TCGGTA:62 ACAGCG:0
EA2454	980533	snp	C	T	T:130 C:0
EA2454	980542	snp	A	G	G:130 A:0
EA2454	980565	complex	TGGCA	CTGCT	CTGCT:60 TGGCA:0
EA2454	980590	snp	T	C	C:44 T:0
EA2454	980595	complex	ACTCGA	CATCGG	CATCGG:28 ACTCGA:0
EA2454	980605	complex	CT	AG	AG:29 CT:0
EA2454	980614	complex	TGTG	CGTA	CGTA:75 TGTG:0
EA2454	980657	mnp	CC	AA	AA:162 CC:0
EA2454	980665	snp	T	C	C:184 T:0
EA2454	980670	snp	A	G	G:192 A:0
EA2454	980680	snp	G	A	A:192 G:0
EA2454	980715	snp	A	G	G:199 A:0
EA2454	980745	complex	AGT	GAGC	GAGC:168 AGT:0
EA2454	980789	complex	GCCGC	ACCGT	ACCGT:123 GCCGC:0
EA2454	980815	snp	C	T	T:150 C:0
EA2454	980830	snp	A	G	G:144 A:0
EA2454	980839	snp	A	G	G:147 A:0
EA2454	980862	complex	GTGCG	ATGCA	ATGCA:133 GTGCG:0
EA2454	980877	snp	C	A	A:132 C:0
EA2454	980891	complex	ATA	GTG	GTG:134 ATA:0
EA2454	980903	snp	T	C	C:159 T:0
EA2454	980914	snp	T	G	G:155 T:0
EA2454	980923	snp	A	G	G:122 A:0
EA2454	980942	snp	A	C	C:127 A:0
EA2454	980957	snp	A	C	C:135 A:0
EA2454	980978	snp	T	C	C:147 T:0
EA2454	980983	snp	G	A	A:140 G:0
EA2454	980991	snp	A	G	G:131 A:0
EA2454	981028	complex	TGGC	CGGT	CGGT:127 TGGC:0
EA2454	981058	complex	CTCA	TTCC	TTCC:144 CTCA:0
EA2454	981070	snp	C	T	T:164 C:0
EA2454	981095	snp	A	G	G:198 A:0
EA2454	981118	snp	C	T	T:224 C:0
EA2454	981151	snp	A	G	G:191 A:0
EA2454	981160	snp	T	C	C:170 T:0
EA2454	981166	snp	G	C	C:163 G:0
EA2454	981179	snp	A	G	G:150 A:0
EA2454	981190	snp	A	C	C:124 A:0
EA2454	981214	snp	A	G	G:126 A:0
EA2454	981241	snp	T	C	C:104 T:0
EA2454	981254	snp	A	C	C:115 A:0
EA2454	981271	snp	T	C	C:98 T:0
EA2454	981282	snp	C	T	T:110 C:0
EA2454	981295	snp	A	G	G:110 A:0
EA2454	981318	complex	GCA	CCG	CCG:97 GCA:0
EA2454	981342	complex	GGT	AAA	AAA:69 GGT:0
EA2454	981349	snp	A	G	G:69 A:0
EA2454	981354	snp	A	C	C:113 A:0
EA2454	981376	complex	GCTTAC	TCTGAT	TCTGAT:105 GCTTAC:0
EA2454	981387	snp	T	C	C:146 T:0
EA2454	981416	snp	T	A	A:196 T:0
EA2454	981427	complex	TG	CT	CT:142 TG:0
EA2454	981442	complex	AT	GG	GG:108 AT:0
EA2454	981454	complex	AAAC	GAAT	GAAT:107 AAAC:0
EA2454	981464	snp	C	T	T:113 C:0
EA2454	981504	snp	T	C	C:97 T:0
EA2454	981533	snp	T	C	C:50 T:0
EA2454	983278	snp	T	G	G:114 T:0
EA2454	983325	complex	TCG	ACC	ACC:138 TCG:0
EA2454	983359	complex	GCATA	ACACT	ACACT:108 GCATA:0
EA2454	983371	snp	G	A	A:192 G:0
EA2454	983404	snp	T	C	C:206 T:0
EA2454	983426	snp	G	A	A:232 G:0
EA2454	983446	snp	A	C	C:208 A:1
EA2454	983525	snp	A	G	G:171 A:0
EA2454	983570	complex	CTGC	TTGT	TTGT:153 CTGC:0
EA2454	983840	snp	A	G	G:152 A:0
EA2454	983901	snp	C	T	T:229 C:0
EA2454	983906	complex	TGGT	CGGC	CGGC:208 TGGT:0
EA2454	984038	snp	A	G	G:161 A:0
EA2454	984050	snp	G	T	T:165 G:0
EA2454	984129	complex	ACTCTGG	GCCCTGT	GCCCTGT:200 ACTCTGG:0
EA2454	984294	snp	G	A	A:157 G:0
EA2454	984305	complex	AGCA	TGCT	TGCT:143 AGCA:0
EA2454	984317	snp	A	G	G:150 A:0
EA2454	984344	snp	C	T	T:146 C:0
EA2454	984401	snp	A	T	T:111 A:1
EA2454	984422	complex	GCGCAAC	ACGCGAT	ACGCGAT:53 GCGCAAC:0
EA2454	984434	snp	G	A	A:52 G:0
EA2454	984440	snp	T	C	C:43 T:0
EA2454	984452	snp	T	C	C:28 T:0
EA2454	989594	snp	T	A	A:109 T:0
EA2454	989710	complex	TGTC	CGTT	CGTT:123 TGTC:0
EA2454	989731	snp	G	A	A:147 G:2
EA2454	989794	complex	CATCA	TATCG	TATCG:125 CATCA:0
EA2454	989831	snp	G	A	A:145 G:0
EA2454	989932	snp	A	G	G:115 A:0
EA2454	989938	complex	AGAC	GGAT	GGAT:127 AGAC:0
EA2454	989989	snp	A	G	G:197 A:0
EA2454	990058	mnp	GC	TT	TT:193 GC:0
EA2454	990100	snp	A	T	T:205 A:1
EA2454	990118	snp	T	A	A:213 T:0
EA2454	990124	snp	T	C	C:221 T:0
EA2454	990230	snp	T	C	C:218 T:0
EA2454	990400	snp	A	G	G:226 A:0
EA2454	990463	snp	A	G	G:178 A:0
EA2454	990562	snp	T	C	C:110 T:0
EA2454	990572	snp	G	A	A:111 G:0
EA2454	990627	snp	C	T	T:116 C:0
EA2454	990637	snp	G	A	A:106 G:0
EA2454	990685	snp	A	G	G:141 A:0
EA2454	990691	snp	G	T	T:136 G:0
EA2454	990697	snp	C	G	G:131 C:0
EA2454	990727	complex	GCGT	ACGG	ACGG:121 GCGT:0
EA2454	990742	snp	C	T	T:149 C:0
EA2454	990757	snp	A	G	G:183 A:0
EA2454	990763	complex	GCCA	ACCG	ACCG:162 GCCA:0
EA2454	990872	complex	TTT	GTA	GTA:72 TTT:0
EA2454	990880	complex	CAGTA	AAGCG	AAGCG:51 CAGTA:0
EA2454	990904	complex	CCCCAC	TGCCGT	TGCCGT:35 CCCCAC:0
EA2454	990925	snp	A	G	G:70 A:0
EA2454	990931	snp	A	G	G:89 A:0
EA2454	990970	snp	C	T	T:120 C:0
EA2454	991009	snp	T	G	G:160 T:1
EA2454	991060	snp	G	A	A:152 G:0
EA2454	991066	complex	AATG	GATA	GATA:121 AATG:0
EA2454	991169	snp	C	T	T:233 C:0
EA2454	991239	snp	A	C	C:200 A:1
EA2454	991259	mnp	CA	TC	TC:182 CA:0
EA2454	991311	snp	A	G	G:151 A:0
EA2454	991365	snp	A	G	G:222 A:0
EA2454	991386	snp	G	A	A:290 G:0
EA2454	991404	snp	A	G	G:252 A:0
EA2454	991428	snp	G	A	A:268 G:0
EA2454	991560	snp	C	T	T:223 C:0
EA2454	991590	snp	A	G	G:227 A:0
EA2454	991596	snp	G	A	A:247 G:0
EA2454	991611	snp	G	A	A:224 G:0
EA2454	991638	snp	C	A	A:231 C:0
EA2454	991686	snp	G	A	A:170 G:0
EA2454	991800	snp	C	T	T:191 C:0
EA2454	991983	snp	A	G	G:165 A:0
EA2454	992001	snp	T	C	C:146 T:0
EA2454	992040	snp	A	C	C:162 A:0
EA2454	992055	snp	G	A	A:177 G:0
EA2454	992231	snp	G	A	A:273 G:0
EA2454	992244	snp	C	T	T:270 C:0
EA2454	992692	snp	G	A	A:311 G:0
EA2454	992921	snp	C	T	T:134 C:0
EA2454	993116	snp	C	T	T:197 C:0
EA2454	994056	snp	A	G	G:242 A:0
EA2454	994074	snp	T	C	C:232 T:0
EA2454	994116	snp	G	A	A:184 G:0
EA2454	994311	snp	T	C	C:186 T:0
EA2454	994443	snp	A	G	G:189 A:0
EA2454	994617	snp	C	T	T:207 C:0
EA2454	994626	snp	G	T	T:228 G:0
EA2454	994884	snp	T	C	C:267 T:0
EA2454	994890	snp	T	C	C:247 T:0
EA2454	994998	snp	A	G	G:194 A:0
EA2454	995076	snp	A	G	G:193 A:0
EA2454	995121	snp	T	A	A:225 T:1
EA2454	995151	complex	AGCC	CGCA	CGCA:204 AGCC:0
EA2454	995193	snp	A	G	G:192 A:0
EA2454	995575	snp	T	A	A:303 T:0
EA2454	996391	snp	G	C	C:143 G:0
EA2454	996427	snp	C	G	G:181 C:0
EA2454	996451	snp	C	G	G:238 C:0
EA2454	996466	snp	A	G	G:236 A:0
EA2454	996547	snp	T	C	C:192 T:0
EA2454	996667	snp	T	C	C:184 T:0
EA2454	996676	snp	C	T	T:178 C:0
EA2454	996712	complex	TGGC	CGGT	CGGT:169 TGGC:0
EA2454	996751	snp	T	C	C:191 T:0
EA2454	996775	snp	G	A	A:176 G:1
EA2454	996850	snp	A	G	G:170 A:0
EA2454	996856	snp	T	C	C:153 T:0
EA2454	996886	snp	G	C	C:188 G:0
EA2454	996901	snp	G	C	C:192 G:0
EA2454	997000	snp	A	G	G:118 A:0
EA2454	997012	snp	G	A	A:128 G:0
EA2454	997024	snp	C	G	G:125 C:0
EA2454	997036	snp	T	C	C:132 T:0
EA2454	997180	complex	CGTG	TGTA	TGTA:167 CGTG:0
EA2454	997189	snp	A	G	G:187 A:0
EA2454	997200	snp	T	C	C:205 T:0
EA2454	997480	snp	A	T	T:207 A:0
EA2454	997504	snp	A	C	C:216 A:0
EA2454	997510	snp	C	T	T:225 C:0
EA2454	997540	complex	TGGT	CGGC	CGGC:183 TGGT:0
EA2454	997555	snp	T	C	C:195 T:0
EA2454	997639	snp	C	T	T:294 C:0
EA2454	997654	snp	C	T	T:272 C:0
EA2454	997681	snp	G	A	A:260 G:0
EA2454	997708	snp	T	C	C:261 T:0
EA2454	997744	snp	G	A	A:172 G:0
EA2454	997756	snp	G	A	A:175 G:0
EA2454	997819	snp	G	A	A:164 G:0
EA2454	997834	snp	T	C	C:183 T:0
EA2454	997879	snp	A	G	G:209 A:0
EA2454	997918	snp	A	G	G:191 A:1
EA2454	997930	snp	C	T	T:178 C:0
EA2454	997987	snp	G	A	A:191 G:0
EA2454	998008	snp	C	T	T:192 C:0
EA2454	998014	complex	TGGT	CGGC	CGGC:160 TGGT:0
EA2454	998026	snp	G	A	A:190 G:0
EA2454	998158	snp	C	T	T:239 C:0
EA2454	998200	snp	A	C	C:272 A:2
EA2454	998404	snp	T	C	C:238 T:0
EA2454	998413	snp	G	A	A:231 G:0
EA2454	998510	snp	A	G	G:174 A:0
EA2454	998626	snp	T	C	C:159 T:0
EA2454	998880	complex	AACACA	CACC	CACC:131 AACACA:0
EA2454	998895	snp	C	A	A:152 C:1
EA2454	998908	snp	C	A	A:155 C:0
EA2454	999123	snp	C	T	T:148 C:0
EA2454	999159	snp	T	A	A:142 T:0
EA2454	999352	snp	G	A	A:119 G:0
EA2454	999551	snp	T	C	C:252 T:0
EA2454	999750	snp	G	A	A:168 G:0
EA2454	999759	snp	A	G	G:184 A:0
EA2454	999829	snp	C	T	T:158 C:0
EA2454	999857	snp	A	T	T:160 A:0
EA2454	999924	snp	T	C	C:192 T:0
EA2454	1000250	snp	T	C	C:145 T:0
EA2454	1000365	snp	C	T	T:214 C:0
EA2454	1000385	snp	T	C	C:215 T:0
EA2454	1000493	snp	G	T	T:216 G:0
EA2454	1000664	snp	G	A	A:121 G:1
EA2454	1000840	snp	A	G	G:140 A:0
EA2454	1000929	snp	G	A	A:114 G:1
EA2454	1001318	snp	A	T	T:171 A:0
EA2454	1001337	snp	G	A	A:165 G:0
EA2454	1001375	snp	C	G	G:119 C:0
EA2454	1001425	snp	A	G	G:82 A:0
EA2454	1001433	snp	C	T	T:97 C:0
EA2454	1001516	snp	C	T	T:123 C:0
EA2454	1001557	snp	C	T	T:107 C:0
EA2454	1001617	snp	C	T	T:144 C:0
EA2454	1001665	snp	C	T	T:183 C:0
EA2454	1001689	complex	TAGT	CAGC	CAGC:191 TAGT:0
EA2454	1001899	snp	T	C	C:185 T:0
EA2454	1001941	snp	A	G	G:170 A:0
EA2454	1001956	complex	CAAT	AAAC	AAAC:153 CAAT:0
EA2454	1002058	snp	T	C	C:192 T:0
EA2454	1002091	snp	A	G	G:258 A:0
EA2454	1002109	snp	G	A	A:254 G:1
EA2454	1002145	snp	G	A	A:264 G:0
EA2454	1002160	snp	G	T	T:234 G:1
EA2454	1002181	snp	A	G	G:225 A:0
EA2454	1002196	snp	A	G	G:229 A:0
EA2454	1002217	complex	CAG	TAA	TAA:140 CAG:0
EA2454	1002277	snp	T	G	G:119 T:0
EA2454	1002406	snp	C	T	T:172 C:1
EA2454	1002450	complex	TAAATAATTAATATCT	AATTGATATCG	AATTGATATCG:44 TAAATAATTAATATCT:0
EA2454	1002492	complex	AA	CT	CT:81 AA:0
EA2454	1002518	complex	CAGTG	TAGTA	TAGTA:39 CAGTG:0
EA2454	1002529	snp	T	C	C:11 T:0
EA2454	1002990	complex	TTT	ATC	ATC:13 TTT:0
EA2454	1003002	snp	C	T	T:19 C:0
EA2454	1003013	complex	CAG	TAC	TAC:17 CAG:0
EA2454	1003025	snp	T	C	C:17 T:0
EA2454	1003047	snp	G	A	A:14 G:0
EA2454	1003056	snp	T	G	G:15 T:0
EA2454	1003091	snp	T	C	C:10 T:0
EA2454	1003104	complex	TACG	CACA	CACA:24 TACG:0
EA2454	1003118	snp	G	A	A:52 G:0
EA2454	1003129	snp	G	T	T:65 G:0
EA2454	1003138	snp	T	C	C:67 T:0
EA2454	1003170	snp	C	A	A:56 C:0
EA2454	1003180	snp	T	C	C:43 T:0
EA2454	1003192	snp	T	A	A:16 T:0
EA2454	1003245	snp	A	G	G:15 A:0
EA2454	1003251	complex	CTTT	TTTC	TTTC:16 CTTT:0
EA2454	1003269	snp	T	A	A:25 T:0
EA2454	1003295	complex	TCA	CTT	CTT:17 TCA:0
EA2454	1003425	complex	TACATG	CATATA	CATATA:24 TACATG:0
EA2454	1003452	snp	G	T	T:85 G:0
EA2454	1003464	snp	A	T	T:103 A:0
EA2454	1003476	complex	AT	GC	GC:86 AT:0
EA2454	1003484	snp	T	G	G:101 T:0
EA2454	1003521	complex	ACC	GTT	GTT:55 ACC:0
EA2454	1003542	complex	ATT	GTA	GTA:30 ATT:0
EA2454	1003554	complex	CTGCGAG	ATGAGGA	ATGAGGA:11 CTGCGAG:0
EA2454	1003733	complex	TCTGATGAT	CCTGCGGAA	CCTGCGGAA:36 TCTGATGAT:0
EA2454	1003755	snp	C	A	A:93 C:0
EA2454	1003796	snp	C	T	T:114 C:0
EA2454	1003824	snp	A	C	C:73 A:0
EA2454	1003842	complex	AGACTTC	GGATTTT	GGATTTT:71 AGACTTC:0
EA2454	1003858	snp	C	G	G:85 C:0
EA2454	1003877	snp	A	G	G:69 A:0
EA2454	1003882	mnp	TT	GA	GA:62 TT:0
EA2454	1003894	snp	A	G	G:91 A:0
EA2454	1003917	complex	TTTAGTAG	ATTATTAA	ATTATTAA:90 TTTAGTAG:0
EA2454	1003950	complex	CTT	TTC	TTC:90 CTT:0
EA2454	1004043	snp	A	G	G:30 A:0
EA2454	1004121	complex	CTTTG	TTTTA	TTTTA:34 CTTTG:0
EA2454	1004201	snp	C	T	T:17 C:0
EA2454	1004211	complex	CACATA	AACACG	AACACG:22 CACATA:0
EA2454	1004225	complex	CTAAGG	TTAAAA	TTAAAA:21 CTAAGG:0
EA2454	1004236	snp	T	C	C:34 T:0
EA2454	1004308	snp	A	G	G:103 A:0
EA2454	1004348	snp	T	C	C:85 T:0
EA2454	1004471	snp	T	C	C:123 T:0
EA2454	1004521	snp	C	T	T:127 C:0
EA2454	1004537	snp	T	A	A:144 T:0
EA2454	1004690	snp	G	A	A:192 G:0
EA2454	1004774	snp	G	A	A:167 G:0
EA2454	1004790	snp	A	G	G:172 A:0
EA2454	1004801	snp	T	C	C:160 T:0
EA2454	1004904	snp	C	T	T:112 C:0
EA2454	1004946	snp	T	C	C:114 T:0
EA2454	1004951	snp	C	T	T:133 C:0
EA2454	1005037	snp	T	G	G:165 T:0
EA2454	1005062	snp	G	T	T:158 G:0
EA2454	1005089	snp	G	T	T:203 G:0
EA2454	1005131	snp	G	C	C:229 G:0
EA2454	1005199	snp	C	T	T:264 C:1
EA2454	1005243	snp	T	A	A:318 T:2
EA2454	1005263	snp	G	A	A:279 G:1
EA2454	1005296	snp	G	A	A:269 G:0
EA2454	1005336	snp	G	A	A:229 G:0
EA2454	1005347	snp	C	G	G:228 C:0
EA2454	1005353	snp	C	T	T:210 C:0
EA2454	1005404	snp	A	G	G:221 A:0
EA2454	1005437	complex	CTTAT	TTTAC	TTTAC:205 CTTAT:0
EA2454	1005567	snp	A	G	G:186 A:0
EA2454	1005624	mnp	TT	CC	CC:197 TT:0
EA2454	1005737	snp	A	T	T:275 A:0
EA2454	1005819	snp	G	A	A:265 G:0
EA2454	1005884	snp	T	C	C:287 T:0
EA2454	1005956	snp	T	G	G:222 T:2
EA2454	1006016	complex	ATAC	TTAT	TTAT:202 ATAC:0
EA2454	1006133	snp	T	C	C:188 T:0
EA2454	1006145	snp	A	G	G:200 A:0
EA2454	1006199	snp	C	T	T:236 C:0
EA2454	1006272	snp	G	A	A:196 G:0
EA2454	1006277	snp	T	G	G:195 T:1
EA2454	1006283	snp	C	T	T:177 C:0
EA2454	1006296	snp	G	A	A:163 G:0
EA2454	1006430	mnp	TC	AT	AT:132 TC:2
EA2454	1006482	snp	T	C	C:129 T:0
EA2454	1006489	complex	TAT	GAG	GAG:111 TAT:0
EA2454	1006575	snp	G	A	A:224 G:0
EA2454	1006584	snp	A	G	G:177 A:0
EA2454	1006770	snp	T	C	C:170 T:0
EA2454	1006788	snp	A	C	C:127 A:0
EA2454	1006812	snp	G	A	A:139 G:0
EA2454	1006833	snp	G	C	C:134 G:0
EA2454	1006847	snp	C	A	A:141 C:0
EA2454	1006863	snp	C	T	T:181 C:0
EA2454	1006922	snp	T	A	A:187 T:1
EA2454	1006936	snp	C	T	T:209 C:1
EA2454	1006947	snp	T	C	C:191 T:0
EA2454	1006994	snp	C	T	T:189 C:0
EA2454	1007029	snp	A	G	G:144 A:0
EA2454	1007067	complex	C	TG	TG:74 C:0
EA2454	1007078	complex	GT	TC	TC:95 GT:0
EA2454	1007097	mnp	TT	CC	CC:107 TT:0
EA2454	1007107	snp	A	T	T:121 A:0
EA2454	1007373	snp	A	C	C:139 A:0
EA2454	1007487	snp	C	T	T:141 C:0
EA2454	1007529	complex	TTCC	ATCT	ATCT:194 TTCC:0
EA2454	1007872	snp	C	T	T:214 C:0
EA2454	1007952	snp	T	C	C:299 T:0
EA2454	1007970	snp	C	A	A:334 C:1
EA2454	1008024	snp	T	C	C:309 T:0
EA2454	1008048	snp	C	T	T:245 C:0
EA2454	1008057	snp	A	G	G:210 A:0
EA2454	1008063	snp	A	G	G:210 A:0
EA2454	1008219	snp	T	C	C:213 T:0
EA2454	1008249	snp	G	A	A:254 G:0
EA2454	1008423	snp	T	C	C:190 T:0
EA2454	1008591	snp	G	A	A:265 G:0
EA2454	1008918	complex	TCAA	CCAG	CCAG:212 TCAA:0
EA2454	1009017	complex	TGGT	AGGC	AGGC:145 TGGT:0
EA2454	1009047	snp	T	C	C:154 T:0
EA2454	1009059	snp	A	G	G:154 A:0
EA2454	1009086	complex	AAACGCCACT	TAATGCTACC	TAATGCTACC:115 AAACGCCACT:0
EA2454	1009122	snp	C	T	T:133 C:0
EA2454	1009179	snp	G	A	A:124 G:0
EA2454	1009381	snp	A	G	G:157 A:0
EA2454	1009529	complex	TAAT	CAGC	CAGC:131 TAAT:0
EA2454	1009649	snp	A	G	G:257 A:0
EA2454	1009733	snp	A	G	G:191 A:0
EA2454	1009832	snp	A	G	G:207 A:0
EA2454	1009904	snp	G	A	A:219 G:0
EA2454	1009970	snp	T	C	C:233 T:0
EA2454	1010000	snp	A	G	G:189 A:0
EA2454	1010048	snp	T	A	A:201 T:0
EA2454	1010054	snp	C	T	T:215 C:0
EA2454	1010222	snp	A	G	G:268 A:0
EA2454	1010230	snp	A	G	G:302 A:0
EA2454	1010267	complex	GCGG	ACGA	ACGA:194 GCGG:0
EA2454	1010309	snp	A	G	G:197 A:0
EA2454	1010462	snp	G	A	A:180 G:1
EA2454	1010594	snp	G	A	A:243 G:0
EA2454	1010870	snp	A	G	G:236 A:0
EA2454	1010888	snp	G	A	A:293 G:0
EA2454	1010972	snp	A	G	G:290 A:0
EA2454	1010978	snp	C	T	T:297 C:1
EA2454	1010990	snp	G	A	A:270 G:0
EA2454	1011035	snp	G	A	A:234 G:1
EA2454	1011647	snp	T	A	A:178 T:0
EA2454	1011722	snp	T	A	A:146 T:2
EA2454	1011815	snp	G	T	T:196 G:0
EA2454	1012482	snp	G	A	A:258 G:0
EA2454	1012525	snp	G	A	A:200 G:0
EA2454	1012705	snp	C	T	T:238 C:0
EA2454	1012856	snp	G	A	A:210 G:0
EA2454	1012876	snp	C	T	T:179 C:0
EA2454	1012885	snp	C	A	A:181 C:0
EA2454	1012934	snp	G	A	A:180 G:0
EA2454	1013020	snp	C	T	T:241 C:1
EA2454	1013065	snp	G	T	T:226 G:0
EA2454	1013137	snp	C	G	G:268 C:0
EA2454	1013167	snp	A	G	G:225 A:0
EA2454	1013194	complex	CGCC	TGCG	TGCG:229 CGCC:0
EA2454	1013293	complex	GCCA	ACCG	ACCG:172 GCCA:0
EA2454	1013311	snp	T	C	C:168 T:1
EA2454	1013338	snp	T	C	C:175 T:0
EA2454	1013374	snp	G	A	A:219 G:1
EA2454	1013383	snp	G	A	A:220 G:0
EA2454	1013633	snp	A	G	G:221 A:0
EA2454	1013771	snp	C	T	T:318 C:0
EA2454	1013795	snp	G	A	A:314 G:0
EA2454	1013910	snp	C	T	T:150 C:2
EA2454	1013927	snp	T	C	C:184 T:0
EA2454	1013990	snp	A	G	G:186 A:0
EA2454	1014080	snp	G	T	T:226 G:0
EA2454	1014125	snp	C	T	T:250 C:0
EA2454	1014236	snp	G	A	A:189 G:0
EA2454	1014275	snp	G	A	A:259 G:0
EA2454	1014281	snp	A	G	G:259 A:0
EA2454	1014320	snp	A	G	G:263 A:0
EA2454	1014344	snp	G	A	A:265 G:0
EA2454	1014422	snp	T	C	C:213 T:0
EA2454	1014473	snp	C	T	T:211 C:0
EA2454	1014500	snp	C	G	G:213 C:1
EA2454	1014518	snp	G	C	C:229 G:0
EA2454	1014533	snp	G	C	C:268 G:0
EA2454	1014572	snp	T	C	C:271 T:0
EA2454	1014662	snp	A	G	G:253 A:0
EA2454	1014683	complex	GGCG	CGCT	CGCT:233 GGCG:0
EA2454	1014824	snp	C	T	T:219 C:0
EA2454	1014898	snp	T	C	C:192 T:0
EA2454	1014971	snp	T	C	C:238 T:0
EA2454	1015006	snp	C	T	T:191 C:0
EA2454	1015113	snp	T	C	C:222 T:0
EA2454	1015148	snp	A	G	G:258 A:0
EA2454	1015257	snp	C	T	T:227 C:0
EA2454	1015329	snp	C	T	T:224 C:0
EA2454	1015530	snp	A	G	G:217 A:0
EA2454	1015610	snp	C	T	T:162 C:0
EA2454	1015646	snp	C	T	T:185 C:0
EA2454	1015656	snp	G	A	A:177 G:0
EA2454	1015668	snp	A	T	T:173 A:0
EA2454	1015728	snp	A	G	G:202 A:0
EA2454	1015884	complex	AGGC	CGGT	CGGT:149 AGGC:0
EA2454	1016017	snp	G	A	A:279 G:2
EA2454	1016175	snp	A	G	G:266 A:0
EA2454	1016214	snp	G	T	T:228 G:2
EA2454	1016337	snp	T	G	G:253 T:0
EA2454	1016385	snp	T	G	G:243 T:0
EA2454	1016440	complex	GTT	ATC	ATC:244 GTT:0
EA2454	1016561	snp	T	C	C:198 T:0
EA2454	1016852	snp	C	A	A:251 C:0
EA2454	1017030	snp	T	C	C:135 T:0
EA2454	1017255	snp	T	C	C:183 T:0
EA2454	1017279	snp	T	C	C:192 T:0
EA2454	1017291	snp	A	G	G:195 A:0
EA2454	1017315	snp	T	C	C:239 T:0
EA2454	1017579	snp	G	A	A:252 G:0
EA2454	1017585	snp	C	T	T:254 C:0
EA2454	1017645	snp	G	A	A:218 G:0
EA2454	1017684	snp	T	A	A:234 T:2
EA2454	1017696	snp	T	G	G:240 T:0
EA2454	1017723	snp	C	T	T:227 C:1
EA2454	1017830	snp	A	G	G:260 A:0
EA2454	1017843	snp	C	A	A:267 C:0
EA2454	1017924	snp	C	T	T:249 C:0
EA2454	1017939	snp	G	A	A:237 G:0
EA2454	1017954	snp	C	T	T:204 C:0
EA2454	1017984	snp	G	A	A:201 G:0
EA2454	1018029	snp	C	T	T:183 C:0
EA2454	1018089	snp	C	T	T:204 C:0
EA2454	1018155	snp	A	G	G:228 A:0
EA2454	1018425	snp	C	G	G:284 C:0
EA2454	1018458	snp	C	T	T:263 C:0
EA2454	1018617	snp	T	C	C:186 T:0
EA2454	1018635	snp	C	G	G:190 C:0
EA2454	1018815	snp	C	T	T:197 C:0
EA2454	1018935	snp	G	A	A:264 G:0
EA2454	1019229	snp	A	C	C:204 A:0
EA2454	1019284	complex	TTGC	CGGCTG	CGGCTG:95 TTGC:0
EA2454	1019343	snp	T	C	C:236 T:0
EA2454	1019503	snp	C	T	T:213 C:0
EA2454	1019578	snp	T	G	G:159 T:0
EA2454	1019642	snp	C	A	A:190 C:0
EA2454	1019667	snp	G	A	A:215 G:0
EA2454	1019707	snp	A	T	T:239 A:0
EA2454	1019749	snp	G	A	A:200 G:0
EA2454	1019968	snp	A	T	T:140 A:0
EA2454	1019995	snp	G	A	A:124 G:0
EA2454	1020007	snp	G	A	A:117 G:0
EA2454	1020019	snp	G	A	A:105 G:0
EA2454	1020046	complex	TGGC	CGGT	CGGT:87 TGGC:0
EA2454	1020055	complex	TC	AT	AT:73 TC:0
EA2454	1020061	snp	C	G	G:82 C:0
EA2454	1020097	snp	C	T	T:89 C:0
EA2454	1020103	snp	A	G	G:81 A:0
EA2454	1020109	complex	TTTG	CTTC	CTTC:84 TTTG:0
EA2454	1020167	snp	T	G	G:183 T:0
EA2454	1020265	snp	T	A	A:71 T:0
EA2454	1020455	complex	TACTGT	ACTGC	ACTGC:81 TACTGT:0
EA2454	1020589	snp	C	A	A:119 C:0
EA2454	1020610	complex	ATTC	GTTT	GTTT:91 ATTC:0
EA2454	1020631	snp	T	C	C:106 T:0
EA2454	1020658	snp	G	T	T:122 G:0
EA2454	1020681	mnp	AT	GC	GC:116 AT:0
EA2454	1020721	complex	CTGC	TTGT	TTGT:126 CTGC:0
EA2454	1020736	snp	A	C	C:135 A:4
EA2454	1020802	snp	C	T	T:148 C:0
EA2454	1020811	snp	G	A	A:169 G:0
EA2454	1020889	snp	G	A	A:199 G:0
EA2454	1020901	snp	C	T	T:199 C:0
EA2454	1020997	snp	A	G	G:152 A:0
EA2454	1021005	snp	A	C	C:105 A:0
EA2454	1021072	snp	T	C	C:144 T:0
EA2454	1021108	snp	A	G	G:139 A:0
EA2454	1021132	snp	A	G	G:194 A:0
EA2454	1021141	snp	G	A	A:210 G:0
EA2454	1021255	snp	T	A	A:305 T:0
EA2454	1021345	snp	G	A	A:201 G:0
EA2454	1021360	snp	C	T	T:236 C:0
EA2454	1021366	snp	C	T	T:225 C:0
EA2454	1021432	snp	G	A	A:169 G:0
EA2454	1021441	snp	T	C	C:159 T:0
EA2454	1021447	snp	G	C	C:184 G:0
EA2454	1021531	complex	AGTA	GGTG	GGTG:230 AGTA:0
EA2454	1022304	snp	G	A	A:235 G:0
EA2454	1022310	snp	A	G	G:246 A:0
EA2454	1022349	snp	A	T	T:233 A:0
EA2454	1022358	snp	C	T	T:195 C:0
EA2454	1022430	complex	GTTA	ACTG	ACTG:133 GTTA:0
EA2454	1022442	snp	C	T	T:174 C:1
EA2454	1022471	snp	A	T	T:214 A:0
EA2454	1022561	snp	A	G	G:99 A:0
EA2454	1022593	snp	A	G	G:176 A:0
EA2454	1022809	snp	C	T	T:257 C:0
EA2454	1022856	snp	A	G	G:276 A:0
EA2454	1022929	snp	A	G	G:216 A:0
EA2454	1022953	snp	C	A	A:248 C:0
EA2454	1023004	snp	G	T	T:179 G:0
EA2454	1023040	snp	A	G	G:164 A:0
EA2454	1023046	snp	A	G	G:165 A:0
EA2454	1023109	snp	T	C	C:179 T:0
EA2454	1023193	snp	A	G	G:142 A:0
EA2454	1023205	snp	A	G	G:132 A:0
EA2454	1023211	complex	GTCA	ATCG	ATCG:100 GTCA:0
EA2454	1023220	snp	T	C	C:115 T:0
EA2454	1023244	snp	C	T	T:151 C:0
EA2454	1023331	snp	G	A	A:236 G:0
EA2454	1023466	snp	A	G	G:195 A:0
EA2454	1023519	snp	C	T	T:158 C:1
EA2454	1023571	snp	T	C	C:146 T:0
EA2454	1023577	snp	G	T	T:147 G:0
EA2454	1023592	snp	A	G	G:172 A:0
EA2454	1023640	snp	G	A	A:219 G:1
EA2454	1023832	snp	C	T	T:170 C:0
EA2454	1023943	snp	T	C	C:161 T:1
EA2454	1024055	snp	T	C	C:131 T:0
EA2454	1024090	complex	GA	CC	CC:117 GA:0
EA2454	1024112	snp	G	A	A:137 G:0
EA2454	1024339	snp	G	A	A:192 G:0
EA2454	1024456	snp	C	T	T:213 C:0
EA2454	1024483	snp	C	A	A:214 C:0
EA2454	1024549	snp	A	C	C:170 A:1
EA2454	1024837	snp	G	A	A:234 G:0
EA2454	1024852	snp	T	G	G:278 T:0
EA2454	1024954	snp	T	C	C:154 T:0
EA2454	1024966	complex	ACTG	GCTT	GCTT:156 ACTG:0
EA2454	1025406	snp	A	G	G:222 A:0
EA2454	1025422	snp	C	T	T:231 C:0
EA2454	1025440	snp	G	A	A:229 G:0
EA2454	1025530	snp	A	G	G:190 A:0
EA2454	1025581	snp	T	C	C:188 T:0
EA2454	1025590	complex	CGCA	TGCG	TGCG:172 CGCA:0
EA2454	1025599	snp	C	G	G:183 C:0
EA2454	1025611	snp	C	T	T:171 C:0
EA2454	1025626	snp	G	A	A:139 G:0
EA2454	1025647	complex	TATG	AATA	AATA:112 TATG:0
EA2454	1025670	snp	G	A	A:145 G:0
EA2454	1025761	snp	G	A	A:217 G:0
EA2454	1025791	snp	G	A	A:265 G:1
EA2454	1025809	snp	T	C	C:208 T:0
EA2454	1025856	snp	G	A	A:210 G:0
EA2454	1025875	snp	A	G	G:172 A:0
EA2454	1025890	snp	T	C	C:174 T:0
EA2454	1025899	snp	C	T	T:150 C:0
EA2454	1025908	snp	T	C	C:149 T:0
EA2454	1025914	complex	CAA	TAG	TAG:121 CAA:0
EA2454	1025962	snp	G	A	A:192 G:0
EA2454	1026329	snp	A	C	C:138 A:0
EA2454	1026335	complex	TGAG	CGAA	CGAA:131 TGAG:0
EA2454	1026344	snp	C	T	T:133 C:0
EA2454	1026353	snp	G	A	A:152 G:0
EA2454	1026374	complex	ACCA	GCCG	GCCG:126 ACCA:0
EA2454	1026383	snp	C	A	A:143 C:0
EA2454	1026401	snp	A	G	G:124 A:0
EA2454	1026419	snp	T	C	C:131 T:0
EA2454	1026428	snp	G	A	A:127 G:0
EA2454	1026473	snp	G	A	A:129 G:2
EA2454	1026485	snp	T	C	C:131 T:0
EA2454	1026506	snp	G	A	A:137 G:0
EA2454	1026521	complex	TCGT	CCGC	CCGC:130 TCGT:0
EA2454	1026530	complex	AACT	TACC	TACC:140 AACT:0
EA2454	1026569	snp	A	G	G:141 A:0
EA2454	1026575	snp	A	G	G:145 A:0
EA2454	1026617	snp	G	C	C:151 G:0
EA2454	1026622	snp	G	T	T:174 G:0
EA2454	1026638	complex	AATT	GATA	GATA:146 AATT:0
EA2454	1026647	snp	T	C	C:150 T:0
EA2454	1026674	snp	G	A	A:185 G:0
EA2454	1026680	snp	G	A	A:197 G:0
EA2454	1026770	snp	A	G	G:179 A:0
EA2454	1026776	snp	G	A	A:181 G:0
EA2454	1026839	complex	GGTGT	AGTGC	AGTGC:140 GGTGT:0
EA2454	1026932	snp	T	C	C:113 T:0
EA2454	1026953	complex	GGTG	TGTT	TGTT:54 GGTG:0
EA2454	1026974	complex	GCCAATC	TCCGATA	TCCGATA:22 GCCAATC:0
EA2454	1026985	complex	GTAA	ACAG	ACAG:22 GTAA:0
EA2454	1026998	complex	AGCT	GGCC	GGCC:51 AGCT:0
EA2454	1027034	snp	C	T	T:174 C:0
EA2454	1027049	snp	A	G	G:209 A:0
EA2454	1027143	snp	C	A	A:171 C:0
EA2454	1027293	snp	A	G	G:144 A:0
EA2454	1027311	snp	C	T	T:163 C:0
EA2454	1027413	snp	G	A	A:120 G:0
EA2454	1027470	snp	T	C	C:142 T:0
EA2454	1027491	snp	G	A	A:142 G:0
EA2454	1027578	snp	A	G	G:178 A:0
EA2454	1027590	snp	T	A	A:161 T:0
EA2454	1027647	snp	A	G	G:143 A:0
EA2454	1027692	complex	GATA	AATG	AATG:134 GATA:0
EA2454	1027704	complex	TGAC	CGAA	CGAA:135 TGAC:0
EA2454	1027729	snp	G	T	T:162 G:0
EA2454	1027755	snp	A	C	C:175 A:0
EA2454	1027824	snp	G	T	T:113 G:0
EA2454	1027908	snp	T	G	G:131 T:0
EA2454	1028015	snp	G	A	A:199 G:0
EA2454	1028106	snp	G	A	A:187 G:0
EA2454	1028127	snp	A	G	G:175 A:0
EA2454	1028146	snp	C	T	T:190 C:0
EA2454	1028160	snp	T	C	C:166 T:0
EA2454	1028238	snp	G	A	A:127 G:0
EA2454	1028274	snp	A	G	G:121 A:0
EA2454	1028283	snp	A	G	G:112 A:0
EA2454	1028346	snp	A	G	G:184 A:0
EA2454	1028358	snp	C	G	G:208 C:0
EA2454	1028364	snp	A	G	G:197 A:0
EA2454	1028379	snp	A	G	G:225 A:0
EA2454	1028385	snp	G	A	A:242 G:0
EA2454	1028424	snp	G	T	T:235 G:0
EA2454	1028436	snp	A	G	G:233 A:0
EA2454	1028442	snp	T	G	G:228 T:0
EA2454	1028448	snp	G	A	A:239 G:0
EA2454	1028529	snp	A	T	T:282 A:0
EA2454	1028535	snp	G	A	A:217 G:0
EA2454	1028556	snp	C	T	T:191 C:0
EA2454	1028565	snp	C	T	T:196 C:0
EA2454	1028601	snp	A	G	G:126 A:0
EA2454	1028679	snp	T	C	C:195 T:0
EA2454	1028693	complex	CG	TA	TA:162 CG:0
EA2454	1028774	snp	T	C	C:213 T:0
EA2454	1028781	snp	T	C	C:210 T:0
EA2454	1028896	snp	G	A	A:232 G:0
EA2454	1028914	complex	TAA	CAG	CAG:147 TAA:0
EA2454	1028965	snp	A	G	G:136 A:0
EA2454	1028971	snp	A	G	G:131 A:0
EA2454	1028977	complex	TCCC	ACCT	ACCT:125 TCCC:0
EA2454	1028986	snp	G	A	A:152 G:0
EA2454	1029004	snp	G	A	A:147 G:0
EA2454	1029025	snp	C	A	A:115 C:0
EA2454	1029043	snp	G	A	A:121 G:0
EA2454	1029052	snp	A	G	G:110 A:0
EA2454	1029058	complex	AATG	GATA	GATA:88 AATG:0
EA2454	1029067	complex	CGTGAGG	TGTCAGA	TGTCAGA:67 CGTGAGG:0
EA2454	1029085	snp	C	T	T:123 C:0
EA2454	1029325	snp	G	A	A:204 G:0
EA2454	1029388	snp	G	A	A:209 G:0
EA2454	1029397	snp	A	G	G:192 A:0
EA2454	1029406	snp	G	A	A:188 G:0
EA2454	1029421	snp	A	G	G:177 A:0
EA2454	1029460	snp	G	A	A:211 G:0
EA2454	1029526	snp	T	A	A:177 T:0
EA2454	1029532	snp	G	A	A:157 G:0
EA2454	1029568	complex	TGCA	CGCG	CGCG:132 TGCA:0
EA2454	1029670	snp	T	A	A:106 T:0
EA2454	1029694	snp	G	A	A:133 G:0
EA2454	1029816	snp	A	G	G:245 A:1
EA2454	1029901	snp	A	G	G:183 A:0
EA2454	1030004	complex	CTGGT	TTGGC	TTGGC:205 CTGGT:0
EA2454	1030266	snp	A	G	G:271 A:0
EA2454	1030314	snp	A	G	G:246 A:0
EA2454	1030443	snp	C	A	A:171 C:0
EA2454	1030611	snp	C	T	T:131 C:0
EA2454	1030626	snp	C	A	A:125 C:0
EA2454	1030645	snp	A	C	C:113 A:1
EA2454	1030713	snp	A	T	T:14 A:0
EA2454	1031377	snp	G	A	A:21 G:0
EA2454	1031388	snp	T	C	C:30 T:0
EA2454	1031410	complex	TTAAT	ATTGC	ATTGC:30 TTAAT:0
EA2454	1031488	snp	A	T	T:29 A:0
EA2454	1032037	snp	C	T	T:321 C:0
EA2454	1032370	snp	G	A	A:298 G:0
EA2454	1032916	snp	G	A	A:261 G:0
EA2454	1033048	snp	G	A	A:230 G:0
EA2454	1033258	snp	C	T	T:173 C:0
EA2454	1033357	snp	C	G	G:248 C:0
EA2454	1033426	snp	C	T	T:193 C:0
EA2454	1033434	snp	T	G	G:176 T:2
EA2454	1033441	snp	G	C	C:175 G:0
EA2454	1033480	complex	AGCC	GGCA	GGCA:185 AGCC:0
EA2454	1033570	snp	A	G	G:211 A:0
EA2454	1033731	snp	G	A	A:158 G:0
EA2454	1033741	snp	C	T	T:143 C:0
EA2454	1034035	snp	A	G	G:184 A:0
EA2454	1034080	snp	T	C	C:248 T:0
EA2454	1034095	snp	C	A	A:238 C:0
EA2454	1034218	snp	A	G	G:230 A:0
EA2454	1034269	snp	C	T	T:226 C:0
EA2454	1034274	snp	A	T	T:222 A:0
EA2454	1034282	snp	A	G	G:220 A:0
EA2454	1034379	snp	A	C	C:168 A:0
EA2454	1034713	snp	T	C	C:241 T:0
EA2454	1034746	complex	GCTG	ACTA	ACTA:229 GCTG:0
EA2454	1034755	snp	G	A	A:245 G:0
EA2454	1034761	snp	A	G	G:248 A:0
EA2454	1034815	complex	CTGGT	TTGAC	TTGAC:166 CTGGT:0
EA2454	1034889	snp	G	T	T:271 G:0
EA2454	1034956	complex	GAGT	AAGC	AAGC:119 GAGT:0
EA2454	1034964	snp	G	A	A:127 G:0
EA2454	1035037	snp	A	C	C:97 A:0
EA2454	1035058	snp	C	T	T:100 C:0
EA2454	1035073	snp	C	T	T:112 C:0
EA2454	1035106	snp	G	A	A:126 G:0
EA2454	1035130	snp	A	C	C:162 A:0
EA2454	1035169	snp	A	G	G:180 A:0
EA2454	1035193	snp	C	T	T:211 C:0
EA2454	1035211	snp	T	C	C:230 T:0
EA2454	1035217	snp	A	G	G:238 A:0
EA2454	1035226	snp	A	G	G:261 A:0
EA2454	1035232	snp	C	T	T:279 C:0
EA2454	1035241	complex	CGTC	TGTT	TGTT:216 CGTC:0
EA2454	1035259	snp	A	C	C:253 A:0
EA2454	1035316	snp	A	G	G:211 A:0
EA2454	1035328	snp	A	G	G:224 A:0
EA2454	1035337	snp	G	A	A:231 G:0
EA2454	1035346	snp	A	G	G:215 A:0
EA2454	1035364	complex	GTT	ATC	ATC:186 GTT:0
EA2454	1035379	complex	GCTA	ACTG	ACTG:152 GCTA:0
EA2454	1035427	snp	C	T	T:202 C:0
EA2454	1035439	snp	T	C	C:200 T:0
EA2454	1035507	snp	T	C	C:146 T:0
EA2454	1035753	snp	C	T	T:137 C:0
EA2454	1035975	snp	G	A	A:148 G:0
EA2454	1036254	snp	A	G	G:236 A:0
EA2454	1036374	snp	C	T	T:263 C:0
EA2454	1036473	snp	A	G	G:199 A:0
EA2454	1036515	snp	C	T	T:258 C:0
EA2454	1036707	snp	T	C	C:168 T:0
EA2454	1036712	snp	A	G	G:162 A:0
EA2454	1036971	snp	T	C	C:306 T:0
EA2454	1037052	snp	A	G	G:195 A:0
EA2454	1037510	complex	AGC	GGT	GGT:187 AGC:0
EA2454	1037532	snp	T	G	G:218 T:0
EA2454	1037793	snp	A	C	C:241 A:0
EA2454	1037808	snp	C	A	A:285 C:0
EA2454	1038010	snp	A	C	C:164 A:0
EA2454	1038081	snp	C	T	T:222 C:0
EA2454	1038089	snp	G	A	A:217 G:0
EA2454	1038273	snp	G	A	A:254 G:0
EA2454	1038350	snp	C	T	T:302 C:0
EA2454	1038937	complex	GGTG	TGTC	TGTC:164 GGTG:0
EA2454	1039012	snp	C	A	A:236 C:0
EA2454	1039024	snp	G	A	A:235 G:0
EA2454	1039186	snp	T	G	G:219 T:1
EA2454	1039462	snp	A	T	T:260 A:1
EA2454	1039501	snp	A	G	G:260 A:0
EA2454	1039522	snp	C	T	T:265 C:0
EA2454	1039552	snp	G	A	A:212 G:0
EA2454	1039564	snp	A	G	G:216 A:0
EA2454	1039621	complex	TCCG	CCCA	CCCA:132 TCCG:0
EA2454	1039660	snp	A	G	G:185 A:0
EA2454	1039774	snp	T	G	G:181 T:1
EA2454	1039895	snp	T	G	G:194 T:0
EA2454	1039930	del	ATTACTGCATAGCACTTT	A	A:47 ATTACTGCATAGCACTTT:0
EA2454	1040587	complex	ACCT	GCCG	GCCG:124 ACCT:0
EA2454	1040608	snp	G	A	A:144 G:0
EA2454	1040662	snp	G	A	A:198 G:0
EA2454	1040683	snp	G	A	A:193 G:0
EA2454	1040758	snp	A	G	G:193 A:0
EA2454	1040776	snp	T	C	C:179 T:0
EA2454	1040824	complex	CGGC	AGGG	AGGG:173 CGGC:0
EA2454	1040905	snp	A	C	C:192 A:1
EA2454	1040962	complex	AGAC	GGAT	GGAT:153 AGAC:0
EA2454	1041003	snp	C	A	A:112 C:0
EA2454	1041027	snp	C	A	A:47 C:0
EA2454	1041037	snp	A	T	T:10 A:0
EA2454	1042286	snp	C	T	T:70 C:0
EA2454	1042343	snp	G	A	A:179 G:0
EA2454	1042379	snp	T	A	A:156 T:0
EA2454	1042391	snp	G	A	A:114 G:0
EA2454	1042436	snp	T	C	C:155 T:0
EA2454	1042547	snp	C	A	A:208 C:0
EA2454	1042571	snp	A	G	G:218 A:0
EA2454	1042595	snp	G	A	A:236 G:1
EA2454	1042613	complex	CGCT	GGCC	GGCC:209 CGCT:0
EA2454	1042642	snp	C	T	T:275 C:0
EA2454	1042667	snp	G	A	A:231 G:0
EA2454	1042832	snp	C	A	A:189 C:0
EA2454	1042874	snp	T	A	A:166 T:0
EA2454	1043143	snp	A	G	G:260 A:0
EA2454	1043266	snp	G	A	A:288 G:0
EA2454	1043392	snp	T	G	G:203 T:1
EA2454	1043455	snp	G	A	A:247 G:0
EA2454	1043483	snp	A	G	G:189 A:0
EA2454	1043488	snp	C	T	T:175 C:0
EA2454	1043494	snp	C	T	T:166 C:0
EA2454	1043503	complex	ATTA	GCTG	GCTG:100 ATTA:0
EA2454	1043518	snp	C	T	T:84 C:0
EA2454	1043524	snp	C	G	G:35 C:0
EA2454	1043570	snp	A	C	C:75 A:0
EA2454	1043582	snp	C	T	T:117 C:0
EA2454	1043587	snp	A	G	G:120 A:0
EA2454	1043878	snp	G	A	A:168 G:0
EA2454	1043899	snp	A	G	G:163 A:0
EA2454	1043938	snp	G	T	T:178 G:0
EA2454	1043962	snp	T	C	C:187 T:0
EA2454	1044107	snp	G	A	A:248 G:0
EA2454	1044129	snp	T	C	C:208 T:0
EA2454	1044169	snp	T	C	C:161 T:0
EA2454	1044247	snp	T	C	C:202 T:0
EA2454	1044271	snp	T	C	C:216 T:0
EA2454	1044325	complex	AGTA	GGTG	GGTG:268 AGTA:0
EA2454	1044358	snp	A	G	G:272 A:0
EA2454	1044412	snp	C	T	T:203 C:0
EA2454	1044445	snp	C	T	T:164 C:0
EA2454	1044605	complex	AACAG	GACAA	GACAA:179 AACAG:0
EA2454	1044658	snp	T	C	C:221 T:0
EA2454	1044667	snp	T	G	G:202 T:0
EA2454	1044706	snp	C	T	T:175 C:0
EA2454	1044717	snp	G	A	A:171 G:0
EA2454	1044734	snp	A	G	G:174 A:1
EA2454	1044748	complex	AGAGC	GGAAA	GGAAA:125 AGAGC:0
EA2454	1044808	snp	C	G	G:168 C:0
EA2454	1044888	snp	T	A	A:192 T:0
EA2454	1044988	snp	T	A	A:128 T:0
EA2454	1045030	snp	G	A	A:157 G:0
EA2454	1045045	snp	A	G	G:153 A:0
EA2454	1045139	snp	A	T	T:162 A:1
EA2454	1045170	snp	T	C	C:123 T:0
EA2454	1045182	complex	TTTATTGG	CTTTTGT	CTTTTGT:101 TTTATTGG:0
EA2454	1045231	mnp	AC	GA	GA:87 AC:0
EA2454	1045243	snp	A	G	G:94 A:0
EA2454	1045247	del	AAGCTC	A	A:95 AAGCTC:0
EA2454	1045259	snp	T	G	G:126 T:0
EA2454	1045627	snp	C	T	T:192 C:0
EA2454	1045784	snp	G	A	A:248 G:0
EA2454	1045855	complex	CCTGG	ACTGA	ACTGA:151 CCTGG:0
EA2454	1046012	snp	G	A	A:147 G:0
EA2454	1046044	snp	C	T	T:125 C:0
EA2454	1046050	complex	ACATGCA	TCACGCG	TCACGCG:79 ACATGCA:0
EA2454	1046061	complex	CCTCC	AATCT	AATCT:70 CCTCC:0
EA2454	1046108	snp	C	T	T:150 C:0
EA2454	1046157	snp	G	C	C:157 G:0
EA2454	1046167	snp	C	T	T:148 C:0
EA2454	1046192	complex	AAA	GAG	GAG:142 AAA:0
EA2454	1046215	snp	G	C	C:113 G:0
EA2454	1046233	snp	C	T	T:109 C:0
EA2454	1046239	snp	A	G	G:107 A:0
EA2454	1046290	snp	T	C	C:117 T:1
EA2454	1046314	snp	A	G	G:133 A:0
EA2454	1046329	snp	C	T	T:149 C:0
EA2454	1046408	snp	G	A	A:103 G:0
EA2454	1046419	snp	C	T	T:96 C:0
EA2454	1046425	snp	A	G	G:95 A:0
EA2454	1046437	complex	CGGA	TGGC	TGGC:75 CGGA:0
EA2454	1046446	snp	C	T	T:91 C:0
EA2454	1046497	snp	T	C	C:74 T:0
EA2454	1046510	snp	A	G	G:78 A:0
EA2454	1046524	snp	T	G	G:85 T:0
EA2454	1046539	snp	T	C	C:79 T:0
EA2454	1046593	snp	C	A	A:92 C:0
EA2454	1046602	snp	A	T	T:94 A:0
EA2454	1046779	snp	A	G	G:208 A:0
EA2454	1046842	snp	G	A	A:130 G:0
EA2454	1046890	snp	G	C	C:185 G:0
EA2454	1046935	snp	T	C	C:249 T:0
EA2454	1046986	snp	C	T	T:231 C:0
EA2454	1046998	snp	C	T	T:199 C:0
EA2454	1047016	snp	G	C	C:147 G:0
EA2454	1047137	snp	G	A	A:255 G:0
EA2454	1047190	snp	G	A	A:271 G:0
EA2454	1047217	snp	G	A	A:219 G:0
EA2454	1047283	snp	A	G	G:123 A:0
EA2454	1047304	snp	A	G	G:93 A:0
EA2454	1047354	mnp	CG	TA	TA:128 CG:0
EA2454	1047374	snp	C	T	T:165 C:0
EA2454	1047379	snp	C	T	T:165 C:0
EA2454	1047400	snp	A	G	G:202 A:0
EA2454	1047416	snp	A	G	G:179 A:0
EA2454	1047445	snp	C	T	T:166 C:0
EA2454	1047508	snp	T	C	C:135 T:0
EA2454	1047520	snp	G	A	A:138 G:0
EA2454	1047547	complex	ACTC	GATA	GATA:124 ACTC:0
EA2454	1047571	snp	A	G	G:148 A:0
EA2454	1047602	snp	A	G	G:172 A:0
EA2454	1047616	complex	CGCG	TGCA	TGCA:116 CGCG:0
EA2454	1047674	snp	G	A	A:190 G:0
EA2454	1047745	snp	G	A	A:151 G:1
EA2454	1047834	snp	A	G	G:209 A:0
EA2454	1047894	snp	C	T	T:140 C:0
EA2454	1047939	snp	A	G	G:129 A:0
EA2454	1047951	snp	C	T	T:159 C:0
EA2454	1048005	snp	T	C	C:144 T:0
EA2454	1048047	mnp	GT	AC	AC:156 GT:0
EA2454	1048062	snp	T	C	C:223 T:0
EA2454	1052435	snp	C	T	T:140 C:0
EA2454	1053345	complex	GCCCG	TCCC	TCCC:227 GCCCG:0
EA2454	1053700	snp	A	G	G:199 A:0
EA2454	1053814	snp	C	T	T:196 C:0
EA2454	1053873	snp	T	C	C:175 T:0
EA2454	1053931	snp	C	T	T:200 C:0
EA2454	1053973	snp	G	A	A:242 G:0
EA2454	1054078	snp	T	A	A:202 T:0
EA2454	1054099	snp	G	T	T:210 G:0
EA2454	1054213	snp	G	A	A:164 G:0
EA2454	1054264	snp	C	T	T:156 C:0
EA2454	1054270	snp	G	A	A:153 G:0
EA2454	1054276	snp	T	C	C:136 T:0
EA2454	1054315	snp	T	C	C:122 T:0
EA2454	1054372	snp	T	C	C:149 T:0
EA2454	1054393	snp	G	A	A:139 G:0
EA2454	1054462	snp	C	A	A:164 C:0
EA2454	1054699	snp	C	T	T:153 C:0
EA2454	1054758	snp	C	T	T:137 C:0
EA2454	1054882	snp	T	C	C:132 T:0
EA2454	1055114	snp	T	G	G:173 T:0
EA2454	1055170	snp	C	T	T:177 C:0
EA2454	1055371	snp	G	A	A:167 G:0
EA2454	1055413	snp	C	G	G:159 C:0
EA2454	1055650	snp	C	T	T:212 C:1
EA2454	1055698	snp	A	G	G:168 A:0
EA2454	1055818	snp	G	A	A:149 G:0
EA2454	1055875	snp	T	C	C:150 T:0
EA2454	1055905	snp	G	T	T:191 G:0
EA2454	1055962	snp	T	G	G:145 T:1
EA2454	1055971	complex	TCTGTTTGGTTGT	GTTTTTCGGCTGC	GTTTTTCGGCTGC:84 TCTGTTTGGTTGT:0
EA2454	1056124	snp	C	G	G:228 C:0
EA2454	1056130	snp	T	C	C:234 T:0
EA2454	1056139	snp	T	A	A:223 T:1
EA2454	1056145	snp	T	C	C:222 T:0
EA2454	1056160	snp	C	T	T:166 C:0
EA2454	1056196	snp	C	T	T:171 C:0
EA2454	1056202	snp	T	C	C:148 T:0
EA2454	1056211	complex	TGATGTAATT	CGATATAACA	CGATATAACA:108 TGATGTAATT:0
EA2454	1059191	snp	G	T	T:109 G:0
EA2454	1067810	ins	T	TG	TG:49 T:0
EA2454	1073767	snp	A	G	G:212 A:0
EA2454	1075753	snp	A	G	G:139 A:0
EA2454	1079000	snp	T	C	C:206 T:0
EA2454	1087521	snp	A	C	C:185 A:0
EA2454	1088904	snp	G	A	A:160 G:0
EA2454	1093309	snp	A	G	G:212 A:0
EA2454	1100866	snp	G	A	A:197 G:0
EA2454	1103669	snp	T	C	C:187 T:0
EA2454	1107237	snp	C	T	T:286 C:0
EA2454	1109672	snp	T	C	C:153 T:0
EA2454	1122934	snp	C	T	T:381 C:0
EA2454	1124033	snp	G	A	A:238 G:0
EA2454	1128458	snp	T	C	C:36 T:0
EA2454	1128599	snp	C	T	T:24 C:0
EA2454	1129220	snp	C	T	T:110 C:0
EA2454	1130101	snp	T	C	C:105 T:0
EA2454	1130813	snp	T	G	G:106 T:0
EA2454	1137327	snp	C	T	T:223 C:0
EA2454	1138215	snp	T	C	C:204 T:0
EA2454	1140326	snp	A	G	G:188 A:0
EA2454	1141515	snp	A	T	T:113 A:0
EA2454	1143467	snp	C	T	T:275 C:0
EA2454	1144975	snp	T	C	C:43 T:0
EA2454	1147228	snp	C	T	T:184 C:0
EA2454	1150160	snp	T	A	A:133 T:0
EA2454	1151448	snp	T	C	C:219 T:0
EA2454	1153447	snp	T	C	C:164 T:0
EA2454	1153937	snp	G	A	A:278 G:0
EA2454	1160822	snp	A	T	T:198 A:0
EA2454	1161286	snp	C	T	T:155 C:0
EA2454	1162900	snp	T	C	C:104 T:1
EA2454	1167666	snp	T	C	C:123 T:0
EA2454	1171208	snp	C	T	T:209 C:0
EA2454	1174352	snp	T	C	C:121 T:0
EA2454	1175614	snp	T	C	C:128 T:0
EA2454	1175890	snp	G	T	T:209 G:0
EA2454	1180279	snp	C	T	T:117 C:0
EA2454	1184312	snp	C	T	T:301 C:1
EA2454	1186746	snp	T	C	C:224 T:0
EA2454	1187745	snp	C	T	T:205 C:0
EA2454	1190353	snp	G	T	T:114 G:0
EA2454	1197020	snp	G	A	A:303 G:0
EA2454	1201704	snp	G	A	A:240 G:0
EA2454	1211256	snp	T	C	C:335 T:0
EA2454	1216869	snp	C	T	T:194 C:0
EA2454	1216961	snp	G	T	T:227 G:0
EA2454	1218789	snp	A	G	G:44 A:0
EA2454	1219256	snp	C	T	T:136 C:0
EA2454	1231927	snp	G	A	A:167 G:0
EA2454	1235752	snp	A	G	G:270 A:0
EA2454	1236723	snp	T	C	C:126 T:0
EA2454	1245865	snp	C	T	T:283 C:1
EA2454	1255549	snp	A	G	G:294 A:0
EA2454	1260022	snp	G	T	T:267 G:1
EA2454	1261600	snp	C	T	T:132 C:0
EA2454	1261876	snp	A	C	C:136 A:0
EA2454	1272930	snp	T	C	C:206 T:0
EA2454	1274943	snp	G	T	T:335 G:1
EA2454	1280572	snp	C	A	A:229 C:0
EA2454	1282553	snp	T	C	C:164 T:0
EA2454	1283629	snp	A	G	G:36 A:0
EA2454	1297315	snp	T	G	G:181 T:0
EA2454	1299372	snp	T	C	C:169 T:0
EA2454	1307648	snp	C	T	T:223 C:0
EA2454	1309315	snp	T	C	C:197 T:0
EA2454	1317400	snp	G	A	A:209 G:0
EA2454	1320805	snp	A	G	G:96 A:0
EA2454	1322163	snp	T	C	C:164 T:0
EA2454	1322665	snp	T	C	C:115 T:2
EA2454	1325571	snp	C	T	T:122 C:0
EA2454	1328307	complex	ATTAA	GTTAG	GTTAG:151 ATTAA:0
EA2454	1330704	snp	G	T	T:125 G:0
EA2454	1331179	snp	T	G	G:153 T:0
EA2454	1335631	snp	T	G	G:129 T:0
EA2454	1336195	snp	G	T	T:217 G:0
EA2454	1340886	snp	A	C	C:140 A:0
EA2454	1343278	snp	C	A	A:266 C:0
EA2454	1345460	snp	T	G	G:141 T:0
EA2454	1345847	snp	T	C	C:179 T:0
EA2454	1351707	snp	G	C	C:125 G:0
EA2454	1351769	snp	T	G	G:127 T:1
EA2454	1355247	snp	G	C	C:152 G:0
EA2454	1358384	snp	A	G	G:187 A:0
EA2454	1360577	snp	A	G	G:136 A:0
EA2454	1361115	snp	C	T	T:197 C:0
EA2454	1361133	snp	G	A	A:224 G:0
EA2454	1363598	snp	C	T	T:180 C:0
EA2454	1364198	ins	A	AG	AG:151 A:3
EA2454	1365707	snp	C	T	T:134 C:0
EA2454	1371250	snp	T	C	C:119 T:0
EA2454	1373482	snp	T	C	C:112 T:0
EA2454	1378312	snp	T	C	C:252 T:0
EA2454	1382325	ins	G	GT	GT:145 G:0
EA2454	1387493	snp	A	G	G:92 A:0
EA2454	1389276	snp	A	G	G:218 A:0
EA2454	1394505	snp	A	G	G:210 A:0
EA2454	1398315	snp	G	A	A:180 G:0
EA2454	1401264	snp	A	G	G:159 A:0
EA2454	1401535	snp	C	T	T:186 C:0
EA2454	1407426	snp	G	T	T:83 G:0
EA2454	1413069	snp	G	A	A:123 G:0
EA2454	1413295	snp	T	C	C:139 T:0
EA2454	1418580	snp	T	G	G:136 T:0
EA2454	1422407	snp	A	G	G:139 A:0
EA2454	1422494	snp	T	G	G:170 T:0
EA2454	1428495	snp	A	T	T:126 A:0
EA2454	1435223	snp	G	A	A:131 G:0
EA2454	1440651	snp	C	T	T:182 C:1
EA2454	1443770	snp	A	T	T:163 A:0
EA2454	1445222	snp	G	T	T:236 G:0
EA2454	1445619	snp	G	A	A:231 G:0
EA2454	1448050	snp	T	G	G:198 T:0
EA2454	1452075	snp	T	C	C:216 T:0
EA2454	1455169	snp	G	A	A:170 G:0
EA2454	1455358	snp	A	G	G:252 A:0
EA2454	1458467	snp	A	G	G:126 A:0
EA2454	1459664	snp	T	G	G:180 T:0
EA2454	1463104	snp	C	T	T:167 C:0
EA2454	1463829	ins	C	CTT	CTT:125 C:0
EA2454	1464587	snp	T	A	A:93 T:0
EA2454	1473808	snp	T	C	C:91 T:0
EA2454	1473936	snp	C	T	T:155 C:0
EA2454	1474887	snp	C	T	T:171 C:0
EA2454	1476139	snp	T	C	C:145 T:0
EA2454	1476516	snp	G	A	A:131 G:0
EA2454	1480708	snp	T	G	G:271 T:0
EA2454	1482449	snp	A	G	G:143 A:0
EA2454	1483731	snp	C	T	T:184 C:0
EA2454	1483915	snp	T	C	C:108 T:0
EA2454	1490337	snp	A	T	T:180 A:0
EA2454	1491226	snp	T	C	C:194 T:0
EA2454	1491674	snp	A	G	G:138 A:0
EA2454	1492527	ins	C	CA	CA:103 C:0
EA2454	1495054	snp	G	A	A:104 G:0
EA2454	1495417	snp	C	T	T:184 C:0
EA2454	1495581	snp	T	A	A:156 T:0
EA2454	1500517	ins	T	TA	TA:113 T:0
EA2454	1505531	snp	C	A	A:103 C:0
EA2454	1505571	snp	C	T	T:110 C:0
EA2454	1505915	snp	A	C	C:163 A:0
EA2454	1506283	snp	C	T	T:152 C:0
EA2454	1509044	snp	C	G	G:132 C:0
EA2454	1518451	complex	GGAAG	AAAAA	AAAAA:69 GGAAG:0
EA2454	1518480	snp	T	G	G:78 T:0
EA2454	1519405	snp	T	C	C:104 T:0
EA2454	1519819	snp	A	G	G:167 A:0
EA2454	1521514	snp	C	A	A:135 C:0
EA2454	1525679	snp	C	T	T:96 C:0
EA2454	1528611	snp	C	T	T:137 C:0
EA2454	1533339	snp	A	G	G:147 A:0
EA2454	1534292	snp	A	G	G:157 A:0
EA2454	1546855	snp	C	T	T:165 C:0
EA2454	1547465	snp	G	T	T:116 G:0
EA2454	1548845	snp	T	C	C:246 T:0
EA2454	1549828	snp	T	C	C:186 T:0
EA2454	1549834	del	ACGCCATTG	A	A:124 ACGCCATTG:0
EA2454	1556519	snp	A	G	G:131 A:0
EA2454	1557348	snp	G	A	A:183 G:0
EA2454	1557966	snp	A	G	G:185 A:0
EA2454	1559423	snp	A	G	G:102 A:0
EA2454	1559525	snp	G	A	A:79 G:0
EA2454	1560679	snp	G	A	A:172 G:0
EA2454	1562488	snp	G	A	A:197 G:0
EA2454	1564301	snp	G	T	T:160 G:0
EA2454	1568375	snp	A	C	C:186 A:1
EA2454	1570233	snp	A	G	G:185 A:0
EA2454	1573803	snp	T	A	A:125 T:0
EA2454	1587379	snp	T	C	C:218 T:0
EA2454	1587792	snp	A	C	C:217 A:0
EA2454	1592505	snp	T	C	C:110 T:0
EA2454	1596282	snp	T	G	G:182 T:1
EA2454	1596875	snp	A	C	C:200 A:0
EA2454	1597496	snp	T	C	C:172 T:0
EA2454	1599599	snp	T	G	G:147 T:1
EA2454	1599906	snp	T	C	C:142 T:0
EA2454	1600258	snp	C	A	A:126 C:0
EA2454	1600919	snp	A	G	G:185 A:0
EA2454	1601885	snp	A	G	G:128 A:0
EA2454	1606482	snp	A	G	G:139 A:0
EA2454	1610176	snp	G	A	A:148 G:0
EA2454	1610501	del	AT	A	A:231 AT:0
EA2454	1612435	snp	G	A	A:175 G:0
EA2454	1613406	snp	T	A	A:172 T:1
EA2454	1613463	snp	A	G	G:186 A:0
EA2454	1614409	snp	G	T	T:155 G:0
EA2454	1617239	snp	C	T	T:158 C:0
EA2454	1617684	snp	G	C	C:169 G:0
EA2454	1624217	snp	A	G	G:21 A:0
EA2454	1624256	snp	T	A	A:21 T:0
EA2454	1624262	complex	AA	CG	CG:21 AA:0
EA2454	1624351	snp	G	C	C:10 G:0
EA2454	1624379	snp	C	T	T:20 C:0
EA2454	1624393	snp	C	T	T:22 C:0
EA2454	1624401	snp	C	T	T:22 C:0
EA2454	1624422	snp	C	A	A:12 C:0
EA2454	1625151	snp	G	T	T:30 G:0
EA2454	1625175	complex	TCCG	CCCA	CCCA:58 TCCG:0
EA2454	1625193	snp	G	A	A:83 G:0
EA2454	1625205	snp	C	T	T:99 C:0
EA2454	1625235	snp	A	G	G:101 A:0
EA2454	1625258	complex	AACTA	GACTC	GACTC:83 AACTA:0
EA2454	1625280	snp	A	T	T:107 A:1
EA2454	1625298	snp	A	G	G:104 A:0
EA2454	1625361	snp	T	A	A:80 T:1
EA2454	1625376	snp	G	T	T:82 G:0
EA2454	1625382	snp	T	C	C:76 T:0
EA2454	1625390	snp	G	A	A:86 G:0
EA2454	1625406	complex	AGGC	TGGT	TGGT:94 AGGC:0
EA2454	1625417	snp	G	A	A:119 G:0
EA2454	1625424	snp	G	A	A:127 G:0
EA2454	1625430	snp	G	A	A:136 G:0
EA2454	1625455	snp	G	A	A:167 G:0
EA2454	1625460	snp	A	T	T:165 A:1
EA2454	1625475	complex	CGGT	AGGA	AGGA:173 CGGT:0
EA2454	1625505	snp	A	T	T:177 A:0
EA2454	1625519	snp	G	A	A:179 G:0
EA2454	1625559	snp	G	A	A:127 G:0
EA2454	1625589	snp	C	A	A:145 C:0
EA2454	1625637	snp	T	C	C:179 T:1
EA2454	1625649	mnp	CG	TC	TC:154 CG:0
EA2454	1625658	snp	T	C	C:189 T:0
EA2454	1625688	complex	TGTC	CATT	CATT:121 TGTC:0
EA2454	1625764	snp	C	T	T:121 C:1
EA2454	1625826	snp	T	C	C:145 T:0
EA2454	1625835	snp	A	G	G:144 A:0
EA2454	1625853	snp	T	G	G:137 T:1
EA2454	1625874	snp	T	C	C:136 T:0
EA2454	1625895	snp	A	G	G:126 A:0
EA2454	1625922	snp	T	C	C:109 T:0
EA2454	1625946	snp	T	A	A:85 T:2
EA2454	1625960	snp	A	G	G:59 A:0
EA2454	1625984	snp	T	C	C:30 T:1
EA2454	1626031	snp	G	A	A:38 G:0
EA2454	1626042	snp	T	C	C:42 T:0
EA2454	1626118	snp	A	G	G:76 A:0
EA2454	1626136	snp	T	C	C:45 T:0
EA2454	1626159	complex	GCCCC	ATCAA	ATCAA:10 GCCCC:0
EA2454	1626237	snp	T	C	C:13 T:0
EA2454	1626252	snp	T	A	A:14 T:0
EA2454	1626267	snp	C	T	T:14 C:0
EA2454	1626275	snp	C	G	G:12 C:0
EA2454	1629068	snp	G	A	A:41 G:0
EA2454	1629119	complex	CGCA	AGCG	AGCG:70 CGCA:0
EA2454	1629149	complex	TGGCTATA	CGGTTATG	CGGTTATG:64 TGGCTATA:0
EA2454	1629200	snp	T	C	C:56 T:0
EA2454	1629240	snp	T	C	C:74 T:0
EA2454	1629285	complex	GTAC	ATAT	ATAT:30 GTAC:0
EA2454	1629295	complex	ACAAAAT	TCTAAAC	TCTAAAC:21 ACAAAAT:0
EA2454	1629306	snp	C	G	G:25 C:0
EA2454	1629375	snp	G	A	A:32 G:0
EA2454	1629399	snp	G	A	A:27 G:1
EA2454	1629404	snp	T	A	A:26 T:0
EA2454	1629412	complex	TGAG	AGAA	AGAA:20 TGAG:0
EA2454	1629423	complex	ATATA	GTATT	GTATT:16 ATATA:0
EA2454	1629435	snp	G	A	A:11 G:0
EA2454	1630981	snp	A	G	G:15 A:0
EA2454	1630990	snp	T	C	C:27 T:0
EA2454	1634228	snp	A	G	G:276 A:0
EA2454	1641556	snp	C	A	A:223 C:0
EA2454	1642336	snp	A	G	G:141 A:0
EA2454	1652108	snp	T	C	C:58 T:0
EA2454	1652131	snp	G	C	C:16 G:0
EA2454	1652374	snp	G	A	A:136 G:0
EA2454	1655522	snp	T	G	G:147 T:0
EA2454	1673448	snp	A	G	G:155 A:0
EA2454	1676378	snp	T	C	C:128 T:0
EA2454	1681971	snp	C	T	T:130 C:0
EA2454	1682457	snp	A	G	G:190 A:0
EA2454	1683078	snp	C	T	T:130 C:0
EA2454	1684983	snp	A	C	C:153 A:0
EA2454	1686483	snp	C	T	T:55 C:1
EA2454	1689622	snp	T	A	A:243 T:1
EA2454	1690336	snp	C	A	A:244 C:0
EA2454	1694588	snp	A	T	T:226 A:0
EA2454	1701919	snp	A	G	G:218 A:0
EA2454	1702950	snp	T	A	A:119 T:0
EA2454	1707192	snp	A	G	G:155 A:0
EA2454	1708150	snp	G	A	A:178 G:0
EA2454	1710872	snp	C	T	T:132 C:0
EA2454	1714697	snp	T	C	C:195 T:0
EA2454	1717835	snp	C	A	A:126 C:0
EA2454	1719996	snp	C	G	G:145 C:0
EA2454	1725762	snp	A	G	G:187 A:0
EA2454	1729448	del	GCTC	G	G:90 GCTC:0
EA2454	1730329	snp	T	C	C:163 T:0
EA2454	1737561	snp	A	G	G:150 A:0
EA2454	1739772	del	CG	C	C:120 CG:0
EA2454	1740298	snp	C	G	G:134 C:0
EA2454	1740558	snp	T	G	G:85 T:1
EA2454	1740938	snp	A	G	G:29 A:0
EA2454	1740958	complex	AT	GC	GC:26 AT:0
EA2454	1743887	snp	C	T	T:151 C:0
EA2454	1744296	snp	C	T	T:105 C:0
EA2454	1745576	snp	T	C	C:163 T:0
EA2454	1748585	snp	A	C	C:169 A:0
EA2454	1763293	snp	T	C	C:167 T:0
EA2454	1780322	snp	C	T	T:183 C:3
EA2454	1780790	snp	G	C	C:160 G:0
EA2454	1783740	snp	C	T	T:155 C:0
EA2454	1785674	snp	G	T	T:250 G:1
EA2454	1786685	snp	T	C	C:159 T:0
EA2454	1788816	snp	T	G	G:167 T:0
EA2454	1794938	snp	T	G	G:176 T:0
EA2454	1795161	snp	A	G	G:136 A:0
EA2454	1799132	snp	G	A	A:229 G:0
EA2454	1802874	snp	A	G	G:134 A:0
EA2454	1803664	snp	T	C	C:168 T:0
EA2454	1803862	snp	A	C	C:222 A:2
EA2454	1809011	snp	G	A	A:258 G:0
EA2454	1816986	snp	G	A	A:134 G:0
EA2454	1820083	snp	T	C	C:166 T:0
EA2454	1824156	snp	T	C	C:168 T:0
EA2454	1824395	snp	C	T	T:182 C:0
EA2454	1824499	snp	T	C	C:156 T:0
EA2454	1825107	snp	G	A	A:117 G:0
EA2454	1825274	del	GT	G	G:18 GT:0
EA2454	1825439	snp	C	T	T:101 C:0
EA2454	1827400	snp	G	A	A:173 G:0
EA2454	1828548	snp	C	T	T:211 C:0
EA2454	1832674	snp	A	C	C:250 A:0
EA2454	1833049	snp	C	T	T:208 C:0
EA2454	1836316	snp	G	A	A:183 G:0
EA2454	1839836	snp	C	T	T:136 C:0
EA2454	1841787	snp	C	T	T:252 C:0
EA2454	1844569	snp	A	G	G:169 A:0
EA2454	1847356	snp	G	A	A:208 G:0
EA2454	1851862	snp	C	T	T:149 C:0
EA2454	1852886	snp	A	G	G:166 A:0
EA2454	1853109	snp	C	T	T:190 C:0
EA2454	1860310	snp	T	C	C:50 T:0
EA2454	1867578	snp	G	A	A:357 G:0
EA2454	1877345	snp	T	C	C:179 T:0
EA2454	1880076	snp	G	A	A:288 G:0
EA2454	1881056	snp	C	G	G:132 C:0
EA2454	1883320	snp	A	T	T:212 A:0
EA2454	1883789	snp	G	A	A:274 G:0
EA2454	1885869	snp	A	C	C:120 A:0
EA2454	1887544	snp	A	G	G:181 A:0
EA2454	1890386	snp	T	C	C:241 T:0
EA2454	1900231	snp	G	A	A:188 G:0
EA2454	1901401	snp	G	A	A:225 G:0
EA2454	1902291	snp	G	C	C:311 G:0
EA2454	1902743	snp	C	T	T:250 C:0
EA2454	1909088	snp	T	C	C:301 T:0
EA2454	1909748	snp	T	G	G:338 T:2
EA2454	1912473	snp	A	G	G:260 A:0
EA2454	1919919	snp	G	A	A:216 G:0
EA2454	1922848	snp	A	C	C:227 A:2
EA2454	1924083	snp	C	T	T:146 C:0
EA2454	1929193	ins	T	TTTA	TTTA:39 T:0
[truncated: 7,271 more rows]
