# Supplementary material for: Escherichia coli ST302: Genomic Analysis of Virulence Potential and Antimicrobial Resistance Mediated by Mobile Genetic Elements
Source: Front Microbiol. 2020 Jan 21;10:3098. doi: 10.3389/fmicb.2019.03098 (PMC6985150; doi:10.3389/fmicb.2019.03098)
Supplement: DATA S2 — ST302 SNP analysis. [file Data_Sheet_2.ZIP › SNP_Analysis/ST302_SNP/SNP_analysis/snippyout/ST302/IA4731-Poultry-ST302.out/snps.csv]

CHROM	POS	TYPE	REF	ALT	EVIDENCE	FTYPE	STRAND	NT_POS	AA_POS	EFFECT	LOCUS_TAG	GENE	PRODUCT
EA2454	977	snp	T	C	C:37 T:0
EA2454	6517	snp	C	T	T:53 C:0
EA2454	11382	snp	A	G	G:60 A:0
EA2454	25719	snp	T	C	C:46 T:0
EA2454	30862	snp	A	C	C:67 A:0
EA2454	34494	snp	T	C	C:49 T:0
EA2454	36375	snp	C	A	A:52 C:0
EA2454	37987	snp	T	C	C:52 T:0
EA2454	39065	snp	T	C	C:45 T:0
EA2454	52423	snp	A	C	C:45 A:0
EA2454	56628	snp	A	C	C:31 A:0
EA2454	57116	snp	A	T	T:35 A:0
EA2454	58152	snp	T	C	C:69 T:0
EA2454	67315	snp	A	C	C:51 A:0
EA2454	69595	snp	A	G	G:25 A:0
EA2454	74952	snp	G	T	T:39 G:0
EA2454	75057	del	GT	G	G:33 GT:0
EA2454	84557	snp	T	G	G:53 T:0
EA2454	102014	snp	A	T	T:79 A:0
EA2454	111773	snp	C	G	G:56 C:0
EA2454	124865	snp	T	C	C:38 T:0
EA2454	130629	snp	C	T	T:50 C:0
EA2454	131613	snp	A	G	G:75 A:0
EA2454	140951	snp	T	G	G:81 T:0
EA2454	146087	snp	A	C	C:53 A:0
EA2454	162974	snp	G	T	T:35 G:0
EA2454	163970	del	AT	A	A:16 AT:0
EA2454	164371	snp	T	A	A:17 T:0
EA2454	174420	snp	A	G	G:55 A:0
EA2454	186550	snp	T	C	C:57 T:0
EA2454	190313	snp	T	C	C:19 T:0
EA2454	220577	snp	G	A	A:66 G:0
EA2454	229589	snp	C	T	T:12 C:0
EA2454	229594	complex	ATCG	TTCA	TTCA:12 ATCG:0
EA2454	229613	complex	AAGACACTA	GCGACGCTG	GCGACGCTG:18 AAGACACTA:0
EA2454	229626	snp	G	C	C:18 G:0
EA2454	239221	snp	A	G	G:39 A:0
EA2454	241567	snp	A	G	G:18 A:0
EA2454	241572	snp	G	A	A:17 G:0
EA2454	241603	snp	G	A	A:13 G:0
EA2454	241652	snp	C	T	T:27 C:0
EA2454	245301	snp	C	T	T:55 C:0
EA2454	270317	snp	A	T	T:62 A:0
EA2454	273279	snp	C	T	T:56 C:0
EA2454	276220	snp	T	C	C:35 T:0
EA2454	277907	snp	G	T	T:69 G:0
EA2454	281316	snp	C	T	T:36 C:0
EA2454	285627	ins	A	AT	AT:35 A:1
EA2454	298286	snp	T	C	C:58 T:0
EA2454	304693	del	AT	A	A:37 AT:0
EA2454	313034	snp	A	G	G:36 A:0
EA2454	314871	snp	C	T	T:35 C:0
EA2454	317106	snp	T	C	C:63 T:1
EA2454	318467	snp	T	C	C:64 T:0
EA2454	322834	snp	C	T	T:53 C:0
EA2454	332521	snp	A	C	C:24 A:0
EA2454	333155	snp	G	T	T:52 G:0
EA2454	334084	snp	G	A	A:66 G:0
EA2454	337102	snp	G	A	A:51 G:1
EA2454	342188	snp	G	A	A:58 G:0
EA2454	350969	snp	A	G	G:39 A:0
EA2454	359374	snp	C	T	T:65 C:0
EA2454	371150	snp	T	C	C:80 T:0
EA2454	376903	snp	G	A	A:84 G:0
EA2454	388918	snp	T	G	G:74 T:0
EA2454	393575	snp	A	G	G:45 A:0
EA2454	393743	snp	A	G	G:86 A:2
EA2454	396912	snp	T	A	A:66 T:0
EA2454	397444	snp	C	G	G:60 C:0
EA2454	407113	snp	A	G	G:69 A:0
EA2454	407887	snp	C	G	G:62 C:0
EA2454	412458	snp	G	A	A:70 G:0
EA2454	437474	snp	A	G	G:60 A:0
EA2454	440837	snp	C	A	A:73 C:0
EA2454	443213	snp	A	G	G:10 A:0
EA2454	447459	snp	A	G	G:40 A:0
EA2454	448711	snp	A	G	G:51 A:0
EA2454	454890	snp	C	T	T:66 C:0
EA2454	456123	snp	G	A	A:51 G:0
EA2454	457082	snp	C	T	T:56 C:0
EA2454	465826	snp	A	T	T:74 A:0
EA2454	470437	snp	C	T	T:66 C:1
EA2454	472911	snp	T	C	C:62 T:0
EA2454	478727	snp	C	A	A:57 C:0
EA2454	483833	snp	G	A	A:43 G:0
EA2454	485246	snp	C	T	T:62 C:0
EA2454	485779	snp	C	G	G:105 C:0
EA2454	485955	snp	G	T	T:81 G:2
EA2454	486024	snp	G	A	A:82 G:1
EA2454	497460	snp	T	G	G:12 T:0
EA2454	506352	snp	T	G	G:24 T:0
EA2454	510992	snp	C	T	T:54 C:0
EA2454	519195	snp	G	A	A:25 G:0
EA2454	519811	snp	A	C	C:53 A:0
EA2454	520294	snp	C	T	T:59 C:0
EA2454	528123	snp	A	T	T:63 A:0
EA2454	534151	snp	A	G	G:75 A:0
EA2454	537287	snp	G	C	C:30 G:0
EA2454	539426	snp	T	C	C:78 T:0
EA2454	546428	snp	A	C	C:61 A:0
EA2454	550000	snp	G	A	A:73 G:0
EA2454	559017	snp	A	G	G:71 A:0
EA2454	559185	snp	G	A	A:76 G:1
EA2454	561226	snp	G	A	A:52 G:0
EA2454	561259	snp	C	A	A:46 C:0
EA2454	561272	snp	T	A	A:45 T:0
EA2454	562933	snp	T	C	C:68 T:0
EA2454	582745	snp	C	T	T:47 C:0
EA2454	590181	ins	T	TA	TA:24 T:0
EA2454	597386	snp	A	G	G:83 A:0
EA2454	606088	ins	G	GA	GA:62 G:0
EA2454	611222	del	TGCATA	T	T:35 TGCATA:0
EA2454	611872	snp	A	G	G:14 A:0
EA2454	612726	snp	A	G	G:14 A:0
EA2454	613906	snp	C	A	A:30 C:0
EA2454	634477	snp	C	A	A:87 C:2
EA2454	642337	snp	A	G	G:74 A:1
EA2454	669330	snp	A	G	G:78 A:0
EA2454	670594	snp	C	A	A:67 C:0
EA2454	676368	snp	G	A	A:68 G:0
EA2454	683177	snp	T	G	G:62 T:0
EA2454	686003	snp	A	G	G:47 A:0
EA2454	686104	snp	G	C	C:63 G:0
EA2454	687410	snp	A	G	G:59 A:0
EA2454	690408	snp	A	G	G:57 A:0
EA2454	690611	snp	T	C	C:44 T:0
EA2454	691401	snp	C	T	T:64 C:0
EA2454	705263	snp	C	A	A:77 C:0
EA2454	709632	snp	T	C	C:67 T:0
EA2454	710977	snp	A	G	G:45 A:0
EA2454	714973	snp	C	T	T:44 C:0
EA2454	715370	snp	C	T	T:51 C:1
EA2454	719734	snp	C	T	T:85 C:0
EA2454	731219	snp	T	G	G:88 T:0
EA2454	731329	snp	G	A	A:89 G:0
EA2454	737672	snp	A	G	G:73 A:0
EA2454	743375	snp	T	A	A:83 T:0
EA2454	751386	snp	G	A	A:104 G:0
EA2454	754898	snp	G	A	A:82 G:0
EA2454	755366	snp	A	G	G:77 A:0
EA2454	756040	snp	T	G	G:70 T:0
EA2454	758394	snp	C	T	T:57 C:0
EA2454	765032	snp	T	C	C:90 T:0
EA2454	779769	del	TA	T	T:11 TA:0
EA2454	781424	snp	T	G	G:76 T:0
EA2454	781436	snp	C	A	A:81 C:0
EA2454	781442	snp	G	A	A:80 G:0
EA2454	781448	snp	G	A	A:83 G:0
EA2454	785375	snp	T	C	C:46 T:0
EA2454	788461	snp	G	T	T:50 G:0
EA2454	789417	snp	A	C	C:78 A:0
EA2454	803220	snp	G	A	A:44 G:2
EA2454	805481	snp	A	G	G:45 A:0
EA2454	815610	snp	T	A	A:45 T:0
EA2454	817985	snp	T	G	G:43 T:0
EA2454	818649	snp	A	C	C:50 A:0
EA2454	829606	snp	G	A	A:66 G:0
EA2454	831520	snp	G	T	T:63 G:0
EA2454	839497	snp	T	A	A:38 T:0
EA2454	852695	snp	A	G	G:41 A:0
EA2454	860226	snp	C	A	A:42 C:0
EA2454	894538	snp	C	T	T:35 C:0
EA2454	904482	snp	A	G	G:36 A:0
EA2454	923875	snp	T	A	A:67 T:0
EA2454	924579	snp	T	C	C:59 T:0
EA2454	926548	snp	G	A	A:76 G:0
EA2454	930102	snp	A	G	G:55 A:0
EA2454	934663	snp	G	A	A:48 G:0
EA2454	935854	snp	C	T	T:35 C:0
EA2454	938891	snp	T	C	C:62 T:0
EA2454	938923	snp	G	A	A:54 G:0
EA2454	945162	snp	A	G	G:73 A:0
EA2454	946875	snp	T	C	C:48 T:0
EA2454	953884	snp	T	C	C:12 T:0
EA2454	953998	snp	G	A	A:61 G:0
EA2454	954055	complex	CCGG	GCAC	GCAC:80 CCGG:0
EA2454	954235	complex	ATGT	GTGG	GTGG:84 ATGT:0
EA2454	954391	snp	G	A	A:47 G:0
EA2454	962114	complex	CTCAGA	GCCAGC	GCCAGC:12 CTCAGA:0
EA2454	962126	complex	TTCCAGG	ATTTAGA	ATTTAGA:12 TTCCAGG:0
EA2454	962144	snp	C	T	T:14 C:0
EA2454	962169	snp	G	A	A:14 G:0
EA2454	981741	snp	A	C	C:10 A:0
EA2454	983743	snp	A	G	G:84 A:0
EA2454	986640	snp	G	A	A:90 G:0
EA2454	990058	snp	G	T	T:107 G:0
EA2454	990374	snp	C	A	A:99 C:0
EA2454	999377	snp	G	A	A:37 G:0
EA2454	1002504	snp	C	T	T:33 C:0
EA2454	1003603	snp	A	G	G:23 A:0
EA2454	1003611	snp	C	A	A:20 C:0
EA2454	1003672	snp	C	T	T:14 C:1
EA2454	1003690	snp	T	C	C:11 T:0
EA2454	1026843	snp	T	C	C:49 T:0
EA2454	1026952	snp	C	T	T:45 C:0
EA2454	1033522	snp	C	A	A:53 C:0
EA2454	1041381	snp	C	T	T:37 C:0
EA2454	1044717	snp	G	A	A:56 G:0
EA2454	1046210	snp	G	A	A:63 G:2
EA2454	1049442	snp	G	A	A:54 G:0
EA2454	1052435	snp	C	T	T:43 C:0
EA2454	1055114	snp	T	G	G:67 T:0
EA2454	1067401	snp	C	A	A:121 C:0
EA2454	1073767	snp	A	G	G:82 A:0
EA2454	1079000	snp	T	C	C:67 T:0
EA2454	1082762	snp	G	A	A:83 G:0
EA2454	1093309	snp	A	G	G:66 A:0
EA2454	1098037	snp	T	G	G:68 T:0
EA2454	1128458	snp	T	C	C:15 T:0
EA2454	1138215	snp	T	C	C:90 T:0
EA2454	1144904	snp	C	T	T:21 C:1
EA2454	1144975	snp	T	C	C:12 T:0
EA2454	1153745	snp	G	A	A:83 G:0
EA2454	1160822	snp	A	T	T:74 A:0
EA2454	1167666	snp	T	C	C:63 T:0
EA2454	1173060	snp	C	T	T:81 C:0
EA2454	1174352	snp	T	C	C:32 T:0
EA2454	1186746	snp	T	C	C:85 T:0
EA2454	1190353	snp	G	T	T:38 G:0
EA2454	1204325	snp	C	T	T:23 C:0
EA2454	1211256	snp	T	C	C:73 T:0
EA2454	1225308	snp	C	A	A:73 C:0
EA2454	1228038	snp	C	T	T:60 C:1
EA2454	1236723	snp	T	C	C:52 T:0
EA2454	1253669	snp	C	T	T:57 C:0
EA2454	1254097	snp	A	G	G:93 A:1
EA2454	1261876	snp	A	C	C:36 A:0
EA2454	1264081	snp	A	G	G:45 A:0
EA2454	1279253	snp	C	T	T:45 C:0
EA2454	1280572	snp	C	A	A:63 C:0
EA2454	1289894	snp	A	G	G:69 A:0
EA2454	1292233	snp	A	G	G:78 A:1
EA2454	1299878	snp	C	T	T:49 C:0
EA2454	1311735	snp	G	A	A:64 G:0
EA2454	1317400	snp	G	A	A:86 G:0
EA2454	1320805	snp	A	G	G:34 A:0
EA2454	1322163	snp	T	C	C:50 T:0
EA2454	1322665	snp	T	C	C:33 T:0
EA2454	1331179	snp	T	G	G:65 T:0
EA2454	1340886	snp	A	C	C:68 A:0
EA2454	1358384	snp	A	G	G:47 A:0
EA2454	1360577	snp	A	G	G:53 A:0
EA2454	1371250	snp	T	C	C:35 T:0
EA2454	1382646	snp	C	T	T:47 C:0
EA2454	1392683	snp	C	T	T:43 C:0
EA2454	1394505	snp	A	G	G:72 A:0
EA2454	1397531	snp	G	A	A:54 G:0
EA2454	1401264	snp	A	G	G:56 A:0
EA2454	1413295	snp	T	C	C:42 T:0
EA2454	1416501	snp	A	C	C:63 A:0
EA2454	1421020	snp	G	A	A:63 G:0
EA2454	1426621	snp	T	G	G:11 T:0
EA2454	1434846	snp	T	A	A:57 T:0
EA2454	1435223	snp	G	A	A:53 G:0
EA2454	1442459	snp	G	A	A:49 G:0
EA2454	1443281	snp	G	A	A:26 G:0
EA2454	1443339	snp	C	T	T:16 C:0
EA2454	1445619	snp	G	A	A:76 G:0
EA2454	1445708	snp	G	A	A:71 G:0
EA2454	1455169	snp	G	A	A:75 G:0
EA2454	1461457	snp	T	G	G:58 T:0
EA2454	1471260	snp	C	T	T:56 C:0
EA2454	1475821	snp	C	T	T:32 C:0
EA2454	1480708	snp	T	G	G:69 T:0
EA2454	1484305	snp	C	T	T:41 C:0
EA2454	1487410	snp	G	A	A:25 G:0
EA2454	1492527	ins	C	CA	CA:39 C:0
EA2454	1495581	snp	T	A	A:66 T:0
EA2454	1496904	snp	G	A	A:52 G:1
EA2454	1518455	snp	G	A	A:47 G:0
EA2454	1525679	snp	C	T	T:45 C:0
EA2454	1533339	snp	A	G	G:43 A:0
EA2454	1534292	snp	A	G	G:43 A:0
EA2454	1547465	snp	G	T	T:34 G:0
EA2454	1549828	snp	T	C	C:55 T:0
EA2454	1549888	snp	G	A	A:59 G:0
EA2454	1557966	snp	A	G	G:85 A:0
EA2454	1560679	snp	G	A	A:41 G:1
EA2454	1570233	snp	A	G	G:53 A:0
EA2454	1576045	snp	T	C	C:64 T:2
EA2454	1577742	snp	G	A	A:67 G:0
EA2454	1587710	snp	C	A	A:56 C:0
EA2454	1587792	snp	A	C	C:44 A:0
EA2454	1588489	snp	G	A	A:53 G:0
EA2454	1592505	snp	T	C	C:46 T:0
EA2454	1597496	snp	T	C	C:48 T:0
EA2454	1597743	snp	C	T	T:40 C:0
EA2454	1599906	snp	T	C	C:51 T:0
EA2454	1600199	snp	C	T	T:48 C:0
EA2454	1600919	snp	A	G	G:67 A:0
EA2454	1608650	del	TA	T	T:42 TA:0
EA2454	1612435	snp	G	A	A:53 G:0
EA2454	1613406	snp	T	A	A:38 T:0
EA2454	1613463	snp	A	G	G:37 A:0
EA2454	1613485	snp	C	T	T:34 C:0
EA2454	1616033	snp	G	A	A:68 G:0
EA2454	1619172	snp	G	A	A:19 G:0
EA2454	1619178	complex	TACA	AACG	AACG:17 TACA:0
EA2454	1620945	snp	C	T	T:11 C:0
EA2454	1621020	snp	C	A	A:22 C:0
EA2454	1621049	snp	G	A	A:20 G:0
EA2454	1621074	snp	T	A	A:23 T:0
EA2454	1621137	snp	T	A	A:20 T:0
EA2454	1624032	snp	A	T	T:12 A:0
EA2454	1624047	snp	C	T	T:13 C:0
EA2454	1624053	snp	C	T	T:13 C:0
EA2454	1624069	complex	GAAGGT	AACGGC	AACGGC:15 GAAGGT:0
EA2454	1624086	snp	C	T	T:18 C:0
EA2454	1624128	complex	TAG	AAA	AAA:20 TAG:0
EA2454	1624137	snp	T	C	C:21 T:0
EA2454	1624153	snp	T	A	A:20 T:0
EA2454	1624217	snp	A	G	G:22 A:0
EA2454	1624254	snp	A	G	G:21 A:0
EA2454	1624263	complex	ATTG	GTTA	GTTA:21 ATTG:0
EA2454	1624280	snp	T	C	C:23 T:0
EA2454	1624351	complex	GT	TA	TA:10 GT:0
EA2454	1625175	complex	TCCG	CCCA	CCCA:11 TCCG:0
EA2454	1625193	snp	G	A	A:17 G:0
EA2454	1625205	snp	C	T	T:20 C:0
EA2454	1625235	snp	A	G	G:29 A:0
EA2454	1625258	complex	AACTA	GACTC	GACTC:33 AACTA:0
EA2454	1625280	snp	A	T	T:41 A:0
EA2454	1625298	snp	A	G	G:45 A:0
EA2454	1625376	snp	G	T	T:57 G:0
EA2454	1625382	snp	T	C	C:56 T:0
EA2454	1625390	snp	G	A	A:59 G:0
EA2454	1625406	complex	AGGC	TGGT	TGGT:67 AGGC:0
EA2454	1625417	snp	G	A	A:68 G:0
EA2454	1625424	snp	G	A	A:65 G:0
EA2454	1625430	snp	G	A	A:61 G:0
EA2454	1625455	snp	G	A	A:67 G:0
EA2454	1625460	snp	A	T	T:67 A:0
EA2454	1625475	complex	CGGT	AGGA	AGGA:62 CGGT:0
EA2454	1625505	snp	A	T	T:58 A:0
EA2454	1625519	snp	G	A	A:60 G:0
EA2454	1625559	snp	G	A	A:57 G:0
EA2454	1625589	snp	C	A	A:63 C:0
EA2454	1625637	snp	T	C	C:61 T:0
EA2454	1625649	complex	CG	TC	TC:57 CG:0
EA2454	1625658	snp	T	C	C:62 T:0
EA2454	1625688	complex	TGTC	CATT	CATT:49 TGTC:0
EA2454	1625826	snp	T	C	C:65 T:0
EA2454	1625835	snp	A	G	G:62 A:0
EA2454	1625853	snp	T	G	G:58 T:0
EA2454	1625874	snp	T	C	C:53 T:0
EA2454	1625895	snp	A	G	G:44 A:0
EA2454	1625922	snp	T	C	C:40 T:0
EA2454	1625946	snp	T	A	A:41 T:0
EA2454	1625960	snp	A	G	G:39 A:0
EA2454	1625984	snp	T	C	C:33 T:0
EA2454	1625995	complex	TGCGCAAT	GGAACAAC	GGAACAAC:29 TGCGCAAT:0
EA2454	1626008	snp	A	T	T:29 A:0
EA2454	1626017	complex	CAAC	GAGA	GAGA:29 CAAC:0
EA2454	1626031	snp	G	A	A:31 G:0
EA2454	1626042	snp	T	C	C:30 T:0
EA2454	1626118	snp	A	G	G:12 A:0
EA2454	1626136	snp	T	C	C:11 T:0
EA2454	1626549	snp	C	T	T:12 C:0
EA2454	1626559	snp	A	G	G:16 A:0
EA2454	1626568	complex	TGC	CGT	CGT:19 TGC:0
EA2454	1626586	snp	G	A	A:28 G:0
EA2454	1626595	complex	ACGA	GCGT	GCGT:28 ACGA:0
EA2454	1626603	snp	A	T	T:33 A:0
EA2454	1626611	snp	T	C	C:35 T:0
EA2454	1626705	snp	A	G	G:43 A:0
EA2454	1626723	snp	C	T	T:62 C:0
EA2454	1626772	mnp	GG	AA	AA:67 GG:0
EA2454	1626790	snp	T	C	C:68 T:0
EA2454	1626807	snp	T	C	C:60 T:1
EA2454	1626849	snp	G	A	A:84 G:0
EA2454	1626896	snp	A	G	G:81 A:0
EA2454	1627011	snp	G	T	T:68 G:0
EA2454	1627061	snp	A	T	T:51 A:0
EA2454	1627068	snp	C	T	T:50 C:0
EA2454	1627153	snp	C	T	T:46 C:0
EA2454	1627159	snp	G	A	A:45 G:0
EA2454	1627168	snp	A	G	G:43 A:0
EA2454	1627173	snp	A	G	G:44 A:0
EA2454	1627182	snp	C	T	T:44 C:0
EA2454	1627188	snp	G	T	T:44 G:0
EA2454	1627206	snp	T	C	C:44 T:0
EA2454	1627314	snp	T	A	A:50 T:0
EA2454	1627320	snp	A	G	G:55 A:0
EA2454	1627350	snp	C	T	T:56 C:0
EA2454	1627377	snp	T	G	G:62 T:0
EA2454	1627407	snp	T	G	G:57 T:0
EA2454	1627560	snp	C	T	T:31 C:0
EA2454	1627605	snp	G	T	T:41 G:0
EA2454	1627656	snp	A	C	C:47 A:0
EA2454	1627737	snp	C	A	A:43 C:0
EA2454	1627800	snp	A	C	C:43 A:0
EA2454	1627809	snp	T	C	C:46 T:0
EA2454	1627815	snp	T	C	C:44 T:0
EA2454	1628278	snp	A	G	G:59 A:0
EA2454	1628285	snp	G	A	A:59 G:0
EA2454	1628345	snp	C	T	T:58 C:0
EA2454	1628366	complex	AGAGAGCAAG	CGAAAGTAAA	CGAAAGTAAA:42 AGAGAGCAAG:0
EA2454	1628390	snp	G	A	A:55 G:0
EA2454	1628427	snp	T	C	C:48 T:0
EA2454	1628438	snp	T	C	C:48 T:0
EA2454	1628465	complex	GGCT	AGCG	AGCG:50 GGCT:0
EA2454	1628498	snp	T	C	C:53 T:0
EA2454	1628523	snp	C	A	A:60 C:0
EA2454	1628540	snp	A	G	G:65 A:0
EA2454	1628553	snp	A	C	C:66 A:0
EA2454	1628585	snp	A	T	T:66 A:0
EA2454	1628591	snp	C	T	T:63 C:0
EA2454	1628597	snp	T	C	C:63 T:0
EA2454	1628627	snp	A	G	G:59 A:0
EA2454	1628649	mnp	AG	GA	GA:58 AG:0
EA2454	1628690	snp	A	G	G:58 A:0
EA2454	1628750	complex	CACA	TACG	TACG:53 CACA:0
EA2454	1628810	snp	T	C	C:57 T:0
EA2454	1628831	snp	G	A	A:51 G:0
EA2454	1628837	snp	A	T	T:52 A:0
EA2454	1628869	snp	T	C	C:49 T:0
EA2454	1628897	complex	ACGA	CCGG	CCGG:48 ACGA:0
EA2454	1628912	snp	A	T	T:43 A:0
EA2454	1628980	complex	TACTA	GACTT	GACTT:36 TACTA:0
EA2454	1629008	snp	A	C	C:39 A:0
EA2454	1629015	snp	C	T	T:40 C:0
EA2454	1629065	complex	TCCG	CCCT	CCCT:34 TCCG:0
EA2454	1629122	snp	A	G	G:27 A:0
EA2454	1629149	snp	T	C	C:30 T:0
EA2454	1629156	snp	A	G	G:34 A:0
EA2454	1629183	snp	A	C	C:26 A:0
EA2454	1629196	complex	GAACT	TAACC	TAACC:30 GAACT:0
EA2454	1629240	snp	T	C	C:38 T:0
EA2454	1631639	snp	C	T	T:49 C:0
EA2454	1632262	snp	A	C	C:35 A:0
EA2454	1634228	snp	A	G	G:82 A:0
EA2454	1642336	snp	A	G	G:59 A:0
EA2454	1648224	snp	C	T	T:45 C:0
EA2454	1650551	snp	C	T	T:37 C:0
EA2454	1652374	snp	G	A	A:71 G:0
EA2454	1666579	snp	G	A	A:67 G:0
EA2454	1668108	snp	C	G	G:46 C:0
EA2454	1682457	snp	A	G	G:51 A:0
EA2454	1682580	snp	G	T	T:44 G:0
EA2454	1694320	snp	A	C	C:40 A:0
EA2454	1697199	snp	G	T	T:70 G:0
EA2454	1699835	snp	C	G	G:56 C:0
EA2454	1701919	snp	A	G	G:65 A:0
EA2454	1711079	snp	C	T	T:66 C:0
EA2454	1714697	snp	T	C	C:67 T:0
EA2454	1725286	snp	A	G	G:40 A:0
EA2454	1728257	snp	G	T	T:43 G:1
EA2454	1730226	snp	G	A	A:69 G:4
EA2454	1730329	snp	T	C	C:48 T:0
EA2454	1732462	snp	A	G	G:48 A:0
EA2454	1737561	snp	A	G	G:47 A:0
EA2454	1740180	snp	T	A	A:43 T:0
EA2454	1745576	snp	T	C	C:75 T:0
EA2454	1748003	snp	C	T	T:55 C:0
EA2454	1748585	snp	A	C	C:43 A:0
EA2454	1759737	snp	T	C	C:63 T:0
EA2454	1761551	snp	T	G	G:68 T:0
EA2454	1763293	snp	T	C	C:48 T:0
EA2454	1770797	snp	C	T	T:70 C:0
EA2454	1771506	snp	G	A	A:70 G:0
EA2454	1782964	snp	T	C	C:51 T:0
EA2454	1789627	del	GCGCGGGTTAGCGATCCATGCGTGGAATAAGCAACACGATTATGAGCTGGC	G	G:14 GCGCGGGTTAGCGATCCATGCGTGGAATAAGCAACACGATTATGAGCTGGC:0
EA2454	1790536	snp	G	A	A:55 G:0
EA2454	1795161	snp	A	G	G:56 A:0
EA2454	1799132	snp	G	A	A:63 G:0
EA2454	1803610	snp	C	A	A:51 C:0
EA2454	1803664	snp	T	C	C:56 T:0
EA2454	1815466	snp	A	G	G:47 A:0
EA2454	1817358	snp	A	C	C:41 A:0
EA2454	1820083	snp	T	C	C:47 T:0
EA2454	1824156	snp	T	C	C:47 T:0
EA2454	1824499	snp	T	C	C:51 T:0
EA2454	1850317	snp	G	A	A:33 G:1
EA2454	1860665	snp	T	C	C:54 T:0
EA2454	1868384	snp	G	A	A:24 G:0
EA2454	1875721	snp	G	T	T:41 G:0
EA2454	1887544	snp	A	G	G:42 A:0
EA2454	1906815	snp	A	T	T:58 A:0
EA2454	1906895	ins	A	AG	AG:71 A:0
EA2454	1909088	snp	T	C	C:66 T:0
EA2454	1909804	snp	G	A	A:42 G:0
EA2454	1910698	snp	C	T	T:52 C:0
EA2454	1929193	ins	T	TTTA	TTTA:15 T:0
EA2454	1944963	snp	G	A	A:53 G:0
EA2454	1945608	snp	T	C	C:68 T:0
EA2454	1950298	snp	T	G	G:92 T:0
EA2454	1958733	snp	T	C	C:48 T:0
EA2454	1965637	snp	G	A	A:31 G:0
EA2454	1971726	snp	T	G	G:71 T:0
EA2454	1973974	snp	T	A	A:68 T:2
EA2454	1979564	snp	A	G	G:55 A:0
EA2454	1980186	snp	C	T	T:65 C:0
EA2454	1994897	snp	G	T	T:13 G:0
EA2454	1995211	snp	T	C	C:29 T:0
EA2454	1997936	snp	C	T	T:63 C:0
EA2454	2005086	snp	G	A	A:68 G:0
EA2454	2006271	snp	G	A	A:52 G:0
EA2454	2009779	snp	G	A	A:44 G:0
EA2454	2026653	snp	C	T	T:45 C:0
EA2454	2028772	snp	C	A	A:49 C:1
EA2454	2038279	ins	A	AAC	AAC:57 A:0
EA2454	2041023	snp	G	A	A:53 G:1
EA2454	2044987	snp	T	C	C:11 T:0
EA2454	2045007	snp	A	G	G:10 A:0
EA2454	2045064	snp	T	C	C:13 T:0
EA2454	2062156	snp	T	C	C:50 T:0
EA2454	2062631	snp	G	T	T:62 G:0
EA2454	2063839	snp	T	C	C:50 T:0
EA2454	2068297	snp	T	G	G:56 T:0
EA2454	2070162	snp	T	C	C:36 T:0
EA2454	2091780	snp	T	C	C:76 T:0
EA2454	2094829	snp	T	C	C:68 T:0
EA2454	2096088	snp	A	G	G:74 A:0
EA2454	2099145	snp	G	A	A:56 G:0
EA2454	2110900	snp	G	A	A:57 G:0
EA2454	2119737	snp	T	C	C:56 T:0
EA2454	2120021	snp	A	C	C:24 A:0
EA2454	2141700	snp	C	T	T:62 C:0
EA2454	2156285	snp	G	T	T:33 G:0
EA2454	2158854	snp	G	A	A:52 G:0
EA2454	2159363	snp	C	T	T:53 C:0
EA2454	2168167	snp	G	A	A:36 G:0
EA2454	2180212	snp	G	A	A:57 G:0
EA2454	2181710	snp	T	C	C:40 T:0
EA2454	2183355	snp	T	C	C:57 T:0
EA2454	2187546	snp	T	A	A:56 T:0
EA2454	2195062	snp	T	C	C:65 T:0
EA2454	2217598	snp	A	G	G:97 A:1
EA2454	2228600	snp	T	C	C:76 T:0
EA2454	2232376	snp	A	G	G:92 A:0
EA2454	2233442	snp	A	T	T:82 A:0
EA2454	2253986	snp	C	T	T:42 C:1
EA2454	2256445	snp	G	A	A:31 G:0
EA2454	2259197	snp	G	A	A:74 G:0
EA2454	2268389	snp	G	C	C:47 G:0
EA2454	2273193	snp	A	G	G:58 A:0
EA2454	2283117	snp	T	C	C:63 T:0
EA2454	2283880	snp	A	G	G:84 A:0
EA2454	2289041	snp	T	C	C:30 T:0
EA2454	2290318	snp	C	T	T:75 C:0
EA2454	2291863	snp	T	C	C:72 T:0
EA2454	2331237	snp	A	G	G:51 A:0
EA2454	2336753	snp	C	T	T:71 C:0
EA2454	2338673	snp	G	A	A:57 G:0
EA2454	2345099	snp	A	G	G:65 A:0
EA2454	2350339	snp	T	C	C:84 T:0
EA2454	2354351	snp	A	G	G:69 A:0
EA2454	2359024	snp	A	G	G:67 A:0
EA2454	2364340	snp	T	G	G:67 T:0
EA2454	2371672	snp	T	C	C:68 T:0
EA2454	2383455	snp	G	A	A:87 G:0
EA2454	2402050	snp	C	T	T:52 C:0
EA2454	2403442	snp	T	C	C:70 T:0
EA2454	2407449	snp	A	G	G:45 A:0
EA2454	2413493	snp	G	A	A:95 G:0
EA2454	2421589	snp	G	A	A:53 G:0
EA2454	2449977	snp	C	T	T:66 C:0
EA2454	2461974	snp	A	G	G:32 A:0
EA2454	2498074	snp	G	A	A:36 G:0
EA2454	2500481	del	GTAATGCGAA	G	G:25 GTAATGCGAA:1
EA2454	2515650	del	AAAGCCCGCCAT	A	A:33 AAAGCCCGCCAT:0
EA2454	2518906	snp	A	C	C:17 A:0
EA2454	2521382	snp	C	T	T:79 C:0
EA2454	2528246	snp	T	C	C:53 T:0
EA2454	2533120	snp	C	T	T:46 C:0
EA2454	2538084	snp	G	A	A:59 G:0
EA2454	2538679	snp	T	C	C:81 T:0
EA2454	2548521	snp	A	C	C:34 A:0
EA2454	2550163	snp	G	A	A:25 G:0
EA2454	2555441	snp	A	G	G:61 A:0
EA2454	2559290	snp	C	A	A:68 C:0
EA2454	2565399	snp	C	A	A:56 C:0
EA2454	2565432	snp	G	A	A:57 G:0
EA2454	2575186	snp	A	G	G:56 A:0
EA2454	2586095	snp	C	T	T:36 C:0
EA2454	2589008	snp	T	C	C:47 T:0
EA2454	2591008	snp	G	A	A:25 G:0
EA2454	2596899	snp	G	A	A:68 G:0
EA2454	2597428	snp	T	C	C:43 T:0
EA2454	2598908	snp	T	C	C:83 T:0
EA2454	2600229	snp	A	G	G:56 A:0
EA2454	2606061	snp	G	A	A:54 G:0
EA2454	2607401	snp	A	T	T:65 A:0
EA2454	2631943	snp	A	G	G:58 A:0
EA2454	2632096	snp	G	C	C:30 G:0
EA2454	2637515	snp	C	T	T:50 C:0
EA2454	2639012	snp	C	T	T:54 C:0
EA2454	2641059	snp	T	C	C:61 T:0
EA2454	2644202	snp	T	G	G:46 T:0
EA2454	2658667	snp	A	C	C:69 A:1
EA2454	2660000	snp	A	G	G:66 A:0
EA2454	2664103	snp	G	A	A:50 G:0
EA2454	2666737	snp	C	T	T:55 C:0
EA2454	2670543	snp	C	T	T:65 C:0
EA2454	2672475	ins	G	GCAAGACAT	GCAAGACAT:19 G:0
EA2454	2672665	snp	C	T	T:16 C:0
EA2454	2672705	snp	C	T	T:24 C:0
EA2454	2718692	snp	A	C	C:57 A:0
EA2454	2720677	ins	A	AACCTGCACCTGC	AACCTGCACCTGC:32 A:0
EA2454	2722619	snp	A	G	G:40 A:0
EA2454	2725564	snp	T	A	A:65 T:0
EA2454	2743080	snp	T	G	G:72 T:0
EA2454	2748849	del	GT	G	G:16 GT:0
EA2454	2755025	snp	C	T	T:86 C:0
EA2454	2755245	snp	G	C	C:89 G:0
EA2454	2760352	snp	A	G	G:25 A:0
EA2454	2760369	snp	G	A	A:25 G:0
EA2454	2763065	snp	A	G	G:112 A:0
EA2454	2768974	snp	C	T	T:91 C:0
EA2454	2771595	snp	T	A	A:79 T:0
EA2454	2774852	snp	A	G	G:41 A:0
EA2454	2775069	snp	A	G	G:35 A:0
EA2454	2777153	snp	T	G	G:63 T:1
EA2454	2782254	del	CA	C	C:64 CA:0
EA2454	2782946	snp	C	T	T:80 C:0
EA2454	2783274	snp	C	T	T:68 C:2
EA2454	2785945	snp	T	A	A:119 T:0
EA2454	2793323	snp	T	C	C:42 T:0
EA2454	2809435	snp	G	C	C:71 G:0
EA2454	2815762	snp	A	G	G:52 A:0
EA2454	2816107	snp	C	A	A:71 C:0
EA2454	2824579	ins	C	CT	CT:16 C:0
EA2454	2829690	snp	G	C	C:68 G:0
EA2454	2830990	snp	C	A	A:68 C:0
EA2454	2831971	snp	C	T	T:51 C:0
EA2454	2832637	snp	C	T	T:34 C:0
EA2454	2837636	snp	T	C	C:55 T:0
EA2454	2843028	snp	C	G	G:49 C:0
EA2454	2846381	snp	G	A	A:46 G:0
EA2454	2847080	snp	T	C	C:40 T:0
EA2454	2850370	snp	A	C	C:47 A:0
EA2454	2851743	snp	T	A	A:44 T:0
EA2454	2860024	snp	T	G	G:45 T:0
EA2454	2865701	snp	T	C	C:74 T:0
EA2454	2866171	snp	G	A	A:53 G:0
EA2454	2872360	snp	A	G	G:61 A:0
EA2454	2876151	snp	T	C	C:19 T:0
EA2454	2881008	snp	G	C	C:64 G:0
EA2454	2883184	snp	T	C	C:52 T:0
EA2454	2897200	snp	G	A	A:65 G:0
EA2454	2901111	snp	A	G	G:70 A:0
EA2454	2901882	snp	G	T	T:75 G:0
EA2454	2903547	snp	C	A	A:66 C:0
EA2454	2906728	snp	A	G	G:62 A:0
EA2454	2927920	snp	T	C	C:75 T:0
EA2454	2931389	snp	T	G	G:43 T:0
EA2454	2934279	snp	A	G	G:65 A:0
EA2454	2935576	snp	C	T	T:50 C:0
EA2454	2937585	snp	A	G	G:73 A:0
EA2454	2939135	ins	A	AT	AT:15 A:0
EA2454	2941498	snp	G	A	A:50 G:0
EA2454	2945610	snp	G	A	A:69 G:0
EA2454	2950952	snp	T	G	G:66 T:2
EA2454	2954425	snp	A	G	G:10 A:0
EA2454	2954433	snp	G	C	C:10 G:0
EA2454	2954439	snp	A	G	G:10 A:0
EA2454	2961386	snp	G	C	C:45 G:0
EA2454	2963100	snp	G	A	A:68 G:0
EA2454	2965650	snp	G	A	A:77 G:0
EA2454	2967930	snp	A	G	G:18 A:0
EA2454	2988598	snp	A	T	T:45 A:0
EA2454	2995599	snp	T	C	C:36 T:0
EA2454	2998717	snp	A	G	G:66 A:0
EA2454	3015833	snp	A	C	C:47 A:0
EA2454	3029386	snp	C	T	T:67 C:0
EA2454	3041125	snp	T	G	G:51 T:0
EA2454	3052455	snp	G	A	A:46 G:0
EA2454	3052992	snp	G	C	C:39 G:0
EA2454	3055255	snp	G	A	A:50 G:0
EA2454	3057242	snp	A	G	G:62 A:0
EA2454	3060330	snp	A	G	G:71 A:0
EA2454	3070440	snp	A	G	G:31 A:0
EA2454	3091335	snp	T	C	C:77 T:0
EA2454	3093850	snp	T	C	C:60 T:0
EA2454	3099129	snp	T	C	C:57 T:0
EA2454	3101851	snp	A	G	G:69 A:0
EA2454	3104888	snp	C	T	T:52 C:0
EA2454	3112595	ins	C	CG	CG:50 C:0
EA2454	3112890	snp	A	G	G:56 A:0
EA2454	3115749	snp	T	A	A:75 T:0
EA2454	3117020	snp	C	G	G:64 C:0
EA2454	3125212	snp	A	G	G:78 A:0
EA2454	3133556	snp	G	T	T:77 G:0
EA2454	3135617	snp	A	C	C:59 A:0
EA2454	3141450	snp	A	T	T:59 A:0
EA2454	3149583	snp	G	A	A:113 G:0
EA2454	3169766	snp	G	A	A:107 G:0
EA2454	3174516	del	TA	T	T:30 TA:0
EA2454	3175254	snp	T	C	C:57 T:0
EA2454	3188469	snp	T	C	C:64 T:0
EA2454	3188675	snp	T	A	A:103 T:0
EA2454	3192856	snp	C	T	T:26 C:0
EA2454	3196063	snp	T	C	C:73 T:0
EA2454	3197243	snp	T	C	C:13 T:0
EA2454	3211809	snp	T	C	C:73 T:0
EA2454	3213292	snp	A	C	C:54 A:0
EA2454	3218193	snp	T	G	G:53 T:0
EA2454	3224798	snp	A	G	G:48 A:0
EA2454	3240902	del	AACTG	A	A:46 AACTG:1
EA2454	3254909	snp	C	G	G:62 C:0
EA2454	3258454	snp	T	A	A:43 T:0
EA2454	3258466	snp	C	T	T:43 C:1
EA2454	3263384	snp	T	C	C:47 T:0
EA2454	3268326	snp	G	A	A:66 G:0
EA2454	3271358	snp	T	C	C:15 T:0
EA2454	3272561	snp	G	T	T:24 G:0
EA2454	3281767	ins	G	GC	GC:61 G:0
EA2454	3305295	snp	A	G	G:66 A:0
EA2454	3305988	snp	G	C	C:53 G:0
EA2454	3307663	snp	C	T	T:52 C:0
EA2454	3310578	snp	A	G	G:28 A:0
EA2454	3318387	snp	C	G	G:51 C:0
EA2454	3374533	snp	G	T	T:54 G:0
EA2454	3381441	snp	A	G	G:55 A:0
EA2454	3387556	snp	T	A	A:28 T:0
EA2454	3395362	snp	A	C	C:59 A:0
EA2454	3400480	ins	T	TGAAGCTGGA	TGAAGCTGGA:40 T:3
EA2454	3403186	snp	C	T	T:41 C:0
EA2454	3405179	snp	T	G	G:43 T:0
EA2454	3426445	snp	T	C	C:54 T:0
EA2454	3431147	del	GC	G	G:37 GC:0
EA2454	3440338	snp	C	T	T:78 C:0
EA2454	3440424	snp	G	T	T:80 G:0
EA2454	3441887	snp	T	C	C:39 T:0
EA2454	3441936	snp	A	G	G:35 A:0
EA2454	3446573	snp	G	A	A:88 G:0
EA2454	3448725	snp	C	T	T:67 C:0
EA2454	3451003	snp	C	T	T:77 C:0
EA2454	3459261	snp	C	T	T:56 C:0
EA2454	3462462	snp	T	C	C:59 T:0
EA2454	3462699	snp	A	G	G:59 A:0
EA2454	3463669	snp	T	C	C:59 T:0
EA2454	3467662	snp	G	A	A:107 G:0
EA2454	3470509	snp	G	T	T:11 G:0
EA2454	3470536	snp	A	G	G:12 A:0
EA2454	3470560	snp	C	A	A:16 C:0
EA2454	3470581	snp	A	G	G:18 A:0
EA2454	3470631	complex	TCCCA	CCCCG	CCCCG:22 TCCCA:0
EA2454	3470646	complex	GCTTA	ACTTC	ACTTC:22 GCTTA:0
EA2454	3470655	complex	ACCAG	GCCAA	GCCAA:23 ACCAG:0
EA2454	3470677	complex	GGCT	TGCG	TGCG:24 GGCT:0
EA2454	3470709	mnp	GG	CC	CC:18 GG:0
EA2454	3470718	complex	TGCCGGAC	CGTTAAAT	CGTTAAAT:15 TGCCGGAC:0
EA2454	3470763	complex	CATCA	TATCG	TATCG:29 CATCA:0
EA2454	3470779	complex	AAGG	GAGA	GAGA:29 AAGG:0
EA2454	3470799	complex	GCTC	CCTT	CCTT:30 GCTC:0
EA2454	3470818	complex	GCCA	ACCT	ACCT:27 GCCA:0
EA2454	3470827	snp	T	C	C:31 T:0
EA2454	3470833	snp	T	C	C:31 T:0
EA2454	3470842	snp	C	T	T:30 C:0
EA2454	3470851	snp	C	A	A:30 C:0
EA2454	3470866	complex	CGTC	TGTT	TGTT:26 CGTC:0
EA2454	3470881	snp	T	G	G:28 T:0
EA2454	3470893	snp	G	A	A:32 G:0
EA2454	3470971	ins	A	AC	AC:33 A:0
EA2454	3471091	snp	A	T	T:29 A:0
EA2454	3471244	complex	AACTCGA	GACACGG	GACACGG:19 AACTCGA:0
EA2454	3471258	snp	A	G	G:22 A:0
EA2454	3471442	snp	C	A	A:21 C:0
EA2454	3471517	snp	T	G	G:15 T:0
EA2454	3471664	snp	T	C	C:18 T:0
EA2454	3472001	snp	T	C	C:25 T:0
EA2454	3475468	snp	G	A	A:22 G:0
EA2454	3475725	snp	A	C	C:20 A:0
EA2454	3476940	snp	A	C	C:40 A:0
EA2454	3477111	snp	C	T	T:39 C:0
EA2454	3477318	snp	A	G	G:30 A:0
EA2454	3485805	snp	G	A	A:11 G:0
EA2454	3485832	snp	C	T	T:16 C:0
EA2454	3487252	snp	C	T	T:25 C:0
EA2454	3487281	snp	G	A	A:23 G:0
EA2454	3487495	snp	A	G	G:35 A:0
EA2454	3487552	snp	C	G	G:37 C:0
EA2454	3487803	snp	C	T	T:18 C:0
EA2454	3487858	snp	T	C	C:17 T:0
EA2454	3489779	snp	A	G	G:34 A:0
EA2454	3489796	snp	A	T	T:30 A:0
EA2454	3489826	snp	C	A	A:20 C:0
EA2454	3490001	snp	C	T	T:13 C:0
EA2454	3490048	snp	C	A	A:17 C:0
EA2454	3490077	snp	T	C	C:15 T:0
EA2454	3490088	snp	A	G	G:15 A:0
EA2454	3490111	snp	C	T	T:13 C:0
EA2454	3490141	snp	C	T	T:13 C:0
EA2454	3490593	snp	G	T	T:12 G:1
EA2454	3490652	complex	GGCT	TGCC	TGCC:17 GGCT:0
EA2454	3490853	snp	T	C	C:10 T:0
EA2454	3490905	snp	C	T	T:10 C:0
EA2454	3490999	snp	G	A	A:12 G:0
EA2454	3491018	snp	A	C	C:12 A:0
EA2454	3491024	snp	C	T	T:14 C:0
EA2454	3491035	complex	TA	CC	CC:13 TA:0
EA2454	3491044	complex	TGC	CGA	CGA:13 TGC:0
EA2454	3491249	snp	A	G	G:37 A:0
EA2454	3491388	snp	C	A	A:34 C:0
EA2454	3491434	snp	T	A	A:28 T:0
EA2454	3491445	snp	A	G	G:26 A:0
EA2454	3491453	snp	T	A	A:25 T:0
EA2454	3491471	snp	C	T	T:26 C:0
EA2454	3491482	snp	C	T	T:25 C:0
EA2454	3491517	snp	C	T	T:30 C:0
EA2454	3491532	snp	A	C	C:32 A:0
EA2454	3491547	snp	C	A	A:33 C:0
EA2454	3491564	mnp	GA	TC	TC:28 GA:0
EA2454	3491714	snp	A	C	C:33 A:0
EA2454	3491813	snp	T	G	G:41 T:0
EA2454	3491863	snp	A	G	G:42 A:0
EA2454	3491938	snp	G	A	A:35 G:0
EA2454	3492010	complex	GGA	AAC	AAC:28 GGA:0
EA2454	3492078	snp	T	C	C:24 T:0
EA2454	3492303	snp	A	G	G:20 A:0
EA2454	3492396	snp	G	T	T:22 G:0
EA2454	3492435	snp	G	A	A:26 G:0
EA2454	3492474	snp	T	A	A:24 T:0
EA2454	3492568	ins	A	AACGCCG	AACGCCG:14 A:0
EA2454	3493230	snp	C	T	T:10 C:0
EA2454	3493284	complex	GTTCA	ATTTC	ATTTC:11 GTTCA:0
EA2454	3493299	snp	C	A	A:14 C:0
EA2454	3493340	complex	TG	CA	CA:22 TG:0
EA2454	3493348	complex	TA	AT	AT:21 TA:0
EA2454	3493394	snp	G	A	A:27 G:0
EA2454	3493445	complex	TCATCT	CTATCC	CTATCC:34 TCATCT:0
EA2454	3493456	snp	A	G	G:37 A:0
EA2454	3493466	snp	C	T	T:40 C:0
EA2454	3493485	snp	C	A	A:36 C:0
EA2454	3493591	snp	T	C	C:28 T:0
EA2454	3493648	snp	A	G	G:26 A:0
EA2454	3493672	snp	T	A	A:24 T:0
EA2454	3493711	snp	T	C	C:22 T:0
EA2454	3493756	snp	C	T	T:31 C:0
EA2454	3493840	snp	C	T	T:30 C:0
EA2454	3493966	snp	C	T	T:29 C:0
EA2454	3493979	snp	G	A	A:29 G:0
EA2454	3494161	snp	G	A	A:17 G:0
EA2454	3494254	snp	C	T	T:36 C:0
EA2454	3494356	snp	T	C	C:34 T:0
EA2454	3494735	snp	T	C	C:39 T:0
EA2454	3494787	snp	T	A	A:36 T:0
EA2454	3494849	complex	AC	GG	GG:42 AC:0
EA2454	3495054	snp	T	C	C:31 T:0
EA2454	3495084	mnp	GA	AC	AC:28 GA:0
EA2454	3495174	snp	G	A	A:26 G:0
EA2454	3495305	snp	T	C	C:36 T:0
EA2454	3495394	snp	A	G	G:33 A:0
EA2454	3495402	snp	A	G	G:33 A:0
EA2454	3495478	snp	A	C	C:29 A:0
EA2454	3495486	snp	C	T	T:28 C:0
EA2454	3495508	snp	T	C	C:20 T:0
EA2454	3495575	snp	G	A	A:14 G:0
EA2454	3495637	snp	G	A	A:13 G:0
EA2454	3495642	complex	TC	CA	CA:12 TC:0
EA2454	3496049	snp	C	T	T:33 C:0
EA2454	3496079	snp	A	G	G:40 A:0
EA2454	3496337	snp	T	A	A:36 T:0
EA2454	3496529	snp	A	G	G:35 A:0
EA2454	3496610	snp	T	C	C:35 T:0
EA2454	3496652	snp	A	G	G:32 A:0
EA2454	3496995	complex	TGAAGAGG	CGAGGAGA	CGAGGAGA:23 TGAAGAGG:0
EA2454	3497007	snp	A	T	T:24 A:0
EA2454	3497379	snp	A	G	G:14 A:0
EA2454	3497964	snp	G	T	T:11 G:0
EA2454	3497970	snp	A	C	C:10 A:0
EA2454	3497976	del	GA	G	G:10 GA:0
EA2454	3498411	snp	C	T	T:33 C:0
EA2454	3498684	snp	C	T	T:16 C:0
EA2454	3498888	snp	T	C	C:25 T:1
EA2454	3499050	snp	C	T	T:30 C:1
EA2454	3499149	snp	A	G	G:27 A:0
EA2454	3499161	snp	C	T	T:29 C:0
EA2454	3499177	complex	TTG	CTA	CTA:36 TTG:0
EA2454	3499185	snp	C	T	T:34 C:0
EA2454	3499203	snp	T	C	C:39 T:0
EA2454	3499581	snp	C	T	T:43 C:0
EA2454	3499605	snp	C	T	T:42 C:0
EA2454	3499653	snp	G	A	A:41 G:0
EA2454	3499752	snp	T	C	C:27 T:0
EA2454	3499902	snp	T	G	G:46 T:0
EA2454	3500010	complex	TGCG	CGCT	CGCT:40 TGCG:0
EA2454	3500058	snp	G	A	A:34 G:0
EA2454	3500091	snp	C	T	T:34 C:0
EA2454	3500133	snp	C	T	T:38 C:0
EA2454	3500157	snp	G	A	A:32 G:0
EA2454	3500193	snp	G	A	A:34 G:0
EA2454	3500328	complex	CGCAGGT	TGCGGGC	TGCGGGC:29 CGCAGGT:0
EA2454	3500350	complex	CTG	TTA	TTA:32 CTG:0
EA2454	3500379	snp	C	T	T:31 C:0
EA2454	3500427	snp	A	G	G:30 A:0
EA2454	3500523	snp	G	A	A:34 G:0
EA2454	3500538	snp	T	C	C:36 T:0
EA2454	3500548	snp	C	T	T:36 C:0
EA2454	3500559	complex	TGGC	CGGT	CGGT:35 TGGC:0
EA2454	3500574	snp	C	T	T:32 C:0
EA2454	3500580	snp	G	A	A:33 G:0
EA2454	3500586	complex	CATTTCC	AATCTCA	AATCTCA:31 CATTTCC:0
EA2454	3500601	snp	T	G	G:37 T:0
EA2454	3500610	snp	C	T	T:31 C:0
EA2454	3500634	snp	G	C	C:32 G:0
EA2454	3500658	snp	C	T	T:33 C:0
EA2454	3500667	snp	T	C	C:34 T:0
EA2454	3500694	snp	G	A	A:34 G:0
EA2454	3500719	snp	T	C	C:39 T:0
EA2454	3500742	snp	C	T	T:42 C:0
EA2454	3500770	complex	ATC	CTG	CTG:41 ATC:0
EA2454	3500821	snp	G	T	T:52 G:0
EA2454	3500832	complex	TTT	CTA	CTA:48 TTT:0
EA2454	3500871	snp	C	T	T:48 C:0
EA2454	3500880	snp	C	T	T:47 C:0
EA2454	3500894	snp	C	T	T:44 C:0
EA2454	3500901	snp	T	C	C:46 T:0
EA2454	3500928	snp	A	G	G:43 A:0
EA2454	3500934	snp	C	T	T:43 C:0
EA2454	3500994	complex	ATCAC	GTCAA	GTCAA:36 ATCAC:0
EA2454	3501021	snp	C	T	T:35 C:0
EA2454	3501039	snp	T	A	A:34 T:0
EA2454	3501054	snp	A	T	T:33 A:0
EA2454	3501072	complex	AGGTACTTCG	TGGCACCTCT	TGGCACCTCT:23 AGGTACTTCG:0
EA2454	3501099	snp	T	C	C:22 T:0
EA2454	3501126	snp	C	T	T:22 C:0
EA2454	3501138	snp	T	C	C:25 T:0
EA2454	3501198	snp	A	C	C:16 A:0
EA2454	3501212	complex	ACCCG	GCCCT	GCCCT:15 ACCCG:0
EA2454	3501222	snp	C	T	T:16 C:0
EA2454	3501230	mnp	AGT	CCG	CCG:16 AGT:0
EA2454	3501237	snp	C	T	T:16 C:0
EA2454	3501444	snp	A	G	G:26 A:0
EA2454	3501549	snp	A	G	G:15 A:0
EA2454	3501558	snp	T	C	C:18 T:0
EA2454	3501611	snp	C	T	T:15 C:0
EA2454	3501618	snp	T	G	G:18 T:0
EA2454	3501628	complex	TCTGCCCC	CCTGACCA	CCTGACCA:20 TCTGCCCC:0
EA2454	3501644	snp	A	G	G:20 A:0
EA2454	3501666	snp	C	A	A:22 C:0
EA2454	3501684	snp	C	T	T:24 C:0
EA2454	3502029	snp	C	T	T:26 C:0
EA2454	3502110	snp	T	C	C:23 T:0
EA2454	3502188	snp	G	A	A:23 G:0
EA2454	3502206	snp	C	T	T:24 C:0
EA2454	3502280	snp	A	G	G:18 A:0
EA2454	3502307	snp	A	T	T:22 A:0
EA2454	3502314	snp	C	G	G:26 C:0
EA2454	3502354	snp	T	A	A:20 T:0
EA2454	3502385	snp	C	T	T:25 C:0
EA2454	3502394	snp	C	A	A:25 C:0
EA2454	3502415	snp	A	G	G:22 A:0
EA2454	3502445	snp	G	A	A:22 G:0
EA2454	3502454	snp	C	T	T:22 C:0
EA2454	3502476	snp	G	T	T:19 G:0
EA2454	3502481	complex	TGCTTTCAGTGGT	CGCTCTGGGGGGG	CGCTCTGGGGGGG:15 TGCTTTCAGTGGT:0
EA2454	3502498	complex	CGCAGGTT	TGCAAGTA	TGCAAGTA:17 CGCAGGTT:0
EA2454	3502526	snp	G	T	T:17 G:0
EA2454	3503047	snp	T	C	C:16 T:0
EA2454	3503113	snp	T	A	A:17 T:0
EA2454	3503233	snp	G	T	T:26 G:0
EA2454	3503272	snp	T	A	A:26 T:0
EA2454	3503353	snp	C	T	T:14 C:0
EA2454	3503395	snp	T	G	G:14 T:0
EA2454	3503408	snp	C	T	T:13 C:0
EA2454	3503453	complex	TA	CT	CT:14 TA:0
EA2454	3503641	snp	A	C	C:24 A:0
EA2454	3503647	snp	C	T	T:26 C:0
EA2454	3503832	snp	G	C	C:40 G:0
EA2454	3503862	mnp	CT	TC	TC:34 CT:0
EA2454	3503884	snp	T	C	C:34 T:0
EA2454	3503977	snp	T	C	C:26 T:0
EA2454	3503992	snp	T	A	A:30 T:0
EA2454	3504028	snp	T	C	C:31 T:0
EA2454	3504074	mnp	AA	GT	GT:34 AA:0
EA2454	3504109	complex	TCCG	CCCA	CCCA:25 TCCG:0
EA2454	3504139	complex	TGTCGCA	GGTTGCT	GGTTGCT:22 TGTCGCA:0
EA2454	3504196	complex	AAAAGG	GACAGA	GACAGA:25 AAAAGG:0
EA2454	3504209	snp	G	A	A:26 G:0
EA2454	3504218	complex	CGTAT	AGCAC	AGCAC:29 CGTAT:0
EA2454	3504311	complex	GAATG	TAATA	TAATA:21 GAATG:0
EA2454	3504324	snp	A	T	T:19 A:0
EA2454	3504332	snp	T	C	C:19 T:0
EA2454	3504346	complex	GCGGG	ACGAT	ACGAT:11 GCGGG:0
EA2454	3504767	snp	C	T	T:13 C:0
EA2454	3504794	snp	T	C	C:13 T:0
EA2454	3504916	snp	G	A	A:13 G:0
EA2454	3505210	snp	T	C	C:14 T:0
EA2454	3505347	snp	A	G	G:41 A:0
EA2454	3505808	snp	T	C	C:18 T:0
EA2454	3505859	snp	A	C	C:13 A:0
EA2454	3505901	snp	G	A	A:17 G:0
EA2454	3506015	complex	GCCT	ACCA	ACCA:16 GCCT:0
EA2454	3506030	snp	A	T	T:19 A:0
EA2454	3506075	snp	A	C	C:17 A:0
EA2454	3506129	snp	G	A	A:16 G:0
EA2454	3506421	complex	GCC	ACT	ACT:12 GCC:0
EA2454	3506442	snp	T	A	A:19 T:1
EA2454	3506634	snp	T	C	C:34 T:0
EA2454	3506837	snp	A	G	G:30 A:0
EA2454	3506964	snp	C	G	G:10 C:0
EA2454	3506970	snp	C	T	T:12 C:0
EA2454	3507137	snp	T	C	C:10 T:0
EA2454	3507174	snp	C	T	T:13 C:0
EA2454	3507248	snp	A	G	G:25 A:0
EA2454	3507260	snp	T	C	C:25 T:0
EA2454	3507278	snp	T	C	C:32 T:0
EA2454	3507751	snp	C	T	T:10 C:0
EA2454	3507774	snp	T	C	C:12 T:0
EA2454	3510390	snp	A	G	G:22 A:0
EA2454	3510396	complex	GCAT	ACAC	ACAC:22 GCAT:0
EA2454	3510420	snp	C	T	T:23 C:0
EA2454	3510427	complex	GCCA	ACCT	ACCT:21 GCCA:0
EA2454	3510450	snp	A	T	T:24 A:0
EA2454	3510480	snp	A	G	G:26 A:1
EA2454	3510486	snp	C	T	T:30 C:0
EA2454	3510510	snp	T	C	C:33 T:0
EA2454	3510603	snp	T	G	G:28 T:1
EA2454	3510741	snp	G	A	A:26 G:0
EA2454	3510747	snp	A	G	G:25 A:0
EA2454	3510974	snp	T	C	C:19 T:0
EA2454	3511225	snp	T	C	C:34 T:0
EA2454	3511312	snp	T	G	G:32 T:0
EA2454	3511318	snp	T	C	C:32 T:0
EA2454	3511333	snp	C	A	A:27 C:0
EA2454	3511417	snp	T	C	C:34 T:0
EA2454	3511488	snp	T	C	C:31 T:0
EA2454	3511821	snp	G	T	T:33 G:0
EA2454	3511890	snp	C	T	T:26 C:0
EA2454	3511923	snp	T	A	A:32 T:0
EA2454	3511944	snp	C	T	T:34 C:0
EA2454	3512097	snp	G	A	A:38 G:0
EA2454	3512205	complex	TCAG	CCAA	CCAA:34 TCAG:0
EA2454	3512235	snp	A	G	G:40 A:0
EA2454	3512365	snp	T	C	C:27 T:0
EA2454	3512398	snp	A	G	G:32 A:0
EA2454	3512422	snp	G	A	A:39 G:0
EA2454	3512520	snp	T	A	A:42 T:0
EA2454	3512556	snp	G	A	A:46 G:0
EA2454	3512565	snp	A	T	T:46 A:0
EA2454	3512589	snp	T	C	C:40 T:0
EA2454	3512622	complex	CCGGCCA	ACGTCCT	ACGTCCT:37 CCGGCCA:0
EA2454	3512638	snp	G	A	A:34 G:0
EA2454	3512643	snp	T	A	A:35 T:0
EA2454	3512655	snp	G	A	A:36 G:0
EA2454	3512670	snp	G	C	C:31 G:0
EA2454	3512718	snp	G	A	A:28 G:0
EA2454	3512729	snp	T	A	A:26 T:0
EA2454	3512738	complex	CGCA	AGCG	AGCG:26 CGCA:0
EA2454	3512754	complex	TACGCG	CACACC	CACACC:24 TACGCG:0
EA2454	3512780	snp	A	G	G:29 A:0
EA2454	3512791	snp	A	C	C:27 A:0
EA2454	3512796	snp	A	G	G:27 A:0
EA2454	3512808	snp	G	A	A:28 G:0
EA2454	3512814	snp	A	G	G:26 A:0
EA2454	3512826	snp	T	C	C:27 T:0
EA2454	3512940	snp	T	A	A:26 T:0
EA2454	3512955	complex	TGCT	AGCA	AGCA:26 TGCT:0
EA2454	3512973	snp	C	A	A:27 C:0
EA2454	3513022	snp	C	T	T:23 C:0
EA2454	3513150	snp	T	C	C:21 T:0
EA2454	3513306	snp	G	T	T:17 G:0
EA2454	3513698	snp	C	T	T:11 C:0
EA2454	3513915	complex	TGGGA	CGGGG	CGGGG:18 TGGGA:0
EA2454	3513943	snp	G	T	T:15 G:0
EA2454	3513948	snp	C	T	T:15 C:0
EA2454	3513984	snp	C	T	T:16 C:0
EA2454	3514006	snp	G	A	A:13 G:0
EA2454	3514011	snp	A	T	T:12 A:0
EA2454	3514542	snp	G	A	A:12 G:0
EA2454	3514572	snp	T	C	C:18 T:0
EA2454	3514722	snp	C	T	T:16 C:0
EA2454	3514732	snp	T	G	G:20 T:0
EA2454	3514737	snp	T	C	C:19 T:0
EA2454	3514752	complex	AGGAGGG	TGGTGGT	TGGTGGT:17 AGGAGGG:0
EA2454	3514773	complex	GTCTC	ATCTA	ATCTA:17 GTCTC:0
EA2454	3514795	snp	G	A	A:13 G:0
EA2454	3514804	snp	T	C	C:13 T:0
EA2454	3514818	snp	A	T	T:11 A:0
EA2454	3514824	snp	G	A	A:10 G:0
EA2454	3514836	snp	C	T	T:11 C:0
EA2454	3514920	snp	T	C	C:11 T:0
EA2454	3515019	snp	T	A	A:20 T:0
EA2454	3515109	snp	G	A	A:20 G:0
EA2454	3515187	snp	T	C	C:36 T:0
EA2454	3515192	snp	C	T	T:36 C:0
EA2454	3515244	snp	C	T	T:36 C:0
EA2454	3515298	snp	G	T	T:34 G:0
EA2454	3515325	snp	C	G	G:29 C:0
EA2454	3515337	snp	C	T	T:31 C:0
EA2454	3515346	complex	AAG	GAA	GAA:27 AAG:2
EA2454	3515355	snp	A	C	C:26 A:0
EA2454	3515361	complex	GGCAG	AGCAA	AGCAA:29 GGCAG:0
EA2454	3515370	snp	C	T	T:28 C:0
EA2454	3515388	complex	ACCT	TCCG	TCCG:19 ACCT:0
EA2454	3515409	snp	A	G	G:19 A:0
EA2454	3515423	snp	A	G	G:17 A:0
EA2454	3515445	snp	G	A	A:13 G:0
EA2454	3515475	complex	GTATGAC	ATTCGAT	ATTCGAT:11 GTATGAC:0
EA2454	3515488	complex	ATTAATGCCCGGGGA	CGCAACTCGCCGGGG	CGCAACTCGCCGGGG:10 ATTAATGCCCGGGGA:0
EA2454	3515508	complex	CTC	GAA	GAA:11 CTC:0
EA2454	3515518	complex	TCTCCTC	GCGCCTG	GCGCCTG:11 TCTCCTC:0
EA2454	3515532	snp	T	C	C:16 T:0
EA2454	3515545	snp	A	G	G:18 A:0
EA2454	3515580	snp	T	C	C:23 T:0
EA2454	3515586	snp	A	T	T:22 A:0
EA2454	3515601	snp	A	G	G:22 A:1
EA2454	3515718	snp	T	C	C:20 T:0
EA2454	3515891	snp	A	G	G:24 A:0
EA2454	3516379	snp	A	G	G:22 A:0
EA2454	3516478	snp	C	G	G:23 C:0
EA2454	3516485	snp	G	A	A:25 G:0
EA2454	3516496	snp	A	C	C:21 A:0
EA2454	3516514	snp	T	C	C:24 T:0
EA2454	3516537	snp	C	T	T:28 C:0
EA2454	3516772	snp	A	T	T:29 A:0
EA2454	3516787	snp	T	C	C:22 T:0
EA2454	3516832	snp	A	G	G:27 A:0
EA2454	3516841	snp	T	G	G:25 T:0
EA2454	3521717	snp	C	G	G:37 C:0
EA2454	3527982	ins	G	GA	GA:55 G:0
EA2454	3536376	snp	T	C	C:42 T:0
EA2454	3539749	snp	T	C	C:58 T:0
EA2454	3540229	snp	T	C	C:63 T:2
EA2454	3546655	snp	C	T	T:76 C:0
EA2454	3547948	snp	T	C	C:88 T:0
EA2454	3548625	snp	G	C	C:59 G:0
EA2454	3554302	snp	G	T	T:43 G:0
EA2454	3556473	snp	G	A	A:81 G:0
EA2454	3566015	snp	T	C	C:67 T:0
EA2454	3569782	snp	C	T	T:105 C:0
EA2454	3574205	snp	G	T	T:60 G:0
EA2454	3575127	snp	A	C	C:33 A:0
EA2454	3586272	snp	C	T	T:13 C:0
EA2454	3590214	snp	T	C	C:76 T:0
EA2454	3590259	snp	C	T	T:73 C:0
EA2454	3594055	snp	T	C	C:62 T:2
EA2454	3595770	snp	T	G	G:46 T:0
EA2454	3600939	snp	G	C	C:46 G:0
EA2454	3602569	snp	C	A	A:43 C:0
EA2454	3613661	snp	G	A	A:37 G:0
EA2454	3613761	snp	T	C	C:31 T:0
EA2454	3615292	snp	T	G	G:50 T:0
EA2454	3615330	snp	A	C	C:52 A:0
EA2454	3628517	snp	A	G	G:59 A:0
EA2454	3632526	snp	C	A	A:63 C:0
EA2454	3634246	snp	A	T	T:22 A:0
EA2454	3634750	snp	C	T	T:68 C:0
EA2454	3640661	snp	A	G	G:54 A:0
EA2454	3645952	snp	G	A	A:51 G:0
EA2454	3657942	snp	T	G	G:103 T:0
EA2454	3662284	snp	A	G	G:68 A:0
EA2454	3665749	snp	G	A	A:105 G:0
EA2454	3666055	snp	C	T	T:84 C:0
EA2454	3680210	snp	A	T	T:64 A:0
EA2454	3682843	snp	T	G	G:64 T:0
EA2454	3690835	snp	T	G	G:65 T:0
EA2454	3701518	snp	C	T	T:41 C:0
EA2454	3701756	snp	A	G	G:31 A:0
EA2454	3705284	snp	A	G	G:23 A:0
EA2454	3706695	snp	C	T	T:42 C:1
EA2454	3709916	snp	G	A	A:34 G:0
EA2454	3731404	snp	G	A	A:57 G:2
EA2454	3731422	snp	C	A	A:61 C:2
EA2454	3739482	snp	A	G	G:30 A:0
EA2454	3750262	del	GAA	G	G:33 GAA:0
EA2454	3751756	snp	C	T	T:17 C:0
EA2454	3753142	snp	G	T	T:21 G:0
EA2454	3756054	snp	T	C	C:69 T:0
EA2454	3763988	snp	A	G	G:60 A:1
EA2454	3766157	snp	G	A	A:66 G:0
EA2454	3772277	snp	T	A	A:30 T:0
EA2454	3779368	snp	C	T	T:44 C:0
EA2454	3782707	snp	C	T	T:65 C:0
EA2454	3795140	snp	T	C	C:49 T:0
EA2454	3801431	snp	C	T	T:71 C:0
EA2454	3807575	snp	A	G	G:89 A:0
EA2454	3808964	snp	C	T	T:39 C:0
EA2454	3815430	snp	T	C	C:42 T:0
EA2454	3817838	complex	AGGTGC	GATAAGGCGT	GATAAGGCGT:15 AGGTGC:1
EA2454	3837457	snp	C	A	A:48 C:0
EA2454	3839065	snp	G	A	A:48 G:0
EA2454	3840206	snp	C	T	T:84 C:0
EA2454	3842198	ins	C	CT	CT:54 C:0
EA2454	3844395	snp	T	C	C:71 T:0
EA2454	3851605	snp	C	T	T:18 C:0
EA2454	3851695	snp	T	C	C:21 T:0
EA2454	3851703	complex	ACCA	GCCT	GCCT:21 ACCA:0
EA2454	3851762	snp	C	T	T:23 C:2
EA2454	3851770	complex	TAGCC	CAGCG	CAGCG:24 TAGCC:0
EA2454	3851849	snp	G	A	A:23 G:2
EA2454	3851865	snp	C	T	T:23 C:2
EA2454	3851884	snp	C	T	T:15 C:0
EA2454	3851913	complex	GAT	AAA	AAA:12 GAT:0
EA2454	3852607	complex	CCGTT	TCGTC	TCGTC:97 CCGTT:0
EA2454	3852799	snp	A	G	G:66 A:0
EA2454	3852974	snp	A	G	G:93 A:0
EA2454	3852999	snp	T	C	C:66 T:0
EA2454	3856047	complex	AAAG	GAAA	GAAA:60 AAAG:0
EA2454	3856149	snp	T	A	A:91 T:0
EA2454	3856458	snp	A	G	G:114 A:0
EA2454	3859719	snp	G	A	A:68 G:0
EA2454	3859941	snp	T	C	C:28 T:0
EA2454	3860187	snp	T	C	C:66 T:0
EA2454	3861129	snp	G	A	A:94 G:0
EA2454	3861180	snp	C	T	T:103 C:0
EA2454	3861216	snp	C	G	G:109 C:0
EA2454	3861222	snp	T	C	C:103 T:0
EA2454	3861402	complex	CCCA	TCCG	TCCG:71 CCCA:0
EA2454	3861516	snp	T	C	C:66 T:0
EA2454	3861585	complex	TTTC	CTTT	CTTT:78 TTTC:0
EA2454	3861594	snp	G	T	T:83 G:0
EA2454	3861621	snp	T	C	C:91 T:0
EA2454	3861630	snp	T	C	C:96 T:0
EA2454	3861636	snp	C	T	T:96 C:0
EA2454	3861840	snp	T	C	C:85 T:0
EA2454	3861856	snp	A	C	C:85 A:0
EA2454	3861864	snp	T	C	C:85 T:0
EA2454	3861870	complex	CCCA	TCCG	TCCG:81 CCCA:0
EA2454	3861957	snp	G	A	A:91 G:0
EA2454	3861993	complex	AGTTGAAAAG	CGTGGAGAAA	CGTGGAGAAA:86 AGTTGAAAAG:0
EA2454	3862023	snp	G	A	A:98 G:0
EA2454	3862029	snp	C	T	T:95 C:0
EA2454	3862086	snp	C	A	A:88 C:0
EA2454	3862353	snp	T	C	C:82 T:0
EA2454	3862476	snp	T	C	C:84 T:0
EA2454	3862614	snp	C	T	T:110 C:0
EA2454	3862731	snp	C	T	T:99 C:1
EA2454	3862765	snp	A	G	G:107 A:0
EA2454	3862783	snp	A	C	C:98 A:0
EA2454	3862788	complex	CAGCGAG	TAACGAC	TAACGAC:94 CAGCGAG:0
EA2454	3862833	snp	T	C	C:113 T:0
EA2454	3862974	snp	T	G	G:76 T:0
EA2454	3862990	complex	TCCCTGATTATC	AGCCTTATCATT	AGCCTTATCATT:59 TCCCTGATTATC:0
EA2454	3863014	snp	A	C	C:71 A:0
EA2454	3863036	mnp	CT	AC	AC:65 CT:0
EA2454	3863043	snp	A	G	G:67 A:0
EA2454	3863139	snp	C	T	T:91 C:0
EA2454	3863214	snp	T	C	C:100 T:0
EA2454	3863280	snp	T	C	C:90 T:1
EA2454	3863319	snp	G	C	C:85 G:0
EA2454	3863331	snp	C	T	T:82 C:0
EA2454	3863490	snp	C	G	G:68 C:0
EA2454	3863532	complex	ATCG	GTCA	GTCA:61 ATCG:0
EA2454	3863559	snp	G	A	A:59 G:0
EA2454	3863732	snp	A	G	G:68 A:0
EA2454	3863840	snp	T	C	C:86 T:0
EA2454	3863900	snp	T	G	G:84 T:0
EA2454	3863966	snp	G	A	A:104 G:0
EA2454	3864034	snp	A	C	C:106 A:0
EA2454	3864046	snp	C	T	T:102 C:0
EA2454	3864070	mnp	GC	AA	AA:105 GC:0
EA2454	3864181	snp	C	T	T:84 C:0
EA2454	3864199	complex	TCCTGGA	GCCCGGT	GCCCGGT:76 TCCTGGA:0
EA2454	3864220	snp	A	G	G:88 A:0
EA2454	3864227	snp	A	G	G:86 A:0
EA2454	3864307	snp	A	T	T:86 A:0
EA2454	3865110	snp	T	C	C:107 T:0
EA2454	3865119	snp	A	C	C:108 A:0
EA2454	3865509	snp	T	C	C:43 T:0
EA2454	3865545	snp	T	C	C:39 T:0
EA2454	3865593	snp	C	A	A:21 C:0
EA2454	3865745	complex	TGAA	AGAG	AGAG:10 TGAA:0
EA2454	3865854	snp	A	G	G:30 A:0
EA2454	3865988	snp	T	C	C:46 T:0
EA2454	3866184	snp	A	G	G:18 A:0
EA2454	3866269	snp	T	C	C:12 T:0
EA2454	3866278	snp	T	C	C:21 T:0
EA2454	3866284	snp	G	C	C:21 G:0
EA2454	3866302	snp	T	C	C:28 T:0
EA2454	3866312	snp	A	G	G:30 A:0
EA2454	3866320	complex	CTTC	ATTT	ATTT:30 CTTC:0
EA2454	3866335	snp	T	G	G:32 T:0
EA2454	3866365	snp	C	A	A:32 C:0
EA2454	3866373	mnp	TT	CG	CG:28 TT:0
EA2454	3866383	snp	T	C	C:28 T:0
EA2454	3866395	snp	C	T	T:26 C:0
EA2454	3866419	snp	T	G	G:21 T:0
EA2454	3866503	snp	G	T	T:10 G:0
EA2454	3866512	complex	CTGTTTCA	TTGCTTCC	TTGCTTCC:10 CTGTTTCA:0
EA2454	3867326	complex	TAGCCGG	AAACCGC	AAACCGC:106 TAGCCGG:0
EA2454	3868798	snp	A	G	G:47 A:0
EA2454	3869010	del	CTGA	C	C:53 CTGA:0
EA2454	3870424	snp	C	T	T:71 C:0
EA2454	3870448	snp	G	A	A:84 G:0
EA2454	3870523	snp	A	G	G:88 A:0
EA2454	3870529	snp	A	G	G:87 A:0
EA2454	3871083	snp	T	C	C:20 T:0
EA2454	3871269	snp	G	A	A:33 G:1
EA2454	3871487	snp	T	C	C:64 T:0
EA2454	3872599	snp	G	A	A:113 G:0
EA2454	3873309	snp	C	T	T:124 C:0
EA2454	3873396	snp	T	C	C:112 T:0
EA2454	3873594	snp	G	A	A:107 G:0
EA2454	3873609	snp	A	G	G:108 A:0
EA2454	3873636	snp	G	A	A:118 G:0
EA2454	3873750	snp	T	C	C:103 T:0
EA2454	3874068	snp	T	C	C:103 T:0
EA2454	3874077	snp	G	A	A:107 G:0
EA2454	3874083	snp	T	C	C:106 T:0
EA2454	3874221	snp	T	C	C:113 T:0
EA2454	3874329	complex	GGCG	AGCA	AGCA:124 GGCG:0
EA2454	3874393	snp	T	A	A:132 T:0
EA2454	3874500	snp	C	T	T:133 C:0
EA2454	3874551	complex	AAGA	TCAG	TCAG:87 AAGA:0
EA2454	3874566	snp	A	C	C:99 A:0
EA2454	3874580	snp	G	C	C:98 G:0
EA2454	3874587	snp	G	C	C:97 G:0
EA2454	3874599	snp	C	A	A:94 C:0
EA2454	3874749	snp	C	T	T:60 C:0
EA2454	3874767	snp	G	A	A:68 G:0
EA2454	3874824	snp	A	G	G:93 A:0
EA2454	3874851	snp	C	T	T:94 C:1
EA2454	3874866	complex	CCAGC	TCAGT	TCAGT:101 CCAGC:0
EA2454	3874887	snp	C	T	T:121 C:0
EA2454	3874893	complex	AAAA	GAAG	GAAG:118 AAAA:0
EA2454	3874996	snp	C	T	T:139 C:0
EA2454	3875022	snp	G	A	A:173 G:2
EA2454	3875037	snp	G	A	A:145 G:0
EA2454	3875046	snp	C	A	A:137 C:0
EA2454	3875073	snp	C	A	A:135 C:0
EA2454	3875100	snp	T	G	G:136 T:0
EA2454	3875106	snp	G	C	C:139 G:0
EA2454	3875118	snp	T	G	G:138 T:0
EA2454	3875157	snp	T	G	G:146 T:0
EA2454	3875169	complex	GGACATC	CGATATT	CGATATT:137 GGACATC:0
EA2454	3875205	complex	GGGG	TGGT	TGGT:145 GGGG:0
EA2454	3875214	snp	C	T	T:144 C:0
EA2454	3875232	snp	T	C	C:144 T:0
EA2454	3875328	complex	CCGAGGC	TAAAGGG	TAAAGGG:62 CCGAGGC:0
EA2454	3875340	complex	CGGA	AGGT	AGGT:63 CGGA:0
EA2454	3875354	snp	G	A	A:77 G:0
EA2454	3875370	snp	A	G	G:69 A:0
EA2454	3875383	complex	GGAA	AGAG	AGAG:62 GGAA:0
EA2454	3875403	complex	ACAA	GCAG	GCAG:58 ACAA:0
EA2454	3875437	snp	A	G	G:61 A:0
EA2454	3875460	snp	A	G	G:43 A:0
EA2454	3875465	snp	G	C	C:45 G:0
EA2454	3875514	snp	A	G	G:52 A:0
EA2454	3875523	snp	G	A	A:52 G:0
EA2454	3875536	complex	CAC	TAT	TAT:46 CAC:0
EA2454	3875549	complex	ATTGTATG	GCTGTTTTT	GCTGTTTTT:35 ATTGTATG:0
EA2454	3875572	complex	AAAA	GATG	GATG:40 AAAA:0
EA2454	3875580	complex	GCT	ACC	ACC:40 GCT:0
EA2454	3875597	snp	G	A	A:45 G:0
EA2454	3875612	complex	CATT	TATC	TATC:52 CATT:0
EA2454	3875632	snp	A	G	G:53 A:0
EA2454	3875641	snp	G	A	A:52 G:0
EA2454	3875652	snp	G	A	A:50 G:0
EA2454	3875660	snp	C	G	G:49 C:0
EA2454	3875665	complex	GCTTTATT	TCTTCATA	TCTTCATA:46 GCTTTATT:0
EA2454	3875688	snp	T	C	C:63 T:0
EA2454	3875702	complex	ATTT	GTTC	GTTC:74 ATTT:0
EA2454	3875727	snp	C	A	A:73 C:0
EA2454	3875747	complex	ATTC	GTTT	GTTT:71 ATTC:0
EA2454	3875772	complex	CT	AC	AC:68 CT:0
EA2454	3875853	snp	A	G	G:33 A:0
EA2454	3876036	snp	T	C	C:12 T:0
EA2454	3876047	complex	CTATG	TTATT	TTATT:16 CTATG:0
EA2454	3876061	snp	G	A	A:19 G:0
EA2454	3876075	snp	G	A	A:23 G:0
EA2454	3876084	snp	T	A	A:23 T:0
EA2454	3876119	snp	C	T	T:31 C:0
EA2454	3877989	snp	T	C	C:118 T:0
EA2454	3881618	snp	A	G	G:88 A:0
EA2454	3881743	snp	T	C	C:94 T:0
EA2454	3881813	snp	G	A	A:109 G:0
EA2454	3881990	complex	GATA	TATC	TATC:93 GATA:0
EA2454	3882005	snp	A	G	G:84 A:0
EA2454	3883790	snp	C	T	T:160 C:0
EA2454	3883796	complex	GGAG	AGAA	AGAA:157 GGAG:0
EA2454	3883811	snp	C	T	T:155 C:0
EA2454	3883883	snp	C	T	T:128 C:0
EA2454	3883908	snp	C	G	G:121 C:0
EA2454	3883927	snp	T	C	C:114 T:0
EA2454	3884078	snp	A	G	G:133 A:0
EA2454	3884537	complex	ACGT	GCGC	GCGC:55 ACGT:0
EA2454	3884622	snp	T	A	A:49 T:0
EA2454	3884753	snp	T	C	C:53 T:0
EA2454	3884948	snp	T	C	C:61 T:0
EA2454	3884985	snp	A	G	G:68 A:0
EA2454	3885050	snp	A	G	G:74 A:0
EA2454	3885384	snp	C	G	G:95 C:0
EA2454	3885390	snp	T	A	A:98 T:0
EA2454	3885480	snp	T	G	G:111 T:0
EA2454	3885930	snp	A	G	G:75 A:0
EA2454	3885970	complex	ACG	GTA	GTA:69 ACG:0
EA2454	3885978	snp	T	C	C:86 T:0
EA2454	3886116	snp	A	G	G:90 A:0
EA2454	3886122	snp	A	G	G:89 A:0
EA2454	3886176	snp	A	G	G:92 A:0
EA2454	3886212	snp	G	A	A:85 G:0
EA2454	3886328	complex	AATTA	GATTG	GATTG:74 AATTA:0
EA2454	3888146	snp	G	C	C:83 G:0
EA2454	3888832	snp	C	A	A:66 C:0
EA2454	3888966	snp	A	C	C:49 A:0
EA2454	3890498	snp	C	T	T:86 C:0
EA2454	3890579	snp	G	T	T:65 G:0
EA2454	3890586	snp	T	C	C:71 T:0
EA2454	3890922	complex	TG	CT	CT:35 TG:0
EA2454	3890980	ins	C	CT	CT:42 C:0
EA2454	3891090	snp	T	A	A:40 T:0
EA2454	3891195	complex	ACTG	GCTC	GCTC:52 ACTG:0
EA2454	3891223	complex	CTTA	TCTG	TCTG:50 CTTA:0
EA2454	3891274	snp	G	T	T:51 G:0
EA2454	3891301	complex	TGTGCCAT	GGTATCAC	GGTATCAC:40 TGTGCCAT:0
EA2454	3891315	complex	TA	CC	CC:40 TA:2
EA2454	3891332	snp	A	C	C:47 A:2
EA2454	3891344	snp	T	C	C:44 T:2
EA2454	3891353	snp	C	T	T:43 C:1
EA2454	3891366	snp	A	G	G:41 A:1
EA2454	3891377	complex	CAC	TAT	TAT:41 CAC:1
EA2454	3891387	ins	G	GTA	GTA:18 G:2
EA2454	3891433	complex	AC	GT	GT:20 AC:2
EA2454	3891444	snp	A	G	G:20 A:2
EA2454	3892802	snp	G	A	A:13 G:0
EA2454	3892809	ins	C	CG	CG:15 C:0
EA2454	3892842	snp	G	A	A:23 G:0
EA2454	3904266	snp	T	C	C:17 T:0
EA2454	3905167	snp	C	A	A:34 C:0
EA2454	3906805	snp	A	G	G:34 A:0
EA2454	3907290	snp	G	A	A:59 G:0
EA2454	3908657	snp	T	C	C:59 T:0
EA2454	3908840	snp	C	A	A:27 C:0
EA2454	3910882	snp	G	A	A:69 G:0
EA2454	3925436	snp	A	G	G:14 A:0
EA2454	3929224	snp	C	T	T:12 C:0
EA2454	3931051	snp	C	T	T:82 C:0
EA2454	3935774	snp	A	G	G:23 A:0
EA2454	3937328	snp	G	A	A:48 G:0
EA2454	3939722	snp	A	C	C:50 A:0
EA2454	3944749	snp	A	C	C:54 A:0
EA2454	3964027	snp	G	T	T:74 G:0
EA2454	4001088	snp	G	A	A:48 G:0
EA2454	4002543	snp	C	T	T:48 C:0
EA2454	4004474	snp	A	G	G:25 A:0
EA2454	4004676	snp	C	T	T:31 C:1
EA2454	4004935	snp	G	A	A:51 G:0
EA2454	4006309	snp	C	T	T:69 C:0
EA2454	4008915	snp	G	A	A:45 G:0
EA2454	4014768	snp	T	C	C:46 T:0
EA2454	4016930	snp	T	A	A:52 T:0
EA2454	4026172	snp	T	G	G:87 T:0
EA2454	4030798	snp	G	T	T:32 G:0
EA2454	4036181	snp	A	G	G:50 A:0
EA2454	4036304	snp	T	C	C:50 T:0
EA2454	4041761	snp	T	C	C:57 T:0
EA2454	4042461	snp	G	A	A:45 G:0
EA2454	4046742	snp	G	A	A:64 G:0
EA2454	4058462	snp	T	G	G:47 T:0
EA2454	4062557	snp	A	C	C:65 A:0
EA2454	4065982	snp	G	A	A:82 G:0
EA2454	4069538	del	TG	T	T:68 TG:0
EA2454	4081880	snp	T	G	G:15 T:0
EA2454	4116563	snp	G	A	A:67 G:0
EA2454	4121457	snp	C	T	T:68 C:0
EA2454	4141091	snp	A	G	G:55 A:0
EA2454	4168245	snp	C	T	T:60 C:0
EA2454	4182589	snp	C	T	T:34 C:0
EA2454	4182701	snp	T	C	C:19 T:0
EA2454	4183029	complex	ACCG	GTCA	GTCA:35 ACCG:0
EA2454	4183044	snp	C	T	T:43 C:0
EA2454	4183097	complex	TACTGCAC	CCCGGCAA	CCCGGCAA:47 TACTGCAC:0
EA2454	4183119	snp	C	A	A:49 C:0
EA2454	4183137	snp	A	C	C:48 A:0
EA2454	4183168	snp	T	C	C:59 T:0
EA2454	4183176	snp	G	T	T:59 G:0
EA2454	4183200	snp	A	G	G:57 A:0
EA2454	4183227	snp	C	T	T:55 C:0
EA2454	4183232	complex	TTGAC	CTGGG	CTGGG:52 TTGAC:0
EA2454	4183275	snp	T	C	C:55 T:0
EA2454	4183284	snp	A	G	G:54 A:0
EA2454	4183293	snp	G	A	A:55 G:1
EA2454	4183298	complex	GC	AT	AT:55 GC:0
EA2454	4183305	snp	A	C	C:58 A:0
EA2454	4183321	snp	C	T	T:61 C:0
EA2454	4183335	snp	A	G	G:65 A:0
EA2454	4183407	snp	T	C	C:57 T:0
EA2454	4183425	snp	C	A	A:48 C:0
EA2454	4183492	snp	A	C	C:45 A:0
EA2454	4183516	snp	A	G	G:43 A:0
EA2454	4183522	snp	T	C	C:41 T:0
EA2454	4183571	complex	GGT	AGTA	AGTA:35 GGT:0
EA2454	4183583	snp	T	C	C:37 T:0
EA2454	4183608	snp	T	C	C:34 T:0
EA2454	4183619	complex	GTTGTTGTAAT	ATTACTCCAAA	ATTACTCCAAA:30 GTTGTTGTAAT:0
EA2454	4183646	snp	A	G	G:33 A:0
EA2454	4183653	snp	G	A	A:32 G:0
EA2454	4183660	snp	T	A	A:34 T:0
EA2454	4183681	snp	A	G	G:21 A:0
EA2454	4188735	snp	T	C	C:16 T:0
EA2454	4188742	snp	A	C	C:16 A:0
EA2454	4188748	snp	C	T	T:16 C:0
EA2454	4188757	complex	CCGG	ACGA	ACGA:22 CCGG:0
EA2454	4188793	complex	GTGGGCA	ATGAGCG	ATGAGCG:32 GTGGGCA:0
EA2454	4188816	snp	A	G	G:38 A:0
EA2454	4188829	snp	T	C	C:39 T:0
EA2454	4188862	snp	A	G	G:37 A:0
EA2454	4188877	complex	TGTAGCC	CGTGGCA	CGTGGCA:40 TGTAGCC:0
EA2454	4188889	complex	TCCGGGTATA	CCCCGGAATG	CCCCGGAATG:40 TCCGGGTATA:0
EA2454	4188906	complex	TGGCC	CGGCT	CGGCT:44 TGGCC:0
EA2454	4188931	snp	C	T	T:43 C:0
EA2454	4188946	snp	T	G	G:41 T:0
EA2454	4188970	snp	A	T	T:40 A:0
EA2454	4188976	snp	A	G	G:39 A:0
EA2454	4188988	snp	G	A	A:40 G:0
EA2454	4188997	snp	A	G	G:41 A:0
EA2454	4189017	complex	CGTGAATG	TGTAAATA	TGTAAATA:41 CGTGAATG:0
EA2454	4189030	snp	T	C	C:48 T:0
EA2454	4189056	complex	TCCTG	GCCTA	GCCTA:53 TCCTG:0
EA2454	4189078	snp	G	A	A:54 G:0
EA2454	4189084	snp	C	A	A:57 C:0
EA2454	4189092	snp	T	C	C:57 T:0
EA2454	4189132	snp	T	G	G:53 T:0
EA2454	4189147	snp	G	A	A:52 G:0
EA2454	4189156	snp	C	A	A:49 C:0
EA2454	4189180	snp	C	G	G:68 C:0
EA2454	4189204	snp	T	G	G:84 T:0
EA2454	4189238	snp	A	T	T:91 A:0
EA2454	4189255	complex	CGGC	GGGT	GGGT:84 CGGC:0
EA2454	4189281	complex	AT	TC	TC:81 AT:0
EA2454	4189288	snp	T	A	A:80 T:0
EA2454	4189300	snp	A	G	G:78 A:0
EA2454	4189321	complex	CGCC	TGCT	TGCT:77 CGCC:0
EA2454	4189336	snp	A	G	G:86 A:0
EA2454	4189345	snp	G	T	T:90 G:0
EA2454	4189592	complex	ACA	GCG	GCG:71 ACA:0
EA2454	4189600	snp	T	C	C:71 T:0
EA2454	4189605	snp	C	A	A:71 C:0
EA2454	4189699	complex	AGGA	TGGG	TGGG:62 AGGA:0
EA2454	4189726	snp	C	T	T:58 C:0
EA2454	4189768	snp	A	C	C:58 A:0
EA2454	4189773	snp	T	G	G:52 T:0
EA2454	4189798	snp	A	G	G:51 A:0
EA2454	4189807	snp	T	G	G:58 T:0
EA2454	4189852	snp	C	T	T:52 C:0
EA2454	4189861	snp	A	C	C:48 A:0
EA2454	4189893	complex	TGTT	CGTC	CGTC:49 TGTT:0
EA2454	4189912	snp	T	C	C:53 T:0
EA2454	4189933	snp	A	G	G:35 A:0
EA2454	4189958	snp	C	T	T:19 C:0
EA2454	4189967	snp	G	A	A:11 G:0
EA2454	4189974	snp	T	G	G:10 T:0
EA2454	4189981	snp	G	A	A:11 G:0
EA2454	4190010	complex	TCCC	CCCT	CCCT:10 TCCC:0
EA2454	4190041	del	TC	T	T:12 TC:0
EA2454	4190304	snp	C	T	T:17 C:0
EA2454	4199452	snp	A	T	T:65 A:0
EA2454	4200656	snp	A	G	G:68 A:1
EA2454	4201996	snp	A	G	G:38 A:0
EA2454	4205428	snp	A	G	G:47 A:0
EA2454	4206562	snp	G	A	A:44 G:0
EA2454	4208099	snp	C	T	T:81 C:0
EA2454	4208280	snp	G	T	T:83 G:0
EA2454	4212664	snp	T	A	A:42 T:0
EA2454	4216725	del	CTTTT	C	C:49 CTTTT:0
EA2454	4227994	snp	G	T	T:62 G:0
EA2454	4231280	snp	G	A	A:50 G:0
EA2454	4231669	snp	C	T	T:18 C:0
EA2454	4234319	snp	A	G	G:56 A:0
EA2454	4235320	snp	A	G	G:47 A:0
EA2454	4235834	snp	C	T	T:60 C:0
EA2454	4236400	snp	C	T	T:37 C:0
EA2454	4240327	snp	G	A	A:50 G:0
EA2454	4247151	del	GGCTGCCGGACTCATTCGCAGTGGACAAATTTT	G	G:50 GGCTGCCGGACTCATTCGCAGTGGACAAATTTT:0
EA2454	4247909	snp	G	A	A:65 G:0
EA2454	4254789	snp	C	T	T:50 C:0
EA2454	4255432	ins	G	GCAGCGCCAGGC	GCAGCGCCAGGC:22 G:0
EA2454	4257673	snp	C	T	T:63 C:0
EA2454	4259428	snp	A	G	G:65 A:0
EA2454	4267142	snp	A	G	G:65 A:0
EA2454	4269409	snp	C	T	T:43 C:0
EA2454	4272983	snp	A	G	G:72 A:0
EA2454	4273176	snp	C	T	T:44 C:0
EA2454	4281791	snp	G	A	A:36 G:0
EA2454	4283531	snp	A	T	T:59 A:0
EA2454	4285277	snp	C	T	T:32 C:0
EA2454	4290073	del	AGGAT	A	A:59 AGGAT:0
EA2454	4318055	snp	T	C	C:52 T:0
EA2454	4318287	del	AT	A	A:49 AT:0
EA2454	4318390	snp	A	G	G:61 A:0
EA2454	4321572	snp	T	C	C:18 T:0
EA2454	4323585	snp	G	A	A:68 G:0
EA2454	4325610	snp	G	T	T:55 G:0
EA2454	4326226	snp	C	T	T:65 C:0
EA2454	4326301	snp	A	G	G:68 A:0
EA2454	4351324	snp	G	A	A:62 G:0
EA2454	4368872	snp	C	T	T:64 C:1
EA2454	4369258	snp	A	C	C:48 A:0
EA2454	4372384	snp	C	G	G:79 C:2
EA2454	4380080	snp	A	C	C:53 A:0
EA2454	4385085	snp	G	A	A:55 G:0
EA2454	4394869	snp	T	C	C:54 T:0
EA2454	4396058	snp	C	T	T:40 C:0
EA2454	4397902	snp	T	C	C:52 T:0
EA2454	4397940	snp	A	G	G:52 A:0
EA2454	4398179	mnp	TC	CT	CT:38 TC:0
EA2454	4398202	snp	G	A	A:35 G:0
EA2454	4398208	snp	G	A	A:32 G:0
EA2454	4398218	complex	TGAAT	CGAAG	CGAAG:35 TGAAT:0
EA2454	4398233	snp	T	C	C:38 T:0
EA2454	4398250	snp	C	T	T:40 C:0
EA2454	4398268	complex	ATA	GTG	GTG:41 ATA:0
EA2454	4398405	snp	C	T	T:40 C:0
EA2454	4398439	snp	C	T	T:37 C:0
EA2454	4398451	snp	T	C	C:37 T:0
EA2454	4398477	snp	T	C	C:22 T:0
EA2454	4398538	snp	G	A	A:11 G:0
EA2454	4414071	snp	G	T	T:89 G:0
EA2454	4414845	snp	G	T	T:52 G:0
EA2454	4416190	snp	A	G	G:58 A:0
EA2454	4419628	snp	T	C	C:70 T:0
EA2454	4420363	snp	A	G	G:90 A:0
EA2454	4425528	snp	C	T	T:14 C:0
EA2454	4425538	snp	C	T	T:15 C:0
EA2454	4425608	snp	A	G	G:12 A:0
EA2454	4425634	snp	G	A	A:12 G:0
EA2454	4425679	snp	T	C	C:10 T:0
EA2454	4425733	snp	A	G	G:10 A:0
EA2454	4425949	snp	A	G	G:33 A:0
EA2454	4426004	snp	C	T	T:62 C:0
EA2454	4426020	complex	GTT	ATA	ATA:67 GTT:0
EA2454	4426346	snp	A	C	C:73 A:0
EA2454	4426565	snp	A	G	G:21 A:0
EA2454	4426585	complex	GGTG	AGTT	AGTT:13 GGTG:0
EA2454	4426615	snp	G	A	A:11 G:0
EA2454	4426633	snp	A	G	G:12 A:0
EA2454	4427581	snp	G	A	A:13 G:0
EA2454	4427634	snp	T	C	C:14 T:0
EA2454	4427651	complex	TTG	CTA	CTA:17 TTG:0
EA2454	4427662	complex	TCCGAAGGG	GCCGCAGGA	GCCGCAGGA:17 TCCGAAGGG:0
EA2454	4427857	snp	A	C	C:11 A:0
EA2454	4428487	complex	AGCTA	CGTTC	CGTTC:10 AGCTA:0
EA2454	4428515	snp	C	T	T:17 C:0
EA2454	4428530	complex	CCGA	TCGG	TCGG:19 CCGA:0
EA2454	4428560	snp	G	T	T:22 G:0
EA2454	4428566	snp	A	G	G:24 A:0
EA2454	4428578	snp	A	C	C:25 A:0
EA2454	4428595	complex	ACGG	T	T:21 ACGG:0
EA2454	4428602	ins	A	AAAC	AAAC:21 A:0
EA2454	4428635	mnp	TC	GT	GT:24 TC:0
EA2454	4428732	snp	T	A	A:22 T:0
EA2454	4428824	snp	C	T	T:15 C:0
EA2454	4428882	snp	C	G	G:12 C:0
EA2454	4429789	snp	C	T	T:18 C:0
EA2454	4429837	complex	ACCAG	GCCAT	GCCAT:19 ACCAG:0
EA2454	4429867	complex	TGGCT	CGGTC	CGGTC:16 TGGCT:0
EA2454	4429885	snp	C	T	T:18 C:0
EA2454	4429894	snp	G	A	A:18 G:0
EA2454	4429924	snp	T	A	A:15 T:0
EA2454	4429942	snp	A	G	G:11 A:0
EA2454	4431001	complex	GAATA	AAATG	AAATG:12 GAATA:0
EA2454	4431014	snp	C	T	T:17 C:0
EA2454	4431022	ins	T	TG	TG:16 T:0
EA2454	4431105	snp	T	A	A:18 T:0
EA2454	4431111	snp	G	A	A:20 G:0
EA2454	4431186	snp	C	T	T:34 C:0
EA2454	4431198	snp	G	A	A:31 G:0
EA2454	4431210	snp	T	G	G:32 T:0
EA2454	4431285	snp	C	T	T:26 C:0
EA2454	4431332	snp	A	G	G:23 A:0
EA2454	4431396	snp	A	G	G:33 A:0
EA2454	4431430	snp	T	G	G:29 T:0
EA2454	4431452	snp	A	G	G:28 A:0
EA2454	4431522	snp	T	C	C:36 T:0
EA2454	4431719	snp	A	G	G:26 A:0
EA2454	4431741	snp	G	A	A:22 G:0
EA2454	4431803	snp	T	C	C:21 T:0
EA2454	4432016	snp	T	C	C:28 T:0
EA2454	4432127	snp	G	T	T:30 G:0
EA2454	4432168	complex	GAGG	AAGA	AAGA:30 GAGG:0
EA2454	4432189	snp	G	A	A:40 G:0
EA2454	4432198	snp	G	A	A:39 G:0
EA2454	4432205	snp	T	C	C:38 T:0
EA2454	4432259	snp	G	T	T:31 G:0
EA2454	4432264	snp	C	T	T:34 C:0
EA2454	4432294	snp	G	T	T:43 G:0
EA2454	4432335	snp	A	G	G:43 A:0
EA2454	4432348	snp	G	C	C:35 G:0
EA2454	4432356	snp	A	G	G:34 A:0
EA2454	4432374	snp	A	G	G:36 A:0
EA2454	4432449	snp	C	A	A:38 C:0
EA2454	4432465	snp	T	A	A:38 T:0
EA2454	4432476	snp	T	C	C:36 T:0
EA2454	4432512	snp	T	C	C:34 T:0
EA2454	4432569	snp	C	T	T:42 C:0
EA2454	4432581	snp	G	T	T:39 G:0
EA2454	4432644	snp	G	T	T:41 G:0
EA2454	4432722	snp	T	C	C:25 T:0
EA2454	4432770	snp	G	C	C:23 G:0
EA2454	4432777	complex	GATG	AATA	AATA:21 GATG:0
EA2454	4432803	snp	A	G	G:22 A:0
EA2454	4432857	complex	TTACCGT	CTGCCGC	CTGCCGC:18 TTACCGT:0
EA2454	4432884	complex	AGCCGCAA	GGCTACTC	GGCTACTC:14 AGCCGCAA:0
EA2454	4432959	snp	C	T	T:20 C:0
EA2454	4433028	complex	TGGC	AGGT	AGGT:20 TGGC:0
EA2454	4433058	snp	G	T	T:20 G:0
EA2454	4433073	complex	ACCT	GCCC	GCCC:20 ACCT:0
EA2454	4433094	snp	T	G	G:20 T:0
EA2454	4433115	snp	G	C	C:22 G:0
EA2454	4433124	snp	G	T	T:23 G:0
EA2454	4433193	complex	CGCA	TGCT	TGCT:26 CGCA:0
EA2454	4433327	snp	A	G	G:21 A:0
EA2454	4433346	snp	G	A	A:17 G:0
EA2454	4433371	snp	C	T	T:19 C:0
EA2454	4433382	snp	T	G	G:20 T:0
EA2454	4433483	snp	T	C	C:42 T:0
EA2454	4433563	snp	C	T	T:35 C:0
EA2454	4433605	snp	C	T	T:35 C:0
EA2454	4433731	snp	G	T	T:29 G:0
EA2454	4433815	snp	A	G	G:20 A:0
EA2454	4433844	snp	C	T	T:19 C:0
EA2454	4433958	ins	T	TA	TA:24 T:0
EA2454	4434044	snp	G	A	A:26 G:0
EA2454	4434065	snp	T	C	C:25 T:0
EA2454	4434071	complex	TAAT	AAAC	AAAC:26 TAAT:0
EA2454	4434098	snp	C	A	A:27 C:0
EA2454	4434114	complex	AGG	GGA	GGA:27 AGG:0
EA2454	4434131	snp	C	T	T:29 C:0
EA2454	4434146	snp	A	T	T:27 A:0
EA2454	4434152	complex	GAAG	AAAA	AAAA:28 GAAG:0
EA2454	4434183	snp	T	G	G:30 T:0
EA2454	4434196	snp	A	G	G:31 A:0
EA2454	4434214	snp	C	T	T:29 C:0
EA2454	4435411	snp	A	C	C:27 A:0
EA2454	4435732	snp	G	A	A:64 G:0
EA2454	4435774	snp	A	T	T:57 A:0
EA2454	4435853	snp	T	C	C:51 T:0
EA2454	4436017	snp	C	A	A:42 C:0
EA2454	4436113	snp	T	C	C:38 T:0
EA2454	4436215	snp	C	A	A:69 C:0
EA2454	4436260	snp	G	A	A:67 G:0
EA2454	4436702	snp	G	A	A:48 G:0
EA2454	4437072	snp	A	G	G:27 A:1
EA2454	4437096	complex	TGCACCG	CGCAACA	CGCAACA:27 TGCACCG:2
EA2454	4437117	complex	ACGT	CCGC	CCGC:26 ACGT:1
EA2454	4437221	snp	T	A	A:21 T:0
EA2454	4437228	complex	GC	AG	AG:17 GC:0
EA2454	4437239	snp	A	G	G:16 A:0
EA2454	4437255	snp	A	G	G:11 A:0
EA2454	4437266	snp	C	T	T:10 C:0
EA2454	4437287	snp	T	A	A:10 T:0
EA2454	4437314	snp	T	G	G:11 T:0
EA2454	4437371	snp	A	G	G:15 A:0
EA2454	4437511	snp	C	T	T:28 C:0
EA2454	4437519	snp	C	A	A:28 C:0
EA2454	4437536	snp	G	A	A:28 G:0
EA2454	4437611	snp	T	C	C:22 T:0
EA2454	4437638	snp	A	C	C:19 A:0
EA2454	4437677	snp	T	C	C:17 T:0
EA2454	4437740	snp	A	G	G:17 A:0
EA2454	4437767	snp	T	C	C:18 T:0
EA2454	4437785	snp	C	T	T:22 C:0
EA2454	4437803	snp	G	A	A:20 G:0
EA2454	4437815	snp	A	T	T:20 A:0
EA2454	4437821	snp	C	T	T:20 C:0
EA2454	4437834	snp	A	C	C:19 A:0
EA2454	4439156	snp	G	A	A:14 G:0
EA2454	4439395	snp	A	G	G:10 A:0
EA2454	4439404	snp	A	G	G:10 A:0
EA2454	4439419	snp	A	G	G:10 A:0
EA2454	4439439	snp	A	T	T:16 A:0
EA2454	4439470	snp	T	A	A:19 T:0
EA2454	4439537	snp	G	T	T:24 G:0
EA2454	4439772	snp	A	T	T:32 A:0
EA2454	4439839	snp	G	A	A:23 G:0
EA2454	4439897	snp	A	G	G:12 A:0
EA2454	4439910	snp	A	C	C:13 A:0
EA2454	4439915	snp	G	A	A:13 G:0
EA2454	4439925	snp	A	G	G:13 A:0
EA2454	4439931	snp	A	G	G:12 A:0
EA2454	4439971	snp	G	T	T:13 G:0
EA2454	4439988	snp	C	T	T:10 C:0
EA2454	4440081	snp	T	C	C:26 T:0
EA2454	4440099	snp	T	A	A:32 T:0
EA2454	4440197	snp	G	T	T:30 G:0
EA2454	4440381	snp	T	C	C:25 T:0
EA2454	4440425	snp	A	G	G:25 A:0
EA2454	4440536	snp	G	A	A:18 G:0
EA2454	4440582	snp	G	A	A:12 G:0
EA2454	4440737	snp	A	G	G:10 A:0
EA2454	4440743	snp	C	T	T:11 C:0
EA2454	4440770	snp	G	A	A:13 G:0
EA2454	4440854	snp	T	C	C:18 T:0
EA2454	4440875	snp	T	G	G:24 T:0
EA2454	4440881	snp	T	C	C:24 T:0
EA2454	4440890	snp	T	C	C:29 T:0
EA2454	4440897	snp	C	T	T:31 C:0
EA2454	4440908	snp	A	C	C:28 A:0
EA2454	4440915	snp	G	T	T:31 G:0
EA2454	4440947	snp	T	A	A:34 T:0
EA2454	4440998	complex	CG	TA	TA:43 CG:0
EA2454	4441004	snp	A	G	G:43 A:0
EA2454	4441073	snp	A	G	G:48 A:0
EA2454	4441085	snp	T	G	G:48 T:0
EA2454	4441095	snp	C	T	T:47 C:0
EA2454	4441128	snp	G	T	T:43 G:0
EA2454	4441136	mnp	TG	AC	AC:43 TG:0
EA2454	4441190	snp	T	C	C:39 T:0
EA2454	4441205	snp	C	G	G:39 C:0
EA2454	4441223	snp	T	C	C:36 T:0
EA2454	4441229	snp	A	G	G:38 A:0
EA2454	4441286	complex	CGCT	TGCC	TGCC:19 CGCT:0
EA2454	4441334	snp	T	C	C:23 T:0
EA2454	4441527	complex	TGTCACCATCT	AGTCGCCAGCC	AGTCGCCAGCC:24 TGTCACCATCT:0
EA2454	4441549	snp	C	T	T:24 C:0
EA2454	4441556	snp	T	C	C:22 T:0
EA2454	4441567	snp	G	A	A:20 G:0
EA2454	4441579	snp	C	T	T:20 C:0
EA2454	4441585	snp	G	A	A:20 G:0
EA2454	4441591	snp	T	C	C:20 T:0
EA2454	4441600	complex	CCCCGTT	TCCTGTC	TCCTGTC:20 CCCCGTT:0
EA2454	4441612	snp	C	T	T:20 C:0
EA2454	4441618	snp	G	T	T:22 G:0
EA2454	4441633	snp	T	C	C:20 T:0
EA2454	4441645	complex	AACG	CACC	CACC:19 AACG:0
EA2454	4441654	snp	G	A	A:19 G:0
EA2454	4441660	snp	G	A	A:18 G:0
EA2454	4441669	complex	GCTTACTAG	TTTTGCTAA	TTTTGCTAA:17 GCTTACTAG:0
EA2454	4441685	complex	GGGGAA	TCTGAG	TCTGAG:17 GGGGAA:0
EA2454	4441703	snp	C	T	T:19 C:0
EA2454	4441714	snp	A	T	T:19 A:0
EA2454	4441722	snp	C	T	T:21 C:0
EA2454	4441745	snp	C	T	T:19 C:0
EA2454	4442995	snp	A	T	T:30 A:2
EA2454	4443833	snp	T	G	G:16 T:0
EA2454	4449842	snp	C	T	T:13 C:0
EA2454	4449848	complex	CGGA	TGGT	TGGT:14 CGGA:0
EA2454	4449881	snp	T	C	C:16 T:0
EA2454	4449908	snp	C	T	T:23 C:0
EA2454	4449923	complex	TGAT	AGAC	AGAC:24 TGAT:0
EA2454	4449935	complex	CGTT	TGTG	TGTG:25 CGTT:0
EA2454	4449956	snp	T	C	C:33 T:0
EA2454	4449974	snp	T	C	C:31 T:0
EA2454	4449983	snp	C	G	G:28 C:0
EA2454	4450022	snp	T	G	G:38 T:1
EA2454	4450067	snp	C	T	T:42 C:0
EA2454	4450115	snp	G	T	T:38 G:0
EA2454	4450151	snp	A	G	G:50 A:0
EA2454	4450286	snp	C	G	G:56 C:0
EA2454	4450294	snp	T	A	A:53 T:0
EA2454	4450348	complex	TCCGT	ACCGA	ACCGA:52 TCCGT:0
EA2454	4450358	snp	C	T	T:48 C:0
EA2454	4450366	complex	TGGAGGAA	CGGAACAG	CGGAACAG:43 TGGAGGAA:0
EA2454	4450397	snp	G	A	A:46 G:0
EA2454	4450432	snp	A	G	G:42 A:0
EA2454	4450441	snp	C	G	G:40 C:0
EA2454	4450451	complex	CAG	ACC	ACC:35 CAG:0
EA2454	4450462	snp	C	T	T:40 C:0
EA2454	4450481	snp	A	G	G:39 A:0
EA2454	4450486	snp	C	G	G:41 C:0
EA2454	4450539	complex	TAAAG	CAAAA	CAAAA:50 TAAAG:0
EA2454	4450561	snp	A	G	G:49 A:0
EA2454	4450579	snp	G	A	A:49 G:0
EA2454	4450589	snp	T	C	C:55 T:0
EA2454	4450648	snp	C	T	T:61 C:1
EA2454	4450666	complex	TACG	CACA	CACA:56 TACG:0
EA2454	4450690	complex	AGGT	GGGA	GGGA:57 AGGT:0
EA2454	4450699	snp	A	G	G:58 A:0
EA2454	4450713	snp	A	G	G:56 A:0
EA2454	4450722	snp	C	A	A:55 C:0
EA2454	4450731	snp	G	A	A:52 G:0
EA2454	4450747	snp	A	G	G:53 A:0
EA2454	4450776	snp	A	C	C:52 A:0
EA2454	4450785	snp	C	T	T:49 C:0
EA2454	4450815	complex	CGGTAAGACG	TGGCAGGTCA	TGGCAGGTCA:40 CGGTAAGACG:0
EA2454	4450836	complex	TAAC	CAAT	CAAT:46 TAAC:0
EA2454	4450846	snp	C	T	T:49 C:0
EA2454	4450861	snp	T	C	C:52 T:0
EA2454	4450878	snp	C	T	T:56 C:0
EA2454	4450914	complex	GGATAAAAT	AGAGAAAGC	AGAGAAAGC:50 GGATAAAAT:0
EA2454	4450956	snp	T	C	C:47 T:0
EA2454	4450970	snp	C	G	G:48 C:0
EA2454	4451046	snp	T	A	A:58 T:0
EA2454	4451056	complex	AGTGTC	TGCATT	TGCATT:57 AGTGTC:0
EA2454	4451073	snp	G	C	C:67 G:0
EA2454	4451118	snp	G	A	A:64 G:0
EA2454	4451130	complex	TCCT	CCCA	CCCA:60 TCCT:0
EA2454	4451160	complex	GCGA	ACGG	ACGG:56 GCGA:0
EA2454	4451178	complex	GGCA	AGCT	AGCT:48 GGCA:0
EA2454	4451195	snp	T	C	C:47 T:0
EA2454	4451214	snp	A	T	T:14 A:0
EA2454	4451227	complex	CAA	GAG	GAG:12 CAA:0
EA2454	4451235	snp	A	G	G:12 A:0
EA2454	4451245	snp	T	C	C:12 T:0
EA2454	4451251	snp	C	T	T:10 C:0
EA2454	4478572	snp	A	T	T:49 A:0
EA2454	4491535	snp	T	C	C:49 T:0
EA2454	4505570	ins	A	AG	AG:64 A:0
EA2454	4507253	del	TA	T	T:27 TA:0
EA2454	4509771	snp	G	A	A:53 G:0
EA2454	4510584	del	GT	G	G:19 GT:0
EA2454	4515568	snp	T	C	C:83 T:0
EA2454	4520058	snp	A	G	G:12 A:1
EA2454	4520064	snp	T	C	C:12 T:0
EA2454	4520070	snp	T	C	C:13 T:0
EA2454	4520148	snp	A	G	G:23 A:2
EA2454	4520296	snp	G	A	A:10 G:0
EA2454	4520298	snp	A	G	G:11 A:0
EA2454	4520825	snp	C	G	G:30 C:0
EA2454	4521494	snp	T	A	A:13 T:0
EA2454	4521518	snp	G	A	A:14 G:0
EA2454	4521526	snp	A	G	G:18 A:0
EA2454	4521569	complex	GCACCCCGGAA	ACAGTCAGAAG	ACAGTCAGAAG:17 GCACCCCGGAA:0
EA2454	4521584	snp	A	C	C:17 A:0
EA2454	4521589	snp	A	G	G:17 A:0
EA2454	4521598	complex	GCAGAACCGTGAGCTT	ACAGGAGCATGAACTC	ACAGGAGCATGAACTC:17 GCAGAACCGTGAGCTT:0
EA2454	4521623	snp	T	G	G:24 T:0
EA2454	4521639	snp	T	C	C:28 T:0
EA2454	4521665	complex	CTGCAGA	TTACAGG	TTACAGG:28 CTGCAGA:0
EA2454	4521680	mnp	CAC	AGT	AGT:28 CAC:0
EA2454	4521694	complex	CG	TT	TT:25 CG:0
EA2454	4521724	snp	G	T	T:29 G:0
EA2454	4521731	snp	C	A	A:28 C:0
EA2454	4521752	complex	GCA	ACT	ACT:28 GCA:0
EA2454	4521784	snp	C	T	T:26 C:0
EA2454	4521812	snp	C	T	T:20 C:0
EA2454	4521856	snp	T	C	C:13 T:0
EA2454	4521877	snp	G	A	A:15 G:0
EA2454	4521898	snp	T	C	C:16 T:0
EA2454	4521913	snp	A	G	G:15 A:0
EA2454	4521927	complex	CT	TC	TC:15 CT:0
EA2454	4521934	snp	T	C	C:15 T:0
EA2454	4521941	complex	ACCGTTCTTA	CTATCATTC	CTATCATTC:12 ACCGTTCTTA:0
EA2454	4521960	snp	T	C	C:14 T:0
EA2454	4521979	snp	C	T	T:11 C:0
EA2454	4524700	snp	T	C	C:77 T:0
EA2454	4526687	snp	C	A	A:52 C:0
EA2454	4531145	snp	C	T	T:75 C:0
EA2454	4533515	snp	A	G	G:31 A:0
EA2454	4544866	snp	T	C	C:34 T:0
EA2454	4559006	snp	C	A	A:57 C:0
EA2454	4564154	snp	T	A	A:77 T:0
EA2454	4568271	snp	A	G	G:54 A:0
EA2454	4568846	snp	G	T	T:59 G:0
EA2454	4578784	snp	A	G	G:28 A:0
EA2454	4586361	snp	T	C	C:20 T:0
EA2454	4588946	snp	A	G	G:55 A:0
EA2454	4593973	snp	A	C	C:89 A:0
EA2454	4595613	snp	A	G	G:41 A:0
EA2454	4603502	complex	CA	TC	TC:16 CA:0
EA2454	4613336	snp	C	A	A:55 C:0
EA2454	4613663	snp	G	T	T:67 G:0
EA2454	4616724	snp	A	G	G:68 A:0
EA2454	4617046	snp	T	C	C:27 T:0
EA2454	4617581	snp	A	G	G:21 A:0
EA2454	4619923	snp	T	C	C:69 T:0
EA2454	4626629	snp	A	G	G:95 A:0
EA2454	4638132	snp	G	A	A:75 G:0
EA2454	4640298	snp	C	T	T:81 C:0
EA2454	4652543	snp	C	T	T:35 C:0
EA2454	4653396	snp	C	T	T:50 C:1
EA2454	4660745	snp	G	A	A:57 G:0
EA2454	4661591	snp	A	G	G:42 A:0
EA2454	4664714	snp	C	A	A:56 C:0
EA2454	4665968	snp	G	A	A:59 G:0
EA2454	4670469	snp	A	G	G:11 A:0
EA2454	4670848	complex	TGCG	CGCA	CGCA:96 TGCG:3
EA2454	4670861	snp	T	C	C:109 T:3
EA2454	4670947	snp	T	C	C:88 T:0
EA2454	4676024	complex	TGAG	GGAT	GGAT:15 TGAG:0
EA2454	4676032	del	CA	C	C:16 CA:0
EA2454	4676043	snp	G	T	T:27 G:0
EA2454	4676049	snp	T	G	G:29 T:0
EA2454	4676060	snp	G	T	T:33 G:0
EA2454	4676065	snp	T	A	A:35 T:0
EA2454	4676075	complex	GATG	TATT	TATT:37 GATG:0
EA2454	4676096	complex	GAA	CAG	CAG:42 GAA:0
EA2454	4676103	complex	GGGT	TGAC	TGAC:40 GGGT:0
EA2454	4676406	snp	G	C	C:45 G:0
EA2454	4676421	snp	G	A	A:45 G:0
EA2454	4676505	snp	C	G	G:45 C:0
EA2454	4676553	snp	C	T	T:40 C:0
EA2454	4676559	snp	T	C	C:44 T:0
EA2454	4676571	complex	TGTC	AGTG	AGTG:36 TGTC:0
EA2454	4676635	snp	C	A	A:43 C:0
EA2454	4676734	snp	C	G	G:38 C:0
EA2454	4676748	snp	A	G	G:45 A:0
EA2454	4676766	snp	T	C	C:44 T:0
EA2454	4676781	snp	A	G	G:43 A:0
EA2454	4681821	complex	TCCG	ACCT	ACCT:10 TCCG:0
EA2454	4681879	snp	T	C	C:11 T:0
EA2454	4681884	snp	T	C	C:11 T:0
EA2454	4681890	snp	T	C	C:11 T:0
EA2454	4681899	snp	T	C	C:11 T:0
EA2454	4681911	complex	AAAAACT	TAAGACA	TAAGACA:12 AAAAACT:0
EA2454	4681923	snp	T	C	C:12 T:0
EA2454	4681932	complex	AGTGTGTGGAGGTTCC	GGTCTGCGGTGGCTCT	GGTCTGCGGTGGCTCT:12 AGTGTGTGGAGGTTCC:0
EA2454	4681959	complex	CACA	TGCC	TGCC:12 CACA:0
EA2454	4681978	complex	GTG	ATT	ATT:12 GTG:0
EA2454	4681986	complex	TCGT	CCGC	CCGC:13 TCGT:0
EA2454	4681996	complex	AGA	CGG	CGG:13 AGA:0
EA2454	4682007	complex	TATT	CATC	CATC:14 TATT:0
EA2454	4682016	snp	C	T	T:16 C:0
EA2454	4682025	snp	G	T	T:17 G:0
EA2454	4682064	snp	T	A	A:14 T:0
EA2454	4682073	complex	GTCCTCA	CTCATCT	CTCATCT:11 GTCCTCA:0
EA2454	4682172	snp	T	C	C:11 T:0
EA2454	4682187	snp	T	G	G:11 T:0
EA2454	4682205	snp	A	G	G:10 A:0
EA2454	4682211	snp	T	A	A:14 T:0
EA2454	4682230	complex	AGGTTAGT	GGGCTGGC	GGGCTGGC:15 AGGTTAGT:0
EA2454	4682246	complex	CATACCA	TGTAACG	TGTAACG:15 CATACCA:0
EA2454	4682262	complex	CGCTGT	AACTGC	AACTGC:15 CGCTGT:0
EA2454	4682288	snp	G	A	A:27 G:0
EA2454	4682296	snp	G	C	C:27 G:0
EA2454	4682301	complex	TTT	CTC	CTC:26 TTT:0
[truncated: 1,109 more rows]
