# Supplementary material for: Escherichia coli ST302: Genomic Analysis of Virulence Potential and Antimicrobial Resistance Mediated by Mobile Genetic Elements
Source: Front Microbiol. 2020 Jan 21;10:3098. doi: 10.3389/fmicb.2019.03098 (PMC6985150; doi:10.3389/fmicb.2019.03098)
Supplement: DATA S2 — ST302 SNP analysis. [file Data_Sheet_2.ZIP › SNP_Analysis/ST302_SNP/SNP_analysis/snippyout/ST302/IA4731-Poultry-ST302.out/snps.gff]

##gff-version 3
EA2454	snippy:4.3.6	variation	977	977	.	.	0	note=snp T=>C C:37 T:0
EA2454	snippy:4.3.6	variation	6517	6517	.	.	0	note=snp C=>T T:53 C:0
EA2454	snippy:4.3.6	variation	11382	11382	.	.	0	note=snp A=>G G:60 A:0
EA2454	snippy:4.3.6	variation	25719	25719	.	.	0	note=snp T=>C C:46 T:0
EA2454	snippy:4.3.6	variation	30862	30862	.	.	0	note=snp A=>C C:67 A:0
EA2454	snippy:4.3.6	variation	34494	34494	.	.	0	note=snp T=>C C:49 T:0
EA2454	snippy:4.3.6	variation	36375	36375	.	.	0	note=snp C=>A A:52 C:0
EA2454	snippy:4.3.6	variation	37987	37987	.	.	0	note=snp T=>C C:52 T:0
EA2454	snippy:4.3.6	variation	39065	39065	.	.	0	note=snp T=>C C:45 T:0
EA2454	snippy:4.3.6	variation	52423	52423	.	.	0	note=snp A=>C C:45 A:0
EA2454	snippy:4.3.6	variation	56628	56628	.	.	0	note=snp A=>C C:31 A:0
EA2454	snippy:4.3.6	variation	57116	57116	.	.	0	note=snp A=>T T:35 A:0
EA2454	snippy:4.3.6	variation	58152	58152	.	.	0	note=snp T=>C C:69 T:0
EA2454	snippy:4.3.6	variation	67315	67315	.	.	0	note=snp A=>C C:51 A:0
EA2454	snippy:4.3.6	variation	69595	69595	.	.	0	note=snp A=>G G:25 A:0
EA2454	snippy:4.3.6	variation	74952	74952	.	.	0	note=snp G=>T T:39 G:0
EA2454	snippy:4.3.6	variation	75057	75057	.	.	0	note=del GT=>G G:33 GT:0
EA2454	snippy:4.3.6	variation	84557	84557	.	.	0	note=snp T=>G G:53 T:0
EA2454	snippy:4.3.6	variation	102014	102014	.	.	0	note=snp A=>T T:79 A:0
EA2454	snippy:4.3.6	variation	111773	111773	.	.	0	note=snp C=>G G:56 C:0
EA2454	snippy:4.3.6	variation	124865	124865	.	.	0	note=snp T=>C C:38 T:0
EA2454	snippy:4.3.6	variation	130629	130629	.	.	0	note=snp C=>T T:50 C:0
EA2454	snippy:4.3.6	variation	131613	131613	.	.	0	note=snp A=>G G:75 A:0
EA2454	snippy:4.3.6	variation	140951	140951	.	.	0	note=snp T=>G G:81 T:0
EA2454	snippy:4.3.6	variation	146087	146087	.	.	0	note=snp A=>C C:53 A:0
EA2454	snippy:4.3.6	variation	162974	162974	.	.	0	note=snp G=>T T:35 G:0
EA2454	snippy:4.3.6	variation	163970	163970	.	.	0	note=del AT=>A A:16 AT:0
EA2454	snippy:4.3.6	variation	164371	164371	.	.	0	note=snp T=>A A:17 T:0
EA2454	snippy:4.3.6	variation	174420	174420	.	.	0	note=snp A=>G G:55 A:0
EA2454	snippy:4.3.6	variation	186550	186550	.	.	0	note=snp T=>C C:57 T:0
EA2454	snippy:4.3.6	variation	190313	190313	.	.	0	note=snp T=>C C:19 T:0
EA2454	snippy:4.3.6	variation	220577	220577	.	.	0	note=snp G=>A A:66 G:0
EA2454	snippy:4.3.6	variation	229589	229589	.	.	0	note=snp C=>T T:12 C:0
EA2454	snippy:4.3.6	variation	229594	229594	.	.	0	note=complex ATCG=>TTCA TTCA:12 ATCG:0
EA2454	snippy:4.3.6	variation	229613	229613	.	.	0	note=complex AAGACACTA=>GCGACGCTG GCGACGCTG:18 AAGACACTA:0
EA2454	snippy:4.3.6	variation	229626	229626	.	.	0	note=snp G=>C C:18 G:0
EA2454	snippy:4.3.6	variation	239221	239221	.	.	0	note=snp A=>G G:39 A:0
EA2454	snippy:4.3.6	variation	241567	241567	.	.	0	note=snp A=>G G:18 A:0
EA2454	snippy:4.3.6	variation	241572	241572	.	.	0	note=snp G=>A A:17 G:0
EA2454	snippy:4.3.6	variation	241603	241603	.	.	0	note=snp G=>A A:13 G:0
EA2454	snippy:4.3.6	variation	241652	241652	.	.	0	note=snp C=>T T:27 C:0
EA2454	snippy:4.3.6	variation	245301	245301	.	.	0	note=snp C=>T T:55 C:0
EA2454	snippy:4.3.6	variation	270317	270317	.	.	0	note=snp A=>T T:62 A:0
EA2454	snippy:4.3.6	variation	273279	273279	.	.	0	note=snp C=>T T:56 C:0
EA2454	snippy:4.3.6	variation	276220	276220	.	.	0	note=snp T=>C C:35 T:0
EA2454	snippy:4.3.6	variation	277907	277907	.	.	0	note=snp G=>T T:69 G:0
EA2454	snippy:4.3.6	variation	281316	281316	.	.	0	note=snp C=>T T:36 C:0
EA2454	snippy:4.3.6	variation	285627	285627	.	.	0	note=ins A=>AT AT:35 A:1
EA2454	snippy:4.3.6	variation	298286	298286	.	.	0	note=snp T=>C C:58 T:0
EA2454	snippy:4.3.6	variation	304693	304693	.	.	0	note=del AT=>A A:37 AT:0
EA2454	snippy:4.3.6	variation	313034	313034	.	.	0	note=snp A=>G G:36 A:0
EA2454	snippy:4.3.6	variation	314871	314871	.	.	0	note=snp C=>T T:35 C:0
EA2454	snippy:4.3.6	variation	317106	317106	.	.	0	note=snp T=>C C:63 T:1
EA2454	snippy:4.3.6	variation	318467	318467	.	.	0	note=snp T=>C C:64 T:0
EA2454	snippy:4.3.6	variation	322834	322834	.	.	0	note=snp C=>T T:53 C:0
EA2454	snippy:4.3.6	variation	332521	332521	.	.	0	note=snp A=>C C:24 A:0
EA2454	snippy:4.3.6	variation	333155	333155	.	.	0	note=snp G=>T T:52 G:0
EA2454	snippy:4.3.6	variation	334084	334084	.	.	0	note=snp G=>A A:66 G:0
EA2454	snippy:4.3.6	variation	337102	337102	.	.	0	note=snp G=>A A:51 G:1
EA2454	snippy:4.3.6	variation	342188	342188	.	.	0	note=snp G=>A A:58 G:0
EA2454	snippy:4.3.6	variation	350969	350969	.	.	0	note=snp A=>G G:39 A:0
EA2454	snippy:4.3.6	variation	359374	359374	.	.	0	note=snp C=>T T:65 C:0
EA2454	snippy:4.3.6	variation	371150	371150	.	.	0	note=snp T=>C C:80 T:0
EA2454	snippy:4.3.6	variation	376903	376903	.	.	0	note=snp G=>A A:84 G:0
EA2454	snippy:4.3.6	variation	388918	388918	.	.	0	note=snp T=>G G:74 T:0
EA2454	snippy:4.3.6	variation	393575	393575	.	.	0	note=snp A=>G G:45 A:0
EA2454	snippy:4.3.6	variation	393743	393743	.	.	0	note=snp A=>G G:86 A:2
EA2454	snippy:4.3.6	variation	396912	396912	.	.	0	note=snp T=>A A:66 T:0
EA2454	snippy:4.3.6	variation	397444	397444	.	.	0	note=snp C=>G G:60 C:0
EA2454	snippy:4.3.6	variation	407113	407113	.	.	0	note=snp A=>G G:69 A:0
EA2454	snippy:4.3.6	variation	407887	407887	.	.	0	note=snp C=>G G:62 C:0
EA2454	snippy:4.3.6	variation	412458	412458	.	.	0	note=snp G=>A A:70 G:0
EA2454	snippy:4.3.6	variation	437474	437474	.	.	0	note=snp A=>G G:60 A:0
EA2454	snippy:4.3.6	variation	440837	440837	.	.	0	note=snp C=>A A:73 C:0
EA2454	snippy:4.3.6	variation	443213	443213	.	.	0	note=snp A=>G G:10 A:0
EA2454	snippy:4.3.6	variation	447459	447459	.	.	0	note=snp A=>G G:40 A:0
EA2454	snippy:4.3.6	variation	448711	448711	.	.	0	note=snp A=>G G:51 A:0
EA2454	snippy:4.3.6	variation	454890	454890	.	.	0	note=snp C=>T T:66 C:0
EA2454	snippy:4.3.6	variation	456123	456123	.	.	0	note=snp G=>A A:51 G:0
EA2454	snippy:4.3.6	variation	457082	457082	.	.	0	note=snp C=>T T:56 C:0
EA2454	snippy:4.3.6	variation	465826	465826	.	.	0	note=snp A=>T T:74 A:0
EA2454	snippy:4.3.6	variation	470437	470437	.	.	0	note=snp C=>T T:66 C:1
EA2454	snippy:4.3.6	variation	472911	472911	.	.	0	note=snp T=>C C:62 T:0
EA2454	snippy:4.3.6	variation	478727	478727	.	.	0	note=snp C=>A A:57 C:0
EA2454	snippy:4.3.6	variation	483833	483833	.	.	0	note=snp G=>A A:43 G:0
EA2454	snippy:4.3.6	variation	485246	485246	.	.	0	note=snp C=>T T:62 C:0
EA2454	snippy:4.3.6	variation	485779	485779	.	.	0	note=snp C=>G G:105 C:0
EA2454	snippy:4.3.6	variation	485955	485955	.	.	0	note=snp G=>T T:81 G:2
EA2454	snippy:4.3.6	variation	486024	486024	.	.	0	note=snp G=>A A:82 G:1
EA2454	snippy:4.3.6	variation	497460	497460	.	.	0	note=snp T=>G G:12 T:0
EA2454	snippy:4.3.6	variation	506352	506352	.	.	0	note=snp T=>G G:24 T:0
EA2454	snippy:4.3.6	variation	510992	510992	.	.	0	note=snp C=>T T:54 C:0
EA2454	snippy:4.3.6	variation	519195	519195	.	.	0	note=snp G=>A A:25 G:0
EA2454	snippy:4.3.6	variation	519811	519811	.	.	0	note=snp A=>C C:53 A:0
EA2454	snippy:4.3.6	variation	520294	520294	.	.	0	note=snp C=>T T:59 C:0
EA2454	snippy:4.3.6	variation	528123	528123	.	.	0	note=snp A=>T T:63 A:0
EA2454	snippy:4.3.6	variation	534151	534151	.	.	0	note=snp A=>G G:75 A:0
EA2454	snippy:4.3.6	variation	537287	537287	.	.	0	note=snp G=>C C:30 G:0
EA2454	snippy:4.3.6	variation	539426	539426	.	.	0	note=snp T=>C C:78 T:0
EA2454	snippy:4.3.6	variation	546428	546428	.	.	0	note=snp A=>C C:61 A:0
EA2454	snippy:4.3.6	variation	550000	550000	.	.	0	note=snp G=>A A:73 G:0
EA2454	snippy:4.3.6	variation	559017	559017	.	.	0	note=snp A=>G G:71 A:0
EA2454	snippy:4.3.6	variation	559185	559185	.	.	0	note=snp G=>A A:76 G:1
EA2454	snippy:4.3.6	variation	561226	561226	.	.	0	note=snp G=>A A:52 G:0
EA2454	snippy:4.3.6	variation	561259	561259	.	.	0	note=snp C=>A A:46 C:0
EA2454	snippy:4.3.6	variation	561272	561272	.	.	0	note=snp T=>A A:45 T:0
EA2454	snippy:4.3.6	variation	562933	562933	.	.	0	note=snp T=>C C:68 T:0
EA2454	snippy:4.3.6	variation	582745	582745	.	.	0	note=snp C=>T T:47 C:0
EA2454	snippy:4.3.6	variation	590181	590181	.	.	0	note=ins T=>TA TA:24 T:0
EA2454	snippy:4.3.6	variation	597386	597386	.	.	0	note=snp A=>G G:83 A:0
EA2454	snippy:4.3.6	variation	606088	606088	.	.	0	note=ins G=>GA GA:62 G:0
EA2454	snippy:4.3.6	variation	611222	611222	.	.	0	note=del TGCATA=>T T:35 TGCATA:0
EA2454	snippy:4.3.6	variation	611872	611872	.	.	0	note=snp A=>G G:14 A:0
EA2454	snippy:4.3.6	variation	612726	612726	.	.	0	note=snp A=>G G:14 A:0
EA2454	snippy:4.3.6	variation	613906	613906	.	.	0	note=snp C=>A A:30 C:0
EA2454	snippy:4.3.6	variation	634477	634477	.	.	0	note=snp C=>A A:87 C:2
EA2454	snippy:4.3.6	variation	642337	642337	.	.	0	note=snp A=>G G:74 A:1
EA2454	snippy:4.3.6	variation	669330	669330	.	.	0	note=snp A=>G G:78 A:0
EA2454	snippy:4.3.6	variation	670594	670594	.	.	0	note=snp C=>A A:67 C:0
EA2454	snippy:4.3.6	variation	676368	676368	.	.	0	note=snp G=>A A:68 G:0
EA2454	snippy:4.3.6	variation	683177	683177	.	.	0	note=snp T=>G G:62 T:0
EA2454	snippy:4.3.6	variation	686003	686003	.	.	0	note=snp A=>G G:47 A:0
EA2454	snippy:4.3.6	variation	686104	686104	.	.	0	note=snp G=>C C:63 G:0
EA2454	snippy:4.3.6	variation	687410	687410	.	.	0	note=snp A=>G G:59 A:0
EA2454	snippy:4.3.6	variation	690408	690408	.	.	0	note=snp A=>G G:57 A:0
EA2454	snippy:4.3.6	variation	690611	690611	.	.	0	note=snp T=>C C:44 T:0
EA2454	snippy:4.3.6	variation	691401	691401	.	.	0	note=snp C=>T T:64 C:0
EA2454	snippy:4.3.6	variation	705263	705263	.	.	0	note=snp C=>A A:77 C:0
EA2454	snippy:4.3.6	variation	709632	709632	.	.	0	note=snp T=>C C:67 T:0
EA2454	snippy:4.3.6	variation	710977	710977	.	.	0	note=snp A=>G G:45 A:0
EA2454	snippy:4.3.6	variation	714973	714973	.	.	0	note=snp C=>T T:44 C:0
EA2454	snippy:4.3.6	variation	715370	715370	.	.	0	note=snp C=>T T:51 C:1
EA2454	snippy:4.3.6	variation	719734	719734	.	.	0	note=snp C=>T T:85 C:0
EA2454	snippy:4.3.6	variation	731219	731219	.	.	0	note=snp T=>G G:88 T:0
EA2454	snippy:4.3.6	variation	731329	731329	.	.	0	note=snp G=>A A:89 G:0
EA2454	snippy:4.3.6	variation	737672	737672	.	.	0	note=snp A=>G G:73 A:0
EA2454	snippy:4.3.6	variation	743375	743375	.	.	0	note=snp T=>A A:83 T:0
EA2454	snippy:4.3.6	variation	751386	751386	.	.	0	note=snp G=>A A:104 G:0
EA2454	snippy:4.3.6	variation	754898	754898	.	.	0	note=snp G=>A A:82 G:0
EA2454	snippy:4.3.6	variation	755366	755366	.	.	0	note=snp A=>G G:77 A:0
EA2454	snippy:4.3.6	variation	756040	756040	.	.	0	note=snp T=>G G:70 T:0
EA2454	snippy:4.3.6	variation	758394	758394	.	.	0	note=snp C=>T T:57 C:0
EA2454	snippy:4.3.6	variation	765032	765032	.	.	0	note=snp T=>C C:90 T:0
EA2454	snippy:4.3.6	variation	779769	779769	.	.	0	note=del TA=>T T:11 TA:0
EA2454	snippy:4.3.6	variation	781424	781424	.	.	0	note=snp T=>G G:76 T:0
EA2454	snippy:4.3.6	variation	781436	781436	.	.	0	note=snp C=>A A:81 C:0
EA2454	snippy:4.3.6	variation	781442	781442	.	.	0	note=snp G=>A A:80 G:0
EA2454	snippy:4.3.6	variation	781448	781448	.	.	0	note=snp G=>A A:83 G:0
EA2454	snippy:4.3.6	variation	785375	785375	.	.	0	note=snp T=>C C:46 T:0
EA2454	snippy:4.3.6	variation	788461	788461	.	.	0	note=snp G=>T T:50 G:0
EA2454	snippy:4.3.6	variation	789417	789417	.	.	0	note=snp A=>C C:78 A:0
EA2454	snippy:4.3.6	variation	803220	803220	.	.	0	note=snp G=>A A:44 G:2
EA2454	snippy:4.3.6	variation	805481	805481	.	.	0	note=snp A=>G G:45 A:0
EA2454	snippy:4.3.6	variation	815610	815610	.	.	0	note=snp T=>A A:45 T:0
EA2454	snippy:4.3.6	variation	817985	817985	.	.	0	note=snp T=>G G:43 T:0
EA2454	snippy:4.3.6	variation	818649	818649	.	.	0	note=snp A=>C C:50 A:0
EA2454	snippy:4.3.6	variation	829606	829606	.	.	0	note=snp G=>A A:66 G:0
EA2454	snippy:4.3.6	variation	831520	831520	.	.	0	note=snp G=>T T:63 G:0
EA2454	snippy:4.3.6	variation	839497	839497	.	.	0	note=snp T=>A A:38 T:0
EA2454	snippy:4.3.6	variation	852695	852695	.	.	0	note=snp A=>G G:41 A:0
EA2454	snippy:4.3.6	variation	860226	860226	.	.	0	note=snp C=>A A:42 C:0
EA2454	snippy:4.3.6	variation	894538	894538	.	.	0	note=snp C=>T T:35 C:0
EA2454	snippy:4.3.6	variation	904482	904482	.	.	0	note=snp A=>G G:36 A:0
EA2454	snippy:4.3.6	variation	923875	923875	.	.	0	note=snp T=>A A:67 T:0
EA2454	snippy:4.3.6	variation	924579	924579	.	.	0	note=snp T=>C C:59 T:0
EA2454	snippy:4.3.6	variation	926548	926548	.	.	0	note=snp G=>A A:76 G:0
EA2454	snippy:4.3.6	variation	930102	930102	.	.	0	note=snp A=>G G:55 A:0
EA2454	snippy:4.3.6	variation	934663	934663	.	.	0	note=snp G=>A A:48 G:0
EA2454	snippy:4.3.6	variation	935854	935854	.	.	0	note=snp C=>T T:35 C:0
EA2454	snippy:4.3.6	variation	938891	938891	.	.	0	note=snp T=>C C:62 T:0
EA2454	snippy:4.3.6	variation	938923	938923	.	.	0	note=snp G=>A A:54 G:0
EA2454	snippy:4.3.6	variation	945162	945162	.	.	0	note=snp A=>G G:73 A:0
EA2454	snippy:4.3.6	variation	946875	946875	.	.	0	note=snp T=>C C:48 T:0
EA2454	snippy:4.3.6	variation	953884	953884	.	.	0	note=snp T=>C C:12 T:0
EA2454	snippy:4.3.6	variation	953998	953998	.	.	0	note=snp G=>A A:61 G:0
EA2454	snippy:4.3.6	variation	954055	954055	.	.	0	note=complex CCGG=>GCAC GCAC:80 CCGG:0
EA2454	snippy:4.3.6	variation	954235	954235	.	.	0	note=complex ATGT=>GTGG GTGG:84 ATGT:0
EA2454	snippy:4.3.6	variation	954391	954391	.	.	0	note=snp G=>A A:47 G:0
EA2454	snippy:4.3.6	variation	962114	962114	.	.	0	note=complex CTCAGA=>GCCAGC GCCAGC:12 CTCAGA:0
EA2454	snippy:4.3.6	variation	962126	962126	.	.	0	note=complex TTCCAGG=>ATTTAGA ATTTAGA:12 TTCCAGG:0
EA2454	snippy:4.3.6	variation	962144	962144	.	.	0	note=snp C=>T T:14 C:0
EA2454	snippy:4.3.6	variation	962169	962169	.	.	0	note=snp G=>A A:14 G:0
EA2454	snippy:4.3.6	variation	981741	981741	.	.	0	note=snp A=>C C:10 A:0
EA2454	snippy:4.3.6	variation	983743	983743	.	.	0	note=snp A=>G G:84 A:0
EA2454	snippy:4.3.6	variation	986640	986640	.	.	0	note=snp G=>A A:90 G:0
EA2454	snippy:4.3.6	variation	990058	990058	.	.	0	note=snp G=>T T:107 G:0
EA2454	snippy:4.3.6	variation	990374	990374	.	.	0	note=snp C=>A A:99 C:0
EA2454	snippy:4.3.6	variation	999377	999377	.	.	0	note=snp G=>A A:37 G:0
EA2454	snippy:4.3.6	variation	1002504	1002504	.	.	0	note=snp C=>T T:33 C:0
EA2454	snippy:4.3.6	variation	1003603	1003603	.	.	0	note=snp A=>G G:23 A:0
EA2454	snippy:4.3.6	variation	1003611	1003611	.	.	0	note=snp C=>A A:20 C:0
EA2454	snippy:4.3.6	variation	1003672	1003672	.	.	0	note=snp C=>T T:14 C:1
EA2454	snippy:4.3.6	variation	1003690	1003690	.	.	0	note=snp T=>C C:11 T:0
EA2454	snippy:4.3.6	variation	1026843	1026843	.	.	0	note=snp T=>C C:49 T:0
EA2454	snippy:4.3.6	variation	1026952	1026952	.	.	0	note=snp C=>T T:45 C:0
EA2454	snippy:4.3.6	variation	1033522	1033522	.	.	0	note=snp C=>A A:53 C:0
EA2454	snippy:4.3.6	variation	1041381	1041381	.	.	0	note=snp C=>T T:37 C:0
EA2454	snippy:4.3.6	variation	1044717	1044717	.	.	0	note=snp G=>A A:56 G:0
EA2454	snippy:4.3.6	variation	1046210	1046210	.	.	0	note=snp G=>A A:63 G:2
EA2454	snippy:4.3.6	variation	1049442	1049442	.	.	0	note=snp G=>A A:54 G:0
EA2454	snippy:4.3.6	variation	1052435	1052435	.	.	0	note=snp C=>T T:43 C:0
EA2454	snippy:4.3.6	variation	1055114	1055114	.	.	0	note=snp T=>G G:67 T:0
EA2454	snippy:4.3.6	variation	1067401	1067401	.	.	0	note=snp C=>A A:121 C:0
EA2454	snippy:4.3.6	variation	1073767	1073767	.	.	0	note=snp A=>G G:82 A:0
EA2454	snippy:4.3.6	variation	1079000	1079000	.	.	0	note=snp T=>C C:67 T:0
EA2454	snippy:4.3.6	variation	1082762	1082762	.	.	0	note=snp G=>A A:83 G:0
EA2454	snippy:4.3.6	variation	1093309	1093309	.	.	0	note=snp A=>G G:66 A:0
EA2454	snippy:4.3.6	variation	1098037	1098037	.	.	0	note=snp T=>G G:68 T:0
EA2454	snippy:4.3.6	variation	1128458	1128458	.	.	0	note=snp T=>C C:15 T:0
EA2454	snippy:4.3.6	variation	1138215	1138215	.	.	0	note=snp T=>C C:90 T:0
EA2454	snippy:4.3.6	variation	1144904	1144904	.	.	0	note=snp C=>T T:21 C:1
EA2454	snippy:4.3.6	variation	1144975	1144975	.	.	0	note=snp T=>C C:12 T:0
EA2454	snippy:4.3.6	variation	1153745	1153745	.	.	0	note=snp G=>A A:83 G:0
EA2454	snippy:4.3.6	variation	1160822	1160822	.	.	0	note=snp A=>T T:74 A:0
EA2454	snippy:4.3.6	variation	1167666	1167666	.	.	0	note=snp T=>C C:63 T:0
EA2454	snippy:4.3.6	variation	1173060	1173060	.	.	0	note=snp C=>T T:81 C:0
EA2454	snippy:4.3.6	variation	1174352	1174352	.	.	0	note=snp T=>C C:32 T:0
EA2454	snippy:4.3.6	variation	1186746	1186746	.	.	0	note=snp T=>C C:85 T:0
EA2454	snippy:4.3.6	variation	1190353	1190353	.	.	0	note=snp G=>T T:38 G:0
EA2454	snippy:4.3.6	variation	1204325	1204325	.	.	0	note=snp C=>T T:23 C:0
EA2454	snippy:4.3.6	variation	1211256	1211256	.	.	0	note=snp T=>C C:73 T:0
EA2454	snippy:4.3.6	variation	1225308	1225308	.	.	0	note=snp C=>A A:73 C:0
EA2454	snippy:4.3.6	variation	1228038	1228038	.	.	0	note=snp C=>T T:60 C:1
EA2454	snippy:4.3.6	variation	1236723	1236723	.	.	0	note=snp T=>C C:52 T:0
EA2454	snippy:4.3.6	variation	1253669	1253669	.	.	0	note=snp C=>T T:57 C:0
EA2454	snippy:4.3.6	variation	1254097	1254097	.	.	0	note=snp A=>G G:93 A:1
EA2454	snippy:4.3.6	variation	1261876	1261876	.	.	0	note=snp A=>C C:36 A:0
EA2454	snippy:4.3.6	variation	1264081	1264081	.	.	0	note=snp A=>G G:45 A:0
EA2454	snippy:4.3.6	variation	1279253	1279253	.	.	0	note=snp C=>T T:45 C:0
EA2454	snippy:4.3.6	variation	1280572	1280572	.	.	0	note=snp C=>A A:63 C:0
EA2454	snippy:4.3.6	variation	1289894	1289894	.	.	0	note=snp A=>G G:69 A:0
EA2454	snippy:4.3.6	variation	1292233	1292233	.	.	0	note=snp A=>G G:78 A:1
EA2454	snippy:4.3.6	variation	1299878	1299878	.	.	0	note=snp C=>T T:49 C:0
EA2454	snippy:4.3.6	variation	1311735	1311735	.	.	0	note=snp G=>A A:64 G:0
EA2454	snippy:4.3.6	variation	1317400	1317400	.	.	0	note=snp G=>A A:86 G:0
EA2454	snippy:4.3.6	variation	1320805	1320805	.	.	0	note=snp A=>G G:34 A:0
EA2454	snippy:4.3.6	variation	1322163	1322163	.	.	0	note=snp T=>C C:50 T:0
EA2454	snippy:4.3.6	variation	1322665	1322665	.	.	0	note=snp T=>C C:33 T:0
EA2454	snippy:4.3.6	variation	1331179	1331179	.	.	0	note=snp T=>G G:65 T:0
EA2454	snippy:4.3.6	variation	1340886	1340886	.	.	0	note=snp A=>C C:68 A:0
EA2454	snippy:4.3.6	variation	1358384	1358384	.	.	0	note=snp A=>G G:47 A:0
EA2454	snippy:4.3.6	variation	1360577	1360577	.	.	0	note=snp A=>G G:53 A:0
EA2454	snippy:4.3.6	variation	1371250	1371250	.	.	0	note=snp T=>C C:35 T:0
EA2454	snippy:4.3.6	variation	1382646	1382646	.	.	0	note=snp C=>T T:47 C:0
EA2454	snippy:4.3.6	variation	1392683	1392683	.	.	0	note=snp C=>T T:43 C:0
EA2454	snippy:4.3.6	variation	1394505	1394505	.	.	0	note=snp A=>G G:72 A:0
EA2454	snippy:4.3.6	variation	1397531	1397531	.	.	0	note=snp G=>A A:54 G:0
EA2454	snippy:4.3.6	variation	1401264	1401264	.	.	0	note=snp A=>G G:56 A:0
EA2454	snippy:4.3.6	variation	1413295	1413295	.	.	0	note=snp T=>C C:42 T:0
EA2454	snippy:4.3.6	variation	1416501	1416501	.	.	0	note=snp A=>C C:63 A:0
EA2454	snippy:4.3.6	variation	1421020	1421020	.	.	0	note=snp G=>A A:63 G:0
EA2454	snippy:4.3.6	variation	1426621	1426621	.	.	0	note=snp T=>G G:11 T:0
EA2454	snippy:4.3.6	variation	1434846	1434846	.	.	0	note=snp T=>A A:57 T:0
EA2454	snippy:4.3.6	variation	1435223	1435223	.	.	0	note=snp G=>A A:53 G:0
EA2454	snippy:4.3.6	variation	1442459	1442459	.	.	0	note=snp G=>A A:49 G:0
EA2454	snippy:4.3.6	variation	1443281	1443281	.	.	0	note=snp G=>A A:26 G:0
EA2454	snippy:4.3.6	variation	1443339	1443339	.	.	0	note=snp C=>T T:16 C:0
EA2454	snippy:4.3.6	variation	1445619	1445619	.	.	0	note=snp G=>A A:76 G:0
EA2454	snippy:4.3.6	variation	1445708	1445708	.	.	0	note=snp G=>A A:71 G:0
EA2454	snippy:4.3.6	variation	1455169	1455169	.	.	0	note=snp G=>A A:75 G:0
EA2454	snippy:4.3.6	variation	1461457	1461457	.	.	0	note=snp T=>G G:58 T:0
EA2454	snippy:4.3.6	variation	1471260	1471260	.	.	0	note=snp C=>T T:56 C:0
EA2454	snippy:4.3.6	variation	1475821	1475821	.	.	0	note=snp C=>T T:32 C:0
EA2454	snippy:4.3.6	variation	1480708	1480708	.	.	0	note=snp T=>G G:69 T:0
EA2454	snippy:4.3.6	variation	1484305	1484305	.	.	0	note=snp C=>T T:41 C:0
EA2454	snippy:4.3.6	variation	1487410	1487410	.	.	0	note=snp G=>A A:25 G:0
EA2454	snippy:4.3.6	variation	1492527	1492527	.	.	0	note=ins C=>CA CA:39 C:0
EA2454	snippy:4.3.6	variation	1495581	1495581	.	.	0	note=snp T=>A A:66 T:0
EA2454	snippy:4.3.6	variation	1496904	1496904	.	.	0	note=snp G=>A A:52 G:1
EA2454	snippy:4.3.6	variation	1518455	1518455	.	.	0	note=snp G=>A A:47 G:0
EA2454	snippy:4.3.6	variation	1525679	1525679	.	.	0	note=snp C=>T T:45 C:0
EA2454	snippy:4.3.6	variation	1533339	1533339	.	.	0	note=snp A=>G G:43 A:0
EA2454	snippy:4.3.6	variation	1534292	1534292	.	.	0	note=snp A=>G G:43 A:0
EA2454	snippy:4.3.6	variation	1547465	1547465	.	.	0	note=snp G=>T T:34 G:0
EA2454	snippy:4.3.6	variation	1549828	1549828	.	.	0	note=snp T=>C C:55 T:0
EA2454	snippy:4.3.6	variation	1549888	1549888	.	.	0	note=snp G=>A A:59 G:0
EA2454	snippy:4.3.6	variation	1557966	1557966	.	.	0	note=snp A=>G G:85 A:0
EA2454	snippy:4.3.6	variation	1560679	1560679	.	.	0	note=snp G=>A A:41 G:1
EA2454	snippy:4.3.6	variation	1570233	1570233	.	.	0	note=snp A=>G G:53 A:0
EA2454	snippy:4.3.6	variation	1576045	1576045	.	.	0	note=snp T=>C C:64 T:2
EA2454	snippy:4.3.6	variation	1577742	1577742	.	.	0	note=snp G=>A A:67 G:0
EA2454	snippy:4.3.6	variation	1587710	1587710	.	.	0	note=snp C=>A A:56 C:0
EA2454	snippy:4.3.6	variation	1587792	1587792	.	.	0	note=snp A=>C C:44 A:0
EA2454	snippy:4.3.6	variation	1588489	1588489	.	.	0	note=snp G=>A A:53 G:0
EA2454	snippy:4.3.6	variation	1592505	1592505	.	.	0	note=snp T=>C C:46 T:0
EA2454	snippy:4.3.6	variation	1597496	1597496	.	.	0	note=snp T=>C C:48 T:0
EA2454	snippy:4.3.6	variation	1597743	1597743	.	.	0	note=snp C=>T T:40 C:0
EA2454	snippy:4.3.6	variation	1599906	1599906	.	.	0	note=snp T=>C C:51 T:0
EA2454	snippy:4.3.6	variation	1600199	1600199	.	.	0	note=snp C=>T T:48 C:0
EA2454	snippy:4.3.6	variation	1600919	1600919	.	.	0	note=snp A=>G G:67 A:0
EA2454	snippy:4.3.6	variation	1608650	1608650	.	.	0	note=del TA=>T T:42 TA:0
EA2454	snippy:4.3.6	variation	1612435	1612435	.	.	0	note=snp G=>A A:53 G:0
EA2454	snippy:4.3.6	variation	1613406	1613406	.	.	0	note=snp T=>A A:38 T:0
EA2454	snippy:4.3.6	variation	1613463	1613463	.	.	0	note=snp A=>G G:37 A:0
EA2454	snippy:4.3.6	variation	1613485	1613485	.	.	0	note=snp C=>T T:34 C:0
EA2454	snippy:4.3.6	variation	1616033	1616033	.	.	0	note=snp G=>A A:68 G:0
EA2454	snippy:4.3.6	variation	1619172	1619172	.	.	0	note=snp G=>A A:19 G:0
EA2454	snippy:4.3.6	variation	1619178	1619178	.	.	0	note=complex TACA=>AACG AACG:17 TACA:0
EA2454	snippy:4.3.6	variation	1620945	1620945	.	.	0	note=snp C=>T T:11 C:0
EA2454	snippy:4.3.6	variation	1621020	1621020	.	.	0	note=snp C=>A A:22 C:0
EA2454	snippy:4.3.6	variation	1621049	1621049	.	.	0	note=snp G=>A A:20 G:0
EA2454	snippy:4.3.6	variation	1621074	1621074	.	.	0	note=snp T=>A A:23 T:0
EA2454	snippy:4.3.6	variation	1621137	1621137	.	.	0	note=snp T=>A A:20 T:0
EA2454	snippy:4.3.6	variation	1624032	1624032	.	.	0	note=snp A=>T T:12 A:0
EA2454	snippy:4.3.6	variation	1624047	1624047	.	.	0	note=snp C=>T T:13 C:0
EA2454	snippy:4.3.6	variation	1624053	1624053	.	.	0	note=snp C=>T T:13 C:0
EA2454	snippy:4.3.6	variation	1624069	1624069	.	.	0	note=complex GAAGGT=>AACGGC AACGGC:15 GAAGGT:0
EA2454	snippy:4.3.6	variation	1624086	1624086	.	.	0	note=snp C=>T T:18 C:0
EA2454	snippy:4.3.6	variation	1624128	1624128	.	.	0	note=complex TAG=>AAA AAA:20 TAG:0
EA2454	snippy:4.3.6	variation	1624137	1624137	.	.	0	note=snp T=>C C:21 T:0
EA2454	snippy:4.3.6	variation	1624153	1624153	.	.	0	note=snp T=>A A:20 T:0
EA2454	snippy:4.3.6	variation	1624217	1624217	.	.	0	note=snp A=>G G:22 A:0
EA2454	snippy:4.3.6	variation	1624254	1624254	.	.	0	note=snp A=>G G:21 A:0
EA2454	snippy:4.3.6	variation	1624263	1624263	.	.	0	note=complex ATTG=>GTTA GTTA:21 ATTG:0
EA2454	snippy:4.3.6	variation	1624280	1624280	.	.	0	note=snp T=>C C:23 T:0
EA2454	snippy:4.3.6	variation	1624351	1624351	.	.	0	note=complex GT=>TA TA:10 GT:0
EA2454	snippy:4.3.6	variation	1625175	1625175	.	.	0	note=complex TCCG=>CCCA CCCA:11 TCCG:0
EA2454	snippy:4.3.6	variation	1625193	1625193	.	.	0	note=snp G=>A A:17 G:0
EA2454	snippy:4.3.6	variation	1625205	1625205	.	.	0	note=snp C=>T T:20 C:0
EA2454	snippy:4.3.6	variation	1625235	1625235	.	.	0	note=snp A=>G G:29 A:0
EA2454	snippy:4.3.6	variation	1625258	1625258	.	.	0	note=complex AACTA=>GACTC GACTC:33 AACTA:0
EA2454	snippy:4.3.6	variation	1625280	1625280	.	.	0	note=snp A=>T T:41 A:0
EA2454	snippy:4.3.6	variation	1625298	1625298	.	.	0	note=snp A=>G G:45 A:0
EA2454	snippy:4.3.6	variation	1625376	1625376	.	.	0	note=snp G=>T T:57 G:0
EA2454	snippy:4.3.6	variation	1625382	1625382	.	.	0	note=snp T=>C C:56 T:0
EA2454	snippy:4.3.6	variation	1625390	1625390	.	.	0	note=snp G=>A A:59 G:0
EA2454	snippy:4.3.6	variation	1625406	1625406	.	.	0	note=complex AGGC=>TGGT TGGT:67 AGGC:0
EA2454	snippy:4.3.6	variation	1625417	1625417	.	.	0	note=snp G=>A A:68 G:0
EA2454	snippy:4.3.6	variation	1625424	1625424	.	.	0	note=snp G=>A A:65 G:0
EA2454	snippy:4.3.6	variation	1625430	1625430	.	.	0	note=snp G=>A A:61 G:0
EA2454	snippy:4.3.6	variation	1625455	1625455	.	.	0	note=snp G=>A A:67 G:0
EA2454	snippy:4.3.6	variation	1625460	1625460	.	.	0	note=snp A=>T T:67 A:0
EA2454	snippy:4.3.6	variation	1625475	1625475	.	.	0	note=complex CGGT=>AGGA AGGA:62 CGGT:0
EA2454	snippy:4.3.6	variation	1625505	1625505	.	.	0	note=snp A=>T T:58 A:0
EA2454	snippy:4.3.6	variation	1625519	1625519	.	.	0	note=snp G=>A A:60 G:0
EA2454	snippy:4.3.6	variation	1625559	1625559	.	.	0	note=snp G=>A A:57 G:0
EA2454	snippy:4.3.6	variation	1625589	1625589	.	.	0	note=snp C=>A A:63 C:0
EA2454	snippy:4.3.6	variation	1625637	1625637	.	.	0	note=snp T=>C C:61 T:0
EA2454	snippy:4.3.6	variation	1625649	1625649	.	.	0	note=complex CG=>TC TC:57 CG:0
EA2454	snippy:4.3.6	variation	1625658	1625658	.	.	0	note=snp T=>C C:62 T:0
EA2454	snippy:4.3.6	variation	1625688	1625688	.	.	0	note=complex TGTC=>CATT CATT:49 TGTC:0
EA2454	snippy:4.3.6	variation	1625826	1625826	.	.	0	note=snp T=>C C:65 T:0
EA2454	snippy:4.3.6	variation	1625835	1625835	.	.	0	note=snp A=>G G:62 A:0
EA2454	snippy:4.3.6	variation	1625853	1625853	.	.	0	note=snp T=>G G:58 T:0
EA2454	snippy:4.3.6	variation	1625874	1625874	.	.	0	note=snp T=>C C:53 T:0
EA2454	snippy:4.3.6	variation	1625895	1625895	.	.	0	note=snp A=>G G:44 A:0
EA2454	snippy:4.3.6	variation	1625922	1625922	.	.	0	note=snp T=>C C:40 T:0
EA2454	snippy:4.3.6	variation	1625946	1625946	.	.	0	note=snp T=>A A:41 T:0
EA2454	snippy:4.3.6	variation	1625960	1625960	.	.	0	note=snp A=>G G:39 A:0
EA2454	snippy:4.3.6	variation	1625984	1625984	.	.	0	note=snp T=>C C:33 T:0
EA2454	snippy:4.3.6	variation	1625995	1625995	.	.	0	note=complex TGCGCAAT=>GGAACAAC GGAACAAC:29 TGCGCAAT:0
EA2454	snippy:4.3.6	variation	1626008	1626008	.	.	0	note=snp A=>T T:29 A:0
EA2454	snippy:4.3.6	variation	1626017	1626017	.	.	0	note=complex CAAC=>GAGA GAGA:29 CAAC:0
EA2454	snippy:4.3.6	variation	1626031	1626031	.	.	0	note=snp G=>A A:31 G:0
EA2454	snippy:4.3.6	variation	1626042	1626042	.	.	0	note=snp T=>C C:30 T:0
EA2454	snippy:4.3.6	variation	1626118	1626118	.	.	0	note=snp A=>G G:12 A:0
EA2454	snippy:4.3.6	variation	1626136	1626136	.	.	0	note=snp T=>C C:11 T:0
EA2454	snippy:4.3.6	variation	1626549	1626549	.	.	0	note=snp C=>T T:12 C:0
EA2454	snippy:4.3.6	variation	1626559	1626559	.	.	0	note=snp A=>G G:16 A:0
EA2454	snippy:4.3.6	variation	1626568	1626568	.	.	0	note=complex TGC=>CGT CGT:19 TGC:0
EA2454	snippy:4.3.6	variation	1626586	1626586	.	.	0	note=snp G=>A A:28 G:0
EA2454	snippy:4.3.6	variation	1626595	1626595	.	.	0	note=complex ACGA=>GCGT GCGT:28 ACGA:0
EA2454	snippy:4.3.6	variation	1626603	1626603	.	.	0	note=snp A=>T T:33 A:0
EA2454	snippy:4.3.6	variation	1626611	1626611	.	.	0	note=snp T=>C C:35 T:0
EA2454	snippy:4.3.6	variation	1626705	1626705	.	.	0	note=snp A=>G G:43 A:0
EA2454	snippy:4.3.6	variation	1626723	1626723	.	.	0	note=snp C=>T T:62 C:0
EA2454	snippy:4.3.6	variation	1626772	1626772	.	.	0	note=mnp GG=>AA AA:67 GG:0
EA2454	snippy:4.3.6	variation	1626790	1626790	.	.	0	note=snp T=>C C:68 T:0
EA2454	snippy:4.3.6	variation	1626807	1626807	.	.	0	note=snp T=>C C:60 T:1
EA2454	snippy:4.3.6	variation	1626849	1626849	.	.	0	note=snp G=>A A:84 G:0
EA2454	snippy:4.3.6	variation	1626896	1626896	.	.	0	note=snp A=>G G:81 A:0
EA2454	snippy:4.3.6	variation	1627011	1627011	.	.	0	note=snp G=>T T:68 G:0
EA2454	snippy:4.3.6	variation	1627061	1627061	.	.	0	note=snp A=>T T:51 A:0
EA2454	snippy:4.3.6	variation	1627068	1627068	.	.	0	note=snp C=>T T:50 C:0
EA2454	snippy:4.3.6	variation	1627153	1627153	.	.	0	note=snp C=>T T:46 C:0
EA2454	snippy:4.3.6	variation	1627159	1627159	.	.	0	note=snp G=>A A:45 G:0
EA2454	snippy:4.3.6	variation	1627168	1627168	.	.	0	note=snp A=>G G:43 A:0
EA2454	snippy:4.3.6	variation	1627173	1627173	.	.	0	note=snp A=>G G:44 A:0
EA2454	snippy:4.3.6	variation	1627182	1627182	.	.	0	note=snp C=>T T:44 C:0
EA2454	snippy:4.3.6	variation	1627188	1627188	.	.	0	note=snp G=>T T:44 G:0
EA2454	snippy:4.3.6	variation	1627206	1627206	.	.	0	note=snp T=>C C:44 T:0
EA2454	snippy:4.3.6	variation	1627314	1627314	.	.	0	note=snp T=>A A:50 T:0
EA2454	snippy:4.3.6	variation	1627320	1627320	.	.	0	note=snp A=>G G:55 A:0
EA2454	snippy:4.3.6	variation	1627350	1627350	.	.	0	note=snp C=>T T:56 C:0
EA2454	snippy:4.3.6	variation	1627377	1627377	.	.	0	note=snp T=>G G:62 T:0
EA2454	snippy:4.3.6	variation	1627407	1627407	.	.	0	note=snp T=>G G:57 T:0
EA2454	snippy:4.3.6	variation	1627560	1627560	.	.	0	note=snp C=>T T:31 C:0
EA2454	snippy:4.3.6	variation	1627605	1627605	.	.	0	note=snp G=>T T:41 G:0
EA2454	snippy:4.3.6	variation	1627656	1627656	.	.	0	note=snp A=>C C:47 A:0
EA2454	snippy:4.3.6	variation	1627737	1627737	.	.	0	note=snp C=>A A:43 C:0
EA2454	snippy:4.3.6	variation	1627800	1627800	.	.	0	note=snp A=>C C:43 A:0
EA2454	snippy:4.3.6	variation	1627809	1627809	.	.	0	note=snp T=>C C:46 T:0
EA2454	snippy:4.3.6	variation	1627815	1627815	.	.	0	note=snp T=>C C:44 T:0
EA2454	snippy:4.3.6	variation	1628278	1628278	.	.	0	note=snp A=>G G:59 A:0
EA2454	snippy:4.3.6	variation	1628285	1628285	.	.	0	note=snp G=>A A:59 G:0
EA2454	snippy:4.3.6	variation	1628345	1628345	.	.	0	note=snp C=>T T:58 C:0
EA2454	snippy:4.3.6	variation	1628366	1628366	.	.	0	note=complex AGAGAGCAAG=>CGAAAGTAAA CGAAAGTAAA:42 AGAGAGCAAG:0
EA2454	snippy:4.3.6	variation	1628390	1628390	.	.	0	note=snp G=>A A:55 G:0
EA2454	snippy:4.3.6	variation	1628427	1628427	.	.	0	note=snp T=>C C:48 T:0
EA2454	snippy:4.3.6	variation	1628438	1628438	.	.	0	note=snp T=>C C:48 T:0
EA2454	snippy:4.3.6	variation	1628465	1628465	.	.	0	note=complex GGCT=>AGCG AGCG:50 GGCT:0
EA2454	snippy:4.3.6	variation	1628498	1628498	.	.	0	note=snp T=>C C:53 T:0
EA2454	snippy:4.3.6	variation	1628523	1628523	.	.	0	note=snp C=>A A:60 C:0
EA2454	snippy:4.3.6	variation	1628540	1628540	.	.	0	note=snp A=>G G:65 A:0
EA2454	snippy:4.3.6	variation	1628553	1628553	.	.	0	note=snp A=>C C:66 A:0
EA2454	snippy:4.3.6	variation	1628585	1628585	.	.	0	note=snp A=>T T:66 A:0
EA2454	snippy:4.3.6	variation	1628591	1628591	.	.	0	note=snp C=>T T:63 C:0
EA2454	snippy:4.3.6	variation	1628597	1628597	.	.	0	note=snp T=>C C:63 T:0
EA2454	snippy:4.3.6	variation	1628627	1628627	.	.	0	note=snp A=>G G:59 A:0
EA2454	snippy:4.3.6	variation	1628649	1628649	.	.	0	note=mnp AG=>GA GA:58 AG:0
EA2454	snippy:4.3.6	variation	1628690	1628690	.	.	0	note=snp A=>G G:58 A:0
EA2454	snippy:4.3.6	variation	1628750	1628750	.	.	0	note=complex CACA=>TACG TACG:53 CACA:0
EA2454	snippy:4.3.6	variation	1628810	1628810	.	.	0	note=snp T=>C C:57 T:0
EA2454	snippy:4.3.6	variation	1628831	1628831	.	.	0	note=snp G=>A A:51 G:0
EA2454	snippy:4.3.6	variation	1628837	1628837	.	.	0	note=snp A=>T T:52 A:0
EA2454	snippy:4.3.6	variation	1628869	1628869	.	.	0	note=snp T=>C C:49 T:0
EA2454	snippy:4.3.6	variation	1628897	1628897	.	.	0	note=complex ACGA=>CCGG CCGG:48 ACGA:0
EA2454	snippy:4.3.6	variation	1628912	1628912	.	.	0	note=snp A=>T T:43 A:0
EA2454	snippy:4.3.6	variation	1628980	1628980	.	.	0	note=complex TACTA=>GACTT GACTT:36 TACTA:0
EA2454	snippy:4.3.6	variation	1629008	1629008	.	.	0	note=snp A=>C C:39 A:0
EA2454	snippy:4.3.6	variation	1629015	1629015	.	.	0	note=snp C=>T T:40 C:0
EA2454	snippy:4.3.6	variation	1629065	1629065	.	.	0	note=complex TCCG=>CCCT CCCT:34 TCCG:0
EA2454	snippy:4.3.6	variation	1629122	1629122	.	.	0	note=snp A=>G G:27 A:0
EA2454	snippy:4.3.6	variation	1629149	1629149	.	.	0	note=snp T=>C C:30 T:0
EA2454	snippy:4.3.6	variation	1629156	1629156	.	.	0	note=snp A=>G G:34 A:0
EA2454	snippy:4.3.6	variation	1629183	1629183	.	.	0	note=snp A=>C C:26 A:0
EA2454	snippy:4.3.6	variation	1629196	1629196	.	.	0	note=complex GAACT=>TAACC TAACC:30 GAACT:0
EA2454	snippy:4.3.6	variation	1629240	1629240	.	.	0	note=snp T=>C C:38 T:0
EA2454	snippy:4.3.6	variation	1631639	1631639	.	.	0	note=snp C=>T T:49 C:0
EA2454	snippy:4.3.6	variation	1632262	1632262	.	.	0	note=snp A=>C C:35 A:0
EA2454	snippy:4.3.6	variation	1634228	1634228	.	.	0	note=snp A=>G G:82 A:0
EA2454	snippy:4.3.6	variation	1642336	1642336	.	.	0	note=snp A=>G G:59 A:0
EA2454	snippy:4.3.6	variation	1648224	1648224	.	.	0	note=snp C=>T T:45 C:0
EA2454	snippy:4.3.6	variation	1650551	1650551	.	.	0	note=snp C=>T T:37 C:0
EA2454	snippy:4.3.6	variation	1652374	1652374	.	.	0	note=snp G=>A A:71 G:0
EA2454	snippy:4.3.6	variation	1666579	1666579	.	.	0	note=snp G=>A A:67 G:0
EA2454	snippy:4.3.6	variation	1668108	1668108	.	.	0	note=snp C=>G G:46 C:0
EA2454	snippy:4.3.6	variation	1682457	1682457	.	.	0	note=snp A=>G G:51 A:0
EA2454	snippy:4.3.6	variation	1682580	1682580	.	.	0	note=snp G=>T T:44 G:0
EA2454	snippy:4.3.6	variation	1694320	1694320	.	.	0	note=snp A=>C C:40 A:0
EA2454	snippy:4.3.6	variation	1697199	1697199	.	.	0	note=snp G=>T T:70 G:0
EA2454	snippy:4.3.6	variation	1699835	1699835	.	.	0	note=snp C=>G G:56 C:0
EA2454	snippy:4.3.6	variation	1701919	1701919	.	.	0	note=snp A=>G G:65 A:0
EA2454	snippy:4.3.6	variation	1711079	1711079	.	.	0	note=snp C=>T T:66 C:0
EA2454	snippy:4.3.6	variation	1714697	1714697	.	.	0	note=snp T=>C C:67 T:0
EA2454	snippy:4.3.6	variation	1725286	1725286	.	.	0	note=snp A=>G G:40 A:0
EA2454	snippy:4.3.6	variation	1728257	1728257	.	.	0	note=snp G=>T T:43 G:1
EA2454	snippy:4.3.6	variation	1730226	1730226	.	.	0	note=snp G=>A A:69 G:4
EA2454	snippy:4.3.6	variation	1730329	1730329	.	.	0	note=snp T=>C C:48 T:0
EA2454	snippy:4.3.6	variation	1732462	1732462	.	.	0	note=snp A=>G G:48 A:0
EA2454	snippy:4.3.6	variation	1737561	1737561	.	.	0	note=snp A=>G G:47 A:0
EA2454	snippy:4.3.6	variation	1740180	1740180	.	.	0	note=snp T=>A A:43 T:0
EA2454	snippy:4.3.6	variation	1745576	1745576	.	.	0	note=snp T=>C C:75 T:0
EA2454	snippy:4.3.6	variation	1748003	1748003	.	.	0	note=snp C=>T T:55 C:0
EA2454	snippy:4.3.6	variation	1748585	1748585	.	.	0	note=snp A=>C C:43 A:0
EA2454	snippy:4.3.6	variation	1759737	1759737	.	.	0	note=snp T=>C C:63 T:0
EA2454	snippy:4.3.6	variation	1761551	1761551	.	.	0	note=snp T=>G G:68 T:0
EA2454	snippy:4.3.6	variation	1763293	1763293	.	.	0	note=snp T=>C C:48 T:0
EA2454	snippy:4.3.6	variation	1770797	1770797	.	.	0	note=snp C=>T T:70 C:0
EA2454	snippy:4.3.6	variation	1771506	1771506	.	.	0	note=snp G=>A A:70 G:0
EA2454	snippy:4.3.6	variation	1782964	1782964	.	.	0	note=snp T=>C C:51 T:0
EA2454	snippy:4.3.6	variation	1789627	1789627	.	.	0	note=del GCGCGGGTTAGCGATCCATGCGTGGAATAAGCAACACGATTATGAGCTGGC=>G G:14 GCGCGGGTTAGCGATCCATGCGTGGAATAAGCAACACGATTATGAGCTGGC:0
EA2454	snippy:4.3.6	variation	1790536	1790536	.	.	0	note=snp G=>A A:55 G:0
EA2454	snippy:4.3.6	variation	1795161	1795161	.	.	0	note=snp A=>G G:56 A:0
EA2454	snippy:4.3.6	variation	1799132	1799132	.	.	0	note=snp G=>A A:63 G:0
EA2454	snippy:4.3.6	variation	1803610	1803610	.	.	0	note=snp C=>A A:51 C:0
EA2454	snippy:4.3.6	variation	1803664	1803664	.	.	0	note=snp T=>C C:56 T:0
EA2454	snippy:4.3.6	variation	1815466	1815466	.	.	0	note=snp A=>G G:47 A:0
EA2454	snippy:4.3.6	variation	1817358	1817358	.	.	0	note=snp A=>C C:41 A:0
EA2454	snippy:4.3.6	variation	1820083	1820083	.	.	0	note=snp T=>C C:47 T:0
EA2454	snippy:4.3.6	variation	1824156	1824156	.	.	0	note=snp T=>C C:47 T:0
EA2454	snippy:4.3.6	variation	1824499	1824499	.	.	0	note=snp T=>C C:51 T:0
EA2454	snippy:4.3.6	variation	1850317	1850317	.	.	0	note=snp G=>A A:33 G:1
EA2454	snippy:4.3.6	variation	1860665	1860665	.	.	0	note=snp T=>C C:54 T:0
EA2454	snippy:4.3.6	variation	1868384	1868384	.	.	0	note=snp G=>A A:24 G:0
EA2454	snippy:4.3.6	variation	1875721	1875721	.	.	0	note=snp G=>T T:41 G:0
EA2454	snippy:4.3.6	variation	1887544	1887544	.	.	0	note=snp A=>G G:42 A:0
EA2454	snippy:4.3.6	variation	1906815	1906815	.	.	0	note=snp A=>T T:58 A:0
EA2454	snippy:4.3.6	variation	1906895	1906895	.	.	0	note=ins A=>AG AG:71 A:0
EA2454	snippy:4.3.6	variation	1909088	1909088	.	.	0	note=snp T=>C C:66 T:0
EA2454	snippy:4.3.6	variation	1909804	1909804	.	.	0	note=snp G=>A A:42 G:0
EA2454	snippy:4.3.6	variation	1910698	1910698	.	.	0	note=snp C=>T T:52 C:0
EA2454	snippy:4.3.6	variation	1929193	1929193	.	.	0	note=ins T=>TTTA TTTA:15 T:0
EA2454	snippy:4.3.6	variation	1944963	1944963	.	.	0	note=snp G=>A A:53 G:0
EA2454	snippy:4.3.6	variation	1945608	1945608	.	.	0	note=snp T=>C C:68 T:0
EA2454	snippy:4.3.6	variation	1950298	1950298	.	.	0	note=snp T=>G G:92 T:0
EA2454	snippy:4.3.6	variation	1958733	1958733	.	.	0	note=snp T=>C C:48 T:0
EA2454	snippy:4.3.6	variation	1965637	1965637	.	.	0	note=snp G=>A A:31 G:0
EA2454	snippy:4.3.6	variation	1971726	1971726	.	.	0	note=snp T=>G G:71 T:0
EA2454	snippy:4.3.6	variation	1973974	1973974	.	.	0	note=snp T=>A A:68 T:2
EA2454	snippy:4.3.6	variation	1979564	1979564	.	.	0	note=snp A=>G G:55 A:0
EA2454	snippy:4.3.6	variation	1980186	1980186	.	.	0	note=snp C=>T T:65 C:0
EA2454	snippy:4.3.6	variation	1994897	1994897	.	.	0	note=snp G=>T T:13 G:0
EA2454	snippy:4.3.6	variation	1995211	1995211	.	.	0	note=snp T=>C C:29 T:0
EA2454	snippy:4.3.6	variation	1997936	1997936	.	.	0	note=snp C=>T T:63 C:0
EA2454	snippy:4.3.6	variation	2005086	2005086	.	.	0	note=snp G=>A A:68 G:0
EA2454	snippy:4.3.6	variation	2006271	2006271	.	.	0	note=snp G=>A A:52 G:0
EA2454	snippy:4.3.6	variation	2009779	2009779	.	.	0	note=snp G=>A A:44 G:0
EA2454	snippy:4.3.6	variation	2026653	2026653	.	.	0	note=snp C=>T T:45 C:0
EA2454	snippy:4.3.6	variation	2028772	2028772	.	.	0	note=snp C=>A A:49 C:1
EA2454	snippy:4.3.6	variation	2038279	2038279	.	.	0	note=ins A=>AAC AAC:57 A:0
EA2454	snippy:4.3.6	variation	2041023	2041023	.	.	0	note=snp G=>A A:53 G:1
EA2454	snippy:4.3.6	variation	2044987	2044987	.	.	0	note=snp T=>C C:11 T:0
EA2454	snippy:4.3.6	variation	2045007	2045007	.	.	0	note=snp A=>G G:10 A:0
EA2454	snippy:4.3.6	variation	2045064	2045064	.	.	0	note=snp T=>C C:13 T:0
EA2454	snippy:4.3.6	variation	2062156	2062156	.	.	0	note=snp T=>C C:50 T:0
EA2454	snippy:4.3.6	variation	2062631	2062631	.	.	0	note=snp G=>T T:62 G:0
EA2454	snippy:4.3.6	variation	2063839	2063839	.	.	0	note=snp T=>C C:50 T:0
EA2454	snippy:4.3.6	variation	2068297	2068297	.	.	0	note=snp T=>G G:56 T:0
EA2454	snippy:4.3.6	variation	2070162	2070162	.	.	0	note=snp T=>C C:36 T:0
EA2454	snippy:4.3.6	variation	2091780	2091780	.	.	0	note=snp T=>C C:76 T:0
EA2454	snippy:4.3.6	variation	2094829	2094829	.	.	0	note=snp T=>C C:68 T:0
EA2454	snippy:4.3.6	variation	2096088	2096088	.	.	0	note=snp A=>G G:74 A:0
EA2454	snippy:4.3.6	variation	2099145	2099145	.	.	0	note=snp G=>A A:56 G:0
EA2454	snippy:4.3.6	variation	2110900	2110900	.	.	0	note=snp G=>A A:57 G:0
EA2454	snippy:4.3.6	variation	2119737	2119737	.	.	0	note=snp T=>C C:56 T:0
EA2454	snippy:4.3.6	variation	2120021	2120021	.	.	0	note=snp A=>C C:24 A:0
EA2454	snippy:4.3.6	variation	2141700	2141700	.	.	0	note=snp C=>T T:62 C:0
EA2454	snippy:4.3.6	variation	2156285	2156285	.	.	0	note=snp G=>T T:33 G:0
EA2454	snippy:4.3.6	variation	2158854	2158854	.	.	0	note=snp G=>A A:52 G:0
EA2454	snippy:4.3.6	variation	2159363	2159363	.	.	0	note=snp C=>T T:53 C:0
EA2454	snippy:4.3.6	variation	2168167	2168167	.	.	0	note=snp G=>A A:36 G:0
EA2454	snippy:4.3.6	variation	2180212	2180212	.	.	0	note=snp G=>A A:57 G:0
EA2454	snippy:4.3.6	variation	2181710	2181710	.	.	0	note=snp T=>C C:40 T:0
EA2454	snippy:4.3.6	variation	2183355	2183355	.	.	0	note=snp T=>C C:57 T:0
EA2454	snippy:4.3.6	variation	2187546	2187546	.	.	0	note=snp T=>A A:56 T:0
EA2454	snippy:4.3.6	variation	2195062	2195062	.	.	0	note=snp T=>C C:65 T:0
EA2454	snippy:4.3.6	variation	2217598	2217598	.	.	0	note=snp A=>G G:97 A:1
EA2454	snippy:4.3.6	variation	2228600	2228600	.	.	0	note=snp T=>C C:76 T:0
EA2454	snippy:4.3.6	variation	2232376	2232376	.	.	0	note=snp A=>G G:92 A:0
EA2454	snippy:4.3.6	variation	2233442	2233442	.	.	0	note=snp A=>T T:82 A:0
EA2454	snippy:4.3.6	variation	2253986	2253986	.	.	0	note=snp C=>T T:42 C:1
EA2454	snippy:4.3.6	variation	2256445	2256445	.	.	0	note=snp G=>A A:31 G:0
EA2454	snippy:4.3.6	variation	2259197	2259197	.	.	0	note=snp G=>A A:74 G:0
EA2454	snippy:4.3.6	variation	2268389	2268389	.	.	0	note=snp G=>C C:47 G:0
EA2454	snippy:4.3.6	variation	2273193	2273193	.	.	0	note=snp A=>G G:58 A:0
EA2454	snippy:4.3.6	variation	2283117	2283117	.	.	0	note=snp T=>C C:63 T:0
EA2454	snippy:4.3.6	variation	2283880	2283880	.	.	0	note=snp A=>G G:84 A:0
EA2454	snippy:4.3.6	variation	2289041	2289041	.	.	0	note=snp T=>C C:30 T:0
EA2454	snippy:4.3.6	variation	2290318	2290318	.	.	0	note=snp C=>T T:75 C:0
EA2454	snippy:4.3.6	variation	2291863	2291863	.	.	0	note=snp T=>C C:72 T:0
EA2454	snippy:4.3.6	variation	2331237	2331237	.	.	0	note=snp A=>G G:51 A:0
EA2454	snippy:4.3.6	variation	2336753	2336753	.	.	0	note=snp C=>T T:71 C:0
EA2454	snippy:4.3.6	variation	2338673	2338673	.	.	0	note=snp G=>A A:57 G:0
EA2454	snippy:4.3.6	variation	2345099	2345099	.	.	0	note=snp A=>G G:65 A:0
EA2454	snippy:4.3.6	variation	2350339	2350339	.	.	0	note=snp T=>C C:84 T:0
EA2454	snippy:4.3.6	variation	2354351	2354351	.	.	0	note=snp A=>G G:69 A:0
EA2454	snippy:4.3.6	variation	2359024	2359024	.	.	0	note=snp A=>G G:67 A:0
EA2454	snippy:4.3.6	variation	2364340	2364340	.	.	0	note=snp T=>G G:67 T:0
EA2454	snippy:4.3.6	variation	2371672	2371672	.	.	0	note=snp T=>C C:68 T:0
EA2454	snippy:4.3.6	variation	2383455	2383455	.	.	0	note=snp G=>A A:87 G:0
EA2454	snippy:4.3.6	variation	2402050	2402050	.	.	0	note=snp C=>T T:52 C:0
EA2454	snippy:4.3.6	variation	2403442	2403442	.	.	0	note=snp T=>C C:70 T:0
EA2454	snippy:4.3.6	variation	2407449	2407449	.	.	0	note=snp A=>G G:45 A:0
EA2454	snippy:4.3.6	variation	2413493	2413493	.	.	0	note=snp G=>A A:95 G:0
EA2454	snippy:4.3.6	variation	2421589	2421589	.	.	0	note=snp G=>A A:53 G:0
EA2454	snippy:4.3.6	variation	2449977	2449977	.	.	0	note=snp C=>T T:66 C:0
EA2454	snippy:4.3.6	variation	2461974	2461974	.	.	0	note=snp A=>G G:32 A:0
EA2454	snippy:4.3.6	variation	2498074	2498074	.	.	0	note=snp G=>A A:36 G:0
EA2454	snippy:4.3.6	variation	2500481	2500481	.	.	0	note=del GTAATGCGAA=>G G:25 GTAATGCGAA:1
EA2454	snippy:4.3.6	variation	2515650	2515650	.	.	0	note=del AAAGCCCGCCAT=>A A:33 AAAGCCCGCCAT:0
EA2454	snippy:4.3.6	variation	2518906	2518906	.	.	0	note=snp A=>C C:17 A:0
EA2454	snippy:4.3.6	variation	2521382	2521382	.	.	0	note=snp C=>T T:79 C:0
EA2454	snippy:4.3.6	variation	2528246	2528246	.	.	0	note=snp T=>C C:53 T:0
EA2454	snippy:4.3.6	variation	2533120	2533120	.	.	0	note=snp C=>T T:46 C:0
EA2454	snippy:4.3.6	variation	2538084	2538084	.	.	0	note=snp G=>A A:59 G:0
EA2454	snippy:4.3.6	variation	2538679	2538679	.	.	0	note=snp T=>C C:81 T:0
EA2454	snippy:4.3.6	variation	2548521	2548521	.	.	0	note=snp A=>C C:34 A:0
EA2454	snippy:4.3.6	variation	2550163	2550163	.	.	0	note=snp G=>A A:25 G:0
EA2454	snippy:4.3.6	variation	2555441	2555441	.	.	0	note=snp A=>G G:61 A:0
EA2454	snippy:4.3.6	variation	2559290	2559290	.	.	0	note=snp C=>A A:68 C:0
EA2454	snippy:4.3.6	variation	2565399	2565399	.	.	0	note=snp C=>A A:56 C:0
EA2454	snippy:4.3.6	variation	2565432	2565432	.	.	0	note=snp G=>A A:57 G:0
EA2454	snippy:4.3.6	variation	2575186	2575186	.	.	0	note=snp A=>G G:56 A:0
EA2454	snippy:4.3.6	variation	2586095	2586095	.	.	0	note=snp C=>T T:36 C:0
EA2454	snippy:4.3.6	variation	2589008	2589008	.	.	0	note=snp T=>C C:47 T:0
EA2454	snippy:4.3.6	variation	2591008	2591008	.	.	0	note=snp G=>A A:25 G:0
EA2454	snippy:4.3.6	variation	2596899	2596899	.	.	0	note=snp G=>A A:68 G:0
EA2454	snippy:4.3.6	variation	2597428	2597428	.	.	0	note=snp T=>C C:43 T:0
EA2454	snippy:4.3.6	variation	2598908	2598908	.	.	0	note=snp T=>C C:83 T:0
EA2454	snippy:4.3.6	variation	2600229	2600229	.	.	0	note=snp A=>G G:56 A:0
EA2454	snippy:4.3.6	variation	2606061	2606061	.	.	0	note=snp G=>A A:54 G:0
EA2454	snippy:4.3.6	variation	2607401	2607401	.	.	0	note=snp A=>T T:65 A:0
EA2454	snippy:4.3.6	variation	2631943	2631943	.	.	0	note=snp A=>G G:58 A:0
EA2454	snippy:4.3.6	variation	2632096	2632096	.	.	0	note=snp G=>C C:30 G:0
EA2454	snippy:4.3.6	variation	2637515	2637515	.	.	0	note=snp C=>T T:50 C:0
EA2454	snippy:4.3.6	variation	2639012	2639012	.	.	0	note=snp C=>T T:54 C:0
EA2454	snippy:4.3.6	variation	2641059	2641059	.	.	0	note=snp T=>C C:61 T:0
EA2454	snippy:4.3.6	variation	2644202	2644202	.	.	0	note=snp T=>G G:46 T:0
EA2454	snippy:4.3.6	variation	2658667	2658667	.	.	0	note=snp A=>C C:69 A:1
EA2454	snippy:4.3.6	variation	2660000	2660000	.	.	0	note=snp A=>G G:66 A:0
EA2454	snippy:4.3.6	variation	2664103	2664103	.	.	0	note=snp G=>A A:50 G:0
EA2454	snippy:4.3.6	variation	2666737	2666737	.	.	0	note=snp C=>T T:55 C:0
EA2454	snippy:4.3.6	variation	2670543	2670543	.	.	0	note=snp C=>T T:65 C:0
EA2454	snippy:4.3.6	variation	2672475	2672475	.	.	0	note=ins G=>GCAAGACAT GCAAGACAT:19 G:0
EA2454	snippy:4.3.6	variation	2672665	2672665	.	.	0	note=snp C=>T T:16 C:0
EA2454	snippy:4.3.6	variation	2672705	2672705	.	.	0	note=snp C=>T T:24 C:0
EA2454	snippy:4.3.6	variation	2718692	2718692	.	.	0	note=snp A=>C C:57 A:0
EA2454	snippy:4.3.6	variation	2720677	2720677	.	.	0	note=ins A=>AACCTGCACCTGC AACCTGCACCTGC:32 A:0
EA2454	snippy:4.3.6	variation	2722619	2722619	.	.	0	note=snp A=>G G:40 A:0
EA2454	snippy:4.3.6	variation	2725564	2725564	.	.	0	note=snp T=>A A:65 T:0
EA2454	snippy:4.3.6	variation	2743080	2743080	.	.	0	note=snp T=>G G:72 T:0
EA2454	snippy:4.3.6	variation	2748849	2748849	.	.	0	note=del GT=>G G:16 GT:0
EA2454	snippy:4.3.6	variation	2755025	2755025	.	.	0	note=snp C=>T T:86 C:0
EA2454	snippy:4.3.6	variation	2755245	2755245	.	.	0	note=snp G=>C C:89 G:0
EA2454	snippy:4.3.6	variation	2760352	2760352	.	.	0	note=snp A=>G G:25 A:0
EA2454	snippy:4.3.6	variation	2760369	2760369	.	.	0	note=snp G=>A A:25 G:0
EA2454	snippy:4.3.6	variation	2763065	2763065	.	.	0	note=snp A=>G G:112 A:0
EA2454	snippy:4.3.6	variation	2768974	2768974	.	.	0	note=snp C=>T T:91 C:0
EA2454	snippy:4.3.6	variation	2771595	2771595	.	.	0	note=snp T=>A A:79 T:0
EA2454	snippy:4.3.6	variation	2774852	2774852	.	.	0	note=snp A=>G G:41 A:0
EA2454	snippy:4.3.6	variation	2775069	2775069	.	.	0	note=snp A=>G G:35 A:0
EA2454	snippy:4.3.6	variation	2777153	2777153	.	.	0	note=snp T=>G G:63 T:1
EA2454	snippy:4.3.6	variation	2782254	2782254	.	.	0	note=del CA=>C C:64 CA:0
EA2454	snippy:4.3.6	variation	2782946	2782946	.	.	0	note=snp C=>T T:80 C:0
EA2454	snippy:4.3.6	variation	2783274	2783274	.	.	0	note=snp C=>T T:68 C:2
EA2454	snippy:4.3.6	variation	2785945	2785945	.	.	0	note=snp T=>A A:119 T:0
EA2454	snippy:4.3.6	variation	2793323	2793323	.	.	0	note=snp T=>C C:42 T:0
EA2454	snippy:4.3.6	variation	2809435	2809435	.	.	0	note=snp G=>C C:71 G:0
EA2454	snippy:4.3.6	variation	2815762	2815762	.	.	0	note=snp A=>G G:52 A:0
EA2454	snippy:4.3.6	variation	2816107	2816107	.	.	0	note=snp C=>A A:71 C:0
EA2454	snippy:4.3.6	variation	2824579	2824579	.	.	0	note=ins C=>CT CT:16 C:0
EA2454	snippy:4.3.6	variation	2829690	2829690	.	.	0	note=snp G=>C C:68 G:0
EA2454	snippy:4.3.6	variation	2830990	2830990	.	.	0	note=snp C=>A A:68 C:0
EA2454	snippy:4.3.6	variation	2831971	2831971	.	.	0	note=snp C=>T T:51 C:0
EA2454	snippy:4.3.6	variation	2832637	2832637	.	.	0	note=snp C=>T T:34 C:0
EA2454	snippy:4.3.6	variation	2837636	2837636	.	.	0	note=snp T=>C C:55 T:0
EA2454	snippy:4.3.6	variation	2843028	2843028	.	.	0	note=snp C=>G G:49 C:0
EA2454	snippy:4.3.6	variation	2846381	2846381	.	.	0	note=snp G=>A A:46 G:0
EA2454	snippy:4.3.6	variation	2847080	2847080	.	.	0	note=snp T=>C C:40 T:0
EA2454	snippy:4.3.6	variation	2850370	2850370	.	.	0	note=snp A=>C C:47 A:0
EA2454	snippy:4.3.6	variation	2851743	2851743	.	.	0	note=snp T=>A A:44 T:0
EA2454	snippy:4.3.6	variation	2860024	2860024	.	.	0	note=snp T=>G G:45 T:0
EA2454	snippy:4.3.6	variation	2865701	2865701	.	.	0	note=snp T=>C C:74 T:0
EA2454	snippy:4.3.6	variation	2866171	2866171	.	.	0	note=snp G=>A A:53 G:0
EA2454	snippy:4.3.6	variation	2872360	2872360	.	.	0	note=snp A=>G G:61 A:0
EA2454	snippy:4.3.6	variation	2876151	2876151	.	.	0	note=snp T=>C C:19 T:0
EA2454	snippy:4.3.6	variation	2881008	2881008	.	.	0	note=snp G=>C C:64 G:0
EA2454	snippy:4.3.6	variation	2883184	2883184	.	.	0	note=snp T=>C C:52 T:0
EA2454	snippy:4.3.6	variation	2897200	2897200	.	.	0	note=snp G=>A A:65 G:0
EA2454	snippy:4.3.6	variation	2901111	2901111	.	.	0	note=snp A=>G G:70 A:0
EA2454	snippy:4.3.6	variation	2901882	2901882	.	.	0	note=snp G=>T T:75 G:0
EA2454	snippy:4.3.6	variation	2903547	2903547	.	.	0	note=snp C=>A A:66 C:0
EA2454	snippy:4.3.6	variation	2906728	2906728	.	.	0	note=snp A=>G G:62 A:0
EA2454	snippy:4.3.6	variation	2927920	2927920	.	.	0	note=snp T=>C C:75 T:0
EA2454	snippy:4.3.6	variation	2931389	2931389	.	.	0	note=snp T=>G G:43 T:0
EA2454	snippy:4.3.6	variation	2934279	2934279	.	.	0	note=snp A=>G G:65 A:0
EA2454	snippy:4.3.6	variation	2935576	2935576	.	.	0	note=snp C=>T T:50 C:0
EA2454	snippy:4.3.6	variation	2937585	2937585	.	.	0	note=snp A=>G G:73 A:0
EA2454	snippy:4.3.6	variation	2939135	2939135	.	.	0	note=ins A=>AT AT:15 A:0
EA2454	snippy:4.3.6	variation	2941498	2941498	.	.	0	note=snp G=>A A:50 G:0
EA2454	snippy:4.3.6	variation	2945610	2945610	.	.	0	note=snp G=>A A:69 G:0
EA2454	snippy:4.3.6	variation	2950952	2950952	.	.	0	note=snp T=>G G:66 T:2
EA2454	snippy:4.3.6	variation	2954425	2954425	.	.	0	note=snp A=>G G:10 A:0
EA2454	snippy:4.3.6	variation	2954433	2954433	.	.	0	note=snp G=>C C:10 G:0
EA2454	snippy:4.3.6	variation	2954439	2954439	.	.	0	note=snp A=>G G:10 A:0
EA2454	snippy:4.3.6	variation	2961386	2961386	.	.	0	note=snp G=>C C:45 G:0
EA2454	snippy:4.3.6	variation	2963100	2963100	.	.	0	note=snp G=>A A:68 G:0
EA2454	snippy:4.3.6	variation	2965650	2965650	.	.	0	note=snp G=>A A:77 G:0
EA2454	snippy:4.3.6	variation	2967930	2967930	.	.	0	note=snp A=>G G:18 A:0
EA2454	snippy:4.3.6	variation	2988598	2988598	.	.	0	note=snp A=>T T:45 A:0
EA2454	snippy:4.3.6	variation	2995599	2995599	.	.	0	note=snp T=>C C:36 T:0
EA2454	snippy:4.3.6	variation	2998717	2998717	.	.	0	note=snp A=>G G:66 A:0
EA2454	snippy:4.3.6	variation	3015833	3015833	.	.	0	note=snp A=>C C:47 A:0
EA2454	snippy:4.3.6	variation	3029386	3029386	.	.	0	note=snp C=>T T:67 C:0
EA2454	snippy:4.3.6	variation	3041125	3041125	.	.	0	note=snp T=>G G:51 T:0
EA2454	snippy:4.3.6	variation	3052455	3052455	.	.	0	note=snp G=>A A:46 G:0
EA2454	snippy:4.3.6	variation	3052992	3052992	.	.	0	note=snp G=>C C:39 G:0
EA2454	snippy:4.3.6	variation	3055255	3055255	.	.	0	note=snp G=>A A:50 G:0
EA2454	snippy:4.3.6	variation	3057242	3057242	.	.	0	note=snp A=>G G:62 A:0
EA2454	snippy:4.3.6	variation	3060330	3060330	.	.	0	note=snp A=>G G:71 A:0
EA2454	snippy:4.3.6	variation	3070440	3070440	.	.	0	note=snp A=>G G:31 A:0
EA2454	snippy:4.3.6	variation	3091335	3091335	.	.	0	note=snp T=>C C:77 T:0
EA2454	snippy:4.3.6	variation	3093850	3093850	.	.	0	note=snp T=>C C:60 T:0
EA2454	snippy:4.3.6	variation	3099129	3099129	.	.	0	note=snp T=>C C:57 T:0
EA2454	snippy:4.3.6	variation	3101851	3101851	.	.	0	note=snp A=>G G:69 A:0
EA2454	snippy:4.3.6	variation	3104888	3104888	.	.	0	note=snp C=>T T:52 C:0
EA2454	snippy:4.3.6	variation	3112595	3112595	.	.	0	note=ins C=>CG CG:50 C:0
EA2454	snippy:4.3.6	variation	3112890	3112890	.	.	0	note=snp A=>G G:56 A:0
EA2454	snippy:4.3.6	variation	3115749	3115749	.	.	0	note=snp T=>A A:75 T:0
EA2454	snippy:4.3.6	variation	3117020	3117020	.	.	0	note=snp C=>G G:64 C:0
EA2454	snippy:4.3.6	variation	3125212	3125212	.	.	0	note=snp A=>G G:78 A:0
EA2454	snippy:4.3.6	variation	3133556	3133556	.	.	0	note=snp G=>T T:77 G:0
EA2454	snippy:4.3.6	variation	3135617	3135617	.	.	0	note=snp A=>C C:59 A:0
EA2454	snippy:4.3.6	variation	3141450	3141450	.	.	0	note=snp A=>T T:59 A:0
EA2454	snippy:4.3.6	variation	3149583	3149583	.	.	0	note=snp G=>A A:113 G:0
EA2454	snippy:4.3.6	variation	3169766	3169766	.	.	0	note=snp G=>A A:107 G:0
EA2454	snippy:4.3.6	variation	3174516	3174516	.	.	0	note=del TA=>T T:30 TA:0
EA2454	snippy:4.3.6	variation	3175254	3175254	.	.	0	note=snp T=>C C:57 T:0
EA2454	snippy:4.3.6	variation	3188469	3188469	.	.	0	note=snp T=>C C:64 T:0
EA2454	snippy:4.3.6	variation	3188675	3188675	.	.	0	note=snp T=>A A:103 T:0
EA2454	snippy:4.3.6	variation	3192856	3192856	.	.	0	note=snp C=>T T:26 C:0
EA2454	snippy:4.3.6	variation	3196063	3196063	.	.	0	note=snp T=>C C:73 T:0
EA2454	snippy:4.3.6	variation	3197243	3197243	.	.	0	note=snp T=>C C:13 T:0
EA2454	snippy:4.3.6	variation	3211809	3211809	.	.	0	note=snp T=>C C:73 T:0
EA2454	snippy:4.3.6	variation	3213292	3213292	.	.	0	note=snp A=>C C:54 A:0
EA2454	snippy:4.3.6	variation	3218193	3218193	.	.	0	note=snp T=>G G:53 T:0
EA2454	snippy:4.3.6	variation	3224798	3224798	.	.	0	note=snp A=>G G:48 A:0
EA2454	snippy:4.3.6	variation	3240902	3240902	.	.	0	note=del AACTG=>A A:46 AACTG:1
EA2454	snippy:4.3.6	variation	3254909	3254909	.	.	0	note=snp C=>G G:62 C:0
EA2454	snippy:4.3.6	variation	3258454	3258454	.	.	0	note=snp T=>A A:43 T:0
EA2454	snippy:4.3.6	variation	3258466	3258466	.	.	0	note=snp C=>T T:43 C:1
EA2454	snippy:4.3.6	variation	3263384	3263384	.	.	0	note=snp T=>C C:47 T:0
EA2454	snippy:4.3.6	variation	3268326	3268326	.	.	0	note=snp G=>A A:66 G:0
EA2454	snippy:4.3.6	variation	3271358	3271358	.	.	0	note=snp T=>C C:15 T:0
EA2454	snippy:4.3.6	variation	3272561	3272561	.	.	0	note=snp G=>T T:24 G:0
EA2454	snippy:4.3.6	variation	3281767	3281767	.	.	0	note=ins G=>GC GC:61 G:0
EA2454	snippy:4.3.6	variation	3305295	3305295	.	.	0	note=snp A=>G G:66 A:0
EA2454	snippy:4.3.6	variation	3305988	3305988	.	.	0	note=snp G=>C C:53 G:0
EA2454	snippy:4.3.6	variation	3307663	3307663	.	.	0	note=snp C=>T T:52 C:0
EA2454	snippy:4.3.6	variation	3310578	3310578	.	.	0	note=snp A=>G G:28 A:0
EA2454	snippy:4.3.6	variation	3318387	3318387	.	.	0	note=snp C=>G G:51 C:0
EA2454	snippy:4.3.6	variation	3374533	3374533	.	.	0	note=snp G=>T T:54 G:0
EA2454	snippy:4.3.6	variation	3381441	3381441	.	.	0	note=snp A=>G G:55 A:0
EA2454	snippy:4.3.6	variation	3387556	3387556	.	.	0	note=snp T=>A A:28 T:0
EA2454	snippy:4.3.6	variation	3395362	3395362	.	.	0	note=snp A=>C C:59 A:0
EA2454	snippy:4.3.6	variation	3400480	3400480	.	.	0	note=ins T=>TGAAGCTGGA TGAAGCTGGA:40 T:3
EA2454	snippy:4.3.6	variation	3403186	3403186	.	.	0	note=snp C=>T T:41 C:0
EA2454	snippy:4.3.6	variation	3405179	3405179	.	.	0	note=snp T=>G G:43 T:0
EA2454	snippy:4.3.6	variation	3426445	3426445	.	.	0	note=snp T=>C C:54 T:0
EA2454	snippy:4.3.6	variation	3431147	3431147	.	.	0	note=del GC=>G G:37 GC:0
EA2454	snippy:4.3.6	variation	3440338	3440338	.	.	0	note=snp C=>T T:78 C:0
EA2454	snippy:4.3.6	variation	3440424	3440424	.	.	0	note=snp G=>T T:80 G:0
EA2454	snippy:4.3.6	variation	3441887	3441887	.	.	0	note=snp T=>C C:39 T:0
EA2454	snippy:4.3.6	variation	3441936	3441936	.	.	0	note=snp A=>G G:35 A:0
EA2454	snippy:4.3.6	variation	3446573	3446573	.	.	0	note=snp G=>A A:88 G:0
EA2454	snippy:4.3.6	variation	3448725	3448725	.	.	0	note=snp C=>T T:67 C:0
EA2454	snippy:4.3.6	variation	3451003	3451003	.	.	0	note=snp C=>T T:77 C:0
EA2454	snippy:4.3.6	variation	3459261	3459261	.	.	0	note=snp C=>T T:56 C:0
EA2454	snippy:4.3.6	variation	3462462	3462462	.	.	0	note=snp T=>C C:59 T:0
EA2454	snippy:4.3.6	variation	3462699	3462699	.	.	0	note=snp A=>G G:59 A:0
EA2454	snippy:4.3.6	variation	3463669	3463669	.	.	0	note=snp T=>C C:59 T:0
EA2454	snippy:4.3.6	variation	3467662	3467662	.	.	0	note=snp G=>A A:107 G:0
EA2454	snippy:4.3.6	variation	3470509	3470509	.	.	0	note=snp G=>T T:11 G:0
EA2454	snippy:4.3.6	variation	3470536	3470536	.	.	0	note=snp A=>G G:12 A:0
EA2454	snippy:4.3.6	variation	3470560	3470560	.	.	0	note=snp C=>A A:16 C:0
EA2454	snippy:4.3.6	variation	3470581	3470581	.	.	0	note=snp A=>G G:18 A:0
EA2454	snippy:4.3.6	variation	3470631	3470631	.	.	0	note=complex TCCCA=>CCCCG CCCCG:22 TCCCA:0
EA2454	snippy:4.3.6	variation	3470646	3470646	.	.	0	note=complex GCTTA=>ACTTC ACTTC:22 GCTTA:0
EA2454	snippy:4.3.6	variation	3470655	3470655	.	.	0	note=complex ACCAG=>GCCAA GCCAA:23 ACCAG:0
EA2454	snippy:4.3.6	variation	3470677	3470677	.	.	0	note=complex GGCT=>TGCG TGCG:24 GGCT:0
EA2454	snippy:4.3.6	variation	3470709	3470709	.	.	0	note=mnp GG=>CC CC:18 GG:0
EA2454	snippy:4.3.6	variation	3470718	3470718	.	.	0	note=complex TGCCGGAC=>CGTTAAAT CGTTAAAT:15 TGCCGGAC:0
EA2454	snippy:4.3.6	variation	3470763	3470763	.	.	0	note=complex CATCA=>TATCG TATCG:29 CATCA:0
EA2454	snippy:4.3.6	variation	3470779	3470779	.	.	0	note=complex AAGG=>GAGA GAGA:29 AAGG:0
EA2454	snippy:4.3.6	variation	3470799	3470799	.	.	0	note=complex GCTC=>CCTT CCTT:30 GCTC:0
EA2454	snippy:4.3.6	variation	3470818	3470818	.	.	0	note=complex GCCA=>ACCT ACCT:27 GCCA:0
EA2454	snippy:4.3.6	variation	3470827	3470827	.	.	0	note=snp T=>C C:31 T:0
EA2454	snippy:4.3.6	variation	3470833	3470833	.	.	0	note=snp T=>C C:31 T:0
EA2454	snippy:4.3.6	variation	3470842	3470842	.	.	0	note=snp C=>T T:30 C:0
EA2454	snippy:4.3.6	variation	3470851	3470851	.	.	0	note=snp C=>A A:30 C:0
EA2454	snippy:4.3.6	variation	3470866	3470866	.	.	0	note=complex CGTC=>TGTT TGTT:26 CGTC:0
EA2454	snippy:4.3.6	variation	3470881	3470881	.	.	0	note=snp T=>G G:28 T:0
EA2454	snippy:4.3.6	variation	3470893	3470893	.	.	0	note=snp G=>A A:32 G:0
EA2454	snippy:4.3.6	variation	3470971	3470971	.	.	0	note=ins A=>AC AC:33 A:0
EA2454	snippy:4.3.6	variation	3471091	3471091	.	.	0	note=snp A=>T T:29 A:0
EA2454	snippy:4.3.6	variation	3471244	3471244	.	.	0	note=complex AACTCGA=>GACACGG GACACGG:19 AACTCGA:0
EA2454	snippy:4.3.6	variation	3471258	3471258	.	.	0	note=snp A=>G G:22 A:0
EA2454	snippy:4.3.6	variation	3471442	3471442	.	.	0	note=snp C=>A A:21 C:0
EA2454	snippy:4.3.6	variation	3471517	3471517	.	.	0	note=snp T=>G G:15 T:0
EA2454	snippy:4.3.6	variation	3471664	3471664	.	.	0	note=snp T=>C C:18 T:0
EA2454	snippy:4.3.6	variation	3472001	3472001	.	.	0	note=snp T=>C C:25 T:0
EA2454	snippy:4.3.6	variation	3475468	3475468	.	.	0	note=snp G=>A A:22 G:0
EA2454	snippy:4.3.6	variation	3475725	3475725	.	.	0	note=snp A=>C C:20 A:0
EA2454	snippy:4.3.6	variation	3476940	3476940	.	.	0	note=snp A=>C C:40 A:0
EA2454	snippy:4.3.6	variation	3477111	3477111	.	.	0	note=snp C=>T T:39 C:0
EA2454	snippy:4.3.6	variation	3477318	3477318	.	.	0	note=snp A=>G G:30 A:0
EA2454	snippy:4.3.6	variation	3485805	3485805	.	.	0	note=snp G=>A A:11 G:0
EA2454	snippy:4.3.6	variation	3485832	3485832	.	.	0	note=snp C=>T T:16 C:0
EA2454	snippy:4.3.6	variation	3487252	3487252	.	.	0	note=snp C=>T T:25 C:0
EA2454	snippy:4.3.6	variation	3487281	3487281	.	.	0	note=snp G=>A A:23 G:0
EA2454	snippy:4.3.6	variation	3487495	3487495	.	.	0	note=snp A=>G G:35 A:0
EA2454	snippy:4.3.6	variation	3487552	3487552	.	.	0	note=snp C=>G G:37 C:0
EA2454	snippy:4.3.6	variation	3487803	3487803	.	.	0	note=snp C=>T T:18 C:0
EA2454	snippy:4.3.6	variation	3487858	3487858	.	.	0	note=snp T=>C C:17 T:0
EA2454	snippy:4.3.6	variation	3489779	3489779	.	.	0	note=snp A=>G G:34 A:0
EA2454	snippy:4.3.6	variation	3489796	3489796	.	.	0	note=snp A=>T T:30 A:0
EA2454	snippy:4.3.6	variation	3489826	3489826	.	.	0	note=snp C=>A A:20 C:0
EA2454	snippy:4.3.6	variation	3490001	3490001	.	.	0	note=snp C=>T T:13 C:0
EA2454	snippy:4.3.6	variation	3490048	3490048	.	.	0	note=snp C=>A A:17 C:0
EA2454	snippy:4.3.6	variation	3490077	3490077	.	.	0	note=snp T=>C C:15 T:0
EA2454	snippy:4.3.6	variation	3490088	3490088	.	.	0	note=snp A=>G G:15 A:0
EA2454	snippy:4.3.6	variation	3490111	3490111	.	.	0	note=snp C=>T T:13 C:0
EA2454	snippy:4.3.6	variation	3490141	3490141	.	.	0	note=snp C=>T T:13 C:0
EA2454	snippy:4.3.6	variation	3490593	3490593	.	.	0	note=snp G=>T T:12 G:1
EA2454	snippy:4.3.6	variation	3490652	3490652	.	.	0	note=complex GGCT=>TGCC TGCC:17 GGCT:0
EA2454	snippy:4.3.6	variation	3490853	3490853	.	.	0	note=snp T=>C C:10 T:0
EA2454	snippy:4.3.6	variation	3490905	3490905	.	.	0	note=snp C=>T T:10 C:0
EA2454	snippy:4.3.6	variation	3490999	3490999	.	.	0	note=snp G=>A A:12 G:0
EA2454	snippy:4.3.6	variation	3491018	3491018	.	.	0	note=snp A=>C C:12 A:0
EA2454	snippy:4.3.6	variation	3491024	3491024	.	.	0	note=snp C=>T T:14 C:0
EA2454	snippy:4.3.6	variation	3491035	3491035	.	.	0	note=complex TA=>CC CC:13 TA:0
EA2454	snippy:4.3.6	variation	3491044	3491044	.	.	0	note=complex TGC=>CGA CGA:13 TGC:0
EA2454	snippy:4.3.6	variation	3491249	3491249	.	.	0	note=snp A=>G G:37 A:0
EA2454	snippy:4.3.6	variation	3491388	3491388	.	.	0	note=snp C=>A A:34 C:0
EA2454	snippy:4.3.6	variation	3491434	3491434	.	.	0	note=snp T=>A A:28 T:0
EA2454	snippy:4.3.6	variation	3491445	3491445	.	.	0	note=snp A=>G G:26 A:0
EA2454	snippy:4.3.6	variation	3491453	3491453	.	.	0	note=snp T=>A A:25 T:0
EA2454	snippy:4.3.6	variation	3491471	3491471	.	.	0	note=snp C=>T T:26 C:0
EA2454	snippy:4.3.6	variation	3491482	3491482	.	.	0	note=snp C=>T T:25 C:0
EA2454	snippy:4.3.6	variation	3491517	3491517	.	.	0	note=snp C=>T T:30 C:0
EA2454	snippy:4.3.6	variation	3491532	3491532	.	.	0	note=snp A=>C C:32 A:0
EA2454	snippy:4.3.6	variation	3491547	3491547	.	.	0	note=snp C=>A A:33 C:0
EA2454	snippy:4.3.6	variation	3491564	3491564	.	.	0	note=mnp GA=>TC TC:28 GA:0
EA2454	snippy:4.3.6	variation	3491714	3491714	.	.	0	note=snp A=>C C:33 A:0
EA2454	snippy:4.3.6	variation	3491813	3491813	.	.	0	note=snp T=>G G:41 T:0
EA2454	snippy:4.3.6	variation	3491863	3491863	.	.	0	note=snp A=>G G:42 A:0
EA2454	snippy:4.3.6	variation	3491938	3491938	.	.	0	note=snp G=>A A:35 G:0
EA2454	snippy:4.3.6	variation	3492010	3492010	.	.	0	note=complex GGA=>AAC AAC:28 GGA:0
EA2454	snippy:4.3.6	variation	3492078	3492078	.	.	0	note=snp T=>C C:24 T:0
EA2454	snippy:4.3.6	variation	3492303	3492303	.	.	0	note=snp A=>G G:20 A:0
EA2454	snippy:4.3.6	variation	3492396	3492396	.	.	0	note=snp G=>T T:22 G:0
EA2454	snippy:4.3.6	variation	3492435	3492435	.	.	0	note=snp G=>A A:26 G:0
EA2454	snippy:4.3.6	variation	3492474	3492474	.	.	0	note=snp T=>A A:24 T:0
EA2454	snippy:4.3.6	variation	3492568	3492568	.	.	0	note=ins A=>AACGCCG AACGCCG:14 A:0
EA2454	snippy:4.3.6	variation	3493230	3493230	.	.	0	note=snp C=>T T:10 C:0
EA2454	snippy:4.3.6	variation	3493284	3493284	.	.	0	note=complex GTTCA=>ATTTC ATTTC:11 GTTCA:0
EA2454	snippy:4.3.6	variation	3493299	3493299	.	.	0	note=snp C=>A A:14 C:0
EA2454	snippy:4.3.6	variation	3493340	3493340	.	.	0	note=complex TG=>CA CA:22 TG:0
EA2454	snippy:4.3.6	variation	3493348	3493348	.	.	0	note=complex TA=>AT AT:21 TA:0
EA2454	snippy:4.3.6	variation	3493394	3493394	.	.	0	note=snp G=>A A:27 G:0
EA2454	snippy:4.3.6	variation	3493445	3493445	.	.	0	note=complex TCATCT=>CTATCC CTATCC:34 TCATCT:0
EA2454	snippy:4.3.6	variation	3493456	3493456	.	.	0	note=snp A=>G G:37 A:0
EA2454	snippy:4.3.6	variation	3493466	3493466	.	.	0	note=snp C=>T T:40 C:0
EA2454	snippy:4.3.6	variation	3493485	3493485	.	.	0	note=snp C=>A A:36 C:0
EA2454	snippy:4.3.6	variation	3493591	3493591	.	.	0	note=snp T=>C C:28 T:0
EA2454	snippy:4.3.6	variation	3493648	3493648	.	.	0	note=snp A=>G G:26 A:0
EA2454	snippy:4.3.6	variation	3493672	3493672	.	.	0	note=snp T=>A A:24 T:0
EA2454	snippy:4.3.6	variation	3493711	3493711	.	.	0	note=snp T=>C C:22 T:0
EA2454	snippy:4.3.6	variation	3493756	3493756	.	.	0	note=snp C=>T T:31 C:0
EA2454	snippy:4.3.6	variation	3493840	3493840	.	.	0	note=snp C=>T T:30 C:0
EA2454	snippy:4.3.6	variation	3493966	3493966	.	.	0	note=snp C=>T T:29 C:0
EA2454	snippy:4.3.6	variation	3493979	3493979	.	.	0	note=snp G=>A A:29 G:0
EA2454	snippy:4.3.6	variation	3494161	3494161	.	.	0	note=snp G=>A A:17 G:0
EA2454	snippy:4.3.6	variation	3494254	3494254	.	.	0	note=snp C=>T T:36 C:0
EA2454	snippy:4.3.6	variation	3494356	3494356	.	.	0	note=snp T=>C C:34 T:0
EA2454	snippy:4.3.6	variation	3494735	3494735	.	.	0	note=snp T=>C C:39 T:0
EA2454	snippy:4.3.6	variation	3494787	3494787	.	.	0	note=snp T=>A A:36 T:0
EA2454	snippy:4.3.6	variation	3494849	3494849	.	.	0	note=complex AC=>GG GG:42 AC:0
EA2454	snippy:4.3.6	variation	3495054	3495054	.	.	0	note=snp T=>C C:31 T:0
EA2454	snippy:4.3.6	variation	3495084	3495084	.	.	0	note=mnp GA=>AC AC:28 GA:0
EA2454	snippy:4.3.6	variation	3495174	3495174	.	.	0	note=snp G=>A A:26 G:0
EA2454	snippy:4.3.6	variation	3495305	3495305	.	.	0	note=snp T=>C C:36 T:0
EA2454	snippy:4.3.6	variation	3495394	3495394	.	.	0	note=snp A=>G G:33 A:0
EA2454	snippy:4.3.6	variation	3495402	3495402	.	.	0	note=snp A=>G G:33 A:0
EA2454	snippy:4.3.6	variation	3495478	3495478	.	.	0	note=snp A=>C C:29 A:0
EA2454	snippy:4.3.6	variation	3495486	3495486	.	.	0	note=snp C=>T T:28 C:0
EA2454	snippy:4.3.6	variation	3495508	3495508	.	.	0	note=snp T=>C C:20 T:0
EA2454	snippy:4.3.6	variation	3495575	3495575	.	.	0	note=snp G=>A A:14 G:0
EA2454	snippy:4.3.6	variation	3495637	3495637	.	.	0	note=snp G=>A A:13 G:0
EA2454	snippy:4.3.6	variation	3495642	3495642	.	.	0	note=complex TC=>CA CA:12 TC:0
EA2454	snippy:4.3.6	variation	3496049	3496049	.	.	0	note=snp C=>T T:33 C:0
EA2454	snippy:4.3.6	variation	3496079	3496079	.	.	0	note=snp A=>G G:40 A:0
EA2454	snippy:4.3.6	variation	3496337	3496337	.	.	0	note=snp T=>A A:36 T:0
EA2454	snippy:4.3.6	variation	3496529	3496529	.	.	0	note=snp A=>G G:35 A:0
EA2454	snippy:4.3.6	variation	3496610	3496610	.	.	0	note=snp T=>C C:35 T:0
EA2454	snippy:4.3.6	variation	3496652	3496652	.	.	0	note=snp A=>G G:32 A:0
EA2454	snippy:4.3.6	variation	3496995	3496995	.	.	0	note=complex TGAAGAGG=>CGAGGAGA CGAGGAGA:23 TGAAGAGG:0
EA2454	snippy:4.3.6	variation	3497007	3497007	.	.	0	note=snp A=>T T:24 A:0
EA2454	snippy:4.3.6	variation	3497379	3497379	.	.	0	note=snp A=>G G:14 A:0
EA2454	snippy:4.3.6	variation	3497964	3497964	.	.	0	note=snp G=>T T:11 G:0
EA2454	snippy:4.3.6	variation	3497970	3497970	.	.	0	note=snp A=>C C:10 A:0
EA2454	snippy:4.3.6	variation	3497976	3497976	.	.	0	note=del GA=>G G:10 GA:0
EA2454	snippy:4.3.6	variation	3498411	3498411	.	.	0	note=snp C=>T T:33 C:0
EA2454	snippy:4.3.6	variation	3498684	3498684	.	.	0	note=snp C=>T T:16 C:0
EA2454	snippy:4.3.6	variation	3498888	3498888	.	.	0	note=snp T=>C C:25 T:1
EA2454	snippy:4.3.6	variation	3499050	3499050	.	.	0	note=snp C=>T T:30 C:1
EA2454	snippy:4.3.6	variation	3499149	3499149	.	.	0	note=snp A=>G G:27 A:0
EA2454	snippy:4.3.6	variation	3499161	3499161	.	.	0	note=snp C=>T T:29 C:0
EA2454	snippy:4.3.6	variation	3499177	3499177	.	.	0	note=complex TTG=>CTA CTA:36 TTG:0
EA2454	snippy:4.3.6	variation	3499185	3499185	.	.	0	note=snp C=>T T:34 C:0
EA2454	snippy:4.3.6	variation	3499203	3499203	.	.	0	note=snp T=>C C:39 T:0
EA2454	snippy:4.3.6	variation	3499581	3499581	.	.	0	note=snp C=>T T:43 C:0
EA2454	snippy:4.3.6	variation	3499605	3499605	.	.	0	note=snp C=>T T:42 C:0
EA2454	snippy:4.3.6	variation	3499653	3499653	.	.	0	note=snp G=>A A:41 G:0
EA2454	snippy:4.3.6	variation	3499752	3499752	.	.	0	note=snp T=>C C:27 T:0
EA2454	snippy:4.3.6	variation	3499902	3499902	.	.	0	note=snp T=>G G:46 T:0
EA2454	snippy:4.3.6	variation	3500010	3500010	.	.	0	note=complex TGCG=>CGCT CGCT:40 TGCG:0
EA2454	snippy:4.3.6	variation	3500058	3500058	.	.	0	note=snp G=>A A:34 G:0
EA2454	snippy:4.3.6	variation	3500091	3500091	.	.	0	note=snp C=>T T:34 C:0
EA2454	snippy:4.3.6	variation	3500133	3500133	.	.	0	note=snp C=>T T:38 C:0
EA2454	snippy:4.3.6	variation	3500157	3500157	.	.	0	note=snp G=>A A:32 G:0
EA2454	snippy:4.3.6	variation	3500193	3500193	.	.	0	note=snp G=>A A:34 G:0
EA2454	snippy:4.3.6	variation	3500328	3500328	.	.	0	note=complex CGCAGGT=>TGCGGGC TGCGGGC:29 CGCAGGT:0
EA2454	snippy:4.3.6	variation	3500350	3500350	.	.	0	note=complex CTG=>TTA TTA:32 CTG:0
EA2454	snippy:4.3.6	variation	3500379	3500379	.	.	0	note=snp C=>T T:31 C:0
EA2454	snippy:4.3.6	variation	3500427	3500427	.	.	0	note=snp A=>G G:30 A:0
EA2454	snippy:4.3.6	variation	3500523	3500523	.	.	0	note=snp G=>A A:34 G:0
EA2454	snippy:4.3.6	variation	3500538	3500538	.	.	0	note=snp T=>C C:36 T:0
EA2454	snippy:4.3.6	variation	3500548	3500548	.	.	0	note=snp C=>T T:36 C:0
EA2454	snippy:4.3.6	variation	3500559	3500559	.	.	0	note=complex TGGC=>CGGT CGGT:35 TGGC:0
EA2454	snippy:4.3.6	variation	3500574	3500574	.	.	0	note=snp C=>T T:32 C:0
EA2454	snippy:4.3.6	variation	3500580	3500580	.	.	0	note=snp G=>A A:33 G:0
EA2454	snippy:4.3.6	variation	3500586	3500586	.	.	0	note=complex CATTTCC=>AATCTCA AATCTCA:31 CATTTCC:0
EA2454	snippy:4.3.6	variation	3500601	3500601	.	.	0	note=snp T=>G G:37 T:0
EA2454	snippy:4.3.6	variation	3500610	3500610	.	.	0	note=snp C=>T T:31 C:0
EA2454	snippy:4.3.6	variation	3500634	3500634	.	.	0	note=snp G=>C C:32 G:0
EA2454	snippy:4.3.6	variation	3500658	3500658	.	.	0	note=snp C=>T T:33 C:0
EA2454	snippy:4.3.6	variation	3500667	3500667	.	.	0	note=snp T=>C C:34 T:0
EA2454	snippy:4.3.6	variation	3500694	3500694	.	.	0	note=snp G=>A A:34 G:0
EA2454	snippy:4.3.6	variation	3500719	3500719	.	.	0	note=snp T=>C C:39 T:0
EA2454	snippy:4.3.6	variation	3500742	3500742	.	.	0	note=snp C=>T T:42 C:0
EA2454	snippy:4.3.6	variation	3500770	3500770	.	.	0	note=complex ATC=>CTG CTG:41 ATC:0
EA2454	snippy:4.3.6	variation	3500821	3500821	.	.	0	note=snp G=>T T:52 G:0
EA2454	snippy:4.3.6	variation	3500832	3500832	.	.	0	note=complex TTT=>CTA CTA:48 TTT:0
EA2454	snippy:4.3.6	variation	3500871	3500871	.	.	0	note=snp C=>T T:48 C:0
EA2454	snippy:4.3.6	variation	3500880	3500880	.	.	0	note=snp C=>T T:47 C:0
EA2454	snippy:4.3.6	variation	3500894	3500894	.	.	0	note=snp C=>T T:44 C:0
EA2454	snippy:4.3.6	variation	3500901	3500901	.	.	0	note=snp T=>C C:46 T:0
EA2454	snippy:4.3.6	variation	3500928	3500928	.	.	0	note=snp A=>G G:43 A:0
EA2454	snippy:4.3.6	variation	3500934	3500934	.	.	0	note=snp C=>T T:43 C:0
EA2454	snippy:4.3.6	variation	3500994	3500994	.	.	0	note=complex ATCAC=>GTCAA GTCAA:36 ATCAC:0
EA2454	snippy:4.3.6	variation	3501021	3501021	.	.	0	note=snp C=>T T:35 C:0
EA2454	snippy:4.3.6	variation	3501039	3501039	.	.	0	note=snp T=>A A:34 T:0
EA2454	snippy:4.3.6	variation	3501054	3501054	.	.	0	note=snp A=>T T:33 A:0
EA2454	snippy:4.3.6	variation	3501072	3501072	.	.	0	note=complex AGGTACTTCG=>TGGCACCTCT TGGCACCTCT:23 AGGTACTTCG:0
EA2454	snippy:4.3.6	variation	3501099	3501099	.	.	0	note=snp T=>C C:22 T:0
EA2454	snippy:4.3.6	variation	3501126	3501126	.	.	0	note=snp C=>T T:22 C:0
EA2454	snippy:4.3.6	variation	3501138	3501138	.	.	0	note=snp T=>C C:25 T:0
EA2454	snippy:4.3.6	variation	3501198	3501198	.	.	0	note=snp A=>C C:16 A:0
EA2454	snippy:4.3.6	variation	3501212	3501212	.	.	0	note=complex ACCCG=>GCCCT GCCCT:15 ACCCG:0
EA2454	snippy:4.3.6	variation	3501222	3501222	.	.	0	note=snp C=>T T:16 C:0
EA2454	snippy:4.3.6	variation	3501230	3501230	.	.	0	note=mnp AGT=>CCG CCG:16 AGT:0
EA2454	snippy:4.3.6	variation	3501237	3501237	.	.	0	note=snp C=>T T:16 C:0
EA2454	snippy:4.3.6	variation	3501444	3501444	.	.	0	note=snp A=>G G:26 A:0
EA2454	snippy:4.3.6	variation	3501549	3501549	.	.	0	note=snp A=>G G:15 A:0
EA2454	snippy:4.3.6	variation	3501558	3501558	.	.	0	note=snp T=>C C:18 T:0
EA2454	snippy:4.3.6	variation	3501611	3501611	.	.	0	note=snp C=>T T:15 C:0
EA2454	snippy:4.3.6	variation	3501618	3501618	.	.	0	note=snp T=>G G:18 T:0
EA2454	snippy:4.3.6	variation	3501628	3501628	.	.	0	note=complex TCTGCCCC=>CCTGACCA CCTGACCA:20 TCTGCCCC:0
EA2454	snippy:4.3.6	variation	3501644	3501644	.	.	0	note=snp A=>G G:20 A:0
EA2454	snippy:4.3.6	variation	3501666	3501666	.	.	0	note=snp C=>A A:22 C:0
EA2454	snippy:4.3.6	variation	3501684	3501684	.	.	0	note=snp C=>T T:24 C:0
EA2454	snippy:4.3.6	variation	3502029	3502029	.	.	0	note=snp C=>T T:26 C:0
EA2454	snippy:4.3.6	variation	3502110	3502110	.	.	0	note=snp T=>C C:23 T:0
EA2454	snippy:4.3.6	variation	3502188	3502188	.	.	0	note=snp G=>A A:23 G:0
EA2454	snippy:4.3.6	variation	3502206	3502206	.	.	0	note=snp C=>T T:24 C:0
EA2454	snippy:4.3.6	variation	3502280	3502280	.	.	0	note=snp A=>G G:18 A:0
EA2454	snippy:4.3.6	variation	3502307	3502307	.	.	0	note=snp A=>T T:22 A:0
EA2454	snippy:4.3.6	variation	3502314	3502314	.	.	0	note=snp C=>G G:26 C:0
EA2454	snippy:4.3.6	variation	3502354	3502354	.	.	0	note=snp T=>A A:20 T:0
EA2454	snippy:4.3.6	variation	3502385	3502385	.	.	0	note=snp C=>T T:25 C:0
EA2454	snippy:4.3.6	variation	3502394	3502394	.	.	0	note=snp C=>A A:25 C:0
EA2454	snippy:4.3.6	variation	3502415	3502415	.	.	0	note=snp A=>G G:22 A:0
EA2454	snippy:4.3.6	variation	3502445	3502445	.	.	0	note=snp G=>A A:22 G:0
EA2454	snippy:4.3.6	variation	3502454	3502454	.	.	0	note=snp C=>T T:22 C:0
EA2454	snippy:4.3.6	variation	3502476	3502476	.	.	0	note=snp G=>T T:19 G:0
EA2454	snippy:4.3.6	variation	3502481	3502481	.	.	0	note=complex TGCTTTCAGTGGT=>CGCTCTGGGGGGG CGCTCTGGGGGGG:15 TGCTTTCAGTGGT:0
EA2454	snippy:4.3.6	variation	3502498	3502498	.	.	0	note=complex CGCAGGTT=>TGCAAGTA TGCAAGTA:17 CGCAGGTT:0
EA2454	snippy:4.3.6	variation	3502526	3502526	.	.	0	note=snp G=>T T:17 G:0
EA2454	snippy:4.3.6	variation	3503047	3503047	.	.	0	note=snp T=>C C:16 T:0
EA2454	snippy:4.3.6	variation	3503113	3503113	.	.	0	note=snp T=>A A:17 T:0
EA2454	snippy:4.3.6	variation	3503233	3503233	.	.	0	note=snp G=>T T:26 G:0
EA2454	snippy:4.3.6	variation	3503272	3503272	.	.	0	note=snp T=>A A:26 T:0
EA2454	snippy:4.3.6	variation	3503353	3503353	.	.	0	note=snp C=>T T:14 C:0
EA2454	snippy:4.3.6	variation	3503395	3503395	.	.	0	note=snp T=>G G:14 T:0
EA2454	snippy:4.3.6	variation	3503408	3503408	.	.	0	note=snp C=>T T:13 C:0
EA2454	snippy:4.3.6	variation	3503453	3503453	.	.	0	note=complex TA=>CT CT:14 TA:0
EA2454	snippy:4.3.6	variation	3503641	3503641	.	.	0	note=snp A=>C C:24 A:0
EA2454	snippy:4.3.6	variation	3503647	3503647	.	.	0	note=snp C=>T T:26 C:0
EA2454	snippy:4.3.6	variation	3503832	3503832	.	.	0	note=snp G=>C C:40 G:0
EA2454	snippy:4.3.6	variation	3503862	3503862	.	.	0	note=mnp CT=>TC TC:34 CT:0
EA2454	snippy:4.3.6	variation	3503884	3503884	.	.	0	note=snp T=>C C:34 T:0
EA2454	snippy:4.3.6	variation	3503977	3503977	.	.	0	note=snp T=>C C:26 T:0
EA2454	snippy:4.3.6	variation	3503992	3503992	.	.	0	note=snp T=>A A:30 T:0
EA2454	snippy:4.3.6	variation	3504028	3504028	.	.	0	note=snp T=>C C:31 T:0
EA2454	snippy:4.3.6	variation	3504074	3504074	.	.	0	note=mnp AA=>GT GT:34 AA:0
EA2454	snippy:4.3.6	variation	3504109	3504109	.	.	0	note=complex TCCG=>CCCA CCCA:25 TCCG:0
EA2454	snippy:4.3.6	variation	3504139	3504139	.	.	0	note=complex TGTCGCA=>GGTTGCT GGTTGCT:22 TGTCGCA:0
EA2454	snippy:4.3.6	variation	3504196	3504196	.	.	0	note=complex AAAAGG=>GACAGA GACAGA:25 AAAAGG:0
EA2454	snippy:4.3.6	variation	3504209	3504209	.	.	0	note=snp G=>A A:26 G:0
EA2454	snippy:4.3.6	variation	3504218	3504218	.	.	0	note=complex CGTAT=>AGCAC AGCAC:29 CGTAT:0
EA2454	snippy:4.3.6	variation	3504311	3504311	.	.	0	note=complex GAATG=>TAATA TAATA:21 GAATG:0
EA2454	snippy:4.3.6	variation	3504324	3504324	.	.	0	note=snp A=>T T:19 A:0
EA2454	snippy:4.3.6	variation	3504332	3504332	.	.	0	note=snp T=>C C:19 T:0
EA2454	snippy:4.3.6	variation	3504346	3504346	.	.	0	note=complex GCGGG=>ACGAT ACGAT:11 GCGGG:0
EA2454	snippy:4.3.6	variation	3504767	3504767	.	.	0	note=snp C=>T T:13 C:0
EA2454	snippy:4.3.6	variation	3504794	3504794	.	.	0	note=snp T=>C C:13 T:0
EA2454	snippy:4.3.6	variation	3504916	3504916	.	.	0	note=snp G=>A A:13 G:0
EA2454	snippy:4.3.6	variation	3505210	3505210	.	.	0	note=snp T=>C C:14 T:0
EA2454	snippy:4.3.6	variation	3505347	3505347	.	.	0	note=snp A=>G G:41 A:0
EA2454	snippy:4.3.6	variation	3505808	3505808	.	.	0	note=snp T=>C C:18 T:0
EA2454	snippy:4.3.6	variation	3505859	3505859	.	.	0	note=snp A=>C C:13 A:0
EA2454	snippy:4.3.6	variation	3505901	3505901	.	.	0	note=snp G=>A A:17 G:0
EA2454	snippy:4.3.6	variation	3506015	3506015	.	.	0	note=complex GCCT=>ACCA ACCA:16 GCCT:0
EA2454	snippy:4.3.6	variation	3506030	3506030	.	.	0	note=snp A=>T T:19 A:0
EA2454	snippy:4.3.6	variation	3506075	3506075	.	.	0	note=snp A=>C C:17 A:0
EA2454	snippy:4.3.6	variation	3506129	3506129	.	.	0	note=snp G=>A A:16 G:0
EA2454	snippy:4.3.6	variation	3506421	3506421	.	.	0	note=complex GCC=>ACT ACT:12 GCC:0
EA2454	snippy:4.3.6	variation	3506442	3506442	.	.	0	note=snp T=>A A:19 T:1
EA2454	snippy:4.3.6	variation	3506634	3506634	.	.	0	note=snp T=>C C:34 T:0
EA2454	snippy:4.3.6	variation	3506837	3506837	.	.	0	note=snp A=>G G:30 A:0
EA2454	snippy:4.3.6	variation	3506964	3506964	.	.	0	note=snp C=>G G:10 C:0
EA2454	snippy:4.3.6	variation	3506970	3506970	.	.	0	note=snp C=>T T:12 C:0
EA2454	snippy:4.3.6	variation	3507137	3507137	.	.	0	note=snp T=>C C:10 T:0
EA2454	snippy:4.3.6	variation	3507174	3507174	.	.	0	note=snp C=>T T:13 C:0
EA2454	snippy:4.3.6	variation	3507248	3507248	.	.	0	note=snp A=>G G:25 A:0
EA2454	snippy:4.3.6	variation	3507260	3507260	.	.	0	note=snp T=>C C:25 T:0
EA2454	snippy:4.3.6	variation	3507278	3507278	.	.	0	note=snp T=>C C:32 T:0
EA2454	snippy:4.3.6	variation	3507751	3507751	.	.	0	note=snp C=>T T:10 C:0
EA2454	snippy:4.3.6	variation	3507774	3507774	.	.	0	note=snp T=>C C:12 T:0
EA2454	snippy:4.3.6	variation	3510390	3510390	.	.	0	note=snp A=>G G:22 A:0
EA2454	snippy:4.3.6	variation	3510396	3510396	.	.	0	note=complex GCAT=>ACAC ACAC:22 GCAT:0
EA2454	snippy:4.3.6	variation	3510420	3510420	.	.	0	note=snp C=>T T:23 C:0
EA2454	snippy:4.3.6	variation	3510427	3510427	.	.	0	note=complex GCCA=>ACCT ACCT:21 GCCA:0
EA2454	snippy:4.3.6	variation	3510450	3510450	.	.	0	note=snp A=>T T:24 A:0
EA2454	snippy:4.3.6	variation	3510480	3510480	.	.	0	note=snp A=>G G:26 A:1
EA2454	snippy:4.3.6	variation	3510486	3510486	.	.	0	note=snp C=>T T:30 C:0
EA2454	snippy:4.3.6	variation	3510510	3510510	.	.	0	note=snp T=>C C:33 T:0
EA2454	snippy:4.3.6	variation	3510603	3510603	.	.	0	note=snp T=>G G:28 T:1
EA2454	snippy:4.3.6	variation	3510741	3510741	.	.	0	note=snp G=>A A:26 G:0
EA2454	snippy:4.3.6	variation	3510747	3510747	.	.	0	note=snp A=>G G:25 A:0
EA2454	snippy:4.3.6	variation	3510974	3510974	.	.	0	note=snp T=>C C:19 T:0
EA2454	snippy:4.3.6	variation	3511225	3511225	.	.	0	note=snp T=>C C:34 T:0
EA2454	snippy:4.3.6	variation	3511312	3511312	.	.	0	note=snp T=>G G:32 T:0
EA2454	snippy:4.3.6	variation	3511318	3511318	.	.	0	note=snp T=>C C:32 T:0
EA2454	snippy:4.3.6	variation	3511333	3511333	.	.	0	note=snp C=>A A:27 C:0
EA2454	snippy:4.3.6	variation	3511417	3511417	.	.	0	note=snp T=>C C:34 T:0
EA2454	snippy:4.3.6	variation	3511488	3511488	.	.	0	note=snp T=>C C:31 T:0
EA2454	snippy:4.3.6	variation	3511821	3511821	.	.	0	note=snp G=>T T:33 G:0
EA2454	snippy:4.3.6	variation	3511890	3511890	.	.	0	note=snp C=>T T:26 C:0
EA2454	snippy:4.3.6	variation	3511923	3511923	.	.	0	note=snp T=>A A:32 T:0
EA2454	snippy:4.3.6	variation	3511944	3511944	.	.	0	note=snp C=>T T:34 C:0
EA2454	snippy:4.3.6	variation	3512097	3512097	.	.	0	note=snp G=>A A:38 G:0
EA2454	snippy:4.3.6	variation	3512205	3512205	.	.	0	note=complex TCAG=>CCAA CCAA:34 TCAG:0
EA2454	snippy:4.3.6	variation	3512235	3512235	.	.	0	note=snp A=>G G:40 A:0
EA2454	snippy:4.3.6	variation	3512365	3512365	.	.	0	note=snp T=>C C:27 T:0
EA2454	snippy:4.3.6	variation	3512398	3512398	.	.	0	note=snp A=>G G:32 A:0
EA2454	snippy:4.3.6	variation	3512422	3512422	.	.	0	note=snp G=>A A:39 G:0
EA2454	snippy:4.3.6	variation	3512520	3512520	.	.	0	note=snp T=>A A:42 T:0
EA2454	snippy:4.3.6	variation	3512556	3512556	.	.	0	note=snp G=>A A:46 G:0
EA2454	snippy:4.3.6	variation	3512565	3512565	.	.	0	note=snp A=>T T:46 A:0
EA2454	snippy:4.3.6	variation	3512589	3512589	.	.	0	note=snp T=>C C:40 T:0
EA2454	snippy:4.3.6	variation	3512622	3512622	.	.	0	note=complex CCGGCCA=>ACGTCCT ACGTCCT:37 CCGGCCA:0
EA2454	snippy:4.3.6	variation	3512638	3512638	.	.	0	note=snp G=>A A:34 G:0
EA2454	snippy:4.3.6	variation	3512643	3512643	.	.	0	note=snp T=>A A:35 T:0
EA2454	snippy:4.3.6	variation	3512655	3512655	.	.	0	note=snp G=>A A:36 G:0
EA2454	snippy:4.3.6	variation	3512670	3512670	.	.	0	note=snp G=>C C:31 G:0
EA2454	snippy:4.3.6	variation	3512718	3512718	.	.	0	note=snp G=>A A:28 G:0
EA2454	snippy:4.3.6	variation	3512729	3512729	.	.	0	note=snp T=>A A:26 T:0
EA2454	snippy:4.3.6	variation	3512738	3512738	.	.	0	note=complex CGCA=>AGCG AGCG:26 CGCA:0
EA2454	snippy:4.3.6	variation	3512754	3512754	.	.	0	note=complex TACGCG=>CACACC CACACC:24 TACGCG:0
EA2454	snippy:4.3.6	variation	3512780	3512780	.	.	0	note=snp A=>G G:29 A:0
EA2454	snippy:4.3.6	variation	3512791	3512791	.	.	0	note=snp A=>C C:27 A:0
EA2454	snippy:4.3.6	variation	3512796	3512796	.	.	0	note=snp A=>G G:27 A:0
EA2454	snippy:4.3.6	variation	3512808	3512808	.	.	0	note=snp G=>A A:28 G:0
EA2454	snippy:4.3.6	variation	3512814	3512814	.	.	0	note=snp A=>G G:26 A:0
EA2454	snippy:4.3.6	variation	3512826	3512826	.	.	0	note=snp T=>C C:27 T:0
EA2454	snippy:4.3.6	variation	3512940	3512940	.	.	0	note=snp T=>A A:26 T:0
EA2454	snippy:4.3.6	variation	3512955	3512955	.	.	0	note=complex TGCT=>AGCA AGCA:26 TGCT:0
EA2454	snippy:4.3.6	variation	3512973	3512973	.	.	0	note=snp C=>A A:27 C:0
EA2454	snippy:4.3.6	variation	3513022	3513022	.	.	0	note=snp C=>T T:23 C:0
EA2454	snippy:4.3.6	variation	3513150	3513150	.	.	0	note=snp T=>C C:21 T:0
EA2454	snippy:4.3.6	variation	3513306	3513306	.	.	0	note=snp G=>T T:17 G:0
EA2454	snippy:4.3.6	variation	3513698	3513698	.	.	0	note=snp C=>T T:11 C:0
EA2454	snippy:4.3.6	variation	3513915	3513915	.	.	0	note=complex TGGGA=>CGGGG CGGGG:18 TGGGA:0
EA2454	snippy:4.3.6	variation	3513943	3513943	.	.	0	note=snp G=>T T:15 G:0
EA2454	snippy:4.3.6	variation	3513948	3513948	.	.	0	note=snp C=>T T:15 C:0
EA2454	snippy:4.3.6	variation	3513984	3513984	.	.	0	note=snp C=>T T:16 C:0
EA2454	snippy:4.3.6	variation	3514006	3514006	.	.	0	note=snp G=>A A:13 G:0
EA2454	snippy:4.3.6	variation	3514011	3514011	.	.	0	note=snp A=>T T:12 A:0
EA2454	snippy:4.3.6	variation	3514542	3514542	.	.	0	note=snp G=>A A:12 G:0
EA2454	snippy:4.3.6	variation	3514572	3514572	.	.	0	note=snp T=>C C:18 T:0
EA2454	snippy:4.3.6	variation	3514722	3514722	.	.	0	note=snp C=>T T:16 C:0
EA2454	snippy:4.3.6	variation	3514732	3514732	.	.	0	note=snp T=>G G:20 T:0
EA2454	snippy:4.3.6	variation	3514737	3514737	.	.	0	note=snp T=>C C:19 T:0
EA2454	snippy:4.3.6	variation	3514752	3514752	.	.	0	note=complex AGGAGGG=>TGGTGGT TGGTGGT:17 AGGAGGG:0
EA2454	snippy:4.3.6	variation	3514773	3514773	.	.	0	note=complex GTCTC=>ATCTA ATCTA:17 GTCTC:0
EA2454	snippy:4.3.6	variation	3514795	3514795	.	.	0	note=snp G=>A A:13 G:0
EA2454	snippy:4.3.6	variation	3514804	3514804	.	.	0	note=snp T=>C C:13 T:0
EA2454	snippy:4.3.6	variation	3514818	3514818	.	.	0	note=snp A=>T T:11 A:0
EA2454	snippy:4.3.6	variation	3514824	3514824	.	.	0	note=snp G=>A A:10 G:0
EA2454	snippy:4.3.6	variation	3514836	3514836	.	.	0	note=snp C=>T T:11 C:0
EA2454	snippy:4.3.6	variation	3514920	3514920	.	.	0	note=snp T=>C C:11 T:0
EA2454	snippy:4.3.6	variation	3515019	3515019	.	.	0	note=snp T=>A A:20 T:0
EA2454	snippy:4.3.6	variation	3515109	3515109	.	.	0	note=snp G=>A A:20 G:0
EA2454	snippy:4.3.6	variation	3515187	3515187	.	.	0	note=snp T=>C C:36 T:0
EA2454	snippy:4.3.6	variation	3515192	3515192	.	.	0	note=snp C=>T T:36 C:0
EA2454	snippy:4.3.6	variation	3515244	3515244	.	.	0	note=snp C=>T T:36 C:0
EA2454	snippy:4.3.6	variation	3515298	3515298	.	.	0	note=snp G=>T T:34 G:0
EA2454	snippy:4.3.6	variation	3515325	3515325	.	.	0	note=snp C=>G G:29 C:0
EA2454	snippy:4.3.6	variation	3515337	3515337	.	.	0	note=snp C=>T T:31 C:0
EA2454	snippy:4.3.6	variation	3515346	3515346	.	.	0	note=complex AAG=>GAA GAA:27 AAG:2
EA2454	snippy:4.3.6	variation	3515355	3515355	.	.	0	note=snp A=>C C:26 A:0
EA2454	snippy:4.3.6	variation	3515361	3515361	.	.	0	note=complex GGCAG=>AGCAA AGCAA:29 GGCAG:0
EA2454	snippy:4.3.6	variation	3515370	3515370	.	.	0	note=snp C=>T T:28 C:0
EA2454	snippy:4.3.6	variation	3515388	3515388	.	.	0	note=complex ACCT=>TCCG TCCG:19 ACCT:0
EA2454	snippy:4.3.6	variation	3515409	3515409	.	.	0	note=snp A=>G G:19 A:0
EA2454	snippy:4.3.6	variation	3515423	3515423	.	.	0	note=snp A=>G G:17 A:0
EA2454	snippy:4.3.6	variation	3515445	3515445	.	.	0	note=snp G=>A A:13 G:0
EA2454	snippy:4.3.6	variation	3515475	3515475	.	.	0	note=complex GTATGAC=>ATTCGAT ATTCGAT:11 GTATGAC:0
EA2454	snippy:4.3.6	variation	3515488	3515488	.	.	0	note=complex ATTAATGCCCGGGGA=>CGCAACTCGCCGGGG CGCAACTCGCCGGGG:10 ATTAATGCCCGGGGA:0
EA2454	snippy:4.3.6	variation	3515508	3515508	.	.	0	note=complex CTC=>GAA GAA:11 CTC:0
EA2454	snippy:4.3.6	variation	3515518	3515518	.	.	0	note=complex TCTCCTC=>GCGCCTG GCGCCTG:11 TCTCCTC:0
EA2454	snippy:4.3.6	variation	3515532	3515532	.	.	0	note=snp T=>C C:16 T:0
EA2454	snippy:4.3.6	variation	3515545	3515545	.	.	0	note=snp A=>G G:18 A:0
EA2454	snippy:4.3.6	variation	3515580	3515580	.	.	0	note=snp T=>C C:23 T:0
EA2454	snippy:4.3.6	variation	3515586	3515586	.	.	0	note=snp A=>T T:22 A:0
EA2454	snippy:4.3.6	variation	3515601	3515601	.	.	0	note=snp A=>G G:22 A:1
EA2454	snippy:4.3.6	variation	3515718	3515718	.	.	0	note=snp T=>C C:20 T:0
EA2454	snippy:4.3.6	variation	3515891	3515891	.	.	0	note=snp A=>G G:24 A:0
EA2454	snippy:4.3.6	variation	3516379	3516379	.	.	0	note=snp A=>G G:22 A:0
EA2454	snippy:4.3.6	variation	3516478	3516478	.	.	0	note=snp C=>G G:23 C:0
EA2454	snippy:4.3.6	variation	3516485	3516485	.	.	0	note=snp G=>A A:25 G:0
EA2454	snippy:4.3.6	variation	3516496	3516496	.	.	0	note=snp A=>C C:21 A:0
EA2454	snippy:4.3.6	variation	3516514	3516514	.	.	0	note=snp T=>C C:24 T:0
EA2454	snippy:4.3.6	variation	3516537	3516537	.	.	0	note=snp C=>T T:28 C:0
EA2454	snippy:4.3.6	variation	3516772	3516772	.	.	0	note=snp A=>T T:29 A:0
EA2454	snippy:4.3.6	variation	3516787	3516787	.	.	0	note=snp T=>C C:22 T:0
EA2454	snippy:4.3.6	variation	3516832	3516832	.	.	0	note=snp A=>G G:27 A:0
EA2454	snippy:4.3.6	variation	3516841	3516841	.	.	0	note=snp T=>G G:25 T:0
EA2454	snippy:4.3.6	variation	3521717	3521717	.	.	0	note=snp C=>G G:37 C:0
EA2454	snippy:4.3.6	variation	3527982	3527982	.	.	0	note=ins G=>GA GA:55 G:0
EA2454	snippy:4.3.6	variation	3536376	3536376	.	.	0	note=snp T=>C C:42 T:0
EA2454	snippy:4.3.6	variation	3539749	3539749	.	.	0	note=snp T=>C C:58 T:0
EA2454	snippy:4.3.6	variation	3540229	3540229	.	.	0	note=snp T=>C C:63 T:2
EA2454	snippy:4.3.6	variation	3546655	3546655	.	.	0	note=snp C=>T T:76 C:0
EA2454	snippy:4.3.6	variation	3547948	3547948	.	.	0	note=snp T=>C C:88 T:0
EA2454	snippy:4.3.6	variation	3548625	3548625	.	.	0	note=snp G=>C C:59 G:0
EA2454	snippy:4.3.6	variation	3554302	3554302	.	.	0	note=snp G=>T T:43 G:0
EA2454	snippy:4.3.6	variation	3556473	3556473	.	.	0	note=snp G=>A A:81 G:0
EA2454	snippy:4.3.6	variation	3566015	3566015	.	.	0	note=snp T=>C C:67 T:0
EA2454	snippy:4.3.6	variation	3569782	3569782	.	.	0	note=snp C=>T T:105 C:0
EA2454	snippy:4.3.6	variation	3574205	3574205	.	.	0	note=snp G=>T T:60 G:0
EA2454	snippy:4.3.6	variation	3575127	3575127	.	.	0	note=snp A=>C C:33 A:0
EA2454	snippy:4.3.6	variation	3586272	3586272	.	.	0	note=snp C=>T T:13 C:0
EA2454	snippy:4.3.6	variation	3590214	3590214	.	.	0	note=snp T=>C C:76 T:0
EA2454	snippy:4.3.6	variation	3590259	3590259	.	.	0	note=snp C=>T T:73 C:0
EA2454	snippy:4.3.6	variation	3594055	3594055	.	.	0	note=snp T=>C C:62 T:2
EA2454	snippy:4.3.6	variation	3595770	3595770	.	.	0	note=snp T=>G G:46 T:0
EA2454	snippy:4.3.6	variation	3600939	3600939	.	.	0	note=snp G=>C C:46 G:0
EA2454	snippy:4.3.6	variation	3602569	3602569	.	.	0	note=snp C=>A A:43 C:0
EA2454	snippy:4.3.6	variation	3613661	3613661	.	.	0	note=snp G=>A A:37 G:0
EA2454	snippy:4.3.6	variation	3613761	3613761	.	.	0	note=snp T=>C C:31 T:0
EA2454	snippy:4.3.6	variation	3615292	3615292	.	.	0	note=snp T=>G G:50 T:0
EA2454	snippy:4.3.6	variation	3615330	3615330	.	.	0	note=snp A=>C C:52 A:0
EA2454	snippy:4.3.6	variation	3628517	3628517	.	.	0	note=snp A=>G G:59 A:0
EA2454	snippy:4.3.6	variation	3632526	3632526	.	.	0	note=snp C=>A A:63 C:0
EA2454	snippy:4.3.6	variation	3634246	3634246	.	.	0	note=snp A=>T T:22 A:0
EA2454	snippy:4.3.6	variation	3634750	3634750	.	.	0	note=snp C=>T T:68 C:0
EA2454	snippy:4.3.6	variation	3640661	3640661	.	.	0	note=snp A=>G G:54 A:0
EA2454	snippy:4.3.6	variation	3645952	3645952	.	.	0	note=snp G=>A A:51 G:0
EA2454	snippy:4.3.6	variation	3657942	3657942	.	.	0	note=snp T=>G G:103 T:0
EA2454	snippy:4.3.6	variation	3662284	3662284	.	.	0	note=snp A=>G G:68 A:0
EA2454	snippy:4.3.6	variation	3665749	3665749	.	.	0	note=snp G=>A A:105 G:0
EA2454	snippy:4.3.6	variation	3666055	3666055	.	.	0	note=snp C=>T T:84 C:0
EA2454	snippy:4.3.6	variation	3680210	3680210	.	.	0	note=snp A=>T T:64 A:0
EA2454	snippy:4.3.6	variation	3682843	3682843	.	.	0	note=snp T=>G G:64 T:0
EA2454	snippy:4.3.6	variation	3690835	3690835	.	.	0	note=snp T=>G G:65 T:0
EA2454	snippy:4.3.6	variation	3701518	3701518	.	.	0	note=snp C=>T T:41 C:0
EA2454	snippy:4.3.6	variation	3701756	3701756	.	.	0	note=snp A=>G G:31 A:0
EA2454	snippy:4.3.6	variation	3705284	3705284	.	.	0	note=snp A=>G G:23 A:0
EA2454	snippy:4.3.6	variation	3706695	3706695	.	.	0	note=snp C=>T T:42 C:1
EA2454	snippy:4.3.6	variation	3709916	3709916	.	.	0	note=snp G=>A A:34 G:0
EA2454	snippy:4.3.6	variation	3731404	3731404	.	.	0	note=snp G=>A A:57 G:2
EA2454	snippy:4.3.6	variation	3731422	3731422	.	.	0	note=snp C=>A A:61 C:2
EA2454	snippy:4.3.6	variation	3739482	3739482	.	.	0	note=snp A=>G G:30 A:0
EA2454	snippy:4.3.6	variation	3750262	3750262	.	.	0	note=del GAA=>G G:33 GAA:0
EA2454	snippy:4.3.6	variation	3751756	3751756	.	.	0	note=snp C=>T T:17 C:0
EA2454	snippy:4.3.6	variation	3753142	3753142	.	.	0	note=snp G=>T T:21 G:0
EA2454	snippy:4.3.6	variation	3756054	3756054	.	.	0	note=snp T=>C C:69 T:0
EA2454	snippy:4.3.6	variation	3763988	3763988	.	.	0	note=snp A=>G G:60 A:1
EA2454	snippy:4.3.6	variation	3766157	3766157	.	.	0	note=snp G=>A A:66 G:0
EA2454	snippy:4.3.6	variation	3772277	3772277	.	.	0	note=snp T=>A A:30 T:0
EA2454	snippy:4.3.6	variation	3779368	3779368	.	.	0	note=snp C=>T T:44 C:0
EA2454	snippy:4.3.6	variation	3782707	3782707	.	.	0	note=snp C=>T T:65 C:0
EA2454	snippy:4.3.6	variation	3795140	3795140	.	.	0	note=snp T=>C C:49 T:0
EA2454	snippy:4.3.6	variation	3801431	3801431	.	.	0	note=snp C=>T T:71 C:0
EA2454	snippy:4.3.6	variation	3807575	3807575	.	.	0	note=snp A=>G G:89 A:0
EA2454	snippy:4.3.6	variation	3808964	3808964	.	.	0	note=snp C=>T T:39 C:0
EA2454	snippy:4.3.6	variation	3815430	3815430	.	.	0	note=snp T=>C C:42 T:0
EA2454	snippy:4.3.6	variation	3817838	3817838	.	.	0	note=complex AGGTGC=>GATAAGGCGT GATAAGGCGT:15 AGGTGC:1
EA2454	snippy:4.3.6	variation	3837457	3837457	.	.	0	note=snp C=>A A:48 C:0
EA2454	snippy:4.3.6	variation	3839065	3839065	.	.	0	note=snp G=>A A:48 G:0
EA2454	snippy:4.3.6	variation	3840206	3840206	.	.	0	note=snp C=>T T:84 C:0
EA2454	snippy:4.3.6	variation	3842198	3842198	.	.	0	note=ins C=>CT CT:54 C:0
EA2454	snippy:4.3.6	variation	3844395	3844395	.	.	0	note=snp T=>C C:71 T:0
EA2454	snippy:4.3.6	variation	3851605	3851605	.	.	0	note=snp C=>T T:18 C:0
EA2454	snippy:4.3.6	variation	3851695	3851695	.	.	0	note=snp T=>C C:21 T:0
EA2454	snippy:4.3.6	variation	3851703	3851703	.	.	0	note=complex ACCA=>GCCT GCCT:21 ACCA:0
EA2454	snippy:4.3.6	variation	3851762	3851762	.	.	0	note=snp C=>T T:23 C:2
EA2454	snippy:4.3.6	variation	3851770	3851770	.	.	0	note=complex TAGCC=>CAGCG CAGCG:24 TAGCC:0
EA2454	snippy:4.3.6	variation	3851849	3851849	.	.	0	note=snp G=>A A:23 G:2
EA2454	snippy:4.3.6	variation	3851865	3851865	.	.	0	note=snp C=>T T:23 C:2
EA2454	snippy:4.3.6	variation	3851884	3851884	.	.	0	note=snp C=>T T:15 C:0
EA2454	snippy:4.3.6	variation	3851913	3851913	.	.	0	note=complex GAT=>AAA AAA:12 GAT:0
EA2454	snippy:4.3.6	variation	3852607	3852607	.	.	0	note=complex CCGTT=>TCGTC TCGTC:97 CCGTT:0
EA2454	snippy:4.3.6	variation	3852799	3852799	.	.	0	note=snp A=>G G:66 A:0
EA2454	snippy:4.3.6	variation	3852974	3852974	.	.	0	note=snp A=>G G:93 A:0
EA2454	snippy:4.3.6	variation	3852999	3852999	.	.	0	note=snp T=>C C:66 T:0
EA2454	snippy:4.3.6	variation	3856047	3856047	.	.	0	note=complex AAAG=>GAAA GAAA:60 AAAG:0
EA2454	snippy:4.3.6	variation	3856149	3856149	.	.	0	note=snp T=>A A:91 T:0
EA2454	snippy:4.3.6	variation	3856458	3856458	.	.	0	note=snp A=>G G:114 A:0
EA2454	snippy:4.3.6	variation	3859719	3859719	.	.	0	note=snp G=>A A:68 G:0
EA2454	snippy:4.3.6	variation	3859941	3859941	.	.	0	note=snp T=>C C:28 T:0
EA2454	snippy:4.3.6	variation	3860187	3860187	.	.	0	note=snp T=>C C:66 T:0
EA2454	snippy:4.3.6	variation	3861129	3861129	.	.	0	note=snp G=>A A:94 G:0
EA2454	snippy:4.3.6	variation	3861180	3861180	.	.	0	note=snp C=>T T:103 C:0
EA2454	snippy:4.3.6	variation	3861216	3861216	.	.	0	note=snp C=>G G:109 C:0
EA2454	snippy:4.3.6	variation	3861222	3861222	.	.	0	note=snp T=>C C:103 T:0
EA2454	snippy:4.3.6	variation	3861402	3861402	.	.	0	note=complex CCCA=>TCCG TCCG:71 CCCA:0
EA2454	snippy:4.3.6	variation	3861516	3861516	.	.	0	note=snp T=>C C:66 T:0
EA2454	snippy:4.3.6	variation	3861585	3861585	.	.	0	note=complex TTTC=>CTTT CTTT:78 TTTC:0
EA2454	snippy:4.3.6	variation	3861594	3861594	.	.	0	note=snp G=>T T:83 G:0
EA2454	snippy:4.3.6	variation	3861621	3861621	.	.	0	note=snp T=>C C:91 T:0
EA2454	snippy:4.3.6	variation	3861630	3861630	.	.	0	note=snp T=>C C:96 T:0
EA2454	snippy:4.3.6	variation	3861636	3861636	.	.	0	note=snp C=>T T:96 C:0
EA2454	snippy:4.3.6	variation	3861840	3861840	.	.	0	note=snp T=>C C:85 T:0
EA2454	snippy:4.3.6	variation	3861856	3861856	.	.	0	note=snp A=>C C:85 A:0
EA2454	snippy:4.3.6	variation	3861864	3861864	.	.	0	note=snp T=>C C:85 T:0
EA2454	snippy:4.3.6	variation	3861870	3861870	.	.	0	note=complex CCCA=>TCCG TCCG:81 CCCA:0
EA2454	snippy:4.3.6	variation	3861957	3861957	.	.	0	note=snp G=>A A:91 G:0
EA2454	snippy:4.3.6	variation	3861993	3861993	.	.	0	note=complex AGTTGAAAAG=>CGTGGAGAAA CGTGGAGAAA:86 AGTTGAAAAG:0
EA2454	snippy:4.3.6	variation	3862023	3862023	.	.	0	note=snp G=>A A:98 G:0
EA2454	snippy:4.3.6	variation	3862029	3862029	.	.	0	note=snp C=>T T:95 C:0
EA2454	snippy:4.3.6	variation	3862086	3862086	.	.	0	note=snp C=>A A:88 C:0
EA2454	snippy:4.3.6	variation	3862353	3862353	.	.	0	note=snp T=>C C:82 T:0
EA2454	snippy:4.3.6	variation	3862476	3862476	.	.	0	note=snp T=>C C:84 T:0
EA2454	snippy:4.3.6	variation	3862614	3862614	.	.	0	note=snp C=>T T:110 C:0
EA2454	snippy:4.3.6	variation	3862731	3862731	.	.	0	note=snp C=>T T:99 C:1
EA2454	snippy:4.3.6	variation	3862765	3862765	.	.	0	note=snp A=>G G:107 A:0
EA2454	snippy:4.3.6	variation	3862783	3862783	.	.	0	note=snp A=>C C:98 A:0
EA2454	snippy:4.3.6	variation	3862788	3862788	.	.	0	note=complex CAGCGAG=>TAACGAC TAACGAC:94 CAGCGAG:0
EA2454	snippy:4.3.6	variation	3862833	3862833	.	.	0	note=snp T=>C C:113 T:0
EA2454	snippy:4.3.6	variation	3862974	3862974	.	.	0	note=snp T=>G G:76 T:0
EA2454	snippy:4.3.6	variation	3862990	3862990	.	.	0	note=complex TCCCTGATTATC=>AGCCTTATCATT AGCCTTATCATT:59 TCCCTGATTATC:0
EA2454	snippy:4.3.6	variation	3863014	3863014	.	.	0	note=snp A=>C C:71 A:0
EA2454	snippy:4.3.6	variation	3863036	3863036	.	.	0	note=mnp CT=>AC AC:65 CT:0
EA2454	snippy:4.3.6	variation	3863043	3863043	.	.	0	note=snp A=>G G:67 A:0
EA2454	snippy:4.3.6	variation	3863139	3863139	.	.	0	note=snp C=>T T:91 C:0
EA2454	snippy:4.3.6	variation	3863214	3863214	.	.	0	note=snp T=>C C:100 T:0
EA2454	snippy:4.3.6	variation	3863280	3863280	.	.	0	note=snp T=>C C:90 T:1
EA2454	snippy:4.3.6	variation	3863319	3863319	.	.	0	note=snp G=>C C:85 G:0
EA2454	snippy:4.3.6	variation	3863331	3863331	.	.	0	note=snp C=>T T:82 C:0
EA2454	snippy:4.3.6	variation	3863490	3863490	.	.	0	note=snp C=>G G:68 C:0
EA2454	snippy:4.3.6	variation	3863532	3863532	.	.	0	note=complex ATCG=>GTCA GTCA:61 ATCG:0
EA2454	snippy:4.3.6	variation	3863559	3863559	.	.	0	note=snp G=>A A:59 G:0
EA2454	snippy:4.3.6	variation	3863732	3863732	.	.	0	note=snp A=>G G:68 A:0
EA2454	snippy:4.3.6	variation	3863840	3863840	.	.	0	note=snp T=>C C:86 T:0
EA2454	snippy:4.3.6	variation	3863900	3863900	.	.	0	note=snp T=>G G:84 T:0
EA2454	snippy:4.3.6	variation	3863966	3863966	.	.	0	note=snp G=>A A:104 G:0
EA2454	snippy:4.3.6	variation	3864034	3864034	.	.	0	note=snp A=>C C:106 A:0
EA2454	snippy:4.3.6	variation	3864046	3864046	.	.	0	note=snp C=>T T:102 C:0
EA2454	snippy:4.3.6	variation	3864070	3864070	.	.	0	note=mnp GC=>AA AA:105 GC:0
EA2454	snippy:4.3.6	variation	3864181	3864181	.	.	0	note=snp C=>T T:84 C:0
EA2454	snippy:4.3.6	variation	3864199	3864199	.	.	0	note=complex TCCTGGA=>GCCCGGT GCCCGGT:76 TCCTGGA:0
EA2454	snippy:4.3.6	variation	3864220	3864220	.	.	0	note=snp A=>G G:88 A:0
EA2454	snippy:4.3.6	variation	3864227	3864227	.	.	0	note=snp A=>G G:86 A:0
EA2454	snippy:4.3.6	variation	3864307	3864307	.	.	0	note=snp A=>T T:86 A:0
EA2454	snippy:4.3.6	variation	3865110	3865110	.	.	0	note=snp T=>C C:107 T:0
EA2454	snippy:4.3.6	variation	3865119	3865119	.	.	0	note=snp A=>C C:108 A:0
EA2454	snippy:4.3.6	variation	3865509	3865509	.	.	0	note=snp T=>C C:43 T:0
EA2454	snippy:4.3.6	variation	3865545	3865545	.	.	0	note=snp T=>C C:39 T:0
EA2454	snippy:4.3.6	variation	3865593	3865593	.	.	0	note=snp C=>A A:21 C:0
EA2454	snippy:4.3.6	variation	3865745	3865745	.	.	0	note=complex TGAA=>AGAG AGAG:10 TGAA:0
EA2454	snippy:4.3.6	variation	3865854	3865854	.	.	0	note=snp A=>G G:30 A:0
EA2454	snippy:4.3.6	variation	3865988	3865988	.	.	0	note=snp T=>C C:46 T:0
EA2454	snippy:4.3.6	variation	3866184	3866184	.	.	0	note=snp A=>G G:18 A:0
EA2454	snippy:4.3.6	variation	3866269	3866269	.	.	0	note=snp T=>C C:12 T:0
EA2454	snippy:4.3.6	variation	3866278	3866278	.	.	0	note=snp T=>C C:21 T:0
EA2454	snippy:4.3.6	variation	3866284	3866284	.	.	0	note=snp G=>C C:21 G:0
EA2454	snippy:4.3.6	variation	3866302	3866302	.	.	0	note=snp T=>C C:28 T:0
EA2454	snippy:4.3.6	variation	3866312	3866312	.	.	0	note=snp A=>G G:30 A:0
EA2454	snippy:4.3.6	variation	3866320	3866320	.	.	0	note=complex CTTC=>ATTT ATTT:30 CTTC:0
EA2454	snippy:4.3.6	variation	3866335	3866335	.	.	0	note=snp T=>G G:32 T:0
EA2454	snippy:4.3.6	variation	3866365	3866365	.	.	0	note=snp C=>A A:32 C:0
EA2454	snippy:4.3.6	variation	3866373	3866373	.	.	0	note=mnp TT=>CG CG:28 TT:0
EA2454	snippy:4.3.6	variation	3866383	3866383	.	.	0	note=snp T=>C C:28 T:0
EA2454	snippy:4.3.6	variation	3866395	3866395	.	.	0	note=snp C=>T T:26 C:0
EA2454	snippy:4.3.6	variation	3866419	3866419	.	.	0	note=snp T=>G G:21 T:0
EA2454	snippy:4.3.6	variation	3866503	3866503	.	.	0	note=snp G=>T T:10 G:0
EA2454	snippy:4.3.6	variation	3866512	3866512	.	.	0	note=complex CTGTTTCA=>TTGCTTCC TTGCTTCC:10 CTGTTTCA:0
EA2454	snippy:4.3.6	variation	3867326	3867326	.	.	0	note=complex TAGCCGG=>AAACCGC AAACCGC:106 TAGCCGG:0
EA2454	snippy:4.3.6	variation	3868798	3868798	.	.	0	note=snp A=>G G:47 A:0
EA2454	snippy:4.3.6	variation	3869010	3869010	.	.	0	note=del CTGA=>C C:53 CTGA:0
EA2454	snippy:4.3.6	variation	3870424	3870424	.	.	0	note=snp C=>T T:71 C:0
EA2454	snippy:4.3.6	variation	3870448	3870448	.	.	0	note=snp G=>A A:84 G:0
EA2454	snippy:4.3.6	variation	3870523	3870523	.	.	0	note=snp A=>G G:88 A:0
EA2454	snippy:4.3.6	variation	3870529	3870529	.	.	0	note=snp A=>G G:87 A:0
EA2454	snippy:4.3.6	variation	3871083	3871083	.	.	0	note=snp T=>C C:20 T:0
EA2454	snippy:4.3.6	variation	3871269	3871269	.	.	0	note=snp G=>A A:33 G:1
EA2454	snippy:4.3.6	variation	3871487	3871487	.	.	0	note=snp T=>C C:64 T:0
EA2454	snippy:4.3.6	variation	3872599	3872599	.	.	0	note=snp G=>A A:113 G:0
EA2454	snippy:4.3.6	variation	3873309	3873309	.	.	0	note=snp C=>T T:124 C:0
EA2454	snippy:4.3.6	variation	3873396	3873396	.	.	0	note=snp T=>C C:112 T:0
EA2454	snippy:4.3.6	variation	3873594	3873594	.	.	0	note=snp G=>A A:107 G:0
EA2454	snippy:4.3.6	variation	3873609	3873609	.	.	0	note=snp A=>G G:108 A:0
EA2454	snippy:4.3.6	variation	3873636	3873636	.	.	0	note=snp G=>A A:118 G:0
EA2454	snippy:4.3.6	variation	3873750	3873750	.	.	0	note=snp T=>C C:103 T:0
EA2454	snippy:4.3.6	variation	3874068	3874068	.	.	0	note=snp T=>C C:103 T:0
EA2454	snippy:4.3.6	variation	3874077	3874077	.	.	0	note=snp G=>A A:107 G:0
EA2454	snippy:4.3.6	variation	3874083	3874083	.	.	0	note=snp T=>C C:106 T:0
EA2454	snippy:4.3.6	variation	3874221	3874221	.	.	0	note=snp T=>C C:113 T:0
EA2454	snippy:4.3.6	variation	3874329	3874329	.	.	0	note=complex GGCG=>AGCA AGCA:124 GGCG:0
EA2454	snippy:4.3.6	variation	3874393	3874393	.	.	0	note=snp T=>A A:132 T:0
EA2454	snippy:4.3.6	variation	3874500	3874500	.	.	0	note=snp C=>T T:133 C:0
EA2454	snippy:4.3.6	variation	3874551	3874551	.	.	0	note=complex AAGA=>TCAG TCAG:87 AAGA:0
EA2454	snippy:4.3.6	variation	3874566	3874566	.	.	0	note=snp A=>C C:99 A:0
EA2454	snippy:4.3.6	variation	3874580	3874580	.	.	0	note=snp G=>C C:98 G:0
EA2454	snippy:4.3.6	variation	3874587	3874587	.	.	0	note=snp G=>C C:97 G:0
EA2454	snippy:4.3.6	variation	3874599	3874599	.	.	0	note=snp C=>A A:94 C:0
EA2454	snippy:4.3.6	variation	3874749	3874749	.	.	0	note=snp C=>T T:60 C:0
EA2454	snippy:4.3.6	variation	3874767	3874767	.	.	0	note=snp G=>A A:68 G:0
EA2454	snippy:4.3.6	variation	3874824	3874824	.	.	0	note=snp A=>G G:93 A:0
EA2454	snippy:4.3.6	variation	3874851	3874851	.	.	0	note=snp C=>T T:94 C:1
EA2454	snippy:4.3.6	variation	3874866	3874866	.	.	0	note=complex CCAGC=>TCAGT TCAGT:101 CCAGC:0
EA2454	snippy:4.3.6	variation	3874887	3874887	.	.	0	note=snp C=>T T:121 C:0
EA2454	snippy:4.3.6	variation	3874893	3874893	.	.	0	note=complex AAAA=>GAAG GAAG:118 AAAA:0
EA2454	snippy:4.3.6	variation	3874996	3874996	.	.	0	note=snp C=>T T:139 C:0
EA2454	snippy:4.3.6	variation	3875022	3875022	.	.	0	note=snp G=>A A:173 G:2
EA2454	snippy:4.3.6	variation	3875037	3875037	.	.	0	note=snp G=>A A:145 G:0
EA2454	snippy:4.3.6	variation	3875046	3875046	.	.	0	note=snp C=>A A:137 C:0
EA2454	snippy:4.3.6	variation	3875073	3875073	.	.	0	note=snp C=>A A:135 C:0
EA2454	snippy:4.3.6	variation	3875100	3875100	.	.	0	note=snp T=>G G:136 T:0
EA2454	snippy:4.3.6	variation	3875106	3875106	.	.	0	note=snp G=>C C:139 G:0
EA2454	snippy:4.3.6	variation	3875118	3875118	.	.	0	note=snp T=>G G:138 T:0
EA2454	snippy:4.3.6	variation	3875157	3875157	.	.	0	note=snp T=>G G:146 T:0
EA2454	snippy:4.3.6	variation	3875169	3875169	.	.	0	note=complex GGACATC=>CGATATT CGATATT:137 GGACATC:0
EA2454	snippy:4.3.6	variation	3875205	3875205	.	.	0	note=complex GGGG=>TGGT TGGT:145 GGGG:0
EA2454	snippy:4.3.6	variation	3875214	3875214	.	.	0	note=snp C=>T T:144 C:0
EA2454	snippy:4.3.6	variation	3875232	3875232	.	.	0	note=snp T=>C C:144 T:0
EA2454	snippy:4.3.6	variation	3875328	3875328	.	.	0	note=complex CCGAGGC=>TAAAGGG TAAAGGG:62 CCGAGGC:0
EA2454	snippy:4.3.6	variation	3875340	3875340	.	.	0	note=complex CGGA=>AGGT AGGT:63 CGGA:0
EA2454	snippy:4.3.6	variation	3875354	3875354	.	.	0	note=snp G=>A A:77 G:0
EA2454	snippy:4.3.6	variation	3875370	3875370	.	.	0	note=snp A=>G G:69 A:0
EA2454	snippy:4.3.6	variation	3875383	3875383	.	.	0	note=complex GGAA=>AGAG AGAG:62 GGAA:0
EA2454	snippy:4.3.6	variation	3875403	3875403	.	.	0	note=complex ACAA=>GCAG GCAG:58 ACAA:0
EA2454	snippy:4.3.6	variation	3875437	3875437	.	.	0	note=snp A=>G G:61 A:0
EA2454	snippy:4.3.6	variation	3875460	3875460	.	.	0	note=snp A=>G G:43 A:0
EA2454	snippy:4.3.6	variation	3875465	3875465	.	.	0	note=snp G=>C C:45 G:0
EA2454	snippy:4.3.6	variation	3875514	3875514	.	.	0	note=snp A=>G G:52 A:0
EA2454	snippy:4.3.6	variation	3875523	3875523	.	.	0	note=snp G=>A A:52 G:0
EA2454	snippy:4.3.6	variation	3875536	3875536	.	.	0	note=complex CAC=>TAT TAT:46 CAC:0
EA2454	snippy:4.3.6	variation	3875549	3875549	.	.	0	note=complex ATTGTATG=>GCTGTTTTT GCTGTTTTT:35 ATTGTATG:0
EA2454	snippy:4.3.6	variation	3875572	3875572	.	.	0	note=complex AAAA=>GATG GATG:40 AAAA:0
EA2454	snippy:4.3.6	variation	3875580	3875580	.	.	0	note=complex GCT=>ACC ACC:40 GCT:0
EA2454	snippy:4.3.6	variation	3875597	3875597	.	.	0	note=snp G=>A A:45 G:0
EA2454	snippy:4.3.6	variation	3875612	3875612	.	.	0	note=complex CATT=>TATC TATC:52 CATT:0
EA2454	snippy:4.3.6	variation	3875632	3875632	.	.	0	note=snp A=>G G:53 A:0
EA2454	snippy:4.3.6	variation	3875641	3875641	.	.	0	note=snp G=>A A:52 G:0
EA2454	snippy:4.3.6	variation	3875652	3875652	.	.	0	note=snp G=>A A:50 G:0
EA2454	snippy:4.3.6	variation	3875660	3875660	.	.	0	note=snp C=>G G:49 C:0
EA2454	snippy:4.3.6	variation	3875665	3875665	.	.	0	note=complex GCTTTATT=>TCTTCATA TCTTCATA:46 GCTTTATT:0
EA2454	snippy:4.3.6	variation	3875688	3875688	.	.	0	note=snp T=>C C:63 T:0
EA2454	snippy:4.3.6	variation	3875702	3875702	.	.	0	note=complex ATTT=>GTTC GTTC:74 ATTT:0
EA2454	snippy:4.3.6	variation	3875727	3875727	.	.	0	note=snp C=>A A:73 C:0
EA2454	snippy:4.3.6	variation	3875747	3875747	.	.	0	note=complex ATTC=>GTTT GTTT:71 ATTC:0
EA2454	snippy:4.3.6	variation	3875772	3875772	.	.	0	note=complex CT=>AC AC:68 CT:0
EA2454	snippy:4.3.6	variation	3875853	3875853	.	.	0	note=snp A=>G G:33 A:0
EA2454	snippy:4.3.6	variation	3876036	3876036	.	.	0	note=snp T=>C C:12 T:0
EA2454	snippy:4.3.6	variation	3876047	3876047	.	.	0	note=complex CTATG=>TTATT TTATT:16 CTATG:0
EA2454	snippy:4.3.6	variation	3876061	3876061	.	.	0	note=snp G=>A A:19 G:0
EA2454	snippy:4.3.6	variation	3876075	3876075	.	.	0	note=snp G=>A A:23 G:0
EA2454	snippy:4.3.6	variation	3876084	3876084	.	.	0	note=snp T=>A A:23 T:0
EA2454	snippy:4.3.6	variation	3876119	3876119	.	.	0	note=snp C=>T T:31 C:0
EA2454	snippy:4.3.6	variation	3877989	3877989	.	.	0	note=snp T=>C C:118 T:0
EA2454	snippy:4.3.6	variation	3881618	3881618	.	.	0	note=snp A=>G G:88 A:0
EA2454	snippy:4.3.6	variation	3881743	3881743	.	.	0	note=snp T=>C C:94 T:0
EA2454	snippy:4.3.6	variation	3881813	3881813	.	.	0	note=snp G=>A A:109 G:0
EA2454	snippy:4.3.6	variation	3881990	3881990	.	.	0	note=complex GATA=>TATC TATC:93 GATA:0
EA2454	snippy:4.3.6	variation	3882005	3882005	.	.	0	note=snp A=>G G:84 A:0
EA2454	snippy:4.3.6	variation	3883790	3883790	.	.	0	note=snp C=>T T:160 C:0
EA2454	snippy:4.3.6	variation	3883796	3883796	.	.	0	note=complex GGAG=>AGAA AGAA:157 GGAG:0
EA2454	snippy:4.3.6	variation	3883811	3883811	.	.	0	note=snp C=>T T:155 C:0
EA2454	snippy:4.3.6	variation	3883883	3883883	.	.	0	note=snp C=>T T:128 C:0
EA2454	snippy:4.3.6	variation	3883908	3883908	.	.	0	note=snp C=>G G:121 C:0
EA2454	snippy:4.3.6	variation	3883927	3883927	.	.	0	note=snp T=>C C:114 T:0
EA2454	snippy:4.3.6	variation	3884078	3884078	.	.	0	note=snp A=>G G:133 A:0
EA2454	snippy:4.3.6	variation	3884537	3884537	.	.	0	note=complex ACGT=>GCGC GCGC:55 ACGT:0
EA2454	snippy:4.3.6	variation	3884622	3884622	.	.	0	note=snp T=>A A:49 T:0
EA2454	snippy:4.3.6	variation	3884753	3884753	.	.	0	note=snp T=>C C:53 T:0
EA2454	snippy:4.3.6	variation	3884948	3884948	.	.	0	note=snp T=>C C:61 T:0
EA2454	snippy:4.3.6	variation	3884985	3884985	.	.	0	note=snp A=>G G:68 A:0
EA2454	snippy:4.3.6	variation	3885050	3885050	.	.	0	note=snp A=>G G:74 A:0
EA2454	snippy:4.3.6	variation	3885384	3885384	.	.	0	note=snp C=>G G:95 C:0
EA2454	snippy:4.3.6	variation	3885390	3885390	.	.	0	note=snp T=>A A:98 T:0
EA2454	snippy:4.3.6	variation	3885480	3885480	.	.	0	note=snp T=>G G:111 T:0
EA2454	snippy:4.3.6	variation	3885930	3885930	.	.	0	note=snp A=>G G:75 A:0
EA2454	snippy:4.3.6	variation	3885970	3885970	.	.	0	note=complex ACG=>GTA GTA:69 ACG:0
EA2454	snippy:4.3.6	variation	3885978	3885978	.	.	0	note=snp T=>C C:86 T:0
EA2454	snippy:4.3.6	variation	3886116	3886116	.	.	0	note=snp A=>G G:90 A:0
EA2454	snippy:4.3.6	variation	3886122	3886122	.	.	0	note=snp A=>G G:89 A:0
EA2454	snippy:4.3.6	variation	3886176	3886176	.	.	0	note=snp A=>G G:92 A:0
EA2454	snippy:4.3.6	variation	3886212	3886212	.	.	0	note=snp G=>A A:85 G:0
EA2454	snippy:4.3.6	variation	3886328	3886328	.	.	0	note=complex AATTA=>GATTG GATTG:74 AATTA:0
EA2454	snippy:4.3.6	variation	3888146	3888146	.	.	0	note=snp G=>C C:83 G:0
EA2454	snippy:4.3.6	variation	3888832	3888832	.	.	0	note=snp C=>A A:66 C:0
EA2454	snippy:4.3.6	variation	3888966	3888966	.	.	0	note=snp A=>C C:49 A:0
EA2454	snippy:4.3.6	variation	3890498	3890498	.	.	0	note=snp C=>T T:86 C:0
EA2454	snippy:4.3.6	variation	3890579	3890579	.	.	0	note=snp G=>T T:65 G:0
EA2454	snippy:4.3.6	variation	3890586	3890586	.	.	0	note=snp T=>C C:71 T:0
EA2454	snippy:4.3.6	variation	3890922	3890922	.	.	0	note=complex TG=>CT CT:35 TG:0
EA2454	snippy:4.3.6	variation	3890980	3890980	.	.	0	note=ins C=>CT CT:42 C:0
EA2454	snippy:4.3.6	variation	3891090	3891090	.	.	0	note=snp T=>A A:40 T:0
EA2454	snippy:4.3.6	variation	3891195	3891195	.	.	0	note=complex ACTG=>GCTC GCTC:52 ACTG:0
EA2454	snippy:4.3.6	variation	3891223	3891223	.	.	0	note=complex CTTA=>TCTG TCTG:50 CTTA:0
EA2454	snippy:4.3.6	variation	3891274	3891274	.	.	0	note=snp G=>T T:51 G:0
EA2454	snippy:4.3.6	variation	3891301	3891301	.	.	0	note=complex TGTGCCAT=>GGTATCAC GGTATCAC:40 TGTGCCAT:0
EA2454	snippy:4.3.6	variation	3891315	3891315	.	.	0	note=complex TA=>CC CC:40 TA:2
EA2454	snippy:4.3.6	variation	3891332	3891332	.	.	0	note=snp A=>C C:47 A:2
EA2454	snippy:4.3.6	variation	3891344	3891344	.	.	0	note=snp T=>C C:44 T:2
EA2454	snippy:4.3.6	variation	3891353	3891353	.	.	0	note=snp C=>T T:43 C:1
EA2454	snippy:4.3.6	variation	3891366	3891366	.	.	0	note=snp A=>G G:41 A:1
EA2454	snippy:4.3.6	variation	3891377	3891377	.	.	0	note=complex CAC=>TAT TAT:41 CAC:1
EA2454	snippy:4.3.6	variation	3891387	3891387	.	.	0	note=ins G=>GTA GTA:18 G:2
EA2454	snippy:4.3.6	variation	3891433	3891433	.	.	0	note=complex AC=>GT GT:20 AC:2
EA2454	snippy:4.3.6	variation	3891444	3891444	.	.	0	note=snp A=>G G:20 A:2
EA2454	snippy:4.3.6	variation	3892802	3892802	.	.	0	note=snp G=>A A:13 G:0
EA2454	snippy:4.3.6	variation	3892809	3892809	.	.	0	note=ins C=>CG CG:15 C:0
EA2454	snippy:4.3.6	variation	3892842	3892842	.	.	0	note=snp G=>A A:23 G:0
EA2454	snippy:4.3.6	variation	3904266	3904266	.	.	0	note=snp T=>C C:17 T:0
EA2454	snippy:4.3.6	variation	3905167	3905167	.	.	0	note=snp C=>A A:34 C:0
EA2454	snippy:4.3.6	variation	3906805	3906805	.	.	0	note=snp A=>G G:34 A:0
EA2454	snippy:4.3.6	variation	3907290	3907290	.	.	0	note=snp G=>A A:59 G:0
EA2454	snippy:4.3.6	variation	3908657	3908657	.	.	0	note=snp T=>C C:59 T:0
EA2454	snippy:4.3.6	variation	3908840	3908840	.	.	0	note=snp C=>A A:27 C:0
EA2454	snippy:4.3.6	variation	3910882	3910882	.	.	0	note=snp G=>A A:69 G:0
EA2454	snippy:4.3.6	variation	3925436	3925436	.	.	0	note=snp A=>G G:14 A:0
EA2454	snippy:4.3.6	variation	3929224	3929224	.	.	0	note=snp C=>T T:12 C:0
EA2454	snippy:4.3.6	variation	3931051	3931051	.	.	0	note=snp C=>T T:82 C:0
EA2454	snippy:4.3.6	variation	3935774	3935774	.	.	0	note=snp A=>G G:23 A:0
EA2454	snippy:4.3.6	variation	3937328	3937328	.	.	0	note=snp G=>A A:48 G:0
EA2454	snippy:4.3.6	variation	3939722	3939722	.	.	0	note=snp A=>C C:50 A:0
EA2454	snippy:4.3.6	variation	3944749	3944749	.	.	0	note=snp A=>C C:54 A:0
EA2454	snippy:4.3.6	variation	3964027	3964027	.	.	0	note=snp G=>T T:74 G:0
EA2454	snippy:4.3.6	variation	4001088	4001088	.	.	0	note=snp G=>A A:48 G:0
EA2454	snippy:4.3.6	variation	4002543	4002543	.	.	0	note=snp C=>T T:48 C:0
EA2454	snippy:4.3.6	variation	4004474	4004474	.	.	0	note=snp A=>G G:25 A:0
EA2454	snippy:4.3.6	variation	4004676	4004676	.	.	0	note=snp C=>T T:31 C:1
EA2454	snippy:4.3.6	variation	4004935	4004935	.	.	0	note=snp G=>A A:51 G:0
EA2454	snippy:4.3.6	variation	4006309	4006309	.	.	0	note=snp C=>T T:69 C:0
EA2454	snippy:4.3.6	variation	4008915	4008915	.	.	0	note=snp G=>A A:45 G:0
EA2454	snippy:4.3.6	variation	4014768	4014768	.	.	0	note=snp T=>C C:46 T:0
EA2454	snippy:4.3.6	variation	4016930	4016930	.	.	0	note=snp T=>A A:52 T:0
EA2454	snippy:4.3.6	variation	4026172	4026172	.	.	0	note=snp T=>G G:87 T:0
EA2454	snippy:4.3.6	variation	4030798	4030798	.	.	0	note=snp G=>T T:32 G:0
EA2454	snippy:4.3.6	variation	4036181	4036181	.	.	0	note=snp A=>G G:50 A:0
EA2454	snippy:4.3.6	variation	4036304	4036304	.	.	0	note=snp T=>C C:50 T:0
EA2454	snippy:4.3.6	variation	4041761	4041761	.	.	0	note=snp T=>C C:57 T:0
EA2454	snippy:4.3.6	variation	4042461	4042461	.	.	0	note=snp G=>A A:45 G:0
EA2454	snippy:4.3.6	variation	4046742	4046742	.	.	0	note=snp G=>A A:64 G:0
EA2454	snippy:4.3.6	variation	4058462	4058462	.	.	0	note=snp T=>G G:47 T:0
EA2454	snippy:4.3.6	variation	4062557	4062557	.	.	0	note=snp A=>C C:65 A:0
EA2454	snippy:4.3.6	variation	4065982	4065982	.	.	0	note=snp G=>A A:82 G:0
EA2454	snippy:4.3.6	variation	4069538	4069538	.	.	0	note=del TG=>T T:68 TG:0
EA2454	snippy:4.3.6	variation	4081880	4081880	.	.	0	note=snp T=>G G:15 T:0
EA2454	snippy:4.3.6	variation	4116563	4116563	.	.	0	note=snp G=>A A:67 G:0
EA2454	snippy:4.3.6	variation	4121457	4121457	.	.	0	note=snp C=>T T:68 C:0
EA2454	snippy:4.3.6	variation	4141091	4141091	.	.	0	note=snp A=>G G:55 A:0
EA2454	snippy:4.3.6	variation	4168245	4168245	.	.	0	note=snp C=>T T:60 C:0
EA2454	snippy:4.3.6	variation	4182589	4182589	.	.	0	note=snp C=>T T:34 C:0
EA2454	snippy:4.3.6	variation	4182701	4182701	.	.	0	note=snp T=>C C:19 T:0
EA2454	snippy:4.3.6	variation	4183029	4183029	.	.	0	note=complex ACCG=>GTCA GTCA:35 ACCG:0
EA2454	snippy:4.3.6	variation	4183044	4183044	.	.	0	note=snp C=>T T:43 C:0
EA2454	snippy:4.3.6	variation	4183097	4183097	.	.	0	note=complex TACTGCAC=>CCCGGCAA CCCGGCAA:47 TACTGCAC:0
EA2454	snippy:4.3.6	variation	4183119	4183119	.	.	0	note=snp C=>A A:49 C:0
EA2454	snippy:4.3.6	variation	4183137	4183137	.	.	0	note=snp A=>C C:48 A:0
EA2454	snippy:4.3.6	variation	4183168	4183168	.	.	0	note=snp T=>C C:59 T:0
EA2454	snippy:4.3.6	variation	4183176	4183176	.	.	0	note=snp G=>T T:59 G:0
EA2454	snippy:4.3.6	variation	4183200	4183200	.	.	0	note=snp A=>G G:57 A:0
EA2454	snippy:4.3.6	variation	4183227	4183227	.	.	0	note=snp C=>T T:55 C:0
EA2454	snippy:4.3.6	variation	4183232	4183232	.	.	0	note=complex TTGAC=>CTGGG CTGGG:52 TTGAC:0
EA2454	snippy:4.3.6	variation	4183275	4183275	.	.	0	note=snp T=>C C:55 T:0
EA2454	snippy:4.3.6	variation	4183284	4183284	.	.	0	note=snp A=>G G:54 A:0
EA2454	snippy:4.3.6	variation	4183293	4183293	.	.	0	note=snp G=>A A:55 G:1
EA2454	snippy:4.3.6	variation	4183298	4183298	.	.	0	note=complex GC=>AT AT:55 GC:0
EA2454	snippy:4.3.6	variation	4183305	4183305	.	.	0	note=snp A=>C C:58 A:0
EA2454	snippy:4.3.6	variation	4183321	4183321	.	.	0	note=snp C=>T T:61 C:0
EA2454	snippy:4.3.6	variation	4183335	4183335	.	.	0	note=snp A=>G G:65 A:0
EA2454	snippy:4.3.6	variation	4183407	4183407	.	.	0	note=snp T=>C C:57 T:0
EA2454	snippy:4.3.6	variation	4183425	4183425	.	.	0	note=snp C=>A A:48 C:0
EA2454	snippy:4.3.6	variation	4183492	4183492	.	.	0	note=snp A=>C C:45 A:0
EA2454	snippy:4.3.6	variation	4183516	4183516	.	.	0	note=snp A=>G G:43 A:0
EA2454	snippy:4.3.6	variation	4183522	4183522	.	.	0	note=snp T=>C C:41 T:0
EA2454	snippy:4.3.6	variation	4183571	4183571	.	.	0	note=complex GGT=>AGTA AGTA:35 GGT:0
EA2454	snippy:4.3.6	variation	4183583	4183583	.	.	0	note=snp T=>C C:37 T:0
EA2454	snippy:4.3.6	variation	4183608	4183608	.	.	0	note=snp T=>C C:34 T:0
EA2454	snippy:4.3.6	variation	4183619	4183619	.	.	0	note=complex GTTGTTGTAAT=>ATTACTCCAAA ATTACTCCAAA:30 GTTGTTGTAAT:0
EA2454	snippy:4.3.6	variation	4183646	4183646	.	.	0	note=snp A=>G G:33 A:0
EA2454	snippy:4.3.6	variation	4183653	4183653	.	.	0	note=snp G=>A A:32 G:0
EA2454	snippy:4.3.6	variation	4183660	4183660	.	.	0	note=snp T=>A A:34 T:0
EA2454	snippy:4.3.6	variation	4183681	4183681	.	.	0	note=snp A=>G G:21 A:0
EA2454	snippy:4.3.6	variation	4188735	4188735	.	.	0	note=snp T=>C C:16 T:0
EA2454	snippy:4.3.6	variation	4188742	4188742	.	.	0	note=snp A=>C C:16 A:0
EA2454	snippy:4.3.6	variation	4188748	4188748	.	.	0	note=snp C=>T T:16 C:0
EA2454	snippy:4.3.6	variation	4188757	4188757	.	.	0	note=complex CCGG=>ACGA ACGA:22 CCGG:0
EA2454	snippy:4.3.6	variation	4188793	4188793	.	.	0	note=complex GTGGGCA=>ATGAGCG ATGAGCG:32 GTGGGCA:0
EA2454	snippy:4.3.6	variation	4188816	4188816	.	.	0	note=snp A=>G G:38 A:0
EA2454	snippy:4.3.6	variation	4188829	4188829	.	.	0	note=snp T=>C C:39 T:0
EA2454	snippy:4.3.6	variation	4188862	4188862	.	.	0	note=snp A=>G G:37 A:0
EA2454	snippy:4.3.6	variation	4188877	4188877	.	.	0	note=complex TGTAGCC=>CGTGGCA CGTGGCA:40 TGTAGCC:0
EA2454	snippy:4.3.6	variation	4188889	4188889	.	.	0	note=complex TCCGGGTATA=>CCCCGGAATG CCCCGGAATG:40 TCCGGGTATA:0
EA2454	snippy:4.3.6	variation	4188906	4188906	.	.	0	note=complex TGGCC=>CGGCT CGGCT:44 TGGCC:0
EA2454	snippy:4.3.6	variation	4188931	4188931	.	.	0	note=snp C=>T T:43 C:0
EA2454	snippy:4.3.6	variation	4188946	4188946	.	.	0	note=snp T=>G G:41 T:0
EA2454	snippy:4.3.6	variation	4188970	4188970	.	.	0	note=snp A=>T T:40 A:0
EA2454	snippy:4.3.6	variation	4188976	4188976	.	.	0	note=snp A=>G G:39 A:0
EA2454	snippy:4.3.6	variation	4188988	4188988	.	.	0	note=snp G=>A A:40 G:0
EA2454	snippy:4.3.6	variation	4188997	4188997	.	.	0	note=snp A=>G G:41 A:0
EA2454	snippy:4.3.6	variation	4189017	4189017	.	.	0	note=complex CGTGAATG=>TGTAAATA TGTAAATA:41 CGTGAATG:0
EA2454	snippy:4.3.6	variation	4189030	4189030	.	.	0	note=snp T=>C C:48 T:0
EA2454	snippy:4.3.6	variation	4189056	4189056	.	.	0	note=complex TCCTG=>GCCTA GCCTA:53 TCCTG:0
EA2454	snippy:4.3.6	variation	4189078	4189078	.	.	0	note=snp G=>A A:54 G:0
EA2454	snippy:4.3.6	variation	4189084	4189084	.	.	0	note=snp C=>A A:57 C:0
EA2454	snippy:4.3.6	variation	4189092	4189092	.	.	0	note=snp T=>C C:57 T:0
EA2454	snippy:4.3.6	variation	4189132	4189132	.	.	0	note=snp T=>G G:53 T:0
EA2454	snippy:4.3.6	variation	4189147	4189147	.	.	0	note=snp G=>A A:52 G:0
EA2454	snippy:4.3.6	variation	4189156	4189156	.	.	0	note=snp C=>A A:49 C:0
EA2454	snippy:4.3.6	variation	4189180	4189180	.	.	0	note=snp C=>G G:68 C:0
EA2454	snippy:4.3.6	variation	4189204	4189204	.	.	0	note=snp T=>G G:84 T:0
EA2454	snippy:4.3.6	variation	4189238	4189238	.	.	0	note=snp A=>T T:91 A:0
EA2454	snippy:4.3.6	variation	4189255	4189255	.	.	0	note=complex CGGC=>GGGT GGGT:84 CGGC:0
EA2454	snippy:4.3.6	variation	4189281	4189281	.	.	0	note=complex AT=>TC TC:81 AT:0
EA2454	snippy:4.3.6	variation	4189288	4189288	.	.	0	note=snp T=>A A:80 T:0
EA2454	snippy:4.3.6	variation	4189300	4189300	.	.	0	note=snp A=>G G:78 A:0
EA2454	snippy:4.3.6	variation	4189321	4189321	.	.	0	note=complex CGCC=>TGCT TGCT:77 CGCC:0
EA2454	snippy:4.3.6	variation	4189336	4189336	.	.	0	note=snp A=>G G:86 A:0
EA2454	snippy:4.3.6	variation	4189345	4189345	.	.	0	note=snp G=>T T:90 G:0
EA2454	snippy:4.3.6	variation	4189592	4189592	.	.	0	note=complex ACA=>GCG GCG:71 ACA:0
EA2454	snippy:4.3.6	variation	4189600	4189600	.	.	0	note=snp T=>C C:71 T:0
EA2454	snippy:4.3.6	variation	4189605	4189605	.	.	0	note=snp C=>A A:71 C:0
EA2454	snippy:4.3.6	variation	4189699	4189699	.	.	0	note=complex AGGA=>TGGG TGGG:62 AGGA:0
EA2454	snippy:4.3.6	variation	4189726	4189726	.	.	0	note=snp C=>T T:58 C:0
EA2454	snippy:4.3.6	variation	4189768	4189768	.	.	0	note=snp A=>C C:58 A:0
EA2454	snippy:4.3.6	variation	4189773	4189773	.	.	0	note=snp T=>G G:52 T:0
EA2454	snippy:4.3.6	variation	4189798	4189798	.	.	0	note=snp A=>G G:51 A:0
EA2454	snippy:4.3.6	variation	4189807	4189807	.	.	0	note=snp T=>G G:58 T:0
EA2454	snippy:4.3.6	variation	4189852	4189852	.	.	0	note=snp C=>T T:52 C:0
EA2454	snippy:4.3.6	variation	4189861	4189861	.	.	0	note=snp A=>C C:48 A:0
EA2454	snippy:4.3.6	variation	4189893	4189893	.	.	0	note=complex TGTT=>CGTC CGTC:49 TGTT:0
EA2454	snippy:4.3.6	variation	4189912	4189912	.	.	0	note=snp T=>C C:53 T:0
EA2454	snippy:4.3.6	variation	4189933	4189933	.	.	0	note=snp A=>G G:35 A:0
EA2454	snippy:4.3.6	variation	4189958	4189958	.	.	0	note=snp C=>T T:19 C:0
EA2454	snippy:4.3.6	variation	4189967	4189967	.	.	0	note=snp G=>A A:11 G:0
EA2454	snippy:4.3.6	variation	4189974	4189974	.	.	0	note=snp T=>G G:10 T:0
EA2454	snippy:4.3.6	variation	4189981	4189981	.	.	0	note=snp G=>A A:11 G:0
EA2454	snippy:4.3.6	variation	4190010	4190010	.	.	0	note=complex TCCC=>CCCT CCCT:10 TCCC:0
EA2454	snippy:4.3.6	variation	4190041	4190041	.	.	0	note=del TC=>T T:12 TC:0
EA2454	snippy:4.3.6	variation	4190304	4190304	.	.	0	note=snp C=>T T:17 C:0
EA2454	snippy:4.3.6	variation	4199452	4199452	.	.	0	note=snp A=>T T:65 A:0
EA2454	snippy:4.3.6	variation	4200656	4200656	.	.	0	note=snp A=>G G:68 A:1
EA2454	snippy:4.3.6	variation	4201996	4201996	.	.	0	note=snp A=>G G:38 A:0
EA2454	snippy:4.3.6	variation	4205428	4205428	.	.	0	note=snp A=>G G:47 A:0
EA2454	snippy:4.3.6	variation	4206562	4206562	.	.	0	note=snp G=>A A:44 G:0
EA2454	snippy:4.3.6	variation	4208099	4208099	.	.	0	note=snp C=>T T:81 C:0
EA2454	snippy:4.3.6	variation	4208280	4208280	.	.	0	note=snp G=>T T:83 G:0
EA2454	snippy:4.3.6	variation	4212664	4212664	.	.	0	note=snp T=>A A:42 T:0
EA2454	snippy:4.3.6	variation	4216725	4216725	.	.	0	note=del CTTTT=>C C:49 CTTTT:0
EA2454	snippy:4.3.6	variation	4227994	4227994	.	.	0	note=snp G=>T T:62 G:0
EA2454	snippy:4.3.6	variation	4231280	4231280	.	.	0	note=snp G=>A A:50 G:0
EA2454	snippy:4.3.6	variation	4231669	4231669	.	.	0	note=snp C=>T T:18 C:0
EA2454	snippy:4.3.6	variation	4234319	4234319	.	.	0	note=snp A=>G G:56 A:0
EA2454	snippy:4.3.6	variation	4235320	4235320	.	.	0	note=snp A=>G G:47 A:0
EA2454	snippy:4.3.6	variation	4235834	4235834	.	.	0	note=snp C=>T T:60 C:0
EA2454	snippy:4.3.6	variation	4236400	4236400	.	.	0	note=snp C=>T T:37 C:0
EA2454	snippy:4.3.6	variation	4240327	4240327	.	.	0	note=snp G=>A A:50 G:0
EA2454	snippy:4.3.6	variation	4247151	4247151	.	.	0	note=del GGCTGCCGGACTCATTCGCAGTGGACAAATTTT=>G G:50 GGCTGCCGGACTCATTCGCAGTGGACAAATTTT:0
EA2454	snippy:4.3.6	variation	4247909	4247909	.	.	0	note=snp G=>A A:65 G:0
EA2454	snippy:4.3.6	variation	4254789	4254789	.	.	0	note=snp C=>T T:50 C:0
EA2454	snippy:4.3.6	variation	4255432	4255432	.	.	0	note=ins G=>GCAGCGCCAGGC GCAGCGCCAGGC:22 G:0
EA2454	snippy:4.3.6	variation	4257673	4257673	.	.	0	note=snp C=>T T:63 C:0
EA2454	snippy:4.3.6	variation	4259428	4259428	.	.	0	note=snp A=>G G:65 A:0
EA2454	snippy:4.3.6	variation	4267142	4267142	.	.	0	note=snp A=>G G:65 A:0
EA2454	snippy:4.3.6	variation	4269409	4269409	.	.	0	note=snp C=>T T:43 C:0
EA2454	snippy:4.3.6	variation	4272983	4272983	.	.	0	note=snp A=>G G:72 A:0
EA2454	snippy:4.3.6	variation	4273176	4273176	.	.	0	note=snp C=>T T:44 C:0
EA2454	snippy:4.3.6	variation	4281791	4281791	.	.	0	note=snp G=>A A:36 G:0
EA2454	snippy:4.3.6	variation	4283531	4283531	.	.	0	note=snp A=>T T:59 A:0
EA2454	snippy:4.3.6	variation	4285277	4285277	.	.	0	note=snp C=>T T:32 C:0
EA2454	snippy:4.3.6	variation	4290073	4290073	.	.	0	note=del AGGAT=>A A:59 AGGAT:0
EA2454	snippy:4.3.6	variation	4318055	4318055	.	.	0	note=snp T=>C C:52 T:0
EA2454	snippy:4.3.6	variation	4318287	4318287	.	.	0	note=del AT=>A A:49 AT:0
EA2454	snippy:4.3.6	variation	4318390	4318390	.	.	0	note=snp A=>G G:61 A:0
EA2454	snippy:4.3.6	variation	4321572	4321572	.	.	0	note=snp T=>C C:18 T:0
EA2454	snippy:4.3.6	variation	4323585	4323585	.	.	0	note=snp G=>A A:68 G:0
EA2454	snippy:4.3.6	variation	4325610	4325610	.	.	0	note=snp G=>T T:55 G:0
EA2454	snippy:4.3.6	variation	4326226	4326226	.	.	0	note=snp C=>T T:65 C:0
EA2454	snippy:4.3.6	variation	4326301	4326301	.	.	0	note=snp A=>G G:68 A:0
EA2454	snippy:4.3.6	variation	4351324	4351324	.	.	0	note=snp G=>A A:62 G:0
EA2454	snippy:4.3.6	variation	4368872	4368872	.	.	0	note=snp C=>T T:64 C:1
EA2454	snippy:4.3.6	variation	4369258	4369258	.	.	0	note=snp A=>C C:48 A:0
EA2454	snippy:4.3.6	variation	4372384	4372384	.	.	0	note=snp C=>G G:79 C:2
EA2454	snippy:4.3.6	variation	4380080	4380080	.	.	0	note=snp A=>C C:53 A:0
EA2454	snippy:4.3.6	variation	4385085	4385085	.	.	0	note=snp G=>A A:55 G:0
EA2454	snippy:4.3.6	variation	4394869	4394869	.	.	0	note=snp T=>C C:54 T:0
EA2454	snippy:4.3.6	variation	4396058	4396058	.	.	0	note=snp C=>T T:40 C:0
EA2454	snippy:4.3.6	variation	4397902	4397902	.	.	0	note=snp T=>C C:52 T:0
EA2454	snippy:4.3.6	variation	4397940	4397940	.	.	0	note=snp A=>G G:52 A:0
EA2454	snippy:4.3.6	variation	4398179	4398179	.	.	0	note=mnp TC=>CT CT:38 TC:0
EA2454	snippy:4.3.6	variation	4398202	4398202	.	.	0	note=snp G=>A A:35 G:0
EA2454	snippy:4.3.6	variation	4398208	4398208	.	.	0	note=snp G=>A A:32 G:0
EA2454	snippy:4.3.6	variation	4398218	4398218	.	.	0	note=complex TGAAT=>CGAAG CGAAG:35 TGAAT:0
EA2454	snippy:4.3.6	variation	4398233	4398233	.	.	0	note=snp T=>C C:38 T:0
EA2454	snippy:4.3.6	variation	4398250	4398250	.	.	0	note=snp C=>T T:40 C:0
EA2454	snippy:4.3.6	variation	4398268	4398268	.	.	0	note=complex ATA=>GTG GTG:41 ATA:0
EA2454	snippy:4.3.6	variation	4398405	4398405	.	.	0	note=snp C=>T T:40 C:0
EA2454	snippy:4.3.6	variation	4398439	4398439	.	.	0	note=snp C=>T T:37 C:0
EA2454	snippy:4.3.6	variation	4398451	4398451	.	.	0	note=snp T=>C C:37 T:0
EA2454	snippy:4.3.6	variation	4398477	4398477	.	.	0	note=snp T=>C C:22 T:0
EA2454	snippy:4.3.6	variation	4398538	4398538	.	.	0	note=snp G=>A A:11 G:0
EA2454	snippy:4.3.6	variation	4414071	4414071	.	.	0	note=snp G=>T T:89 G:0
EA2454	snippy:4.3.6	variation	4414845	4414845	.	.	0	note=snp G=>T T:52 G:0
EA2454	snippy:4.3.6	variation	4416190	4416190	.	.	0	note=snp A=>G G:58 A:0
EA2454	snippy:4.3.6	variation	4419628	4419628	.	.	0	note=snp T=>C C:70 T:0
EA2454	snippy:4.3.6	variation	4420363	4420363	.	.	0	note=snp A=>G G:90 A:0
EA2454	snippy:4.3.6	variation	4425528	4425528	.	.	0	note=snp C=>T T:14 C:0
EA2454	snippy:4.3.6	variation	4425538	4425538	.	.	0	note=snp C=>T T:15 C:0
EA2454	snippy:4.3.6	variation	4425608	4425608	.	.	0	note=snp A=>G G:12 A:0
EA2454	snippy:4.3.6	variation	4425634	4425634	.	.	0	note=snp G=>A A:12 G:0
EA2454	snippy:4.3.6	variation	4425679	4425679	.	.	0	note=snp T=>C C:10 T:0
EA2454	snippy:4.3.6	variation	4425733	4425733	.	.	0	note=snp A=>G G:10 A:0
EA2454	snippy:4.3.6	variation	4425949	4425949	.	.	0	note=snp A=>G G:33 A:0
EA2454	snippy:4.3.6	variation	4426004	4426004	.	.	0	note=snp C=>T T:62 C:0
EA2454	snippy:4.3.6	variation	4426020	4426020	.	.	0	note=complex GTT=>ATA ATA:67 GTT:0
EA2454	snippy:4.3.6	variation	4426346	4426346	.	.	0	note=snp A=>C C:73 A:0
EA2454	snippy:4.3.6	variation	4426565	4426565	.	.	0	note=snp A=>G G:21 A:0
EA2454	snippy:4.3.6	variation	4426585	4426585	.	.	0	note=complex GGTG=>AGTT AGTT:13 GGTG:0
EA2454	snippy:4.3.6	variation	4426615	4426615	.	.	0	note=snp G=>A A:11 G:0
EA2454	snippy:4.3.6	variation	4426633	4426633	.	.	0	note=snp A=>G G:12 A:0
EA2454	snippy:4.3.6	variation	4427581	4427581	.	.	0	note=snp G=>A A:13 G:0
EA2454	snippy:4.3.6	variation	4427634	4427634	.	.	0	note=snp T=>C C:14 T:0
EA2454	snippy:4.3.6	variation	4427651	4427651	.	.	0	note=complex TTG=>CTA CTA:17 TTG:0
EA2454	snippy:4.3.6	variation	4427662	4427662	.	.	0	note=complex TCCGAAGGG=>GCCGCAGGA GCCGCAGGA:17 TCCGAAGGG:0
EA2454	snippy:4.3.6	variation	4427857	4427857	.	.	0	note=snp A=>C C:11 A:0
EA2454	snippy:4.3.6	variation	4428487	4428487	.	.	0	note=complex AGCTA=>CGTTC CGTTC:10 AGCTA:0
EA2454	snippy:4.3.6	variation	4428515	4428515	.	.	0	note=snp C=>T T:17 C:0
EA2454	snippy:4.3.6	variation	4428530	4428530	.	.	0	note=complex CCGA=>TCGG TCGG:19 CCGA:0
EA2454	snippy:4.3.6	variation	4428560	4428560	.	.	0	note=snp G=>T T:22 G:0
EA2454	snippy:4.3.6	variation	4428566	4428566	.	.	0	note=snp A=>G G:24 A:0
EA2454	snippy:4.3.6	variation	4428578	4428578	.	.	0	note=snp A=>C C:25 A:0
EA2454	snippy:4.3.6	variation	4428595	4428595	.	.	0	note=complex ACGG=>T T:21 ACGG:0
EA2454	snippy:4.3.6	variation	4428602	4428602	.	.	0	note=ins A=>AAAC AAAC:21 A:0
EA2454	snippy:4.3.6	variation	4428635	4428635	.	.	0	note=mnp TC=>GT GT:24 TC:0
EA2454	snippy:4.3.6	variation	4428732	4428732	.	.	0	note=snp T=>A A:22 T:0
EA2454	snippy:4.3.6	variation	4428824	4428824	.	.	0	note=snp C=>T T:15 C:0
EA2454	snippy:4.3.6	variation	4428882	4428882	.	.	0	note=snp C=>G G:12 C:0
EA2454	snippy:4.3.6	variation	4429789	4429789	.	.	0	note=snp C=>T T:18 C:0
EA2454	snippy:4.3.6	variation	4429837	4429837	.	.	0	note=complex ACCAG=>GCCAT GCCAT:19 ACCAG:0
EA2454	snippy:4.3.6	variation	4429867	4429867	.	.	0	note=complex TGGCT=>CGGTC CGGTC:16 TGGCT:0
EA2454	snippy:4.3.6	variation	4429885	4429885	.	.	0	note=snp C=>T T:18 C:0
EA2454	snippy:4.3.6	variation	4429894	4429894	.	.	0	note=snp G=>A A:18 G:0
EA2454	snippy:4.3.6	variation	4429924	4429924	.	.	0	note=snp T=>A A:15 T:0
EA2454	snippy:4.3.6	variation	4429942	4429942	.	.	0	note=snp A=>G G:11 A:0
EA2454	snippy:4.3.6	variation	4431001	4431001	.	.	0	note=complex GAATA=>AAATG AAATG:12 GAATA:0
EA2454	snippy:4.3.6	variation	4431014	4431014	.	.	0	note=snp C=>T T:17 C:0
EA2454	snippy:4.3.6	variation	4431022	4431022	.	.	0	note=ins T=>TG TG:16 T:0
EA2454	snippy:4.3.6	variation	4431105	4431105	.	.	0	note=snp T=>A A:18 T:0
EA2454	snippy:4.3.6	variation	4431111	4431111	.	.	0	note=snp G=>A A:20 G:0
EA2454	snippy:4.3.6	variation	4431186	4431186	.	.	0	note=snp C=>T T:34 C:0
EA2454	snippy:4.3.6	variation	4431198	4431198	.	.	0	note=snp G=>A A:31 G:0
EA2454	snippy:4.3.6	variation	4431210	4431210	.	.	0	note=snp T=>G G:32 T:0
EA2454	snippy:4.3.6	variation	4431285	4431285	.	.	0	note=snp C=>T T:26 C:0
EA2454	snippy:4.3.6	variation	4431332	4431332	.	.	0	note=snp A=>G G:23 A:0
EA2454	snippy:4.3.6	variation	4431396	4431396	.	.	0	note=snp A=>G G:33 A:0
EA2454	snippy:4.3.6	variation	4431430	4431430	.	.	0	note=snp T=>G G:29 T:0
EA2454	snippy:4.3.6	variation	4431452	4431452	.	.	0	note=snp A=>G G:28 A:0
EA2454	snippy:4.3.6	variation	4431522	4431522	.	.	0	note=snp T=>C C:36 T:0
EA2454	snippy:4.3.6	variation	4431719	4431719	.	.	0	note=snp A=>G G:26 A:0
EA2454	snippy:4.3.6	variation	4431741	4431741	.	.	0	note=snp G=>A A:22 G:0
EA2454	snippy:4.3.6	variation	4431803	4431803	.	.	0	note=snp T=>C C:21 T:0
EA2454	snippy:4.3.6	variation	4432016	4432016	.	.	0	note=snp T=>C C:28 T:0
EA2454	snippy:4.3.6	variation	4432127	4432127	.	.	0	note=snp G=>T T:30 G:0
EA2454	snippy:4.3.6	variation	4432168	4432168	.	.	0	note=complex GAGG=>AAGA AAGA:30 GAGG:0
EA2454	snippy:4.3.6	variation	4432189	4432189	.	.	0	note=snp G=>A A:40 G:0
EA2454	snippy:4.3.6	variation	4432198	4432198	.	.	0	note=snp G=>A A:39 G:0
EA2454	snippy:4.3.6	variation	4432205	4432205	.	.	0	note=snp T=>C C:38 T:0
EA2454	snippy:4.3.6	variation	4432259	4432259	.	.	0	note=snp G=>T T:31 G:0
EA2454	snippy:4.3.6	variation	4432264	4432264	.	.	0	note=snp C=>T T:34 C:0
EA2454	snippy:4.3.6	variation	4432294	4432294	.	.	0	note=snp G=>T T:43 G:0
EA2454	snippy:4.3.6	variation	4432335	4432335	.	.	0	note=snp A=>G G:43 A:0
EA2454	snippy:4.3.6	variation	4432348	4432348	.	.	0	note=snp G=>C C:35 G:0
EA2454	snippy:4.3.6	variation	4432356	4432356	.	.	0	note=snp A=>G G:34 A:0
EA2454	snippy:4.3.6	variation	4432374	4432374	.	.	0	note=snp A=>G G:36 A:0
EA2454	snippy:4.3.6	variation	4432449	4432449	.	.	0	note=snp C=>A A:38 C:0
EA2454	snippy:4.3.6	variation	4432465	4432465	.	.	0	note=snp T=>A A:38 T:0
EA2454	snippy:4.3.6	variation	4432476	4432476	.	.	0	note=snp T=>C C:36 T:0
EA2454	snippy:4.3.6	variation	4432512	4432512	.	.	0	note=snp T=>C C:34 T:0
EA2454	snippy:4.3.6	variation	4432569	4432569	.	.	0	note=snp C=>T T:42 C:0
EA2454	snippy:4.3.6	variation	4432581	4432581	.	.	0	note=snp G=>T T:39 G:0
EA2454	snippy:4.3.6	variation	4432644	4432644	.	.	0	note=snp G=>T T:41 G:0
EA2454	snippy:4.3.6	variation	4432722	4432722	.	.	0	note=snp T=>C C:25 T:0
EA2454	snippy:4.3.6	variation	4432770	4432770	.	.	0	note=snp G=>C C:23 G:0
EA2454	snippy:4.3.6	variation	4432777	4432777	.	.	0	note=complex GATG=>AATA AATA:21 GATG:0
EA2454	snippy:4.3.6	variation	4432803	4432803	.	.	0	note=snp A=>G G:22 A:0
EA2454	snippy:4.3.6	variation	4432857	4432857	.	.	0	note=complex TTACCGT=>CTGCCGC CTGCCGC:18 TTACCGT:0
EA2454	snippy:4.3.6	variation	4432884	4432884	.	.	0	note=complex AGCCGCAA=>GGCTACTC GGCTACTC:14 AGCCGCAA:0
EA2454	snippy:4.3.6	variation	4432959	4432959	.	.	0	note=snp C=>T T:20 C:0
EA2454	snippy:4.3.6	variation	4433028	4433028	.	.	0	note=complex TGGC=>AGGT AGGT:20 TGGC:0
EA2454	snippy:4.3.6	variation	4433058	4433058	.	.	0	note=snp G=>T T:20 G:0
EA2454	snippy:4.3.6	variation	4433073	4433073	.	.	0	note=complex ACCT=>GCCC GCCC:20 ACCT:0
EA2454	snippy:4.3.6	variation	4433094	4433094	.	.	0	note=snp T=>G G:20 T:0
EA2454	snippy:4.3.6	variation	4433115	4433115	.	.	0	note=snp G=>C C:22 G:0
EA2454	snippy:4.3.6	variation	4433124	4433124	.	.	0	note=snp G=>T T:23 G:0
EA2454	snippy:4.3.6	variation	4433193	4433193	.	.	0	note=complex CGCA=>TGCT TGCT:26 CGCA:0
EA2454	snippy:4.3.6	variation	4433327	4433327	.	.	0	note=snp A=>G G:21 A:0
EA2454	snippy:4.3.6	variation	4433346	4433346	.	.	0	note=snp G=>A A:17 G:0
EA2454	snippy:4.3.6	variation	4433371	4433371	.	.	0	note=snp C=>T T:19 C:0
EA2454	snippy:4.3.6	variation	4433382	4433382	.	.	0	note=snp T=>G G:20 T:0
EA2454	snippy:4.3.6	variation	4433483	4433483	.	.	0	note=snp T=>C C:42 T:0
EA2454	snippy:4.3.6	variation	4433563	4433563	.	.	0	note=snp C=>T T:35 C:0
EA2454	snippy:4.3.6	variation	4433605	4433605	.	.	0	note=snp C=>T T:35 C:0
EA2454	snippy:4.3.6	variation	4433731	4433731	.	.	0	note=snp G=>T T:29 G:0
EA2454	snippy:4.3.6	variation	4433815	4433815	.	.	0	note=snp A=>G G:20 A:0
EA2454	snippy:4.3.6	variation	4433844	4433844	.	.	0	note=snp C=>T T:19 C:0
EA2454	snippy:4.3.6	variation	4433958	4433958	.	.	0	note=ins T=>TA TA:24 T:0
EA2454	snippy:4.3.6	variation	4434044	4434044	.	.	0	note=snp G=>A A:26 G:0
EA2454	snippy:4.3.6	variation	4434065	4434065	.	.	0	note=snp T=>C C:25 T:0
EA2454	snippy:4.3.6	variation	4434071	4434071	.	.	0	note=complex TAAT=>AAAC AAAC:26 TAAT:0
EA2454	snippy:4.3.6	variation	4434098	4434098	.	.	0	note=snp C=>A A:27 C:0
EA2454	snippy:4.3.6	variation	4434114	4434114	.	.	0	note=complex AGG=>GGA GGA:27 AGG:0
EA2454	snippy:4.3.6	variation	4434131	4434131	.	.	0	note=snp C=>T T:29 C:0
EA2454	snippy:4.3.6	variation	4434146	4434146	.	.	0	note=snp A=>T T:27 A:0
EA2454	snippy:4.3.6	variation	4434152	4434152	.	.	0	note=complex GAAG=>AAAA AAAA:28 GAAG:0
EA2454	snippy:4.3.6	variation	4434183	4434183	.	.	0	note=snp T=>G G:30 T:0
EA2454	snippy:4.3.6	variation	4434196	4434196	.	.	0	note=snp A=>G G:31 A:0
EA2454	snippy:4.3.6	variation	4434214	4434214	.	.	0	note=snp C=>T T:29 C:0
EA2454	snippy:4.3.6	variation	4435411	4435411	.	.	0	note=snp A=>C C:27 A:0
EA2454	snippy:4.3.6	variation	4435732	4435732	.	.	0	note=snp G=>A A:64 G:0
EA2454	snippy:4.3.6	variation	4435774	4435774	.	.	0	note=snp A=>T T:57 A:0
EA2454	snippy:4.3.6	variation	4435853	4435853	.	.	0	note=snp T=>C C:51 T:0
EA2454	snippy:4.3.6	variation	4436017	4436017	.	.	0	note=snp C=>A A:42 C:0
EA2454	snippy:4.3.6	variation	4436113	4436113	.	.	0	note=snp T=>C C:38 T:0
EA2454	snippy:4.3.6	variation	4436215	4436215	.	.	0	note=snp C=>A A:69 C:0
EA2454	snippy:4.3.6	variation	4436260	4436260	.	.	0	note=snp G=>A A:67 G:0
EA2454	snippy:4.3.6	variation	4436702	4436702	.	.	0	note=snp G=>A A:48 G:0
EA2454	snippy:4.3.6	variation	4437072	4437072	.	.	0	note=snp A=>G G:27 A:1
EA2454	snippy:4.3.6	variation	4437096	4437096	.	.	0	note=complex TGCACCG=>CGCAACA CGCAACA:27 TGCACCG:2
EA2454	snippy:4.3.6	variation	4437117	4437117	.	.	0	note=complex ACGT=>CCGC CCGC:26 ACGT:1
EA2454	snippy:4.3.6	variation	4437221	4437221	.	.	0	note=snp T=>A A:21 T:0
EA2454	snippy:4.3.6	variation	4437228	4437228	.	.	0	note=complex GC=>AG AG:17 GC:0
EA2454	snippy:4.3.6	variation	4437239	4437239	.	.	0	note=snp A=>G G:16 A:0
EA2454	snippy:4.3.6	variation	4437255	4437255	.	.	0	note=snp A=>G G:11 A:0
EA2454	snippy:4.3.6	variation	4437266	4437266	.	.	0	note=snp C=>T T:10 C:0
EA2454	snippy:4.3.6	variation	4437287	4437287	.	.	0	note=snp T=>A A:10 T:0
EA2454	snippy:4.3.6	variation	4437314	4437314	.	.	0	note=snp T=>G G:11 T:0
EA2454	snippy:4.3.6	variation	4437371	4437371	.	.	0	note=snp A=>G G:15 A:0
EA2454	snippy:4.3.6	variation	4437511	4437511	.	.	0	note=snp C=>T T:28 C:0
EA2454	snippy:4.3.6	variation	4437519	4437519	.	.	0	note=snp C=>A A:28 C:0
EA2454	snippy:4.3.6	variation	4437536	4437536	.	.	0	note=snp G=>A A:28 G:0
EA2454	snippy:4.3.6	variation	4437611	4437611	.	.	0	note=snp T=>C C:22 T:0
EA2454	snippy:4.3.6	variation	4437638	4437638	.	.	0	note=snp A=>C C:19 A:0
EA2454	snippy:4.3.6	variation	4437677	4437677	.	.	0	note=snp T=>C C:17 T:0
EA2454	snippy:4.3.6	variation	4437740	4437740	.	.	0	note=snp A=>G G:17 A:0
EA2454	snippy:4.3.6	variation	4437767	4437767	.	.	0	note=snp T=>C C:18 T:0
EA2454	snippy:4.3.6	variation	4437785	4437785	.	.	0	note=snp C=>T T:22 C:0
EA2454	snippy:4.3.6	variation	4437803	4437803	.	.	0	note=snp G=>A A:20 G:0
EA2454	snippy:4.3.6	variation	4437815	4437815	.	.	0	note=snp A=>T T:20 A:0
EA2454	snippy:4.3.6	variation	4437821	4437821	.	.	0	note=snp C=>T T:20 C:0
EA2454	snippy:4.3.6	variation	4437834	4437834	.	.	0	note=snp A=>C C:19 A:0
EA2454	snippy:4.3.6	variation	4439156	4439156	.	.	0	note=snp G=>A A:14 G:0
EA2454	snippy:4.3.6	variation	4439395	4439395	.	.	0	note=snp A=>G G:10 A:0
EA2454	snippy:4.3.6	variation	4439404	4439404	.	.	0	note=snp A=>G G:10 A:0
EA2454	snippy:4.3.6	variation	4439419	4439419	.	.	0	note=snp A=>G G:10 A:0
EA2454	snippy:4.3.6	variation	4439439	4439439	.	.	0	note=snp A=>T T:16 A:0
EA2454	snippy:4.3.6	variation	4439470	4439470	.	.	0	note=snp T=>A A:19 T:0
EA2454	snippy:4.3.6	variation	4439537	4439537	.	.	0	note=snp G=>T T:24 G:0
EA2454	snippy:4.3.6	variation	4439772	4439772	.	.	0	note=snp A=>T T:32 A:0
EA2454	snippy:4.3.6	variation	4439839	4439839	.	.	0	note=snp G=>A A:23 G:0
EA2454	snippy:4.3.6	variation	4439897	4439897	.	.	0	note=snp A=>G G:12 A:0
EA2454	snippy:4.3.6	variation	4439910	4439910	.	.	0	note=snp A=>C C:13 A:0
EA2454	snippy:4.3.6	variation	4439915	4439915	.	.	0	note=snp G=>A A:13 G:0
EA2454	snippy:4.3.6	variation	4439925	4439925	.	.	0	note=snp A=>G G:13 A:0
EA2454	snippy:4.3.6	variation	4439931	4439931	.	.	0	note=snp A=>G G:12 A:0
EA2454	snippy:4.3.6	variation	4439971	4439971	.	.	0	note=snp G=>T T:13 G:0
EA2454	snippy:4.3.6	variation	4439988	4439988	.	.	0	note=snp C=>T T:10 C:0
EA2454	snippy:4.3.6	variation	4440081	4440081	.	.	0	note=snp T=>C C:26 T:0
EA2454	snippy:4.3.6	variation	4440099	4440099	.	.	0	note=snp T=>A A:32 T:0
EA2454	snippy:4.3.6	variation	4440197	4440197	.	.	0	note=snp G=>T T:30 G:0
EA2454	snippy:4.3.6	variation	4440381	4440381	.	.	0	note=snp T=>C C:25 T:0
EA2454	snippy:4.3.6	variation	4440425	4440425	.	.	0	note=snp A=>G G:25 A:0
EA2454	snippy:4.3.6	variation	4440536	4440536	.	.	0	note=snp G=>A A:18 G:0
EA2454	snippy:4.3.6	variation	4440582	4440582	.	.	0	note=snp G=>A A:12 G:0
EA2454	snippy:4.3.6	variation	4440737	4440737	.	.	0	note=snp A=>G G:10 A:0
EA2454	snippy:4.3.6	variation	4440743	4440743	.	.	0	note=snp C=>T T:11 C:0
EA2454	snippy:4.3.6	variation	4440770	4440770	.	.	0	note=snp G=>A A:13 G:0
EA2454	snippy:4.3.6	variation	4440854	4440854	.	.	0	note=snp T=>C C:18 T:0
EA2454	snippy:4.3.6	variation	4440875	4440875	.	.	0	note=snp T=>G G:24 T:0
EA2454	snippy:4.3.6	variation	4440881	4440881	.	.	0	note=snp T=>C C:24 T:0
EA2454	snippy:4.3.6	variation	4440890	4440890	.	.	0	note=snp T=>C C:29 T:0
EA2454	snippy:4.3.6	variation	4440897	4440897	.	.	0	note=snp C=>T T:31 C:0
EA2454	snippy:4.3.6	variation	4440908	4440908	.	.	0	note=snp A=>C C:28 A:0
EA2454	snippy:4.3.6	variation	4440915	4440915	.	.	0	note=snp G=>T T:31 G:0
EA2454	snippy:4.3.6	variation	4440947	4440947	.	.	0	note=snp T=>A A:34 T:0
EA2454	snippy:4.3.6	variation	4440998	4440998	.	.	0	note=complex CG=>TA TA:43 CG:0
EA2454	snippy:4.3.6	variation	4441004	4441004	.	.	0	note=snp A=>G G:43 A:0
EA2454	snippy:4.3.6	variation	4441073	4441073	.	.	0	note=snp A=>G G:48 A:0
EA2454	snippy:4.3.6	variation	4441085	4441085	.	.	0	note=snp T=>G G:48 T:0
EA2454	snippy:4.3.6	variation	4441095	4441095	.	.	0	note=snp C=>T T:47 C:0
EA2454	snippy:4.3.6	variation	4441128	4441128	.	.	0	note=snp G=>T T:43 G:0
EA2454	snippy:4.3.6	variation	4441136	4441136	.	.	0	note=mnp TG=>AC AC:43 TG:0
EA2454	snippy:4.3.6	variation	4441190	4441190	.	.	0	note=snp T=>C C:39 T:0
EA2454	snippy:4.3.6	variation	4441205	4441205	.	.	0	note=snp C=>G G:39 C:0
EA2454	snippy:4.3.6	variation	4441223	4441223	.	.	0	note=snp T=>C C:36 T:0
EA2454	snippy:4.3.6	variation	4441229	4441229	.	.	0	note=snp A=>G G:38 A:0
EA2454	snippy:4.3.6	variation	4441286	4441286	.	.	0	note=complex CGCT=>TGCC TGCC:19 CGCT:0
EA2454	snippy:4.3.6	variation	4441334	4441334	.	.	0	note=snp T=>C C:23 T:0
EA2454	snippy:4.3.6	variation	4441527	4441527	.	.	0	note=complex TGTCACCATCT=>AGTCGCCAGCC AGTCGCCAGCC:24 TGTCACCATCT:0
EA2454	snippy:4.3.6	variation	4441549	4441549	.	.	0	note=snp C=>T T:24 C:0
EA2454	snippy:4.3.6	variation	4441556	4441556	.	.	0	note=snp T=>C C:22 T:0
EA2454	snippy:4.3.6	variation	4441567	4441567	.	.	0	note=snp G=>A A:20 G:0
EA2454	snippy:4.3.6	variation	4441579	4441579	.	.	0	note=snp C=>T T:20 C:0
EA2454	snippy:4.3.6	variation	4441585	4441585	.	.	0	note=snp G=>A A:20 G:0
EA2454	snippy:4.3.6	variation	4441591	4441591	.	.	0	note=snp T=>C C:20 T:0
EA2454	snippy:4.3.6	variation	4441600	4441600	.	.	0	note=complex CCCCGTT=>TCCTGTC TCCTGTC:20 CCCCGTT:0
EA2454	snippy:4.3.6	variation	4441612	4441612	.	.	0	note=snp C=>T T:20 C:0
EA2454	snippy:4.3.6	variation	4441618	4441618	.	.	0	note=snp G=>T T:22 G:0
EA2454	snippy:4.3.6	variation	4441633	4441633	.	.	0	note=snp T=>C C:20 T:0
EA2454	snippy:4.3.6	variation	4441645	4441645	.	.	0	note=complex AACG=>CACC CACC:19 AACG:0
EA2454	snippy:4.3.6	variation	4441654	4441654	.	.	0	note=snp G=>A A:19 G:0
EA2454	snippy:4.3.6	variation	4441660	4441660	.	.	0	note=snp G=>A A:18 G:0
EA2454	snippy:4.3.6	variation	4441669	4441669	.	.	0	note=complex GCTTACTAG=>TTTTGCTAA TTTTGCTAA:17 GCTTACTAG:0
EA2454	snippy:4.3.6	variation	4441685	4441685	.	.	0	note=complex GGGGAA=>TCTGAG TCTGAG:17 GGGGAA:0
EA2454	snippy:4.3.6	variation	4441703	4441703	.	.	0	note=snp C=>T T:19 C:0
EA2454	snippy:4.3.6	variation	4441714	4441714	.	.	0	note=snp A=>T T:19 A:0
EA2454	snippy:4.3.6	variation	4441722	4441722	.	.	0	note=snp C=>T T:21 C:0
EA2454	snippy:4.3.6	variation	4441745	4441745	.	.	0	note=snp C=>T T:19 C:0
EA2454	snippy:4.3.6	variation	4442995	4442995	.	.	0	note=snp A=>T T:30 A:2
EA2454	snippy:4.3.6	variation	4443833	4443833	.	.	0	note=snp T=>G G:16 T:0
EA2454	snippy:4.3.6	variation	4449842	4449842	.	.	0	note=snp C=>T T:13 C:0
EA2454	snippy:4.3.6	variation	4449848	4449848	.	.	0	note=complex CGGA=>TGGT TGGT:14 CGGA:0
EA2454	snippy:4.3.6	variation	4449881	4449881	.	.	0	note=snp T=>C C:16 T:0
EA2454	snippy:4.3.6	variation	4449908	4449908	.	.	0	note=snp C=>T T:23 C:0
EA2454	snippy:4.3.6	variation	4449923	4449923	.	.	0	note=complex TGAT=>AGAC AGAC:24 TGAT:0
EA2454	snippy:4.3.6	variation	4449935	4449935	.	.	0	note=complex CGTT=>TGTG TGTG:25 CGTT:0
EA2454	snippy:4.3.6	variation	4449956	4449956	.	.	0	note=snp T=>C C:33 T:0
EA2454	snippy:4.3.6	variation	4449974	4449974	.	.	0	note=snp T=>C C:31 T:0
EA2454	snippy:4.3.6	variation	4449983	4449983	.	.	0	note=snp C=>G G:28 C:0
EA2454	snippy:4.3.6	variation	4450022	4450022	.	.	0	note=snp T=>G G:38 T:1
EA2454	snippy:4.3.6	variation	4450067	4450067	.	.	0	note=snp C=>T T:42 C:0
EA2454	snippy:4.3.6	variation	4450115	4450115	.	.	0	note=snp G=>T T:38 G:0
EA2454	snippy:4.3.6	variation	4450151	4450151	.	.	0	note=snp A=>G G:50 A:0
EA2454	snippy:4.3.6	variation	4450286	4450286	.	.	0	note=snp C=>G G:56 C:0
EA2454	snippy:4.3.6	variation	4450294	4450294	.	.	0	note=snp T=>A A:53 T:0
EA2454	snippy:4.3.6	variation	4450348	4450348	.	.	0	note=complex TCCGT=>ACCGA ACCGA:52 TCCGT:0
EA2454	snippy:4.3.6	variation	4450358	4450358	.	.	0	note=snp C=>T T:48 C:0
EA2454	snippy:4.3.6	variation	4450366	4450366	.	.	0	note=complex TGGAGGAA=>CGGAACAG CGGAACAG:43 TGGAGGAA:0
EA2454	snippy:4.3.6	variation	4450397	4450397	.	.	0	note=snp G=>A A:46 G:0
EA2454	snippy:4.3.6	variation	4450432	4450432	.	.	0	note=snp A=>G G:42 A:0
EA2454	snippy:4.3.6	variation	4450441	4450441	.	.	0	note=snp C=>G G:40 C:0
EA2454	snippy:4.3.6	variation	4450451	4450451	.	.	0	note=complex CAG=>ACC ACC:35 CAG:0
EA2454	snippy:4.3.6	variation	4450462	4450462	.	.	0	note=snp C=>T T:40 C:0
EA2454	snippy:4.3.6	variation	4450481	4450481	.	.	0	note=snp A=>G G:39 A:0
EA2454	snippy:4.3.6	variation	4450486	4450486	.	.	0	note=snp C=>G G:41 C:0
EA2454	snippy:4.3.6	variation	4450539	4450539	.	.	0	note=complex TAAAG=>CAAAA CAAAA:50 TAAAG:0
EA2454	snippy:4.3.6	variation	4450561	4450561	.	.	0	note=snp A=>G G:49 A:0
EA2454	snippy:4.3.6	variation	4450579	4450579	.	.	0	note=snp G=>A A:49 G:0
EA2454	snippy:4.3.6	variation	4450589	4450589	.	.	0	note=snp T=>C C:55 T:0
EA2454	snippy:4.3.6	variation	4450648	4450648	.	.	0	note=snp C=>T T:61 C:1
EA2454	snippy:4.3.6	variation	4450666	4450666	.	.	0	note=complex TACG=>CACA CACA:56 TACG:0
EA2454	snippy:4.3.6	variation	4450690	4450690	.	.	0	note=complex AGGT=>GGGA GGGA:57 AGGT:0
EA2454	snippy:4.3.6	variation	4450699	4450699	.	.	0	note=snp A=>G G:58 A:0
EA2454	snippy:4.3.6	variation	4450713	4450713	.	.	0	note=snp A=>G G:56 A:0
EA2454	snippy:4.3.6	variation	4450722	4450722	.	.	0	note=snp C=>A A:55 C:0
EA2454	snippy:4.3.6	variation	4450731	4450731	.	.	0	note=snp G=>A A:52 G:0
EA2454	snippy:4.3.6	variation	4450747	4450747	.	.	0	note=snp A=>G G:53 A:0
EA2454	snippy:4.3.6	variation	4450776	4450776	.	.	0	note=snp A=>C C:52 A:0
EA2454	snippy:4.3.6	variation	4450785	4450785	.	.	0	note=snp C=>T T:49 C:0
EA2454	snippy:4.3.6	variation	4450815	4450815	.	.	0	note=complex CGGTAAGACG=>TGGCAGGTCA TGGCAGGTCA:40 CGGTAAGACG:0
EA2454	snippy:4.3.6	variation	4450836	4450836	.	.	0	note=complex TAAC=>CAAT CAAT:46 TAAC:0
EA2454	snippy:4.3.6	variation	4450846	4450846	.	.	0	note=snp C=>T T:49 C:0
EA2454	snippy:4.3.6	variation	4450861	4450861	.	.	0	note=snp T=>C C:52 T:0
EA2454	snippy:4.3.6	variation	4450878	4450878	.	.	0	note=snp C=>T T:56 C:0
EA2454	snippy:4.3.6	variation	4450914	4450914	.	.	0	note=complex GGATAAAAT=>AGAGAAAGC AGAGAAAGC:50 GGATAAAAT:0
EA2454	snippy:4.3.6	variation	4450956	4450956	.	.	0	note=snp T=>C C:47 T:0
EA2454	snippy:4.3.6	variation	4450970	4450970	.	.	0	note=snp C=>G G:48 C:0
EA2454	snippy:4.3.6	variation	4451046	4451046	.	.	0	note=snp T=>A A:58 T:0
EA2454	snippy:4.3.6	variation	4451056	4451056	.	.	0	note=complex AGTGTC=>TGCATT TGCATT:57 AGTGTC:0
EA2454	snippy:4.3.6	variation	4451073	4451073	.	.	0	note=snp G=>C C:67 G:0
EA2454	snippy:4.3.6	variation	4451118	4451118	.	.	0	note=snp G=>A A:64 G:0
EA2454	snippy:4.3.6	variation	4451130	4451130	.	.	0	note=complex TCCT=>CCCA CCCA:60 TCCT:0
EA2454	snippy:4.3.6	variation	4451160	4451160	.	.	0	note=complex GCGA=>ACGG ACGG:56 GCGA:0
EA2454	snippy:4.3.6	variation	4451178	4451178	.	.	0	note=complex GGCA=>AGCT AGCT:48 GGCA:0
EA2454	snippy:4.3.6	variation	4451195	4451195	.	.	0	note=snp T=>C C:47 T:0
EA2454	snippy:4.3.6	variation	4451214	4451214	.	.	0	note=snp A=>T T:14 A:0
EA2454	snippy:4.3.6	variation	4451227	4451227	.	.	0	note=complex CAA=>GAG GAG:12 CAA:0
EA2454	snippy:4.3.6	variation	4451235	4451235	.	.	0	note=snp A=>G G:12 A:0
EA2454	snippy:4.3.6	variation	4451245	4451245	.	.	0	note=snp T=>C C:12 T:0
EA2454	snippy:4.3.6	variation	4451251	4451251	.	.	0	note=snp C=>T T:10 C:0
EA2454	snippy:4.3.6	variation	4478572	4478572	.	.	0	note=snp A=>T T:49 A:0
EA2454	snippy:4.3.6	variation	4491535	4491535	.	.	0	note=snp T=>C C:49 T:0
EA2454	snippy:4.3.6	variation	4505570	4505570	.	.	0	note=ins A=>AG AG:64 A:0
EA2454	snippy:4.3.6	variation	4507253	4507253	.	.	0	note=del TA=>T T:27 TA:0
EA2454	snippy:4.3.6	variation	4509771	4509771	.	.	0	note=snp G=>A A:53 G:0
EA2454	snippy:4.3.6	variation	4510584	4510584	.	.	0	note=del GT=>G G:19 GT:0
EA2454	snippy:4.3.6	variation	4515568	4515568	.	.	0	note=snp T=>C C:83 T:0
EA2454	snippy:4.3.6	variation	4520058	4520058	.	.	0	note=snp A=>G G:12 A:1
EA2454	snippy:4.3.6	variation	4520064	4520064	.	.	0	note=snp T=>C C:12 T:0
EA2454	snippy:4.3.6	variation	4520070	4520070	.	.	0	note=snp T=>C C:13 T:0
EA2454	snippy:4.3.6	variation	4520148	4520148	.	.	0	note=snp A=>G G:23 A:2
EA2454	snippy:4.3.6	variation	4520296	4520296	.	.	0	note=snp G=>A A:10 G:0
EA2454	snippy:4.3.6	variation	4520298	4520298	.	.	0	note=snp A=>G G:11 A:0
EA2454	snippy:4.3.6	variation	4520825	4520825	.	.	0	note=snp C=>G G:30 C:0
EA2454	snippy:4.3.6	variation	4521494	4521494	.	.	0	note=snp T=>A A:13 T:0
EA2454	snippy:4.3.6	variation	4521518	4521518	.	.	0	note=snp G=>A A:14 G:0
EA2454	snippy:4.3.6	variation	4521526	4521526	.	.	0	note=snp A=>G G:18 A:0
EA2454	snippy:4.3.6	variation	4521569	4521569	.	.	0	note=complex GCACCCCGGAA=>ACAGTCAGAAG ACAGTCAGAAG:17 GCACCCCGGAA:0
EA2454	snippy:4.3.6	variation	4521584	4521584	.	.	0	note=snp A=>C C:17 A:0
EA2454	snippy:4.3.6	variation	4521589	4521589	.	.	0	note=snp A=>G G:17 A:0
EA2454	snippy:4.3.6	variation	4521598	4521598	.	.	0	note=complex GCAGAACCGTGAGCTT=>ACAGGAGCATGAACTC ACAGGAGCATGAACTC:17 GCAGAACCGTGAGCTT:0
EA2454	snippy:4.3.6	variation	4521623	4521623	.	.	0	note=snp T=>G G:24 T:0
EA2454	snippy:4.3.6	variation	4521639	4521639	.	.	0	note=snp T=>C C:28 T:0
EA2454	snippy:4.3.6	variation	4521665	4521665	.	.	0	note=complex CTGCAGA=>TTACAGG TTACAGG:28 CTGCAGA:0
EA2454	snippy:4.3.6	variation	4521680	4521680	.	.	0	note=mnp CAC=>AGT AGT:28 CAC:0
EA2454	snippy:4.3.6	variation	4521694	4521694	.	.	0	note=complex CG=>TT TT:25 CG:0
EA2454	snippy:4.3.6	variation	4521724	4521724	.	.	0	note=snp G=>T T:29 G:0
EA2454	snippy:4.3.6	variation	4521731	4521731	.	.	0	note=snp C=>A A:28 C:0
EA2454	snippy:4.3.6	variation	4521752	4521752	.	.	0	note=complex GCA=>ACT ACT:28 GCA:0
EA2454	snippy:4.3.6	variation	4521784	4521784	.	.	0	note=snp C=>T T:26 C:0
EA2454	snippy:4.3.6	variation	4521812	4521812	.	.	0	note=snp C=>T T:20 C:0
EA2454	snippy:4.3.6	variation	4521856	4521856	.	.	0	note=snp T=>C C:13 T:0
EA2454	snippy:4.3.6	variation	4521877	4521877	.	.	0	note=snp G=>A A:15 G:0
EA2454	snippy:4.3.6	variation	4521898	4521898	.	.	0	note=snp T=>C C:16 T:0
EA2454	snippy:4.3.6	variation	4521913	4521913	.	.	0	note=snp A=>G G:15 A:0
EA2454	snippy:4.3.6	variation	4521927	4521927	.	.	0	note=complex CT=>TC TC:15 CT:0
EA2454	snippy:4.3.6	variation	4521934	4521934	.	.	0	note=snp T=>C C:15 T:0
EA2454	snippy:4.3.6	variation	4521941	4521941	.	.	0	note=complex ACCGTTCTTA=>CTATCATTC CTATCATTC:12 ACCGTTCTTA:0
EA2454	snippy:4.3.6	variation	4521960	4521960	.	.	0	note=snp T=>C C:14 T:0
EA2454	snippy:4.3.6	variation	4521979	4521979	.	.	0	note=snp C=>T T:11 C:0
EA2454	snippy:4.3.6	variation	4524700	4524700	.	.	0	note=snp T=>C C:77 T:0
EA2454	snippy:4.3.6	variation	4526687	4526687	.	.	0	note=snp C=>A A:52 C:0
EA2454	snippy:4.3.6	variation	4531145	4531145	.	.	0	note=snp C=>T T:75 C:0
EA2454	snippy:4.3.6	variation	4533515	4533515	.	.	0	note=snp A=>G G:31 A:0
EA2454	snippy:4.3.6	variation	4544866	4544866	.	.	0	note=snp T=>C C:34 T:0
EA2454	snippy:4.3.6	variation	4559006	4559006	.	.	0	note=snp C=>A A:57 C:0
EA2454	snippy:4.3.6	variation	4564154	4564154	.	.	0	note=snp T=>A A:77 T:0
EA2454	snippy:4.3.6	variation	4568271	4568271	.	.	0	note=snp A=>G G:54 A:0
EA2454	snippy:4.3.6	variation	4568846	4568846	.	.	0	note=snp G=>T T:59 G:0
EA2454	snippy:4.3.6	variation	4578784	4578784	.	.	0	note=snp A=>G G:28 A:0
EA2454	snippy:4.3.6	variation	4586361	4586361	.	.	0	note=snp T=>C C:20 T:0
EA2454	snippy:4.3.6	variation	4588946	4588946	.	.	0	note=snp A=>G G:55 A:0
EA2454	snippy:4.3.6	variation	4593973	4593973	.	.	0	note=snp A=>C C:89 A:0
EA2454	snippy:4.3.6	variation	4595613	4595613	.	.	0	note=snp A=>G G:41 A:0
EA2454	snippy:4.3.6	variation	4603502	4603502	.	.	0	note=complex CA=>TC TC:16 CA:0
EA2454	snippy:4.3.6	variation	4613336	4613336	.	.	0	note=snp C=>A A:55 C:0
EA2454	snippy:4.3.6	variation	4613663	4613663	.	.	0	note=snp G=>T T:67 G:0
EA2454	snippy:4.3.6	variation	4616724	4616724	.	.	0	note=snp A=>G G:68 A:0
EA2454	snippy:4.3.6	variation	4617046	4617046	.	.	0	note=snp T=>C C:27 T:0
EA2454	snippy:4.3.6	variation	4617581	4617581	.	.	0	note=snp A=>G G:21 A:0
EA2454	snippy:4.3.6	variation	4619923	4619923	.	.	0	note=snp T=>C C:69 T:0
EA2454	snippy:4.3.6	variation	4626629	4626629	.	.	0	note=snp A=>G G:95 A:0
EA2454	snippy:4.3.6	variation	4638132	4638132	.	.	0	note=snp G=>A A:75 G:0
EA2454	snippy:4.3.6	variation	4640298	4640298	.	.	0	note=snp C=>T T:81 C:0
EA2454	snippy:4.3.6	variation	4652543	4652543	.	.	0	note=snp C=>T T:35 C:0
EA2454	snippy:4.3.6	variation	4653396	4653396	.	.	0	note=snp C=>T T:50 C:1
EA2454	snippy:4.3.6	variation	4660745	4660745	.	.	0	note=snp G=>A A:57 G:0
EA2454	snippy:4.3.6	variation	4661591	4661591	.	.	0	note=snp A=>G G:42 A:0
EA2454	snippy:4.3.6	variation	4664714	4664714	.	.	0	note=snp C=>A A:56 C:0
EA2454	snippy:4.3.6	variation	4665968	4665968	.	.	0	note=snp G=>A A:59 G:0
EA2454	snippy:4.3.6	variation	4670469	4670469	.	.	0	note=snp A=>G G:11 A:0
EA2454	snippy:4.3.6	variation	4670848	4670848	.	.	0	note=complex TGCG=>CGCA CGCA:96 TGCG:3
EA2454	snippy:4.3.6	variation	4670861	4670861	.	.	0	note=snp T=>C C:109 T:3
EA2454	snippy:4.3.6	variation	4670947	4670947	.	.	0	note=snp T=>C C:88 T:0
EA2454	snippy:4.3.6	variation	4676024	4676024	.	.	0	note=complex TGAG=>GGAT GGAT:15 TGAG:0
EA2454	snippy:4.3.6	variation	4676032	4676032	.	.	0	note=del CA=>C C:16 CA:0
EA2454	snippy:4.3.6	variation	4676043	4676043	.	.	0	note=snp G=>T T:27 G:0
EA2454	snippy:4.3.6	variation	4676049	4676049	.	.	0	note=snp T=>G G:29 T:0
EA2454	snippy:4.3.6	variation	4676060	4676060	.	.	0	note=snp G=>T T:33 G:0
EA2454	snippy:4.3.6	variation	4676065	4676065	.	.	0	note=snp T=>A A:35 T:0
EA2454	snippy:4.3.6	variation	4676075	4676075	.	.	0	note=complex GATG=>TATT TATT:37 GATG:0
EA2454	snippy:4.3.6	variation	4676096	4676096	.	.	0	note=complex GAA=>CAG CAG:42 GAA:0
EA2454	snippy:4.3.6	variation	4676103	4676103	.	.	0	note=complex GGGT=>TGAC TGAC:40 GGGT:0
EA2454	snippy:4.3.6	variation	4676406	4676406	.	.	0	note=snp G=>C C:45 G:0
EA2454	snippy:4.3.6	variation	4676421	4676421	.	.	0	note=snp G=>A A:45 G:0
EA2454	snippy:4.3.6	variation	4676505	4676505	.	.	0	note=snp C=>G G:45 C:0
EA2454	snippy:4.3.6	variation	4676553	4676553	.	.	0	note=snp C=>T T:40 C:0
EA2454	snippy:4.3.6	variation	4676559	4676559	.	.	0	note=snp T=>C C:44 T:0
EA2454	snippy:4.3.6	variation	4676571	4676571	.	.	0	note=complex TGTC=>AGTG AGTG:36 TGTC:0
EA2454	snippy:4.3.6	variation	4676635	4676635	.	.	0	note=snp C=>A A:43 C:0
EA2454	snippy:4.3.6	variation	4676734	4676734	.	.	0	note=snp C=>G G:38 C:0
EA2454	snippy:4.3.6	variation	4676748	4676748	.	.	0	note=snp A=>G G:45 A:0
EA2454	snippy:4.3.6	variation	4676766	4676766	.	.	0	note=snp T=>C C:44 T:0
EA2454	snippy:4.3.6	variation	4676781	4676781	.	.	0	note=snp A=>G G:43 A:0
EA2454	snippy:4.3.6	variation	4681821	4681821	.	.	0	note=complex TCCG=>ACCT ACCT:10 TCCG:0
EA2454	snippy:4.3.6	variation	4681879	4681879	.	.	0	note=snp T=>C C:11 T:0
EA2454	snippy:4.3.6	variation	4681884	4681884	.	.	0	note=snp T=>C C:11 T:0
EA2454	snippy:4.3.6	variation	4681890	4681890	.	.	0	note=snp T=>C C:11 T:0
EA2454	snippy:4.3.6	variation	4681899	4681899	.	.	0	note=snp T=>C C:11 T:0
EA2454	snippy:4.3.6	variation	4681911	4681911	.	.	0	note=complex AAAAACT=>TAAGACA TAAGACA:12 AAAAACT:0
EA2454	snippy:4.3.6	variation	4681923	4681923	.	.	0	note=snp T=>C C:12 T:0
EA2454	snippy:4.3.6	variation	4681932	4681932	.	.	0	note=complex AGTGTGTGGAGGTTCC=>GGTCTGCGGTGGCTCT GGTCTGCGGTGGCTCT:12 AGTGTGTGGAGGTTCC:0
EA2454	snippy:4.3.6	variation	4681959	4681959	.	.	0	note=complex CACA=>TGCC TGCC:12 CACA:0
EA2454	snippy:4.3.6	variation	4681978	4681978	.	.	0	note=complex GTG=>ATT ATT:12 GTG:0
EA2454	snippy:4.3.6	variation	4681986	4681986	.	.	0	note=complex TCGT=>CCGC CCGC:13 TCGT:0
EA2454	snippy:4.3.6	variation	4681996	4681996	.	.	0	note=complex AGA=>CGG CGG:13 AGA:0
EA2454	snippy:4.3.6	variation	4682007	4682007	.	.	0	note=complex TATT=>CATC CATC:14 TATT:0
EA2454	snippy:4.3.6	variation	4682016	4682016	.	.	0	note=snp C=>T T:16 C:0
EA2454	snippy:4.3.6	variation	4682025	4682025	.	.	0	note=snp G=>T T:17 G:0
EA2454	snippy:4.3.6	variation	4682064	4682064	.	.	0	note=snp T=>A A:14 T:0
EA2454	snippy:4.3.6	variation	4682073	4682073	.	.	0	note=complex GTCCTCA=>CTCATCT CTCATCT:11 GTCCTCA:0
EA2454	snippy:4.3.6	variation	4682172	4682172	.	.	0	note=snp T=>C C:11 T:0
EA2454	snippy:4.3.6	variation	4682187	4682187	.	.	0	note=snp T=>G G:11 T:0
EA2454	snippy:4.3.6	variation	4682205	4682205	.	.	0	note=snp A=>G G:10 A:0
EA2454	snippy:4.3.6	variation	4682211	4682211	.	.	0	note=snp T=>A A:14 T:0
EA2454	snippy:4.3.6	variation	4682230	4682230	.	.	0	note=complex AGGTTAGT=>GGGCTGGC GGGCTGGC:15 AGGTTAGT:0
EA2454	snippy:4.3.6	variation	4682246	4682246	.	.	0	note=complex CATACCA=>TGTAACG TGTAACG:15 CATACCA:0
EA2454	snippy:4.3.6	variation	4682262	4682262	.	.	0	note=complex CGCTGT=>AACTGC AACTGC:15 CGCTGT:0
EA2454	snippy:4.3.6	variation	4682288	4682288	.	.	0	note=snp G=>A A:27 G:0
EA2454	snippy:4.3.6	variation	4682296	4682296	.	.	0	note=snp G=>C C:27 G:0
EA2454	snippy:4.3.6	variation	4682301	4682301	.	.	0	note=complex TTT=>CTC CTC:26 TTT:0
[truncated: 1,109 more rows]
