# Supplementary material for: Escherichia coli ST302: Genomic Analysis of Virulence Potential and Antimicrobial Resistance Mediated by Mobile Genetic Elements
Source: Front Microbiol. 2020 Jan 21;10:3098. doi: 10.3389/fmicb.2019.03098 (PMC6985150; doi:10.3389/fmicb.2019.03098)
Supplement: DATA S2 — ST302 SNP analysis. [file Data_Sheet_2.ZIP › SNP_Analysis/ST302_SNP/SNP_analysis/snippyout/ST302/IA7122-Poultry-ST302.out/snps.csv]

CHROM	POS	TYPE	REF	ALT	EVIDENCE	FTYPE	STRAND	NT_POS	AA_POS	EFFECT	LOCUS_TAG	GENE	PRODUCT
EA2454	977	snp	T	C	C:32 T:0
EA2454	6107	snp	C	T	T:61 C:0
EA2454	34494	snp	T	C	C:46 T:0
EA2454	67315	snp	A	C	C:46 A:0
EA2454	81449	snp	T	G	G:61 T:1
EA2454	111773	snp	C	G	G:51 C:0
EA2454	229626	snp	G	C	C:10 G:0
EA2454	238631	del	CT	C	C:76 CT:0
EA2454	253532	snp	G	T	T:96 G:0
EA2454	287343	del	TAGCTGA	T	T:33 TAGCTGA:0
EA2454	393575	snp	A	G	G:65 A:0
EA2454	471914	snp	T	G	G:51 T:0
EA2454	484699	del	CA	C	C:50 CA:0
EA2454	497568	snp	A	T	T:48 A:0
EA2454	539426	snp	T	C	C:56 T:0
EA2454	542323	snp	G	A	A:45 G:0
EA2454	569410	snp	C	T	T:38 C:0
EA2454	572900	snp	G	A	A:19 G:2
EA2454	606088	ins	G	GA	GA:61 G:0
EA2454	649480	snp	T	C	C:50 T:0
EA2454	669330	snp	A	G	G:62 A:0
EA2454	682546	snp	A	T	T:65 A:0
EA2454	690611	snp	T	C	C:48 T:0
EA2454	731329	snp	G	A	A:77 G:1
EA2454	744988	snp	A	G	G:68 A:0
EA2454	755366	snp	A	G	G:71 A:0
EA2454	775062	snp	G	A	A:39 G:0
EA2454	783701	snp	G	A	A:62 G:0
EA2454	817985	snp	T	G	G:38 T:0
EA2454	825262	snp	T	G	G:57 T:0
EA2454	951585	snp	G	A	A:27 G:0
EA2454	966712	snp	T	C	C:82 T:0
EA2454	1026843	snp	T	C	C:52 T:0
EA2454	1084393	snp	G	A	A:52 G:0
EA2454	1160822	snp	A	T	T:65 A:0
EA2454	1236723	snp	T	C	C:36 T:0
EA2454	1318145	snp	G	T	T:61 G:0
EA2454	1364207	snp	C	G	G:67 C:0
EA2454	1380330	snp	C	T	T:71 C:0
EA2454	1394505	snp	A	G	G:55 A:0
EA2454	1404411	del	AC	A	A:38 AC:0
EA2454	1440039	snp	C	T	T:33 C:0
EA2454	1520287	snp	C	T	T:79 C:0
EA2454	1525679	snp	C	T	T:59 C:0
EA2454	1560679	snp	G	A	A:52 G:0
EA2454	1619109	snp	T	A	A:22 T:0
EA2454	1620374	complex	ATTTT	GTTTG	GTTTG:17 ATTTT:0
EA2454	1620389	snp	G	C	C:18 G:0
EA2454	1620403	snp	A	T	T:26 A:0
EA2454	1620466	snp	T	C	C:39 T:0
EA2454	1620785	snp	T	C	C:54 T:0
EA2454	1620828	snp	T	C	C:46 T:0
EA2454	1620912	complex	GACA	TACT	TACT:47 GACA:0
EA2454	1621047	snp	C	G	G:55 C:0
EA2454	1621140	snp	C	A	A:55 C:0
EA2454	1621305	snp	G	T	T:43 G:0
EA2454	1621358	snp	G	A	A:30 G:0
EA2454	1622531	snp	C	A	A:59 C:0
EA2454	1624169	snp	A	G	G:49 A:0
EA2454	1624244	snp	C	T	T:41 C:0
EA2454	1624279	complex	GT	TC	TC:32 GT:0
EA2454	1624285	snp	A	C	C:32 A:0
EA2454	1624316	snp	C	A	A:25 C:0
EA2454	1624351	complex	GT	TC	TC:13 GT:0
EA2454	1624956	snp	C	T	T:57 C:0
EA2454	1624998	complex	CCCG	TCCA	TCCA:56 CCCG:0
EA2454	1625089	snp	C	T	T:56 C:4
EA2454	1625102	snp	G	A	A:59 G:0
EA2454	1625124	snp	C	T	T:56 C:0
EA2454	1625175	snp	T	C	C:58 T:0
EA2454	1625184	complex	TGGC	CGGT	CGGT:57 TGGC:0
EA2454	1625235	snp	A	G	G:67 A:0
EA2454	1625283	snp	G	A	A:72 G:0
EA2454	1625502	snp	G	A	A:81 G:0
EA2454	1625526	snp	T	G	G:71 T:0
EA2454	1625541	snp	T	C	C:71 T:3
EA2454	1625589	snp	C	T	T:71 C:0
EA2454	1629122	snp	A	G	G:11 A:0
EA2454	1629149	snp	T	C	C:12 T:0
EA2454	1629156	snp	A	G	G:12 A:0
EA2454	1629183	snp	A	C	C:15 A:0
EA2454	1629200	snp	T	C	C:16 T:0
EA2454	1629240	snp	T	C	C:19 T:0
EA2454	1629255	snp	G	A	A:20 G:0
EA2454	1629281	complex	CAAGGTAC	TAAGATAT	TAAGATAT:21 CAAGGTAC:0
EA2454	1629295	complex	ACA	TCT	TCT:23 ACA:0
EA2454	1629306	snp	C	G	G:25 C:0
EA2454	1629336	snp	T	G	G:20 T:0
EA2454	1629375	snp	G	A	A:20 G:0
EA2454	1629399	snp	G	A	A:20 G:0
EA2454	1629423	complex	ATATA	GTATT	GTATT:17 ATATA:1
EA2454	1629435	snp	G	A	A:20 G:0
EA2454	1629538	snp	A	C	C:35 A:0
EA2454	1629550	snp	A	G	G:37 A:1
EA2454	1629565	snp	A	G	G:41 A:0
EA2454	1629667	snp	G	A	A:56 G:0
EA2454	1629743	snp	A	G	G:70 A:0
EA2454	1629890	snp	G	A	A:49 G:0
EA2454	1629968	snp	G	A	A:42 G:0
EA2454	1630016	snp	T	C	C:53 T:0
EA2454	1630100	snp	G	A	A:55 G:0
EA2454	1630127	snp	A	C	C:59 A:0
EA2454	1630181	snp	A	G	G:61 A:0
EA2454	1630208	snp	G	A	A:61 G:0
EA2454	1630220	snp	T	C	C:67 T:0
EA2454	1630304	snp	A	G	G:85 A:0
EA2454	1630448	snp	T	C	C:86 T:0
EA2454	1630496	snp	C	T	T:72 C:0
EA2454	1630550	snp	G	A	A:52 G:0
EA2454	1630872	complex	GTT	ATA	ATA:40 GTT:0
EA2454	1630941	snp	A	G	G:41 A:0
EA2454	1630947	snp	T	C	C:43 T:0
EA2454	1630956	snp	G	A	A:41 G:0
EA2454	1630981	snp	A	G	G:38 A:0
EA2454	1646924	snp	G	A	A:70 G:0
EA2454	1679531	snp	C	T	T:30 C:0
EA2454	1799132	snp	G	A	A:56 G:0
EA2454	1825274	del	GT	G	G:10 GT:0
EA2454	1966999	snp	G	T	T:54 G:0
EA2454	1999916	snp	A	C	C:79 A:0
EA2454	2040728	snp	C	T	T:68 C:0
EA2454	2096311	del	TA	T	T:54 TA:0
EA2454	2113179	snp	G	A	A:66 G:0
EA2454	2183355	snp	T	C	C:65 T:0
EA2454	2187722	snp	C	A	A:25 C:0
EA2454	2292077	snp	C	T	T:48 C:0
EA2454	2364340	snp	T	G	G:60 T:0
EA2454	2419574	del	CT	C	C:13 CT:0
EA2454	2493670	snp	A	C	C:49 A:0
EA2454	2538679	snp	T	C	C:74 T:0
EA2454	2555441	snp	A	G	G:47 A:0
EA2454	2623767	snp	C	A	A:63 C:0
EA2454	2641059	snp	T	C	C:57 T:0
EA2454	2644202	snp	T	G	G:74 T:0
EA2454	2662250	ins	C	CA	CA:36 C:0
EA2454	2672475	ins	G	GCAAGACAT	GCAAGACAT:25 G:0
EA2454	2693407	snp	G	A	A:57 G:1
EA2454	2720677	ins	A	AACCTGCACCTGC	AACCTGCACCTGC:43 A:0
EA2454	2752557	snp	C	T	T:37 C:0
EA2454	2764522	snp	C	A	A:56 C:0
EA2454	2835582	snp	C	T	T:44 C:1
EA2454	2883184	snp	T	C	C:46 T:0
EA2454	2941498	snp	G	A	A:65 G:0
EA2454	2952105	mnp	AG	GA	GA:65 AG:0
EA2454	2952236	snp	A	G	G:74 A:0
EA2454	2952306	snp	T	C	C:59 T:0
EA2454	2952337	snp	G	A	A:63 G:0
EA2454	2952364	complex	CAGG	TAGA	TAGA:65 CAGG:0
EA2454	2952391	snp	T	C	C:67 T:0
EA2454	2952403	snp	A	T	T:70 A:0
EA2454	2952433	snp	C	T	T:76 C:0
EA2454	2952439	snp	A	G	G:72 A:0
EA2454	2952472	complex	TGGTCTT	CGGCTTC	CGGCTTC:66 TGGTCTT:0
EA2454	2952502	complex	AATCAGGTACGGGCTC	GATTAGATATGGACTT	GATTAGATATGGACTT:62 AATCAGGTACGGGCTC:0
EA2454	2952529	complex	CCTGCAT	TCGGCAC	TCGGCAC:69 CCTGCAT:0
EA2454	2952544	snp	T	A	A:83 T:0
EA2454	2952550	snp	C	T	T:82 C:0
EA2454	2952555	complex	GCGA	ACGT	ACGT:82 GCGA:0
EA2454	2952568	snp	G	A	A:86 G:0
EA2454	2952625	snp	T	G	G:85 T:0
EA2454	2952633	snp	G	A	A:82 G:0
EA2454	2952775	complex	AAGT	GAGC	GAGC:82 AAGT:0
EA2454	2952787	complex	TGTC	GGTT	GGTT:80 TGTC:0
EA2454	2952814	snp	T	A	A:76 T:0
EA2454	2952823	snp	G	A	A:75 G:0
EA2454	2952841	snp	A	G	G:69 A:0
EA2454	2952847	complex	TCCA	CCCT	CCCT:69 TCCA:0
EA2454	2952859	snp	C	T	T:69 C:0
EA2454	2952871	snp	T	A	A:70 T:0
EA2454	2952883	snp	C	T	T:68 C:0
EA2454	2952889	snp	A	G	G:65 A:0
EA2454	2952899	complex	TTT	CTC	CTC:63 TTT:0
EA2454	2952907	snp	A	G	G:63 A:0
EA2454	2952916	snp	A	G	G:56 A:0
EA2454	2953004	snp	A	T	T:56 A:0
EA2454	2953018	snp	C	G	G:45 C:0
EA2454	2953033	snp	G	A	A:45 G:0
EA2454	2953068	snp	C	T	T:44 C:0
EA2454	2953102	snp	T	C	C:49 T:0
EA2454	2953114	snp	G	A	A:47 G:0
EA2454	2953203	mnp	TG	AA	AA:59 TG:0
EA2454	2953223	mnp	TT	CC	CC:61 TT:0
EA2454	2953258	snp	T	C	C:62 T:0
EA2454	2953291	snp	G	A	A:65 G:1
EA2454	2953306	snp	T	C	C:64 T:0
EA2454	2953321	snp	C	G	G:66 C:0
EA2454	2953327	snp	A	G	G:67 A:0
EA2454	2953376	complex	TAGCGCG	CAGTGCA	CAGTGCA:55 TAGCGCG:0
EA2454	2953430	snp	T	C	C:51 T:0
EA2454	2953442	snp	A	T	T:50 A:0
EA2454	2953502	snp	C	T	T:41 C:0
EA2454	2953529	complex	ATTC	GTTT	GTTT:27 ATTC:0
EA2454	2953544	snp	G	A	A:25 G:0
EA2454	2953556	snp	A	T	T:25 A:0
EA2454	2953614	snp	A	C	C:14 A:0
EA2454	2953624	snp	A	G	G:14 A:0
EA2454	2953632	snp	C	T	T:13 C:0
EA2454	2953637	complex	CG	GA	GA:13 CG:0
EA2454	2953643	snp	T	C	C:12 T:0
EA2454	2953650	snp	G	A	A:12 G:0
EA2454	2954237	snp	C	T	T:22 C:0
EA2454	2954253	complex	CA	TG	TG:23 CA:0
EA2454	2954277	snp	A	G	G:28 A:0
EA2454	2954301	snp	T	G	G:32 T:0
EA2454	2954328	snp	G	T	T:36 G:1
EA2454	2954391	snp	T	G	G:38 T:0
EA2454	2954402	snp	C	T	T:35 C:1
EA2454	2954420	snp	C	T	T:34 C:0
EA2454	2954433	snp	G	A	A:32 G:0
EA2454	2954439	snp	A	G	G:31 A:0
EA2454	2954451	complex	GCCG	ATCC	ATCC:18 GCCG:0
EA2454	2954460	complex	GGT	AGA	AGA:18 GGT:0
EA2454	2954475	mnp	GG	AT	AT:21 GG:0
EA2454	2954481	snp	G	A	A:22 G:0
EA2454	2954571	snp	T	C	C:11 T:0
EA2454	2954576	snp	A	C	C:11 A:0
EA2454	2954581	snp	C	T	T:11 C:0
EA2454	2954660	snp	C	T	T:10 C:0
EA2454	2954679	snp	T	A	A:10 T:0
EA2454	2954691	snp	A	C	C:10 A:0
EA2454	2954993	snp	T	C	C:37 T:0
EA2454	2955083	snp	T	C	C:44 T:0
EA2454	2955094	snp	G	C	C:44 G:0
EA2454	2963100	snp	G	A	A:54 G:0
EA2454	2998642	snp	G	A	A:31 G:1
EA2454	3006788	snp	T	G	G:66 T:0
EA2454	3036124	snp	C	T	T:65 C:0
EA2454	3038860	snp	C	T	T:90 C:1
EA2454	3041125	snp	T	G	G:65 T:0
EA2454	3056545	snp	G	A	A:21 G:0
EA2454	3112595	ins	C	CG	CG:44 C:0
EA2454	3147479	del	TCGCCTTTCAGCACTTTATCTGCGGTTTCAA	T	T:43 TCGCCTTTCAGCACTTTATCTGCGGTTTCAA:0
EA2454	3195002	del	GA	G	G:18 GA:0
EA2454	3214904	snp	A	C	C:47 A:0
EA2454	3281767	ins	G	GC	GC:35 G:0
EA2454	3292219	snp	C	T	T:51 C:1
EA2454	3339461	snp	T	C	C:23 T:0
EA2454	3339497	snp	C	T	T:51 C:0
EA2454	3339614	snp	A	T	T:93 A:0
EA2454	3339638	snp	T	G	G:99 T:0
EA2454	3339673	complex	CCACGACC	TCACCACG	TCACCACG:99 CCACGACC:0
EA2454	3339740	snp	G	A	A:71 G:0
EA2454	3339755	snp	C	T	T:67 C:0
EA2454	3339797	complex	ACGT	GCGC	GCGC:45 ACGT:0
EA2454	3339818	snp	G	T	T:42 G:0
EA2454	3339839	snp	A	C	C:34 A:0
EA2454	3339848	complex	AATCACA	GATGACG	GATGACG:30 AATCACA:0
EA2454	3339866	snp	T	C	C:28 T:0
EA2454	3339907	complex	GTGACGT	ATGGCGG	ATGGCGG:11 GTGACGT:0
EA2454	3339918	snp	C	T	T:12 C:0
EA2454	3339964	snp	G	A	A:12 G:0
EA2454	3340054	snp	A	G	G:24 A:0
EA2454	3381306	snp	G	A	A:76 G:0
EA2454	3383117	snp	A	T	T:66 A:0
EA2454	3412663	snp	G	A	A:89 G:0
EA2454	3484930	snp	C	T	T:12 C:0
EA2454	3554302	snp	G	T	T:29 G:0
EA2454	3591244	snp	T	G	G:82 T:0
EA2454	3657942	snp	T	G	G:83 T:0
EA2454	3662284	snp	A	G	G:64 A:1
EA2454	3729296	snp	G	A	A:55 G:0
EA2454	3729404	snp	A	G	G:59 A:0
EA2454	3729452	snp	A	C	C:64 A:0
EA2454	3729991	snp	C	T	T:40 C:1
EA2454	3730012	snp	C	G	G:45 C:0
EA2454	3730027	snp	A	G	G:50 A:0
EA2454	3730165	snp	C	T	T:72 C:0
EA2454	3730234	snp	G	T	T:68 G:0
EA2454	3730246	snp	G	A	A:68 G:0
EA2454	3730273	snp	T	C	C:63 T:0
EA2454	3730279	snp	G	A	A:66 G:0
EA2454	3730288	snp	G	A	A:60 G:0
EA2454	3730297	snp	T	C	C:62 T:0
EA2454	3730307	snp	T	A	A:61 T:0
EA2454	3730363	complex	CGAG	TGAA	TGAA:63 CGAG:0
EA2454	3730447	snp	G	T	T:71 G:0
EA2454	3730615	snp	T	C	C:89 T:0
EA2454	3730642	snp	C	T	T:86 C:0
EA2454	3730666	snp	A	G	G:85 A:0
EA2454	3732121	snp	A	G	G:18 A:0
EA2454	3732141	snp	G	T	T:23 G:0
EA2454	3732406	snp	T	C	C:41 T:0
EA2454	3732532	snp	T	C	C:35 T:0
EA2454	3732538	snp	G	A	A:41 G:0
EA2454	3732544	snp	T	C	C:42 T:0
EA2454	3732613	snp	G	A	A:38 G:0
EA2454	3732626	snp	T	C	C:40 T:0
EA2454	3732649	complex	CTGC	TTGT	TTGT:35 CTGC:0
EA2454	3732701	snp	G	T	T:42 G:0
EA2454	3732769	snp	T	C	C:53 T:0
EA2454	3732877	snp	A	T	T:51 A:0
EA2454	3732907	snp	C	T	T:50 C:0
EA2454	3732940	snp	T	C	C:58 T:0
EA2454	3732955	snp	C	T	T:56 C:0
EA2454	3732964	snp	G	A	A:56 G:0
EA2454	3732976	snp	A	G	G:52 A:0
EA2454	3733096	snp	T	C	C:59 T:0
EA2454	3733117	snp	T	C	C:61 T:0
EA2454	3733123	snp	G	A	A:61 G:0
EA2454	3733150	snp	C	T	T:70 C:0
EA2454	3733171	snp	C	G	G:75 C:0
EA2454	3733274	snp	A	G	G:73 A:0
EA2454	3733350	complex	TGTA	CGTT	CGTT:84 TGTA:0
EA2454	3733378	complex	GCACGC	ACGCGT	ACGCGT:79 GCACGC:0
EA2454	3733392	snp	G	A	A:78 G:0
EA2454	3733401	snp	G	T	T:78 G:0
EA2454	3733407	complex	TAGT	CAGC	CAGC:66 TAGT:0
EA2454	3733430	snp	G	C	C:69 G:0
EA2454	3733441	snp	T	C	C:71 T:0
EA2454	3733461	snp	G	A	A:64 G:0
EA2454	3733491	complex	GGAAC	CGAGT	CGAGT:64 GGAAC:0
EA2454	3733527	snp	C	T	T:62 C:0
EA2454	3733562	snp	A	C	C:60 A:0
EA2454	3733572	snp	T	A	A:67 T:0
EA2454	3733590	snp	G	A	A:65 G:0
EA2454	3733602	snp	A	G	G:61 A:0
EA2454	3733617	snp	C	G	G:58 C:0
EA2454	3733626	complex	TGGG	GGGT	GGGT:58 TGGG:0
EA2454	3733701	complex	GGGCTGTAAA	AGGTTGCAAT	AGGTTGCAAT:61 GGGCTGTAAA:0
EA2454	3733776	complex	TGTA	CGTG	CGTG:65 TGTA:0
EA2454	3733821	snp	A	G	G:58 A:0
EA2454	3733896	snp	G	A	A:59 G:0
EA2454	3733902	snp	T	C	C:57 T:0
EA2454	3733908	snp	G	A	A:66 G:0
EA2454	3733950	snp	C	T	T:63 C:0
EA2454	3733963	snp	T	C	C:70 T:0
EA2454	3733968	snp	C	G	G:70 C:0
EA2454	3733974	snp	C	T	T:68 C:1
EA2454	3733986	complex	AAT	TAC	TAC:76 AAT:0
EA2454	3734064	complex	TGACG	CGATA	CGATA:65 TGACG:0
EA2454	3734094	snp	A	G	G:51 A:1
EA2454	3734109	complex	GTTA	ACTG	ACTG:58 GTTA:0
EA2454	3734153	snp	A	G	G:60 A:1
EA2454	3734196	snp	G	A	A:58 G:0
EA2454	3734202	complex	CTCCAAC	TTCTAAT	TTCTAAT:42 CTCCAAC:0
EA2454	3734250	snp	T	C	C:47 T:0
EA2454	3734256	snp	T	G	G:47 T:0
EA2454	3734310	snp	C	G	G:53 C:0
EA2454	3734319	complex	GGGTGATTAC	AGGCGACTAT	AGGCGACTAT:50 GGGTGATTAC:0
EA2454	3734337	snp	C	T	T:57 C:0
EA2454	3734352	snp	G	A	A:62 G:0
EA2454	3734367	snp	C	T	T:71 C:0
EA2454	3734373	complex	CACC	GACG	GACG:67 CACC:0
EA2454	3734391	snp	G	C	C:70 G:0
EA2454	3734397	snp	A	T	T:69 A:0
EA2454	3734412	snp	C	T	T:72 C:0
EA2454	3734427	snp	A	G	G:68 A:0
EA2454	3734439	complex	GGGG	AGGT	AGGT:65 GGGG:0
EA2454	3734460	snp	A	G	G:76 A:0
EA2454	3734466	snp	A	T	T:82 A:0
EA2454	3734496	snp	C	T	T:76 C:1
EA2454	3734509	snp	A	G	G:74 A:0
EA2454	3734699	snp	G	A	A:81 G:0
EA2454	3734774	snp	A	G	G:69 A:0
EA2454	3734816	snp	G	A	A:65 G:0
EA2454	3734822	snp	C	T	T:61 C:0
EA2454	3734840	snp	A	G	G:67 A:0
EA2454	3734852	snp	C	A	A:63 C:0
EA2454	3734897	snp	C	T	T:58 C:0
EA2454	3734935	complex	AGGAC	TGGAA	TGGAA:56 AGGAC:0
EA2454	3735020	snp	C	A	A:56 C:0
EA2454	3735026	snp	A	G	G:56 A:0
EA2454	3735056	snp	C	T	T:52 C:0
EA2454	3735071	snp	G	C	C:56 G:0
EA2454	3735080	snp	G	A	A:55 G:0
EA2454	3735122	snp	A	G	G:51 A:0
EA2454	3735173	snp	A	G	G:51 A:0
EA2454	3735197	complex	TC	GT	GT:48 TC:0
EA2454	3735206	snp	C	G	G:49 C:0
EA2454	3735266	snp	T	C	C:66 T:0
EA2454	3735305	complex	GGCC	CGCA	CGCA:70 GGCC:0
EA2454	3735329	snp	G	A	A:67 G:0
EA2454	3735344	complex	TGAG	CGAA	CGAA:65 TGAG:0
EA2454	3735415	snp	G	A	A:73 G:0
EA2454	3735425	snp	C	T	T:69 C:0
EA2454	3735527	snp	A	C	C:64 A:0
EA2454	3735582	snp	C	T	T:63 C:1
EA2454	3735718	snp	A	G	G:57 A:0
EA2454	3735757	complex	CTACAAA	ATATAAG	ATATAAG:48 CTACAAA:0
EA2454	3735769	snp	A	G	G:51 A:0
EA2454	3735778	snp	C	T	T:51 C:0
EA2454	3735793	snp	G	T	T:52 G:2
EA2454	3735799	snp	G	A	A:55 G:0
EA2454	3735865	snp	A	G	G:57 A:0
EA2454	3735871	snp	G	A	A:57 G:0
EA2454	3735895	complex	TCCG	CCCA	CCCA:51 TCCG:0
EA2454	3735958	complex	CCTT	TCTC	TCTC:59 CCTT:0
EA2454	3735982	snp	T	C	C:59 T:0
EA2454	3736027	complex	CGCT	GGCG	GGCG:62 CGCT:0
EA2454	3736047	snp	C	A	A:61 C:0
EA2454	3736070	snp	A	G	G:60 A:2
EA2454	3736096	snp	G	A	A:60 G:2
EA2454	3736105	snp	T	C	C:56 T:2
EA2454	3736126	snp	C	T	T:69 C:0
EA2454	3736153	snp	A	G	G:60 A:0
EA2454	3736162	snp	C	T	T:62 C:0
EA2454	3736168	snp	G	A	A:60 G:2
EA2454	3736180	snp	T	C	C:59 T:0
EA2454	3736225	snp	C	T	T:62 C:0
EA2454	3736243	snp	C	T	T:60 C:0
EA2454	3736261	snp	C	T	T:56 C:1
EA2454	3736336	snp	C	G	G:65 C:0
EA2454	3736423	complex	TGCA	CGCG	CGCG:63 TGCA:0
EA2454	3736465	snp	C	T	T:64 C:1
EA2454	3736504	snp	A	G	G:63 A:0
EA2454	3736531	snp	C	T	T:66 C:0
EA2454	3736552	complex	CCTG	GCTA	GCTA:59 CCTG:0
EA2454	3736585	snp	C	T	T:58 C:0
EA2454	3736600	snp	C	T	T:59 C:0
EA2454	3736654	snp	T	C	C:72 T:0
EA2454	3736719	snp	C	T	T:74 C:0
EA2454	3736788	complex	CGTA	AGTG	AGTG:61 CGTA:0
EA2454	3736830	snp	T	C	C:55 T:0
EA2454	3736956	snp	T	C	C:28 T:0
EA2454	3737127	snp	G	A	A:23 G:0
EA2454	3737375	complex	CTTA	ATTG	ATTG:51 CTTA:0
EA2454	3737409	snp	C	T	T:59 C:0
EA2454	3737480	snp	C	G	G:50 C:0
EA2454	3737516	snp	T	C	C:46 T:0
EA2454	3737555	snp	A	G	G:53 A:0
EA2454	3737567	snp	T	C	C:52 T:1
EA2454	3737627	snp	C	T	T:60 C:0
EA2454	3737672	snp	C	T	T:56 C:0
EA2454	3737699	snp	C	T	T:53 C:0
EA2454	3737777	snp	G	A	A:67 G:0
EA2454	3737816	snp	T	C	C:67 T:0
EA2454	3737825	snp	C	T	T:66 C:0
EA2454	3737867	snp	G	A	A:74 G:0
EA2454	3737876	snp	C	A	A:69 C:0
EA2454	3737885	snp	T	C	C:76 T:0
EA2454	3737898	snp	G	A	A:78 G:0
EA2454	3737906	complex	GGCG	TGCT	TGCT:72 GGCG:0
EA2454	3737921	snp	T	C	C:76 T:0
EA2454	3738088	complex	CGTG	TGTA	TGTA:64 CGTG:0
EA2454	3738112	snp	T	C	C:62 T:0
EA2454	3738142	snp	T	C	C:63 T:0
EA2454	3738166	snp	C	T	T:57 C:0
EA2454	3738195	snp	T	G	G:60 T:0
EA2454	3738325	snp	A	G	G:44 A:0
EA2454	3738349	snp	T	C	C:46 T:0
EA2454	3738361	complex	GTGT	ATGC	ATGC:48 GTGT:0
EA2454	3738373	complex	GGGT	CGGC	CGGC:47 GGGT:0
EA2454	3738451	snp	C	T	T:51 C:0
EA2454	3738469	snp	G	A	A:57 G:0
EA2454	3738499	complex	CGGT	TGGA	TGGA:52 CGGT:0
EA2454	3738523	snp	T	C	C:67 T:0
EA2454	3738565	snp	A	G	G:75 A:0
EA2454	3738580	snp	G	A	A:78 G:1
EA2454	3738586	snp	G	A	A:77 G:0
EA2454	3738625	snp	C	G	G:75 C:1
EA2454	3738673	snp	C	T	T:72 C:0
EA2454	3738783	snp	C	T	T:50 C:0
EA2454	3738816	snp	T	G	G:50 T:0
EA2454	3738849	snp	C	T	T:43 C:0
EA2454	3738856	snp	C	T	T:48 C:0
EA2454	3738918	snp	T	C	C:49 T:0
EA2454	3738981	complex	CGTAGTAAA	TGTGGTGAG	TGTGGTGAG:46 CGTAGTAAA:0
EA2454	3738996	snp	G	T	T:56 G:0
EA2454	3739005	snp	C	T	T:53 C:1
EA2454	3739018	snp	C	T	T:56 C:0
EA2454	3739026	snp	A	G	G:50 A:0
EA2454	3739032	snp	G	A	A:51 G:0
EA2454	3739038	snp	T	A	A:53 T:0
EA2454	3739044	snp	A	G	G:49 A:1
EA2454	3739095	snp	A	G	G:63 A:0
EA2454	3739137	snp	C	T	T:59 C:0
EA2454	3739194	snp	G	A	A:55 G:0
EA2454	3739212	snp	A	G	G:52 A:0
EA2454	3739281	snp	A	G	G:48 A:0
EA2454	3739287	snp	C	T	T:50 C:0
EA2454	3739308	complex	GC	AT	AT:48 GC:0
EA2454	3739332	snp	C	T	T:42 C:0
EA2454	3739344	snp	G	A	A:42 G:0
EA2454	3739356	complex	GCG	ACA	ACA:44 GCG:0
EA2454	3739415	del	CAA	C	C:37 CAA:0
EA2454	3739463	complex	GCTGC	ACCAA	ACCAA:47 GCTGC:0
EA2454	3739476	snp	T	C	C:48 T:0
EA2454	3739482	snp	A	G	G:51 A:0
EA2454	3739500	snp	A	G	G:54 A:0
EA2454	3739611	snp	T	C	C:58 T:0
EA2454	3739617	snp	G	A	A:60 G:0
EA2454	3739647	snp	T	C	C:62 T:1
EA2454	3739654	snp	C	T	T:64 C:0
EA2454	3739659	snp	G	A	A:65 G:0
EA2454	3739667	snp	G	A	A:61 G:0
EA2454	3739680	snp	T	A	A:63 T:0
EA2454	3739725	snp	G	A	A:71 G:0
EA2454	3739887	complex	GACT	AACC	AACC:74 GACT:0
EA2454	3739903	complex	TTCAG	CTCAA	CTCAA:71 TTCAG:0
EA2454	3739965	complex	TTCTTCG	CTCTACA	CTCTACA:71 TTCTTCG:0
EA2454	3740001	complex	CTT	TTG	TTG:81 CTT:0
EA2454	3740013	snp	C	T	T:85 C:0
EA2454	3740052	snp	T	C	C:85 T:0
EA2454	3740064	snp	T	G	G:88 T:0
EA2454	3740076	snp	G	A	A:90 G:0
EA2454	3740097	snp	C	T	T:84 C:0
EA2454	3740103	complex	TGC	AGG	AGG:82 TGC:0
EA2454	3740115	snp	G	A	A:88 G:0
EA2454	3740169	snp	T	C	C:82 T:0
EA2454	3740204	complex	GA	AT	AT:78 GA:0
EA2454	3740343	snp	G	A	A:80 G:0
EA2454	3740384	snp	A	T	T:74 A:0
EA2454	3740503	complex	GCCA	CTCG	CTCG:41 GCCA:0
EA2454	3740524	snp	A	G	G:30 A:0
EA2454	3740548	snp	A	T	T:37 A:0
EA2454	3740612	snp	A	G	G:51 A:0
EA2454	3740672	snp	G	A	A:61 G:0
EA2454	3740681	snp	G	A	A:60 G:0
EA2454	3740735	complex	CGAG	TGAA	TGAA:64 CGAG:0
EA2454	3740762	snp	A	G	G:69 A:0
EA2454	3740879	snp	T	C	C:68 T:0
EA2454	3740909	snp	G	A	A:76 G:0
EA2454	3740933	snp	G	A	A:71 G:0
EA2454	3740980	snp	A	G	G:65 A:0
EA2454	3741053	complex	ACGCGGA	GCGTGGG	GCGTGGG:56 ACGCGGA:0
EA2454	3741167	complex	GAAA	AAAC	AAAC:68 GAAA:0
EA2454	3741176	snp	A	T	T:68 A:0
EA2454	3741191	complex	GGTTGAA	AGTGGAG	AGTGGAG:64 GGTTGAA:0
EA2454	3741213	snp	A	G	G:66 A:0
EA2454	3741245	snp	T	C	C:88 T:0
EA2454	3741287	snp	G	T	T:85 G:0
EA2454	3741305	complex	GAGA	AAGG	AAGG:86 GAGA:0
EA2454	3741320	snp	G	A	A:99 G:0
EA2454	3741527	snp	G	A	A:77 G:0
EA2454	3741659	snp	C	A	A:47 C:0
EA2454	3741712	snp	G	A	A:49 G:0
EA2454	3741731	snp	T	A	A:47 T:0
EA2454	3741937	snp	T	C	C:29 T:0
EA2454	3741952	snp	G	A	A:29 G:0
EA2454	3742122	snp	G	A	A:63 G:0
EA2454	3742134	snp	G	A	A:66 G:0
EA2454	3742152	snp	A	G	G:66 A:0
EA2454	3742161	snp	A	C	C:68 A:0
EA2454	3742167	snp	A	C	C:70 A:0
EA2454	3742221	snp	G	A	A:91 G:0
EA2454	3742236	complex	CTTG	TTTA	TTTA:82 CTTG:0
EA2454	3742284	snp	A	G	G:76 A:0
EA2454	3742293	snp	A	G	G:74 A:0
EA2454	3742332	snp	A	G	G:82 A:0
EA2454	3742356	snp	G	A	A:85 G:0
EA2454	3742392	complex	AGCACGC	GGCGCGT	GGCGCGT:89 AGCACGC:0
EA2454	3742416	complex	GGCG	AGCA	AGCA:94 GGCG:0
EA2454	3742446	snp	A	C	C:79 A:0
EA2454	3742452	snp	A	G	G:79 A:0
EA2454	3742485	snp	A	T	T:80 A:0
EA2454	3742494	snp	C	T	T:76 C:0
EA2454	3742521	snp	C	T	T:82 C:0
EA2454	3742530	snp	G	A	A:85 G:1
EA2454	3742542	snp	T	C	C:91 T:0
EA2454	3742611	snp	A	G	G:83 A:0
EA2454	3742620	snp	G	A	A:81 G:1
EA2454	3742629	complex	GCCC	ACCG	ACCG:75 GCCC:0
EA2454	3742641	complex	ATTTGCT	GTTAGCC	GTTAGCC:66 ATTTGCT:0
EA2454	3742659	snp	A	G	G:79 A:0
EA2454	3742674	snp	G	A	A:76 G:0
EA2454	3742713	snp	A	G	G:75 A:0
EA2454	3742764	snp	C	G	G:81 C:0
EA2454	3742775	snp	G	A	A:76 G:0
EA2454	3742787	complex	AA	TG	TG:73 AA:0
EA2454	3742830	complex	TAA	CAG	CAG:73 TAA:0
EA2454	3742842	snp	A	G	G:75 A:0
EA2454	3742869	snp	T	C	C:78 T:0
EA2454	3742884	snp	C	T	T:77 C:0
EA2454	3742905	snp	T	G	G:77 T:0
EA2454	3742914	complex	CGGTTCGCCA	TGGCTCACCG	TGGCTCACCG:69 CGGTTCGCCA:0
EA2454	3742932	complex	AACG	CACT	CACT:73 AACG:0
EA2454	3742959	snp	A	C	C:80 A:0
EA2454	3742986	snp	G	T	T:83 G:0
EA2454	3743022	snp	C	T	T:85 C:0
EA2454	3743037	snp	A	G	G:83 A:0
EA2454	3743049	complex	GATA	AATG	AATG:80 GATA:0
EA2454	3743061	snp	A	G	G:80 A:0
EA2454	3743181	snp	C	G	G:75 C:0
EA2454	3743226	snp	A	C	C:71 A:0
EA2454	3743238	snp	A	G	G:70 A:0
EA2454	3743373	snp	C	T	T:24 C:0
EA2454	3743394	snp	G	T	T:17 G:0
EA2454	3743400	snp	G	A	A:15 G:0
EA2454	3762952	snp	A	C	C:10 A:0
EA2454	3762967	complex	GTAT	ATAA	ATAA:16 GTAT:0
EA2454	3763000	snp	T	A	A:21 T:0
EA2454	3763015	snp	G	T	T:26 G:0
EA2454	3763024	snp	G	A	A:27 G:0
EA2454	3763041	snp	G	T	T:31 G:0
EA2454	3763057	snp	A	T	T:34 A:0
EA2454	3763063	complex	CTGA	TTGG	TTGG:36 CTGA:0
EA2454	3763087	snp	T	C	C:51 T:0
EA2454	3763099	snp	T	A	A:53 T:0
EA2454	3763117	snp	G	T	T:56 G:0
EA2454	3763195	complex	GACG	AACA	AACA:76 GACG:0
EA2454	3763204	snp	A	G	G:79 A:0
EA2454	3763213	snp	A	G	G:79 A:0
EA2454	3763219	complex	ACGG	GCGA	GCGA:78 ACGG:0
EA2454	3763231	snp	C	T	T:82 C:0
EA2454	3763243	snp	G	A	A:81 G:0
EA2454	3763249	snp	C	G	G:83 C:0
EA2454	3763264	complex	GTCA	ATCG	ATCG:74 GTCA:0
EA2454	3763294	snp	A	G	G:73 A:0
EA2454	3763300	snp	G	T	T:70 G:0
EA2454	3763309	snp	A	T	T:72 A:0
EA2454	3763315	complex	ACGT	GCGC	GCGC:67 ACGT:0
EA2454	3763330	snp	A	T	T:59 A:0
EA2454	3763342	snp	A	G	G:64 A:0
EA2454	3763363	snp	G	A	A:61 G:0
EA2454	3763402	snp	A	G	G:58 A:0
EA2454	3763417	snp	A	G	G:57 A:0
EA2454	3763429	snp	T	C	C:57 T:0
EA2454	3763444	snp	C	T	T:56 C:0
EA2454	3763492	snp	C	T	T:56 C:0
EA2454	3763531	snp	T	C	C:68 T:0
EA2454	3763540	snp	T	C	C:70 T:1
EA2454	3763564	snp	A	T	T:74 A:0
EA2454	3763866	snp	T	G	G:59 T:0
EA2454	3763954	snp	T	C	C:56 T:0
EA2454	3764038	snp	A	T	T:71 A:0
EA2454	3764143	snp	T	G	G:83 T:0
EA2454	3764179	snp	A	T	T:78 A:0
EA2454	3764209	complex	AAG	TAA	TAA:81 AAG:0
EA2454	3764221	snp	G	C	C:81 G:0
EA2454	3764232	snp	T	C	C:87 T:0
EA2454	3764275	snp	G	A	A:69 G:0
EA2454	3764323	snp	T	C	C:73 T:0
EA2454	3764389	snp	T	G	G:70 T:0
EA2454	3764464	snp	C	G	G:65 C:0
EA2454	3764476	snp	G	A	A:77 G:0
EA2454	3764500	snp	C	T	T:70 C:0
EA2454	3764511	snp	A	G	G:71 A:0
EA2454	3764632	snp	A	G	G:84 A:0
EA2454	3764638	complex	ATAA	GTAG	GTAG:83 ATAA:0
EA2454	3764647	snp	C	A	A:85 C:0
EA2454	3764652	complex	CAAGG	AAAGA	AAAGA:79 CAAGG:0
EA2454	3764665	snp	A	G	G:80 A:0
EA2454	3764684	snp	C	T	T:81 C:0
EA2454	3764689	snp	G	A	A:81 G:0
EA2454	3764764	snp	G	A	A:51 G:0
EA2454	3764770	snp	G	C	C:40 G:0
EA2454	3764794	snp	G	A	A:36 G:0
EA2454	3764839	complex	CAAAATA	TAAGATG	TAAGATG:13 CAAAATA:0
EA2454	3766011	snp	A	C	C:50 A:0
EA2454	3785445	snp	G	T	T:50 G:0
EA2454	3785909	snp	C	T	T:53 C:0
EA2454	3841154	snp	G	T	T:74 G:0
EA2454	3851565	complex	TAAAC	CAGAT	CAGAT:12 TAAAC:0
EA2454	3851575	snp	A	T	T:12 A:0
EA2454	3851580	complex	AC	TT	TT:12 AC:0
EA2454	3851695	snp	T	C	C:13 T:0
EA2454	3851703	complex	ACCA	GCCT	GCCT:13 ACCA:0
EA2454	3851770	snp	T	C	C:12 T:0
EA2454	3851774	snp	C	G	G:10 C:0
EA2454	3851884	complex	CTTC	TTTT	TTTT:21 CTTC:0
EA2454	3851913	snp	G	A	A:24 G:0
EA2454	3852607	complex	CCGTT	TCGTC	TCGTC:44 CCGTT:0
EA2454	3852799	snp	A	G	G:39 A:0
EA2454	3852974	snp	A	G	G:38 A:0
EA2454	3852999	snp	T	C	C:36 T:0
EA2454	3853929	snp	A	C	C:13 A:0
EA2454	3854000	snp	A	G	G:15 A:0
EA2454	3854060	snp	G	A	A:23 G:0
EA2454	3854630	snp	A	G	G:10 A:0
EA2454	3854838	snp	C	T	T:11 C:0
EA2454	3855001	snp	A	G	G:21 A:0
EA2454	3855008	snp	A	T	T:21 A:0
EA2454	3855032	snp	C	T	T:20 C:0
EA2454	3855138	snp	A	G	G:15 A:0
EA2454	3855170	snp	C	T	T:10 C:0
EA2454	3855627	snp	T	A	A:17 T:0
EA2454	3856458	snp	A	G	G:24 A:0
EA2454	3856485	snp	G	A	A:24 G:0
EA2454	3856521	snp	T	C	C:24 T:0
EA2454	3856590	snp	C	T	T:36 C:0
EA2454	3856623	snp	T	C	C:36 T:0
EA2454	3856715	snp	A	C	C:29 A:0
EA2454	3857191	complex	AGAACGT	TGAGCGG	TGAGCGG:26 AGAACGT:0
EA2454	3857206	snp	T	C	C:29 T:0
EA2454	3857293	snp	T	A	A:25 T:0
EA2454	3859504	snp	C	G	G:20 C:0
EA2454	3859719	snp	G	A	A:27 G:0
EA2454	3860286	snp	T	C	C:18 T:0
EA2454	3860512	snp	A	T	T:19 A:0
EA2454	3860678	snp	C	T	T:13 C:0
EA2454	3860700	snp	C	T	T:11 C:0
EA2454	3861180	snp	C	T	T:15 C:0
EA2454	3861252	complex	TATT	GGTG	GGTG:11 TATT:0
EA2454	3861261	complex	GTGT	CTGC	CTGC:13 GTGT:0
EA2454	3861333	snp	A	G	G:11 A:0
EA2454	3861384	snp	A	C	C:10 A:0
EA2454	3861498	snp	C	T	T:12 C:0
EA2454	3861516	snp	T	C	C:11 T:0
EA2454	3861585	complex	TTTC	CTTT	CTTT:13 TTTC:0
EA2454	3861594	snp	G	T	T:14 G:0
EA2454	3861621	snp	T	C	C:13 T:0
EA2454	3861630	snp	T	C	C:12 T:0
EA2454	3861636	snp	C	T	T:12 C:0
EA2454	3861820	snp	A	G	G:14 A:0
EA2454	3861840	snp	T	C	C:16 T:0
EA2454	3861856	snp	A	C	C:18 A:0
EA2454	3861864	snp	T	C	C:21 T:0
EA2454	3861870	complex	CCCA	TCCG	TCCG:20 CCCA:0
EA2454	3861957	snp	G	A	A:24 G:0
EA2454	3861966	snp	G	A	A:25 G:0
EA2454	3861990	complex	GTCAGTTGAAAAG	CTCCGTGGAGAAA	CTCCGTGGAGAAA:24 GTCAGTTGAAAAG:0
EA2454	3862023	snp	G	A	A:28 G:0
EA2454	3862029	snp	C	T	T:26 C:0
EA2454	3862185	snp	C	T	T:26 C:0
EA2454	3862290	snp	G	T	T:19 G:0
EA2454	3862338	snp	C	T	T:13 C:0
EA2454	3862353	snp	T	C	C:11 T:0
EA2454	3862383	snp	C	T	T:12 C:0
EA2454	3862389	snp	T	C	C:10 T:1
EA2454	3862390	mnp	AA	CG	CG:11 AA:0
EA2454	3862456	snp	T	C	C:13 T:0
EA2454	3862467	snp	A	C	C:12 A:0
EA2454	3862476	snp	T	C	C:13 T:0
EA2454	3862512	snp	C	T	T:14 C:0
EA2454	3862527	complex	CTAC	ATAT	ATAT:12 CTAC:0
EA2454	3862554	complex	GGGCGTA	CGGGGTG	CGGGGTG:12 GGGCGTA:0
EA2454	3862614	snp	C	T	T:14 C:0
EA2454	3862638	snp	C	T	T:19 C:0
EA2454	3862715	mnp	AA	GG	GG:20 AA:0
EA2454	3862731	snp	C	T	T:20 C:0
EA2454	3862740	mnp	TCA	CAG	CAG:18 TCA:0
EA2454	3862752	snp	T	C	C:18 T:0
EA2454	3862765	snp	A	G	G:20 A:0
EA2454	3862783	snp	A	C	C:20 A:0
EA2454	3862788	complex	CAGCGAG	TAACGAC	TAACGAC:20 CAGCGAG:0
EA2454	3862802	snp	C	T	T:22 C:0
EA2454	3862866	snp	C	T	T:23 C:0
EA2454	3862878	snp	T	C	C:20 T:0
EA2454	3862883	snp	G	A	A:19 G:0
EA2454	3862890	snp	T	C	C:20 T:0
EA2454	3862896	snp	T	C	C:20 T:0
EA2454	3862923	complex	CAG	GAA	GAA:21 CAG:0
EA2454	3862947	snp	G	C	C:21 G:0
EA2454	3862974	snp	T	G	G:23 T:0
EA2454	3862990	complex	TCCCTGATTATC	AGCCTTATCATT	AGCCTTATCATT:21 TCCCTGATTATC:0
EA2454	3863007	snp	C	T	T:22 C:0
EA2454	3863014	snp	A	C	C:22 A:0
EA2454	3863036	mnp	CT	AC	AC:22 CT:0
EA2454	3863043	snp	A	G	G:22 A:0
EA2454	3863093	complex	GTAAA	ACAAG	ACAAG:20 GTAAA:0
EA2454	3863106	snp	G	A	A:19 G:0
EA2454	3863113	complex	CAA	GAG	GAG:19 CAA:0
EA2454	3863121	snp	T	C	C:19 T:0
EA2454	3863127	complex	CACCTGT	TACCGCC	TACCGCC:16 CACCTGT:0
EA2454	3863139	snp	C	T	T:19 C:0
EA2454	3863208	snp	T	G	G:18 T:0
EA2454	3863217	snp	G	A	A:17 G:0
EA2454	3863280	snp	T	C	C:13 T:0
EA2454	3863287	complex	TTATTC	CTGTAT	CTGTAT:13 TTATTC:0
EA2454	3863319	snp	G	T	T:15 G:0
EA2454	3863331	snp	C	T	T:13 C:2
EA2454	3863337	snp	T	C	C:14 T:0
EA2454	3863346	snp	T	C	C:15 T:0
EA2454	3863352	snp	C	T	T:16 C:0
EA2454	3863406	snp	T	C	C:12 T:0
EA2454	3863478	complex	ACGCAGG	GCGTAAA	GCGTAAA:14 ACGCAGG:0
EA2454	3863490	snp	C	G	G:17 C:0
EA2454	3863532	complex	ATCG	GTCA	GTCA:21 ATCG:0
EA2454	3863559	snp	G	A	A:22 G:0
EA2454	3863700	snp	G	A	A:27 G:0
EA2454	3863732	snp	A	G	G:32 A:0
EA2454	3863740	snp	T	C	C:34 T:0
EA2454	3863840	snp	T	C	C:30 T:0
EA2454	3863865	complex	ACG	GCA	GCA:28 ACG:0
EA2454	3863900	snp	T	G	G:30 T:0
EA2454	3863924	snp	A	T	T:28 A:0
EA2454	3863966	snp	G	A	A:30 G:0
EA2454	3863978	snp	G	A	A:28 G:0
EA2454	3864011	snp	A	G	G:31 A:0
EA2454	3864034	snp	A	C	C:27 A:0
EA2454	3864070	complex	GC	AA	AA:32 GC:0
EA2454	3864181	snp	C	T	T:33 C:0
EA2454	3864199	complex	TCCTGGA	GCCCGGT	GCCCGGT:37 TCCTGGA:0
EA2454	3864220	snp	A	G	G:37 A:0
EA2454	3864262	snp	T	G	G:33 T:0
EA2454	3864307	snp	A	T	T:32 A:0
EA2454	3864334	snp	T	G	G:25 T:0
EA2454	3864841	snp	T	A	A:25 T:0
EA2454	3864900	snp	G	A	A:26 G:0
EA2454	3864918	snp	G	T	T:25 G:0
EA2454	3865044	snp	G	T	T:28 G:0
EA2454	3865110	snp	T	C	C:23 T:0
EA2454	3865119	snp	A	C	C:22 A:0
EA2454	3865227	snp	T	C	C:27 T:0
EA2454	3865473	snp	C	T	T:27 C:0
EA2454	3865485	snp	A	G	G:21 A:0
EA2454	3865509	snp	T	C	C:23 T:0
EA2454	3865545	snp	T	C	C:24 T:0
EA2454	3865854	snp	A	G	G:25 A:0
EA2454	3867113	snp	C	T	T:11 C:0
EA2454	3867122	snp	C	T	T:12 C:0
EA2454	3867188	snp	C	T	T:17 C:0
EA2454	3867227	snp	T	G	G:22 T:0
EA2454	3867239	snp	A	G	G:23 A:0
EA2454	3867296	snp	C	T	T:28 C:0
EA2454	3867326	complex	TAGCCGG	AAACCGC	AAACCGC:29 TAGCCGG:0
EA2454	3868706	snp	T	C	C:18 T:0
EA2454	3868760	snp	A	G	G:16 A:0
EA2454	3868774	complex	AAAAT	GAAAC	GAAAC:11 AAAAT:0
EA2454	3868787	snp	A	G	G:11 A:0
EA2454	3868798	snp	A	G	G:10 A:0
EA2454	3868909	complex	TGCAGGTGAGATA	GGCAAACGGGATG	GGCAAACGGGATG:10 TGCAGGTGAGATA:0
EA2454	3868927	snp	T	C	C:10 T:0
EA2454	3869010	del	CTGA	C	C:12 CTGA:0
EA2454	3869028	snp	G	A	A:14 G:0
EA2454	3869102	snp	A	G	G:19 A:0
EA2454	3869195	snp	C	T	T:21 C:0
EA2454	3869216	snp	A	G	G:23 A:0
EA2454	3869360	snp	G	A	A:34 G:0
EA2454	3869426	snp	G	A	A:40 G:0
EA2454	3869547	snp	A	C	C:27 A:0
EA2454	3869555	snp	C	G	G:27 C:0
EA2454	3869591	snp	T	C	C:20 T:0
EA2454	3869705	snp	T	C	C:37 T:0
EA2454	3869920	snp	A	T	T:33 A:0
EA2454	3870310	snp	A	G	G:21 A:0
EA2454	3870334	snp	T	C	C:23 T:0
EA2454	3870424	snp	C	T	T:38 C:0
EA2454	3870529	snp	A	G	G:57 A:0
EA2454	3870848	snp	C	T	T:26 C:1
EA2454	3870881	snp	G	A	A:20 G:1
EA2454	3870904	snp	T	C	C:24 T:0
EA2454	3871047	complex	GGA	AGG	AGG:21 GGA:0
EA2454	3871083	snp	T	C	C:20 T:0
EA2454	3871146	snp	A	G	G:21 A:0
EA2454	3872518	snp	A	G	G:50 A:0
EA2454	3872599	snp	G	A	A:49 G:1
EA2454	3873309	snp	C	T	T:52 C:0
EA2454	3873396	snp	T	C	C:42 T:0
EA2454	3873594	snp	G	A	A:43 G:0
EA2454	3873609	snp	A	G	G:43 A:0
EA2454	3873636	snp	G	A	A:50 G:1
EA2454	3873750	snp	T	C	C:43 T:0
EA2454	3874068	snp	T	C	C:20 T:0
EA2454	3874077	snp	G	A	A:20 G:0
EA2454	3874083	snp	T	C	C:21 T:0
EA2454	3874221	snp	T	C	C:40 T:1
EA2454	3874329	complex	GGCG	AGCA	AGCA:51 GGCG:0
EA2454	3874393	snp	T	A	A:45 T:1
EA2454	3874500	snp	C	T	T:26 C:0
EA2454	3874551	complex	AAGA	TCAG	TCAG:21 AAGA:0
EA2454	3874566	snp	A	C	C:24 A:0
EA2454	3874580	snp	G	C	C:27 G:0
EA2454	3874587	snp	G	C	C:27 G:0
EA2454	3874599	snp	C	A	A:29 C:0
EA2454	3874680	complex	AAGT	TGGC	TGGC:15 AAGT:0
EA2454	3874701	snp	G	T	T:19 G:0
EA2454	3874744	snp	A	G	G:21 A:0
EA2454	3874749	snp	C	T	T:21 C:0
EA2454	3874767	snp	G	A	A:25 G:1
EA2454	3874824	snp	A	G	G:33 A:0
EA2454	3874839	snp	G	T	T:32 G:0
EA2454	3874851	snp	C	T	T:31 C:0
EA2454	3874866	complex	CCAGC	TCAGT	TCAGT:31 CCAGC:0
EA2454	3874887	snp	C	T	T:31 C:0
EA2454	3874893	complex	AAAA	GAAG	GAAG:32 AAAA:0
EA2454	3874996	snp	C	T	T:39 C:0
EA2454	3875022	snp	G	A	A:44 G:0
EA2454	3875037	snp	G	A	A:37 G:0
EA2454	3875046	snp	C	A	A:37 C:0
EA2454	3875073	snp	C	A	A:42 C:0
EA2454	3875100	snp	T	G	G:46 T:0
EA2454	3875106	snp	G	C	C:46 G:0
EA2454	3875118	snp	T	G	G:45 T:0
EA2454	3875157	snp	T	G	G:37 T:0
EA2454	3875169	complex	GGACATC	CGATATT	CGATATT:36 GGACATC:0
EA2454	3875205	complex	GGGG	TGGT	TGGT:29 GGGG:0
EA2454	3875214	snp	C	T	T:30 C:0
EA2454	3875232	snp	T	C	C:29 T:1
EA2454	3875328	complex	CCGAGGC	TAAAGGG	TAAAGGG:24 CCGAGGC:0
EA2454	3875340	complex	CGGA	AGGT	AGGT:24 CGGA:0
EA2454	3875354	snp	G	A	A:24 G:0
EA2454	3875370	snp	A	G	G:25 A:0
EA2454	3875383	complex	GGAA	AGAG	AGAG:20 GGAA:0
EA2454	3875403	complex	ACAA	GCAG	GCAG:20 ACAA:0
EA2454	3875437	snp	A	G	G:23 A:0
EA2454	3875460	snp	A	G	G:27 A:0
EA2454	3875465	snp	G	C	C:27 G:0
EA2454	3875514	snp	A	G	G:33 A:0
EA2454	3875523	snp	G	A	A:33 G:0
EA2454	3875536	complex	CAC	TAT	TAT:29 CAC:0
EA2454	3875549	complex	ATTGTATG	GCTGTTTTT	GCTGTTTTT:23 ATTGTATG:0
EA2454	3875572	complex	AAAA	GATG	GATG:26 AAAA:0
EA2454	3875580	complex	GCT	ACC	ACC:25 GCT:0
EA2454	3875597	snp	G	A	A:32 G:0
EA2454	3875612	complex	CATT	TATC	TATC:32 CATT:0
EA2454	3875632	snp	A	G	G:34 A:0
EA2454	3875641	snp	G	A	A:34 G:0
EA2454	3875652	snp	G	A	A:33 G:0
EA2454	3875660	snp	C	G	G:32 C:0
EA2454	3875665	complex	GCTTTATT	TCTTCATA	TCTTCATA:29 GCTTTATT:0
EA2454	3875688	snp	T	C	C:30 T:0
EA2454	3875702	complex	ATTT	GTTC	GTTC:28 ATTT:0
EA2454	3875727	snp	C	A	A:27 C:0
EA2454	3875747	complex	ATTC	GTTT	GTTT:23 ATTC:0
EA2454	3875772	complex	CT	AC	AC:19 CT:0
EA2454	3877989	snp	T	C	C:38 T:0
EA2454	3881618	snp	A	G	G:33 A:2
EA2454	3881743	snp	T	C	C:37 T:0
EA2454	3881813	snp	G	A	A:47 G:0
EA2454	3881990	complex	GATA	TATC	TATC:31 GATA:0
EA2454	3882005	snp	A	G	G:31 A:0
EA2454	3885267	snp	A	G	G:29 A:0
EA2454	3888966	snp	A	C	C:28 A:0
EA2454	3890101	snp	C	T	T:30 C:0
EA2454	3890179	snp	G	A	A:28 G:2
EA2454	3890560	snp	T	C	C:26 T:0
EA2454	3890645	complex	AATA	GATG	GATG:18 AATA:0
EA2454	3890654	complex	TGCGCCTCAGC	CACCTCCCACA	CACCTCCCACA:16 TGCGCCTCAGC:0
EA2454	3893975	snp	G	A	A:62 G:0
EA2454	3894436	complex	TA	CC	CC:13 TA:0
EA2454	3894443	snp	A	G	G:13 A:0
EA2454	3894927	snp	G	A	A:54 G:0
EA2454	3895094	snp	A	T	T:18 A:0
EA2454	3895411	snp	T	C	C:13 T:0
EA2454	3897276	snp	A	G	G:44 A:0
EA2454	3898302	snp	G	A	A:62 G:0
EA2454	3900076	complex	GCCA	TCCG	TCCG:20 GCCA:0
EA2454	3900788	snp	T	C	C:17 T:0
EA2454	3901046	snp	T	G	G:34 T:0
EA2454	3901349	snp	A	C	C:33 A:0
EA2454	3901468	snp	A	G	G:31 A:0
EA2454	3901670	snp	A	C	C:30 A:0
EA2454	3901676	snp	T	G	G:26 T:0
EA2454	3901681	complex	CTTCG	ATTCA	ATTCA:22 CTTCG:0
EA2454	3901969	snp	T	A	A:83 T:0
EA2454	3902889	snp	G	C	C:102 G:0
EA2454	3903505	snp	G	A	A:71 G:0
EA2454	3904266	snp	T	C	C:54 T:0
EA2454	3904888	snp	C	T	T:12 C:0
EA2454	3904915	snp	A	T	T:10 A:0
EA2454	3905020	snp	A	C	C:19 A:0
EA2454	3905167	snp	C	A	A:41 C:0
EA2454	3905252	snp	G	A	A:51 G:0
EA2454	3906820	snp	G	A	A:20 G:0
EA2454	3906853	snp	G	A	A:24 G:0
EA2454	3906959	snp	G	A	A:18 G:0
EA2454	3908657	snp	T	C	C:48 T:0
EA2454	3908840	snp	C	A	A:49 C:0
EA2454	3909285	snp	G	A	A:48 G:0
EA2454	3909320	snp	T	C	C:53 T:0
EA2454	3909916	snp	T	G	G:51 T:0
EA2454	3910184	snp	C	T	T:14 C:0
EA2454	3914479	snp	T	C	C:31 T:0
EA2454	3914657	snp	A	G	G:26 A:0
EA2454	3914694	snp	G	T	T:37 G:0
EA2454	3915502	complex	TTTG	CTTA	CTTA:26 TTTG:0
EA2454	3916927	snp	A	C	C:47 A:0
EA2454	3918637	ins	T	TG	TG:42 T:0
EA2454	3918830	snp	A	G	G:36 A:0
EA2454	3918863	snp	C	T	T:34 C:0
EA2454	3919614	snp	A	C	C:41 A:0
EA2454	3919962	snp	A	G	G:15 A:0
EA2454	3920088	snp	A	G	G:15 A:0
EA2454	3920864	snp	A	G	G:51 A:0
EA2454	3920963	snp	C	T	T:24 C:0
EA2454	3922597	snp	G	T	T:51 G:0
EA2454	3923073	snp	C	A	A:10 C:0
EA2454	3923719	snp	G	A	A:10 G:0
EA2454	3924830	snp	G	A	A:21 G:0
EA2454	3925423	del	TC	T	T:14 TC:0
EA2454	3925471	snp	A	G	G:21 A:0
EA2454	3925516	snp	C	T	T:19 C:0
EA2454	3925534	snp	C	T	T:21 C:0
EA2454	3925556	snp	T	C	C:22 T:0
EA2454	3925925	snp	G	C	C:61 G:0
EA2454	3926066	snp	A	T	T:60 A:0
EA2454	3926469	snp	C	A	A:28 C:0
EA2454	3927872	snp	A	G	G:10 A:0
EA2454	3928796	snp	A	T	T:41 A:0
EA2454	3929569	snp	T	A	A:23 T:0
EA2454	3929766	snp	T	A	A:65 T:0
EA2454	3930273	snp	A	G	G:69 A:0
EA2454	3930584	snp	T	C	C:72 T:0
EA2454	3931130	snp	T	C	C:19 T:0
EA2454	3960724	snp	G	A	A:69 G:0
EA2454	3970086	complex	ACCA	GCCG	GCCG:20 ACCA:0
EA2454	3970127	snp	T	C	C:33 T:0
EA2454	3970160	snp	C	T	T:43 C:0
EA2454	3970212	complex	GCCGGGAGGG	ACCTGCAGGA	ACCTGCAGGA:46 GCCGGGAGGG:0
EA2454	3970248	snp	A	G	G:55 A:0
EA2454	3970254	snp	G	C	C:53 G:0
EA2454	3970275	snp	T	C	C:52 T:0
EA2454	3970398	snp	C	G	G:58 C:0
EA2454	3970435	snp	G	T	T:64 G:0
EA2454	3970471	snp	T	C	C:59 T:0
EA2454	3970534	snp	C	A	A:54 C:0
EA2454	3970545	snp	C	T	T:58 C:0
EA2454	3970563	complex	CA	TG	TG:55 CA:0
EA2454	3970591	snp	A	G	G:48 A:0
EA2454	3970651	snp	C	A	A:48 C:0
EA2454	3970660	snp	C	T	T:44 C:0
EA2454	3970681	snp	A	T	T:38 A:0
EA2454	3970687	snp	C	A	A:38 C:0
EA2454	3970708	snp	C	T	T:33 C:0
EA2454	3970717	snp	C	T	T:32 C:0
EA2454	3970723	snp	T	C	C:31 T:0
EA2454	3970732	snp	G	A	A:29 G:0
EA2454	3970744	snp	G	A	A:33 G:0
EA2454	3970753	complex	GCCCGTT	ACCTGTA	ACCTGTA:29 GCCCGTT:0
EA2454	3970873	snp	G	A	A:41 G:0
EA2454	3970884	snp	T	G	G:39 T:0
EA2454	3970926	snp	C	T	T:41 C:0
EA2454	3970945	complex	CCGA	ACGG	ACGG:41 CCGA:0
EA2454	3970981	snp	C	T	T:43 C:0
EA2454	3971002	snp	A	G	G:42 A:0
EA2454	3971122	snp	T	G	G:42 T:0
EA2454	3971130	snp	G	A	A:40 G:0
EA2454	3971173	snp	T	C	C:34 T:0
EA2454	3971191	snp	G	A	A:36 G:0
EA2454	3971215	snp	G	A	A:41 G:0
EA2454	3971224	snp	A	G	G:42 A:0
EA2454	3971233	complex	GATG	AATA	AATA:42 GATG:0
EA2454	3971314	complex	AAAG	GAAC	GAAC:46 AAAG:0
EA2454	3971326	complex	AT	GC	GC:45 AT:0
EA2454	3971374	snp	T	C	C:50 T:0
EA2454	3971383	snp	A	G	G:54 A:0
EA2454	3971438	complex	TGT	CGC	CGC:57 TGT:0
EA2454	3971449	snp	G	A	A:57 G:0
EA2454	3971463	complex	ACAGT	GCAGC	GCAGC:49 ACAGT:0
EA2454	3971473	snp	A	C	C:49 A:0
EA2454	3971482	complex	TTGT	CGTA	CGTA:43 TTGT:0
EA2454	3971503	snp	G	T	T:47 G:0
EA2454	3971548	complex	ATTCTGG	GTTTTGT	GTTTTGT:47 ATTCTGG:0
EA2454	3971587	snp	T	C	C:45 T:0
EA2454	3971620	snp	A	G	G:52 A:0
EA2454	3971671	snp	G	A	A:52 G:0
EA2454	3971683	snp	A	G	G:50 A:0
EA2454	3971691	snp	G	A	A:53 G:0
EA2454	3971700	complex	AAGCACAGAT	CAGTACGGAC	CAGTACGGAC:49 AAGCACAGAT:0
EA2454	3971730	snp	A	C	C:55 A:0
EA2454	3971748	snp	A	G	G:55 A:0
EA2454	3971755	snp	T	C	C:58 T:0
EA2454	3971844	snp	T	C	C:60 T:0
EA2454	3971864	snp	G	A	A:59 G:0
EA2454	3971874	snp	G	A	A:62 G:0
EA2454	3971940	snp	A	G	G:58 A:0
EA2454	3971952	snp	A	G	G:65 A:0
EA2454	3971961	snp	A	G	G:60 A:0
EA2454	3971979	complex	ACCG	CCCC	CCCC:58 ACCG:0
EA2454	3972009	snp	A	G	G:61 A:0
EA2454	3972030	snp	G	A	A:62 G:0
EA2454	3972051	snp	A	G	G:66 A:0
EA2454	3972060	snp	C	T	T:70 C:0
EA2454	3972096	snp	A	G	G:64 A:0
EA2454	3972120	snp	G	T	T:65 G:0
EA2454	3972138	snp	G	C	C:71 G:0
EA2454	3972192	snp	C	T	T:81 C:0
EA2454	3972312	snp	G	T	T:75 G:0
EA2454	3972350	complex	GTTCA	CTTCC	CTTCC:84 GTTCA:0
EA2454	3972390	complex	ATCA	TTCG	TTCG:74 ATCA:0
EA2454	3972425	snp	C	T	T:82 C:0
EA2454	3972480	snp	G	A	A:64 G:0
EA2454	3972525	snp	C	T	T:78 C:0
EA2454	3972558	snp	A	G	G:76 A:1
EA2454	3972591	snp	G	A	A:81 G:1
EA2454	3972675	snp	G	A	A:79 G:0
EA2454	3972684	snp	C	T	T:77 C:0
EA2454	3972692	snp	G	A	A:82 G:0
EA2454	3972702	snp	C	T	T:85 C:0
EA2454	3972717	snp	G	A	A:77 G:1
EA2454	3972774	snp	A	C	C:72 A:0
EA2454	3972789	snp	A	G	G:69 A:0
EA2454	3972899	snp	G	A	A:58 G:0
EA2454	3972991	snp	T	C	C:33 T:0
EA2454	3972999	complex	GTGTC	TTGTT	TTGTT:30 GTGTC:0
EA2454	3973034	snp	G	A	A:28 G:0
EA2454	3973387	snp	T	C	C:10 T:0
EA2454	3973420	snp	A	G	G:14 A:0
EA2454	3973521	snp	T	C	C:23 T:0
EA2454	3973611	snp	G	A	A:23 G:0
EA2454	3973632	snp	T	G	G:22 T:1
EA2454	3973746	complex	GCCA	ACCG	ACCG:41 GCCA:0
EA2454	3973812	snp	T	G	G:51 T:0
EA2454	3973842	snp	A	G	G:50 A:0
EA2454	3973890	complex	CGAA	GGAG	GGAG:59 CGAA:0
EA2454	3973908	complex	CAC	AAT	AAT:56 CAC:0
EA2454	3973950	complex	CTCACCAAAG	TTCGCCGAAT	TTCGCCGAAT:55 CTCACCAAAG:0
EA2454	3973971	snp	A	G	G:61 A:0
EA2454	3974028	snp	C	T	T:57 C:0
EA2454	3974052	complex	GACG	AACA	AACA:47 GACG:0
EA2454	3974070	snp	G	A	A:48 G:0
EA2454	3974088	complex	AAAC	GAAT	GAAT:49 AAAC:0
EA2454	3974109	snp	C	G	G:49 C:0
EA2454	3974118	snp	T	G	G:54 T:0
EA2454	3974136	snp	A	T	T:50 A:0
EA2454	3974162	snp	A	G	G:54 A:0
EA2454	3974169	snp	T	C	C:55 T:0
EA2454	3974183	snp	C	T	T:52 C:1
EA2454	3974280	snp	T	C	C:44 T:0
EA2454	3974328	snp	T	G	G:42 T:0
EA2454	3974496	snp	T	C	C:48 T:0
EA2454	3974583	snp	A	G	G:44 A:0
EA2454	3974603	snp	C	G	G:48 C:0
EA2454	3974615	snp	G	A	A:49 G:0
EA2454	3974637	complex	GAT	AAG	AAG:45 GAT:0
EA2454	3974646	complex	TCCG	CCCA	CCCA:43 TCCG:0
EA2454	3974754	snp	A	G	G:68 A:0
EA2454	3974769	complex	AGTC	GGTA	GGTA:69 AGTC:0
EA2454	3974835	snp	A	G	G:71 A:0
EA2454	3974853	snp	A	G	G:68 A:0
EA2454	3974929	snp	G	T	T:64 G:0
EA2454	3975031	snp	C	T	T:76 C:1
EA2454	3975073	snp	G	A	A:80 G:2
EA2454	3975160	complex	TGGACCC	CGGGCCA	CGGGCCA:74 TGGACCC:0
EA2454	3975210	snp	G	A	A:77 G:0
EA2454	3975244	snp	C	A	A:72 C:1
EA2454	3975280	snp	G	A	A:64 G:3
EA2454	3975340	snp	C	T	T:48 C:0
EA2454	3975676	snp	G	A	A:52 G:0
EA2454	3975694	snp	C	T	T:53 C:0
EA2454	3975700	complex	CGCG	AGCA	AGCA:51 CGCG:0
EA2454	3975724	snp	A	G	G:63 A:0
EA2454	3975916	snp	T	C	C:46 T:0
EA2454	3976039	snp	G	A	A:51 G:0
EA2454	3976054	snp	G	A	A:50 G:0
EA2454	3976111	snp	A	G	G:52 A:0
EA2454	3976177	snp	G	T	T:56 G:0
EA2454	3976360	snp	A	G	G:81 A:0
EA2454	3976405	snp	T	C	C:85 T:0
EA2454	3976414	snp	G	A	A:77 G:0
EA2454	3976458	snp	T	A	A:67 T:0
EA2454	3976570	snp	G	T	T:74 G:0
EA2454	3976609	complex	TGCT	CGCC	CGCC:78 TGCT:0
EA2454	3976627	snp	C	T	T:79 C:0
EA2454	3976646	complex	TTTC	CTCT	CTCT:75 TTTC:0
EA2454	3976660	snp	C	T	T:76 C:0
EA2454	3976672	snp	G	T	T:72 G:0
EA2454	3976680	snp	G	A	A:73 G:0
EA2454	3976816	snp	T	G	G:66 T:0
EA2454	3976822	complex	GCCC	ACCT	ACCT:64 GCCC:0
EA2454	3976831	snp	G	A	A:62 G:0
EA2454	3976846	snp	A	G	G:63 A:0
EA2454	3976917	snp	A	G	G:69 A:0
EA2454	3976933	snp	G	A	A:73 G:0
EA2454	3976942	snp	A	G	G:61 A:0
EA2454	3976972	snp	G	A	A:56 G:0
EA2454	3976978	snp	A	G	G:53 A:2
EA2454	3976987	complex	ACCG	GCCA	GCCA:54 ACCG:0
EA2454	3977050	snp	A	G	G:43 A:0
EA2454	3977062	snp	C	T	T:44 C:0
EA2454	3977102	snp	A	G	G:40 A:0
EA2454	3977110	snp	C	T	T:39 C:0
EA2454	3977128	snp	G	C	C:41 G:0
EA2454	3977134	snp	A	G	G:37 A:0
EA2454	3977143	snp	G	T	T:38 G:0
EA2454	3977149	snp	G	T	T:31 G:0
EA2454	3977161	complex	AGC	GGT	GGT:36 AGC:0
EA2454	3977200	snp	A	G	G:41 A:0
EA2454	3977291	snp	C	T	T:54 C:0
EA2454	3977350	snp	T	G	G:57 T:0
EA2454	3977410	snp	G	A	A:70 G:0
EA2454	3977425	snp	G	A	A:64 G:0
EA2454	3977522	snp	T	A	A:61 T:0
EA2454	3977725	snp	G	A	A:55 G:0
EA2454	3977765	snp	G	A	A:47 G:0
EA2454	3977876	snp	A	G	G:48 A:0
EA2454	3978061	snp	G	A	A:70 G:0
EA2454	3978094	snp	A	G	G:79 A:0
EA2454	3978241	snp	G	A	A:72 G:0
EA2454	3978247	snp	G	C	C:71 G:0
EA2454	3978259	snp	T	C	C:69 T:0
EA2454	3978280	snp	A	G	G:63 A:0
EA2454	3978292	snp	C	T	T:68 C:0
EA2454	3978325	complex	ATTG	GTTA	GTTA:63 ATTG:0
EA2454	3978364	complex	TACC	CACT	CACT:59 TACC:0
EA2454	3978372	snp	A	G	G:62 A:0
EA2454	3978604	snp	G	C	C:56 G:0
EA2454	3978625	snp	G	A	A:54 G:0
EA2454	3978637	snp	G	A	A:57 G:0
EA2454	3978679	snp	A	G	G:59 A:0
EA2454	3978742	snp	G	A	A:53 G:0
EA2454	3978836	snp	A	G	G:46 A:0
EA2454	3978853	snp	A	C	C:47 A:0
EA2454	3978883	snp	A	T	T:49 A:0
EA2454	3978943	snp	T	C	C:63 T:0
EA2454	3978964	snp	A	G	G:59 A:0
EA2454	3979008	mnp	AT	GC	GC:62 AT:0
EA2454	3979028	snp	T	C	C:65 T:0
EA2454	3979096	snp	A	C	C:61 A:0
EA2454	3979135	snp	G	A	A:59 G:0
EA2454	3979201	snp	T	C	C:48 T:0
EA2454	3979451	complex	GCAGG	ACAGA	ACAGA:43 GCAGG:0
EA2454	3979467	snp	A	G	G:44 A:1
EA2454	3979503	snp	C	T	T:57 C:0
EA2454	3979542	snp	T	C	C:56 T:0
EA2454	3979560	snp	T	C	C:55 T:0
EA2454	3979665	snp	C	G	G:54 C:0
EA2454	3979713	snp	A	G	G:56 A:0
EA2454	3979815	complex	GCGTTCGG	ACGATCGA	ACGATCGA:58 GCGTTCGG:0
EA2454	3979935	snp	A	G	G:54 A:0
EA2454	3979948	snp	T	C	C:51 T:0
EA2454	3979992	complex	CTCCT	ATCCG	ATCCG:48 CTCCT:0
EA2454	3980004	snp	A	G	G:50 A:0
EA2454	3980091	snp	C	T	T:46 C:0
EA2454	3980154	snp	C	T	T:50 C:0
EA2454	3980190	snp	G	A	A:62 G:0
EA2454	3980244	snp	T	C	C:60 T:0
EA2454	3980259	snp	C	A	A:59 C:0
EA2454	3980430	snp	G	A	A:53 G:2
EA2454	3980442	snp	C	T	T:53 C:0
EA2454	3980535	snp	A	G	G:69 A:0
EA2454	3980571	snp	A	T	T:73 A:0
EA2454	3980657	complex	TGCA	CGCG	CGCG:68 TGCA:0
EA2454	3980711	snp	T	A	A:81 T:0
EA2454	3980720	complex	CGCT	AGCG	AGCG:74 CGCT:0
EA2454	3980774	snp	A	G	G:69 A:0
EA2454	3981172	snp	C	T	T:83 C:0
EA2454	3981199	snp	G	A	A:82 G:0
EA2454	3981256	snp	T	C	C:79 T:0
EA2454	3981301	snp	T	C	C:79 T:0
EA2454	3981322	snp	T	C	C:79 T:1
EA2454	3981337	snp	G	A	A:76 G:0
EA2454	3981352	snp	C	G	G:72 C:0
EA2454	3981391	snp	A	G	G:57 A:0
EA2454	3981412	snp	A	G	G:51 A:0
EA2454	3981436	snp	C	T	T:34 C:0
EA2454	3981466	snp	A	G	G:35 A:0
EA2454	3981562	snp	A	G	G:24 A:0
EA2454	3981625	snp	G	A	A:34 G:0
EA2454	3981697	snp	G	A	A:49 G:0
EA2454	3981709	snp	A	G	G:49 A:0
EA2454	3981781	snp	G	A	A:64 G:0
EA2454	3981835	snp	C	G	G:59 C:0
EA2454	3981973	snp	A	G	G:47 A:0
EA2454	3982000	snp	G	A	A:45 G:0
EA2454	3982203	snp	T	A	A:51 T:0
EA2454	3982224	snp	G	A	A:60 G:0
EA2454	3982272	snp	C	T	T:57 C:0
EA2454	3982292	snp	T	A	A:57 T:0
EA2454	3982308	snp	A	G	G:56 A:0
EA2454	3982347	snp	T	C	C:62 T:0
EA2454	3982395	snp	A	G	G:51 A:0
EA2454	3982410	snp	C	T	T:52 C:0
EA2454	3982446	snp	G	T	T:57 G:0
EA2454	3982611	snp	A	G	G:87 A:0
EA2454	3982623	snp	A	G	G:88 A:0
EA2454	3982659	snp	G	A	A:94 G:0
EA2454	3982692	snp	G	A	A:86 G:0
EA2454	3982749	snp	G	A	A:80 G:0
EA2454	3982770	snp	G	A	A:75 G:0
EA2454	3982806	snp	C	G	G:78 C:0
EA2454	3982887	snp	G	C	C:77 G:0
EA2454	3982914	snp	C	T	T:75 C:0
EA2454	3983043	snp	A	G	G:60 A:0
EA2454	3983396	snp	C	A	A:62 C:0
EA2454	3983474	snp	G	C	C:70 G:0
EA2454	3983540	snp	C	A	A:74 C:0
EA2454	3983558	snp	T	A	A:77 T:0
EA2454	3983570	snp	G	C	C:78 G:1
EA2454	3983678	snp	A	C	C:72 A:0
EA2454	3983705	complex	ACCG	TCCA	TCCA:72 ACCG:0
EA2454	3983849	snp	G	C	C:54 G:0
EA2454	3983882	snp	T	A	A:71 T:0
EA2454	3983897	snp	G	A	A:62 G:0
EA2454	3983903	snp	C	T	T:66 C:0
EA2454	3983942	snp	G	T	T:61 G:0
EA2454	3983957	complex	AGCC	GGCT	GGCT:61 AGCC:0
EA2454	3983975	snp	G	A	A:60 G:0
EA2454	3984184	snp	T	A	A:47 T:0
EA2454	3984257	snp	T	C	C:48 T:0
EA2454	3984347	snp	A	G	G:42 A:0
EA2454	3984353	snp	G	A	A:42 G:0
EA2454	3984359	snp	A	G	G:42 A:0
EA2454	3984440	snp	T	C	C:43 T:0
EA2454	3984879	snp	C	T	T:67 C:0
EA2454	3984912	snp	G	A	A:65 G:0
EA2454	3984933	complex	TGCA	CGCG	CGCG:61 TGCA:0
EA2454	3985224	snp	G	A	A:85 G:0
EA2454	3985293	snp	G	A	A:79 G:0
EA2454	3985311	snp	C	T	T:79 C:0
EA2454	3985322	snp	T	C	C:75 T:0
EA2454	3985371	snp	A	T	T:67 A:0
EA2454	3985458	snp	G	A	A:72 G:1
EA2454	3985527	snp	A	G	G:88 A:0
EA2454	3985611	snp	G	A	A:100 G:0
EA2454	3985629	snp	G	A	A:97 G:0
EA2454	3985744	snp	C	G	G:84 C:0
EA2454	3985828	snp	A	C	C:75 A:0
EA2454	3985834	snp	G	C	C:74 G:0
EA2454	3985843	snp	G	A	A:73 G:0
EA2454	3985882	snp	C	T	T:69 C:0
EA2454	3985888	snp	A	G	G:69 A:0
EA2454	3986001	snp	T	A	A:57 T:0
EA2454	3986137	snp	T	C	C:69 T:0
EA2454	3986185	snp	G	A	A:68 G:0
EA2454	3986211	mnp	AG	GA	GA:64 AG:0
EA2454	3986226	complex	CCTCG	TTTCT	TTTCT:58 CCTCG:0
EA2454	3986245	complex	ACCG	GCCA	GCCA:61 ACCG:0
EA2454	3986275	snp	A	C	C:70 A:0
EA2454	3986284	snp	G	A	A:65 G:0
EA2454	3986296	snp	G	A	A:61 G:0
EA2454	3986338	snp	C	T	T:68 C:0
EA2454	3986350	snp	A	G	G:62 A:0
EA2454	3986413	snp	A	G	G:64 A:0
EA2454	3986443	snp	C	T	T:56 C:0
EA2454	3986488	snp	T	A	A:55 T:0
EA2454	3986536	snp	G	A	A:47 G:0
EA2454	3986548	snp	C	T	T:46 C:0
EA2454	3986713	snp	T	C	C:51 T:0
EA2454	3986740	snp	T	G	G:61 T:0
EA2454	3986791	snp	G	A	A:59 G:1
EA2454	3986830	snp	G	A	A:60 G:0
EA2454	3986982	snp	G	A	A:54 G:0
EA2454	3987087	snp	C	A	A:79 C:0
EA2454	3987105	snp	T	G	G:78 T:0
EA2454	3987111	snp	G	A	A:82 G:0
EA2454	3987135	snp	C	T	T:74 C:0
EA2454	3987306	snp	T	C	C:67 T:0
EA2454	3987336	snp	T	A	A:63 T:0
EA2454	3987372	snp	G	A	A:64 G:0
EA2454	3987471	snp	T	C	C:82 T:0
EA2454	3987494	snp	G	A	A:82 G:0
EA2454	3987518	complex	GGCG	TGCA	TGCA:71 GGCG:0
EA2454	3987533	snp	G	A	A:76 G:0
EA2454	3987545	snp	G	T	T:71 G:0
EA2454	3987563	snp	T	C	C:72 T:0
EA2454	3987632	snp	C	T	T:73 C:0
EA2454	3987698	snp	C	T	T:70 C:0
EA2454	3987746	snp	G	A	A:70 G:0
EA2454	3987926	snp	G	A	A:90 G:0
EA2454	3987935	snp	G	T	T:86 G:0
EA2454	3987944	snp	G	A	A:86 G:0
EA2454	3987950	snp	G	A	A:84 G:0
EA2454	3987965	snp	A	G	G:83 A:0
EA2454	3988004	snp	T	C	C:82 T:0
EA2454	3988037	snp	A	G	G:73 A:0
EA2454	3988043	complex	GGTA	AGTG	AGTG:63 GGTA:1
EA2454	3988150	snp	A	G	G:53 A:0
EA2454	3988333	snp	G	A	A:54 G:0
EA2454	3988510	snp	G	A	A:68 G:1
EA2454	3988627	snp	T	C	C:74 T:0
EA2454	3988702	mnp	TA	AG	AG:74 TA:0
EA2454	3988774	snp	A	G	G:76 A:0
EA2454	3988816	snp	C	G	G:70 C:0
EA2454	3988840	snp	T	C	C:62 T:0
EA2454	3988938	snp	G	A	A:56 G:0
EA2454	3988948	snp	C	A	A:56 C:0
EA2454	3988954	snp	A	G	G:54 A:0
EA2454	3989065	snp	C	T	T:51 C:0
EA2454	3989073	snp	G	A	A:53 G:0
EA2454	3989233	snp	G	A	A:62 G:0
EA2454	3989242	snp	G	A	A:62 G:0
EA2454	3989365	complex	GCGC	ACGG	ACGG:66 GCGC:0
EA2454	3989374	snp	C	T	T:68 C:0
EA2454	3989410	snp	G	A	A:67 G:0
EA2454	3989425	complex	CTCT	TTCG	TTCG:60 CTCT:0
EA2454	3989470	snp	C	G	G:64 C:0
EA2454	3989638	snp	A	G	G:77 A:0
EA2454	3989770	snp	G	A	A:59 G:0
EA2454	3989851	snp	G	A	A:67 G:0
EA2454	3989867	snp	T	G	G:66 T:0
EA2454	3989883	snp	T	C	C:69 T:0
EA2454	3989904	snp	T	G	G:62 T:0
EA2454	3989914	snp	A	G	G:67 A:0
EA2454	3989945	snp	G	T	T:82 G:0
EA2454	3989989	snp	G	A	A:82 G:0
EA2454	3989998	snp	A	G	G:79 A:0
EA2454	3990010	complex	ATCG	GTCA	GTCA:74 ATCG:0
EA2454	3990058	snp	A	G	G:61 A:0
EA2454	3990070	snp	A	G	G:65 A:1
EA2454	3990085	snp	C	T	T:68 C:0
EA2454	3990094	snp	G	A	A:67 G:0
EA2454	3990106	snp	A	G	G:64 A:0
EA2454	3990358	snp	G	A	A:51 G:0
EA2454	3990364	snp	A	G	G:41 A:0
EA2454	3990370	snp	G	A	A:46 G:0
EA2454	3990481	snp	T	C	C:63 T:0
EA2454	3990648	snp	C	A	A:92 C:0
EA2454	3990705	snp	G	A	A:96 G:0
EA2454	3990720	snp	A	G	G:94 A:0
EA2454	3990735	complex	ACGG	CCGT	CCGT:94 ACGG:0
EA2454	3990918	snp	T	G	G:94 T:0
EA2454	3991103	snp	G	C	C:84 G:1
EA2454	3991217	snp	G	A	A:90 G:0
EA2454	3991223	snp	A	G	G:91 A:0
EA2454	3991241	snp	G	A	A:85 G:2
EA2454	3991307	snp	T	C	C:82 T:0
EA2454	3991364	snp	A	G	G:78 A:0
EA2454	3991370	snp	G	A	A:79 G:0
EA2454	3991412	snp	C	T	T:76 C:0
EA2454	3991490	snp	A	G	G:82 A:0
EA2454	3991517	snp	A	G	G:75 A:0
EA2454	3991547	complex	GCCG	ACCT	ACCT:76 GCCG:0
EA2454	3991562	snp	T	C	C:89 T:0
EA2454	3991592	snp	G	A	A:91 G:1
EA2454	3991676	snp	A	G	G:93 A:0
EA2454	3991808	snp	C	G	G:78 C:0
EA2454	3992103	snp	T	A	A:62 T:0
EA2454	3992167	snp	A	C	C:52 A:1
EA2454	3992322	mnp	AA	TG	TG:58 AA:0
EA2454	3992330	snp	G	A	A:57 G:0
EA2454	3992354	snp	T	C	C:50 T:0
EA2454	3992510	snp	A	G	G:22 A:0
EA2454	3992521	snp	A	G	G:19 A:0
EA2454	3992531	snp	A	G	G:16 A:0
EA2454	3992541	snp	A	T	T:17 A:0
EA2454	3992549	complex	AGCGT	TGCGC	TGCGC:14 AGCGT:0
EA2454	3992581	snp	A	G	G:15 A:0
EA2454	3992616	complex	CGATGTTCTAG	TGAGGTTATTA	TGAGGTTATTA:10 CGATGTTCTAG:0
EA2454	3992639	snp	G	A	A:19 G:0
EA2454	3992657	complex	TG	CA	CA:27 TG:0
EA2454	3992676	snp	T	C	C:28 T:0
EA2454	3992864	snp	C	T	T:51 C:1
EA2454	3992897	snp	G	A	A:52 G:0
EA2454	3993009	snp	A	T	T:54 A:0
EA2454	3993125	snp	A	G	G:44 A:0
EA2454	3993149	snp	C	T	T:52 C:0
EA2454	3993332	snp	T	C	C:74 T:0
EA2454	3993353	snp	T	C	C:71 T:0
EA2454	3993521	snp	G	A	A:63 G:0
EA2454	3993620	snp	T	A	A:58 T:0
EA2454	3993815	snp	A	T	T:64 A:0
EA2454	3993884	snp	A	G	G:56 A:0
EA2454	3993923	snp	A	G	G:63 A:1
EA2454	3993953	complex	TTCA	CTCG	CTCG:53 TTCA:0
EA2454	3994100	snp	A	G	G:62 A:0
EA2454	3994274	snp	A	G	G:25 A:0
EA2454	3994280	snp	T	A	A:23 T:0
EA2454	3994286	snp	T	G	G:21 T:0
EA2454	3995077	snp	C	A	A:10 C:0
EA2454	3995104	snp	G	A	A:15 G:0
EA2454	3995194	snp	A	G	G:40 A:0
EA2454	3995251	snp	G	C	C:43 G:0
EA2454	3995344	snp	A	G	G:46 A:0
EA2454	3995358	snp	A	G	G:44 A:0
EA2454	3995443	snp	A	C	C:32 A:0
EA2454	3995458	snp	G	A	A:32 G:0
EA2454	3995485	snp	A	G	G:31 A:0
EA2454	3995494	snp	T	C	C:37 T:0
EA2454	3995545	snp	A	G	G:28 A:0
EA2454	3995550	snp	C	T	T:32 C:0
EA2454	3995563	complex	CGCCGTCCCC	TGCCTGTCCT	TGCCTGTCCT:27 CGCCGTCCCC:0
EA2454	3995638	snp	C	T	T:31 C:0
EA2454	3995683	snp	G	A	A:35 G:0
EA2454	3995782	snp	T	C	C:33 T:0
EA2454	3995879	snp	G	A	A:39 G:0
EA2454	3995950	snp	G	A	A:42 G:0
EA2454	3996013	snp	G	T	T:53 G:0
EA2454	3996097	snp	G	A	A:68 G:0
EA2454	3996124	snp	A	G	G:56 A:0
EA2454	3996139	complex	ACTA	GCTG	GCTG:40 ACTA:0
EA2454	3996229	snp	T	G	G:48 T:0
EA2454	3996355	snp	G	A	A:57 G:0
EA2454	3996661	snp	G	A	A:69 G:1
EA2454	3996694	snp	C	T	T:71 C:0
EA2454	3997075	snp	T	C	C:36 T:1
EA2454	3997123	snp	G	A	A:45 G:0
EA2454	3997185	complex	AG	GT	GT:52 AG:0
EA2454	3997290	complex	TTTCA	CCTCG	CCTCG:58 TTTCA:0
EA2454	3997324	snp	A	G	G:58 A:0
EA2454	3997446	snp	G	C	C:59 G:0
EA2454	3997733	snp	T	C	C:74 T:0
EA2454	3997766	snp	G	T	T:67 G:0
EA2454	3997850	snp	G	T	T:74 G:0
EA2454	3997865	snp	G	A	A:74 G:0
EA2454	3997886	snp	C	T	T:79 C:0
EA2454	3997891	snp	A	G	G:76 A:0
EA2454	3998026	snp	A	G	G:82 A:0
EA2454	3998386	snp	G	A	A:91 G:0
EA2454	3998437	snp	T	A	A:89 T:0
EA2454	3998448	snp	A	C	C:83 A:0
EA2454	3998553	snp	C	T	T:65 C:0
EA2454	3998658	snp	C	T	T:45 C:0
EA2454	3998787	snp	T	C	C:53 T:0
EA2454	3998844	snp	C	G	G:48 C:0
EA2454	3998892	complex	GCTA	ACTG	ACTG:42 GCTA:0
EA2454	3998922	snp	C	A	A:38 C:0
EA2454	3998997	snp	T	G	G:53 T:0
EA2454	3999002	snp	T	C	C:54 T:1
EA2454	3999054	snp	G	T	T:56 G:1
EA2454	3999072	snp	T	A	A:58 T:0
EA2454	3999081	snp	G	A	A:62 G:0
EA2454	3999276	snp	T	C	C:60 T:0
EA2454	3999357	snp	G	A	A:69 G:0
EA2454	3999507	snp	T	C	C:68 T:0
EA2454	3999513	snp	T	C	C:67 T:0
EA2454	3999519	snp	G	A	A:74 G:0
EA2454	3999537	snp	A	G	G:72 A:0
EA2454	3999594	snp	G	A	A:65 G:0
EA2454	3999651	snp	C	G	G:59 C:0
EA2454	3999672	snp	A	C	C:56 A:0
EA2454	3999720	snp	T	C	C:64 T:0
EA2454	3999771	snp	G	C	C:73 G:0
EA2454	3999777	snp	C	T	T:71 C:1
EA2454	3999843	snp	T	C	C:70 T:0
EA2454	3999858	snp	A	G	G:71 A:0
EA2454	3999888	snp	G	A	A:73 G:0
EA2454	3999910	complex	TTG	CTT	CTT:67 TTG:0
EA2454	3999969	snp	A	G	G:74 A:1
EA2454	4000029	snp	T	C	C:61 T:0
EA2454	4000047	snp	T	C	C:65 T:0
EA2454	4000053	snp	G	A	A:66 G:0
EA2454	4000068	snp	G	T	T:67 G:0
EA2454	4000098	snp	A	G	G:65 A:1
EA2454	4000107	snp	T	C	C:64 T:0
EA2454	4000131	snp	C	T	T:70 C:0
EA2454	4000197	complex	GGTT	AGTG	AGTG:71 GGTT:0
EA2454	4000254	snp	T	G	G:78 T:0
EA2454	4000266	snp	T	C	C:75 T:0
EA2454	4000342	snp	G	A	A:77 G:0
EA2454	4000455	snp	C	T	T:81 C:0
EA2454	4000479	snp	T	C	C:84 T:0
EA2454	4000494	snp	T	C	C:84 T:0
EA2454	4000575	snp	T	C	C:96 T:0
EA2454	4000584	snp	A	G	G:96 A:0
EA2454	4000647	snp	C	T	T:91 C:0
EA2454	4000665	snp	A	G	G:90 A:0
EA2454	4000701	snp	G	A	A:91 G:1
EA2454	4000770	complex	TGCGGCG	CGCCGCT	CGCCGCT:81 TGCGGCG:0
EA2454	4000788	snp	G	A	A:89 G:0
EA2454	4000833	snp	T	C	C:79 T:0
EA2454	4000848	snp	G	A	A:84 G:0
EA2454	4000854	complex	CGGT	TGGC	TGGC:81 CGGT:0
EA2454	4000884	complex	CTGC	TTGT	TTGT:80 CTGC:0
EA2454	4000893	snp	T	C	C:79 T:0
EA2454	4000899	complex	CGCT	TGCG	TGCG:76 CGCT:0
EA2454	4000920	snp	T	C	C:74 T:0
EA2454	4000929	complex	TGCT	CGCC	CGCC:78 TGCT:0
EA2454	4000953	snp	A	C	C:74 A:0
EA2454	4000962	complex	CCGG	ACGT	ACGT:65 CCGG:0
EA2454	4000986	snp	C	T	T:64 C:0
EA2454	4001004	snp	C	T	T:60 C:0
EA2454	4001028	snp	A	T	T:61 A:0
EA2454	4001079	snp	A	C	C:63 A:0
EA2454	4001095	snp	G	A	A:69 G:0
EA2454	4001106	snp	A	G	G:67 A:0
EA2454	4001116	snp	G	A	A:69 G:0
EA2454	4001229	snp	G	A	A:53 G:0
EA2454	4001322	snp	G	A	A:48 G:0
EA2454	4001343	snp	C	A	A:49 C:0
EA2454	4001358	snp	A	T	T:46 A:0
EA2454	4001379	complex	AGCGG	GCGA	GCGA:42 AGCGG:0
EA2454	4001421	snp	C	T	T:49 C:0
EA2454	4001444	complex	TG	CA	CA:52 TG:0
EA2454	4001451	snp	G	A	A:54 G:0
EA2454	4001457	snp	C	A	A:55 C:0
EA2454	4001466	snp	G	A	A:59 G:0
EA2454	4001478	snp	T	C	C:62 T:0
EA2454	4001485	snp	C	T	T:58 C:0
EA2454	4001520	snp	T	A	A:64 T:0
EA2454	4001580	complex	AGTGC	CGTAT	CGTAT:61 AGTGC:0
EA2454	4001589	snp	C	T	T:62 C:0
EA2454	4001631	snp	G	A	A:72 G:0
EA2454	4001649	snp	G	A	A:75 G:1
EA2454	4001685	snp	T	A	A:72 T:0
EA2454	4001715	snp	T	C	C:66 T:0
EA2454	4001736	snp	A	G	G:67 A:0
EA2454	4001748	snp	A	G	G:64 A:0
EA2454	4001776	complex	TTA	CTG	CTG:58 TTA:0
EA2454	4001804	snp	A	G	G:64 A:0
EA2454	4001823	snp	T	C	C:72 T:0
EA2454	4001868	snp	T	C	C:78 T:0
EA2454	4001894	snp	T	A	A:62 T:0
EA2454	4001916	snp	A	G	G:54 A:0
EA2454	4006214	snp	C	T	T:71 C:0
EA2454	4016930	snp	T	A	A:70 T:0
EA2454	4041410	snp	G	A	A:67 G:0
EA2454	4087346	snp	A	G	G:24 A:0
EA2454	4089720	snp	C	T	T:105 C:0
EA2454	4090983	snp	G	A	A:71 G:0
EA2454	4105692	snp	G	A	A:11 G:0
EA2454	4105770	complex	TGGTGC	CGATGA	CGATGA:35 TGGTGC:0
EA2454	4105784	snp	C	T	T:34 C:0
EA2454	4105797	snp	T	C	C:34 T:0
EA2454	4105809	complex	CTCGTGCACCTGTCGG	TTCA	TTCA:33 CTCGTGCACCTGTCGG:0
EA2454	4105851	snp	C	A	A:46 C:0
EA2454	4105857	snp	T	C	C:46 T:0
EA2454	4105910	snp	T	G	G:52 T:0
EA2454	4105927	snp	G	C	C:49 G:0
EA2454	4105996	complex	TCCCCGT	CCCCTG	CCCCTG:39 TCCCCGT:0
EA2454	4106022	del	GCAGAC	G	G:39 GCAGAC:0
EA2454	4106051	snp	G	A	A:51 G:0
EA2454	4106057	snp	G	A	A:59 G:0
EA2454	4106062	snp	G	A	A:62 G:0
EA2454	4106087	snp	G	A	A:74 G:0
EA2454	4106099	snp	G	A	A:75 G:0
EA2454	4106141	snp	G	A	A:95 G:0
EA2454	4106152	snp	C	T	T:90 C:0
EA2454	4106175	complex	TGTCAG	GT	GT:86 TGTCAG:0
EA2454	4106210	snp	A	G	G:90 A:0
EA2454	4106231	snp	C	T	T:90 C:0
EA2454	4106344	snp	G	A	A:71 G:1
EA2454	4106530	snp	G	T	T:84 G:0
EA2454	4106535	snp	T	G	G:80 T:0
EA2454	4106547	snp	G	T	T:81 G:0
EA2454	4106559	complex	ACTGT	GCTGA	GCTGA:79 ACTGT:0
EA2454	4106570	snp	T	A	A:78 T:0
EA2454	4107318	ins	G	GGTTTAAGGTGAA	GGTTTAAGGTGAA:71 G:0
EA2454	4107516	snp	C	T	T:86 C:0
EA2454	4107527	snp	C	T	T:88 C:0
EA2454	4107538	complex	GC	CT	CT:84 GC:0
EA2454	4107566	complex	CCCG	ACCA	ACCA:86 CCCG:0
EA2454	4107596	snp	T	C	C:90 T:0
EA2454	4107673	snp	A	C	C:91 A:0
EA2454	4107839	snp	G	A	A:85 G:0
EA2454	4107854	complex	TTG	CTT	CTT:81 TTG:0
EA2454	4107863	snp	C	T	T:85 C:1
EA2454	4108018	snp	T	C	C:111 T:0
EA2454	4108028	complex	TTTC	ATGT	ATGT:109 TTTC:0
EA2454	4108052	snp	G	T	T:119 G:0
EA2454	4108065	complex	TCG	GCA	GCA:113 TCG:0
EA2454	4108094	complex	CGG	TAA	TAA:92 CGG:0
EA2454	4108102	snp	G	T	T:93 G:0
EA2454	4108116	snp	A	G	G:87 A:0
EA2454	4108126	snp	G	A	A:85 G:0
EA2454	4108146	snp	T	A	A:71 T:0
EA2454	4108172	snp	C	T	T:65 C:0
EA2454	4108177	complex	ACAGA	CCAGG	CCAGG:56 ACAGA:0
EA2454	4108189	snp	C	T	T:51 C:0
EA2454	4108195	complex	GGCTG	TACTT	TACTT:46 GGCTG:0
EA2454	4109845	snp	A	C	C:14 A:0
EA2454	4109861	snp	T	C	C:14 T:0
EA2454	4109920	snp	A	T	T:20 A:0
EA2454	4109933	complex	AGT	TAGC	TAGC:20 AGT:0
EA2454	4109959	ins	G	GATGTATTTCAGACAAAGCA	GATGTATTTCAGACAAAGCA:19 G:0
EA2454	4109967	snp	T	C	C:20 T:0
EA2454	4109980	snp	C	T	T:20 C:0
EA2454	4109991	complex	GTAGAAG	ATAGGGC	ATAGGGC:20 GTAGAAG:0
EA2454	4110010	snp	T	C	C:20 T:0
EA2454	4110344	snp	T	C	C:23 T:0
EA2454	4110375	complex	GT	AC	AC:27 GT:0
EA2454	4110434	snp	C	T	T:33 C:0
EA2454	4110455	snp	A	T	T:40 A:0
EA2454	4110491	snp	C	T	T:45 C:0
EA2454	4110556	complex	ATGACCC	CTGAACA	CTGAACA:42 ATGACCC:0
EA2454	4110574	complex	TTT	ACA	ACA:37 TTT:0
EA2454	4110596	complex	GCGTGTGA	AAATGTAG	AAATGTAG:31 GCGTGTGA:0
EA2454	4110622	snp	A	G	G:34 A:0
EA2454	4110640	snp	G	A	A:34 G:0
EA2454	4110756	complex	GCAT	ATAG	ATAG:20 GCAT:0
EA2454	4110775	snp	G	A	A:25 G:0
EA2454	4110780	snp	G	A	A:25 G:0
EA2454	4110832	snp	A	G	G:20 A:0
EA2454	4110880	snp	A	G	G:21 A:0
EA2454	4110902	snp	G	T	T:23 G:0
EA2454	4110925	complex	CCTCC	TCTCT	TCTCT:24 CCTCC:0
EA2454	4110937	snp	C	T	T:28 C:0
EA2454	4110947	complex	CT	TC	TC:25 CT:0
EA2454	4110983	snp	C	T	T:23 C:0
EA2454	4111007	snp	G	A	A:23 G:0
EA2454	4111015	complex	TAGGCGGA	CAGGAGGG	CAGGAGGG:23 TAGGCGGA:0
EA2454	4111081	snp	G	A	A:35 G:0
EA2454	4111096	snp	A	T	T:35 A:0
EA2454	4111133	snp	A	T	T:43 A:0
EA2454	4111158	complex	CTATA	TTATG	TTATG:40 CTATA:0
EA2454	4111168	complex	ACACT	GTACC	GTACC:39 ACACT:0
EA2454	4111187	complex	AGG	CGA	CGA:38 AGG:0
EA2454	4111229	snp	G	A	A:38 G:0
EA2454	4111241	snp	G	A	A:40 G:0
EA2454	4111247	snp	T	C	C:42 T:0
EA2454	4111273	snp	T	G	G:40 T:0
EA2454	4111292	snp	A	G	G:40 A:0
EA2454	4111391	complex	TA	CG	CG:28 TA:0
EA2454	4111412	snp	T	C	C:31 T:0
EA2454	4111424	snp	A	T	T:28 A:0
EA2454	4111463	snp	C	A	A:25 C:0
EA2454	4111504	snp	C	T	T:30 C:0
EA2454	4111535	complex	CTTC	TTTT	TTTT:32 CTTC:0
EA2454	4111586	snp	G	T	T:28 G:0
EA2454	4111748	snp	G	A	A:44 G:0
EA2454	4111815	snp	T	G	G:49 T:0
EA2454	4111853	snp	A	C	C:57 A:0
EA2454	4111935	snp	T	C	C:67 T:0
EA2454	4111982	snp	C	T	T:77 C:0
EA2454	4111991	snp	G	A	A:73 G:0
EA2454	4112027	snp	T	C	C:75 T:0
EA2454	4112036	snp	T	C	C:75 T:0
EA2454	4112052	complex	AGC	GGT	GGT:65 AGC:0
EA2454	4112069	snp	A	G	G:67 A:0
EA2454	4112075	snp	G	A	A:70 G:0
EA2454	4112111	complex	TAGC	CAGT	CAGT:67 TAGC:0
EA2454	4112126	snp	T	C	C:71 T:0
EA2454	4112140	snp	A	G	G:66 A:0
EA2454	4112147	snp	T	C	C:60 T:0
EA2454	4112153	snp	A	G	G:61 A:0
EA2454	4112202	snp	A	C	C:62 A:0
EA2454	4112232	snp	C	A	A:58 C:0
EA2454	4112246	snp	A	T	T:55 A:0
EA2454	4112252	snp	G	A	A:57 G:0
EA2454	4112258	snp	A	G	G:55 A:0
EA2454	4112278	snp	C	A	A:62 C:0
EA2454	4112304	snp	G	C	C:53 G:0
EA2454	4112310	snp	T	C	C:54 T:0
EA2454	4112333	snp	A	T	T:53 A:0
EA2454	4112342	snp	C	T	T:53 C:0
EA2454	4112351	complex	CGCCGACATTA	TGCTGATATTG	TGCTGATATTG:47 CGCCGACATTA:0
EA2454	4112390	snp	C	T	T:66 C:0
EA2454	4112459	complex	TGC	CGA	CGA:71 TGC:0
EA2454	4112491	mnp	CG	AA	AA:67 CG:0
EA2454	4112507	complex	GGTG	AGTA	AGTA:65 GGTG:0
EA2454	4112537	snp	T	G	G:61 T:0
EA2454	4112564	snp	T	C	C:55 T:0
EA2454	4112582	snp	C	T	T:56 C:0
EA2454	4112591	complex	GTTT	ACTG	ACTG:50 GTTT:0
EA2454	4112639	complex	GGTG	AGTT	AGTT:33 GGTG:0
EA2454	4112660	snp	A	G	G:26 A:0
EA2454	4112683	snp	A	G	G:23 A:0
EA2454	4112699	snp	G	A	A:23 G:0
EA2454	4112711	complex	AA	CG	CG:22 AA:0
EA2454	4112726	snp	T	C	C:22 T:0
EA2454	4112734	complex	TC	CT	CT:20 TC:0
EA2454	4112746	complex	GT	AA	AA:24 GT:0
EA2454	4112753	snp	T	C	C:24 T:0
EA2454	4112786	snp	A	G	G:27 A:0
EA2454	4112808	snp	C	T	T:35 C:0
EA2454	4112814	snp	A	G	G:35 A:0
EA2454	4112828	snp	G	T	T:40 G:0
EA2454	4112877	snp	G	A	A:51 G:0
EA2454	4112899	complex	TCA	CCC	CCC:56 TCA:0
EA2454	4112912	snp	T	G	G:58 T:0
EA2454	4112925	snp	A	G	G:61 A:0
EA2454	4112952	snp	C	T	T:70 C:0
EA2454	4112961	snp	C	T	T:70 C:0
EA2454	4113156	snp	C	T	T:90 C:0
EA2454	4113171	snp	T	C	C:93 T:0
EA2454	4113195	snp	T	C	C:77 T:0
EA2454	4113210	snp	T	C	C:83 T:0
EA2454	4113229	snp	A	C	C:87 A:0
EA2454	4113237	snp	C	T	T:99 C:0
EA2454	4114023	snp	C	T	T:100 C:0
EA2454	4114371	snp	T	C	C:60 T:0
EA2454	4114519	snp	G	A	A:40 G:0
EA2454	4114549	snp	C	T	T:43 C:0
EA2454	4114649	snp	G	A	A:49 G:0
EA2454	4115026	snp	C	T	T:36 C:0
EA2454	4115122	snp	T	C	C:17 T:0
EA2454	4115154	complex	CCGGTCAG	ACGGAGAA	ACGGAGAA:10 CCGGTCAG:0
EA2454	4115167	snp	G	C	C:10 G:0
EA2454	4152030	snp	C	A	A:44 C:0
EA2454	4182589	snp	C	T	T:44 C:0
EA2454	4182656	snp	A	G	G:40 A:0
EA2454	4182701	snp	T	C	C:24 T:0
EA2454	4182773	snp	T	C	C:12 T:0
EA2454	4182778	snp	G	T	T:12 G:0
EA2454	4182936	snp	G	C	C:17 G:0
EA2454	4182942	snp	A	G	G:19 A:0
EA2454	4183168	snp	T	C	C:87 T:0
EA2454	4183174	complex	GAG	AAT	AAT:87 GAG:0
EA2454	4183191	snp	T	C	C:85 T:1
EA2454	4183199	mnp	GA	AG	AG:79 GA:0
EA2454	4183406	complex	ATCCC	GACCT	GACCT:42 ATCCC:0
EA2454	4183428	snp	A	G	G:47 A:0
EA2454	4183441	complex	GCGAAATT	ATGAAGTC	ATGAAGTC:46 GCGAAATT:0
EA2454	4183467	snp	G	A	A:46 G:0
EA2454	4183492	snp	A	C	C:36 A:0
EA2454	4183502	complex	CTC	GTT	GTT:33 CTC:0
EA2454	4183513	complex	AGGA	GTGG	GTGG:33 AGGA:0
EA2454	4183522	complex	TG	CA	CA:33 TG:0
EA2454	4183537	complex	AACAT	TACAG	TACAG:48 AACAT:0
EA2454	4183554	snp	A	G	G:42 A:0
EA2454	4183583	snp	T	C	C:35 T:0
EA2454	4183608	snp	T	C	C:26 T:0
EA2454	4183619	complex	GTTGTTGTAAT	ATTACTCCAAA	ATTACTCCAAA:24 GTTGTTGTAAT:0
EA2454	4183646	snp	A	G	G:24 A:0
EA2454	4183653	snp	G	A	A:28 G:0
EA2454	4183660	snp	T	A	A:27 T:0
EA2454	4183681	snp	A	G	G:25 A:0
EA2454	4183700	del	AC	A	A:20 AC:0
EA2454	4188735	snp	T	C	C:13 T:0
EA2454	4188742	snp	A	C	C:13 A:0
EA2454	4188748	snp	C	T	T:17 C:0
EA2454	4188757	complex	CCGG	ACGA	ACGA:23 CCGG:0
EA2454	4188793	complex	GTGGGCA	ATGAGCG	ATGAGCG:36 GTGGGCA:0
EA2454	4188816	snp	A	G	G:41 A:0
EA2454	4188829	snp	T	C	C:47 T:0
EA2454	4188862	snp	A	G	G:66 A:0
EA2454	4188877	complex	TGTAGCC	CGTGGCA	CGTGGCA:67 TGTAGCC:0
EA2454	4188889	complex	TCCGGGTATA	CCCCGGAATG	CCCCGGAATG:67 TCCGGGTATA:0
EA2454	4188906	complex	TGGCC	CGGCT	CGGCT:73 TGGCC:0
EA2454	4188931	snp	C	T	T:80 C:0
EA2454	4188946	snp	T	G	G:78 T:0
EA2454	4188970	snp	A	T	T:83 A:0
EA2454	4188976	snp	A	G	G:80 A:0
EA2454	4188988	snp	G	A	A:79 G:0
EA2454	4188997	snp	A	G	G:72 A:0
EA2454	4189017	complex	CGTGAATG	TGTAAATA	TGTAAATA:61 CGTGAATG:0
EA2454	4189030	snp	T	C	C:61 T:0
EA2454	4189056	complex	TCCTG	GCCTA	GCCTA:59 TCCTG:0
EA2454	4189078	snp	G	A	A:57 G:0
EA2454	4189084	snp	C	A	A:53 C:0
EA2454	4189092	snp	T	C	C:51 T:0
EA2454	4189132	snp	T	G	G:41 T:0
EA2454	4189147	snp	G	A	A:39 G:0
EA2454	4189156	snp	C	A	A:41 C:0
EA2454	4189180	snp	C	G	G:42 C:0
EA2454	4189204	snp	T	G	G:54 T:0
EA2454	4189238	snp	A	T	T:51 A:0
EA2454	4189255	complex	CGGC	GGGT	GGGT:53 CGGC:0
EA2454	4189281	complex	AT	TC	TC:52 AT:0
EA2454	4189288	snp	T	A	A:55 T:0
EA2454	4189300	snp	A	G	G:57 A:0
EA2454	4189321	complex	CGCC	TGCT	TGCT:56 CGCC:0
EA2454	4189336	snp	A	G	G:55 A:0
EA2454	4189345	snp	G	T	T:62 G:0
EA2454	4189592	complex	ACA	GCG	GCG:69 ACA:0
EA2454	4189600	snp	T	C	C:70 T:0
EA2454	4189605	snp	C	A	A:70 C:0
EA2454	4189699	complex	AGGA	TGGG	TGGG:77 AGGA:0
EA2454	4189726	snp	C	T	T:81 C:0
EA2454	4189768	snp	A	C	C:82 A:0
EA2454	4189773	snp	T	G	G:79 T:0
EA2454	4189798	snp	A	G	G:84 A:0
EA2454	4189807	snp	T	G	G:82 T:1
EA2454	4189852	snp	C	T	T:70 C:0
EA2454	4189861	snp	A	C	C:68 A:0
EA2454	4189893	complex	TGTT	CGTC	CGTC:59 TGTT:0
EA2454	4189912	snp	T	C	C:53 T:0
EA2454	4189933	snp	A	G	G:47 A:0
EA2454	4189958	snp	C	T	T:36 C:0
EA2454	4189967	snp	G	A	A:32 G:0
EA2454	4189974	snp	T	G	G:30 T:0
EA2454	4189981	snp	G	A	A:28 G:0
EA2454	4189997	complex	GG	AA	AA:10 GG:0
EA2454	4200656	snp	A	G	G:56 A:0
EA2454	4212664	snp	T	A	A:48 T:0
EA2454	4235320	snp	A	G	G:55 A:0
EA2454	4283978	snp	C	T	T:56 C:0
EA2454	4321572	snp	T	C	C:12 T:0
EA2454	4394869	snp	T	C	C:92 T:0
EA2454	4397996	snp	A	G	G:48 A:0
EA2454	4398115	snp	T	C	C:41 T:0
EA2454	4398127	complex	ATGC	GTGT	GTGT:39 ATGC:0
EA2454	4399245	snp	C	T	T:23 C:0
EA2454	4399263	snp	A	T	T:23 A:0
EA2454	4399296	snp	G	A	A:23 G:0
EA2454	4399302	snp	T	C	C:23 T:0
EA2454	4399350	snp	T	C	C:25 T:0
EA2454	4399368	snp	C	T	T:23 C:0
EA2454	4399386	snp	G	T	T:29 G:1
EA2454	4399485	snp	C	T	T:26 C:0
EA2454	4418078	snp	G	T	T:94 G:0
EA2454	4420363	snp	A	G	G:71 A:0
EA2454	4427260	snp	C	T	T:12 C:0
EA2454	4449508	snp	C	A	A:34 C:0
EA2454	4449564	snp	C	T	T:49 C:0
EA2454	4449625	mnp	CC	AA	AA:68 CC:0
EA2454	4449642	snp	C	T	T:75 C:0
EA2454	4449663	snp	C	T	T:72 C:0
EA2454	4449848	snp	C	T	T:70 C:0
EA2454	4449881	snp	T	C	C:70 T:0
EA2454	4449888	snp	C	T	T:69 C:0
EA2454	4449908	snp	C	T	T:68 C:0
EA2454	4449923	complex	TGAT	GGAC	GGAC:64 TGAT:0
EA2454	4449935	complex	CGTT	AGTG	AGTG:59 CGTT:0
EA2454	4449950	snp	A	G	G:57 A:0
EA2454	4449956	snp	T	C	C:65 T:0
EA2454	4449974	snp	T	C	C:61 T:0
EA2454	4449983	snp	C	G	G:62 C:0
EA2454	4450005	complex	GT	AA	AA:55 GT:0
EA2454	4450022	snp	T	G	G:59 T:0
EA2454	4450035	snp	A	G	G:57 A:0
EA2454	4450058	snp	T	G	G:49 T:0
EA2454	4450076	complex	AGGC	TGGT	TGGT:45 AGGC:0
EA2454	4450088	complex	TACG	CACT	CACT:43 TACG:0
EA2454	4450097	complex	TC	CT	CT:42 TC:0
EA2454	4450128	complex	ACA	GCC	GCC:54 ACA:0
EA2454	4450151	snp	A	G	G:51 A:0
EA2454	4450166	snp	A	T	T:51 A:0
EA2454	4450172	snp	G	A	A:51 G:0
EA2454	4450178	snp	G	C	C:51 G:0
EA2454	4450190	snp	G	A	A:49 G:0
EA2454	4450227	snp	C	A	A:59 C:0
EA2454	4450235	complex	TGAT	GGAC	GGAC:51 TGAT:0
EA2454	4450244	complex	TCGT	CCAC	CCAC:52 TCGT:0
EA2454	4450265	snp	T	C	C:54 T:0
EA2454	4450271	snp	G	T	T:53 G:0
EA2454	4450294	snp	T	A	A:51 T:0
EA2454	4450314	complex	TCT	GCC	GCC:56 TCT:0
EA2454	4450366	snp	T	C	C:55 T:0
EA2454	4450432	snp	A	G	G:58 A:0
EA2454	4450451	mnp	CAG	ACC	ACC:54 CAG:0
EA2454	4450492	snp	G	T	T:60 G:0
EA2454	4450511	complex	CGAC	AGGT	AGGT:62 CGAC:0
EA2454	4450522	snp	A	G	G:59 A:0
EA2454	4450539	complex	TAAAG	CAAAA	CAAAA:64 TAAAG:0
EA2454	4450579	snp	G	A	A:66 G:0
EA2454	4450611	snp	C	A	A:64 C:0
EA2454	4450648	snp	C	T	T:64 C:1
EA2454	4450666	complex	TACG	CACA	CACA:59 TACG:0
EA2454	4450821	snp	G	A	A:53 G:0
EA2454	4450827	snp	G	A	A:56 G:0
EA2454	4450876	snp	A	G	G:57 A:0
EA2454	4450896	snp	A	G	G:60 A:0
EA2454	4450914	complex	GGATAAAATTGAGCTGGAAGCG	AGAGAAACCTGAACTTGAGGCT	AGAGAAACCTGAACTTGAGGCT:47 GGATAAAATTGAGCTGGAAGCG:0
EA2454	4450944	complex	AGAG	GGAT	GGAT:53 AGAG:0
EA2454	4450956	snp	T	C	C:56 T:0
EA2454	4450968	complex	GAC	AAG	AAG:54 GAC:0
EA2454	4450979	snp	C	T	T:54 C:0
EA2454	4451007	snp	T	C	C:41 T:0
EA2454	4451016	complex	AGTCATA	GGTGATT	GGTGATT:33 AGTCATA:0
EA2454	4451028	snp	G	A	A:32 G:0
EA2454	4451040	complex	GCATCCT	ACACCCA	ACACCCA:29 GCATCCT:0
EA2454	4451056	complex	AGTG	TGTA	TGTA:25 AGTG:0
EA2454	4451073	snp	G	A	A:22 G:0
EA2454	4451083	snp	C	A	A:17 C:0
EA2454	4451100	snp	C	A	A:11 C:0
EA2454	4451125	snp	G	T	T:11 G:0
EA2454	4452014	snp	G	T	T:42 G:0
EA2454	4457560	snp	A	C	C:28 A:0
EA2454	4465590	snp	C	T	T:66 C:1
EA2454	4465659	del	TG	T	T:53 TG:0
EA2454	4467661	snp	A	C	C:82 A:0
EA2454	4513917	del	TC	T	T:52 TC:0
EA2454	4520296	complex	GTA	ATG	ATG:95 GTA:0
EA2454	4520960	complex	CGGC	TGGT	TGGT:84 CGGC:0
EA2454	4521276	snp	T	C	C:57 T:5
EA2454	4521304	snp	C	T	T:58 C:1
EA2454	4521317	snp	C	A	A:59 C:0
EA2454	4521405	mnp	AA	GG	GG:46 AA:0
EA2454	4521436	snp	A	G	G:44 A:0
EA2454	4521454	complex	CGTTT	TGTTA	TGTTA:46 CGTTT:0
EA2454	4521518	snp	G	A	A:61 G:0
EA2454	4521526	snp	A	G	G:63 A:0
EA2454	4521563	snp	C	T	T:45 C:0
EA2454	4521568	complex	GGCACCCCGGAAAATCAGGGAA	AACAGCCAGGAGAGTCGGGGTG	AACAGCCAGGAGAGTCGGGGTG:41 GGCACCCCGGAAAATCAGGGAA:0
EA2454	4521602	snp	A	G	G:46 A:0
EA2454	4521623	snp	T	G	G:50 T:0
EA2454	4521639	snp	T	C	C:57 T:0
EA2454	4521649	snp	A	G	G:60 A:0
EA2454	4521671	snp	A	G	G:54 A:0
EA2454	4521694	complex	CG	TT	TT:52 CG:0
EA2454	4521710	snp	A	T	T:58 A:0
EA2454	4521724	complex	GGTT	CGTC	CGTC:51 GGTT:0
EA2454	4521754	snp	A	T	T:50 A:0
EA2454	4521812	snp	C	T	T:48 C:0
EA2454	4521856	snp	T	C	C:41 T:0
EA2454	4521877	snp	G	T	T:33 G:0
EA2454	4521892	snp	C	T	T:30 C:0
EA2454	4521898	snp	T	C	C:27 T:0
EA2454	4521913	snp	A	G	G:25 A:0
EA2454	4521925	complex	ACCT	CCCC	CCCC:23 ACCT:0
EA2454	4521934	snp	T	C	C:23 T:0
EA2454	4521941	complex	ACCGTTCTTA	CTATCATTC	CTATCATTC:13 ACCGTTCTTA:0
EA2454	4521960	snp	T	C	C:13 T:0
EA2454	4521979	snp	C	T	T:12 C:0
EA2454	4521991	snp	T	C	C:11 T:0
EA2454	4593973	snp	A	C	C:88 A:0
EA2454	4668242	complex	CG	TA	TA:52 CG:0
EA2454	4668354	snp	A	G	G:59 A:0
EA2454	4668457	snp	A	G	G:69 A:0
EA2454	4668484	complex	ATTG	GTTT	GTTT:59 ATTG:0
EA2454	4668494	snp	G	A	A:60 G:0
EA2454	4668523	snp	G	A	A:54 G:0
EA2454	4668551	snp	T	C	C:47 T:0
EA2454	4668589	snp	C	T	T:42 C:0
EA2454	4668678	snp	G	A	A:39 G:0
EA2454	4668696	snp	C	T	T:40 C:0
EA2454	4668940	snp	G	A	A:30 G:0
EA2454	4668953	complex	ATTATAC	TTCATAT	TTCATAT:23 ATTATAC:0
EA2454	4668964	complex	GGGTGTT	AGGCATC	AGGCATC:23 GGGTGTT:0
EA2454	4668982	snp	A	G	G:32 A:0
EA2454	4668994	complex	TCAC	CTAT	CTAT:30 TCAC:0
EA2454	4669003	snp	G	T	T:32 G:0
EA2454	4669009	snp	A	G	G:32 A:0
EA2454	4669018	snp	C	T	T:28 C:0
EA2454	4669024	complex	TCAT	CTAC	CTAC:28 TCAT:0
EA2454	4669033	snp	G	A	A:27 G:0
EA2454	4669038	snp	G	A	A:30 G:0
EA2454	4669043	complex	CA	AG	AG:31 CA:0
EA2454	4669079	snp	C	T	T:41 C:0
EA2454	4669098	complex	GTAGT	ATAGC	ATAGC:49 GTAGT:0
EA2454	4669107	snp	C	A	A:58 C:0
EA2454	4669123	complex	AAGC	CAGA	CAGA:57 AAGC:0
EA2454	4669132	complex	TAG	CAA	CAA:56 TAG:0
EA2454	4669154	complex	CAGAT	AAGAC	AAGAC:57 CAGAT:0
EA2454	4669165	snp	T	G	G:60 T:0
EA2454	4669222	complex	TA	GG	GG:51 TA:0
EA2454	4669240	snp	A	G	G:52 A:0
EA2454	4669294	snp	C	T	T:44 C:0
EA2454	4669318	snp	C	T	T:40 C:0
EA2454	4669342	snp	T	C	C:25 T:0
EA2454	4669363	complex	ACC	TCT	TCT:18 ACC:0
EA2454	4669371	complex	CA	TG	TG:18 CA:0
EA2454	4669388	complex	CAA	GAG	GAG:16 CAA:0
EA2454	4669717	snp	C	T	T:10 C:0
EA2454	4669729	snp	G	T	T:15 G:0
EA2454	4669738	snp	G	A	A:20 G:0
EA2454	4669744	snp	G	A	A:20 G:0
EA2454	4669774	snp	T	C	C:26 T:0
EA2454	4669804	snp	T	A	A:26 T:0
EA2454	4669832	snp	C	A	A:24 C:0
EA2454	4669882	snp	A	G	G:22 A:0
EA2454	4669892	snp	G	C	C:25 G:0
EA2454	4669933	snp	T	C	C:31 T:0
EA2454	4669954	snp	T	C	C:27 T:0
EA2454	4669980	complex	TAACCAC	AACTTAT	AACTTAT:12 TAACCAC:0
EA2454	4669991	complex	AAAGAACAC	GAATAGCAT	GAATAGCAT:12 AAAGAACAC:0
EA2454	4670004	complex	CAAT	ACAC	ACAC:12 CAAT:0
EA2454	4670015	complex	AGTT	GTAG	GTAG:12 AGTT:0
EA2454	4670026	complex	TAAGGAACG	GAAAACA	GAAAACA:12 TAAGGAACG:0
EA2454	4670040	snp	G	A	A:14 G:0
EA2454	4670049	snp	T	C	C:15 T:0
EA2454	4670068	complex	CCAC	ACAA	ACAA:16 CCAC:0
EA2454	4670078	complex	AG	GC	GC:16 AG:0
EA2454	4670084	snp	C	T	T:20 C:0
EA2454	4670113	complex	CT	TC	TC:30 CT:0
EA2454	4670136	snp	G	A	A:38 G:0
EA2454	4671838	snp	A	G	G:18 A:0
[truncated: 560 more rows]
