# Supplementary material for: Escherichia coli ST302: Genomic Analysis of Virulence Potential and Antimicrobial Resistance Mediated by Mobile Genetic Elements
Source: Front Microbiol. 2020 Jan 21;10:3098. doi: 10.3389/fmicb.2019.03098 (PMC6985150; doi:10.3389/fmicb.2019.03098)
Supplement: DATA S2 — ST302 SNP analysis. [file Data_Sheet_2.ZIP › SNP_Analysis/ST302_SNP/SNP_analysis/snippyout/ST302/IA7122-Poultry-ST302.out/snps.gff]

##gff-version 3
EA2454	snippy:4.3.6	variation	977	977	.	.	0	note=snp T=>C C:32 T:0
EA2454	snippy:4.3.6	variation	6107	6107	.	.	0	note=snp C=>T T:61 C:0
EA2454	snippy:4.3.6	variation	34494	34494	.	.	0	note=snp T=>C C:46 T:0
EA2454	snippy:4.3.6	variation	67315	67315	.	.	0	note=snp A=>C C:46 A:0
EA2454	snippy:4.3.6	variation	81449	81449	.	.	0	note=snp T=>G G:61 T:1
EA2454	snippy:4.3.6	variation	111773	111773	.	.	0	note=snp C=>G G:51 C:0
EA2454	snippy:4.3.6	variation	229626	229626	.	.	0	note=snp G=>C C:10 G:0
EA2454	snippy:4.3.6	variation	238631	238631	.	.	0	note=del CT=>C C:76 CT:0
EA2454	snippy:4.3.6	variation	253532	253532	.	.	0	note=snp G=>T T:96 G:0
EA2454	snippy:4.3.6	variation	287343	287343	.	.	0	note=del TAGCTGA=>T T:33 TAGCTGA:0
EA2454	snippy:4.3.6	variation	393575	393575	.	.	0	note=snp A=>G G:65 A:0
EA2454	snippy:4.3.6	variation	471914	471914	.	.	0	note=snp T=>G G:51 T:0
EA2454	snippy:4.3.6	variation	484699	484699	.	.	0	note=del CA=>C C:50 CA:0
EA2454	snippy:4.3.6	variation	497568	497568	.	.	0	note=snp A=>T T:48 A:0
EA2454	snippy:4.3.6	variation	539426	539426	.	.	0	note=snp T=>C C:56 T:0
EA2454	snippy:4.3.6	variation	542323	542323	.	.	0	note=snp G=>A A:45 G:0
EA2454	snippy:4.3.6	variation	569410	569410	.	.	0	note=snp C=>T T:38 C:0
EA2454	snippy:4.3.6	variation	572900	572900	.	.	0	note=snp G=>A A:19 G:2
EA2454	snippy:4.3.6	variation	606088	606088	.	.	0	note=ins G=>GA GA:61 G:0
EA2454	snippy:4.3.6	variation	649480	649480	.	.	0	note=snp T=>C C:50 T:0
EA2454	snippy:4.3.6	variation	669330	669330	.	.	0	note=snp A=>G G:62 A:0
EA2454	snippy:4.3.6	variation	682546	682546	.	.	0	note=snp A=>T T:65 A:0
EA2454	snippy:4.3.6	variation	690611	690611	.	.	0	note=snp T=>C C:48 T:0
EA2454	snippy:4.3.6	variation	731329	731329	.	.	0	note=snp G=>A A:77 G:1
EA2454	snippy:4.3.6	variation	744988	744988	.	.	0	note=snp A=>G G:68 A:0
EA2454	snippy:4.3.6	variation	755366	755366	.	.	0	note=snp A=>G G:71 A:0
EA2454	snippy:4.3.6	variation	775062	775062	.	.	0	note=snp G=>A A:39 G:0
EA2454	snippy:4.3.6	variation	783701	783701	.	.	0	note=snp G=>A A:62 G:0
EA2454	snippy:4.3.6	variation	817985	817985	.	.	0	note=snp T=>G G:38 T:0
EA2454	snippy:4.3.6	variation	825262	825262	.	.	0	note=snp T=>G G:57 T:0
EA2454	snippy:4.3.6	variation	951585	951585	.	.	0	note=snp G=>A A:27 G:0
EA2454	snippy:4.3.6	variation	966712	966712	.	.	0	note=snp T=>C C:82 T:0
EA2454	snippy:4.3.6	variation	1026843	1026843	.	.	0	note=snp T=>C C:52 T:0
EA2454	snippy:4.3.6	variation	1084393	1084393	.	.	0	note=snp G=>A A:52 G:0
EA2454	snippy:4.3.6	variation	1160822	1160822	.	.	0	note=snp A=>T T:65 A:0
EA2454	snippy:4.3.6	variation	1236723	1236723	.	.	0	note=snp T=>C C:36 T:0
EA2454	snippy:4.3.6	variation	1318145	1318145	.	.	0	note=snp G=>T T:61 G:0
EA2454	snippy:4.3.6	variation	1364207	1364207	.	.	0	note=snp C=>G G:67 C:0
EA2454	snippy:4.3.6	variation	1380330	1380330	.	.	0	note=snp C=>T T:71 C:0
EA2454	snippy:4.3.6	variation	1394505	1394505	.	.	0	note=snp A=>G G:55 A:0
EA2454	snippy:4.3.6	variation	1404411	1404411	.	.	0	note=del AC=>A A:38 AC:0
EA2454	snippy:4.3.6	variation	1440039	1440039	.	.	0	note=snp C=>T T:33 C:0
EA2454	snippy:4.3.6	variation	1520287	1520287	.	.	0	note=snp C=>T T:79 C:0
EA2454	snippy:4.3.6	variation	1525679	1525679	.	.	0	note=snp C=>T T:59 C:0
EA2454	snippy:4.3.6	variation	1560679	1560679	.	.	0	note=snp G=>A A:52 G:0
EA2454	snippy:4.3.6	variation	1619109	1619109	.	.	0	note=snp T=>A A:22 T:0
EA2454	snippy:4.3.6	variation	1620374	1620374	.	.	0	note=complex ATTTT=>GTTTG GTTTG:17 ATTTT:0
EA2454	snippy:4.3.6	variation	1620389	1620389	.	.	0	note=snp G=>C C:18 G:0
EA2454	snippy:4.3.6	variation	1620403	1620403	.	.	0	note=snp A=>T T:26 A:0
EA2454	snippy:4.3.6	variation	1620466	1620466	.	.	0	note=snp T=>C C:39 T:0
EA2454	snippy:4.3.6	variation	1620785	1620785	.	.	0	note=snp T=>C C:54 T:0
EA2454	snippy:4.3.6	variation	1620828	1620828	.	.	0	note=snp T=>C C:46 T:0
EA2454	snippy:4.3.6	variation	1620912	1620912	.	.	0	note=complex GACA=>TACT TACT:47 GACA:0
EA2454	snippy:4.3.6	variation	1621047	1621047	.	.	0	note=snp C=>G G:55 C:0
EA2454	snippy:4.3.6	variation	1621140	1621140	.	.	0	note=snp C=>A A:55 C:0
EA2454	snippy:4.3.6	variation	1621305	1621305	.	.	0	note=snp G=>T T:43 G:0
EA2454	snippy:4.3.6	variation	1621358	1621358	.	.	0	note=snp G=>A A:30 G:0
EA2454	snippy:4.3.6	variation	1622531	1622531	.	.	0	note=snp C=>A A:59 C:0
EA2454	snippy:4.3.6	variation	1624169	1624169	.	.	0	note=snp A=>G G:49 A:0
EA2454	snippy:4.3.6	variation	1624244	1624244	.	.	0	note=snp C=>T T:41 C:0
EA2454	snippy:4.3.6	variation	1624279	1624279	.	.	0	note=complex GT=>TC TC:32 GT:0
EA2454	snippy:4.3.6	variation	1624285	1624285	.	.	0	note=snp A=>C C:32 A:0
EA2454	snippy:4.3.6	variation	1624316	1624316	.	.	0	note=snp C=>A A:25 C:0
EA2454	snippy:4.3.6	variation	1624351	1624351	.	.	0	note=complex GT=>TC TC:13 GT:0
EA2454	snippy:4.3.6	variation	1624956	1624956	.	.	0	note=snp C=>T T:57 C:0
EA2454	snippy:4.3.6	variation	1624998	1624998	.	.	0	note=complex CCCG=>TCCA TCCA:56 CCCG:0
EA2454	snippy:4.3.6	variation	1625089	1625089	.	.	0	note=snp C=>T T:56 C:4
EA2454	snippy:4.3.6	variation	1625102	1625102	.	.	0	note=snp G=>A A:59 G:0
EA2454	snippy:4.3.6	variation	1625124	1625124	.	.	0	note=snp C=>T T:56 C:0
EA2454	snippy:4.3.6	variation	1625175	1625175	.	.	0	note=snp T=>C C:58 T:0
EA2454	snippy:4.3.6	variation	1625184	1625184	.	.	0	note=complex TGGC=>CGGT CGGT:57 TGGC:0
EA2454	snippy:4.3.6	variation	1625235	1625235	.	.	0	note=snp A=>G G:67 A:0
EA2454	snippy:4.3.6	variation	1625283	1625283	.	.	0	note=snp G=>A A:72 G:0
EA2454	snippy:4.3.6	variation	1625502	1625502	.	.	0	note=snp G=>A A:81 G:0
EA2454	snippy:4.3.6	variation	1625526	1625526	.	.	0	note=snp T=>G G:71 T:0
EA2454	snippy:4.3.6	variation	1625541	1625541	.	.	0	note=snp T=>C C:71 T:3
EA2454	snippy:4.3.6	variation	1625589	1625589	.	.	0	note=snp C=>T T:71 C:0
EA2454	snippy:4.3.6	variation	1629122	1629122	.	.	0	note=snp A=>G G:11 A:0
EA2454	snippy:4.3.6	variation	1629149	1629149	.	.	0	note=snp T=>C C:12 T:0
EA2454	snippy:4.3.6	variation	1629156	1629156	.	.	0	note=snp A=>G G:12 A:0
EA2454	snippy:4.3.6	variation	1629183	1629183	.	.	0	note=snp A=>C C:15 A:0
EA2454	snippy:4.3.6	variation	1629200	1629200	.	.	0	note=snp T=>C C:16 T:0
EA2454	snippy:4.3.6	variation	1629240	1629240	.	.	0	note=snp T=>C C:19 T:0
EA2454	snippy:4.3.6	variation	1629255	1629255	.	.	0	note=snp G=>A A:20 G:0
EA2454	snippy:4.3.6	variation	1629281	1629281	.	.	0	note=complex CAAGGTAC=>TAAGATAT TAAGATAT:21 CAAGGTAC:0
EA2454	snippy:4.3.6	variation	1629295	1629295	.	.	0	note=complex ACA=>TCT TCT:23 ACA:0
EA2454	snippy:4.3.6	variation	1629306	1629306	.	.	0	note=snp C=>G G:25 C:0
EA2454	snippy:4.3.6	variation	1629336	1629336	.	.	0	note=snp T=>G G:20 T:0
EA2454	snippy:4.3.6	variation	1629375	1629375	.	.	0	note=snp G=>A A:20 G:0
EA2454	snippy:4.3.6	variation	1629399	1629399	.	.	0	note=snp G=>A A:20 G:0
EA2454	snippy:4.3.6	variation	1629423	1629423	.	.	0	note=complex ATATA=>GTATT GTATT:17 ATATA:1
EA2454	snippy:4.3.6	variation	1629435	1629435	.	.	0	note=snp G=>A A:20 G:0
EA2454	snippy:4.3.6	variation	1629538	1629538	.	.	0	note=snp A=>C C:35 A:0
EA2454	snippy:4.3.6	variation	1629550	1629550	.	.	0	note=snp A=>G G:37 A:1
EA2454	snippy:4.3.6	variation	1629565	1629565	.	.	0	note=snp A=>G G:41 A:0
EA2454	snippy:4.3.6	variation	1629667	1629667	.	.	0	note=snp G=>A A:56 G:0
EA2454	snippy:4.3.6	variation	1629743	1629743	.	.	0	note=snp A=>G G:70 A:0
EA2454	snippy:4.3.6	variation	1629890	1629890	.	.	0	note=snp G=>A A:49 G:0
EA2454	snippy:4.3.6	variation	1629968	1629968	.	.	0	note=snp G=>A A:42 G:0
EA2454	snippy:4.3.6	variation	1630016	1630016	.	.	0	note=snp T=>C C:53 T:0
EA2454	snippy:4.3.6	variation	1630100	1630100	.	.	0	note=snp G=>A A:55 G:0
EA2454	snippy:4.3.6	variation	1630127	1630127	.	.	0	note=snp A=>C C:59 A:0
EA2454	snippy:4.3.6	variation	1630181	1630181	.	.	0	note=snp A=>G G:61 A:0
EA2454	snippy:4.3.6	variation	1630208	1630208	.	.	0	note=snp G=>A A:61 G:0
EA2454	snippy:4.3.6	variation	1630220	1630220	.	.	0	note=snp T=>C C:67 T:0
EA2454	snippy:4.3.6	variation	1630304	1630304	.	.	0	note=snp A=>G G:85 A:0
EA2454	snippy:4.3.6	variation	1630448	1630448	.	.	0	note=snp T=>C C:86 T:0
EA2454	snippy:4.3.6	variation	1630496	1630496	.	.	0	note=snp C=>T T:72 C:0
EA2454	snippy:4.3.6	variation	1630550	1630550	.	.	0	note=snp G=>A A:52 G:0
EA2454	snippy:4.3.6	variation	1630872	1630872	.	.	0	note=complex GTT=>ATA ATA:40 GTT:0
EA2454	snippy:4.3.6	variation	1630941	1630941	.	.	0	note=snp A=>G G:41 A:0
EA2454	snippy:4.3.6	variation	1630947	1630947	.	.	0	note=snp T=>C C:43 T:0
EA2454	snippy:4.3.6	variation	1630956	1630956	.	.	0	note=snp G=>A A:41 G:0
EA2454	snippy:4.3.6	variation	1630981	1630981	.	.	0	note=snp A=>G G:38 A:0
EA2454	snippy:4.3.6	variation	1646924	1646924	.	.	0	note=snp G=>A A:70 G:0
EA2454	snippy:4.3.6	variation	1679531	1679531	.	.	0	note=snp C=>T T:30 C:0
EA2454	snippy:4.3.6	variation	1799132	1799132	.	.	0	note=snp G=>A A:56 G:0
EA2454	snippy:4.3.6	variation	1825274	1825274	.	.	0	note=del GT=>G G:10 GT:0
EA2454	snippy:4.3.6	variation	1966999	1966999	.	.	0	note=snp G=>T T:54 G:0
EA2454	snippy:4.3.6	variation	1999916	1999916	.	.	0	note=snp A=>C C:79 A:0
EA2454	snippy:4.3.6	variation	2040728	2040728	.	.	0	note=snp C=>T T:68 C:0
EA2454	snippy:4.3.6	variation	2096311	2096311	.	.	0	note=del TA=>T T:54 TA:0
EA2454	snippy:4.3.6	variation	2113179	2113179	.	.	0	note=snp G=>A A:66 G:0
EA2454	snippy:4.3.6	variation	2183355	2183355	.	.	0	note=snp T=>C C:65 T:0
EA2454	snippy:4.3.6	variation	2187722	2187722	.	.	0	note=snp C=>A A:25 C:0
EA2454	snippy:4.3.6	variation	2292077	2292077	.	.	0	note=snp C=>T T:48 C:0
EA2454	snippy:4.3.6	variation	2364340	2364340	.	.	0	note=snp T=>G G:60 T:0
EA2454	snippy:4.3.6	variation	2419574	2419574	.	.	0	note=del CT=>C C:13 CT:0
EA2454	snippy:4.3.6	variation	2493670	2493670	.	.	0	note=snp A=>C C:49 A:0
EA2454	snippy:4.3.6	variation	2538679	2538679	.	.	0	note=snp T=>C C:74 T:0
EA2454	snippy:4.3.6	variation	2555441	2555441	.	.	0	note=snp A=>G G:47 A:0
EA2454	snippy:4.3.6	variation	2623767	2623767	.	.	0	note=snp C=>A A:63 C:0
EA2454	snippy:4.3.6	variation	2641059	2641059	.	.	0	note=snp T=>C C:57 T:0
EA2454	snippy:4.3.6	variation	2644202	2644202	.	.	0	note=snp T=>G G:74 T:0
EA2454	snippy:4.3.6	variation	2662250	2662250	.	.	0	note=ins C=>CA CA:36 C:0
EA2454	snippy:4.3.6	variation	2672475	2672475	.	.	0	note=ins G=>GCAAGACAT GCAAGACAT:25 G:0
EA2454	snippy:4.3.6	variation	2693407	2693407	.	.	0	note=snp G=>A A:57 G:1
EA2454	snippy:4.3.6	variation	2720677	2720677	.	.	0	note=ins A=>AACCTGCACCTGC AACCTGCACCTGC:43 A:0
EA2454	snippy:4.3.6	variation	2752557	2752557	.	.	0	note=snp C=>T T:37 C:0
EA2454	snippy:4.3.6	variation	2764522	2764522	.	.	0	note=snp C=>A A:56 C:0
EA2454	snippy:4.3.6	variation	2835582	2835582	.	.	0	note=snp C=>T T:44 C:1
EA2454	snippy:4.3.6	variation	2883184	2883184	.	.	0	note=snp T=>C C:46 T:0
EA2454	snippy:4.3.6	variation	2941498	2941498	.	.	0	note=snp G=>A A:65 G:0
EA2454	snippy:4.3.6	variation	2952105	2952105	.	.	0	note=mnp AG=>GA GA:65 AG:0
EA2454	snippy:4.3.6	variation	2952236	2952236	.	.	0	note=snp A=>G G:74 A:0
EA2454	snippy:4.3.6	variation	2952306	2952306	.	.	0	note=snp T=>C C:59 T:0
EA2454	snippy:4.3.6	variation	2952337	2952337	.	.	0	note=snp G=>A A:63 G:0
EA2454	snippy:4.3.6	variation	2952364	2952364	.	.	0	note=complex CAGG=>TAGA TAGA:65 CAGG:0
EA2454	snippy:4.3.6	variation	2952391	2952391	.	.	0	note=snp T=>C C:67 T:0
EA2454	snippy:4.3.6	variation	2952403	2952403	.	.	0	note=snp A=>T T:70 A:0
EA2454	snippy:4.3.6	variation	2952433	2952433	.	.	0	note=snp C=>T T:76 C:0
EA2454	snippy:4.3.6	variation	2952439	2952439	.	.	0	note=snp A=>G G:72 A:0
EA2454	snippy:4.3.6	variation	2952472	2952472	.	.	0	note=complex TGGTCTT=>CGGCTTC CGGCTTC:66 TGGTCTT:0
EA2454	snippy:4.3.6	variation	2952502	2952502	.	.	0	note=complex AATCAGGTACGGGCTC=>GATTAGATATGGACTT GATTAGATATGGACTT:62 AATCAGGTACGGGCTC:0
EA2454	snippy:4.3.6	variation	2952529	2952529	.	.	0	note=complex CCTGCAT=>TCGGCAC TCGGCAC:69 CCTGCAT:0
EA2454	snippy:4.3.6	variation	2952544	2952544	.	.	0	note=snp T=>A A:83 T:0
EA2454	snippy:4.3.6	variation	2952550	2952550	.	.	0	note=snp C=>T T:82 C:0
EA2454	snippy:4.3.6	variation	2952555	2952555	.	.	0	note=complex GCGA=>ACGT ACGT:82 GCGA:0
EA2454	snippy:4.3.6	variation	2952568	2952568	.	.	0	note=snp G=>A A:86 G:0
EA2454	snippy:4.3.6	variation	2952625	2952625	.	.	0	note=snp T=>G G:85 T:0
EA2454	snippy:4.3.6	variation	2952633	2952633	.	.	0	note=snp G=>A A:82 G:0
EA2454	snippy:4.3.6	variation	2952775	2952775	.	.	0	note=complex AAGT=>GAGC GAGC:82 AAGT:0
EA2454	snippy:4.3.6	variation	2952787	2952787	.	.	0	note=complex TGTC=>GGTT GGTT:80 TGTC:0
EA2454	snippy:4.3.6	variation	2952814	2952814	.	.	0	note=snp T=>A A:76 T:0
EA2454	snippy:4.3.6	variation	2952823	2952823	.	.	0	note=snp G=>A A:75 G:0
EA2454	snippy:4.3.6	variation	2952841	2952841	.	.	0	note=snp A=>G G:69 A:0
EA2454	snippy:4.3.6	variation	2952847	2952847	.	.	0	note=complex TCCA=>CCCT CCCT:69 TCCA:0
EA2454	snippy:4.3.6	variation	2952859	2952859	.	.	0	note=snp C=>T T:69 C:0
EA2454	snippy:4.3.6	variation	2952871	2952871	.	.	0	note=snp T=>A A:70 T:0
EA2454	snippy:4.3.6	variation	2952883	2952883	.	.	0	note=snp C=>T T:68 C:0
EA2454	snippy:4.3.6	variation	2952889	2952889	.	.	0	note=snp A=>G G:65 A:0
EA2454	snippy:4.3.6	variation	2952899	2952899	.	.	0	note=complex TTT=>CTC CTC:63 TTT:0
EA2454	snippy:4.3.6	variation	2952907	2952907	.	.	0	note=snp A=>G G:63 A:0
EA2454	snippy:4.3.6	variation	2952916	2952916	.	.	0	note=snp A=>G G:56 A:0
EA2454	snippy:4.3.6	variation	2953004	2953004	.	.	0	note=snp A=>T T:56 A:0
EA2454	snippy:4.3.6	variation	2953018	2953018	.	.	0	note=snp C=>G G:45 C:0
EA2454	snippy:4.3.6	variation	2953033	2953033	.	.	0	note=snp G=>A A:45 G:0
EA2454	snippy:4.3.6	variation	2953068	2953068	.	.	0	note=snp C=>T T:44 C:0
EA2454	snippy:4.3.6	variation	2953102	2953102	.	.	0	note=snp T=>C C:49 T:0
EA2454	snippy:4.3.6	variation	2953114	2953114	.	.	0	note=snp G=>A A:47 G:0
EA2454	snippy:4.3.6	variation	2953203	2953203	.	.	0	note=mnp TG=>AA AA:59 TG:0
EA2454	snippy:4.3.6	variation	2953223	2953223	.	.	0	note=mnp TT=>CC CC:61 TT:0
EA2454	snippy:4.3.6	variation	2953258	2953258	.	.	0	note=snp T=>C C:62 T:0
EA2454	snippy:4.3.6	variation	2953291	2953291	.	.	0	note=snp G=>A A:65 G:1
EA2454	snippy:4.3.6	variation	2953306	2953306	.	.	0	note=snp T=>C C:64 T:0
EA2454	snippy:4.3.6	variation	2953321	2953321	.	.	0	note=snp C=>G G:66 C:0
EA2454	snippy:4.3.6	variation	2953327	2953327	.	.	0	note=snp A=>G G:67 A:0
EA2454	snippy:4.3.6	variation	2953376	2953376	.	.	0	note=complex TAGCGCG=>CAGTGCA CAGTGCA:55 TAGCGCG:0
EA2454	snippy:4.3.6	variation	2953430	2953430	.	.	0	note=snp T=>C C:51 T:0
EA2454	snippy:4.3.6	variation	2953442	2953442	.	.	0	note=snp A=>T T:50 A:0
EA2454	snippy:4.3.6	variation	2953502	2953502	.	.	0	note=snp C=>T T:41 C:0
EA2454	snippy:4.3.6	variation	2953529	2953529	.	.	0	note=complex ATTC=>GTTT GTTT:27 ATTC:0
EA2454	snippy:4.3.6	variation	2953544	2953544	.	.	0	note=snp G=>A A:25 G:0
EA2454	snippy:4.3.6	variation	2953556	2953556	.	.	0	note=snp A=>T T:25 A:0
EA2454	snippy:4.3.6	variation	2953614	2953614	.	.	0	note=snp A=>C C:14 A:0
EA2454	snippy:4.3.6	variation	2953624	2953624	.	.	0	note=snp A=>G G:14 A:0
EA2454	snippy:4.3.6	variation	2953632	2953632	.	.	0	note=snp C=>T T:13 C:0
EA2454	snippy:4.3.6	variation	2953637	2953637	.	.	0	note=complex CG=>GA GA:13 CG:0
EA2454	snippy:4.3.6	variation	2953643	2953643	.	.	0	note=snp T=>C C:12 T:0
EA2454	snippy:4.3.6	variation	2953650	2953650	.	.	0	note=snp G=>A A:12 G:0
EA2454	snippy:4.3.6	variation	2954237	2954237	.	.	0	note=snp C=>T T:22 C:0
EA2454	snippy:4.3.6	variation	2954253	2954253	.	.	0	note=complex CA=>TG TG:23 CA:0
EA2454	snippy:4.3.6	variation	2954277	2954277	.	.	0	note=snp A=>G G:28 A:0
EA2454	snippy:4.3.6	variation	2954301	2954301	.	.	0	note=snp T=>G G:32 T:0
EA2454	snippy:4.3.6	variation	2954328	2954328	.	.	0	note=snp G=>T T:36 G:1
EA2454	snippy:4.3.6	variation	2954391	2954391	.	.	0	note=snp T=>G G:38 T:0
EA2454	snippy:4.3.6	variation	2954402	2954402	.	.	0	note=snp C=>T T:35 C:1
EA2454	snippy:4.3.6	variation	2954420	2954420	.	.	0	note=snp C=>T T:34 C:0
EA2454	snippy:4.3.6	variation	2954433	2954433	.	.	0	note=snp G=>A A:32 G:0
EA2454	snippy:4.3.6	variation	2954439	2954439	.	.	0	note=snp A=>G G:31 A:0
EA2454	snippy:4.3.6	variation	2954451	2954451	.	.	0	note=complex GCCG=>ATCC ATCC:18 GCCG:0
EA2454	snippy:4.3.6	variation	2954460	2954460	.	.	0	note=complex GGT=>AGA AGA:18 GGT:0
EA2454	snippy:4.3.6	variation	2954475	2954475	.	.	0	note=mnp GG=>AT AT:21 GG:0
EA2454	snippy:4.3.6	variation	2954481	2954481	.	.	0	note=snp G=>A A:22 G:0
EA2454	snippy:4.3.6	variation	2954571	2954571	.	.	0	note=snp T=>C C:11 T:0
EA2454	snippy:4.3.6	variation	2954576	2954576	.	.	0	note=snp A=>C C:11 A:0
EA2454	snippy:4.3.6	variation	2954581	2954581	.	.	0	note=snp C=>T T:11 C:0
EA2454	snippy:4.3.6	variation	2954660	2954660	.	.	0	note=snp C=>T T:10 C:0
EA2454	snippy:4.3.6	variation	2954679	2954679	.	.	0	note=snp T=>A A:10 T:0
EA2454	snippy:4.3.6	variation	2954691	2954691	.	.	0	note=snp A=>C C:10 A:0
EA2454	snippy:4.3.6	variation	2954993	2954993	.	.	0	note=snp T=>C C:37 T:0
EA2454	snippy:4.3.6	variation	2955083	2955083	.	.	0	note=snp T=>C C:44 T:0
EA2454	snippy:4.3.6	variation	2955094	2955094	.	.	0	note=snp G=>C C:44 G:0
EA2454	snippy:4.3.6	variation	2963100	2963100	.	.	0	note=snp G=>A A:54 G:0
EA2454	snippy:4.3.6	variation	2998642	2998642	.	.	0	note=snp G=>A A:31 G:1
EA2454	snippy:4.3.6	variation	3006788	3006788	.	.	0	note=snp T=>G G:66 T:0
EA2454	snippy:4.3.6	variation	3036124	3036124	.	.	0	note=snp C=>T T:65 C:0
EA2454	snippy:4.3.6	variation	3038860	3038860	.	.	0	note=snp C=>T T:90 C:1
EA2454	snippy:4.3.6	variation	3041125	3041125	.	.	0	note=snp T=>G G:65 T:0
EA2454	snippy:4.3.6	variation	3056545	3056545	.	.	0	note=snp G=>A A:21 G:0
EA2454	snippy:4.3.6	variation	3112595	3112595	.	.	0	note=ins C=>CG CG:44 C:0
EA2454	snippy:4.3.6	variation	3147479	3147479	.	.	0	note=del TCGCCTTTCAGCACTTTATCTGCGGTTTCAA=>T T:43 TCGCCTTTCAGCACTTTATCTGCGGTTTCAA:0
EA2454	snippy:4.3.6	variation	3195002	3195002	.	.	0	note=del GA=>G G:18 GA:0
EA2454	snippy:4.3.6	variation	3214904	3214904	.	.	0	note=snp A=>C C:47 A:0
EA2454	snippy:4.3.6	variation	3281767	3281767	.	.	0	note=ins G=>GC GC:35 G:0
EA2454	snippy:4.3.6	variation	3292219	3292219	.	.	0	note=snp C=>T T:51 C:1
EA2454	snippy:4.3.6	variation	3339461	3339461	.	.	0	note=snp T=>C C:23 T:0
EA2454	snippy:4.3.6	variation	3339497	3339497	.	.	0	note=snp C=>T T:51 C:0
EA2454	snippy:4.3.6	variation	3339614	3339614	.	.	0	note=snp A=>T T:93 A:0
EA2454	snippy:4.3.6	variation	3339638	3339638	.	.	0	note=snp T=>G G:99 T:0
EA2454	snippy:4.3.6	variation	3339673	3339673	.	.	0	note=complex CCACGACC=>TCACCACG TCACCACG:99 CCACGACC:0
EA2454	snippy:4.3.6	variation	3339740	3339740	.	.	0	note=snp G=>A A:71 G:0
EA2454	snippy:4.3.6	variation	3339755	3339755	.	.	0	note=snp C=>T T:67 C:0
EA2454	snippy:4.3.6	variation	3339797	3339797	.	.	0	note=complex ACGT=>GCGC GCGC:45 ACGT:0
EA2454	snippy:4.3.6	variation	3339818	3339818	.	.	0	note=snp G=>T T:42 G:0
EA2454	snippy:4.3.6	variation	3339839	3339839	.	.	0	note=snp A=>C C:34 A:0
EA2454	snippy:4.3.6	variation	3339848	3339848	.	.	0	note=complex AATCACA=>GATGACG GATGACG:30 AATCACA:0
EA2454	snippy:4.3.6	variation	3339866	3339866	.	.	0	note=snp T=>C C:28 T:0
EA2454	snippy:4.3.6	variation	3339907	3339907	.	.	0	note=complex GTGACGT=>ATGGCGG ATGGCGG:11 GTGACGT:0
EA2454	snippy:4.3.6	variation	3339918	3339918	.	.	0	note=snp C=>T T:12 C:0
EA2454	snippy:4.3.6	variation	3339964	3339964	.	.	0	note=snp G=>A A:12 G:0
EA2454	snippy:4.3.6	variation	3340054	3340054	.	.	0	note=snp A=>G G:24 A:0
EA2454	snippy:4.3.6	variation	3381306	3381306	.	.	0	note=snp G=>A A:76 G:0
EA2454	snippy:4.3.6	variation	3383117	3383117	.	.	0	note=snp A=>T T:66 A:0
EA2454	snippy:4.3.6	variation	3412663	3412663	.	.	0	note=snp G=>A A:89 G:0
EA2454	snippy:4.3.6	variation	3484930	3484930	.	.	0	note=snp C=>T T:12 C:0
EA2454	snippy:4.3.6	variation	3554302	3554302	.	.	0	note=snp G=>T T:29 G:0
EA2454	snippy:4.3.6	variation	3591244	3591244	.	.	0	note=snp T=>G G:82 T:0
EA2454	snippy:4.3.6	variation	3657942	3657942	.	.	0	note=snp T=>G G:83 T:0
EA2454	snippy:4.3.6	variation	3662284	3662284	.	.	0	note=snp A=>G G:64 A:1
EA2454	snippy:4.3.6	variation	3729296	3729296	.	.	0	note=snp G=>A A:55 G:0
EA2454	snippy:4.3.6	variation	3729404	3729404	.	.	0	note=snp A=>G G:59 A:0
EA2454	snippy:4.3.6	variation	3729452	3729452	.	.	0	note=snp A=>C C:64 A:0
EA2454	snippy:4.3.6	variation	3729991	3729991	.	.	0	note=snp C=>T T:40 C:1
EA2454	snippy:4.3.6	variation	3730012	3730012	.	.	0	note=snp C=>G G:45 C:0
EA2454	snippy:4.3.6	variation	3730027	3730027	.	.	0	note=snp A=>G G:50 A:0
EA2454	snippy:4.3.6	variation	3730165	3730165	.	.	0	note=snp C=>T T:72 C:0
EA2454	snippy:4.3.6	variation	3730234	3730234	.	.	0	note=snp G=>T T:68 G:0
EA2454	snippy:4.3.6	variation	3730246	3730246	.	.	0	note=snp G=>A A:68 G:0
EA2454	snippy:4.3.6	variation	3730273	3730273	.	.	0	note=snp T=>C C:63 T:0
EA2454	snippy:4.3.6	variation	3730279	3730279	.	.	0	note=snp G=>A A:66 G:0
EA2454	snippy:4.3.6	variation	3730288	3730288	.	.	0	note=snp G=>A A:60 G:0
EA2454	snippy:4.3.6	variation	3730297	3730297	.	.	0	note=snp T=>C C:62 T:0
EA2454	snippy:4.3.6	variation	3730307	3730307	.	.	0	note=snp T=>A A:61 T:0
EA2454	snippy:4.3.6	variation	3730363	3730363	.	.	0	note=complex CGAG=>TGAA TGAA:63 CGAG:0
EA2454	snippy:4.3.6	variation	3730447	3730447	.	.	0	note=snp G=>T T:71 G:0
EA2454	snippy:4.3.6	variation	3730615	3730615	.	.	0	note=snp T=>C C:89 T:0
EA2454	snippy:4.3.6	variation	3730642	3730642	.	.	0	note=snp C=>T T:86 C:0
EA2454	snippy:4.3.6	variation	3730666	3730666	.	.	0	note=snp A=>G G:85 A:0
EA2454	snippy:4.3.6	variation	3732121	3732121	.	.	0	note=snp A=>G G:18 A:0
EA2454	snippy:4.3.6	variation	3732141	3732141	.	.	0	note=snp G=>T T:23 G:0
EA2454	snippy:4.3.6	variation	3732406	3732406	.	.	0	note=snp T=>C C:41 T:0
EA2454	snippy:4.3.6	variation	3732532	3732532	.	.	0	note=snp T=>C C:35 T:0
EA2454	snippy:4.3.6	variation	3732538	3732538	.	.	0	note=snp G=>A A:41 G:0
EA2454	snippy:4.3.6	variation	3732544	3732544	.	.	0	note=snp T=>C C:42 T:0
EA2454	snippy:4.3.6	variation	3732613	3732613	.	.	0	note=snp G=>A A:38 G:0
EA2454	snippy:4.3.6	variation	3732626	3732626	.	.	0	note=snp T=>C C:40 T:0
EA2454	snippy:4.3.6	variation	3732649	3732649	.	.	0	note=complex CTGC=>TTGT TTGT:35 CTGC:0
EA2454	snippy:4.3.6	variation	3732701	3732701	.	.	0	note=snp G=>T T:42 G:0
EA2454	snippy:4.3.6	variation	3732769	3732769	.	.	0	note=snp T=>C C:53 T:0
EA2454	snippy:4.3.6	variation	3732877	3732877	.	.	0	note=snp A=>T T:51 A:0
EA2454	snippy:4.3.6	variation	3732907	3732907	.	.	0	note=snp C=>T T:50 C:0
EA2454	snippy:4.3.6	variation	3732940	3732940	.	.	0	note=snp T=>C C:58 T:0
EA2454	snippy:4.3.6	variation	3732955	3732955	.	.	0	note=snp C=>T T:56 C:0
EA2454	snippy:4.3.6	variation	3732964	3732964	.	.	0	note=snp G=>A A:56 G:0
EA2454	snippy:4.3.6	variation	3732976	3732976	.	.	0	note=snp A=>G G:52 A:0
EA2454	snippy:4.3.6	variation	3733096	3733096	.	.	0	note=snp T=>C C:59 T:0
EA2454	snippy:4.3.6	variation	3733117	3733117	.	.	0	note=snp T=>C C:61 T:0
EA2454	snippy:4.3.6	variation	3733123	3733123	.	.	0	note=snp G=>A A:61 G:0
EA2454	snippy:4.3.6	variation	3733150	3733150	.	.	0	note=snp C=>T T:70 C:0
EA2454	snippy:4.3.6	variation	3733171	3733171	.	.	0	note=snp C=>G G:75 C:0
EA2454	snippy:4.3.6	variation	3733274	3733274	.	.	0	note=snp A=>G G:73 A:0
EA2454	snippy:4.3.6	variation	3733350	3733350	.	.	0	note=complex TGTA=>CGTT CGTT:84 TGTA:0
EA2454	snippy:4.3.6	variation	3733378	3733378	.	.	0	note=complex GCACGC=>ACGCGT ACGCGT:79 GCACGC:0
EA2454	snippy:4.3.6	variation	3733392	3733392	.	.	0	note=snp G=>A A:78 G:0
EA2454	snippy:4.3.6	variation	3733401	3733401	.	.	0	note=snp G=>T T:78 G:0
EA2454	snippy:4.3.6	variation	3733407	3733407	.	.	0	note=complex TAGT=>CAGC CAGC:66 TAGT:0
EA2454	snippy:4.3.6	variation	3733430	3733430	.	.	0	note=snp G=>C C:69 G:0
EA2454	snippy:4.3.6	variation	3733441	3733441	.	.	0	note=snp T=>C C:71 T:0
EA2454	snippy:4.3.6	variation	3733461	3733461	.	.	0	note=snp G=>A A:64 G:0
EA2454	snippy:4.3.6	variation	3733491	3733491	.	.	0	note=complex GGAAC=>CGAGT CGAGT:64 GGAAC:0
EA2454	snippy:4.3.6	variation	3733527	3733527	.	.	0	note=snp C=>T T:62 C:0
EA2454	snippy:4.3.6	variation	3733562	3733562	.	.	0	note=snp A=>C C:60 A:0
EA2454	snippy:4.3.6	variation	3733572	3733572	.	.	0	note=snp T=>A A:67 T:0
EA2454	snippy:4.3.6	variation	3733590	3733590	.	.	0	note=snp G=>A A:65 G:0
EA2454	snippy:4.3.6	variation	3733602	3733602	.	.	0	note=snp A=>G G:61 A:0
EA2454	snippy:4.3.6	variation	3733617	3733617	.	.	0	note=snp C=>G G:58 C:0
EA2454	snippy:4.3.6	variation	3733626	3733626	.	.	0	note=complex TGGG=>GGGT GGGT:58 TGGG:0
EA2454	snippy:4.3.6	variation	3733701	3733701	.	.	0	note=complex GGGCTGTAAA=>AGGTTGCAAT AGGTTGCAAT:61 GGGCTGTAAA:0
EA2454	snippy:4.3.6	variation	3733776	3733776	.	.	0	note=complex TGTA=>CGTG CGTG:65 TGTA:0
EA2454	snippy:4.3.6	variation	3733821	3733821	.	.	0	note=snp A=>G G:58 A:0
EA2454	snippy:4.3.6	variation	3733896	3733896	.	.	0	note=snp G=>A A:59 G:0
EA2454	snippy:4.3.6	variation	3733902	3733902	.	.	0	note=snp T=>C C:57 T:0
EA2454	snippy:4.3.6	variation	3733908	3733908	.	.	0	note=snp G=>A A:66 G:0
EA2454	snippy:4.3.6	variation	3733950	3733950	.	.	0	note=snp C=>T T:63 C:0
EA2454	snippy:4.3.6	variation	3733963	3733963	.	.	0	note=snp T=>C C:70 T:0
EA2454	snippy:4.3.6	variation	3733968	3733968	.	.	0	note=snp C=>G G:70 C:0
EA2454	snippy:4.3.6	variation	3733974	3733974	.	.	0	note=snp C=>T T:68 C:1
EA2454	snippy:4.3.6	variation	3733986	3733986	.	.	0	note=complex AAT=>TAC TAC:76 AAT:0
EA2454	snippy:4.3.6	variation	3734064	3734064	.	.	0	note=complex TGACG=>CGATA CGATA:65 TGACG:0
EA2454	snippy:4.3.6	variation	3734094	3734094	.	.	0	note=snp A=>G G:51 A:1
EA2454	snippy:4.3.6	variation	3734109	3734109	.	.	0	note=complex GTTA=>ACTG ACTG:58 GTTA:0
EA2454	snippy:4.3.6	variation	3734153	3734153	.	.	0	note=snp A=>G G:60 A:1
EA2454	snippy:4.3.6	variation	3734196	3734196	.	.	0	note=snp G=>A A:58 G:0
EA2454	snippy:4.3.6	variation	3734202	3734202	.	.	0	note=complex CTCCAAC=>TTCTAAT TTCTAAT:42 CTCCAAC:0
EA2454	snippy:4.3.6	variation	3734250	3734250	.	.	0	note=snp T=>C C:47 T:0
EA2454	snippy:4.3.6	variation	3734256	3734256	.	.	0	note=snp T=>G G:47 T:0
EA2454	snippy:4.3.6	variation	3734310	3734310	.	.	0	note=snp C=>G G:53 C:0
EA2454	snippy:4.3.6	variation	3734319	3734319	.	.	0	note=complex GGGTGATTAC=>AGGCGACTAT AGGCGACTAT:50 GGGTGATTAC:0
EA2454	snippy:4.3.6	variation	3734337	3734337	.	.	0	note=snp C=>T T:57 C:0
EA2454	snippy:4.3.6	variation	3734352	3734352	.	.	0	note=snp G=>A A:62 G:0
EA2454	snippy:4.3.6	variation	3734367	3734367	.	.	0	note=snp C=>T T:71 C:0
EA2454	snippy:4.3.6	variation	3734373	3734373	.	.	0	note=complex CACC=>GACG GACG:67 CACC:0
EA2454	snippy:4.3.6	variation	3734391	3734391	.	.	0	note=snp G=>C C:70 G:0
EA2454	snippy:4.3.6	variation	3734397	3734397	.	.	0	note=snp A=>T T:69 A:0
EA2454	snippy:4.3.6	variation	3734412	3734412	.	.	0	note=snp C=>T T:72 C:0
EA2454	snippy:4.3.6	variation	3734427	3734427	.	.	0	note=snp A=>G G:68 A:0
EA2454	snippy:4.3.6	variation	3734439	3734439	.	.	0	note=complex GGGG=>AGGT AGGT:65 GGGG:0
EA2454	snippy:4.3.6	variation	3734460	3734460	.	.	0	note=snp A=>G G:76 A:0
EA2454	snippy:4.3.6	variation	3734466	3734466	.	.	0	note=snp A=>T T:82 A:0
EA2454	snippy:4.3.6	variation	3734496	3734496	.	.	0	note=snp C=>T T:76 C:1
EA2454	snippy:4.3.6	variation	3734509	3734509	.	.	0	note=snp A=>G G:74 A:0
EA2454	snippy:4.3.6	variation	3734699	3734699	.	.	0	note=snp G=>A A:81 G:0
EA2454	snippy:4.3.6	variation	3734774	3734774	.	.	0	note=snp A=>G G:69 A:0
EA2454	snippy:4.3.6	variation	3734816	3734816	.	.	0	note=snp G=>A A:65 G:0
EA2454	snippy:4.3.6	variation	3734822	3734822	.	.	0	note=snp C=>T T:61 C:0
EA2454	snippy:4.3.6	variation	3734840	3734840	.	.	0	note=snp A=>G G:67 A:0
EA2454	snippy:4.3.6	variation	3734852	3734852	.	.	0	note=snp C=>A A:63 C:0
EA2454	snippy:4.3.6	variation	3734897	3734897	.	.	0	note=snp C=>T T:58 C:0
EA2454	snippy:4.3.6	variation	3734935	3734935	.	.	0	note=complex AGGAC=>TGGAA TGGAA:56 AGGAC:0
EA2454	snippy:4.3.6	variation	3735020	3735020	.	.	0	note=snp C=>A A:56 C:0
EA2454	snippy:4.3.6	variation	3735026	3735026	.	.	0	note=snp A=>G G:56 A:0
EA2454	snippy:4.3.6	variation	3735056	3735056	.	.	0	note=snp C=>T T:52 C:0
EA2454	snippy:4.3.6	variation	3735071	3735071	.	.	0	note=snp G=>C C:56 G:0
EA2454	snippy:4.3.6	variation	3735080	3735080	.	.	0	note=snp G=>A A:55 G:0
EA2454	snippy:4.3.6	variation	3735122	3735122	.	.	0	note=snp A=>G G:51 A:0
EA2454	snippy:4.3.6	variation	3735173	3735173	.	.	0	note=snp A=>G G:51 A:0
EA2454	snippy:4.3.6	variation	3735197	3735197	.	.	0	note=complex TC=>GT GT:48 TC:0
EA2454	snippy:4.3.6	variation	3735206	3735206	.	.	0	note=snp C=>G G:49 C:0
EA2454	snippy:4.3.6	variation	3735266	3735266	.	.	0	note=snp T=>C C:66 T:0
EA2454	snippy:4.3.6	variation	3735305	3735305	.	.	0	note=complex GGCC=>CGCA CGCA:70 GGCC:0
EA2454	snippy:4.3.6	variation	3735329	3735329	.	.	0	note=snp G=>A A:67 G:0
EA2454	snippy:4.3.6	variation	3735344	3735344	.	.	0	note=complex TGAG=>CGAA CGAA:65 TGAG:0
EA2454	snippy:4.3.6	variation	3735415	3735415	.	.	0	note=snp G=>A A:73 G:0
EA2454	snippy:4.3.6	variation	3735425	3735425	.	.	0	note=snp C=>T T:69 C:0
EA2454	snippy:4.3.6	variation	3735527	3735527	.	.	0	note=snp A=>C C:64 A:0
EA2454	snippy:4.3.6	variation	3735582	3735582	.	.	0	note=snp C=>T T:63 C:1
EA2454	snippy:4.3.6	variation	3735718	3735718	.	.	0	note=snp A=>G G:57 A:0
EA2454	snippy:4.3.6	variation	3735757	3735757	.	.	0	note=complex CTACAAA=>ATATAAG ATATAAG:48 CTACAAA:0
EA2454	snippy:4.3.6	variation	3735769	3735769	.	.	0	note=snp A=>G G:51 A:0
EA2454	snippy:4.3.6	variation	3735778	3735778	.	.	0	note=snp C=>T T:51 C:0
EA2454	snippy:4.3.6	variation	3735793	3735793	.	.	0	note=snp G=>T T:52 G:2
EA2454	snippy:4.3.6	variation	3735799	3735799	.	.	0	note=snp G=>A A:55 G:0
EA2454	snippy:4.3.6	variation	3735865	3735865	.	.	0	note=snp A=>G G:57 A:0
EA2454	snippy:4.3.6	variation	3735871	3735871	.	.	0	note=snp G=>A A:57 G:0
EA2454	snippy:4.3.6	variation	3735895	3735895	.	.	0	note=complex TCCG=>CCCA CCCA:51 TCCG:0
EA2454	snippy:4.3.6	variation	3735958	3735958	.	.	0	note=complex CCTT=>TCTC TCTC:59 CCTT:0
EA2454	snippy:4.3.6	variation	3735982	3735982	.	.	0	note=snp T=>C C:59 T:0
EA2454	snippy:4.3.6	variation	3736027	3736027	.	.	0	note=complex CGCT=>GGCG GGCG:62 CGCT:0
EA2454	snippy:4.3.6	variation	3736047	3736047	.	.	0	note=snp C=>A A:61 C:0
EA2454	snippy:4.3.6	variation	3736070	3736070	.	.	0	note=snp A=>G G:60 A:2
EA2454	snippy:4.3.6	variation	3736096	3736096	.	.	0	note=snp G=>A A:60 G:2
EA2454	snippy:4.3.6	variation	3736105	3736105	.	.	0	note=snp T=>C C:56 T:2
EA2454	snippy:4.3.6	variation	3736126	3736126	.	.	0	note=snp C=>T T:69 C:0
EA2454	snippy:4.3.6	variation	3736153	3736153	.	.	0	note=snp A=>G G:60 A:0
EA2454	snippy:4.3.6	variation	3736162	3736162	.	.	0	note=snp C=>T T:62 C:0
EA2454	snippy:4.3.6	variation	3736168	3736168	.	.	0	note=snp G=>A A:60 G:2
EA2454	snippy:4.3.6	variation	3736180	3736180	.	.	0	note=snp T=>C C:59 T:0
EA2454	snippy:4.3.6	variation	3736225	3736225	.	.	0	note=snp C=>T T:62 C:0
EA2454	snippy:4.3.6	variation	3736243	3736243	.	.	0	note=snp C=>T T:60 C:0
EA2454	snippy:4.3.6	variation	3736261	3736261	.	.	0	note=snp C=>T T:56 C:1
EA2454	snippy:4.3.6	variation	3736336	3736336	.	.	0	note=snp C=>G G:65 C:0
EA2454	snippy:4.3.6	variation	3736423	3736423	.	.	0	note=complex TGCA=>CGCG CGCG:63 TGCA:0
EA2454	snippy:4.3.6	variation	3736465	3736465	.	.	0	note=snp C=>T T:64 C:1
EA2454	snippy:4.3.6	variation	3736504	3736504	.	.	0	note=snp A=>G G:63 A:0
EA2454	snippy:4.3.6	variation	3736531	3736531	.	.	0	note=snp C=>T T:66 C:0
EA2454	snippy:4.3.6	variation	3736552	3736552	.	.	0	note=complex CCTG=>GCTA GCTA:59 CCTG:0
EA2454	snippy:4.3.6	variation	3736585	3736585	.	.	0	note=snp C=>T T:58 C:0
EA2454	snippy:4.3.6	variation	3736600	3736600	.	.	0	note=snp C=>T T:59 C:0
EA2454	snippy:4.3.6	variation	3736654	3736654	.	.	0	note=snp T=>C C:72 T:0
EA2454	snippy:4.3.6	variation	3736719	3736719	.	.	0	note=snp C=>T T:74 C:0
EA2454	snippy:4.3.6	variation	3736788	3736788	.	.	0	note=complex CGTA=>AGTG AGTG:61 CGTA:0
EA2454	snippy:4.3.6	variation	3736830	3736830	.	.	0	note=snp T=>C C:55 T:0
EA2454	snippy:4.3.6	variation	3736956	3736956	.	.	0	note=snp T=>C C:28 T:0
EA2454	snippy:4.3.6	variation	3737127	3737127	.	.	0	note=snp G=>A A:23 G:0
EA2454	snippy:4.3.6	variation	3737375	3737375	.	.	0	note=complex CTTA=>ATTG ATTG:51 CTTA:0
EA2454	snippy:4.3.6	variation	3737409	3737409	.	.	0	note=snp C=>T T:59 C:0
EA2454	snippy:4.3.6	variation	3737480	3737480	.	.	0	note=snp C=>G G:50 C:0
EA2454	snippy:4.3.6	variation	3737516	3737516	.	.	0	note=snp T=>C C:46 T:0
EA2454	snippy:4.3.6	variation	3737555	3737555	.	.	0	note=snp A=>G G:53 A:0
EA2454	snippy:4.3.6	variation	3737567	3737567	.	.	0	note=snp T=>C C:52 T:1
EA2454	snippy:4.3.6	variation	3737627	3737627	.	.	0	note=snp C=>T T:60 C:0
EA2454	snippy:4.3.6	variation	3737672	3737672	.	.	0	note=snp C=>T T:56 C:0
EA2454	snippy:4.3.6	variation	3737699	3737699	.	.	0	note=snp C=>T T:53 C:0
EA2454	snippy:4.3.6	variation	3737777	3737777	.	.	0	note=snp G=>A A:67 G:0
EA2454	snippy:4.3.6	variation	3737816	3737816	.	.	0	note=snp T=>C C:67 T:0
EA2454	snippy:4.3.6	variation	3737825	3737825	.	.	0	note=snp C=>T T:66 C:0
EA2454	snippy:4.3.6	variation	3737867	3737867	.	.	0	note=snp G=>A A:74 G:0
EA2454	snippy:4.3.6	variation	3737876	3737876	.	.	0	note=snp C=>A A:69 C:0
EA2454	snippy:4.3.6	variation	3737885	3737885	.	.	0	note=snp T=>C C:76 T:0
EA2454	snippy:4.3.6	variation	3737898	3737898	.	.	0	note=snp G=>A A:78 G:0
EA2454	snippy:4.3.6	variation	3737906	3737906	.	.	0	note=complex GGCG=>TGCT TGCT:72 GGCG:0
EA2454	snippy:4.3.6	variation	3737921	3737921	.	.	0	note=snp T=>C C:76 T:0
EA2454	snippy:4.3.6	variation	3738088	3738088	.	.	0	note=complex CGTG=>TGTA TGTA:64 CGTG:0
EA2454	snippy:4.3.6	variation	3738112	3738112	.	.	0	note=snp T=>C C:62 T:0
EA2454	snippy:4.3.6	variation	3738142	3738142	.	.	0	note=snp T=>C C:63 T:0
EA2454	snippy:4.3.6	variation	3738166	3738166	.	.	0	note=snp C=>T T:57 C:0
EA2454	snippy:4.3.6	variation	3738195	3738195	.	.	0	note=snp T=>G G:60 T:0
EA2454	snippy:4.3.6	variation	3738325	3738325	.	.	0	note=snp A=>G G:44 A:0
EA2454	snippy:4.3.6	variation	3738349	3738349	.	.	0	note=snp T=>C C:46 T:0
EA2454	snippy:4.3.6	variation	3738361	3738361	.	.	0	note=complex GTGT=>ATGC ATGC:48 GTGT:0
EA2454	snippy:4.3.6	variation	3738373	3738373	.	.	0	note=complex GGGT=>CGGC CGGC:47 GGGT:0
EA2454	snippy:4.3.6	variation	3738451	3738451	.	.	0	note=snp C=>T T:51 C:0
EA2454	snippy:4.3.6	variation	3738469	3738469	.	.	0	note=snp G=>A A:57 G:0
EA2454	snippy:4.3.6	variation	3738499	3738499	.	.	0	note=complex CGGT=>TGGA TGGA:52 CGGT:0
EA2454	snippy:4.3.6	variation	3738523	3738523	.	.	0	note=snp T=>C C:67 T:0
EA2454	snippy:4.3.6	variation	3738565	3738565	.	.	0	note=snp A=>G G:75 A:0
EA2454	snippy:4.3.6	variation	3738580	3738580	.	.	0	note=snp G=>A A:78 G:1
EA2454	snippy:4.3.6	variation	3738586	3738586	.	.	0	note=snp G=>A A:77 G:0
EA2454	snippy:4.3.6	variation	3738625	3738625	.	.	0	note=snp C=>G G:75 C:1
EA2454	snippy:4.3.6	variation	3738673	3738673	.	.	0	note=snp C=>T T:72 C:0
EA2454	snippy:4.3.6	variation	3738783	3738783	.	.	0	note=snp C=>T T:50 C:0
EA2454	snippy:4.3.6	variation	3738816	3738816	.	.	0	note=snp T=>G G:50 T:0
EA2454	snippy:4.3.6	variation	3738849	3738849	.	.	0	note=snp C=>T T:43 C:0
EA2454	snippy:4.3.6	variation	3738856	3738856	.	.	0	note=snp C=>T T:48 C:0
EA2454	snippy:4.3.6	variation	3738918	3738918	.	.	0	note=snp T=>C C:49 T:0
EA2454	snippy:4.3.6	variation	3738981	3738981	.	.	0	note=complex CGTAGTAAA=>TGTGGTGAG TGTGGTGAG:46 CGTAGTAAA:0
EA2454	snippy:4.3.6	variation	3738996	3738996	.	.	0	note=snp G=>T T:56 G:0
EA2454	snippy:4.3.6	variation	3739005	3739005	.	.	0	note=snp C=>T T:53 C:1
EA2454	snippy:4.3.6	variation	3739018	3739018	.	.	0	note=snp C=>T T:56 C:0
EA2454	snippy:4.3.6	variation	3739026	3739026	.	.	0	note=snp A=>G G:50 A:0
EA2454	snippy:4.3.6	variation	3739032	3739032	.	.	0	note=snp G=>A A:51 G:0
EA2454	snippy:4.3.6	variation	3739038	3739038	.	.	0	note=snp T=>A A:53 T:0
EA2454	snippy:4.3.6	variation	3739044	3739044	.	.	0	note=snp A=>G G:49 A:1
EA2454	snippy:4.3.6	variation	3739095	3739095	.	.	0	note=snp A=>G G:63 A:0
EA2454	snippy:4.3.6	variation	3739137	3739137	.	.	0	note=snp C=>T T:59 C:0
EA2454	snippy:4.3.6	variation	3739194	3739194	.	.	0	note=snp G=>A A:55 G:0
EA2454	snippy:4.3.6	variation	3739212	3739212	.	.	0	note=snp A=>G G:52 A:0
EA2454	snippy:4.3.6	variation	3739281	3739281	.	.	0	note=snp A=>G G:48 A:0
EA2454	snippy:4.3.6	variation	3739287	3739287	.	.	0	note=snp C=>T T:50 C:0
EA2454	snippy:4.3.6	variation	3739308	3739308	.	.	0	note=complex GC=>AT AT:48 GC:0
EA2454	snippy:4.3.6	variation	3739332	3739332	.	.	0	note=snp C=>T T:42 C:0
EA2454	snippy:4.3.6	variation	3739344	3739344	.	.	0	note=snp G=>A A:42 G:0
EA2454	snippy:4.3.6	variation	3739356	3739356	.	.	0	note=complex GCG=>ACA ACA:44 GCG:0
EA2454	snippy:4.3.6	variation	3739415	3739415	.	.	0	note=del CAA=>C C:37 CAA:0
EA2454	snippy:4.3.6	variation	3739463	3739463	.	.	0	note=complex GCTGC=>ACCAA ACCAA:47 GCTGC:0
EA2454	snippy:4.3.6	variation	3739476	3739476	.	.	0	note=snp T=>C C:48 T:0
EA2454	snippy:4.3.6	variation	3739482	3739482	.	.	0	note=snp A=>G G:51 A:0
EA2454	snippy:4.3.6	variation	3739500	3739500	.	.	0	note=snp A=>G G:54 A:0
EA2454	snippy:4.3.6	variation	3739611	3739611	.	.	0	note=snp T=>C C:58 T:0
EA2454	snippy:4.3.6	variation	3739617	3739617	.	.	0	note=snp G=>A A:60 G:0
EA2454	snippy:4.3.6	variation	3739647	3739647	.	.	0	note=snp T=>C C:62 T:1
EA2454	snippy:4.3.6	variation	3739654	3739654	.	.	0	note=snp C=>T T:64 C:0
EA2454	snippy:4.3.6	variation	3739659	3739659	.	.	0	note=snp G=>A A:65 G:0
EA2454	snippy:4.3.6	variation	3739667	3739667	.	.	0	note=snp G=>A A:61 G:0
EA2454	snippy:4.3.6	variation	3739680	3739680	.	.	0	note=snp T=>A A:63 T:0
EA2454	snippy:4.3.6	variation	3739725	3739725	.	.	0	note=snp G=>A A:71 G:0
EA2454	snippy:4.3.6	variation	3739887	3739887	.	.	0	note=complex GACT=>AACC AACC:74 GACT:0
EA2454	snippy:4.3.6	variation	3739903	3739903	.	.	0	note=complex TTCAG=>CTCAA CTCAA:71 TTCAG:0
EA2454	snippy:4.3.6	variation	3739965	3739965	.	.	0	note=complex TTCTTCG=>CTCTACA CTCTACA:71 TTCTTCG:0
EA2454	snippy:4.3.6	variation	3740001	3740001	.	.	0	note=complex CTT=>TTG TTG:81 CTT:0
EA2454	snippy:4.3.6	variation	3740013	3740013	.	.	0	note=snp C=>T T:85 C:0
EA2454	snippy:4.3.6	variation	3740052	3740052	.	.	0	note=snp T=>C C:85 T:0
EA2454	snippy:4.3.6	variation	3740064	3740064	.	.	0	note=snp T=>G G:88 T:0
EA2454	snippy:4.3.6	variation	3740076	3740076	.	.	0	note=snp G=>A A:90 G:0
EA2454	snippy:4.3.6	variation	3740097	3740097	.	.	0	note=snp C=>T T:84 C:0
EA2454	snippy:4.3.6	variation	3740103	3740103	.	.	0	note=complex TGC=>AGG AGG:82 TGC:0
EA2454	snippy:4.3.6	variation	3740115	3740115	.	.	0	note=snp G=>A A:88 G:0
EA2454	snippy:4.3.6	variation	3740169	3740169	.	.	0	note=snp T=>C C:82 T:0
EA2454	snippy:4.3.6	variation	3740204	3740204	.	.	0	note=complex GA=>AT AT:78 GA:0
EA2454	snippy:4.3.6	variation	3740343	3740343	.	.	0	note=snp G=>A A:80 G:0
EA2454	snippy:4.3.6	variation	3740384	3740384	.	.	0	note=snp A=>T T:74 A:0
EA2454	snippy:4.3.6	variation	3740503	3740503	.	.	0	note=complex GCCA=>CTCG CTCG:41 GCCA:0
EA2454	snippy:4.3.6	variation	3740524	3740524	.	.	0	note=snp A=>G G:30 A:0
EA2454	snippy:4.3.6	variation	3740548	3740548	.	.	0	note=snp A=>T T:37 A:0
EA2454	snippy:4.3.6	variation	3740612	3740612	.	.	0	note=snp A=>G G:51 A:0
EA2454	snippy:4.3.6	variation	3740672	3740672	.	.	0	note=snp G=>A A:61 G:0
EA2454	snippy:4.3.6	variation	3740681	3740681	.	.	0	note=snp G=>A A:60 G:0
EA2454	snippy:4.3.6	variation	3740735	3740735	.	.	0	note=complex CGAG=>TGAA TGAA:64 CGAG:0
EA2454	snippy:4.3.6	variation	3740762	3740762	.	.	0	note=snp A=>G G:69 A:0
EA2454	snippy:4.3.6	variation	3740879	3740879	.	.	0	note=snp T=>C C:68 T:0
EA2454	snippy:4.3.6	variation	3740909	3740909	.	.	0	note=snp G=>A A:76 G:0
EA2454	snippy:4.3.6	variation	3740933	3740933	.	.	0	note=snp G=>A A:71 G:0
EA2454	snippy:4.3.6	variation	3740980	3740980	.	.	0	note=snp A=>G G:65 A:0
EA2454	snippy:4.3.6	variation	3741053	3741053	.	.	0	note=complex ACGCGGA=>GCGTGGG GCGTGGG:56 ACGCGGA:0
EA2454	snippy:4.3.6	variation	3741167	3741167	.	.	0	note=complex GAAA=>AAAC AAAC:68 GAAA:0
EA2454	snippy:4.3.6	variation	3741176	3741176	.	.	0	note=snp A=>T T:68 A:0
EA2454	snippy:4.3.6	variation	3741191	3741191	.	.	0	note=complex GGTTGAA=>AGTGGAG AGTGGAG:64 GGTTGAA:0
EA2454	snippy:4.3.6	variation	3741213	3741213	.	.	0	note=snp A=>G G:66 A:0
EA2454	snippy:4.3.6	variation	3741245	3741245	.	.	0	note=snp T=>C C:88 T:0
EA2454	snippy:4.3.6	variation	3741287	3741287	.	.	0	note=snp G=>T T:85 G:0
EA2454	snippy:4.3.6	variation	3741305	3741305	.	.	0	note=complex GAGA=>AAGG AAGG:86 GAGA:0
EA2454	snippy:4.3.6	variation	3741320	3741320	.	.	0	note=snp G=>A A:99 G:0
EA2454	snippy:4.3.6	variation	3741527	3741527	.	.	0	note=snp G=>A A:77 G:0
EA2454	snippy:4.3.6	variation	3741659	3741659	.	.	0	note=snp C=>A A:47 C:0
EA2454	snippy:4.3.6	variation	3741712	3741712	.	.	0	note=snp G=>A A:49 G:0
EA2454	snippy:4.3.6	variation	3741731	3741731	.	.	0	note=snp T=>A A:47 T:0
EA2454	snippy:4.3.6	variation	3741937	3741937	.	.	0	note=snp T=>C C:29 T:0
EA2454	snippy:4.3.6	variation	3741952	3741952	.	.	0	note=snp G=>A A:29 G:0
EA2454	snippy:4.3.6	variation	3742122	3742122	.	.	0	note=snp G=>A A:63 G:0
EA2454	snippy:4.3.6	variation	3742134	3742134	.	.	0	note=snp G=>A A:66 G:0
EA2454	snippy:4.3.6	variation	3742152	3742152	.	.	0	note=snp A=>G G:66 A:0
EA2454	snippy:4.3.6	variation	3742161	3742161	.	.	0	note=snp A=>C C:68 A:0
EA2454	snippy:4.3.6	variation	3742167	3742167	.	.	0	note=snp A=>C C:70 A:0
EA2454	snippy:4.3.6	variation	3742221	3742221	.	.	0	note=snp G=>A A:91 G:0
EA2454	snippy:4.3.6	variation	3742236	3742236	.	.	0	note=complex CTTG=>TTTA TTTA:82 CTTG:0
EA2454	snippy:4.3.6	variation	3742284	3742284	.	.	0	note=snp A=>G G:76 A:0
EA2454	snippy:4.3.6	variation	3742293	3742293	.	.	0	note=snp A=>G G:74 A:0
EA2454	snippy:4.3.6	variation	3742332	3742332	.	.	0	note=snp A=>G G:82 A:0
EA2454	snippy:4.3.6	variation	3742356	3742356	.	.	0	note=snp G=>A A:85 G:0
EA2454	snippy:4.3.6	variation	3742392	3742392	.	.	0	note=complex AGCACGC=>GGCGCGT GGCGCGT:89 AGCACGC:0
EA2454	snippy:4.3.6	variation	3742416	3742416	.	.	0	note=complex GGCG=>AGCA AGCA:94 GGCG:0
EA2454	snippy:4.3.6	variation	3742446	3742446	.	.	0	note=snp A=>C C:79 A:0
EA2454	snippy:4.3.6	variation	3742452	3742452	.	.	0	note=snp A=>G G:79 A:0
EA2454	snippy:4.3.6	variation	3742485	3742485	.	.	0	note=snp A=>T T:80 A:0
EA2454	snippy:4.3.6	variation	3742494	3742494	.	.	0	note=snp C=>T T:76 C:0
EA2454	snippy:4.3.6	variation	3742521	3742521	.	.	0	note=snp C=>T T:82 C:0
EA2454	snippy:4.3.6	variation	3742530	3742530	.	.	0	note=snp G=>A A:85 G:1
EA2454	snippy:4.3.6	variation	3742542	3742542	.	.	0	note=snp T=>C C:91 T:0
EA2454	snippy:4.3.6	variation	3742611	3742611	.	.	0	note=snp A=>G G:83 A:0
EA2454	snippy:4.3.6	variation	3742620	3742620	.	.	0	note=snp G=>A A:81 G:1
EA2454	snippy:4.3.6	variation	3742629	3742629	.	.	0	note=complex GCCC=>ACCG ACCG:75 GCCC:0
EA2454	snippy:4.3.6	variation	3742641	3742641	.	.	0	note=complex ATTTGCT=>GTTAGCC GTTAGCC:66 ATTTGCT:0
EA2454	snippy:4.3.6	variation	3742659	3742659	.	.	0	note=snp A=>G G:79 A:0
EA2454	snippy:4.3.6	variation	3742674	3742674	.	.	0	note=snp G=>A A:76 G:0
EA2454	snippy:4.3.6	variation	3742713	3742713	.	.	0	note=snp A=>G G:75 A:0
EA2454	snippy:4.3.6	variation	3742764	3742764	.	.	0	note=snp C=>G G:81 C:0
EA2454	snippy:4.3.6	variation	3742775	3742775	.	.	0	note=snp G=>A A:76 G:0
EA2454	snippy:4.3.6	variation	3742787	3742787	.	.	0	note=complex AA=>TG TG:73 AA:0
EA2454	snippy:4.3.6	variation	3742830	3742830	.	.	0	note=complex TAA=>CAG CAG:73 TAA:0
EA2454	snippy:4.3.6	variation	3742842	3742842	.	.	0	note=snp A=>G G:75 A:0
EA2454	snippy:4.3.6	variation	3742869	3742869	.	.	0	note=snp T=>C C:78 T:0
EA2454	snippy:4.3.6	variation	3742884	3742884	.	.	0	note=snp C=>T T:77 C:0
EA2454	snippy:4.3.6	variation	3742905	3742905	.	.	0	note=snp T=>G G:77 T:0
EA2454	snippy:4.3.6	variation	3742914	3742914	.	.	0	note=complex CGGTTCGCCA=>TGGCTCACCG TGGCTCACCG:69 CGGTTCGCCA:0
EA2454	snippy:4.3.6	variation	3742932	3742932	.	.	0	note=complex AACG=>CACT CACT:73 AACG:0
EA2454	snippy:4.3.6	variation	3742959	3742959	.	.	0	note=snp A=>C C:80 A:0
EA2454	snippy:4.3.6	variation	3742986	3742986	.	.	0	note=snp G=>T T:83 G:0
EA2454	snippy:4.3.6	variation	3743022	3743022	.	.	0	note=snp C=>T T:85 C:0
EA2454	snippy:4.3.6	variation	3743037	3743037	.	.	0	note=snp A=>G G:83 A:0
EA2454	snippy:4.3.6	variation	3743049	3743049	.	.	0	note=complex GATA=>AATG AATG:80 GATA:0
EA2454	snippy:4.3.6	variation	3743061	3743061	.	.	0	note=snp A=>G G:80 A:0
EA2454	snippy:4.3.6	variation	3743181	3743181	.	.	0	note=snp C=>G G:75 C:0
EA2454	snippy:4.3.6	variation	3743226	3743226	.	.	0	note=snp A=>C C:71 A:0
EA2454	snippy:4.3.6	variation	3743238	3743238	.	.	0	note=snp A=>G G:70 A:0
EA2454	snippy:4.3.6	variation	3743373	3743373	.	.	0	note=snp C=>T T:24 C:0
EA2454	snippy:4.3.6	variation	3743394	3743394	.	.	0	note=snp G=>T T:17 G:0
EA2454	snippy:4.3.6	variation	3743400	3743400	.	.	0	note=snp G=>A A:15 G:0
EA2454	snippy:4.3.6	variation	3762952	3762952	.	.	0	note=snp A=>C C:10 A:0
EA2454	snippy:4.3.6	variation	3762967	3762967	.	.	0	note=complex GTAT=>ATAA ATAA:16 GTAT:0
EA2454	snippy:4.3.6	variation	3763000	3763000	.	.	0	note=snp T=>A A:21 T:0
EA2454	snippy:4.3.6	variation	3763015	3763015	.	.	0	note=snp G=>T T:26 G:0
EA2454	snippy:4.3.6	variation	3763024	3763024	.	.	0	note=snp G=>A A:27 G:0
EA2454	snippy:4.3.6	variation	3763041	3763041	.	.	0	note=snp G=>T T:31 G:0
EA2454	snippy:4.3.6	variation	3763057	3763057	.	.	0	note=snp A=>T T:34 A:0
EA2454	snippy:4.3.6	variation	3763063	3763063	.	.	0	note=complex CTGA=>TTGG TTGG:36 CTGA:0
EA2454	snippy:4.3.6	variation	3763087	3763087	.	.	0	note=snp T=>C C:51 T:0
EA2454	snippy:4.3.6	variation	3763099	3763099	.	.	0	note=snp T=>A A:53 T:0
EA2454	snippy:4.3.6	variation	3763117	3763117	.	.	0	note=snp G=>T T:56 G:0
EA2454	snippy:4.3.6	variation	3763195	3763195	.	.	0	note=complex GACG=>AACA AACA:76 GACG:0
EA2454	snippy:4.3.6	variation	3763204	3763204	.	.	0	note=snp A=>G G:79 A:0
EA2454	snippy:4.3.6	variation	3763213	3763213	.	.	0	note=snp A=>G G:79 A:0
EA2454	snippy:4.3.6	variation	3763219	3763219	.	.	0	note=complex ACGG=>GCGA GCGA:78 ACGG:0
EA2454	snippy:4.3.6	variation	3763231	3763231	.	.	0	note=snp C=>T T:82 C:0
EA2454	snippy:4.3.6	variation	3763243	3763243	.	.	0	note=snp G=>A A:81 G:0
EA2454	snippy:4.3.6	variation	3763249	3763249	.	.	0	note=snp C=>G G:83 C:0
EA2454	snippy:4.3.6	variation	3763264	3763264	.	.	0	note=complex GTCA=>ATCG ATCG:74 GTCA:0
EA2454	snippy:4.3.6	variation	3763294	3763294	.	.	0	note=snp A=>G G:73 A:0
EA2454	snippy:4.3.6	variation	3763300	3763300	.	.	0	note=snp G=>T T:70 G:0
EA2454	snippy:4.3.6	variation	3763309	3763309	.	.	0	note=snp A=>T T:72 A:0
EA2454	snippy:4.3.6	variation	3763315	3763315	.	.	0	note=complex ACGT=>GCGC GCGC:67 ACGT:0
EA2454	snippy:4.3.6	variation	3763330	3763330	.	.	0	note=snp A=>T T:59 A:0
EA2454	snippy:4.3.6	variation	3763342	3763342	.	.	0	note=snp A=>G G:64 A:0
EA2454	snippy:4.3.6	variation	3763363	3763363	.	.	0	note=snp G=>A A:61 G:0
EA2454	snippy:4.3.6	variation	3763402	3763402	.	.	0	note=snp A=>G G:58 A:0
EA2454	snippy:4.3.6	variation	3763417	3763417	.	.	0	note=snp A=>G G:57 A:0
EA2454	snippy:4.3.6	variation	3763429	3763429	.	.	0	note=snp T=>C C:57 T:0
EA2454	snippy:4.3.6	variation	3763444	3763444	.	.	0	note=snp C=>T T:56 C:0
EA2454	snippy:4.3.6	variation	3763492	3763492	.	.	0	note=snp C=>T T:56 C:0
EA2454	snippy:4.3.6	variation	3763531	3763531	.	.	0	note=snp T=>C C:68 T:0
EA2454	snippy:4.3.6	variation	3763540	3763540	.	.	0	note=snp T=>C C:70 T:1
EA2454	snippy:4.3.6	variation	3763564	3763564	.	.	0	note=snp A=>T T:74 A:0
EA2454	snippy:4.3.6	variation	3763866	3763866	.	.	0	note=snp T=>G G:59 T:0
EA2454	snippy:4.3.6	variation	3763954	3763954	.	.	0	note=snp T=>C C:56 T:0
EA2454	snippy:4.3.6	variation	3764038	3764038	.	.	0	note=snp A=>T T:71 A:0
EA2454	snippy:4.3.6	variation	3764143	3764143	.	.	0	note=snp T=>G G:83 T:0
EA2454	snippy:4.3.6	variation	3764179	3764179	.	.	0	note=snp A=>T T:78 A:0
EA2454	snippy:4.3.6	variation	3764209	3764209	.	.	0	note=complex AAG=>TAA TAA:81 AAG:0
EA2454	snippy:4.3.6	variation	3764221	3764221	.	.	0	note=snp G=>C C:81 G:0
EA2454	snippy:4.3.6	variation	3764232	3764232	.	.	0	note=snp T=>C C:87 T:0
EA2454	snippy:4.3.6	variation	3764275	3764275	.	.	0	note=snp G=>A A:69 G:0
EA2454	snippy:4.3.6	variation	3764323	3764323	.	.	0	note=snp T=>C C:73 T:0
EA2454	snippy:4.3.6	variation	3764389	3764389	.	.	0	note=snp T=>G G:70 T:0
EA2454	snippy:4.3.6	variation	3764464	3764464	.	.	0	note=snp C=>G G:65 C:0
EA2454	snippy:4.3.6	variation	3764476	3764476	.	.	0	note=snp G=>A A:77 G:0
EA2454	snippy:4.3.6	variation	3764500	3764500	.	.	0	note=snp C=>T T:70 C:0
EA2454	snippy:4.3.6	variation	3764511	3764511	.	.	0	note=snp A=>G G:71 A:0
EA2454	snippy:4.3.6	variation	3764632	3764632	.	.	0	note=snp A=>G G:84 A:0
EA2454	snippy:4.3.6	variation	3764638	3764638	.	.	0	note=complex ATAA=>GTAG GTAG:83 ATAA:0
EA2454	snippy:4.3.6	variation	3764647	3764647	.	.	0	note=snp C=>A A:85 C:0
EA2454	snippy:4.3.6	variation	3764652	3764652	.	.	0	note=complex CAAGG=>AAAGA AAAGA:79 CAAGG:0
EA2454	snippy:4.3.6	variation	3764665	3764665	.	.	0	note=snp A=>G G:80 A:0
EA2454	snippy:4.3.6	variation	3764684	3764684	.	.	0	note=snp C=>T T:81 C:0
EA2454	snippy:4.3.6	variation	3764689	3764689	.	.	0	note=snp G=>A A:81 G:0
EA2454	snippy:4.3.6	variation	3764764	3764764	.	.	0	note=snp G=>A A:51 G:0
EA2454	snippy:4.3.6	variation	3764770	3764770	.	.	0	note=snp G=>C C:40 G:0
EA2454	snippy:4.3.6	variation	3764794	3764794	.	.	0	note=snp G=>A A:36 G:0
EA2454	snippy:4.3.6	variation	3764839	3764839	.	.	0	note=complex CAAAATA=>TAAGATG TAAGATG:13 CAAAATA:0
EA2454	snippy:4.3.6	variation	3766011	3766011	.	.	0	note=snp A=>C C:50 A:0
EA2454	snippy:4.3.6	variation	3785445	3785445	.	.	0	note=snp G=>T T:50 G:0
EA2454	snippy:4.3.6	variation	3785909	3785909	.	.	0	note=snp C=>T T:53 C:0
EA2454	snippy:4.3.6	variation	3841154	3841154	.	.	0	note=snp G=>T T:74 G:0
EA2454	snippy:4.3.6	variation	3851565	3851565	.	.	0	note=complex TAAAC=>CAGAT CAGAT:12 TAAAC:0
EA2454	snippy:4.3.6	variation	3851575	3851575	.	.	0	note=snp A=>T T:12 A:0
EA2454	snippy:4.3.6	variation	3851580	3851580	.	.	0	note=complex AC=>TT TT:12 AC:0
EA2454	snippy:4.3.6	variation	3851695	3851695	.	.	0	note=snp T=>C C:13 T:0
EA2454	snippy:4.3.6	variation	3851703	3851703	.	.	0	note=complex ACCA=>GCCT GCCT:13 ACCA:0
EA2454	snippy:4.3.6	variation	3851770	3851770	.	.	0	note=snp T=>C C:12 T:0
EA2454	snippy:4.3.6	variation	3851774	3851774	.	.	0	note=snp C=>G G:10 C:0
EA2454	snippy:4.3.6	variation	3851884	3851884	.	.	0	note=complex CTTC=>TTTT TTTT:21 CTTC:0
EA2454	snippy:4.3.6	variation	3851913	3851913	.	.	0	note=snp G=>A A:24 G:0
EA2454	snippy:4.3.6	variation	3852607	3852607	.	.	0	note=complex CCGTT=>TCGTC TCGTC:44 CCGTT:0
EA2454	snippy:4.3.6	variation	3852799	3852799	.	.	0	note=snp A=>G G:39 A:0
EA2454	snippy:4.3.6	variation	3852974	3852974	.	.	0	note=snp A=>G G:38 A:0
EA2454	snippy:4.3.6	variation	3852999	3852999	.	.	0	note=snp T=>C C:36 T:0
EA2454	snippy:4.3.6	variation	3853929	3853929	.	.	0	note=snp A=>C C:13 A:0
EA2454	snippy:4.3.6	variation	3854000	3854000	.	.	0	note=snp A=>G G:15 A:0
EA2454	snippy:4.3.6	variation	3854060	3854060	.	.	0	note=snp G=>A A:23 G:0
EA2454	snippy:4.3.6	variation	3854630	3854630	.	.	0	note=snp A=>G G:10 A:0
EA2454	snippy:4.3.6	variation	3854838	3854838	.	.	0	note=snp C=>T T:11 C:0
EA2454	snippy:4.3.6	variation	3855001	3855001	.	.	0	note=snp A=>G G:21 A:0
EA2454	snippy:4.3.6	variation	3855008	3855008	.	.	0	note=snp A=>T T:21 A:0
EA2454	snippy:4.3.6	variation	3855032	3855032	.	.	0	note=snp C=>T T:20 C:0
EA2454	snippy:4.3.6	variation	3855138	3855138	.	.	0	note=snp A=>G G:15 A:0
EA2454	snippy:4.3.6	variation	3855170	3855170	.	.	0	note=snp C=>T T:10 C:0
EA2454	snippy:4.3.6	variation	3855627	3855627	.	.	0	note=snp T=>A A:17 T:0
EA2454	snippy:4.3.6	variation	3856458	3856458	.	.	0	note=snp A=>G G:24 A:0
EA2454	snippy:4.3.6	variation	3856485	3856485	.	.	0	note=snp G=>A A:24 G:0
EA2454	snippy:4.3.6	variation	3856521	3856521	.	.	0	note=snp T=>C C:24 T:0
EA2454	snippy:4.3.6	variation	3856590	3856590	.	.	0	note=snp C=>T T:36 C:0
EA2454	snippy:4.3.6	variation	3856623	3856623	.	.	0	note=snp T=>C C:36 T:0
EA2454	snippy:4.3.6	variation	3856715	3856715	.	.	0	note=snp A=>C C:29 A:0
EA2454	snippy:4.3.6	variation	3857191	3857191	.	.	0	note=complex AGAACGT=>TGAGCGG TGAGCGG:26 AGAACGT:0
EA2454	snippy:4.3.6	variation	3857206	3857206	.	.	0	note=snp T=>C C:29 T:0
EA2454	snippy:4.3.6	variation	3857293	3857293	.	.	0	note=snp T=>A A:25 T:0
EA2454	snippy:4.3.6	variation	3859504	3859504	.	.	0	note=snp C=>G G:20 C:0
EA2454	snippy:4.3.6	variation	3859719	3859719	.	.	0	note=snp G=>A A:27 G:0
EA2454	snippy:4.3.6	variation	3860286	3860286	.	.	0	note=snp T=>C C:18 T:0
EA2454	snippy:4.3.6	variation	3860512	3860512	.	.	0	note=snp A=>T T:19 A:0
EA2454	snippy:4.3.6	variation	3860678	3860678	.	.	0	note=snp C=>T T:13 C:0
EA2454	snippy:4.3.6	variation	3860700	3860700	.	.	0	note=snp C=>T T:11 C:0
EA2454	snippy:4.3.6	variation	3861180	3861180	.	.	0	note=snp C=>T T:15 C:0
EA2454	snippy:4.3.6	variation	3861252	3861252	.	.	0	note=complex TATT=>GGTG GGTG:11 TATT:0
EA2454	snippy:4.3.6	variation	3861261	3861261	.	.	0	note=complex GTGT=>CTGC CTGC:13 GTGT:0
EA2454	snippy:4.3.6	variation	3861333	3861333	.	.	0	note=snp A=>G G:11 A:0
EA2454	snippy:4.3.6	variation	3861384	3861384	.	.	0	note=snp A=>C C:10 A:0
EA2454	snippy:4.3.6	variation	3861498	3861498	.	.	0	note=snp C=>T T:12 C:0
EA2454	snippy:4.3.6	variation	3861516	3861516	.	.	0	note=snp T=>C C:11 T:0
EA2454	snippy:4.3.6	variation	3861585	3861585	.	.	0	note=complex TTTC=>CTTT CTTT:13 TTTC:0
EA2454	snippy:4.3.6	variation	3861594	3861594	.	.	0	note=snp G=>T T:14 G:0
EA2454	snippy:4.3.6	variation	3861621	3861621	.	.	0	note=snp T=>C C:13 T:0
EA2454	snippy:4.3.6	variation	3861630	3861630	.	.	0	note=snp T=>C C:12 T:0
EA2454	snippy:4.3.6	variation	3861636	3861636	.	.	0	note=snp C=>T T:12 C:0
EA2454	snippy:4.3.6	variation	3861820	3861820	.	.	0	note=snp A=>G G:14 A:0
EA2454	snippy:4.3.6	variation	3861840	3861840	.	.	0	note=snp T=>C C:16 T:0
EA2454	snippy:4.3.6	variation	3861856	3861856	.	.	0	note=snp A=>C C:18 A:0
EA2454	snippy:4.3.6	variation	3861864	3861864	.	.	0	note=snp T=>C C:21 T:0
EA2454	snippy:4.3.6	variation	3861870	3861870	.	.	0	note=complex CCCA=>TCCG TCCG:20 CCCA:0
EA2454	snippy:4.3.6	variation	3861957	3861957	.	.	0	note=snp G=>A A:24 G:0
EA2454	snippy:4.3.6	variation	3861966	3861966	.	.	0	note=snp G=>A A:25 G:0
EA2454	snippy:4.3.6	variation	3861990	3861990	.	.	0	note=complex GTCAGTTGAAAAG=>CTCCGTGGAGAAA CTCCGTGGAGAAA:24 GTCAGTTGAAAAG:0
EA2454	snippy:4.3.6	variation	3862023	3862023	.	.	0	note=snp G=>A A:28 G:0
EA2454	snippy:4.3.6	variation	3862029	3862029	.	.	0	note=snp C=>T T:26 C:0
EA2454	snippy:4.3.6	variation	3862185	3862185	.	.	0	note=snp C=>T T:26 C:0
EA2454	snippy:4.3.6	variation	3862290	3862290	.	.	0	note=snp G=>T T:19 G:0
EA2454	snippy:4.3.6	variation	3862338	3862338	.	.	0	note=snp C=>T T:13 C:0
EA2454	snippy:4.3.6	variation	3862353	3862353	.	.	0	note=snp T=>C C:11 T:0
EA2454	snippy:4.3.6	variation	3862383	3862383	.	.	0	note=snp C=>T T:12 C:0
EA2454	snippy:4.3.6	variation	3862389	3862389	.	.	0	note=snp T=>C C:10 T:1
EA2454	snippy:4.3.6	variation	3862390	3862390	.	.	0	note=mnp AA=>CG CG:11 AA:0
EA2454	snippy:4.3.6	variation	3862456	3862456	.	.	0	note=snp T=>C C:13 T:0
EA2454	snippy:4.3.6	variation	3862467	3862467	.	.	0	note=snp A=>C C:12 A:0
EA2454	snippy:4.3.6	variation	3862476	3862476	.	.	0	note=snp T=>C C:13 T:0
EA2454	snippy:4.3.6	variation	3862512	3862512	.	.	0	note=snp C=>T T:14 C:0
EA2454	snippy:4.3.6	variation	3862527	3862527	.	.	0	note=complex CTAC=>ATAT ATAT:12 CTAC:0
EA2454	snippy:4.3.6	variation	3862554	3862554	.	.	0	note=complex GGGCGTA=>CGGGGTG CGGGGTG:12 GGGCGTA:0
EA2454	snippy:4.3.6	variation	3862614	3862614	.	.	0	note=snp C=>T T:14 C:0
EA2454	snippy:4.3.6	variation	3862638	3862638	.	.	0	note=snp C=>T T:19 C:0
EA2454	snippy:4.3.6	variation	3862715	3862715	.	.	0	note=mnp AA=>GG GG:20 AA:0
EA2454	snippy:4.3.6	variation	3862731	3862731	.	.	0	note=snp C=>T T:20 C:0
EA2454	snippy:4.3.6	variation	3862740	3862740	.	.	0	note=mnp TCA=>CAG CAG:18 TCA:0
EA2454	snippy:4.3.6	variation	3862752	3862752	.	.	0	note=snp T=>C C:18 T:0
EA2454	snippy:4.3.6	variation	3862765	3862765	.	.	0	note=snp A=>G G:20 A:0
EA2454	snippy:4.3.6	variation	3862783	3862783	.	.	0	note=snp A=>C C:20 A:0
EA2454	snippy:4.3.6	variation	3862788	3862788	.	.	0	note=complex CAGCGAG=>TAACGAC TAACGAC:20 CAGCGAG:0
EA2454	snippy:4.3.6	variation	3862802	3862802	.	.	0	note=snp C=>T T:22 C:0
EA2454	snippy:4.3.6	variation	3862866	3862866	.	.	0	note=snp C=>T T:23 C:0
EA2454	snippy:4.3.6	variation	3862878	3862878	.	.	0	note=snp T=>C C:20 T:0
EA2454	snippy:4.3.6	variation	3862883	3862883	.	.	0	note=snp G=>A A:19 G:0
EA2454	snippy:4.3.6	variation	3862890	3862890	.	.	0	note=snp T=>C C:20 T:0
EA2454	snippy:4.3.6	variation	3862896	3862896	.	.	0	note=snp T=>C C:20 T:0
EA2454	snippy:4.3.6	variation	3862923	3862923	.	.	0	note=complex CAG=>GAA GAA:21 CAG:0
EA2454	snippy:4.3.6	variation	3862947	3862947	.	.	0	note=snp G=>C C:21 G:0
EA2454	snippy:4.3.6	variation	3862974	3862974	.	.	0	note=snp T=>G G:23 T:0
EA2454	snippy:4.3.6	variation	3862990	3862990	.	.	0	note=complex TCCCTGATTATC=>AGCCTTATCATT AGCCTTATCATT:21 TCCCTGATTATC:0
EA2454	snippy:4.3.6	variation	3863007	3863007	.	.	0	note=snp C=>T T:22 C:0
EA2454	snippy:4.3.6	variation	3863014	3863014	.	.	0	note=snp A=>C C:22 A:0
EA2454	snippy:4.3.6	variation	3863036	3863036	.	.	0	note=mnp CT=>AC AC:22 CT:0
EA2454	snippy:4.3.6	variation	3863043	3863043	.	.	0	note=snp A=>G G:22 A:0
EA2454	snippy:4.3.6	variation	3863093	3863093	.	.	0	note=complex GTAAA=>ACAAG ACAAG:20 GTAAA:0
EA2454	snippy:4.3.6	variation	3863106	3863106	.	.	0	note=snp G=>A A:19 G:0
EA2454	snippy:4.3.6	variation	3863113	3863113	.	.	0	note=complex CAA=>GAG GAG:19 CAA:0
EA2454	snippy:4.3.6	variation	3863121	3863121	.	.	0	note=snp T=>C C:19 T:0
EA2454	snippy:4.3.6	variation	3863127	3863127	.	.	0	note=complex CACCTGT=>TACCGCC TACCGCC:16 CACCTGT:0
EA2454	snippy:4.3.6	variation	3863139	3863139	.	.	0	note=snp C=>T T:19 C:0
EA2454	snippy:4.3.6	variation	3863208	3863208	.	.	0	note=snp T=>G G:18 T:0
EA2454	snippy:4.3.6	variation	3863217	3863217	.	.	0	note=snp G=>A A:17 G:0
EA2454	snippy:4.3.6	variation	3863280	3863280	.	.	0	note=snp T=>C C:13 T:0
EA2454	snippy:4.3.6	variation	3863287	3863287	.	.	0	note=complex TTATTC=>CTGTAT CTGTAT:13 TTATTC:0
EA2454	snippy:4.3.6	variation	3863319	3863319	.	.	0	note=snp G=>T T:15 G:0
EA2454	snippy:4.3.6	variation	3863331	3863331	.	.	0	note=snp C=>T T:13 C:2
EA2454	snippy:4.3.6	variation	3863337	3863337	.	.	0	note=snp T=>C C:14 T:0
EA2454	snippy:4.3.6	variation	3863346	3863346	.	.	0	note=snp T=>C C:15 T:0
EA2454	snippy:4.3.6	variation	3863352	3863352	.	.	0	note=snp C=>T T:16 C:0
EA2454	snippy:4.3.6	variation	3863406	3863406	.	.	0	note=snp T=>C C:12 T:0
EA2454	snippy:4.3.6	variation	3863478	3863478	.	.	0	note=complex ACGCAGG=>GCGTAAA GCGTAAA:14 ACGCAGG:0
EA2454	snippy:4.3.6	variation	3863490	3863490	.	.	0	note=snp C=>G G:17 C:0
EA2454	snippy:4.3.6	variation	3863532	3863532	.	.	0	note=complex ATCG=>GTCA GTCA:21 ATCG:0
EA2454	snippy:4.3.6	variation	3863559	3863559	.	.	0	note=snp G=>A A:22 G:0
EA2454	snippy:4.3.6	variation	3863700	3863700	.	.	0	note=snp G=>A A:27 G:0
EA2454	snippy:4.3.6	variation	3863732	3863732	.	.	0	note=snp A=>G G:32 A:0
EA2454	snippy:4.3.6	variation	3863740	3863740	.	.	0	note=snp T=>C C:34 T:0
EA2454	snippy:4.3.6	variation	3863840	3863840	.	.	0	note=snp T=>C C:30 T:0
EA2454	snippy:4.3.6	variation	3863865	3863865	.	.	0	note=complex ACG=>GCA GCA:28 ACG:0
EA2454	snippy:4.3.6	variation	3863900	3863900	.	.	0	note=snp T=>G G:30 T:0
EA2454	snippy:4.3.6	variation	3863924	3863924	.	.	0	note=snp A=>T T:28 A:0
EA2454	snippy:4.3.6	variation	3863966	3863966	.	.	0	note=snp G=>A A:30 G:0
EA2454	snippy:4.3.6	variation	3863978	3863978	.	.	0	note=snp G=>A A:28 G:0
EA2454	snippy:4.3.6	variation	3864011	3864011	.	.	0	note=snp A=>G G:31 A:0
EA2454	snippy:4.3.6	variation	3864034	3864034	.	.	0	note=snp A=>C C:27 A:0
EA2454	snippy:4.3.6	variation	3864070	3864070	.	.	0	note=complex GC=>AA AA:32 GC:0
EA2454	snippy:4.3.6	variation	3864181	3864181	.	.	0	note=snp C=>T T:33 C:0
EA2454	snippy:4.3.6	variation	3864199	3864199	.	.	0	note=complex TCCTGGA=>GCCCGGT GCCCGGT:37 TCCTGGA:0
EA2454	snippy:4.3.6	variation	3864220	3864220	.	.	0	note=snp A=>G G:37 A:0
EA2454	snippy:4.3.6	variation	3864262	3864262	.	.	0	note=snp T=>G G:33 T:0
EA2454	snippy:4.3.6	variation	3864307	3864307	.	.	0	note=snp A=>T T:32 A:0
EA2454	snippy:4.3.6	variation	3864334	3864334	.	.	0	note=snp T=>G G:25 T:0
EA2454	snippy:4.3.6	variation	3864841	3864841	.	.	0	note=snp T=>A A:25 T:0
EA2454	snippy:4.3.6	variation	3864900	3864900	.	.	0	note=snp G=>A A:26 G:0
EA2454	snippy:4.3.6	variation	3864918	3864918	.	.	0	note=snp G=>T T:25 G:0
EA2454	snippy:4.3.6	variation	3865044	3865044	.	.	0	note=snp G=>T T:28 G:0
EA2454	snippy:4.3.6	variation	3865110	3865110	.	.	0	note=snp T=>C C:23 T:0
EA2454	snippy:4.3.6	variation	3865119	3865119	.	.	0	note=snp A=>C C:22 A:0
EA2454	snippy:4.3.6	variation	3865227	3865227	.	.	0	note=snp T=>C C:27 T:0
EA2454	snippy:4.3.6	variation	3865473	3865473	.	.	0	note=snp C=>T T:27 C:0
EA2454	snippy:4.3.6	variation	3865485	3865485	.	.	0	note=snp A=>G G:21 A:0
EA2454	snippy:4.3.6	variation	3865509	3865509	.	.	0	note=snp T=>C C:23 T:0
EA2454	snippy:4.3.6	variation	3865545	3865545	.	.	0	note=snp T=>C C:24 T:0
EA2454	snippy:4.3.6	variation	3865854	3865854	.	.	0	note=snp A=>G G:25 A:0
EA2454	snippy:4.3.6	variation	3867113	3867113	.	.	0	note=snp C=>T T:11 C:0
EA2454	snippy:4.3.6	variation	3867122	3867122	.	.	0	note=snp C=>T T:12 C:0
EA2454	snippy:4.3.6	variation	3867188	3867188	.	.	0	note=snp C=>T T:17 C:0
EA2454	snippy:4.3.6	variation	3867227	3867227	.	.	0	note=snp T=>G G:22 T:0
EA2454	snippy:4.3.6	variation	3867239	3867239	.	.	0	note=snp A=>G G:23 A:0
EA2454	snippy:4.3.6	variation	3867296	3867296	.	.	0	note=snp C=>T T:28 C:0
EA2454	snippy:4.3.6	variation	3867326	3867326	.	.	0	note=complex TAGCCGG=>AAACCGC AAACCGC:29 TAGCCGG:0
EA2454	snippy:4.3.6	variation	3868706	3868706	.	.	0	note=snp T=>C C:18 T:0
EA2454	snippy:4.3.6	variation	3868760	3868760	.	.	0	note=snp A=>G G:16 A:0
EA2454	snippy:4.3.6	variation	3868774	3868774	.	.	0	note=complex AAAAT=>GAAAC GAAAC:11 AAAAT:0
EA2454	snippy:4.3.6	variation	3868787	3868787	.	.	0	note=snp A=>G G:11 A:0
EA2454	snippy:4.3.6	variation	3868798	3868798	.	.	0	note=snp A=>G G:10 A:0
EA2454	snippy:4.3.6	variation	3868909	3868909	.	.	0	note=complex TGCAGGTGAGATA=>GGCAAACGGGATG GGCAAACGGGATG:10 TGCAGGTGAGATA:0
EA2454	snippy:4.3.6	variation	3868927	3868927	.	.	0	note=snp T=>C C:10 T:0
EA2454	snippy:4.3.6	variation	3869010	3869010	.	.	0	note=del CTGA=>C C:12 CTGA:0
EA2454	snippy:4.3.6	variation	3869028	3869028	.	.	0	note=snp G=>A A:14 G:0
EA2454	snippy:4.3.6	variation	3869102	3869102	.	.	0	note=snp A=>G G:19 A:0
EA2454	snippy:4.3.6	variation	3869195	3869195	.	.	0	note=snp C=>T T:21 C:0
EA2454	snippy:4.3.6	variation	3869216	3869216	.	.	0	note=snp A=>G G:23 A:0
EA2454	snippy:4.3.6	variation	3869360	3869360	.	.	0	note=snp G=>A A:34 G:0
EA2454	snippy:4.3.6	variation	3869426	3869426	.	.	0	note=snp G=>A A:40 G:0
EA2454	snippy:4.3.6	variation	3869547	3869547	.	.	0	note=snp A=>C C:27 A:0
EA2454	snippy:4.3.6	variation	3869555	3869555	.	.	0	note=snp C=>G G:27 C:0
EA2454	snippy:4.3.6	variation	3869591	3869591	.	.	0	note=snp T=>C C:20 T:0
EA2454	snippy:4.3.6	variation	3869705	3869705	.	.	0	note=snp T=>C C:37 T:0
EA2454	snippy:4.3.6	variation	3869920	3869920	.	.	0	note=snp A=>T T:33 A:0
EA2454	snippy:4.3.6	variation	3870310	3870310	.	.	0	note=snp A=>G G:21 A:0
EA2454	snippy:4.3.6	variation	3870334	3870334	.	.	0	note=snp T=>C C:23 T:0
EA2454	snippy:4.3.6	variation	3870424	3870424	.	.	0	note=snp C=>T T:38 C:0
EA2454	snippy:4.3.6	variation	3870529	3870529	.	.	0	note=snp A=>G G:57 A:0
EA2454	snippy:4.3.6	variation	3870848	3870848	.	.	0	note=snp C=>T T:26 C:1
EA2454	snippy:4.3.6	variation	3870881	3870881	.	.	0	note=snp G=>A A:20 G:1
EA2454	snippy:4.3.6	variation	3870904	3870904	.	.	0	note=snp T=>C C:24 T:0
EA2454	snippy:4.3.6	variation	3871047	3871047	.	.	0	note=complex GGA=>AGG AGG:21 GGA:0
EA2454	snippy:4.3.6	variation	3871083	3871083	.	.	0	note=snp T=>C C:20 T:0
EA2454	snippy:4.3.6	variation	3871146	3871146	.	.	0	note=snp A=>G G:21 A:0
EA2454	snippy:4.3.6	variation	3872518	3872518	.	.	0	note=snp A=>G G:50 A:0
EA2454	snippy:4.3.6	variation	3872599	3872599	.	.	0	note=snp G=>A A:49 G:1
EA2454	snippy:4.3.6	variation	3873309	3873309	.	.	0	note=snp C=>T T:52 C:0
EA2454	snippy:4.3.6	variation	3873396	3873396	.	.	0	note=snp T=>C C:42 T:0
EA2454	snippy:4.3.6	variation	3873594	3873594	.	.	0	note=snp G=>A A:43 G:0
EA2454	snippy:4.3.6	variation	3873609	3873609	.	.	0	note=snp A=>G G:43 A:0
EA2454	snippy:4.3.6	variation	3873636	3873636	.	.	0	note=snp G=>A A:50 G:1
EA2454	snippy:4.3.6	variation	3873750	3873750	.	.	0	note=snp T=>C C:43 T:0
EA2454	snippy:4.3.6	variation	3874068	3874068	.	.	0	note=snp T=>C C:20 T:0
EA2454	snippy:4.3.6	variation	3874077	3874077	.	.	0	note=snp G=>A A:20 G:0
EA2454	snippy:4.3.6	variation	3874083	3874083	.	.	0	note=snp T=>C C:21 T:0
EA2454	snippy:4.3.6	variation	3874221	3874221	.	.	0	note=snp T=>C C:40 T:1
EA2454	snippy:4.3.6	variation	3874329	3874329	.	.	0	note=complex GGCG=>AGCA AGCA:51 GGCG:0
EA2454	snippy:4.3.6	variation	3874393	3874393	.	.	0	note=snp T=>A A:45 T:1
EA2454	snippy:4.3.6	variation	3874500	3874500	.	.	0	note=snp C=>T T:26 C:0
EA2454	snippy:4.3.6	variation	3874551	3874551	.	.	0	note=complex AAGA=>TCAG TCAG:21 AAGA:0
EA2454	snippy:4.3.6	variation	3874566	3874566	.	.	0	note=snp A=>C C:24 A:0
EA2454	snippy:4.3.6	variation	3874580	3874580	.	.	0	note=snp G=>C C:27 G:0
EA2454	snippy:4.3.6	variation	3874587	3874587	.	.	0	note=snp G=>C C:27 G:0
EA2454	snippy:4.3.6	variation	3874599	3874599	.	.	0	note=snp C=>A A:29 C:0
EA2454	snippy:4.3.6	variation	3874680	3874680	.	.	0	note=complex AAGT=>TGGC TGGC:15 AAGT:0
EA2454	snippy:4.3.6	variation	3874701	3874701	.	.	0	note=snp G=>T T:19 G:0
EA2454	snippy:4.3.6	variation	3874744	3874744	.	.	0	note=snp A=>G G:21 A:0
EA2454	snippy:4.3.6	variation	3874749	3874749	.	.	0	note=snp C=>T T:21 C:0
EA2454	snippy:4.3.6	variation	3874767	3874767	.	.	0	note=snp G=>A A:25 G:1
EA2454	snippy:4.3.6	variation	3874824	3874824	.	.	0	note=snp A=>G G:33 A:0
EA2454	snippy:4.3.6	variation	3874839	3874839	.	.	0	note=snp G=>T T:32 G:0
EA2454	snippy:4.3.6	variation	3874851	3874851	.	.	0	note=snp C=>T T:31 C:0
EA2454	snippy:4.3.6	variation	3874866	3874866	.	.	0	note=complex CCAGC=>TCAGT TCAGT:31 CCAGC:0
EA2454	snippy:4.3.6	variation	3874887	3874887	.	.	0	note=snp C=>T T:31 C:0
EA2454	snippy:4.3.6	variation	3874893	3874893	.	.	0	note=complex AAAA=>GAAG GAAG:32 AAAA:0
EA2454	snippy:4.3.6	variation	3874996	3874996	.	.	0	note=snp C=>T T:39 C:0
EA2454	snippy:4.3.6	variation	3875022	3875022	.	.	0	note=snp G=>A A:44 G:0
EA2454	snippy:4.3.6	variation	3875037	3875037	.	.	0	note=snp G=>A A:37 G:0
EA2454	snippy:4.3.6	variation	3875046	3875046	.	.	0	note=snp C=>A A:37 C:0
EA2454	snippy:4.3.6	variation	3875073	3875073	.	.	0	note=snp C=>A A:42 C:0
EA2454	snippy:4.3.6	variation	3875100	3875100	.	.	0	note=snp T=>G G:46 T:0
EA2454	snippy:4.3.6	variation	3875106	3875106	.	.	0	note=snp G=>C C:46 G:0
EA2454	snippy:4.3.6	variation	3875118	3875118	.	.	0	note=snp T=>G G:45 T:0
EA2454	snippy:4.3.6	variation	3875157	3875157	.	.	0	note=snp T=>G G:37 T:0
EA2454	snippy:4.3.6	variation	3875169	3875169	.	.	0	note=complex GGACATC=>CGATATT CGATATT:36 GGACATC:0
EA2454	snippy:4.3.6	variation	3875205	3875205	.	.	0	note=complex GGGG=>TGGT TGGT:29 GGGG:0
EA2454	snippy:4.3.6	variation	3875214	3875214	.	.	0	note=snp C=>T T:30 C:0
EA2454	snippy:4.3.6	variation	3875232	3875232	.	.	0	note=snp T=>C C:29 T:1
EA2454	snippy:4.3.6	variation	3875328	3875328	.	.	0	note=complex CCGAGGC=>TAAAGGG TAAAGGG:24 CCGAGGC:0
EA2454	snippy:4.3.6	variation	3875340	3875340	.	.	0	note=complex CGGA=>AGGT AGGT:24 CGGA:0
EA2454	snippy:4.3.6	variation	3875354	3875354	.	.	0	note=snp G=>A A:24 G:0
EA2454	snippy:4.3.6	variation	3875370	3875370	.	.	0	note=snp A=>G G:25 A:0
EA2454	snippy:4.3.6	variation	3875383	3875383	.	.	0	note=complex GGAA=>AGAG AGAG:20 GGAA:0
EA2454	snippy:4.3.6	variation	3875403	3875403	.	.	0	note=complex ACAA=>GCAG GCAG:20 ACAA:0
EA2454	snippy:4.3.6	variation	3875437	3875437	.	.	0	note=snp A=>G G:23 A:0
EA2454	snippy:4.3.6	variation	3875460	3875460	.	.	0	note=snp A=>G G:27 A:0
EA2454	snippy:4.3.6	variation	3875465	3875465	.	.	0	note=snp G=>C C:27 G:0
EA2454	snippy:4.3.6	variation	3875514	3875514	.	.	0	note=snp A=>G G:33 A:0
EA2454	snippy:4.3.6	variation	3875523	3875523	.	.	0	note=snp G=>A A:33 G:0
EA2454	snippy:4.3.6	variation	3875536	3875536	.	.	0	note=complex CAC=>TAT TAT:29 CAC:0
EA2454	snippy:4.3.6	variation	3875549	3875549	.	.	0	note=complex ATTGTATG=>GCTGTTTTT GCTGTTTTT:23 ATTGTATG:0
EA2454	snippy:4.3.6	variation	3875572	3875572	.	.	0	note=complex AAAA=>GATG GATG:26 AAAA:0
EA2454	snippy:4.3.6	variation	3875580	3875580	.	.	0	note=complex GCT=>ACC ACC:25 GCT:0
EA2454	snippy:4.3.6	variation	3875597	3875597	.	.	0	note=snp G=>A A:32 G:0
EA2454	snippy:4.3.6	variation	3875612	3875612	.	.	0	note=complex CATT=>TATC TATC:32 CATT:0
EA2454	snippy:4.3.6	variation	3875632	3875632	.	.	0	note=snp A=>G G:34 A:0
EA2454	snippy:4.3.6	variation	3875641	3875641	.	.	0	note=snp G=>A A:34 G:0
EA2454	snippy:4.3.6	variation	3875652	3875652	.	.	0	note=snp G=>A A:33 G:0
EA2454	snippy:4.3.6	variation	3875660	3875660	.	.	0	note=snp C=>G G:32 C:0
EA2454	snippy:4.3.6	variation	3875665	3875665	.	.	0	note=complex GCTTTATT=>TCTTCATA TCTTCATA:29 GCTTTATT:0
EA2454	snippy:4.3.6	variation	3875688	3875688	.	.	0	note=snp T=>C C:30 T:0
EA2454	snippy:4.3.6	variation	3875702	3875702	.	.	0	note=complex ATTT=>GTTC GTTC:28 ATTT:0
EA2454	snippy:4.3.6	variation	3875727	3875727	.	.	0	note=snp C=>A A:27 C:0
EA2454	snippy:4.3.6	variation	3875747	3875747	.	.	0	note=complex ATTC=>GTTT GTTT:23 ATTC:0
EA2454	snippy:4.3.6	variation	3875772	3875772	.	.	0	note=complex CT=>AC AC:19 CT:0
EA2454	snippy:4.3.6	variation	3877989	3877989	.	.	0	note=snp T=>C C:38 T:0
EA2454	snippy:4.3.6	variation	3881618	3881618	.	.	0	note=snp A=>G G:33 A:2
EA2454	snippy:4.3.6	variation	3881743	3881743	.	.	0	note=snp T=>C C:37 T:0
EA2454	snippy:4.3.6	variation	3881813	3881813	.	.	0	note=snp G=>A A:47 G:0
EA2454	snippy:4.3.6	variation	3881990	3881990	.	.	0	note=complex GATA=>TATC TATC:31 GATA:0
EA2454	snippy:4.3.6	variation	3882005	3882005	.	.	0	note=snp A=>G G:31 A:0
EA2454	snippy:4.3.6	variation	3885267	3885267	.	.	0	note=snp A=>G G:29 A:0
EA2454	snippy:4.3.6	variation	3888966	3888966	.	.	0	note=snp A=>C C:28 A:0
EA2454	snippy:4.3.6	variation	3890101	3890101	.	.	0	note=snp C=>T T:30 C:0
EA2454	snippy:4.3.6	variation	3890179	3890179	.	.	0	note=snp G=>A A:28 G:2
EA2454	snippy:4.3.6	variation	3890560	3890560	.	.	0	note=snp T=>C C:26 T:0
EA2454	snippy:4.3.6	variation	3890645	3890645	.	.	0	note=complex AATA=>GATG GATG:18 AATA:0
EA2454	snippy:4.3.6	variation	3890654	3890654	.	.	0	note=complex TGCGCCTCAGC=>CACCTCCCACA CACCTCCCACA:16 TGCGCCTCAGC:0
EA2454	snippy:4.3.6	variation	3893975	3893975	.	.	0	note=snp G=>A A:62 G:0
EA2454	snippy:4.3.6	variation	3894436	3894436	.	.	0	note=complex TA=>CC CC:13 TA:0
EA2454	snippy:4.3.6	variation	3894443	3894443	.	.	0	note=snp A=>G G:13 A:0
EA2454	snippy:4.3.6	variation	3894927	3894927	.	.	0	note=snp G=>A A:54 G:0
EA2454	snippy:4.3.6	variation	3895094	3895094	.	.	0	note=snp A=>T T:18 A:0
EA2454	snippy:4.3.6	variation	3895411	3895411	.	.	0	note=snp T=>C C:13 T:0
EA2454	snippy:4.3.6	variation	3897276	3897276	.	.	0	note=snp A=>G G:44 A:0
EA2454	snippy:4.3.6	variation	3898302	3898302	.	.	0	note=snp G=>A A:62 G:0
EA2454	snippy:4.3.6	variation	3900076	3900076	.	.	0	note=complex GCCA=>TCCG TCCG:20 GCCA:0
EA2454	snippy:4.3.6	variation	3900788	3900788	.	.	0	note=snp T=>C C:17 T:0
EA2454	snippy:4.3.6	variation	3901046	3901046	.	.	0	note=snp T=>G G:34 T:0
EA2454	snippy:4.3.6	variation	3901349	3901349	.	.	0	note=snp A=>C C:33 A:0
EA2454	snippy:4.3.6	variation	3901468	3901468	.	.	0	note=snp A=>G G:31 A:0
EA2454	snippy:4.3.6	variation	3901670	3901670	.	.	0	note=snp A=>C C:30 A:0
EA2454	snippy:4.3.6	variation	3901676	3901676	.	.	0	note=snp T=>G G:26 T:0
EA2454	snippy:4.3.6	variation	3901681	3901681	.	.	0	note=complex CTTCG=>ATTCA ATTCA:22 CTTCG:0
EA2454	snippy:4.3.6	variation	3901969	3901969	.	.	0	note=snp T=>A A:83 T:0
EA2454	snippy:4.3.6	variation	3902889	3902889	.	.	0	note=snp G=>C C:102 G:0
EA2454	snippy:4.3.6	variation	3903505	3903505	.	.	0	note=snp G=>A A:71 G:0
EA2454	snippy:4.3.6	variation	3904266	3904266	.	.	0	note=snp T=>C C:54 T:0
EA2454	snippy:4.3.6	variation	3904888	3904888	.	.	0	note=snp C=>T T:12 C:0
EA2454	snippy:4.3.6	variation	3904915	3904915	.	.	0	note=snp A=>T T:10 A:0
EA2454	snippy:4.3.6	variation	3905020	3905020	.	.	0	note=snp A=>C C:19 A:0
EA2454	snippy:4.3.6	variation	3905167	3905167	.	.	0	note=snp C=>A A:41 C:0
EA2454	snippy:4.3.6	variation	3905252	3905252	.	.	0	note=snp G=>A A:51 G:0
EA2454	snippy:4.3.6	variation	3906820	3906820	.	.	0	note=snp G=>A A:20 G:0
EA2454	snippy:4.3.6	variation	3906853	3906853	.	.	0	note=snp G=>A A:24 G:0
EA2454	snippy:4.3.6	variation	3906959	3906959	.	.	0	note=snp G=>A A:18 G:0
EA2454	snippy:4.3.6	variation	3908657	3908657	.	.	0	note=snp T=>C C:48 T:0
EA2454	snippy:4.3.6	variation	3908840	3908840	.	.	0	note=snp C=>A A:49 C:0
EA2454	snippy:4.3.6	variation	3909285	3909285	.	.	0	note=snp G=>A A:48 G:0
EA2454	snippy:4.3.6	variation	3909320	3909320	.	.	0	note=snp T=>C C:53 T:0
EA2454	snippy:4.3.6	variation	3909916	3909916	.	.	0	note=snp T=>G G:51 T:0
EA2454	snippy:4.3.6	variation	3910184	3910184	.	.	0	note=snp C=>T T:14 C:0
EA2454	snippy:4.3.6	variation	3914479	3914479	.	.	0	note=snp T=>C C:31 T:0
EA2454	snippy:4.3.6	variation	3914657	3914657	.	.	0	note=snp A=>G G:26 A:0
EA2454	snippy:4.3.6	variation	3914694	3914694	.	.	0	note=snp G=>T T:37 G:0
EA2454	snippy:4.3.6	variation	3915502	3915502	.	.	0	note=complex TTTG=>CTTA CTTA:26 TTTG:0
EA2454	snippy:4.3.6	variation	3916927	3916927	.	.	0	note=snp A=>C C:47 A:0
EA2454	snippy:4.3.6	variation	3918637	3918637	.	.	0	note=ins T=>TG TG:42 T:0
EA2454	snippy:4.3.6	variation	3918830	3918830	.	.	0	note=snp A=>G G:36 A:0
EA2454	snippy:4.3.6	variation	3918863	3918863	.	.	0	note=snp C=>T T:34 C:0
EA2454	snippy:4.3.6	variation	3919614	3919614	.	.	0	note=snp A=>C C:41 A:0
EA2454	snippy:4.3.6	variation	3919962	3919962	.	.	0	note=snp A=>G G:15 A:0
EA2454	snippy:4.3.6	variation	3920088	3920088	.	.	0	note=snp A=>G G:15 A:0
EA2454	snippy:4.3.6	variation	3920864	3920864	.	.	0	note=snp A=>G G:51 A:0
EA2454	snippy:4.3.6	variation	3920963	3920963	.	.	0	note=snp C=>T T:24 C:0
EA2454	snippy:4.3.6	variation	3922597	3922597	.	.	0	note=snp G=>T T:51 G:0
EA2454	snippy:4.3.6	variation	3923073	3923073	.	.	0	note=snp C=>A A:10 C:0
EA2454	snippy:4.3.6	variation	3923719	3923719	.	.	0	note=snp G=>A A:10 G:0
EA2454	snippy:4.3.6	variation	3924830	3924830	.	.	0	note=snp G=>A A:21 G:0
EA2454	snippy:4.3.6	variation	3925423	3925423	.	.	0	note=del TC=>T T:14 TC:0
EA2454	snippy:4.3.6	variation	3925471	3925471	.	.	0	note=snp A=>G G:21 A:0
EA2454	snippy:4.3.6	variation	3925516	3925516	.	.	0	note=snp C=>T T:19 C:0
EA2454	snippy:4.3.6	variation	3925534	3925534	.	.	0	note=snp C=>T T:21 C:0
EA2454	snippy:4.3.6	variation	3925556	3925556	.	.	0	note=snp T=>C C:22 T:0
EA2454	snippy:4.3.6	variation	3925925	3925925	.	.	0	note=snp G=>C C:61 G:0
EA2454	snippy:4.3.6	variation	3926066	3926066	.	.	0	note=snp A=>T T:60 A:0
EA2454	snippy:4.3.6	variation	3926469	3926469	.	.	0	note=snp C=>A A:28 C:0
EA2454	snippy:4.3.6	variation	3927872	3927872	.	.	0	note=snp A=>G G:10 A:0
EA2454	snippy:4.3.6	variation	3928796	3928796	.	.	0	note=snp A=>T T:41 A:0
EA2454	snippy:4.3.6	variation	3929569	3929569	.	.	0	note=snp T=>A A:23 T:0
EA2454	snippy:4.3.6	variation	3929766	3929766	.	.	0	note=snp T=>A A:65 T:0
EA2454	snippy:4.3.6	variation	3930273	3930273	.	.	0	note=snp A=>G G:69 A:0
EA2454	snippy:4.3.6	variation	3930584	3930584	.	.	0	note=snp T=>C C:72 T:0
EA2454	snippy:4.3.6	variation	3931130	3931130	.	.	0	note=snp T=>C C:19 T:0
EA2454	snippy:4.3.6	variation	3960724	3960724	.	.	0	note=snp G=>A A:69 G:0
EA2454	snippy:4.3.6	variation	3970086	3970086	.	.	0	note=complex ACCA=>GCCG GCCG:20 ACCA:0
EA2454	snippy:4.3.6	variation	3970127	3970127	.	.	0	note=snp T=>C C:33 T:0
EA2454	snippy:4.3.6	variation	3970160	3970160	.	.	0	note=snp C=>T T:43 C:0
EA2454	snippy:4.3.6	variation	3970212	3970212	.	.	0	note=complex GCCGGGAGGG=>ACCTGCAGGA ACCTGCAGGA:46 GCCGGGAGGG:0
EA2454	snippy:4.3.6	variation	3970248	3970248	.	.	0	note=snp A=>G G:55 A:0
EA2454	snippy:4.3.6	variation	3970254	3970254	.	.	0	note=snp G=>C C:53 G:0
EA2454	snippy:4.3.6	variation	3970275	3970275	.	.	0	note=snp T=>C C:52 T:0
EA2454	snippy:4.3.6	variation	3970398	3970398	.	.	0	note=snp C=>G G:58 C:0
EA2454	snippy:4.3.6	variation	3970435	3970435	.	.	0	note=snp G=>T T:64 G:0
EA2454	snippy:4.3.6	variation	3970471	3970471	.	.	0	note=snp T=>C C:59 T:0
EA2454	snippy:4.3.6	variation	3970534	3970534	.	.	0	note=snp C=>A A:54 C:0
EA2454	snippy:4.3.6	variation	3970545	3970545	.	.	0	note=snp C=>T T:58 C:0
EA2454	snippy:4.3.6	variation	3970563	3970563	.	.	0	note=complex CA=>TG TG:55 CA:0
EA2454	snippy:4.3.6	variation	3970591	3970591	.	.	0	note=snp A=>G G:48 A:0
EA2454	snippy:4.3.6	variation	3970651	3970651	.	.	0	note=snp C=>A A:48 C:0
EA2454	snippy:4.3.6	variation	3970660	3970660	.	.	0	note=snp C=>T T:44 C:0
EA2454	snippy:4.3.6	variation	3970681	3970681	.	.	0	note=snp A=>T T:38 A:0
EA2454	snippy:4.3.6	variation	3970687	3970687	.	.	0	note=snp C=>A A:38 C:0
EA2454	snippy:4.3.6	variation	3970708	3970708	.	.	0	note=snp C=>T T:33 C:0
EA2454	snippy:4.3.6	variation	3970717	3970717	.	.	0	note=snp C=>T T:32 C:0
EA2454	snippy:4.3.6	variation	3970723	3970723	.	.	0	note=snp T=>C C:31 T:0
EA2454	snippy:4.3.6	variation	3970732	3970732	.	.	0	note=snp G=>A A:29 G:0
EA2454	snippy:4.3.6	variation	3970744	3970744	.	.	0	note=snp G=>A A:33 G:0
EA2454	snippy:4.3.6	variation	3970753	3970753	.	.	0	note=complex GCCCGTT=>ACCTGTA ACCTGTA:29 GCCCGTT:0
EA2454	snippy:4.3.6	variation	3970873	3970873	.	.	0	note=snp G=>A A:41 G:0
EA2454	snippy:4.3.6	variation	3970884	3970884	.	.	0	note=snp T=>G G:39 T:0
EA2454	snippy:4.3.6	variation	3970926	3970926	.	.	0	note=snp C=>T T:41 C:0
EA2454	snippy:4.3.6	variation	3970945	3970945	.	.	0	note=complex CCGA=>ACGG ACGG:41 CCGA:0
EA2454	snippy:4.3.6	variation	3970981	3970981	.	.	0	note=snp C=>T T:43 C:0
EA2454	snippy:4.3.6	variation	3971002	3971002	.	.	0	note=snp A=>G G:42 A:0
EA2454	snippy:4.3.6	variation	3971122	3971122	.	.	0	note=snp T=>G G:42 T:0
EA2454	snippy:4.3.6	variation	3971130	3971130	.	.	0	note=snp G=>A A:40 G:0
EA2454	snippy:4.3.6	variation	3971173	3971173	.	.	0	note=snp T=>C C:34 T:0
EA2454	snippy:4.3.6	variation	3971191	3971191	.	.	0	note=snp G=>A A:36 G:0
EA2454	snippy:4.3.6	variation	3971215	3971215	.	.	0	note=snp G=>A A:41 G:0
EA2454	snippy:4.3.6	variation	3971224	3971224	.	.	0	note=snp A=>G G:42 A:0
EA2454	snippy:4.3.6	variation	3971233	3971233	.	.	0	note=complex GATG=>AATA AATA:42 GATG:0
EA2454	snippy:4.3.6	variation	3971314	3971314	.	.	0	note=complex AAAG=>GAAC GAAC:46 AAAG:0
EA2454	snippy:4.3.6	variation	3971326	3971326	.	.	0	note=complex AT=>GC GC:45 AT:0
EA2454	snippy:4.3.6	variation	3971374	3971374	.	.	0	note=snp T=>C C:50 T:0
EA2454	snippy:4.3.6	variation	3971383	3971383	.	.	0	note=snp A=>G G:54 A:0
EA2454	snippy:4.3.6	variation	3971438	3971438	.	.	0	note=complex TGT=>CGC CGC:57 TGT:0
EA2454	snippy:4.3.6	variation	3971449	3971449	.	.	0	note=snp G=>A A:57 G:0
EA2454	snippy:4.3.6	variation	3971463	3971463	.	.	0	note=complex ACAGT=>GCAGC GCAGC:49 ACAGT:0
EA2454	snippy:4.3.6	variation	3971473	3971473	.	.	0	note=snp A=>C C:49 A:0
EA2454	snippy:4.3.6	variation	3971482	3971482	.	.	0	note=complex TTGT=>CGTA CGTA:43 TTGT:0
EA2454	snippy:4.3.6	variation	3971503	3971503	.	.	0	note=snp G=>T T:47 G:0
EA2454	snippy:4.3.6	variation	3971548	3971548	.	.	0	note=complex ATTCTGG=>GTTTTGT GTTTTGT:47 ATTCTGG:0
EA2454	snippy:4.3.6	variation	3971587	3971587	.	.	0	note=snp T=>C C:45 T:0
EA2454	snippy:4.3.6	variation	3971620	3971620	.	.	0	note=snp A=>G G:52 A:0
EA2454	snippy:4.3.6	variation	3971671	3971671	.	.	0	note=snp G=>A A:52 G:0
EA2454	snippy:4.3.6	variation	3971683	3971683	.	.	0	note=snp A=>G G:50 A:0
EA2454	snippy:4.3.6	variation	3971691	3971691	.	.	0	note=snp G=>A A:53 G:0
EA2454	snippy:4.3.6	variation	3971700	3971700	.	.	0	note=complex AAGCACAGAT=>CAGTACGGAC CAGTACGGAC:49 AAGCACAGAT:0
EA2454	snippy:4.3.6	variation	3971730	3971730	.	.	0	note=snp A=>C C:55 A:0
EA2454	snippy:4.3.6	variation	3971748	3971748	.	.	0	note=snp A=>G G:55 A:0
EA2454	snippy:4.3.6	variation	3971755	3971755	.	.	0	note=snp T=>C C:58 T:0
EA2454	snippy:4.3.6	variation	3971844	3971844	.	.	0	note=snp T=>C C:60 T:0
EA2454	snippy:4.3.6	variation	3971864	3971864	.	.	0	note=snp G=>A A:59 G:0
EA2454	snippy:4.3.6	variation	3971874	3971874	.	.	0	note=snp G=>A A:62 G:0
EA2454	snippy:4.3.6	variation	3971940	3971940	.	.	0	note=snp A=>G G:58 A:0
EA2454	snippy:4.3.6	variation	3971952	3971952	.	.	0	note=snp A=>G G:65 A:0
EA2454	snippy:4.3.6	variation	3971961	3971961	.	.	0	note=snp A=>G G:60 A:0
EA2454	snippy:4.3.6	variation	3971979	3971979	.	.	0	note=complex ACCG=>CCCC CCCC:58 ACCG:0
EA2454	snippy:4.3.6	variation	3972009	3972009	.	.	0	note=snp A=>G G:61 A:0
EA2454	snippy:4.3.6	variation	3972030	3972030	.	.	0	note=snp G=>A A:62 G:0
EA2454	snippy:4.3.6	variation	3972051	3972051	.	.	0	note=snp A=>G G:66 A:0
EA2454	snippy:4.3.6	variation	3972060	3972060	.	.	0	note=snp C=>T T:70 C:0
EA2454	snippy:4.3.6	variation	3972096	3972096	.	.	0	note=snp A=>G G:64 A:0
EA2454	snippy:4.3.6	variation	3972120	3972120	.	.	0	note=snp G=>T T:65 G:0
EA2454	snippy:4.3.6	variation	3972138	3972138	.	.	0	note=snp G=>C C:71 G:0
EA2454	snippy:4.3.6	variation	3972192	3972192	.	.	0	note=snp C=>T T:81 C:0
EA2454	snippy:4.3.6	variation	3972312	3972312	.	.	0	note=snp G=>T T:75 G:0
EA2454	snippy:4.3.6	variation	3972350	3972350	.	.	0	note=complex GTTCA=>CTTCC CTTCC:84 GTTCA:0
EA2454	snippy:4.3.6	variation	3972390	3972390	.	.	0	note=complex ATCA=>TTCG TTCG:74 ATCA:0
EA2454	snippy:4.3.6	variation	3972425	3972425	.	.	0	note=snp C=>T T:82 C:0
EA2454	snippy:4.3.6	variation	3972480	3972480	.	.	0	note=snp G=>A A:64 G:0
EA2454	snippy:4.3.6	variation	3972525	3972525	.	.	0	note=snp C=>T T:78 C:0
EA2454	snippy:4.3.6	variation	3972558	3972558	.	.	0	note=snp A=>G G:76 A:1
EA2454	snippy:4.3.6	variation	3972591	3972591	.	.	0	note=snp G=>A A:81 G:1
EA2454	snippy:4.3.6	variation	3972675	3972675	.	.	0	note=snp G=>A A:79 G:0
EA2454	snippy:4.3.6	variation	3972684	3972684	.	.	0	note=snp C=>T T:77 C:0
EA2454	snippy:4.3.6	variation	3972692	3972692	.	.	0	note=snp G=>A A:82 G:0
EA2454	snippy:4.3.6	variation	3972702	3972702	.	.	0	note=snp C=>T T:85 C:0
EA2454	snippy:4.3.6	variation	3972717	3972717	.	.	0	note=snp G=>A A:77 G:1
EA2454	snippy:4.3.6	variation	3972774	3972774	.	.	0	note=snp A=>C C:72 A:0
EA2454	snippy:4.3.6	variation	3972789	3972789	.	.	0	note=snp A=>G G:69 A:0
EA2454	snippy:4.3.6	variation	3972899	3972899	.	.	0	note=snp G=>A A:58 G:0
EA2454	snippy:4.3.6	variation	3972991	3972991	.	.	0	note=snp T=>C C:33 T:0
EA2454	snippy:4.3.6	variation	3972999	3972999	.	.	0	note=complex GTGTC=>TTGTT TTGTT:30 GTGTC:0
EA2454	snippy:4.3.6	variation	3973034	3973034	.	.	0	note=snp G=>A A:28 G:0
EA2454	snippy:4.3.6	variation	3973387	3973387	.	.	0	note=snp T=>C C:10 T:0
EA2454	snippy:4.3.6	variation	3973420	3973420	.	.	0	note=snp A=>G G:14 A:0
EA2454	snippy:4.3.6	variation	3973521	3973521	.	.	0	note=snp T=>C C:23 T:0
EA2454	snippy:4.3.6	variation	3973611	3973611	.	.	0	note=snp G=>A A:23 G:0
EA2454	snippy:4.3.6	variation	3973632	3973632	.	.	0	note=snp T=>G G:22 T:1
EA2454	snippy:4.3.6	variation	3973746	3973746	.	.	0	note=complex GCCA=>ACCG ACCG:41 GCCA:0
EA2454	snippy:4.3.6	variation	3973812	3973812	.	.	0	note=snp T=>G G:51 T:0
EA2454	snippy:4.3.6	variation	3973842	3973842	.	.	0	note=snp A=>G G:50 A:0
EA2454	snippy:4.3.6	variation	3973890	3973890	.	.	0	note=complex CGAA=>GGAG GGAG:59 CGAA:0
EA2454	snippy:4.3.6	variation	3973908	3973908	.	.	0	note=complex CAC=>AAT AAT:56 CAC:0
EA2454	snippy:4.3.6	variation	3973950	3973950	.	.	0	note=complex CTCACCAAAG=>TTCGCCGAAT TTCGCCGAAT:55 CTCACCAAAG:0
EA2454	snippy:4.3.6	variation	3973971	3973971	.	.	0	note=snp A=>G G:61 A:0
EA2454	snippy:4.3.6	variation	3974028	3974028	.	.	0	note=snp C=>T T:57 C:0
EA2454	snippy:4.3.6	variation	3974052	3974052	.	.	0	note=complex GACG=>AACA AACA:47 GACG:0
EA2454	snippy:4.3.6	variation	3974070	3974070	.	.	0	note=snp G=>A A:48 G:0
EA2454	snippy:4.3.6	variation	3974088	3974088	.	.	0	note=complex AAAC=>GAAT GAAT:49 AAAC:0
EA2454	snippy:4.3.6	variation	3974109	3974109	.	.	0	note=snp C=>G G:49 C:0
EA2454	snippy:4.3.6	variation	3974118	3974118	.	.	0	note=snp T=>G G:54 T:0
EA2454	snippy:4.3.6	variation	3974136	3974136	.	.	0	note=snp A=>T T:50 A:0
EA2454	snippy:4.3.6	variation	3974162	3974162	.	.	0	note=snp A=>G G:54 A:0
EA2454	snippy:4.3.6	variation	3974169	3974169	.	.	0	note=snp T=>C C:55 T:0
EA2454	snippy:4.3.6	variation	3974183	3974183	.	.	0	note=snp C=>T T:52 C:1
EA2454	snippy:4.3.6	variation	3974280	3974280	.	.	0	note=snp T=>C C:44 T:0
EA2454	snippy:4.3.6	variation	3974328	3974328	.	.	0	note=snp T=>G G:42 T:0
EA2454	snippy:4.3.6	variation	3974496	3974496	.	.	0	note=snp T=>C C:48 T:0
EA2454	snippy:4.3.6	variation	3974583	3974583	.	.	0	note=snp A=>G G:44 A:0
EA2454	snippy:4.3.6	variation	3974603	3974603	.	.	0	note=snp C=>G G:48 C:0
EA2454	snippy:4.3.6	variation	3974615	3974615	.	.	0	note=snp G=>A A:49 G:0
EA2454	snippy:4.3.6	variation	3974637	3974637	.	.	0	note=complex GAT=>AAG AAG:45 GAT:0
EA2454	snippy:4.3.6	variation	3974646	3974646	.	.	0	note=complex TCCG=>CCCA CCCA:43 TCCG:0
EA2454	snippy:4.3.6	variation	3974754	3974754	.	.	0	note=snp A=>G G:68 A:0
EA2454	snippy:4.3.6	variation	3974769	3974769	.	.	0	note=complex AGTC=>GGTA GGTA:69 AGTC:0
EA2454	snippy:4.3.6	variation	3974835	3974835	.	.	0	note=snp A=>G G:71 A:0
EA2454	snippy:4.3.6	variation	3974853	3974853	.	.	0	note=snp A=>G G:68 A:0
EA2454	snippy:4.3.6	variation	3974929	3974929	.	.	0	note=snp G=>T T:64 G:0
EA2454	snippy:4.3.6	variation	3975031	3975031	.	.	0	note=snp C=>T T:76 C:1
EA2454	snippy:4.3.6	variation	3975073	3975073	.	.	0	note=snp G=>A A:80 G:2
EA2454	snippy:4.3.6	variation	3975160	3975160	.	.	0	note=complex TGGACCC=>CGGGCCA CGGGCCA:74 TGGACCC:0
EA2454	snippy:4.3.6	variation	3975210	3975210	.	.	0	note=snp G=>A A:77 G:0
EA2454	snippy:4.3.6	variation	3975244	3975244	.	.	0	note=snp C=>A A:72 C:1
EA2454	snippy:4.3.6	variation	3975280	3975280	.	.	0	note=snp G=>A A:64 G:3
EA2454	snippy:4.3.6	variation	3975340	3975340	.	.	0	note=snp C=>T T:48 C:0
EA2454	snippy:4.3.6	variation	3975676	3975676	.	.	0	note=snp G=>A A:52 G:0
EA2454	snippy:4.3.6	variation	3975694	3975694	.	.	0	note=snp C=>T T:53 C:0
EA2454	snippy:4.3.6	variation	3975700	3975700	.	.	0	note=complex CGCG=>AGCA AGCA:51 CGCG:0
EA2454	snippy:4.3.6	variation	3975724	3975724	.	.	0	note=snp A=>G G:63 A:0
EA2454	snippy:4.3.6	variation	3975916	3975916	.	.	0	note=snp T=>C C:46 T:0
EA2454	snippy:4.3.6	variation	3976039	3976039	.	.	0	note=snp G=>A A:51 G:0
EA2454	snippy:4.3.6	variation	3976054	3976054	.	.	0	note=snp G=>A A:50 G:0
EA2454	snippy:4.3.6	variation	3976111	3976111	.	.	0	note=snp A=>G G:52 A:0
EA2454	snippy:4.3.6	variation	3976177	3976177	.	.	0	note=snp G=>T T:56 G:0
EA2454	snippy:4.3.6	variation	3976360	3976360	.	.	0	note=snp A=>G G:81 A:0
EA2454	snippy:4.3.6	variation	3976405	3976405	.	.	0	note=snp T=>C C:85 T:0
EA2454	snippy:4.3.6	variation	3976414	3976414	.	.	0	note=snp G=>A A:77 G:0
EA2454	snippy:4.3.6	variation	3976458	3976458	.	.	0	note=snp T=>A A:67 T:0
EA2454	snippy:4.3.6	variation	3976570	3976570	.	.	0	note=snp G=>T T:74 G:0
EA2454	snippy:4.3.6	variation	3976609	3976609	.	.	0	note=complex TGCT=>CGCC CGCC:78 TGCT:0
EA2454	snippy:4.3.6	variation	3976627	3976627	.	.	0	note=snp C=>T T:79 C:0
EA2454	snippy:4.3.6	variation	3976646	3976646	.	.	0	note=complex TTTC=>CTCT CTCT:75 TTTC:0
EA2454	snippy:4.3.6	variation	3976660	3976660	.	.	0	note=snp C=>T T:76 C:0
EA2454	snippy:4.3.6	variation	3976672	3976672	.	.	0	note=snp G=>T T:72 G:0
EA2454	snippy:4.3.6	variation	3976680	3976680	.	.	0	note=snp G=>A A:73 G:0
EA2454	snippy:4.3.6	variation	3976816	3976816	.	.	0	note=snp T=>G G:66 T:0
EA2454	snippy:4.3.6	variation	3976822	3976822	.	.	0	note=complex GCCC=>ACCT ACCT:64 GCCC:0
EA2454	snippy:4.3.6	variation	3976831	3976831	.	.	0	note=snp G=>A A:62 G:0
EA2454	snippy:4.3.6	variation	3976846	3976846	.	.	0	note=snp A=>G G:63 A:0
EA2454	snippy:4.3.6	variation	3976917	3976917	.	.	0	note=snp A=>G G:69 A:0
EA2454	snippy:4.3.6	variation	3976933	3976933	.	.	0	note=snp G=>A A:73 G:0
EA2454	snippy:4.3.6	variation	3976942	3976942	.	.	0	note=snp A=>G G:61 A:0
EA2454	snippy:4.3.6	variation	3976972	3976972	.	.	0	note=snp G=>A A:56 G:0
EA2454	snippy:4.3.6	variation	3976978	3976978	.	.	0	note=snp A=>G G:53 A:2
EA2454	snippy:4.3.6	variation	3976987	3976987	.	.	0	note=complex ACCG=>GCCA GCCA:54 ACCG:0
EA2454	snippy:4.3.6	variation	3977050	3977050	.	.	0	note=snp A=>G G:43 A:0
EA2454	snippy:4.3.6	variation	3977062	3977062	.	.	0	note=snp C=>T T:44 C:0
EA2454	snippy:4.3.6	variation	3977102	3977102	.	.	0	note=snp A=>G G:40 A:0
EA2454	snippy:4.3.6	variation	3977110	3977110	.	.	0	note=snp C=>T T:39 C:0
EA2454	snippy:4.3.6	variation	3977128	3977128	.	.	0	note=snp G=>C C:41 G:0
EA2454	snippy:4.3.6	variation	3977134	3977134	.	.	0	note=snp A=>G G:37 A:0
EA2454	snippy:4.3.6	variation	3977143	3977143	.	.	0	note=snp G=>T T:38 G:0
EA2454	snippy:4.3.6	variation	3977149	3977149	.	.	0	note=snp G=>T T:31 G:0
EA2454	snippy:4.3.6	variation	3977161	3977161	.	.	0	note=complex AGC=>GGT GGT:36 AGC:0
EA2454	snippy:4.3.6	variation	3977200	3977200	.	.	0	note=snp A=>G G:41 A:0
EA2454	snippy:4.3.6	variation	3977291	3977291	.	.	0	note=snp C=>T T:54 C:0
EA2454	snippy:4.3.6	variation	3977350	3977350	.	.	0	note=snp T=>G G:57 T:0
EA2454	snippy:4.3.6	variation	3977410	3977410	.	.	0	note=snp G=>A A:70 G:0
EA2454	snippy:4.3.6	variation	3977425	3977425	.	.	0	note=snp G=>A A:64 G:0
EA2454	snippy:4.3.6	variation	3977522	3977522	.	.	0	note=snp T=>A A:61 T:0
EA2454	snippy:4.3.6	variation	3977725	3977725	.	.	0	note=snp G=>A A:55 G:0
EA2454	snippy:4.3.6	variation	3977765	3977765	.	.	0	note=snp G=>A A:47 G:0
EA2454	snippy:4.3.6	variation	3977876	3977876	.	.	0	note=snp A=>G G:48 A:0
EA2454	snippy:4.3.6	variation	3978061	3978061	.	.	0	note=snp G=>A A:70 G:0
EA2454	snippy:4.3.6	variation	3978094	3978094	.	.	0	note=snp A=>G G:79 A:0
EA2454	snippy:4.3.6	variation	3978241	3978241	.	.	0	note=snp G=>A A:72 G:0
EA2454	snippy:4.3.6	variation	3978247	3978247	.	.	0	note=snp G=>C C:71 G:0
EA2454	snippy:4.3.6	variation	3978259	3978259	.	.	0	note=snp T=>C C:69 T:0
EA2454	snippy:4.3.6	variation	3978280	3978280	.	.	0	note=snp A=>G G:63 A:0
EA2454	snippy:4.3.6	variation	3978292	3978292	.	.	0	note=snp C=>T T:68 C:0
EA2454	snippy:4.3.6	variation	3978325	3978325	.	.	0	note=complex ATTG=>GTTA GTTA:63 ATTG:0
EA2454	snippy:4.3.6	variation	3978364	3978364	.	.	0	note=complex TACC=>CACT CACT:59 TACC:0
EA2454	snippy:4.3.6	variation	3978372	3978372	.	.	0	note=snp A=>G G:62 A:0
EA2454	snippy:4.3.6	variation	3978604	3978604	.	.	0	note=snp G=>C C:56 G:0
EA2454	snippy:4.3.6	variation	3978625	3978625	.	.	0	note=snp G=>A A:54 G:0
EA2454	snippy:4.3.6	variation	3978637	3978637	.	.	0	note=snp G=>A A:57 G:0
EA2454	snippy:4.3.6	variation	3978679	3978679	.	.	0	note=snp A=>G G:59 A:0
EA2454	snippy:4.3.6	variation	3978742	3978742	.	.	0	note=snp G=>A A:53 G:0
EA2454	snippy:4.3.6	variation	3978836	3978836	.	.	0	note=snp A=>G G:46 A:0
EA2454	snippy:4.3.6	variation	3978853	3978853	.	.	0	note=snp A=>C C:47 A:0
EA2454	snippy:4.3.6	variation	3978883	3978883	.	.	0	note=snp A=>T T:49 A:0
EA2454	snippy:4.3.6	variation	3978943	3978943	.	.	0	note=snp T=>C C:63 T:0
EA2454	snippy:4.3.6	variation	3978964	3978964	.	.	0	note=snp A=>G G:59 A:0
EA2454	snippy:4.3.6	variation	3979008	3979008	.	.	0	note=mnp AT=>GC GC:62 AT:0
EA2454	snippy:4.3.6	variation	3979028	3979028	.	.	0	note=snp T=>C C:65 T:0
EA2454	snippy:4.3.6	variation	3979096	3979096	.	.	0	note=snp A=>C C:61 A:0
EA2454	snippy:4.3.6	variation	3979135	3979135	.	.	0	note=snp G=>A A:59 G:0
EA2454	snippy:4.3.6	variation	3979201	3979201	.	.	0	note=snp T=>C C:48 T:0
EA2454	snippy:4.3.6	variation	3979451	3979451	.	.	0	note=complex GCAGG=>ACAGA ACAGA:43 GCAGG:0
EA2454	snippy:4.3.6	variation	3979467	3979467	.	.	0	note=snp A=>G G:44 A:1
EA2454	snippy:4.3.6	variation	3979503	3979503	.	.	0	note=snp C=>T T:57 C:0
EA2454	snippy:4.3.6	variation	3979542	3979542	.	.	0	note=snp T=>C C:56 T:0
EA2454	snippy:4.3.6	variation	3979560	3979560	.	.	0	note=snp T=>C C:55 T:0
EA2454	snippy:4.3.6	variation	3979665	3979665	.	.	0	note=snp C=>G G:54 C:0
EA2454	snippy:4.3.6	variation	3979713	3979713	.	.	0	note=snp A=>G G:56 A:0
EA2454	snippy:4.3.6	variation	3979815	3979815	.	.	0	note=complex GCGTTCGG=>ACGATCGA ACGATCGA:58 GCGTTCGG:0
EA2454	snippy:4.3.6	variation	3979935	3979935	.	.	0	note=snp A=>G G:54 A:0
EA2454	snippy:4.3.6	variation	3979948	3979948	.	.	0	note=snp T=>C C:51 T:0
EA2454	snippy:4.3.6	variation	3979992	3979992	.	.	0	note=complex CTCCT=>ATCCG ATCCG:48 CTCCT:0
EA2454	snippy:4.3.6	variation	3980004	3980004	.	.	0	note=snp A=>G G:50 A:0
EA2454	snippy:4.3.6	variation	3980091	3980091	.	.	0	note=snp C=>T T:46 C:0
EA2454	snippy:4.3.6	variation	3980154	3980154	.	.	0	note=snp C=>T T:50 C:0
EA2454	snippy:4.3.6	variation	3980190	3980190	.	.	0	note=snp G=>A A:62 G:0
EA2454	snippy:4.3.6	variation	3980244	3980244	.	.	0	note=snp T=>C C:60 T:0
EA2454	snippy:4.3.6	variation	3980259	3980259	.	.	0	note=snp C=>A A:59 C:0
EA2454	snippy:4.3.6	variation	3980430	3980430	.	.	0	note=snp G=>A A:53 G:2
EA2454	snippy:4.3.6	variation	3980442	3980442	.	.	0	note=snp C=>T T:53 C:0
EA2454	snippy:4.3.6	variation	3980535	3980535	.	.	0	note=snp A=>G G:69 A:0
EA2454	snippy:4.3.6	variation	3980571	3980571	.	.	0	note=snp A=>T T:73 A:0
EA2454	snippy:4.3.6	variation	3980657	3980657	.	.	0	note=complex TGCA=>CGCG CGCG:68 TGCA:0
EA2454	snippy:4.3.6	variation	3980711	3980711	.	.	0	note=snp T=>A A:81 T:0
EA2454	snippy:4.3.6	variation	3980720	3980720	.	.	0	note=complex CGCT=>AGCG AGCG:74 CGCT:0
EA2454	snippy:4.3.6	variation	3980774	3980774	.	.	0	note=snp A=>G G:69 A:0
EA2454	snippy:4.3.6	variation	3981172	3981172	.	.	0	note=snp C=>T T:83 C:0
EA2454	snippy:4.3.6	variation	3981199	3981199	.	.	0	note=snp G=>A A:82 G:0
EA2454	snippy:4.3.6	variation	3981256	3981256	.	.	0	note=snp T=>C C:79 T:0
EA2454	snippy:4.3.6	variation	3981301	3981301	.	.	0	note=snp T=>C C:79 T:0
EA2454	snippy:4.3.6	variation	3981322	3981322	.	.	0	note=snp T=>C C:79 T:1
EA2454	snippy:4.3.6	variation	3981337	3981337	.	.	0	note=snp G=>A A:76 G:0
EA2454	snippy:4.3.6	variation	3981352	3981352	.	.	0	note=snp C=>G G:72 C:0
EA2454	snippy:4.3.6	variation	3981391	3981391	.	.	0	note=snp A=>G G:57 A:0
EA2454	snippy:4.3.6	variation	3981412	3981412	.	.	0	note=snp A=>G G:51 A:0
EA2454	snippy:4.3.6	variation	3981436	3981436	.	.	0	note=snp C=>T T:34 C:0
EA2454	snippy:4.3.6	variation	3981466	3981466	.	.	0	note=snp A=>G G:35 A:0
EA2454	snippy:4.3.6	variation	3981562	3981562	.	.	0	note=snp A=>G G:24 A:0
EA2454	snippy:4.3.6	variation	3981625	3981625	.	.	0	note=snp G=>A A:34 G:0
EA2454	snippy:4.3.6	variation	3981697	3981697	.	.	0	note=snp G=>A A:49 G:0
EA2454	snippy:4.3.6	variation	3981709	3981709	.	.	0	note=snp A=>G G:49 A:0
EA2454	snippy:4.3.6	variation	3981781	3981781	.	.	0	note=snp G=>A A:64 G:0
EA2454	snippy:4.3.6	variation	3981835	3981835	.	.	0	note=snp C=>G G:59 C:0
EA2454	snippy:4.3.6	variation	3981973	3981973	.	.	0	note=snp A=>G G:47 A:0
EA2454	snippy:4.3.6	variation	3982000	3982000	.	.	0	note=snp G=>A A:45 G:0
EA2454	snippy:4.3.6	variation	3982203	3982203	.	.	0	note=snp T=>A A:51 T:0
EA2454	snippy:4.3.6	variation	3982224	3982224	.	.	0	note=snp G=>A A:60 G:0
EA2454	snippy:4.3.6	variation	3982272	3982272	.	.	0	note=snp C=>T T:57 C:0
EA2454	snippy:4.3.6	variation	3982292	3982292	.	.	0	note=snp T=>A A:57 T:0
EA2454	snippy:4.3.6	variation	3982308	3982308	.	.	0	note=snp A=>G G:56 A:0
EA2454	snippy:4.3.6	variation	3982347	3982347	.	.	0	note=snp T=>C C:62 T:0
EA2454	snippy:4.3.6	variation	3982395	3982395	.	.	0	note=snp A=>G G:51 A:0
EA2454	snippy:4.3.6	variation	3982410	3982410	.	.	0	note=snp C=>T T:52 C:0
EA2454	snippy:4.3.6	variation	3982446	3982446	.	.	0	note=snp G=>T T:57 G:0
EA2454	snippy:4.3.6	variation	3982611	3982611	.	.	0	note=snp A=>G G:87 A:0
EA2454	snippy:4.3.6	variation	3982623	3982623	.	.	0	note=snp A=>G G:88 A:0
EA2454	snippy:4.3.6	variation	3982659	3982659	.	.	0	note=snp G=>A A:94 G:0
EA2454	snippy:4.3.6	variation	3982692	3982692	.	.	0	note=snp G=>A A:86 G:0
EA2454	snippy:4.3.6	variation	3982749	3982749	.	.	0	note=snp G=>A A:80 G:0
EA2454	snippy:4.3.6	variation	3982770	3982770	.	.	0	note=snp G=>A A:75 G:0
EA2454	snippy:4.3.6	variation	3982806	3982806	.	.	0	note=snp C=>G G:78 C:0
EA2454	snippy:4.3.6	variation	3982887	3982887	.	.	0	note=snp G=>C C:77 G:0
EA2454	snippy:4.3.6	variation	3982914	3982914	.	.	0	note=snp C=>T T:75 C:0
EA2454	snippy:4.3.6	variation	3983043	3983043	.	.	0	note=snp A=>G G:60 A:0
EA2454	snippy:4.3.6	variation	3983396	3983396	.	.	0	note=snp C=>A A:62 C:0
EA2454	snippy:4.3.6	variation	3983474	3983474	.	.	0	note=snp G=>C C:70 G:0
EA2454	snippy:4.3.6	variation	3983540	3983540	.	.	0	note=snp C=>A A:74 C:0
EA2454	snippy:4.3.6	variation	3983558	3983558	.	.	0	note=snp T=>A A:77 T:0
EA2454	snippy:4.3.6	variation	3983570	3983570	.	.	0	note=snp G=>C C:78 G:1
EA2454	snippy:4.3.6	variation	3983678	3983678	.	.	0	note=snp A=>C C:72 A:0
EA2454	snippy:4.3.6	variation	3983705	3983705	.	.	0	note=complex ACCG=>TCCA TCCA:72 ACCG:0
EA2454	snippy:4.3.6	variation	3983849	3983849	.	.	0	note=snp G=>C C:54 G:0
EA2454	snippy:4.3.6	variation	3983882	3983882	.	.	0	note=snp T=>A A:71 T:0
EA2454	snippy:4.3.6	variation	3983897	3983897	.	.	0	note=snp G=>A A:62 G:0
EA2454	snippy:4.3.6	variation	3983903	3983903	.	.	0	note=snp C=>T T:66 C:0
EA2454	snippy:4.3.6	variation	3983942	3983942	.	.	0	note=snp G=>T T:61 G:0
EA2454	snippy:4.3.6	variation	3983957	3983957	.	.	0	note=complex AGCC=>GGCT GGCT:61 AGCC:0
EA2454	snippy:4.3.6	variation	3983975	3983975	.	.	0	note=snp G=>A A:60 G:0
EA2454	snippy:4.3.6	variation	3984184	3984184	.	.	0	note=snp T=>A A:47 T:0
EA2454	snippy:4.3.6	variation	3984257	3984257	.	.	0	note=snp T=>C C:48 T:0
EA2454	snippy:4.3.6	variation	3984347	3984347	.	.	0	note=snp A=>G G:42 A:0
EA2454	snippy:4.3.6	variation	3984353	3984353	.	.	0	note=snp G=>A A:42 G:0
EA2454	snippy:4.3.6	variation	3984359	3984359	.	.	0	note=snp A=>G G:42 A:0
EA2454	snippy:4.3.6	variation	3984440	3984440	.	.	0	note=snp T=>C C:43 T:0
EA2454	snippy:4.3.6	variation	3984879	3984879	.	.	0	note=snp C=>T T:67 C:0
EA2454	snippy:4.3.6	variation	3984912	3984912	.	.	0	note=snp G=>A A:65 G:0
EA2454	snippy:4.3.6	variation	3984933	3984933	.	.	0	note=complex TGCA=>CGCG CGCG:61 TGCA:0
EA2454	snippy:4.3.6	variation	3985224	3985224	.	.	0	note=snp G=>A A:85 G:0
EA2454	snippy:4.3.6	variation	3985293	3985293	.	.	0	note=snp G=>A A:79 G:0
EA2454	snippy:4.3.6	variation	3985311	3985311	.	.	0	note=snp C=>T T:79 C:0
EA2454	snippy:4.3.6	variation	3985322	3985322	.	.	0	note=snp T=>C C:75 T:0
EA2454	snippy:4.3.6	variation	3985371	3985371	.	.	0	note=snp A=>T T:67 A:0
EA2454	snippy:4.3.6	variation	3985458	3985458	.	.	0	note=snp G=>A A:72 G:1
EA2454	snippy:4.3.6	variation	3985527	3985527	.	.	0	note=snp A=>G G:88 A:0
EA2454	snippy:4.3.6	variation	3985611	3985611	.	.	0	note=snp G=>A A:100 G:0
EA2454	snippy:4.3.6	variation	3985629	3985629	.	.	0	note=snp G=>A A:97 G:0
EA2454	snippy:4.3.6	variation	3985744	3985744	.	.	0	note=snp C=>G G:84 C:0
EA2454	snippy:4.3.6	variation	3985828	3985828	.	.	0	note=snp A=>C C:75 A:0
EA2454	snippy:4.3.6	variation	3985834	3985834	.	.	0	note=snp G=>C C:74 G:0
EA2454	snippy:4.3.6	variation	3985843	3985843	.	.	0	note=snp G=>A A:73 G:0
EA2454	snippy:4.3.6	variation	3985882	3985882	.	.	0	note=snp C=>T T:69 C:0
EA2454	snippy:4.3.6	variation	3985888	3985888	.	.	0	note=snp A=>G G:69 A:0
EA2454	snippy:4.3.6	variation	3986001	3986001	.	.	0	note=snp T=>A A:57 T:0
EA2454	snippy:4.3.6	variation	3986137	3986137	.	.	0	note=snp T=>C C:69 T:0
EA2454	snippy:4.3.6	variation	3986185	3986185	.	.	0	note=snp G=>A A:68 G:0
EA2454	snippy:4.3.6	variation	3986211	3986211	.	.	0	note=mnp AG=>GA GA:64 AG:0
EA2454	snippy:4.3.6	variation	3986226	3986226	.	.	0	note=complex CCTCG=>TTTCT TTTCT:58 CCTCG:0
EA2454	snippy:4.3.6	variation	3986245	3986245	.	.	0	note=complex ACCG=>GCCA GCCA:61 ACCG:0
EA2454	snippy:4.3.6	variation	3986275	3986275	.	.	0	note=snp A=>C C:70 A:0
EA2454	snippy:4.3.6	variation	3986284	3986284	.	.	0	note=snp G=>A A:65 G:0
EA2454	snippy:4.3.6	variation	3986296	3986296	.	.	0	note=snp G=>A A:61 G:0
EA2454	snippy:4.3.6	variation	3986338	3986338	.	.	0	note=snp C=>T T:68 C:0
EA2454	snippy:4.3.6	variation	3986350	3986350	.	.	0	note=snp A=>G G:62 A:0
EA2454	snippy:4.3.6	variation	3986413	3986413	.	.	0	note=snp A=>G G:64 A:0
EA2454	snippy:4.3.6	variation	3986443	3986443	.	.	0	note=snp C=>T T:56 C:0
EA2454	snippy:4.3.6	variation	3986488	3986488	.	.	0	note=snp T=>A A:55 T:0
EA2454	snippy:4.3.6	variation	3986536	3986536	.	.	0	note=snp G=>A A:47 G:0
EA2454	snippy:4.3.6	variation	3986548	3986548	.	.	0	note=snp C=>T T:46 C:0
EA2454	snippy:4.3.6	variation	3986713	3986713	.	.	0	note=snp T=>C C:51 T:0
EA2454	snippy:4.3.6	variation	3986740	3986740	.	.	0	note=snp T=>G G:61 T:0
EA2454	snippy:4.3.6	variation	3986791	3986791	.	.	0	note=snp G=>A A:59 G:1
EA2454	snippy:4.3.6	variation	3986830	3986830	.	.	0	note=snp G=>A A:60 G:0
EA2454	snippy:4.3.6	variation	3986982	3986982	.	.	0	note=snp G=>A A:54 G:0
EA2454	snippy:4.3.6	variation	3987087	3987087	.	.	0	note=snp C=>A A:79 C:0
EA2454	snippy:4.3.6	variation	3987105	3987105	.	.	0	note=snp T=>G G:78 T:0
EA2454	snippy:4.3.6	variation	3987111	3987111	.	.	0	note=snp G=>A A:82 G:0
EA2454	snippy:4.3.6	variation	3987135	3987135	.	.	0	note=snp C=>T T:74 C:0
EA2454	snippy:4.3.6	variation	3987306	3987306	.	.	0	note=snp T=>C C:67 T:0
EA2454	snippy:4.3.6	variation	3987336	3987336	.	.	0	note=snp T=>A A:63 T:0
EA2454	snippy:4.3.6	variation	3987372	3987372	.	.	0	note=snp G=>A A:64 G:0
EA2454	snippy:4.3.6	variation	3987471	3987471	.	.	0	note=snp T=>C C:82 T:0
EA2454	snippy:4.3.6	variation	3987494	3987494	.	.	0	note=snp G=>A A:82 G:0
EA2454	snippy:4.3.6	variation	3987518	3987518	.	.	0	note=complex GGCG=>TGCA TGCA:71 GGCG:0
EA2454	snippy:4.3.6	variation	3987533	3987533	.	.	0	note=snp G=>A A:76 G:0
EA2454	snippy:4.3.6	variation	3987545	3987545	.	.	0	note=snp G=>T T:71 G:0
EA2454	snippy:4.3.6	variation	3987563	3987563	.	.	0	note=snp T=>C C:72 T:0
EA2454	snippy:4.3.6	variation	3987632	3987632	.	.	0	note=snp C=>T T:73 C:0
EA2454	snippy:4.3.6	variation	3987698	3987698	.	.	0	note=snp C=>T T:70 C:0
EA2454	snippy:4.3.6	variation	3987746	3987746	.	.	0	note=snp G=>A A:70 G:0
EA2454	snippy:4.3.6	variation	3987926	3987926	.	.	0	note=snp G=>A A:90 G:0
EA2454	snippy:4.3.6	variation	3987935	3987935	.	.	0	note=snp G=>T T:86 G:0
EA2454	snippy:4.3.6	variation	3987944	3987944	.	.	0	note=snp G=>A A:86 G:0
EA2454	snippy:4.3.6	variation	3987950	3987950	.	.	0	note=snp G=>A A:84 G:0
EA2454	snippy:4.3.6	variation	3987965	3987965	.	.	0	note=snp A=>G G:83 A:0
EA2454	snippy:4.3.6	variation	3988004	3988004	.	.	0	note=snp T=>C C:82 T:0
EA2454	snippy:4.3.6	variation	3988037	3988037	.	.	0	note=snp A=>G G:73 A:0
EA2454	snippy:4.3.6	variation	3988043	3988043	.	.	0	note=complex GGTA=>AGTG AGTG:63 GGTA:1
EA2454	snippy:4.3.6	variation	3988150	3988150	.	.	0	note=snp A=>G G:53 A:0
EA2454	snippy:4.3.6	variation	3988333	3988333	.	.	0	note=snp G=>A A:54 G:0
EA2454	snippy:4.3.6	variation	3988510	3988510	.	.	0	note=snp G=>A A:68 G:1
EA2454	snippy:4.3.6	variation	3988627	3988627	.	.	0	note=snp T=>C C:74 T:0
EA2454	snippy:4.3.6	variation	3988702	3988702	.	.	0	note=mnp TA=>AG AG:74 TA:0
EA2454	snippy:4.3.6	variation	3988774	3988774	.	.	0	note=snp A=>G G:76 A:0
EA2454	snippy:4.3.6	variation	3988816	3988816	.	.	0	note=snp C=>G G:70 C:0
EA2454	snippy:4.3.6	variation	3988840	3988840	.	.	0	note=snp T=>C C:62 T:0
EA2454	snippy:4.3.6	variation	3988938	3988938	.	.	0	note=snp G=>A A:56 G:0
EA2454	snippy:4.3.6	variation	3988948	3988948	.	.	0	note=snp C=>A A:56 C:0
EA2454	snippy:4.3.6	variation	3988954	3988954	.	.	0	note=snp A=>G G:54 A:0
EA2454	snippy:4.3.6	variation	3989065	3989065	.	.	0	note=snp C=>T T:51 C:0
EA2454	snippy:4.3.6	variation	3989073	3989073	.	.	0	note=snp G=>A A:53 G:0
EA2454	snippy:4.3.6	variation	3989233	3989233	.	.	0	note=snp G=>A A:62 G:0
EA2454	snippy:4.3.6	variation	3989242	3989242	.	.	0	note=snp G=>A A:62 G:0
EA2454	snippy:4.3.6	variation	3989365	3989365	.	.	0	note=complex GCGC=>ACGG ACGG:66 GCGC:0
EA2454	snippy:4.3.6	variation	3989374	3989374	.	.	0	note=snp C=>T T:68 C:0
EA2454	snippy:4.3.6	variation	3989410	3989410	.	.	0	note=snp G=>A A:67 G:0
EA2454	snippy:4.3.6	variation	3989425	3989425	.	.	0	note=complex CTCT=>TTCG TTCG:60 CTCT:0
EA2454	snippy:4.3.6	variation	3989470	3989470	.	.	0	note=snp C=>G G:64 C:0
EA2454	snippy:4.3.6	variation	3989638	3989638	.	.	0	note=snp A=>G G:77 A:0
EA2454	snippy:4.3.6	variation	3989770	3989770	.	.	0	note=snp G=>A A:59 G:0
EA2454	snippy:4.3.6	variation	3989851	3989851	.	.	0	note=snp G=>A A:67 G:0
EA2454	snippy:4.3.6	variation	3989867	3989867	.	.	0	note=snp T=>G G:66 T:0
EA2454	snippy:4.3.6	variation	3989883	3989883	.	.	0	note=snp T=>C C:69 T:0
EA2454	snippy:4.3.6	variation	3989904	3989904	.	.	0	note=snp T=>G G:62 T:0
EA2454	snippy:4.3.6	variation	3989914	3989914	.	.	0	note=snp A=>G G:67 A:0
EA2454	snippy:4.3.6	variation	3989945	3989945	.	.	0	note=snp G=>T T:82 G:0
EA2454	snippy:4.3.6	variation	3989989	3989989	.	.	0	note=snp G=>A A:82 G:0
EA2454	snippy:4.3.6	variation	3989998	3989998	.	.	0	note=snp A=>G G:79 A:0
EA2454	snippy:4.3.6	variation	3990010	3990010	.	.	0	note=complex ATCG=>GTCA GTCA:74 ATCG:0
EA2454	snippy:4.3.6	variation	3990058	3990058	.	.	0	note=snp A=>G G:61 A:0
EA2454	snippy:4.3.6	variation	3990070	3990070	.	.	0	note=snp A=>G G:65 A:1
EA2454	snippy:4.3.6	variation	3990085	3990085	.	.	0	note=snp C=>T T:68 C:0
EA2454	snippy:4.3.6	variation	3990094	3990094	.	.	0	note=snp G=>A A:67 G:0
EA2454	snippy:4.3.6	variation	3990106	3990106	.	.	0	note=snp A=>G G:64 A:0
EA2454	snippy:4.3.6	variation	3990358	3990358	.	.	0	note=snp G=>A A:51 G:0
EA2454	snippy:4.3.6	variation	3990364	3990364	.	.	0	note=snp A=>G G:41 A:0
EA2454	snippy:4.3.6	variation	3990370	3990370	.	.	0	note=snp G=>A A:46 G:0
EA2454	snippy:4.3.6	variation	3990481	3990481	.	.	0	note=snp T=>C C:63 T:0
EA2454	snippy:4.3.6	variation	3990648	3990648	.	.	0	note=snp C=>A A:92 C:0
EA2454	snippy:4.3.6	variation	3990705	3990705	.	.	0	note=snp G=>A A:96 G:0
EA2454	snippy:4.3.6	variation	3990720	3990720	.	.	0	note=snp A=>G G:94 A:0
EA2454	snippy:4.3.6	variation	3990735	3990735	.	.	0	note=complex ACGG=>CCGT CCGT:94 ACGG:0
EA2454	snippy:4.3.6	variation	3990918	3990918	.	.	0	note=snp T=>G G:94 T:0
EA2454	snippy:4.3.6	variation	3991103	3991103	.	.	0	note=snp G=>C C:84 G:1
EA2454	snippy:4.3.6	variation	3991217	3991217	.	.	0	note=snp G=>A A:90 G:0
EA2454	snippy:4.3.6	variation	3991223	3991223	.	.	0	note=snp A=>G G:91 A:0
EA2454	snippy:4.3.6	variation	3991241	3991241	.	.	0	note=snp G=>A A:85 G:2
EA2454	snippy:4.3.6	variation	3991307	3991307	.	.	0	note=snp T=>C C:82 T:0
EA2454	snippy:4.3.6	variation	3991364	3991364	.	.	0	note=snp A=>G G:78 A:0
EA2454	snippy:4.3.6	variation	3991370	3991370	.	.	0	note=snp G=>A A:79 G:0
EA2454	snippy:4.3.6	variation	3991412	3991412	.	.	0	note=snp C=>T T:76 C:0
EA2454	snippy:4.3.6	variation	3991490	3991490	.	.	0	note=snp A=>G G:82 A:0
EA2454	snippy:4.3.6	variation	3991517	3991517	.	.	0	note=snp A=>G G:75 A:0
EA2454	snippy:4.3.6	variation	3991547	3991547	.	.	0	note=complex GCCG=>ACCT ACCT:76 GCCG:0
EA2454	snippy:4.3.6	variation	3991562	3991562	.	.	0	note=snp T=>C C:89 T:0
EA2454	snippy:4.3.6	variation	3991592	3991592	.	.	0	note=snp G=>A A:91 G:1
EA2454	snippy:4.3.6	variation	3991676	3991676	.	.	0	note=snp A=>G G:93 A:0
EA2454	snippy:4.3.6	variation	3991808	3991808	.	.	0	note=snp C=>G G:78 C:0
EA2454	snippy:4.3.6	variation	3992103	3992103	.	.	0	note=snp T=>A A:62 T:0
EA2454	snippy:4.3.6	variation	3992167	3992167	.	.	0	note=snp A=>C C:52 A:1
EA2454	snippy:4.3.6	variation	3992322	3992322	.	.	0	note=mnp AA=>TG TG:58 AA:0
EA2454	snippy:4.3.6	variation	3992330	3992330	.	.	0	note=snp G=>A A:57 G:0
EA2454	snippy:4.3.6	variation	3992354	3992354	.	.	0	note=snp T=>C C:50 T:0
EA2454	snippy:4.3.6	variation	3992510	3992510	.	.	0	note=snp A=>G G:22 A:0
EA2454	snippy:4.3.6	variation	3992521	3992521	.	.	0	note=snp A=>G G:19 A:0
EA2454	snippy:4.3.6	variation	3992531	3992531	.	.	0	note=snp A=>G G:16 A:0
EA2454	snippy:4.3.6	variation	3992541	3992541	.	.	0	note=snp A=>T T:17 A:0
EA2454	snippy:4.3.6	variation	3992549	3992549	.	.	0	note=complex AGCGT=>TGCGC TGCGC:14 AGCGT:0
EA2454	snippy:4.3.6	variation	3992581	3992581	.	.	0	note=snp A=>G G:15 A:0
EA2454	snippy:4.3.6	variation	3992616	3992616	.	.	0	note=complex CGATGTTCTAG=>TGAGGTTATTA TGAGGTTATTA:10 CGATGTTCTAG:0
EA2454	snippy:4.3.6	variation	3992639	3992639	.	.	0	note=snp G=>A A:19 G:0
EA2454	snippy:4.3.6	variation	3992657	3992657	.	.	0	note=complex TG=>CA CA:27 TG:0
EA2454	snippy:4.3.6	variation	3992676	3992676	.	.	0	note=snp T=>C C:28 T:0
EA2454	snippy:4.3.6	variation	3992864	3992864	.	.	0	note=snp C=>T T:51 C:1
EA2454	snippy:4.3.6	variation	3992897	3992897	.	.	0	note=snp G=>A A:52 G:0
EA2454	snippy:4.3.6	variation	3993009	3993009	.	.	0	note=snp A=>T T:54 A:0
EA2454	snippy:4.3.6	variation	3993125	3993125	.	.	0	note=snp A=>G G:44 A:0
EA2454	snippy:4.3.6	variation	3993149	3993149	.	.	0	note=snp C=>T T:52 C:0
EA2454	snippy:4.3.6	variation	3993332	3993332	.	.	0	note=snp T=>C C:74 T:0
EA2454	snippy:4.3.6	variation	3993353	3993353	.	.	0	note=snp T=>C C:71 T:0
EA2454	snippy:4.3.6	variation	3993521	3993521	.	.	0	note=snp G=>A A:63 G:0
EA2454	snippy:4.3.6	variation	3993620	3993620	.	.	0	note=snp T=>A A:58 T:0
EA2454	snippy:4.3.6	variation	3993815	3993815	.	.	0	note=snp A=>T T:64 A:0
EA2454	snippy:4.3.6	variation	3993884	3993884	.	.	0	note=snp A=>G G:56 A:0
EA2454	snippy:4.3.6	variation	3993923	3993923	.	.	0	note=snp A=>G G:63 A:1
EA2454	snippy:4.3.6	variation	3993953	3993953	.	.	0	note=complex TTCA=>CTCG CTCG:53 TTCA:0
EA2454	snippy:4.3.6	variation	3994100	3994100	.	.	0	note=snp A=>G G:62 A:0
EA2454	snippy:4.3.6	variation	3994274	3994274	.	.	0	note=snp A=>G G:25 A:0
EA2454	snippy:4.3.6	variation	3994280	3994280	.	.	0	note=snp T=>A A:23 T:0
EA2454	snippy:4.3.6	variation	3994286	3994286	.	.	0	note=snp T=>G G:21 T:0
EA2454	snippy:4.3.6	variation	3995077	3995077	.	.	0	note=snp C=>A A:10 C:0
EA2454	snippy:4.3.6	variation	3995104	3995104	.	.	0	note=snp G=>A A:15 G:0
EA2454	snippy:4.3.6	variation	3995194	3995194	.	.	0	note=snp A=>G G:40 A:0
EA2454	snippy:4.3.6	variation	3995251	3995251	.	.	0	note=snp G=>C C:43 G:0
EA2454	snippy:4.3.6	variation	3995344	3995344	.	.	0	note=snp A=>G G:46 A:0
EA2454	snippy:4.3.6	variation	3995358	3995358	.	.	0	note=snp A=>G G:44 A:0
EA2454	snippy:4.3.6	variation	3995443	3995443	.	.	0	note=snp A=>C C:32 A:0
EA2454	snippy:4.3.6	variation	3995458	3995458	.	.	0	note=snp G=>A A:32 G:0
EA2454	snippy:4.3.6	variation	3995485	3995485	.	.	0	note=snp A=>G G:31 A:0
EA2454	snippy:4.3.6	variation	3995494	3995494	.	.	0	note=snp T=>C C:37 T:0
EA2454	snippy:4.3.6	variation	3995545	3995545	.	.	0	note=snp A=>G G:28 A:0
EA2454	snippy:4.3.6	variation	3995550	3995550	.	.	0	note=snp C=>T T:32 C:0
EA2454	snippy:4.3.6	variation	3995563	3995563	.	.	0	note=complex CGCCGTCCCC=>TGCCTGTCCT TGCCTGTCCT:27 CGCCGTCCCC:0
EA2454	snippy:4.3.6	variation	3995638	3995638	.	.	0	note=snp C=>T T:31 C:0
EA2454	snippy:4.3.6	variation	3995683	3995683	.	.	0	note=snp G=>A A:35 G:0
EA2454	snippy:4.3.6	variation	3995782	3995782	.	.	0	note=snp T=>C C:33 T:0
EA2454	snippy:4.3.6	variation	3995879	3995879	.	.	0	note=snp G=>A A:39 G:0
EA2454	snippy:4.3.6	variation	3995950	3995950	.	.	0	note=snp G=>A A:42 G:0
EA2454	snippy:4.3.6	variation	3996013	3996013	.	.	0	note=snp G=>T T:53 G:0
EA2454	snippy:4.3.6	variation	3996097	3996097	.	.	0	note=snp G=>A A:68 G:0
EA2454	snippy:4.3.6	variation	3996124	3996124	.	.	0	note=snp A=>G G:56 A:0
EA2454	snippy:4.3.6	variation	3996139	3996139	.	.	0	note=complex ACTA=>GCTG GCTG:40 ACTA:0
EA2454	snippy:4.3.6	variation	3996229	3996229	.	.	0	note=snp T=>G G:48 T:0
EA2454	snippy:4.3.6	variation	3996355	3996355	.	.	0	note=snp G=>A A:57 G:0
EA2454	snippy:4.3.6	variation	3996661	3996661	.	.	0	note=snp G=>A A:69 G:1
EA2454	snippy:4.3.6	variation	3996694	3996694	.	.	0	note=snp C=>T T:71 C:0
EA2454	snippy:4.3.6	variation	3997075	3997075	.	.	0	note=snp T=>C C:36 T:1
EA2454	snippy:4.3.6	variation	3997123	3997123	.	.	0	note=snp G=>A A:45 G:0
EA2454	snippy:4.3.6	variation	3997185	3997185	.	.	0	note=complex AG=>GT GT:52 AG:0
EA2454	snippy:4.3.6	variation	3997290	3997290	.	.	0	note=complex TTTCA=>CCTCG CCTCG:58 TTTCA:0
EA2454	snippy:4.3.6	variation	3997324	3997324	.	.	0	note=snp A=>G G:58 A:0
EA2454	snippy:4.3.6	variation	3997446	3997446	.	.	0	note=snp G=>C C:59 G:0
EA2454	snippy:4.3.6	variation	3997733	3997733	.	.	0	note=snp T=>C C:74 T:0
EA2454	snippy:4.3.6	variation	3997766	3997766	.	.	0	note=snp G=>T T:67 G:0
EA2454	snippy:4.3.6	variation	3997850	3997850	.	.	0	note=snp G=>T T:74 G:0
EA2454	snippy:4.3.6	variation	3997865	3997865	.	.	0	note=snp G=>A A:74 G:0
EA2454	snippy:4.3.6	variation	3997886	3997886	.	.	0	note=snp C=>T T:79 C:0
EA2454	snippy:4.3.6	variation	3997891	3997891	.	.	0	note=snp A=>G G:76 A:0
EA2454	snippy:4.3.6	variation	3998026	3998026	.	.	0	note=snp A=>G G:82 A:0
EA2454	snippy:4.3.6	variation	3998386	3998386	.	.	0	note=snp G=>A A:91 G:0
EA2454	snippy:4.3.6	variation	3998437	3998437	.	.	0	note=snp T=>A A:89 T:0
EA2454	snippy:4.3.6	variation	3998448	3998448	.	.	0	note=snp A=>C C:83 A:0
EA2454	snippy:4.3.6	variation	3998553	3998553	.	.	0	note=snp C=>T T:65 C:0
EA2454	snippy:4.3.6	variation	3998658	3998658	.	.	0	note=snp C=>T T:45 C:0
EA2454	snippy:4.3.6	variation	3998787	3998787	.	.	0	note=snp T=>C C:53 T:0
EA2454	snippy:4.3.6	variation	3998844	3998844	.	.	0	note=snp C=>G G:48 C:0
EA2454	snippy:4.3.6	variation	3998892	3998892	.	.	0	note=complex GCTA=>ACTG ACTG:42 GCTA:0
EA2454	snippy:4.3.6	variation	3998922	3998922	.	.	0	note=snp C=>A A:38 C:0
EA2454	snippy:4.3.6	variation	3998997	3998997	.	.	0	note=snp T=>G G:53 T:0
EA2454	snippy:4.3.6	variation	3999002	3999002	.	.	0	note=snp T=>C C:54 T:1
EA2454	snippy:4.3.6	variation	3999054	3999054	.	.	0	note=snp G=>T T:56 G:1
EA2454	snippy:4.3.6	variation	3999072	3999072	.	.	0	note=snp T=>A A:58 T:0
EA2454	snippy:4.3.6	variation	3999081	3999081	.	.	0	note=snp G=>A A:62 G:0
EA2454	snippy:4.3.6	variation	3999276	3999276	.	.	0	note=snp T=>C C:60 T:0
EA2454	snippy:4.3.6	variation	3999357	3999357	.	.	0	note=snp G=>A A:69 G:0
EA2454	snippy:4.3.6	variation	3999507	3999507	.	.	0	note=snp T=>C C:68 T:0
EA2454	snippy:4.3.6	variation	3999513	3999513	.	.	0	note=snp T=>C C:67 T:0
EA2454	snippy:4.3.6	variation	3999519	3999519	.	.	0	note=snp G=>A A:74 G:0
EA2454	snippy:4.3.6	variation	3999537	3999537	.	.	0	note=snp A=>G G:72 A:0
EA2454	snippy:4.3.6	variation	3999594	3999594	.	.	0	note=snp G=>A A:65 G:0
EA2454	snippy:4.3.6	variation	3999651	3999651	.	.	0	note=snp C=>G G:59 C:0
EA2454	snippy:4.3.6	variation	3999672	3999672	.	.	0	note=snp A=>C C:56 A:0
EA2454	snippy:4.3.6	variation	3999720	3999720	.	.	0	note=snp T=>C C:64 T:0
EA2454	snippy:4.3.6	variation	3999771	3999771	.	.	0	note=snp G=>C C:73 G:0
EA2454	snippy:4.3.6	variation	3999777	3999777	.	.	0	note=snp C=>T T:71 C:1
EA2454	snippy:4.3.6	variation	3999843	3999843	.	.	0	note=snp T=>C C:70 T:0
EA2454	snippy:4.3.6	variation	3999858	3999858	.	.	0	note=snp A=>G G:71 A:0
EA2454	snippy:4.3.6	variation	3999888	3999888	.	.	0	note=snp G=>A A:73 G:0
EA2454	snippy:4.3.6	variation	3999910	3999910	.	.	0	note=complex TTG=>CTT CTT:67 TTG:0
EA2454	snippy:4.3.6	variation	3999969	3999969	.	.	0	note=snp A=>G G:74 A:1
EA2454	snippy:4.3.6	variation	4000029	4000029	.	.	0	note=snp T=>C C:61 T:0
EA2454	snippy:4.3.6	variation	4000047	4000047	.	.	0	note=snp T=>C C:65 T:0
EA2454	snippy:4.3.6	variation	4000053	4000053	.	.	0	note=snp G=>A A:66 G:0
EA2454	snippy:4.3.6	variation	4000068	4000068	.	.	0	note=snp G=>T T:67 G:0
EA2454	snippy:4.3.6	variation	4000098	4000098	.	.	0	note=snp A=>G G:65 A:1
EA2454	snippy:4.3.6	variation	4000107	4000107	.	.	0	note=snp T=>C C:64 T:0
EA2454	snippy:4.3.6	variation	4000131	4000131	.	.	0	note=snp C=>T T:70 C:0
EA2454	snippy:4.3.6	variation	4000197	4000197	.	.	0	note=complex GGTT=>AGTG AGTG:71 GGTT:0
EA2454	snippy:4.3.6	variation	4000254	4000254	.	.	0	note=snp T=>G G:78 T:0
EA2454	snippy:4.3.6	variation	4000266	4000266	.	.	0	note=snp T=>C C:75 T:0
EA2454	snippy:4.3.6	variation	4000342	4000342	.	.	0	note=snp G=>A A:77 G:0
EA2454	snippy:4.3.6	variation	4000455	4000455	.	.	0	note=snp C=>T T:81 C:0
EA2454	snippy:4.3.6	variation	4000479	4000479	.	.	0	note=snp T=>C C:84 T:0
EA2454	snippy:4.3.6	variation	4000494	4000494	.	.	0	note=snp T=>C C:84 T:0
EA2454	snippy:4.3.6	variation	4000575	4000575	.	.	0	note=snp T=>C C:96 T:0
EA2454	snippy:4.3.6	variation	4000584	4000584	.	.	0	note=snp A=>G G:96 A:0
EA2454	snippy:4.3.6	variation	4000647	4000647	.	.	0	note=snp C=>T T:91 C:0
EA2454	snippy:4.3.6	variation	4000665	4000665	.	.	0	note=snp A=>G G:90 A:0
EA2454	snippy:4.3.6	variation	4000701	4000701	.	.	0	note=snp G=>A A:91 G:1
EA2454	snippy:4.3.6	variation	4000770	4000770	.	.	0	note=complex TGCGGCG=>CGCCGCT CGCCGCT:81 TGCGGCG:0
EA2454	snippy:4.3.6	variation	4000788	4000788	.	.	0	note=snp G=>A A:89 G:0
EA2454	snippy:4.3.6	variation	4000833	4000833	.	.	0	note=snp T=>C C:79 T:0
EA2454	snippy:4.3.6	variation	4000848	4000848	.	.	0	note=snp G=>A A:84 G:0
EA2454	snippy:4.3.6	variation	4000854	4000854	.	.	0	note=complex CGGT=>TGGC TGGC:81 CGGT:0
EA2454	snippy:4.3.6	variation	4000884	4000884	.	.	0	note=complex CTGC=>TTGT TTGT:80 CTGC:0
EA2454	snippy:4.3.6	variation	4000893	4000893	.	.	0	note=snp T=>C C:79 T:0
EA2454	snippy:4.3.6	variation	4000899	4000899	.	.	0	note=complex CGCT=>TGCG TGCG:76 CGCT:0
EA2454	snippy:4.3.6	variation	4000920	4000920	.	.	0	note=snp T=>C C:74 T:0
EA2454	snippy:4.3.6	variation	4000929	4000929	.	.	0	note=complex TGCT=>CGCC CGCC:78 TGCT:0
EA2454	snippy:4.3.6	variation	4000953	4000953	.	.	0	note=snp A=>C C:74 A:0
EA2454	snippy:4.3.6	variation	4000962	4000962	.	.	0	note=complex CCGG=>ACGT ACGT:65 CCGG:0
EA2454	snippy:4.3.6	variation	4000986	4000986	.	.	0	note=snp C=>T T:64 C:0
EA2454	snippy:4.3.6	variation	4001004	4001004	.	.	0	note=snp C=>T T:60 C:0
EA2454	snippy:4.3.6	variation	4001028	4001028	.	.	0	note=snp A=>T T:61 A:0
EA2454	snippy:4.3.6	variation	4001079	4001079	.	.	0	note=snp A=>C C:63 A:0
EA2454	snippy:4.3.6	variation	4001095	4001095	.	.	0	note=snp G=>A A:69 G:0
EA2454	snippy:4.3.6	variation	4001106	4001106	.	.	0	note=snp A=>G G:67 A:0
EA2454	snippy:4.3.6	variation	4001116	4001116	.	.	0	note=snp G=>A A:69 G:0
EA2454	snippy:4.3.6	variation	4001229	4001229	.	.	0	note=snp G=>A A:53 G:0
EA2454	snippy:4.3.6	variation	4001322	4001322	.	.	0	note=snp G=>A A:48 G:0
EA2454	snippy:4.3.6	variation	4001343	4001343	.	.	0	note=snp C=>A A:49 C:0
EA2454	snippy:4.3.6	variation	4001358	4001358	.	.	0	note=snp A=>T T:46 A:0
EA2454	snippy:4.3.6	variation	4001379	4001379	.	.	0	note=complex AGCGG=>GCGA GCGA:42 AGCGG:0
EA2454	snippy:4.3.6	variation	4001421	4001421	.	.	0	note=snp C=>T T:49 C:0
EA2454	snippy:4.3.6	variation	4001444	4001444	.	.	0	note=complex TG=>CA CA:52 TG:0
EA2454	snippy:4.3.6	variation	4001451	4001451	.	.	0	note=snp G=>A A:54 G:0
EA2454	snippy:4.3.6	variation	4001457	4001457	.	.	0	note=snp C=>A A:55 C:0
EA2454	snippy:4.3.6	variation	4001466	4001466	.	.	0	note=snp G=>A A:59 G:0
EA2454	snippy:4.3.6	variation	4001478	4001478	.	.	0	note=snp T=>C C:62 T:0
EA2454	snippy:4.3.6	variation	4001485	4001485	.	.	0	note=snp C=>T T:58 C:0
EA2454	snippy:4.3.6	variation	4001520	4001520	.	.	0	note=snp T=>A A:64 T:0
EA2454	snippy:4.3.6	variation	4001580	4001580	.	.	0	note=complex AGTGC=>CGTAT CGTAT:61 AGTGC:0
EA2454	snippy:4.3.6	variation	4001589	4001589	.	.	0	note=snp C=>T T:62 C:0
EA2454	snippy:4.3.6	variation	4001631	4001631	.	.	0	note=snp G=>A A:72 G:0
EA2454	snippy:4.3.6	variation	4001649	4001649	.	.	0	note=snp G=>A A:75 G:1
EA2454	snippy:4.3.6	variation	4001685	4001685	.	.	0	note=snp T=>A A:72 T:0
EA2454	snippy:4.3.6	variation	4001715	4001715	.	.	0	note=snp T=>C C:66 T:0
EA2454	snippy:4.3.6	variation	4001736	4001736	.	.	0	note=snp A=>G G:67 A:0
EA2454	snippy:4.3.6	variation	4001748	4001748	.	.	0	note=snp A=>G G:64 A:0
EA2454	snippy:4.3.6	variation	4001776	4001776	.	.	0	note=complex TTA=>CTG CTG:58 TTA:0
EA2454	snippy:4.3.6	variation	4001804	4001804	.	.	0	note=snp A=>G G:64 A:0
EA2454	snippy:4.3.6	variation	4001823	4001823	.	.	0	note=snp T=>C C:72 T:0
EA2454	snippy:4.3.6	variation	4001868	4001868	.	.	0	note=snp T=>C C:78 T:0
EA2454	snippy:4.3.6	variation	4001894	4001894	.	.	0	note=snp T=>A A:62 T:0
EA2454	snippy:4.3.6	variation	4001916	4001916	.	.	0	note=snp A=>G G:54 A:0
EA2454	snippy:4.3.6	variation	4006214	4006214	.	.	0	note=snp C=>T T:71 C:0
EA2454	snippy:4.3.6	variation	4016930	4016930	.	.	0	note=snp T=>A A:70 T:0
EA2454	snippy:4.3.6	variation	4041410	4041410	.	.	0	note=snp G=>A A:67 G:0
EA2454	snippy:4.3.6	variation	4087346	4087346	.	.	0	note=snp A=>G G:24 A:0
EA2454	snippy:4.3.6	variation	4089720	4089720	.	.	0	note=snp C=>T T:105 C:0
EA2454	snippy:4.3.6	variation	4090983	4090983	.	.	0	note=snp G=>A A:71 G:0
EA2454	snippy:4.3.6	variation	4105692	4105692	.	.	0	note=snp G=>A A:11 G:0
EA2454	snippy:4.3.6	variation	4105770	4105770	.	.	0	note=complex TGGTGC=>CGATGA CGATGA:35 TGGTGC:0
EA2454	snippy:4.3.6	variation	4105784	4105784	.	.	0	note=snp C=>T T:34 C:0
EA2454	snippy:4.3.6	variation	4105797	4105797	.	.	0	note=snp T=>C C:34 T:0
EA2454	snippy:4.3.6	variation	4105809	4105809	.	.	0	note=complex CTCGTGCACCTGTCGG=>TTCA TTCA:33 CTCGTGCACCTGTCGG:0
EA2454	snippy:4.3.6	variation	4105851	4105851	.	.	0	note=snp C=>A A:46 C:0
EA2454	snippy:4.3.6	variation	4105857	4105857	.	.	0	note=snp T=>C C:46 T:0
EA2454	snippy:4.3.6	variation	4105910	4105910	.	.	0	note=snp T=>G G:52 T:0
EA2454	snippy:4.3.6	variation	4105927	4105927	.	.	0	note=snp G=>C C:49 G:0
EA2454	snippy:4.3.6	variation	4105996	4105996	.	.	0	note=complex TCCCCGT=>CCCCTG CCCCTG:39 TCCCCGT:0
EA2454	snippy:4.3.6	variation	4106022	4106022	.	.	0	note=del GCAGAC=>G G:39 GCAGAC:0
EA2454	snippy:4.3.6	variation	4106051	4106051	.	.	0	note=snp G=>A A:51 G:0
EA2454	snippy:4.3.6	variation	4106057	4106057	.	.	0	note=snp G=>A A:59 G:0
EA2454	snippy:4.3.6	variation	4106062	4106062	.	.	0	note=snp G=>A A:62 G:0
EA2454	snippy:4.3.6	variation	4106087	4106087	.	.	0	note=snp G=>A A:74 G:0
EA2454	snippy:4.3.6	variation	4106099	4106099	.	.	0	note=snp G=>A A:75 G:0
EA2454	snippy:4.3.6	variation	4106141	4106141	.	.	0	note=snp G=>A A:95 G:0
EA2454	snippy:4.3.6	variation	4106152	4106152	.	.	0	note=snp C=>T T:90 C:0
EA2454	snippy:4.3.6	variation	4106175	4106175	.	.	0	note=complex TGTCAG=>GT GT:86 TGTCAG:0
EA2454	snippy:4.3.6	variation	4106210	4106210	.	.	0	note=snp A=>G G:90 A:0
EA2454	snippy:4.3.6	variation	4106231	4106231	.	.	0	note=snp C=>T T:90 C:0
EA2454	snippy:4.3.6	variation	4106344	4106344	.	.	0	note=snp G=>A A:71 G:1
EA2454	snippy:4.3.6	variation	4106530	4106530	.	.	0	note=snp G=>T T:84 G:0
EA2454	snippy:4.3.6	variation	4106535	4106535	.	.	0	note=snp T=>G G:80 T:0
EA2454	snippy:4.3.6	variation	4106547	4106547	.	.	0	note=snp G=>T T:81 G:0
EA2454	snippy:4.3.6	variation	4106559	4106559	.	.	0	note=complex ACTGT=>GCTGA GCTGA:79 ACTGT:0
EA2454	snippy:4.3.6	variation	4106570	4106570	.	.	0	note=snp T=>A A:78 T:0
EA2454	snippy:4.3.6	variation	4107318	4107318	.	.	0	note=ins G=>GGTTTAAGGTGAA GGTTTAAGGTGAA:71 G:0
EA2454	snippy:4.3.6	variation	4107516	4107516	.	.	0	note=snp C=>T T:86 C:0
EA2454	snippy:4.3.6	variation	4107527	4107527	.	.	0	note=snp C=>T T:88 C:0
EA2454	snippy:4.3.6	variation	4107538	4107538	.	.	0	note=complex GC=>CT CT:84 GC:0
EA2454	snippy:4.3.6	variation	4107566	4107566	.	.	0	note=complex CCCG=>ACCA ACCA:86 CCCG:0
EA2454	snippy:4.3.6	variation	4107596	4107596	.	.	0	note=snp T=>C C:90 T:0
EA2454	snippy:4.3.6	variation	4107673	4107673	.	.	0	note=snp A=>C C:91 A:0
EA2454	snippy:4.3.6	variation	4107839	4107839	.	.	0	note=snp G=>A A:85 G:0
EA2454	snippy:4.3.6	variation	4107854	4107854	.	.	0	note=complex TTG=>CTT CTT:81 TTG:0
EA2454	snippy:4.3.6	variation	4107863	4107863	.	.	0	note=snp C=>T T:85 C:1
EA2454	snippy:4.3.6	variation	4108018	4108018	.	.	0	note=snp T=>C C:111 T:0
EA2454	snippy:4.3.6	variation	4108028	4108028	.	.	0	note=complex TTTC=>ATGT ATGT:109 TTTC:0
EA2454	snippy:4.3.6	variation	4108052	4108052	.	.	0	note=snp G=>T T:119 G:0
EA2454	snippy:4.3.6	variation	4108065	4108065	.	.	0	note=complex TCG=>GCA GCA:113 TCG:0
EA2454	snippy:4.3.6	variation	4108094	4108094	.	.	0	note=complex CGG=>TAA TAA:92 CGG:0
EA2454	snippy:4.3.6	variation	4108102	4108102	.	.	0	note=snp G=>T T:93 G:0
EA2454	snippy:4.3.6	variation	4108116	4108116	.	.	0	note=snp A=>G G:87 A:0
EA2454	snippy:4.3.6	variation	4108126	4108126	.	.	0	note=snp G=>A A:85 G:0
EA2454	snippy:4.3.6	variation	4108146	4108146	.	.	0	note=snp T=>A A:71 T:0
EA2454	snippy:4.3.6	variation	4108172	4108172	.	.	0	note=snp C=>T T:65 C:0
EA2454	snippy:4.3.6	variation	4108177	4108177	.	.	0	note=complex ACAGA=>CCAGG CCAGG:56 ACAGA:0
EA2454	snippy:4.3.6	variation	4108189	4108189	.	.	0	note=snp C=>T T:51 C:0
EA2454	snippy:4.3.6	variation	4108195	4108195	.	.	0	note=complex GGCTG=>TACTT TACTT:46 GGCTG:0
EA2454	snippy:4.3.6	variation	4109845	4109845	.	.	0	note=snp A=>C C:14 A:0
EA2454	snippy:4.3.6	variation	4109861	4109861	.	.	0	note=snp T=>C C:14 T:0
EA2454	snippy:4.3.6	variation	4109920	4109920	.	.	0	note=snp A=>T T:20 A:0
EA2454	snippy:4.3.6	variation	4109933	4109933	.	.	0	note=complex AGT=>TAGC TAGC:20 AGT:0
EA2454	snippy:4.3.6	variation	4109959	4109959	.	.	0	note=ins G=>GATGTATTTCAGACAAAGCA GATGTATTTCAGACAAAGCA:19 G:0
EA2454	snippy:4.3.6	variation	4109967	4109967	.	.	0	note=snp T=>C C:20 T:0
EA2454	snippy:4.3.6	variation	4109980	4109980	.	.	0	note=snp C=>T T:20 C:0
EA2454	snippy:4.3.6	variation	4109991	4109991	.	.	0	note=complex GTAGAAG=>ATAGGGC ATAGGGC:20 GTAGAAG:0
EA2454	snippy:4.3.6	variation	4110010	4110010	.	.	0	note=snp T=>C C:20 T:0
EA2454	snippy:4.3.6	variation	4110344	4110344	.	.	0	note=snp T=>C C:23 T:0
EA2454	snippy:4.3.6	variation	4110375	4110375	.	.	0	note=complex GT=>AC AC:27 GT:0
EA2454	snippy:4.3.6	variation	4110434	4110434	.	.	0	note=snp C=>T T:33 C:0
EA2454	snippy:4.3.6	variation	4110455	4110455	.	.	0	note=snp A=>T T:40 A:0
EA2454	snippy:4.3.6	variation	4110491	4110491	.	.	0	note=snp C=>T T:45 C:0
EA2454	snippy:4.3.6	variation	4110556	4110556	.	.	0	note=complex ATGACCC=>CTGAACA CTGAACA:42 ATGACCC:0
EA2454	snippy:4.3.6	variation	4110574	4110574	.	.	0	note=complex TTT=>ACA ACA:37 TTT:0
EA2454	snippy:4.3.6	variation	4110596	4110596	.	.	0	note=complex GCGTGTGA=>AAATGTAG AAATGTAG:31 GCGTGTGA:0
EA2454	snippy:4.3.6	variation	4110622	4110622	.	.	0	note=snp A=>G G:34 A:0
EA2454	snippy:4.3.6	variation	4110640	4110640	.	.	0	note=snp G=>A A:34 G:0
EA2454	snippy:4.3.6	variation	4110756	4110756	.	.	0	note=complex GCAT=>ATAG ATAG:20 GCAT:0
EA2454	snippy:4.3.6	variation	4110775	4110775	.	.	0	note=snp G=>A A:25 G:0
EA2454	snippy:4.3.6	variation	4110780	4110780	.	.	0	note=snp G=>A A:25 G:0
EA2454	snippy:4.3.6	variation	4110832	4110832	.	.	0	note=snp A=>G G:20 A:0
EA2454	snippy:4.3.6	variation	4110880	4110880	.	.	0	note=snp A=>G G:21 A:0
EA2454	snippy:4.3.6	variation	4110902	4110902	.	.	0	note=snp G=>T T:23 G:0
EA2454	snippy:4.3.6	variation	4110925	4110925	.	.	0	note=complex CCTCC=>TCTCT TCTCT:24 CCTCC:0
EA2454	snippy:4.3.6	variation	4110937	4110937	.	.	0	note=snp C=>T T:28 C:0
EA2454	snippy:4.3.6	variation	4110947	4110947	.	.	0	note=complex CT=>TC TC:25 CT:0
EA2454	snippy:4.3.6	variation	4110983	4110983	.	.	0	note=snp C=>T T:23 C:0
EA2454	snippy:4.3.6	variation	4111007	4111007	.	.	0	note=snp G=>A A:23 G:0
EA2454	snippy:4.3.6	variation	4111015	4111015	.	.	0	note=complex TAGGCGGA=>CAGGAGGG CAGGAGGG:23 TAGGCGGA:0
EA2454	snippy:4.3.6	variation	4111081	4111081	.	.	0	note=snp G=>A A:35 G:0
EA2454	snippy:4.3.6	variation	4111096	4111096	.	.	0	note=snp A=>T T:35 A:0
EA2454	snippy:4.3.6	variation	4111133	4111133	.	.	0	note=snp A=>T T:43 A:0
EA2454	snippy:4.3.6	variation	4111158	4111158	.	.	0	note=complex CTATA=>TTATG TTATG:40 CTATA:0
EA2454	snippy:4.3.6	variation	4111168	4111168	.	.	0	note=complex ACACT=>GTACC GTACC:39 ACACT:0
EA2454	snippy:4.3.6	variation	4111187	4111187	.	.	0	note=complex AGG=>CGA CGA:38 AGG:0
EA2454	snippy:4.3.6	variation	4111229	4111229	.	.	0	note=snp G=>A A:38 G:0
EA2454	snippy:4.3.6	variation	4111241	4111241	.	.	0	note=snp G=>A A:40 G:0
EA2454	snippy:4.3.6	variation	4111247	4111247	.	.	0	note=snp T=>C C:42 T:0
EA2454	snippy:4.3.6	variation	4111273	4111273	.	.	0	note=snp T=>G G:40 T:0
EA2454	snippy:4.3.6	variation	4111292	4111292	.	.	0	note=snp A=>G G:40 A:0
EA2454	snippy:4.3.6	variation	4111391	4111391	.	.	0	note=complex TA=>CG CG:28 TA:0
EA2454	snippy:4.3.6	variation	4111412	4111412	.	.	0	note=snp T=>C C:31 T:0
EA2454	snippy:4.3.6	variation	4111424	4111424	.	.	0	note=snp A=>T T:28 A:0
EA2454	snippy:4.3.6	variation	4111463	4111463	.	.	0	note=snp C=>A A:25 C:0
EA2454	snippy:4.3.6	variation	4111504	4111504	.	.	0	note=snp C=>T T:30 C:0
EA2454	snippy:4.3.6	variation	4111535	4111535	.	.	0	note=complex CTTC=>TTTT TTTT:32 CTTC:0
EA2454	snippy:4.3.6	variation	4111586	4111586	.	.	0	note=snp G=>T T:28 G:0
EA2454	snippy:4.3.6	variation	4111748	4111748	.	.	0	note=snp G=>A A:44 G:0
EA2454	snippy:4.3.6	variation	4111815	4111815	.	.	0	note=snp T=>G G:49 T:0
EA2454	snippy:4.3.6	variation	4111853	4111853	.	.	0	note=snp A=>C C:57 A:0
EA2454	snippy:4.3.6	variation	4111935	4111935	.	.	0	note=snp T=>C C:67 T:0
EA2454	snippy:4.3.6	variation	4111982	4111982	.	.	0	note=snp C=>T T:77 C:0
EA2454	snippy:4.3.6	variation	4111991	4111991	.	.	0	note=snp G=>A A:73 G:0
EA2454	snippy:4.3.6	variation	4112027	4112027	.	.	0	note=snp T=>C C:75 T:0
EA2454	snippy:4.3.6	variation	4112036	4112036	.	.	0	note=snp T=>C C:75 T:0
EA2454	snippy:4.3.6	variation	4112052	4112052	.	.	0	note=complex AGC=>GGT GGT:65 AGC:0
EA2454	snippy:4.3.6	variation	4112069	4112069	.	.	0	note=snp A=>G G:67 A:0
EA2454	snippy:4.3.6	variation	4112075	4112075	.	.	0	note=snp G=>A A:70 G:0
EA2454	snippy:4.3.6	variation	4112111	4112111	.	.	0	note=complex TAGC=>CAGT CAGT:67 TAGC:0
EA2454	snippy:4.3.6	variation	4112126	4112126	.	.	0	note=snp T=>C C:71 T:0
EA2454	snippy:4.3.6	variation	4112140	4112140	.	.	0	note=snp A=>G G:66 A:0
EA2454	snippy:4.3.6	variation	4112147	4112147	.	.	0	note=snp T=>C C:60 T:0
EA2454	snippy:4.3.6	variation	4112153	4112153	.	.	0	note=snp A=>G G:61 A:0
EA2454	snippy:4.3.6	variation	4112202	4112202	.	.	0	note=snp A=>C C:62 A:0
EA2454	snippy:4.3.6	variation	4112232	4112232	.	.	0	note=snp C=>A A:58 C:0
EA2454	snippy:4.3.6	variation	4112246	4112246	.	.	0	note=snp A=>T T:55 A:0
EA2454	snippy:4.3.6	variation	4112252	4112252	.	.	0	note=snp G=>A A:57 G:0
EA2454	snippy:4.3.6	variation	4112258	4112258	.	.	0	note=snp A=>G G:55 A:0
EA2454	snippy:4.3.6	variation	4112278	4112278	.	.	0	note=snp C=>A A:62 C:0
EA2454	snippy:4.3.6	variation	4112304	4112304	.	.	0	note=snp G=>C C:53 G:0
EA2454	snippy:4.3.6	variation	4112310	4112310	.	.	0	note=snp T=>C C:54 T:0
EA2454	snippy:4.3.6	variation	4112333	4112333	.	.	0	note=snp A=>T T:53 A:0
EA2454	snippy:4.3.6	variation	4112342	4112342	.	.	0	note=snp C=>T T:53 C:0
EA2454	snippy:4.3.6	variation	4112351	4112351	.	.	0	note=complex CGCCGACATTA=>TGCTGATATTG TGCTGATATTG:47 CGCCGACATTA:0
EA2454	snippy:4.3.6	variation	4112390	4112390	.	.	0	note=snp C=>T T:66 C:0
EA2454	snippy:4.3.6	variation	4112459	4112459	.	.	0	note=complex TGC=>CGA CGA:71 TGC:0
EA2454	snippy:4.3.6	variation	4112491	4112491	.	.	0	note=mnp CG=>AA AA:67 CG:0
EA2454	snippy:4.3.6	variation	4112507	4112507	.	.	0	note=complex GGTG=>AGTA AGTA:65 GGTG:0
EA2454	snippy:4.3.6	variation	4112537	4112537	.	.	0	note=snp T=>G G:61 T:0
EA2454	snippy:4.3.6	variation	4112564	4112564	.	.	0	note=snp T=>C C:55 T:0
EA2454	snippy:4.3.6	variation	4112582	4112582	.	.	0	note=snp C=>T T:56 C:0
EA2454	snippy:4.3.6	variation	4112591	4112591	.	.	0	note=complex GTTT=>ACTG ACTG:50 GTTT:0
EA2454	snippy:4.3.6	variation	4112639	4112639	.	.	0	note=complex GGTG=>AGTT AGTT:33 GGTG:0
EA2454	snippy:4.3.6	variation	4112660	4112660	.	.	0	note=snp A=>G G:26 A:0
EA2454	snippy:4.3.6	variation	4112683	4112683	.	.	0	note=snp A=>G G:23 A:0
EA2454	snippy:4.3.6	variation	4112699	4112699	.	.	0	note=snp G=>A A:23 G:0
EA2454	snippy:4.3.6	variation	4112711	4112711	.	.	0	note=complex AA=>CG CG:22 AA:0
EA2454	snippy:4.3.6	variation	4112726	4112726	.	.	0	note=snp T=>C C:22 T:0
EA2454	snippy:4.3.6	variation	4112734	4112734	.	.	0	note=complex TC=>CT CT:20 TC:0
EA2454	snippy:4.3.6	variation	4112746	4112746	.	.	0	note=complex GT=>AA AA:24 GT:0
EA2454	snippy:4.3.6	variation	4112753	4112753	.	.	0	note=snp T=>C C:24 T:0
EA2454	snippy:4.3.6	variation	4112786	4112786	.	.	0	note=snp A=>G G:27 A:0
EA2454	snippy:4.3.6	variation	4112808	4112808	.	.	0	note=snp C=>T T:35 C:0
EA2454	snippy:4.3.6	variation	4112814	4112814	.	.	0	note=snp A=>G G:35 A:0
EA2454	snippy:4.3.6	variation	4112828	4112828	.	.	0	note=snp G=>T T:40 G:0
EA2454	snippy:4.3.6	variation	4112877	4112877	.	.	0	note=snp G=>A A:51 G:0
EA2454	snippy:4.3.6	variation	4112899	4112899	.	.	0	note=complex TCA=>CCC CCC:56 TCA:0
EA2454	snippy:4.3.6	variation	4112912	4112912	.	.	0	note=snp T=>G G:58 T:0
EA2454	snippy:4.3.6	variation	4112925	4112925	.	.	0	note=snp A=>G G:61 A:0
EA2454	snippy:4.3.6	variation	4112952	4112952	.	.	0	note=snp C=>T T:70 C:0
EA2454	snippy:4.3.6	variation	4112961	4112961	.	.	0	note=snp C=>T T:70 C:0
EA2454	snippy:4.3.6	variation	4113156	4113156	.	.	0	note=snp C=>T T:90 C:0
EA2454	snippy:4.3.6	variation	4113171	4113171	.	.	0	note=snp T=>C C:93 T:0
EA2454	snippy:4.3.6	variation	4113195	4113195	.	.	0	note=snp T=>C C:77 T:0
EA2454	snippy:4.3.6	variation	4113210	4113210	.	.	0	note=snp T=>C C:83 T:0
EA2454	snippy:4.3.6	variation	4113229	4113229	.	.	0	note=snp A=>C C:87 A:0
EA2454	snippy:4.3.6	variation	4113237	4113237	.	.	0	note=snp C=>T T:99 C:0
EA2454	snippy:4.3.6	variation	4114023	4114023	.	.	0	note=snp C=>T T:100 C:0
EA2454	snippy:4.3.6	variation	4114371	4114371	.	.	0	note=snp T=>C C:60 T:0
EA2454	snippy:4.3.6	variation	4114519	4114519	.	.	0	note=snp G=>A A:40 G:0
EA2454	snippy:4.3.6	variation	4114549	4114549	.	.	0	note=snp C=>T T:43 C:0
EA2454	snippy:4.3.6	variation	4114649	4114649	.	.	0	note=snp G=>A A:49 G:0
EA2454	snippy:4.3.6	variation	4115026	4115026	.	.	0	note=snp C=>T T:36 C:0
EA2454	snippy:4.3.6	variation	4115122	4115122	.	.	0	note=snp T=>C C:17 T:0
EA2454	snippy:4.3.6	variation	4115154	4115154	.	.	0	note=complex CCGGTCAG=>ACGGAGAA ACGGAGAA:10 CCGGTCAG:0
EA2454	snippy:4.3.6	variation	4115167	4115167	.	.	0	note=snp G=>C C:10 G:0
EA2454	snippy:4.3.6	variation	4152030	4152030	.	.	0	note=snp C=>A A:44 C:0
EA2454	snippy:4.3.6	variation	4182589	4182589	.	.	0	note=snp C=>T T:44 C:0
EA2454	snippy:4.3.6	variation	4182656	4182656	.	.	0	note=snp A=>G G:40 A:0
EA2454	snippy:4.3.6	variation	4182701	4182701	.	.	0	note=snp T=>C C:24 T:0
EA2454	snippy:4.3.6	variation	4182773	4182773	.	.	0	note=snp T=>C C:12 T:0
EA2454	snippy:4.3.6	variation	4182778	4182778	.	.	0	note=snp G=>T T:12 G:0
EA2454	snippy:4.3.6	variation	4182936	4182936	.	.	0	note=snp G=>C C:17 G:0
EA2454	snippy:4.3.6	variation	4182942	4182942	.	.	0	note=snp A=>G G:19 A:0
EA2454	snippy:4.3.6	variation	4183168	4183168	.	.	0	note=snp T=>C C:87 T:0
EA2454	snippy:4.3.6	variation	4183174	4183174	.	.	0	note=complex GAG=>AAT AAT:87 GAG:0
EA2454	snippy:4.3.6	variation	4183191	4183191	.	.	0	note=snp T=>C C:85 T:1
EA2454	snippy:4.3.6	variation	4183199	4183199	.	.	0	note=mnp GA=>AG AG:79 GA:0
EA2454	snippy:4.3.6	variation	4183406	4183406	.	.	0	note=complex ATCCC=>GACCT GACCT:42 ATCCC:0
EA2454	snippy:4.3.6	variation	4183428	4183428	.	.	0	note=snp A=>G G:47 A:0
EA2454	snippy:4.3.6	variation	4183441	4183441	.	.	0	note=complex GCGAAATT=>ATGAAGTC ATGAAGTC:46 GCGAAATT:0
EA2454	snippy:4.3.6	variation	4183467	4183467	.	.	0	note=snp G=>A A:46 G:0
EA2454	snippy:4.3.6	variation	4183492	4183492	.	.	0	note=snp A=>C C:36 A:0
EA2454	snippy:4.3.6	variation	4183502	4183502	.	.	0	note=complex CTC=>GTT GTT:33 CTC:0
EA2454	snippy:4.3.6	variation	4183513	4183513	.	.	0	note=complex AGGA=>GTGG GTGG:33 AGGA:0
EA2454	snippy:4.3.6	variation	4183522	4183522	.	.	0	note=complex TG=>CA CA:33 TG:0
EA2454	snippy:4.3.6	variation	4183537	4183537	.	.	0	note=complex AACAT=>TACAG TACAG:48 AACAT:0
EA2454	snippy:4.3.6	variation	4183554	4183554	.	.	0	note=snp A=>G G:42 A:0
EA2454	snippy:4.3.6	variation	4183583	4183583	.	.	0	note=snp T=>C C:35 T:0
EA2454	snippy:4.3.6	variation	4183608	4183608	.	.	0	note=snp T=>C C:26 T:0
EA2454	snippy:4.3.6	variation	4183619	4183619	.	.	0	note=complex GTTGTTGTAAT=>ATTACTCCAAA ATTACTCCAAA:24 GTTGTTGTAAT:0
EA2454	snippy:4.3.6	variation	4183646	4183646	.	.	0	note=snp A=>G G:24 A:0
EA2454	snippy:4.3.6	variation	4183653	4183653	.	.	0	note=snp G=>A A:28 G:0
EA2454	snippy:4.3.6	variation	4183660	4183660	.	.	0	note=snp T=>A A:27 T:0
EA2454	snippy:4.3.6	variation	4183681	4183681	.	.	0	note=snp A=>G G:25 A:0
EA2454	snippy:4.3.6	variation	4183700	4183700	.	.	0	note=del AC=>A A:20 AC:0
EA2454	snippy:4.3.6	variation	4188735	4188735	.	.	0	note=snp T=>C C:13 T:0
EA2454	snippy:4.3.6	variation	4188742	4188742	.	.	0	note=snp A=>C C:13 A:0
EA2454	snippy:4.3.6	variation	4188748	4188748	.	.	0	note=snp C=>T T:17 C:0
EA2454	snippy:4.3.6	variation	4188757	4188757	.	.	0	note=complex CCGG=>ACGA ACGA:23 CCGG:0
EA2454	snippy:4.3.6	variation	4188793	4188793	.	.	0	note=complex GTGGGCA=>ATGAGCG ATGAGCG:36 GTGGGCA:0
EA2454	snippy:4.3.6	variation	4188816	4188816	.	.	0	note=snp A=>G G:41 A:0
EA2454	snippy:4.3.6	variation	4188829	4188829	.	.	0	note=snp T=>C C:47 T:0
EA2454	snippy:4.3.6	variation	4188862	4188862	.	.	0	note=snp A=>G G:66 A:0
EA2454	snippy:4.3.6	variation	4188877	4188877	.	.	0	note=complex TGTAGCC=>CGTGGCA CGTGGCA:67 TGTAGCC:0
EA2454	snippy:4.3.6	variation	4188889	4188889	.	.	0	note=complex TCCGGGTATA=>CCCCGGAATG CCCCGGAATG:67 TCCGGGTATA:0
EA2454	snippy:4.3.6	variation	4188906	4188906	.	.	0	note=complex TGGCC=>CGGCT CGGCT:73 TGGCC:0
EA2454	snippy:4.3.6	variation	4188931	4188931	.	.	0	note=snp C=>T T:80 C:0
EA2454	snippy:4.3.6	variation	4188946	4188946	.	.	0	note=snp T=>G G:78 T:0
EA2454	snippy:4.3.6	variation	4188970	4188970	.	.	0	note=snp A=>T T:83 A:0
EA2454	snippy:4.3.6	variation	4188976	4188976	.	.	0	note=snp A=>G G:80 A:0
EA2454	snippy:4.3.6	variation	4188988	4188988	.	.	0	note=snp G=>A A:79 G:0
EA2454	snippy:4.3.6	variation	4188997	4188997	.	.	0	note=snp A=>G G:72 A:0
EA2454	snippy:4.3.6	variation	4189017	4189017	.	.	0	note=complex CGTGAATG=>TGTAAATA TGTAAATA:61 CGTGAATG:0
EA2454	snippy:4.3.6	variation	4189030	4189030	.	.	0	note=snp T=>C C:61 T:0
EA2454	snippy:4.3.6	variation	4189056	4189056	.	.	0	note=complex TCCTG=>GCCTA GCCTA:59 TCCTG:0
EA2454	snippy:4.3.6	variation	4189078	4189078	.	.	0	note=snp G=>A A:57 G:0
EA2454	snippy:4.3.6	variation	4189084	4189084	.	.	0	note=snp C=>A A:53 C:0
EA2454	snippy:4.3.6	variation	4189092	4189092	.	.	0	note=snp T=>C C:51 T:0
EA2454	snippy:4.3.6	variation	4189132	4189132	.	.	0	note=snp T=>G G:41 T:0
EA2454	snippy:4.3.6	variation	4189147	4189147	.	.	0	note=snp G=>A A:39 G:0
EA2454	snippy:4.3.6	variation	4189156	4189156	.	.	0	note=snp C=>A A:41 C:0
EA2454	snippy:4.3.6	variation	4189180	4189180	.	.	0	note=snp C=>G G:42 C:0
EA2454	snippy:4.3.6	variation	4189204	4189204	.	.	0	note=snp T=>G G:54 T:0
EA2454	snippy:4.3.6	variation	4189238	4189238	.	.	0	note=snp A=>T T:51 A:0
EA2454	snippy:4.3.6	variation	4189255	4189255	.	.	0	note=complex CGGC=>GGGT GGGT:53 CGGC:0
EA2454	snippy:4.3.6	variation	4189281	4189281	.	.	0	note=complex AT=>TC TC:52 AT:0
EA2454	snippy:4.3.6	variation	4189288	4189288	.	.	0	note=snp T=>A A:55 T:0
EA2454	snippy:4.3.6	variation	4189300	4189300	.	.	0	note=snp A=>G G:57 A:0
EA2454	snippy:4.3.6	variation	4189321	4189321	.	.	0	note=complex CGCC=>TGCT TGCT:56 CGCC:0
EA2454	snippy:4.3.6	variation	4189336	4189336	.	.	0	note=snp A=>G G:55 A:0
EA2454	snippy:4.3.6	variation	4189345	4189345	.	.	0	note=snp G=>T T:62 G:0
EA2454	snippy:4.3.6	variation	4189592	4189592	.	.	0	note=complex ACA=>GCG GCG:69 ACA:0
EA2454	snippy:4.3.6	variation	4189600	4189600	.	.	0	note=snp T=>C C:70 T:0
EA2454	snippy:4.3.6	variation	4189605	4189605	.	.	0	note=snp C=>A A:70 C:0
EA2454	snippy:4.3.6	variation	4189699	4189699	.	.	0	note=complex AGGA=>TGGG TGGG:77 AGGA:0
EA2454	snippy:4.3.6	variation	4189726	4189726	.	.	0	note=snp C=>T T:81 C:0
EA2454	snippy:4.3.6	variation	4189768	4189768	.	.	0	note=snp A=>C C:82 A:0
EA2454	snippy:4.3.6	variation	4189773	4189773	.	.	0	note=snp T=>G G:79 T:0
EA2454	snippy:4.3.6	variation	4189798	4189798	.	.	0	note=snp A=>G G:84 A:0
EA2454	snippy:4.3.6	variation	4189807	4189807	.	.	0	note=snp T=>G G:82 T:1
EA2454	snippy:4.3.6	variation	4189852	4189852	.	.	0	note=snp C=>T T:70 C:0
EA2454	snippy:4.3.6	variation	4189861	4189861	.	.	0	note=snp A=>C C:68 A:0
EA2454	snippy:4.3.6	variation	4189893	4189893	.	.	0	note=complex TGTT=>CGTC CGTC:59 TGTT:0
EA2454	snippy:4.3.6	variation	4189912	4189912	.	.	0	note=snp T=>C C:53 T:0
EA2454	snippy:4.3.6	variation	4189933	4189933	.	.	0	note=snp A=>G G:47 A:0
EA2454	snippy:4.3.6	variation	4189958	4189958	.	.	0	note=snp C=>T T:36 C:0
EA2454	snippy:4.3.6	variation	4189967	4189967	.	.	0	note=snp G=>A A:32 G:0
EA2454	snippy:4.3.6	variation	4189974	4189974	.	.	0	note=snp T=>G G:30 T:0
EA2454	snippy:4.3.6	variation	4189981	4189981	.	.	0	note=snp G=>A A:28 G:0
EA2454	snippy:4.3.6	variation	4189997	4189997	.	.	0	note=complex GG=>AA AA:10 GG:0
EA2454	snippy:4.3.6	variation	4200656	4200656	.	.	0	note=snp A=>G G:56 A:0
EA2454	snippy:4.3.6	variation	4212664	4212664	.	.	0	note=snp T=>A A:48 T:0
EA2454	snippy:4.3.6	variation	4235320	4235320	.	.	0	note=snp A=>G G:55 A:0
EA2454	snippy:4.3.6	variation	4283978	4283978	.	.	0	note=snp C=>T T:56 C:0
EA2454	snippy:4.3.6	variation	4321572	4321572	.	.	0	note=snp T=>C C:12 T:0
EA2454	snippy:4.3.6	variation	4394869	4394869	.	.	0	note=snp T=>C C:92 T:0
EA2454	snippy:4.3.6	variation	4397996	4397996	.	.	0	note=snp A=>G G:48 A:0
EA2454	snippy:4.3.6	variation	4398115	4398115	.	.	0	note=snp T=>C C:41 T:0
EA2454	snippy:4.3.6	variation	4398127	4398127	.	.	0	note=complex ATGC=>GTGT GTGT:39 ATGC:0
EA2454	snippy:4.3.6	variation	4399245	4399245	.	.	0	note=snp C=>T T:23 C:0
EA2454	snippy:4.3.6	variation	4399263	4399263	.	.	0	note=snp A=>T T:23 A:0
EA2454	snippy:4.3.6	variation	4399296	4399296	.	.	0	note=snp G=>A A:23 G:0
EA2454	snippy:4.3.6	variation	4399302	4399302	.	.	0	note=snp T=>C C:23 T:0
EA2454	snippy:4.3.6	variation	4399350	4399350	.	.	0	note=snp T=>C C:25 T:0
EA2454	snippy:4.3.6	variation	4399368	4399368	.	.	0	note=snp C=>T T:23 C:0
EA2454	snippy:4.3.6	variation	4399386	4399386	.	.	0	note=snp G=>T T:29 G:1
EA2454	snippy:4.3.6	variation	4399485	4399485	.	.	0	note=snp C=>T T:26 C:0
EA2454	snippy:4.3.6	variation	4418078	4418078	.	.	0	note=snp G=>T T:94 G:0
EA2454	snippy:4.3.6	variation	4420363	4420363	.	.	0	note=snp A=>G G:71 A:0
EA2454	snippy:4.3.6	variation	4427260	4427260	.	.	0	note=snp C=>T T:12 C:0
EA2454	snippy:4.3.6	variation	4449508	4449508	.	.	0	note=snp C=>A A:34 C:0
EA2454	snippy:4.3.6	variation	4449564	4449564	.	.	0	note=snp C=>T T:49 C:0
EA2454	snippy:4.3.6	variation	4449625	4449625	.	.	0	note=mnp CC=>AA AA:68 CC:0
EA2454	snippy:4.3.6	variation	4449642	4449642	.	.	0	note=snp C=>T T:75 C:0
EA2454	snippy:4.3.6	variation	4449663	4449663	.	.	0	note=snp C=>T T:72 C:0
EA2454	snippy:4.3.6	variation	4449848	4449848	.	.	0	note=snp C=>T T:70 C:0
EA2454	snippy:4.3.6	variation	4449881	4449881	.	.	0	note=snp T=>C C:70 T:0
EA2454	snippy:4.3.6	variation	4449888	4449888	.	.	0	note=snp C=>T T:69 C:0
EA2454	snippy:4.3.6	variation	4449908	4449908	.	.	0	note=snp C=>T T:68 C:0
EA2454	snippy:4.3.6	variation	4449923	4449923	.	.	0	note=complex TGAT=>GGAC GGAC:64 TGAT:0
EA2454	snippy:4.3.6	variation	4449935	4449935	.	.	0	note=complex CGTT=>AGTG AGTG:59 CGTT:0
EA2454	snippy:4.3.6	variation	4449950	4449950	.	.	0	note=snp A=>G G:57 A:0
EA2454	snippy:4.3.6	variation	4449956	4449956	.	.	0	note=snp T=>C C:65 T:0
EA2454	snippy:4.3.6	variation	4449974	4449974	.	.	0	note=snp T=>C C:61 T:0
EA2454	snippy:4.3.6	variation	4449983	4449983	.	.	0	note=snp C=>G G:62 C:0
EA2454	snippy:4.3.6	variation	4450005	4450005	.	.	0	note=complex GT=>AA AA:55 GT:0
EA2454	snippy:4.3.6	variation	4450022	4450022	.	.	0	note=snp T=>G G:59 T:0
EA2454	snippy:4.3.6	variation	4450035	4450035	.	.	0	note=snp A=>G G:57 A:0
EA2454	snippy:4.3.6	variation	4450058	4450058	.	.	0	note=snp T=>G G:49 T:0
EA2454	snippy:4.3.6	variation	4450076	4450076	.	.	0	note=complex AGGC=>TGGT TGGT:45 AGGC:0
EA2454	snippy:4.3.6	variation	4450088	4450088	.	.	0	note=complex TACG=>CACT CACT:43 TACG:0
EA2454	snippy:4.3.6	variation	4450097	4450097	.	.	0	note=complex TC=>CT CT:42 TC:0
EA2454	snippy:4.3.6	variation	4450128	4450128	.	.	0	note=complex ACA=>GCC GCC:54 ACA:0
EA2454	snippy:4.3.6	variation	4450151	4450151	.	.	0	note=snp A=>G G:51 A:0
EA2454	snippy:4.3.6	variation	4450166	4450166	.	.	0	note=snp A=>T T:51 A:0
EA2454	snippy:4.3.6	variation	4450172	4450172	.	.	0	note=snp G=>A A:51 G:0
EA2454	snippy:4.3.6	variation	4450178	4450178	.	.	0	note=snp G=>C C:51 G:0
EA2454	snippy:4.3.6	variation	4450190	4450190	.	.	0	note=snp G=>A A:49 G:0
EA2454	snippy:4.3.6	variation	4450227	4450227	.	.	0	note=snp C=>A A:59 C:0
EA2454	snippy:4.3.6	variation	4450235	4450235	.	.	0	note=complex TGAT=>GGAC GGAC:51 TGAT:0
EA2454	snippy:4.3.6	variation	4450244	4450244	.	.	0	note=complex TCGT=>CCAC CCAC:52 TCGT:0
EA2454	snippy:4.3.6	variation	4450265	4450265	.	.	0	note=snp T=>C C:54 T:0
EA2454	snippy:4.3.6	variation	4450271	4450271	.	.	0	note=snp G=>T T:53 G:0
EA2454	snippy:4.3.6	variation	4450294	4450294	.	.	0	note=snp T=>A A:51 T:0
EA2454	snippy:4.3.6	variation	4450314	4450314	.	.	0	note=complex TCT=>GCC GCC:56 TCT:0
EA2454	snippy:4.3.6	variation	4450366	4450366	.	.	0	note=snp T=>C C:55 T:0
EA2454	snippy:4.3.6	variation	4450432	4450432	.	.	0	note=snp A=>G G:58 A:0
EA2454	snippy:4.3.6	variation	4450451	4450451	.	.	0	note=mnp CAG=>ACC ACC:54 CAG:0
EA2454	snippy:4.3.6	variation	4450492	4450492	.	.	0	note=snp G=>T T:60 G:0
EA2454	snippy:4.3.6	variation	4450511	4450511	.	.	0	note=complex CGAC=>AGGT AGGT:62 CGAC:0
EA2454	snippy:4.3.6	variation	4450522	4450522	.	.	0	note=snp A=>G G:59 A:0
EA2454	snippy:4.3.6	variation	4450539	4450539	.	.	0	note=complex TAAAG=>CAAAA CAAAA:64 TAAAG:0
EA2454	snippy:4.3.6	variation	4450579	4450579	.	.	0	note=snp G=>A A:66 G:0
EA2454	snippy:4.3.6	variation	4450611	4450611	.	.	0	note=snp C=>A A:64 C:0
EA2454	snippy:4.3.6	variation	4450648	4450648	.	.	0	note=snp C=>T T:64 C:1
EA2454	snippy:4.3.6	variation	4450666	4450666	.	.	0	note=complex TACG=>CACA CACA:59 TACG:0
EA2454	snippy:4.3.6	variation	4450821	4450821	.	.	0	note=snp G=>A A:53 G:0
EA2454	snippy:4.3.6	variation	4450827	4450827	.	.	0	note=snp G=>A A:56 G:0
EA2454	snippy:4.3.6	variation	4450876	4450876	.	.	0	note=snp A=>G G:57 A:0
EA2454	snippy:4.3.6	variation	4450896	4450896	.	.	0	note=snp A=>G G:60 A:0
EA2454	snippy:4.3.6	variation	4450914	4450914	.	.	0	note=complex GGATAAAATTGAGCTGGAAGCG=>AGAGAAACCTGAACTTGAGGCT AGAGAAACCTGAACTTGAGGCT:47 GGATAAAATTGAGCTGGAAGCG:0
EA2454	snippy:4.3.6	variation	4450944	4450944	.	.	0	note=complex AGAG=>GGAT GGAT:53 AGAG:0
EA2454	snippy:4.3.6	variation	4450956	4450956	.	.	0	note=snp T=>C C:56 T:0
EA2454	snippy:4.3.6	variation	4450968	4450968	.	.	0	note=complex GAC=>AAG AAG:54 GAC:0
EA2454	snippy:4.3.6	variation	4450979	4450979	.	.	0	note=snp C=>T T:54 C:0
EA2454	snippy:4.3.6	variation	4451007	4451007	.	.	0	note=snp T=>C C:41 T:0
EA2454	snippy:4.3.6	variation	4451016	4451016	.	.	0	note=complex AGTCATA=>GGTGATT GGTGATT:33 AGTCATA:0
EA2454	snippy:4.3.6	variation	4451028	4451028	.	.	0	note=snp G=>A A:32 G:0
EA2454	snippy:4.3.6	variation	4451040	4451040	.	.	0	note=complex GCATCCT=>ACACCCA ACACCCA:29 GCATCCT:0
EA2454	snippy:4.3.6	variation	4451056	4451056	.	.	0	note=complex AGTG=>TGTA TGTA:25 AGTG:0
EA2454	snippy:4.3.6	variation	4451073	4451073	.	.	0	note=snp G=>A A:22 G:0
EA2454	snippy:4.3.6	variation	4451083	4451083	.	.	0	note=snp C=>A A:17 C:0
EA2454	snippy:4.3.6	variation	4451100	4451100	.	.	0	note=snp C=>A A:11 C:0
EA2454	snippy:4.3.6	variation	4451125	4451125	.	.	0	note=snp G=>T T:11 G:0
EA2454	snippy:4.3.6	variation	4452014	4452014	.	.	0	note=snp G=>T T:42 G:0
EA2454	snippy:4.3.6	variation	4457560	4457560	.	.	0	note=snp A=>C C:28 A:0
EA2454	snippy:4.3.6	variation	4465590	4465590	.	.	0	note=snp C=>T T:66 C:1
EA2454	snippy:4.3.6	variation	4465659	4465659	.	.	0	note=del TG=>T T:53 TG:0
EA2454	snippy:4.3.6	variation	4467661	4467661	.	.	0	note=snp A=>C C:82 A:0
EA2454	snippy:4.3.6	variation	4513917	4513917	.	.	0	note=del TC=>T T:52 TC:0
EA2454	snippy:4.3.6	variation	4520296	4520296	.	.	0	note=complex GTA=>ATG ATG:95 GTA:0
EA2454	snippy:4.3.6	variation	4520960	4520960	.	.	0	note=complex CGGC=>TGGT TGGT:84 CGGC:0
EA2454	snippy:4.3.6	variation	4521276	4521276	.	.	0	note=snp T=>C C:57 T:5
EA2454	snippy:4.3.6	variation	4521304	4521304	.	.	0	note=snp C=>T T:58 C:1
EA2454	snippy:4.3.6	variation	4521317	4521317	.	.	0	note=snp C=>A A:59 C:0
EA2454	snippy:4.3.6	variation	4521405	4521405	.	.	0	note=mnp AA=>GG GG:46 AA:0
EA2454	snippy:4.3.6	variation	4521436	4521436	.	.	0	note=snp A=>G G:44 A:0
EA2454	snippy:4.3.6	variation	4521454	4521454	.	.	0	note=complex CGTTT=>TGTTA TGTTA:46 CGTTT:0
EA2454	snippy:4.3.6	variation	4521518	4521518	.	.	0	note=snp G=>A A:61 G:0
EA2454	snippy:4.3.6	variation	4521526	4521526	.	.	0	note=snp A=>G G:63 A:0
EA2454	snippy:4.3.6	variation	4521563	4521563	.	.	0	note=snp C=>T T:45 C:0
EA2454	snippy:4.3.6	variation	4521568	4521568	.	.	0	note=complex GGCACCCCGGAAAATCAGGGAA=>AACAGCCAGGAGAGTCGGGGTG AACAGCCAGGAGAGTCGGGGTG:41 GGCACCCCGGAAAATCAGGGAA:0
EA2454	snippy:4.3.6	variation	4521602	4521602	.	.	0	note=snp A=>G G:46 A:0
EA2454	snippy:4.3.6	variation	4521623	4521623	.	.	0	note=snp T=>G G:50 T:0
EA2454	snippy:4.3.6	variation	4521639	4521639	.	.	0	note=snp T=>C C:57 T:0
EA2454	snippy:4.3.6	variation	4521649	4521649	.	.	0	note=snp A=>G G:60 A:0
EA2454	snippy:4.3.6	variation	4521671	4521671	.	.	0	note=snp A=>G G:54 A:0
EA2454	snippy:4.3.6	variation	4521694	4521694	.	.	0	note=complex CG=>TT TT:52 CG:0
EA2454	snippy:4.3.6	variation	4521710	4521710	.	.	0	note=snp A=>T T:58 A:0
EA2454	snippy:4.3.6	variation	4521724	4521724	.	.	0	note=complex GGTT=>CGTC CGTC:51 GGTT:0
EA2454	snippy:4.3.6	variation	4521754	4521754	.	.	0	note=snp A=>T T:50 A:0
EA2454	snippy:4.3.6	variation	4521812	4521812	.	.	0	note=snp C=>T T:48 C:0
EA2454	snippy:4.3.6	variation	4521856	4521856	.	.	0	note=snp T=>C C:41 T:0
EA2454	snippy:4.3.6	variation	4521877	4521877	.	.	0	note=snp G=>T T:33 G:0
EA2454	snippy:4.3.6	variation	4521892	4521892	.	.	0	note=snp C=>T T:30 C:0
EA2454	snippy:4.3.6	variation	4521898	4521898	.	.	0	note=snp T=>C C:27 T:0
EA2454	snippy:4.3.6	variation	4521913	4521913	.	.	0	note=snp A=>G G:25 A:0
EA2454	snippy:4.3.6	variation	4521925	4521925	.	.	0	note=complex ACCT=>CCCC CCCC:23 ACCT:0
EA2454	snippy:4.3.6	variation	4521934	4521934	.	.	0	note=snp T=>C C:23 T:0
EA2454	snippy:4.3.6	variation	4521941	4521941	.	.	0	note=complex ACCGTTCTTA=>CTATCATTC CTATCATTC:13 ACCGTTCTTA:0
EA2454	snippy:4.3.6	variation	4521960	4521960	.	.	0	note=snp T=>C C:13 T:0
EA2454	snippy:4.3.6	variation	4521979	4521979	.	.	0	note=snp C=>T T:12 C:0
EA2454	snippy:4.3.6	variation	4521991	4521991	.	.	0	note=snp T=>C C:11 T:0
EA2454	snippy:4.3.6	variation	4593973	4593973	.	.	0	note=snp A=>C C:88 A:0
EA2454	snippy:4.3.6	variation	4668242	4668242	.	.	0	note=complex CG=>TA TA:52 CG:0
EA2454	snippy:4.3.6	variation	4668354	4668354	.	.	0	note=snp A=>G G:59 A:0
EA2454	snippy:4.3.6	variation	4668457	4668457	.	.	0	note=snp A=>G G:69 A:0
EA2454	snippy:4.3.6	variation	4668484	4668484	.	.	0	note=complex ATTG=>GTTT GTTT:59 ATTG:0
EA2454	snippy:4.3.6	variation	4668494	4668494	.	.	0	note=snp G=>A A:60 G:0
EA2454	snippy:4.3.6	variation	4668523	4668523	.	.	0	note=snp G=>A A:54 G:0
EA2454	snippy:4.3.6	variation	4668551	4668551	.	.	0	note=snp T=>C C:47 T:0
EA2454	snippy:4.3.6	variation	4668589	4668589	.	.	0	note=snp C=>T T:42 C:0
EA2454	snippy:4.3.6	variation	4668678	4668678	.	.	0	note=snp G=>A A:39 G:0
EA2454	snippy:4.3.6	variation	4668696	4668696	.	.	0	note=snp C=>T T:40 C:0
EA2454	snippy:4.3.6	variation	4668940	4668940	.	.	0	note=snp G=>A A:30 G:0
EA2454	snippy:4.3.6	variation	4668953	4668953	.	.	0	note=complex ATTATAC=>TTCATAT TTCATAT:23 ATTATAC:0
EA2454	snippy:4.3.6	variation	4668964	4668964	.	.	0	note=complex GGGTGTT=>AGGCATC AGGCATC:23 GGGTGTT:0
EA2454	snippy:4.3.6	variation	4668982	4668982	.	.	0	note=snp A=>G G:32 A:0
EA2454	snippy:4.3.6	variation	4668994	4668994	.	.	0	note=complex TCAC=>CTAT CTAT:30 TCAC:0
EA2454	snippy:4.3.6	variation	4669003	4669003	.	.	0	note=snp G=>T T:32 G:0
EA2454	snippy:4.3.6	variation	4669009	4669009	.	.	0	note=snp A=>G G:32 A:0
EA2454	snippy:4.3.6	variation	4669018	4669018	.	.	0	note=snp C=>T T:28 C:0
EA2454	snippy:4.3.6	variation	4669024	4669024	.	.	0	note=complex TCAT=>CTAC CTAC:28 TCAT:0
EA2454	snippy:4.3.6	variation	4669033	4669033	.	.	0	note=snp G=>A A:27 G:0
EA2454	snippy:4.3.6	variation	4669038	4669038	.	.	0	note=snp G=>A A:30 G:0
EA2454	snippy:4.3.6	variation	4669043	4669043	.	.	0	note=complex CA=>AG AG:31 CA:0
EA2454	snippy:4.3.6	variation	4669079	4669079	.	.	0	note=snp C=>T T:41 C:0
EA2454	snippy:4.3.6	variation	4669098	4669098	.	.	0	note=complex GTAGT=>ATAGC ATAGC:49 GTAGT:0
EA2454	snippy:4.3.6	variation	4669107	4669107	.	.	0	note=snp C=>A A:58 C:0
EA2454	snippy:4.3.6	variation	4669123	4669123	.	.	0	note=complex AAGC=>CAGA CAGA:57 AAGC:0
EA2454	snippy:4.3.6	variation	4669132	4669132	.	.	0	note=complex TAG=>CAA CAA:56 TAG:0
EA2454	snippy:4.3.6	variation	4669154	4669154	.	.	0	note=complex CAGAT=>AAGAC AAGAC:57 CAGAT:0
EA2454	snippy:4.3.6	variation	4669165	4669165	.	.	0	note=snp T=>G G:60 T:0
EA2454	snippy:4.3.6	variation	4669222	4669222	.	.	0	note=complex TA=>GG GG:51 TA:0
EA2454	snippy:4.3.6	variation	4669240	4669240	.	.	0	note=snp A=>G G:52 A:0
EA2454	snippy:4.3.6	variation	4669294	4669294	.	.	0	note=snp C=>T T:44 C:0
EA2454	snippy:4.3.6	variation	4669318	4669318	.	.	0	note=snp C=>T T:40 C:0
EA2454	snippy:4.3.6	variation	4669342	4669342	.	.	0	note=snp T=>C C:25 T:0
EA2454	snippy:4.3.6	variation	4669363	4669363	.	.	0	note=complex ACC=>TCT TCT:18 ACC:0
EA2454	snippy:4.3.6	variation	4669371	4669371	.	.	0	note=complex CA=>TG TG:18 CA:0
EA2454	snippy:4.3.6	variation	4669388	4669388	.	.	0	note=complex CAA=>GAG GAG:16 CAA:0
EA2454	snippy:4.3.6	variation	4669717	4669717	.	.	0	note=snp C=>T T:10 C:0
EA2454	snippy:4.3.6	variation	4669729	4669729	.	.	0	note=snp G=>T T:15 G:0
EA2454	snippy:4.3.6	variation	4669738	4669738	.	.	0	note=snp G=>A A:20 G:0
EA2454	snippy:4.3.6	variation	4669744	4669744	.	.	0	note=snp G=>A A:20 G:0
EA2454	snippy:4.3.6	variation	4669774	4669774	.	.	0	note=snp T=>C C:26 T:0
EA2454	snippy:4.3.6	variation	4669804	4669804	.	.	0	note=snp T=>A A:26 T:0
EA2454	snippy:4.3.6	variation	4669832	4669832	.	.	0	note=snp C=>A A:24 C:0
EA2454	snippy:4.3.6	variation	4669882	4669882	.	.	0	note=snp A=>G G:22 A:0
EA2454	snippy:4.3.6	variation	4669892	4669892	.	.	0	note=snp G=>C C:25 G:0
EA2454	snippy:4.3.6	variation	4669933	4669933	.	.	0	note=snp T=>C C:31 T:0
EA2454	snippy:4.3.6	variation	4669954	4669954	.	.	0	note=snp T=>C C:27 T:0
EA2454	snippy:4.3.6	variation	4669980	4669980	.	.	0	note=complex TAACCAC=>AACTTAT AACTTAT:12 TAACCAC:0
EA2454	snippy:4.3.6	variation	4669991	4669991	.	.	0	note=complex AAAGAACAC=>GAATAGCAT GAATAGCAT:12 AAAGAACAC:0
EA2454	snippy:4.3.6	variation	4670004	4670004	.	.	0	note=complex CAAT=>ACAC ACAC:12 CAAT:0
EA2454	snippy:4.3.6	variation	4670015	4670015	.	.	0	note=complex AGTT=>GTAG GTAG:12 AGTT:0
EA2454	snippy:4.3.6	variation	4670026	4670026	.	.	0	note=complex TAAGGAACG=>GAAAACA GAAAACA:12 TAAGGAACG:0
EA2454	snippy:4.3.6	variation	4670040	4670040	.	.	0	note=snp G=>A A:14 G:0
EA2454	snippy:4.3.6	variation	4670049	4670049	.	.	0	note=snp T=>C C:15 T:0
EA2454	snippy:4.3.6	variation	4670068	4670068	.	.	0	note=complex CCAC=>ACAA ACAA:16 CCAC:0
EA2454	snippy:4.3.6	variation	4670078	4670078	.	.	0	note=complex AG=>GC GC:16 AG:0
EA2454	snippy:4.3.6	variation	4670084	4670084	.	.	0	note=snp C=>T T:20 C:0
EA2454	snippy:4.3.6	variation	4670113	4670113	.	.	0	note=complex CT=>TC TC:30 CT:0
EA2454	snippy:4.3.6	variation	4670136	4670136	.	.	0	note=snp G=>A A:38 G:0
EA2454	snippy:4.3.6	variation	4671838	4671838	.	.	0	note=snp A=>G G:18 A:0
[truncated: 560 more rows]
