# Supplementary material for: Escherichia coli ST302: Genomic Analysis of Virulence Potential and Antimicrobial Resistance Mediated by Mobile Genetic Elements
Source: Front Microbiol. 2020 Jan 21;10:3098. doi: 10.3389/fmicb.2019.03098 (PMC6985150; doi:10.3389/fmicb.2019.03098)
Supplement: DATA S2 — ST302 SNP analysis. [file Data_Sheet_2.ZIP › SNP_Analysis/ST302_SNP/SNP_analysis/snp_dists/pairwise_snps.csv]

snp-dists 0.6.3	BA8907	BA9503	CA0191	CA0229	EA1682	EA2455	EA8393	F2_18C	FA0416	FA5537	IA1186	IA1729	IA4731	IA7122	EA2454
BA8907	0	1	1255	1071	1073	1117	938	685	2131	1414	2132	992	1065	1131	1123
BA9503	1	0	1254	1070	1072	1116	937	684	2130	1413	2131	991	1064	1130	1122
CA0191	1255	1254	0	524	526	760	1173	1261	2166	1446	2167	1227	518	774	766
CA0229	1071	1070	524	0	276	572	991	1077	1984	1262	1985	1045	266	588	578
EA1682	1073	1072	526	276	0	560	993	1079	1984	1264	1985	1047	224	576	566
EA2455	1117	1116	760	572	560	0	1037	1123	2030	1308	2029	1091	566	70	8
EA8393	938	937	1173	991	993	1037	0	945	2045	1331	2046	223	985	1053	1043
F2_18C	685	684	1261	1077	1079	1123	945	0	2138	1422	2139	999	1071	1139	1129
FA0416	2131	2130	2166	1984	1984	2030	2045	2138	0	2136	27	2097	1974	2046	2036
FA5537	1414	1413	1446	1262	1264	1308	1331	1422	2136	0	2137	1387	1256	1324	1314
IA1186	2132	2131	2167	1985	1985	2029	2046	2139	27	2137	0	2098	1975	2045	2035
IA1729	992	991	1227	1045	1047	1091	223	999	2097	1387	2098	0	1039	1107	1097
IA4731	1065	1064	518	266	224	566	985	1071	1974	1256	1975	1039	0	582	572
IA7122	1131	1130	774	588	576	70	1053	1139	2046	1324	2045	1107	582	0	76
EA2454	1123	1122	766	578	566	8	1043	1129	2036	1314	2035	1097	572	76	0
