# Supplementary material for: Escherichia coli ST302: Genomic Analysis of Virulence Potential and Antimicrobial Resistance Mediated by Mobile Genetic Elements
Source: Front Microbiol. 2020 Jan 21;10:3098. doi: 10.3389/fmicb.2019.03098 (PMC6985150; doi:10.3389/fmicb.2019.03098)
Supplement: DATA S2 — ST302 SNP analysis. [file Data_Sheet_2.ZIP › SNP_Analysis/ST302_SNP/SNP_analysis/snp_sites/clean.fullcore.aln]

>BA8907-ND-ST302
CACTCCCACCCCTCCCCGGTGGGCTGACCCCGGACCGACAGGCCGCCCATTTGCGATATGTTCTGGACAATTCCCCCATTTCCCCTCACCTTCTGCACCGGCAAGCAGGTGTGGGGCCCCGGTCGTTCCCTGGCGTTGAACTCGCCCCCCCACGTCGACACGAGGACCCCCCGGCGGCTTGCTTCGCAGCGGAACGAATCCTACATGCGCCCACCAGCTGGGCGCACGCTCATTGTCCGCGCTCTGGGGCCCCGTGACGACCTCCGCCCCTCGGACCCCCAGCCCACGACCAGCCTGCCTCGTCATCCCGAGACTTTCCCCGTACCCGTGAGTGCATTTCGAGTCCCTCGCCATAACACTCAGCAAATCTGCCCGGCCCACCTTTACTTGACTCGCTCGCTCCCAACTGGTGACCGGGGTCAGGCAACGCGGACGCACTGCGCGGGGCACTCGACGGGTAATGTGTCGCGGAGCCACCCGCACGTGCGGGGCGTCACCGGAAGTTCTCCGCGCGGGGAATGAGGGGGGCTCATGGGCCTAGTGTCGGTAGTGCCCGAGAGAGTGGAATTAGTAAGATAGTGAGCAATTCCATACGCCCATGGGGTAGCGCGCGGTTCAGAAATGCGCCTGTCGGGGCTGACGACTATACAATGTCAGACTTCTCCGGAGTCCGGAGTGCCGAGGCTCGAGTTCCGCAAGGGCGATCCCGCTGCGGGGCCCTGCCTTTCTTCGAACTGGCCGGGCCAGATGACCCATGTAATGGCCTGAGAGGCGGTGGACTGTTTCGTCTGCGCCGCTTTCCCCCCTAGCCTTTGAACGTGACCTGTGCTCACTTTCCGCACTGAATACGTGTCACCCGCCGTGTGCCACTCCGGCACCCCAGAGGCGTTTCATGTTGGCTACGGCCAGGGGGCTGTCTCCTCCGGGTCAGACCTGAGCCGCGCCGGCGACATTGCTCCTCCTAACCCACCCCCGTTCCCCTCACGCAAGCGCTATGGCGGAGACTTCTACATCCTGACCCTAGCTGCCCGGCCCTACGGGTTCCTCCCCACGGTGCGGGCTGCACCGGGGGGGTGAAGAGGGGCCCTGCATCGGGGCGCTGCCGCCGTTAATGGCTAGGCAGCTCATCCGCATAGGGGACCAGGGGGGGGAGGCTGTTGGAGTGAGCGTAACGCGGGCGTGTGTATCCTGTAGCGATCGGAACGTCGAGGGGAAGATGCCCAGGTTGCTCGCCGAGTACGGGGCGGGGCGGTGTCGGCGGGGGGCACCTCGCCGTGGATCGTCGTGGGTTGAGTTACACGTCTGGGCTCAGCTAGTGGTGGTACGCGGGGAAAACGGGTGGATTCCGCTAGGGAGGGGCAGCCACCGCGCCGAGAGCTCCCGGCGGTTGAGCGAGCTAACGCAACCCAACGAGCCTCGTGTCAGCGCGATGGGCGATCCACGTCCAACCCGCCGCTCTACATTTCCAGACCTCCGCCACCTCTCGGCCCAGCTTCGCCCGCACCAGCTCGCTGCCACCCGTTTCCTCCGGACGACTTGCGGAGTGGAGCGCGCTAGTACCCCGAAGGTGCCGGACGCCGCGCTAAGGGTCGTCGGGCAGCCGCTAGGCCCTTTGGTGCCTGCCCCGGTGTCGCCCGTGTCCCGCCTAGCCGTGTCTCCGCCCCCTCAGCAAACCCGCGGCTGTACTGGAAGGCCGCTGAGGGCCACACCGCACGCCCCCCCCGGTGTCAGCGGTCGTCCCCGCACGAACGCAAAGGTCAGCCGTCGCTACTACCGCTCCGTCGGATAAAATATACGCCAAAATCCGCCTGGGAGCCGCTGACCATACCCTGGCGCCCGCACGTGGGAGGTATTACTGCAGAGCCACCGTGCCCCAGAATCTCGGCGACACGCCCTAAAACTCCCGTCCCGACTGACCCGCCAGGTCGCCAGCATCGTTACTAGCATAAGCCCTGGCAGCGTCCCTGCATTTCGCGGTGCAGAACCGGCCGCGAGAGTCTCGAGCACGGCGCAAACTGCGCCCCGGGCGGAGGGTGATCGCCTCAGAGGTCGTACAGGTTAGGGTGTCGCAGCCGTAGAAAACGTGCGTTGACACAGCAGGCGGCAAAGGACCACTTTGGCCCTCTACTCCCTAGCCGCGCCTCGACCTGCTCACCGGCTCTGTTTCCGCGAACGCGTCCGGAGGACCTCTGGGCACACGGCCCTGCCGAAGCCAGCCCGCGCGCCGTATTGATGGTACGCCCCTACACGACTCCGGTGGGCGACTGCTGGCGTGTCACGTACCCACGGGGGGGTGTAGGCGGAAAGGGTCCAGCGAAAAGGCCCGTGGGTGGAACCTAGAAGGCAACGGCTGCCCGCGGGGGACGGAGGCGACGCGCAAGGGGATGCCAGCGAAGTAGCGTCGCGCGCTGTTACGCGTAATAAGCGTTGAGAAGTTTCGCGACAGGGACGGGGGCTCATCAAGGACCAGCGGGCGGTACAGTGGGCTGACATCCAACGGAGCGTCATCTGGCGTGTTTAAGGATCGTTCAGAGGAGTTCGCAAGGCCAACGGAGGGACTGCGGTGGGACGCCCAGCGGCATAACGGGTAGCCGCGTCGCCGACCGGCGGTAAGTGGCGGCCTACGAGGCGTGCCGCGGAGATCAACGGGGAGGTAGGGCGCCGGAATCGTATACTGCGGCCCCATACTCACCGACTTTGACTACGCCGAGCGCCCTATCCCTGCGCGATCAGGTCAAGATTACTACACATACTATCTTTAATGCATGCATGCTTGACTGTCTGTACGCGCCCCCCGCTGATGCCTTCTGAGCGCCCACGGCCTCGCACGGATTCGCAAGTCGTCCGTAACCCAAGGAAGACGGACCCCATCCGCAAGGCGGCCCTGGCCTAGACGGCGTCACGCTTAGGCCCTCGCTCACTTCAAAGTCCGAAGGCCACGAACCCGCCCCCCCAAGGGGATACAGAGGGGGATCGCTAAGGGGAGCACCCCGGAACGCCGCACACGTGCGTGTCTGCGGGGGTCTTGTGAGGTGCGGCTGGCCCTCTTGGACCTCTCGCGGGGGGGATGGTAACCCGGGGTCGGCGCACTGGGGCGAGGGCGACGACCGACAATATTCAGGAGGTGGACTGACCCGGTCGACTTATAGGGCGGGCAAGTAGAACTAGCTCGCCTCCGCACCCACACAAGTCGGACCCCTTGCGCTGAGACGCCCGGCCCTAGAGACCCGGCGCCCCGCGAACACCTTGCCAAGGGTCCCGTCCGGCCGGGTCTTCCCTCCGCACAGCAAGAGGGAGATGCGCCTGGGGGACTGCACCTGTGTCACCGGGATGAGCACGACCATGCGTTGGTTGTACCGGCCCGAGTCCGCCACGCCCTAGGCCCACTCGGCAGACCCGCCCCACCTCGTGCCCCCACTGCGCGGCGCTACGGTTGTCCAGAGGCCAGGGTCCCGGCCCTCGCGTGTCGACCCGTCTCGACCGAGCGGCCCGAAACACGCAGAAGGCGTGTCGCTCCCCGACGTGTCAGCACGAGCGACCGTCAATGGTCTGGTTTGTAATGTTGCGTCAGGGGAGCGTGCCCGCGGTGGACCATGTCGGCACGGAATGGACTATGCTTGATATCTGCCGGCCCAATGTCCAACCCCCGGGGAGCTGCTACCGGCTGGTGACCCCTGTTTCGTCGTACGGACCTTAGCGGCCCACCCCCCTCGCCCGCACGTGTCCTGTCAAAGCGCGCGTTTCGTTCCTCTTTAACGGGACGGAGGGGGCCCGTGCGAGCCTCCGGTCACGCCCCCGCCGCTGGACACTCTCGCTCCCGGGCGGCATCCGTGGGGGTCGCAGTCGTTGGGTGAGCCCCTAGCTGAGGCCTGAAGTGTAACCGCGAAAGCTCTGTGTGTCCGCCCCGTCCCGCTGCCATGATGCGTTGGCGCGCGCCGGCCGTCGCCGCGTCGAGCCGCGCCCCGTGCCTCGCAGGCCGACCCCCCTGCTATCTGCCAGCCCCTCCTTCCGTACGCGGTCCTCGCCGCTTGGGGTTGTGGGCCATGTTCCCGGGCACCGCAACATAGCGCTTGATCAGGAGGAGACGAGGAGTCGTGCGCAGGACTGCCACCCGCGGCCTGCCCGCGGGACCAGGGGACGACCGACCACGGATAGTGCGCAATAGGACTTGGGGCGAGCAGAGGTGCGACATCCAACTGGTCTAAAGTCCTTCCCTATCCCCGCTGCGCGCCCCCCGCCTCTTACTCCGCAGTGTTCGCTGCCGGGCCCCCGGCCGCCGGATAGGATCCGGAGCGTGTTGGGTTCTACCCGCCCGCACCTTACAGCTAGTGCGACGAATGCCCGGGGGTGGGTACAATCTCGCCAGACCACCCCCGGCCTCCGATGTGCGCCACCTCGGGCGCGCCCTGCGCCTCCCGCCCCGCGCCCCCCGCAATGCCACTGAGAACCTTCCCCTCTGCCGGCGTGGGCTGCTCGGCTTCTAGCTGCTGGACATGGCCGTCGGACTCCACCCCTAGCCACTACTGGCGGCCCCGAGCCCCTCCGGCCTGGCTCCTCCCCCCTCAAGTGATGACGGGTGCTTTACATGACTGAGGTGCTGCGCAGGGCGTGATGCTCACGGGCGTGCAACCCTGCCCAGCGCGAGCAGCAATCTGCACTATCTAGTCAAAACCGAGACTAGAAATCGCGGCCCCGGCCTCCTAGCAATTAGTCGGACCCTGGAAGCCGTGAAGAGTGGCCTCAGTGGCCTGTGTCAAGGCCCCCCATGTTCCCGAGCTTCCTTACAGGGGGGGGGCAGCATGAGCCGTTATCCCTGACACCGGCTGGTTCTATCGCGGACAATCCAACCAGAGGTCCCCGTATCCGCGCGGAAGGGCAGCCGAGTGGCGCCAGAGACCGTACGGAACACAGGAGAAGCCAGCTTGACGGGAGCTATTCGCGGGGTGACAGGTGTGGGGGAGAGAGAGGCAGAGCATCCGTTACATATGATGGGGGTGTGGCGACCTGCCTAGTCCCGTTGGGGGACCGGGATGGAGCCGCGACGCGACCCTCCCGCATTCTCCCGGCCACATTCTGACCCCCTGTAATAGCATAAGCAGCAGTTCCCTACTTGCACGGCCCGCCCCCCTTCGGCTCTGGTGAACCCTAGGCTTGGGTCCCGC
>BA9503-ND-ST302
CACTCCCACCCCTCCCCGGTGGGCTGACCCCGGACCGACAGGCCGCCCATTTGCGATATGTTCTGGACAATTCCCCCATTTCCCCTCACCTTCTGCACCGGCAAGCAGGTGTGGGGCCCCGGTCGTTCCCTGGCGTTGAACTCGCCCCCCCACGTCGACACGAGGACCCCCCGGCGGCTTGCTTCGCAGCGGAACGAATCCTACATGCGCCCACCAGCTGGGCGCACGCTCATTGTCCGCGCTCTGGGGCCCCGTGACGACCTCCGCCCCTCGGACCCCCAGCCCACGACCAGCCTGCCTCGTCATCCCGAGACTTTCCCCGTACCCGTGAGTGCATTTCGAGTCCCTCGCCATAACACTCAGCAAATCTGCCCGGCCCACCTTTACTTGACTCGCTCGCTCCCAACTGGTGACCGGGGTCAGGCAACGCGGACGCACTGCGCGGGGCACTCGACGGGTAATGTGTCGCGGAGCCACCCGCACGTGCGGGGCGTCACCGGAAGTTCTCCGCGCGGGGAATGAGGGGGGCTCATGGGCCTAGTGTCGGTAGTGCCCGAGAGAGTGGAATTAGTAAGATAGTGAGCAATTCCATACGCCCATGGGGTAGCGCGCGGTTCAGAAATGCGCCTGTCGGGGCTGACGACTATACAATGTCAGACTTCTCCGGAGTCCGGAGTGCCGAGGCTCGAGTTCCGCAAGGGCGATCCCGCTGCGGGGCCCTGCCTTTCTTCGAACTGGCCGGGCCAGATGACCCATGTAATGGCCTGAGAGGCGGTGGACTGTTTCGTCTGCGCCGCTTTCCCCCCTAGCCTTTGAACGTGACCTGTGCTCACTTTCCGCACTGAATACGTGTCACCCGCCGTGTGCCACTCCGGCACCCCAGAGGCGTTTCATGTTGGCTACGGCCAGGGGGCTGTCTCCTCCGGGTCAGACCTGAGCCGCGCCGGCGACATTGCTCCTCCTAACCCACCCCCGTTCCCCTCACGCAAGCGCTATGGCGGAGACTTCTACATCCTGACCCTAGCTGCCCGGCCCTACGGGTTCCTCCCCACGGTGCGGGCTGCACCGGGGGGGTGAAGAGGGGCCCTGCATCGGGGCGCTGCCGCCGTTAATGGCTAGGCAGCTCATCCGCATAGGGGACCAGGGGGGGGAGGCTGTTGGAGTGAGCGTAACGCGGGCGTGTGTATCCTGTAGCGATCGGAACGTCGAGGGGAAGATGCCCAGGTTGCTCGCCGAGTACGGGGCGGGGCGGTGTCGGCGGGGGGCACCTCGCCGTGGATCGTCGTGGGTTGAGTTACACGTCTGGGCTCAGCTAGTGGTGGTACGCGGGGAAAACGGGTGGATTCCGCTAGGGAGGGGCAGCCACCGCGCCGAGAGCTCCCGGCGGTTGAGCGAGCTAACGCAACCCAACGAGCCTCGTGTCAGCGCGATGGGCGATCCACGTCCAACCCGCCGCTCTACATTTCCAGACCTCCGCCACCTCTCGGCCCAGCTTCGCCCGCACCAGCTCGCTGCCACCCGTTTCCTCCGGACGACTTGCGGAGTGGAGCGCGCTAGTACCCCGAAGGTGCCGGACGCCGCGCTAAGGGTCGTCGGGCAGCCGCTAGGCCCTTTGGTGCCTGCCCCGGTGTCGCCCGTGTCCCGCCTAGCCGTGTCTCCGCCCCCTCAGCAAACCCGCGGCTGTACTGGAAGGCCGCTGAGGGCCACACCGCACGCCCCCCCCGGTGTCAGCGGTCGTCCCCGCACGAACGCAAAGGTCAGCCGTCGCTACTACCGCTCCGTCGGATAAAATATACGCCAAAATCCGCCTGGGAGCCGCTGACCATACCCTGGCGCCCGCACGTGGGAGGTATTACTGCAGAGCCACCGTGCCCCAGAATCTCGGCGACACGCCCTAAAACTCCCGTCCCGACTGACCCGCCAGGTCGCCAGCATCGTTACTAGCATAAGCCCTGGCAGCGTCCCTGCATTTCGCGGTGCAGAACCGGCCGCGAGAGTCTCGAGCACGGCGCAAACTGCGCCCCGGGCGGAGGGTGATCGCCTCAGAGGTCGTACAGGTTAGGGTGTCGCAGCCGTAGAAAACGTGCGTTGACACAGCAGGCGGCAAAGGACCACTTTGGCCCTCTACTCCCTAGCCGCGCCTCGACCTGCTCACCGGCTCTGTTTCCGCGAACGCGTCCGGAGGACCTCTGGGCACACGGCCCTGCCGAAGCCAGCCCGCGCGCCGTATTGATGGTACGCCCCTACACGACTCCGGTGGGCGACTGCTGGCGTGTCACGTACCCACGGGGGGGTGTAGGCGGAAAGGGTCCAGCGAAAAGGCCCGTGGGTGGAACCTAGAAGGCAACGGCTGCCCGCGGGGGACGGAGGCGACGCGCAAGGGGATGCCAGCGAAGTAGCGTCGCGCGCTGTTACGCGTAATAAGCGTTGAGAAGTTTCGCGACAGGGACGGGGGCTCATCAAGGACCAGCGGGCGGTACAGTGGGCTGACATCCAACGGAGCGTCATCTGGCGTGTTTAAGGATCGTTCAGAGGAGTTCGCAAGGCCAACGGAGGGACTGCGGTGGGACGCCCAGCGGCATAACGGGTAGCCGCGTCGCCGACCGGCGGTAAGTGGCGGCCTACGAGGCGTGCCGCGGAGATCAACGGGGAGGTAGGGCGCCGGAATCGTATACTGCGGCCCCATACTCACCGACTTTGACTACGCCGAGCGCCCTATCCCTGCGCGATCAGGTCAAGATTACTACACATACTATCTTTAATGCATGCATGCTTGACTGTCTGTACGCGCCCCCCGCTGATGCCTTCTGAGCGCCCACGGCCTCGCACGGATTCGCAAGTCGTCCGTAACCCAAGGAAGGCGGACCCCATCCGCAAGGCGGCCCTGGCCTAGACGGCGTCACGCTTAGGCCCTCGCTCACTTCAAAGTCCGAAGGCCACGAACCCGCCCCCCCAAGGGGATACAGAGGGGGATCGCTAAGGGGAGCACCCCGGAACGCCGCACACGTGCGTGTCTGCGGGGGTCTTGTGAGGTGCGGCTGGCCCTCTTGGACCTCTCGCGGGGGGGATGGTAACCCGGGGTCGGCGCACTGGGGCGAGGGCGACGACCGACAATATTCAGGAGGTGGACTGACCCGGTCGACTTATAGGGCGGGCAAGTAGAACTAGCTCGCCTCCGCACCCACACAAGTCGGACCCCTTGCGCTGAGACGCCCGGCCCTAGAGACCCGGCGCCCCGCGAACACCTTGCCAAGGGTCCCGTCCGGCCGGGTCTTCCCTCCGCACAGCAAGAGGGAGATGCGCCTGGGGGACTGCACCTGTGTCACCGGGATGAGCACGACCATGCGTTGGTTGTACCGGCCCGAGTCCGCCACGCCCTAGGCCCACTCGGCAGACCCGCCCCACCTCGTGCCCCCACTGCGCGGCGCTACGGTTGTCCAGAGGCCAGGGTCCCGGCCCTCGCGTGTCGACCCGTCTCGACCGAGCGGCCCGAAACACGCAGAAGGCGTGTCGCTCCCCGACGTGTCAGCACGAGCGACCGTCAATGGTCTGGTTTGTAATGTTGCGTCAGGGGAGCGTGCCCGCGGTGGACCATGTCGGCACGGAATGGACTATGCTTGATATCTGCCGGCCCAATGTCCAACCCCCGGGGAGCTGCTACCGGCTGGTGACCCCTGTTTCGTCGTACGGACCTTAGCGGCCCACCCCCCTCGCCCGCACGTGTCCTGTCAAAGCGCGCGTTTCGTTCCTCTTTAACGGGACGGAGGGGGCCCGTGCGAGCCTCCGGTCACGCCCCCGCCGCTGGACACTCTCGCTCCCGGGCGGCATCCGTGGGGGTCGCAGTCGTTGGGTGAGCCCCTAGCTGAGGCCTGAAGTGTAACCGCGAAAGCTCTGTGTGTCCGCCCCGTCCCGCTGCCATGATGCGTTGGCGCGCGCCGGCCGTCGCCGCGTCGAGCCGCGCCCCGTGCCTCGCAGGCCGACCCCCCTGCTATCTGCCAGCCCCTCCTTCCGTACGCGGTCCTCGCCGCTTGGGGTTGTGGGCCATGTTCCCGGGCACCGCAACATAGCGCTTGATCAGGAGGAGACGAGGAGTCGTGCGCAGGACTGCCACCCGCGGCCTGCCCGCGGGACCAGGGGACGACCGACCACGGATAGTGCGCAATAGGACTTGGGGCGAGCAGAGGTGCGACATCCAACTGGTCTAAAGTCCTTCCCTATCCCCGCTGCGCGCCCCCCGCCTCTTACTCCGCAGTGTTCGCTGCCGGGCCCCCGGCCGCCGGATAGGATCCGGAGCGTGTTGGGTTCTACCCGCCCGCACCTTACAGCTAGTGCGACGAATGCCCGGGGGTGGGTACAATCTCGCCAGACCACCCCCGGCCTCCGATGTGCGCCACCTCGGGCGCGCCCTGCGCCTCCCGCCCCGCGCCCCCCGCAATGCCACTGAGAACCTTCCCCTCTGCCGGCGTGGGCTGCTCGGCTTCTAGCTGCTGGACATGGCCGTCGGACTCCACCCCTAGCCACTACTGGCGGCCCCGAGCCCCTCCGGCCTGGCTCCTCCCCCCTCAAGTGATGACGGGTGCTTTACATGACTGAGGTGCTGCGCAGGGCGTGATGCTCACGGGCGTGCAACCCTGCCCAGCGCGAGCAGCAATCTGCACTATCTAGTCAAAACCGAGACTAGAAATCGCGGCCCCGGCCTCCTAGCAATTAGTCGGACCCTGGAAGCCGTGAAGAGTGGCCTCAGTGGCCTGTGTCAAGGCCCCCCATGTTCCCGAGCTTCCTTACAGGGGGGGGGCAGCATGAGCCGTTATCCCTGACACCGGCTGGTTCTATCGCGGACAATCCAACCAGAGGTCCCCGTATCCGCGCGGAAGGGCAGCCGAGTGGCGCCAGAGACCGTACGGAACACAGGAGAAGCCAGCTTGACGGGAGCTATTCGCGGGGTGACAGGTGTGGGGGAGAGAGAGGCAGAGCATCCGTTACATATGATGGGGGTGTGGCGACCTGCCTAGTCCCGTTGGGGGACCGGGATGGAGCCGCGACGCGACCCTCCCGCATTCTCCCGGCCACATTCTGACCCCCTGTAATAGCATAAGCAGCAGTTCCCTACTTGCACGGCCCGCCCCCCTTCGGCTCTGGTGAACCCTAGGCTTGGGTCCCGC
>CA0191-ND-ST302
CACGCCTACCCCTCCCCGAGGTACGGACCCCGTACCGACAGGCCGCCCAGTGGCAATCTGTTCTGGACACTTCCACCCCTTCTCTTCACCTGTATCACCAGCAAGAAGGCGTATGGACTAAGCCGTTGCCAGGCGTTGAACTCACCTCACCATGCGGAAATTAGGACCTCCCGGCGGCTCGCCTCACGACAAAACGGGTCCCACATGCGTTCACCAGCTGAGTTCACTCACTTTGTTCGCGCCCCGGGGCCTCGTAACGACCTCTACCCCTCGGACCCCCAGCCCACGACCAGCCCGCCTCGTCATCCCGAGGCCTCCTCCGTACCCGTGAGTGCATCTCGGGTTCCTCGCCATAGCACGCAGCCACCCTTCCCGGCCCACCTTTACCCGGCTCGCTCACTCCCAACCAGTGACCGGAGTTAGGCAGCGCGGACGTCCCGCGCGGGACACTCGACGTATAATACGCCGAGGGGTCACCCGGCAGCGTGGGGCATTGACGGGGGTCCCCTGTACGGGGAATGGAGGGGGCTCATGGGCATAGGGTTGGTCGTGCCCGTGAGAGTGTGATTAGCAGGGTGGTGTACAATTCCACGCGGCTATGGGGCAGCGAGTGGTTCAGACTCGCGTTTGTCAGGGATGACGGTAATACAGCGTTGGACTTCTCCAGGGTTCGGCGTGCTAGGTCTCGAGAGCCGCAGGGACGGTTCCACTGCGGGACCCTCCCTCTCTCCGAGCCGGCCGGGCCGGACGGCCCATGGAACAGCTCGAGGGACGGTAGACCGTCTCGTCTGCACCTCTCTTCCCCCTGGCCGTTGAACGGGAGCTATACTCACTTTCAGCGCTGCACATGCGTCGACCTCCGTATGTCATTCCGGACCCCCAGGAGTGTTGCACTTTGGCTGCGGCCAGGCGACTGCACCCTGCGGATCGGACCTGAGCCGCGCCGGCGATGCCGCTCCTCCTAACCCACCCCCGTTTCCTTTACACGAGCGTCAGGGCGGAGACTTCCACACCTAGACCCTAGCTGGCTAACCTTCCGGGTTCCCCCTCGACGTGCAGGCGGGGCCTGGGAGGTGAAGAGGGAACTCGTAACGGAGCGCGGACGTCGTTAGGGGCTATGGAGCTCATCTGTACAGGGAACCAGGGGGGTGGGGCCAGAGGAGTGAGCGTATAGCGGGTATATGTACCCTGTAACATTCAGAGCGTCGAAGGGAGGATTCACTGGTCGTGCGCCTAGCACGGGGCGTGGCGAAGCCGGCGGGGCGCACACTAACATGACTCGTCGTGAGTTAGACTCCACGTCCGGGTTAAGCCGGTGGTGGTACGCAGGGAAAACGGGTTGTTTCCGCTAGGGAGAGGTAGGCACCGTATTGCGAGCTCCCGGCAGTCGTGTGAGCTGGCGCCACCCAACAAGCCTCGGGTCTGTGTGGTGGGCGCTCTACACCCAACCCGCCGCTCTACATTGTCAGACATCCGCCACCTCGCGGCCCAGCTCCGTCCGCACCAGCTCGTAGCTATCCGTCACATCCTGACGACTTACGGAGCGGCGCGCGTACGTCCCTCGAAGGTGCCGAACGCCGCGCCAAGGGTTGCCGTGCAGCCGCAGGTTCCTTTGGCGCGTGCCCGGGTGTCGACCGTGCCCCGCTTCATTTTGCTTCCGCTCATGAGACAAACCCGTGGCTGTATTGGAAGGCCTCTGAAAGCCACGCCGCACGCTTCCCCTGGTGTCGGCGACCACTCCCGCATGCCTACGAATGCCAACCGTCGCCACTGGCGCGCCGTCAGATAGGATATACGCTCAAATCCGCCTGGGAGCCGCTGGGCATGCCCTAGTGTCCGCACGTAGGAGGGACTACTGCAGGGCCACCGTGCCCCAGTGTTTCGACTATGCATTCCAAAATTACCACCCCGACTTACCCACCAGTTCGTCCGCACTGTTACATAAGTAAGCCCTATCAGCGTGCCGGAATTTTGCGGCGCGGAACTGGCCGTGAGTGTCTCGGGCACGGCGCAAACTGTGCCCCGGTCGGAAGGTGTTCGCCTCAGAGATCGTACAGGTCCAGGGGGCGCAGTCGCGTCCACCGCGTCTCGACACAGCAGTCGGCACGCGACCACTATGGCCCTCTGCCCCCCAGCCGCGACTCGCCCTGCGCACTGGTTTTGTTCCTACGGACGCGTCCGGATGGCTTATGGGCACACTGCCCTGCCGAGAACAGCCCGTGCACCTTGTTGATGGCACGTCCCTGCACGGCCACGGTGGGCGGCTACTAGCGTGTCACGCACACACAGGGGGGGGGTGATAGGAACGATCCAGCGAACAGGCTAGTAGGTGGGGGCTAGGGGGCATCGGCTGCCTGCAAGGGATGGAGGCGACACGCGCAGGGACGCCAGCGAAGGAGCGTTGCGCACTGCCGCGTGTTGTGGGCGTTGAAGTGTTCCGCGGCAAGGATGGGGTCTCGTCAGAGATCGGCGGATAGGGCAGTAGGCCGACCGACGACGGGGCGTCATCTGGCGCATTTAAGGATTGTCCGGAGAAGTCCGCAAGGTCAGTTGGAAAACCGCGGTGGAACGATCAGAGGCATAGCAGGTAACCGCGTCGCCGATTGGCAGCTATTAGCTACCTGCGAGGCATGCCGCGGAAAGCGGCGGGGTAGTTGGGTACCGGAACCAGATACGGCGGCTCCATACTCACCGGCTTTAACTGCGCCGAGCATCCCATTCCTGCGCGGTCAGGTCAGGCATGTTACACATACCATCTTTCATGCATGCATTTCTAACGGTCCGTACGCGCCCCCCGCTGCCGCCGGTTGAACGCCCACGTCCCCGCAATGAGTCGCAAGCCGTCCGAGACCCGATGCATGTGGACCACGTCGGCGCGGCGGTAGTGGCCGGGAATGCGTCACGTTTAGTCTCTCGTTCACCGTAACGTCCGAAGACTTTGTCCCCACCCCCCCAGGGGGGCGCGGCGTAGGGTCACTAAGGGAGGCACCCCGGGATACCGAACATGTGAGTGAGGGCGGGGGTCCGGTGAGGTGCGGCAGGCTCGCTTGGACATCTCGCGGGGGGGATAGTGACCTGGGGTATGCGCACTGGGGCGAGGGCGATGACCGACCCCATTTGGGAGGTGGGGAGACCCGGTCGACTCGGAGGGCGGTCAGTTTGAACTAGTCTGCCTCTACACCCACACAAGCCGGTCCCCCCATGCTGAGATGCCCGGCCCTAAAGACCCAACGCCCCGTGAGCTCTTTGCCAAGAGGTCCGGCCGCCCAAGTCTACTCCCCGCAAGACAAGAAGGAGATGCGCTCGGGGGACGGCGTCTATGTCCCCGGGATGGGCGTGACCGTACGATGGTTGTACCGGCCTGAGTCCGCCACGCTCCGAGCCCACCTGGCAGGCCCGCCCCATCATGTGCTCCCACTGCGCGGTGCCACGGTTGTCCAGAGGCCAAGGTTCCGGCCCCCGCACATCTACTTGCATCGACCGAACGGCCCGAAACGCGCAGGAGGCGTATCCCTCCCCGACATGCCCGCACAAGCGACCCTCGATGGTCAGGTTTTTAATGCTGCTCCGGGGGGGCTCGCCCGCGGTGGGACATGTCAGCACGGGATTGACTATACTTAGTATCCGTCGGCCCAATGCCCAACTCCCGGGGTGCTACCACCGACCGGTAATTCCTGCATTGTCGCGCGGACCTTAGCGGTCTACCCCCCTCGCCCGCACGCGTTCAATCGTAGCGCGCGTTTCGTTCCCCCTTAGTGGGGCGACGGGGGCCCGTGCGAGCCTCCGCTCGTACCCTTGCCGCTGGACAGACTCGCCTACGGGCGGCGTTCGTGGGGGTCGCAGCCGAGGGGTGCACCTCCAGCTGCGGCCCGAAGTGTAACAGCTCAAGTTCTTTGGGTCCGCCCCGTCCCGCTGCCGTGAGGCGTTGGCGCGCGCCGGTCGCTGCCGTTCCGAACCGCGCCCCGTGCCTCGCGGACCAGCCACCCCGCCACCCGCCACGCCCCCCATCCGCGCTCGGTCCTCGCCGCCGGAGGTTGTAGGCCATGCTCCCGGTTATCGTAGCACAGCGCGTGACTCGGAGGAGACGAGGAGACGCACACCTGACTGCCACTCGCGGGCGGCTCGCGAAACCAGGGGGCGACCAACCGCGGACGATGCACAGGGAGATTTAGGGCGGACGGAGGTACGATACAACATTTGGTCAAGGTCCCCGCCCAGTCCCGCTGCGCATCCCCCGCCTCCCACTCCGCAGTGCCCGTTACCGGGACCCTGGTCGCCAGTCAGGATCCGGAGCGTGTTGGGTGCGACCCTCCCTCACCCTGCAGCTAGTGCGCCGGGTGCTCGGGTGTAGGTACCATCTCGCCGTACAACTCTCGGCCCCAGGTACGTGCCACCTCGGGCGCGCCCTGCACCTTCCGCCCCGCTCCTCCCGCAGGACCTCTAACAGCCTTCCCCGATTCCGGCAAGGATCGGCCGGCTTCTAGCTGCTGGACACGGCCGTCAGACACCACCTAGAGCCACTACGGATGGCCCCGAGTCCCTCCGACCTTACTCTGCCCCCTTCAAGTGATGACAAGCGCGTTACCTGGCCGAGACACTGCGCGGAGAGTGATGATCGCGAGTGTGTAACCCCACCCAGCACGGCCAACAGTCTGCACAATCTAGACAAACCTAGGGCCAGAAATCGCGGCCCCAGCCTCCCGGCGGTTGGGCAGATTCGAGAGGCTGTGAGAAGTGGCCTCCGTGACCTGTGTTGAGTCCACCCATGTTTCCGGGCTTCCCCATAGGGGGGGAGTGACATGACCCGTTAGCCATGACACCGGCTGATTCCACCGCGAGCGATTCAACCAGGAGTTCCCGTAACCGCGTGGAAAGGCAGCCGGGCGGTGCTAGATCCCGTACGACACACAGGAGGGGTCAGTTTAACGGGTGTTTCCCGATGGGTGACAGGTGTTGGGAAGAGCGGGGTAGAGAATCCGTCACATATGCTGGGGTTGTGACGCCCCTCCCCGACTAGTTGGGGAATTGGGACGGAGACGCGACATGATCACTCACCGTCCCTCCGGCCACAGCCTTACTCCCTGTATTAGCATAAGCAGCAGTCTCCTACTTGCATGGTCCGCCCTCCTCCGGCTCTGGCGAATCACGGGCTTGGTTCCCGC
>CA0229-ND-ST302
CACGCCTACCCCTCCCCGATGTGCGGACCCCGTACCGACAGGCCGCCCAGTGGCAACATGTTCTGGATACTTCCACCCCTTCTCCTCTCCTGCATCACCGGCAAAAAGGCGTATGGACCCGGCCGTTGCCTGACGTTGAACTCGCCTCACCACGCCGAATTTAGGACACTTCGGCGGCTCGCCTCACGGCAGAACGGGTCCCACACGCGTCCACCAGCTGGGCTCACTCACTTTGTCCGCGCCCCGGGGCCCCGTGACGACCTCCACCCCTCGGACCCCCAGCCCACGACCAGCCCGCCTCGTTATCCCGAGATCTCCCCCGTACCCGTGAGTGCATCTCGAGTTCCTCGCCATAGCACGCAGCCAACTTGCCTGGCCCACCTTTACCCGGCTCGCTCACTCCCAACCAGTGACCGGGGTCAGGCAGTGCGGACGCCCCGCGCGGGGCACTCGACTTATAATACGCCACGGGGTAACCCGGCAACGCGGGACGTTGCCGGGGGTCCCCTGCACGGGGAATGGAGGGGGCTCATGGGCCTAGGGTTGGTCGTGCCCGTAAGAGTGTGATTAACAGGGCGGTGTGCAATTCCACGCGGCTATGGGGCAGCGCGTGGTTCAAACTCGCGCTTGTCAGGGATGACGGTAATACAGCGTCGGACTGCTCTGGGGTTCGGCTTGCTGGGGCTCGAGAGTCGCAGGGGTGGTTCCACTGCGGGACCCTCTCTTTCTCCGAGCTGGCCAGGCCGGACGGCCTATGGAACAGCTCGAGGGGCGGTAGACCGTCTCGCCTGCACCTTTCTTCTCCCTGGCCTTTGAACGGGAGCTATACTCACTTTCAGCGCTGCACACGCGTTGACCTCCATGTGTCACTCCGGACCTGCACGAGTGTTGCACTTTGGCTACGGCCAGGCGACTGCACCCTGCGGGTCGGATCTGAGCCGCGCCGGCGACACCGCTCCTCCTAACCCACCCCCGTTCCCTTTACATGAGCGTCAGGGCGGAGACTTCCATACCTAGACCCTAGCTGGCTGACTTTCCGGGTTCCCCCTCGACGTGCAGGCGGCGCCTGGGGGATGAAGAGGGGACTCGCAACGGAGCGCGGATGCCGCTAAGAGCTATGGAGCTCATCCGTACAGGGGACCAGGGGGGGGGGGCTGTTGGAGTGAGCGTAAAGCGAGCGTATGTACCCTGTAGCGTTCGGAACGTCGAAAGGAGGATTCCCTGGTTGCGCGCCGAGTACGGGGCGTGGCGGAGCCAGCGGGGCGCACCCCAACGCGGCTCGTCGTGAGTTGGGCTCCACGTCCGGGCTAAGCCGGTGGTGGTACGCAGGGAAAACAGGCGGTTTCCGCGAGGGAGAGGTAGGCACCGCGTCGCGATCTCCCGGCGGCCGTGTGAGCTGACGCCACCCAACAAGCCTCGTGCCTGTGTGGTGGGCGATCTACGCCCATCCCGCCGCTCTACATTGCCAGACATCCTCCACCTCGCGGATCAGCTCCGCCCGCACCAGCTCGTAGCCACCCGTCACATTCTGACGACTTACGGAGTGGCGCGCGTACATCCCTCGAAGGTGCCGGACGCCGCGCCAAGGGTCGCCGTGCAGCCGCTGGTTCCTTTGGCGCGTGCCTGGGTGACGACCGTGCCCCGCCTCGTCTTGCTTCCGCCCACTAGACAAACCCGTGGCTGTACTGGAAGGCCGCTGAAGGCTACGCCGCACGTTTCCTCTGGTGTCAGCGACCGCTCCCGCATGCCTACGAATGCCAACCGTCGCCACTGCCGCGCTGTCGGATAGGATATACGCCCAAATCCGCCTGGGAGTCGCTGGGCATGCTCTGGTGCCCGCACGTAGGAGGTACTACTGCAGGGCCACCGTGCCCCAGTGTTTCGAAGATACACCCCAAAATTACCACCCCGACTTATCCGCCAGTTCGTCCGCACTGTTACAAGCGTAAGCCCTATTAGCGTGCCGGCATTCCACGGCGCGGAACTGATGGTGAGTGTCTTGGGCACGGCGCAAACTGTGCCCCGGTCGGAGGGTGTTCGTCTCCGAGAGCGTACAGGTTCAGGGGGCGTAGTCGCGTACACCGCGCCTCGACATAGCAATCGGCACGGGGCCACTTTGGTCCACTGCCCCCCAGTCGCGACTCGCCCTGCGCACCGGCTTTGTTCCCGCGAACGCGTCCGGATGGCTTCTGGGCACACTGCCCTGCCGAGAACAGCCCGCGCACCGGGTTGCTGGCACGCCCCTGCACGGCCACGGTGGGCGGCTACTGGCGTATCACGCACCCACGGAGGGGGGGTGGTAGGAACGGTCCAGCGAAAAGGCTCGTGGGTGGGGGCTAGGGGGCATCGGCTGCCCGCGACGGGCGGAGGCGACGCGCGCGGGGACGCCAGCGAAGGAGCGTCGCGCGCTGCCGCGTGTTGTGGGTGTTGAGGTGTTCCGCGGCAGGAATGGGGTCTCGTCAGAGACCGGCGGATAGTGTAGTGGGCCGACATACGACGGGGCGTCATCTGGCGCGTCTAAGGATTGTCCGGAGAAGTCCGCAAGGTCCACTGGGGAACCGCGGTGGAACGCCCAGCGGCATAGCGGGTAGCCGCATCGCTGATTGGCGGCTAGTAGCTGCCTGCGAGGCATGTCGCGGAAATCGGCGGGGTAGTTGGATGCCGGAACCGGATACGGCGGCCCCATACTCACCGGCTTTAACTGCGCCGAGCACCCCATTCCTGCGCGGTCTGGCCAGGCATGTTACACATATTATCTTTCATGCATGCATTCTTAACTGTCCGTACGCGCCCCCCGCTGCCGCCGGCTGAACGCCCACGTCTCCGCACTGAGTCGCAGGCCGTCCGAGACGCGAGGCAGGTGGACCACGTTGGCGCGGCGGCCGTGGCCGGGACGGCGTCACGTTTAAGCCCTCGTTCACCTCAACGTCCGAAGGCCTTGACCCCACCCCCCCAGGGGGGCGCGGAGTAGGGTCACTAAGGGAGGCACCCCGGGATACCGAACACGTGAGTGTGGGCGGGGGTCCGGTGAGGTGCGGCTGGCCCGCTTGGACATCTCGCGGGGGGGATGGTGACCTGGGGTATGCGCACTGGGGCGAGGGCGACGACCGACCCCATTTGGTAGGTGGGGTGACCCGGTCGACTCGGAGGGCGGTCAGTTAGAACTAGCCTGCCTCTACACCCACACAAGCCGGTCCCCTCACGCTGAGATGCCCGGCCCTAAAGACCCGACGCCCCGTGAGCTCTTTGCCAAGGGTCCCGTCCGCTCAAGTCTACTCCTCGCAAGGCAAGAGGGAGATGCGCTCGGGGGACTGCATCTGTGTCCCCGGGATGGGCGTGACCGTGCGATGGTTGTACCGGCCCGAGTCCGCCACGCTCCGAGCCCACCCGGCAGGCCCGCCCCATCACGTGCTCCCACTGCGCGGCGCCACGGTTGTCCAGAGGCCAGGGTTCCGGCCCCCGTGCATCTACTTGCATCGTCCGAACGGCCCGAAACGTGCAGGAGGCGTGTCCCTCCCCGACGTGCCCGCACAAGCGACCCTCGATGGTCAGATTTTTAATGCTGCTCCGGGGGGGCTCGCCCGTGGTGGGCCATGTCGGTACGGGATTGACTATGCTTAGTATCCGCCGGCCCAATGCCCAACTCCCGGGGTACTACCACCGGCCGGTAACTCCTGCATCGTCGTGCGGACCTTAGCGGTCTACCCCCCTCGCCCGCACGCGTTCTATCATAGCGCGCGTTTCGTTCCCCCTTAGCGGGGCGAAGGGAGCCCGTGCGAACCTCCGCTCGCGCTCTTGCCGCTGGACAGACTCGCCTACGGGCGGCGTCCGAGGGGGTCGCAGCCAAGGGGTGCACCCCCAGCTGCGGCCCGAGGTGTAACCGCTCAAGTTCTTTGGGTCCGCCCCGTCCCGCTGCCGTGAGGCGTTGGCGCGCGCCGGTCGCTGCCGTTTCGAACCGCGCCCCGTGCCTTGCAGGCCGGCCCCCCCGCCACCCGCCACGCCCCCCATCCGCACGCGGTCCTCGCCGCCTGAGGTTGTAGGCCATGCTCCCGGTTATCGCAGCACAGCGCGTGACTCGGAGGAGACAAGGAGACTCACACCTGACTGCCACTCGCAGGCGGTTCGCGGGACCAGGGGGCGACCGACCGCGGATGATGCGCTGGGGGATTTGGGGCGGGCGGAGGTACGACACCCAACTTGGCCAAGGTCCCCGCCCAGTCCCGCTTTGCACCCCCCGCCTCCCACTCCGCAGTGCCCGTTGCCGGGACCCTGGTCGCCAGTCAGGATCCGGATCGTGTTGGGTGCGACCCTTCCGCACCCAGCAGCTAGTGCGCCGGGTGCTCGGGTGTGGGTACCATCTCGCCGTACAATCCCCGGCCCCAGATACGCGCCACCTCGGGCGCGCCCTACACCTCCCGCTCCGCTCCTCCCGAAGGACCTCGGACAACCTTCCCCTCTGCTTGTAAGTGCCGGCCGGCTTCTAGCTGCTGGACACGGTCGTCAGACACCACCTCGAGCCACTACTGATGGCCCCGAGTCCCTCCGACCTTGCTCTGCCCCCCTCAAGTGATGACAGGCGCGTTACCTGGCCTGGACGCTGCGCGGAGAGTGATGATCGCGGGCGTGCAACCCCGCCCAGCACGACCAACAGTCTGCACTATCTAGACAAACCCGGGGCCAGAAATCGTGGCTCCGGCCTCCCGTCGATTGGGCGGACCCGAGAGGCCGTGAGGAGTGGCCTCAGTGACCTGCGTTGAGTCCACCCATGTTCCCGGGCGTCCCTATAGGGGGGAAGTAGCATGACCCGTTAGCCATGACACCGGCAGATTCCACCGCGGACGATCCAACCAGAAGTTCCCGTATCCGCGTGGAAAGGCAGCCGGGCAGTGCTAGATACCGTACGACACACAAGAGGGGTCAGCTTGACGGGTGTTACTTGCTGGGTGACAGGTGTGGGGGAAAGAGGGGCAGAGCACCCGTTACATATGCTGGGGTTGTGGCGCCCCTCCCAGACTAGTTGGGGGATTGGGACGGAGCCGCGACGCGATCCCTCACCGTCCCTCCGGCCACAGCCTTACCCCCTGCAATAGCATAAGTAGCAGTCTCCTACTTGCATGGCCCGTCCTCCTCCGGCTCTGGTGAACCACAGGCTTAGGTCCTGC
>EA1682-Poultry-ST302
CACGCCTACCCCTCCCCGATGTGCGGACCCCGTACTGACAGGCCGCCCAGTGGCAACATGTTCTGGACACTTCCACCCCTTCTCCTCTCCTGCATCACCGGCAAGAAGGCGTATGGACCCGGCTGTTGCCTGGCGTTGAACTCGCCTCACCACGCCGAATTTAGGACCCCCTGGCGGCTCGCCTCACGGCAGAACGGGTCCCACATGCGTCCACCAGCTGGGCTCACTCACTTTGTCCGCGCCCCGGGGCCCCGTGACGACCTCCATCCCTCGGACCCCCAGCCCACGACCAGCCCGCCTCGTCATCCCGAGACCTCCCCCGTACCCGTGAGTGCATCTCGAGTTCCTCGCCATAGCACGCAGCCAACCTGCCCGGCCCTCCTTTACCCGGCTCGCTCACTCCTAACCAGTGACCGGGGTCAGGCAGCGCGGACGCCCCGCGCGGGGCACTCGACTTATAATACGCCACGGGGTCACCCGGCAGCGCGGGGCGTTGCCGGGGGTCCCCTACACGGGGAATGGAGGGGGCTCATGGGCCTAGGGTTGGTCGTGCCCGTGAGAGTGTGATTAACAGGGTGGTGTGCAATTCTACGCAGCTAGGGAGCAGCGCGTGGTTCAGACTCGCGCTTGTCAGGGATGACGGTAATACAGCGTCGGACTTCTCCGGGGTTCGGCTTGCTGGGGCTCGAGAGCCGTAGGAGCGGTTCCACTGCGGGACCCTCCCGTTCTCCGAGCTGGCCGGACCGGACGGCCCATGGAACAGCTCGAGGGGCGGTAGACCGTCTCGTCTGCACCTCTCTTCCCCCTGGCCTTTGAATGGGAGCTATACTCACTTTCAGCGCTGCACACGCGTCGACCTCCGTGTGTCACTCCGGACCCCCAGGAGTGTTGCACTTTGGCTACGGCCAGGCGACTGCACCCTGCGGGTCGGACCTGAGCCGCGCCGGCGACACCGCCTCTCCTAACCCACCCCCGTTCCCTTTACACGAGCGTCAGGGCGGAGACTTCCACCCCTAGACCCTAGCTGGCTGACCTTCCAGGTTCCCCCTCGACGTGCAGGCGGCGCCTGGGGGATGAAGAGGGGACTCGCAACGGAGCGCGGACGCCGTTAAGAGCTATGGAGCTCATCCGTACAGGGGACCAGGGGGGGGGGGCTGTTGGAGTGAGCGTAAAGCGGGCGTATGTACCCTGTAGCGTTCGGTACGTCGAAGGGAGAATTCCCTGGTTGCGCGCCGAGTACGGGACGTGGCGGAGCCAGCGGGGCGCACCCCAACGCAGCTCGTCGTGAGTTGGGCTCCACGTCCGAGCTAATCCGGTGGTGGTACGCAGGGAAAACGGGTGGTTTACGCGAGGGAGAGGTAGGCACCGCGTCGCGAGCCCCCGGTGGTCGTGTTAGCTGAAGCCACCCAACAAGCCTCGTGTCTGTGTAGGGGGCGATCTACGCCCAATCCGCCGCTCTACATTGCCAGACATCCGCCACCTCGCGGCCCAGCTCCGCCCGCACCAGCTCGTAGTCACCCGGCACATTCTGACGACTGACGGAGTGGCGCGCGTACATCCCTCGAAGGTGCCGGACGCCGCGCCAAGGGTCGCCGTGCTGCCGCTGGTTCCTTTGGCGCGTGCCCGGGTGTCGACCGTACCCCGCCTCGTCTTGCTTCTGCCCACTAGACAAACCTGTGGCTGTACTGGAAGGCCGCTGAAGGCCGCGCCGCACGCTTCCCCTGGTGTCAGCGACCGCTCTCGCATGCCTACGAATGCCAACCGTCGCCACTGCCGCGCCGTCGGATAGGATATACGCCCAAATCCGCCTGGGAGCCGTTGGGCATGCCCTGGTGCCCGCACGTAGGAGGTACTACTGCAAGGCCACCGTGCCCCAGTGTTTCGACGATACACCCCAAAATTACCACCCCGACTTACCCGCCAGTTCGTCCGCACTGTTACAAGCGTAAGCTCTATTAGGGCGCCGGCATTTCGCGGCGCGGAACTGGTCGTGAGTGTCTCGGGCACGACGTAAACTGTGCCCCGGTCGGAGGATGTTCACCTCCGAGATCGAACAGGTTCAGGGGGCGTAGTCGCGTACACCGCGCCTCGACACAGCAGTCGGCACGGGGCCACTTTGGCCCACTGCCCCCCAGTCGCGACGCGCCCTGCGCACCGTCTTTATTCCCGTGAACGCGTCCGGATGGCTTCTGGGCACACTGCCCTGCCGAGAACAGCCCGCGCACCGTGTTGCTAGCACGCCCCTGCACGGCCACGGTGGGCGGCTACTGGCGTATCACGCACCCACGGGGGGGGGGTGGTAGGAACGGTCCAGCGAAAAGGCTCGTGGGTGGGGGCTAGGGGGCATCGGCTACCCGCGAGGGACGGAGGCGACGCGCGCGGGGACACCAACGAAGGAGCGTCGCTCGCTGCCGCGTGTTGTGGGCGTTGAGGTGTTCCGCGGCAGGGATGGGGTCCCGTCAGAGACCGGCGGATAGTGCAGTGGGCCGACATACGACGGGGCGTCAGCTGGCGCGTTTAAGGATTGTCCGGAGAAGTCCGCAAGGTCAACTGGGGAACCGCGGTGGAGCGCCCAGCGGCATAGCGGGTAGCCGCGTAGCCGATTGGCGGCTAGTAGCTGCCTGCGAGACATGTCGCGGAAATCGGCGGGGTAGTTGGGTGCCGGAACCGGATACGGCGGCCCTATACTCACCGGCTTTAACTGCACCGAGCACCCCATTCCTGCGCGGTTTGGTCAGGCAGGTTATACATACTATCTTTCATGCATGCATTCTTAACTGTCCGCACGCGCCCCCCGCTGCCGCCGGCTGAACGCCTATGTCCCCGCACTGAGTCGCAGTCCGTCCGAGACCCGAGGCAGGTGGATCACGTCGGCGCGGCGGCCGTGGCCGGGACGGTGTCACGTTTAAGCCCTCGTTCACCTCAACGTCCGAAGGCCTTGACCCCACCCCCCCAGGGGGGCGCGAAGTAGGGCCACTAAGGGAGGCACCCCGGGATACCGAATACGTGAGTGTGGGCGGGGGTCCGGTGAGGTGCGGCTGGCCCGCTTGGACATCTCGCGGGGGGGATGGTGACCTGGGGTATGCGCACTGAGGTGAGGACGACAACCGACCCCATTTGGGAGGTGGGGTGACCCAGTCGACTCGGAGGGCGGTCAGTTAGATTTAGCCTGCCTCTACACCCACACAAGCCGGTCTCCTCACGCTAAGATGCCCGGCCCTAAAGACCCGACGCCTCGTGAGCTCTTTGCCAAGGGTCCCATCTGCCCAAGTCTACTCCTCGCAAGGCAAGAGGGAGATGCGCTCGGGGGACTGCATCTGTGTCCCCGGGATGGGCGTGACCGTGCGATGGTTGTACCGGCCCGAGTCCGCCAAGTTCCGAGCCCACCCGGTAGGCCCGCCCCATCACGTGCTCCCACTGCACGGCGCCACGGTTGTCCAGAGGCCAGGGTTCCGGCCCCCGCGCATCTACTTGCATCGACCGAACGGCTCGAAAAGCGCAGGAGGCGTGTCCCTCCCCGACGTGCCCGCACAAGCGACCCTCGATGGTCAGGTTTTAAATGCTGCTCTGGGAGGGCTCGCCCGCGGTGGGCCATGTCGGCACGGGATTGACTATACTTAGTACCCGCCGGCCCATTGCCCAACTCTCGGGGTGCTACCACCGGCCGGTAACTCCTGCATCGTCGTGCGGACCTTAGCGGTCTACTCCCCTCGCCCGCACGCGTTCTATCATAGCGCGCGTTTCGTTCCCCCTTTGCGGGGCGAAGAGGGCCCGTGCGAGCCTCCGCTCGCGCCCTTGCCGCTGGACAGACTCGCCTACGGGCGGCGTCCGTGGGGGTCGCAGCCGAGGGGTGCACTCCCAGGTGCGGCCCGAAATGTAACCGCTCAGGTTCTTTGGGTCCGCCCCGTCCCGCTGCCGTGAGGCGTTGGCGCGCGCCGGTCGCTGCCGTTTCGAACCGCGCCCCGCGCCTCGCAGGCCGGCCCCCCCGCCACCCGCCACGCCCCCCATCCGCACGCGGTCATCGCCGCCTGAGGTTGTAGGCCATGCTCCCGGTTATCGCAGCACAGCGCGTGACTCGGAGGAGACGAGGAGACGCACACCTGACTGCCACTCGCGGGCGGCTCGCGGGACCAGGGGGCGACCGACCGCGGATGATGCGCAGGGGGATTTGGGGCGGGCGGAGGTACGACACCCAACTTGGCCAAGGTCCCCGCCCAGTCCCGCTGCGCACCCCCCGCCTCCCACTCCGCAGTGCCCGTTGCTGGGACCCTGGTCGCCAGTCAGGATCCGGAGCGTGTTGGGTGCGACCCTCCCGCACCCTGCAGCTAGTGCGCCGGGAGCTCGGGTGCGGGTACCATCTCGCCGTACAACCCCCGGCCCCAGATACGCATCACCTCGGGTGCGCCCTACACCTCCCGCCCCGCTTCTCCCGCAGGACCTCTGACAACCTTCCCCTCTGCTGGCAAGGGCCGGCCGGCTTCTAGCTGCTGGACACGGCTGTCAGACACCACCTCGAACCACTACTGATGGCCCCGAGTCCCTCCGACCTTGCTCTGCCCCCCTCAAGTGATGACAGGCGCGTTACCTAGCCGAGACGCTGCGCGGAGAGTGATGATCGCGGGCGTGCAACCCCGCCCGGCACGACCAACAGTCTGCACTATCTAGACAAAACCGGGGCCAGAAATCGCGGCCCCGGCCTCCCGTCGATTGGGCGGACCCGAGAGGCCGTGAGGAGTGGCCTCAGTGACCTGCGTTGAGTCCACCCATGTTCCCGGGCTTCTCTCTAGGGGGGGAGTAGCATGACCCGTTAGCCATGACACCAGCTGATTCCACCGCGGACGATCCAACCAGAAGTTCCTGTATCCGCGTGGAAAGGCAGCCAGGCGGTGCTAGATACCGTACGACACACAGGAGGGGTCAGCTTGACGGGTGTTACTCGCTGGGTGACAGGAGTGGGGGAGAGAGGGGCAGAGCTTCTGTTACATATGCTGGGGTTGTGGCGCCCCTCCCAGACTAGTTGGGGGATTAGGACGAAGCCGCGACGCGATCCCTCACCGTCCCTCCGGCCACAGCCTTACCCCCAGCAATAGCATAAGCAGCAGTCTCCTACTTGCATGGCCCGCCCTCCGCTGGCTCTGGTGAACCACAGGCTTAGGTCCCGC
>EA2455-Poultry-ST302
CATGCCTACCCCTCCCCGATATGCGGACCCCGTATCGACAGGCCGCCTCGTGGTAATATGTTCTGGACACTTCCACCACTTCTCCTAATCTGCATCACCGGAAAGAAAGCGTAGGGACCCGGCCGTTGCCTTGCGTTGAACTCGCCTCACCACGCCGAAATTAGGACCCCCCGGCCGCTCGCCTCACGGTAGAACAGGTCCCACATTCGTCAACCAGCTGGGCTCACGCTCTTTGTCCGCGCCCCAGGGCCCCGTGACGACTTCCACCTCTCGGACCCCCAGCCCACGACCAGCCCGCCTCGTCGTCCCGAGACCTCCCCCGTACCCGTAAGTGCATCCCGAGTTCCTCGCCATAGCACGCAGCCAACCTGCCCGGCCCACCTTTACCCGGCTCGCGCACTCCCAACCAGTGACCGGGGTCAGGCAGCGCAGACGCCTTGCGCGGGGCACTCGACGTGTAATGCGCCGCGGGGTCACCCAGCAGCGCGGGGCGTCGCCGGGGGTCCCCTGCATGGGGAATGGGGGGGGCTCATGGGCCTAGTGTTAATCGTCCCCGTGAAACTGTGATTAGCAGGGTGGTGTGCAATTCCACGCGGCTATAGGGCCGCGCGTAATTCAGACTCGCGCCTGCCAGGGAAGACGGCAATATAGCGTCGGCCTTCTCCGGGGTCCCGCGTGCTGGGGCTCTAGAGCCGCAGGGGCGGTCCCACTGCGGGGACCTCCCTTTCACCGAGCTGACCGGGTCGGACGGCACATGGAACGGCTCGAGGGGCAGTAGGTCGTCTCGTCTGCACCTCTCTTCCCCCTGGCCTTTGAACGGAAGCTATACTCACTTTCAGCGCTGCCCACGCGTCGACCTCCGTGTGTCACTCCGGACCCCCAGAAGTGTTGCACTTTGGCTACGGCCAGGCGACTACCCCCTGCGGGTCGGACCTGATCCGCAGCGACGACACCACTCCTCCTAACCCCCCCTCATTCCCCTCACACGAGCGTCAGGGCGTAGACTTCCACACCTTGACCCTAGCTGGCTGGCCTTCCGATTCCCCTCTCGACGTGCAGGCGGCGCCTGGGGGGTGAAGAGAGGACTCGCATCGGATAGCGGACGCCGTTAAGGGCTAGGGAGCTCATCCGTACAGGGGACCAGGGGGGGGGGGCTGTTGAAGTGAGCGTAACGCGGGCGTATGTACCCTGTAGCGTTCGGAACGTCGAAGGGAGGACTCCCTGGTTACGCGCCGAGTACGGGGCGTGGCGGTGCTGGCGGAGCGCACCCCAACGTGGCTCATTGTGGGTTGGGCCCCACGTCCGGGCTCAGCCGGTAGTGGTATGCGGGGAAAACGGGTGATTTCCGCTAGGGAGAGGTAGGCACCGCGTCGCGAGCTACCGGCGGTCGTGTGAGCTGACGCCACTCAACAAGCCTCGTGTCTGTGTGGTGGGCGAACTACGCCTAACCCGCCGCTCTATATTGCCAGACATCCGCTACCGCGCGGCCCAGCTCCGCCCGCACCAGCTTGTAGCCACCCGTCACCTCCTGACGACTTATGGAGTGGCGCGCGTACGTCCCTCGAGGGTGCCAGATGTCGCGCCAAGGTTCGCCGTGCAGCAGCTGGTTCCTTTGGCGCGTGCCCGGATATCGACCGTGCCCTGCCTCGTCTTGCTTCCGCCCACTAGACAAACCCGCGACTGTACTGGAAGACCGCTGAAGGCCACGTCGCACGCCTCCCCTGGTGTCATCGACCGCTCCCGCATGCCTACGAATGCCTGCCGTCGCCACTGCCGCGCCGTCGGATAGGGTATACGCCCAAACCCGCCTGAAAGCCGCTGGGCATGCCCGGGTGCTCGCACGTAGGAAGTACTGCTGCAGGGCCACCATGCCCCAGTGTTTCGGCGATACACCCCAAAATTCACGCCCTGACTTACTCGCCAGTTTGCCCACACTGTTACAAGCGTGTACCCTGTCAGCATGCCGGCATTTCGCGACGCGGAACCGGCCGTGGGTGTCTCGGGCACGGCGCAAACTGTGCCCCGAGCGGAGGGTGTTCGCCTCAGAGATCGTACAGATTCAGGGGGCGCAGTTGCGTACACCGCGCCTCGACACAGCAGGCGGTACGGGACCACTTTGACCCTCTGCCCCTCAGCAGCGACTCGCCCTGCTTACCGGCTCTGTTCCCGCGAACGCGTCCGGATGGCTTCTGGGCACACTACCCTGCCGAGACTAGCCCGCGCACCGTATTGATGGCATGCTCTTGCACGGCCACGGTGGGCGGCTACTGGCGTGTCACGTACCCACGGGGGGGGGGTGGTAGGAACGGTCCAGCGAAAAGACTCGTGGGTGGGGGCTAGGGGGCAACGGTTGCCCGCGAGGGACGGAGGCGACGCGCGCGGGGACGTCAGCTAAGGAGCGTCGCGTGCTGCCGCGTGTTGTGGGCACTGAGGTGTTCCGCGGCAGGGATGGGGGTTCGCCAGAGACCGGCGGGTAGTGCAGTGGGCCGACATACGACGGGGCGTCATCTGGCGCGTTTAAGGATTGTTTGAAGGAGTCCGCAAGGTCAACTGGGGGACCGCGGTGGAACGCCTAGCGGCATAGCGGGTAGCCGCGTCGCCGACTGGCGGCTAGTAGCTGCCTGCGAGGCGTGCCGCGGAAATCGGCGGGGTAGTTGGGTGCCGGAATTGGATACGGCGGCCTCATACTCACCGGCTTTAACTACGCCGAGCACCCCATTCTTGCGCGATCAGGTCAGGCATGCTGCGCATACTATGTTTCATGCATGCATTCTTAATTATCCGTATGCGCCCTCCGCTGCCGCCGGCTGAACGCCCACGTCCCCGCACTGAGTCGCAAGCCGTCCGAGGCCCGAGGCAGGTGGACTACGTCGACGCGGCGACCGTGGCCGGTACGGCGTTACGTTTAAGCCCTCGTTCACCTCAACGTCCGAAGGCCTTGACCCCACCCCCTCAGGGGAGCGCGGAGTAGGGTCACTAAGGGAGGCACCCCGGGATACCGAACACGTGAGTGTGGGCGGAGGTCCGGTGAGGTGCGGCTGGCCCGCTTGGACATCTCGCGGGGGGGATGGTGACATGGGGCATGCGTACTGGGGCGAGGGTGACGACCGACCCCATTTGGGAGGTGAGGTGCCCCGGTCGACTCGGAGGGCGGTCAGTTAGAACCAGCCTGCCTCTGTATCCACACAAGCCGGACCCCTCACGCTGAGATGCCCGGCCCTAAAAAGCCGACGCCCCGCGAGTTCTTTGCCAAGGGTCCCGTACACCCAGGTCTACCCCCCGCAAGGCAAGAGGGAGATGCGCTCGGGGGACTGCATCTGTGTCACCAGGATGGGCGTGACCGTGCGATTGTTGTACGGGCCCGAGTCCGGCACGCCCCGAGCCTACCCGCCAGGTCCGCCACTTCACGTGCTCCCACTTCGCGGCGCCATGGTTGTCCAGAGACCAGGGTTCCGGGCCCTGCGCATCTACTTGCATCGACCGAGCGACCCGAACCGCGCAGGAGGCGTGTCCCTCCCCGATGTTCCCACACAAACGACCCTCGGTGGTCAGGTTTTAAATGCTGCTCTGGGAGGGCTCGCCCGCGGTGGGCCATGTCGGCACGGGATTGACTATGCTTAGTATCCGCCGGCCCAATGCCCAACTCCCGGGTTGCTACCACCGGCCGGTAACTCCTGCATCGTTGTGTGGATCTTAGCAGTCCACCCCCCTCACCCGCTCCCGTTCTATCATAACGCGCGTTTCGGTACCCCTTAGCGGGGCGGAGGGGGCCCGTGCGAGCCTCCGCTCGCGCCCTTGCCGCTGGACAGACTTGACTACGGGCGTCGTCCGTGGAGGTCGCAGCCGAGGGGTGCACCCCCAGCTGCGGCCCGAAGGGTAACCGCTAAAGTTCTTTGTGTCCGCCCCGTCCTGCTGCCGTGAGGCGTCGGTACGCGCCGGCCGCCGCCGTTTCGAACCGCGCTCCATGCCTCGCAGGCCGGCCCCCCCGCCACCCGCTACGCCTTCCATCCGCACGCGGTCCTTGGCGCCTGAGGTTGTGGGCCATGCTCTCGGTTACCACAGCACCGCGCGCGACTCGGAAGAGACGGGGAGACGCACACCTTACTGCCGCCCGCGGGCGGCTCGCGGGACCAGGGTGCGACCGACCGCGGATGATGCGCAGGGGGATCTGAGGCGAGCGGAGGTGCGACACCCAGCTTGGCCATGGTCCCCGCCCAGCCCCGCTGCGCACCCCCTGCCTCCCACTCCGCAATGCCCGCTGCCGGGATCCTGGTCGCCAGTCAGGATCCGGCGCGTGTCGGGTGCGACTCTCCCGCACCCTGCAGCTAGTGCGCCGGGTGCTCGGGTGTGGGTGCCATCTCGTCGTTCAACCCCCGGCCCCAGAGACGCATCACCTCGGGTGCGCCCTGCACCTCCCGCCCCGCTCCTCCCACAGGACCTCTGACAACCTTCCCCTCTGCCGGCAAGGGCCGGCCGGCTGCTAGCTGCCGGACACAACCGCCGGACACCACCTCGAGCCACTACTGACGACCCCGAACCCCTCCGACCTTGCTCTGCCCCCCTCAAGTGATGACAGGCGCGTTACCTAGCCGAGGCGCGGCACGGAGAGTGATGATCGCGGGCGTGCGACCCCGCCCAGCACGACCAACAGTCTGCACTATCTAGACAAAACCGGGGCCAGAAATCGCGGTCCCGGCCTCCCGTCGAGGGAGCGGACCTGAAAGGCCGTGAGGAGAGGCCTCAGTGACCTGTGTTGAGTCCACCTCTATTCCCGGGCTTCCCTATAGGGAGGGAGTAGCATGACCCGTTAGCCCGGACACCGATTGATTTCACCGCAGACGATCCAACCAGAGGCTCCCGTATCCGCGTGGAAGGACAGCCGGACGGTGTCATAGACTGTACGGCACACAGGAGGGGTCAGCTTGACGGGTGTTACTCGCTGGGTGACAGATGTGGGGGAGAGAGGGGCAAAGCATCCGTTACATGTGATAGGGTAGTGGCGCCCCTCCCAGACCAGTTGGGGGATTGGGACGGAGCCACGGCGCGATTCCTCCCCGTCCCTCCGGCCACCGCCTTACCCCCTGTGATAGCATAAGCAGTAGTCTCCTACGTGTACGGCCTGCCCTCCTCCGGCTATGATGATCCACAGGCTCGGGTCCCGC
>EA8393-Porcine-ST302
TACGCCCACCCCTCCCCGATGGGCGGACCTTAGACCGTCAGGCCGCCCAGTTGCAGTATTTGCTGGCCAATTACCCTATGTCCCCTCACCTTCATCACCGACAAGAAGGTGTGGGGACCCGGTCGTTGCCTGGTTTTGAACTCGCCTCACCGCGTCGACATTAGGGCCCCCCGGCGGCTCGCCTCGCAGCGGAGCGAGTCCCACATGCGCCCACCATCTGGGCTCACGCTCTTTGTCCGCACTTCGGGGCCCCTTGCCGACCTCCGCCCCTCGGACCCCCAGCCCTCGATCAGCCTGCCTCGTCATCCCGAGACCTCCCCTGTACCCGTGAGTGCATCTCGATTCCCTCGCCAAAGTACGCGGCCAACCGGCACGGCCCACCGTTACCCGATTCGCTCGCCCCCAACCGGTAACCGGGGTCAGGCAGCGTGAACGCCCTGCGCGGGGCACTCGATGTGTAATGCGCCGCGGGGCCAACCGGAAGCGCGGAGCGTCGCCGGGGGTCCCCCGCACGGGGGATGGGAGGGGCCCATGGGCCTAGTAGCGGTCGTGTCCGTGAGCGTGGGTTTAGTAGGGTGGTGAGCAAATACACGTGGCCATGGGGCAATGCGTGGTTCAGACACGCGCCTGTAGGGTATGACGGCAGTACGGCAACAGACTTCTCCGGGGTCTGGCGTGCTGAGGCTCGAAAGCCGCAGGGGCGGTCCCGCTACGGAGCCCTGCCTTACTCCGGACTGGCCGGGCCGGATGGCCCATGGAACGGCCTGAGGGGTGGTAGACCGTCTCGTCTGCGACTCTCTTCCCCCAGGCCTTTGAACGGGAGCTATGTTCACTTTCCGTACTGCACACGCGTCGACCGCCGTGGGCCACTCCGGCCCCCCAGAGTCATTGTATTTTGGCTACGACCATGGGACTGCCCTCTCCGAGTCGGACCTGAGCCGCGCTGGCGACACCGCTCCTTCTAACCTATCCCCGTGCCCCTCACACGAGCGTCAGAGTGGAGACTTCTACACCTTGACCCCTGCGGCCTGGCCCTCCGGGTTCCCCCTCGACGTACGGGCGGCGTTTAGGGGGTACAGAGGGGACTCGCATCGGGGCGCTACCGCCGTTAAGGGCTAGGGAGTGCATGCGTACAGGAGACTCGGTGGTGGGGTCTGTTGGGGCGAGCGTAACGCGGGCGTGTGTACCCCGTAGCGTTAGGAACGGCGAAGGGAGGATTTCCTGGTTGCTCGACGCGTGCGGGGCGGAGCGGTATCGGCGGGGCGCCCCTCGACGTGGATTGTCGTGGGTTGGGCTCCACGTCCGGGCTCAGCCGGTGGTGGTACGCGGGGAAACCGAGTGGTTTCCGCTAGGAAGAGGCAGGCATCGCGCCGCGAGCTCCTGGCGGTTGTGCGAGCTGACGCCATCCAACGTGTCTTGTGTCAGCGCGATGGGCGATTCACGCCCAACCTGCCGCTCTACATTTCCAGATATCCGCCATCTCGCGGCCCAATTCCGCCCGCTCCAGCTCGTAGCCACTCTTTACCTCCTGACGACTTGCGGGGTGGCGCGCGCACGTCCCTCGAAGGTGCCGGACGCCGCGTCGGGTGTCGCCGGGCAGCCGATGGGCCCTTTGGCGCCGGCCCCGGTGTCGACCGTGTCCCGCCTCGCCTTGCCTCCGCCCACTAGGCAGCCCCGCGGCTGTACTGAAAGGTCGCTGAAGGCCACACCGCACGCCCCTCCCAGGGTCAGCGGCCGTCCCCACATGCCCGCGAATACCAGCCGTCGATCTTGCGGCGCCGTCGGATAAAAGACACGACAAAATCCGTCTGGGAGCCGCTGGGCATGCCTTGGCGCCCGCGCGTGGGAGGTGCTACTGCAGATCCCCCGTGCCCCAGAGTTTCGGCGATACACCCCAAAACTCCCGCCCCGACTGCCCCGCCAGGTCACCAGCGCTGTTGCAAGCATAAGCCCTGTCAGCGTGCCGGCATTTCGCGGCGCGGAACCGGCCGCCAGTGGCTCGGGCACGGCGCAAACTGCGCCCTTGGTGGCGGGTGATAGCCTCAGTGATCGTACAGGATCGGAGGGTGCAGTCGCGTAAACCGCGCGTCGACACAGCAGGCGGCACGGAACCACTTTGGCCCTCGGCTCCCCAGCCGCGACTCGCCCTGCTCACCGGCTCTGTTCCCGCGAACGTCTCTGGATTGCCTCGGGGCACACGGCCCTGCCGAGGCCAGCCCGCACACCGTATTAATGGCACGCCCCTATACAGCCCCGGTGGGCGGCTGCTGGCATGTCGTGTACCCACGAGGGGGGGGTGGCAGAAAGGGTCCAGCGCAAAGGCCCGTGGGTGGAGCTTAGGGGGCAACGGCGGCCCGCGGGGGACGACGGTGACGCGCACGGGGCCGCCAGCGAAGGAGCGTCGCGCGCTGCCGTGTATTGTGGGCGTAGAGGAGTTCCACGGCAGGGACGGGGGCTCATCAGGGACCGGCGGGTGGTGCCGTGGGCCGACATCCGACGGAGCTTCATCTGGCGTGTTTAATGCTTATTCGGAGGAGTCCGAATAGCCAACGGGGGGCCCGCGGGGGGACGCCCAACGGCATAGCGGGCAGCCGAGTCGCCGCCCCGCGTCAAGAGGCTGTATACGAGGCGTGCCGCGGAGGTCGGCGGGGAGATTGGGCGCCGGAGTCGGATACGGCGGCCCCTTACCCTCCGGCTTTAACTACGTAGAACACCCCATCCCAGCGCGATCAGATCAGGAATACTACACATACTATCTTTCATGCATGCATTCTTAACTGCCCGTACGCGCCCCCCGCTGCTGCTGTCTGAACTTCCACGGCCCTGTACTGAGTCCCAAGCCGTTCAAGACCCGAGGCTGGCGGACCCCGGCGGCGAGGCGGCCGTGGCCGGGACGGCGTCACGCTTGGGCCCTCGTGCTCCTCCTCGTCCGGAGGCCTCGACCCCACCCCCCCAAGGGGATGTGGATGGAGGTCATTAAGGGGAGCATCCCGGGACGCCGCACACGTGAGTGTGGGCGAGGGTCTGGTGAGGTACAGCTGGTCCGCTTGGACCTCCCGCGGCGGGGATGGTGACCCGAGATCGGCGCACCGGGGCGAAGGCGACGACCGACAACATTTGGGAGGGGGGCTGACCCGATCGACTCGTAGGGCGGTCAGTCAGAACTAGCCCGCCTCCGCACCCACACAAGCCGGACCCTTCACGCTGAGTCGCCCGGCCCTAGAGACCCGGCGCCCCTCGAGCACCTTGCCTTGGGTCCCGTCCGCCAGGATCTACCCTCCGCACAGCAAGCGGGAGTTGCACCCGGGGGCCTGCACCTGTGTAACCGGGTTGGGCGTGACCATGCGACGACCGTTCCGGCCCGAGCACGCCACCCCTCGGGCTCACCCAGCAGGCCCGCCCCACCACGTGCCCCCTCTGCGCGGCGTCGCGGGGGTCCAGGGGCTCGGATCCCGGCCCCCGCGCGTCTGCCCGCCTCGACCGAGTGGACCGGAACGCGCAAGAGACGTGTCCACCCCCGACGTGCCAGCACGAGCGACCCTCGATGGTCAGGTTTTTAATGCGGCGTCGGGGAGGCGTGCCCGCGGTAGGCCATGTCGGCACGGGTCTGACCATGGTTAGTATCTGCCGGCCCAATGCCCAACTCCCGGGGTGCTACTACCGGCTGGCGACTTCTGTATCGTCGTGCGGACCTTAGCGGCCCGCCTCCCTCGCACGCACGCGTCTTGTCATAGCGCGCTTTTCGTACCCCTTTAGCAGGGCGGAGGGGGCCCGTGCGAGCCACCGCTCACGCCCCCGTCGCTGGACCGACTCGCCCACGGGCGGCAGCCGTGGGGGTCGCAGCCGTGGGGTGCGCCCCTAGCTACGGCCCGAAGTGTAACCACTAAAGCTCTTTGTGTCCGCCCAGTTCCGCTGCCGTGGGGCGTTGGCGTGCTCCGGCCGCCGCCGCTTCCAACCGCATCTCGTACCTCGCAGGCCGACCCCTCTACCACCCGCCACGTCCTCCTCCCGCACGCGATCCTCGCCGCCTGAGGTTGTGGGCCATGCCACCGGTTACCGCGGCACAACGCGTGGCCAGGAGGAGACGAGACGACGCACACCTGACTGCTACCTGCGGGCGGCTCGCGGGACCAGGGGGCGACCGCCCACAGATGGTGCGCAGTGGGACTTGGGGCGAGCAGAGGTGTGACACCCAACGTGGCCAAGATCCTCCCCCAGCCCCGCTGCGCACCCCCCGCTTCTCACTTCGCAGTGTCCGCTGCCGGGACCCTGGTCGCCGGACAGGATCCGGAGCGTGGTAGGGGCGACCCGCCCGCACCCTGCAGCTCGCGCGACGGATACTCGGGGGTAGATACCATCTCGCCGGACATCCCCCGGCCCCCGATATGCGCCACCTCGGGCGCGCCCTGTGTCTCCCGCCCCGCGCCCCCCGCAGGGCCACTGAGAATCTTTCCCTCTGCCGGCATGGGCCGGCCAGCTTCTAGCTGCTGGACGCGGCCGTCGGACACCACCCCTAGCCACTACTGGCCGCCCCGAGCCCCTTCGGCCTTGCTTCGCTCCCCTCGAGTGATGACGGGCGCTTTCCCTGACTGAGGTGCTGCGTAGAAAGTACTGATCGCGGGCGTGCAACCCCGCCCAGCGCGACCAGTAGTCAGCACTATCTGGTCCAAACCGGGGCCAGAAGTCACGGCCCCGGCTTCCCGGCGATTGGGCGGACCCGGGAGACCGGGAGGCGTGGCCTCAGTGACCTGTGTTGAGGCCACCCATGTTCCCGGGCTGCCCTATAGGGGGGGGGTAGCATGACCCGTTATCCCTGTTACCGGCTGATTCCATCGTGGACAATCCAACCAGAGATCCCCGTTTCCGCGCGGAAGGGCAGCCGGGCGTCGCCAGAGACCATACGGAACACCGGCAGGGTCAGCTTGATGGATGCTACTCACTGGGTGACAGGTATGGGGGAGAGAGAGGCAGAGCATCCGTTACATATGATGGGGGTGTGGTGCCCCTCCCAGTCCCGTTGGGGGACCGGACTAGAGCCGCGACGCGATCCCTCCCCATCCCTCCGGCCGCATTCCTACCCCCTGTAATAGCCTAAACAGCTGTCTCCTACTTACCCGGCCCGCCCCCCTCCGGCCCTGGTGAACCACAAGCTTGGGTCCCGG
>F2_18C-Porcine-ST302
CACGCCCACTCCTCCCCGGTGGGCGGACCCCGGACCGACAGGCTGTCCAGTTGCAATATGCTCTGGACAATTCCCCCATTTCCACTCACCTTCATCACAGGCAAGCAGATGTGGGGCCCCGGTCGTCGCCTGGCGTTGAACTCGCCTCACCACGTCGACATTGGGACCCCCCGGCGGCGTGCTTTGAAGCGGGACGAACCCCACATGCGCCCACTAGCTGGGCTCCCGCTCTCTGTCCCTGCTCCGGGGTCCCGTGATGAACTCCGCCCCGCGGACCCCCATCCCACGACTAGTCTGCCTCGTCATCCCGAGACCTCCCCCGTACCCTTGAGTGCGTCTTGAGTCCACCGCCATAACACGCAGCAAACCTGCCCGGCCCACCTTTACCCAACTCGTTCGCTTCCAGCTGGTGACCGGGGTCAGACAACGCGGACGCACTGCGCGGGGCACTCGACGTGCAATGCGTCGCGGAGCCACCCGGACGCACGGGGTGACACCGAGAGTCCCCCGCACGGGGAATGGGGAGGGCTCATGGGCCTAGTGTCGGTAGTGCCTATGAGAGCTGGATTAGTAAAATGGTGAGCAATTCCACACGGACATGGGGCAGCGCTTGGTTCAGAAACGAGCCTGTCGGGGCTAACGACAATCCAACGTCAGACTTCTCCGGAGTCCGGCGTGCTGAGGCTCGAGTTCAGCAAGGGCGGTCTCGCCGCAGGGCCCTGCCTTTCTTAGAACTGGCCGGGCCGGATGACCCATAGAATGGCCTGAGGGGCGGTAGACTGTCTCGTCCACGCCTCTCTTCCCCCTAGCCTTTGAACGGGAGCTATGCTCACTGTCCGCATTGCATACGCGTCGACCGCTGTGTGCCACTCCTGCACCCCAGAGGCGTTTCATTGTGGCTACGGCCAGGGGACTGCCCCCGCCGGGTCGGACCTGAGCTACGCCGGCAACACCGCTCCTCCTAACTCACTCCCGTTCCCCTCACACAAGCGTCAGGGCGGAGACTTCTACACCCTGACCCTAGCTGCATGGCCCTACGGGTTCCCCCTCACGGCGCGGGCGGCGCCGGGGGGGTGAAGTGGGGACTCGCATTTGGGCGCTGCCGCCGTTAAGGGCTAGGGAGCTCATCCGTACAAAGGGCCAGAGGAGGGGGGCTGTTGGATTGCGCGCTACGCGGACGTGTGTACCCTGTAGCGTGCGGAACGTCGAGGGGAGGATTCCCAGGTTGCTCGCCGATTATAGGGCAGGGCGGTGTCGGCGGGACGCATCTCGACGTGGATCGTCGCGGGTTGAGCTCCATGTCCGGGCTCAGCCAGTGGTGGCACGCGGGGGAAACGGGTGGTCTCCGCTAGGGAGAGGCAGGCACCGCGCCGCGAGCTCCCGGCGGTTGAGCGTGCTAACGCCACCCAACGAGCCTCGTATCAACGCGATGGGCGATCCACGTCCAACCCGCCGCTCTACATTTCTAGACATCCGCCACCTCGCGGCCCGGCTTCTCCCACACCAGCTCGCAGCCACCCGTTTACTCCTGACGACTTGCGGAGTGGCGCGCGCACGTACCCTCAAGGCGACGGACTCCGCGCCAAGGGTCGTCGGGCAGCCGCTGGGCCCTTTGTCGCCTGCCCCGGTGTCGACCGTGTCCCGCCTCGCCGTGCCTCCGCCCACTAGGCAAACCCGCGGCCGGACTGGAAGGCCGCTGTAGGTCACACCACACGCCCCCCCCGGTGTGAGCGGCCGTCCCCGCATGCCCGTGAGTGCCAGCCGCCGCTACTGCCGTTCCGTTGGATAAAATCTACGCCAAAATTGGCCTGGGAGCCCCTGGGCATGCCCTGGCGCCCGCACGTGGGAGGTATTATTCCAGAGCTACCGTGCCCCAGAATCTCGGCGCCACACCTCAAAACTCCCGCCCCGATTGACCCGCCAGGTCGCCAGCATTGTTACAAGCATAAGCCCTGGCAGCGTGCCGGCATTTCGCTGTGCGGAACCGGCCGCGAAAGTCACGAGTACGGCTCACACTGCATCCCGGGCAGAGGGTGATCGCTTCAGAGATTGTACATGTTCGGGGGGCACAGCCACGTAAAACGCGCGTCGCCACAGCTGGCGGCAAGGGACTACTTTGGCCCTCTGCTCCCCAGCCGCGACTCGCGCTGCTCACCGGCCCTGTTCCCGCGAACGCGTACGGGTGGCCCCTGTGCACACGGCCCGGCCGAGGCCAGCCCGCGCACCGTATTGATGGCACGCCCCTACACGGCTCCGGGGGGCGGCTGCTGGCGTGTCACGTACCTACGGGGGGGGGTTGGCAGAAGGGGTCCAGCGAAAAAGCCCGTGGGTGGAACCTAGGAGGCAACAGCTGCCCGTGTGGGACAGAGGCGACGCGTACGGGGACGCCAGCGTAGGAGCATCACGCGCTGCCGCGCGTTGTGGACGTTAAGGAGTTCCGCGGCAGGGACGGGGGCTCATAAGGGACCAGCGGGTGGTACAGTGGGCCGACATCCGACGGAGCGTCATCTGGCGTGTTTAAGAATCGTTCAGAAGAGTCCGCTAGACCAACGGAGGGACCGCGGTGGGACGCCCAGCGGCATAGCGGGTAGCCACGTCGCCGACCGGCGGTAAGTGGTTGCCTACGAAGCGAGCCACGGAGATCAGTGGAGAGGTTGGGCGCCGGAATCGTATACTGCGGCCCCATACTCACCGGCTTTAACTACGCCGAGCGCCTCATCTCTGCGAGATCAGGTCAGGATTACTACACGTACTATCCTTAATGCATGCAAGCTTAACTGTCCGTACGCGCCCCCTGCTGATGCCGTCTGAACGCCCACGGCCTCGCACGGGTTCGCAAGCAGTCCGAGACCCGAGGCAGGCGGACCCCGTCCGCGAAGCGGCCGTGGCCGGGACGGCGTCACGCATAGGTCCGCGCTCAATTCAACGTCCGAAGGCCACGAACCCGCCCCCCCCAGGAGATGCGGAGGGGGGTGGCTACGAGGAGCACCCCGGAACGCCGCACACGTGCGCGTCGGCGGGGGTCTGGTAAGGTGCGGCTGGCCCGCTTGGAACTCTCGCAGGGGGGGTGATGACCCGGGGTCGGCGCGCTGGGGCGAGGGCGACGACCGACAATATTCAGGAGATGGGCTAACACGGTCACCTCGTAGGGCAGGCAGTTAGGACTTGCTCGCTTCCGCACTCACACAAGTCGGACCCCTCGCGCGGGGACGCCCGGCCCTGGAGACCCGGCGCCCCGCGAACACCTTGCCAATGGTCCCGTCCGCCCGGGTCTACCCTCCGCACAGCAAGAGGGAGATGCGTCCGGGGGACTACACCTGTGTCACCGGGATGGGTGCGACCATGCGTTGGTTATACCAGCCCGAGTCCGCCACGCCCCAGGCCCACCCGGCAGGCCAGCCCCACCTCGTGCCCTCACTGCGCGGCTCCACGGTTGGCCAGAAGCCAGGGTCCCGGCCCCCTCGCGTCTATCCGTCTCAATCGAGCGGCCCGAAACGCACAGGAGGCGTGTCCCTCCCTGGCGTGCCAGCACGAGCAACCGTTAATGGTCAGGTTTGTGGTGTTGCGTCGGGGGGGCGTGCCCGCGGTGGACTGTGTCGGCACGGGATTGACTATGCTTGGTATCTGCCGGCCCAATGTTCAATTCCCGGGGTGCTACTACCGGATGGTGACCCCAGTATCGTCGTACAGCCCTTAGCGGCCCACCCCCCTCGCCCGCACGCGGCCTGTTATAGCCCGCGTTTCGTTCTCTTTTAACGGGGCGGAGGGGGCCCGTGCGAGCCTCCGGTCACGCCCCCGCCGCTGGACAGACTCGCCCACAGGCGGCATCCGTAGGGGTCGCAACCGTGGAGTGCGCCCCTAGCTGCGGACTGAAGTGTAACCGCTAAAGCTCTTTGTGTCCGCCACGTCCCGCTTCTGTGATGCGTTGGCGCGCGCCGGCCGCCGCCGCTTCGAACCGCGCCCCGTGCCTCGAAGGCCGACCCCCCTGATACCCGCCACGCCCTTCTTCCGCACGCGGTCCTCGCCGCCTGGGGTTGTGGGCTATTCTCCCGGTTACCGCAGCATAGCGCTTGATCAGGAGGAGACGAGGAGACGCACGCCTGATTGCCACCCGCGCCCTGCCCGCGGGACCAGGGGAAGAACGACCAGGGATAGTGCGCAATGGGACTTGGTGCAAGCAGCGGTGCGACCCCCAACTGGTCCAAAGTCCTTCCCCAGCCCTGCTGCGCACTCCCCGCCACTCATTCCGCTGTATCCGCTGCCGGGACCCTTGCTGTTGGACTGAATCCGAAGCGTGTTGAGTTCTATCCGCTCGCACCCTGTAGCTAGTGCGACGAATGCTTGGGGGTGGGTACAATTTCGCCAGACAACCCCCGGCCTTCGATATGCGCCACCTCGGGCGCGCTCTGCGCCCCCCGCCCCGCGCCCCCCGCAGTGCCACTGAGAACCTTCCCCTCTGCCGGCATGGGCCGGTCGGCTTCTAGCTGCTGGGCACGGCCGTCGAAAACCACCCCTAGCTGCTACTGGCGGCCTCGTGCCCCTCCGGCCTTGCTCCGCCTTCCTCAAATGATGACGGGCGCTTTACATGAGTGAGGTGCTGCGCAGAGAGTGATAACGGCGGTCGTGCAACCCCGCCAAACGCGACCAGCAGTCTGCACTATCTAGTCAAAACCGAGGCCAGAAATCGCGGCCCCGGCCTCCTGGTAATTAGTCGGACCCTGGAAGCCGTGAGGAGTGGCCTCAGTGGACCGTGTTGAGGCCACCCATGTACTCGAGCTTCCTTATAGGGGGGGGATAGCGTGAGCCGTCATCCCTGACACCGGCTAATTCCATCGCGGACAATCCAACTATAGGTCCCCGTATCCACGCGGAAGCGCAGCCGGGTGGCGCCAGAGACCGCACGGAACACAGGAGGGATCAGCTTGACGGGTGCTACTCGCTGGGTGACATGTGTGGGGGAGTGAGAGTCGGAGCATCCGTTATATATGATGGGGGTGTGGCGCCCCGCCTAGTCCCGTTTGGGGACCGGGATGGAGCCGCTACGCGATCCCTCCCCATCCTTCCGGCCAAATTCTTACCCTCTGTAATAGCATAAGCAGCAGTTTCCTACTTGCACGGCCCGCTCCCCTCCCGCTCTGGTGAACCACAGGCTTGGGACTCGC
>FA0416-Human-ST302
CGCGACCGACCCTCACTTATGGGTGAACTCCGGACCGATAGGCCTCCCAGGGACAATACGTTCTGTACAAAGCTCTCATTACCCCCCACTAGCATAGCCGGCGTGATGGCAGGGAAATCCGGCCGTTGATTGGCGACACCCCCGCTTAACTACTCCGGAATTAAGATCCCCCGGCGGTTCATCCCACGGCGGAACGAGTTCCCCATGCGCCCGTCAGTGAGGCTTATGTTTTTTGTCTGCGTCCCGTAGCTCTGTGACGCCCTACGCCCCTTAGATTTTTAGTTCATACCCGTCTCGTCTCAGCATCCTGGAACCGCACTCGCGCCAGCGAGCGCACCTCAAGCCTCTTGTCATGGCATGTAATCAACCTGCCCAGTATACATGGTCCCGACTCACTAGCTCTCGACCGGTGATCGAGAACCAGTCGCTCGGTCACCCTCAACGGAGCCCTGGACGTGTCAAGCACCGCAGGGCCCCCCGGAAGCGCAAGGCGTCGCTAGGGCCCACCCGCACGGGAACAAGGGGGAATTTATGAACCTAGTGTCGGCCATGCTCGTGCGAGTGGGATTCGCGGGGTGATGTGTCCTCCCACGCGGCCCTGTGGCAGCACGTGGTCAAGCCACGCTCCTGTCGAAGATGTTGGCAATACAGCGTCAGATGTTGACGGGGTCCGACGCGCTGGAGATAGAGAGCCACAGAGGCAGTCCTGTTGTGAGGCCATGCTTTTCTCCTAGTTAGATGAGCAGGTCGGCCCCTGGAGCGGTCTGGAGCGCGGTAGACCAGCTCGTTTGTACCTCGCTTTCTTCTGTTTTTCAGACGGGGGAGAGGCTAGATTGCCGCGCTGCACACACAGCGACTGCCGTGTACCTCCACGTCCACCCCGAGGCGTCGCTCTTTAGTCAAGGTTAGACAAGGGCCCCTTCTGGGTCGGGCCCAAGTCGTGCCAGAGCCACCGCTCTTCCTTGTCCACCTCTGTTCACCTCTTACGAACTTCAGGGCAGAAACCTTCACACGTTAATTCTACCTACCTGGCCCGCTGGGGTTTCCTTCGACATGTGGGCGACGCCTGGGGGGAGAAGAGGTGATTCACGTCGTGGCTCGGCCACCGTTAAGGTTGAGGGTACTACCCCGTCCCGGGGAACAAGGAGGGGGGGCTGTTTGAGTGAGAGTAACATAGGCGCGTAGCCTCTACGGAATTCGGAATATTACAGTTTGGGTTCCTTAACTGCGTGCAGAGTACGTGGAGGGATGGTGCCGACGCGGCACACCTCGACGTGGAACGGCATAGGTGGGGCTCCCCACCCAGACTCGGCCGGTGGGTGTACATGGAGACTACGGATGGTTCCAGCTGGGGAGAAGCGAGCACTGCGCCACCTGCTCTCGACGTTCATCCGAATTGACATCACCCGCCGAACAGCTTGTCTGCGCGGTAAATCATCCCTGCCCAACACATAACGCAACACTGCCAAGCAGCCGTCCCCTAGCGACCTAGCCCTGCCCGCACTAGTCCTTAGCCACCTGTCACCTCCTTATGATCTGCGAACTATCGTTCGCACGACTTTCGGAAGTACAGGACGCCCCGCCAAGGGACACCAGGTAAACGCTGAGCTTAGTGGCGCCTATCCGGGCGTCGACATCGCCTCTTCACGCCTGACCCCCACCCACTAGGTCAATTCACAGTTATTCTGGTAGGCTGTTAAAGGCCATGCAGCAGTCCTCCCCCGGTCCCAGCTACAGCTCCAGCCTGCCCGCGCATGCCAGCTATTACCACCGCCGCGGCATCGAGCAGGATATACGCCAGATTCCGCCATGGGACTGCTAGGCGGGTCCTGACGCCTGTACTAGGCAGATACCACGGTTGAGTCACTGTCCCGTAAAGCTTCAGCGATATACCCCGAGTTACCCGCTTCGCCTGACCCGTTGATTCGCCCGCACTACCATAAGCGAAAGCCCCGTCCACGTGCAGGCCCATCGCGGCATGGGCTCGGCCACCAGTATATCGGACCTTGCGCCAAAAACGCCTCGGGCGGAGAGTGATCGCCTCAAAAATCGTACGGGTTCGAGGGGCGCCATCGCGTACGCTACACGGCGACACAACAGGAGGCGCGGGATCGTCTCGGCAATCTGACCACCGTCCACTAATTTCCTTGTTCCACAGCTCTGTCCACGCGATCGCGTCCAGATGGCCTCTGGGTTTGTGGCTCTATCAAGGCCAGCCTACGCAATGTAGGGATGACACGCCCCTACACGGCCCCGATGAACTGATGTCGGCGAGTCACGTGTCCCAGGGAATGGTGTTGCAAAAAGAGGCCAGTAACAAGGTCCATGAGCGAGGCCACAGGAACCATGGCTGCCCGCGGGGAACGGAGACGCTGCGCGCGTGGACGCTTGAGAAAGGATGCCGTGCGTTGCCGCGTGTTGTGGGCGTTGGGGTGACCAGCTGCTGAGTCGAGGGCTTATCGGGAACTGATGTGTGGTGCATGGAATCGCCATCAGCCAGATCGACCTTAAACACGCTGTGGGAATGATCGGCGGGACCCGCAAGGCCAACTAGGGGATCACGATTAGACGCCCCGCCGTCACGTGGGTAGCCGCGCCAACGACCGGTGGCTGGTGGCTGCCGGTGTGGTGTGCCGTGGCGATCGGCGAGGTAGCTGAGCGTTGAGATCGGGTCCGACAGTCCCATACTTATCGGTGTCAATTACGCCAGGTACTCCGTCCCTGGACGATCAAGTTAGGAATGCAACATATACTTCCTTCCTGGTAAGCATTCTTAACTGTTCATTCCTGCTCCCCTTGACCATCGTCTATACGCTCGCTGTCCCTCTCTAAGTTGTCAGCCATCCGAGAACGGAGACAGGCGGCCCCCGTCGGCGCGGTGGCCGCTGCTGGGGCGGCACCATGCTCAGGCCTTTTTTTACCTCAACGCGCAAAAGCCTCCACTTTATTCCCCTAAAAGGGTGCGGAGTGGAGTCACGTAAGGGAGAACATTAGGGTGACTCGCCCATGAATTTGGGCAGGAGTCCGACGAAGCGCGGTTAACCCGTTTAAACCCCTTGCGTGAAGGATGGAGAACTAGGGTCGACACATTAGAACATGAGCAGCGGTTGACCCCATCTGGGGAGTAGGCTGACCCGGGAGATACGTAGGAAGATTAGTTAAAACTAACCCACCTTCGCGCCCATGACAGCCTGATCTCTCACGTTGAGACGCTCGTTGTTAGAGTCCTGGTATCCTGCAGGCTTCGAGTTAAGGGTCTCGTCCGCCCGGGTCAATCATCTACTCGGTGGGAGAAAAAGGTACCCCGAGAATTGCACTCGAAGCATTGGGATGGTCGTAGTAACGTGATGGTTGCATCGTATCGCGTCAGCCACGCCCCGGACCCGTCCGGCAGGCTCTTTCCACTACGTACCTCTATAGCGTAGCGCCACGATTATTCTGAGGTCAGAGTCTCGTCTTCCGCGCGCCTACTCGCCGTGACTTAGCGGCCTGATACGCGTAGGAGGCGAGGTCCTGCTCGACGTGCCCGTGCGAGAGATCCGCGAGAGTTAAGTTGTTAACGCTATGCCGGGGGGAATCGCTTGCAGGGAGCCATGGGGACATAAGATTAACTGTGCGCAGGGTACACCGGCCCAATGCCCCGCTCCTGAAGTGCTATCACCAGCTTGTGCCTCTTTCACCTTCGTGCGTACTTCTGCGGCCCACCCCTAATGACTGCACGCATCCTATCATTGAGAACGCCTTATTCCCCCACAGCGATGCGGAAGGGGATTGGGGATGTTTTTGCATGCGTCGCCACCACCAGGCAGAAGCGCCCACGTATGGCATCTATGAGGACCACGGCCGTGAGGTACGCCCCTAGCTGCATCCCAAAGTAGGGTCGTTAAAGCGCGTCATACCAGTTCCGTCTCGTTGCCGTAAGGTATTGACGCACGTTGACCACCATCACTTTCAACTACGCCCTGTGCTCCGCAAGCTGATGCTCTCGCCACGCATCGCGCTCTCGTTTTTCATGTGGCCCTCACTGCCTGAGGTTGTGTGCCATGCTCCTGGTTTCCGCAGTTCAGCATGTAACCCAAGGAGGATGAGGAAATGCACATCTGACCGTCATCCATGGGTGACTTAAAGGGATATAAGGCTACAGAGTGCGGGTGGTATGAAGTGGGACTTGGGACGAGCGGAGACGCGACACCCAACTTGGCCGAGGGTTCCCTTCAGCTCCTCCGCGCACCTCCCGCCTCCCGCACCAAAGAGTCCACGGACAAAACCTTGTTCACCGGACAAGACTCAGAGCGGGTTGGGTGTGTCCTGCCTGCGTACTGCAATAAATTCGACGGGAGATCGGGGTTGGGTACCATCATACCGGATAACCTCCGGTCCCCGATATGCGCCATCTTAGACGAATCTTGCGCTTCCTACCCTATGCGCTTTGCGGGATCTTTGTGGACCTGCTTCTCAGCCGGCAAAGGCCGGCCGATGTTGATTGGTTGTATACGGCCGTTGGGCACTCCACCTAGCCATTACTAGCGGCTCCGAGCCCTCCTAGTCTTGTTCCGTCCCTCGTAAGCAGCGTTGGGCGATTAACCTGGCCGAAGCGTTGCGCGTAGATTGATGATCGTTGGCGTACACTTTCGATCAGCGCTACTGGCTGGTTTCACTTTCCAGTTACCACCGGGGGCTATTACAGCAACCCTGTTCCTTCGGCGATTGGGTGGGCCCGAGTGGTCATGCGGAGTGATGCCAGTAACTTATACTGAAGCCATTCACGCTCCTAGATTTCCCTATAGAGGAAGGGTAGCAAAGCACGATTGCCCTAACGTCGGCTGATCCCCCATCGGATGTCCCTGTCTGAGGTCTTCACATATGCTCGAAGGGGTAGTCGGGCGGCACCGGAGATCGTCTGGAACCTAGAAGGGGTTAACTCGTCAAGTACGACTCGCTAGAGAGTAGGTGAGGGGGGGATAAGCGCAGAGCATCCACTACACACAATGGATTTGGGGCACTTCTTCCAGTTCCACTGTGAGACCGGGACGGGGCCGTGAAGCAATCCCTTCCTGTCACTTCGATTACAGCCTTGCCTCATATAATGACACGGGCCACAGTCTTTCTATTGCACAGCACGCCCCTCTCCGACTCTGGTAAACTACAGGCGTGAGTCCCGC
>FA5537-ND-ST302
CGCGCTCACCCCCGCTCGATGGGCGGATCCCGGCCCAACATATCGCACAGTGGCAATATGTTCGCGACAATGCCCCCATTTTCCCTCACCTGCATCATCGGCGAGAAGGCGTGGGGACCCGACCGTTGCCTGGCGTTGAACCCGTCTCATCACGCCGAAATTAGTACCCCCCAATGACTCGCCTCACGGCGGAACGAGTCACCTCTGTACCCACCCGCTGGACTCACGCTCTTTGACCGCGCCCCGGGACCCCGTGACAACCCCCGCCCTTCGAACCCCCTGTCTACGACCGGCCCACTGTGTCATTACAAGACCTCCCCCATATTCGTGAGCGCATCTCGAGCCCCTCGCTATAGCTCGCAGCCCACCTGCCCGGCCCATCTTTTCCCGACTTGCTCGTTCCCAATCGAGGACTAGGGTCAGGCAGCGCGGACGCCCTGCGCATGGGATTCAACGTGTAGTGCGCAGCGTGACCCCCCGGCAGCGCGGGGCGTCGCCGGGGGTCCCACGCACATAGAATGGGGGAGGCTCAAAGGTCAAATGTCGGCCGTGCCCGTGAGAGTGGGAACAGCAGGGTGGAATGCAATTCCGCGCGGCCATGGGACAGCGCGTGGTTCCGACACACGCCCGTCGGGGATGACAGCAATACAGCGTCATACTTCTCCGGGAGCCGGCGTGTTGGGGCACGAGAGCCGCGGGGGCGGACCCGCTGCGGGGCCCGGCCTTTCTCCGAGCTGGCCGGGCCGGACAGTCCAAGGAGCGGCCTAGGGGGCGGCAGACCGTCCCGTCTGCACTTCTCCTCCCCCTGGCCTGCGGTCTGGAGCTATGCTCACCTTTCACGCCGCACTCGCGTCGACCGACGGGTGCTACTCCGGCCCCCTAGAGGCGTTGCACTTGGTCTACAGCCAGGCGACTGCCCCCTCCGGGGCGAGCATGAGCCGCGCCGGCGACACCGCTCCTCTCAGCCCACCCCCGGTCCCCGCACACGAGTGTCGGGACGGAGATTCCCACACCTTGACCTTAGATGCCTGGTCCTCCGGGTTCCCCCTCGACGTGCGAAAGGCGCCTGATGAGTGACGAAGGGACTCGCATCGGGGCGTGGCCGCTATTCAGGGCTCGTGAGCTCACCCGTACAGGGGACCAGGGGGGGAGAGTTGTTGGAGTGAACATAACGCGGGCGTGCGTACCTTGCAGCGTTCGAAACGTCAAAGGGAGGATTCCCTGGTTGCGCACCGAGTACGGGGCGGGGCGGTGCCGGCGGGGCACACCTCGAAGTGGATCGTCGTGGACTGGGCTCAACGTTCGGGCCCAGTCGAAGCTGATCCGCGAGGAAAATGGGTGGTTTCCATTGTAGCAAGACAGGTGCCACGCCGCGAGTTCCCGGCGGTCGTGCGAGCTGACGCCTCCTACTGAGCCTCGTGTTTGCACGGTGGGCGATCCCCGCTCCACCCGCCGCGTTGCGTTGCCGGACATCTGCCACTTCGTAGCCCAGCTCCGCTTGTAACGACTCGTAACCCCCCGTCACCACTTGGCGCCCTGCGGAGTGGCTCGCACACGACCCTCGAAGGTGCCGGTCGCTGTACCAAAGGTCGCTGGGCAGCCACTGGGCCTTTCTGCCACTGCTCGAGTGTCGACCGTGCTCCGCCTCGCCTTGCCTCCGTCAACTAGGCCAACCCGCGGCTGTACGGGAGAGCCGCAGAAGGCCACGCCGTTCGCCTCCCCCGGTGTCAGTGACCGCTCCCGTATGCCCGCGAATGCCAGTCGTCGCCACCGCCACGCCGGCGGATCGGATATACTCCAAGATCCCCTTGGGAGCCGCCGGGTATGCCCTGGCACCCGCATGTGGGGGGTACTACTGCAGAGCCATCGGCTAGCGGAGTTTTGGCGATACACCCCGCAATTCCTGCCCCTACGGACCCGCCGGTCCGCTCGTACTGTCACAAGCGAAAGCCTTGTCAGCGTGTCGACATTTCGCGGCGCGGAACCAGCCGCGAGTGTCTCAGGCACGGCGCAAACTGCGCCCCGGGCGAAGGGCAAGCGCCGTAGAAATCGTGCGGGTTCGGGGAGCGCAGTCGCGTACACCGCGCGTCAATACAGTAGGCTGCACGGGACCACCTTCGCCCTCTGACCCCCAGCCGTGACTCGCCCTACTCACCGGCTCCGGTCCCGCTAATACGTCCGCATGGTCTCTAGGCACACGGTCGTGCTGAGGCCATTGCGCGTACCGTATTGAAGGCGCACCCCCACTTGGCCCCAGTGGGCGGCCGCTGGAGAGACACATACCCACGGGGGGAGGGCGGCAGATAGGGTTTAGCGACACGGCCCGCGGGTAGGGCCTAGGGGGTAACGACTGCACACGGGAGACGGCTGCAACGAGCGCGGAAACGCCTGCGAGGGAGTGTCGCGCGCATCCGCGTGTTGTGGGCGTTGGGGTGTTCCGGTGAAGGGACTGAAGCTCATCGGGGACCGGTGGGTGGTGCAGTGGGCCAATATCAGACGGAGTGTCCTCTGGTGCGTTTAGGGATTGTTCGGAGGAGTCCTCAAGGCGAACTGGGGGACCGTGGTGGGAAGCCCAGCGTCATAGCGTTTGGTTGCGTCGCCAACCGACGGCTAGTGACTGCCGGCGAGGCGTACTGCAAAGATTGGCGGGCTAGCTAGGCGCCGGGATCGGATACGGTGACCCCACGTTCACTGGCTCTACCCATGCCGAGCACCCCACCCCTACGCAATCAGGTCCGAAATGCTACACAAGCTATCTCTCATTCATGTGTTCTTAGCTGTCCGTTCGCACCTCCCGCTGCCGCCGTCTAAATGCCCACGGCCCCGCACTGAGGCGCAAGCCGCCCGAGACCCGAGGCAGGCAAACCCTGTCGGTGCGACAGCCGTGGTCGGGACGACGTCGCTCTTAGGCCCTCGTTCACCTCAACGCCTGAGGGTCTTGACCCCACCCCTCCAAGGGGGTGCGGAGTGGGGTCACTAAGGTGAACGCCCCGAGATGCCGCACCCGAGAGTGTGGATGGGGACTCGGTGGGATGTGACTGGCCGGCCGGGACCTTTCCGGGGGGAAATGGTGGCCTGGTGTCGGTGCACTGGGGCGAGGGCGACGACCGATCCCACTTGGGAGGTGGGCTGATCCGGTCGACTCGTATTGCGGTCAGTTAGAACTAGCCCGTCGCCGCGCCTACACATACTGGACCCCTCACACTGACACTCCTGGCCCGAGGGACTCGGCGCCCCGCGAGCTCCTTGCCAAGGATCCTGTCCGCCCGGGCTTACCCTCCGCACGGCAGAAGGGGGATGCGCCCGAGGGACTGTACCTGTGTCACCGTAATAGGCGTGACCATGCAACGGTTGTACCGGCCCGAATCCACTACGCCCCGGGCCCGCCCGGCGGGCCCGCCCTACCACATGACCCCACTGCGCGGCGCCACGATTGTCTAGAGGCCAGGGTCCTTGCCCCCGCGCGCCTACTCACCTCGACCGGGCTGCCCGAAACGCGCGGGAAGTATGTCCCTCTCCGACGAGCTCGCACGGGCGACACGCGATGTTCAGGATTTTAACACTGCGCCGAGGGGGCTCAGCCACGATGGGCCATGTCGGCCCGGGATTGATTACGCTTAGTATCCGCCAGTTTCAGACCCAACTCCCCGGGTGTAACCTCTGGCTGATGACTCCTGCACCGGCATGCGGACCCTAATGACTCATCCCCCTCGCCCAAACGCGTCCTAGCATAGCGCGTGCTTCGTTCCCCCTCAGCGGGGTGGAGGAGGCCCATACGAGCCTCCGCTCGCGCCCCCGCTGTCGTGAAGACTCGCCCAAGGGCAGAATCCGTGGGAGTGGTGGCTGTGGGAAGCGTCCTTGACCGCGGCTCGCAGTGTAGCCGCTACAACTCTTTATGCTCACCCCTTCCCTCTGTCGGGAGACGATGGCGCGTGCCGGCCGCCGCTGCTTCGTATCGCGCCCCGTGTCTCGCAGGCCGACCCCCCCGCCGCCCGCCACGCCCTCGTTCCGCACGCAGTCCCCGCCAGCTAAAACTTAGGGACAAGCTCCCATTTACTGCAGCACAGGGCGTGACCCGAAGGAACCGAAGAGACGCATACCTGGCTGCCACCCGCGGGCGGCTCGCGGGACCATGGGGCGGCCGACCGCGAATGGTGCGCAGTGGGCCTCGGGGTGAGCGAATGTGCAACACCCAACTTTGCCAAGGTCCCCCCCCCGCCACGCTGCGCACCCTTCACCTTCCACTCTACAGTGTCGGCGGCCGGGACTCTGGTCGCCGTACAGGATCTGGAGTGGATTGGGTGCGACCCGCCCGTACCCTGCAGCTAGTTTAATTGGTGCTCAGAGGTGGGCATCACCTCGCTGGACAACCCCAGACTCCCAATATACGCTGCTCCGGGCGCGCCCCGCGCCTCCCGTCTCGCGCCCCCCGCAGGACTTCTGAGAACCGTCCCTTCTGTCGGCAAGGGCCAGCCGGCTTCTGGCTGCTTGACACGGCCATCGGACATCACCCCTCGTCACGTCTGGCGGTCCTAAGCATCCCCGGCCGTGCGCCGCCCCCCTCATGCGACGACGGACACTATATCTGGCCGAGGCGCTACGCGGAGAGGGATGATCGCTGGCACGCAACCCCGCCCAGCGTGACCGGCAGTCTGCATTAACTAATCAAAATCGGGGCCAGAAATCGCGGCCTCGGCCTCCCGGCGATTGGGCGGACCCGAGAGGCCGTAAGGAATAGCCTAATGGACCTGTGTTGGGGTGACCCATGTTCCCGGACTTACCTATGAGAGGGGGGTAGTATGACCGGTTAGCTCTGACACTGGCTGACTCCACCGCGGATGATCAAACCAGAGGTCCCCGTATCCGCGCGGAGGGGCTACTGGGCGGCGCCAGGGACCGTACGGCACACAGGAGGGGTCAGCGCGACGGGTGCTACTCGCTGGGTGACGGGTGTGAAAGAGAGAGGGGCAGTGCATTCGCTACATACGACGGGGTTATAGCGCCCCTCCCAATCCCGTTGGAGGGCCGAGACGGAGCTGCGACGCGGTCCCTCCCCGGCCCTCAGGCCACAGCTTTGCCCCCTGTAAGAGCATAAGCAGCAAACTCCCAATCGCACGACCCGCCTCCCTCCGGTTCTAGTGTACCACAGGATTGGGTTCCGC
>IA1186-Poultry-ST302
CGCGACCGACCCTCACTTATGGGTGAACTCCGGACCGATAGGCCTCCCAGGGACAATACGTTCTGTACGAAGCTCTCATTACCCCCCACTAGCATAGCCGGCGTGATGGCAGGGAAATCCGGCCGTTGATTGGCGACACCCCCGCTTAACTACTCCGGAATTAAGATCCCCCGGCGGTTCATCCCACGGCGGAACGAGTTCCCCATGCGCCCGTCAGTGAGGCTTATGTTTTTTGTCTGCGTCCCGTAGCTCTGAGACGCCCTACGCCCCTTAGATTTTTAGTTCATACCCGTCTCGTCTCAGCATCCTGGAACCGCACTCGCGCCAGCGAGCGCACCTCAAGCCTCTTGTCCTGGCATGTAATCAACCTGCCCAGTATACCTGGTCCCGACTCACTAGCTCTCGACCGGTGATCGAGAACCAGTCGCTCGGTCACCCTCAACGGAGCCCTGGACGTGTCAAGCACCGCAGGGCCCCCCGGAAGCGCAAGGCGTCGCTAGGGCCCACCCGCACGGGAACAAGGGGGAATTTATGAACCTAGTGTCGGCCATGCTCGTGCGAGTGGGATTCGCGGGGTGATGTGTCCTCCCACGCGGCCCTGTGGCAGCACGTGGTCAAGCCACGCTCCTGTCGAAGATGTTGGCAATACAGCGTCAGATGTTGACGGGGTCCGACGCGCTGGAGATAGAGAGCCACAGAGGCAGTCCTGTTGTGAGGCCATGCTTTTCTCCTAGCTAGATGAGCAGGTCGGCCCCTGGAGCGGTCTGGAGCGCGGTAGACCAGCTCGTTTGTACCTCGCTTTCTTCTGTTTTTCAGACGGGGGAGAGGCTAGATTGCCGCGCTGCACACACAGCGACTGCCGTGTACCTCCACGTCCACCCCGAGGCGTCGCTCTTTAGTCAAGGTTAGACAAGGGCCCCTTCTGGGTCGGGCCCAAGTCGTGCCAGAGCCACCGCTCTGCCTTGTCCACCTCTGTTCCCCTCTTACGAACTTCAGGGCAGAAACCTTCACACGTTAATTCTACCTACCTGGCCCGCTGGGGTTTCCTTCGACATGTGGGCGACGCCTGGGGGGAGAAGAGGTGATTCACGTCGTGGCTCGGCCACCGTTAAGGTTGAGGGTACTACCCCGTCCCGGGGAACAAGGAGGGGGGGCTGTTTGAGTGAGAGTAACATAGGCGCGTAGCCTCTACGGAATTCGGAATATTACAGTTTGGGTTCCTTAACTGCGTGCAGAGTACGTGGAGGGATGGTGCCGACACGGCACACCTCGACGTGGAACGGCATAGGTGGGGCTCCCCACCCAGACTCGGCCGGTGGGTGTACATGGAGACTACGGATGGTTCCAGCTGGGGAGAAGCGAGCACTGCGCCACCTGCTCTCGACGTTCATCCGAATTGACATCACCCGCCGAACAGCTTGTCTGCGCGGTAAATCATCCCTGCCCAACACATAACGCTACACTGCCAAGCAGCCGTCCCCTAGCGACCTAGCCCTGCCCGCACTAGTCCTTAGCCACCTGTCACCTCCTTATGATCTGCGAACTATCGTTCGCACGACTTTCGGAAGTACAGGACGCCCCGCCAAGGGACACCAGGTAAACGCTGAGCTTAGTGGCGCCTATCCGGGCGTCGACATCGCCTCTTCACGCCTGACCCCCACCCACTAGGTCAATTCACAGTTATTCTGGTAGGCTGTTAAAGGCCATGCAGCAGTCCTCCCCCGTTCCCAGCTACAGCTTCAGCCTGCCCGCGCATGCCAGCTATTACCACCGCCGCGGCATCGAGCAGGATATACGCCAGATTCCGCCATGGGACTGCTAGGCGGGTCCGGACGCCTGTACTAGGCAGATACCACGGTTGAGTCACTGTCCCGTAAAGCTTCAGCGATATACCCCGAGTTACCCGCTTCGCCTGACCCGTTGATTCGCCCGCACTACCATAAGCGAAAGCCCCGTCCACGTGCAGGCCCATCGCGGCATGGGCTCGGCCACCAGTATATCGGACCTTGCGCCAAAAACGCCTCGGGCGGAGAGTGATCGCCTCAAAAATCGTACGGGTTCGAGGGGCGCCATCGCGTACGCTACACGGCGACACAACAGGAGGCGCGGGATCGTCTCGGCAATCTGACCACCGTCCACTAATTTCCTTGTTCCACAGCTCTGTCCACGCGATCGCGTCCAGATGGCCTCTGGGTTTGTGGCTCTGTCAAGGCCAGCCTACGCAATGTAGGGATGACACGCCCCTACACGGCCCCGATGAACTGATGTCGGCGAGTCACGTGTCCCAGGGAATGGTGTTGCAAAAAGAGGCCAGTAACAAGGTCCATGAGTGAGGCCACAGGAACCATGGCTGCCCGCGGGGAACGGAGACGCTGCGCGCGTGGACGCTTGAGAAAGGATGCCGTGCGTTGCCGCGTGTTGTGGGCGTTGGGGTGACCAGCTGCTGAGTCGAGGGCTTATCGGGAACTGATGTGTGGTGCATGGAATCGCCATCAGCCAGATCGACCTTAAACACGCTGTGGGAATGATCGGCGGGACCCGCAAGGCCAACTAGGGGATCACGATTAGACGCCCCGCCGTCACGTGGGTAGCCGCGCCAACGACCGGTGGCTGGTGGCTGCCGGTGTGGTGTGCCGTGGCGATCGGCGAGGTAGCTGAGCGTTGAGATCGGGTCCGACAGTCCCATACTTATCGGTGTCAATTACGCCAGGTACTCCGTCCCTGGACGATCAAGTTAGGAATGCAACATATACTTCCTTCCTGGTAAGCATTCTTAACTGTTCATTCCTGCTCCCCTTGACCATCGTCTATACGCTCGCTGTCCCTCTCTAAGTTGTCAGCCATCCGAGAACGGAGACAGGCGGCCCCCGTCGGCGCGGTGGCCGCTACTGGGGCGGCACCATGCTCAGGCCTTTTTTTACCTCAACGCGCAAAAGCCTCCACTTTATTCCCCTAAAAGGGTGCGGAGTGGAGTCACGTAAGGGAGAACATTAGGGTGACTCGCCCATAAATTTGGGCAGGAGTCCGACGAAGCGCGGTTAACCCGTTTAAACCCCTTGCGTGAAGGATGGAGAACTAGGGTCGACACATTAGAACATGAGCAGCGGTTGACCCCATCTGGGGAGTAGGCTGACCCGGGAGATACGTAGGAAGATTAGTTAAAACTAACCCACCTTCGCGCCCATGACAGCCTGATCTCTCACGTTGAGACGCTCGTTGTTAGAGTCCTGGTATCCTGCAGGCTTCGAGTTAAGGGTCTCGTCCGCCCGGGTCAATCATCTACTCGGTGGGAGAAAAAGGCACCCCGAGAATTGCACTCGAAGCATTGGGATGGTCGTAGTAACGTGATGGTTGCATCGTATCGCGTCAGCCACGCCCCGGACCCGTCCGGCAGGCTCTCTCCACTACGTACCTCTATAGCGTAGCGCCACGATTATTCTGAGGTCAGAGTCTCGTCTTCCGCGCGCCTACTCGCCGTGACTGAGCGGCCTGATACGCGTAGGAGGCGAGGTCCTGCTCGACGTGCCCGTGCGAGAGATCCGCGAGAGTTAAGTTGTTAACGCTATGCCGGGGGGAATCGCTTGCAGGGAGCCATGGGGACATAAGATTAACTGTGCGCAGGGTACACCGGCCCAATGCCCCGCTCCTGAAGTGCTATCACCAGCTTGTGCCTCTTTCACCTTCGTGCGTACTTCTGCGGCCCACCCCTAATGACTGCATGCATCCTATCATTGAGAACGCCTTATTCCCCCACAGCGATGCGGAAGGGGATTGGGGATGTTTTTGCATGCGTCGCCACCACCAGGCAGAAGCACCCACGTATGGCATCTATGAGGACCACGGCCGTGAGGTACGCCCCTAGCTGCATCCCAAAGTAGGGTCGTTAAAGCGCGTCATACCAGTTCCGTCTCGTTGCCGTAAGGTATTGACGCACGTTGACCACCACCACTTTCAACTACGCCCTGTGCTCCGCAAGCTGATGCTCTCGCCACGCATCGCGCTCTCGTTTTTCATGTGGCCCTCACTGCCTGAGGTTGTGGGCCATGCTCCTGGTTTCCGCAGTTCAGCATGTAACCCAAGGAGGATGAGGAAATGCACATCTGACCGTCATCCATGGGTGACTTAAAGGGATATAAGGCTACAGAGTGCGGGTGGTATGAAGTGGAACTTGGGACGAGCGGAGACGCGACACCCAACTTGGCCGAGGGTTCCCTTCAGCTCCTCCGCGCACCTCCCGCCTCCCGCACCAAAGAGTCCACGGACAAAACCTTGTTCACCGGACAAGACTCAGAGCGGGTTGGGTGTGTCCTGCCTGCGTACTGCAATAAATTCGACGGGAGATCGGGGTTGGGTACCATCATACCGGATAACCTCCGGTCCCCGATATGCGCCATCTTAGACGAATCTTGCGCTTCCTACCCTATGCGCTTTGCGGGATCTTTGTGGACCTGCTTCTCAGCCGGCAAAGGCCGGCCGATGTTGATTGGTTGTATACGGCCGTTGGGCACTCCACCTAGCCATTACTAGCGGCTCCGAGCCCTCCTAGTCTTGTTCCGTCCCTCGTAAGCAGCGATGGGCGATTAACCTGGCCGAAGCGTTGCGCGTAGATTGATGATCGTTGGCGTACACTTTCGATCAGCGCTACTGGCTGGTTTCACTTTCCAGTTACCACCGGGGGCTATTACAGCAACCCTGTTCCTTCGGCGATTGGGTGGGCCCGAGTGGTCATGCGGAGTGATGCCAGTAACTTATACTGAAGCCATTCACGCTCCTAGATTTCCCTATAGAGGAAGGGTAGCAAAGCACAATTGCCCTAACGTCGGCTGATCCCCCATCGGATGTCCCTGTCTGAGGTCTTCACATATGCTCGAAGGGGTAGTCGGGCGGCACCGGAGATCGTCTGGAACCTAGAAGGGGTTAACTCGTCAAGTACGACTCGCTAGAGAGTAGGTGAGGGGGGGATAAGCGCAGAGCATCCACTACATACAATGGATTTGGGGCACTTCTTCCAGTTCCACTGTGAGACCGGGACGGGGCCGTGAAGCAATCCCTTCCTGTCACTTCGATTACAGCCTTGCCTCATATAATGACACGGGCCACAGTCTTTCTATTGCACAGCACGCCCCTCTCCGACTCTGGTAAACTACAGGCGTGAGTCCCGC
>IA1729-Canine-ST302
CACGCCCACCCCTCCCCGATGGGCGGGCCTTAGACCGTCAGGCCGCCCAGTTGCAGTATTTGATGGACAATTACCCTATGTCCCCTCACCTTCATCACCGACAAGAAGGTGTGGGGACCCGGTCTTTGCCTGGTTTTGAATTTGCCTCACCGCGTCTACATTAGGGCCCCCCGGCGGCTCGCCTCGCAGCGGAGCGAGTCCCACATGCGCCCACCAGCTGGGCTCACGCTCTTGTTCCGCGCTTCGGGGCCCCTTGACGACCTCCGCTCCTCGGTCCCCCAGCCCACGATCAGCCTGCCTCGTCACCCCGAGACCTCCCCCGTACCCGTGAGTGCATCTCGATTCCCTCGCCAAAGTACGCGGCCAACCTGTACGACCCACCGTTACCCGATTCGCTCGCCCCCAACCGGTACCCGGGGTCAGGCAGCGTGAACGCCCTGCGCGGGGCACGCGATGTGTAATGCGCCGCGGGGCCAATTGGAAGCGCGGGGCGTCGCCGGGGGTCCCCCGCACGGGGAATGGGAGGGGCCCCTGGGCCTCGTAGCGGTCGTGTCCGTGAGAGTGGGTTTAGTAGGGTGGTGAGCAATTACACGTGGCCATGGGGCAATGCGTGGGTCAGACACGCGCCTGTAGGGTATGACGGCAGTACGGCAACAGACTTCTCCGGGGTCTGGCGTGCTGAGGCTCGAAAGCCGCAGGGGCGGTCCCGCTACGGAGCCCTGCCTTATTCCGGACTGGCCGGGCCGGATGGCCCATGGGACGTCCTGAGGGGCGGTAAACCGTCTCATCTGCGACTCTCTTCCCCCAGGCCTTTGAACGGGAGCTATGTCCACTTTCCGTACTACACACGCGTCGATCGCCGTGTGCCACTCCGGCCCCCCAGAGTCATTGTATTTTGGCTACGGCCCGGGGACTGCCCTCTCCGAGTTGGACCTGAGCCGCGCCGGCGACACCGCTCCTTCTAACCTATCCCCGTTCCCCTCACACGGGCGTCAGAGTGGAGGCTTCTACACCTTGACCCCTGCGGCCTGGCCCTCCGGGTTCCCCCTTGACGTACGGGCGGCGTCTAGGGGGTACAAAGGGGACTCGCATCGGGGCGCTGCCGCCGTTAAGGGCTAGGGAGCTCATCCTTACAGGGGACTCGGTGGTGGGGTCTGTTGGGGTTAGCGTAACGCGGGCGTGTGTACCCCGTAGCGTTAGGAACGTCGAAGGGAGGATTTCCTGGTTGCTCGCCGCGTGCGGAGCGGAGCTGTGTCGGTGGGGCGCCCCTCGACGTGGATTGTCGTGGGTTGGGCTCCACGTCCGGGCTCAGCCGGTGGTGGTACGCGGGGAAACCGAGTGGTTTCCGCTAGGAAGAGGCAGGCATCGCGCCGCGAGCTCCTAGCGGTTGTGCGAGCGGACGCCATCCAACGTGTCTTGTGTCAGCGCGATGGGCGATTCACGCCCAACCTGCCGCTCTACATCTCCAGATATTCGCCATCTCGCGGCCCAACTCCGCCCGCACCAGCTCGTAGCCACTCTTTACCTCCTGACAACTTGCTGAGTGGCGCGTGCACGTCCCTCGAAGGTGCCGGACGCCGCGTCGGGTGTCGCCGGTCAGCCGATGGGCCCTTTGGCGCCGGCCCCGGTGTTAATCGTGTCCCGCCTCGCCTTGCCTCCGCCCACTAGGCAGACCCGCGGCTGTACTGAAAGGTCGCTGAAGTCCACACCGCACGCCCTTCCCAGTGTCAGCGGCCGTCCCCGCATGCCCGCGAATACTAGCCGTCGATCTTGCGGCGCCGTCGGATAAAAGACGCGCCAAAATCCGTCTGGGAGCCGCTGGGCATGCCTTGGCGCCCGCACGTGAGAGGTGCTACTGCAGATCCCCCGTGCCCCAGAGTTTCGGCGATACACCCCAAAACTCCCGCCCCGACTGCCCCGCCAGGTCGCCAGCGCTGTTGCAAGCATAAGCCCTGTCAGCGTGCCGGCATTTCGAGGCGCGGAACCGGCCGCCAGTGGCTCGGGCACGGCGCAAGCTGCGCCCTGGGTGGCGGGTGATAGCCTCAGTGATCGTACAGGATCGGAGGGTGCAGTCGCGTAAACCGCGCGTCGACACGGCAGGCGGCACGGGACCACTTTGGCCCTGGGCTTCCCAGCCGCGACTCGCCCTGCTCACCGGCTCTGTTCCCGCGAACGTCTCTGGATTGCCTCGGGGCACACGGCCCTGCCGAGGCCCGCCCGCACACCGTATTAATGGCACGCCTCTATACAGTCCTGGTAGGTGGCTGCTGACGTGTTGTGTACCCACGAGGGGGGGGTGGCAGAAAGGGTCCTACGCAAAGGCCCGTGGATGGAGCTTAGGGGGCAACGGCGGCCCGCGGGGGACGACGGTGACGCCCACGGGGCCGCCAGCGAAGGAGCGTCGCGCGCTGCCGTGTATTGTGGGCGTAGAGGAATTCCGCGGCAGGGACGGGGGCTCATCAGGGACCGGCGGGTGGTGCCGTGGGCCGACATCCGACGAAGCTTCATCTGGCGTGTTTAATGCTTATTCGGAGGAGTCTGAATAGCCAACGGGGGGCCCGCGGGGGGACACCCAACGGCATAGCGGGCAGCCGAGTCGCCGCCCCGCGGCAAGAGGCTGTCTACGAGGCGTGCCGCGGAGGTCGGCGGGGAGATTGGGCGCCGGAGTCGGATACGGCGGCCCCATACCCTCCAGCTTTAACTACGTAGAACACCCCATCCCAGCGCGACCAGATCAGGAATACTACACATACTATCTTTCATGCATACATTCTGAACTGCCCGTACGCGCCCCCCGCTGCTGCTGTCGGAACTTCCACGGCCCTGTACTGAGTCGCAAGCCGTTCAAGACCCGAGGCTGGCGGACCCCGGCGGCGAGGCGGCCGTGGCCGGGACGGCGTCACGCTTGGGCCCTCGTGCTCCTCCACGTCCGAAGGCCTCGACCCCACCCTCCCAAGGGGATGTGGATGGAGGTCATTAAGGGGAGCACCCCGGGACGCCGCACACGTGAGTGTGGGCGGGGGTCTGGTGAGGTGCAGCTGGTCCGCTTGGACCTCCCGCGGCGGGGAAGGTGACCCGAGGTCGGCGCACTGGGGCGAAGGCGACGACCTTCAACATTTGGGAGGGGGGCTGACCCGATCGACTCGTAGGGCGGTCGGTCAGAACTAGCCCGCCTCCGCACCCACACAAGCCGGACCCTTCACGCTGAGTCGCCCAGCCCTAGAGACCCGGCGCCCCTCGAGCACCTTGCCTTGGGTCCCGTCCGCCAGGATCTACCCTCCGCACAGCAAGCGGGAGTTGCACCCGGGAGCCTGCACCTGTGTAACCGGGTTGGGCGTGACCATGCGATGACTGTTCCGGCCCTAGCACGCCCCGCCCCGGGCTCACCCAGCAGGCCCGCCCCACCACGAGCCCCCTCTGAGCGTCGTCGCGGGGGTCCATGGGCTCGGAGCCCGGCCCCCGCGCGTATACCCGCCTCGACCGAGTGGACCGGAACGCGCAGGAGACGTGTCCACCCCCAACGTGCCAGCACGAGCGACCCTCGATGGTCAGGTATTTAATGCGGCGTCGGGGAGGCGTGCCCGCGGTAGGCCATTTCGGCACGGGTCTGACTATGATTAGTATCTGCCGTCCCAATGCCCAACTCCCGGGGTGCTACTAGCGGCTGGTGACTTCTGTATCGTCGTGCGGACCTTAGCGGCCCGCCTACCTCGCACGCACGCGTCTTGTCATAGCGCGCGTTGCGTACCCCTTTAGCAGGGCAGAGGGGACCCGTGCGAGCCTCCGCTCACGCCCCCGTCGCTGGACCGACTCGCCCACGGGCGGCAGCCGTGGGGGTCGCAGCCGTGGGGTGCGCCCCTAGCTGCGGCCCGAAGTGTAACCGCTAAAGCTCTTTGTGTCCGCCCAGGTCCGCGGCCGTGGGGCGTTGGCGTGCTCCGGCTGCCGCCGCTTCCAACCGCATCTCGTACCTCGCAGGTCGACCCCTCTACCACCCGCCACGCCCTCCTCCCGCACGCGATCCTCGCCGCCTGAGGTTGTGGTCCCTGCTACCGGTTACCGCGGCACAACGCGTGACCAGGAGGAGACGAGACGACGCACACCTGACTGCTACCTGCGGGCGGCTCGCGGGACCAGGGGGCGACCGCCCACAGATGGGGCGCAGTGGGACTTGGGGCGAGCAGAGGTGTGGCACCCAACTTGGCCAAGATCCTCCCCCAGCCCCGCTGCGCACCCCCCGCTTCTCACTTCGCAGTGTCCGCTGCCGGGACCCTGGTCGCCGGACAGGGTCCGGAGCGTGTTAGGGGCGACCCGCCCGCACCCTGCCGCTCGCGCGACGGATGCTCGGGGGTAGATACCGTCTCGCCGGACAACCCCCAGCCCCCGATATGCGCCACCTCGGGCGCGCCCTGTGCCTCCCGCCCCGCGCCCCCCGCAGGGCCACTGAGAATCTTCCCCTCTGCCGACATGGGCCGGCTAGCTTCTAGCTGCTGGACGCGGCCGTCGGACACCAACCCTAGCCACTACTGGCGGCCCCGAGCCCCTCCGGCTTTGCTTCGCCCCCCTCGAGTGATAACGGGCGCTTTCCCTGACTGAGGTGCTGCGTAGAAAGTACGGATCGCGGGCGTGCAACCCCGCCCAGTGCGACCAGTAGTCAGCACTATCTGGTCAAAACCGGGGCCAGAAATCACGGCCCCGGCCTCCCGGCGATTGGGCGGACCCGGGAGACCGGGAGGCGTGGCCTCAGTGACCTGTGTTGAGGCCACCCATGTTCCCGGGCTGCCCTATAGGGGGGGGGTAGCATGACCCGTTATTCCTGTTACCGGCTGATTCCATCGTGGACAATCCAACCAGAGATCCCCGTTTCCGTGCAGCAGGGCAGCCGGGCGGCGCCAGAGACCATCCGGATTACCGGCAGGGTCCGCTTGACGGATGCTACTCACTGAGTGACAGGTATGGGGGAGAGAGAGGCAGAACATCCGTTACATATGATGGGGGTGTGGTGCCCCTCCCAGTCCCGTCGGGGGACCGGACTAGAACCGCGACGCGATCCCTCCCCATCCCTCCGGCCGCATTCCTACCCCCTGTAATAGCATAAACAGCTGTCTCCTACTTACACGGCCCGCCCCCCTCCGGCTCCGGTGAACCACAAGCTTGGGTCCCAG
>IA4731-Poultry-ST302
CACGCCTACCCTTCCCCGATGTGCGGACCCCGTACCGACCGGCCGCCCAGTGGCAACATGTTCTGGACACTTCCACCCCTTCTCCTCTCCTGCATCACCGGCAAGAAGGCGTATGGACCCGGCCGTTGCCTGGCGTTGAACTCGCCTCACCACGCCGAATTTAGGACCCCCCGGCGGCTCGCCTCACGGCAGAATGGGTCCCACATGCGTCCACCAGCTGGGCTCACTCACTTTGTCCGCGCCCCGGGGCCCCGTGACGACCTCCACCCCTCGGACCCCCAGCCCACGACCAGCCCGCCTCGTCATCCCGAGACCTCCCCCGTACCCGTGGATATATCTCGAGTTCCTCGCCATAGCACGCAGCCAACCTGCCCGGCCCTCCTTTATCCGGCCCGCTCACTCCTAACCAGTGACCGGGGTCAGGCAGCGCGGATGCCCCGCGTGGGGCACTCGCCTTATAATACGCCACGGGGTCACCCGGCAGCGCGGGGCGTTGCCGGGGGTCCCCTGCACGGGGAATGGAGGGGGCTCATGGGCCTAGGGTTGGTCGAGCCCGTGAGAGTGTGATTAACAGGGTGGTGTGCAATTCCACGCGGCTATGGGGCAGCGCGTGGTTCAGACTCGCGCTTATCAGGGATGACGGTAATACAGCGTCGGACTTCTCCGAGGTTCGGCTTACTGGGGCTCGAGAGCCGCAGGGGCGGTTCCACTGCGGGACTCTCCCTTTCTCCGAGCTGGCCGGGCCGGACGGCCCATGGAACAGCTCGAGGGGCGATAGACCGTCTCGTCTGCACCTCTCTTCCCCTTGGCCTTTGAACGGGAGCTATACTCACTTTCAGCGCTGCACACGCGTCGACCTCCGTGTGTCACTCAGGACCCCCAGGAGTGTTGCACTTTGGCTACGGCCAGGCGACTGCACCCTGCAGGTCGGACCTGAGCCGCGCCGGCGACACCGCTTCTCCTAACCCACCCCCGTTCCTTTTACACGAGCGTCAGGGCGGAGACTTCCGCACCTAGACCCTAGCTGGCTGACCTTCCAGGTTCCCCCTCGACGTGCAGGCGGCGCCTGGGGGATGAAGAGGGGACTCGCAACGGAGCGCGGACGCCGTTAAGAGCTATGGAGCTCATCCGTACAGGGGACCAGGGGGGGGGGGCTGTTGGAGTGAGCGTAAAGCGGGCGTATGTACCCTGTAGCGTTCGGAACGTCGAAGGGAGGATTCCCTGGTTGCGCGCCGAGTACGGGGCGTGGCGGAGCCAGCGGGGCGTACCCCAACGCAGCTCGTCGTGAGTTGGGCTCCACGTCCGGGCTAAGCCGGTGGTGGTACGCAGGGAAAACGGGTGGTTTCCGCGAGGGAGAGGTAGGCACCGCGTCGCGAGCTCCCGGCGGTCGTGTGAGCTGACGCCACCCAACAAGCCTCGTGTCTGTGTAGTGGGCGATCTACGCCCAACCCGCCGTTCTACATTGCCAGACATCCGCCACCTCGCGGCCCAGCTCCGCCCGCACCAGCTCGTAGCCACCCGTCACATTCTGACGACTTACGGAGTGGCGCGCGTACATCCCTCGAAGGTGCCGGACGCCGCGCCAAGGGTCGCCGTGCAGCCGCTGGTTCCTTTGGCGCGTGCCCGGGTGTCGACCGTGCCCCGCCTCGTCTTGCTTCTGCCCACTAGACAAACCCGTGGCTGTACTAGAAGGCCGCTGAAGGCCACGCCGCACGCTTCCCTTGGTGTCAGCGACCGCTCTCGCATACCTACGAATGCCAACCGTCGCCACTGCCGCGCCGTCGGATAGGATATACGCCCAAATCCGCCTGGGAGCCGCTGGGCATGCCCTGGTGCCCACACGTAGGAGGTACTACTGCAGGGCCACCGTGCCCCAGTGTTCCGACGATACACCCCAAAATTACCACCCCGACTTACCTGCCAGTTCGTCCGCACTGTTACAAGCGTAAGTCCTATTCGCGTGCCGGCATTTCGCGGCGCGGAACTGGTCGTGAGTGTCTCGGGCACGAGGCAAACTGTGCCCCGGTCGGAGGGTGTTCGCCTCCGAGATCTTAGAGGTTCAGGGGGCGTAGTCGCGTACACCGCGCCTCGACGCAGCAGTCGACACGGGGCCACTTTGGCCCACTGCCCCCCAGTCGCGACTCGCCCCGCGCACCGGCTTTATTCCCGCGAACGCGCCCGGATGGCTTCTGGACACACTGCCCTGCCGAGAACAGCCCGCGCACCGTGTTGCTGGCACGCCCCTGCACGGCCACGGTGGGCGGCTACTGGCGTATCACGCACCCACGGGGGGGGGGTGGTAGGAACGGTCCAGCGAAAAGGCTCGTGGGTGGGGGCTAGGGGGCATCGGCTATCCGCGAGGGACGGAGGCGACGCGCGCGGGGACACCAGCGAAGGAGCGTCGCGCGCTGCCGCGTGGTGAGGGCGTTGAGGTGTTCCGCGGCAGGGATGGGGTCTCGTCAGAGACCGGCAGATAATGCAGTGGGCCGACATACGATGGGGCGTAATCTGGCGCGTTTAAGGATTGTCCGGAGAAGTCCGCAAGGTCAACTGGGGAACCGCGGTGGAACGCCCCGCGGCATAGCGGGTAGCCGCGTCGCCGATTGGCGGCTAGTAGCTGCCTGCTAGGCATGTCGCGGAAATCGGCAGGGTAGTTGGGTGCCAGAACCGGAAACGGCGGCCCCATACTCACCGGCTTTAACTGCGCCGAGCACCCCATTCCTGCGCGGTCTGGTCAGGCATGTTACACATACTATCTTTCATGCGTGCATTCTTAACTGTCCGTACGCGTCCCCCGCTGCCGCCGGCTGAACGCCCACGTCCCCGCACTGAGTCGCAGGCCGTCTGAGACCCGGGGCAGGTGGACCACGTCGGCGCGGCGGCCGTGGCCGGGACGGCGTCACGTTTAAGCCCTCGTTCACCTCAACATCCGAAGGCCTTGACCCCACCTCCCCAGGGGGGCGCGAAGTAGGGTCACTAAGGGAGGCACCCCGGGATACTGAACACGTGAGTGTGGGCGGGGGTCCGGTGAGGTGCGGCTGGCCCGCTTGGACATCTCGCGGGGGGGATGGTGACCTGGGGTATGCGCACTGGGGTGAGGACGACGACCGACCCCCTTTGAGAGGTGGGGTGACCAAGTCGACTCGGGGGGCGGTCAGTTAGAACTAGCCTGCCTCTACACCCGCACAAGCCGATCCCCTCACGCTGAGATGCCCGGCCCTAAAGACCCGACGCTCCGTGAGCTCTTTGCCAAGGGTCCCGTCCGCCCAAGTCTACTCCTCGTAAGGCAAGAGGGAGATGCGCTCGGGGGACTGCATCTGTGTCCCCGGGAAGGGCGTGACCGTGCGATGGTTGTACCGGCCCGAGTCCGCCAAGTTCCGAGCCCACCCGGCAAGCCCGCCCCATCACGTGCTCCCACTGCGCGGCGCCACAGTTGTCCAGAGGCCAGGGTTCCGGCCCCCGCGCATCTACTTGCATCGACCGAACGGCCCTAAACGCGCAGGGGGCGTGTCCCTCCCCGACGTGCCCGCATAAGCGACCCTCGATGGGCAGGTTTTTAATGCTGCTCCGGGGGGGCTCGCCCGCGGTGGGCCATGTCGGCACGGGATTGCCTATGCTTAGTATCCGCTGGCCCAATGCCCAACTCCCGGGGTGCTACCACCGGCCGGTAACTCCTGCATCGTCGTGCGGACCTTAGCGGTCTACCCCCCTCGCCCGCACGCGTTCTATCATAGCGCGCGTTTCGTTCCCCCTTTGCGGGGCGAAGGGGGCCCGTGCGAGCCTCCACTCGCGCCCTTGCCGCTGGACAGACTCGCCTACGGGCGGCGTCCGTGGGGGTCGCAGCCGAGGGGTGCACCCCCAGGTGCGGCCCGAAGTGTAACCGCTCAAGTTTTTTGGGTCCGCCCCGTCCCGCTGCCGTGAGGCGTTTGCGCGCGCCAGTCGCTGCCGTTTCGAACCGTGCCCCGCGCCTCACAGGCCGGCCCCCCCGCCACCCGCCACGCCCCCCATCCGCACGCGGTTCTCGCCGCCTGAGGTTGTAGGCCATGCTCCCGGTTATCGCAGCACAGCGCGTGACTCGGAGGAGACGAGGAGACGCACACCTGACTGCCACTCGCGGGCGGCTCGCGGGACCTGGGGGCGACCGACCGCGGATGATGCGCAGGGGGATTTGGGGCGGGTGGAGGTACGACACCCAACTTGGCCAAGGTCCCCGCCCAGTCCCGTTGCGCACCCCCCGTCTCCCACTCCGCAGTGCCCGTTGCCGGGACCCTGGTCGCCAGTCAGGATCCGGAGCATGTTGGGTGCGACCCTCCCGCACCCTGCAGCTAGTGCGCCGGGTGCTCGGGTGTGTGTACCATCTCGCCGTACAACCCCCGGCCCCAGATACGCGCCACCTCGGGCACGCCCTACACCTCTCGCCCCGCTCCTCCCGCAGGACCTCTGACAACCTTCCCCTCTGCTGGCAAGGGCCGGCCGGCTTCTAGCTACTGGACACGGCTGTCAGACACCACCTCGAACCACTATTGATGGCCCCGAGTCCCTCCGACCTTGCTCTGCCCCCCTCAAGTGATGACAGGCGCGTTACCCGGCCGAGACGCTGTGCGGAGAGTGATGATCGCGGGCGTGCAACCCCGCCCAGCACGACCAACAGTCTGTCCTATGTAGACAAACCCGGAGCCAGAAATCGCGGCCCCGGCCTCCCGTCGATTGGGCGGACCCGAGAGGCCGTGAGGAGTGGCCTCAGTGACCTGCGTTGAGTCCACCCATGTTCCCGGGCTTCCCTATAGGGGGGGAGTAGCATGACCCGTTAGCCATGACACCGGCTGATTCCACCGCGGACGATCCAACCAGAAGTTCCCGTATCCGCGTGGAAAGGCAGCCGGGCGGTGCTAGATACCGTACAACACACAGGAGGGGTCAGCTTGACGGGTGTTACTCGCTGGGTGACAGGTGTGGGGGAGAGAGGGGCAGAGCATCCGTTACGTATGCTGGGGTTGTGGCGCCCCTCTCAGACTAGTTGGGGGATTGGGACGGAGCCGCGACGCGATCCCTCACCGTCCCTCCAGCCACAGCCTTATCCCCTGCAATAGTATAAGCAGCAGTCTCCTACTTGCATGGCCCACCCTCCTCCGGCTCTGGTGAACCACAGGCTTAGGTCCCGC
>IA7122-Poultry-ST302
CACGCCTACCTCTCCCCGATATGCGGACCCCGTATCGACAGGCCGCCCCGTGGTAATATGTTCTGGACACTTCCACCACTTCTCCTAATCTGCATCACCGGCAAGAAAGCGTAGGGACCCGGCCGGTGCCTTGCGTTGAACTCGCCTCACCACGCCGAAATTAGGACCCCCCGGCGGCTCGCCTCACGGTAGAACAGGTCCCACATTCGTCAACCAGCTGGGCTCACGCTCTTTGTCCGCGCCCCAGGGCCCCGTGACGACTTCCACCTCTCGGACCCCCAGCCCACGACCAGCCCGCCTCGTCGTCCCGAGACCTCCCCCGTACCCGTAAGTGCATCCCGAGTTCCTCTCCATAGCACGCAGCCAACCTGCCCGGCCCACCTTTACCCGGCTCGCGCACTCCCAACCAGTGACCGGGGTCAGGCAGCGCAGACGCCTTGCGCGGGGCACTCGACGTGTAATGCGCCGCGGGGTCACCCAGCAGCGCGGGGCGTCGCCGGGGGTCCCCTGCATGGGGAATGGGGGGGGCTCATGGGCCTAGTGTTGATCGTCCCCGTGAAACTGTGATTAGCAGGGTGGTGTGCAATTCCACGCGGCTATAGGGCCGCGCGTAATTCAGACTCGCGCCTGCCAGGGAAGACGGCAAGATAGCGTCGGCCTTCTCCGGGGTCCCGCGTGCTGGGGCTCTTGAGCCGCAGGGGCGGTCCCACTGCGGGGACCTCCCTTTCACCGAGCTGACCGGGCCGAACGGCACATGGAACGGCTCGAGGGGCAGTAGGTCGTCTTGTCTGCACCTCTCTTCCCCCTGGCCTTTGAACGGAAGCTATACTCACTTTCAGCGCTGCCCACGCGTCGACCTCCGTGTGTCACTCCGGACCCCCAGAAGTGCTGCACTTTGGCTACGGCCAGGCGACTGCCCCCTGCGGGTCGGACCTGTTCCGCAGCGACGACACCACTCCTCCTAACCCCCCCTCATTCCCCTCACACGAGCGTCAGGGCGTAGACTTCCACACCTTGGCCCTAGCTGGCTGGCCTTCCGGTTCCCCTCTCGACGTGCAGGCGGCGCCTGGGGGGTGAAGAGAGGACTCGCATCGGAGAGCGGACGCCGTGAAGGGCTAGGGAGCTCATCCGTACAGGGGACCAGGGGGGGGGGGCTGTTGAAGTGAGCGTAACGCGGGCGTATGTACCCTGTAGCGTTCGGAACGTCGAAGGGAGGACTCCCTGGTTACGCGCCGAGTACGGGGCGTGGCGGTGCTGGCGGAGCGCACCCCAACGTGGCTCATTGTGGGTTGGGCCCCACGTCCGGGCTCAGCCGGTAGTGGTATGCGGGAAAAACGGGTGATTTCCGCTAGGGAGAGGTAGGCACCGCGTCGCGAGCTCCCGGCGGTCGTGTGAGCTGACGCCACTCAACAAGCCTCGTGTCTGTGTGGTGGGCGATCTACGCCTAACCCGCCGCTCTATATTGCCAGACATCCGCTACCGCGCGGCCCAGCTCCGCCCGCACCAGCTTGTAGCCACCCGTCACCTCCTGACGACTTACGGAGTGGCGCGCGTACGTCCCTCGAGGTTGCCAGATGTCGCGCCAAGGTTCGCCGTGCAGCAGCTGGTTCCTTTGGCGCGTGCCCGGATATCGACCGTGCCCTGCCTCGTCTTGCTTTCGCCCACTAGACAAACCCGCGGCTGTACTGGAAGACCGCTGAAGGCCACGTCGCACGCCTCCCCTGGTGTCATCGACCGCTCCCGCATGCCTACGAATGCCTGCCGTCGCCACTGCCGCGCCGTCGGATAGGGTATATGCCCAAATCCGCCTGAAAGCCGCTGGGCATGCCCGGGTGCTCGCACGTAGGAAGTACTACTGCAGGGCCACCATGCCCCAGTGTTTCGGCGATACACCCCAAAATTCACGCCCTGACTTACTCGCCAGTTTGCCCACACTGTTACAAGCGTGTACCCTGTCAGCATGCCGGCATTTCGCGACGCGAAACCGGCCGTGGGTGTCTCGGGCACGGCGCAAACTGTGCTCCGAGCGGAGGGTGTTCGCCTCAGAGATCGTACAGATTCAGGGGGCGCAGTTGCGTACACCGCGCCTCGACACAGCAGGCGGTACGGGACCACTTTGACCCTCTGCCCCTCAGCAGCGACTCGCCCTGCTTACCGGCTCTGTTCCCGCGAACGCGTCCGGATGGCTTCTGGGCACACTACCCTGCCGAGACTAGCCCGCGCACCGTATTGATGGCATGCTCTTGCACGGCCACGGTGGGCGGCTACTGGCGTGTCACGTACCCACGGGGGGGGGGTGGTAGGAACGGTCCAGCGAAAAGACTCGTGGGTGGGGGCTAGGGGGCAACGGTTGCCCGCGAGGGACGGAGGCGACGCGCGCGGGGACGTCAGCTAAGGAGCGTCGCGTGCTGCCGCTTGTTGTGGGCACTGAGGTGTTCCGCGGCAGGGATGGGGGTTCGCCAGAGCCCGGCGGGTAGTGCAGTGGGCCGACATACGACGGGGCGTCATCTGGCGCGTTTAAGGATTGTTTGAAGGAGTCCGCAAGGTCAACTGGGGGACCGCAGTGGAACGCCTAGCGGCATAGCGGGTAGCCGCGTCGCCGACTGGCGGCTAGTAGCTGCCTGCGAGGCGTGCCGCGGAAATCGGCGGGGTAGTTGGGTGCCGGAATCGGATAAGGCGGCCTCATACTCACCGGCTTTAACTACGCCGAGCACCCCATTCTTGCGCGATCAGGTCAGGCATGCTGCGCATACTATGTTTCATGCATGCATTCTTAATTATCCGTATGCGCCCTTCGCTGCCGCCGGCTGAACGCCCACGTCCCCGCACTGAGTCGCAAGCCGTCCGAGGCCCGAGGCAGGTGGACTACGTCGACGCGGCGACCGTGGCCGGGACGGCGTTACGTTTAAGCCCTCGTTCACCTCAACGTCCGAAGGCCTTGACCCCACCCCCTCAGGGGAGCGCGGAGTAGGGTCACTAAGGGAGGCACCCCGGGATACCGAACACGTGAGTGTGGGCGGAGGTCCGGTGAGGTGCGGCTGGCCCGCTTGGCCATCTCGCGGGGGGGATGGTGACATGGGGCATGCGTACTGGGGCGAGGGCGACGACCGACCCCATTTGGGAGGTGGGGTGCCCCGGTCGACTCGGAGGGCGGTCAGTTAGAACCAGCCTGCCTCTGTATCCACACAAGCCGGACCCCTCACGCTGAGATGACCGGCCCTAAAAAGCCGACGCCCCGCGAGCTCTTTGCCAAGGGTCCCGTACACCCAGGTCTACCCCCCGCAAGGCAAGAGGGAGATACGCTCGGGGGACTGCATCTGTGTCACCAGGATGGGCGTGACCGTGCGATTGTTGTACGGGCCCGAGTCCGGCACGCCCCGAGTCTACCCGCCAGGTCCGCCACTTCACGTGCTCCCACTTCGCGGCGCCATGGTTGTCCAGAGACCAGGGTTCCGGGCCCCGCGCATCTACTTGCATCGACCGAGCGACCCGAACCGCGCAGGAGGCGTGTCCCTCCCCGATGTTCCCACACAAACGACCCTCGGTGGTCAGGTTTTAAATGCTGCTCTGGAAGGGCTCGCCCGCGGTGGGCCAGGTCGGCACGGGATTGACTATGCTTAGTATCCGCCGGCCCAATGCCTAACTTCCGGGGTGCTACCACCGGCCGGTAACTCCTGCATCGTTGTGTGGATCTTAGCAGTCCACCCCCCTCACCCGCTCCCGTTCTATCATAACGCGCGTTTCGGTACCCCTTAGCGGGGCGGAGGGGGCCCGTGCGAGCCTCCGCTCGCGCCCTTGCCGCTGGACAGACTTGACTCCGGGCGTCGTCCGTGGAGGTCGCAGCCGAGGGGTGCACCCCCAGCTGCGGCCCGAAGGGTAACCGCTAAAGTTCTTTGTGTCCGCCCCGTCCTGCTGCCGTGAGGCGTCGGTACGCGCCGGCCGCCGCCGTTTCGAACCGCGCTCCATGCCTCGCAGGCCGGCCCCCCCGCCACCCGCTACGCCTTCCATCCGCACGCGGTCCTTGGCGCCTGAGGTTGTGGGCCATGCTCTCGGTTACCACAGCACCGCGCGCGACTCGGAAGAGACGGGGAGACGCACACCTGACTGCCGCCCGCGGGCGGCTCGCGGGACCAGGGTGCGACCGACCGCGGATGATGCGCAGGGGGATCTGAGGCGAGCGGAGGTGCGACACCCCGCTTGGCCATGGTCCCCGCCCAGCCCCGCTGCTTACCCCCTGCCTCCCACTCCGCAATGCCCGCTGCCGGGATCCTGGTCGCCAGTCAGGATCCGGCGCGTGTCGGTTGCGACTCTCCCGCACCCTGCAGCTAGTGCGCCGGGTGCTCGAGTGTGGGTGCCATCTCGTCGTACAACCCCCGGCCCCAGAGACGCATCACCTCGAGTGCGCCCTGCACCTCCCGCCCCGCTCCTCCCACAGGACCTCTGACAACATTCCCCTCTGCCGGCAAGGGCCGGCCGGCTGCTAGCTGCCGGACACAGCCGCCGGACACCACCTCGAGCCACTACTGACGACCCCGAACCCCTCCGACCTTGCTCTGCCCCCCTCAAGTGATGACAGGCGCGTTACCTAGCCGAGGCGCGGCACGGAGAGTGATGATCGCGGGCGTGCGACCCCGCCCAGCACGACCAACAGTCTGCACTATCTAGACAAAACCGGGGCCAGAAATCGCGGCCCCGGCCTCCCGTCGAGGGAGCGTACCTGAGAGGCCGTGAGGAGAGGCCTCAGTGACCTGTGTTGAGTCCACCTCTATTCCCGGGCTTCCCTATAGGGAGGGAGTAGCATGACCCGTTAGCCCGGACACCGATTGATTTCACCGCAGACGATCCAACCAGAGGCTCCCGTATCCGCGTGGAAGGACAGCCGGACGGTGTCATAGACTGTACGGCACACAGGAGGGGTCAGCTTGACGGGTGTTACTCGCTGGGTGACAGATGTGGGGGAGAGAGGGGCAAAGCATCCGTTTCATGTGATAAGGTAGTGGCGCCCCTCCCAGACCAGTTGGGGGATTGGGACGGAGCCACGGCGCGATTCCTCCCCGTCCCTCCGGCCACCGCCTTACCCCCTGTGATAGCATAAGCAGTAGTCTCCTACGTGTACGGCCTGCCCTCTTCCGGCTATGATGATCCACAGACTCGGGTCCCGC
>Reference
CATGCCTACCCCTCCCCGATATGCGGACCCCGTATCGACAGGCCGCCTCGTGGTAATATGTTCTGGACACTTCCACCACTTCTCCTAATCTGCATCACCGGAAAGAAAGCGTAGGGACCCGGCCGTTGCCTTGCGTTGAACTCGCCTCACCACGCCGAAATTAGGACCCCCCGGCCGCTCGCCTCACGGTAGAACAGGTCCCACATTCGTCAACCAGCTGGGCTCACGCTCTTTGTCCGCGCCCCAGGGCCCCGTGACGACTTCCACCTCTCGGACCCCCAGCCCACGACCAGCCCGCCTCGTCGTCCCGAGACCTCCCCCGTACCCGTAAGTGCATCCCGAGTTCCTCGCCATAGCACGCAGCCAACCTGCCCGGCCCACCTTTACCCGGCTCGCGCACTCCCAACCAGTGACCGGGGTCAGGCAGCGCAGACGCCTTGCGCGGGGCACTCGACGTGTAATGCGCCGCGGGGTCACCCAGCAGCGCGGGGCGTCGCCGGGGGTCCCCTGCATGGGGAATGGGGGGGGCTCATGGGCCTAGTGTTAATCGTCCCCGTGAAACTGTGATTAGCAGGGTGGTGTGCAATTCCACGCGGCTATAGGGCCGCGCGTAATTCAGACTCGCGCCTGCCAGGGAAGACGGCAATATAGCGTCGGCCTTCTCCGGGGTCCCGCGTGCTGGGGCTCTAGAGCCGCAGGGGCGGTCCCACTGCGGGGACCTCCCTTTCACCGAGCTGACCGGGTCGGACGGCACATGGAACGGCTCGAGGGGCAGTAGGTCGTCTCGTCTGCACCTCTCTTCCCCCTGGCCTTTGAACGGAAGCTATACTCACTTTCAGCGCTGCCCACGCGTCGACCTCCGTGTGTCACTCCGGACCCCCAGAAGTGTTGCACTTTGGCTACGGCCAGGCGACTACCCCCTGCGGGTCGGACCTGATCCGCAGCGACGACACCATTCCTCCTAACCCCCCCTCATTCCCCTCACACGAGCGTCAGGGCGTGGACTTCCACACCTTGACCCTAGCTGGCTGGCCTTCCGATTCCCCTCTCGACGTGCAGGCGGCGCCTGGGGGGTGAAGAGAGGACTCGCATCGGATAGCGGACGCCGTTAAGGGCTAGGGAGCTCATCCGTACAGGGGACCAGGGGGGGGGGGCTGTTGAAGTGAGCGTAACGCGGGCGTATGTACCCTGTAGCGTTCGGAACGTCGAAGGGAGGACTCCCTGGTTACGCGCCGAGTACGGGGCGTGGCGGTGCTGGCGGAGCGCACCCCAACGTGGCTCATTGTGGGTTGGGCCCCACGTCCGGGCTCAGCCGGTAGTGGTATGCGGGGAAAACGGGTGATTTCCGCTAGGGAGAGGTAGGCACCGCGTCGCGAGCTCCCGGCGGTCGTGTGAGCTGACGCCACTCAACAAGCCTCGTGTCTGTGTGGTGGGCGAACTACGCCTAACCCGCCGCTCTATATTGCCAGACATCCGCTACCGCGCGGCCCAGCTCCGCCCGCACCAGCTTGTAGCCACCCGTCACCTCCTGACGACTTATGGAGTGGCGCGCGTACGTCCCTCGAGGGTGCCAGATGTCGCGCCAAGGTTCGCCGTGCAGCAGCTGGTTCCTTTGGCGCGTGCCCGGATATCGACCGTGCCCTGCCTCGTCTTGCTTCCGCCCACTAGACAAACCCGCGACTGTACTGGAAGACCGCTGAAGGCCACGTCGCACGCCTCCCCTGGTGTCATCGACCGCTCCCGCATGCCTACGAATGCCTGCCGTCGCCACTGCCGCGCCGTCGGATAGGGTATACGCCCAAACCCGCCTGAAAGCCGCTGGGCATGCCCGGGTGCTCGCACGTAGGAAGTACTGCTGCAGGGCCACCATGCCCCAGTGTTTCGGCGATACACCCCAAAATTCACGCCCTGACTTACTCGCCAGTTTGCCCACACTGTTACAAGCGTGTACCCTGTCAGCATGCCGGCATTTCGCGACGCGGAACCGGCCGTGGGTGTCTCGGGCACGGCGCAAACTGTGCCCCGAGCGGAGGGTGTTCGCCTCAGAGATCGTACAGATTCAGGGGGCGCAGTTGCGTACACCGCGCCTCGACACAGCAGGCGGTACGGGACCACTTTGACCCTCTGCCCCTCAGCAGCGACTCGCCCTGCTTACCGGCTCTGTTCCCGCGAACGCGTCCGGATGGCTTCTGGGCACACTACCCTGCCGGGACTAGCCCGCGCACCGTATTGATGGCATGCTCTTGCACGGCCACGGTGGGCGGCTACTGGCGTGTCACGTACCCACGGGGGGGGGGTGGTAGGAACGGTCCAGCGAAAAGACTCGTGGGTGGGGGCTAGGGGGCAACGGTTGCCCGCGAGGGACGGAGGCGACGCGCGCGGGGACGTCAGCTAAGGAGCGTCGCGTGCTGCCGCGTGTTGTGGGCACTGAGGTGTTCCGCGGCAGGGATGGGGGTTCGCCAGAGACCGGCGGGTAGTGCAGTGGGCCGACATACGACGGGGCGTCATCTGGCGCGTTTAAGGATTGTTTGAAGGAGTCCGCAAGGTCAACTGGGGGACCGCGGTGGAACGCCTAGCGGCATAGCGGGTAGCCGCGTCGCCGACTGGCGGCTAGTAGCTGCCTGCGAGGCGTGCCGCGGAAATCGGCGGGGTAGTTGGGTGCCGGAATTGGATACGGCGGCCTCATACTCACCGGCTTTAACTACGCCGAGCACCCCATTCTTGCGCGATCAGGTCAGGCATGCTGCGCATACTATGTTTCATGCATGCATTCTTAATTATCCGTATGCGCCCTCCGCTGCCGCCGGCTGAACGCCCACGTCCCCGCACTGAGTCGCAAGCCGTCCGAGGCCCGAGGCAGGTGGACTACGTCGACGCGGCGACCGTGGCCGGTACGGCGTTACGTTTAAGCCCTCGTTCACCTCAACGTCCGAAGGCCTTGACCCCACCCCCTCAGGGGAGCGCGGAGTAGGGTCACTAAGGGAGGCACCCCGGGATACCGAACACGTGAGTGTGGGCGGAGGTCCGGTGAGGTGCGGCTGGCCCGCTTGGACATCTCGCGGGGGGGATGGTGACATGGGGCATGCGTACTGGGGCGAGGGTGACGACCGACCCCATTTGGGAGGTGAGGTGCCCCGGTCGACTCGGAGGGCGGTCAGTTAGAACCAGCCTGCCTCTGTATCCACACAAGCCGGACCCCTCACGCTGAGATGCCCGGCCCTAAAAAGCCGACGCCCCGCGAGTTCTTTTCCAAGGGTCCCGTACACCCAGGTCTACCCCCCGCAAGGCAAGAGGGAGATGCGCTCGGGGGACTGCATCTGTGTCACCAGGATGGGCGTGACCGTGCGATTGTTGTACGGGCCCGAGTCCGGCACGCCCCGAGCCTACCCGCCAGGTCCGCCACTTCACGTGCTCCCACTTCGCGGCGCCATGGTTGTCCAGAGACCAGGGTTCCGGGCCCTGCGCATCTACTTGCATCGACCGAGCGACCCGAACCGCGCAGGAGGCGTGTCCCTCCCCGATGTTCCCACACAAACGGCCCTCGGTGGTCAGGTTTTAAATGCTGCTCTGGGAGGGCTCGCCCGCGGTGGGCCATGTCGGCACGGGATTGACTATGCTTAGTATCCGCCGGCCCAATGCCCAACTCCCGGGTTGCTACCACCGGCCGGTAACTCCTGCATCGTTGTGTGGATCTTAGCAGTCCACCCCCCTCACCCGCTCCCGTTCTATCATAACGCGCGTTTCGGTACCCCTTAGCGGGGCGGAGGGGGCCCGTGCGAGCCTCCGCTCGCGCCCTTGCCGCTGGACAGACTTGACTACGGGCGTCGTCCGTGGAGGTCGCAGCCGAGGGGTGCACCCCCAGCTGCGGCCCGAAGGGTAACCGCTAAAGTTCTTTGTGTCCGCCCCGTCCTGCTGCCGTGAGGCGTCGGTACGCGCCGGCCGCCGCCGTTTCGAACCGCGCTCCATGCCTCGCAGGCCGGCCCCCCCGCCACCCGCTACGCCTTCCATCCGCACGCGGTCCTTGGCGCCTGAGGTGGTGGGCCATGCTCTCGGTTACCACAGCACCGCGCGCGACTCGGAAGAGACGGGGAGACGCACACCTTACTACCGCCCGCGGGCGGCTCGCGGGACCAGGGTGCGACCGACCGCGGATGATGCGCAGGGGGATCTGAGGCGAGCGGAGGTGCGACACCCAGCTTGGCCATGGTCCCCGCCCAGCCCCGCTGCGCACCCCCTGCCTCCCACTCCGCAATGCCCGCTGCCGGGATCCTGGTCGCCAGTCAGGATCCGGCGCGTGTCGGGTGCGACTCTCCCGCACCCTGCAGCTAGTGCGCCGGGTGCTCGGGTGTGGGTGCCATCTCGTCGTTCAACCCCCGGCCCCAGAGACGCATCACCTCGGGTGCGCCCTGCACCTCCCGCCCCGCTCCTCCCACAGGACCTCTGACAACCTTCCCCTCTGCCGGCAAGGGCCGGCCGGCTGCTAGCTGCCGGACACAACCGCCGGACACCACCTCGAGCCACTACTGACGACCCCGAACCCCTCCGACCTTGCTCTGCCCCCCTCAAGTGATGACAGGCGCGTTACCTAGCCGAGGCGCGGCACGGAGAGTGATGATCGCGGGCGTGCGACCCCGCCCAGCACGACCAACAGTCTGCACTATCTAGACAAAACCGGGGCCAGAAATCGCGGTCCCGGCCTCCCGTCGAGGGAGCGGACCTGAAAGGCCGTGAGGAGAGGCCTCAGTGACCTGTGTTGAGTCCACCTCTATTCCCGGGCTTCCCTATAGGGAGGGAGTAGCATGACCCGTTAGCCCGGACACCGATTGATTTCACCGCAGACGATCCAACCAGAGGCTCCCGTATCCGCGTGGAAGGACAGCCGGACGGTGTCATAGACTGTACGGCACACAGGAGGGGTCAGCTTGACGGGTGTTACTCGCTGGGTGACAGATGTGGGGGAGAGAGGGGCAAAGCATCCGTTACATGTGATAGGGTAGTGGCGCCCCTCCCAGACCAGTTGGGGGATTGGGACGGAGCCACGGCGCGATTCCTCCCCGTCCCTCCGGCCACCGCCTTACCCCCTGTGATAGCATAAGCAGTAGTCTCCTACGTGTACGGCCTGCCCTCCTCCGGCTATGATGATCCACAGGCTCGGGTCCCGC
