# Supplementary material for: Escherichia coli ST302: Genomic Analysis of Virulence Potential and Antimicrobial Resistance Mediated by Mobile Genetic Elements
Source: Front Microbiol. 2020 Jan 21;10:3098. doi: 10.3389/fmicb.2019.03098 (PMC6985150; doi:10.3389/fmicb.2019.03098)
Supplement: DATA S2 — ST302 SNP analysis. [file Data_Sheet_2.ZIP › SNP_Analysis/ST302_SNP/Strain_names.txt]

The ST302 SNP analysis was performed using Enterobase barcodes as identifers.
For reference, the following barcodes refer to ST302 strains:

BA9007 = 29563
BA9503 = 29396
CA0191 = 400654*
CA0229 = 14719
EA1682 = MOD1-EC6540
EA2454 = MOD1-EC5671
EA2455 = MOD1-EC5670
EA8393 = MOD1-EC1934
FA0416 = 267792
FA5537 = DTU2016*
